# Supplementary material for: Student engagement, assessed using heart rate, shows no reset following active learning sessions in lectures
Source: PubMed Central journal article supplement (PMC6886849; doi:10.1371/journal.pone.0225709), 2019-12-02

1st 3 minutes  
time

S2 Dataset A

1st 3 minutes

S2 I

|         | 91914.17    |    | 91914.18    |    | 92214.18   |    | 92214.2    |    | 92314.16   |    |
|---------|-------------|----|-------------|----|------------|----|------------|----|------------|----|
|         | 10:00-10:50 |    | 11:00-11:50 |    | 11-11:50   |    | 1-2:20     |    | 9am        |    |
| 0:00:01 | 82.0721129  | 61 | 77.8069058  | 61 | 78.1395516 | 63 | 84.8538805 | 73 | 74.6681032 | 63 |
| 0:00:02 | 80.9471129  | 61 | 77.3130787  | 61 | 77.9173294 | 63 | 84.8538805 | 73 | 74.0014366 | 63 |
| 0:00:03 | 80.5096129  | 61 | 77.2329976  | 61 | 77.2506627 | 63 | 85.2538805 | 73 | 73.6681032 | 63 |
| 0:00:04 | 80.9314879  | 61 | 76.8996642  | 61 | 77.0284405 | 63 | 85.2538805 | 73 | 73.6828782 | 63 |
| 0:00:05 | 80.5096129  | 61 | 77.2329976  | 61 | 76.6951071 | 63 | 85.2538805 | 73 | 74.1114496 | 63 |
| 0:00:06 | 81.0721129  | 61 | 77.0107753  | 61 | 76.583996  | 63 | 85.4538805 | 73 | 74.2543067 | 63 |
| 0:00:07 | 81.9158629  | 61 | 77.0107753  | 61 | 76.2506627 | 63 | 87.024606  | 73 | 73.9685925 | 63 |
| 0:00:08 | 82.4783629  | 61 | 76.4552198  | 61 | 76.1395516 | 63 | 87.024606  | 73 | 74.1114496 | 63 |
| 0:00:09 | 82.0564879  | 61 | 75.7885531  | 61 | 76.2506627 | 63 | 87.024606  | 73 | 74.2543067 | 63 |
| 0:00:10 | 83.3221129  | 61 | 75.8996642  | 61 | 76.3617738 | 63 | 87.4134949 | 73 | 74.3971639 | 63 |
| 0:00:11 | 83.6033629  | 61 | 75.1218865  | 61 | 75.6951071 | 63 | 87.8023838 | 73 | 73.6828782 | 63 |
| 0:00:12 | 83.2908629  | 61 | 75.5663309  | 61 | 75.583996  | 63 | 87.4134949 | 73 | 73.6828782 | 63 |
| 0:00:13 | 81.2263973  | 61 | 76.0107753  | 61 | 75.583996  | 63 | 87.4134949 | 73 | 74.6828782 | 63 |
| 0:00:14 | 82.1346129  | 61 | 76.2329976  | 61 | 75.1428504 | 63 | 87.8023838 | 73 | 74.540021  | 63 |
| 0:00:15 | 82.2752379  | 61 | 77.1218865  | 61 | 75.3428504 | 63 | 88.1912727 | 73 | 74.3971639 | 63 |
| 0:00:16 | 82.1346129  | 61 | 77.3441087  | 61 | 75.4428504 | 63 | 88.1634949 | 73 | 74.8257353 | 63 |
| 0:00:17 | 81.5721129  | 61 | 77.5663309  | 61 | 75.4428504 | 63 | 90.3023838 | 73 | 75.2543067 | 63 |
| 0:00:18 | 81.0252379  | 61 | 77.8996642  | 61 | 75.8428504 | 63 | 96.1634949 | 73 | 75.540021  | 63 |
| 0:00:19 | 80.6971129  | 61 | 78.0107753  | 61 | 74.7149913 | 63 | 97.6912727 | 73 | 76.1114496 | 63 |
| 0:00:20 | 81.0564879  | 61 | 77.8996642  | 61 | 73.9449913 | 63 | 97.7190505 | 73 | 76.2543067 | 63 |
| 0:00:21 | 81.3377379  | 61 | 78.0107753  | 61 | 73.6459207 | 63 | 99.274606  | 73 | 75.8257353 | 63 |
| 0:00:22 | 81.3221129  | 61 | 77.8996642  | 61 | 74.4849399 | 63 | 99.6376194 | 73 | 76.1114496 | 63 |
| 0:00:23 | 80.7596129  | 61 | 78.0107753  | 61 | 73.3849913 | 63 | 100.248731 | 73 | 76.1114496 | 63 |
| 0:00:24 | 80.6189879  | 61 | 78.4552198  | 61 | 73.8249913 | 63 | 101.082064 | 73 | 75.8257353 | 63 |
| 0:00:25 | 80.4783629  | 61 | 77.7885531  | 61 | 73.7149913 | 63 | 97.7562139 | 73 | 76.8257353 | 63 |
| 0:00:26 | 80.6189879  | 61 | 76.1218865  | 61 | 73.8049913 | 63 | 96.5895472 | 73 | 77.2543067 | 63 |
| 0:00:27 | 79.9627379  | 61 | 75.677442   | 61 | 73.0349913 | 63 | 95.8117695 | 73 | 76.9685925 | 63 |
| 0:00:28 | 80.6658629  | 61 | 75.5663309  | 61 | 72.4749913 | 63 | 95.9784361 | 73 | 76.8257353 | 63 |
| 0:00:29 | 80.2439879  | 61 | 75.0107753  | 61 | 71.7049913 | 63 | 96.1451028 | 73 | 76.8257353 | 63 |
| 0:00:30 | 80.2439879  | 61 | 75.1218865  | 61 | 71.7049913 | 63 | 96.0895472 | 73 | 76.3971639 | 63 |
| 0:00:31 | 80.9273281  | 61 | 75.1218865  | 61 | 73.0428504 | 63 | 96.367325  | 73 | 76.540021  | 63 |
| 0:00:32 | 80.6773281  | 61 | 76.1218865  | 61 | 72.3428504 | 63 | 97.0895472 | 73 | 76.3971639 | 63 |
| 0:00:33 | 80.3023281  | 61 | 76.3441087  | 61 | 72.4428504 | 63 | 100.96905  | 73 | 76.8257353 | 63 |
| 0:00:34 | 80.3023281  | 61 | 76.3441087  | 61 | 72.9428504 | 63 | 100.385717 | 73 | 77.3971639 | 63 |
| 0:00:35 | 80.3023281  | 61 | 75.8996642  | 61 | 73.0428504 | 63 | 100.024606 | 73 | 76.9685925 | 63 |
| 0:00:36 | 79.1773281  | 61 | 75.0107753  | 61 | 72.0428504 | 63 | 99.0801616 | 73 | 77.2543067 | 63 |
| 0:00:37 | 79.4273281  | 61 | 74.8996642  | 61 | 71.5428504 | 63 | 99.0801616 | 73 | 76.9685925 | 63 |
| 0:00:38 | 79.3023281  | 61 | 74.5663309  | 61 | 71.5428504 | 63 | 97.1634949 | 73 | 76.9685925 | 63 |
| 0:00:39 | 79.5523281  | 61 | 74.5663309  | 61 | 72.1428504 | 63 | 97.774606  | 73 | 77.3971639 | 63 |

|         |            |    |            |    |            |    |            |    |            |    |
|---------|------------|----|------------|----|------------|----|------------|----|------------|----|
| 0:00:40 | 79.5523281 | 61 | 74.5663309 | 61 | 72.4428504 | 63 | 97.3857171 | 73 | 77.9685925 | 63 |
| 0:00:41 | 79.4273281 | 61 | 74.3441087 | 61 | 72.8428504 | 63 | 97.774606  | 73 | 76.9685925 | 63 |
| 0:00:42 | 78.6773281 | 61 | 74.677442  | 61 | 72.5428504 | 63 | 97.774606  | 73 | 77.1114496 | 63 |
| 0:00:43 | 78.9273281 | 61 | 73.677442  | 61 | 72.7428504 | 63 | 97.774606  | 73 | 76.8257353 | 63 |
| 0:00:44 | 78.9273281 | 61 | 73.0107753 | 61 | 72.3428504 | 63 | 98.1912727 | 73 | 77.540021  | 63 |
| 0:00:45 | 78.9273281 | 61 | 73.5663309 | 61 | 71.9428504 | 63 | 97.8023838 | 73 | 77.540021  | 63 |
| 0:00:46 | 78.8023281 | 61 | 73.3441087 | 61 | 71.9428504 | 63 | 97.8023838 | 73 | 78.1114496 | 63 |
| 0:00:47 | 78.4273281 | 61 | 70.216646  | 61 | 71.9428504 | 63 | 97.4412727 | 73 | 78.5735122 | 63 |
| 0:00:48 | 78.4273281 | 61 | 70.1055349 | 61 | 71.9428504 | 63 | 97.0523838 | 73 | 78.3235122 | 63 |
| 0:00:49 | 78.1773281 | 61 | 69.3524485 | 61 | 72.3428504 | 63 | 96.6634949 | 73 | 78.0735122 | 63 |
| 0:00:50 | 78.0523281 | 61 | 69.5993621 | 61 | 71.9428504 | 63 | 96.274606  | 73 | 77.5735122 | 63 |
| 0:00:51 | 78.8023281 | 61 | 69.7228189 | 61 | 72.0428504 | 63 | 96.0801616 | 73 | 76.9485122 | 63 |
| 0:00:52 | 78.9273281 | 61 | 69.8462757 | 61 | 71.7428504 | 63 | 95.6912727 | 73 | 76.8235122 | 63 |
| 0:00:53 | 79.0523281 | 61 | 70.4635596 | 61 | 71.4428504 | 63 | 95.3301616 | 73 | 76.6985122 | 63 |
| 0:00:54 | 76.9002379 | 61 | 72.5663309 | 61 | 71.2428504 | 63 | 95.7468282 | 73 | 76.4485122 | 63 |
| 0:00:55 | 79.3023281 | 61 | 73.7885531 | 61 | 71.1428504 | 63 | 96.7190505 | 73 | 76.9485122 | 63 |
| 0:00:56 | 79.5523281 | 61 | 73.8996642 | 61 | 71.0428504 | 63 | 97.5523838 | 73 | 76.8235122 | 63 |
| 0:00:57 | 79.8023281 | 61 | 74.0107753 | 61 | 71.2428504 | 63 | 97.5523838 | 73 | 77.0735122 | 63 |
| 0:00:58 | 79.1773281 | 61 | 74.677442  | 61 | 70.9428504 | 63 | 97.5523838 | 73 | 77.1985122 | 63 |
| 0:00:59 | 79.3023281 | 61 | 75.2329976 | 61 | 71.3428504 | 63 | 97.7468282 | 73 | 76.6985122 | 63 |
| 0:01:00 | 79.5523281 | 61 | 75.677442  | 61 | 71.6428504 | 63 | 98.3301616 | 73 | 75.9485122 | 63 |
| 0:01:01 | 79.5523281 | 61 | 75.677442  | 61 | 71.8428504 | 63 | 99.1079393 | 73 | 76.0735122 | 63 |
| 0:01:02 | 79.4273281 | 61 | 75.4552198 | 61 | 72.0428504 | 63 | 98.6912727 | 73 | 76.3235122 | 63 |
| 0:01:03 | 79.0523281 | 61 | 75.677442  | 61 | 71.8428504 | 63 | 99.274606  | 73 | 76.6985122 | 63 |
| 0:01:04 | 79.1773281 | 61 | 75.7885531 | 61 | 71.9428504 | 63 | 99.8579393 | 73 | 77.1985122 | 63 |
| 0:01:05 | 78.5523281 | 61 | 75.3441087 | 61 | 71.5428504 | 63 | 99.274606  | 73 | 77.4485122 | 63 |
| 0:01:06 | 78.8023281 | 61 | 75.0107753 | 61 | 71.1428504 | 63 | 99.274606  | 73 | 78.3235122 | 63 |
| 0:01:07 | 78.9273281 | 61 | 75.3441087 | 61 | 69.2649913 | 63 | 97.7190505 | 73 | 78.3235122 | 63 |
| 0:01:08 | 79.1773281 | 61 | 75.2329976 | 61 | 69.6049913 | 63 | 97.6079393 | 73 | 78.6985122 | 63 |
| 0:01:09 | 79.4273281 | 61 | 75.4552198 | 61 | 69.4949913 | 63 | 95.4690505 | 73 | 78.3235122 | 63 |
| 0:01:10 | 79.5523281 | 61 | 75.5663309 | 61 | 69.8428504 | 63 | 95.3857171 | 73 | 75.7575116 | 63 |
| 0:01:11 | 79.5523281 | 61 | 75.677442  | 61 | 69.9428504 | 63 | 94.1912727 | 73 | 75.6168866 | 63 |
| 0:01:12 | 79.1773281 | 61 | 75.0107753 | 61 | 69.9428504 | 63 | 92.2468282 | 73 | 75.6168866 | 63 |
| 0:01:13 | 79.3023281 | 61 | 74.677442  | 61 | 70.1428504 | 63 | 91.4690505 | 73 | 77.1985122 | 63 |
| 0:01:14 | 78.8023281 | 61 | 74.7885531 | 61 | 70.2428504 | 63 | 90.274606  | 73 | 76.8235122 | 63 |
| 0:01:15 | 80.1773281 | 61 | 74.8996642 | 61 | 70.2428504 | 63 | 89.6912727 | 73 | 76.8235122 | 63 |
| 0:01:16 | 80.1773281 | 61 | 74.7885531 | 61 | 69.7428504 | 63 | 89.6912727 | 73 | 76.9485122 | 63 |
| 0:01:17 | 80.4273281 | 61 | 74.5663309 | 61 | 69.6428504 | 63 | 88.3301616 | 73 | 76.9748892 | 63 |
| 0:01:18 | 80.0523281 | 61 | 74.4552198 | 61 | 69.4428504 | 63 | 88.3301616 | 73 | 76.9748892 | 63 |
| 0:01:19 | 80.0523281 | 61 | 73.8996642 | 61 | 69.1428504 | 63 | 86.9690505 | 73 | 75.9748892 | 63 |
| 0:01:20 | 80.6773281 | 69 | 73.2329976 | 61 | 69.2428504 | 63 | 86.774606  | 73 | 75.9748892 | 63 |
| 0:01:21 | 80.8023281 | 69 | 72.7885531 | 61 | 69.3428504 | 63 | 86.774606  | 73 | 76.0860003 | 63 |
| 0:01:22 | 80.3023281 | 69 | 72.0107753 | 61 | 69.5428504 | 63 | 86.3857171 | 73 | 75.9748892 | 63 |

|         |            |    |            |    |            |    |            |    |            |    |
|---------|------------|----|------------|----|------------|----|------------|----|------------|----|
| 0:01:23 | 80.5523281 | 69 | 71.8996642 | 61 | 70.0428504 | 63 | 86.3857171 | 73 | 76.3082225 | 63 |
| 0:01:24 | 80.8023281 | 69 | 71.8996642 | 61 | 70.3428504 | 63 | 81.524606  | 73 | 76.4193336 | 63 |
| 0:01:25 | 80.6773281 | 69 | 71.677442  | 61 | 70.4428504 | 63 | 81.1079393 | 73 | 76.3082225 | 63 |
| 0:01:26 | 79.8023281 | 69 | 71.5663309 | 61 | 70.5428504 | 63 | 81.4968282 | 73 | 76.4193336 | 63 |
| 0:01:27 | 79.6773281 | 69 | 71.3441087 | 61 | 70.4428504 | 63 | 82.274606  | 73 | 76.4193336 | 63 |
| 0:01:28 | 79.6773281 | 69 | 71.8996642 | 61 | 70.2428504 | 63 | 82.024606  | 73 | 76.3082225 | 63 |
| 0:01:29 | 79.4273281 | 69 | 71.8996642 | 61 | 70.5428504 | 63 | 82.4134949 | 73 | 76.0860003 | 63 |
| 0:01:30 | 79.4273281 | 69 | 72.1218865 | 61 | 70.4428504 | 63 | 83.3301616 | 73 | 76.1971114 | 63 |
| 0:01:31 | 79.5523281 | 69 | 72.8996642 | 61 | 70.4428504 | 63 | 82.524606  | 73 | 76.7526669 | 63 |
| 0:01:32 | 80.1773281 | 69 | 73.4552198 | 61 | 70.4428504 | 63 | 82.7190505 | 73 | 76.7526669 | 63 |
| 0:01:33 | 80.4273281 | 69 | 74.1218865 | 61 | 70.8428504 | 63 | 82.5801616 | 73 | 75.9748892 | 63 |
| 0:01:34 | 79.9273281 | 69 | 74.3441087 | 61 | 70.6428504 | 63 | 82.1912727 | 73 | 76.8637781 | 63 |
| 0:01:35 | 79.6773281 | 69 | 72.83393   | 61 | 71.4428504 | 63 | 82.5801616 | 73 | 76.8637781 | 63 |
| 0:01:36 | 79.3023281 | 69 | 72.7351646 | 61 | 71.1428504 | 63 | 82.4968282 | 73 | 76.4193336 | 63 |
| 0:01:37 | 79.4273281 | 69 | 72.3647942 | 61 | 70.7428504 | 63 | 82.8857171 | 73 | 76.3082225 | 63 |
| 0:01:38 | 78.9273281 | 69 | 72.6363991 | 61 | 70.5428504 | 63 | 83.5523838 | 73 | 75.3082225 | 63 |
| 0:01:39 | 78.0523281 | 69 | 72.7722016 | 61 | 70.3428504 | 63 | 83.6079393 | 73 | 75.8637781 | 63 |
| 0:01:40 | 77.9273281 | 69 | 72.6487448 | 61 | 70.1428504 | 63 | 82.8301616 | 73 | 75.9748892 | 63 |
| 0:01:41 | 77.9273281 | 69 | 72.7722016 | 61 | 70.1428504 | 63 | 82.2468282 | 73 | 75.6415558 | 63 |
| 0:01:42 | 78.3023281 | 69 | 73.0191152 | 61 | 70.4428504 | 63 | 81.8579393 | 73 | 75.5304447 | 63 |
| 0:01:43 | 78.3023281 | 69 | 73.3894856 | 61 | 70.3428504 | 63 | 81.6634949 | 73 | 75.4193336 | 63 |
| 0:01:44 | 78.1773281 | 69 | 73.142572  | 61 | 70.4428504 | 63 | 81.1357171 | 73 | 74.9748892 | 63 |
| 0:01:45 | 78.9273281 | 69 | 73.7598559 | 61 | 70.6428504 | 63 | 81.1357171 | 73 | 74.8821932 | 63 |
| 0:01:46 | 79.1773281 | 69 | 73.8833127 | 61 | 71.4428504 | 63 | 81.524606  | 73 | 74.6821932 | 63 |
| 0:01:47 | 77.5156461 | 69 | 73.6363991 | 61 | 72.2428504 | 63 | 81.9134949 | 73 | 74.8821932 | 63 |
| 0:01:48 | 76.6718961 | 69 | 73.7598559 | 61 | 72.0428504 | 63 | 82.3301616 | 73 | 74.9821932 | 63 |
| 0:01:49 | 76.2500211 | 69 | 74.6240535 | 61 | 72.2428504 | 63 | 82.1357171 | 73 | 75.2821932 | 63 |
| 0:01:50 | 76.2500211 | 69 | 74.3524485 | 61 | 71.7428504 | 63 | 82.524606  | 73 | 75.1821932 | 63 |
| 0:01:51 | 76.1093961 | 69 | 74.5993621 | 61 | 71.6428504 | 63 | 82.9412727 | 73 | 75.3821932 | 63 |
| 0:01:52 | 75.8281461 | 69 | 74.83393   | 61 | 71.4428504 | 63 | 82.2190505 | 73 | 75.2821932 | 63 |
| 0:01:53 | 75.5781461 | 69 | 74.9697325 | 61 | 71.9428504 | 63 | 81.8301616 | 73 | 75.9821932 | 63 |
| 0:01:54 | 75.7343961 | 69 | 74.1178806 | 61 | 71.8428504 | 63 | 81.8579393 | 73 | 76.3821932 | 63 |
| 0:01:55 | 75.1718961 | 69 | 72.326533  | 61 | 72.0428504 | 63 | 81.0801616 | 73 | 76.9821932 | 63 |
| 0:01:56 | 75.0468961 | 69 | 74.44165   | 61 | 72.4428504 | 63 | 80.1079393 | 73 | 77.5821932 | 63 |
| 0:01:57 | 75.0625211 | 69 | 74.5897981 | 61 | 72.6428504 | 63 | 79.1357171 | 73 | 78.1821932 | 63 |
| 0:01:58 | 72.8495261 | 69 | 74.7626376 | 61 | 73.1428504 | 63 | 78.7468282 | 73 | 78.5821932 | 63 |
| 0:01:59 | 72.8495261 | 69 | 74.5404154 | 61 | 73.0428504 | 63 | 78.5523838 | 73 | 79.0821932 | 63 |
| 0:02:00 | 74.7500211 | 69 | 74.6885635 | 61 | 72.8428504 | 63 | 77.774606  | 73 | 79.3821932 | 63 |
| 0:02:01 | 74.7500211 | 69 | 74.9478228 | 61 | 72.1428504 | 63 | 77.3857171 | 73 | 79.3821932 | 63 |
| 0:02:02 | 75.1718961 | 69 | 75.0218969 | 61 | 71.0428504 | 63 | 77.9412727 | 73 | 79.0821932 | 63 |
| 0:02:03 | 75.7343961 | 69 | 73.4252984 | 61 | 70.3428504 | 63 | 77.5523838 | 69 | 78.7821932 | 63 |
| 0:02:04 | 75.5937711 | 69 | 75.7749833 | 61 | 70.2428504 | 63 | 77.4690505 | 69 | 78.0821932 | 63 |
| 0:02:05 | 75.7343961 | 69 | 74.1536935 | 61 | 70.9428504 | 63 | 78.2468282 | 69 | 76.6821932 | 63 |

|         |            |    |            |    |            |    |            |    |            |    |
|---------|------------|----|------------|----|------------|----|------------|----|------------|----|
| 0:02:06 | 73.4120261 | 69 | 74.6104836 | 61 | 70.6428504 | 63 | 78.6079393 | 69 | 77.0821932 | 63 |
| 0:02:07 | 75.3125211 | 69 | 76.6638722 | 61 | 70.5428504 | 63 | 78.6079393 | 69 | 76.8821932 | 63 |
| 0:02:08 | 74.7500211 | 69 | 76.478687  | 61 | 70.2428504 | 63 | 78.2190505 | 69 | 77.1821932 | 63 |
| 0:02:09 | 74.8906461 | 69 | 76.2564648 | 61 | 70.2428504 | 63 | 78.5801616 | 69 | 76.4821932 | 63 |
| 0:02:10 | 75.1562711 | 69 | 75.9231314 | 61 | 69.4428504 | 63 | 78.5523838 | 69 | 76.4821932 | 63 |
| 0:02:11 | 75.4218961 | 69 | 74.0055453 | 61 | 69.2428504 | 71 | 77.774606  | 69 | 76.5821932 | 63 |
| 0:02:12 | 75.8281461 | 69 | 76.2070821 | 61 | 69.2428504 | 71 | 78.1357171 | 69 | 76.0821932 | 63 |
| 0:02:13 | 76.5312711 | 69 | 76.170045  | 61 | 69.5428504 | 71 | 80.6634949 | 69 | 75.4821932 | 63 |
| 0:02:14 | 77.0937711 | 69 | 76.0342425 | 61 | 70.4428504 | 71 | 80.6634949 | 69 | 75.8821932 | 63 |
| 0:02:15 | 77.2500211 | 69 | 74.0425824 | 61 | 71.0428504 | 71 | 80.4690505 | 69 | 75.8821932 | 63 |
| 0:02:16 | 76.5312711 | 69 | 73.635175  | 61 | 71.9428504 | 71 | 82.2190505 | 69 | 76.4821932 | 63 |
| 0:02:17 | 74.7557761 | 69 | 72.7709774 | 61 | 73.2428504 | 71 | 82.2190505 | 69 | 76.7821932 | 63 |
| 0:02:18 | 74.5995261 | 69 | 71.8450515 | 61 | 73.3428504 | 71 | 82.2190505 | 69 | 76.4821932 | 63 |
| 0:02:19 | 74.9120261 | 69 | 71.9685083 | 61 | 73.3428504 | 71 | 82.4412727 | 69 | 76.3821932 | 63 |
| 0:02:20 | 76.9687711 | 69 | 72.017891  | 61 | 73.2428504 | 71 | 83.0523838 | 69 | 74.9102608 | 63 |
| 0:02:21 | 77.6718961 | 69 | 72.017891  | 61 | 73.5428504 | 71 | 84.6079393 | 69 | 74.8002608 | 63 |
| 0:02:22 | 77.6718961 | 69 | 71.9561626 | 61 | 73.4428504 | 71 | 86.9412727 | 69 | 74.6902608 | 63 |
| 0:02:23 | 78.3906461 | 69 | 71.6845577 | 61 | 73.4428504 | 71 | 87.3023838 | 69 | 74.4702608 | 63 |
| 0:02:24 | 77.9531461 | 69 | 71.3141873 | 61 | 73.1428504 | 71 | 87.3023838 | 69 | 74.8002608 | 63 |
| 0:02:25 | 78.2343961 | 69 | 71.3882614 | 61 | 72.8428504 | 71 | 87.8857171 | 69 | 76.7821932 | 63 |
| 0:02:26 | 78.8125211 | 69 | 71.3018416 | 61 | 72.7428504 | 71 | 88.4690505 | 69 | 76.7821932 | 63 |
| 0:02:27 | 79.0937711 | 69 | 71.326533  | 61 | 72.4428504 | 71 | 88.0801616 | 69 | 75.9821932 | 63 |
| 0:02:28 | 79.3750211 | 69 | 71.3759157 | 61 | 73.5428504 | 71 | 87.3023838 | 69 | 75.3821932 | 63 |
| 0:02:29 | 81.9273281 | 69 | 72.1907305 | 61 | 73.6428504 | 71 | 87.8857171 | 69 | 75.2821932 | 63 |
| 0:02:30 | 80.3750211 | 69 | 72.4623355 | 61 | 74.0428504 | 71 | 87.8857171 | 69 | 74.9821932 | 63 |
| 0:02:31 | 82.8023281 | 69 | 72.8697429 | 61 | 74.2428504 | 71 | 88.0801616 | 69 | 75.1821932 | 63 |
| 0:02:32 | 82.6773281 | 69 | 73.1043108 | 61 | 74.4428504 | 71 | 86.7190505 | 69 | 74.9821932 | 63 |
| 0:02:33 | 82.9273281 | 69 | 73.3759157 | 61 | 73.5428504 | 71 | 86.7190505 | 69 | 74.9821932 | 63 |
| 0:02:34 | 82.6773281 | 69 | 74.4870268 | 61 | 73.0428504 | 71 | 86.524606  | 69 | 74.1821932 | 63 |
| 0:02:35 | 81.8023281 | 69 | 75.1660392 | 61 | 72.6428504 | 71 | 85.7468282 | 69 | 72.7821932 | 63 |
| 0:02:36 | 81.8023281 | 69 | 76.9685083 | 61 | 72.3428504 | 71 | 84.7468282 | 69 | 72.1821932 | 63 |
| 0:02:37 | 81.5523281 | 69 | 78.0425824 | 61 | 71.1428504 | 71 | 84.774606  | 69 | 71.6821932 | 63 |
| 0:02:38 | 81.0523281 | 69 | 79.4746811 | 61 | 70.0428504 | 71 | 84.024606  | 69 | 73.0821932 | 63 |
| 0:02:39 | 81.1773281 | 69 | 79.5240639 | 61 | 70.0428504 | 71 | 83.2468282 | 69 | 74.6821932 | 63 |
| 0:02:40 | 80.4273281 | 69 | 79.4129528 | 61 | 69.9428504 | 71 | 83.274606  | 69 | 75.5821932 | 63 |
| 0:02:41 | 80.6773281 | 69 | 79.5734466 | 61 | 69.6428504 | 71 | 83.274606  | 69 | 76.1821932 | 63 |
| 0:02:42 | 80.5523281 | 69 | 79.8450515 | 61 | 70.2428504 | 71 | 83.0523838 | 69 | 74.5802608 | 63 |
| 0:02:43 | 80.4273281 | 69 | 79.8697429 | 61 | 69.7428504 | 71 | 82.274606  | 69 | 74.1502608 | 63 |
| 0:02:44 | 80.3023281 | 69 | 79.0796194 | 61 | 69.6428504 | 71 | 82.6634949 | 69 | 74.2602608 | 63 |
| 0:02:45 | 80.0523281 | 69 | 78.943817  | 61 | 69.3428504 | 71 | 79.9134949 | 69 | 74.2602608 | 63 |
| 0:02:46 | 80.0523281 | 69 | 77.5611009 | 61 | 68.9428504 | 71 | 79.1357171 | 69 | 75.1402608 | 63 |
| 0:02:47 | 79.8023281 | 69 | 76.6104836 | 61 | 69.1428504 | 71 | 79.1357171 | 69 | 75.9821932 | 63 |
| 0:02:48 | 80.3023281 | 69 | 76.1783849 | 61 | 69.7428504 | 71 | 79.274606  | 69 | 75.9821932 | 63 |

|         |            |    |            |    |            |    |            |    |            |    |
|---------|------------|----|------------|----|------------|----|------------|----|------------|----|
| 0:02:49 | 80.4273281 | 69 | 75.6598663 | 61 | 69.8428504 | 71 | 79.2468282 | 69 | 75.1821932 | 63 |
| 0:02:50 | 81.0523281 | 69 | 75.4129528 | 61 | 69.8428504 | 63 | 79.9968282 | 69 | 73.7821932 | 63 |
| 0:02:51 | 81.3023281 | 69 | 75.1660392 | 61 | 69.3428504 | 63 | 80.774606  | 69 | 73.3821932 | 63 |
| 0:02:52 | 81.3023281 | 69 | 75.1413478 | 61 | 68.7428504 | 63 | 80.3857171 | 69 | 74.4821932 | 63 |
| 0:02:53 | 81.1773281 | 69 | 75.4129528 | 61 | 68.7428504 | 63 | 80.774606  | 69 | 74.8821932 | 63 |
| 0:02:54 | 81.0523281 | 69 | 75.6598663 | 61 | 68.7428504 | 63 | 81.1634949 | 69 | 75.2821932 | 63 |
| 0:02:55 | 80.9273281 | 69 | 75.6598663 | 61 | 69.9428504 | 63 | 83.1079393 | 69 | 75.2821932 | 63 |
| 0:02:56 | 80.3023281 | 69 | 75.635175  | 61 | 70.2428504 | 63 | 81.7468282 | 69 | 75.0821932 | 63 |
| 0:02:57 | 81.3023281 | 69 | 75.9067799 | 61 | 71.1428504 | 63 | 81.7468282 | 69 | 74.6821932 | 63 |
| 0:02:58 | 80.9273281 | 69 | 75.9931997 | 61 | 71.6428504 | 63 | 80.9412727 | 69 | 74.5821932 | 63 |
| 0:02:59 | 81.1773281 | 69 | 76.4006071 | 61 | 72.1428504 | 63 | 76.7589485 | 69 | 74.4821932 | 63 |
| 0:03:00 | 80.8023281 | 69 | 76.6228293 | 61 | 72.0428504 | 63 | 75.2589485 | 69 | 74.2821932 | 63 |

Dataset A

1st 3 minutes

S2 Dataset A

| 92314.17 | 92414.15  | 92414.16   | 92414.17    | 92514.18 | 92514.2  |
|----------|-----------|------------|-------------|----------|----------|
| 10am     | 8.30-9.30 | 9:30-10:30 | 10:30-11:35 | 9-10:15  | 10:30-12 |

|            |    |            |    |            |    |            |    |            |    |            |
|------------|----|------------|----|------------|----|------------|----|------------|----|------------|
| 67.2120799 | 63 | 78.493489  | 61 | 75.6830694 | 61 | 69.3849147 | 61 | 79.4139558 | 60 | 63.4095318 |
| 66.9120799 | 63 | 79.1601557 | 61 | 75.8830694 | 63 | 69.5099147 | 61 | 79.595774  | 60 | 63.8857223 |
| 66.6120799 | 63 | 79.493489  | 61 | 76.2830694 | 63 | 69.6349147 | 61 | 78.7775921 | 60 | 64.0444525 |
| 65.6120799 | 63 | 79.8268223 | 61 | 76.8830694 | 63 | 69.5099147 | 61 | 78.5048649 | 60 | 63.9492144 |
| 65.6120799 | 63 | 80.8268223 | 61 | 74.7770893 | 63 | 70.2599147 | 61 | 78.1412285 | 60 | 63.9501513 |
| 65.5120799 | 63 | 81.8268223 | 61 | 75.0170893 | 63 | 70.3849147 | 61 | 78.2321376 | 60 | 65.5676978 |
| 65.5120799 | 63 | 81.1601557 | 61 | 75.2570893 | 63 | 70.5099147 | 61 | 77.8685012 | 60 | 66.0676978 |
| 65.3120799 | 63 | 82.493489  | 61 | 78.4830694 | 63 | 70.7599147 | 61 | 78.0503194 | 60 | 65.9426978 |
| 65.0120799 | 63 | 77.0245939 | 61 | 78.8830694 | 63 | 70.8849147 | 61 | 77.2321376 | 60 | 65.3176978 |
| 65.0120799 | 63 | 76.5801494 | 61 | 79.0830694 | 63 | 71.5099147 | 61 | 76.9594103 | 60 | 64.9426978 |
| 65.3120799 | 63 | 76.135705  | 61 | 80.0830694 | 63 | 70.7599147 | 61 | 77.1412285 | 60 | 64.4426978 |
| 65.1120799 | 63 | 75.3579272 | 61 | 80.4830694 | 63 | 70.8849147 | 61 | 77.5048649 | 60 | 64.4426978 |
| 65.0120799 | 63 | 74.0245939 | 61 | 80.6830694 | 63 | 68.2599147 | 61 | 77.7775921 | 60 | 64.1926978 |
| 64.8120799 | 63 | 74.4690383 | 61 | 80.4830694 | 63 | 67.7599147 | 61 | 78.2321376 | 60 | 64.6216908 |
| 64.8120799 | 63 | 74.3579272 | 61 | 80.2830694 | 63 | 68.6349147 | 61 | 78.5048649 | 60 | 64.7328019 |
| 65.1120799 | 63 | 75.2468161 | 61 | 78.6830694 | 63 | 68.5099147 | 61 | 78.6866831 | 60 | 65.0898244 |
| 65.5120799 | 63 | 76.5801494 | 61 | 78.4830694 | 63 | 68.0099147 | 61 | 78.595774  | 60 | 65.0898244 |
| 65.6120799 | 63 | 77.4690383 | 61 | 79.2830694 | 63 | 67.2599147 | 61 | 78.595774  | 60 | 64.9080063 |
| 65.7120799 | 63 | 77.0245939 | 61 | 79.4830694 | 63 | 64.6617634 | 61 | 78.9594103 | 60 | 64.9080063 |
| 65.7120799 | 63 | 82.8268223 | 61 | 79.2830694 | 63 | 64.3805134 | 61 | 79.0503194 | 60 | 64.9080063 |
| 65.7120799 | 63 | 82.493489  | 61 | 79.2830694 | 63 | 64.3961384 | 61 | 79.1412285 | 60 | 65.3625517 |
| 66.6120799 | 63 | 77.4690383 | 61 | 79.2830694 | 63 | 64.2555134 | 61 | 79.4139558 | 60 | 65.2716426 |
| 66.6120799 | 63 | 77.0245939 | 61 | 79.4830694 | 63 | 64.5367634 | 61 | 79.7775921 | 60 | 65.7261881 |
| 66.4120799 | 63 | 75.5801494 | 61 | 78.2830694 | 63 | 65.1305134 | 61 | 79.6866831 | 60 | 66.1807335 |
| 66.7120799 | 63 | 79.1601557 | 61 | 78.0830694 | 63 | 64.7242634 | 61 | 79.9594103 | 60 | 68.9989154 |
| 67.0120799 | 63 | 79.1601557 | 61 | 77.8830694 | 63 | 65.5680134 | 61 | 80.0503194 | 60 | 69.0898244 |
| 67.3120799 | 63 | 79.1601557 | 61 | 77.6830694 | 63 | 65.4273884 | 61 | 80.595774  | 60 | 70.7261881 |
| 67.6120799 | 63 | 72.7972013 | 61 | 77.8830694 | 63 | 65.5680134 | 61 | 80.8685012 | 60 | 71.8170972 |
| 67.9120799 | 63 | 72.1097013 | 61 | 77.8830694 | 63 | 66.2711384 | 61 | 80.595774  | 60 | 71.9989154 |
| 68.3120799 | 63 | 70.8597013 | 61 | 77.6830694 | 63 | 66.5523884 | 61 | 79.9623816 | 60 | 72.5443699 |
| 68.8120799 | 63 | 70.9847013 | 61 | 77.0830694 | 63 | 66.9742634 | 61 | 81.5048649 | 61 | 72.7261881 |
| 69.0120799 | 63 | 72.1844626 | 61 | 76.8830694 | 63 | 68.0992634 | 61 | 81.4139558 | 61 | 72.7261881 |
| 68.9120799 | 63 | 71.4344626 | 61 | 76.4830694 | 63 | 68.3805134 | 61 | 81.8685012 | 61 | 72.9989154 |
| 69.5120799 | 63 | 71.6844626 | 61 | 76.8830694 | 63 | 68.3805134 | 61 | 81.7775921 | 61 | 72.9989154 |
| 69.8120799 | 63 | 71.9344626 | 61 | 76.4830694 | 63 | 68.5211384 | 61 | 81.1412285 | 61 | 73.0898244 |
| 69.9120799 | 63 | 71.6844626 | 61 | 76.0830694 | 63 | 68.1148884 | 61 | 81.1412285 | 61 | 71.7261881 |
| 69.4120799 | 63 | 71.9344626 | 61 | 76.0830694 | 63 | 67.4273884 | 61 | 81.5048649 | 61 | 71.8170972 |
| 70.1120799 | 63 | 71.6844626 | 61 | 76.6830694 | 63 | 67.1617634 | 61 | 81.595774  | 61 | 71.1807335 |
| 70.4120799 | 63 | 71.1844626 | 61 | 77.6830694 | 63 | 67.1617634 | 61 | 81.9594103 | 63 | 71.0898244 |

|            |    |            |    |            |    |            |    |            |    |            |
|------------|----|------------|----|------------|----|------------|----|------------|----|------------|
| 70.8120799 | 63 | 71.9344626 | 61 | 78.0830694 | 63 | 66.7398884 | 61 | 82.1412285 | 63 | 70.7261881 |
| 71.2120799 | 63 | 67.9847013 | 61 | 77.6830694 | 63 | 66.8805134 | 61 | 81.9594103 | 63 | 70.8170972 |
| 70.5120799 | 63 | 67.6722013 | 61 | 77.6830694 | 63 | 66.1461384 | 61 | 81.6866831 | 63 | 71.0898244 |
| 70.5120799 | 63 | 67.9847013 | 61 | 77.8830694 | 63 | 66.0211384 | 61 | 82.1412285 | 63 | 71.0898244 |
| 70.6120799 | 63 | 67.9847013 | 61 | 77.8830694 | 63 | 66.1617634 | 61 | 82.0503194 | 63 | 70.5443699 |
| 70.6120799 | 63 | 68.0472013 | 61 | 78.0830694 | 63 | 66.3180134 | 61 | 82.2321376 | 63 | 70.4534608 |
| 70.9120799 | 63 | 67.7347013 | 61 | 78.4830694 | 63 | 66.3180134 | 61 | 82.2321376 | 63 | 70.5443699 |
| 71.1120799 | 63 | 66.7972013 | 61 | 78.8830694 | 63 | 67.0367634 | 61 | 82.2321376 | 63 | 70.4534608 |
| 70.6120799 | 63 | 67.1097013 | 61 | 80.2830694 | 63 | 67.0367634 | 61 | 82.9594103 | 63 | 69.8170972 |
| 69.9632566 | 63 | 67.1097013 | 61 | 80.6830694 | 63 | 67.5992634 | 61 | 81.4139558 | 63 | 69.5443699 |
| 69.5996202 | 63 | 67.1097013 | 61 | 80.4830694 | 63 | 68.7242634 | 61 | 80.9594103 | 63 | 69.635279  |
| 69.1450748 | 63 | 66.7972013 | 61 | 80.4830694 | 63 | 69.4117634 | 61 | 81.1412285 | 63 | 69.5443699 |
| 68.5996202 | 63 | 67.6722013 | 61 | 80.2830694 | 63 | 69.6461384 | 61 | 81.2321376 | 63 | 68.9989154 |
| 68.417802  | 63 | 67.9847013 | 61 | 79.4830694 | 63 | 69.7867634 | 61 | 81.0503194 | 63 | 69.3625517 |
| 67.5087111 | 63 | 68.3597013 | 61 | 78.8830694 | 63 | 69.2242634 | 61 | 81.6866831 | 63 | 69.2716426 |
| 67.1450748 | 63 | 68.3597013 | 61 | 78.2830694 | 63 | 68.2242634 | 61 | 81.595774  | 63 | 69.635279  |
| 66.9632566 | 63 | 70.0472013 | 61 | 78.4830694 | 63 | 67.0523884 | 61 | 81.2321376 | 63 | 69.635279  |
| 66.8723475 | 63 | 70.2972013 | 61 | 78.8830694 | 63 | 66.4898884 | 61 | 81.4139558 | 63 | 69.3625517 |
| 66.7814384 | 63 | 71.4847013 | 61 | 79.6830694 | 63 | 68.6349147 | 61 | 81.4139558 | 63 | 69.3625517 |
| 66.7814384 | 63 | 73.0129817 | 61 | 79.4830694 | 63 | 67.8849147 | 61 | 81.3230467 | 63 | 69.5443699 |
| 65.7814384 | 63 | 77.6830694 | 61 | 79.0830694 | 63 | 68.2599147 | 61 | 81.5048649 | 63 | 70.0898244 |
| 65.5087111 | 63 | 78.0830694 | 61 | 78.6830694 | 63 | 68.1349147 | 61 | 81.1412285 | 63 | 70.635279  |
| 64.9632566 | 63 | 78.6830694 | 61 | 78.2830694 | 63 | 68.1349147 | 61 | 80.8685012 | 63 | 70.9080063 |
| 64.6905293 | 63 | 79.0830694 | 61 | 76.4830694 | 63 | 68.1349147 | 61 | 80.6866831 | 63 | 70.635279  |
| 64.5087111 | 63 | 79.6830694 | 61 | 74.8830694 | 63 | 68.1349147 | 61 | 80.4139558 | 63 | 70.2716426 |
| 65.2359838 | 63 | 79.0830694 | 61 | 73.8830694 | 63 | 68.2599147 | 61 | 80.3230467 | 63 | 70.0898244 |
| 65.1450748 | 63 | 78.8830694 | 61 | 73.4830694 | 63 | 69.2599147 | 61 | 80.7775921 | 63 | 69.9989154 |
| 65.1450748 | 63 | 78.4830694 | 61 | 73.6830694 | 63 | 70.0099147 | 61 | 81.1412285 | 63 | 69.635279  |
| 65.417802  | 63 | 77.2830694 | 61 | 74.2830694 | 63 | 70.2599147 | 61 | 81.2321376 | 63 | 69.3625517 |
| 65.1450748 | 63 | 77.4830694 | 61 | 74.8830694 | 63 | 70.2599147 | 61 | 81.6866831 | 63 | 69.4534608 |
| 65.6905293 | 63 | 77.2830694 | 61 | 75.0830694 | 63 | 70.3849147 | 61 | 81.6866831 | 63 | 69.9080063 |
| 66.6905293 | 63 | 76.8830694 | 61 | 75.0830694 | 63 | 70.2599147 | 61 | 81.4139558 | 63 | 70.1807335 |
| 66.3268929 | 63 | 77.0830694 | 61 | 75.0830694 | 63 | 68.0099147 | 61 | 81.595774  | 63 | 71.3625517 |
| 66.7814384 | 63 | 77.6830694 | 61 | 75.2830694 | 63 | 68.0099147 | 61 | 81.3230467 | 63 | 71.5443699 |
| 67.1450748 | 63 | 77.6830694 | 61 | 75.4830694 | 63 | 67.7599147 | 61 | 78.3665685 | 63 | 71.2716426 |
| 66.7814384 | 63 | 77.6830694 | 61 | 74.6830694 | 63 | 67.8849147 | 61 | 78.0773123 | 63 | 71.635279  |
| 66.417802  | 63 | 77.6830694 | 61 | 75.6830694 | 63 | 67.1349147 | 61 | 77.8789652 | 63 | 71.7261881 |
| 66.0541657 | 63 | 77.2830694 | 61 | 76.2830694 | 63 | 67.0099147 | 61 | 78.267395  | 63 | 71.4534608 |
| 66.6905293 | 63 | 77.0830694 | 61 | 76.4830694 | 63 | 67.0099147 | 61 | 80.3230467 | 63 | 71.1807335 |
| 66.6905293 | 63 | 77.4830694 | 61 | 76.4830694 | 63 | 67.0099147 | 61 | 80.6866831 | 63 | 71.0898244 |
| 66.5996202 | 63 | 77.2830694 | 61 | 76.6830694 | 63 | 66.6349147 | 61 | 80.3230467 | 63 | 71.0898244 |
| 67.1450748 | 63 | 77.2830694 | 61 | 76.2830694 | 63 | 66.8849147 | 63 | 79.0690479 | 63 | 70.9080063 |
| 67.3268929 | 63 | 76.8830694 | 61 | 76.4830694 | 63 | 67.1349147 | 63 | 79.0690479 | 63 | 70.8170972 |

|            |    |            |    |            |    |            |    |            |    |            |
|------------|----|------------|----|------------|----|------------|----|------------|----|------------|
| 67.8723475 | 63 | 76.6830694 | 61 | 76.0830694 | 63 | 67.5099147 | 63 | 79.0690479 | 63 | 69.9989154 |
| 68.1450748 | 63 | 76.8830694 | 61 | 76.0830694 | 63 | 67.2599147 | 63 | 79.6640892 | 63 | 69.2716426 |
| 68.5996202 | 63 | 77.0830694 | 61 | 75.4830694 | 63 | 67.0099147 | 63 | 80.595774  | 63 | 69.1807335 |
| 68.7814384 | 63 | 76.4830694 | 61 | 75.0830694 | 63 | 67.7599147 | 63 | 80.2321376 | 63 | 68.8170972 |
| 68.8723475 | 63 | 76.0830694 | 61 | 74.8830694 | 63 | 67.8849147 | 63 | 80.0503194 | 63 | 68.8170972 |
| 68.8723475 | 63 | 76.0830694 | 61 | 74.8830694 | 63 | 68.0099147 | 63 | 79.7775921 | 63 | 68.635279  |
| 68.8723475 | 63 | 75.6830694 | 61 | 75.6830694 | 63 | 69.2599147 | 63 | 79.6866831 | 63 | 68.5443699 |
| 68.9632566 | 63 | 75.4830694 | 61 | 75.4830694 | 63 | 69.5099147 | 63 | 80.4139558 | 63 | 68.0898244 |
| 69.0541657 | 63 | 75.4830694 | 61 | 75.0830694 | 63 | 69.8849147 | 63 | 80.9594103 | 63 | 68.1807335 |
| 69.0541657 | 63 | 75.4830694 | 61 | 75.0830694 | 63 | 69.7599147 | 63 | 80.1412285 | 63 | 68.2716426 |
| 68.9632566 | 63 | 75.4830694 | 61 | 74.6830694 | 63 | 69.7599147 | 63 | 79.8685012 | 63 | 68.0898244 |
| 69.1450748 | 63 | 75.4830694 | 61 | 75.2830694 | 63 | 68.6349147 | 63 | 79.5048649 | 63 | 67.9989154 |
| 69.2359838 | 63 | 75.2830694 | 61 | 75.0830694 | 63 | 68.5099147 | 63 | 79.2321376 | 63 | 67.4534608 |
| 69.0541657 | 63 | 75.2830694 | 61 | 75.0830694 | 63 | 65.5444656 | 63 | 79.0503194 | 63 | 67.7261881 |
| 69.0541657 | 63 | 75.6830694 | 61 | 75.2830694 | 63 | 65.4350906 | 63 | 78.9594103 | 63 | 68.2716426 |
| 68.7814384 | 63 | 75.6830694 | 61 | 74.6830694 | 63 | 65.4507156 | 63 | 79.2321376 | 63 | 68.5443699 |
| 68.5996202 | 63 | 75.8830694 | 61 | 74.2830694 | 63 | 65.1694656 | 63 | 77.5048649 | 63 | 69.9989154 |
| 68.5087111 | 63 | 75.8830694 | 61 | 73.8830694 | 63 | 65.1225906 | 63 | 77.595774  | 63 | 69.9989154 |
| 69.0541657 | 63 | 75.8830694 | 61 | 74.0830694 | 63 | 65.2632156 | 63 | 77.595774  | 63 | 69.7261881 |
| 68.7814384 | 63 | 75.4830694 | 61 | 73.5407084 | 63 | 65.1069656 | 63 | 77.3230467 | 63 | 69.4534608 |
| 68.9632566 | 63 | 75.4830694 | 61 | 73.8740417 | 63 | 68.2599147 | 63 | 77.4139558 | 63 | 69.0898244 |
| 68.5996202 | 63 | 75.4830694 | 61 | 74.0407084 | 63 | 68.3849147 | 63 | 77.3230467 | 63 | 69.2716426 |
| 68.5996202 | 63 | 75.6830694 | 61 | 73.707375  | 63 | 68.3849147 | 63 | 77.595774  | 63 | 70.0898244 |
| 68.7814384 | 63 | 76.0830694 | 61 | 74.0407084 | 63 | 68.8849147 | 63 | 77.595774  | 63 | 70.3625517 |
| 68.9632566 | 63 | 76.0830694 | 61 | 74.707375  | 63 | 69.2599147 | 63 | 77.7775921 | 71 | 70.4534608 |
| 69.5996202 | 63 | 76.0830694 | 61 | 75.5407084 | 63 | 69.7599147 | 63 | 78.1412285 | 71 | 71.635279  |
| 70.1450748 | 63 | 75.6830694 | 61 | 75.707375  | 63 | 70.6349147 | 63 | 78.4139558 | 71 | 71.9989154 |
| 70.3268929 | 63 | 75.6830694 | 61 | 75.0407084 | 63 | 70.5099147 | 63 | 79.595774  | 71 | 72.2716426 |
| 70.5087111 | 63 | 75.6830694 | 61 | 75.5407084 | 63 | 69.6349147 | 63 | 80.4139558 | 71 | 72.9989154 |
| 71.417802  | 63 | 75.4830694 | 61 | 74.8740417 | 63 | 69.3849147 | 63 | 79.9594103 | 71 | 72.9989154 |
| 71.417802  | 63 | 75.4830694 | 61 | 75.707375  | 63 | 69.7599147 | 63 | 79.9594103 | 71 | 72.635279  |
| 72.3268929 | 63 | 74.8830694 | 61 | 75.707375  | 63 | 69.7599147 | 63 | 79.3230467 | 71 | 71.9989154 |
| 72.5996202 | 63 | 75.0830694 | 61 | 75.707375  | 63 | 70.1349147 | 63 | 79.1412285 | 71 | 72.0898244 |
| 73.5996202 | 63 | 74.8830694 | 61 | 76.207375  | 63 | 70.0099147 | 63 | 79.0503194 | 71 | 71.2716426 |
| 73.0541657 | 63 | 75.6830694 | 61 | 75.707375  | 63 | 69.8849147 | 63 | 79.2321376 | 71 | 70.8170972 |
| 72.0541657 | 63 | 75.8830694 | 61 | 75.3740417 | 63 | 69.6349147 | 63 | 79.4139558 | 71 | 70.8170972 |
| 71.2359838 | 63 | 76.2830694 | 61 | 75.0407084 | 63 | 69.6349147 | 63 | 79.7775921 | 71 | 69.9989154 |
| 70.8723475 | 63 | 76.8830694 | 61 | 74.707375  | 63 | 70.0099147 | 63 | 80.2321376 | 71 | 69.8170972 |
| 70.6905293 | 63 | 74.7770893 | 61 | 74.3740417 | 63 | 70.5099147 | 63 | 80.2321376 | 71 | 69.1807335 |
| 70.2359838 | 63 | 75.0170893 | 61 | 74.707375  | 63 | 70.8849147 | 63 | 80.3230467 | 71 | 68.9080063 |
| 70.5087111 | 63 | 75.2570893 | 61 | 74.207375  | 63 | 71.5099147 | 63 | 80.2321376 | 71 | 68.4534608 |
| 70.417802  | 63 | 78.4830694 | 61 | 73.8740417 | 63 | 71.3849147 | 63 | 79.8685012 | 63 | 68.4534608 |
| 70.417802  | 63 | 78.8830694 | 61 | 73.8740417 | 63 | 70.3849147 | 63 | 79.4139558 | 63 | 68.3625517 |



|            |    |            |    |            |    |            |    |            |    |            |
|------------|----|------------|----|------------|----|------------|----|------------|----|------------|
| 70.3268929 | 63 | 79.0830694 | 61 | 73.8740417 | 63 | 70.3849147 | 63 | 78.6866831 | 63 | 67.9989154 |
| 70.5087111 | 63 | 80.0830694 | 61 | 74.3740417 | 63 | 69.3849147 | 63 | 78.595774  | 63 | 68.3625517 |
| 70.5087111 | 63 | 80.4830694 | 61 | 74.3740417 | 63 | 68.6349147 | 63 | 77.595774  | 63 | 68.5443699 |
| 70.0541657 | 63 | 80.6830694 | 63 | 74.207375  | 63 | 69.0099147 | 63 | 77.595774  | 63 | 68.2716426 |
| 69.5087111 | 63 | 80.4830694 | 63 | 73.8740417 | 63 | 68.3849147 | 63 | 77.6866831 | 63 | 68.635279  |
| 69.5087111 | 63 | 80.2830694 | 63 | 74.8740417 | 63 | 68.2599147 | 63 | 78.2321376 | 63 | 68.8170972 |
| 69.3268929 | 63 | 78.6830694 | 63 | 75.8740417 | 63 | 68.3849147 | 63 | 78.6866831 | 63 | 69.4534608 |
| 69.6905293 | 63 | 78.4830694 | 63 | 75.8740417 | 63 | 68.8849147 | 63 | 79.2321376 | 63 | 69.5443699 |
| 69.8723475 | 63 | 79.2830694 | 63 | 76.5407084 | 63 | 69.7599147 | 63 | 79.1412285 | 63 | 69.635279  |
| 69.0541657 | 63 | 79.4830694 | 63 | 76.207375  | 63 | 70.1349147 | 63 | 78.7775921 | 63 | 70.0898244 |
| 69.2359838 | 63 | 79.2830694 | 63 | 76.8656403 | 63 | 69.8849147 | 63 | 78.5048649 | 63 | 70.4534608 |
| 69.5996202 | 63 | 79.2830694 | 63 | 76.7406403 | 63 | 70.0099147 | 63 | 78.3230467 | 63 | 70.635279  |
| 69.5996202 | 63 | 79.2830694 | 63 | 76.9906403 | 63 | 69.6349147 | 63 | 78.5048649 | 63 | 71.2716426 |
| 69.7814384 | 63 | 79.4830694 | 63 | 77.3656403 | 63 | 69.2599147 | 63 | 78.3230467 | 63 | 71.9080063 |
| 70.1450748 | 63 | 78.2830694 | 63 | 77.3656403 | 63 | 69.2599147 | 63 | 78.2321376 | 63 | 71.5443699 |
| 70.1450748 | 63 | 78.0830694 | 63 | 77.6156403 | 63 | 70.0099147 | 63 | 78.595774  | 63 | 71.4534608 |
| 70.3268929 | 63 | 77.8830694 | 63 | 77.4906403 | 63 | 70.1349147 | 63 | 78.7775921 | 63 | 71.4534608 |
| 70.5087111 | 63 | 77.6830694 | 63 | 77.9906403 | 63 | 69.7599147 | 63 | 78.9594103 | 63 | 71.9080063 |
| 70.417802  | 63 | 77.8830694 | 63 | 77.8172418 | 63 | 69.6349147 | 63 | 79.1412285 | 63 | 72.8170972 |
| 70.7814384 | 63 | 77.8830694 | 63 | 77.5950196 | 63 | 69.0099147 | 63 | 79.3230467 | 63 | 73.3625517 |
| 70.7814384 | 63 | 77.6830694 | 63 | 77.7061307 | 63 | 69.1349147 | 63 | 79.2321376 | 63 | 73.2716426 |
| 70.7814384 | 63 | 77.0830694 | 63 | 77.8172418 | 63 | 69.1349147 | 63 | 79.1412285 | 63 | 72.7261881 |
| 70.8723475 | 63 | 76.8830694 | 63 | 77.9283529 | 63 | 68.3849147 | 63 | 78.1412285 | 63 | 72.7261881 |
| 71.1450748 | 63 | 76.4830694 | 63 | 77.7061307 | 63 | 67.6349147 | 63 | 77.6866831 | 63 | 71.9080063 |
| 71.2359838 | 63 | 76.8830694 | 63 | 77.7061307 | 63 | 67.2599147 | 63 | 77.0503194 | 63 | 71.8170972 |
| 71.2359838 | 63 | 76.4830694 | 63 | 77.4839085 | 63 | 66.8849147 | 63 | 77.0503194 | 63 | 70.9080063 |
| 70.9632566 | 63 | 76.0830694 | 63 | 77.7061307 | 63 | 66.7599147 | 63 | 76.595774  | 63 | 70.4534608 |
| 70.2359838 | 63 | 76.0830694 | 63 | 77.8172418 | 63 | 67.1349147 | 63 | 77.0503194 | 63 | 70.2716426 |
| 70.0541657 | 63 | 76.6830694 | 63 | 77.9283529 | 63 | 67.3849147 | 63 | 77.595774  | 63 | 70.4534608 |
| 69.7814384 | 63 | 77.6830694 | 63 | 77.5950196 | 63 | 67.1349147 | 63 | 77.595774  | 63 | 70.3625517 |
| 69.5996202 | 63 | 78.0830694 | 63 | 77.5950196 | 63 | 67.1349147 | 63 | 77.5048649 | 63 | 70.9080063 |
| 69.2359838 | 63 | 77.6830694 | 63 | 77.9283529 | 63 | 66.8849147 | 63 | 77.9594103 | 63 | 71.4534608 |
| 69.1450748 | 63 | 77.6830694 | 63 | 77.8172418 | 63 | 67.6349147 | 63 | 78.0503194 | 63 | 71.5443699 |
| 68.7814384 | 63 | 77.8830694 | 63 | 77.9283529 | 63 | 68.0099147 | 63 | 78.0503194 | 63 | 71.635279  |
| 67.9632566 | 63 | 77.8830694 | 63 | 77.7061307 | 63 | 68.1349147 | 63 | 77.8685012 | 63 | 71.5443699 |
| 66.5996202 | 63 | 78.0830694 | 63 | 77.4839085 | 63 | 68.0099147 | 63 | 77.8685012 | 63 | 71.635279  |
| 65.8723475 | 63 | 78.4830694 | 63 | 77.039464  | 63 | 67.6349147 | 63 | 77.9594103 | 63 | 70.5443699 |
| 66.0541657 | 63 | 78.8830694 | 63 | 76.8172418 | 63 | 67.7599147 | 63 | 79.1412285 | 63 | 69.5443699 |
| 65.9632566 | 63 | 80.2830694 | 63 | 76.5950196 | 63 | 67.3849147 | 63 | 79.1412285 | 63 | 69.8170972 |
| 66.3268929 | 63 | 80.6830694 | 63 | 76.5950196 | 63 | 67.6349147 | 63 | 79.0503194 | 63 | 69.635279  |
| 66.6905293 | 63 | 80.4830694 | 63 | 76.7061307 | 63 | 67.8849147 | 63 | 78.6866831 | 63 | 68.4969562 |
| 66.6905293 | 63 | 80.4830694 | 63 | 75.9283529 | 63 | 67.0099147 | 63 | 76.9623816 | 63 | 68.6939259 |
| 67.6905293 | 63 | 80.2830694 | 63 | 75.8172418 | 63 | 66.8849147 | 63 | 75.879737  | 63 | 70.0898244 |

|            |    |            |    |            |    |            |    |            |    |            |
|------------|----|------------|----|------------|----|------------|----|------------|----|------------|
| 68.1450748 | 63 | 79.4830694 | 63 | 75.8172418 | 63 | 66.8849147 | 63 | 75.0863485 | 63 | 70.2716426 |
| 68.5087111 | 63 | 78.8830694 | 63 | 76.2616862 | 63 | 66.8849147 | 63 | 74.6896543 | 63 | 70.1807335 |
| 68.3268929 | 63 | 78.2830694 | 63 | 76.039464  | 63 | 66.8849147 | 63 | 74.987175  | 63 | 70.0898244 |
| 67.6905293 | 63 | 78.4830694 | 63 | 76.1505751 | 63 | 66.7599147 | 63 | 74.7970923 | 63 | 69.7261881 |
| 67.6905293 | 63 | 78.8830694 | 63 | 76.039464  | 63 | 67.0099147 | 63 | 75.2929601 | 63 | 69.2716426 |
| 68.0541657 | 63 | 79.6830694 | 63 | 75.3727973 | 63 | 67.5099147 | 63 | 76.1937866 | 63 | 69.0898244 |
| 68.7814384 | 63 | 79.4830694 | 63 | 75.039464  | 63 | 67.3849147 | 63 | 77.3838692 | 63 | 68.7261881 |
| 68.8723475 | 63 | 79.0830694 | 63 | 74.9283529 | 63 | 67.2599147 | 63 | 77.7805634 | 63 | 69.1807335 |
| 69.5087111 | 63 | 78.6830694 | 63 | 74.5950196 | 63 | 67.0099147 | 63 | 78.0780841 | 63 | 69.7261881 |
| 69.3268929 | 63 | 78.2830694 | 63 | 74.5950196 | 63 | 66.6349147 | 63 | 77.7722989 | 63 | 70.1807335 |
| 69.1450748 | 63 | 76.4830694 | 63 | 74.5950196 | 63 | 66.6349147 | 63 | 77.4747783 | 63 | 70.5443699 |
| 69.3268929 | 63 | 74.8830694 | 63 | 74.7061307 | 63 | 67.2599147 | 63 | 76.9623816 | 63 | 70.3625517 |

| 1st 3 minutes |            |    | S2 Dataset A |          |            | 1st 3 minutes |            |    |            |    |
|---------------|------------|----|--------------|----------|------------|---------------|------------|----|------------|----|
| 92614.17      | 92614.18   |    | 92914.17     | 92914.18 | 92914.2    |               |            |    |            |    |
| 10-11.        | 11-12.     |    | 9:30-10:46   | 11-11:50 | 1-2:00     |               |            |    |            |    |
| 63            | 78.3805438 | 63 | 76.6666667   | 63       | 77.478866  | 63            | 69.3249208 | 71 | 72.2863593 | 63 |
| 63            | 79.0472104 | 63 | 76.6666667   | 63       | 76.978866  | 63            | 69.506739  | 71 | 72.2863593 | 63 |
| 63            | 79.5472104 | 63 | 76.7777778   | 63       | 76.1455327 | 63            | 69.3249208 | 71 | 71.9738593 | 63 |
| 63            | 79.5472104 | 63 | 77           | 63       | 76.7572916 | 63            | 69.5976481 | 71 | 71.6613593 | 63 |
| 63            | 79.7138771 | 63 | 77.4444444   | 63       | 76.9001488 | 63            | 68.8703754 | 71 | 71.7238593 | 63 |
| 63            | 79.5472104 | 63 | 78.1111111   | 63       | 76.3287202 | 63            | 69.0521935 | 71 | 71.5988593 | 63 |
| 63            | 79.5472104 | 63 | 78.3333333   | 63       | 76.4715773 | 63            | 68.3249208 | 71 | 72.0988593 | 63 |
| 63            | 79.8805438 | 63 | 78.3333333   | 63       | 76.3287202 | 63            | 67.8703754 | 71 | 72.8488593 | 63 |
| 63            | 79.7138771 | 63 | 79.1111111   | 63       | 76.3287202 | 63            | 67.8703754 | 71 | 72.8488593 | 63 |
| 63            | 80.0472104 | 63 | 79.2222222   | 63       | 76.1858631 | 63            | 68.1431026 | 71 | 72.8488593 | 63 |
| 63            | 79.3805438 | 63 | 79.5555556   | 63       | 75.7572916 | 63            | 68.0521935 | 71 | 73.2238593 | 63 |
| 63            | 78.8805438 | 63 | 80           | 63       | 75.6144345 | 63            | 69.3249208 | 71 | 73.5988593 | 63 |
| 63            | 78.7138771 | 63 | 80.3333333   | 63       | 76.7158641 | 63            | 69.1431026 | 71 | 73.2863593 | 63 |
| 63            | 78.7138771 | 63 | 81.1111111   | 63       | 76.9658641 | 63            | 68.7794663 | 71 | 72.5363593 | 63 |
| 63            | 80.0472104 | 63 | 81.5555556   | 63       | 77.2158641 | 63            | 69.1431026 | 71 | 72.4113593 | 63 |
| 63            | 80.3805438 | 63 | 80.4444444   | 63       | 77.0908641 | 63            | 68.0521935 | 71 | 72.4113593 | 63 |
| 63            | 80.3805438 | 63 | 79.5555556   | 63       | 77.5908641 | 63            | 67.4158299 | 71 | 72.4738593 | 63 |
| 63            | 80.7138771 | 63 | 78.7777778   | 63       | 77.7158641 | 63            | 66.9612845 | 71 | 73.5363593 | 63 |
| 63            | 81.0472104 | 63 | 78.3333333   | 63       | 77.8408641 | 63            | 66.9612845 | 71 | 73.3488593 | 63 |
| 63            | 80.5472104 | 63 | 78.2222222   | 63       | 77.2024518 | 63            | 66.9612845 | 71 | 72.9738593 | 63 |
| 63            | 80.7138771 | 63 | 78.8888889   | 63       | 77.2024518 | 63            | 68.0521935 | 71 | 72.5988593 | 63 |
| 63            | 80.5472104 | 63 | 78           | 63       | 76.9802296 | 63            | 68.0521935 | 71 | 72.2863593 | 71 |
| 63            | 80.7138771 | 63 | 77.2222222   | 63       | 77.9802296 | 63            | 67.6885572 | 71 | 72.2863593 | 71 |
| 63            | 81.2138771 | 63 | 77.2222222   | 63       | 78.0913407 | 63            | 67.4158299 | 71 | 72.2863593 | 71 |
| 63            | 81.0472104 | 63 | 75.5555556   | 63       | 77.7580074 | 63            | 66.8703754 | 71 | 71.4738593 | 71 |
| 63            | 80.8805438 | 63 | 75.1111111   | 63       | 77.9802296 | 63            | 66.8703754 | 71 | 72.0363593 | 71 |
| 63            | 80.2138771 | 63 | 75.6666667   | 63       | 77.4246741 | 63            | 66.2340117 | 71 | 71.6613593 | 71 |
| 63            | 80.0472104 | 63 | 76.2222222   | 63       | 77.0913407 | 63            | 66.2340117 | 71 | 71.4738593 | 71 |
| 63            | 80.3805438 | 63 | 75.8888889   | 63       | 76.5357852 | 63            | 65.8703754 | 71 | 71.2863593 | 71 |
| 63            | 80.3805438 | 63 | 75.1716368   | 63       | 76.2024518 | 63            | 66.2340117 | 71 | 71.3553542 | 71 |
| 63            | 80.5472104 | 63 | 75.5420072   | 63       | 76.2024518 | 63            | 66.2340117 | 71 | 71.5220209 | 71 |
| 63            | 80.5472104 | 63 | 75.7889207   | 63       | 76.313563  | 63            | 66.2340117 | 71 | 72.0220209 | 71 |
| 63            | 80.2138771 | 63 | 76.0358343   | 63       | 75.8691185 | 63            | 65.9612845 | 71 | 72.0220209 | 71 |
| 63            | 80.0472104 | 63 | 75.8012664   | 63       | 75.9802296 | 63            | 66.2340117 | 71 | 72.5220209 | 71 |
| 63            | 80.0472104 | 63 | 75.5543528   | 63       | 76.0913407 | 63            | 66.1431026 | 71 | 72.6886876 | 71 |
| 63            | 80.0472104 | 63 | 75.6901553   | 63       | 76.0913407 | 63            | 66.4158299 | 71 | 73.0220209 | 71 |
| 63            | 80.3805438 | 63 | 76.0605257   | 63       | 77.6468963 | 63            | 66.7794663 | 71 | 73.3553542 | 71 |
| 63            | 80.5472104 | 63 | 75.4308961   | 63       | 77.1033341 | 63            | 66.7794663 | 71 | 73.1886876 | 71 |
| 63            | 80.7138771 | 63 | 75.5543528   | 63       | 77.1527168 | 63            | 66.8703754 | 71 | 72.5220209 | 71 |

63 80.0472104 63 75.5555556 63 77.3996304 63 67.1431026 71 71.5220209 71  
63 79.8805438 63 76.2222222 63 77.1897538 63 67.9612845 71 70.8553542 71  
63 79.2138771 63 76.3333333 63 77.2020995 63 68.7794663 71 70.1886876 71  
63 79.0472104 63 76.3333333 63 77.8193834 63 68.9612845 71 70.1886876 71  
63 78.7138771 63 76.7777778 63 78.2144452 63 69.0521935 71 69.8553542 71  
63 78.8805438 63 76.5555556 63 77.9798773 63 68.2340117 71 69.3553542 71  
63 79.0472104 63 76.4444444 63 77.7453094 63 68.3249208 71 69.3553542 71  
63 78.7138771 63 75.6666667 63 78.3625933 63 68.2340117 71 69.1886876 71  
63 78.5472104 63 74.2222222 63 77.8687662 63 68.2340117 71 68.8553542 71  
63 78.0472104 63 73.2222222 63 75.8934575 63 68.5976481 71 68.0220209 71  
63 78.0472104 63 73 63 74.5971612 63 68.5976481 71 70.0248486 71  
63 77.7138771 63 72.6666667 63 72.6218526 63 68.4158299 71 69.8819915 71  
63 78.7138771 63 72.3333333 63 72.6218526 63 68.9612845 71 69.7391343 71  
63 79.5472104 63 72 63 72.6218526 63 69.1431026 71 70.5962772 71  
63 80.3805438 63 72.1111111 63 72.4983958 63 69.3249208 71 71.8819915 71  
63 79.8805438 63 72 63 73.6468963 63 69.4158299 71 71.7391343 71  
63 80.5472104 63 71.6666667 63 73.4246741 63 69.506739 71 71.7391343 71  
63 81.5472104 63 71.7777778 63 71.7580074 63 69.6885572 71 71.3105629 71  
63 82.3805438 63 72 63 70.2024518 63 69.5976481 71 71.4534201 71  
63 83.2138771 63 71.8888889 63 69.9802296 63 69.2340117 71 72.1677058 71  
63 84.2138771 63 71.7777778 63 70.2024518 63 69.4158299 71 71.8819915 71  
63 84.8805438 63 72.1111111 63 69.9802296 63 69.0521935 71 71.5962772 71  
63 85.8805438 63 72.2222222 63 70.0913407 63 68.6885572 71 71.3105629 71  
63 85.7138771 63 72.3333333 63 69.6468963 63 68.9612845 63 71.4534201 71  
63 85.7138771 63 73.4444444 63 69.8691185 63 69.1431026 63 71.0248486 71  
63 86.8805438 63 73.8888889 63 69.6468963 63 69.2340117 63 71.0248486 71  
63 87.2138771 63 73.8888889 63 69.7580074 63 69.6885572 63 71.0248486 71  
63 87.5472104 63 74.5555556 63 69.7580074 63 70.1431026 63 70.4534201 71  
63 87.5472104 63 74.1111111 63 70.2024518 63 69.9612845 63 70.4534201 71  
63 87.3805438 63 74.2222222 63 70.0913407 63 70.0521935 63 70.1677058 71  
63 83.3239293 63 74 63 70.0913407 63 70.506739 63 70.4534201 71  
63 84.3805438 63 73.1111111 63 69.8691185 63 70.6885572 63 70.7391343 71  
63 84.3805438 63 73.1111111 63 69.8691185 63 70.3249208 63 71.0248486 71  
63 84.7138771 63 73 63 69.7580074 63 70.3249208 63 70.8819915 71  
63 80.22584 63 72.6666667 63 69.5357852 63 70.8703754 63 71.1677058 71  
63 80.22584 63 72.3333333 63 69.313563 63 70.2340117 63 70.8819915 71  
63 79.72584 63 71.5555556 63 69.5357852 63 69.7794663 63 71.5962772 63  
63 80.22584 63 71.7777778 63 69.7580074 63 69.4158299 63 72.1677058 63  
63 79.9202845 63 71.7777778 63 69.8691185 63 69.4158299 63 72.3105629 63  
63 79.7536178 63 71.5555556 63 69.6468963 63 68.7794663 63 72.3105629 63  
63 79.1702845 63 72.6666667 63 69.0913407 63 66.506739 63 72.8819915 63  
63 78.1980623 63 72.3333333 63 68.8691185 63 66.3249208 63 72.7391343 63  
63 77.0591734 63 71.6666667 63 68.8691185 63 66.506739 63 71.7391343 63

63 76.6147289 63 71.8888889 63 68.4246741 63 66.7794663 63 70.8819915 63  
63 80.0472104 63 71.4444444 63 68.5357852 63 67.5976481 63 70.8819915 63  
63 80.2138771 63 72.3333333 63 68.9802296 63 67.9612845 63 71.1677058 63  
63 79.7138771 63 72.6666667 63 69.2024518 63 68.2340117 63 70.4534201 63  
63 80.0472104 63 72.7777778 63 69.4246741 63 68.506739 63 71.0248486 63  
63 80.0472104 63 70.9112983 63 70.6468963 63 68.4158299 63 71.4534201 63  
63 79.5472104 63 73.3333333 63 72.4246741 63 68.5976481 63 71.9990238 63  
63 79.3805438 63 73.7777778 63 72.4246741 63 68.6885572 63 72.1656905 63  
63 79.0472104 63 74.3333333 63 72.9802296 63 68.6885572 63 72.4434682 63  
63 79.0472104 63 74.7777778 63 72.4246741 63 68.6885572 63 72.3323571 63  
63 78.5472104 63 75 63 73.7580074 63 68.8703754 63 72.3323571 63  
63 78.7138771 63 74.5555556 63 74.0913407 63 68.6885572 63 72.0545793 63  
63 78.8805438 63 74.8888889 63 74.6468963 63 68.7794663 63 72.6101349 63  
63 79.0472104 63 75.5555556 63 74.6468963 63 68.2340117 63 72.7490238 63  
63 79.3805438 63 75.2222222 63 74.313563 63 68.3249208 63 73.3045793 63  
63 80.7138771 63 75.2222222 63 74.313563 63 68.3249208 63 73.4434682 63  
63 80.5472104 63 74.8888889 63 74.7580074 63 69.2340117 63 73.3601349 63  
63 80.8805438 63 75 63 74.9802296 63 69.4158299 63 73.3601349 63  
63 81.0472104 63 75.2222222 63 74.3338183 63 69.506739 63 71.4961336 63  
63 80.5472104 63 74.7777778 63 74.2338183 63 69.6885572 63 71.6183559 63  
63 80.5472104 63 74.4444444 63 74.1338183 63 70.1431026 63 71.8628003 63  
63 80.5472104 63 74 63 74.6338183 63 70.4158299 63 72.229467 63  
63 78.2368411 63 73.1111111 63 74.8338183 63 70.6885572 63 72.329467 63  
63 78.0423967 63 72.5555556 63 75.4338183 63 70.9612845 63 72.5739114 63  
63 80.3805438 63 72.2222222 63 75.2338183 63 71.2340117 63 72.7739114 63  
63 79.7138771 63 73.2222222 63 75.6338183 63 70.7794663 63 72.8961336 63  
63 78.8805438 63 74.2222222 63 75.4338183 63 69.7794663 63 72.729467 63  
63 78.7138771 63 75.1111111 63 75.0338183 63 70.3249208 63 73.6617012 63  
63 77.7138771 63 75 63 74.6338183 63 70.4158299 63 72.2172567 63  
63 77.5472104 63 73.6678398 63 74.7338183 63 70.7794663 71 71.8839234 63  
63 77.3805438 63 74.5320373 63 74.8338183 63 70.4158299 71 71.7728123 63  
63 77.5472104 63 74.5320373 63 74.3338183 63 70.506739 63 71.55059 63  
63 74.8672788 63 75.5555556 63 74.0338183 63 70.0521935 63 70.9950345 63  
63 76.5472104 63 75.1111111 63 73.5338183 63 69.9612845 63 70.55059 63  
63 76.7138771 63 75.3333333 63 73.4338183 63 69.3249208 63 70.55059 63  
63 77.3805438 63 75.3333333 63 73.4338183 63 68.9612845 63 70.2172567 63  
63 76.2561677 63 76.1111111 63 73.0338183 63 69.3249208 63 70.2172567 63  
63 78.7138771 63 75.0258645 63 73.0338183 63 69.1431026 63 70.3283678 63  
63 76.0617232 63 75.2727781 63 72.7338183 63 69.5976481 71 70.4394789 63  
63 76.0617232 63 76.4444444 63 72.7338183 63 68.7794663 71 70.55059 63  
63 77.0472104 63 76.5555556 63 72.6338183 63 68.8703754 71 70.7728123 63  
63 76.7138771 63 75.6666667 63 72.6338183 63 69.0521935 71 70.9950345 63  
63 77.3805438 63 72.6643847 63 72.7338183 63 68.8703754 71 71.6617012 63

63 77.3805438 63 74 63 73.2338183 63 68.6885572 71 71.6617012 63  
63 77.0472104 63 74 63 73.1338183 63 68.6885572 71 72.2172567 63  
63 76.7138771 63 74 63 73.2338183 63 69.0521935 71 72.3283678 63  
63 76.5472104 63 72.4174711 63 73.9338183 63 69.1431026 71 72.4394789 63  
63 76.7138771 63 72.0471008 63 74.2338183 63 69.1431026 71 72.6617012 63  
63 76.3805438 63 71.923644 63 74.7338183 63 69.1431026 71 73.2172567 63  
63 76.0472104 63 71.923644 63 74.6338183 63 68.4158299 71 73.2172567 63  
63 75.8805438 63 71.4174711 63 74.8338183 63 68.8703754 71 73.4394789 63  
63 75.5472104 63 71.1705576 63 75.5338183 63 69.3333333 71 73.3283678 63  
63 75.5472104 63 71.5409279 63 75.5338183 63 69.75 63 72.9950345 63  
63 76.2138771 63 73 63 75.1338183 63 70.0833333 63 72.8839234 63  
63 76.5472104 63 71.1498156 63 75.1338183 63 70.25 63 72.4394789 63  
63 76.5472104 63 70.2856181 63 75.1338183 63 70.25 63 72.6617012 63  
63 75.8805438 63 70.6559885 63 75.1338183 63 70 63 72.6617012 63  
63 75.7138771 63 72.2222222 63 75.1338183 63 69.5833333 63 72.55059 63  
63 75.7138771 63 72.2222222 63 75.7338183 63 69.1666667 63 72.9950345 63  
63 75.5472104 63 71.7777778 63 75.3338183 63 68.9166667 63 73.2172567 63  
63 75.3805438 63 72.1111111 63 75.1338183 63 68.9166667 63 71.786852 63  
63 75.3805438 63 72.2222222 63 75.0432037 63 68.75 63 72.0312965 63  
63 75.5472104 63 72 63 74.8338183 63 69 63 71.9090742 63  
63 76.0472104 63 71.5555556 63 74.9338183 63 68.5 63 74.3283678 63  
63 76.3805438 63 71.4444444 63 74.9338183 63 68.25 63 73.55059 63  
63 77.2138771 63 71.5555556 63 74.8338183 63 68.0833333 63 73.55059 63  
63 76.8805438 63 71.4444444 63 74.8338183 63 67.9166667 63 73.8839234 63  
63 77.8805438 63 71.2222222 63 75.0338183 63 67.6666667 63 73.7728123 63  
63 78.3805438 63 71.2222222 63 75.6338183 63 67.3333333 63 74.1061456 63  
63 79.2363953 63 71.4444444 63 75.7338183 63 67.4166667 63 74.2172567 63  
63 78.3792524 63 71.2222222 63 75.8338183 63 67.6666667 63 73.9950345 63  
63 78.0935381 63 70.7777778 63 75.7338183 63 67.9166667 63 73.8839234 63  
63 76.2363953 63 70 63 75.8338183 63 67.9166667 63 73.3283678 63  
63 76.0935381 63 69.7777778 63 75.8338183 63 68.1666667 63 74.1061456 63  
63 76.0935381 63 69.8888889 63 75.4338183 63 68.4166667 63 74.7728123 63  
63 75.950681 63 69.8888889 63 75.3338183 63 67.2689259 63 74.55059 63  
63 76.8078238 63 70.2222222 63 75.6338183 63 68.5416532 63 72.9933826 63  
63 76.950681 63 70.4444444 63 76.4338183 63 69.1780168 63 73.4489382 63  
63 77.5221096 63 70.3333333 63 76.1338183 63 69.6325623 63 73.7378271 63  
63 77.3792524 63 70.3333333 63 75.0338183 63 69.9052895 63 73.9044937 63  
63 77.5221096 63 70.7777778 63 74.8338183 63 69.7234714 63 74.2711604 63  
63 77.5221096 63 70.6666667 63 75.0338183 63 69.7234714 63 74.5378271 63  
63 77.8078238 63 70.5555556 63 75.1338183 63 69.7234714 63 75.5156048 63  
63 77.6649667 63 70.1111111 63 75.3338183 63 71.4166667 63 75.1489382 63  
63 77.6649667 63 69.5555556 63 75.6338183 63 71.25 63 74.6378271 63  
63 78.0935381 63 69.8888889 63 75.7338183 63 71.4166667 63 74.8822715 63

63 78.3792524 63 70.6666667 63 76.5338183 63 71.4166667 63 74.8822715 63  
63 79.0935381 63 70.5555556 63 77.1338183 63 71.3333333 63 74.5156048 63  
63 78.950681 63 71.3333333 63 77.3338183 63 72.25 63 74.1489382 63  
63 79.6649667 63 71.6666667 63 77.3338183 63 71.75 63 74.2489382 63  
63 80.3792524 63 72.4444444 63 77.7338183 63 71.3333333 63 73.7600493 63  
63 79.3792524 63 72.7777778 63 77.6338183 63 71.3333333 63 74.1267159 63  
63 79.0935381 63 73.6666667 63 77.7338183 63 71.3333333 63 74.1044937 63  
63 79.0935381 63 73.5555556 63 77.3338183 63 70.9166667 63 72.8822715 63  
63 79.6649667 63 73.6666667 63 76.6338183 63 71.1666667 63 73.0044937 63  
63 79.0935381 63 74.7777778 63 76.0338183 63 71.0833333 63 73.2489382 63  
63 79.0935381 63 75.6666667 63 75.5338183 63 71.1666667 63 73.7489382 63  
63 80.2363953 63 76.1111111 63 75.0338183 63 69.0439894 63 73.5044937 63

| S2 Dataset A |    |            |    | 1st 3 minutes |    |            |    | S2 Dataset A |    |            |  |
|--------------|----|------------|----|---------------|----|------------|----|--------------|----|------------|--|
| 100114       |    | 100114     |    | 100314        |    | 100314     |    | 101314       |    | 101314     |  |
| 11:00        |    | 10:00      |    | 10-11.        |    | 11-12.     |    | 9-10.        |    | 10-11.     |  |
| 71.0445582   | 63 | 69.4502952 | 61 | 77.8882694    | 71 | 74.9643873 | 61 | 73.180476    | 63 | 65.5811285 |  |
| 70.89641     | 63 | 69.4502952 | 61 | 77.2216027    | 71 | 75.5754984 | 61 | 72.9860315   | 63 | 65.7239857 |  |
| 71.1433236   | 63 | 69.6419618 | 61 | 79.554936     | 71 | 75.5754984 | 61 | 72.6249204   | 63 | 65.8668428 |  |
| 71.0445582   | 63 | 69.3169618 | 63 | 77.8882694    | 71 | 75.5643873 | 61 | 73.2082538   | 63 | 66.1525571 |  |
| 71.0692495   | 63 | 68.6669618 | 63 | 77.8882694    | 71 | 75.2088317 | 61 | 73.5971427   | 63 | 66.2954143 |  |
| 70.450997    | 63 | 68.2086285 | 63 | 77.8882694    | 71 | 76.4963334 | 61 | 73.680476    | 63 | 65.5811285 |  |
| 70.41396     | 63 | 69.7106527 | 63 | 78.2216027    | 71 | 76.4963334 | 61 | 74.2638093   | 63 | 64.8668428 |  |
| 70.8213674   | 63 | 69.7106527 | 63 | 79.2216027    | 71 | 76.6074445 | 61 | 74.0693649   | 63 | 64.2954143 |  |
| 72.9257483   | 63 | 69.7106527 | 63 | 79.8882694    | 71 | 76.2741111 | 61 | 74.2638093   | 63 | 64.2954143 |  |
| 73.1726619   | 63 | 69.6106527 | 63 | 81.2216027    | 71 | 76.7185556 | 61 | 74.4026982   | 63 | 64.7239857 |  |
| 74.666489    | 63 | 69.4106527 | 63 | 80.554936     | 71 | 77.2741111 | 61 | 74.9860315   | 63 | 64.8668428 |  |
| 74.666489    | 63 | 69.2106527 | 63 | 80.8882694    | 71 | 77.3852223 | 61 | 75.3749204   | 63 | 64.8668428 |  |
| 73.9257483   | 63 | 68.8106527 | 63 | 80.8882694    | 71 | 78.0518889 | 61 | 76.1526982   | 63 | 65.1525571 |  |
| 74.0492051   | 63 | 68.8106527 | 63 | 81.2216027    | 71 | 78.0518889 | 61 | 76.3471427   | 63 | 64.8668428 |  |
| 74.1726619   | 63 | 68.7106527 | 63 | 81.2216027    | 71 | 77.9407778 | 61 | 76.5415871   | 63 | 64.5811285 |  |
| 73.5553779   | 63 | 68.2106527 | 63 | 81.554936     | 71 | 77.7185556 | 61 | 76.5415871   | 63 | 64.8668428 |  |
| 73.4566125   | 63 | 68.5106527 | 63 | 81.8882694    | 71 | 77.3852223 | 61 | 76.7360315   | 63 | 65.1525571 |  |
| 73.5800693   | 63 | 68.6106527 | 63 | 82.8882694    | 71 | 77.163     | 61 | 76.5415871   | 63 | 65.4382714 |  |
| 73.4813038   | 63 | 69.1106527 | 63 | 83.8882694    | 63 | 77.3852223 | 61 | 76.5415871   | 63 | 66.0097    |  |
| 73.4813038   | 63 | 69.4106527 | 63 | 84.8882694    | 63 | 77.7185556 | 61 | 76.4582538   | 63 | 67.2954143 |  |
| 73.2096989   | 63 | 69.4106527 | 63 | 85.554936     | 63 | 77.8296667 | 61 | 76.6526982   | 63 | 68.1525571 |  |
| 73.2096989   | 63 | 70.1106527 | 63 | 85.2216027    | 63 | 77.3852223 | 61 | 76.6526982   | 63 | 68.8668428 |  |
| 72.841176    | 63 | 70.1636822 | 63 | 85.554936     | 63 | 77.2741111 | 61 | 76.4582538   | 63 | 69.2954143 |  |
| 73.5730874   | 63 | 70.3641494 | 63 | 84.554936     | 63 | 76.6799866 | 61 | 76.4582538   | 63 | 69.2954143 |  |
| 73.5553779   | 63 | 69.8586285 | 63 | 82.8882694    | 63 | 76.9799866 | 61 | 75.2915871   | 63 | 69.1525571 |  |
| 73.6788347   | 63 | 70.0169618 | 63 | 82.2216027    | 63 | 77.0799866 | 61 | 74.5744972   | 63 | 69.5811285 |  |
| 73.2961186   | 63 | 69.6586285 | 63 | 81.2216027    | 63 | 77.1799866 | 61 | 76.2915871   | 63 | 67.634602  |  |
| 72.8022915   | 63 | 69.5502952 | 63 | 81.2216027    | 63 | 77.4799866 | 61 | 76.2915871   | 63 | 67.3080714 |  |
| 72.9134026   | 63 | 70.2002952 | 63 | 80.8507433    | 63 | 77.5799866 | 61 | 76.680476    | 63 | 67.1448061 |  |
| 72.4195754   | 63 | 70.1419618 | 63 | 81.4757433    | 63 | 77.7799866 | 63 | 75.9026982   | 63 | 69.7239857 |  |
| 72.2961186   | 63 | 70.0836285 | 63 | 81.4757433    | 63 | 78.0799866 | 63 | 73.3397988   | 63 | 69.5811285 |  |
| 72.2961186   | 63 | 70.0836285 | 63 | 81.4132433    | 63 | 77.6799866 | 63 | 73.3397988   | 63 | 69.4382714 |  |
| 71.7899458   | 63 | 70.4086285 | 63 | 81.7257433    | 63 | 77.1799866 | 63 | 73.0064654   | 63 | 69.5811285 |  |
| 70.6911804   | 63 | 70.2106527 | 63 | 80.7882433    | 63 | 76.0799866 | 63 | 72.9509099   | 63 | 69.7239857 |  |
| 72.2600502   | 63 | 70.0106527 | 63 | 80.4757433    | 63 | 75.3799866 | 63 | 73.2286876   | 63 | 70.5811285 |  |
| 69.8949375   | 63 | 70.0106527 | 63 | 80.4132433    | 63 | 75.3799866 | 63 | 72.8397988   | 63 | 70.7239857 |  |
| 71.7044947   | 63 | 70.2106527 | 63 | 80.7257433    | 63 | 75.4799866 | 63 | 73.3397988   | 63 | 70.7239857 |  |
| 71.5933835   | 63 | 69.5106527 | 63 | 80.1007433    | 63 | 73.8012351 | 63 | 73.0064654   | 63 | 70.5811285 |  |
| 71.1489391   | 63 | 69.9106527 | 63 | 79.7882433    | 63 | 73.5912351 | 63 | 72.1175765   | 63 | 70.4382714 |  |



70.9267169 63 70.1106527 63 78.7882433 63 73.4912351 63 70.9252485 63 70.7239857  
70.2600502 63 70.3106527 63 75.9468463 63 73.7112351 63 70.480804 63 70.4382714  
68.9267169 63 70.3106527 63 75.9468463 63 73.7112351 63 69.5085818 63 70.7239857  
68.9267169 63 69.8106527 63 75.6968463 63 73.4912351 63 69.0085818 63 71.1525571  
69.1489391 63 69.6106527 63 75.9468463 63 73.2712351 63 68.8419151 63 71.0097  
68.4822724 63 69.5106527 63 76.4468463 63 73.4912351 63 68.8419151 63 71.0097  
68.5933835 63 69.1106527 63 74.9468463 63 72.4512351 63 68.8419151 63 70.8668428  
68.3711613 63 68.7106527 63 74.9468463 63 73.3799866 63 68.8419151 63 70.5811285  
68.037828 63 68.1106527 63 74.1968463 63 73.1799866 63 68.8419151 63 70.5811285  
68.4822724 63 67.9106527 63 73.9468463 63 73.3799866 63 68.6474707 63 70.5811285  
69.2600502 63 67.9106527 63 74.1968463 63 74.1799866 63 68.8419151 63 70.8668428  
69.037828 63 67.8106527 63 74.4468463 63 74.4799866 63 69.0363596 63 71.2954143  
69.2600502 63 67.4106527 63 76.6968463 63 74.4799866 63 68.6474707 63 71.2954143  
69.5933835 63 67.2106527 63 76.6968463 63 75.4799866 63 69.0363596 63 71.5811285  
69.5933835 63 66.9106527 63 78.4468463 63 75.5799866 63 73.5437035 63 70.5811285  
70.1489391 63 66.6106527 63 78.4468463 63 75.9799866 63 73.7103701 63 70.1525571  
71.8925569 63 66.7106527 63 82.4150475 63 76.3799866 63 75.7103701 63 68.1525571  
72.0925569 63 66.5106527 63 81.8150475 63 76.3799866 63 75.8770368 63 67.7239857  
71.7862202 63 66.8106527 63 81.8150475 63 76.3799866 63 75.3770368 63 66.7239857  
71.5134929 63 67.3106527 63 81.8150475 63 76.0799866 63 76.3770368 63 65.5811285  
71.604402 63 67.8106527 63 82.0150475 63 76.6799866 63 76.2103701 63 65.2954143  
70.8771293 63 68.0106527 63 82.4150475 63 76.4799866 63 76.2103701 63 65.2954143  
70.3316747 63 68.1106527 63 82.0150475 63 75.9799866 63 76.5437035 63 65.4382714  
69.6953111 63 67.7106527 63 82.0150475 63 75.9799866 63 76.0437035 63 65.8668428  
69.0589474 63 67.8106527 63 83.4150475 63 76.2799866 63 75.3770368 63 66.4382714  
68.0589474 63 68.2106527 63 83.8150475 63 76.2799866 63 75.3770368 63 67.1525571  
67.7862202 63 68.6106527 63 84.2150475 63 75.5799866 63 73.3770368 63 67.4382714  
67.8771293 63 69.5106527 63 84.4150475 63 75.3799866 63 72.5437035 63 67.2954143  
67.8771293 63 69.5106527 63 84.8150475 63 75.3799866 63 72.2103701 63 67.4382714  
67.7862202 63 70.4106527 63 83.8150475 63 74.1799866 63 72.2103701 63 67.0097  
67.1498565 63 70.4106527 63 84.8150475 63 74.6799866 63 72.0437035 63 66.7239857  
66.9680384 63 71.3106527 63 86.0150475 63 75.0799866 63 71.2103701 63 67.0097  
67.1498565 63 71.6106527 63 86.4150475 63 75.2799866 63 71.0437035 63 66.4382714  
67.1498565 63 71.8106527 63 86.6150475 63 75.5799866 63 70.8770368 63 66.8668428  
66.9680384 63 71.5106527 63 87.8150475 63 75.8799866 63 71.3770368 63 66.8668428  
67.0589474 63 71.4106527 63 89.0150475 63 75.7799866 63 71.7103701 63 67.0097  
66.9680384 63 70.7106527 63 89.6150475 63 75.9799866 63 71.7103701 63 67.0097  
66.9680384 63 70.7324646 63 89.0150475 63 74.3086798 63 71.5437035 63 67.2954143  
67.1498565 63 68.9245416 63 88.6150475 63 74.0786798 63 71.2103701 63 68.1525571  
67.4225838 63 68.4106527 63 86.6150475 63 75.3799866 63 71.0437035 63 68.7239857  
67.0589474 63 67.8106527 63 85.8150475 63 73.6901349 63 68.3744972 63 69.0097  
66.9680384 63 67.7106527 63 86.0150475 63 73.8001349 63 70.7103701 63 68.7239857  
67.0589474 63 67.1106527 63 86.0150475 63 73.5801349 63 71.3770368 63 66.6690679

67.604402 63 67.0106527 63 86.8150475 63 73.2501349 63 72.2103701 63 69.5811285  
67.7862202 63 67.6106527 63 85.2150475 63 73.4601349 63 72.3770368 63 67.2404964  
68.0589474 63 67.6106527 63 84.8150475 63 75.0799866 63 72.8770368 63 66.4649862  
67.6953111 63 67.8106527 63 84.2150475 63 75.1799866 63 72.7103701 63 66.3425372  
67.5134929 63 68.0106527 63 83.6150475 63 74.8799866 63 72.8770368 63 67.1996801  
67.4225838 63 68.3106527 63 83.0150475 63 74.7799866 63 72.2103701 63 67.0772311  
68.2407656 63 67.4754728 63 82.2150475 63 75.1799866 63 72.0437035 63 67.567027  
68.604402 63 67.7421395 63 82.4150475 63 75.1799866 63 71.7103701 63 67.5874352  
68.8771293 63 67.7421395 63 82.2150475 63 75.4799866 63 68.9026982 63 67.4853944  
69.1498565 63 68.2838061 63 82.2150475 63 75.5799866 63 74.5437035 63 67.3629454  
68.604402 63 68.5754728 63 82.2150475 63 75.6799866 63 71.6196929 63 66.8527413  
67.0589474 63 68.9504728 63 81.6150475 63 75.8799866 63 71.480804 63 68.8668428  
66.6953111 63 69.1671395 63 80.6150475 63 75.9799866 63 72.4530262 63 67.7239857  
67.0589474 63 69.6004728 63 80.8150475 63 75.4799866 63 76.2103701 63 66.5811285  
66.7862202 63 69.8171395 63 81.4150475 63 75.0799866 63 76.7103701 63 65.5811285  
67.2407656 63 70.7921395 63 81.8150475 63 75.3799866 63 77.7103701 63 65.1525571  
67.2407656 63 71.4421395 63 81.6150475 63 75.4799866 63 77.7103701 63 65.1525571  
66.7862202 63 72.9106527 63 82.0150475 63 75.2799866 63 77.8770368 63 66.5811285  
66.3316747 63 73.4106527 63 82.2150475 63 75.2799866 63 76.9717932 63 67.2954143  
65.4225838 63 73.5106527 63 81.4447152 63 75.2799866 63 77.2575075 63 67.2954143  
65.1498565 63 72.8106527 63 81.2780485 63 74.6799866 63 76.828936 63 67.0097  
65.3316747 63 72.2106527 63 81.2780485 63 74.6799866 63 77.1146503 63 66.8668428  
65.2407656 63 71.8106527 63 81.2780485 63 74.9799866 63 76.828936 63 67.0097  
64.8771293 63 71.4106527 63 81.7780485 63 75.1799866 63 75.2575075 63 66.2954143  
64.604402 63 71.0106527 63 81.7780485 63 75.0799866 63 71.6263729 63 66.8668428  
64.8771293 63 70.7106527 63 81.7780485 63 75.4799866 63 71.136577 63 66.4382714  
65.2407656 63 71.1106527 63 81.2780485 63 75.2799866 63 71.2998423 63 66.0097  
66.0589474 63 71.3106527 63 80.9447152 63 75.2799866 63 70.4835158 63 65.8668428  
66.3316747 63 71.2106527 63 80.6113819 63 75.6799866 63 70.3202505 63 65.1525571  
66.0589474 63 71.2106527 63 80.4447152 63 75.4799866 63 70.4835158 63 64.8668428  
66.5134929 63 70.7106527 63 80.9447152 63 75.0799866 63 70.8304545 63 65.2954143  
66.604402 63 69.8848952 63 80.9447152 63 75.2799866 63 70.1773933 63 65.5811285  
66.6953111 63 69.8015618 63 81.6551506 63 75.4799866 63 70.3406586 63 66.4382714  
65.9680384 63 70.1265618 63 82.2265792 63 75.9799866 63 68.6875974 63 66.8668428  
65.8771293 63 71.0106527 63 82.0837221 63 76.3799866 63 68.8508627 63 66.7239857  
65.4225838 63 71.2106527 63 81.9408649 63 77.1799866 63 69.014128 63 66.5811285  
65.3316747 63 70.6106527 63 81.3694363 63 77.4799866 63 69.5039239 63 67.4382714  
65.1498565 63 70.1106527 63 81.6551506 63 77.6799866 63 69.6875974 63 67.5811285  
65.2407656 63 69.3106527 63 81.6551506 63 77.9799866 63 69.8508627 63 67.7239857  
65.5134929 63 69.3106527 63 81.6551506 63 78.3799866 63 70.6875974 63 68.4382714  
65.1498565 63 68.9106527 63 82.0837221 63 76.7799866 63 71.1773933 63 68.5811285  
65.2407656 63 68.8106527 63 81.5122935 63 76.0799866 63 71.014128 63 68.2954143  
65.1498565 63 68.7106527 63 81.5122935 63 75.1799866 63 70.5243321 63 68.4382714

64.7862202 63 68.5106527 63 81.7980078 63 74.9799866 63 70.7080056 63 67.2954143  
64.6953111 63 68.1106527 63 81.6551506 63 75.0799866 63 70.0549443 63 67.7239857  
64.604402 63 67.7106527 63 81.2265792 63 74.7799866 63 69.5651484 63 67.5811285  
64.5134929 63 67.6106527 63 81.0837221 63 74.8799866 63 69.5651484 63 67.5811285  
64.3316747 63 66.8106527 63 80.6551506 63 74.8799866 63 69.2386178 63 67.8668428  
64.3316747 63 66.8271593 63 80.5122935 63 74.8799866 63 69.0753525 63 68.2954143  
64.0589474 63 65.8106527 63 79.5122935 63 76.4283771 63 68.9120872 63 68.8668428  
63.8771293 63 65.9106527 63 79.2265792 63 76.6101953 63 68.9120872 63 68.5811285  
63.8771293 63 65.9106527 63 78.5122935 63 77.2465589 63 69.1466133 63 68.4382714  
63.7862202 63 66.6106527 63 78.5122935 63 77.337468 63 69.0168386 63 68.2954143  
63.6953111 63 67.0106527 63 78.5122935 63 77.2465589 63 68.7488219 63 68.2954143  
63.9680384 63 67.2106527 63 78.5122935 63 77.337468 63 68.7284137 63 65.4382714  
64.0589474 63 67.3106527 63 77.7980078 63 77.7011044 63 68.891679 63 64.8668428  
63.9680384 63 67.6106527 63 77.7980078 63 77.4283771 63 69.0345362 63 64.5811285  
63.7862202 63 68.5106527 63 78.3694363 63 76.8829225 63 69.0345362 63 65.0097  
63.8771293 63 68.4106527 63 78.0837221 63 76.8829225 63 69.2794341 63 65.0097  
66.1498565 63 67.7106527 63 78.0837221 63 76.7920134 63 68.7896382 63 65.1525571  
66.4225838 63 67.7106527 63 77.6551506 63 76.6101953 63 70.828936 63 64.8668428  
66.604402 63 68.8106527 63 78.3694363 63 76.6101953 63 71.2575075 63 64.5811285  
66.5134929 63 69.0106527 63 78.6551506 63 76.4283771 63 71.6860789 63 63.7239857  
66.4225838 63 69.2106527 63 79.7980078 63 75.9738316 63 71.6860789 63 64.0097  
66.8771293 63 69.4106527 63 79.6551506 63 75.8829225 63 71.1146503 63 64.1525571  
66.8771293 63 69.2106527 63 79.5122935 63 75.9738316 63 71.2575075 63 64.1525571  
67.0589474 63 69.1106527 63 77.0749688 63 75.1556498 63 68.9733117 63 64.2954143  
67.0589474 63 69.1106527 63 76.9117035 63 74.9738316 63 69.7896382 63 64.7239857  
66.6953111 63 69.0106527 63 75.7892545 63 75.2465589 63 70.136577 63 65.2954143  
66.4225838 63 69.0106527 63 75.7892545 63 75.1556498 63 70.2998423 63 65.4382714  
66.6953111 63 68.7106527 63 76.1157851 63 75.2465589 63 70.136577 63 65.4382714  
66.3316747 63 68.0106527 63 76.2790504 63 75.5192862 63 70.136577 63 65.2954143  
66.0589474 63 68.2106527 63 76.4423157 63 75.337468 63 69.9733117 63 65.7239857  
66.2407656 63 68.5106527 63 76.2790504 63 75.1556498 63 69.6059647 63 66.0097  
66.2407656 63 68.4106527 63 76.605581 63 75.4283771 63 72.1146503 63 66.2954143  
65.9680384 63 68.3106527 63 76.605581 63 75.337468 63 73.1146503 63 66.5811285  
64.6123737 63 68.3106527 63 76.605581 63 75.7920134 63 73.9717932 63 67.0097  
64.4222911 63 68.3106527 63 80.6551506 63 75.6101953 63 74.828936 63 67.4382714  
64.6123737 63 68.6106527 63 81.2265792 63 75.6101953 63 75.9717932 63 68.0097  
65.8771293 63 69.4106527 63 81.7980078 63 75.7011044 63 74.828936 63 68.4382714  
65.604402 63 69.8106527 63 82.0837221 63 75.7920134 63 75.4003646 63 67.8668428  
65.6953111 63 69.7106527 63 82.5122935 63 76.2465589 63 75.2575075 63 67.7239857  
65.6953111 63 69.8106527 63 82.9408649 63 76.7920134 63 75.1146503 63 67.7239857  
65.3316747 63 69.7106527 63 83.2265792 63 76.6101953 63 74.6860789 63 67.5811285  
65.1498565 63 69.3106527 63 83.2265792 63 76.9738316 63 74.9717932 63 67.0097  
65.0589474 63 69.0106527 63 82.9408649 63 76.8829225 63 74.6860789 63 67.0097

64.7862202 63 69.1106527 63 82.6551506 63 76.6101953 63 74.4003646 63 67.0097  
64.8771293 63 69.1106527 63 81.7980078 63 76.7011044 63 74.2575075 63 67.2954143  
64.9680384 63 69.4106527 63 81.6551506 63 76.5192862 63 74.6860789 63 67.5811285  
64.7862202 63 69.1106527 63 81.5122935 63 76.5192862 63 74.4003646 63 67.0097  
65.1498565 63 69.0106527 63 82.2265792 63 76.8829225 63 70.9717932 63 66.8668428  
65.2407656 63 68.4106527 63 82.9408649 63 76.337468 63 70.9717932 63 66.7239857  
65.3316747 63 68.4106527 63 83.5122935 63 76.337468 63 71.4003646 63 66.7239857  
65.6953111 63 69.0106527 63 84.0837221 63 76.1556498 63 72.4003646 63 66.2954143  
65.8771293 63 69.3106527 63 84.9408649 63 76.337468 63 72.4003646 63 66.0097  
65.6953111 63 69.9106527 63 84.7980078 63 76.6101953 63 69.6059647 63 66.0097  
65.8771293 63 70.0106527 63 84.0837221 63 76.5192862 63 71.5432218 63 66.0097  
66.0589474 63 70.2106527 63 81.5851729 63 76.6101953 63 71.2575075 63 66.1525571

1st 3 minutes

S2 Dataset A

|  | 101514  |  | 101614 |  | 101714  |  | 102014 |  | 102014 |  |
|--|---------|--|--------|--|---------|--|--------|--|--------|--|
|  | 9-1030. |  | 9-10.  |  | 9-1030. |  | 1:00   |  | 10-11. |  |

|    |            |    |           |    |            |    |            |    |            |    |
|----|------------|----|-----------|----|------------|----|------------|----|------------|----|
| 63 | 79.2039708 | 61 | 67.034831 | 63 | 78.3861474 | 61 | 72.2627068 | 63 | 69.34662   | 61 |
| 63 | 80.8706374 | 61 | 67.034831 | 63 | 78.1861474 | 61 | 72.4293735 | 63 | 69.2474465 | 61 |
| 63 | 80.8706374 | 61 | 67.034831 | 63 | 78.5861474 | 61 | 72.4293735 | 63 | 69.7433142 | 61 |
| 63 | 78.5373041 | 61 | 68.534831 | 63 | 79.1861474 | 61 | 71.9293735 | 63 | 70.0490994 | 61 |
| 63 | 77.0928597 | 61 | 68.534831 | 63 | 79.3861474 | 61 | 71.7627068 | 63 | 70.8424878 | 63 |
| 63 | 77.0928597 | 61 | 69.034831 | 63 | 79.7861474 | 61 | 71.5960402 | 63 | 72.4198147 | 63 |
| 63 | 76.6484152 | 61 | 69.034831 | 63 | 79.7861474 | 61 | 72.7627068 | 63 | 71.6016329 | 63 |
| 63 | 75.8706374 | 61 | 70.034831 | 63 | 79.1861474 | 61 | 73.0960402 | 63 | 69.8424878 | 63 |
| 63 | 76.3150819 | 61 | 70.034831 | 63 | 77.9861474 | 61 | 73.9293735 | 63 | 70.692542  | 63 |
| 63 | 76.7595263 | 61 | 70.534831 | 63 | 76.9861474 | 61 | 75.7627068 | 63 | 69.7834511 | 63 |
| 63 | 81.2532676 | 61 | 70.034831 | 63 | 75.9861474 | 61 | 77.0960402 | 63 | 69.7834511 | 63 |
| 63 | 81.5866009 | 61 | 70.034831 | 63 | 76.7861474 | 61 | 78.5960402 | 63 | 69.4198147 | 63 |
| 63 | 75.7595263 | 61 | 70.534831 | 63 | 78.7861474 | 61 | 78.9293735 | 63 | 68.9652692 | 63 |
| 63 | 78.9199342 | 61 | 70.534831 | 63 | 78.7861474 | 61 | 79.0960402 | 63 | 68.692542  | 63 |
| 63 | 77.5866009 | 61 | 71.034831 | 63 | 79.1861474 | 61 | 78.9293735 | 63 | 66.1883722 | 63 |
| 63 | 79.2532676 | 61 | 71.534831 | 63 | 80.3861474 | 61 | 79.5960402 | 63 | 66.1222565 | 63 |
| 63 | 79.5866009 | 61 | 71.034831 | 63 | 80.3861474 | 61 | 79.7627068 | 63 | 66.1387855 | 63 |
| 63 | 79.5866009 | 61 | 71.034831 | 63 | 80.3861474 | 61 | 79.9293735 | 63 | 65.8577937 | 63 |
| 63 | 81.9199342 | 61 | 71.034831 | 63 | 80.5861474 | 61 | 77.9293735 | 63 | 65.9569673 | 63 |
| 63 | 82.5866009 | 61 | 71.534831 | 63 | 80.5861474 | 61 | 78.0960402 | 63 | 65.6594466 | 63 |
| 63 | 82.9199342 | 61 | 72.534831 | 63 | 79.9861474 | 61 | 75.0321146 | 63 | 65.5602731 | 63 |
| 63 | 82.5866009 | 61 | 74.534831 | 63 | 79.9861474 | 61 | 73.6710035 | 63 | 66.3619259 | 63 |
| 63 | 82.5866009 | 61 | 75.034831 | 63 | 79.5861474 | 61 | 73.8654479 | 63 | 65.9734962 | 63 |
| 63 | 82.5866009 | 61 | 75.034831 | 63 | 78.9861474 | 61 | 73.8654479 | 63 | 66.5602731 | 63 |
| 63 | 82.5866009 | 61 | 73.034831 | 63 | 76.7861474 | 61 | 74.1987812 | 63 | 66.6677111 | 63 |
| 63 | 82.5866009 | 61 | 72.034831 | 63 | 75.7861474 | 61 | 77.5960402 | 63 | 66.1718433 | 63 |
| 63 | 79.8911918 | 61 | 72.034831 | 63 | 75.9861474 | 61 | 77.5960402 | 63 | 65.0242685 | 63 |
| 63 | 80.1411918 | 61 | 71.034831 | 63 | 75.9861474 | 61 | 78.4293735 | 63 | 65.1317065 | 63 |
| 63 | 80.3911918 | 61 | 70.534831 | 63 | 75.9861474 | 61 | 78.9293735 | 63 | 64.9168305 | 63 |
| 63 | 80.6411918 | 61 | 70.534831 | 63 | 76.3861474 | 61 | 78.5960402 | 63 | 64.9912106 | 63 |
| 63 | 80.8911918 | 61 | 70.534831 | 63 | 76.5861474 | 61 | 78.4293735 | 63 | 64.8507148 | 63 |
| 63 | 80.6411918 | 61 | 70.534831 | 63 | 76.9861474 | 61 | 78.7627068 | 63 | 64.8341858 | 63 |
| 63 | 79.1411918 | 61 | 70.534831 | 63 | 77.1861474 | 61 | 77.7627068 | 63 | 64.7102189 | 63 |
| 63 | 78.6411918 | 61 | 70.034831 | 63 | 76.7861474 | 61 | 77.4293735 | 63 | 64.5118718 | 63 |
| 63 | 79.1411918 | 61 | 69.034831 | 63 | 76.9861474 | 61 | 74.1588015 | 63 | 64.4953429 | 63 |
| 63 | 79.8911918 | 61 | 68.034831 | 63 | 76.5861474 | 61 | 73.5754681 | 63 | 64.2930848 | 63 |
| 63 | 81.1411918 | 61 | 68.034831 | 63 | 76.5861474 | 61 | 72.9921348 | 63 | 65.6456889 | 63 |
| 63 | 81.3911918 | 61 | 67.534831 | 63 | 76.5861474 | 61 | 72.7976904 | 63 | 65.6441407 | 63 |
| 63 | 77.448595  | 61 | 67.534831 | 63 | 77.3861474 | 61 | 72.9921348 | 63 | 67.0561783 | 63 |

63 81.8911918 61 67.534831 63 77.9861474 61 72.9921348 63 67.1470874 63  
63 81.8911918 61 67.034831 63 77.9861474 61 73.7699126 63 67.2379965 63  
63 82.8911918 61 67.534831 63 77.9861474 61 74.3532459 63 67.3289056 63  
63 82.8911918 61 67.534831 63 77.9861474 61 74.1588015 63 68.0561783 63  
63 82.1411918 61 67.534831 63 78.5861474 61 77.5960402 63 67.5107238 63  
63 82.6411918 61 67.534831 63 79.1861474 61 75.3532459 63 67.6016329 63  
63 82.6411918 61 68.034831 63 79.3861474 61 77.5960402 63 68.0561783 63  
63 82.8911918 61 67.534831 63 79.3861474 61 77.0960402 63 67.5107238 63  
63 83.3911918 61 67.534831 63 81.1861474 61 76.7627068 63 67.5107238 63  
63 82.8911918 61 67.034831 63 82.1861474 61 75.5960402 63 66.6016329 63  
63 82.1411918 61 67.034831 63 81.3861474 61 75.4293735 63 66.5107238 63  
63 81.1411918 61 67.034831 63 81.5861474 61 72.0960402 63 66.1470874 63  
63 81.1411918 61 67.034831 63 79.7421587 61 71.5960402 63 65.692542 63  
63 79.8911918 61 67.034831 63 79.9088254 61 71.5960402 63 65.4198147 63  
63 79.8911918 61 66.034831 63 79.4088254 61 71.4293735 63 65.4198147 63  
63 78.3911918 61 66.034831 63 79.4088254 61 69.9293735 63 65.6016329 63  
63 77.8911918 61 66.034831 63 79.4088254 61 70.5960402 63 65.692542 63  
63 79.0134889 61 66.034831 63 78.7421587 61 70.5960402 63 65.7834511 63  
63 79.2134889 61 66.034831 63 78.7421587 61 70.7627068 63 66.0561783 63  
63 79.0134889 61 66.034831 63 78.7421587 61 69.7627068 63 65.6016329 63  
63 78.8134889 61 66.034831 63 79.0754921 63 69.0960402 63 64.9652692 63  
63 78.6134889 61 66.034831 63 79.4088254 63 69.0960402 63 64.692542 63  
63 78.4134889 61 66.034831 63 80.2421587 63 66.3163882 63 64.692542 63  
63 76.0134889 61 66.034831 63 80.4088254 63 69.0960402 63 64.692542 63  
63 76.2134889 61 65.534831 63 80.2421587 63 69.0960402 63 64.4198147 63  
63 76.8134889 61 65.534831 63 80.0754921 63 65.8997215 63 64.6016329 63  
63 76.6134889 61 66.534831 63 80.2421587 63 67.9293735 63 64.6016329 63  
63 76.2134889 61 66.534831 63 79.0754921 63 67.4293735 63 64.8743601 63  
63 75.2134889 61 66.534831 63 78.5754921 63 67.9293735 63 64.7834511 63  
63 75.6134889 61 66.534831 63 78.0754921 63 68.0960402 63 64.8743601 63  
63 75.4134889 61 66.534831 63 77.0754921 63 67.9293735 63 64.9652692 63  
63 75.6134889 61 67.034831 63 75.9088254 63 67.9293735 63 65.3289056 63  
63 75.8134889 61 67.534831 63 75.7421587 63 68.9293735 63 65.4198147 63  
63 75.0134889 61 69.034831 63 75.7421587 63 65.8997215 63 65.8743601 63  
63 75.6134889 61 69.534831 63 75.5754921 63 66.2052771 63 65.9652692 63  
63 76.0134889 61 70.034831 63 75.9088254 63 66.6497215 63 65.692542 63  
63 77.0134889 61 70.534831 63 75.7421587 63 66.2608327 63 66.1470874 63  
63 78.2134889 61 69.534831 63 75.0754921 63 66.2608327 63 65.7834511 63  
63 78.0134889 61 68.534831 63 74.9088254 63 66.4552771 63 66.4198147 63  
63 78.6134889 61 69.034831 63 75.0754921 63 66.8163882 63 66.692542 63  
63 80.0134889 61 68.534831 63 75.9088254 63 66.2330549 63 67.0561783 63  
63 80.4134889 61 68.034831 63 75.9088254 63 66.0108327 63 66.8743601 63  
63 81.2134889 61 68.534831 63 76.7421587 63 66.3163882 63 65.7834511 63

63 81.0134889 61 69.534831 63 76.9088254 63 68.9293735 63 65.5107238 63  
63 81.0134889 61 70.034831 63 79.5754921 63 69.5960402 63 64.692542 63  
63 80.4134889 61 70.034831 63 80.2421587 63 69.0960402 63 64.692542 63  
63 79.4472432 61 69.534831 63 80.4088254 63 69.0960402 63 64.4198147 63  
63 78.4472432 61 70.034831 63 80.5754921 63 68.5960402 63 64.7834511 63  
63 77.6139099 61 70.034831 63 80.4088254 63 68.2627068 63 64.9652692 63  
63 76.9472432 61 70.034831 63 79.4088254 63 67.5960402 63 65.1470874 63  
63 77.6139099 61 69.534831 63 79.0754921 63 66.9293735 63 65.1470874 63  
63 77.3788632 61 69.534831 63 78.7421587 63 67.2627068 63 66.0561783 63  
63 77.093149 61 69.534831 63 78.0754921 63 67.2627068 63 66.2379965 63  
63 77.093149 61 69.534831 63 77.2421587 63 66.9293735 63 66.2379965 63  
63 76.8074347 61 69.534831 63 76.2421587 63 66.7627068 71 66.1470874 63  
63 75.9502918 61 69.034831 63 76.5754921 63 66.5960402 71 66.9652692 63  
63 75.9502918 61 69.534831 63 76.4088254 63 67.2627068 71 66.7834511 63  
63 76.5217204 61 69.034831 63 76.4088254 63 67.2627068 63 66.692542 63  
63 76.5217204 61 69.534831 63 77.2421587 63 66.2627068 63 67.0561783 63  
63 76.3788632 61 69.034831 63 77.2421587 63 62.5386104 63 66.6016329 63  
63 76.6645775 61 68.034831 63 77.2421587 63 62.3163882 63 66.692542 63  
63 76.5217204 61 67.034831 63 77.5754921 63 62.3163882 63 66.9652692 63  
63 75.3788632 61 66.534831 63 77.7421587 63 63.8719438 63 66.8743601 63  
63 75.5217204 61 66.034831 63 77.7421587 63 64.3163882 63 66.692542 63  
63 74.8074347 61 65.534831 63 77.7421587 63 64.8719438 63 67.0561783 63  
63 74.093149 61 65.034831 63 77.5754921 63 66.4274993 63 67.0561783 63  
63 75.2360061 61 64.534831 63 77.7421587 63 66.6497215 63 67.1470874 63  
63 75.5217204 61 64.534831 63 76.7421587 63 66.7330549 63 66.7834511 63  
63 74.6889155 61 64.534831 63 75.7421587 63 66.5386104 63 67.5107238 63  
63 75.3139155 61 64.034831 63 75.5754921 63 67.1497215 63 67.2214301 63  
63 75.5639155 61 63.534831 63 75.0754921 63 68.1497215 63 67.023083 63  
63 75.3139155 61 63.534831 63 77.7421587 63 68.5177032 63 66.8247359 63  
63 75.5639155 61 66.6271324 63 78.0754921 63 68.5779279 63 66.6677111 63  
63 74.5639155 61 66.5938707 63 77.2421587 63 67.9552771 63 66.6677111 63  
63 74.4389155 61 66.5606091 63 76.7421587 63 68.344166 63 66.3701904 63  
63 73.9389155 61 66.5273474 63 77.4088254 63 69.1497215 63 65.0809342 63  
63 74.0639155 61 66.4940857 63 77.0754921 63 70.6774993 63 64.8825871 63  
63 73.6889155 61 66.4608241 63 76.9088254 63 72.4293735 63 64.68424 63  
63 73.6889155 61 66.4275624 63 76.7421587 63 73.0960402 63 64.68424 63  
63 73.0639155 61 66.3943007 63 77.0754921 63 71.9293735 63 64.5354797 63  
63 72.8139155 61 66.3610391 63 76.9088254 63 71.4293735 63 64.6263888 63  
63 72.9389155 61 66.3277774 63 77.0754921 63 71.5960402 63 64.5272152 63  
63 72.8139155 63 66.2945157 63 77.2421587 63 71.5960402 63 63.7338268 63  
63 72.8139155 63 66.261254 63 77.2421587 63 71.0960402 63 64.2214301 63  
63 72.8139155 63 66.2279924 63 77.2421587 63 71.2627068 63 64.2049012 63  
63 72.6889155 63 66.1947307 63 77.2421587 63 71.7627068 63 65.1470874 63

63 73.5639155 63 66.161469 63 78.2421587 63 71.9293735 63 64.6016329 63  
63 73.5639155 63 66.1282074 63 78.0754921 63 71.9293735 63 64.692542 63  
63 73.4389155 63 66.0949457 63 78.5754921 63 72.0960402 63 64.8743601 63  
63 74.0639155 63 66.061684 63 78.7421587 63 72.0960402 63 65.3289056 63  
63 73.9389155 63 66.0284223 63 78.5754921 63 72.0960402 63 65.4198147 63  
63 73.8139155 63 65.9951607 63 78.9088254 63 71.9293735 63 65.7834511 63  
63 72.6889155 63 65.961899 63 80.9088254 63 69.9293735 63 66.6016329 63  
63 74.1889155 63 65.9286373 63 82.0754921 63 69.9293735 63 66.692542 63  
63 73.8139155 63 65.8953757 63 82.0754921 63 69.9293735 63 65.9652692 63  
63 74.0639155 63 65.862114 63 82.2421587 63 69.9293735 63 65.692542 63  
63 70.0388615 63 65.8288523 63 81.5754921 63 70.2627068 63 65.4198147 63  
63 72.7632822 63 65.7955906 63 81.0754921 63 69.4293735 69 65.7834511 63  
63 72.9039072 63 65.762329 63 81.7421587 63 68.7627068 69 66.1470874 63  
63 73.3257822 63 65.7290673 63 80.5754921 63 68.4293735 69 67.0561783 63  
63 73.6070322 63 65.6958056 63 79.9088254 63 68.5960402 69 67.4198147 63  
63 73.3570322 63 65.662544 63 79.0754921 63 68.2627068 69 67.4198147 63  
63 73.3414072 63 65.6292823 63 78.5754921 63 68.0960402 69 67.2379965 63  
63 74.6889155 63 65.5960206 63 77.7421587 63 67.4293735 69 66.8743601 63  
63 72.5639155 63 65.562759 63 77.4088254 63 67.0960402 69 66.8743601 63  
63 72.4389155 63 65.5294973 63 76.5754921 63 67.4293735 69 66.692542 63  
63 72.0639155 63 65.4962356 63 76.4088254 63 67.0960402 69 66.9652692 63  
63 72.0639155 63 65.4629739 63 76.7421587 63 67.0960402 69 67.692542 63  
63 72.1889155 63 65.4297123 63 76.5754921 63 66.9293735 63 67.9652692 63  
63 72.3139155 63 65.3964506 63 76.4088254 63 66.9293735 63 67.7834511 63  
63 71.6889155 63 65.3631889 63 76.4088254 63 66.7627068 63 67.5107238 63  
63 71.5639155 63 65.3299273 63 76.4088254 63 67.9293735 63 67.6016329 63  
63 71.8139155 63 65.2966656 63 74.0367846 63 68.5960402 63 67.4198147 63  
63 72.5639155 63 65.2634039 63 73.8939274 63 68.9293735 63 66.7834511 63  
63 72.8139155 63 65.2301422 63 73.7510703 63 68.9293735 63 66.7834511 63  
63 72.6889155 63 65.1968806 63 73.3224988 63 68.7627068 63 66.8743601 63  
63 73.0639155 63 65.1636189 63 73.465356 63 69.0960402 63 66.692542 63  
63 71.4045166 63 65.1303572 63 72.7510703 63 69.4293735 63 66.692542 63  
63 73.6889155 63 65.0970956 63 72.7510703 63 69.5960402 63 66.692542 63  
63 73.8139155 63 65.0638339 63 72.0367846 63 69.5960402 63 66.3289056 63  
63 71.8767389 63 65.0305722 63 71.8939274 63 69.4293735 63 65.7834511 63  
63 71.48785 63 64.9973106 63 72.465356 63 69.5960402 63 65.3289056 63  
63 70.5434055 63 64.9640489 63 72.465356 63 69.9293735 63 65.2379965 63  
63 70.7239611 63 64.9307872 63 72.1131737 63 69.7627068 63 65.2379965 63  
63 70.86285 63 64.8975255 63 72.1131737 63 70.0960402 63 65.9652692 63  
63 71.1545166 63 64.8642639 63 72.3631737 63 70.0960402 63 66.1470874 63  
63 71.5711833 63 64.8310022 63 72.2381737 63 69.7627068 63 64.3030348 63  
63 71.2934055 63 64.7977405 63 72.1131737 63 69.5960402 63 64.699729 63  
63 71.4461833 63 64.7644789 63 72.2381737 63 69.7627068 63 65.022043 63



63 71.1406277 63 64.7312172 63 72.7381737 63 68.0960402 63 65.0303075 63  
63 71.9739611 63 64.6979555 63 73.2381737 63 68.5960402 63 64.7410513 63  
63 71.5434055 63 64.6646938 63 73.9881737 63 67.9293735 63 64.914605 63  
63 71.2656277 63 64.6314322 63 74.3631737 63 67.5960402 63 65.0881588 63  
63 70.8350722 63 64.5981705 63 75.3631737 63 67.7627068 63 64.3691505 63  
63 71.11285 63 64.5649088 63 75.4881737 63 65.7627068 63 65.692542 63  
63 71.3350722 63 64.5316472 63 76.1131737 63 65.5960402 63 65.4198147 63  
63 72.5639155 63 64.4983855 63 76.7381737 63 65.2627068 63 64.4198147 63  
63 73.8197358 63 64.4651238 63 76.6131737 63 65.0960402 63 63.692542 63  
63 74.041958 63 64.4318621 63 76.6131737 63 64.9293735 63 63.6016329 63  
63 74.1530691 63 64.3986005 63 76.7381737 63 64.7627068 63 63.6016329 63  
63 74.3752914 63 64.3653388 63 76.7381737 63 64.9293735 63 63.4198147 63

## 1st 3 minutes

## S2 Dataset A

| 102014 |  | 102014 |  | 102114 |  | 102114 |  | 102214 |  | 102214 |
|--------|--|--------|--|--------|--|--------|--|--------|--|--------|
| 11-12. |  | 9:00   |  | 9-10.  |  | 10-11. |  | 9-10.  |  | 10-11. |

|            |    |            |    |            |    |            |    |            |    |            |
|------------|----|------------|----|------------|----|------------|----|------------|----|------------|
| 62.5950535 | 61 | 68.5682219 | 61 | 75.3431299 | 71 | 70.5179799 | 63 | 69.8222677 | 61 | 64.2485032 |
| 63.150609  | 61 | 68.9015553 | 61 | 75.3431299 | 71 | 69.8679799 | 63 | 70.0222677 | 61 | 63.1127008 |
| 63.150609  | 61 | 68.2348886 | 61 | 75.6764632 | 71 | 70.6479799 | 63 | 70.2222677 | 61 | 64.9045393 |
| 62.9283868 | 61 | 70.9015553 | 61 | 76.3431299 | 71 | 71.0879799 | 63 | 70.4222677 | 61 | 64.4107121 |
| 63.150609  | 61 | 71.2348886 | 61 | 74.3431299 | 71 | 70.8679799 | 63 | 70.4222677 | 61 | 64.2749097 |
| 63.301845  | 61 | 71.5682219 | 61 | 74.0097966 | 71 | 70.9779799 | 63 | 70.6222677 | 61 | 63.2872553 |
| 63.150609  | 61 | 71.5682219 | 61 | 72.3431299 | 71 | 71.7579799 | 63 | 70.6222677 | 61 | 63.2872553 |
| 63.4839424 | 61 | 71.9015553 | 61 | 70.6764632 | 71 | 72.7379799 | 63 | 71.0222677 | 61 | 63.2872553 |
| 63.7061646 | 61 | 72.2348886 | 61 | 69.6764632 | 71 | 72.9579799 | 63 | 70.6222677 | 61 | 63.1637986 |
| 64.2617201 | 61 | 71.9015553 | 61 | 70.3431299 | 71 | 72.5179799 | 63 | 70.6222677 | 61 | 63.2872553 |
| 64.2617201 | 61 | 71.9015553 | 61 | 70.0097966 | 71 | 72.5079799 | 63 | 70.4222677 | 61 | 63.2872553 |
| 64.8053172 | 61 | 71.9015553 | 61 | 70.0097966 | 71 | 72.1679799 | 63 | 70.4222677 | 61 | 63.2872553 |
| 65.5950535 | 61 | 71.9015553 | 61 | 69.6764632 | 71 | 72.1679799 | 63 | 70.6222677 | 61 | 63.0403418 |
| 65.5950535 | 61 | 71.9015553 | 61 | 67.7959325 | 71 | 72.6079799 | 63 | 70.4222677 | 61 | 62.5341689 |
| 64.9283868 | 61 | 71.9015553 | 61 | 67.7959325 | 71 | 73.4879799 | 63 | 70.2222677 | 61 | 62.2872553 |
| 64.2617201 | 61 | 71.9015553 | 61 | 67.2959325 | 71 | 74.9585601 | 63 | 70.4222677 | 61 | 62.2872553 |
| 63.5950535 | 61 | 72.2348886 | 61 | 67.5459325 | 71 | 74.9585601 | 63 | 69.8222677 | 61 | 62.1761442 |
| 63.3728312 | 61 | 72.5682219 | 61 | 67.7959325 | 71 | 74.5585601 | 63 | 69.6222677 | 61 | 62.7934282 |
| 63.0394979 | 61 | 72.5682219 | 61 | 67.7959325 | 71 | 73.1585601 | 63 | 69.2222677 | 61 | 62.916885  |
| 62.4839424 | 61 | 72.2348886 | 61 | 67.7959325 | 61 | 72.5585601 | 63 | 69.4222677 | 61 | 62.6699714 |
| 62.4839424 | 61 | 73.2348886 | 61 | 67.7959325 | 61 | 72.2585601 | 63 | 69.4222677 | 61 | 62.8057739 |
| 62.5950535 | 61 | 73.2348886 | 61 | 67.5459325 | 61 | 70.6794007 | 63 | 69.6222677 | 61 | 63.1761442 |
| 62.8172757 | 61 | 74.2348886 | 61 | 68.2959325 | 61 | 72.9585601 | 63 | 69.4222677 | 61 | 63.0650331 |
| 62.5950535 | 61 | 74.9015553 | 61 | 69.0459325 | 61 | 70.8994007 | 63 | 69.6222677 | 61 | 63.1884899 |
| 63.0394979 | 61 | 75.2348886 | 61 | 69.0459325 | 61 | 72.995862  | 63 | 69.6222677 | 61 | 63.8057739 |
| 63.2617201 | 61 | 75.5682219 | 61 | 69.7959325 | 61 | 71.8847509 | 63 | 69.8222677 | 61 | 64.0526874 |
| 63.2617201 | 61 | 75.9015553 | 61 | 70.0459325 | 61 | 71.1069731 | 63 | 70.4222677 | 61 | 64.1761442 |
| 62.9283868 | 61 | 77.9015553 | 61 | 70.0459325 | 61 | 67.8601393 | 63 | 70.6222677 | 61 | 64.4230578 |
| 63.3728312 | 61 | 77.9015553 | 61 | 69.5459325 | 61 | 67.2428554 | 63 | 70.4222677 | 61 | 64.7810825 |
| 63.2617201 | 61 | 77.9015553 | 61 | 69.7959325 | 61 | 66.6132258 | 63 | 70.4222677 | 61 | 64.5218232 |
| 63.7061646 | 61 | 77.9015553 | 61 | 69.0459325 | 61 | 65.5021147 | 63 | 70.6222677 | 61 | 64.7687368 |
| 64.7061646 | 61 | 77.9015553 | 61 | 68.7959325 | 61 | 65.1317443 | 63 | 70.6222677 | 61 | 64.64528   |
| 64.7061646 | 61 | 81.6903142 | 61 | 69.0459325 | 61 | 64.7613739 | 63 | 70.2222677 | 61 | 64.64528   |
| 64.2617201 | 61 | 81.1903142 | 61 | 68.7959325 | 61 | 64.6379171 | 63 | 70.2222677 | 61 | 64.3860208 |
| 63.4839424 | 61 | 81.1903142 | 61 | 69.5459325 | 61 | 65.0082875 | 63 | 70.2222677 | 61 | 64.0033047 |
| 62.9283868 | 61 | 81.1903142 | 61 | 69.5459325 | 61 | 64.872485  | 63 | 70.0222677 | 61 | 64.0033047 |
| 62.9283868 | 61 | 80.9403142 | 61 | 69.7959325 | 61 | 64.6255714 | 63 | 69.8222677 | 61 | 64.225527  |
| 60.4839424 | 61 | 81.1903142 | 61 | 70.2959325 | 61 | 66.3291953 | 63 | 68.8222677 | 61 | 64.5958973 |
| 60.8172757 | 61 | 80.9403142 | 61 | 70.2959325 | 61 | 66.7736398 | 63 | 68.4222677 | 61 | 65.7070084 |

61.0394979 61 80.9403142 61 71.2959325 61 66.5514176 63 68.2222677 61 65.7070084  
60.5950535 61 80.9403142 61 71.2959325 61 66.8847509 63 68.4222677 61 65.5835516  
60.2617201 61 80.9403142 61 71.2959325 61 66.8847509 63 69.6222677 61 65.3242924  
60.150609 61 80.9403142 61 72.2959325 61 67.7736398 63 70.0222677 61 64.8428109  
60.150609 61 80.9403142 61 72.0459325 61 67.6625287 63 70.0222677 61 64.5958973  
60.2617201 61 80.9403142 61 71.5613146 61 67.8847509 63 70.0222677 61 64.3489837  
61.9852632 61 81.1903142 61 70.7613146 61 67.995862 63 69.6222677 61 64.8551566  
62.0943541 61 81.1903142 61 70.7613146 61 66.0641034 63 69.0222677 61 65.2378726  
62.1412072 61 81.4403142 61 70.5613146 61 66.002375 63 69.4222677 61 66.3138728  
61.9412072 61 81.4403142 61 70.9613146 61 67.6443503 63 69.0222677 61 66.0916506  
62.1412072 61 82.4403142 61 71.3613146 61 67.4344738 63 69.2222677 71 65.536095  
62.4412072 61 82.4403142 61 73.7613146 61 67.0517577 63 69.4222677 71 65.0916506  
63.1412072 61 82.4403142 61 74.7613146 61 67.0764491 63 70.0222677 71 65.0916506  
64.6412072 61 81.6903142 61 74.5613146 61 67.2122516 63 69.6222677 71 65.0916506  
64.8412072 61 76.911245 61 73.3613146 61 67.4838565 63 69.6222677 71 64.8694284  
64.5412072 61 75.973745 61 72.5613146 61 67.27398 63 69.2222677 71 65.0916506  
63.9412072 61 81.6903142 61 71.5613146 61 67.2863256 63 69.2222677 71 65.4249839  
63.2412072 61 77.223745 61 71.5613146 61 67.2863256 63 69.0222677 71 65.536095  
62.3412072 61 76.911245 61 71.5613146 61 67.2986713 63 68.6222677 71 65.7583173  
61.8412072 61 77.098745 61 71.5613146 61 67.5455849 63 68.4222677 71 64.5444519  
62.3412072 61 76.473745 61 71.5613146 61 69.27398 63 69.0222677 71 64.8284026  
61.7412072 61 76.161245 61 71.7613146 61 69.5332392 63 70.0222677 71 65.4456865  
61.9412072 61 75.536245 61 70.9613146 61 69.4097824 63 70.4222677 71 65.6802544  
61.9412072 61 74.973745 61 71.5613146 61 69.6443503 63 70.6222677 71 67.6472062  
62.4412072 61 74.348745 61 71.3613146 61 69.0147207 63 71.2222677 71 67.0916506  
62.3849785 61 74.348745 61 70.5613146 61 68.5208935 63 71.4222677 71 66.6472062  
61.8087777 61 72.473745 61 70.3613146 61 67.6073133 63 71.2222677 71 66.0916506  
61.2412072 61 72.536245 61 71.1613146 61 67.3727454 63 71.6222677 71 65.8694284  
60.6412072 61 72.661245 61 71.1613146 61 65.5580104 63 72.0222677 71 66.2027617  
60.6412072 61 72.973745 61 72.3613146 61 66.6255714 63 72.8222677 71 65.9805395  
59.4310619 61 72.973745 61 71.7613146 61 66.2552011 63 73.6222677 71 65.9805395  
59.9946983 61 73.973745 61 71.9613146 61 68.1069731 63 73.6222677 71 65.6472062  
62.1412072 61 74.286245 61 70.7613146 61 65.8895554 63 73.6222677 71 65.536095  
62.6412072 61 74.598745 61 70.5613146 61 65.1317443 63 73.8222677 71 65.6472062  
63.1412072 61 74.286245 61 69.1613146 61 65.5021147 63 72.8222677 71 65.3138728  
63.2412072 61 72.911245 61 68.9613146 61 65.3786579 63 73.2222677 71 65.0916506  
63.6412072 61 72.598745 61 69.3613146 61 67.1069731 63 73.2222677 71 66.3138728  
63.6412072 61 72.286245 61 69.3613146 61 67.5514176 63 73.2222677 71 66.2027617  
63.6412072 61 74.6903142 61 68.5613146 61 67.6625287 63 72.8222677 71 65.9805395  
63.6412072 61 74.6903142 61 68.5613146 61 67.4403065 63 72.4222677 71 65.536095  
63.9412072 71 74.4403142 61 68.5613146 61 66.995862 63 72.4222677 71 64.9805395  
64.3412072 71 73.6903142 61 68.1613146 61 66.7736398 63 72.6222677 71 64.8694284  
64.4412072 71 73.6903142 61 67.1613146 61 66.5514176 63 72.8222677 71 64.8694284

64.4412072 71 72.9403142 61 67.1613146 61 66.3291953 63 73.6222677 71 64.8694284  
64.2412072 71 72.4403142 61 67.1613146 61 65.8847509 63 74.6222677 73 63.6472062  
63.8412072 71 72.4403142 61 69.5333615 61 65.7736398 63 74.8222677 73 63.8694284  
63.7412072 71 72.4403142 61 69.5333615 61 65.4403065 63 75.0222677 73 63.4249839  
63.8412072 71 73.1903142 61 69.5333615 61 65.3291953 63 75.6222677 73 63.7583173  
64.3412072 71 74.6903142 63 69.2000281 61 65.6625287 63 76.8222677 73 64.0916506  
64.4412072 71 75.4403142 63 68.2000281 61 65.8847509 63 76.8222677 73 63.7583173  
64.1412072 71 75.4403142 63 68.5333615 61 65.5514176 63 76.8222677 73 63.2027617  
64.0412072 71 75.9403142 63 68.3666948 61 65.8847509 63 76.4222677 73 62.9805395  
63.2412072 71 75.6903142 63 67.0333615 61 67.1069731 63 76.0222677 73 62.8694284  
63.1412072 71 75.1903142 63 66.8666948 61 66.8847509 63 75.6222677 73 62.4249839  
63.1412072 71 74.9403142 63 66.7000281 61 65.4221281 63 75.2222677 73 62.4249839  
63.2412072 71 75.4403142 63 66.0333615 61 65.4344738 63 74.8222677 73 62.7583173  
63.4412072 71 74.6903142 63 65.8666948 61 65.0887948 63 75.0222677 73 63.6472062  
63.2412072 71 75.1903142 63 65.8666948 61 64.9776837 63 74.4222677 73 64.3138728  
63.3412072 71 75.1903142 63 66.0333615 61 64.619659 63 72.8222677 73 64.4249839  
63.5412072 71 77.1903142 63 66.2000281 61 64.2492886 63 72.8222677 73 64.2027617  
63.9412072 71 76.4403142 63 66.0333615 61 64.619659 63 71.4222677 73 63.9805395  
64.1412072 71 75.4403142 63 66.0333615 61 64.5085479 63 70.8222677 73 64.3138728  
63.7412072 71 73.4403142 63 66.5333615 61 65.3727454 63 70.6222677 73 64.536095  
63.0412072 71 72.9403142 63 66.8666948 61 65.9900293 63 70.6222677 73 65.3138728  
62.2412072 71 72.6903142 63 67.0333615 61 66.27398 63 70.0222677 73 65.3138728  
61.5412072 71 71.9403142 63 66.5333615 61 67.1505232 75 69.8222677 73 65.2027617  
61.6412072 71 71.6903142 63 67.3666948 69 68.0394121 75 70.2222677 73 65.3138728  
61.8412072 71 72.6903142 63 67.5333615 69 68.0394121 75 70.2222677 73 64.7583173  
62.1412072 71 72.9403142 63 67.8666948 69 68.5332392 75 70.4222677 73 64.3138728  
62.2412072 71 73.1903142 63 68.5333615 69 68.5455849 75 70.6222677 73 63.9805395  
63.0412072 71 74.1903142 63 68.5333615 69 68.6690417 75 70.6222677 73 63.9805395  
62.8412072 71 74.1903142 63 68.5333615 69 68.6690417 75 70.4222677 73 64.0916506  
63.1412072 71 71.9403142 63 69.0333615 69 68.4221281 75 70.0222677 73 64.4249839  
63.1412072 71 71.9403142 63 69.5333615 69 68.0517577 75 69.2222677 73 64.8694284  
64.2412072 71 70.9403142 63 69.2000281 69 68.0641034 75 69.0222677 73 64.9805395  
64.0412072 71 71.4403142 63 69.8666948 69 67.8048442 75 68.8222677 73 65.0916506  
62.1144064 71 71.4403142 63 69.7000281 69 67.5579306 75 68.6222677 73 65.0916506  
62.7689518 71 71.6903142 63 69.3666948 69 67.1875602 75 69.0222677 73 64.536095  
62.75077 71 72.6903142 63 69.2000281 69 67.1875602 75 68.0222677 73 64.7583173  
62.75077 71 73.6903142 63 69.2000281 69 67.5455849 75 67.4222677 73 64.8694284  
61.998389 71 74.6903142 63 68.8666948 69 67.5208935 75 67.4222677 73 65.2027617  
64.2412072 71 74.6903142 63 68.8666948 69 67.3233627 75 67.2222677 73 65.3138728  
61.9412072 71 75.4403142 63 68.8666948 69 69.5514176 75 67.0222677 73 65.3138728  
61.8412072 71 74.6903142 63 68.8666948 69 69.8847509 75 67.0222677 73 65.8694284  
60.9412072 71 75.6903142 63 68.5333615 69 69.6625287 75 67.0222677 61 66.4249839  
60.9412072 71 75.9403142 63 67.5333615 69 67.9406566 75 67.6222677 61 66.7583173

60.7412072 71 76.9403142 63 67.2000281 69 69.8847509 75 67.8222677 61 67.3138728  
61.0412072 71 77.1903142 63 67.5333615 69 69.6625287 75 69.0222677 61 68.2027617  
61.0412072 71 76.6903142 63 68.3666948 69 69.6625287 75 69.2222677 61 68.536095  
61.3412072 71 76.6903142 63 69.0333615 69 69.5514176 75 70.2222677 61 68.536095  
61.9412072 71 75.9403142 63 69.2000281 69 68.995862 75 70.6222677 61 68.6472062  
61.9412072 71 75.9403142 63 69.5333615 69 68.8847509 75 71.4222677 61 68.3138728  
62.1412072 71 75.9403142 63 69.7000281 69 68.8847509 75 72.0222677 61 68.3138728  
62.0412072 71 75.9403142 63 69.7000281 69 68.6625287 75 72.0222677 61 67.9805395  
62.2412072 71 74.6903142 63 70.0806473 69 68.1069731 75 72.6222677 61 67.536095  
62.2412072 71 74.1903142 63 69.9377901 69 67.995862 75 73.0222677 61 67.3138728  
62.7412072 71 73.4403142 63 69.9377901 69 67.2180842 75 74.2222677 61 67.8694284  
62.9412072 71 72.1903142 63 70.6520759 69 66.5514176 75 73.6222677 61 68.0916506  
63.3412072 71 71.4403142 63 71.0806473 69 65.4403065 75 70.6227018 61 68.3138728  
63.0412072 71 71.4403142 63 70.6520759 69 64.995862 75 73.6222677 61 68.3138728  
63.2412072 71 71.6903142 63 70.2235044 69 65.5514176 75 68.3027018 61 68.2027617  
63.5412072 71 72.1903142 63 70.5092187 69 65.4403065 75 68.3027018 61 67.9805395  
64.1412072 71 71.6903142 63 70.5092187 69 65.1069731 75 68.3027018 61 66.7583173  
64.6412072 71 70.9403142 63 70.6520759 69 64.6625287 75 71.5251997 61 66.2027617  
64.6412072 71 70.9403142 63 70.6520759 69 64.6625287 75 71.2196442 61 65.9805395  
64.0412072 71 69.6903142 63 70.794933 69 65.2180842 75 71.4696442 61 65.9805395  
64.0412072 71 69.6903142 63 67.4481668 69 65.2180842 75 71.6640886 61 66.4249839  
61.7765164 71 69.4403142 63 67.6981668 69 65.3291953 75 71.8585331 61 66.536095  
61.7765164 71 69.9403142 63 67.9481668 69 65.4403065 63 72.2474219 61 67.0916506  
61.9037892 71 69.9403142 63 68.0731668 69 65.7736398 63 72.2474219 63 67.7604977  
61.5765164 71 70.1903142 63 68.4481668 69 66.1069731 63 72.6085331 63 67.5876582  
61.3583346 71 70.4403142 63 69.0731668 69 66.4403065 63 72.2196442 63 67.7234607  
61.0310619 71 70.1903142 63 68.9481668 69 66.7736398 63 71.4418664 63 68.4395101  
61.2674255 71 70.4403142 63 69.0731668 69 66.995862 63 71.2474219 63 68.5135842  
61.1401528 71 70.4403142 63 69.1981668 69 66.4403065 63 70.7474219 63 67.9703743  
61.5037892 71 70.9403142 63 68.8231668 69 66.5514176 63 70.9140886 63 66.0321027  
62.1037892 71 70.9403142 63 68.4481668 69 66.5514176 63 69.7474219 63 65.3037076  
61.9037892 71 70.9403142 63 68.4481668 69 66.995862 63 69.5529775 63 64.6987694  
62.0310619 71 71.651788 63 68.9286951 69 67.6625287 63 69.5251997 63 64.6987694  
61.8128801 71 71.451788 63 68.7064728 69 68.5514176 63 69.6918664 63 64.9333373  
61.8674255 71 71.451788 63 68.817584 69 68.3291953 63 72.7435183 63 64.6246953  
62.2310619 71 71.851788 63 69.3731395 69 67.7736398 63 72.910185 63 64.5876582  
61.6492437 71 71.851788 63 70.817584 69 67.6625287 63 72.910185 63 64.7728434  
61.9946983 71 71.651788 63 72.0398062 69 64.9406466 63 72.910185 63 64.6987694  
62.6492437 71 72.451788 63 72.5953617 69 64.4591651 63 73.5768517 63 64.8469175  
63.321971 63 72.651788 63 73.1509173 69 64.5949676 63 73.5768517 63 65.0444484  
63.2128801 63 72.651788 63 73.3731395 69 65.1258318 63 70.9140886 63 65.1432138  
63.4128801 63 73.051788 63 73.2620284 69 65.2863256 63 70.9140886 63 64.8345718  
63.1946983 63 73.051788 63 72.817584 69 65.4097824 63 71.6918664 63 64.5629669

62.5583346 63 74.451788 63 73.0398062 69 66.1011404 63 71.6918664 63 65.7583173  
61.9037892 63 74.651788 63 73.7064728 69 66.3233627 63 74.5768517 63 65.7583173  
61.6492437 63 74.851788 63 74.0398062 69 66.1752145 63 74.7435183 63 64.7583173  
61.5401528 63 75.251788 63 74.2620284 69 67.4403065 63 74.5768517 63 64.536095  
61.636461 63 75.451788 63 74.3731395 69 67.1069731 63 74.5768517 63 64.7583173  
61.9236804 63 75.251788 63 72.8555963 69 66.5514176 63 74.410185 63 65.0916506  
62.9401528 63 75.651788 63 72.6210284 69 64.7743164 63 72.0807553 63 65.3138728  
63.6412072 63 75.651788 63 72.1272012 69 64.7743164 63 73.5768517 63 64.8694284  
64.6412072 63 75.651788 63 71.633374 69 64.1570324 63 73.410185 63 64.4249839  
64.1412072 63 75.251788 63 71.2630037 69 63.9101188 63 74.0768517 63 64.6472062  
63.6412072 63 75.651788 63 71.4975716 69 63.618652 63 74.2435183 63 64.6472062  
63.5412072 63 75.851788 63 70.156855 69 63.6298456 63 73.910185 63 65.2027617

| 1st 3 minutes |            |         |            | S2 Dataset A |            |        |            | time | Average |            |
|---------------|------------|---------|------------|--------------|------------|--------|------------|------|---------|------------|
| 102214        |            | 102314  |            | 102414       |            | 102814 |            |      |         |            |
| 11-12.        |            | 9-10.30 |            | 9-10.        |            | 10-11. |            |      |         |            |
| 63            | 70.1221509 | 60      | 72.678859  | 63           | 79.1399432 | 63     | 75.1428571 | 63   | 0:00:01 | 73.2918191 |
| 63            | 70.4971509 | 60      | 72.678859  | 63           | 79.1399432 | 63     | 75.4285714 | 63   | 0:00:02 | 73.3035249 |
| 63            | 70.6846509 | 60      | 72.678859  | 63           | 78.6399432 | 63     | 75.5714286 | 63   | 0:00:03 | 73.4057722 |
| 63            | 66.3721509 | 60      | 72.678859  | 63           | 77.6399432 | 63     | 75.7142857 | 63   | 0:00:04 | 73.312347  |
| 63            | 66.3721509 | 60      | 72.678859  | 63           | 77.6399432 | 63     | 75.8571429 | 63   | 0:00:05 | 73.2218871 |
| 63            | 66.8721509 | 60      | 72.678859  | 63           | 76.6399432 | 63     | 75.2857143 | 63   | 0:00:06 | 73.3252288 |
| 63            | 65.9346509 | 60      | 72.678859  | 63           | 76.1399432 | 63     | 74.1428571 | 63   | 0:00:07 | 73.3176905 |
| 63            | 65.2471509 | 60      | 72.678859  | 63           | 75.1399432 | 63     | 73.7142857 | 63   | 0:00:08 | 73.3826564 |
| 71            | 65.2471509 | 60      | 71.678859  | 63           | 75.1399432 | 63     | 73.8571429 | 63   | 0:00:09 | 73.2487214 |
| 71            | 66.1846509 | 63      | 70.678859  | 63           | 75.1399432 | 63     | 73.5714286 | 63   | 0:00:10 | 73.4084973 |
| 71            | 65.5596509 | 63      | 70.678859  | 63           | 77.1399432 | 63     | 73.1428571 | 63   | 0:00:11 | 73.529039  |
| 71            | 65.4971509 | 63      | 70.678859  | 63           | 77.1399432 | 63     | 72.7142857 | 63   | 0:00:12 | 73.6265437 |
| 63            | 65.4971509 | 63      | 72.8072921 | 63           | 77.1399432 | 63     | 71.4285714 | 63   | 0:00:13 | 73.483611  |
| 63            | 65.4971509 | 63      | 72.3072921 | 63           | 77.1399432 | 63     | 71.2857143 | 63   | 0:00:14 | 73.535172  |
| 63            | 65.3096509 | 63      | 72.3072921 | 63           | 76.6399432 | 63     | 71.2857143 | 63   | 0:00:15 | 73.5482939 |
| 63            | 65.8096509 | 63      | 72.8072921 | 63           | 76.1399432 | 63     | 71.7142857 | 63   | 0:00:16 | 73.6366906 |
| 63            | 66.1846509 | 63      | 72.8072921 | 63           | 76.1399432 | 63     | 72.1428571 | 63   | 0:00:17 | 73.7154448 |
| 63            | 69.620477  | 63      | 73.3072921 | 63           | 75.6399432 | 63     | 71.8571429 | 63   | 0:00:18 | 74.0393786 |
| 63            | 69.9538104 | 63      | 73.3072921 | 63           | 75.1399432 | 63     | 71.4285714 | 63   | 0:00:19 | 73.9967851 |
| 63            | 70.4538104 | 63      | 72.8072921 | 63           | 73.2701234 | 63     | 71.2857143 | 63   | 0:00:20 | 74.0983881 |
| 63            | 71.120477  | 63      | 72.8072921 | 63           | 73.6034568 | 63     | 71.8571429 | 63   | 0:00:21 | 74.2208877 |
| 63            | 71.2871437 | 63      | 72.8072921 | 63           | 74.9367901 | 63     | 72.1428571 | 63   | 0:00:22 | 74.1687047 |
| 63            | 67.9971509 | 63      | 72.8072921 | 63           | 74.9367901 | 63     | 73.2857143 | 63   | 0:00:23 | 74.2168133 |
| 63            | 67.8096509 | 63      | 72.8072921 | 63           | 75.6034568 | 63     | 73.2857143 | 63   | 0:00:24 | 74.1899405 |
| 63            | 67.6221509 | 63      | 72.8072921 | 63           | 75.6034568 | 63     | 74         | 63   | 0:00:25 | 74.0995773 |
| 63            | 67.4346509 | 63      | 72.3072921 | 63           | 75.6034568 | 63     | 73.8571429 | 63   | 0:00:26 | 74.0796864 |
| 63            | 66.4346509 | 63      | 72.3072921 | 63           | 76.6034568 | 63     | 73.8571429 | 63   | 0:00:27 | 73.878187  |
| 63            | 66.0596509 | 63      | 72.8072921 | 63           | 76.2701234 | 63     | 73.5714286 | 63   | 0:00:28 | 73.7025103 |
| 63            | 66.0596509 | 63      | 72.8072921 | 63           | 75.2701234 | 63     | 73.7142857 | 63   | 0:00:29 | 73.6191671 |
| 63            | 68.2871437 | 63      | 72.8072921 | 63           | 75.2701234 | 63     | 70.6605211 | 63   | 0:00:30 | 73.5932579 |
| 63            | 68.2871437 | 63      | 74.8072921 | 63           | 75.6034568 | 63     | 70.6809292 | 63   | 0:00:31 | 73.7082848 |
| 63            | 68.2871437 | 63      | 74.8072921 | 63           | 76.6034568 | 63     | 71.1911333 | 63   | 0:00:32 | 73.8528541 |
| 63            | 68.2871437 | 63      | 74.8072921 | 63           | 76.9367901 | 63     | 71.1911333 | 63   | 0:00:33 | 73.9563361 |
| 63            | 66.7871437 | 63      | 77.3072921 | 63           | 76.6034568 | 63     | 71.5176639 | 63   | 0:00:34 | 73.8581525 |
| 63            | 66.620477  | 63      | 77.3072921 | 63           | 76.2701234 | 63     | 70.6605211 | 63   | 0:00:35 | 73.7245828 |
| 63            | 66.4538104 | 63      | 77.3072921 | 63           | 76.6034568 | 63     | 70.8237864 | 63   | 0:00:36 | 73.4564395 |
| 63            | 65.4538104 | 63      | 77.3072921 | 63           | 76.6034568 | 63     | 72.8571429 | 63   | 0:00:37 | 73.6612082 |
| 63            | 62.3721509 | 63      | 79.3072921 | 63           | 76.6034568 | 63     | 73.1428571 | 63   | 0:00:38 | 73.4243781 |
| 63            | 62.5596509 | 63      | 80.3072921 | 63           | 76.6034568 | 63     | 73.2857143 | 63   | 0:00:39 | 73.4827727 |

|    |            |    |            |    |            |    |            |    |         |            |
|----|------------|----|------------|----|------------|----|------------|----|---------|------------|
| 63 | 63.4971509 | 63 | 80.3072921 | 63 | 76.2701234 | 71 | 73.2857143 | 63 | 0:00:40 | 73.6122824 |
| 63 | 63.4971509 | 63 | 80.3072921 | 63 | 75.9367901 | 71 | 72.5714286 | 63 | 0:00:41 | 73.3812429 |
| 63 | 63.8096509 | 63 | 80.3072921 | 63 | 75.9367901 | 71 | 72         | 63 | 0:00:42 | 73.3215267 |
| 63 | 63.9971509 | 63 | 79.8072921 | 63 | 75.9367901 | 71 | 71.8571429 | 63 | 0:00:43 | 73.3585836 |
| 63 | 63.4346509 | 63 | 79.8072921 | 63 | 76.6034568 | 71 | 71.7142857 | 63 | 0:00:44 | 73.4064231 |
| 63 | 63.8096509 | 63 | 80.3072921 | 71 | 76.6034568 | 71 | 72.5714286 | 63 | 0:00:45 | 73.3767857 |
| 63 | 64.3721509 | 73 | 80.3072921 | 71 | 77.9367901 | 71 | 72.7142857 | 63 | 0:00:46 | 73.4975863 |
| 63 | 64.3721509 | 73 | 80.3072921 | 63 | 78.9367901 | 71 | 73.1428571 | 63 | 0:00:47 | 73.3422189 |
| 63 | 64.5596509 | 73 | 78.8072921 | 63 | 78.6034568 | 71 | 75.1428571 | 63 | 0:00:48 | 73.3439422 |
| 63 | 64.8721509 | 73 | 79.3072921 | 63 | 78.6034568 | 71 | 76.2857143 | 63 | 0:00:49 | 73.1928035 |
| 63 | 64.8721509 | 73 | 79.3072921 | 63 | 78.6034568 | 71 | 76.8571429 | 63 | 0:00:50 | 73.2366256 |
| 63 | 64.4971509 | 73 | 79.8072921 | 63 | 78.6034568 | 71 | 76.2857143 | 63 | 0:00:51 | 73.1063272 |
| 63 | 64.3096509 | 73 | 81.3072921 | 63 | 78.6034568 | 71 | 76.2857143 | 63 | 0:00:52 | 73.1856569 |
| 63 | 64.4971509 | 73 | 81.3072921 | 63 | 78.6034568 | 71 | 75.8571429 | 63 | 0:00:53 | 73.2301127 |
| 63 | 64.8721509 | 73 | 81.3072921 | 63 | 77.6034568 | 71 | 75.5714286 | 63 | 0:00:54 | 73.1707886 |
| 63 | 65.2471509 | 73 | 82.3072921 | 63 | 80.2701234 | 71 | 75.7142857 | 63 | 0:00:55 | 73.2552725 |
| 63 | 64.8721509 | 73 | 82.3072921 | 63 | 81.2701234 | 71 | 75.7142857 | 63 | 0:00:56 | 73.6038747 |
| 63 | 65.0596509 | 73 | 82.3072921 | 63 | 81.6034568 | 71 | 74.7142857 | 63 | 0:00:57 | 73.4380502 |
| 63 | 65.2471509 | 73 | 82.3072921 | 63 | 81.9367901 | 71 | 73.2857143 | 63 | 0:00:58 | 73.4463642 |
| 63 | 65.8721509 | 73 | 82.3072921 | 63 | 82.2701234 | 71 | 71.8571429 | 63 | 0:00:59 | 73.4051485 |
| 63 | 66.4971509 | 73 | 82.3072921 | 63 | 82.6034568 | 71 | 70.2857143 | 63 | 0:01:00 | 73.6173224 |
| 63 | 67.1221509 | 73 | 82.8072921 | 63 | 82.9367901 | 71 | 69.8571429 | 63 | 0:01:01 | 73.6914423 |
| 63 | 68.4971509 | 73 | 82.3072921 | 63 | 82.6034568 | 71 | 69.8571429 | 63 | 0:01:02 | 73.6029483 |
| 63 | 68.6846509 | 73 | 80.8072921 | 63 | 81.1018088 | 71 | 70.8571429 | 63 | 0:01:03 | 73.5612528 |
| 63 | 69.6221509 | 73 | 80.8072921 | 63 | 78.8518088 | 71 | 71.4285714 | 63 | 0:01:04 | 73.5441066 |
| 63 | 69.6846509 | 73 | 81.3072921 | 63 | 78.6018088 | 71 | 72         | 63 | 0:01:05 | 73.4327312 |
| 63 | 69.8096509 | 73 | 82.3072921 | 63 | 78.3518088 | 71 | 72.1428571 | 63 | 0:01:06 | 73.4265207 |
| 63 | 73.4538104 | 73 | 82.3072921 | 63 | 77.6018088 | 71 | 71.8571429 | 63 | 0:01:07 | 73.4136936 |
| 63 | 73.2871437 | 73 | 82.3072921 | 63 | 77.6018088 | 71 | 70.7142857 | 63 | 0:01:08 | 73.3205736 |
| 63 | 70.3721509 | 73 | 82.3072921 | 63 | 77.3518088 | 71 | 70.2857143 | 63 | 0:01:09 | 73.2249508 |
| 63 | 73.2871437 | 73 | 81.3072921 | 63 | 77.1018088 | 71 | 69.8571429 | 63 | 0:01:10 | 73.076639  |
| 63 | 68.8721509 | 73 | 81.3072921 | 63 | 76.8518088 | 71 | 70         | 63 | 0:01:11 | 73.081816  |
| 63 | 68.8721509 | 73 | 81.3072921 | 63 | 76.8518088 | 71 | 69.4285714 | 63 | 0:01:12 | 72.9794642 |
| 63 | 67.9346509 | 73 | 81.3072921 | 63 | 76.8518088 | 71 | 68.4285714 | 63 | 0:01:13 | 72.9589914 |
| 63 | 67.6846509 | 73 | 81.3072921 | 63 | 76.8518088 | 71 | 68.5714286 | 63 | 0:01:14 | 72.731398  |
| 63 | 68.2471509 | 73 | 81.3072921 | 63 | 76.6018088 | 63 | 68.7142857 | 63 | 0:01:15 | 72.744039  |
| 63 | 68.6221509 | 63 | 79.3072921 | 63 | 76.8518088 | 63 | 68.7142857 | 63 | 0:01:16 | 72.7972314 |
| 63 | 66.1513651 | 63 | 78.8072921 | 63 | 76.8518088 | 63 | 68.7142857 | 63 | 0:01:17 | 72.6259245 |
| 63 | 65.3180317 | 63 | 79.3072921 | 63 | 77.3518088 | 63 | 68.4285714 | 63 | 0:01:18 | 72.6363933 |
| 63 | 66.1846509 | 63 | 79.3072921 | 63 | 77.3518088 | 63 | 68.1428571 | 63 | 0:01:19 | 72.557697  |
| 63 | 65.9971509 | 63 | 79.8072921 | 63 | 76.1018088 | 63 | 67.7142857 | 63 | 0:01:20 | 72.3054227 |
| 63 | 66.0596509 | 63 | 80.3072921 | 63 | 76.1018088 | 63 | 68         | 63 | 0:01:21 | 72.268367  |
| 63 | 65.6221509 | 63 | 80.3072921 | 63 | 75.6018088 | 63 | 68.2857143 | 63 | 0:01:22 | 72.0952866 |



|    |            |    |            |    |            |    |            |    |         |            |
|----|------------|----|------------|----|------------|----|------------|----|---------|------------|
| 63 | 65.2471509 | 63 | 80.3072921 | 63 | 75.1018088 | 63 | 68.2857143 | 63 | 0:01:23 | 72.2613397 |
| 63 | 64.4971509 | 63 | 82.8072921 | 63 | 74.8518088 | 63 | 69         | 63 | 0:01:24 | 72.2853518 |
| 63 | 65.1846509 | 63 | 83.8072921 | 63 | 75.1018088 | 63 | 67.0269871 | 63 | 0:01:25 | 72.4218667 |
| 63 | 68.4538104 | 63 | 84.3072921 | 63 | 74.8518088 | 63 | 70.7142857 | 63 | 0:01:26 | 72.487706  |
| 63 | 70.2871437 | 63 | 84.3072921 | 63 | 74.8518088 | 63 | 71.4285714 | 63 | 0:01:27 | 72.627371  |
| 63 | 70.4538104 | 63 | 86.3072921 | 63 | 75.3518088 | 63 | 72.5714286 | 63 | 0:01:28 | 72.7427662 |
| 63 | 69.2871437 | 63 | 87.3072921 | 63 | 74.1018088 | 63 | 72.5714286 | 63 | 0:01:29 | 72.8019262 |
| 63 | 71.7871437 | 63 | 87.8072921 | 63 | 73.6018088 | 63 | 68.8637218 | 63 | 0:01:30 | 72.7889471 |
| 63 | 72.2871437 | 63 | 88.3072921 | 63 | 73.1018088 | 63 | 68.2106605 | 63 | 0:01:31 | 72.7981106 |
| 63 | 72.120477  | 63 | 87.8072921 | 63 | 73.1018088 | 63 | 69.4285714 | 63 | 0:01:32 | 72.9289731 |
| 63 | 74.120477  | 63 | 87.8072921 | 63 | 72.8518088 | 63 | 68.5714286 | 63 | 0:01:33 | 72.7937508 |
| 63 | 74.120477  | 63 | 87.8072921 | 63 | 73.3518088 | 63 | 68.8571429 | 71 | 0:01:34 | 72.6880304 |
| 63 | 73.7871437 | 63 | 87.8072921 | 63 | 73.3518088 | 63 | 69.5714286 | 71 | 0:01:35 | 72.6488013 |
| 63 | 73.620477  | 63 | 87.3072921 | 63 | 74.1018088 | 63 | 69.5714286 | 71 | 0:01:36 | 72.6517306 |
| 63 | 74.120477  | 63 | 86.8072921 | 63 | 75.8518088 | 63 | 70         | 71 | 0:01:37 | 72.7314412 |
| 63 | 73.7871437 | 63 | 84.3072921 | 63 | 75.6018088 | 63 | 71         | 71 | 0:01:38 | 72.7350415 |
| 63 | 72.4538104 | 63 | 83.8072921 | 63 | 74.6018088 | 63 | 71.1428571 | 71 | 0:01:39 | 72.5814853 |
| 63 | 72.2871437 | 63 | 83.8072921 | 63 | 74.6018088 | 63 | 71         | 71 | 0:01:40 | 72.5591083 |
| 63 | 72.120477  | 63 | 83.3072921 | 63 | 74.3518088 | 63 | 71         | 71 | 0:01:41 | 72.429724  |
| 63 | 71.9538104 | 63 | 83.8072921 | 63 | 74.3518088 | 63 | 71.2857143 | 71 | 0:01:42 | 72.3233708 |
| 63 | 72.4538104 | 63 | 83.8072921 | 63 | 74.1018088 | 63 | 71.4285714 | 71 | 0:01:43 | 72.3773952 |
| 63 | 73.9538104 | 63 | 83.8072921 | 63 | 74.3518088 | 63 | 70.8571429 | 71 | 0:01:44 | 72.347085  |
| 63 | 77.9538104 | 63 | 85.3072921 | 63 | 74.6018088 | 63 | 70.1428571 | 71 | 0:01:45 | 72.4362097 |
| 63 | 77.620477  | 63 | 87.8072921 | 63 | 74.6018088 | 63 | 71.2857143 | 71 | 0:01:46 | 72.6411708 |
| 63 | 77.620477  | 63 | 88.3072921 | 63 | 73.3518088 | 63 | 71.5714286 | 71 | 0:01:47 | 72.6080316 |
| 63 | 77.9538104 | 63 | 88.8072921 | 63 | 74.1018088 | 63 | 71.7142857 | 71 | 0:01:48 | 72.7303512 |
| 63 | 77.7871437 | 63 | 88.3072921 | 63 | 73.6018088 | 63 | 71.7142857 | 71 | 0:01:49 | 72.7622121 |
| 63 | 78.120477  | 63 | 88.3072921 | 63 | 74.3518088 | 63 | 72.1428571 | 71 | 0:01:50 | 72.9074708 |
| 63 | 77.120477  | 63 | 88.3072921 | 63 | 74.6018088 | 63 | 72.5714286 | 71 | 0:01:51 | 72.91959   |
| 63 | 77.120477  | 63 | 88.8072921 | 63 | 75.6018088 | 63 | 72.1428571 | 71 | 0:01:52 | 72.8932465 |
| 63 | 77.2871437 | 63 | 88.8072921 | 63 | 76.6018088 | 63 | 71.8571429 | 71 | 0:01:53 | 72.9164959 |
| 63 | 77.2871437 | 63 | 87.8072921 | 63 | 76.8518088 | 63 | 71.8571429 | 71 | 0:01:54 | 72.7996021 |
| 63 | 76.7871437 | 63 | 82.8072921 | 63 | 78.8518088 | 63 | 72         | 71 | 0:01:55 | 72.645769  |
| 63 | 76.4538104 | 63 | 79.8072921 | 63 | 79.1018088 | 63 | 72.2857143 | 71 | 0:01:56 | 72.5830242 |
| 63 | 76.4538104 | 63 | 77.8072921 | 63 | 78.6018088 | 63 | 72.8571429 | 71 | 0:01:57 | 72.560509  |
| 63 | 75.2871437 | 63 | 77.8072921 | 63 | 78.6018088 | 63 | 73.1428571 | 71 | 0:01:58 | 72.4871388 |
| 63 | 73.4538104 | 63 | 76.8072921 | 63 | 77.8518088 | 63 | 73.5714286 | 71 | 0:01:59 | 72.3480289 |
| 63 | 73.120477  | 63 | 76.3072921 | 63 | 77.8518088 | 63 | 73.4285714 | 71 | 0:02:00 | 72.3950971 |
| 63 | 73.2871437 | 63 | 76.3072921 | 63 | 77.6018088 | 63 | 72         | 71 | 0:02:01 | 72.2583596 |
| 63 | 72.9538104 | 63 | 75.3072921 | 63 | 77.3518088 | 63 | 72         | 71 | 0:02:02 | 72.2789422 |
| 63 | 72.620477  | 63 | 74.8072921 | 63 | 77.3518088 | 63 | 72.1428571 | 71 | 0:02:03 | 72.1973032 |
| 63 | 73.120477  | 63 | 75.3072921 | 63 | 77.3518088 | 63 | 72.1428571 | 71 | 0:02:04 | 72.2596822 |
| 63 | 73.620477  | 63 | 75.8072921 | 63 | 77.3518088 | 63 | 72.4285714 | 71 | 0:02:05 | 72.1324969 |

|    |            |    |            |    |            |    |            |    |         |            |
|----|------------|----|------------|----|------------|----|------------|----|---------|------------|
| 63 | 73.7871437 | 63 | 76.3072921 | 63 | 76.8518088 | 63 | 71.7142857 | 71 | 0:02:06 | 72.184174  |
| 63 | 73.9538104 | 63 | 76.3072921 | 63 | 76.6018088 | 63 | 71.2857143 | 71 | 0:02:07 | 72.3490786 |
| 63 | 73.9538104 | 63 | 76.8072921 | 63 | 76.1018088 | 63 | 70.8571429 | 71 | 0:02:08 | 72.2737501 |
| 63 | 73.4538104 | 63 | 76.3072921 | 63 | 75.6018088 | 63 | 70.5714286 | 71 | 0:02:09 | 72.259221  |
| 63 | 73.120477  | 63 | 77.3072921 | 63 | 75.1018088 | 63 | 71         | 71 | 0:02:10 | 72.1796541 |
| 63 | 72.620477  | 63 | 77.8072921 | 63 | 75.1018088 | 63 | 70.4285714 | 71 | 0:02:11 | 72.1823502 |
| 63 | 73.120477  | 63 | 77.8072921 | 63 | 74.8518088 | 63 | 70.2857143 | 71 | 0:02:12 | 72.2402808 |
| 63 | 72.7871437 | 63 | 77.8072921 | 63 | 75.3518088 | 63 | 70         | 71 | 0:02:13 | 72.3990937 |
| 63 | 73.4538104 | 63 | 78.3072921 | 63 | 75.1018088 | 63 | 70         | 71 | 0:02:14 | 72.4922635 |
| 63 | 76.2871437 | 63 | 78.3072921 | 63 | 75.3518088 | 63 | 69.5714286 | 71 | 0:02:15 | 72.5234759 |
| 63 | 75.4538104 | 63 | 77.3072921 | 63 | 75.6018088 | 63 | 69.1428571 | 71 | 0:02:16 | 72.4844072 |
| 63 | 75.2871437 | 63 | 77.3072921 | 63 | 75.1018088 | 63 | 69.4285714 | 71 | 0:02:17 | 72.3540221 |
| 63 | 73.2871437 | 63 | 77.3072921 | 63 | 74.3518088 | 63 | 69.1428571 | 71 | 0:02:18 | 72.1331175 |
| 63 | 71.9538104 | 63 | 77.3072921 | 63 | 73.6018088 | 63 | 69.8571429 | 71 | 0:02:19 | 72.1573596 |
| 63 | 72.4538104 | 63 | 77.3072921 | 63 | 72.6018088 | 63 | 69.2857143 | 71 | 0:02:20 | 72.0515601 |
| 63 | 72.7871437 | 63 | 77.3072921 | 63 | 72.1018088 | 63 | 70.1428571 | 71 | 0:02:21 | 72.1621603 |
| 63 | 73.4538104 | 63 | 77.3072921 | 63 | 72.1018088 | 63 | 69.7142857 | 71 | 0:02:22 | 72.1677387 |
| 63 | 69.1354317 | 63 | 78.4309396 | 63 | 72.3518088 | 63 | 69.2857143 | 71 | 0:02:23 | 72.1535842 |
| 63 | 69.1830507 | 63 | 77.7642729 | 63 | 71.8518088 | 63 | 69.1428571 | 71 | 0:02:24 | 72.0926749 |
| 63 | 68.9767015 | 63 | 77.7642729 | 63 | 71.8518088 | 63 | 69.2857143 | 71 | 0:02:25 | 72.1117659 |
| 63 | 69.2465428 | 63 | 77.7642729 | 63 | 71.6018088 | 63 | 69.4285714 | 63 | 0:02:26 | 72.1335655 |
| 63 | 69.5640031 | 63 | 77.4309396 | 63 | 71.8518088 | 63 | 69         | 63 | 0:02:27 | 72.0217636 |
| 63 | 72.1611686 | 63 | 77.4309396 | 63 | 72.1018088 | 63 | 68.2857143 | 63 | 0:02:28 | 72.0986049 |
| 63 | 72.0183114 | 63 | 77.0976062 | 63 | 72.6018088 | 63 | 68.1428571 | 63 | 0:02:29 | 72.0138505 |
| 63 | 72.0183114 | 63 | 76.7642729 | 63 | 73.1018088 | 63 | 68         | 63 | 0:02:30 | 71.9995235 |
| 63 | 71.3040257 | 63 | 76.0976062 | 63 | 73.6018088 | 63 | 67.4285714 | 63 | 0:02:31 | 72.0701141 |
| 63 | 71.7325971 | 63 | 75.4309396 | 63 | 74.1018088 | 63 | 66.2857143 | 63 | 0:02:32 | 71.9511085 |
| 63 | 72.1611686 | 63 | 75.8296353 | 63 | 74.1018088 | 63 | 66.5714286 | 63 | 0:02:33 | 71.9788256 |
| 63 | 73.7325971 | 63 | 75.0796353 | 63 | 73.6018088 | 63 | 66.4285714 | 63 | 0:02:34 | 71.9264709 |
| 63 | 74.0183114 | 63 | 75.0796353 | 63 | 73.8518088 | 63 | 66.2857143 | 63 | 0:02:35 | 71.7351526 |
| 63 | 73.8754543 | 63 | 74.8296353 | 63 | 74.1018088 | 63 | 66.2857143 | 63 | 0:02:36 | 71.7382929 |
| 63 | 73.7325971 | 63 | 74.5796353 | 63 | 74.1018088 | 63 | 66.7142857 | 63 | 0:02:37 | 71.7599185 |
| 63 | 73.8754543 | 63 | 74.5796353 | 63 | 74.3518088 | 63 | 66.8571429 | 63 | 0:02:38 | 71.9040492 |
| 71 | 73.8754543 | 63 | 74.5796353 | 63 | 75.3518088 | 63 | 66.7142857 | 63 | 0:02:39 | 71.9992183 |
| 71 | 74.0183114 | 63 | 74.8296353 | 63 | 76.3518088 | 63 | 66.7142857 | 63 | 0:02:40 | 72.19524   |
| 71 | 75.1611686 | 63 | 74.5796353 | 63 | 76.6018088 | 63 | 67.1428571 | 63 | 0:02:41 | 72.3383802 |
| 71 | 76.7325971 | 63 | 73.8296353 | 63 | 76.6018088 | 63 | 67.2857143 | 63 | 0:02:42 | 72.3154283 |
| 71 | 77.4468828 | 63 | 73.5796353 | 63 | 77.1018088 | 63 | 67.4285714 | 63 | 0:02:43 | 72.2949333 |
| 63 | 77.8754543 | 63 | 73.3296353 | 63 | 77.1018088 | 63 | 67.7142857 | 63 | 0:02:44 | 72.4405057 |
| 63 | 78.0183114 | 63 | 73.3296353 | 63 | 76.8518088 | 63 | 66.7142857 | 63 | 0:02:45 | 72.4630288 |
| 63 | 78.3040257 | 63 | 73.5796353 | 63 | 77.1018088 | 63 | 67.5714286 | 63 | 0:02:46 | 72.3320619 |
| 63 | 78.0183114 | 63 | 73.8296353 | 63 | 77.1018088 | 63 | 67.8571429 | 63 | 0:02:47 | 72.2133783 |
| 71 | 77.8754543 | 63 | 73.5796353 | 63 | 76.1018088 | 63 | 67.8571429 | 63 | 0:02:48 | 72.2461174 |

|    |            |    |            |    |            |    |            |    |         |            |
|----|------------|----|------------|----|------------|----|------------|----|---------|------------|
| 71 | 78.1513472 | 63 | 73.3296353 | 63 | 76.3518088 | 63 | 68.1428571 | 63 | 0:02:49 | 72.265178  |
| 63 | 77.9846805 | 63 | 73.8296353 | 71 | 75.6018088 | 63 | 68.5714286 | 63 | 0:02:50 | 72.3871055 |
| 63 | 77.8180139 | 63 | 73.8296353 | 71 | 74.8518088 | 63 | 69.1428571 | 63 | 0:02:51 | 72.3869437 |
| 63 | 77.6513472 | 63 | 73.5796353 | 63 | 74.8518088 | 63 | 69.5714286 | 63 | 0:02:52 | 72.3748807 |
| 71 | 78.1513472 | 63 | 73.8296353 | 63 | 74.3518088 | 63 | 69.1428571 | 63 | 0:02:53 | 72.3849867 |
| 71 | 77.6513472 | 63 | 73.8296353 | 63 | 73.6018088 | 63 | 69.2857143 | 63 | 0:02:54 | 72.3447223 |
| 71 | 77.8180139 | 63 | 73.8296353 | 63 | 72.8518088 | 63 | 69.1428571 | 63 | 0:02:55 | 72.4158753 |
| 71 | 77.3180139 | 63 | 74.3296353 | 63 | 73.1018088 | 63 | 69         | 63 | 0:02:56 | 72.4165018 |
| 71 | 76.4846805 | 63 | 74.5796353 | 63 | 72.8518088 | 63 | 69         | 63 | 0:02:57 | 72.4842181 |
| 71 | 74.8180139 | 63 | 74.8296353 | 63 | 72.6018088 | 63 | 69.7142857 | 63 | 0:02:58 | 72.3410522 |
| 71 | 74.6513472 | 63 | 74.3296353 | 63 | 72.8518088 | 63 | 69.1428571 | 63 | 0:02:59 | 72.2438451 |
| 71 | 73.8180139 | 63 | 73.8296353 | 63 | 73.3518088 | 63 | 68.2857143 | 63 | 0:03:00 | 71.9924524 |

| S2B Dataset |             |    | Last 3 min  |    |            | S2B Dataset |            |    |            |    |
|-------------|-------------|----|-------------|----|------------|-------------|------------|----|------------|----|
| time        | 91914.17    |    | 91914.18    |    | 92214.18   |             | 92214.2    |    | 92314.16   |    |
|             | 10:00-10:50 |    | 11:00-11:50 |    | 11-11:50   |             | 1-2:20     |    | 9am        |    |
|             | 1.00        |    | 2.00        |    | 3.00       |             | 4.00       |    | 5.00       |    |
| 0:00:01     | 73.9273281  | 63 | 70.646412   | 65 | 73.0258374 | 65          | 70.6953836 | 71 | 66.1721197 | 63 |
| 0:00:02     | 74.0523281  | 63 | 70.5353009  | 65 | 72.9258374 | 65          | 70.6953836 | 71 | 66.0812106 | 63 |
| 0:00:03     | 73.9273281  | 63 | 71.6587577  | 65 | 72.6258374 | 65          | 69.8953836 | 71 | 65.9903015 | 63 |
| 0:00:04     | 73.8023281  | 63 | 71.0538194  | 65 | 72.5258374 | 65          | 70.4953836 | 71 | 66.2630288 | 63 |
| 0:00:05     | 73.6773281  | 63 | 71.0661651  | 65 | 72.7258374 | 65          | 70.6953836 | 71 | 66.7175742 | 63 |
| 0:00:06     | 73.3023281  | 63 | 72.4488811  | 65 | 72.8258374 | 65          | 70.6953836 | 71 | 66.8993924 | 63 |
| 0:00:07     | 73.0523281  | 63 | 73.4365354  | 65 | 72.8258374 | 65          | 72.0953836 | 71 | 67.8993924 | 63 |
| 0:00:08     | 73.3023281  | 63 | 74.2329976  | 65 | 72.0258374 | 65          | 72.2953836 | 71 | 68.1721197 | 63 |
| 0:00:09     | 73.0523281  | 63 | 74.0107753  | 65 | 71.9258374 | 65          | 72.0953836 | 71 | 68.1721197 | 63 |
| 0:00:10     | 73.3023281  | 63 | 71.1647878  | 65 | 71.6258374 | 65          | 72.2953836 | 71 | 68.535756  | 63 |
| 0:00:11     | 73.1773281  | 63 | 70.6833064  | 65 | 71.3258374 | 65          | 71.8953836 | 71 | 69.2630288 | 63 |
| 0:00:12     | 73.1773281  | 63 | 70.5598496  | 65 | 71.1258374 | 65          | 71.2953836 | 71 | 69.535756  | 63 |
| 0:00:13     | 73.9273281  | 63 | 70.5598496  | 65 | 71.0258374 | 65          | 72.0953836 | 71 | 69.6266651 | 63 |
| 0:00:14     | 73.5523281  | 63 | 70.5475039  | 65 | 71.0258374 | 65          | 72.8953836 | 71 | 69.9903015 | 63 |
| 0:00:15     | 73.5523281  | 63 | 71.1647878  | 65 | 71.1258374 | 65          | 74.2953836 | 71 | 70.3539378 | 63 |
| 0:00:16     | 74.3023281  | 63 | 71.4117014  | 65 | 71.1258374 | 65          | 74.4953836 | 71 | 70.3539378 | 63 |
| 0:00:17     | 74.3023281  | 63 | 72.677442   | 65 | 71.3258374 | 65          | 73.6953836 | 71 | 70.8993924 | 63 |
| 0:00:18     | 75.1773281  | 63 | 72.677442   | 65 | 71.2258374 | 65          | 72.2953836 | 71 | 71.0812106 | 63 |
| 0:00:19     | 75.1773281  | 63 | 72.8996642  | 65 | 70.9258374 | 65          | 71.2953836 | 71 | 69.9903015 | 63 |
| 0:00:20     | 75.1773281  | 63 | 71.7885531  | 65 | 70.8258374 | 65          | 71.6953836 | 71 | 69.2630288 | 63 |
| 0:00:21     | 75.3023281  | 63 | 72.4552198  | 65 | 70.8258374 | 65          | 71.8953836 | 71 | 69.1721197 | 63 |
| 0:00:22     | 75.0523281  | 63 | 72.677442   | 65 | 70.3258374 | 65          | 72.8953836 | 71 | 68.9903015 | 63 |
| 0:00:23     | 74.9273281  | 63 | 72.677442   | 65 | 70.2258374 | 65          | 73.2953836 | 71 | 68.9903015 | 63 |
| 0:00:24     | 74.1773281  | 63 | 73.4552198  | 65 | 70.3258374 | 65          | 73.2953836 | 71 | 68.6266651 | 63 |
| 0:00:25     | 72.9273281  | 63 | 73.3441087  | 65 | 70.3258374 | 65          | 72.0953836 | 71 | 68.2630288 | 63 |
| 0:00:26     | 72.1773281  | 63 | 73.0107753  | 65 | 70.6258374 | 65          | 70.6953836 | 71 | 68.3539378 | 63 |
| 0:00:27     | 72.1773281  | 63 | 73.1218865  | 65 | 70.9258374 | 65          | 69.8953836 | 71 | 67.9903015 | 63 |
| 0:00:28     | 72.4273281  | 63 | 72.5663309  | 65 | 70.6258374 | 65          | 69.6953836 | 71 | 68.3539378 | 63 |
| 0:00:29     | 72.6773281  | 63 | 72.8996642  | 65 | 69.8258374 | 65          | 69.4953836 | 71 | 67.8993924 | 63 |
| 0:00:30     | 73.6773281  | 63 | 72.3441087  | 65 | 69.8258374 | 65          | 68.8953836 | 71 | 67.8084833 | 63 |
| 0:00:31     | 74.0523281  | 63 | 72.3441087  | 65 | 69.9258374 | 65          | 68.4953836 | 71 | 67.4448469 | 63 |
| 0:00:32     | 74.1773281  | 63 | 71.8996642  | 65 | 70.1258374 | 65          | 68.0953836 | 71 | 67.4448469 | 63 |
| 0:00:33     | 72.4273281  | 63 | 71.4552198  | 65 | 70.8258374 | 65          | 67.6953836 | 71 | 67.535756  | 63 |
| 0:00:34     | 71.1773281  | 63 | 69.0414737  | 65 | 69.6766933 | 65          | 67.8953836 | 71 | 67.535756  | 63 |
| 0:00:35     | 71.0523281  | 63 | 68.0661651  | 65 | 69.6766933 | 65          | 67.6953836 | 71 | 67.7175742 | 63 |
| 0:00:36     | 70.6773281  | 63 | 67.3254243  | 65 | 69.5666933 | 65          | 67.4953836 | 71 | 67.8084833 | 63 |
| 0:00:37     | 70.8023281  | 63 | 66.8315972  | 65 | 69.3366933 | 65          | 67.2953836 | 71 | 67.8084833 | 63 |
| 0:00:38     | 70.3023281  | 63 | 67.2143132  | 65 | 71.0258374 | 65          | 66.8953836 | 71 | 67.9903015 | 63 |
| 0:00:39     | 70.8023281  | 63 | 67.5846836  | 65 | 71.0258374 | 65          | 67.0953836 | 71 | 67.9903015 | 63 |

|         |            |    |            |    |            |    |            |    |            |    |
|---------|------------|----|------------|----|------------|----|------------|----|------------|----|
| 0:00:40 | 70.9273281 | 63 | 69.2329976 | 65 | 70.5981292 | 65 | 67.6953836 | 71 | 67.8084833 | 63 |
| 0:00:41 | 70.4273281 | 63 | 68.4552198 | 65 | 71.9258374 | 65 | 67.8953836 | 71 | 68.2630288 | 63 |
| 0:00:42 | 70.3023281 | 63 | 68.3441087 | 65 | 72.3258374 | 65 | 68.6953836 | 71 | 68.3539378 | 63 |
| 0:00:43 | 70.0523281 | 63 | 68.4552198 | 65 | 72.2258374 | 65 | 70.0953836 | 71 | 67.9903015 | 63 |
| 0:00:44 | 69.9273281 | 63 | 68.3441087 | 65 | 71.8258374 | 65 | 70.0953836 | 71 | 67.8084833 | 63 |
| 0:00:45 | 70.0523281 | 63 | 67.2329976 | 65 | 72.2258374 | 65 | 70.4953836 | 71 | 66.9903015 | 63 |
| 0:00:46 | 70.6773281 | 63 | 66.8996642 | 65 | 72.4258374 | 65 | 70.0953836 | 71 | 66.8993924 | 63 |
| 0:00:47 | 71.3023281 | 63 | 67.0107753 | 65 | 72.4258374 | 65 | 69.2953836 | 71 | 66.9903015 | 63 |
| 0:00:48 | 71.8023281 | 63 | 66.5663309 | 65 | 72.0258374 | 65 | 70.4953836 | 71 | 67.0812106 | 63 |
| 0:00:49 | 72.0523281 | 63 | 66.7885531 | 65 | 72.2258374 | 65 | 70.8953836 | 71 | 66.7175742 | 63 |
| 0:00:50 | 72.4273281 | 63 | 67.1218865 | 65 | 72.8258374 | 65 | 71.2953836 | 71 | 66.8993924 | 63 |
| 0:00:51 | 72.4273281 | 63 | 67.3441087 | 65 | 73.3258374 | 65 | 70.6953836 | 71 | 66.7175742 | 63 |
| 0:00:52 | 72.8023281 | 63 | 66.8996642 | 65 | 73.2258374 | 65 | 67.8953836 | 71 | 67.0812106 | 63 |
| 0:00:53 | 73.0523281 | 63 | 66.8996642 | 65 | 73.5258374 | 65 | 63.6953836 | 71 | 67.1721197 | 63 |
| 0:00:54 | 73.6773281 | 63 | 67.0107753 | 65 | 73.4258374 | 65 | 66.0953836 | 71 | 67.2630288 | 63 |
| 0:00:55 | 73.8023281 | 63 | 66.7885531 | 65 | 74.2258374 | 65 | 66.6953836 | 71 | 67.3539378 | 63 |
| 0:00:56 | 74.0523281 | 63 | 66.7885531 | 65 | 74.0258374 | 65 | 66.2953836 | 71 | 67.4448469 | 63 |
| 0:00:57 | 73.3414297 | 63 | 66.8996642 | 65 | 74.0258374 | 65 | 67.0953836 | 71 | 67.4448469 | 63 |
| 0:00:58 | 73.4508047 | 63 | 66.677442  | 65 | 74.0258374 | 63 | 67.2953836 | 71 | 67.2630288 | 63 |
| 0:00:59 | 73.5758047 | 63 | 66.677442  | 65 | 73.8258374 | 63 | 67.8953836 | 71 | 66.8084833 | 63 |
| 0:01:00 | 74.1695547 | 63 | 66.7885531 | 63 | 73.8258374 | 63 | 67.8953836 | 71 | 66.8084833 | 63 |
| 0:01:01 | 74.1695547 | 63 | 67.0107753 | 63 | 73.5258374 | 63 | 68.0953836 | 71 | 66.9903015 | 63 |
| 0:01:02 | 73.9508047 | 63 | 67.677442  | 63 | 72.9258374 | 63 | 68.8953836 | 71 | 67.1721197 | 63 |
| 0:01:03 | 74.0914297 | 63 | 68.0107753 | 63 | 72.4258374 | 63 | 68.6953836 | 71 | 67.0812106 | 63 |
| 0:01:04 | 73.7789297 | 63 | 68.2329976 | 63 | 72.0258374 | 63 | 69.0953836 | 71 | 67.2630288 | 63 |
| 0:01:05 | 74.6226797 | 63 | 68.7885531 | 63 | 72.0258374 | 63 | 69.0953836 | 71 | 67.1721197 | 63 |
| 0:01:06 | 74.6226797 | 63 | 69.1218865 | 63 | 71.8258374 | 63 | 69.4953836 | 71 | 68.1721197 | 63 |
| 0:01:07 | 74.9195547 | 63 | 69.7885531 | 63 | 71.6258374 | 63 | 71.4953836 | 71 | 68.2630288 | 63 |
| 0:01:08 | 76.2008047 | 63 | 70.677442  | 63 | 71.4258374 | 63 | 71.2953836 | 71 | 68.0812106 | 63 |
| 0:01:09 | 75.7789297 | 63 | 70.4510888 | 63 | 71.1258374 | 63 | 73.6953836 | 71 | 67.2630288 | 63 |
| 0:01:10 | 75.5133047 | 63 | 70.327632  | 63 | 70.4258374 | 63 | 74.6953836 | 71 | 67.2630288 | 63 |
| 0:01:11 | 75.5133047 | 63 | 70.5745456 | 63 | 70.4258374 | 63 | 75.2953836 | 71 | 67.6266651 | 63 |
| 0:01:12 | 75.5133047 | 63 | 73.2329976 | 63 | 70.5258374 | 63 | 76.2953836 | 71 | 67.0812106 | 63 |
| 0:01:13 | 75.5289297 | 63 | 73.677442  | 63 | 70.6258374 | 63 | 75.4953836 | 71 | 67.9903015 | 63 |
| 0:01:14 | 75.6851797 | 63 | 73.4552198 | 63 | 70.7258374 | 63 | 75.4953836 | 71 | 66.9168146 | 63 |
| 0:01:15 | 75.7945547 | 63 | 72.7885531 | 63 | 71.4258374 | 63 | 75.0953836 | 71 | 66.7597898 | 63 |
| 0:01:16 | 75.7945547 | 63 | 72.677442  | 63 | 71.9258374 | 63 | 74.2953836 | 71 | 66.8084833 | 63 |
| 0:01:17 | 75.5758047 | 63 | 73.3441087 | 63 | 71.9258374 | 63 | 74.4953836 | 71 | 66.3539378 | 63 |
| 0:01:18 | 75.6851797 | 63 | 73.4552198 | 63 | 72.8258374 | 63 | 74.0953836 | 71 | 65.4448469 | 63 |
| 0:01:19 | 75.9508047 | 63 | 73.677442  | 63 | 73.0258374 | 63 | 73.8953836 | 71 | 65.3539378 | 63 |
| 0:01:20 | 76.2320547 | 63 | 73.8996642 | 63 | 72.6258374 | 63 | 73.8953836 | 71 | 65.7175742 | 63 |
| 0:01:21 | 76.6539297 | 63 | 73.3441087 | 63 | 72.4258374 | 63 | 72.0953836 | 71 | 65.8084833 | 63 |
| 0:01:22 | 76.6539297 | 63 | 73.2329976 | 63 | 73.5258374 | 63 | 74.2953836 | 71 | 65.3539378 | 63 |

|         |            |    |            |    |            |    |            |    |            |    |
|---------|------------|----|------------|----|------------|----|------------|----|------------|----|
| 0:01:23 | 76.7945547 | 63 | 73.2329976 | 63 | 73.7258374 | 63 | 74.2953836 | 71 | 65.8993924 | 67 |
| 0:01:24 | 78.6773281 | 63 | 73.3441087 | 63 | 73.7258374 | 63 | 74.4953836 | 71 | 66.1721197 | 67 |
| 0:01:25 | 78.5523281 | 63 | 73.3441087 | 63 | 73.6258374 | 63 | 74.0953836 | 71 | 66.4448469 | 67 |
| 0:01:26 | 78.3023281 | 63 | 73.5663309 | 63 | 74.0258374 | 63 | 74.2953836 | 71 | 66.535756  | 67 |
| 0:01:27 | 78.0523281 | 63 | 74.0107753 | 63 | 74.1258374 | 63 | 74.6953836 | 71 | 66.7175742 | 67 |
| 0:01:28 | 78.0523281 | 63 | 74.677442  | 63 | 74.7258374 | 63 | 73.8953836 | 71 | 67.1721197 | 67 |
| 0:01:29 | 77.4273281 | 63 | 74.1218865 | 63 | 75.1258374 | 63 | 74.6953836 | 71 | 67.1721197 | 67 |
| 0:01:30 | 76.9273281 | 63 | 74.1218865 | 63 | 75.4258374 | 63 | 74.0953836 | 71 | 67.0812106 | 67 |
| 0:01:31 | 76.5523281 | 63 | 74.1218865 | 63 | 75.4258374 | 63 | 73.6953836 | 71 | 66.6266651 | 67 |
| 0:01:32 | 76.8023281 | 63 | 74.1218865 | 63 | 75.5258374 | 63 | 74.0953836 | 71 | 66.535756  | 67 |
| 0:01:33 | 76.8023281 | 63 | 73.8996642 | 63 | 75.5258374 | 63 | 76.0953836 | 71 | 66.535756  | 67 |
| 0:01:34 | 76.8023281 | 63 | 73.4552198 | 63 | 75.5258374 | 63 | 75.6953836 | 71 | 66.535756  | 67 |
| 0:01:35 | 76.1773281 | 63 | 73.3441087 | 63 | 75.1258374 | 63 | 76.6953836 | 71 | 66.4448469 | 67 |
| 0:01:36 | 76.3023281 | 63 | 73.4552198 | 63 | 74.9258374 | 63 | 76.6953836 | 71 | 66.1721197 | 67 |
| 0:01:37 | 75.9273281 | 63 | 73.0107753 | 63 | 74.1258374 | 63 | 77.0953836 | 71 | 66.535756  | 67 |
| 0:01:38 | 75.3023281 | 63 | 72.1218865 | 63 | 73.5258374 | 63 | 76.8953836 | 71 | 66.7175742 | 67 |
| 0:01:39 | 75.3023281 | 63 | 71.1218865 | 63 | 73.8258374 | 63 | 71.6251951 | 71 | 66.9903015 | 67 |
| 0:01:40 | 75.4273281 | 63 | 70.677442  | 63 | 73.6258374 | 63 | 72.1851951 | 71 | 67.3539378 | 67 |
| 0:01:41 | 75.6773281 | 63 | 70.3441087 | 63 | 73.8258374 | 63 | 72.2251951 | 71 | 67.2630288 | 67 |
| 0:01:42 | 75.6773281 | 63 | 70.4552198 | 63 | 74.2258374 | 63 | 72.2251951 | 71 | 66.535756  | 67 |
| 0:01:43 | 75.6773281 | 63 | 70.4552198 | 63 | 74.5258374 | 63 | 71.2651951 | 71 | 66.2630288 | 67 |
| 0:01:44 | 75.1773281 | 63 | 70.5663309 | 63 | 74.6258374 | 63 | 70.3051951 | 71 | 65.7175742 | 67 |
| 0:01:45 | 74.6773281 | 63 | 68.7825148 | 63 | 75.0258374 | 63 | 70.3051951 | 71 | 64.535756  | 67 |
| 0:01:46 | 73.8023281 | 63 | 68.9183173 | 63 | 75.7258374 | 63 | 70.8251951 | 71 | 64.3539378 | 67 |
| 0:01:47 | 73.9273281 | 63 | 69.0541197 | 63 | 74.836277  | 63 | 71.5851951 | 71 | 64.2630288 | 67 |
| 0:01:48 | 74.0523281 | 63 | 69.1899222 | 63 | 74.226277  | 63 | 71.5851951 | 71 | 64.1721197 | 67 |
| 0:01:49 | 74.0523281 | 63 | 68.4491815 | 63 | 74.226277  | 63 | 69.9051951 | 71 | 64.7175742 | 67 |
| 0:01:50 | 74.0523281 | 63 | 68.0788111 | 63 | 74.886277  | 63 | 73.2651951 | 71 | 65.1721197 | 67 |
| 0:01:51 | 74.4273281 | 63 | 67.9677    | 63 | 75.176277  | 63 | 72.8251951 | 71 | 65.1721197 | 67 |
| 0:01:52 | 74.8023281 | 63 | 68.1158481 | 63 | 75.836277  | 63 | 71.6251951 | 71 | 65.8084833 | 67 |
| 0:01:53 | 75.1773281 | 63 | 68.4862185 | 63 | 76.166277  | 63 | 71.9051951 | 71 | 66.2630288 | 67 |
| 0:01:54 | 75.3023281 | 63 | 68.350416  | 63 | 75.946277  | 63 | 71.9051951 | 71 | 66.8084833 | 67 |
| 0:01:55 | 75.9273281 | 63 | 68.4738728 | 63 | 76.596277  | 63 | 72.8651951 | 71 | 66.4448469 | 67 |
| 0:01:56 | 76.1773281 | 63 | 69.1035024 | 63 | 76.256277  | 63 | 73.1051951 | 71 | 67.7175742 | 67 |
| 0:01:57 | 76.5523281 | 63 | 69.2516506 | 63 | 75.476277  | 63 | 74.3051951 | 71 | 68.2630288 | 67 |
| 0:01:58 | 77.3023281 | 63 | 68.7825148 | 63 | 74.486277  | 63 | 78.6953836 | 71 | 67.8993924 | 67 |
| 0:01:59 | 76.8023281 | 63 | 67.9430086 | 63 | 74.266277  | 63 | 79.6953836 | 71 | 67.8084833 | 67 |
| 0:02:00 | 76.8023281 | 63 | 67.4615271 | 63 | 74.686277  | 63 | 79.6953836 | 71 | 67.535756  | 67 |
| 0:02:01 | 75.6773281 | 63 | 66.8442432 | 63 | 76.1258374 | 63 | 75.2953836 | 71 | 67.7175742 | 67 |
| 0:02:02 | 75.5523281 | 63 | 66.2269592 | 63 | 76.0258374 | 63 | 74.0953836 | 71 | 67.6266651 | 67 |
| 0:02:03 | 75.5523281 | 63 | 66.5849839 | 63 | 75.6258374 | 63 | 73.8953836 | 71 | 68.3539378 | 67 |
| 0:02:04 | 75.6773281 | 63 | 65.9553543 | 63 | 75.1258374 | 63 | 74.6953836 | 71 | 68.3539378 | 67 |
| 0:02:05 | 75.8023281 | 63 | 65.8318975 | 63 | 74.7258374 | 63 | 74.8953836 | 71 | 68.8084833 | 67 |

|         |            |    |            |    |            |    |            |    |            |    |
|---------|------------|----|------------|----|------------|----|------------|----|------------|----|
| 0:02:06 | 76.1773281 | 63 | 65.041774  | 63 | 73.236277  | 63 | 74.8953836 | 71 | 68.6266651 | 67 |
| 0:02:07 | 76.8023281 | 63 | 64.5479469 | 63 | 72.926277  | 63 | 75.6953836 | 71 | 68.7175742 | 67 |
| 0:02:08 | 76.5523281 | 63 | 64.041774  | 63 | 72.506277  | 63 | 75.8953836 | 71 | 69.3539378 | 67 |
| 0:02:09 | 75.6773281 | 63 | 64.1405395 | 63 | 72.506277  | 63 | 75.6953836 | 71 | 69.6266651 | 67 |
| 0:02:10 | 75.0523281 | 63 | 64.2639963 | 63 | 72.396277  | 63 | 78.2953836 | 71 | 69.7175742 | 67 |
| 0:02:11 | 74.4273281 | 63 | 65.2269592 | 63 | 71.986277  | 63 | 78.2953836 | 71 | 69.4448469 | 67 |
| 0:02:12 | 74.3023281 | 63 | 65.7207864 | 63 | 72.426277  | 63 | 77.4953836 | 71 | 69.4448469 | 67 |
| 0:02:13 | 74.4273281 | 63 | 67.2329976 | 63 | 72.866277  | 63 | 78.2953836 | 71 | 68.9903015 | 67 |
| 0:02:14 | 73.6773281 | 63 | 66.3441087 | 63 | 73.106277  | 63 | 78.0953836 | 71 | 68.535756  | 67 |
| 0:02:15 | 73.6773281 | 63 | 65.7885531 | 63 | 73.766277  | 63 | 79.0953836 | 71 | 67.7175742 | 67 |
| 0:02:16 | 74.3023281 | 63 | 65.4552198 | 63 | 74.226277  | 63 | 79.0953836 | 71 | 67.2630288 | 67 |
| 0:02:17 | 74.4273281 | 63 | 65.8996642 | 63 | 74.566277  | 63 | 78.8953836 | 71 | 67.0812106 | 67 |
| 0:02:18 | 73.6773281 | 63 | 64.9059716 | 63 | 74.566277  | 63 | 78.6953836 | 71 | 66.8993924 | 67 |
| 0:02:19 | 72.8023281 | 63 | 65.2886876 | 63 | 74.9258374 | 63 | 77.2953836 | 71 | 67.0812106 | 67 |
| 0:02:20 | 73.1773281 | 63 | 65.1652308 | 63 | 74.1258374 | 63 | 75.0953836 | 71 | 68.1791799 | 67 |
| 0:02:21 | 72.6773281 | 63 | 64.3380703 | 63 | 73.5258374 | 63 | 74.0953836 | 71 | 68.6791799 | 67 |
| 0:02:22 | 73.6773281 | 63 | 64.1652308 | 63 | 73.8258374 | 63 | 73.2953836 | 71 | 68.8791799 | 67 |
| 0:02:23 | 74.5523281 | 63 | 64.041774  | 63 | 73.6258374 | 63 | 72.2953836 | 71 | 69.2791799 | 67 |
| 0:02:24 | 75.1773281 | 63 | 63.8072061 | 63 | 73.8258374 | 63 | 72.0953836 | 71 | 68.9791799 | 67 |
| 0:02:25 | 75.5523281 | 63 | 63.5602926 | 63 | 74.2258374 | 63 | 71.4953836 | 71 | 68.8791799 | 67 |
| 0:02:26 | 75.9273281 | 63 | 63.5602926 | 63 | 74.5258374 | 63 | 71.4953836 | 71 | 69.1791799 | 67 |
| 0:02:27 | 73.6909876 | 63 | 63.8072061 | 63 | 74.6258374 | 63 | 71.2953836 | 71 | 68.0791799 | 67 |
| 0:02:28 | 73.3941126 | 63 | 64.4368358 | 63 | 75.0258374 | 63 | 71.0953836 | 71 | 67.8791799 | 67 |
| 0:02:29 | 73.1128626 | 63 | 64.5602926 | 63 | 75.7258374 | 63 | 70.8953836 | 71 | 67.8791799 | 67 |
| 0:02:30 | 73.9273281 | 63 | 65.0664654 | 63 | 74.9898734 | 63 | 69.4953836 | 71 | 67.4791799 | 67 |
| 0:02:31 | 73.6773281 | 63 | 66.6714037 | 63 | 74.426237  | 63 | 68.8953836 | 71 | 67.4791799 | 67 |
| 0:02:32 | 73.8023281 | 63 | 65.2081322 | 63 | 74.426237  | 63 | 68.6953836 | 71 | 68.1791799 | 67 |
| 0:02:33 | 73.8023281 | 63 | 67.9183173 | 63 | 75.0807825 | 63 | 68.4953836 | 71 | 68.3791799 | 67 |
| 0:02:34 | 73.9273281 | 63 | 68.4121444 | 63 | 75.3353279 | 63 | 68.2953836 | 71 | 68.3791799 | 67 |
| 0:02:35 | 74.3023281 | 63 | 68.1652308 | 63 | 75.9898734 | 63 | 68.6953836 | 71 | 68.5791799 | 67 |
| 0:02:36 | 74.5523281 | 63 | 67.7825148 | 63 | 76.3171461 | 63 | 69.4953836 | 71 | 69.7791799 | 67 |
| 0:02:37 | 74.9273281 | 63 | 68.0294284 | 63 | 76.0989643 | 63 | 69.4953836 | 71 | 70.1791799 | 67 |
| 0:02:38 | 74.4273281 | 63 | 68.0788111 | 63 | 76.7353279 | 63 | 68.8953836 | 71 | 71.2791799 | 67 |
| 0:02:39 | 73.5523281 | 63 | 68.4491815 | 63 | 76.3898734 | 63 | 67.6953836 | 71 | 71.0791799 | 67 |
| 0:02:40 | 73.1773281 | 63 | 69.1218865 | 63 | 75.6080552 | 63 | 67.8953836 | 71 | 70.6791799 | 67 |
| 0:02:41 | 72.6773281 | 63 | 67.677442  | 63 | 74.626237  | 63 | 67.0953836 | 71 | 70.8791799 | 67 |
| 0:02:42 | 72.8023281 | 63 | 67.0107753 | 63 | 74.4080552 | 63 | 67.0953836 | 71 | 70.9791799 | 67 |
| 0:02:43 | 72.5523281 | 63 | 67.2329976 | 63 | 74.8080552 | 63 | 67.0953836 | 71 | 70.7791799 | 67 |
| 0:02:44 | 72.4273281 | 63 | 66.4552198 | 63 | 76.1258374 | 63 | 67.2953836 | 71 | 71.0791799 | 67 |
| 0:02:45 | 72.0523281 | 63 | 66.3441087 | 63 | 76.0258374 | 63 | 67.0953836 | 71 | 71.1791799 | 67 |
| 0:02:46 | 71.6773281 | 63 | 65.677442  | 63 | 75.6258374 | 63 | 69.0953836 | 71 | 70.7210154 | 67 |
| 0:02:47 | 71.8023281 | 63 | 65.2329976 | 63 | 75.1258374 | 63 | 74.2953836 | 71 | 70.8321265 | 67 |
| 0:02:48 | 72.0523281 | 63 | 64.8996642 | 63 | 74.7258374 | 63 | 74.2953836 | 71 | 71.4987932 | 67 |





## Last 3 min

## S2B Dataset

| 92314.17   |    | 92414.15   |    | 92414.16   |    | 92414.17    |    | 92514.18   |    | 92514.2    |
|------------|----|------------|----|------------|----|-------------|----|------------|----|------------|
| 10am       |    | 8.30-9.30  |    | 9:30-10:30 |    | 10:30-11:35 |    | 9-10:15    |    | 10:30-12   |
| 6.00       |    | 7.00       |    | 8.00       |    | 9.00        |    | 10.00      |    | 11.00      |
| 62.7396609 | 63 | 72.3514706 | 69 | 72.6614706 | 63 | 63.7647378  | 69 | 72.3282058 | 71 | 69.1398247 |
| 63.1446196 | 63 | 72.2414706 | 69 | 72.3514706 | 63 | 64.2647378  | 69 | 72.510024  | 71 | 68.2648247 |
| 63.3429667 | 63 | 71.7214706 | 69 | 72.2414706 | 63 | 64.9314045  | 69 | 72.8736604 | 71 | 67.5148247 |
| 63.9628014 | 63 | 71.1714706 | 69 | 71.7214706 | 63 | 65.2647378  | 69 | 72.8736604 | 71 | 67.5148247 |
| 64.5578428 | 63 | 71.1714706 | 69 | 71.1714706 | 63 | 65.5980711  | 69 | 73.3282058 | 71 | 66.7648247 |
| 64.5578428 | 63 | 70.7314706 | 69 | 71.1714706 | 63 | 66.0980711  | 69 | 73.6918422 | 71 | 66.2648247 |
| 64.0041237 | 63 | 70.0714706 | 69 | 70.7314706 | 63 | 66.0980711  | 69 | 73.8736604 | 71 | 65.6398247 |
| 64.2189998 | 63 | 70.4314706 | 69 | 70.0714706 | 63 | 66.0980711  | 69 | 72.2679925 | 71 | 65.3898247 |
| 64.3264378 | 63 | 70.2714706 | 69 | 70.4314706 | 63 | 65.9314045  | 69 | 71.9725379 | 71 | 65.2648247 |
| 64.5247849 | 63 | 70.0514706 | 69 | 70.2714706 | 63 | 66.2647378  | 69 | 72.3513258 | 71 | 65.3898247 |
| 64.8223056 | 63 | 69.0614706 | 69 | 70.0514706 | 63 | 64.9314045  | 69 | 73.2372968 | 71 | 65.2648247 |
| 65.2189998 | 63 | 68.9714706 | 69 | 69.0614706 | 63 | 64.2647378  | 69 | 74.3282058 | 71 | 65.7648247 |
| 65.9297436 | 63 | 68.9914706 | 69 | 68.9714706 | 63 | 63.5980711  | 69 | 74.6918422 | 71 | 66.1398247 |
| 65.83057   | 63 | 68.8814706 | 69 | 68.9914706 | 63 | 63.4314045  | 69 | 74.6009331 | 71 | 66.3898247 |
| 66.0289171 | 63 | 68.7714706 | 69 | 68.8814706 | 63 | 63.2647378  | 69 | 75.0554786 | 71 | 66.2648247 |
| 65.7313965 | 63 | 68.8814706 | 69 | 68.7714706 | 63 | 63.0980711  | 69 | 74.9645695 | 71 | 65.7648247 |
| 65.3925535 | 63 | 68.8814706 | 69 | 68.8814706 | 63 | 63.0980711  | 69 | 74.7827513 | 71 | 65.7648247 |
| 65.3016444 | 63 | 69.1014706 | 69 | 68.8814706 | 63 | 62.9314045  | 69 | 75.0554786 | 71 | 66.1398247 |
| 65.3347023 | 63 | 69.1014706 | 69 | 69.1014706 | 63 | 63.2647378  | 69 | 74.3282058 | 71 | 65.8898247 |
| 65.1859419 | 63 | 70.4214706 | 69 | 69.1014706 | 63 | 63.2647378  | 69 | 73.4191149 | 71 | 66.1398247 |
| 65.0371816 | 63 | 70.7514706 | 69 | 70.4214706 | 63 | 63.4314045  | 69 | 71.4339663 | 69 | 66.7648247 |
| 64.8553634 | 63 | 70.9814706 | 69 | 70.7514706 | 63 | 63.9314045  | 69 | 72.0400269 | 69 | 67.1398247 |
| 65.7479254 | 63 | 70.9814706 | 69 | 70.9814706 | 63 | 63.9314045  | 69 | 72.2369966 | 69 | 67.1398247 |
| 65.7479254 | 63 | 70.9914706 | 69 | 70.9814706 | 63 | 63.9314045  | 69 | 71.5476027 | 69 | 68.1398247 |
| 66.1446196 | 63 | 70.8814706 | 69 | 70.9914706 | 63 | 63.9314045  | 69 | 72.2372968 | 69 | 68.3898247 |
| 65.8553634 | 63 | 70.5514706 | 69 | 70.8814706 | 63 | 63.4314045  | 69 | 72.0554786 | 69 | 68.8898247 |
| 65.8801568 | 63 | 70.1114706 | 69 | 70.5514706 | 63 | 63.4314045  | 69 | 71.9645695 | 69 | 69.0148247 |
| 65.7809833 | 63 | 69.8914706 | 69 | 70.1114706 | 63 | 62.5836602  | 69 | 72.3282058 | 69 | 69.2648247 |
| 65.6818097 | 63 | 69.5614706 | 69 | 69.8914706 | 63 | 62.5836602  | 69 | 71.9645695 | 69 | 69.8898247 |
| 65.8718923 | 63 | 68.6814706 | 69 | 69.5614706 | 63 | 62.9836602  | 69 | 71.1463877 | 69 | 69.7648247 |
| 65.8223056 | 63 | 68.4614706 | 69 | 68.6814706 | 63 | 63.7836602  | 69 | 71.2372968 | 69 | 70.2648247 |
| 65.83057   | 63 | 69.2314706 | 69 | 68.4614706 | 63 | 64.3836602  | 69 | 70.8736604 | 69 | 70.2648247 |
| 65.83057   | 63 | 69.6714706 | 71 | 69.2314706 | 63 | 65.1836602  | 69 | 70.0554786 | 69 | 70.1398247 |
| 66.0289171 | 63 | 69.8814706 | 71 | 69.6714706 | 63 | 65.3836602  | 69 | 69.6009331 | 69 | 70.5148247 |
| 66.0371816 | 63 | 69.9914706 | 71 | 69.8814706 | 63 | 65.7836602  | 69 | 69.1463877 | 69 | 70.3898247 |
| 66.0371816 | 63 | 69.5514706 | 71 | 69.9914706 | 63 | 66.3836602  | 69 | 69.4191149 | 69 | 70.1398247 |
| 66.5330494 | 63 | 69.4314706 | 71 | 69.5514706 | 63 | 66.5836602  | 69 | 69.4191149 | 69 | 69.6398247 |
| 67.6074295 | 63 | 69.3214706 | 71 | 69.4314706 | 63 | 67.5836602  | 69 | 69.7827513 | 69 | 68.8898247 |
| 68.0123882 | 63 | 69.4314706 | 71 | 69.3214706 | 63 | 67.7836602  | 69 | 69.8736604 | 69 | 68.1398247 |

|            |    |            |    |            |    |            |    |            |    |            |
|------------|----|------------|----|------------|----|------------|----|------------|----|------------|
| 68.0041237 | 63 | 69.8614706 | 71 | 69.4314706 | 63 | 68.1836602 | 69 | 69.8736604 | 69 | 68.1398247 |
| 68.2024709 | 63 | 70.0814706 | 71 | 69.8614706 | 63 | 67.9836602 | 69 | 70.4191149 | 69 | 68.5148247 |
| 67.4090824 | 63 | 70.5214706 | 71 | 70.0814706 | 63 | 67.7836602 | 69 | 70.510024  | 69 | 68.7648247 |
| 67.2107353 | 63 | 71.2814706 | 71 | 70.5214706 | 63 | 66.1836602 | 69 | 70.9645695 | 69 | 67.7648247 |
| 67.8057766 | 63 | 72.1614706 | 71 | 71.2814706 | 63 | 65.9836602 | 69 | 70.9645695 | 69 | 68.2648247 |
| 67.8966857 | 63 | 72.3814706 | 71 | 72.1614706 | 63 | 63.9836602 | 69 | 70.3282058 | 69 | 68.2648247 |
| 68.3925535 | 63 | 72.7014706 | 71 | 72.3814706 | 63 | 63.7836602 | 69 | 69.8736604 | 69 | 68.1398247 |
| 68.6900742 | 63 | 73.1414706 | 71 | 72.7014706 | 63 | 63.9836602 | 69 | 69.8736604 | 69 | 68.0148247 |
| 69.0785039 | 63 | 73.6914706 | 71 | 73.1414706 | 63 | 64.1836602 | 69 | 70.0554786 | 69 | 68.1398247 |
| 68.9875948 | 63 | 74.2414706 | 71 | 73.6914706 | 63 | 64.9836602 | 69 | 69.9645695 | 69 | 68.6398247 |
| 68.9132147 | 63 | 73.6814706 | 71 | 74.2414706 | 63 | 64.3836602 | 69 | 70.6009331 | 69 | 69.0148247 |
| 68.5165204 | 63 | 73.5714706 | 71 | 73.6814706 | 63 | 62.9836602 | 69 | 71.3282058 | 69 | 69.0148247 |
| 68.0537105 | 63 | 73.6314706 | 71 | 73.5714706 | 63 | 62.1836602 | 69 | 71.8736604 | 69 | 69.2648247 |
| 67.5743717 | 63 | 74.7883718 | 71 | 73.6314706 | 63 | 62.1836602 | 69 | 71.9645695 | 71 | 69.6398247 |
| 67.6735452 | 63 | 75.0883718 | 71 | 74.7883718 | 63 | 62.9836602 | 69 | 72.0554786 | 71 | 69.6398247 |
| 67.6900742 | 63 | 74.0883718 | 71 | 75.0883718 | 63 | 62.9836602 | 69 | 72.1463877 | 71 | 70.1398247 |
| 67.6900742 | 63 | 73.4883718 | 71 | 74.0883718 | 63 | 64.7836602 | 69 | 71.8736604 | 71 | 70.5148247 |
| 67.1942064 | 63 | 73.1883718 | 71 | 73.4883718 | 63 | 65.3836602 | 69 | 72.6009331 | 71 | 70.8898247 |
| 67.0867684 | 63 | 72.5883718 | 71 | 73.1883718 | 63 | 66.5836602 | 69 | 72.9645695 | 71 | 70.8898247 |
| 66.8884213 | 63 | 72.6883718 | 71 | 72.5883718 | 63 | 66.3836602 | 69 | 71.9876895 | 71 | 70.7648247 |
| 66.8884213 | 63 | 72.6883718 | 71 | 72.6883718 | 63 | 66.5836602 | 69 | 72.2149622 | 71 | 71.2648247 |
| 66.8636279 | 63 | 73.4883718 | 71 | 72.6883718 | 63 | 66.5836602 | 69 | 72.313447  | 71 | 71.6398247 |
| 67.2520576 | 63 | 73.3883718 | 71 | 73.4883718 | 63 | 67.7836602 | 69 | 72.8058713 | 71 | 69.4148716 |
| 66.954537  | 63 | 73.4883718 | 71 | 73.3883718 | 63 | 67.7836602 | 69 | 73.3816288 | 71 | 69.4148716 |
| 66.8553634 | 63 | 72.7883718 | 71 | 73.4883718 | 63 | 66.1836602 | 69 | 74.8736604 | 71 | 70.4426494 |
| 67.0537105 | 63 | 72.0883718 | 71 | 72.7883718 | 63 | 65.9836602 | 69 | 74.8736604 | 71 | 70.9148716 |
| 67.615694  | 63 | 71.5883718 | 71 | 72.0883718 | 63 | 66.3836602 | 69 | 75.6918422 | 71 | 70.5537605 |
| 67.0206527 | 63 | 70.0538582 | 71 | 71.5883718 | 63 | 66.1836602 | 69 | 75.3282058 | 71 | 70.4148716 |
| 66.9049502 | 63 | 69.8638582 | 71 | 70.0538582 | 63 | 65.9836602 | 69 | 73.7827513 | 71 | 70.8898247 |
| 66.2107353 | 63 | 69.7538582 | 71 | 69.8638582 | 63 | 66.1836602 | 69 | 73.6009331 | 71 | 70.1398247 |
| 65.7148675 | 63 | 69.8838582 | 71 | 69.7538582 | 63 | 66.1836602 | 69 | 73.510024  | 71 | 70.0148247 |
| 65.615694  | 63 | 69.7838582 | 71 | 69.8838582 | 63 | 66.1836602 | 69 | 73.7827513 | 71 | 69.2648247 |
| 65.8140411 | 63 | 69.6838582 | 71 | 69.7838582 | 63 | 65.9836602 | 69 | 74.1463877 | 71 | 68.1398247 |
| 65.4090824 | 63 | 69.6838582 | 71 | 69.6838582 | 63 | 64.9836602 | 69 | 75.1463877 | 71 | 68.0148247 |
| 65.2107353 | 63 | 69.6938582 | 71 | 69.6838582 | 63 | 64.3836602 | 69 | 75.4191149 | 71 | 67.6398247 |
| 64.4090824 | 63 | 69.3738582 | 71 | 69.6938582 | 63 | 63.9836602 | 69 | 74.8736604 | 71 | 67.3898247 |
| 63.9710659 | 63 | 69.1938582 | 71 | 69.3738582 | 63 | 63.3836602 | 69 | 74.4191149 | 71 | 67.1398247 |
| 63.8553634 | 63 | 69.3438582 | 63 | 69.1938582 | 63 | 63.5836602 | 69 | 74.510024  | 71 | 66.6398247 |
| 63.723132  | 63 | 70.7883718 | 63 | 69.3438582 | 63 | 63.9836602 | 69 | 74.2372968 | 71 | 66.8898247 |
| 64.1115618 | 63 | 70.8883718 | 63 | 70.7883718 | 63 | 63.7836602 | 69 | 73.7827513 | 71 | 66.7648247 |
| 64.6074295 | 63 | 69.3994593 | 63 | 70.8883718 | 63 | 63.7836602 | 61 | 73.510024  | 71 | 66.5148247 |
| 65.1032973 | 63 | 69.1894593 | 63 | 69.3994593 | 63 | 64.5836602 | 61 | 73.8736604 | 71 | 66.3898247 |
| 65.5991651 | 63 | 69.1994593 | 63 | 69.1894593 | 63 | 65.5836602 | 61 | 73.7827513 | 71 | 66.8898247 |

|            |    |            |    |            |    |            |    |            |    |            |
|------------|----|------------|----|------------|----|------------|----|------------|----|------------|
| 66.1776775 | 63 | 69.0894593 | 63 | 69.1994593 | 63 | 66.1836602 | 61 | 73.510024  | 71 | 67.5148247 |
| 66.276851  | 63 | 68.7894593 | 63 | 69.0894593 | 63 | 66.9836602 | 61 | 73.8736604 | 71 | 67.7648247 |
| 66.0785039 | 63 | 68.4594593 | 63 | 68.7894593 | 63 | 68.1836602 | 61 | 73.7827513 | 71 | 67.8898247 |
| 65.8801568 | 63 | 68.0294593 | 63 | 68.4594593 | 63 | 68.9836602 | 61 | 73.7827513 | 71 | 68.0148247 |
| 65.9958593 | 63 | 67.8094593 | 63 | 68.0294593 | 63 | 69.3836602 | 61 | 73.1463877 | 71 | 67.7648247 |
| 66.0041237 | 63 | 67.9194593 | 63 | 67.8094593 | 63 | 69.5836602 | 61 | 73.2372968 | 71 | 68.0148247 |
| 66.400818  | 63 | 68.0294593 | 63 | 67.9194593 | 63 | 70.1836602 | 61 | 72.9645695 | 71 | 68.2648247 |
| 66.7975122 | 63 | 68.1394593 | 63 | 68.0294593 | 63 | 70.3836602 | 61 | 72.4191149 | 71 | 68.0148247 |
| 67.276851  | 63 | 68.5594593 | 63 | 68.1394593 | 63 | 70.5836602 | 61 | 72.4191149 | 71 | 68.1398247 |
| 67.2685866 | 63 | 68.7794593 | 63 | 68.5594593 | 63 | 70.3836602 | 61 | 72.6009331 | 71 | 68.1398247 |
| 67.3594956 | 63 | 68.7694593 | 63 | 68.7794593 | 63 | 70.3836602 | 61 | 72.7827513 | 71 | 67.5148247 |
| 67.5495783 | 63 | 68.0894593 | 63 | 68.7694593 | 63 | 69.9836602 | 61 | 72.7827513 | 71 | 67.2648247 |
| 68.1280907 | 63 | 68.1994593 | 63 | 68.0894593 | 63 | 69.1836602 | 61 | 71.4564457 | 71 | 67.0148247 |
| 67.9793304 | 63 | 68.1994593 | 63 | 68.1994593 | 63 | 68.1836602 | 61 | 71.6685669 | 71 | 67.2648247 |
| 69.6905293 | 63 | 68.0794593 | 63 | 68.1994593 | 63 | 68.1836602 | 61 | 72.1609911 | 71 | 67.6398247 |
| 68.9632566 | 63 | 68.4094593 | 63 | 68.0794593 | 63 | 68.9836602 | 61 | 72.1609911 | 71 | 67.6398247 |
| 69.0541657 | 63 | 69.9883718 | 63 | 68.4094593 | 63 | 70.9836602 | 61 | 72.259476  | 71 | 67.8898247 |
| 68.6905293 | 63 | 70.6883718 | 63 | 69.9883718 | 63 | 70.9836602 | 61 | 72.8655366 | 71 | 67.6398247 |
| 68.1450748 | 63 | 69.6883718 | 63 | 70.6883718 | 63 | 70.9836602 | 61 | 72.7670517 | 71 | 67.3898247 |
| 67.1450748 | 63 | 69.4883718 | 63 | 69.6883718 | 63 | 66.1697311 | 61 | 72.7670517 | 71 | 66.8898247 |
| 66.0541657 | 63 | 69.0883718 | 63 | 69.4883718 | 63 | 66.7297311 | 61 | 72.4867487 | 71 | 66.8898247 |
| 66.0541657 | 63 | 69.4883718 | 63 | 69.0883718 | 63 | 67.4897311 | 61 | 72.5852336 | 71 | 66.8898247 |
| 66.3268929 | 63 | 69.2883718 | 63 | 69.4883718 | 63 | 68.4097311 | 61 | 72.2064457 | 71 | 67.1398247 |
| 66.7814384 | 63 | 69.1883718 | 63 | 69.2883718 | 63 | 68.2897311 | 61 | 71.7140214 | 71 | 67.5148247 |
| 66.9632566 | 63 | 69.3883718 | 63 | 69.1883718 | 63 | 68.3297311 | 61 | 71.5170517 | 71 | 67.8898247 |
| 67.1450748 | 63 | 68.9883718 | 63 | 69.3883718 | 63 | 68.0897311 | 61 | 71.2215972 | 71 | 68.7648247 |
| 66.8723475 | 63 | 68.6883718 | 63 | 68.9883718 | 63 | 68.1697311 | 61 | 70.7140214 | 71 | 69.1398247 |
| 67.0541657 | 63 | 69.0883718 | 63 | 68.6883718 | 63 | 67.8097311 | 61 | 70.9109911 | 71 | 69.6398247 |
| 67.1450748 | 63 | 69.0883718 | 63 | 69.0883718 | 63 | 68.1297311 | 61 | 71.009476  | 71 | 69.7648247 |
| 67.3268929 | 63 | 69.0883718 | 63 | 69.0883718 | 63 | 68.3697311 | 61 | 70.6003851 | 71 | 69.8898247 |
| 67.5087111 | 63 | 69.5883718 | 63 | 69.0883718 | 63 | 68.2897311 | 61 | 70.4034154 | 71 | 69.3898247 |
| 67.5087111 | 63 | 69.7883718 | 63 | 69.5883718 | 63 | 68.4497311 | 61 | 71.4191149 | 71 | 69.7648247 |
| 67.5996202 | 63 | 69.5883718 | 63 | 69.7883718 | 63 | 68.4497311 | 61 | 71.4191149 | 71 | 70.1398247 |
| 68.3268929 | 63 | 69.3883718 | 63 | 69.5883718 | 63 | 66.5297311 | 61 | 71.4191149 | 71 | 71.0148247 |
| 68.0541657 | 63 | 69.0883718 | 63 | 69.3883718 | 63 | 66.6897311 | 61 | 71.8736604 | 71 | 71.0148247 |
| 68.7814384 | 63 | 69.6883718 | 63 | 69.0883718 | 63 | 66.2897311 | 61 | 72.1463877 | 71 | 71.3898247 |
| 65.9793304 | 63 | 70.0883718 | 63 | 69.6883718 | 63 | 69.5836602 | 61 | 72.6918422 | 71 | 71.1398247 |
| 66.0123882 | 63 | 70.6883718 | 63 | 70.0883718 | 63 | 68.1836602 | 61 | 72.6918422 | 71 | 71.2648247 |
| 66.0371816 | 63 | 71.2883718 | 63 | 70.6883718 | 63 | 65.3836602 | 61 | 72.4191149 | 71 | 71.0148247 |
| 66.4504047 | 63 | 71.6883718 | 63 | 71.2883718 | 63 | 64.9836602 | 61 | 72.6918422 | 71 | 71.3898247 |
| 66.5495783 | 63 | 71.3883718 | 63 | 71.6883718 | 63 | 63.3836602 | 61 | 72.6918422 | 71 | 71.7648247 |
| 65.6487518 | 63 | 70.9883718 | 63 | 71.3883718 | 63 | 63.5836602 | 61 | 73.0554786 | 71 | 72.2648247 |
| 65.8140411 | 63 | 70.7883718 | 63 | 70.9883718 | 63 | 63.3836602 | 61 | 73.6009331 | 71 | 72.8898247 |

|            |    |            |    |            |    |            |    |            |    |            |
|------------|----|------------|----|------------|----|------------|----|------------|----|------------|
| 65.9793304 | 63 | 68.6914706 | 63 | 70.7883718 | 63 | 62.3836602 | 61 | 73.8736604 | 71 | 72.8898247 |
| 68.2359838 | 63 | 68.6914706 | 63 | 68.6914706 | 63 | 61.9836602 | 61 | 73.8736604 | 71 | 73.2648247 |
| 68.5996202 | 63 | 68.5814706 | 63 | 68.6914706 | 63 | 62.1836602 | 61 | 74.0554786 | 71 | 73.3898247 |
| 68.7814384 | 63 | 68.3714706 | 63 | 68.5814706 | 63 | 62.1836602 | 61 | 74.0554786 | 71 | 73.5148247 |
| 68.417802  | 63 | 68.1814706 | 63 | 68.3714706 | 63 | 61.9836602 | 61 | 74.510024  | 71 | 73.8898247 |
| 68.417802  | 63 | 68.4714706 | 63 | 68.1814706 | 63 | 61.9836602 | 61 | 74.7827513 | 71 | 74.1398247 |
| 68.1450748 | 63 | 69.4883718 | 63 | 68.4714706 | 63 | 61.7836602 | 61 | 75.4191149 | 71 | 74.2648247 |
| 67.1450748 | 63 | 69.1883718 | 63 | 69.4883718 | 63 | 62.1836602 | 61 | 75.510024  | 71 | 74.5148247 |
| 66.8723475 | 63 | 68.9883718 | 63 | 69.1883718 | 63 | 62.5836602 | 61 | 75.2372968 | 71 | 74.5148247 |
| 66.3268929 | 63 | 68.7883718 | 63 | 68.9883718 | 63 | 62.5836602 | 61 | 74.8736604 | 71 | 74.5148247 |
| 66.0541657 | 63 | 68.4883718 | 63 | 68.7883718 | 63 | 62.1836602 | 61 | 74.4191149 | 71 | 72.5146274 |
| 65.3268929 | 63 | 68.2883718 | 63 | 68.4883718 | 63 | 62.1836602 | 61 | 74.6918422 | 71 | 72.2646274 |
| 65.2359838 | 63 | 68.1883718 | 63 | 68.2883718 | 63 | 61.9836602 | 61 | 74.8736604 | 71 | 72.4590718 |
| 65.9632566 | 63 | 68.6883718 | 63 | 68.1883718 | 63 | 62.3836602 | 61 | 74.9645695 | 71 | 72.2090718 |
| 65.8723475 | 63 | 68.1883718 | 63 | 68.6883718 | 63 | 62.1836602 | 61 | 75.0554786 | 71 | 73.4590718 |
| 65.5087111 | 63 | 67.9883718 | 63 | 68.1883718 | 63 | 61.9836602 | 61 | 75.2372968 | 71 | 73.0424052 |
| 65.5996202 | 63 | 68.0883718 | 63 | 67.9883718 | 63 | 61.5836602 | 61 | 75.2372968 | 71 | 73.1812941 |
| 64.9632566 | 63 | 67.9883718 | 63 | 68.0883718 | 63 | 61.5836602 | 61 | 75.7827513 | 71 | 72.7924052 |
| 64.8723475 | 63 | 68.1883718 | 63 | 67.9883718 | 63 | 61.7836602 | 61 | 76.0554786 | 71 | 73.070183  |
| 64.8723475 | 63 | 68.0883718 | 63 | 68.1883718 | 63 | 62.1836602 | 60 | 75.9645695 | 71 | 72.7924052 |
| 64.7814384 | 63 | 68.1883718 | 63 | 68.0883718 | 63 | 63.1836602 | 60 | 75.7827513 | 71 | 72.070183  |
| 65.1450748 | 63 | 68.3883718 | 63 | 68.1883718 | 63 | 63.5836602 | 60 | 73.9744046 | 71 | 71.6535163 |
| 65.0541657 | 63 | 68.5883718 | 63 | 68.3883718 | 63 | 63.5836602 | 60 | 73.9744046 | 71 | 70.7924052 |
| 65.3268929 | 63 | 68.4883718 | 63 | 68.5883718 | 63 | 63.7836602 | 60 | 72.8910712 | 71 | 70.2646274 |
| 65.417802  | 63 | 69.0883718 | 71 | 68.4883718 | 63 | 63.7836602 | 60 | 72.6941015 | 71 | 70.5146274 |
| 65.417802  | 63 | 68.0694593 | 71 | 69.0883718 | 63 | 63.9836602 | 60 | 72.7925864 | 71 | 72.3898247 |
| 65.417802  | 63 | 69.1794593 | 71 | 68.0694593 | 63 | 63.5836602 | 60 | 74.3282058 | 71 | 71.7648247 |
| 65.9632566 | 63 | 69.3994593 | 71 | 69.1794593 | 63 | 63.3836602 | 60 | 74.2372968 | 71 | 71.6398247 |
| 66.0541657 | 63 | 69.1794593 | 71 | 69.3994593 | 63 | 63.7836602 | 60 | 74.0554786 | 71 | 71.3898247 |
| 65.6905293 | 63 | 69.1794593 | 71 | 69.1794593 | 63 | 64.5836602 | 60 | 73.9645695 | 71 | 70.1398247 |
| 65.6905293 | 63 | 68.2994593 | 71 | 69.1794593 | 63 | 65.1836602 | 60 | 73.8736604 | 71 | 69.3898247 |
| 65.7814384 | 63 | 67.9694593 | 71 | 68.2994593 | 63 | 65.3836602 | 60 | 73.8736604 | 71 | 68.3898247 |
| 65.8723475 | 63 | 67.7494593 | 71 | 67.9694593 | 63 | 65.7836602 | 60 | 74.2372968 | 71 | 68.1398247 |
| 66.417802  | 63 | 67.8594593 | 71 | 67.7494593 | 63 | 64.9836602 | 60 | 74.1463877 | 71 | 67.8898247 |
| 66.3268929 | 63 | 67.8594593 | 71 | 67.8594593 | 63 | 64.3836602 | 60 | 74.2372968 | 71 | 68.0148247 |
| 65.9632566 | 63 | 67.4194593 | 71 | 67.8594593 | 63 | 65.1836602 | 60 | 74.2372968 | 71 | 68.0148247 |
| 65.1450748 | 63 | 67.5394593 | 71 | 67.4194593 | 63 | 65.3836602 | 60 | 75.510024  | 71 | 68.2648247 |
| 64.8723475 | 63 | 67.7594593 | 71 | 67.5394593 | 63 | 65.5836602 | 60 | 75.7827513 | 71 | 66.3757385 |
| 65.0541657 | 63 | 69.0694593 | 71 | 67.7594593 | 63 | 65.9836602 | 60 | 76.3282058 | 71 | 66.6535163 |
| 65.417802  | 63 | 70.6883718 | 71 | 69.0694593 | 63 | 66.1836602 | 60 | 76.9645695 | 71 | 66.5979607 |
| 65.3268929 | 63 | 70.4883718 | 71 | 70.6883718 | 63 | 66.5836602 | 60 | 77.4191149 | 71 | 66.5979607 |
| 65.1450748 | 63 | 70.5883718 | 71 | 70.4883718 | 63 | 67.3836602 | 60 | 77.4191149 | 71 | 66.8757385 |
| 65.1450748 | 63 | 69.0694593 | 71 | 70.5883718 | 63 | 67.5836602 | 60 | 76.2672997 | 71 | 66.6257385 |

|            |    |            |    |            |    |            |    |            |    |            |
|------------|----|------------|----|------------|----|------------|----|------------|----|------------|
| 65.1450748 | 63 | 70.4883718 | 71 | 69.0694593 | 63 | 67.5836602 | 60 | 76.3960876 | 61 | 66.5424052 |
| 65.1450748 | 63 | 70.7883718 | 71 | 70.4883718 | 63 | 67.1836602 | 60 | 76.3127542 | 61 | 66.9868496 |
| 64.5996202 | 63 | 71.0883718 | 71 | 70.7883718 | 63 | 67.1836602 | 60 | 76.5097239 | 61 | 66.5146274 |
| 64.1450748 | 63 | 71.1883718 | 71 | 71.0883718 | 63 | 67.1836602 | 60 | 76.3127542 | 61 | 67.320183  |
| 64.3268929 | 63 | 71.2883718 | 71 | 71.1883718 | 63 | 66.5836602 | 60 | 76.0324512 | 61 | 67.2646274 |
| 64.5996202 | 63 | 71.8883718 | 71 | 71.2883718 | 63 | 66.1836602 | 60 | 75.0627542 | 61 | 67.4590718 |
| 64.7814384 | 63 | 72.1883718 | 71 | 71.8883718 | 63 | 65.3836602 | 60 | 74.57033   | 61 | 67.8757385 |
| 65.2359838 | 63 | 72.7883718 | 71 | 72.1883718 | 63 | 64.7836602 | 60 | 73.7672997 | 61 | 67.9868496 |
| 64.8723475 | 63 | 72.9883718 | 71 | 72.7883718 | 63 | 65.1836602 | 60 | 73.7672997 | 61 | 68.1257385 |
| 64.6905293 | 63 | 72.7883718 | 71 | 72.9883718 | 63 | 65.7836602 | 60 | 73.57033   | 61 | 68.570183  |
| 64.3268929 | 63 | 72.3883718 | 71 | 72.7883718 | 63 | 66.3836602 | 60 | 73.57033   | 61 | 68.5146274 |
| 64.2359838 | 63 | 72.2883718 | 71 | 72.3883718 | 63 | 66.1836602 | 60 | 73.0627542 | 61 | 69.3757385 |
|            |    |            |    | 72.2883718 | 60 | 66.3836602 | 60 | 73.6362287 | 61 | 69.5146274 |

Last 3 min

S2B Dataset

Last

|    | 92614.17   |    | 92614.18   |    | 92914.17   |    | 92914.18   |    | 92914.2    |    |
|----|------------|----|------------|----|------------|----|------------|----|------------|----|
|    | 10-11.     |    | 11-12.     |    | 9:30-10:46 |    | 11-11:50   |    | 1-2:00     |    |
|    | 12.00      |    | 13.00      |    | 14.00      |    | 15.00      |    | 16.00      |    |
| 63 | 79.8888889 | 63 | 71.6666667 | 63 | 70.8621712 | 63 | 64.4458951 | 63 | 67.8863882 | 63 |
| 63 | 79.1111111 | 63 | 72.1111111 | 63 | 71.589444  | 63 | 64.2640769 | 63 | 67.7863882 | 63 |
| 69 | 78.5555556 | 63 | 72.2222222 | 63 | 71.8621712 | 63 | 64.1731678 | 63 | 67.1863882 | 63 |
| 69 | 78.4444444 | 63 | 73.1111111 | 63 | 72.4985349 | 63 | 63.7186223 | 63 | 67.1863882 | 63 |
| 69 | 78.4444444 | 63 | 71.557223  | 63 | 72.4076258 | 63 | 63.0822587 | 63 | 66.8863882 | 63 |
| 69 | 78.1111111 | 63 | 70.9275934 | 63 | 70.6922306 | 63 | 62.9913496 | 63 | 68.1863882 | 63 |
| 69 | 77.8888889 | 63 | 70.3103095 | 63 | 70.7914042 | 63 | 62.9913496 | 63 | 67.4863882 | 63 |
| 69 | 77.4444444 | 63 | 69.9399391 | 63 | 71.1054538 | 63 | 62.7186223 | 63 | 66.980092  | 63 |
| 69 | 77.3333333 | 63 | 69.6930255 | 63 | 71.1137182 | 63 | 62.5368042 | 63 | 66.030092  | 63 |
| 69 | 77.2222222 | 63 | 69.1991983 | 63 | 70.1219827 | 63 | 62.354986  | 63 | 66.160092  | 63 |
| 69 | 77         | 63 | 68.3350008 | 63 | 70.0228091 | 63 | 61.7186223 | 63 | 66.050092  | 63 |
| 69 | 77.1111111 | 63 | 67.9646304 | 63 | 69.7087596 | 63 | 61.2640769 | 63 | 66.500092  | 63 |
| 69 | 77.2222222 | 63 | 67.9769761 | 63 | 69.4938835 | 63 | 61.0822587 | 63 | 67.160092  | 63 |
| 69 | 77.6666667 | 63 | 68.8411737 | 63 | 70.589444  | 63 | 61.4458951 | 63 | 67.160092  | 63 |
| 69 | 78.2222222 | 63 | 69.4337662 | 63 | 70.1348985 | 63 | 62.1731678 | 63 | 67.710092  | 63 |
| 69 | 78.5555556 | 63 | 68.7794453 | 63 | 69.8621712 | 63 | 62.354986  | 63 | 67.490092  | 63 |
| 69 | 78.3333333 | 63 | 69.8888889 | 63 | 70.1348985 | 63 | 63.5368042 | 63 | 66.940092  | 63 |
| 69 | 77.8888889 | 63 | 69.5555556 | 63 | 70.4985349 | 63 | 63.9004405 | 63 | 67.160092  | 63 |
| 69 | 77.6666667 | 63 | 69.6666667 | 63 | 71.0439894 | 63 | 64.2640769 | 63 | 67.250092  | 63 |
| 69 | 77         | 63 | 70.2222222 | 63 | 70.4076258 | 63 | 64.6277133 | 63 | 68.8863882 | 63 |
| 69 | 77.1111111 | 63 | 70.1111111 | 63 | 69.8621712 | 63 | 64.8095314 | 63 | 69.8863882 | 63 |
| 69 | 76.7777778 | 63 | 70.8888889 | 63 | 69.589444  | 63 | 65.2640769 | 63 | 69.7863882 | 63 |
| 69 | 76.5555556 | 63 | 71.5555556 | 63 | 68.8621712 | 63 | 65.6277133 | 63 | 68.5863882 | 63 |
| 69 | 76         | 63 | 72.8888889 | 63 | 68.3167167 | 63 | 64.9913496 | 63 | 68.5863882 | 63 |
| 69 | 75.7777778 | 63 | 72.6666667 | 63 | 68.2258076 | 63 | 65.2640769 | 63 | 68.0863882 | 63 |
| 69 | 76         | 63 | 73.7777778 | 63 | 67.4076258 | 63 | 65.2640769 | 63 | 67.7863882 | 63 |
| 69 | 75.7777778 | 63 | 73.5555556 | 63 | 67.0439894 | 63 | 65.6277133 | 63 | 68.1863882 | 63 |
| 69 | 76         | 63 | 74.5555556 | 63 | 67.4076258 | 63 | 65.7186223 | 63 | 68.4863882 | 63 |
| 69 | 75.4444444 | 63 | 75         | 63 | 67.680353  | 63 | 66.0822587 | 63 | 69.4863882 | 63 |
| 69 | 75.5555556 | 63 | 75.7777778 | 63 | 68.0439894 | 63 | 66.5368042 | 63 | 70.1863882 | 63 |
| 69 | 75.7777778 | 63 | 77         | 63 | 68.2258076 | 63 | 66.8095314 | 63 | 69.8863882 | 63 |
| 69 | 75.6666667 | 63 | 77         | 63 | 69.2258076 | 63 | 67.0822587 | 63 | 69.1863882 | 63 |
| 69 | 75.6666667 | 63 | 75.8888889 | 63 | 69.4076258 | 63 | 67.2640769 | 63 | 68.6863882 | 63 |
| 69 | 75.8888889 | 63 | 73.8123195 | 63 | 69.4076258 | 63 | 67.8095314 | 63 | 68.2863882 | 63 |
| 69 | 76.1111111 | 63 | 73.3184923 | 63 | 69.4076258 | 63 | 67.9913496 | 63 | 67.7863882 | 63 |
| 69 | 76.1111111 | 63 | 73.5900972 | 63 | 69.4076258 | 63 | 67.7186223 | 63 | 67.9863882 | 63 |
| 69 | 76.6666667 | 63 | 73.6024429 | 63 | 69.8621712 | 63 | 67.6277133 | 63 | 67.5863882 | 63 |
| 69 | 77         | 63 | 74.2197269 | 63 | 69.9530803 | 63 | 67.0822587 | 63 | 67.3863882 | 63 |
| 69 | 77.2222222 | 63 | 74.7777778 | 63 | 69.7712621 | 63 | 66.9004405 | 63 | 66.9863882 | 63 |

69 77.3333333 63 75 63 69.7712621 63 67.1731678 63 66.8863882 63  
69 77.6666667 63 74.6666667 63 69.8621712 63 67.6277133 63 66.9863882 63  
69 77.8888889 63 74.3333333 63 69.8621712 63 68.354986 63 66.8863882 63  
69 78.5555556 63 74.3333333 63 69.0233566 63 68.7186223 63 67.0863882 63  
69 78.5555556 63 73.2222222 63 69.0729434 63 68.9913496 63 67.2863882 63  
69 78.2222222 63 72.6666667 63 68.6927781 63 68.5368042 63 66.9863882 63  
69 77.3333333 63 72.3333333 63 68.601869 63 68.0822587 63 67.1863882 63  
69 77.4444444 63 72.5555556 63 68.494431 63 68.1731678 63 66.9863882 63  
69 76.8888889 63 72.4444444 63 68.2960839 63 68.6277133 63 66.7863882 63  
69 77.3333333 63 72.4444444 63 69.155588 71 67.9913496 63 66.7863882 63  
69 77.2222222 63 72.8888889 63 69.4365798 71 67.9955496 63 66.2863882 63  
69 77.3333333 63 72.8888889 63 71.1348985 71 66.9913496 63 66.1863882 63  
69 77.4444444 63 72.5555556 63 69.9530803 71 66.2640769 63 65.9863882 63  
69 77.3333333 63 72 63 69.1348985 71 65.9913496 63 66.1863882 63  
69 76.5555556 63 72 63 68.680353 71 64.9913496 63 66.5863882 63  
69 75.8888889 63 71 63 68.4985349 71 64.9004405 63 67.2863882 63  
69 75.2222222 63 71 63 68.4076258 71 64.354986 63 67.6863882 63  
69 74.7789509 63 70.8888889 63 68.3167167 71 64.354986 63 67.3863882 63  
69 74.5690744 63 70.7777778 63 68.589444 71 64.8095314 63 66.7863882 63  
69 74.3345065 63 71.6666667 63 68.4985349 67 64.9004405 63 66.5863882 63  
69 74.3345065 63 71.8888889 63 69.0439894 67 64.8095314 63 66.6863882 63  
69 74.4332719 63 72.3333333 63 69.589444 67 64.9004405 63 66.6863882 63  
69 75.2851238 63 72.4444444 63 69.7712621 67 64.4458951 63 67.0863882 63  
69 76.4444444 63 71.5538123 63 69.8621712 67 64.7186223 63 67.1863882 63  
69 76.2222222 63 72.1710963 63 71.2258076 67 64.7186223 63 67.5863882 63  
69 76.2222222 63 72.6896148 63 70.9530803 67 64.7186223 63 68.0863882 63  
69 75.8888889 63 72.603195 63 70.7712621 69 65.1731678 63 68.6863882 63  
69 75.5555556 63 72.7266518 63 71.1348985 69 66.354986 63 69.2863882 63  
69 75.1111111 63 73.1217136 63 71.4985349 69 66.7186223 63 69.3863882 63  
69 74.7777778 63 73.1464049 63 71.680353 69 66.9004405 63 69.5863882 63  
69 74.8888889 63 73.2328247 63 71.7712621 69 67.3388729 63 69.3863882 63  
69 75.2222222 63 73.4797382 63 71.589444 69 67.4388729 63 69.2863882 63  
69 75.5555556 63 73.2081333 63 71.4076258 69 67.7388729 63 69.7863882 63  
69 76.5555556 63 73.5538123 63 71.1348985 69 67.6388729 63 69.7863882 63  
69 77.2222222 63 75 63 70.4985349 69 67.9388729 63 69.8863882 63  
69 77.2222222 63 75.2222222 63 69.9530803 69 67.7388729 63 70.0863882 63  
63 77.4444444 63 75.1111111 63 69.9530803 69 68.1388729 63 69.9863882 63  
63 77.3333333 63 75.1111111 63 69.8621712 69 68.9388729 63 67.7024399 63  
63 76.8888889 63 75.4444444 63 70.4076258 69 69.0388729 63 67.7024399 63  
63 77 63 76.6666667 63 71.0439894 69 68.8388729 63 69.1863882 63  
63 76.8888889 63 76.8888889 63 71.3058013 69 68.7388729 63 69.4863882 63  
63 76.6666667 63 77 63 72.0058013 69 68.6388729 63 69.4863882 63  
63 76.4444444 63 76.6666667 63 72.5058013 69 68.5388729 63 69.3863882 63

63 76.3333333 63 76.5555556 63 72.6058013 69 68.2388729 63 69.2863882 63  
63 76.4444444 63 76.1111111 63 72.4058013 69 68.1388729 63 69.3863882 63  
63 77.2222222 63 75.7777778 63 72.3058013 69 67.2388729 63 68.7863882 63  
63 77.3333333 63 74.6666667 63 72.3058013 69 67.2388729 63 69.0863882 63  
63 77.4444444 63 74.1111111 63 72.7058013 69 67.3388729 63 67.7863882 63  
63 77.7777778 63 73.1111111 63 72.3058013 69 67.6388729 63 67.4863882 63  
63 78 63 72.7777778 63 72.3058013 69 67.9388729 63 67.6863882 63  
63 78 63 72.2222222 63 71.8058013 69 68.0388729 63 67.1863882 63  
63 77.6666667 63 71.5555556 63 71.8058013 69 68.1388729 63 67.1863882 63  
63 76.6666667 63 72 63 71.8058013 69 67.7388729 63 66.9863882 63  
63 77.2222222 63 72.3333333 63 71.6058013 69 67.7388729 63 67.0863882 63  
63 77.1111111 63 71.4444444 63 71.6058013 69 67.8388729 63 66.7863882 63  
63 76.8888889 63 71.7777778 63 71.4058013 69 68.0388729 63 66.6863882 63  
63 75.1200136 63 72 63 71.5058013 69 67.4388729 63 66.7863882 63  
63 76.8888889 63 72.3333333 63 71.5058013 69 67.1388729 63 66.9863882 63  
63 76.8888889 63 73 63 71.6058013 69 67.4388729 63 66.6863882 63  
63 77 63 73.2222222 63 71.7058013 69 67.8388729 63 66.4863882 63  
63 77.6666667 63 73.5555556 63 72.2058013 69 67.9388729 63 66.3863882 63  
63 77.4444444 63 73.7777778 63 71.5058013 69 68.0388729 63 65.9863882 71  
63 77.3333333 63 73.4444444 63 71.9058013 69 68.3388729 63 65.7863882 71  
63 77.5555556 63 73.2222222 63 72.0058013 69 68.7388729 63 65.5863882 71  
63 75.8273818 63 72 63 72.4058013 69 68.7388729 63 65.8863882 71  
63 76.0742954 63 71.6666667 63 73.1058013 69 69.0388729 63 65.9863882 71  
63 76.0002213 63 71.5555556 63 73.3058013 69 70.0388729 63 66.3863882 71  
63 76.012567 63 71.6666667 63 73.4058013 69 70.5388729 63 66.1863882 71  
63 76.012567 63 71.6666667 63 74.0058013 69 70.7388729 63 66.5863882 71  
63 76.012567 63 71.2222222 63 74.0058013 69 70.9388729 63 66.5863882 71  
63 76.049604 63 70.2222222 63 74.5058013 69 71.0388729 63 66.0863882 71  
63 76.0619497 63 70.3333333 63 73.0058013 69 70.9388729 63 65.7863882 71  
63 76.4570114 63 70.6666667 63 72.8058013 69 70.8388729 63 65.6863882 71  
63 76.3459003 63 70.7777778 63 73.1058013 69 71.3388729 63 65.3863882 71  
63 76.0866411 63 71 63 73.3058013 69 71.8388729 63 65.1863882 71  
69 76.0619497 63 71 63 73.8058013 69 71.6388729 63 64.9863882 71  
69 75.666888 63 71 63 73.7058013 69 71.9388729 63 64.5863882 71  
69 75.358246 63 70.6666667 63 74.1058013 69 71.8388729 63 64.7863882 71  
69 76.3333333 63 70.3333333 63 74.0058013 69 71.9388729 63 65.7863882 71  
69 77.2222222 63 68.6554941 63 73.7058013 69 71.7388729 63 66.2863882 71  
69 77.5555556 63 68.7912966 63 73.7058013 69 71.6388729 63 66.3863882 71  
69 77.2222222 63 69.0382102 63 74.6058013 69 70.9388729 63 66.3863882 71  
63 76.3333333 63 69.161667 63 74.9058013 69 71.4388729 63 66.8863882 71  
63 76 63 69.3962349 63 75.1058013 69 71.5388729 63 66.8863882 71  
63 75.6666667 63 70.7777778 63 75.8058013 69 68.7695188 63 66.3517855 71  
63 75.6666667 63 70.2222222 63 75.6058013 69 68.9995188 63 66.4617855 71



63 75.5555556 63 70 63 75.1058013 69 68.8895188 63 66.6917855 71  
63 76.1111111 63 69.8888889 63 74.5058013 69 68.5495188 63 66.4817855 71  
63 76.3333333 63 70.1111111 63 73.8058013 69 70.7388729 63 66.2617855 71  
63 76.2222222 63 70.6666667 63 73.0058013 69 70.2388729 63 66.1517855 71  
63 76.5555556 63 70.4444444 63 72.5058013 69 70.3388729 63 66.7017855 71  
63 76 63 70.3333333 63 72.5058013 69 69.7388729 63 66.4617855 71  
63 75.1111111 63 70 63 72.7058013 69 69.9388729 63 68.2863882 71  
63 75.2222222 63 69.7777778 63 72.8058013 69 69.5388729 63 68.2863882 71  
63 75.4444444 63 70.1111111 63 72.8058013 69 69.1388729 63 65.7917855 71  
63 75 63 70.1111111 63 72.8058013 69 68.8388729 63 64.7017855 71  
63 75.2222222 63 70.1111111 63 72.3058013 69 68.5388729 63 64.3717855 71  
63 74.7777778 63 70.4444444 63 72.1058013 69 68.6388729 63 65.1417855 71  
63 74.6666667 63 70.2222222 63 71.4058013 69 68.4388729 63 64.3076364 71  
63 74.2222222 63 69.8888889 63 71.0058013 69 68.5388729 63 63.6409697 71  
63 74.5555556 63 71 63 70.9058013 69 68.6388729 63 63.3076364 71  
63 74.3333333 63 71.2222222 63 70.6058013 69 69.3388729 63 64.8631919 71  
63 74 63 71.1111111 63 71.2058013 69 68.7388729 63 65.8631919 71  
63 73.8888889 63 71.3333333 63 71.2058013 69 68.5388729 63 67.5298586 71  
63 73.8888889 63 70.4085806 63 71.8058013 69 68.5388729 63 67.6409697 71  
63 73.6666667 63 70.4085806 63 71.8058013 69 68.6388729 63 68.0854142 71  
63 73.3333333 63 70.9024077 63 72.0058013 69 68.5388729 63 68.3076364 71  
63 72.7777778 63 71.1493213 63 72.3058013 69 68.8388729 63 68.7520808 71  
63 72.6666667 63 73.2222222 63 72.4058013 69 68.7388729 63 69.4187475 71  
63 72.6666667 63 73 63 72.2058013 69 69.0388729 63 69.7520808 71  
63 72.8888889 63 71.1493213 63 72.3058013 69 69.0388729 63 69.7520808 71  
63 73.5555556 63 73.1111111 63 72.4058013 69 69.1388729 63 70.1965253 71  
63 74.3333333 63 73.1111111 63 72.9058013 69 69.4388729 63 70.5298586 71  
63 74.7777778 63 73.2222222 63 72.6058013 69 69.7388729 63 70.6409697 71  
63 75.2222222 63 71.9123775 63 72.2058013 69 69.7388729 63 70.3076364 71  
63 73.5325317 63 71.7889207 63 72.0058013 69 69.0388729 63 70.4187475 71  
63 72.7917909 63 71.9494146 63 72.1058013 69 69.1388729 63 69.0854142 71  
63 72.6683341 63 72.2086738 63 71.9058013 69 67.9388729 63 67.9743031 71  
63 72.6683341 63 72.3444763 63 72.2058013 69 67.9388729 63 67.8631919 71  
63 72.6683341 63 72.8506491 63 72.5058013 69 67.8388729 63 67.0854142 71  
63 72.7917909 63 73.2210195 63 72.6058013 69 68.1388729 63 67.3076364 71  
63 71.4461119 63 74.3321306 63 72.5058013 69 68.0388729 63 67.4187475 71  
63 70.5819144 63 74.3321306 63 73.0058013 69 68.4388729 63 67.5298586 71  
63 70.3226551 63 75.7777778 63 72.9058013 69 68.7388729 63 67.6409697 71  
63 70.1991983 63 76.6666667 63 72.7058013 69 69.4388729 63 67.5298586 71  
63 70.9275934 63 77 63 72.9058013 69 70.0388729 63 67.4187475 63  
63 71.4214206 63 77.7777778 63 72.8058013 69 70.6388729 63 67.4187475 63  
63 71.902902 63 78 63 73.0058013 69 69.884762 63 67.6409697 63  
63 74.1111111 63 78.1111111 63 72.6058013 69 70.9958731 63 67.7520808 63

63 75.1111111 63 78.4444444 63 72.7058013 69 72.2180954 63 67.7520808 63  
63 75.1111111 63 78.5555556 63 72.7058013 69 72.884762 63 69.1965253 63  
63 75.4444444 63 78.6666667 63 72.9058013 69 74.1069843 63 71.2863882 63  
63 76.4444444 63 79 63 73.6058013 69 74.4403176 63 71.6863882 63  
63 76.8888889 63 78.7777778 63 73.7058013 69 74.3292065 63 71.4863882 63  
63 76.8888889 63 78.8888889 63 74.4058013 69 74.4403176 63 71.5863882 63  
63 77.1111111 63 79.2222222 63 74.1058013 69 74.4403176 63 71.0863882 63  
63 77.1111111 63 80 63 73.9058013 61 74.6625398 63 70.9863882 63  
63 76.7777778 63 80 63 74.3058013 61 74.884762 63 70.8863882 63  
63 76.6666667 63 80.4444444 63 74.2058013 61 74.9958731 63 71.0863882 71  
63 76.7777778 63 80.5555556 60 74.2058013 60 74.884762 63 71.4863882 71  
63 74.9123775 63 79.7777778 60 73.7058013 60 74.884762 63 71.4863882 71  
60 75.2827479 63 78.6666667 60 73.5058013 60 74.9958731 60 71.3863882 60

t 3 min

S2B Dataset

Last 3 min

| 100114     |    | 100114     |    | 100314     |    | 100314     |    | 101314     |    | 101314     |  |
|------------|----|------------|----|------------|----|------------|----|------------|----|------------|--|
| 11:00      |    | 10:00      |    | 10-11.     |    | 11-12.     |    | 9-10.      |    | 10-11.     |  |
| 17.00      |    | 18.00      |    | 19.00      |    | 20.00      |    | 21.00      |    | 22.00      |  |
| 67.9925569 | 63 | 68.4081496 | 63 | 70.1501363 | 63 | 70.7097112 | 63 | 64.9717932 | 67 | 69.6703045 |  |
| 67.1925569 | 63 | 68.2333244 | 63 | 70.6501363 | 63 | 70.4097112 | 63 | 65.4003646 | 67 | 69.1703045 |  |
| 67.5925569 | 63 | 68.2333244 | 63 | 70.7751363 | 63 | 70.6097112 | 63 | 65.2575075 | 67 | 69.0453045 |  |
| 67.6925569 | 63 | 68.0584992 | 63 | 70.5251363 | 63 | 70.6097112 | 63 | 64.9717932 | 67 | 69.5453045 |  |
| 67.7925569 | 63 | 68.2543034 | 63 | 70.2751363 | 63 | 70.8097112 | 63 | 64.9717932 | 67 | 68.9203045 |  |
| 67.8925569 | 63 | 67.7647929 | 63 | 70.4001363 | 63 | 70.7097112 | 63 | 64.9717932 | 67 | 68.6703045 |  |
| 67.6925569 | 63 | 67.5689887 | 63 | 70.5251363 | 63 | 70.3097112 | 63 | 64.5432218 | 67 | 68.6703045 |  |
| 68.3925569 | 63 | 66.7857719 | 63 | 70.5251363 | 63 | 70.2097112 | 63 | 64.4003646 | 67 | 68.2953045 |  |
| 68.4925569 | 63 | 66.2193384 | 63 | 71.2751363 | 63 | 70.1097112 | 63 | 64.5432218 | 67 | 68.2953045 |  |
| 68.9925569 | 63 | 67.1633943 | 63 | 71.5251363 | 63 | 70.3097112 | 63 | 64.828936  | 67 | 68.2953045 |  |
| 69.2925569 | 63 | 67.3801775 | 63 | 71.4001363 | 63 | 70.3097112 | 63 | 64.828936  | 67 | 68.4203045 |  |
| 69.2925569 | 63 | 66.890667  | 63 | 71.2751363 | 63 | 69.6097112 | 63 | 65.6860789 | 67 | 68.4203045 |  |
| 69.1925569 | 63 | 66.9885691 | 63 | 72.1501363 | 63 | 69.3097112 | 63 | 68.6860789 | 67 | 68.2953045 |  |
| 69.4925569 | 63 | 66.6948628 | 63 | 72.0251363 | 63 | 69.0097112 | 69 | 68.6860789 | 67 | 68.0453045 |  |
| 69.7925569 | 63 | 67.890667  | 63 | 73.1501363 | 63 | 68.2097112 | 69 | 68.828936  | 67 | 68.2953045 |  |
| 69.8925569 | 63 | 67.7927649 | 63 | 73.7751363 | 63 | 67.8097112 | 69 | 68.4003646 | 67 | 68.1703045 |  |
| 69.3925569 | 63 | 68.1633943 | 63 | 74.5251363 | 63 | 67.4097112 | 69 | 68.4003646 | 67 | 68.2953045 |  |
| 69.3925569 | 63 | 68.4377767 | 63 | 73.9001363 | 63 | 67.1097112 | 69 | 68.2575075 | 67 | 68.7953045 |  |
| 69.9925569 | 63 | 68.3303282 | 63 | 73.4001363 | 63 | 67.0097112 | 69 | 67.6860789 | 67 | 69.4203045 |  |
| 67.1385314 | 63 | 67.7997579 | 63 | 73.2751363 | 63 | 67.0097112 | 69 | 67.6860789 | 67 | 67.9618951 |  |
| 67.0985314 | 63 | 67.9381144 | 63 | 73.0251363 | 63 | 67.8097112 | 69 | 67.828936  | 67 | 68.3837701 |  |
| 66.7985314 | 63 | 67.2108417 | 63 | 72.4001363 | 63 | 67.9097112 | 69 | 67.828936  | 67 | 66.8993951 |  |
| 67.0385314 | 63 | 66.8472053 | 63 | 72.4001363 | 63 | 68.7097112 | 69 | 69.2575075 | 67 | 66.7587701 |  |
| 67.0485314 | 63 | 66.3926598 | 63 | 71.4001363 | 63 | 68.4097112 | 69 | 69.2575075 | 67 | 66.1962701 |  |
| 67.1585314 | 63 | 66.1199326 | 63 | 69.6501363 | 63 | 68.7097112 | 69 | 69.2575075 | 67 | 66.1962701 |  |
| 67.0485314 | 63 | 65.574478  | 63 | 68.9001363 | 63 | 69.2097112 | 69 | 69.5432218 | 67 | 67.0400201 |  |
| 67.0485314 | 63 | 64.9381144 | 63 | 68.2751363 | 63 | 69.3097112 | 69 | 69.9717932 | 67 | 66.6181451 |  |
| 66.9785314 | 63 | 65.0290235 | 63 | 67.2751363 | 63 | 69.4097112 | 69 | 70.2575075 | 67 | 66.2118951 |  |
| 66.8985314 | 63 | 64.3792765 | 63 | 67.1501363 | 63 | 69.2097112 | 63 | 70.2575075 | 67 | 65.2275201 |  |
| 66.8085314 | 63 | 64.6729828 | 63 | 67.4001363 | 63 | 69.3097112 | 63 | 70.6860789 | 67 | 64.6650201 |  |
| 66.9185314 | 63 | 65.0645912 | 63 | 67.2751363 | 63 | 69.2097112 | 63 | 71.2575075 | 67 | 64.3837701 |  |
| 66.8385314 | 63 | 65.5750807 | 63 | 67.7751363 | 63 | 69.3097112 | 63 | 68.5432218 | 67 | 63.7587701 |  |
| 66.2885314 | 63 | 66.1624933 | 63 | 68.0251363 | 63 | 70.0097112 | 63 | 68.2575075 | 67 | 63.9618951 |  |
| 65.3085314 | 63 | 66.3582975 | 63 | 68.5251363 | 63 | 70.4097112 | 63 | 67.828936  | 67 | 63.6962701 |  |
| 65.0985314 | 63 | 66.3582975 | 63 | 70.0251363 | 63 | 70.3097112 | 63 | 67.4003646 | 67 | 63.9775201 |  |
| 64.4385314 | 63 | 66.1275282 | 63 | 70.6501363 | 63 | 70.0097112 | 63 | 67.4003646 | 67 | 64.3368951 |  |
| 64.4385314 | 63 | 65.8338219 | 63 | 71.1501363 | 63 | 69.6097112 | 63 | 66.4003646 | 67 | 65.0712701 |  |
| 64.2185314 | 63 | 65.5191366 | 63 | 71.6501363 | 63 | 69.6097112 | 63 | 65.9717932 | 67 | 65.5243951 |  |
| 63.9985314 | 63 | 65.3233324 | 63 | 72.2751363 | 63 | 69.3097112 | 63 | 66.4003646 | 67 | 66.1025201 |  |

64.4285314 63 65.4212345 63 72.6501363 63 69.4097112 63 65.9717932 67 66.3837701  
64.2085314 63 65.2603954 63 72.7751363 63 69.2097112 63 65.9717932 67 66.8993951  
63.9885314 63 65.4561996 63 72.5251363 63 69.1097112 63 66.9717932 67 67.2118951  
64.4085314 63 66.1415142 63 72.1501363 63 69.0097112 63 67.1146503 67 68.0712701  
64.8085314 63 66.7562962 63 72.5251363 63 69.4097112 63 67.5432218 67 69.1962701  
64.5785314 63 66.6653871 63 72.5251363 63 69.2097112 63 67.2575075 67 69.7587701  
64.2385314 63 66.574478 63 72.7751363 63 69.0097112 63 67.5432218 67 70.3993951  
64.1285314 63 65.8472053 63 72.2751363 63 69.0097112 63 65.2579204 67 69.6962701  
63.7985314 63 66.9381144 63 70.9001363 63 69.2097112 63 65.6252673 67 69.3993951  
63.3485314 63 67.4835689 63 70.9001363 63 70.1097112 63 65.0334306 67 68.9775201  
63.5685314 63 67.8472053 63 68.4982738 63 70.633115 63 65.4007775 67 68.4150201  
63.7785314 63 67.7562962 63 68.2170238 63 70.743115 63 65.5640428 67 68.2743951  
64.4285314 63 67.7562962 63 69.7751363 63 70.953115 63 65.0946551 67 68.4150201  
64.4285314 63 67.9381144 63 69.5251363 63 70.993115 63 65.2579204 67 68.4150201  
64.4185314 63 68.3926598 63 69.5251363 63 71.103115 63 65.2375122 67 68.2743951  
64.3085314 63 68.4835689 63 68.9001363 63 70.923115 63 65.1966959 67 68.9775201  
64.1985314 63 68.7562962 63 68.9001363 63 70.933115 63 65.1966959 67 69.1181451  
64.1985314 63 68.3017507 63 69.1501363 63 70.163115 63 65.1966959 67 69.1337701  
64.1885314 63 67.574478 63 69.2751363 63 69.833115 63 65.1762877 67 69.5400201  
64.6285314 63 67.0778292 63 68.7751363 63 70.0735976 63 65.3191449 67 69.5556451  
64.9585314 63 67.3925145 63 69.0251363 63 70.6908815 63 65.3191449 67 69.4150201  
65.0585314 63 68.1199326 63 68.9001363 63 70.8143383 63 65.7043493 67 69.3138547  
65.2785314 63 67.8472053 63 68.9001363 63 70.8143383 63 65.4824102 67 68.7492213  
65.1685314 63 67.574478 63 69.4001363 63 71.0612519 63 65.4415938 67 69.3429713  
64.9385314 63 67.1199326 63 69.5251363 63 70.8143383 63 64.7477163 67 69.6554713  
65.2685314 63 66.8472053 63 69.6501363 63 70.6785358 63 63.584451 67 69.6867213  
64.9385314 63 67.3926598 63 69.6501363 63 70.0612519 63 66.2575075 67 69.6867213  
65.1585314 63 67.574478 63 69.5251363 63 69.7402642 63 63.9722061 67 69.5617213  
65.1585314 63 66.7562962 63 69.7751363 63 69.9871778 63 63.6864918 67 69.8429713  
64.5885314 63 66.7562962 63 69.7751363 63 69.9871778 63 63.1966959 67 69.7492213  
65.4385314 63 66.9381144 63 70.0251363 63 71.4182496 63 63.584451 67 70.3429713  
65.4385314 63 66.6653871 63 69.6501363 63 71.5293607 63 64.0742469 67 70.5304713  
67.0785314 63 66.5745986 63 69.6501363 63 71.5293607 63 63.9926143 67 70.0304713  
67.3985314 63 66.1931528 63 69.6501363 63 70.9738052 63 64.1762877 67 70.1554713  
67.1785314 63 66.1199326 63 69.5251363 63 70.9738052 63 63.6456755 67 70.3117213  
67.4985314 63 66.8472053 63 69.6501363 63 69.9559497 63 62.9722061 67 70.4367213  
67.3885314 63 67.1199326 63 69.9001363 63 67.1781719 63 62.4415938 67 70.5929713  
67.3785314 63 66.574478 63 69.9001363 63 66.9312583 63 62.4415938 67 71.0617213  
68.9925569 63 66.1199326 63 69.9001363 63 66.4003941 63 62.9109816 67 71.0617213  
68.6925569 63 66.2108417 63 69.5251363 63 66.1164435 63 63.4007775 67 71.8742213  
66.4685314 63 66.3017507 63 69.5251363 63 66.2275546 63 64.7069 67 72.4992213  
68.6925569 63 65.3926598 63 69.1501363 63 66.215209 63 64.7069 67 72.4367213  
68.4925569 63 65.0290235 63 69.0251363 63 65.9682954 63 64.5640428 67 74.4150201

68.4925569 63 64.7562962 63 69.2751363 63 65.9682954 63 64.4007775 67 74.1337701  
68.3925569 63 64.6653871 63 69.4001363 63 66.0794065 63 64.584451 67 73.7275201  
68.1925569 63 64.6653871 63 69.5251363 63 66.3263201 63 65.0946551 67 74.1650201  
68.3925569 63 65.574478 63 69.6501363 63 65.8201472 63 65.584451 67 73.8837701  
69.1925569 63 65.9381144 63 69.9001363 63 66.0670608 63 65.7681245 67 73.8837701  
69.5925569 63 66.3926598 63 70.4001363 63 68.9131037 63 65.9313898 67 73.7431451  
70.0925569 63 67.0290235 63 70.1501363 63 68.5427334 63 65.9313898 67 74.2900201  
68.9925569 63 66.6653871 63 70.5251363 63 68.172363 63 66.2579204 67 73.3056451  
68.9925569 63 67.3926598 63 71.0251363 63 67.8143383 63 66.6048592 67 72.8681451  
68.6925569 63 67.6653871 63 71.5251363 63 66.5303877 63 66.9313898 67 72.4306451  
68.7925569 63 67.1607359 63 71.7751363 63 67.0242149 63 66.9517979 67 71.5868951  
68.8925569 63 67.6152814 63 71.9001363 63 66.7773013 63 67.6048592 67 71.4462701  
68.8925569 63 67.3215751 63 71.6501363 63 67.1106346 63 68.0946551 67 71.6025201  
68.7925569 63 67.1677289 63 71.2751363 63 66.863721 63 67.1150632 67 71.6025201  
68.8925569 63 66.6012954 63 69.7416829 63 68.6404718 63 66.7477163 67 71.9150201  
68.9925569 63 66.4264702 63 69.7416829 63 68.5293607 63 67.0742469 67 71.9306451  
69.2925569 63 66.4264702 63 68.9604329 63 68.6404718 63 66.7885326 67 71.5087701  
69.9925569 63 66.3635331 63 69.2885579 63 68.7515829 63 66.9722061 67 71.3681451  
69.9925569 63 66.6572394 63 69.1791829 63 68.4182496 63 67.2987367 67 71.3681451  
70.1925569 63 67.223673 63 69.1791829 63 68.3071385 63 67.4415938 67 71.5087701  
70.2925569 63 67.5733233 63 70.2729329 63 68.0849163 63 67.6048592 67 71.9306451  
71.0925569 63 68.8472053 63 70.5229329 63 68.1960274 63 68.0946551 67 72.0400201  
70.9925569 63 69.1199326 63 70.7729329 63 68.3071385 63 68.7477163 67 71.9462701  
71.4925569 63 69.3017507 63 71.6501363 63 68.3071385 63 68.5640428 67 71.9462701  
71.4925569 63 69.3926598 63 71.7751363 63 67.9738052 63 69.0538387 67 71.8525201  
71.4925569 63 70.1199326 63 70.7751363 63 67.6404718 63 69.0130224 67 71.6962701  
71.1925569 63 70.0290235 63 70.7751363 63 67.3071385 63 69.1762877 67 72.3993951  
70.9925569 63 66.3652905 63 71.1501363 63 67.0849163 63 68.8497571 67 69.9775201  
71.1925569 63 66.1694863 63 72.4001363 63 67.4182496 63 68.8497571 67 69.8368951  
71.2925569 63 66.0925632 63 73.0251363 63 68.4182496 63 67.7069 67 71.7953045  
70.4925569 63 66.0715842 63 74.0251363 63 68.6404718 63 67.5436347 67 71.5453045  
69.7925569 63 66.1694863 63 74.0251363 63 68.7515829 63 67.7330164 67 71.6703045  
69.8925569 63 66.3233324 63 74.1501363 63 69.0849163 63 66.0742469 67 71.6703045  
69.9925569 63 67.9381144 63 74.1501363 63 69.5293607 63 65.584451 67 69.4865334  
69.8925569 63 67.8472053 63 73.5251363 63 69.5293607 63 65.2579204 67 72.2953045  
70.1925569 63 67.8472053 63 73.7751363 63 70.1960274 63 65.0946551 67 72.6703045  
68.5035923 63 67.9381144 63 73.4001363 63 70.0849163 61 64.7681245 67 72.7953045  
66.5796321 63 67.7562962 63 73.1501363 63 70.7515829 61 65.2375122 67 72.9203045  
66.5196321 63 67.574478 63 73.4001363 63 71.1960274 61 65.0538387 67 73.1703045  
66.0396321 63 67.8472053 63 73.4001363 63 71.6404718 61 65.6864918 67 72.4203045  
65.7196321 63 68.0290235 63 73.4001363 63 71.3071385 61 66.0130224 67 72.2953045  
64.8796321 63 68.3926598 63 72.9001363 63 71.0849163 61 66.1762877 67 72.9203045  
64.5196321 63 68.574478 63 72.6501363 63 71.3071385 61 66.5232265 67 73.1703045

64.7596321 63 68.4097438 63 72.2751363 63 71.4182496 61 66.5232265 67 73.2953045  
65.1196321 63 67.9889752 63 71.9001363 63 71.6404718 61 66.7069 67 73.0453045  
65.2396321 63 68.574478 63 71.7751363 63 71.6404718 61 66.5028183 67 73.4203045  
65.5796321 63 69.6653871 63 71.6501363 63 71.9738052 61 66.3599612 67 73.4203045  
65.9396321 63 69.6653871 63 71.2751363 63 72.1960274 61 66.5232265 67 73.5453045  
65.6996321 63 69.6513219 63 71.2751363 63 72.862694 61 66.9109816 67 73.7953045  
65.2596321 63 72.0290235 63 71.4001363 63 72.9738052 61 66.584451 67 74.0453045  
65.6996321 63 72.574478 63 71.7751363 63 72.862694 61 66.7885326 67 73.5453045  
65.9996321 63 72.6653871 63 71.9001363 63 73.1960274 61 66.9517979 67 73.4203045  
67.2535923 63 72.7562962 63 72.0251363 63 73.3071385 61 67.2783285 67 73.2953045  
66.9235923 63 73.0290235 63 72.0251363 63 73.3071385 61 67.2987367 67 73.0453045  
66.0435923 63 71.2806925 63 71.7751363 63 73.0849163 61 66.9722061 67 73.2953045  
66.0335923 63 71.0848883 63 72.6501363 63 73.1960274 61 66.9722061 67 73.2953045  
66.1435923 63 70.2037694 63 72.4001363 63 73.1960274 61 66.3191449 67 73.4203045  
65.9335923 63 69.5534198 63 72.4001363 63 73.3071385 61 65.5028183 67 73.5453045  
65.6035923 63 67.1773011 63 72.1501363 63 70.8201472 61 65.1966959 67 73.1703045  
65.5235923 63 66.5479305 63 71.4001363 63 70.2028633 61 65.0130224 67 73.2953045  
65.7435923 63 66.5968815 63 71.1501363 63 70.1960274 61 64.3191449 67 71.3837701  
66.0735923 63 68.6808768 63 70.7751363 63 69.6404718 61 64.3191449 67 71.3837701  
66.7335923 63 68.7018559 63 70.1501363 63 69.7515829 61 63.9926143 67 71.8212701  
67.2935923 63 68.5270307 63 69.7751363 63 69.6404718 61 62.9926143 67 71.8368951  
67.8435923 63 68.3522055 63 69.9001363 63 69.7515829 61 63.2987367 67 72.1650201  
68.1735923 63 68.3312265 63 69.5251363 63 69.7515829 61 63.462002 67 72.7587701  
68.4935923 63 67.9396181 63 69.6501363 63 69.7515829 61 63.2579204 67 73.4618951  
68.4535923 63 67.5270307 63 69.4001363 63 69.7515829 61 63.2579204 67 74.1650201  
68.5435923 63 67.3312265 63 69.4001363 63 69.6404718 61 62.9722061 67 74.2743951  
70.1925569 63 68.3926598 63 69.5251363 63 69.4182496 61 62.462002 67 74.2743951  
69.7925569 63 67.574478 63 70.1501363 63 69.1960274 61 62.462002 67 74.1337701  
69.8925569 63 67.3017507 63 70.2751363 63 68.8360716 61 62.6252673 67 74.4306451  
69.8925569 63 67.1199326 63 70.4001363 63 68.7110716 61 62.1354714 67 74.0400201  
69.5925569 63 66.9381144 63 71.0251363 63 65.8808195 61 61.6456755 67 73.9462701  
69.4925569 63 66.9381144 63 71.4001363 63 65.1776945 61 61.3191449 67 73.5556451  
69.9925569 63 66.3926598 63 70.9001363 63 64.9120695 61 61.1762877 67 72.3056451  
69.9925569 63 66.2108417 63 70.4001363 63 65.0526945 61 60.8497571 67 72.0556451  
70.4925569 63 66.4835689 63 70.0251363 63 65.5995695 61 61.0130224 67 72.0556451  
70.4925569 63 66.574478 63 70.2751363 63 68.5860716 61 61.0130224 67 72.7587701  
70.4925569 63 66.2108417 63 70.4001363 63 68.7110716 61 61.3191449 67 72.4931451  
70.5925569 63 65.9381144 63 70.6501363 63 70.7110716 61 61.4824102 67 72.2118951  
70.7925569 63 65.9381144 63 70.6501363 63 71.5860716 61 61.6456755 67 72.0712701  
70.5925569 63 66.4835689 63 70.6501363 63 71.7110716 61 61.6252673 67 71.9462701  
70.8925569 63 68.0290235 63 70.6501363 63 71.9610716 61 60.9722061 67 72.0868951  
70.2925569 63 67.0515062 63 70.5251363 63 72.0860716 61 60.7681245 67 71.6650201  
69.5925569 63 67.3452125 63 70.7751363 63 69.9827953 61 60.7681245 67 70.5400201

68.8925569 63 68.3926598 63 71.6501363 63 69.9984203 61 62.828936 67 69.7240186  
68.6925569 63 68.7562962 63 71.6501363 63 72.0860716 61 62.828936 67 70.3837701  
68.5925569 63 68.7562962 63 71.7751363 63 72.3360716 61 63.2575075 67 71.0868951  
68.6925569 63 68.8472053 63 72.2751363 63 72.0860716 61 63.828936 67 70.9462701  
67.6925569 63 68.8472053 63 72.4001363 63 72.5860716 61 63.9717932 67 70.6650201  
67.2925569 63 69.2108417 63 72.6501363 63 72.5860716 61 64.5432218 67 70.5243951  
67.2925569 63 69.2108417 63 72.7751363 63 72.3360716 61 64.5432218 67 70.1025201  
67.2925569 63 69.4835689 63 72.7751363 63 72.2110716 61 64.9717932 67 70.2275201  
65.4398382 63 69.1199326 63 72.7751363 63 71.9610716 61 65.1146503 67 70.3681451  
65.2398382 63 68.4835689 63 72.4001363 63 71.8360716 61 65.6860789 67 70.3681451  
65.0598382 63 68.3926598 63 73.2751363 63 72.3360716 61 66.2575075 67 70.6650201  
64.6398382 63 68.3185049 63 73.4001363 63 72.2110716 61 69.4003646 67 70.3993951  
64.5198382 63 68.0053678 63 73.6501363 63 72.6522851 61 68.0946551 67 70.1181451

## S2B Dataset

Last 3 min

| 101514  |            | 101614 |            | 101714  |            | 102014 |            | 102014 |            |    |
|---------|------------|--------|------------|---------|------------|--------|------------|--------|------------|----|
| 9-1030. |            | 9-10.  |            | 9-1030. |            | 1:00   |            | 10-11. |            |    |
| 23.00   |            | 24.00  |            | 25.00   |            | 26.00  |            | 27.00  |            |    |
| 71      | 73.041958  | 71     | 66.375     | 63      | 69.2437021 | 63     | 66.9326031 | 69     | 66.8000474 | 63 |
| 63      | 73.9308469 | 71     | 66         | 63      | 69.2437021 | 63     | 66.9326031 | 69     | 66.6000474 | 63 |
| 63      | 74.1530691 | 71     | 66.125     | 63      | 68.8437021 | 63     | 67.3701031 | 69     | 66.4900474 | 63 |
| 63      | 74.5975136 | 63     | 64.5059463 | 63      | 68.5437021 | 63     | 67.7919781 | 69     | 65.9400474 | 63 |
| 63      | 75.041958  | 63     | 66         | 63      | 68.7437021 | 63     | 68.9169781 | 69     | 65.8300474 | 63 |
| 63      | 75.1530691 | 63     | 66.125     | 63      | 69.1437021 | 63     | 69.7607281 | 69     | 66.0500474 | 63 |
| 63      | 75.4864025 | 63     | 67.625     | 63      | 69.7437021 | 63     | 69.9013531 | 69     | 66.2700474 | 63 |
| 63      | 75.7086247 | 63     | 67.0601791 | 63      | 69.8437021 | 63     | 70.0419781 | 69     | 66.4900474 | 63 |
| 63      | 75.9308469 | 63     | 67.2008041 | 63      | 69.9437021 | 63     | 69.7451031 | 69     | 66.8200474 | 63 |
| 63      | 75.9308469 | 63     | 68.625     | 63      | 69.7437021 | 63     | 69.4638531 | 69     | 67.1500474 | 63 |
| 63      | 76.2641802 | 63     | 68.625     | 63      | 69.5437021 | 63     | 68.9013531 | 69     | 67.4700474 | 63 |
| 63      | 76.041958  | 63     | 68.125     | 63      | 68.8437021 | 63     | 70.955669  | 69     | 67.6800474 | 63 |
| 63      | 75.4864025 | 63     | 68         | 63      | 68.4437021 | 63     | 70.830669  | 69     | 67.6800474 | 63 |
| 63      | 75.1530691 | 63     | 67.625     | 63      | 68.0437021 | 63     | 69.830669  | 69     | 67.7900474 | 63 |
| 63      | 75.1530691 | 63     | 66.625     | 63      | 67.9437021 | 63     | 70.080669  | 69     | 68.0100474 | 63 |
| 63      | 75.041958  | 63     | 66.5       | 63      | 67.3437021 | 63     | 70.080669  | 69     | 68.3400474 | 63 |
| 63      | 74.3752914 | 63     | 66.5       | 63      | 67.5437021 | 63     | 69.830669  | 69     | 68.5600474 | 63 |
| 63      | 73.9308469 | 63     | 66.375     | 63      | 67.2437021 | 63     | 69.205669  | 69     | 68.7800474 | 63 |
| 63      | 73.9308469 | 63     | 65.875     | 63      | 67.3437021 | 63     | 68.580669  | 69     | 68.6700474 | 63 |
| 63      | 73.7086247 | 63     | 66.625     | 63      | 67.6437021 | 63     | 68.955669  | 69     | 68.6466491 | 63 |
| 63      | 73.4864025 | 63     | 66.75      | 63      | 67.9437021 | 63     | 68.455669  | 69     | 69.3400474 | 63 |
| 63      | 73.4864025 | 63     | 67         | 63      | 67.9437021 | 63     | 68.205669  | 69     | 69.3400474 | 63 |
| 63      | 74.041958  | 63     | 67.125     | 63      | 67.9437021 | 63     | 67.080669  | 69     | 69.9000474 | 63 |
| 63      | 73.9308469 | 63     | 67.5       | 63      | 67.6437021 | 63     | 66.455669  | 69     | 70.3400474 | 63 |
| 63      | 73.9308469 | 63     | 66.125     | 63      | 67.6437021 | 63     | 66.705669  | 69     | 70.4500474 | 63 |
| 63      | 73.3752914 | 63     | 65.75      | 63      | 67.6437021 | 63     | 66.580669  | 69     | 70.5600474 | 63 |
| 63      | 73.4864025 | 63     | 65.625     | 63      | 67.9437021 | 63     | 66.955669  | 69     | 69.9000474 | 63 |
| 63      | 73.5975136 | 63     | 65.375     | 63      | 68.5437021 | 63     | 66.705669  | 69     | 69.1300474 | 63 |
| 63      | 73.3752914 | 63     | 65.25      | 63      | 68.3437021 | 63     | 66.705669  | 69     | 68.9100474 | 63 |
| 63      | 73.2641802 | 63     | 64.5       | 63      | 68.4437021 | 63     | 66.205669  | 69     | 68.9100474 | 63 |
| 63      | 73.5975136 | 63     | 64.125     | 63      | 68.7437021 | 63     | 65.705669  | 69     | 68.9100474 | 63 |
| 63      | 73.2641802 | 63     | 64         | 63      | 68.5437021 | 63     | 65.330669  | 69     | 68.2500474 | 63 |
| 63      | 73.3752914 | 63     | 63.875     | 63      | 68.5437021 | 63     | 65.205669  | 69     | 68.5800474 | 63 |
| 63      | 73.5975136 | 63     | 64         | 63      | 68.6437021 | 63     | 65.205669  | 69     | 68.1400474 | 63 |
| 63      | 72.8197358 | 63     | 64.25      | 63      | 68.4437021 | 63     | 64.330669  | 69     | 67.9200474 | 63 |
| 63      | 73.7086247 | 63     | 65         | 63      | 68.4437021 | 63     | 64.455669  | 69     | 67.2600474 | 63 |
| 63      | 74.8197358 | 63     | 65.25      | 63      | 68.2437021 | 63     | 65.205669  | 69     | 67.3700474 | 63 |
| 63      | 75.8197358 | 63     | 65.25      | 63      | 68.4437021 | 63     | 65.455669  | 69     | 67.2700474 | 63 |
| 63      | 75.7086247 | 63     | 65         | 63      | 68.9437021 | 63     | 65.330669  | 69     | 67.8200474 | 63 |



63 75.4864025 63 65.875 63 69.2437021 63 65.205669 69 68.0400474 63  
63 74.3752914 63 62.8498576 63 69.2437021 63 65.330669 69 68.1500474 63  
63 73.3752914 63 63.6876613 63 69.5343684 63 65.330669 69 68.0300474 63  
63 72.9308469 63 64.0001613 63 69.5437021 63 65.205669 69 67.9200474 63  
63 73.3752914 63 64.0939113 63 69.3437021 63 64.830669 69 67.8100474 63  
63 74.2641802 63 64.0939113 63 69.0437021 63 64.830669 69 67.7000474 63  
63 73.8197358 63 63.3216129 63 68.7437021 63 64.955669 69 67.1500474 63  
63 73.4864025 63 63.7189113 63 69.1437021 63 65.705669 69 67.2600474 63  
63 73.4864025 63 63.8751613 63 69.7437021 63 66.705669 69 67.8000474 63  
63 73.1530691 63 63.8751613 63 69.9437021 63 66.830669 69 67.6900474 63  
63 72.5975136 63 64.8439113 63 70.2437021 63 66.455669 69 67.4600474 63  
63 72.3752914 63 65.2189113 63 70.7437021 63 66.080669 69 67.1200474 63  
63 71.9308469 63 65.5001613 63 70.5437021 63 66.080669 69 66.8700474 63  
63 72.041958 63 65.0782863 63 70.3437021 63 65.330669 69 67.6412072 63  
63 72.2641802 63 65.6095363 63 70.2437021 63 65.455669 69 67.2412072 63  
63 72.8197358 63 65.7657863 63 69.6437021 63 65.330669 69 67.5412072 63  
63 73.9308469 63 65.7501613 63 69.5437021 63 65.080669 69 67.1412072 63  
63 74.3752914 63 65.7501613 63 69.6437021 63 65.330669 69 67.0412072 63  
63 74.3752914 71 66.1564113 63 69.1437021 63 65.205669 69 67.2412072 63  
63 74.3752914 71 66.4220363 63 68.7437021 63 65.330669 69 68.0412072 63  
63 74.7086247 71 67.2657863 63 68.9437021 63 65.455669 69 66.4723162 63  
63 75.041958 71 67.2657863 63 69.5437021 63 65.830669 69 65.21697 63  
63 75.3752914 71 67.8282863 63 69.2437021 63 66.830669 69 65.995861 63  
63 73.8011299 71 67.9689113 63 69.2437021 63 67.080669 69 66.105861 63  
63 73.5511299 71 68.5314113 63 69.0437021 63 67.705669 63 63.51697 63  
63 73.8011299 71 68.3907863 63 68.7437021 63 67.705669 63 63.57697 63  
63 74.3011299 71 68.5314113 63 68.9437021 63 67.580669 63 65.155861 63  
63 74.1761299 71 68.1095363 63 67.8437021 63 67.455669 63 63.59697 63  
63 74.1761299 71 67.9532863 63 67.7437021 63 67.455669 63 63.63697 63  
63 74.3011299 71 70.125 63 67.6437021 63 68.080669 63 63.65697 63  
63 74.8011299 71 70.75 63 67.8437021 63 67.830669 63 65.2823162 63  
63 74.6761299 71 69.610935 63 68.2437021 63 67.830669 63 65.0623162 63  
63 74.9261299 71 69.610935 63 67.3437021 63 67.830669 63 64.9523162 63  
63 75.1761299 71 69.62656 63 67.2437021 63 67.580669 63 65.0623162 63  
63 75.9261299 71 71.5 63 67.6437021 63 67.830669 63 64.9595 63  
63 75.5511299 71 71.625 63 67.6437021 63 67.580669 63 64.6963968 63  
63 75.5511299 71 71.75 63 67.9437021 63 67.455669 63 64.6223162 63  
63 73.4261299 71 71.5 63 68.2437021 63 67.455669 63 64.7323162 71  
63 73.3011299 71 71.875 63 68.2437021 63 67.455669 63 64.4123162 71  
63 72.5511299 71 71.375 63 68.4437021 63 67.080669 63 64.8523162 71  
63 72.5511299 71 71.25 63 68.8437021 63 66.830669 63 65.1823162 71  
63 71.8011299 71 71.125 63 69.2437021 63 67.330669 63 65.6223162 71  
63 71.1761299 71 70.875 63 69.3437021 63 67.580669 63 65.5923162 71

63 70.9261299 71 70.75 63 70.3437021 63 70.205669 63 66.7412072 71  
63 71.3011299 71 70.625 63 69.1437021 63 71.580669 63 66.3412072 71  
63 69.1557797 71 70.375 63 68.8437021 63 72.705669 63 66.0412072 71  
63 69.2946686 71 70.125 63 68.9437021 63 72.580669 63 66.5412072 71  
63 69.2113352 71 69.375 63 69.8437021 63 72.455669 63 66.7412072 71  
63 68.3780019 71 69 63 70.2437021 63 72.330669 63 67.4412072 71  
63 68.739113 71 68.75 63 70.3437021 63 71.955669 63 67.7412072 71  
63 68.8780019 71 68.875 63 71.0437021 63 71.205669 63 67.8412072 71  
63 68.6002241 71 68.625 63 71.2437021 63 70.205669 63 68.1412072 71  
63 68.6280019 71 68.25 63 71.5437021 63 69.830669 63 67.9412072 71  
63 69.8780019 71 68.5 63 71.9437021 63 69.830669 63 67.6412072 71  
63 70.4335574 71 68.5 63 72.0437021 63 69.580669 63 67.1412072 71  
63 70.2946686 71 68.625 63 70.1939594 63 70.330669 63 67.1412072 71  
63 70.1557797 71 68.25 63 72.2550582 63 70.330669 63 67.1412072 71  
63 70.4335574 71 68.25 71 72.5437021 63 70.705669 63 67.2412072 71  
63 70.4335574 71 69.125 71 72.1437021 63 70.455669 63 66.6412072 71  
63 70.6835574 71 69.125 71 72.2437021 63 70.580669 63 66.3412072 71  
63 71.0446686 71 68.2515996 71 72.3437021 63 70.830669 63 66.0412072 71  
63 72.6761299 71 68.2984746 71 72.2437021 63 69.740402 63 66.3412072 71  
63 73.4261299 71 68.8609746 71 72.7437021 63 70.052902 63 66.5412072 71  
63 73.8011299 71 68.9390996 71 72.4559197 63 70.349777 63 67.9412072 71  
63 73.1761299 71 69.4234746 71 73.0114753 63 70.349777 63 68.3412072 71  
63 73.3011299 71 69.7203496 71 73.5670308 63 69.912277 63 68.7412072 71  
63 72.5511299 71 69.6890996 71 73.2336975 63 69.771652 63 68.7412072 71  
63 72.6761299 71 68.8140996 71 72.7892531 63 70.052902 63 69.8412072 71  
63 73.0511299 71 68.0640996 71 73.0114753 63 70.615402 63 70.0412072 71  
63 73.4261299 63 67.7672246 71 72.7892531 63 70.615402 63 69.8412072 71  
63 73.3011299 63 67.2047246 71 72.7892531 63 70.052902 63 69.8412072 71  
63 72.9261299 63 67.0640996 71 71.5670308 63 69.771652 63 69.9412072 71  
63 72.9261299 63 67.2203496 71 70.4559197 63 69.615402 63 69.8412072 71  
63 73.8011299 63 67.7828496 71 69.6781419 63 69.474777 63 69.8412072 71  
63 74.0511299 63 68.0640996 71 68.5670308 63 68.177902 63 69.9412072 71  
63 74.0511299 63 68.5015996 71 68.4559197 63 67.740402 63 68.2001549 71  
63 74.8011299 63 68.5328496 71 67.3448086 63 68.955669 63 67.0201549 71  
63 74.3011299 63 68.2984746 71 67.1225864 63 68.205669 63 66.4901549 71  
63 73.8011299 63 70.2047246 71 67.3430467 63 67.080669 63 66.7201549 71  
63 73.9261299 63 70.1422246 71 67.4601179 63 67.080669 63 66.6101549 71  
63 73.9261299 63 69.8765996 71 67.8351179 63 66.955669 63 66.8301549 71  
63 74.1761299 63 69.2984746 71 69.2101179 63 66.955669 63 66.7401549 71  
63 73.9261299 63 68.9547246 71 69.5851179 63 67.455669 63 66.4101549 71  
63 73.3011299 63 68.1422246 71 69.8351179 63 67.955669 63 66.1901549 71  
63 73.4261299 63 67.8609746 71 69.7101179 63 68.205669 63 66.2301549 69  
63 73.1761299 63 67.4390996 71 70.2101179 63 67.830669 63 66.6701549 69

63 73.0511299 63 67.1265996 71 70.4601179 63 66.955669 63 67.3301549 69  
63 72.8011299 63 67.0953496 71 69.9601179 63 67.080669 63 67.8801549 69  
75 72.5511299 63 67.4078496 71 70.7190065 63 67.080669 63 67.8066506 69  
75 72.5511299 63 67.4078496 71 71.1475779 63 67.080669 63 69.4865165 69  
75 72.5360259 71 68.75 71 71.7190065 63 66.705669 63 69.2001549 69  
75 70.9261299 71 69 71 71.8618636 63 66.580669 63 69.6401549 69  
75 70.6761299 71 69 71 71.2904351 63 66.330669 63 69.2001549 69  
75 72.0511299 71 69.125 71 71.5761494 63 66.080669 63 69.5301549 69  
75 72.4261299 71 68 71 71.1475779 63 66.080669 63 69.9701549 69  
75 73.6761299 71 67 71 70.3714177 63 65.955669 63 69.8301549 69  
75 74.3011299 71 66.375 71 70.204751 63 66.080669 63 69.9401549 69  
75 74.8011299 71 66.125 71 70.204751 63 66.205669 63 70.0501549 69  
75 75.1761299 71 65.875 71 70.0380843 63 66.330669 63 70.5901549 69  
75 75.0511299 71 66.25 71 69.704751 63 66.455669 63 71.1201549 69  
75 75.3011299 71 66.75 71 69.5380843 63 66.705669 63 71.0101549 69  
75 75.3011299 71 67.625 71 70.3714177 63 66.955669 63 73.1412072 69  
75 74.9261299 71 68 71 70.5380843 63 66.580669 63 73.8412072 69  
75 75.1761299 71 69 71 70.5380843 63 66.580669 63 74.2412072 69  
75 75.4261299 71 69.25 71 69.8714177 63 67.205669 63 74.1412072 69  
75 75.5511299 71 69 71 70.204751 63 67.080669 63 74.2412072 69  
75 75.5511299 71 69 71 69.8714177 63 66.955669 63 74.0412072 69  
75 74.5511299 71 69.125 71 69.8714177 63 66.955669 63 73.6412072 69  
75 73.6761299 71 69.25 71 69.8714177 63 67.205669 63 72.4412072 69  
75 73.4261299 71 69.25 71 70.0950555 63 66.830669 63 72.7412072 69  
75 72.9261299 71 69 71 70.3714177 63 66.830669 63 72.2412072 69  
75 72.3011299 71 69.125 71 70.5380843 63 66.705669 63 70.108462 69  
75 72.3011299 71 69.625 71 70.8714177 61 67.580669 63 69.678462 69  
75 71.9261299 71 69.625 71 70.704751 61 67.705669 63 68.9731158 69  
75 71.6761299 71 69.625 71 71.204751 61 68.0474893 63 68.6131158 69  
75 71.6761299 71 69.875 71 71.704751 61 68.1903465 63 68.8531158 69  
75 72.5511299 71 70 71 71.704751 61 68.3332036 63 70.435861 69  
75 72.8011299 71 69.5 71 72.704751 61 68.6189179 63 68.8543227 69  
75 72.3011299 71 69 71 72.5380843 61 68.6189179 63 68.4943227 69  
75 71.8011299 71 68.875 71 73.5380843 61 69.4760608 63 68.4943227 69  
75 71.6761299 71 68.5 71 74.0380843 69 69.3332036 63 69.0943227 69  
75 71.4261299 71 68.25 71 75.8714177 69 69.9046322 63 69.5743227 69  
75 71.3011299 71 67.5 71 75.8714177 69 70.4760608 63 69.6943227 69  
75 71.1761299 71 67 71 75.8714177 69 70.3332036 63 70.895861 69  
75 71.5511299 71 67.125 71 75.704751 69 70.761775 63 69.795861 69  
75 71.8011299 71 66.875 71 74.8714177 69 70.3332036 63 69.685861 69  
75 70.4301818 71 66.75 71 74.704751 69 70.9046322 63 69.245861 69  
75 70.652404 71 66.625 71 74.5380843 69 71.0474893 63 69.245861 69  
75 70.3746262 71 66.875 71 74.704751 69 70.0930789 63 68.805861 69

|    |            |    |        |    |            |    |            |    |            |    |
|----|------------|----|--------|----|------------|----|------------|----|------------|----|
| 75 | 69.902404  | 71 | 67     | 71 | 74.704751  | 69 | 70.2597456 | 63 | 68.695861  | 69 |
| 75 | 69.7635151 | 71 | 67     | 71 | 75.204751  | 69 | 70.5930789 | 63 | 69.245861  | 69 |
| 75 | 69.7635151 | 71 | 67.125 | 71 | 75.3714177 | 69 | 70.4264122 | 63 | 69.135861  | 69 |
| 75 | 69.0690706 | 71 | 66.875 | 71 | 75.5380843 | 69 | 70.4264122 | 63 | 70.235861  | 69 |
| 75 | 67.9579595 | 71 | 67.125 | 71 | 75.5380843 | 69 | 70.4264122 | 63 | 70.675861  | 69 |
| 75 | 67.5412929 | 71 | 67.125 | 71 | 76.0380843 | 69 | 70.5930789 | 63 | 70.675861  | 69 |
| 75 | 67.5412929 | 71 | 67.125 | 71 | 75.704751  | 69 | 69.9264122 | 63 | 70.675861  | 69 |
| 75 | 67.9579595 | 71 | 67.625 | 71 | 75.204751  | 69 | 69.7597456 | 63 | 70.345861  | 69 |
| 75 | 68.3746262 | 71 | 68     | 71 | 78.5491162 | 69 | 69.861725  | 63 | 69.575861  | 69 |
| 75 | 67.8190706 | 71 | 67.875 | 71 | 77.1491162 | 69 | 71.261725  | 63 | 69.135861  | 69 |
| 75 | 67.7079595 | 71 | 67.5   | 71 | 76.3491162 | 69 | 72.261725  | 63 | 69.245861  | 69 |
| 75 | 67.8468484 | 71 | 67.5   | 71 | 76.1491162 | 69 | 73.261725  | 63 | 68.915861  | 69 |
| 75 | 67.8468484 | 71 | 67.25  | 71 | 76.1491162 | 69 | 74.261725  | 60 | 67.1625866 | 69 |

## S2B Dataset

## Last 3 min

| 102014     |    | 102014     |    | 102114     |    | 102114     |    | 102214     |    | 102214     |  |
|------------|----|------------|----|------------|----|------------|----|------------|----|------------|--|
| 11-12.     |    | 9:00       |    | 9-10.      |    | 10-11.     |    | 9-10.      |    | 10-11.     |  |
| 28.00      |    | 29.00      |    | 30.00      |    | 31.00      |    | 32.00      |    | 33.00      |  |
| 62.9652692 | 63 | 71.4523292 | 63 | 65.4259273 | 63 | 62.5791422 | 71 | 66.7155498 | 63 | 63.9027222 |  |
| 63.2379965 | 63 | 71.4523292 | 63 | 65.2092606 | 63 | 62.2978922 | 71 | 66.6044387 | 63 | 63.9027222 |  |
| 63.6016329 | 63 | 71.4523292 | 63 | 64.8842606 | 71 | 62.1572672 | 71 | 66.3698708 | 63 | 63.7777222 |  |
| 63.8743601 | 63 | 71.5523292 | 63 | 65.3585601 | 71 | 64.4895621 | 71 | 66.0118461 | 63 | 63.7777222 |  |
| 63.7834511 | 63 | 72.0523292 | 63 | 64.8585601 | 71 | 64.9895621 | 71 | 65.8883893 | 63 | 63.4027222 |  |
| 63.692542  | 63 | 72.5523292 | 63 | 64.8585601 | 71 | 64.9895621 | 71 | 65.283451  | 63 | 63.4027222 |  |
| 64.2379965 | 63 | 72.6523292 | 63 | 65.2585601 | 71 | 65.8645621 | 71 | 65.5303646 | 63 | 63.4027222 |  |
| 64.0561783 | 63 | 72.5523292 | 63 | 65.1585601 | 63 | 65.7395621 | 71 | 65.1229572 | 63 | 62.7777222 |  |
| 63.692542  | 63 | 72.9523292 | 63 | 65.4585601 | 63 | 64.5169351 | 71 | 64.8019695 | 63 | 63.1527222 |  |
| 63.7834511 | 63 | 73.8523292 | 63 | 65.5585601 | 63 | 66.6145621 | 63 | 64.555056  | 63 | 63.7777222 |  |
| 63.8743601 | 63 | 73.8523292 | 63 | 65.7585601 | 63 | 65.3645621 | 63 | 64.4192535 | 63 | 63.9027222 |  |
| 64.1470874 | 63 | 73.7523292 | 63 | 65.9585601 | 63 | 64.7395621 | 63 | 64.283451  | 63 | 64.5277222 |  |
| 63.8743601 | 63 | 73.8523292 | 63 | 66.4585601 | 63 | 64.6145621 | 63 | 64.3822165 | 63 | 64.7777222 |  |
| 63.7834511 | 63 | 73.8523292 | 63 | 66.6585601 | 63 | 64.6145621 | 63 | 64.1229572 | 63 | 65.1527222 |  |
| 64.2379965 | 63 | 73.6523292 | 63 | 66.4585601 | 63 | 64.3645621 | 63 | 63.9871547 | 63 | 66.7777222 |  |
| 64.3289056 | 63 | 73.2523292 | 63 | 66.7585601 | 63 | 64.4895621 | 63 | 64.4809819 | 63 | 66.9027222 |  |
| 63.9652692 | 63 | 73.0523292 | 63 | 66.9585601 | 63 | 64.4895621 | 63 | 64.2217226 | 63 | 66.7777222 |  |
| 63.692542  | 63 | 72.5523292 | 63 | 66.9585601 | 63 | 64.2395621 | 63 | 63.6167844 | 63 | 66.7777222 |  |
| 64.0561783 | 63 | 71.5523292 | 63 | 67.0573697 | 63 | 64.6145621 | 63 | 63.8760436 | 63 | 66.7777222 |  |
| 63.9652692 | 63 | 71.5523292 | 63 | 66.9585601 | 63 | 64.9895621 | 63 | 64.1229572 | 63 | 66.4027222 |  |
| 64.1470874 | 63 | 70.7523292 | 63 | 66.3585601 | 63 | 65.1145621 | 63 | 64.4933276 | 63 | 64.2028292 |  |
| 64.4198147 | 63 | 70.2523292 | 63 | 66.2585601 | 63 | 65.3645621 | 63 | 64.62913   | 63 | 64.3434542 |  |
| 66.2379965 | 63 | 70.3523292 | 63 | 66.1585601 | 63 | 65.6145621 | 63 | 64.6538214 | 63 | 63.7965792 |  |
| 66.2379965 | 63 | 70.3523292 | 63 | 66.2585601 | 63 | 65.7395621 | 63 | 66.2330703 | 63 | 63.5153292 |  |
| 66.3289056 | 63 | 70.2523292 | 63 | 66.3585601 | 63 | 65.7395621 | 63 | 65.7886259 | 63 | 63.5153292 |  |
| 66.3289056 | 63 | 70.2523292 | 63 | 66.0585601 | 63 | 65.9895621 | 63 | 65.3441814 | 63 | 63.5153292 |  |
| 64.8743601 | 63 | 70.2523292 | 63 | 65.9585601 | 63 | 65.4895621 | 63 | 65.7886259 | 63 | 62.5465792 |  |
| 64.9652692 | 63 | 70.9523292 | 63 | 65.8585601 | 63 | 65.3645621 | 63 | 66.3441814 | 63 | 62.9528292 |  |
| 64.7834511 | 63 | 71.1523292 | 63 | 65.6585601 | 63 | 64.4895621 | 63 | 66.4552926 | 71 | 63.2340792 |  |
| 63.9652692 | 63 | 70.9523292 | 63 | 64.8585601 | 63 | 63.4895621 | 63 | 66.6775148 | 71 | 64.2184542 |  |
| 63.8743601 | 63 | 70.5523292 | 63 | 65.3585601 | 63 | 63.4895621 | 63 | 66.7886259 | 71 | 65.7653292 |  |
| 63.7834511 | 63 | 70.3523292 | 63 | 65.0585601 | 63 | 62.8645621 | 63 | 67.1219592 | 71 | 67.9027222 |  |
| 62.3045166 | 63 | 69.9523292 | 63 | 65.1585601 | 63 | 63.1145621 | 63 | 67.3441814 | 71 | 66.0314159 |  |
| 62.205343  | 63 | 69.7523292 | 63 | 64.9585601 | 63 | 63.2395621 | 63 | 67.6775148 | 71 | 66.3171302 |  |
| 61.4119546 | 63 | 69.6523292 | 63 | 64.6585601 | 63 | 62.9895621 | 63 | 67.7886259 | 71 | 65.1742731 |  |
| 63.3289056 | 63 | 69.3523292 | 63 | 64.6585601 | 63 | 62.7395621 | 63 | 67.4552926 | 71 | 64.7457016 |  |
| 63.3289056 | 63 | 69.3523292 | 63 | 64.6585601 | 63 | 62.8645621 | 63 | 67.4552926 | 63 | 64.7457016 |  |
| 63.4198147 | 63 | 69.2523292 | 63 | 64.0585601 | 63 | 63.1145621 | 63 | 67.1219592 | 63 | 64.8885588 |  |
| 63.2379965 | 63 | 68.6523292 | 63 | 64.4585601 | 63 | 63.7395621 | 63 | 67.0108481 | 63 | 64.6028445 |  |

63.2379965 63 68.2523292 63 64.9585601 63 63.4895621 63 66.2330703 63 64.7457016  
63.8743601 63 68.0523292 63 64.9585601 63 63.3645621 63 66.0108481 63 64.4599873  
63.6016329 63 67.6523292 63 65.0585601 63 63.2395621 63 65.899737 63 63.6028445  
64.1470874 63 67.6523292 63 65.4585601 63 63.2395621 63 66.2330703 63 63.8885588  
64.4198147 63 67.4523292 63 66.1585601 63 62.2395621 63 66.0108481 63 63.7457016  
64.5107238 63 67.1523292 63 66.0585601 63 62.6145621 63 66.2330703 63 63.6028445  
64.4198147 63 67.1523292 63 65.8585601 63 62.7395621 63 66.3441814 63 63.4599873  
64.7834511 63 67.2523292 63 65.8585601 63 63.8645621 63 66.2330703 63 62.4599873  
65.2379965 63 67.6523292 63 65.8585601 63 64.4895621 63 65.6775148 63 62.4599873  
65.5107238 63 67.9523292 63 65.8585601 63 64.7395621 63 65.3441814 63 62.3171302  
65.692542 63 68.5523292 63 66.0585601 63 65.2395621 63 65.0108481 63 61.3171302  
65.7834511 63 68.9523292 63 66.2585601 63 64.9895621 63 65.2330703 63 61.4599873  
66.0561783 63 68.9523292 63 66.7585601 63 65.1145621 63 65.4552926 63 61.4599873  
65.692542 63 68.6523292 63 66.9585601 63 65.3645621 63 65.4552926 63 62.0314159  
65.8743601 63 68.7523292 63 67.2585601 63 65.8645621 63 65.1219592 63 61.8885588  
66.0561783 63 69.4523292 63 67.0585601 63 65.9895621 63 64.7886259 63 62.4599873  
65.7834511 63 69.9523292 63 67.4585601 63 65.9895621 63 65.4552926 63 63.1742731  
65.7834511 63 69.4523292 63 67.5585601 63 65.4895621 63 65.6775148 63 63.6028445  
65.7834511 63 68.9523292 63 67.1585601 63 65.2395621 63 66.1219592 63 64.4599873  
66.2379965 63 68.9523292 63 67.8585601 63 65.3645621 63 66.3441814 63 64.6028445  
66.0561783 63 68.6523292 63 66.9585601 63 65.9895621 63 65.4552926 63 64.4599873  
65.0561783 63 68.7523292 63 67.3585601 63 65.9895621 63 65.5664037 63 64.6028445  
64.4198147 63 69.0523292 63 66.6585601 63 66.1145621 63 65.0108481 63 64.6028445  
64.4198147 63 69.5523292 63 66.5585601 63 65.3645621 63 64.2330703 63 64.7457016  
64.2379965 63 69.6523292 63 66.0585601 63 65.7395621 63 64.0108481 63 64.1742731  
61.7906381 63 69.8523292 63 66.0585601 63 66.4895621 63 64.0108481 63 64.3171302  
61.592291 63 69.4523292 63 65.7585601 63 66.8645621 63 63.6775148 63 63.620477  
63.9652692 63 69.4523292 63 65.5585601 63 67.2395621 63 63.5664037 63 63.620477  
63.6016329 63 69.4523292 63 65.3585601 63 67.1145621 63 63.899737 63 63.9538104  
62.7834511 63 69.6523292 63 65.5585601 63 67.2395621 63 64.1219592 63 63.9538104  
62.8743601 63 69.6523292 63 65.6585601 63 67.6145621 63 63.899737 63 63.2871437  
62.9652692 63 70.0523292 63 65.5585601 63 67.8645621 63 64.5664037 63 62.2871437  
62.3289056 63 70.7523292 63 65.6259487 63 67.8645621 63 64.5664037 63 61.9538104  
62.5107238 63 71.1523292 63 66.1536332 63 68.3645621 63 64.4552926 63 62.620477  
62.692542 63 71.5523292 63 65.8585601 63 68.2395621 63 64.3441814 63 62.7871437  
62.4198147 63 71.4523292 63 65.8585601 63 68.1145621 63 64.4552926 63 64.620477  
62.6016329 63 71.2523292 63 65.6585601 63 68.7395621 63 64.6775148 63 64.4538104  
63.0561783 63 70.1222816 63 65.9585601 63 68.4895621 63 65.2330703 63 64.620477  
63.3289056 63 69.3522816 63 65.5585601 63 68.9895621 63 65.3441814 63 64.620477  
63.3289056 63 69.3522816 63 65.6585601 63 69.1145621 63 65.5664037 63 64.7871437  
63.3289056 63 69.9523292 63 65.6585601 63 69.6145621 63 65.2330703 63 64.9538104  
63.1470874 63 69.9523292 63 65.5585601 63 69.8645621 63 65.4552926 63 64.9538104  
63.1470874 63 69.0523292 63 66.2585601 63 69.8645621 63 65.5664037 63 64.9538104

62.8743601 63 68.4523292 63 67.7585601 63 68.5956493 63 65.5664037 63 65.4538104  
61.0821572 63 68.5523292 63 67.9585601 63 69.1737743 63 66.0108481 63 64.620477  
61.0821572 63 69.7523292 63 68.0585601 63 69.1737743 63 66.0108481 63 64.2871437  
61.1730663 63 70.1523292 63 68.4585601 63 69.6552068 63 65.1219592 63 63.620477  
62.9652692 63 70.5523292 63 68.9585601 63 69.4706493 63 64.3441814 63 63.620477  
62.9652692 71 70.3523292 63 69.2585601 63 69.3456493 63 63.6775148 63 63.7871437  
63.0561783 71 70.4523292 63 69.2585601 63 69.9237743 63 63.4552926 63 63.9538104  
63.5107238 71 69.8523292 63 69.3585601 63 69.6737743 63 63.3441814 63 64.4538104  
63.4198147 71 69.6523292 63 69.4585601 63 69.1268993 63 63.3441814 63 64.620477  
63.0561783 71 69.5523292 63 69.4585601 63 69.1268993 63 63.3441814 63 64.9538104  
62.7834511 71 70.1523292 63 69.8585601 63 69.1268993 63 63.3441814 63 64.4538104  
62.8743601 71 70.6523292 63 70.0585601 63 68.8456493 63 63.4552926 63 65.620477  
63.0561783 71 71.2523292 63 70.0585601 63 68.9862743 63 64.4552926 63 65.7871437  
63.1470874 71 71.6523292 63 69.4585601 63 68.5800243 63 64.899737 63 65.9538104  
63.3289056 71 71.7523292 63 69.0585601 63 67.9706493 63 65.3441814 63 66.120477  
63.5107238 71 71.8523292 63 69.3585601 63 68.1112743 63 64.1219592 63 66.4538104  
63.7834511 71 72.7523292 63 69.2585601 63 68.2206493 63 64.1219592 63 66.4538104  
63.9652692 71 71.660167 63 69.1585601 63 68.6268993 71 64.4552926 63 66.620477  
64.0561783 71 71.370167 63 69.4585601 63 69.3143993 71 64.6775148 63 66.620477  
63.9652692 71 70.490167 63 69.7585601 63 71.7395621 71 65.1219592 63 66.9538104  
63.9652692 71 69.630167 63 69.6585601 63 71.8645621 71 65.6775148 63 66.9538104  
63.9652692 71 69.100167 63 69.2585601 63 71.9895621 63 66.2330703 63 66.9538104  
64.2379965 71 69.030167 63 67.6672451 63 71.4895621 63 66.5664037 63 67.620477  
64.692542 71 68.280167 63 68.4585601 63 70.7395621 63 66.6775148 63 68.120477  
65.8743601 71 68.310167 63 68.1585601 63 70.7395621 63 66.5664037 63 67.4538104  
66.3289056 71 68.200167 63 67.0585601 63 70.3645621 63 66.4552926 63 67.4538104  
66.8743601 71 68.480167 63 66.0585601 63 68.6145621 63 66.6775148 63 67.7871437  
66.9652692 71 68.260167 63 65.4585601 63 67.9895621 63 66.3441814 63 67.620477  
66.3289056 71 68.370167 63 65.4585601 63 66.4895621 63 66.3441814 63 67.4538104  
65.6016329 71 68.390167 63 65.4585601 63 66.2395621 63 66.5664037 63 67.4538104  
65.2379965 71 68.500167 69 65.8585601 63 64.7395621 63 66.4552926 63 67.120477  
65.2379965 71 68.610167 69 66.2585601 63 64.2395621 63 67.3441814 63 66.7871437  
65.3289056 71 68.400167 69 66.2585601 63 63.8645621 63 67.4552926 69 66.120477  
65.4198147 71 68.070167 69 66.5585601 63 63.8645621 63 67.1219592 69 65.4538104  
65.8743601 71 68.400167 69 66.8585601 63 63.9895621 63 66.6775148 69 64.9538104  
66.2379965 71 69.180167 69 66.8585601 63 63.8645621 63 67.0108481 69 62.4538104  
66.3289056 71 70.220167 69 66.9585601 63 63.8645621 63 67.6775148 69 62.4538104  
66.2379965 71 70.770167 69 66.4585601 63 64.1145621 63 67.2330703 69 62.620477  
66.0561783 71 71.210167 69 66.4585601 63 63.9895621 63 66.6775148 69 61.9538104  
65.9652692 71 71.430167 69 67.1585601 63 63.9895621 63 66.4552926 69 62.120477  
66.0561783 71 71.990167 69 67.2585601 63 64.4895621 63 66.0108481 69 62.120477  
64.8082069 71 72.100167 69 67.4585601 63 64.2395621 63 65.6775148 69 62.120477  
64.1139921 71 72.420167 69 67.8585601 63 63.9895621 63 65.5664037 69 62.620477

64.2131656 71 72.550167 69 67.9339915 63 64.6145621 63 65.5664037 69 62.7871437  
64.7834511 71 72.550167 69 68.4603045 63 64.8645621 63 63.9944275 69 62.7871437  
64.8743601 71 72.520167 69 68.1585601 63 65.1145621 63 64.2536868 69 62.9538104  
64.1470874 71 72.070167 69 67.5585601 63 65.2395621 63 64.5252917 69 63.4538104  
63.8743601 71 72.9523292 69 67.9585601 63 65.4895621 63 64.4018349 69 64.2871437  
62.5880228 71 72.1523292 69 67.5585601 63 65.6145621 63 63.7351073 69 64.4538104  
64.1470874 71 72.2523292 69 67.8585601 63 66.1145621 63 64.1594682 69 64.2871437  
62.5962872 71 72.5523292 69 66.5263294 63 66.4895621 63 64.0594682 69 63.7871437  
62.6294636 71 72.8523292 69 66.4179961 63 66.4895621 63 63.6594682 69 63.620477  
62.2905021 71 72.8523292 69 66.0929961 63 66.4895621 63 63.9594682 69 63.620477  
64.3289056 71 75.3523292 69 66.2013294 63 67.1145621 63 64.0594682 69 66.2871437  
64.692542 71 75.5523292 69 67.0585601 63 67.2395621 63 64.0594682 69 66.7871437  
64.8743601 71 76.7523292 69 65.1763294 63 67.2395621 63 64.5594682 69 66.2871437  
65.2379965 71 76.4523292 69 66.6585601 63 67.2395621 63 63.9594682 69 65.7871437  
65.3289056 71 75.8523292 69 65.1763294 63 66.9895621 63 64.1594682 69 65.4538104  
64.8743601 71 75.5523292 69 66.0585601 63 65.6145621 63 64.7594682 69 65.4538104  
64.7834511 71 75.2523292 69 66.2585601 63 65.1145621 63 64.9594682 69 65.120477  
64.7834511 71 74.7939606 69 66.3585601 63 65.1145621 63 64.5594682 69 65.120477  
64.5107238 71 74.5639606 69 66.1585601 63 65.6145621 63 64.7594682 69 65.120477  
64.1470874 71 74.7839606 69 66.4585601 63 65.4895621 63 63.9594682 69 65.7871437  
62.0928625 71 74.4539606 69 66.5585601 63 65.1145621 63 64.7594682 69 65.4538104  
61.9121833 71 75.5439606 69 66.4585601 63 65.2395621 63 64.8594682 69 65.120477  
61.8212742 71 75.5439606 69 66.6585601 63 64.7395621 63 64.8594682 69 64.2871437  
62.0196213 71 75.9739606 69 66.6585601 63 64.3645621 63 65.3594682 69 63.4538104  
61.763423 71 74.9094252 69 66.6585601 63 64.2395621 63 65.3594682 69 63.4538104  
61.5650759 71 74.6694252 69 66.6585601 63 64.1145621 63 64.6594682 69 63.2871437  
62.0609436 71 74.5294252 69 66.8585601 63 64.2395621 63 64.6594682 69 63.120477  
62.4741668 71 73.6694252 69 66.7585601 63 64.6145621 63 64.5594682 69 63.120477  
62.7799519 71 73.1094252 69 66.7585601 63 64.3645621 63 65.3594682 69 61.9538104  
63.3006131 71 73.1094252 69 66.6585601 63 64.6145621 63 65.9594682 69 62.120477  
63.4163155 71 72.8894252 69 66.4585601 63 64.6145621 63 66.1594682 69 61.7871437  
64.6063982 71 73.5539606 69 66.2585601 63 64.4895621 63 66.4594682 69 61.7871437  
65.4080511 71 73.5639606 69 66.0585601 63 64.6145621 63 67.1594682 69 61.9538104  
66.209704 71 73.4539606 69 65.7585601 63 64.8645621 63 67.4594682 69 61.9538104  
67.1022659 71 72.7939606 69 66.2585601 63 64.9895621 63 68.0594682 69 61.7871437  
67.3997866 71 72.6839606 69 66.1585601 63 65.2395621 63 67.9594682 69 61.7871437  
67.8956544 71 73.1139606 69 66.2585601 63 64.4669663 63 68.4594682 69 61.2871437  
66.9007931 71 72.8939606 69 66.2585601 63 65.0607163 63 68.2594682 69 64.620477  
68.9617701 71 72.7839606 69 66.3585601 69 65.3419663 63 68.2594682 69 65.4538104  
68.1735203 71 71.7939606 69 66.6585601 69 65.7794663 63 66.9357101 69 65.4538104  
69.185284 71 71.6839606 69 66.4585601 69 66.2013413 63 66.2757101 69 65.4538104  
69.292722 71 72.6739606 69 66.5585601 69 66.3419663 63 66.2857101 69 66.120477  
68.9952013 71 72.9939606 69 66.4585601 69 66.7638413 63 65.8457101 69 66.7871437



68.6976807 71 72.8839606 69 66.9585601 69 66.9044663 63 65.1857101 69 66.620477  
68.4993336 71 73.2039606 69 67.0585601 69 68.8645621 63 64.7557101 69 67.120477  
68.2761931 71 73.0939606 69 67.7585601 69 68.6145621 63 64.7857101 69 68.620477  
68.8547055 71 73.5339606 69 68.5585601 69 68.6145621 63 64.4557101 69 68.4538104  
68.7555319 71 73.6339606 69 68.5585601 69 68.4895621 63 64.3657101 69 68.620477  
68.3588377 71 73.4139606 69 68.6585601 69 63.6625287 63 64.1257101 69 68.7871437  
68.5571848 71 73.1939606 69 68.9585601 69 64.6625287 63 63.7957101 69 69.120477  
68.846441 71 73.1939606 69 69.1585601 69 64.995862 63 63.4457101 69 69.4538104  
68.4497468 71 73.3639606 69 68.9585601 69 65.3291953 63 63.1157101 69 69.9538104  
68.4497468 71 73.4739606 69 69.0585601 69 65.4403065 63 62.5757101 69 69.9538104  
68.1522261 71 73.2239606 69 69.2585601 69 65.6625287 63 62.3457101 69 69.9538104  
69.0656283 71 73.3339606 69 69.2585601 69 65.2180842 63 62.3457101 69 70.120477  
69.1648019 60 74.2328441 69 68.9337419 69 65.3291953 63 63.2594682 60 69.9538104

## S2B Dataset

## Last 3 min

| 102214 |            | 102314 |            | 102414 |            | 102814 |            | time | Average |            |
|--------|------------|--------|------------|--------|------------|--------|------------|------|---------|------------|
| 11-12. |            | 9-1030 |            | 9-10.  |            | 10-11. |            |      |         |            |
| 34.00  |            | 35.00  |            | 36.00  |            | 37.00  |            |      |         |            |
| 63     | 60.1611686 | 63     | 70.1980058 | 63     | 70.7813595 | 63     | 65.7417983 | 71   | 0:00:01 | 68.5519377 |
| 63     | 60.58974   | 63     | 71.0551486 | 63     | 70.7813595 | 63     | 65.3529094 | 71   | 0:00:02 | 68.5453171 |
| 63     | 60.58974   | 63     | 70.7694343 | 63     | 70.7813595 | 63     | 67.2276555 | 71   | 0:00:03 | 68.5629634 |
| 63     | 60.58974   | 63     | 71.1980058 | 63     | 71.352788  | 63     | 67.0609888 | 71   | 0:00:04 | 68.6393664 |
| 63     | 61.1611686 | 63     | 70.7694343 | 63     | 73.2099309 | 63     | 66.8943221 | 71   | 0:00:05 | 68.7140128 |
| 63     | 61.1611686 | 63     | 69.6265772 | 63     | 73.7813595 | 63     | 67.2276555 | 71   | 0:00:06 | 68.7246969 |
| 63     | 61.7325971 | 63     | 68.7694343 | 63     | 74.352788  | 63     | 67.8943221 | 71   | 0:00:07 | 68.8440146 |
| 63     | 62.0183114 | 63     | 67.9122915 | 63     | 74.4956452 | 63     | 68.0609888 | 71   | 0:00:08 | 68.7119722 |
| 63     | 62.8754543 | 63     | 67.3408629 | 63     | 74.7813595 | 63     | 68.5609888 | 71   | 0:00:09 | 68.6721908 |
| 63     | 62.58974   | 63     | 67.0551486 | 63     | 74.9242166 | 63     | 68.8943221 | 71   | 0:00:10 | 68.7694537 |
| 63     | 62.1611686 | 63     | 67.0551486 | 63     | 74.9242166 | 63     | 69.2276555 | 71   | 0:00:11 | 68.6436828 |
| 63     | 62.3040257 | 63     | 65.6265772 | 63     | 74.9242166 | 63     | 69.5609888 | 71   | 0:00:12 | 68.608051  |
| 63     | 62.1611686 | 63     | 65.9122915 | 63     | 73.7813595 | 63     | 69.8943221 | 71   | 0:00:13 | 68.7368916 |
| 63     | 62.0183114 | 63     | 66.0551486 | 63     | 72.352788  | 63     | 70.8943221 | 71   | 0:00:14 | 68.7497727 |
| 63     | 61.7325971 | 63     | 65.9122915 | 63     | 72.352788  | 63     | 71.5609888 | 73   | 0:00:15 | 68.9581111 |
| 63     | 61.4468828 | 63     | 66.3408629 | 63     | 71.9242166 | 63     | 70.5609888 | 73   | 0:00:16 | 68.9074721 |
| 63     | 62.3040257 | 63     | 66.3408629 | 63     | 72.0670737 | 63     | 70.8943221 | 73   | 0:00:17 | 68.9892749 |
| 63     | 62.3040257 | 63     | 66.3408629 | 63     | 71.2099309 | 63     | 68.8943221 | 73   | 0:00:18 | 68.8347813 |
| 63     | 62.8754543 | 63     | 66.0551486 | 63     | 70.7813595 | 63     | 68.0609888 | 73   | 0:00:19 | 68.7337015 |
| 63     | 63.0183114 | 63     | 66.4837201 | 63     | 70.6385023 | 63     | 67.5609888 | 73   | 0:00:20 | 68.6370357 |
| 63     | 63.0183114 | 63     | 66.3408629 | 63     | 70.7813595 | 63     | 68.3943221 | 73   | 0:00:21 | 68.6739214 |
| 63     | 63.8754543 | 63     | 65.9122915 | 63     | 69.7813595 | 63     | 67.8943221 | 73   | 0:00:22 | 68.6405967 |
| 63     | 63.8754543 | 63     | 66.4837201 | 63     | 69.2099309 | 63     | 67.7276555 | 73   | 0:00:23 | 68.7442329 |
| 63     | 64.0183114 | 63     | 66.3408629 | 63     | 69.2099309 | 63     | 67.3943221 | 73   | 0:00:24 | 68.6994279 |
| 63     | 64.0183114 | 63     | 66.3408629 | 63     | 69.2099309 | 63     | 67.2276555 | 73   | 0:00:25 | 68.5481059 |
| 63     | 63.8754543 | 63     | 66.0551486 | 63     | 68.6385023 | 63     | 67.7276555 | 73   | 0:00:26 | 68.426367  |
| 63     | 64.0183114 | 63     | 65.6265772 | 63     | 68.9242166 | 63     | 67.3943221 | 73   | 0:00:27 | 68.2757231 |
| 63     | 63.58974   | 63     | 66.0551486 | 63     | 69.352788  | 63     | 67.0609888 | 73   | 0:00:28 | 68.2921016 |
| 63     | 64.0183114 | 63     | 66.0551486 | 63     | 69.4956452 | 63     | 67.3943221 | 73   | 0:00:29 | 68.2299446 |
| 63     | 64.4468828 | 63     | 66.1980058 | 63     | 69.4956452 | 63     | 67.3943221 | 73   | 0:00:30 | 68.1952424 |
| 63     | 65.58974   | 71     | 66.3408629 | 63     | 69.352788  | 63     | 67.7276555 | 73   | 0:00:31 | 68.3309198 |
| 63     | 65.8754543 | 71     | 67.1980058 | 63     | 69.4956452 | 63     | 67.8943221 | 73   | 0:00:32 | 68.3158351 |
| 63     | 66.3040257 | 71     | 68.9122915 | 63     | 69.352788  | 63     | 67.8943221 | 73   | 0:00:33 | 68.2599898 |
| 63     | 66.4468828 | 71     | 69.4837201 | 63     | 69.2099309 | 63     | 68.5609888 | 73   | 0:00:34 | 68.1399579 |
| 63     | 64.4197552 | 71     | 69.1980058 | 63     | 69.2099309 | 63     | 69.8943221 | 73   | 0:00:35 | 67.9833552 |
| 63     | 63.9435647 | 71     | 68.7694343 | 63     | 69.4956452 | 63     | 71.0609888 | 73   | 0:00:36 | 68.015975  |
| 63     | 63.4673742 | 71     | 68.3408629 | 63     | 69.352788  | 63     | 71.0609888 | 73   | 0:00:37 | 68.0161841 |
| 63     | 62.9435647 | 71     | 68.0551486 | 63     | 69.0670737 | 63     | 71.2276555 | 73   | 0:00:38 | 68.0964408 |
| 63     | 62.7372155 | 71     | 68.9122915 | 63     | 68.9242166 | 63     | 68.7417983 | 73   | 0:00:39 | 68.1067406 |

|    |            |    |            |    |            |    |            |    |         |            |
|----|------------|----|------------|----|------------|----|------------|----|---------|------------|
| 63 | 62.261025  | 71 | 69.4837201 | 63 | 69.2099309 | 63 | 72.2276555 | 73 | 0:00:40 | 68.3280063 |
| 63 | 62.1022948 | 71 | 70.0551486 | 63 | 68.352788  | 63 | 71.5609888 | 73 | 0:00:41 | 68.2677247 |
| 63 | 63.0183114 | 71 | 70.0551486 | 63 | 68.6385023 | 63 | 71.8943221 | 73 | 0:00:42 | 68.3324365 |
| 63 | 59.3721361 | 71 | 70.1980058 | 63 | 69.352788  | 63 | 71.5609888 | 73 | 0:00:43 | 68.3260104 |
| 63 | 60.4468828 | 71 | 71.0551486 | 63 | 69.2099309 | 63 | 70.8943221 | 73 | 0:00:44 | 68.4572233 |
| 63 | 60.4468828 | 71 | 71.0551486 | 63 | 69.7813595 | 63 | 70.8943221 | 71 | 0:00:45 | 68.3620374 |
| 63 | 60.0183114 | 71 | 71.6265772 | 63 | 69.9242166 | 63 | 70.8943221 | 71 | 0:00:46 | 68.2912576 |
| 63 | 59.58974   | 71 | 70.0194122 | 63 | 71.4956452 | 63 | 70.3943221 | 71 | 0:00:47 | 68.2314692 |
| 63 | 59.4468828 | 71 | 70.7694343 | 63 | 71.352788  | 63 | 70.7276555 | 71 | 0:00:48 | 68.3908072 |
| 63 | 59.7325971 | 71 | 70.3408629 | 63 | 71.7813595 | 63 | 71.0609888 | 71 | 0:00:49 | 68.5103571 |
| 63 | 60.0183114 | 71 | 69.9122915 | 63 | 71.9242166 | 63 | 71.0609888 | 71 | 0:00:50 | 68.5401507 |
| 63 | 60.1611686 | 71 | 69.7694343 | 63 | 71.9242166 | 63 | 71.3943221 | 71 | 0:00:51 | 68.5389019 |
| 63 | 61.58974   | 71 | 70.3408629 | 63 | 71.7813595 | 63 | 71.2276555 | 71 | 0:00:52 | 68.5073372 |
| 63 | 61.58974   | 71 | 70.4837201 | 63 | 71.7813595 | 63 | 71.0609888 | 71 | 0:00:53 | 68.40102   |
| 63 | 63.0183114 | 71 | 70.9122915 | 63 | 71.9242166 | 63 | 70.77077   | 71 | 0:00:54 | 68.5855896 |
| 63 | 63.0183114 | 71 | 70.9122915 | 63 | 72.2099309 | 63 | 71.3541034 | 71 | 0:00:55 | 68.6423657 |
| 63 | 62.58974   | 71 | 71.6265772 | 63 | 72.352788  | 63 | 70.3818811 | 71 | 0:00:56 | 68.6765161 |
| 63 | 62.4468828 | 71 | 72.1980058 | 63 | 72.0670737 | 63 | 70.6874367 | 71 | 0:00:57 | 68.662896  |
| 63 | 62.3040257 | 71 | 72.1980058 | 63 | 71.9242166 | 63 | 69.9096589 | 71 | 0:00:58 | 68.6299428 |
| 63 | 62.7325971 | 63 | 73.1980058 | 63 | 72.0670737 | 63 | 68.77077   | 71 | 0:00:59 | 68.6633118 |
| 63 | 62.3040257 | 63 | 73.0551486 | 63 | 71.9242166 | 63 | 68.1874367 | 71 | 0:01:00 | 68.6829674 |
| 63 | 61.8754543 | 63 | 72.7694343 | 63 | 72.352788  | 63 | 68.02077   | 71 | 0:01:01 | 68.7693672 |
| 63 | 61.7325971 | 63 | 71.4837201 | 63 | 72.9242166 | 63 | 67.6318811 | 71 | 0:01:02 | 68.8044576 |
| 63 | 61.8754543 | 63 | 70.4837201 | 63 | 72.7813595 | 63 | 67.4652145 | 71 | 0:01:03 | 68.7608254 |
| 63 | 62.8754543 | 63 | 70.3408629 | 63 | 71.6385023 | 63 | 66.8818811 | 71 | 0:01:04 | 68.694937  |
| 63 | 63.3040257 | 63 | 70.3408629 | 63 | 71.6385023 | 63 | 65.5485478 | 71 | 0:01:05 | 68.6314052 |
| 69 | 64.1611686 | 63 | 69.9122915 | 63 | 70.4956452 | 63 | 64.3818811 | 71 | 0:01:06 | 68.7215895 |
| 69 | 63.8754543 | 63 | 69.7694343 | 63 | 70.2099309 | 63 | 64.2429923 | 71 | 0:01:07 | 68.6474383 |
| 69 | 64.0183114 | 63 | 70.6265772 | 63 | 70.2099309 | 63 | 64.8263256 | 71 | 0:01:08 | 68.6548673 |
| 69 | 64.0183114 | 63 | 71.1980058 | 63 | 71.352788  | 63 | 65.7985478 | 71 | 0:01:09 | 68.7485502 |
| 69 | 64.58974   | 63 | 71.0551486 | 63 | 72.352788  | 63 | 67.4096589 | 71 | 0:01:10 | 68.987941  |
| 69 | 64.58974   | 63 | 71.1980058 | 63 | 72.9242166 | 63 | 68.7985478 | 71 | 0:01:11 | 69.0563166 |
| 69 | 64.58974   | 63 | 70.7694343 | 63 | 72.4956452 | 63 | 68.9929923 | 71 | 0:01:12 | 69.1177345 |
| 69 | 63.7325971 | 63 | 70.7694343 | 63 | 72.4956452 | 63 | 68.7985478 | 71 | 0:01:13 | 69.1675432 |
| 69 | 63.8754543 | 63 | 70.4837201 | 63 | 72.9242166 | 63 | 67.8541034 | 71 | 0:01:14 | 69.2184357 |
| 69 | 63.58974   | 63 | 69.6265772 | 63 | 73.2099309 | 63 | 67.6874367 | 71 | 0:01:15 | 69.1163032 |
| 69 | 63.58974   | 63 | 70.1980058 | 63 | 73.9242166 | 63 | 66.5485478 | 73 | 0:01:16 | 69.005542  |
| 69 | 63.4468828 | 63 | 70.1980058 | 63 | 74.352788  | 63 | 66.6041034 | 73 | 0:01:17 | 68.9053253 |
| 69 | 62.4468828 | 63 | 70.4837201 | 63 | 75.0670737 | 63 | 66.5763256 | 73 | 0:01:18 | 68.9836863 |
| 69 | 62.58974   | 63 | 70.1980058 | 63 | 73.9242166 | 63 | 66.9652145 | 73 | 0:01:19 | 69.0909917 |
| 69 | 62.0183114 | 63 | 69.7694343 | 63 | 74.352788  | 63 | 67.1596589 | 65 | 0:01:20 | 69.1030126 |
| 69 | 62.4468828 | 63 | 69.9887373 | 63 | 73.7813595 | 63 | 67.7429923 | 65 | 0:01:21 | 69.1154986 |
| 69 | 62.58974   | 63 | 70.0839754 | 63 | 73.4956452 | 63 | 67.77077   | 65 | 0:01:22 | 69.2349555 |

|    |            |    |            |    |            |    |            |    |         |            |
|----|------------|----|------------|----|------------|----|------------|----|---------|------------|
| 69 | 62.8754543 | 63 | 70.0681024 | 63 | 73.4956452 | 63 | 68.5485478 | 65 | 0:01:23 | 69.4142061 |
| 69 | 64.3040257 | 63 | 70.703023  | 63 | 72.9242166 | 63 | 68.7429923 | 65 | 0:01:24 | 69.5025103 |
| 69 | 65.1611686 | 63 | 70.8617532 | 63 | 72.7813595 | 63 | 69.9096589 | 65 | 0:01:25 | 69.5336868 |
| 69 | 65.1611686 | 63 | 69.8458802 | 63 | 71.7813595 | 63 | 69.9096589 | 65 | 0:01:26 | 69.507499  |
| 69 | 65.1611686 | 63 | 69.8458802 | 63 | 71.7813595 | 63 | 70.4929923 | 65 | 0:01:27 | 69.5861543 |
| 69 | 64.4468828 | 63 | 69.68715   | 63 | 71.7813595 | 63 | 70.6874367 | 65 | 0:01:28 | 69.6693987 |
| 69 | 63.58974   | 63 | 71.1157215 | 63 | 71.4956452 | 63 | 70.4929923 | 65 | 0:01:29 | 69.766859  |
| 69 | 63.3040257 | 63 | 71.4331818 | 63 | 71.352788  | 63 | 70.8818811 | 65 | 0:01:30 | 69.6653191 |
| 69 | 62.8754543 | 63 | 71.2744516 | 63 | 70.9242166 | 63 | 70.6874367 | 65 | 0:01:31 | 69.5889479 |
| 69 | 63.1611686 | 63 | 71.2744516 | 63 | 70.9242166 | 63 | 70.8818811 | 65 | 0:01:32 | 69.5598271 |
| 69 | 64.0183114 | 63 | 71.4331818 | 63 | 70.4956452 | 63 | 71.0763256 | 65 | 0:01:33 | 69.6827797 |
| 69 | 64.8754543 | 63 | 70.9411183 | 63 | 70.4956452 | 63 | 71.4652145 | 65 | 0:01:34 | 69.6881221 |
| 69 | 64.8754543 | 63 | 72.4837201 | 63 | 70.4956452 | 63 | 71.4652145 | 65 | 0:01:35 | 69.6981235 |
| 69 | 62.7325971 | 63 | 72.0551486 | 63 | 71.2099309 | 63 | 71.6596589 | 65 | 0:01:36 | 69.5728538 |
| 69 | 62.1611686 | 63 | 70.9122915 | 63 | 71.7813595 | 63 | 71.8263256 | 65 | 0:01:37 | 69.6613896 |
| 69 | 61.7325971 | 63 | 70.1980058 | 63 | 72.0670737 | 63 | 71.6041034 | 65 | 0:01:38 | 69.5925445 |
| 69 | 61.58974   | 63 | 69.5626474 | 63 | 72.2099309 | 63 | 71.4096589 | 65 | 0:01:39 | 69.5583216 |
| 69 | 61.3040257 | 63 | 70.6265772 | 63 | 71.9242166 | 63 | 71.4096589 | 65 | 0:01:40 | 69.6994295 |
| 69 | 61.3040257 | 63 | 67.4479836 | 63 | 71.7813595 | 63 | 71.2152145 | 65 | 0:01:41 | 69.6002985 |
| 69 | 62.0183114 | 63 | 67.6543328 | 63 | 71.352788  | 63 | 71.1874367 | 65 | 0:01:42 | 69.5620711 |
| 69 | 62.1611686 | 63 | 67.3844916 | 63 | 71.0670737 | 63 | 71.5485478 | 65 | 0:01:43 | 69.599735  |
| 69 | 62.1611686 | 63 | 67.2733804 | 63 | 71.4956452 | 63 | 71.9374367 | 65 | 0:01:44 | 69.6299984 |
| 69 | 62.3040257 | 63 | 67.5908408 | 63 | 72.2099309 | 63 | 72.52077   | 65 | 0:01:45 | 69.687142  |
| 69 | 62.4468828 | 63 | 67.7495709 | 63 | 69.694646  | 63 | 73.7152145 | 65 | 0:01:46 | 69.7165685 |
| 69 | 62.4468828 | 63 | 67.5908408 | 63 | 70.0824011 | 63 | 74.4929923 | 65 | 0:01:47 | 69.7887281 |
| 69 | 62.8754543 | 63 | 68.0670312 | 63 | 71.0824011 | 63 | 76.27077   | 65 | 0:01:48 | 69.8786964 |
| 69 | 62.7325971 | 63 | 68.0670312 | 63 | 71.4089317 | 63 | 80.5485478 | 65 | 0:01:49 | 69.8718175 |
| 69 | 63.1611686 | 63 | 67.6384598 | 63 | 71.4089317 | 63 | 79.3818811 | 65 | 0:01:50 | 69.6861386 |
| 69 | 63.0183114 | 63 | 68.4321106 | 63 | 72.061993  | 63 | 81.52077   | 65 | 0:01:51 | 69.6901726 |
| 69 | 63.4468828 | 63 | 68.5273487 | 63 | 72.061993  | 63 | 83.0763256 | 65 | 0:01:52 | 69.7896988 |
| 69 | 64.0183114 | 63 | 68.9400471 | 63 | 72.3885236 | 63 | 83.5485478 | 65 | 0:01:53 | 69.8628512 |
| 69 | 64.3040257 | 63 | 69.1463963 | 63 | 72.3068909 | 63 | 84.52077   | 65 | 0:01:54 | 69.9445588 |
| 69 | 64.8754543 | 63 | 68.5114757 | 63 | 72.2864827 | 63 | 85.0763256 | 65 | 0:01:55 | 69.921837  |
| 69 | 64.7325971 | 63 | 68.5114757 | 63 | 72.4497481 | 63 | 84.6874367 | 65 | 0:01:56 | 69.8846224 |
| 69 | 64.58974   | 63 | 68.5590947 | 63 | 71.9599521 | 63 | 82.2991762 | 65 | 0:01:57 | 69.8281356 |
| 69 | 64.3040257 | 63 | 68.7178249 | 63 | 72.0824011 | 63 | 84.1325095 | 65 | 0:01:58 | 70.0734072 |
| 69 | 64.3040257 | 63 | 68.7178249 | 63 | 72.0824011 | 63 | 83.7436206 | 65 | 0:01:59 | 70.0636902 |
| 69 | 64.1611686 | 69 | 69.2892535 | 63 | 70.1232174 | 63 | 83.4658429 | 65 | 0:02:00 | 69.9860026 |
| 69 | 64.3040257 | 69 | 69.1305233 | 63 | 74.4956452 | 63 | 83.3547318 | 65 | 0:02:01 | 69.9353802 |
| 69 | 64.4468828 | 69 | 69.4956027 | 63 | 72.7813595 | 63 | 81.5213984 | 65 | 0:02:02 | 69.8777384 |
| 69 | 64.1611686 | 69 | 69.1305233 | 63 | 73.6385023 | 63 | 80.1880651 | 65 | 0:02:03 | 69.8280817 |
| 69 | 64.7325971 | 69 | 69.2892535 | 63 | 73.4956452 | 63 | 79.6325095 | 65 | 0:02:04 | 69.7148737 |
| 69 | 64.8754543 | 69 | 69.0035392 | 63 | 73.6385023 | 63 | 79.5213984 | 65 | 0:02:05 | 69.7341695 |

|    |            |    |            |    |            |    |            |    |         |            |
|----|------------|----|------------|----|------------|----|------------|----|---------|------------|
| 69 | 65.4468828 | 69 | 68.2098884 | 63 | 73.9242166 | 63 | 77.9102873 | 65 | 0:02:06 | 69.5564346 |
| 69 | 65.58974   | 69 | 68.0511582 | 63 | 74.0670737 | 71 | 78.1325095 | 65 | 0:02:07 | 69.5531639 |
| 69 | 65.4468828 | 69 | 67.79719   | 63 | 74.9242166 | 71 | 78.576954  | 65 | 0:02:08 | 69.6875856 |
| 69 | 66.3040257 | 69 | 67.6543328 | 63 | 74.4956452 | 71 | 78.4658429 | 65 | 0:02:09 | 69.7204643 |
| 69 | 66.0183114 | 69 | 69.0551486 | 63 | 74.7813595 | 71 | 77.6325095 | 65 | 0:02:10 | 69.8954854 |
| 69 | 65.7325971 | 69 | 68.1980058 | 63 | 75.2099309 | 71 | 76.8547318 | 65 | 0:02:11 | 69.7486247 |
| 69 | 65.8754543 | 69 | 68.1980058 | 63 | 75.4956452 | 71 | 76.076954  | 65 | 0:02:12 | 69.898899  |
| 69 | 64.0183114 | 69 | 68.3408629 | 63 | 75.4956452 | 71 | 77.4652145 | 65 | 0:02:13 | 69.9571274 |
| 69 | 62.0183114 | 69 | 68.3408629 | 63 | 75.7813595 | 71 | 74.52077   | 65 | 0:02:14 | 69.6898421 |
| 69 | 61.8754543 | 69 | 69.1980058 | 63 | 75.2099309 | 71 | 72.77077   | 65 | 0:02:15 | 69.5861387 |
| 69 | 61.0183114 | 69 | 68.7694343 | 63 | 75.0670737 | 71 | 71.4096589 | 65 | 0:02:16 | 69.6075458 |
| 69 | 60.8754543 | 69 | 69.1980058 | 63 | 75.352788  | 71 | 70.2152145 | 65 | 0:02:17 | 69.5700522 |
| 69 | 61.0183114 | 69 | 69.1980058 | 63 | 75.6385023 | 71 | 70.4096589 | 65 | 0:02:18 | 69.4921767 |
| 69 | 60.7325971 | 69 | 69.7694343 | 63 | 76.352788  | 71 | 69.5763256 | 65 | 0:02:19 | 69.4356321 |
| 69 | 60.8754543 | 69 | 69.9122915 | 63 | 75.9242166 | 71 | 69.3818811 | 65 | 0:02:20 | 69.356752  |
| 69 | 60.7325971 | 69 | 69.7694343 | 63 | 75.352788  | 71 | 68.9652145 | 65 | 0:02:21 | 69.1965882 |
| 69 | 60.4468828 | 69 | 69.3408629 | 63 | 74.6385023 | 71 | 69.3541034 | 65 | 0:02:22 | 69.1237484 |
| 69 | 60.0183114 | 69 | 68.1980058 | 63 | 74.6385023 | 71 | 68.8818811 | 65 | 0:02:23 | 69.0508891 |
| 69 | 59.58974   | 69 | 67.6265772 | 63 | 74.7813595 | 71 | 68.6596589 | 65 | 0:02:24 | 69.0886207 |
| 69 | 59.58974   | 69 | 67.0551486 | 63 | 74.6385023 | 71 | 69.2429923 | 65 | 0:02:25 | 69.102407  |
| 69 | 59.7325971 | 69 | 67.9122915 | 63 | 72.0670737 | 71 | 69.4374367 | 65 | 0:02:26 | 68.9983415 |
| 69 | 60.0183114 | 69 | 67.7694343 | 63 | 73.6385023 | 71 | 69.6318811 | 65 | 0:02:27 | 68.9703753 |
| 69 | 60.4468828 | 69 | 67.6265772 | 63 | 73.7813595 | 71 | 70.1874367 | 65 | 0:02:28 | 69.0017297 |
| 69 | 60.4468828 | 69 | 67.3408629 | 63 | 74.352788  | 71 | 69.9929923 | 65 | 0:02:29 | 69.0011159 |
| 69 | 62.3040257 | 69 | 67.7694343 | 63 | 74.6385023 | 71 | 70.77077   | 65 | 0:02:30 | 68.9695086 |
| 69 | 62.7325971 | 69 | 67.9122915 | 63 | 74.7813595 | 71 | 71.1596589 | 65 | 0:02:31 | 69.0210708 |
| 69 | 63.3040257 | 69 | 66.4548701 | 63 | 73.5109725 | 71 | 67.8541034 | 65 | 0:02:32 | 69.0239929 |
| 69 | 63.4468828 | 69 | 66.4548701 | 63 | 74.4089317 | 71 | 69.0457463 | 65 | 0:02:33 | 69.1692248 |
| 69 | 64.0183114 | 69 | 65.9786796 | 63 | 74.7354623 | 71 | 69.0457463 | 65 | 0:02:34 | 69.1413571 |
| 69 | 64.1611686 | 69 | 66.5024892 | 63 | 74.817095  | 71 | 68.5790796 | 65 | 0:02:35 | 69.1263741 |
| 69 | 65.58974   | 69 | 66.5501082 | 63 | 74.572197  | 69 | 68.8124129 | 65 | 0:02:36 | 69.1221052 |
| 69 | 62.613754  | 69 | 66.5024892 | 63 | 74.4089317 | 69 | 69.0457463 | 65 | 0:02:37 | 68.9516811 |
| 69 | 62.5026429 | 69 | 68.0551486 | 63 | 77.0670737 | 69 | 70.2124129 | 65 | 0:02:38 | 69.0653042 |
| 69 | 62.3439128 | 69 | 66.6265772 | 63 | 76.352788  | 69 | 70.9124129 | 65 | 0:02:39 | 68.9687459 |
| 69 | 62.8201032 | 69 | 67.3408629 | 63 | 75.9242166 | 69 | 70.9124129 | 65 | 0:02:40 | 69.0683336 |
| 69 | 62.9788334 | 69 | 66.6265772 | 63 | 75.2099309 | 69 | 71.1457463 | 65 | 0:02:41 | 69.115981  |
| 69 | 62.9788334 | 69 | 66.7694343 | 63 | 74.4956452 | 69 | 70.1457463 | 65 | 0:02:42 | 69.0753525 |
| 69 | 63.550262  | 69 | 66.4837201 | 63 | 74.7813595 | 69 | 68.4790796 | 65 | 0:02:43 | 69.18699   |
| 69 | 63.8677223 | 69 | 66.7694343 | 63 | 74.6385023 | 69 | 68.0457463 | 65 | 0:02:44 | 69.4290566 |
| 69 | 64.1851826 | 69 | 66.4837201 | 63 | 74.6385023 | 69 | 68.4252542 | 65 | 0:02:45 | 69.4868337 |
| 69 | 63.9788334 | 69 | 66.6265772 | 63 | 74.7813595 | 69 | 68.4252542 | 65 | 0:02:46 | 69.6124866 |
| 69 | 63.9788334 | 69 | 66.1980058 | 63 | 75.0670737 | 69 | 69.0252542 | 65 | 0:02:47 | 69.7746826 |
| 69 | 64.4074048 | 69 | 66.0551486 | 63 | 76.0670737 | 69 | 66.5834412 | 65 | 0:02:48 | 69.6524929 |

|    |            |    |            |    |            |    |            |    |         |            |
|----|------------|----|------------|----|------------|----|------------|----|---------|------------|
| 69 | 64.8359763 | 69 | 65.7694343 | 63 | 76.0670737 | 69 | 66.9501078 | 65 | 0:02:49 | 69.5696575 |
| 69 | 64.8359763 | 69 | 65.4837201 | 63 | 77.9242166 | 69 | 67.0834412 | 65 | 0:02:50 | 69.8839217 |
| 69 | 67.3040257 | 69 | 65.3408629 | 63 | 74.6538297 | 69 | 66.9834412 | 65 | 0:02:51 | 70.1705871 |
| 69 | 64.9947064 | 69 | 65.3408629 | 63 | 72.8579113 | 69 | 67.0501078 | 65 | 0:02:52 | 70.1799152 |
| 69 | 64.9947064 | 69 | 65.3408629 | 63 | 72.8579113 | 69 | 66.7501078 | 65 | 0:02:53 | 70.1487401 |
| 69 | 64.9947064 | 69 | 65.6265772 | 63 | 72.8579113 | 69 | 66.9834412 | 60 | 0:02:54 | 70.0487664 |
| 69 | 64.9312144 | 69 | 65.3408629 | 63 | 74.0007685 | 69 | 67.0167745 | 60 | 0:02:55 | 70.1096911 |
| 69 | 64.8677223 | 69 | 65.7694343 | 63 | 75.2048501 | 69 | 67.2501078 | 60 | 0:02:56 | 70.2583648 |
| 69 | 64.7089921 | 69 | 65.7694343 | 63 | 77.0670737 | 69 | 68.1834412 | 60 | 0:02:57 | 70.4553036 |
| 69 | 64.4550239 | 69 | 65.4837201 | 63 | 77.2099309 | 69 | 68.1834412 | 60 | 0:02:58 | 70.4733096 |
| 69 | 66.8754543 | 69 | 65.6265772 | 63 | 75.0670737 | 69 | 68.9834412 | 60 | 0:02:59 | 70.5315965 |
| 69 | 65.4468828 | 69 | 65.0551486 | 63 | 74.7813595 | 69 | 70.3167745 | 60 | 0:03:00 | 70.5467647 |
| 69 | 64.8754543 | 69 | 65.0551486 | 63 | 72.2366278 | 69 | 71.9167745 | 60 |         |            |

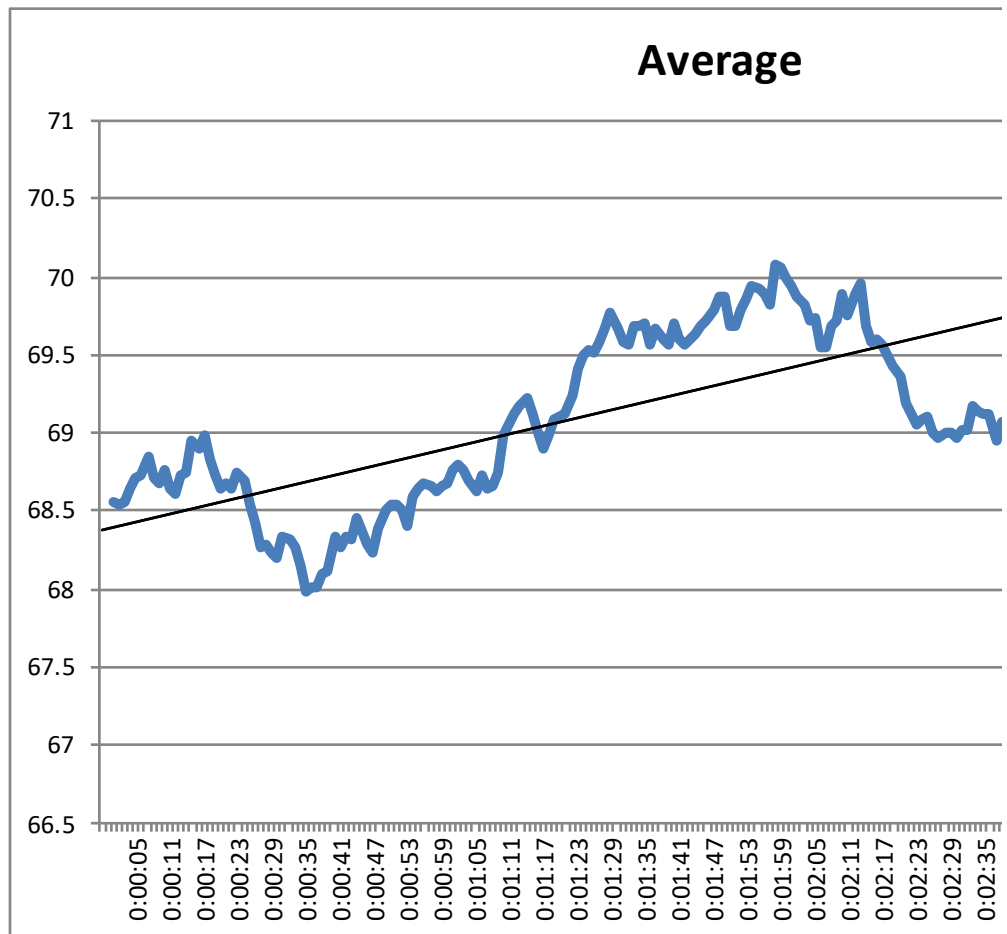











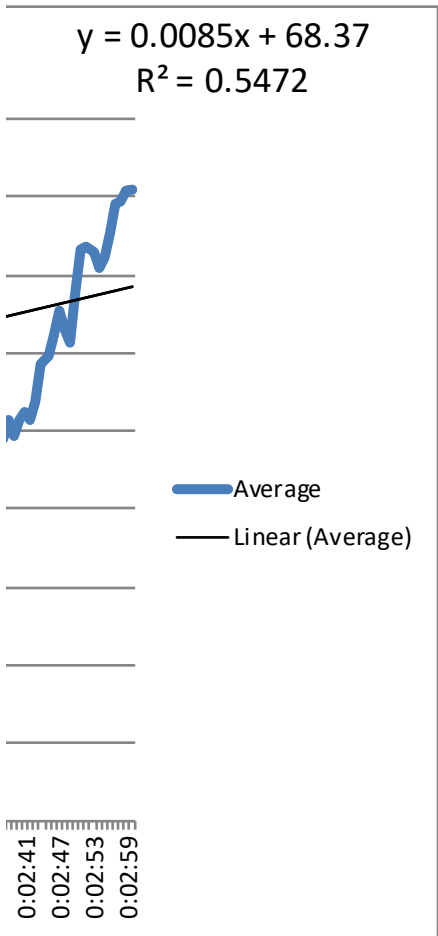

Supplement: pone.0225709.s002.pdf [file pone.0225709.s002.pdf]
