# Supplementary material for: Student engagement, assessed using heart rate, shows no reset following active learning sessions in lectures
Source: PubMed Central journal article supplement (PMC6886849; doi:10.1371/journal.pone.0225709), 2019-12-02
Supplement: pone.0225709.s001.pdf [file pone.0225709.s001.pdf]

|          | 0            |  | Person 1   | Person 6   | Person 3  | Person 5   |
|----------|--------------|--|------------|------------|-----------|------------|
| Time     | Time elapsed |  |            |            |           |            |
| 17:02:00 | 0:00:00      |  | 90.6930524 | 90.3812876 | 84.731787 | 68.2395153 |
| 17:02:01 | 0:00:01      |  | 89.6930524 | 91.3812876 | 84.731787 | 71.2395153 |
| 17:02:02 | 0:00:02      |  | 89.6930524 | 91.3812876 | 80.731787 | 71.2395153 |
| 17:02:03 | 0:00:03      |  | 89.6930524 | 91.3812876 | 77.731787 | 74.2395153 |
| 17:02:04 | 0:00:04      |  | 90.6930524 | 91.3812876 | 74.731787 | 76.2395153 |
| 17:02:05 | 0:00:05      |  | 89.6930524 | 92.3812876 | 75.731787 | 78.2395153 |
| 17:02:06 | 0:00:06      |  | 88.6930524 | 92.3812876 | 75.731787 | 78.2395153 |
| 17:02:07 | 0:00:07      |  | 86.6930524 | 92.3812876 | 76.731787 | 79.2395153 |
| 17:02:08 | 0:00:08      |  | 86.6930524 | 92.3812876 | 76.731787 | 79.2395153 |
| 17:02:09 | 0:00:09      |  | 85.6930524 | 92.3812876 | 76.731787 | 79.2395153 |
| 17:02:10 | 0:00:10      |  | 85.6930524 | 92.3812876 | 76.731787 | 80.2395153 |
| 17:02:11 | 0:00:11      |  | 83.6930524 | 93.3812876 | 79.731787 | 80.2395153 |
| 17:02:12 | 0:00:12      |  | 81.6930524 | 93.3812876 | 80.731787 | 84.2395153 |
| 17:02:13 | 0:00:13      |  | 81.6930524 | 93.3812876 | 80.731787 | 86.2395153 |
| 17:02:14 | 0:00:14      |  | 81.6930524 | 94.3812876 | 80.731787 | 86.2395153 |
| 17:02:15 | 0:00:15      |  | 81.6930524 | 94.3812876 | 80.731787 | 83.2395153 |
| 17:02:16 | 0:00:16      |  | 80.6930524 | 93.3812876 | 79.731787 | 82.2395153 |
| 17:02:17 | 0:00:17      |  | 81.6930524 | 93.3812876 | 79.731787 | 81.2395153 |
| 17:02:18 | 0:00:18      |  | 81.6930524 | 94.3812876 | 79.731787 | 79.2395153 |
| 17:02:19 | 0:00:19      |  | 81.6930524 | 94.3812876 | 79.731787 | 79.2395153 |
| 17:02:20 | 0:00:20      |  | 82.6930524 | 94.3812876 | 78.731787 | 76.2395153 |
| 17:02:21 | 0:00:21      |  | 82.6930524 | 94.3812876 | 80.731787 | 74.2395153 |
| 17:02:22 | 0:00:22      |  | 82.6930524 | 95.3812876 | 79.731787 | 72.2395153 |
| 17:02:23 | 0:00:23      |  | 83.6930524 | 95.3812876 | 79.731787 | 72.2395153 |
| 17:02:24 | 0:00:24      |  | 83.6930524 | 95.3812876 | 79.731787 | 72.2395153 |
| 17:02:25 | 0:00:25      |  | 84.6930524 | 96.3812876 | 78.731787 | 73.2395153 |
| 17:02:26 | 0:00:26      |  | 86.6930524 | 97.3812876 | 78.731787 | 73.2395153 |
| 17:02:27 | 0:00:27      |  | 88.6930524 | 97.3812876 | 78.731787 | 73.2395153 |
| 17:02:28 | 0:00:28      |  | 90.6930524 | 97.3812876 | 78.731787 | 75.2395153 |
| 17:02:29 | 0:00:29      |  | 91.6930524 | 101.381288 | 78.731787 | 75.2395153 |
| 17:02:30 | 0:00:30      |  | 91.6930524 | 100.381288 | 78.731787 | 76.2395153 |
| 17:02:31 | 0:00:31      |  | 91.6930524 | 100.381288 | 76.731787 | 82.2395153 |
| 17:02:32 | 0:00:32      |  | 92.6930524 | 100.381288 | 76.731787 | 82.2395153 |
| 17:02:33 | 0:00:33      |  | 93.6930524 | 100.381288 | 76.731787 | 82.2395153 |
| 17:02:34 | 0:00:34      |  | 93.6930524 | 98.3812876 | 73.731787 | 83.2395153 |
| 17:02:35 | 0:00:35      |  | 93.6930524 | 95.3812876 | 73.731787 | 83.2395153 |
| 17:02:36 | 0:00:36      |  | 93.6930524 | 93.3812876 | 73.731787 | 83.2395153 |
| 17:02:37 | 0:00:37      |  | 94.6930524 | 93.3812876 | 73.731787 | 81.2395153 |
| 17:02:38 | 0:00:38      |  | 94.6930524 | 91.3812876 | 73.731787 | 78.2395153 |
| 17:02:39 | 0:00:39      |  | 95.6930524 | 90.3812876 | 73.731787 | 78.2395153 |
| 17:02:40 | 0:00:40      |  | 95.6930524 | 87.3812876 | 73.731787 | 78.2395153 |
| 17:02:41 | 0:00:41      |  | 95.6930524 | 84.3812876 | 74.731787 | 80.2395153 |
| 17:02:42 | 0:00:42      |  | 95.6930524 | 84.3812876 | 83.731787 | 81.2395153 |

|          |         |  |            |            |           |            |
|----------|---------|--|------------|------------|-----------|------------|
| 17:02:43 | 0:00:43 |  | 95.6930524 | 74.3812876 | 84.731787 | 81.2395153 |
| 17:02:44 | 0:00:44 |  | 95.6930524 | 74.3812876 | 84.731787 | 80.2395153 |
| 17:02:45 | 0:00:45 |  | 95.6930524 | 74.3812876 | 83.731787 | 80.2395153 |
| 17:02:46 | 0:00:46 |  | 94.6930524 | 74.3812876 | 79.731787 | 78.2395153 |
| 17:02:47 | 0:00:47 |  | 94.6930524 | 74.3812876 | 76.731787 | 78.2395153 |
| 17:02:48 | 0:00:48 |  | 94.6930524 | 75.3812876 | 76.731787 | 77.2395153 |
| 17:02:49 | 0:00:49 |  | 93.6930524 | 75.3812876 | 76.731787 | 76.2395153 |
| 17:02:50 | 0:00:50 |  | 93.6930524 | 78.3812876 | 77.731787 | 77.2395153 |
| 17:02:51 | 0:00:51 |  | 93.6930524 | 79.3812876 | 78.731787 | 78.2395153 |
| 17:02:52 | 0:00:52 |  | 92.6930524 | 82.3812876 | 80.731787 | 78.2395153 |
| 17:02:53 | 0:00:53 |  | 92.6930524 | 82.3812876 | 80.731787 | 78.2395153 |
| 17:02:54 | 0:00:54 |  | 93.6930524 | 84.3812876 | 80.731787 | 84.2395153 |
| 17:02:55 | 0:00:55 |  | 101.693052 | 87.3812876 | 79.731787 | 84.2395153 |
| 17:02:56 | 0:00:56 |  | 101.693052 | 89.3812876 | 79.731787 | 84.2395153 |
| 17:02:57 | 0:00:57 |  | 103.693052 | 89.3812876 | 79.731787 | 84.2395153 |
| 17:02:58 | 0:00:58 |  | 90.6930524 | 93.3812876 | 79.731787 | 84.2395153 |
| 17:02:59 | 0:00:59 |  | 90.6930524 | 93.3812876 | 79.731787 | 84.2395153 |
| 17:03:00 | 0:01:00 |  | 88.6930524 | 93.3812876 | 79.731787 | 85.2395153 |
| 17:03:01 | 0:01:01 |  | 88.6930524 | 90.3812876 | 79.731787 | 85.2395153 |
| 17:03:02 | 0:01:02 |  | 88.6930524 | 89.3812876 | 79.731787 | 85.2395153 |
| 17:03:03 | 0:01:03 |  | 88.6930524 | 89.3812876 | 76.731787 | 86.2395153 |
| 17:03:04 | 0:01:04 |  | 90.6930524 | 89.3812876 | 76.731787 | 87.2395153 |
| 17:03:05 | 0:01:05 |  | 91.6930524 | 89.3812876 | 76.731787 | 88.2395153 |
| 17:03:06 | 0:01:06 |  | 91.6930524 | 89.3812876 | 76.731787 | 88.2395153 |
| 17:03:07 | 0:01:07 |  | 92.6930524 | 89.3812876 | 76.731787 | 83.2395153 |
| 17:03:08 | 0:01:08 |  | 92.6930524 | 89.3812876 | 76.731787 | 83.2395153 |
| 17:03:09 | 0:01:09 |  | 92.6930524 | 88.3812876 | 75.731787 | 84.2395153 |
| 17:03:10 | 0:01:10 |  | 92.6930524 | 87.3812876 | 77.731787 | 84.2395153 |
| 17:03:11 | 0:01:11 |  | 92.6930524 | 84.3812876 | 77.731787 | 83.2395153 |
| 17:03:12 | 0:01:12 |  | 92.6930524 | 84.3812876 | 77.731787 | 83.2395153 |
| 17:03:13 | 0:01:13 |  | 88.6930524 | 85.3812876 | 77.731787 | 83.2395153 |
| 17:03:14 | 0:01:14 |  | 88.6930524 | 85.3812876 | 77.731787 | 83.2395153 |
| 17:03:15 | 0:01:15 |  | 84.6930524 | 85.3812876 | 76.731787 | 82.2395153 |
| 17:03:16 | 0:01:16 |  | 83.6930524 | 85.3812876 | 76.731787 | 82.2395153 |
| 17:03:17 | 0:01:17 |  | 82.6930524 | 85.3812876 | 75.731787 | 82.2395153 |
| 17:03:18 | 0:01:18 |  | 82.6930524 | 85.3812876 | 75.731787 | 82.2395153 |
| 17:03:19 | 0:01:19 |  | 82.6930524 | 85.3812876 | 75.731787 | 82.2395153 |
| 17:03:20 | 0:01:20 |  | 79.6930524 | 85.3812876 | 75.731787 | 79.2395153 |
| 17:03:21 | 0:01:21 |  | 78.6930524 | 89.3812876 | 75.731787 | 79.2395153 |
| 17:03:22 | 0:01:22 |  | 78.6930524 | 89.3812876 | 75.731787 | 76.2395153 |
| 17:03:23 | 0:01:23 |  | 79.6930524 | 89.3812876 | 75.731787 | 77.2395153 |
| 17:03:24 | 0:01:24 |  | 79.6930524 | 90.3812876 | 75.731787 | 77.2395153 |
| 17:03:25 | 0:01:25 |  | 79.6930524 | 90.3812876 | 74.731787 | 77.2395153 |
| 17:03:26 | 0:01:26 |  | 79.6930524 | 85.3812876 | 72.731787 | 77.2395153 |
| 17:03:27 | 0:01:27 |  | 80.6930524 | 85.3812876 | 72.731787 | 77.2395153 |

|          |         |  |            |            |           |            |
|----------|---------|--|------------|------------|-----------|------------|
| 17:03:28 | 0:01:28 |  | 80.6930524 | 85.3812876 | 71.731787 | 75.2395153 |
| 17:03:29 | 0:01:29 |  | 80.6930524 | 83.3812876 | 72.731787 | 75.2395153 |
| 17:03:30 | 0:01:30 |  | 80.6930524 | 83.3812876 | 72.731787 | 73.2395153 |
| 17:03:31 | 0:01:31 |  | 79.6930524 | 83.3812876 | 72.731787 | 73.2395153 |
| 17:03:32 | 0:01:32 |  | 79.6930524 | 83.3812876 | 73.731787 | 73.2395153 |
| 17:03:33 | 0:01:33 |  | 78.6930524 | 84.3812876 | 73.731787 | 71.2395153 |
| 17:03:34 | 0:01:34 |  | 78.6930524 | 84.3812876 | 73.731787 | 70.2395153 |
| 17:03:35 | 0:01:35 |  | 79.6930524 | 85.3812876 | 73.731787 | 71.2395153 |
| 17:03:36 | 0:01:36 |  | 79.6930524 | 83.3812876 | 73.731787 | 71.2395153 |
| 17:03:37 | 0:01:37 |  | 79.6930524 | 83.3812876 | 72.731787 | 71.2395153 |
| 17:03:38 | 0:01:38 |  | 79.6930524 | 82.3812876 | 72.731787 | 71.2395153 |
| 17:03:39 | 0:01:39 |  | 79.6930524 | 82.3812876 | 73.731787 | 71.2395153 |
| 17:03:40 | 0:01:40 |  | 80.6930524 | 82.3812876 | 74.731787 | 70.2395153 |
| 17:03:41 | 0:01:41 |  | 80.6930524 | 82.3812876 | 74.731787 | 70.2395153 |
| 17:03:42 | 0:01:42 |  | 80.6930524 | 82.3812876 | 74.731787 | 69.2395153 |
| 17:03:43 | 0:01:43 |  | 80.6930524 | 82.3812876 | 75.731787 | 69.2395153 |
| 17:03:44 | 0:01:44 |  | 80.6930524 | 82.3812876 | 75.731787 | 69.2395153 |
| 17:03:45 | 0:01:45 |  | 79.6930524 | 82.3812876 | 75.731787 | 69.2395153 |
| 17:03:46 | 0:01:46 |  | 78.6930524 | 81.3812876 | 75.731787 | 70.2395153 |
| 17:03:47 | 0:01:47 |  | 78.6930524 | 81.3812876 | 75.731787 | 70.2395153 |
| 17:03:48 | 0:01:48 |  | 78.6930524 | 81.3812876 | 75.731787 | 70.2395153 |
| 17:03:49 | 0:01:49 |  | 78.6930524 | 81.3812876 | 76.731787 | 70.2395153 |
| 17:03:50 | 0:01:50 |  | 78.6930524 | 83.3812876 | 76.731787 | 72.2395153 |
| 17:03:51 | 0:01:51 |  | 78.6930524 | 83.3812876 | 76.731787 | 73.2395153 |
| 17:03:52 | 0:01:52 |  | 79.6930524 | 83.3812876 | 76.731787 | 74.2395153 |
| 17:03:53 | 0:01:53 |  | 79.6930524 | 83.3812876 | 76.731787 | 75.2395153 |
| 17:03:54 | 0:01:54 |  | 80.6930524 | 86.3812876 | 76.731787 | 75.2395153 |
| 17:03:55 | 0:01:55 |  | 80.6930524 | 86.3812876 | 76.731787 | 75.2395153 |
| 17:03:56 | 0:01:56 |  | 80.6930524 | 86.3812876 | 75.731787 | 75.2395153 |
| 17:03:57 | 0:01:57 |  | 80.6930524 | 87.3812876 | 75.731787 | 75.2395153 |
| 17:03:58 | 0:01:58 |  | 80.6930524 | 87.3812876 | 76.731787 | 76.2395153 |
| 17:03:59 | 0:01:59 |  | 80.6930524 | 87.3812876 | 76.731787 | 76.2395153 |
| 17:04:00 | 0:02:00 |  | 80.6930524 | 88.3812876 | 76.731787 | 77.2395153 |
| 17:04:01 | 0:02:01 |  | 80.6930524 | 90.3812876 | 77.731787 | 78.2395153 |
| 17:04:02 | 0:02:02 |  | 80.6930524 | 90.3812876 | 77.731787 | 80.2395153 |
| 17:04:03 | 0:02:03 |  | 80.6930524 | 90.3812876 | 77.731787 | 81.2395153 |
| 17:04:04 | 0:02:04 |  | 80.6930524 | 90.3812876 | 77.731787 | 81.2395153 |
| 17:04:05 | 0:02:05 |  | 80.6930524 | 89.3812876 | 77.731787 | 81.2395153 |
| 17:04:06 | 0:02:06 |  | 80.6930524 | 87.3812876 | 77.731787 | 80.2395153 |
| 17:04:07 | 0:02:07 |  | 80.6930524 | 85.3812876 | 81.731787 | 79.2395153 |
| 17:04:08 | 0:02:08 |  | 81.6930524 | 85.3812876 | 81.731787 | 79.2395153 |
| 17:04:09 | 0:02:09 |  | 80.6930524 | 85.3812876 | 81.731787 | 80.2395153 |
| 17:04:10 | 0:02:10 |  | 80.6930524 | 85.3812876 | 77.731787 | 81.2395153 |
| 17:04:11 | 0:02:11 |  | 80.6930524 | 86.3812876 | 76.731787 | 82.2395153 |
| 17:04:12 | 0:02:12 |  | 80.6930524 | 86.3812876 | 76.731787 | 82.2395153 |

|          |         |  |            |            |           |            |
|----------|---------|--|------------|------------|-----------|------------|
| 17:04:13 | 0:02:13 |  | 81.6930524 | 85.3812876 | 75.731787 | 83.2395153 |
| 17:04:14 | 0:02:14 |  | 81.6930524 | 85.3812876 | 75.731787 | 83.2395153 |
| 17:04:15 | 0:02:15 |  | 81.6930524 | 85.3812876 | 75.731787 | 83.2395153 |
| 17:04:16 | 0:02:16 |  | 82.6930524 | 85.3812876 | 75.731787 | 83.2395153 |
| 17:04:17 | 0:02:17 |  | 83.6930524 | 86.3812876 | 75.731787 | 83.2395153 |
| 17:04:18 | 0:02:18 |  | 83.6930524 | 86.3812876 | 75.731787 | 81.2395153 |
| 17:04:19 | 0:02:19 |  | 83.6930524 | 86.3812876 | 74.731787 | 80.2395153 |
| 17:04:20 | 0:02:20 |  | 82.6930524 | 86.3812876 | 74.731787 | 79.2395153 |
| 17:04:21 | 0:02:21 |  | 82.6930524 | 86.3812876 | 74.731787 | 80.2395153 |
| 17:04:22 | 0:02:22 |  | 82.6930524 | 86.3812876 | 74.731787 | 80.2395153 |
| 17:04:23 | 0:02:23 |  | 81.6930524 | 86.3812876 | 74.731787 | 80.2395153 |
| 17:04:24 | 0:02:24 |  | 81.6930524 | 85.3812876 | 74.731787 | 79.2395153 |
| 17:04:25 | 0:02:25 |  | 81.6930524 | 85.3812876 | 74.731787 | 78.2395153 |
| 17:04:26 | 0:02:26 |  | 82.6930524 | 86.3812876 | 73.731787 | 78.2395153 |
| 17:04:27 | 0:02:27 |  | 82.6930524 | 87.3812876 | 73.731787 | 78.2395153 |
| 17:04:28 | 0:02:28 |  | 82.6930524 | 87.3812876 | 73.731787 | 78.2395153 |
| 17:04:29 | 0:02:29 |  | 82.6930524 | 88.3812876 | 73.731787 | 77.2395153 |
| 17:04:30 | 0:02:30 |  | 82.6930524 | 88.3812876 | 75.731787 | 78.2395153 |
| 17:04:31 | 0:02:31 |  | 83.6930524 | 90.3812876 | 76.731787 | 78.2395153 |
| 17:04:32 | 0:02:32 |  | 83.6930524 | 90.3812876 | 76.731787 | 77.2395153 |
| 17:04:33 | 0:02:33 |  | 83.6930524 | 90.3812876 | 76.731787 | 75.2395153 |
| 17:04:34 | 0:02:34 |  | 84.6930524 | 91.3812876 | 76.731787 | 74.2395153 |
| 17:04:35 | 0:02:35 |  | 84.6930524 | 91.3812876 | 75.731787 | 74.2395153 |
| 17:04:36 | 0:02:36 |  | 84.6930524 | 91.3812876 | 75.731787 | 74.2395153 |
| 17:04:37 | 0:02:37 |  | 84.6930524 | 91.3812876 | 74.731787 | 74.2395153 |
| 17:04:38 | 0:02:38 |  | 84.6930524 | 92.3812876 | 74.731787 | 74.2395153 |
| 17:04:39 | 0:02:39 |  | 84.6930524 | 93.3812876 | 74.731787 | 73.2395153 |
| 17:04:40 | 0:02:40 |  | 84.6930524 | 93.3812876 | 74.731787 | 73.2395153 |
| 17:04:41 | 0:02:41 |  | 87.6930524 | 93.3812876 | 73.731787 | 71.2395153 |
| 17:04:42 | 0:02:42 |  | 87.6930524 | 94.3812876 | 73.731787 | 69.2395153 |
| 17:04:43 | 0:02:43 |  | 87.6930524 | 94.3812876 | 73.731787 | 69.2395153 |
| 17:04:44 | 0:02:44 |  | 88.6930524 | 93.3812876 | 73.731787 | 68.2395153 |
| 17:04:45 | 0:02:45 |  | 88.6930524 | 92.3812876 | 73.731787 | 68.2395153 |
| 17:04:46 | 0:02:46 |  | 88.6930524 | 92.3812876 | 73.731787 | 68.2395153 |
| 17:04:47 | 0:02:47 |  | 89.6930524 | 92.3812876 | 73.731787 | 67.2395153 |
| 17:04:48 | 0:02:48 |  | 89.6930524 | 92.3812876 | 73.731787 | 66.2395153 |
| 17:04:49 | 0:02:49 |  | 89.6930524 | 94.3812876 | 73.731787 | 66.2395153 |
| 17:04:50 | 0:02:50 |  | 89.6930524 | 94.3812876 | 73.731787 | 66.2395153 |
| 17:04:51 | 0:02:51 |  | 90.6930524 | 93.3812876 | 73.731787 | 66.2395153 |
| 17:04:52 | 0:02:52 |  | 90.6930524 | 93.3812876 | 73.731787 | 65.2395153 |
| 17:04:53 | 0:02:53 |  | 90.6930524 | 93.3812876 | 74.731787 | 65.2395153 |
| 17:04:54 | 0:02:54 |  | 90.6930524 | 93.3812876 | 74.731787 | 67.2395153 |
| 17:04:55 | 0:02:55 |  | 89.6930524 | 93.3812876 | 77.731787 | 68.2395153 |
| 17:04:56 | 0:02:56 |  | 86.6930524 | 93.3812876 | 77.731787 | 70.2395153 |
| 17:04:57 | 0:02:57 |  | 86.6930524 | 93.3812876 | 81.731787 | 70.2395153 |



|          |         |  |            |            |           |            |
|----------|---------|--|------------|------------|-----------|------------|
| 17:04:58 | 0:02:58 |  | 86.6930524 | 94.3812876 | 81.731787 | 72.2395153 |
| 17:04:59 | 0:02:59 |  | 86.6930524 | 94.3812876 | 81.731787 | 72.2395153 |
| 17:05:00 | 0:03:00 |  | 85.6930524 | 94.3812876 | 77.731787 | 72.2395153 |
| 17:05:01 | 0:03:01 |  | 85.6930524 | 95.3812876 | 76.731787 | 74.2395153 |
| 17:05:02 | 0:03:02 |  | 84.6930524 | 95.3812876 | 76.731787 | 74.2395153 |
| 17:05:03 | 0:03:03 |  | 84.6930524 | 95.3812876 | 76.731787 | 75.2395153 |
| 17:05:04 | 0:03:04 |  | 84.6930524 | 95.3812876 | 76.731787 | 75.2395153 |
| 17:05:05 | 0:03:05 |  | 84.6930524 | 93.3812876 | 75.731787 | 77.2395153 |
| 17:05:06 | 0:03:06 |  | 84.6930524 | 93.3812876 | 75.731787 | 77.2395153 |
| 17:05:07 | 0:03:07 |  | 87.6930524 | 93.3812876 | 72.731787 | 79.2395153 |
| 17:05:08 | 0:03:08 |  | 87.6930524 | 90.3812876 | 72.731787 | 79.2395153 |
| 17:05:09 | 0:03:09 |  | 87.6930524 | 89.3812876 | 73.731787 | 79.2395153 |
| 17:05:10 | 0:03:10 |  | 88.6930524 | 89.3812876 | 73.731787 | 78.2395153 |
| 17:05:11 | 0:03:11 |  | 88.6930524 | 89.3812876 | 74.731787 | 78.2395153 |
| 17:05:12 | 0:03:12 |  | 88.6930524 | 89.3812876 | 74.731787 | 79.2395153 |
| 17:05:13 | 0:03:13 |  | 86.6930524 | 88.3812876 | 74.731787 | 79.2395153 |
| 17:05:14 | 0:03:14 |  | 86.6930524 | 87.3812876 | 78.731787 | 79.2395153 |
| 17:05:15 | 0:03:15 |  | 84.6930524 | 87.3812876 | 82.731787 | 79.2395153 |
| 17:05:16 | 0:03:16 |  | 84.6930524 | 87.3812876 | 82.731787 | 77.2395153 |
| 17:05:17 | 0:03:17 |  | 85.6930524 | 87.3812876 | 83.731787 | 77.2395153 |
| 17:05:18 | 0:03:18 |  | 84.6930524 | 87.3812876 | 83.731787 | 76.2395153 |
| 17:05:19 | 0:03:19 |  | 81.6930524 | 86.3812876 | 83.731787 | 77.2395153 |
| 17:05:20 | 0:03:20 |  | 81.6930524 | 84.3812876 | 84.731787 | 77.2395153 |
| 17:05:21 | 0:03:21 |  | 80.6930524 | 82.3812876 | 85.731787 | 78.2395153 |
| 17:05:22 | 0:03:22 |  | 80.6930524 | 81.3812876 | 85.731787 | 78.2395153 |
| 17:05:23 | 0:03:23 |  | 80.6930524 | 81.3812876 | 86.731787 | 79.2395153 |
| 17:05:24 | 0:03:24 |  | 80.6930524 | 81.3812876 | 86.731787 | 79.2395153 |
| 17:05:25 | 0:03:25 |  | 79.6930524 | 82.3812876 | 87.731787 | 84.2395153 |
| 17:05:26 | 0:03:26 |  | 79.6930524 | 82.3812876 | 87.731787 | 85.2395153 |
| 17:05:27 | 0:03:27 |  | 79.6930524 | 81.3812876 | 87.731787 | 85.2395153 |
| 17:05:28 | 0:03:28 |  | 79.6930524 | 81.3812876 | 87.731787 | 84.2395153 |
| 17:05:29 | 0:03:29 |  | 80.6930524 | 81.3812876 | 84.731787 | 84.2395153 |
| 17:05:30 | 0:03:30 |  | 81.6930524 | 81.3812876 | 84.731787 | 84.2395153 |
| 17:05:31 | 0:03:31 |  | 81.6930524 | 81.3812876 | 84.731787 | 81.2395153 |
| 17:05:32 | 0:03:32 |  | 82.6930524 | 81.3812876 | 84.731787 | 80.2395153 |
| 17:05:33 | 0:03:33 |  | 82.6930524 | 82.3812876 | 83.731787 | 80.2395153 |
| 17:05:34 | 0:03:34 |  | 82.6930524 | 82.3812876 | 85.731787 | 79.2395153 |
| 17:05:35 | 0:03:35 |  | 82.6930524 | 83.3812876 | 85.731787 | 79.2395153 |
| 17:05:36 | 0:03:36 |  | 81.6930524 | 83.3812876 | 85.731787 | 78.2395153 |
| 17:05:37 | 0:03:37 |  | 80.6930524 | 83.3812876 | 85.731787 | 77.2395153 |
| 17:05:38 | 0:03:38 |  | 80.6930524 | 84.3812876 | 84.731787 | 75.2395153 |
| 17:05:39 | 0:03:39 |  | 79.6930524 | 84.3812876 | 84.731787 | 75.2395153 |
| 17:05:40 | 0:03:40 |  | 78.6930524 | 83.3812876 | 83.731787 | 73.2395153 |
| 17:05:41 | 0:03:41 |  | 78.6930524 | 91.3812876 | 82.731787 | 73.2395153 |
| 17:05:42 | 0:03:42 |  | 78.6930524 | 91.3812876 | 81.731787 | 73.2395153 |

|          |         |  |            |            |           |            |
|----------|---------|--|------------|------------|-----------|------------|
| 17:05:43 | 0:03:43 |  | 78.6930524 | 94.3812876 | 81.731787 | 73.2395153 |
| 17:05:44 | 0:03:44 |  | 78.6930524 | 93.3812876 | 81.731787 | 73.2395153 |
| 17:05:45 | 0:03:45 |  | 79.6930524 | 89.3812876 | 81.731787 | 75.2395153 |
| 17:05:46 | 0:03:46 |  | 79.6930524 | 89.3812876 | 81.731787 | 76.2395153 |
| 17:05:47 | 0:03:47 |  | 79.6930524 | 86.3812876 | 81.731787 | 77.2395153 |
| 17:05:48 | 0:03:48 |  | 79.6930524 | 85.3812876 | 81.731787 | 77.2395153 |
| 17:05:49 | 0:03:49 |  | 79.6930524 | 85.3812876 | 81.731787 | 77.2395153 |
| 17:05:50 | 0:03:50 |  | 80.6930524 | 85.3812876 | 81.731787 | 77.2395153 |
| 17:05:51 | 0:03:51 |  | 80.6930524 | 85.3812876 | 80.731787 | 77.2395153 |
| 17:05:52 | 0:03:52 |  | 80.6930524 | 85.3812876 | 80.731787 | 78.2395153 |
| 17:05:53 | 0:03:53 |  | 80.6930524 | 85.3812876 | 80.731787 | 78.2395153 |
| 17:05:54 | 0:03:54 |  | 80.6930524 | 85.3812876 | 79.731787 | 78.2395153 |
| 17:05:55 | 0:03:55 |  | 82.6930524 | 85.3812876 | 80.731787 | 80.2395153 |
| 17:05:56 | 0:03:56 |  | 79.6930524 | 85.3812876 | 80.731787 | 80.2395153 |
| 17:05:57 | 0:03:57 |  | 78.6930524 | 85.3812876 | 80.731787 | 77.2395153 |
| 17:05:58 | 0:03:58 |  | 78.6930524 | 85.3812876 | 80.731787 | 75.2395153 |
| 17:05:59 | 0:03:59 |  | 79.6930524 | 85.3812876 | 80.731787 | 75.2395153 |
| 17:06:00 | 0:04:00 |  | 79.6930524 | 85.3812876 | 80.731787 | 75.2395153 |
| 17:06:01 | 0:04:01 |  | 79.6930524 | 86.3812876 | 80.731787 | 74.2395153 |
| 17:06:02 | 0:04:02 |  | 79.6930524 | 86.3812876 | 80.731787 | 74.2395153 |
| 17:06:03 | 0:04:03 |  | 78.6930524 | 86.3812876 | 79.731787 | 73.2395153 |
| 17:06:04 | 0:04:04 |  | 78.6930524 | 87.3812876 | 80.731787 | 71.2395153 |
| 17:06:05 | 0:04:05 |  | 77.6930524 | 87.3812876 | 80.731787 | 69.2395153 |
| 17:06:06 | 0:04:06 |  | 77.6930524 | 87.3812876 | 80.731787 | 69.2395153 |
| 17:06:07 | 0:04:07 |  | 77.6930524 | 87.3812876 | 80.731787 | 68.2395153 |
| 17:06:08 | 0:04:08 |  | 76.6930524 | 87.3812876 | 80.731787 | 68.2395153 |
| 17:06:09 | 0:04:09 |  | 76.6930524 | 87.3812876 | 80.731787 | 68.2395153 |
| 17:06:10 | 0:04:10 |  | 77.6930524 | 87.3812876 | 82.731787 | 68.2395153 |
| 17:06:11 | 0:04:11 |  | 78.6930524 | 83.3812876 | 82.731787 | 68.2395153 |
| 17:06:12 | 0:04:12 |  | 79.6930524 | 82.3812876 | 81.731787 | 67.2395153 |
| 17:06:13 | 0:04:13 |  | 79.6930524 | 82.3812876 | 81.731787 | 67.2395153 |
| 17:06:14 | 0:04:14 |  | 80.6930524 | 82.3812876 | 79.731787 | 67.2395153 |
| 17:06:15 | 0:04:15 |  | 80.6930524 | 81.3812876 | 79.731787 | 71.2395153 |
| 17:06:16 | 0:04:16 |  | 80.6930524 | 81.3812876 | 79.731787 | 72.2395153 |
| 17:06:17 | 0:04:17 |  | 79.6930524 | 81.3812876 | 79.731787 | 72.2395153 |
| 17:06:18 | 0:04:18 |  | 78.6930524 | 81.3812876 | 79.731787 | 73.2395153 |
| 17:06:19 | 0:04:19 |  | 79.6930524 | 80.3812876 | 80.731787 | 75.2395153 |
| 17:06:20 | 0:04:20 |  | 79.6930524 | 82.3812876 | 80.731787 | 75.2395153 |
| 17:06:21 | 0:04:21 |  | 79.6930524 | 82.3812876 | 80.731787 | 75.2395153 |
| 17:06:22 | 0:04:22 |  | 79.6930524 | 82.3812876 | 80.731787 | 75.2395153 |
| 17:06:23 | 0:04:23 |  | 79.6930524 | 82.3812876 | 81.731787 | 75.2395153 |
| 17:06:24 | 0:04:24 |  | 79.6930524 | 83.3812876 | 81.731787 | 76.2395153 |
| 17:06:25 | 0:04:25 |  | 79.6930524 | 83.3812876 | 81.731787 | 76.2395153 |
| 17:06:26 | 0:04:26 |  | 79.6930524 | 83.3812876 | 81.731787 | 76.2395153 |
| 17:06:27 | 0:04:27 |  | 79.6930524 | 81.3812876 | 86.731787 | 75.2395153 |

|          |         |  |            |            |           |            |
|----------|---------|--|------------|------------|-----------|------------|
| 17:06:28 | 0:04:28 |  | 78.6930524 | 82.3812876 | 87.731787 | 73.2395153 |
| 17:06:29 | 0:04:29 |  | 77.6930524 | 82.3812876 | 87.731787 | 72.2395153 |
| 17:06:30 | 0:04:30 |  | 76.6930524 | 82.3812876 | 88.731787 | 72.2395153 |
| 17:06:31 | 0:04:31 |  | 75.6930524 | 81.3812876 | 89.731787 | 72.2395153 |
| 17:06:32 | 0:04:32 |  | 74.6930524 | 81.3812876 | 88.731787 | 72.2395153 |
| 17:06:33 | 0:04:33 |  | 74.6930524 | 81.3812876 | 87.731787 | 71.2395153 |
| 17:06:34 | 0:04:34 |  | 74.6930524 | 80.3812876 | 85.731787 | 68.2395153 |
| 17:06:35 | 0:04:35 |  | 74.6930524 | 80.3812876 | 84.731787 | 67.2395153 |
| 17:06:36 | 0:04:36 |  | 75.6930524 | 80.3812876 | 84.731787 | 69.2395153 |
| 17:06:37 | 0:04:37 |  | 75.6930524 | 80.3812876 | 84.731787 | 68.2395153 |
| 17:06:38 | 0:04:38 |  | 75.6930524 | 80.3812876 | 84.731787 | 68.2395153 |
| 17:06:39 | 0:04:39 |  | 75.6930524 | 81.3812876 | 84.731787 | 68.2395153 |
| 17:06:40 | 0:04:40 |  | 76.6930524 | 81.3812876 | 83.731787 | 68.2395153 |
| 17:06:41 | 0:04:41 |  | 76.6930524 | 81.3812876 | 83.731787 | 69.2395153 |
| 17:06:42 | 0:04:42 |  | 76.6930524 | 81.3812876 | 81.731787 | 69.2395153 |
| 17:06:43 | 0:04:43 |  | 76.6930524 | 81.3812876 | 81.731787 | 69.2395153 |
| 17:06:44 | 0:04:44 |  | 76.6930524 | 81.3812876 | 81.731787 | 71.2395153 |
| 17:06:45 | 0:04:45 |  | 78.6930524 | 81.3812876 | 82.731787 | 73.2395153 |
| 17:06:46 | 0:04:46 |  | 78.6930524 | 81.3812876 | 83.731787 | 73.2395153 |
| 17:06:47 | 0:04:47 |  | 78.6930524 | 81.3812876 | 84.731787 | 74.2395153 |
| 17:06:48 | 0:04:48 |  | 76.6930524 | 81.3812876 | 84.731787 | 74.2395153 |
| 17:06:49 | 0:04:49 |  | 76.6930524 | 81.3812876 | 86.731787 | 75.2395153 |
| 17:06:50 | 0:04:50 |  | 75.6930524 | 81.3812876 | 86.731787 | 75.2395153 |
| 17:06:51 | 0:04:51 |  | 74.6930524 | 81.3812876 | 86.731787 | 71.2395153 |
| 17:06:52 | 0:04:52 |  | 74.6930524 | 82.3812876 | 86.731787 | 71.2395153 |
| 17:06:53 | 0:04:53 |  | 74.6930524 | 85.3812876 | 85.731787 | 71.2395153 |
| 17:06:54 | 0:04:54 |  | 74.6930524 | 85.3812876 | 85.731787 | 71.2395153 |
| 17:06:55 | 0:04:55 |  | 75.6930524 | 87.3812876 | 84.731787 | 73.2395153 |
| 17:06:56 | 0:04:56 |  | 75.6930524 | 87.3812876 | 83.731787 | 73.2395153 |
| 17:06:57 | 0:04:57 |  | 75.6930524 | 87.3812876 | 81.731787 | 72.2395153 |
| 17:06:58 | 0:04:58 |  | 78.6930524 | 86.3812876 | 81.731787 | 72.2395153 |
| 17:06:59 | 0:04:59 |  | 76.6930524 | 86.3812876 | 81.731787 | 74.2395153 |
| 17:07:00 | 0:05:00 |  | 76.6930524 | 86.3812876 | 80.731787 | 75.2395153 |
| 17:07:01 | 0:05:01 |  | 76.6930524 | 86.3812876 | 80.731787 | 75.2395153 |
| 17:07:02 | 0:05:02 |  | 76.6930524 | 85.3812876 | 80.731787 | 76.2395153 |
| 17:07:03 | 0:05:03 |  | 75.6930524 | 85.3812876 | 79.731787 | 77.2395153 |
| 17:07:04 | 0:05:04 |  | 75.6930524 | 85.3812876 | 80.731787 | 78.2395153 |
| 17:07:05 | 0:05:05 |  | 75.6930524 | 85.3812876 | 83.731787 | 78.2395153 |
| 17:07:06 | 0:05:06 |  | 75.6930524 | 84.3812876 | 83.731787 | 78.2395153 |
| 17:07:07 | 0:05:07 |  | 75.6930524 | 83.3812876 | 82.731787 | 78.2395153 |
| 17:07:08 | 0:05:08 |  | 75.6930524 | 82.3812876 | 80.731787 | 76.2395153 |
| 17:07:09 | 0:05:09 |  | 75.6930524 | 82.3812876 | 80.731787 | 74.2395153 |
| 17:07:10 | 0:05:10 |  | 75.6930524 | 82.3812876 | 81.731787 | 74.2395153 |
| 17:07:11 | 0:05:11 |  | 76.6930524 | 82.3812876 | 81.731787 | 72.2395153 |
| 17:07:12 | 0:05:12 |  | 76.6930524 | 84.3812876 | 81.731787 | 72.2395153 |

|          |         |  |            |            |           |            |
|----------|---------|--|------------|------------|-----------|------------|
| 17:07:13 | 0:05:13 |  | 76.6930524 | 86.3812876 | 81.731787 | 72.2395153 |
| 17:07:14 | 0:05:14 |  | 77.6930524 | 86.3812876 | 81.731787 | 71.2395153 |
| 17:07:15 | 0:05:15 |  | 78.6930524 | 87.3812876 | 81.731787 | 73.2395153 |
| 17:07:16 | 0:05:16 |  | 78.6930524 | 89.3812876 | 81.731787 | 73.2395153 |
| 17:07:17 | 0:05:17 |  | 78.6930524 | 89.3812876 | 81.731787 | 76.2395153 |
| 17:07:18 | 0:05:18 |  | 79.6930524 | 89.3812876 | 81.731787 | 77.2395153 |
| 17:07:19 | 0:05:19 |  | 79.6930524 | 88.3812876 | 80.731787 | 77.2395153 |
| 17:07:20 | 0:05:20 |  | 79.6930524 | 88.3812876 | 78.731787 | 77.2395153 |
| 17:07:21 | 0:05:21 |  | 79.6930524 | 88.3812876 | 77.731787 | 77.2395153 |
| 17:07:22 | 0:05:22 |  | 79.6930524 | 89.3812876 | 77.731787 | 77.2395153 |
| 17:07:23 | 0:05:23 |  | 79.6930524 | 89.3812876 | 77.731787 | 77.2395153 |
| 17:07:24 | 0:05:24 |  | 79.6930524 | 89.3812876 | 77.731787 | 78.2395153 |
| 17:07:25 | 0:05:25 |  | 80.6930524 | 89.3812876 | 78.731787 | 79.2395153 |
| 17:07:26 | 0:05:26 |  | 79.6930524 | 89.3812876 | 78.731787 | 80.2395153 |
| 17:07:27 | 0:05:27 |  | 79.6930524 | 89.3812876 | 78.731787 | 80.2395153 |
| 17:07:28 | 0:05:28 |  | 79.6930524 | 87.3812876 | 78.731787 | 83.2395153 |
| 17:07:29 | 0:05:29 |  | 79.6930524 | 87.3812876 | 78.731787 | 82.2395153 |
| 17:07:30 | 0:05:30 |  | 79.6930524 | 87.3812876 | 78.731787 | 82.2395153 |
| 17:07:31 | 0:05:31 |  | 79.6930524 | 86.3812876 | 78.731787 | 81.2395153 |
| 17:07:32 | 0:05:32 |  | 79.6930524 | 86.3812876 | 78.731787 | 81.2395153 |
| 17:07:33 | 0:05:33 |  | 80.6930524 | 87.3812876 | 77.731787 | 80.2395153 |
| 17:07:34 | 0:05:34 |  | 80.6930524 | 87.3812876 | 77.731787 | 82.2395153 |
| 17:07:35 | 0:05:35 |  | 80.6930524 | 87.3812876 | 78.731787 | 82.2395153 |
| 17:07:36 | 0:05:36 |  | 80.6930524 | 87.3812876 | 79.731787 | 82.2395153 |
| 17:07:37 | 0:05:37 |  | 80.6930524 | 87.3812876 | 80.731787 | 86.2395153 |
| 17:07:38 | 0:05:38 |  | 80.6930524 | 92.3812876 | 80.731787 | 86.2395153 |
| 17:07:39 | 0:05:39 |  | 79.6930524 | 93.3812876 | 80.731787 | 87.2395153 |
| 17:07:40 | 0:05:40 |  | 79.6930524 | 94.3812876 | 80.731787 | 85.2395153 |
| 17:07:41 | 0:05:41 |  | 79.6930524 | 94.3812876 | 80.731787 | 85.2395153 |
| 17:07:42 | 0:05:42 |  | 79.6930524 | 94.3812876 | 80.731787 | 83.2395153 |
| 17:07:43 | 0:05:43 |  | 78.6930524 | 94.3812876 | 79.731787 | 82.2395153 |
| 17:07:44 | 0:05:44 |  | 78.6930524 | 94.3812876 | 80.731787 | 80.2395153 |
| 17:07:45 | 0:05:45 |  | 78.6930524 | 94.3812876 | 80.731787 | 81.2395153 |
| 17:07:46 | 0:05:46 |  | 77.6930524 | 94.3812876 | 81.731787 | 81.2395153 |
| 17:07:47 | 0:05:47 |  | 77.6930524 | 94.3812876 | 82.731787 | 81.2395153 |
| 17:07:48 | 0:05:48 |  | 77.6930524 | 94.3812876 | 82.731787 | 81.2395153 |
| 17:07:49 | 0:05:49 |  | 79.6930524 | 94.3812876 | 84.731787 | 83.2395153 |
| 17:07:50 | 0:05:50 |  | 80.6930524 | 94.3812876 | 84.731787 | 83.2395153 |
| 17:07:51 | 0:05:51 |  | 80.6930524 | 94.3812876 | 83.731787 | 82.2395153 |
| 17:07:52 | 0:05:52 |  | 81.6930524 | 94.3812876 | 83.731787 | 80.2395153 |
| 17:07:53 | 0:05:53 |  | 80.6930524 | 94.3812876 | 82.731787 | 80.2395153 |
| 17:07:54 | 0:05:54 |  | 80.6930524 | 93.3812876 | 82.731787 | 79.2395153 |
| 17:07:55 | 0:05:55 |  | 80.6930524 | 93.3812876 | 81.731787 | 78.2395153 |
| 17:07:56 | 0:05:56 |  | 81.6930524 | 92.3812876 | 81.731787 | 78.2395153 |
| 17:07:57 | 0:05:57 |  | 80.6930524 | 91.3812876 | 81.731787 | 78.2395153 |

|          |         |  |            |            |           |            |
|----------|---------|--|------------|------------|-----------|------------|
| 17:07:58 | 0:05:58 |  | 80.6930524 | 89.3812876 | 80.731787 | 78.2395153 |
| 17:07:59 | 0:05:59 |  | 80.6930524 | 89.3812876 | 78.731787 | 78.2395153 |
| 17:08:00 | 0:06:00 |  | 80.6930524 | 88.3812876 | 77.731787 | 78.2395153 |
| 17:08:01 | 0:06:01 |  | 79.6930524 | 87.3812876 | 77.731787 | 78.2395153 |
| 17:08:02 | 0:06:02 |  | 78.6930524 | 86.3812876 | 77.731787 | 78.2395153 |
| 17:08:03 | 0:06:03 |  | 82.6930524 | 85.3812876 | 77.731787 | 77.2395153 |
| 17:08:04 | 0:06:04 |  | 82.6930524 | 85.3812876 | 78.731787 | 76.2395153 |
| 17:08:05 | 0:06:05 |  | 82.6930524 | 85.3812876 | 79.731787 | 75.2395153 |
| 17:08:06 | 0:06:06 |  | 82.6930524 | 85.3812876 | 79.731787 | 75.2395153 |
| 17:08:07 | 0:06:07 |  | 82.6930524 | 85.3812876 | 79.731787 | 75.2395153 |
| 17:08:08 | 0:06:08 |  | 83.6930524 | 85.3812876 | 79.731787 | 75.2395153 |
| 17:08:09 | 0:06:09 |  | 83.6930524 | 84.3812876 | 79.731787 | 76.2395153 |
| 17:08:10 | 0:06:10 |  | 82.6930524 | 82.3812876 | 79.731787 | 77.2395153 |
| 17:08:11 | 0:06:11 |  | 81.6930524 | 82.3812876 | 79.731787 | 79.2395153 |
| 17:08:12 | 0:06:12 |  | 81.6930524 | 82.3812876 | 79.731787 | 77.2395153 |
| 17:08:13 | 0:06:13 |  | 81.6930524 | 82.3812876 | 79.731787 | 77.2395153 |
| 17:08:14 | 0:06:14 |  | 80.6930524 | 81.3812876 | 75.731787 | 76.2395153 |
| 17:08:15 | 0:06:15 |  | 80.6930524 | 81.3812876 | 74.731787 | 75.2395153 |
| 17:08:16 | 0:06:16 |  | 79.6930524 | 81.3812876 | 74.731787 | 75.2395153 |
| 17:08:17 | 0:06:17 |  | 79.6930524 | 80.3812876 | 76.731787 | 75.2395153 |
| 17:08:18 | 0:06:18 |  | 79.6930524 | 79.3812876 | 76.731787 | 74.2395153 |
| 17:08:19 | 0:06:19 |  | 79.6930524 | 79.3812876 | 76.731787 | 74.2395153 |
| 17:08:20 | 0:06:20 |  | 79.6930524 | 80.3812876 | 76.731787 | 74.2395153 |
| 17:08:21 | 0:06:21 |  | 79.6930524 | 80.3812876 | 76.731787 | 76.2395153 |
| 17:08:22 | 0:06:22 |  | 79.6930524 | 80.3812876 | 77.731787 | 76.2395153 |
| 17:08:23 | 0:06:23 |  | 79.6930524 | 76.3812876 | 77.731787 | 76.2395153 |
| 17:08:24 | 0:06:24 |  | 79.6930524 | 76.3812876 | 78.731787 | 76.2395153 |
| 17:08:25 | 0:06:25 |  | 78.6930524 | 77.3812876 | 80.731787 | 76.2395153 |
| 17:08:26 | 0:06:26 |  | 79.6930524 | 77.3812876 | 80.731787 | 77.2395153 |
| 17:08:27 | 0:06:27 |  | 79.6930524 | 80.3812876 | 79.731787 | 79.2395153 |
| 17:08:28 | 0:06:28 |  | 78.6930524 | 80.3812876 | 76.731787 | 80.2395153 |
| 17:08:29 | 0:06:29 |  | 78.6930524 | 82.3812876 | 76.731787 | 80.2395153 |
| 17:08:30 | 0:06:30 |  | 78.6930524 | 82.3812876 | 76.731787 | 80.2395153 |
| 17:08:31 | 0:06:31 |  | 78.6930524 | 83.3812876 | 76.731787 | 79.2395153 |
| 17:08:32 | 0:06:32 |  | 79.6930524 | 82.3812876 | 75.731787 | 78.2395153 |
| 17:08:33 | 0:06:33 |  | 79.6930524 | 82.3812876 | 74.731787 | 78.2395153 |
| 17:08:34 | 0:06:34 |  | 79.6930524 | 82.3812876 | 75.731787 | 78.2395153 |
| 17:08:35 | 0:06:35 |  | 79.6930524 | 83.3812876 | 77.731787 | 78.2395153 |
| 17:08:36 | 0:06:36 |  | 79.6930524 | 84.3812876 | 77.731787 | 78.2395153 |
| 17:08:37 | 0:06:37 |  | 79.6930524 | 84.3812876 | 77.731787 | 77.2395153 |
| 17:08:38 | 0:06:38 |  | 79.6930524 | 85.3812876 | 77.731787 | 75.2395153 |
| 17:08:39 | 0:06:39 |  | 78.6930524 | 85.3812876 | 77.731787 | 74.2395153 |
| 17:08:40 | 0:06:40 |  | 77.6930524 | 85.3812876 | 79.731787 | 75.2395153 |
| 17:08:41 | 0:06:41 |  | 77.6930524 | 85.3812876 | 79.731787 | 75.2395153 |
| 17:08:42 | 0:06:42 |  | 77.6930524 | 85.3812876 | 79.731787 | 75.2395153 |

|          |         |  |            |            |           |            |
|----------|---------|--|------------|------------|-----------|------------|
| 17:08:43 | 0:06:43 |  | 77.6930524 | 86.3812876 | 80.731787 | 75.2395153 |
| 17:08:44 | 0:06:44 |  | 77.6930524 | 86.3812876 | 80.731787 | 75.2395153 |
| 17:08:45 | 0:06:45 |  | 77.6930524 | 86.3812876 | 80.731787 | 74.2395153 |
| 17:08:46 | 0:06:46 |  | 77.6930524 | 86.3812876 | 80.731787 | 73.2395153 |
| 17:08:47 | 0:06:47 |  | 78.6930524 | 87.3812876 | 80.731787 | 73.2395153 |
| 17:08:48 | 0:06:48 |  | 80.6930524 | 87.3812876 | 80.731787 | 74.2395153 |
| 17:08:49 | 0:06:49 |  | 81.6930524 | 87.3812876 | 80.731787 | 72.2395153 |
| 17:08:50 | 0:06:50 |  | 81.6930524 | 87.3812876 | 81.731787 | 71.2395153 |
| 17:08:51 | 0:06:51 |  | 82.6930524 | 88.3812876 | 82.731787 | 71.2395153 |
| 17:08:52 | 0:06:52 |  | 90.6930524 | 88.3812876 | 89.731787 | 71.2395153 |
| 17:08:53 | 0:06:53 |  | 79.6930524 | 88.3812876 | 91.731787 | 71.2395153 |
| 17:08:54 | 0:06:54 |  | 79.6930524 | 88.3812876 | 91.731787 | 71.2395153 |
| 17:08:55 | 0:06:55 |  | 78.6930524 | 88.3812876 | 91.731787 | 71.2395153 |
| 17:08:56 | 0:06:56 |  | 77.6930524 | 87.3812876 | 92.731787 | 71.2395153 |
| 17:08:57 | 0:06:57 |  | 76.6930524 | 87.3812876 | 92.731787 | 71.2395153 |
| 17:08:58 | 0:06:58 |  | 76.6930524 | 90.3812876 | 93.731787 | 71.2395153 |
| 17:08:59 | 0:06:59 |  | 77.6930524 | 90.3812876 | 94.731787 | 71.2395153 |
| 17:09:00 | 0:07:00 |  | 77.6930524 | 90.3812876 | 94.731787 | 71.2395153 |
| 17:09:01 | 0:07:01 |  | 78.6930524 | 89.3812876 | 94.731787 | 71.2395153 |
| 17:09:02 | 0:07:02 |  | 78.6930524 | 89.3812876 | 94.731787 | 71.2395153 |
| 17:09:03 | 0:07:03 |  | 78.6930524 | 89.3812876 | 94.731787 | 71.2395153 |
| 17:09:04 | 0:07:04 |  | 77.6930524 | 89.3812876 | 94.731787 | 70.2395153 |
| 17:09:05 | 0:07:05 |  | 78.6930524 | 89.3812876 | 94.731787 | 70.2395153 |
| 17:09:06 | 0:07:06 |  | 77.6930524 | 88.3812876 | 94.731787 | 70.2395153 |
| 17:09:07 | 0:07:07 |  | 76.6930524 | 88.3812876 | 90.731787 | 70.2395153 |
| 17:09:08 | 0:07:08 |  | 75.6930524 | 88.3812876 | 86.731787 | 70.2395153 |
| 17:09:09 | 0:07:09 |  | 76.6930524 | 85.3812876 | 86.731787 | 70.2395153 |
| 17:09:10 | 0:07:10 |  | 77.6930524 | 84.3812876 | 86.731787 | 70.2395153 |
| 17:09:11 | 0:07:11 |  | 77.6930524 | 84.3812876 | 86.731787 | 70.2395153 |
| 17:09:12 | 0:07:12 |  | 77.6930524 | 80.3812876 | 86.731787 | 69.2395153 |
| 17:09:13 | 0:07:13 |  | 78.6930524 | 80.3812876 | 85.731787 | 69.2395153 |
| 17:09:14 | 0:07:14 |  | 78.6930524 | 80.3812876 | 85.731787 | 70.2395153 |
| 17:09:15 | 0:07:15 |  | 78.6930524 | 80.3812876 | 89.731787 | 70.2395153 |
| 17:09:16 | 0:07:16 |  | 78.6930524 | 79.3812876 | 89.731787 | 74.2395153 |
| 17:09:17 | 0:07:17 |  | 77.6930524 | 79.3812876 | 92.731787 | 74.2395153 |
| 17:09:18 | 0:07:18 |  | 76.6930524 | 79.3812876 | 92.731787 | 74.2395153 |
| 17:09:19 | 0:07:19 |  | 77.6930524 | 79.3812876 | 91.731787 | 74.2395153 |
| 17:09:20 | 0:07:20 |  | 77.6930524 | 80.3812876 | 87.731787 | 74.2395153 |
| 17:09:21 | 0:07:21 |  | 78.6930524 | 82.3812876 | 83.731787 | 74.2395153 |
| 17:09:22 | 0:07:22 |  | 79.6930524 | 83.3812876 | 80.731787 | 76.2395153 |
| 17:09:23 | 0:07:23 |  | 80.6930524 | 83.3812876 | 79.731787 | 76.2395153 |
| 17:09:24 | 0:07:24 |  | 80.6930524 | 84.3812876 | 78.731787 | 76.2395153 |
| 17:09:25 | 0:07:25 |  | 80.6930524 | 84.3812876 | 78.731787 | 76.2395153 |
| 17:09:26 | 0:07:26 |  | 80.6930524 | 88.3812876 | 78.731787 | 76.2395153 |
| 17:09:27 | 0:07:27 |  | 80.6930524 | 89.3812876 | 78.731787 | 76.2395153 |

|          |         |  |            |            |           |            |
|----------|---------|--|------------|------------|-----------|------------|
| 17:09:28 | 0:07:28 |  | 80.6930524 | 89.3812876 | 77.731787 | 76.2395153 |
| 17:09:29 | 0:07:29 |  | 80.6930524 | 88.3812876 | 77.731787 | 75.2395153 |
| 17:09:30 | 0:07:30 |  | 80.6930524 | 87.3812876 | 76.731787 | 75.2395153 |
| 17:09:31 | 0:07:31 |  | 80.6930524 | 87.3812876 | 77.731787 | 75.2395153 |
| 17:09:32 | 0:07:32 |  | 80.6930524 | 89.3812876 | 77.731787 | 75.2395153 |
| 17:09:33 | 0:07:33 |  | 80.6930524 | 89.3812876 | 78.731787 | 75.2395153 |
| 17:09:34 | 0:07:34 |  | 80.6930524 | 91.3812876 | 80.731787 | 74.2395153 |
| 17:09:35 | 0:07:35 |  | 80.6930524 | 91.3812876 | 81.731787 | 74.2395153 |
| 17:09:36 | 0:07:36 |  | 80.6930524 | 91.3812876 | 81.731787 | 74.2395153 |
| 17:09:37 | 0:07:37 |  | 80.6930524 | 91.3812876 | 82.731787 | 74.2395153 |
| 17:09:38 | 0:07:38 |  | 80.6930524 | 91.3812876 | 82.731787 | 74.2395153 |
| 17:09:39 | 0:07:39 |  | 79.6930524 | 91.3812876 | 83.731787 | 73.2395153 |
| 17:09:40 | 0:07:40 |  | 79.6930524 | 84.3812876 | 83.731787 | 73.2395153 |
| 17:09:41 | 0:07:41 |  | 78.6930524 | 81.3812876 | 83.731787 | 74.2395153 |
| 17:09:42 | 0:07:42 |  | 78.6930524 | 81.3812876 | 83.731787 | 75.2395153 |
| 17:09:43 | 0:07:43 |  | 78.6930524 | 80.3812876 | 83.731787 | 76.2395153 |
| 17:09:44 | 0:07:44 |  | 78.6930524 | 79.3812876 | 83.731787 | 76.2395153 |
| 17:09:45 | 0:07:45 |  | 78.6930524 | 79.3812876 | 83.731787 | 75.2395153 |
| 17:09:46 | 0:07:46 |  | 77.6930524 | 79.3812876 | 84.731787 | 75.2395153 |
| 17:09:47 | 0:07:47 |  | 77.6930524 | 79.3812876 | 84.731787 | 75.2395153 |
| 17:09:48 | 0:07:48 |  | 76.6930524 | 74.3812876 | 90.731787 | 75.2395153 |
| 17:09:49 | 0:07:49 |  | 77.6930524 | 73.3812876 | 90.731787 | 75.2395153 |
| 17:09:50 | 0:07:50 |  | 77.6930524 | 73.3812876 | 90.731787 | 75.2395153 |
| 17:09:51 | 0:07:51 |  | 77.6930524 | 72.3812876 | 91.731787 | 76.2395153 |
| 17:09:52 | 0:07:52 |  | 77.6930524 | 72.3812876 | 91.731787 | 77.2395153 |
| 17:09:53 | 0:07:53 |  | 78.6930524 | 76.3812876 | 92.731787 | 78.2395153 |
| 17:09:54 | 0:07:54 |  | 78.6930524 | 79.3812876 | 92.731787 | 78.2395153 |
| 17:09:55 | 0:07:55 |  | 78.6930524 | 79.3812876 | 92.731787 | 78.2395153 |
| 17:09:56 | 0:07:56 |  | 79.6930524 | 81.3812876 | 92.731787 | 77.2395153 |
| 17:09:57 | 0:07:57 |  | 81.6930524 | 81.3812876 | 91.731787 | 77.2395153 |
| 17:09:58 | 0:07:58 |  | 81.6930524 | 83.3812876 | 91.731787 | 76.2395153 |
| 17:09:59 | 0:07:59 |  | 81.6930524 | 83.3812876 | 91.731787 | 75.2395153 |
| 17:10:00 | 0:08:00 |  | 81.6930524 | 83.3812876 | 91.731787 | 75.2395153 |
| 17:10:01 | 0:08:01 |  | 82.6930524 | 83.3812876 | 91.731787 | 75.2395153 |
| 17:10:02 | 0:08:02 |  | 83.6930524 | 83.3812876 | 91.731787 | 75.2395153 |
| 17:10:03 | 0:08:03 |  | 83.6930524 | 83.3812876 | 89.731787 | 75.2395153 |
| 17:10:04 | 0:08:04 |  | 83.6930524 | 83.3812876 | 89.731787 | 75.2395153 |
| 17:10:05 | 0:08:05 |  | 85.6930524 | 84.3812876 | 88.731787 | 74.2395153 |
| 17:10:06 | 0:08:06 |  | 86.6930524 | 84.3812876 | 87.731787 | 74.2395153 |
| 17:10:07 | 0:08:07 |  | 86.6930524 | 84.3812876 | 87.731787 | 74.2395153 |
| 17:10:08 | 0:08:08 |  | 86.6930524 | 84.3812876 | 87.731787 | 73.2395153 |
| 17:10:09 | 0:08:09 |  | 84.6930524 | 84.3812876 | 85.731787 | 73.2395153 |
| 17:10:10 | 0:08:10 |  | 83.6930524 | 83.3812876 | 85.731787 | 73.2395153 |
| 17:10:11 | 0:08:11 |  | 83.6930524 | 84.3812876 | 81.731787 | 74.2395153 |
| 17:10:12 | 0:08:12 |  | 80.6930524 | 87.3812876 | 81.731787 | 74.2395153 |

|          |         |  |            |            |           |            |
|----------|---------|--|------------|------------|-----------|------------|
| 17:10:13 | 0:08:13 |  | 79.6930524 | 88.3812876 | 80.731787 | 77.2395153 |
| 17:10:14 | 0:08:14 |  | 78.6930524 | 88.3812876 | 80.731787 | 78.2395153 |
| 17:10:15 | 0:08:15 |  | 78.6930524 | 88.3812876 | 80.731787 | 78.2395153 |
| 17:10:16 | 0:08:16 |  | 79.6930524 | 87.3812876 | 80.731787 | 78.2395153 |
| 17:10:17 | 0:08:17 |  | 79.6930524 | 87.3812876 | 80.731787 | 78.2395153 |
| 17:10:18 | 0:08:18 |  | 80.6930524 | 87.3812876 | 80.731787 | 81.2395153 |
| 17:10:19 | 0:08:19 |  | 83.6930524 | 87.3812876 | 80.731787 | 81.2395153 |
| 17:10:20 | 0:08:20 |  | 83.6930524 | 87.3812876 | 80.731787 | 82.2395153 |
| 17:10:21 | 0:08:21 |  | 83.6930524 | 87.3812876 | 80.731787 | 81.2395153 |
| 17:10:22 | 0:08:22 |  | 83.6930524 | 86.3812876 | 80.731787 | 80.2395153 |
| 17:10:23 | 0:08:23 |  | 82.6930524 | 86.3812876 | 79.731787 | 80.2395153 |
| 17:10:24 | 0:08:24 |  | 80.6930524 | 86.3812876 | 79.731787 | 77.2395153 |
| 17:10:25 | 0:08:25 |  | 80.6930524 | 85.3812876 | 78.731787 | 76.2395153 |
| 17:10:26 | 0:08:26 |  | 80.6930524 | 85.3812876 | 78.731787 | 75.2395153 |
| 17:10:27 | 0:08:27 |  | 79.6930524 | 85.3812876 | 78.731787 | 75.2395153 |
| 17:10:28 | 0:08:28 |  | 78.6930524 | 85.3812876 | 78.731787 | 73.2395153 |
| 17:10:29 | 0:08:29 |  | 76.6930524 | 85.3812876 | 78.731787 | 73.2395153 |
| 17:10:30 | 0:08:30 |  | 76.6930524 | 85.3812876 | 78.731787 | 73.2395153 |
| 17:10:31 | 0:08:31 |  | 76.6930524 | 85.3812876 | 78.731787 | 73.2395153 |
| 17:10:32 | 0:08:32 |  | 76.6930524 | 84.3812876 | 78.731787 | 72.2395153 |
| 17:10:33 | 0:08:33 |  | 76.6930524 | 83.3812876 | 79.731787 | 72.2395153 |
| 17:10:34 | 0:08:34 |  | 76.6930524 | 82.3812876 | 79.731787 | 72.2395153 |
| 17:10:35 | 0:08:35 |  | 76.6930524 | 82.3812876 | 80.731787 | 72.2395153 |
| 17:10:36 | 0:08:36 |  | 74.6930524 | 81.3812876 | 79.731787 | 72.2395153 |
| 17:10:37 | 0:08:37 |  | 74.6930524 | 79.3812876 | 79.731787 | 72.2395153 |
| 17:10:38 | 0:08:38 |  | 74.6930524 | 80.3812876 | 79.731787 | 72.2395153 |
| 17:10:39 | 0:08:39 |  | 75.6930524 | 81.3812876 | 79.731787 | 72.2395153 |
| 17:10:40 | 0:08:40 |  | 75.6930524 | 81.3812876 | 80.731787 | 72.2395153 |
| 17:10:41 | 0:08:41 |  | 75.6930524 | 81.3812876 | 80.731787 | 72.2395153 |
| 17:10:42 | 0:08:42 |  | 78.6930524 | 81.3812876 | 80.731787 | 72.2395153 |
| 17:10:43 | 0:08:43 |  | 80.6930524 | 81.3812876 | 80.731787 | 72.2395153 |
| 17:10:44 | 0:08:44 |  | 80.6930524 | 81.3812876 | 80.731787 | 73.2395153 |
| 17:10:45 | 0:08:45 |  | 81.6930524 | 81.3812876 | 80.731787 | 73.2395153 |
| 17:10:46 | 0:08:46 |  | 81.6930524 | 82.3812876 | 80.731787 | 73.2395153 |
| 17:10:47 | 0:08:47 |  | 81.6930524 | 82.3812876 | 79.731787 | 73.2395153 |
| 17:10:48 | 0:08:48 |  | 80.6930524 | 84.3812876 | 79.731787 | 74.2395153 |
| 17:10:49 | 0:08:49 |  | 80.6930524 | 85.3812876 | 79.731787 | 74.2395153 |
| 17:10:50 | 0:08:50 |  | 80.6930524 | 85.3812876 | 79.731787 | 74.2395153 |
| 17:10:51 | 0:08:51 |  | 79.6930524 | 88.3812876 | 79.731787 | 74.2395153 |
| 17:10:52 | 0:08:52 |  | 79.6930524 | 89.3812876 | 80.731787 | 74.2395153 |
| 17:10:53 | 0:08:53 |  | 79.6930524 | 92.3812876 | 80.731787 | 74.2395153 |
| 17:10:54 | 0:08:54 |  | 78.6930524 | 92.3812876 | 81.731787 | 75.2395153 |
| 17:10:55 | 0:08:55 |  | 78.6930524 | 94.3812876 | 81.731787 | 76.2395153 |
| 17:10:56 | 0:08:56 |  | 77.6930524 | 95.3812876 | 81.731787 | 76.2395153 |
| 17:10:57 | 0:08:57 |  | 78.6930524 | 95.3812876 | 81.731787 | 76.2395153 |



|          |         |  |            |            |           |            |
|----------|---------|--|------------|------------|-----------|------------|
| 17:10:58 | 0:08:58 |  | 78.6930524 | 95.3812876 | 81.731787 | 77.2395153 |
| 17:10:59 | 0:08:59 |  | 78.6930524 | 95.3812876 | 80.731787 | 77.2395153 |
| 17:11:00 | 0:09:00 |  | 78.6930524 | 96.3812876 | 80.731787 | 77.2395153 |
| 17:11:01 | 0:09:01 |  | 79.6930524 | 96.3812876 | 80.731787 | 77.2395153 |
| 17:11:02 | 0:09:02 |  | 78.6930524 | 97.3812876 | 80.731787 | 77.2395153 |
| 17:11:03 | 0:09:03 |  | 78.6930524 | 97.3812876 | 80.731787 | 77.2395153 |
| 17:11:04 | 0:09:04 |  | 77.6930524 | 97.3812876 | 81.731787 | 77.2395153 |
| 17:11:05 | 0:09:05 |  | 76.6930524 | 97.3812876 | 82.731787 | 77.2395153 |
| 17:11:06 | 0:09:06 |  | 76.6930524 | 96.3812876 | 83.731787 | 77.2395153 |
| 17:11:07 | 0:09:07 |  | 75.6930524 | 96.3812876 | 83.731787 | 78.2395153 |
| 17:11:08 | 0:09:08 |  | 75.6930524 | 92.3812876 | 83.731787 | 73.2395153 |
| 17:11:09 | 0:09:09 |  | 76.6930524 | 92.3812876 | 81.731787 | 71.2395153 |
| 17:11:10 | 0:09:10 |  | 76.6930524 | 92.3812876 | 79.731787 | 71.2395153 |
| 17:11:11 | 0:09:11 |  | 77.6930524 | 91.3812876 | 78.731787 | 72.2395153 |
| 17:11:12 | 0:09:12 |  | 78.6930524 | 90.3812876 | 78.731787 | 72.2395153 |
| 17:11:13 | 0:09:13 |  | 78.6930524 | 89.3812876 | 77.731787 | 75.2395153 |
| 17:11:14 | 0:09:14 |  | 79.6930524 | 87.3812876 | 77.731787 | 74.2395153 |
| 17:11:15 | 0:09:15 |  | 79.6930524 | 85.3812876 | 78.731787 | 74.2395153 |
| 17:11:16 | 0:09:16 |  | 78.6930524 | 85.3812876 | 79.731787 | 74.2395153 |
| 17:11:17 | 0:09:17 |  | 78.6930524 | 84.3812876 | 79.731787 | 74.2395153 |
| 17:11:18 | 0:09:18 |  | 77.6930524 | 79.3812876 | 81.731787 | 73.2395153 |
| 17:11:19 | 0:09:19 |  | 76.6930524 | 77.3812876 | 81.731787 | 73.2395153 |
| 17:11:20 | 0:09:20 |  | 75.6930524 | 77.3812876 | 81.731787 | 73.2395153 |
| 17:11:21 | 0:09:21 |  | 74.6930524 | 77.3812876 | 80.731787 | 74.2395153 |
| 17:11:22 | 0:09:22 |  | 75.6930524 | 76.3812876 | 80.731787 | 75.2395153 |
| 17:11:23 | 0:09:23 |  | 75.6930524 | 76.3812876 | 82.731787 | 75.2395153 |
| 17:11:24 | 0:09:24 |  | 75.6930524 | 76.3812876 | 82.731787 | 75.2395153 |
| 17:11:25 | 0:09:25 |  | 76.6930524 | 75.3812876 | 85.731787 | 74.2395153 |
| 17:11:26 | 0:09:26 |  | 77.6930524 | 76.3812876 | 85.731787 | 74.2395153 |
| 17:11:27 | 0:09:27 |  | 78.6930524 | 76.3812876 | 85.731787 | 75.2395153 |
| 17:11:28 | 0:09:28 |  | 77.6930524 | 76.3812876 | 85.731787 | 75.2395153 |
| 17:11:29 | 0:09:29 |  | 77.6930524 | 77.3812876 | 85.731787 | 75.2395153 |
| 17:11:30 | 0:09:30 |  | 77.6930524 | 77.3812876 | 85.731787 | 75.2395153 |
| 17:11:31 | 0:09:31 |  | 76.6930524 | 77.3812876 | 85.731787 | 75.2395153 |
| 17:11:32 | 0:09:32 |  | 76.6930524 | 77.3812876 | 85.731787 | 75.2395153 |
| 17:11:33 | 0:09:33 |  | 76.6930524 | 78.3812876 | 84.731787 | 75.2395153 |
| 17:11:34 | 0:09:34 |  | 76.6930524 | 78.3812876 | 82.731787 | 75.2395153 |
| 17:11:35 | 0:09:35 |  | 76.6930524 | 78.3812876 | 81.731787 | 74.2395153 |
| 17:11:36 | 0:09:36 |  | 76.6930524 | 77.3812876 | 81.731787 | 74.2395153 |
| 17:11:37 | 0:09:37 |  | 76.6930524 | 77.3812876 | 81.731787 | 71.2395153 |
| 17:11:38 | 0:09:38 |  | 76.6930524 | 78.3812876 | 81.731787 | 71.2395153 |
| 17:11:39 | 0:09:39 |  | 76.6930524 | 78.3812876 | 81.731787 | 71.2395153 |
| 17:11:40 | 0:09:40 |  | 77.6930524 | 78.3812876 | 81.731787 | 71.2395153 |
| 17:11:41 | 0:09:41 |  | 76.6930524 | 83.3812876 | 81.731787 | 71.2395153 |
| 17:11:42 | 0:09:42 |  | 76.6930524 | 83.3812876 | 80.731787 | 71.2395153 |

|          |         |  |            |            |           |            |
|----------|---------|--|------------|------------|-----------|------------|
| 17:11:43 | 0:09:43 |  | 76.6930524 | 83.3812876 | 79.731787 | 74.2395153 |
| 17:11:44 | 0:09:44 |  | 76.6930524 | 80.3812876 | 78.731787 | 75.2395153 |
| 17:11:45 | 0:09:45 |  | 77.6930524 | 78.3812876 | 78.731787 | 76.2395153 |
| 17:11:46 | 0:09:46 |  | 78.6930524 | 78.3812876 | 78.731787 | 76.2395153 |
| 17:11:47 | 0:09:47 |  | 79.6930524 | 79.3812876 | 78.731787 | 76.2395153 |
| 17:11:48 | 0:09:48 |  | 79.6930524 | 79.3812876 | 79.731787 | 76.2395153 |
| 17:11:49 | 0:09:49 |  | 79.6930524 | 82.3812876 | 80.731787 | 77.2395153 |
| 17:11:50 | 0:09:50 |  | 78.6930524 | 82.3812876 | 81.731787 | 77.2395153 |
| 17:11:51 | 0:09:51 |  | 77.6930524 | 83.3812876 | 82.731787 | 77.2395153 |
| 17:11:52 | 0:09:52 |  | 75.6930524 | 83.3812876 | 82.731787 | 77.2395153 |
| 17:11:53 | 0:09:53 |  | 75.6930524 | 83.3812876 | 82.731787 | 77.2395153 |
| 17:11:54 | 0:09:54 |  | 74.6930524 | 83.3812876 | 81.731787 | 75.2395153 |
| 17:11:55 | 0:09:55 |  | 75.6930524 | 83.3812876 | 81.731787 | 76.2395153 |
| 17:11:56 | 0:09:56 |  | 75.6930524 | 83.3812876 | 81.731787 | 77.2395153 |
| 17:11:57 | 0:09:57 |  | 75.6930524 | 83.3812876 | 81.731787 | 78.2395153 |
| 17:11:58 | 0:09:58 |  | 76.6930524 | 83.3812876 | 81.731787 | 78.2395153 |
| 17:11:59 | 0:09:59 |  | 77.6930524 | 83.3812876 | 81.731787 | 78.2395153 |
| 17:12:00 | 0:10:00 |  | 77.6930524 | 84.3812876 | 81.731787 | 78.2395153 |
| 17:12:01 | 0:10:01 |  | 79.6930524 | 87.3812876 | 81.731787 | 78.2395153 |
| 17:12:02 | 0:10:02 |  | 79.6930524 | 89.3812876 | 81.731787 | 78.2395153 |
| 17:12:03 | 0:10:03 |  | 79.6930524 | 92.3812876 | 81.731787 | 78.2395153 |
| 17:12:04 | 0:10:04 |  | 79.6930524 | 92.3812876 | 82.731787 | 78.2395153 |
| 17:12:05 | 0:10:05 |  | 79.6930524 | 94.3812876 | 82.731787 | 78.2395153 |
| 17:12:06 | 0:10:06 |  | 78.6930524 | 94.3812876 | 83.731787 | 78.2395153 |
| 17:12:07 | 0:10:07 |  | 77.6930524 | 94.3812876 | 83.731787 | 78.2395153 |
| 17:12:08 | 0:10:08 |  | 77.6930524 | 95.3812876 | 84.731787 | 77.2395153 |
| 17:12:09 | 0:10:09 |  | 77.6930524 | 95.3812876 | 84.731787 | 77.2395153 |
| 17:12:10 | 0:10:10 |  | 77.6930524 | 95.3812876 | 84.731787 | 77.2395153 |
| 17:12:11 | 0:10:11 |  | 77.6930524 | 95.3812876 | 86.731787 | 77.2395153 |
| 17:12:12 | 0:10:12 |  | 78.6930524 | 94.3812876 | 86.731787 | 77.2395153 |
| 17:12:13 | 0:10:13 |  | 78.6930524 | 94.3812876 | 86.731787 | 77.2395153 |
| 17:12:14 | 0:10:14 |  | 78.6930524 | 94.3812876 | 88.731787 | 77.2395153 |
| 17:12:15 | 0:10:15 |  | 78.6930524 | 93.3812876 | 88.731787 | 77.2395153 |
| 17:12:16 | 0:10:16 |  | 78.6930524 | 93.3812876 | 90.731787 | 77.2395153 |
| 17:12:17 | 0:10:17 |  | 78.6930524 | 93.3812876 | 92.731787 | 78.2395153 |
| 17:12:18 | 0:10:18 |  | 78.6930524 | 93.3812876 | 92.731787 | 78.2395153 |
| 17:12:19 | 0:10:19 |  | 77.6930524 | 93.3812876 | 92.731787 | 76.2395153 |
| 17:12:20 | 0:10:20 |  | 77.6930524 | 88.3812876 | 92.731787 | 76.2395153 |
| 17:12:21 | 0:10:21 |  | 77.6930524 | 88.3812876 | 92.731787 | 76.2395153 |
| 17:12:22 | 0:10:22 |  | 77.6930524 | 86.3812876 | 92.731787 | 76.2395153 |
| 17:12:23 | 0:10:23 |  | 76.6930524 | 77.3812876 | 92.731787 | 76.2395153 |
| 17:12:24 | 0:10:24 |  | 75.6930524 | 77.3812876 | 93.731787 | 76.2395153 |
| 17:12:25 | 0:10:25 |  | 75.6930524 | 77.3812876 | 93.731787 | 74.2395153 |
| 17:12:26 | 0:10:26 |  | 74.6930524 | 77.3812876 | 93.731787 | 74.2395153 |
| 17:12:27 | 0:10:27 |  | 74.6930524 | 76.3812876 | 93.731787 | 74.2395153 |

|          |         |  |            |            |           |            |
|----------|---------|--|------------|------------|-----------|------------|
| 17:12:28 | 0:10:28 |  | 75.6930524 | 76.3812876 | 93.731787 | 74.2395153 |
| 17:12:29 | 0:10:29 |  | 75.6930524 | 76.3812876 | 93.731787 | 74.2395153 |
| 17:12:30 | 0:10:30 |  | 76.6930524 | 76.3812876 | 93.731787 | 76.2395153 |
| 17:12:31 | 0:10:31 |  | 77.6930524 | 75.3812876 | 78.731787 | 76.2395153 |
| 17:12:32 | 0:10:32 |  | 77.6930524 | 78.3812876 | 76.731787 | 77.2395153 |
| 17:12:33 | 0:10:33 |  | 76.6930524 | 78.3812876 | 75.731787 | 78.2395153 |
| 17:12:34 | 0:10:34 |  | 76.6930524 | 77.3812876 | 75.731787 | 78.2395153 |
| 17:12:35 | 0:10:35 |  | 75.6930524 | 76.3812876 | 75.731787 | 78.2395153 |
| 17:12:36 | 0:10:36 |  | 75.6930524 | 75.3812876 | 77.731787 | 77.2395153 |
| 17:12:37 | 0:10:37 |  | 74.6930524 | 76.3812876 | 78.731787 | 74.2395153 |
| 17:12:38 | 0:10:38 |  | 74.6930524 | 76.3812876 | 79.731787 | 74.2395153 |
| 17:12:39 | 0:10:39 |  | 74.6930524 | 76.3812876 | 80.731787 | 74.2395153 |
| 17:12:40 | 0:10:40 |  | 74.6930524 | 76.3812876 | 79.731787 | 73.2395153 |
| 17:12:41 | 0:10:41 |  | 74.6930524 | 76.3812876 | 79.731787 | 71.2395153 |
| 17:12:42 | 0:10:42 |  | 76.6930524 | 76.3812876 | 79.731787 | 72.2395153 |
| 17:12:43 | 0:10:43 |  | 76.6930524 | 76.3812876 | 78.731787 | 72.2395153 |
| 17:12:44 | 0:10:44 |  | 77.6930524 | 76.3812876 | 78.731787 | 72.2395153 |
| 17:12:45 | 0:10:45 |  | 78.6930524 | 77.3812876 | 79.731787 | 72.2395153 |
| 17:12:46 | 0:10:46 |  | 79.6930524 | 76.3812876 | 79.731787 | 72.2395153 |
| 17:12:47 | 0:10:47 |  | 79.6930524 | 76.3812876 | 80.731787 | 73.2395153 |
| 17:12:48 | 0:10:48 |  | 79.6930524 | 77.3812876 | 81.731787 | 73.2395153 |
| 17:12:49 | 0:10:49 |  | 79.6930524 | 76.3812876 | 81.731787 | 73.2395153 |
| 17:12:50 | 0:10:50 |  | 78.6930524 | 76.3812876 | 81.731787 | 73.2395153 |
| 17:12:51 | 0:10:51 |  | 79.6930524 | 77.3812876 | 81.731787 | 73.2395153 |
| 17:12:52 | 0:10:52 |  | 79.6930524 | 78.3812876 | 81.731787 | 75.2395153 |
| 17:12:53 | 0:10:53 |  | 79.6930524 | 78.3812876 | 81.731787 | 76.2395153 |
| 17:12:54 | 0:10:54 |  | 79.6930524 | 80.3812876 | 81.731787 | 77.2395153 |
| 17:12:55 | 0:10:55 |  | 80.6930524 | 81.3812876 | 81.731787 | 77.2395153 |
| 17:12:56 | 0:10:56 |  | 79.6930524 | 82.3812876 | 81.731787 | 77.2395153 |
| 17:12:57 | 0:10:57 |  | 78.6930524 | 82.3812876 | 81.731787 | 76.2395153 |
| 17:12:58 | 0:10:58 |  | 78.6930524 | 82.3812876 | 81.731787 | 75.2395153 |
| 17:12:59 | 0:10:59 |  | 78.6930524 | 82.3812876 | 82.731787 | 75.2395153 |
| 17:13:00 | 0:11:00 |  | 78.6930524 | 82.3812876 | 82.731787 | 74.2395153 |
| 17:13:01 | 0:11:01 |  | 78.6930524 | 82.3812876 | 82.731787 | 74.2395153 |
| 17:13:02 | 0:11:02 |  | 78.6930524 | 82.3812876 | 82.731787 | 74.2395153 |
| 17:13:03 | 0:11:03 |  | 78.6930524 | 85.3812876 | 83.731787 | 74.2395153 |
| 17:13:04 | 0:11:04 |  | 78.6930524 | 88.3812876 | 84.731787 | 74.2395153 |
| 17:13:05 | 0:11:05 |  | 78.6930524 | 90.3812876 | 84.731787 | 75.2395153 |
| 17:13:06 | 0:11:06 |  | 78.6930524 | 90.3812876 | 84.731787 | 75.2395153 |
| 17:13:07 | 0:11:07 |  | 78.6930524 | 90.3812876 | 84.731787 | 76.2395153 |
| 17:13:08 | 0:11:08 |  | 78.6930524 | 89.3812876 | 84.731787 | 76.2395153 |
| 17:13:09 | 0:11:09 |  | 78.6930524 | 88.3812876 | 85.731787 | 76.2395153 |
| 17:13:10 | 0:11:10 |  | 78.6930524 | 88.3812876 | 85.731787 | 76.2395153 |
| 17:13:11 | 0:11:11 |  | 79.6930524 | 87.3812876 | 85.731787 | 76.2395153 |
| 17:13:12 | 0:11:12 |  | 79.6930524 | 87.3812876 | 85.731787 | 76.2395153 |

|          |         |  |            |            |           |            |
|----------|---------|--|------------|------------|-----------|------------|
| 17:13:13 | 0:11:13 |  | 79.6930524 | 88.3812876 | 84.731787 | 80.2395153 |
| 17:13:14 | 0:11:14 |  | 79.6930524 | 87.3812876 | 84.731787 | 80.2395153 |
| 17:13:15 | 0:11:15 |  | 79.6930524 | 87.3812876 | 84.731787 | 79.2395153 |
| 17:13:16 | 0:11:16 |  | 80.6930524 | 87.3812876 | 77.731787 | 79.2395153 |
| 17:13:17 | 0:11:17 |  | 80.6930524 | 86.3812876 | 76.731787 | 78.2395153 |
| 17:13:18 | 0:11:18 |  | 79.6930524 | 86.3812876 | 76.731787 | 76.2395153 |
| 17:13:19 | 0:11:19 |  | 78.6930524 | 86.3812876 | 76.731787 | 75.2395153 |
| 17:13:20 | 0:11:20 |  | 78.6930524 | 81.3812876 | 76.731787 | 74.2395153 |
| 17:13:21 | 0:11:21 |  | 78.6930524 | 79.3812876 | 76.731787 | 71.2395153 |
| 17:13:22 | 0:11:22 |  | 79.6930524 | 79.3812876 | 76.731787 | 70.2395153 |
| 17:13:23 | 0:11:23 |  | 79.6930524 | 75.3812876 | 75.731787 | 70.2395153 |
| 17:13:24 | 0:11:24 |  | 81.6930524 | 74.3812876 | 75.731787 | 70.2395153 |
| 17:13:25 | 0:11:25 |  | 81.6930524 | 77.3812876 | 76.731787 | 70.2395153 |
| 17:13:26 | 0:11:26 |  | 81.6930524 | 77.3812876 | 78.731787 | 71.2395153 |
| 17:13:27 | 0:11:27 |  | 82.6930524 | 77.3812876 | 78.731787 | 72.2395153 |
| 17:13:28 | 0:11:28 |  | 82.6930524 | 77.3812876 | 79.731787 | 72.2395153 |
| 17:13:29 | 0:11:29 |  | 81.6930524 | 77.3812876 | 79.731787 | 74.2395153 |
| 17:13:30 | 0:11:30 |  | 81.6930524 | 77.3812876 | 79.731787 | 74.2395153 |
| 17:13:31 | 0:11:31 |  | 82.6930524 | 77.3812876 | 79.731787 | 74.2395153 |
| 17:13:32 | 0:11:32 |  | 82.6930524 | 81.3812876 | 80.731787 | 70.2395153 |
| 17:13:33 | 0:11:33 |  | 82.6930524 | 84.3812876 | 81.731787 | 71.2395153 |
| 17:13:34 | 0:11:34 |  | 82.6930524 | 84.3812876 | 81.731787 | 71.2395153 |
| 17:13:35 | 0:11:35 |  | 82.6930524 | 84.3812876 | 82.731787 | 71.2395153 |
| 17:13:36 | 0:11:36 |  | 81.6930524 | 86.3812876 | 83.731787 | 71.2395153 |
| 17:13:37 | 0:11:37 |  | 79.6930524 | 86.3812876 | 84.731787 | 72.2395153 |
| 17:13:38 | 0:11:38 |  | 78.6930524 | 86.3812876 | 85.731787 | 71.2395153 |
| 17:13:39 | 0:11:39 |  | 76.6930524 | 86.3812876 | 85.731787 | 70.2395153 |
| 17:13:40 | 0:11:40 |  | 76.6930524 | 86.3812876 | 84.731787 | 69.2395153 |
| 17:13:41 | 0:11:41 |  | 76.6930524 | 86.3812876 | 83.731787 | 69.2395153 |
| 17:13:42 | 0:11:42 |  | 76.6930524 | 87.3812876 | 82.731787 | 69.2395153 |
| 17:13:43 | 0:11:43 |  | 76.6930524 | 87.3812876 | 82.731787 | 69.2395153 |
| 17:13:44 | 0:11:44 |  | 76.6930524 | 88.3812876 | 81.731787 | 69.2395153 |
| 17:13:45 | 0:11:45 |  | 76.6930524 | 88.3812876 | 81.731787 | 69.2395153 |
| 17:13:46 | 0:11:46 |  | 76.6930524 | 88.3812876 | 81.731787 | 70.2395153 |
| 17:13:47 | 0:11:47 |  | 76.6930524 | 85.3812876 | 81.731787 | 70.2395153 |
| 17:13:48 | 0:11:48 |  | 76.6930524 | 85.3812876 | 81.731787 | 71.2395153 |
| 17:13:49 | 0:11:49 |  | 76.6930524 | 85.3812876 | 81.731787 | 72.2395153 |
| 17:13:50 | 0:11:50 |  | 76.6930524 | 85.3812876 | 81.731787 | 72.2395153 |
| 17:13:51 | 0:11:51 |  | 76.6930524 | 85.3812876 | 80.731787 | 72.2395153 |
| 17:13:52 | 0:11:52 |  | 75.6930524 | 85.3812876 | 80.731787 | 72.2395153 |
| 17:13:53 | 0:11:53 |  | 75.6930524 | 87.3812876 | 80.731787 | 74.2395153 |
| 17:13:54 | 0:11:54 |  | 75.6930524 | 88.3812876 | 81.731787 | 74.2395153 |
| 17:13:55 | 0:11:55 |  | 75.6930524 | 88.3812876 | 82.731787 | 74.2395153 |
| 17:13:56 | 0:11:56 |  | 75.6930524 | 88.3812876 | 82.731787 | 73.2395153 |
| 17:13:57 | 0:11:57 |  | 74.6930524 | 88.3812876 | 81.731787 | 73.2395153 |

|          |         |  |            |            |           |            |
|----------|---------|--|------------|------------|-----------|------------|
| 17:13:58 | 0:11:58 |  | 74.6930524 | 88.3812876 | 81.731787 | 73.2395153 |
| 17:13:59 | 0:11:59 |  | 74.6930524 | 85.3812876 | 81.731787 | 73.2395153 |
| 17:14:00 | 0:12:00 |  | 74.6930524 | 85.3812876 | 81.731787 | 74.2395153 |
| 17:14:01 | 0:12:01 |  | 74.6930524 | 84.3812876 | 80.731787 | 74.2395153 |
| 17:14:02 | 0:12:02 |  | 74.6930524 | 84.3812876 | 80.731787 | 74.2395153 |
| 17:14:03 | 0:12:03 |  | 74.6930524 | 83.3812876 | 80.731787 | 75.2395153 |
| 17:14:04 | 0:12:04 |  | 74.6930524 | 83.3812876 | 80.731787 | 76.2395153 |
| 17:14:05 | 0:12:05 |  | 74.6930524 | 83.3812876 | 80.731787 | 76.2395153 |
| 17:14:06 | 0:12:06 |  | 74.6930524 | 83.3812876 | 80.731787 | 76.2395153 |
| 17:14:07 | 0:12:07 |  | 73.6930524 | 81.3812876 | 81.731787 | 76.2395153 |
| 17:14:08 | 0:12:08 |  | 73.6930524 | 80.3812876 | 81.731787 | 76.2395153 |
| 17:14:09 | 0:12:09 |  | 73.6930524 | 79.3812876 | 82.731787 | 76.2395153 |
| 17:14:10 | 0:12:10 |  | 73.6930524 | 79.3812876 | 82.731787 | 76.2395153 |
| 17:14:11 | 0:12:11 |  | 73.6930524 | 82.3812876 | 82.731787 | 76.2395153 |
| 17:14:12 | 0:12:12 |  | 73.6930524 | 82.3812876 | 82.731787 | 76.2395153 |
| 17:14:13 | 0:12:13 |  | 73.6930524 | 82.3812876 | 82.731787 | 76.2395153 |
| 17:14:14 | 0:12:14 |  | 73.6930524 | 82.3812876 | 82.731787 | 76.2395153 |
| 17:14:15 | 0:12:15 |  | 73.6930524 | 82.3812876 | 82.731787 | 75.2395153 |
| 17:14:16 | 0:12:16 |  | 73.6930524 | 82.3812876 | 87.731787 | 74.2395153 |
| 17:14:17 | 0:12:17 |  | 74.6930524 | 84.3812876 | 89.731787 | 74.2395153 |
| 17:14:18 | 0:12:18 |  | 72.6930524 | 85.3812876 | 89.731787 | 74.2395153 |
| 17:14:19 | 0:12:19 |  | 70.6930524 | 85.3812876 | 89.731787 | 74.2395153 |
| 17:14:20 | 0:12:20 |  | 70.6930524 | 83.3812876 | 89.731787 | 74.2395153 |
| 17:14:21 | 0:12:21 |  | 70.6930524 | 83.3812876 | 88.731787 | 75.2395153 |
| 17:14:22 | 0:12:22 |  | 70.6930524 | 86.3812876 | 88.731787 | 75.2395153 |
| 17:14:23 | 0:12:23 |  | 71.6930524 | 87.3812876 | 87.731787 | 75.2395153 |
| 17:14:24 | 0:12:24 |  | 72.6930524 | 88.3812876 | 87.731787 | 76.2395153 |
| 17:14:25 | 0:12:25 |  | 73.6930524 | 88.3812876 | 87.731787 | 78.2395153 |
| 17:14:26 | 0:12:26 |  | 73.6930524 | 92.3812876 | 83.731787 | 78.2395153 |
| 17:14:27 | 0:12:27 |  | 73.6930524 | 95.3812876 | 83.731787 | 78.2395153 |
| 17:14:28 | 0:12:28 |  | 75.6930524 | 95.3812876 | 83.731787 | 78.2395153 |
| 17:14:29 | 0:12:29 |  | 76.6930524 | 94.3812876 | 81.731787 | 78.2395153 |
| 17:14:30 | 0:12:30 |  | 77.6930524 | 94.3812876 | 80.731787 | 77.2395153 |
| 17:14:31 | 0:12:31 |  | 77.6930524 | 90.3812876 | 80.731787 | 77.2395153 |
| 17:14:32 | 0:12:32 |  | 76.6930524 | 89.3812876 | 80.731787 | 77.2395153 |
| 17:14:33 | 0:12:33 |  | 75.6930524 | 88.3812876 | 80.731787 | 77.2395153 |
| 17:14:34 | 0:12:34 |  | 74.6930524 | 87.3812876 | 80.731787 | 78.2395153 |
| 17:14:35 | 0:12:35 |  | 73.6930524 | 87.3812876 | 81.731787 | 78.2395153 |
| 17:14:36 | 0:12:36 |  | 72.6930524 | 87.3812876 | 81.731787 | 76.2395153 |
| 17:14:37 | 0:12:37 |  | 72.6930524 | 89.3812876 | 81.731787 | 76.2395153 |
| 17:14:38 | 0:12:38 |  | 72.6930524 | 90.3812876 | 81.731787 | 74.2395153 |
| 17:14:39 | 0:12:39 |  | 73.6930524 | 90.3812876 | 80.731787 | 71.2395153 |
| 17:14:40 | 0:12:40 |  | 73.6930524 | 91.3812876 | 80.731787 | 71.2395153 |
| 17:14:41 | 0:12:41 |  | 74.6930524 | 90.3812876 | 80.731787 | 71.2395153 |
| 17:14:42 | 0:12:42 |  | 74.6930524 | 88.3812876 | 80.731787 | 71.2395153 |

|          |         |  |            |            |           |            |
|----------|---------|--|------------|------------|-----------|------------|
| 17:14:43 | 0:12:43 |  | 75.6930524 | 89.3812876 | 80.731787 | 71.2395153 |
| 17:14:44 | 0:12:44 |  | 75.6930524 | 89.3812876 | 80.731787 | 71.2395153 |
| 17:14:45 | 0:12:45 |  | 75.6930524 | 89.3812876 | 81.731787 | 70.2395153 |
| 17:14:46 | 0:12:46 |  | 76.6930524 | 90.3812876 | 81.731787 | 67.2395153 |
| 17:14:47 | 0:12:47 |  | 75.6930524 | 90.3812876 | 81.731787 | 67.2395153 |
| 17:14:48 | 0:12:48 |  | 75.6930524 | 90.3812876 | 81.731787 | 66.2395153 |
| 17:14:49 | 0:12:49 |  | 75.6930524 | 90.3812876 | 81.731787 | 66.2395153 |
| 17:14:50 | 0:12:50 |  | 75.6930524 | 89.3812876 | 81.731787 | 67.2395153 |
| 17:14:51 | 0:12:51 |  | 76.6930524 | 88.3812876 | 81.731787 | 67.2395153 |
| 17:14:52 | 0:12:52 |  | 75.6930524 | 88.3812876 | 81.731787 | 67.2395153 |
| 17:14:53 | 0:12:53 |  | 75.6930524 | 86.3812876 | 80.731787 | 67.2395153 |
| 17:14:54 | 0:12:54 |  | 75.6930524 | 83.3812876 | 80.731787 | 65.2395153 |
| 17:14:55 | 0:12:55 |  | 75.6930524 | 83.3812876 | 80.731787 | 65.2395153 |
| 17:14:56 | 0:12:56 |  | 75.6930524 | 80.3812876 | 80.731787 | 65.2395153 |
| 17:14:57 | 0:12:57 |  | 75.6930524 | 80.3812876 | 80.731787 | 65.2395153 |
| 17:14:58 | 0:12:58 |  | 75.6930524 | 81.3812876 | 80.731787 | 63.2395153 |
| 17:14:59 | 0:12:59 |  | 76.6930524 | 81.3812876 | 81.731787 | 63.2395153 |
| 17:15:00 | 0:13:00 |  | 76.6930524 | 81.3812876 | 81.731787 | 63.2395153 |
| 17:15:01 | 0:13:01 |  | 77.6930524 | 81.3812876 | 81.731787 | 64.2395153 |
| 17:15:02 | 0:13:02 |  | 77.6930524 | 80.3812876 | 81.731787 | 64.2395153 |
| 17:15:03 | 0:13:03 |  | 77.6930524 | 78.3812876 | 82.731787 | 63.2395153 |
| 17:15:04 | 0:13:04 |  | 76.6930524 | 78.3812876 | 82.731787 | 63.2395153 |
| 17:15:05 | 0:13:05 |  | 76.6930524 | 78.3812876 | 82.731787 | 63.2395153 |
| 17:15:06 | 0:13:06 |  | 76.6930524 | 78.3812876 | 83.731787 | 67.2395153 |
| 17:15:07 | 0:13:07 |  | 77.6930524 | 78.3812876 | 83.731787 | 71.2395153 |
| 17:15:08 | 0:13:08 |  | 78.6930524 | 79.3812876 | 84.731787 | 72.2395153 |
| 17:15:09 | 0:13:09 |  | 78.6930524 | 79.3812876 | 84.731787 | 72.2395153 |
| 17:15:10 | 0:13:10 |  | 78.6930524 | 79.3812876 | 84.731787 | 72.2395153 |
| 17:15:11 | 0:13:11 |  | 77.6930524 | 80.3812876 | 85.731787 | 72.2395153 |
| 17:15:12 | 0:13:12 |  | 76.6930524 | 80.3812876 | 87.731787 | 73.2395153 |
| 17:15:13 | 0:13:13 |  | 75.6930524 | 80.3812876 | 84.731787 | 73.2395153 |
| 17:15:14 | 0:13:14 |  | 74.6930524 | 80.3812876 | 84.731787 | 73.2395153 |
| 17:15:15 | 0:13:15 |  | 74.6930524 | 80.3812876 | 83.731787 | 74.2395153 |
| 17:15:16 | 0:13:16 |  | 74.6930524 | 79.3812876 | 79.731787 | 75.2395153 |
| 17:15:17 | 0:13:17 |  | 74.6930524 | 79.3812876 | 78.731787 | 76.2395153 |
| 17:15:18 | 0:13:18 |  | 74.6930524 | 79.3812876 | 77.731787 | 76.2395153 |
| 17:15:19 | 0:13:19 |  | 75.6930524 | 79.3812876 | 76.731787 | 76.2395153 |
| 17:15:20 | 0:13:20 |  | 75.6930524 | 79.3812876 | 76.731787 | 74.2395153 |
| 17:15:21 | 0:13:21 |  | 76.6930524 | 79.3812876 | 77.731787 | 73.2395153 |
| 17:15:22 | 0:13:22 |  | 75.6930524 | 79.3812876 | 78.731787 | 73.2395153 |
| 17:15:23 | 0:13:23 |  | 76.6930524 | 80.3812876 | 79.731787 | 73.2395153 |
| 17:15:24 | 0:13:24 |  | 76.6930524 | 81.3812876 | 79.731787 | 72.2395153 |
| 17:15:25 | 0:13:25 |  | 75.6930524 | 82.3812876 | 79.731787 | 70.2395153 |
| 17:15:26 | 0:13:26 |  | 75.6930524 | 83.3812876 | 79.731787 | 70.2395153 |
| 17:15:27 | 0:13:27 |  | 75.6930524 | 84.3812876 | 79.731787 | 70.2395153 |

|          |         |  |            |            |           |            |
|----------|---------|--|------------|------------|-----------|------------|
| 17:15:28 | 0:13:28 |  | 75.6930524 | 84.3812876 | 80.731787 | 70.2395153 |
| 17:15:29 | 0:13:29 |  | 76.6930524 | 83.3812876 | 80.731787 | 70.2395153 |
| 17:15:30 | 0:13:30 |  | 76.6930524 | 83.3812876 | 81.731787 | 68.2395153 |
| 17:15:31 | 0:13:31 |  | 76.6930524 | 83.3812876 | 81.731787 | 67.2395153 |
| 17:15:32 | 0:13:32 |  | 76.6930524 | 83.3812876 | 82.731787 | 66.2395153 |
| 17:15:33 | 0:13:33 |  | 76.6930524 | 82.3812876 | 82.731787 | 66.2395153 |
| 17:15:34 | 0:13:34 |  | 76.6930524 | 79.3812876 | 82.731787 | 63.2395153 |
| 17:15:35 | 0:13:35 |  | 76.6930524 | 78.3812876 | 81.731787 | 62.2395153 |
| 17:15:36 | 0:13:36 |  | 76.6930524 | 78.3812876 | 80.731787 | 62.2395153 |
| 17:15:37 | 0:13:37 |  | 75.6930524 | 78.3812876 | 80.731787 | 62.2395153 |
| 17:15:38 | 0:13:38 |  | 75.6930524 | 78.3812876 | 80.731787 | 65.2395153 |
| 17:15:39 | 0:13:39 |  | 75.6930524 | 78.3812876 | 79.731787 | 68.2395153 |
| 17:15:40 | 0:13:40 |  | 76.6930524 | 79.3812876 | 78.731787 | 69.2395153 |
| 17:15:41 | 0:13:41 |  | 76.6930524 | 79.3812876 | 78.731787 | 69.2395153 |
| 17:15:42 | 0:13:42 |  | 76.6930524 | 79.3812876 | 78.731787 | 69.2395153 |
| 17:15:43 | 0:13:43 |  | 75.6930524 | 79.3812876 | 78.731787 | 69.2395153 |
| 17:15:44 | 0:13:44 |  | 75.6930524 | 80.3812876 | 78.731787 | 69.2395153 |
| 17:15:45 | 0:13:45 |  | 78.6930524 | 80.3812876 | 78.731787 | 69.2395153 |
| 17:15:46 | 0:13:46 |  | 78.6930524 | 80.3812876 | 78.731787 | 69.2395153 |
| 17:15:47 | 0:13:47 |  | 78.6930524 | 80.3812876 | 78.731787 | 69.2395153 |
| 17:15:48 | 0:13:48 |  | 78.6930524 | 80.3812876 | 78.731787 | 69.2395153 |
| 17:15:49 | 0:13:49 |  | 79.6930524 | 80.3812876 | 77.731787 | 69.2395153 |
| 17:15:50 | 0:13:50 |  | 79.6930524 | 80.3812876 | 77.731787 | 69.2395153 |
| 17:15:51 | 0:13:51 |  | 79.6930524 | 81.3812876 | 77.731787 | 70.2395153 |
| 17:15:52 | 0:13:52 |  | 78.6930524 | 81.3812876 | 77.731787 | 70.2395153 |
| 17:15:53 | 0:13:53 |  | 77.6930524 | 82.3812876 | 77.731787 | 70.2395153 |
| 17:15:54 | 0:13:54 |  | 77.6930524 | 82.3812876 | 77.731787 | 70.2395153 |
| 17:15:55 | 0:13:55 |  | 76.6930524 | 83.3812876 | 77.731787 | 71.2395153 |
| 17:15:56 | 0:13:56 |  | 76.6930524 | 84.3812876 | 77.731787 | 71.2395153 |
| 17:15:57 | 0:13:57 |  | 75.6930524 | 85.3812876 | 77.731787 | 71.2395153 |
| 17:15:58 | 0:13:58 |  | 75.6930524 | 85.3812876 | 77.731787 | 71.2395153 |
| 17:15:59 | 0:13:59 |  | 75.6930524 | 91.3812876 | 76.731787 | 71.2395153 |
| 17:16:00 | 0:14:00 |  | 76.6930524 | 92.3812876 | 76.731787 | 71.2395153 |
| 17:16:01 | 0:14:01 |  | 77.6930524 | 91.3812876 | 72.731787 | 70.2395153 |
| 17:16:02 | 0:14:02 |  | 77.6930524 | 89.3812876 | 72.731787 | 70.2395153 |
| 17:16:03 | 0:14:03 |  | 77.6930524 | 88.3812876 | 72.731787 | 70.2395153 |
| 17:16:04 | 0:14:04 |  | 76.6930524 | 90.3812876 | 72.731787 | 70.2395153 |
| 17:16:05 | 0:14:05 |  | 76.6930524 | 89.3812876 | 73.731787 | 70.2395153 |
| 17:16:06 | 0:14:06 |  | 75.6930524 | 89.3812876 | 74.731787 | 71.2395153 |
| 17:16:07 | 0:14:07 |  | 75.6930524 | 89.3812876 | 74.731787 | 72.2395153 |
| 17:16:08 | 0:14:08 |  | 75.6930524 | 89.3812876 | 75.731787 | 72.2395153 |
| 17:16:09 | 0:14:09 |  | 75.6930524 | 89.3812876 | 74.731787 | 72.2395153 |
| 17:16:10 | 0:14:10 |  | 75.6930524 | 90.3812876 | 74.731787 | 73.2395153 |
| 17:16:11 | 0:14:11 |  | 75.6930524 | 90.3812876 | 74.731787 | 74.2395153 |
| 17:16:12 | 0:14:12 |  | 75.6930524 | 90.3812876 | 74.731787 | 74.2395153 |

|          |         |  |            |            |           |            |
|----------|---------|--|------------|------------|-----------|------------|
| 17:16:13 | 0:14:13 |  | 75.6930524 | 90.3812876 | 74.731787 | 74.2395153 |
| 17:16:14 | 0:14:14 |  | 76.6930524 | 90.3812876 | 73.731787 | 72.2395153 |
| 17:16:15 | 0:14:15 |  | 76.6930524 | 90.3812876 | 72.731787 | 70.2395153 |
| 17:16:16 | 0:14:16 |  | 76.6930524 | 89.3812876 | 72.731787 | 69.2395153 |
| 17:16:17 | 0:14:17 |  | 76.6930524 | 88.3812876 | 73.731787 | 67.2395153 |
| 17:16:18 | 0:14:18 |  | 75.6930524 | 88.3812876 | 73.731787 | 67.2395153 |
| 17:16:19 | 0:14:19 |  | 74.6930524 | 88.3812876 | 73.731787 | 67.2395153 |
| 17:16:20 | 0:14:20 |  | 74.6930524 | 88.3812876 | 76.731787 | 67.2395153 |
| 17:16:21 | 0:14:21 |  | 74.6930524 | 88.3812876 | 77.731787 | 66.2395153 |
| 17:16:22 | 0:14:22 |  | 74.6930524 | 88.3812876 | 77.731787 | 67.2395153 |
| 17:16:23 | 0:14:23 |  | 74.6930524 | 87.3812876 | 76.731787 | 68.2395153 |
| 17:16:24 | 0:14:24 |  | 74.6930524 | 87.3812876 | 76.731787 | 69.2395153 |
| 17:16:25 | 0:14:25 |  | 74.6930524 | 71.3812876 | 75.731787 | 69.2395153 |
| 17:16:26 | 0:14:26 |  | 73.6930524 | 71.3812876 | 75.731787 | 69.2395153 |
| 17:16:27 | 0:14:27 |  | 73.6930524 | 71.3812876 | 76.731787 | 70.2395153 |
| 17:16:28 | 0:14:28 |  | 73.6930524 | 72.3812876 | 75.731787 | 72.2395153 |
| 17:16:29 | 0:14:29 |  | 74.6930524 | 79.3812876 | 75.731787 | 72.2395153 |
| 17:16:30 | 0:14:30 |  | 74.6930524 | 85.3812876 | 75.731787 | 72.2395153 |
| 17:16:31 | 0:14:31 |  | 74.6930524 | 85.3812876 | 75.731787 | 73.2395153 |
| 17:16:32 | 0:14:32 |  | 74.6930524 | 86.3812876 | 76.731787 | 74.2395153 |
| 17:16:33 | 0:14:33 |  | 75.6930524 | 86.3812876 | 75.731787 | 74.2395153 |
| 17:16:34 | 0:14:34 |  | 75.6930524 | 86.3812876 | 75.731787 | 75.2395153 |
| 17:16:35 | 0:14:35 |  | 76.6930524 | 86.3812876 | 75.731787 | 74.2395153 |
| 17:16:36 | 0:14:36 |  | 77.6930524 | 86.3812876 | 75.731787 | 73.2395153 |
| 17:16:37 | 0:14:37 |  | 77.6930524 | 86.3812876 | 75.731787 | 73.2395153 |
| 17:16:38 | 0:14:38 |  | 77.6930524 | 85.3812876 | 76.731787 | 73.2395153 |
| 17:16:39 | 0:14:39 |  | 77.6930524 | 85.3812876 | 76.731787 | 72.2395153 |
| 17:16:40 | 0:14:40 |  | 77.6930524 | 84.3812876 | 76.731787 | 72.2395153 |
| 17:16:41 | 0:14:41 |  | 77.6930524 | 84.3812876 | 76.731787 | 72.2395153 |
| 17:16:42 | 0:14:42 |  | 76.6930524 | 83.3812876 | 76.731787 | 72.2395153 |
| 17:16:43 | 0:14:43 |  | 76.6930524 | 81.3812876 | 76.731787 | 75.2395153 |
| 17:16:44 | 0:14:44 |  | 76.6930524 | 80.3812876 | 75.731787 | 76.2395153 |
| 17:16:45 | 0:14:45 |  | 77.6930524 | 80.3812876 | 74.731787 | 76.2395153 |
| 17:16:46 | 0:14:46 |  | 77.6930524 | 80.3812876 | 74.731787 | 76.2395153 |
| 17:16:47 | 0:14:47 |  | 77.6930524 | 80.3812876 | 73.731787 | 75.2395153 |
| 17:16:48 | 0:14:48 |  | 77.6930524 | 80.3812876 | 73.731787 | 75.2395153 |
| 17:16:49 | 0:14:49 |  | 78.6930524 | 80.3812876 | 74.731787 | 75.2395153 |
| 17:16:50 | 0:14:50 |  | 78.6930524 | 77.3812876 | 74.731787 | 74.2395153 |
| 17:16:51 | 0:14:51 |  | 78.6930524 | 73.3812876 | 77.731787 | 74.2395153 |
| 17:16:52 | 0:14:52 |  | 78.6930524 | 70.3812876 | 77.731787 | 74.2395153 |
| 17:16:53 | 0:14:53 |  | 78.6930524 | 69.3812876 | 76.731787 | 75.2395153 |
| 17:16:54 | 0:14:54 |  | 76.6930524 | 69.3812876 | 76.731787 | 75.2395153 |
| 17:16:55 | 0:14:55 |  | 75.6930524 | 68.3812876 | 76.731787 | 76.2395153 |
| 17:16:56 | 0:14:56 |  | 73.6930524 | 68.3812876 | 75.731787 | 79.2395153 |
| 17:16:57 | 0:14:57 |  | 73.6930524 | 68.3812876 | 75.731787 | 80.2395153 |



|          |         |  |            |            |           |            |
|----------|---------|--|------------|------------|-----------|------------|
| 17:16:58 | 0:14:58 |  | 74.6930524 | 68.3812876 | 75.731787 | 80.2395153 |
| 17:16:59 | 0:14:59 |  | 74.6930524 | 68.3812876 | 76.731787 | 80.2395153 |
| 17:17:00 | 0:15:00 |  | 76.6930524 | 68.3812876 | 76.731787 | 78.2395153 |
| 17:17:01 | 0:15:01 |  | 76.6930524 | 68.3812876 | 76.731787 | 78.2395153 |
| 17:17:02 | 0:15:02 |  | 76.6930524 | 68.3812876 | 75.731787 | 77.2395153 |
| 17:17:03 | 0:15:03 |  | 76.6930524 | 68.3812876 | 75.731787 | 74.2395153 |
| 17:17:04 | 0:15:04 |  | 76.6930524 | 68.3812876 | 76.731787 | 70.2395153 |
| 17:17:05 | 0:15:05 |  | 76.6930524 | 69.3812876 | 78.731787 | 69.2395153 |
| 17:17:06 | 0:15:06 |  | 76.6930524 | 69.3812876 | 79.731787 | 69.2395153 |
| 17:17:07 | 0:15:07 |  | 77.6930524 | 70.3812876 | 80.731787 | 70.2395153 |
| 17:17:08 | 0:15:08 |  | 78.6930524 | 70.3812876 | 80.731787 | 71.2395153 |
| 17:17:09 | 0:15:09 |  | 78.6930524 | 68.3812876 | 80.731787 | 71.2395153 |
| 17:17:10 | 0:15:10 |  | 78.6930524 | 68.3812876 | 80.731787 | 70.2395153 |
| 17:17:11 | 0:15:11 |  | 78.6930524 | 68.3812876 | 80.731787 | 70.2395153 |
| 17:17:12 | 0:15:12 |  | 78.6930524 | 68.3812876 | 82.731787 | 70.2395153 |
| 17:17:13 | 0:15:13 |  | 78.6930524 | 68.3812876 | 82.731787 | 70.2395153 |
| 17:17:14 | 0:15:14 |  | 78.6930524 | 68.3812876 | 81.731787 | 69.2395153 |
| 17:17:15 | 0:15:15 |  | 78.6930524 | 68.3812876 | 79.731787 | 71.2395153 |
| 17:17:16 | 0:15:16 |  | 79.6930524 | 69.3812876 | 77.731787 | 71.2395153 |
| 17:17:17 | 0:15:17 |  | 79.6930524 | 69.3812876 | 76.731787 | 71.2395153 |
| 17:17:18 | 0:15:18 |  | 79.6930524 | 70.3812876 | 75.731787 | 71.2395153 |
| 17:17:19 | 0:15:19 |  | 80.6930524 | 70.3812876 | 75.731787 | 71.2395153 |
| 17:17:20 | 0:15:20 |  | 88.6930524 | 70.3812876 | 76.731787 | 71.2395153 |
| 17:17:21 | 0:15:21 |  | 88.6930524 | 71.3812876 | 76.731787 | 71.2395153 |
| 17:17:22 | 0:15:22 |  | 90.6930524 | 73.3812876 | 76.731787 | 71.2395153 |
| 17:17:23 | 0:15:23 |  | 89.6930524 | 73.3812876 | 76.731787 | 68.2395153 |
| 17:17:24 | 0:15:24 |  | 89.6930524 | 74.3812876 | 76.731787 | 68.2395153 |
| 17:17:25 | 0:15:25 |  | 89.6930524 | 74.3812876 | 76.731787 | 68.2395153 |
| 17:17:26 | 0:15:26 |  | 88.6930524 | 74.3812876 | 76.731787 | 68.2395153 |
| 17:17:27 | 0:15:27 |  | 88.6930524 | 76.3812876 | 77.731787 | 68.2395153 |
| 17:17:28 | 0:15:28 |  | 85.6930524 | 79.3812876 | 76.731787 | 68.2395153 |
| 17:17:29 | 0:15:29 |  | 86.6930524 | 79.3812876 | 76.731787 | 68.2395153 |
| 17:17:30 | 0:15:30 |  | 86.6930524 | 80.3812876 | 75.731787 | 67.2395153 |
| 17:17:31 | 0:15:31 |  | 87.6930524 | 80.3812876 | 75.731787 | 66.2395153 |
| 17:17:32 | 0:15:32 |  | 87.6930524 | 80.3812876 | 75.731787 | 66.2395153 |
| 17:17:33 | 0:15:33 |  | 87.6930524 | 80.3812876 | 75.731787 | 66.2395153 |
| 17:17:34 | 0:15:34 |  | 84.6930524 | 80.3812876 | 74.731787 | 66.2395153 |
| 17:17:35 | 0:15:35 |  | 83.6930524 | 80.3812876 | 74.731787 | 65.2395153 |
| 17:17:36 | 0:15:36 |  | 84.6930524 | 80.3812876 | 73.731787 | 65.2395153 |
| 17:17:37 | 0:15:37 |  | 84.6930524 | 79.3812876 | 74.731787 | 68.2395153 |
| 17:17:38 | 0:15:38 |  | 84.6930524 | 79.3812876 | 74.731787 | 69.2395153 |
| 17:17:39 | 0:15:39 |  | 84.6930524 | 79.3812876 | 74.731787 | 69.2395153 |
| 17:17:40 | 0:15:40 |  | 83.6930524 | 80.3812876 | 74.731787 | 69.2395153 |
| 17:17:41 | 0:15:41 |  | 82.6930524 | 81.3812876 | 74.731787 | 69.2395153 |
| 17:17:42 | 0:15:42 |  | 82.6930524 | 81.3812876 | 74.731787 | 69.2395153 |

|          |         |  |            |            |           |            |
|----------|---------|--|------------|------------|-----------|------------|
| 17:17:43 | 0:15:43 |  | 80.6930524 | 81.3812876 | 76.731787 | 69.2395153 |
| 17:17:44 | 0:15:44 |  | 79.6930524 | 81.3812876 | 76.731787 | 69.2395153 |
| 17:17:45 | 0:15:45 |  | 79.6930524 | 79.3812876 | 76.731787 | 69.2395153 |
| 17:17:46 | 0:15:46 |  | 78.6930524 | 79.3812876 | 76.731787 | 69.2395153 |
| 17:17:47 | 0:15:47 |  | 78.6930524 | 79.3812876 | 74.731787 | 69.2395153 |
| 17:17:48 | 0:15:48 |  | 78.6930524 | 79.3812876 | 74.731787 | 73.2395153 |
| 17:17:49 | 0:15:49 |  | 77.6930524 | 82.3812876 | 74.731787 | 74.2395153 |
| 17:17:50 | 0:15:50 |  | 77.6930524 | 82.3812876 | 74.731787 | 74.2395153 |
| 17:17:51 | 0:15:51 |  | 77.6930524 | 84.3812876 | 75.731787 | 75.2395153 |
| 17:17:52 | 0:15:52 |  | 76.6930524 | 84.3812876 | 76.731787 | 75.2395153 |
| 17:17:53 | 0:15:53 |  | 76.6930524 | 85.3812876 | 76.731787 | 75.2395153 |
| 17:17:54 | 0:15:54 |  | 76.6930524 | 86.3812876 | 76.731787 | 74.2395153 |
| 17:17:55 | 0:15:55 |  | 76.6930524 | 86.3812876 | 74.731787 | 73.2395153 |
| 17:17:56 | 0:15:56 |  | 76.6930524 | 88.3812876 | 73.731787 | 73.2395153 |
| 17:17:57 | 0:15:57 |  | 77.6930524 | 89.3812876 | 72.731787 | 73.2395153 |
| 17:17:58 | 0:15:58 |  | 76.6930524 | 91.3812876 | 72.731787 | 72.2395153 |
| 17:17:59 | 0:15:59 |  | 75.6930524 | 92.3812876 | 72.731787 | 73.2395153 |
| 17:18:00 | 0:16:00 |  | 74.6930524 | 92.3812876 | 72.731787 | 73.2395153 |
| 17:18:01 | 0:16:01 |  | 73.6930524 | 92.3812876 | 73.731787 | 72.2395153 |
| 17:18:02 | 0:16:02 |  | 71.6930524 | 88.3812876 | 74.731787 | 73.2395153 |
| 17:18:03 | 0:16:03 |  | 71.6930524 | 83.3812876 | 75.731787 | 74.2395153 |
| 17:18:04 | 0:16:04 |  | 71.6930524 | 82.3812876 | 76.731787 | 74.2395153 |
| 17:18:05 | 0:16:05 |  | 72.6930524 | 82.3812876 | 75.731787 | 73.2395153 |
| 17:18:06 | 0:16:06 |  | 73.6930524 | 79.3812876 | 75.731787 | 73.2395153 |
| 17:18:07 | 0:16:07 |  | 73.6930524 | 79.3812876 | 75.731787 | 72.2395153 |
| 17:18:08 | 0:16:08 |  | 74.6930524 | 79.3812876 | 75.731787 | 72.2395153 |
| 17:18:09 | 0:16:09 |  | 74.6930524 | 79.3812876 | 75.731787 | 72.2395153 |
| 17:18:10 | 0:16:10 |  | 74.6930524 | 79.3812876 | 75.731787 | 72.2395153 |
| 17:18:11 | 0:16:11 |  | 73.6930524 | 78.3812876 | 75.731787 | 72.2395153 |
| 17:18:12 | 0:16:12 |  | 73.6930524 | 77.3812876 | 76.731787 | 72.2395153 |
| 17:18:13 | 0:16:13 |  | 73.6930524 | 77.3812876 | 77.731787 | 74.2395153 |
| 17:18:14 | 0:16:14 |  | 73.6930524 | 76.3812876 | 78.731787 | 74.2395153 |
| 17:18:15 | 0:16:15 |  | 72.6930524 | 76.3812876 | 78.731787 | 75.2395153 |
| 17:18:16 | 0:16:16 |  | 72.6930524 | 76.3812876 | 78.731787 | 76.2395153 |
| 17:18:17 | 0:16:17 |  | 72.6930524 | 76.3812876 | 78.731787 | 77.2395153 |
| 17:18:18 | 0:16:18 |  | 73.6930524 | 76.3812876 | 77.731787 | 77.2395153 |
| 17:18:19 | 0:16:19 |  | 73.6930524 | 77.3812876 | 77.731787 | 77.2395153 |
| 17:18:20 | 0:16:20 |  | 74.6930524 | 77.3812876 | 77.731787 | 77.2395153 |
| 17:18:21 | 0:16:21 |  | 74.6930524 | 77.3812876 | 77.731787 | 77.2395153 |
| 17:18:22 | 0:16:22 |  | 75.6930524 | 77.3812876 | 77.731787 | 78.2395153 |
| 17:18:23 | 0:16:23 |  | 74.6930524 | 77.3812876 | 77.731787 | 78.2395153 |
| 17:18:24 | 0:16:24 |  | 74.6930524 | 77.3812876 | 78.731787 | 79.2395153 |
| 17:18:25 | 0:16:25 |  | 74.6930524 | 77.3812876 | 78.731787 | 80.2395153 |
| 17:18:26 | 0:16:26 |  | 74.6930524 | 79.3812876 | 79.731787 | 80.2395153 |
| 17:18:27 | 0:16:27 |  | 74.6930524 | 79.3812876 | 78.731787 | 80.2395153 |

|          |         |  |            |            |           |            |
|----------|---------|--|------------|------------|-----------|------------|
| 17:18:28 | 0:16:28 |  | 75.6930524 | 80.3812876 | 78.731787 | 80.2395153 |
| 17:18:29 | 0:16:29 |  | 75.6930524 | 80.3812876 | 78.731787 | 81.2395153 |
| 17:18:30 | 0:16:30 |  | 75.6930524 | 81.3812876 | 77.731787 | 81.2395153 |
| 17:18:31 | 0:16:31 |  | 75.6930524 | 81.3812876 | 77.731787 | 81.2395153 |
| 17:18:32 | 0:16:32 |  | 75.6930524 | 82.3812876 | 77.731787 | 83.2395153 |
| 17:18:33 | 0:16:33 |  | 75.6930524 | 83.3812876 | 77.731787 | 85.2395153 |
| 17:18:34 | 0:16:34 |  | 74.6930524 | 84.3812876 | 77.731787 | 88.2395153 |
| 17:18:35 | 0:16:35 |  | 75.6930524 | 84.3812876 | 77.731787 | 90.2395153 |
| 17:18:36 | 0:16:36 |  | 75.6930524 | 84.3812876 | 77.731787 | 90.2395153 |
| 17:18:37 | 0:16:37 |  | 74.6930524 | 84.3812876 | 85.731787 | 92.2395153 |
| 17:18:38 | 0:16:38 |  | 73.6930524 | 84.3812876 | 86.731787 | 91.2395153 |
| 17:18:39 | 0:16:39 |  | 71.6930524 | 84.3812876 | 86.731787 | 91.2395153 |
| 17:18:40 | 0:16:40 |  | 71.6930524 | 82.3812876 | 87.731787 | 91.2395153 |
| 17:18:41 | 0:16:41 |  | 74.6930524 | 82.3812876 | 88.731787 | 90.2395153 |
| 17:18:42 | 0:16:42 |  | 75.6930524 | 82.3812876 | 88.731787 | 90.2395153 |
| 17:18:43 | 0:16:43 |  | 74.6930524 | 82.3812876 | 87.731787 | 89.2395153 |
| 17:18:44 | 0:16:44 |  | 74.6930524 | 82.3812876 | 87.731787 | 89.2395153 |
| 17:18:45 | 0:16:45 |  | 74.6930524 | 82.3812876 | 85.731787 | 87.2395153 |
| 17:18:46 | 0:16:46 |  | 74.6930524 | 82.3812876 | 85.731787 | 85.2395153 |
| 17:18:47 | 0:16:47 |  | 75.6930524 | 83.3812876 | 81.731787 | 84.2395153 |
| 17:18:48 | 0:16:48 |  | 76.6930524 | 79.3812876 | 81.731787 | 84.2395153 |
| 17:18:49 | 0:16:49 |  | 76.6930524 | 79.3812876 | 80.731787 | 85.2395153 |
| 17:18:50 | 0:16:50 |  | 76.6930524 | 79.3812876 | 78.731787 | 85.2395153 |
| 17:18:51 | 0:16:51 |  | 76.6930524 | 79.3812876 | 76.731787 | 85.2395153 |
| 17:18:52 | 0:16:52 |  | 76.6930524 | 79.3812876 | 75.731787 | 84.2395153 |
| 17:18:53 | 0:16:53 |  | 76.6930524 | 79.3812876 | 74.731787 | 84.2395153 |
| 17:18:54 | 0:16:54 |  | 75.6930524 | 79.3812876 | 73.731787 | 84.2395153 |
| 17:18:55 | 0:16:55 |  | 75.6930524 | 79.3812876 | 74.731787 | 85.2395153 |
| 17:18:56 | 0:16:56 |  | 74.6930524 | 79.3812876 | 74.731787 | 85.2395153 |
| 17:18:57 | 0:16:57 |  | 74.6930524 | 78.3812876 | 74.731787 | 81.2395153 |
| 17:18:58 | 0:16:58 |  | 73.6930524 | 78.3812876 | 74.731787 | 81.2395153 |
| 17:18:59 | 0:16:59 |  | 73.6930524 | 78.3812876 | 74.731787 | 80.2395153 |
| 17:19:00 | 0:17:00 |  | 73.6930524 | 77.3812876 | 75.731787 | 78.2395153 |
| 17:19:01 | 0:17:01 |  | 74.6930524 | 77.3812876 | 76.731787 | 76.2395153 |
| 17:19:02 | 0:17:02 |  | 74.6930524 | 77.3812876 | 76.731787 | 76.2395153 |
| 17:19:03 | 0:17:03 |  | 75.6930524 | 77.3812876 | 76.731787 | 74.2395153 |
| 17:19:04 | 0:17:04 |  | 76.6930524 | 78.3812876 | 78.731787 | 71.2395153 |
| 17:19:05 | 0:17:05 |  | 76.6930524 | 78.3812876 | 78.731787 | 71.2395153 |
| 17:19:06 | 0:17:06 |  | 77.6930524 | 78.3812876 | 78.731787 | 68.2395153 |
| 17:19:07 | 0:17:07 |  | 77.6930524 | 78.3812876 | 78.731787 | 67.2395153 |
| 17:19:08 | 0:17:08 |  | 77.6930524 | 77.3812876 | 77.731787 | 69.2395153 |
| 17:19:09 | 0:17:09 |  | 76.6930524 | 77.3812876 | 77.731787 | 70.2395153 |
| 17:19:10 | 0:17:10 |  | 76.6930524 | 75.3812876 | 77.731787 | 72.2395153 |
| 17:19:11 | 0:17:11 |  | 75.6930524 | 75.3812876 | 78.731787 | 72.2395153 |
| 17:19:12 | 0:17:12 |  | 75.6930524 | 73.3812876 | 76.731787 | 72.2395153 |

|          |         |  |            |            |           |            |
|----------|---------|--|------------|------------|-----------|------------|
| 17:19:13 | 0:17:13 |  | 74.6930524 | 76.3812876 | 75.731787 | 72.2395153 |
| 17:19:14 | 0:17:14 |  | 74.6930524 | 79.3812876 | 74.731787 | 71.2395153 |
| 17:19:15 | 0:17:15 |  | 73.6930524 | 79.3812876 | 74.731787 | 71.2395153 |
| 17:19:16 | 0:17:16 |  | 73.6930524 | 80.3812876 | 74.731787 | 71.2395153 |
| 17:19:17 | 0:17:17 |  | 73.6930524 | 80.3812876 | 74.731787 | 71.2395153 |
| 17:19:18 | 0:17:18 |  | 73.6930524 | 81.3812876 | 74.731787 | 71.2395153 |
| 17:19:19 | 0:17:19 |  | 73.6930524 | 80.3812876 | 74.731787 | 71.2395153 |
| 17:19:20 | 0:17:20 |  | 73.6930524 | 80.3812876 | 72.731787 | 72.2395153 |
| 17:19:21 | 0:17:21 |  | 73.6930524 | 79.3812876 | 72.731787 | 72.2395153 |
| 17:19:22 | 0:17:22 |  | 73.6930524 | 79.3812876 | 71.731787 | 72.2395153 |
| 17:19:23 | 0:17:23 |  | 73.6930524 | 79.3812876 | 71.731787 | 75.2395153 |
| 17:19:24 | 0:17:24 |  | 74.6930524 | 79.3812876 | 71.731787 | 77.2395153 |
| 17:19:25 | 0:17:25 |  | 74.6930524 | 75.3812876 | 72.731787 | 79.2395153 |
| 17:19:26 | 0:17:26 |  | 74.6930524 | 74.3812876 | 72.731787 | 79.2395153 |
| 17:19:27 | 0:17:27 |  | 75.6930524 | 74.3812876 | 72.731787 | 79.2395153 |
| 17:19:28 | 0:17:28 |  | 76.6930524 | 71.3812876 | 75.731787 | 80.2395153 |
| 17:19:29 | 0:17:29 |  | 76.6930524 | 71.3812876 | 80.731787 | 77.2395153 |
| 17:19:30 | 0:17:30 |  | 76.6930524 | 71.3812876 | 80.731787 | 77.2395153 |
| 17:19:31 | 0:17:31 |  | 76.6930524 | 73.3812876 | 82.731787 | 75.2395153 |
| 17:19:32 | 0:17:32 |  | 77.6930524 | 73.3812876 | 82.731787 | 75.2395153 |
| 17:19:33 | 0:17:33 |  | 77.6930524 | 75.3812876 | 81.731787 | 75.2395153 |
| 17:19:34 | 0:17:34 |  | 77.6930524 | 75.3812876 | 79.731787 | 75.2395153 |
| 17:19:35 | 0:17:35 |  | 78.6930524 | 75.3812876 | 77.731787 | 75.2395153 |
| 17:19:36 | 0:17:36 |  | 78.6930524 | 75.3812876 | 75.731787 | 74.2395153 |
| 17:19:37 | 0:17:37 |  | 79.6930524 | 75.3812876 | 75.731787 | 74.2395153 |
| 17:19:38 | 0:17:38 |  | 80.6930524 | 74.3812876 | 74.731787 | 74.2395153 |
| 17:19:39 | 0:17:39 |  | 80.6930524 | 73.3812876 | 73.731787 | 75.2395153 |
| 17:19:40 | 0:17:40 |  | 80.6930524 | 72.3812876 | 73.731787 | 75.2395153 |
| 17:19:41 | 0:17:41 |  | 80.6930524 | 71.3812876 | 73.731787 | 75.2395153 |
| 17:19:42 | 0:17:42 |  | 79.6930524 | 70.3812876 | 74.731787 | 75.2395153 |
| 17:19:43 | 0:17:43 |  | 78.6930524 | 70.3812876 | 75.731787 | 74.2395153 |
| 17:19:44 | 0:17:44 |  | 76.6930524 | 70.3812876 | 75.731787 | 74.2395153 |
| 17:19:45 | 0:17:45 |  | 76.6930524 | 70.3812876 | 75.731787 | 74.2395153 |
| 17:19:46 | 0:17:46 |  | 76.6930524 | 70.3812876 | 75.731787 | 74.2395153 |
| 17:19:47 | 0:17:47 |  | 76.6930524 | 70.3812876 | 75.731787 | 73.2395153 |
| 17:19:48 | 0:17:48 |  | 76.6930524 | 76.3812876 | 74.731787 | 72.2395153 |
| 17:19:49 | 0:17:49 |  | 76.6930524 | 81.3812876 | 73.731787 | 71.2395153 |
| 17:19:50 | 0:17:50 |  | 77.6930524 | 81.3812876 | 73.731787 | 71.2395153 |
| 17:19:51 | 0:17:51 |  | 76.6930524 | 81.3812876 | 74.731787 | 71.2395153 |
| 17:19:52 | 0:17:52 |  | 76.6930524 | 82.3812876 | 74.731787 | 71.2395153 |
| 17:19:53 | 0:17:53 |  | 76.6930524 | 82.3812876 | 74.731787 | 72.2395153 |
| 17:19:54 | 0:17:54 |  | 76.6930524 | 83.3812876 | 73.731787 | 73.2395153 |
| 17:19:55 | 0:17:55 |  | 76.6930524 | 83.3812876 | 73.731787 | 73.2395153 |
| 17:19:56 | 0:17:56 |  | 76.6930524 | 83.3812876 | 72.731787 | 74.2395153 |
| 17:19:57 | 0:17:57 |  | 77.6930524 | 84.3812876 | 72.731787 | 73.2395153 |

|          |         |  |            |            |           |            |
|----------|---------|--|------------|------------|-----------|------------|
| 17:19:58 | 0:17:58 |  | 77.6930524 | 85.3812876 | 72.731787 | 70.2395153 |
| 17:19:59 | 0:17:59 |  | 77.6930524 | 86.3812876 | 72.731787 | 68.2395153 |
| 17:20:00 | 0:18:00 |  | 78.6930524 | 86.3812876 | 72.731787 | 68.2395153 |
| 17:20:01 | 0:18:01 |  | 77.6930524 | 86.3812876 | 72.731787 | 68.2395153 |
| 17:20:02 | 0:18:02 |  | 77.6930524 | 86.3812876 | 72.731787 | 68.2395153 |
| 17:20:03 | 0:18:03 |  | 77.6930524 | 86.3812876 | 72.731787 | 68.2395153 |
| 17:20:04 | 0:18:04 |  | 77.6930524 | 86.3812876 | 72.731787 | 68.2395153 |
| 17:20:05 | 0:18:05 |  | 77.6930524 | 86.3812876 | 72.731787 | 70.2395153 |
| 17:20:06 | 0:18:06 |  | 77.6930524 | 86.3812876 | 73.731787 | 71.2395153 |
| 17:20:07 | 0:18:07 |  | 76.6930524 | 86.3812876 | 75.731787 | 71.2395153 |
| 17:20:08 | 0:18:08 |  | 75.6930524 | 86.3812876 | 75.731787 | 73.2395153 |
| 17:20:09 | 0:18:09 |  | 76.6930524 | 86.3812876 | 76.731787 | 74.2395153 |
| 17:20:10 | 0:18:10 |  | 77.6930524 | 86.3812876 | 77.731787 | 74.2395153 |
| 17:20:11 | 0:18:11 |  | 81.6930524 | 85.3812876 | 77.731787 | 76.2395153 |
| 17:20:12 | 0:18:12 |  | 85.6930524 | 85.3812876 | 77.731787 | 76.2395153 |
| 17:20:13 | 0:18:13 |  | 86.6930524 | 84.3812876 | 77.731787 | 76.2395153 |
| 17:20:14 | 0:18:14 |  | 86.6930524 | 85.3812876 | 76.731787 | 77.2395153 |
| 17:20:15 | 0:18:15 |  | 86.6930524 | 85.3812876 | 76.731787 | 77.2395153 |
| 17:20:16 | 0:18:16 |  | 86.6930524 | 85.3812876 | 76.731787 | 76.2395153 |
| 17:20:17 | 0:18:17 |  | 86.6930524 | 85.3812876 | 75.731787 | 74.2395153 |
| 17:20:18 | 0:18:18 |  | 87.6930524 | 84.3812876 | 75.731787 | 74.2395153 |
| 17:20:19 | 0:18:19 |  | 88.6930524 | 84.3812876 | 75.731787 | 74.2395153 |
| 17:20:20 | 0:18:20 |  | 88.6930524 | 84.3812876 | 75.731787 | 74.2395153 |
| 17:20:21 | 0:18:21 |  | 88.6930524 | 83.3812876 | 75.731787 | 76.2395153 |
| 17:20:22 | 0:18:22 |  | 88.6930524 | 83.3812876 | 76.731787 | 76.2395153 |
| 17:20:23 | 0:18:23 |  | 83.6930524 | 83.3812876 | 75.731787 | 76.2395153 |
| 17:20:24 | 0:18:24 |  | 83.6930524 | 83.3812876 | 75.731787 | 76.2395153 |
| 17:20:25 | 0:18:25 |  | 79.6930524 | 83.3812876 | 75.731787 | 78.2395153 |
| 17:20:26 | 0:18:26 |  | 78.6930524 | 83.3812876 | 75.731787 | 78.2395153 |
| 17:20:27 | 0:18:27 |  | 78.6930524 | 83.3812876 | 75.731787 | 79.2395153 |
| 17:20:28 | 0:18:28 |  | 78.6930524 | 83.3812876 | 75.731787 | 80.2395153 |
| 17:20:29 | 0:18:29 |  | 78.6930524 | 83.3812876 | 77.731787 | 80.2395153 |
| 17:20:30 | 0:18:30 |  | 78.6930524 | 86.3812876 | 80.731787 | 78.2395153 |
| 17:20:31 | 0:18:31 |  | 78.6930524 | 87.3812876 | 81.731787 | 77.2395153 |
| 17:20:32 | 0:18:32 |  | 80.6930524 | 84.3812876 | 80.731787 | 76.2395153 |
| 17:20:33 | 0:18:33 |  | 83.6930524 | 84.3812876 | 79.731787 | 76.2395153 |
| 17:20:34 | 0:18:34 |  | 87.6930524 | 82.3812876 | 77.731787 | 74.2395153 |
| 17:20:35 | 0:18:35 |  | 86.6930524 | 82.3812876 | 76.731787 | 74.2395153 |
| 17:20:36 | 0:18:36 |  | 85.6930524 | 83.3812876 | 76.731787 | 74.2395153 |
| 17:20:37 | 0:18:37 |  | 83.6930524 | 83.3812876 | 75.731787 | 73.2395153 |
| 17:20:38 | 0:18:38 |  | 82.6930524 | 83.3812876 | 75.731787 | 72.2395153 |
| 17:20:39 | 0:18:39 |  | 82.6930524 | 83.3812876 | 75.731787 | 72.2395153 |
| 17:20:40 | 0:18:40 |  | 81.6930524 | 83.3812876 | 75.731787 | 72.2395153 |
| 17:20:41 | 0:18:41 |  | 80.6930524 | 83.3812876 | 75.731787 | 72.2395153 |
| 17:20:42 | 0:18:42 |  | 78.6930524 | 82.3812876 | 75.731787 | 72.2395153 |

|          |         |  |            |            |           |            |
|----------|---------|--|------------|------------|-----------|------------|
| 17:20:43 | 0:18:43 |  | 77.6930524 | 82.3812876 | 75.731787 | 71.2395153 |
| 17:20:44 | 0:18:44 |  | 76.6930524 | 80.3812876 | 75.731787 | 71.2395153 |
| 17:20:45 | 0:18:45 |  | 74.6930524 | 80.3812876 | 75.731787 | 68.2395153 |
| 17:20:46 | 0:18:46 |  | 74.6930524 | 80.3812876 | 76.731787 | 68.2395153 |
| 17:20:47 | 0:18:47 |  | 74.6930524 | 80.3812876 | 76.731787 | 70.2395153 |
| 17:20:48 | 0:18:48 |  | 75.6930524 | 80.3812876 | 76.731787 | 70.2395153 |
| 17:20:49 | 0:18:49 |  | 77.6930524 | 80.3812876 | 77.731787 | 70.2395153 |
| 17:20:50 | 0:18:50 |  | 79.6930524 | 82.3812876 | 77.731787 | 70.2395153 |
| 17:20:51 | 0:18:51 |  | 80.6930524 | 82.3812876 | 77.731787 | 70.2395153 |
| 17:20:52 | 0:18:52 |  | 81.6930524 | 82.3812876 | 78.731787 | 71.2395153 |
| 17:20:53 | 0:18:53 |  | 81.6930524 | 82.3812876 | 83.731787 | 71.2395153 |
| 17:20:54 | 0:18:54 |  | 81.6930524 | 82.3812876 | 85.731787 | 72.2395153 |
| 17:20:55 | 0:18:55 |  | 81.6930524 | 81.3812876 | 84.731787 | 71.2395153 |
| 17:20:56 | 0:18:56 |  | 81.6930524 | 82.3812876 | 82.731787 | 71.2395153 |
| 17:20:57 | 0:18:57 |  | 82.6930524 | 82.3812876 | 78.731787 | 71.2395153 |
| 17:20:58 | 0:18:58 |  | 83.6930524 | 82.3812876 | 75.731787 | 71.2395153 |
| 17:20:59 | 0:18:59 |  | 79.6930524 | 85.3812876 | 74.731787 | 70.2395153 |
| 17:21:00 | 0:19:00 |  | 79.6930524 | 86.3812876 | 74.731787 | 68.2395153 |
| 17:21:01 | 0:19:01 |  | 79.6930524 | 87.3812876 | 75.731787 | 67.2395153 |
| 17:21:02 | 0:19:02 |  | 79.6930524 | 87.3812876 | 74.731787 | 67.2395153 |
| 17:21:03 | 0:19:03 |  | 80.6930524 | 87.3812876 | 74.731787 | 67.2395153 |
| 17:21:04 | 0:19:04 |  | 80.6930524 | 87.3812876 | 74.731787 | 67.2395153 |
| 17:21:05 | 0:19:05 |  | 81.6930524 | 87.3812876 | 73.731787 | 68.2395153 |
| 17:21:06 | 0:19:06 |  | 81.6930524 | 87.3812876 | 73.731787 | 68.2395153 |
| 17:21:07 | 0:19:07 |  | 82.6930524 | 86.3812876 | 73.731787 | 69.2395153 |
| 17:21:08 | 0:19:08 |  | 82.6930524 | 86.3812876 | 73.731787 | 69.2395153 |
| 17:21:09 | 0:19:09 |  | 82.6930524 | 81.3812876 | 73.731787 | 70.2395153 |
| 17:21:10 | 0:19:10 |  | 81.6930524 | 81.3812876 | 72.731787 | 70.2395153 |
| 17:21:11 | 0:19:11 |  | 79.6930524 | 81.3812876 | 72.731787 | 70.2395153 |
| 17:21:12 | 0:19:12 |  | 78.6930524 | 80.3812876 | 72.731787 | 70.2395153 |
| 17:21:13 | 0:19:13 |  | 78.6930524 | 80.3812876 | 72.731787 | 71.2395153 |
| 17:21:14 | 0:19:14 |  | 79.6930524 | 80.3812876 | 72.731787 | 71.2395153 |
| 17:21:15 | 0:19:15 |  | 79.6930524 | 80.3812876 | 72.731787 | 72.2395153 |
| 17:21:16 | 0:19:16 |  | 79.6930524 | 80.3812876 | 72.731787 | 72.2395153 |
| 17:21:17 | 0:19:17 |  | 79.6930524 | 80.3812876 | 71.731787 | 72.2395153 |
| 17:21:18 | 0:19:18 |  | 79.6930524 | 80.3812876 | 71.731787 | 72.2395153 |
| 17:21:19 | 0:19:19 |  | 78.6930524 | 78.3812876 | 69.731787 | 70.2395153 |
| 17:21:20 | 0:19:20 |  | 78.6930524 | 78.3812876 | 68.731787 | 63.2395153 |
| 17:21:21 | 0:19:21 |  | 78.6930524 | 78.3812876 | 71.731787 | 62.2395153 |
| 17:21:22 | 0:19:22 |  | 77.6930524 | 78.3812876 | 73.731787 | 62.2395153 |
| 17:21:23 | 0:19:23 |  | 77.6930524 | 79.3812876 | 73.731787 | 62.2395153 |
| 17:21:24 | 0:19:24 |  | 76.6930524 | 79.3812876 | 73.731787 | 63.2395153 |
| 17:21:25 | 0:19:25 |  | 75.6930524 | 78.3812876 | 73.731787 | 63.2395153 |
| 17:21:26 | 0:19:26 |  | 75.6930524 | 78.3812876 | 73.731787 | 64.2395153 |
| 17:21:27 | 0:19:27 |  | 77.6930524 | 77.3812876 | 73.731787 | 65.2395153 |

|          |         |  |            |            |           |            |
|----------|---------|--|------------|------------|-----------|------------|
| 17:21:28 | 0:19:28 |  | 78.6930524 | 77.3812876 | 73.731787 | 65.2395153 |
| 17:21:29 | 0:19:29 |  | 79.6930524 | 77.3812876 | 73.731787 | 66.2395153 |
| 17:21:30 | 0:19:30 |  | 79.6930524 | 78.3812876 | 73.731787 | 69.2395153 |
| 17:21:31 | 0:19:31 |  | 79.6930524 | 79.3812876 | 74.731787 | 68.2395153 |
| 17:21:32 | 0:19:32 |  | 79.6930524 | 79.3812876 | 74.731787 | 68.2395153 |
| 17:21:33 | 0:19:33 |  | 78.6930524 | 86.3812876 | 74.731787 | 69.2395153 |
| 17:21:34 | 0:19:34 |  | 78.6930524 | 85.3812876 | 74.731787 | 69.2395153 |
| 17:21:35 | 0:19:35 |  | 79.6930524 | 83.3812876 | 74.731787 | 69.2395153 |
| 17:21:36 | 0:19:36 |  | 81.6930524 | 83.3812876 | 74.731787 | 69.2395153 |
| 17:21:37 | 0:19:37 |  | 84.6930524 | 81.3812876 | 76.731787 | 74.2395153 |
| 17:21:38 | 0:19:38 |  | 87.6930524 | 81.3812876 | 77.731787 | 74.2395153 |
| 17:21:39 | 0:19:39 |  | 88.6930524 | 80.3812876 | 78.731787 | 74.2395153 |
| 17:21:40 | 0:19:40 |  | 89.6930524 | 80.3812876 | 78.731787 | 72.2395153 |
| 17:21:41 | 0:19:41 |  | 89.6930524 | 80.3812876 | 79.731787 | 72.2395153 |
| 17:21:42 | 0:19:42 |  | 88.6930524 | 80.3812876 | 78.731787 | 72.2395153 |
| 17:21:43 | 0:19:43 |  | 87.6930524 | 80.3812876 | 78.731787 | 72.2395153 |
| 17:21:44 | 0:19:44 |  | 86.6930524 | 80.3812876 | 79.731787 | 72.2395153 |
| 17:21:45 | 0:19:45 |  | 85.6930524 | 80.3812876 | 79.731787 | 72.2395153 |
| 17:21:46 | 0:19:46 |  | 83.6930524 | 80.3812876 | 79.731787 | 73.2395153 |
| 17:21:47 | 0:19:47 |  | 82.6930524 | 80.3812876 | 79.731787 | 77.2395153 |
| 17:21:48 | 0:19:48 |  | 82.6930524 | 80.3812876 | 79.731787 | 79.2395153 |
| 17:21:49 | 0:19:49 |  | 81.6930524 | 79.3812876 | 79.731787 | 79.2395153 |
| 17:21:50 | 0:19:50 |  | 80.6930524 | 79.3812876 | 78.731787 | 79.2395153 |
| 17:21:51 | 0:19:51 |  | 80.6930524 | 79.3812876 | 78.731787 | 77.2395153 |
| 17:21:52 | 0:19:52 |  | 80.6930524 | 80.3812876 | 78.731787 | 76.2395153 |
| 17:21:53 | 0:19:53 |  | 79.6930524 | 80.3812876 | 79.731787 | 76.2395153 |
| 17:21:54 | 0:19:54 |  | 79.6930524 | 80.3812876 | 79.731787 | 76.2395153 |
| 17:21:55 | 0:19:55 |  | 78.6930524 | 80.3812876 | 79.731787 | 77.2395153 |
| 17:21:56 | 0:19:56 |  | 78.6930524 | 80.3812876 | 79.731787 | 77.2395153 |
| 17:21:57 | 0:19:57 |  | 78.6930524 | 76.3812876 | 79.731787 | 77.2395153 |
| 17:21:58 | 0:19:58 |  | 78.6930524 | 76.3812876 | 79.731787 | 79.2395153 |
| 17:21:59 | 0:19:59 |  | 78.6930524 | 76.3812876 | 79.731787 | 81.2395153 |
| 17:22:00 | 0:20:00 |  | 78.6930524 | 76.3812876 | 78.731787 | 81.2395153 |
| 17:22:01 | 0:20:01 |  | 77.6930524 | 77.3812876 | 77.731787 | 82.2395153 |
| 17:22:02 | 0:20:02 |  | 77.6930524 | 77.3812876 | 77.731787 | 84.2395153 |
| 17:22:03 | 0:20:03 |  | 76.6930524 | 78.3812876 | 78.731787 | 84.2395153 |
| 17:22:04 | 0:20:04 |  | 75.6930524 | 80.3812876 | 78.731787 | 85.2395153 |
| 17:22:05 | 0:20:05 |  | 75.6930524 | 80.3812876 | 78.731787 | 85.2395153 |
| 17:22:06 | 0:20:06 |  | 76.6930524 | 80.3812876 | 78.731787 | 85.2395153 |
| 17:22:07 | 0:20:07 |  | 77.6930524 | 80.3812876 | 79.731787 | 85.2395153 |
| 17:22:08 | 0:20:08 |  | 77.6930524 | 82.3812876 | 79.731787 | 85.2395153 |
| 17:22:09 | 0:20:09 |  | 77.6930524 | 83.3812876 | 79.731787 | 85.2395153 |
| 17:22:10 | 0:20:10 |  | 77.6930524 | 85.3812876 | 79.731787 | 85.2395153 |
| 17:22:11 | 0:20:11 |  | 77.6930524 | 85.3812876 | 79.731787 | 87.2395153 |
| 17:22:12 | 0:20:12 |  | 77.6930524 | 85.3812876 | 79.731787 | 87.2395153 |

|          |         |  |            |            |           |            |
|----------|---------|--|------------|------------|-----------|------------|
| 17:22:13 | 0:20:13 |  | 76.6930524 | 88.3812876 | 79.731787 | 90.2395153 |
| 17:22:14 | 0:20:14 |  | 76.6930524 | 89.3812876 | 79.731787 | 92.2395153 |
| 17:22:15 | 0:20:15 |  | 76.6930524 | 90.3812876 | 79.731787 | 95.2395153 |
| 17:22:16 | 0:20:16 |  | 76.6930524 | 89.3812876 | 79.731787 | 95.2395153 |
| 17:22:17 | 0:20:17 |  | 76.6930524 | 89.3812876 | 79.731787 | 98.2395153 |
| 17:22:18 | 0:20:18 |  | 77.6930524 | 89.3812876 | 79.731787 | 98.2395153 |
| 17:22:19 | 0:20:19 |  | 79.6930524 | 88.3812876 | 79.731787 | 98.2395153 |
| 17:22:20 | 0:20:20 |  | 82.6930524 | 87.3812876 | 79.731787 | 82.2395153 |
| 17:22:21 | 0:20:21 |  | 86.6930524 | 87.3812876 | 79.731787 | 82.2395153 |
| 17:22:22 | 0:20:22 |  | 88.6930524 | 87.3812876 | 79.731787 | 73.2395153 |
| 17:22:23 | 0:20:23 |  | 89.6930524 | 85.3812876 | 79.731787 | 73.2395153 |
| 17:22:24 | 0:20:24 |  | 90.6930524 | 84.3812876 | 78.731787 | 73.2395153 |
| 17:22:25 | 0:20:25 |  | 90.6930524 | 84.3812876 | 77.731787 | 72.2395153 |
| 17:22:26 | 0:20:26 |  | 90.6930524 | 84.3812876 | 77.731787 | 72.2395153 |
| 17:22:27 | 0:20:27 |  | 90.6930524 | 83.3812876 | 77.731787 | 71.2395153 |
| 17:22:28 | 0:20:28 |  | 86.6930524 | 83.3812876 | 77.731787 | 71.2395153 |
| 17:22:29 | 0:20:29 |  | 82.6930524 | 82.3812876 | 76.731787 | 71.2395153 |
| 17:22:30 | 0:20:30 |  | 80.6930524 | 82.3812876 | 76.731787 | 71.2395153 |
| 17:22:31 | 0:20:31 |  | 80.6930524 | 80.3812876 | 76.731787 | 71.2395153 |
| 17:22:32 | 0:20:32 |  | 79.6930524 | 80.3812876 | 75.731787 | 71.2395153 |
| 17:22:33 | 0:20:33 |  | 79.6930524 | 80.3812876 | 73.731787 | 71.2395153 |
| 17:22:34 | 0:20:34 |  | 78.6930524 | 80.3812876 | 73.731787 | 70.2395153 |
| 17:22:35 | 0:20:35 |  | 78.6930524 | 80.3812876 | 73.731787 | 69.2395153 |
| 17:22:36 | 0:20:36 |  | 78.6930524 | 80.3812876 | 81.731787 | 69.2395153 |
| 17:22:37 | 0:20:37 |  | 77.6930524 | 80.3812876 | 81.731787 | 69.2395153 |
| 17:22:38 | 0:20:38 |  | 77.6930524 | 81.3812876 | 77.731787 | 68.2395153 |
| 17:22:39 | 0:20:39 |  | 77.6930524 | 80.3812876 | 76.731787 | 68.2395153 |
| 17:22:40 | 0:20:40 |  | 77.6930524 | 80.3812876 | 75.731787 | 63.2395153 |
| 17:22:41 | 0:20:41 |  | 77.6930524 | 81.3812876 | 74.731787 | 63.2395153 |
| 17:22:42 | 0:20:42 |  | 77.6930524 | 82.3812876 | 74.731787 | 63.2395153 |
| 17:22:43 | 0:20:43 |  | 77.6930524 | 82.3812876 | 73.731787 | 62.2395153 |
| 17:22:44 | 0:20:44 |  | 77.6930524 | 82.3812876 | 73.731787 | 59.2395153 |
| 17:22:45 | 0:20:45 |  | 76.6930524 | 82.3812876 | 73.731787 | 59.2395153 |
| 17:22:46 | 0:20:46 |  | 78.6930524 | 82.3812876 | 73.731787 | 58.2395153 |
| 17:22:47 | 0:20:47 |  | 79.6930524 | 82.3812876 | 73.731787 | 63.2395153 |
| 17:22:48 | 0:20:48 |  | 99.6930524 | 82.3812876 | 73.731787 | 66.2395153 |
| 17:22:49 | 0:20:49 |  | 107.693052 | 87.3812876 | 73.731787 | 66.2395153 |
| 17:22:50 | 0:20:50 |  | 111.693052 | 88.3812876 | 72.731787 | 68.2395153 |
| 17:22:51 | 0:20:51 |  | 111.693052 | 88.3812876 | 72.731787 | 70.2395153 |
| 17:22:52 | 0:20:52 |  | 112.693052 | 87.3812876 | 72.731787 | 70.2395153 |
| 17:22:53 | 0:20:53 |  | 114.693052 | 86.3812876 | 72.731787 | 70.2395153 |
| 17:22:54 | 0:20:54 |  | 117.693052 | 86.3812876 | 70.731787 | 70.2395153 |
| 17:22:55 | 0:20:55 |  | 117.693052 | 85.3812876 | 70.731787 | 70.2395153 |
| 17:22:56 | 0:20:56 |  | 117.693052 | 83.3812876 | 69.731787 | 70.2395153 |
| 17:22:57 | 0:20:57 |  | 115.693052 | 83.3812876 | 69.731787 | 71.2395153 |



|          |         |  |            |            |           |            |
|----------|---------|--|------------|------------|-----------|------------|
| 17:22:58 | 0:20:58 |  | 111.693052 | 82.3812876 | 77.731787 | 71.2395153 |
| 17:22:59 | 0:20:59 |  | 107.693052 | 82.3812876 | 78.731787 | 72.2395153 |
| 17:23:00 | 0:21:00 |  | 91.6930524 | 82.3812876 | 78.731787 | 71.2395153 |
| 17:23:01 | 0:21:01 |  | 91.6930524 | 80.3812876 | 78.731787 | 71.2395153 |
| 17:23:02 | 0:21:02 |  | 91.6930524 | 79.3812876 | 78.731787 | 71.2395153 |
| 17:23:03 | 0:21:03 |  | 91.6930524 | 76.3812876 | 78.731787 | 71.2395153 |
| 17:23:04 | 0:21:04 |  | 91.6930524 | 76.3812876 | 77.731787 | 71.2395153 |
| 17:23:05 | 0:21:05 |  | 89.6930524 | 71.3812876 | 77.731787 | 71.2395153 |
| 17:23:06 | 0:21:06 |  | 89.6930524 | 71.3812876 | 77.731787 | 71.2395153 |
| 17:23:07 | 0:21:07 |  | 86.6930524 | 71.3812876 | 75.731787 | 71.2395153 |
| 17:23:08 | 0:21:08 |  | 82.6930524 | 71.3812876 | 75.731787 | 73.2395153 |
| 17:23:09 | 0:21:09 |  | 80.6930524 | 71.3812876 | 76.731787 | 75.2395153 |
| 17:23:10 | 0:21:10 |  | 80.6930524 | 71.3812876 | 77.731787 | 79.2395153 |
| 17:23:11 | 0:21:11 |  | 79.6930524 | 70.3812876 | 77.731787 | 79.2395153 |
| 17:23:12 | 0:21:12 |  | 79.6930524 | 70.3812876 | 77.731787 | 76.2395153 |
| 17:23:13 | 0:21:13 |  | 79.6930524 | 70.3812876 | 78.731787 | 76.2395153 |
| 17:23:14 | 0:21:14 |  | 79.6930524 | 70.3812876 | 78.731787 | 76.2395153 |
| 17:23:15 | 0:21:15 |  | 79.6930524 | 69.3812876 | 78.731787 | 75.2395153 |
| 17:23:16 | 0:21:16 |  | 80.6930524 | 69.3812876 | 78.731787 | 75.2395153 |
| 17:23:17 | 0:21:17 |  | 79.6930524 | 74.3812876 | 78.731787 | 73.2395153 |
| 17:23:18 | 0:21:18 |  | 79.6930524 | 76.3812876 | 78.731787 | 73.2395153 |
| 17:23:19 | 0:21:19 |  | 79.6930524 | 77.3812876 | 78.731787 | 72.2395153 |
| 17:23:20 | 0:21:20 |  | 79.6930524 | 77.3812876 | 78.731787 | 71.2395153 |
| 17:23:21 | 0:21:21 |  | 78.6930524 | 77.3812876 | 78.731787 | 71.2395153 |
| 17:23:22 | 0:21:22 |  | 78.6930524 | 77.3812876 | 80.731787 | 71.2395153 |
| 17:23:23 | 0:21:23 |  | 78.6930524 | 77.3812876 | 81.731787 | 71.2395153 |
| 17:23:24 | 0:21:24 |  | 78.6930524 | 78.3812876 | 81.731787 | 73.2395153 |
| 17:23:25 | 0:21:25 |  | 77.6930524 | 78.3812876 | 83.731787 | 73.2395153 |
| 17:23:26 | 0:21:26 |  | 77.6930524 | 80.3812876 | 83.731787 | 75.2395153 |
| 17:23:27 | 0:21:27 |  | 78.6930524 | 80.3812876 | 83.731787 | 75.2395153 |
| 17:23:28 | 0:21:28 |  | 78.6930524 | 80.3812876 | 80.731787 | 75.2395153 |
| 17:23:29 | 0:21:29 |  | 78.6930524 | 80.3812876 | 80.731787 | 75.2395153 |
| 17:23:30 | 0:21:30 |  | 77.6930524 | 80.3812876 | 79.731787 | 75.2395153 |
| 17:23:31 | 0:21:31 |  | 77.6930524 | 81.3812876 | 79.731787 | 75.2395153 |
| 17:23:32 | 0:21:32 |  | 78.6930524 | 81.3812876 | 79.731787 | 77.2395153 |
| 17:23:33 | 0:21:33 |  | 78.6930524 | 81.3812876 | 81.731787 | 77.2395153 |
| 17:23:34 | 0:21:34 |  | 79.6930524 | 82.3812876 | 81.731787 | 77.2395153 |
| 17:23:35 | 0:21:35 |  | 79.6930524 | 82.3812876 | 81.731787 | 77.2395153 |
| 17:23:36 | 0:21:36 |  | 78.6930524 | 82.3812876 | 82.731787 | 77.2395153 |
| 17:23:37 | 0:21:37 |  | 78.6930524 | 82.3812876 | 82.731787 | 77.2395153 |
| 17:23:38 | 0:21:38 |  | 78.6930524 | 82.3812876 | 82.731787 | 77.2395153 |
| 17:23:39 | 0:21:39 |  | 78.6930524 | 82.3812876 | 82.731787 | 77.2395153 |
| 17:23:40 | 0:21:40 |  | 78.6930524 | 82.3812876 | 82.731787 | 76.2395153 |
| 17:23:41 | 0:21:41 |  | 77.6930524 | 79.3812876 | 82.731787 | 76.2395153 |
| 17:23:42 | 0:21:42 |  | 76.6930524 | 79.3812876 | 82.731787 | 77.2395153 |

|          |         |  |            |            |           |            |
|----------|---------|--|------------|------------|-----------|------------|
| 17:23:43 | 0:21:43 |  | 76.6930524 | 76.3812876 | 84.731787 | 77.2395153 |
| 17:23:44 | 0:21:44 |  | 76.6930524 | 74.3812876 | 84.731787 | 76.2395153 |
| 17:23:45 | 0:21:45 |  | 77.6930524 | 76.3812876 | 85.731787 | 74.2395153 |
| 17:23:46 | 0:21:46 |  | 78.6930524 | 77.3812876 | 85.731787 | 73.2395153 |
| 17:23:47 | 0:21:47 |  | 77.6930524 | 78.3812876 | 85.731787 | 71.2395153 |
| 17:23:48 | 0:21:48 |  | 77.6930524 | 78.3812876 | 85.731787 | 71.2395153 |
| 17:23:49 | 0:21:49 |  | 77.6930524 | 78.3812876 | 84.731787 | 71.2395153 |
| 17:23:50 | 0:21:50 |  | 77.6930524 | 79.3812876 | 84.731787 | 71.2395153 |
| 17:23:51 | 0:21:51 |  | 77.6930524 | 80.3812876 | 83.731787 | 71.2395153 |
| 17:23:52 | 0:21:52 |  | 80.6930524 | 80.3812876 | 80.731787 | 71.2395153 |
| 17:23:53 | 0:21:53 |  | 82.6930524 | 80.3812876 | 80.731787 | 75.2395153 |
| 17:23:54 | 0:21:54 |  | 82.6930524 | 80.3812876 | 80.731787 | 76.2395153 |
| 17:23:55 | 0:21:55 |  | 82.6930524 | 80.3812876 | 80.731787 | 75.2395153 |
| 17:23:56 | 0:21:56 |  | 90.6930524 | 81.3812876 | 80.731787 | 75.2395153 |
| 17:23:57 | 0:21:57 |  | 95.6930524 | 81.3812876 | 80.731787 | 75.2395153 |
| 17:23:58 | 0:21:58 |  | 95.6930524 | 81.3812876 | 79.731787 | 75.2395153 |
| 17:23:59 | 0:21:59 |  | 95.6930524 | 81.3812876 | 78.731787 | 75.2395153 |
| 17:24:00 | 0:22:00 |  | 95.6930524 | 81.3812876 | 78.731787 | 75.2395153 |
| 17:24:01 | 0:22:01 |  | 95.6930524 | 82.3812876 | 78.731787 | 75.2395153 |
| 17:24:02 | 0:22:02 |  | 95.6930524 | 82.3812876 | 76.731787 | 75.2395153 |
| 17:24:03 | 0:22:03 |  | 95.6930524 | 81.3812876 | 76.731787 | 75.2395153 |
| 17:24:04 | 0:22:04 |  | 95.6930524 | 80.3812876 | 76.731787 | 73.2395153 |
| 17:24:05 | 0:22:05 |  | 95.6930524 | 79.3812876 | 74.731787 | 73.2395153 |
| 17:24:06 | 0:22:06 |  | 95.6930524 | 79.3812876 | 74.731787 | 73.2395153 |
| 17:24:07 | 0:22:07 |  | 97.6930524 | 77.3812876 | 74.731787 | 72.2395153 |
| 17:24:08 | 0:22:08 |  | 97.6930524 | 77.3812876 | 73.731787 | 72.2395153 |
| 17:24:09 | 0:22:09 |  | 98.6930524 | 77.3812876 | 73.731787 | 72.2395153 |
| 17:24:10 | 0:22:10 |  | 98.6930524 | 77.3812876 | 73.731787 | 73.2395153 |
| 17:24:11 | 0:22:11 |  | 99.6930524 | 77.3812876 | 73.731787 | 73.2395153 |
| 17:24:12 | 0:22:12 |  | 99.6930524 | 77.3812876 | 73.731787 | 73.2395153 |
| 17:24:13 | 0:22:13 |  | 84.6930524 | 77.3812876 | 73.731787 | 73.2395153 |
| 17:24:14 | 0:22:14 |  | 81.6930524 | 77.3812876 | 73.731787 | 74.2395153 |
| 17:24:15 | 0:22:15 |  | 78.6930524 | 77.3812876 | 73.731787 | 73.2395153 |
| 17:24:16 | 0:22:16 |  | 78.6930524 | 77.3812876 | 73.731787 | 73.2395153 |
| 17:24:17 | 0:22:17 |  | 78.6930524 | 75.3812876 | 72.731787 | 72.2395153 |
| 17:24:18 | 0:22:18 |  | 78.6930524 | 75.3812876 | 72.731787 | 72.2395153 |
| 17:24:19 | 0:22:19 |  | 78.6930524 | 74.3812876 | 72.731787 | 72.2395153 |
| 17:24:20 | 0:22:20 |  | 78.6930524 | 74.3812876 | 74.731787 | 72.2395153 |
| 17:24:21 | 0:22:21 |  | 77.6930524 | 75.3812876 | 78.731787 | 72.2395153 |
| 17:24:22 | 0:22:22 |  | 76.6930524 | 76.3812876 | 81.731787 | 72.2395153 |
| 17:24:23 | 0:22:23 |  | 76.6930524 | 77.3812876 | 82.731787 | 72.2395153 |
| 17:24:24 | 0:22:24 |  | 75.6930524 | 77.3812876 | 82.731787 | 71.2395153 |
| 17:24:25 | 0:22:25 |  | 75.6930524 | 89.3812876 | 83.731787 | 71.2395153 |
| 17:24:26 | 0:22:26 |  | 75.6930524 | 90.3812876 | 83.731787 | 73.2395153 |
| 17:24:27 | 0:22:27 |  | 75.6930524 | 90.3812876 | 84.731787 | 73.2395153 |

|          |         |  |            |            |           |            |
|----------|---------|--|------------|------------|-----------|------------|
| 17:24:28 | 0:22:28 |  | 76.6930524 | 90.3812876 | 84.731787 | 73.2395153 |
| 17:24:29 | 0:22:29 |  | 77.6930524 | 81.3812876 | 87.731787 | 74.2395153 |
| 17:24:30 | 0:22:30 |  | 77.6930524 | 81.3812876 | 88.731787 | 74.2395153 |
| 17:24:31 | 0:22:31 |  | 77.6930524 | 81.3812876 | 88.731787 | 74.2395153 |
| 17:24:32 | 0:22:32 |  | 76.6930524 | 81.3812876 | 88.731787 | 74.2395153 |
| 17:24:33 | 0:22:33 |  | 76.6930524 | 81.3812876 | 88.731787 | 74.2395153 |
| 17:24:34 | 0:22:34 |  | 76.6930524 | 81.3812876 | 89.731787 | 75.2395153 |
| 17:24:35 | 0:22:35 |  | 76.6930524 | 80.3812876 | 90.731787 | 75.2395153 |
| 17:24:36 | 0:22:36 |  | 75.6930524 | 76.3812876 | 90.731787 | 75.2395153 |
| 17:24:37 | 0:22:37 |  | 77.6930524 | 76.3812876 | 90.731787 | 75.2395153 |
| 17:24:38 | 0:22:38 |  | 77.6930524 | 72.3812876 | 90.731787 | 75.2395153 |
| 17:24:39 | 0:22:39 |  | 77.6930524 | 73.3812876 | 90.731787 | 74.2395153 |
| 17:24:40 | 0:22:40 |  | 77.6930524 | 75.3812876 | 91.731787 | 74.2395153 |
| 17:24:41 | 0:22:41 |  | 77.6930524 | 77.3812876 | 91.731787 | 73.2395153 |
| 17:24:42 | 0:22:42 |  | 77.6930524 | 78.3812876 | 91.731787 | 73.2395153 |
| 17:24:43 | 0:22:43 |  | 77.6930524 | 78.3812876 | 91.731787 | 73.2395153 |
| 17:24:44 | 0:22:44 |  | 77.6930524 | 80.3812876 | 91.731787 | 73.2395153 |
| 17:24:45 | 0:22:45 |  | 75.6930524 | 81.3812876 | 91.731787 | 73.2395153 |
| 17:24:46 | 0:22:46 |  | 74.6930524 | 81.3812876 | 91.731787 | 73.2395153 |
| 17:24:47 | 0:22:47 |  | 74.6930524 | 81.3812876 | 91.731787 | 74.2395153 |
| 17:24:48 | 0:22:48 |  | 74.6930524 | 81.3812876 | 91.731787 | 74.2395153 |
| 17:24:49 | 0:22:49 |  | 73.6930524 | 81.3812876 | 91.731787 | 73.2395153 |
| 17:24:50 | 0:22:50 |  | 73.6930524 | 81.3812876 | 91.731787 | 76.2395153 |
| 17:24:51 | 0:22:51 |  | 74.6930524 | 80.3812876 | 91.731787 | 77.2395153 |
| 17:24:52 | 0:22:52 |  | 74.6930524 | 80.3812876 | 90.731787 | 78.2395153 |
| 17:24:53 | 0:22:53 |  | 74.6930524 | 80.3812876 | 88.731787 | 78.2395153 |
| 17:24:54 | 0:22:54 |  | 74.6930524 | 80.3812876 | 88.731787 | 78.2395153 |
| 17:24:55 | 0:22:55 |  | 75.6930524 | 80.3812876 | 86.731787 | 77.2395153 |
| 17:24:56 | 0:22:56 |  | 75.6930524 | 80.3812876 | 86.731787 | 76.2395153 |
| 17:24:57 | 0:22:57 |  | 75.6930524 | 79.3812876 | 86.731787 | 75.2395153 |
| 17:24:58 | 0:22:58 |  | 75.6930524 | 81.3812876 | 86.731787 | 74.2395153 |
| 17:24:59 | 0:22:59 |  | 75.6930524 | 83.3812876 | 86.731787 | 73.2395153 |
| 17:25:00 | 0:23:00 |  | 77.6930524 | 83.3812876 | 85.731787 | 72.2395153 |
| 17:25:01 | 0:23:01 |  | 77.6930524 | 83.3812876 | 84.731787 | 72.2395153 |
| 17:25:02 | 0:23:02 |  | 85.6930524 | 81.3812876 | 84.731787 | 72.2395153 |
| 17:25:03 | 0:23:03 |  | 86.6930524 | 78.3812876 | 81.731787 | 73.2395153 |
| 17:25:04 | 0:23:04 |  | 87.6930524 | 78.3812876 | 80.731787 | 73.2395153 |
| 17:25:05 | 0:23:05 |  | 90.6930524 | 75.3812876 | 79.731787 | 73.2395153 |
| 17:25:06 | 0:23:06 |  | 90.6930524 | 74.3812876 | 79.731787 | 73.2395153 |
| 17:25:07 | 0:23:07 |  | 92.6930524 | 74.3812876 | 76.731787 | 73.2395153 |
| 17:25:08 | 0:23:08 |  | 92.6930524 | 74.3812876 | 76.731787 | 73.2395153 |
| 17:25:09 | 0:23:09 |  | 91.6930524 | 74.3812876 | 77.731787 | 73.2395153 |
| 17:25:10 | 0:23:10 |  | 90.6930524 | 74.3812876 | 76.731787 | 73.2395153 |
| 17:25:11 | 0:23:11 |  | 88.6930524 | 74.3812876 | 76.731787 | 73.2395153 |
| 17:25:12 | 0:23:12 |  | 87.6930524 | 74.3812876 | 78.731787 | 73.2395153 |

|          |         |  |            |            |           |            |
|----------|---------|--|------------|------------|-----------|------------|
| 17:25:13 | 0:23:13 |  | 83.6930524 | 74.3812876 | 79.731787 | 73.2395153 |
| 17:25:14 | 0:23:14 |  | 81.6930524 | 75.3812876 | 78.731787 | 73.2395153 |
| 17:25:15 | 0:23:15 |  | 80.6930524 | 75.3812876 | 77.731787 | 74.2395153 |
| 17:25:16 | 0:23:16 |  | 80.6930524 | 76.3812876 | 76.731787 | 74.2395153 |
| 17:25:17 | 0:23:17 |  | 79.6930524 | 76.3812876 | 76.731787 | 74.2395153 |
| 17:25:18 | 0:23:18 |  | 79.6930524 | 76.3812876 | 75.731787 | 74.2395153 |
| 17:25:19 | 0:23:19 |  | 79.6930524 | 77.3812876 | 75.731787 | 73.2395153 |
| 17:25:20 | 0:23:20 |  | 79.6930524 | 78.3812876 | 75.731787 | 73.2395153 |
| 17:25:21 | 0:23:21 |  | 79.6930524 | 80.3812876 | 75.731787 | 73.2395153 |
| 17:25:22 | 0:23:22 |  | 79.6930524 | 80.3812876 | 75.731787 | 74.2395153 |
| 17:25:23 | 0:23:23 |  | 78.6930524 | 81.3812876 | 75.731787 | 74.2395153 |
| 17:25:24 | 0:23:24 |  | 77.6930524 | 81.3812876 | 75.731787 | 74.2395153 |
| 17:25:25 | 0:23:25 |  | 77.6930524 | 81.3812876 | 75.731787 | 76.2395153 |
| 17:25:26 | 0:23:26 |  | 77.6930524 | 80.3812876 | 76.731787 | 76.2395153 |
| 17:25:27 | 0:23:27 |  | 76.6930524 | 80.3812876 | 76.731787 | 76.2395153 |
| 17:25:28 | 0:23:28 |  | 77.6930524 | 80.3812876 | 76.731787 | 76.2395153 |
| 17:25:29 | 0:23:29 |  | 78.6930524 | 80.3812876 | 77.731787 | 76.2395153 |
| 17:25:30 | 0:23:30 |  | 77.6930524 | 80.3812876 | 80.731787 | 76.2395153 |
| 17:25:31 | 0:23:31 |  | 77.6930524 | 80.3812876 | 81.731787 | 80.2395153 |
| 17:25:32 | 0:23:32 |  | 78.6930524 | 80.3812876 | 82.731787 | 80.2395153 |
| 17:25:33 | 0:23:33 |  | 79.6930524 | 80.3812876 | 82.731787 | 83.2395153 |
| 17:25:34 | 0:23:34 |  | 79.6930524 | 80.3812876 | 82.731787 | 84.2395153 |
| 17:25:35 | 0:23:35 |  | 79.6930524 | 80.3812876 | 82.731787 | 84.2395153 |
| 17:25:36 | 0:23:36 |  | 79.6930524 | 80.3812876 | 81.731787 | 84.2395153 |
| 17:25:37 | 0:23:37 |  | 79.6930524 | 80.3812876 | 81.731787 | 84.2395153 |
| 17:25:38 | 0:23:38 |  | 79.6930524 | 80.3812876 | 82.731787 | 87.2395153 |
| 17:25:39 | 0:23:39 |  | 79.6930524 | 80.3812876 | 82.731787 | 87.2395153 |
| 17:25:40 | 0:23:40 |  | 77.6930524 | 78.3812876 | 81.731787 | 87.2395153 |
| 17:25:41 | 0:23:41 |  | 76.6930524 | 77.3812876 | 81.731787 | 88.2395153 |
| 17:25:42 | 0:23:42 |  | 76.6930524 | 77.3812876 | 81.731787 | 88.2395153 |
| 17:25:43 | 0:23:43 |  | 76.6930524 | 77.3812876 | 81.731787 | 88.2395153 |
| 17:25:44 | 0:23:44 |  | 76.6930524 | 77.3812876 | 81.731787 | 89.2395153 |
| 17:25:45 | 0:23:45 |  | 76.6930524 | 77.3812876 | 81.731787 | 89.2395153 |
| 17:25:46 | 0:23:46 |  | 76.6930524 | 81.3812876 | 81.731787 | 89.2395153 |
| 17:25:47 | 0:23:47 |  | 76.6930524 | 82.3812876 | 80.731787 | 89.2395153 |
| 17:25:48 | 0:23:48 |  | 76.6930524 | 82.3812876 | 80.731787 | 89.2395153 |
| 17:25:49 | 0:23:49 |  | 75.6930524 | 82.3812876 | 79.731787 | 89.2395153 |
| 17:25:50 | 0:23:50 |  | 75.6930524 | 82.3812876 | 78.731787 | 89.2395153 |
| 17:25:51 | 0:23:51 |  | 75.6930524 | 82.3812876 | 79.731787 | 86.2395153 |
| 17:25:52 | 0:23:52 |  | 74.6930524 | 82.3812876 | 79.731787 | 82.2395153 |
| 17:25:53 | 0:23:53 |  | 73.6930524 | 82.3812876 | 75.731787 | 81.2395153 |
| 17:25:54 | 0:23:54 |  | 73.6930524 | 83.3812876 | 74.731787 | 80.2395153 |
| 17:25:55 | 0:23:55 |  | 73.6930524 | 83.3812876 | 73.731787 | 79.2395153 |
| 17:25:56 | 0:23:56 |  | 72.6930524 | 83.3812876 | 73.731787 | 74.2395153 |
| 17:25:57 | 0:23:57 |  | 72.6930524 | 85.3812876 | 73.731787 | 71.2395153 |

|          |         |  |            |            |           |            |
|----------|---------|--|------------|------------|-----------|------------|
| 17:25:58 | 0:23:58 |  | 72.6930524 | 85.3812876 | 73.731787 | 68.2395153 |
| 17:25:59 | 0:23:59 |  | 72.6930524 | 85.3812876 | 73.731787 | 66.2395153 |
| 17:26:00 | 0:24:00 |  | 72.6930524 | 85.3812876 | 75.731787 | 65.2395153 |
| 17:26:01 | 0:24:01 |  | 73.6930524 | 86.3812876 | 77.731787 | 64.2395153 |
| 17:26:02 | 0:24:02 |  | 78.6930524 | 86.3812876 | 77.731787 | 63.2395153 |
| 17:26:03 | 0:24:03 |  | 79.6930524 | 87.3812876 | 76.731787 | 65.2395153 |
| 17:26:04 | 0:24:04 |  | 79.6930524 | 88.3812876 | 74.731787 | 66.2395153 |
| 17:26:05 | 0:24:05 |  | 79.6930524 | 86.3812876 | 73.731787 | 67.2395153 |
| 17:26:06 | 0:24:06 |  | 79.6930524 | 80.3812876 | 72.731787 | 67.2395153 |
| 17:26:07 | 0:24:07 |  | 80.6930524 | 79.3812876 | 71.731787 | 67.2395153 |
| 17:26:08 | 0:24:08 |  | 77.6930524 | 79.3812876 | 71.731787 | 67.2395153 |
| 17:26:09 | 0:24:09 |  | 76.6930524 | 77.3812876 | 72.731787 | 67.2395153 |
| 17:26:10 | 0:24:10 |  | 76.6930524 | 77.3812876 | 73.731787 | 67.2395153 |
| 17:26:11 | 0:24:11 |  | 76.6930524 | 76.3812876 | 73.731787 | 67.2395153 |
| 17:26:12 | 0:24:12 |  | 76.6930524 | 75.3812876 | 73.731787 | 67.2395153 |
| 17:26:13 | 0:24:13 |  | 76.6930524 | 75.3812876 | 73.731787 | 68.2395153 |
| 17:26:14 | 0:24:14 |  | 77.6930524 | 71.3812876 | 73.731787 | 69.2395153 |
| 17:26:15 | 0:24:15 |  | 77.6930524 | 73.3812876 | 72.731787 | 70.2395153 |
| 17:26:16 | 0:24:16 |  | 77.6930524 | 75.3812876 | 72.731787 | 72.2395153 |
| 17:26:17 | 0:24:17 |  | 77.6930524 | 75.3812876 | 72.731787 | 72.2395153 |
| 17:26:18 | 0:24:18 |  | 77.6930524 | 75.3812876 | 72.731787 | 73.2395153 |
| 17:26:19 | 0:24:19 |  | 77.6930524 | 74.3812876 | 73.731787 | 76.2395153 |
| 17:26:20 | 0:24:20 |  | 77.6930524 | 74.3812876 | 74.731787 | 76.2395153 |
| 17:26:21 | 0:24:21 |  | 77.6930524 | 74.3812876 | 75.731787 | 77.2395153 |
| 17:26:22 | 0:24:22 |  | 76.6930524 | 78.3812876 | 75.731787 | 77.2395153 |
| 17:26:23 | 0:24:23 |  | 76.6930524 | 78.3812876 | 75.731787 | 77.2395153 |
| 17:26:24 | 0:24:24 |  | 76.6930524 | 77.3812876 | 75.731787 | 76.2395153 |
| 17:26:25 | 0:24:25 |  | 75.6930524 | 77.3812876 | 75.731787 | 76.2395153 |
| 17:26:26 | 0:24:26 |  | 75.6930524 | 75.3812876 | 76.731787 | 76.2395153 |
| 17:26:27 | 0:24:27 |  | 75.6930524 | 75.3812876 | 76.731787 | 76.2395153 |
| 17:26:28 | 0:24:28 |  | 75.6930524 | 75.3812876 | 76.731787 | 77.2395153 |
| 17:26:29 | 0:24:29 |  | 75.6930524 | 74.3812876 | 75.731787 | 77.2395153 |
| 17:26:30 | 0:24:30 |  | 76.6930524 | 74.3812876 | 75.731787 | 76.2395153 |
| 17:26:31 | 0:24:31 |  | 77.6930524 | 74.3812876 | 75.731787 | 75.2395153 |
| 17:26:32 | 0:24:32 |  | 77.6930524 | 74.3812876 | 75.731787 | 75.2395153 |
| 17:26:33 | 0:24:33 |  | 77.6930524 | 74.3812876 | 73.731787 | 75.2395153 |
| 17:26:34 | 0:24:34 |  | 77.6930524 | 72.3812876 | 73.731787 | 75.2395153 |
| 17:26:35 | 0:24:35 |  | 77.6930524 | 72.3812876 | 72.731787 | 75.2395153 |
| 17:26:36 | 0:24:36 |  | 77.6930524 | 71.3812876 | 72.731787 | 75.2395153 |
| 17:26:37 | 0:24:37 |  | 77.6930524 | 76.3812876 | 72.731787 | 73.2395153 |
| 17:26:38 | 0:24:38 |  | 77.6930524 | 76.3812876 | 72.731787 | 71.2395153 |
| 17:26:39 | 0:24:39 |  | 77.6930524 | 76.3812876 | 72.731787 | 72.2395153 |
| 17:26:40 | 0:24:40 |  | 78.6930524 | 76.3812876 | 71.731787 | 72.2395153 |
| 17:26:41 | 0:24:41 |  | 78.6930524 | 73.3812876 | 70.731787 | 73.2395153 |
| 17:26:42 | 0:24:42 |  | 78.6930524 | 73.3812876 | 70.731787 | 73.2395153 |

|          |         |  |            |            |           |            |
|----------|---------|--|------------|------------|-----------|------------|
| 17:26:43 | 0:24:43 |  | 82.6930524 | 73.3812876 | 69.731787 | 73.2395153 |
| 17:26:44 | 0:24:44 |  | 82.6930524 | 72.3812876 | 68.731787 | 74.2395153 |
| 17:26:45 | 0:24:45 |  | 84.6930524 | 72.3812876 | 68.731787 | 75.2395153 |
| 17:26:46 | 0:24:46 |  | 84.6930524 | 72.3812876 | 65.731787 | 75.2395153 |
| 17:26:47 | 0:24:47 |  | 84.6930524 | 72.3812876 | 65.731787 | 75.2395153 |
| 17:26:48 | 0:24:48 |  | 86.6930524 | 72.3812876 | 64.731787 | 74.2395153 |
| 17:26:49 | 0:24:49 |  | 87.6930524 | 72.3812876 | 63.731787 | 73.2395153 |
| 17:26:50 | 0:24:50 |  | 87.6930524 | 73.3812876 | 62.731787 | 73.2395153 |
| 17:26:51 | 0:24:51 |  | 88.6930524 | 73.3812876 | 62.731787 | 71.2395153 |
| 17:26:52 | 0:24:52 |  | 84.6930524 | 73.3812876 | 63.731787 | 69.2395153 |
| 17:26:53 | 0:24:53 |  | 83.6930524 | 74.3812876 | 63.731787 | 67.2395153 |
| 17:26:54 | 0:24:54 |  | 83.6930524 | 74.3812876 | 64.731787 | 66.2395153 |
| 17:26:55 | 0:24:55 |  | 83.6930524 | 74.3812876 | 65.731787 | 66.2395153 |
| 17:26:56 | 0:24:56 |  | 82.6930524 | 74.3812876 | 67.731787 | 66.2395153 |
| 17:26:57 | 0:24:57 |  | 82.6930524 | 74.3812876 | 72.731787 | 67.2395153 |
| 17:26:58 | 0:24:58 |  | 82.6930524 | 76.3812876 | 77.731787 | 69.2395153 |
| 17:26:59 | 0:24:59 |  | 81.6930524 | 76.3812876 | 77.731787 | 70.2395153 |
| 17:27:00 | 0:25:00 |  | 80.6930524 | 74.3812876 | 79.731787 | 72.2395153 |
| 17:27:01 | 0:25:01 |  | 80.6930524 | 73.3812876 | 80.731787 | 75.2395153 |
| 17:27:02 | 0:25:02 |  | 78.6930524 | 77.3812876 | 81.731787 | 76.2395153 |
| 17:27:03 | 0:25:03 |  | 78.6930524 | 77.3812876 | 79.731787 | 78.2395153 |
| 17:27:04 | 0:25:04 |  | 78.6930524 | 78.3812876 | 79.731787 | 79.2395153 |
| 17:27:05 | 0:25:05 |  | 78.6930524 | 78.3812876 | 79.731787 | 80.2395153 |
| 17:27:06 | 0:25:06 |  | 78.6930524 | 79.3812876 | 79.731787 | 80.2395153 |
| 17:27:07 | 0:25:07 |  | 78.6930524 | 81.3812876 | 79.731787 | 80.2395153 |
| 17:27:08 | 0:25:08 |  | 79.6930524 | 83.3812876 | 79.731787 | 80.2395153 |
| 17:27:09 | 0:25:09 |  | 80.6930524 | 84.3812876 | 80.731787 | 78.2395153 |
| 17:27:10 | 0:25:10 |  | 80.6930524 | 83.3812876 | 80.731787 | 77.2395153 |
| 17:27:11 | 0:25:11 |  | 80.6930524 | 80.3812876 | 80.731787 | 76.2395153 |
| 17:27:12 | 0:25:12 |  | 80.6930524 | 80.3812876 | 77.731787 | 75.2395153 |
| 17:27:13 | 0:25:13 |  | 81.6930524 | 79.3812876 | 77.731787 | 75.2395153 |
| 17:27:14 | 0:25:14 |  | 82.6930524 | 77.3812876 | 77.731787 | 75.2395153 |
| 17:27:15 | 0:25:15 |  | 82.6930524 | 77.3812876 | 77.731787 | 75.2395153 |
| 17:27:16 | 0:25:16 |  | 82.6930524 | 76.3812876 | 75.731787 | 75.2395153 |
| 17:27:17 | 0:25:17 |  | 82.6930524 | 74.3812876 | 75.731787 | 76.2395153 |
| 17:27:18 | 0:25:18 |  | 82.6930524 | 73.3812876 | 76.731787 | 76.2395153 |
| 17:27:19 | 0:25:19 |  | 81.6930524 | 73.3812876 | 78.731787 | 76.2395153 |
| 17:27:20 | 0:25:20 |  | 81.6930524 | 72.3812876 | 81.731787 | 74.2395153 |
| 17:27:21 | 0:25:21 |  | 80.6930524 | 72.3812876 | 84.731787 | 74.2395153 |
| 17:27:22 | 0:25:22 |  | 80.6930524 | 72.3812876 | 87.731787 | 74.2395153 |
| 17:27:23 | 0:25:23 |  | 80.6930524 | 72.3812876 | 88.731787 | 75.2395153 |
| 17:27:24 | 0:25:24 |  | 80.6930524 | 70.3812876 | 88.731787 | 76.2395153 |
| 17:27:25 | 0:25:25 |  | 77.6930524 | 68.3812876 | 88.731787 | 75.2395153 |
| 17:27:26 | 0:25:26 |  | 76.6930524 | 64.3812876 | 88.731787 | 73.2395153 |
| 17:27:27 | 0:25:27 |  | 76.6930524 | 64.3812876 | 88.731787 | 71.2395153 |

|          |         |  |            |            |           |            |
|----------|---------|--|------------|------------|-----------|------------|
| 17:27:28 | 0:25:28 |  | 77.6930524 | 64.3812876 | 88.731787 | 71.2395153 |
| 17:27:29 | 0:25:29 |  | 77.6930524 | 64.3812876 | 87.731787 | 71.2395153 |
| 17:27:30 | 0:25:30 |  | 78.6930524 | 64.3812876 | 87.731787 | 69.2395153 |
| 17:27:31 | 0:25:31 |  | 79.6930524 | 64.3812876 | 87.731787 | 68.2395153 |
| 17:27:32 | 0:25:32 |  | 79.6930524 | 64.3812876 | 86.731787 | 70.2395153 |
| 17:27:33 | 0:25:33 |  | 80.6930524 | 64.3812876 | 85.731787 | 70.2395153 |
| 17:27:34 | 0:25:34 |  | 80.6930524 | 64.3812876 | 85.731787 | 69.2395153 |
| 17:27:35 | 0:25:35 |  | 80.6930524 | 65.3812876 | 85.731787 | 69.2395153 |
| 17:27:36 | 0:25:36 |  | 80.6930524 | 65.3812876 | 85.731787 | 69.2395153 |
| 17:27:37 | 0:25:37 |  | 80.6930524 | 69.3812876 | 85.731787 | 70.2395153 |
| 17:27:38 | 0:25:38 |  | 80.6930524 | 69.3812876 | 85.731787 | 69.2395153 |
| 17:27:39 | 0:25:39 |  | 79.6930524 | 70.3812876 | 85.731787 | 69.2395153 |
| 17:27:40 | 0:25:40 |  | 79.6930524 | 70.3812876 | 86.731787 | 69.2395153 |
| 17:27:41 | 0:25:41 |  | 79.6930524 | 70.3812876 | 80.731787 | 68.2395153 |
| 17:27:42 | 0:25:42 |  | 74.6930524 | 70.3812876 | 80.731787 | 68.2395153 |
| 17:27:43 | 0:25:43 |  | 74.6930524 | 71.3812876 | 80.731787 | 68.2395153 |
| 17:27:44 | 0:25:44 |  | 74.6930524 | 71.3812876 | 80.731787 | 68.2395153 |
| 17:27:45 | 0:25:45 |  | 75.6930524 | 70.3812876 | 80.731787 | 69.2395153 |
| 17:27:46 | 0:25:46 |  | 76.6930524 | 70.3812876 | 80.731787 | 73.2395153 |
| 17:27:47 | 0:25:47 |  | 77.6930524 | 70.3812876 | 79.731787 | 73.2395153 |
| 17:27:48 | 0:25:48 |  | 77.6930524 | 70.3812876 | 77.731787 | 74.2395153 |
| 17:27:49 | 0:25:49 |  | 78.6930524 | 70.3812876 | 76.731787 | 74.2395153 |
| 17:27:50 | 0:25:50 |  | 79.6930524 | 71.3812876 | 76.731787 | 78.2395153 |
| 17:27:51 | 0:25:51 |  | 79.6930524 | 73.3812876 | 77.731787 | 81.2395153 |
| 17:27:52 | 0:25:52 |  | 80.6930524 | 73.3812876 | 77.731787 | 82.2395153 |
| 17:27:53 | 0:25:53 |  | 80.6930524 | 74.3812876 | 77.731787 | 82.2395153 |
| 17:27:54 | 0:25:54 |  | 80.6930524 | 74.3812876 | 77.731787 | 80.2395153 |
| 17:27:55 | 0:25:55 |  | 82.6930524 | 74.3812876 | 77.731787 | 80.2395153 |
| 17:27:56 | 0:25:56 |  | 82.6930524 | 74.3812876 | 77.731787 | 79.2395153 |
| 17:27:57 | 0:25:57 |  | 82.6930524 | 75.3812876 | 77.731787 | 77.2395153 |
| 17:27:58 | 0:25:58 |  | 77.6930524 | 76.3812876 | 76.731787 | 77.2395153 |
| 17:27:59 | 0:25:59 |  | 76.6930524 | 76.3812876 | 76.731787 | 75.2395153 |
| 17:28:00 | 0:26:00 |  | 75.6930524 | 76.3812876 | 76.731787 | 70.2395153 |
| 17:28:01 | 0:26:01 |  | 75.6930524 | 77.3812876 | 76.731787 | 69.2395153 |
| 17:28:02 | 0:26:02 |  | 75.6930524 | 77.3812876 | 76.731787 | 68.2395153 |
| 17:28:03 | 0:26:03 |  | 74.6930524 | 77.3812876 | 76.731787 | 67.2395153 |
| 17:28:04 | 0:26:04 |  | 74.6930524 | 77.3812876 | 76.731787 | 67.2395153 |
| 17:28:05 | 0:26:05 |  | 74.6930524 | 77.3812876 | 77.731787 | 67.2395153 |
| 17:28:06 | 0:26:06 |  | 74.6930524 | 77.3812876 | 77.731787 | 67.2395153 |
| 17:28:07 | 0:26:07 |  | 74.6930524 | 77.3812876 | 79.731787 | 67.2395153 |
| 17:28:08 | 0:26:08 |  | 73.6930524 | 77.3812876 | 81.731787 | 67.2395153 |
| 17:28:09 | 0:26:09 |  | 73.6930524 | 77.3812876 | 83.731787 | 66.2395153 |
| 17:28:10 | 0:26:10 |  | 74.6930524 | 77.3812876 | 84.731787 | 66.2395153 |
| 17:28:11 | 0:26:11 |  | 75.6930524 | 77.3812876 | 85.731787 | 66.2395153 |
| 17:28:12 | 0:26:12 |  | 76.6930524 | 78.3812876 | 85.731787 | 66.2395153 |

|          |         |  |            |            |           |            |
|----------|---------|--|------------|------------|-----------|------------|
| 17:28:13 | 0:26:13 |  | 76.6930524 | 77.3812876 | 84.731787 | 66.2395153 |
| 17:28:14 | 0:26:14 |  | 76.6930524 | 77.3812876 | 79.731787 | 68.2395153 |
| 17:28:15 | 0:26:15 |  | 75.6930524 | 75.3812876 | 77.731787 | 69.2395153 |
| 17:28:16 | 0:26:16 |  | 75.6930524 | 75.3812876 | 76.731787 | 69.2395153 |
| 17:28:17 | 0:26:17 |  | 74.6930524 | 73.3812876 | 75.731787 | 70.2395153 |
| 17:28:18 | 0:26:18 |  | 74.6930524 | 72.3812876 | 75.731787 | 70.2395153 |
| 17:28:19 | 0:26:19 |  | 74.6930524 | 72.3812876 | 74.731787 | 69.2395153 |
| 17:28:20 | 0:26:20 |  | 74.6930524 | 73.3812876 | 74.731787 | 69.2395153 |
| 17:28:21 | 0:26:21 |  | 74.6930524 | 77.3812876 | 74.731787 | 68.2395153 |
| 17:28:22 | 0:26:22 |  | 74.6930524 | 77.3812876 | 74.731787 | 69.2395153 |
| 17:28:23 | 0:26:23 |  | 74.6930524 | 77.3812876 | 77.731787 | 69.2395153 |
| 17:28:24 | 0:26:24 |  | 74.6930524 | 76.3812876 | 81.731787 | 71.2395153 |
| 17:28:25 | 0:26:25 |  | 74.6930524 | 76.3812876 | 81.731787 | 71.2395153 |
| 17:28:26 | 0:26:26 |  | 74.6930524 | 77.3812876 | 80.731787 | 72.2395153 |
| 17:28:27 | 0:26:27 |  | 74.6930524 | 78.3812876 | 76.731787 | 72.2395153 |
| 17:28:28 | 0:26:28 |  | 75.6930524 | 77.3812876 | 76.731787 | 72.2395153 |
| 17:28:29 | 0:26:29 |  | 75.6930524 | 77.3812876 | 76.731787 | 73.2395153 |
| 17:28:30 | 0:26:30 |  | 75.6930524 | 77.3812876 | 76.731787 | 73.2395153 |
| 17:28:31 | 0:26:31 |  | 72.6930524 | 74.3812876 | 74.731787 | 73.2395153 |
| 17:28:32 | 0:26:32 |  | 71.6930524 | 72.3812876 | 74.731787 | 73.2395153 |
| 17:28:33 | 0:26:33 |  | 71.6930524 | 72.3812876 | 74.731787 | 74.2395153 |
| 17:28:34 | 0:26:34 |  | 71.6930524 | 72.3812876 | 74.731787 | 74.2395153 |
| 17:28:35 | 0:26:35 |  | 71.6930524 | 72.3812876 | 74.731787 | 74.2395153 |
| 17:28:36 | 0:26:36 |  | 71.6930524 | 71.3812876 | 74.731787 | 74.2395153 |
| 17:28:37 | 0:26:37 |  | 70.6930524 | 69.3812876 | 74.731787 | 74.2395153 |
| 17:28:38 | 0:26:38 |  | 70.6930524 | 69.3812876 | 73.731787 | 74.2395153 |
| 17:28:39 | 0:26:39 |  | 70.6930524 | 69.3812876 | 70.731787 | 74.2395153 |
| 17:28:40 | 0:26:40 |  | 70.6930524 | 68.3812876 | 68.731787 | 74.2395153 |
| 17:28:41 | 0:26:41 |  | 70.6930524 | 68.3812876 | 67.731787 | 73.2395153 |
| 17:28:42 | 0:26:42 |  | 72.6930524 | 73.3812876 | 66.731787 | 73.2395153 |
| 17:28:43 | 0:26:43 |  | 72.6930524 | 75.3812876 | 66.731787 | 73.2395153 |
| 17:28:44 | 0:26:44 |  | 72.6930524 | 78.3812876 | 65.731787 | 73.2395153 |
| 17:28:45 | 0:26:45 |  | 72.6930524 | 77.3812876 | 66.731787 | 73.2395153 |
| 17:28:46 | 0:26:46 |  | 72.6930524 | 77.3812876 | 67.731787 | 71.2395153 |
| 17:28:47 | 0:26:47 |  | 72.6930524 | 76.3812876 | 67.731787 | 68.2395153 |
| 17:28:48 | 0:26:48 |  | 72.6930524 | 73.3812876 | 70.731787 | 67.2395153 |
| 17:28:49 | 0:26:49 |  | 72.6930524 | 71.3812876 | 73.731787 | 67.2395153 |
| 17:28:50 | 0:26:50 |  | 72.6930524 | 71.3812876 | 74.731787 | 68.2395153 |
| 17:28:51 | 0:26:51 |  | 73.6930524 | 71.3812876 | 73.731787 | 69.2395153 |
| 17:28:52 | 0:26:52 |  | 73.6930524 | 71.3812876 | 71.731787 | 69.2395153 |
| 17:28:53 | 0:26:53 |  | 73.6930524 | 71.3812876 | 70.731787 | 68.2395153 |
| 17:28:54 | 0:26:54 |  | 74.6930524 | 71.3812876 | 70.731787 | 68.2395153 |
| 17:28:55 | 0:26:55 |  | 74.6930524 | 73.3812876 | 70.731787 | 68.2395153 |
| 17:28:56 | 0:26:56 |  | 74.6930524 | 74.3812876 | 70.731787 | 68.2395153 |
| 17:28:57 | 0:26:57 |  | 74.6930524 | 74.3812876 | 72.731787 | 68.2395153 |



|          |         |  |            |            |           |            |
|----------|---------|--|------------|------------|-----------|------------|
| 17:28:58 | 0:26:58 |  | 73.6930524 | 74.3812876 | 72.731787 | 68.2395153 |
| 17:28:59 | 0:26:59 |  | 73.6930524 | 74.3812876 | 72.731787 | 68.2395153 |
| 17:29:00 | 0:27:00 |  | 73.6930524 | 73.3812876 | 72.731787 | 67.2395153 |
| 17:29:01 | 0:27:01 |  | 73.6930524 | 74.3812876 | 71.731787 | 68.2395153 |
| 17:29:02 | 0:27:02 |  | 73.6930524 | 73.3812876 | 71.731787 | 69.2395153 |
| 17:29:03 | 0:27:03 |  | 73.6930524 | 73.3812876 | 71.731787 | 70.2395153 |
| 17:29:04 | 0:27:04 |  | 73.6930524 | 73.3812876 | 71.731787 | 70.2395153 |
| 17:29:05 | 0:27:05 |  | 73.6930524 | 72.3812876 | 71.731787 | 69.2395153 |
| 17:29:06 | 0:27:06 |  | 73.6930524 | 73.3812876 | 71.731787 | 68.2395153 |
| 17:29:07 | 0:27:07 |  | 72.6930524 | 75.3812876 | 71.731787 | 67.2395153 |
| 17:29:08 | 0:27:08 |  | 72.6930524 | 75.3812876 | 71.731787 | 63.2395153 |
| 17:29:09 | 0:27:09 |  | 72.6930524 | 75.3812876 | 71.731787 | 62.2395153 |
| 17:29:10 | 0:27:10 |  | 72.6930524 | 74.3812876 | 72.731787 | 62.2395153 |
| 17:29:11 | 0:27:11 |  | 72.6930524 | 73.3812876 | 73.731787 | 62.2395153 |
| 17:29:12 | 0:27:12 |  | 73.6930524 | 70.3812876 | 73.731787 | 62.2395153 |
| 17:29:13 | 0:27:13 |  | 73.6930524 | 69.3812876 | 71.731787 | 62.2395153 |
| 17:29:14 | 0:27:14 |  | 73.6930524 | 69.3812876 | 70.731787 | 61.2395153 |
| 17:29:15 | 0:27:15 |  | 73.6930524 | 68.3812876 | 70.731787 | 60.2395153 |
| 17:29:16 | 0:27:16 |  | 73.6930524 | 68.3812876 | 71.731787 | 60.2395153 |
| 17:29:17 | 0:27:17 |  | 73.6930524 | 69.3812876 | 71.731787 | 62.2395153 |
| 17:29:18 | 0:27:18 |  | 73.6930524 | 73.3812876 | 71.731787 | 64.2395153 |
| 17:29:19 | 0:27:19 |  | 74.6930524 | 73.3812876 | 71.731787 | 66.2395153 |
| 17:29:20 | 0:27:20 |  | 74.6930524 | 72.3812876 | 72.731787 | 68.2395153 |
| 17:29:21 | 0:27:21 |  | 74.6930524 | 72.3812876 | 72.731787 | 69.2395153 |
| 17:29:22 | 0:27:22 |  | 73.6930524 | 71.3812876 | 73.731787 | 68.2395153 |
| 17:29:23 | 0:27:23 |  | 73.6930524 | 70.3812876 | 73.731787 | 68.2395153 |
| 17:29:24 | 0:27:24 |  | 73.6930524 | 70.3812876 | 73.731787 | 68.2395153 |
| 17:29:25 | 0:27:25 |  | 73.6930524 | 71.3812876 | 72.731787 | 68.2395153 |
| 17:29:26 | 0:27:26 |  | 73.6930524 | 72.3812876 | 72.731787 | 68.2395153 |
| 17:29:27 | 0:27:27 |  | 73.6930524 | 72.3812876 | 72.731787 | 71.2395153 |
| 17:29:28 | 0:27:28 |  | 73.6930524 | 72.3812876 | 72.731787 | 73.2395153 |
| 17:29:29 | 0:27:29 |  | 74.6930524 | 73.3812876 | 72.731787 | 74.2395153 |
| 17:29:30 | 0:27:30 |  | 74.6930524 | 73.3812876 | 72.731787 | 75.2395153 |
| 17:29:31 | 0:27:31 |  | 74.6930524 | 73.3812876 | 72.731787 | 75.2395153 |
| 17:29:32 | 0:27:32 |  | 74.6930524 | 74.3812876 | 72.731787 | 76.2395153 |
| 17:29:33 | 0:27:33 |  | 74.6930524 | 75.3812876 | 73.731787 | 76.2395153 |
| 17:29:34 | 0:27:34 |  | 74.6930524 | 77.3812876 | 73.731787 | 76.2395153 |
| 17:29:35 | 0:27:35 |  | 74.6930524 | 79.3812876 | 74.731787 | 76.2395153 |
| 17:29:36 | 0:27:36 |  | 74.6930524 | 79.3812876 | 74.731787 | 76.2395153 |
| 17:29:37 | 0:27:37 |  | 74.6930524 | 78.3812876 | 74.731787 | 75.2395153 |
| 17:29:38 | 0:27:38 |  | 74.6930524 | 78.3812876 | 75.731787 | 74.2395153 |
| 17:29:39 | 0:27:39 |  | 74.6930524 | 72.3812876 | 75.731787 | 74.2395153 |
| 17:29:40 | 0:27:40 |  | 74.6930524 | 70.3812876 | 76.731787 | 74.2395153 |
| 17:29:41 | 0:27:41 |  | 75.6930524 | 70.3812876 | 76.731787 | 73.2395153 |
| 17:29:42 | 0:27:42 |  | 75.6930524 | 68.3812876 | 76.731787 | 73.2395153 |

|          |         |  |            |            |           |            |
|----------|---------|--|------------|------------|-----------|------------|
| 17:29:43 | 0:27:43 |  | 77.6930524 | 69.3812876 | 77.731787 | 73.2395153 |
| 17:29:44 | 0:27:44 |  | 78.6930524 | 69.3812876 | 77.731787 | 73.2395153 |
| 17:29:45 | 0:27:45 |  | 77.6930524 | 70.3812876 | 77.731787 | 73.2395153 |
| 17:29:46 | 0:27:46 |  | 77.6930524 | 70.3812876 | 77.731787 | 68.2395153 |
| 17:29:47 | 0:27:47 |  | 78.6930524 | 70.3812876 | 76.731787 | 67.2395153 |
| 17:29:48 | 0:27:48 |  | 77.6930524 | 75.3812876 | 76.731787 | 66.2395153 |
| 17:29:49 | 0:27:49 |  | 77.6930524 | 76.3812876 | 76.731787 | 66.2395153 |
| 17:29:50 | 0:27:50 |  | 77.6930524 | 76.3812876 | 75.731787 | 66.2395153 |
| 17:29:51 | 0:27:51 |  | 76.6930524 | 76.3812876 | 75.731787 | 65.2395153 |
| 17:29:52 | 0:27:52 |  | 75.6930524 | 76.3812876 | 77.731787 | 65.2395153 |
| 17:29:53 | 0:27:53 |  | 75.6930524 | 76.3812876 | 79.731787 | 65.2395153 |
| 17:29:54 | 0:27:54 |  | 75.6930524 | 75.3812876 | 79.731787 | 65.2395153 |
| 17:29:55 | 0:27:55 |  | 75.6930524 | 77.3812876 | 79.731787 | 65.2395153 |
| 17:29:56 | 0:27:56 |  | 75.6930524 | 78.3812876 | 76.731787 | 66.2395153 |
| 17:29:57 | 0:27:57 |  | 75.6930524 | 78.3812876 | 76.731787 | 66.2395153 |
| 17:29:58 | 0:27:58 |  | 75.6930524 | 78.3812876 | 73.731787 | 66.2395153 |
| 17:29:59 | 0:27:59 |  | 76.6930524 | 78.3812876 | 72.731787 | 65.2395153 |
| 17:30:00 | 0:28:00 |  | 76.6930524 | 72.3812876 | 72.731787 | 65.2395153 |
| 17:30:01 | 0:28:01 |  | 76.6930524 | 72.3812876 | 72.731787 | 65.2395153 |
| 17:30:02 | 0:28:02 |  | 76.6930524 | 71.3812876 | 72.731787 | 65.2395153 |
| 17:30:03 | 0:28:03 |  | 75.6930524 | 71.3812876 | 72.731787 | 65.2395153 |
| 17:30:04 | 0:28:04 |  | 75.6930524 | 71.3812876 | 72.731787 | 66.2395153 |
| 17:30:05 | 0:28:05 |  | 73.6930524 | 71.3812876 | 72.731787 | 68.2395153 |
| 17:30:06 | 0:28:06 |  | 73.6930524 | 70.3812876 | 72.731787 | 68.2395153 |
| 17:30:07 | 0:28:07 |  | 73.6930524 | 69.3812876 | 72.731787 | 70.2395153 |
| 17:30:08 | 0:28:08 |  | 74.6930524 | 66.3812876 | 71.731787 | 70.2395153 |
| 17:30:09 | 0:28:09 |  | 74.6930524 | 68.3812876 | 71.731787 | 67.2395153 |
| 17:30:10 | 0:28:10 |  | 75.6930524 | 69.3812876 | 71.731787 | 66.2395153 |
| 17:30:11 | 0:28:11 |  | 75.6930524 | 70.3812876 | 71.731787 | 66.2395153 |
| 17:30:12 | 0:28:12 |  | 76.6930524 | 70.3812876 | 71.731787 | 67.2395153 |
| 17:30:13 | 0:28:13 |  | 76.6930524 | 70.3812876 | 72.731787 | 69.2395153 |
| 17:30:14 | 0:28:14 |  | 76.6930524 | 70.3812876 | 72.731787 | 69.2395153 |
| 17:30:15 | 0:28:15 |  | 77.6930524 | 70.3812876 | 73.731787 | 69.2395153 |
| 17:30:16 | 0:28:16 |  | 76.6930524 | 71.3812876 | 73.731787 | 69.2395153 |
| 17:30:17 | 0:28:17 |  | 75.6930524 | 71.3812876 | 73.731787 | 70.2395153 |
| 17:30:18 | 0:28:18 |  | 75.6930524 | 71.3812876 | 73.731787 | 70.2395153 |
| 17:30:19 | 0:28:19 |  | 73.6930524 | 72.3812876 | 73.731787 | 66.2395153 |
| 17:30:20 | 0:28:20 |  | 71.6930524 | 73.3812876 | 74.731787 | 65.2395153 |
| 17:30:21 | 0:28:21 |  | 71.6930524 | 73.3812876 | 73.731787 | 65.2395153 |
| 17:30:22 | 0:28:22 |  | 70.6930524 | 73.3812876 | 72.731787 | 65.2395153 |
| 17:30:23 | 0:28:23 |  | 70.6930524 | 73.3812876 | 72.731787 | 65.2395153 |
| 17:30:24 | 0:28:24 |  | 71.6930524 | 73.3812876 | 71.731787 | 65.2395153 |
| 17:30:25 | 0:28:25 |  | 71.6930524 | 73.3812876 | 72.731787 | 65.2395153 |
| 17:30:26 | 0:28:26 |  | 71.6930524 | 73.3812876 | 72.731787 | 66.2395153 |
| 17:30:27 | 0:28:27 |  | 72.6930524 | 74.3812876 | 72.731787 | 67.2395153 |

|          |         |  |            |            |           |            |
|----------|---------|--|------------|------------|-----------|------------|
| 17:30:28 | 0:28:28 |  | 72.6930524 | 74.3812876 | 72.731787 | 67.2395153 |
| 17:30:29 | 0:28:29 |  | 75.6930524 | 75.3812876 | 72.731787 | 67.2395153 |
| 17:30:30 | 0:28:30 |  | 75.6930524 | 76.3812876 | 73.731787 | 67.2395153 |
| 17:30:31 | 0:28:31 |  | 75.6930524 | 76.3812876 | 73.731787 | 67.2395153 |
| 17:30:32 | 0:28:32 |  | 75.6930524 | 78.3812876 | 73.731787 | 67.2395153 |
| 17:30:33 | 0:28:33 |  | 76.6930524 | 78.3812876 | 73.731787 | 69.2395153 |
| 17:30:34 | 0:28:34 |  | 77.6930524 | 78.3812876 | 73.731787 | 69.2395153 |
| 17:30:35 | 0:28:35 |  | 78.6930524 | 78.3812876 | 73.731787 | 70.2395153 |
| 17:30:36 | 0:28:36 |  | 78.6930524 | 83.3812876 | 73.731787 | 70.2395153 |
| 17:30:37 | 0:28:37 |  | 78.6930524 | 84.3812876 | 73.731787 | 70.2395153 |
| 17:30:38 | 0:28:38 |  | 75.6930524 | 86.3812876 | 78.731787 | 69.2395153 |
| 17:30:39 | 0:28:39 |  | 75.6930524 | 86.3812876 | 80.731787 | 68.2395153 |
| 17:30:40 | 0:28:40 |  | 75.6930524 | 86.3812876 | 82.731787 | 68.2395153 |
| 17:30:41 | 0:28:41 |  | 75.6930524 | 86.3812876 | 84.731787 | 69.2395153 |
| 17:30:42 | 0:28:42 |  | 75.6930524 | 82.3812876 | 84.731787 | 68.2395153 |
| 17:30:43 | 0:28:43 |  | 75.6930524 | 82.3812876 | 83.731787 | 69.2395153 |
| 17:30:44 | 0:28:44 |  | 75.6930524 | 77.3812876 | 82.731787 | 69.2395153 |
| 17:30:45 | 0:28:45 |  | 75.6930524 | 77.3812876 | 80.731787 | 69.2395153 |
| 17:30:46 | 0:28:46 |  | 75.6930524 | 77.3812876 | 78.731787 | 69.2395153 |
| 17:30:47 | 0:28:47 |  | 75.6930524 | 78.3812876 | 76.731787 | 69.2395153 |
| 17:30:48 | 0:28:48 |  | 74.6930524 | 78.3812876 | 74.731787 | 69.2395153 |
| 17:30:49 | 0:28:49 |  | 73.6930524 | 78.3812876 | 73.731787 | 69.2395153 |
| 17:30:50 | 0:28:50 |  | 73.6930524 | 78.3812876 | 73.731787 | 69.2395153 |
| 17:30:51 | 0:28:51 |  | 73.6930524 | 77.3812876 | 73.731787 | 68.2395153 |
| 17:30:52 | 0:28:52 |  | 73.6930524 | 77.3812876 | 74.731787 | 68.2395153 |
| 17:30:53 | 0:28:53 |  | 73.6930524 | 76.3812876 | 74.731787 | 68.2395153 |
| 17:30:54 | 0:28:54 |  | 75.6930524 | 75.3812876 | 74.731787 | 67.2395153 |
| 17:30:55 | 0:28:55 |  | 75.6930524 | 74.3812876 | 75.731787 | 67.2395153 |
| 17:30:56 | 0:28:56 |  | 75.6930524 | 74.3812876 | 75.731787 | 67.2395153 |
| 17:30:57 | 0:28:57 |  | 75.6930524 | 74.3812876 | 75.731787 | 67.2395153 |
| 17:30:58 | 0:28:58 |  | 75.6930524 | 72.3812876 | 75.731787 | 67.2395153 |
| 17:30:59 | 0:28:59 |  | 75.6930524 | 71.3812876 | 75.731787 | 67.2395153 |
| 17:31:00 | 0:29:00 |  | 75.6930524 | 71.3812876 | 74.731787 | 67.2395153 |
| 17:31:01 | 0:29:01 |  | 75.6930524 | 71.3812876 | 74.731787 | 67.2395153 |
| 17:31:02 | 0:29:02 |  | 75.6930524 | 72.3812876 | 74.731787 | 67.2395153 |
| 17:31:03 | 0:29:03 |  | 75.6930524 | 72.3812876 | 74.731787 | 67.2395153 |
| 17:31:04 | 0:29:04 |  | 75.6930524 | 72.3812876 | 74.731787 | 66.2395153 |
| 17:31:05 | 0:29:05 |  | 75.6930524 | 72.3812876 | 74.731787 | 64.2395153 |
| 17:31:06 | 0:29:06 |  | 74.6930524 | 72.3812876 | 74.731787 | 64.2395153 |
| 17:31:07 | 0:29:07 |  | 73.6930524 | 71.3812876 | 73.731787 | 64.2395153 |
| 17:31:08 | 0:29:08 |  | 73.6930524 | 71.3812876 | 73.731787 | 64.2395153 |
| 17:31:09 | 0:29:09 |  | 73.6930524 | 71.3812876 | 72.731787 | 65.2395153 |
| 17:31:10 | 0:29:10 |  | 74.6930524 | 71.3812876 | 72.731787 | 66.2395153 |
| 17:31:11 | 0:29:11 |  | 74.6930524 | 71.3812876 | 71.731787 | 67.2395153 |
| 17:31:12 | 0:29:12 |  | 74.6930524 | 71.3812876 | 71.731787 | 67.2395153 |

|          |         |  |            |            |           |            |
|----------|---------|--|------------|------------|-----------|------------|
| 17:31:13 | 0:29:13 |  | 73.6930524 | 71.3812876 | 71.731787 | 69.2395153 |
| 17:31:14 | 0:29:14 |  | 73.6930524 | 71.3812876 | 71.731787 | 69.2395153 |
| 17:31:15 | 0:29:15 |  | 74.6930524 | 71.3812876 | 71.731787 | 68.2395153 |
| 17:31:16 | 0:29:16 |  | 75.6930524 | 71.3812876 | 72.731787 | 66.2395153 |
| 17:31:17 | 0:29:17 |  | 76.6930524 | 72.3812876 | 72.731787 | 66.2395153 |
| 17:31:18 | 0:29:18 |  | 76.6930524 | 72.3812876 | 73.731787 | 67.2395153 |
| 17:31:19 | 0:29:19 |  | 76.6930524 | 72.3812876 | 73.731787 | 67.2395153 |
| 17:31:20 | 0:29:20 |  | 76.6930524 | 74.3812876 | 72.731787 | 68.2395153 |
| 17:31:21 | 0:29:21 |  | 76.6930524 | 74.3812876 | 71.731787 | 71.2395153 |
| 17:31:22 | 0:29:22 |  | 76.6930524 | 75.3812876 | 71.731787 | 71.2395153 |
| 17:31:23 | 0:29:23 |  | 76.6930524 | 75.3812876 | 71.731787 | 71.2395153 |
| 17:31:24 | 0:29:24 |  | 76.6930524 | 75.3812876 | 71.731787 | 71.2395153 |
| 17:31:25 | 0:29:25 |  | 76.6930524 | 75.3812876 | 71.731787 | 69.2395153 |
| 17:31:26 | 0:29:26 |  | 73.6930524 | 75.3812876 | 72.731787 | 68.2395153 |
| 17:31:27 | 0:29:27 |  | 72.6930524 | 76.3812876 | 72.731787 | 68.2395153 |
| 17:31:28 | 0:29:28 |  | 72.6930524 | 76.3812876 | 73.731787 | 68.2395153 |
| 17:31:29 | 0:29:29 |  | 72.6930524 | 76.3812876 | 73.731787 | 67.2395153 |
| 17:31:30 | 0:29:30 |  | 72.6930524 | 77.3812876 | 73.731787 | 67.2395153 |
| 17:31:31 | 0:29:31 |  | 72.6930524 | 77.3812876 | 73.731787 | 68.2395153 |
| 17:31:32 | 0:29:32 |  | 72.6930524 | 77.3812876 | 73.731787 | 69.2395153 |
| 17:31:33 | 0:29:33 |  | 72.6930524 | 77.3812876 | 73.731787 | 69.2395153 |
| 17:31:34 | 0:29:34 |  | 72.6930524 | 78.3812876 | 73.731787 | 71.2395153 |
| 17:31:35 | 0:29:35 |  | 71.6930524 | 79.3812876 | 74.731787 | 71.2395153 |
| 17:31:36 | 0:29:36 |  | 71.6930524 | 80.3812876 | 75.731787 | 70.2395153 |
| 17:31:37 | 0:29:37 |  | 72.6930524 | 80.3812876 | 78.731787 | 69.2395153 |
| 17:31:38 | 0:29:38 |  | 73.6930524 | 79.3812876 | 79.731787 | 68.2395153 |
| 17:31:39 | 0:29:39 |  | 74.6930524 | 77.3812876 | 77.731787 | 69.2395153 |
| 17:31:40 | 0:29:40 |  | 74.6930524 | 76.3812876 | 76.731787 | 68.2395153 |
| 17:31:41 | 0:29:41 |  | 73.6930524 | 76.3812876 | 75.731787 | 69.2395153 |
| 17:31:42 | 0:29:42 |  | 72.6930524 | 76.3812876 | 74.731787 | 69.2395153 |
| 17:31:43 | 0:29:43 |  | 73.6930524 | 77.3812876 | 74.731787 | 69.2395153 |
| 17:31:44 | 0:29:44 |  | 73.6930524 | 77.3812876 | 74.731787 | 69.2395153 |
| 17:31:45 | 0:29:45 |  | 74.6930524 | 75.3812876 | 74.731787 | 70.2395153 |
| 17:31:46 | 0:29:46 |  | 74.6930524 | 75.3812876 | 75.731787 | 70.2395153 |
| 17:31:47 | 0:29:47 |  | 74.6930524 | 74.3812876 | 74.731787 | 70.2395153 |
| 17:31:48 | 0:29:48 |  | 74.6930524 | 73.3812876 | 73.731787 | 67.2395153 |
| 17:31:49 | 0:29:49 |  | 74.6930524 | 73.3812876 | 72.731787 | 66.2395153 |
| 17:31:50 | 0:29:50 |  | 74.6930524 | 73.3812876 | 72.731787 | 67.2395153 |
| 17:31:51 | 0:29:51 |  | 75.6930524 | 73.3812876 | 72.731787 | 69.2395153 |
| 17:31:52 | 0:29:52 |  | 75.6930524 | 73.3812876 | 73.731787 | 70.2395153 |
| 17:31:53 | 0:29:53 |  | 76.6930524 | 73.3812876 | 74.731787 | 70.2395153 |
| 17:31:54 | 0:29:54 |  | 76.6930524 | 73.3812876 | 74.731787 | 71.2395153 |
| 17:31:55 | 0:29:55 |  | 76.6930524 | 73.3812876 | 74.731787 | 72.2395153 |
| 17:31:56 | 0:29:56 |  | 76.6930524 | 73.3812876 | 74.731787 | 72.2395153 |
| 17:31:57 | 0:29:57 |  | 76.6930524 | 73.3812876 | 73.731787 | 69.2395153 |

|          |         |  |            |            |           |            |
|----------|---------|--|------------|------------|-----------|------------|
| 17:31:58 | 0:29:58 |  | 76.6930524 | 73.3812876 | 73.731787 | 67.2395153 |
| 17:31:59 | 0:29:59 |  | 76.6930524 | 73.3812876 | 73.731787 | 66.2395153 |
| 17:32:00 | 0:30:00 |  | 76.6930524 | 73.3812876 | 72.731787 | 65.2395153 |
| 17:32:01 | 0:30:01 |  | 75.6930524 | 73.3812876 | 72.731787 | 65.2395153 |
| 17:32:02 | 0:30:02 |  | 75.6930524 | 73.3812876 | 73.731787 | 66.2395153 |
| 17:32:03 | 0:30:03 |  | 75.6930524 | 73.3812876 | 74.731787 | 66.2395153 |
| 17:32:04 | 0:30:04 |  | 75.6930524 | 73.3812876 | 75.731787 | 66.2395153 |
| 17:32:05 | 0:30:05 |  | 75.6930524 | 73.3812876 | 75.731787 | 66.2395153 |
| 17:32:06 | 0:30:06 |  | 75.6930524 | 73.3812876 | 75.731787 | 66.2395153 |
| 17:32:07 | 0:30:07 |  | 75.6930524 | 73.3812876 | 76.731787 | 66.2395153 |
| 17:32:08 | 0:30:08 |  | 75.6930524 | 73.3812876 | 75.731787 | 67.2395153 |
| 17:32:09 | 0:30:09 |  | 76.6930524 | 73.3812876 | 75.731787 | 67.2395153 |
| 17:32:10 | 0:30:10 |  | 76.6930524 | 78.3812876 | 74.731787 | 66.2395153 |
| 17:32:11 | 0:30:11 |  | 75.6930524 | 78.3812876 | 76.731787 | 66.2395153 |
| 17:32:12 | 0:30:12 |  | 76.6930524 | 78.3812876 | 77.731787 | 66.2395153 |
| 17:32:13 | 0:30:13 |  | 76.6930524 | 77.3812876 | 78.731787 | 66.2395153 |
| 17:32:14 | 0:30:14 |  | 77.6930524 | 75.3812876 | 78.731787 | 67.2395153 |
| 17:32:15 | 0:30:15 |  | 77.6930524 | 75.3812876 | 78.731787 | 67.2395153 |
| 17:32:16 | 0:30:16 |  | 77.6930524 | 75.3812876 | 78.731787 | 67.2395153 |
| 17:32:17 | 0:30:17 |  | 78.6930524 | 75.3812876 | 77.731787 | 67.2395153 |
| 17:32:18 | 0:30:18 |  | 78.6930524 | 75.3812876 | 77.731787 | 67.2395153 |
| 17:32:19 | 0:30:19 |  | 79.6930524 | 75.3812876 | 76.731787 | 67.2395153 |
| 17:32:20 | 0:30:20 |  | 80.6930524 | 75.3812876 | 76.731787 | 72.2395153 |
| 17:32:21 | 0:30:21 |  | 80.6930524 | 76.3812876 | 75.731787 | 73.2395153 |
| 17:32:22 | 0:30:22 |  | 81.6930524 | 76.3812876 | 75.731787 | 74.2395153 |
| 17:32:23 | 0:30:23 |  | 81.6930524 | 77.3812876 | 75.731787 | 74.2395153 |
| 17:32:24 | 0:30:24 |  | 81.6930524 | 78.3812876 | 78.731787 | 74.2395153 |
| 17:32:25 | 0:30:25 |  | 81.6930524 | 78.3812876 | 79.731787 | 74.2395153 |
| 17:32:26 | 0:30:26 |  | 80.6930524 | 78.3812876 | 79.731787 | 74.2395153 |
| 17:32:27 | 0:30:27 |  | 78.6930524 | 78.3812876 | 79.731787 | 76.2395153 |
| 17:32:28 | 0:30:28 |  | 77.6930524 | 78.3812876 | 79.731787 | 76.2395153 |
| 17:32:29 | 0:30:29 |  | 77.6930524 | 78.3812876 | 79.731787 | 76.2395153 |
| 17:32:30 | 0:30:30 |  | 76.6930524 | 78.3812876 | 79.731787 | 76.2395153 |
| 17:32:31 | 0:30:31 |  | 76.6930524 | 81.3812876 | 79.731787 | 76.2395153 |
| 17:32:32 | 0:30:32 |  | 76.6930524 | 81.3812876 | 79.731787 | 76.2395153 |
| 17:32:33 | 0:30:33 |  | 77.6930524 | 80.3812876 | 78.731787 | 76.2395153 |
| 17:32:34 | 0:30:34 |  | 77.6930524 | 80.3812876 | 78.731787 | 75.2395153 |
| 17:32:35 | 0:30:35 |  | 77.6930524 | 80.3812876 | 78.731787 | 76.2395153 |
| 17:32:36 | 0:30:36 |  | 77.6930524 | 80.3812876 | 77.731787 | 75.2395153 |
| 17:32:37 | 0:30:37 |  | 78.6930524 | 80.3812876 | 77.731787 | 74.2395153 |
| 17:32:38 | 0:30:38 |  | 78.6930524 | 73.3812876 | 77.731787 | 74.2395153 |
| 17:32:39 | 0:30:39 |  | 78.6930524 | 71.3812876 | 77.731787 | 74.2395153 |
| 17:32:40 | 0:30:40 |  | 78.6930524 | 71.3812876 | 77.731787 | 73.2395153 |
| 17:32:41 | 0:30:41 |  | 78.6930524 | 71.3812876 | 78.731787 | 73.2395153 |
| 17:32:42 | 0:30:42 |  | 78.6930524 | 70.3812876 | 78.731787 | 73.2395153 |

|          |         |  |            |            |           |            |
|----------|---------|--|------------|------------|-----------|------------|
| 17:32:43 | 0:30:43 |  | 78.6930524 | 70.3812876 | 79.731787 | 73.2395153 |
| 17:32:44 | 0:30:44 |  | 77.6930524 | 70.3812876 | 79.731787 | 73.2395153 |
| 17:32:45 | 0:30:45 |  | 77.6930524 | 70.3812876 | 78.731787 | 73.2395153 |
| 17:32:46 | 0:30:46 |  | 80.6930524 | 70.3812876 | 78.731787 | 72.2395153 |
| 17:32:47 | 0:30:47 |  | 83.6930524 | 70.3812876 | 75.731787 | 73.2395153 |
| 17:32:48 | 0:30:48 |  | 84.6930524 | 69.3812876 | 74.731787 | 72.2395153 |
| 17:32:49 | 0:30:49 |  | 85.6930524 | 69.3812876 | 73.731787 | 72.2395153 |
| 17:32:50 | 0:30:50 |  | 88.6930524 | 69.3812876 | 73.731787 | 72.2395153 |
| 17:32:51 | 0:30:51 |  | 89.6930524 | 69.3812876 | 73.731787 | 72.2395153 |
| 17:32:52 | 0:30:52 |  | 89.6930524 | 70.3812876 | 73.731787 | 72.2395153 |
| 17:32:53 | 0:30:53 |  | 85.6930524 | 70.3812876 | 73.731787 | 71.2395153 |
| 17:32:54 | 0:30:54 |  | 85.6930524 | 70.3812876 | 73.731787 | 70.2395153 |
| 17:32:55 | 0:30:55 |  | 81.6930524 | 70.3812876 | 73.731787 | 69.2395153 |
| 17:32:56 | 0:30:56 |  | 80.6930524 | 72.3812876 | 73.731787 | 68.2395153 |
| 17:32:57 | 0:30:57 |  | 79.6930524 | 77.3812876 | 73.731787 | 69.2395153 |
| 17:32:58 | 0:30:58 |  | 78.6930524 | 79.3812876 | 73.731787 | 70.2395153 |
| 17:32:59 | 0:30:59 |  | 78.6930524 | 79.3812876 | 73.731787 | 71.2395153 |
| 17:33:00 | 0:31:00 |  | 78.6930524 | 79.3812876 | 73.731787 | 71.2395153 |
| 17:33:01 | 0:31:01 |  | 78.6930524 | 76.3812876 | 73.731787 | 73.2395153 |
| 17:33:02 | 0:31:02 |  | 78.6930524 | 76.3812876 | 74.731787 | 75.2395153 |
| 17:33:03 | 0:31:03 |  | 79.6930524 | 76.3812876 | 76.731787 | 76.2395153 |
| 17:33:04 | 0:31:04 |  | 79.6930524 | 76.3812876 | 77.731787 | 76.2395153 |
| 17:33:05 | 0:31:05 |  | 78.6930524 | 76.3812876 | 77.731787 | 75.2395153 |
| 17:33:06 | 0:31:06 |  | 78.6930524 | 75.3812876 | 75.731787 | 74.2395153 |
| 17:33:07 | 0:31:07 |  | 77.6930524 | 75.3812876 | 75.731787 | 73.2395153 |
| 17:33:08 | 0:31:08 |  | 77.6930524 | 75.3812876 | 75.731787 | 74.2395153 |
| 17:33:09 | 0:31:09 |  | 75.6930524 | 75.3812876 | 75.731787 | 74.2395153 |
| 17:33:10 | 0:31:10 |  | 75.6930524 | 75.3812876 | 74.731787 | 76.2395153 |
| 17:33:11 | 0:31:11 |  | 75.6930524 | 73.3812876 | 74.731787 | 76.2395153 |
| 17:33:12 | 0:31:12 |  | 74.6930524 | 68.3812876 | 73.731787 | 76.2395153 |
| 17:33:13 | 0:31:13 |  | 75.6930524 | 68.3812876 | 73.731787 | 76.2395153 |
| 17:33:14 | 0:31:14 |  | 75.6930524 | 67.3812876 | 73.731787 | 76.2395153 |
| 17:33:15 | 0:31:15 |  | 75.6930524 | 68.3812876 | 73.731787 | 74.2395153 |
| 17:33:16 | 0:31:16 |  | 74.6930524 | 73.3812876 | 73.731787 | 74.2395153 |
| 17:33:17 | 0:31:17 |  | 74.6930524 | 72.3812876 | 73.731787 | 75.2395153 |
| 17:33:18 | 0:31:18 |  | 74.6930524 | 72.3812876 | 74.731787 | 75.2395153 |
| 17:33:19 | 0:31:19 |  | 74.6930524 | 72.3812876 | 75.731787 | 75.2395153 |
| 17:33:20 | 0:31:20 |  | 74.6930524 | 72.3812876 | 76.731787 | 76.2395153 |
| 17:33:21 | 0:31:21 |  | 74.6930524 | 72.3812876 | 76.731787 | 77.2395153 |
| 17:33:22 | 0:31:22 |  | 74.6930524 | 71.3812876 | 76.731787 | 76.2395153 |
| 17:33:23 | 0:31:23 |  | 73.6930524 | 70.3812876 | 75.731787 | 75.2395153 |
| 17:33:24 | 0:31:24 |  | 73.6930524 | 70.3812876 | 74.731787 | 75.2395153 |
| 17:33:25 | 0:31:25 |  | 73.6930524 | 70.3812876 | 73.731787 | 77.2395153 |
| 17:33:26 | 0:31:26 |  | 73.6930524 | 69.3812876 | 72.731787 | 78.2395153 |
| 17:33:27 | 0:31:27 |  | 73.6930524 | 69.3812876 | 72.731787 | 78.2395153 |

|          |         |  |            |            |           |            |
|----------|---------|--|------------|------------|-----------|------------|
| 17:33:28 | 0:31:28 |  | 73.6930524 | 69.3812876 | 72.731787 | 78.2395153 |
| 17:33:29 | 0:31:29 |  | 73.6930524 | 69.3812876 | 72.731787 | 78.2395153 |
| 17:33:30 | 0:31:30 |  | 73.6930524 | 69.3812876 | 72.731787 | 78.2395153 |
| 17:33:31 | 0:31:31 |  | 74.6930524 | 71.3812876 | 72.731787 | 78.2395153 |
| 17:33:32 | 0:31:32 |  | 75.6930524 | 72.3812876 | 73.731787 | 79.2395153 |
| 17:33:33 | 0:31:33 |  | 75.6930524 | 72.3812876 | 74.731787 | 78.2395153 |
| 17:33:34 | 0:31:34 |  | 75.6930524 | 78.3812876 | 74.731787 | 78.2395153 |
| 17:33:35 | 0:31:35 |  | 75.6930524 | 80.3812876 | 74.731787 | 77.2395153 |
| 17:33:36 | 0:31:36 |  | 75.6930524 | 81.3812876 | 74.731787 | 76.2395153 |
| 17:33:37 | 0:31:37 |  | 77.6930524 | 81.3812876 | 74.731787 | 74.2395153 |
| 17:33:38 | 0:31:38 |  | 77.6930524 | 81.3812876 | 73.731787 | 74.2395153 |
| 17:33:39 | 0:31:39 |  | 76.6930524 | 82.3812876 | 73.731787 | 74.2395153 |
| 17:33:40 | 0:31:40 |  | 76.6930524 | 82.3812876 | 73.731787 | 70.2395153 |
| 17:33:41 | 0:31:41 |  | 76.6930524 | 85.3812876 | 73.731787 | 70.2395153 |
| 17:33:42 | 0:31:42 |  | 77.6930524 | 85.3812876 | 73.731787 | 70.2395153 |
| 17:33:43 | 0:31:43 |  | 78.6930524 | 85.3812876 | 72.731787 | 72.2395153 |
| 17:33:44 | 0:31:44 |  | 79.6930524 | 85.3812876 | 69.731787 | 74.2395153 |
| 17:33:45 | 0:31:45 |  | 79.6930524 | 85.3812876 | 67.731787 | 76.2395153 |
| 17:33:46 | 0:31:46 |  | 78.6930524 | 85.3812876 | 66.731787 | 76.2395153 |
| 17:33:47 | 0:31:47 |  | 77.6930524 | 85.3812876 | 66.731787 | 75.2395153 |
| 17:33:48 | 0:31:48 |  | 77.6930524 | 85.3812876 | 66.731787 | 75.2395153 |
| 17:33:49 | 0:31:49 |  | 75.6930524 | 83.3812876 | 67.731787 | 74.2395153 |
| 17:33:50 | 0:31:50 |  | 75.6930524 | 73.3812876 | 67.731787 | 74.2395153 |
| 17:33:51 | 0:31:51 |  | 74.6930524 | 69.3812876 | 67.731787 | 76.2395153 |
| 17:33:52 | 0:31:52 |  | 74.6930524 | 69.3812876 | 70.731787 | 76.2395153 |
| 17:33:53 | 0:31:53 |  | 75.6930524 | 69.3812876 | 72.731787 | 77.2395153 |
| 17:33:54 | 0:31:54 |  | 75.6930524 | 69.3812876 | 72.731787 | 77.2395153 |
| 17:33:55 | 0:31:55 |  | 76.6930524 | 69.3812876 | 74.731787 | 78.2395153 |
| 17:33:56 | 0:31:56 |  | 78.6930524 | 69.3812876 | 74.731787 | 81.2395153 |
| 17:33:57 | 0:31:57 |  | 79.6930524 | 69.3812876 | 73.731787 | 81.2395153 |
| 17:33:58 | 0:31:58 |  | 79.6930524 | 69.3812876 | 73.731787 | 80.2395153 |
| 17:33:59 | 0:31:59 |  | 78.6930524 | 70.3812876 | 73.731787 | 79.2395153 |
| 17:34:00 | 0:32:00 |  | 78.6930524 | 71.3812876 | 72.731787 | 78.2395153 |
| 17:34:01 | 0:32:01 |  | 77.6930524 | 71.3812876 | 72.731787 | 78.2395153 |
| 17:34:02 | 0:32:02 |  | 77.6930524 | 77.3812876 | 71.731787 | 76.2395153 |
| 17:34:03 | 0:32:03 |  | 77.6930524 | 77.3812876 | 71.731787 | 77.2395153 |
| 17:34:04 | 0:32:04 |  | 77.6930524 | 77.3812876 | 72.731787 | 79.2395153 |
| 17:34:05 | 0:32:05 |  | 77.6930524 | 77.3812876 | 75.731787 | 80.2395153 |
| 17:34:06 | 0:32:06 |  | 77.6930524 | 81.3812876 | 75.731787 | 80.2395153 |
| 17:34:07 | 0:32:07 |  | 77.6930524 | 81.3812876 | 75.731787 | 80.2395153 |
| 17:34:08 | 0:32:08 |  | 76.6930524 | 82.3812876 | 74.731787 | 80.2395153 |
| 17:34:09 | 0:32:09 |  | 75.6930524 | 82.3812876 | 75.731787 | 79.2395153 |
| 17:34:10 | 0:32:10 |  | 75.6930524 | 82.3812876 | 77.731787 | 79.2395153 |
| 17:34:11 | 0:32:11 |  | 75.6930524 | 82.3812876 | 77.731787 | 76.2395153 |
| 17:34:12 | 0:32:12 |  | 75.6930524 | 82.3812876 | 76.731787 | 74.2395153 |

|          |         |  |            |            |           |            |
|----------|---------|--|------------|------------|-----------|------------|
| 17:34:13 | 0:32:13 |  | 74.6930524 | 82.3812876 | 75.731787 | 74.2395153 |
| 17:34:14 | 0:32:14 |  | 74.6930524 | 81.3812876 | 74.731787 | 74.2395153 |
| 17:34:15 | 0:32:15 |  | 74.6930524 | 81.3812876 | 74.731787 | 74.2395153 |
| 17:34:16 | 0:32:16 |  | 74.6930524 | 79.3812876 | 74.731787 | 74.2395153 |
| 17:34:17 | 0:32:17 |  | 74.6930524 | 79.3812876 | 75.731787 | 74.2395153 |
| 17:34:18 | 0:32:18 |  | 74.6930524 | 79.3812876 | 76.731787 | 73.2395153 |
| 17:34:19 | 0:32:19 |  | 74.6930524 | 79.3812876 | 77.731787 | 73.2395153 |
| 17:34:20 | 0:32:20 |  | 74.6930524 | 76.3812876 | 77.731787 | 74.2395153 |
| 17:34:21 | 0:32:21 |  | 74.6930524 | 75.3812876 | 77.731787 | 75.2395153 |
| 17:34:22 | 0:32:22 |  | 78.6930524 | 75.3812876 | 78.731787 | 78.2395153 |
| 17:34:23 | 0:32:23 |  | 82.6930524 | 75.3812876 | 79.731787 | 79.2395153 |
| 17:34:24 | 0:32:24 |  | 85.6930524 | 72.3812876 | 79.731787 | 79.2395153 |
| 17:34:25 | 0:32:25 |  | 86.6930524 | 71.3812876 | 80.731787 | 80.2395153 |
| 17:34:26 | 0:32:26 |  | 83.6930524 | 70.3812876 | 81.731787 | 82.2395153 |
| 17:34:27 | 0:32:27 |  | 82.6930524 | 70.3812876 | 81.731787 | 82.2395153 |
| 17:34:28 | 0:32:28 |  | 82.6930524 | 69.3812876 | 79.731787 | 83.2395153 |
| 17:34:29 | 0:32:29 |  | 81.6930524 | 69.3812876 | 77.731787 | 83.2395153 |
| 17:34:30 | 0:32:30 |  | 81.6930524 | 69.3812876 | 76.731787 | 83.2395153 |
| 17:34:31 | 0:32:31 |  | 80.6930524 | 69.3812876 | 75.731787 | 81.2395153 |
| 17:34:32 | 0:32:32 |  | 80.6930524 | 71.3812876 | 75.731787 | 81.2395153 |
| 17:34:33 | 0:32:33 |  | 80.6930524 | 71.3812876 | 75.731787 | 81.2395153 |
| 17:34:34 | 0:32:34 |  | 81.6930524 | 71.3812876 | 75.731787 | 75.2395153 |
| 17:34:35 | 0:32:35 |  | 81.6930524 | 71.3812876 | 75.731787 | 69.2395153 |
| 17:34:36 | 0:32:36 |  | 82.6930524 | 72.3812876 | 75.731787 | 68.2395153 |
| 17:34:37 | 0:32:37 |  | 82.6930524 | 72.3812876 | 74.731787 | 66.2395153 |
| 17:34:38 | 0:32:38 |  | 83.6930524 | 74.3812876 | 74.731787 | 62.2395153 |
| 17:34:39 | 0:32:39 |  | 82.6930524 | 74.3812876 | 73.731787 | 61.2395153 |
| 17:34:40 | 0:32:40 |  | 81.6930524 | 74.3812876 | 73.731787 | 61.2395153 |
| 17:34:41 | 0:32:41 |  | 80.6930524 | 74.3812876 | 72.731787 | 60.2395153 |
| 17:34:42 | 0:32:42 |  | 79.6930524 | 74.3812876 | 71.731787 | 60.2395153 |
| 17:34:43 | 0:32:43 |  | 79.6930524 | 74.3812876 | 70.731787 | 60.2395153 |
| 17:34:44 | 0:32:44 |  | 75.6930524 | 74.3812876 | 70.731787 | 61.2395153 |
| 17:34:45 | 0:32:45 |  | 73.6930524 | 75.3812876 | 70.731787 | 61.2395153 |
| 17:34:46 | 0:32:46 |  | 71.6930524 | 75.3812876 | 69.731787 | 62.2395153 |
| 17:34:47 | 0:32:47 |  | 72.6930524 | 76.3812876 | 68.731787 | 62.2395153 |
| 17:34:48 | 0:32:48 |  | 72.6930524 | 76.3812876 | 68.731787 | 62.2395153 |
| 17:34:49 | 0:32:49 |  | 74.6930524 | 76.3812876 | 67.731787 | 63.2395153 |
| 17:34:50 | 0:32:50 |  | 74.6930524 | 76.3812876 | 67.731787 | 63.2395153 |
| 17:34:51 | 0:32:51 |  | 74.6930524 | 75.3812876 | 67.731787 | 64.2395153 |
| 17:34:52 | 0:32:52 |  | 74.6930524 | 75.3812876 | 68.731787 | 64.2395153 |
| 17:34:53 | 0:32:53 |  | 75.6930524 | 75.3812876 | 68.731787 | 64.2395153 |
| 17:34:54 | 0:32:54 |  | 75.6930524 | 75.3812876 | 70.731787 | 65.2395153 |
| 17:34:55 | 0:32:55 |  | 75.6930524 | 76.3812876 | 70.731787 | 65.2395153 |
| 17:34:56 | 0:32:56 |  | 75.6930524 | 76.3812876 | 70.731787 | 65.2395153 |
| 17:34:57 | 0:32:57 |  | 75.6930524 | 76.3812876 | 70.731787 | 65.2395153 |



|          |         |  |            |            |           |            |
|----------|---------|--|------------|------------|-----------|------------|
| 17:34:58 | 0:32:58 |  | 75.6930524 | 76.3812876 | 70.731787 | 65.2395153 |
| 17:34:59 | 0:32:59 |  | 75.6930524 | 76.3812876 | 70.731787 | 66.2395153 |
| 17:35:00 | 0:33:00 |  | 75.6930524 | 76.3812876 | 70.731787 | 66.2395153 |
| 17:35:01 | 0:33:01 |  | 75.6930524 | 75.3812876 | 70.731787 | 64.2395153 |
| 17:35:02 | 0:33:02 |  | 75.6930524 | 75.3812876 | 70.731787 | 63.2395153 |
| 17:35:03 | 0:33:03 |  | 75.6930524 | 75.3812876 | 71.731787 | 63.2395153 |
| 17:35:04 | 0:33:04 |  | 75.6930524 | 76.3812876 | 72.731787 | 65.2395153 |
| 17:35:05 | 0:33:05 |  | 75.6930524 | 76.3812876 | 72.731787 | 68.2395153 |
| 17:35:06 | 0:33:06 |  | 75.6930524 | 76.3812876 | 72.731787 | 70.2395153 |
| 17:35:07 | 0:33:07 |  | 75.6930524 | 77.3812876 | 72.731787 | 70.2395153 |
| 17:35:08 | 0:33:08 |  | 75.6930524 | 77.3812876 | 72.731787 | 68.2395153 |
| 17:35:09 | 0:33:09 |  | 75.6930524 | 78.3812876 | 72.731787 | 68.2395153 |
| 17:35:10 | 0:33:10 |  | 75.6930524 | 80.3812876 | 71.731787 | 68.2395153 |
| 17:35:11 | 0:33:11 |  | 74.6930524 | 80.3812876 | 71.731787 | 68.2395153 |
| 17:35:12 | 0:33:12 |  | 74.6930524 | 80.3812876 | 71.731787 | 67.2395153 |
| 17:35:13 | 0:33:13 |  | 74.6930524 | 80.3812876 | 71.731787 | 67.2395153 |
| 17:35:14 | 0:33:14 |  | 74.6930524 | 80.3812876 | 71.731787 | 67.2395153 |
| 17:35:15 | 0:33:15 |  | 75.6930524 | 80.3812876 | 71.731787 | 64.2395153 |
| 17:35:16 | 0:33:16 |  | 75.6930524 | 82.3812876 | 72.731787 | 64.2395153 |
| 17:35:17 | 0:33:17 |  | 75.6930524 | 82.3812876 | 73.731787 | 64.2395153 |
| 17:35:18 | 0:33:18 |  | 77.6930524 | 82.3812876 | 73.731787 | 64.2395153 |
| 17:35:19 | 0:33:19 |  | 77.6930524 | 83.3812876 | 73.731787 | 64.2395153 |
| 17:35:20 | 0:33:20 |  | 77.6930524 | 83.3812876 | 73.731787 | 64.2395153 |
| 17:35:21 | 0:33:21 |  | 77.6930524 | 83.3812876 | 73.731787 | 64.2395153 |
| 17:35:22 | 0:33:22 |  | 77.6930524 | 84.3812876 | 73.731787 | 64.2395153 |
| 17:35:23 | 0:33:23 |  | 77.6930524 | 84.3812876 | 73.731787 | 64.2395153 |
| 17:35:24 | 0:33:24 |  | 78.6930524 | 84.3812876 | 73.731787 | 63.2395153 |
| 17:35:25 | 0:33:25 |  | 79.6930524 | 84.3812876 | 72.731787 | 63.2395153 |
| 17:35:26 | 0:33:26 |  | 83.6930524 | 88.3812876 | 73.731787 | 66.2395153 |
| 17:35:27 | 0:33:27 |  | 86.6930524 | 90.3812876 | 73.731787 | 68.2395153 |
| 17:35:28 | 0:33:28 |  | 88.6930524 | 91.3812876 | 78.731787 | 70.2395153 |
| 17:35:29 | 0:33:29 |  | 90.6930524 | 92.3812876 | 78.731787 | 70.2395153 |
| 17:35:30 | 0:33:30 |  | 90.6930524 | 92.3812876 | 80.731787 | 70.2395153 |
| 17:35:31 | 0:33:31 |  | 89.6930524 | 92.3812876 | 80.731787 | 70.2395153 |
| 17:35:32 | 0:33:32 |  | 85.6930524 | 90.3812876 | 80.731787 | 70.2395153 |
| 17:35:33 | 0:33:33 |  | 80.6930524 | 87.3812876 | 80.731787 | 69.2395153 |
| 17:35:34 | 0:33:34 |  | 79.6930524 | 87.3812876 | 79.731787 | 71.2395153 |
| 17:35:35 | 0:33:35 |  | 78.6930524 | 87.3812876 | 79.731787 | 71.2395153 |
| 17:35:36 | 0:33:36 |  | 78.6930524 | 87.3812876 | 79.731787 | 73.2395153 |
| 17:35:37 | 0:33:37 |  | 78.6930524 | 87.3812876 | 79.731787 | 73.2395153 |
| 17:35:38 | 0:33:38 |  | 78.6930524 | 86.3812876 | 79.731787 | 71.2395153 |
| 17:35:39 | 0:33:39 |  | 78.6930524 | 85.3812876 | 79.731787 | 71.2395153 |
| 17:35:40 | 0:33:40 |  | 79.6930524 | 85.3812876 | 78.731787 | 70.2395153 |
| 17:35:41 | 0:33:41 |  | 80.6930524 | 85.3812876 | 75.731787 | 69.2395153 |
| 17:35:42 | 0:33:42 |  | 80.6930524 | 85.3812876 | 75.731787 | 69.2395153 |

|          |         |  |            |            |           |            |
|----------|---------|--|------------|------------|-----------|------------|
| 17:35:43 | 0:33:43 |  | 80.6930524 | 81.3812876 | 74.731787 | 70.2395153 |
| 17:35:44 | 0:33:44 |  | 80.6930524 | 81.3812876 | 74.731787 | 69.2395153 |
| 17:35:45 | 0:33:45 |  | 80.6930524 | 81.3812876 | 73.731787 | 69.2395153 |
| 17:35:46 | 0:33:46 |  | 80.6930524 | 81.3812876 | 73.731787 | 69.2395153 |
| 17:35:47 | 0:33:47 |  | 80.6930524 | 81.3812876 | 73.731787 | 68.2395153 |
| 17:35:48 | 0:33:48 |  | 79.6930524 | 81.3812876 | 73.731787 | 68.2395153 |
| 17:35:49 | 0:33:49 |  | 79.6930524 | 81.3812876 | 72.731787 | 68.2395153 |
| 17:35:50 | 0:33:50 |  | 74.6930524 | 81.3812876 | 72.731787 | 68.2395153 |
| 17:35:51 | 0:33:51 |  | 73.6930524 | 80.3812876 | 72.731787 | 68.2395153 |
| 17:35:52 | 0:33:52 |  | 73.6930524 | 79.3812876 | 73.731787 | 68.2395153 |
| 17:35:53 | 0:33:53 |  | 71.6930524 | 79.3812876 | 73.731787 | 67.2395153 |
| 17:35:54 | 0:33:54 |  | 71.6930524 | 80.3812876 | 73.731787 | 67.2395153 |
| 17:35:55 | 0:33:55 |  | 71.6930524 | 80.3812876 | 73.731787 | 66.2395153 |
| 17:35:56 | 0:33:56 |  | 71.6930524 | 79.3812876 | 73.731787 | 65.2395153 |
| 17:35:57 | 0:33:57 |  | 71.6930524 | 78.3812876 | 73.731787 | 65.2395153 |
| 17:35:58 | 0:33:58 |  | 73.6930524 | 78.3812876 | 73.731787 | 65.2395153 |
| 17:35:59 | 0:33:59 |  | 75.6930524 | 78.3812876 | 73.731787 | 65.2395153 |
| 17:36:00 | 0:34:00 |  | 75.6930524 | 77.3812876 | 73.731787 | 65.2395153 |
| 17:36:01 | 0:34:01 |  | 75.6930524 | 76.3812876 | 73.731787 | 65.2395153 |
| 17:36:02 | 0:34:02 |  | 75.6930524 | 75.3812876 | 72.731787 | 67.2395153 |
| 17:36:03 | 0:34:03 |  | 75.6930524 | 75.3812876 | 72.731787 | 67.2395153 |
| 17:36:04 | 0:34:04 |  | 75.6930524 | 76.3812876 | 72.731787 | 68.2395153 |
| 17:36:05 | 0:34:05 |  | 75.6930524 | 76.3812876 | 74.731787 | 68.2395153 |
| 17:36:06 | 0:34:06 |  | 75.6930524 | 76.3812876 | 74.731787 | 66.2395153 |
| 17:36:07 | 0:34:07 |  | 75.6930524 | 76.3812876 | 74.731787 | 66.2395153 |
| 17:36:08 | 0:34:08 |  | 76.6930524 | 76.3812876 | 73.731787 | 66.2395153 |
| 17:36:09 | 0:34:09 |  | 77.6930524 | 76.3812876 | 73.731787 | 66.2395153 |
| 17:36:10 | 0:34:10 |  | 79.6930524 | 76.3812876 | 73.731787 | 66.2395153 |
| 17:36:11 | 0:34:11 |  | 79.6930524 | 76.3812876 | 73.731787 | 65.2395153 |
| 17:36:12 | 0:34:12 |  | 79.6930524 | 74.3812876 | 73.731787 | 64.2395153 |
| 17:36:13 | 0:34:13 |  | 80.6930524 | 73.3812876 | 75.731787 | 65.2395153 |
| 17:36:14 | 0:34:14 |  | 80.6930524 | 73.3812876 | 75.731787 | 66.2395153 |
| 17:36:15 | 0:34:15 |  | 80.6930524 | 73.3812876 | 76.731787 | 65.2395153 |
| 17:36:16 | 0:34:16 |  | 80.6930524 | 73.3812876 | 76.731787 | 66.2395153 |
| 17:36:17 | 0:34:17 |  | 81.6930524 | 73.3812876 | 76.731787 | 66.2395153 |
| 17:36:18 | 0:34:18 |  | 82.6930524 | 73.3812876 | 76.731787 | 66.2395153 |
| 17:36:19 | 0:34:19 |  | 84.6930524 | 73.3812876 | 76.731787 | 66.2395153 |
| 17:36:20 | 0:34:20 |  | 84.6930524 | 73.3812876 | 76.731787 | 66.2395153 |
| 17:36:21 | 0:34:21 |  | 84.6930524 | 73.3812876 | 75.731787 | 66.2395153 |
| 17:36:22 | 0:34:22 |  | 85.6930524 | 75.3812876 | 75.731787 | 66.2395153 |
| 17:36:23 | 0:34:23 |  | 85.6930524 | 75.3812876 | 75.731787 | 68.2395153 |
| 17:36:24 | 0:34:24 |  | 85.6930524 | 78.3812876 | 75.731787 | 67.2395153 |
| 17:36:25 | 0:34:25 |  | 85.6930524 | 80.3812876 | 75.731787 | 67.2395153 |
| 17:36:26 | 0:34:26 |  | 85.6930524 | 80.3812876 | 75.731787 | 67.2395153 |
| 17:36:27 | 0:34:27 |  | 84.6930524 | 80.3812876 | 76.731787 | 67.2395153 |

|          |         |  |            |            |           |            |
|----------|---------|--|------------|------------|-----------|------------|
| 17:36:28 | 0:34:28 |  | 84.6930524 | 80.3812876 | 75.731787 | 67.2395153 |
| 17:36:29 | 0:34:29 |  | 84.6930524 | 80.3812876 | 75.731787 | 66.2395153 |
| 17:36:30 | 0:34:30 |  | 83.6930524 | 82.3812876 | 74.731787 | 66.2395153 |
| 17:36:31 | 0:34:31 |  | 82.6930524 | 83.3812876 | 74.731787 | 66.2395153 |
| 17:36:32 | 0:34:32 |  | 81.6930524 | 83.3812876 | 74.731787 | 66.2395153 |
| 17:36:33 | 0:34:33 |  | 81.6930524 | 84.3812876 | 74.731787 | 66.2395153 |
| 17:36:34 | 0:34:34 |  | 80.6930524 | 77.3812876 | 74.731787 | 66.2395153 |
| 17:36:35 | 0:34:35 |  | 80.6930524 | 77.3812876 | 74.731787 | 66.2395153 |
| 17:36:36 | 0:34:36 |  | 80.6930524 | 77.3812876 | 74.731787 | 66.2395153 |
| 17:36:37 | 0:34:37 |  | 80.6930524 | 74.3812876 | 74.731787 | 67.2395153 |
| 17:36:38 | 0:34:38 |  | 80.6930524 | 73.3812876 | 74.731787 | 67.2395153 |
| 17:36:39 | 0:34:39 |  | 79.6930524 | 73.3812876 | 75.731787 | 67.2395153 |
| 17:36:40 | 0:34:40 |  | 79.6930524 | 73.3812876 | 75.731787 | 69.2395153 |
| 17:36:41 | 0:34:41 |  | 79.6930524 | 73.3812876 | 75.731787 | 69.2395153 |
| 17:36:42 | 0:34:42 |  | 80.6930524 | 72.3812876 | 76.731787 | 69.2395153 |
| 17:36:43 | 0:34:43 |  | 80.6930524 | 71.3812876 | 76.731787 | 69.2395153 |
| 17:36:44 | 0:34:44 |  | 80.6930524 | 70.3812876 | 76.731787 | 68.2395153 |
| 17:36:45 | 0:34:45 |  | 80.6930524 | 67.3812876 | 78.731787 | 67.2395153 |
| 17:36:46 | 0:34:46 |  | 80.6930524 | 67.3812876 | 84.731787 | 66.2395153 |
| 17:36:47 | 0:34:47 |  | 79.6930524 | 65.3812876 | 84.731787 | 65.2395153 |
| 17:36:48 | 0:34:48 |  | 79.6930524 | 65.3812876 | 81.731787 | 65.2395153 |
| 17:36:49 | 0:34:49 |  | 79.6930524 | 65.3812876 | 80.731787 | 65.2395153 |
| 17:36:50 | 0:34:50 |  | 79.6930524 | 65.3812876 | 79.731787 | 66.2395153 |
| 17:36:51 | 0:34:51 |  | 79.6930524 | 65.3812876 | 78.731787 | 66.2395153 |
| 17:36:52 | 0:34:52 |  | 79.6930524 | 65.3812876 | 78.731787 | 66.2395153 |
| 17:36:53 | 0:34:53 |  | 79.6930524 | 65.3812876 | 78.731787 | 66.2395153 |
| 17:36:54 | 0:34:54 |  | 79.6930524 | 66.3812876 | 78.731787 | 67.2395153 |
| 17:36:55 | 0:34:55 |  | 79.6930524 | 66.3812876 | 78.731787 | 71.2395153 |
| 17:36:56 | 0:34:56 |  | 78.6930524 | 68.3812876 | 78.731787 | 72.2395153 |
| 17:36:57 | 0:34:57 |  | 77.6930524 | 68.3812876 | 77.731787 | 73.2395153 |
| 17:36:58 | 0:34:58 |  | 76.6930524 | 69.3812876 | 77.731787 | 73.2395153 |
| 17:36:59 | 0:34:59 |  | 76.6930524 | 70.3812876 | 75.731787 | 71.2395153 |
| 17:37:00 | 0:35:00 |  | 76.6930524 | 71.3812876 | 76.731787 | 70.2395153 |
| 17:37:01 | 0:35:01 |  | 78.6930524 | 73.3812876 | 76.731787 | 70.2395153 |
| 17:37:02 | 0:35:02 |  | 80.6930524 | 73.3812876 | 76.731787 | 70.2395153 |
| 17:37:03 | 0:35:03 |  | 80.6930524 | 73.3812876 | 77.731787 | 70.2395153 |
| 17:37:04 | 0:35:04 |  | 80.6930524 | 73.3812876 | 78.731787 | 70.2395153 |
| 17:37:05 | 0:35:05 |  | 80.6930524 | 73.3812876 | 77.731787 | 72.2395153 |
| 17:37:06 | 0:35:06 |  | 80.6930524 | 73.3812876 | 76.731787 | 72.2395153 |
| 17:37:07 | 0:35:07 |  | 79.6930524 | 74.3812876 | 75.731787 | 72.2395153 |
| 17:37:08 | 0:35:08 |  | 78.6930524 | 74.3812876 | 73.731787 | 73.2395153 |
| 17:37:09 | 0:35:09 |  | 78.6930524 | 74.3812876 | 72.731787 | 73.2395153 |
| 17:37:10 | 0:35:10 |  | 77.6930524 | 74.3812876 | 72.731787 | 73.2395153 |
| 17:37:11 | 0:35:11 |  | 76.6930524 | 75.3812876 | 72.731787 | 73.2395153 |
| 17:37:12 | 0:35:12 |  | 75.6930524 | 75.3812876 | 72.731787 | 72.2395153 |

|          |         |  |            |            |           |            |
|----------|---------|--|------------|------------|-----------|------------|
| 17:37:13 | 0:35:13 |  | 76.6930524 | 75.3812876 | 73.731787 | 72.2395153 |
| 17:37:14 | 0:35:14 |  | 76.6930524 | 75.3812876 | 74.731787 | 72.2395153 |
| 17:37:15 | 0:35:15 |  | 76.6930524 | 75.3812876 | 74.731787 | 72.2395153 |
| 17:37:16 | 0:35:16 |  | 75.6930524 | 74.3812876 | 74.731787 | 72.2395153 |
| 17:37:17 | 0:35:17 |  | 75.6930524 | 74.3812876 | 74.731787 | 72.2395153 |
| 17:37:18 | 0:35:18 |  | 75.6930524 | 77.3812876 | 74.731787 | 72.2395153 |
| 17:37:19 | 0:35:19 |  | 75.6930524 | 77.3812876 | 75.731787 | 72.2395153 |
| 17:37:20 | 0:35:20 |  | 75.6930524 | 77.3812876 | 75.731787 | 72.2395153 |
| 17:37:21 | 0:35:21 |  | 75.6930524 | 76.3812876 | 73.731787 | 73.2395153 |
| 17:37:22 | 0:35:22 |  | 76.6930524 | 75.3812876 | 73.731787 | 73.2395153 |
| 17:37:23 | 0:35:23 |  | 76.6930524 | 75.3812876 | 73.731787 | 72.2395153 |
| 17:37:24 | 0:35:24 |  | 76.6930524 | 75.3812876 | 73.731787 | 73.2395153 |
| 17:37:25 | 0:35:25 |  | 76.6930524 | 73.3812876 | 73.731787 | 73.2395153 |
| 17:37:26 | 0:35:26 |  | 76.6930524 | 73.3812876 | 73.731787 | 72.2395153 |
| 17:37:27 | 0:35:27 |  | 76.6930524 | 72.3812876 | 73.731787 | 72.2395153 |
| 17:37:28 | 0:35:28 |  | 76.6930524 | 71.3812876 | 73.731787 | 72.2395153 |
| 17:37:29 | 0:35:29 |  | 76.6930524 | 71.3812876 | 73.731787 | 72.2395153 |
| 17:37:30 | 0:35:30 |  | 76.6930524 | 71.3812876 | 73.731787 | 72.2395153 |
| 17:37:31 | 0:35:31 |  | 77.6930524 | 71.3812876 | 71.731787 | 70.2395153 |
| 17:37:32 | 0:35:32 |  | 77.6930524 | 72.3812876 | 71.731787 | 69.2395153 |
| 17:37:33 | 0:35:33 |  | 77.6930524 | 72.3812876 | 72.731787 | 69.2395153 |
| 17:37:34 | 0:35:34 |  | 78.6930524 | 72.3812876 | 72.731787 | 69.2395153 |
| 17:37:35 | 0:35:35 |  | 78.6930524 | 72.3812876 | 72.731787 | 69.2395153 |
| 17:37:36 | 0:35:36 |  | 77.6930524 | 72.3812876 | 73.731787 | 69.2395153 |
| 17:37:37 | 0:35:37 |  | 77.6930524 | 74.3812876 | 73.731787 | 69.2395153 |
| 17:37:38 | 0:35:38 |  | 77.6930524 | 75.3812876 | 75.731787 | 69.2395153 |
| 17:37:39 | 0:35:39 |  | 77.6930524 | 75.3812876 | 76.731787 | 69.2395153 |
| 17:37:40 | 0:35:40 |  | 76.6930524 | 77.3812876 | 77.731787 | 69.2395153 |
| 17:37:41 | 0:35:41 |  | 76.6930524 | 77.3812876 | 78.731787 | 73.2395153 |
| 17:37:42 | 0:35:42 |  | 76.6930524 | 77.3812876 | 78.731787 | 80.2395153 |
| 17:37:43 | 0:35:43 |  | 76.6930524 | 77.3812876 | 78.731787 | 83.2395153 |
| 17:37:44 | 0:35:44 |  | 77.6930524 | 77.3812876 | 77.731787 | 82.2395153 |
| 17:37:45 | 0:35:45 |  | 76.6930524 | 78.3812876 | 77.731787 | 82.2395153 |
| 17:37:46 | 0:35:46 |  | 76.6930524 | 78.3812876 | 76.731787 | 82.2395153 |
| 17:37:47 | 0:35:47 |  | 76.6930524 | 78.3812876 | 76.731787 | 82.2395153 |
| 17:37:48 | 0:35:48 |  | 75.6930524 | 73.3812876 | 76.731787 | 81.2395153 |
| 17:37:49 | 0:35:49 |  | 75.6930524 | 73.3812876 | 77.731787 | 81.2395153 |
| 17:37:50 | 0:35:50 |  | 75.6930524 | 72.3812876 | 78.731787 | 81.2395153 |
| 17:37:51 | 0:35:51 |  | 75.6930524 | 72.3812876 | 78.731787 | 81.2395153 |
| 17:37:52 | 0:35:52 |  | 75.6930524 | 72.3812876 | 78.731787 | 82.2395153 |
| 17:37:53 | 0:35:53 |  | 76.6930524 | 72.3812876 | 77.731787 | 82.2395153 |
| 17:37:54 | 0:35:54 |  | 76.6930524 | 72.3812876 | 77.731787 | 82.2395153 |
| 17:37:55 | 0:35:55 |  | 76.6930524 | 71.3812876 | 76.731787 | 82.2395153 |
| 17:37:56 | 0:35:56 |  | 77.6930524 | 71.3812876 | 75.731787 | 82.2395153 |
| 17:37:57 | 0:35:57 |  | 78.6930524 | 70.3812876 | 74.731787 | 83.2395153 |

|          |         |  |            |            |           |            |
|----------|---------|--|------------|------------|-----------|------------|
| 17:37:58 | 0:35:58 |  | 78.6930524 | 70.3812876 | 75.731787 | 84.2395153 |
| 17:37:59 | 0:35:59 |  | 78.6930524 | 70.3812876 | 76.731787 | 84.2395153 |
| 17:38:00 | 0:36:00 |  | 78.6930524 | 70.3812876 | 77.731787 | 84.2395153 |
| 17:38:01 | 0:36:01 |  | 78.6930524 | 71.3812876 | 77.731787 | 83.2395153 |
| 17:38:02 | 0:36:02 |  | 78.6930524 | 71.3812876 | 78.731787 | 82.2395153 |
| 17:38:03 | 0:36:03 |  | 78.6930524 | 73.3812876 | 77.731787 | 82.2395153 |
| 17:38:04 | 0:36:04 |  | 78.6930524 | 73.3812876 | 76.731787 | 77.2395153 |
| 17:38:05 | 0:36:05 |  | 77.6930524 | 73.3812876 | 75.731787 | 75.2395153 |
| 17:38:06 | 0:36:06 |  | 77.6930524 | 72.3812876 | 75.731787 | 74.2395153 |
| 17:38:07 | 0:36:07 |  | 77.6930524 | 72.3812876 | 75.731787 | 73.2395153 |
| 17:38:08 | 0:36:08 |  | 77.6930524 | 73.3812876 | 75.731787 | 72.2395153 |
| 17:38:09 | 0:36:09 |  | 77.6930524 | 74.3812876 | 75.731787 | 72.2395153 |
| 17:38:10 | 0:36:10 |  | 77.6930524 | 73.3812876 | 75.731787 | 72.2395153 |
| 17:38:11 | 0:36:11 |  | 77.6930524 | 73.3812876 | 75.731787 | 72.2395153 |
| 17:38:12 | 0:36:12 |  | 77.6930524 | 73.3812876 | 75.731787 | 74.2395153 |
| 17:38:13 | 0:36:13 |  | 77.6930524 | 73.3812876 | 77.731787 | 76.2395153 |
| 17:38:14 | 0:36:14 |  | 78.6930524 | 73.3812876 | 79.731787 | 76.2395153 |
| 17:38:15 | 0:36:15 |  | 77.6930524 | 71.3812876 | 80.731787 | 76.2395153 |
| 17:38:16 | 0:36:16 |  | 76.6930524 | 71.3812876 | 80.731787 | 73.2395153 |
| 17:38:17 | 0:36:17 |  | 75.6930524 | 71.3812876 | 79.731787 | 73.2395153 |
| 17:38:18 | 0:36:18 |  | 75.6930524 | 72.3812876 | 78.731787 | 73.2395153 |
| 17:38:19 | 0:36:19 |  | 75.6930524 | 70.3812876 | 77.731787 | 73.2395153 |
| 17:38:20 | 0:36:20 |  | 76.6930524 | 70.3812876 | 77.731787 | 73.2395153 |
| 17:38:21 | 0:36:21 |  | 78.6930524 | 68.3812876 | 76.731787 | 73.2395153 |
| 17:38:22 | 0:36:22 |  | 79.6930524 | 67.3812876 | 76.731787 | 73.2395153 |
| 17:38:23 | 0:36:23 |  | 79.6930524 | 67.3812876 | 76.731787 | 73.2395153 |
| 17:38:24 | 0:36:24 |  | 79.6930524 | 67.3812876 | 76.731787 | 73.2395153 |
| 17:38:25 | 0:36:25 |  | 80.6930524 | 67.3812876 | 77.731787 | 81.2395153 |
| 17:38:26 | 0:36:26 |  | 80.6930524 | 67.3812876 | 76.731787 | 74.2395153 |
| 17:38:27 | 0:36:27 |  | 82.6930524 | 70.3812876 | 75.731787 | 73.2395153 |
| 17:38:28 | 0:36:28 |  | 82.6930524 | 71.3812876 | 75.731787 | 73.2395153 |
| 17:38:29 | 0:36:29 |  | 83.6930524 | 71.3812876 | 75.731787 | 71.2395153 |
| 17:38:30 | 0:36:30 |  | 85.6930524 | 71.3812876 | 74.731787 | 72.2395153 |
| 17:38:31 | 0:36:31 |  | 86.6930524 | 71.3812876 | 74.731787 | 72.2395153 |
| 17:38:32 | 0:36:32 |  | 86.6930524 | 72.3812876 | 74.731787 | 71.2395153 |
| 17:38:33 | 0:36:33 |  | 86.6930524 | 72.3812876 | 74.731787 | 71.2395153 |
| 17:38:34 | 0:36:34 |  | 90.6930524 | 73.3812876 | 73.731787 | 71.2395153 |
| 17:38:35 | 0:36:35 |  | 90.6930524 | 73.3812876 | 73.731787 | 70.2395153 |
| 17:38:36 | 0:36:36 |  | 90.6930524 | 73.3812876 | 73.731787 | 70.2395153 |
| 17:38:37 | 0:36:37 |  | 91.6930524 | 73.3812876 | 73.731787 | 70.2395153 |
| 17:38:38 | 0:36:38 |  | 91.6930524 | 74.3812876 | 75.731787 | 70.2395153 |
| 17:38:39 | 0:36:39 |  | 91.6930524 | 74.3812876 | 76.731787 | 70.2395153 |
| 17:38:40 | 0:36:40 |  | 90.6930524 | 74.3812876 | 76.731787 | 70.2395153 |
| 17:38:41 | 0:36:41 |  | 91.6930524 | 74.3812876 | 76.731787 | 70.2395153 |
| 17:38:42 | 0:36:42 |  | 78.6930524 | 74.3812876 | 76.731787 | 71.2395153 |

|          |         |  |            |            |           |            |
|----------|---------|--|------------|------------|-----------|------------|
| 17:38:43 | 0:36:43 |  | 77.6930524 | 74.3812876 | 76.731787 | 72.2395153 |
| 17:38:44 | 0:36:44 |  | 77.6930524 | 74.3812876 | 76.731787 | 72.2395153 |
| 17:38:45 | 0:36:45 |  | 77.6930524 | 74.3812876 | 76.731787 | 73.2395153 |
| 17:38:46 | 0:36:46 |  | 77.6930524 | 75.3812876 | 76.731787 | 76.2395153 |
| 17:38:47 | 0:36:47 |  | 77.6930524 | 75.3812876 | 78.731787 | 76.2395153 |
| 17:38:48 | 0:36:48 |  | 78.6930524 | 74.3812876 | 79.731787 | 78.2395153 |
| 17:38:49 | 0:36:49 |  | 79.6930524 | 74.3812876 | 79.731787 | 78.2395153 |
| 17:38:50 | 0:36:50 |  | 79.6930524 | 74.3812876 | 78.731787 | 78.2395153 |
| 17:38:51 | 0:36:51 |  | 79.6930524 | 74.3812876 | 77.731787 | 79.2395153 |
| 17:38:52 | 0:36:52 |  | 79.6930524 | 74.3812876 | 77.731787 | 81.2395153 |
| 17:38:53 | 0:36:53 |  | 79.6930524 | 74.3812876 | 77.731787 | 81.2395153 |
| 17:38:54 | 0:36:54 |  | 79.6930524 | 75.3812876 | 77.731787 | 81.2395153 |
| 17:38:55 | 0:36:55 |  | 78.6930524 | 75.3812876 | 77.731787 | 81.2395153 |
| 17:38:56 | 0:36:56 |  | 78.6930524 | 75.3812876 | 76.731787 | 80.2395153 |
| 17:38:57 | 0:36:57 |  | 78.6930524 | 74.3812876 | 76.731787 | 80.2395153 |
| 17:38:58 | 0:36:58 |  | 78.6930524 | 74.3812876 | 75.731787 | 80.2395153 |
| 17:38:59 | 0:36:59 |  | 77.6930524 | 74.3812876 | 76.731787 | 80.2395153 |
| 17:39:00 | 0:37:00 |  | 76.6930524 | 73.3812876 | 77.731787 | 81.2395153 |
| 17:39:01 | 0:37:01 |  | 76.6930524 | 71.3812876 | 78.731787 | 82.2395153 |
| 17:39:02 | 0:37:02 |  | 75.6930524 | 71.3812876 | 79.731787 | 82.2395153 |
| 17:39:03 | 0:37:03 |  | 73.6930524 | 72.3812876 | 79.731787 | 82.2395153 |
| 17:39:04 | 0:37:04 |  | 72.6930524 | 72.3812876 | 79.731787 | 82.2395153 |
| 17:39:05 | 0:37:05 |  | 72.6930524 | 72.3812876 | 79.731787 | 82.2395153 |
| 17:39:06 | 0:37:06 |  | 77.6930524 | 73.3812876 | 79.731787 | 84.2395153 |
| 17:39:07 | 0:37:07 |  | 79.6930524 | 73.3812876 | 78.731787 | 86.2395153 |
| 17:39:08 | 0:37:08 |  | 80.6930524 | 73.3812876 | 78.731787 | 90.2395153 |
| 17:39:09 | 0:37:09 |  | 80.6930524 | 73.3812876 | 78.731787 | 90.2395153 |
| 17:39:10 | 0:37:10 |  | 79.6930524 | 74.3812876 | 78.731787 | 91.2395153 |
| 17:39:11 | 0:37:11 |  | 77.6930524 | 74.3812876 | 82.731787 | 92.2395153 |
| 17:39:12 | 0:37:12 |  | 76.6930524 | 74.3812876 | 85.731787 | 95.2395153 |
| 17:39:13 | 0:37:13 |  | 76.6930524 | 74.3812876 | 87.731787 | 97.2395153 |
| 17:39:14 | 0:37:14 |  | 75.6930524 | 76.3812876 | 88.731787 | 98.2395153 |
| 17:39:15 | 0:37:15 |  | 74.6930524 | 76.3812876 | 88.731787 | 99.2395153 |
| 17:39:16 | 0:37:16 |  | 74.6930524 | 76.3812876 | 88.731787 | 103.239515 |
| 17:39:17 | 0:37:17 |  | 74.6930524 | 76.3812876 | 86.731787 | 104.239515 |
| 17:39:18 | 0:37:18 |  | 74.6930524 | 76.3812876 | 86.731787 | 104.239515 |
| 17:39:19 | 0:37:19 |  | 73.6930524 | 78.3812876 | 84.731787 | 104.239515 |
| 17:39:20 | 0:37:20 |  | 74.6930524 | 78.3812876 | 82.731787 | 104.239515 |
| 17:39:21 | 0:37:21 |  | 75.6930524 | 79.3812876 | 80.731787 | 105.239515 |
| 17:39:22 | 0:37:22 |  | 75.6930524 | 81.3812876 | 78.731787 | 107.239515 |
| 17:39:23 | 0:37:23 |  | 75.6930524 | 81.3812876 | 77.731787 | 110.239515 |
| 17:39:24 | 0:37:24 |  | 76.6930524 | 84.3812876 | 76.731787 | 110.239515 |
| 17:39:25 | 0:37:25 |  | 76.6930524 | 84.3812876 | 76.731787 | 111.239515 |
| 17:39:26 | 0:37:26 |  | 75.6930524 | 84.3812876 | 77.731787 | 111.239515 |
| 17:39:27 | 0:37:27 |  | 75.6930524 | 85.3812876 | 78.731787 | 111.239515 |

|          |         |  |            |            |           |            |
|----------|---------|--|------------|------------|-----------|------------|
| 17:39:28 | 0:37:28 |  | 74.6930524 | 85.3812876 | 80.731787 | 111.239515 |
| 17:39:29 | 0:37:29 |  | 74.6930524 | 85.3812876 | 82.731787 | 111.239515 |
| 17:39:30 | 0:37:30 |  | 74.6930524 | 85.3812876 | 84.731787 | 111.239515 |
| 17:39:31 | 0:37:31 |  | 75.6930524 | 85.3812876 | 84.731787 | 111.239515 |
| 17:39:32 | 0:37:32 |  | 75.6930524 | 85.3812876 | 83.731787 | 110.239515 |
| 17:39:33 | 0:37:33 |  | 75.6930524 | 86.3812876 | 83.731787 | 109.239515 |
| 17:39:34 | 0:37:34 |  | 76.6930524 | 86.3812876 | 82.731787 | 109.239515 |
| 17:39:35 | 0:37:35 |  | 75.6930524 | 88.3812876 | 81.731787 | 109.239515 |
| 17:39:36 | 0:37:36 |  | 75.6930524 | 88.3812876 | 81.731787 | 109.239515 |
| 17:39:37 | 0:37:37 |  | 75.6930524 | 88.3812876 | 80.731787 | 108.239515 |
| 17:39:38 | 0:37:38 |  | 75.6930524 | 88.3812876 | 80.731787 | 109.239515 |
| 17:39:39 | 0:37:39 |  | 75.6930524 | 88.3812876 | 80.731787 | 111.239515 |
| 17:39:40 | 0:37:40 |  | 75.6930524 | 88.3812876 | 80.731787 | 112.239515 |
| 17:39:41 | 0:37:41 |  | 75.6930524 | 88.3812876 | 80.731787 | 112.239515 |
| 17:39:42 | 0:37:42 |  | 75.6930524 | 87.3812876 | 80.731787 | 112.239515 |
| 17:39:43 | 0:37:43 |  | 75.6930524 | 87.3812876 | 79.731787 | 111.239515 |
| 17:39:44 | 0:37:44 |  | 76.6930524 | 87.3812876 | 76.731787 | 109.239515 |
| 17:39:45 | 0:37:45 |  | 75.6930524 | 86.3812876 | 75.731787 | 108.239515 |
| 17:39:46 | 0:37:46 |  | 75.6930524 | 84.3812876 | 74.731787 | 107.239515 |
| 17:39:47 | 0:37:47 |  | 76.6930524 | 82.3812876 | 74.731787 | 106.239515 |
| 17:39:48 | 0:37:48 |  | 76.6930524 | 82.3812876 | 74.731787 | 106.239515 |
| 17:39:49 | 0:37:49 |  | 76.6930524 | 82.3812876 | 74.731787 | 104.239515 |
| 17:39:50 | 0:37:50 |  | 76.6930524 | 77.3812876 | 74.731787 | 104.239515 |
| 17:39:51 | 0:37:51 |  | 76.6930524 | 75.3812876 | 74.731787 | 104.239515 |
| 17:39:52 | 0:37:52 |  | 76.6930524 | 75.3812876 | 74.731787 | 103.239515 |
| 17:39:53 | 0:37:53 |  | 76.6930524 | 75.3812876 | 74.731787 | 103.239515 |
| 17:39:54 | 0:37:54 |  | 76.6930524 | 78.3812876 | 73.731787 | 103.239515 |
| 17:39:55 | 0:37:55 |  | 76.6930524 | 74.3812876 | 73.731787 | 102.239515 |
| 17:39:56 | 0:37:56 |  | 75.6930524 | 74.3812876 | 73.731787 | 102.239515 |
| 17:39:57 | 0:37:57 |  | 75.6930524 | 72.3812876 | 73.731787 | 102.239515 |
| 17:39:58 | 0:37:58 |  | 75.6930524 | 71.3812876 | 73.731787 | 102.239515 |
| 17:39:59 | 0:37:59 |  | 75.6930524 | 72.3812876 | 73.731787 | 102.239515 |
| 17:40:00 | 0:38:00 |  | 75.6930524 | 72.3812876 | 73.731787 | 101.239515 |
| 17:40:01 | 0:38:01 |  | 75.6930524 | 72.3812876 | 73.731787 | 101.239515 |
| 17:40:02 | 0:38:02 |  | 75.6930524 | 72.3812876 | 73.731787 | 100.239515 |
| 17:40:03 | 0:38:03 |  | 74.6930524 | 72.3812876 | 73.731787 | 100.239515 |
| 17:40:04 | 0:38:04 |  | 73.6930524 | 72.3812876 | 73.731787 | 98.2395153 |
| 17:40:05 | 0:38:05 |  | 72.6930524 | 72.3812876 | 72.731787 | 98.2395153 |
| 17:40:06 | 0:38:06 |  | 71.6930524 | 75.3812876 | 72.731787 | 96.2395153 |
| 17:40:07 | 0:38:07 |  | 71.6930524 | 75.3812876 | 71.731787 | 96.2395153 |
| 17:40:08 | 0:38:08 |  | 71.6930524 | 75.3812876 | 71.731787 | 95.2395153 |
| 17:40:09 | 0:38:09 |  | 71.6930524 | 75.3812876 | 72.731787 | 95.2395153 |
| 17:40:10 | 0:38:10 |  | 71.6930524 | 74.3812876 | 75.731787 | 94.2395153 |
| 17:40:11 | 0:38:11 |  | 71.6930524 | 74.3812876 | 77.731787 | 94.2395153 |
| 17:40:12 | 0:38:12 |  | 71.6930524 | 74.3812876 | 77.731787 | 94.2395153 |

|          |         |  |            |            |           |            |
|----------|---------|--|------------|------------|-----------|------------|
| 17:40:13 | 0:38:13 |  | 71.6930524 | 74.3812876 | 76.731787 | 86.2395153 |
| 17:40:14 | 0:38:14 |  | 70.6930524 | 74.3812876 | 74.731787 | 85.2395153 |
| 17:40:15 | 0:38:15 |  | 69.6930524 | 76.3812876 | 72.731787 | 85.2395153 |
| 17:40:16 | 0:38:16 |  | 70.6930524 | 76.3812876 | 70.731787 | 84.2395153 |
| 17:40:17 | 0:38:17 |  | 71.6930524 | 76.3812876 | 69.731787 | 84.2395153 |
| 17:40:18 | 0:38:18 |  | 72.6930524 | 76.3812876 | 69.731787 | 84.2395153 |
| 17:40:19 | 0:38:19 |  | 72.6930524 | 77.3812876 | 69.731787 | 84.2395153 |
| 17:40:20 | 0:38:20 |  | 73.6930524 | 77.3812876 | 69.731787 | 84.2395153 |
| 17:40:21 | 0:38:21 |  | 73.6930524 | 75.3812876 | 70.731787 | 84.2395153 |
| 17:40:22 | 0:38:22 |  | 73.6930524 | 74.3812876 | 72.731787 | 84.2395153 |
| 17:40:23 | 0:38:23 |  | 73.6930524 | 74.3812876 | 75.731787 | 84.2395153 |
| 17:40:24 | 0:38:24 |  | 73.6930524 | 77.3812876 | 76.731787 | 85.2395153 |
| 17:40:25 | 0:38:25 |  | 72.6930524 | 79.3812876 | 75.731787 | 85.2395153 |
| 17:40:26 | 0:38:26 |  | 72.6930524 | 79.3812876 | 76.731787 | 85.2395153 |
| 17:40:27 | 0:38:27 |  | 72.6930524 | 78.3812876 | 77.731787 | 85.2395153 |
| 17:40:28 | 0:38:28 |  | 72.6930524 | 74.3812876 | 77.731787 | 86.2395153 |
| 17:40:29 | 0:38:29 |  | 72.6930524 | 74.3812876 | 76.731787 | 86.2395153 |
| 17:40:30 | 0:38:30 |  | 72.6930524 | 74.3812876 | 75.731787 | 85.2395153 |
| 17:40:31 | 0:38:31 |  | 73.6930524 | 74.3812876 | 74.731787 | 85.2395153 |
| 17:40:32 | 0:38:32 |  | 74.6930524 | 73.3812876 | 74.731787 | 85.2395153 |
| 17:40:33 | 0:38:33 |  | 74.6930524 | 73.3812876 | 74.731787 | 82.2395153 |
| 17:40:34 | 0:38:34 |  | 74.6930524 | 72.3812876 | 74.731787 | 82.2395153 |
| 17:40:35 | 0:38:35 |  | 74.6930524 | 76.3812876 | 74.731787 | 79.2395153 |
| 17:40:36 | 0:38:36 |  | 74.6930524 | 78.3812876 | 74.731787 | 77.2395153 |
| 17:40:37 | 0:38:37 |  | 74.6930524 | 79.3812876 | 74.731787 | 76.2395153 |
| 17:40:38 | 0:38:38 |  | 74.6930524 | 79.3812876 | 74.731787 | 76.2395153 |
| 17:40:39 | 0:38:39 |  | 74.6930524 | 79.3812876 | 74.731787 | 76.2395153 |
| 17:40:40 | 0:38:40 |  | 75.6930524 | 79.3812876 | 75.731787 | 76.2395153 |
| 17:40:41 | 0:38:41 |  | 76.6930524 | 79.3812876 | 75.731787 | 76.2395153 |
| 17:40:42 | 0:38:42 |  | 76.6930524 | 79.3812876 | 74.731787 | 79.2395153 |
| 17:40:43 | 0:38:43 |  | 77.6930524 | 78.3812876 | 74.731787 | 79.2395153 |
| 17:40:44 | 0:38:44 |  | 77.6930524 | 77.3812876 | 75.731787 | 79.2395153 |
| 17:40:45 | 0:38:45 |  | 76.6930524 | 77.3812876 | 76.731787 | 79.2395153 |
| 17:40:46 | 0:38:46 |  | 76.6930524 | 77.3812876 | 76.731787 | 80.2395153 |
| 17:40:47 | 0:38:47 |  | 75.6930524 | 77.3812876 | 77.731787 | 79.2395153 |
| 17:40:48 | 0:38:48 |  | 75.6930524 | 74.3812876 | 77.731787 | 79.2395153 |
| 17:40:49 | 0:38:49 |  | 75.6930524 | 74.3812876 | 77.731787 | 79.2395153 |
| 17:40:50 | 0:38:50 |  | 75.6930524 | 74.3812876 | 76.731787 | 79.2395153 |
| 17:40:51 | 0:38:51 |  | 76.6930524 | 72.3812876 | 76.731787 | 79.2395153 |
| 17:40:52 | 0:38:52 |  | 77.6930524 | 72.3812876 | 75.731787 | 79.2395153 |
| 17:40:53 | 0:38:53 |  | 77.6930524 | 72.3812876 | 75.731787 | 80.2395153 |
| 17:40:54 | 0:38:54 |  | 78.6930524 | 71.3812876 | 74.731787 | 81.2395153 |
| 17:40:55 | 0:38:55 |  | 78.6930524 | 71.3812876 | 74.731787 | 81.2395153 |
| 17:40:56 | 0:38:56 |  | 78.6930524 | 71.3812876 | 73.731787 | 83.2395153 |
| 17:40:57 | 0:38:57 |  | 78.6930524 | 71.3812876 | 73.731787 | 83.2395153 |



|          |         |  |            |            |           |            |
|----------|---------|--|------------|------------|-----------|------------|
| 17:40:58 | 0:38:58 |  | 78.6930524 | 71.3812876 | 73.731787 | 84.2395153 |
| 17:40:59 | 0:38:59 |  | 78.6930524 | 71.3812876 | 72.731787 | 85.2395153 |
| 17:41:00 | 0:39:00 |  | 78.6930524 | 71.3812876 | 72.731787 | 86.2395153 |
| 17:41:01 | 0:39:01 |  | 77.6930524 | 71.3812876 | 71.731787 | 86.2395153 |
| 17:41:02 | 0:39:02 |  | 76.6930524 | 68.3812876 | 71.731787 | 86.2395153 |
| 17:41:03 | 0:39:03 |  | 75.6930524 | 66.3812876 | 70.731787 | 86.2395153 |
| 17:41:04 | 0:39:04 |  | 75.6930524 | 65.3812876 | 70.731787 | 83.2395153 |
| 17:41:05 | 0:39:05 |  | 76.6930524 | 65.3812876 | 72.731787 | 82.2395153 |
| 17:41:06 | 0:39:06 |  | 76.6930524 | 65.3812876 | 72.731787 | 82.2395153 |
| 17:41:07 | 0:39:07 |  | 77.6930524 | 68.3812876 | 72.731787 | 82.2395153 |
| 17:41:08 | 0:39:08 |  | 77.6930524 | 68.3812876 | 73.731787 | 82.2395153 |
| 17:41:09 | 0:39:09 |  | 77.6930524 | 69.3812876 | 73.731787 | 81.2395153 |
| 17:41:10 | 0:39:10 |  | 77.6930524 | 69.3812876 | 74.731787 | 80.2395153 |
| 17:41:11 | 0:39:11 |  | 77.6930524 | 69.3812876 | 74.731787 | 80.2395153 |
| 17:41:12 | 0:39:12 |  | 76.6930524 | 69.3812876 | 74.731787 | 79.2395153 |
| 17:41:13 | 0:39:13 |  | 76.6930524 | 68.3812876 | 74.731787 | 78.2395153 |
| 17:41:14 | 0:39:14 |  | 75.6930524 | 69.3812876 | 74.731787 | 77.2395153 |
| 17:41:15 | 0:39:15 |  | 75.6930524 | 69.3812876 | 74.731787 | 75.2395153 |
| 17:41:16 | 0:39:16 |  | 75.6930524 | 69.3812876 | 74.731787 | 74.2395153 |
| 17:41:17 | 0:39:17 |  | 75.6930524 | 69.3812876 | 74.731787 | 73.2395153 |
| 17:41:18 | 0:39:18 |  | 75.6930524 | 69.3812876 | 74.731787 | 73.2395153 |
| 17:41:19 | 0:39:19 |  | 75.6930524 | 69.3812876 | 74.731787 | 75.2395153 |
| 17:41:20 | 0:39:20 |  | 76.6930524 | 69.3812876 | 74.731787 | 75.2395153 |
| 17:41:21 | 0:39:21 |  | 77.6930524 | 69.3812876 | 73.731787 | 76.2395153 |
| 17:41:22 | 0:39:22 |  | 77.6930524 | 69.3812876 | 70.731787 | 77.2395153 |
| 17:41:23 | 0:39:23 |  | 77.6930524 | 69.3812876 | 69.731787 | 77.2395153 |
| 17:41:24 | 0:39:24 |  | 77.6930524 | 67.3812876 | 69.731787 | 79.2395153 |
| 17:41:25 | 0:39:25 |  | 76.6930524 | 66.3812876 | 68.731787 | 80.2395153 |
| 17:41:26 | 0:39:26 |  | 75.6930524 | 66.3812876 | 68.731787 | 80.2395153 |
| 17:41:27 | 0:39:27 |  | 75.6930524 | 66.3812876 | 68.731787 | 80.2395153 |
| 17:41:28 | 0:39:28 |  | 75.6930524 | 68.3812876 | 67.731787 | 80.2395153 |
| 17:41:29 | 0:39:29 |  | 75.6930524 | 68.3812876 | 67.731787 | 80.2395153 |
| 17:41:30 | 0:39:30 |  | 75.6930524 | 68.3812876 | 66.731787 | 79.2395153 |
| 17:41:31 | 0:39:31 |  | 76.6930524 | 68.3812876 | 70.731787 | 77.2395153 |
| 17:41:32 | 0:39:32 |  | 76.6930524 | 69.3812876 | 74.731787 | 79.2395153 |
| 17:41:33 | 0:39:33 |  | 76.6930524 | 69.3812876 | 75.731787 | 79.2395153 |
| 17:41:34 | 0:39:34 |  | 76.6930524 | 69.3812876 | 76.731787 | 79.2395153 |
| 17:41:35 | 0:39:35 |  | 77.6930524 | 69.3812876 | 77.731787 | 79.2395153 |
| 17:41:36 | 0:39:36 |  | 77.6930524 | 70.3812876 | 77.731787 | 79.2395153 |
| 17:41:37 | 0:39:37 |  | 77.6930524 | 70.3812876 | 78.731787 | 79.2395153 |
| 17:41:38 | 0:39:38 |  | 77.6930524 | 70.3812876 | 79.731787 | 80.2395153 |
| 17:41:39 | 0:39:39 |  | 76.6930524 | 71.3812876 | 80.731787 | 80.2395153 |
| 17:41:40 | 0:39:40 |  | 76.6930524 | 71.3812876 | 80.731787 | 80.2395153 |
| 17:41:41 | 0:39:41 |  | 76.6930524 | 71.3812876 | 80.731787 | 80.2395153 |
| 17:41:42 | 0:39:42 |  | 76.6930524 | 71.3812876 | 80.731787 | 80.2395153 |

|          |         |  |            |            |           |            |
|----------|---------|--|------------|------------|-----------|------------|
| 17:41:43 | 0:39:43 |  | 76.6930524 | 71.3812876 | 80.731787 | 79.2395153 |
| 17:41:44 | 0:39:44 |  | 77.6930524 | 71.3812876 | 81.731787 | 79.2395153 |
| 17:41:45 | 0:39:45 |  | 77.6930524 | 71.3812876 | 81.731787 | 79.2395153 |
| 17:41:46 | 0:39:46 |  | 83.6930524 | 71.3812876 | 81.731787 | 79.2395153 |
| 17:41:47 | 0:39:47 |  | 81.6930524 | 71.3812876 | 82.731787 | 79.2395153 |
| 17:41:48 | 0:39:48 |  | 81.6930524 | 71.3812876 | 82.731787 | 79.2395153 |
| 17:41:49 | 0:39:49 |  | 83.6930524 | 71.3812876 | 82.731787 | 81.2395153 |
| 17:41:50 | 0:39:50 |  | 87.6930524 | 71.3812876 | 78.731787 | 81.2395153 |
| 17:41:51 | 0:39:51 |  | 89.6930524 | 71.3812876 | 77.731787 | 81.2395153 |
| 17:41:52 | 0:39:52 |  | 90.6930524 | 70.3812876 | 77.731787 | 81.2395153 |
| 17:41:53 | 0:39:53 |  | 90.6930524 | 70.3812876 | 77.731787 | 81.2395153 |
| 17:41:54 | 0:39:54 |  | 90.6930524 | 70.3812876 | 77.731787 | 82.2395153 |
| 17:41:55 | 0:39:55 |  | 93.6930524 | 69.3812876 | 78.731787 | 82.2395153 |
| 17:41:56 | 0:39:56 |  | 96.6930524 | 69.3812876 | 79.731787 | 81.2395153 |
| 17:41:57 | 0:39:57 |  | 98.6930524 | 69.3812876 | 79.731787 | 79.2395153 |
| 17:41:58 | 0:39:58 |  | 99.6930524 | 70.3812876 | 80.731787 | 78.2395153 |
| 17:41:59 | 0:39:59 |  | 99.6930524 | 70.3812876 | 80.731787 | 78.2395153 |
| 17:42:00 | 0:40:00 |  | 99.6930524 | 70.3812876 | 80.731787 | 78.2395153 |
| 17:42:01 | 0:40:01 |  | 100.693052 | 71.3812876 | 81.731787 | 77.2395153 |
| 17:42:02 | 0:40:02 |  | 94.6930524 | 72.3812876 | 82.731787 | 77.2395153 |
| 17:42:03 | 0:40:03 |  | 86.6930524 | 73.3812876 | 83.731787 | 77.2395153 |
| 17:42:04 | 0:40:04 |  | 86.6930524 | 73.3812876 | 85.731787 | 78.2395153 |
| 17:42:05 | 0:40:05 |  | 82.6930524 | 72.3812876 | 86.731787 | 78.2395153 |
| 17:42:06 | 0:40:06 |  | 81.6930524 | 71.3812876 | 87.731787 | 78.2395153 |
| 17:42:07 | 0:40:07 |  | 80.6930524 | 71.3812876 | 84.731787 | 78.2395153 |
| 17:42:08 | 0:40:08 |  | 79.6930524 | 71.3812876 | 83.731787 | 79.2395153 |
| 17:42:09 | 0:40:09 |  | 79.6930524 | 71.3812876 | 82.731787 | 80.2395153 |
| 17:42:10 | 0:40:10 |  | 78.6930524 | 71.3812876 | 81.731787 | 80.2395153 |
| 17:42:11 | 0:40:11 |  | 78.6930524 | 71.3812876 | 80.731787 | 81.2395153 |
| 17:42:12 | 0:40:12 |  | 78.6930524 | 71.3812876 | 80.731787 | 81.2395153 |
| 17:42:13 | 0:40:13 |  | 78.6930524 | 70.3812876 | 79.731787 | 81.2395153 |
| 17:42:14 | 0:40:14 |  | 77.6930524 | 70.3812876 | 78.731787 | 83.2395153 |
| 17:42:15 | 0:40:15 |  | 77.6930524 | 70.3812876 | 77.731787 | 83.2395153 |
| 17:42:16 | 0:40:16 |  | 77.6930524 | 70.3812876 | 77.731787 | 84.2395153 |
| 17:42:17 | 0:40:17 |  | 77.6930524 | 70.3812876 | 77.731787 | 84.2395153 |
| 17:42:18 | 0:40:18 |  | 77.6930524 | 70.3812876 | 77.731787 | 84.2395153 |
| 17:42:19 | 0:40:19 |  | 75.6930524 | 70.3812876 | 76.731787 | 84.2395153 |
| 17:42:20 | 0:40:20 |  | 73.6930524 | 70.3812876 | 75.731787 | 85.2395153 |
| 17:42:21 | 0:40:21 |  | 73.6930524 | 70.3812876 | 75.731787 | 85.2395153 |
| 17:42:22 | 0:40:22 |  | 75.6930524 | 70.3812876 | 74.731787 | 86.2395153 |
| 17:42:23 | 0:40:23 |  | 77.6930524 | 70.3812876 | 74.731787 | 86.2395153 |
| 17:42:24 | 0:40:24 |  | 77.6930524 | 70.3812876 | 77.731787 | 87.2395153 |
| 17:42:25 | 0:40:25 |  | 78.6930524 | 70.3812876 | 80.731787 | 87.2395153 |
| 17:42:26 | 0:40:26 |  | 78.6930524 | 71.3812876 | 83.731787 | 87.2395153 |
| 17:42:27 | 0:40:27 |  | 78.6930524 | 71.3812876 | 84.731787 | 87.2395153 |

|          |         |  |            |            |           |            |
|----------|---------|--|------------|------------|-----------|------------|
| 17:42:28 | 0:40:28 |  | 78.6930524 | 71.3812876 | 84.731787 | 87.2395153 |
| 17:42:29 | 0:40:29 |  | 78.6930524 | 71.3812876 | 82.731787 | 87.2395153 |
| 17:42:30 | 0:40:30 |  | 78.6930524 | 72.3812876 | 81.731787 | 88.2395153 |
| 17:42:31 | 0:40:31 |  | 78.6930524 | 72.3812876 | 80.731787 | 89.2395153 |
| 17:42:32 | 0:40:32 |  | 76.6930524 | 74.3812876 | 80.731787 | 90.2395153 |
| 17:42:33 | 0:40:33 |  | 75.6930524 | 76.3812876 | 78.731787 | 90.2395153 |
| 17:42:34 | 0:40:34 |  | 75.6930524 | 77.3812876 | 77.731787 | 91.2395153 |
| 17:42:35 | 0:40:35 |  | 74.6930524 | 77.3812876 | 76.731787 | 91.2395153 |
| 17:42:36 | 0:40:36 |  | 74.6930524 | 76.3812876 | 75.731787 | 92.2395153 |
| 17:42:37 | 0:40:37 |  | 74.6930524 | 76.3812876 | 75.731787 | 91.2395153 |
| 17:42:38 | 0:40:38 |  | 74.6930524 | 76.3812876 | 74.731787 | 88.2395153 |
| 17:42:39 | 0:40:39 |  | 74.6930524 | 77.3812876 | 73.731787 | 87.2395153 |
| 17:42:40 | 0:40:40 |  | 75.6930524 | 78.3812876 | 73.731787 | 85.2395153 |
| 17:42:41 | 0:40:41 |  | 76.6930524 | 81.3812876 | 72.731787 | 84.2395153 |
| 17:42:42 | 0:40:42 |  | 76.6930524 | 83.3812876 | 72.731787 | 82.2395153 |
| 17:42:43 | 0:40:43 |  | 74.6930524 | 83.3812876 | 72.731787 | 82.2395153 |
| 17:42:44 | 0:40:44 |  | 74.6930524 | 84.3812876 | 72.731787 | 81.2395153 |
| 17:42:45 | 0:40:45 |  | 73.6930524 | 84.3812876 | 72.731787 | 81.2395153 |
| 17:42:46 | 0:40:46 |  | 73.6930524 | 80.3812876 | 73.731787 | 80.2395153 |
| 17:42:47 | 0:40:47 |  | 74.6930524 | 80.3812876 | 74.731787 | 77.2395153 |
| 17:42:48 | 0:40:48 |  | 74.6930524 | 67.3812876 | 74.731787 | 77.2395153 |
| 17:42:49 | 0:40:49 |  | 73.6930524 | 64.3812876 | 74.731787 | 78.2395153 |
| 17:42:50 | 0:40:50 |  | 73.6930524 | 62.3812876 | 74.731787 | 78.2395153 |
| 17:42:51 | 0:40:51 |  | 74.6930524 | 62.3812876 | 73.731787 | 80.2395153 |
| 17:42:52 | 0:40:52 |  | 73.6930524 | 63.3812876 | 73.731787 | 88.2395153 |
| 17:42:53 | 0:40:53 |  | 72.6930524 | 63.3812876 | 73.731787 | 92.2395153 |
| 17:42:54 | 0:40:54 |  | 72.6930524 | 63.3812876 | 73.731787 | 92.2395153 |
| 17:42:55 | 0:40:55 |  | 70.6930524 | 63.3812876 | 73.731787 | 95.2395153 |
| 17:42:56 | 0:40:56 |  | 70.6930524 | 63.3812876 | 74.731787 | 95.2395153 |
| 17:42:57 | 0:40:57 |  | 70.6930524 | 63.3812876 | 74.731787 | 95.2395153 |
| 17:42:58 | 0:40:58 |  | 69.6930524 | 64.3812876 | 74.731787 | 95.2395153 |
| 17:42:59 | 0:40:59 |  | 65.6930524 | 64.3812876 | 75.731787 | 96.2395153 |
| 17:43:00 | 0:41:00 |  | 64.6930524 | 62.3812876 | 75.731787 | 96.2395153 |
| 17:43:01 | 0:41:01 |  | 64.6930524 | 62.3812876 | 79.731787 | 94.2395153 |
| 17:43:02 | 0:41:02 |  | 66.6930524 | 64.3812876 | 79.731787 | 79.2395153 |
| 17:43:03 | 0:41:03 |  | 67.6930524 | 64.3812876 | 79.731787 | 70.2395153 |
| 17:43:04 | 0:41:04 |  | 69.6930524 | 66.3812876 | 76.731787 | 66.2395153 |
| 17:43:05 | 0:41:05 |  | 70.6930524 | 69.3812876 | 75.731787 | 63.2395153 |
| 17:43:06 | 0:41:06 |  | 71.6930524 | 69.3812876 | 75.731787 | 63.2395153 |
| 17:43:07 | 0:41:07 |  | 71.6930524 | 69.3812876 | 75.731787 | 64.2395153 |
| 17:43:08 | 0:41:08 |  | 71.6930524 | 69.3812876 | 75.731787 | 64.2395153 |
| 17:43:09 | 0:41:09 |  | 71.6930524 | 70.3812876 | 75.731787 | 64.2395153 |
| 17:43:10 | 0:41:10 |  | 71.6930524 | 73.3812876 | 75.731787 | 64.2395153 |
| 17:43:11 | 0:41:11 |  | 72.6930524 | 73.3812876 | 75.731787 | 64.2395153 |
| 17:43:12 | 0:41:12 |  | 72.6930524 | 73.3812876 | 76.731787 | 65.2395153 |

|          |         |  |            |            |           |            |
|----------|---------|--|------------|------------|-----------|------------|
| 17:43:13 | 0:41:13 |  | 72.6930524 | 74.3812876 | 77.731787 | 67.2395153 |
| 17:43:14 | 0:41:14 |  | 72.6930524 | 75.3812876 | 77.731787 | 67.2395153 |
| 17:43:15 | 0:41:15 |  | 72.6930524 | 73.3812876 | 77.731787 | 71.2395153 |
| 17:43:16 | 0:41:16 |  | 72.6930524 | 73.3812876 | 79.731787 | 73.2395153 |
| 17:43:17 | 0:41:17 |  | 73.6930524 | 72.3812876 | 79.731787 | 74.2395153 |
| 17:43:18 | 0:41:18 |  | 72.6930524 | 72.3812876 | 79.731787 | 75.2395153 |
| 17:43:19 | 0:41:19 |  | 72.6930524 | 72.3812876 | 81.731787 | 76.2395153 |
| 17:43:20 | 0:41:20 |  | 72.6930524 | 72.3812876 | 81.731787 | 76.2395153 |
| 17:43:21 | 0:41:21 |  | 72.6930524 | 71.3812876 | 77.731787 | 76.2395153 |
| 17:43:22 | 0:41:22 |  | 72.6930524 | 71.3812876 | 76.731787 | 74.2395153 |
| 17:43:23 | 0:41:23 |  | 72.6930524 | 71.3812876 | 76.731787 | 74.2395153 |
| 17:43:24 | 0:41:24 |  | 71.6930524 | 71.3812876 | 76.731787 | 74.2395153 |
| 17:43:25 | 0:41:25 |  | 71.6930524 | 70.3812876 | 76.731787 | 73.2395153 |
| 17:43:26 | 0:41:26 |  | 73.6930524 | 65.3812876 | 76.731787 | 72.2395153 |
| 17:43:27 | 0:41:27 |  | 74.6930524 | 65.3812876 | 76.731787 | 70.2395153 |
| 17:43:28 | 0:41:28 |  | 74.6930524 | 65.3812876 | 76.731787 | 69.2395153 |
| 17:43:29 | 0:41:29 |  | 74.6930524 | 66.3812876 | 76.731787 | 69.2395153 |
| 17:43:30 | 0:41:30 |  | 75.6930524 | 68.3812876 | 77.731787 | 69.2395153 |
| 17:43:31 | 0:41:31 |  | 76.6930524 | 68.3812876 | 80.731787 | 69.2395153 |
| 17:43:32 | 0:41:32 |  | 76.6930524 | 68.3812876 | 80.731787 | 68.2395153 |
| 17:43:33 | 0:41:33 |  | 76.6930524 | 68.3812876 | 80.731787 | 68.2395153 |
| 17:43:34 | 0:41:34 |  | 74.6930524 | 68.3812876 | 80.731787 | 68.2395153 |
| 17:43:35 | 0:41:35 |  | 74.6930524 | 68.3812876 | 78.731787 | 68.2395153 |
| 17:43:36 | 0:41:36 |  | 74.6930524 | 68.3812876 | 75.731787 | 68.2395153 |
| 17:43:37 | 0:41:37 |  | 74.6930524 | 68.3812876 | 74.731787 | 68.2395153 |
| 17:43:38 | 0:41:38 |  | 74.6930524 | 68.3812876 | 74.731787 | 68.2395153 |
| 17:43:39 | 0:41:39 |  | 73.6930524 | 69.3812876 | 73.731787 | 69.2395153 |
| 17:43:40 | 0:41:40 |  | 73.6930524 | 69.3812876 | 73.731787 | 69.2395153 |
| 17:43:41 | 0:41:41 |  | 73.6930524 | 69.3812876 | 73.731787 | 69.2395153 |
| 17:43:42 | 0:41:42 |  | 73.6930524 | 69.3812876 | 73.731787 | 69.2395153 |
| 17:43:43 | 0:41:43 |  | 73.6930524 | 70.3812876 | 73.731787 | 68.2395153 |
| 17:43:44 | 0:41:44 |  | 72.6930524 | 70.3812876 | 72.731787 | 69.2395153 |
| 17:43:45 | 0:41:45 |  | 73.6930524 | 70.3812876 | 72.731787 | 69.2395153 |
| 17:43:46 | 0:41:46 |  | 73.6930524 | 70.3812876 | 72.731787 | 69.2395153 |
| 17:43:47 | 0:41:47 |  | 74.6930524 | 70.3812876 | 72.731787 | 69.2395153 |
| 17:43:48 | 0:41:48 |  | 74.6930524 | 70.3812876 | 72.731787 | 69.2395153 |
| 17:43:49 | 0:41:49 |  | 74.6930524 | 70.3812876 | 72.731787 | 69.2395153 |
| 17:43:50 | 0:41:50 |  | 74.6930524 | 70.3812876 | 73.731787 | 66.2395153 |
| 17:43:51 | 0:41:51 |  | 74.6930524 | 70.3812876 | 73.731787 | 66.2395153 |
| 17:43:52 | 0:41:52 |  | 74.6930524 | 70.3812876 | 73.731787 | 62.2395153 |
| 17:43:53 | 0:41:53 |  | 74.6930524 | 69.3812876 | 73.731787 | 61.2395153 |
| 17:43:54 | 0:41:54 |  | 73.6930524 | 69.3812876 | 73.731787 | 61.2395153 |
| 17:43:55 | 0:41:55 |  | 73.6930524 | 68.3812876 | 73.731787 | 62.2395153 |
| 17:43:56 | 0:41:56 |  | 74.6930524 | 68.3812876 | 73.731787 | 64.2395153 |
| 17:43:57 | 0:41:57 |  | 74.6930524 | 65.3812876 | 74.731787 | 64.2395153 |

|          |         |  |            |            |           |            |
|----------|---------|--|------------|------------|-----------|------------|
| 17:43:58 | 0:41:58 |  | 74.6930524 | 62.3812876 | 74.731787 | 66.2395153 |
| 17:43:59 | 0:41:59 |  | 74.6930524 | 60.3812876 | 74.731787 | 66.2395153 |
| 17:44:00 | 0:42:00 |  | 74.6930524 | 60.3812876 | 75.731787 | 64.2395153 |
| 17:44:01 | 0:42:01 |  | 74.6930524 | 55.3812876 | 75.731787 | 63.2395153 |
| 17:44:02 | 0:42:02 |  | 75.6930524 | 55.3812876 | 75.731787 | 63.2395153 |
| 17:44:03 | 0:42:03 |  | 76.6930524 | 55.3812876 | 75.731787 | 63.2395153 |
| 17:44:04 | 0:42:04 |  | 76.6930524 | 56.3812876 | 75.731787 | 62.2395153 |
| 17:44:05 | 0:42:05 |  | 77.6930524 | 56.3812876 | 75.731787 | 62.2395153 |
| 17:44:06 | 0:42:06 |  | 77.6930524 | 57.3812876 | 75.731787 | 62.2395153 |
| 17:44:07 | 0:42:07 |  | 78.6930524 | 57.3812876 | 74.731787 | 61.2395153 |
| 17:44:08 | 0:42:08 |  | 78.6930524 | 57.3812876 | 74.731787 | 61.2395153 |
| 17:44:09 | 0:42:09 |  | 78.6930524 | 61.3812876 | 74.731787 | 60.2395153 |
| 17:44:10 | 0:42:10 |  | 77.6930524 | 63.3812876 | 73.731787 | 59.2395153 |
| 17:44:11 | 0:42:11 |  | 76.6930524 | 63.3812876 | 72.731787 | 60.2395153 |
| 17:44:12 | 0:42:12 |  | 76.6930524 | 64.3812876 | 73.731787 | 61.2395153 |
| 17:44:13 | 0:42:13 |  | 75.6930524 | 64.3812876 | 74.731787 | 61.2395153 |
| 17:44:14 | 0:42:14 |  | 75.6930524 | 64.3812876 | 74.731787 | 62.2395153 |
| 17:44:15 | 0:42:15 |  | 75.6930524 | 64.3812876 | 74.731787 | 70.2395153 |
| 17:44:16 | 0:42:16 |  | 75.6930524 | 64.3812876 | 74.731787 | 73.2395153 |
| 17:44:17 | 0:42:17 |  | 76.6930524 | 64.3812876 | 74.731787 | 77.2395153 |
| 17:44:18 | 0:42:18 |  | 76.6930524 | 64.3812876 | 75.731787 | 77.2395153 |
| 17:44:19 | 0:42:19 |  | 76.6930524 | 64.3812876 | 75.731787 | 78.2395153 |
| 17:44:20 | 0:42:20 |  | 76.6930524 | 64.3812876 | 76.731787 | 79.2395153 |
| 17:44:21 | 0:42:21 |  | 76.6930524 | 66.3812876 | 76.731787 | 81.2395153 |
| 17:44:22 | 0:42:22 |  | 75.6930524 | 66.3812876 | 76.731787 | 81.2395153 |
| 17:44:23 | 0:42:23 |  | 73.6930524 | 66.3812876 | 77.731787 | 81.2395153 |
| 17:44:24 | 0:42:24 |  | 73.6930524 | 66.3812876 | 79.731787 | 81.2395153 |
| 17:44:25 | 0:42:25 |  | 72.6930524 | 66.3812876 | 79.731787 | 81.2395153 |
| 17:44:26 | 0:42:26 |  | 72.6930524 | 67.3812876 | 78.731787 | 82.2395153 |
| 17:44:27 | 0:42:27 |  | 72.6930524 | 67.3812876 | 78.731787 | 82.2395153 |
| 17:44:28 | 0:42:28 |  | 71.6930524 | 66.3812876 | 79.731787 | 83.2395153 |
| 17:44:29 | 0:42:29 |  | 71.6930524 | 65.3812876 | 79.731787 | 84.2395153 |
| 17:44:30 | 0:42:30 |  | 71.6930524 | 64.3812876 | 79.731787 | 86.2395153 |
| 17:44:31 | 0:42:31 |  | 71.6930524 | 64.3812876 | 78.731787 | 86.2395153 |
| 17:44:32 | 0:42:32 |  | 71.6930524 | 62.3812876 | 78.731787 | 86.2395153 |
| 17:44:33 | 0:42:33 |  | 71.6930524 | 62.3812876 | 78.731787 | 86.2395153 |
| 17:44:34 | 0:42:34 |  | 71.6930524 | 62.3812876 | 79.731787 | 86.2395153 |
| 17:44:35 | 0:42:35 |  | 71.6930524 | 62.3812876 | 80.731787 | 86.2395153 |
| 17:44:36 | 0:42:36 |  | 71.6930524 | 62.3812876 | 80.731787 | 86.2395153 |
| 17:44:37 | 0:42:37 |  | 71.6930524 | 63.3812876 | 78.731787 | 83.2395153 |
| 17:44:38 | 0:42:38 |  | 69.6930524 | 63.3812876 | 77.731787 | 82.2395153 |
| 17:44:39 | 0:42:39 |  | 69.6930524 | 63.3812876 | 76.731787 | 82.2395153 |
| 17:44:40 | 0:42:40 |  | 69.6930524 | 63.3812876 | 76.731787 | 81.2395153 |
| 17:44:41 | 0:42:41 |  | 69.6930524 | 63.3812876 | 76.731787 | 81.2395153 |
| 17:44:42 | 0:42:42 |  | 69.6930524 | 63.3812876 | 76.731787 | 81.2395153 |

|          |         |  |            |            |           |            |
|----------|---------|--|------------|------------|-----------|------------|
| 17:44:43 | 0:42:43 |  | 71.6930524 | 65.3812876 | 77.731787 | 77.2395153 |
| 17:44:44 | 0:42:44 |  | 72.6930524 | 65.3812876 | 77.731787 | 77.2395153 |
| 17:44:45 | 0:42:45 |  | 73.6930524 | 69.3812876 | 76.731787 | 81.2395153 |
| 17:44:46 | 0:42:46 |  | 73.6930524 | 73.3812876 | 76.731787 | 82.2395153 |
| 17:44:47 | 0:42:47 |  | 74.6930524 | 73.3812876 | 75.731787 | 83.2395153 |
| 17:44:48 | 0:42:48 |  | 74.6930524 | 72.3812876 | 75.731787 | 83.2395153 |
| 17:44:49 | 0:42:49 |  | 74.6930524 | 72.3812876 | 74.731787 | 83.2395153 |
| 17:44:50 | 0:42:50 |  | 74.6930524 | 72.3812876 | 74.731787 | 83.2395153 |
| 17:44:51 | 0:42:51 |  | 74.6930524 | 72.3812876 | 71.731787 | 81.2395153 |
| 17:44:52 | 0:42:52 |  | 75.6930524 | 72.3812876 | 71.731787 | 79.2395153 |
| 17:44:53 | 0:42:53 |  | 75.6930524 | 70.3812876 | 71.731787 | 79.2395153 |
| 17:44:54 | 0:42:54 |  | 74.6930524 | 70.3812876 | 71.731787 | 78.2395153 |
| 17:44:55 | 0:42:55 |  | 74.6930524 | 69.3812876 | 72.731787 | 78.2395153 |
| 17:44:56 | 0:42:56 |  | 74.6930524 | 70.3812876 | 73.731787 | 78.2395153 |
| 17:44:57 | 0:42:57 |  | 74.6930524 | 70.3812876 | 74.731787 | 78.2395153 |
| 17:44:58 | 0:42:58 |  | 74.6930524 | 70.3812876 | 74.731787 | 78.2395153 |
| 17:44:59 | 0:42:59 |  | 74.6930524 | 71.3812876 | 76.731787 | 77.2395153 |
| 17:45:00 | 0:43:00 |  | 75.6930524 | 69.3812876 | 75.731787 | 78.2395153 |
| 17:45:01 | 0:43:01 |  | 75.6930524 | 68.3812876 | 74.731787 | 78.2395153 |
| 17:45:02 | 0:43:02 |  | 75.6930524 | 68.3812876 | 73.731787 | 78.2395153 |
| 17:45:03 | 0:43:03 |  | 75.6930524 | 67.3812876 | 72.731787 | 78.2395153 |
| 17:45:04 | 0:43:04 |  | 75.6930524 | 66.3812876 | 72.731787 | 77.2395153 |
| 17:45:05 | 0:43:05 |  | 77.6930524 | 66.3812876 | 72.731787 | 77.2395153 |
| 17:45:06 | 0:43:06 |  | 77.6930524 | 65.3812876 | 72.731787 | 77.2395153 |
| 17:45:07 | 0:43:07 |  | 77.6930524 | 65.3812876 | 72.731787 | 77.2395153 |
| 17:45:08 | 0:43:08 |  | 77.6930524 | 66.3812876 | 72.731787 | 77.2395153 |
| 17:45:09 | 0:43:09 |  | 77.6930524 | 66.3812876 | 71.731787 | 77.2395153 |
| 17:45:10 | 0:43:10 |  | 77.6930524 | 67.3812876 | 71.731787 | 77.2395153 |
| 17:45:11 | 0:43:11 |  | 76.6930524 | 67.3812876 | 71.731787 | 77.2395153 |
| 17:45:12 | 0:43:12 |  | 76.6930524 | 67.3812876 | 71.731787 | 77.2395153 |
| 17:45:13 | 0:43:13 |  | 77.6930524 | 67.3812876 | 70.731787 | 77.2395153 |
| 17:45:14 | 0:43:14 |  | 78.6930524 | 67.3812876 | 70.731787 | 77.2395153 |
| 17:45:15 | 0:43:15 |  | 77.6930524 | 68.3812876 | 71.731787 | 77.2395153 |
| 17:45:16 | 0:43:16 |  | 75.6930524 | 68.3812876 | 72.731787 | 77.2395153 |
| 17:45:17 | 0:43:17 |  | 75.6930524 | 75.3812876 | 72.731787 | 74.2395153 |
| 17:45:18 | 0:43:18 |  | 74.6930524 | 74.3812876 | 72.731787 | 72.2395153 |
| 17:45:19 | 0:43:19 |  | 74.6930524 | 73.3812876 | 72.731787 | 71.2395153 |
| 17:45:20 | 0:43:20 |  | 73.6930524 | 73.3812876 | 75.731787 | 70.2395153 |
| 17:45:21 | 0:43:21 |  | 73.6930524 | 73.3812876 | 79.731787 | 69.2395153 |
| 17:45:22 | 0:43:22 |  | 73.6930524 | 73.3812876 | 79.731787 | 69.2395153 |
| 17:45:23 | 0:43:23 |  | 74.6930524 | 73.3812876 | 79.731787 | 68.2395153 |
| 17:45:24 | 0:43:24 |  | 74.6930524 | 71.3812876 | 78.731787 | 68.2395153 |
| 17:45:25 | 0:43:25 |  | 74.6930524 | 70.3812876 | 76.731787 | 68.2395153 |
| 17:45:26 | 0:43:26 |  | 73.6930524 | 69.3812876 | 76.731787 | 68.2395153 |
| 17:45:27 | 0:43:27 |  | 74.6930524 | 69.3812876 | 76.731787 | 66.2395153 |

|          |         |  |            |            |           |            |
|----------|---------|--|------------|------------|-----------|------------|
| 17:45:28 | 0:43:28 |  | 74.6930524 | 69.3812876 | 76.731787 | 66.2395153 |
| 17:45:29 | 0:43:29 |  | 73.6930524 | 70.3812876 | 76.731787 | 66.2395153 |
| 17:45:30 | 0:43:30 |  | 73.6930524 | 70.3812876 | 76.731787 | 66.2395153 |
| 17:45:31 | 0:43:31 |  | 72.6930524 | 71.3812876 | 76.731787 | 66.2395153 |
| 17:45:32 | 0:43:32 |  | 71.6930524 | 71.3812876 | 77.731787 | 65.2395153 |
| 17:45:33 | 0:43:33 |  | 71.6930524 | 72.3812876 | 78.731787 | 66.2395153 |
| 17:45:34 | 0:43:34 |  | 70.6930524 | 72.3812876 | 78.731787 | 67.2395153 |
| 17:45:35 | 0:43:35 |  | 70.6930524 | 73.3812876 | 78.731787 | 68.2395153 |
| 17:45:36 | 0:43:36 |  | 70.6930524 | 73.3812876 | 78.731787 | 68.2395153 |
| 17:45:37 | 0:43:37 |  | 71.6930524 | 72.3812876 | 75.731787 | 68.2395153 |
| 17:45:38 | 0:43:38 |  | 71.6930524 | 71.3812876 | 73.731787 | 70.2395153 |
| 17:45:39 | 0:43:39 |  | 72.6930524 | 70.3812876 | 73.731787 | 71.2395153 |
| 17:45:40 | 0:43:40 |  | 72.6930524 | 71.3812876 | 73.731787 | 71.2395153 |
| 17:45:41 | 0:43:41 |  | 72.6930524 | 71.3812876 | 74.731787 | 71.2395153 |
| 17:45:42 | 0:43:42 |  | 73.6930524 | 71.3812876 | 76.731787 | 71.2395153 |
| 17:45:43 | 0:43:43 |  | 73.6930524 | 71.3812876 | 77.731787 | 71.2395153 |
| 17:45:44 | 0:43:44 |  | 73.6930524 | 71.3812876 | 77.731787 | 71.2395153 |
| 17:45:45 | 0:43:45 |  | 73.6930524 | 71.3812876 | 77.731787 | 71.2395153 |
| 17:45:46 | 0:43:46 |  | 73.6930524 | 71.3812876 | 77.731787 | 71.2395153 |
| 17:45:47 | 0:43:47 |  | 73.6930524 | 73.3812876 | 76.731787 | 71.2395153 |
| 17:45:48 | 0:43:48 |  | 73.6930524 | 78.3812876 | 76.731787 | 71.2395153 |
| 17:45:49 | 0:43:49 |  | 72.6930524 | 78.3812876 | 77.731787 | 71.2395153 |
| 17:45:50 | 0:43:50 |  | 72.6930524 | 79.3812876 | 77.731787 | 72.2395153 |
| 17:45:51 | 0:43:51 |  | 72.6930524 | 79.3812876 | 78.731787 | 72.2395153 |
| 17:45:52 | 0:43:52 |  | 72.6930524 | 79.3812876 | 78.731787 | 72.2395153 |
| 17:45:53 | 0:43:53 |  | 72.6930524 | 80.3812876 | 78.731787 | 72.2395153 |
| 17:45:54 | 0:43:54 |  | 72.6930524 | 80.3812876 | 78.731787 | 71.2395153 |
| 17:45:55 | 0:43:55 |  | 74.6930524 | 80.3812876 | 82.731787 | 72.2395153 |
| 17:45:56 | 0:43:56 |  | 74.6930524 | 80.3812876 | 83.731787 | 72.2395153 |
| 17:45:57 | 0:43:57 |  | 74.6930524 | 80.3812876 | 83.731787 | 72.2395153 |
| 17:45:58 | 0:43:58 |  | 74.6930524 | 78.3812876 | 83.731787 | 75.2395153 |
| 17:45:59 | 0:43:59 |  | 74.6930524 | 77.3812876 | 83.731787 | 75.2395153 |
| 17:46:00 | 0:44:00 |  | 74.6930524 | 73.3812876 | 83.731787 | 73.2395153 |
| 17:46:01 | 0:44:01 |  | 73.6930524 | 70.3812876 | 84.731787 | 70.2395153 |
| 17:46:02 | 0:44:02 |  | 73.6930524 | 69.3812876 | 86.731787 | 69.2395153 |
| 17:46:03 | 0:44:03 |  | 72.6930524 | 69.3812876 | 85.731787 | 69.2395153 |
| 17:46:04 | 0:44:04 |  | 72.6930524 | 70.3812876 | 83.731787 | 68.2395153 |
| 17:46:05 | 0:44:05 |  | 72.6930524 | 71.3812876 | 81.731787 | 68.2395153 |
| 17:46:06 | 0:44:06 |  | 72.6930524 | 72.3812876 | 79.731787 | 67.2395153 |
| 17:46:07 | 0:44:07 |  | 73.6930524 | 73.3812876 | 79.731787 | 64.2395153 |
| 17:46:08 | 0:44:08 |  | 73.6930524 | 73.3812876 | 79.731787 | 63.2395153 |
| 17:46:09 | 0:44:09 |  | 75.6930524 | 73.3812876 | 78.731787 | 63.2395153 |
| 17:46:10 | 0:44:10 |  | 75.6930524 | 73.3812876 | 77.731787 | 63.2395153 |
| 17:46:11 | 0:44:11 |  | 75.6930524 | 73.3812876 | 75.731787 | 63.2395153 |
| 17:46:12 | 0:44:12 |  | 74.6930524 | 74.3812876 | 75.731787 | 63.2395153 |

|          |         |  |            |            |           |            |
|----------|---------|--|------------|------------|-----------|------------|
| 17:46:13 | 0:44:13 |  | 74.6930524 | 74.3812876 | 74.731787 | 63.2395153 |
| 17:46:14 | 0:44:14 |  | 74.6930524 | 73.3812876 | 73.731787 | 64.2395153 |
| 17:46:15 | 0:44:15 |  | 69.6930524 | 71.3812876 | 73.731787 | 65.2395153 |
| 17:46:16 | 0:44:16 |  | 68.6930524 | 71.3812876 | 74.731787 | 65.2395153 |
| 17:46:17 | 0:44:17 |  | 68.6930524 | 70.3812876 | 75.731787 | 66.2395153 |
| 17:46:18 | 0:44:18 |  | 68.6930524 | 70.3812876 | 74.731787 | 67.2395153 |
| 17:46:19 | 0:44:19 |  | 68.6930524 | 67.3812876 | 74.731787 | 69.2395153 |
| 17:46:20 | 0:44:20 |  | 68.6930524 | 67.3812876 | 74.731787 | 69.2395153 |
| 17:46:21 | 0:44:21 |  | 67.6930524 | 70.3812876 | 74.731787 | 69.2395153 |
| 17:46:22 | 0:44:22 |  | 67.6930524 | 71.3812876 | 74.731787 | 70.2395153 |
| 17:46:23 | 0:44:23 |  | 68.6930524 | 72.3812876 | 74.731787 | 70.2395153 |
| 17:46:24 | 0:44:24 |  | 69.6930524 | 72.3812876 | 74.731787 | 70.2395153 |
| 17:46:25 | 0:44:25 |  | 72.6930524 | 72.3812876 | 74.731787 | 71.2395153 |
| 17:46:26 | 0:44:26 |  | 72.6930524 | 72.3812876 | 74.731787 | 71.2395153 |
| 17:46:27 | 0:44:27 |  | 72.6930524 | 73.3812876 | 74.731787 | 71.2395153 |
| 17:46:28 | 0:44:28 |  | 72.6930524 | 75.3812876 | 74.731787 | 71.2395153 |
| 17:46:29 | 0:44:29 |  | 73.6930524 | 75.3812876 | 74.731787 | 71.2395153 |
| 17:46:30 | 0:44:30 |  | 73.6930524 | 75.3812876 | 74.731787 | 71.2395153 |
| 17:46:31 | 0:44:31 |  | 75.6930524 | 74.3812876 | 76.731787 | 73.2395153 |
| 17:46:32 | 0:44:32 |  | 75.6930524 | 75.3812876 | 76.731787 | 73.2395153 |
| 17:46:33 | 0:44:33 |  | 75.6930524 | 75.3812876 | 76.731787 | 74.2395153 |
| 17:46:34 | 0:44:34 |  | 77.6930524 | 75.3812876 | 76.731787 | 74.2395153 |
| 17:46:35 | 0:44:35 |  | 78.6930524 | 74.3812876 | 76.731787 | 73.2395153 |
| 17:46:36 | 0:44:36 |  | 78.6930524 | 74.3812876 | 76.731787 | 73.2395153 |
| 17:46:37 | 0:44:37 |  | 78.6930524 | 74.3812876 | 77.731787 | 71.2395153 |
| 17:46:38 | 0:44:38 |  | 78.6930524 | 74.3812876 | 77.731787 | 68.2395153 |
| 17:46:39 | 0:44:39 |  | 78.6930524 | 76.3812876 | 79.731787 | 67.2395153 |
| 17:46:40 | 0:44:40 |  | 79.6930524 | 78.3812876 | 81.731787 | 67.2395153 |
| 17:46:41 | 0:44:41 |  | 79.6930524 | 78.3812876 | 81.731787 | 64.2395153 |
| 17:46:42 | 0:44:42 |  | 79.6930524 | 79.3812876 | 80.731787 | 64.2395153 |
| 17:46:43 | 0:44:43 |  | 79.6930524 | 80.3812876 | 74.731787 | 66.2395153 |
| 17:46:44 | 0:44:44 |  | 79.6930524 | 80.3812876 | 73.731787 | 68.2395153 |
| 17:46:45 | 0:44:45 |  | 77.6930524 | 80.3812876 | 72.731787 | 69.2395153 |
| 17:46:46 | 0:44:46 |  | 75.6930524 | 79.3812876 | 73.731787 | 69.2395153 |
| 17:46:47 | 0:44:47 |  | 74.6930524 | 77.3812876 | 73.731787 | 70.2395153 |
| 17:46:48 | 0:44:48 |  | 73.6930524 | 75.3812876 | 74.731787 | 71.2395153 |
| 17:46:49 | 0:44:49 |  | 73.6930524 | 75.3812876 | 74.731787 | 71.2395153 |
| 17:46:50 | 0:44:50 |  | 71.6930524 | 71.3812876 | 74.731787 | 70.2395153 |
| 17:46:51 | 0:44:51 |  | 71.6930524 | 70.3812876 | 75.731787 | 70.2395153 |
| 17:46:52 | 0:44:52 |  | 71.6930524 | 68.3812876 | 74.731787 | 70.2395153 |
| 17:46:53 | 0:44:53 |  | 72.6930524 | 68.3812876 | 73.731787 | 70.2395153 |
| 17:46:54 | 0:44:54 |  | 73.6930524 | 68.3812876 | 73.731787 | 70.2395153 |
| 17:46:55 | 0:44:55 |  | 74.6930524 | 69.3812876 | 73.731787 | 72.2395153 |
| 17:46:56 | 0:44:56 |  | 75.6930524 | 69.3812876 | 73.731787 | 74.2395153 |
| 17:46:57 | 0:44:57 |  | 75.6930524 | 72.3812876 | 73.731787 | 75.2395153 |



|          |         |  |            |            |           |            |
|----------|---------|--|------------|------------|-----------|------------|
| 17:46:58 | 0:44:58 |  | 75.6930524 | 76.3812876 | 73.731787 | 78.2395153 |
| 17:46:59 | 0:44:59 |  | 75.6930524 | 77.3812876 | 74.731787 | 79.2395153 |
| 17:47:00 | 0:45:00 |  | 75.6930524 | 77.3812876 | 75.731787 | 79.2395153 |
| 17:47:01 | 0:45:01 |  | 75.6930524 | 78.3812876 | 76.731787 | 78.2395153 |
| 17:47:02 | 0:45:02 |  | 74.6930524 | 78.3812876 | 76.731787 | 78.2395153 |
| 17:47:03 | 0:45:03 |  | 74.6930524 | 79.3812876 | 76.731787 | 77.2395153 |
| 17:47:04 | 0:45:04 |  | 73.6930524 | 83.3812876 | 76.731787 | 77.2395153 |
| 17:47:05 | 0:45:05 |  | 73.6930524 | 83.3812876 | 76.731787 | 77.2395153 |
| 17:47:06 | 0:45:06 |  | 72.6930524 | 84.3812876 | 75.731787 | 77.2395153 |
| 17:47:07 | 0:45:07 |  | 72.6930524 | 85.3812876 | 75.731787 | 78.2395153 |
| 17:47:08 | 0:45:08 |  | 72.6930524 | 86.3812876 | 76.731787 | 80.2395153 |
| 17:47:09 | 0:45:09 |  | 72.6930524 | 86.3812876 | 76.731787 | 80.2395153 |
| 17:47:10 | 0:45:10 |  | 72.6930524 | 86.3812876 | 76.731787 | 80.2395153 |
| 17:47:11 | 0:45:11 |  | 72.6930524 | 87.3812876 | 76.731787 | 80.2395153 |
| 17:47:12 | 0:45:12 |  | 72.6930524 | 88.3812876 | 76.731787 | 80.2395153 |
| 17:47:13 | 0:45:13 |  | 73.6930524 | 80.3812876 | 77.731787 | 79.2395153 |
| 17:47:14 | 0:45:14 |  | 73.6930524 | 79.3812876 | 79.731787 | 78.2395153 |
| 17:47:15 | 0:45:15 |  | 74.6930524 | 79.3812876 | 80.731787 | 79.2395153 |
| 17:47:16 | 0:45:16 |  | 74.6930524 | 79.3812876 | 79.731787 | 79.2395153 |
| 17:47:17 | 0:45:17 |  | 74.6930524 | 78.3812876 | 77.731787 | 78.2395153 |
| 17:47:18 | 0:45:18 |  | 73.6930524 | 78.3812876 | 74.731787 | 78.2395153 |
| 17:47:19 | 0:45:19 |  | 73.6930524 | 78.3812876 | 73.731787 | 77.2395153 |
| 17:47:20 | 0:45:20 |  | 73.6930524 | 78.3812876 | 72.731787 | 77.2395153 |
| 17:47:21 | 0:45:21 |  | 73.6930524 | 78.3812876 | 72.731787 | 77.2395153 |
| 17:47:22 | 0:45:22 |  | 73.6930524 | 78.3812876 | 72.731787 | 77.2395153 |
| 17:47:23 | 0:45:23 |  | 72.6930524 | 78.3812876 | 74.731787 | 78.2395153 |
| 17:47:24 | 0:45:24 |  | 72.6930524 | 78.3812876 | 74.731787 | 78.2395153 |
| 17:47:25 | 0:45:25 |  | 72.6930524 | 78.3812876 | 75.731787 | 75.2395153 |
| 17:47:26 | 0:45:26 |  | 72.6930524 | 77.3812876 | 76.731787 | 75.2395153 |
| 17:47:27 | 0:45:27 |  | 72.6930524 | 77.3812876 | 76.731787 | 75.2395153 |
| 17:47:28 | 0:45:28 |  | 72.6930524 | 77.3812876 | 76.731787 | 75.2395153 |
| 17:47:29 | 0:45:29 |  | 72.6930524 | 77.3812876 | 76.731787 | 75.2395153 |
| 17:47:30 | 0:45:30 |  | 74.6930524 | 77.3812876 | 75.731787 | 74.2395153 |
| 17:47:31 | 0:45:31 |  | 77.6930524 | 77.3812876 | 75.731787 | 73.2395153 |
| 17:47:32 | 0:45:32 |  | 82.6930524 | 77.3812876 | 75.731787 | 72.2395153 |
| 17:47:33 | 0:45:33 |  | 82.6930524 | 77.3812876 | 76.731787 | 72.2395153 |
| 17:47:34 | 0:45:34 |  | 79.6930524 | 78.3812876 | 77.731787 | 69.2395153 |
| 17:47:35 | 0:45:35 |  | 78.6930524 | 78.3812876 | 77.731787 | 69.2395153 |
| 17:47:36 | 0:45:36 |  | 78.6930524 | 77.3812876 | 76.731787 | 68.2395153 |
| 17:47:37 | 0:45:37 |  | 76.6930524 | 77.3812876 | 76.731787 | 68.2395153 |
| 17:47:38 | 0:45:38 |  | 76.6930524 | 77.3812876 | 76.731787 | 68.2395153 |
| 17:47:39 | 0:45:39 |  | 75.6930524 | 78.3812876 | 76.731787 | 68.2395153 |
| 17:47:40 | 0:45:40 |  | 75.6930524 | 78.3812876 | 76.731787 | 68.2395153 |
| 17:47:41 | 0:45:41 |  | 75.6930524 | 78.3812876 | 76.731787 | 68.2395153 |
| 17:47:42 | 0:45:42 |  | 75.6930524 | 78.3812876 | 76.731787 | 66.2395153 |

|          |         |  |            |            |           |            |
|----------|---------|--|------------|------------|-----------|------------|
| 17:47:43 | 0:45:43 |  | 74.6930524 | 78.3812876 | 75.731787 | 66.2395153 |
| 17:47:44 | 0:45:44 |  | 74.6930524 | 78.3812876 | 75.731787 | 65.2395153 |
| 17:47:45 | 0:45:45 |  | 74.6930524 | 80.3812876 | 74.731787 | 66.2395153 |
| 17:47:46 | 0:45:46 |  | 73.6930524 | 80.3812876 | 74.731787 | 65.2395153 |
| 17:47:47 | 0:45:47 |  | 73.6930524 | 81.3812876 | 74.731787 | 65.2395153 |
| 17:47:48 | 0:45:48 |  | 73.6930524 | 81.3812876 | 74.731787 | 65.2395153 |
| 17:47:49 | 0:45:49 |  | 73.6930524 | 81.3812876 | 75.731787 | 65.2395153 |
| 17:47:50 | 0:45:50 |  | 73.6930524 | 81.3812876 | 75.731787 | 63.2395153 |
| 17:47:51 | 0:45:51 |  | 73.6930524 | 81.3812876 | 75.731787 | 61.2395153 |
| 17:47:52 | 0:45:52 |  | 74.6930524 | 81.3812876 | 76.731787 | 61.2395153 |
| 17:47:53 | 0:45:53 |  | 74.6930524 | 81.3812876 | 76.731787 | 58.2395153 |
| 17:47:54 | 0:45:54 |  | 73.6930524 | 80.3812876 | 76.731787 | 56.2395153 |
| 17:47:55 | 0:45:55 |  | 73.6930524 | 79.3812876 | 77.731787 | 55.2395153 |
| 17:47:56 | 0:45:56 |  | 73.6930524 | 79.3812876 | 77.731787 | 55.2395153 |
| 17:47:57 | 0:45:57 |  | 73.6930524 | 78.3812876 | 77.731787 | 55.2395153 |
| 17:47:58 | 0:45:58 |  | 73.6930524 | 78.3812876 | 77.731787 | 54.2395153 |
| 17:47:59 | 0:45:59 |  | 73.6930524 | 75.3812876 | 77.731787 | 54.2395153 |
| 17:48:00 | 0:46:00 |  | 74.6930524 | 74.3812876 | 77.731787 | 53.2395153 |
| 17:48:01 | 0:46:01 |  | 74.6930524 | 74.3812876 | 77.731787 | 53.2395153 |
| 17:48:02 | 0:46:02 |  | 74.6930524 | 74.3812876 | 77.731787 | 53.2395153 |
| 17:48:03 | 0:46:03 |  | 74.6930524 | 75.3812876 | 77.731787 | 53.2395153 |
| 17:48:04 | 0:46:04 |  | 74.6930524 | 75.3812876 | 77.731787 | 53.2395153 |
| 17:48:05 | 0:46:05 |  | 74.6930524 | 73.3812876 | 77.731787 | 54.2395153 |
| 17:48:06 | 0:46:06 |  | 74.6930524 | 73.3812876 | 78.731787 | 54.2395153 |
| 17:48:07 | 0:46:07 |  | 74.6930524 | 72.3812876 | 78.731787 | 55.2395153 |
| 17:48:08 | 0:46:08 |  | 74.6930524 | 71.3812876 | 79.731787 | 55.2395153 |
| 17:48:09 | 0:46:09 |  | 75.6930524 | 71.3812876 | 79.731787 | 55.2395153 |
| 17:48:10 | 0:46:10 |  | 75.6930524 | 71.3812876 | 78.731787 | 55.2395153 |
| 17:48:11 | 0:46:11 |  | 76.6930524 | 74.3812876 | 78.731787 | 56.2395153 |
| 17:48:12 | 0:46:12 |  | 77.6930524 | 75.3812876 | 78.731787 | 57.2395153 |
| 17:48:13 | 0:46:13 |  | 78.6930524 | 74.3812876 | 78.731787 | 58.2395153 |
| 17:48:14 | 0:46:14 |  | 78.6930524 | 72.3812876 | 78.731787 | 59.2395153 |
| 17:48:15 | 0:46:15 |  | 77.6930524 | 72.3812876 | 78.731787 | 59.2395153 |
| 17:48:16 | 0:46:16 |  | 77.6930524 | 71.3812876 | 78.731787 | 60.2395153 |
| 17:48:17 | 0:46:17 |  | 77.6930524 | 72.3812876 | 78.731787 | 60.2395153 |
| 17:48:18 | 0:46:18 |  | 77.6930524 | 72.3812876 | 78.731787 | 60.2395153 |
| 17:48:19 | 0:46:19 |  | 77.6930524 | 72.3812876 | 78.731787 | 68.2395153 |
| 17:48:20 | 0:46:20 |  | 78.6930524 | 73.3812876 | 80.731787 | 68.2395153 |
| 17:48:21 | 0:46:21 |  | 78.6930524 | 73.3812876 | 81.731787 | 72.2395153 |
| 17:48:22 | 0:46:22 |  | 78.6930524 | 73.3812876 | 80.731787 | 73.2395153 |
| 17:48:23 | 0:46:23 |  | 77.6930524 | 74.3812876 | 80.731787 | 75.2395153 |
| 17:48:24 | 0:46:24 |  | 76.6930524 | 74.3812876 | 80.731787 | 76.2395153 |
| 17:48:25 | 0:46:25 |  | 76.6930524 | 74.3812876 | 80.731787 | 77.2395153 |
| 17:48:26 | 0:46:26 |  | 75.6930524 | 73.3812876 | 81.731787 | 78.2395153 |
| 17:48:27 | 0:46:27 |  | 74.6930524 | 73.3812876 | 81.731787 | 78.2395153 |

|          |         |    |            |            |           |            |
|----------|---------|----|------------|------------|-----------|------------|
| 17:48:28 | 0:46:28 |    | 74.6930524 | 71.3812876 | 81.731787 | 79.2395153 |
| 17:48:29 | 0:46:29 |    | 74.6930524 | 71.3812876 | 81.731787 | 80.2395153 |
| 17:48:30 | 0:46:30 |    | 74.6930524 | 71.3812876 | 83.731787 | 80.2395153 |
| 17:48:31 | 0:46:31 |    | 74.6930524 | 72.3812876 | 83.731787 | 80.2395153 |
| 17:48:32 | 0:46:32 |    | 74.6930524 | 72.3812876 | 82.731787 | 80.2395153 |
| 17:48:33 | 0:46:33 |    | 74.6930524 | 72.3812876 | 82.731787 | 80.2395153 |
| 17:48:34 | 0:46:34 |    | 74.6930524 | 71.3812876 | 82.731787 | 80.2395153 |
| 17:48:35 | 0:46:35 |    | 74.6930524 | 71.3812876 | 82.731787 | 80.2395153 |
| 17:48:36 | 0:46:36 |    | 74.6930524 | 71.3812876 | 82.731787 | 85.2395153 |
| 17:48:37 | 0:46:37 |    | 75.6930524 | 71.3812876 | 82.731787 | 85.2395153 |
| 17:48:38 | 0:46:38 |    | 75.6930524 | 71.3812876 | 82.731787 | 85.2395153 |
| 17:48:39 | 0:46:39 |    | 75.6930524 | 71.3812876 | 79.731787 | 86.2395153 |
| 17:48:40 | 0:46:40 |    | 75.6930524 | 71.3812876 | 79.731787 | 86.2395153 |
| 17:48:41 | 0:46:41 |    | 76.6930524 | 72.3812876 | 79.731787 | 86.2395153 |
| 17:48:42 | 0:46:42 |    | 77.6930524 | 72.3812876 | 77.731787 | 86.2395153 |
| 17:48:43 | 0:46:43 |    | 78.6930524 | 72.3812876 | 76.731787 | 86.2395153 |
| 17:48:44 | 0:46:44 |    | 78.6930524 | 75.3812876 | 76.731787 | 86.2395153 |
| 17:48:45 | 0:46:45 |    | 80.6930524 | 75.3812876 | 76.731787 | 82.2395153 |
| 17:48:46 | 0:46:46 |    | 80.6930524 | 75.3812876 | 77.731787 | 82.2395153 |
| 17:48:47 | 0:46:47 |    | 80.6930524 | 75.3812876 | 77.731787 | 82.2395153 |
| 17:48:48 | 0:46:48 |    | 79.6930524 | 75.3812876 | 78.731787 | 81.2395153 |
| 17:48:49 | 0:46:49 |    | 78.6930524 | 74.3812876 | 78.731787 | 81.2395153 |
| 17:48:50 | 0:46:50 |    | 78.6930524 | 74.3812876 | 78.731787 | 82.2395153 |
| 17:48:51 | 0:46:51 |    | 78.6930524 | 73.3812876 | 77.731787 | 82.2395153 |
| 17:48:52 | 0:46:52 |    | 77.6930524 | 73.3812876 | 77.731787 | 81.2395153 |
| 17:48:53 | 0:46:53 |    | 77.6930524 | 74.3812876 | 76.731787 | 82.2395153 |
| 17:48:54 | 0:46:54 |    | 77.6930524 | 74.3812876 | 76.731787 | 82.2395153 |
| 17:48:55 | 0:46:55 |    | 76.6930524 | 74.3812876 | 75.731787 | 82.2395153 |
| 17:48:56 | 0:46:56 |    | 76.6930524 | 74.3812876 | 75.731787 | 81.2395153 |
| 17:48:57 | 0:46:57 |    | 76.6930524 | 73.3812876 | 75.731787 | 81.2395153 |
| 17:48:58 | 0:46:58 |    | 77.6930524 | 73.3812876 | 75.731787 | 81.2395153 |
| 17:48:59 | 0:46:59 |    | 77.6930524 | 73.3812876 | 73.731787 | 81.2395153 |
| 17:49:00 | 0:47:00 |    | 77.6930524 | 73.3812876 | 72.731787 | 82.2395153 |
| 17:49:01 | 0:47:01 | 1  | 77.6930524 | 73.3812876 | 71.731787 | 82.2395153 |
| 17:49:02 | 0:47:02 | 2  | 77.6930524 | 73.3812876 | 71.731787 | 81.2395153 |
| 17:49:03 | 0:47:03 | 3  | 77.6930524 | 73.3812876 | 71.731787 | 81.2395153 |
| 17:49:04 | 0:47:04 | 4  | 76.6930524 | 73.3812876 | 71.731787 | 81.2395153 |
| 17:49:05 | 0:47:05 | 5  | 74.6930524 | 73.3812876 | 71.731787 | 82.2395153 |
| 17:49:06 | 0:47:06 | 6  | 73.6930524 | 72.3812876 | 71.731787 | 82.2395153 |
| 17:49:07 | 0:47:07 | 7  | 70.6930524 | 72.3812876 | 72.731787 | 82.2395153 |
| 17:49:08 | 0:47:08 | 8  | 70.6930524 | 72.3812876 | 73.731787 | 82.2395153 |
| 17:49:09 | 0:47:09 | 9  | 71.6930524 | 72.3812876 | 72.731787 | 81.2395153 |
| 17:49:10 | 0:47:10 | 10 | 72.6930524 | 72.3812876 | 72.731787 | 81.2395153 |
| 17:49:11 | 0:47:11 | 11 | 72.6930524 | 72.3812876 | 72.731787 | 81.2395153 |
| 17:49:12 | 0:47:12 | 12 | 72.6930524 | 72.3812876 | 72.731787 | 81.2395153 |

|          |         |    |            |            |           |            |
|----------|---------|----|------------|------------|-----------|------------|
| 17:49:13 | 0:47:13 | 13 | 74.6930524 | 72.3812876 | 73.731787 | 82.2395153 |
| 17:49:14 | 0:47:14 | 14 | 74.6930524 | 73.3812876 | 73.731787 | 82.2395153 |
| 17:49:15 | 0:47:15 | 15 | 74.6930524 | 73.3812876 | 73.731787 | 82.2395153 |
| 17:49:16 | 0:47:16 | 16 | 75.6930524 | 73.3812876 | 73.731787 | 83.2395153 |
| 17:49:17 | 0:47:17 | 17 | 76.6930524 | 73.3812876 | 73.731787 | 83.2395153 |
| 17:49:18 | 0:47:18 | 18 | 75.6930524 | 74.3812876 | 73.731787 | 85.2395153 |
| 17:49:19 | 0:47:19 | 19 | 75.6930524 | 74.3812876 | 73.731787 | 85.2395153 |
| 17:49:20 | 0:47:20 | 20 | 74.6930524 | 74.3812876 | 73.731787 | 86.2395153 |
| 17:49:21 | 0:47:21 | 21 | 74.6930524 | 74.3812876 | 72.731787 | 86.2395153 |
| 17:49:22 | 0:47:22 | 22 | 73.6930524 | 73.3812876 | 72.731787 | 85.2395153 |
| 17:49:23 | 0:47:23 | 23 | 73.6930524 | 72.3812876 | 72.731787 | 85.2395153 |
| 17:49:24 | 0:47:24 | 24 | 72.6930524 | 72.3812876 | 73.731787 | 84.2395153 |
| 17:49:25 | 0:47:25 | 25 | 72.6930524 | 72.3812876 | 74.731787 | 81.2395153 |
| 17:49:26 | 0:47:26 | 26 | 71.6930524 | 73.3812876 | 75.731787 | 79.2395153 |
| 17:49:27 | 0:47:27 | 27 | 71.6930524 | 73.3812876 | 75.731787 | 79.2395153 |
| 17:49:28 | 0:47:28 | 28 | 71.6930524 | 74.3812876 | 75.731787 | 79.2395153 |
| 17:49:29 | 0:47:29 | 29 | 72.6930524 | 74.3812876 | 76.731787 | 78.2395153 |
| 17:49:30 | 0:47:30 | 30 | 73.6930524 | 77.3812876 | 76.731787 | 78.2395153 |
| 17:49:31 | 0:47:31 | 31 | 73.6930524 | 77.3812876 | 76.731787 | 78.2395153 |
| 17:49:32 | 0:47:32 | 32 | 73.6930524 | 77.3812876 | 76.731787 | 78.2395153 |
| 17:49:33 | 0:47:33 | 33 | 73.6930524 | 69.3812876 | 76.731787 | 77.2395153 |
| 17:49:34 | 0:47:34 | 34 | 73.6930524 | 66.3812876 | 75.731787 | 77.2395153 |
| 17:49:35 | 0:47:35 | 35 | 74.6930524 | 66.3812876 | 75.731787 | 76.2395153 |
| 17:49:36 | 0:47:36 | 36 | 74.6930524 | 66.3812876 | 74.731787 | 76.2395153 |
| 17:49:37 | 0:47:37 | 37 | 74.6930524 | 67.3812876 | 73.731787 | 76.2395153 |
| 17:49:38 | 0:47:38 | 38 | 74.6930524 | 67.3812876 | 72.731787 | 74.2395153 |
| 17:49:39 | 0:47:39 | 39 | 74.6930524 | 69.3812876 | 72.731787 | 74.2395153 |
| 17:49:40 | 0:47:40 | 40 | 74.6930524 | 69.3812876 | 72.731787 | 74.2395153 |
| 17:49:41 | 0:47:41 | 41 | 73.6930524 | 69.3812876 | 72.731787 | 72.2395153 |
| 17:49:42 | 0:47:42 | 42 | 73.6930524 | 69.3812876 | 72.731787 | 72.2395153 |
| 17:49:43 | 0:47:43 | 43 | 73.6930524 | 69.3812876 | 72.731787 | 72.2395153 |
| 17:49:44 | 0:47:44 | 44 | 73.6930524 | 69.3812876 | 73.731787 | 72.2395153 |
| 17:49:45 | 0:47:45 | 45 | 73.6930524 | 70.3812876 | 74.731787 | 70.2395153 |
| 17:49:46 | 0:47:46 | 46 | 73.6930524 | 70.3812876 | 74.731787 | 70.2395153 |
| 17:49:47 | 0:47:47 | 47 | 73.6930524 | 71.3812876 | 74.731787 | 70.2395153 |
| 17:49:48 | 0:47:48 | 48 | 74.6930524 | 72.3812876 | 75.731787 | 72.2395153 |
| 17:49:49 | 0:47:49 | 49 | 74.6930524 | 72.3812876 | 74.731787 | 77.2395153 |
| 17:49:50 | 0:47:50 | 50 | 74.6930524 | 73.3812876 | 74.731787 | 77.2395153 |
| 17:49:51 | 0:47:51 | 51 | 74.6930524 | 73.3812876 | 72.731787 | 77.2395153 |
| 17:49:52 | 0:47:52 | 52 | 74.6930524 | 73.3812876 | 72.731787 | 77.2395153 |
| 17:49:53 | 0:47:53 | 53 | 75.6930524 | 73.3812876 | 72.731787 | 77.2395153 |
| 17:49:54 | 0:47:54 | 54 | 75.6930524 | 73.3812876 | 73.731787 | 78.2395153 |
| 17:49:55 | 0:47:55 | 55 | 75.6930524 | 73.3812876 | 73.731787 | 80.2395153 |
| 17:49:56 | 0:47:56 | 56 | 75.6930524 | 74.3812876 | 73.731787 | 80.2395153 |
| 17:49:57 | 0:47:57 | 57 | 75.6930524 | 74.3812876 | 73.731787 | 93.2395153 |

|          |         |     |            |            |           |            |
|----------|---------|-----|------------|------------|-----------|------------|
| 17:49:58 | 0:47:58 | 58  | 75.6930524 | 74.3812876 | 73.731787 | 109.239515 |
| 17:49:59 | 0:47:59 | 59  | 75.6930524 | 72.3812876 | 76.731787 | 117.239515 |
| 17:50:00 | 0:48:00 | 60  | 75.6930524 | 72.3812876 | 78.731787 | 119.239515 |
| 17:50:01 | 0:48:01 | 61  | 74.6930524 | 72.3812876 | 78.731787 | 119.239515 |
| 17:50:02 | 0:48:02 | 62  | 75.6930524 | 72.3812876 | 77.731787 | 114.239515 |
| 17:50:03 | 0:48:03 | 63  | 75.6930524 | 72.3812876 | 77.731787 | 114.239515 |
| 17:50:04 | 0:48:04 | 64  | 75.6930524 | 70.3812876 | 77.731787 | 112.239515 |
| 17:50:05 | 0:48:05 | 65  | 75.6930524 | 70.3812876 | 77.731787 | 112.239515 |
| 17:50:06 | 0:48:06 | 66  | 75.6930524 | 70.3812876 | 77.731787 | 112.239515 |
| 17:50:07 | 0:48:07 | 67  | 74.6930524 | 70.3812876 | 77.731787 | 122.239515 |
| 17:50:08 | 0:48:08 | 68  | 74.6930524 | 80.3812876 | 77.731787 | 123.239515 |
| 17:50:09 | 0:48:09 | 69  | 73.6930524 | 80.3812876 | 77.731787 | 123.239515 |
| 17:50:10 | 0:48:10 | 70  | 73.6930524 | 80.3812876 | 77.731787 | 124.239515 |
| 17:50:11 | 0:48:11 | 71  | 73.6930524 | 79.3812876 | 78.731787 | 124.239515 |
| 17:50:12 | 0:48:12 | 72  | 72.6930524 | 79.3812876 | 78.731787 | 124.239515 |
| 17:50:13 | 0:48:13 | 73  | 72.6930524 | 79.3812876 | 78.731787 | 125.239515 |
| 17:50:14 | 0:48:14 | 74  | 71.6930524 | 79.3812876 | 78.731787 | 126.239515 |
| 17:50:15 | 0:48:15 | 75  | 71.6930524 | 80.3812876 | 78.731787 | 115.239515 |
| 17:50:16 | 0:48:16 | 76  | 70.6930524 | 80.3812876 | 78.731787 | 106.239515 |
| 17:50:17 | 0:48:17 | 77  | 69.6930524 | 80.3812876 | 76.731787 | 101.239515 |
| 17:50:18 | 0:48:18 | 78  | 69.6930524 | 80.3812876 | 75.731787 | 99.2395153 |
| 17:50:19 | 0:48:19 | 79  | 68.6930524 | 82.3812876 | 75.731787 | 98.2395153 |
| 17:50:20 | 0:48:20 | 80  | 68.6930524 | 83.3812876 | 74.731787 | 98.2395153 |
| 17:50:21 | 0:48:21 | 81  | 67.6930524 | 83.3812876 | 76.731787 | 98.2395153 |
| 17:50:22 | 0:48:22 | 82  | 67.6930524 | 83.3812876 | 76.731787 | 98.2395153 |
| 17:50:23 | 0:48:23 | 83  | 67.6930524 | 83.3812876 | 76.731787 | 98.2395153 |
| 17:50:24 | 0:48:24 | 84  | 68.6930524 | 83.3812876 | 76.731787 | 93.2395153 |
| 17:50:25 | 0:48:25 | 85  | 68.6930524 | 83.3812876 | 76.731787 | 91.2395153 |
| 17:50:26 | 0:48:26 | 86  | 68.6930524 | 82.3812876 | 77.731787 | 91.2395153 |
| 17:50:27 | 0:48:27 | 87  | 69.6930524 | 82.3812876 | 76.731787 | 90.2395153 |
| 17:50:28 | 0:48:28 | 88  | 69.6930524 | 82.3812876 | 77.731787 | 90.2395153 |
| 17:50:29 | 0:48:29 | 89  | 69.6930524 | 79.3812876 | 77.731787 | 88.2395153 |
| 17:50:30 | 0:48:30 | 90  | 70.6930524 | 75.3812876 | 76.731787 | 87.2395153 |
| 17:50:31 | 0:48:31 | 91  | 70.6930524 | 70.3812876 | 76.731787 | 88.2395153 |
| 17:50:32 | 0:48:32 | 92  | 71.6930524 | 70.3812876 | 76.731787 | 88.2395153 |
| 17:50:33 | 0:48:33 | 93  | 73.6930524 | 70.3812876 | 76.731787 | 88.2395153 |
| 17:50:34 | 0:48:34 | 94  | 73.6930524 | 70.3812876 | 76.731787 | 88.2395153 |
| 17:50:35 | 0:48:35 | 95  | 74.6930524 | 68.3812876 | 76.731787 | 88.2395153 |
| 17:50:36 | 0:48:36 | 96  | 75.6930524 | 69.3812876 | 76.731787 | 89.2395153 |
| 17:50:37 | 0:48:37 | 97  | 79.6930524 | 69.3812876 | 75.731787 | 90.2395153 |
| 17:50:38 | 0:48:38 | 98  | 80.6930524 | 69.3812876 | 74.731787 | 90.2395153 |
| 17:50:39 | 0:48:39 | 99  | 80.6930524 | 71.3812876 | 74.731787 | 89.2395153 |
| 17:50:40 | 0:48:40 | 100 | 80.6930524 | 71.3812876 | 74.731787 | 89.2395153 |
| 17:50:41 | 0:48:41 | 101 | 80.6930524 | 71.3812876 | 74.731787 | 89.2395153 |
| 17:50:42 | 0:48:42 | 102 | 80.6930524 | 71.3812876 | 74.731787 | 89.2395153 |

|          |         |     |            |            |           |            |
|----------|---------|-----|------------|------------|-----------|------------|
| 17:50:43 | 0:48:43 | 103 | 80.6930524 | 71.3812876 | 75.731787 | 89.2395153 |
| 17:50:44 | 0:48:44 | 104 | 79.6930524 | 70.3812876 | 75.731787 | 89.2395153 |
| 17:50:45 | 0:48:45 | 105 | 79.6930524 | 70.3812876 | 76.731787 | 89.2395153 |
| 17:50:46 | 0:48:46 | 106 | 78.6930524 | 69.3812876 | 76.731787 | 88.2395153 |
| 17:50:47 | 0:48:47 | 107 | 78.6930524 | 69.3812876 | 77.731787 | 88.2395153 |
| 17:50:48 | 0:48:48 | 108 | 78.6930524 | 69.3812876 | 77.731787 | 88.2395153 |
| 17:50:49 | 0:48:49 | 109 | 78.6930524 | 68.3812876 | 77.731787 | 87.2395153 |
| 17:50:50 | 0:48:50 | 110 | 78.6930524 | 68.3812876 | 77.731787 | 86.2395153 |
| 17:50:51 | 0:48:51 | 111 | 78.6930524 | 68.3812876 | 77.731787 | 85.2395153 |
| 17:50:52 | 0:48:52 | 112 | 78.6930524 | 68.3812876 | 79.731787 | 85.2395153 |
| 17:50:53 | 0:48:53 | 113 | 76.6930524 | 68.3812876 | 81.731787 | 85.2395153 |
| 17:50:54 | 0:48:54 | 114 | 76.6930524 | 68.3812876 | 81.731787 | 85.2395153 |
| 17:50:55 | 0:48:55 | 115 | 76.6930524 | 68.3812876 | 83.731787 | 85.2395153 |
| 17:50:56 | 0:48:56 | 116 | 75.6930524 | 68.3812876 | 83.731787 | 86.2395153 |
| 17:50:57 | 0:48:57 | 117 | 75.6930524 | 67.3812876 | 84.731787 | 86.2395153 |
| 17:50:58 | 0:48:58 | 118 | 74.6930524 | 68.3812876 | 84.731787 | 86.2395153 |
| 17:50:59 | 0:48:59 | 119 | 74.6930524 | 67.3812876 | 83.731787 | 88.2395153 |
| 17:51:00 | 0:49:00 | 120 | 74.6930524 | 67.3812876 | 83.731787 | 88.2395153 |
| 17:51:01 | 0:49:01 | 121 | 74.6930524 | 65.3812876 | 82.731787 | 88.2395153 |
| 17:51:02 | 0:49:02 | 122 | 74.6930524 | 65.3812876 | 82.731787 | 86.2395153 |
| 17:51:03 | 0:49:03 | 123 | 74.6930524 | 65.3812876 | 81.731787 | 86.2395153 |
| 17:51:04 | 0:49:04 | 124 | 74.6930524 | 65.3812876 | 80.731787 | 86.2395153 |
| 17:51:05 | 0:49:05 | 125 | 74.6930524 | 65.3812876 | 81.731787 | 86.2395153 |
| 17:51:06 | 0:49:06 | 126 | 74.6930524 | 65.3812876 | 84.731787 | 86.2395153 |
| 17:51:07 | 0:49:07 | 127 | 74.6930524 | 66.3812876 | 88.731787 | 86.2395153 |
| 17:51:08 | 0:49:08 | 128 | 73.6930524 | 66.3812876 | 88.731787 | 86.2395153 |
| 17:51:09 | 0:49:09 | 129 | 73.6930524 | 66.3812876 | 86.731787 | 83.2395153 |
| 17:51:10 | 0:49:10 | 130 | 72.6930524 | 66.3812876 | 82.731787 | 82.2395153 |
| 17:51:11 | 0:49:11 | 131 | 72.6930524 | 66.3812876 | 79.731787 | 82.2395153 |
| 17:51:12 | 0:49:12 | 132 | 74.6930524 | 66.3812876 | 78.731787 | 81.2395153 |
| 17:51:13 | 0:49:13 | 133 | 74.6930524 | 66.3812876 | 77.731787 | 80.2395153 |
| 17:51:14 | 0:49:14 | 134 | 75.6930524 | 67.3812876 | 77.731787 | 72.2395153 |
| 17:51:15 | 0:49:15 | 135 | 75.6930524 | 67.3812876 | 78.731787 | 68.2395153 |
| 17:51:16 | 0:49:16 | 136 | 76.6930524 | 67.3812876 | 80.731787 | 67.2395153 |
| 17:51:17 | 0:49:17 | 137 | 77.6930524 | 67.3812876 | 81.731787 | 66.2395153 |
| 17:51:18 | 0:49:18 | 138 | 79.6930524 | 69.3812876 | 81.731787 | 65.2395153 |
| 17:51:19 | 0:49:19 | 139 | 80.6930524 | 68.3812876 | 81.731787 | 65.2395153 |
| 17:51:20 | 0:49:20 | 140 | 81.6930524 | 68.3812876 | 82.731787 | 66.2395153 |
| 17:51:21 | 0:49:21 | 141 | 81.6930524 | 69.3812876 | 82.731787 | 67.2395153 |
| 17:51:22 | 0:49:22 | 142 | 84.6930524 | 69.3812876 | 83.731787 | 69.2395153 |
| 17:51:23 | 0:49:23 | 143 | 87.6930524 | 70.3812876 | 85.731787 | 68.2395153 |
| 17:51:24 | 0:49:24 | 144 | 87.6930524 | 71.3812876 | 87.731787 | 68.2395153 |
| 17:51:25 | 0:49:25 | 145 | 89.6930524 | 71.3812876 | 87.731787 | 68.2395153 |
| 17:51:26 | 0:49:26 | 146 | 91.6930524 | 71.3812876 | 87.731787 | 69.2395153 |
| 17:51:27 | 0:49:27 | 147 | 92.6930524 | 71.3812876 | 88.731787 | 69.2395153 |

|          |         |     |            |            |           |            |
|----------|---------|-----|------------|------------|-----------|------------|
| 17:51:28 | 0:49:28 | 148 | 91.6930524 | 71.3812876 | 88.731787 | 69.2395153 |
| 17:51:29 | 0:49:29 | 149 | 91.6930524 | 71.3812876 | 87.731787 | 69.2395153 |
| 17:51:30 | 0:49:30 | 150 | 83.6930524 | 71.3812876 | 83.731787 | 69.2395153 |
| 17:51:31 | 0:49:31 | 151 | 78.6930524 | 73.3812876 | 83.731787 | 70.2395153 |
| 17:51:32 | 0:49:32 | 152 | 77.6930524 | 73.3812876 | 83.731787 | 70.2395153 |
| 17:51:33 | 0:49:33 | 153 | 77.6930524 | 73.3812876 | 83.731787 | 73.2395153 |
| 17:51:34 | 0:49:34 | 154 | 77.6930524 | 73.3812876 | 83.731787 | 73.2395153 |
| 17:51:35 | 0:49:35 | 155 | 77.6930524 | 73.3812876 | 83.731787 | 76.2395153 |
| 17:51:36 | 0:49:36 | 156 | 77.6930524 | 73.3812876 | 83.731787 | 76.2395153 |
| 17:51:37 | 0:49:37 | 157 | 77.6930524 | 73.3812876 | 83.731787 | 76.2395153 |
| 17:51:38 | 0:49:38 | 158 | 77.6930524 | 73.3812876 | 80.731787 | 76.2395153 |
| 17:51:39 | 0:49:39 | 159 | 77.6930524 | 73.3812876 | 77.731787 | 73.2395153 |
| 17:51:40 | 0:49:40 | 160 | 76.6930524 | 73.3812876 | 76.731787 | 72.2395153 |
| 17:51:41 | 0:49:41 | 161 | 73.6930524 | 73.3812876 | 75.731787 | 72.2395153 |
| 17:51:42 | 0:49:42 | 162 | 73.6930524 | 73.3812876 | 74.731787 | 74.2395153 |
| 17:51:43 | 0:49:43 | 163 | 73.6930524 | 72.3812876 | 73.731787 | 74.2395153 |
| 17:51:44 | 0:49:44 | 164 | 73.6930524 | 72.3812876 | 73.731787 | 75.2395153 |
| 17:51:45 | 0:49:45 | 165 | 72.6930524 | 72.3812876 | 73.731787 | 75.2395153 |
| 17:51:46 | 0:49:46 | 166 | 72.6930524 | 72.3812876 | 72.731787 | 75.2395153 |
| 17:51:47 | 0:49:47 | 167 | 72.6930524 | 72.3812876 | 72.731787 | 76.2395153 |
| 17:51:48 | 0:49:48 | 168 | 72.6930524 | 73.3812876 | 73.731787 | 76.2395153 |
| 17:51:49 | 0:49:49 | 169 | 73.6930524 | 73.3812876 | 73.731787 | 75.2395153 |
| 17:51:50 | 0:49:50 | 170 | 76.6930524 | 73.3812876 | 74.731787 | 75.2395153 |
| 17:51:51 | 0:49:51 | 171 | 76.6930524 | 73.3812876 | 74.731787 | 74.2395153 |
| 17:51:52 | 0:49:52 | 172 | 79.6930524 | 73.3812876 | 74.731787 | 74.2395153 |
| 17:51:53 | 0:49:53 | 173 | 79.6930524 | 73.3812876 | 74.731787 | 74.2395153 |
| 17:51:54 | 0:49:54 | 174 | 79.6930524 | 73.3812876 | 74.731787 | 74.2395153 |
| 17:51:55 | 0:49:55 | 175 | 78.6930524 | 74.3812876 | 75.731787 | 75.2395153 |
| 17:51:56 | 0:49:56 | 176 | 78.6930524 | 74.3812876 | 75.731787 | 75.2395153 |
| 17:51:57 | 0:49:57 | 177 | 78.6930524 | 74.3812876 | 75.731787 | 76.2395153 |
| 17:51:58 | 0:49:58 | 178 | 78.6930524 | 75.3812876 | 75.731787 | 75.2395153 |
| 17:51:59 | 0:49:59 | 179 | 77.6930524 | 75.3812876 | 74.731787 | 75.2395153 |
| 17:52:00 | 0:50:00 | 180 | 77.6930524 | 75.3812876 | 74.731787 | 75.2395153 |

| Person 8   | Person 2   | Person 9   | Person 10 | behavior | average    | annotation |
|------------|------------|------------|-----------|----------|------------|------------|
| 79.8457846 | 81.9030219 |            |           | 69       | 82.6324081 |            |
| 78.8457846 | 83.9030219 |            | 141.26905 | 69       | 91.5804998 |            |
| 78.8457846 | 83.9030219 |            | 141.26905 | 69       | 91.0090713 |            |
| 84.8457846 | 83.9030219 |            | 140.26905 | 69       | 91.723357  |            |
| 83.8457846 | 83.9030219 |            | 140.26905 | 69       | 91.5804998 |            |
| 82.8457846 | 83.9030219 |            | 140.26905 | 69       | 91.8662141 |            |
| 82.8457846 | 84.9030219 | 75.3551261 | 140.26905 | 69       | 89.8023281 |            |
| 82.8457846 | 84.9030219 | 75.3551261 | 140.26905 | 69       | 89.8023281 |            |
| 82.8457846 | 84.9030219 | 77.3551261 | 140.26905 | 69       | 90.0523281 |            |
| 83.8457846 | 84.9030219 | 77.3551261 | 140.26905 | 69       | 90.0523281 |            |
| 83.8457846 | 84.9030219 | 77.3551261 | 139.26905 | 69       | 90.0523281 |            |
| 83.8457846 | 84.9030219 | 77.3551261 | 139.26905 | 69       | 90.3023281 |            |
| 84.8457846 | 83.9030219 | 76.3551261 | 139.26905 | 69       | 90.5523281 |            |
| 87.8457846 | 81.9030219 | 75.3551261 | 138.26905 | 69       | 90.6773281 |            |
| 87.8457846 | 81.9030219 | 75.3551261 | 137.26905 | 69       | 90.6773281 |            |
| 87.8457846 | 80.9030219 | 75.3551261 | 136.26905 | 69       | 90.0523281 |            |
| 87.8457846 | 80.9030219 | 75.3551261 | 135.26905 | 69       | 89.4273281 |            |
| 87.8457846 | 80.9030219 | 76.3551261 | 135.26905 | 69       | 89.5523281 |            |
| 87.8457846 | 80.9030219 | 76.3551261 | 133.26905 | 69       | 89.1773281 |            |
| 86.8457846 | 82.9030219 | 77.3551261 | 132.26905 | 69       | 89.3023281 |            |
| 86.8457846 | 83.9030219 | 77.3551261 | 131.26905 | 69       | 88.9273281 |            |
| 86.8457846 | 84.9030219 | 77.3551261 | 131.26905 | 69       | 89.0523281 |            |
| 85.8457846 | 85.9030219 | 77.3551261 | 131.26905 | 69       | 88.8023281 |            |
| 82.8457846 | 86.9030219 | 77.3551261 | 131.26905 | 69       | 88.6773281 |            |
| 82.8457846 | 86.9030219 | 77.3551261 | 131.26905 | 69       | 88.6773281 |            |
| 81.8457846 | 91.9030219 | 77.3551261 | 131.26905 | 69       | 89.4273281 |            |
| 81.8457846 | 91.9030219 | 77.3551261 | 127.26905 | 69       | 89.3023281 |            |
| 82.8457846 | 92.9030219 | 75.3551261 | 126.26905 | 69       | 89.4273281 |            |
| 82.8457846 | 92.9030219 | 75.3551261 | 126.26905 | 69       | 89.9273281 |            |
| 82.8457846 | 92.9030219 | 75.3551261 | 126.26905 | 69       | 90.5523281 |            |
| 82.8457846 | 93.9030219 | 73.3551261 | 125.26905 | 69       | 90.3023281 |            |
| 81.8457846 | 93.9030219 | 74.3551261 | 125.26905 | 69       | 90.8023281 |            |
| 81.8457846 | 93.9030219 | 74.3551261 | 125.26905 | 69       | 90.9273281 |            |
| 81.8457846 | 93.9030219 | 74.3551261 | 124.26905 | 69       | 90.9273281 |            |
| 82.8457846 | 93.9030219 | 74.3551261 | 124.26905 | 69       | 90.5523281 |            |
| 82.8457846 | 93.9030219 | 74.3551261 | 124.26905 | 69       | 90.1773281 |            |
| 82.8457846 | 93.9030219 | 74.3551261 | 124.26905 | 69       | 89.9273281 |            |
| 84.8457846 | 93.9030219 | 74.3551261 | 122.26905 | 69       | 89.8023281 |            |
| 86.8457846 | 93.9030219 | 74.3551261 | 122.26905 | 69       | 89.4273281 |            |
| 86.8457846 | 91.9030219 | 74.3551261 | 121.26905 | 69       | 89.0523281 |            |
| 90.8457846 | 90.9030219 | 74.3551261 | 120.26905 | 69       | 88.9273281 |            |
| 90.8457846 | 89.9030219 | 74.3551261 | 118.26905 | 69       | 88.5523281 |            |
| 90.8457846 | 87.9030219 | 74.3551261 | 115.26905 | 69       | 89.1773281 |            |



|            |            |            |            |    |            |  |
|------------|------------|------------|------------|----|------------|--|
| 85.8457846 | 87.9030219 | 74.3551261 | 115.26905  | 69 | 87.4273281 |  |
| 79.8457846 | 87.9030219 | 74.3551261 | 112.26905  | 69 | 86.1773281 |  |
| 74.8457846 | 87.9030219 | 74.3551261 | 112.26905  | 69 | 85.4273281 |  |
| 74.8457846 | 87.9030219 | 73.3551261 | 112.26905  | 69 | 84.4273281 |  |
| 74.8457846 | 87.9030219 | 73.3551261 | 111.26905  | 69 | 83.9273281 |  |
| 78.8457846 | 86.9030219 | 73.3551261 | 111.26905  | 69 | 84.3023281 |  |
| 78.8457846 | 85.9030219 | 73.3551261 | 111.26905  | 69 | 83.9273281 |  |
| 81.8457846 | 83.9030219 | 71.3551261 | 111.26905  | 69 | 84.4273281 |  |
| 84.8457846 | 83.9030219 | 71.3551261 | 111.26905  | 69 | 85.1773281 |  |
| 84.8457846 | 82.9030219 | 72.3551261 | 111.26905  | 69 | 85.6773281 |  |
| 82.8457846 | 81.9030219 | 72.3551261 | 111.26905  | 69 | 85.3023281 |  |
| 82.8457846 | 81.9030219 | 72.3551261 | 111.26905  | 69 | 86.4273281 |  |
| 82.8457846 | 73.9030219 | 72.3551261 | 111.26905  | 69 | 86.6773281 |  |
| 78.8457846 | 73.9030219 | 72.3551261 | 109.26905  | 69 | 86.1773281 |  |
| 78.8457846 | 73.9030219 | 71.3551261 | 108.26905  | 69 | 86.1773281 |  |
| 78.8457846 | 73.9030219 | 71.3551261 | 107.26905  | 69 | 84.9273281 |  |
| 78.8457846 | 73.9030219 | 72.3551261 | 107.26905  | 69 | 85.0523281 |  |
| 78.8457846 | 73.9030219 | 72.3551261 | 107.26905  | 69 | 84.9273281 |  |
| 78.8457846 | 73.9030219 | 71.3551261 | 107.26905  | 69 | 84.4273281 |  |
| 77.8457846 | 71.9030219 | 71.3551261 | 108.26905  | 69 | 84.0523281 |  |
| 78.8457846 | 70.9030219 | 71.3551261 | 105.26905  | 69 | 83.4273281 |  |
| 79.8457846 | 70.9030219 | 70.3551261 | 101.26905  | 69 | 83.3023281 |  |
| 79.8457846 | 70.9030219 | 70.3551261 | 101.26905  | 69 | 83.5523281 |  |
| 79.8457846 | 70.9030219 | 70.3551261 | 100.26905  | 69 | 83.4273281 |  |
| 79.8457846 | 70.9030219 | 70.3551261 | 100.26905  | 69 | 82.9273281 |  |
| 78.8457846 | 70.9030219 | 70.3551261 | 100.26905  | 69 | 82.8023281 |  |
| 78.8457846 | 70.9030219 | 70.3551261 | 100.26905  | 69 | 82.6773281 |  |
| 78.8457846 | 70.9030219 | 70.3551261 | 100.26905  | 69 | 82.8023281 |  |
| 79.8457846 | 69.9030219 | 69.3551261 | 103.26905  | 69 | 82.5523281 |  |
| 80.8457846 | 73.9030219 | 69.3551261 | 103.26905  | 69 | 83.1773281 |  |
| 80.8457846 | 73.9030219 | 69.3551261 | 103.26905  | 69 | 82.8023281 |  |
| 79.8457846 | 74.9030219 | 69.3551261 | 103.26905  | 69 | 82.8023281 |  |
| 78.8457846 | 74.9030219 | 69.3551261 | 95.2690501 | 69 | 80.9273281 |  |
| 78.8457846 | 74.9030219 | 69.3551261 | 94.2690501 | 69 | 80.6773281 |  |
| 78.8457846 | 74.9030219 | 69.3551261 | 93.2690501 | 69 | 80.3023281 |  |
| 78.8457846 | 74.9030219 | 69.3551261 | 93.2690501 | 69 | 80.3023281 |  |
| 79.8457846 | 72.9030219 | 69.3551261 | 94.2690501 | 69 | 80.3023281 |  |
| 79.8457846 | 68.9030219 | 70.3551261 | 94.2690501 | 69 | 79.1773281 |  |
| 81.8457846 | 65.9030219 | 71.3551261 | 93.2690501 | 69 | 79.4273281 |  |
| 83.8457846 | 64.9030219 | 72.3551261 | 93.2690501 | 69 | 79.3023281 |  |
| 83.8457846 | 64.9030219 | 72.3551261 | 93.2690501 | 69 | 79.5523281 |  |
| 82.8457846 | 64.9030219 | 73.3551261 | 92.2690501 | 63 | 79.5523281 |  |
| 81.8457846 | 65.9030219 | 73.3551261 | 92.2690501 | 63 | 79.4273281 |  |
| 82.8457846 | 66.9030219 | 72.3551261 | 92.2690501 | 63 | 78.6773281 |  |
| 82.8457846 | 67.9030219 | 72.3551261 | 92.2690501 | 63 | 78.9273281 |  |

|            |            |            |            |    |            |
|------------|------------|------------|------------|----|------------|
| 84.8457846 | 67.9030219 | 72.3551261 | 93.2690501 | 63 | 78.9273281 |
| 85.8457846 | 67.9030219 | 72.3551261 | 93.2690501 | 63 | 78.9273281 |
| 86.8457846 | 67.9030219 | 72.3551261 | 93.2690501 | 63 | 78.8023281 |
| 85.8457846 | 67.9030219 | 72.3551261 | 92.2690501 | 63 | 78.4273281 |
| 84.8457846 | 67.9030219 | 73.3551261 | 91.2690501 | 63 | 78.4273281 |
| 83.8457846 | 67.9030219 | 74.3551261 | 91.2690501 | 63 | 78.1773281 |
| 83.8457846 | 67.9030219 | 74.3551261 | 91.2690501 | 63 | 78.0523281 |
| 84.8457846 | 68.9030219 | 75.3551261 | 91.2690501 | 63 | 78.8023281 |
| 85.8457846 | 67.9030219 | 75.3551261 | 94.2690501 | 63 | 78.9273281 |
| 86.8457846 | 67.9030219 | 75.3551261 | 95.2690501 | 63 | 79.0523281 |
| 86.8457846 | 67.9030219 | 75.3551261 | 96.2690501 | 63 | 79.0523281 |
| 87.8457846 | 67.9030219 | 77.3551261 | 94.2690501 | 63 | 79.3023281 |
| 87.8457846 | 67.9030219 | 78.3551261 | 94.2690501 | 63 | 79.5523281 |
| 89.8457846 | 68.9030219 | 79.3551261 | 92.2690501 | 63 | 79.8023281 |
| 88.8457846 | 68.9030219 | 79.3551261 | 89.2690501 | 63 | 79.1773281 |
| 87.8457846 | 69.9030219 | 80.3551261 | 88.2690501 | 63 | 79.3023281 |
| 88.8457846 | 69.9030219 | 80.3551261 | 89.2690501 | 63 | 79.5523281 |
| 88.8457846 | 69.9030219 | 80.3551261 | 90.2690501 | 63 | 79.5523281 |
| 89.8457846 | 69.9030219 | 79.3551261 | 90.2690501 | 63 | 79.4273281 |
| 89.8457846 | 69.9030219 | 76.3551261 | 90.2690501 | 63 | 79.0523281 |
| 88.8457846 | 71.9030219 | 76.3551261 | 90.2690501 | 63 | 79.1773281 |
| 85.8457846 | 71.9030219 | 73.3551261 | 90.2690501 | 63 | 78.5523281 |
| 85.8457846 | 72.9030219 | 72.3551261 | 88.2690501 | 63 | 78.8023281 |
| 85.8457846 | 74.9030219 | 72.3551261 | 86.2690501 | 63 | 78.9273281 |
| 85.8457846 | 74.9030219 | 72.3551261 | 86.2690501 | 63 | 79.1773281 |
| 86.8457846 | 75.9030219 | 71.3551261 | 86.2690501 | 63 | 79.4273281 |
| 88.8457846 | 75.9030219 | 67.3551261 | 85.2690501 | 63 | 79.5523281 |
| 88.8457846 | 75.9030219 | 67.3551261 | 85.2690501 | 63 | 79.5523281 |
| 88.8457846 | 75.9030219 | 66.3551261 | 84.2690501 | 63 | 79.1773281 |
| 88.8457846 | 75.9030219 | 66.3551261 | 84.2690501 | 63 | 79.3023281 |
| 82.8457846 | 75.9030219 | 67.3551261 | 83.2690501 | 63 | 78.8023281 |
| 80.8457846 | 79.9030219 | 75.3551261 | 84.2690501 | 63 | 80.1773281 |
| 80.8457846 | 79.9030219 | 75.3551261 | 82.2690501 | 63 | 80.1773281 |
| 80.8457846 | 77.9030219 | 75.3551261 | 82.2690501 | 63 | 80.4273281 |
| 80.8457846 | 72.9030219 | 75.3551261 | 82.2690501 | 63 | 80.0523281 |
| 81.8457846 | 70.9030219 | 75.3551261 | 82.2690501 | 63 | 80.0523281 |
| 83.8457846 | 70.9030219 | 77.3551261 | 83.2690501 | 63 | 80.6773281 |
| 83.8457846 | 67.9030219 | 80.3551261 | 85.2690501 | 63 | 80.8023281 |
| 83.8457846 | 66.9030219 | 80.3551261 | 85.2690501 | 63 | 80.3023281 |
| 83.8457846 | 66.9030219 | 80.3551261 | 86.2690501 | 63 | 80.5523281 |
| 84.8457846 | 66.9030219 | 80.3551261 | 86.2690501 | 63 | 80.8023281 |
| 84.8457846 | 66.9030219 | 78.3551261 | 87.2690501 | 63 | 80.6773281 |
| 84.8457846 | 66.9030219 | 74.3551261 | 87.2690501 | 63 | 79.8023281 |
| 85.8457846 | 65.9030219 | 72.3551261 | 87.2690501 | 63 | 79.6773281 |
| 85.8457846 | 65.9030219 | 72.3551261 | 87.2690501 | 63 | 79.6773281 |

|            |            |            |            |    |            |  |
|------------|------------|------------|------------|----|------------|--|
| 85.8457846 | 64.9030219 | 71.3551261 | 87.2690501 | 63 | 79.4273281 |  |
| 85.8457846 | 64.9030219 | 71.3551261 | 87.2690501 | 63 | 79.4273281 |  |
| 85.8457846 | 63.9030219 | 71.3551261 | 89.2690501 | 63 | 79.5523281 |  |
| 89.8457846 | 63.9030219 | 71.3551261 | 89.2690501 | 63 | 80.1773281 |  |
| 89.8457846 | 63.9030219 | 71.3551261 | 89.2690501 | 63 | 80.4273281 |  |
| 89.8457846 | 63.9030219 | 69.3551261 | 89.2690501 | 63 | 79.9273281 |  |
| 90.8457846 | 63.9030219 | 69.3551261 | 88.2690501 | 63 | 79.6773281 |  |
| 91.8457846 | 62.9030219 | 68.3551261 | 88.2690501 | 63 | 79.3023281 |  |
| 92.8457846 | 62.9030219 | 68.3551261 | 87.2690501 | 63 | 79.4273281 |  |
| 92.8457846 | 62.9030219 | 64.3551261 | 87.2690501 | 63 | 78.9273281 |  |
| 92.8457846 | 62.9030219 | 58.3551261 | 87.2690501 | 63 | 78.0523281 |  |
| 93.8457846 | 62.9030219 | 58.3551261 | 87.2690501 | 63 | 77.9273281 |  |
| 93.8457846 | 62.9030219 | 58.3551261 | 88.2690501 | 63 | 77.9273281 |  |
| 93.8457846 | 62.9030219 | 58.3551261 | 90.2690501 | 63 | 78.3023281 |  |
| 93.8457846 | 62.9030219 | 57.3551261 | 90.2690501 | 63 | 78.3023281 |  |
| 93.8457846 | 62.9030219 | 56.3551261 | 90.2690501 | 63 | 78.1773281 |  |
| 94.8457846 | 65.9030219 | 56.3551261 | 92.2690501 | 63 | 78.9273281 |  |
| 94.8457846 | 65.9030219 | 55.3551261 | 92.2690501 | 63 | 79.1773281 |  |
| 95.8457846 | 65.9030219 | 54.3551261 | 91.2690501 | 63 | 79.5523281 |  |
| 95.8457846 | 64.9030219 | 51.3551261 | 90.2690501 | 63 | 78.8023281 |  |
| 95.8457846 | 64.9030219 | 51.3551261 | 89.2690501 | 63 | 78.4273281 |  |
| 95.8457846 | 64.9030219 | 51.3551261 | 88.2690501 | 63 | 78.4273281 |  |
| 95.8457846 | 65.9030219 | 51.3551261 | 87.2690501 | 63 | 78.3023281 |  |
| 95.8457846 | 65.9030219 | 49.3551261 | 87.2690501 | 63 | 78.0523281 |  |
| 97.8457846 | 65.9030219 | 49.3551261 | 86.2690501 | 63 | 78.0523281 |  |
| 98.8457846 | 66.9030219 | 49.3551261 | 85.2690501 | 63 | 78.3023281 |  |
| 98.8457846 | 66.9030219 | 45.3551261 | 85.2690501 | 63 | 77.8023281 |  |
| 99.8457846 | 65.9030219 | 45.3551261 | 85.2690501 | 63 | 77.8023281 |  |
| 100.845785 | 65.9030219 | 45.3551261 | 85.2690501 | 63 | 77.9273281 |  |
| 100.845785 | 65.9030219 | 45.3551261 | 85.2690501 | 63 | 77.8023281 |  |
| 100.845785 | 65.9030219 | 45.3551261 | 85.2690501 | 63 | 77.8023281 |  |
| 98.8457846 | 65.9030219 | 45.3551261 | 85.2690501 | 63 | 77.4273281 |  |
| 98.8457846 | 65.9030219 | 45.3551261 | 86.2690501 | 63 | 77.4273281 |  |
| 98.8457846 | 65.9030219 | 45.3551261 | 89.2690501 | 63 | 77.8023281 |  |
| 98.8457846 | 67.9030219 | 45.3551261 | 91.2690501 | 63 | 78.3023281 |  |
| 98.8457846 | 67.9030219 | 45.3551261 | 91.2690501 | 63 | 78.1773281 |  |
| 98.8457846 | 66.9030219 | 45.3551261 | 91.2690501 | 63 | 78.3023281 |  |
| 98.8457846 | 66.9030219 | 43.3551261 | 91.2690501 | 63 | 78.0523281 |  |
| 98.8457846 | 66.9030219 | 43.3551261 | 90.2690501 | 63 | 77.9273281 |  |
| 98.8457846 | 66.9030219 | 43.3551261 | 87.2690501 | 63 | 77.4273281 |  |
| 98.8457846 | 66.9030219 | 43.3551261 | 87.2690501 | 63 | 77.5523281 |  |
| 97.8457846 | 66.9030219 | 43.3551261 | 87.2690501 | 63 | 77.6773281 |  |
| 96.8457846 | 66.9030219 | 43.3551261 | 86.2690501 | 63 | 77.8023281 |  |
| 95.8457846 | 68.9030219 | 43.3551261 | 88.2690501 | 63 | 78.0523281 |  |
| 95.8457846 | 68.9030219 | 44.3551261 | 88.2690501 | 63 | 78.6773281 |  |

|            |            |            |            |    |            |  |
|------------|------------|------------|------------|----|------------|--|
| 95.8457846 | 68.9030219 | 44.3551261 | 89.2690501 | 63 | 79.1773281 |  |
| 96.8457846 | 68.9030219 | 44.3551261 | 90.2690501 | 63 | 79.4273281 |  |
| 95.8457846 | 68.9030219 | 44.3551261 | 90.2690501 | 63 | 78.6773281 |  |
| 95.8457846 | 68.9030219 | 44.3551261 | 90.2690501 | 63 | 78.9273281 |  |
| 95.8457846 | 68.9030219 | 44.3551261 | 90.2690501 | 63 | 78.8023281 |  |
| 95.8457846 | 69.9030219 | 44.3551261 | 90.2690501 | 63 | 79.0523281 |  |
| 96.8457846 | 69.9030219 | 44.3551261 | 90.2690501 | 63 | 79.1773281 |  |
| 96.8457846 | 69.9030219 | 49.3551261 | 91.2690501 | 63 | 79.8023281 |  |
| 96.8457846 | 69.9030219 | 49.3551261 | 91.2690501 | 63 | 79.8023281 |  |
| 97.8457846 | 69.9030219 | 54.3551261 | 89.2690501 | 63 | 80.5523281 |  |
| 96.8457846 | 69.9030219 | 55.3551261 | 88.2690501 | 63 | 80.0523281 |  |
| 96.8457846 | 69.9030219 | 57.3551261 | 88.2690501 | 63 | 80.3023281 |  |
| 97.8457846 | 69.9030219 | 61.3551261 | 88.2690501 | 63 | 80.9273281 |  |
| 97.8457846 | 69.9030219 | 62.3551261 | 88.2690501 | 63 | 81.1773281 |  |
| 97.8457846 | 68.9030219 | 62.3551261 | 90.2690501 | 63 | 81.4273281 |  |
| 97.8457846 | 68.9030219 | 68.3551261 | 91.2690501 | 63 | 81.9273281 |  |
| 98.8457846 | 69.9030219 | 67.3551261 | 91.2690501 | 63 | 82.4273281 |  |
| 98.8457846 | 70.9030219 | 67.3551261 | 91.2690501 | 63 | 82.8023281 |  |
| 98.8457846 | 71.9030219 | 67.3551261 | 91.2690501 | 63 | 82.6773281 |  |
| 98.8457846 | 71.9030219 | 67.3551261 | 91.2690501 | 63 | 82.9273281 |  |
| 98.8457846 | 71.9030219 | 68.3551261 | 90.2690501 | 63 | 82.6773281 |  |
| 95.8457846 | 70.9030219 | 68.3551261 | 90.2690501 | 63 | 81.8023281 |  |
| 95.8457846 | 69.9030219 | 69.3551261 | 91.2690501 | 63 | 81.8023281 |  |
| 94.8457846 | 69.9030219 | 69.3551261 | 91.2690501 | 63 | 81.5523281 |  |
| 93.8457846 | 68.9030219 | 69.3551261 | 90.2690501 | 63 | 81.0523281 |  |
| 93.8457846 | 68.9030219 | 69.3551261 | 89.2690501 | 63 | 81.1773281 |  |
| 87.8457846 | 69.9030219 | 69.3551261 | 88.2690501 | 63 | 80.4273281 |  |
| 87.8457846 | 69.9030219 | 67.3551261 | 86.2690501 | 63 | 80.6773281 |  |
| 87.8457846 | 69.9030219 | 66.3551261 | 85.2690501 | 63 | 80.5523281 |  |
| 87.8457846 | 69.9030219 | 66.3551261 | 85.2690501 | 63 | 80.4273281 |  |
| 86.8457846 | 69.9030219 | 67.3551261 | 85.2690501 | 63 | 80.3023281 |  |
| 86.8457846 | 69.9030219 | 67.3551261 | 85.2690501 | 63 | 80.0523281 |  |
| 85.8457846 | 69.9030219 | 67.3551261 | 85.2690501 | 63 | 80.0523281 |  |
| 86.8457846 | 69.9030219 | 68.3551261 | 84.2690501 | 63 | 79.8023281 |  |
| 88.8457846 | 70.9030219 | 68.3551261 | 85.2690501 | 63 | 80.3023281 |  |
| 88.8457846 | 70.9030219 | 68.3551261 | 86.2690501 | 63 | 80.4273281 |  |
| 90.8457846 | 69.9030219 | 70.3551261 | 87.2690501 | 63 | 81.0523281 |  |
| 90.8457846 | 69.9030219 | 71.3551261 | 87.2690501 | 63 | 81.3023281 |  |
| 91.8457846 | 70.9030219 | 71.3551261 | 87.2690501 | 63 | 81.3023281 |  |
| 91.8457846 | 70.9030219 | 72.3551261 | 87.2690501 | 63 | 81.1773281 |  |
| 90.8457846 | 70.9030219 | 73.3551261 | 88.2690501 | 63 | 81.0523281 |  |
| 90.8457846 | 70.9030219 | 73.3551261 | 88.2690501 | 63 | 80.9273281 |  |
| 90.8457846 | 70.9030219 | 73.3551261 | 88.2690501 | 63 | 80.3023281 |  |
| 90.8457846 | 70.9030219 | 73.3551261 | 89.2690501 | 63 | 81.3023281 |  |
| 89.8457846 | 69.9030219 | 73.3551261 | 89.2690501 | 63 | 80.9273281 |  |

|            |            |            |            |    |            |  |
|------------|------------|------------|------------|----|------------|--|
| 88.8457846 | 69.9030219 | 73.3551261 | 89.2690501 | 63 | 81.1773281 |  |
| 87.8457846 | 69.9030219 | 73.3551261 | 88.2690501 | 63 | 80.8023281 |  |
| 87.8457846 | 69.9030219 | 74.3551261 | 87.2690501 | 63 | 80.6773281 |  |
| 87.8457846 | 69.9030219 | 74.3551261 | 87.2690501 | 63 | 80.8023281 |  |
| 87.8457846 | 70.9030219 | 73.3551261 | 87.2690501 | 63 | 80.5523281 |  |
| 88.8457846 | 71.9030219 | 72.3551261 | 87.2690501 | 63 | 80.5523281 |  |
| 88.8457846 | 71.9030219 | 72.3551261 | 88.2690501 | 63 | 80.6773281 |  |
| 88.8457846 | 71.9030219 | 72.3551261 | 88.2690501 | 63 | 80.8023281 |  |
| 86.8457846 | 71.9030219 | 71.3551261 | 88.2690501 | 63 | 80.3023281 |  |
| 85.8457846 | 71.9030219 | 72.3551261 | 86.2690501 | 63 | 80.1773281 |  |
| 84.8457846 | 71.9030219 | 72.3551261 | 86.2690501 | 63 | 80.0523281 |  |
| 84.8457846 | 71.9030219 | 72.3551261 | 86.2690501 | 63 | 79.9273281 |  |
| 83.8457846 | 71.9030219 | 72.3551261 | 85.2690501 | 63 | 80.3023281 |  |
| 83.8457846 | 71.9030219 | 72.3551261 | 84.2690501 | 63 | 79.8023281 |  |
| 83.8457846 | 71.9030219 | 72.3551261 | 84.2690501 | 63 | 79.3023281 |  |
| 84.8457846 | 71.9030219 | 73.3551261 | 84.2690501 | 63 | 79.3023281 |  |
| 84.8457846 | 72.9030219 | 72.3551261 | 83.2690501 | 63 | 79.3023281 |  |
| 84.8457846 | 72.9030219 | 72.3551261 | 83.2690501 | 63 | 79.3023281 |  |
| 85.8457846 | 82.9030219 | 74.3551261 | 83.2690501 | 63 | 80.9273281 |  |
| 86.8457846 | 82.9030219 | 74.3551261 | 83.2690501 | 63 | 81.0523281 |  |
| 87.8457846 | 82.9030219 | 75.3551261 | 83.2690501 | 63 | 80.9273281 |  |
| 87.8457846 | 82.9030219 | 75.3551261 | 84.2690501 | 63 | 81.0523281 |  |
| 87.8457846 | 76.9030219 | 75.3551261 | 85.2690501 | 63 | 80.0523281 |  |
| 87.8457846 | 76.9030219 | 75.3551261 | 86.2690501 | 63 | 80.1773281 |  |
| 87.8457846 | 73.9030219 | 76.3551261 | 86.2690501 | 63 | 79.8023281 |  |
| 87.8457846 | 71.9030219 | 75.3551261 | 86.2690501 | 63 | 79.3023281 |  |
| 86.8457846 | 70.9030219 | 74.3551261 | 86.2690501 | 63 | 78.9273281 |  |
| 82.8457846 | 70.9030219 | 72.3551261 | 86.2690501 | 63 | 78.5523281 |  |
| 80.8457846 | 70.9030219 | 72.3551261 | 86.2690501 | 63 | 77.9273281 |  |
| 77.8457846 | 70.9030219 | 72.3551261 | 85.2690501 | 63 | 77.1773281 |  |
| 75.8457846 | 70.9030219 | 71.3551261 | 85.2690501 | 63 | 76.8023281 |  |
| 75.8457846 | 69.9030219 | 70.3551261 | 86.2690501 | 63 | 76.5523281 |  |
| 75.8457846 | 69.9030219 | 69.3551261 | 86.2690501 | 63 | 76.8023281 |  |
| 75.8457846 | 69.9030219 | 69.3551261 | 86.2690501 | 63 | 76.9273281 |  |
| 75.8457846 | 69.9030219 | 69.3551261 | 86.2690501 | 63 | 76.8023281 |  |
| 75.8457846 | 69.9030219 | 69.3551261 | 85.2690501 | 63 | 76.6773281 |  |
| 74.8457846 | 69.9030219 | 71.3551261 | 84.2690501 | 63 | 77.0523281 |  |
| 74.8457846 | 69.9030219 | 71.3551261 | 84.2690501 | 63 | 77.3023281 |  |
| 74.8457846 | 69.9030219 | 71.3551261 | 84.2690501 | 63 | 77.3023281 |  |
| 74.8457846 | 69.9030219 | 71.3551261 | 84.2690501 | 63 | 77.3023281 |  |
| 74.8457846 | 68.9030219 | 71.3551261 | 84.2690501 | 63 | 77.3023281 |  |
| 74.8457846 | 68.9030219 | 71.3551261 | 85.2690501 | 63 | 77.6773281 |  |
| 74.8457846 | 68.9030219 | 72.3551261 | 85.2690501 | 63 | 77.8023281 |  |
| 74.8457846 | 68.9030219 | 73.3551261 | 86.2690501 | 63 | 78.0523281 |  |
| 76.8457846 | 69.9030219 | 73.3551261 | 86.2690501 | 63 | 78.6773281 |  |

|            |            |            |            |    |            |  |
|------------|------------|------------|------------|----|------------|--|
| 76.8457846 | 69.9030219 | 74.3551261 | 85.2690501 | 63 | 78.5523281 |  |
| 76.8457846 | 71.9030219 | 76.3551261 | 85.2690501 | 63 | 78.8023281 |  |
| 76.8457846 | 69.9030219 | 76.3551261 | 84.2690501 | 63 | 78.4273281 |  |
| 75.8457846 | 68.9030219 | 77.3551261 | 84.2690501 | 63 | 78.1773281 |  |
| 73.8457846 | 68.9030219 | 77.3551261 | 84.2690501 | 63 | 77.6773281 |  |
| 73.8457846 | 66.9030219 | 79.3551261 | 84.2690501 | 63 | 77.4273281 |  |
| 73.8457846 | 64.9030219 | 79.3551261 | 85.2690501 | 63 | 76.5523281 |  |
| 73.8457846 | 64.9030219 | 79.3551261 | 85.2690501 | 63 | 76.3023281 |  |
| 72.8457846 | 64.9030219 | 75.3551261 | 85.2690501 | 63 | 76.0523281 |  |
| 72.8457846 | 65.9030219 | 73.3551261 | 84.2690501 | 63 | 75.6773281 |  |
| 72.8457846 | 70.9030219 | 73.3551261 | 83.2690501 | 63 | 76.1773281 |  |
| 72.8457846 | 70.9030219 | 72.3551261 | 83.2690501 | 63 | 76.1773281 |  |
| 74.8457846 | 72.9030219 | 71.3551261 | 83.2690501 | 63 | 76.5523281 |  |
| 74.8457846 | 73.9030219 | 71.3551261 | 83.2690501 | 63 | 76.8023281 |  |
| 74.8457846 | 73.9030219 | 71.3551261 | 82.2690501 | 63 | 76.4273281 |  |
| 74.8457846 | 73.9030219 | 70.3551261 | 82.2690501 | 63 | 76.3023281 |  |
| 75.8457846 | 72.9030219 | 70.3551261 | 81.2690501 | 63 | 76.4273281 |  |
| 75.8457846 | 70.9030219 | 70.3551261 | 81.2690501 | 63 | 76.8023281 |  |
| 74.8457846 | 69.9030219 | 70.3551261 | 85.2690501 | 63 | 77.1773281 |  |
| 70.8457846 | 69.9030219 | 70.3551261 | 85.2690501 | 63 | 76.9273281 |  |
| 66.8457846 | 70.9030219 | 70.3551261 | 85.2690501 | 63 | 76.3023281 |  |
| 64.8457846 | 70.9030219 | 70.3551261 | 85.2690501 | 63 | 76.4273281 |  |
| 64.8457846 | 70.9030219 | 70.3551261 | 84.2690501 | 63 | 76.1773281 |  |
| 68.8457846 | 70.9030219 | 71.3551261 | 84.2690501 | 63 | 76.1773281 |  |
| 70.8457846 | 70.9030219 | 72.3551261 | 84.2690501 | 63 | 76.6773281 |  |
| 70.8457846 | 70.9030219 | 72.3551261 | 84.2690501 | 63 | 76.9273281 |  |
| 70.8457846 | 70.9030219 | 72.3551261 | 84.2690501 | 63 | 76.9273281 |  |
| 70.8457846 | 69.9030219 | 74.3551261 | 84.2690501 | 63 | 77.5523281 |  |
| 71.8457846 | 68.9030219 | 74.3551261 | 84.2690501 | 63 | 77.4273281 |  |
| 72.8457846 | 68.9030219 | 74.3551261 | 84.2690501 | 63 | 77.1773281 |  |
| 73.8457846 | 68.9030219 | 74.3551261 | 84.2690501 | 63 | 77.5523281 |  |
| 73.8457846 | 68.9030219 | 74.3551261 | 83.2690501 | 63 | 77.4273281 |  |
| 73.8457846 | 69.9030219 | 74.3551261 | 83.2690501 | 63 | 77.5523281 |  |
| 71.8457846 | 70.9030219 | 74.3551261 | 85.2690501 | 63 | 77.6773281 |  |
| 70.8457846 | 70.9030219 | 75.3551261 | 87.2690501 | 63 | 77.9273281 |  |
| 69.8457846 | 71.9030219 | 75.3551261 | 87.2690501 | 63 | 77.8023281 |  |
| 69.8457846 | 71.9030219 | 75.3551261 | 86.2690501 | 63 | 77.9273281 |  |
| 71.8457846 | 72.9030219 | 75.3551261 | 84.2690501 | 63 | 78.4273281 |  |
| 75.8457846 | 72.9030219 | 75.3551261 | 84.2690501 | 63 | 78.8023281 |  |
| 75.8457846 | 72.9030219 | 75.3551261 | 83.2690501 | 63 | 78.4273281 |  |
| 75.8457846 | 72.9030219 | 76.3551261 | 83.2690501 | 63 | 77.9273281 |  |
| 75.8457846 | 72.9030219 | 77.3551261 | 83.2690501 | 63 | 77.8023281 |  |
| 75.8457846 | 74.9030219 | 77.3551261 | 83.2690501 | 63 | 78.1773281 |  |
| 75.8457846 | 75.9030219 | 77.3551261 | 83.2690501 | 63 | 78.1773281 |  |
| 75.8457846 | 75.9030219 | 79.3551261 | 87.2690501 | 63 | 79.1773281 |  |

|            |            |            |            |    |            |
|------------|------------|------------|------------|----|------------|
| 75.8457846 | 75.9030219 | 79.3551261 | 87.2690501 | 63 | 79.4273281 |
| 75.8457846 | 75.9030219 | 77.3551261 | 89.2690501 | 63 | 79.4273281 |
| 74.8457846 | 75.9030219 | 76.3551261 | 89.2690501 | 63 | 79.6773281 |
| 73.8457846 | 75.9030219 | 74.3551261 | 88.2690501 | 63 | 79.4273281 |
| 73.8457846 | 73.9030219 | 74.3551261 | 86.2690501 | 63 | 79.3023281 |
| 73.8457846 | 72.9030219 | 74.3551261 | 86.2690501 | 63 | 79.4273281 |
| 74.8457846 | 72.9030219 | 74.3551261 | 84.2690501 | 63 | 79.0523281 |
| 74.8457846 | 72.9030219 | 74.3551261 | 84.2690501 | 63 | 78.8023281 |
| 74.8457846 | 72.9030219 | 74.3551261 | 84.2690501 | 63 | 78.6773281 |
| 71.8457846 | 72.9030219 | 74.3551261 | 85.2690501 | 63 | 78.5523281 |
| 70.8457846 | 72.9030219 | 74.3551261 | 86.2690501 | 63 | 78.5523281 |
| 70.8457846 | 73.9030219 | 74.3551261 | 86.2690501 | 63 | 78.8023281 |
| 70.8457846 | 73.9030219 | 74.3551261 | 83.2690501 | 63 | 78.8023281 |
| 70.8457846 | 73.9030219 | 75.3551261 | 82.2690501 | 63 | 78.8023281 |
| 70.8457846 | 75.9030219 | 75.3551261 | 82.2690501 | 63 | 79.0523281 |
| 70.8457846 | 75.9030219 | 75.3551261 | 82.2690501 | 63 | 79.1773281 |
| 70.8457846 | 75.9030219 | 74.3551261 | 83.2690501 | 63 | 79.0523281 |
| 71.8457846 | 74.9030219 | 74.3551261 | 83.2690501 | 63 | 79.0523281 |
| 80.8457846 | 72.9030219 | 74.3551261 | 83.2690501 | 63 | 79.6773281 |
| 83.8457846 | 71.9030219 | 74.3551261 | 84.2690501 | 63 | 80.0523281 |
| 83.8457846 | 71.9030219 | 74.3551261 | 84.2690501 | 63 | 80.0523281 |
| 82.8457846 | 70.9030219 | 74.3551261 | 85.2690501 | 63 | 80.1773281 |
| 82.8457846 | 70.9030219 | 74.3551261 | 85.2690501 | 63 | 80.3023281 |
| 83.8457846 | 70.9030219 | 73.3551261 | 85.2690501 | 63 | 80.4273281 |
| 83.8457846 | 70.9030219 | 72.3551261 | 84.2690501 | 63 | 80.8023281 |
| 84.8457846 | 70.9030219 | 71.3551261 | 84.2690501 | 63 | 81.4273281 |
| 85.8457846 | 70.9030219 | 71.3551261 | 84.2690501 | 63 | 81.6773281 |
| 84.8457846 | 70.9030219 | 71.3551261 | 83.2690501 | 63 | 81.3023281 |
| 83.8457846 | 69.9030219 | 71.3551261 | 83.2690501 | 63 | 81.0523281 |
| 79.8457846 | 69.9030219 | 71.3551261 | 83.2690501 | 63 | 80.3023281 |
| 77.8457846 | 68.9030219 | 72.3551261 | 83.2690501 | 63 | 79.6773281 |
| 77.8457846 | 68.9030219 | 72.3551261 | 83.2690501 | 63 | 79.5523281 |
| 77.8457846 | 68.9030219 | 72.3551261 | 83.2690501 | 63 | 79.6773281 |
| 77.8457846 | 68.9030219 | 72.3551261 | 83.2690501 | 63 | 79.6773281 |
| 77.8457846 | 68.9030219 | 73.3551261 | 84.2690501 | 63 | 80.0523281 |
| 77.8457846 | 68.9030219 | 73.3551261 | 84.2690501 | 63 | 80.0523281 |
| 77.8457846 | 68.9030219 | 73.3551261 | 84.2690501 | 63 | 80.8023281 |
| 76.8457846 | 69.9030219 | 73.3551261 | 84.2690501 | 63 | 80.9273281 |
| 75.8457846 | 70.9030219 | 73.3551261 | 84.2690501 | 63 | 80.6773281 |
| 69.8457846 | 70.9030219 | 73.3551261 | 85.2690501 | 63 | 79.9273281 |
| 69.8457846 | 70.9030219 | 73.3551261 | 86.2690501 | 63 | 79.8023281 |
| 69.8457846 | 70.9030219 | 73.3551261 | 86.2690501 | 63 | 79.5523281 |
| 69.8457846 | 70.9030219 | 73.3551261 | 85.2690501 | 63 | 79.1773281 |
| 69.8457846 | 70.9030219 | 73.3551261 | 86.2690501 | 63 | 79.3023281 |
| 69.8457846 | 70.9030219 | 73.3551261 | 86.2690501 | 63 | 79.0523281 |

|            |            |            |            |    |            |  |
|------------|------------|------------|------------|----|------------|--|
| 70.8457846 | 70.9030219 | 73.3551261 | 89.2690501 | 63 | 79.1773281 |  |
| 72.8457846 | 70.9030219 | 73.3551261 | 89.2690501 | 63 | 79.1773281 |  |
| 72.8457846 | 70.9030219 | 73.3551261 | 88.2690501 | 63 | 78.8023281 |  |
| 75.8457846 | 70.9030219 | 74.3551261 | 88.2690501 | 63 | 79.0523281 |  |
| 74.8457846 | 70.9030219 | 75.3551261 | 86.2690501 | 63 | 78.5523281 |  |
| 74.8457846 | 71.9030219 | 76.3551261 | 86.2690501 | 63 | 79.0523281 |  |
| 74.8457846 | 73.9030219 | 76.3551261 | 87.2690501 | 63 | 79.4273281 |  |
| 74.8457846 | 73.9030219 | 76.3551261 | 87.2690501 | 63 | 79.4273281 |  |
| 73.8457846 | 75.9030219 | 75.3551261 | 89.2690501 | 63 | 79.6773281 |  |
| 73.8457846 | 75.9030219 | 74.3551261 | 89.2690501 | 63 | 79.5523281 |  |
| 73.8457846 | 75.9030219 | 73.3551261 | 91.2690501 | 63 | 79.8023281 |  |
| 73.8457846 | 75.9030219 | 73.3551261 | 92.2690501 | 63 | 79.9273281 |  |
| 73.8457846 | 74.9030219 | 72.3551261 | 92.2690501 | 63 | 79.4273281 |  |
| 73.8457846 | 74.9030219 | 72.3551261 | 93.2690501 | 63 | 79.6773281 |  |
| 73.8457846 | 73.9030219 | 73.3551261 | 93.2690501 | 63 | 79.4273281 |  |
| 73.8457846 | 73.9030219 | 73.3551261 | 94.2690501 | 63 | 79.5523281 |  |
| 73.8457846 | 72.9030219 | 75.3551261 | 94.2690501 | 63 | 78.8023281 |  |
| 72.8457846 | 72.9030219 | 76.3551261 | 94.2690501 | 63 | 78.5523281 |  |
| 72.8457846 | 72.9030219 | 76.3551261 | 95.2690501 | 63 | 78.5523281 |  |
| 72.8457846 | 71.9030219 | 76.3551261 | 95.2690501 | 63 | 78.5523281 |  |
| 70.8457846 | 71.9030219 | 76.3551261 | 95.2690501 | 63 | 78.0523281 |  |
| 70.8457846 | 71.9030219 | 78.3551261 | 94.2690501 | 63 | 78.1773281 |  |
| 69.8457846 | 71.9030219 | 78.3551261 | 94.2690501 | 63 | 78.1773281 |  |
| 76.8457846 | 71.9030219 | 79.3551261 | 92.2690501 | 63 | 79.1773281 |  |
| 76.8457846 | 72.9030219 | 79.3551261 | 92.2690501 | 63 | 79.4273281 |  |
| 85.8457846 | 72.9030219 | 80.3551261 | 88.2690501 | 63 | 79.6773281 |  |
| 87.8457846 | 71.9030219 | 80.3551261 | 87.2690501 | 63 | 79.8023281 |  |
| 87.8457846 | 70.9030219 | 79.3551261 | 86.2690501 | 63 | 79.6773281 |  |
| 87.8457846 | 70.9030219 | 79.3551261 | 86.2690501 | 63 | 79.9273281 |  |
| 87.8457846 | 70.9030219 | 79.3551261 | 86.2690501 | 63 | 80.4273281 |  |
| 87.8457846 | 70.9030219 | 78.3551261 | 89.2690501 | 63 | 80.3023281 |  |
| 87.8457846 | 70.9030219 | 76.3551261 | 90.2690501 | 63 | 80.4273281 |  |
| 86.8457846 | 69.9030219 | 76.3551261 | 92.2690501 | 63 | 80.4273281 |  |
| 85.8457846 | 69.9030219 | 76.3551261 | 92.2690501 | 63 | 80.3023281 |  |
| 84.8457846 | 68.9030219 | 76.3551261 | 93.2690501 | 63 | 79.9273281 |  |
| 83.8457846 | 68.9030219 | 76.3551261 | 92.2690501 | 63 | 79.5523281 |  |
| 81.8457846 | 68.9030219 | 76.3551261 | 91.2690501 | 63 | 79.3023281 |  |
| 81.8457846 | 72.9030219 | 75.3551261 | 90.2690501 | 63 | 79.9273281 |  |
| 74.8457846 | 72.9030219 | 75.3551261 | 90.2690501 | 63 | 79.1773281 |  |
| 74.8457846 | 72.9030219 | 74.3551261 | 89.2690501 | 63 | 78.8023281 |  |
| 73.8457846 | 72.9030219 | 73.3551261 | 88.2690501 | 63 | 78.3023281 |  |
| 73.8457846 | 72.9030219 | 73.3551261 | 87.2690501 | 63 | 77.9273281 |  |
| 74.8457846 | 72.9030219 | 73.3551261 | 88.2690501 | 63 | 78.4273281 |  |
| 74.8457846 | 72.9030219 | 73.3551261 | 88.2690501 | 63 | 78.4273281 |  |
| 74.8457846 | 72.9030219 | 73.3551261 | 88.2690501 | 63 | 78.4273281 |  |



|            |            |            |            |    |            |
|------------|------------|------------|------------|----|------------|
| 77.8457846 | 71.9030219 | 72.3551261 | 88.2690501 | 63 | 78.8023281 |
| 77.8457846 | 71.9030219 | 72.3551261 | 88.2690501 | 63 | 78.8023281 |
| 78.8457846 | 71.9030219 | 71.3551261 | 87.2690501 | 63 | 78.5523281 |
| 80.8457846 | 74.9030219 | 70.3551261 | 87.2690501 | 63 | 78.9273281 |
| 80.8457846 | 75.9030219 | 66.3551261 | 86.2690501 | 63 | 78.6773281 |
| 79.8457846 | 75.9030219 | 66.3551261 | 86.2690501 | 63 | 78.9273281 |
| 79.8457846 | 75.9030219 | 66.3551261 | 86.2690501 | 63 | 78.8023281 |
| 80.8457846 | 77.9030219 | 68.3551261 | 88.2690501 | 63 | 79.6773281 |
| 81.8457846 | 77.9030219 | 68.3551261 | 89.2690501 | 63 | 80.3023281 |
| 82.8457846 | 77.9030219 | 68.3551261 | 90.2690501 | 63 | 82.4273281 |
| 82.8457846 | 76.9030219 | 70.3551261 | 90.2690501 | 63 | 81.4273281 |
| 82.8457846 | 76.9030219 | 70.3551261 | 90.2690501 | 63 | 81.4273281 |
| 83.8457846 | 73.9030219 | 70.3551261 | 90.2690501 | 63 | 81.0523281 |
| 85.8457846 | 72.9030219 | 71.3551261 | 90.2690501 | 63 | 81.1773281 |
| 86.8457846 | 72.9030219 | 72.3551261 | 90.2690501 | 63 | 81.3023281 |
| 87.8457846 | 71.9030219 | 73.3551261 | 90.2690501 | 63 | 81.9273281 |
| 87.8457846 | 71.9030219 | 73.3551261 | 90.2690501 | 63 | 82.1773281 |
| 87.8457846 | 71.9030219 | 73.3551261 | 90.2690501 | 63 | 82.1773281 |
| 86.8457846 | 71.9030219 | 73.3551261 | 90.2690501 | 63 | 82.0523281 |
| 86.8457846 | 71.9030219 | 73.3551261 | 89.2690501 | 63 | 81.9273281 |
| 85.8457846 | 71.9030219 | 73.3551261 | 89.2690501 | 63 | 81.8023281 |
| 85.8457846 | 72.9030219 | 73.3551261 | 89.2690501 | 63 | 81.6773281 |
| 82.8457846 | 72.9030219 | 73.3551261 | 89.2690501 | 63 | 81.4273281 |
| 82.8457846 | 72.9030219 | 74.3551261 | 90.2690501 | 63 | 81.4273281 |
| 81.8457846 | 72.9030219 | 73.3551261 | 90.2690501 | 63 | 80.5523281 |
| 81.8457846 | 73.9030219 | 73.3551261 | 90.2690501 | 63 | 80.0523281 |
| 81.8457846 | 76.9030219 | 73.3551261 | 88.2690501 | 63 | 79.9273281 |
| 81.8457846 | 77.9030219 | 73.3551261 | 87.2690501 | 63 | 79.9273281 |
| 80.8457846 | 78.9030219 | 73.3551261 | 87.2690501 | 63 | 79.9273281 |
| 78.8457846 | 78.9030219 | 75.3551261 | 86.2690501 | 63 | 79.1773281 |
| 78.8457846 | 78.9030219 | 75.3551261 | 86.2690501 | 63 | 79.1773281 |
| 78.8457846 | 79.9030219 | 75.3551261 | 86.2690501 | 63 | 79.4273281 |
| 78.8457846 | 79.9030219 | 73.3551261 | 87.2690501 | 63 | 79.8023281 |
| 79.8457846 | 79.9030219 | 72.3551261 | 86.2690501 | 63 | 80.0523281 |
| 80.8457846 | 78.9030219 | 72.3551261 | 87.2690501 | 63 | 80.4273281 |
| 80.8457846 | 78.9030219 | 72.3551261 | 88.2690501 | 63 | 80.4273281 |
| 80.8457846 | 76.9030219 | 72.3551261 | 87.2690501 | 63 | 80.0523281 |
| 80.8457846 | 75.9030219 | 72.3551261 | 87.2690501 | 63 | 79.5523281 |
| 81.8457846 | 75.9030219 | 72.3551261 | 87.2690501 | 63 | 79.5523281 |
| 84.8457846 | 73.9030219 | 72.3551261 | 85.2690501 | 63 | 79.5523281 |
| 84.8457846 | 72.9030219 | 73.3551261 | 84.2690501 | 63 | 79.4273281 |
| 84.8457846 | 72.9030219 | 73.3551261 | 84.2690501 | 63 | 79.4273281 |
| 84.8457846 | 71.9030219 | 73.3551261 | 85.2690501 | 63 | 79.4273281 |
| 84.8457846 | 75.9030219 | 73.3551261 | 84.2690501 | 63 | 80.3023281 |
| 84.8457846 | 76.9030219 | 73.3551261 | 84.2690501 | 63 | 80.5523281 |

|            |            |            |            |    |            |
|------------|------------|------------|------------|----|------------|
| 83.8457846 | 76.9030219 | 73.3551261 | 84.2690501 | 63 | 80.3023281 |
| 83.8457846 | 74.9030219 | 73.3551261 | 84.2690501 | 63 | 79.8023281 |
| 83.8457846 | 72.9030219 | 73.3551261 | 83.2690501 | 63 | 79.1773281 |
| 83.8457846 | 70.9030219 | 73.3551261 | 83.2690501 | 63 | 79.0523281 |
| 82.8457846 | 68.9030219 | 73.3551261 | 83.2690501 | 63 | 78.9273281 |
| 82.8457846 | 66.9030219 | 73.3551261 | 83.2690501 | 63 | 78.8023281 |
| 82.8457846 | 65.9030219 | 73.3551261 | 83.2690501 | 63 | 79.0523281 |
| 82.8457846 | 65.9030219 | 73.3551261 | 83.2690501 | 63 | 79.1773281 |
| 82.8457846 | 65.9030219 | 73.3551261 | 83.2690501 | 63 | 79.1773281 |
| 83.8457846 | 66.9030219 | 73.3551261 | 83.2690501 | 63 | 79.5523281 |
| 84.8457846 | 67.9030219 | 73.3551261 | 88.2690501 | 63 | 80.4273281 |
| 84.8457846 | 68.9030219 | 73.3551261 | 89.2690501 | 63 | 80.5523281 |
| 84.8457846 | 69.9030219 | 71.3551261 | 89.2690501 | 63 | 79.5523281 |
| 84.8457846 | 69.9030219 | 70.3551261 | 88.2690501 | 63 | 78.9273281 |
| 83.8457846 | 69.9030219 | 70.3551261 | 86.2690501 | 63 | 78.6773281 |
| 82.8457846 | 69.9030219 | 72.3551261 | 86.2690501 | 63 | 78.8023281 |
| 79.8457846 | 68.9030219 | 72.3551261 | 85.2690501 | 63 | 78.0523281 |
| 78.8457846 | 68.9030219 | 72.3551261 | 85.2690501 | 63 | 77.8023281 |
| 78.8457846 | 68.9030219 | 72.3551261 | 85.2690501 | 63 | 77.8023281 |
| 78.8457846 | 68.9030219 | 72.3551261 | 85.2690501 | 63 | 77.8023281 |
| 76.8457846 | 68.9030219 | 72.3551261 | 87.2690501 | 63 | 77.8023281 |
| 74.8457846 | 68.9030219 | 72.3551261 | 89.2690501 | 63 | 77.8023281 |
| 74.8457846 | 69.9030219 | 72.3551261 | 90.2690501 | 63 | 78.0523281 |
| 74.8457846 | 69.9030219 | 72.3551261 | 90.2690501 | 63 | 78.1773281 |
| 73.8457846 | 70.9030219 | 73.3551261 | 90.2690501 | 63 | 78.4273281 |
| 73.8457846 | 70.9030219 | 74.3551261 | 90.2690501 | 63 | 79.4273281 |
| 73.8457846 | 70.9030219 | 74.3551261 | 90.2690501 | 63 | 79.8023281 |
| 73.8457846 | 70.9030219 | 74.3551261 | 90.2690501 | 63 | 79.8023281 |
| 73.8457846 | 70.9030219 | 74.3551261 | 91.2690501 | 63 | 80.1773281 |
| 73.8457846 | 70.9030219 | 74.3551261 | 91.2690501 | 63 | 80.3023281 |
| 73.8457846 | 73.9030219 | 74.3551261 | 92.2690501 | 63 | 80.9273281 |
| 73.8457846 | 76.9030219 | 73.3551261 | 92.2690501 | 63 | 81.0523281 |
| 73.8457846 | 78.9030219 | 73.3551261 | 92.2690501 | 63 | 81.3023281 |
| 79.8457846 | 78.9030219 | 73.3551261 | 92.2690501 | 63 | 82.1773281 |
| 84.8457846 | 78.9030219 | 73.3551261 | 92.2690501 | 63 | 82.9273281 |
| 85.8457846 | 78.9030219 | 73.3551261 | 92.2690501 | 63 | 82.8023281 |
| 85.8457846 | 78.9030219 | 73.3551261 | 90.2690501 | 63 | 82.5523281 |
| 85.8457846 | 78.9030219 | 73.3551261 | 88.2690501 | 63 | 82.4273281 |
| 85.8457846 | 78.9030219 | 75.3551261 | 88.2690501 | 63 | 82.6773281 |
| 86.8457846 | 74.9030219 | 76.3551261 | 87.2690501 | 63 | 82.3023281 |
| 86.8457846 | 73.9030219 | 76.3551261 | 87.2690501 | 63 | 82.0523281 |
| 86.8457846 | 73.9030219 | 76.3551261 | 87.2690501 | 63 | 81.5523281 |
| 82.8457846 | 72.9030219 | 76.3551261 | 87.2690501 | 63 | 80.6773281 |
| 82.8457846 | 72.9030219 | 76.3551261 | 87.2690501 | 63 | 80.4273281 |
| 81.8457846 | 73.9030219 | 76.3551261 | 87.2690501 | 63 | 80.4273281 |

|            |            |            |            |    |            |  |
|------------|------------|------------|------------|----|------------|--|
| 82.8457846 | 73.9030219 | 76.3551261 | 87.2690501 | 63 | 80.8023281 |  |
| 82.8457846 | 73.9030219 | 76.3551261 | 87.2690501 | 63 | 80.8023281 |  |
| 82.8457846 | 72.9030219 | 76.3551261 | 87.2690501 | 63 | 80.6773281 |  |
| 82.8457846 | 72.9030219 | 76.3551261 | 83.2690501 | 63 | 80.1773281 |  |
| 82.8457846 | 72.9030219 | 76.3551261 | 81.2690501 | 63 | 79.9273281 |  |
| 82.8457846 | 72.9030219 | 78.3551261 | 82.2690501 | 63 | 80.8023281 |  |
| 82.8457846 | 72.9030219 | 78.3551261 | 82.2690501 | 63 | 81.1773281 |  |
| 82.8457846 | 72.9030219 | 73.3551261 | 83.2690501 | 63 | 80.8023281 |  |
| 82.8457846 | 72.9030219 | 73.3551261 | 84.2690501 | 63 | 80.8023281 |  |
| 82.8457846 | 71.9030219 | 73.3551261 | 83.2690501 | 63 | 80.3023281 |  |
| 82.8457846 | 71.9030219 | 73.3551261 | 83.2690501 | 63 | 80.0523281 |  |
| 82.8457846 | 71.9030219 | 73.3551261 | 83.2690501 | 63 | 79.4273281 |  |
| 82.8457846 | 71.9030219 | 73.3551261 | 82.2690501 | 63 | 78.9273281 |  |
| 80.8457846 | 71.9030219 | 72.3551261 | 82.2690501 | 63 | 78.4273281 |  |
| 80.8457846 | 71.9030219 | 72.3551261 | 82.2690501 | 63 | 78.3023281 |  |
| 79.8457846 | 71.9030219 | 72.3551261 | 82.2690501 | 63 | 77.8023281 |  |
| 75.8457846 | 71.9030219 | 72.3551261 | 82.2690501 | 63 | 77.0523281 |  |
| 75.8457846 | 71.9030219 | 72.3551261 | 82.2690501 | 63 | 77.0523281 |  |
| 72.8457846 | 72.9030219 | 72.3551261 | 84.2690501 | 63 | 77.0523281 |  |
| 72.8457846 | 72.9030219 | 72.3551261 | 85.2690501 | 63 | 76.9273281 |  |
| 72.8457846 | 73.9030219 | 74.3551261 | 85.2690501 | 63 | 77.3023281 |  |
| 71.8457846 | 73.9030219 | 74.3551261 | 85.2690501 | 63 | 77.0523281 |  |
| 71.8457846 | 73.9030219 | 74.3551261 | 85.2690501 | 63 | 77.1773281 |  |
| 71.8457846 | 72.9030219 | 74.3551261 | 85.2690501 | 63 | 76.5523281 |  |
| 71.8457846 | 71.9030219 | 74.3551261 | 84.2690501 | 63 | 76.0523281 |  |
| 72.8457846 | 71.9030219 | 74.3551261 | 84.2690501 | 63 | 76.3023281 |  |
| 73.8457846 | 71.9030219 | 74.3551261 | 84.2690501 | 63 | 76.6773281 |  |
| 77.8457846 | 72.9030219 | 74.3551261 | 84.2690501 | 63 | 77.4273281 |  |
| 77.8457846 | 73.9030219 | 74.3551261 | 84.2690501 | 63 | 77.5523281 |  |
| 78.8457846 | 74.9030219 | 74.3551261 | 87.2690501 | 63 | 78.5523281 |  |
| 78.8457846 | 74.9030219 | 74.3551261 | 87.2690501 | 63 | 78.8023281 |  |
| 78.8457846 | 76.9030219 | 74.3551261 | 88.2690501 | 63 | 79.3023281 |  |
| 78.8457846 | 76.9030219 | 74.3551261 | 88.2690501 | 63 | 79.4273281 |  |
| 78.8457846 | 76.9030219 | 73.3551261 | 90.2690501 | 63 | 79.6773281 |  |
| 78.8457846 | 75.9030219 | 73.3551261 | 90.2690501 | 63 | 79.4273281 |  |
| 78.8457846 | 75.9030219 | 72.3551261 | 90.2690501 | 63 | 79.5523281 |  |
| 78.8457846 | 74.9030219 | 70.3551261 | 91.2690501 | 63 | 79.4273281 |  |
| 78.8457846 | 73.9030219 | 67.3551261 | 91.2690501 | 63 | 78.9273281 |  |
| 77.8457846 | 73.9030219 | 67.3551261 | 90.2690501 | 63 | 78.9273281 |  |
| 76.8457846 | 73.9030219 | 65.3551261 | 89.2690501 | 63 | 78.6773281 |  |
| 75.8457846 | 73.9030219 | 65.3551261 | 89.2690501 | 63 | 78.9273281 |  |
| 75.8457846 | 74.9030219 | 65.3551261 | 87.2690501 | 63 | 78.9273281 |  |
| 75.8457846 | 75.9030219 | 66.3551261 | 86.2690501 | 63 | 79.4273281 |  |
| 73.8457846 | 75.9030219 | 67.3551261 | 86.2690501 | 63 | 79.3023281 |  |
| 74.8457846 | 75.9030219 | 67.3551261 | 86.2690501 | 63 | 79.5523281 |  |

|            |            |            |            |    |            |  |
|------------|------------|------------|------------|----|------------|--|
| 74.8457846 | 75.9030219 | 68.3551261 | 86.2690501 | 63 | 79.8023281 |  |
| 76.8457846 | 74.9030219 | 68.3551261 | 86.2690501 | 63 | 79.8023281 |  |
| 77.8457846 | 74.9030219 | 69.3551261 | 88.2690501 | 63 | 80.4273281 |  |
| 78.8457846 | 73.9030219 | 70.3551261 | 88.2690501 | 63 | 80.6773281 |  |
| 78.8457846 | 72.9030219 | 69.3551261 | 87.2690501 | 63 | 80.3023281 |  |
| 78.8457846 | 72.9030219 | 69.3551261 | 87.2690501 | 63 | 80.3023281 |  |
| 78.8457846 | 72.9030219 | 75.3551261 | 87.2690501 | 63 | 81.0523281 |  |
| 77.8457846 | 72.9030219 | 76.3551261 | 88.2690501 | 63 | 81.1773281 |  |
| 77.8457846 | 72.9030219 | 76.3551261 | 89.2690501 | 63 | 81.3023281 |  |
| 77.8457846 | 72.9030219 | 76.3551261 | 89.2690501 | 63 | 81.3023281 |  |
| 78.8457846 | 72.9030219 | 76.3551261 | 89.2690501 | 63 | 80.3023281 |  |
| 78.8457846 | 72.9030219 | 76.3551261 | 89.2690501 | 63 | 79.9273281 |  |
| 78.8457846 | 71.9030219 | 78.3551261 | 89.2690501 | 63 | 79.8023281 |  |
| 79.8457846 | 72.9030219 | 78.3551261 | 89.2690501 | 63 | 80.0523281 |  |
| 80.8457846 | 72.9030219 | 80.3551261 | 89.2690501 | 63 | 80.4273281 |  |
| 81.8457846 | 74.9030219 | 80.3551261 | 89.2690501 | 63 | 80.9273281 |  |
| 82.8457846 | 74.9030219 | 80.3551261 | 90.2690501 | 63 | 80.9273281 |  |
| 82.8457846 | 74.9030219 | 80.3551261 | 89.2690501 | 63 | 80.6773281 |  |
| 80.8457846 | 74.9030219 | 80.3551261 | 89.2690501 | 63 | 80.4273281 |  |
| 80.8457846 | 75.9030219 | 80.3551261 | 89.2690501 | 63 | 80.4273281 |  |
| 80.8457846 | 75.9030219 | 80.3551261 | 89.2690501 | 63 | 79.8023281 |  |
| 80.8457846 | 74.9030219 | 80.3551261 | 89.2690501 | 63 | 79.3023281 |  |
| 80.8457846 | 74.9030219 | 81.3551261 | 90.2690501 | 63 | 79.4273281 |  |
| 79.8457846 | 75.9030219 | 81.3551261 | 91.2690501 | 63 | 79.4273281 |  |
| 79.8457846 | 76.9030219 | 83.3551261 | 91.2690501 | 63 | 79.9273281 |  |
| 79.8457846 | 76.9030219 | 83.3551261 | 91.2690501 | 63 | 80.1773281 |  |
| 79.8457846 | 76.9030219 | 83.3551261 | 91.2690501 | 63 | 80.1773281 |  |
| 77.8457846 | 75.9030219 | 81.3551261 | 91.2690501 | 63 | 79.8023281 |  |
| 77.8457846 | 75.9030219 | 81.3551261 | 90.2690501 | 63 | 79.9273281 |  |
| 76.8457846 | 73.9030219 | 79.3551261 | 90.2690501 | 63 | 79.5523281 |  |
| 74.8457846 | 71.9030219 | 79.3551261 | 90.2690501 | 63 | 78.9273281 |  |
| 74.8457846 | 69.9030219 | 79.3551261 | 90.2690501 | 63 | 78.8023281 |  |
| 74.8457846 | 69.9030219 | 79.3551261 | 90.2690501 | 63 | 78.8023281 |  |
| 74.8457846 | 69.9030219 | 79.3551261 | 90.2690501 | 63 | 78.6773281 |  |
| 74.8457846 | 69.9030219 | 79.3551261 | 90.2690501 | 63 | 78.6773281 |  |
| 74.8457846 | 70.9030219 | 80.3551261 | 90.2690501 | 63 | 78.9273281 |  |
| 75.8457846 | 71.9030219 | 81.3551261 | 90.2690501 | 63 | 79.0523281 |  |
| 75.8457846 | 72.9030219 | 84.3551261 | 89.2690501 | 63 | 79.1773281 |  |
| 76.8457846 | 73.9030219 | 84.3551261 | 89.2690501 | 63 | 79.3023281 |  |
| 75.8457846 | 73.9030219 | 81.3551261 | 89.2690501 | 63 | 78.4273281 |  |
| 75.8457846 | 72.9030219 | 78.3551261 | 89.2690501 | 63 | 78.0523281 |  |
| 75.8457846 | 72.9030219 | 77.3551261 | 89.2690501 | 63 | 77.9273281 |  |
| 75.8457846 | 72.9030219 | 76.3551261 | 89.2690501 | 63 | 77.9273281 |  |
| 75.8457846 | 71.9030219 | 76.3551261 | 89.2690501 | 63 | 78.3023281 |  |
| 74.8457846 | 68.9030219 | 74.3551261 | 90.2690501 | 63 | 77.5523281 |  |

|            |            |            |            |    |            |  |
|------------|------------|------------|------------|----|------------|--|
| 72.8457846 | 68.9030219 | 75.3551261 | 90.2690501 | 63 | 77.6773281 |  |
| 71.8457846 | 68.9030219 | 76.3551261 | 90.2690501 | 63 | 77.3023281 |  |
| 71.8457846 | 69.9030219 | 77.3551261 | 90.2690501 | 63 | 77.5523281 |  |
| 70.8457846 | 69.9030219 | 77.3551261 | 90.2690501 | 63 | 77.5523281 |  |
| 70.8457846 | 69.9030219 | 78.3551261 | 90.2690501 | 63 | 77.9273281 |  |
| 70.8457846 | 69.9030219 | 77.3551261 | 88.2690501 | 63 | 77.6773281 |  |
| 77.8457846 | 69.9030219 | 74.3551261 | 88.2690501 | 63 | 78.8023281 |  |
| 78.8457846 | 69.9030219 | 72.3551261 | 89.2690501 | 63 | 78.8023281 |  |
| 78.8457846 | 69.9030219 | 70.3551261 | 90.2690501 | 63 | 78.8023281 |  |
| 78.8457846 | 69.9030219 | 69.3551261 | 90.2690501 | 63 | 78.4273281 |  |
| 78.8457846 | 71.9030219 | 68.3551261 | 91.2690501 | 63 | 78.6773281 |  |
| 77.8457846 | 71.9030219 | 66.3551261 | 90.2690501 | 63 | 77.6773281 |  |
| 77.8457846 | 71.9030219 | 66.3551261 | 89.2690501 | 63 | 77.8023281 |  |
| 77.8457846 | 72.9030219 | 65.3551261 | 89.2690501 | 63 | 77.9273281 |  |
| 78.8457846 | 73.9030219 | 64.3551261 | 88.2690501 | 63 | 78.0523281 |  |
| 81.8457846 | 74.9030219 | 64.3551261 | 88.2690501 | 63 | 78.6773281 |  |
| 83.8457846 | 75.9030219 | 64.3551261 | 88.2690501 | 63 | 79.1773281 |  |
| 79.8457846 | 75.9030219 | 64.3551261 | 87.2690501 | 63 | 78.6773281 |  |
| 79.8457846 | 71.9030219 | 64.3551261 | 87.2690501 | 63 | 78.8023281 |  |
| 76.8457846 | 70.9030219 | 64.3551261 | 87.2690501 | 63 | 78.5523281 |  |
| 75.8457846 | 70.9030219 | 65.3551261 | 85.2690501 | 63 | 78.6773281 |  |
| 76.8457846 | 70.9030219 | 65.3551261 | 85.2690501 | 63 | 78.9273281 |  |
| 77.8457846 | 70.9030219 | 65.3551261 | 85.2690501 | 63 | 79.3023281 |  |
| 79.8457846 | 71.9030219 | 65.3551261 | 85.2690501 | 63 | 79.6773281 |  |
| 79.8457846 | 71.9030219 | 64.3551261 | 85.2690501 | 63 | 79.4273281 |  |
| 79.8457846 | 71.9030219 | 64.3551261 | 84.2690501 | 63 | 79.4273281 |  |
| 79.8457846 | 71.9030219 | 64.3551261 | 84.2690501 | 63 | 79.4273281 |  |
| 79.8457846 | 72.9030219 | 64.3551261 | 87.2690501 | 63 | 79.9273281 |  |
| 79.8457846 | 72.9030219 | 64.3551261 | 88.2690501 | 63 | 80.3023281 |  |
| 80.8457846 | 72.9030219 | 64.3551261 | 88.2690501 | 63 | 80.4273281 |  |
| 79.8457846 | 72.9030219 | 65.3551261 | 88.2690501 | 63 | 80.4273281 |  |
| 79.8457846 | 73.9030219 | 68.3551261 | 88.2690501 | 63 | 81.1773281 |  |
| 79.8457846 | 74.9030219 | 69.3551261 | 89.2690501 | 63 | 81.4273281 |  |
| 79.8457846 | 74.9030219 | 69.3551261 | 90.2690501 | 63 | 81.8023281 |  |
| 78.8457846 | 76.9030219 | 69.3551261 | 90.2690501 | 63 | 82.3023281 |  |
| 78.8457846 | 76.9030219 | 69.3551261 | 90.2690501 | 63 | 82.3023281 |  |
| 78.8457846 | 76.9030219 | 71.3551261 | 91.2690501 | 63 | 82.3023281 |  |
| 78.8457846 | 78.9030219 | 69.3551261 | 92.2690501 | 63 | 81.8023281 |  |
| 78.8457846 | 80.9030219 | 69.3551261 | 92.2690501 | 63 | 82.0523281 |  |
| 78.8457846 | 81.9030219 | 69.3551261 | 92.2690501 | 63 | 81.9273281 |  |
| 79.8457846 | 81.9030219 | 69.3551261 | 89.2690501 | 63 | 80.4273281 |  |
| 79.8457846 | 81.9030219 | 67.3551261 | 89.2690501 | 63 | 80.1773281 |  |
| 81.8457846 | 81.9030219 | 66.3551261 | 89.2690501 | 63 | 80.0523281 |  |
| 81.8457846 | 81.9030219 | 66.3551261 | 87.2690501 | 63 | 79.6773281 |  |
| 81.8457846 | 82.9030219 | 67.3551261 | 87.2690501 | 63 | 79.8023281 |  |

|            |            |            |            |    |            |
|------------|------------|------------|------------|----|------------|
| 81.8457846 | 83.9030219 | 67.3551261 | 87.2690501 | 63 | 80.0523281 |
| 81.8457846 | 83.9030219 | 67.3551261 | 83.2690501 | 63 | 79.5523281 |
| 81.8457846 | 83.9030219 | 68.3551261 | 83.2690501 | 63 | 80.0523281 |
| 81.8457846 | 82.9030219 | 68.3551261 | 83.2690501 | 63 | 78.0523281 |
| 82.8457846 | 81.9030219 | 69.3551261 | 84.2690501 | 63 | 78.5523281 |
| 82.8457846 | 79.9030219 | 69.3551261 | 86.2690501 | 63 | 78.4273281 |
| 84.8457846 | 79.9030219 | 71.3551261 | 86.2690501 | 63 | 78.8023281 |
| 84.8457846 | 74.9030219 | 71.3551261 | 86.2690501 | 63 | 77.9273281 |
| 85.8457846 | 70.9030219 | 71.3551261 | 86.2690501 | 63 | 77.5523281 |
| 88.8457846 | 68.9030219 | 72.3551261 | 85.2690501 | 63 | 77.4273281 |
| 88.8457846 | 68.9030219 | 72.3551261 | 85.2690501 | 63 | 77.5523281 |
| 88.8457846 | 68.9030219 | 72.3551261 | 85.2690501 | 63 | 77.6773281 |
| 88.8457846 | 68.9030219 | 72.3551261 | 84.2690501 | 63 | 77.3023281 |
| 88.8457846 | 68.9030219 | 72.3551261 | 84.2690501 | 63 | 77.0523281 |
| 89.8457846 | 67.9030219 | 72.3551261 | 84.2690501 | 63 | 77.4273281 |
| 89.8457846 | 68.9030219 | 72.3551261 | 85.2690501 | 63 | 77.5523281 |
| 90.8457846 | 71.9030219 | 72.3551261 | 86.2690501 | 63 | 78.3023281 |
| 90.8457846 | 71.9030219 | 71.3551261 | 86.2690501 | 63 | 78.5523281 |
| 89.8457846 | 73.9030219 | 70.3551261 | 88.2690501 | 63 | 78.8023281 |
| 90.8457846 | 76.9030219 | 70.3551261 | 89.2690501 | 63 | 79.6773281 |
| 90.8457846 | 76.9030219 | 70.3551261 | 89.2690501 | 63 | 79.9273281 |
| 90.8457846 | 76.9030219 | 70.3551261 | 88.2690501 | 63 | 79.6773281 |
| 90.8457846 | 77.9030219 | 70.3551261 | 88.2690501 | 63 | 79.6773281 |
| 91.8457846 | 76.9030219 | 77.3551261 | 88.2690501 | 63 | 80.8023281 |
| 91.8457846 | 74.9030219 | 78.3551261 | 89.2690501 | 63 | 81.1773281 |
| 91.8457846 | 71.9030219 | 78.3551261 | 91.2690501 | 63 | 81.1773281 |
| 91.8457846 | 71.9030219 | 78.3551261 | 93.2690501 | 63 | 81.8023281 |
| 91.8457846 | 71.9030219 | 78.3551261 | 94.2690501 | 63 | 82.1773281 |
| 92.8457846 | 71.9030219 | 77.3551261 | 95.2690501 | 63 | 82.3023281 |
| 92.8457846 | 71.9030219 | 77.3551261 | 95.2690501 | 63 | 82.0523281 |
| 92.8457846 | 70.9030219 | 77.3551261 | 95.2690501 | 63 | 81.8023281 |
| 95.8457846 | 69.9030219 | 77.3551261 | 91.2690501 | 63 | 81.6773281 |
| 96.8457846 | 69.9030219 | 78.3551261 | 89.2690501 | 63 | 81.5523281 |
| 96.8457846 | 69.9030219 | 78.3551261 | 88.2690501 | 63 | 81.4273281 |
| 93.8457846 | 68.9030219 | 78.3551261 | 87.2690501 | 63 | 80.8023281 |
| 93.8457846 | 68.9030219 | 78.3551261 | 87.2690501 | 63 | 81.3023281 |
| 92.8457846 | 67.9030219 | 78.3551261 | 86.2690501 | 63 | 81.4273281 |
| 91.8457846 | 66.9030219 | 78.3551261 | 86.2690501 | 63 | 81.5523281 |
| 91.8457846 | 66.9030219 | 78.3551261 | 85.2690501 | 63 | 81.4273281 |
| 91.8457846 | 67.9030219 | 78.3551261 | 84.2690501 | 63 | 81.5523281 |
| 90.8457846 | 67.9030219 | 78.3551261 | 83.2690501 | 63 | 81.1773281 |
| 90.8457846 | 68.9030219 | 78.3551261 | 82.2690501 | 63 | 81.1773281 |
| 90.8457846 | 68.9030219 | 80.3551261 | 81.2690501 | 63 | 81.3023281 |
| 88.8457846 | 68.9030219 | 81.3551261 | 81.2690501 | 63 | 81.1773281 |
| 88.8457846 | 68.9030219 | 81.3551261 | 81.2690501 | 63 | 81.1773281 |

|            |            |            |            |    |            |  |
|------------|------------|------------|------------|----|------------|--|
| 87.8457846 | 67.9030219 | 80.3551261 | 82.2690501 | 63 | 81.4273281 |  |
| 86.8457846 | 67.9030219 | 80.3551261 | 82.2690501 | 63 | 81.1773281 |  |
| 84.8457846 | 68.9030219 | 80.3551261 | 83.2690501 | 63 | 81.0523281 |  |
| 84.8457846 | 68.9030219 | 76.3551261 | 82.2690501 | 63 | 79.6773281 |  |
| 80.8457846 | 69.9030219 | 72.3551261 | 82.2690501 | 63 | 78.4273281 |  |
| 82.8457846 | 69.9030219 | 71.3551261 | 81.2690501 | 63 | 78.0523281 |  |
| 82.8457846 | 69.9030219 | 70.3551261 | 81.2690501 | 63 | 77.6773281 |  |
| 82.8457846 | 68.9030219 | 70.3551261 | 82.2690501 | 63 | 76.9273281 |  |
| 84.8457846 | 67.9030219 | 70.3551261 | 82.2690501 | 63 | 76.4273281 |  |
| 84.8457846 | 67.9030219 | 70.3551261 | 83.2690501 | 63 | 76.5523281 |  |
| 84.8457846 | 67.9030219 | 70.3551261 | 83.2690501 | 63 | 75.9273281 |  |
| 84.8457846 | 67.9030219 | 70.3551261 | 83.2690501 | 63 | 76.0523281 |  |
| 84.8457846 | 67.9030219 | 70.3551261 | 83.2690501 | 63 | 76.5523281 |  |
| 84.8457846 | 68.9030219 | 70.3551261 | 83.2690501 | 63 | 77.0523281 |  |
| 84.8457846 | 68.9030219 | 70.3551261 | 82.2690501 | 63 | 77.1773281 |  |
| 84.8457846 | 68.9030219 | 69.3551261 | 82.2690501 | 63 | 77.1773281 |  |
| 83.8457846 | 68.9030219 | 67.3551261 | 82.2690501 | 63 | 76.9273281 |  |
| 83.8457846 | 68.9030219 | 67.3551261 | 82.2690501 | 63 | 76.9273281 |  |
| 83.8457846 | 68.9030219 | 67.3551261 | 81.2690501 | 63 | 76.9273281 |  |
| 83.8457846 | 68.9030219 | 67.3551261 | 81.2690501 | 63 | 77.0523281 |  |
| 81.8457846 | 68.9030219 | 66.3551261 | 81.2690501 | 63 | 77.3023281 |  |
| 78.8457846 | 68.9030219 | 65.3551261 | 81.2690501 | 63 | 76.8023281 |  |
| 75.8457846 | 68.9030219 | 65.3551261 | 81.2690501 | 63 | 76.5523281 |  |
| 75.8457846 | 67.9030219 | 65.3551261 | 81.2690501 | 63 | 76.6773281 |  |
| 75.8457846 | 67.9030219 | 65.3551261 | 81.2690501 | 63 | 76.6773281 |  |
| 75.8457846 | 67.9030219 | 65.3551261 | 80.2690501 | 63 | 76.4273281 |  |
| 75.8457846 | 68.9030219 | 64.3551261 | 80.2690501 | 63 | 76.0523281 |  |
| 75.8457846 | 68.9030219 | 64.3551261 | 80.2690501 | 63 | 75.8023281 |  |
| 75.8457846 | 68.9030219 | 69.3551261 | 81.2690501 | 63 | 76.4273281 |  |
| 74.8457846 | 68.9030219 | 71.3551261 | 82.2690501 | 63 | 76.6773281 |  |
| 74.8457846 | 68.9030219 | 71.3551261 | 82.2690501 | 63 | 76.6773281 |  |
| 75.8457846 | 68.9030219 | 71.3551261 | 82.2690501 | 63 | 76.8023281 |  |
| 76.8457846 | 69.9030219 | 72.3551261 | 82.2690501 | 63 | 77.1773281 |  |
| 76.8457846 | 69.9030219 | 73.3551261 | 82.2690501 | 63 | 77.4273281 |  |
| 76.8457846 | 69.9030219 | 74.3551261 | 83.2690501 | 63 | 77.3023281 |  |
| 77.8457846 | 71.9030219 | 74.3551261 | 83.2690501 | 63 | 77.8023281 |  |
| 78.8457846 | 71.9030219 | 76.3551261 | 87.2690501 | 63 | 78.8023281 |  |
| 80.8457846 | 72.9030219 | 76.3551261 | 88.2690501 | 63 | 79.3023281 |  |
| 80.8457846 | 72.9030219 | 76.3551261 | 89.2690501 | 63 | 79.3023281 |  |
| 80.8457846 | 72.9030219 | 76.3551261 | 89.2690501 | 63 | 79.1773281 |  |
| 80.8457846 | 72.9030219 | 76.3551261 | 89.2690501 | 63 | 79.6773281 |  |
| 80.8457846 | 72.9030219 | 77.3551261 | 89.2690501 | 63 | 80.0523281 |  |
| 80.8457846 | 72.9030219 | 77.3551261 | 89.2690501 | 63 | 80.1773281 |  |
| 80.8457846 | 72.9030219 | 77.3551261 | 90.2690501 | 63 | 80.1773281 |  |
| 80.8457846 | 72.9030219 | 77.3551261 | 91.2690501 | 63 | 80.0523281 |  |

|            |            |            |            |    |            |  |
|------------|------------|------------|------------|----|------------|--|
| 78.8457846 | 72.9030219 | 77.3551261 | 91.2690501 | 63 | 79.8023281 |  |
| 77.8457846 | 72.9030219 | 76.3551261 | 91.2690501 | 63 | 79.1773281 |  |
| 77.8457846 | 72.9030219 | 75.3551261 | 90.2690501 | 63 | 79.0523281 |  |
| 76.8457846 | 72.9030219 | 73.3551261 | 90.2690501 | 63 | 78.4273281 |  |
| 76.8457846 | 72.9030219 | 72.3551261 | 87.2690501 | 63 | 77.9273281 |  |
| 76.8457846 | 72.9030219 | 72.3551261 | 86.2690501 | 63 | 77.8023281 |  |
| 76.8457846 | 72.9030219 | 71.3551261 | 86.2690501 | 63 | 77.8023281 |  |
| 76.8457846 | 72.9030219 | 71.3551261 | 86.2690501 | 63 | 77.8023281 |  |
| 76.8457846 | 72.9030219 | 71.3551261 | 86.2690501 | 63 | 77.8023281 |  |
| 76.8457846 | 71.9030219 | 71.3551261 | 87.2690501 | 63 | 77.5523281 |  |
| 76.8457846 | 71.9030219 | 71.3551261 | 87.2690501 | 63 | 77.4273281 |  |
| 75.8457846 | 71.9030219 | 71.3551261 | 88.2690501 | 63 | 77.4273281 |  |
| 75.8457846 | 75.9030219 | 71.3551261 | 88.2690501 | 63 | 77.9273281 |  |
| 75.8457846 | 76.9030219 | 72.3551261 | 88.2690501 | 63 | 78.5523281 |  |
| 75.8457846 | 76.9030219 | 74.3551261 | 88.2690501 | 63 | 78.8023281 |  |
| 75.8457846 | 76.9030219 | 74.3551261 | 88.2690501 | 63 | 78.8023281 |  |
| 75.8457846 | 76.9030219 | 76.3551261 | 87.2690501 | 63 | 78.9273281 |  |
| 75.8457846 | 76.9030219 | 77.3551261 | 87.2690501 | 63 | 78.9273281 |  |
| 75.8457846 | 76.9030219 | 77.3551261 | 87.2690501 | 63 | 79.4273281 |  |
| 76.8457846 | 76.9030219 | 77.3551261 | 87.2690501 | 63 | 80.1773281 |  |
| 76.8457846 | 76.9030219 | 78.3551261 | 87.2690501 | 63 | 80.1773281 |  |
| 76.8457846 | 74.9030219 | 81.3551261 | 88.2690501 | 63 | 80.1773281 |  |
| 76.8457846 | 73.9030219 | 81.3551261 | 88.2690501 | 63 | 79.8023281 |  |
| 76.8457846 | 73.9030219 | 81.3551261 | 88.2690501 | 63 | 79.8023281 |  |
| 76.8457846 | 73.9030219 | 81.3551261 | 86.2690501 | 63 | 79.9273281 |  |
| 79.8457846 | 73.9030219 | 82.3551261 | 86.2690501 | 63 | 80.5523281 |  |
| 79.8457846 | 73.9030219 | 83.3551261 | 86.2690501 | 63 | 81.0523281 |  |
| 79.8457846 | 73.9030219 | 84.3551261 | 86.2690501 | 63 | 81.5523281 |  |
| 79.8457846 | 73.9030219 | 86.3551261 | 85.2690501 | 63 | 81.6773281 |  |
| 77.8457846 | 73.9030219 | 87.3551261 | 85.2690501 | 63 | 81.9273281 |  |
| 75.8457846 | 73.9030219 | 87.3551261 | 85.2690501 | 63 | 81.9273281 |  |
| 75.8457846 | 73.9030219 | 87.3551261 | 85.2690501 | 63 | 81.6773281 |  |
| 78.8457846 | 73.9030219 | 87.3551261 | 85.2690501 | 63 | 81.9273281 |  |
| 77.8457846 | 73.9030219 | 89.3551261 | 85.2690501 | 63 | 81.5523281 |  |
| 76.8457846 | 74.9030219 | 86.3551261 | 86.2690501 | 63 | 81.0523281 |  |
| 75.8457846 | 74.9030219 | 87.3551261 | 86.2690501 | 63 | 80.8023281 |  |
| 75.8457846 | 74.9030219 | 87.3551261 | 86.2690501 | 63 | 80.6773281 |  |
| 75.8457846 | 74.9030219 | 87.3551261 | 86.2690501 | 63 | 80.6773281 |  |
| 75.8457846 | 75.9030219 | 88.3551261 | 86.2690501 | 63 | 80.5523281 |  |
| 75.8457846 | 75.9030219 | 88.3551261 | 86.2690501 | 63 | 80.8023281 |  |
| 76.8457846 | 75.9030219 | 88.3551261 | 86.2690501 | 63 | 80.8023281 |  |
| 76.8457846 | 76.9030219 | 86.3551261 | 87.2690501 | 63 | 80.4273281 |  |
| 78.8457846 | 76.9030219 | 79.3551261 | 87.2690501 | 63 | 79.9273281 |  |
| 79.8457846 | 75.9030219 | 76.3551261 | 87.2690501 | 63 | 79.5523281 |  |
| 79.8457846 | 74.9030219 | 73.3551261 | 87.2690501 | 63 | 78.8023281 |  |



|            |            |            |            |    |            |  |
|------------|------------|------------|------------|----|------------|--|
| 80.8457846 | 75.9030219 | 71.3551261 | 87.2690501 | 63 | 79.0523281 |  |
| 80.8457846 | 75.9030219 | 71.3551261 | 86.2690501 | 63 | 78.9273281 |  |
| 79.8457846 | 75.9030219 | 69.3551261 | 86.2690501 | 69 | 78.5523281 |  |
| 79.8457846 | 75.9030219 | 69.3551261 | 86.2690501 | 69 | 78.4273281 |  |
| 79.8457846 | 75.9030219 | 69.3551261 | 86.2690501 | 69 | 78.3023281 |  |
| 79.8457846 | 79.9030219 | 68.3551261 | 88.2690501 | 69 | 78.8023281 |  |
| 78.8457846 | 80.9030219 | 68.3551261 | 88.2690501 | 69 | 78.8023281 |  |
| 78.8457846 | 80.9030219 | 69.3551261 | 87.2690501 | 69 | 78.8023281 |  |
| 78.8457846 | 81.9030219 | 69.3551261 | 87.2690501 | 69 | 78.9273281 |  |
| 76.8457846 | 81.9030219 | 68.3551261 | 87.2690501 | 69 | 78.4273281 |  |
| 76.8457846 | 81.9030219 | 67.3551261 | 87.2690501 | 69 | 77.9273281 |  |
| 75.8457846 | 80.9030219 | 67.3551261 | 87.2690501 | 69 | 77.0523281 |  |
| 75.8457846 | 79.9030219 | 67.3551261 | 87.2690501 | 69 | 76.9273281 |  |
| 75.8457846 | 78.9030219 | 67.3551261 | 87.2690501 | 69 | 76.4273281 |  |
| 74.8457846 | 78.9030219 | 67.3551261 | 87.2690501 | 69 | 76.3023281 |  |
| 74.8457846 | 73.9030219 | 67.3551261 | 86.2690501 | 69 | 75.4273281 |  |
| 72.8457846 | 71.9030219 | 67.3551261 | 86.2690501 | 69 | 75.1773281 |  |
| 72.8457846 | 71.9030219 | 67.3551261 | 86.2690501 | 69 | 75.1773281 |  |
| 71.8457846 | 69.9030219 | 68.3551261 | 88.2690501 | 69 | 75.4273281 |  |
| 71.8457846 | 69.9030219 | 68.3551261 | 89.2690501 | 69 | 75.4273281 |  |
| 70.8457846 | 69.9030219 | 68.3551261 | 90.2690501 | 69 | 75.1773281 |  |
| 71.8457846 | 68.9030219 | 67.3551261 | 91.2690501 | 69 | 75.0523281 |  |
| 71.8457846 | 66.9030219 | 67.3551261 | 91.2690501 | 69 | 74.8023281 |  |
| 72.8457846 | 66.9030219 | 68.3551261 | 93.2690501 | 69 | 75.9273281 |  |
| 72.8457846 | 66.9030219 | 68.3551261 | 94.2690501 | 69 | 76.6773281 |  |
| 76.8457846 | 64.9030219 | 68.3551261 | 94.2690501 | 69 | 77.4273281 |  |
| 76.8457846 | 64.9030219 | 68.3551261 | 93.2690501 | 69 | 77.3023281 |  |
| 76.8457846 | 63.9030219 | 69.3551261 | 92.2690501 | 69 | 77.1773281 |  |
| 84.8457846 | 64.9030219 | 68.3551261 | 92.2690501 | 69 | 78.3023281 |  |
| 84.8457846 | 64.9030219 | 68.3551261 | 92.2690501 | 69 | 78.5523281 |  |
| 85.8457846 | 64.9030219 | 68.3551261 | 92.2690501 | 69 | 78.1773281 |  |
| 85.8457846 | 64.9030219 | 68.3551261 | 92.2690501 | 69 | 78.0523281 |  |
| 86.8457846 | 64.9030219 | 69.3551261 | 91.2690501 | 69 | 78.1773281 |  |
| 86.8457846 | 65.9030219 | 69.3551261 | 91.2690501 | 69 | 77.8023281 |  |
| 87.8457846 | 65.9030219 | 69.3551261 | 91.2690501 | 69 | 77.9273281 |  |
| 89.8457846 | 66.9030219 | 69.3551261 | 89.2690501 | 69 | 77.9273281 |  |
| 88.8457846 | 66.9030219 | 70.3551261 | 89.2690501 | 69 | 77.9273281 |  |
| 88.8457846 | 66.9030219 | 70.3551261 | 88.2690501 | 69 | 77.5523281 |  |
| 85.8457846 | 67.9030219 | 70.3551261 | 91.2690501 | 69 | 77.8023281 |  |
| 79.8457846 | 68.9030219 | 70.3551261 | 91.2690501 | 69 | 77.1773281 |  |
| 79.8457846 | 68.9030219 | 70.3551261 | 90.2690501 | 69 | 77.4273281 |  |
| 79.8457846 | 68.9030219 | 70.3551261 | 90.2690501 | 69 | 77.4273281 |  |
| 79.8457846 | 68.9030219 | 72.3551261 | 86.2690501 | 69 | 76.9273281 |  |
| 77.8457846 | 68.9030219 | 72.3551261 | 85.2690501 | 69 | 76.6773281 |  |
| 77.8457846 | 68.9030219 | 72.3551261 | 85.2690501 | 69 | 76.8023281 |  |

|            |            |            |            |    |            |
|------------|------------|------------|------------|----|------------|
| 78.8457846 | 68.9030219 | 72.3551261 | 84.2690501 | 69 | 76.9273281 |
| 78.8457846 | 68.9030219 | 74.3551261 | 84.2690501 | 69 | 77.1773281 |
| 78.8457846 | 68.9030219 | 76.3551261 | 84.2690501 | 69 | 77.3023281 |
| 79.8457846 | 69.9030219 | 76.3551261 | 84.2690501 | 69 | 77.4273281 |
| 79.8457846 | 69.9030219 | 76.3551261 | 84.2690501 | 69 | 77.4273281 |
| 79.8457846 | 70.9030219 | 74.3551261 | 84.2690501 | 69 | 77.1773281 |
| 78.8457846 | 70.9030219 | 73.3551261 | 83.2690501 | 69 | 76.0523281 |
| 77.8457846 | 70.9030219 | 73.3551261 | 83.2690501 | 69 | 75.5523281 |
| 79.8457846 | 69.9030219 | 73.3551261 | 83.2690501 | 69 | 75.5523281 |
| 79.8457846 | 69.9030219 | 72.3551261 | 83.2690501 | 69 | 75.3023281 |
| 79.8457846 | 69.9030219 | 72.3551261 | 83.2690501 | 69 | 75.6773281 |
| 79.8457846 | 68.9030219 | 71.3551261 | 83.2690501 | 69 | 75.6773281 |
| 78.8457846 | 68.9030219 | 71.3551261 | 81.2690501 | 69 | 75.5523281 |
| 78.8457846 | 69.9030219 | 71.3551261 | 79.2690501 | 69 | 75.4273281 |
| 79.8457846 | 69.9030219 | 71.3551261 | 79.2690501 | 69 | 75.5523281 |
| 79.8457846 | 69.9030219 | 71.3551261 | 79.2690501 | 69 | 75.4273281 |
| 79.8457846 | 69.9030219 | 71.3551261 | 79.2690501 | 69 | 75.5523281 |
| 79.8457846 | 69.9030219 | 71.3551261 | 79.2690501 | 69 | 75.9273281 |
| 79.8457846 | 70.9030219 | 70.3551261 | 79.2690501 | 69 | 75.9273281 |
| 79.8457846 | 70.9030219 | 69.3551261 | 79.2690501 | 69 | 75.8023281 |
| 83.8457846 | 70.9030219 | 68.3551261 | 80.2690501 | 69 | 76.3023281 |
| 82.8457846 | 70.9030219 | 67.3551261 | 82.2690501 | 69 | 76.3023281 |
| 82.8457846 | 71.9030219 | 67.3551261 | 82.2690501 | 69 | 76.4273281 |
| 82.8457846 | 70.9030219 | 67.3551261 | 82.2690501 | 69 | 76.5523281 |
| 82.8457846 | 68.9030219 | 67.3551261 | 82.2690501 | 69 | 76.1773281 |
| 82.8457846 | 68.9030219 | 67.3551261 | 83.2690501 | 69 | 76.3023281 |
| 82.8457846 | 68.9030219 | 67.3551261 | 83.2690501 | 63 | 76.3023281 |
| 80.8457846 | 70.9030219 | 67.3551261 | 83.2690501 | 63 | 76.4273281 |
| 80.8457846 | 71.9030219 | 67.3551261 | 82.2690501 | 63 | 76.5523281 |
| 80.8457846 | 73.9030219 | 67.3551261 | 82.2690501 | 63 | 76.8023281 |
| 80.8457846 | 73.9030219 | 67.3551261 | 78.2690501 | 63 | 76.3023281 |
| 79.8457846 | 73.9030219 | 67.3551261 | 78.2690501 | 63 | 76.8023281 |
| 79.8457846 | 72.9030219 | 67.3551261 | 79.2690501 | 63 | 77.0523281 |
| 78.8457846 | 71.9030219 | 67.3551261 | 79.2690501 | 63 | 76.1773281 |
| 77.8457846 | 71.9030219 | 67.3551261 | 81.2690501 | 63 | 76.0523281 |
| 77.8457846 | 68.9030219 | 67.3551261 | 82.2690501 | 63 | 75.6773281 |
| 77.8457846 | 67.9030219 | 67.3551261 | 82.2690501 | 63 | 75.6773281 |
| 77.8457846 | 66.9030219 | 68.3551261 | 83.2690501 | 63 | 75.8023281 |
| 77.8457846 | 64.9030219 | 71.3551261 | 83.2690501 | 63 | 76.0523281 |
| 82.8457846 | 64.9030219 | 73.3551261 | 83.2690501 | 63 | 77.0523281 |
| 85.8457846 | 65.9030219 | 73.3551261 | 83.2690501 | 63 | 77.6773281 |
| 85.8457846 | 66.9030219 | 73.3551261 | 83.2690501 | 63 | 77.6773281 |
| 85.8457846 | 66.9030219 | 74.3551261 | 83.2690501 | 63 | 78.0523281 |
| 85.8457846 | 66.9030219 | 73.3551261 | 83.2690501 | 63 | 78.0523281 |
| 85.8457846 | 67.9030219 | 72.3551261 | 83.2690501 | 63 | 78.0523281 |

|            |            |            |            |    |            |  |
|------------|------------|------------|------------|----|------------|--|
| 86.8457846 | 67.9030219 | 70.3551261 | 83.2690501 | 63 | 77.9273281 |  |
| 86.8457846 | 67.9030219 | 70.3551261 | 85.2690501 | 63 | 77.9273281 |  |
| 86.8457846 | 68.9030219 | 70.3551261 | 85.2690501 | 63 | 77.6773281 |  |
| 87.8457846 | 68.9030219 | 69.3551261 | 86.2690501 | 63 | 77.5523281 |  |
| 87.8457846 | 69.9030219 | 67.3551261 | 86.2690501 | 63 | 77.1773281 |  |
| 87.8457846 | 68.9030219 | 67.3551261 | 86.2690501 | 63 | 76.9273281 |  |
| 87.8457846 | 68.9030219 | 67.3551261 | 85.2690501 | 63 | 76.6773281 |  |
| 86.8457846 | 67.9030219 | 67.3551261 | 82.2690501 | 63 | 76.4273281 |  |
| 81.8457846 | 67.9030219 | 67.3551261 | 81.2690501 | 63 | 75.6773281 |  |
| 78.8457846 | 65.9030219 | 66.3551261 | 81.2690501 | 63 | 75.0523281 |  |
| 76.8457846 | 65.9030219 | 67.3551261 | 81.2690501 | 63 | 74.8023281 |  |
| 76.8457846 | 65.9030219 | 67.3551261 | 82.2690501 | 63 | 75.0523281 |  |
| 76.8457846 | 65.9030219 | 68.3551261 | 84.2690501 | 63 | 73.3023281 |  |
| 76.8457846 | 65.9030219 | 68.3551261 | 84.2690501 | 63 | 73.1773281 |  |
| 80.8457846 | 65.9030219 | 69.3551261 | 83.2690501 | 63 | 73.9273281 |  |
| 80.8457846 | 64.9030219 | 69.3551261 | 81.2690501 | 63 | 73.8023281 |  |
| 81.8457846 | 65.9030219 | 69.3551261 | 81.2690501 | 63 | 75.0523281 |  |
| 79.8457846 | 65.9030219 | 70.3551261 | 81.2690501 | 63 | 75.6773281 |  |
| 72.8457846 | 65.9030219 | 70.3551261 | 81.2690501 | 63 | 74.9273281 |  |
| 68.8457846 | 65.9030219 | 70.3551261 | 81.2690501 | 63 | 74.8023281 |  |
| 68.8457846 | 65.9030219 | 70.3551261 | 82.2690501 | 63 | 74.9273281 |  |
| 64.8457846 | 66.9030219 | 70.3551261 | 82.2690501 | 63 | 74.6773281 |  |
| 64.8457846 | 66.9030219 | 70.3551261 | 82.2690501 | 63 | 74.6773281 |  |
| 64.8457846 | 66.9030219 | 70.3551261 | 82.2690501 | 63 | 74.6773281 |  |
| 64.8457846 | 66.9030219 | 70.3551261 | 82.2690501 | 63 | 74.6773281 |  |
| 65.8457846 | 66.9030219 | 70.3551261 | 81.2690501 | 63 | 74.6773281 |  |
| 65.8457846 | 67.9030219 | 70.3551261 | 81.2690501 | 63 | 74.6773281 |  |
| 69.8457846 | 67.9030219 | 68.3551261 | 82.2690501 | 63 | 74.9273281 |  |
| 69.8457846 | 66.9030219 | 68.3551261 | 83.2690501 | 63 | 74.9273281 |  |
| 72.8457846 | 66.9030219 | 69.3551261 | 84.2690501 | 63 | 75.3023281 |  |
| 73.8457846 | 67.9030219 | 70.3551261 | 85.2690501 | 63 | 75.9273281 |  |
| 73.8457846 | 67.9030219 | 70.3551261 | 85.2690501 | 63 | 75.8023281 |  |
| 73.8457846 | 68.9030219 | 70.3551261 | 86.2690501 | 63 | 76.0523281 |  |
| 72.8457846 | 69.9030219 | 70.3551261 | 84.2690501 | 63 | 75.8023281 |  |
| 72.8457846 | 71.9030219 | 70.3551261 | 83.2690501 | 63 | 75.6773281 |  |
| 72.8457846 | 71.9030219 | 70.3551261 | 83.2690501 | 63 | 75.6773281 |  |
| 72.8457846 | 73.9030219 | 70.3551261 | 82.2690501 | 63 | 76.0523281 |  |
| 72.8457846 | 73.9030219 | 70.3551261 | 82.2690501 | 63 | 75.5523281 |  |
| 72.8457846 | 72.9030219 | 68.3551261 | 82.2690501 | 63 | 75.0523281 |  |
| 71.8457846 | 72.9030219 | 68.3551261 | 83.2690501 | 63 | 74.6773281 |  |
| 71.8457846 | 72.9030219 | 69.3551261 | 83.2690501 | 63 | 74.6773281 |  |
| 72.8457846 | 72.9030219 | 69.3551261 | 83.2690501 | 63 | 74.5523281 |  |
| 72.8457846 | 70.9030219 | 70.3551261 | 83.2690501 | 63 | 74.3023281 |  |
| 75.8457846 | 70.9030219 | 70.3551261 | 82.2690501 | 63 | 74.5523281 |  |
| 77.8457846 | 70.9030219 | 70.3551261 | 81.2690501 | 63 | 74.8023281 |  |

|            |            |            |            |    |            |
|------------|------------|------------|------------|----|------------|
| 77.8457846 | 70.9030219 | 70.3551261 | 81.2690501 | 63 | 74.9273281 |
| 77.8457846 | 70.9030219 | 69.3551261 | 80.2690501 | 63 | 74.8023281 |
| 77.8457846 | 70.9030219 | 70.3551261 | 80.2690501 | 63 | 74.9273281 |
| 76.8457846 | 70.9030219 | 70.3551261 | 80.2690501 | 63 | 74.8023281 |
| 76.8457846 | 70.9030219 | 70.3551261 | 79.2690501 | 63 | 74.4273281 |
| 77.8457846 | 70.9030219 | 70.3551261 | 79.2690501 | 63 | 74.1773281 |
| 78.8457846 | 70.9030219 | 70.3551261 | 79.2690501 | 63 | 73.9273281 |
| 79.8457846 | 69.9030219 | 70.3551261 | 79.2690501 | 63 | 74.1773281 |
| 79.8457846 | 67.9030219 | 70.3551261 | 80.2690501 | 63 | 74.1773281 |
| 78.8457846 | 66.9030219 | 70.3551261 | 82.2690501 | 63 | 74.6773281 |
| 77.8457846 | 66.9030219 | 70.3551261 | 82.2690501 | 63 | 74.8023281 |
| 76.8457846 | 66.9030219 | 70.3551261 | 82.2690501 | 63 | 74.4273281 |
| 76.8457846 | 66.9030219 | 70.3551261 | 81.2690501 | 63 | 74.1773281 |
| 77.8457846 | 66.9030219 | 70.3551261 | 81.2690501 | 63 | 74.3023281 |
| 78.8457846 | 66.9030219 | 70.3551261 | 81.2690501 | 63 | 74.6773281 |
| 79.8457846 | 66.9030219 | 70.3551261 | 81.2690501 | 63 | 74.8023281 |
| 79.8457846 | 66.9030219 | 69.3551261 | 81.2690501 | 63 | 74.4273281 |
| 79.8457846 | 65.9030219 | 69.3551261 | 81.2690501 | 63 | 74.3023281 |
| 79.8457846 | 64.9030219 | 69.3551261 | 81.2690501 | 63 | 74.1773281 |
| 78.8457846 | 63.9030219 | 68.3551261 | 82.2690501 | 63 | 73.8023281 |
| 77.8457846 | 63.9030219 | 68.3551261 | 80.2690501 | 63 | 73.4273281 |
| 77.8457846 | 62.9030219 | 68.3551261 | 79.2690501 | 63 | 73.3023281 |
| 77.8457846 | 63.9030219 | 67.3551261 | 79.2690501 | 63 | 74.4273281 |
| 77.8457846 | 63.9030219 | 67.3551261 | 78.2690501 | 63 | 74.4273281 |
| 77.8457846 | 63.9030219 | 67.3551261 | 78.2690501 | 63 | 74.9273281 |
| 78.8457846 | 63.9030219 | 68.3551261 | 78.2690501 | 63 | 74.6773281 |
| 79.8457846 | 63.9030219 | 69.3551261 | 78.2690501 | 63 | 75.0523281 |
| 79.8457846 | 63.9030219 | 69.3551261 | 78.2690501 | 63 | 75.0523281 |
| 80.8457846 | 63.9030219 | 69.3551261 | 79.2690501 | 63 | 75.1773281 |
| 80.8457846 | 66.9030219 | 69.3551261 | 79.2690501 | 63 | 75.9273281 |
| 80.8457846 | 66.9030219 | 69.3551261 | 79.2690501 | 63 | 75.8023281 |
| 80.8457846 | 66.9030219 | 69.3551261 | 79.2690501 | 63 | 75.9273281 |
| 80.8457846 | 66.9030219 | 69.3551261 | 79.2690501 | 63 | 75.8023281 |
| 79.8457846 | 66.9030219 | 70.3551261 | 79.2690501 | 63 | 75.8023281 |
| 79.8457846 | 67.9030219 | 71.3551261 | 84.2690501 | 63 | 76.6773281 |
| 79.8457846 | 67.9030219 | 71.3551261 | 84.2690501 | 63 | 76.6773281 |
| 79.8457846 | 68.9030219 | 71.3551261 | 85.2690501 | 63 | 76.4273281 |
| 79.8457846 | 68.9030219 | 71.3551261 | 85.2690501 | 63 | 76.1773281 |
| 79.8457846 | 68.9030219 | 73.3551261 | 85.2690501 | 63 | 76.4273281 |
| 79.8457846 | 69.9030219 | 73.3551261 | 84.2690501 | 63 | 76.8023281 |
| 79.8457846 | 69.9030219 | 75.3551261 | 82.2690501 | 63 | 76.9273281 |
| 79.8457846 | 70.9030219 | 74.3551261 | 81.2690501 | 63 | 76.8023281 |
| 79.8457846 | 71.9030219 | 74.3551261 | 79.2690501 | 63 | 76.6773281 |
| 80.8457846 | 71.9030219 | 74.3551261 | 79.2690501 | 63 | 76.8023281 |
| 80.8457846 | 71.9030219 | 74.3551261 | 79.2690501 | 63 | 76.8023281 |

|            |            |            |            |    |            |           |
|------------|------------|------------|------------|----|------------|-----------|
| 82.8457846 | 71.9030219 | 73.3551261 | 79.2690501 | 63 | 76.9273281 |           |
| 80.8457846 | 66.9030219 | 73.3551261 | 79.2690501 | 63 | 75.9273281 |           |
| 79.8457846 | 66.9030219 | 73.3551261 | 79.2690501 | 63 | 75.5523281 |           |
| 77.8457846 | 65.9030219 | 73.3551261 | 80.2690501 | 63 | 75.1773281 |           |
| 76.8457846 | 65.9030219 | 73.3551261 | 80.2690501 | 63 | 74.8023281 |           |
| 77.8457846 | 65.9030219 | 73.3551261 | 80.2690501 | 63 | 75.4273281 |           |
| 78.8457846 | 64.9030219 | 74.3551261 | 81.2690501 | 63 | 76.0523281 |           |
| 77.8457846 | 64.9030219 | 74.3551261 | 82.2690501 | 63 | 76.0523281 |           |
| 76.8457846 | 64.9030219 | 74.3551261 | 83.2690501 | 63 | 76.5523281 |           |
| 76.8457846 | 63.9030219 | 74.3551261 | 83.2690501 | 63 | 76.4273281 |           |
| 75.8457846 | 61.9030219 | 73.3551261 | 83.2690501 | 63 | 76.0523281 |           |
| 75.8457846 | 61.9030219 | 73.3551261 | 83.2690501 | 63 | 76.0523281 |           |
| 76.8457846 | 61.9030219 | 72.3551261 | 82.2690501 | 63 | 75.5523281 |           |
| 76.8457846 | 62.9030219 | 71.3551261 | 81.2690501 | 63 | 75.5523281 |           |
| 77.8457846 | 62.9030219 | 71.3551261 | 80.2690501 | 63 | 75.6773281 | before 1  |
| 78.8457846 | 64.9030219 | 72.3551261 | 80.2690501 | 63 | 76.1773281 | before 2  |
| 79.8457846 | 65.9030219 | 72.3551261 | 80.2690501 | 63 | 76.5523281 | before 3  |
| 80.8457846 | 65.9030219 | 72.3551261 | 80.2690501 | 63 | 76.5523281 | before 4  |
| 80.8457846 | 70.9030219 | 72.3551261 | 80.2690501 | 63 | 77.0523281 | before 5  |
| 79.8457846 | 71.9030219 | 72.3551261 | 81.2690501 | 63 | 76.6773281 | before 6  |
| 79.8457846 | 72.9030219 | 72.3551261 | 82.2690501 | 63 | 76.5523281 | before 7  |
| 78.8457846 | 71.9030219 | 74.3551261 | 82.2690501 | 63 | 76.5523281 | before 8  |
| 77.8457846 | 70.9030219 | 74.3551261 | 82.2690501 | 63 | 76.1773281 | before 9  |
| 77.8457846 | 69.9030219 | 74.3551261 | 81.2690501 | 63 | 75.6773281 | before 10 |
| 77.8457846 | 68.9030219 | 74.3551261 | 81.2690501 | 63 | 75.4273281 | before 11 |
| 76.8457846 | 68.9030219 | 74.3551261 | 81.2690501 | 63 | 75.4273281 | before 12 |
| 76.8457846 | 67.9030219 | 74.3551261 | 80.2690501 | 63 | 75.1773281 | before 13 |
| 76.8457846 | 67.9030219 | 75.3551261 | 80.2690501 | 63 | 75.3023281 | before 14 |
| 76.8457846 | 67.9030219 | 75.3551261 | 80.2690501 | 63 | 75.0523281 | before 15 |
| 76.8457846 | 67.9030219 | 75.3551261 | 81.2690501 | 63 | 75.1773281 | before 16 |
| 76.8457846 | 67.9030219 | 75.3551261 | 82.2690501 | 63 | 75.6773281 | before 17 |
| 76.8457846 | 67.9030219 | 75.3551261 | 82.2690501 | 63 | 75.6773281 | before 18 |
| 76.8457846 | 67.9030219 | 75.3551261 | 84.2690501 | 63 | 75.9273281 | before 19 |
| 75.8457846 | 68.9030219 | 75.3551261 | 85.2690501 | 63 | 76.1773281 | before 20 |
| 76.8457846 | 68.9030219 | 75.3551261 | 85.2690501 | 63 | 76.4273281 | before 21 |
| 78.8457846 | 68.9030219 | 75.3551261 | 86.2690501 | 63 | 76.8023281 | before 22 |
| 78.8457846 | 69.9030219 | 75.3551261 | 86.2690501 | 63 | 77.0523281 | before 23 |
| 78.8457846 | 69.9030219 | 74.3551261 | 87.2690501 | 63 | 77.1773281 | before 24 |
| 78.8457846 | 69.9030219 | 73.3551261 | 87.2690501 | 63 | 77.0523281 | before 25 |
| 78.8457846 | 69.9030219 | 71.3551261 | 87.2690501 | 63 | 77.0523281 | before 26 |
| 77.8457846 | 69.9030219 | 70.3551261 | 86.2690501 | 63 | 76.5523281 | before 27 |
| 78.8457846 | 69.9030219 | 69.3551261 | 86.2690501 | 63 | 76.8023281 | before 28 |
| 76.8457846 | 69.9030219 | 69.3551261 | 85.2690501 | 63 | 76.5523281 | before 29 |
| 74.8457846 | 69.9030219 | 69.3551261 | 85.2690501 | 63 | 76.6773281 | before 30 |
| 73.8457846 | 68.9030219 | 69.3551261 | 85.2690501 | 63 | 76.3023281 | before 31 |

|            |            |            |            |    |            |           |
|------------|------------|------------|------------|----|------------|-----------|
| 73.8457846 | 68.9030219 | 69.3551261 | 84.2690501 | 63 | 76.4273281 | before 32 |
| 74.8457846 | 83.9030219 | 69.3551261 | 82.2690501 | 63 | 78.3023281 | before 33 |
| 74.8457846 | 84.9030219 | 69.3551261 | 82.2690501 | 63 | 78.4273281 | before 34 |
| 75.8457846 | 84.9030219 | 69.3551261 | 81.2690501 | 63 | 78.4273281 | before 35 |
| 77.8457846 | 80.9030219 | 69.3551261 | 80.2690501 | 63 | 78.4273281 | before 36 |
| 79.8457846 | 75.9030219 | 69.3551261 | 80.2690501 | 63 | 78.4273281 | before 37 |
| 80.8457846 | 72.9030219 | 69.3551261 | 81.2690501 | 63 | 78.6773281 | before 38 |
| 80.8457846 | 71.9030219 | 70.3551261 | 81.2690501 | 63 | 79.0523281 | before 39 |
| 80.8457846 | 71.9030219 | 70.3551261 | 81.2690501 | 63 | 79.0523281 | before 40 |
| 79.8457846 | 71.9030219 | 70.3551261 | 81.2690501 | 63 | 80.0523281 | before 41 |
| 79.8457846 | 70.9030219 | 71.3551261 | 81.2690501 | 63 | 79.9273281 | before 42 |
| 79.8457846 | 68.9030219 | 71.3551261 | 79.2690501 | 63 | 79.1773281 | before 43 |
| 79.8457846 | 68.9030219 | 71.3551261 | 75.2690501 | 63 | 78.5523281 | before 44 |
| 77.8457846 | 67.9030219 | 71.3551261 | 75.2690501 | 63 | 78.5523281 | before 45 |
| 76.8457846 | 67.9030219 | 71.3551261 | 75.2690501 | 63 | 78.5523281 | before 46 |
| 76.8457846 | 67.9030219 | 72.3551261 | 76.2690501 | 63 | 78.4273281 | before 47 |
| 76.8457846 | 66.9030219 | 72.3551261 | 77.2690501 | 63 | 78.4273281 | before 48 |
| 77.8457846 | 66.9030219 | 73.3551261 | 78.2690501 | 63 | 78.3023281 | before 49 |
| 77.8457846 | 66.9030219 | 73.3551261 | 78.2690501 | 63 | 78.0523281 | before 50 |
| 77.8457846 | 66.9030219 | 73.3551261 | 78.2690501 | 63 | 77.6773281 | before 51 |
| 82.8457846 | 66.9030219 | 73.3551261 | 78.2690501 | 63 | 77.9273281 | before 52 |
| 83.8457846 | 66.9030219 | 73.3551261 | 78.2690501 | 63 | 78.0523281 | before 53 |
| 83.8457846 | 66.9030219 | 73.3551261 | 78.2690501 | 63 | 77.8023281 | before 54 |
| 83.8457846 | 67.9030219 | 73.3551261 | 78.2690501 | 63 | 77.6773281 | before 55 |
| 84.8457846 | 67.9030219 | 73.3551261 | 78.2690501 | 63 | 77.5523281 | before 56 |
| 84.8457846 | 66.9030219 | 73.3551261 | 78.2690501 | 63 | 77.3023281 | before 57 |
| 84.8457846 | 66.9030219 | 73.3551261 | 77.2690501 | 63 | 76.9273281 | before 58 |
| 87.8457846 | 66.9030219 | 73.3551261 | 77.2690501 | 63 | 77.5523281 | before 59 |
| 87.8457846 | 67.9030219 | 73.3551261 | 77.2690501 | 63 | 77.5523281 | before 60 |
| 86.8457846 | 67.9030219 | 73.3551261 | 77.2690501 | 63 | 76.8023281 | before 61 |
| 86.8457846 | 68.9030219 | 73.3551261 | 78.2690501 | 63 | 76.9273281 | before 62 |
| 86.8457846 | 70.9030219 | 73.3551261 | 78.2690501 | 63 | 77.0523281 | before 63 |
| 84.8457846 | 70.9030219 | 74.3551261 | 78.2690501 | 63 | 76.6773281 | before 64 |
| 82.8457846 | 71.9030219 | 75.3551261 | 78.2690501 | 63 | 76.6773281 | before 65 |
| 81.8457846 | 71.9030219 | 75.3551261 | 77.2690501 | 63 | 76.4273281 | before 66 |
| 81.8457846 | 71.9030219 | 75.3551261 | 76.2690501 | 63 | 76.1773281 | before 67 |
| 81.8457846 | 69.9030219 | 76.3551261 | 77.2690501 | 63 | 76.3023281 | before 68 |
| 81.8457846 | 69.9030219 | 76.3551261 | 77.2690501 | 63 | 76.3023281 | before 69 |
| 81.8457846 | 68.9030219 | 76.3551261 | 77.2690501 | 63 | 75.9273281 | before 70 |
| 80.8457846 | 67.9030219 | 76.3551261 | 78.2690501 | 63 | 75.6773281 | before 71 |
| 79.8457846 | 67.9030219 | 76.3551261 | 79.2690501 | 63 | 75.6773281 | before 72 |
| 79.8457846 | 66.9030219 | 77.3551261 | 79.2690501 | 63 | 75.6773281 | before 73 |
| 79.8457846 | 66.9030219 | 78.3551261 | 80.2690501 | 63 | 75.9273281 | before 74 |
| 79.8457846 | 66.9030219 | 77.3551261 | 80.2690501 | 63 | 75.8023281 | before 75 |
| 79.8457846 | 68.9030219 | 77.3551261 | 80.2690501 | 63 | 75.5523281 | before 76 |

|            |            |            |            |    |            |            |
|------------|------------|------------|------------|----|------------|------------|
| 79.8457846 | 68.9030219 | 75.3551261 | 80.2690501 | 63 | 75.4273281 | before 77  |
| 81.8457846 | 68.9030219 | 74.3551261 | 80.2690501 | 63 | 75.6773281 | before 78  |
| 81.8457846 | 68.9030219 | 74.3551261 | 80.2690501 | 63 | 75.5523281 | before 79  |
| 81.8457846 | 68.9030219 | 74.3551261 | 79.2690501 | 63 | 75.5523281 | before 80  |
| 81.8457846 | 69.9030219 | 74.3551261 | 78.2690501 | 63 | 75.5523281 | before 81  |
| 81.8457846 | 69.9030219 | 74.3551261 | 78.2690501 | 63 | 75.6773281 | before 82  |
| 81.8457846 | 69.9030219 | 75.3551261 | 78.2690501 | 63 | 75.6773281 | before 83  |
| 81.8457846 | 69.9030219 | 79.3551261 | 78.2690501 | 63 | 76.0523281 | before 84  |
| 81.8457846 | 69.9030219 | 79.3551261 | 78.2690501 | 63 | 75.9273281 | before 85  |
| 81.8457846 | 69.9030219 | 80.3551261 | 77.2690501 | 63 | 75.8023281 | before 86  |
| 80.8457846 | 69.9030219 | 80.3551261 | 78.2690501 | 63 | 76.1773281 | before 87  |
| 80.8457846 | 69.9030219 | 80.3551261 | 78.2690501 | 63 | 76.5523281 | before 88  |
| 79.8457846 | 69.9030219 | 83.3551261 | 78.2690501 | 63 | 76.6773281 | before 89  |
| 79.8457846 | 69.9030219 | 88.3551261 | 78.2690501 | 63 | 77.1773281 | before 90  |
| 79.8457846 | 70.9030219 | 89.3551261 | 78.2690501 | 63 | 77.5523281 | before 91  |
| 80.8457846 | 73.9030219 | 90.3551261 | 78.2690501 | 63 | 78.4273281 | before 92  |
| 81.8457846 | 73.9030219 | 92.3551261 | 78.2690501 | 63 | 79.0523281 | before 93  |
| 81.8457846 | 73.9030219 | 92.3551261 | 78.2690501 | 63 | 79.0523281 | before 94  |
| 81.8457846 | 73.9030219 | 96.3551261 | 78.2690501 | 63 | 79.8023281 | before 95  |
| 81.8457846 | 73.9030219 | 92.3551261 | 78.2690501 | 63 | 79.4273281 | before 96  |
| 81.8457846 | 73.9030219 | 84.3551261 | 78.2690501 | 63 | 78.5523281 | before 97  |
| 81.8457846 | 73.9030219 | 84.3551261 | 87.2690501 | 63 | 79.4273281 | before 98  |
| 80.8457846 | 73.9030219 | 78.3551261 | 89.2690501 | 63 | 78.6773281 | before 99  |
| 80.8457846 | 72.9030219 | 77.3551261 | 90.2690501 | 63 | 78.1773281 | before 100 |
| 80.8457846 | 72.9030219 | 76.3551261 | 91.2690501 | 63 | 78.3023281 | before 101 |
| 80.8457846 | 72.9030219 | 75.3551261 | 91.2690501 | 63 | 78.0523281 | before 102 |
| 80.8457846 | 72.9030219 | 74.3551261 | 91.2690501 | 63 | 77.8023281 | before 103 |
| 80.8457846 | 72.9030219 | 73.3551261 | 91.2690501 | 63 | 77.5523281 | before 104 |
| 80.8457846 | 72.9030219 | 73.3551261 | 91.2690501 | 63 | 77.4273281 | before 105 |
| 79.8457846 | 73.9030219 | 71.3551261 | 91.2690501 | 63 | 77.0523281 | before 106 |
| 79.8457846 | 73.9030219 | 71.3551261 | 93.2690501 | 63 | 77.1773281 | before 107 |
| 77.8457846 | 73.9030219 | 71.3551261 | 94.2690501 | 63 | 76.8023281 | before 108 |
| 77.8457846 | 71.9030219 | 71.3551261 | 96.2690501 | 63 | 76.8023281 | before 109 |
| 77.8457846 | 71.9030219 | 71.3551261 | 96.2690501 | 63 | 76.8023281 | before 110 |
| 77.8457846 | 71.9030219 | 71.3551261 | 99.2690501 | 63 | 77.0523281 | before 111 |
| 80.8457846 | 71.9030219 | 71.3551261 | 98.2690501 | 63 | 77.8023281 | before 112 |
| 82.8457846 | 70.9030219 | 70.3551261 | 97.2690501 | 63 | 78.0523281 | before 113 |
| 82.8457846 | 68.9030219 | 69.3551261 | 96.2690501 | 63 | 77.6773281 | before 114 |
| 82.8457846 | 67.9030219 | 68.3551261 | 95.2690501 | 63 | 77.3023281 | before 115 |
| 83.8457846 | 66.9030219 | 69.3551261 | 95.2690501 | 63 | 77.5523281 | before 116 |
| 82.8457846 | 66.9030219 | 70.3551261 | 95.2690501 | 63 | 77.6773281 | before 117 |
| 82.8457846 | 66.9030219 | 70.3551261 | 90.2690501 | 63 | 77.1773281 | before 118 |
| 82.8457846 | 66.9030219 | 70.3551261 | 87.2690501 | 63 | 76.8023281 | before 119 |
| 79.8457846 | 66.9030219 | 70.3551261 | 86.2690501 | 63 | 76.3023281 | before 120 |
| 79.8457846 | 65.9030219 | 70.3551261 | 85.2690501 | 63 | 76.1773281 | before 121 |

|            |            |            |            |    |            |            |
|------------|------------|------------|------------|----|------------|------------|
| 79.8457846 | 65.9030219 | 70.3551261 | 84.2690501 | 63 | 75.8023281 | before 122 |
| 79.8457846 | 65.9030219 | 72.3551261 | 83.2690501 | 63 | 75.8023281 | before 123 |
| 79.8457846 | 66.9030219 | 72.3551261 | 81.2690501 | 63 | 75.8023281 | before 124 |
| 79.8457846 | 66.9030219 | 72.3551261 | 81.2690501 | 63 | 75.6773281 | before 125 |
| 79.8457846 | 68.9030219 | 72.3551261 | 81.2690501 | 63 | 75.9273281 | before 126 |
| 79.8457846 | 69.9030219 | 72.3551261 | 81.2690501 | 63 | 76.0523281 | before 127 |
| 78.8457846 | 70.9030219 | 72.3551261 | 80.2690501 | 63 | 75.9273281 | before 128 |
| 78.8457846 | 71.9030219 | 72.3551261 | 80.2690501 | 63 | 76.3023281 | before 129 |
| 78.8457846 | 71.9030219 | 75.3551261 | 81.2690501 | 63 | 77.0523281 | before 130 |
| 74.8457846 | 71.9030219 | 76.3551261 | 80.2690501 | 63 | 76.6773281 | before 131 |
| 72.8457846 | 71.9030219 | 76.3551261 | 81.2690501 | 63 | 76.6773281 | before 132 |
| 72.8457846 | 70.9030219 | 76.3551261 | 81.2690501 | 63 | 76.9273281 | before 133 |
| 74.8457846 | 68.9030219 | 76.3551261 | 81.2690501 | 63 | 77.1773281 | before 134 |
| 76.8457846 | 67.9030219 | 76.3551261 | 81.2690501 | 63 | 77.9273281 | before 135 |
| 78.8457846 | 67.9030219 | 76.3551261 | 82.2690501 | 63 | 78.8023281 | before 136 |
| 79.8457846 | 67.9030219 | 76.3551261 | 81.2690501 | 63 | 78.8023281 | before 137 |
| 78.8457846 | 68.9030219 | 77.3551261 | 81.2690501 | 63 | 79.0523281 | before 138 |
| 76.8457846 | 68.9030219 | 77.3551261 | 81.2690501 | 63 | 78.8023281 | before 139 |
| 75.8457846 | 67.9030219 | 77.3551261 | 81.2690501 | 63 | 78.4273281 | before 140 |
| 74.8457846 | 65.9030219 | 79.3551261 | 81.2690501 | 63 | 77.9273281 | before 141 |
| 75.8457846 | 65.9030219 | 82.3551261 | 81.2690501 | 63 | 78.4273281 | before 142 |
| 75.8457846 | 66.9030219 | 84.3551261 | 81.2690501 | 63 | 78.9273281 | before 143 |
| 76.8457846 | 66.9030219 | 84.3551261 | 81.2690501 | 63 | 79.0523281 | before 144 |
| 76.8457846 | 66.9030219 | 82.3551261 | 81.2690501 | 63 | 78.9273281 | before 145 |
| 76.8457846 | 66.9030219 | 80.3551261 | 81.2690501 | 63 | 78.8023281 | before 146 |
| 76.8457846 | 66.9030219 | 77.3551261 | 81.2690501 | 63 | 77.6773281 | before 147 |
| 76.8457846 | 66.9030219 | 77.3551261 | 81.2690501 | 63 | 77.6773281 | before 148 |
| 76.8457846 | 66.9030219 | 76.3551261 | 81.2690501 | 63 | 77.3023281 | before 149 |
| 77.8457846 | 67.9030219 | 75.3551261 | 81.2690501 | 63 | 77.3023281 | before 150 |
| 77.8457846 | 69.9030219 | 75.3551261 | 81.2690501 | 63 | 77.6773281 | before 151 |
| 77.8457846 | 69.9030219 | 74.3551261 | 80.2690501 | 63 | 77.5523281 | before 152 |
| 77.8457846 | 67.9030219 | 73.3551261 | 80.2690501 | 63 | 77.4273281 | before 153 |
| 76.8457846 | 67.9030219 | 73.3551261 | 80.2690501 | 63 | 77.8023281 | before 154 |
| 76.8457846 | 66.9030219 | 73.3551261 | 80.2690501 | 63 | 77.8023281 | before 155 |
| 76.8457846 | 66.9030219 | 73.3551261 | 82.2690501 | 63 | 77.6773281 | before 156 |
| 76.8457846 | 66.9030219 | 73.3551261 | 82.2690501 | 63 | 77.9273281 | before 157 |
| 73.8457846 | 66.9030219 | 73.3551261 | 83.2690501 | 63 | 77.4273281 | before 158 |
| 72.8457846 | 66.9030219 | 73.3551261 | 84.2690501 | 63 | 77.1773281 | before 159 |
| 71.8457846 | 66.9030219 | 74.3551261 | 84.2690501 | 63 | 77.1773281 | before 160 |
| 70.8457846 | 67.9030219 | 74.3551261 | 84.2690501 | 63 | 76.6773281 | before 161 |
| 70.8457846 | 67.9030219 | 74.3551261 | 84.2690501 | 63 | 76.4273281 | before 162 |
| 70.8457846 | 67.9030219 | 74.3551261 | 84.2690501 | 63 | 76.4273281 | before 163 |
| 69.8457846 | 67.9030219 | 76.3551261 | 84.2690501 | 63 | 76.4273281 | before 164 |
| 69.8457846 | 67.9030219 | 81.3551261 | 84.2690501 | 63 | 76.9273281 | before 165 |
| 73.8457846 | 68.9030219 | 81.3551261 | 84.2690501 | 63 | 77.1773281 | before 166 |



|            |            |            |            |    |            |            |
|------------|------------|------------|------------|----|------------|------------|
| 76.8457846 | 68.9030219 | 82.3551261 | 83.2690501 | 63 | 77.3023281 | before 167 |
| 75.8457846 | 68.9030219 | 82.3551261 | 83.2690501 | 63 | 76.8023281 | before 168 |
| 75.8457846 | 69.9030219 | 82.3551261 | 83.2690501 | 63 | 76.3023281 | before 169 |
| 75.8457846 | 70.9030219 | 82.3551261 | 83.2690501 | 63 | 76.5523281 | before 170 |
| 67.8457846 | 70.9030219 | 83.3551261 | 83.2690501 | 69 | 75.9273281 | before 171 |
| 67.8457846 | 71.9030219 | 84.3551261 | 82.2690501 | 69 | 76.1773281 | before 172 |
| 67.8457846 | 71.9030219 | 84.3551261 | 82.2690501 | 69 | 76.5523281 | before 173 |
| 67.8457846 | 71.9030219 | 83.3551261 | 82.2690501 | 69 | 76.9273281 | before 174 |
| 68.8457846 | 71.9030219 | 83.3551261 | 83.2690501 | 69 | 77.3023281 | before 175 |
| 67.8457846 | 71.9030219 | 83.3551261 | 82.2690501 | 69 | 77.4273281 | before 176 |
| 67.8457846 | 72.9030219 | 83.3551261 | 82.2690501 | 69 | 78.1773281 | before 177 |
| 67.8457846 | 75.9030219 | 81.3551261 | 82.2690501 | 69 | 78.6773281 | before 178 |
| 68.8457846 | 75.9030219 | 81.3551261 | 82.2690501 | 69 | 78.4273281 | before 179 |
| 68.8457846 | 74.9030219 | 80.3551261 | 82.2690501 | 69 | 78.0523281 | before 180 |
| 69.8457846 | 68.9030219 | 79.3551261 | 81.2690501 | 69 | 76.8023281 | before 181 |
| 69.8457846 | 68.9030219 | 79.3551261 | 81.2690501 | 69 | 76.5523281 | before 182 |
| 69.8457846 | 68.9030219 | 78.3551261 | 81.2690501 | 69 | 76.0523281 | before 183 |
| 69.8457846 | 68.9030219 | 77.3551261 | 79.2690501 | 69 | 75.5523281 | before 184 |
| 70.8457846 | 68.9030219 | 77.3551261 | 79.2690501 | 69 | 75.8023281 | before 185 |
| 70.8457846 | 68.9030219 | 71.3551261 | 78.2690501 | 69 | 74.8023281 | before 186 |
| 70.8457846 | 68.9030219 | 69.3551261 | 74.2690501 | 69 | 74.1773281 | before 187 |
| 70.8457846 | 68.9030219 | 68.3551261 | 73.2690501 | 69 | 73.9273281 | before 188 |
| 70.8457846 | 68.9030219 | 67.3551261 | 73.2690501 | 69 | 73.9273281 | before 189 |
| 71.8457846 | 69.9030219 | 68.3551261 | 83.2690501 | 69 | 75.5523281 | before 190 |
| 71.8457846 | 69.9030219 | 68.3551261 | 85.2690501 | 69 | 75.9273281 | before 191 |
| 71.8457846 | 68.9030219 | 68.3551261 | 85.2690501 | 69 | 75.8023281 | before 192 |
| 72.8457846 | 68.9030219 | 68.3551261 | 87.2690501 | 69 | 75.6773281 | before 193 |
| 72.8457846 | 68.9030219 | 68.3551261 | 87.2690501 | 69 | 75.4273281 | before 194 |
| 73.8457846 | 67.9030219 | 68.3551261 | 87.2690501 | 69 | 75.1773281 | before 195 |
| 73.8457846 | 67.9030219 | 68.3551261 | 85.2690501 | 69 | 74.6773281 | before 196 |
| 73.8457846 | 66.9030219 | 69.3551261 | 85.2690501 | 69 | 74.8023281 | before 197 |
| 80.8457846 | 66.9030219 | 69.3551261 | 85.2690501 | 69 | 75.8023281 | before 198 |
| 80.8457846 | 66.9030219 | 69.3551261 | 85.2690501 | 69 | 75.9273281 | before 199 |
| 82.8457846 | 66.9030219 | 69.3551261 | 85.2690501 | 69 | 76.1773281 | before 200 |
| 82.8457846 | 66.9030219 | 69.3551261 | 85.2690501 | 63 | 76.0523281 | before 201 |
| 82.8457846 | 66.9030219 | 69.3551261 | 85.2690501 | 63 | 76.0523281 | before 202 |
| 82.8457846 | 66.9030219 | 70.3551261 | 84.2690501 | 63 | 75.1773281 | before 203 |
| 83.8457846 | 66.9030219 | 70.3551261 | 84.2690501 | 63 | 74.3023281 | before 204 |
| 84.8457846 | 66.9030219 | 70.3551261 | 84.2690501 | 63 | 74.6773281 | before 205 |
| 84.8457846 | 66.9030219 | 70.3551261 | 84.2690501 | 63 | 74.8023281 | before 206 |
| 84.8457846 | 66.9030219 | 71.3551261 | 84.2690501 | 63 | 75.0523281 | before 207 |
| 85.8457846 | 66.9030219 | 71.3551261 | 81.2690501 | 63 | 74.8023281 | before 208 |
| 85.8457846 | 67.9030219 | 71.3551261 | 80.2690501 | 63 | 74.5523281 | before 209 |
| 84.8457846 | 67.9030219 | 71.3551261 | 80.2690501 | 63 | 74.5523281 | before 210 |
| 81.8457846 | 67.9030219 | 71.3551261 | 79.2690501 | 63 | 74.3023281 | before 211 |

|            |            |            |            |    |            |               |
|------------|------------|------------|------------|----|------------|---------------|
| 81.8457846 | 67.9030219 | 71.3551261 | 78.2690501 | 63 | 74.3023281 | before 212    |
| 70.8457846 | 67.9030219 | 71.3551261 | 74.2690501 | 63 | 72.6773281 | before 213    |
| 69.8457846 | 67.9030219 | 72.3551261 | 74.2690501 | 63 | 73.1773281 | before 214    |
| 69.8457846 | 68.9030219 | 73.3551261 | 72.2690501 | 63 | 73.3023281 | before 215    |
| 69.8457846 | 68.9030219 | 73.3551261 | 72.2690501 | 63 | 73.3023281 | before 216    |
| 69.8457846 | 69.9030219 | 75.3551261 | 76.2690501 | 63 | 75.0523281 | before 217    |
| 69.8457846 | 71.9030219 | 76.3551261 | 80.2690501 | 63 | 75.8023281 | before 218    |
| 69.8457846 | 71.9030219 | 76.3551261 | 81.2690501 | 63 | 75.8023281 | before 219    |
| 70.8457846 | 74.9030219 | 74.3551261 | 80.2690501 | 63 | 76.1773281 | before 220    |
| 71.8457846 | 75.9030219 | 73.3551261 | 81.2690501 | 63 | 77.4273281 | before 221    |
| 72.8457846 | 75.9030219 | 72.3551261 | 83.2690501 | 63 | 78.1773281 | before 222    |
| 72.8457846 | 74.9030219 | 71.3551261 | 85.2690501 | 63 | 78.3023281 | before 223    |
| 73.8457846 | 74.9030219 | 71.3551261 | 87.2690501 | 63 | 78.5523281 | before 224    |
| 72.8457846 | 74.9030219 | 71.3551261 | 88.2690501 | 63 | 78.6773281 | before 225    |
| 71.8457846 | 75.9030219 | 71.3551261 | 88.2690501 | 63 | 78.4273281 | before 226    |
| 71.8457846 | 78.9030219 | 71.3551261 | 89.2690501 | 63 | 78.8023281 | before 227    |
| 71.8457846 | 79.9030219 | 71.3551261 | 90.2690501 | 63 | 79.0523281 | before 228    |
| 71.8457846 | 79.9030219 | 72.3551261 | 92.2690501 | 63 | 79.3023281 | before 229    |
| 71.8457846 | 79.9030219 | 72.3551261 | 92.2690501 | 63 | 79.1773281 | before 230    |
| 71.8457846 | 79.9030219 | 73.3551261 | 93.2690501 | 63 | 79.8023281 | before 231    |
| 71.8457846 | 78.9030219 | 73.3551261 | 93.2690501 | 63 | 79.9273281 | before 232    |
| 72.8457846 | 77.9030219 | 73.3551261 | 93.2690501 | 63 | 79.6773281 | before 233    |
| 72.8457846 | 77.9030219 | 72.3551261 | 93.2690501 | 63 | 79.3023281 | before 234    |
| 73.8457846 | 77.9030219 | 72.3551261 | 92.2690501 | 63 | 79.0523281 | before 235    |
| 73.8457846 | 77.9030219 | 72.3551261 | 87.2690501 | 63 | 78.4273281 | before 236    |
| 74.8457846 | 76.9030219 | 72.3551261 | 85.2690501 | 63 | 78.1773281 | before 237    |
| 74.8457846 | 74.9030219 | 71.3551261 | 84.2690501 | 63 | 77.6773281 | before 238    |
| 75.8457846 | 74.9030219 | 70.3551261 | 85.2690501 | 63 | 77.8023281 | before 239    |
| 75.8457846 | 75.9030219 | 69.3551261 | 86.2690501 | 63 | 77.9273281 | before 240    |
| 74.8457846 | 75.9030219 | 69.3551261 | 87.2690501 | 63 | 77.4273281 | minute gap 1  |
| 74.8457846 | 76.9030219 | 69.3551261 | 87.2690501 | 63 | 77.8023281 | minute gap 2  |
| 73.8457846 | 77.9030219 | 68.3551261 | 87.2690501 | 63 | 77.9273281 | minute gap 3  |
| 73.8457846 | 77.9030219 | 67.3551261 | 86.2690501 | 63 | 77.5523281 | minute gap 4  |
| 74.8457846 | 76.9030219 | 66.3551261 | 82.2690501 | 63 | 76.9273281 | minute gap 5  |
| 74.8457846 | 76.9030219 | 65.3551261 | 81.2690501 | 63 | 76.9273281 | minute gap 6  |
| 74.8457846 | 76.9030219 | 65.3551261 | 81.2690501 | 63 | 77.0523281 | minute gap 7  |
| 73.8457846 | 76.9030219 | 65.3551261 | 81.2690501 | 63 | 77.1773281 | minute gap 8  |
| 72.8457846 | 76.9030219 | 66.3551261 | 83.2690501 | 63 | 77.4273281 | minute gap 9  |
| 71.8457846 | 75.9030219 | 66.3551261 | 84.2690501 | 63 | 77.4273281 | minute gap 10 |
| 68.8457846 | 71.9030219 | 67.3551261 | 85.2690501 | 63 | 77.0523281 | minute gap 11 |
| 68.8457846 | 71.9030219 | 67.3551261 | 85.2690501 | 63 | 77.3023281 | minute gap 12 |
| 68.8457846 | 67.9030219 | 66.3551261 | 86.2690501 | 63 | 76.9273281 | minute gap 13 |
| 68.8457846 | 65.9030219 | 66.3551261 | 86.2690501 | 63 | 76.9273281 | minute gap 14 |
| 68.8457846 | 64.9030219 | 66.3551261 | 86.2690501 | 63 | 77.0523281 | minute gap 15 |
| 68.8457846 | 64.9030219 | 66.3551261 | 86.2690501 | 63 | 77.0523281 | minute gap 16 |

|            |            |            |            |    |            |               |
|------------|------------|------------|------------|----|------------|---------------|
| 68.8457846 | 63.9030219 | 68.3551261 | 88.2690501 | 63 | 78.0523281 | minute gap 17 |
| 69.8457846 | 63.9030219 | 68.3551261 | 89.2690501 | 63 | 78.6773281 | minute gap 18 |
| 71.8457846 | 62.9030219 | 70.3551261 | 89.2690501 | 63 | 79.5523281 | minute gap 19 |
| 72.8457846 | 62.9030219 | 70.3551261 | 89.2690501 | 63 | 79.5523281 | minute gap 20 |
| 72.8457846 | 62.9030219 | 70.3551261 | 88.2690501 | 63 | 79.8023281 | minute gap 21 |
| 72.8457846 | 63.9030219 | 71.3551261 | 87.2690501 | 63 | 80.0523281 | minute gap 22 |
| 70.8457846 | 67.9030219 | 71.3551261 | 87.2690501 | 63 | 80.4273281 | minute gap 23 |
| 68.8457846 | 68.9030219 | 71.3551261 | 87.2690501 | 63 | 78.5523281 | minute gap 24 |
| 68.8457846 | 68.9030219 | 71.3551261 | 85.2690501 | 63 | 78.8023281 | minute gap 25 |
| 68.8457846 | 69.9030219 | 70.3551261 | 85.2690501 | 63 | 77.9273281 | minute gap 26 |
| 69.8457846 | 69.9030219 | 70.3551261 | 86.2690501 | 63 | 78.0523281 | minute gap 27 |
| 70.8457846 | 69.9030219 | 70.3551261 | 85.2690501 | 63 | 77.9273281 | minute gap 28 |
| 71.8457846 | 69.9030219 | 70.3551261 | 85.2690501 | 63 | 77.8023281 | minute gap 29 |
| 71.8457846 | 69.9030219 | 70.3551261 | 85.2690501 | 63 | 77.8023281 | minute gap 30 |
| 71.8457846 | 69.9030219 | 71.3551261 | 83.2690501 | 63 | 77.4273281 | minute gap 31 |
| 71.8457846 | 69.9030219 | 72.3551261 | 81.2690501 | 63 | 76.8023281 | minute gap 32 |
| 72.8457846 | 69.9030219 | 72.3551261 | 79.2690501 | 63 | 75.9273281 | minute gap 33 |
| 73.8457846 | 68.9030219 | 72.3551261 | 78.2690501 | 63 | 75.5523281 | minute gap 34 |
| 73.8457846 | 68.9030219 | 74.3551261 | 78.2690501 | 63 | 75.5523281 | minute gap 35 |
| 73.8457846 | 66.9030219 | 74.3551261 | 78.2690501 | 63 | 75.0523281 | minute gap 36 |
| 74.8457846 | 65.9030219 | 74.3551261 | 77.2690501 | 63 | 74.6773281 | minute gap 37 |
| 75.8457846 | 64.9030219 | 74.3551261 | 77.2690501 | 63 | 74.4273281 | minute gap 38 |
| 75.8457846 | 63.9030219 | 75.3551261 | 77.2690501 | 63 | 74.3023281 | minute gap 39 |
| 74.8457846 | 63.9030219 | 75.3551261 | 77.2690501 | 63 | 75.1773281 | minute gap 40 |
| 72.8457846 | 63.9030219 | 74.3551261 | 77.2690501 | 63 | 74.6773281 | minute gap 41 |
| 70.8457846 | 63.9030219 | 73.3551261 | 77.2690501 | 63 | 73.8023281 | minute gap 42 |
| 69.8457846 | 64.9030219 | 73.3551261 | 77.2690501 | 63 | 73.5523281 | minute gap 43 |
| 69.8457846 | 64.9030219 | 73.3551261 | 77.2690501 | 63 | 72.8023281 | minute gap 44 |
| 69.8457846 | 64.9030219 | 73.3551261 | 77.2690501 | 63 | 72.8023281 | minute gap 45 |
| 69.8457846 | 64.9030219 | 71.3551261 | 77.2690501 | 63 | 72.6773281 | minute gap 46 |
| 67.8457846 | 65.9030219 | 71.3551261 | 77.2690501 | 63 | 72.3023281 | minute gap 47 |
| 67.8457846 | 65.9030219 | 71.3551261 | 78.2690501 | 63 | 72.0523281 | minute gap 48 |
| 67.8457846 | 65.9030219 | 71.3551261 | 79.2690501 | 63 | 72.0523281 | minute gap 49 |
| 67.8457846 | 65.9030219 | 71.3551261 | 79.2690501 | 63 | 72.1773281 | minute gap 50 |
| 68.8457846 | 65.9030219 | 71.3551261 | 79.2690501 | 63 | 73.0523281 | minute gap 51 |
| 68.8457846 | 65.9030219 | 70.3551261 | 78.2690501 | 63 | 75.6773281 | minute gap 52 |
| 71.8457846 | 65.9030219 | 69.3551261 | 76.2690501 | 63 | 77.3023281 | minute gap 53 |
| 71.8457846 | 65.9030219 | 69.3551261 | 74.2690501 | 63 | 77.8023281 | minute gap 54 |
| 70.8457846 | 66.9030219 | 69.3551261 | 73.2690501 | 63 | 77.9273281 | minute gap 55 |
| 70.8457846 | 67.9030219 | 69.3551261 | 73.2690501 | 63 | 78.0523281 | minute gap 56 |
| 69.8457846 | 67.9030219 | 69.3551261 | 73.2690501 | 63 | 78.0523281 | minute gap 57 |
| 70.8457846 | 67.9030219 | 70.3551261 | 75.2690501 | 63 | 78.6773281 | minute gap 58 |
| 71.8457846 | 67.9030219 | 70.3551261 | 79.2690501 | 63 | 79.1773281 | minute gap 59 |
| 71.8457846 | 67.9030219 | 70.3551261 | 81.2690501 | 63 | 79.0523281 | minute gap 60 |
| 73.8457846 | 67.9030219 | 70.3551261 | 81.2690501 | 73 | 79.1773281 | Activity      |

|            |            |            |            |    |            |          |
|------------|------------|------------|------------|----|------------|----------|
| 73.8457846 | 67.9030219 | 70.3551261 | 83.2690501 | 73 | 79.8023281 | Activity |
| 74.8457846 | 70.9030219 | 70.3551261 | 80.2690501 | 73 | 79.6773281 | Activity |
| 74.8457846 | 72.9030219 | 70.3551261 | 78.2690501 | 73 | 77.5523281 | Activity |
| 74.8457846 | 73.9030219 | 70.3551261 | 78.2690501 | 73 | 77.4273281 | Activity |
| 75.8457846 | 74.9030219 | 70.3551261 | 77.2690501 | 73 | 77.4273281 | Activity |
| 75.8457846 | 75.9030219 | 69.3551261 | 76.2690501 | 73 | 76.9273281 | Activity |
| 75.8457846 | 76.9030219 | 69.3551261 | 76.2690501 | 73 | 76.9273281 | Activity |
| 75.8457846 | 76.9030219 | 69.3551261 | 77.2690501 | 73 | 76.1773281 | Activity |
| 75.8457846 | 76.9030219 | 69.3551261 | 77.2690501 | 73 | 76.1773281 | Activity |
| 75.8457846 | 77.9030219 | 68.3551261 | 77.2690501 | 73 | 75.5523281 | Activity |
| 75.8457846 | 77.9030219 | 68.3551261 | 77.2690501 | 73 | 75.3023281 | Activity |
| 75.8457846 | 78.9030219 | 68.3551261 | 77.2690501 | 73 | 75.5523281 | Activity |
| 75.8457846 | 78.9030219 | 68.3551261 | 77.2690501 | 73 | 76.1773281 | Activity |
| 75.8457846 | 80.9030219 | 68.3551261 | 78.2690501 | 73 | 76.3023281 | Activity |
| 76.8457846 | 81.9030219 | 68.3551261 | 78.2690501 | 73 | 76.1773281 | Activity |
| 76.8457846 | 81.9030219 | 68.3551261 | 78.2690501 | 73 | 76.3023281 | Activity |
| 76.8457846 | 81.9030219 | 69.3551261 | 78.2690501 | 73 | 76.4273281 | Activity |
| 74.8457846 | 81.9030219 | 70.3551261 | 79.2690501 | 73 | 76.1773281 | Activity |
| 74.8457846 | 79.9030219 | 70.3551261 | 80.2690501 | 73 | 76.1773281 | Activity |
| 74.8457846 | 79.9030219 | 70.3551261 | 80.2690501 | 73 | 76.4273281 | Activity |
| 74.8457846 | 79.9030219 | 70.3551261 | 72.2690501 | 73 | 75.6773281 | Activity |
| 74.8457846 | 80.9030219 | 70.3551261 | 72.2690501 | 73 | 75.8023281 | Activity |
| 73.8457846 | 80.9030219 | 70.3551261 | 72.2690501 | 73 | 75.5523281 | Activity |
| 72.8457846 | 81.9030219 | 70.3551261 | 72.2690501 | 73 | 75.4273281 | Activity |
| 71.8457846 | 82.9030219 | 70.3551261 | 72.2690501 | 73 | 75.6773281 | Activity |
| 71.8457846 | 83.9030219 | 70.3551261 | 72.2690501 | 73 | 75.9273281 | Activity |
| 70.8457846 | 84.9030219 | 70.3551261 | 73.2690501 | 73 | 76.4273281 | Activity |
| 71.8457846 | 86.9030219 | 70.3551261 | 73.2690501 | 73 | 76.9273281 | Activity |
| 71.8457846 | 88.9030219 | 70.3551261 | 73.2690501 | 73 | 77.6773281 | Activity |
| 72.8457846 | 89.9030219 | 72.3551261 | 75.2690501 | 73 | 78.5523281 | Activity |
| 72.8457846 | 89.9030219 | 73.3551261 | 75.2690501 | 73 | 78.3023281 | Activity |
| 71.8457846 | 90.9030219 | 73.3551261 | 77.2690501 | 73 | 78.5523281 | Activity |
| 72.8457846 | 92.9030219 | 72.3551261 | 77.2690501 | 73 | 78.5523281 | Activity |
| 73.8457846 | 96.9030219 | 72.3551261 | 78.2690501 | 73 | 79.4273281 | Activity |
| 73.8457846 | 100.903022 | 72.3551261 | 79.2690501 | 73 | 80.4273281 | Activity |
| 73.8457846 | 100.903022 | 71.3551261 | 79.2690501 | 73 | 80.5523281 | Activity |
| 74.8457846 | 100.903022 | 71.3551261 | 79.2690501 | 73 | 80.9273281 | Activity |
| 74.8457846 | 100.903022 | 70.3551261 | 77.2690501 | 73 | 80.5523281 | Activity |
| 74.8457846 | 99.9030219 | 69.3551261 | 77.2690501 | 73 | 80.3023281 | Activity |
| 74.8457846 | 98.9030219 | 69.3551261 | 76.2690501 | 73 | 80.0523281 | Activity |
| 80.8457846 | 98.9030219 | 68.3551261 | 76.2690501 | 73 | 80.6773281 | Activity |
| 81.8457846 | 98.9030219 | 69.3551261 | 76.2690501 | 73 | 80.9273281 | Activity |
| 78.8457846 | 98.9030219 | 69.3551261 | 76.2690501 | 73 | 80.4273281 | Activity |
| 76.8457846 | 97.9030219 | 69.3551261 | 76.2690501 | 73 | 79.5523281 | Activity |
| 76.8457846 | 97.9030219 | 69.3551261 | 77.2690501 | 73 | 79.6773281 | Activity |

|            |            |            |            |    |            |          |
|------------|------------|------------|------------|----|------------|----------|
| 76.8457846 | 89.9030219 | 69.3551261 | 76.2690501 | 73 | 78.4273281 | Activity |
| 76.8457846 | 88.9030219 | 70.3551261 | 76.2690501 | 73 | 78.0523281 | Activity |
| 76.8457846 | 88.9030219 | 70.3551261 | 76.2690501 | 73 | 78.3023281 | Activity |
| 76.8457846 | 87.9030219 | 70.3551261 | 75.2690501 | 73 | 78.1773281 | Activity |
| 76.8457846 | 87.9030219 | 70.3551261 | 76.2690501 | 73 | 78.0523281 | Activity |
| 76.8457846 | 85.9030219 | 70.3551261 | 77.2690501 | 73 | 77.9273281 | Activity |
| 74.8457846 | 88.9030219 | 70.3551261 | 77.2690501 | 73 | 77.9273281 | Activity |
| 74.8457846 | 89.9030219 | 70.3551261 | 77.2690501 | 73 | 78.1773281 | Activity |
| 68.8457846 | 91.9030219 | 71.3551261 | 77.2690501 | 73 | 77.8023281 | Activity |
| 67.8457846 | 92.9030219 | 71.3551261 | 78.2690501 | 73 | 77.9273281 | Activity |
| 67.8457846 | 93.9030219 | 74.3551261 | 78.2690501 | 73 | 79.1773281 | Activity |
| 66.8457846 | 94.9030219 | 75.3551261 | 78.2690501 | 73 | 79.4273281 | Activity |
| 66.8457846 | 94.9030219 | 75.3551261 | 78.2690501 | 73 | 79.3023281 | Activity |
| 66.8457846 | 94.9030219 | 75.3551261 | 79.2690501 | 73 | 80.5523281 | Activity |
| 66.8457846 | 95.9030219 | 75.3551261 | 79.2690501 | 73 | 81.3023281 | Activity |
| 66.8457846 | 96.9030219 | 74.3551261 | 80.2690501 | 73 | 81.3023281 | Activity |
| 71.8457846 | 96.9030219 | 74.3551261 | 80.2690501 | 73 | 81.8023281 | Activity |
| 71.8457846 | 96.9030219 | 74.3551261 | 80.2690501 | 73 | 81.8023281 | Activity |
| 72.8457846 | 97.9030219 | 73.3551261 | 84.2690501 | 73 | 82.5523281 | Activity |
| 72.8457846 | 97.9030219 | 73.3551261 | 85.2690501 | 73 | 82.4273281 | Activity |
| 72.8457846 | 97.9030219 | 73.3551261 | 85.2690501 | 73 | 82.3023281 | Activity |
| 72.8457846 | 97.9030219 | 73.3551261 | 86.2690501 | 73 | 82.0523281 | Activity |
| 72.8457846 | 97.9030219 | 73.3551261 | 76.2690501 | 73 | 80.4273281 | Activity |
| 73.8457846 | 97.9030219 | 73.3551261 | 76.2690501 | 73 | 80.5523281 | Activity |
| 77.8457846 | 97.9030219 | 73.3551261 | 76.2690501 | 73 | 80.9273281 | Activity |
| 77.8457846 | 97.9030219 | 73.3551261 | 77.2690501 | 73 | 80.9273281 | Activity |
| 80.8457846 | 98.9030219 | 74.3551261 | 77.2690501 | 73 | 81.6773281 | Activity |
| 82.8457846 | 98.9030219 | 74.3551261 | 77.2690501 | 73 | 82.0523281 | Activity |
| 83.8457846 | 98.9030219 | 74.3551261 | 76.2690501 | 73 | 82.1773281 | Activity |
| 84.8457846 | 98.9030219 | 75.3551261 | 74.2690501 | 73 | 82.1773281 | Activity |
| 85.8457846 | 98.9030219 | 78.3551261 | 74.2690501 | 73 | 80.8023281 | Activity |
| 85.8457846 | 98.9030219 | 78.3551261 | 74.2690501 | 73 | 80.5523281 | Activity |
| 85.8457846 | 98.9030219 | 78.3551261 | 74.2690501 | 73 | 80.0523281 | Activity |
| 85.8457846 | 98.9030219 | 77.3551261 | 74.2690501 | 73 | 79.9273281 | Activity |
| 85.8457846 | 99.9030219 | 77.3551261 | 74.2690501 | 73 | 79.5523281 | Activity |
| 83.8457846 | 99.9030219 | 77.3551261 | 75.2690501 | 73 | 79.4273281 | Activity |
| 83.8457846 | 99.9030219 | 77.3551261 | 75.2690501 | 73 | 79.3023281 | Activity |
| 83.8457846 | 97.9030219 | 77.3551261 | 76.2690501 | 73 | 79.4273281 | Activity |
| 82.8457846 | 97.9030219 | 77.3551261 | 76.2690501 | 73 | 79.8023281 | Activity |
| 82.8457846 | 97.9030219 | 77.3551261 | 75.2690501 | 73 | 80.0523281 | Activity |
| 82.8457846 | 98.9030219 | 78.3551261 | 75.2690501 | 73 | 80.5523281 | Activity |
| 81.8457846 | 97.9030219 | 79.3551261 | 75.2690501 | 73 | 80.1773281 | Activity |
| 81.8457846 | 97.9030219 | 79.3551261 | 75.2690501 | 73 | 81.8023281 | Activity |
| 81.8457846 | 94.9030219 | 80.3551261 | 75.2690501 | 73 | 81.9273281 | Activity |
| 81.8457846 | 94.9030219 | 80.3551261 | 75.2690501 | 73 | 82.0523281 | Activity |



|            |            |            |            |    |            |          |
|------------|------------|------------|------------|----|------------|----------|
| 81.8457846 | 94.9030219 | 83.3551261 | 75.2690501 | 73 | 82.5523281 | Activity |
| 81.8457846 | 94.9030219 | 85.3551261 | 75.2690501 | 73 | 82.3023281 | Activity |
| 81.8457846 | 93.9030219 | 85.3551261 | 77.2690501 | 73 | 82.5523281 | Activity |
| 81.8457846 | 93.9030219 | 83.3551261 | 77.2690501 | 73 | 82.3023281 | Activity |
| 81.8457846 | 83.9030219 | 81.3551261 | 77.2690501 | 73 | 80.6773281 | Activity |
| 81.8457846 | 83.9030219 | 80.3551261 | 77.2690501 | 73 | 80.5523281 | Activity |
| 80.8457846 | 83.9030219 | 78.3551261 | 77.2690501 | 73 | 80.4273281 | Activity |
| 80.8457846 | 83.9030219 | 77.3551261 | 77.2690501 | 73 | 80.3023281 | Activity |
| 81.8457846 | 83.9030219 | 77.3551261 | 77.2690501 | 73 | 79.8023281 | Activity |
| 81.8457846 | 83.9030219 | 76.3551261 | 77.2690501 | 73 | 79.9273281 | Activity |
| 84.8457846 | 83.9030219 | 76.3551261 | 79.2690501 | 73 | 80.0523281 | Activity |
| 84.8457846 | 82.9030219 | 75.3551261 | 79.2690501 | 73 | 79.8023281 | Activity |
| 84.8457846 | 82.9030219 | 76.3551261 | 81.2690501 | 73 | 80.5523281 | Activity |
| 84.8457846 | 83.9030219 | 76.3551261 | 81.2690501 | 73 | 80.8023281 | Activity |
| 84.8457846 | 82.9030219 | 77.3551261 | 86.2690501 | 73 | 81.5523281 | Activity |
| 85.8457846 | 81.9030219 | 78.3551261 | 90.2690501 | 73 | 82.1773281 | Activity |
| 85.8457846 | 81.9030219 | 77.3551261 | 91.2690501 | 73 | 82.4273281 | Activity |
| 81.8457846 | 80.9030219 | 75.3551261 | 91.2690501 | 73 | 81.4273281 | Activity |
| 76.8457846 | 79.9030219 | 74.3551261 | 91.2690501 | 73 | 80.4273281 | Activity |
| 75.8457846 | 76.9030219 | 74.3551261 | 92.2690501 | 73 | 80.1773281 | Activity |
| 75.8457846 | 76.9030219 | 74.3551261 | 92.2690501 | 73 | 80.1773281 | Activity |
| 74.8457846 | 73.9030219 | 74.3551261 | 92.2690501 | 73 | 79.4273281 | Activity |
| 73.8457846 | 74.9030219 | 75.3551261 | 92.2690501 | 73 | 79.9273281 | Activity |
| 73.8457846 | 74.9030219 | 75.3551261 | 95.2690501 | 73 | 80.4273281 | Activity |
| 72.8457846 | 74.9030219 | 75.3551261 | 96.2690501 | 73 | 80.4273281 | Activity |
| 71.8457846 | 74.9030219 | 76.3551261 | 99.2690501 | 73 | 80.5523281 | Activity |
| 71.8457846 | 74.9030219 | 76.3551261 | 99.2690501 | 73 | 80.5523281 | Activity |
| 71.8457846 | 74.9030219 | 76.3551261 | 100.26905  | 73 | 80.4273281 | Activity |
| 70.8457846 | 75.9030219 | 74.3551261 | 101.26905  | 73 | 80.1773281 | Activity |
| 70.8457846 | 76.9030219 | 72.3551261 | 101.26905  | 73 | 79.8023281 | Activity |
| 70.8457846 | 76.9030219 | 71.3551261 | 100.26905  | 73 | 79.6773281 | Activity |
| 70.8457846 | 75.9030219 | 71.3551261 | 100.26905  | 73 | 79.6773281 | Activity |
| 71.8457846 | 75.9030219 | 70.3551261 | 99.2690501 | 73 | 79.5523281 | Activity |
| 71.8457846 | 75.9030219 | 70.3551261 | 98.2690501 | 73 | 79.3023281 | Activity |
| 70.8457846 | 75.9030219 | 70.3551261 | 97.2690501 | 73 | 79.8023281 | Activity |
| 71.8457846 | 74.9030219 | 70.3551261 | 96.2690501 | 73 | 79.1773281 | Activity |
| 71.8457846 | 73.9030219 | 70.3551261 | 94.2690501 | 73 | 78.8023281 | Activity |
| 71.8457846 | 68.9030219 | 70.3551261 | 92.2690501 | 73 | 77.8023281 | Activity |
| 72.8457846 | 68.9030219 | 70.3551261 | 90.2690501 | 73 | 77.5523281 | Activity |
| 74.8457846 | 66.9030219 | 70.3551261 | 89.2690501 | 73 | 77.3023281 | Activity |
| 72.8457846 | 66.9030219 | 71.3551261 | 89.2690501 | 73 | 77.1773281 | Activity |
| 71.8457846 | 66.9030219 | 71.3551261 | 89.2690501 | 73 | 77.0523281 | Activity |
| 71.8457846 | 66.9030219 | 71.3551261 | 89.2690501 | 73 | 76.8023281 | Activity |
| 71.8457846 | 66.9030219 | 71.3551261 | 89.2690501 | 73 | 76.5523281 | Activity |
| 70.8457846 | 66.9030219 | 71.3551261 | 91.2690501 | 73 | 76.8023281 | Activity |

|            |            |            |            |    |            |          |
|------------|------------|------------|------------|----|------------|----------|
| 71.8457846 | 66.9030219 | 71.3551261 | 91.2690501 | 73 | 76.5523281 | Activity |
| 71.8457846 | 67.9030219 | 73.3551261 | 91.2690501 | 73 | 76.6773281 | Activity |
| 73.8457846 | 67.9030219 | 72.3551261 | 91.2690501 | 73 | 76.6773281 | Activity |
| 73.8457846 | 68.9030219 | 72.3551261 | 90.2690501 | 73 | 76.6773281 | Activity |
| 73.8457846 | 71.9030219 | 72.3551261 | 87.2690501 | 73 | 76.5523281 | Activity |
| 73.8457846 | 71.9030219 | 74.3551261 | 86.2690501 | 73 | 76.5523281 | Activity |
| 71.8457846 | 73.9030219 | 74.3551261 | 86.2690501 | 73 | 76.5523281 | Activity |
| 71.8457846 | 74.9030219 | 74.3551261 | 85.2690501 | 73 | 76.6773281 | Activity |
| 71.8457846 | 76.9030219 | 74.3551261 | 85.2690501 | 73 | 77.1773281 | Activity |
| 69.8457846 | 76.9030219 | 74.3551261 | 85.2690501 | 73 | 77.0523281 | Activity |
| 66.8457846 | 79.9030219 | 74.3551261 | 85.2690501 | 73 | 77.0523281 | Activity |
| 64.8457846 | 86.9030219 | 74.3551261 | 85.2690501 | 73 | 77.5523281 | Activity |
| 63.8457846 | 92.9030219 | 74.3551261 | 85.2690501 | 73 | 78.4273281 | Activity |
| 63.8457846 | 84.9030219 | 74.3551261 | 87.2690501 | 73 | 77.6773281 | Activity |
| 63.8457846 | 84.9030219 | 75.3551261 | 88.2690501 | 73 | 77.8023281 | Activity |
| 63.8457846 | 78.9030219 | 75.3551261 | 88.2690501 | 73 | 77.1773281 | Activity |
| 63.8457846 | 75.9030219 | 75.3551261 | 88.2690501 | 73 | 77.0523281 | Activity |
| 63.8457846 | 75.9030219 | 75.3551261 | 88.2690501 | 73 | 77.3023281 | Activity |
| 63.8457846 | 72.9030219 | 74.3551261 | 95.2690501 | 73 | 78.3023281 | Activity |
| 63.8457846 | 72.9030219 | 74.3551261 | 98.2690501 | 73 | 78.9273281 | Activity |
| 63.8457846 | 72.9030219 | 74.3551261 | 98.2690501 | 73 | 79.4273281 | Activity |
| 64.8457846 | 77.9030219 | 73.3551261 | 98.2690501 | 73 | 80.1773281 | Activity |
| 64.8457846 | 74.9030219 | 73.3551261 | 98.2690501 | 73 | 79.8023281 | Activity |
| 64.8457846 | 74.9030219 | 73.3551261 | 98.2690501 | 73 | 79.6773281 | Activity |
| 64.8457846 | 72.9030219 | 75.3551261 | 96.2690501 | 73 | 79.4273281 | Activity |
| 64.8457846 | 70.9030219 | 75.3551261 | 95.2690501 | 73 | 79.5523281 | Activity |
| 64.8457846 | 69.9030219 | 75.3551261 | 90.2690501 | 73 | 78.8023281 | Activity |
| 68.8457846 | 69.9030219 | 75.3551261 | 88.2690501 | 73 | 78.4273281 | Activity |
| 67.8457846 | 69.9030219 | 75.3551261 | 88.2690501 | 73 | 78.1773281 | Activity |
| 67.8457846 | 69.9030219 | 75.3551261 | 88.2690501 | 73 | 78.1773281 | Activity |
| 67.8457846 | 71.9030219 | 75.3551261 | 87.2690501 | 73 | 78.3023281 | Activity |
| 67.8457846 | 71.9030219 | 74.3551261 | 87.2690501 | 73 | 78.3023281 | Activity |
| 69.8457846 | 72.9030219 | 74.3551261 | 86.2690501 | 73 | 78.5523281 | Activity |
| 70.8457846 | 73.9030219 | 74.3551261 | 80.2690501 | 73 | 78.5523281 | Activity |
| 70.8457846 | 76.9030219 | 74.3551261 | 79.2690501 | 73 | 78.8023281 | Activity |
| 70.8457846 | 76.9030219 | 74.3551261 | 79.2690501 | 73 | 78.8023281 | Activity |
| 71.8457846 | 77.9030219 | 74.3551261 | 78.2690501 | 73 | 78.6773281 | Activity |
| 72.8457846 | 77.9030219 | 71.3551261 | 78.2690501 | 73 | 78.3023281 | Activity |
| 72.8457846 | 76.9030219 | 71.3551261 | 81.2690501 | 73 | 78.3023281 | Activity |
| 73.8457846 | 75.9030219 | 73.3551261 | 81.2690501 | 73 | 77.9273281 | Activity |
| 73.8457846 | 74.9030219 | 73.3551261 | 88.2690501 | 73 | 77.9273281 | Activity |
| 73.8457846 | 74.9030219 | 73.3551261 | 88.2690501 | 73 | 77.8023281 | Activity |
| 72.8457846 | 73.9030219 | 74.3551261 | 89.2690501 | 73 | 77.5523281 | Activity |
| 73.8457846 | 72.9030219 | 76.3551261 | 89.2690501 | 73 | 77.0523281 | Activity |
| 75.8457846 | 78.9030219 | 77.3551261 | 90.2690501 | 73 | 78.1773281 | Activity |

|            |            |            |            |    |            |          |
|------------|------------|------------|------------|----|------------|----------|
| 76.8457846 | 80.9030219 | 78.3551261 | 90.2690501 | 73 | 78.3023281 | Activity |
| 76.8457846 | 84.9030219 | 78.3551261 | 90.2690501 | 73 | 78.5523281 | Activity |
| 76.8457846 | 86.9030219 | 77.3551261 | 91.2690501 | 73 | 78.9273281 | Activity |
| 79.8457846 | 86.9030219 | 76.3551261 | 91.2690501 | 73 | 79.5523281 | Activity |
| 81.8457846 | 88.9030219 | 76.3551261 | 91.2690501 | 73 | 80.5523281 | Activity |
| 81.8457846 | 98.9030219 | 76.3551261 | 91.2690501 | 73 | 82.1773281 | Activity |
| 81.8457846 | 100.903022 | 76.3551261 | 92.2690501 | 73 | 82.5523281 | Activity |
| 81.8457846 | 105.903022 | 76.3551261 | 92.2690501 | 73 | 82.9273281 | Activity |
| 81.8457846 | 107.903022 | 76.3551261 | 92.2690501 | 73 | 82.3023281 | Activity |
| 81.8457846 | 108.903022 | 76.3551261 | 92.2690501 | 73 | 82.3023281 | Activity |
| 82.8457846 | 108.903022 | 77.3551261 | 92.2690501 | 73 | 82.1773281 | Activity |
| 82.8457846 | 110.903022 | 76.3551261 | 92.2690501 | 73 | 82.0523281 | Activity |
| 82.8457846 | 110.903022 | 76.3551261 | 91.2690501 | 73 | 82.0523281 | Activity |
| 84.8457846 | 110.903022 | 76.3551261 | 91.2690501 | 73 | 82.1773281 | Activity |
| 84.8457846 | 109.903022 | 75.3551261 | 89.2690501 | 73 | 81.5523281 | Activity |
| 86.8457846 | 109.903022 | 75.3551261 | 86.2690501 | 73 | 81.5523281 | Activity |
| 86.8457846 | 109.903022 | 74.3551261 | 86.2690501 | 73 | 81.1773281 | Activity |
| 88.8457846 | 109.903022 | 73.3551261 | 86.2690501 | 73 | 81.5523281 | Activity |
| 89.8457846 | 108.903022 | 73.3551261 | 88.2690501 | 73 | 82.3023281 | Activity |
| 90.8457846 | 107.903022 | 73.3551261 | 88.2690501 | 73 | 82.3023281 | Activity |
| 91.8457846 | 107.903022 | 73.3551261 | 88.2690501 | 73 | 82.5523281 | Activity |
| 92.8457846 | 106.903022 | 73.3551261 | 85.2690501 | 73 | 82.5523281 | Activity |
| 93.8457846 | 107.903022 | 73.3551261 | 82.2690501 | 73 | 82.5523281 | Activity |
| 93.8457846 | 107.903022 | 73.3551261 | 82.2690501 | 73 | 82.8023281 | Activity |
| 93.8457846 | 107.903022 | 73.3551261 | 82.2690501 | 73 | 83.1773281 | Activity |
| 94.8457846 | 107.903022 | 73.3551261 | 80.2690501 | 73 | 83.0523281 | Activity |
| 94.8457846 | 106.903022 | 73.3551261 | 80.2690501 | 73 | 82.6773281 | Activity |
| 94.8457846 | 106.903022 | 73.3551261 | 81.2690501 | 73 | 82.6773281 | Activity |
| 92.8457846 | 105.903022 | 73.3551261 | 84.2690501 | 73 | 82.5523281 | Activity |
| 89.8457846 | 104.903022 | 73.3551261 | 84.2690501 | 73 | 82.0523281 | Activity |
| 87.8457846 | 105.903022 | 73.3551261 | 84.2690501 | 73 | 82.0523281 | Activity |
| 85.8457846 | 105.903022 | 73.3551261 | 84.2690501 | 73 | 81.5523281 | Activity |
| 84.8457846 | 105.903022 | 73.3551261 | 84.2690501 | 73 | 81.4273281 | Activity |
| 82.8457846 | 105.903022 | 73.3551261 | 84.2690501 | 73 | 81.1773281 | Activity |
| 80.8457846 | 98.9030219 | 73.3551261 | 85.2690501 | 73 | 80.1773281 | Activity |
| 80.8457846 | 89.9030219 | 73.3551261 | 85.2690501 | 73 | 78.8023281 | Activity |
| 80.8457846 | 80.9030219 | 73.3551261 | 85.2690501 | 73 | 77.4273281 | Activity |
| 80.8457846 | 74.9030219 | 73.3551261 | 84.2690501 | 73 | 76.4273281 | Activity |
| 81.8457846 | 72.9030219 | 73.3551261 | 84.2690501 | 73 | 76.1773281 | Activity |
| 81.8457846 | 71.9030219 | 73.3551261 | 84.2690501 | 73 | 76.4273281 | Activity |
| 82.8457846 | 71.9030219 | 74.3551261 | 84.2690501 | 73 | 76.4273281 | Activity |
| 82.8457846 | 70.9030219 | 71.3551261 | 87.2690501 | 73 | 76.4273281 | Activity |
| 82.8457846 | 69.9030219 | 71.3551261 | 89.2690501 | 73 | 76.5523281 | Activity |
| 82.8457846 | 67.9030219 | 72.3551261 | 91.2690501 | 73 | 76.3023281 | Activity |
| 82.8457846 | 67.9030219 | 72.3551261 | 91.2690501 | 73 | 76.3023281 | Activity |



|            |            |            |            |    |            |          |
|------------|------------|------------|------------|----|------------|----------|
| 82.8457846 | 67.9030219 | 74.3551261 | 91.2690501 | 73 | 76.9273281 | Activity |
| 82.8457846 | 65.9030219 | 74.3551261 | 91.2690501 | 73 | 76.5523281 | Activity |
| 82.8457846 | 64.9030219 | 74.3551261 | 91.2690501 | 73 | 76.8023281 | Activity |
| 82.8457846 | 64.9030219 | 74.3551261 | 91.2690501 | 73 | 76.4273281 | Activity |
| 81.8457846 | 64.9030219 | 74.3551261 | 85.2690501 | 73 | 75.5523281 | Activity |
| 81.8457846 | 64.9030219 | 74.3551261 | 85.2690501 | 73 | 75.5523281 | Activity |
| 80.8457846 | 65.9030219 | 74.3551261 | 85.2690501 | 73 | 75.4273281 | Activity |
| 81.8457846 | 66.9030219 | 72.3551261 | 86.2690501 | 73 | 75.5523281 | Activity |
| 81.8457846 | 67.9030219 | 72.3551261 | 85.2690501 | 73 | 75.4273281 | Activity |
| 81.8457846 | 67.9030219 | 72.3551261 | 86.2690501 | 73 | 74.9273281 | Activity |
| 81.8457846 | 67.9030219 | 72.3551261 | 86.2690501 | 73 | 74.6773281 | Activity |
| 81.8457846 | 67.9030219 | 75.3551261 | 86.2690501 | 73 | 75.0523281 | Activity |
| 81.8457846 | 67.9030219 | 77.3551261 | 87.2690501 | 73 | 75.5523281 | Activity |
| 82.8457846 | 68.9030219 | 78.3551261 | 87.2690501 | 73 | 76.0523281 | Activity |
| 82.8457846 | 68.9030219 | 78.3551261 | 87.2690501 | 73 | 76.8023281 | Activity |
| 83.8457846 | 68.9030219 | 77.3551261 | 88.2690501 | 73 | 78.0523281 | Activity |
| 83.8457846 | 69.9030219 | 77.3551261 | 88.2690501 | 73 | 78.1773281 | Activity |
| 83.8457846 | 69.9030219 | 75.3551261 | 89.2690501 | 73 | 78.1773281 | Activity |
| 83.8457846 | 69.9030219 | 74.3551261 | 89.2690501 | 73 | 78.4273281 | Activity |
| 83.8457846 | 70.9030219 | 73.3551261 | 89.2690501 | 73 | 78.9273281 | Activity |
| 82.8457846 | 70.9030219 | 72.3551261 | 89.2690501 | 73 | 78.6773281 | Activity |
| 82.8457846 | 70.9030219 | 73.3551261 | 89.2690501 | 73 | 79.0523281 | Activity |
| 82.8457846 | 70.9030219 | 74.3551261 | 90.2690501 | 73 | 79.4273281 | Activity |
| 82.8457846 | 70.9030219 | 75.3551261 | 90.2690501 | 73 | 79.6773281 | Activity |
| 81.8457846 | 69.9030219 | 75.3551261 | 90.2690501 | 73 | 79.6773281 | Activity |
| 81.8457846 | 69.9030219 | 76.3551261 | 94.2690501 | 73 | 80.6773281 | Activity |
| 78.8457846 | 68.9030219 | 77.3551261 | 93.2690501 | 73 | 80.3023281 | Activity |
| 73.8457846 | 68.9030219 | 77.3551261 | 93.2690501 | 73 | 79.4273281 | Activity |
| 73.8457846 | 68.9030219 | 77.3551261 | 93.2690501 | 73 | 78.9273281 | Activity |
| 73.8457846 | 68.9030219 | 77.3551261 | 93.2690501 | 73 | 78.4273281 | Activity |
| 72.8457846 | 69.9030219 | 77.3551261 | 93.2690501 | 73 | 78.4273281 | Activity |
| 72.8457846 | 73.9030219 | 75.3551261 | 93.2690501 | 73 | 78.5523281 | Activity |
| 72.8457846 | 74.9030219 | 74.3551261 | 93.2690501 | 73 | 78.5523281 | Activity |
| 73.8457846 | 74.9030219 | 74.3551261 | 93.2690501 | 73 | 78.3023281 | Activity |
| 73.8457846 | 74.9030219 | 74.3551261 | 95.2690501 | 73 | 78.4273281 | Activity |
| 73.8457846 | 75.9030219 | 74.3551261 | 95.2690501 | 73 | 78.5523281 | Activity |
| 73.8457846 | 75.9030219 | 74.3551261 | 95.2690501 | 73 | 78.6773281 | Activity |
| 73.8457846 | 75.9030219 | 74.3551261 | 91.2690501 | 73 | 78.1773281 | Activity |
| 73.8457846 | 75.9030219 | 73.3551261 | 86.2690501 | 73 | 77.6773281 | Activity |
| 77.8457846 | 75.9030219 | 73.3551261 | 86.2690501 | 73 | 78.5523281 | Activity |
| 80.8457846 | 75.9030219 | 73.3551261 | 86.2690501 | 73 | 79.1773281 | Activity |
| 80.8457846 | 75.9030219 | 75.3551261 | 88.2690501 | 73 | 79.5523281 | Activity |
| 80.8457846 | 75.9030219 | 78.3551261 | 88.2690501 | 73 | 79.1773281 | Activity |
| 80.8457846 | 75.9030219 | 80.3551261 | 88.2690501 | 73 | 78.5523281 | Activity |
| 80.8457846 | 75.9030219 | 79.3551261 | 92.2690501 | 73 | 78.6773281 | Activity |

|            |            |            |            |    |            |               |
|------------|------------|------------|------------|----|------------|---------------|
| 80.8457846 | 75.9030219 | 78.3551261 | 92.2690501 | 73 | 78.6773281 | Activity      |
| 78.8457846 | 75.9030219 | 77.3551261 | 92.2690501 | 73 | 78.1773281 | Activity      |
| 75.8457846 | 71.9030219 | 77.3551261 | 92.2690501 | 73 | 77.1773281 | Activity      |
| 72.8457846 | 67.9030219 | 77.3551261 | 92.2690501 | 73 | 76.3023281 | Activity      |
| 71.8457846 | 67.9030219 | 77.3551261 | 92.2690501 | 73 | 76.3023281 | Activity      |
| 71.8457846 | 65.9030219 | 77.3551261 | 92.2690501 | 73 | 76.0523281 | Activity      |
| 71.8457846 | 64.9030219 | 76.3551261 | 86.2690501 | 73 | 74.9273281 | Activity      |
| 71.8457846 | 64.9030219 | 75.3551261 | 85.2690501 | 73 | 74.8023281 | Activity      |
| 71.8457846 | 64.9030219 | 75.3551261 | 85.2690501 | 73 | 74.8023281 | Activity      |
| 71.8457846 | 65.9030219 | 75.3551261 | 86.2690501 | 73 | 75.6773281 | Activity      |
| 71.8457846 | 66.9030219 | 75.3551261 | 86.2690501 | 73 | 75.6773281 | Activity      |
| 72.8457846 | 67.9030219 | 75.3551261 | 86.2690501 | 73 | 75.9273281 | Activity      |
| 79.8457846 | 67.9030219 | 71.3551261 | 86.2690501 | 73 | 76.4273281 | Activity      |
| 84.8457846 | 65.9030219 | 69.3551261 | 86.2690501 | 73 | 75.6773281 | Activity      |
| 86.8457846 | 65.9030219 | 69.3551261 | 86.2690501 | 73 | 75.3023281 | Activity      |
| 85.8457846 | 65.9030219 | 68.3551261 | 86.2690501 | 73 | 75.1773281 | Activity      |
| 83.8457846 | 65.9030219 | 68.3551261 | 86.2690501 | 73 | 74.9273281 | End activity  |
| 80.8457846 | 65.9030219 | 69.3551261 | 90.2690501 | 63 | 75.3023281 | minute gap 1  |
| 78.8457846 | 64.9030219 | 69.3551261 | 90.2690501 | 63 | 75.5523281 | minute gap 2  |
| 77.8457846 | 63.9030219 | 69.3551261 | 90.2690501 | 63 | 75.3023281 | minute gap 3  |
| 75.8457846 | 63.9030219 | 71.3551261 | 85.2690501 | 63 | 74.5523281 | minute gap 4  |
| 74.8457846 | 64.9030219 | 71.3551261 | 85.2690501 | 63 | 74.5523281 | minute gap 5  |
| 73.8457846 | 65.9030219 | 71.3551261 | 86.2690501 | 63 | 75.4273281 | minute gap 6  |
| 71.8457846 | 65.9030219 | 70.3551261 | 87.2690501 | 63 | 75.9273281 | minute gap 7  |
| 70.8457846 | 66.9030219 | 70.3551261 | 87.2690501 | 63 | 76.1773281 | minute gap 8  |
| 69.8457846 | 66.9030219 | 70.3551261 | 88.2690501 | 63 | 76.3023281 | minute gap 9  |
| 68.8457846 | 66.9030219 | 70.3551261 | 89.2690501 | 63 | 76.0523281 | minute gap 10 |
| 68.8457846 | 66.9030219 | 70.3551261 | 89.2690501 | 63 | 76.3023281 | minute gap 11 |
| 68.8457846 | 66.9030219 | 70.3551261 | 93.2690501 | 63 | 76.6773281 | minute gap 12 |
| 69.8457846 | 66.9030219 | 71.3551261 | 93.2690501 | 63 | 76.8023281 | minute gap 13 |
| 69.8457846 | 66.9030219 | 71.3551261 | 93.2690501 | 63 | 76.1773281 | minute gap 14 |
| 70.8457846 | 66.9030219 | 71.3551261 | 91.2690501 | 63 | 75.6773281 | minute gap 15 |
| 70.8457846 | 66.9030219 | 70.3551261 | 84.2690501 | 63 | 73.9273281 | minute gap 16 |
| 70.8457846 | 66.9030219 | 69.3551261 | 84.2690501 | 63 | 73.8023281 | minute gap 17 |
| 71.8457846 | 66.9030219 | 69.3551261 | 83.2690501 | 63 | 73.6773281 | minute gap 18 |
| 71.8457846 | 66.9030219 | 69.3551261 | 82.2690501 | 63 | 73.3023281 | minute gap 19 |
| 73.8457846 | 66.9030219 | 70.3551261 | 81.2690501 | 63 | 73.5523281 | minute gap 20 |
| 73.8457846 | 65.9030219 | 70.3551261 | 80.2690501 | 63 | 73.4273281 | minute gap 21 |
| 73.8457846 | 65.9030219 | 71.3551261 | 80.2690501 | 63 | 73.5523281 | minute gap 22 |
| 73.8457846 | 68.9030219 | 72.3551261 | 80.2690501 | 63 | 74.3023281 | minute gap 23 |
| 74.8457846 | 71.9030219 | 72.3551261 | 79.2690501 | 63 | 74.8023281 | minute gap 24 |
| 74.8457846 | 70.9030219 | 73.3551261 | 77.2690501 | 63 | 74.6773281 | minute gap 25 |
| 74.8457846 | 69.9030219 | 73.3551261 | 77.2690501 | 63 | 74.8023281 | minute gap 26 |
| 73.8457846 | 67.9030219 | 73.3551261 | 77.2690501 | 63 | 74.6773281 | minute gap 27 |
| 73.8457846 | 66.9030219 | 74.3551261 | 76.2690501 | 63 | 74.8023281 | minute gap 28 |

|            |            |            |            |    |            |               |
|------------|------------|------------|------------|----|------------|---------------|
| 73.8457846 | 66.9030219 | 75.3551261 | 73.2690501 | 63 | 74.3023281 | minute gap 29 |
| 75.8457846 | 66.9030219 | 76.3551261 | 72.2690501 | 63 | 74.1773281 | minute gap 30 |
| 75.8457846 | 66.9030219 | 79.3551261 | 72.2690501 | 63 | 74.0523281 | minute gap 31 |
| 75.8457846 | 65.9030219 | 80.3551261 | 72.2690501 | 63 | 73.9273281 | minute gap 32 |
| 75.8457846 | 66.9030219 | 80.3551261 | 72.2690501 | 63 | 73.6773281 | minute gap 33 |
| 74.8457846 | 66.9030219 | 81.3551261 | 78.2690501 | 63 | 74.3023281 | minute gap 34 |
| 74.8457846 | 66.9030219 | 81.3551261 | 85.2690501 | 63 | 74.9273281 | minute gap 35 |
| 74.8457846 | 66.9030219 | 81.3551261 | 85.2690501 | 63 | 75.0523281 | minute gap 36 |
| 74.8457846 | 66.9030219 | 82.3551261 | 91.2690501 | 63 | 76.3023281 | minute gap 37 |
| 74.8457846 | 67.9030219 | 82.3551261 | 91.2690501 | 63 | 76.5523281 | minute gap 38 |
| 73.8457846 | 67.9030219 | 82.3551261 | 91.2690501 | 63 | 76.8023281 | minute gap 39 |
| 71.8457846 | 67.9030219 | 78.3551261 | 89.2690501 | 63 | 76.4273281 | minute gap 40 |
| 71.8457846 | 67.9030219 | 78.3551261 | 89.2690501 | 63 | 76.4273281 | minute gap 41 |
| 71.8457846 | 68.9030219 | 77.3551261 | 82.2690501 | 63 | 75.6773281 | minute gap 42 |
| 71.8457846 | 68.9030219 | 76.3551261 | 79.2690501 | 63 | 74.8023281 | minute gap 43 |
| 71.8457846 | 68.9030219 | 75.3551261 | 78.2690501 | 63 | 74.5523281 | minute gap 44 |
| 70.8457846 | 68.9030219 | 74.3551261 | 77.2690501 | 63 | 74.3023281 | minute gap 45 |
| 70.8457846 | 68.9030219 | 74.3551261 | 77.2690501 | 63 | 74.3023281 | minute gap 46 |
| 72.8457846 | 69.9030219 | 73.3551261 | 76.2690501 | 63 | 73.4273281 | minute gap 47 |
| 74.8457846 | 69.9030219 | 73.3551261 | 76.2690501 | 63 | 73.3023281 | minute gap 48 |
| 75.8457846 | 69.9030219 | 74.3551261 | 76.2690501 | 63 | 73.6773281 | minute gap 49 |
| 75.8457846 | 70.9030219 | 77.3551261 | 76.2690501 | 63 | 74.1773281 | minute gap 50 |
| 75.8457846 | 70.9030219 | 82.3551261 | 76.2690501 | 63 | 74.8023281 | minute gap 51 |
| 75.8457846 | 70.9030219 | 85.3551261 | 79.2690501 | 63 | 75.4273281 | minute gap 52 |
| 76.8457846 | 72.9030219 | 88.3551261 | 80.2690501 | 63 | 75.9273281 | minute gap 53 |
| 77.8457846 | 72.9030219 | 90.3551261 | 80.2690501 | 63 | 76.1773281 | minute gap 54 |
| 77.8457846 | 72.9030219 | 90.3551261 | 80.2690501 | 63 | 75.8023281 | minute gap 55 |
| 77.8457846 | 72.9030219 | 99.3551261 | 80.2690501 | 63 | 76.5523281 | minute gap 56 |
| 77.8457846 | 72.9030219 | 111.355126 | 80.2690501 | 63 | 77.8023281 | minute gap 57 |
| 77.8457846 | 72.9030219 | 117.355126 | 80.2690501 | 63 | 79.3023281 | minute gap 58 |
| 77.8457846 | 72.9030219 | 117.355126 | 82.2690501 | 63 | 79.8023281 | minute gap 59 |
| 77.8457846 | 72.9030219 | 117.355126 | 89.2690501 | 63 | 80.9273281 | minute gap 60 |
| 77.8457846 | 72.9030219 | 119.355126 | 90.2690501 | 63 | 81.3023281 | After 1       |
| 77.8457846 | 73.9030219 | 119.355126 | 89.2690501 | 63 | 81.1773281 | After 2       |
| 77.8457846 | 73.9030219 | 129.355126 | 88.2690501 | 63 | 81.8023281 | After 3       |
| 76.8457846 | 76.9030219 | 129.355126 | 88.2690501 | 63 | 81.9273281 | After 4       |
| 70.8457846 | 78.9030219 | 129.355126 | 85.2690501 | 63 | 81.1773281 | After 5       |
| 70.8457846 | 79.9030219 | 134.355126 | 85.2690501 | 63 | 82.1773281 | After 6       |
| 66.8457846 | 81.9030219 | 135.355126 | 85.2690501 | 63 | 82.1773281 | After 7       |
| 66.8457846 | 83.9030219 | 135.355126 | 85.2690501 | 63 | 82.1773281 | After 8       |
| 66.8457846 | 83.9030219 | 138.355126 | 85.2690501 | 63 | 82.3023281 | After 9       |
| 66.8457846 | 85.9030219 | 137.355126 | 85.2690501 | 63 | 82.5523281 | After 10      |
| 66.8457846 | 85.9030219 | 137.355126 | 85.2690501 | 63 | 82.8023281 | After 11      |
| 67.8457846 | 86.9030219 | 137.355126 | 84.2690501 | 63 | 83.0523281 | After 12      |
| 68.8457846 | 86.9030219 | 137.355126 | 84.2690501 | 63 | 83.4273281 | After 13      |

|            |            |            |            |    |            |          |
|------------|------------|------------|------------|----|------------|----------|
| 70.8457846 | 86.9030219 | 106.355126 | 85.2690501 | 63 | 79.8023281 | After 14 |
| 71.8457846 | 86.9030219 | 90.3551261 | 85.2690501 | 63 | 77.9273281 | After 15 |
| 72.8457846 | 85.9030219 | 80.3551261 | 84.2690501 | 63 | 76.3023281 | After 16 |
| 73.8457846 | 84.9030219 | 75.3551261 | 83.2690501 | 63 | 75.6773281 | After 17 |
| 73.8457846 | 84.9030219 | 74.3551261 | 82.2690501 | 63 | 75.4273281 | After 18 |
| 75.8457846 | 84.9030219 | 74.3551261 | 85.2690501 | 63 | 76.1773281 | After 19 |
| 76.8457846 | 85.9030219 | 73.3551261 | 85.2690501 | 63 | 76.3023281 | After 20 |
| 76.8457846 | 85.9030219 | 72.3551261 | 85.2690501 | 63 | 75.9273281 | After 21 |
| 76.8457846 | 87.9030219 | 72.3551261 | 82.2690501 | 63 | 75.8023281 | After 22 |
| 76.8457846 | 85.9030219 | 71.3551261 | 80.2690501 | 63 | 75.1773281 | After 23 |
| 76.8457846 | 84.9030219 | 71.3551261 | 79.2690501 | 63 | 74.4273281 | After 24 |
| 76.8457846 | 84.9030219 | 71.3551261 | 79.2690501 | 63 | 74.3023281 | After 25 |
| 77.8457846 | 84.9030219 | 71.3551261 | 78.2690501 | 63 | 74.3023281 | After 26 |
| 77.8457846 | 84.9030219 | 71.3551261 | 78.2690501 | 63 | 74.3023281 | After 27 |
| 76.8457846 | 84.9030219 | 71.3551261 | 78.2690501 | 63 | 73.9273281 | After 28 |
| 75.8457846 | 84.9030219 | 71.3551261 | 81.2690501 | 63 | 73.8023281 | After 29 |
| 73.8457846 | 87.9030219 | 71.3551261 | 81.2690501 | 63 | 73.6773281 | After 30 |
| 72.8457846 | 88.9030219 | 71.3551261 | 81.2690501 | 63 | 73.4273281 | After 31 |
| 71.8457846 | 89.9030219 | 71.3551261 | 81.2690501 | 63 | 73.5523281 | After 32 |
| 70.8457846 | 90.9030219 | 70.3551261 | 79.2690501 | 63 | 73.5523281 | After 33 |
| 70.8457846 | 91.9030219 | 70.3551261 | 79.2690501 | 63 | 74.4273281 | After 34 |
| 70.8457846 | 92.9030219 | 69.3551261 | 78.2690501 | 63 | 74.6773281 | After 35 |
| 69.8457846 | 92.9030219 | 69.3551261 | 78.2690501 | 63 | 74.8023281 | After 36 |
| 69.8457846 | 93.9030219 | 69.3551261 | 78.2690501 | 63 | 75.0523281 | After 37 |
| 70.8457846 | 93.9030219 | 68.3551261 | 79.2690501 | 63 | 74.9273281 | After 38 |
| 71.8457846 | 91.9030219 | 68.3551261 | 79.2690501 | 63 | 74.6773281 | After 39 |
| 71.8457846 | 91.9030219 | 68.3551261 | 79.2690501 | 63 | 74.6773281 | After 40 |
| 72.8457846 | 90.9030219 | 68.3551261 | 81.2690501 | 63 | 74.9273281 | After 41 |
| 74.8457846 | 90.9030219 | 68.3551261 | 81.2690501 | 63 | 75.3023281 | After 42 |
| 74.8457846 | 87.9030219 | 68.3551261 | 81.2690501 | 63 | 75.3023281 | After 43 |
| 74.8457846 | 87.9030219 | 68.3551261 | 81.2690501 | 63 | 75.5523281 | After 44 |
| 76.8457846 | 87.9030219 | 68.3551261 | 83.2690501 | 63 | 76.4273281 | After 45 |
| 77.8457846 | 87.9030219 | 69.3551261 | 82.2690501 | 63 | 76.6773281 | After 46 |
| 80.8457846 | 87.9030219 | 69.3551261 | 82.2690501 | 63 | 77.0523281 | After 47 |
| 81.8457846 | 87.9030219 | 72.3551261 | 82.2690501 | 63 | 77.8023281 | After 48 |
| 82.8457846 | 86.9030219 | 74.3551261 | 82.2690501 | 63 | 78.3023281 | After 49 |
| 82.8457846 | 85.9030219 | 75.3551261 | 82.2690501 | 63 | 78.5523281 | After 50 |
| 82.8457846 | 86.9030219 | 75.3551261 | 81.2690501 | 63 | 78.9273281 | After 51 |
| 83.8457846 | 87.9030219 | 75.3551261 | 81.2690501 | 63 | 79.1773281 | After 52 |
| 83.8457846 | 89.9030219 | 75.3551261 | 80.2690501 | 63 | 79.0523281 | After 53 |
| 81.8457846 | 89.9030219 | 75.3551261 | 79.2690501 | 63 | 78.6773281 | After 54 |
| 74.8457846 | 89.9030219 | 71.3551261 | 78.2690501 | 63 | 76.4273281 | After 55 |
| 71.8457846 | 91.9030219 | 70.3551261 | 78.2690501 | 63 | 76.0523281 | After 56 |
| 70.8457846 | 91.9030219 | 69.3551261 | 78.2690501 | 63 | 75.8023281 | After 57 |
| 71.8457846 | 92.9030219 | 69.3551261 | 78.2690501 | 63 | 75.8023281 | After 58 |

|            |            |            |            |    |            |           |
|------------|------------|------------|------------|----|------------|-----------|
| 71.8457846 | 92.9030219 | 69.3551261 | 78.2690501 | 63 | 76.3023281 | After 59  |
| 71.8457846 | 92.9030219 | 69.3551261 | 78.2690501 | 63 | 76.4273281 | After 60  |
| 74.8457846 | 92.9030219 | 69.3551261 | 78.2690501 | 63 | 76.8023281 | After 61  |
| 75.8457846 | 91.9030219 | 68.3551261 | 78.2690501 | 63 | 76.0523281 | After 62  |
| 75.8457846 | 91.9030219 | 69.3551261 | 80.2690501 | 63 | 76.3023281 | After 63  |
| 75.8457846 | 92.9030219 | 69.3551261 | 80.2690501 | 63 | 76.8023281 | After 64  |
| 70.8457846 | 92.9030219 | 68.3551261 | 80.2690501 | 63 | 76.1773281 | After 65  |
| 69.8457846 | 93.9030219 | 68.3551261 | 80.2690501 | 63 | 76.0523281 | After 66  |
| 70.8457846 | 93.9030219 | 68.3551261 | 80.2690501 | 63 | 75.9273281 | After 67  |
| 71.8457846 | 93.9030219 | 62.3551261 | 80.2690501 | 63 | 75.4273281 | After 68  |
| 73.8457846 | 93.9030219 | 64.3551261 | 80.2690501 | 63 | 76.1773281 | After 69  |
| 73.8457846 | 93.9030219 | 65.3551261 | 79.2690501 | 63 | 76.0523281 | After 70  |
| 75.8457846 | 93.9030219 | 65.3551261 | 78.2690501 | 63 | 76.4273281 | After 71  |
| 76.8457846 | 93.9030219 | 66.3551261 | 78.2690501 | 63 | 76.5523281 | After 72  |
| 77.8457846 | 93.9030219 | 66.3551261 | 77.2690501 | 63 | 76.5523281 | After 73  |
| 77.8457846 | 93.9030219 | 65.3551261 | 77.2690501 | 63 | 76.0523281 | After 74  |
| 76.8457846 | 92.9030219 | 65.3551261 | 77.2690501 | 63 | 75.6773281 | After 75  |
| 76.8457846 | 89.9030219 | 65.3551261 | 77.2690501 | 63 | 74.5523281 | After 76  |
| 73.8457846 | 84.9030219 | 65.3551261 | 77.2690501 | 63 | 73.5523281 | After 77  |
| 72.8457846 | 83.9030219 | 64.3551261 | 78.2690501 | 63 | 73.1773281 | After 78  |
| 72.8457846 | 82.9030219 | 64.3551261 | 78.2690501 | 63 | 72.9273281 | After 79  |
| 73.8457846 | 81.9030219 | 64.3551261 | 78.2690501 | 63 | 73.0523281 | After 80  |
| 73.8457846 | 81.9030219 | 64.3551261 | 78.2690501 | 63 | 73.0523281 | After 81  |
| 73.8457846 | 81.9030219 | 64.3551261 | 78.2690501 | 63 | 72.9273281 | After 82  |
| 73.8457846 | 81.9030219 | 64.3551261 | 78.2690501 | 63 | 73.0523281 | After 83  |
| 72.8457846 | 81.9030219 | 64.3551261 | 79.2690501 | 63 | 72.6773281 | After 84  |
| 70.8457846 | 81.9030219 | 64.3551261 | 80.2690501 | 63 | 72.4273281 | After 85  |
| 70.8457846 | 81.9030219 | 64.3551261 | 80.2690501 | 63 | 72.5523281 | After 86  |
| 69.8457846 | 80.9030219 | 64.3551261 | 80.2690501 | 63 | 72.4273281 | After 87  |
| 69.8457846 | 80.9030219 | 64.3551261 | 78.2690501 | 63 | 72.4273281 | After 88  |
| 67.8457846 | 81.9030219 | 64.3551261 | 76.2690501 | 63 | 72.4273281 | After 89  |
| 66.8457846 | 81.9030219 | 64.3551261 | 75.2690501 | 63 | 72.1773281 | After 90  |
| 64.8457846 | 84.9030219 | 64.3551261 | 75.2690501 | 63 | 72.5523281 | After 91  |
| 64.8457846 | 84.9030219 | 64.3551261 | 75.2690501 | 63 | 72.5523281 | After 92  |
| 64.8457846 | 84.9030219 | 64.3551261 | 75.2690501 | 63 | 72.5523281 | After 93  |
| 64.8457846 | 84.9030219 | 64.3551261 | 75.2690501 | 63 | 72.5523281 | After 94  |
| 67.8457846 | 120.903022 | 63.3551261 | 75.2690501 | 63 | 76.6773281 | After 95  |
| 69.8457846 | 121.903022 | 63.3551261 | 74.2690501 | 63 | 76.8023281 | After 96  |
| 71.8457846 | 113.903022 | 63.3551261 | 74.2690501 | 63 | 75.9273281 | After 97  |
| 73.8457846 | 85.9030219 | 63.3551261 | 73.2690501 | 63 | 72.3023281 | After 98  |
| 73.8457846 | 77.9030219 | 63.3551261 | 72.2690501 | 63 | 71.1773281 | After 99  |
| 73.8457846 | 72.9030219 | 63.3551261 | 72.2690501 | 63 | 70.5523281 | After 100 |
| 72.8457846 | 69.9030219 | 63.3551261 | 73.2690501 | 63 | 70.3023281 | After 101 |
| 72.8457846 | 68.9030219 | 63.3551261 | 73.2690501 | 63 | 70.3023281 | After 102 |
| 73.8457846 | 67.9030219 | 63.3551261 | 72.2690501 | 63 | 70.5523281 | After 103 |



|            |            |            |            |    |            |           |
|------------|------------|------------|------------|----|------------|-----------|
| 75.8457846 | 67.9030219 | 63.3551261 | 72.2690501 | 63 | 70.8023281 | After 104 |
| 75.8457846 | 67.9030219 | 63.3551261 | 72.2690501 | 63 | 71.3023281 | After 105 |
| 78.8457846 | 68.9030219 | 65.3551261 | 71.2690501 | 63 | 72.1773281 | After 106 |
| 79.8457846 | 68.9030219 | 65.3551261 | 71.2690501 | 63 | 72.3023281 | After 107 |
| 79.8457846 | 68.9030219 | 68.3551261 | 67.2690501 | 63 | 72.4273281 | After 108 |
| 80.8457846 | 68.9030219 | 68.3551261 | 67.2690501 | 63 | 72.9273281 | After 109 |
| 81.8457846 | 68.9030219 | 69.3551261 | 67.2690501 | 63 | 73.3023281 | After 110 |
| 82.8457846 | 68.9030219 | 69.3551261 | 67.2690501 | 63 | 73.6773281 | After 111 |
| 82.8457846 | 68.9030219 | 69.3551261 | 67.2690501 | 63 | 74.3023281 | After 112 |
| 82.8457846 | 68.9030219 | 69.3551261 | 67.2690501 | 63 | 74.4273281 | After 113 |
| 82.8457846 | 68.9030219 | 69.3551261 | 66.2690501 | 63 | 74.6773281 | After 114 |
| 82.8457846 | 68.9030219 | 69.3551261 | 66.2690501 | 63 | 74.8023281 | After 115 |
| 82.8457846 | 68.9030219 | 68.3551261 | 67.2690501 | 63 | 75.0523281 | After 116 |
| 82.8457846 | 68.9030219 | 68.3551261 | 67.2690501 | 63 | 75.4273281 | After 117 |
| 82.8457846 | 68.9030219 | 68.3551261 | 67.2690501 | 63 | 74.8023281 | After 118 |
| 82.8457846 | 68.9030219 | 69.3551261 | 68.2690501 | 63 | 75.0523281 | After 119 |
| 78.8457846 | 69.9030219 | 69.3551261 | 67.2690501 | 63 | 73.8023281 | After 120 |
| 77.8457846 | 70.9030219 | 69.3551261 | 68.2690501 | 63 | 73.6773281 | After 121 |
| 75.8457846 | 73.9030219 | 70.3551261 | 68.2690501 | 63 | 73.6773281 | After 122 |
| 75.8457846 | 75.9030219 | 71.3551261 | 68.2690501 | 63 | 73.9273281 | After 123 |
| 75.8457846 | 75.9030219 | 71.3551261 | 69.2690501 | 63 | 73.6773281 | After 124 |
| 75.8457846 | 76.9030219 | 72.3551261 | 69.2690501 | 63 | 73.6773281 | After 125 |
| 74.8457846 | 78.9030219 | 72.3551261 | 69.2690501 | 63 | 73.8023281 | After 126 |
| 72.8457846 | 78.9030219 | 72.3551261 | 69.2690501 | 63 | 73.3023281 | After 127 |
| 70.8457846 | 79.9030219 | 72.3551261 | 69.2690501 | 63 | 73.3023281 | After 128 |
| 70.8457846 | 80.9030219 | 72.3551261 | 69.2690501 | 63 | 73.3023281 | After 129 |
| 70.8457846 | 80.9030219 | 72.3551261 | 69.2690501 | 63 | 73.3023281 | After 130 |
| 69.8457846 | 80.9030219 | 72.3551261 | 69.2690501 | 63 | 73.1773281 | After 131 |
| 66.8457846 | 75.9030219 | 72.3551261 | 74.2690501 | 63 | 72.8023281 | After 132 |
| 65.8457846 | 75.9030219 | 72.3551261 | 74.2690501 | 63 | 72.6773281 | After 133 |
| 64.8457846 | 72.9030219 | 72.3551261 | 73.2690501 | 63 | 71.8023281 | After 134 |
| 64.8457846 | 71.9030219 | 72.3551261 | 73.2690501 | 63 | 71.5523281 | After 135 |
| 65.8457846 | 71.9030219 | 73.3551261 | 73.2690501 | 63 | 71.6773281 | After 136 |
| 65.8457846 | 69.9030219 | 73.3551261 | 73.2690501 | 63 | 71.4273281 | After 137 |
| 66.8457846 | 69.9030219 | 72.3551261 | 73.2690501 | 63 | 71.5523281 | After 138 |
| 69.8457846 | 69.9030219 | 72.3551261 | 72.2690501 | 63 | 71.8023281 | After 139 |
| 69.8457846 | 69.9030219 | 72.3551261 | 72.2690501 | 63 | 71.6773281 | After 140 |
| 70.8457846 | 69.9030219 | 71.3551261 | 73.2690501 | 63 | 71.5523281 | After 141 |
| 70.8457846 | 70.9030219 | 71.3551261 | 74.2690501 | 63 | 71.6773281 | After 142 |
| 70.8457846 | 67.9030219 | 71.3551261 | 75.2690501 | 63 | 71.0523281 | After 143 |
| 70.8457846 | 67.9030219 | 71.3551261 | 76.2690501 | 63 | 71.1773281 | After 144 |
| 70.8457846 | 65.9030219 | 71.3551261 | 76.2690501 | 63 | 70.9273281 | After 145 |
| 70.8457846 | 64.9030219 | 71.3551261 | 77.2690501 | 63 | 71.1773281 | After 146 |
| 70.8457846 | 64.9030219 | 69.3551261 | 77.2690501 | 63 | 70.9273281 | After 147 |
| 70.8457846 | 64.9030219 | 69.3551261 | 77.2690501 | 63 | 70.9273281 | After 148 |

|            |            |            |            |    |            |           |
|------------|------------|------------|------------|----|------------|-----------|
| 72.8457846 | 64.9030219 | 68.3551261 | 77.2690501 | 63 | 71.1773281 | After 149 |
| 72.8457846 | 64.9030219 | 68.3551261 | 77.2690501 | 63 | 71.1773281 | After 150 |
| 72.8457846 | 64.9030219 | 66.3551261 | 77.2690501 | 63 | 70.9273281 | After 151 |
| 72.8457846 | 66.9030219 | 68.3551261 | 77.2690501 | 63 | 71.4273281 | After 152 |
| 72.8457846 | 66.9030219 | 70.3551261 | 77.2690501 | 63 | 71.9273281 | After 153 |
| 72.8457846 | 66.9030219 | 72.3551261 | 77.2690501 | 63 | 72.4273281 | After 154 |
| 72.8457846 | 66.9030219 | 73.3551261 | 76.2690501 | 63 | 72.4273281 | After 155 |
| 71.8457846 | 66.9030219 | 73.3551261 | 76.2690501 | 63 | 72.5523281 | After 156 |
| 71.8457846 | 66.9030219 | 71.3551261 | 76.2690501 | 63 | 72.5523281 | After 157 |
| 66.8457846 | 69.9030219 | 70.3551261 | 76.2690501 | 63 | 72.3023281 | After 158 |
| 63.8457846 | 72.9030219 | 70.3551261 | 76.2690501 | 63 | 72.3023281 | After 159 |
| 60.8457846 | 74.9030219 | 70.3551261 | 76.2690501 | 63 | 72.1773281 | After 160 |
| 59.8457846 | 74.9030219 | 71.3551261 | 76.2690501 | 63 | 71.9273281 | After 161 |
| 58.8457846 | 80.9030219 | 72.3551261 | 76.2690501 | 63 | 72.3023281 | After 162 |
| 58.8457846 | 86.9030219 | 73.3551261 | 76.2690501 | 63 | 73.1773281 | After 163 |
| 58.8457846 | 91.9030219 | 75.3551261 | 75.2690501 | 63 | 74.0523281 | After 164 |
| 58.8457846 | 91.9030219 | 77.3551261 | 75.2690501 | 63 | 74.1773281 | After 165 |
| 57.8457846 | 85.9030219 | 78.3551261 | 74.2690501 | 63 | 73.4273281 | After 166 |
| 56.8457846 | 80.9030219 | 78.3551261 | 73.2690501 | 63 | 72.6773281 | After 167 |
| 56.8457846 | 74.9030219 | 78.3551261 | 72.2690501 | 63 | 71.9273281 | After 168 |
| 69.8457846 | 72.9030219 | 77.3551261 | 73.2690501 | 63 | 73.3023281 | After 169 |
| 72.8457846 | 71.9030219 | 77.3551261 | 73.2690501 | 63 | 73.9273281 | After 170 |
| 73.8457846 | 71.9030219 | 75.3551261 | 73.2690501 | 63 | 73.9273281 | After 171 |
| 73.8457846 | 70.9030219 | 74.3551261 | 74.2690501 | 63 | 73.9273281 | After 172 |
| 73.8457846 | 70.9030219 | 73.3551261 | 74.2690501 | 63 | 74.1773281 | After 173 |
| 76.8457846 | 70.9030219 | 73.3551261 | 74.2690501 | 63 | 74.5523281 | After 174 |
| 75.8457846 | 70.9030219 | 73.3551261 | 74.2690501 | 63 | 74.1773281 | After 175 |
| 74.8457846 | 70.9030219 | 73.3551261 | 74.2690501 | 63 | 73.6773281 | After 176 |
| 73.8457846 | 69.9030219 | 73.3551261 | 75.2690501 | 63 | 73.4273281 | After 177 |
| 73.8457846 | 69.9030219 | 73.3551261 | 76.2690501 | 63 | 73.3023281 | After 178 |
| 73.8457846 | 68.9030219 | 73.3551261 | 76.2690501 | 63 | 73.4273281 | After 179 |
| 72.8457846 | 68.9030219 | 73.3551261 | 76.2690501 | 63 | 73.3023281 | After 180 |
| 72.8457846 | 66.9030219 | 73.3551261 | 77.2690501 | 63 | 73.1773281 | After 181 |
| 72.8457846 | 67.9030219 | 73.3551261 | 77.2690501 | 63 | 73.4273281 | After 182 |
| 72.8457846 | 67.9030219 | 74.3551261 | 77.2690501 | 63 | 73.3023281 | After 183 |
| 72.8457846 | 67.9030219 | 74.3551261 | 77.2690501 | 63 | 72.6773281 | After 184 |
| 72.8457846 | 67.9030219 | 75.3551261 | 78.2690501 | 63 | 72.6773281 | After 185 |
| 73.8457846 | 67.9030219 | 75.3551261 | 78.2690501 | 63 | 72.9273281 | After 186 |
| 73.8457846 | 65.9030219 | 77.3551261 | 78.2690501 | 63 | 73.3023281 | After 187 |
| 74.8457846 | 65.9030219 | 78.3551261 | 75.2690501 | 63 | 73.4273281 | After 188 |
| 74.8457846 | 65.9030219 | 79.3551261 | 75.2690501 | 63 | 73.8023281 | After 189 |
| 76.8457846 | 66.9030219 | 79.3551261 | 75.2690501 | 63 | 74.3023281 | After 190 |
| 76.8457846 | 66.9030219 | 81.3551261 | 73.2690501 | 63 | 74.4273281 | After 191 |
| 77.8457846 | 69.9030219 | 82.3551261 | 73.2690501 | 63 | 75.0523281 | After 192 |
| 77.8457846 | 70.9030219 | 83.3551261 | 73.2690501 | 63 | 74.8023281 | After 193 |

|            |            |            |            |    |            |           |
|------------|------------|------------|------------|----|------------|-----------|
| 77.8457846 | 70.9030219 | 83.3551261 | 71.2690501 | 63 | 74.3023281 | After 194 |
| 77.8457846 | 73.9030219 | 83.3551261 | 71.2690501 | 63 | 74.5523281 | After 195 |
| 77.8457846 | 73.9030219 | 83.3551261 | 70.2690501 | 63 | 74.1773281 | After 196 |
| 77.8457846 | 73.9030219 | 83.3551261 | 71.2690501 | 63 | 74.1773281 | After 197 |
| 77.8457846 | 73.9030219 | 84.3551261 | 71.2690501 | 63 | 74.5523281 | After 198 |
| 77.8457846 | 73.9030219 | 84.3551261 | 71.2690501 | 63 | 74.6773281 | After 199 |
| 77.8457846 | 73.9030219 | 86.3551261 | 70.2690501 | 63 | 74.9273281 | After 200 |
| 77.8457846 | 76.9030219 | 86.3551261 | 70.2690501 | 63 | 75.3023281 | After 201 |
| 77.8457846 | 76.9030219 | 86.3551261 | 70.2690501 | 63 | 75.3023281 | After 202 |
| 77.8457846 | 78.9030219 | 86.3551261 | 69.2690501 | 63 | 75.5523281 | After 203 |
| 77.8457846 | 86.9030219 | 86.3551261 | 68.2690501 | 63 | 76.4273281 | After 204 |
| 77.8457846 | 86.9030219 | 85.3551261 | 73.2690501 | 63 | 77.0523281 | After 205 |
| 77.8457846 | 88.9030219 | 85.3551261 | 74.2690501 | 63 | 77.8023281 | After 206 |
| 78.8457846 | 91.9030219 | 72.3551261 | 74.2690501 | 63 | 76.8023281 | After 207 |
| 78.8457846 | 92.9030219 | 70.3551261 | 74.2690501 | 63 | 76.9273281 | After 208 |
| 78.8457846 | 93.9030219 | 70.3551261 | 74.2690501 | 63 | 77.0523281 | After 209 |
| 78.8457846 | 94.9030219 | 70.3551261 | 74.2690501 | 63 | 77.1773281 | After 210 |
| 78.8457846 | 94.9030219 | 70.3551261 | 74.2690501 | 63 | 77.1773281 | After 211 |
| 78.8457846 | 98.9030219 | 69.3551261 | 74.2690501 | 63 | 77.5523281 | After 212 |
| 79.8457846 | 99.9030219 | 69.3551261 | 74.2690501 | 63 | 77.8023281 | After 213 |
| 79.8457846 | 99.9030219 | 69.3551261 | 75.2690501 | 63 | 77.9273281 | After 214 |
| 80.8457846 | 99.9030219 | 69.3551261 | 75.2690501 | 63 | 78.0523281 | After 215 |
| 80.8457846 | 101.903022 | 70.3551261 | 74.2690501 | 63 | 79.0523281 | After 216 |
| 80.8457846 | 103.903022 | 70.3551261 | 75.2690501 | 63 | 79.5523281 | After 217 |
| 81.8457846 | 102.903022 | 70.3551261 | 74.2690501 | 63 | 79.6773281 | After 218 |
| 82.8457846 | 97.9030219 | 71.3551261 | 74.2690501 | 63 | 79.4273281 | After 219 |
| 82.8457846 | 97.9030219 | 72.3551261 | 74.2690501 | 63 | 80.0523281 | After 220 |
| 82.8457846 | 97.9030219 | 73.3551261 | 74.2690501 | 63 | 80.3023281 | After 221 |
| 82.8457846 | 96.9030219 | 76.3551261 | 74.2690501 | 63 | 80.4273281 | After 222 |
| 82.8457846 | 97.9030219 | 71.3551261 | 74.2690501 | 63 | 79.9273281 | After 223 |
| 84.8457846 | 97.9030219 | 69.3551261 | 75.2690501 | 63 | 79.9273281 | After 224 |
| 84.8457846 | 100.903022 | 69.3551261 | 75.2690501 | 63 | 80.3023281 | After 225 |
| 84.8457846 | 102.903022 | 68.3551261 | 75.2690501 | 63 | 80.3023281 | After 226 |
| 84.8457846 | 104.903022 | 68.3551261 | 75.2690501 | 63 | 80.9273281 | After 227 |
| 84.8457846 | 104.903022 | 68.3551261 | 75.2690501 | 63 | 80.9273281 | After 228 |
| 84.8457846 | 103.903022 | 68.3551261 | 75.2690501 | 63 | 80.6773281 | After 229 |
| 84.8457846 | 102.903022 | 68.3551261 | 73.2690501 | 63 | 80.1773281 | After 230 |
| 85.8457846 | 101.903022 | 68.3551261 | 73.2690501 | 63 | 80.3023281 | After 231 |
| 82.8457846 | 101.903022 | 68.3551261 | 73.2690501 | 63 | 79.6773281 | After 232 |
| 82.8457846 | 100.903022 | 68.3551261 | 73.2690501 | 63 | 79.5523281 | After 233 |
| 82.8457846 | 99.9030219 | 65.3551261 | 73.2690501 | 63 | 78.1773281 | After 234 |
| 83.8457846 | 99.9030219 | 63.3551261 | 73.2690501 | 63 | 77.8023281 | After 235 |
| 84.8457846 | 99.9030219 | 63.3551261 | 73.2690501 | 63 | 77.8023281 | After 236 |
| 85.8457846 | 99.9030219 | 63.3551261 | 73.2690501 | 63 | 78.0523281 | After 237 |
| 86.8457846 | 99.9030219 | 63.3551261 | 73.2690501 | 63 | 78.0523281 | After 238 |



|            |            |            |            |    |            |           |
|------------|------------|------------|------------|----|------------|-----------|
| 87.8457846 | 100.903022 | 64.3551261 | 73.2690501 | 63 | 78.5523281 | After 239 |
| 88.8457846 | 100.903022 | 65.3551261 | 73.2690501 | 63 | 78.6773281 | After 240 |
| 88.8457846 | 82.9030219 | 66.3551261 | 72.2690501 | 63 | 76.3023281 |           |
| 88.8457846 | 73.9030219 | 66.3551261 | 72.2690501 | 63 | 75.4273281 |           |
| 88.8457846 | 67.9030219 | 66.3551261 | 72.2690501 | 63 | 74.8023281 |           |
| 89.8457846 | 64.9030219 | 66.3551261 | 75.2690501 | 63 | 74.6773281 |           |
| 90.8457846 | 63.9030219 | 66.3551261 | 75.2690501 | 63 | 74.6773281 |           |
| 89.8457846 | 63.9030219 | 66.3551261 | 75.2690501 | 63 | 74.9273281 |           |
| 89.8457846 | 63.9030219 | 66.3551261 | 75.2690501 | 63 | 75.0523281 |           |
| 89.8457846 | 63.9030219 | 66.3551261 | 75.2690501 | 63 | 75.1773281 |           |
| 89.8457846 | 63.9030219 | 66.3551261 | 72.2690501 | 63 | 74.1773281 |           |
| 89.8457846 | 61.9030219 | 66.3551261 | 69.2690501 | 63 | 73.4273281 |           |
| 89.8457846 | 61.9030219 | 66.3551261 | 68.2690501 | 63 | 72.6773281 |           |
| 89.8457846 | 61.9030219 | 67.3551261 | 68.2690501 | 63 | 72.8023281 |           |
| 89.8457846 | 61.9030219 | 69.3551261 | 68.2690501 | 63 | 73.6773281 |           |
| 89.8457846 | 62.9030219 | 69.3551261 | 68.2690501 | 63 | 74.0523281 |           |
| 89.8457846 | 62.9030219 | 69.3551261 | 68.2690501 | 63 | 74.1773281 |           |
| 89.8457846 | 62.9030219 | 69.3551261 | 68.2690501 | 63 | 74.1773281 |           |
| 92.8457846 | 62.9030219 | 69.3551261 | 68.2690501 | 63 | 74.4273281 |           |
| 92.8457846 | 63.9030219 | 69.3551261 | 68.2690501 | 63 | 74.9273281 |           |
| 92.8457846 | 63.9030219 | 69.3551261 | 67.2690501 | 63 | 75.3023281 |           |
| 92.8457846 | 62.9030219 | 69.3551261 | 67.2690501 | 63 | 75.3023281 |           |
| 88.8457846 | 63.9030219 | 69.3551261 | 68.2690501 | 63 | 74.8023281 |           |
| 84.8457846 | 66.9030219 | 69.3551261 | 69.2690501 | 63 | 74.3023281 |           |
| 81.8457846 | 67.9030219 | 70.3551261 | 70.2690501 | 63 | 74.0523281 |           |
| 80.8457846 | 65.9030219 | 70.3551261 | 70.2690501 | 63 | 73.8023281 |           |
| 79.8457846 | 64.9030219 | 72.3551261 | 70.2690501 | 63 | 73.5523281 |           |
| 79.8457846 | 62.9030219 | 73.3551261 | 69.2690501 | 63 | 73.4273281 |           |
| 78.8457846 | 61.9030219 | 73.3551261 | 69.2690501 | 63 | 72.9273281 |           |
| 77.8457846 | 60.9030219 | 73.3551261 | 69.2690501 | 63 | 71.8023281 |           |
| 77.8457846 | 60.9030219 | 73.3551261 | 69.2690501 | 63 | 71.9273281 |           |
| 77.8457846 | 60.9030219 | 73.3551261 | 69.2690501 | 63 | 71.8023281 |           |
| 77.8457846 | 61.9030219 | 73.3551261 | 69.2690501 | 63 | 71.8023281 |           |
| 77.8457846 | 62.9030219 | 73.3551261 | 69.2690501 | 63 | 72.4273281 |           |
| 77.8457846 | 64.9030219 | 73.3551261 | 70.2690501 | 63 | 72.8023281 |           |
| 78.8457846 | 64.9030219 | 72.3551261 | 69.2690501 | 63 | 72.8023281 |           |
| 78.8457846 | 64.9030219 | 71.3551261 | 69.2690501 | 63 | 72.8023281 |           |
| 78.8457846 | 64.9030219 | 73.3551261 | 69.2690501 | 63 | 73.3023281 |           |
| 78.8457846 | 64.9030219 | 80.3551261 | 69.2690501 | 63 | 74.3023281 |           |
| 76.8457846 | 64.9030219 | 80.3551261 | 69.2690501 | 63 | 73.8023281 |           |
| 76.8457846 | 64.9030219 | 82.3551261 | 71.2690501 | 63 | 73.8023281 |           |
| 75.8457846 | 65.9030219 | 82.3551261 | 71.2690501 | 63 | 73.6773281 |           |
| 74.8457846 | 66.9030219 | 82.3551261 | 71.2690501 | 63 | 73.8023281 |           |
| 74.8457846 | 66.9030219 | 82.3551261 | 73.2690501 | 63 | 73.9273281 |           |
| 73.8457846 | 66.9030219 | 82.3551261 | 74.2690501 | 63 | 73.9273281 |           |

|            |            |            |            |    |            |  |
|------------|------------|------------|------------|----|------------|--|
| 73.8457846 | 66.9030219 | 82.3551261 | 76.2690501 | 63 | 74.1773281 |  |
| 72.8457846 | 66.9030219 | 82.3551261 | 76.2690501 | 63 | 74.0523281 |  |
| 71.8457846 | 66.9030219 | 82.3551261 | 75.2690501 | 63 | 73.8023281 |  |
| 70.8457846 | 66.9030219 | 82.3551261 | 74.2690501 | 63 | 73.9273281 |  |
| 70.8457846 | 66.9030219 | 83.3551261 | 74.2690501 | 63 | 74.5523281 |  |
| 70.8457846 | 66.9030219 | 83.3551261 | 74.2690501 | 63 | 74.5523281 |  |
| 69.8457846 | 69.9030219 | 83.3551261 | 74.2690501 | 63 | 75.5523281 |  |
| 69.8457846 | 71.9030219 | 83.3551261 | 74.2690501 | 63 | 75.9273281 |  |
| 70.8457846 | 73.9030219 | 83.3551261 | 74.2690501 | 63 | 76.3023281 |  |
| 71.8457846 | 73.9030219 | 79.3551261 | 74.2690501 | 63 | 75.9273281 |  |
| 72.8457846 | 73.9030219 | 75.3551261 | 74.2690501 | 63 | 75.4273281 |  |
| 72.8457846 | 73.9030219 | 75.3551261 | 74.2690501 | 63 | 75.4273281 |  |
| 75.8457846 | 76.9030219 | 73.3551261 | 74.2690501 | 63 | 75.4273281 |  |
| 75.8457846 | 76.9030219 | 71.3551261 | 74.2690501 | 63 | 75.5523281 |  |
| 75.8457846 | 74.9030219 | 71.3551261 | 73.2690501 | 63 | 75.3023281 |  |
| 77.8457846 | 74.9030219 | 71.3551261 | 73.2690501 | 63 | 75.8023281 |  |
| 77.8457846 | 73.9030219 | 71.3551261 | 73.2690501 | 63 | 75.6773281 |  |
| 77.8457846 | 73.9030219 | 71.3551261 | 74.2690501 | 63 | 75.8023281 |  |
| 77.8457846 | 73.9030219 | 71.3551261 | 74.2690501 | 63 | 75.5523281 |  |
| 77.8457846 | 73.9030219 | 71.3551261 | 74.2690501 | 63 | 75.3023281 |  |
| 77.8457846 | 73.9030219 | 71.3551261 | 73.2690501 | 63 | 75.1773281 |  |
| 76.8457846 | 73.9030219 | 71.3551261 | 73.2690501 | 63 | 74.5523281 |  |
| 76.8457846 | 74.9030219 | 70.3551261 | 73.2690501 | 63 | 73.3023281 |  |
| 75.8457846 | 74.9030219 | 70.3551261 | 73.2690501 | 63 | 72.8023281 |  |
| 75.8457846 | 74.9030219 | 70.3551261 | 73.2690501 | 63 | 73.1773281 |  |
| 75.8457846 | 77.9030219 | 70.3551261 | 72.2690501 | 63 | 73.9273281 |  |
| 75.8457846 | 77.9030219 | 70.3551261 | 72.2690501 | 63 | 73.9273281 |  |
| 76.8457846 | 79.9030219 | 70.3551261 | 71.2690501 | 63 | 74.6773281 |  |
| 76.8457846 | 80.9030219 | 70.3551261 | 70.2690501 | 63 | 75.3023281 |  |
| 77.8457846 | 82.9030219 | 70.3551261 | 70.2690501 | 63 | 75.6773281 |  |
| 77.8457846 | 84.9030219 | 72.3551261 | 70.2690501 | 63 | 76.0523281 |  |
| 77.8457846 | 85.9030219 | 71.3551261 | 70.2690501 | 63 | 75.9273281 |  |
| 77.8457846 | 85.9030219 | 71.3551261 | 69.2690501 | 69 | 75.6773281 |  |
| 77.8457846 | 85.9030219 | 71.3551261 | 69.2690501 | 69 | 75.5523281 |  |
| 77.8457846 | 85.9030219 | 72.3551261 | 67.2690501 | 69 | 75.8023281 |  |
| 77.8457846 | 86.9030219 | 72.3551261 | 68.2690501 | 69 | 76.1773281 |  |
| 76.8457846 | 87.9030219 | 75.3551261 | 68.2690501 | 69 | 76.9273281 |  |
| 76.8457846 | 87.9030219 | 76.3551261 | 68.2690501 | 69 | 77.5523281 |  |
| 76.8457846 | 87.9030219 | 79.3551261 | 68.2690501 | 69 | 78.4273281 |  |
| 75.8457846 | 87.9030219 | 77.3551261 | 68.2690501 | 69 | 78.0523281 |  |
| 74.8457846 | 87.9030219 | 76.3551261 | 68.2690501 | 69 | 77.6773281 |  |
| 75.8457846 | 87.9030219 | 76.3551261 | 68.2690501 | 69 | 77.6773281 |  |
| 78.8457846 | 89.9030219 | 75.3551261 | 68.2690501 | 69 | 78.4273281 |  |
| 79.8457846 | 91.9030219 | 75.3551261 | 68.2690501 | 69 | 78.4273281 |  |
| 80.8457846 | 92.9030219 | 74.3551261 | 69.2690501 | 69 | 78.3023281 |  |

|            |            |            |            |    |            |  |
|------------|------------|------------|------------|----|------------|--|
| 79.8457846 | 93.9030219 | 74.3551261 | 69.2690501 | 69 | 78.0523281 |  |
| 77.8457846 | 95.9030219 | 73.3551261 | 71.2690501 | 69 | 77.9273281 |  |
| 77.8457846 | 95.9030219 | 73.3551261 | 71.2690501 | 69 | 77.9273281 |  |
| 79.8457846 | 95.9030219 | 73.3551261 | 71.2690501 | 69 | 77.9273281 |  |
| 82.8457846 | 96.9030219 | 79.3551261 | 72.2690501 | 69 | 79.4273281 |  |
| 86.8457846 | 96.9030219 | 81.3551261 | 72.2690501 | 69 | 80.1773281 |  |
| 86.8457846 | 96.9030219 | 81.3551261 | 72.2690501 | 69 | 80.3023281 |  |
| 88.8457846 | 96.9030219 | 80.3551261 | 72.2690501 | 69 | 80.1773281 |  |
| 89.8457846 | 96.9030219 | 80.3551261 | 73.2690501 | 69 | 80.4273281 |  |
| 89.8457846 | 97.9030219 | 80.3551261 | 73.2690501 | 69 | 81.5523281 |  |
| 89.8457846 | 97.9030219 | 81.3551261 | 74.2690501 | 69 | 82.5523281 |  |
| 89.8457846 | 98.9030219 | 81.3551261 | 77.2690501 | 69 | 83.0523281 |  |
| 89.8457846 | 98.9030219 | 81.3551261 | 77.2690501 | 69 | 83.3023281 |  |
| 89.8457846 | 99.9030219 | 85.3551261 | 77.2690501 | 69 | 83.8023281 |  |
| 89.8457846 | 98.9030219 | 85.3551261 | 80.2690501 | 69 | 83.9273281 |  |
| 87.8457846 | 98.9030219 | 86.3551261 | 78.2690501 | 69 | 83.3023281 |  |
| 85.8457846 | 98.9030219 | 86.3551261 | 77.2690501 | 69 | 82.5523281 |  |
| 85.8457846 | 98.9030219 | 86.3551261 | 77.2690501 | 69 | 82.4273281 |  |
| 85.8457846 | 98.9030219 | 86.3551261 | 77.2690501 | 69 | 81.9273281 |  |
| 83.8457846 | 99.9030219 | 87.3551261 | 77.2690501 | 69 | 82.1773281 |  |
| 82.8457846 | 99.9030219 | 87.3551261 | 77.2690501 | 69 | 82.0523281 |  |
| 82.8457846 | 100.903022 | 88.3551261 | 75.2690501 | 69 | 81.4273281 |  |
| 81.8457846 | 100.903022 | 88.3551261 | 75.2690501 | 69 | 80.5523281 |  |
| 80.8457846 | 101.903022 | 88.3551261 | 72.2690501 | 69 | 80.3023281 |  |
| 80.8457846 | 102.903022 | 88.3551261 | 72.2690501 | 69 | 80.0523281 |  |
| 80.8457846 | 103.903022 | 87.3551261 | 72.2690501 | 69 | 79.9273281 |  |
| 79.8457846 | 104.903022 | 85.3551261 | 72.2690501 | 69 | 79.3023281 |  |
| 80.8457846 | 104.903022 | 84.3551261 | 70.2690501 | 63 | 78.9273281 |  |
| 80.8457846 | 104.903022 | 84.3551261 | 70.2690501 | 63 | 78.5523281 |  |
| 82.8457846 | 104.903022 | 83.3551261 | 70.2690501 | 63 | 78.4273281 |  |
| 82.8457846 | 105.903022 | 83.3551261 | 72.2690501 | 63 | 78.6773281 |  |
| 84.8457846 | 105.903022 | 83.3551261 | 70.2690501 | 63 | 78.3023281 |  |
| 84.8457846 | 104.903022 | 83.3551261 | 69.2690501 | 63 | 77.9273281 |  |
| 84.8457846 | 103.903022 | 83.3551261 | 69.2690501 | 63 | 77.5523281 |  |
| 84.8457846 | 103.903022 | 81.3551261 | 68.2690501 | 63 | 77.3023281 |  |
| 84.8457846 | 103.903022 | 81.3551261 | 68.2690501 | 63 | 77.3023281 |  |
| 81.8457846 | 104.903022 | 73.3551261 | 68.2690501 | 63 | 76.3023281 |  |
| 81.8457846 | 104.903022 | 71.3551261 | 65.2690501 | 63 | 75.6773281 |  |
| 80.8457846 | 104.903022 | 70.3551261 | 65.2690501 | 63 | 75.4273281 |  |
| 80.8457846 | 104.903022 | 70.3551261 | 66.2690501 | 63 | 75.6773281 |  |
| 80.8457846 | 104.903022 | 70.3551261 | 66.2690501 | 63 | 75.8023281 |  |
| 75.8457846 | 104.903022 | 70.3551261 | 69.2690501 | 63 | 75.9273281 |  |
| 72.8457846 | 104.903022 | 69.3551261 | 70.2690501 | 63 | 75.6773281 |  |
| 72.8457846 | 104.903022 | 69.3551261 | 70.2690501 | 63 | 75.6773281 |  |
| 71.8457846 | 104.903022 | 69.3551261 | 69.2690501 | 63 | 75.4273281 |  |

|            |            |            |            |    |            |  |
|------------|------------|------------|------------|----|------------|--|
| 71.8457846 | 104.903022 | 70.3551261 | 69.2690501 | 63 | 75.5523281 |  |
| 71.8457846 | 103.903022 | 72.3551261 | 68.2690501 | 63 | 75.6773281 |  |
| 71.8457846 | 102.903022 | 71.3551261 | 68.2690501 | 63 | 75.4273281 |  |
| 70.8457846 | 101.903022 | 71.3551261 | 68.2690501 | 63 | 74.8023281 |  |
| 70.8457846 | 98.9030219 | 71.3551261 | 69.2690501 | 63 | 74.4273281 |  |
| 70.8457846 | 95.9030219 | 72.3551261 | 70.2690501 | 63 | 74.4273281 |  |
| 70.8457846 | 95.9030219 | 73.3551261 | 70.2690501 | 63 | 75.0523281 |  |
| 69.8457846 | 95.9030219 | 75.3551261 | 71.2690501 | 63 | 75.6773281 |  |
| 68.8457846 | 95.9030219 | 78.3551261 | 71.2690501 | 63 | 76.1773281 |  |
| 68.8457846 | 95.9030219 | 78.3551261 | 71.2690501 | 63 | 76.3023281 |  |
| 68.8457846 | 96.9030219 | 78.3551261 | 71.2690501 | 63 | 76.1773281 |  |
| 69.8457846 | 99.9030219 | 78.3551261 | 71.2690501 | 63 | 76.8023281 |  |
| 69.8457846 | 107.903022 | 76.3551261 | 72.2690501 | 63 | 77.8023281 |  |
| 69.8457846 | 106.903022 | 73.3551261 | 73.2690501 | 63 | 77.3023281 |  |
| 69.8457846 | 106.903022 | 72.3551261 | 76.2690501 | 63 | 77.4273281 |  |
| 70.8457846 | 106.903022 | 72.3551261 | 77.2690501 | 63 | 77.6773281 |  |
| 71.8457846 | 108.903022 | 71.3551261 | 76.2690501 | 63 | 77.8023281 |  |
| 78.8457846 | 108.903022 | 71.3551261 | 76.2690501 | 63 | 78.4273281 |  |
| 79.8457846 | 111.903022 | 70.3551261 | 78.2690501 | 63 | 79.4273281 |  |
| 79.8457846 | 111.903022 | 70.3551261 | 78.2690501 | 63 | 79.5523281 |  |
| 81.8457846 | 111.903022 | 70.3551261 | 78.2690501 | 63 | 80.0523281 |  |
| 83.8457846 | 112.903022 | 70.3551261 | 77.2690501 | 63 | 80.4273281 |  |
| 83.8457846 | 112.903022 | 70.3551261 | 77.2690501 | 63 | 80.4273281 |  |
| 82.8457846 | 113.903022 | 70.3551261 | 77.2690501 | 63 | 80.4273281 |  |
| 80.8457846 | 113.903022 | 70.3551261 | 76.2690501 | 63 | 80.1773281 |  |
| 80.8457846 | 113.903022 | 70.3551261 | 75.2690501 | 63 | 80.0523281 |  |
| 79.8457846 | 113.903022 | 70.3551261 | 75.2690501 | 63 | 79.9273281 |  |
| 78.8457846 | 113.903022 | 70.3551261 | 77.2690501 | 63 | 80.0523281 |  |
| 78.8457846 | 108.903022 | 70.3551261 | 77.2690501 | 63 | 80.9273281 |  |
| 73.8457846 | 89.9030219 | 70.3551261 | 81.2690501 | 63 | 79.3023281 |  |
| 72.8457846 | 89.9030219 | 70.3551261 | 82.2690501 | 63 | 80.5523281 |  |
| 72.8457846 | 74.9030219 | 70.3551261 | 83.2690501 | 63 | 79.1773281 |  |
| 72.8457846 | 70.9030219 | 70.3551261 | 83.2690501 | 63 | 78.9273281 |  |
| 73.8457846 | 68.9030219 | 70.3551261 | 83.2690501 | 63 | 78.6773281 |  |
| 73.8457846 | 66.9030219 | 70.3551261 | 83.2690501 | 63 | 77.6773281 |  |
| 73.8457846 | 66.9030219 | 70.3551261 | 83.2690501 | 63 | 76.5523281 |  |
| 73.8457846 | 65.9030219 | 70.3551261 | 82.2690501 | 63 | 76.3023281 |  |
| 73.8457846 | 64.9030219 | 70.3551261 | 79.2690501 | 63 | 75.6773281 |  |
| 73.8457846 | 64.9030219 | 72.3551261 | 79.2690501 | 63 | 76.1773281 |  |
| 72.8457846 | 63.9030219 | 74.3551261 | 79.2690501 | 63 | 76.1773281 |  |
| 72.8457846 | 62.9030219 | 73.3551261 | 76.2690501 | 63 | 75.1773281 |  |
| 73.8457846 | 62.9030219 | 73.3551261 | 75.2690501 | 63 | 75.0523281 |  |
| 74.8457846 | 62.9030219 | 73.3551261 | 75.2690501 | 63 | 75.0523281 |  |
| 74.8457846 | 62.9030219 | 73.3551261 | 75.2690501 | 63 | 74.6773281 |  |
| 74.8457846 | 62.9030219 | 73.3551261 | 75.2690501 | 63 | 74.6773281 |  |

|            |            |            |            |    |            |
|------------|------------|------------|------------|----|------------|
| 76.8457846 | 62.9030219 | 74.3551261 | 74.2690501 | 63 | 74.4273281 |
| 77.8457846 | 62.9030219 | 75.3551261 | 74.2690501 | 63 | 74.5523281 |
| 78.8457846 | 62.9030219 | 76.3551261 | 75.2690501 | 63 | 74.8023281 |
| 78.8457846 | 62.9030219 | 77.3551261 | 77.2690501 | 63 | 75.1773281 |
| 78.8457846 | 62.9030219 | 77.3551261 | 76.2690501 | 63 | 74.9273281 |
| 78.8457846 | 61.9030219 | 77.3551261 | 76.2690501 | 63 | 74.6773281 |
| 78.8457846 | 61.9030219 | 77.3551261 | 76.2690501 | 63 | 74.5523281 |
| 78.8457846 | 61.9030219 | 77.3551261 | 76.2690501 | 63 | 73.9273281 |
| 79.8457846 | 61.9030219 | 77.3551261 | 76.2690501 | 63 | 73.8023281 |
| 80.8457846 | 61.9030219 | 76.3551261 | 72.2690501 | 63 | 73.3023281 |
| 82.8457846 | 61.9030219 | 74.3551261 | 70.2690501 | 63 | 72.6773281 |
| 84.8457846 | 60.9030219 | 71.3551261 | 69.2690501 | 63 | 72.4273281 |
| 86.8457846 | 60.9030219 | 71.3551261 | 69.2690501 | 63 | 72.5523281 |
| 86.8457846 | 62.9030219 | 71.3551261 | 68.2690501 | 63 | 72.4273281 |
| 86.8457846 | 62.9030219 | 71.3551261 | 68.2690501 | 63 | 72.3023281 |
| 86.8457846 | 62.9030219 | 71.3551261 | 68.2690501 | 63 | 72.5523281 |
| 86.8457846 | 62.9030219 | 72.3551261 | 68.2690501 | 63 | 72.9273281 |
| 85.8457846 | 61.9030219 | 72.3551261 | 68.2690501 | 63 | 72.5523281 |
| 85.8457846 | 61.9030219 | 72.3551261 | 68.2690501 | 63 | 72.4273281 |
| 85.8457846 | 63.9030219 | 72.3551261 | 68.2690501 | 63 | 72.6773281 |
| 83.8457846 | 65.9030219 | 72.3551261 | 68.2690501 | 63 | 72.6773281 |
| 82.8457846 | 66.9030219 | 71.3551261 | 68.2690501 | 63 | 72.8023281 |
| 82.8457846 | 68.9030219 | 71.3551261 | 69.2690501 | 63 | 73.4273281 |
| 82.8457846 | 69.9030219 | 71.3551261 | 69.2690501 | 63 | 73.3023281 |
| 79.8457846 | 69.9030219 | 71.3551261 | 69.2690501 | 63 | 72.9273281 |
| 78.8457846 | 69.9030219 | 71.3551261 | 69.2690501 | 63 | 72.8023281 |
| 78.8457846 | 68.9030219 | 76.3551261 | 69.2690501 | 63 | 73.4273281 |
| 78.8457846 | 67.9030219 | 76.3551261 | 72.2690501 | 63 | 73.9273281 |
| 77.8457846 | 67.9030219 | 76.3551261 | 73.2690501 | 63 | 73.8023281 |
| 77.8457846 | 67.9030219 | 76.3551261 | 73.2690501 | 63 | 73.4273281 |
| 78.8457846 | 67.9030219 | 76.3551261 | 73.2690501 | 63 | 73.9273281 |
| 78.8457846 | 67.9030219 | 75.3551261 | 73.2690501 | 63 | 73.9273281 |
| 76.8457846 | 67.9030219 | 75.3551261 | 74.2690501 | 63 | 73.8023281 |
| 75.8457846 | 67.9030219 | 75.3551261 | 74.2690501 | 63 | 73.8023281 |
| 74.8457846 | 67.9030219 | 75.3551261 | 74.2690501 | 63 | 73.8023281 |
| 73.8457846 | 67.9030219 | 74.3551261 | 74.2690501 | 63 | 73.6773281 |
| 73.8457846 | 67.9030219 | 74.3551261 | 74.2690501 | 63 | 73.9273281 |
| 73.8457846 | 67.9030219 | 73.3551261 | 74.2690501 | 63 | 73.8023281 |
| 74.8457846 | 66.9030219 | 73.3551261 | 75.2690501 | 63 | 73.8023281 |
| 75.8457846 | 64.9030219 | 74.3551261 | 76.2690501 | 63 | 74.3023281 |
| 77.8457846 | 64.9030219 | 74.3551261 | 76.2690501 | 63 | 74.8023281 |
| 77.8457846 | 63.9030219 | 75.3551261 | 77.2690501 | 63 | 75.1773281 |
| 76.8457846 | 63.9030219 | 75.3551261 | 77.2690501 | 63 | 75.3023281 |
| 76.8457846 | 63.9030219 | 75.3551261 | 75.2690501 | 63 | 75.0523281 |
| 76.8457846 | 63.9030219 | 75.3551261 | 70.2690501 | 63 | 74.4273281 |

|            |            |            |            |    |            |
|------------|------------|------------|------------|----|------------|
| 76.8457846 | 63.9030219 | 75.3551261 | 69.2690501 | 63 | 74.1773281 |
| 76.8457846 | 64.9030219 | 74.3551261 | 68.2690501 | 63 | 73.9273281 |
| 76.8457846 | 65.9030219 | 74.3551261 | 68.2690501 | 63 | 74.0523281 |
| 76.8457846 | 65.9030219 | 74.3551261 | 68.2690501 | 63 | 74.0523281 |
| 76.8457846 | 64.9030219 | 74.3551261 | 69.2690501 | 63 | 73.9273281 |
| 76.8457846 | 64.9030219 | 74.3551261 | 71.2690501 | 63 | 74.3023281 |
| 76.8457846 | 64.9030219 | 74.3551261 | 71.2690501 | 63 | 73.3023281 |
| 76.8457846 | 64.9030219 | 74.3551261 | 71.2690501 | 63 | 73.3023281 |
| 76.8457846 | 64.9030219 | 74.3551261 | 71.2690501 | 63 | 73.3023281 |
| 75.8457846 | 64.9030219 | 74.3551261 | 71.2690501 | 63 | 72.9273281 |
| 75.8457846 | 64.9030219 | 74.3551261 | 73.2690501 | 63 | 73.0523281 |
| 74.8457846 | 64.9030219 | 74.3551261 | 71.2690501 | 63 | 72.6773281 |
| 73.8457846 | 64.9030219 | 75.3551261 | 70.2690501 | 63 | 72.8023281 |
| 73.8457846 | 64.9030219 | 76.3551261 | 70.2690501 | 63 | 72.9273281 |
| 73.8457846 | 64.9030219 | 76.3551261 | 70.2690501 | 63 | 73.0523281 |
| 73.8457846 | 64.9030219 | 74.3551261 | 70.2690501 | 63 | 72.6773281 |
| 73.8457846 | 64.9030219 | 72.3551261 | 70.2690501 | 63 | 72.1773281 |
| 73.8457846 | 64.9030219 | 70.3551261 | 70.2690501 | 63 | 71.6773281 |
| 73.8457846 | 64.9030219 | 70.3551261 | 70.2690501 | 63 | 72.3023281 |
| 74.8457846 | 64.9030219 | 70.3551261 | 69.2690501 | 63 | 71.8023281 |
| 76.8457846 | 64.9030219 | 69.3551261 | 68.2690501 | 63 | 71.4273281 |
| 76.8457846 | 63.9030219 | 69.3551261 | 68.2690501 | 63 | 71.1773281 |
| 76.8457846 | 64.9030219 | 69.3551261 | 68.2690501 | 63 | 71.3023281 |
| 76.8457846 | 64.9030219 | 69.3551261 | 68.2690501 | 63 | 71.1773281 |
| 76.8457846 | 64.9030219 | 69.3551261 | 68.2690501 | 63 | 71.1773281 |
| 76.8457846 | 64.9030219 | 69.3551261 | 68.2690501 | 63 | 71.1773281 |
| 76.8457846 | 64.9030219 | 68.3551261 | 68.2690501 | 63 | 71.3023281 |
| 76.8457846 | 64.9030219 | 67.3551261 | 69.2690501 | 63 | 71.8023281 |
| 77.8457846 | 64.9030219 | 67.3551261 | 69.2690501 | 63 | 72.1773281 |
| 78.8457846 | 64.9030219 | 67.3551261 | 69.2690501 | 63 | 72.1773281 |
| 79.8457846 | 64.9030219 | 67.3551261 | 69.2690501 | 63 | 72.3023281 |
| 80.8457846 | 65.9030219 | 67.3551261 | 69.2690501 | 63 | 72.1773281 |
| 80.8457846 | 65.9030219 | 67.3551261 | 69.2690501 | 63 | 72.3023281 |
| 80.8457846 | 66.9030219 | 67.3551261 | 69.2690501 | 63 | 72.9273281 |
| 80.8457846 | 66.9030219 | 69.3551261 | 69.2690501 | 63 | 73.4273281 |
| 81.8457846 | 66.9030219 | 69.3551261 | 70.2690501 | 63 | 73.8023281 |
| 81.8457846 | 66.9030219 | 71.3551261 | 70.2690501 | 63 | 74.1773281 |
| 81.8457846 | 66.9030219 | 71.3551261 | 70.2690501 | 63 | 74.3023281 |
| 81.8457846 | 65.9030219 | 71.3551261 | 70.2690501 | 63 | 74.0523281 |
| 81.8457846 | 65.9030219 | 71.3551261 | 72.2690501 | 63 | 74.1773281 |
| 81.8457846 | 65.9030219 | 71.3551261 | 69.2690501 | 63 | 73.5523281 |
| 81.8457846 | 65.9030219 | 77.3551261 | 69.2690501 | 63 | 74.1773281 |
| 82.8457846 | 65.9030219 | 78.3551261 | 69.2690501 | 63 | 74.3023281 |
| 87.8457846 | 65.9030219 | 78.3551261 | 70.2690501 | 63 | 75.0523281 |
| 88.8457846 | 68.9030219 | 78.3551261 | 71.2690501 | 63 | 75.4273281 |

|            |            |            |            |    |            |  |
|------------|------------|------------|------------|----|------------|--|
| 90.8457846 | 69.9030219 | 78.3551261 | 72.2690501 | 63 | 76.1773281 |  |
| 91.8457846 | 69.9030219 | 78.3551261 | 74.2690501 | 63 | 76.6773281 |  |
| 90.8457846 | 71.9030219 | 79.3551261 | 74.2690501 | 63 | 76.9273281 |  |
| 90.8457846 | 71.9030219 | 79.3551261 | 74.2690501 | 63 | 76.6773281 |  |
| 89.8457846 | 71.9030219 | 79.3551261 | 74.2690501 | 63 | 76.5523281 |  |
| 87.8457846 | 68.9030219 | 80.3551261 | 75.2690501 | 63 | 76.5523281 |  |
| 86.8457846 | 66.9030219 | 81.3551261 | 76.2690501 | 63 | 76.5523281 |  |
| 86.8457846 | 65.9030219 | 82.3551261 | 77.2690501 | 63 | 76.6773281 |  |
| 86.8457846 | 64.9030219 | 82.3551261 | 78.2690501 | 63 | 76.4273281 |  |
| 86.8457846 | 64.9030219 | 83.3551261 | 77.2690501 | 63 | 76.4273281 |  |
| 86.8457846 | 64.9030219 | 83.3551261 | 76.2690501 | 63 | 76.1773281 |  |
| 86.8457846 | 65.9030219 | 82.3551261 | 74.2690501 | 63 | 76.0523281 |  |
| 86.8457846 | 65.9030219 | 81.3551261 | 74.2690501 | 63 | 75.6773281 |  |
| 86.8457846 | 65.9030219 | 79.3551261 | 74.2690501 | 63 | 75.3023281 |  |
| 87.8457846 | 66.9030219 | 78.3551261 | 73.2690501 | 63 | 75.1773281 |  |
| 85.8457846 | 66.9030219 | 75.3551261 | 74.2690501 | 63 | 74.5523281 |  |
| 83.8457846 | 65.9030219 | 74.3551261 | 74.2690501 | 63 | 74.0523281 |  |
| 83.8457846 | 65.9030219 | 74.3551261 | 74.2690501 | 63 | 74.0523281 |  |
| 81.8457846 | 65.9030219 | 74.3551261 | 74.2690501 | 63 | 73.4273281 |  |
| 81.8457846 | 65.9030219 | 74.3551261 | 74.2690501 | 63 | 73.4273281 |  |
| 81.8457846 | 64.9030219 | 73.3551261 | 74.2690501 | 63 | 73.3023281 |  |
| 81.8457846 | 64.9030219 | 73.3551261 | 75.2690501 | 63 | 73.5523281 |  |
| 81.8457846 | 64.9030219 | 72.3551261 | 75.2690501 | 63 | 73.4273281 |  |
| 81.8457846 | 64.9030219 | 72.3551261 | 75.2690501 | 63 | 73.4273281 |  |
| 81.8457846 | 64.9030219 | 72.3551261 | 75.2690501 | 63 | 73.6773281 |  |
| 81.8457846 | 64.9030219 | 73.3551261 | 75.2690501 | 63 | 74.1773281 |  |
| 81.8457846 | 64.9030219 | 73.3551261 | 77.2690501 | 63 | 74.5523281 |  |
| 79.8457846 | 64.9030219 | 72.3551261 | 79.2690501 | 63 | 74.6773281 |  |
| 77.8457846 | 65.9030219 | 71.3551261 | 81.2690501 | 63 | 75.3023281 |  |
| 77.8457846 | 65.9030219 | 71.3551261 | 81.2690501 | 63 | 76.1773281 |  |
| 77.8457846 | 65.9030219 | 71.3551261 | 81.2690501 | 63 | 76.5523281 |  |
| 77.8457846 | 66.9030219 | 71.3551261 | 81.2690501 | 63 | 76.5523281 |  |
| 77.8457846 | 72.9030219 | 71.3551261 | 79.2690501 | 63 | 77.0523281 |  |
| 76.8457846 | 72.9030219 | 71.3551261 | 78.2690501 | 63 | 76.6773281 |  |
| 76.8457846 | 89.9030219 | 71.3551261 | 77.2690501 | 63 | 78.6773281 |  |
| 77.8457846 | 89.9030219 | 71.3551261 | 77.2690501 | 63 | 77.9273281 |  |
| 78.8457846 | 109.903022 | 72.3551261 | 77.2690501 | 63 | 80.8023281 |  |
| 79.8457846 | 95.9030219 | 72.3551261 | 76.2690501 | 63 | 79.0523281 |  |
| 80.8457846 | 92.9030219 | 72.3551261 | 76.2690501 | 63 | 78.8023281 |  |
| 80.8457846 | 92.9030219 | 72.3551261 | 75.2690501 | 63 | 78.8023281 |  |
| 80.8457846 | 92.9030219 | 72.3551261 | 75.2690501 | 63 | 78.8023281 |  |
| 80.8457846 | 76.9030219 | 73.3551261 | 75.2690501 | 63 | 76.9273281 |  |
| 80.8457846 | 76.9030219 | 72.3551261 | 75.2690501 | 63 | 76.5523281 |  |
| 80.8457846 | 74.9030219 | 71.3551261 | 75.2690501 | 63 | 76.1773281 |  |
| 79.8457846 | 74.9030219 | 71.3551261 | 72.2690501 | 63 | 75.6773281 |  |

|            |            |            |            |    |            |
|------------|------------|------------|------------|----|------------|
| 78.8457846 | 74.9030219 | 71.3551261 | 72.2690501 | 63 | 75.8023281 |
| 78.8457846 | 72.9030219 | 70.3551261 | 73.2690501 | 63 | 75.6773281 |
| 74.8457846 | 73.9030219 | 68.3551261 | 74.2690501 | 63 | 75.3023281 |
| 74.8457846 | 73.9030219 | 68.3551261 | 74.2690501 | 63 | 75.3023281 |
| 74.8457846 | 75.9030219 | 68.3551261 | 74.2690501 | 63 | 75.5523281 |
| 74.8457846 | 75.9030219 | 68.3551261 | 74.2690501 | 63 | 75.6773281 |
| 73.8457846 | 76.9030219 | 67.3551261 | 73.2690501 | 63 | 74.6773281 |
| 73.8457846 | 78.9030219 | 67.3551261 | 74.2690501 | 63 | 74.5523281 |
| 73.8457846 | 81.9030219 | 67.3551261 | 74.2690501 | 63 | 74.6773281 |
| 73.8457846 | 82.9030219 | 64.3551261 | 73.2690501 | 63 | 74.1773281 |
| 75.8457846 | 82.9030219 | 64.3551261 | 73.2690501 | 63 | 74.4273281 |
| 77.8457846 | 83.9030219 | 66.3551261 | 72.2690501 | 63 | 75.0523281 |
| 78.8457846 | 83.9030219 | 67.3551261 | 71.2690501 | 63 | 75.0523281 |
| 78.8457846 | 86.9030219 | 67.3551261 | 71.2690501 | 63 | 75.4273281 |
| 78.8457846 | 86.9030219 | 67.3551261 | 71.2690501 | 63 | 75.6773281 |
| 77.8457846 | 86.9030219 | 71.3551261 | 71.2690501 | 63 | 76.5523281 |
| 77.8457846 | 88.9030219 | 72.3551261 | 72.2690501 | 63 | 77.4273281 |
| 77.8457846 | 90.9030219 | 73.3551261 | 72.2690501 | 63 | 77.5523281 |
| 77.8457846 | 90.9030219 | 76.3551261 | 72.2690501 | 63 | 77.4273281 |
| 77.8457846 | 88.9030219 | 77.3551261 | 73.2690501 | 63 | 77.1773281 |
| 77.8457846 | 88.9030219 | 77.3551261 | 73.2690501 | 63 | 77.1773281 |
| 77.8457846 | 88.9030219 | 77.3551261 | 72.2690501 | 63 | 76.6773281 |
| 77.8457846 | 75.9030219 | 79.3551261 | 72.2690501 | 63 | 75.4273281 |
| 77.8457846 | 75.9030219 | 80.3551261 | 71.2690501 | 63 | 75.3023281 |
| 76.8457846 | 74.9030219 | 81.3551261 | 71.2690501 | 63 | 75.1773281 |
| 76.8457846 | 74.9030219 | 81.3551261 | 71.2690501 | 63 | 75.1773281 |
| 76.8457846 | 74.9030219 | 81.3551261 | 71.2690501 | 63 | 75.1773281 |
| 76.8457846 | 74.9030219 | 81.3551261 | 72.2690501 | 63 | 76.5523281 |
| 76.8457846 | 74.9030219 | 81.3551261 | 71.2690501 | 63 | 75.4273281 |
| 78.8457846 | 70.9030219 | 81.3551261 | 70.2690501 | 63 | 75.4273281 |
| 79.8457846 | 70.9030219 | 81.3551261 | 70.2690501 | 63 | 75.6773281 |
| 81.8457846 | 70.9030219 | 81.3551261 | 69.2690501 | 63 | 75.6773281 |
| 82.8457846 | 72.9030219 | 81.3551261 | 68.2690501 | 63 | 76.1773281 |
| 83.8457846 | 74.9030219 | 81.3551261 | 68.2690501 | 63 | 76.6773281 |
| 83.8457846 | 75.9030219 | 81.3551261 | 68.2690501 | 63 | 76.8023281 |
| 85.8457846 | 75.9030219 | 82.3551261 | 68.2690501 | 63 | 77.1773281 |
| 86.8457846 | 78.9030219 | 81.3551261 | 68.2690501 | 63 | 78.0523281 |
| 87.8457846 | 78.9030219 | 81.3551261 | 68.2690501 | 63 | 78.0523281 |
| 87.8457846 | 78.9030219 | 82.3551261 | 69.2690501 | 63 | 78.3023281 |
| 87.8457846 | 78.9030219 | 82.3551261 | 68.2690501 | 63 | 78.3023281 |
| 87.8457846 | 78.9030219 | 82.3551261 | 68.2690501 | 63 | 78.6773281 |
| 87.8457846 | 79.9030219 | 81.3551261 | 68.2690501 | 63 | 78.8023281 |
| 87.8457846 | 81.9030219 | 81.3551261 | 68.2690501 | 63 | 78.9273281 |
| 87.8457846 | 82.9030219 | 81.3551261 | 68.2690501 | 63 | 79.1773281 |
| 87.8457846 | 84.9030219 | 80.3551261 | 72.2690501 | 63 | 78.3023281 |



|            |            |            |            |    |            |  |
|------------|------------|------------|------------|----|------------|--|
| 86.8457846 | 84.9030219 | 80.3551261 | 73.2690501 | 63 | 78.3023281 |  |
| 85.8457846 | 85.9030219 | 75.3551261 | 73.2690501 | 63 | 77.6773281 |  |
| 83.8457846 | 85.9030219 | 74.3551261 | 73.2690501 | 63 | 77.4273281 |  |
| 83.8457846 | 86.9030219 | 74.3551261 | 73.2690501 | 63 | 78.0523281 |  |
| 83.8457846 | 85.9030219 | 74.3551261 | 73.2690501 | 63 | 78.1773281 |  |
| 83.8457846 | 85.9030219 | 75.3551261 | 75.2690501 | 63 | 78.9273281 |  |
| 83.8457846 | 84.9030219 | 76.3551261 | 75.2690501 | 63 | 79.0523281 |  |
| 83.8457846 | 84.9030219 | 77.3551261 | 84.2690501 | 63 | 80.1773281 |  |
| 83.8457846 | 84.9030219 | 77.3551261 | 84.2690501 | 63 | 80.1773281 |  |
| 83.8457846 | 83.9030219 | 77.3551261 | 85.2690501 | 63 | 80.4273281 |  |
| 85.8457846 | 83.9030219 | 78.3551261 | 85.2690501 | 63 | 80.8023281 |  |
| 90.8457846 | 83.9030219 | 77.3551261 | 78.2690501 | 63 | 80.5523281 |  |
| 90.8457846 | 83.9030219 | 77.3551261 | 74.2690501 | 63 | 79.9273281 |  |
| 90.8457846 | 83.9030219 | 77.3551261 | 72.2690501 | 63 | 79.4273281 |  |
| 91.8457846 | 81.9030219 | 73.3551261 | 70.2690501 | 63 | 78.4273281 |  |
| 91.8457846 | 81.9030219 | 72.3551261 | 69.2690501 | 63 | 78.0523281 |  |
| 91.8457846 | 81.9030219 | 66.3551261 | 68.2690501 | 63 | 77.1773281 |  |
| 91.8457846 | 81.9030219 | 65.3551261 | 69.2690501 | 63 | 77.1773281 |  |
| 90.8457846 | 83.9030219 | 65.3551261 | 69.2690501 | 63 | 77.3023281 |  |
| 86.8457846 | 83.9030219 | 71.3551261 | 69.2690501 | 63 | 77.5523281 |  |
| 85.8457846 | 83.9030219 | 80.3551261 | 69.2690501 | 63 | 78.4273281 |  |
| 85.8457846 | 83.9030219 | 82.3551261 | 69.2690501 | 63 | 78.5523281 |  |
| 83.8457846 | 83.9030219 | 82.3551261 | 69.2690501 | 69 | 78.3023281 |  |
| 82.8457846 | 83.9030219 | 82.3551261 | 70.2690501 | 69 | 79.3023281 |  |
| 81.8457846 | 84.9030219 | 82.3551261 | 71.2690501 | 69 | 79.8023281 |  |
| 81.8457846 | 85.9030219 | 83.3551261 | 71.2690501 | 69 | 80.6773281 |  |
| 80.8457846 | 85.9030219 | 83.3551261 | 71.2690501 | 69 | 80.5523281 |  |
| 77.8457846 | 90.9030219 | 71.3551261 | 75.2690501 | 69 | 79.9273281 |  |
| 75.8457846 | 90.9030219 | 69.3551261 | 76.2690501 | 69 | 79.9273281 |  |
| 75.8457846 | 91.9030219 | 68.3551261 | 77.2690501 | 69 | 80.6773281 |  |
| 74.8457846 | 92.9030219 | 68.3551261 | 76.2690501 | 69 | 81.0523281 |  |
| 74.8457846 | 92.9030219 | 69.3551261 | 75.2690501 | 69 | 81.4273281 |  |
| 74.8457846 | 93.9030219 | 69.3551261 | 75.2690501 | 69 | 81.5523281 |  |
| 74.8457846 | 92.9030219 | 71.3551261 | 74.2690501 | 69 | 82.0523281 |  |
| 74.8457846 | 92.9030219 | 73.3551261 | 74.2690501 | 69 | 82.1773281 |  |
| 74.8457846 | 92.9030219 | 73.3551261 | 74.2690501 | 69 | 82.1773281 |  |
| 73.8457846 | 87.9030219 | 73.3551261 | 73.2690501 | 69 | 81.1773281 |  |
| 74.8457846 | 86.9030219 | 74.3551261 | 73.2690501 | 63 | 81.1773281 |  |
| 74.8457846 | 86.9030219 | 74.3551261 | 73.2690501 | 63 | 81.3023281 |  |
| 74.8457846 | 85.9030219 | 74.3551261 | 73.2690501 | 63 | 81.4273281 |  |
| 74.8457846 | 84.9030219 | 74.3551261 | 73.2690501 | 63 | 81.5523281 |  |
| 74.8457846 | 84.9030219 | 75.3551261 | 73.2690501 | 63 | 82.0523281 |  |
| 74.8457846 | 84.9030219 | 75.3551261 | 72.2690501 | 63 | 82.0523281 |  |
| 73.8457846 | 84.9030219 | 75.3551261 | 70.2690501 | 63 | 81.6773281 |  |
| 73.8457846 | 82.9030219 | 76.3551261 | 69.2690501 | 63 | 81.6773281 |  |

|            |            |            |            |    |            |
|------------|------------|------------|------------|----|------------|
| 73.8457846 | 69.9030219 | 76.3551261 | 69.2690501 | 63 | 80.1773281 |
| 73.8457846 | 69.9030219 | 77.3551261 | 68.2690501 | 63 | 80.4273281 |
| 73.8457846 | 65.9030219 | 77.3551261 | 68.2690501 | 63 | 80.1773281 |
| 74.8457846 | 64.9030219 | 77.3551261 | 68.2690501 | 63 | 80.3023281 |
| 75.8457846 | 64.9030219 | 77.3551261 | 67.2690501 | 63 | 80.0523281 |
| 75.8457846 | 64.9030219 | 78.3551261 | 66.2690501 | 63 | 80.0523281 |
| 76.8457846 | 64.9030219 | 78.3551261 | 65.2690501 | 63 | 80.0523281 |
| 77.8457846 | 64.9030219 | 78.3551261 | 65.2690501 | 63 | 80.1773281 |
| 77.8457846 | 63.9030219 | 76.3551261 | 65.2690501 | 63 | 79.8023281 |
| 79.8457846 | 63.9030219 | 76.3551261 | 66.2690501 | 63 | 79.9273281 |
| 80.8457846 | 63.9030219 | 76.3551261 | 71.2690501 | 63 | 80.8023281 |
| 80.8457846 | 63.9030219 | 76.3551261 | 78.2690501 | 63 | 81.9273281 |
| 80.8457846 | 63.9030219 | 76.3551261 | 81.2690501 | 63 | 82.4273281 |
| 80.8457846 | 63.9030219 | 76.3551261 | 82.2690501 | 63 | 82.5523281 |
| 81.8457846 | 61.9030219 | 76.3551261 | 82.2690501 | 63 | 82.3023281 |
| 81.8457846 | 61.9030219 | 77.3551261 | 82.2690501 | 63 | 82.1773281 |
| 82.8457846 | 61.9030219 | 77.3551261 | 81.2690501 | 63 | 81.6773281 |
| 83.8457846 | 60.9030219 | 77.3551261 | 81.2690501 | 63 | 81.1773281 |
| 86.8457846 | 67.9030219 | 79.3551261 | 81.2690501 | 63 | 82.1773281 |
| 88.8457846 | 72.9030219 | 79.3551261 | 81.2690501 | 63 | 82.8023281 |
| 89.8457846 | 79.9030219 | 79.3551261 | 81.2690501 | 63 | 83.8023281 |
| 90.8457846 | 79.9030219 | 81.3551261 | 81.2690501 | 63 | 83.9273281 |
| 91.8457846 | 83.9030219 | 81.3551261 | 81.2690501 | 63 | 83.9273281 |
| 91.8457846 | 90.9030219 | 77.3551261 | 82.2690501 | 63 | 84.1773281 |
| 91.8457846 | 93.9030219 | 75.3551261 | 81.2690501 | 63 | 84.0523281 |
| 91.8457846 | 95.9030219 | 76.3551261 | 81.2690501 | 63 | 84.4273281 |
| 92.8457846 | 95.9030219 | 77.3551261 | 80.2690501 | 63 | 84.8023281 |
| 92.8457846 | 84.9030219 | 78.3551261 | 80.2690501 | 63 | 82.9273281 |
| 92.8457846 | 76.9030219 | 78.3551261 | 80.2690501 | 63 | 81.8023281 |
| 92.8457846 | 76.9030219 | 78.3551261 | 81.2690501 | 63 | 81.6773281 |
| 90.8457846 | 76.9030219 | 79.3551261 | 81.2690501 | 63 | 81.4273281 |
| 90.8457846 | 75.9030219 | 79.3551261 | 81.2690501 | 63 | 81.4273281 |
| 86.8457846 | 73.9030219 | 79.3551261 | 79.2690501 | 63 | 80.3023281 |
| 86.8457846 | 73.9030219 | 80.3551261 | 79.2690501 | 63 | 80.4273281 |
| 86.8457846 | 73.9030219 | 80.3551261 | 78.2690501 | 63 | 80.1773281 |
| 86.8457846 | 73.9030219 | 80.3551261 | 78.2690501 | 63 | 80.0523281 |
| 87.8457846 | 71.9030219 | 81.3551261 | 78.2690501 | 63 | 79.6773281 |
| 87.8457846 | 70.9030219 | 83.3551261 | 78.2690501 | 63 | 79.5523281 |
| 90.8457846 | 70.9030219 | 86.3551261 | 79.2690501 | 63 | 80.4273281 |
| 89.8457846 | 70.9030219 | 87.3551261 | 80.2690501 | 63 | 80.4273281 |
| 86.8457846 | 70.9030219 | 87.3551261 | 80.2690501 | 63 | 79.9273281 |
| 86.8457846 | 70.9030219 | 88.3551261 | 79.2690501 | 63 | 80.0523281 |
| 83.8457846 | 72.9030219 | 88.3551261 | 76.2690501 | 63 | 79.6773281 |
| 67.8457846 | 73.9030219 | 88.3551261 | 75.2690501 | 63 | 77.9273281 |
| 67.8457846 | 73.9030219 | 88.3551261 | 75.2690501 | 63 | 77.9273281 |

|            |            |            |            |    |            |
|------------|------------|------------|------------|----|------------|
| 60.8457846 | 74.9030219 | 88.3551261 | 74.2690501 | 63 | 75.9273281 |
| 58.8457846 | 74.9030219 | 89.3551261 | 74.2690501 | 63 | 75.3023281 |
| 58.8457846 | 76.9030219 | 88.3551261 | 74.2690501 | 63 | 75.3023281 |
| 56.8457846 | 81.9030219 | 88.3551261 | 74.2690501 | 63 | 75.4273281 |
| 56.8457846 | 81.9030219 | 86.3551261 | 74.2690501 | 63 | 75.1773281 |
| 55.8457846 | 81.9030219 | 86.3551261 | 74.2690501 | 63 | 75.1773281 |
| 55.8457846 | 81.9030219 | 86.3551261 | 74.2690501 | 63 | 75.3023281 |
| 55.8457846 | 81.9030219 | 84.3551261 | 74.2690501 | 63 | 75.1773281 |
| 55.8457846 | 81.9030219 | 80.3551261 | 72.2690501 | 63 | 74.3023281 |
| 55.8457846 | 79.9030219 | 80.3551261 | 69.2690501 | 63 | 73.8023281 |
| 55.8457846 | 80.9030219 | 76.3551261 | 69.2690501 | 63 | 73.8023281 |
| 57.8457846 | 80.9030219 | 76.3551261 | 69.2690501 | 63 | 74.6773281 |
| 58.8457846 | 81.9030219 | 77.3551261 | 70.2690501 | 63 | 75.1773281 |
| 58.8457846 | 81.9030219 | 76.3551261 | 73.2690501 | 63 | 75.5523281 |
| 58.8457846 | 82.9030219 | 76.3551261 | 75.2690501 | 63 | 75.9273281 |
| 64.8457846 | 82.9030219 | 76.3551261 | 77.2690501 | 63 | 76.5523281 |
| 67.8457846 | 82.9030219 | 76.3551261 | 81.2690501 | 63 | 77.3023281 |
| 68.8457846 | 82.9030219 | 76.3551261 | 84.2690501 | 63 | 77.5523281 |
| 69.8457846 | 82.9030219 | 76.3551261 | 84.2690501 | 63 | 77.6773281 |
| 69.8457846 | 74.9030219 | 76.3551261 | 85.2690501 | 63 | 76.8023281 |
| 67.8457846 | 74.9030219 | 76.3551261 | 88.2690501 | 63 | 76.5523281 |
| 66.8457846 | 70.9030219 | 77.3551261 | 88.2690501 | 63 | 75.9273281 |
| 66.8457846 | 61.9030219 | 78.3551261 | 90.2690501 | 63 | 75.3023281 |
| 68.8457846 | 59.9030219 | 77.3551261 | 89.2690501 | 63 | 75.0523281 |
| 71.8457846 | 59.9030219 | 77.3551261 | 89.2690501 | 63 | 75.4273281 |
| 74.8457846 | 58.9030219 | 77.3551261 | 85.2690501 | 63 | 75.1773281 |
| 75.8457846 | 57.9030219 | 77.3551261 | 85.2690501 | 63 | 75.1773281 |
| 75.8457846 | 58.9030219 | 77.3551261 | 85.2690501 | 63 | 75.5523281 |
| 76.8457846 | 58.9030219 | 77.3551261 | 84.2690501 | 63 | 75.6773281 |
| 76.8457846 | 58.9030219 | 77.3551261 | 84.2690501 | 63 | 75.9273281 |
| 77.8457846 | 58.9030219 | 78.3551261 | 84.2690501 | 63 | 76.1773281 |
| 77.8457846 | 59.9030219 | 78.3551261 | 84.2690501 | 63 | 76.3023281 |
| 77.8457846 | 59.9030219 | 79.3551261 | 82.2690501 | 63 | 76.1773281 |
| 78.8457846 | 59.9030219 | 79.3551261 | 82.2690501 | 63 | 76.4273281 |
| 80.8457846 | 60.9030219 | 79.3551261 | 82.2690501 | 63 | 76.6773281 |
| 81.8457846 | 60.9030219 | 79.3551261 | 70.2690501 | 63 | 74.9273281 |
| 81.8457846 | 61.9030219 | 79.3551261 | 70.2690501 | 63 | 75.0523281 |
| 82.8457846 | 62.9030219 | 82.3551261 | 68.2690501 | 63 | 75.3023281 |
| 82.8457846 | 63.9030219 | 80.3551261 | 68.2690501 | 63 | 75.0523281 |
| 81.8457846 | 63.9030219 | 79.3551261 | 68.2690501 | 63 | 74.8023281 |
| 80.8457846 | 69.9030219 | 79.3551261 | 71.2690501 | 63 | 75.9273281 |
| 80.8457846 | 73.9030219 | 78.3551261 | 71.2690501 | 63 | 76.3023281 |
| 80.8457846 | 74.9030219 | 78.3551261 | 71.2690501 | 63 | 76.4273281 |
| 80.8457846 | 73.9030219 | 78.3551261 | 71.2690501 | 63 | 76.4273281 |
| 79.8457846 | 72.9030219 | 78.3551261 | 78.2690501 | 63 | 77.0523281 |

|            |            |            |            |    |            |  |
|------------|------------|------------|------------|----|------------|--|
| 79.8457846 | 72.9030219 | 78.3551261 | 78.2690501 | 63 | 77.1773281 |  |
| 79.8457846 | 72.9030219 | 78.3551261 | 75.2690501 | 63 | 76.8023281 |  |
| 79.8457846 | 74.9030219 | 78.3551261 | 74.2690501 | 63 | 77.0523281 |  |
| 79.8457846 | 75.9030219 | 79.3551261 | 74.2690501 | 63 | 77.0523281 |  |
| 79.8457846 | 75.9030219 | 80.3551261 | 74.2690501 | 63 | 76.6773281 |  |
| 79.8457846 | 75.9030219 | 80.3551261 | 74.2690501 | 63 | 76.1773281 |  |
| 80.8457846 | 76.9030219 | 80.3551261 | 74.2690501 | 63 | 75.9273281 |  |
| 80.8457846 | 78.9030219 | 80.3551261 | 73.2690501 | 63 | 76.3023281 |  |
| 80.8457846 | 78.9030219 | 80.3551261 | 73.2690501 | 63 | 76.3023281 |  |
| 83.8457846 | 78.9030219 | 80.3551261 | 73.2690501 | 63 | 77.1773281 |  |
| 83.8457846 | 77.9030219 | 79.3551261 | 73.2690501 | 63 | 77.0523281 |  |
| 84.8457846 | 75.9030219 | 77.3551261 | 73.2690501 | 63 | 76.6773281 |  |
| 84.8457846 | 75.9030219 | 76.3551261 | 73.2690501 | 63 | 76.5523281 |  |
| 84.8457846 | 75.9030219 | 76.3551261 | 73.2690501 | 63 | 76.5523281 |  |
| 83.8457846 | 75.9030219 | 77.3551261 | 72.2690501 | 63 | 76.1773281 |  |
| 83.8457846 | 74.9030219 | 78.3551261 | 72.2690501 | 63 | 75.9273281 |  |
| 82.8457846 | 71.9030219 | 78.3551261 | 70.2690501 | 63 | 75.0523281 |  |
| 82.8457846 | 70.9030219 | 78.3551261 | 72.2690501 | 63 | 74.9273281 |  |
| 82.8457846 | 70.9030219 | 78.3551261 | 72.2690501 | 63 | 74.8023281 |  |
| 82.8457846 | 70.9030219 | 79.3551261 | 71.2690501 | 63 | 74.6773281 |  |
| 82.8457846 | 70.9030219 | 79.3551261 | 71.2690501 | 63 | 74.6773281 |  |
| 82.8457846 | 69.9030219 | 79.3551261 | 72.2690501 | 63 | 74.9273281 |  |
| 82.8457846 | 69.9030219 | 79.3551261 | 75.2690501 | 63 | 75.4273281 |  |
| 81.8457846 | 69.9030219 | 77.3551261 | 75.2690501 | 63 | 75.1773281 |  |
| 81.8457846 | 68.9030219 | 77.3551261 | 75.2690501 | 63 | 74.8023281 |  |
| 80.8457846 | 68.9030219 | 77.3551261 | 76.2690501 | 63 | 74.6773281 |  |
| 79.8457846 | 67.9030219 | 79.3551261 | 76.2690501 | 63 | 74.6773281 |  |
| 79.8457846 | 65.9030219 | 80.3551261 | 77.2690501 | 63 | 74.4273281 |  |
| 79.8457846 | 63.9030219 | 81.3551261 | 77.2690501 | 63 | 74.1773281 |  |
| 79.8457846 | 62.9030219 | 81.3551261 | 76.2690501 | 63 | 73.9273281 |  |
| 78.8457846 | 61.9030219 | 82.3551261 | 76.2690501 | 63 | 73.9273281 |  |
| 78.8457846 | 61.9030219 | 82.3551261 | 75.2690501 | 63 | 73.8023281 |  |
| 77.8457846 | 60.9030219 | 83.3551261 | 75.2690501 | 63 | 73.4273281 |  |
| 77.8457846 | 61.9030219 | 85.3551261 | 75.2690501 | 63 | 74.1773281 |  |
| 77.8457846 | 62.9030219 | 86.3551261 | 74.2690501 | 63 | 75.1773281 |  |
| 75.8457846 | 62.9030219 | 84.3551261 | 74.2690501 | 63 | 74.8023281 |  |
| 76.8457846 | 63.9030219 | 81.3551261 | 76.2690501 | 63 | 75.0523281 |  |
| 76.8457846 | 63.9030219 | 79.3551261 | 77.2690501 | 63 | 75.1773281 |  |
| 76.8457846 | 63.9030219 | 78.3551261 | 77.2690501 | 63 | 75.1773281 |  |
| 76.8457846 | 64.9030219 | 77.3551261 | 77.2690501 | 63 | 75.3023281 |  |
| 77.8457846 | 63.9030219 | 76.3551261 | 76.2690501 | 63 | 75.3023281 |  |
| 77.8457846 | 63.9030219 | 77.3551261 | 77.2690501 | 63 | 75.6773281 |  |
| 76.8457846 | 63.9030219 | 76.3551261 | 77.2690501 | 63 | 75.4273281 |  |
| 76.8457846 | 63.9030219 | 76.3551261 | 79.2690501 | 63 | 75.6773281 |  |
| 77.8457846 | 63.9030219 | 76.3551261 | 79.2690501 | 63 | 75.8023281 |  |

|            |            |            |            |    |            |
|------------|------------|------------|------------|----|------------|
| 77.8457846 | 63.9030219 | 76.3551261 | 80.2690501 | 63 | 75.8023281 |
| 76.8457846 | 64.9030219 | 76.3551261 | 81.2690501 | 63 | 76.1773281 |
| 76.8457846 | 63.9030219 | 76.3551261 | 82.2690501 | 63 | 76.1773281 |
| 76.8457846 | 63.9030219 | 76.3551261 | 84.2690501 | 63 | 77.1773281 |
| 75.8457846 | 63.9030219 | 76.3551261 | 84.2690501 | 63 | 76.9273281 |
| 75.8457846 | 62.9030219 | 76.3551261 | 84.2690501 | 63 | 76.8023281 |
| 75.8457846 | 62.9030219 | 75.3551261 | 83.2690501 | 63 | 77.0523281 |
| 75.8457846 | 62.9030219 | 75.3551261 | 82.2690501 | 63 | 76.9273281 |
| 75.8457846 | 61.9030219 | 74.3551261 | 80.2690501 | 63 | 76.5523281 |
| 76.8457846 | 62.9030219 | 74.3551261 | 78.2690501 | 63 | 76.5523281 |
| 77.8457846 | 62.9030219 | 74.3551261 | 77.2690501 | 63 | 76.5523281 |
| 77.8457846 | 62.9030219 | 74.3551261 | 77.2690501 | 63 | 76.6773281 |
| 77.8457846 | 62.9030219 | 74.3551261 | 77.2690501 | 63 | 77.0523281 |
| 77.8457846 | 61.9030219 | 74.3551261 | 77.2690501 | 63 | 77.3023281 |
| 77.8457846 | 61.9030219 | 74.3551261 | 76.2690501 | 63 | 77.1773281 |
| 77.8457846 | 61.9030219 | 74.3551261 | 77.2690501 | 63 | 77.5523281 |
| 78.8457846 | 61.9030219 | 75.3551261 | 77.2690501 | 63 | 77.8023281 |
| 78.8457846 | 61.9030219 | 75.3551261 | 77.2690501 | 63 | 77.8023281 |
| 80.8457846 | 61.9030219 | 75.3551261 | 77.2690501 | 63 | 78.3023281 |
| 80.8457846 | 61.9030219 | 75.3551261 | 76.2690501 | 63 | 77.6773281 |
| 81.8457846 | 61.9030219 | 75.3551261 | 76.2690501 | 63 | 77.0523281 |
| 82.8457846 | 61.9030219 | 75.3551261 | 76.2690501 | 63 | 77.5523281 |
| 82.8457846 | 61.9030219 | 73.3551261 | 76.2690501 | 63 | 76.8023281 |
| 85.8457846 | 61.9030219 | 71.3551261 | 76.2690501 | 63 | 76.8023281 |
| 85.8457846 | 61.9030219 | 70.3551261 | 77.2690501 | 63 | 76.3023281 |
| 86.8457846 | 61.9030219 | 70.3551261 | 78.2690501 | 63 | 76.4273281 |
| 73.8457846 | 66.9030219 | 70.3551261 | 78.2690501 | 63 | 75.4273281 |
| 70.8457846 | 67.9030219 | 70.3551261 | 79.2690501 | 63 | 75.0523281 |
| 70.8457846 | 68.9030219 | 70.3551261 | 81.2690501 | 63 | 75.4273281 |
| 70.8457846 | 68.9030219 | 70.3551261 | 81.2690501 | 63 | 75.4273281 |
| 69.8457846 | 68.9030219 | 70.3551261 | 82.2690501 | 63 | 75.1773281 |
| 69.8457846 | 68.9030219 | 70.3551261 | 83.2690501 | 63 | 75.3023281 |
| 67.8457846 | 69.9030219 | 71.3551261 | 83.2690501 | 63 | 75.1773281 |
| 66.8457846 | 69.9030219 | 71.3551261 | 83.2690501 | 63 | 75.1773281 |
| 66.8457846 | 69.9030219 | 70.3551261 | 83.2690501 | 63 | 75.0523281 |
| 65.8457846 | 69.9030219 | 70.3551261 | 83.2690501 | 63 | 74.9273281 |
| 65.8457846 | 69.9030219 | 70.3551261 | 83.2690501 | 63 | 74.5523281 |
| 65.8457846 | 70.9030219 | 71.3551261 | 84.2690501 | 63 | 74.6773281 |
| 66.8457846 | 70.9030219 | 71.3551261 | 84.2690501 | 63 | 74.8023281 |
| 70.8457846 | 70.9030219 | 70.3551261 | 84.2690501 | 63 | 75.4273281 |
| 72.8457846 | 70.9030219 | 70.3551261 | 83.2690501 | 63 | 75.8023281 |
| 72.8457846 | 70.9030219 | 70.3551261 | 81.2690501 | 63 | 76.0523281 |
| 73.8457846 | 70.9030219 | 70.3551261 | 79.2690501 | 63 | 76.4273281 |
| 73.8457846 | 65.9030219 | 70.3551261 | 78.2690501 | 63 | 76.1773281 |
| 73.8457846 | 64.9030219 | 68.3551261 | 78.2690501 | 63 | 75.9273281 |

|            |            |            |            |    |            |  |
|------------|------------|------------|------------|----|------------|--|
| 73.8457846 | 62.9030219 | 68.3551261 | 77.2690501 | 63 | 75.5523281 |  |
| 73.8457846 | 62.9030219 | 68.3551261 | 77.2690501 | 63 | 75.3023281 |  |
| 73.8457846 | 62.9030219 | 68.3551261 | 79.2690501 | 63 | 75.6773281 |  |
| 75.8457846 | 61.9030219 | 67.3551261 | 78.2690501 | 63 | 75.5523281 |  |
| 75.8457846 | 61.9030219 | 65.3551261 | 78.2690501 | 63 | 75.4273281 |  |
| 76.8457846 | 60.9030219 | 65.3551261 | 78.2690501 | 63 | 75.3023281 |  |
| 76.8457846 | 60.9030219 | 63.3551261 | 76.2690501 | 63 | 74.9273281 |  |
| 76.8457846 | 60.9030219 | 62.3551261 | 76.2690501 | 63 | 74.5523281 |  |
| 76.8457846 | 60.9030219 | 62.3551261 | 74.2690501 | 63 | 74.1773281 |  |
| 77.8457846 | 61.9030219 | 62.3551261 | 73.2690501 | 63 | 74.1773281 |  |
| 77.8457846 | 60.9030219 | 62.3551261 | 72.2690501 | 63 | 73.4273281 |  |
| 77.8457846 | 60.9030219 | 63.3551261 | 74.2690501 | 63 | 73.6773281 |  |
| 77.8457846 | 60.9030219 | 63.3551261 | 74.2690501 | 63 | 73.6773281 |  |
| 76.8457846 | 60.9030219 | 66.3551261 | 74.2690501 | 63 | 74.1773281 |  |
| 76.8457846 | 60.9030219 | 68.3551261 | 74.2690501 | 63 | 74.4273281 |  |
| 76.8457846 | 60.9030219 | 68.3551261 | 73.2690501 | 63 | 74.0523281 |  |
| 76.8457846 | 60.9030219 | 68.3551261 | 72.2690501 | 63 | 73.9273281 |  |
| 74.8457846 | 60.9030219 | 69.3551261 | 72.2690501 | 63 | 73.6773281 |  |
| 74.8457846 | 60.9030219 | 69.3551261 | 72.2690501 | 63 | 73.1773281 |  |
| 74.8457846 | 61.9030219 | 71.3551261 | 72.2690501 | 63 | 73.4273281 |  |
| 74.8457846 | 61.9030219 | 70.3551261 | 74.2690501 | 63 | 71.9273281 |  |
| 74.8457846 | 62.9030219 | 70.3551261 | 74.2690501 | 63 | 71.6773281 |  |
| 74.8457846 | 63.9030219 | 70.3551261 | 74.2690501 | 63 | 71.5523281 |  |
| 75.8457846 | 63.9030219 | 70.3551261 | 74.2690501 | 63 | 71.9273281 |  |
| 76.8457846 | 63.9030219 | 69.3551261 | 74.2690501 | 63 | 72.9273281 |  |
| 76.8457846 | 63.9030219 | 68.3551261 | 74.2690501 | 63 | 73.1773281 |  |
| 76.8457846 | 63.9030219 | 68.3551261 | 74.2690501 | 63 | 73.1773281 |  |
| 76.8457846 | 63.9030219 | 67.3551261 | 74.2690501 | 63 | 73.1773281 |  |
| 76.8457846 | 68.9030219 | 68.3551261 | 76.2690501 | 63 | 74.3023281 |  |
| 76.8457846 | 68.9030219 | 69.3551261 | 76.2690501 | 63 | 74.4273281 |  |
| 77.8457846 | 68.9030219 | 70.3551261 | 80.2690501 | 63 | 75.1773281 |  |
| 78.8457846 | 68.9030219 | 71.3551261 | 80.2690501 | 63 | 75.1773281 |  |
| 77.8457846 | 68.9030219 | 72.3551261 | 80.2690501 | 63 | 74.8023281 |  |
| 77.8457846 | 68.9030219 | 72.3551261 | 80.2690501 | 63 | 75.0523281 |  |
| 77.8457846 | 68.9030219 | 72.3551261 | 82.2690501 | 63 | 73.9273281 |  |
| 77.8457846 | 68.9030219 | 74.3551261 | 86.2690501 | 63 | 73.6773281 |  |
| 76.8457846 | 68.9030219 | 76.3551261 | 87.2690501 | 63 | 73.5523281 |  |
| 76.8457846 | 68.9030219 | 77.3551261 | 88.2690501 | 63 | 73.8023281 |  |
| 76.8457846 | 68.9030219 | 77.3551261 | 88.2690501 | 63 | 73.9273281 |  |
| 76.8457846 | 69.9030219 | 76.3551261 | 88.2690501 | 63 | 74.0523281 |  |
| 76.8457846 | 70.9030219 | 75.3551261 | 88.2690501 | 63 | 74.0523281 |  |
| 76.8457846 | 70.9030219 | 74.3551261 | 87.2690501 | 63 | 73.9273281 |  |
| 75.8457846 | 72.9030219 | 72.3551261 | 87.2690501 | 63 | 74.1773281 |  |
| 76.8457846 | 73.9030219 | 71.3551261 | 87.2690501 | 63 | 74.4273281 |  |
| 76.8457846 | 73.9030219 | 69.3551261 | 88.2690501 | 63 | 74.5523281 |  |

|            |            |            |            |    |            |
|------------|------------|------------|------------|----|------------|
| 76.8457846 | 73.9030219 | 69.3551261 | 89.2690501 | 63 | 75.1773281 |
| 74.8457846 | 77.9030219 | 69.3551261 | 91.2690501 | 63 | 75.8023281 |
| 74.8457846 | 78.9030219 | 69.3551261 | 93.2690501 | 63 | 76.4273281 |
| 74.8457846 | 80.9030219 | 69.3551261 | 94.2690501 | 63 | 77.3023281 |
| 73.8457846 | 80.9030219 | 70.3551261 | 92.2690501 | 63 | 77.1773281 |
| 73.8457846 | 80.9030219 | 70.3551261 | 92.2690501 | 63 | 77.1773281 |
| 73.8457846 | 80.9030219 | 70.3551261 | 92.2690501 | 63 | 77.5523281 |
| 73.8457846 | 80.9030219 | 70.3551261 | 88.2690501 | 63 | 77.0523281 |
| 73.8457846 | 81.9030219 | 70.3551261 | 80.2690501 | 63 | 75.5523281 |
| 73.8457846 | 84.9030219 | 69.3551261 | 79.2690501 | 63 | 75.3023281 |
| 73.8457846 | 84.9030219 | 69.3551261 | 79.2690501 | 63 | 75.3023281 |
| 73.8457846 | 85.9030219 | 69.3551261 | 79.2690501 | 63 | 75.3023281 |
| 73.8457846 | 85.9030219 | 69.3551261 | 78.2690501 | 63 | 74.9273281 |
| 72.8457846 | 86.9030219 | 70.3551261 | 78.2690501 | 63 | 74.5523281 |
| 71.8457846 | 86.9030219 | 70.3551261 | 78.2690501 | 63 | 74.3023281 |
| 70.8457846 | 86.9030219 | 70.3551261 | 78.2690501 | 63 | 74.0523281 |
| 70.8457846 | 85.9030219 | 70.3551261 | 78.2690501 | 63 | 74.0523281 |
| 69.8457846 | 85.9030219 | 70.3551261 | 78.2690501 | 63 | 74.4273281 |
| 69.8457846 | 86.9030219 | 69.3551261 | 78.2690501 | 63 | 74.9273281 |
| 71.8457846 | 86.9030219 | 68.3551261 | 78.2690501 | 63 | 74.9273281 |
| 74.8457846 | 87.9030219 | 68.3551261 | 77.2690501 | 63 | 75.3023281 |
| 73.8457846 | 89.9030219 | 67.3551261 | 77.2690501 | 63 | 75.0523281 |
| 73.8457846 | 80.9030219 | 66.3551261 | 77.2690501 | 63 | 73.5523281 |
| 73.8457846 | 74.9030219 | 66.3551261 | 77.2690501 | 63 | 72.4273281 |
| 73.8457846 | 73.9030219 | 66.3551261 | 77.2690501 | 63 | 72.1773281 |
| 73.8457846 | 73.9030219 | 66.3551261 | 77.2690501 | 63 | 72.1773281 |
| 73.8457846 | 69.9030219 | 66.3551261 | 76.2690501 | 63 | 71.5523281 |
| 74.8457846 | 69.9030219 | 66.3551261 | 75.2690501 | 63 | 71.5523281 |
| 74.8457846 | 68.9030219 | 66.3551261 | 74.2690501 | 63 | 71.3023281 |
| 74.8457846 | 68.9030219 | 66.3551261 | 73.2690501 | 63 | 71.1773281 |
| 75.8457846 | 67.9030219 | 66.3551261 | 73.2690501 | 63 | 71.1773281 |
| 75.8457846 | 66.9030219 | 66.3551261 | 73.2690501 | 63 | 70.9273281 |
| 76.8457846 | 66.9030219 | 66.3551261 | 73.2690501 | 63 | 71.1773281 |
| 77.8457846 | 66.9030219 | 66.3551261 | 74.2690501 | 63 | 71.4273281 |
| 76.8457846 | 66.9030219 | 67.3551261 | 75.2690501 | 63 | 71.6773281 |
| 76.8457846 | 66.9030219 | 67.3551261 | 75.2690501 | 63 | 71.6773281 |
| 76.8457846 | 66.9030219 | 66.3551261 | 76.2690501 | 63 | 71.6773281 |
| 76.8457846 | 66.9030219 | 66.3551261 | 76.2690501 | 63 | 71.4273281 |
| 76.8457846 | 65.9030219 | 67.3551261 | 74.2690501 | 63 | 71.1773281 |
| 75.8457846 | 65.9030219 | 67.3551261 | 74.2690501 | 63 | 70.5523281 |
| 75.8457846 | 65.9030219 | 67.3551261 | 74.2690501 | 63 | 70.3023281 |
| 76.8457846 | 64.9030219 | 69.3551261 | 74.2690501 | 63 | 70.4273281 |
| 77.8457846 | 64.9030219 | 69.3551261 | 74.2690501 | 63 | 70.5523281 |
| 77.8457846 | 69.9030219 | 70.3551261 | 74.2690501 | 63 | 71.6773281 |
| 78.8457846 | 69.9030219 | 70.3551261 | 78.2690501 | 63 | 72.0523281 |

|            |            |            |            |    |            |  |
|------------|------------|------------|------------|----|------------|--|
| 80.8457846 | 69.9030219 | 71.3551261 | 77.2690501 | 63 | 72.1773281 |  |
| 81.8457846 | 69.9030219 | 71.3551261 | 76.2690501 | 63 | 71.9273281 |  |
| 81.8457846 | 69.9030219 | 71.3551261 | 76.2690501 | 63 | 71.8023281 |  |
| 81.8457846 | 69.9030219 | 70.3551261 | 76.2690501 | 63 | 70.9273281 |  |
| 81.8457846 | 68.9030219 | 67.3551261 | 76.2690501 | 63 | 70.5523281 |  |
| 81.8457846 | 68.9030219 | 66.3551261 | 78.2690501 | 63 | 70.8023281 |  |
| 81.8457846 | 67.9030219 | 66.3551261 | 78.2690501 | 63 | 70.6773281 |  |
| 81.8457846 | 67.9030219 | 66.3551261 | 79.2690501 | 63 | 70.9273281 |  |
| 77.8457846 | 67.9030219 | 67.3551261 | 79.2690501 | 63 | 70.6773281 |  |
| 76.8457846 | 67.9030219 | 67.3551261 | 80.2690501 | 63 | 70.5523281 |  |
| 76.8457846 | 67.9030219 | 66.3551261 | 80.2690501 | 63 | 70.4273281 |  |
| 77.8457846 | 67.9030219 | 66.3551261 | 81.2690501 | 63 | 71.0523281 |  |
| 77.8457846 | 70.9030219 | 66.3551261 | 81.2690501 | 63 | 71.3023281 |  |
| 76.8457846 | 82.9030219 | 67.3551261 | 79.2690501 | 63 | 72.4273281 |  |
| 76.8457846 | 82.9030219 | 67.3551261 | 78.2690501 | 63 | 72.6773281 |  |
| 75.8457846 | 86.9030219 | 67.3551261 | 77.2690501 | 63 | 72.9273281 |  |
| 75.8457846 | 86.9030219 | 67.3551261 | 78.2690501 | 63 | 73.1773281 |  |
| 76.8457846 | 88.9030219 | 67.3551261 | 80.2690501 | 63 | 74.8023281 |  |
| 76.8457846 | 95.9030219 | 67.3551261 | 82.2690501 | 63 | 76.3023281 |  |
| 77.8457846 | 95.9030219 | 67.3551261 | 84.2690501 | 63 | 77.3023281 |  |
| 77.8457846 | 95.9030219 | 67.3551261 | 85.2690501 | 63 | 77.5523281 |  |
| 77.8457846 | 96.9030219 | 67.3551261 | 85.2690501 | 63 | 77.8023281 |  |
| 78.8457846 | 98.9030219 | 67.3551261 | 86.2690501 | 63 | 78.5523281 |  |
| 76.8457846 | 98.9030219 | 67.3551261 | 89.2690501 | 63 | 79.1773281 |  |
| 77.8457846 | 98.9030219 | 67.3551261 | 89.2690501 | 63 | 79.1773281 |  |
| 77.8457846 | 102.903022 | 67.3551261 | 88.2690501 | 63 | 79.4273281 |  |
| 77.8457846 | 102.903022 | 68.3551261 | 87.2690501 | 63 | 79.6773281 |  |
| 77.8457846 | 102.903022 | 68.3551261 | 84.2690501 | 63 | 79.1773281 |  |
| 77.8457846 | 107.903022 | 69.3551261 | 81.2690501 | 63 | 79.6773281 |  |
| 77.8457846 | 107.903022 | 69.3551261 | 80.2690501 | 63 | 79.5523281 |  |
| 76.8457846 | 108.903022 | 69.3551261 | 79.2690501 | 63 | 79.4273281 |  |
| 76.8457846 | 108.903022 | 69.3551261 | 81.2690501 | 63 | 79.6773281 |  |
| 77.8457846 | 108.903022 | 69.3551261 | 82.2690501 | 63 | 80.0523281 |  |
| 77.8457846 | 109.903022 | 69.3551261 | 79.2690501 | 63 | 79.6773281 |  |
| 78.8457846 | 109.903022 | 69.3551261 | 78.2690501 | 63 | 79.4273281 |  |
| 78.8457846 | 111.903022 | 69.3551261 | 76.2690501 | 63 | 79.4273281 |  |
| 78.8457846 | 111.903022 | 69.3551261 | 74.2690501 | 63 | 79.3023281 |  |
| 78.8457846 | 111.903022 | 69.3551261 | 74.2690501 | 63 | 79.4273281 |  |
| 78.8457846 | 112.903022 | 70.3551261 | 74.2690501 | 63 | 79.6773281 |  |
| 79.8457846 | 114.903022 | 70.3551261 | 74.2690501 | 63 | 79.5523281 |  |
| 79.8457846 | 114.903022 | 71.3551261 | 75.2690501 | 63 | 79.3023281 |  |
| 78.8457846 | 114.903022 | 71.3551261 | 76.2690501 | 63 | 79.1773281 |  |
| 76.8457846 | 114.903022 | 70.3551261 | 76.2690501 | 63 | 78.6773281 |  |
| 74.8457846 | 114.903022 | 70.3551261 | 76.2690501 | 63 | 78.4273281 |  |
| 74.8457846 | 114.903022 | 70.3551261 | 76.2690501 | 63 | 78.4273281 |  |



|            |            |            |            |    |            |  |
|------------|------------|------------|------------|----|------------|--|
| 72.8457846 | 116.903022 | 70.3551261 | 76.2690501 | 63 | 78.5523281 |  |
| 72.8457846 | 113.903022 | 71.3551261 | 76.2690501 | 63 | 78.4273281 |  |
| 72.8457846 | 111.903022 | 71.3551261 | 76.2690501 | 63 | 79.1773281 |  |
| 72.8457846 | 109.903022 | 73.3551261 | 76.2690501 | 63 | 79.8023281 |  |
| 70.8457846 | 108.903022 | 74.3551261 | 76.2690501 | 63 | 79.6773281 |  |
| 70.8457846 | 108.903022 | 76.3551261 | 77.2690501 | 63 | 79.9273281 |  |
| 70.8457846 | 108.903022 | 74.3551261 | 77.2690501 | 63 | 79.5523281 |  |
| 72.8457846 | 108.903022 | 74.3551261 | 76.2690501 | 63 | 79.6773281 |  |
| 72.8457846 | 109.903022 | 74.3551261 | 75.2690501 | 63 | 79.0523281 |  |
| 72.8457846 | 110.903022 | 74.3551261 | 75.2690501 | 63 | 79.0523281 |  |
| 72.8457846 | 111.903022 | 74.3551261 | 70.2690501 | 63 | 78.3023281 |  |
| 72.8457846 | 111.903022 | 73.3551261 | 67.2690501 | 63 | 77.5523281 |  |
| 72.8457846 | 111.903022 | 71.3551261 | 72.2690501 | 63 | 77.9273281 |  |
| 72.8457846 | 112.903022 | 71.3551261 | 72.2690501 | 63 | 78.3023281 |  |
| 72.8457846 | 113.903022 | 71.3551261 | 74.2690501 | 63 | 78.8023281 |  |
| 73.8457846 | 113.903022 | 71.3551261 | 76.2690501 | 63 | 79.1773281 |  |
| 74.8457846 | 113.903022 | 71.3551261 | 75.2690501 | 63 | 79.4273281 |  |
| 74.8457846 | 114.903022 | 71.3551261 | 75.2690501 | 63 | 79.4273281 |  |
| 74.8457846 | 115.903022 | 71.3551261 | 74.2690501 | 63 | 79.1773281 |  |
| 74.8457846 | 117.903022 | 71.3551261 | 72.2690501 | 63 | 79.0523281 |  |
| 74.8457846 | 117.903022 | 71.3551261 | 72.2690501 | 63 | 78.8023281 |  |
| 74.8457846 | 117.903022 | 71.3551261 | 71.2690501 | 63 | 78.4273281 |  |
| 74.8457846 | 118.903022 | 72.3551261 | 71.2690501 | 63 | 78.9273281 |  |
| 75.8457846 | 118.903022 | 72.3551261 | 70.2690501 | 63 | 78.8023281 |  |
| 75.8457846 | 118.903022 | 73.3551261 | 70.2690501 | 63 | 78.9273281 |  |
| 75.8457846 | 118.903022 | 73.3551261 | 71.2690501 | 63 | 79.1773281 |  |
| 76.8457846 | 118.903022 | 73.3551261 | 72.2690501 | 63 | 79.3023281 |  |
| 78.8457846 | 117.903022 | 73.3551261 | 72.2690501 | 63 | 79.5523281 |  |
| 78.8457846 | 117.903022 | 75.3551261 | 72.2690501 | 63 | 79.6773281 |  |
| 77.8457846 | 117.903022 | 76.3551261 | 73.2690501 | 63 | 79.8023281 |  |
| 77.8457846 | 117.903022 | 77.3551261 | 77.2690501 | 63 | 80.4273281 |  |
| 77.8457846 | 116.903022 | 78.3551261 | 77.2690501 | 63 | 80.5523281 |  |
| 77.8457846 | 115.903022 | 78.3551261 | 79.2690501 | 63 | 80.8023281 |  |
| 77.8457846 | 115.903022 | 78.3551261 | 78.2690501 | 63 | 80.5523281 |  |
| 77.8457846 | 115.903022 | 79.3551261 | 78.2690501 | 63 | 81.1773281 |  |
| 78.8457846 | 115.903022 | 79.3551261 | 78.2690501 | 63 | 80.8023281 |  |
| 82.8457846 | 116.903022 | 79.3551261 | 78.2690501 | 63 | 81.1773281 |  |
| 82.8457846 | 116.903022 | 80.3551261 | 79.2690501 | 63 | 81.5523281 |  |
| 89.8457846 | 116.903022 | 80.3551261 | 80.2690501 | 63 | 82.9273281 |  |
| 89.8457846 | 116.903022 | 80.3551261 | 81.2690501 | 63 | 83.0523281 |  |
| 90.8457846 | 117.903022 | 80.3551261 | 83.2690501 | 63 | 83.5523281 |  |
| 90.8457846 | 117.903022 | 80.3551261 | 84.2690501 | 63 | 83.3023281 |  |
| 91.8457846 | 117.903022 | 79.3551261 | 84.2690501 | 63 | 82.9273281 |  |
| 90.8457846 | 117.903022 | 78.3551261 | 83.2690501 | 63 | 82.3023281 |  |
| 91.8457846 | 117.903022 | 77.3551261 | 81.2690501 | 63 | 81.9273281 |  |

|            |            |            |            |    |            |  |
|------------|------------|------------|------------|----|------------|--|
| 91.8457846 | 116.903022 | 76.3551261 | 79.2690501 | 63 | 81.4273281 |  |
| 91.8457846 | 116.903022 | 74.3551261 | 78.2690501 | 63 | 81.0523281 |  |
| 91.8457846 | 116.903022 | 73.3551261 | 77.2690501 | 63 | 80.8023281 |  |
| 92.8457846 | 116.903022 | 73.3551261 | 77.2690501 | 63 | 80.9273281 |  |
| 93.8457846 | 115.903022 | 73.3551261 | 78.2690501 | 63 | 80.9273281 |  |
| 94.8457846 | 115.903022 | 73.3551261 | 79.2690501 | 63 | 81.5523281 |  |
| 94.8457846 | 115.903022 | 73.3551261 | 82.2690501 | 63 | 81.9273281 |  |
| 94.8457846 | 115.903022 | 73.3551261 | 85.2690501 | 63 | 82.5523281 |  |
| 94.8457846 | 115.903022 | 73.3551261 | 85.2690501 | 63 | 82.5523281 |  |
| 95.8457846 | 116.903022 | 73.3551261 | 85.2690501 | 63 | 82.4273281 |  |
| 96.8457846 | 116.903022 | 73.3551261 | 89.2690501 | 63 | 82.9273281 |  |
| 96.8457846 | 116.903022 | 73.3551261 | 89.2690501 | 63 | 83.0523281 |  |
| 96.8457846 | 117.903022 | 73.3551261 | 89.2690501 | 63 | 83.3023281 |  |
| 94.8457846 | 117.903022 | 73.3551261 | 89.2690501 | 63 | 83.1773281 |  |
| 93.8457846 | 117.903022 | 73.3551261 | 89.2690501 | 63 | 83.4273281 |  |
| 93.8457846 | 117.903022 | 73.3551261 | 89.2690501 | 63 | 83.5523281 |  |
| 92.8457846 | 117.903022 | 73.3551261 | 86.2690501 | 63 | 83.0523281 |  |
| 92.8457846 | 117.903022 | 75.3551261 | 84.2690501 | 63 | 83.0523281 |  |
| 91.8457846 | 111.903022 | 78.3551261 | 81.2690501 | 63 | 82.1773281 |  |
| 90.8457846 | 87.9030219 | 80.3551261 | 80.2690501 | 63 | 79.3023281 |  |
| 89.8457846 | 76.9030219 | 80.3551261 | 79.2690501 | 63 | 78.3023281 |  |
| 89.8457846 | 76.9030219 | 79.3551261 | 76.2690501 | 63 | 77.8023281 |  |
| 87.8457846 | 66.9030219 | 79.3551261 | 76.2690501 | 63 | 76.5523281 |  |
| 85.8457846 | 63.9030219 | 78.3551261 | 76.2690501 | 63 | 75.9273281 |  |
| 84.8457846 | 61.9030219 | 78.3551261 | 76.2690501 | 63 | 75.5523281 |  |
| 83.8457846 | 61.9030219 | 77.3551261 | 76.2690501 | 63 | 75.4273281 |  |
| 83.8457846 | 61.9030219 | 77.3551261 | 76.2690501 | 63 | 75.3023281 |  |
| 83.8457846 | 61.9030219 | 76.3551261 | 77.2690501 | 63 | 76.1773281 |  |
| 82.8457846 | 61.9030219 | 76.3551261 | 77.2690501 | 63 | 76.1773281 |  |
| 81.8457846 | 61.9030219 | 75.3551261 | 78.2690501 | 63 | 76.0523281 |  |
| 81.8457846 | 61.9030219 | 74.3551261 | 77.2690501 | 63 | 75.9273281 |  |
| 81.8457846 | 62.9030219 | 73.3551261 | 77.2690501 | 63 | 75.8023281 |  |
| 80.8457846 | 62.9030219 | 72.3551261 | 76.2690501 | 63 | 74.6773281 |  |
| 80.8457846 | 61.9030219 | 72.3551261 | 76.2690501 | 63 | 73.8023281 |  |
| 79.8457846 | 62.9030219 | 72.3551261 | 76.2690501 | 63 | 73.8023281 |  |
| 79.8457846 | 63.9030219 | 72.3551261 | 76.2690501 | 63 | 73.6773281 |  |
| 79.8457846 | 66.9030219 | 72.3551261 | 78.2690501 | 63 | 74.0523281 |  |
| 79.8457846 | 69.9030219 | 71.3551261 | 80.2690501 | 63 | 74.4273281 |  |
| 80.8457846 | 70.9030219 | 71.3551261 | 80.2690501 | 63 | 74.4273281 |  |
| 81.8457846 | 70.9030219 | 71.3551261 | 80.2690501 | 63 | 74.4273281 |  |
| 81.8457846 | 70.9030219 | 71.3551261 | 81.2690501 | 63 | 74.4273281 |  |
| 80.8457846 | 68.9030219 | 71.3551261 | 81.2690501 | 63 | 74.1773281 |  |
| 78.8457846 | 67.9030219 | 70.3551261 | 81.2690501 | 63 | 73.5523281 |  |
| 74.8457846 | 66.9030219 | 69.3551261 | 81.2690501 | 63 | 72.5523281 |  |
| 72.8457846 | 66.9030219 | 68.3551261 | 81.2690501 | 63 | 72.1773281 |  |

|            |            |            |            |    |            |
|------------|------------|------------|------------|----|------------|
| 72.8457846 | 65.9030219 | 68.3551261 | 81.2690501 | 63 | 71.9273281 |
| 72.8457846 | 65.9030219 | 69.3551261 | 81.2690501 | 63 | 71.9273281 |
| 73.8457846 | 65.9030219 | 70.3551261 | 78.2690501 | 63 | 71.0523281 |
| 74.8457846 | 65.9030219 | 70.3551261 | 74.2690501 | 63 | 70.6773281 |
| 74.8457846 | 65.9030219 | 71.3551261 | 74.2690501 | 63 | 70.9273281 |
| 74.8457846 | 65.9030219 | 71.3551261 | 74.2690501 | 63 | 70.9273281 |
| 75.8457846 | 66.9030219 | 71.3551261 | 76.2690501 | 63 | 71.3023281 |
| 76.8457846 | 69.9030219 | 71.3551261 | 78.2690501 | 63 | 72.0523281 |
| 77.8457846 | 69.9030219 | 71.3551261 | 79.2690501 | 63 | 72.5523281 |
| 77.8457846 | 69.9030219 | 71.3551261 | 79.2690501 | 63 | 72.8023281 |
| 76.8457846 | 68.9030219 | 70.3551261 | 79.2690501 | 63 | 72.6773281 |
| 76.8457846 | 67.9030219 | 70.3551261 | 79.2690501 | 63 | 72.6773281 |
| 76.8457846 | 67.9030219 | 70.3551261 | 78.2690501 | 63 | 73.0523281 |
| 75.8457846 | 67.9030219 | 70.3551261 | 77.2690501 | 63 | 72.8023281 |
| 75.8457846 | 67.9030219 | 69.3551261 | 77.2690501 | 63 | 72.8023281 |
| 75.8457846 | 66.9030219 | 68.3551261 | 77.2690501 | 63 | 72.8023281 |
| 75.8457846 | 66.9030219 | 68.3551261 | 78.2690501 | 63 | 73.0523281 |
| 75.8457846 | 66.9030219 | 68.3551261 | 78.2690501 | 63 | 73.0523281 |
| 75.8457846 | 67.9030219 | 68.3551261 | 78.2690501 | 63 | 73.8023281 |
| 75.8457846 | 67.9030219 | 68.3551261 | 78.2690501 | 63 | 73.9273281 |
| 79.8457846 | 68.9030219 | 68.3551261 | 76.2690501 | 63 | 74.4273281 |
| 80.8457846 | 69.9030219 | 68.3551261 | 74.2690501 | 63 | 74.6773281 |
| 80.8457846 | 71.9030219 | 68.3551261 | 74.2690501 | 63 | 74.8023281 |
| 80.8457846 | 71.9030219 | 68.3551261 | 72.2690501 | 63 | 74.5523281 |
| 80.8457846 | 70.9030219 | 69.3551261 | 71.2690501 | 63 | 74.3023281 |
| 79.8457846 | 69.9030219 | 70.3551261 | 71.2690501 | 63 | 73.8023281 |
| 78.8457846 | 69.9030219 | 72.3551261 | 71.2690501 | 63 | 74.3023281 |
| 77.8457846 | 69.9030219 | 72.3551261 | 71.2690501 | 63 | 74.8023281 |
| 77.8457846 | 69.9030219 | 74.3551261 | 72.2690501 | 63 | 74.8023281 |
| 77.8457846 | 69.9030219 | 73.3551261 | 72.2690501 | 63 | 74.6773281 |
| 75.8457846 | 69.9030219 | 73.3551261 | 71.2690501 | 63 | 73.9273281 |
| 74.8457846 | 69.9030219 | 72.3551261 | 70.2690501 | 63 | 73.6773281 |
| 72.8457846 | 69.9030219 | 72.3551261 | 70.2690501 | 63 | 73.1773281 |
| 72.8457846 | 69.9030219 | 72.3551261 | 70.2690501 | 63 | 72.9273281 |
| 69.8457846 | 69.9030219 | 72.3551261 | 71.2690501 | 63 | 72.4273281 |
| 69.8457846 | 69.9030219 | 72.3551261 | 71.2690501 | 63 | 72.3023281 |
| 69.8457846 | 69.9030219 | 72.3551261 | 74.2690501 | 63 | 72.6773281 |
| 70.8457846 | 68.9030219 | 72.3551261 | 75.2690501 | 63 | 71.9273281 |
| 71.8457846 | 68.9030219 | 72.3551261 | 76.2690501 | 63 | 72.1773281 |
| 71.8457846 | 68.9030219 | 71.3551261 | 76.2690501 | 63 | 71.6773281 |
| 71.8457846 | 69.9030219 | 71.3551261 | 76.2690501 | 63 | 71.8023281 |
| 71.8457846 | 69.9030219 | 71.3551261 | 76.2690501 | 63 | 71.9273281 |
| 71.8457846 | 69.9030219 | 71.3551261 | 76.2690501 | 63 | 72.4273281 |
| 72.8457846 | 69.9030219 | 71.3551261 | 76.2690501 | 63 | 72.9273281 |
| 72.8457846 | 68.9030219 | 71.3551261 | 77.2690501 | 63 | 73.4273281 |

|            |            |            |            |    |            |
|------------|------------|------------|------------|----|------------|
| 72.8457846 | 68.9030219 | 71.3551261 | 76.2690501 | 63 | 74.1773281 |
| 72.8457846 | 68.9030219 | 70.3551261 | 76.2690501 | 63 | 74.4273281 |
| 72.8457846 | 67.9030219 | 70.3551261 | 76.2690501 | 63 | 74.4273281 |
| 72.8457846 | 67.9030219 | 70.3551261 | 76.2690501 | 63 | 74.5523281 |
| 74.8457846 | 67.9030219 | 70.3551261 | 76.2690501 | 63 | 74.6773281 |
| 74.8457846 | 67.9030219 | 71.3551261 | 76.2690501 | 63 | 74.8023281 |
| 75.8457846 | 67.9030219 | 72.3551261 | 76.2690501 | 63 | 75.4273281 |
| 75.8457846 | 66.9030219 | 73.3551261 | 76.2690501 | 63 | 75.4273281 |
| 75.8457846 | 67.9030219 | 74.3551261 | 75.2690501 | 63 | 75.4273281 |
| 75.8457846 | 69.9030219 | 74.3551261 | 75.2690501 | 63 | 75.9273281 |
| 75.8457846 | 72.9030219 | 74.3551261 | 74.2690501 | 63 | 76.6773281 |
| 74.8457846 | 72.9030219 | 75.3551261 | 73.2690501 | 63 | 76.5523281 |
| 73.8457846 | 72.9030219 | 77.3551261 | 73.2690501 | 63 | 76.6773281 |
| 75.8457846 | 72.9030219 | 77.3551261 | 71.2690501 | 63 | 76.8023281 |
| 76.8457846 | 69.9030219 | 79.3551261 | 71.2690501 | 63 | 76.9273281 |
| 76.8457846 | 69.9030219 | 80.3551261 | 70.2690501 | 63 | 76.0523281 |
| 78.8457846 | 68.9030219 | 80.3551261 | 69.2690501 | 63 | 76.0523281 |
| 79.8457846 | 67.9030219 | 80.3551261 | 69.2690501 | 63 | 76.4273281 |
| 82.8457846 | 67.9030219 | 80.3551261 | 69.2690501 | 63 | 76.6773281 |
| 77.8457846 | 67.9030219 | 80.3551261 | 70.2690501 | 63 | 75.6773281 |
| 77.8457846 | 67.9030219 | 80.3551261 | 70.2690501 | 63 | 75.1773281 |
| 74.8457846 | 67.9030219 | 80.3551261 | 70.2690501 | 63 | 74.5523281 |
| 72.8457846 | 67.9030219 | 81.3551261 | 70.2690501 | 63 | 74.3023281 |
| 72.8457846 | 67.9030219 | 81.3551261 | 70.2690501 | 63 | 74.3023281 |
| 72.8457846 | 66.9030219 | 80.3551261 | 72.2690501 | 63 | 74.3023281 |
| 72.8457846 | 66.9030219 | 79.3551261 | 72.2690501 | 63 | 74.4273281 |
| 72.8457846 | 66.9030219 | 79.3551261 | 72.2690501 | 63 | 74.4273281 |
| 72.8457846 | 66.9030219 | 78.3551261 | 76.2690501 | 63 | 74.5523281 |
| 72.8457846 | 66.9030219 | 78.3551261 | 79.2690501 | 63 | 74.9273281 |
| 72.8457846 | 66.9030219 | 78.3551261 | 79.2690501 | 63 | 74.9273281 |
| 72.8457846 | 66.9030219 | 78.3551261 | 81.2690501 | 63 | 75.1773281 |
| 72.8457846 | 66.9030219 | 76.3551261 | 81.2690501 | 63 | 74.9273281 |
| 70.8457846 | 71.9030219 | 75.3551261 | 81.2690501 | 63 | 75.1773281 |
| 68.8457846 | 71.9030219 | 74.3551261 | 81.2690501 | 63 | 75.0523281 |
| 68.8457846 | 70.9030219 | 74.3551261 | 81.2690501 | 63 | 75.4273281 |
| 68.8457846 | 70.9030219 | 74.3551261 | 81.2690501 | 63 | 75.5523281 |
| 68.8457846 | 69.9030219 | 74.3551261 | 81.2690501 | 63 | 74.9273281 |
| 68.8457846 | 69.9030219 | 74.3551261 | 81.2690501 | 63 | 74.8023281 |
| 68.8457846 | 69.9030219 | 73.3551261 | 81.2690501 | 63 | 74.3023281 |
| 68.8457846 | 69.9030219 | 73.3551261 | 80.2690501 | 63 | 73.9273281 |
| 71.8457846 | 69.9030219 | 73.3551261 | 80.2690501 | 63 | 74.3023281 |
| 72.8457846 | 70.9030219 | 74.3551261 | 80.2690501 | 63 | 74.6773281 |
| 73.8457846 | 70.9030219 | 74.3551261 | 78.2690501 | 63 | 74.5523281 |
| 73.8457846 | 70.9030219 | 74.3551261 | 72.2690501 | 63 | 73.8023281 |
| 73.8457846 | 70.9030219 | 74.3551261 | 72.2690501 | 63 | 73.5523281 |

|            |            |            |            |    |            |  |
|------------|------------|------------|------------|----|------------|--|
| 73.8457846 | 70.9030219 | 73.3551261 | 69.2690501 | 63 | 72.8023281 |  |
| 73.8457846 | 70.9030219 | 74.3551261 | 67.2690501 | 63 | 72.5523281 |  |
| 73.8457846 | 70.9030219 | 75.3551261 | 67.2690501 | 63 | 72.9273281 |  |
| 74.8457846 | 68.9030219 | 75.3551261 | 65.2690501 | 63 | 72.3023281 |  |
| 74.8457846 | 67.9030219 | 77.3551261 | 65.2690501 | 63 | 72.5523281 |  |
| 75.8457846 | 67.9030219 | 79.3551261 | 65.2690501 | 63 | 72.9273281 |  |
| 76.8457846 | 67.9030219 | 80.3551261 | 66.2690501 | 63 | 73.4273281 |  |
| 76.8457846 | 68.9030219 | 80.3551261 | 67.2690501 | 63 | 73.4273281 |  |
| 76.8457846 | 69.9030219 | 80.3551261 | 67.2690501 | 63 | 73.3023281 |  |
| 76.8457846 | 69.9030219 | 79.3551261 | 67.2690501 | 63 | 73.4273281 |  |
| 77.8457846 | 69.9030219 | 79.3551261 | 67.2690501 | 63 | 73.1773281 |  |
| 78.8457846 | 69.9030219 | 78.3551261 | 67.2690501 | 63 | 72.6773281 |  |
| 79.8457846 | 69.9030219 | 77.3551261 | 67.2690501 | 63 | 72.5523281 |  |
| 79.8457846 | 69.9030219 | 77.3551261 | 67.2690501 | 63 | 72.5523281 |  |
| 79.8457846 | 70.9030219 | 77.3551261 | 67.2690501 | 63 | 72.5523281 |  |
| 79.8457846 | 70.9030219 | 76.3551261 | 67.2690501 | 63 | 72.3023281 |  |
| 72.8457846 | 70.9030219 | 76.3551261 | 67.2690501 | 63 | 71.0523281 |  |
| 69.8457846 | 70.9030219 | 76.3551261 | 70.2690501 | 63 | 70.9273281 |  |
| 69.8457846 | 70.9030219 | 75.3551261 | 70.2690501 | 63 | 70.8023281 |  |
| 69.8457846 | 70.9030219 | 75.3551261 | 70.2690501 | 63 | 70.8023281 |  |
| 69.8457846 | 70.9030219 | 74.3551261 | 69.2690501 | 63 | 70.6773281 |  |
| 69.8457846 | 71.9030219 | 74.3551261 | 70.2690501 | 63 | 70.9273281 |  |
| 69.8457846 | 72.9030219 | 73.3551261 | 70.2690501 | 63 | 70.8023281 |  |
| 71.8457846 | 72.9030219 | 73.3551261 | 70.2690501 | 63 | 71.1773281 |  |
| 71.8457846 | 75.9030219 | 72.3551261 | 70.2690501 | 63 | 71.4273281 |  |
| 69.8457846 | 74.9030219 | 72.3551261 | 70.2690501 | 63 | 71.0523281 |  |
| 67.8457846 | 74.9030219 | 72.3551261 | 71.2690501 | 63 | 71.0523281 |  |
| 67.8457846 | 73.9030219 | 73.3551261 | 71.2690501 | 63 | 70.9273281 |  |
| 67.8457846 | 72.9030219 | 74.3551261 | 71.2690501 | 63 | 71.5523281 |  |
| 67.8457846 | 67.9030219 | 74.3551261 | 71.2690501 | 63 | 71.3023281 |  |
| 67.8457846 | 67.9030219 | 74.3551261 | 71.2690501 | 63 | 71.4273281 |  |
| 67.8457846 | 67.9030219 | 74.3551261 | 71.2690501 | 63 | 71.3023281 |  |
| 67.8457846 | 67.9030219 | 74.3551261 | 71.2690501 | 63 | 71.1773281 |  |
| 68.8457846 | 67.9030219 | 75.3551261 | 71.2690501 | 63 | 71.4273281 |  |
| 68.8457846 | 66.9030219 | 76.3551261 | 75.2690501 | 63 | 72.0523281 |  |
| 68.8457846 | 66.9030219 | 76.3551261 | 75.2690501 | 63 | 72.0523281 |  |
| 70.8457846 | 63.9030219 | 75.3551261 | 76.2690501 | 63 | 72.9273281 |  |
| 71.8457846 | 62.9030219 | 76.3551261 | 76.2690501 | 63 | 73.5523281 |  |
| 73.8457846 | 62.9030219 | 77.3551261 | 76.2690501 | 63 | 74.5523281 |  |
| 74.8457846 | 62.9030219 | 77.3551261 | 76.2690501 | 63 | 74.6773281 |  |
| 74.8457846 | 63.9030219 | 77.3551261 | 75.2690501 | 63 | 74.9273281 |  |
| 74.8457846 | 63.9030219 | 77.3551261 | 72.2690501 | 63 | 74.5523281 |  |
| 74.8457846 | 63.9030219 | 77.3551261 | 70.2690501 | 63 | 74.4273281 |  |
| 74.8457846 | 63.9030219 | 77.3551261 | 69.2690501 | 63 | 74.3023281 |  |
| 71.8457846 | 63.9030219 | 76.3551261 | 69.2690501 | 63 | 73.6773281 |  |

|            |            |            |            |    |            |  |
|------------|------------|------------|------------|----|------------|--|
| 69.8457846 | 64.9030219 | 76.3551261 | 69.2690501 | 63 | 73.4273281 |  |
| 69.8457846 | 64.9030219 | 76.3551261 | 71.2690501 | 63 | 73.8023281 |  |
| 69.8457846 | 64.9030219 | 76.3551261 | 71.2690501 | 63 | 74.0523281 |  |
| 69.8457846 | 64.9030219 | 76.3551261 | 71.2690501 | 63 | 74.1773281 |  |
| 69.8457846 | 64.9030219 | 76.3551261 | 70.2690501 | 63 | 73.9273281 |  |
| 69.8457846 | 64.9030219 | 76.3551261 | 70.2690501 | 63 | 73.9273281 |  |
| 69.8457846 | 62.9030219 | 76.3551261 | 70.2690501 | 63 | 73.5523281 |  |
| 73.8457846 | 62.9030219 | 76.3551261 | 70.2690501 | 63 | 74.0523281 |  |
| 73.8457846 | 62.9030219 | 77.3551261 | 70.2690501 | 63 | 74.8023281 |  |
| 73.8457846 | 62.9030219 | 79.3551261 | 70.2690501 | 63 | 75.1773281 |  |
| 73.8457846 | 62.9030219 | 80.3551261 | 71.2690501 | 63 | 75.4273281 |  |
| 73.8457846 | 62.9030219 | 80.3551261 | 72.2690501 | 63 | 75.3023281 |  |
| 74.8457846 | 61.9030219 | 79.3551261 | 72.2690501 | 63 | 75.1773281 |  |
| 74.8457846 | 61.9030219 | 78.3551261 | 71.2690501 | 63 | 75.1773281 |  |
| 80.8457846 | 57.9030219 | 78.3551261 | 70.2690501 | 63 | 75.1773281 |  |
| 81.8457846 | 56.9030219 | 76.3551261 | 70.2690501 | 63 | 74.9273281 |  |
| 82.8457846 | 56.9030219 | 75.3551261 | 71.2690501 | 63 | 75.4273281 |  |
| 82.8457846 | 62.9030219 | 74.3551261 | 71.2690501 | 63 | 75.8023281 |  |
| 82.8457846 | 63.9030219 | 75.3551261 | 72.2690501 | 63 | 76.3023281 |  |
| 81.8457846 | 63.9030219 | 76.3551261 | 71.2690501 | 63 | 76.1773281 |  |
| 81.8457846 | 65.9030219 | 76.3551261 | 70.2690501 | 63 | 76.1773281 |  |
| 81.8457846 | 66.9030219 | 75.3551261 | 69.2690501 | 63 | 75.8023281 |  |
| 81.8457846 | 67.9030219 | 74.3551261 | 69.2690501 | 63 | 75.9273281 |  |
| 81.8457846 | 68.9030219 | 74.3551261 | 69.2690501 | 63 | 75.8023281 |  |
| 82.8457846 | 68.9030219 | 74.3551261 | 70.2690501 | 63 | 75.8023281 |  |
| 82.8457846 | 69.9030219 | 74.3551261 | 71.2690501 | 63 | 76.1773281 |  |
| 80.8457846 | 69.9030219 | 73.3551261 | 71.2690501 | 63 | 75.8023281 |  |
| 80.8457846 | 69.9030219 | 73.3551261 | 71.2690501 | 63 | 75.5523281 |  |
| 77.8457846 | 66.9030219 | 74.3551261 | 71.2690501 | 63 | 74.8023281 |  |
| 75.8457846 | 65.9030219 | 75.3551261 | 71.2690501 | 63 | 74.4273281 |  |
| 74.8457846 | 64.9030219 | 75.3551261 | 71.2690501 | 63 | 74.3023281 |  |
| 73.8457846 | 64.9030219 | 76.3551261 | 71.2690501 | 63 | 74.0523281 |  |
| 72.8457846 | 65.9030219 | 76.3551261 | 71.2690501 | 63 | 74.0523281 |  |
| 72.8457846 | 65.9030219 | 76.3551261 | 71.2690501 | 63 | 73.9273281 |  |
| 72.8457846 | 65.9030219 | 77.3551261 | 72.2690501 | 63 | 74.0523281 |  |
| 70.8457846 | 66.9030219 | 77.3551261 | 72.2690501 | 63 | 73.9273281 |  |
| 70.8457846 | 66.9030219 | 77.3551261 | 72.2690501 | 63 | 73.8023281 |  |
| 70.8457846 | 66.9030219 | 77.3551261 | 72.2690501 | 63 | 73.6773281 |  |
| 70.8457846 | 66.9030219 | 77.3551261 | 71.2690501 | 63 | 73.3023281 |  |
| 70.8457846 | 66.9030219 | 77.3551261 | 71.2690501 |    | 73.0523281 |  |
| 71.8457846 | 66.9030219 | 78.3551261 | 70.2690501 |    | 73.3023281 |  |
| 71.8457846 | 65.9030219 | 78.3551261 | 70.2690501 |    | 73.0523281 |  |
| 72.8457846 | 64.9030219 | 79.3551261 | 70.2690501 |    | 73.3023281 |  |
| 71.8457846 | 63.9030219 | 80.3551261 | 70.2690501 |    | 73.1773281 |  |
| 71.8457846 | 63.9030219 | 80.3551261 | 70.2690501 |    | 73.1773281 |  |

|            |            |            |            |  |            |
|------------|------------|------------|------------|--|------------|
| 71.8457846 | 63.9030219 | 82.3551261 | 70.2690501 |  | 73.9273281 |
| 67.8457846 | 63.9030219 | 82.3551261 | 70.2690501 |  | 73.5523281 |
| 66.8457846 | 63.9030219 | 83.3551261 | 70.2690501 |  | 73.5523281 |
| 66.8457846 | 64.9030219 | 85.3551261 | 71.2690501 |  | 74.3023281 |
| 66.8457846 | 64.9030219 | 85.3551261 | 70.2690501 |  | 74.3023281 |
| 66.8457846 | 68.9030219 | 86.3551261 | 70.2690501 |  | 75.1773281 |
| 66.8457846 | 68.9030219 | 86.3551261 | 70.2690501 |  | 75.1773281 |
| 65.8457846 | 68.9030219 | 86.3551261 | 71.2690501 |  | 75.1773281 |
| 65.8457846 | 68.9030219 | 87.3551261 | 72.2690501 |  | 75.3023281 |
| 65.8457846 | 68.9030219 | 88.3551261 | 72.2690501 |  | 75.0523281 |
| 65.8457846 | 68.9030219 | 88.3551261 | 72.2690501 |  | 74.9273281 |
| 65.8457846 | 68.9030219 | 84.3551261 | 71.2690501 |  | 74.1773281 |
| 65.8457846 | 68.9030219 | 76.3551261 | 71.2690501 |  | 72.9273281 |
| 65.8457846 | 68.9030219 | 72.3551261 | 70.2690501 |  | 72.1773281 |
| 66.8457846 | 68.9030219 | 71.3551261 | 70.2690501 |  | 72.1773281 |
| 67.8457846 | 68.9030219 | 70.3551261 | 71.2690501 |  | 72.4273281 |
| 67.8457846 | 68.9030219 | 70.3551261 | 72.2690501 |  | 72.6773281 |
| 70.8457846 | 69.9030219 | 69.3551261 | 73.2690501 |  | 73.6773281 |
| 71.8457846 | 69.9030219 | 69.3551261 | 75.2690501 |  | 74.0523281 |
| 72.8457846 | 69.9030219 | 69.3551261 | 75.2690501 |  | 74.1773281 |
| 71.8457846 | 66.9030219 | 68.3551261 | 75.2690501 |  | 72.4273281 |
| 70.8457846 | 64.9030219 | 67.3551261 | 73.2690501 |  | 71.1773281 |
| 70.8457846 | 64.9030219 | 67.3551261 | 72.2690501 |  | 71.0523281 |
| 71.8457846 | 63.9030219 | 67.3551261 | 70.2690501 |  | 70.6773281 |
| 71.8457846 | 63.9030219 | 68.3551261 | 70.2690501 |  | 70.8023281 |
| 71.8457846 | 63.9030219 | 68.3551261 | 69.2690501 |  | 70.3023281 |
| 72.8457846 | 63.9030219 | 69.3551261 | 69.2690501 |  | 70.8023281 |
| 72.8457846 | 64.9030219 | 69.3551261 | 69.2690501 |  | 70.9273281 |
| 71.8457846 | 64.9030219 | 69.3551261 | 69.2690501 |  | 70.4273281 |
| 69.8457846 | 64.9030219 | 69.3551261 | 70.2690501 |  | 70.3023281 |
| 67.8457846 | 61.9030219 | 71.3551261 | 71.2690501 |  | 70.0523281 |
| 66.8457846 | 60.9030219 | 71.3551261 | 71.2690501 |  | 69.9273281 |
| 65.8457846 | 60.9030219 | 71.3551261 | 73.2690501 |  | 70.0523281 |
| 65.8457846 | 63.9030219 | 70.3551261 | 76.2690501 |  | 70.6773281 |
| 66.8457846 | 64.9030219 | 70.3551261 | 78.2690501 |  | 71.3023281 |
| 66.8457846 | 64.9030219 | 68.3551261 | 79.2690501 |  | 71.8023281 |
| 65.8457846 | 64.9030219 | 67.3551261 | 79.2690501 |  | 72.0523281 |
| 67.8457846 | 64.9030219 | 67.3551261 | 79.2690501 |  | 72.4273281 |
| 67.8457846 | 65.9030219 | 68.3551261 | 79.2690501 |  | 72.4273281 |
| 69.8457846 | 65.9030219 | 69.3551261 | 79.2690501 |  | 72.8023281 |
| 70.8457846 | 66.9030219 | 69.3551261 | 78.2690501 |  | 73.0523281 |
| 72.8457846 | 66.9030219 | 70.3551261 | 78.2690501 |  | 73.6773281 |
| 72.8457846 | 65.9030219 | 70.3551261 | 78.2690501 |  | 73.8023281 |
| 73.8457846 | 65.9030219 | 70.3551261 | 78.2690501 |  | 74.0523281 |
| 73.8457846 | 65.9030219 | 71.3551261 | 76.2690501 |  | 75.5523281 |

|            |            |            |            |  |            |
|------------|------------|------------|------------|--|------------|
| 75.8457846 | 63.9030219 | 71.3551261 | 75.2690501 |  | 77.4273281 |
| 76.8457846 | 63.9030219 | 70.3551261 | 74.2690501 |  | 78.4273281 |
| 76.8457846 | 64.9030219 | 71.3551261 | 74.2690501 |  | 79.1773281 |
| 76.8457846 | 64.9030219 | 72.3551261 | 74.2690501 |  | 79.1773281 |
| 76.8457846 | 64.9030219 | 73.3551261 | 72.2690501 |  | 78.4273281 |
| 76.8457846 | 66.9030219 | 73.3551261 | 71.2690501 |  | 78.5523281 |
| 75.8457846 | 66.9030219 | 73.3551261 | 72.2690501 |  | 78.0523281 |
| 80.8457846 | 66.9030219 | 73.3551261 | 73.2690501 |  | 78.8023281 |
| 80.8457846 | 66.9030219 | 73.3551261 | 73.2690501 |  | 78.8023281 |
| 78.8457846 | 67.9030219 | 74.3551261 | 75.2690501 |  | 80.1773281 |
| 77.8457846 | 67.9030219 | 74.3551261 | 75.2690501 |  | 81.4273281 |
| 75.8457846 | 67.9030219 | 74.3551261 | 75.2690501 |  | 81.0523281 |
| 74.8457846 | 67.9030219 | 74.3551261 | 74.2690501 |  | 80.9273281 |
| 74.8457846 | 67.9030219 | 74.3551261 | 74.2690501 |  | 80.9273281 |
| 75.8457846 | 67.9030219 | 75.3551261 | 73.2690501 |  | 80.9273281 |
| 75.8457846 | 67.9030219 | 75.3551261 | 73.2690501 |  | 81.0523281 |
| 75.8457846 | 67.9030219 | 76.3551261 | 74.2690501 |  | 81.3023281 |
| 75.8457846 | 67.9030219 | 76.3551261 | 75.2690501 |  | 80.1773281 |
| 75.8457846 | 68.9030219 | 77.3551261 | 75.2690501 |  | 79.1773281 |
| 76.8457846 | 68.9030219 | 77.3551261 | 76.2690501 |  | 78.4273281 |
| 76.8457846 | 69.9030219 | 78.3551261 | 76.2690501 |  | 78.3023281 |
| 77.8457846 | 69.9030219 | 78.3551261 | 76.2690501 |  | 78.4273281 |
| 78.8457846 | 69.9030219 | 78.3551261 | 77.2690501 |  | 78.6773281 |
| 78.8457846 | 70.9030219 | 79.3551261 | 77.2690501 |  | 79.0523281 |
| 78.8457846 | 70.9030219 | 79.3551261 | 77.2690501 |  | 79.0523281 |
| 79.8457846 | 70.9030219 | 79.3551261 | 77.2690501 |  | 79.1773281 |
| 79.8457846 | 70.9030219 | 79.3551261 | 77.2690501 |  | 78.6773281 |
| 79.8457846 | 72.9030219 | 79.3551261 | 76.2690501 |  | 78.5523281 |
| 79.8457846 | 73.9030219 | 79.3551261 | 73.2690501 |  | 78.3023281 |
| 77.8457846 | 74.9030219 | 79.3551261 | 73.2690501 |  | 78.0523281 |
| 75.8457846 | 74.9030219 | 80.3551261 | 73.2690501 |  | 78.0523281 |
| 74.8457846 | 74.9030219 | 81.3551261 | 73.2690501 |  | 77.4273281 |
| 74.8457846 | 75.9030219 | 81.3551261 | 73.2690501 |  | 76.9273281 |
| 74.8457846 | 75.9030219 | 82.3551261 | 73.2690501 |  | 76.5523281 |
| 75.8457846 | 75.9030219 | 82.3551261 | 73.2690501 |  | 76.8023281 |
| 75.8457846 | 75.9030219 | 82.3551261 | 71.2690501 |  | 76.8023281 |
| 76.8457846 | 75.9030219 | 82.3551261 | 70.2690501 |  | 76.8023281 |
| 76.8457846 | 70.9030219 | 83.3551261 | 70.2690501 |  | 76.1773281 |
| 74.8457846 | 70.9030219 | 83.3551261 | 70.2690501 |  | 76.3023281 |
| 73.8457846 | 66.9030219 | 82.3551261 | 69.2690501 |  | 75.9273281 |
| 71.8457846 | 65.9030219 | 80.3551261 | 69.2690501 |  | 75.3023281 |
| 71.8457846 | 64.9030219 | 80.3551261 | 69.2690501 |  | 75.3023281 |
| 72.8457846 | 64.9030219 | 80.3551261 | 69.2690501 |  | 75.4273281 |
| 72.8457846 | 65.9030219 | 80.3551261 | 70.2690501 |  | 75.6773281 |
| 73.8457846 | 64.9030219 | 80.3551261 | 70.2690501 |  | 75.6773281 |



|            |            |            |            |  |            |
|------------|------------|------------|------------|--|------------|
| 74.8457846 | 64.9030219 | 79.3551261 | 69.2690501 |  | 75.6773281 |
| 74.8457846 | 64.9030219 | 79.3551261 | 67.2690501 |  | 75.1773281 |
| 74.8457846 | 63.9030219 | 78.3551261 | 64.2690501 |  | 74.6773281 |
| 73.8457846 | 63.9030219 | 77.3551261 | 62.2690501 |  | 73.8023281 |
| 74.8457846 | 63.9030219 | 77.3551261 | 61.2690501 |  | 73.9273281 |
| 76.8457846 | 62.9030219 | 77.3551261 | 61.2690501 |  | 74.0523281 |
| 77.8457846 | 62.9030219 | 77.3551261 | 62.2690501 |  | 74.0523281 |
| 77.8457846 | 62.9030219 | 77.3551261 | 63.2690501 |  | 74.0523281 |
| 78.8457846 | 63.9030219 | 77.3551261 | 65.2690501 |  | 74.4273281 |
| 78.8457846 | 63.9030219 | 77.3551261 | 66.2690501 |  | 74.8023281 |
| 78.8457846 | 63.9030219 | 79.3551261 | 67.2690501 |  | 75.1773281 |
| 78.8457846 | 64.9030219 | 79.3551261 | 67.2690501 |  | 75.3023281 |
| 78.8457846 | 64.9030219 | 81.3551261 | 68.2690501 |  | 75.9273281 |
| 80.8457846 | 64.9030219 | 82.3551261 | 67.2690501 |  | 76.1773281 |
| 79.8457846 | 67.9030219 | 83.3551261 | 67.2690501 |  | 76.5523281 |
| 79.8457846 | 73.9030219 | 84.3551261 | 66.2690501 |  | 77.3023281 |
| 76.8457846 | 73.9030219 | 84.3551261 | 65.2690501 |  | 76.8023281 |
| 76.8457846 | 73.9030219 | 84.3551261 | 65.2690501 |  | 76.8023281 |
| 72.8457846 | 70.9030219 | 85.3551261 | 65.2690501 |  | 75.6773281 |
| 72.8457846 | 70.9030219 | 85.3551261 | 66.2690501 |  | 75.5523281 |
| 73.8457846 | 67.9030219 | 87.3551261 | 67.2690501 |  | 75.5523281 |
| 74.8457846 | 67.9030219 | 87.3551261 | 68.2690501 |  | 75.6773281 |
| 74.8457846 | 67.9030219 | 87.3551261 | 68.2690501 |  | 75.8023281 |
| 74.8457846 | 67.9030219 | 87.3551261 | 68.2690501 |  | 76.1773281 |
| 74.8457846 | 67.9030219 | 88.3551261 | 67.2690501 |  | 76.8023281 |
| 74.8457846 | 67.9030219 | 88.3551261 | 66.2690501 |  | 76.5523281 |
| 74.8457846 | 67.9030219 | 86.3551261 | 66.2690501 |  | 75.6773281 |
| 76.8457846 | 68.9030219 | 85.3551261 | 65.2690501 |  | 75.0523281 |
| 76.8457846 | 68.9030219 | 82.3551261 | 66.2690501 |  | 74.4273281 |
| 76.8457846 | 69.9030219 | 80.3551261 | 66.2690501 |  | 74.3023281 |
| 76.8457846 | 71.9030219 | 80.3551261 | 67.2690501 |  | 74.4273281 |
| 77.8457846 | 71.9030219 | 79.3551261 | 67.2690501 |  | 73.6773281 |
| 78.8457846 | 74.9030219 | 78.3551261 | 67.2690501 |  | 73.6773281 |
| 79.8457846 | 76.9030219 | 78.3551261 | 67.2690501 |  | 74.3023281 |
| 79.8457846 | 76.9030219 | 78.3551261 | 67.2690501 |  | 74.4273281 |
| 67.8457846 | 79.9030219 | 78.3551261 | 67.2690501 |  | 73.6773281 |
| 64.8457846 | 74.9030219 | 77.3551261 | 69.2690501 |  | 72.8023281 |
| 64.8457846 | 74.9030219 | 77.3551261 | 69.2690501 |  | 73.1773281 |
| 66.8457846 | 65.9030219 | 77.3551261 | 70.2690501 |  | 72.6773281 |
| 68.8457846 | 64.9030219 | 77.3551261 | 71.2690501 |  | 73.6773281 |
| 70.8457846 | 64.9030219 | 77.3551261 | 71.2690501 |  | 74.5523281 |
| 72.8457846 | 63.9030219 | 77.3551261 | 72.2690501 |  | 75.1773281 |
| 73.8457846 | 63.9030219 | 77.3551261 | 72.2690501 |  | 75.5523281 |
| 74.8457846 | 63.9030219 | 78.3551261 | 70.2690501 |  | 75.9273281 |
| 74.8457846 | 63.9030219 | 76.3551261 | 69.2690501 |  | 75.8023281 |

|            |            |            |            |  |            |  |
|------------|------------|------------|------------|--|------------|--|
| 75.8457846 | 63.9030219 | 74.3551261 | 68.2690501 |  | 75.4273281 |  |
| 75.8457846 | 63.9030219 | 73.3551261 | 68.2690501 |  | 75.1773281 |  |
| 76.8457846 | 63.9030219 | 73.3551261 | 69.2690501 |  | 73.9273281 |  |
| 77.8457846 | 63.9030219 | 72.3551261 | 69.2690501 |  | 73.6773281 |  |
| 78.8457846 | 63.9030219 | 72.3551261 | 70.2690501 |  | 73.8023281 |  |
| 78.8457846 | 62.9030219 | 71.3551261 | 69.2690501 |  | 73.8023281 |  |
| 79.8457846 | 61.9030219 | 72.3551261 | 69.2690501 |  | 73.9273281 |  |
| 79.8457846 | 61.9030219 | 72.3551261 | 69.2690501 |  | 74.3023281 |  |
| 79.8457846 | 61.9030219 | 74.3551261 | 69.2690501 |  | 74.5523281 |  |
| 78.8457846 | 62.9030219 | 77.3551261 | 69.2690501 |  | 74.9273281 |  |
| 77.8457846 | 62.9030219 | 77.3551261 | 69.2690501 |  | 74.4273281 |  |
| 76.8457846 | 63.9030219 | 76.3551261 | 69.2690501 |  | 73.5523281 |  |
| 76.8457846 | 65.9030219 | 74.3551261 | 69.2690501 |  | 73.1773281 |  |
| 76.8457846 | 66.9030219 | 74.3551261 | 68.2690501 |  | 72.6773281 |  |
| 76.8457846 | 66.9030219 | 74.3551261 | 68.2690501 |  | 72.8023281 |  |
| 76.8457846 | 66.9030219 | 74.3551261 | 68.2690501 |  | 72.5523281 |  |
| 75.8457846 | 66.9030219 | 74.3551261 | 67.2690501 |  | 72.4273281 |  |
| 73.8457846 | 66.9030219 | 74.3551261 | 67.2690501 |  | 72.0523281 |  |
| 71.8457846 | 67.9030219 | 73.3551261 | 67.2690501 |  | 71.6773281 |  |
| 71.8457846 | 67.9030219 | 74.3551261 | 66.2690501 |  | 71.8023281 |  |
| 70.8457846 | 67.9030219 | 76.3551261 | 65.2690501 |  | 72.0523281 |  |
| 70.8457846 | 67.9030219 | 78.3551261 | 65.2690501 |  | 72.3023281 |  |
| 70.8457846 | 67.9030219 | 78.3551261 | 65.2690501 |  | 72.8023281 |  |
| 71.8457846 | 67.9030219 | 78.3551261 | 65.2690501 |  | 72.8023281 |  |
| 71.8457846 | 65.9030219 | 78.3551261 | 65.2690501 |  | 72.9273281 |  |
| 72.8457846 | 64.9030219 | 78.3551261 | 70.2690501 |  | 73.5523281 |  |
| 72.8457846 | 64.9030219 | 78.3551261 | 70.2690501 |  | 73.5523281 |  |
| 72.8457846 | 65.9030219 | 78.3551261 | 77.2690501 |  | 74.8023281 |  |
| 72.8457846 | 65.9030219 | 80.3551261 | 77.2690501 |  | 75.0523281 |  |
| 73.8457846 | 65.9030219 | 80.3551261 | 80.2690501 |  | 75.6773281 |  |
| 73.8457846 | 66.9030219 | 80.3551261 | 80.2690501 |  | 75.8023281 |  |
| 76.8457846 | 66.9030219 | 75.3551261 | 79.2690501 |  | 75.1773281 |  |
| 73.8457846 | 66.9030219 | 75.3551261 | 78.2690501 |  | 74.6773281 |  |

| moving average |  |
|----------------|--|
|                |  |
| 87.1464035     |  |
| 87.2787765     |  |
| 87.4309412     |  |
| 87.5685225     |  |
| 87.6488122     |  |
| 87.7082685     |  |
| 87.7989748     |  |
| 87.8865562     |  |
| 88.0147625     |  |
| 88.1596355     |  |
| 88.3284668     |  |
| 88.4785482     |  |
| 88.6452962     |  |
| 88.8026692     |  |
| 88.9600422     |  |
| 89.1163735     |  |
| 89.2633298     |  |
| 89.4040362     |  |
| 89.5499508     |  |
| 89.7114905     |  |
| 89.8636552     |  |
| 90.0210282     |  |
| 89.9453239     |  |
| 89.8995303     |  |
| 89.7921296     |  |
| 89.6570503     |  |
| 89.4960781     |  |
| 89.3617031     |  |
| 89.2148281     |  |
| 89.0710781     |  |
| 88.9179531     |  |
| 88.7773281     |  |
| 88.6492031     |  |
| 88.5273281     |  |
| 88.3929531     |  |
| 88.2867031     |  |
| 88.2023281     |  |
| 88.1210781     |  |
| 88.0367031     |  |
| 87.9304531     |  |
| 87.8242031     |  |
| 87.7242031     |  |
| 87.6085781     |  |

|            |  |
|------------|--|
| 87.4898281 |  |
| 87.3585781 |  |
| 87.2242031 |  |
| 87.0773281 |  |
| 86.9304531 |  |
| 86.7679531 |  |
| 86.5898281 |  |
| 86.3929531 |  |
| 86.2054531 |  |
| 85.9992031 |  |
| 85.8054531 |  |
| 85.6023281 |  |
| 85.4085781 |  |
| 85.1773281 |  |
| 84.9460781 |  |
| 84.7085781 |  |
| 84.4804531 |  |
| 84.2617031 |  |
| 84.0179531 |  |
| 83.7898281 |  |
| 83.5429531 |  |
| 83.3460781 |  |
| 83.1804531 |  |
| 83.0304531 |  |
| 82.8867031 |  |
| 82.7617031 |  |
| 82.6273281 |  |
| 82.5023281 |  |
| 82.3617031 |  |
| 82.1929531 |  |
| 82.0117031 |  |
| 81.8335781 |  |
| 81.6242031 |  |
| 81.4273281 |  |
| 81.2460781 |  |
| 81.0679531 |  |
| 80.9210781 |  |
| 80.7773281 |  |
| 80.6429531 |  |
| 80.5273281 |  |
| 80.4054531 |  |
| 80.3023281 |  |
| 80.2085781 |  |
| 80.1085781 |  |
| 80.0085781 |  |

|            |  |
|------------|--|
| 79.9117031 |  |
| 79.8210781 |  |
| 79.7179531 |  |
| 79.6179531 |  |
| 79.5273281 |  |
| 79.4273281 |  |
| 79.3429531 |  |
| 79.2617031 |  |
| 79.2273281 |  |
| 79.1898281 |  |
| 79.1648281 |  |
| 79.1273281 |  |
| 79.1242031 |  |
| 79.1492031 |  |
| 79.1742031 |  |
| 79.1929531 |  |
| 79.2054531 |  |
| 79.2335781 |  |
| 79.2679531 |  |
| 79.3085781 |  |
| 79.3492031 |  |
| 79.3960781 |  |
| 79.4398281 |  |
| 79.4648281 |  |
| 79.4960781 |  |
| 79.5273281 |  |
| 79.5585781 |  |
| 79.5929531 |  |
| 79.6117031 |  |
| 79.6429531 |  |
| 79.6773281 |  |
| 79.6992031 |  |
| 79.7085781 |  |
| 79.7023281 |  |
| 79.6929531 |  |
| 79.6867031 |  |
| 79.6554531 |  |
| 79.6148281 |  |
| 79.5742031 |  |
| 79.5460781 |  |
| 79.5273281 |  |
| 79.5023281 |  |
| 79.5117031 |  |
| 79.5210781 |  |
| 79.5367031 |  |

|            |  |
|------------|--|
| 79.5273281 |  |
| 79.5023281 |  |
| 79.4742031 |  |
| 79.4429531 |  |
| 79.4148281 |  |
| 79.3835781 |  |
| 79.3710781 |  |
| 79.3117031 |  |
| 79.2523281 |  |
| 79.1898281 |  |
| 79.1335781 |  |
| 79.0773281 |  |
| 78.9960781 |  |
| 78.9117031 |  |
| 78.8492031 |  |
| 78.7929531 |  |
| 78.7273281 |  |
| 78.6679531 |  |
| 78.6242031 |  |
| 78.5804531 |  |
| 78.5242031 |  |
| 78.4773281 |  |
| 78.4335781 |  |
| 78.3898281 |  |
| 78.3367031 |  |
| 78.2929531 |  |
| 78.2742031 |  |
| 78.2679531 |  |
| 78.2523281 |  |
| 78.2398281 |  |
| 78.2367031 |  |
| 78.2617031 |  |
| 78.2929531 |  |
| 78.3398281 |  |
| 78.3773281 |  |
| 78.4335781 |  |
| 78.4804531 |  |
| 78.5148281 |  |
| 78.5585781 |  |
| 78.5992031 |  |
| 78.6648281 |  |
| 78.7523281 |  |
| 78.8523281 |  |
| 78.9648281 |  |
| 79.0804531 |  |

|            |  |
|------------|--|
| 79.2023281 |  |
| 79.3117031 |  |
| 79.4117031 |  |
| 79.5117031 |  |
| 79.6023281 |  |
| 79.6835781 |  |
| 79.7679531 |  |
| 79.8429531 |  |
| 79.9242031 |  |
| 79.9929531 |  |
| 80.0460781 |  |
| 80.0992031 |  |
| 80.1429531 |  |
| 80.1929531 |  |
| 80.2398281 |  |
| 80.3117031 |  |
| 80.3835781 |  |
| 80.4679531 |  |
| 80.5554531 |  |
| 80.6367031 |  |
| 80.6992031 |  |
| 80.7460781 |  |
| 80.7835781 |  |
| 80.8242031 |  |
| 80.8835781 |  |
| 80.9367031 |  |
| 80.9898281 |  |
| 81.0304531 |  |
| 81.0523281 |  |
| 81.0773281 |  |
| 81.0773281 |  |
| 81.0898281 |  |
| 81.0992031 |  |
| 81.0960781 |  |
| 81.0742031 |  |
| 81.0429531 |  |
| 80.9960781 |  |
| 80.9335781 |  |
| 80.8710781 |  |
| 80.7992031 |  |
| 80.7085781 |  |
| 80.6242031 |  |
| 80.5617031 |  |
| 80.4992031 |  |
| 80.4835781 |  |

|            |  |
|------------|--|
| 80.4835781 |  |
| 80.4773281 |  |
| 80.4929531 |  |
| 80.4773281 |  |
| 80.4679531 |  |
| 80.4523281 |  |
| 80.4273281 |  |
| 80.3992031 |  |
| 80.3617031 |  |
| 80.3148281 |  |
| 80.2367031 |  |
| 80.1460781 |  |
| 80.0335781 |  |
| 79.9210781 |  |
| 79.8117031 |  |
| 79.7023281 |  |
| 79.5929531 |  |
| 79.4960781 |  |
| 79.4210781 |  |
| 79.3210781 |  |
| 79.2304531 |  |
| 79.1335781 |  |
| 79.0554531 |  |
| 78.9835781 |  |
| 78.9148281 |  |
| 78.8679531 |  |
| 78.8179531 |  |
| 78.7710781 |  |
| 78.7117031 |  |
| 78.6585781 |  |
| 78.5960781 |  |
| 78.5304531 |  |
| 78.4460781 |  |
| 78.3460781 |  |
| 78.2523281 |  |
| 78.1617031 |  |
| 78.0835781 |  |
| 78.0054531 |  |
| 77.9367031 |  |
| 77.8335781 |  |
| 77.7179531 |  |
| 77.6023281 |  |
| 77.4867031 |  |
| 77.4054531 |  |
| 77.3304531 |  |



|            |  |
|------------|--|
| 77.2585781 |  |
| 77.1835781 |  |
| 77.1210781 |  |
| 77.0617031 |  |
| 77.0179531 |  |
| 77.0054531 |  |
| 77.0085781 |  |
| 77.0179531 |  |
| 77.0367031 |  |
| 77.0492031 |  |
| 77.0585781 |  |
| 77.0804531 |  |
| 77.0898281 |  |
| 77.0960781 |  |
| 77.1054531 |  |
| 77.1210781 |  |
| 77.1335781 |  |
| 77.1398281 |  |
| 77.1554531 |  |
| 77.1742031 |  |
| 77.1679531 |  |
| 77.1523281 |  |
| 77.1273281 |  |
| 77.1210781 |  |
| 77.1210781 |  |
| 77.1585781 |  |
| 77.2085781 |  |
| 77.2804531 |  |
| 77.3648281 |  |
| 77.4492031 |  |
| 77.5398281 |  |
| 77.6210781 |  |
| 77.6929531 |  |
| 77.7492031 |  |
| 77.7960781 |  |
| 77.8492031 |  |
| 77.9054531 |  |
| 77.9648281 |  |
| 78.0148281 |  |
| 78.0554531 |  |
| 78.1085781 |  |
| 78.1804531 |  |
| 78.2460781 |  |
| 78.3179531 |  |
| 78.4054531 |  |

|            |  |
|------------|--|
| 78.4898281 |  |
| 78.5679531 |  |
| 78.6492031 |  |
| 78.7179531 |  |
| 78.7929531 |  |
| 78.8835781 |  |
| 78.9804531 |  |
| 79.0867031 |  |
| 79.1804531 |  |
| 79.2648281 |  |
| 79.3242031 |  |
| 79.3710781 |  |
| 79.4117031 |  |
| 79.4429531 |  |
| 79.4648281 |  |
| 79.5054531 |  |
| 79.5585781 |  |
| 79.6335781 |  |
| 79.7023281 |  |
| 79.7648281 |  |
| 79.7835781 |  |
| 79.7929531 |  |
| 79.7960781 |  |
| 79.7835781 |  |
| 79.7804531 |  |
| 79.7742031 |  |
| 79.7679531 |  |
| 79.7710781 |  |
| 79.7710781 |  |
| 79.7804531 |  |
| 79.7804531 |  |
| 79.7929531 |  |
| 79.8085781 |  |
| 79.8242031 |  |
| 79.8460781 |  |
| 79.8585781 |  |
| 79.8742031 |  |
| 79.8960781 |  |
| 79.9054531 |  |
| 79.9054531 |  |
| 79.8898281 |  |
| 79.8773281 |  |
| 79.8429531 |  |
| 79.7992031 |  |
| 79.7523281 |  |

|            |  |
|------------|--|
| 79.6960781 |  |
| 79.6117031 |  |
| 79.5242031 |  |
| 79.4460781 |  |
| 79.3992031 |  |
| 79.3773281 |  |
| 79.3773281 |  |
| 79.3835781 |  |
| 79.3835781 |  |
| 79.3898281 |  |
| 79.3992031 |  |
| 79.4054531 |  |
| 79.3960781 |  |
| 79.3835781 |  |
| 79.3742031 |  |
| 79.3742031 |  |
| 79.3679531 |  |
| 79.3617031 |  |
| 79.3804531 |  |
| 79.3773281 |  |
| 79.3710781 |  |
| 79.3492031 |  |
| 79.3179531 |  |
| 79.3085781 |  |
| 79.2929531 |  |
| 79.2898281 |  |
| 79.2835781 |  |
| 79.2679531 |  |
| 79.2460781 |  |
| 79.2273281 |  |
| 79.2054531 |  |
| 79.1835781 |  |
| 79.1554531 |  |
| 79.1617031 |  |
| 79.1773281 |  |
| 79.2523281 |  |
| 79.2992031 |  |
| 79.3648281 |  |
| 79.4273281 |  |
| 79.4929531 |  |
| 79.5617031 |  |
| 79.6585781 |  |
| 79.7585781 |  |
| 79.8585781 |  |
| 79.9304531 |  |

|            |  |
|------------|--|
| 79.9929531 |  |
| 80.0460781 |  |
| 80.0929531 |  |
| 80.1367031 |  |
| 80.1742031 |  |
| 80.1773281 |  |
| 80.1710781 |  |
| 80.1585781 |  |
| 80.1460781 |  |
| 80.1367031 |  |
| 80.1179531 |  |
| 80.1085781 |  |
| 80.1117031 |  |
| 80.1085781 |  |
| 80.1304531 |  |
| 80.1710781 |  |
| 80.2242031 |  |
| 80.2773281 |  |
| 80.3054531 |  |
| 80.3335781 |  |
| 80.3617031 |  |
| 80.3773281 |  |
| 80.3929531 |  |
| 80.4148281 |  |
| 80.4492031 |  |
| 80.4960781 |  |
| 80.5304531 |  |
| 80.5554531 |  |
| 80.5429531 |  |
| 80.5117031 |  |
| 80.4242031 |  |
| 80.3585781 |  |
| 80.2992031 |  |
| 80.2523281 |  |
| 80.2023281 |  |
| 80.1585781 |  |
| 80.1210781 |  |
| 80.0804531 |  |
| 80.0148281 |  |
| 79.9367031 |  |
| 79.8554531 |  |
| 79.7804531 |  |
| 79.6898281 |  |
| 79.5992031 |  |
| 79.5085781 |  |

|            |  |
|------------|--|
| 79.4398281 |  |
| 79.3835781 |  |
| 79.3304531 |  |
| 79.2835781 |  |
| 79.2398281 |  |
| 79.2210781 |  |
| 79.2273281 |  |
| 79.2367031 |  |
| 79.2367031 |  |
| 79.2398281 |  |
| 79.2367031 |  |
| 79.2492031 |  |
| 79.2742031 |  |
| 79.3179531 |  |
| 79.3835781 |  |
| 79.4679531 |  |
| 79.5523281 |  |
| 79.6304531 |  |
| 79.7054531 |  |
| 79.7648281 |  |
| 79.8085781 |  |
| 79.8523281 |  |
| 79.8960781 |  |
| 79.9335781 |  |
| 79.9679531 |  |
| 80.0054531 |  |
| 80.0554531 |  |
| 80.0992031 |  |
| 80.1367031 |  |
| 80.1617031 |  |
| 80.1710781 |  |
| 80.1804531 |  |
| 80.1960781 |  |
| 80.2273281 |  |
| 80.2742031 |  |
| 80.3148281 |  |
| 80.3460781 |  |
| 80.3804531 |  |
| 80.4085781 |  |
| 80.4242031 |  |
| 80.4367031 |  |
| 80.4367031 |  |
| 80.4179531 |  |
| 80.3929531 |  |
| 80.3648281 |  |

|            |  |
|------------|--|
| 80.3273281 |  |
| 80.2742031 |  |
| 80.2054531 |  |
| 80.1398281 |  |
| 80.0492031 |  |
| 79.9429531 |  |
| 79.8273281 |  |
| 79.7179531 |  |
| 79.6210781 |  |
| 79.5054531 |  |
| 79.3960781 |  |
| 79.2960781 |  |
| 79.2148281 |  |
| 79.1398281 |  |
| 79.0648281 |  |
| 78.9929531 |  |
| 78.9304531 |  |
| 78.8773281 |  |
| 78.8335781 |  |
| 78.7960781 |  |
| 78.7523281 |  |
| 78.7054531 |  |
| 78.6585781 |  |
| 78.6273281 |  |
| 78.6054531 |  |
| 78.5960781 |  |
| 78.5710781 |  |
| 78.5367031 |  |
| 78.5273281 |  |
| 78.5242031 |  |
| 78.5242031 |  |
| 78.5304531 |  |
| 78.5710781 |  |
| 78.6273281 |  |
| 78.6992031 |  |
| 78.7742031 |  |
| 78.8367031 |  |
| 78.9085781 |  |
| 78.9773281 |  |
| 79.0523281 |  |
| 79.1398281 |  |
| 79.2304531 |  |
| 79.3273281 |  |
| 79.4148281 |  |
| 79.5117031 |  |

|            |  |
|------------|--|
| 79.6210781 |  |
| 79.7085781 |  |
| 79.7742031 |  |
| 79.8242031 |  |
| 79.8710781 |  |
| 79.9054531 |  |
| 79.9398281 |  |
| 79.9617031 |  |
| 79.9710781 |  |
| 79.9773281 |  |
| 79.9804531 |  |
| 79.9648281 |  |
| 79.9492031 |  |
| 79.9460781 |  |
| 79.9398281 |  |
| 79.9398281 |  |
| 79.9398281 |  |
| 79.9429531 |  |
| 79.9367031 |  |
| 79.9367031 |  |
| 79.9085781 |  |
| 79.8648281 |  |
| 79.8179531 |  |
| 79.7554531 |  |
| 79.6960781 |  |
| 79.6273281 |  |
| 79.5617031 |  |
| 79.4679531 |  |
| 79.3773281 |  |
| 79.2835781 |  |
| 79.1992031 |  |
| 79.1335781 |  |
| 79.1054531 |  |
| 79.0804531 |  |
| 79.0492031 |  |
| 78.9992031 |  |
| 78.9429531 |  |
| 78.8617031 |  |
| 78.7898281 |  |
| 78.7273281 |  |
| 78.6679531 |  |
| 78.6398281 |  |
| 78.6367031 |  |
| 78.6179531 |  |
| 78.6023281 |  |

|            |  |
|------------|--|
| 78.5679531 |  |
| 78.5304531 |  |
| 78.4992031 |  |
| 78.4867031 |  |
| 78.4804531 |  |
| 78.4773281 |  |
| 78.4898281 |  |
| 78.5054531 |  |
| 78.5335781 |  |
| 78.5742031 |  |
| 78.6179531 |  |
| 78.6554531 |  |
| 78.7085781 |  |
| 78.7648281 |  |
| 78.8273281 |  |
| 78.9242031 |  |
| 79.0304531 |  |
| 79.1398281 |  |
| 79.2367031 |  |
| 79.3304531 |  |
| 79.4398281 |  |
| 79.5085781 |  |
| 79.5804531 |  |
| 79.6429531 |  |
| 79.6960781 |  |
| 79.7429531 |  |
| 79.8023281 |  |
| 79.8210781 |  |
| 79.8523281 |  |
| 79.8335781 |  |
| 79.8367031 |  |
| 79.8304531 |  |
| 79.8585781 |  |
| 79.8617031 |  |
| 79.8523281 |  |
| 79.8367031 |  |
| 79.8085781 |  |
| 79.7710781 |  |
| 79.7367031 |  |
| 79.6929531 |  |
| 79.6648281 |  |
| 79.6367031 |  |
| 79.6210781 |  |
| 79.6023281 |  |
| 79.5804531 |  |



|            |  |
|------------|--|
| 79.5867031 |  |
| 79.5992031 |  |
| 79.6054531 |  |
| 79.5992031 |  |
| 79.6117031 |  |
| 79.6304531 |  |
| 79.6492031 |  |
| 79.6648281 |  |
| 79.6835781 |  |
| 79.6960781 |  |
| 79.6898281 |  |
| 79.6773281 |  |
| 79.6617031 |  |
| 79.6554531 |  |
| 79.6398281 |  |
| 79.6117031 |  |
| 79.6335781 |  |
| 79.6648281 |  |
| 79.7023281 |  |
| 79.7460781 |  |
| 79.7898281 |  |
| 79.8179531 |  |
| 79.8585781 |  |
| 79.8898281 |  |
| 79.9679531 |  |
| 80.0335781 |  |
| 80.1085781 |  |
| 80.1679531 |  |
| 80.2460781 |  |
| 80.2992031 |  |
| 80.3242031 |  |
| 80.3367031 |  |
| 80.3367031 |  |
| 80.3273281 |  |
| 80.3117031 |  |
| 80.2898281 |  |
| 80.2492031 |  |
| 80.1929531 |  |
| 80.1429531 |  |
| 80.0992031 |  |
| 80.0367031 |  |
| 79.9679531 |  |
| 79.8992031 |  |
| 79.8304531 |  |
| 79.7335781 |  |

|            |  |
|------------|--|
| 79.6304531 |  |
| 79.5335781 |  |
| 79.4085781 |  |
| 79.2679531 |  |
| 79.1273281 |  |
| 78.9929531 |  |
| 78.8585781 |  |
| 78.7179531 |  |
| 78.5742031 |  |
| 78.4492031 |  |
| 78.3460781 |  |
| 78.2304531 |  |
| 78.1148281 |  |
| 78.0054531 |  |
| 77.9054531 |  |
| 77.7992031 |  |
| 77.7148281 |  |
| 77.6554531 |  |
| 77.6054531 |  |
| 77.5585781 |  |
| 77.5085781 |  |
| 77.4648281 |  |
| 77.4367031 |  |
| 77.4148281 |  |
| 77.4273281 |  |
| 77.4679531 |  |
| 77.5117031 |  |
| 77.5492031 |  |
| 77.6023281 |  |
| 77.6523281 |  |
| 77.6867031 |  |
| 77.7335781 |  |
| 77.7773281 |  |
| 77.8085781 |  |
| 77.8273281 |  |
| 77.8367031 |  |
| 77.8429531 |  |
| 77.8554531 |  |
| 77.8804531 |  |
| 77.9210781 |  |
| 77.9648281 |  |
| 78.0023281 |  |
| 78.0554531 |  |
| 78.1148281 |  |
| 78.1835781 |  |

|            |  |
|------------|--|
| 78.2710781 |  |
| 78.3648281 |  |
| 78.4679531 |  |
| 78.5679531 |  |
| 78.6523281 |  |
| 78.7335781 |  |
| 78.8304531 |  |
| 78.9367031 |  |
| 79.0460781 |  |
| 79.1523281 |  |
| 79.2679531 |  |
| 79.3710781 |  |
| 79.4429531 |  |
| 79.5085781 |  |
| 79.5648281 |  |
| 79.6117031 |  |
| 79.6398281 |  |
| 79.6554531 |  |
| 79.6679531 |  |
| 79.6773281 |  |
| 79.6960781 |  |
| 79.7210781 |  |
| 79.7523281 |  |
| 79.7742031 |  |
| 79.8023281 |  |
| 79.8242031 |  |
| 79.8554531 |  |
| 79.8835781 |  |
| 79.9023281 |  |
| 79.9179531 |  |
| 79.9367031 |  |
| 79.9710781 |  |
| 80.0054531 |  |
| 80.0273281 |  |
| 80.0367031 |  |
| 80.0273281 |  |
| 80.0054531 |  |
| 79.9585781 |  |
| 79.9085781 |  |
| 79.8335781 |  |
| 79.7367031 |  |
| 79.6179531 |  |
| 79.4929531 |  |
| 79.3773281 |  |
| 79.2679531 |  |

|            |  |
|------------|--|
| 79.1554531 |  |
| 79.0210781 |  |
| 78.8710781 |  |
| 78.7023281 |  |
| 78.5585781 |  |
| 78.4273281 |  |
| 78.3148281 |  |
| 78.2054531 |  |
| 78.0867031 |  |
| 78.0054531 |  |
| 77.9429531 |  |
| 77.8773281 |  |
| 77.8117031 |  |
| 77.7492031 |  |
| 77.6804531 |  |
| 77.6085781 |  |
| 77.5367031 |  |
| 77.4742031 |  |
| 77.4148281 |  |
| 77.3710781 |  |
| 77.3304531 |  |
| 77.2898281 |  |
| 77.2523281 |  |
| 77.2117031 |  |
| 77.1679531 |  |
| 77.1304531 |  |
| 77.0835781 |  |
| 77.0429531 |  |
| 77.0054531 |  |
| 76.9679531 |  |
| 76.9429531 |  |
| 76.9242031 |  |
| 76.8992031 |  |
| 76.8648281 |  |
| 76.8429531 |  |
| 76.8179531 |  |
| 76.8242031 |  |
| 76.8367031 |  |
| 76.8460781 |  |
| 76.8460781 |  |
| 76.8492031 |  |
| 76.8554531 |  |
| 76.8679531 |  |
| 76.8960781 |  |
| 76.8960781 |  |

|            |  |
|------------|--|
| 76.8742031 |  |
| 76.8460781 |  |
| 76.8210781 |  |
| 76.8023281 |  |
| 76.7585781 |  |
| 76.6992031 |  |
| 76.6523281 |  |
| 76.6085781 |  |
| 76.5648281 |  |
| 76.5335781 |  |
| 76.5054531 |  |
| 76.4648281 |  |
| 76.4367031 |  |
| 76.4242031 |  |
| 76.3835781 |  |
| 76.3554531 |  |
| 76.3117031 |  |
| 76.2679531 |  |
| 76.2398281 |  |
| 76.2242031 |  |
| 76.2304531 |  |
| 76.2492031 |  |
| 76.2617031 |  |
| 76.2804531 |  |
| 76.2960781 |  |
| 76.3117031 |  |
| 76.3304531 |  |
| 76.3773281 |  |
| 76.4304531 |  |
| 76.4804531 |  |
| 76.5273281 |  |
| 76.5585781 |  |
| 76.5835781 |  |
| 76.6054531 |  |
| 76.6117031 |  |
| 76.5992031 |  |
| 76.5835781 |  |
| 76.5710781 |  |
| 76.5054531 |  |
| 76.4367031 |  |
| 76.3898281 |  |
| 76.3273281 |  |
| 76.2960781 |  |
| 76.2773281 |  |
| 76.2367031 |  |

|            |  |
|------------|--|
| 76.2023281 |  |
| 76.1679531 |  |
| 76.1273281 |  |
| 76.0835781 |  |
| 76.0367031 |  |
| 75.9835781 |  |
| 75.9429531 |  |
| 75.8898281 |  |
| 75.8367031 |  |
| 75.8054531 |  |
| 75.7867031 |  |
| 75.7929531 |  |
| 75.7960781 |  |
| 75.8023281 |  |
| 75.7960781 |  |
| 75.7617031 |  |
| 75.7117031 |  |
| 75.6710781 |  |
| 75.6085781 |  |
| 75.5335781 |  |
| 75.4492031 |  |
| 75.3679531 |  |
| 75.2835781 |  |
| 75.1992031 |  |
| 75.1242031 |  |
| 75.0648281 |  |
| 75.0148281 |  |
| 74.9679531 |  |
| 74.9304531 |  |
| 74.9085781 |  |
| 74.8929531 |  |
| 74.8773281 |  |
| 74.8492031 |  |
| 74.8710781 |  |
| 74.8960781 |  |
| 74.9148281 |  |
| 74.9398281 |  |
| 74.9242031 |  |
| 74.8867031 |  |
| 74.8710781 |  |
| 74.8679531 |  |
| 74.8648281 |  |
| 74.8585781 |  |
| 74.8492031 |  |
| 74.8367031 |  |

|            |  |
|------------|--|
| 74.8148281 |  |
| 74.7835781 |  |
| 74.7492031 |  |
| 74.7367031 |  |
| 74.7242031 |  |
| 74.7148281 |  |
| 74.6835781 |  |
| 74.6648281 |  |
| 74.6398281 |  |
| 74.6242031 |  |
| 74.6304531 |  |
| 74.6335781 |  |
| 74.6304531 |  |
| 74.6367031 |  |
| 74.6554531 |  |
| 74.7054531 |  |
| 74.7554531 |  |
| 74.8023281 |  |
| 74.8492031 |  |
| 74.8960781 |  |
| 74.9460781 |  |
| 74.9960781 |  |
| 75.0460781 |  |
| 75.0898281 |  |
| 75.1398281 |  |
| 75.1992031 |  |
| 75.2679531 |  |
| 75.3179531 |  |
| 75.3523281 |  |
| 75.3773281 |  |
| 75.3804531 |  |
| 75.3960781 |  |
| 75.4367031 |  |
| 75.4835781 |  |
| 75.5398281 |  |
| 75.5835781 |  |
| 75.6148281 |  |
| 75.6554531 |  |
| 75.6867031 |  |
| 75.7210781 |  |
| 75.7679531 |  |
| 75.8367031 |  |
| 75.9179531 |  |
| 75.9710781 |  |
| 76.0367031 |  |

|            |  |
|------------|--|
| 76.0804531 |  |
| 76.1273281 |  |
| 76.1648281 |  |
| 76.1929531 |  |
| 76.2054531 |  |
| 76.1929531 |  |
| 76.1835781 |  |
| 76.1648281 |  |
| 76.1523281 |  |
| 76.1335781 |  |
| 76.0960781 |  |
| 76.0710781 |  |
| 76.0523281 |  |
| 76.0460781 |  |
| 76.0398281 |  |
| 76.0304531 |  |
| 76.0273281 |  |
| 76.0335781 |  |
| 76.0460781 |  |
| 76.0523281 |  |
| 76.0585781 |  |
| 76.0492031 |  |
| 76.0710781 |  |
| 76.0960781 |  |
| 76.1335781 |  |
| 76.1710781 |  |
| 76.1960781 |  |
| 76.2523281 |  |
| 76.3117031 |  |
| 76.3585781 |  |
| 76.4085781 |  |
| 76.4679531 |  |
| 76.5335781 |  |
| 76.6210781 |  |
| 76.7085781 |  |
| 76.8179531 |  |
| 76.9117031 |  |
| 76.9773281 |  |
| 77.0273281 |  |
| 77.0648281 |  |
| 77.1117031 |  |
| 77.1585781 |  |
| 77.2054531 |  |
| 77.2585781 |  |
| 77.3179531 |  |



|            |  |
|------------|--|
| 77.3742031 |  |
| 77.4367031 |  |
| 77.5085781 |  |
| 77.5710781 |  |
| 77.6367031 |  |
| 77.6960781 |  |
| 77.7367031 |  |
| 77.7679531 |  |
| 77.8085781 |  |
| 77.8429531 |  |
| 77.8523281 |  |
| 77.8554531 |  |
| 77.8554531 |  |
| 77.8429531 |  |
| 77.8335781 |  |
| 77.8179531 |  |
| 77.8085781 |  |
| 77.7960781 |  |
| 77.7898281 |  |
| 77.7710781 |  |
| 77.7554531 |  |
| 77.7367031 |  |
| 77.6710781 |  |
| 77.6085781 |  |
| 77.5429531 |  |
| 77.4710781 |  |
| 77.3960781 |  |
| 77.3210781 |  |
| 77.2335781 |  |
| 77.1460781 |  |
| 77.0335781 |  |
| 76.9273281 |  |
| 76.8398281 |  |
| 76.7773281 |  |
| 76.7117031 |  |
| 76.6429531 |  |
| 76.5867031 |  |
| 76.5398281 |  |
| 76.4992031 |  |
| 76.4773281 |  |
| 76.4742031 |  |
| 76.4867031 |  |
| 76.5117031 |  |
| 76.5429531 |  |
| 76.5960781 |  |

|            |  |
|------------|--|
| 76.6429531 |  |
| 76.6742031 |  |
| 76.7367031 |  |
| 76.7648281 |  |
| 76.7804531 |  |
| 76.8179531 |  |
| 76.8460781 |  |
| 76.8648281 |  |
| 76.8867031 |  |
| 76.9054531 |  |
| 76.9210781 |  |
| 76.9460781 |  |
| 76.9585781 |  |
| 76.9710781 |  |
| 76.9929531 |  |
| 77.0273281 |  |
| 77.0804531 |  |
| 77.1398281 |  |
| 77.1835781 |  |
| 77.2210781 |  |
| 77.2710781 |  |
| 77.3273281 |  |
| 77.3648281 |  |
| 77.3960781 |  |
| 77.4148281 |  |
| 77.4304531 |  |
| 77.4335781 |  |
| 77.4367031 |  |
| 77.4304531 |  |
| 77.4242031 |  |
| 77.4273281 |  |
| 77.4242031 |  |
| 77.4085781 |  |
| 77.3992031 |  |
| 77.3960781 |  |
| 77.3742031 |  |
| 77.3304531 |  |
| 77.2773281 |  |
| 77.2304531 |  |
| 77.1835781 |  |
| 77.1679531 |  |
| 77.1742031 |  |
| 77.1648281 |  |
| 77.1679531 |  |
| 77.1742031 |  |

|            |  |
|------------|--|
| 77.1648281 |  |
| 77.1742031 |  |
| 77.2023281 |  |
| 77.2398281 |  |
| 77.2773281 |  |
| 77.3210781 |  |
| 77.3335781 |  |
| 77.3554531 |  |
| 77.3679531 |  |
| 77.3804531 |  |
| 77.3960781 |  |
| 77.3898281 |  |
| 77.3742031 |  |
| 77.3773281 |  |
| 77.3898281 |  |
| 77.3929531 |  |
| 77.3992031 |  |
| 77.4054531 |  |
| 77.4148281 |  |
| 77.4367031 |  |
| 77.4492031 |  |
| 77.4648281 |  |
| 77.4804531 |  |
| 77.4960781 |  |
| 77.5273281 |  |
| 77.5585781 |  |
| 77.5898281 |  |
| 77.6117031 |  |
| 77.6117031 |  |
| 77.5992031 |  |
| 77.5804531 |  |
| 77.5679531 |  |
| 77.5585781 |  |
| 77.5523281 |  |
| 77.5367031 |  |
| 77.5023281 |  |
| 77.4867031 |  |
| 77.4773281 |  |
| 77.4679531 |  |
| 77.4585781 |  |
| 77.4304531 |  |
| 77.3835781 |  |
| 77.3117031 |  |
| 77.2242031 |  |
| 77.1460781 |  |

|            |  |
|------------|--|
| 77.0460781 |  |
| 76.9585781 |  |
| 76.8648281 |  |
| 76.7804531 |  |
| 76.7367031 |  |
| 76.6929531 |  |
| 76.6492031 |  |
| 76.6054531 |  |
| 76.5460781 |  |
| 76.4804531 |  |
| 76.4054531 |  |
| 76.3273281 |  |
| 76.2867031 |  |
| 76.2554531 |  |
| 76.2304531 |  |
| 76.2148281 |  |
| 76.2054531 |  |
| 76.1742031 |  |
| 76.1210781 |  |
| 76.0648281 |  |
| 76.0054531 |  |
| 75.9492031 |  |
| 75.8992031 |  |
| 75.8554531 |  |
| 75.8054531 |  |
| 75.7648281 |  |
| 75.7179531 |  |
| 75.6210781 |  |
| 75.5273281 |  |
| 75.4273281 |  |
| 75.3242031 |  |
| 75.2460781 |  |
| 75.1742031 |  |
| 75.1085781 |  |
| 75.0617031 |  |
| 75.0773281 |  |
| 75.1179531 |  |
| 75.1742031 |  |
| 75.2492031 |  |
| 75.3210781 |  |
| 75.4117031 |  |
| 75.5273281 |  |
| 75.6554531 |  |
| 75.7898281 |  |
| 75.8804531 |  |

|            |  |
|------------|--|
| 75.9773281 |  |
| 76.0804531 |  |
| 76.1804531 |  |
| 76.2773281 |  |
| 76.3742031 |  |
| 76.4679531 |  |
| 76.5523281 |  |
| 76.5992031 |  |
| 76.6460781 |  |
| 76.6898281 |  |
| 76.7242031 |  |
| 76.7679531 |  |
| 76.8367031 |  |
| 76.9179531 |  |
| 76.9742031 |  |
| 77.0273281 |  |
| 77.0773281 |  |
| 77.1367031 |  |
| 77.2085781 |  |
| 77.2804531 |  |
| 77.3492031 |  |
| 77.4242031 |  |
| 77.5304531 |  |
| 77.6242031 |  |
| 77.7179531 |  |
| 77.8117031 |  |
| 77.8867031 |  |
| 77.9585781 |  |
| 78.0523281 |  |
| 78.1367031 |  |
| 78.1960781 |  |
| 78.2429531 |  |
| 78.2960781 |  |
| 78.2960781 |  |
| 78.2992031 |  |
| 78.2867031 |  |
| 78.2679531 |  |
| 78.2398281 |  |
| 78.2023281 |  |
| 78.1679531 |  |
| 78.1085781 |  |
| 78.0304531 |  |
| 77.9367031 |  |
| 77.8429531 |  |
| 77.7554531 |  |

|            |  |
|------------|--|
| 77.6710781 |  |
| 77.5835781 |  |
| 77.5023281 |  |
| 77.4148281 |  |
| 77.3460781 |  |
| 77.2773281 |  |
| 77.1773281 |  |
| 77.0679531 |  |
| 76.9492031 |  |
| 76.8460781 |  |
| 76.7398281 |  |
| 76.6210781 |  |
| 76.4929531 |  |
| 76.3585781 |  |
| 76.2273281 |  |
| 76.1273281 |  |
| 76.0867031 |  |
| 76.0960781 |  |
| 76.1179531 |  |
| 76.1398281 |  |
| 76.1648281 |  |
| 76.1648281 |  |
| 76.1648281 |  |
| 76.1554531 |  |
| 76.1429531 |  |
| 76.1273281 |  |
| 76.1210781 |  |
| 76.1023281 |  |
| 76.0773281 |  |
| 76.0429531 |  |
| 76.0304531 |  |
| 76.0023281 |  |
| 75.9773281 |  |
| 75.9367031 |  |
| 75.8960781 |  |
| 75.8492031 |  |
| 75.8117031 |  |
| 75.8023281 |  |
| 75.8179531 |  |
| 75.8367031 |  |
| 75.8648281 |  |
| 75.9054531 |  |
| 75.9554531 |  |
| 76.0023281 |  |
| 76.0273281 |  |

|            |  |
|------------|--|
| 76.0710781 |  |
| 76.1179531 |  |
| 76.1742031 |  |
| 76.2429531 |  |
| 76.3085781 |  |
| 76.3835781 |  |
| 76.4742031 |  |
| 76.5835781 |  |
| 76.7054531 |  |
| 76.8429531 |  |
| 76.9804531 |  |
| 77.0460781 |  |
| 77.0773281 |  |
| 77.0960781 |  |
| 77.1335781 |  |
| 77.1929531 |  |
| 77.2554531 |  |
| 77.3117031 |  |
| 77.3460781 |  |
| 77.3773281 |  |
| 77.3992031 |  |
| 77.4210781 |  |
| 77.4523281 |  |
| 77.5242031 |  |
| 77.5773281 |  |
| 77.6335781 |  |
| 77.6710781 |  |
| 77.6992031 |  |
| 77.7523281 |  |
| 77.8023281 |  |
| 77.8648281 |  |
| 77.9304531 |  |
| 77.9898281 |  |
| 78.0398281 |  |
| 78.0773281 |  |
| 78.1210781 |  |
| 78.1929531 |  |
| 78.2679531 |  |
| 78.3460781 |  |
| 78.4554531 |  |
| 78.5773281 |  |
| 78.7179531 |  |
| 78.8679531 |  |
| 79.0242031 |  |
| 79.2023281 |  |

|            |  |
|------------|--|
| 79.3710781 |  |
| 79.5304531 |  |
| 79.6710781 |  |
| 79.7585781 |  |
| 79.8304531 |  |
| 79.8898281 |  |
| 79.9554531 |  |
| 80.0335781 |  |
| 80.1210781 |  |
| 80.1898281 |  |
| 80.2335781 |  |
| 80.2398281 |  |
| 80.2304531 |  |
| 80.2179531 |  |
| 80.2085781 |  |
| 80.1960781 |  |
| 80.1648281 |  |
| 80.1242031 |  |
| 80.0992031 |  |
| 80.1054531 |  |
| 80.1148281 |  |
| 80.1679531 |  |
| 80.2210781 |  |
| 80.3085781 |  |
| 80.4023281 |  |
| 80.5023281 |  |
| 80.6179531 |  |
| 80.7273281 |  |
| 80.8367031 |  |
| 80.9492031 |  |
| 81.0179531 |  |
| 81.0523281 |  |
| 81.0773281 |  |
| 81.1023281 |  |
| 81.0835781 |  |
| 81.0492031 |  |
| 81.0179531 |  |
| 80.9679531 |  |
| 80.9367031 |  |
| 80.8929531 |  |
| 80.8710781 |  |
| 80.8679531 |  |
| 80.8773281 |  |
| 80.9023281 |  |
| 80.8992031 |  |



|            |  |
|------------|--|
| 80.8804531 |  |
| 80.8617031 |  |
| 80.8054531 |  |
| 80.7523281 |  |
| 80.7085781 |  |
| 80.6648281 |  |
| 80.6585781 |  |
| 80.6585781 |  |
| 80.6679531 |  |
| 80.6742031 |  |
| 80.6804531 |  |
| 80.6867031 |  |
| 80.6960781 |  |
| 80.6992031 |  |
| 80.6867031 |  |
| 80.6804531 |  |
| 80.6460781 |  |
| 80.6117031 |  |
| 80.5117031 |  |
| 80.4023281 |  |
| 80.2835781 |  |
| 80.1492031 |  |
| 80.0179531 |  |
| 79.8742031 |  |
| 79.7304531 |  |
| 79.6335781 |  |
| 79.5335781 |  |
| 79.4398281 |  |
| 79.3492031 |  |
| 79.2710781 |  |
| 79.1867031 |  |
| 79.0992031 |  |
| 79.0179531 |  |
| 78.9210781 |  |
| 78.8304531 |  |
| 78.7179531 |  |
| 78.5898281 |  |
| 78.4679531 |  |
| 78.3929531 |  |
| 78.3242031 |  |
| 78.2648281 |  |
| 78.1898281 |  |
| 78.1304531 |  |
| 78.0648281 |  |
| 78.0117031 |  |

|            |  |
|------------|--|
| 77.9742031 |  |
| 77.9460781 |  |
| 77.9367031 |  |
| 77.9210781 |  |
| 77.9085781 |  |
| 77.8992031 |  |
| 77.8960781 |  |
| 77.8742031 |  |
| 77.8460781 |  |
| 77.8179531 |  |
| 77.7773281 |  |
| 77.7554531 |  |
| 77.7429531 |  |
| 77.7617031 |  |
| 77.7867031 |  |
| 77.8242031 |  |
| 77.8648281 |  |
| 77.9054531 |  |
| 77.9429531 |  |
| 77.9867031 |  |
| 78.0148281 |  |
| 78.0492031 |  |
| 78.0773281 |  |
| 78.0992031 |  |
| 78.1085781 |  |
| 78.1492031 |  |
| 78.1929531 |  |
| 78.2429531 |  |
| 78.2992031 |  |
| 78.3585781 |  |
| 78.4460781 |  |
| 78.5742031 |  |
| 78.6992031 |  |
| 78.8117031 |  |
| 78.9273281 |  |
| 79.0398281 |  |
| 79.1648281 |  |
| 79.2898281 |  |
| 79.4085781 |  |
| 79.5054531 |  |
| 79.5710781 |  |
| 79.6242031 |  |
| 79.6492031 |  |
| 79.6929531 |  |
| 79.7585781 |  |

|            |  |
|------------|--|
| 79.8304531 |  |
| 79.9054531 |  |
| 79.9992031 |  |
| 80.1023281 |  |
| 80.2179531 |  |
| 80.3429531 |  |
| 80.4617031 |  |
| 80.5710781 |  |
| 80.6742031 |  |
| 80.7742031 |  |
| 80.8554531 |  |
| 80.9367031 |  |
| 81.0085781 |  |
| 81.0867031 |  |
| 81.1585781 |  |
| 81.2148281 |  |
| 81.2367031 |  |
| 81.2273281 |  |
| 81.1992031 |  |
| 81.1773281 |  |
| 81.1335781 |  |
| 81.0867031 |  |
| 81.0335781 |  |
| 80.9742031 |  |
| 80.8929531 |  |
| 80.7867031 |  |
| 80.6554531 |  |
| 80.5054531 |  |
| 80.3523281 |  |
| 80.2054531 |  |
| 80.0367031 |  |
| 79.8710781 |  |
| 79.7054531 |  |
| 79.5429531 |  |
| 79.3742031 |  |
| 79.2085781 |  |
| 79.0367031 |  |
| 78.8835781 |  |
| 78.7335781 |  |
| 78.5773281 |  |
| 78.4398281 |  |
| 78.3273281 |  |
| 78.2179531 |  |
| 78.1085781 |  |
| 77.9992031 |  |

|            |  |
|------------|--|
| 77.8929531 |  |
| 77.7835781 |  |
| 77.6929531 |  |
| 77.6117031 |  |
| 77.5398281 |  |
| 77.4804531 |  |
| 77.4460781 |  |
| 77.4148281 |  |
| 77.3648281 |  |
| 77.3085781 |  |
| 77.2648281 |  |
| 77.2554531 |  |
| 77.2835781 |  |
| 77.3367031 |  |
| 77.3898281 |  |
| 77.4398281 |  |
| 77.4929531 |  |
| 77.5492031 |  |
| 77.5898281 |  |
| 77.6242031 |  |
| 77.6804531 |  |
| 77.7367031 |  |
| 77.8117031 |  |
| 77.8710781 |  |
| 77.9242031 |  |
| 78.0023281 |  |
| 78.0804531 |  |
| 78.1492031 |  |
| 78.1898281 |  |
| 78.2117031 |  |
| 78.2460781 |  |
| 78.2804531 |  |
| 78.2773281 |  |
| 78.2585781 |  |
| 78.2273281 |  |
| 78.1992031 |  |
| 78.1398281 |  |
| 78.0835781 |  |
| 78.0398281 |  |
| 77.9710781 |  |
| 77.8804531 |  |
| 77.7929531 |  |
| 77.6898281 |  |
| 77.5867031 |  |
| 77.4835781 |  |

|            |  |
|------------|--|
| 77.3742031 |  |
| 77.2210781 |  |
| 77.0773281 |  |
| 76.9773281 |  |
| 76.9023281 |  |
| 76.8460781 |  |
| 76.7929531 |  |
| 76.7304531 |  |
| 76.6742031 |  |
| 76.6335781 |  |
| 76.5929531 |  |
| 76.5335781 |  |
| 76.4585781 |  |
| 76.3523281 |  |
| 76.2554531 |  |
| 76.1335781 |  |
| 75.9867031 |  |
| 75.8367031 |  |
| 75.6929531 |  |
| 75.5679531 |  |
| 75.4585781 |  |
| 75.3617031 |  |
| 75.2742031 |  |
| 75.2148281 |  |
| 75.1742031 |  |
| 75.1367031 |  |
| 75.0929531 |  |
| 75.0742031 |  |
| 75.0554531 |  |
| 75.0335781 |  |
| 74.9835781 |  |
| 74.9492031 |  |
| 74.9242031 |  |
| 74.8898281 |  |
| 74.9054531 |  |
| 74.9367031 |  |
| 74.9773281 |  |
| 75.0148281 |  |
| 75.0429531 |  |
| 75.0460781 |  |
| 75.0335781 |  |
| 75.0335781 |  |
| 75.0273281 |  |
| 74.9992031 |  |
| 74.9367031 |  |

|            |  |
|------------|--|
| 74.8648281 |  |
| 74.7992031 |  |
| 74.7523281 |  |
| 74.7148281 |  |
| 74.6835781 |  |
| 74.6617031 |  |
| 74.6617031 |  |
| 74.6648281 |  |
| 74.7304531 |  |
| 74.8304531 |  |
| 74.9710781 |  |
| 75.1335781 |  |
| 75.3179531 |  |
| 75.5148281 |  |
| 75.7054531 |  |
| 75.8929531 |  |
| 76.0710781 |  |
| 76.2335781 |  |
| 76.4179531 |  |
| 76.6054531 |  |
| 76.7898281 |  |
| 76.9898281 |  |
| 77.1992031 |  |
| 77.4179531 |  |
| 77.6460781 |  |
| 77.8898281 |  |
| 78.0273281 |  |
| 78.1023281 |  |
| 78.1335781 |  |
| 78.1179531 |  |
| 78.0898281 |  |
| 78.0742031 |  |
| 78.0710781 |  |
| 78.0585781 |  |
| 78.0617031 |  |
| 78.0710781 |  |
| 78.0679531 |  |
| 78.0679531 |  |
| 78.0679531 |  |
| 78.0898281 |  |
| 78.1054531 |  |
| 78.1085781 |  |
| 78.0960781 |  |
| 78.0617031 |  |
| 78.0148281 |  |

|            |  |
|------------|--|
| 77.9554531 |  |
| 77.9117031 |  |
| 77.8835781 |  |
| 77.8398281 |  |
| 77.7710781 |  |
| 77.6617031 |  |
| 77.5335781 |  |
| 77.3773281 |  |
| 77.2179531 |  |
| 77.0710781 |  |
| 76.9085781 |  |
| 76.7492031 |  |
| 76.6304531 |  |
| 76.4929531 |  |
| 76.3648281 |  |
| 76.2554531 |  |
| 76.1554531 |  |
| 76.0554531 |  |
| 75.9585781 |  |
| 75.8617031 |  |
| 75.7523281 |  |
| 75.7242031 |  |
| 75.6867031 |  |
| 75.6804531 |  |
| 75.6835781 |  |
| 75.6929531 |  |
| 75.6960781 |  |
| 75.6992031 |  |
| 75.7210781 |  |
| 75.7273281 |  |
| 75.7554531 |  |
| 75.8148281 |  |
| 75.8617031 |  |
| 75.9054531 |  |
| 75.9460781 |  |
| 75.9835781 |  |
| 76.0429531 |  |
| 76.1023281 |  |
| 76.1773281 |  |
| 76.2523281 |  |
| 76.3273281 |  |
| 76.3679531 |  |
| 76.3929531 |  |
| 76.3867031 |  |
| 76.3492031 |  |

|            |  |
|------------|--|
| 76.3054531 |  |
| 76.2617031 |  |
| 76.2210781 |  |
| 76.1742031 |  |
| 76.1148281 |  |
| 76.0585781 |  |
| 75.9867031 |  |
| 75.8867031 |  |
| 75.7835781 |  |
| 75.6679531 |  |
| 75.5335781 |  |
| 75.3867031 |  |
| 75.2273281 |  |
| 75.0679531 |  |
| 74.9023281 |  |
| 74.7398281 |  |
| 74.5867031 |  |
| 74.5929531 |  |
| 74.6117031 |  |
| 74.6148281 |  |
| 74.5273281 |  |
| 74.3992031 |  |
| 74.2523281 |  |
| 74.0898281 |  |
| 73.9460781 |  |
| 73.8023281 |  |
| 73.6523281 |  |
| 73.5304531 |  |
| 73.4335781 |  |
| 73.3429531 |  |
| 73.2679531 |  |
| 73.1867031 |  |
| 73.1179531 |  |
| 73.0492031 |  |
| 72.9929531 |  |
| 72.9398281 |  |
| 72.9054531 |  |
| 72.8835781 |  |
| 72.8960781 |  |
| 72.9429531 |  |
| 72.9835781 |  |
| 73.0367031 |  |
| 73.0554531 |  |
| 73.0710781 |  |
| 73.0898281 |  |



|            |  |
|------------|--|
| 73.1117031 |  |
| 73.1367031 |  |
| 73.1679531 |  |
| 73.1992031 |  |
| 73.2210781 |  |
| 73.2429531 |  |
| 73.2648281 |  |
| 73.2929531 |  |
| 73.3085781 |  |
| 73.3148281 |  |
| 73.3179531 |  |
| 73.2992031 |  |
| 73.1710781 |  |
| 73.0429531 |  |
| 72.9304531 |  |
| 72.9117031 |  |
| 72.9273281 |  |
| 72.9554531 |  |
| 72.9867031 |  |
| 73.0210781 |  |
| 73.0335781 |  |
| 73.0429531 |  |
| 73.0335781 |  |
| 73.0085781 |  |
| 72.9742031 |  |
| 72.9367031 |  |
| 72.8929531 |  |
| 72.8398281 |  |
| 72.7710781 |  |
| 72.6992031 |  |
| 72.6367031 |  |
| 72.5804531 |  |
| 72.5210781 |  |
| 72.4585781 |  |
| 72.3867031 |  |
| 72.3242031 |  |
| 72.2554531 |  |
| 72.2148281 |  |
| 72.1710781 |  |
| 72.1367031 |  |
| 72.1179531 |  |
| 72.1273281 |  |
| 72.1398281 |  |
| 72.1304531 |  |
| 72.1148281 |  |

|            |  |
|------------|--|
| 72.0804531 |  |
| 72.0804531 |  |
| 72.0960781 |  |
| 72.1148281 |  |
| 72.1429531 |  |
| 72.1804531 |  |
| 72.2492031 |  |
| 72.3148281 |  |
| 72.3648281 |  |
| 72.4148281 |  |
| 72.4585781 |  |
| 72.4992031 |  |
| 72.5398281 |  |
| 72.5804531 |  |
| 72.6242031 |  |
| 72.6804531 |  |
| 72.7179531 |  |
| 72.7617031 |  |
| 72.8054531 |  |
| 72.8648281 |  |
| 72.9273281 |  |
| 72.9929531 |  |
| 73.0710781 |  |
| 73.1585781 |  |
| 73.2492031 |  |
| 73.3210781 |  |
| 73.3679531 |  |
| 73.4210781 |  |
| 73.4617031 |  |
| 73.5023281 |  |
| 73.5585781 |  |
| 73.6179531 |  |
| 73.6867031 |  |
| 73.7710781 |  |
| 73.8460781 |  |
| 73.9054531 |  |
| 73.9648281 |  |
| 74.0367031 |  |
| 74.1460781 |  |
| 74.2492031 |  |
| 74.3742031 |  |
| 74.4679531 |  |
| 74.5492031 |  |
| 74.6304531 |  |
| 74.7210781 |  |

|            |  |
|------------|--|
| 74.8117031 |  |
| 74.8960781 |  |
| 74.9929531 |  |
| 75.1273281 |  |
| 75.2804531 |  |
| 75.4398281 |  |
| 75.5898281 |  |
| 75.7585781 |  |
| 75.9367031 |  |
| 76.1117031 |  |
| 76.2773281 |  |
| 76.4585781 |  |
| 76.6492031 |  |
| 76.8335781 |  |
| 77.0242031 |  |
| 77.2117031 |  |
| 77.3835781 |  |
| 77.5304531 |  |
| 77.6773281 |  |
| 77.7929531 |  |
| 77.9117031 |  |
| 78.0085781 |  |
| 78.0898281 |  |
| 78.1804531 |  |
| 78.2773281 |  |
| 78.3648281 |  |
| 78.4617031 |  |
| 78.5554531 |  |
| 78.5804531 |  |
| 78.5835781 |  |
| 78.5648281 |  |
| 78.5210781 |  |
| 78.4617031 |  |
| 78.3898281 |  |
| 78.3460781 |  |
| 78.3023281 |  |
| 78.2304531 |  |
| 78.1367031 |  |
| 78.0242031 |  |
| 77.9054531 |  |
| 77.8023281 |  |
| 77.7054531 |  |
| 77.6085781 |  |
| 77.4867031 |  |
| 77.3585781 |  |

|            |  |
|------------|--|
| 77.2398281 |  |
| 77.1367031 |  |
| 77.0179531 |  |
| 76.8804531 |  |
| 76.7273281 |  |
| 76.5804531 |  |
| 76.4273281 |  |
| 76.2585781 |  |
| 76.0867031 |  |
| 75.8867031 |  |
| 75.6585781 |  |
| 75.4398281 |  |
| 75.2304531 |  |
| 75.0179531 |  |
| 74.8367031 |  |
| 74.6679531 |  |
| 74.5335781 |  |
| 74.4085781 |  |
| 74.2960781 |  |
| 74.2023281 |  |
| 74.0960781 |  |
| 73.9773281 |  |
| 73.8523281 |  |
| 73.7898281 |  |
| 73.7523281 |  |
| 73.7304531 |  |
| 73.7179531 |  |
| 73.7023281 |  |
| 73.6742031 |  |
| 73.6460781 |  |
| 73.6304531 |  |
| 73.6398281 |  |
| 73.6929531 |  |
| 73.7742031 |  |
| 73.8617031 |  |
| 73.9179531 |  |
| 73.9523281 |  |
| 73.9835781 |  |
| 74.0148281 |  |
| 74.0429531 |  |
| 74.0523281 |  |
| 74.0648281 |  |
| 74.0742031 |  |
| 74.0992031 |  |
| 74.1304531 |  |

|            |  |
|------------|--|
| 74.1617031 |  |
| 74.1960781 |  |
| 74.2210781 |  |
| 74.2179531 |  |
| 74.2148281 |  |
| 74.2492031 |  |
| 74.2992031 |  |
| 74.3523281 |  |
| 74.4242031 |  |
| 74.4960781 |  |
| 74.5679531 |  |
| 74.6492031 |  |
| 74.7273281 |  |
| 74.7867031 |  |
| 74.8179531 |  |
| 74.8679531 |  |
| 74.9273281 |  |
| 75.0085781 |  |
| 75.1023281 |  |
| 75.2148281 |  |
| 75.3179531 |  |
| 75.4054531 |  |
| 75.4960781 |  |
| 75.6117031 |  |
| 75.7242031 |  |
| 75.8179531 |  |
| 75.9054531 |  |
| 75.9648281 |  |
| 76.0148281 |  |
| 76.0554531 |  |
| 76.1429531 |  |
| 76.2617031 |  |
| 76.3835781 |  |
| 76.5023281 |  |
| 76.6242031 |  |
| 76.7804531 |  |
| 76.9492031 |  |
| 77.1335781 |  |
| 77.3210781 |  |
| 77.5273281 |  |
| 77.7429531 |  |
| 77.9460781 |  |
| 78.1460781 |  |
| 78.3742031 |  |
| 78.6023281 |  |

|            |  |
|------------|--|
| 78.8273281 |  |
| 79.0304531 |  |
| 79.2179531 |  |
| 79.3648281 |  |
| 79.4898281 |  |
| 79.5992031 |  |
| 79.6960781 |  |
| 79.7804531 |  |
| 79.8617031 |  |
| 79.9367031 |  |
| 80.0023281 |  |
| 80.0648281 |  |
| 80.0992031 |  |
| 80.1085781 |  |
| 80.0867031 |  |
| 80.0679531 |  |
| 80.0585781 |  |
| 80.0242031 |  |
| 79.9554531 |  |
| 79.8804531 |  |
| 79.8148281 |  |
| 79.7585781 |  |
| 79.7085781 |  |
| 79.6523281 |  |
| 79.5960781 |  |
| 79.4960781 |  |
| 79.3804531 |  |
| 79.2648281 |  |
| 79.1460781 |  |
| 79.0054531 |  |
| 78.8273281 |  |
| 78.6242031 |  |
| 78.4242031 |  |
| 78.2335781 |  |
| 78.0429531 |  |
| 77.8523281 |  |
| 77.6742031 |  |
| 77.5304531 |  |
| 77.4148281 |  |
| 77.2992031 |  |
| 77.1804531 |  |
| 77.0710781 |  |
| 76.9804531 |  |
| 76.9273281 |  |
| 76.9054531 |  |

|            |  |
|------------|--|
| 76.8929531 |  |
| 76.8960781 |  |
| 76.9242031 |  |
| 76.9617031 |  |
| 77.0085781 |  |
| 77.0523281 |  |
| 77.0867031 |  |
| 77.1273281 |  |
| 77.1804531 |  |
| 77.2648281 |  |
| 77.3148281 |  |
| 77.3960781 |  |
| 77.4679531 |  |
| 77.5492031 |  |
| 77.6304531 |  |
| 77.6804531 |  |
| 77.6992031 |  |
| 77.7085781 |  |
| 77.7085781 |  |
| 77.7210781 |  |
| 77.7398281 |  |
| 77.7304531 |  |
| 77.7148281 |  |
| 77.7054531 |  |
| 77.7023281 |  |
| 77.7085781 |  |
| 77.7085781 |  |
| 77.6960781 |  |
| 77.6742031 |  |
| 77.6492031 |  |
| 77.6148281 |  |
| 77.5773281 |  |
| 77.5210781 |  |
| 77.4242031 |  |
| 77.3367031 |  |
| 77.2335781 |  |
| 77.1085781 |  |
| 76.9742031 |  |
| 76.8273281 |  |
| 76.6523281 |  |
| 76.4710781 |  |
| 76.2835781 |  |
| 76.0960781 |  |
| 75.8992031 |  |
| 75.6992031 |  |

|            |  |
|------------|--|
| 75.5117031 |  |
| 75.3273281 |  |
| 75.1492031 |  |
| 74.9835781 |  |
| 74.7929531 |  |
| 74.6335781 |  |
| 74.4398281 |  |
| 74.2960781 |  |
| 74.1710781 |  |
| 74.0492031 |  |
| 73.9429531 |  |
| 73.8773281 |  |
| 73.8179531 |  |
| 73.7710781 |  |
| 73.7117031 |  |
| 73.6523281 |  |
| 73.6148281 |  |
| 73.5867031 |  |
| 73.5554531 |  |
| 73.5335781 |  |
| 73.5242031 |  |
| 73.5335781 |  |
| 73.5492031 |  |
| 73.5617031 |  |
| 73.5585781 |  |
| 73.5460781 |  |
| 73.5335781 |  |
| 73.5179531 |  |
| 73.5210781 |  |
| 73.5273281 |  |
| 73.5429531 |  |
| 73.5835781 |  |
| 73.6054531 |  |
| 73.6242031 |  |
| 73.6460781 |  |
| 73.6617031 |  |
| 73.6742031 |  |
| 73.6679531 |  |
| 73.6742031 |  |
| 73.6867031 |  |
| 73.6960781 |  |
| 73.6960781 |  |
| 73.6804531 |  |
| 73.6367031 |  |
| 73.6117031 |  |



|            |  |
|------------|--|
| 73.5835781 |  |
| 73.5492031 |  |
| 73.4929531 |  |
| 73.4273281 |  |
| 73.3617031 |  |
| 73.3054531 |  |
| 73.2367031 |  |
| 73.1710781 |  |
| 73.1210781 |  |
| 73.0804531 |  |
| 73.0398281 |  |
| 73.0054531 |  |
| 72.9617031 |  |
| 72.9242031 |  |
| 72.9023281 |  |
| 72.8804531 |  |
| 72.8554531 |  |
| 72.8304531 |  |
| 72.8054531 |  |
| 72.7804531 |  |
| 72.7742031 |  |
| 72.7585781 |  |
| 72.7648281 |  |
| 72.7710781 |  |
| 72.7960781 |  |
| 72.8335781 |  |
| 72.8804531 |  |
| 72.9648281 |  |
| 73.0554531 |  |
| 73.1398281 |  |
| 73.2304531 |  |
| 73.3179531 |  |
| 73.4148281 |  |
| 73.5117031 |  |
| 73.5992031 |  |
| 73.6835781 |  |
| 73.7710781 |  |
| 73.8679531 |  |
| 73.9679531 |  |
| 74.0429531 |  |
| 74.1273281 |  |
| 74.2054531 |  |
| 74.2773281 |  |
| 74.3460781 |  |
| 74.4023281 |  |

|            |  |
|------------|--|
| 74.4585781 |  |
| 74.5117031 |  |
| 74.5679531 |  |
| 74.6085781 |  |
| 74.6398281 |  |
| 74.6773281 |  |
| 74.7242031 |  |
| 74.7835781 |  |
| 74.8429531 |  |
| 74.9023281 |  |
| 74.9710781 |  |
| 75.0398281 |  |
| 75.0992031 |  |
| 75.1679531 |  |
| 75.2335781 |  |
| 75.3460781 |  |
| 75.4554531 |  |
| 75.6210781 |  |
| 75.7398281 |  |
| 75.8335781 |  |
| 75.9179531 |  |
| 75.9835781 |  |
| 75.9898281 |  |
| 75.9804531 |  |
| 75.9679531 |  |
| 75.9460781 |  |
| 75.9273281 |  |
| 75.9054531 |  |
| 75.8710781 |  |
| 75.8429531 |  |
| 75.8210781 |  |
| 75.8085781 |  |
| 75.7742031 |  |
| 75.7460781 |  |
| 75.7304531 |  |
| 75.7054531 |  |
| 75.7023281 |  |
| 75.7273281 |  |
| 75.7523281 |  |
| 75.8023281 |  |
| 75.8585781 |  |
| 75.9398281 |  |
| 76.0367031 |  |
| 76.1398281 |  |
| 76.2398281 |  |

|            |  |
|------------|--|
| 76.3273281 |  |
| 76.4023281 |  |
| 76.4554531 |  |
| 76.4742031 |  |
| 76.4742031 |  |
| 76.4492031 |  |
| 76.4148281 |  |
| 76.3804531 |  |
| 76.3679531 |  |
| 76.3367031 |  |
| 76.2554531 |  |
| 76.1992031 |  |
| 76.0710781 |  |
| 75.9992031 |  |
| 75.9460781 |  |
| 75.8960781 |  |
| 75.8554531 |  |
| 75.8835781 |  |
| 75.9210781 |  |
| 75.9742031 |  |
| 76.0398281 |  |
| 76.1117031 |  |
| 76.1898281 |  |
| 76.2804531 |  |
| 76.3773281 |  |
| 76.4460781 |  |
| 76.5117031 |  |
| 76.5867031 |  |
| 76.6585781 |  |
| 76.7429531 |  |
| 76.8429531 |  |
| 76.9554531 |  |
| 77.0554531 |  |
| 77.1835781 |  |
| 77.3023281 |  |
| 77.4210781 |  |
| 77.5273281 |  |
| 77.6054531 |  |
| 77.6648281 |  |
| 77.7148281 |  |
| 77.7460781 |  |
| 77.7679531 |  |
| 77.7804531 |  |
| 77.8242031 |  |
| 77.8742031 |  |

|            |  |
|------------|--|
| 77.9335781 |  |
| 78.0148281 |  |
| 78.0992031 |  |
| 78.1429531 |  |
| 78.2398281 |  |
| 78.3492031 |  |
| 78.4742031 |  |
| 78.5960781 |  |
| 78.6898281 |  |
| 78.7710781 |  |
| 78.8679531 |  |
| 78.9648281 |  |
| 79.0492031 |  |
| 79.1367031 |  |
| 79.2304531 |  |
| 79.3273281 |  |
| 79.4148281 |  |
| 79.4742031 |  |
| 79.5304531 |  |
| 79.5835781 |  |
| 79.6617031 |  |
| 79.7429531 |  |
| 79.8523281 |  |
| 79.9679531 |  |
| 80.0585781 |  |
| 80.1460781 |  |
| 80.1773281 |  |
| 80.2117031 |  |
| 80.2117031 |  |
| 80.2148281 |  |
| 80.2054531 |  |
| 80.1867031 |  |
| 80.1742031 |  |
| 80.1804531 |  |
| 80.1898281 |  |
| 80.2273281 |  |
| 80.2960781 |  |
| 80.4148281 |  |
| 80.5460781 |  |
| 80.6773281 |  |
| 80.7960781 |  |
| 80.8898281 |  |
| 80.9679531 |  |
| 81.0398281 |  |
| 81.1117031 |  |

|            |  |
|------------|--|
| 81.1867031 |  |
| 81.2648281 |  |
| 81.3492031 |  |
| 81.4492031 |  |
| 81.5554531 |  |
| 81.6398281 |  |
| 81.7242031 |  |
| 81.8085781 |  |
| 81.8429531 |  |
| 81.8367031 |  |
| 81.8242031 |  |
| 81.8054531 |  |
| 81.8117031 |  |
| 81.7898281 |  |
| 81.7679531 |  |
| 81.7367031 |  |
| 81.6992031 |  |
| 81.6398281 |  |
| 81.5773281 |  |
| 81.5460781 |  |
| 81.5148281 |  |
| 81.5085781 |  |
| 81.4992031 |  |
| 81.4867031 |  |
| 81.4273281 |  |
| 81.3742031 |  |
| 81.2710781 |  |
| 81.1523281 |  |
| 81.0304531 |  |
| 80.9210781 |  |
| 80.8023281 |  |
| 80.6617031 |  |
| 80.4960781 |  |
| 80.3148281 |  |
| 80.1085781 |  |
| 79.8960781 |  |
| 79.6867031 |  |
| 79.5117031 |  |
| 79.3617031 |  |
| 79.1960781 |  |
| 79.0242031 |  |
| 78.8429531 |  |
| 78.6773281 |  |
| 78.5179531 |  |
| 78.3554531 |  |

|            |  |
|------------|--|
| 78.1742031 |  |
| 77.9773281 |  |
| 77.7554531 |  |
| 77.5648281 |  |
| 77.3960781 |  |
| 77.2398281 |  |
| 77.0835781 |  |
| 76.9273281 |  |
| 76.8085781 |  |
| 76.6898281 |  |
| 76.5835781 |  |
| 76.4867031 |  |
| 76.4023281 |  |
| 76.3179531 |  |
| 76.2179531 |  |
| 76.1242031 |  |
| 75.9992031 |  |
| 75.8742031 |  |
| 75.7648281 |  |
| 75.6929531 |  |
| 75.6148281 |  |
| 75.6148281 |  |
| 75.6398281 |  |
| 75.6679531 |  |
| 75.6929531 |  |
| 75.7398281 |  |
| 75.7898281 |  |
| 75.8273281 |  |
| 75.8742031 |  |
| 75.9429531 |  |
| 76.0148281 |  |
| 76.0742031 |  |
| 76.1054531 |  |
| 76.1335781 |  |
| 76.1523281 |  |
| 76.1835781 |  |
| 76.1960781 |  |
| 76.1804531 |  |
| 76.1554531 |  |
| 76.1273281 |  |
| 76.1117031 |  |
| 76.0960781 |  |
| 76.0742031 |  |
| 76.0648281 |  |
| 76.0585781 |  |

|            |  |
|------------|--|
| 76.0398281 |  |
| 76.0273281 |  |
| 76.0210781 |  |
| 76.0179531 |  |
| 76.0054531 |  |
| 75.9773281 |  |
| 75.9398281 |  |
| 75.8992031 |  |
| 75.8554531 |  |
| 75.7992031 |  |
| 75.7304531 |  |
| 75.7054531 |  |
| 75.6742031 |  |
| 75.6273281 |  |
| 75.6054531 |  |
| 75.6148281 |  |
| 75.5867031 |  |
| 75.5554531 |  |
| 75.5242031 |  |
| 75.4929531 |  |
| 75.4492031 |  |
| 75.4023281 |  |
| 75.3742031 |  |
| 75.3335781 |  |
| 75.2992031 |  |
| 75.2773281 |  |
| 75.2679531 |  |
| 75.2742031 |  |
| 75.2710781 |  |
| 75.2929531 |  |
| 75.2867031 |  |
| 75.2804531 |  |
| 75.2898281 |  |
| 75.2992031 |  |
| 75.2992031 |  |
| 75.3085781 |  |
| 75.3242031 |  |
| 75.3648281 |  |
| 75.4179531 |  |
| 75.4804531 |  |
| 75.5429531 |  |
| 75.6148281 |  |
| 75.6867031 |  |
| 75.7460781 |  |
| 75.8242031 |  |

|            |  |
|------------|--|
| 75.8960781 |  |
| 75.9554531 |  |
| 76.0273281 |  |
| 76.0867031 |  |
| 76.1523281 |  |
| 76.2117031 |  |
| 76.2742031 |  |
| 76.3148281 |  |
| 76.3554531 |  |
| 76.3867031 |  |
| 76.3929531 |  |
| 76.4023281 |  |
| 76.4085781 |  |
| 76.4085781 |  |
| 76.4085781 |  |
| 76.4023281 |  |
| 76.3929531 |  |
| 76.3648281 |  |
| 76.3460781 |  |
| 76.3242031 |  |
| 76.3148281 |  |
| 76.3148281 |  |
| 76.3117031 |  |
| 76.3179531 |  |
| 76.2929531 |  |
| 76.2679531 |  |
| 76.2367031 |  |
| 76.1929531 |  |
| 76.1617031 |  |
| 76.1367031 |  |
| 76.1085781 |  |
| 76.0773281 |  |
| 76.0335781 |  |
| 75.9710781 |  |
| 75.8929531 |  |
| 75.8179531 |  |
| 75.7148281 |  |
| 75.6117031 |  |
| 75.5085781 |  |
| 75.4054531 |  |
| 75.3242031 |  |
| 75.2492031 |  |
| 75.1585781 |  |
| 75.0804531 |  |
| 74.9898281 |  |



|            |  |
|------------|--|
| 74.9179531 |  |
| 74.8054531 |  |
| 74.7117031 |  |
| 74.6242031 |  |
| 74.5367031 |  |
| 74.4742031 |  |
| 74.4242031 |  |
| 74.3710781 |  |
| 74.3210781 |  |
| 74.2992031 |  |
| 74.2835781 |  |
| 74.2898281 |  |
| 74.3054531 |  |
| 74.3085781 |  |
| 74.3148281 |  |
| 74.2773281 |  |
| 74.2242031 |  |
| 74.1617031 |  |
| 74.0960781 |  |
| 74.0398281 |  |
| 73.9929531 |  |
| 73.9554531 |  |
| 73.9210781 |  |
| 73.8835781 |  |
| 73.8554531 |  |
| 73.8335781 |  |
| 73.8304531 |  |
| 73.8523281 |  |
| 73.8992031 |  |
| 73.9773281 |  |
| 74.0523281 |  |
| 74.1460781 |  |
| 74.2429531 |  |
| 74.3273281 |  |
| 74.3617031 |  |
| 74.3835781 |  |
| 74.4148281 |  |
| 74.4492031 |  |
| 74.4804531 |  |
| 74.5148281 |  |
| 74.5367031 |  |
| 74.5898281 |  |
| 74.6492031 |  |
| 74.7210781 |  |
| 74.7960781 |  |

|            |  |
|------------|--|
| 74.8460781 |  |
| 74.8992031 |  |
| 74.9460781 |  |
| 74.9554531 |  |
| 74.9085781 |  |
| 74.8523281 |  |
| 74.7773281 |  |
| 74.6867031 |  |
| 74.6054531 |  |
| 74.5117031 |  |
| 74.4429531 |  |
| 74.3804531 |  |
| 74.3148281 |  |
| 74.2492031 |  |
| 74.1867031 |  |
| 74.1273281 |  |
| 74.0679531 |  |
| 74.0117031 |  |
| 73.9429531 |  |
| 73.8617031 |  |
| 73.7617031 |  |
| 73.6398281 |  |
| 73.5054531 |  |
| 73.3585781 |  |
| 73.2179531 |  |
| 73.0898281 |  |
| 72.9648281 |  |
| 72.8242031 |  |
| 72.6929531 |  |
| 72.5773281 |  |
| 72.4585781 |  |
| 72.3460781 |  |
| 72.2304531 |  |
| 72.1304531 |  |
| 72.0335781 |  |
| 71.9398281 |  |
| 71.8492031 |  |
| 71.7742031 |  |
| 71.6960781 |  |
| 71.6335781 |  |
| 71.5773281 |  |
| 71.5179531 |  |
| 71.4710781 |  |
| 71.5023281 |  |
| 71.5992031 |  |

|            |  |
|------------|--|
| 71.7273281 |  |
| 71.8617031 |  |
| 72.0179531 |  |
| 72.1929531 |  |
| 72.3898281 |  |
| 72.5898281 |  |
| 72.7960781 |  |
| 73.0148281 |  |
| 73.2148281 |  |
| 73.4210781 |  |
| 73.6179531 |  |
| 73.8117031 |  |
| 74.0117031 |  |
| 74.2273281 |  |
| 74.4398281 |  |
| 74.6617031 |  |
| 74.8898281 |  |
| 75.1117031 |  |
| 75.3335781 |  |
| 75.5335781 |  |
| 75.7210781 |  |
| 75.8992031 |  |
| 76.0804531 |  |
| 76.2523281 |  |
| 76.4398281 |  |
| 76.6367031 |  |
| 76.8304531 |  |
| 77.0242031 |  |
| 77.2304531 |  |
| 77.4585781 |  |
| 77.6867031 |  |
| 77.9242031 |  |
| 78.1367031 |  |
| 78.3460781 |  |
| 78.5117031 |  |
| 78.6710781 |  |
| 78.8054531 |  |
| 78.9148281 |  |
| 78.9929531 |  |
| 79.0429531 |  |
| 79.0804531 |  |
| 79.1210781 |  |
| 79.1617031 |  |
| 79.1835781 |  |
| 79.1835781 |  |

|            |  |
|------------|--|
| 79.1804531 |  |
| 79.1648281 |  |
| 79.1335781 |  |
| 79.1273281 |  |
| 79.1054531 |  |
| 79.0898281 |  |
| 79.0835781 |  |
| 79.0742031 |  |
| 79.0617031 |  |
| 79.0617031 |  |
| 79.0710781 |  |
| 79.0960781 |  |
| 79.1273281 |  |
| 79.1617031 |  |
| 79.1835781 |  |
| 79.2242031 |  |
| 79.2617031 |  |
| 79.3117031 |  |
| 79.3835781 |  |
| 79.4960781 |  |
| 79.6117031 |  |
| 79.7367031 |  |
| 79.8585781 |  |
| 79.9523281 |  |
| 80.0148281 |  |
| 80.0710781 |  |
| 80.1085781 |  |
| 80.1460781 |  |
| 80.1742031 |  |
| 80.2210781 |  |
| 80.2679531 |  |
| 80.3492031 |  |
| 80.4585781 |  |
| 80.5742031 |  |
| 80.6804531 |  |
| 80.7710781 |  |
| 80.8648281 |  |
| 80.9554531 |  |
| 81.0523281 |  |
| 81.1523281 |  |
| 81.2617031 |  |
| 81.3804531 |  |
| 81.4960781 |  |
| 81.5992031 |  |
| 81.6835781 |  |

|            |  |
|------------|--|
| 81.6929531 |  |
| 81.6710781 |  |
| 81.6335781 |  |
| 81.5585781 |  |
| 81.4648281 |  |
| 81.3585781 |  |
| 81.2335781 |  |
| 81.1023281 |  |
| 80.9867031 |  |
| 80.8773281 |  |
| 80.7492031 |  |
| 80.6273281 |  |
| 80.4929531 |  |
| 80.3210781 |  |
| 80.0929531 |  |
| 79.8617031 |  |
| 79.6148281 |  |
| 79.3835781 |  |
| 79.1710781 |  |
| 78.9742031 |  |
| 78.7867031 |  |
| 78.6117031 |  |
| 78.4398281 |  |
| 78.2585781 |  |
| 78.0492031 |  |
| 77.8304531 |  |
| 77.5898281 |  |
| 77.3398281 |  |
| 77.0523281 |  |
| 76.7554531 |  |
| 76.4679531 |  |
| 76.1679531 |  |
| 75.8742031 |  |
| 75.5929531 |  |
| 75.3273281 |  |
| 75.0617031 |  |
| 74.7898281 |  |
| 74.5304531 |  |
| 74.2804531 |  |
| 74.0460781 |  |
| 73.8835781 |  |
| 73.7460781 |  |
| 73.6273281 |  |
| 73.5398281 |  |
| 73.4867031 |  |

|            |  |
|------------|--|
| 73.4460781 |  |
| 73.4210781 |  |
| 73.4054531 |  |
| 73.3710781 |  |
| 73.3304531 |  |
| 73.2867031 |  |
| 73.2335781 |  |
| 73.1960781 |  |
| 73.1992031 |  |
| 73.2242031 |  |
| 73.2460781 |  |
| 73.2523281 |  |
| 73.2429531 |  |
| 73.2117031 |  |
| 73.1742031 |  |
| 73.1242031 |  |
| 73.0710781 |  |
| 73.0335781 |  |
| 72.9929531 |  |
| 72.9835781 |  |
| 72.9710781 |  |
| 72.9679531 |  |
| 72.9679531 |  |
| 73.0023281 |  |
| 73.0585781 |  |
| 73.1210781 |  |
| 73.2023281 |  |
| 73.2804531 |  |
| 73.3398281 |  |
| 73.3898281 |  |
| 73.4367031 |  |
| 73.4898281 |  |
| 73.5585781 |  |
| 73.6179531 |  |
| 73.6835781 |  |
| 73.7617031 |  |
| 73.8585781 |  |
| 73.9460781 |  |
| 74.0367031 |  |
| 74.1117031 |  |
| 74.1867031 |  |
| 74.2273281 |  |
| 74.2617031 |  |
| 74.3023281 |  |
| 74.3554531 |  |

|            |  |
|------------|--|
| 74.3898281 |  |
| 74.4242031 |  |
| 74.4304531 |  |
| 74.4179531 |  |
| 74.4054531 |  |
| 74.3960781 |  |
| 74.4085781 |  |
| 74.4273281 |  |
| 74.4617031 |  |
| 74.5117031 |  |
| 74.5742031 |  |
| 74.6460781 |  |
| 74.7023281 |  |
| 74.7835781 |  |
| 74.8554531 |  |
| 74.9492031 |  |
| 75.0429531 |  |
| 75.1179531 |  |
| 75.1773281 |  |
| 75.2117031 |  |
| 75.2242031 |  |
| 75.2273281 |  |
| 75.2335781 |  |
| 75.2367031 |  |
| 75.2179531 |  |
| 75.1898281 |  |
| 75.1398281 |  |
| 75.0679531 |  |
| 75.0054531 |  |
| 74.9273281 |  |
| 74.8429531 |  |
| 74.7492031 |  |
| 74.6710781 |  |
| 74.5898281 |  |
| 74.5023281 |  |
| 74.4148281 |  |
| 74.3429531 |  |
| 74.2585781 |  |
| 74.1617031 |  |
| 74.0585781 |  |
| 73.9804531 |  |
| 73.9085781 |  |
| 73.8210781 |  |
| 73.7367031 |  |
| 73.6492031 |  |

|            |  |
|------------|--|
| 73.5617031 |  |
| 73.4679531 |  |
| 73.3804531 |  |
| 73.2867031 |  |
| 73.1929531 |  |
| 73.1054531 |  |
| 73.0023281 |  |
| 72.9054531 |  |
| 72.7992031 |  |
| 72.7117031 |  |
| 72.6085781 |  |
| 72.5054531 |  |
| 72.4148281 |  |
| 72.3242031 |  |
| 72.2523281 |  |
| 72.2054531 |  |
| 72.1492031 |  |
| 72.1054531 |  |
| 72.0804531 |  |
| 72.0992031 |  |
| 72.1273281 |  |
| 72.1804531 |  |
| 72.2304531 |  |
| 72.2679531 |  |
| 72.3179531 |  |
| 72.3460781 |  |
| 72.3585781 |  |
| 72.3679531 |  |
| 72.3835781 |  |
| 72.4054531 |  |
| 72.4179531 |  |
| 72.4367031 |  |
| 72.4585781 |  |
| 72.4960781 |  |
| 72.5523281 |  |
| 72.6179531 |  |
| 72.6960781 |  |
| 72.8023281 |  |
| 72.9085781 |  |
| 73.0179531 |  |
| 73.1273281 |  |
| 73.2335781 |  |
| 73.3460781 |  |
| 73.4710781 |  |
| 73.5992031 |  |



|            |  |
|------------|--|
| 73.7179531 |  |
| 73.8460781 |  |
| 73.9648281 |  |
| 74.0898281 |  |
| 74.1960781 |  |
| 74.3085781 |  |
| 74.4273281 |  |
| 74.5398281 |  |
| 74.6492031 |  |
| 74.7335781 |  |
| 74.7929531 |  |
| 74.8492031 |  |
| 74.8773281 |  |
| 74.8898281 |  |
| 74.8742031 |  |
| 74.8585781 |  |
| 74.8335781 |  |
| 74.8148281 |  |
| 74.7960781 |  |
| 74.7710781 |  |
| 74.7554531 |  |
| 74.7523281 |  |
| 74.7335781 |  |
| 74.7148281 |  |
| 74.6898281 |  |
| 74.6710781 |  |
| 74.6710781 |  |
| 74.6710781 |  |
| 74.6585781 |  |
| 74.6460781 |  |
| 74.6242031 |  |
| 74.6179531 |  |
| 74.6148281 |  |
| 74.6148281 |  |
| 74.6179531 |  |
| 74.6148281 |  |
| 74.6148281 |  |
| 74.5835781 |  |
| 74.5117031 |  |
| 74.4085781 |  |
| 74.3085781 |  |
| 74.2148281 |  |
| 74.1367031 |  |
| 74.0804531 |  |
| 74.0367031 |  |

|            |  |
|------------|--|
| 73.9960781 |  |
| 73.9023281 |  |
| 73.7867031 |  |
| 73.6742031 |  |
| 73.5710781 |  |
| 73.4804531 |  |
| 73.3804531 |  |
| 73.2992031 |  |
| 73.2210781 |  |
| 73.1335781 |  |
| 73.0398281 |  |
| 72.9429531 |  |
| 72.8460781 |  |
| 72.7554531 |  |
| 72.6898281 |  |
| 72.6460781 |  |
| 72.6085781 |  |
| 72.5835781 |  |
| 72.5617031 |  |
| 72.5429531 |  |
| 72.5335781 |  |
| 72.5117031 |  |
| 72.5148281 |  |
| 72.5210781 |  |
| 72.5148281 |  |
| 72.5460781 |  |
| 72.6023281 |  |
| 72.6835781 |  |
| 72.7835781 |  |
| 72.8804531 |  |
| 72.9648281 |  |
| 73.0554531 |  |
| 73.1523281 |  |
| 73.2992031 |  |
| 73.4648281 |  |
| 73.6648281 |  |
| 73.8898281 |  |
| 74.0992031 |  |
| 74.2804531 |  |
| 74.4523281 |  |
| 74.6210781 |  |
| 74.8367031 |  |
| 75.0898281 |  |
| 75.3179531 |  |
| 75.5304531 |  |

|            |  |
|------------|--|
| 75.7210781 |  |
| 75.9210781 |  |
| 76.1117031 |  |
| 76.3054531 |  |
| 76.5210781 |  |
| 76.7398281 |  |
| 76.9679531 |  |
| 77.1867031 |  |
| 77.3992031 |  |
| 77.5898281 |  |
| 77.7585781 |  |
| 77.9148281 |  |
| 78.0492031 |  |
| 78.1617031 |  |
| 78.2648281 |  |
| 78.3648281 |  |
| 78.4585781 |  |
| 78.5367031 |  |
| 78.5960781 |  |
| 78.6523281 |  |
| 78.6617031 |  |
| 78.6085781 |  |
| 78.5304531 |  |
| 78.4367031 |  |
| 78.3492031 |  |
| 78.2804531 |  |
| 78.2085781 |  |
| 78.1367031 |  |
| 78.0335781 |  |
| 77.9085781 |  |
| 77.7523281 |  |
| 77.5679531 |  |
| 77.3929531 |  |
| 77.2210781 |  |
| 77.0585781 |  |
| 76.9054531 |  |
| 76.7585781 |  |
| 76.6085781 |  |
| 76.5023281 |  |
| 76.4273281 |  |
| 76.3804531 |  |
| 76.3554531 |  |
| 76.3148281 |  |
| 76.2679531 |  |
| 76.1835781 |  |

|            |  |
|------------|--|
| 76.0960781 |  |
| 76.0054531 |  |
| 75.9304531 |  |
| 75.8617031 |  |
| 75.8085781 |  |
| 75.7773281 |  |
| 75.7398281 |  |
| 75.6960781 |  |
| 75.6492031 |  |
| 75.5960781 |  |
| 75.5335781 |  |
| 75.4742031 |  |
| 75.3960781 |  |
| 75.3335781 |  |
| 75.2835781 |  |
| 75.2460781 |  |
| 75.2054531 |  |
| 75.1429531 |  |
| 75.0867031 |  |
| 75.0117031 |  |
| 74.9617031 |  |
| 74.9335781 |  |
| 74.9335781 |  |
| 74.9554531 |  |
| 75.0085781 |  |
| 75.0554531 |  |
| 75.0898281 |  |
| 75.1179531 |  |
| 75.1148281 |  |
| 75.0960781 |  |
| 75.0710781 |  |
| 75.0367031 |  |
| 75.0023281 |  |
| 74.9617031 |  |
| 74.9210781 |  |
| 74.8804531 |  |
| 74.8085781 |  |
| 74.7273281 |  |
| 74.6367031 |  |
| 74.5617031 |  |
| 74.4929531 |  |
| 74.4179531 |  |
| 74.3367031 |  |
| 74.2429531 |  |
| 74.1304531 |  |

|            |  |
|------------|--|
| 74.0054531 |  |
| 73.8929531 |  |
| 73.8085781 |  |
| 73.7523281 |  |
| 73.7117031 |  |
| 73.6773281 |  |
| 73.6554531 |  |
| 73.6523281 |  |
| 73.6804531 |  |
| 73.6992031 |  |
| 73.7304531 |  |
| 73.7835781 |  |
| 73.8429531 |  |
| 73.8804531 |  |
| 73.9475042 |  |
| 73.9895553 |  |
| 73.9990171 |  |
| 73.9999968 |  |
| 73.98803   |  |
| 73.9595454 |  |
| 73.9520429 |  |
| 73.950344  |  |
| 73.9548951 |  |
| 73.9835533 |  |
| 74.0398902 |  |
| 74.1002448 |  |
| 74.1605995 |  |
| 74.2106863 |  |
| 74.2442552 |  |
| 74.2608599 |  |
| 74.2752324 |  |
| 74.2985335 |  |
| 74.3294239 |  |

| time GMT | elapsed | Person 1   | Person 6   | Person 3  | Person 5   | Person 8   |
|----------|---------|------------|------------|-----------|------------|------------|
| 17:59:31 |         | 77.6930524 | 71.3812876 | 70.731787 | 80.2395153 | 72.8457846 |
| 17:59:32 |         | 80.6930524 | 71.3812876 | 71.731787 | 80.2395153 | 72.8457846 |
| 17:59:33 |         | 81.6930524 | 72.3812876 | 71.731787 | 80.2395153 | 72.8457846 |
| 17:59:34 |         | 77.6930524 | 72.3812876 | 71.731787 | 81.2395153 | 72.8457846 |
| 17:59:35 |         | 75.6930524 | 73.3812876 | 71.731787 | 82.2395153 | 74.8457846 |
| 17:59:36 |         | 74.6930524 | 76.3812876 | 71.731787 | 82.2395153 | 75.8457846 |
| 17:59:37 |         | 74.6930524 | 78.3812876 | 71.731787 | 82.2395153 | 76.8457846 |
| 17:59:38 |         | 74.6930524 | 79.3812876 | 71.731787 | 82.2395153 | 77.8457846 |
| 17:59:39 |         | 74.6930524 | 79.3812876 | 72.731787 | 82.2395153 | 78.8457846 |
| 17:59:40 |         | 76.6930524 | 79.3812876 | 72.731787 | 82.2395153 | 78.8457846 |
| 17:59:41 |         | 80.6930524 | 79.3812876 | 70.731787 | 82.2395153 | 78.8457846 |
| 17:59:42 |         | 82.6930524 | 80.3812876 | 70.731787 | 83.2395153 | 76.8457846 |
| 17:59:43 |         | 83.6930524 | 80.3812876 | 70.731787 | 84.2395153 | 76.8457846 |
| 17:59:44 |         | 83.6930524 | 80.3812876 | 71.731787 | 84.2395153 | 77.8457846 |
| 17:59:45 |         | 85.6930524 | 80.3812876 | 73.731787 | 85.2395153 | 79.8457846 |
| 17:59:46 |         | 85.6930524 | 80.3812876 | 74.731787 | 88.2395153 | 80.8457846 |
| 17:59:47 |         | 85.6930524 | 80.3812876 | 74.731787 | 93.2395153 | 81.8457846 |
| 17:59:48 |         | 79.6930524 | 80.3812876 | 74.731787 | 95.2395153 | 82.8457846 |
| 17:59:49 |         | 79.6930524 | 80.3812876 | 74.731787 | 95.2395153 | 83.8457846 |
| 17:59:50 |         | 79.6930524 | 80.3812876 | 74.731787 | 96.2395153 | 83.8457846 |
| 17:59:51 |         | 80.6930524 | 79.3812876 | 74.731787 | 96.2395153 | 81.8457846 |
| 17:59:52 |         | 80.6930524 | 79.3812876 | 75.731787 | 95.2395153 | 77.8457846 |
| 17:59:53 |         | 80.6930524 | 79.3812876 | 74.731787 | 93.2395153 | 77.8457846 |
| 17:59:54 |         | 79.6930524 | 79.3812876 | 74.731787 | 93.2395153 | 75.8457846 |
| 17:59:55 |         | 78.6930524 | 79.3812876 | 74.731787 | 89.2395153 | 75.8457846 |
| 17:59:56 |         | 77.6930524 | 79.3812876 | 74.731787 | 88.2395153 | 75.8457846 |
| 17:59:57 |         | 76.6930524 | 79.3812876 | 74.731787 | 87.2395153 | 74.8457846 |
| 17:59:58 |         | 76.6930524 | 79.3812876 | 75.731787 | 87.2395153 | 74.8457846 |
| 17:59:59 |         | 76.6930524 | 79.3812876 | 75.731787 | 87.2395153 | 73.8457846 |
| 18:00:00 |         | 76.6930524 | 79.3812876 | 75.731787 | 87.2395153 | 73.8457846 |
| 18:00:01 |         | 75.6930524 | 78.3812876 | 77.731787 | 90.2395153 | 70.8457846 |
| 18:00:02 |         | 74.6930524 | 79.3812876 | 78.731787 | 90.2395153 | 69.8457846 |
| 18:00:03 |         | 74.6930524 | 79.3812876 | 78.731787 | 90.2395153 | 69.8457846 |
| 18:00:04 |         | 74.6930524 | 79.3812876 | 77.731787 | 89.2395153 | 69.8457846 |
| 18:00:05 |         | 74.6930524 | 78.3812876 | 77.731787 | 82.2395153 | 70.8457846 |
| 18:00:06 |         | 73.6930524 | 76.3812876 | 77.731787 | 82.2395153 | 70.8457846 |
| 18:00:07 |         | 73.6930524 | 67.3812876 | 77.731787 | 80.2395153 | 70.8457846 |
| 18:00:08 |         | 73.6930524 | 65.3812876 | 76.731787 | 77.2395153 | 70.8457846 |
| 18:00:09 |         | 72.6930524 | 65.3812876 | 76.731787 | 74.2395153 | 70.8457846 |
| 18:00:10 |         | 72.6930524 | 65.3812876 | 76.731787 | 74.2395153 | 70.8457846 |
| 18:00:11 |         | 73.6930524 | 67.3812876 | 76.731787 | 72.2395153 | 70.8457846 |
| 18:00:12 |         | 73.6930524 | 67.3812876 | 76.731787 | 72.2395153 | 70.8457846 |

|          |         |            |            |           |            |            |
|----------|---------|------------|------------|-----------|------------|------------|
| 18:00:13 |         | 74.6930524 | 67.3812876 | 76.731787 | 72.2395153 | 70.8457846 |
| 18:00:14 |         | 74.6930524 | 67.3812876 | 77.731787 | 72.2395153 | 78.8457846 |
| 18:00:15 |         | 74.6930524 | 67.3812876 | 78.731787 | 72.2395153 | 78.8457846 |
| 18:00:16 |         | 75.6930524 | 66.3812876 | 75.731787 | 72.2395153 | 81.8457846 |
| 18:00:17 |         | 74.6930524 | 65.3812876 | 73.731787 | 72.2395153 | 82.8457846 |
| 18:00:18 |         | 74.6930524 | 65.3812876 | 73.731787 | 74.2395153 | 82.8457846 |
| 18:00:19 | 0:00:00 | 74.6930524 | 65.3812876 | 74.731787 | 77.2395153 | 81.8457846 |
| 18:00:20 | 0:00:01 | 74.6930524 | 65.3812876 | 75.731787 | 80.2395153 | 81.8457846 |
| 18:00:21 | 0:00:02 | 74.6930524 | 63.3812876 | 75.731787 | 80.2395153 | 81.8457846 |
| 18:00:22 | 0:00:03 | 74.6930524 | 63.3812876 | 75.731787 | 81.2395153 | 81.8457846 |
| 18:00:23 | 0:00:04 | 73.6930524 | 63.3812876 | 75.731787 | 81.2395153 | 81.8457846 |
| 18:00:24 | 0:00:05 | 73.6930524 | 63.3812876 | 75.731787 | 82.2395153 | 81.8457846 |
| 18:00:25 | 0:00:06 | 71.6930524 | 61.3812876 | 76.731787 | 83.2395153 | 81.8457846 |
| 18:00:26 | 0:00:07 | 71.6930524 | 60.3812876 | 76.731787 | 84.2395153 | 81.8457846 |
| 18:00:27 | 0:00:08 | 72.6930524 | 59.3812876 | 76.731787 | 84.2395153 | 82.8457846 |
| 18:00:28 | 0:00:09 | 73.6930524 | 59.3812876 | 76.731787 | 85.2395153 | 82.8457846 |
| 18:00:29 | 0:00:10 | 75.6930524 | 59.3812876 | 76.731787 | 85.2395153 | 82.8457846 |
| 18:00:30 | 0:00:11 | 76.6930524 | 58.3812876 | 77.731787 | 85.2395153 | 81.8457846 |
| 18:00:31 | 0:00:12 | 78.6930524 | 58.3812876 | 82.731787 | 84.2395153 | 79.8457846 |
| 18:00:32 | 0:00:13 | 80.6930524 | 58.3812876 | 84.731787 | 85.2395153 | 78.8457846 |
| 18:00:33 | 0:00:14 | 80.6930524 | 58.3812876 | 84.731787 | 85.2395153 | 78.8457846 |
| 18:00:34 | 0:00:15 | 87.6930524 | 58.3812876 | 81.731787 | 86.2395153 | 77.8457846 |
| 18:00:35 | 0:00:16 | 88.6930524 | 58.3812876 | 77.731787 | 86.2395153 | 77.8457846 |
| 18:00:36 | 0:00:17 | 88.6930524 | 58.3812876 | 74.731787 | 86.2395153 | 76.8457846 |
| 18:00:37 | 0:00:18 | 88.6930524 | 60.3812876 | 72.731787 | 87.2395153 | 76.8457846 |
| 18:00:38 | 0:00:19 | 89.6930524 | 60.3812876 | 71.731787 | 87.2395153 | 76.8457846 |
| 18:00:39 | 0:00:20 | 89.6930524 | 61.3812876 | 71.731787 | 86.2395153 | 75.8457846 |
| 18:00:40 | 0:00:21 | 89.6930524 | 61.3812876 | 71.731787 | 84.2395153 | 75.8457846 |
| 18:00:41 | 0:00:22 | 90.6930524 | 61.3812876 | 71.731787 | 82.2395153 | 74.8457846 |
| 18:00:42 | 0:00:23 | 90.6930524 | 59.3812876 | 71.731787 | 82.2395153 | 74.8457846 |
| 18:00:43 | 0:00:24 | 88.6930524 | 58.3812876 | 71.731787 | 84.2395153 | 74.8457846 |
| 18:00:44 | 0:00:25 | 87.6930524 | 58.3812876 | 71.731787 | 79.2395153 | 74.8457846 |
| 18:00:45 | 0:00:26 | 86.6930524 | 57.3812876 | 71.731787 | 69.2395153 | 72.8457846 |
| 18:00:46 | 0:00:27 | 84.6930524 | 57.3812876 | 73.731787 | 66.2395153 | 70.8457846 |
| 18:00:47 | 0:00:28 | 84.6930524 | 57.3812876 | 73.731787 | 66.2395153 | 70.8457846 |
| 18:00:48 | 0:00:29 | 79.6930524 | 55.3812876 | 74.731787 | 66.2395153 | 70.8457846 |
| 18:00:49 | 0:00:30 | 78.6930524 | 55.3812876 | 77.731787 | 65.2395153 | 71.8457846 |
| 18:00:50 | 0:00:31 | 78.6930524 | 55.3812876 | 78.731787 | 63.2395153 | 72.8457846 |
| 18:00:51 | 0:00:32 | 78.6930524 | 55.3812876 | 79.731787 | 63.2395153 | 76.8457846 |
| 18:00:52 | 0:00:33 | 78.6930524 | 55.3812876 | 79.731787 | 63.2395153 | 78.8457846 |
| 18:00:53 | 0:00:34 | 78.6930524 | 56.3812876 | 79.731787 | 63.2395153 | 79.8457846 |
| 18:00:54 | 0:00:35 | 78.6930524 | 56.3812876 | 79.731787 | 63.2395153 | 79.8457846 |
| 18:00:55 | 0:00:36 | 78.6930524 | 56.3812876 | 80.731787 | 67.2395153 | 80.8457846 |
| 18:00:56 | 0:00:37 | 77.6930524 | 56.3812876 | 80.731787 | 69.2395153 | 81.8457846 |
| 18:00:57 | 0:00:38 | 78.6930524 | 56.3812876 | 81.731787 | 71.2395153 | 81.8457846 |

|          |         |            |            |           |            |            |
|----------|---------|------------|------------|-----------|------------|------------|
| 18:00:58 | 0:00:39 | 78.6930524 | 56.3812876 | 81.731787 | 72.2395153 | 82.8457846 |
| 18:00:59 | 0:00:40 | 78.6930524 | 56.3812876 | 81.731787 | 71.2395153 | 83.8457846 |
| 18:01:00 | 0:00:41 | 78.6930524 | 56.3812876 | 82.731787 | 71.2395153 | 82.8457846 |
| 18:01:01 | 0:00:42 | 80.6930524 | 57.3812876 | 79.731787 | 71.2395153 | 82.8457846 |
| 18:01:02 | 0:00:43 | 81.6930524 | 57.3812876 | 79.731787 | 70.2395153 | 82.8457846 |
| 18:01:03 | 0:00:44 | 81.6930524 | 57.3812876 | 75.731787 | 71.2395153 | 82.8457846 |
| 18:01:04 | 0:00:45 | 82.6930524 | 57.3812876 | 74.731787 | 72.2395153 | 82.8457846 |
| 18:01:05 | 0:00:46 | 81.6930524 | 58.3812876 | 74.731787 | 73.2395153 | 79.8457846 |
| 18:01:06 | 0:00:47 | 81.6930524 | 58.3812876 | 74.731787 | 73.2395153 | 75.8457846 |
| 18:01:07 | 0:00:48 | 81.6930524 | 58.3812876 | 74.731787 | 74.2395153 | 73.8457846 |
| 18:01:08 | 0:00:49 | 79.6930524 | 58.3812876 | 74.731787 | 75.2395153 | 71.8457846 |
| 18:01:09 | 0:00:50 | 79.6930524 | 58.3812876 | 74.731787 | 75.2395153 | 70.8457846 |
| 18:01:10 | 0:00:51 | 79.6930524 | 59.3812876 | 74.731787 | 74.2395153 | 70.8457846 |
| 18:01:11 | 0:00:52 | 78.6930524 | 60.3812876 | 73.731787 | 71.2395153 | 71.8457846 |
| 18:01:12 | 0:00:53 | 77.6930524 | 60.3812876 | 71.731787 | 71.2395153 | 72.8457846 |
| 18:01:13 | 0:00:54 | 77.6930524 | 61.3812876 | 70.731787 | 71.2395153 | 73.8457846 |
| 18:01:14 | 0:00:55 | 78.6930524 | 70.3812876 | 69.731787 | 71.2395153 | 74.8457846 |
| 18:01:15 | 0:00:56 | 78.6930524 | 71.3812876 | 69.731787 | 70.2395153 | 74.8457846 |
| 18:01:16 | 0:00:57 | 78.6930524 | 74.3812876 | 69.731787 | 70.2395153 | 74.8457846 |
| 18:01:17 | 0:00:58 | 78.6930524 | 77.3812876 | 69.731787 | 70.2395153 | 74.8457846 |
| 18:01:18 | 0:00:59 | 78.6930524 | 77.3812876 | 69.731787 | 69.2395153 | 74.8457846 |
| 18:01:19 | 0:01:00 | 77.6930524 | 81.3812876 | 70.731787 | 69.2395153 | 74.8457846 |
| 18:01:20 | 0:01:01 | 76.6930524 | 82.3812876 | 70.731787 | 68.2395153 | 74.8457846 |
| 18:01:21 | 0:01:02 | 75.6930524 | 82.3812876 | 70.731787 | 68.2395153 | 73.8457846 |
| 18:01:22 | 0:01:03 | 75.6930524 | 82.3812876 | 70.731787 | 69.2395153 | 73.8457846 |
| 18:01:23 | 0:01:04 | 74.6930524 | 83.3812876 | 70.731787 | 70.2395153 | 72.8457846 |
| 18:01:24 | 0:01:05 | 74.6930524 | 83.3812876 | 70.731787 | 71.2395153 | 72.8457846 |
| 18:01:25 | 0:01:06 | 74.6930524 | 83.3812876 | 70.731787 | 71.2395153 | 72.8457846 |
| 18:01:26 | 0:01:07 | 75.6930524 | 83.3812876 | 70.731787 | 72.2395153 | 72.8457846 |
| 18:01:27 | 0:01:08 | 75.6930524 | 82.3812876 | 70.731787 | 72.2395153 | 72.8457846 |
| 18:01:28 | 0:01:09 | 75.6930524 | 82.3812876 | 71.731787 | 72.2395153 | 72.8457846 |
| 18:01:29 | 0:01:10 | 75.6930524 | 79.3812876 | 71.731787 | 72.2395153 | 76.8457846 |
| 18:01:30 | 0:01:11 | 76.6930524 | 79.3812876 | 71.731787 | 72.2395153 | 77.8457846 |
| 18:01:31 | 0:01:12 | 76.6930524 | 69.3812876 | 72.731787 | 70.2395153 | 77.8457846 |
| 18:01:32 | 0:01:13 | 77.6930524 | 65.3812876 | 72.731787 | 70.2395153 | 77.8457846 |
| 18:01:33 | 0:01:14 | 78.6930524 | 64.3812876 | 72.731787 | 71.2395153 | 77.8457846 |
| 18:01:34 | 0:01:15 | 78.6930524 | 64.3812876 | 72.731787 | 72.2395153 | 77.8457846 |
| 18:01:35 | 0:01:16 | 79.6930524 | 62.3812876 | 72.731787 | 73.2395153 | 76.8457846 |
| 18:01:36 | 0:01:17 | 79.6930524 | 62.3812876 | 72.731787 | 73.2395153 | 75.8457846 |
| 18:01:37 | 0:01:18 | 78.6930524 | 60.3812876 | 73.731787 | 73.2395153 | 75.8457846 |
| 18:01:38 | 0:01:19 | 77.6930524 | 60.3812876 | 73.731787 | 73.2395153 | 72.8457846 |
| 18:01:39 | 0:01:20 | 77.6930524 | 60.3812876 | 73.731787 | 72.2395153 | 71.8457846 |
| 18:01:40 | 0:01:21 | 76.6930524 | 60.3812876 | 73.731787 | 73.2395153 | 69.8457846 |
| 18:01:41 | 0:01:22 | 76.6930524 | 61.3812876 | 73.731787 | 73.2395153 | 68.8457846 |
| 18:01:42 | 0:01:23 | 76.6930524 | 60.3812876 | 73.731787 | 74.2395153 | 68.8457846 |



|          |         |            |            |           |            |            |
|----------|---------|------------|------------|-----------|------------|------------|
| 18:01:43 | 0:01:24 | 76.6930524 | 58.3812876 | 73.731787 | 74.2395153 | 68.8457846 |
| 18:01:44 | 0:01:25 | 75.6930524 | 58.3812876 | 73.731787 | 74.2395153 | 67.8457846 |
| 18:01:45 | 0:01:26 | 75.6930524 | 58.3812876 | 73.731787 | 75.2395153 | 66.8457846 |
| 18:01:46 | 0:01:27 | 75.6930524 | 58.3812876 | 73.731787 | 72.2395153 | 66.8457846 |
| 18:01:47 | 0:01:28 | 75.6930524 | 59.3812876 | 74.731787 | 72.2395153 | 65.8457846 |
| 18:01:48 | 0:01:29 | 75.6930524 | 59.3812876 | 74.731787 | 72.2395153 | 65.8457846 |
| 18:01:49 | 0:01:30 | 76.6930524 | 59.3812876 | 76.731787 | 71.2395153 | 63.8457846 |
| 18:01:50 | 0:01:31 | 77.6930524 | 62.3812876 | 76.731787 | 71.2395153 | 63.8457846 |
| 18:01:51 | 0:01:32 | 77.6930524 | 62.3812876 | 76.731787 | 71.2395153 | 63.8457846 |
| 18:01:52 | 0:01:33 | 75.6930524 | 63.3812876 | 76.731787 | 70.2395153 | 63.8457846 |
| 18:01:53 | 0:01:34 | 74.6930524 | 62.3812876 | 76.731787 | 68.2395153 | 61.8457846 |
| 18:01:54 | 0:01:35 | 74.6930524 | 61.3812876 | 75.731787 | 67.2395153 | 61.8457846 |
| 18:01:55 | 0:01:36 | 74.6930524 | 61.3812876 | 75.731787 | 67.2395153 | 60.8457846 |
| 18:01:56 | 0:01:37 | 73.6930524 | 61.3812876 | 75.731787 | 67.2395153 | 60.8457846 |
| 18:01:57 | 0:01:38 | 73.6930524 | 61.3812876 | 75.731787 | 67.2395153 | 60.8457846 |
| 18:01:58 | 0:01:39 | 74.6930524 | 61.3812876 | 75.731787 | 67.2395153 | 60.8457846 |
| 18:01:59 | 0:01:40 | 74.6930524 | 61.3812876 | 73.731787 | 67.2395153 | 61.8457846 |
| 18:02:00 | 0:01:41 | 75.6930524 | 62.3812876 | 73.731787 | 66.2395153 | 61.8457846 |
| 18:02:01 | 0:01:42 | 75.6930524 | 62.3812876 | 73.731787 | 66.2395153 | 62.8457846 |
| 18:02:02 | 0:01:43 | 76.6930524 | 62.3812876 | 74.731787 | 66.2395153 | 63.8457846 |
| 18:02:03 | 0:01:44 | 76.6930524 | 62.3812876 | 74.731787 | 66.2395153 | 63.8457846 |
| 18:02:04 | 0:01:45 | 76.6930524 | 62.3812876 | 74.731787 | 66.2395153 | 64.8457846 |
| 18:02:05 | 0:01:46 | 76.6930524 | 63.3812876 | 74.731787 | 66.2395153 | 65.8457846 |
| 18:02:06 | 0:01:47 | 75.6930524 | 63.3812876 | 73.731787 | 67.2395153 | 66.8457846 |
| 18:02:07 | 0:01:48 | 75.6930524 | 63.3812876 | 73.731787 | 69.2395153 | 66.8457846 |
| 18:02:08 | 0:01:49 | 73.6930524 | 63.3812876 | 73.731787 | 70.2395153 | 68.8457846 |
| 18:02:09 | 0:01:50 | 73.6930524 | 61.3812876 | 72.731787 | 70.2395153 | 68.8457846 |
| 18:02:10 | 0:01:51 | 72.6930524 | 61.3812876 | 72.731787 | 71.2395153 | 70.8457846 |
| 18:02:11 | 0:01:52 | 72.6930524 | 61.3812876 | 72.731787 | 71.2395153 | 70.8457846 |
| 18:02:12 | 0:01:53 | 73.6930524 | 61.3812876 | 72.731787 | 71.2395153 | 69.8457846 |
| 18:02:13 | 0:01:54 | 73.6930524 | 62.3812876 | 72.731787 | 72.2395153 | 68.8457846 |
| 18:02:14 | 0:01:55 | 73.6930524 | 64.3812876 | 72.731787 | 71.2395153 | 68.8457846 |
| 18:02:15 | 0:01:56 | 73.6930524 | 67.3812876 | 72.731787 | 71.2395153 | 68.8457846 |
| 18:02:16 | 0:01:57 | 73.6930524 | 67.3812876 | 72.731787 | 71.2395153 | 68.8457846 |
| 18:02:17 | 0:01:58 | 73.6930524 | 68.3812876 | 73.731787 | 71.2395153 | 68.8457846 |
| 18:02:18 | 0:01:59 | 73.6930524 | 68.3812876 | 73.731787 | 71.2395153 | 68.8457846 |
| 18:02:19 | 0:02:00 | 72.6930524 | 68.3812876 | 74.731787 | 71.2395153 | 69.8457846 |
| 18:02:20 | 0:02:01 | 73.6930524 | 70.3812876 | 74.731787 | 71.2395153 | 68.8457846 |
| 18:02:21 | 0:02:02 | 72.6930524 | 70.3812876 | 74.731787 | 72.2395153 | 67.8457846 |
| 18:02:22 | 0:02:03 | 72.6930524 | 69.3812876 | 75.731787 | 73.2395153 | 66.8457846 |
| 18:02:23 | 0:02:04 | 73.6930524 | 69.3812876 | 76.731787 | 73.2395153 | 68.8457846 |
| 18:02:24 | 0:02:05 | 73.6930524 | 69.3812876 | 76.731787 | 72.2395153 | 72.8457846 |
| 18:02:25 | 0:02:06 | 74.6930524 | 70.3812876 | 77.731787 | 71.2395153 | 73.8457846 |
| 18:02:26 | 0:02:07 | 74.6930524 | 71.3812876 | 76.731787 | 71.2395153 | 74.8457846 |
| 18:02:27 | 0:02:08 | 74.6930524 | 70.3812876 | 74.731787 | 71.2395153 | 73.8457846 |

|          |         |            |            |           |            |            |
|----------|---------|------------|------------|-----------|------------|------------|
| 18:02:28 | 0:02:09 | 74.6930524 | 70.3812876 | 73.731787 | 69.2395153 | 73.8457846 |
| 18:02:29 | 0:02:10 | 73.6930524 | 66.3812876 | 73.731787 | 69.2395153 | 73.8457846 |
| 18:02:30 | 0:02:11 | 73.6930524 | 66.3812876 | 73.731787 | 69.2395153 | 73.8457846 |
| 18:02:31 | 0:02:12 | 73.6930524 | 65.3812876 | 73.731787 | 71.2395153 | 73.8457846 |
| 18:02:32 | 0:02:13 | 73.6930524 | 65.3812876 | 73.731787 | 71.2395153 | 73.8457846 |
| 18:02:33 | 0:02:14 | 73.6930524 | 65.3812876 | 73.731787 | 72.2395153 | 72.8457846 |
| 18:02:34 | 0:02:15 | 72.6930524 | 65.3812876 | 72.731787 | 72.2395153 | 72.8457846 |
| 18:02:35 | 0:02:16 | 73.6930524 | 65.3812876 | 71.731787 | 71.2395153 | 70.8457846 |
| 18:02:36 | 0:02:17 | 73.6930524 | 64.3812876 | 70.731787 | 70.2395153 | 69.8457846 |
| 18:02:37 | 0:02:18 | 73.6930524 | 64.3812876 | 69.731787 | 69.2395153 | 66.8457846 |
| 18:02:38 | 0:02:19 | 74.6930524 | 64.3812876 | 69.731787 | 69.2395153 | 66.8457846 |
| 18:02:39 | 0:02:20 | 74.6930524 | 64.3812876 | 68.731787 | 70.2395153 | 67.8457846 |
| 18:02:40 | 0:02:21 | 74.6930524 | 64.3812876 | 67.731787 | 71.2395153 | 67.8457846 |
| 18:02:41 | 0:02:22 | 74.6930524 | 64.3812876 | 66.731787 | 71.2395153 | 67.8457846 |
| 18:02:42 | 0:02:23 | 74.6930524 | 64.3812876 | 66.731787 | 71.2395153 | 67.8457846 |
| 18:02:43 | 0:02:24 | 74.6930524 | 64.3812876 | 66.731787 | 71.2395153 | 67.8457846 |
| 18:02:44 | 0:02:25 | 75.6930524 | 64.3812876 | 64.731787 | 72.2395153 | 68.8457846 |
| 18:02:45 | 0:02:26 | 75.6930524 | 63.3812876 | 64.731787 | 72.2395153 | 68.8457846 |
| 18:02:46 | 0:02:27 | 74.6930524 | 62.3812876 | 64.731787 | 75.2395153 | 68.8457846 |
| 18:02:47 | 0:02:28 | 73.6930524 | 62.3812876 | 64.731787 | 75.2395153 | 69.8457846 |
| 18:02:48 | 0:02:29 | 73.6930524 | 62.3812876 | 64.731787 | 75.2395153 | 76.8457846 |
| 18:02:49 | 0:02:30 | 73.6930524 | 63.3812876 | 64.731787 | 75.2395153 | 77.8457846 |
| 18:02:50 | 0:02:31 | 73.6930524 | 63.3812876 | 64.731787 | 78.2395153 | 76.8457846 |
| 18:02:51 | 0:02:32 | 73.6930524 | 64.3812876 | 63.731787 | 81.2395153 | 75.8457846 |
| 18:02:52 | 0:02:33 | 74.6930524 | 65.3812876 | 62.731787 | 82.2395153 | 75.8457846 |
| 18:02:53 | 0:02:34 | 74.6930524 | 65.3812876 | 62.731787 | 82.2395153 | 74.8457846 |
| 18:02:54 | 0:02:35 | 74.6930524 | 65.3812876 | 62.731787 | 86.2395153 | 74.8457846 |
| 18:02:55 | 0:02:36 | 74.6930524 | 66.3812876 | 62.731787 | 88.2395153 | 75.8457846 |
| 18:02:56 | 0:02:37 | 74.6930524 | 66.3812876 | 62.731787 | 89.2395153 | 77.8457846 |
| 18:02:57 | 0:02:38 | 74.6930524 | 68.3812876 | 62.731787 | 91.2395153 | 78.8457846 |
| 18:02:58 | 0:02:39 | 73.6930524 | 69.3812876 | 62.731787 | 91.2395153 | 79.8457846 |
| 18:02:59 | 0:02:40 | 72.6930524 | 69.3812876 | 62.731787 | 91.2395153 | 80.8457846 |
| 18:03:00 | 0:02:41 | 70.6930524 | 69.3812876 | 63.731787 | 92.2395153 | 81.8457846 |
| 18:03:01 | 0:02:42 | 70.6930524 | 69.3812876 | 67.731787 | 92.2395153 | 80.8457846 |
| 18:03:02 | 0:02:43 | 69.6930524 | 69.3812876 | 71.731787 | 93.2395153 | 78.8457846 |
| 18:03:03 | 0:02:44 | 68.6930524 | 69.3812876 | 72.731787 | 93.2395153 | 77.8457846 |
| 18:03:04 | 0:02:45 | 68.6930524 | 69.3812876 | 72.731787 | 92.2395153 | 77.8457846 |
| 18:03:05 | 0:02:46 | 68.6930524 | 69.3812876 | 73.731787 | 90.2395153 | 77.8457846 |
| 18:03:06 | 0:02:47 | 69.6930524 | 70.3812876 | 75.731787 | 88.2395153 | 77.8457846 |
| 18:03:07 | 0:02:48 | 69.6930524 | 69.3812876 | 75.731787 | 88.2395153 | 76.8457846 |
| 18:03:08 | 0:02:49 | 69.6930524 | 69.3812876 | 75.731787 | 86.2395153 | 74.8457846 |
| 18:03:09 | 0:02:50 | 69.6930524 | 70.3812876 | 76.731787 | 84.2395153 | 72.8457846 |
| 18:03:10 | 0:02:51 | 69.6930524 | 70.3812876 | 76.731787 | 83.2395153 | 72.8457846 |
| 18:03:11 | 0:02:52 | 69.6930524 | 70.3812876 | 75.731787 | 83.2395153 | 72.8457846 |
| 18:03:12 | 0:02:53 | 70.6930524 | 68.3812876 | 74.731787 | 83.2395153 | 72.8457846 |

|          |         |            |            |           |            |            |
|----------|---------|------------|------------|-----------|------------|------------|
| 18:03:13 | 0:02:54 | 70.6930524 | 68.3812876 | 74.731787 | 83.2395153 | 72.8457846 |
| 18:03:14 | 0:02:55 | 70.6930524 | 68.3812876 | 74.731787 | 83.2395153 | 72.8457846 |
| 18:03:15 | 0:02:56 | 70.6930524 | 68.3812876 | 74.731787 | 80.2395153 | 73.8457846 |
| 18:03:16 | 0:02:57 | 70.6930524 | 69.3812876 | 74.731787 | 80.2395153 | 73.8457846 |
| 18:03:17 | 0:02:58 | 70.6930524 | 69.3812876 | 73.731787 | 80.2395153 | 73.8457846 |
| 18:03:18 | 0:02:59 | 71.6930524 | 69.3812876 | 73.731787 | 79.2395153 | 75.8457846 |
| 18:03:19 | 0:03:00 | 72.6930524 | 69.3812876 | 73.731787 | 79.2395153 | 75.8457846 |
| 18:03:20 | 0:03:01 | 73.6930524 | 69.3812876 | 73.731787 | 79.2395153 | 74.8457846 |
| 18:03:21 | 0:03:02 | 74.6930524 | 70.3812876 | 73.731787 | 78.2395153 | 74.8457846 |
| 18:03:22 | 0:03:03 | 74.6930524 | 70.3812876 | 73.731787 | 77.2395153 | 74.8457846 |
| 18:03:23 | 0:03:04 | 71.6930524 | 71.3812876 | 73.731787 | 77.2395153 | 74.8457846 |
| 18:03:24 | 0:03:05 | 70.6930524 | 71.3812876 | 73.731787 | 75.2395153 | 75.8457846 |
| 18:03:25 | 0:03:06 | 69.6930524 | 72.3812876 | 73.731787 | 73.2395153 | 75.8457846 |
| 18:03:26 | 0:03:07 | 69.6930524 | 74.3812876 | 74.731787 | 73.2395153 | 75.8457846 |
| 18:03:27 | 0:03:08 | 69.6930524 | 74.3812876 | 70.731787 | 74.2395153 | 75.8457846 |
| 18:03:28 | 0:03:09 | 69.6930524 | 74.3812876 | 70.731787 | 74.2395153 | 76.8457846 |
| 18:03:29 | 0:03:10 | 68.6930524 | 74.3812876 | 68.731787 | 74.2395153 | 76.8457846 |
| 18:03:30 | 0:03:11 | 68.6930524 | 74.3812876 | 68.731787 | 74.2395153 | 76.8457846 |
| 18:03:31 | 0:03:12 | 68.6930524 | 75.3812876 | 68.731787 | 72.2395153 | 78.8457846 |
| 18:03:32 | 0:03:13 | 68.6930524 | 75.3812876 | 69.731787 | 72.2395153 | 78.8457846 |
| 18:03:33 | 0:03:14 | 68.6930524 | 76.3812876 | 69.731787 | 69.2395153 | 78.8457846 |
| 18:03:34 | 0:03:15 | 68.6930524 | 76.3812876 | 69.731787 | 67.2395153 | 77.8457846 |
| 18:03:35 | 0:03:16 | 72.6930524 | 76.3812876 | 69.731787 | 67.2395153 | 76.8457846 |
| 18:03:36 | 0:03:17 | 72.6930524 | 76.3812876 | 69.731787 | 67.2395153 | 76.8457846 |
| 18:03:37 | 0:03:18 | 72.6930524 | 75.3812876 | 69.731787 | 67.2395153 | 73.8457846 |
| 18:03:38 | 0:03:19 | 72.6930524 | 75.3812876 | 69.731787 | 68.2395153 | 73.8457846 |
| 18:03:39 | 0:03:20 | 72.6930524 | 74.3812876 | 67.731787 | 67.2395153 | 72.8457846 |
| 18:03:40 | 0:03:21 | 73.6930524 | 74.3812876 | 67.731787 | 66.2395153 | 72.8457846 |
| 18:03:41 | 0:03:22 | 73.6930524 | 72.3812876 | 67.731787 | 66.2395153 | 72.8457846 |
| 18:03:42 | 0:03:23 | 73.6930524 | 72.3812876 | 67.731787 | 66.2395153 | 72.8457846 |
| 18:03:43 | 0:03:24 | 72.6930524 | 72.3812876 | 67.731787 | 66.2395153 | 72.8457846 |
| 18:03:44 | 0:03:25 | 72.6930524 | 72.3812876 | 69.731787 | 65.2395153 | 71.8457846 |
| 18:03:45 | 0:03:26 | 71.6930524 | 72.3812876 | 70.731787 | 69.2395153 | 71.8457846 |
| 18:03:46 | 0:03:27 | 70.6930524 | 73.3812876 | 71.731787 | 70.2395153 | 71.8457846 |
| 18:03:47 | 0:03:28 | 70.6930524 | 72.3812876 | 71.731787 | 69.2395153 | 71.8457846 |
| 18:03:48 | 0:03:29 | 69.6930524 | 71.3812876 | 71.731787 | 69.2395153 | 71.8457846 |
| 18:03:49 | 0:03:30 | 69.6930524 | 71.3812876 | 71.731787 | 69.2395153 | 70.8457846 |
| 18:03:50 | 0:03:31 | 68.6930524 | 71.3812876 | 71.731787 | 69.2395153 | 70.8457846 |
| 18:03:51 | 0:03:32 | 68.6930524 | 71.3812876 | 71.731787 | 70.2395153 | 70.8457846 |
| 18:03:52 | 0:03:33 | 69.6930524 | 71.3812876 | 71.731787 | 70.2395153 | 71.8457846 |
| 18:03:53 | 0:03:34 | 69.6930524 | 71.3812876 | 71.731787 | 70.2395153 | 71.8457846 |
| 18:03:54 | 0:03:35 | 69.6930524 | 71.3812876 | 71.731787 | 69.2395153 | 71.8457846 |
| 18:03:55 | 0:03:36 | 69.6930524 | 70.3812876 | 73.731787 | 69.2395153 | 71.8457846 |
| 18:03:56 | 0:03:37 | 69.6930524 | 71.3812876 | 73.731787 | 68.2395153 | 73.8457846 |
| 18:03:57 | 0:03:38 | 69.6930524 | 71.3812876 | 73.731787 | 68.2395153 | 73.8457846 |

|          |         |            |            |           |            |            |
|----------|---------|------------|------------|-----------|------------|------------|
| 18:03:58 | 0:03:39 | 69.6930524 | 71.3812876 | 73.731787 | 67.2395153 | 75.8457846 |
| 18:03:59 | 0:03:40 | 69.6930524 | 71.3812876 | 72.731787 | 67.2395153 | 75.8457846 |
| 18:04:00 | 0:03:41 | 69.6930524 | 71.3812876 | 71.731787 | 66.2395153 | 75.8457846 |
| 18:04:01 | 0:03:42 | 69.6930524 | 71.3812876 | 70.731787 | 65.2395153 | 75.8457846 |
| 18:04:02 | 0:03:43 | 70.6930524 | 71.3812876 | 70.731787 | 65.2395153 | 75.8457846 |
| 18:04:03 | 0:03:44 | 70.6930524 | 72.3812876 | 70.731787 | 63.2395153 | 74.8457846 |
| 18:04:04 | 0:03:45 | 70.6930524 | 72.3812876 | 71.731787 | 62.2395153 | 74.8457846 |
| 18:04:05 | 0:03:46 | 71.6930524 | 75.3812876 | 71.731787 | 62.2395153 | 72.8457846 |
| 18:04:06 | 0:03:47 | 71.6930524 | 75.3812876 | 71.731787 | 62.2395153 | 71.8457846 |
| 18:04:07 | 0:03:48 | 71.6930524 | 75.3812876 | 71.731787 | 62.2395153 | 67.8457846 |
| 18:04:08 | 0:03:49 | 70.6930524 | 75.3812876 | 72.731787 | 62.2395153 | 67.8457846 |
| 18:04:09 | 0:03:50 | 70.6930524 | 74.3812876 | 72.731787 | 62.2395153 | 67.8457846 |
| 18:04:10 | 0:03:51 | 70.6930524 | 74.3812876 | 72.731787 | 64.2395153 | 67.8457846 |
| 18:04:11 | 0:03:52 | 70.6930524 | 74.3812876 | 72.731787 | 64.2395153 | 67.8457846 |
| 18:04:12 | 0:03:53 | 70.6930524 | 74.3812876 | 72.731787 | 65.2395153 | 68.8457846 |
| 18:04:13 | 0:03:54 | 70.6930524 | 74.3812876 | 72.731787 | 65.2395153 | 69.8457846 |
| 18:04:14 | 0:03:55 | 71.6930524 | 73.3812876 | 72.731787 | 65.2395153 | 69.8457846 |
| 18:04:15 | 0:03:56 | 71.6930524 | 73.3812876 | 72.731787 | 65.2395153 | 70.8457846 |
| 18:04:16 | 0:03:57 | 72.6930524 | 70.3812876 | 71.731787 | 66.2395153 | 70.8457846 |
| 18:04:17 | 0:03:58 | 72.6930524 | 70.3812876 | 71.731787 | 67.2395153 | 70.8457846 |
| 18:04:18 | 0:03:59 | 72.6930524 | 70.3812876 | 71.731787 | 67.2395153 | 70.8457846 |
| 18:04:19 | 0:04:00 | 72.6930524 | 70.3812876 | 71.731787 | 68.2395153 | 71.8457846 |
| 18:04:20 | 0:04:01 | 72.6930524 | 70.3812876 | 73.731787 | 68.2395153 | 72.8457846 |
| 18:04:21 | 0:04:02 | 72.6930524 | 74.3812876 | 74.731787 | 72.2395153 | 73.8457846 |
| 18:04:22 | 0:04:03 | 73.6930524 | 75.3812876 | 74.731787 | 74.2395153 | 73.8457846 |
| 18:04:23 | 0:04:04 | 73.6930524 | 76.3812876 | 73.731787 | 75.2395153 | 73.8457846 |
| 18:04:24 | 0:04:05 | 73.6930524 | 76.3812876 | 73.731787 | 75.2395153 | 73.8457846 |
| 18:04:25 | 0:04:06 | 73.6930524 | 76.3812876 | 72.731787 | 75.2395153 | 73.8457846 |
| 18:04:26 | 0:04:07 | 74.6930524 | 76.3812876 | 72.731787 | 76.2395153 | 73.8457846 |
| 18:04:27 | 0:04:08 | 74.6930524 | 76.3812876 | 72.731787 | 79.2395153 | 73.8457846 |
| 18:04:28 | 0:04:09 | 73.6930524 | 76.3812876 | 72.731787 | 79.2395153 | 73.8457846 |
| 18:04:29 | 0:04:10 | 73.6930524 | 75.3812876 | 72.731787 | 79.2395153 | 73.8457846 |
| 18:04:30 | 0:04:11 | 73.6930524 | 75.3812876 | 72.731787 | 79.2395153 | 73.8457846 |
| 18:04:31 | 0:04:12 | 70.6930524 | 75.3812876 | 72.731787 | 80.2395153 | 74.8457846 |
| 18:04:32 | 0:04:13 | 70.6930524 | 75.3812876 | 71.731787 | 80.2395153 | 73.8457846 |
| 18:04:33 | 0:04:14 | 68.6930524 | 75.3812876 | 71.731787 | 82.2395153 | 73.8457846 |
| 18:04:34 | 0:04:15 | 68.6930524 | 75.3812876 | 71.731787 | 83.2395153 | 72.8457846 |
| 18:04:35 | 0:04:16 | 68.6930524 | 75.3812876 | 71.731787 | 83.2395153 | 71.8457846 |
| 18:04:36 | 0:04:17 | 68.6930524 | 75.3812876 | 70.731787 | 83.2395153 | 72.8457846 |
| 18:04:37 | 0:04:18 | 68.6930524 | 76.3812876 | 70.731787 | 83.2395153 | 73.8457846 |
| 18:04:38 | 0:04:19 | 68.6930524 | 82.3812876 | 70.731787 | 84.2395153 | 73.8457846 |
| 18:04:39 | 0:04:20 | 68.6930524 | 82.3812876 | 71.731787 | 84.2395153 | 74.8457846 |
| 18:04:40 | 0:04:21 | 71.6930524 | 80.3812876 | 71.731787 | 84.2395153 | 75.8457846 |
| 18:04:41 | 0:04:22 | 71.6930524 | 79.3812876 | 71.731787 | 84.2395153 | 77.8457846 |
| 18:04:42 | 0:04:23 | 71.6930524 | 79.3812876 | 70.731787 | 84.2395153 | 78.8457846 |

|          |         |            |            |           |            |            |
|----------|---------|------------|------------|-----------|------------|------------|
| 18:04:43 | 0:04:24 | 71.6930524 | 80.3812876 | 70.731787 | 84.2395153 | 78.8457846 |
| 18:04:44 | 0:04:25 | 71.6930524 | 79.3812876 | 71.731787 | 84.2395153 | 79.8457846 |
| 18:04:45 | 0:04:26 | 71.6930524 | 77.3812876 | 71.731787 | 84.2395153 | 80.8457846 |
| 18:04:46 | 0:04:27 | 71.6930524 | 77.3812876 | 71.731787 | 84.2395153 | 82.8457846 |
| 18:04:47 | 0:04:28 | 70.6930524 | 74.3812876 | 71.731787 | 84.2395153 | 83.8457846 |
| 18:04:48 | 0:04:29 | 70.6930524 | 73.3812876 | 71.731787 | 84.2395153 | 85.8457846 |
| 18:04:49 | 0:04:30 | 70.6930524 | 72.3812876 | 72.731787 | 84.2395153 | 85.8457846 |
| 18:04:50 | 0:04:31 | 69.6930524 | 72.3812876 | 72.731787 | 82.2395153 | 85.8457846 |
| 18:04:51 | 0:04:32 | 69.6930524 | 68.3812876 | 72.731787 | 79.2395153 | 85.8457846 |
| 18:04:52 | 0:04:33 | 69.6930524 | 66.3812876 | 71.731787 | 79.2395153 | 85.8457846 |
| 18:04:53 | 0:04:34 | 69.6930524 | 67.3812876 | 71.731787 | 77.2395153 | 83.8457846 |
| 18:04:54 | 0:04:35 | 69.6930524 | 71.3812876 | 70.731787 | 75.2395153 | 82.8457846 |
| 18:04:55 | 0:04:36 | 69.6930524 | 73.3812876 | 70.731787 | 74.2395153 | 82.8457846 |
| 18:04:56 | 0:04:37 | 69.6930524 | 73.3812876 | 70.731787 | 74.2395153 | 78.8457846 |
| 18:04:57 | 0:04:38 | 69.6930524 | 73.3812876 | 71.731787 | 75.2395153 | 75.8457846 |
| 18:04:58 | 0:04:39 | 69.6930524 | 73.3812876 | 71.731787 | 76.2395153 | 74.8457846 |
| 18:04:59 | 0:04:40 | 69.6930524 | 70.3812876 | 71.731787 | 76.2395153 | 74.8457846 |
| 18:05:00 | 0:04:41 | 68.6930524 | 69.3812876 | 71.731787 | 76.2395153 | 74.8457846 |
| 18:05:01 | 0:04:42 | 68.6930524 | 69.3812876 | 71.731787 | 79.2395153 | 74.8457846 |
| 18:05:02 | 0:04:43 | 68.6930524 | 72.3812876 | 71.731787 | 79.2395153 | 76.8457846 |
| 18:05:03 | 0:04:44 | 68.6930524 | 74.3812876 | 71.731787 | 81.2395153 | 77.8457846 |
| 18:05:04 | 0:04:45 | 68.6930524 | 74.3812876 | 71.731787 | 82.2395153 | 77.8457846 |
| 18:05:05 | 0:04:46 | 67.6930524 | 74.3812876 | 71.731787 | 82.2395153 | 77.8457846 |
| 18:05:06 | 0:04:47 | 67.6930524 | 73.3812876 | 73.731787 | 82.2395153 | 77.8457846 |
| 18:05:07 | 0:04:48 | 67.6930524 | 73.3812876 | 73.731787 | 81.2395153 | 78.8457846 |
| 18:05:08 | 0:04:49 | 67.6930524 | 73.3812876 | 73.731787 | 81.2395153 | 78.8457846 |
| 18:05:09 | 0:04:50 | 67.6930524 | 72.3812876 | 71.731787 | 80.2395153 | 79.8457846 |
| 18:05:10 | 0:04:51 | 67.6930524 | 72.3812876 | 71.731787 | 79.2395153 | 80.8457846 |
| 18:05:11 | 0:04:52 | 67.6930524 | 72.3812876 | 70.731787 | 78.2395153 | 80.8457846 |
| 18:05:12 | 0:04:53 | 67.6930524 | 70.3812876 | 70.731787 | 77.2395153 | 81.8457846 |
| 18:05:13 | 0:04:54 | 67.6930524 | 70.3812876 | 69.731787 | 77.2395153 | 80.8457846 |
| 18:05:14 | 0:04:55 | 67.6930524 | 68.3812876 | 70.731787 | 77.2395153 | 80.8457846 |
| 18:05:15 | 0:04:56 | 68.6930524 | 67.3812876 | 72.731787 | 77.2395153 | 78.8457846 |
| 18:05:16 | 0:04:57 | 68.6930524 | 66.3812876 | 71.731787 | 78.2395153 | 77.8457846 |
| 18:05:17 | 0:04:58 | 69.6930524 | 66.3812876 | 71.731787 | 79.2395153 | 77.8457846 |
| 18:05:18 | 0:04:59 | 69.6930524 | 65.3812876 | 71.731787 | 81.2395153 | 76.8457846 |
| 18:05:19 | 0:05:00 | 69.6930524 | 64.3812876 | 71.731787 | 81.2395153 | 75.8457846 |
| 18:05:20 | 0:05:01 | 69.6930524 | 64.3812876 | 71.731787 | 83.2395153 | 73.8457846 |
| 18:05:21 | 0:05:02 | 69.6930524 | 64.3812876 | 72.731787 | 84.2395153 | 69.8457846 |
| 18:05:22 | 0:05:03 | 68.6930524 | 64.3812876 | 72.731787 | 84.2395153 | 67.8457846 |
| 18:05:23 | 0:05:04 | 68.6930524 | 64.3812876 | 72.731787 | 84.2395153 | 65.8457846 |
| 18:05:24 | 0:05:05 | 68.6930524 | 64.3812876 | 72.731787 | 84.2395153 | 65.8457846 |
| 18:05:25 | 0:05:06 | 68.6930524 | 64.3812876 | 73.731787 | 84.2395153 | 64.8457846 |
| 18:05:26 | 0:05:07 | 69.6930524 | 68.3812876 | 73.731787 | 85.2395153 | 64.8457846 |
| 18:05:27 | 0:05:08 | 69.6930524 | 69.3812876 | 73.731787 | 85.2395153 | 64.8457846 |

|          |         |            |            |           |            |            |
|----------|---------|------------|------------|-----------|------------|------------|
| 18:05:28 | 0:05:09 | 70.6930524 | 69.3812876 | 77.731787 | 85.2395153 | 63.8457846 |
| 18:05:29 | 0:05:10 | 70.6930524 | 70.3812876 | 77.731787 | 86.2395153 | 63.8457846 |
| 18:05:30 | 0:05:11 | 70.6930524 | 70.3812876 | 77.731787 | 86.2395153 | 63.8457846 |
| 18:05:31 | 0:05:12 | 71.6930524 | 70.3812876 | 75.731787 | 86.2395153 | 63.8457846 |
| 18:05:32 | 0:05:13 | 70.6930524 | 71.3812876 | 75.731787 | 87.2395153 | 62.8457846 |
| 18:05:33 | 0:05:14 | 70.6930524 | 71.3812876 | 77.731787 | 87.2395153 | 61.8457846 |
| 18:05:34 | 0:05:15 | 70.6930524 | 71.3812876 | 76.731787 | 86.2395153 | 62.8457846 |
| 18:05:35 | 0:05:16 | 71.6930524 | 70.3812876 | 75.731787 | 85.2395153 | 64.8457846 |
| 18:05:36 | 0:05:17 | 70.6930524 | 69.3812876 | 74.731787 | 84.2395153 | 66.8457846 |
| 18:05:37 | 0:05:18 | 70.6930524 | 69.3812876 | 73.731787 | 84.2395153 | 68.8457846 |
| 18:05:38 | 0:05:19 | 71.6930524 | 68.3812876 | 74.731787 | 84.2395153 | 70.8457846 |
| 18:05:39 | 0:05:20 | 72.6930524 | 74.3812876 | 75.731787 | 82.2395153 | 70.8457846 |
| 18:05:40 | 0:05:21 | 72.6930524 | 74.3812876 | 76.731787 | 80.2395153 | 70.8457846 |
| 18:05:41 | 0:05:22 | 72.6930524 | 74.3812876 | 76.731787 | 80.2395153 | 70.8457846 |
| 18:05:42 | 0:05:23 | 72.6930524 | 74.3812876 | 76.731787 | 79.2395153 | 69.8457846 |
| 18:05:43 | 0:05:24 | 72.6930524 | 72.3812876 | 75.731787 | 79.2395153 | 70.8457846 |
| 18:05:44 | 0:05:25 | 72.6930524 | 72.3812876 | 74.731787 | 78.2395153 | 71.8457846 |
| 18:05:45 | 0:05:26 | 72.6930524 | 70.3812876 | 74.731787 | 77.2395153 | 71.8457846 |
| 18:05:46 | 0:05:27 | 72.6930524 | 70.3812876 | 74.731787 | 72.2395153 | 70.8457846 |
| 18:05:47 | 0:05:28 | 72.6930524 | 70.3812876 | 73.731787 | 71.2395153 | 69.8457846 |
| 18:05:48 | 0:05:29 | 73.6930524 | 69.3812876 | 73.731787 | 71.2395153 | 69.8457846 |
| 18:05:49 | 0:05:30 | 73.6930524 | 69.3812876 | 73.731787 | 71.2395153 | 69.8457846 |
| 18:05:50 | 0:05:31 | 73.6930524 | 68.3812876 | 72.731787 | 71.2395153 | 68.8457846 |
| 18:05:51 | 0:05:32 | 73.6930524 | 68.3812876 | 72.731787 | 71.2395153 | 67.8457846 |
| 18:05:52 | 0:05:33 | 74.6930524 | 68.3812876 | 72.731787 | 66.2395153 | 66.8457846 |
| 18:05:53 | 0:05:34 | 75.6930524 | 68.3812876 | 72.731787 | 65.2395153 | 66.8457846 |
| 18:05:54 | 0:05:35 | 76.6930524 | 71.3812876 | 72.731787 | 65.2395153 | 66.8457846 |
| 18:05:55 | 0:05:36 | 76.6930524 | 73.3812876 | 73.731787 | 65.2395153 | 66.8457846 |
| 18:05:56 | 0:05:37 | 77.6930524 | 75.3812876 | 73.731787 | 63.2395153 | 66.8457846 |
| 18:05:57 | 0:05:38 | 76.6930524 | 75.3812876 | 73.731787 | 61.2395153 | 61.8457846 |
| 18:05:58 | 0:05:39 | 76.6930524 | 75.3812876 | 72.731787 | 62.2395153 | 62.8457846 |
| 18:05:59 | 0:05:40 | 75.6930524 | 75.3812876 | 72.731787 | 62.2395153 | 62.8457846 |
| 18:06:00 | 0:05:41 | 75.6930524 | 75.3812876 | 71.731787 | 64.2395153 | 62.8457846 |
| 18:06:01 | 0:05:42 | 74.6930524 | 75.3812876 | 71.731787 | 67.2395153 | 62.8457846 |
| 18:06:02 | 0:05:43 | 74.6930524 | 72.3812876 | 71.731787 | 69.2395153 | 62.8457846 |
| 18:06:03 | 0:05:44 | 73.6930524 | 73.3812876 | 71.731787 | 69.2395153 | 65.8457846 |
| 18:06:04 | 0:05:45 | 73.6930524 | 73.3812876 | 72.731787 | 69.2395153 | 68.8457846 |
| 18:06:05 | 0:05:46 | 73.6930524 | 73.3812876 | 73.731787 | 72.2395153 | 68.8457846 |
| 18:06:06 | 0:05:47 | 73.6930524 | 73.3812876 | 74.731787 | 75.2395153 | 68.8457846 |
| 18:06:07 | 0:05:48 | 73.6930524 | 73.3812876 | 75.731787 | 75.2395153 | 68.8457846 |
| 18:06:08 | 0:05:49 | 73.6930524 | 73.3812876 | 75.731787 | 80.2395153 | 68.8457846 |
| 18:06:09 | 0:05:50 | 74.6930524 | 72.3812876 | 75.731787 | 84.2395153 | 68.8457846 |
| 18:06:10 | 0:05:51 | 74.6930524 | 69.3812876 | 75.731787 | 86.2395153 | 69.8457846 |
| 18:06:11 | 0:05:52 | 74.6930524 | 67.3812876 | 75.731787 | 86.2395153 | 69.8457846 |
| 18:06:12 | 0:05:53 | 74.6930524 | 67.3812876 | 75.731787 | 75.5451505 | 72.8457846 |

|          |         |            |            |           |            |            |
|----------|---------|------------|------------|-----------|------------|------------|
| 18:06:13 | 0:05:54 | 74.6930524 | 66.3812876 | 75.731787 | 75.5451505 | 73.8457846 |
| 18:06:14 | 0:05:55 | 73.6930524 | 65.3812876 | 75.731787 | 75.2951505 | 73.8457846 |
| 18:06:15 | 0:05:56 | 73.6930524 | 64.3812876 | 76.731787 | 75.4201505 | 73.8457846 |
| 18:06:16 | 0:05:57 | 73.6930524 | 64.3812876 | 75.731787 | 75.0451505 | 73.8457846 |
| 18:06:17 | 0:05:58 | 74.6930524 | 64.3812876 | 74.731787 | 75.0451505 | 73.8457846 |
| 18:06:18 | 0:05:59 | 74.6930524 | 64.3812876 | 74.731787 | 75.0451505 | 73.8457846 |
| 18:06:19 | 0:06:00 | 74.6930524 | 69.3812876 | 74.731787 | 75.7951505 | 74.8457846 |
| 18:06:20 | 0:06:01 | 74.6930524 | 69.3812876 | 74.731787 | 75.7951505 | 74.8457846 |
| 18:06:21 | 0:06:02 | 74.6930524 | 69.3812876 | 74.731787 | 75.9201505 | 74.8457846 |
| 18:06:22 | 0:06:03 | 73.6930524 | 69.3812876 | 74.731787 | 76.2951505 | 74.8457846 |
| 18:06:23 | 0:06:04 | 73.6930524 | 67.3812876 | 75.731787 | 76.6701505 | 73.8457846 |
| 18:06:24 | 0:06:05 | 74.6930524 | 67.3812876 | 75.731787 | 76.4201505 | 70.8457846 |
| 18:06:25 | 0:06:06 | 73.6930524 | 68.3812876 | 74.731787 | 76.2951505 | 70.8457846 |
| 18:06:26 | 0:06:07 | 74.6930524 | 69.3812876 | 74.731787 | 92.2395153 | 70.8457846 |
| 18:06:27 | 0:06:08 | 74.6930524 | 71.3812876 | 74.731787 | 90.2395153 | 70.8457846 |
| 18:06:28 | 0:06:09 | 74.6930524 | 71.3812876 | 74.731787 | 90.2395153 | 70.8457846 |
| 18:06:29 | 0:06:10 | 74.6930524 | 72.3812876 | 74.731787 | 90.2395153 | 70.8457846 |
| 18:06:30 | 0:06:11 | 74.6930524 | 72.3812876 | 74.731787 | 90.2395153 | 70.8457846 |
| 18:06:31 | 0:06:12 | 74.6930524 | 72.3812876 | 72.731787 | 90.2395153 | 70.8457846 |
| 18:06:32 | 0:06:13 | 74.6930524 | 73.3812876 | 72.731787 | 88.2395153 | 70.8457846 |
| 18:06:33 | 0:06:14 | 74.6930524 | 73.3812876 | 73.731787 | 87.2395153 | 69.8457846 |
| 18:06:34 | 0:06:15 | 74.6930524 | 73.3812876 | 73.731787 | 87.2395153 | 69.8457846 |
| 18:06:35 | 0:06:16 | 75.6930524 | 73.3812876 | 73.731787 | 87.2395153 | 69.8457846 |
| 18:06:36 | 0:06:17 | 74.6930524 | 74.3812876 | 73.731787 | 83.2395153 | 69.8457846 |
| 18:06:37 | 0:06:18 | 74.6930524 | 75.3812876 | 75.731787 | 79.2395153 | 69.8457846 |
| 18:06:38 | 0:06:19 | 74.6930524 | 75.3812876 | 76.731787 | 79.2395153 | 68.8457846 |
| 18:06:39 | 0:06:20 | 74.6930524 | 74.3812876 | 77.731787 | 73.2395153 | 68.8457846 |
| 18:06:40 | 0:06:21 | 74.6930524 | 73.3812876 | 78.731787 | 74.2395153 | 68.8457846 |
| 18:06:41 | 0:06:22 | 74.6930524 | 73.3812876 | 82.731787 | 74.2395153 | 69.8457846 |
| 18:06:42 | 0:06:23 | 74.6930524 | 72.3812876 | 82.731787 | 74.2395153 | 69.8457846 |
| 18:06:43 | 0:06:24 | 73.6930524 | 72.3812876 | 81.731787 | 74.2395153 | 70.8457846 |
| 18:06:44 | 0:06:25 | 74.6930524 | 72.3812876 | 79.731787 | 74.2395153 | 70.8457846 |
| 18:06:45 | 0:06:26 | 74.6930524 | 72.3812876 | 78.731787 | 74.2395153 | 69.8457846 |
| 18:06:46 | 0:06:27 | 74.6930524 | 73.3812876 | 78.731787 | 74.2395153 | 69.8457846 |
| 18:06:47 | 0:06:28 | 74.6930524 | 73.3812876 | 77.731787 | 74.2395153 | 70.8457846 |
| 18:06:48 | 0:06:29 | 74.6930524 | 73.3812876 | 77.731787 | 74.2395153 | 70.8457846 |
| 18:06:49 | 0:06:30 | 75.6930524 | 73.3812876 | 77.731787 | 74.2395153 | 70.8457846 |
| 18:06:50 | 0:06:31 | 75.6930524 | 74.3812876 | 77.731787 | 74.2395153 | 69.8457846 |
| 18:06:51 | 0:06:32 | 75.6930524 | 74.3812876 | 77.731787 | 74.2395153 | 67.8457846 |
| 18:06:52 | 0:06:33 | 75.6930524 | 74.3812876 | 76.731787 | 75.2395153 | 67.8457846 |
| 18:06:53 | 0:06:34 | 75.6930524 | 74.3812876 | 76.731787 | 76.2395153 | 67.8457846 |
| 18:06:54 | 0:06:35 | 75.6930524 | 74.3812876 | 76.731787 | 76.2395153 | 67.8457846 |
| 18:06:55 | 0:06:36 | 74.6930524 | 74.3812876 | 76.731787 | 77.2395153 | 67.8457846 |
| 18:06:56 | 0:06:37 | 74.6930524 | 74.3812876 | 76.731787 | 77.2395153 | 66.8457846 |
| 18:06:57 | 0:06:38 | 74.6930524 | 75.3812876 | 74.731787 | 78.2395153 | 67.8457846 |

|          |         |            |            |           |            |            |
|----------|---------|------------|------------|-----------|------------|------------|
| 18:06:58 | 0:06:39 | 74.6930524 | 75.3812876 | 72.731787 | 78.2395153 | 69.8457846 |
| 18:06:59 | 0:06:40 | 74.6930524 | 75.3812876 | 71.731787 | 79.2395153 | 69.8457846 |
| 18:07:00 | 0:06:41 | 74.6930524 | 70.3812876 | 71.731787 | 79.2395153 | 69.8457846 |
| 18:07:01 | 0:06:42 | 74.6930524 | 70.3812876 | 71.731787 | 79.2395153 | 69.8457846 |
| 18:07:02 | 0:06:43 | 75.6930524 | 69.3812876 | 72.731787 | 80.2395153 | 68.8457846 |
| 18:07:03 | 0:06:44 | 76.6930524 | 68.3812876 | 74.731787 | 84.2395153 | 69.8457846 |
| 18:07:04 | 0:06:45 | 76.6930524 | 68.3812876 | 74.731787 | 86.2395153 | 69.8457846 |
| 18:07:05 | 0:06:46 | 76.6930524 | 68.3812876 | 74.731787 | 76.2395153 | 69.8457846 |
| 18:07:06 | 0:06:47 | 76.6930524 | 67.3812876 | 74.731787 | 72.2395153 | 69.8457846 |
| 18:07:07 | 0:06:48 | 76.6930524 | 67.3812876 | 75.731787 | 72.2395153 | 69.8457846 |
| 18:07:08 | 0:06:49 | 76.6930524 | 67.3812876 | 75.731787 | 71.2395153 | 69.8457846 |
| 18:07:09 | 0:06:50 | 76.6930524 | 67.3812876 | 75.731787 | 71.2395153 | 71.8457846 |
| 18:07:10 | 0:06:51 | 76.6930524 | 67.3812876 | 75.731787 | 71.2395153 | 72.8457846 |
| 18:07:11 | 0:06:52 | 75.6930524 | 66.3812876 | 75.731787 | 71.2395153 | 72.8457846 |
| 18:07:12 | 0:06:53 | 75.6930524 | 66.3812876 | 75.731787 | 71.2395153 | 72.8457846 |
| 18:07:13 | 0:06:54 | 75.6930524 | 65.3812876 | 76.731787 | 72.2395153 | 72.8457846 |
| 18:07:14 | 0:06:55 | 75.6930524 | 65.3812876 | 75.731787 | 72.2395153 | 73.8457846 |
| 18:07:15 | 0:06:56 | 74.6930524 | 67.3812876 | 74.731787 | 74.2395153 | 73.8457846 |
| 18:07:16 | 0:06:57 | 74.6930524 | 67.3812876 | 74.731787 | 75.2395153 | 72.8457846 |
| 18:07:17 | 0:06:58 | 74.6930524 | 68.3812876 | 73.731787 | 76.2395153 | 72.8457846 |
| 18:07:18 | 0:06:59 | 73.6930524 | 68.3812876 | 73.731787 | 76.2395153 | 73.8457846 |
| 18:07:19 | 0:07:00 | 73.6930524 | 68.3812876 | 73.731787 | 76.2395153 | 73.8457846 |
| 18:07:20 | 0:07:01 | 73.6930524 | 69.3812876 | 73.731787 | 77.2395153 | 75.8457846 |
| 18:07:21 | 0:07:02 | 73.6930524 | 69.3812876 | 73.731787 | 77.2395153 | 75.8457846 |
| 18:07:22 | 0:07:03 | 73.6930524 | 70.3812876 | 73.731787 | 76.2395153 | 75.8457846 |
| 18:07:23 | 0:07:04 | 73.6930524 | 69.3812876 | 73.731787 | 76.2395153 | 75.8457846 |
| 18:07:24 | 0:07:05 | 73.6930524 | 68.3812876 | 72.731787 | 76.2395153 | 75.8457846 |
| 18:07:25 | 0:07:06 | 73.6930524 | 68.3812876 | 71.731787 | 76.2395153 | 76.8457846 |
| 18:07:26 | 0:07:07 | 73.6930524 | 68.3812876 | 71.731787 | 76.2395153 | 76.8457846 |
| 18:07:27 | 0:07:08 | 73.6930524 | 68.3812876 | 72.731787 | 77.2395153 | 77.8457846 |
| 18:07:28 | 0:07:09 | 72.6930524 | 68.3812876 | 72.731787 | 77.2395153 | 77.8457846 |
| 18:07:29 | 0:07:10 | 72.6930524 | 68.3812876 | 73.731787 | 77.2395153 | 77.8457846 |
| 18:07:30 | 0:07:11 | 72.6930524 | 68.3812876 | 73.731787 | 77.2395153 | 77.8457846 |
| 18:07:31 | 0:07:12 | 72.6930524 | 68.3812876 | 73.731787 | 77.2395153 | 77.8457846 |
| 18:07:32 | 0:07:13 | 72.6930524 | 68.3812876 | 73.731787 | 77.2395153 | 77.8457846 |
| 18:07:33 | 0:07:14 | 72.6930524 | 71.3812876 | 73.731787 | 77.2395153 | 77.8457846 |
| 18:07:34 | 0:07:15 | 72.6930524 | 71.3812876 | 73.731787 | 77.2395153 | 76.8457846 |
| 18:07:35 | 0:07:16 | 72.6930524 | 71.3812876 | 73.731787 | 77.2395153 | 76.8457846 |
| 18:07:36 | 0:07:17 | 72.6930524 | 71.3812876 | 73.731787 | 78.2395153 | 75.8457846 |
| 18:07:37 | 0:07:18 | 71.6930524 | 71.3812876 | 72.731787 | 78.2395153 | 74.8457846 |
| 18:07:38 | 0:07:19 | 71.6930524 | 71.3812876 | 72.731787 | 78.2395153 | 74.8457846 |
| 18:07:39 | 0:07:20 | 74.6930524 | 71.3812876 | 73.731787 | 78.2395153 | 74.8457846 |
| 18:07:40 | 0:07:21 | 75.6930524 | 72.3812876 | 73.731787 | 77.2395153 | 73.8457846 |
| 18:07:41 | 0:07:22 | 76.6930524 | 72.3812876 | 72.731787 | 77.2395153 | 72.8457846 |
| 18:07:42 | 0:07:23 | 76.6930524 | 73.3812876 | 70.731787 | 77.2395153 | 73.8457846 |



|          |         |            |            |           |            |            |
|----------|---------|------------|------------|-----------|------------|------------|
| 18:07:43 | 0:07:24 | 76.6930524 | 73.3812876 | 70.731787 | 76.2395153 | 73.8457846 |
| 18:07:44 | 0:07:25 | 76.6930524 | 74.3812876 | 69.731787 | 76.2395153 | 73.8457846 |
| 18:07:45 | 0:07:26 | 75.6930524 | 74.3812876 | 69.731787 | 76.2395153 | 73.8457846 |
| 18:07:46 | 0:07:27 | 76.6930524 | 74.3812876 | 69.731787 | 76.2395153 | 73.8457846 |
| 18:07:47 | 0:07:28 | 75.6930524 | 74.3812876 | 70.731787 | 76.2395153 | 74.8457846 |
| 18:07:48 | 0:07:29 | 76.6930524 | 74.3812876 | 71.731787 | 76.2395153 | 74.8457846 |
| 18:07:49 | 0:07:30 | 76.6930524 | 74.3812876 | 71.731787 | 76.2395153 | 75.8457846 |
| 18:07:50 | 0:07:31 | 76.6930524 | 74.3812876 | 72.731787 | 77.2395153 | 75.8457846 |
| 18:07:51 | 0:07:32 | 75.6930524 | 74.3812876 | 72.731787 | 78.2395153 | 75.8457846 |
| 18:07:52 | 0:07:33 | 75.6930524 | 74.3812876 | 72.731787 | 78.2395153 | 75.8457846 |
| 18:07:53 | 0:07:34 | 74.6930524 | 74.3812876 | 72.731787 | 78.2395153 | 75.8457846 |
| 18:07:54 | 0:07:35 | 72.6930524 | 74.3812876 | 72.731787 | 79.2395153 | 74.8457846 |
| 18:07:55 | 0:07:36 | 71.6930524 | 74.3812876 | 72.731787 | 81.2395153 | 74.8457846 |
| 18:07:56 | 0:07:37 | 71.6930524 | 74.3812876 | 72.731787 | 83.2395153 | 73.8457846 |
| 18:07:57 | 0:07:38 | 71.6930524 | 75.3812876 | 72.731787 | 82.2395153 | 73.8457846 |
| 18:07:58 | 0:07:39 | 72.6930524 | 75.3812876 | 72.731787 | 82.2395153 | 72.8457846 |
| 18:07:59 | 0:07:40 | 72.6930524 | 75.3812876 | 72.731787 | 82.2395153 | 72.8457846 |
| 18:08:00 | 0:07:41 | 73.6930524 | 77.3812876 | 72.731787 | 82.2395153 | 69.8457846 |
| 18:08:01 | 0:07:42 | 74.6930524 | 81.3812876 | 72.731787 | 82.2395153 | 69.8457846 |
| 18:08:02 | 0:07:43 | 73.6930524 | 81.3812876 | 71.731787 | 83.2395153 | 67.8457846 |
| 18:08:03 | 0:07:44 | 73.6930524 | 81.3812876 | 71.731787 | 85.2395153 | 66.8457846 |
| 18:08:04 | 0:07:45 | 73.6930524 | 81.3812876 | 71.731787 | 85.2395153 | 65.8457846 |
| 18:08:05 | 0:07:46 | 74.6930524 | 80.3812876 | 71.731787 | 89.2395153 | 64.8457846 |
| 18:08:06 | 0:07:47 | 74.6930524 | 80.3812876 | 71.731787 | 89.2395153 | 64.8457846 |
| 18:08:07 | 0:07:48 | 74.6930524 | 80.3812876 | 70.731787 | 91.2395153 | 63.8457846 |
| 18:08:08 | 0:07:49 | 74.6930524 | 79.3812876 | 69.731787 | 91.2395153 | 64.8457846 |
| 18:08:09 | 0:07:50 | 73.6930524 | 79.3812876 | 69.731787 | 93.2395153 | 65.8457846 |
| 18:08:10 | 0:07:51 | 74.6930524 | 79.3812876 | 70.731787 | 93.2395153 | 65.8457846 |
| 18:08:11 | 0:07:52 | 76.6930524 | 78.3812876 | 71.731787 | 93.2395153 | 67.8457846 |
| 18:08:12 | 0:07:53 | 77.6930524 | 79.3812876 | 72.731787 | 93.2395153 | 71.8457846 |
| 18:08:13 | 0:07:54 | 76.6930524 | 79.3812876 | 72.731787 | 93.2395153 | 71.8457846 |
| 18:08:14 | 0:07:55 | 75.6930524 | 81.3812876 | 72.731787 | 93.2395153 | 82.8457846 |
| 18:08:15 | 0:07:56 | 74.6930524 | 82.3812876 | 72.731787 | 91.2395153 | 84.8457846 |
| 18:08:16 | 0:07:57 | 74.6930524 | 83.3812876 | 72.731787 | 89.2395153 | 85.8457846 |
| 18:08:17 | 0:07:58 | 74.6930524 | 83.3812876 | 72.731787 | 89.2395153 | 85.8457846 |
| 18:08:18 | 0:07:59 | 75.6930524 | 84.3812876 | 72.731787 | 89.2395153 | 84.8457846 |
| 18:08:19 | 0:08:00 | 76.6930524 | 84.3812876 | 73.731787 | 85.2395153 | 84.8457846 |
| 18:08:20 | 0:08:01 | 76.6930524 | 84.3812876 | 76.731787 | 85.2395153 | 84.8457846 |
| 18:08:21 | 0:08:02 | 75.6930524 | 79.3812876 | 78.731787 | 79.2395153 | 84.8457846 |
| 18:08:22 | 0:08:03 | 75.6930524 | 76.3812876 | 79.731787 | 76.2395153 | 84.8457846 |
| 18:08:23 | 0:08:04 | 75.6930524 | 74.3812876 | 79.731787 | 76.2395153 | 84.8457846 |
| 18:08:24 | 0:08:05 | 75.6930524 | 72.3812876 | 79.731787 | 75.2395153 | 84.8457846 |
| 18:08:25 | 0:08:06 | 75.6930524 | 72.3812876 | 79.731787 | 74.2395153 | 84.8457846 |
| 18:08:26 | 0:08:07 | 75.6930524 | 74.3812876 | 80.731787 | 74.2395153 | 84.8457846 |
| 18:08:27 | 0:08:08 | 75.6930524 | 74.3812876 | 81.731787 | 74.2395153 | 83.8457846 |

|          |         |            |            |           |            |            |
|----------|---------|------------|------------|-----------|------------|------------|
| 18:08:28 | 0:08:09 | 75.6930524 | 74.3812876 | 81.731787 | 74.2395153 | 82.8457846 |
| 18:08:29 | 0:08:10 | 75.6930524 | 75.3812876 | 84.731787 | 74.2395153 | 82.8457846 |
| 18:08:30 | 0:08:11 | 76.6930524 | 75.3812876 | 84.731787 | 73.2395153 | 81.8457846 |
| 18:08:31 | 0:08:12 | 76.6930524 | 76.3812876 | 84.731787 | 71.2395153 | 80.8457846 |
| 18:08:32 | 0:08:13 | 75.6930524 | 76.3812876 | 84.731787 | 70.2395153 | 80.8457846 |
| 18:08:33 | 0:08:14 | 75.6930524 | 74.3812876 | 84.731787 | 70.2395153 | 78.8457846 |
| 18:08:34 | 0:08:15 | 75.6930524 | 73.3812876 | 84.731787 | 70.2395153 | 78.8457846 |
| 18:08:35 | 0:08:16 | 74.6930524 | 73.3812876 | 80.731787 | 70.2395153 | 77.8457846 |
| 18:08:36 | 0:08:17 | 74.6930524 | 73.3812876 | 75.731787 | 70.2395153 | 76.8457846 |
| 18:08:37 | 0:08:18 | 73.6930524 | 73.3812876 | 71.731787 | 70.2395153 | 76.8457846 |
| 18:08:38 | 0:08:19 | 73.6930524 | 73.3812876 | 71.731787 | 70.2395153 | 75.8457846 |
| 18:08:39 | 0:08:20 | 73.6930524 | 73.3812876 | 70.731787 | 70.2395153 | 73.8457846 |
| 18:08:40 | 0:08:21 | 73.6930524 | 73.3812876 | 70.731787 | 70.2395153 | 72.8457846 |
| 18:08:41 | 0:08:22 | 73.6930524 | 75.3812876 | 70.731787 | 71.2395153 | 72.8457846 |
| 18:08:42 | 0:08:23 | 73.6930524 | 77.3812876 | 70.731787 | 72.2395153 | 71.8457846 |
| 18:08:43 | 0:08:24 | 74.6930524 | 78.3812876 | 70.731787 | 72.2395153 | 71.8457846 |
| 18:08:44 | 0:08:25 | 75.6930524 | 78.3812876 | 70.731787 | 72.2395153 | 70.8457846 |
| 18:08:45 | 0:08:26 | 75.6930524 | 78.3812876 | 70.731787 | 77.2395153 | 70.8457846 |
| 18:08:46 | 0:08:27 | 75.6930524 | 78.3812876 | 70.731787 | 78.2395153 | 69.8457846 |
| 18:08:47 | 0:08:28 | 75.6930524 | 80.3812876 | 70.731787 | 78.2395153 | 69.8457846 |
| 18:08:48 | 0:08:29 | 75.6930524 | 81.3812876 | 70.731787 | 78.2395153 | 67.8457846 |
| 18:08:49 | 0:08:30 | 76.6930524 | 81.3812876 | 71.731787 | 77.2395153 | 67.8457846 |
| 18:08:50 | 0:08:31 | 75.6930524 | 83.3812876 | 71.731787 | 76.2395153 | 67.8457846 |
| 18:08:51 | 0:08:32 | 75.6930524 | 83.3812876 | 71.731787 | 75.2395153 | 67.8457846 |
| 18:08:52 | 0:08:33 | 75.6930524 | 84.3812876 | 72.731787 | 75.2395153 | 67.8457846 |
| 18:08:53 | 0:08:34 | 75.6930524 | 84.3812876 | 72.731787 | 75.2395153 | 69.8457846 |
| 18:08:54 | 0:08:35 | 74.6930524 | 84.3812876 | 72.731787 | 74.2395153 | 70.8457846 |
| 18:08:55 | 0:08:36 | 73.6930524 | 84.3812876 | 72.731787 | 70.2395153 | 71.8457846 |
| 18:08:56 | 0:08:37 | 73.6930524 | 84.3812876 | 72.731787 | 69.2395153 | 71.8457846 |
| 18:08:57 | 0:08:38 | 73.6930524 | 85.3812876 | 72.731787 | 67.2395153 | 71.8457846 |
| 18:08:58 | 0:08:39 | 75.6930524 | 85.3812876 | 72.731787 | 65.2395153 | 71.8457846 |
| 18:08:59 | 0:08:40 | 75.6930524 | 86.3812876 | 72.731787 | 63.2395153 | 72.8457846 |
| 18:09:00 | 0:08:41 | 75.6930524 | 86.3812876 | 72.731787 | 63.2395153 | 72.8457846 |
| 18:09:01 | 0:08:42 | 75.6930524 | 86.3812876 | 72.731787 | 62.2395153 | 72.8457846 |
| 18:09:02 | 0:08:43 | 75.6930524 | 88.3812876 | 75.731787 | 62.2395153 | 73.8457846 |
| 18:09:03 | 0:08:44 | 76.6930524 | 88.3812876 | 83.731787 | 62.2395153 | 75.8457846 |
| 18:09:04 | 0:08:45 | 74.6930524 | 88.3812876 | 85.731787 | 61.2395153 | 75.8457846 |
| 18:09:05 | 0:08:46 | 74.6930524 | 83.3812876 | 86.731787 | 61.2395153 | 71.8457846 |
| 18:09:06 | 0:08:47 | 74.6930524 | 83.3812876 | 88.731787 | 60.2395153 | 71.8457846 |
| 18:09:07 | 0:08:48 | 75.6930524 | 83.3812876 | 87.731787 | 60.2395153 | 71.8457846 |
| 18:09:08 | 0:08:49 | 75.6930524 | 83.3812876 | 87.731787 | 60.2395153 | 70.8457846 |
| 18:09:09 | 0:08:50 | 74.6930524 | 82.3812876 | 86.731787 | 59.2395153 | 70.8457846 |
| 18:09:10 | 0:08:51 | 75.6930524 | 78.3812876 | 86.731787 | 59.2395153 | 70.8457846 |
| 18:09:11 | 0:08:52 | 75.6930524 | 77.3812876 | 86.731787 | 60.2395153 | 69.8457846 |
| 18:09:12 | 0:08:53 | 75.6930524 | 76.3812876 | 86.731787 | 60.2395153 | 69.8457846 |

|          |         |            |            |           |            |            |
|----------|---------|------------|------------|-----------|------------|------------|
| 18:09:13 | 0:08:54 | 75.6930524 | 75.3812876 | 84.731787 | 55.2395153 | 69.8457846 |
| 18:09:14 | 0:08:55 | 75.6930524 | 74.3812876 | 77.731787 | 54.2395153 | 69.8457846 |
| 18:09:15 | 0:08:56 | 75.6930524 | 74.3812876 | 72.731787 | 53.2395153 | 69.8457846 |
| 18:09:16 | 0:08:57 | 74.6930524 | 72.3812876 | 70.731787 | 52.2395153 | 69.8457846 |
| 18:09:17 | 0:08:58 | 74.6930524 | 72.3812876 | 69.731787 | 52.2395153 | 69.8457846 |
| 18:09:18 | 0:08:59 | 74.6930524 | 71.3812876 | 69.731787 | 52.2395153 | 69.8457846 |
| 18:09:19 | 0:09:00 | 73.6930524 | 71.3812876 | 69.731787 | 52.2395153 | 69.8457846 |
| 18:09:20 | 0:09:01 | 73.6930524 | 71.3812876 | 68.731787 | 52.2395153 | 69.8457846 |
| 18:09:21 | 0:09:02 | 73.6930524 | 71.3812876 | 67.731787 | 53.2395153 | 69.8457846 |
| 18:09:22 | 0:09:03 | 73.6930524 | 71.3812876 | 67.731787 | 54.2395153 | 68.8457846 |
| 18:09:23 | 0:09:04 | 73.6930524 | 71.3812876 | 68.731787 | 55.2395153 | 68.8457846 |
| 18:09:24 | 0:09:05 | 73.6930524 | 71.3812876 | 68.731787 | 55.2395153 | 68.8457846 |
| 18:09:25 | 0:09:06 | 73.6930524 | 73.3812876 | 69.731787 | 55.2395153 | 66.8457846 |
| 18:09:26 | 0:09:07 | 73.6930524 | 73.3812876 | 69.731787 | 55.2395153 | 66.8457846 |
| 18:09:27 | 0:09:08 | 73.6930524 | 73.3812876 | 69.731787 | 56.2395153 | 65.8457846 |
| 18:09:28 | 0:09:09 | 72.6930524 | 73.3812876 | 69.731787 | 57.2395153 | 64.8457846 |
| 18:09:29 | 0:09:10 | 72.6930524 | 73.3812876 | 69.731787 | 58.2395153 | 64.8457846 |
| 18:09:30 | 0:09:11 | 72.6930524 | 73.3812876 | 69.731787 | 57.2395153 | 66.8457846 |
| 18:09:31 | 0:09:12 | 73.6930524 | 73.3812876 | 68.731787 | 57.2395153 | 66.8457846 |
| 18:09:32 | 0:09:13 | 73.6930524 | 73.3812876 | 68.731787 | 58.2395153 | 66.8457846 |
| 18:09:33 | 0:09:14 | 74.6930524 | 73.3812876 | 69.731787 | 59.2395153 | 67.8457846 |
| 18:09:34 | 0:09:15 | 75.6930524 | 74.3812876 | 71.731787 | 59.2395153 | 67.8457846 |
| 18:09:35 | 0:09:16 | 75.6930524 | 74.3812876 | 71.731787 | 58.2395153 | 67.8457846 |
| 18:09:36 | 0:09:17 | 76.6930524 | 74.3812876 | 71.731787 | 58.2395153 | 67.8457846 |
| 18:09:37 | 0:09:18 | 76.6930524 | 75.3812876 | 71.731787 | 58.2395153 | 67.8457846 |
| 18:09:38 | 0:09:19 | 76.6930524 | 76.3812876 | 71.731787 | 56.2395153 | 66.8457846 |
| 18:09:39 | 0:09:20 | 76.6930524 | 76.3812876 | 71.731787 | 55.2395153 | 66.8457846 |
| 18:09:40 | 0:09:21 | 76.6930524 | 73.3812876 | 71.731787 | 55.2395153 | 64.8457846 |
| 18:09:41 | 0:09:22 | 77.6930524 | 73.3812876 | 72.731787 | 55.2395153 | 62.8457846 |
| 18:09:42 | 0:09:23 | 77.6930524 | 73.3812876 | 74.731787 | 56.2395153 | 60.8457846 |
| 18:09:43 | 0:09:24 | 78.6930524 | 74.3812876 | 74.731787 | 58.2395153 | 60.8457846 |
| 18:09:44 | 0:09:25 | 77.6930524 | 74.3812876 | 75.731787 | 58.2395153 | 60.8457846 |
| 18:09:45 | 0:09:26 | 77.6930524 | 74.3812876 | 75.731787 | 60.2395153 | 60.8457846 |
| 18:09:46 | 0:09:27 | 77.6930524 | 74.3812876 | 75.731787 | 64.2395153 | 60.8457846 |
| 18:09:47 | 0:09:28 | 77.6930524 | 74.3812876 | 75.731787 | 63.2395153 | 60.8457846 |
| 18:09:48 | 0:09:29 | 78.6930524 | 74.3812876 | 76.731787 | 63.2395153 | 60.8457846 |
| 18:09:49 | 0:09:30 | 78.6930524 | 74.3812876 | 76.731787 | 64.2395153 | 60.8457846 |
| 18:09:50 | 0:09:31 | 78.6930524 | 75.3812876 | 76.731787 | 65.2395153 | 59.8457846 |
| 18:09:51 | 0:09:32 | 78.6930524 | 76.3812876 | 77.731787 | 65.2395153 | 59.8457846 |
| 18:09:52 | 0:09:33 | 79.6930524 | 78.3812876 | 77.731787 | 66.2395153 | 59.8457846 |
| 18:09:53 | 0:09:34 | 79.6930524 | 78.3812876 | 78.731787 | 66.2395153 | 59.8457846 |
| 18:09:54 | 0:09:35 | 79.6930524 | 78.3812876 | 78.731787 | 66.2395153 | 59.8457846 |
| 18:09:55 | 0:09:36 | 77.6930524 | 79.3812876 | 79.731787 | 70.2395153 | 59.8457846 |
| 18:09:56 | 0:09:37 | 77.6930524 | 79.3812876 | 79.731787 | 70.2395153 | 61.8457846 |
| 18:09:57 | 0:09:38 | 76.6930524 | 79.3812876 | 79.731787 | 73.2395153 | 66.8457846 |

|          |         |            |            |           |            |            |
|----------|---------|------------|------------|-----------|------------|------------|
| 18:09:58 | 0:09:39 | 76.6930524 | 79.3812876 | 79.731787 | 72.2395153 | 66.8457846 |
| 18:09:59 | 0:09:40 | 76.6930524 | 77.3812876 | 77.731787 | 72.2395153 | 67.8457846 |
| 18:10:00 | 0:09:41 | 76.6930524 | 75.3812876 | 77.731787 | 71.2395153 | 70.8457846 |
| 18:10:01 | 0:09:42 | 76.6930524 | 73.3812876 | 77.731787 | 70.2395153 | 71.8457846 |
| 18:10:02 | 0:09:43 | 76.6930524 | 74.3812876 | 75.731787 | 69.2395153 | 71.8457846 |
| 18:10:03 | 0:09:44 | 75.6930524 | 74.3812876 | 75.731787 | 69.2395153 | 71.8457846 |
| 18:10:04 | 0:09:45 | 75.6930524 | 74.3812876 | 75.731787 | 69.2395153 | 71.8457846 |
| 18:10:05 | 0:09:46 | 75.6930524 | 74.3812876 | 75.731787 | 69.2395153 | 71.8457846 |
| 18:10:06 | 0:09:47 | 75.6930524 | 73.3812876 | 75.731787 | 69.2395153 | 71.8457846 |
| 18:10:07 | 0:09:48 | 75.6930524 | 72.3812876 | 75.731787 | 69.2395153 | 71.8457846 |
| 18:10:08 | 0:09:49 | 75.6930524 | 72.3812876 | 73.731787 | 69.2395153 | 68.8457846 |
| 18:10:09 | 0:09:50 | 75.6930524 | 72.3812876 | 73.731787 | 71.2395153 | 68.8457846 |
| 18:10:10 | 0:09:51 | 75.6930524 | 71.3812876 | 73.731787 | 74.2395153 | 68.8457846 |
| 18:10:11 | 0:09:52 | 75.6930524 | 71.3812876 | 74.731787 | 74.2395153 | 68.8457846 |
| 18:10:12 | 0:09:53 | 75.6930524 | 71.3812876 | 73.731787 | 75.2395153 | 67.8457846 |
| 18:10:13 | 0:09:54 | 79.6930524 | 71.3812876 | 73.731787 | 75.2395153 | 67.8457846 |
| 18:10:14 | 0:09:55 | 82.6930524 | 71.3812876 | 73.731787 | 74.2395153 | 67.8457846 |
| 18:10:15 | 0:09:56 | 85.6930524 | 71.3812876 | 73.731787 | 74.2395153 | 67.8457846 |
| 18:10:16 | 0:09:57 | 87.6930524 | 71.3812876 | 73.731787 | 74.2395153 | 68.8457846 |
| 18:10:17 | 0:09:58 | 86.6930524 | 71.3812876 | 72.731787 | 74.2395153 | 69.8457846 |
| 18:10:18 | 0:09:59 | 86.6930524 | 70.3812876 | 72.731787 | 75.2395153 | 70.8457846 |
| 18:10:19 | 0:10:00 | 85.6930524 | 74.3812876 | 72.731787 | 76.2395153 | 71.8457846 |
| 18:10:20 | 0:10:01 | 83.6930524 | 74.3812876 | 74.731787 | 75.2395153 | 72.8457846 |
| 18:10:21 | 0:10:02 | 81.6930524 | 74.3812876 | 75.731787 | 75.2395153 | 72.8457846 |
| 18:10:22 | 0:10:03 | 80.6930524 | 75.3812876 | 75.731787 | 75.2395153 | 72.8457846 |
| 18:10:23 | 0:10:04 | 80.6930524 | 75.3812876 | 76.731787 | 75.2395153 | 72.8457846 |
| 18:10:24 | 0:10:05 | 81.6930524 | 75.3812876 | 75.731787 | 72.2395153 | 72.8457846 |
| 18:10:25 | 0:10:06 | 81.6930524 | 75.3812876 | 75.731787 | 72.2395153 | 73.8457846 |
| 18:10:26 | 0:10:07 | 81.6930524 | 75.3812876 | 75.731787 | 72.2395153 | 74.8457846 |
| 18:10:27 | 0:10:08 | 79.6930524 | 75.3812876 | 76.731787 | 72.2395153 | 74.8457846 |
| 18:10:28 | 0:10:09 | 75.6930524 | 74.3812876 | 77.731787 | 71.2395153 | 74.8457846 |
| 18:10:29 | 0:10:10 | 72.6930524 | 74.3812876 | 78.731787 | 71.2395153 | 75.8457846 |
| 18:10:30 | 0:10:11 | 71.6930524 | 74.3812876 | 78.731787 | 71.2395153 | 76.8457846 |
| 18:10:31 | 0:10:12 | 70.6930524 | 74.3812876 | 79.731787 | 69.2395153 | 77.8457846 |
| 18:10:32 | 0:10:13 | 70.6930524 | 74.3812876 | 79.731787 | 69.2395153 | 77.8457846 |
| 18:10:33 | 0:10:14 | 70.6930524 | 74.3812876 | 79.731787 | 69.2395153 | 77.8457846 |
| 18:10:34 | 0:10:15 | 70.6930524 | 74.3812876 | 80.731787 | 69.2395153 | 81.8457846 |
| 18:10:35 | 0:10:16 | 70.6930524 | 74.3812876 | 79.731787 | 69.2395153 | 80.8457846 |
| 18:10:36 | 0:10:17 | 70.6930524 | 75.3812876 | 78.731787 | 70.2395153 | 78.8457846 |
| 18:10:37 | 0:10:18 | 68.6930524 | 75.3812876 | 77.731787 | 71.2395153 | 78.8457846 |
| 18:10:38 | 0:10:19 | 68.6930524 | 74.3812876 | 75.731787 | 72.2395153 | 77.8457846 |
| 18:10:39 | 0:10:20 | 67.6930524 | 74.3812876 | 74.731787 | 77.2395153 | 77.8457846 |
| 18:10:40 | 0:10:21 | 67.6930524 | 74.3812876 | 73.731787 | 79.2395153 | 78.8457846 |
| 18:10:41 | 0:10:22 | 66.6930524 | 75.3812876 | 73.731787 | 78.2395153 | 78.8457846 |
| 18:10:42 | 0:10:23 | 65.6930524 | 75.3812876 | 72.731787 | 78.2395153 | 79.8457846 |

|          |         |            |            |           |            |            |
|----------|---------|------------|------------|-----------|------------|------------|
| 18:10:43 | 0:10:24 | 65.6930524 | 75.3812876 | 71.731787 | 78.2395153 | 79.8457846 |
| 18:10:44 | 0:10:25 | 65.6930524 | 75.3812876 | 71.731787 | 78.2395153 | 79.8457846 |
| 18:10:45 | 0:10:26 | 64.6930524 | 74.3812876 | 72.731787 | 77.2395153 | 79.8457846 |
| 18:10:46 | 0:10:27 | 65.6930524 | 74.3812876 | 73.731787 | 76.2395153 | 79.8457846 |
| 18:10:47 | 0:10:28 | 65.6930524 | 75.3812876 | 72.731787 | 74.2395153 | 79.8457846 |
| 18:10:48 | 0:10:29 | 65.6930524 | 75.3812876 | 72.731787 | 74.2395153 | 79.8457846 |
| 18:10:49 | 0:10:30 | 65.6930524 | 74.3812876 | 69.731787 | 73.2395153 | 80.8457846 |
| 18:10:50 | 0:10:31 | 67.6930524 | 74.3812876 | 68.731787 | 73.2395153 | 80.8457846 |
| 18:10:51 | 0:10:32 | 67.6930524 | 74.3812876 | 67.731787 | 73.2395153 | 81.8457846 |
| 18:10:52 | 0:10:33 | 67.6930524 | 73.3812876 | 66.731787 | 74.2395153 | 81.8457846 |
| 18:10:53 | 0:10:34 | 67.6930524 | 72.3812876 | 63.731787 | 77.2395153 | 81.8457846 |
| 18:10:54 | 0:10:35 | 67.6930524 | 73.3812876 | 63.731787 | 77.2395153 | 76.8457846 |
| 18:10:55 | 0:10:36 | 64.6930524 | 73.3812876 | 62.731787 | 77.2395153 | 76.8457846 |
| 18:10:56 | 0:10:37 | 64.6930524 | 73.3812876 | 62.731787 | 77.2395153 | 76.8457846 |
| 18:10:57 | 0:10:38 | 64.6930524 | 73.3812876 | 62.731787 | 77.2395153 | 76.8457846 |
| 18:10:58 | 0:10:39 | 64.6930524 | 73.3812876 | 61.731787 | 77.2395153 | 76.8457846 |
| 18:10:59 | 0:10:40 | 64.6930524 | 73.3812876 | 61.731787 | 77.2395153 | 76.8457846 |
| 18:11:00 | 0:10:41 | 65.6930524 | 71.3812876 | 61.731787 | 77.2395153 | 76.8457846 |
| 18:11:01 | 0:10:42 | 65.6930524 | 69.3812876 | 61.731787 | 78.2395153 | 78.8457846 |
| 18:11:02 | 0:10:43 | 65.6930524 | 69.3812876 | 61.731787 | 78.2395153 | 78.8457846 |
| 18:11:03 | 0:10:44 | 69.6930524 | 69.3812876 | 62.731787 | 78.2395153 | 78.8457846 |
| 18:11:04 | 0:10:45 | 69.6930524 | 69.3812876 | 68.731787 | 78.2395153 | 78.8457846 |
| 18:11:05 | 0:10:46 | 70.6930524 | 70.3812876 | 73.731787 | 78.2395153 | 78.8457846 |
| 18:11:06 | 0:10:47 | 70.6930524 | 70.3812876 | 74.731787 | 78.2395153 | 78.8457846 |
| 18:11:07 | 0:10:48 | 69.6930524 | 70.3812876 | 75.731787 | 78.2395153 | 74.8457846 |
| 18:11:08 | 0:10:49 | 70.6930524 | 71.3812876 | 75.731787 | 78.2395153 | 73.8457846 |
| 18:11:09 | 0:10:50 | 70.6930524 | 72.3812876 | 75.731787 | 78.2395153 | 73.8457846 |
| 18:11:10 | 0:10:51 | 70.6930524 | 72.3812876 | 75.731787 | 77.2395153 | 71.8457846 |
| 18:11:11 | 0:10:52 | 70.6930524 | 72.3812876 | 75.731787 | 76.2395153 | 70.8457846 |
| 18:11:12 | 0:10:53 | 69.6930524 | 72.3812876 | 74.731787 | 76.2395153 | 70.8457846 |
| 18:11:13 | 0:10:54 | 69.6930524 | 71.3812876 | 74.731787 | 75.2395153 | 70.8457846 |
| 18:11:14 | 0:10:55 | 69.6930524 | 71.3812876 | 73.731787 | 75.2395153 | 69.8457846 |
| 18:11:15 | 0:10:56 | 69.6930524 | 70.3812876 | 72.731787 | 74.2395153 | 71.8457846 |
| 18:11:16 | 0:10:57 | 71.6930524 | 71.3812876 | 71.731787 | 70.2395153 | 71.8457846 |
| 18:11:17 | 0:10:58 | 71.6930524 | 71.3812876 | 71.731787 | 69.2395153 | 73.8457846 |
| 18:11:18 | 0:10:59 | 71.6930524 | 71.3812876 | 71.731787 | 69.2395153 | 74.8457846 |
| 18:11:19 | 0:11:00 | 71.6930524 | 71.3812876 | 71.731787 | 69.2395153 | 75.8457846 |
| 18:11:20 | 0:11:01 | 71.6930524 | 71.3812876 | 71.731787 | 69.2395153 | 76.8457846 |
| 18:11:21 | 0:11:02 | 70.6930524 | 71.3812876 | 70.731787 | 69.2395153 | 76.8457846 |
| 18:11:22 | 0:11:03 | 70.6930524 | 71.3812876 | 70.731787 | 69.2395153 | 76.8457846 |
| 18:11:23 | 0:11:04 | 71.6930524 | 70.3812876 | 70.731787 | 70.2395153 | 80.8457846 |
| 18:11:24 | 0:11:05 | 72.6930524 | 71.3812876 | 70.731787 | 70.2395153 | 80.8457846 |
| 18:11:25 | 0:11:06 | 72.6930524 | 71.3812876 | 70.731787 | 70.2395153 | 85.8457846 |
| 18:11:26 | 0:11:07 | 72.6930524 | 71.3812876 | 70.731787 | 70.2395153 | 87.8457846 |
| 18:11:27 | 0:11:08 | 71.6930524 | 71.3812876 | 72.731787 | 73.2395153 | 87.8457846 |

|          |         |            |            |           |            |            |
|----------|---------|------------|------------|-----------|------------|------------|
| 18:11:28 | 0:11:09 | 71.6930524 | 71.3812876 | 73.731787 | 73.2395153 | 88.8457846 |
| 18:11:29 | 0:11:10 | 73.6930524 | 71.3812876 | 73.731787 | 74.2395153 | 88.8457846 |
| 18:11:30 | 0:11:11 | 75.6930524 | 70.3812876 | 73.731787 | 74.2395153 | 88.8457846 |
| 18:11:31 | 0:11:12 | 76.6930524 | 69.3812876 | 73.731787 | 74.2395153 | 88.8457846 |
| 18:11:32 | 0:11:13 | 76.6930524 | 69.3812876 | 73.731787 | 74.2395153 | 88.8457846 |
| 18:11:33 | 0:11:14 | 75.6930524 | 68.3812876 | 73.731787 | 74.2395153 | 87.8457846 |
| 18:11:34 | 0:11:15 | 75.6930524 | 68.3812876 | 73.731787 | 74.2395153 | 86.8457846 |
| 18:11:35 | 0:11:16 | 75.6930524 | 66.3812876 | 74.731787 | 75.2395153 | 86.8457846 |
| 18:11:36 | 0:11:17 | 74.6930524 | 66.3812876 | 74.731787 | 75.2395153 | 86.8457846 |
| 18:11:37 | 0:11:18 | 74.6930524 | 66.3812876 | 74.731787 | 75.2395153 | 85.8457846 |
| 18:11:38 | 0:11:19 | 73.6930524 | 65.3812876 | 74.731787 | 75.2395153 | 88.8457846 |
| 18:11:39 | 0:11:20 | 74.6930524 | 66.3812876 | 75.731787 | 84.2395153 | 88.8457846 |
| 18:11:40 | 0:11:21 | 74.6930524 | 66.3812876 | 75.731787 | 89.2395153 | 86.8457846 |
| 18:11:41 | 0:11:22 | 74.6930524 | 67.3812876 | 76.731787 | 75.6701505 | 86.8457846 |
| 18:11:42 | 0:11:23 | 74.6930524 | 67.3812876 | 76.731787 | 75.6701505 | 86.8457846 |
| 18:11:43 | 0:11:24 | 75.6930524 | 69.3812876 | 74.731787 | 75.6701505 | 86.8457846 |
| 18:11:44 | 0:11:25 | 75.6930524 | 69.3812876 | 73.731787 | 75.4201505 | 86.8457846 |
| 18:11:45 | 0:11:26 | 75.6930524 | 71.3812876 | 73.731787 | 75.6701505 | 86.8457846 |
| 18:11:46 | 0:11:27 | 75.6930524 | 73.3812876 | 73.731787 | 92.2395153 | 85.8457846 |
| 18:11:47 | 0:11:28 | 75.6930524 | 73.3812876 | 73.731787 | 75.9201505 | 84.8457846 |
| 18:11:48 | 0:11:29 | 76.6930524 | 72.3812876 | 73.731787 | 75.9201505 | 84.8457846 |
| 18:11:49 | 0:11:30 | 74.6930524 | 72.3812876 | 72.731787 | 75.6701505 | 83.8457846 |
| 18:11:50 | 0:11:31 | 72.6930524 | 71.3812876 | 72.731787 | 75.4201505 | 82.8457846 |
| 18:11:51 | 0:11:32 | 72.6930524 | 70.3812876 | 72.731787 | 74.1701505 | 70.8457846 |
| 18:11:52 | 0:11:33 | 72.6930524 | 71.3812876 | 72.731787 | 73.6701505 | 65.8457846 |
| 18:11:53 | 0:11:34 | 72.6930524 | 71.3812876 | 71.731787 | 73.6701505 | 67.8457846 |
| 18:11:54 | 0:11:35 | 72.6930524 | 70.3812876 | 70.731787 | 73.7951505 | 70.8457846 |
| 18:11:55 | 0:11:36 | 72.6930524 | 71.3812876 | 71.731787 | 73.9201505 | 70.8457846 |
| 18:11:56 | 0:11:37 | 72.6930524 | 70.3812876 | 72.731787 | 74.2951505 | 71.8457846 |
| 18:11:57 | 0:11:38 | 72.6930524 | 70.3812876 | 71.731787 | 74.4201505 | 72.8457846 |
| 18:11:58 | 0:11:39 | 72.6930524 | 70.3812876 | 71.731787 | 74.2951505 | 73.8457846 |
| 18:11:59 | 0:11:40 | 71.6930524 | 70.3812876 | 71.731787 | 74.0451505 | 73.8457846 |
| 18:12:00 | 0:11:41 | 69.6930524 | 70.3812876 | 71.731787 | 73.9201505 | 73.8457846 |
| 18:12:01 | 0:11:42 | 69.6930524 | 69.3812876 | 71.731787 | 73.9201505 | 73.8457846 |
| 18:12:02 | 0:11:43 | 69.6930524 | 68.3812876 | 71.731787 | 73.7951505 | 70.8457846 |
| 18:12:03 | 0:11:44 | 74.6930524 | 73.3812876 | 71.731787 | 75.0451505 | 70.8457846 |
| 18:12:04 | 0:11:45 | 79.6930524 | 73.3812876 | 72.731787 | 76.1701505 | 70.8457846 |
| 18:12:05 | 0:11:46 | 80.6930524 | 74.3812876 | 73.731787 | 76.6701505 | 70.8457846 |
| 18:12:06 | 0:11:47 | 80.6930524 | 75.3812876 | 72.731787 | 76.9201505 | 72.8457846 |
| 18:12:07 | 0:11:48 | 86.6930524 | 75.3812876 | 71.731787 | 77.7951505 | 73.8457846 |
| 18:12:08 | 0:11:49 | 87.6930524 | 76.3812876 | 70.731787 | 78.0451505 | 73.8457846 |
| 18:12:09 | 0:11:50 | 89.6930524 | 84.3812876 | 70.731787 | 79.1701505 | 73.8457846 |
| 18:12:10 | 0:11:51 | 94.6930524 | 84.3812876 | 70.731787 | 79.5451505 | 73.8457846 |
| 18:12:11 | 0:11:52 | 95.6930524 | 84.3812876 | 71.731787 | 79.7951505 | 73.8457846 |
| 18:12:12 | 0:11:53 | 95.6930524 | 84.3812876 | 71.731787 | 79.7951505 | 72.8457846 |

|          |         |            |            |           |            |            |
|----------|---------|------------|------------|-----------|------------|------------|
| 18:12:13 | 0:11:54 | 78.6930524 | 84.3812876 | 71.731787 | 77.1701505 | 74.8457846 |
| 18:12:14 | 0:11:55 | 76.6930524 | 84.3812876 | 70.731787 | 83.2395153 | 74.8457846 |
| 18:12:15 | 0:11:56 | 75.6930524 | 84.3812876 | 70.731787 | 77.2395153 | 73.8457846 |
| 18:12:16 | 0:11:57 | 74.6930524 | 84.3812876 | 70.731787 | 77.2395153 | 72.8457846 |
| 18:12:17 | 0:11:58 | 74.6930524 | 84.3812876 | 70.731787 | 74.2395153 | 72.8457846 |
| 18:12:18 | 0:11:59 | 73.6930524 | 85.3812876 | 71.731787 | 73.2395153 | 72.8457846 |
| 18:12:19 | 0:12:00 | 73.6930524 | 85.3812876 | 71.731787 | 73.2395153 | 72.8457846 |
| 18:12:20 | 0:12:01 | 73.6930524 | 84.3812876 | 71.731787 | 73.2395153 | 72.8457846 |
| 18:12:21 | 0:12:02 | 73.6930524 | 84.3812876 | 71.731787 | 72.2395153 | 72.8457846 |
| 18:12:22 | 0:12:03 | 73.6930524 | 84.3812876 | 71.731787 | 73.2395153 | 72.8457846 |
| 18:12:23 | 0:12:04 | 72.6930524 | 84.3812876 | 71.731787 | 73.2395153 | 72.8457846 |
| 18:12:24 | 0:12:05 | 72.6930524 | 84.3812876 | 71.731787 | 72.2395153 | 73.8457846 |
| 18:12:25 | 0:12:06 | 70.6930524 | 84.3812876 | 71.731787 | 69.2395153 | 73.8457846 |
| 18:12:26 | 0:12:07 | 68.6930524 | 82.3812876 | 71.731787 | 69.2395153 | 75.8457846 |
| 18:12:27 | 0:12:08 | 67.6930524 | 81.3812876 | 71.731787 | 68.2395153 | 75.8457846 |
| 18:12:28 | 0:12:09 | 67.6930524 | 81.3812876 | 72.731787 | 68.2395153 | 75.8457846 |
| 18:12:29 | 0:12:10 | 67.6930524 | 77.3812876 | 73.731787 | 68.2395153 | 75.8457846 |
| 18:12:30 | 0:12:11 | 67.6930524 | 77.3812876 | 74.731787 | 68.2395153 | 75.8457846 |
| 18:12:31 | 0:12:12 | 68.6930524 | 77.3812876 | 74.731787 | 68.2395153 | 76.8457846 |
| 18:12:32 | 0:12:13 | 70.6930524 | 77.3812876 | 74.731787 | 69.2395153 | 76.8457846 |
| 18:12:33 | 0:12:14 | 71.6930524 | 78.3812876 | 74.731787 | 70.2395153 | 76.8457846 |
| 18:12:34 | 0:12:15 | 71.6930524 | 79.3812876 | 74.731787 | 70.2395153 | 76.8457846 |
| 18:12:35 | 0:12:16 | 71.6930524 | 79.3812876 | 75.731787 | 71.2395153 | 78.8457846 |
| 18:12:36 | 0:12:17 | 71.6930524 | 79.3812876 | 75.731787 | 71.2395153 | 78.8457846 |
| 18:12:37 | 0:12:18 | 69.6930524 | 79.3812876 | 77.731787 | 75.2395153 | 78.8457846 |
| 18:12:38 | 0:12:19 | 69.6930524 | 79.3812876 | 77.731787 | 75.2395153 | 77.8457846 |
| 18:12:39 | 0:12:20 | 69.6930524 | 74.3812876 | 77.731787 | 76.2395153 | 77.8457846 |
| 18:12:40 | 0:12:21 | 68.6930524 | 74.3812876 | 77.731787 | 76.2395153 | 77.8457846 |
| 18:12:41 | 0:12:22 | 68.6930524 | 74.3812876 | 76.731787 | 77.2395153 | 75.8457846 |
| 18:12:42 | 0:12:23 | 68.6930524 | 74.3812876 | 75.731787 | 77.2395153 | 73.8457846 |
| 18:12:43 | 0:12:24 | 68.6930524 | 74.3812876 | 75.731787 | 78.2395153 | 71.8457846 |
| 18:12:44 | 0:12:25 | 68.6930524 | 69.3812876 | 74.731787 | 78.2395153 | 70.8457846 |
| 18:12:45 | 0:12:26 | 68.6930524 | 69.3812876 | 73.731787 | 79.2395153 | 69.8457846 |
| 18:12:46 | 0:12:27 | 68.6930524 | 68.3812876 | 73.731787 | 80.2395153 | 69.8457846 |
| 18:12:47 | 0:12:28 | 68.6930524 | 67.3812876 | 71.731787 | 80.2395153 | 70.8457846 |
| 18:12:48 | 0:12:29 | 69.6930524 | 67.3812876 | 70.731787 | 79.2395153 | 70.8457846 |
| 18:12:49 | 0:12:30 | 69.6930524 | 70.3812876 | 69.731787 | 80.2395153 | 70.8457846 |
| 18:12:50 | 0:12:31 | 69.6930524 | 71.3812876 | 67.731787 | 80.2395153 | 71.8457846 |
| 18:12:51 | 0:12:32 | 70.6930524 | 71.3812876 | 65.731787 | 80.2395153 | 73.8457846 |
| 18:12:52 | 0:12:33 | 70.6930524 | 72.3812876 | 64.731787 | 79.2395153 | 73.8457846 |
| 18:12:53 | 0:12:34 | 71.6930524 | 72.3812876 | 63.731787 | 75.2395153 | 73.8457846 |
| 18:12:54 | 0:12:35 | 71.6930524 | 72.3812876 | 63.731787 | 72.2395153 | 74.8457846 |
| 18:12:55 | 0:12:36 | 71.6930524 | 72.3812876 | 63.731787 | 72.2395153 | 75.8457846 |
| 18:12:56 | 0:12:37 | 72.6930524 | 71.3812876 | 63.731787 | 72.2395153 | 75.8457846 |
| 18:12:57 | 0:12:38 | 71.6930524 | 71.3812876 | 63.731787 | 72.2395153 | 75.8457846 |

|          |         |            |            |           |            |            |
|----------|---------|------------|------------|-----------|------------|------------|
| 18:12:58 | 0:12:39 | 71.6930524 | 71.3812876 | 63.731787 | 59.2395153 | 74.8457846 |
| 18:12:59 | 0:12:40 | 71.6930524 | 71.3812876 | 63.731787 | 59.2395153 | 73.8457846 |
| 18:13:00 | 0:12:41 | 69.6930524 | 71.3812876 | 63.731787 | 59.2395153 | 73.8457846 |
| 18:13:01 | 0:12:42 | 69.6930524 | 69.3812876 | 63.731787 | 60.2395153 | 73.8457846 |
| 18:13:02 | 0:12:43 | 70.6930524 | 69.3812876 | 64.731787 | 61.2395153 | 73.8457846 |
| 18:13:03 | 0:12:44 | 71.6930524 | 69.3812876 | 66.731787 | 66.2395153 | 73.8457846 |
| 18:13:04 | 0:12:45 | 71.6930524 | 69.3812876 | 67.731787 | 67.2395153 | 73.8457846 |
| 18:13:05 | 0:12:46 | 74.6930524 | 69.3812876 | 67.731787 | 68.2395153 | 73.8457846 |
| 18:13:06 | 0:12:47 | 75.6930524 | 68.3812876 | 67.731787 | 68.2395153 | 73.8457846 |
| 18:13:07 | 0:12:48 | 75.6930524 | 68.3812876 | 66.731787 | 68.2395153 | 75.8457846 |
| 18:13:08 | 0:12:49 | 74.6930524 | 67.3812876 | 66.731787 | 69.2395153 | 78.8457846 |
| 18:13:09 | 0:12:50 | 73.6930524 | 67.3812876 | 66.731787 | 65.2395153 | 78.8457846 |
| 18:13:10 | 0:12:51 | 72.6930524 | 68.3812876 | 66.731787 | 64.2395153 | 78.8457846 |
| 18:13:11 | 0:12:52 | 72.6930524 | 73.3812876 | 66.731787 | 64.2395153 | 79.8457846 |
| 18:13:12 | 0:12:53 | 72.6930524 | 73.3812876 | 66.731787 | 64.2395153 | 80.8457846 |
| 18:13:13 | 0:12:54 | 72.6930524 | 73.3812876 | 66.731787 | 65.2395153 | 81.8457846 |
| 18:13:14 | 0:12:55 | 72.6930524 | 72.3812876 | 66.731787 | 65.2395153 | 82.8457846 |
| 18:13:15 | 0:12:56 | 73.6930524 | 72.3812876 | 66.731787 | 66.2395153 | 83.8457846 |
| 18:13:16 | 0:12:57 | 73.6930524 | 72.3812876 | 66.731787 | 66.2395153 | 83.8457846 |
| 18:13:17 | 0:12:58 | 73.6930524 | 72.3812876 | 66.731787 | 66.2395153 | 83.8457846 |
| 18:13:18 | 0:12:59 | 74.6930524 | 71.3812876 | 66.731787 | 66.2395153 | 83.8457846 |
| 18:13:19 | 0:13:00 | 73.6930524 | 71.3812876 | 66.731787 | 66.2395153 | 83.8457846 |
| 18:13:20 | 0:13:01 | 73.6930524 | 71.3812876 | 66.731787 | 66.2395153 | 83.8457846 |
| 18:13:21 | 0:13:02 | 72.6930524 | 71.3812876 | 65.731787 | 66.2395153 | 83.8457846 |
| 18:13:22 | 0:13:03 | 70.6930524 | 70.3812876 | 64.731787 | 64.2395153 | 85.8457846 |
| 18:13:23 | 0:13:04 | 69.6930524 | 68.3812876 | 67.731787 | 63.2395153 | 84.8457846 |
| 18:13:24 | 0:13:05 | 69.6930524 | 68.3812876 | 69.731787 | 63.2395153 | 84.8457846 |
| 18:13:25 | 0:13:06 | 68.6930524 | 68.3812876 | 69.731787 | 63.2395153 | 84.8457846 |
| 18:13:26 | 0:13:07 | 68.6930524 | 69.3812876 | 69.731787 | 65.2395153 | 83.8457846 |
| 18:13:27 | 0:13:08 | 67.6930524 | 69.3812876 | 70.731787 | 66.2395153 | 83.8457846 |
| 18:13:28 | 0:13:09 | 67.6930524 | 71.3812876 | 71.731787 | 65.2395153 | 82.8457846 |
| 18:13:29 | 0:13:10 | 67.6930524 | 71.3812876 | 71.731787 | 64.2395153 | 83.8457846 |
| 18:13:30 | 0:13:11 | 67.6930524 | 71.3812876 | 71.731787 | 64.2395153 | 83.8457846 |
| 18:13:31 | 0:13:12 | 68.6930524 | 70.3812876 | 72.731787 | 63.2395153 | 83.8457846 |
| 18:13:32 | 0:13:13 | 70.6930524 | 70.3812876 | 72.731787 | 63.2395153 | 82.8457846 |
| 18:13:33 | 0:13:14 | 72.6930524 | 71.3812876 | 72.731787 | 63.2395153 | 81.8457846 |
| 18:13:34 | 0:13:15 | 73.6930524 | 71.3812876 | 72.731787 | 63.2395153 | 80.8457846 |
| 18:13:35 | 0:13:16 | 73.6930524 | 71.3812876 | 73.731787 | 63.2395153 | 81.8457846 |
| 18:13:36 | 0:13:17 | 75.6930524 | 68.3812876 | 72.731787 | 63.2395153 | 82.8457846 |
| 18:13:37 | 0:13:18 | 75.6930524 | 68.3812876 | 72.731787 | 63.2395153 | 83.8457846 |
| 18:13:38 | 0:13:19 | 75.6930524 | 68.3812876 | 72.731787 | 62.2395153 | 83.8457846 |
| 18:13:39 | 0:13:20 | 73.6930524 | 68.3812876 | 71.731787 | 61.2395153 | 83.8457846 |
| 18:13:40 | 0:13:21 | 71.6930524 | 68.3812876 | 70.731787 | 61.2395153 | 83.8457846 |
| 18:13:41 | 0:13:22 | 71.6930524 | 69.3812876 | 70.731787 | 62.2395153 | 83.8457846 |
| 18:13:42 | 0:13:23 | 69.6930524 | 69.3812876 | 69.731787 | 63.2395153 | 83.8457846 |



|          |         |            |            |           |            |            |
|----------|---------|------------|------------|-----------|------------|------------|
| 18:13:43 | 0:13:24 | 67.6930524 | 70.3812876 | 69.731787 | 63.2395153 | 83.8457846 |
| 18:13:44 | 0:13:25 | 67.6930524 | 72.3812876 | 69.731787 | 63.2395153 | 83.8457846 |
| 18:13:45 | 0:13:26 | 67.6930524 | 72.3812876 | 68.731787 | 64.2395153 | 83.8457846 |
| 18:13:46 | 0:13:27 | 67.6930524 | 72.3812876 | 69.731787 | 65.2395153 | 83.8457846 |
| 18:13:47 | 0:13:28 | 66.6930524 | 72.3812876 | 69.731787 | 65.2395153 | 83.8457846 |
| 18:13:48 | 0:13:29 | 66.6930524 | 72.3812876 | 69.731787 | 66.2395153 | 78.8457846 |
| 18:13:49 | 0:13:30 | 65.6930524 | 73.3812876 | 69.731787 | 66.2395153 | 77.8457846 |
| 18:13:50 | 0:13:31 | 66.6930524 | 73.3812876 | 70.731787 | 67.2395153 | 77.8457846 |
| 18:13:51 | 0:13:32 | 67.6930524 | 73.3812876 | 71.731787 | 68.2395153 | 77.8457846 |
| 18:13:52 | 0:13:33 | 67.6930524 | 74.3812876 | 69.731787 | 69.2395153 | 79.8457846 |
| 18:13:53 | 0:13:34 | 69.6930524 | 76.3812876 | 68.731787 | 71.2395153 | 84.8457846 |
| 18:13:54 | 0:13:35 | 73.6930524 | 79.3812876 | 67.731787 | 76.2395153 | 84.8457846 |
| 18:13:55 | 0:13:36 | 75.6930524 | 82.3812876 | 67.731787 | 79.2395153 | 82.8457846 |
| 18:13:56 | 0:13:37 | 77.6930524 | 82.3812876 | 67.731787 | 84.2395153 | 80.8457846 |
| 18:13:57 | 0:13:38 | 76.6930524 | 83.3812876 | 67.731787 | 90.2395153 | 78.8457846 |
| 18:13:58 | 0:13:39 | 75.6930524 | 84.3812876 | 67.731787 | 74.5451505 | 76.8457846 |
| 18:13:59 | 0:13:40 | 74.6930524 | 85.3812876 | 66.731787 | 74.4201505 | 75.8457846 |
| 18:14:00 | 0:13:41 | 73.6930524 | 85.3812876 | 66.731787 | 74.1701505 | 75.8457846 |
| 18:14:01 | 0:13:42 | 72.6930524 | 85.3812876 | 65.731787 | 84.2395153 | 72.8457846 |
| 18:14:02 | 0:13:43 | 71.6930524 | 85.3812876 | 66.731787 | 82.2395153 | 72.8457846 |
| 18:14:03 | 0:13:44 | 70.6930524 | 85.3812876 | 66.731787 | 81.2395153 | 72.8457846 |
| 18:14:04 | 0:13:45 | 69.6930524 | 85.3812876 | 66.731787 | 77.2395153 | 72.8457846 |
| 18:14:05 | 0:13:46 | 69.6930524 | 85.3812876 | 64.731787 | 75.2395153 | 71.8457846 |
| 18:14:06 | 0:13:47 | 68.6930524 | 84.3812876 | 62.731787 | 75.2395153 | 74.8457846 |
| 18:14:07 | 0:13:48 | 68.6930524 | 83.3812876 | 61.731787 | 71.2395153 | 75.8457846 |
| 18:14:08 | 0:13:49 | 68.6930524 | 83.3812876 | 60.731787 | 68.2395153 | 76.8457846 |
| 18:14:09 | 0:13:50 | 67.6930524 | 83.3812876 | 60.731787 | 67.2395153 | 78.8457846 |
| 18:14:10 | 0:13:51 | 67.6930524 | 83.3812876 | 60.731787 | 66.2395153 | 78.8457846 |
| 18:14:11 | 0:13:52 | 68.6930524 | 82.3812876 | 61.731787 | 66.2395153 | 83.8457846 |
| 18:14:12 | 0:13:53 | 69.6930524 | 82.3812876 | 63.731787 | 65.2395153 | 84.8457846 |
| 18:14:13 | 0:13:54 | 70.6930524 | 79.3812876 | 63.731787 | 64.2395153 | 84.8457846 |
| 18:14:14 | 0:13:55 | 70.6930524 | 76.3812876 | 63.731787 | 63.2395153 | 84.8457846 |
| 18:14:15 | 0:13:56 | 70.6930524 | 76.3812876 | 63.731787 | 62.2395153 | 84.8457846 |
| 18:14:16 | 0:13:57 | 70.6930524 | 75.3812876 | 63.731787 | 62.2395153 | 84.8457846 |
| 18:14:17 | 0:13:58 | 70.6930524 | 74.3812876 | 64.731787 | 62.2395153 | 84.8457846 |
| 18:14:18 | 0:13:59 | 70.6930524 | 74.3812876 | 65.731787 | 62.2395153 | 83.8457846 |
| 18:14:19 | 0:14:00 | 70.6930524 | 74.3812876 | 66.731787 | 62.2395153 | 83.8457846 |
| 18:14:20 | 0:14:01 | 71.6930524 | 73.3812876 | 67.731787 | 60.2395153 | 82.8457846 |
| 18:14:21 | 0:14:02 | 71.6930524 | 73.3812876 | 69.731787 | 58.2395153 | 82.8457846 |
| 18:14:22 | 0:14:03 | 72.6930524 | 72.3812876 | 69.731787 | 57.2395153 | 79.8457846 |
| 18:14:23 | 0:14:04 | 72.6930524 | 70.3812876 | 69.731787 | 57.2395153 | 79.8457846 |
| 18:14:24 | 0:14:05 | 72.6930524 | 70.3812876 | 69.731787 | 57.2395153 | 79.8457846 |
| 18:14:25 | 0:14:06 | 71.6930524 | 70.3812876 | 71.731787 | 58.2395153 | 80.8457846 |
| 18:14:26 | 0:14:07 | 71.6930524 | 68.3812876 | 73.731787 | 58.2395153 | 80.8457846 |
| 18:14:27 | 0:14:08 | 71.6930524 | 68.3812876 | 73.731787 | 58.2395153 | 80.8457846 |

|          |         |            |            |           |            |            |
|----------|---------|------------|------------|-----------|------------|------------|
| 18:14:28 | 0:14:09 | 72.6930524 | 68.3812876 | 73.731787 | 59.2395153 | 80.8457846 |
| 18:14:29 | 0:14:10 | 72.6930524 | 67.3812876 | 73.731787 | 59.2395153 | 80.8457846 |
| 18:14:30 | 0:14:11 | 72.6930524 | 68.3812876 | 73.731787 | 60.2395153 | 80.8457846 |
| 18:14:31 | 0:14:12 | 72.6930524 | 68.3812876 | 73.731787 | 60.2395153 | 81.8457846 |
| 18:14:32 | 0:14:13 | 72.6930524 | 68.3812876 | 73.731787 | 60.2395153 | 81.8457846 |
| 18:14:33 | 0:14:14 | 72.6930524 | 66.3812876 | 74.731787 | 60.2395153 | 81.8457846 |
| 18:14:34 | 0:14:15 | 75.6930524 | 66.3812876 | 74.731787 | 61.2395153 | 82.8457846 |
| 18:14:35 | 0:14:16 | 81.6930524 | 66.3812876 | 77.731787 | 61.2395153 | 82.8457846 |
| 18:14:36 | 0:14:17 | 88.6930524 | 66.3812876 | 78.731787 | 63.2395153 | 82.8457846 |
| 18:14:37 | 0:14:18 | 81.6930524 | 66.3812876 | 78.731787 | 63.2395153 | 81.8457846 |
| 18:14:38 | 0:14:19 | 78.6930524 | 66.3812876 | 78.731787 | 63.2395153 | 79.8457846 |
| 18:14:39 | 0:14:20 | 75.6930524 | 66.3812876 | 78.731787 | 63.2395153 | 77.8457846 |
| 18:14:40 | 0:14:21 | 75.6930524 | 66.3812876 | 78.731787 | 64.2395153 | 75.8457846 |
| 18:14:41 | 0:14:22 | 71.6930524 | 66.3812876 | 78.731787 | 64.2395153 | 75.8457846 |
| 18:14:42 | 0:14:23 | 69.6930524 | 66.3812876 | 78.731787 | 65.2395153 | 77.8457846 |
| 18:14:43 | 0:14:24 | 68.6930524 | 67.3812876 | 79.731787 | 68.2395153 | 77.8457846 |
| 18:14:44 | 0:14:25 | 68.6930524 | 67.3812876 | 79.731787 | 69.2395153 | 78.8457846 |
| 18:14:45 | 0:14:26 | 67.6930524 | 67.3812876 | 79.731787 | 69.2395153 | 79.8457846 |
| 18:14:46 | 0:14:27 | 67.6930524 | 68.3812876 | 79.731787 | 68.2395153 | 79.8457846 |
| 18:14:47 | 0:14:28 | 67.6930524 | 69.3812876 | 78.731787 | 67.2395153 | 79.8457846 |
| 18:14:48 | 0:14:29 | 67.6930524 | 70.3812876 | 79.731787 | 67.2395153 | 80.8457846 |
| 18:14:49 | 0:14:30 | 67.6930524 | 71.3812876 | 79.731787 | 67.2395153 | 80.8457846 |
| 18:14:50 | 0:14:31 | 67.6930524 | 72.3812876 | 78.731787 | 66.2395153 | 80.8457846 |
| 18:14:51 | 0:14:32 | 68.6930524 | 72.3812876 | 73.731787 | 66.2395153 | 80.8457846 |
| 18:14:52 | 0:14:33 | 67.6930524 | 72.3812876 | 71.731787 | 66.2395153 | 79.8457846 |
| 18:14:53 | 0:14:34 | 66.6930524 | 73.3812876 | 70.731787 | 69.2395153 | 79.8457846 |
| 18:14:54 | 0:14:35 | 66.6930524 | 74.3812876 | 69.731787 | 71.2395153 | 79.8457846 |
| 18:14:55 | 0:14:36 | 66.6930524 | 74.3812876 | 68.731787 | 71.2395153 | 79.8457846 |
| 18:14:56 | 0:14:37 | 65.6930524 | 74.3812876 | 67.731787 | 71.2395153 | 79.8457846 |
| 18:14:57 | 0:14:38 | 65.6930524 | 74.3812876 | 67.731787 | 70.2395153 | 79.8457846 |
| 18:14:58 | 0:14:39 | 65.6930524 | 74.3812876 | 67.731787 | 70.2395153 | 79.8457846 |
| 18:14:59 | 0:14:40 | 65.6930524 | 74.3812876 | 67.731787 | 68.2395153 | 79.8457846 |
| 18:15:00 | 0:14:41 | 65.6930524 | 74.3812876 | 66.731787 | 68.2395153 | 79.8457846 |
| 18:15:01 | 0:14:42 | 65.6930524 | 75.3812876 | 66.731787 | 68.2395153 | 80.8457846 |
| 18:15:02 | 0:14:43 | 65.6930524 | 76.3812876 | 66.731787 | 68.2395153 | 80.8457846 |
| 18:15:03 | 0:14:44 | 64.6930524 | 76.3812876 | 69.731787 | 67.2395153 | 82.8457846 |
| 18:15:04 | 0:14:45 | 64.6930524 | 76.3812876 | 70.731787 | 68.2395153 | 83.8457846 |
| 18:15:05 | 0:14:46 | 64.6930524 | 75.3812876 | 71.731787 | 72.2395153 | 84.8457846 |
| 18:15:06 | 0:14:47 | 65.6930524 | 75.3812876 | 73.731787 | 76.2395153 | 86.8457846 |
| 18:15:07 | 0:14:48 | 64.6930524 | 75.3812876 | 74.731787 | 77.2395153 | 86.8457846 |
| 18:15:08 | 0:14:49 | 63.6930524 | 75.3812876 | 74.731787 | 77.2395153 | 86.8457846 |
| 18:15:09 | 0:14:50 | 63.6930524 | 75.3812876 | 73.731787 | 77.2395153 | 86.8457846 |
| 18:15:10 | 0:14:51 | 63.6930524 | 75.3812876 | 72.731787 | 77.2395153 | 86.8457846 |
| 18:15:11 | 0:14:52 | 64.6930524 | 75.3812876 | 73.731787 | 77.2395153 | 86.8457846 |
| 18:15:12 | 0:14:53 | 65.6930524 | 74.3812876 | 75.731787 | 77.2395153 | 86.8457846 |

|          |         |            |            |           |            |            |
|----------|---------|------------|------------|-----------|------------|------------|
| 18:15:13 | 0:14:54 | 65.6930524 | 74.3812876 | 77.731787 | 77.2395153 | 86.8457846 |
| 18:15:14 | 0:14:55 | 66.6930524 | 72.3812876 | 77.731787 | 77.2395153 | 86.8457846 |
| 18:15:15 | 0:14:56 | 67.6930524 | 72.3812876 | 77.731787 | 77.2395153 | 86.8457846 |
| 18:15:16 | 0:14:57 | 68.6930524 | 63.3812876 | 77.731787 | 77.2395153 | 86.8457846 |
| 18:15:17 | 0:14:58 | 68.6930524 | 64.3812876 | 77.731787 | 75.2395153 | 86.8457846 |
| 18:15:18 | 0:14:59 | 68.6930524 | 64.3812876 | 77.731787 | 75.2395153 | 86.8457846 |
| 18:15:19 | 0:15:00 | 68.6930524 | 64.3812876 | 78.731787 | 65.2395153 | 69.0451505 |
| 18:15:20 | 0:15:01 | 68.6930524 | 63.3812876 | 79.731787 | 63.2395153 | 68.7951505 |
| 18:15:21 | 0:15:02 | 68.6930524 | 63.3812876 | 80.731787 | 63.2395153 | 68.9201505 |
| 18:15:22 | 0:15:03 | 68.6930524 | 63.3812876 | 80.731787 | 61.2395153 | 68.6701505 |
| 18:15:23 | 0:15:04 | 70.6930524 | 63.3812876 | 80.731787 | 59.2395153 | 69.0451505 |
| 18:15:24 | 0:15:05 | 70.6930524 | 63.3812876 | 81.731787 | 59.2395153 | 69.1701505 |
| 18:15:25 | 0:15:06 | 70.6930524 | 63.3812876 | 82.731787 | 58.2395153 | 83.8457846 |
| 18:15:26 | 0:15:07 | 70.6930524 | 64.3812876 | 81.731787 | 59.2395153 | 78.8457846 |
| 18:15:27 | 0:15:08 | 70.6930524 | 64.3812876 | 81.731787 | 59.2395153 | 78.8457846 |
| 18:15:28 | 0:15:09 | 70.6930524 | 64.3812876 | 81.731787 | 59.2395153 | 78.8457846 |
| 18:15:29 | 0:15:10 | 73.6930524 | 65.3812876 | 81.731787 | 59.2395153 | 78.8457846 |
| 18:15:30 | 0:15:11 | 75.6930524 | 65.3812876 | 81.731787 | 59.2395153 | 78.8457846 |
| 18:15:31 | 0:15:12 | 75.6930524 | 65.3812876 | 81.731787 | 60.2395153 | 78.8457846 |
| 18:15:32 | 0:15:13 | 75.6930524 | 65.3812876 | 80.731787 | 61.2395153 | 78.8457846 |
| 18:15:33 | 0:15:14 | 72.6930524 | 65.3812876 | 80.731787 | 62.2395153 | 79.8457846 |
| 18:15:34 | 0:15:15 | 71.6930524 | 65.3812876 | 79.731787 | 62.2395153 | 80.8457846 |
| 18:15:35 | 0:15:16 | 70.6930524 | 65.3812876 | 79.731787 | 62.2395153 | 81.8457846 |
| 18:15:36 | 0:15:17 | 69.6930524 | 65.3812876 | 80.731787 | 62.2395153 | 81.8457846 |
| 18:15:37 | 0:15:18 | 68.6930524 | 66.3812876 | 81.731787 | 62.2395153 | 81.8457846 |
| 18:15:38 | 0:15:19 | 68.6930524 | 66.3812876 | 81.731787 | 63.2395153 | 81.8457846 |
| 18:15:39 | 0:15:20 | 69.6930524 | 67.3812876 | 81.731787 | 63.2395153 | 83.8457846 |
| 18:15:40 | 0:15:21 | 70.6930524 | 67.3812876 | 81.731787 | 63.2395153 | 84.8457846 |
| 18:15:41 | 0:15:22 | 70.6930524 | 66.3812876 | 81.731787 | 63.2395153 | 84.8457846 |
| 18:15:42 | 0:15:23 | 70.6930524 | 66.3812876 | 81.731787 | 63.2395153 | 84.8457846 |
| 18:15:43 | 0:15:24 | 70.6930524 | 65.3812876 | 82.731787 | 63.2395153 | 85.8457846 |
| 18:15:44 | 0:15:25 | 71.6930524 | 64.3812876 | 82.731787 | 63.2395153 | 85.8457846 |
| 18:15:45 | 0:15:26 | 71.6930524 | 64.3812876 | 82.731787 | 62.2395153 | 85.8457846 |
| 18:15:46 | 0:15:27 | 71.6930524 | 63.3812876 | 82.731787 | 60.2395153 | 86.8457846 |
| 18:15:47 | 0:15:28 | 71.6930524 | 64.3812876 | 81.731787 | 59.2395153 | 88.8457846 |
| 18:15:48 | 0:15:29 | 72.6930524 | 67.3812876 | 79.731787 | 60.2395153 | 84.8457846 |
| 18:15:49 | 0:15:30 | 72.6930524 | 67.3812876 | 79.731787 | 60.2395153 | 80.8457846 |
| 18:15:50 | 0:15:31 | 72.6930524 | 67.3812876 | 78.731787 | 60.2395153 | 78.8457846 |
| 18:15:51 | 0:15:32 | 71.6930524 | 67.3812876 | 78.731787 | 60.2395153 | 76.8457846 |
| 18:15:52 | 0:15:33 | 70.6930524 | 67.3812876 | 78.731787 | 60.2395153 | 78.8457846 |
| 18:15:53 | 0:15:34 | 69.6930524 | 66.3812876 | 77.731787 | 59.2395153 | 79.8457846 |
| 18:15:54 | 0:15:35 | 69.6930524 | 65.3812876 | 75.731787 | 59.2395153 | 79.8457846 |
| 18:15:55 | 0:15:36 | 68.6930524 | 65.3812876 | 72.731787 | 60.2395153 | 79.8457846 |
| 18:15:56 | 0:15:37 | 68.6930524 | 65.3812876 | 71.731787 | 61.2395153 | 78.8457846 |
| 18:15:57 | 0:15:38 | 69.6930524 | 66.3812876 | 70.731787 | 62.2395153 | 77.8457846 |

|          |         |            |            |           |            |            |
|----------|---------|------------|------------|-----------|------------|------------|
| 18:15:58 | 0:15:39 | 69.6930524 | 69.3812876 | 70.731787 | 64.2395153 | 77.8457846 |
| 18:15:59 | 0:15:40 | 70.6930524 | 69.3812876 | 70.731787 | 64.2395153 | 77.8457846 |
| 18:16:00 | 0:15:41 | 70.6930524 | 69.3812876 | 70.731787 | 66.2395153 | 77.8457846 |
| 18:16:01 | 0:15:42 | 71.6930524 | 69.3812876 | 70.731787 | 68.2395153 | 77.8457846 |
| 18:16:02 | 0:15:43 | 71.6930524 | 69.3812876 | 70.731787 | 69.2395153 | 77.8457846 |
| 18:16:03 | 0:15:44 | 71.6930524 | 70.3812876 | 70.731787 | 69.2395153 | 76.8457846 |
| 18:16:04 | 0:15:45 | 70.6930524 | 70.3812876 | 70.731787 | 68.2395153 | 75.8457846 |
| 18:16:05 | 0:15:46 | 69.6930524 | 70.3812876 | 70.731787 | 69.2395153 | 75.8457846 |
| 18:16:06 | 0:15:47 | 69.6930524 | 70.3812876 | 70.731787 | 68.2395153 | 75.8457846 |
| 18:16:07 | 0:15:48 | 69.6930524 | 70.3812876 | 70.731787 | 68.2395153 | 75.8457846 |
| 18:16:08 | 0:15:49 | 68.6930524 | 70.3812876 | 70.731787 | 67.2395153 | 76.8457846 |
| 18:16:09 | 0:15:50 | 69.6930524 | 70.3812876 | 70.731787 | 66.2395153 | 78.8457846 |
| 18:16:10 | 0:15:51 | 70.6930524 | 71.3812876 | 70.731787 | 65.2395153 | 80.8457846 |
| 18:16:11 | 0:15:52 | 70.6930524 | 71.3812876 | 71.731787 | 65.2395153 | 82.8457846 |
| 18:16:12 | 0:15:53 | 70.6930524 | 71.3812876 | 71.731787 | 65.2395153 | 82.8457846 |
| 18:16:13 | 0:15:54 | 72.6930524 | 71.3812876 | 71.731787 | 61.2395153 | 84.8457846 |
| 18:16:14 | 0:15:55 | 72.6930524 | 71.3812876 | 71.731787 | 60.2395153 | 84.8457846 |
| 18:16:15 | 0:15:56 | 72.6930524 | 72.3812876 | 72.731787 | 60.2395153 | 82.8457846 |
| 18:16:16 | 0:15:57 | 72.6930524 | 72.3812876 | 73.731787 | 60.2395153 | 81.8457846 |
| 18:16:17 | 0:15:58 | 72.6930524 | 73.3812876 | 73.731787 | 58.2395153 | 81.8457846 |
| 18:16:18 | 0:15:59 | 71.6930524 | 73.3812876 | 73.731787 | 58.2395153 | 81.8457846 |
| 18:16:19 | 0:16:00 | 70.6930524 | 73.3812876 | 74.731787 | 58.2395153 | 81.8457846 |
| 18:16:20 | 0:16:01 | 69.6930524 | 75.3812876 | 74.731787 | 58.2395153 | 81.8457846 |
| 18:16:21 | 0:16:02 | 69.6930524 | 75.3812876 | 74.731787 | 57.2395153 | 81.8457846 |
| 18:16:22 | 0:16:03 | 69.6930524 | 74.3812876 | 74.731787 | 56.2395153 | 81.8457846 |
| 18:16:23 | 0:16:04 | 68.6930524 | 73.3812876 | 73.731787 | 56.2395153 | 81.8457846 |
| 18:16:24 | 0:16:05 | 68.6930524 | 71.3812876 | 72.731787 | 56.2395153 | 81.8457846 |
| 18:16:25 | 0:16:06 | 68.6930524 | 71.3812876 | 72.731787 | 55.2395153 | 81.8457846 |
| 18:16:26 | 0:16:07 | 68.6930524 | 70.3812876 | 70.731787 | 55.2395153 | 80.8457846 |
| 18:16:27 | 0:16:08 | 68.6930524 | 69.3812876 | 70.731787 | 57.2395153 | 81.8457846 |
| 18:16:28 | 0:16:09 | 68.6930524 | 69.3812876 | 68.731787 | 57.2395153 | 81.8457846 |
| 18:16:29 | 0:16:10 | 68.6930524 | 69.3812876 | 67.731787 | 59.2395153 | 70.0451505 |
| 18:16:30 | 0:16:11 | 68.6930524 | 68.3812876 | 67.731787 | 61.2395153 | 70.0451505 |
| 18:16:31 | 0:16:12 | 67.6930524 | 68.3812876 | 67.731787 | 61.2395153 | 85.8457846 |
| 18:16:32 | 0:16:13 | 67.6930524 | 68.3812876 | 67.731787 | 65.2395153 | 84.8457846 |
| 18:16:33 | 0:16:14 | 67.6930524 | 68.3812876 | 67.731787 | 66.2395153 | 84.8457846 |
| 18:16:34 | 0:16:15 | 67.6930524 | 69.3812876 | 67.731787 | 66.2395153 | 84.8457846 |
| 18:16:35 | 0:16:16 | 67.6930524 | 69.3812876 | 68.731787 | 68.2395153 | 83.8457846 |
| 18:16:36 | 0:16:17 | 67.6930524 | 71.3812876 | 68.731787 | 69.2395153 | 85.8457846 |
| 18:16:37 | 0:16:18 | 67.6930524 | 71.3812876 | 68.731787 | 69.2395153 | 84.8457846 |
| 18:16:38 | 0:16:19 | 68.6930524 | 71.3812876 | 69.731787 | 70.2395153 | 84.8457846 |
| 18:16:39 | 0:16:20 | 69.6930524 | 71.3812876 | 68.731787 | 70.2395153 | 84.8457846 |
| 18:16:40 | 0:16:21 | 69.6930524 | 72.3812876 | 68.731787 | 70.2395153 | 84.8457846 |
| 18:16:41 | 0:16:22 | 68.6930524 | 72.3812876 | 68.731787 | 71.2395153 | 84.8457846 |
| 18:16:42 | 0:16:23 | 68.6930524 | 72.3812876 | 68.731787 | 71.2395153 | 84.8457846 |

|          |         |            |            |           |            |            |
|----------|---------|------------|------------|-----------|------------|------------|
| 18:16:43 | 0:16:24 | 68.6930524 | 72.3812876 | 68.731787 | 72.2395153 | 81.8457846 |
| 18:16:44 | 0:16:25 | 67.6930524 | 72.3812876 | 69.731787 | 73.2395153 | 79.8457846 |
| 18:16:45 | 0:16:26 | 67.6930524 | 71.3812876 | 70.731787 | 73.2395153 | 79.8457846 |
| 18:16:46 | 0:16:27 | 67.6930524 | 71.3812876 | 69.731787 | 74.2395153 | 78.8457846 |
| 18:16:47 | 0:16:28 | 67.6930524 | 71.3812876 | 69.731787 | 74.2395153 | 79.8457846 |
| 18:16:48 | 0:16:29 | 67.6930524 | 71.3812876 | 69.731787 | 75.2395153 | 79.8457846 |
| 18:16:49 | 0:16:30 | 67.6930524 | 71.3812876 | 69.731787 | 75.2395153 | 79.8457846 |
| 18:16:50 | 0:16:31 | 67.6930524 | 68.3812876 | 69.731787 | 75.2395153 | 80.8457846 |
| 18:16:51 | 0:16:32 | 69.6930524 | 68.3812876 | 68.731787 | 75.2395153 | 80.8457846 |
| 18:16:52 | 0:16:33 | 70.6930524 | 67.3812876 | 68.731787 | 75.2395153 | 79.8457846 |
| 18:16:53 | 0:16:34 | 72.6930524 | 67.3812876 | 67.731787 | 75.2395153 | 78.8457846 |
| 18:16:54 | 0:16:35 | 72.6930524 | 68.3812876 | 67.731787 | 75.2395153 | 77.8457846 |
| 18:16:55 | 0:16:36 | 72.6930524 | 69.3812876 | 67.731787 | 76.2395153 | 77.8457846 |
| 18:16:56 | 0:16:37 | 72.6930524 | 70.3812876 | 64.731787 | 76.2395153 | 78.8457846 |
| 18:16:57 | 0:16:38 | 72.6930524 | 70.3812876 | 62.731787 | 77.2395153 | 79.8457846 |
| 18:16:58 | 0:16:39 | 71.6930524 | 69.3812876 | 62.731787 | 77.2395153 | 81.8457846 |
| 18:16:59 | 0:16:40 | 71.6930524 | 69.3812876 | 63.731787 | 78.2395153 | 83.8457846 |
| 18:17:00 | 0:16:41 | 70.6930524 | 69.3812876 | 64.731787 | 81.2395153 | 84.8457846 |
| 18:17:01 | 0:16:42 | 69.6930524 | 70.3812876 | 64.731787 | 83.2395153 | 84.8457846 |
| 18:17:02 | 0:16:43 | 68.6930524 | 70.3812876 | 68.731787 | 83.2395153 | 85.8457846 |
| 18:17:03 | 0:16:44 | 67.6930524 | 70.3812876 | 68.731787 | 84.2395153 | 85.8457846 |
| 18:17:04 | 0:16:45 | 67.6930524 | 71.3812876 | 68.731787 | 84.2395153 | 86.8457846 |
| 18:17:05 | 0:16:46 | 67.6930524 | 72.3812876 | 69.731787 | 86.2395153 | 86.8457846 |
| 18:17:06 | 0:16:47 | 67.6930524 | 72.3812876 | 69.731787 | 86.2395153 | 86.8457846 |
| 18:17:07 | 0:16:48 | 68.6930524 | 73.3812876 | 71.731787 | 86.2395153 | 86.8457846 |
| 18:17:08 | 0:16:49 | 69.6930524 | 74.3812876 | 72.731787 | 85.2395153 | 86.8457846 |
| 18:17:09 | 0:16:50 | 69.6930524 | 75.3812876 | 73.731787 | 85.2395153 | 86.8457846 |
| 18:17:10 | 0:16:51 | 70.6930524 | 75.3812876 | 74.731787 | 86.2395153 | 86.8457846 |
| 18:17:11 | 0:16:52 | 70.6930524 | 75.3812876 | 74.731787 | 86.2395153 | 85.8457846 |
| 18:17:12 | 0:16:53 | 70.6930524 | 75.3812876 | 74.731787 | 86.2395153 | 82.8457846 |
| 18:17:13 | 0:16:54 | 70.6930524 | 75.3812876 | 80.731787 | 85.2395153 | 80.8457846 |
| 18:17:14 | 0:16:55 | 70.6930524 | 75.3812876 | 80.731787 | 85.2395153 | 79.8457846 |
| 18:17:15 | 0:16:56 | 69.6930524 | 73.3812876 | 79.731787 | 84.2395153 | 76.8457846 |
| 18:17:16 | 0:16:57 | 68.6930524 | 73.3812876 | 77.731787 | 83.2395153 | 75.8457846 |
| 18:17:17 | 0:16:58 | 68.6930524 | 73.3812876 | 74.731787 | 83.2395153 | 75.8457846 |
| 18:17:18 | 0:16:59 | 68.6930524 | 73.3812876 | 71.731787 | 84.2395153 | 82.8457846 |
| 18:17:19 | 0:17:00 | 67.6930524 | 73.3812876 | 69.731787 | 85.2395153 | 84.8457846 |
| 18:17:20 | 0:17:01 | 67.6930524 | 73.3812876 | 69.731787 | 86.2395153 | 84.8457846 |
| 18:17:21 | 0:17:02 | 67.6930524 | 78.3812876 | 69.731787 | 87.2395153 | 84.8457846 |
| 18:17:22 | 0:17:03 | 67.6930524 | 79.3812876 | 69.731787 | 85.2395153 | 85.8457846 |
| 18:17:23 | 0:17:04 | 67.6930524 | 79.3812876 | 68.731787 | 74.2395153 | 85.8457846 |
| 18:17:24 | 0:17:05 | 68.6930524 | 81.3812876 | 68.731787 | 69.2395153 | 86.8457846 |
| 18:17:25 | 0:17:06 | 68.6930524 | 81.3812876 | 67.731787 | 69.2395153 | 85.8457846 |
| 18:17:26 | 0:17:07 | 69.6930524 | 79.3812876 | 65.731787 | 70.2395153 | 84.8457846 |
| 18:17:27 | 0:17:08 | 69.6930524 | 79.3812876 | 65.731787 | 71.2395153 | 83.8457846 |

|          |         |            |            |           |            |            |
|----------|---------|------------|------------|-----------|------------|------------|
| 18:17:28 | 0:17:09 | 70.6930524 | 74.3812876 | 64.731787 | 71.2395153 | 83.8457846 |
| 18:17:29 | 0:17:10 | 70.6930524 | 71.3812876 | 66.731787 | 71.2395153 | 82.8457846 |
| 18:17:30 | 0:17:11 | 69.6930524 | 71.3812876 | 67.731787 | 71.2395153 | 82.8457846 |
| 18:17:31 | 0:17:12 | 68.6930524 | 68.3812876 | 67.731787 | 72.2395153 | 83.8457846 |
| 18:17:32 | 0:17:13 | 68.6930524 | 68.3812876 | 68.731787 | 73.2395153 | 84.8457846 |
| 18:17:33 | 0:17:14 | 67.6930524 | 67.3812876 | 68.731787 | 73.2395153 | 84.8457846 |
| 18:17:34 | 0:17:15 | 66.6930524 | 67.3812876 | 69.731787 | 74.2395153 | 85.8457846 |
| 18:17:35 | 0:17:16 | 66.6930524 | 67.3812876 | 70.731787 | 76.2395153 | 86.8457846 |
| 18:17:36 | 0:17:17 | 65.6930524 | 67.3812876 | 71.731787 | 77.2395153 | 86.8457846 |
| 18:17:37 | 0:17:18 | 65.6930524 | 66.3812876 | 71.731787 | 78.2395153 | 86.8457846 |
| 18:17:38 | 0:17:19 | 65.6930524 | 64.3812876 | 71.731787 | 79.2395153 | 86.8457846 |
| 18:17:39 | 0:17:20 | 65.6930524 | 64.3812876 | 71.731787 | 81.2395153 | 86.8457846 |
| 18:17:40 | 0:17:21 | 66.6930524 | 64.3812876 | 71.731787 | 84.2395153 | 87.8457846 |
| 18:17:41 | 0:17:22 | 66.6930524 | 64.3812876 | 71.731787 | 84.2395153 | 86.8457846 |
| 18:17:42 | 0:17:23 | 67.6930524 | 63.3812876 | 72.731787 | 86.2395153 | 86.8457846 |
| 18:17:43 | 0:17:24 | 67.6930524 | 63.3812876 | 72.731787 | 79.2395153 | 86.8457846 |
| 18:17:44 | 0:17:25 | 67.6930524 | 63.3812876 | 71.731787 | 78.2395153 | 86.8457846 |
| 18:17:45 | 0:17:26 | 67.6930524 | 66.3812876 | 71.731787 | 76.2395153 | 84.8457846 |
| 18:17:46 | 0:17:27 | 66.6930524 | 66.3812876 | 71.731787 | 76.2395153 | 83.8457846 |
| 18:17:47 | 0:17:28 | 66.6930524 | 66.3812876 | 70.731787 | 74.2395153 | 83.8457846 |
| 18:17:48 | 0:17:29 | 65.6930524 | 67.3812876 | 69.731787 | 72.2395153 | 83.8457846 |
| 18:17:49 | 0:17:30 | 65.6930524 | 69.3812876 | 67.731787 | 71.2395153 | 83.8457846 |
| 18:17:50 | 0:17:31 | 65.6930524 | 69.3812876 | 66.731787 | 69.2395153 | 83.8457846 |
| 18:17:51 | 0:17:32 | 65.6930524 | 72.3812876 | 66.731787 | 68.2395153 | 83.8457846 |
| 18:17:52 | 0:17:33 | 65.6930524 | 73.3812876 | 65.731787 | 68.2395153 | 83.8457846 |
| 18:17:53 | 0:17:34 | 65.6930524 | 73.3812876 | 65.731787 | 68.2395153 | 83.8457846 |
| 18:17:54 | 0:17:35 | 65.6930524 | 75.3812876 | 62.731787 | 68.2395153 | 82.8457846 |
| 18:17:55 | 0:17:36 | 65.6930524 | 77.3812876 | 61.731787 | 67.2395153 | 81.8457846 |
| 18:17:56 | 0:17:37 | 64.6930524 | 77.3812876 | 61.731787 | 69.2395153 | 81.8457846 |
| 18:17:57 | 0:17:38 | 63.6930524 | 77.3812876 | 61.731787 | 70.2395153 | 81.8457846 |
| 18:17:58 | 0:17:39 | 63.6930524 | 76.3812876 | 63.731787 | 70.2395153 | 81.8457846 |
| 18:17:59 | 0:17:40 | 63.6930524 | 72.3812876 | 64.731787 | 71.2395153 | 81.8457846 |
| 18:18:00 | 0:17:41 | 63.6930524 | 72.3812876 | 64.731787 | 71.2395153 | 81.8457846 |
| 18:18:01 | 0:17:42 | 63.6930524 | 72.3812876 | 64.731787 | 72.2395153 | 78.8457846 |
| 18:18:02 | 0:17:43 | 63.6930524 | 70.3812876 | 64.731787 | 72.2395153 | 78.8457846 |
| 18:18:03 | 0:17:44 | 62.6930524 | 70.3812876 | 64.731787 | 74.2395153 | 78.8457846 |
| 18:18:04 | 0:17:45 | 62.6930524 | 70.3812876 | 64.731787 | 75.2395153 | 78.8457846 |
| 18:18:05 | 0:17:46 | 61.6930524 | 70.3812876 | 67.731787 | 75.2395153 | 81.8457846 |
| 18:18:06 | 0:17:47 | 61.6930524 | 70.3812876 | 74.731787 | 75.2395153 | 81.8457846 |
| 18:18:07 | 0:17:48 | 61.6930524 | 70.3812876 | 75.731787 | 75.2395153 | 84.8457846 |
| 18:18:08 | 0:17:49 | 62.6930524 | 69.3812876 | 76.731787 | 75.2395153 | 85.8457846 |
| 18:18:09 | 0:17:50 | 63.6930524 | 69.3812876 | 77.731787 | 75.2395153 | 85.8457846 |
| 18:18:10 | 0:17:51 | 64.6930524 | 69.3812876 | 76.731787 | 74.2395153 | 85.8457846 |
| 18:18:11 | 0:17:52 | 64.6930524 | 69.3812876 | 75.731787 | 74.2395153 | 85.8457846 |
| 18:18:12 | 0:17:53 | 65.6930524 | 68.3812876 | 75.731787 | 74.2395153 | 85.8457846 |

|          |         |            |            |           |            |            |
|----------|---------|------------|------------|-----------|------------|------------|
| 18:18:13 | 0:17:54 | 65.6930524 | 69.3812876 | 75.731787 | 73.2395153 | 85.8457846 |
| 18:18:14 | 0:17:55 | 65.6930524 | 69.3812876 | 75.731787 | 73.2395153 | 82.8457846 |
| 18:18:15 | 0:17:56 | 65.6930524 | 69.3812876 | 75.731787 | 73.2395153 | 79.8457846 |
| 18:18:16 | 0:17:57 | 66.6930524 | 69.3812876 | 75.731787 | 74.2395153 | 76.8457846 |
| 18:18:17 | 0:17:58 | 68.6930524 | 68.3812876 | 74.731787 | 74.2395153 | 73.8457846 |
| 18:18:18 | 0:17:59 | 69.6930524 | 68.3812876 | 74.731787 | 74.2395153 | 70.8457846 |
| 18:18:19 | 0:18:00 | 71.6930524 | 67.3812876 | 74.731787 | 74.2395153 | 67.8457846 |
| 18:18:20 | 0:18:01 | 72.6930524 | 67.3812876 | 74.731787 | 74.2395153 | 66.8457846 |
| 18:18:21 | 0:18:02 | 74.6930524 | 66.3812876 | 73.731787 | 74.2395153 | 67.8457846 |
| 18:18:22 | 0:18:03 | 74.6930524 | 66.3812876 | 73.731787 | 74.2395153 | 67.8457846 |
| 18:18:23 | 0:18:04 | 74.6930524 | 66.3812876 | 72.731787 | 76.2395153 | 67.8457846 |
| 18:18:24 | 0:18:05 | 72.6930524 | 66.3812876 | 72.731787 | 77.2395153 | 67.8457846 |
| 18:18:25 | 0:18:06 | 71.6930524 | 66.3812876 | 73.731787 | 80.2395153 | 67.8457846 |
| 18:18:26 | 0:18:07 | 70.6930524 | 66.3812876 | 73.731787 | 86.2395153 | 67.8457846 |
| 18:18:27 | 0:18:08 | 69.6930524 | 65.3812876 | 72.731787 | 88.2395153 | 67.8457846 |
| 18:18:28 | 0:18:09 | 70.6930524 | 65.3812876 | 72.731787 | 89.2395153 | 67.8457846 |
| 18:18:29 | 0:18:10 | 71.6930524 | 64.3812876 | 72.731787 | 89.2395153 | 68.8457846 |
| 18:18:30 | 0:18:11 | 71.6930524 | 64.3812876 | 72.731787 | 73.4201505 | 69.8457846 |
| 18:18:31 | 0:18:12 | 71.6930524 | 63.3812876 | 72.731787 | 73.2951505 | 69.8457846 |
| 18:18:32 | 0:18:13 | 71.6930524 | 63.3812876 | 72.731787 | 73.4201505 | 70.8457846 |
| 18:18:33 | 0:18:14 | 71.6930524 | 63.3812876 | 72.731787 | 73.9201505 | 73.8457846 |
| 18:18:34 | 0:18:15 | 70.6930524 | 66.3812876 | 72.731787 | 74.1701505 | 73.8457846 |
| 18:18:35 | 0:18:16 | 70.6930524 | 67.3812876 | 72.731787 | 74.2951505 | 73.8457846 |
| 18:18:36 | 0:18:17 | 69.6930524 | 67.3812876 | 70.731787 | 74.1701505 | 74.8457846 |
| 18:18:37 | 0:18:18 | 69.6930524 | 67.3812876 | 70.731787 | 74.5451505 | 74.8457846 |
| 18:18:38 | 0:18:19 | 68.6930524 | 69.3812876 | 70.731787 | 74.7951505 | 74.8457846 |
| 18:18:39 | 0:18:20 | 67.6930524 | 69.3812876 | 70.731787 | 74.7951505 | 75.8457846 |
| 18:18:40 | 0:18:21 | 66.6930524 | 74.3812876 | 69.731787 | 90.2395153 | 75.8457846 |
| 18:18:41 | 0:18:22 | 66.6930524 | 77.3812876 | 69.731787 | 89.2395153 | 76.8457846 |
| 18:18:42 | 0:18:23 | 66.6930524 | 78.3812876 | 70.731787 | 88.2395153 | 77.8457846 |
| 18:18:43 | 0:18:24 | 66.6930524 | 78.3812876 | 70.731787 | 88.2395153 | 77.8457846 |
| 18:18:44 | 0:18:25 | 66.6930524 | 77.3812876 | 71.731787 | 87.2395153 | 77.8457846 |
| 18:18:45 | 0:18:26 | 67.6930524 | 77.3812876 | 72.731787 | 87.2395153 | 77.8457846 |
| 18:18:46 | 0:18:27 | 68.6930524 | 77.3812876 | 72.731787 | 87.2395153 | 76.8457846 |
| 18:18:47 | 0:18:28 | 69.6930524 | 78.3812876 | 73.731787 | 87.2395153 | 76.8457846 |
| 18:18:48 | 0:18:29 | 69.6930524 | 79.3812876 | 75.731787 | 87.2395153 | 76.8457846 |
| 18:18:49 | 0:18:30 | 69.6930524 | 79.3812876 | 75.731787 | 87.2395153 | 75.8457846 |
| 18:18:50 | 0:18:31 | 69.6930524 | 81.3812876 | 75.731787 | 87.2395153 | 75.8457846 |
| 18:18:51 | 0:18:32 | 69.6930524 | 82.3812876 | 75.731787 | 87.2395153 | 75.8457846 |
| 18:18:52 | 0:18:33 | 69.6930524 | 83.3812876 | 75.731787 | 84.2395153 | 74.8457846 |
| 18:18:53 | 0:18:34 | 69.6930524 | 83.3812876 | 73.731787 | 80.2395153 | 74.8457846 |
| 18:18:54 | 0:18:35 | 69.6930524 | 83.3812876 | 73.731787 | 80.2395153 | 74.8457846 |
| 18:18:55 | 0:18:36 | 69.6930524 | 83.3812876 | 69.731787 | 76.2395153 | 72.8457846 |
| 18:18:56 | 0:18:37 | 69.6930524 | 75.3812876 | 69.731787 | 75.2395153 | 72.8457846 |
| 18:18:57 | 0:18:38 | 69.6930524 | 74.3812876 | 69.731787 | 74.2395153 | 72.8457846 |

|          |         |            |            |           |            |            |
|----------|---------|------------|------------|-----------|------------|------------|
| 18:18:58 | 0:18:39 | 70.6930524 | 73.3812876 | 68.731787 | 73.2395153 | 73.8457846 |
| 18:18:59 | 0:18:40 | 70.6930524 | 73.3812876 | 68.731787 | 72.2395153 | 72.8457846 |
| 18:19:00 | 0:18:41 | 70.6930524 | 72.3812876 | 68.731787 | 69.2395153 | 72.8457846 |
| 18:19:01 | 0:18:42 | 71.6930524 | 72.3812876 | 68.731787 | 68.2395153 | 72.8457846 |
| 18:19:02 | 0:18:43 | 74.6930524 | 72.3812876 | 68.731787 | 68.2395153 | 72.8457846 |
| 18:19:03 | 0:18:44 | 75.6930524 | 72.3812876 | 71.731787 | 68.2395153 | 72.8457846 |
| 18:19:04 | 0:18:45 | 75.6930524 | 72.3812876 | 71.731787 | 68.2395153 | 71.8457846 |
| 18:19:05 | 0:18:46 | 74.6930524 | 72.3812876 | 71.731787 | 68.2395153 | 70.8457846 |
| 18:19:06 | 0:18:47 | 74.6930524 | 72.3812876 | 71.731787 | 68.2395153 | 69.8457846 |
| 18:19:07 | 0:18:48 | 73.6930524 | 72.3812876 | 71.731787 | 68.2395153 | 70.8457846 |
| 18:19:08 | 0:18:49 | 73.6930524 | 73.3812876 | 72.731787 | 69.2395153 | 70.8457846 |
| 18:19:09 | 0:18:50 | 73.6930524 | 74.3812876 | 72.731787 | 70.2395153 | 70.8457846 |
| 18:19:10 | 0:18:51 | 74.6930524 | 74.3812876 | 72.731787 | 71.2395153 | 70.8457846 |
| 18:19:11 | 0:18:52 | 73.6930524 | 74.3812876 | 72.731787 | 74.2395153 | 70.8457846 |
| 18:19:12 | 0:18:53 | 73.6930524 | 74.3812876 | 73.731787 | 76.2395153 | 70.8457846 |
| 18:19:13 | 0:18:54 | 72.6930524 | 75.3812876 | 73.731787 | 77.2395153 | 69.8457846 |
| 18:19:14 | 0:18:55 | 72.6930524 | 75.3812876 | 73.731787 | 78.2395153 | 69.8457846 |
| 18:19:15 | 0:18:56 | 75.6930524 | 76.3812876 | 73.731787 | 80.2395153 | 70.8457846 |
| 18:19:16 | 0:18:57 | 76.6930524 | 77.3812876 | 72.731787 | 80.2395153 | 72.8457846 |
| 18:19:17 | 0:18:58 | 73.6930524 | 77.3812876 | 72.731787 | 80.2395153 | 74.8457846 |
| 18:19:18 | 0:18:59 | 73.6930524 | 77.3812876 | 72.731787 | 80.2395153 | 73.8457846 |
| 18:19:19 | 0:19:00 | 72.6930524 | 77.3812876 | 72.731787 | 80.2395153 | 72.8457846 |
| 18:19:20 | 0:19:01 | 70.6930524 | 78.3812876 | 72.731787 | 80.2395153 | 70.8457846 |
| 18:19:21 | 0:19:02 | 69.6930524 | 79.3812876 | 71.731787 | 78.2395153 | 69.8457846 |
| 18:19:22 | 0:19:03 | 68.6930524 | 79.3812876 | 71.731787 | 77.2395153 | 68.8457846 |
| 18:19:23 | 0:19:04 | 67.6930524 | 79.3812876 | 71.731787 | 77.2395153 | 65.8457846 |
| 18:19:24 | 0:19:05 | 66.6930524 | 80.3812876 | 71.731787 | 77.2395153 | 64.8457846 |
| 18:19:25 | 0:19:06 | 66.6930524 | 80.3812876 | 71.731787 | 78.2395153 | 64.8457846 |
| 18:19:26 | 0:19:07 | 66.6930524 | 80.3812876 | 71.731787 | 78.2395153 | 65.8457846 |
| 18:19:27 | 0:19:08 | 67.6930524 | 82.3812876 | 72.731787 | 79.2395153 | 65.8457846 |
| 18:19:28 | 0:19:09 | 68.6930524 | 82.3812876 | 72.731787 | 80.2395153 | 63.8457846 |
| 18:19:29 | 0:19:10 | 70.6930524 | 82.3812876 | 73.731787 | 81.2395153 | 61.8457846 |
| 18:19:30 | 0:19:11 | 71.6930524 | 83.3812876 | 73.731787 | 82.2395153 | 61.8457846 |
| 18:19:31 | 0:19:12 | 71.6930524 | 85.3812876 | 73.731787 | 82.2395153 | 61.8457846 |
| 18:19:32 | 0:19:13 | 71.6930524 | 86.3812876 | 74.731787 | 82.2395153 | 61.8457846 |
| 18:19:33 | 0:19:14 | 69.6930524 | 87.3812876 | 74.731787 | 81.2395153 | 61.8457846 |
| 18:19:34 | 0:19:15 | 68.6930524 | 87.3812876 | 74.731787 | 81.2395153 | 60.8457846 |
| 18:19:35 | 0:19:16 | 67.6930524 | 87.3812876 | 74.731787 | 80.2395153 | 61.8457846 |
| 18:19:36 | 0:19:17 | 67.6930524 | 87.3812876 | 74.731787 | 80.2395153 | 63.8457846 |
| 18:19:37 | 0:19:18 | 67.6930524 | 87.3812876 | 74.731787 | 80.2395153 | 64.8457846 |
| 18:19:38 | 0:19:19 | 67.6930524 | 87.3812876 | 74.731787 | 83.2395153 | 65.8457846 |
| 18:19:39 | 0:19:20 | 67.6930524 | 87.3812876 | 73.731787 | 86.2395153 | 65.8457846 |
| 18:19:40 | 0:19:21 | 67.6930524 | 86.3812876 | 73.731787 | 75.7951505 | 65.8457846 |
| 18:19:41 | 0:19:22 | 66.6930524 | 87.3812876 | 73.731787 | 75.9201505 | 65.8457846 |
| 18:19:42 | 0:19:23 | 70.6930524 | 87.3812876 | 73.731787 | 76.7951505 | 66.8457846 |



|          |         |            |            |           |            |            |
|----------|---------|------------|------------|-----------|------------|------------|
| 18:19:43 | 0:19:24 | 71.6930524 | 87.3812876 | 74.731787 | 77.1701505 | 66.8457846 |
| 18:19:44 | 0:19:25 | 71.6930524 | 86.3812876 | 73.731787 | 77.0451505 | 67.8457846 |
| 18:19:45 | 0:19:26 | 70.6930524 | 86.3812876 | 73.731787 | 77.0451505 | 68.8457846 |
| 18:19:46 | 0:19:27 | 71.6930524 | 86.3812876 | 74.731787 | 77.2951505 | 68.8457846 |
| 18:19:47 | 0:19:28 | 73.6930524 | 86.3812876 | 74.731787 | 77.7951505 | 68.8457846 |
| 18:19:48 | 0:19:29 | 73.6930524 | 86.3812876 | 74.731787 | 77.7951505 | 68.8457846 |
| 18:19:49 | 0:19:30 | 73.6930524 | 86.3812876 | 75.731787 | 77.9201505 | 68.8457846 |
| 18:19:50 | 0:19:31 | 73.6930524 | 86.3812876 | 74.731787 | 85.2395153 | 68.8457846 |
| 18:19:51 | 0:19:32 | 72.6930524 | 86.3812876 | 74.731787 | 73.2395153 | 70.8457846 |
| 18:19:52 | 0:19:33 | 71.6930524 | 87.3812876 | 74.731787 | 73.2395153 | 73.8457846 |
| 18:19:53 | 0:19:34 | 70.6930524 | 89.3812876 | 75.731787 | 72.2395153 | 75.8457846 |
| 18:19:54 | 0:19:35 | 69.6930524 | 89.3812876 | 75.731787 | 72.2395153 | 76.8457846 |
| 18:19:55 | 0:19:36 | 68.6930524 | 90.3812876 | 74.731787 | 68.2395153 | 75.8457846 |
| 18:19:56 | 0:19:37 | 68.6930524 | 75.0451505 | 74.731787 | 68.2395153 | 72.8457846 |
| 18:19:57 | 0:19:38 | 68.6930524 | 74.9201505 | 74.731787 | 67.2395153 | 71.8457846 |
| 18:19:58 | 0:19:39 | 69.6930524 | 74.9201505 | 74.731787 | 66.2395153 | 70.8457846 |
| 18:19:59 | 0:19:40 | 69.6930524 | 75.0451505 | 74.731787 | 65.2395153 | 72.8457846 |
| 18:20:00 | 0:19:41 | 68.6930524 | 73.2951505 | 74.731787 | 65.2395153 | 72.8457846 |
| 18:20:01 | 0:19:42 | 69.6930524 | 73.2951505 | 74.731787 | 65.2395153 | 69.8457846 |
| 18:20:02 | 0:19:43 | 69.6930524 | 71.7951505 | 74.731787 | 65.2395153 | 67.8457846 |
| 18:20:03 | 0:19:44 | 68.6930524 | 71.6701505 | 75.731787 | 66.2395153 | 65.8457846 |
| 18:20:04 | 0:19:45 | 67.6930524 | 72.4201505 | 77.731787 | 69.2395153 | 64.8457846 |
| 18:20:05 | 0:19:46 | 67.6930524 | 72.7951505 | 79.731787 | 69.2395153 | 64.8457846 |
| 18:20:06 | 0:19:47 | 67.6930524 | 83.3812876 | 79.731787 | 71.2395153 | 65.8457846 |
| 18:20:07 | 0:19:48 | 67.6930524 | 77.3812876 | 78.731787 | 72.2395153 | 67.8457846 |
| 18:20:08 | 0:19:49 | 67.6930524 | 77.3812876 | 74.731787 | 74.2395153 | 68.8457846 |
| 18:20:09 | 0:19:50 | 68.6930524 | 77.3812876 | 73.731787 | 78.2395153 | 69.8457846 |
| 18:20:10 | 0:19:51 | 69.6930524 | 77.3812876 | 73.731787 | 78.2395153 | 69.8457846 |
| 18:20:11 | 0:19:52 | 68.6930524 | 77.3812876 | 72.731787 | 79.2395153 | 69.8457846 |
| 18:20:12 | 0:19:53 | 68.6930524 | 76.3812876 | 71.731787 | 80.2395153 | 69.8457846 |
| 18:20:13 | 0:19:54 | 67.6930524 | 76.3812876 | 71.731787 | 82.2395153 | 70.8457846 |
| 18:20:14 | 0:19:55 | 66.6930524 | 68.3812876 | 71.731787 | 82.2395153 | 70.8457846 |
| 18:20:15 | 0:19:56 | 64.6930524 | 68.3812876 | 71.731787 | 82.2395153 | 67.8457846 |
| 18:20:16 | 0:19:57 | 63.6930524 | 68.3812876 | 71.731787 | 82.2395153 | 65.8457846 |
| 18:20:17 | 0:19:58 | 63.6930524 | 67.3812876 | 71.731787 | 82.2395153 | 64.8457846 |
| 18:20:18 | 0:19:59 | 62.6930524 | 65.3812876 | 71.731787 | 82.2395153 | 64.8457846 |
| 18:20:19 | 0:20:00 | 61.6930524 | 62.3812876 | 70.731787 | 81.2395153 | 64.8457846 |
| 18:20:20 | 0:20:01 | 62.6930524 | 62.3812876 | 70.731787 | 81.2395153 | 67.8457846 |
| 18:20:21 | 0:20:02 | 62.6930524 | 61.3812876 | 70.731787 | 81.2395153 | 68.8457846 |
| 18:20:22 | 0:20:03 | 62.6930524 | 61.3812876 | 70.731787 | 81.2395153 | 68.8457846 |
| 18:20:23 | 0:20:04 | 63.6930524 | 56.3812876 | 70.731787 | 81.2395153 | 66.8457846 |
| 18:20:24 | 0:20:05 | 64.6930524 | 54.3812876 | 71.731787 | 81.2395153 | 63.8457846 |
| 18:20:25 | 0:20:06 | 64.6930524 | 51.3812876 | 71.731787 | 81.2395153 | 62.8457846 |
| 18:20:26 | 0:20:07 | 64.6930524 | 51.3812876 | 71.731787 | 82.2395153 | 62.8457846 |
| 18:20:27 | 0:20:08 | 64.6930524 | 51.3812876 | 71.731787 | 82.2395153 | 63.8457846 |

|          |         |            |            |           |            |            |
|----------|---------|------------|------------|-----------|------------|------------|
| 18:20:28 | 0:20:09 | 64.6930524 | 59.3812876 | 71.731787 | 83.2395153 | 63.8457846 |
| 18:20:29 | 0:20:10 | 64.6930524 | 64.3812876 | 71.731787 | 84.2395153 | 64.8457846 |
| 18:20:30 | 0:20:11 | 64.6930524 | 64.3812876 | 71.731787 | 84.2395153 | 64.8457846 |
| 18:20:31 | 0:20:12 | 65.6930524 | 64.3812876 | 71.731787 | 85.2395153 | 64.8457846 |
| 18:20:32 | 0:20:13 | 65.6930524 | 64.3812876 | 72.731787 | 85.2395153 | 64.8457846 |
| 18:20:33 | 0:20:14 | 66.6930524 | 66.3812876 | 72.731787 | 82.2395153 | 64.8457846 |
| 18:20:34 | 0:20:15 | 67.6930524 | 68.3812876 | 73.731787 | 78.2395153 | 64.8457846 |
| 18:20:35 | 0:20:16 | 67.6930524 | 68.3812876 | 73.731787 | 73.2395153 | 64.8457846 |
| 18:20:36 | 0:20:17 | 68.6930524 | 68.3812876 | 73.731787 | 73.2395153 | 63.8457846 |
| 18:20:37 | 0:20:18 | 69.6930524 | 69.3812876 | 73.731787 | 72.2395153 | 63.8457846 |
| 18:20:38 | 0:20:19 | 70.6930524 | 82.3812876 | 73.731787 | 72.2395153 | 63.8457846 |
| 18:20:39 | 0:20:20 | 70.6930524 | 82.3812876 | 73.731787 | 71.2395153 | 64.8457846 |
| 18:20:40 | 0:20:21 | 73.6930524 | 83.3812876 | 73.731787 | 71.2395153 | 65.8457846 |
| 18:20:41 | 0:20:22 | 69.6930524 | 83.3812876 | 73.731787 | 69.2395153 | 65.8457846 |
| 18:20:42 | 0:20:23 | 69.6930524 | 83.3812876 | 73.731787 | 69.2395153 | 65.8457846 |
| 18:20:43 | 0:20:24 | 68.6930524 | 83.3812876 | 73.731787 | 67.2395153 | 68.8457846 |
| 18:20:44 | 0:20:25 | 68.6930524 | 83.3812876 | 72.731787 | 67.2395153 | 63.8457846 |
| 18:20:45 | 0:20:26 | 69.6930524 | 80.3812876 | 71.731787 | 66.2395153 | 61.8457846 |
| 18:20:46 | 0:20:27 | 71.6930524 | 79.3812876 | 72.731787 | 65.2395153 | 60.8457846 |
| 18:20:47 | 0:20:28 | 71.6930524 | 79.3812876 | 72.731787 | 65.2395153 | 60.8457846 |
| 18:20:48 | 0:20:29 | 72.6930524 | 79.3812876 | 71.731787 | 65.2395153 | 61.8457846 |
| 18:20:49 | 0:20:30 | 73.6930524 | 78.3812876 | 71.731787 | 64.2395153 | 61.8457846 |
| 18:20:50 | 0:20:31 | 73.6930524 | 77.3812876 | 71.731787 | 64.2395153 | 63.8457846 |
| 18:20:51 | 0:20:32 | 73.6930524 | 77.3812876 | 71.731787 | 63.2395153 | 64.8457846 |
| 18:20:52 | 0:20:33 | 73.6930524 | 76.3812876 | 70.731787 | 63.2395153 | 65.8457846 |
| 18:20:53 | 0:20:34 | 73.6930524 | 76.3812876 | 71.731787 | 63.2395153 | 64.8457846 |
| 18:20:54 | 0:20:35 | 73.6930524 | 72.3812876 | 71.731787 | 63.2395153 | 64.8457846 |
| 18:20:55 | 0:20:36 | 73.6930524 | 71.3812876 | 71.731787 | 63.2395153 | 64.8457846 |
| 18:20:56 | 0:20:37 | 73.6930524 | 71.3812876 | 71.731787 | 63.2395153 | 64.8457846 |
| 18:20:57 | 0:20:38 | 73.6930524 | 71.3812876 | 71.731787 | 62.2395153 | 63.8457846 |
| 18:20:58 | 0:20:39 | 73.6930524 | 71.3812876 | 71.731787 | 62.2395153 | 63.8457846 |
| 18:20:59 | 0:20:40 | 73.6930524 | 71.3812876 | 71.731787 | 62.2395153 | 63.8457846 |
| 18:21:00 | 0:20:41 | 73.6930524 | 69.3812876 | 71.731787 | 64.2395153 | 64.8457846 |
| 18:21:01 | 0:20:42 | 73.6930524 | 69.3812876 | 71.731787 | 66.2395153 | 64.8457846 |
| 18:21:02 | 0:20:43 | 74.6930524 | 68.3812876 | 71.731787 | 67.2395153 | 65.8457846 |
| 18:21:03 | 0:20:44 | 74.6930524 | 67.3812876 | 70.731787 | 67.2395153 | 65.8457846 |
| 18:21:04 | 0:20:45 | 74.6930524 | 66.3812876 | 69.731787 | 67.2395153 | 65.8457846 |
| 18:21:05 | 0:20:46 | 74.6930524 | 66.3812876 | 67.731787 | 66.2395153 | 65.8457846 |
| 18:21:06 | 0:20:47 | 74.6930524 | 66.3812876 | 67.731787 | 65.2395153 | 64.8457846 |
| 18:21:07 | 0:20:48 | 73.6930524 | 66.3812876 | 67.731787 | 65.2395153 | 65.8457846 |
| 18:21:08 | 0:20:49 | 73.6930524 | 65.3812876 | 67.731787 | 65.2395153 | 65.8457846 |
| 18:21:09 | 0:20:50 | 73.6930524 | 64.3812876 | 67.731787 | 67.2395153 | 65.8457846 |
| 18:21:10 | 0:20:51 | 74.6930524 | 64.3812876 | 67.731787 | 70.2395153 | 66.8457846 |
| 18:21:11 | 0:20:52 | 74.6930524 | 63.3812876 | 67.731787 | 73.2395153 | 66.8457846 |
| 18:21:12 | 0:20:53 | 74.6930524 | 63.3812876 | 67.731787 | 73.2395153 | 66.8457846 |

|          |         |            |            |           |            |            |
|----------|---------|------------|------------|-----------|------------|------------|
| 18:21:13 | 0:20:54 | 71.6930524 | 63.3812876 | 68.731787 | 73.2395153 | 65.8457846 |
| 18:21:14 | 0:20:55 | 70.6930524 | 63.3812876 | 68.731787 | 73.2395153 | 65.8457846 |
| 18:21:15 | 0:20:56 | 70.6930524 | 64.3812876 | 68.731787 | 73.2395153 | 65.8457846 |
| 18:21:16 | 0:20:57 | 70.6930524 | 64.3812876 | 68.731787 | 74.2395153 | 66.8457846 |
| 18:21:17 | 0:20:58 | 71.6930524 | 67.3812876 | 68.731787 | 74.2395153 | 66.8457846 |
| 18:21:18 | 0:20:59 | 71.6930524 | 68.3812876 | 68.731787 | 73.2395153 | 66.8457846 |
| 18:21:19 | 0:21:00 | 71.6930524 | 68.3812876 | 68.731787 | 72.2395153 | 66.8457846 |
| 18:21:20 | 0:21:01 | 71.6930524 | 68.3812876 | 67.731787 | 73.2395153 | 66.8457846 |
| 18:21:21 | 0:21:02 | 71.6930524 | 68.3812876 | 67.731787 | 73.2395153 | 66.8457846 |
| 18:21:22 | 0:21:03 | 68.6930524 | 68.3812876 | 68.731787 | 74.2395153 | 66.8457846 |
| 18:21:23 | 0:21:04 | 67.6930524 | 69.3812876 | 68.731787 | 75.2395153 | 67.8457846 |
| 18:21:24 | 0:21:05 | 67.6930524 | 70.3812876 | 69.731787 | 76.2395153 | 67.8457846 |
| 18:21:25 | 0:21:06 | 67.6930524 | 71.3812876 | 69.731787 | 76.2395153 | 67.8457846 |
| 18:21:26 | 0:21:07 | 67.6930524 | 73.3812876 | 69.731787 | 76.2395153 | 67.8457846 |
| 18:21:27 | 0:21:08 | 67.6930524 | 73.3812876 | 69.731787 | 77.2395153 | 67.8457846 |
| 18:21:28 | 0:21:09 | 67.6930524 | 75.3812876 | 70.731787 | 77.2395153 | 67.8457846 |
| 18:21:29 | 0:21:10 | 67.6930524 | 76.3812876 | 70.731787 | 77.2395153 | 67.8457846 |
| 18:21:30 | 0:21:11 | 67.6930524 | 76.3812876 | 70.731787 | 76.2395153 | 67.8457846 |
| 18:21:31 | 0:21:12 | 67.6930524 | 77.3812876 | 70.731787 | 76.2395153 | 68.8457846 |
| 18:21:32 | 0:21:13 | 67.6930524 | 76.3812876 | 70.731787 | 73.2395153 | 68.8457846 |
| 18:21:33 | 0:21:14 | 67.6930524 | 76.3812876 | 69.731787 | 72.2395153 | 68.8457846 |
| 18:21:34 | 0:21:15 | 69.6930524 | 76.3812876 | 69.731787 | 71.2395153 | 67.8457846 |
| 18:21:35 | 0:21:16 | 70.6930524 | 76.3812876 | 69.731787 | 69.2395153 | 67.8457846 |
| 18:21:36 | 0:21:17 | 70.6930524 | 76.3812876 | 69.731787 | 69.2395153 | 67.8457846 |
| 18:21:37 | 0:21:18 | 69.6930524 | 74.3812876 | 68.731787 | 62.2395153 | 66.8457846 |
| 18:21:38 | 0:21:19 | 69.6930524 | 74.3812876 | 68.731787 | 61.2395153 | 66.8457846 |
| 18:21:39 | 0:21:20 | 68.6930524 | 74.3812876 | 68.731787 | 58.2395153 | 66.8457846 |
| 18:21:40 | 0:21:21 | 68.6930524 | 73.3812876 | 68.731787 | 56.2395153 | 66.8457846 |
| 18:21:41 | 0:21:22 | 67.6930524 | 73.3812876 | 67.731787 | 55.2395153 | 66.8457846 |
| 18:21:42 | 0:21:23 | 67.6930524 | 73.3812876 | 67.731787 | 56.2395153 | 66.8457846 |
| 18:21:43 | 0:21:24 | 67.6930524 | 73.3812876 | 67.731787 | 54.2395153 | 67.8457846 |
| 18:21:44 | 0:21:25 | 66.6930524 | 72.3812876 | 67.731787 | 54.2395153 | 68.8457846 |
| 18:21:45 | 0:21:26 | 66.6930524 | 73.3812876 | 67.731787 | 53.2395153 | 68.8457846 |
| 18:21:46 | 0:21:27 | 66.6930524 | 73.3812876 | 65.731787 | 53.2395153 | 68.8457846 |
| 18:21:47 | 0:21:28 | 66.6930524 | 74.3812876 | 65.731787 | 53.2395153 | 68.8457846 |
| 18:21:48 | 0:21:29 | 66.6930524 | 76.3812876 | 68.731787 | 53.2395153 | 68.8457846 |
| 18:21:49 | 0:21:30 | 66.6930524 | 75.3812876 | 70.731787 | 53.2395153 | 68.8457846 |
| 18:21:50 | 0:21:31 | 66.6930524 | 75.3812876 | 71.731787 | 53.2395153 | 68.8457846 |
| 18:21:51 | 0:21:32 | 66.6930524 | 76.3812876 | 72.731787 | 53.2395153 | 68.8457846 |
| 18:21:52 | 0:21:33 | 66.6930524 | 76.3812876 | 74.731787 | 53.2395153 | 68.8457846 |
| 18:21:53 | 0:21:34 | 67.6930524 | 75.3812876 | 76.731787 | 52.2395153 | 68.8457846 |
| 18:21:54 | 0:21:35 | 68.6930524 | 75.3812876 | 77.731787 | 52.2395153 | 69.8457846 |
| 18:21:55 | 0:21:36 | 70.6930524 | 76.3812876 | 78.731787 | 53.2395153 | 69.8457846 |
| 18:21:56 | 0:21:37 | 71.6930524 | 76.3812876 | 78.731787 | 53.2395153 | 69.8457846 |
| 18:21:57 | 0:21:38 | 70.6930524 | 75.3812876 | 78.731787 | 54.2395153 | 70.8457846 |

|          |         |            |            |           |            |            |
|----------|---------|------------|------------|-----------|------------|------------|
| 18:21:58 | 0:21:39 | 69.6930524 | 75.3812876 | 78.731787 | 53.2395153 | 70.8457846 |
| 18:21:59 | 0:21:40 | 68.6930524 | 75.3812876 | 78.731787 | 52.2395153 | 71.8457846 |
| 18:22:00 | 0:21:41 | 68.6930524 | 74.3812876 | 78.731787 | 52.2395153 | 71.8457846 |
| 18:22:01 | 0:21:42 | 67.6930524 | 72.3812876 | 71.731787 | 53.2395153 | 72.8457846 |
| 18:22:02 | 0:21:43 | 67.6930524 | 70.3812876 | 70.731787 | 53.2395153 | 72.8457846 |
| 18:22:03 | 0:21:44 | 67.6930524 | 68.3812876 | 70.731787 | 53.2395153 | 72.8457846 |
| 18:22:04 | 0:21:45 | 67.6930524 | 67.3812876 | 70.731787 | 53.2395153 | 73.8457846 |
| 18:22:05 | 0:21:46 | 67.6930524 | 67.3812876 | 71.731787 | 53.2395153 | 73.8457846 |
| 18:22:06 | 0:21:47 | 67.6930524 | 68.3812876 | 71.731787 | 54.2395153 | 73.8457846 |
| 18:22:07 | 0:21:48 | 68.6930524 | 69.3812876 | 71.731787 | 54.2395153 | 77.8457846 |
| 18:22:08 | 0:21:49 | 69.6930524 | 69.3812876 | 71.731787 | 55.2395153 | 77.8457846 |
| 18:22:09 | 0:21:50 | 70.6930524 | 72.3812876 | 70.731787 | 55.2395153 | 83.8457846 |
| 18:22:10 | 0:21:51 | 70.6930524 | 71.3812876 | 69.731787 | 54.2395153 | 85.8457846 |
| 18:22:11 | 0:21:52 | 70.6930524 | 71.3812876 | 69.731787 | 53.2395153 | 71.7951505 |
| 18:22:12 | 0:21:53 | 70.6930524 | 71.3812876 | 69.731787 | 53.2395153 | 71.9201505 |
| 18:22:13 | 0:21:54 | 70.6930524 | 71.3812876 | 69.731787 | 53.2395153 | 72.2951505 |
| 18:22:14 | 0:21:55 | 70.6930524 | 71.3812876 | 69.731787 | 54.2395153 | 72.6701505 |
| 18:22:15 | 0:21:56 | 70.6930524 | 71.3812876 | 69.731787 | 56.2395153 | 73.0451505 |
| 18:22:16 | 0:21:57 | 71.6930524 | 71.3812876 | 74.731787 | 56.2395153 | 73.5451505 |
| 18:22:17 | 0:21:58 | 71.6930524 | 71.3812876 | 76.731787 | 56.2395153 | 73.6701505 |
| 18:22:18 | 0:21:59 | 72.6930524 | 73.3812876 | 76.731787 | 56.2395153 | 78.8457846 |
| 18:22:19 | 0:22:00 | 73.6930524 | 73.3812876 | 77.731787 | 56.2395153 | 70.8457846 |
| 18:22:20 | 0:22:01 | 73.6930524 | 73.3812876 | 78.731787 | 56.2395153 | 67.8457846 |
| 18:22:21 | 0:22:02 | 73.6930524 | 73.3812876 | 78.731787 | 56.2395153 | 67.8457846 |
| 18:22:22 | 0:22:03 | 72.6930524 | 74.3812876 | 78.731787 | 55.2395153 | 65.8457846 |
| 18:22:23 | 0:22:04 | 72.6930524 | 74.3812876 | 79.731787 | 55.2395153 | 64.8457846 |
| 18:22:24 | 0:22:05 | 72.6930524 | 76.3812876 | 81.731787 | 55.2395153 | 64.8457846 |
| 18:22:25 | 0:22:06 | 72.6930524 | 78.3812876 | 80.731787 | 56.2395153 | 61.8457846 |
| 18:22:26 | 0:22:07 | 72.6930524 | 79.3812876 | 76.731787 | 56.2395153 | 62.8457846 |
| 18:22:27 | 0:22:08 | 72.6930524 | 79.3812876 | 74.731787 | 56.2395153 | 65.8457846 |
| 18:22:28 | 0:22:09 | 72.6930524 | 78.3812876 | 72.731787 | 56.2395153 | 67.8457846 |
| 18:22:29 | 0:22:10 | 72.6930524 | 77.3812876 | 72.731787 | 55.2395153 | 67.8457846 |
| 18:22:30 | 0:22:11 | 72.6930524 | 77.3812876 | 72.731787 | 55.2395153 | 67.8457846 |
| 18:22:31 | 0:22:12 | 70.6930524 | 77.3812876 | 70.731787 | 57.2395153 | 71.8457846 |
| 18:22:32 | 0:22:13 | 69.6930524 | 77.3812876 | 69.731787 | 59.2395153 | 68.8457846 |
| 18:22:33 | 0:22:14 | 68.6930524 | 77.3812876 | 69.731787 | 60.2395153 | 67.8457846 |
| 18:22:34 | 0:22:15 | 68.6930524 | 78.3812876 | 68.731787 | 60.2395153 | 66.8457846 |
| 18:22:35 | 0:22:16 | 68.6930524 | 78.3812876 | 68.731787 | 61.2395153 | 65.8457846 |
| 18:22:36 | 0:22:17 | 69.6930524 | 79.3812876 | 68.731787 | 61.2395153 | 64.8457846 |
| 18:22:37 | 0:22:18 | 69.6930524 | 80.3812876 | 67.731787 | 61.2395153 | 64.8457846 |
| 18:22:38 | 0:22:19 | 70.6930524 | 80.3812876 | 68.731787 | 61.2395153 | 64.8457846 |
| 18:22:39 | 0:22:20 | 70.6930524 | 80.3812876 | 68.731787 | 61.2395153 | 64.8457846 |
| 18:22:40 | 0:22:21 | 71.6930524 | 80.3812876 | 68.731787 | 61.2395153 | 64.8457846 |
| 18:22:41 | 0:22:22 | 72.6930524 | 80.3812876 | 69.731787 | 59.2395153 | 65.8457846 |
| 18:22:42 | 0:22:23 | 72.6930524 | 80.3812876 | 69.731787 | 58.2395153 | 65.8457846 |

|          |         |            |            |           |            |            |
|----------|---------|------------|------------|-----------|------------|------------|
| 18:22:43 | 0:22:24 | 72.6930524 | 79.3812876 | 69.731787 | 58.2395153 | 65.8457846 |
| 18:22:44 | 0:22:25 | 72.6930524 | 79.3812876 | 69.731787 | 57.2395153 | 65.8457846 |
| 18:22:45 | 0:22:26 | 71.6930524 | 80.3812876 | 72.731787 | 57.2395153 | 65.8457846 |
| 18:22:46 | 0:22:27 | 71.6930524 | 80.3812876 | 72.731787 | 53.2395153 | 65.8457846 |
| 18:22:47 | 0:22:28 | 70.6930524 | 80.3812876 | 73.731787 | 53.2395153 | 68.8457846 |
| 18:22:48 | 0:22:29 | 70.6930524 | 80.3812876 | 74.731787 | 54.2395153 | 69.8457846 |
| 18:22:49 | 0:22:30 | 69.6930524 | 80.3812876 | 75.731787 | 54.2395153 | 66.8457846 |
| 18:22:50 | 0:22:31 | 68.6930524 | 80.3812876 | 74.731787 | 54.2395153 | 64.8457846 |
| 18:22:51 | 0:22:32 | 68.6930524 | 80.3812876 | 74.731787 | 54.2395153 | 63.8457846 |
| 18:22:52 | 0:22:33 | 68.6930524 | 78.3812876 | 73.731787 | 54.2395153 | 63.8457846 |
| 18:22:53 | 0:22:34 | 68.6930524 | 78.3812876 | 73.731787 | 54.2395153 | 65.8457846 |
| 18:22:54 | 0:22:35 | 68.6930524 | 77.3812876 | 73.731787 | 55.2395153 | 67.8457846 |
| 18:22:55 | 0:22:36 | 68.6930524 | 77.3812876 | 73.731787 | 56.2395153 | 68.8457846 |
| 18:22:56 | 0:22:37 | 71.6930524 | 77.3812876 | 74.731787 | 56.2395153 | 68.8457846 |
| 18:22:57 | 0:22:38 | 77.6930524 | 77.3812876 | 74.731787 | 56.2395153 | 67.8457846 |
| 18:22:58 | 0:22:39 | 78.6930524 | 77.3812876 | 75.731787 | 57.2395153 | 67.8457846 |
| 18:22:59 | 0:22:40 | 79.6930524 | 77.3812876 | 76.731787 | 58.2395153 | 65.8457846 |
| 18:23:00 | 0:22:41 | 79.6930524 | 77.3812876 | 76.731787 | 58.2395153 | 63.8457846 |
| 18:23:01 | 0:22:42 | 79.6930524 | 77.3812876 | 76.731787 | 58.2395153 | 63.8457846 |
| 18:23:02 | 0:22:43 | 79.6930524 | 78.3812876 | 76.731787 | 58.2395153 | 63.8457846 |
| 18:23:03 | 0:22:44 | 79.6930524 | 78.3812876 | 75.731787 | 58.2395153 | 63.8457846 |
| 18:23:04 | 0:22:45 | 78.6930524 | 78.3812876 | 71.731787 | 60.2395153 | 63.8457846 |
| 18:23:05 | 0:22:46 | 77.6930524 | 78.3812876 | 68.731787 | 61.2395153 | 65.8457846 |
| 18:23:06 | 0:22:47 | 77.6930524 | 79.3812876 | 68.731787 | 61.2395153 | 65.8457846 |
| 18:23:07 | 0:22:48 | 77.6930524 | 79.3812876 | 66.731787 | 64.2395153 | 64.8457846 |
| 18:23:08 | 0:22:49 | 77.6930524 | 79.3812876 | 66.731787 | 64.2395153 | 64.8457846 |
| 18:23:09 | 0:22:50 | 77.6930524 | 78.3812876 | 66.731787 | 64.2395153 | 64.8457846 |
| 18:23:10 | 0:22:51 | 77.6930524 | 78.3812876 | 67.731787 | 64.2395153 | 65.8457846 |
| 18:23:11 | 0:22:52 | 77.6930524 | 79.3812876 | 67.731787 | 65.2395153 | 67.8457846 |
| 18:23:12 | 0:22:53 | 77.6930524 | 79.3812876 | 67.731787 | 65.2395153 | 69.8457846 |
| 18:23:13 | 0:22:54 | 78.6930524 | 79.3812876 | 70.731787 | 68.2395153 | 70.8457846 |
| 18:23:14 | 0:22:55 | 78.6930524 | 79.3812876 | 70.731787 | 68.2395153 | 71.8457846 |
| 18:23:15 | 0:22:56 | 78.6930524 | 81.3812876 | 70.731787 | 68.2395153 | 72.8457846 |
| 18:23:16 | 0:22:57 | 78.6930524 | 81.3812876 | 71.731787 | 68.2395153 | 72.8457846 |
| 18:23:17 | 0:22:58 | 78.6930524 | 81.3812876 | 71.731787 | 68.2395153 | 72.8457846 |
| 18:23:18 | 0:22:59 | 77.6930524 | 81.3812876 | 71.731787 | 68.2395153 | 72.8457846 |
| 18:23:19 | 0:23:00 | 77.6930524 | 81.3812876 | 68.731787 | 68.2395153 | 73.8457846 |
| 18:23:20 | 0:23:01 | 77.6930524 | 81.3812876 | 67.731787 | 63.2395153 | 74.8457846 |
| 18:23:21 | 0:23:02 | 76.6930524 | 81.3812876 | 67.731787 | 63.2395153 | 75.8457846 |
| 18:23:22 | 0:23:03 | 76.6930524 | 81.3812876 | 66.731787 | 63.2395153 | 76.8457846 |
| 18:23:23 | 0:23:04 | 75.6930524 | 81.3812876 | 66.731787 | 64.2395153 | 75.8457846 |
| 18:23:24 | 0:23:05 | 75.6930524 | 81.3812876 | 66.731787 | 64.2395153 | 75.8457846 |
| 18:23:25 | 0:23:06 | 74.6930524 | 81.3812876 | 69.731787 | 65.2395153 | 71.8457846 |
| 18:23:26 | 0:23:07 | 74.6930524 | 81.3812876 | 71.731787 | 66.2395153 | 66.8457846 |
| 18:23:27 | 0:23:08 | 73.6930524 | 81.3812876 | 71.731787 | 67.2395153 | 64.8457846 |

|          |         |            |            |           |            |            |
|----------|---------|------------|------------|-----------|------------|------------|
| 18:23:28 | 0:23:09 | 73.6930524 | 81.3812876 | 72.731787 | 68.2395153 | 63.8457846 |
| 18:23:29 | 0:23:10 | 72.6930524 | 80.3812876 | 71.731787 | 69.2395153 | 63.8457846 |
| 18:23:30 | 0:23:11 | 72.6930524 | 79.3812876 | 71.731787 | 69.2395153 | 62.8457846 |
| 18:23:31 | 0:23:12 | 72.6930524 | 77.3812876 | 69.731787 | 69.2395153 | 62.8457846 |
| 18:23:32 | 0:23:13 | 72.6930524 | 77.3812876 | 68.731787 | 70.2395153 | 62.8457846 |
| 18:23:33 | 0:23:14 | 69.6930524 | 77.3812876 | 68.731787 | 72.2395153 | 60.8457846 |
| 18:23:34 | 0:23:15 | 69.6930524 | 76.3812876 | 68.731787 | 76.2395153 | 62.8457846 |
| 18:23:35 | 0:23:16 | 69.6930524 | 76.3812876 | 68.731787 | 76.2395153 | 63.8457846 |
| 18:23:36 | 0:23:17 | 69.6930524 | 75.3812876 | 70.731787 | 78.2395153 | 62.8457846 |
| 18:23:37 | 0:23:18 | 69.6930524 | 75.3812876 | 71.731787 | 79.2395153 | 61.8457846 |
| 18:23:38 | 0:23:19 | 70.6930524 | 75.3812876 | 71.731787 | 78.2395153 | 62.8457846 |
| 18:23:39 | 0:23:20 | 70.6930524 | 75.3812876 | 71.731787 | 77.2395153 | 64.8457846 |
| 18:23:40 | 0:23:21 | 75.6930524 | 75.3812876 | 71.731787 | 76.2395153 | 65.8457846 |
| 18:23:41 | 0:23:22 | 80.6930524 | 74.3812876 | 71.731787 | 75.2395153 | 66.8457846 |
| 18:23:42 | 0:23:23 | 81.6930524 | 72.3812876 | 72.731787 | 75.2395153 | 66.8457846 |
| 18:23:43 | 0:23:24 | 81.6930524 | 72.3812876 | 73.731787 | 75.2395153 | 67.8457846 |
| 18:23:44 | 0:23:25 | 76.6930524 | 71.3812876 | 73.731787 | 75.2395153 | 66.8457846 |
| 18:23:45 | 0:23:26 | 76.6930524 | 71.3812876 | 73.731787 | 75.2395153 | 66.8457846 |
| 18:23:46 | 0:23:27 | 72.6930524 | 71.3812876 | 75.731787 | 75.2395153 | 66.8457846 |
| 18:23:47 | 0:23:28 | 70.6930524 | 71.3812876 | 76.731787 | 75.2395153 | 66.8457846 |
| 18:23:48 | 0:23:29 | 69.6930524 | 71.3812876 | 78.731787 | 76.2395153 | 67.8457846 |
| 18:23:49 | 0:23:30 | 69.6930524 | 71.3812876 | 79.731787 | 75.2395153 | 68.8457846 |
| 18:23:50 | 0:23:31 | 70.6930524 | 71.3812876 | 79.731787 | 74.2395153 | 69.8457846 |
| 18:23:51 | 0:23:32 | 70.6930524 | 71.3812876 | 79.731787 | 73.2395153 | 69.8457846 |
| 18:23:52 | 0:23:33 | 70.6930524 | 73.3812876 | 79.731787 | 71.2395153 | 69.8457846 |
| 18:23:53 | 0:23:34 | 71.6930524 | 73.3812876 | 80.731787 | 71.2395153 | 68.8457846 |
| 18:23:54 | 0:23:35 | 72.6930524 | 73.3812876 | 80.731787 | 71.2395153 | 68.8457846 |
| 18:23:55 | 0:23:36 | 71.6930524 | 73.3812876 | 80.731787 | 71.2395153 | 68.8457846 |
| 18:23:56 | 0:23:37 | 71.6930524 | 71.3812876 | 80.731787 | 70.2395153 | 68.8457846 |
| 18:23:57 | 0:23:38 | 64.6930524 | 69.3812876 | 80.731787 | 65.2395153 | 68.8457846 |
| 18:23:58 | 0:23:39 | 61.6930524 | 66.3812876 | 80.731787 | 65.2395153 | 68.8457846 |
| 18:23:59 | 0:23:40 | 60.6930524 | 66.3812876 | 82.731787 | 65.2395153 | 68.8457846 |
| 18:24:00 | 0:23:41 | 59.6930524 | 66.3812876 | 84.731787 | 64.2395153 | 68.8457846 |
| 18:24:01 | 0:23:42 | 58.6930524 | 64.3812876 | 85.731787 | 64.2395153 | 68.8457846 |
| 18:24:02 | 0:23:43 | 58.6930524 | 63.3812876 | 83.731787 | 64.2395153 | 68.8457846 |
| 18:24:03 | 0:23:44 | 58.6930524 | 63.3812876 | 81.731787 | 64.2395153 | 69.8457846 |
| 18:24:04 | 0:23:45 | 55.6930524 | 63.3812876 | 81.731787 | 63.2395153 | 68.8457846 |
| 18:24:05 | 0:23:46 | 55.6930524 | 63.3812876 | 79.731787 | 61.2395153 | 68.8457846 |
| 18:24:06 | 0:23:47 | 55.6930524 | 62.3812876 | 79.731787 | 59.2395153 | 68.8457846 |
| 18:24:07 | 0:23:48 | 55.6930524 | 63.3812876 | 78.731787 | 59.2395153 | 69.8457846 |
| 18:24:08 | 0:23:49 | 54.6930524 | 63.3812876 | 78.731787 | 59.2395153 | 70.8457846 |
| 18:24:09 | 0:23:50 | 54.6930524 | 64.3812876 | 76.731787 | 59.2395153 | 71.8457846 |
| 18:24:10 | 0:23:51 | 54.6930524 | 64.3812876 | 73.731787 | 59.2395153 | 71.8457846 |
| 18:24:11 | 0:23:52 | 54.6930524 | 64.3812876 | 71.731787 | 59.2395153 | 71.8457846 |
| 18:24:12 | 0:23:53 | 55.6930524 | 64.3812876 | 71.731787 | 59.2395153 | 70.8457846 |

|          |         |            |            |           |            |            |
|----------|---------|------------|------------|-----------|------------|------------|
| 18:24:13 | 0:23:54 | 56.6930524 | 65.3812876 | 71.731787 | 60.2395153 | 69.8457846 |
| 18:24:14 | 0:23:55 | 56.6930524 | 65.3812876 | 71.731787 | 59.2395153 | 69.8457846 |
| 18:24:15 | 0:23:56 | 55.6930524 | 66.3812876 | 72.731787 | 59.2395153 | 70.8457846 |
| 18:24:16 | 0:23:57 | 55.6930524 | 66.3812876 | 74.731787 | 59.2395153 | 70.8457846 |
| 18:24:17 | 0:23:58 | 53.6930524 | 67.3812876 | 74.731787 | 59.2395153 | 70.8457846 |
| 18:24:18 | 0:23:59 | 53.6930524 | 67.3812876 | 74.731787 | 59.2395153 | 70.8457846 |
| 18:24:19 | 0:24:00 | 52.6930524 | 70.3812876 | 73.731787 | 60.2395153 | 69.8457846 |
| 18:24:20 | 0:24:01 | 51.6930524 | 70.3812876 | 71.731787 | 61.2395153 | 69.8457846 |
| 18:24:21 | 0:24:02 | 51.6930524 | 70.3812876 | 70.731787 | 61.2395153 | 69.8457846 |
| 18:24:22 | 0:24:03 | 51.6930524 | 70.3812876 | 69.731787 | 62.2395153 | 69.8457846 |
| 18:24:23 | 0:24:04 | 53.6930524 | 71.3812876 | 69.731787 | 62.2395153 | 69.8457846 |
| 18:24:24 | 0:24:05 | 54.6930524 | 71.3812876 | 69.731787 | 63.2395153 | 69.8457846 |
| 18:24:25 | 0:24:06 | 54.6930524 | 71.3812876 | 69.731787 | 64.2395153 | 69.8457846 |
| 18:24:26 | 0:24:07 | 55.6930524 | 71.3812876 | 69.731787 | 64.2395153 | 69.8457846 |
| 18:24:27 | 0:24:08 | 55.6930524 | 71.3812876 | 69.731787 | 63.2395153 | 69.8457846 |
| 18:24:28 | 0:24:09 | 55.6930524 | 71.3812876 | 68.731787 | 61.2395153 | 70.8457846 |
| 18:24:29 | 0:24:10 | 55.6930524 | 71.3812876 | 67.731787 | 61.2395153 | 71.8457846 |
| 18:24:30 | 0:24:11 | 57.6930524 | 71.3812876 | 67.731787 | 61.2395153 | 72.8457846 |
| 18:24:31 | 0:24:12 | 57.6930524 | 71.3812876 | 67.731787 | 64.2395153 | 72.8457846 |
| 18:24:32 | 0:24:13 | 59.6930524 | 71.3812876 | 67.731787 | 66.2395153 | 74.8457846 |
| 18:24:33 | 0:24:14 | 60.6930524 | 71.3812876 | 68.731787 | 68.2395153 | 77.8457846 |
| 18:24:34 | 0:24:15 | 60.6930524 | 71.3812876 | 68.731787 | 69.2395153 | 80.8457846 |
| 18:24:35 | 0:24:16 | 65.6930524 | 73.3812876 | 68.731787 | 69.2395153 | 78.8457846 |
| 18:24:36 | 0:24:17 | 65.6930524 | 73.3812876 | 68.731787 | 70.2395153 | 77.8457846 |
| 18:24:37 | 0:24:18 | 65.6930524 | 73.3812876 | 68.731787 | 70.2395153 | 77.8457846 |
| 18:24:38 | 0:24:19 | 65.6930524 | 73.3812876 | 68.731787 | 70.2395153 | 74.8457846 |
| 18:24:39 | 0:24:20 | 65.6930524 | 73.3812876 | 68.731787 | 70.2395153 | 72.8457846 |
| 18:24:40 | 0:24:21 | 65.6930524 | 72.3812876 | 68.731787 | 70.2395153 | 72.8457846 |
| 18:24:41 | 0:24:22 | 63.6930524 | 73.3812876 | 70.731787 | 71.2395153 | 72.8457846 |
| 18:24:42 | 0:24:23 | 62.6930524 | 73.3812876 | 70.731787 | 71.2395153 | 71.8457846 |
| 18:24:43 | 0:24:24 | 62.6930524 | 74.3812876 | 72.731787 | 72.2395153 | 71.8457846 |
| 18:24:44 | 0:24:25 | 62.6930524 | 82.3812876 | 72.731787 | 73.2395153 | 71.8457846 |
| 18:24:45 | 0:24:26 | 62.6930524 | 82.3812876 | 75.731787 | 73.2395153 | 71.8457846 |
| 18:24:46 | 0:24:27 | 62.6930524 | 82.3812876 | 75.731787 | 74.2395153 | 71.8457846 |
| 18:24:47 | 0:24:28 | 63.6930524 | 83.3812876 | 75.731787 | 74.2395153 | 71.8457846 |
| 18:24:48 | 0:24:29 | 65.6930524 | 83.3812876 | 76.731787 | 74.2395153 | 71.8457846 |
| 18:24:49 | 0:24:30 | 66.6930524 | 84.3812876 | 78.731787 | 75.2395153 | 71.8457846 |
| 18:24:50 | 0:24:31 | 66.6930524 | 78.3812876 | 78.731787 | 76.2395153 | 71.8457846 |
| 18:24:51 | 0:24:32 | 67.6930524 | 77.3812876 | 78.731787 | 76.2395153 | 71.8457846 |
| 18:24:52 | 0:24:33 | 67.6930524 | 76.3812876 | 78.731787 | 79.2395153 | 71.8457846 |
| 18:24:53 | 0:24:34 | 67.6930524 | 76.3812876 | 79.731787 | 82.2395153 | 72.8457846 |
| 18:24:54 | 0:24:35 | 67.6930524 | 76.3812876 | 79.731787 | 85.2395153 | 72.8457846 |
| 18:24:55 | 0:24:36 | 66.6930524 | 75.3812876 | 80.731787 | 87.2395153 | 72.8457846 |
| 18:24:56 | 0:24:37 | 67.6930524 | 74.3812876 | 80.731787 | 87.2395153 | 72.8457846 |
| 18:24:57 | 0:24:38 | 68.6930524 | 72.3812876 | 80.731787 | 86.2395153 | 73.8457846 |

|          |         |            |            |           |            |            |
|----------|---------|------------|------------|-----------|------------|------------|
| 18:24:58 | 0:24:39 | 70.6930524 | 72.3812876 | 82.731787 | 85.2395153 | 72.8457846 |
| 18:24:59 | 0:24:40 | 71.6930524 | 71.3812876 | 82.731787 | 84.2395153 | 72.8457846 |
| 18:25:00 | 0:24:41 | 70.6930524 | 73.3812876 | 81.731787 | 83.2395153 | 71.8457846 |
| 18:25:01 | 0:24:42 | 69.6930524 | 73.3812876 | 76.731787 | 83.2395153 | 71.8457846 |
| 18:25:02 | 0:24:43 | 69.6930524 | 73.3812876 | 75.731787 | 81.2395153 | 70.8457846 |
| 18:25:03 | 0:24:44 | 69.6930524 | 73.3812876 | 75.731787 | 78.2395153 | 69.8457846 |
| 18:25:04 | 0:24:45 | 68.6930524 | 74.3812876 | 75.731787 | 75.2395153 | 69.8457846 |
| 18:25:05 | 0:24:46 | 68.6930524 | 74.3812876 | 75.731787 | 75.2395153 | 69.8457846 |
| 18:25:06 | 0:24:47 | 69.6930524 | 74.3812876 | 75.731787 | 71.2395153 | 68.8457846 |
| 18:25:07 | 0:24:48 | 70.6930524 | 75.3812876 | 75.731787 | 69.2395153 | 67.8457846 |
| 18:25:08 | 0:24:49 | 70.6930524 | 76.3812876 | 75.731787 | 68.2395153 | 67.8457846 |
| 18:25:09 | 0:24:50 | 71.6930524 | 76.3812876 | 73.731787 | 67.2395153 | 67.8457846 |
| 18:25:10 | 0:24:51 | 71.6930524 | 76.3812876 | 73.731787 | 64.2395153 | 67.8457846 |
| 18:25:11 | 0:24:52 | 70.6930524 | 76.3812876 | 71.731787 | 64.2395153 | 67.8457846 |
| 18:25:12 | 0:24:53 | 70.6930524 | 76.3812876 | 71.731787 | 64.2395153 | 67.8457846 |
| 18:25:13 | 0:24:54 | 67.6930524 | 74.3812876 | 71.731787 | 60.2395153 | 67.8457846 |
| 18:25:14 | 0:24:55 | 66.6930524 | 74.3812876 | 70.731787 | 59.2395153 | 67.8457846 |
| 18:25:15 | 0:24:56 | 66.6930524 | 74.3812876 | 70.731787 | 57.2395153 | 67.8457846 |
| 18:25:16 | 0:24:57 | 66.6930524 | 74.3812876 | 70.731787 | 56.2395153 | 67.8457846 |
| 18:25:17 | 0:24:58 | 66.6930524 | 74.3812876 | 70.731787 | 55.2395153 | 66.8457846 |
| 18:25:18 | 0:24:59 | 66.6930524 | 74.3812876 | 71.731787 | 55.2395153 | 64.8457846 |
| 18:25:19 | 0:25:00 | 65.6930524 | 75.3812876 | 71.731787 | 55.2395153 | 64.8457846 |
| 18:25:20 | 0:25:01 | 63.6930524 | 73.3812876 | 72.731787 | 55.2395153 | 64.8457846 |
| 18:25:21 | 0:25:02 | 64.6930524 | 73.3812876 | 72.731787 | 55.2395153 | 65.8457846 |
| 18:25:22 | 0:25:03 | 64.6930524 | 73.3812876 | 74.731787 | 55.2395153 | 67.8457846 |
| 18:25:23 | 0:25:04 | 65.6930524 | 72.3812876 | 75.731787 | 58.2395153 | 68.8457846 |
| 18:25:24 | 0:25:05 | 67.6930524 | 73.3812876 | 75.731787 | 59.2395153 | 69.8457846 |
| 18:25:25 | 0:25:06 | 68.6930524 | 73.3812876 | 75.731787 | 59.2395153 | 69.8457846 |
| 18:25:26 | 0:25:07 | 69.6930524 | 75.3812876 | 76.731787 | 59.2395153 | 69.8457846 |
| 18:25:27 | 0:25:08 | 68.6930524 | 75.3812876 | 76.731787 | 59.2395153 | 69.8457846 |
| 18:25:28 | 0:25:09 | 69.6930524 | 75.3812876 | 77.731787 | 59.2395153 | 69.8457846 |
| 18:25:29 | 0:25:10 | 68.6930524 | 74.3812876 | 77.731787 | 59.2395153 | 69.8457846 |
| 18:25:30 | 0:25:11 | 66.6930524 | 71.3812876 | 77.731787 | 60.2395153 | 69.8457846 |
| 18:25:31 | 0:25:12 | 66.6930524 | 71.3812876 | 78.731787 | 60.2395153 | 70.8457846 |
| 18:25:32 | 0:25:13 | 67.6930524 | 70.3812876 | 78.731787 | 60.2395153 | 73.8457846 |
| 18:25:33 | 0:25:14 | 68.6930524 | 70.3812876 | 79.731787 | 61.2395153 | 74.8457846 |
| 18:25:34 | 0:25:15 | 68.6930524 | 72.3812876 | 80.731787 | 60.2395153 | 77.8457846 |
| 18:25:35 | 0:25:16 | 68.6930524 | 72.3812876 | 80.731787 | 60.2395153 | 77.8457846 |
| 18:25:36 | 0:25:17 | 68.6930524 | 73.3812876 | 80.731787 | 60.2395153 | 76.8457846 |
| 18:25:37 | 0:25:18 | 67.6930524 | 73.3812876 | 80.731787 | 60.2395153 | 76.8457846 |
| 18:25:38 | 0:25:19 | 67.6930524 | 73.3812876 | 80.731787 | 60.2395153 | 76.8457846 |
| 18:25:39 | 0:25:20 | 67.6930524 | 72.3812876 | 80.731787 | 60.2395153 | 75.8457846 |
| 18:25:40 | 0:25:21 | 66.6930524 | 72.3812876 | 82.731787 | 58.2395153 | 75.8457846 |
| 18:25:41 | 0:25:22 | 66.6930524 | 72.3812876 | 82.731787 | 57.2395153 | 74.8457846 |
| 18:25:42 | 0:25:23 | 66.6930524 | 73.3812876 | 82.731787 | 57.2395153 | 73.8457846 |



|          |         |            |            |           |            |            |
|----------|---------|------------|------------|-----------|------------|------------|
| 18:25:43 | 0:25:24 | 67.6930524 | 73.3812876 | 82.731787 | 57.2395153 | 73.8457846 |
| 18:25:44 | 0:25:25 | 68.6930524 | 73.3812876 | 82.731787 | 57.2395153 | 73.8457846 |
| 18:25:45 | 0:25:26 | 69.6930524 | 71.3812876 | 82.731787 | 57.2395153 | 72.8457846 |
| 18:25:46 | 0:25:27 | 69.6930524 | 71.3812876 | 82.731787 | 57.2395153 | 66.8457846 |
| 18:25:47 | 0:25:28 | 68.6930524 | 71.3812876 | 82.731787 | 58.2395153 | 64.8457846 |
| 18:25:48 | 0:25:29 | 68.6930524 | 71.3812876 | 81.731787 | 59.2395153 | 63.8457846 |
| 18:25:49 | 0:25:30 | 68.6930524 | 71.3812876 | 78.731787 | 59.2395153 | 63.8457846 |
| 18:25:50 | 0:25:31 | 68.6930524 | 69.3812876 | 78.731787 | 61.2395153 | 64.8457846 |
| 18:25:51 | 0:25:32 | 67.6930524 | 67.3812876 | 78.731787 | 62.2395153 | 63.8457846 |
| 18:25:52 | 0:25:33 | 66.6930524 | 67.3812876 | 78.731787 | 63.2395153 | 61.8457846 |
| 18:25:53 | 0:25:34 | 66.6930524 | 67.3812876 | 79.731787 | 62.2395153 | 60.8457846 |
| 18:25:54 | 0:25:35 | 65.6930524 | 66.3812876 | 79.731787 | 62.2395153 | 59.8457846 |
| 18:25:55 | 0:25:36 | 64.6930524 | 65.3812876 | 76.731787 | 62.2395153 | 59.8457846 |
| 18:25:56 | 0:25:37 | 64.6930524 | 64.3812876 | 75.731787 | 62.2395153 | 59.8457846 |
| 18:25:57 | 0:25:38 | 63.6930524 | 64.3812876 | 74.731787 | 62.2395153 | 60.8457846 |
| 18:25:58 | 0:25:39 | 61.6930524 | 64.3812876 | 74.731787 | 62.2395153 | 62.8457846 |
| 18:25:59 | 0:25:40 | 62.6930524 | 64.3812876 | 74.731787 | 62.2395153 | 62.8457846 |
| 18:26:00 | 0:25:41 | 62.6930524 | 63.3812876 | 74.731787 | 62.2395153 | 63.8457846 |
| 18:26:01 | 0:25:42 | 62.6930524 | 63.3812876 | 74.731787 | 63.2395153 | 63.8457846 |
| 18:26:02 | 0:25:43 | 68.6930524 | 61.3812876 | 72.731787 | 63.2395153 | 63.8457846 |
| 18:26:03 | 0:25:44 | 69.6930524 | 61.3812876 | 71.731787 | 63.2395153 | 63.8457846 |
| 18:26:04 | 0:25:45 | 68.6930524 | 61.3812876 | 69.731787 | 67.2395153 | 66.8457846 |
| 18:26:05 | 0:25:46 | 67.6930524 | 61.3812876 | 68.731787 | 67.2395153 | 66.8457846 |
| 18:26:06 | 0:25:47 | 67.6930524 | 61.3812876 | 68.731787 | 67.2395153 | 66.8457846 |
| 18:26:07 | 0:25:48 | 66.6930524 | 61.3812876 | 68.731787 | 67.2395153 | 69.8457846 |
| 18:26:08 | 0:25:49 | 64.6930524 | 61.3812876 | 65.731787 | 68.2395153 | 69.8457846 |
| 18:26:09 | 0:25:50 | 64.6930524 | 62.3812876 | 64.731787 | 68.2395153 | 69.8457846 |
| 18:26:10 | 0:25:51 | 64.6930524 | 62.3812876 | 64.731787 | 69.2395153 | 69.8457846 |
| 18:26:11 | 0:25:52 | 64.6930524 | 62.3812876 | 64.731787 | 70.2395153 | 69.8457846 |
| 18:26:12 | 0:25:53 | 63.6930524 | 62.3812876 | 63.731787 | 72.2395153 | 69.8457846 |
| 18:26:13 | 0:25:54 | 63.6930524 | 62.3812876 | 63.731787 | 72.2395153 | 69.8457846 |
| 18:26:14 | 0:25:55 | 64.6930524 | 60.3812876 | 63.731787 | 73.2395153 | 69.8457846 |
| 18:26:15 | 0:25:56 | 63.6930524 | 59.3812876 | 63.731787 | 73.2395153 | 69.8457846 |
| 18:26:16 | 0:25:57 | 63.6930524 | 59.3812876 | 65.731787 | 73.2395153 | 72.8457846 |
| 18:26:17 | 0:25:58 | 63.6930524 | 60.3812876 | 65.731787 | 74.2395153 | 72.8457846 |
| 18:26:18 | 0:25:59 | 63.6930524 | 60.3812876 | 66.731787 | 75.2395153 | 69.8457846 |
| 18:26:19 | 0:26:00 | 63.6930524 | 60.3812876 | 66.731787 | 75.2395153 | 67.8457846 |
| 18:26:20 | 0:26:01 | 62.6930524 | 61.3812876 | 67.731787 | 75.2395153 | 67.8457846 |
| 18:26:21 | 0:26:02 | 65.6930524 | 64.3812876 | 67.731787 | 75.2395153 | 67.8457846 |
| 18:26:22 | 0:26:03 | 66.6930524 | 70.3812876 | 67.731787 | 75.2395153 | 67.8457846 |
| 18:26:23 | 0:26:04 | 66.6930524 | 73.3812876 | 67.731787 | 75.2395153 | 67.8457846 |
| 18:26:24 | 0:26:05 | 67.6930524 | 74.3812876 | 66.731787 | 75.2395153 | 67.8457846 |
| 18:26:25 | 0:26:06 | 69.6930524 | 74.3812876 | 66.731787 | 73.2395153 | 68.8457846 |
| 18:26:26 | 0:26:07 | 70.6930524 | 74.3812876 | 66.731787 | 73.2395153 | 70.8457846 |
| 18:26:27 | 0:26:08 | 70.6930524 | 71.3812876 | 65.731787 | 73.2395153 | 70.8457846 |

|          |         |            |            |           |            |            |
|----------|---------|------------|------------|-----------|------------|------------|
| 18:26:28 | 0:26:09 | 70.6930524 | 70.3812876 | 65.731787 | 72.2395153 | 70.8457846 |
| 18:26:29 | 0:26:10 | 69.6930524 | 69.3812876 | 65.731787 | 72.2395153 | 71.8457846 |
| 18:26:30 | 0:26:11 | 68.6930524 | 70.3812876 | 66.731787 | 72.2395153 | 71.8457846 |
| 18:26:31 | 0:26:12 | 68.6930524 | 71.3812876 | 66.731787 | 74.2395153 | 71.8457846 |
| 18:26:32 | 0:26:13 | 66.6930524 | 71.3812876 | 66.731787 | 76.2395153 | 70.8457846 |
| 18:26:33 | 0:26:14 | 65.6930524 | 73.3812876 | 67.731787 | 76.2395153 | 69.8457846 |
| 18:26:34 | 0:26:15 | 65.6930524 | 74.3812876 | 67.731787 | 76.2395153 | 68.8457846 |
| 18:26:35 | 0:26:16 | 65.6930524 | 75.3812876 | 67.731787 | 77.2395153 | 67.8457846 |
| 18:26:36 | 0:26:17 | 65.6930524 | 75.3812876 | 67.731787 | 78.2395153 | 67.8457846 |
| 18:26:37 | 0:26:18 | 65.6930524 | 75.3812876 | 68.731787 | 80.2395153 | 67.8457846 |
| 18:26:38 | 0:26:19 | 66.6930524 | 75.3812876 | 69.731787 | 80.2395153 | 67.8457846 |
| 18:26:39 | 0:26:20 | 66.6930524 | 75.3812876 | 69.731787 | 80.2395153 | 67.8457846 |
| 18:26:40 | 0:26:21 | 66.6930524 | 74.3812876 | 70.731787 | 79.2395153 | 66.8457846 |
| 18:26:41 | 0:26:22 | 66.6930524 | 74.3812876 | 71.731787 | 79.2395153 | 64.8457846 |
| 18:26:42 | 0:26:23 | 66.6930524 | 70.3812876 | 71.731787 | 79.2395153 | 62.8457846 |
| 18:26:43 | 0:26:24 | 66.6930524 | 69.3812876 | 71.731787 | 78.2395153 | 63.8457846 |
| 18:26:44 | 0:26:25 | 66.6930524 | 68.3812876 | 71.731787 | 77.2395153 | 64.8457846 |
| 18:26:45 | 0:26:26 | 73.6930524 | 67.3812876 | 70.731787 | 77.2395153 | 64.8457846 |
| 18:26:46 | 0:26:27 | 76.6930524 | 67.3812876 | 70.731787 | 76.2395153 | 64.8457846 |
| 18:26:47 | 0:26:28 | 77.6930524 | 67.3812876 | 70.731787 | 76.2395153 | 63.8457846 |
| 18:26:48 | 0:26:29 | 79.6930524 | 67.3812876 | 70.731787 | 76.2395153 | 61.8457846 |
| 18:26:49 | 0:26:30 | 81.6930524 | 68.3812876 | 69.731787 | 71.2395153 | 61.8457846 |
| 18:26:50 | 0:26:31 | 82.6930524 | 65.3812876 | 68.731787 | 69.2395153 | 61.8457846 |
| 18:26:51 | 0:26:32 | 86.6930524 | 65.3812876 | 68.731787 | 68.2395153 | 64.8457846 |
| 18:26:52 | 0:26:33 | 70.4201505 | 64.3812876 | 68.731787 | 66.2395153 | 64.8457846 |
| 18:26:53 | 0:26:34 | 70.6701505 | 64.3812876 | 67.731787 | 65.2395153 | 64.8457846 |
| 18:26:54 | 0:26:35 | 70.2951505 | 65.3812876 | 65.731787 | 65.2395153 | 64.8457846 |
| 18:26:55 | 0:26:36 | 70.0451505 | 65.3812876 | 63.731787 | 65.2395153 | 64.8457846 |
| 18:26:56 | 0:26:37 | 69.9201505 | 65.3812876 | 62.731787 | 65.2395153 | 64.8457846 |
| 18:26:57 | 0:26:38 | 70.2951505 | 65.3812876 | 62.731787 | 65.2395153 | 64.8457846 |
| 18:26:58 | 0:26:39 | 70.4201505 | 65.3812876 | 62.731787 | 67.2395153 | 64.8457846 |
| 18:26:59 | 0:26:40 | 70.2951505 | 65.3812876 | 62.731787 | 68.2395153 | 64.8457846 |
| 18:27:00 | 0:26:41 | 70.2951505 | 65.3812876 | 62.731787 | 68.2395153 | 64.8457846 |
| 18:27:01 | 0:26:42 | 85.6930524 | 65.3812876 | 63.731787 | 69.2395153 | 70.8457846 |
| 18:27:02 | 0:26:43 | 84.6930524 | 65.3812876 | 63.731787 | 70.2395153 | 72.8457846 |
| 18:27:03 | 0:26:44 | 83.6930524 | 67.3812876 | 63.731787 | 70.2395153 | 70.8457846 |
| 18:27:04 | 0:26:45 | 81.6930524 | 71.3812876 | 63.731787 | 71.2395153 | 70.8457846 |
| 18:27:05 | 0:26:46 | 80.6930524 | 72.3812876 | 64.731787 | 71.2395153 | 66.8457846 |
| 18:27:06 | 0:26:47 | 79.6930524 | 72.3812876 | 65.731787 | 72.2395153 | 66.8457846 |
| 18:27:07 | 0:26:48 | 77.6930524 | 72.3812876 | 65.731787 | 72.2395153 | 66.8457846 |
| 18:27:08 | 0:26:49 | 71.6930524 | 72.3812876 | 65.731787 | 72.2395153 | 66.8457846 |
| 18:27:09 | 0:26:50 | 68.6930524 | 72.3812876 | 65.731787 | 74.2395153 | 66.8457846 |
| 18:27:10 | 0:26:51 | 67.6930524 | 72.3812876 | 65.731787 | 75.2395153 | 66.8457846 |
| 18:27:11 | 0:26:52 | 67.6930524 | 72.3812876 | 65.731787 | 75.2395153 | 66.8457846 |
| 18:27:12 | 0:26:53 | 67.6930524 | 73.3812876 | 65.731787 | 77.2395153 | 66.8457846 |

|          |         |            |            |           |            |            |
|----------|---------|------------|------------|-----------|------------|------------|
| 18:27:13 | 0:26:54 | 67.6930524 | 73.3812876 | 65.731787 | 77.2395153 | 66.8457846 |
| 18:27:14 | 0:26:55 | 67.6930524 | 73.3812876 | 65.731787 | 86.2395153 | 69.8457846 |
| 18:27:15 | 0:26:56 | 66.6930524 | 73.3812876 | 65.731787 | 87.2395153 | 67.8457846 |
| 18:27:16 | 0:26:57 | 66.6930524 | 73.3812876 | 65.731787 | 71.4201505 | 67.8457846 |
| 18:27:17 | 0:26:58 | 66.6930524 | 74.3812876 | 65.731787 | 71.6701505 | 67.8457846 |
| 18:27:18 | 0:26:59 | 66.6930524 | 75.3812876 | 65.731787 | 72.2951505 | 70.8457846 |
| 18:27:19 | 0:27:00 | 65.6930524 | 75.3812876 | 65.731787 | 72.5451505 | 70.8457846 |
| 18:27:20 | 0:27:01 | 65.6930524 | 75.3812876 | 65.731787 | 72.5451505 | 70.8457846 |
| 18:27:21 | 0:27:02 | 65.6930524 | 75.3812876 | 65.731787 | 71.9201505 | 70.8457846 |
| 18:27:22 | 0:27:03 | 67.6930524 | 75.3812876 | 66.731787 | 87.2395153 | 70.8457846 |
| 18:27:23 | 0:27:04 | 67.6930524 | 75.3812876 | 66.731787 | 80.2395153 | 71.8457846 |
| 18:27:24 | 0:27:05 | 67.6930524 | 77.3812876 | 68.731787 | 79.2395153 | 71.8457846 |
| 18:27:25 | 0:27:06 | 67.6930524 | 77.3812876 | 71.731787 | 77.2395153 | 73.8457846 |
| 18:27:26 | 0:27:07 | 67.6930524 | 77.3812876 | 71.731787 | 75.2395153 | 73.8457846 |
| 18:27:27 | 0:27:08 | 68.6930524 | 77.3812876 | 71.731787 | 73.2395153 | 73.8457846 |
| 18:27:28 | 0:27:09 | 67.6930524 | 77.3812876 | 71.731787 | 72.2395153 | 73.8457846 |
| 18:27:29 | 0:27:10 | 67.6930524 | 77.3812876 | 72.731787 | 70.2395153 | 73.8457846 |
| 18:27:30 | 0:27:11 | 67.6930524 | 77.3812876 | 72.731787 | 70.2395153 | 73.8457846 |
| 18:27:31 | 0:27:12 | 66.6930524 | 77.3812876 | 72.731787 | 76.2395153 | 73.8457846 |
| 18:27:32 | 0:27:13 | 66.6930524 | 77.3812876 | 73.731787 | 80.2395153 | 74.8457846 |
| 18:27:33 | 0:27:14 | 65.6930524 | 77.3812876 | 73.731787 | 80.2395153 | 77.8457846 |
| 18:27:34 | 0:27:15 | 65.6930524 | 77.3812876 | 73.731787 | 81.2395153 | 78.8457846 |
| 18:27:35 | 0:27:16 | 65.6930524 | 77.3812876 | 73.731787 | 81.2395153 | 77.8457846 |
| 18:27:36 | 0:27:17 | 67.6930524 | 77.3812876 | 72.731787 | 84.2395153 | 73.8457846 |
| 18:27:37 | 0:27:18 | 69.6930524 | 77.3812876 | 70.731787 | 84.2395153 | 71.8457846 |
| 18:27:38 | 0:27:19 | 69.6930524 | 79.3812876 | 68.731787 | 79.2395153 | 69.8457846 |
| 18:27:39 | 0:27:20 | 69.6930524 | 80.3812876 | 68.731787 | 79.2395153 | 68.8457846 |
| 18:27:40 | 0:27:21 | 69.6930524 | 82.3812876 | 68.731787 | 77.2395153 | 67.8457846 |
| 18:27:41 | 0:27:22 | 69.6930524 | 82.3812876 | 68.731787 | 71.2395153 | 67.8457846 |
| 18:27:42 | 0:27:23 | 69.6930524 | 82.3812876 | 68.731787 | 69.2395153 | 67.8457846 |
| 18:27:43 | 0:27:24 | 69.6930524 | 82.3812876 | 69.731787 | 69.2395153 | 67.8457846 |
| 18:27:44 | 0:27:25 | 69.6930524 | 82.3812876 | 69.731787 | 64.2395153 | 67.8457846 |
| 18:27:45 | 0:27:26 | 69.6930524 | 81.3812876 | 70.731787 | 63.2395153 | 67.8457846 |
| 18:27:46 | 0:27:27 | 70.6930524 | 81.3812876 | 70.731787 | 63.2395153 | 68.8457846 |
| 18:27:47 | 0:27:28 | 71.6930524 | 80.3812876 | 68.731787 | 64.2395153 | 68.8457846 |
| 18:27:48 | 0:27:29 | 71.6930524 | 80.3812876 | 67.731787 | 69.2395153 | 68.8457846 |
| 18:27:49 | 0:27:30 | 71.6930524 | 81.3812876 | 66.731787 | 73.2395153 | 69.8457846 |
| 18:27:50 | 0:27:31 | 72.6930524 | 81.3812876 | 65.731787 | 77.2395153 | 67.8457846 |
| 18:27:51 | 0:27:32 | 73.6930524 | 81.3812876 | 64.731787 | 89.2395153 | 66.8457846 |
| 18:27:52 | 0:27:33 | 76.6930524 | 81.3812876 | 63.731787 | 74.2951505 | 67.8457846 |
| 18:27:53 | 0:27:34 | 76.6930524 | 83.3812876 | 63.731787 | 75.6701505 | 67.8457846 |
| 18:27:54 | 0:27:35 | 76.6930524 | 83.3812876 | 63.731787 | 75.6701505 | 67.8457846 |
| 18:27:55 | 0:27:36 | 76.6930524 | 84.3812876 | 63.731787 | 75.9201505 | 65.8457846 |
| 18:27:56 | 0:27:37 | 76.6930524 | 84.3812876 | 62.731787 | 75.7951505 | 65.8457846 |
| 18:27:57 | 0:27:38 | 76.6930524 | 84.3812876 | 62.731787 | 75.9201505 | 65.8457846 |

|          |         |            |            |           |            |            |
|----------|---------|------------|------------|-----------|------------|------------|
| 18:27:58 | 0:27:39 | 76.6930524 | 83.3812876 | 63.731787 | 76.0451505 | 66.8457846 |
| 18:27:59 | 0:27:40 | 75.6930524 | 83.3812876 | 63.731787 | 76.2951505 | 67.8457846 |
| 18:28:00 | 0:27:41 | 76.6930524 | 84.3812876 | 64.731787 | 76.7951505 | 67.8457846 |
| 18:28:01 | 0:27:42 | 80.6930524 | 85.3812876 | 64.731787 | 77.4201505 | 67.8457846 |
| 18:28:02 | 0:27:43 | 72.6930524 | 85.3812876 | 65.731787 | 76.7951505 | 70.8457846 |
| 18:28:03 | 0:27:44 | 70.6930524 | 85.3812876 | 65.731787 | 76.5451505 | 71.8457846 |
| 18:28:04 | 0:27:45 | 70.6930524 | 85.3812876 | 65.731787 | 76.6701505 | 72.8457846 |
| 18:28:05 | 0:27:46 | 70.6930524 | 86.3812876 | 66.731787 | 76.9201505 | 72.8457846 |
| 18:28:06 | 0:27:47 | 73.6930524 | 86.3812876 | 68.731787 | 77.7951505 | 72.8457846 |
| 18:28:07 | 0:27:48 | 78.6930524 | 86.3812876 | 68.731787 | 79.6701505 | 72.8457846 |
| 18:28:08 | 0:27:49 | 85.6930524 | 86.3812876 | 68.731787 | 80.9201505 | 71.8457846 |
| 18:28:09 | 0:27:50 | 98.6930524 | 86.3812876 | 69.731787 | 82.7951505 | 71.8457846 |
| 18:28:10 | 0:27:51 | 84.6701505 | 86.3812876 | 69.731787 | 84.6701505 | 71.8457846 |
| 18:28:11 | 0:27:52 | 84.4201505 | 85.3812876 | 68.731787 | 84.4201505 | 72.8457846 |
| 18:28:12 | 0:27:53 | 84.5451505 | 85.3812876 | 69.731787 | 84.5451505 | 72.8457846 |
| 18:28:13 | 0:27:54 | 85.5451505 | 85.3812876 | 72.731787 | 85.5451505 | 73.8457846 |
| 18:28:14 | 0:27:55 | 92.6930524 | 85.3812876 | 72.731787 | 83.0451505 | 77.8457846 |
| 18:28:15 | 0:27:56 | 88.6930524 | 85.3812876 | 72.731787 | 83.1701505 | 77.8457846 |
| 18:28:16 | 0:27:57 | 79.6930524 | 85.3812876 | 72.731787 | 82.4201505 | 77.8457846 |
| 18:28:17 | 0:27:58 | 75.6930524 | 82.3812876 | 71.731787 | 81.4201505 | 72.8457846 |
| 18:28:18 | 0:27:59 | 73.6930524 | 82.3812876 | 70.731787 | 80.5451505 | 69.8457846 |
| 18:28:19 | 0:28:00 | 72.6930524 | 80.3812876 | 70.731787 | 79.9201505 | 68.8457846 |
| 18:28:20 | 0:28:01 | 72.6930524 | 80.3812876 | 70.731787 | 79.9201505 | 70.8457846 |
| 18:28:21 | 0:28:02 | 72.6930524 | 79.3812876 | 70.731787 | 79.9201505 | 71.8457846 |
| 18:28:22 | 0:28:03 | 72.6930524 | 78.3812876 | 70.731787 | 80.0451505 | 71.8457846 |
| 18:28:23 | 0:28:04 | 72.6930524 | 78.3812876 | 72.731787 | 80.4201505 | 71.8457846 |
| 18:28:24 | 0:28:05 | 71.6930524 | 77.3812876 | 72.731787 | 79.7951505 | 71.8457846 |
| 18:28:25 | 0:28:06 | 71.6930524 | 75.3812876 | 70.731787 | 79.5451505 | 71.8457846 |
| 18:28:26 | 0:28:07 | 72.6930524 | 75.3812876 | 70.731787 | 79.7951505 | 71.8457846 |
| 18:28:27 | 0:28:08 | 72.6930524 | 75.3812876 | 70.731787 | 80.0451505 | 71.8457846 |
| 18:28:28 | 0:28:09 | 72.6930524 | 75.3812876 | 70.731787 | 80.4201505 | 71.8457846 |
| 18:28:29 | 0:28:10 | 72.6930524 | 75.3812876 | 70.731787 | 80.0451505 | 70.8457846 |
| 18:28:30 | 0:28:11 | 73.6930524 | 75.3812876 | 70.731787 | 80.2951505 | 70.8457846 |
| 18:28:31 | 0:28:12 | 75.6930524 | 77.3812876 | 70.731787 | 80.6701505 | 70.8457846 |
| 18:28:32 | 0:28:13 | 76.6930524 | 78.3812876 | 70.731787 | 81.0451505 | 70.8457846 |
| 18:28:33 | 0:28:14 | 76.6930524 | 78.3812876 | 70.731787 | 80.7951505 | 70.8457846 |
| 18:28:34 | 0:28:15 | 77.6930524 | 78.3812876 | 70.731787 | 81.4201505 | 69.8457846 |
| 18:28:35 | 0:28:16 | 77.6930524 | 78.3812876 | 70.731787 | 81.4201505 | 70.8457846 |
| 18:28:36 | 0:28:17 | 77.6930524 | 78.3812876 | 70.731787 | 79.6701505 | 70.8457846 |
| 18:28:37 | 0:28:18 | 77.6930524 | 80.3812876 | 67.731787 | 79.1701505 | 71.8457846 |
| 18:28:38 | 0:28:19 | 77.6930524 | 80.3812876 | 66.731787 | 78.7951505 | 71.8457846 |
| 18:28:39 | 0:28:20 | 77.6930524 | 80.3812876 | 65.731787 | 78.6701505 | 72.8457846 |
| 18:28:40 | 0:28:21 | 77.6930524 | 77.3812876 | 65.731787 | 78.1701505 | 75.8457846 |
| 18:28:41 | 0:28:22 | 77.6930524 | 76.3812876 | 65.731787 | 78.1701505 | 77.8457846 |
| 18:28:42 | 0:28:23 | 76.6930524 | 76.3812876 | 65.731787 | 77.5451505 | 77.8457846 |

|          |         |            |            |           |            |            |
|----------|---------|------------|------------|-----------|------------|------------|
| 18:28:43 | 0:28:24 | 74.6930524 | 75.3812876 | 66.731787 | 77.0451505 | 77.8457846 |
| 18:28:44 | 0:28:25 | 72.6930524 | 75.3812876 | 66.731787 | 76.9201505 | 77.8457846 |
| 18:28:45 | 0:28:26 | 71.6930524 | 73.3812876 | 66.731787 | 76.7951505 | 77.8457846 |
| 18:28:46 | 0:28:27 | 72.6930524 | 71.3812876 | 66.731787 | 77.2951505 | 77.8457846 |
| 18:28:47 | 0:28:28 | 72.6930524 | 71.3812876 | 66.731787 | 77.5451505 | 78.8457846 |
| 18:28:48 | 0:28:29 | 72.6930524 | 71.3812876 | 66.731787 | 77.5451505 | 78.8457846 |
| 18:28:49 | 0:28:30 | 72.6930524 | 70.3812876 | 67.731787 | 78.6701505 | 81.8457846 |
| 18:28:50 | 0:28:31 | 72.6930524 | 68.3812876 | 67.731787 | 78.6701505 | 81.8457846 |
| 18:28:51 | 0:28:32 | 72.6930524 | 68.3812876 | 67.731787 | 78.5451505 | 81.8457846 |
| 18:28:52 | 0:28:33 | 72.6930524 | 67.3812876 | 68.731787 | 78.2951505 | 81.8457846 |
| 18:28:53 | 0:28:34 | 72.6930524 | 65.3812876 | 74.731787 | 78.4201505 | 80.8457846 |
| 18:28:54 | 0:28:35 | 74.6930524 | 65.3812876 | 76.731787 | 78.7951505 | 78.8457846 |
| 18:28:55 | 0:28:36 | 75.6930524 | 65.3812876 | 77.731787 | 78.7951505 | 76.8457846 |
| 18:28:56 | 0:28:37 | 76.6930524 | 65.3812876 | 77.731787 | 78.6701505 | 74.8457846 |
| 18:28:57 | 0:28:38 | 77.6930524 | 64.3812876 | 77.731787 | 78.4201505 | 72.8457846 |
| 18:28:58 | 0:28:39 | 77.6930524 | 64.3812876 | 77.731787 | 78.5451505 | 70.8457846 |
| 18:28:59 | 0:28:40 | 79.6930524 | 64.3812876 | 77.731787 | 78.6701505 | 69.8457846 |
| 18:29:00 | 0:28:41 | 81.6930524 | 64.3812876 | 76.731787 | 78.5451505 | 69.8457846 |
| 18:29:01 | 0:28:42 | 82.6930524 | 63.3812876 | 76.731787 | 78.2951505 | 69.8457846 |
| 18:29:02 | 0:28:43 | 84.6930524 | 63.3812876 | 76.731787 | 78.4201505 | 69.8457846 |
| 18:29:03 | 0:28:44 | 84.6930524 | 62.3812876 | 76.731787 | 78.4201505 | 70.8457846 |
| 18:29:04 | 0:28:45 | 86.6930524 | 62.3812876 | 76.731787 | 78.4201505 | 70.8457846 |
| 18:29:05 | 0:28:46 | 86.6930524 | 62.3812876 | 76.731787 | 78.2951505 | 70.8457846 |
| 18:29:06 | 0:28:47 | 86.6930524 | 62.3812876 | 76.731787 | 78.2951505 | 70.8457846 |
| 18:29:07 | 0:28:48 | 85.6930524 | 61.3812876 | 75.731787 | 78.1701505 | 70.8457846 |
| 18:29:08 | 0:28:49 | 83.6930524 | 61.3812876 | 75.731787 | 78.2951505 | 73.8457846 |
| 18:29:09 | 0:28:50 | 82.6930524 | 61.3812876 | 75.731787 | 78.4201505 | 73.8457846 |
| 18:29:10 | 0:28:51 | 82.6930524 | 61.3812876 | 75.731787 | 78.1701505 | 73.8457846 |
| 18:29:11 | 0:28:52 | 82.6930524 | 61.3812876 | 75.731787 | 77.5451505 | 73.8457846 |
| 18:29:12 | 0:28:53 | 82.6930524 | 61.3812876 | 75.731787 | 77.1701505 | 73.8457846 |
| 18:29:13 | 0:28:54 | 86.6930524 | 61.3812876 | 75.731787 | 77.5451505 | 73.8457846 |
| 18:29:14 | 0:28:55 | 90.6930524 | 63.3812876 | 73.731787 | 77.7951505 | 72.8457846 |
| 18:29:15 | 0:28:56 | 84.6930524 | 65.3812876 | 74.731787 | 77.4201505 | 72.8457846 |
| 18:29:16 | 0:28:57 | 84.6930524 | 65.3812876 | 74.731787 | 77.5451505 | 72.8457846 |
| 18:29:17 | 0:28:58 | 85.6930524 | 66.3812876 | 74.731787 | 78.0451505 | 72.8457846 |
| 18:29:18 | 0:28:59 | 85.6930524 | 66.3812876 | 74.731787 | 78.0451505 | 72.8457846 |
| 18:29:19 | 0:29:00 | 86.6930524 | 66.3812876 | 74.731787 | 78.0451505 | 72.8457846 |
| 18:29:20 | 0:29:01 | 87.6930524 | 67.3812876 | 73.731787 | 77.6701505 | 71.8457846 |
| 18:29:21 | 0:29:02 | 88.6930524 | 68.3812876 | 72.731787 | 77.2951505 | 71.8457846 |
| 18:29:22 | 0:29:03 | 88.6930524 | 68.3812876 | 73.731787 | 77.4201505 | 71.8457846 |
| 18:29:23 | 0:29:04 | 88.6930524 | 68.3812876 | 73.731787 | 76.9201505 | 70.8457846 |
| 18:29:24 | 0:29:05 | 88.6930524 | 69.3812876 | 72.731787 | 76.7951505 | 70.8457846 |
| 18:29:25 | 0:29:06 | 88.6930524 | 69.3812876 | 72.731787 | 77.0451505 | 69.8457846 |
| 18:29:26 | 0:29:07 | 89.6930524 | 69.3812876 | 69.731787 | 77.0451505 | 69.8457846 |
| 18:29:27 | 0:29:08 | 92.6930524 | 69.3812876 | 68.731787 | 77.9201505 | 69.8457846 |

|          |         |            |            |           |            |            |
|----------|---------|------------|------------|-----------|------------|------------|
| 18:29:28 | 0:29:09 | 93.6930524 | 69.3812876 | 66.731787 | 78.1701505 | 69.8457846 |
| 18:29:29 | 0:29:10 | 93.6930524 | 70.3812876 | 66.731787 | 78.4201505 | 69.8457846 |
| 18:29:30 | 0:29:11 | 91.6930524 | 70.3812876 | 66.731787 | 78.0451505 | 70.8457846 |
| 18:29:31 | 0:29:12 | 91.6930524 | 70.3812876 | 66.731787 | 77.5451505 | 71.8457846 |
| 18:29:32 | 0:29:13 | 90.6930524 | 70.3812876 | 68.731787 | 77.9201505 | 71.8457846 |
| 18:29:33 | 0:29:14 | 88.6930524 | 70.3812876 | 70.731787 | 77.6701505 | 71.8457846 |
| 18:29:34 | 0:29:15 | 87.6930524 | 70.3812876 | 71.731787 | 77.9201505 | 71.8457846 |
| 18:29:35 | 0:29:16 | 85.6930524 | 70.3812876 | 71.731787 | 78.0451505 | 70.8457846 |
| 18:29:36 | 0:29:17 | 79.6930524 | 70.3812876 | 71.731787 | 77.6701505 | 70.8457846 |
| 18:29:37 | 0:29:18 | 79.6930524 | 70.3812876 | 72.731787 | 78.1701505 | 71.8457846 |
| 18:29:38 | 0:29:19 | 82.6930524 | 72.3812876 | 72.731787 | 79.2951505 | 72.8457846 |
| 18:29:39 | 0:29:20 | 83.6930524 | 72.3812876 | 72.731787 | 79.4201505 | 72.8457846 |
| 18:29:40 | 0:29:21 | 83.6930524 | 72.3812876 | 72.731787 | 79.5451505 | 72.8457846 |
| 18:29:41 | 0:29:22 | 83.6930524 | 72.3812876 | 73.731787 | 79.9201505 | 72.8457846 |
| 18:29:42 | 0:29:23 | 83.6930524 | 72.3812876 | 73.731787 | 79.9201505 | 72.8457846 |
| 18:29:43 | 0:29:24 | 84.6930524 | 73.3812876 | 73.731787 | 80.0451505 | 70.8457846 |
| 18:29:44 | 0:29:25 | 84.6930524 | 73.3812876 | 73.731787 | 80.5451505 | 70.8457846 |
| 18:29:45 | 0:29:26 | 86.6930524 | 73.3812876 | 73.731787 | 80.9201505 | 70.8457846 |
| 18:29:46 | 0:29:27 | 84.6930524 | 76.3812876 | 73.731787 | 81.0451505 | 70.8457846 |
| 18:29:47 | 0:29:28 | 83.6930524 | 78.3812876 | 73.731787 | 80.9201505 | 70.8457846 |
| 18:29:48 | 0:29:29 | 83.6930524 | 78.3812876 | 73.731787 | 80.5451505 | 70.8457846 |
| 18:29:49 | 0:29:30 | 81.6930524 | 78.3812876 | 73.731787 | 80.5451505 | 70.8457846 |
| 18:29:50 | 0:29:31 | 80.6930524 | 72.3812876 | 73.731787 | 79.6701505 | 71.8457846 |
| 18:29:51 | 0:29:32 | 78.6930524 | 69.3812876 | 73.731787 | 79.1701505 | 71.8457846 |
| 18:29:52 | 0:29:33 | 79.6930524 | 66.3812876 | 72.731787 | 78.6701505 | 71.8457846 |
| 18:29:53 | 0:29:34 | 77.6930524 | 65.3812876 | 73.731787 | 78.4201505 | 72.8457846 |
| 18:29:54 | 0:29:35 | 77.6930524 | 65.3812876 | 75.731787 | 78.6701505 | 72.8457846 |
| 18:29:55 | 0:29:36 | 77.6930524 | 65.3812876 | 75.731787 | 78.6701505 | 72.8457846 |
| 18:29:56 | 0:29:37 | 77.6930524 | 65.3812876 | 75.731787 | 78.4201505 | 73.8457846 |
| 18:29:57 | 0:29:38 | 76.6930524 | 64.3812876 | 72.731787 | 77.2951505 | 73.8457846 |
| 18:29:58 | 0:29:39 | 76.6930524 | 64.3812876 | 70.731787 | 76.2951505 | 70.8457846 |
| 18:29:59 | 0:29:40 | 76.6930524 | 63.3812876 | 70.731787 | 75.2951505 | 69.8457846 |
| 18:30:00 | 0:29:41 | 70.6930524 | 63.3812876 | 70.731787 | 74.4201505 | 70.8457846 |
| 18:30:01 | 0:29:42 | 69.6930524 | 63.3812876 | 70.731787 | 74.4201505 | 72.8457846 |
| 18:30:02 | 0:29:43 | 70.6930524 | 65.3812876 | 70.731787 | 74.7951505 | 72.8457846 |
| 18:30:03 | 0:29:44 | 70.6930524 | 65.3812876 | 70.731787 | 74.6701505 | 72.8457846 |
| 18:30:04 | 0:29:45 | 70.6930524 | 62.3812876 | 71.731787 | 74.4201505 | 72.8457846 |
| 18:30:05 | 0:29:46 | 70.6930524 | 60.3812876 | 70.731787 | 73.9201505 | 70.8457846 |
| 18:30:06 | 0:29:47 | 71.6930524 | 60.3812876 | 70.731787 | 74.0451505 | 70.8457846 |
| 18:30:07 | 0:29:48 | 70.6930524 | 59.3812876 | 70.731787 | 73.7951505 | 70.8457846 |
| 18:30:08 | 0:29:49 | 70.6930524 | 59.3812876 | 70.731787 | 74.0451505 | 70.8457846 |
| 18:30:09 | 0:29:50 | 69.6930524 | 59.3812876 | 66.731787 | 73.9201505 | 70.8457846 |
| 18:30:10 | 0:29:51 | 67.6930524 | 59.3812876 | 66.731787 | 73.7951505 | 70.8457846 |
| 18:30:11 | 0:29:52 | 66.6930524 | 59.3812876 | 66.731787 | 73.9201505 | 69.8457846 |
| 18:30:12 | 0:29:53 | 66.6930524 | 59.3812876 | 67.731787 | 74.0451505 | 69.8457846 |

|          |         |            |            |           |            |            |
|----------|---------|------------|------------|-----------|------------|------------|
| 18:30:13 | 0:29:54 | 66.6930524 | 59.3812876 | 67.731787 | 74.1701505 | 70.8457846 |
| 18:30:14 | 0:29:55 | 66.6930524 | 61.3812876 | 67.731787 | 73.9201505 | 67.8457846 |
| 18:30:15 | 0:29:56 | 66.6930524 | 61.3812876 | 68.731787 | 74.0451505 | 64.8457846 |
| 18:30:16 | 0:29:57 | 66.6930524 | 61.3812876 | 68.731787 | 73.9201505 | 63.8457846 |
| 18:30:17 | 0:29:58 | 66.6930524 | 61.3812876 | 68.731787 | 72.6701505 | 62.8457846 |
| 18:30:18 | 0:29:59 | 66.6930524 | 61.3812876 | 66.731787 | 72.2951505 | 61.8457846 |
| 18:30:19 | 0:30:00 | 67.6930524 | 61.3812876 | 66.731787 | 72.7951505 | 61.8457846 |
| 18:30:20 | 0:30:01 | 67.6930524 | 61.3812876 | 66.731787 | 73.0451505 | 61.8457846 |
| 18:30:21 | 0:30:02 | 67.6930524 | 60.3812876 | 66.731787 | 72.5451505 | 61.8457846 |
| 18:30:22 | 0:30:03 | 67.6930524 | 61.3812876 | 67.731787 | 72.7951505 | 61.8457846 |
| 18:30:23 | 0:30:04 | 68.6930524 | 62.3812876 | 67.731787 | 73.1701505 | 61.8457846 |
| 18:30:24 | 0:30:05 | 68.6930524 | 62.3812876 | 67.731787 | 73.0451505 | 61.8457846 |
| 18:30:25 | 0:30:06 | 68.6930524 | 62.3812876 | 67.731787 | 72.9201505 | 61.8457846 |
| 18:30:26 | 0:30:07 | 68.6930524 | 62.3812876 | 68.731787 | 73.0451505 | 61.8457846 |
| 18:30:27 | 0:30:08 | 68.6930524 | 62.3812876 | 68.731787 | 72.7951505 | 61.8457846 |
| 18:30:28 | 0:30:09 | 68.6930524 | 62.3812876 | 68.731787 | 72.2951505 | 61.8457846 |
| 18:30:29 | 0:30:10 | 67.6930524 | 62.3812876 | 68.731787 | 71.9201505 | 61.8457846 |
| 18:30:30 | 0:30:11 | 67.6930524 | 62.3812876 | 68.731787 | 71.7951505 | 61.8457846 |
| 18:30:31 | 0:30:12 | 67.6930524 | 64.3812876 | 67.731787 | 72.2951505 | 64.8457846 |
| 18:30:32 | 0:30:13 | 67.6930524 | 65.3812876 | 67.731787 | 73.1701505 | 68.8457846 |
| 18:30:33 | 0:30:14 | 67.6930524 | 65.3812876 | 68.731787 | 73.6701505 | 70.8457846 |
| 18:30:34 | 0:30:15 | 67.6930524 | 66.3812876 | 68.731787 | 74.4201505 | 70.8457846 |
| 18:30:35 | 0:30:16 | 68.6930524 | 66.3812876 | 68.731787 | 75.0451505 | 70.8457846 |
| 18:30:36 | 0:30:17 | 68.6930524 | 66.3812876 | 68.731787 | 75.0451505 | 70.8457846 |
| 18:30:37 | 0:30:18 | 69.6930524 | 67.3812876 | 68.731787 | 75.4201505 | 70.8457846 |
| 18:30:38 | 0:30:19 | 71.6930524 | 67.3812876 | 68.731787 | 75.6701505 | 70.8457846 |
| 18:30:39 | 0:30:20 | 71.6930524 | 68.3812876 | 68.731787 | 74.9201505 | 70.8457846 |
| 18:30:40 | 0:30:21 | 72.6930524 | 68.3812876 | 68.731787 | 74.5451505 | 71.8457846 |
| 18:30:41 | 0:30:22 | 71.6930524 | 66.3812876 | 68.731787 | 74.1701505 | 72.8457846 |
| 18:30:42 | 0:30:23 | 71.6930524 | 66.3812876 | 68.731787 | 74.0451505 | 72.8457846 |
| 18:30:43 | 0:30:24 | 68.6930524 | 66.3812876 | 69.731787 | 73.2951505 | 73.8457846 |
| 18:30:44 | 0:30:25 | 68.6930524 | 66.3812876 | 69.731787 | 72.5451505 | 73.8457846 |
| 18:30:45 | 0:30:26 | 67.6930524 | 66.3812876 | 69.731787 | 72.2951505 | 73.8457846 |
| 18:30:46 | 0:30:27 | 67.6930524 | 66.3812876 | 69.731787 | 72.1701505 | 74.8457846 |
| 18:30:47 | 0:30:28 | 67.6930524 | 66.3812876 | 70.731787 | 72.2951505 | 73.8457846 |
| 18:30:48 | 0:30:29 | 67.6930524 | 66.3812876 | 70.731787 | 72.2951505 | 72.8457846 |
| 18:30:49 | 0:30:30 | 67.6930524 | 66.3812876 | 70.731787 | 72.6701505 | 72.8457846 |
| 18:30:50 | 0:30:31 | 66.6930524 | 67.3812876 | 70.731787 | 73.0451505 | 72.8457846 |
| 18:30:51 | 0:30:32 | 66.6930524 | 67.3812876 | 70.731787 | 73.6701505 | 72.8457846 |
| 18:30:52 | 0:30:33 | 66.6930524 | 67.3812876 | 70.731787 | 74.0451505 | 73.8457846 |
| 18:30:53 | 0:30:34 | 66.6930524 | 68.3812876 | 70.731787 | 73.9201505 | 73.8457846 |
| 18:30:54 | 0:30:35 | 66.6930524 | 68.3812876 | 69.731787 | 73.7951505 | 72.8457846 |
| 18:30:55 | 0:30:36 | 68.6930524 | 68.3812876 | 69.731787 | 73.9201505 | 71.8457846 |
| 18:30:56 | 0:30:37 | 68.6930524 | 69.3812876 | 69.731787 | 73.1701505 | 66.8457846 |
| 18:30:57 | 0:30:38 | 68.6930524 | 69.3812876 | 69.731787 | 72.5451505 | 63.8457846 |

|          |         |            |            |           |            |            |
|----------|---------|------------|------------|-----------|------------|------------|
| 18:30:58 | 0:30:39 | 68.6930524 | 68.3812876 | 70.731787 | 71.7951505 | 61.8457846 |
| 18:30:59 | 0:30:40 | 68.6930524 | 68.3812876 | 70.731787 | 83.2395153 | 60.8457846 |
| 18:31:00 | 0:30:41 | 68.6930524 | 67.3812876 | 71.731787 | 67.2395153 | 60.8457846 |
| 18:31:01 | 0:30:42 | 67.6930524 | 65.3812876 | 71.731787 | 62.2395153 | 60.8457846 |
| 18:31:02 | 0:30:43 | 67.6930524 | 65.3812876 | 71.731787 | 61.2395153 | 61.8457846 |
| 18:31:03 | 0:30:44 | 67.6930524 | 65.3812876 | 71.731787 | 61.2395153 | 61.8457846 |
| 18:31:04 | 0:30:45 | 66.6930524 | 65.3812876 | 71.731787 | 61.2395153 | 66.8457846 |
| 18:31:05 | 0:30:46 | 66.6930524 | 63.3812876 | 71.731787 | 61.2395153 | 67.8457846 |
| 18:31:06 | 0:30:47 | 66.6930524 | 64.3812876 | 71.731787 | 61.2395153 | 67.8457846 |
| 18:31:07 | 0:30:48 | 66.6930524 | 65.3812876 | 71.731787 | 61.2395153 | 67.8457846 |
| 18:31:08 | 0:30:49 | 66.6930524 | 66.3812876 | 71.731787 | 61.2395153 | 68.8457846 |
| 18:31:09 | 0:30:50 | 66.6930524 | 66.3812876 | 72.731787 | 61.2395153 | 68.8457846 |
| 18:31:10 | 0:30:51 | 68.6930524 | 66.3812876 | 72.731787 | 62.2395153 | 68.8457846 |
| 18:31:11 | 0:30:52 | 67.6930524 | 67.3812876 | 72.731787 | 62.2395153 | 69.8457846 |
| 18:31:12 | 0:30:53 | 67.6930524 | 68.3812876 | 69.731787 | 63.2395153 | 69.8457846 |
| 18:31:13 | 0:30:54 | 66.6930524 | 68.3812876 | 67.731787 | 59.2395153 | 69.8457846 |
| 18:31:14 | 0:30:55 | 66.6930524 | 68.3812876 | 67.731787 | 59.2395153 | 69.8457846 |
| 18:31:15 | 0:30:56 | 66.6930524 | 69.3812876 | 66.731787 | 60.2395153 | 69.8457846 |
| 18:31:16 | 0:30:57 | 66.6930524 | 69.3812876 | 66.731787 | 60.2395153 | 70.8457846 |
| 18:31:17 | 0:30:58 | 64.6930524 | 69.3812876 | 67.731787 | 60.2395153 | 70.8457846 |
| 18:31:18 | 0:30:59 | 64.6930524 | 69.3812876 | 68.731787 | 60.2395153 | 70.8457846 |
| 18:31:19 | 0:31:00 | 65.6930524 | 70.3812876 | 69.731787 | 60.2395153 | 70.8457846 |
| 18:31:20 | 0:31:01 | 65.6930524 | 70.3812876 | 69.731787 | 60.2395153 | 73.8457846 |
| 18:31:21 | 0:31:02 | 65.6930524 | 70.3812876 | 69.731787 | 60.2395153 | 75.8457846 |
| 18:31:22 | 0:31:03 | 67.6930524 | 70.3812876 | 70.731787 | 60.2395153 | 75.8457846 |
| 18:31:23 | 0:31:04 | 67.6930524 | 70.3812876 | 70.731787 | 61.2395153 | 75.8457846 |
| 18:31:24 | 0:31:05 | 67.6930524 | 68.3812876 | 70.731787 | 61.2395153 | 78.8457846 |
| 18:31:25 | 0:31:06 | 67.6930524 | 68.3812876 | 71.731787 | 63.2395153 | 79.8457846 |
| 18:31:26 | 0:31:07 | 67.6930524 | 68.3812876 | 71.731787 | 63.2395153 | 79.8457846 |
| 18:31:27 | 0:31:08 | 69.6930524 | 68.3812876 | 73.731787 | 63.2395153 | 79.8457846 |
| 18:31:28 | 0:31:09 | 69.6930524 | 68.3812876 | 73.731787 | 63.2395153 | 79.8457846 |
| 18:31:29 | 0:31:10 | 69.6930524 | 68.3812876 | 79.731787 | 62.2395153 | 79.8457846 |
| 18:31:30 | 0:31:11 | 69.6930524 | 68.3812876 | 79.731787 | 62.2395153 | 79.8457846 |
| 18:31:31 | 0:31:12 | 71.6930524 | 65.3812876 | 83.731787 | 62.2395153 | 73.8457846 |
| 18:31:32 | 0:31:13 | 73.6930524 | 64.3812876 | 83.731787 | 62.2395153 | 69.8457846 |
| 18:31:33 | 0:31:14 | 73.6930524 | 64.3812876 | 83.731787 | 62.2395153 | 66.8457846 |
| 18:31:34 | 0:31:15 | 73.6930524 | 64.3812876 | 83.731787 | 62.2395153 | 66.8457846 |
| 18:31:35 | 0:31:16 | 71.6930524 | 63.3812876 | 83.731787 | 62.2395153 | 67.8457846 |
| 18:31:36 | 0:31:17 | 71.6930524 | 63.3812876 | 84.731787 | 62.2395153 | 69.8457846 |
| 18:31:37 | 0:31:18 | 71.6930524 | 63.3812876 | 84.731787 | 62.2395153 | 69.8457846 |
| 18:31:38 | 0:31:19 | 71.6930524 | 63.3812876 | 84.731787 | 62.2395153 | 67.8457846 |
| 18:31:39 | 0:31:20 | 71.6930524 | 63.3812876 | 84.731787 | 62.2395153 | 65.8457846 |
| 18:31:40 | 0:31:21 | 69.6930524 | 63.3812876 | 84.731787 | 62.2395153 | 64.8457846 |
| 18:31:41 | 0:31:22 | 69.6930524 | 61.3812876 | 83.731787 | 63.2395153 | 64.8457846 |
| 18:31:42 | 0:31:23 | 69.6930524 | 61.3812876 | 83.731787 | 63.2395153 | 65.8457846 |



|          |         |            |            |            |            |            |
|----------|---------|------------|------------|------------|------------|------------|
| 18:31:43 | 0:31:24 | 68.6930524 | 61.3812876 | 83.731787  | 65.2395153 | 67.8457846 |
| 18:31:44 | 0:31:25 | 68.6930524 | 61.3812876 | 82.731787  | 65.2395153 | 69.8457846 |
| 18:31:45 | 0:31:26 | 68.6930524 | 61.3812876 | 82.731787  | 66.2395153 | 69.8457846 |
| 18:31:46 | 0:31:27 | 68.6930524 | 61.3812876 | 83.731787  | 69.2395153 | 68.8457846 |
| 18:31:47 | 0:31:28 | 69.6930524 | 61.3812876 | 83.731787  | 69.2395153 | 68.8457846 |
| 18:31:48 | 0:31:29 | 69.6930524 | 62.3812876 | 84.731787  | 69.2395153 | 67.8457846 |
| 18:31:49 | 0:31:30 | 69.6930524 | 62.3812876 | 85.731787  | 69.2395153 | 67.8457846 |
| 18:31:50 | 0:31:31 | 69.6930524 | 63.3812876 | 85.731787  | 69.2395153 | 68.8457846 |
| 18:31:51 | 0:31:32 | 69.6930524 | 64.3812876 | 85.731787  | 69.2395153 | 71.8457846 |
| 18:31:52 | 0:31:33 | 68.6930524 | 64.3812876 | 70.2951505 | 69.2395153 | 72.8457846 |
| 18:31:53 | 0:31:34 | 68.6930524 | 64.3812876 | 70.1701505 | 68.2395153 | 72.8457846 |
| 18:31:54 | 0:31:35 | 67.6930524 | 68.3812876 | 86.731787  | 69.2395153 | 72.8457846 |
| 18:31:55 | 0:31:36 | 67.6930524 | 68.3812876 | 73.731787  | 69.2395153 | 73.8457846 |
| 18:31:56 | 0:31:37 | 67.6930524 | 69.3812876 | 69.731787  | 70.2395153 | 75.8457846 |
| 18:31:57 | 0:31:38 | 66.6930524 | 71.3812876 | 67.731787  | 72.2395153 | 75.8457846 |
| 18:31:58 | 0:31:39 | 67.6930524 | 71.3812876 | 67.731787  | 71.2395153 | 75.8457846 |
| 18:31:59 | 0:31:40 | 67.6930524 | 71.3812876 | 67.731787  | 71.2395153 | 73.8457846 |
| 18:32:00 | 0:31:41 | 67.6930524 | 74.3812876 | 67.731787  | 72.2395153 | 71.8457846 |
| 18:32:01 | 0:31:42 | 67.6930524 | 74.3812876 | 67.731787  | 73.2395153 | 71.8457846 |
| 18:32:02 | 0:31:43 | 67.6930524 | 74.3812876 | 67.731787  | 73.2395153 | 70.8457846 |
| 18:32:03 | 0:31:44 | 67.6930524 | 76.3812876 | 67.731787  | 74.2395153 | 71.8457846 |
| 18:32:04 | 0:31:45 | 67.6930524 | 76.3812876 | 67.731787  | 76.2395153 | 72.8457846 |
| 18:32:05 | 0:31:46 | 66.6930524 | 76.3812876 | 67.731787  | 78.2395153 | 74.8457846 |
| 18:32:06 | 0:31:47 | 66.6930524 | 74.3812876 | 67.731787  | 81.2395153 | 76.8457846 |
| 18:32:07 | 0:31:48 | 67.6930524 | 74.3812876 | 67.731787  | 81.2395153 | 77.8457846 |
| 18:32:08 | 0:31:49 | 67.6930524 | 72.3812876 | 67.731787  | 81.2395153 | 77.8457846 |
| 18:32:09 | 0:31:50 | 68.6930524 | 72.3812876 | 67.731787  | 80.2395153 | 76.8457846 |
| 18:32:10 | 0:31:51 | 68.6930524 | 72.3812876 | 67.731787  | 80.2395153 | 76.8457846 |
| 18:32:11 | 0:31:52 | 68.6930524 | 71.3812876 | 67.731787  | 76.2395153 | 76.8457846 |
| 18:32:12 | 0:31:53 | 68.6930524 | 70.3812876 | 67.731787  | 76.2395153 | 76.8457846 |
| 18:32:13 | 0:31:54 | 68.6930524 | 70.3812876 | 67.731787  | 73.2395153 | 74.8457846 |
| 18:32:14 | 0:31:55 | 68.6930524 | 70.3812876 | 67.731787  | 70.2395153 | 73.8457846 |
| 18:32:15 | 0:31:56 | 67.6930524 | 70.3812876 | 67.731787  | 70.2395153 | 73.8457846 |
| 18:32:16 | 0:31:57 | 67.6930524 | 67.3812876 | 67.731787  | 68.2395153 | 73.8457846 |
| 18:32:17 | 0:31:58 | 67.6930524 | 66.3812876 | 66.731787  | 68.2395153 | 74.8457846 |
| 18:32:18 | 0:31:59 | 67.6930524 | 66.3812876 | 67.731787  | 67.2395153 | 74.8457846 |
| 18:32:19 | 0:32:00 | 66.6930524 | 65.3812876 | 67.731787  | 67.2395153 | 74.8457846 |
| 18:32:20 | 0:32:01 | 65.6930524 | 64.3812876 | 68.731787  | 68.2395153 | 74.8457846 |
| 18:32:21 | 0:32:02 | 63.6930524 | 64.3812876 | 68.731787  | 68.2395153 | 74.8457846 |
| 18:32:22 | 0:32:03 | 65.6930524 | 64.3812876 | 68.731787  | 70.2395153 | 74.8457846 |
| 18:32:23 | 0:32:04 | 65.6930524 | 63.3812876 | 67.731787  | 73.2395153 | 74.8457846 |
| 18:32:24 | 0:32:05 | 65.6930524 | 63.3812876 | 67.731787  | 73.2395153 | 74.8457846 |
| 18:32:25 | 0:32:06 | 65.6930524 | 62.3812876 | 68.731787  | 75.2395153 | 79.8457846 |
| 18:32:26 | 0:32:07 | 65.6930524 | 62.3812876 | 68.731787  | 76.2395153 | 78.8457846 |
| 18:32:27 | 0:32:08 | 65.6930524 | 62.3812876 | 68.731787  | 76.2395153 | 77.8457846 |

|          |         |            |            |           |            |            |
|----------|---------|------------|------------|-----------|------------|------------|
| 18:32:28 | 0:32:09 | 65.6930524 | 62.3812876 | 69.731787 | 80.2395153 | 76.8457846 |
| 18:32:29 | 0:32:10 | 65.6930524 | 62.3812876 | 70.731787 | 82.2395153 | 76.8457846 |
| 18:32:30 | 0:32:11 | 65.6930524 | 62.3812876 | 70.731787 | 83.2395153 | 74.8457846 |
| 18:32:31 | 0:32:12 | 65.6930524 | 62.3812876 | 70.731787 | 83.2395153 | 74.8457846 |
| 18:32:32 | 0:32:13 | 65.6930524 | 62.3812876 | 70.731787 | 84.2395153 | 75.8457846 |
| 18:32:33 | 0:32:14 | 65.6930524 | 62.3812876 | 70.731787 | 69.6701505 | 75.8457846 |
| 18:32:34 | 0:32:15 | 65.6930524 | 63.3812876 | 70.731787 | 69.7951505 | 75.8457846 |
| 18:32:35 | 0:32:16 | 64.6930524 | 63.3812876 | 68.731787 | 69.2951505 | 75.8457846 |
| 18:32:36 | 0:32:17 | 64.6930524 | 63.3812876 | 68.731787 | 69.2951505 | 75.8457846 |
| 18:32:37 | 0:32:18 | 64.6930524 | 64.3812876 | 68.731787 | 80.2395153 | 74.8457846 |
| 18:32:38 | 0:32:19 | 65.6930524 | 64.3812876 | 68.731787 | 80.2395153 | 74.8457846 |
| 18:32:39 | 0:32:20 | 65.6930524 | 65.3812876 | 68.731787 | 80.2395153 | 74.8457846 |
| 18:32:40 | 0:32:21 | 66.6930524 | 65.3812876 | 67.731787 | 79.2395153 | 74.8457846 |
| 18:32:41 | 0:32:22 | 67.6930524 | 65.3812876 | 68.731787 | 79.2395153 | 74.8457846 |
| 18:32:42 | 0:32:23 | 67.6930524 | 65.3812876 | 70.731787 | 75.2395153 | 74.8457846 |
| 18:32:43 | 0:32:24 | 69.6930524 | 65.3812876 | 76.731787 | 72.2395153 | 76.8457846 |
| 18:32:44 | 0:32:25 | 69.6930524 | 66.3812876 | 77.731787 | 68.2395153 | 68.8457846 |
| 18:32:45 | 0:32:26 | 72.6930524 | 67.3812876 | 77.731787 | 66.2395153 | 68.8457846 |
| 18:32:46 | 0:32:27 | 73.6930524 | 67.3812876 | 78.731787 | 66.2395153 | 63.8457846 |
| 18:32:47 | 0:32:28 | 71.2951505 | 67.3812876 | 78.731787 | 66.2395153 | 62.8457846 |
| 18:32:48 | 0:32:29 | 72.5451505 | 67.3812876 | 78.731787 | 66.2395153 | 63.8457846 |
| 18:32:49 | 0:32:30 | 72.6701505 | 67.3812876 | 77.731787 | 64.2395153 | 63.8457846 |
| 18:32:50 | 0:32:31 | 73.0451505 | 67.3812876 | 77.731787 | 63.2395153 | 66.8457846 |
| 18:32:51 | 0:32:32 | 73.5451505 | 67.3812876 | 76.731787 | 63.2395153 | 68.8457846 |
| 18:32:52 | 0:32:33 | 74.0451505 | 67.3812876 | 75.731787 | 63.2395153 | 68.8457846 |
| 18:32:53 | 0:32:34 | 74.2951505 | 68.3812876 | 75.731787 | 63.2395153 | 68.8457846 |
| 18:32:54 | 0:32:35 | 75.6701505 | 77.3812876 | 74.731787 | 63.2395153 | 68.8457846 |
| 18:32:55 | 0:32:36 | 76.1701505 | 79.3812876 | 73.731787 | 63.2395153 | 68.8457846 |
| 18:32:56 | 0:32:37 | 76.0451505 | 81.3812876 | 73.731787 | 63.2395153 | 67.8457846 |
| 18:32:57 | 0:32:38 | 76.2951505 | 82.3812876 | 73.731787 | 63.2395153 | 68.8457846 |
| 18:32:58 | 0:32:39 | 76.6701505 | 83.3812876 | 73.731787 | 63.2395153 | 68.8457846 |
| 18:32:59 | 0:32:40 | 76.7951505 | 83.3812876 | 72.731787 | 63.2395153 | 68.8457846 |
| 18:33:00 | 0:32:41 | 76.5451505 | 83.3812876 | 72.731787 | 64.2395153 | 67.8457846 |
| 18:33:01 | 0:32:42 | 75.1701505 | 83.3812876 | 72.731787 | 64.2395153 | 67.8457846 |
| 18:33:02 | 0:32:43 | 74.1701505 | 79.3812876 | 72.731787 | 64.2395153 | 66.8457846 |
| 18:33:03 | 0:32:44 | 73.9201505 | 78.3812876 | 72.731787 | 66.2395153 | 66.8457846 |
| 18:33:04 | 0:32:45 | 73.1701505 | 77.3812876 | 72.731787 | 66.2395153 | 66.8457846 |
| 18:33:05 | 0:32:46 | 72.6701505 | 77.3812876 | 72.731787 | 66.2395153 | 66.8457846 |
| 18:33:06 | 0:32:47 | 87.6930524 | 77.3812876 | 72.731787 | 70.2395153 | 67.8457846 |
| 18:33:07 | 0:32:48 | 86.6930524 | 76.3812876 | 72.731787 | 70.2395153 | 66.8457846 |
| 18:33:08 | 0:32:49 | 86.6930524 | 76.3812876 | 72.731787 | 70.2395153 | 66.8457846 |
| 18:33:09 | 0:32:50 | 85.6930524 | 76.3812876 | 72.731787 | 69.2395153 | 66.8457846 |
| 18:33:10 | 0:32:51 | 85.6930524 | 73.3812876 | 72.731787 | 68.2395153 | 66.8457846 |
| 18:33:11 | 0:32:52 | 70.2951505 | 70.3812876 | 72.731787 | 68.2395153 | 67.8457846 |
| 18:33:12 | 0:32:53 | 86.6930524 | 70.3812876 | 73.731787 | 68.2395153 | 68.8457846 |

|          |         |            |            |           |            |            |
|----------|---------|------------|------------|-----------|------------|------------|
| 18:33:13 | 0:32:54 | 73.0451505 | 70.3812876 | 76.731787 | 70.2395153 | 69.8457846 |
| 18:33:14 | 0:32:55 | 74.0451505 | 70.3812876 | 75.731787 | 72.2395153 | 74.8457846 |
| 18:33:15 | 0:32:56 | 74.0451505 | 69.3812876 | 76.731787 | 72.2395153 | 75.8457846 |
| 18:33:16 | 0:32:57 | 86.6930524 | 69.3812876 | 76.731787 | 72.2395153 | 75.8457846 |
| 18:33:17 | 0:32:58 | 84.6930524 | 69.3812876 | 76.731787 | 68.2395153 | 74.8457846 |
| 18:33:18 | 0:32:59 | 84.6930524 | 69.3812876 | 76.731787 | 68.2395153 | 74.8457846 |
| 18:33:19 | 0:33:00 | 82.6930524 | 68.3812876 | 77.731787 | 68.2395153 | 71.8457846 |
| 18:33:20 | 0:33:01 | 81.6930524 | 67.3812876 | 77.731787 | 68.2395153 | 71.8457846 |
| 18:33:21 | 0:33:02 | 81.6930524 | 67.3812876 | 78.731787 | 69.2395153 | 70.8457846 |
| 18:33:22 | 0:33:03 | 79.6930524 | 67.3812876 | 77.731787 | 69.2395153 | 69.8457846 |
| 18:33:23 | 0:33:04 | 77.6930524 | 65.3812876 | 76.731787 | 70.2395153 | 69.8457846 |
| 18:33:24 | 0:33:05 | 77.6930524 | 65.3812876 | 75.731787 | 70.2395153 | 68.8457846 |
| 18:33:25 | 0:33:06 | 74.6930524 | 65.3812876 | 75.731787 | 70.2395153 | 68.8457846 |
| 18:33:26 | 0:33:07 | 73.6930524 | 68.3812876 | 75.731787 | 70.2395153 | 67.8457846 |
| 18:33:27 | 0:33:08 | 72.6930524 | 69.3812876 | 74.731787 | 70.2395153 | 67.8457846 |
| 18:33:28 | 0:33:09 | 72.6930524 | 69.3812876 | 74.731787 | 70.2395153 | 66.8457846 |
| 18:33:29 | 0:33:10 | 72.6930524 | 69.3812876 | 72.731787 | 71.2395153 | 66.8457846 |
| 18:33:30 | 0:33:11 | 71.6930524 | 69.3812876 | 72.731787 | 72.2395153 | 66.8457846 |
| 18:33:31 | 0:33:12 | 72.6930524 | 69.3812876 | 72.731787 | 73.2395153 | 64.8457846 |
| 18:33:32 | 0:33:13 | 71.6930524 | 69.3812876 | 73.731787 | 74.2395153 | 63.8457846 |
| 18:33:33 | 0:33:14 | 71.6930524 | 69.3812876 | 73.731787 | 73.2395153 | 63.8457846 |
| 18:33:34 | 0:33:15 | 71.6930524 | 69.3812876 | 73.731787 | 72.2395153 | 64.8457846 |
| 18:33:35 | 0:33:16 | 70.6930524 | 69.3812876 | 73.731787 | 72.2395153 | 65.8457846 |
| 18:33:36 | 0:33:17 | 70.6930524 | 70.3812876 | 73.731787 | 72.2395153 | 66.8457846 |
| 18:33:37 | 0:33:18 | 70.6930524 | 71.3812876 | 73.731787 | 72.2395153 | 66.8457846 |
| 18:33:38 | 0:33:19 | 70.6930524 | 71.3812876 | 74.731787 | 72.2395153 | 66.8457846 |
| 18:33:39 | 0:33:20 | 70.6930524 | 71.3812876 | 74.731787 | 72.2395153 | 64.8457846 |
| 18:33:40 | 0:33:21 | 69.6930524 | 72.3812876 | 74.731787 | 71.2395153 | 64.8457846 |
| 18:33:41 | 0:33:22 | 69.6930524 | 72.3812876 | 74.731787 | 71.2395153 | 64.8457846 |
| 18:33:42 | 0:33:23 | 70.6930524 | 72.3812876 | 75.731787 | 71.2395153 | 65.8457846 |
| 18:33:43 | 0:33:24 | 69.6930524 | 73.3812876 | 75.731787 | 71.2395153 | 65.8457846 |
| 18:33:44 | 0:33:25 | 69.6930524 | 71.3812876 | 75.731787 | 70.2395153 | 66.8457846 |
| 18:33:45 | 0:33:26 | 69.6930524 | 71.3812876 | 73.731787 | 70.2395153 | 67.8457846 |
| 18:33:46 | 0:33:27 | 68.6930524 | 71.3812876 | 73.731787 | 71.2395153 | 66.8457846 |
| 18:33:47 | 0:33:28 | 68.6930524 | 71.3812876 | 72.731787 | 71.2395153 | 66.8457846 |
| 18:33:48 | 0:33:29 | 68.6930524 | 71.3812876 | 72.731787 | 71.2395153 | 66.8457846 |
| 18:33:49 | 0:33:30 | 68.6930524 | 71.3812876 | 72.731787 | 68.2395153 | 67.8457846 |
| 18:33:50 | 0:33:31 | 68.6930524 | 72.3812876 | 72.731787 | 67.2395153 | 67.8457846 |
| 18:33:51 | 0:33:32 | 68.6930524 | 72.3812876 | 72.731787 | 67.2395153 | 66.8457846 |
| 18:33:52 | 0:33:33 | 68.6930524 | 72.3812876 | 71.731787 | 66.2395153 | 66.8457846 |
| 18:33:53 | 0:33:34 | 68.6930524 | 73.3812876 | 71.731787 | 65.2395153 | 67.8457846 |
| 18:33:54 | 0:33:35 | 69.6930524 | 75.3812876 | 71.731787 | 65.2395153 | 67.8457846 |
| 18:33:55 | 0:33:36 | 70.6930524 | 75.3812876 | 69.731787 | 66.2395153 | 67.8457846 |
| 18:33:56 | 0:33:37 | 70.6930524 | 75.3812876 | 68.731787 | 66.2395153 | 65.8457846 |
| 18:33:57 | 0:33:38 | 71.6930524 | 72.3812876 | 68.731787 | 66.2395153 | 65.8457846 |

|          |         |            |            |           |            |            |
|----------|---------|------------|------------|-----------|------------|------------|
| 18:33:58 | 0:33:39 | 71.6930524 | 71.3812876 | 68.731787 | 66.2395153 | 65.8457846 |
| 18:33:59 | 0:33:40 | 71.6930524 | 71.3812876 | 68.731787 | 66.2395153 | 65.8457846 |
| 18:34:00 | 0:33:41 | 71.6930524 | 71.3812876 | 67.731787 | 66.2395153 | 65.8457846 |
| 18:34:01 | 0:33:42 | 71.6930524 | 71.3812876 | 66.731787 | 67.2395153 | 64.8457846 |
| 18:34:02 | 0:33:43 | 71.6930524 | 72.3812876 | 66.731787 | 68.2395153 | 64.8457846 |
| 18:34:03 | 0:33:44 | 71.6930524 | 72.3812876 | 69.731787 | 68.2395153 | 63.8457846 |
| 18:34:04 | 0:33:45 | 70.6930524 | 72.3812876 | 67.731787 | 68.2395153 | 61.8457846 |
| 18:34:05 | 0:33:46 | 70.6930524 | 72.3812876 | 66.731787 | 70.2395153 | 61.8457846 |
| 18:34:06 | 0:33:47 | 70.6930524 | 72.3812876 | 65.731787 | 71.2395153 | 56.8457846 |
| 18:34:07 | 0:33:48 | 70.6930524 | 72.3812876 | 65.731787 | 70.2395153 | 55.8457846 |
| 18:34:08 | 0:33:49 | 69.6930524 | 72.3812876 | 65.731787 | 70.2395153 | 55.8457846 |
| 18:34:09 | 0:33:50 | 70.6930524 | 72.3812876 | 65.731787 | 67.2395153 | 55.8457846 |
| 18:34:10 | 0:33:51 | 71.6930524 | 72.3812876 | 65.731787 | 66.2395153 | 54.8457846 |
| 18:34:11 | 0:33:52 | 71.6930524 | 71.3812876 | 65.731787 | 66.2395153 | 53.8457846 |
| 18:34:12 | 0:33:53 | 71.6930524 | 71.3812876 | 65.731787 | 66.2395153 | 53.8457846 |
| 18:34:13 | 0:33:54 | 70.6930524 | 71.3812876 | 65.731787 | 65.2395153 | 52.8457846 |
| 18:34:14 | 0:33:55 | 71.6930524 | 71.3812876 | 65.731787 | 65.2395153 | 51.8457846 |
| 18:34:15 | 0:33:56 | 71.6930524 | 71.3812876 | 65.731787 | 65.2395153 | 51.8457846 |
| 18:34:16 | 0:33:57 | 71.6930524 | 72.3812876 | 65.731787 | 66.2395153 | 50.8457846 |
| 18:34:17 | 0:33:58 | 71.6930524 | 72.3812876 | 65.731787 | 68.2395153 | 50.8457846 |
| 18:34:18 | 0:33:59 | 71.6930524 | 73.3812876 | 65.731787 | 70.2395153 | 50.8457846 |
| 18:34:19 | 0:34:00 | 71.6930524 | 73.3812876 | 65.731787 | 70.2395153 | 49.8457846 |
| 18:34:20 | 0:34:01 | 72.6930524 | 73.3812876 | 65.731787 | 71.2395153 | 48.8457846 |
| 18:34:21 | 0:34:02 | 72.6930524 | 71.3812876 | 65.731787 | 74.2395153 | 48.8457846 |
| 18:34:22 | 0:34:03 | 73.6930524 | 69.3812876 | 65.731787 | 75.2395153 | 48.8457846 |
| 18:34:23 | 0:34:04 | 73.6930524 | 68.3812876 | 65.731787 | 76.2395153 | 45.8457846 |
| 18:34:24 | 0:34:05 | 72.6930524 | 67.3812876 | 65.731787 | 77.2395153 | 58.8457846 |
| 18:34:25 | 0:34:06 | 72.6930524 | 67.3812876 | 65.731787 | 77.2395153 | 70.8457846 |
| 18:34:26 | 0:34:07 | 72.6930524 | 67.3812876 | 65.731787 | 77.2395153 | 70.8457846 |
| 18:34:27 | 0:34:08 | 72.6930524 | 67.3812876 | 66.731787 | 77.2395153 | 75.8457846 |
| 18:34:28 | 0:34:09 | 72.6930524 | 67.3812876 | 66.731787 | 77.2395153 | 77.8457846 |
| 18:34:29 | 0:34:10 | 67.6930524 | 67.3812876 | 65.731787 | 77.2395153 | 78.8457846 |
| 18:34:30 | 0:34:11 | 64.6930524 | 67.3812876 | 66.731787 | 76.2395153 | 78.8457846 |
| 18:34:31 | 0:34:12 | 63.6930524 | 66.3812876 | 66.731787 | 76.2395153 | 78.8457846 |
| 18:34:32 | 0:34:13 | 62.6930524 | 66.3812876 | 69.731787 | 74.2395153 | 78.8457846 |
| 18:34:33 | 0:34:14 | 62.6930524 | 67.3812876 | 69.731787 | 74.2395153 | 78.8457846 |
| 18:34:34 | 0:34:15 | 62.6930524 | 66.3812876 | 69.731787 | 74.2395153 | 79.8457846 |
| 18:34:35 | 0:34:16 | 61.6930524 | 66.3812876 | 69.731787 | 74.2395153 | 81.8457846 |
| 18:34:36 | 0:34:17 | 61.6930524 | 66.3812876 | 70.731787 | 74.2395153 | 81.8457846 |
| 18:34:37 | 0:34:18 | 61.6930524 | 70.3812876 | 70.731787 | 74.2395153 | 76.8457846 |
| 18:34:38 | 0:34:19 | 60.6930524 | 70.3812876 | 70.731787 | 74.2395153 | 74.8457846 |
| 18:34:39 | 0:34:20 | 59.6930524 | 76.3812876 | 70.731787 | 75.2395153 | 74.8457846 |
| 18:34:40 | 0:34:21 | 59.6930524 | 75.3812876 | 70.731787 | 75.2395153 | 74.8457846 |
| 18:34:41 | 0:34:22 | 59.6930524 | 75.3812876 | 71.731787 | 75.2395153 | 74.8457846 |
| 18:34:42 | 0:34:23 | 59.6930524 | 75.3812876 | 69.731787 | 75.2395153 | 70.8457846 |

|          |         |            |            |           |            |            |
|----------|---------|------------|------------|-----------|------------|------------|
| 18:34:43 | 0:34:24 | 59.6930524 | 75.3812876 | 68.731787 | 75.2395153 | 68.8457846 |
| 18:34:44 | 0:34:25 | 59.6930524 | 75.3812876 | 67.731787 | 75.2395153 | 68.8457846 |
| 18:34:45 | 0:34:26 | 59.6930524 | 77.3812876 | 65.731787 | 74.2395153 | 68.8457846 |
| 18:34:46 | 0:34:27 | 59.6930524 | 77.3812876 | 65.731787 | 73.2395153 | 68.8457846 |
| 18:34:47 | 0:34:28 | 58.6930524 | 78.3812876 | 63.731787 | 73.2395153 | 65.8457846 |
| 18:34:48 | 0:34:29 | 58.6930524 | 78.3812876 | 63.731787 | 73.2395153 | 63.8457846 |
| 18:34:49 | 0:34:30 | 57.6930524 | 77.3812876 | 62.731787 | 72.2395153 | 63.8457846 |
| 18:34:50 | 0:34:31 | 56.6930524 | 75.3812876 | 62.731787 | 69.2395153 | 63.8457846 |
| 18:34:51 | 0:34:32 | 56.6930524 | 75.3812876 | 62.731787 | 69.2395153 | 63.8457846 |
| 18:34:52 | 0:34:33 | 56.6930524 | 74.3812876 | 60.731787 | 69.2395153 | 64.8457846 |
| 18:34:53 | 0:34:34 | 56.6930524 | 74.3812876 | 59.731787 | 67.2395153 | 65.8457846 |
| 18:34:54 | 0:34:35 | 57.6930524 | 74.3812876 | 58.731787 | 67.2395153 | 65.8457846 |
| 18:34:55 | 0:34:36 | 57.6930524 | 73.3812876 | 58.731787 | 67.2395153 | 66.8457846 |
| 18:34:56 | 0:34:37 | 58.6930524 | 73.3812876 | 57.731787 | 67.2395153 | 68.8457846 |
| 18:34:57 | 0:34:38 | 58.6930524 | 73.3812876 | 55.731787 | 67.2395153 | 71.8457846 |
| 18:34:58 | 0:34:39 | 59.6930524 | 73.3812876 | 55.731787 | 68.2395153 | 72.8457846 |
| 18:34:59 | 0:34:40 | 59.6930524 | 73.3812876 | 61.731787 | 69.2395153 | 73.8457846 |
| 18:35:00 | 0:34:41 | 59.6930524 | 73.3812876 | 64.731787 | 70.2395153 | 70.8457846 |
| 18:35:01 | 0:34:42 | 59.6930524 | 73.3812876 | 65.731787 | 70.2395153 | 67.8457846 |
| 18:35:02 | 0:34:43 | 59.6930524 | 73.3812876 | 66.731787 | 70.2395153 | 67.8457846 |
| 18:35:03 | 0:34:44 | 59.6930524 | 71.3812876 | 66.731787 | 70.2395153 | 67.8457846 |
| 18:35:04 | 0:34:45 | 59.6930524 | 70.3812876 | 66.731787 | 70.2395153 | 67.8457846 |
| 18:35:05 | 0:34:46 | 59.6930524 | 69.3812876 | 66.731787 | 71.2395153 | 67.8457846 |
| 18:35:06 | 0:34:47 | 59.6930524 | 69.3812876 | 66.731787 | 71.2395153 | 67.8457846 |
| 18:35:07 | 0:34:48 | 59.6930524 | 69.3812876 | 66.731787 | 72.2395153 | 68.8457846 |
| 18:35:08 | 0:34:49 | 59.6930524 | 68.3812876 | 66.731787 | 72.2395153 | 70.8457846 |
| 18:35:09 | 0:34:50 | 58.6930524 | 71.3812876 | 67.731787 | 72.2395153 | 71.8457846 |
| 18:35:10 | 0:34:51 | 58.6930524 | 72.3812876 | 67.731787 | 72.2395153 | 74.8457846 |
| 18:35:11 | 0:34:52 | 58.6930524 | 73.3812876 | 67.731787 | 73.2395153 | 75.8457846 |
| 18:35:12 | 0:34:53 | 58.6930524 | 75.3812876 | 67.731787 | 73.2395153 | 76.8457846 |
| 18:35:13 | 0:34:54 | 57.6930524 | 76.3812876 | 67.731787 | 75.2395153 | 76.8457846 |
| 18:35:14 | 0:34:55 | 57.6930524 | 78.3812876 | 68.731787 | 75.2395153 | 76.8457846 |
| 18:35:15 | 0:34:56 | 57.6930524 | 78.3812876 | 69.731787 | 75.2395153 | 75.8457846 |
| 18:35:16 | 0:34:57 | 57.6930524 | 78.3812876 | 69.731787 | 77.2395153 | 74.8457846 |
| 18:35:17 | 0:34:58 | 57.6930524 | 78.3812876 | 69.731787 | 77.2395153 | 72.8457846 |
| 18:35:18 | 0:34:59 | 57.6930524 | 74.3812876 | 71.731787 | 79.2395153 | 70.8457846 |
| 18:35:19 | 0:35:00 | 57.6930524 | 73.3812876 | 71.731787 | 79.2395153 | 71.8457846 |
| 18:35:20 | 0:35:01 | 57.6930524 | 71.3812876 | 72.731787 | 79.2395153 | 72.8457846 |
| 18:35:21 | 0:35:02 | 57.6930524 | 71.3812876 | 75.731787 | 80.2395153 | 72.8457846 |
| 18:35:22 | 0:35:03 | 57.6930524 | 70.3812876 | 77.731787 | 80.2395153 | 69.8457846 |
| 18:35:23 | 0:35:04 | 57.6930524 | 70.3812876 | 78.731787 | 81.2395153 | 69.8457846 |
| 18:35:24 | 0:35:05 | 57.6930524 | 69.3812876 | 78.731787 | 81.2395153 | 69.8457846 |
| 18:35:25 | 0:35:06 | 57.6930524 | 69.3812876 | 78.731787 | 82.2395153 | 70.8457846 |
| 18:35:26 | 0:35:07 | 57.6930524 | 69.3812876 | 80.731787 | 83.2395153 | 71.8457846 |
| 18:35:27 | 0:35:08 | 57.6930524 | 69.3812876 | 80.731787 | 83.2395153 | 71.8457846 |

|          |         |            |            |           |            |            |
|----------|---------|------------|------------|-----------|------------|------------|
| 18:35:28 | 0:35:09 | 56.6930524 | 69.3812876 | 81.731787 | 82.2395153 | 71.8457846 |
| 18:35:29 | 0:35:10 | 55.6930524 | 70.3812876 | 83.731787 | 82.2395153 | 71.8457846 |
| 18:35:30 | 0:35:11 | 55.6930524 | 73.3812876 | 84.731787 | 82.2395153 | 71.8457846 |
| 18:35:31 | 0:35:12 | 56.6930524 | 73.3812876 | 85.731787 | 82.2395153 | 71.8457846 |
| 18:35:32 | 0:35:13 | 56.6930524 | 74.3812876 | 85.731787 | 85.2395153 | 70.8457846 |
| 18:35:33 | 0:35:14 | 56.6930524 | 74.3812876 | 86.731787 | 86.2395153 | 68.8457846 |
| 18:35:34 | 0:35:15 | 57.6930524 | 74.3812876 | 74.731787 | 70.2951505 | 67.8457846 |
| 18:35:35 | 0:35:16 | 57.6930524 | 67.3812876 | 73.731787 | 69.9201505 | 67.8457846 |
| 18:35:36 | 0:35:17 | 57.6930524 | 67.3812876 | 72.731787 | 69.9201505 | 67.8457846 |
| 18:35:37 | 0:35:18 | 57.6930524 | 67.3812876 | 71.731787 | 70.1701505 | 69.8457846 |
| 18:35:38 | 0:35:19 | 57.6930524 | 67.3812876 | 71.731787 | 69.6701505 | 71.8457846 |
| 18:35:39 | 0:35:20 | 57.6930524 | 67.3812876 | 71.731787 | 82.2395153 | 71.8457846 |
| 18:35:40 | 0:35:21 | 59.6930524 | 67.3812876 | 70.731787 | 82.2395153 | 69.8457846 |
| 18:35:41 | 0:35:22 | 61.6930524 | 67.3812876 | 69.731787 | 81.2395153 | 64.8457846 |
| 18:35:42 | 0:35:23 | 62.6930524 | 70.3812876 | 69.731787 | 78.2395153 | 62.8457846 |
| 18:35:43 | 0:35:24 | 64.6930524 | 70.3812876 | 69.731787 | 73.2395153 | 61.8457846 |
| 18:35:44 | 0:35:25 | 68.6930524 | 70.3812876 | 69.731787 | 65.2395153 | 62.8457846 |
| 18:35:45 | 0:35:26 | 70.6930524 | 71.3812876 | 70.731787 | 61.2395153 | 64.8457846 |
| 18:35:46 | 0:35:27 | 70.6930524 | 73.3812876 | 70.731787 | 60.2395153 | 65.8457846 |
| 18:35:47 | 0:35:28 | 70.6930524 | 75.3812876 | 70.731787 | 58.2395153 | 67.8457846 |
| 18:35:48 | 0:35:29 | 70.6930524 | 75.3812876 | 70.731787 | 59.2395153 | 69.8457846 |
| 18:35:49 | 0:35:30 | 70.6930524 | 73.3812876 | 70.731787 | 60.2395153 | 70.8457846 |
| 18:35:50 | 0:35:31 | 70.6930524 | 73.3812876 | 71.731787 | 61.2395153 | 71.8457846 |
| 18:35:51 | 0:35:32 | 71.6930524 | 73.3812876 | 71.731787 | 61.2395153 | 71.8457846 |
| 18:35:52 | 0:35:33 | 71.6930524 | 73.3812876 | 71.731787 | 61.2395153 | 71.8457846 |
| 18:35:53 | 0:35:34 | 71.6930524 | 73.3812876 | 71.731787 | 62.2395153 | 73.8457846 |
| 18:35:54 | 0:35:35 | 72.6930524 | 71.3812876 | 71.731787 | 62.2395153 | 73.8457846 |
| 18:35:55 | 0:35:36 | 72.6930524 | 70.3812876 | 73.731787 | 63.2395153 | 74.8457846 |
| 18:35:56 | 0:35:37 | 72.6930524 | 70.3812876 | 72.731787 | 64.2395153 | 74.8457846 |
| 18:35:57 | 0:35:38 | 68.6930524 | 70.3812876 | 71.731787 | 65.2395153 | 74.8457846 |
| 18:35:58 | 0:35:39 | 66.6930524 | 70.3812876 | 71.731787 | 65.2395153 | 74.8457846 |
| 18:35:59 | 0:35:40 | 66.6930524 | 70.3812876 | 72.731787 | 65.2395153 | 74.8457846 |
| 18:36:00 | 0:35:41 | 66.6930524 | 70.3812876 | 72.731787 | 65.2395153 | 74.8457846 |
| 18:36:01 | 0:35:42 | 66.6930524 | 69.3812876 | 70.731787 | 65.2395153 | 74.8457846 |
| 18:36:02 | 0:35:43 | 66.6930524 | 69.3812876 | 69.731787 | 65.2395153 | 74.8457846 |
| 18:36:03 | 0:35:44 | 67.6930524 | 69.3812876 | 68.731787 | 64.2395153 | 74.8457846 |
| 18:36:04 | 0:35:45 | 68.6930524 | 69.3812876 | 68.731787 | 63.2395153 | 74.8457846 |
| 18:36:05 | 0:35:46 | 67.6930524 | 70.3812876 | 68.731787 | 62.2395153 | 72.8457846 |
| 18:36:06 | 0:35:47 | 67.6930524 | 70.3812876 | 69.731787 | 62.2395153 | 71.8457846 |
| 18:36:07 | 0:35:48 | 66.6930524 | 70.3812876 | 69.731787 | 62.2395153 | 71.8457846 |
| 18:36:08 | 0:35:49 | 65.6930524 | 70.3812876 | 69.731787 | 62.2395153 | 71.8457846 |
| 18:36:09 | 0:35:50 | 64.6930524 | 71.3812876 | 70.731787 | 62.2395153 | 71.8457846 |
| 18:36:10 | 0:35:51 | 64.6930524 | 71.3812876 | 71.731787 | 62.2395153 | 72.8457846 |
| 18:36:11 | 0:35:52 | 63.6930524 | 71.3812876 | 72.731787 | 62.2395153 | 72.8457846 |
| 18:36:12 | 0:35:53 | 63.6930524 | 72.3812876 | 72.731787 | 64.2395153 | 72.8457846 |

|          |         |            |            |           |            |            |
|----------|---------|------------|------------|-----------|------------|------------|
| 18:36:13 | 0:35:54 | 62.6930524 | 75.3812876 | 72.731787 | 66.2395153 | 72.8457846 |
| 18:36:14 | 0:35:55 | 62.6930524 | 75.3812876 | 73.731787 | 66.2395153 | 73.8457846 |
| 18:36:15 | 0:35:56 | 62.6930524 | 74.3812876 | 74.731787 | 66.2395153 | 72.8457846 |
| 18:36:16 | 0:35:57 | 62.6930524 | 74.3812876 | 75.731787 | 66.2395153 | 67.8457846 |
| 18:36:17 | 0:35:58 | 62.6930524 | 74.3812876 | 75.731787 | 66.2395153 | 66.8457846 |
| 18:36:18 | 0:35:59 | 61.6930524 | 74.3812876 | 75.731787 | 64.2395153 | 67.8457846 |
| 18:36:19 | 0:36:00 | 57.6930524 | 69.3812876 | 75.731787 | 64.2395153 | 70.8457846 |
| 18:36:20 | 0:36:01 | 56.6930524 | 67.3812876 | 76.731787 | 64.2395153 | 71.8457846 |
| 18:36:21 | 0:36:02 | 56.6930524 | 66.3812876 | 76.731787 | 63.2395153 | 71.8457846 |
| 18:36:22 | 0:36:03 | 56.6930524 | 66.3812876 | 75.731787 | 62.2395153 | 70.8457846 |
| 18:36:23 | 0:36:04 | 56.6930524 | 66.3812876 | 74.731787 | 62.2395153 | 70.8457846 |
| 18:36:24 | 0:36:05 | 56.6930524 | 67.3812876 | 74.731787 | 63.2395153 | 69.8457846 |
| 18:36:25 | 0:36:06 | 56.6930524 | 67.3812876 | 73.731787 | 64.2395153 | 69.8457846 |
| 18:36:26 | 0:36:07 | 56.6930524 | 67.3812876 | 72.731787 | 65.2395153 | 69.8457846 |
| 18:36:27 | 0:36:08 | 56.6930524 | 67.3812876 | 71.731787 | 66.2395153 | 69.8457846 |
| 18:36:28 | 0:36:09 | 57.6930524 | 67.3812876 | 71.731787 | 66.2395153 | 69.8457846 |
| 18:36:29 | 0:36:10 | 57.6930524 | 67.3812876 | 70.731787 | 66.2395153 | 71.8457846 |
| 18:36:30 | 0:36:11 | 57.6930524 | 67.3812876 | 70.731787 | 67.2395153 | 71.8457846 |
| 18:36:31 | 0:36:12 | 57.6930524 | 67.3812876 | 70.731787 | 68.2395153 | 72.8457846 |
| 18:36:32 | 0:36:13 | 55.6930524 | 67.3812876 | 70.731787 | 69.2395153 | 70.8457846 |
| 18:36:33 | 0:36:14 | 55.6930524 | 67.3812876 | 70.731787 | 69.2395153 | 67.8457846 |
| 18:36:34 | 0:36:15 | 55.6930524 | 67.3812876 | 70.731787 | 72.2395153 | 64.8457846 |
| 18:36:35 | 0:36:16 | 55.6930524 | 67.3812876 | 70.731787 | 72.2395153 | 62.8457846 |
| 18:36:36 | 0:36:17 | 56.6930524 | 67.3812876 | 71.731787 | 72.2395153 | 60.8457846 |
| 18:36:37 | 0:36:18 | 57.6930524 | 67.3812876 | 71.731787 | 72.2395153 | 60.8457846 |
| 18:36:38 | 0:36:19 | 57.6930524 | 67.3812876 | 69.731787 | 72.2395153 | 62.8457846 |
| 18:36:39 | 0:36:20 | 57.6930524 | 67.3812876 | 68.731787 | 72.2395153 | 64.8457846 |
| 18:36:40 | 0:36:21 | 57.6930524 | 67.3812876 | 68.731787 | 66.2395153 | 63.8457846 |
| 18:36:41 | 0:36:22 | 58.6930524 | 67.3812876 | 68.731787 | 65.2395153 | 62.8457846 |
| 18:36:42 | 0:36:23 | 58.6930524 | 65.3812876 | 68.731787 | 65.2395153 | 61.8457846 |
| 18:36:43 | 0:36:24 | 57.6930524 | 65.3812876 | 68.731787 | 66.2395153 | 61.8457846 |
| 18:36:44 | 0:36:25 | 57.6930524 | 63.3812876 | 69.731787 | 66.2395153 | 61.8457846 |
| 18:36:45 | 0:36:26 | 57.6930524 | 62.3812876 | 70.731787 | 65.2395153 | 61.8457846 |
| 18:36:46 | 0:36:27 | 57.6930524 | 62.3812876 | 70.731787 | 65.2395153 | 63.8457846 |
| 18:36:47 | 0:36:28 | 57.6930524 | 59.3812876 | 69.731787 | 65.2395153 | 64.8457846 |
| 18:36:48 | 0:36:29 | 57.6930524 | 59.3812876 | 68.731787 | 65.2395153 | 65.8457846 |
| 18:36:49 | 0:36:30 | 57.6930524 | 59.3812876 | 68.731787 | 64.2395153 | 65.8457846 |
| 18:36:50 | 0:36:31 | 57.6930524 | 61.3812876 | 68.731787 | 64.2395153 | 66.8457846 |
| 18:36:51 | 0:36:32 | 57.6930524 | 62.3812876 | 68.731787 | 64.2395153 | 68.8457846 |
| 18:36:52 | 0:36:33 | 58.6930524 | 63.3812876 | 68.731787 | 65.2395153 | 66.8457846 |
| 18:36:53 | 0:36:34 | 58.6930524 | 63.3812876 | 67.731787 | 66.2395153 | 65.8457846 |
| 18:36:54 | 0:36:35 | 58.6930524 | 63.3812876 | 67.731787 | 66.2395153 | 65.8457846 |
| 18:36:55 | 0:36:36 | 58.6930524 | 66.3812876 | 66.731787 | 69.2395153 | 65.8457846 |
| 18:36:56 | 0:36:37 | 58.6930524 | 66.3812876 | 64.731787 | 70.2395153 | 66.8457846 |
| 18:36:57 | 0:36:38 | 58.6930524 | 67.3812876 | 64.731787 | 71.2395153 | 66.8457846 |

|          |         |            |            |           |            |            |
|----------|---------|------------|------------|-----------|------------|------------|
| 18:36:58 | 0:36:39 | 58.6930524 | 67.3812876 | 64.731787 | 71.2395153 | 66.8457846 |
| 18:36:59 | 0:36:40 | 58.6930524 | 67.3812876 | 63.731787 | 71.2395153 | 67.8457846 |
| 18:37:00 | 0:36:41 | 58.6930524 | 68.3812876 | 62.731787 | 71.2395153 | 68.8457846 |
| 18:37:01 | 0:36:42 | 58.6930524 | 68.3812876 | 62.731787 | 70.2395153 | 69.8457846 |
| 18:37:02 | 0:36:43 | 59.6930524 | 71.3812876 | 62.731787 | 70.2395153 | 69.8457846 |
| 18:37:03 | 0:36:44 | 59.6930524 | 71.3812876 | 62.731787 | 70.2395153 | 69.8457846 |
| 18:37:04 | 0:36:45 | 66.6930524 | 71.3812876 | 62.731787 | 69.2395153 | 69.8457846 |
| 18:37:05 | 0:36:46 | 72.1701505 | 72.3812876 | 70.731787 | 70.2395153 | 70.8457846 |
| 18:37:06 | 0:36:47 | 74.0451505 | 72.3812876 | 70.731787 | 70.2395153 | 70.8457846 |
| 18:37:07 | 0:36:48 | 75.4201505 | 72.3812876 | 71.731787 | 70.2395153 | 72.8457846 |
| 18:37:08 | 0:36:49 | 75.6701505 | 72.3812876 | 72.731787 | 68.2395153 | 72.8457846 |
| 18:37:09 | 0:36:50 | 76.1701505 | 72.3812876 | 73.731787 | 67.2395153 | 71.8457846 |
| 18:37:10 | 0:36:51 | 76.6701505 | 72.3812876 | 74.731787 | 67.2395153 | 70.8457846 |
| 18:37:11 | 0:36:52 | 77.2951505 | 72.3812876 | 74.731787 | 67.2395153 | 71.8457846 |
| 18:37:12 | 0:36:53 | 77.4201505 | 71.3812876 | 74.731787 | 67.2395153 | 71.8457846 |
| 18:37:13 | 0:36:54 | 77.9201505 | 71.3812876 | 73.731787 | 67.2395153 | 71.8457846 |
| 18:37:14 | 0:36:55 | 78.0451505 | 71.3812876 | 72.731787 | 66.2395153 | 71.8457846 |
| 18:37:15 | 0:36:56 | 77.6701505 | 69.3812876 | 72.731787 | 66.2395153 | 71.8457846 |
| 18:37:16 | 0:36:57 | 77.4201505 | 69.3812876 | 71.731787 | 65.2395153 | 73.8457846 |
| 18:37:17 | 0:36:58 | 77.5451505 | 69.3812876 | 70.731787 | 64.2395153 | 76.8457846 |
| 18:37:18 | 0:36:59 | 77.2951505 | 67.3812876 | 69.731787 | 64.2395153 | 78.8457846 |
| 18:37:19 | 0:37:00 | 76.6701505 | 63.3812876 | 68.731787 | 64.2395153 | 78.8457846 |
| 18:37:20 | 0:37:01 | 75.9201505 | 60.3812876 | 67.731787 | 64.2395153 | 76.8457846 |
| 18:37:21 | 0:37:02 | 75.2951505 | 60.3812876 | 67.731787 | 64.2395153 | 73.8457846 |
| 18:37:22 | 0:37:03 | 75.0451505 | 60.3812876 | 67.731787 | 64.2395153 | 71.8457846 |
| 18:37:23 | 0:37:04 | 74.7951505 | 59.3812876 | 67.731787 | 64.2395153 | 70.8457846 |
| 18:37:24 | 0:37:05 | 74.5451505 | 58.3812876 | 67.731787 | 64.2395153 | 69.8457846 |
| 18:37:25 | 0:37:06 | 74.4201505 | 58.3812876 | 67.731787 | 64.2395153 | 70.8457846 |
| 18:37:26 | 0:37:07 | 74.4201505 | 59.3812876 | 67.731787 | 67.2395153 | 69.8457846 |
| 18:37:27 | 0:37:08 | 75.2951505 | 68.3812876 | 67.731787 | 69.2395153 | 67.8457846 |
| 18:37:28 | 0:37:09 | 75.5451505 | 68.3812876 | 68.731787 | 75.2395153 | 67.8457846 |
| 18:37:29 | 0:37:10 | 74.6701505 | 68.3812876 | 68.731787 | 75.2395153 | 65.8457846 |
| 18:37:30 | 0:37:11 | 75.1701505 | 68.3812876 | 68.731787 | 81.2395153 | 65.8457846 |
| 18:37:31 | 0:37:12 | 75.1701505 | 67.3812876 | 67.731787 | 83.2395153 | 65.8457846 |
| 18:37:32 | 0:37:13 | 86.6930524 | 67.3812876 | 66.731787 | 85.2395153 | 66.8457846 |
| 18:37:33 | 0:37:14 | 82.6930524 | 67.3812876 | 63.731787 | 86.2395153 | 67.8457846 |
| 18:37:34 | 0:37:15 | 79.6930524 | 67.3812876 | 63.731787 | 87.2395153 | 67.8457846 |
| 18:37:35 | 0:37:16 | 75.6930524 | 66.3812876 | 66.731787 | 72.9201505 | 67.8457846 |
| 18:37:36 | 0:37:17 | 72.6930524 | 64.3812876 | 66.731787 | 72.9201505 | 67.8457846 |
| 18:37:37 | 0:37:18 | 70.6930524 | 64.3812876 | 67.731787 | 73.0451505 | 67.8457846 |
| 18:37:38 | 0:37:19 | 67.6930524 | 61.3812876 | 67.731787 | 72.6701505 | 68.8457846 |
| 18:37:39 | 0:37:20 | 66.6930524 | 61.3812876 | 67.731787 | 72.6701505 | 68.8457846 |
| 18:37:40 | 0:37:21 | 66.6930524 | 61.3812876 | 67.731787 | 72.6701505 | 68.8457846 |
| 18:37:41 | 0:37:22 | 63.6930524 | 59.3812876 | 68.731787 | 71.4201505 | 68.8457846 |
| 18:37:42 | 0:37:23 | 61.6930524 | 59.3812876 | 68.731787 | 70.4201505 | 68.8457846 |



|          |         |            |            |           |            |            |
|----------|---------|------------|------------|-----------|------------|------------|
| 18:37:43 | 0:37:24 | 61.6930524 | 59.3812876 | 68.731787 | 69.9201505 | 68.8457846 |
| 18:37:44 | 0:37:25 | 60.6930524 | 58.3812876 | 69.731787 | 69.0451505 | 67.8457846 |
| 18:37:45 | 0:37:26 | 59.6930524 | 58.3812876 | 69.731787 | 69.0451505 | 67.8457846 |
| 18:37:46 | 0:37:27 | 59.6930524 | 58.3812876 | 69.731787 | 68.9201505 | 67.8457846 |
| 18:37:47 | 0:37:28 | 59.6930524 | 58.3812876 | 69.731787 | 69.0451505 | 67.8457846 |
| 18:37:48 | 0:37:29 | 59.6930524 | 58.3812876 | 69.731787 | 69.0451505 | 67.8457846 |
| 18:37:49 | 0:37:30 | 59.6930524 | 58.3812876 | 69.731787 | 68.6701505 | 67.8457846 |
| 18:37:50 | 0:37:31 | 59.6930524 | 60.3812876 | 69.731787 | 68.9201505 | 66.8457846 |
| 18:37:51 | 0:37:32 | 59.6930524 | 63.3812876 | 68.731787 | 68.9201505 | 65.8457846 |
| 18:37:52 | 0:37:33 | 59.6930524 | 63.3812876 | 68.731787 | 68.9201505 | 65.8457846 |
| 18:37:53 | 0:37:34 | 59.6930524 | 64.3812876 | 70.731787 | 85.2395153 | 66.8457846 |
| 18:37:54 | 0:37:35 | 58.6930524 | 64.3812876 | 71.731787 | 83.2395153 | 65.8457846 |
| 18:37:55 | 0:37:36 | 58.6930524 | 64.3812876 | 71.731787 | 83.2395153 | 66.8457846 |
| 18:37:56 | 0:37:37 | 58.6930524 | 70.3812876 | 71.731787 | 82.2395153 | 66.8457846 |
| 18:37:57 | 0:37:38 | 58.6930524 | 71.3812876 | 71.731787 | 81.2395153 | 65.8457846 |
| 18:37:58 | 0:37:39 | 58.6930524 | 71.3812876 | 74.731787 | 81.2395153 | 65.8457846 |
| 18:37:59 | 0:37:40 | 58.6930524 | 72.3812876 | 75.731787 | 81.2395153 | 65.8457846 |
| 18:38:00 | 0:37:41 | 58.6930524 | 72.3812876 | 74.731787 | 81.2395153 | 64.8457846 |
| 18:38:01 | 0:37:42 | 58.6930524 | 72.3812876 | 73.731787 | 81.2395153 | 64.8457846 |
| 18:38:02 | 0:37:43 | 59.6930524 | 74.3812876 | 71.731787 | 81.2395153 | 63.8457846 |
| 18:38:03 | 0:37:44 | 60.6930524 | 75.3812876 | 70.731787 | 83.2395153 | 62.8457846 |
| 18:38:04 | 0:37:45 | 60.6930524 | 78.3812876 | 70.731787 | 84.2395153 | 62.8457846 |
| 18:38:05 | 0:37:46 | 60.6930524 | 78.3812876 | 71.731787 | 86.2395153 | 62.8457846 |
| 18:38:06 | 0:37:47 | 60.6930524 | 79.3812876 | 71.731787 | 87.2395153 | 63.8457846 |
| 18:38:07 | 0:37:48 | 60.6930524 | 79.3812876 | 72.731787 | 87.2395153 | 64.8457846 |
| 18:38:08 | 0:37:49 | 61.6930524 | 79.3812876 | 72.731787 | 88.2395153 | 65.8457846 |
| 18:38:09 | 0:37:50 | 61.6930524 | 79.3812876 | 75.731787 | 88.2395153 | 66.8457846 |
| 18:38:10 | 0:37:51 | 62.6930524 | 78.3812876 | 75.731787 | 88.2395153 | 66.8457846 |
| 18:38:11 | 0:37:52 | 62.6930524 | 78.3812876 | 76.731787 | 88.2395153 | 66.8457846 |
| 18:38:12 | 0:37:53 | 62.6930524 | 70.3812876 | 76.731787 | 88.2395153 | 66.8457846 |
| 18:38:13 | 0:37:54 | 62.6930524 | 68.3812876 | 76.731787 | 88.2395153 | 66.8457846 |
| 18:38:14 | 0:37:55 | 61.6930524 | 66.3812876 | 72.731787 | 88.2395153 | 66.8457846 |
| 18:38:15 | 0:37:56 | 61.6930524 | 65.3812876 | 71.731787 | 85.2395153 | 67.8457846 |
| 18:38:16 | 0:37:57 | 61.6930524 | 65.3812876 | 71.731787 | 80.2395153 | 68.8457846 |
| 18:38:17 | 0:37:58 | 61.6930524 | 65.3812876 | 71.731787 | 75.2395153 | 69.8457846 |
| 18:38:18 | 0:37:59 | 61.6930524 | 66.3812876 | 71.731787 | 75.2395153 | 69.8457846 |
| 18:38:19 | 0:38:00 | 61.6930524 | 67.3812876 | 71.731787 | 75.2395153 | 69.8457846 |
| 18:38:20 | 0:38:01 | 61.6930524 | 65.3812876 | 71.731787 | 75.2395153 | 68.8457846 |
| 18:38:21 | 0:38:02 | 61.6930524 | 65.3812876 | 71.731787 | 75.2395153 | 68.8457846 |
| 18:38:22 | 0:38:03 | 60.6930524 | 63.3812876 | 71.731787 | 74.2395153 | 68.8457846 |
| 18:38:23 | 0:38:04 | 60.6930524 | 62.3812876 | 72.731787 | 74.2395153 | 69.8457846 |
| 18:38:24 | 0:38:05 | 60.6930524 | 61.3812876 | 72.731787 | 74.2395153 | 69.8457846 |
| 18:38:25 | 0:38:06 | 60.6930524 | 61.3812876 | 72.731787 | 74.2395153 | 70.8457846 |
| 18:38:26 | 0:38:07 | 60.6930524 | 60.3812876 | 72.731787 | 76.2395153 | 70.8457846 |
| 18:38:27 | 0:38:08 | 60.6930524 | 61.3812876 | 73.731787 | 83.2395153 | 69.8457846 |

|          |         |            |            |           |            |            |
|----------|---------|------------|------------|-----------|------------|------------|
| 18:38:28 | 0:38:09 | 59.6930524 | 63.3812876 | 74.731787 | 84.2395153 | 68.8457846 |
| 18:38:29 | 0:38:10 | 59.6930524 | 65.3812876 | 75.731787 | 85.2395153 | 68.8457846 |
| 18:38:30 | 0:38:11 | 59.6930524 | 65.3812876 | 75.731787 | 87.2395153 | 67.8457846 |
| 18:38:31 | 0:38:12 | 59.6930524 | 66.3812876 | 74.731787 | 88.2395153 | 67.8457846 |
| 18:38:32 | 0:38:13 | 59.6930524 | 67.3812876 | 74.731787 | 72.4201505 | 67.8457846 |
| 18:38:33 | 0:38:14 | 59.6930524 | 67.3812876 | 73.731787 | 72.0451505 | 66.8457846 |
| 18:38:34 | 0:38:15 | 58.6930524 | 67.3812876 | 73.731787 | 71.4201505 | 65.8457846 |
| 18:38:35 | 0:38:16 | 56.6930524 | 68.3812876 | 72.731787 | 70.9201505 | 64.8457846 |
| 18:38:36 | 0:38:17 | 56.6930524 | 68.3812876 | 72.731787 | 71.1701505 | 66.8457846 |
| 18:38:37 | 0:38:18 | 56.6930524 | 68.3812876 | 72.731787 | 71.4201505 | 68.8457846 |
| 18:38:38 | 0:38:19 | 57.6930524 | 68.3812876 | 71.731787 | 71.4201505 | 68.8457846 |
| 18:38:39 | 0:38:20 | 58.6930524 | 67.3812876 | 71.731787 | 71.4201505 | 68.8457846 |
| 18:38:40 | 0:38:21 | 58.6930524 | 67.3812876 | 70.731787 | 71.6701505 | 69.8457846 |
| 18:38:41 | 0:38:22 | 58.6930524 | 66.3812876 | 69.731787 | 71.5451505 | 70.8457846 |
| 18:38:42 | 0:38:23 | 58.6930524 | 66.3812876 | 69.731787 | 71.5451505 | 70.8457846 |
| 18:38:43 | 0:38:24 | 58.6930524 | 66.3812876 | 67.731787 | 70.7951505 | 69.8457846 |
| 18:38:44 | 0:38:25 | 59.6930524 | 66.3812876 | 67.731787 | 70.6701505 | 69.8457846 |
| 18:38:45 | 0:38:26 | 59.6930524 | 66.3812876 | 67.731787 | 84.2395153 | 69.8457846 |
| 18:38:46 | 0:38:27 | 59.6930524 | 66.3812876 | 68.731787 | 83.2395153 | 69.8457846 |
| 18:38:47 | 0:38:28 | 60.6930524 | 64.3812876 | 68.731787 | 81.2395153 | 68.8457846 |
| 18:38:48 | 0:38:29 | 60.6930524 | 63.3812876 | 68.731787 | 78.2395153 | 69.8457846 |
| 18:38:49 | 0:38:30 | 60.6930524 | 64.3812876 | 68.731787 | 76.2395153 | 69.8457846 |
| 18:38:50 | 0:38:31 | 61.6930524 | 65.3812876 | 73.731787 | 75.2395153 | 69.8457846 |
| 18:38:51 | 0:38:32 | 61.6930524 | 65.3812876 | 74.731787 | 74.2395153 | 69.8457846 |
| 18:38:52 | 0:38:33 | 62.6930524 | 65.3812876 | 75.731787 | 74.2395153 | 69.8457846 |
| 18:38:53 | 0:38:34 | 63.6930524 | 66.3812876 | 75.731787 | 73.2395153 | 68.8457846 |
| 18:38:54 | 0:38:35 | 63.6930524 | 73.3812876 | 75.731787 | 73.2395153 | 67.8457846 |
| 18:38:55 | 0:38:36 | 62.6930524 | 79.3812876 | 74.731787 | 72.2395153 | 67.8457846 |
| 18:38:56 | 0:38:37 | 62.6930524 | 79.3812876 | 72.731787 | 67.2395153 | 67.8457846 |
| 18:38:57 | 0:38:38 | 62.6930524 | 79.3812876 | 72.731787 | 67.2395153 | 67.8457846 |
| 18:38:58 | 0:38:39 | 62.6930524 | 79.3812876 | 72.731787 | 67.2395153 | 67.8457846 |
| 18:38:59 | 0:38:40 | 61.6930524 | 78.3812876 | 71.731787 | 66.2395153 | 67.8457846 |
| 18:39:00 | 0:38:41 | 61.6930524 | 77.3812876 | 71.731787 | 65.2395153 | 65.8457846 |
| 18:39:01 | 0:38:42 | 60.6930524 | 77.3812876 | 71.731787 | 64.2395153 | 64.8457846 |
| 18:39:02 | 0:38:43 | 60.6930524 | 75.3812876 | 71.731787 | 64.2395153 | 63.8457846 |
| 18:39:03 | 0:38:44 | 60.6930524 | 75.3812876 | 71.731787 | 64.2395153 | 62.8457846 |
| 18:39:04 | 0:38:45 | 61.6930524 | 75.3812876 | 71.731787 | 64.2395153 | 62.8457846 |
| 18:39:05 | 0:38:46 | 61.6930524 | 74.3812876 | 71.731787 | 64.2395153 | 63.8457846 |
| 18:39:06 | 0:38:47 | 60.6930524 | 74.3812876 | 70.731787 | 66.2395153 | 63.8457846 |
| 18:39:07 | 0:38:48 | 60.6930524 | 74.3812876 | 70.731787 | 67.2395153 | 64.8457846 |
| 18:39:08 | 0:38:49 | 59.6930524 | 73.3812876 | 70.731787 | 67.2395153 | 64.8457846 |
| 18:39:09 | 0:38:50 | 59.6930524 | 73.3812876 | 71.731787 | 67.2395153 | 65.8457846 |
| 18:39:10 | 0:38:51 | 59.6930524 | 74.3812876 | 71.731787 | 68.2395153 | 65.8457846 |
| 18:39:11 | 0:38:52 | 59.6930524 | 74.3812876 | 71.731787 | 68.2395153 | 65.8457846 |
| 18:39:12 | 0:38:53 | 59.6930524 | 78.3812876 | 71.731787 | 67.2395153 | 65.8457846 |

|          |         |            |            |           |            |            |
|----------|---------|------------|------------|-----------|------------|------------|
| 18:39:13 | 0:38:54 | 59.6930524 | 77.3812876 | 71.731787 | 67.2395153 | 66.8457846 |
| 18:39:14 | 0:38:55 | 59.6930524 | 75.3812876 | 71.731787 | 67.2395153 | 67.8457846 |
| 18:39:15 | 0:38:56 | 59.6930524 | 75.3812876 | 71.731787 | 65.2395153 | 67.8457846 |
| 18:39:16 | 0:38:57 | 58.6930524 | 73.3812876 | 72.731787 | 65.2395153 | 67.8457846 |
| 18:39:17 | 0:38:58 | 58.6930524 | 70.3812876 | 72.731787 | 65.2395153 | 66.8457846 |
| 18:39:18 | 0:38:59 | 58.6930524 | 70.3812876 | 72.731787 | 67.2395153 | 66.8457846 |
| 18:39:19 | 0:39:00 | 58.6930524 | 69.3812876 | 72.731787 | 67.2395153 | 67.8457846 |
| 18:39:20 | 0:39:01 | 58.6930524 | 70.3812876 | 72.731787 | 67.2395153 | 67.8457846 |
| 18:39:21 | 0:39:02 | 58.6930524 | 71.3812876 | 72.731787 | 69.2395153 | 67.8457846 |
| 18:39:22 | 0:39:03 | 60.6930524 | 71.3812876 | 72.731787 | 70.2395153 | 67.8457846 |
| 18:39:23 | 0:39:04 | 61.6930524 | 71.3812876 | 72.731787 | 71.2395153 | 67.8457846 |
| 18:39:24 | 0:39:05 | 61.6930524 | 71.3812876 | 72.731787 | 72.2395153 | 67.8457846 |
| 18:39:25 | 0:39:06 | 61.6930524 | 71.3812876 | 72.731787 | 72.2395153 | 69.8457846 |
| 18:39:26 | 0:39:07 | 60.6930524 | 72.3812876 | 71.731787 | 72.2395153 | 68.8457846 |
| 18:39:27 | 0:39:08 | 60.6930524 | 72.3812876 | 71.731787 | 72.2395153 | 66.8457846 |
| 18:39:28 | 0:39:09 | 60.6930524 | 72.3812876 | 71.731787 | 73.2395153 | 65.8457846 |
| 18:39:29 | 0:39:10 | 59.6930524 | 73.3812876 | 71.731787 | 74.2395153 | 65.8457846 |
| 18:39:30 | 0:39:11 | 59.6930524 | 75.3812876 | 71.731787 | 74.2395153 | 64.8457846 |
| 18:39:31 | 0:39:12 | 59.6930524 | 76.3812876 | 71.731787 | 74.2395153 | 64.8457846 |
| 18:39:32 | 0:39:13 | 58.6930524 | 71.3812876 | 71.731787 | 74.2395153 | 63.8457846 |
| 18:39:33 | 0:39:14 | 61.6930524 | 72.3812876 | 72.731787 | 74.2395153 | 63.8457846 |
| 18:39:34 | 0:39:15 | 62.6930524 | 73.3812876 | 72.731787 | 77.2395153 | 65.8457846 |
| 18:39:35 | 0:39:16 | 62.6930524 | 74.3812876 | 74.731787 | 77.2395153 | 65.8457846 |
| 18:39:36 | 0:39:17 | 62.6930524 | 74.3812876 | 74.731787 | 77.2395153 | 65.8457846 |
| 18:39:37 | 0:39:18 | 62.6930524 | 75.3812876 | 75.731787 | 77.2395153 | 65.8457846 |
| 18:39:38 | 0:39:19 | 62.6930524 | 75.3812876 | 77.731787 | 77.2395153 | 65.8457846 |
| 18:39:39 | 0:39:20 | 60.6930524 | 77.3812876 | 77.731787 | 76.2395153 | 62.8457846 |
| 18:39:40 | 0:39:21 | 60.6930524 | 78.3812876 | 77.731787 | 75.2395153 | 63.8457846 |
| 18:39:41 | 0:39:22 | 60.6930524 | 78.3812876 | 77.731787 | 75.2395153 | 63.8457846 |
| 18:39:42 | 0:39:23 | 60.6930524 | 79.3812876 | 77.731787 | 74.2395153 | 62.8457846 |
| 18:39:43 | 0:39:24 | 60.6930524 | 78.3812876 | 77.731787 | 74.2395153 | 63.8457846 |
| 18:39:44 | 0:39:25 | 60.6930524 | 74.3812876 | 76.731787 | 74.2395153 | 63.8457846 |
| 18:39:45 | 0:39:26 | 60.6930524 | 73.3812876 | 74.731787 | 74.2395153 | 63.8457846 |
| 18:39:46 | 0:39:27 | 60.6930524 | 73.3812876 | 74.731787 | 74.2395153 | 63.8457846 |
| 18:39:47 | 0:39:28 | 60.6930524 | 73.3812876 | 73.731787 | 74.2395153 | 63.8457846 |
| 18:39:48 | 0:39:29 | 60.6930524 | 71.3812876 | 72.731787 | 74.2395153 | 63.8457846 |
| 18:39:49 | 0:39:30 | 60.6930524 | 71.3812876 | 71.731787 | 71.2395153 | 63.8457846 |
| 18:39:50 | 0:39:31 | 59.6930524 | 70.3812876 | 70.731787 | 70.2395153 | 65.8457846 |
| 18:39:51 | 0:39:32 | 59.6930524 | 70.3812876 | 68.731787 | 70.2395153 | 66.8457846 |
| 18:39:52 | 0:39:33 | 60.6930524 | 70.3812876 | 65.731787 | 67.2395153 | 67.8457846 |
| 18:39:53 | 0:39:34 | 60.6930524 | 71.3812876 | 65.731787 | 63.2395153 | 67.8457846 |
| 18:39:54 | 0:39:35 | 60.6930524 | 72.3812876 | 65.731787 | 62.2395153 | 68.8457846 |
| 18:39:55 | 0:39:36 | 60.6930524 | 72.3812876 | 65.731787 | 62.2395153 | 68.8457846 |
| 18:39:56 | 0:39:37 | 61.6930524 | 72.3812876 | 65.731787 | 62.2395153 | 68.8457846 |
| 18:39:57 | 0:39:38 | 61.6930524 | 72.3812876 | 65.731787 | 62.2395153 | 70.8457846 |

|          |         |            |            |           |            |            |
|----------|---------|------------|------------|-----------|------------|------------|
| 18:39:58 | 0:39:39 | 61.6930524 | 72.3812876 | 65.731787 | 62.2395153 | 70.8457846 |
| 18:39:59 | 0:39:40 | 63.6930524 | 73.3812876 | 65.731787 | 62.2395153 | 70.8457846 |
| 18:40:00 | 0:39:41 | 63.6930524 | 73.3812876 | 65.731787 | 62.2395153 | 70.8457846 |
| 18:40:01 | 0:39:42 | 62.6930524 | 73.3812876 | 65.731787 | 62.2395153 | 71.8457846 |
| 18:40:02 | 0:39:43 | 63.6930524 | 75.3812876 | 65.731787 | 62.2395153 | 72.8457846 |
| 18:40:03 | 0:39:44 | 63.6930524 | 76.3812876 | 65.731787 | 63.2395153 | 72.8457846 |
| 18:40:04 | 0:39:45 | 63.6930524 | 77.3812876 | 65.731787 | 63.2395153 | 72.8457846 |
| 18:40:05 | 0:39:46 | 63.6930524 | 77.3812876 | 65.731787 | 63.2395153 | 72.8457846 |
| 18:40:06 | 0:39:47 | 63.6930524 | 79.3812876 | 65.731787 | 62.2395153 | 73.8457846 |
| 18:40:07 | 0:39:48 | 63.6930524 | 82.3812876 | 65.731787 | 62.2395153 | 74.8457846 |
| 18:40:08 | 0:39:49 | 63.6930524 | 82.3812876 | 65.731787 | 62.2395153 | 75.8457846 |
| 18:40:09 | 0:39:50 | 63.6930524 | 82.3812876 | 65.731787 | 62.2395153 | 76.8457846 |
| 18:40:10 | 0:39:51 | 63.6930524 | 82.3812876 | 65.731787 | 63.2395153 | 76.8457846 |
| 18:40:11 | 0:39:52 | 64.6930524 | 83.3812876 | 65.731787 | 63.2395153 | 76.8457846 |
| 18:40:12 | 0:39:53 | 64.6930524 | 84.3812876 | 65.731787 | 64.2395153 | 76.8457846 |
| 18:40:13 | 0:39:54 | 64.6930524 | 82.3812876 | 65.731787 | 64.2395153 | 76.8457846 |
| 18:40:14 | 0:39:55 | 64.6930524 | 82.3812876 | 65.731787 | 65.2395153 | 77.8457846 |
| 18:40:15 | 0:39:56 | 65.6930524 | 82.3812876 | 65.731787 | 64.2395153 | 78.8457846 |
| 18:40:16 | 0:39:57 | 65.6930524 | 82.3812876 | 65.731787 | 63.2395153 | 78.8457846 |
| 18:40:17 | 0:39:58 | 65.6930524 | 82.3812876 | 65.731787 | 63.2395153 | 78.8457846 |
| 18:40:18 | 0:39:59 | 65.6930524 | 82.3812876 | 65.731787 | 63.2395153 | 79.8457846 |
| 18:40:19 | 0:40:00 | 65.6930524 | 82.3812876 | 65.731787 | 63.2395153 | 79.8457846 |
| 18:40:20 | 0:40:01 | 66.6930524 | 82.3812876 | 65.731787 | 62.2395153 | 79.8457846 |
| 18:40:21 | 0:40:02 | 65.6930524 | 84.3812876 | 67.731787 | 62.2395153 | 79.8457846 |
| 18:40:22 | 0:40:03 | 65.6930524 | 84.3812876 | 70.731787 | 62.2395153 | 79.8457846 |
| 18:40:23 | 0:40:04 | 65.6930524 | 84.3812876 | 70.731787 | 62.2395153 | 79.8457846 |
| 18:40:24 | 0:40:05 | 65.6930524 | 84.3812876 | 70.731787 | 62.2395153 | 79.8457846 |
| 18:40:25 | 0:40:06 | 65.6930524 | 85.3812876 | 69.731787 | 62.2395153 | 78.8457846 |
| 18:40:26 | 0:40:07 | 65.6930524 | 85.3812876 | 69.731787 | 62.2395153 | 78.8457846 |
| 18:40:27 | 0:40:08 | 65.6930524 | 85.3812876 | 69.731787 | 62.2395153 | 78.8457846 |
| 18:40:28 | 0:40:09 | 65.6930524 | 84.3812876 | 69.731787 | 62.2395153 | 78.8457846 |
| 18:40:29 | 0:40:10 | 65.6930524 | 83.3812876 | 70.731787 | 62.2395153 | 78.8457846 |
| 18:40:30 | 0:40:11 | 65.6930524 | 83.3812876 | 70.731787 | 62.2395153 | 78.8457846 |
| 18:40:31 | 0:40:12 | 64.6930524 | 82.3812876 | 70.731787 | 62.2395153 | 80.8457846 |
| 18:40:32 | 0:40:13 | 64.6930524 | 76.3812876 | 70.731787 | 62.2395153 | 81.8457846 |
| 18:40:33 | 0:40:14 | 64.6930524 | 76.3812876 | 71.731787 | 61.2395153 | 81.8457846 |
| 18:40:34 | 0:40:15 | 64.6930524 | 76.3812876 | 71.731787 | 61.2395153 | 82.8457846 |
| 18:40:35 | 0:40:16 | 64.6930524 | 75.3812876 | 71.731787 | 61.2395153 | 81.8457846 |
| 18:40:36 | 0:40:17 | 64.6930524 | 75.3812876 | 71.731787 | 61.2395153 | 81.8457846 |
| 18:40:37 | 0:40:18 | 65.6930524 | 75.3812876 | 71.731787 | 61.2395153 | 80.8457846 |
| 18:40:38 | 0:40:19 | 65.6930524 | 75.3812876 | 70.731787 | 61.2395153 | 79.8457846 |
| 18:40:39 | 0:40:20 | 65.6930524 | 75.3812876 | 69.731787 | 61.2395153 | 79.8457846 |
| 18:40:40 | 0:40:21 | 65.6930524 | 75.3812876 | 68.731787 | 61.2395153 | 79.8457846 |
| 18:40:41 | 0:40:22 | 66.6930524 | 75.3812876 | 68.731787 | 61.2395153 | 79.8457846 |
| 18:40:42 | 0:40:23 | 66.6930524 | 76.3812876 | 68.731787 | 61.2395153 | 79.8457846 |

|          |         |            |            |           |            |            |
|----------|---------|------------|------------|-----------|------------|------------|
| 18:40:43 | 0:40:24 | 67.6930524 | 75.3812876 | 69.731787 | 60.2395153 | 79.8457846 |
| 18:40:44 | 0:40:25 | 68.6930524 | 75.3812876 | 69.731787 | 62.2395153 | 79.8457846 |
| 18:40:45 | 0:40:26 | 69.6930524 | 74.3812876 | 69.731787 | 62.2395153 | 79.8457846 |
| 18:40:46 | 0:40:27 | 70.6930524 | 73.3812876 | 69.731787 | 62.2395153 | 79.8457846 |
| 18:40:47 | 0:40:28 | 70.6930524 | 73.3812876 | 68.731787 | 62.2395153 | 79.8457846 |
| 18:40:48 | 0:40:29 | 68.6930524 | 73.3812876 | 68.731787 | 63.2395153 | 79.8457846 |
| 18:40:49 | 0:40:30 | 65.6930524 | 72.3812876 | 68.731787 | 63.2395153 | 78.8457846 |
| 18:40:50 | 0:40:31 | 65.6930524 | 71.3812876 | 68.731787 | 60.2395153 | 77.8457846 |
| 18:40:51 | 0:40:32 | 63.6930524 | 71.3812876 | 69.731787 | 60.2395153 | 77.8457846 |
| 18:40:52 | 0:40:33 | 63.6930524 | 71.3812876 | 69.731787 | 60.2395153 | 77.8457846 |
| 18:40:53 | 0:40:34 | 62.6930524 | 71.3812876 | 69.731787 | 60.2395153 | 77.8457846 |
| 18:40:54 | 0:40:35 | 62.6930524 | 71.3812876 | 68.731787 | 60.2395153 | 77.8457846 |
| 18:40:55 | 0:40:36 | 62.6930524 | 71.3812876 | 68.731787 | 60.2395153 | 75.8457846 |
| 18:40:56 | 0:40:37 | 63.6930524 | 71.3812876 | 68.731787 | 62.2395153 | 75.8457846 |
| 18:40:57 | 0:40:38 | 63.6930524 | 71.3812876 | 69.731787 | 64.2395153 | 74.8457846 |
| 18:40:58 | 0:40:39 | 64.6930524 | 70.3812876 | 70.731787 | 64.2395153 | 74.8457846 |
| 18:40:59 | 0:40:40 | 66.6930524 | 71.3812876 | 71.731787 | 64.2395153 | 74.8457846 |
| 18:41:00 | 0:40:41 | 68.6930524 | 71.3812876 | 72.731787 | 66.2395153 | 73.8457846 |
| 18:41:01 | 0:40:42 | 69.6930524 | 71.3812876 | 72.731787 | 67.2395153 | 73.8457846 |
| 18:41:02 | 0:40:43 | 72.6930524 | 70.3812876 | 73.731787 | 68.2395153 | 73.8457846 |
| 18:41:03 | 0:40:44 | 76.6930524 | 69.3812876 | 73.731787 | 68.2395153 | 72.8457846 |
| 18:41:04 | 0:40:45 | 77.6930524 | 68.3812876 | 74.731787 | 68.2395153 | 72.8457846 |
| 18:41:05 | 0:40:46 | 77.6930524 | 66.3812876 | 75.731787 | 69.2395153 | 71.8457846 |
| 18:41:06 | 0:40:47 | 73.6930524 | 66.3812876 | 76.731787 | 69.2395153 | 71.8457846 |
| 18:41:07 | 0:40:48 | 69.6930524 | 64.3812876 | 76.731787 | 72.2395153 | 69.8457846 |
| 18:41:08 | 0:40:49 | 68.6930524 | 64.3812876 | 74.731787 | 72.2395153 | 69.8457846 |
| 18:41:09 | 0:40:50 | 68.6930524 | 63.3812876 | 73.731787 | 74.2395153 | 73.8457846 |
| 18:41:10 | 0:40:51 | 68.6930524 | 63.3812876 | 73.731787 | 75.2395153 | 74.8457846 |
| 18:41:11 | 0:40:52 | 67.6930524 | 63.3812876 | 73.731787 | 75.2395153 | 73.8457846 |
| 18:41:12 | 0:40:53 | 67.6930524 | 63.3812876 | 73.731787 | 75.2395153 | 73.8457846 |
| 18:41:13 | 0:40:54 | 67.6930524 | 64.3812876 | 73.731787 | 76.2395153 | 72.8457846 |
| 18:41:14 | 0:40:55 | 66.6930524 | 67.3812876 | 71.731787 | 76.2395153 | 71.8457846 |
| 18:41:15 | 0:40:56 | 66.6930524 | 67.3812876 | 70.731787 | 79.2395153 | 71.8457846 |
| 18:41:16 | 0:40:57 | 64.6930524 | 70.3812876 | 70.731787 | 79.2395153 | 71.8457846 |
| 18:41:17 | 0:40:58 | 64.6930524 | 70.3812876 | 69.731787 | 79.2395153 | 69.8457846 |
| 18:41:18 | 0:40:59 | 64.6930524 | 70.3812876 | 67.731787 | 80.2395153 | 68.8457846 |
| 18:41:19 | 0:41:00 | 65.6930524 | 70.3812876 | 67.731787 | 79.2395153 | 69.8457846 |
| 18:41:20 | 0:41:01 | 65.6930524 | 71.3812876 | 66.731787 | 79.2395153 | 69.8457846 |
| 18:41:21 | 0:41:02 | 65.6930524 | 71.3812876 | 64.731787 | 79.2395153 | 70.8457846 |
| 18:41:22 | 0:41:03 | 65.6930524 | 71.3812876 | 62.731787 | 79.2395153 | 70.8457846 |
| 18:41:23 | 0:41:04 | 66.6930524 | 71.3812876 | 62.731787 | 79.2395153 | 71.8457846 |
| 18:41:24 | 0:41:05 | 66.6930524 | 71.3812876 | 62.731787 | 79.2395153 | 71.8457846 |
| 18:41:25 | 0:41:06 | 69.6930524 | 71.3812876 | 62.731787 | 79.2395153 | 71.8457846 |
| 18:41:26 | 0:41:07 | 72.6930524 | 71.3812876 | 63.731787 | 79.2395153 | 70.8457846 |
| 18:41:27 | 0:41:08 | 73.6930524 | 71.3812876 | 63.731787 | 79.2395153 | 68.8457846 |

|          |         |            |            |           |            |            |
|----------|---------|------------|------------|-----------|------------|------------|
| 18:41:28 | 0:41:09 | 74.6930524 | 73.3812876 | 65.731787 | 78.2395153 | 68.8457846 |
| 18:41:29 | 0:41:10 | 75.6930524 | 73.3812876 | 66.731787 | 78.2395153 | 68.8457846 |
| 18:41:30 | 0:41:11 | 76.6930524 | 74.3812876 | 67.731787 | 78.2395153 | 67.8457846 |
| 18:41:31 | 0:41:12 | 77.6930524 | 73.3812876 | 68.731787 | 77.2395153 | 66.8457846 |
| 18:41:32 | 0:41:13 | 77.6930524 | 72.3812876 | 68.731787 | 65.2395153 | 65.8457846 |
| 18:41:33 | 0:41:14 | 77.6930524 | 71.3812876 | 68.731787 | 62.2395153 | 65.8457846 |
| 18:41:34 | 0:41:15 | 80.6930524 | 71.3812876 | 68.731787 | 62.2395153 | 65.8457846 |
| 18:41:35 | 0:41:16 | 79.6930524 | 70.3812876 | 67.731787 | 62.2395153 | 65.8457846 |
| 18:41:36 | 0:41:17 | 74.6930524 | 69.3812876 | 66.731787 | 62.2395153 | 66.8457846 |
| 18:41:37 | 0:41:18 | 74.6930524 | 69.3812876 | 66.731787 | 62.2395153 | 67.8457846 |
| 18:41:38 | 0:41:19 | 75.6930524 | 71.3812876 | 66.731787 | 62.2395153 | 67.8457846 |
| 18:41:39 | 0:41:20 | 75.6930524 | 71.3812876 | 66.731787 | 62.2395153 | 69.8457846 |
| 18:41:40 | 0:41:21 | 76.6930524 | 71.3812876 | 66.731787 | 62.2395153 | 70.8457846 |
| 18:41:41 | 0:41:22 | 77.6930524 | 71.3812876 | 67.731787 | 63.2395153 | 70.8457846 |
| 18:41:42 | 0:41:23 | 77.6930524 | 71.3812876 | 67.731787 | 63.2395153 | 70.8457846 |
| 18:41:43 | 0:41:24 | 76.6930524 | 71.3812876 | 67.731787 | 63.2395153 | 70.8457846 |
| 18:41:44 | 0:41:25 | 76.6930524 | 71.3812876 | 69.731787 | 63.2395153 | 70.8457846 |
| 18:41:45 | 0:41:26 | 73.6930524 | 71.3812876 | 68.731787 | 63.2395153 | 70.8457846 |
| 18:41:46 | 0:41:27 | 67.6930524 | 71.3812876 | 68.731787 | 63.2395153 | 70.8457846 |
| 18:41:47 | 0:41:28 | 65.6930524 | 72.3812876 | 68.731787 | 64.2395153 | 70.8457846 |
| 18:41:48 | 0:41:29 | 65.6930524 | 72.3812876 | 68.731787 | 65.2395153 | 70.8457846 |
| 18:41:49 | 0:41:30 | 63.6930524 | 72.3812876 | 68.731787 | 67.2395153 | 72.8457846 |
| 18:41:50 | 0:41:31 | 61.6930524 | 72.3812876 | 68.731787 | 73.2395153 | 74.8457846 |
| 18:41:51 | 0:41:32 | 61.6930524 | 72.3812876 | 68.731787 | 74.2395153 | 74.8457846 |
| 18:41:52 | 0:41:33 | 61.6930524 | 72.3812876 | 68.731787 | 75.2395153 | 75.8457846 |
| 18:41:53 | 0:41:34 | 61.6930524 | 72.3812876 | 68.731787 | 76.2395153 | 75.8457846 |
| 18:41:54 | 0:41:35 | 60.6930524 | 73.3812876 | 68.731787 | 77.2395153 | 75.8457846 |
| 18:41:55 | 0:41:36 | 60.6930524 | 73.3812876 | 68.731787 | 78.2395153 | 75.8457846 |
| 18:41:56 | 0:41:37 | 60.6930524 | 73.3812876 | 68.731787 | 80.2395153 | 75.8457846 |
| 18:41:57 | 0:41:38 | 60.6930524 | 73.3812876 | 68.731787 | 80.2395153 | 75.8457846 |
| 18:41:58 | 0:41:39 | 60.6930524 | 73.3812876 | 68.731787 | 81.2395153 | 75.8457846 |
| 18:41:59 | 0:41:40 | 59.6930524 | 74.3812876 | 68.731787 | 81.2395153 | 75.8457846 |
| 18:42:00 | 0:41:41 | 59.6930524 | 73.3812876 | 69.731787 | 81.2395153 | 75.8457846 |
| 18:42:01 | 0:41:42 | 59.6930524 | 73.3812876 | 70.731787 | 74.2395153 | 75.8457846 |
| 18:42:02 | 0:41:43 | 59.6930524 | 73.3812876 | 70.731787 | 73.2395153 | 74.8457846 |
| 18:42:03 | 0:41:44 | 59.6930524 | 74.3812876 | 72.731787 | 73.2395153 | 74.8457846 |
| 18:42:04 | 0:41:45 | 58.6930524 | 73.3812876 | 73.731787 | 73.2395153 | 72.8457846 |
| 18:42:05 | 0:41:46 | 57.6930524 | 73.3812876 | 73.731787 | 73.2395153 | 71.8457846 |
| 18:42:06 | 0:41:47 | 56.6930524 | 74.3812876 | 73.731787 | 73.2395153 | 71.8457846 |
| 18:42:07 | 0:41:48 | 56.6930524 | 74.3812876 | 73.731787 | 73.2395153 | 71.8457846 |
| 18:42:08 | 0:41:49 | 56.6930524 | 74.3812876 | 73.731787 | 73.2395153 | 71.8457846 |
| 18:42:09 | 0:41:50 | 56.6930524 | 74.3812876 | 72.731787 | 74.2395153 | 69.8457846 |
| 18:42:10 | 0:41:51 | 56.6930524 | 70.3812876 | 69.731787 | 74.2395153 | 69.8457846 |
| 18:42:11 | 0:41:52 | 56.6930524 | 67.3812876 | 68.731787 | 75.2395153 | 68.8457846 |
| 18:42:12 | 0:41:53 | 56.6930524 | 66.3812876 | 67.731787 | 75.2395153 | 66.8457846 |

|          |         |            |            |           |            |            |
|----------|---------|------------|------------|-----------|------------|------------|
| 18:42:13 | 0:41:54 | 56.6930524 | 66.3812876 | 67.731787 | 78.2395153 | 66.8457846 |
| 18:42:14 | 0:41:55 | 56.6930524 | 65.3812876 | 66.731787 | 77.2395153 | 66.8457846 |
| 18:42:15 | 0:41:56 | 56.6930524 | 66.3812876 | 65.731787 | 72.2395153 | 66.8457846 |
| 18:42:16 | 0:41:57 | 56.6930524 | 66.3812876 | 66.731787 | 66.2395153 | 66.8457846 |
| 18:42:17 | 0:41:58 | 56.6930524 | 66.3812876 | 66.731787 | 66.2395153 | 66.8457846 |
| 18:42:18 | 0:41:59 | 56.6930524 | 66.3812876 | 66.731787 | 66.2395153 | 66.8457846 |
| 18:42:19 | 0:42:00 | 56.6930524 | 65.3812876 | 67.731787 | 65.2395153 | 68.8457846 |
| 18:42:20 | 0:42:01 | 57.6930524 | 65.3812876 | 66.731787 | 65.2395153 | 69.8457846 |
| 18:42:21 | 0:42:02 | 57.6930524 | 65.3812876 | 65.731787 | 66.2395153 | 70.8457846 |
| 18:42:22 | 0:42:03 | 57.6930524 | 64.3812876 | 64.731787 | 66.2395153 | 70.8457846 |
| 18:42:23 | 0:42:04 | 57.6930524 | 64.3812876 | 64.731787 | 71.2395153 | 70.8457846 |
| 18:42:24 | 0:42:05 | 57.6930524 | 64.3812876 | 64.731787 | 73.2395153 | 70.8457846 |
| 18:42:25 | 0:42:06 | 57.6930524 | 64.3812876 | 65.731787 | 73.2395153 | 70.8457846 |
| 18:42:26 | 0:42:07 | 57.6930524 | 65.3812876 | 65.731787 | 73.2395153 | 66.8457846 |
| 18:42:27 | 0:42:08 | 57.6930524 | 64.3812876 | 66.731787 | 73.2395153 | 64.8457846 |
| 18:42:28 | 0:42:09 | 58.6930524 | 64.3812876 | 66.731787 | 73.2395153 | 63.8457846 |
| 18:42:29 | 0:42:10 | 58.6930524 | 64.3812876 | 66.731787 | 74.2395153 | 63.8457846 |
| 18:42:30 | 0:42:11 | 58.6930524 | 64.3812876 | 66.731787 | 74.2395153 | 63.8457846 |
| 18:42:31 | 0:42:12 | 57.6930524 | 64.3812876 | 65.731787 | 75.2395153 | 63.8457846 |
| 18:42:32 | 0:42:13 | 57.6930524 | 64.3812876 | 65.731787 | 77.2395153 | 63.8457846 |
| 18:42:33 | 0:42:14 | 57.6930524 | 64.3812876 | 65.731787 | 80.2395153 | 64.8457846 |
| 18:42:34 | 0:42:15 | 57.6930524 | 66.3812876 | 64.731787 | 81.2395153 | 64.8457846 |
| 18:42:35 | 0:42:16 | 57.6930524 | 67.3812876 | 66.731787 | 81.2395153 | 65.8457846 |
| 18:42:36 | 0:42:17 | 58.6930524 | 68.3812876 | 66.731787 | 78.2395153 | 69.8457846 |
| 18:42:37 | 0:42:18 | 58.6930524 | 68.3812876 | 66.731787 | 75.2395153 | 69.8457846 |
| 18:42:38 | 0:42:19 | 58.6930524 | 69.3812876 | 66.731787 | 75.2395153 | 69.8457846 |
| 18:42:39 | 0:42:20 | 58.6930524 | 69.3812876 | 66.731787 | 74.2395153 | 69.8457846 |
| 18:42:40 | 0:42:21 | 58.6930524 | 69.3812876 | 66.731787 | 74.2395153 | 69.8457846 |
| 18:42:41 | 0:42:22 | 59.6930524 | 69.3812876 | 67.731787 | 74.2395153 | 67.8457846 |
| 18:42:42 | 0:42:23 | 58.6930524 | 69.3812876 | 67.731787 | 75.2395153 | 67.8457846 |
| 18:42:43 | 0:42:24 | 58.6930524 | 69.3812876 | 67.731787 | 75.2395153 | 67.8457846 |
| 18:42:44 | 0:42:25 | 58.6930524 | 69.3812876 | 67.731787 | 75.2395153 | 68.8457846 |
| 18:42:45 | 0:42:26 | 58.6930524 | 68.3812876 | 67.731787 | 76.2395153 | 68.8457846 |
| 18:42:46 | 0:42:27 | 58.6930524 | 68.3812876 | 67.731787 | 77.2395153 | 68.8457846 |
| 18:42:47 | 0:42:28 | 57.6930524 | 67.3812876 | 67.731787 | 77.2395153 | 68.8457846 |
| 18:42:48 | 0:42:29 | 58.6930524 | 67.3812876 | 67.731787 | 78.2395153 | 69.8457846 |
| 18:42:49 | 0:42:30 | 58.6930524 | 67.3812876 | 67.731787 | 78.2395153 | 70.8457846 |
| 18:42:50 | 0:42:31 | 58.6930524 | 68.3812876 | 66.731787 | 77.2395153 | 69.8457846 |
| 18:42:51 | 0:42:32 | 57.6930524 | 69.3812876 | 70.731787 | 76.2395153 | 68.8457846 |
| 18:42:52 | 0:42:33 | 57.6930524 | 69.3812876 | 70.731787 | 76.2395153 | 68.8457846 |
| 18:42:53 | 0:42:34 | 56.6930524 | 70.3812876 | 70.731787 | 75.2395153 | 68.8457846 |
| 18:42:54 | 0:42:35 | 55.6930524 | 70.3812876 | 69.731787 | 75.2395153 | 68.8457846 |
| 18:42:55 | 0:42:36 | 55.6930524 | 70.3812876 | 69.731787 | 75.2395153 | 67.8457846 |
| 18:42:56 | 0:42:37 | 55.6930524 | 70.3812876 | 69.731787 | 77.2395153 | 67.8457846 |
| 18:42:57 | 0:42:38 | 55.6930524 | 70.3812876 | 69.731787 | 78.2395153 | 66.8457846 |

|          |         |            |            |           |            |            |
|----------|---------|------------|------------|-----------|------------|------------|
| 18:42:58 | 0:42:39 | 54.6930524 | 70.3812876 | 69.731787 | 78.2395153 | 66.8457846 |
| 18:42:59 | 0:42:40 | 54.6930524 | 70.3812876 | 69.731787 | 80.2395153 | 66.8457846 |
| 18:43:00 | 0:42:41 | 55.6930524 | 70.3812876 | 70.731787 | 83.2395153 | 66.8457846 |
| 18:43:01 | 0:42:42 | 56.6930524 | 70.3812876 | 70.731787 | 83.2395153 | 65.8457846 |
| 18:43:02 | 0:42:43 | 56.6930524 | 71.3812876 | 71.731787 | 78.2395153 | 65.8457846 |
| 18:43:03 | 0:42:44 | 56.6930524 | 71.3812876 | 70.731787 | 78.2395153 | 65.8457846 |
| 18:43:04 | 0:42:45 | 57.6930524 | 71.3812876 | 67.731787 | 70.2395153 | 66.8457846 |
| 18:43:05 | 0:42:46 | 57.6930524 | 71.3812876 | 64.731787 | 69.2395153 | 66.8457846 |
| 18:43:06 | 0:42:47 | 57.6930524 | 71.3812876 | 63.731787 | 68.2395153 | 68.8457846 |
| 18:43:07 | 0:42:48 | 57.6930524 | 71.3812876 | 63.731787 | 67.2395153 | 70.8457846 |
| 18:43:08 | 0:42:49 | 57.6930524 | 71.3812876 | 63.731787 | 67.2395153 | 70.8457846 |
| 18:43:09 | 0:42:50 | 57.6930524 | 71.3812876 | 63.731787 | 67.2395153 | 71.8457846 |
| 18:43:10 | 0:42:51 | 56.6930524 | 71.3812876 | 64.731787 | 67.2395153 | 73.8457846 |
| 18:43:11 | 0:42:52 | 56.6930524 | 71.3812876 | 64.731787 | 67.2395153 | 73.8457846 |
| 18:43:12 | 0:42:53 | 56.6930524 | 71.3812876 | 64.731787 | 67.2395153 | 73.8457846 |
| 18:43:13 | 0:42:54 | 58.6930524 | 71.3812876 | 67.731787 | 65.2395153 | 73.8457846 |
| 18:43:14 | 0:42:55 | 60.6930524 | 74.3812876 | 67.731787 | 64.2395153 | 74.8457846 |
| 18:43:15 | 0:42:56 | 62.6930524 | 74.3812876 | 66.731787 | 64.2395153 | 74.8457846 |
| 18:43:16 | 0:42:57 | 63.6930524 | 74.3812876 | 66.731787 | 66.2395153 | 74.8457846 |
| 18:43:17 | 0:42:58 | 64.6930524 | 72.3812876 | 66.731787 | 66.2395153 | 74.8457846 |
| 18:43:18 | 0:42:59 | 66.6930524 | 70.3812876 | 66.731787 | 66.2395153 | 74.8457846 |
| 18:43:19 | 0:43:00 | 66.6930524 | 70.3812876 | 66.731787 | 67.2395153 | 75.8457846 |
| 18:43:20 | 0:43:01 | 65.6930524 | 72.3812876 | 66.731787 | 68.2395153 | 75.8457846 |
| 18:43:21 | 0:43:02 | 65.6930524 | 74.3812876 | 66.731787 | 69.2395153 | 75.8457846 |
| 18:43:22 | 0:43:03 | 64.6930524 | 74.3812876 | 66.731787 | 69.2395153 | 75.8457846 |
| 18:43:23 | 0:43:04 | 64.6930524 | 74.3812876 | 66.731787 | 70.2395153 | 75.8457846 |
| 18:43:24 | 0:43:05 | 64.6930524 | 74.3812876 | 66.731787 | 70.2395153 | 75.8457846 |
| 18:43:25 | 0:43:06 | 62.6930524 | 75.3812876 | 68.731787 | 70.2395153 | 75.8457846 |
| 18:43:26 | 0:43:07 | 61.6930524 | 75.3812876 | 68.731787 | 70.2395153 | 75.8457846 |
| 18:43:27 | 0:43:08 | 60.6930524 | 75.3812876 | 69.731787 | 70.2395153 | 75.8457846 |
| 18:43:28 | 0:43:09 | 59.6930524 | 75.3812876 | 69.731787 | 70.2395153 | 75.8457846 |
| 18:43:29 | 0:43:10 | 58.6930524 | 76.3812876 | 69.731787 | 71.2395153 | 74.8457846 |
| 18:43:30 | 0:43:11 | 58.6930524 | 76.3812876 | 70.731787 | 71.2395153 | 74.8457846 |
| 18:43:31 | 0:43:12 | 58.6930524 | 76.3812876 | 75.731787 | 71.2395153 | 72.8457846 |
| 18:43:32 | 0:43:13 | 59.6930524 | 76.3812876 | 75.731787 | 72.2395153 | 72.8457846 |
| 18:43:33 | 0:43:14 | 59.6930524 | 76.3812876 | 74.731787 | 72.2395153 | 72.8457846 |
| 18:43:34 | 0:43:15 | 60.6930524 | 76.3812876 | 74.731787 | 72.2395153 | 73.8457846 |
| 18:43:35 | 0:43:16 | 60.6930524 | 76.3812876 | 74.731787 | 72.2395153 | 74.8457846 |
| 18:43:36 | 0:43:17 | 61.6930524 | 77.3812876 | 73.731787 | 75.2395153 | 75.8457846 |
| 18:43:37 | 0:43:18 | 60.6930524 | 78.3812876 | 73.731787 | 75.2395153 | 74.8457846 |
| 18:43:38 | 0:43:19 | 60.6930524 | 80.3812876 | 73.731787 | 76.2395153 | 73.8457846 |
| 18:43:39 | 0:43:20 | 60.6930524 | 80.3812876 | 73.731787 | 76.2395153 | 73.8457846 |
| 18:43:40 | 0:43:21 | 59.6930524 | 80.3812876 | 73.731787 | 76.2395153 | 72.8457846 |
| 18:43:41 | 0:43:22 | 59.6930524 | 80.3812876 | 73.731787 | 75.2395153 | 72.8457846 |
| 18:43:42 | 0:43:23 | 60.6930524 | 80.3812876 | 72.731787 | 74.2395153 | 72.8457846 |



|          |         |            |            |           |            |            |
|----------|---------|------------|------------|-----------|------------|------------|
| 18:43:43 | 0:43:24 | 61.6930524 | 80.3812876 | 72.731787 | 74.2395153 | 76.8457846 |
| 18:43:44 | 0:43:25 | 61.6930524 | 81.3812876 | 72.731787 | 73.2395153 | 76.8457846 |
| 18:43:45 | 0:43:26 | 62.6930524 | 81.3812876 | 71.731787 | 72.2395153 | 77.8457846 |
| 18:43:46 | 0:43:27 | 63.6930524 | 82.3812876 | 71.731787 | 63.2395153 | 77.8457846 |
| 18:43:47 | 0:43:28 | 63.6930524 | 82.3812876 | 71.731787 | 61.2395153 | 78.8457846 |
| 18:43:48 | 0:43:29 | 66.6930524 | 83.3812876 | 71.731787 | 60.2395153 | 78.8457846 |
| 18:43:49 | 0:43:30 | 68.6930524 | 83.3812876 | 70.731787 | 60.2395153 | 78.8457846 |
| 18:43:50 | 0:43:31 | 66.6930524 | 85.3812876 | 70.731787 | 60.2395153 | 78.8457846 |
| 18:43:51 | 0:43:32 | 64.6930524 | 85.3812876 | 69.731787 | 61.2395153 | 78.8457846 |
| 18:43:52 | 0:43:33 | 63.6930524 | 68.9201505 | 69.731787 | 61.2395153 | 78.8457846 |
| 18:43:53 | 0:43:34 | 63.6930524 | 80.3812876 | 69.731787 | 61.2395153 | 78.8457846 |
| 18:43:54 | 0:43:35 | 63.6930524 | 74.3812876 | 69.731787 | 62.2395153 | 78.8457846 |
| 18:43:55 | 0:43:36 | 63.6930524 | 74.3812876 | 69.731787 | 62.2395153 | 78.8457846 |
| 18:43:56 | 0:43:37 | 63.6930524 | 73.3812876 | 69.731787 | 66.2395153 | 78.8457846 |
| 18:43:57 | 0:43:38 | 63.6930524 | 72.3812876 | 69.731787 | 67.2395153 | 78.8457846 |
| 18:43:58 | 0:43:39 | 63.6930524 | 72.3812876 | 70.731787 | 69.2395153 | 79.8457846 |
| 18:43:59 | 0:43:40 | 63.6930524 | 71.3812876 | 70.731787 | 71.2395153 | 78.8457846 |
| 18:44:00 | 0:43:41 | 63.6930524 | 71.3812876 | 68.731787 | 71.2395153 | 76.8457846 |
| 18:44:01 | 0:43:42 | 64.6930524 | 71.3812876 | 68.731787 | 72.2395153 | 74.8457846 |
| 18:44:02 | 0:43:43 | 64.6930524 | 71.3812876 | 68.731787 | 72.2395153 | 74.8457846 |
| 18:44:03 | 0:43:44 | 65.6930524 | 68.3812876 | 68.731787 | 73.2395153 | 74.8457846 |
| 18:44:04 | 0:43:45 | 66.6930524 | 68.3812876 | 68.731787 | 73.2395153 | 74.8457846 |
| 18:44:05 | 0:43:46 | 66.6930524 | 69.3812876 | 68.731787 | 73.2395153 | 73.8457846 |
| 18:44:06 | 0:43:47 | 66.6930524 | 69.3812876 | 68.731787 | 73.2395153 | 73.8457846 |
| 18:44:07 | 0:43:48 | 69.6930524 | 69.3812876 | 69.731787 | 75.2395153 | 71.8457846 |
| 18:44:08 | 0:43:49 | 69.6930524 | 72.3812876 | 69.731787 | 75.2395153 | 70.8457846 |
| 18:44:09 | 0:43:50 | 65.6930524 | 75.3812876 | 70.731787 | 76.2395153 | 70.8457846 |
| 18:44:10 | 0:43:51 | 65.6930524 | 75.3812876 | 70.731787 | 77.2395153 | 70.8457846 |
| 18:44:11 | 0:43:52 | 66.6930524 | 76.3812876 | 70.731787 | 80.2395153 | 70.8457846 |
| 18:44:12 | 0:43:53 | 66.6930524 | 76.3812876 | 69.731787 | 83.2395153 | 70.8457846 |
| 18:44:13 | 0:43:54 | 67.6930524 | 76.3812876 | 70.731787 | 84.2395153 | 70.8457846 |
| 18:44:14 | 0:43:55 | 68.6930524 | 76.3812876 | 74.731787 | 85.2395153 | 70.8457846 |
| 18:44:15 | 0:43:56 | 69.6930524 | 75.3812876 | 74.731787 | 86.2395153 | 65.8457846 |
| 18:44:16 | 0:43:57 | 69.6930524 | 75.3812876 | 74.731787 | 71.0451505 | 64.8457846 |
| 18:44:17 | 0:43:58 | 68.6930524 | 73.3812876 | 74.731787 | 71.1701505 | 64.8457846 |
| 18:44:18 | 0:43:59 | 68.6930524 | 73.3812876 | 75.731787 | 71.0451505 | 62.8457846 |
| 18:44:19 | 0:44:00 | 67.6930524 | 73.3812876 | 72.731787 | 70.6701505 | 62.8457846 |
| 18:44:20 | 0:44:01 | 66.6930524 | 73.3812876 | 71.731787 | 70.2951505 | 62.8457846 |
| 18:44:21 | 0:44:02 | 66.6930524 | 73.3812876 | 71.731787 | 70.4201505 | 62.8457846 |
| 18:44:22 | 0:44:03 | 65.6930524 | 73.3812876 | 72.731787 | 70.6701505 | 63.8457846 |
| 18:44:23 | 0:44:04 | 65.6930524 | 74.3812876 | 71.731787 | 71.1701505 | 64.8457846 |
| 18:44:24 | 0:44:05 | 65.6930524 | 73.3812876 | 71.731787 | 71.0451505 | 65.8457846 |
| 18:44:25 | 0:44:06 | 65.6930524 | 73.3812876 | 72.731787 | 71.0451505 | 65.8457846 |
| 18:44:26 | 0:44:07 | 65.6930524 | 75.3812876 | 72.731787 | 71.2951505 | 65.8457846 |
| 18:44:27 | 0:44:08 | 65.6930524 | 75.3812876 | 72.731787 | 71.1701505 | 65.8457846 |

|          |         |            |            |           |            |            |
|----------|---------|------------|------------|-----------|------------|------------|
| 18:44:28 | 0:44:09 | 65.6930524 | 75.3812876 | 71.731787 | 71.0451505 | 65.8457846 |
| 18:44:29 | 0:44:10 | 65.6930524 | 77.3812876 | 70.731787 | 71.2951505 | 66.8457846 |
| 18:44:30 | 0:44:11 | 65.6930524 | 77.3812876 | 69.731787 | 71.7951505 | 70.8457846 |
| 18:44:31 | 0:44:12 | 65.6930524 | 77.3812876 | 69.731787 | 72.0451505 | 70.8457846 |
| 18:44:32 | 0:44:13 | 64.6930524 | 75.3812876 | 68.731787 | 72.1701505 | 71.8457846 |
| 18:44:33 | 0:44:14 | 64.6930524 | 75.3812876 | 68.731787 | 72.5451505 | 73.8457846 |
| 18:44:34 | 0:44:15 | 63.6930524 | 75.3812876 | 68.731787 | 72.9201505 | 74.8457846 |
| 18:44:35 | 0:44:16 | 62.6930524 | 73.3812876 | 69.731787 | 73.2951505 | 77.8457846 |
| 18:44:36 | 0:44:17 | 62.6930524 | 72.3812876 | 70.731787 | 73.5451505 | 76.8457846 |
| 18:44:37 | 0:44:18 | 62.6930524 | 73.3812876 | 70.731787 | 73.6701505 | 75.8457846 |
| 18:44:38 | 0:44:19 | 62.6930524 | 73.3812876 | 71.731787 | 73.7951505 | 74.8457846 |
| 18:44:39 | 0:44:20 | 62.6930524 | 73.3812876 | 70.731787 | 73.7951505 | 74.8457846 |
| 18:44:40 | 0:44:21 | 62.6930524 | 73.3812876 | 69.731787 | 73.5451505 | 73.8457846 |
| 18:44:41 | 0:44:22 | 63.6930524 | 63.3812876 | 69.731787 | 72.9201505 | 74.8457846 |
| 18:44:42 | 0:44:23 | 63.6930524 | 63.3812876 | 68.731787 | 73.0451505 | 74.8457846 |
| 18:44:43 | 0:44:24 | 64.6930524 | 62.3812876 | 68.731787 | 72.9201505 | 74.8457846 |
| 18:44:44 | 0:44:25 | 64.6930524 | 62.3812876 | 67.731787 | 72.6701505 | 74.8457846 |
| 18:44:45 | 0:44:26 | 64.6930524 | 62.3812876 | 67.731787 | 71.1701505 | 67.8457846 |
| 18:44:46 | 0:44:27 | 67.6930524 | 62.3812876 | 67.731787 | 71.1701505 | 67.8457846 |
| 18:44:47 | 0:44:28 | 66.6930524 | 62.3812876 | 68.731787 | 71.7951505 | 67.8457846 |
| 18:44:48 | 0:44:29 | 66.6930524 | 62.3812876 | 69.731787 | 71.4201505 | 67.8457846 |
| 18:44:49 | 0:44:30 | 66.6930524 | 62.3812876 | 69.731787 | 71.5451505 | 67.8457846 |
| 18:44:50 | 0:44:31 | 66.6930524 | 62.3812876 | 71.731787 | 71.7951505 | 66.8457846 |
| 18:44:51 | 0:44:32 | 66.6930524 | 62.3812876 | 71.731787 | 71.2951505 | 66.8457846 |
| 18:44:52 | 0:44:33 | 66.6930524 | 62.3812876 | 72.731787 | 71.1701505 | 66.8457846 |
| 18:44:53 | 0:44:34 | 66.6930524 | 63.3812876 | 72.731787 | 70.9201505 | 66.8457846 |
| 18:44:54 | 0:44:35 | 66.6930524 | 63.3812876 | 72.731787 | 70.9201505 | 67.8457846 |
| 18:44:55 | 0:44:36 | 66.6930524 | 63.3812876 | 72.731787 | 70.5451505 | 67.8457846 |
| 18:44:56 | 0:44:37 | 67.6930524 | 67.3812876 | 72.731787 | 71.1701505 | 68.8457846 |
| 18:44:57 | 0:44:38 | 67.6930524 | 67.3812876 | 73.731787 | 71.0451505 | 68.8457846 |
| 18:44:58 | 0:44:39 | 67.6930524 | 70.3812876 | 73.731787 | 71.4201505 | 68.8457846 |
| 18:44:59 | 0:44:40 | 67.6930524 | 71.3812876 | 73.731787 | 71.5451505 | 69.8457846 |
| 18:45:00 | 0:44:41 | 67.6930524 | 71.3812876 | 73.731787 | 71.5451505 | 69.8457846 |
| 18:45:01 | 0:44:42 | 68.6930524 | 72.3812876 | 71.731787 | 71.4201505 | 70.8457846 |
| 18:45:02 | 0:44:43 | 67.6930524 | 72.3812876 | 70.731787 | 71.4201505 | 70.8457846 |
| 18:45:03 | 0:44:44 | 67.6930524 | 73.3812876 | 69.731787 | 71.7951505 | 71.8457846 |
| 18:45:04 | 0:44:45 | 67.6930524 | 73.3812876 | 69.731787 | 72.0451505 | 72.8457846 |
| 18:45:05 | 0:44:46 | 67.6930524 | 73.3812876 | 69.731787 | 72.1701505 | 73.8457846 |
| 18:45:06 | 0:44:47 | 67.6930524 | 72.3812876 | 68.731787 | 72.1701505 | 73.8457846 |
| 18:45:07 | 0:44:48 | 67.6930524 | 72.3812876 | 68.731787 | 72.2951505 | 73.8457846 |
| 18:45:08 | 0:44:49 | 66.6930524 | 72.3812876 | 67.731787 | 71.6701505 | 73.8457846 |
| 18:45:09 | 0:44:50 | 66.6930524 | 73.3812876 | 67.731787 | 71.6701505 | 73.8457846 |
| 18:45:10 | 0:44:51 | 67.6930524 | 74.3812876 | 67.731787 | 71.7951505 | 72.8457846 |
| 18:45:11 | 0:44:52 | 67.6930524 | 74.3812876 | 67.731787 | 71.6701505 | 72.8457846 |
| 18:45:12 | 0:44:53 | 67.6930524 | 74.3812876 | 68.731787 | 71.6701505 | 70.8457846 |

|          |         |            |            |           |            |            |
|----------|---------|------------|------------|-----------|------------|------------|
| 18:45:13 | 0:44:54 | 66.6930524 | 74.3812876 | 68.731787 | 71.5451505 | 70.8457846 |
| 18:45:14 | 0:44:55 | 66.6930524 | 72.3812876 | 69.731787 | 71.5451505 | 69.8457846 |
| 18:45:15 | 0:44:56 | 66.6930524 | 71.3812876 | 69.731787 | 71.7951505 | 68.8457846 |
| 18:45:16 | 0:44:57 | 66.6930524 | 71.3812876 | 70.731787 | 71.9201505 | 68.8457846 |
| 18:45:17 | 0:44:58 | 66.6930524 | 71.3812876 | 72.731787 | 72.0451505 | 67.8457846 |
| 18:45:18 | 0:44:59 | 66.6930524 | 71.3812876 | 72.731787 | 71.7951505 | 67.8457846 |
| 18:45:19 | 0:45:00 | 66.6930524 | 71.3812876 | 72.731787 | 71.7951505 | 67.8457846 |
| 18:45:20 | 0:45:01 | 66.6930524 | 71.3812876 | 73.731787 | 71.6701505 | 67.8457846 |
| 18:45:21 | 0:45:02 | 66.6930524 | 66.3812876 | 73.731787 | 71.0451505 | 67.8457846 |
| 18:45:22 | 0:45:03 | 66.6930524 | 66.3812876 | 73.731787 | 70.4201505 | 67.8457846 |
| 18:45:23 | 0:45:04 | 67.6930524 | 65.3812876 | 73.731787 | 70.2951505 | 67.8457846 |
| 18:45:24 | 0:45:05 | 67.6930524 | 65.3812876 | 73.731787 | 87.2395153 | 68.8457846 |
| 18:45:25 | 0:45:06 | 67.6930524 | 65.3812876 | 72.731787 | 84.2395153 | 67.8457846 |
| 18:45:26 | 0:45:07 | 66.6930524 | 65.3812876 | 72.731787 | 80.2395153 | 68.8457846 |
| 18:45:27 | 0:45:08 | 66.6930524 | 65.3812876 | 72.731787 | 80.2395153 | 68.8457846 |
| 18:45:28 | 0:45:09 | 66.6930524 | 65.3812876 | 72.731787 | 78.2395153 | 68.8457846 |
| 18:45:29 | 0:45:10 | 66.6930524 | 65.3812876 | 70.731787 | 78.2395153 | 68.8457846 |
| 18:45:30 | 0:45:11 | 66.6930524 | 66.3812876 | 69.731787 | 77.2395153 | 69.8457846 |
| 18:45:31 | 0:45:12 | 66.6930524 | 67.3812876 | 69.731787 | 77.2395153 | 69.8457846 |
| 18:45:32 | 0:45:13 | 66.6930524 | 67.3812876 | 69.731787 | 77.2395153 | 69.8457846 |
| 18:45:33 | 0:45:14 | 66.6930524 | 67.3812876 | 69.731787 | 71.2395153 | 69.8457846 |
| 18:45:34 | 0:45:15 | 67.6930524 | 68.3812876 | 70.731787 | 70.2395153 | 70.8457846 |
| 18:45:35 | 0:45:16 | 67.6930524 | 69.3812876 | 71.731787 | 69.2395153 | 70.8457846 |
| 18:45:36 | 0:45:17 | 67.6930524 | 70.3812876 | 72.731787 | 68.2395153 | 70.8457846 |
| 18:45:37 | 0:45:18 | 67.6930524 | 70.3812876 | 72.731787 | 67.2395153 | 70.8457846 |
| 18:45:38 | 0:45:19 | 66.6930524 | 70.3812876 | 72.731787 | 66.2395153 | 70.8457846 |
| 18:45:39 | 0:45:20 | 67.6930524 | 70.3812876 | 72.731787 | 66.2395153 | 71.8457846 |
| 18:45:40 | 0:45:21 | 67.6930524 | 69.3812876 | 71.731787 | 64.2395153 | 72.8457846 |
| 18:45:41 | 0:45:22 | 67.6930524 | 69.3812876 | 70.731787 | 65.2395153 | 72.8457846 |
| 18:45:42 | 0:45:23 | 68.6930524 | 69.3812876 | 71.731787 | 66.2395153 | 72.8457846 |
| 18:45:43 | 0:45:24 | 68.6930524 | 69.3812876 | 71.731787 | 68.2395153 | 72.8457846 |
| 18:45:44 | 0:45:25 | 71.6930524 | 70.3812876 | 71.731787 | 68.2395153 | 72.8457846 |
| 18:45:45 | 0:45:26 | 70.6930524 | 70.3812876 | 71.731787 | 68.2395153 | 71.8457846 |
| 18:45:46 | 0:45:27 | 69.6930524 | 70.3812876 | 71.731787 | 68.2395153 | 71.8457846 |
| 18:45:47 | 0:45:28 | 68.6930524 | 70.3812876 | 71.731787 | 67.2395153 | 71.8457846 |
| 18:45:48 | 0:45:29 | 69.6930524 | 70.3812876 | 72.731787 | 67.2395153 | 71.8457846 |
| 18:45:49 | 0:45:30 | 69.6930524 | 70.3812876 | 73.731787 | 66.2395153 | 71.8457846 |
| 18:45:50 | 0:45:31 | 69.6930524 | 71.3812876 | 73.731787 | 66.2395153 | 71.8457846 |
| 18:45:51 | 0:45:32 | 69.6930524 | 71.3812876 | 73.731787 | 66.2395153 | 68.8457846 |
| 18:45:52 | 0:45:33 | 68.6930524 | 72.3812876 | 73.731787 | 66.2395153 | 68.8457846 |
| 18:45:53 | 0:45:34 | 68.6930524 | 73.3812876 | 73.731787 | 65.2395153 | 68.8457846 |
| 18:45:54 | 0:45:35 | 68.6930524 | 73.3812876 | 73.731787 | 65.2395153 | 68.8457846 |
| 18:45:55 | 0:45:36 | 68.6930524 | 74.3812876 | 74.731787 | 65.2395153 | 69.8457846 |
| 18:45:56 | 0:45:37 | 67.6930524 | 74.3812876 | 74.731787 | 65.2395153 | 69.8457846 |
| 18:45:57 | 0:45:38 | 67.6930524 | 74.3812876 | 74.731787 | 63.2395153 | 69.8457846 |

|          |         |            |            |           |            |            |
|----------|---------|------------|------------|-----------|------------|------------|
| 18:45:58 | 0:45:39 | 66.6930524 | 74.3812876 | 72.731787 | 63.2395153 | 69.8457846 |
| 18:45:59 | 0:45:40 | 66.6930524 | 74.3812876 | 71.731787 | 60.2395153 | 69.8457846 |
| 18:46:00 | 0:45:41 | 67.6930524 | 74.3812876 | 71.731787 | 60.2395153 | 70.8457846 |
| 18:46:01 | 0:45:42 | 67.6930524 | 70.3812876 | 70.731787 | 59.2395153 | 71.8457846 |
| 18:46:02 | 0:45:43 | 67.6930524 | 80.3812876 | 68.731787 | 59.2395153 | 71.8457846 |
| 18:46:03 | 0:45:44 | 67.6930524 | 80.3812876 | 67.731787 | 59.2395153 | 71.8457846 |
| 18:46:04 | 0:45:45 | 68.6930524 | 80.3812876 | 66.731787 | 59.2395153 | 71.8457846 |
| 18:46:05 | 0:45:46 | 68.6930524 | 80.3812876 | 66.731787 | 59.2395153 | 71.8457846 |
| 18:46:06 | 0:45:47 | 68.6930524 | 79.3812876 | 66.731787 | 58.2395153 | 65.8457846 |
| 18:46:07 | 0:45:48 | 68.6930524 | 79.3812876 | 66.731787 | 58.2395153 | 62.8457846 |
| 18:46:08 | 0:45:49 | 67.6930524 | 80.3812876 | 66.731787 | 57.2395153 | 59.8457846 |
| 18:46:09 | 0:45:50 | 67.6930524 | 80.3812876 | 68.731787 | 57.2395153 | 58.8457846 |
| 18:46:10 | 0:45:51 | 68.6930524 | 80.3812876 | 68.731787 | 63.2395153 | 57.8457846 |
| 18:46:11 | 0:45:52 | 68.6930524 | 80.3812876 | 68.731787 | 63.2395153 | 56.8457846 |
| 18:46:12 | 0:45:53 | 68.6930524 | 80.3812876 | 68.731787 | 64.2395153 | 56.8457846 |
| 18:46:13 | 0:45:54 | 68.6930524 | 80.3812876 | 68.731787 | 64.2395153 | 56.8457846 |
| 18:46:14 | 0:45:55 | 68.6930524 | 80.3812876 | 68.731787 | 64.2395153 | 56.8457846 |
| 18:46:15 | 0:45:56 | 68.6930524 | 80.3812876 | 68.731787 | 62.2395153 | 56.8457846 |
| 18:46:16 | 0:45:57 | 68.6930524 | 80.3812876 | 69.731787 | 62.2395153 | 56.8457846 |
| 18:46:17 | 0:45:58 | 69.6930524 | 80.3812876 | 69.731787 | 62.2395153 | 56.8457846 |
| 18:46:18 | 0:45:59 | 69.6930524 | 80.3812876 | 69.731787 | 61.2395153 | 57.8457846 |
| 18:46:19 | 0:46:00 | 69.6930524 | 80.3812876 | 69.731787 | 61.2395153 | 59.8457846 |
| 18:46:20 | 0:46:01 | 68.6930524 | 80.3812876 | 69.731787 | 61.2395153 | 59.8457846 |
| 18:46:21 | 0:46:02 | 68.6930524 | 80.3812876 | 69.731787 | 61.2395153 | 59.8457846 |
| 18:46:22 | 0:46:03 | 68.6930524 | 80.3812876 | 69.731787 | 61.2395153 | 59.8457846 |
| 18:46:23 | 0:46:04 | 68.6930524 | 80.3812876 | 68.731787 | 62.2395153 | 59.8457846 |
| 18:46:24 | 0:46:05 | 68.6930524 | 79.3812876 | 68.731787 | 62.2395153 | 59.8457846 |
| 18:46:25 | 0:46:06 | 68.6930524 | 77.3812876 | 68.731787 | 61.2395153 | 59.8457846 |
| 18:46:26 | 0:46:07 | 68.6930524 | 77.3812876 | 67.731787 | 61.2395153 | 59.8457846 |
| 18:46:27 | 0:46:08 | 69.6930524 | 74.3812876 | 67.731787 | 60.2395153 | 60.8457846 |
| 18:46:28 | 0:46:09 | 68.6930524 | 73.3812876 | 67.731787 | 60.2395153 | 60.8457846 |
| 18:46:29 | 0:46:10 | 68.6930524 | 73.3812876 | 67.731787 | 59.2395153 | 62.8457846 |
| 18:46:30 | 0:46:11 | 68.6930524 | 73.3812876 | 67.731787 | 60.2395153 | 62.8457846 |
| 18:46:31 | 0:46:12 | 68.6930524 | 73.3812876 | 67.731787 | 60.2395153 | 63.8457846 |
| 18:46:32 | 0:46:13 | 69.6930524 | 73.3812876 | 67.731787 | 60.2395153 | 62.8457846 |
| 18:46:33 | 0:46:14 | 69.6930524 | 73.3812876 | 67.731787 | 60.2395153 | 62.8457846 |
| 18:46:34 | 0:46:15 | 70.6930524 | 73.3812876 | 67.731787 | 59.2395153 | 62.8457846 |
| 18:46:35 | 0:46:16 | 71.6930524 | 73.3812876 | 67.731787 | 59.2395153 | 62.8457846 |
| 18:46:36 | 0:46:17 | 72.6930524 | 71.3812876 | 70.731787 | 59.2395153 | 64.8457846 |
| 18:46:37 | 0:46:18 | 71.6930524 | 71.3812876 | 72.731787 | 59.2395153 | 66.8457846 |
| 18:46:38 | 0:46:19 | 71.6930524 | 71.3812876 | 72.731787 | 59.2395153 | 67.8457846 |
| 18:46:39 | 0:46:20 | 70.6930524 | 72.3812876 | 72.731787 | 59.2395153 | 67.8457846 |
| 18:46:40 | 0:46:21 | 70.6930524 | 76.3812876 | 72.731787 | 59.2395153 | 67.8457846 |
| 18:46:41 | 0:46:22 | 71.6930524 | 79.3812876 | 72.731787 | 59.2395153 | 68.8457846 |
| 18:46:42 | 0:46:23 | 71.6930524 | 78.3812876 | 72.731787 | 59.2395153 | 68.8457846 |

|          |         |            |            |           |            |            |
|----------|---------|------------|------------|-----------|------------|------------|
| 18:46:43 | 0:46:24 | 72.6930524 | 76.3812876 | 71.731787 | 59.2395153 | 68.8457846 |
| 18:46:44 | 0:46:25 | 73.6930524 | 76.3812876 | 70.731787 | 60.2395153 | 66.8457846 |
| 18:46:45 | 0:46:26 | 73.6930524 | 76.3812876 | 69.731787 | 63.2395153 | 66.8457846 |
| 18:46:46 | 0:46:27 | 72.6930524 | 77.3812876 | 68.731787 | 64.2395153 | 65.8457846 |
| 18:46:47 | 0:46:28 | 72.6930524 | 77.3812876 | 67.731787 | 65.2395153 | 65.8457846 |
| 18:46:48 | 0:46:29 | 72.6930524 | 77.3812876 | 67.731787 | 65.2395153 | 65.8457846 |
| 18:46:49 | 0:46:30 | 70.6930524 | 76.3812876 | 67.731787 | 67.2395153 | 64.8457846 |
| 18:46:50 | 0:46:31 | 69.6930524 | 76.3812876 | 68.731787 | 68.2395153 | 63.8457846 |
| 18:46:51 | 0:46:32 | 69.6930524 | 76.3812876 | 68.731787 | 70.2395153 | 63.8457846 |
| 18:46:52 | 0:46:33 | 69.6930524 | 76.3812876 | 68.731787 | 70.2395153 | 66.8457846 |
| 18:46:53 | 0:46:34 | 68.6930524 | 76.3812876 | 68.731787 | 74.2395153 | 69.8457846 |
| 18:46:54 | 0:46:35 | 68.6930524 | 75.3812876 | 66.731787 | 75.2395153 | 70.8457846 |
| 18:46:55 | 0:46:36 | 68.6930524 | 75.3812876 | 66.731787 | 75.2395153 | 71.8457846 |
| 18:46:56 | 0:46:37 | 67.6930524 | 75.3812876 | 66.731787 | 75.2395153 | 71.8457846 |
| 18:46:57 | 0:46:38 | 66.6930524 | 75.3812876 | 66.731787 | 74.2395153 | 71.8457846 |
| 18:46:58 | 0:46:39 | 66.6930524 | 75.3812876 | 67.731787 | 73.2395153 | 71.8457846 |
| 18:46:59 | 0:46:40 | 66.6930524 | 72.3812876 | 67.731787 | 73.2395153 | 71.8457846 |
| 18:47:00 | 0:46:41 | 67.6930524 | 69.3812876 | 68.731787 | 74.2395153 | 72.8457846 |
| 18:47:01 | 0:46:42 | 67.6930524 | 69.3812876 | 70.731787 | 74.2395153 | 72.8457846 |
| 18:47:02 | 0:46:43 | 67.6930524 | 68.3812876 | 71.731787 | 74.2395153 | 72.8457846 |
| 18:47:03 | 0:46:44 | 68.6930524 | 66.3812876 | 71.731787 | 74.2395153 | 72.8457846 |
| 18:47:04 | 0:46:45 | 68.6930524 | 65.3812876 | 71.731787 | 74.2395153 | 72.8457846 |
| 18:47:05 | 0:46:46 | 69.6930524 | 65.3812876 | 71.731787 | 74.2395153 | 72.8457846 |
| 18:47:06 | 0:46:47 | 69.6930524 | 65.3812876 | 71.731787 | 73.2395153 | 73.8457846 |
| 18:47:07 | 0:46:48 | 69.6930524 | 64.3812876 | 71.731787 | 73.2395153 | 73.8457846 |
| 18:47:08 | 0:46:49 | 69.6930524 | 64.3812876 | 71.731787 | 72.2395153 | 73.8457846 |
| 18:47:09 | 0:46:50 | 69.6930524 | 68.3812876 | 70.731787 | 72.2395153 | 73.8457846 |
| 18:47:10 | 0:46:51 | 69.6930524 | 70.3812876 | 69.731787 | 72.2395153 | 73.8457846 |
| 18:47:11 | 0:46:52 | 69.6930524 | 71.3812876 | 69.731787 | 72.2395153 | 73.8457846 |
| 18:47:12 | 0:46:53 | 68.6930524 | 71.3812876 | 69.731787 | 71.2395153 | 73.8457846 |
| 18:47:13 | 0:46:54 | 67.6930524 | 72.3812876 | 69.731787 | 71.2395153 | 73.8457846 |
| 18:47:14 | 0:46:55 | 67.6930524 | 75.3812876 | 68.731787 | 70.2395153 | 73.8457846 |
| 18:47:15 | 0:46:56 | 67.6930524 | 75.3812876 | 68.731787 | 69.2395153 | 71.8457846 |
| 18:47:16 | 0:46:57 | 67.6930524 | 76.3812876 | 67.731787 | 66.2395153 | 71.8457846 |
| 18:47:17 | 0:46:58 | 69.6930524 | 75.3812876 | 67.731787 | 64.2395153 | 71.8457846 |
| 18:47:18 | 0:46:59 | 69.6930524 | 75.3812876 | 67.731787 | 63.2395153 | 71.8457846 |
| 18:47:19 | 0:47:00 | 69.6930524 | 75.3812876 | 67.731787 | 63.2395153 | 71.8457846 |
| 18:47:20 | 0:47:01 | 69.6930524 | 75.3812876 | 67.731787 | 63.2395153 | 71.8457846 |
| 18:47:21 | 0:47:02 | 69.6930524 | 75.3812876 | 67.731787 | 63.2395153 | 71.8457846 |
| 18:47:22 | 0:47:03 | 69.6930524 | 75.3812876 | 67.731787 | 64.2395153 | 71.8457846 |
| 18:47:23 | 0:47:04 | 69.6930524 | 75.3812876 | 67.731787 | 65.2395153 | 71.8457846 |
| 18:47:24 | 0:47:05 | 69.6930524 | 75.3812876 | 68.731787 | 64.2395153 | 72.8457846 |
| 18:47:25 | 0:47:06 | 69.6930524 | 75.3812876 | 68.731787 | 64.2395153 | 72.8457846 |
| 18:47:26 | 0:47:07 | 68.6930524 | 75.3812876 | 68.731787 | 64.2395153 | 73.8457846 |
| 18:47:27 | 0:47:08 | 68.6930524 | 79.3812876 | 68.731787 | 64.2395153 | 73.8457846 |

|          |         |            |            |           |            |            |
|----------|---------|------------|------------|-----------|------------|------------|
| 18:47:28 | 0:47:09 | 68.6930524 | 79.3812876 | 69.731787 | 63.2395153 | 75.8457846 |
| 18:47:29 | 0:47:10 | 68.6930524 | 79.3812876 | 69.731787 | 63.2395153 | 75.8457846 |
| 18:47:30 | 0:47:11 | 66.6930524 | 78.3812876 | 69.731787 | 65.2395153 | 76.8457846 |
| 18:47:31 | 0:47:12 | 66.6930524 | 77.3812876 | 68.731787 | 66.2395153 | 76.8457846 |
| 18:47:32 | 0:47:13 | 66.6930524 | 76.3812876 | 66.731787 | 66.2395153 | 76.8457846 |
| 18:47:33 | 0:47:14 | 66.6930524 | 75.3812876 | 66.731787 | 66.2395153 | 78.8457846 |
| 18:47:34 | 0:47:15 | 66.6930524 | 74.3812876 | 66.731787 | 67.2395153 | 79.8457846 |
| 18:47:35 | 0:47:16 | 66.6930524 | 74.3812876 | 66.731787 | 67.2395153 | 79.8457846 |
| 18:47:36 | 0:47:17 | 66.6930524 | 74.3812876 | 66.731787 | 68.2395153 | 79.8457846 |
| 18:47:37 | 0:47:18 | 66.6930524 | 73.3812876 | 67.731787 | 69.2395153 | 78.8457846 |
| 18:47:38 | 0:47:19 | 66.6930524 | 73.3812876 | 67.731787 | 69.2395153 | 76.8457846 |
| 18:47:39 | 0:47:20 | 66.6930524 | 73.3812876 | 68.731787 | 69.2395153 | 75.8457846 |
| 18:47:40 | 0:47:21 | 66.6930524 | 73.3812876 | 69.731787 | 71.2395153 | 75.8457846 |
| 18:47:41 | 0:47:22 | 66.6930524 | 73.3812876 | 69.731787 | 71.2395153 | 75.8457846 |
| 18:47:42 | 0:47:23 | 66.6930524 | 73.3812876 | 69.731787 | 71.2395153 | 75.8457846 |
| 18:47:43 | 0:47:24 | 66.6930524 | 73.3812876 | 70.731787 | 74.2395153 | 76.8457846 |
| 18:47:44 | 0:47:25 | 66.6930524 | 72.3812876 | 70.731787 | 74.2395153 | 76.8457846 |
| 18:47:45 | 0:47:26 | 66.6930524 | 72.3812876 | 70.731787 | 74.2395153 | 77.8457846 |
| 18:47:46 | 0:47:27 | 65.6930524 | 72.3812876 | 70.731787 | 74.2395153 | 77.8457846 |
| 18:47:47 | 0:47:28 | 65.6930524 | 68.3812876 | 70.731787 | 75.2395153 | 76.8457846 |
| 18:47:48 | 0:47:29 | 64.6930524 | 68.3812876 | 70.731787 | 75.2395153 | 76.8457846 |
| 18:47:49 | 0:47:30 | 63.6930524 | 67.3812876 | 70.731787 | 76.2395153 | 75.8457846 |
| 18:47:50 | 0:47:31 | 63.6930524 | 67.3812876 | 68.731787 | 76.2395153 | 75.8457846 |
| 18:47:51 | 0:47:32 | 63.6930524 | 67.3812876 | 70.731787 | 76.2395153 | 75.8457846 |
| 18:47:52 | 0:47:33 | 64.6930524 | 67.3812876 | 69.731787 | 76.2395153 | 75.8457846 |
| 18:47:53 | 0:47:34 | 64.6930524 | 66.3812876 | 69.731787 | 76.2395153 | 76.8457846 |
| 18:47:54 | 0:47:35 | 64.6930524 | 67.3812876 | 69.731787 | 77.2395153 | 76.8457846 |
| 18:47:55 | 0:47:36 | 65.6930524 | 67.3812876 | 70.731787 | 77.2395153 | 75.8457846 |
| 18:47:56 | 0:47:37 | 65.6930524 | 67.3812876 | 70.731787 | 77.2395153 | 75.8457846 |
| 18:47:57 | 0:47:38 | 65.6930524 | 68.3812876 | 70.731787 | 77.2395153 | 75.8457846 |
| 18:47:58 | 0:47:39 | 64.6930524 | 69.3812876 | 70.731787 | 77.2395153 | 75.8457846 |
| 18:47:59 | 0:47:40 | 64.6930524 | 69.3812876 | 70.731787 | 77.2395153 | 75.8457846 |
| 18:48:00 | 0:47:41 | 63.6930524 | 70.3812876 | 71.731787 | 77.2395153 | 75.8457846 |
| 18:48:01 | 0:47:42 | 62.6930524 | 70.3812876 | 71.731787 | 79.2395153 | 75.8457846 |
| 18:48:02 | 0:47:43 | 61.6930524 | 71.3812876 | 72.731787 | 79.2395153 | 75.8457846 |
| 18:48:03 | 0:47:44 | 61.6930524 | 70.3812876 | 72.731787 | 79.2395153 | 76.8457846 |
| 18:48:04 | 0:47:45 | 61.6930524 | 68.3812876 | 72.731787 | 78.2395153 | 76.8457846 |
| 18:48:05 | 0:47:46 | 61.6930524 | 68.3812876 | 72.731787 | 77.2395153 | 76.8457846 |
| 18:48:06 | 0:47:47 | 60.6930524 | 65.3812876 | 72.731787 | 77.2395153 | 76.8457846 |
| 18:48:07 | 0:47:48 | 60.6930524 | 65.3812876 | 72.731787 | 77.2395153 | 75.8457846 |
| 18:48:08 | 0:47:49 | 60.6930524 | 65.3812876 | 72.731787 | 74.2395153 | 74.8457846 |
| 18:48:09 | 0:47:50 | 60.6930524 | 69.3812876 | 72.731787 | 74.2395153 | 74.8457846 |
| 18:48:10 | 0:47:51 | 60.6930524 | 72.3812876 | 72.731787 | 74.2395153 | 74.8457846 |
| 18:48:11 | 0:47:52 | 61.6930524 | 73.3812876 | 71.731787 | 73.2395153 | 74.8457846 |
| 18:48:12 | 0:47:53 | 61.6930524 | 73.3812876 | 71.731787 | 74.2395153 | 73.8457846 |

|          |         |            |            |           |            |            |
|----------|---------|------------|------------|-----------|------------|------------|
| 18:48:13 | 0:47:54 | 61.6930524 | 69.3812876 | 71.731787 | 74.2395153 | 72.8457846 |
| 18:48:14 | 0:47:55 | 62.6930524 | 69.3812876 | 70.731787 | 74.2395153 | 72.8457846 |
| 18:48:15 | 0:47:56 | 62.6930524 | 66.3812876 | 69.731787 | 75.2395153 | 71.8457846 |
| 18:48:16 | 0:47:57 | 62.6930524 | 65.3812876 | 69.731787 | 76.2395153 | 70.8457846 |
| 18:48:17 | 0:47:58 | 62.6930524 | 64.3812876 | 68.731787 | 76.2395153 | 70.8457846 |
| 18:48:18 | 0:47:59 | 62.6930524 | 64.3812876 | 67.731787 | 76.2395153 | 70.8457846 |
| 18:48:19 | 0:48:00 | 62.6930524 | 64.3812876 | 67.731787 | 76.2395153 | 70.8457846 |
| 18:48:20 | 0:48:01 | 62.6930524 | 64.3812876 | 67.731787 | 76.2395153 | 69.8457846 |
| 18:48:21 | 0:48:02 | 62.6930524 | 64.3812876 | 68.731787 | 78.2395153 | 69.8457846 |
| 18:48:22 | 0:48:03 | 62.6930524 | 63.3812876 | 68.731787 | 78.2395153 | 72.8457846 |
| 18:48:23 | 0:48:04 | 62.6930524 | 63.3812876 | 69.731787 | 81.2395153 | 75.8457846 |
| 18:48:24 | 0:48:05 | 63.6930524 | 63.3812876 | 69.731787 | 81.2395153 | 76.8457846 |
| 18:48:25 | 0:48:06 | 63.6930524 | 63.3812876 | 70.731787 | 83.2395153 | 75.8457846 |
| 18:48:26 | 0:48:07 | 74.6930524 | 65.3812876 | 69.731787 | 83.2395153 | 75.8457846 |
| 18:48:27 | 0:48:08 | 75.6930524 | 65.3812876 | 68.731787 | 83.2395153 | 74.8457846 |
| 18:48:28 | 0:48:09 | 76.6930524 | 65.3812876 | 68.731787 | 83.2395153 | 73.8457846 |
| 18:48:29 | 0:48:10 | 77.6930524 | 65.3812876 | 68.731787 | 83.2395153 | 72.8457846 |
| 18:48:30 | 0:48:11 | 77.6930524 | 65.3812876 | 68.731787 | 83.2395153 | 71.8457846 |
| 18:48:31 | 0:48:12 | 77.6930524 | 65.3812876 | 68.731787 | 77.2395153 | 71.8457846 |
| 18:48:32 | 0:48:13 | 76.6930524 | 62.3812876 | 68.731787 | 76.2395153 | 72.8457846 |
| 18:48:33 | 0:48:14 | 75.6930524 | 61.3812876 | 68.731787 | 74.2395153 | 72.8457846 |
| 18:48:34 | 0:48:15 | 74.6930524 | 62.3812876 | 70.731787 | 72.2395153 | 72.8457846 |
| 18:48:35 | 0:48:16 | 73.6930524 | 61.3812876 | 71.731787 | 72.2395153 | 72.8457846 |
| 18:48:36 | 0:48:17 | 73.6930524 | 61.3812876 | 71.731787 | 72.2395153 | 72.8457846 |
| 18:48:37 | 0:48:18 | 73.6930524 | 61.3812876 | 71.731787 | 73.2395153 | 72.8457846 |
| 18:48:38 | 0:48:19 | 72.6930524 | 62.3812876 | 69.731787 | 66.2395153 | 72.8457846 |
| 18:48:39 | 0:48:20 | 72.6930524 | 63.3812876 | 68.731787 | 64.2395153 | 72.8457846 |
| 18:48:40 | 0:48:21 | 73.6930524 | 65.3812876 | 67.731787 | 62.2395153 | 72.8457846 |
| 18:48:41 | 0:48:22 | 75.6930524 | 70.3812876 | 66.731787 | 62.2395153 | 73.8457846 |
| 18:48:42 | 0:48:23 | 75.6930524 | 71.3812876 | 66.731787 | 62.2395153 | 73.8457846 |
| 18:48:43 | 0:48:24 | 75.6930524 | 71.3812876 | 66.731787 | 62.2395153 | 73.8457846 |
| 18:48:44 | 0:48:25 | 74.6930524 | 70.3812876 | 66.731787 | 61.2395153 | 73.8457846 |
| 18:48:45 | 0:48:26 | 73.6930524 | 69.3812876 | 65.731787 | 61.2395153 | 72.8457846 |
| 18:48:46 | 0:48:27 | 72.6930524 | 69.3812876 | 65.731787 | 61.2395153 | 72.8457846 |
| 18:48:47 | 0:48:28 | 70.6930524 | 68.3812876 | 65.731787 | 61.2395153 | 72.8457846 |
| 18:48:48 | 0:48:29 | 69.6930524 | 68.3812876 | 64.731787 | 61.2395153 | 72.8457846 |
| 18:48:49 | 0:48:30 | 69.6930524 | 68.3812876 | 64.731787 | 61.2395153 | 74.8457846 |
| 18:48:50 | 0:48:31 | 68.6930524 | 68.3812876 | 64.731787 | 61.2395153 | 74.8457846 |
| 18:48:51 | 0:48:32 | 68.6930524 | 68.3812876 | 64.731787 | 61.2395153 | 75.8457846 |
| 18:48:52 | 0:48:33 | 67.6930524 | 68.3812876 | 65.731787 | 60.2395153 | 75.8457846 |
| 18:48:53 | 0:48:34 | 67.6930524 | 68.3812876 | 64.731787 | 60.2395153 | 75.8457846 |
| 18:48:54 | 0:48:35 | 67.6930524 | 68.3812876 | 64.731787 | 60.2395153 | 76.8457846 |
| 18:48:55 | 0:48:36 | 67.6930524 | 67.3812876 | 64.731787 | 63.2395153 | 76.8457846 |
| 18:48:56 | 0:48:37 | 67.6930524 | 68.3812876 | 64.731787 | 67.2395153 | 76.8457846 |
| 18:48:57 | 0:48:38 | 67.6930524 | 68.3812876 | 64.731787 | 69.2395153 | 85.8457846 |

|          |         |            |            |            |            |            |
|----------|---------|------------|------------|------------|------------|------------|
| 18:48:58 | 0:48:39 | 67.6930524 | 70.3812876 | 69.731787  | 71.2395153 | 85.8457846 |
| 18:48:59 | 0:48:40 | 67.6930524 | 69.3812876 | 69.731787  | 72.2395153 | 85.8457846 |
| 18:49:00 | 0:48:41 | 66.6930524 | 69.3812876 | 69.731787  | 72.2395153 | 83.8457846 |
| 18:49:01 | 0:48:42 | 65.6930524 | 66.3812876 | 68.731787  | 72.2395153 | 71.8457846 |
| 18:49:02 | 0:48:43 | 65.6930524 | 66.3812876 | 68.731787  | 73.2395153 | 66.8457846 |
| 18:49:03 | 0:48:44 | 64.6930524 | 66.3812876 | 68.731787  | 73.2395153 | 65.8457846 |
| 18:49:04 | 0:48:45 | 64.6930524 | 66.3812876 | 69.731787  | 73.2395153 | 64.8457846 |
| 18:49:05 | 0:48:46 | 64.6930524 | 66.3812876 | 70.731787  | 73.2395153 | 64.8457846 |
| 18:49:06 | 0:48:47 | 64.6930524 | 66.3812876 | 71.731787  | 73.2395153 | 62.8457846 |
| 18:49:07 | 0:48:48 | 65.6930524 | 67.3812876 | 71.731787  | 73.2395153 | 62.8457846 |
| 18:49:08 | 0:48:49 | 65.6930524 | 67.3812876 | 71.731787  | 73.2395153 | 62.8457846 |
| 18:49:09 | 0:48:50 | 66.6930524 | 67.3812876 | 70.731787  | 74.2395153 | 63.8457846 |
| 18:49:10 | 0:48:51 | 67.6930524 | 68.3812876 | 68.731787  | 74.2395153 | 65.8457846 |
| 18:49:11 | 0:48:52 | 67.6930524 | 68.3812876 | 68.731787  | 74.2395153 | 65.8457846 |
| 18:49:12 | 0:48:53 | 66.6930524 | 68.3812876 | 67.731787  | 75.2395153 | 65.8457846 |
| 18:49:13 | 0:48:54 | 67.6930524 | 67.3812876 | 68.731787  | 75.2395153 | 62.8457846 |
| 18:49:14 | 0:48:55 | 67.6930524 | 64.3812876 | 68.731787  | 78.2395153 | 62.8457846 |
| 18:49:15 | 0:48:56 | 66.6930524 | 64.3812876 | 68.731787  | 79.2395153 | 61.8457846 |
| 18:49:16 | 0:48:57 | 66.6930524 | 63.3812876 | 69.731787  | 79.2395153 | 61.8457846 |
| 18:49:17 | 0:48:58 | 66.6930524 | 64.3812876 | 70.731787  | 78.2395153 | 61.8457846 |
| 18:49:18 | 0:48:59 | 66.6930524 | 65.3812876 | 70.731787  | 67.2395153 | 61.8457846 |
| 18:49:19 | 0:49:00 | 66.6930524 | 65.3812876 | 71.731787  | 67.2395153 | 60.8457846 |
| 18:49:20 | 0:49:01 | 66.6930524 | 65.3812876 | 72.731787  | 62.2395153 | 60.8457846 |
| 18:49:21 | 0:49:02 | 66.6930524 | 67.3812876 | 72.731787  | 62.2395153 | 60.8457846 |
| 18:49:22 | 0:49:03 | 66.6930524 | 68.3812876 | 73.731787  | 62.2395153 | 60.8457846 |
| 18:49:23 | 0:49:04 | 66.6930524 | 69.3812876 | 74.731787  | 62.2395153 | 60.8457846 |
| 18:49:24 | 0:49:05 | 66.6930524 | 69.3812876 | 75.731787  | 61.2395153 | 61.8457846 |
| 18:49:25 | 0:49:06 | 66.6930524 | 71.3812876 | 77.731787  | 60.2395153 | 61.8457846 |
| 18:49:26 | 0:49:07 | 66.6930524 | 71.3812876 | 79.731787  | 60.2395153 | 61.8457846 |
| 18:49:27 | 0:49:08 | 66.6930524 | 71.3812876 | 82.731787  | 60.2395153 | 65.8457846 |
| 18:49:28 | 0:49:09 | 66.6930524 | 71.3812876 | 82.731787  | 58.2395153 | 70.8457846 |
| 18:49:29 | 0:49:10 | 66.6930524 | 71.3812876 | 67.2951505 | 55.2395153 | 71.8457846 |
| 18:49:30 | 0:49:11 | 66.6930524 | 71.3812876 | 67.2951505 | 55.2395153 | 71.8457846 |
| 18:49:31 | 0:49:12 | 69.6930524 | 70.3812876 | 82.731787  | 50.2395153 | 68.8457846 |
| 18:49:32 | 0:49:13 | 71.6930524 | 70.3812876 | 82.731787  | 50.2395153 | 67.8457846 |
| 18:49:33 | 0:49:14 | 71.6930524 | 70.3812876 | 82.731787  | 51.2395153 | 67.8457846 |
| 18:49:34 | 0:49:15 | 72.6930524 | 69.3812876 | 77.731787  | 51.2395153 | 67.8457846 |
| 18:49:35 | 0:49:16 | 71.6930524 | 69.3812876 | 75.731787  | 53.2395153 | 67.8457846 |
| 18:49:36 | 0:49:17 | 71.6930524 | 69.3812876 | 74.731787  | 55.2395153 | 69.8457846 |
| 18:49:37 | 0:49:18 | 71.6930524 | 68.3812876 | 74.731787  | 56.2395153 | 70.8457846 |
| 18:49:38 | 0:49:19 | 71.6930524 | 66.3812876 | 74.731787  | 58.2395153 | 69.8457846 |
| 18:49:39 | 0:49:20 | 71.6930524 | 66.3812876 | 73.731787  | 61.2395153 | 67.8457846 |
| 18:49:40 | 0:49:21 | 71.6930524 | 66.3812876 | 72.731787  | 61.2395153 | 65.8457846 |
| 18:49:41 | 0:49:22 | 71.6930524 | 66.3812876 | 71.731787  | 62.2395153 | 65.8457846 |
| 18:49:42 | 0:49:23 | 71.6930524 | 66.3812876 | 70.731787  | 63.2395153 | 66.8457846 |



|          |         |            |            |           |            |            |
|----------|---------|------------|------------|-----------|------------|------------|
| 18:49:43 | 0:49:24 | 70.6930524 | 66.3812876 | 69.731787 | 63.2395153 | 66.8457846 |
| 18:49:44 | 0:49:25 | 70.6930524 | 66.3812876 | 68.731787 | 64.2395153 | 67.8457846 |
| 18:49:45 | 0:49:26 | 70.6930524 | 65.3812876 | 68.731787 | 66.2395153 | 67.8457846 |
| 18:49:46 | 0:49:27 | 70.6930524 | 65.3812876 | 68.731787 | 67.2395153 | 67.8457846 |
| 18:49:47 | 0:49:28 | 70.6930524 | 65.3812876 | 69.731787 | 68.2395153 | 67.8457846 |
| 18:49:48 | 0:49:29 | 69.6930524 | 65.3812876 | 70.731787 | 69.2395153 | 67.8457846 |
| 18:49:49 | 0:49:30 | 69.6930524 | 64.3812876 | 69.731787 | 70.2395153 | 67.8457846 |
| 18:49:50 | 0:49:31 | 69.6930524 | 64.3812876 | 69.731787 | 69.2395153 | 67.8457846 |
| 18:49:51 | 0:49:32 | 69.6930524 | 64.3812876 | 70.731787 | 67.2395153 | 68.8457846 |
| 18:49:52 | 0:49:33 | 69.6930524 | 64.3812876 | 69.731787 | 61.2395153 | 70.8457846 |
| 18:49:53 | 0:49:34 | 69.6930524 | 64.3812876 | 69.731787 | 60.2395153 | 69.8457846 |
| 18:49:54 | 0:49:35 | 68.6930524 | 65.3812876 | 69.731787 | 59.2395153 | 68.8457846 |
| 18:49:55 | 0:49:36 | 68.6930524 | 66.3812876 | 69.731787 | 59.2395153 | 67.8457846 |
| 18:49:56 | 0:49:37 | 70.6930524 | 66.3812876 | 70.731787 | 59.2395153 | 67.8457846 |
| 18:49:57 | 0:49:38 | 71.6930524 | 69.3812876 | 70.731787 | 59.2395153 | 66.8457846 |
| 18:49:58 | 0:49:39 | 71.6930524 | 69.3812876 | 70.731787 | 59.2395153 | 65.8457846 |
| 18:49:59 | 0:49:40 | 70.6930524 | 69.3812876 | 71.731787 | 59.2395153 | 66.8457846 |
| 18:50:00 | 0:49:41 | 70.6930524 | 69.3812876 | 72.731787 | 58.2395153 | 68.8457846 |
| 18:50:01 | 0:49:42 | 71.6930524 | 69.3812876 | 72.731787 | 58.2395153 | 69.8457846 |
| 18:50:02 | 0:49:43 | 70.6930524 | 69.3812876 | 78.731787 | 56.2395153 | 69.8457846 |
| 18:50:03 | 0:49:44 | 69.6930524 | 69.3812876 | 78.731787 | 56.2395153 | 69.8457846 |
| 18:50:04 | 0:49:45 | 68.6930524 | 69.3812876 | 78.731787 | 56.2395153 | 69.8457846 |
| 18:50:05 | 0:49:46 | 67.6930524 | 69.3812876 | 79.731787 | 56.2395153 | 70.8457846 |
| 18:50:06 | 0:49:47 | 67.6930524 | 69.3812876 | 80.731787 | 57.2395153 | 70.8457846 |
| 18:50:07 | 0:49:48 | 67.6930524 | 69.3812876 | 80.731787 | 58.2395153 | 70.8457846 |
| 18:50:08 | 0:49:49 | 67.6930524 | 67.3812876 | 82.731787 | 60.2395153 | 70.8457846 |
| 18:50:09 | 0:49:50 | 66.6930524 | 67.3812876 | 82.731787 | 61.2395153 | 67.8457846 |
| 18:50:10 | 0:49:51 | 66.6930524 | 66.3812876 | 82.731787 | 61.2395153 | 65.8457846 |
| 18:50:11 | 0:49:52 | 70.6930524 | 66.3812876 | 82.731787 | 61.2395153 | 64.8457846 |
| 18:50:12 | 0:49:53 | 70.6930524 | 66.3812876 | 82.731787 | 61.2395153 | 64.8457846 |
| 18:50:13 | 0:49:54 | 71.6930524 | 65.3812876 | 81.731787 | 60.2395153 | 65.8457846 |
| 18:50:14 | 0:49:55 | 71.6930524 | 62.3812876 | 81.731787 | 59.2395153 | 67.8457846 |
| 18:50:15 | 0:49:56 | 71.6930524 | 62.3812876 | 80.731787 | 58.2395153 | 68.8457846 |
| 18:50:16 | 0:49:57 | 71.6930524 | 62.3812876 | 80.731787 | 57.2395153 | 70.8457846 |
| 18:50:17 | 0:49:58 | 70.6930524 | 62.3812876 | 80.731787 | 57.2395153 | 70.8457846 |
| 18:50:18 | 0:49:59 | 69.6930524 | 61.3812876 | 80.731787 | 57.2395153 | 69.8457846 |
| 18:50:19 | 0:50:00 | 70.6930524 | 60.3812876 | 75.731787 | 57.2395153 | 69.8457846 |
| 18:50:20 | 0:50:01 | 70.6930524 | 60.3812876 | 75.731787 | 58.2395153 | 69.8457846 |
| 18:50:21 | 0:50:02 | 70.6930524 | 60.3812876 | 73.731787 | 59.2395153 | 69.8457846 |
| 18:50:22 | 0:50:03 | 70.6930524 | 60.3812876 | 73.731787 | 59.2395153 | 69.8457846 |
| 18:50:23 | 0:50:04 | 70.6930524 | 62.3812876 | 73.731787 | 60.2395153 | 69.8457846 |
| 18:50:24 | 0:50:05 | 70.6930524 | 62.3812876 | 73.731787 | 60.2395153 | 69.8457846 |
| 18:50:25 | 0:50:06 | 71.6930524 | 63.3812876 | 74.731787 | 64.2395153 | 69.8457846 |
| 18:50:26 | 0:50:07 | 71.6930524 | 63.3812876 | 74.731787 | 66.2395153 | 68.8457846 |
| 18:50:27 | 0:50:08 | 70.6930524 | 63.3812876 | 74.731787 | 66.2395153 | 68.8457846 |

|          |         |            |            |           |            |            |
|----------|---------|------------|------------|-----------|------------|------------|
| 18:50:28 | 0:50:09 | 69.6930524 | 61.3812876 | 74.731787 | 67.2395153 | 68.8457846 |
| 18:50:29 | 0:50:10 | 68.6930524 | 61.3812876 | 72.731787 | 67.2395153 | 67.8457846 |
| 18:50:30 | 0:50:11 | 67.6930524 | 61.3812876 | 72.731787 | 67.2395153 | 67.8457846 |
| 18:50:31 | 0:50:12 | 67.6930524 | 61.3812876 | 71.731787 | 68.2395153 | 67.8457846 |
| 18:50:32 | 0:50:13 | 66.6930524 | 61.3812876 | 72.731787 | 69.2395153 | 67.8457846 |
| 18:50:33 | 0:50:14 | 66.6930524 | 61.3812876 | 75.731787 | 70.2395153 | 68.8457846 |
| 18:50:34 | 0:50:15 | 66.6930524 | 61.3812876 | 76.731787 | 69.2395153 | 69.8457846 |
| 18:50:35 | 0:50:16 | 66.6930524 | 62.3812876 | 76.731787 | 69.2395153 | 69.8457846 |
| 18:50:36 | 0:50:17 | 66.6930524 | 62.3812876 | 75.731787 | 69.2395153 | 69.8457846 |
| 18:50:37 | 0:50:18 | 66.6930524 | 62.3812876 | 70.731787 | 70.2395153 | 68.8457846 |
| 18:50:38 | 0:50:19 | 66.6930524 | 62.3812876 | 68.731787 | 73.2395153 | 70.8457846 |
| 18:50:39 | 0:50:20 | 66.6930524 | 62.3812876 | 68.731787 | 75.2395153 | 71.8457846 |
| 18:50:40 | 0:50:21 | 66.6930524 | 59.3812876 | 67.731787 | 77.2395153 | 73.8457846 |
| 18:50:41 | 0:50:22 | 66.6930524 | 59.3812876 | 66.731787 | 80.2395153 | 76.8457846 |
| 18:50:42 | 0:50:23 | 66.6930524 | 58.3812876 | 66.731787 | 80.2395153 | 78.8457846 |
| 18:50:43 | 0:50:24 | 65.6930524 | 58.3812876 | 67.731787 | 81.2395153 | 79.8457846 |
| 18:50:44 | 0:50:25 | 65.6930524 | 58.3812876 | 68.731787 | 84.2395153 | 78.8457846 |
| 18:50:45 | 0:50:26 | 66.6930524 | 58.3812876 | 68.731787 | 84.2395153 | 76.8457846 |
| 18:50:46 | 0:50:27 | 68.6930524 | 57.3812876 | 68.731787 | 84.2395153 | 76.8457846 |
| 18:50:47 | 0:03:00 | 68.6930524 | 56.3812876 | 68.731787 | 85.2395153 | 75.8457846 |
| 18:50:48 | 0:02:59 | 68.6930524 | 56.3812876 | 69.731787 | 85.2395153 | 73.8457846 |
| 18:50:49 | 0:02:58 | 69.6930524 | 64.3812876 | 69.731787 | 84.2395153 | 73.8457846 |
| 18:50:50 | 0:02:57 | 70.6930524 | 64.3812876 | 67.731787 | 83.2395153 | 70.8457846 |
| 18:50:51 | 0:02:56 | 70.6930524 | 64.3812876 | 66.731787 | 83.2395153 | 70.8457846 |
| 18:50:52 | 0:02:55 | 72.6930524 | 65.3812876 | 67.731787 | 83.2395153 | 70.8457846 |
| 18:50:53 | 0:02:54 | 73.6930524 | 65.3812876 | 67.731787 | 82.2395153 | 66.8457846 |
| 18:50:54 | 0:02:53 | 75.6930524 | 64.3812876 | 67.731787 | 83.2395153 | 64.8457846 |
| 18:50:55 | 0:02:52 | 73.6930524 | 64.3812876 | 68.731787 | 83.2395153 | 64.8457846 |
| 18:50:56 | 0:02:51 | 72.6930524 | 64.3812876 | 68.731787 | 84.2395153 | 64.8457846 |
| 18:50:57 | 0:02:50 | 72.6930524 | 64.3812876 | 68.731787 | 83.2395153 | 64.8457846 |
| 18:50:58 | 0:02:49 | 72.6930524 | 64.3812876 | 66.731787 | 83.2395153 | 66.8457846 |
| 18:50:59 | 0:02:48 | 71.6930524 | 64.3812876 | 66.731787 | 85.2395153 | 66.8457846 |
| 18:51:00 | 0:02:47 | 71.6930524 | 64.3812876 | 66.731787 | 85.2395153 | 66.8457846 |
| 18:51:01 | 0:02:46 | 70.6930524 | 70.3812876 | 66.731787 | 85.2395153 | 66.8457846 |
| 18:51:02 | 0:02:45 | 70.6930524 | 70.3812876 | 66.731787 | 85.2395153 | 66.8457846 |
| 18:51:03 | 0:02:44 | 70.6930524 | 71.3812876 | 65.731787 | 86.2395153 | 66.8457846 |
| 18:51:04 | 0:02:43 | 71.6930524 | 71.3812876 | 65.731787 | 86.2395153 | 65.8457846 |
| 18:51:05 | 0:02:42 | 71.6930524 | 72.3812876 | 65.731787 | 86.2395153 | 64.8457846 |
| 18:51:06 | 0:02:41 | 70.6930524 | 72.3812876 | 65.731787 | 86.2395153 | 63.8457846 |
| 18:51:07 | 0:02:40 | 70.6930524 | 72.3812876 | 66.731787 | 86.2395153 | 64.8457846 |
| 18:51:08 | 0:02:39 | 70.6930524 | 72.3812876 | 66.731787 | 87.2395153 | 64.8457846 |
| 18:51:09 | 0:02:38 | 69.6930524 | 73.3812876 | 66.731787 | 87.2395153 | 65.8457846 |
| 18:51:10 | 0:02:37 | 69.6930524 | 73.3812876 | 66.731787 | 87.2395153 | 67.8457846 |
| 18:51:11 | 0:02:36 | 69.6930524 | 73.3812876 | 66.731787 | 83.2395153 | 68.8457846 |
| 18:51:12 | 0:02:35 | 68.6930524 | 74.3812876 | 67.731787 | 79.2395153 | 68.8457846 |

|          |         |            |            |           |            |            |
|----------|---------|------------|------------|-----------|------------|------------|
| 18:51:13 | 0:02:34 | 68.6930524 | 74.3812876 | 67.731787 | 78.2395153 | 66.8457846 |
| 18:51:14 | 0:02:33 | 68.6930524 | 74.3812876 | 66.731787 | 77.2395153 | 65.8457846 |
| 18:51:15 | 0:02:32 | 68.6930524 | 74.3812876 | 66.731787 | 76.2395153 | 66.8457846 |
| 18:51:16 | 0:02:31 | 68.6930524 | 73.3812876 | 66.731787 | 76.2395153 | 67.8457846 |
| 18:51:17 | 0:02:30 | 68.6930524 | 73.3812876 | 66.731787 | 76.2395153 | 69.8457846 |
| 18:51:18 | 0:02:29 | 68.6930524 | 73.3812876 | 66.731787 | 76.2395153 | 69.8457846 |
| 18:51:19 | 0:02:28 | 68.6930524 | 71.3812876 | 67.731787 | 75.2395153 | 70.8457846 |
| 18:51:20 | 0:02:27 | 68.6930524 | 71.3812876 | 67.731787 | 73.2395153 | 70.8457846 |
| 18:51:21 | 0:02:26 | 69.6930524 | 70.3812876 | 68.731787 | 70.2395153 | 69.8457846 |
| 18:51:22 | 0:02:25 | 69.6930524 | 68.3812876 | 69.731787 | 68.2395153 | 68.8457846 |
| 18:51:23 | 0:02:24 | 69.6930524 | 68.3812876 | 69.731787 | 64.2395153 | 68.8457846 |
| 18:51:24 | 0:02:23 | 71.6930524 | 68.3812876 | 69.731787 | 63.2395153 | 67.8457846 |
| 18:51:25 | 0:02:22 | 72.6930524 | 69.3812876 | 68.731787 | 62.2395153 | 67.8457846 |
| 18:51:26 | 0:02:21 | 72.6930524 | 69.3812876 | 68.731787 | 62.2395153 | 67.8457846 |
| 18:51:27 | 0:02:20 | 71.6930524 | 70.3812876 | 68.731787 | 61.2395153 | 67.8457846 |
| 18:51:28 | 0:02:19 | 71.6930524 | 70.3812876 | 68.731787 | 60.2395153 | 68.8457846 |
| 18:51:29 | 0:02:18 | 71.6930524 | 70.3812876 | 68.731787 | 60.2395153 | 68.8457846 |
| 18:51:30 | 0:02:17 | 71.6930524 | 70.3812876 | 69.731787 | 60.2395153 | 67.8457846 |
| 18:51:31 | 0:02:16 | 71.6930524 | 70.3812876 | 69.731787 | 60.2395153 | 66.8457846 |
| 18:51:32 | 0:02:15 | 71.6930524 | 70.3812876 | 67.731787 | 61.2395153 | 64.8457846 |
| 18:51:33 | 0:02:14 | 71.6930524 | 72.3812876 | 66.731787 | 61.2395153 | 63.8457846 |
| 18:51:34 | 0:02:13 | 70.6930524 | 72.3812876 | 65.731787 | 61.2395153 | 63.8457846 |
| 18:51:35 | 0:02:12 | 70.6930524 | 73.3812876 | 64.731787 | 62.2395153 | 64.8457846 |
| 18:51:36 | 0:02:11 | 71.6930524 | 73.3812876 | 64.731787 | 63.2395153 | 65.8457846 |
| 18:51:37 | 0:02:10 | 71.6930524 | 73.3812876 | 64.731787 | 64.2395153 | 67.8457846 |
| 18:51:38 | 0:02:09 | 70.6930524 | 70.3812876 | 63.731787 | 64.2395153 | 68.8457846 |
| 18:51:39 | 0:02:08 | 69.6930524 | 70.3812876 | 64.731787 | 64.2395153 | 69.8457846 |
| 18:51:40 | 0:02:07 | 69.6930524 | 70.3812876 | 64.731787 | 65.2395153 | 70.8457846 |
| 18:51:41 | 0:02:06 | 69.6930524 | 69.3812876 | 64.731787 | 66.2395153 | 70.8457846 |
| 18:51:42 | 0:02:05 | 69.6930524 | 70.3812876 | 64.731787 | 66.2395153 | 70.8457846 |
| 18:51:43 | 0:02:04 | 70.6930524 | 70.3812876 | 64.731787 | 68.2395153 | 70.8457846 |
| 18:51:44 | 0:02:03 | 70.6930524 | 70.3812876 | 64.731787 | 68.2395153 | 69.8457846 |
| 18:51:45 | 0:02:02 | 71.6930524 | 70.3812876 | 64.731787 | 68.2395153 | 69.8457846 |
| 18:51:46 | 0:02:01 | 70.6930524 | 70.3812876 | 68.731787 | 68.2395153 | 69.8457846 |
| 18:51:47 | 0:02:00 | 70.6930524 | 71.3812876 | 69.731787 | 68.2395153 | 69.8457846 |
| 18:51:48 | 0:01:59 | 70.6930524 | 73.3812876 | 69.731787 | 68.2395153 | 69.8457846 |
| 18:51:49 | 0:01:58 | 70.6930524 | 73.3812876 | 70.731787 | 68.2395153 | 69.8457846 |
| 18:51:50 | 0:01:57 | 70.6930524 | 73.3812876 | 70.731787 | 67.2395153 | 68.8457846 |
| 18:51:51 | 0:01:56 | 70.6930524 | 73.3812876 | 70.731787 | 67.2395153 | 71.8457846 |
| 18:51:52 | 0:01:55 | 70.6930524 | 75.3812876 | 70.731787 | 65.2395153 | 75.8457846 |
| 18:51:53 | 0:01:54 | 70.6930524 | 78.3812876 | 70.731787 | 65.2395153 | 77.8457846 |
| 18:51:54 | 0:01:53 | 70.6930524 | 82.3812876 | 71.731787 | 64.2395153 | 78.8457846 |
| 18:51:55 | 0:01:52 | 70.6930524 | 72.7951505 | 72.731787 | 63.2395153 | 78.8457846 |
| 18:51:56 | 0:01:51 | 70.6930524 | 72.5451505 | 72.731787 | 64.2395153 | 76.8457846 |
| 18:51:57 | 0:01:50 | 71.6930524 | 72.6701505 | 73.731787 | 64.2395153 | 75.8457846 |

|          |         |            |            |            |            |            |
|----------|---------|------------|------------|------------|------------|------------|
| 18:51:58 | 0:01:49 | 71.6930524 | 89.3812876 | 73.731787  | 66.2395153 | 75.8457846 |
| 18:51:59 | 0:01:48 | 71.6930524 | 89.3812876 | 74.731787  | 69.2395153 | 74.8457846 |
| 18:52:00 | 0:01:47 | 71.6930524 | 89.3812876 | 74.731787  | 71.2395153 | 72.8457846 |
| 18:52:01 | 0:01:46 | 71.6930524 | 86.3812876 | 74.731787  | 74.2395153 | 70.8457846 |
| 18:52:02 | 0:01:45 | 72.6930524 | 86.3812876 | 74.731787  | 74.2395153 | 70.8457846 |
| 18:52:03 | 0:01:44 | 72.6930524 | 86.3812876 | 75.731787  | 76.2395153 | 71.8457846 |
| 18:52:04 | 0:01:43 | 72.6930524 | 84.3812876 | 75.731787  | 78.2395153 | 72.8457846 |
| 18:52:05 | 0:01:42 | 72.6930524 | 84.3812876 | 76.731787  | 79.2395153 | 72.8457846 |
| 18:52:06 | 0:01:41 | 72.6930524 | 84.3812876 | 76.731787  | 79.2395153 | 72.8457846 |
| 18:52:07 | 0:01:40 | 72.6930524 | 84.3812876 | 76.731787  | 79.2395153 | 71.8457846 |
| 18:52:08 | 0:01:39 | 73.6930524 | 84.3812876 | 76.731787  | 79.2395153 | 69.8457846 |
| 18:52:09 | 0:01:38 | 73.6930524 | 84.3812876 | 78.731787  | 79.2395153 | 69.8457846 |
| 18:52:10 | 0:01:37 | 73.6930524 | 83.3812876 | 80.731787  | 79.2395153 | 69.8457846 |
| 18:52:11 | 0:01:36 | 73.6930524 | 82.3812876 | 80.731787  | 79.2395153 | 70.8457846 |
| 18:52:12 | 0:01:35 | 73.6930524 | 82.3812876 | 80.731787  | 79.2395153 | 70.8457846 |
| 18:52:13 | 0:01:34 | 72.6930524 | 81.3812876 | 81.731787  | 79.2395153 | 72.8457846 |
| 18:52:14 | 0:01:33 | 72.6930524 | 80.3812876 | 82.731787  | 80.2395153 | 72.8457846 |
| 18:52:15 | 0:01:32 | 68.6930524 | 80.3812876 | 83.731787  | 81.2395153 | 69.8457846 |
| 18:52:16 | 0:01:31 | 67.6930524 | 80.3812876 | 83.731787  | 82.2395153 | 66.8457846 |
| 18:52:17 | 0:01:30 | 66.6930524 | 78.3812876 | 83.731787  | 89.2395153 | 65.8457846 |
| 18:52:18 | 0:01:29 | 66.6930524 | 78.3812876 | 83.731787  | 89.2395153 | 67.8457846 |
| 18:52:19 | 0:01:28 | 66.6930524 | 78.3812876 | 83.731787  | 89.2395153 | 68.8457846 |
| 18:52:20 | 0:01:27 | 66.6930524 | 75.3812876 | 83.731787  | 89.2395153 | 69.8457846 |
| 18:52:21 | 0:01:26 | 66.6930524 | 75.3812876 | 82.731787  | 88.2395153 | 70.8457846 |
| 18:52:22 | 0:01:25 | 67.6930524 | 74.3812876 | 82.731787  | 88.2395153 | 69.8457846 |
| 18:52:23 | 0:01:24 | 67.6930524 | 71.3812876 | 82.731787  | 87.2395153 | 68.8457846 |
| 18:52:24 | 0:01:23 | 68.6930524 | 71.3812876 | 80.731787  | 86.2395153 | 65.8457846 |
| 18:52:25 | 0:01:22 | 68.6930524 | 66.3812876 | 80.731787  | 85.2395153 | 63.8457846 |
| 18:52:26 | 0:01:21 | 68.6930524 | 65.3812876 | 80.731787  | 82.2395153 | 63.8457846 |
| 18:52:27 | 0:01:20 | 68.6930524 | 65.3812876 | 81.731787  | 81.2395153 | 62.8457846 |
| 18:52:28 | 0:01:19 | 68.6930524 | 65.3812876 | 84.731787  | 80.2395153 | 63.8457846 |
| 18:52:29 | 0:01:18 | 68.6930524 | 66.3812876 | 85.731787  | 79.2395153 | 63.8457846 |
| 18:52:30 | 0:01:17 | 68.6930524 | 66.3812876 | 85.731787  | 79.2395153 | 65.8457846 |
| 18:52:31 | 0:01:16 | 68.6930524 | 66.3812876 | 71.0451505 | 79.2395153 | 65.8457846 |
| 18:52:32 | 0:01:15 | 67.6930524 | 65.3812876 | 71.0451505 | 79.2395153 | 65.8457846 |
| 18:52:33 | 0:01:14 | 67.6930524 | 65.3812876 | 71.1701505 | 79.2395153 | 65.8457846 |
| 18:52:34 | 0:01:13 | 66.6930524 | 65.3812876 | 71.5451505 | 79.2395153 | 66.8457846 |
| 18:52:35 | 0:01:12 | 66.6930524 | 65.3812876 | 70.7951505 | 75.2395153 | 66.8457846 |
| 18:52:36 | 0:01:11 | 65.6930524 | 66.3812876 | 70.7951505 | 75.2395153 | 66.8457846 |
| 18:52:37 | 0:01:10 | 65.6930524 | 66.3812876 | 70.7951505 | 74.2395153 | 67.8457846 |
| 18:52:38 | 0:01:09 | 65.6930524 | 66.3812876 | 71.1701505 | 74.2395153 | 70.8457846 |
| 18:52:39 | 0:01:08 | 65.6930524 | 67.3812876 | 71.5451505 | 73.2395153 | 71.8457846 |
| 18:52:40 | 0:01:07 | 65.6930524 | 67.3812876 | 71.4201505 | 73.2395153 | 68.8457846 |
| 18:52:41 | 0:01:06 | 65.6930524 | 69.3812876 | 71.4201505 | 72.2395153 | 64.8457846 |
| 18:52:42 | 0:01:05 | 65.6930524 | 73.3812876 | 71.7951505 | 69.2395153 | 62.8457846 |

|          |         |            |            |            |            |            |
|----------|---------|------------|------------|------------|------------|------------|
| 18:52:43 | 0:01:04 | 65.6930524 | 74.3812876 | 72.0451505 | 66.2395153 | 63.8457846 |
| 18:52:44 | 0:01:03 | 66.6930524 | 68.3812876 | 71.7951505 | 66.2395153 | 64.8457846 |
| 18:52:45 | 0:01:02 | 65.6930524 | 68.3812876 | 71.1701505 | 63.2395153 | 63.8457846 |
| 18:52:46 | 0:01:01 | 65.6930524 | 66.3812876 | 70.6701505 | 63.2395153 | 62.8457846 |
| 18:52:47 | 0:01:00 | 64.6930524 | 63.3812876 | 69.9201505 | 63.2395153 | 61.8457846 |
| 18:52:48 | 0:00:59 | 64.6930524 | 62.3812876 | 69.2951505 | 59.2395153 | 61.8457846 |
| 18:52:49 | 0:00:58 | 65.6930524 | 62.3812876 | 69.5451505 | 59.2395153 | 61.8457846 |
| 18:52:50 | 0:00:57 | 65.6930524 | 61.3812876 | 68.6701505 | 58.2395153 | 61.8457846 |
| 18:52:51 | 0:00:56 | 65.6930524 | 61.3812876 | 68.5451505 | 57.2395153 | 61.8457846 |
| 18:52:52 | 0:00:55 | 64.6930524 | 61.3812876 | 67.4201505 | 56.2395153 | 61.8457846 |
| 18:52:53 | 0:00:54 | 64.6930524 | 59.3812876 | 66.9201505 | 56.2395153 | 61.8457846 |
| 18:52:54 | 0:00:53 | 64.6930524 | 59.3812876 | 66.6701505 | 55.2395153 | 61.8457846 |
| 18:52:55 | 0:00:52 | 64.6930524 | 59.3812876 | 66.2951505 | 55.2395153 | 62.8457846 |
| 18:52:56 | 0:00:51 | 65.6930524 | 59.3812876 | 66.4201505 | 55.2395153 | 63.8457846 |
| 18:52:57 | 0:00:50 | 66.6930524 | 59.3812876 | 67.0451505 | 55.2395153 | 67.8457846 |
| 18:52:58 | 0:00:49 | 67.6930524 | 59.3812876 | 67.5451505 | 54.2395153 | 70.8457846 |
| 18:52:59 | 0:00:48 | 67.6930524 | 58.3812876 | 80.731787  | 55.2395153 | 71.8457846 |
| 18:53:00 | 0:00:47 | 67.6930524 | 57.3812876 | 79.731787  | 55.2395153 | 66.8457846 |
| 18:53:01 | 0:00:46 | 63.6930524 | 57.3812876 | 78.731787  | 55.2395153 | 63.8457846 |
| 18:53:02 | 0:00:45 | 62.6930524 | 57.3812876 | 78.731787  | 55.2395153 | 61.8457846 |
| 18:53:03 | 0:00:44 | 62.6930524 | 57.3812876 | 79.731787  | 58.2395153 | 60.8457846 |
| 18:53:04 | 0:00:43 | 62.6930524 | 58.3812876 | 66.2951505 | 60.2395153 | 61.8457846 |
| 18:53:05 | 0:00:42 | 61.6930524 | 60.3812876 | 66.7951505 | 60.2395153 | 61.8457846 |
| 18:53:06 | 0:00:41 | 61.6930524 | 60.3812876 | 66.7951505 | 60.2395153 | 61.8457846 |
| 18:53:07 | 0:00:40 | 61.6930524 | 60.3812876 | 66.2951505 | 59.2395153 | 61.8457846 |
| 18:53:08 | 0:00:39 | 61.6930524 | 60.3812876 | 66.7951505 | 59.2395153 | 62.8457846 |
| 18:53:09 | 0:00:38 | 61.6930524 | 60.3812876 | 66.7951505 | 59.2395153 | 64.8457846 |
| 18:53:10 | 0:00:37 | 60.6930524 | 60.3812876 | 66.5451505 | 59.2395153 | 63.8457846 |
| 18:53:11 | 0:00:36 | 60.6930524 | 60.3812876 | 66.2951505 | 59.2395153 | 61.8457846 |
| 18:53:12 | 0:00:35 | 60.6930524 | 60.3812876 | 66.2951505 | 59.2395153 | 61.8457846 |
| 18:53:13 | 0:00:34 | 60.6930524 | 60.3812876 | 66.2951505 | 59.2395153 | 63.8457846 |
| 18:53:14 | 0:00:33 | 59.6930524 | 60.3812876 | 66.9201505 | 61.2395153 | 64.8457846 |
| 18:53:15 | 0:00:32 | 59.6930524 | 60.3812876 | 66.9201505 | 61.2395153 | 64.8457846 |
| 18:53:16 | 0:00:31 | 60.6930524 | 63.3812876 | 67.5451505 | 61.2395153 | 64.8457846 |
| 18:53:17 | 0:00:30 | 60.6930524 | 63.3812876 | 67.9201505 | 61.2395153 | 63.8457846 |
| 18:53:18 | 0:00:29 | 60.6930524 | 63.3812876 | 68.0451505 | 61.2395153 | 63.8457846 |
| 18:53:19 | 0:00:28 | 61.6930524 | 65.3812876 | 68.9201505 | 62.2395153 | 63.8457846 |
| 18:53:20 | 0:00:27 | 62.6930524 | 68.3812876 | 69.4201505 | 62.2395153 | 64.8457846 |
| 18:53:21 | 0:00:26 | 62.6930524 | 74.3812876 | 70.2951505 | 62.2395153 | 65.8457846 |
| 18:53:22 | 0:00:25 | 62.6930524 | 74.3812876 | 70.4201505 | 61.2395153 | 66.8457846 |
| 18:53:23 | 0:00:24 | 63.6930524 | 70.3812876 | 70.9201505 | 61.2395153 | 68.8457846 |
| 18:53:24 | 0:00:23 | 63.6930524 | 70.3812876 | 70.5451505 | 61.2395153 | 70.8457846 |
| 18:53:25 | 0:00:22 | 64.6930524 | 70.3812876 | 71.0451505 | 62.2395153 | 71.8457846 |
| 18:53:26 | 0:00:21 | 64.6930524 | 69.3812876 | 78.731787  | 65.2395153 | 70.8457846 |
| 18:53:27 | 0:00:20 | 63.6930524 | 69.3812876 | 72.731787  | 65.2395153 | 69.8457846 |

|          |         |            |            |           |            |            |
|----------|---------|------------|------------|-----------|------------|------------|
| 18:53:28 | 0:00:19 | 63.6930524 | 69.3812876 | 69.731787 | 65.2395153 | 68.8457846 |
| 18:53:29 | 0:00:18 | 65.6930524 | 69.3812876 | 68.731787 | 64.2395153 | 68.8457846 |
| 18:53:30 | 0:00:17 | 66.6930524 | 66.3812876 | 67.731787 | 63.2395153 | 68.8457846 |
| 18:53:31 | 0:00:16 | 66.6930524 | 66.3812876 | 67.731787 | 63.2395153 | 68.8457846 |
| 18:53:32 | 0:00:15 | 64.6930524 | 64.3812876 | 67.731787 | 63.2395153 | 69.8457846 |
| 18:53:33 | 0:00:14 | 61.6930524 | 62.3812876 | 68.731787 | 63.2395153 | 69.8457846 |
| 18:53:34 | 0:00:13 | 61.6930524 | 58.3812876 | 70.731787 | 63.2395153 | 69.8457846 |
| 18:53:35 | 0:00:12 | 61.6930524 | 57.3812876 | 70.731787 | 64.2395153 | 69.8457846 |
| 18:53:36 | 0:00:11 | 61.6930524 | 57.3812876 | 72.731787 | 64.2395153 | 68.8457846 |
| 18:53:37 | 0:00:10 | 61.6930524 | 56.3812876 | 73.731787 | 64.2395153 | 68.8457846 |
| 18:53:38 | 0:00:09 | 61.6930524 | 55.3812876 | 74.731787 | 65.2395153 | 68.8457846 |
| 18:53:39 | 0:00:08 | 61.6930524 | 54.3812876 | 73.731787 | 66.2395153 | 68.8457846 |
| 18:53:40 | 0:00:07 | 61.6930524 | 53.3812876 | 72.731787 | 68.2395153 | 69.8457846 |
| 18:53:41 | 0:00:06 | 61.6930524 | 53.3812876 | 72.731787 | 69.2395153 | 69.8457846 |
| 18:53:42 | 0:00:05 | 62.6930524 | 53.3812876 | 72.731787 | 69.2395153 | 69.8457846 |
| 18:53:43 | 0:00:04 | 62.6930524 | 53.3812876 | 72.731787 | 69.2395153 | 69.8457846 |
| 18:53:44 | 0:00:03 | 63.6930524 | 49.3812876 | 71.731787 | 70.2395153 | 69.8457846 |
| 18:53:45 | 0:00:02 | 63.6930524 | 54.3812876 | 71.731787 | 70.2395153 | 69.8457846 |
| 18:53:46 | 0:00:01 | 63.6930524 | 54.3812876 | 71.731787 | 70.2395153 | 69.8457846 |

End of Class

Person 9    Person 10    Person 12    Person 2    Activity Code    Average    annotation

|            |            |            |  |  |            |  |
|------------|------------|------------|--|--|------------|--|
| 77.3551261 | 81.2690501 |            |  |  | 75.9308004 |  |
| 77.3551261 | 81.2690501 |            |  |  | 76.502229  |  |
| 77.3551261 | 83.2690501 |            |  |  | 77.0736576 |  |
| 77.3551261 | 83.2690501 |            |  |  | 76.6450862 |  |
| 78.3551261 | 83.2690501 |            |  |  | 77.0736576 |  |
| 78.3551261 | 81.2690501 |            |  |  | 77.2165147 |  |
| 78.3551261 | 79.2690501 |            |  |  | 77.3593719 |  |
| 79.3551261 | 79.2690501 |            |  |  | 77.7879433 |  |
| 80.3551261 | 79.2690501 |            |  |  | 78.2165147 |  |
| 80.3551261 | 79.2690501 |            |  |  | 78.502229  |  |
| 80.3551261 | 79.2690501 |            |  |  | 78.7879433 |  |
| 78.3551261 | 79.2690501 |            |  |  | 78.7879433 |  |
| 79.3551261 | 79.2690501 |            |  |  | 79.2165147 |  |
| 79.3551261 | 79.2690501 |            |  |  | 79.502229  |  |
| 79.3551261 | 82.2690501 |            |  |  | 80.9308004 |  |
| 78.3551261 | 84.2690501 |            |  |  | 81.7879433 |  |
| 78.3551261 | 87.2690501 |            |  |  | 83.0736576 |  |
| 77.3551261 | 89.2690501 |            |  |  | 82.7879433 |  |
| 77.3551261 | 89.2690501 |            |  |  | 82.9308004 |  |
| 77.3551261 | 88.2690501 |            |  |  | 82.9308004 |  |
| 78.3551261 | 87.2690501 |            |  |  | 82.6450862 |  |
| 80.3551261 | 87.2690501 |            |  |  | 82.3593719 |  |
| 81.3551261 | 87.2690501 |            |  |  | 82.0736576 |  |
| 81.3551261 | 87.2690501 |            |  |  | 81.6450862 |  |
| 81.3551261 | 87.2690501 |            |  |  | 80.9308004 |  |
| 82.3551261 | 87.2690501 |            |  |  | 80.7879433 |  |
| 83.3551261 | 91.2690501 |            |  |  | 81.0736576 |  |
| 82.3551261 | 92.2690501 |            |  |  | 81.2165147 |  |
| 81.3551261 | 92.2690501 |            |  |  | 80.9308004 |  |
| 81.3551261 | 92.2690501 |            |  |  | 80.9308004 |  |
| 81.3551261 | 90.2690501 | 90.8456011 |  |  | 80.6450862 |  |
| 80.3551261 | 90.2690501 | 90.8456011 |  |  | 81.7951505 |  |
| 80.3551261 | 89.2690501 | 92.8456011 |  |  | 81.9201505 |  |
| 80.3551261 | 89.2690501 | 94.8456011 |  |  | 81.9201505 |  |
| 79.3551261 | 89.2690501 | 94.8456011 |  |  | 80.9201505 |  |
| 79.3551261 | 89.2690501 | 94.8456011 |  |  | 80.5451505 |  |
| 78.3551261 | 90.2690501 | 79.0451505 |  |  | 77.1950942 |  |
| 78.3551261 | 92.2690501 | 78.5451505 |  |  | 76.6325942 |  |
| 78.3551261 | 92.2690501 | 78.5451505 |  |  | 76.1325942 |  |
| 78.3551261 | 92.2690501 | 79.1701505 |  |  | 76.2107192 |  |
| 78.3551261 | 93.2690501 | 79.0451505 |  |  | 76.4450942 |  |
| 77.3551261 | 93.2690501 | 79.4201505 |  |  | 76.3669692 |  |

|                   |                   |                   |                   |                   |
|-------------------|-------------------|-------------------|-------------------|-------------------|
| 77.3551261        | 95.2690501        | 80.5451505        |                   | 76.8825942        |
| 77.3551261        | 95.2690501        | 81.0451505        |                   | 78.0700942        |
| 79.3551261        | 95.2690501        | 81.1701505        |                   | 78.4607192        |
| 80.3551261        | 95.2690501        | 80.9201505        |                   | 78.5544692        |
| 81.3551261        | 95.2690501        | 81.2951505        |                   | 78.3513442        |
| 82.3551261        | 95.2690501        | 78.7879433        |                   | 78.4129433        |
| <b>82.3551261</b> | <b>78.7879433</b> | <b>81.2329976</b> | <b>75.7357739</b> | <b>77.1193308</b> |
| 82.3551261        | 95.2690501        | 81.3441087        | 79.7357739        | 79.6325942        |
| 81.3551261        | 95.2690501        | 81.8456011        | 84.7357739        | 79.2951505        |
| 81.3551261        | 91.2690501        | 79.8456011        | 87.7357739        | 78.6701505        |
| 82.3551261        | 90.2690501        | 79.8456011        | 88.7357739        | 78.5451505        |
| 82.3551261        | 87.2690501        | 78.8456011        | 88.7357739        | 78.1701505        |
| 82.3551261        | 87.2690501        | 78.8456011        | 88.7357739        | 77.9201505        |
| 81.3551261        | 87.2690501        | 76.8456011        | 91.7357739        | 77.5451505        |
| 81.3551261        | 80.2690501        | 73.8456011        | 93.7357739        | 76.4201505        |
| 80.3551261        | 75.2690501        | 73.8456011        | 95.7357739        | 75.9201505        |
| 79.3551261        | 75.2690501        | 71.8456011        | 95.7357739        | 75.7951505        |
| 75.3551261        | 74.2690501        | 71.8456011        | 95.7357739        | 75.1701505        |
| 75.3551261        | 74.2690501        | 71.8456011        | 95.7357739        | 75.6701505        |
| 75.3551261        | 73.2690501        | 73.8456011        | 90.7357739        | 76.2951505        |
| 75.3551261        | 73.2690501        | 73.8456011        | 84.7357739        | 76.2951505        |
| 75.3551261        | 74.2690501        | 77.8456011        | 82.7357739        | 77.4201505        |
| 76.3551261        | 74.2690501        | 81.8456011        | 81.7357739        | 77.6701505        |
| 77.3551261        | 74.2690501        | 81.8456011        | 81.7357739        | 77.2951505        |
| 77.3551261        | 76.2690501        | 81.8456011        | 81.7357739        | 77.6701505        |
| 77.3551261        | 77.2690501        | 81.8456011        | 80.7357739        | 77.7951505        |
| 77.3551261        | 77.2690501        | 81.8456011        | 80.7357739        | 77.6701505        |
| 77.3551261        | 80.2690501        | 81.8456011        | 78.7357739        | 77.7951505        |
| 77.3551261        | 80.2690501        | 81.8456011        | 78.7357739        | 77.5451505        |
| 77.3551261        | 80.2690501        | 82.8456011        | 78.7357739        | 77.4201505        |
| 78.3551261        | 83.2690501        | 82.8456011        | 79.7357739        | 77.7951505        |
| 78.3551261        | 83.2690501        | 82.8456011        | 79.7357739        | 77.0451505        |
| 78.3551261        | 83.2690501        | 82.8456011        | 85.7357739        | 75.2951505        |
| 78.3551261        | 84.2690501        | 82.8456011        | 86.7357739        | 74.7951505        |
| 78.3551261        | 84.2690501        | 82.8456011        | 87.7357739        | 74.7951505        |
| 79.3551261        | 84.2690501        | 82.8456011        | 87.7357739        | 74.1701505        |
| 78.3551261        | 84.2690501        | 82.8456011        | 86.7357739        | 74.2951505        |
| 78.3551261        | 84.2690501        | 83.8456011        | 86.7357739        | 74.4201505        |
| 79.3551261        | 86.2690501        | 83.8456011        | 86.7357739        | 75.4201505        |
| 79.3551261        | 86.2690501        | 81.8456011        | 84.7357739        | 75.4201505        |
| 79.3551261        | 86.2690501        | 81.8456011        | 83.7357739        | 75.6701505        |
| 79.3551261        | 86.2690501        | 70.8456011        | 83.7357739        | 74.2951505        |
| 72.3551261        | 90.2690501        | 67.8456011        | 83.7357739        | 74.2951505        |
| 72.3551261        | 90.2690501        | 65.8456011        | 83.7357739        | 74.2951505        |
| 68.3551261        | 90.2690501        | 64.8456011        | 85.7357739        | 74.1701505        |



|            |            |            |            |            |
|------------|------------|------------|------------|------------|
| 68.3551261 | 89.2690501 | 64.8456011 | 88.7357739 | 74.2951505 |
| 68.3551261 | 89.2690501 | 62.8456011 | 88.7357739 | 74.0451505 |
| 68.3551261 | 87.2690501 | 62.8456011 | 92.7357739 | 73.7951505 |
| 71.3551261 | 86.2690501 | 61.8456011 | 93.7357739 | 73.9201505 |
| 72.3551261 | 86.2690501 | 61.8456011 | 94.7357739 | 74.0451505 |
| 73.3551261 | 85.2690501 | 61.8456011 | 94.7357739 | 73.6701505 |
| 73.3551261 | 89.2690501 | 61.8456011 | 94.7357739 | 74.2951505 |
| 73.3551261 | 89.2690501 | 61.8456011 | 94.7357739 | 74.0451505 |
| 72.3551261 | 89.2690501 | 62.8456011 | 94.7357739 | 73.5451505 |
| 71.3551261 | 73.4201505 | 62.8456011 | 94.7357739 | 71.3140381 |
| 71.3551261 | 72.9201505 | 62.8456011 | 94.7357739 | 70.8765381 |
| 71.3551261 | 72.7951505 | 62.8456011 | 94.7357739 | 70.7359131 |
| 71.3551261 | 72.7951505 | 62.8456011 | 91.7357739 | 70.7359131 |
| 72.3551261 | 72.5451505 | 62.8456011 | 91.7357739 | 70.4546631 |
| 72.3551261 | 72.2951505 | 62.8456011 | 86.7357739 | 70.1734131 |
| 73.3551261 | 88.2690501 | 62.8456011 | 87.7357739 | 72.4201505 |
| 74.3551261 | 88.2690501 | 62.8456011 | 88.7357739 | 73.7951505 |
| 76.3551261 | 88.2690501 | 62.8456011 | 89.7357739 | 74.0451505 |
| 76.3551261 | 86.2690501 | 62.8456011 | 92.7357739 | 74.1701505 |
| 76.3551261 | 85.2690501 | 62.8456011 | 93.7357739 | 74.4201505 |
| 78.3551261 | 85.2690501 | 62.8456011 | 94.7357739 | 74.5451505 |
| 79.3551261 | 84.2690501 | 62.8456011 | 94.7357739 | 75.0451505 |
| 80.3551261 | 84.2690501 | 62.8456011 | 90.7357739 | 75.0451505 |
| 80.3551261 | 84.2690501 | 62.8456011 | 87.7357739 | 74.7951505 |
| 80.3551261 | 84.2690501 | 63.8456011 | 87.7357739 | 75.0451505 |
| 80.3551261 | 83.2690501 | 63.8456011 | 81.7357739 | 74.9201505 |
| 80.3551261 | 78.2690501 | 64.8456011 | 79.7357739 | 74.5451505 |
| 80.3551261 | 74.2690501 | 64.8456011 | 78.7357739 | 74.0451505 |
| 80.3551261 | 73.2690501 | 64.8456011 | 80.7357739 | 74.1701505 |
| 80.3551261 | 73.2690501 | 64.8456011 | 80.7357739 | 74.0451505 |
| 81.3551261 | 73.2690501 | 64.8456011 | 82.7357739 | 74.2951505 |
| 81.3551261 | 73.2690501 | 64.8456011 | 83.7357739 | 74.4201505 |
| 81.3551261 | 72.2690501 | 65.8456011 | 85.7357739 | 74.6701505 |
| 81.3551261 | 71.2690501 | 65.8456011 | 87.7357739 | 73.1701505 |
| 81.3551261 | 70.2690501 | 65.8456011 | 87.7357739 | 72.6701505 |
| 81.3551261 | 70.2690501 | 65.8456011 | 88.7357739 | 72.7951505 |
| 81.3551261 | 70.2690501 | 65.8456011 | 89.7357739 | 72.9201505 |
| 81.3551261 | 70.2690501 | 65.8456011 | 89.7357739 | 72.7951505 |
| 81.3551261 | 70.2690501 | 66.8456011 | 88.7357739 | 72.7951505 |
| 81.3551261 | 70.2690501 | 66.8456011 | 87.7357739 | 72.5451505 |
| 80.3551261 | 70.2690501 | 66.8456011 | 86.7357739 | 71.9201505 |
| 80.3551261 | 71.2690501 | 67.8456011 | 86.7357739 | 71.9201505 |
| 80.3551261 | 75.2690501 | 67.8456011 | 86.7357739 | 72.1701505 |
| 80.3551261 | 75.2690501 | 67.8456011 | 86.7357739 | 72.1701505 |
| 79.3551261 | 77.2690501 | 69.8456011 | 86.7357739 | 72.5451505 |

|            |            |            |            |            |
|------------|------------|------------|------------|------------|
| 78.3551261 | 78.2690501 | 69.8456011 | 87.7357739 | 72.2951505 |
| 78.3551261 | 78.2690501 | 69.8456011 | 88.7357739 | 72.0451505 |
| 78.3551261 | 78.2690501 | 70.8456011 | 88.7357739 | 72.1701505 |
| 78.3551261 | 78.2690501 | 71.8456011 | 88.7357739 | 71.9201505 |
| 78.3551261 | 81.2690501 | 71.8456011 | 88.7357739 | 72.4201505 |
| 78.3551261 | 81.2690501 | 72.8456011 | 91.7357739 | 72.5451505 |
| 79.3551261 | 81.2690501 | 74.8456011 | 92.7357739 | 72.9201505 |
| 81.3551261 | 81.2690501 | 75.8456011 | 92.7357739 | 73.7951505 |
| 81.3551261 | 82.2690501 | 76.8456011 | 93.7357739 | 74.0451505 |
| 82.3551261 | 83.2690501 | 76.8456011 | 93.7357739 | 74.0451505 |
| 83.3551261 | 86.2690501 | 77.8456011 | 93.7357739 | 73.9201505 |
| 81.3551261 | 73.9201505 | 78.8456011 | 91.7357739 | 71.8765381 |
| 80.3551261 | 74.0451505 | 78.8456011 | 90.7357739 | 71.6421631 |
| 80.3551261 | 73.9201505 | 81.8456011 | 90.7357739 | 71.8765381 |
| 79.3551261 | 74.4201505 | 81.8456011 | 90.7357739 | 71.8140381 |
| 79.3551261 | 74.6701505 | 81.8456011 | 90.7357739 | 71.9702881 |
| 79.3551261 | 74.5451505 | 81.8456011 | 90.7357739 | 71.8296631 |
| 78.3551261 | 74.5451505 | 81.8456011 | 85.7357739 | 71.8296631 |
| 78.3551261 | 74.6701505 | 81.8456011 | 85.7357739 | 71.9702881 |
| 78.3551261 | 75.0451505 | 81.8456011 | 84.7357739 | 72.3921631 |
| 77.3551261 | 74.9201505 | 86.8456011 | 81.7357739 | 72.8765381 |
| 77.3551261 | 75.6701505 | 87.8456011 | 81.7357739 | 73.2202881 |
| 77.3551261 | 76.0451505 | 87.8456011 | 81.7357739 | 73.5171631 |
| 76.3551261 | 75.9201505 | 87.8456011 | 81.7357739 | 73.3765381 |
| 76.3551261 | 76.1701505 | 88.8456011 | 82.7357739 | 73.7827881 |
| 82.3551261 | 77.1701505 | 89.8456011 | 82.7357739 | 74.9077881 |
| 82.3551261 | 76.6701505 | 89.8456011 | 83.7357739 | 74.4702881 |
| 82.3551261 | 76.9201505 | 89.8456011 | 83.7357739 | 74.7515381 |
| 84.3551261 | 77.0451505 | 89.8456011 | 83.7357739 | 75.0171631 |
| 84.3551261 | 77.1701505 | 79.8456011 | 79.7357739 | 73.7827881 |
| 85.3551261 | 76.2951505 | 69.8456011 | 77.7357739 | 72.6734131 |
| 76.0451505 | 76.0451505 | 67.8456011 | 77.7357739 | 71.3534161 |
| 77.0451505 | 92.2690501 | 66.8456011 | 75.7357739 | 73.7564036 |
| 77.1701505 | 92.2690501 | 66.8456011 | 71.7357739 | 73.7720286 |
| 77.7951505 | 91.2690501 | 66.8456011 | 70.7357739 | 73.9751536 |
| 78.0451505 | 91.2690501 | 66.8456011 | 70.7357739 | 74.0064036 |
| 78.5451505 | 92.2690501 | 66.8456011 | 70.7357739 | 74.3189036 |
| 78.9201505 | 92.2690501 | 66.8456011 | 72.7357739 | 74.6157786 |
| 78.5451505 | 94.2690501 | 67.8456011 | 75.7357739 | 74.8189036 |
| 78.7951505 | 78.7951505 | 67.8456011 | 76.7357739 | 72.9159161 |
| 79.4201505 | 95.2690501 | 65.8456011 | 76.7357739 | 75.3032786 |
| 79.6701505 | 79.6701505 | 65.8456011 | 73.7357739 | 73.7596661 |
| 80.2951505 | 80.2951505 | 64.8456011 | 72.7357739 | 74.1659161 |
| 81.6701505 | 97.2690501 | 65.8456011 | 73.7357739 | 76.7095286 |
| 81.9201505 | 97.2690501 | 65.8456011 | 75.7357739 | 76.2407786 |

|            |            |            |            |            |
|------------|------------|------------|------------|------------|
| 81.7951505 | 97.2690501 | 65.8456011 | 75.7357739 | 75.8501536 |
| 81.5451505 | 97.2690501 | 65.8456011 | 76.7357739 | 75.1939036 |
| 80.6701505 | 80.6701505 | 66.8456011 | 76.7357739 | 73.1346661 |
| 80.9201505 | 80.9201505 | 67.8456011 | 73.7357739 | 73.4471661 |
| 80.5451505 | 96.2690501 | 67.8456011 | 73.7357739 | 75.3189036 |
| 80.2951505 | 95.2690501 | 66.8456011 | 73.7357739 | 75.0376536 |
| 80.1701505 | 80.1701505 | 66.8456011 | 73.7357739 | 72.8846661 |
| 79.7951505 | 79.7951505 | 66.8456011 | 75.7357739 | 72.4159161 |
| 79.0451505 | 79.0451505 | 66.8456011 | 75.7357739 | 71.7284161 |
| 78.5451505 | 78.5451505 | 66.8456011 | 75.7357739 | 70.9784161 |
| 79.2951505 | 79.2951505 | 65.8456011 | 75.7357739 | 71.1659161 |
| 79.5451505 | 79.5451505 | 66.8456011 | 75.7357739 | 71.4784161 |
| 79.6701505 | 79.6701505 | 66.8456011 | 75.7357739 | 71.5096661 |
| 79.9201505 | 79.9201505 | 66.8456011 | 75.7357739 | 71.4471661 |
| 79.9201505 | 79.9201505 | 66.8456011 | 77.7357739 | 71.4471661 |
| 79.4201505 | 79.4201505 | 67.8456011 | 84.7357739 | 71.4471661 |
| 80.0451505 | 80.0451505 | 67.8456011 | 87.7357739 | 71.7284161 |
| 80.1701505 | 80.1701505 | 67.8456011 | 87.7357739 | 71.6346661 |
| 80.4201505 | 80.4201505 | 67.8456011 | 88.7357739 | 71.8221661 |
| 80.6701505 | 80.6701505 | 66.8456011 | 87.7357739 | 71.7596661 |
| 81.4201505 | 81.4201505 | 66.8456011 | 87.7357739 | 72.8221661 |
| 81.6701505 | 81.6701505 | 66.8456011 | 76.7357739 | 73.1346661 |
| 83.2951505 | 83.2951505 | 66.8456011 | 76.7357739 | 73.7909161 |
| 84.0451505 | 84.0451505 | 66.8456011 | 72.7357739 | 74.2284161 |
| 84.2951505 | 84.2951505 | 66.8456011 | 70.7357739 | 74.5409161 |
| 84.2951505 | 84.2951505 | 67.8456011 | 70.7357739 | 74.5409161 |
| 84.9201505 | 84.9201505 | 67.8456011 | 70.7357739 | 75.1971661 |
| 86.2951505 | 86.2951505 | 67.8456011 | 70.7357739 | 76.0409161 |
| 87.2951505 | 87.2951505 | 71.8456011 | 73.7357739 | 77.1659161 |
| 88.7951505 | 88.7951505 | 71.8456011 | 76.7357739 | 78.1659161 |
| 89.1701505 | 89.1701505 | 70.8456011 | 78.7357739 | 78.2596661 |
| 89.1701505 | 89.1701505 | 70.8456011 | 78.7357739 | 78.2596661 |
| 89.4201505 | 89.4201505 | 69.8456011 | 79.7357739 | 78.3221661 |
| 89.6701505 | 89.6701505 | 68.8456011 | 80.7357739 | 78.6346661 |
| 89.9201505 | 89.9201505 | 66.8456011 | 79.7357739 | 78.6971661 |
| 89.6701505 | 89.6701505 | 66.8456011 | 74.7357739 | 78.5096661 |
| 89.5451505 | 89.5451505 | 66.8456011 | 71.7357739 | 78.3534161 |
| 89.2951505 | 89.2951505 | 65.8456011 | 71.7357739 | 78.0409161 |
| 89.4201505 | 89.4201505 | 64.8456011 | 69.7357739 | 78.1971661 |
| 88.9201505 | 88.9201505 | 64.8456011 | 70.7357739 | 77.8221661 |
| 88.5451505 | 88.5451505 | 64.8456011 | 70.7357739 | 77.2284161 |
| 88.4201505 | 88.4201505 | 64.8456011 | 74.7357739 | 76.9471661 |
| 88.4201505 | 88.4201505 | 64.8456011 | 78.7357739 | 76.8221661 |
| 88.1701505 | 88.1701505 | 64.8456011 | 81.7357739 | 76.6346661 |
| 87.9201505 | 87.9201505 | 64.8456011 | 81.7357739 | 76.3221661 |

|            |            |            |            |    |            |
|------------|------------|------------|------------|----|------------|
| 87.7951505 | 87.7951505 | 64.8456011 | 81.7357739 |    | 76.2909161 |
| 87.7951505 | 87.7951505 | 64.8456011 | 81.7357739 |    | 76.2909161 |
| 87.4201505 | 87.4201505 | 64.8456011 | 80.7357739 |    | 75.9471661 |
| 87.5451505 | 87.5451505 | 66.8456011 | 77.7357739 |    | 76.3534161 |
| 87.4201505 | 87.4201505 | 66.8456011 | 76.7357739 |    | 76.1971661 |
| 87.6701505 | 87.6701505 | 67.8456011 | 76.7357739 |    | 76.6346661 |
| 87.6701505 | 87.6701505 | 67.8456011 | 74.7357739 |    | 76.7596661 |
| 87.4201505 | 87.4201505 | 66.8456011 | 73.7357739 | 63 | 76.5721661 |
| 87.2951505 | 87.2951505 | 66.8456011 | 73.7357739 | 63 | 76.6659161 |
| 86.9201505 | 86.9201505 | 65.8456011 | 73.7357739 | 63 | 76.3221661 |
| 86.4201505 | 86.4201505 | 65.8456011 | 73.7357739 | 63 | 75.9471661 |
| 85.7951505 | 85.7951505 | 65.8456011 | 73.7357739 | 63 | 75.5409161 |
| 85.5451505 | 85.5451505 | 65.8456011 | 73.7357739 | 63 | 75.2284161 |
| 85.7951505 | 85.7951505 | 65.8456011 | 72.7357739 | 63 | 75.6659161 |
| 85.4201505 | 85.4201505 | 65.8456011 | 72.7357739 | 63 | 75.1971661 |
| 85.5451505 | 85.5451505 | 66.8456011 | 76.7357739 | 63 | 75.4784161 |
| 85.1701505 | 85.1701505 | 66.8456011 | 79.7357739 | 63 | 75.0096661 |
| 85.1701505 | 85.1701505 | 66.8456011 | 79.7357739 | 63 | 75.0096661 |
| 84.1701505 | 84.1701505 | 66.8456011 | 80.7357739 | 63 | 74.8846661 |
| 84.1701505 | 84.1701505 | 66.8456011 | 81.7357739 | 63 | 75.0096661 |
| 83.9201505 | 83.9201505 | 66.8456011 | 81.7357739 | 63 | 74.6971661 |
| 83.2951505 | 83.2951505 | 66.8456011 | 81.7357739 | 63 | 74.1659161 |
| 83.5451505 | 83.5451505 | 66.8456011 | 82.7357739 | 63 | 74.6034161 |
| 83.5451505 | 83.5451505 | 66.8456011 | 82.7357739 | 63 | 74.6034161 |
| 82.7951505 | 82.7951505 | 66.8456011 | 82.7357739 | 63 | 73.9159161 |
| 82.5451505 | 82.5451505 | 67.8456011 | 81.7357739 | 63 | 74.1034161 |
| 81.9201505 | 81.9201505 | 70.8456011 | 81.7357739 | 63 | 73.6971661 |
| 82.2951505 | 82.2951505 | 70.8456011 | 82.7357739 | 63 | 73.7909161 |
| 82.0451505 | 82.0451505 | 70.8456011 | 82.7357739 | 63 | 73.4784161 |
| 81.7951505 | 81.7951505 | 70.8456011 | 81.7357739 | 63 | 73.4159161 |
| 81.0451505 | 95.2690501 | 70.8456011 | 81.7357739 | 63 | 74.8814036 |
| 77.6701505 | 77.6701505 | 71.8456011 | 81.7357739 | 63 | 72.3846661 |
| 78.2951505 | 78.2951505 | 71.8456011 | 80.7357739 | 63 | 73.0409161 |
| 78.5451505 | 78.5451505 | 71.8456011 | 78.7357739 | 63 | 73.3534161 |
| 78.6701505 | 78.6701505 | 68.8456011 | 78.7357739 | 63 | 72.7596661 |
| 77.9201505 | 77.9201505 | 67.8456011 | 73.7357739 | 63 | 72.1971661 |
| 77.6701505 | 77.6701505 | 66.8456011 | 73.7357739 | 63 | 71.8846661 |
| 77.1701505 | 77.1701505 | 66.8456011 | 72.7357739 | 63 | 71.6346661 |
| 77.1701505 | 77.1701505 | 66.8456011 | 72.7357739 | 63 | 71.7596661 |
| 76.9201505 | 76.9201505 | 66.8456011 | 71.7357739 | 63 | 71.9471661 |
| 76.4201505 | 92.2690501 | 67.8456011 | 71.7357739 | 63 | 73.9282786 |
| 75.9201505 | 90.2690501 | 67.8456011 | 71.7357739 | 63 | 73.4907786 |
| 75.9201505 | 89.2690501 | 67.8456011 | 71.7357739 | 63 | 73.4907786 |
| 76.1701505 | 90.2690501 | 68.8456011 | 71.7357739 | 63 | 74.0220286 |
| 76.0451505 | 90.2690501 | 69.8456011 | 72.7357739 | 63 | 74.1314036 |

|            |            |            |            |    |            |
|------------|------------|------------|------------|----|------------|
| 89.3551261 | 91.2690501 | 69.8456011 | 72.7357739 | 63 | 76.0451505 |
| 89.3551261 | 76.0451505 | 70.8456011 | 72.7357739 | 63 | 74.1421631 |
| 88.3551261 | 75.7951505 | 68.8456011 | 72.7357739 | 63 | 73.4859131 |
| 88.3551261 | 75.2951505 | 66.8456011 | 84.7357739 | 63 | 72.9234131 |
| 88.3551261 | 75.1701505 | 66.8456011 | 86.7357739 | 63 | 73.0327881 |
| 88.3551261 | 90.2690501 | 66.8456011 | 86.7357739 | 63 | 74.6701505 |
| 87.3551261 | 90.2690501 | 66.8456011 | 87.7357739 | 63 | 74.5451505 |
| 86.3551261 | 89.2690501 | 66.8456011 | 86.7357739 | 63 | 74.5451505 |
| 84.3551261 | 89.2690501 | 66.8456011 | 83.7357739 | 63 | 74.1701505 |
| 82.3551261 | 88.2690501 | 66.8456011 | 80.7357739 | 63 | 73.2951505 |
| 82.3551261 | 88.2690501 | 65.8456011 | 78.7357739 | 63 | 73.1701505 |
| 81.3551261 | 88.2690501 | 65.8456011 | 77.7357739 | 63 | 72.9201505 |
| 81.3551261 | 85.2690501 | 65.8456011 | 76.7357739 | 63 | 72.7951505 |
| 80.3551261 | 83.2690501 | 64.8456011 | 77.7357739 | 63 | 72.2951505 |
| 80.3551261 | 83.2690501 | 64.8456011 | 79.7357739 | 63 | 72.5451505 |
| 80.3551261 | 82.2690501 | 64.8456011 | 82.7357739 | 63 | 72.5451505 |
| 80.3551261 | 81.2690501 | 63.8456011 | 82.7357739 | 63 | 72.2951505 |
| 80.3551261 | 79.2690501 | 63.8456011 | 81.7357739 | 63 | 72.1701505 |
| 80.3551261 | 76.2690501 | 65.8456011 | 81.7357739 | 63 | 71.7951505 |
| 80.3551261 | 75.2690501 | 65.8456011 | 81.7357739 | 63 | 71.7951505 |
| 79.3551261 | 79.2690501 | 65.8456011 | 81.7357739 | 63 | 72.1701505 |
| 79.3551261 | 81.2690501 | 65.8456011 | 78.7357739 | 63 | 72.6701505 |
| 79.3551261 | 83.2690501 | 65.8456011 | 77.7357739 | 63 | 73.2951505 |
| 79.3551261 | 83.2690501 | 65.8456011 | 77.7357739 | 63 | 74.5451505 |
| 79.3551261 | 83.2690501 | 65.8456011 | 77.7357739 | 63 | 75.0451505 |
| 79.3551261 | 85.2690501 | 65.8456011 | 77.7357739 | 63 | 75.4201505 |
| 79.3551261 | 85.2690501 | 64.8456011 | 83.7357739 | 63 | 75.2951505 |
| 79.3551261 | 85.2690501 | 64.8456011 | 85.7357739 | 63 | 75.1701505 |
| 79.3551261 | 85.2690501 | 64.8456011 | 85.7357739 | 63 | 75.4201505 |
| 79.3551261 | 83.2690501 | 64.8456011 | 85.7357739 | 63 | 75.5451505 |
| 79.3551261 | 83.2690501 | 64.8456011 | 79.7357739 | 63 | 75.4201505 |
| 79.3551261 | 83.2690501 | 64.8456011 | 79.7357739 | 63 | 75.2951505 |
| 79.3551261 | 83.2690501 | 64.8456011 | 79.7357739 | 63 | 75.2951505 |
| 81.3551261 | 83.2690501 | 65.8456011 | 75.7357739 | 63 | 75.5451505 |
| 82.3551261 | 84.2690501 | 65.8456011 | 69.7357739 | 63 | 75.5451505 |
| 83.3551261 | 84.2690501 | 65.8456011 | 67.7357739 | 63 | 75.6701505 |
| 83.3551261 | 84.2690501 | 65.8456011 | 66.7357739 | 63 | 75.6701505 |
| 83.3551261 | 83.2690501 | 65.8456011 | 66.7357739 | 63 | 75.4201505 |
| 83.3551261 | 83.2690501 | 65.8456011 | 66.7357739 | 63 | 75.4201505 |
| 83.3551261 | 82.2690501 | 65.8456011 | 67.7357739 | 63 | 75.5451505 |
| 83.3551261 | 82.2690501 | 65.8456011 | 70.7357739 | 63 | 76.4201505 |
| 83.3551261 | 82.2690501 | 66.8456011 | 73.7357739 | 63 | 76.7951505 |
| 81.3551261 | 85.2690501 | 66.8456011 | 73.7357739 | 63 | 77.1701505 |
| 79.3551261 | 85.2690501 | 66.8456011 | 73.7357739 | 63 | 77.0451505 |
| 78.3551261 | 85.2690501 | 66.8456011 | 73.7357739 | 63 | 76.9201505 |

|            |            |            |            |    |            |
|------------|------------|------------|------------|----|------------|
| 78.3551261 | 85.2690501 | 66.8456011 | 70.7357739 | 63 | 77.0451505 |
| 76.3551261 | 85.2690501 | 69.8456011 | 70.7357739 | 63 | 77.2951505 |
| 75.3551261 | 86.2690501 | 70.8456011 | 69.7357739 | 63 | 77.2951505 |
| 75.3551261 | 88.2690501 | 69.8456011 | 69.7357739 | 63 | 77.6701505 |
| 75.3551261 | 89.2690501 | 68.8456011 | 69.7357739 | 63 | 77.2951505 |
| 75.3551261 | 89.2690501 | 68.8456011 | 69.7357739 | 63 | 77.4201505 |
| 74.3551261 | 91.2690501 | 68.8456011 | 69.7357739 | 63 | 77.5451505 |
| 73.3551261 | 91.2690501 | 68.8456011 | 69.7357739 | 63 | 77.0451505 |
| 73.3551261 | 90.2690501 | 68.8456011 | 69.7357739 | 63 | 76.0451505 |
| 73.3551261 | 88.2690501 | 68.8456011 | 69.7357739 | 63 | 75.4201505 |
| 73.3551261 | 87.2690501 | 70.8456011 | 70.7357739 | 63 | 75.1701505 |
| 73.3551261 | 87.2690501 | 70.8456011 | 71.7357739 | 63 | 75.1701505 |
| 73.3551261 | 86.2690501 | 69.8456011 | 71.7357739 | 63 | 75.0451505 |
| 73.3551261 | 87.2690501 | 68.8456011 | 76.7357739 | 63 | 74.5451505 |
| 77.3551261 | 88.2690501 | 68.8456011 | 76.7357739 | 63 | 75.0451505 |
| 77.3551261 | 87.2690501 | 68.8456011 | 79.7357739 | 63 | 74.9201505 |
| 77.3551261 | 86.2690501 | 69.8456011 | 81.7357739 | 63 | 74.5451505 |
| 77.3551261 | 84.2690501 | 69.8456011 | 81.7357739 | 63 | 74.0451505 |
| 78.3551261 | 84.2690501 | 69.8456011 | 81.7357739 | 63 | 74.5451505 |
| 78.3551261 | 83.2690501 | 69.8456011 | 76.7357739 | 63 | 75.0451505 |
| 78.3551261 | 81.2690501 | 69.8456011 | 72.7357739 | 63 | 75.4201505 |
| 78.3551261 | 79.2690501 | 69.8456011 | 72.7357739 | 63 | 75.2951505 |
| 77.3551261 | 78.2690501 | 69.8456011 | 69.7357739 | 63 | 74.9201505 |
| 77.3551261 | 77.2690501 | 69.8456011 | 66.7357739 | 63 | 74.9201505 |
| 77.3551261 | 76.2690501 | 69.8456011 | 62.7357739 | 63 | 74.7951505 |
| 77.3551261 | 76.2690501 | 76.8456011 | 62.7357739 | 63 | 75.6701505 |
| 78.3551261 | 77.2690501 | 76.8456011 | 60.7357739 | 63 | 75.5451505 |
| 78.3551261 | 77.2690501 | 76.8456011 | 60.7357739 | 63 | 75.5451505 |
| 80.3551261 | 76.2690501 | 77.8456011 | 60.7357739 | 63 | 75.5451505 |
| 81.3551261 | 76.2690501 | 77.8456011 | 62.7357739 | 63 | 75.4201505 |
| 82.3551261 | 76.2690501 | 77.8456011 | 63.7357739 | 63 | 75.2951505 |
| 83.3551261 | 76.2690501 | 73.8456011 | 65.7357739 | 63 | 74.7951505 |
| 84.3551261 | 77.2690501 | 73.8456011 | 66.7357739 | 63 | 75.0451505 |
| 85.3551261 | 77.2690501 | 72.8456011 | 68.7357739 | 63 | 74.7951505 |
| 87.3551261 | 75.2690501 | 72.8456011 | 68.7357739 | 63 | 75.0451505 |
| 88.3551261 | 75.2690501 | 72.8456011 | 75.7357739 | 63 | 75.1701505 |
| 90.3551261 | 75.2690501 | 72.8456011 | 76.7357739 | 63 | 75.1701505 |
| 90.3551261 | 75.2690501 | 76.8456011 | 76.7357739 | 63 | 75.6701505 |
| 90.3551261 | 75.2690501 | 76.8456011 | 77.7357739 | 63 | 75.4201505 |
| 90.3551261 | 75.2690501 | 76.8456011 | 76.7357739 | 63 | 75.0451505 |
| 90.3551261 | 76.2690501 | 76.8456011 | 74.7357739 | 63 | 74.9201505 |
| 90.3551261 | 76.2690501 | 77.8456011 | 74.7357739 | 63 | 75.0451505 |
| 90.3551261 | 79.2690501 | 83.8456011 | 74.7357739 | 63 | 76.1701505 |
| 91.3551261 | 81.2690501 | 84.8456011 | 74.7357739 | 63 | 77.4201505 |
| 91.3551261 | 81.2690501 | 84.8456011 | 74.7357739 | 63 | 77.5451505 |

|            |            |            |            |    |            |
|------------|------------|------------|------------|----|------------|
| 93.3551261 | 81.2690501 | 87.8456011 | 73.7357739 | 63 | 78.6701505 |
| 83.3551261 | 81.2690501 | 88.8456011 | 73.7357739 | 63 | 77.7951505 |
| 83.3551261 | 81.2690501 | 88.8456011 | 72.7357739 | 63 | 77.7951505 |
| 80.3551261 | 80.2690501 | 70.8456011 | 72.7357739 | 63 | 74.9201505 |
| 79.3551261 | 80.2690501 | 68.8456011 | 72.7357739 | 63 | 74.5451505 |
| 78.3551261 | 80.2690501 | 68.8456011 | 72.7357739 | 63 | 74.5451505 |
| 78.3551261 | 81.2690501 | 66.8456011 | 73.7357739 | 63 | 74.2951505 |
| 78.3551261 | 82.2690501 | 66.8456011 | 73.7357739 | 63 | 74.4201505 |
| 78.3551261 | 82.2690501 | 66.8456011 | 74.7357739 | 63 | 74.1701505 |
| 77.3551261 | 82.2690501 | 66.8456011 | 75.7357739 | 63 | 74.1701505 |
| 75.3551261 | 82.2690501 | 64.8456011 | 75.7357739 | 63 | 74.0451505 |
| 75.3551261 | 82.2690501 | 64.8456011 | 77.7357739 | 63 | 74.7951505 |
| 74.3551261 | 82.2690501 | 63.8456011 | 79.7357739 | 63 | 74.4201505 |
| 74.3551261 | 85.2690501 | 63.8456011 | 80.7357739 | 63 | 74.7951505 |
| 74.3551261 | 85.2690501 | 63.8456011 | 80.7357739 | 63 | 74.5451505 |
| 74.3551261 | 75.1701505 | 64.8456011 | 81.7357739 | 63 | 73.1577881 |
| 74.3551261 | 75.0451505 | 64.8456011 | 82.7357739 | 63 | 73.0171631 |
| 73.3551261 | 74.5451505 | 64.8456011 | 82.7357739 | 63 | 72.4546631 |
| 73.3551261 | 73.7951505 | 65.8456011 | 82.7357739 | 63 | 71.7359131 |
| 73.3551261 | 73.5451505 | 65.8456011 | 82.7357739 | 63 | 71.3296631 |
| 73.3551261 | 73.5451505 | 65.8456011 | 83.7357739 | 63 | 71.3296631 |
| 74.3551261 | 73.6701505 | 65.8456011 | 86.7357739 | 63 | 71.4702881 |
| 76.3551261 | 73.5451505 | 65.8456011 | 86.7357739 | 63 | 71.3296631 |
| 76.3551261 | 73.4201505 | 65.8456011 | 86.7357739 | 63 | 71.1890381 |
| 76.3551261 | 73.1701505 | 65.8456011 | 86.7357739 | 63 | 70.5327881 |
| 76.3551261 | 73.2951505 | 65.8456011 | 86.7357739 | 63 | 70.5484131 |
| 76.3551261 | 73.7951505 | 65.8456011 | 86.7357739 | 63 | 71.1109131 |
| 76.3551261 | 74.1701505 | 65.8456011 | 84.7357739 | 63 | 71.5327881 |
| 76.3551261 | 74.2951505 | 65.8456011 | 84.7357739 | 63 | 71.6734131 |
| 75.3551261 | 73.1701505 | 65.8456011 | 84.7357739 | 63 | 70.4077881 |
| 75.3551261 | 73.2951505 | 65.8456011 | 84.7357739 | 63 | 70.5484131 |
| 75.3551261 | 73.1701505 | 65.8456011 | 84.7357739 | 63 | 70.4077881 |
| 74.3551261 | 73.1701505 | 65.8456011 | 84.7357739 | 63 | 70.4077881 |
| 74.3551261 | 73.4201505 | 65.8456011 | 85.7357739 | 63 | 70.6890381 |
| 74.3551261 | 73.2951505 | 66.8456011 | 86.7357739 | 63 | 70.6734131 |
| 75.3551261 | 87.2690501 | 66.8456011 | 88.7357739 | 63 | 72.9201505 |
| 76.3551261 | 85.2690501 | 66.8456011 | 90.7357739 | 63 | 73.2951505 |
| 77.3551261 | 85.2690501 | 67.8456011 | 90.7357739 | 63 | 74.0451505 |
| 77.3551261 | 84.2690501 | 68.8456011 | 84.7357739 | 63 | 74.5451505 |
| 78.3551261 | 83.2690501 | 68.8456011 | 82.7357739 | 63 | 74.6701505 |
| 77.3551261 | 82.2690501 | 68.8456011 | 82.7357739 | 63 | 75.0451505 |
| 75.3551261 | 81.2690501 | 68.8456011 | 82.7357739 | 63 | 75.1701505 |
| 72.3551261 | 80.2690501 | 69.8456011 | 81.7357739 | 63 | 74.7951505 |
| 70.3551261 | 80.2690501 | 72.8456011 | 81.7357739 | 63 | 74.6701505 |
| 69.3551261 | 79.2690501 | 72.8456011 | 80.7357739 | 63 | 73.4583549 |

|            |            |            |            |    |            |
|------------|------------|------------|------------|----|------------|
| 69.3551261 | 78.2690501 | 72.8456011 | 80.7357739 | 63 | 73.3333549 |
| 69.3551261 | 77.2690501 | 72.8456011 | 79.7357739 | 63 | 72.9271049 |
| 69.3551261 | 77.2690501 | 72.8456011 | 75.7357739 | 63 | 72.9427299 |
| 69.3551261 | 75.2690501 | 72.8456011 | 73.7357739 | 63 | 72.5208549 |
| 70.3551261 | 74.2690501 | 72.8456011 | 73.7357739 | 63 | 72.5208549 |
| 70.3551261 | 74.2690501 | 72.8456011 | 73.7357739 | 63 | 72.5208549 |
| 70.3551261 | 74.2690501 | 72.8456011 | 71.7357739 | 63 | 73.3646049 |
| 70.3551261 | 74.2690501 | 72.8456011 | 71.7357739 | 63 | 73.3646049 |
| 71.3551261 | 74.2690501 | 75.8456011 | 71.7357739 | 63 | 73.8802299 |
| 72.3551261 | 74.2690501 | 75.8456011 | 73.7357739 | 63 | 73.9271049 |
| 77.3551261 | 74.2690501 | 76.8456011 | 75.7357739 | 63 | 74.4739799 |
| 77.3551261 | 75.2690501 | 76.8456011 | 77.7357739 | 63 | 74.3177299 |
| 77.3551261 | 75.2690501 | 77.8456011 | 77.7357739 | 63 | 74.3021049 |
| 77.3551261 | 74.2690501 | 78.8456011 | 80.7357739 | 63 | 76.5451505 |
| 78.3551261 | 74.2690501 | 81.8456011 | 80.7357739 | 63 | 77.0451505 |
| 79.3551261 | 74.2690501 | 81.8456011 | 80.7357739 | 63 | 77.1701505 |
| 79.3551261 | 74.2690501 | 82.8456011 | 80.7357739 | 63 | 77.4201505 |
| 80.3551261 | 74.2690501 | 81.8456011 | 80.7357739 | 63 | 77.4201505 |
| 80.3551261 | 74.2690501 | 78.8456011 | 80.7357739 | 63 | 76.7951505 |
| 80.3551261 | 74.2690501 | 76.8456011 | 80.7357739 | 63 | 76.4201505 |
| 80.3551261 | 74.2690501 | 75.8456011 | 80.7357739 | 63 | 76.1701505 |
| 80.3551261 | 74.2690501 | 75.8456011 | 79.7357739 | 63 | 76.1701505 |
| 80.3551261 | 75.2690501 | 73.8456011 | 80.7357739 | 63 | 76.1701505 |
| 80.3551261 | 75.2690501 | 73.8456011 | 79.7357739 | 63 | 75.6701505 |
| 80.3551261 | 75.2690501 | 73.8456011 | 80.7357739 | 63 | 75.5451505 |
| 80.3551261 | 74.2690501 | 73.8456011 | 81.7357739 | 63 | 75.4201505 |
| 80.3551261 | 75.2690501 | 72.8456011 | 81.7357739 | 63 | 74.6701505 |
| 81.3551261 | 75.2690501 | 72.8456011 | 82.7357739 | 63 | 74.9201505 |
| 80.3551261 | 75.2690501 | 72.8456011 | 82.7357739 | 63 | 75.4201505 |
| 77.3551261 | 75.2690501 | 71.8456011 | 82.7357739 | 63 | 74.7951505 |
| 77.3551261 | 77.2690501 | 71.8456011 | 82.7357739 | 63 | 74.9201505 |
| 76.3551261 | 77.2690501 | 68.8456011 | 84.7357739 | 63 | 74.2951505 |
| 76.3551261 | 77.2690501 | 68.8456011 | 85.7357739 | 63 | 74.0451505 |
| 78.3551261 | 77.2690501 | 68.8456011 | 85.7357739 | 63 | 74.4201505 |
| 78.3551261 | 78.2690501 | 68.8456011 | 85.7357739 | 63 | 74.5451505 |
| 77.3551261 | 80.2690501 | 68.8456011 | 85.7357739 | 63 | 74.6701505 |
| 76.3551261 | 80.2690501 | 67.8456011 | 85.7357739 | 63 | 74.5451505 |
| 76.3551261 | 84.2690501 | 66.8456011 | 85.7357739 | 63 | 74.9201505 |
| 76.3551261 | 86.2690501 | 66.8456011 | 85.7357739 | 63 | 74.9201505 |
| 76.3551261 | 87.2690501 | 66.8456011 | 84.7357739 | 63 | 75.0451505 |
| 76.3551261 | 87.2690501 | 66.8456011 | 84.7357739 | 63 | 75.1701505 |
| 75.3551261 | 87.2690501 | 66.8456011 | 84.7357739 | 63 | 75.0451505 |
| 74.3551261 | 87.2690501 | 68.8456011 | 83.7357739 | 63 | 75.1701505 |
| 74.3551261 | 87.2690501 | 68.8456011 | 84.7357739 | 63 | 75.0451505 |
| 75.3551261 | 87.2690501 | 68.8456011 | 85.7357739 | 63 | 75.2951505 |



|            |            |            |            |    |            |
|------------|------------|------------|------------|----|------------|
| 75.3551261 | 86.2690501 | 69.8456011 | 85.7357739 | 63 | 75.2951505 |
| 76.3551261 | 81.2690501 | 69.8456011 | 83.7357739 | 63 | 74.7951505 |
| 75.3551261 | 78.2690501 | 69.8456011 | 83.7357739 | 63 | 73.6701505 |
| 73.3551261 | 78.2690501 | 69.8456011 | 84.7357739 | 63 | 73.4201505 |
| 70.3551261 | 78.2690501 | 69.8456011 | 87.7357739 | 63 | 73.1701505 |
| 70.3551261 | 78.2690501 | 70.8456011 | 89.7357739 | 63 | 74.1701505 |
| 70.3551261 | 78.2690501 | 71.8456011 | 90.7357739 | 63 | 74.5451505 |
| 70.3551261 | 78.2690501 | 72.8456011 | 90.7357739 | 63 | 73.4201505 |
| 70.3551261 | 77.2690501 | 72.8456011 | 90.7357739 | 63 | 72.6701505 |
| 70.3551261 | 77.2690501 | 69.8456011 | 90.7357739 | 63 | 72.4201505 |
| 71.3551261 | 72.2690501 | 69.8456011 | 90.7357739 | 63 | 71.7951505 |
| 71.3551261 | 69.2690501 | 69.8456011 | 91.7357739 | 63 | 71.6701505 |
| 70.3551261 | 66.2690501 | 68.8456011 | 92.7357739 | 63 | 71.1701505 |
| 70.3551261 | 65.2690501 | 68.8456011 | 94.7357739 | 63 | 70.7951505 |
| 70.3551261 | 65.2690501 | 68.8456011 | 95.7357739 | 63 | 70.7951505 |
| 70.3551261 | 66.2690501 | 67.8456011 | 95.7357739 | 63 | 70.9201505 |
| 70.3551261 | 67.2690501 | 67.8456011 | 93.7357739 | 63 | 71.0451505 |
| 70.3551261 | 67.2690501 | 68.8456011 | 91.7357739 | 63 | 71.4201505 |
| 70.3551261 | 66.2690501 | 69.8456011 | 90.7357739 | 63 | 71.4201505 |
| 70.3551261 | 65.2690501 | 69.8456011 | 89.7357739 | 63 | 71.4201505 |
| 70.3551261 | 65.2690501 | 72.8456011 | 88.7357739 | 63 | 71.7951505 |
| 70.3551261 | 61.2690501 | 72.8456011 | 88.7357739 | 63 | 71.2951505 |
| 70.3551261 | 60.2690501 | 72.8456011 | 87.7357739 | 63 | 71.6701505 |
| 70.3551261 | 60.2690501 | 73.8456011 | 87.7357739 | 63 | 71.7951505 |
| 71.3551261 | 62.2690501 | 75.8456011 | 86.7357739 | 63 | 72.4201505 |
| 71.3551261 | 63.2690501 | 77.8456011 | 86.7357739 | 63 | 72.6701505 |
| 70.3551261 | 63.2690501 | 78.8456011 | 86.7357739 | 63 | 72.4201505 |
| 71.3551261 | 65.2690501 | 80.8456011 | 84.7357739 | 63 | 73.0451505 |
| 72.3551261 | 66.2690501 | 88.8456011 | 84.7357739 | 63 | 74.2951505 |
| 72.3551261 | 66.2690501 | 88.8456011 | 84.7357739 | 63 | 74.6701505 |
| 72.3551261 | 67.2690501 | 89.8456011 | 84.7357739 | 63 | 74.7951505 |
| 72.3551261 | 67.2690501 | 90.8456011 | 83.7357739 | 63 | 75.0451505 |
| 72.3551261 | 67.2690501 | 91.8456011 | 83.7357739 | 63 | 73.1013442 |
| 72.3551261 | 68.2690501 | 91.8456011 | 83.7357739 | 63 | 73.2419692 |
| 72.3551261 | 69.2690501 | 91.8456011 | 83.7357739 | 63 | 75.4201505 |
| 73.3551261 | 69.2690501 | 92.8456011 | 81.7357739 | 63 | 73.9763442 |
| 73.3551261 | 72.2690501 | 76.8996642 | 80.7357739 | 63 | 74.2419692 |
| 73.3551261 | 72.2690501 | 77.1218865 | 80.7357739 | 63 | 74.2732192 |
| 73.3551261 | 72.2690501 | 76.8996642 | 80.7357739 | 63 | 74.2419692 |
| 74.3551261 | 72.2690501 | 77.0107753 | 80.7357739 | 63 | 74.0075942 |
| 74.3551261 | 71.2690501 | 77.5663309 | 80.7357739 | 63 | 73.9607192 |
| 74.3551261 | 71.2690501 | 77.2329976 | 77.7357739 | 63 | 74.4607192 |
| 74.3551261 | 71.2690501 | 76.4552198 | 71.7357739 | 63 | 74.4450942 |
| 74.3551261 | 71.2690501 | 76.1218865 | 68.7357739 | 63 | 74.3200942 |
| 74.3551261 | 71.2690501 | 76.0107753 | 68.7357739 | 63 | 74.3044692 |

|            |            |            |            |    |            |
|------------|------------|------------|------------|----|------------|
| 74.3551261 | 72.2690501 | 75.677442  | 66.7357739 | 63 | 74.2888442 |
| 74.3551261 | 71.2690501 | 75.4552198 | 64.7357739 | 63 | 74.1638442 |
| 75.3551261 | 71.2690501 | 75.7885531 | 63.7357739 | 63 | 74.2263442 |
| 78.3551261 | 71.2690501 | 75.7885531 | 63.7357739 | 63 | 74.7263442 |
| 78.3551261 | 70.2690501 | 76.1218865 | 63.7357739 | 63 | 74.7732192 |
| 79.3551261 | 70.2690501 | 76.677442  | 68.7357739 | 63 | 75.1482192 |
| 79.3551261 | 68.2690501 | 77.0107753 | 69.7357739 | 63 | 75.0544692 |
| 78.3551261 | 68.2690501 | 77.7885531 | 70.7357739 | 63 | 75.2732192 |
| 78.3551261 | 68.2690501 | 78.2329976 | 73.7357739 | 63 | 75.2888442 |
| 78.3551261 | 69.2690501 | 78.3441087 | 74.7357739 | 63 | 75.4138442 |
| 78.3551261 | 69.2690501 | 78.4552198 | 74.7357739 | 63 | 75.3044692 |
| 79.3551261 | 70.2690501 | 78.7885531 | 74.7357739 | 63 | 75.3513442 |
| 80.3551261 | 70.2690501 | 79.0107753 | 74.7357739 | 63 | 75.6325942 |
| 79.3551261 | 70.2690501 | 79.3441087 | 75.7357739 | 63 | 75.6638442 |
| 79.3551261 | 71.2690501 | 78.7885531 | 75.7357739 | 63 | 75.7107192 |
| 78.3551261 | 70.2690501 | 79.0107753 | 78.7357739 | 63 | 75.4450942 |
| 77.3551261 | 70.2690501 | 78.7885531 | 78.7357739 | 63 | 75.2888442 |
| 77.3551261 | 71.2690501 | 79.5663309 | 79.7357739 | 63 | 75.5075942 |
| 77.3551261 | 71.2690501 | 79.677442  | 79.7357739 | 63 | 76.1482192 |
| 77.3551261 | 74.2690501 | 79.7885531 | 79.7357739 | 63 | 76.1638442 |
| 77.3551261 | 74.2690501 | 79.677442  | 79.7357739 | 63 | 76.2732192 |
| 77.3551261 | 74.2690501 | 80.1218865 | 79.7357739 | 63 | 76.2107192 |
| 77.3551261 | 75.2690501 | 80.2329976 | 80.7357739 | 63 | 76.7107192 |
| 77.3551261 | 75.2690501 | 80.2329976 | 83.7357739 | 63 | 76.6638442 |
| 75.3551261 | 74.2690501 | 79.8996642 | 83.7357739 | 63 | 76.2419692 |
| 74.3551261 | 75.2690501 | 80.0107753 | 83.7357739 | 63 | 76.1325942 |
| 73.3551261 | 75.2690501 | 79.7885531 | 82.7357739 | 63 | 76.2419692 |
| 73.3551261 | 76.2690501 | 80.0107753 | 82.7357739 | 63 | 76.6482192 |
| 73.3551261 | 77.2690501 | 95.8456011 | 81.7357739 | 63 | 79.2951505 |
| 73.3551261 | 77.2690501 | 89.8456011 | 81.7357739 | 63 | 79.4201505 |
| 73.3551261 | 76.2690501 | 89.8456011 | 81.7357739 | 63 | 79.1701505 |
| 73.3551261 | 76.2690501 | 88.8456011 | 81.7357739 | 63 | 80.5451505 |
| 73.3551261 | 77.2690501 | 90.8456011 | 81.7357739 | 63 | 80.9201505 |
| 73.3551261 | 77.2690501 | 89.8456011 | 81.7357739 | 63 | 80.7951505 |
| 78.3551261 | 76.2690501 | 88.8456011 | 81.7357739 | 63 | 81.1701505 |
| 82.3551261 | 76.2690501 | 88.8456011 | 77.7357739 | 63 | 81.7951505 |
| 83.3551261 | 76.2690501 | 87.8456011 | 77.7357739 | 63 | 81.5451505 |
| 86.3551261 | 75.2690501 | 83.8456011 | 77.7357739 | 63 | 81.6701505 |
| 83.3551261 | 75.2690501 | 83.8456011 | 76.7357739 | 63 | 80.0451505 |
| 83.3551261 | 76.2690501 | 84.8456011 | 76.7357739 | 63 | 79.6701505 |
| 81.3551261 | 76.2690501 | 86.8456011 | 76.7357739 | 63 | 79.4201505 |
| 80.3551261 | 76.2690501 | 85.8456011 | 78.7357739 | 63 | 78.7951505 |
| 80.3551261 | 76.2690501 | 86.8456011 | 79.7357739 | 63 | 78.7951505 |
| 80.3551261 | 75.2690501 | 84.8456011 | 70.7357739 | 63 | 78.7951505 |
| 80.3551261 | 75.2690501 | 84.8456011 | 67.7357739 | 63 | 78.7951505 |

|            |            |            |            |    |            |
|------------|------------|------------|------------|----|------------|
| 80.3551261 | 75.2690501 | 84.8456011 | 67.7357739 | 63 | 78.6701505 |
| 78.3551261 | 76.2690501 | 79.8456011 | 67.7357739 | 63 | 78.4201505 |
| 78.3551261 | 77.2690501 | 72.8456011 | 61.7357739 | 63 | 77.5451505 |
| 77.3551261 | 76.2690501 | 68.8456011 | 61.7357739 | 63 | 76.5451505 |
| 77.3551261 | 76.2690501 | 67.8456011 | 58.7357739 | 63 | 76.1701505 |
| 77.3551261 | 75.2690501 | 67.8456011 | 61.7357739 | 63 | 75.5451505 |
| 76.3551261 | 74.2690501 | 67.8456011 | 62.7357739 | 63 | 75.1701505 |
| 78.3551261 | 74.2690501 | 67.8456011 | 65.7357739 | 63 | 74.6701505 |
| 79.3551261 | 74.2690501 | 67.8456011 | 72.7357739 | 63 | 74.0451505 |
| 80.3551261 | 73.2690501 | 67.8456011 | 73.7357739 | 63 | 73.4201505 |
| 80.3551261 | 74.2690501 | 67.8456011 | 73.7357739 | 63 | 73.4201505 |
| 78.3551261 | 74.2690501 | 67.8456011 | 72.7357739 | 63 | 72.7951505 |
| 78.3551261 | 74.2690501 | 67.8456011 | 72.7357739 | 63 | 72.6701505 |
| 77.3551261 | 75.2690501 | 66.8456011 | 76.7357739 | 63 | 72.9201505 |
| 76.3551261 | 75.2690501 | 66.8456011 | 80.7357739 | 63 | 73.0451505 |
| 74.3551261 | 75.2690501 | 66.8456011 | 80.7357739 | 63 | 73.0451505 |
| 74.3551261 | 73.2690501 | 67.8456011 | 80.7357739 | 63 | 72.9201505 |
| 74.3551261 | 72.2690501 | 67.8456011 | 80.7357739 | 63 | 73.4201505 |
| 73.3551261 | 72.2690501 | 67.8456011 | 81.7357739 | 63 | 73.2951505 |
| 73.3551261 | 72.2690501 | 69.8456011 | 82.7357739 | 63 | 73.7951505 |
| 74.3551261 | 72.2690501 | 71.8456011 | 82.7357739 | 63 | 74.0451505 |
| 74.3551261 | 74.2690501 | 74.8456011 | 82.7357739 | 63 | 74.7951505 |
| 73.3551261 | 74.2690501 | 80.8456011 | 84.7357739 | 63 | 75.4201505 |
| 73.3551261 | 74.2690501 | 81.8456011 | 84.7357739 | 63 | 75.4201505 |
| 73.3551261 | 73.2690501 | 82.8456011 | 84.7357739 | 63 | 75.6701505 |
| 73.3551261 | 72.2690501 | 83.8456011 | 84.7357739 | 63 | 75.9201505 |
| 72.3551261 | 72.2690501 | 83.8456011 | 84.7357739 | 63 | 75.6701505 |
| 72.3551261 | 72.2690501 | 83.8456011 | 89.7357739 | 63 | 75.1701505 |
| 72.3551261 | 72.2690501 | 84.8456011 | 90.7357739 | 63 | 75.1701505 |
| 71.3551261 | 73.2690501 | 85.8456011 | 90.7357739 | 63 | 75.1701505 |
| 71.3551261 | 73.2690501 | 87.8456011 | 90.7357739 | 63 | 75.4201505 |
| 70.3551261 | 73.2690501 | 87.8456011 | 90.7357739 | 63 | 75.2951505 |
| 70.3551261 | 73.2690501 | 87.8456011 | 89.7357739 | 63 | 75.2951505 |
| 69.3551261 | 71.2690501 | 83.8456011 | 89.7357739 | 63 | 74.2951505 |
| 66.3551261 | 71.2690501 | 78.8456011 | 89.7357739 | 63 | 74.0451505 |
| 66.3551261 | 72.2690501 | 75.8456011 | 84.7357739 | 63 | 75.1701505 |
| 67.3551261 | 73.2690501 | 74.8456011 | 77.7357739 | 63 | 75.1701505 |
| 68.3551261 | 73.2690501 | 70.8456011 | 70.7357739 | 63 | 73.7951505 |
| 69.3551261 | 73.2690501 | 71.8456011 | 68.7357739 | 63 | 74.1701505 |
| 70.3551261 | 73.2690501 | 71.8456011 | 68.7357739 | 63 | 74.2951505 |
| 69.3551261 | 72.2690501 | 71.8456011 | 68.7357739 | 63 | 73.9201505 |
| 69.3551261 | 71.2690501 | 71.8456011 | 67.7357739 | 63 | 73.2951505 |
| 69.3551261 | 71.2690501 | 71.8456011 | 67.7357739 | 63 | 72.9201505 |
| 69.3551261 | 71.2690501 | 71.8456011 | 67.7357739 | 63 | 72.7951505 |
| 68.3551261 | 71.2690501 | 73.8456011 | 67.7357739 | 63 | 72.7951505 |

|            |            |            |            |    |            |
|------------|------------|------------|------------|----|------------|
| 68.3551261 | 73.2690501 | 73.8456011 | 67.7357739 | 63 | 72.0451505 |
| 69.3551261 | 74.2690501 | 73.8456011 | 66.7357739 | 63 | 71.1701505 |
| 70.3551261 | 74.2690501 | 74.8456011 | 69.7357739 | 63 | 70.6701505 |
| 71.3551261 | 74.2690501 | 74.8456011 | 74.7357739 | 63 | 70.0451505 |
| 71.3551261 | 70.2690501 | 75.8456011 | 78.7357739 | 63 | 69.5451505 |
| 71.3551261 | 68.2690501 | 75.8456011 | 80.7357739 | 63 | 69.1701505 |
| 71.3551261 | 68.2690501 | 76.8456011 | 80.7357739 | 63 | 69.1701505 |
| 71.3551261 | 68.2690501 | 76.8456011 | 78.7357739 | 63 | 69.0451505 |
| 71.3551261 | 70.2690501 | 77.8456011 | 78.7357739 | 63 | 69.4201505 |
| 72.3551261 | 71.2690501 | 77.8456011 | 78.7357739 | 63 | 69.6701505 |
| 72.3551261 | 70.2690501 | 77.8456011 | 78.7357739 | 63 | 69.7951505 |
| 72.3551261 | 70.2690501 | 79.8456011 | 79.7357739 | 63 | 70.0451505 |
| 72.3551261 | 69.2690501 | 79.8456011 | 80.7357739 | 63 | 70.0451505 |
| 73.3551261 | 69.2690501 | 79.8456011 | 80.7357739 | 63 | 70.1701505 |
| 73.3551261 | 68.2690501 | 79.8456011 | 79.7357739 | 63 | 70.0451505 |
| 73.3551261 | 68.2690501 | 80.8456011 | 78.7357739 | 63 | 70.0451505 |
| 73.3551261 | 67.2690501 | 80.8456011 | 76.7357739 | 63 | 70.0451505 |
| 73.3551261 | 68.2690501 | 81.8456011 | 75.7357739 | 63 | 70.4201505 |
| 73.3551261 | 68.2690501 | 82.8456011 | 74.7357739 | 63 | 70.5451505 |
| 73.3551261 | 70.2690501 | 74.8456011 | 73.7357739 | 63 | 69.9201505 |
| 73.3551261 | 71.2690501 | 72.8456011 | 73.7357739 | 63 | 70.2951505 |
| 73.3551261 | 72.2690501 | 72.8456011 | 73.7357739 | 63 | 70.9201505 |
| 73.3551261 | 71.2690501 | 68.8456011 | 73.7357739 | 63 | 70.1701505 |
| 73.3551261 | 69.2690501 | 65.8456011 | 74.7357739 | 63 | 69.6701505 |
| 73.3551261 | 68.2690501 | 64.8456011 | 75.7357739 | 63 | 69.5451505 |
| 72.3551261 | 68.2690501 | 64.8456011 | 77.7357739 | 63 | 69.1701505 |
| 72.3551261 | 69.2690501 | 64.8456011 | 78.7357739 | 63 | 69.1701505 |
| 71.3551261 | 70.2690501 | 64.8456011 | 80.7357739 | 63 | 68.5451505 |
| 71.3551261 | 69.2690501 | 62.8456011 | 80.7357739 | 63 | 68.1701505 |
| 71.3551261 | 69.2690501 | 62.8456011 | 78.7357739 | 63 | 68.2951505 |
| 71.3551261 | 69.2690501 | 62.8456011 | 77.7357739 | 63 | 68.7951505 |
| 73.3551261 | 69.2690501 | 63.8456011 | 77.7357739 | 63 | 69.1701505 |
| 74.3551261 | 68.2690501 | 63.8456011 | 77.7357739 | 63 | 69.4201505 |
| 74.3551261 | 67.2690501 | 63.8456011 | 77.7357739 | 63 | 69.7951505 |
| 73.3551261 | 69.2690501 | 63.8456011 | 77.7357739 | 63 | 69.7951505 |
| 73.3551261 | 72.2690501 | 63.8456011 | 77.7357739 | 63 | 70.4201505 |
| 73.3551261 | 72.2690501 | 63.8456011 | 77.7357739 | 63 | 70.5451505 |
| 73.3551261 | 73.2690501 | 63.8456011 | 77.7357739 | 63 | 70.7951505 |
| 73.3551261 | 72.2690501 | 63.8456011 | 78.7357739 | 63 | 70.9201505 |
| 72.3551261 | 71.2690501 | 63.8456011 | 79.7357739 | 63 | 71.1701505 |
| 72.3551261 | 71.2690501 | 63.8456011 | 81.7357739 | 63 | 71.2951505 |
| 72.3551261 | 71.2690501 | 65.8456011 | 81.7357739 | 63 | 71.5451505 |
| 73.3551261 | 74.2690501 | 66.8456011 | 82.7357739 | 63 | 72.6701505 |
| 73.3551261 | 74.2690501 | 68.8456011 | 82.7357739 | 63 | 73.1701505 |
| 73.3551261 | 74.2690501 | 73.8456011 | 82.7357739 | 63 | 74.6701505 |

|            |            |            |            |    |            |
|------------|------------|------------|------------|----|------------|
| 73.3551261 | 75.2690501 | 77.8456011 | 82.7357739 | 63 | 75.1701505 |
| 74.3551261 | 75.2690501 | 77.8456011 | 82.7357739 | 63 | 74.9201505 |
| 74.3551261 | 74.2690501 | 79.8456011 | 80.7357739 | 63 | 75.0451505 |
| 74.3551261 | 71.2690501 | 80.8456011 | 78.7357739 | 63 | 74.5451505 |
| 74.3551261 | 68.2690501 | 82.8456011 | 77.7357739 | 63 | 74.1701505 |
| 74.3551261 | 67.2690501 | 84.8456011 | 77.7357739 | 63 | 74.1701505 |
| 76.3551261 | 66.2690501 | 86.8456011 | 76.7357739 | 63 | 74.5451505 |
| 76.3551261 | 66.2690501 | 75.677442  | 76.7357739 | 63 | 73.1325942 |
| 76.3551261 | 66.2690501 | 76.3441087 | 74.7357739 | 63 | 73.1325942 |
| 77.3551261 | 66.2690501 | 76.2329976 | 72.7357739 | 63 | 73.1482192 |
| 76.3551261 | 67.2690501 | 76.1218865 | 70.7357739 | 63 | 72.5388442 |
| 75.3551261 | 67.2690501 | 76.677442  | 70.7357739 | 63 | 72.7419692 |
| 75.3551261 | 67.2690501 | 76.8996642 | 69.7357739 | 63 | 73.0388442 |
| 75.3551261 | 66.2690501 | 76.677442  | 69.7357739 | 63 | 73.0075942 |
| 75.3551261 | 65.2690501 | 77.0107753 | 69.7357739 | 63 | 72.8044692 |
| 74.3551261 | 65.2690501 | 77.2329976 | 69.7357739 | 63 | 73.2107192 |
| 74.3551261 | 65.2690501 | 77.677442  | 68.7357739 | 63 | 73.5388442 |
| 74.3551261 | 65.2690501 | 78.0107753 | 67.7357739 | 63 | 73.9763442 |
| 74.3551261 | 66.2690501 | 77.7885531 | 67.7357739 | 63 | 74.4450942 |
| 74.3551261 | 66.2690501 | 79.0107753 | 76.7357739 | 63 | 74.3513442 |
| 74.3551261 | 66.2690501 | 79.7885531 | 76.7357739 | 63 | 74.5857192 |
| 74.3551261 | 68.2690501 | 81.0107753 | 84.7357739 | 63 | 75.5075942 |
| 74.3551261 | 69.2690501 | 81.4552198 | 88.7357739 | 63 | 75.6325942 |
| 74.3551261 | 69.2690501 | 81.4552198 | 89.7357739 | 63 | 75.4919692 |
| 72.3551261 | 69.2690501 | 81.4552198 | 88.7357739 | 63 | 75.2575942 |
| 71.3551261 | 70.2690501 | 81.1218865 | 88.7357739 | 63 | 75.3357192 |
| 70.3551261 | 71.2690501 | 81.2329976 | 88.7357739 | 63 | 74.9763442 |
| 71.3551261 | 70.2690501 | 81.2329976 | 88.7357739 | 63 | 75.1013442 |
| 71.3551261 | 69.2690501 | 81.0107753 | 87.7357739 | 63 | 75.0857192 |
| 71.3551261 | 69.2690501 | 80.0107753 | 84.7357739 | 63 | 74.8669692 |
| 71.3551261 | 68.2690501 | 79.7885531 | 84.7357739 | 63 | 74.0857192 |
| 71.3551261 | 68.2690501 | 78.8996642 | 75.7357739 | 63 | 73.9763442 |
| 72.3551261 | 68.2690501 | 78.0107753 | 67.7357739 | 63 | 74.1013442 |
| 71.3551261 | 69.2690501 | 78.1218865 | 67.7357739 | 63 | 73.9919692 |
| 71.3551261 | 70.2690501 | 76.7885531 | 67.7357739 | 63 | 73.9294692 |
| 71.3551261 | 70.2690501 | 77.3441087 | 67.7357739 | 63 | 74.0075942 |
| 71.3551261 | 70.2690501 | 90.8456011 | 66.7357739 | 63 | 76.1701505 |
| 72.3551261 | 69.2690501 | 89.8456011 | 67.7357739 | 63 | 75.7951505 |
| 72.3551261 | 68.2690501 | 89.8456011 | 71.7357739 | 63 | 75.5451505 |
| 73.3551261 | 67.2690501 | 89.8456011 | 73.7357739 | 63 | 75.2951505 |
| 73.3551261 | 67.2690501 | 89.8456011 | 73.7357739 | 63 | 74.9201505 |
| 73.3551261 | 67.2690501 | 87.8456011 | 75.7357739 | 63 | 75.0451505 |
| 73.3551261 | 67.2690501 | 86.8456011 | 76.7357739 | 63 | 75.1701505 |
| 75.3551261 | 68.2690501 | 86.8456011 | 76.7357739 | 63 | 75.4201505 |
| 75.3551261 | 68.2690501 | 86.8456011 | 77.7357739 | 63 | 75.2951505 |

|            |            |            |            |    |            |
|------------|------------|------------|------------|----|------------|
| 76.3551261 | 68.2690501 | 86.8456011 | 77.7357739 | 63 | 75.2951505 |
| 76.3551261 | 68.2690501 | 86.8456011 | 77.7357739 | 63 | 75.2951505 |
| 76.3551261 | 68.2690501 | 86.8456011 | 77.7357739 | 63 | 75.0451505 |
| 74.3551261 | 67.2690501 | 86.8456011 | 78.7357739 | 63 | 74.7951505 |
| 73.3551261 | 67.2690501 | 86.8456011 | 78.7357739 | 63 | 74.4201505 |
| 73.3551261 | 67.2690501 | 86.8456011 | 81.7357739 | 63 | 74.4201505 |
| 73.3551261 | 67.2690501 | 86.8456011 | 81.7357739 | 63 | 73.9201505 |
| 69.3551261 | 68.2690501 | 86.8456011 | 81.7357739 | 63 | 73.6701505 |
| 68.3551261 | 68.2690501 | 86.8456011 | 80.7357739 | 63 | 73.5451505 |
| 67.3551261 | 68.2690501 | 85.8456011 | 77.7357739 | 63 | 73.1701505 |
| 66.3551261 | 68.2690501 | 85.8456011 | 77.7357739 | 63 | 72.9201505 |
| 65.3551261 | 68.2690501 | 85.8456011 | 77.7357739 | 63 | 72.2951505 |
| 66.3551261 | 68.2690501 | 85.8456011 | 71.7357739 | 63 | 71.9201505 |
| 66.3551261 | 68.2690501 | 86.8456011 | 70.7357739 | 63 | 72.0451505 |
| 66.3551261 | 68.2690501 | 72.1218865 | 70.7357739 | 63 | 70.2263442 |
| 66.3551261 | 69.2690501 | 72.2329976 | 70.7357739 | 63 | 70.2419692 |
| 67.3551261 | 69.2690501 | 72.2329976 | 70.7357739 | 63 | 70.3669692 |
| 68.3551261 | 69.2690501 | 72.5663309 | 69.7357739 | 63 | 70.4294692 |
| 69.3551261 | 69.2690501 | 72.3441087 | 69.7357739 | 63 | 70.6482192 |
| 69.3551261 | 67.2690501 | 73.3441087 | 69.7357739 | 63 | 70.5388442 |
| 70.3551261 | 67.2690501 | 74.1218865 | 69.7357739 | 63 | 71.3982192 |
| 70.3551261 | 66.2690501 | 74.7885531 | 69.7357739 | 63 | 72.1169692 |
| 70.3551261 | 65.2690501 | 75.1218865 | 69.7357739 | 63 | 72.9138442 |
| 70.3551261 | 65.2690501 | 74.5663309 | 69.7357739 | 63 | 72.9607192 |
| 70.3551261 | 64.2690501 | 74.677442  | 69.7357739 | 63 | 72.3513442 |
| 70.3551261 | 64.2690501 | 75.0107753 | 71.7357739 | 63 | 72.4919692 |
| 70.3551261 | 64.2690501 | 75.3441087 | 74.7357739 | 63 | 72.6169692 |
| 71.3551261 | 66.2690501 | 75.1218865 | 74.7357739 | 63 | 72.5857192 |
| 71.3551261 | 66.2690501 | 74.7885531 | 73.7357739 | 63 | 72.3044692 |
| 71.3551261 | 66.2690501 | 74.7885531 | 73.7357739 | 63 | 72.0544692 |
| 73.3551261 | 66.2690501 | 74.677442  | 73.7357739 | 63 | 72.0388442 |
| 74.3551261 | 66.2690501 | 74.677442  | 73.7357739 | 63 | 71.9138442 |
| 75.3551261 | 66.2690501 | 73.7885531 | 73.7357739 | 63 | 71.7888442 |
| 77.3551261 | 65.2690501 | 83.8456011 | 73.7357739 | 63 | 72.9201505 |
| 78.3551261 | 65.2690501 | 76.8456011 | 74.7357739 | 63 | 72.2951505 |
| 78.3551261 | 65.2690501 | 71.8456011 | 74.7357739 | 63 | 71.7951505 |
| 80.3551261 | 65.2690501 | 69.8456011 | 76.7357739 | 63 | 71.9201505 |
| 79.3551261 | 64.2690501 | 68.8456011 | 76.7357739 | 63 | 71.6701505 |
| 79.3551261 | 66.2690501 | 68.8456011 | 78.7357739 | 63 | 71.6701505 |
| 78.3551261 | 66.2690501 | 68.8456011 | 78.7357739 | 63 | 71.5451505 |
| 78.3551261 | 66.2690501 | 68.8456011 | 78.7357739 | 63 | 72.1701505 |
| 78.3551261 | 66.2690501 | 67.8456011 | 78.7357739 | 63 | 72.2951505 |
| 78.3551261 | 66.2690501 | 68.8456011 | 78.7357739 | 63 | 73.0451505 |
| 78.3551261 | 66.2690501 | 67.8456011 | 78.7357739 | 63 | 73.1701505 |
| 78.3551261 | 66.2690501 | 66.8456011 | 78.7357739 | 63 | 73.5451505 |

|            |            |            |            |    |            |
|------------|------------|------------|------------|----|------------|
| 78.3551261 | 66.2690501 | 66.8456011 | 77.7357739 | 63 | 73.7951505 |
| 78.3551261 | 66.2690501 | 65.8456011 | 76.7357739 | 63 | 74.0451505 |
| 78.3551261 | 66.2690501 | 65.8456011 | 76.7357739 | 63 | 74.1701505 |
| 78.3551261 | 67.2690501 | 65.8456011 | 76.7357739 | 63 | 74.2951505 |
| 79.3551261 | 66.2690501 | 66.8456011 | 75.7357739 | 63 | 74.4201505 |
| 80.3551261 | 64.2690501 | 67.8456011 | 75.7357739 | 63 | 74.0451505 |
| 80.3551261 | 63.2690501 | 68.8456011 | 74.7357739 | 63 | 73.9201505 |
| 80.3551261 | 62.2690501 | 69.8456011 | 74.7357739 | 63 | 73.9201505 |
| 79.3551261 | 62.2690501 | 70.8456011 | 74.7357739 | 63 | 73.7951505 |
| 79.3551261 | 62.2690501 | 70.8456011 | 75.7357739 | 63 | 73.6701505 |
| 77.3551261 | 62.2690501 | 71.8456011 | 75.7357739 | 63 | 73.6701505 |
| 77.3551261 | 62.2690501 | 71.8456011 | 76.7357739 | 63 | 75.1701505 |
| 77.3551261 | 62.2690501 | 70.8456011 | 77.7357739 | 63 | 75.4201505 |
| 74.3551261 | 62.2690501 | 70.8456011 | 77.7357739 | 63 | 73.5989799 |
| 74.3551261 | 62.2690501 | 69.8456011 | 78.7357739 | 63 | 73.4739799 |
| 74.3551261 | 62.2690501 | 69.8456011 | 77.7357739 | 63 | 73.5989799 |
| 73.3551261 | 62.2690501 | 68.8456011 | 77.7357739 | 63 | 73.1927299 |
| 74.3551261 | 62.2690501 | 68.8456011 | 77.7357739 | 63 | 73.5989799 |
| 75.3551261 | 63.2690501 | 68.8456011 | 78.7357739 | 63 | 76.0451505 |
| 75.3551261 | 63.2690501 | 68.8456011 | 78.7357739 | 63 | 73.8802299 |
| 75.3551261 | 63.2690501 | 70.8456011 | 79.7357739 | 63 | 74.1302299 |
| 74.3551261 | 64.2690501 | 70.8456011 | 79.7357739 | 63 | 73.5989799 |
| 74.3551261 | 65.2690501 | 70.8456011 | 79.7357739 | 63 | 73.1927299 |
| 74.3551261 | 65.2690501 | 70.8456011 | 78.7357739 | 63 | 71.4114799 |
| 73.3551261 | 66.2690501 | 70.8456011 | 79.7357739 | 63 | 70.8489799 |
| 73.3551261 | 66.2690501 | 70.8456011 | 79.7357739 | 63 | 70.9739799 |
| 72.3551261 | 66.2690501 | 70.8456011 | 83.7357739 | 63 | 70.9896049 |
| 71.3551261 | 66.2690501 | 70.8456011 | 83.7357739 | 63 | 71.1302299 |
| 71.3551261 | 66.2690501 | 70.8456011 | 84.7357739 | 63 | 71.3021049 |
| 72.3551261 | 66.2690501 | 71.8456011 | 77.7357739 | 63 | 71.5677299 |
| 72.3551261 | 63.2690501 | 71.8456011 | 71.7357739 | 63 | 71.3021049 |
| 71.3551261 | 62.2690501 | 71.8456011 | 71.7357739 | 63 | 70.8958549 |
| 70.3551261 | 62.2690501 | 71.8456011 | 66.7357739 | 63 | 70.5052299 |
| 70.3551261 | 62.2690501 | 71.8456011 | 66.7357739 | 63 | 70.3802299 |
| 71.3551261 | 62.2690501 | 71.8456011 | 65.7357739 | 63 | 69.9896049 |
| 71.3551261 | 62.2690501 | 73.8456011 | 65.7357739 | 63 | 71.6458549 |
| 71.3551261 | 63.2690501 | 73.8456011 | 65.7357739 | 63 | 72.6614799 |
| 71.3551261 | 64.2690501 | 73.8456011 | 65.7357739 | 63 | 73.2239799 |
| 71.3551261 | 64.2690501 | 73.8456011 | 65.7357739 | 63 | 73.5052299 |
| 71.3551261 | 65.2690501 | 74.8456011 | 68.7357739 | 63 | 74.6146049 |
| 71.3551261 | 65.2690501 | 74.8456011 | 68.7357739 | 63 | 74.7708549 |
| 71.3551261 | 64.2690501 | 73.8456011 | 72.7357739 | 63 | 75.9114799 |
| 71.3551261 | 63.2690501 | 73.8456011 | 72.7357739 | 63 | 76.4583549 |
| 72.3551261 | 62.2690501 | 73.8456011 | 72.7357739 | 63 | 76.7396049 |
| 73.3551261 | 62.2690501 | 71.8456011 | 72.7357739 | 63 | 76.4896049 |

|            |            |            |            |    |            |
|------------|------------|------------|------------|----|------------|
| 73.3551261 | 61.2690501 | 68.8456011 | 72.7357739 | 63 | 73.7864799 |
| 73.3551261 | 61.2690501 | 68.8456011 | 72.7357739 | 63 | 74.1701505 |
| 73.3551261 | 62.2690501 | 66.8456011 | 71.7357739 | 63 | 73.0451505 |
| 73.3551261 | 63.2690501 | 66.8456011 | 71.7357739 | 63 | 72.9201505 |
| 73.3551261 | 62.2690501 | 66.8456011 | 71.7357739 | 63 | 72.4201505 |
| 73.3551261 | 62.2690501 | 66.8456011 | 71.7357739 | 63 | 72.4201505 |
| 73.3551261 | 61.2690501 | 66.8456011 | 71.7357739 | 63 | 72.2951505 |
| 73.3551261 | 62.2690501 | 66.8456011 | 71.7357739 | 63 | 72.2951505 |
| 73.3551261 | 63.2690501 | 66.8456011 | 71.7357739 | 63 | 72.2951505 |
| 73.3551261 | 63.2690501 | 65.8456011 | 71.7357739 | 63 | 72.2951505 |
| 71.3551261 | 63.2690501 | 65.8456011 | 72.7357739 | 63 | 71.9201505 |
| 71.3551261 | 63.2690501 | 65.8456011 | 72.7357739 | 63 | 71.9201505 |
| 71.3551261 | 65.2690501 | 66.8456011 | 73.7357739 | 63 | 71.6701505 |
| 71.3551261 | 66.2690501 | 66.8456011 | 73.7357739 | 63 | 71.5451505 |
| 72.3551261 | 66.2690501 | 68.8456011 | 73.7357739 | 63 | 71.5451505 |
| 72.3551261 | 67.2690501 | 68.8456011 | 73.7357739 | 63 | 71.7951505 |
| 73.3551261 | 70.2690501 | 68.8456011 | 75.7357739 | 63 | 71.9201505 |
| 73.3551261 | 70.2690501 | 69.8456011 | 76.7357739 | 63 | 72.1701505 |
| 72.3551261 | 69.2690501 | 69.8456011 | 77.7357739 | 63 | 72.1701505 |
| 72.3551261 | 67.2690501 | 69.8456011 | 78.7357739 | 63 | 72.2951505 |
| 70.3551261 | 67.2690501 | 69.8456011 | 78.7357739 | 63 | 72.4201505 |
| 69.3551261 | 67.2690501 | 69.8456011 | 79.7357739 | 63 | 72.4201505 |
| 69.3551261 | 66.2690501 | 69.8456011 | 79.7357739 | 63 | 72.7951505 |
| 69.3551261 | 66.2690501 | 67.8456011 | 82.7357739 | 63 | 72.5451505 |
| 69.3551261 | 66.2690501 | 67.8456011 | 82.7357739 | 63 | 73.0451505 |
| 69.3551261 | 66.2690501 | 67.8456011 | 82.7357739 | 63 | 72.9201505 |
| 69.3551261 | 66.2690501 | 67.8456011 | 82.7357739 | 63 | 72.4201505 |
| 69.3551261 | 65.2690501 | 67.8456011 | 83.7357739 | 63 | 72.1701505 |
| 69.3551261 | 66.2690501 | 66.8456011 | 83.7357739 | 63 | 71.9201505 |
| 69.3551261 | 66.2690501 | 66.8456011 | 85.7357739 | 63 | 71.5451505 |
| 69.3551261 | 66.2690501 | 66.8456011 | 85.7357739 | 63 | 71.4201505 |
| 69.3551261 | 67.2690501 | 66.8456011 | 86.7357739 | 63 | 70.6701505 |
| 68.3551261 | 67.2690501 | 67.8456011 | 89.7357739 | 63 | 70.5451505 |
| 68.3551261 | 67.2690501 | 69.8456011 | 89.7357739 | 63 | 70.7951505 |
| 70.3551261 | 68.2690501 | 70.8456011 | 89.7357739 | 63 | 71.0451505 |
| 70.3551261 | 68.2690501 | 70.8456011 | 87.7357739 | 63 | 70.9201505 |
| 76.3551261 | 68.2690501 | 71.8456011 | 85.7357739 | 63 | 72.1701505 |
| 77.3551261 | 69.2690501 | 71.8456011 | 79.7357739 | 63 | 72.4201505 |
| 78.3551261 | 69.2690501 | 72.8456011 | 79.7357739 | 63 | 72.7951505 |
| 78.3551261 | 69.2690501 | 72.8456011 | 75.7357739 | 63 | 72.6701505 |
| 77.3551261 | 70.2690501 | 72.8456011 | 72.7357739 | 63 | 72.1701505 |
| 77.3551261 | 70.2690501 | 72.8456011 | 72.7357739 | 63 | 71.9201505 |
| 77.3551261 | 70.2690501 | 72.8456011 | 71.7357739 | 63 | 72.0451505 |
| 77.3551261 | 70.2690501 | 73.8456011 | 71.7357739 | 63 | 72.1701505 |
| 77.3551261 | 70.2690501 | 74.8456011 | 71.7357739 | 63 | 72.1701505 |



|            |            |            |            |    |            |
|------------|------------|------------|------------|----|------------|
| 77.3551261 | 71.2690501 | 74.8456011 | 70.7357739 | 63 | 70.5451505 |
| 79.3551261 | 70.2690501 | 73.8456011 | 70.7357739 | 63 | 70.4201505 |
| 79.3551261 | 71.2690501 | 73.8456011 | 72.7357739 | 63 | 70.2951505 |
| 80.3551261 | 73.2690501 | 74.8456011 | 73.7357739 | 63 | 70.6701505 |
| 79.3551261 | 73.2690501 | 74.8456011 | 73.7357739 | 63 | 70.9201505 |
| 77.3551261 | 73.2690501 | 74.8456011 | 75.7357739 | 63 | 71.6701505 |
| 76.3551261 | 73.2690501 | 74.8456011 | 80.7357739 | 63 | 71.7951505 |
| 76.3551261 | 72.2690501 | 76.8456011 | 81.7357739 | 63 | 72.4201505 |
| 75.3551261 | 72.2690501 | 77.8456011 | 82.7357739 | 63 | 72.4201505 |
| 75.3551261 | 72.2690501 | 77.8456011 | 83.7357739 | 63 | 72.5451505 |
| 74.3551261 | 71.2690501 | 75.2329976 | 85.7357739 | 63 | 72.0544692 |
| 74.3551261 | 71.2690501 | 75.1218865 | 85.7357739 | 63 | 71.4138442 |
| 73.3551261 | 71.2690501 | 76.5663309 | 85.7357739 | 63 | 71.3669692 |
| 73.3551261 | 78.2690501 | 76.677442  | 85.7357739 | 63 | 73.0075942 |
| 73.3551261 | 79.2690501 | 76.677442  | 85.7357739 | 63 | 73.2575942 |
| 71.3551261 | 79.2690501 | 75.677442  | 85.7357739 | 63 | 73.1169692 |
| 71.3551261 | 70.2690501 | 75.677442  | 85.7357739 | 63 | 71.9919692 |
| 71.3551261 | 67.2690501 | 75.3441087 | 85.7357739 | 63 | 71.9450942 |
| 71.3551261 | 65.2690501 | 75.3441087 | 85.7357739 | 63 | 71.6950942 |
| 71.3551261 | 65.2690501 | 75.2329976 | 84.7357739 | 63 | 71.6950942 |
| 71.3551261 | 65.2690501 | 75.1218865 | 84.7357739 | 63 | 71.6794692 |
| 71.3551261 | 65.2690501 | 74.8996642 | 83.7357739 | 63 | 71.5388442 |
| 71.3551261 | 65.2690501 | 74.677442  | 82.7357739 | 63 | 71.5232192 |
| 71.3551261 | 66.2690501 | 74.0107753 | 82.7357739 | 63 | 71.3044692 |
| 71.3551261 | 64.2690501 | 73.3441087 | 81.7357739 | 63 | 70.4763442 |
| 71.3551261 | 63.2690501 | 88.8456011 | 81.7357739 | 63 | 70.1325942 |
| 70.3551261 | 65.2690501 | 77.8456011 | 80.7357739 | 63 | 71.1701505 |
| 70.3551261 | 66.2690501 | 72.8456011 | 80.7357739 | 63 | 70.5451505 |
| 70.3551261 | 66.2690501 | 72.8456011 | 77.7357739 | 63 | 70.7951505 |
| 71.3551261 | 65.2690501 | 70.8456011 | 77.7357739 | 63 | 70.6701505 |
| 71.3551261 | 63.2690501 | 70.8456011 | 77.7357739 | 63 | 70.5451505 |
| 71.3551261 | 62.2690501 | 70.8456011 | 76.7357739 | 63 | 70.4201505 |
| 71.3551261 | 62.2690501 | 70.8456011 | 76.7357739 | 63 | 70.4201505 |
| 70.3551261 | 61.2690501 | 70.8456011 | 75.7357739 | 63 | 70.1701505 |
| 70.3551261 | 61.2690501 | 70.8456011 | 75.7357739 | 63 | 70.2951505 |
| 70.3551261 | 61.2690501 | 70.8456011 | 75.7357739 | 63 | 70.5451505 |
| 70.3551261 | 60.2690501 | 70.8456011 | 76.7357739 | 63 | 70.4201505 |
| 70.3551261 | 59.2690501 | 70.8456011 | 76.7357739 | 63 | 70.5451505 |
| 70.3551261 | 60.2690501 | 69.8456011 | 76.7357739 | 63 | 70.4201505 |
| 70.3551261 | 62.2690501 | 66.8456011 | 77.7357739 | 63 | 70.4201505 |
| 70.3551261 | 64.2690501 | 66.8456011 | 77.7357739 | 63 | 70.5451505 |
| 70.3551261 | 64.2690501 | 66.8456011 | 82.7357739 | 63 | 70.0451505 |
| 70.3551261 | 65.2690501 | 66.8456011 | 82.7357739 | 63 | 69.7951505 |
| 70.3551261 | 65.2690501 | 66.8456011 | 82.7357739 | 63 | 70.0451505 |
| 69.3551261 | 66.2690501 | 66.8456011 | 84.7357739 | 63 | 69.7951505 |

|            |            |            |            |    |            |
|------------|------------|------------|------------|----|------------|
| 70.3551261 | 66.2690501 | 66.8456011 | 85.7357739 | 63 | 69.7951505 |
| 70.3551261 | 66.2690501 | 66.8456011 | 85.7357739 | 63 | 70.0451505 |
| 70.3551261 | 66.2690501 | 66.8456011 | 85.7357739 | 63 | 70.0451505 |
| 70.3551261 | 66.2690501 | 66.8456011 | 84.7357739 | 63 | 70.2951505 |
| 70.3551261 | 66.2690501 | 65.8456011 | 84.7357739 | 63 | 70.0451505 |
| 71.3551261 | 65.2690501 | 65.8456011 | 84.7357739 | 63 | 69.5451505 |
| 71.3551261 | 65.2690501 | 64.8456011 | 84.7357739 | 63 | 69.2951505 |
| 71.3551261 | 65.2690501 | 64.8456011 | 84.7357739 | 63 | 69.6701505 |
| 71.3551261 | 65.2690501 | 64.8456011 | 84.7357739 | 63 | 70.0451505 |
| 71.3551261 | 65.2690501 | 64.8456011 | 84.7357739 | 63 | 70.2951505 |
| 72.3551261 | 65.2690501 | 64.8456011 | 84.7357739 | 63 | 71.6701505 |
| 72.3551261 | 65.2690501 | 64.8456011 | 83.7357739 | 63 | 73.0451505 |
| 72.3551261 | 64.2690501 | 64.8456011 | 83.7357739 | 63 | 73.6701505 |
| 72.3551261 | 64.2690501 | 64.8456011 | 76.7357739 | 63 | 74.2951505 |
| 73.3551261 | 64.2690501 | 65.8456011 | 71.7357739 | 63 | 75.0451505 |
| 73.3551261 | 61.2690501 | 65.8456011 | 69.7357739 | 63 | 72.4583549 |
| 73.3551261 | 61.2690501 | 64.8456011 | 68.7357739 | 63 | 72.0677299 |
| 73.3551261 | 61.2690501 | 64.8456011 | 69.7357739 | 63 | 71.9114799 |
| 73.3551261 | 62.2690501 | 64.8456011 | 73.7357739 | 63 | 72.6701505 |
| 72.3551261 | 61.2690501 | 64.8456011 | 75.7357739 | 63 | 72.1701505 |
| 72.3551261 | 61.2690501 | 65.8456011 | 75.7357739 | 63 | 72.0451505 |
| 70.3551261 | 60.2690501 | 67.8456011 | 74.7357739 | 63 | 71.2951505 |
| 70.3551261 | 60.2690501 | 68.8456011 | 72.7357739 | 63 | 70.7951505 |
| 70.3551261 | 60.2690501 | 69.8456011 | 71.7357739 | 63 | 70.7951505 |
| 70.3551261 | 60.2690501 | 69.8456011 | 71.7357739 | 63 | 70.1701505 |
| 70.3551261 | 60.2690501 | 69.8456011 | 73.7357739 | 63 | 69.7951505 |
| 70.3551261 | 60.2690501 | 69.8456011 | 74.7357739 | 63 | 69.7951505 |
| 70.3551261 | 60.2690501 | 69.8456011 | 73.7357739 | 63 | 69.6701505 |
| 70.3551261 | 60.2690501 | 68.8456011 | 73.7357739 | 63 | 70.2951505 |
| 70.3551261 | 58.2690501 | 67.8456011 | 73.7357739 | 63 | 70.2951505 |
| 71.3551261 | 57.2690501 | 65.8456011 | 74.7357739 | 63 | 69.6701505 |
| 71.3551261 | 57.2690501 | 65.8456011 | 74.7357739 | 63 | 69.1701505 |
| 76.3551261 | 57.2690501 | 65.8456011 | 75.7357739 | 63 | 69.6701505 |
| 76.3551261 | 57.2690501 | 65.8456011 | 76.7357739 | 63 | 69.5451505 |
| 81.3551261 | 57.2690501 | 65.8456011 | 79.7357739 | 63 | 70.1701505 |
| 81.3551261 | 57.2690501 | 65.8456011 | 80.7357739 | 63 | 70.1701505 |
| 81.3551261 | 57.2690501 | 65.8456011 | 81.7357739 | 63 | 70.2951505 |
| 81.3551261 | 57.2690501 | 65.8456011 | 81.7357739 | 63 | 70.0451505 |
| 80.3551261 | 57.2690501 | 65.8456011 | 80.7357739 | 63 | 69.9201505 |
| 80.3551261 | 61.2690501 | 65.8456011 | 78.7357739 | 63 | 69.9201505 |
| 80.3551261 | 62.2690501 | 65.8456011 | 78.7357739 | 63 | 69.7951505 |
| 80.3551261 | 62.2690501 | 65.8456011 | 76.7357739 | 63 | 69.7951505 |
| 79.3551261 | 64.2690501 | 65.8456011 | 75.7357739 | 63 | 70.2951505 |
| 78.3551261 | 64.2690501 | 65.8456011 | 74.7357739 | 63 | 70.1701505 |
| 78.3551261 | 64.2690501 | 65.8456011 | 72.7357739 | 63 | 70.1701505 |

|            |            |            |            |    |            |
|------------|------------|------------|------------|----|------------|
| 77.3551261 | 66.2690501 | 65.8456011 | 72.7357739 | 63 | 70.5451505 |
| 77.3551261 | 66.2690501 | 65.8456011 | 71.7357739 | 63 | 70.4201505 |
| 80.3551261 | 65.2690501 | 65.8456011 | 71.7357739 | 63 | 70.9201505 |
| 79.3551261 | 65.2690501 | 65.8456011 | 71.7357739 | 63 | 70.9201505 |
| 79.3551261 | 65.2690501 | 66.8456011 | 75.7357739 | 63 | 71.0451505 |
| 79.3551261 | 65.2690501 | 66.8456011 | 76.7357739 | 63 | 70.9201505 |
| 79.3551261 | 65.2690501 | 66.8456011 | 76.7357739 | 63 | 71.5451505 |
| 78.3551261 | 66.2690501 | 67.8456011 | 76.7357739 | 63 | 72.7951505 |
| 77.3551261 | 66.2690501 | 71.8456011 | 72.7357739 | 63 | 74.4201505 |
| 73.3551261 | 66.2690501 | 72.8456011 | 70.7357739 | 63 | 73.0451505 |
| 73.3551261 | 66.2690501 | 72.8456011 | 70.7357739 | 63 | 72.4201505 |
| 73.3551261 | 66.2690501 | 72.8456011 | 71.7357739 | 63 | 71.7951505 |
| 73.3551261 | 63.2690501 | 81.8456011 | 71.7357739 | 63 | 72.4201505 |
| 73.3551261 | 63.2690501 | 81.8456011 | 72.7357739 | 63 | 71.9201505 |
| 73.3551261 | 63.2690501 | 84.8456011 | 73.7357739 | 63 | 72.4201505 |
| 72.3551261 | 63.2690501 | 86.8456011 | 73.7357739 | 63 | 73.0451505 |
| 72.3551261 | 63.2690501 | 86.8456011 | 73.7357739 | 63 | 73.2951505 |
| 76.3551261 | 63.2690501 | 86.8456011 | 73.7357739 | 63 | 73.7951505 |
| 78.3551261 | 63.2690501 | 88.8456011 | 74.7357739 | 63 | 74.2951505 |
| 79.3551261 | 63.2690501 | 89.8456011 | 75.7357739 | 63 | 74.4201505 |
| 79.3551261 | 63.2690501 | 90.8456011 | 76.7357739 | 63 | 74.9201505 |
| 79.3551261 | 63.2690501 | 75.2329976 | 76.7357739 | 63 | 73.0700942 |
| 79.3551261 | 63.2690501 | 74.677442  | 75.7357739 | 63 | 72.8825942 |
| 79.3551261 | 63.2690501 | 73.7885531 | 71.7357739 | 63 | 72.3200942 |
| 79.3551261 | 64.2690501 | 76.8456011 | 69.7357739 | 63 | 72.2951505 |
| 81.3551261 | 64.2690501 | 67.8456011 | 69.7357739 | 63 | 71.6701505 |
| 81.3551261 | 63.2690501 | 67.8456011 | 70.7357739 | 63 | 71.7951505 |
| 81.3551261 | 62.2690501 | 67.8456011 | 70.7357739 | 63 | 71.5451505 |
| 81.3551261 | 62.2690501 | 67.8456011 | 70.7357739 | 63 | 71.2951505 |
| 81.3551261 | 62.2690501 | 67.8456011 | 70.7357739 | 63 | 71.1701505 |
| 80.3551261 | 61.2690501 | 66.8456011 | 72.7357739 | 63 | 70.7951505 |
| 80.3551261 | 60.2690501 | 66.8456011 | 74.7357739 | 63 | 70.4201505 |
| 80.3551261 | 63.2690501 | 66.8456011 | 75.7357739 | 63 | 70.6701505 |
| 80.3551261 | 63.2690501 | 66.8456011 | 73.7357739 | 63 | 70.9201505 |
| 80.3551261 | 65.2690501 | 66.8456011 | 73.7357739 | 63 | 71.2951505 |
| 79.3551261 | 67.2690501 | 66.8456011 | 73.7357739 | 63 | 71.7951505 |
| 79.3551261 | 69.2690501 | 65.8456011 | 74.7357739 | 63 | 72.2951505 |
| 79.3551261 | 68.2690501 | 65.8456011 | 74.7357739 | 63 | 72.7951505 |
| 79.3551261 | 67.2690501 | 65.8456011 | 74.7357739 | 63 | 73.7951505 |
| 79.3551261 | 66.2690501 | 65.8456011 | 74.7357739 | 63 | 73.7951505 |
| 76.3551261 | 66.2690501 | 65.8456011 | 74.7357739 | 63 | 73.2951505 |
| 71.3551261 | 66.2690501 | 65.8456011 | 72.7357739 | 63 | 72.5451505 |
| 70.3551261 | 66.2690501 | 65.8456011 | 70.7357739 | 63 | 72.2951505 |
| 69.3551261 | 66.2690501 | 68.8456011 | 69.7357739 | 63 | 72.7951505 |
| 69.3551261 | 67.2690501 | 70.8456011 | 69.7357739 | 63 | 73.4201505 |

|            |            |            |            |    |            |
|------------|------------|------------|------------|----|------------|
| 69.3551261 | 67.2690501 | 71.8456011 | 69.7357739 | 63 | 73.7951505 |
| 69.3551261 | 68.2690501 | 71.8456011 | 71.7357739 | 63 | 73.7951505 |
| 68.3551261 | 68.2690501 | 71.8456011 | 72.7357739 | 63 | 73.7951505 |
| 63.3551261 | 65.2690501 | 71.8456011 | 73.7357739 | 63 | 71.7951505 |
| 61.3551261 | 59.2690501 | 71.8456011 | 73.7357739 | 63 | 70.6701505 |
| 61.3551261 | 59.2690501 | 71.8456011 | 75.7357739 | 63 | 70.6701505 |
| 60.3551261 | 56.2690501 | 71.8456011 | 75.7357739 | 63 | 66.8200713 |
| 60.3551261 | 56.2690501 | 71.8456011 | 76.7357739 | 63 | 66.5388213 |
| 60.3551261 | 56.2690501 | 71.8456011 | 77.7357739 | 63 | 66.6794463 |
| 60.3551261 | 56.2690501 | 71.8456011 | 77.7357739 | 63 | 66.3981963 |
| 62.3551261 | 56.2690501 | 71.8456011 | 78.7357739 | 63 | 66.6950713 |
| 62.3551261 | 56.2690501 | 72.8456011 | 78.7357739 | 63 | 66.9606963 |
| 62.3551261 | 57.2690501 | 72.8456011 | 79.7357739 | 63 | 68.9201505 |
| 62.3551261 | 57.2690501 | 73.8456011 | 80.7357739 | 63 | 68.5451505 |
| 63.3551261 | 63.2690501 | 75.8456011 | 83.7357739 | 63 | 69.6701505 |
| 63.3551261 | 63.2690501 | 75.8456011 | 83.7357739 | 63 | 69.6701505 |
| 63.3551261 | 66.2690501 | 77.8456011 | 83.7357739 | 63 | 70.7951505 |
| 64.3551261 | 68.2690501 | 77.8456011 | 80.7357739 | 63 | 71.4201505 |
| 64.3551261 | 70.2690501 | 76.8456011 | 79.7357739 | 63 | 71.6701505 |
| 63.3551261 | 72.2690501 | 76.8456011 | 78.7357739 | 63 | 71.7951505 |
| 64.3551261 | 74.2690501 | 76.8456011 | 77.7357739 | 63 | 72.0451505 |
| 65.3551261 | 75.2690501 | 77.8456011 | 77.7357739 | 63 | 72.2951505 |
| 65.3551261 | 79.2690501 | 77.8456011 | 77.7357739 | 63 | 72.7951505 |
| 66.3551261 | 79.2690501 | 78.8456011 | 77.7357739 | 63 | 73.0451505 |
| 67.3551261 | 83.2690501 | 79.7885531 | 77.7357739 | 63 | 73.9450942 |
| 68.3551261 | 83.2690501 | 84.0107753 | 77.7357739 | 63 | 74.7888442 |
| 70.3551261 | 84.2690501 | 86.2329976 | 78.7357739 | 63 | 75.9607192 |
| 70.3551261 | 83.2690501 | 86.4552198 | 78.7357739 | 63 | 76.1169692 |
| 69.3551261 | 83.2690501 | 86.677442  | 79.7357739 | 63 | 75.8825942 |
| 70.3551261 | 83.2690501 | 87.0107753 | 78.7357739 | 63 | 76.0700942 |
| 70.3551261 | 83.2690501 | 87.0107753 | 78.7357739 | 63 | 76.1950942 |
| 70.3551261 | 82.2690501 | 86.677442  | 77.7357739 | 63 | 76.0388442 |
| 68.3551261 | 82.2690501 | 86.5663309 | 77.7357739 | 63 | 75.6482192 |
| 68.3551261 | 81.2690501 | 86.8996642 | 77.7357739 | 63 | 75.3200942 |
| 68.3551261 | 82.2690501 | 86.677442  | 77.7357739 | 63 | 75.5388442 |
| 67.3551261 | 82.2690501 | 86.0107753 | 76.7357739 | 63 | 75.2107192 |
| 67.3551261 | 81.2690501 | 85.7885531 | 76.7357739 | 63 | 74.5544692 |
| 68.3551261 | 81.2690501 | 84.7885531 | 76.7357739 | 63 | 74.1638442 |
| 68.3551261 | 74.2690501 | 84.677442  | 76.7357739 | 63 | 72.8982192 |
| 68.3551261 | 72.2690501 | 84.2329976 | 76.7357739 | 63 | 72.7107192 |
| 68.3551261 | 71.2690501 | 83.677442  | 75.7357739 | 63 | 72.1482192 |
| 68.3551261 | 70.2690501 | 83.2329976 | 74.7357739 | 63 | 71.6013442 |
| 68.3551261 | 70.2690501 | 83.3441087 | 74.7357739 | 63 | 71.2419692 |
| 70.3551261 | 70.2690501 | 83.3441087 | 73.7357739 | 63 | 71.3825942 |
| 70.3551261 | 70.2690501 | 84.0107753 | 73.7357739 | 63 | 71.6013442 |

|            |            |            |            |    |            |
|------------|------------|------------|------------|----|------------|
| 71.3551261 | 70.2690501 | 77.677442  | 73.7357739 | 63 | 71.4607192 |
| 70.3551261 | 70.2690501 | 73.2329976 | 73.7357739 | 63 | 70.8357192 |
| 70.3551261 | 70.2690501 | 83.8456011 | 73.7357739 | 63 | 72.4201505 |
| 70.3551261 | 74.2690501 | 83.8456011 | 73.7357739 | 63 | 73.2951505 |
| 70.3551261 | 76.2690501 | 79.8456011 | 72.7357739 | 63 | 73.1701505 |
| 71.3551261 | 76.2690501 | 76.8456011 | 72.7357739 | 63 | 72.9201505 |
| 72.3551261 | 75.2690501 | 73.8456011 | 73.7357739 | 63 | 72.1701505 |
| 72.3551261 | 73.2690501 | 71.8456011 | 73.7357739 | 63 | 71.6701505 |
| 76.3551261 | 70.2690501 | 68.8456011 | 73.7357739 | 63 | 71.2951505 |
| 76.3551261 | 69.2690501 | 67.8456011 | 74.7357739 | 63 | 71.0451505 |
| 77.3551261 | 68.2690501 | 67.8456011 | 74.7357739 | 63 | 70.9201505 |
| 76.3551261 | 68.2690501 | 67.8456011 | 74.7357739 | 63 | 71.0451505 |
| 76.3551261 | 69.2690501 | 67.8456011 | 75.7357739 | 63 | 71.5451505 |
| 75.3551261 | 69.2690501 | 67.8456011 | 74.7357739 | 63 | 71.7951505 |
| 75.3551261 | 69.2690501 | 67.8456011 | 74.7357739 | 63 | 71.7951505 |
| 75.3551261 | 69.2690501 | 67.8456011 | 72.7357739 | 63 | 71.7951505 |
| 75.3551261 | 68.2690501 | 67.8456011 | 71.7357739 | 63 | 71.5451505 |
| 75.3551261 | 67.2690501 | 67.8456011 | 69.7357739 | 63 | 71.4201505 |
| 75.3551261 | 67.2690501 | 67.8456011 | 68.7357739 | 63 | 71.4201505 |
| 76.3551261 | 67.2690501 | 66.8456011 | 67.7357739 | 63 | 71.2951505 |
| 76.3551261 | 67.2690501 | 65.8456011 | 67.7357739 | 63 | 71.0451505 |
| 76.3551261 | 67.2690501 | 64.8456011 | 67.7357739 | 63 | 70.9201505 |
| 76.3551261 | 68.2690501 | 64.8456011 | 67.7357739 | 63 | 71.1701505 |
| 76.3551261 | 68.2690501 | 64.8456011 | 68.7357739 | 63 | 71.0451505 |
| 78.3551261 | 69.2690501 | 64.8456011 | 68.7357739 | 63 | 71.1701505 |
| 78.3551261 | 71.2690501 | 64.8456011 | 68.7357739 | 63 | 71.0451505 |
| 76.3551261 | 72.2690501 | 64.8456011 | 68.7357739 | 63 | 70.5451505 |
| 76.3551261 | 73.2690501 | 66.8456011 | 68.7357739 | 63 | 70.7951505 |
| 74.3551261 | 74.2690501 | 66.8456011 | 69.7357739 | 63 | 70.1701505 |
| 73.3551261 | 73.2690501 | 66.8456011 | 69.7357739 | 63 | 70.1701505 |
| 72.3551261 | 72.2690501 | 64.8456011 | 70.7357739 | 63 | 69.4201505 |
| 72.3551261 | 71.2690501 | 63.8456011 | 71.7357739 | 63 | 67.8200713 |
| 72.3551261 | 71.2690501 | 63.8456011 | 73.7357739 | 63 | 67.9450713 |
| 73.3551261 | 71.2690501 | 63.8456011 | 78.7357739 | 63 | 69.9201505 |
| 73.3551261 | 70.2690501 | 62.8456011 | 78.7357739 | 63 | 70.0451505 |
| 73.3551261 | 70.2690501 | 62.8456011 | 79.7357739 | 63 | 70.1701505 |
| 74.3551261 | 71.2690501 | 62.8456011 | 78.7357739 | 63 | 70.5451505 |
| 74.3551261 | 72.2690501 | 62.8456011 | 78.7357739 | 63 | 70.9201505 |
| 74.3551261 | 72.2690501 | 62.8456011 | 77.7357739 | 63 | 71.5451505 |
| 74.3551261 | 71.2690501 | 62.8456011 | 77.7357739 | 63 | 71.2951505 |
| 74.3551261 | 71.2690501 | 62.8456011 | 77.7357739 | 63 | 71.6701505 |
| 74.3551261 | 71.2690501 | 63.8456011 | 77.7357739 | 63 | 71.7951505 |
| 74.3551261 | 71.2690501 | 64.8456011 | 76.7357739 | 63 | 72.0451505 |
| 74.3551261 | 67.2690501 | 64.8456011 | 76.7357739 | 63 | 71.5451505 |
| 74.3551261 | 65.2690501 | 63.8456011 | 76.7357739 | 63 | 71.1701505 |

|            |            |            |            |    |            |
|------------|------------|------------|------------|----|------------|
| 76.3551261 | 64.2690501 | 64.8456011 | 76.7357739 | 63 | 71.1701505 |
| 76.3551261 | 65.2690501 | 64.8456011 | 75.7357739 | 63 | 71.1701505 |
| 77.3551261 | 66.2690501 | 64.8456011 | 75.7357739 | 63 | 71.4201505 |
| 79.3551261 | 67.2690501 | 64.8456011 | 75.7357739 | 63 | 71.6701505 |
| 79.3551261 | 67.2690501 | 64.8456011 | 74.7357739 | 63 | 71.7951505 |
| 79.3551261 | 68.2690501 | 66.8456011 | 73.7357739 | 63 | 72.2951505 |
| 79.3551261 | 68.2690501 | 66.8456011 | 69.7357739 | 63 | 72.2951505 |
| 79.3551261 | 68.2690501 | 66.8456011 | 66.7357739 | 63 | 72.0451505 |
| 81.3551261 | 70.2690501 | 66.8456011 | 65.7357739 | 63 | 72.6701505 |
| 83.3551261 | 69.2690501 | 65.8456011 | 60.7357739 | 63 | 72.5451505 |
| 83.3551261 | 69.2690501 | 65.8456011 | 60.7357739 | 63 | 72.5451505 |
| 83.3551261 | 69.2690501 | 65.8456011 | 59.7357739 | 63 | 72.5451505 |
| 84.3551261 | 66.2690501 | 65.8456011 | 58.7357739 | 63 | 72.5451505 |
| 83.3551261 | 65.2690501 | 65.8456011 | 58.7357739 | 63 | 72.1701505 |
| 83.3551261 | 63.2690501 | 66.8456011 | 61.7357739 | 63 | 72.0451505 |
| 80.3551261 | 64.2690501 | 67.8456011 | 61.7357739 | 63 | 71.9201505 |
| 77.3551261 | 64.2690501 | 67.8456011 | 69.7357739 | 63 | 72.0451505 |
| 73.3551261 | 64.2690501 | 67.8456011 | 70.7357739 | 63 | 72.0451505 |
| 72.3551261 | 64.2690501 | 67.8456011 | 71.7357739 | 63 | 72.1701505 |
| 71.3551261 | 64.2690501 | 67.8456011 | 72.7357739 | 63 | 72.5451505 |
| 71.3551261 | 64.2690501 | 68.8456011 | 72.7357739 | 63 | 72.6701505 |
| 70.3551261 | 61.2690501 | 68.8456011 | 72.7357739 | 63 | 72.4201505 |
| 69.3551261 | 61.2690501 | 68.8456011 | 72.7357739 | 63 | 72.7951505 |
| 69.3551261 | 61.2690501 | 68.8456011 | 72.7357739 | 63 | 72.7951505 |
| 69.3551261 | 61.2690501 | 68.8456011 | 72.7357739 | 63 | 73.2951505 |
| 68.3551261 | 61.2690501 | 68.8456011 | 71.7357739 | 63 | 73.4201505 |
| 68.3551261 | 61.2690501 | 68.8456011 | 72.7357739 | 63 | 73.6701505 |
| 68.3551261 | 62.2690501 | 68.8456011 | 72.7357739 | 63 | 74.1701505 |
| 68.3551261 | 64.2690501 | 68.8456011 | 72.7357739 | 63 | 74.2951505 |
| 68.3551261 | 68.2690501 | 75.8456011 | 72.7357739 | 63 | 75.2951505 |
| 68.3551261 | 69.2690501 | 83.8456011 | 73.7357739 | 63 | 76.7951505 |
| 68.3551261 | 68.2690501 | 87.8456011 | 73.7357739 | 63 | 77.0451505 |
| 68.3551261 | 68.2690501 | 77.2329976 | 76.7357739 | 63 | 74.7263442 |
| 67.3551261 | 68.2690501 | 77.677442  | 77.7357739 | 63 | 74.0232192 |
| 67.3551261 | 69.2690501 | 81.0107753 | 77.7357739 | 63 | 74.2419692 |
| 67.3551261 | 70.2690501 | 81.3441087 | 77.7357739 | 63 | 75.0388442 |
| 67.3551261 | 71.2690501 | 82.4552198 | 79.7357739 | 63 | 75.2888442 |
| 67.3551261 | 71.2690501 | 83.5663309 | 79.7357739 | 63 | 75.5700942 |
| 67.3551261 | 72.2690501 | 84.0107753 | 80.7357739 | 63 | 76.4919692 |
| 68.3551261 | 72.2690501 | 82.5663309 | 77.7357739 | 63 | 76.4607192 |
| 70.3551261 | 72.2690501 | 82.5663309 | 77.7357739 | 63 | 75.2107192 |
| 71.3551261 | 72.2690501 | 82.2329976 | 76.7357739 | 63 | 75.1794692 |
| 70.3551261 | 73.2690501 | 81.5663309 | 74.7357739 | 63 | 74.8669692 |
| 70.3551261 | 71.2690501 | 81.4552198 | 72.7357739 | 63 | 74.2575942 |
| 71.3551261 | 71.2690501 | 80.4552198 | 70.7357739 | 63 | 74.2732192 |

|            |            |            |            |    |            |
|------------|------------|------------|------------|----|------------|
| 71.3551261 | 69.2690501 | 79.7885531 | 67.7357739 | 63 | 73.3513442 |
| 71.3551261 | 68.2690501 | 79.677442  | 66.7357739 | 63 | 72.9763442 |
| 71.3551261 | 68.2690501 | 79.5663309 | 66.7357739 | 63 | 72.9607192 |
| 71.3551261 | 68.2690501 | 79.8996642 | 66.7357739 | 63 | 72.7575942 |
| 71.3551261 | 68.2690501 | 79.8996642 | 68.7357739 | 63 | 73.1013442 |
| 71.3551261 | 68.2690501 | 80.2329976 | 68.7357739 | 63 | 72.8982192 |
| 72.3551261 | 68.2690501 | 81.2329976 | 73.7357739 | 63 | 73.3357192 |
| 72.3551261 | 68.2690501 | 81.2329976 | 72.7357739 | 63 | 73.8513442 |
| 72.3551261 | 68.2690501 | 80.8996642 | 70.7357739 | 63 | 73.9607192 |
| 71.3551261 | 68.2690501 | 80.5663309 | 69.7357739 | 63 | 73.8044692 |
| 70.3551261 | 68.2690501 | 81.0107753 | 69.7357739 | 63 | 73.6169692 |
| 70.3551261 | 69.2690501 | 81.3441087 | 67.7357739 | 63 | 74.0700942 |
| 70.3551261 | 69.2690501 | 80.677442  | 67.7357739 | 63 | 74.6013442 |
| 69.3551261 | 70.2690501 | 81.0107753 | 67.7357739 | 63 | 74.5232192 |
| 68.3551261 | 71.2690501 | 79.8996642 | 67.7357739 | 63 | 74.7419692 |
| 67.3551261 | 71.2690501 | 79.5663309 | 67.7357739 | 63 | 73.6950942 |
| 67.3551261 | 71.2690501 | 79.2329976 | 65.7357739 | 63 | 73.4294692 |
| 68.3551261 | 71.2690501 | 79.0107753 | 65.7357739 | 63 | 73.3982192 |
| 68.3551261 | 71.2690501 | 78.677442  | 65.7357739 | 63 | 73.1013442 |
| 68.3551261 | 71.2690501 | 78.3441087 | 65.7357739 | 63 | 72.6794692 |
| 68.3551261 | 71.2690501 | 78.2329976 | 65.7357739 | 63 | 72.2888442 |
| 68.3551261 | 71.2690501 | 78.0107753 | 65.7357739 | 63 | 72.1325942 |
| 68.3551261 | 72.2690501 | 78.1218865 | 64.7357739 | 63 | 71.9138442 |
| 68.3551261 | 72.2690501 | 78.2329976 | 64.7357739 | 63 | 72.1794692 |
| 69.3551261 | 72.2690501 | 79.677442  | 76.7357739 | 63 | 72.3200942 |
| 70.3551261 | 74.2690501 | 79.5663309 | 76.7357739 | 63 | 72.6794692 |
| 72.3551261 | 74.2690501 | 79.3441087 | 74.7357739 | 63 | 72.6794692 |
| 72.3551261 | 75.2690501 | 79.0107753 | 70.7357739 | 63 | 72.6950942 |
| 72.3551261 | 75.2690501 | 78.7885531 | 68.7357739 | 63 | 72.8200942 |
| 72.3551261 | 75.2690501 | 79.2329976 | 68.7357739 | 63 | 72.8825942 |
| 72.3551261 | 78.2690501 | 79.1218865 | 68.7357739 | 63 | 73.3669692 |
| 72.3551261 | 80.2690501 | 79.1218865 | 68.7357739 | 63 | 73.3669692 |
| 72.3551261 | 80.2690501 | 78.8996642 | 68.7357739 | 63 | 73.3357192 |
| 72.3551261 | 80.2690501 | 78.677442  | 68.7357739 | 63 | 73.0544692 |
| 72.3551261 | 81.2690501 | 79.0107753 | 68.7357739 | 63 | 72.9763442 |
| 72.3551261 | 82.2690501 | 79.1218865 | 68.7357739 | 63 | 73.2419692 |
| 72.3551261 | 82.2690501 | 80.1218865 | 70.7357739 | 63 | 73.4763442 |
| 72.3551261 | 83.2690501 | 77.2329976 | 70.7357739 | 63 | 73.8200942 |
| 72.3551261 | 83.2690501 | 90.8456011 | 70.7357739 | 63 | 76.2951505 |
| 71.3551261 | 83.2690501 | 89.8456011 | 66.7357739 | 63 | 76.5451505 |
| 71.3551261 | 83.2690501 | 89.8456011 | 64.7357739 | 63 | 76.7951505 |
| 73.3551261 | 83.2690501 | 88.8456011 | 64.7357739 | 63 | 77.1701505 |
| 73.3551261 | 82.2690501 | 88.8456011 | 64.7357739 | 63 | 76.9201505 |
| 74.3551261 | 80.2690501 | 88.8456011 | 64.7357739 | 63 | 76.6701505 |
| 76.3551261 | 79.2690501 | 88.8456011 | 65.7357739 | 63 | 76.7951505 |

|            |            |            |            |    |            |
|------------|------------|------------|------------|----|------------|
| 75.3551261 | 78.2690501 | 88.8456011 | 65.7357739 | 63 | 76.5451505 |
| 75.3551261 | 78.2690501 | 85.8456011 | 64.7357739 | 63 | 75.7951505 |
| 75.3551261 | 75.2690501 | 85.8456011 | 64.7357739 | 63 | 75.0451505 |
| 75.3551261 | 74.2690501 | 74.8456011 | 63.7357739 | 63 | 73.4201505 |
| 75.3551261 | 73.2690501 | 73.8456011 | 63.7357739 | 63 | 72.7951505 |
| 75.3551261 | 74.2690501 | 73.8456011 | 63.7357739 | 63 | 72.6701505 |
| 75.3551261 | 75.2690501 | 73.8456011 | 63.7357739 | 63 | 72.5451505 |
| 75.3551261 | 75.2690501 | 73.8456011 | 63.7357739 | 63 | 72.5451505 |
| 75.3551261 | 74.2690501 | 74.8456011 | 63.7357739 | 63 | 72.6701505 |
| 75.3551261 | 73.2690501 | 74.8456011 | 63.7357739 | 63 | 72.5451505 |
| 75.3551261 | 72.2690501 | 74.8456011 | 63.7357739 | 63 | 72.5451505 |
| 75.3551261 | 73.2690501 | 74.8456011 | 64.7357739 | 63 | 72.5451505 |
| 75.3551261 | 73.2690501 | 74.8456011 | 65.7357739 | 63 | 72.9201505 |
| 74.3551261 | 72.2690501 | 74.8456011 | 65.7357739 | 63 | 73.2951505 |
| 74.3551261 | 72.2690501 | 74.8456011 | 66.7357739 | 63 | 73.1701505 |
| 74.3551261 | 71.2690501 | 74.8456011 | 73.7357739 | 63 | 73.2951505 |
| 74.3551261 | 70.2690501 | 75.8456011 | 73.7357739 | 63 | 73.4201505 |
| 74.3551261 | 68.2690501 | 75.8456011 | 75.7357739 | 63 | 71.3177299 |
| 74.3551261 | 68.2690501 | 76.8456011 | 75.7357739 | 63 | 71.3021049 |
| 74.3551261 | 67.2690501 | 76.8456011 | 77.7357739 | 63 | 71.3177299 |
| 74.3551261 | 68.2690501 | 76.8456011 | 77.7357739 | 63 | 71.8802299 |
| 73.3551261 | 68.2690501 | 76.8456011 | 77.7357739 | 63 | 72.0364799 |
| 73.3551261 | 68.2690501 | 76.8456011 | 77.7357739 | 63 | 72.1771049 |
| 73.3551261 | 68.2690501 | 77.8456011 | 73.7357739 | 63 | 72.0364799 |
| 73.3551261 | 70.2690501 | 77.8456011 | 74.7357739 | 63 | 72.3333549 |
| 73.3551261 | 71.2690501 | 77.8456011 | 74.7357739 | 63 | 72.6146049 |
| 74.3551261 | 71.2690501 | 78.8456011 | 75.7357739 | 63 | 72.8646049 |
| 74.3551261 | 71.2690501 | 78.8456011 | 75.7357739 | 63 | 75.1701505 |
| 74.3551261 | 71.2690501 | 78.8456011 | 76.7357739 | 63 | 75.5451505 |
| 74.3551261 | 70.2690501 | 79.8456011 | 76.7357739 | 63 | 75.7951505 |
| 74.3551261 | 70.2690501 | 79.8456011 | 77.7357739 | 63 | 75.7951505 |
| 74.3551261 | 69.2690501 | 79.8456011 | 78.7357739 | 63 | 75.5451505 |
| 74.3551261 | 69.2690501 | 79.8456011 | 79.7357739 | 63 | 75.7951505 |
| 73.3551261 | 69.2690501 | 80.8456011 | 79.7357739 | 63 | 75.7951505 |
| 73.3551261 | 67.2690501 | 80.8456011 | 78.7357739 | 63 | 75.9201505 |
| 73.3551261 | 65.2690501 | 80.8456011 | 78.7357739 | 63 | 76.0451505 |
| 72.3551261 | 64.2690501 | 80.8456011 | 78.7357739 | 63 | 75.6701505 |
| 72.3551261 | 64.2690501 | 80.8456011 | 77.7357739 | 63 | 75.9201505 |
| 70.3551261 | 64.2690501 | 82.8456011 | 77.7357739 | 63 | 76.0451505 |
| 69.3551261 | 64.2690501 | 82.8456011 | 77.7357739 | 63 | 75.5451505 |
| 68.3551261 | 64.2690501 | 82.8456011 | 77.7357739 | 63 | 74.6701505 |
| 68.3551261 | 64.2690501 | 83.8456011 | 78.7357739 | 63 | 74.7951505 |
| 68.3551261 | 67.2690501 | 84.8456011 | 79.7357739 | 63 | 74.0451505 |
| 68.3551261 | 68.2690501 | 84.8456011 | 79.7357739 | 63 | 73.0451505 |
| 68.3551261 | 68.2690501 | 82.8456011 | 79.7357739 | 63 | 72.5451505 |



|            |            |            |            |    |            |
|------------|------------|------------|------------|----|------------|
| 67.3551261 | 68.2690501 | 76.8456011 | 79.7357739 | 63 | 71.5451505 |
| 67.3551261 | 69.2690501 | 76.8456011 | 79.7357739 | 63 | 71.4201505 |
| 66.3551261 | 69.2690501 | 75.8456011 | 81.7357739 | 63 | 70.6701505 |
| 66.3551261 | 69.2690501 | 75.8456011 | 82.7357739 | 63 | 70.6701505 |
| 67.3551261 | 69.2690501 | 75.8456011 | 83.7357739 | 63 | 71.1701505 |
| 67.3551261 | 70.2690501 | 75.8456011 | 83.7357739 | 63 | 71.7951505 |
| 67.3551261 | 70.2690501 | 76.8456011 | 83.7357739 | 63 | 71.7951505 |
| 67.3551261 | 71.2690501 | 76.8456011 | 83.7357739 | 63 | 71.6701505 |
| 67.3551261 | 72.2690501 | 76.8456011 | 83.7357739 | 63 | 71.6701505 |
| 67.3551261 | 72.2690501 | 76.8456011 | 89.7357739 | 63 | 71.6701505 |
| 69.3551261 | 72.2690501 | 76.8456011 | 90.7357739 | 63 | 72.2951505 |
| 69.3551261 | 71.2690501 | 76.8456011 | 91.7357739 | 63 | 72.4201505 |
| 69.3551261 | 71.2690501 | 76.8456011 | 90.7357739 | 63 | 72.6701505 |
| 69.3551261 | 71.2690501 | 77.8456011 | 90.7357739 | 63 | 73.0451505 |
| 69.3551261 | 70.2690501 | 73.8456011 | 90.7357739 | 63 | 72.7951505 |
| 69.3551261 | 73.2690501 | 72.8456011 | 90.7357739 | 63 | 73.0451505 |
| 69.3551261 | 73.2690501 | 72.8456011 | 89.7357739 | 63 | 73.1701505 |
| 71.3551261 | 72.2690501 | 72.8456011 | 88.7357739 | 63 | 74.1701505 |
| 71.3551261 | 68.2690501 | 72.8456011 | 87.7357739 | 63 | 74.0451505 |
| 72.3551261 | 66.2690501 | 72.8456011 | 87.7357739 | 63 | 73.7951505 |
| 72.3551261 | 65.2690501 | 72.8456011 | 84.7357739 | 63 | 73.5451505 |
| 71.3551261 | 65.2690501 | 72.8456011 | 76.7357739 | 63 | 73.1701505 |
| 71.3551261 | 60.2690501 | 72.8456011 | 75.7357739 | 63 | 72.1701505 |
| 71.3551261 | 58.2690501 | 72.8456011 | 75.7357739 | 63 | 71.4201505 |
| 71.3551261 | 58.2690501 | 72.8456011 | 75.7357739 | 63 | 71.0451505 |
| 72.3551261 | 59.2690501 | 72.8456011 | 75.7357739 | 63 | 70.7951505 |
| 73.3551261 | 59.2690501 | 72.8456011 | 75.7357739 | 63 | 70.7951505 |
| 73.3551261 | 62.2690501 | 76.8456011 | 81.7357739 | 63 | 71.7951505 |
| 73.3551261 | 65.2690501 | 78.8456011 | 81.7357739 | 63 | 72.5451505 |
| 75.3551261 | 65.2690501 | 78.8456011 | 81.7357739 | 63 | 73.4201505 |
| 75.3551261 | 66.2690501 | 78.8456011 | 81.7357739 | 63 | 73.5451505 |
| 76.3551261 | 65.2690501 | 78.8456011 | 79.7357739 | 63 | 73.7951505 |
| 76.3551261 | 65.2690501 | 78.8456011 | 66.7357739 | 63 | 74.1701505 |
| 77.3551261 | 65.2690501 | 78.8456011 | 60.7357739 | 63 | 74.5451505 |
| 77.3551261 | 65.2690501 | 78.8456011 | 58.7357739 | 63 | 74.7951505 |
| 77.3551261 | 65.2690501 | 76.8456011 | 58.7357739 | 63 | 74.2951505 |
| 77.3551261 | 65.2690501 | 74.8456011 | 58.7357739 | 63 | 73.7951505 |
| 77.3551261 | 69.2690501 | 73.8456011 | 61.7357739 | 63 | 74.0451505 |
| 78.3551261 | 71.2690501 | 72.8456011 | 64.7357739 | 63 | 74.5451505 |
| 78.3551261 | 71.2690501 | 72.8456011 | 67.7357739 | 63 | 74.6701505 |
| 79.3551261 | 69.2690501 | 72.8456011 | 67.7357739 | 63 | 75.0451505 |
| 79.3551261 | 66.2690501 | 72.8456011 | 69.7357739 | 63 | 74.9201505 |
| 79.3551261 | 66.2690501 | 72.8456011 | 68.7357739 | 63 | 73.4896049 |
| 79.3551261 | 66.2690501 | 72.8456011 | 68.7357739 | 63 | 73.5052299 |
| 79.3551261 | 68.2690501 | 72.8456011 | 68.7357739 | 63 | 74.4896049 |

|            |            |            |            |    |            |
|------------|------------|------------|------------|----|------------|
| 79.3551261 | 68.2690501 | 71.8456011 | 71.7357739 | 63 | 74.6614799 |
| 79.3551261 | 69.2690501 | 71.8456011 | 72.7357739 | 63 | 74.6458549 |
| 77.3551261 | 70.2690501 | 71.8456011 | 74.7357739 | 63 | 74.5208549 |
| 77.3551261 | 70.2690501 | 72.8456011 | 76.7357739 | 63 | 74.9271049 |
| 78.3551261 | 70.2690501 | 72.8456011 | 78.7357739 | 63 | 75.3646049 |
| 78.3551261 | 70.2690501 | 72.8456011 | 80.7357739 | 63 | 75.3646049 |
| 78.3551261 | 70.2690501 | 72.8456011 | 80.7357739 | 63 | 75.5052299 |
| 78.3551261 | 71.2690501 | 72.8456011 | 80.7357739 | 63 | 76.4201505 |
| 78.3551261 | 71.2690501 | 72.8456011 | 76.7357739 | 63 | 75.0451505 |
| 78.3551261 | 71.2690501 | 72.8456011 | 76.7357739 | 63 | 75.4201505 |
| 78.3551261 | 71.2690501 | 72.8456011 | 72.7357739 | 63 | 75.7951505 |
| 79.3551261 | 72.2690501 | 72.8456011 | 72.7357739 | 63 | 76.0451505 |
| 78.3551261 | 72.2690501 | 72.8456011 | 73.7357739 | 63 | 75.1701505 |
| 78.3551261 | 73.2690501 | 72.8456011 | 74.7357739 | 63 | 73.0031334 |
| 78.3551261 | 74.2690501 | 73.8456011 | 74.7357739 | 63 | 72.9875084 |
| 78.3551261 | 74.2690501 | 73.8456011 | 74.7357739 | 63 | 72.8625084 |
| 78.3551261 | 74.2690501 | 73.8456011 | 74.7357739 | 63 | 73.0031334 |
| 65.3551261 | 74.2690501 | 74.8456011 | 74.7357739 | 63 | 71.1593834 |
| 65.3551261 | 74.2690501 | 74.8456011 | 74.7357739 | 63 | 70.9093834 |
| 62.3551261 | 67.2690501 | 75.8456011 | 74.7357739 | 63 | 69.3468834 |
| 62.3551261 | 67.2690501 | 78.8456011 | 74.7357739 | 63 | 69.5812584 |
| 62.3551261 | 67.2690501 | 80.8456011 | 74.7357739 | 63 | 70.3000084 |
| 62.3551261 | 66.2690501 | 81.8456011 | 75.7357739 | 63 | 70.5968834 |
| 65.3551261 | 66.2690501 | 81.8456011 | 76.7357739 | 63 | 72.6701505 |
| 68.3551261 | 66.2690501 | 81.8456011 | 76.7357739 | 63 | 72.5451505 |
| 68.3551261 | 67.2690501 | 83.8456011 | 77.7357739 | 63 | 72.7951505 |
| 68.3551261 | 68.2690501 | 84.8456011 | 78.7357739 | 63 | 73.6701505 |
| 68.3551261 | 66.2690501 | 83.8456011 | 79.7357739 | 63 | 73.4201505 |
| 68.3551261 | 66.2690501 | 85.8456011 | 78.7357739 | 63 | 73.5451505 |
| 69.3551261 | 66.2690501 | 85.8456011 | 78.7357739 | 63 | 73.5451505 |
| 69.3551261 | 66.2690501 | 85.8456011 | 77.7357739 | 63 | 73.7951505 |
| 70.3551261 | 64.2690501 | 87.8456011 | 76.7357739 | 63 | 72.7951505 |
| 71.3551261 | 64.2690501 | 87.8456011 | 76.7357739 | 63 | 72.2951505 |
| 72.3551261 | 64.2690501 | 87.8456011 | 75.7357739 | 63 | 72.0451505 |
| 72.3551261 | 64.2690501 | 87.8456011 | 75.7357739 | 63 | 69.7575942 |
| 73.3551261 | 64.2690501 | 86.8456011 | 75.7357739 | 63 | 71.4201505 |
| 74.3551261 | 64.2690501 | 85.8456011 | 80.7357739 | 63 | 70.6701505 |
| 74.3551261 | 64.2690501 | 85.8456011 | 83.7357739 | 63 | 71.1701505 |
| 75.3551261 | 63.2690501 | 83.8456011 | 83.7357739 | 63 | 70.9201505 |
| 74.3551261 | 63.2690501 | 82.8456011 | 84.7357739 | 63 | 70.6701505 |
| 74.3551261 | 64.2690501 | 82.8456011 | 84.7357739 | 63 | 70.0451505 |
| 74.3551261 | 65.2690501 | 83.8456011 | 84.7357739 | 63 | 69.9201505 |
| 74.3551261 | 65.2690501 | 83.8456011 | 83.7357739 | 63 | 69.4201505 |
| 74.3551261 | 67.2690501 | 84.8456011 | 83.7357739 | 63 | 69.9201505 |
| 73.3551261 | 68.2690501 | 84.8456011 | 77.7357739 | 63 | 70.0451505 |

|            |            |            |            |    |            |
|------------|------------|------------|------------|----|------------|
| 73.3551261 | 68.2690501 | 85.8456011 | 77.7357739 | 63 | 71.2951505 |
| 73.3551261 | 68.2690501 | 87.8456011 | 72.7357739 | 63 | 72.4201505 |
| 73.3551261 | 69.2690501 | 88.8456011 | 71.7357739 | 63 | 72.6701505 |
| 76.3551261 | 73.2690501 | 88.8456011 | 73.7357739 | 63 | 73.7951505 |
| 76.3551261 | 73.2690501 | 89.8456011 | 74.7357739 | 63 | 74.0451505 |
| 77.3551261 | 70.2690501 | 73.7885531 | 74.7357739 | 63 | 71.7732192 |
| 76.3551261 | 68.2690501 | 73.8996642 | 78.7357739 | 63 | 71.3513442 |
| 75.3551261 | 68.2690501 | 74.0107753 | 79.7357739 | 63 | 70.6013442 |
| 75.3551261 | 68.2690501 | 74.3441087 | 80.7357739 | 63 | 70.6325942 |
| 75.3551261 | 69.2690501 | 76.7885531 | 80.7357739 | 63 | 71.2263442 |
| 75.3551261 | 71.2690501 | 77.0107753 | 80.7357739 | 63 | 73.2575942 |
| 75.3551261 | 72.2690501 | 77.4552198 | 80.7357739 | 63 | 73.4450942 |
| 75.3551261 | 72.2690501 | 76.8996642 | 81.7357739 | 63 | 73.9763442 |
| 75.3551261 | 72.2690501 | 77.1218865 | 83.7357739 | 63 | 73.2263442 |
| 75.3551261 | 72.2690501 | 77.3441087 | 83.7357739 | 63 | 73.2575942 |
| 75.3551261 | 74.2690501 | 76.7885531 | 83.7357739 | 63 | 73.4294692 |
| 76.3551261 | 74.2690501 | 75.8996642 | 83.7357739 | 63 | 72.6794692 |
| 76.3551261 | 72.2690501 | 75.8996642 | 83.7357739 | 63 | 71.6794692 |
| 76.3551261 | 72.2690501 | 76.1218865 | 83.7357739 | 63 | 71.7107192 |
| 76.3551261 | 72.2690501 | 76.2329976 | 83.7357739 | 63 | 71.7263442 |
| 76.3551261 | 72.2690501 | 76.1218865 | 83.7357739 | 63 | 71.8357192 |
| 75.3551261 | 72.2690501 | 76.4552198 | 81.7357739 | 63 | 71.6638442 |
| 75.3551261 | 76.2690501 | 74.677442  | 77.7357739 | 63 | 72.1013442 |
| 75.3551261 | 76.2690501 | 79.8456011 | 77.7357739 | 63 | 72.7951505 |
| 75.3551261 | 76.2690501 | 74.8456011 | 67.7357739 | 63 | 72.0451505 |
| 78.3551261 | 68.2690501 | 72.8456011 | 67.7357739 | 63 | 71.1701505 |
| 78.3551261 | 63.2690501 | 71.8456011 | 68.7357739 | 63 | 69.9201505 |
| 78.3551261 | 61.2690501 | 71.8456011 | 69.7357739 | 63 | 69.5451505 |
| 78.3551261 | 60.2690501 | 71.8456011 | 69.7357739 | 63 | 69.4201505 |
| 78.3551261 | 60.2690501 | 71.8456011 | 70.7357739 | 63 | 69.1701505 |
| 78.3551261 | 62.2690501 | 71.8456011 | 70.7357739 | 63 | 69.4201505 |
| 78.3551261 | 65.2690501 | 71.8456011 | 70.7357739 | 63 | 69.7951505 |
| 78.3551261 | 68.2690501 | 71.8456011 | 70.7357739 | 63 | 70.2951505 |
| 77.3551261 | 71.2690501 | 72.8456011 | 70.7357739 | 63 | 70.9201505 |
| 74.3551261 | 72.2690501 | 72.8456011 | 70.7357739 | 63 | 70.9201505 |
| 71.3551261 | 73.2690501 | 73.8456011 | 70.7357739 | 63 | 70.5451505 |
| 69.3551261 | 72.2690501 | 73.8456011 | 69.7357739 | 63 | 69.9201505 |
| 69.3551261 | 72.2690501 | 73.8456011 | 67.7357739 | 63 | 69.5451505 |
| 69.3551261 | 68.2690501 | 73.8456011 | 65.7357739 | 63 | 68.7951505 |
| 69.3551261 | 66.2690501 | 71.8456011 | 64.7357739 | 63 | 68.2951505 |
| 69.3551261 | 64.2690501 | 70.8456011 | 65.7357739 | 63 | 67.7951505 |
| 68.3551261 | 63.2690501 | 70.8456011 | 65.7357739 | 63 | 67.6701505 |
| 69.3551261 | 64.2690501 | 70.8456011 | 66.7357739 | 63 | 68.5451505 |
| 69.3551261 | 66.2690501 | 70.8456011 | 66.7357739 | 63 | 69.0451505 |
| 70.3551261 | 68.2690501 | 70.8456011 | 70.7357739 | 63 | 69.4201505 |

|            |            |            |            |    |            |
|------------|------------|------------|------------|----|------------|
| 69.3551261 | 71.2690501 | 70.8456011 | 70.7357739 | 63 | 69.2951505 |
| 68.3551261 | 73.2690501 | 70.8456011 | 70.7357739 | 63 | 69.2951505 |
| 68.3551261 | 74.2690501 | 70.8456011 | 71.7357739 | 63 | 69.5451505 |
| 68.3551261 | 74.2690501 | 69.8456011 | 77.7357739 | 63 | 69.6701505 |
| 68.3551261 | 74.2690501 | 70.8456011 | 80.7357739 | 63 | 70.2951505 |
| 68.3551261 | 73.2690501 | 69.8456011 | 80.7357739 | 63 | 70.0451505 |
| 68.3551261 | 71.2690501 | 69.8456011 | 82.7357739 | 63 | 69.6701505 |
| 67.3551261 | 70.2690501 | 69.8456011 | 82.7357739 | 63 | 69.4201505 |
| 67.3551261 | 70.2690501 | 68.8456011 | 77.7357739 | 63 | 69.2951505 |
| 67.3551261 | 70.2690501 | 68.8456011 | 73.7357739 | 63 | 69.1701505 |
| 67.3551261 | 70.2690501 | 68.8456011 | 73.7357739 | 63 | 69.4201505 |
| 67.3551261 | 70.2690501 | 67.8456011 | 71.7357739 | 63 | 69.6701505 |
| 67.3551261 | 69.2690501 | 67.8456011 | 72.7357739 | 63 | 69.6701505 |
| 67.3551261 | 69.2690501 | 67.8456011 | 73.7357739 | 63 | 69.9201505 |
| 67.3551261 | 68.2690501 | 67.8456011 | 74.7357739 | 63 | 69.9201505 |
| 67.3551261 | 67.2690501 | 67.8456011 | 74.7357739 | 63 | 70.1701505 |
| 67.3551261 | 67.2690501 | 67.8456011 | 74.7357739 | 63 | 70.2951505 |
| 68.3551261 | 65.2690501 | 67.8456011 | 73.7357739 | 63 | 70.0451505 |
| 69.3551261 | 64.2690501 | 67.8456011 | 72.7357739 | 63 | 70.2951505 |
| 71.3551261 | 63.2690501 | 67.8456011 | 73.7357739 | 63 | 69.9201505 |
| 71.3551261 | 63.2690501 | 68.8456011 | 73.7357739 | 63 | 69.7951505 |
| 71.3551261 | 64.2690501 | 68.8456011 | 73.7357739 | 63 | 69.9201505 |
| 72.3551261 | 64.2690501 | 68.8456011 | 73.7357739 | 63 | 69.9201505 |
| 72.3551261 | 64.2690501 | 68.8456011 | 73.7357739 | 63 | 69.9201505 |
| 72.3551261 | 67.2690501 | 68.8456011 | 76.7357739 | 63 | 68.7951505 |
| 72.3551261 | 67.2690501 | 68.8456011 | 77.7357739 | 63 | 68.6701505 |
| 72.3551261 | 66.2690501 | 70.8456011 | 77.7357739 | 63 | 68.2951505 |
| 72.3551261 | 66.2690501 | 70.8456011 | 78.7357739 | 63 | 67.9201505 |
| 73.3551261 | 66.2690501 | 70.8456011 | 78.7357739 | 63 | 67.6701505 |
| 73.3551261 | 65.2690501 | 70.8456011 | 78.7357739 | 63 | 67.6701505 |
| 73.3551261 | 64.2690501 | 71.8456011 | 79.7357739 | 63 | 67.5451505 |
| 73.3551261 | 65.2690501 | 71.8456011 | 81.7357739 | 63 | 67.5451505 |
| 73.3551261 | 65.2690501 | 72.8456011 | 81.7357739 | 63 | 67.6701505 |
| 73.3551261 | 65.2690501 | 71.8456011 | 81.7357739 | 63 | 67.2951505 |
| 73.3551261 | 66.2690501 | 71.8456011 | 81.7357739 | 63 | 67.5451505 |
| 75.3551261 | 67.2690501 | 72.8456011 | 82.7357739 | 63 | 68.6701505 |
| 75.3551261 | 68.2690501 | 72.8456011 | 82.7357739 | 63 | 68.9201505 |
| 76.3551261 | 68.2690501 | 72.8456011 | 82.7357739 | 63 | 69.1701505 |
| 75.3551261 | 69.2690501 | 72.8456011 | 82.7357739 | 63 | 69.4201505 |
| 73.3551261 | 70.2690501 | 72.8456011 | 83.7357739 | 63 | 69.5451505 |
| 72.3551261 | 71.2690501 | 72.8456011 | 83.7357739 | 63 | 69.6701505 |
| 72.3551261 | 72.2690501 | 73.8456011 | 83.7357739 | 63 | 70.2951505 |
| 72.3551261 | 72.2690501 | 73.8456011 | 82.7357739 | 63 | 70.9201505 |
| 72.3551261 | 73.2690501 | 73.8456011 | 79.7357739 | 63 | 71.1701505 |
| 72.3551261 | 74.2690501 | 73.8456011 | 78.7357739 | 63 | 71.2951505 |

|            |            |            |            |    |                      |
|------------|------------|------------|------------|----|----------------------|
| 71.3551261 | 75.2690501 | 73.8456011 | 78.7357739 | 63 | 71.0451505           |
| 70.3551261 | 74.2690501 | 73.8456011 | 76.7357739 | 63 | 70.6701505           |
| 69.3551261 | 73.2690501 | 74.8456011 | 75.7357739 | 63 | 70.4201505           |
| 69.3551261 | 73.2690501 | 76.8456011 | 73.7357739 | 63 | 69.6701505           |
| 69.3551261 | 73.2690501 | 76.8456011 | 73.7357739 | 63 | 69.2951505           |
| 69.3551261 | 74.2690501 | 76.8456011 | 73.7357739 | 63 | 69.1701505           |
| 68.3551261 | 75.2690501 | 76.8456011 | 73.7357739 | 63 | 69.1701505           |
| 68.3551261 | 75.2690501 | 76.8456011 | 72.7357739 | 63 | 69.2951505 Before    |
| 68.3551261 | 75.2690501 | 76.8456011 | 82.7357739 | 63 | 69.5451505 Before 1  |
| 68.3551261 | 75.2690501 | 76.8456011 | 81.7357739 | 63 | 70.2951505 Before 2  |
| 70.3551261 | 76.2690501 | 76.8456011 | 80.7357739 | 63 | 70.9201505 Before 3  |
| 71.3551261 | 73.2690501 | 76.8456011 | 80.7357739 | 63 | 71.7951505 Before 4  |
| 71.3551261 | 72.2690501 | 76.8456011 | 76.7357739 | 63 | 71.5451505 Before 5  |
| 71.3551261 | 72.2690501 | 76.8456011 | 74.7357739 | 63 | 69.6638213 Before 6  |
| 71.3551261 | 71.2690501 | 76.8456011 | 73.7357739 | 63 | 69.5544463 Before 7  |
| 71.3551261 | 72.2690501 | 77.8456011 | 73.7357739 | 63 | 69.8513213 Before 8  |
| 71.3551261 | 72.2690501 | 80.8456011 | 73.7357739 | 63 | 70.3981963 Before 9  |
| 71.3551261 | 71.2690501 | 80.8456011 | 73.7357739 | 63 | 70.5700713 Before 10 |
| 71.3551261 | 69.2690501 | 81.8456011 | 73.7357739 | 63 | 71.2575713 Before 11 |
| 71.3551261 | 67.2690501 | 82.8456011 | 72.7357739 | 63 | 71.3981963 Before 12 |
| 71.3551261 | 66.2690501 | 84.8456011 | 72.7357739 | 63 | 72.5451505 Before 13 |
| 71.3551261 | 65.2690501 | 86.8456011 | 74.7357739 | 63 | 71.9201505 Before 14 |
| 72.3551261 | 64.2690501 | 87.8456011 | 74.7357739 | 63 | 71.7951505 Before 15 |
| 72.3551261 | 64.2690501 | 87.8456011 | 74.7357739 | 63 | 71.7951505 Before 16 |
| 74.3551261 | 64.2690501 | 87.8456011 | 73.7357739 | 63 | 71.6701505 Before 17 |
| 75.3551261 | 65.2690501 | 86.8456011 | 73.7357739 | 63 | 71.7951505 Before 18 |
| 75.3551261 | 68.2690501 | 86.8456011 | 72.7357739 | 63 | 72.6701505 Before 19 |
| 76.3551261 | 69.2690501 | 86.8456011 | 72.7357739 | 63 | 72.7951505 Before 20 |
| 76.3551261 | 69.2690501 | 72.8996642 | 72.7357739 | 63 | 70.8044692 Before 21 |
| 76.3551261 | 68.2690501 | 72.7885531 | 72.7357739 | 63 | 70.7888442 Before 22 |
| 76.3551261 | 67.2690501 | 72.4552198 | 71.7357739 | 63 | 70.5075942 Before 23 |
| 76.3551261 | 66.2690501 | 72.4552198 | 71.7357739 | 63 | 70.1325942 Before 24 |
| 76.3551261 | 66.2690501 | 72.5663309 | 72.7357739 | 63 | 70.1325942 Before 25 |
| 74.3551261 | 66.2690501 | 72.7885531 | 76.7357739 | 63 | 70.1013442 Before 26 |
| 74.3551261 | 67.2690501 | 73.0107753 | 78.7357739 | 63 | 69.8513442 Before 27 |
| 73.3551261 | 69.2690501 | 72.7885531 | 79.7357739 | 63 | 69.8044692 Before 28 |
| 71.3551261 | 69.2690501 | 73.1218865 | 80.7357739 | 63 | 69.4607192 Before 29 |
| 70.3551261 | 72.2690501 | 73.1218865 | 80.7357739 | 63 | 69.7107192 Before 30 |
| 70.3551261 | 71.2690501 | 72.7885531 | 80.7357739 | 63 | 69.6638442 Before 31 |
| 69.3551261 | 69.2690501 | 72.7885531 | 80.7357739 | 63 | 69.2888442 Before 32 |
| 69.3551261 | 67.2690501 | 72.3441087 | 79.7357739 | 63 | 69.2419692 Before 33 |
| 68.3551261 | 65.2690501 | 72.3441087 | 79.7357739 | 63 | 68.8669692 Before 34 |
| 68.3551261 | 64.2690501 | 72.5663309 | 79.7357739 | 63 | 68.8982192 Before 35 |
| 68.3551261 | 65.2690501 | 72.4552198 | 79.7357739 | 63 | 69.1325942 Before 36 |
| 68.3551261 | 65.2690501 | 72.5663309 | 78.7357739 | 63 | 69.0388442 Before 37 |

|            |            |            |            |    |            |           |
|------------|------------|------------|------------|----|------------|-----------|
| 68.3551261 | 66.2690501 | 72.7885531 | 78.7357739 | 63 | 69.0700942 | Before 38 |
| 68.3551261 | 69.2690501 | 73.1218865 | 78.7357739 | 63 | 69.3669692 | Before 39 |
| 67.3551261 | 70.2690501 | 72.677442  | 80.7357739 | 63 | 69.6482192 | Before 40 |
| 67.3551261 | 69.2690501 | 72.677442  | 79.7357739 | 63 | 69.0388442 | Before 41 |
| 67.3551261 | 67.2690501 | 72.7885531 | 78.7357739 | 63 | 69.1950942 | Before 42 |
| 67.3551261 | 66.2690501 | 72.2329976 | 78.7357739 | 63 | 69.3669692 | Before 43 |
| 67.3551261 | 64.2690501 | 71.8996642 | 77.7357739 | 63 | 68.7107192 | Before 44 |
| 68.3551261 | 64.2690501 | 71.677442  | 76.7357739 | 63 | 68.3200942 | Before 45 |
| 68.3551261 | 64.2690501 | 71.2329976 | 76.7357739 | 63 | 68.1325942 | Before 46 |
| 68.3551261 | 63.2690501 | 71.3441087 | 75.7357739 | 63 | 67.6638442 | Before 47 |
| 69.3551261 | 63.2690501 | 71.5663309 | 74.7357739 | 63 | 68.0857192 | Before 48 |
| 69.3551261 | 64.2690501 | 72.1218865 | 75.7357739 | 63 | 68.5232192 | Before 49 |
| 70.3551261 | 65.2690501 | 73.0107753 | 77.7357739 | 63 | 69.1169692 | Before 50 |
| 71.3551261 | 65.2690501 | 73.4552198 | 77.7357739 | 63 | 69.8044692 | Before 51 |
| 71.3551261 | 65.2690501 | 73.8996642 | 77.7357739 | 63 | 70.4919692 | Before 52 |
| 72.3551261 | 65.2690501 | 83.8456011 | 78.7357739 | 63 | 72.2951505 | Before 53 |
| 73.3551261 | 64.2690501 | 76.8456011 | 78.7357739 | 63 | 71.5451505 | Before 54 |
| 73.3551261 | 65.2690501 | 71.8456011 | 78.7357739 | 63 | 70.7951505 | Before 55 |
| 73.3551261 | 65.2690501 | 68.8456011 | 80.7357739 | 63 | 70.4201505 | Before 56 |
| 73.3551261 | 66.2690501 | 68.8456011 | 79.7357739 | 63 | 70.6701505 | Before 57 |
| 73.3551261 | 67.2690501 | 68.8456011 | 76.7357739 | 63 | 70.6701505 | Before 58 |
| 73.3551261 | 68.2690501 | 68.8456011 | 77.7357739 | 63 | 70.4201505 | Before 59 |
| 75.3551261 | 68.2690501 | 67.8456011 | 77.7357739 | 63 | 70.4201505 | Before 60 |
| 75.3551261 | 69.2690501 | 67.8456011 | 77.7357739 | 63 | 70.6701505 | Before 61 |
| 76.3551261 | 68.2690501 | 67.8456011 | 76.7357739 | 63 | 70.6701505 | Before 62 |
| 74.3551261 | 67.2690501 | 67.8456011 | 76.7357739 | 63 | 70.2951505 | Before 63 |
| 72.3551261 | 65.2690501 | 67.8456011 | 76.7357739 | 63 | 69.6701505 | Before 64 |
| 70.3551261 | 64.2690501 | 67.8456011 | 76.7357739 | 63 | 69.5451505 | Before 65 |
| 69.3551261 | 63.2690501 | 67.8456011 | 76.7357739 | 63 | 69.7951505 | Before 66 |
| 68.3551261 | 62.2690501 | 67.8456011 | 76.7357739 | 63 | 69.7951505 | Before 67 |
| 67.3551261 | 62.2690501 | 67.8456011 | 76.7357739 | 63 | 70.6701505 | Before 68 |
| 67.3551261 | 63.2690501 | 63.8456011 | 76.7357739 | 63 | 70.4201505 | Before 69 |
| 66.3551261 | 67.2690501 | 62.8456011 | 76.7357739 | 63 | 71.0451505 | Before 70 |
| 66.3551261 | 69.2690501 | 61.8456011 | 76.7357739 | 63 | 71.2951505 | Before 71 |
| 66.3551261 | 71.2690501 | 61.8456011 | 76.7357739 | 63 | 71.5451505 | Before 72 |
| 66.3551261 | 74.2690501 | 65.8456011 | 76.7357739 | 63 | 72.2951505 | Before 73 |
| 66.3551261 | 77.2690501 | 68.8456011 | 76.7357739 | 63 | 72.7951505 | Before 74 |
| 68.3551261 | 78.2690501 | 68.8456011 | 71.7357739 | 63 | 72.5451505 | Before 75 |
| 70.3551261 | 78.2690501 | 69.8456011 | 71.7357739 | 63 | 72.9201505 | Before 76 |
| 69.3551261 | 78.2690501 | 69.8456011 | 70.7357739 | 63 | 72.7951505 | Before 77 |
| 68.3551261 | 78.2690501 | 69.8456011 | 70.7357739 | 63 | 72.5451505 | Before 78 |
| 68.3551261 | 78.2690501 | 69.8456011 | 70.7357739 | 63 | 72.5451505 | Before 79 |
| 68.3551261 | 69.2690501 | 69.8456011 | 70.7357739 | 63 | 71.2951505 | Before 80 |
| 68.3551261 | 67.2690501 | 69.8456011 | 70.7357739 | 69 | 70.7951505 | Before 81 |
| 67.3551261 | 65.2690501 | 69.8456011 | 73.7357739 | 69 | 70.1701505 | Before 82 |

|            |            |            |            |    |            |            |
|------------|------------|------------|------------|----|------------|------------|
| 67.3551261 | 64.2690501 | 69.8456011 | 73.7357739 | 69 | 70.1701505 | Before 83  |
| 67.3551261 | 64.2690501 | 69.8456011 | 73.7357739 | 69 | 69.9201505 | Before 84  |
| 67.3551261 | 64.2690501 | 72.8456011 | 72.7357739 | 69 | 70.0451505 | Before 85  |
| 67.3551261 | 66.2690501 | 72.8456011 | 72.7357739 | 69 | 69.7951505 | Before 86  |
| 68.3551261 | 66.2690501 | 72.8456011 | 73.7357739 | 69 | 69.9201505 | Before 87  |
| 70.3551261 | 64.2690501 | 71.8456011 | 74.7357739 | 69 | 69.4201505 | Before 88  |
| 70.3551261 | 63.2690501 | 71.8456011 | 75.7357739 | 69 | 69.9201505 | Before 89  |
| 71.3551261 | 63.2690501 | 71.8456011 | 75.7357739 | 69 | 70.1701505 | Before 90  |
| 71.3551261 | 62.2690501 | 71.8456011 | 77.7357739 | 69 | 70.2951505 | Before 91  |
| 72.3551261 | 62.2690501 | 68.8456011 | 77.7357739 | 69 | 70.1701505 | Before 92  |
| 72.3551261 | 61.2690501 | 67.8456011 | 77.7357739 | 69 | 70.0451505 | Before 93  |
| 72.3551261 | 60.2690501 | 67.8456011 | 79.7357739 | 69 | 70.0451505 | Before 94  |
| 72.3551261 | 60.2690501 | 67.8456011 | 79.7357739 | 69 | 70.6701505 | Before 95  |
| 70.3551261 | 60.2690501 | 68.8456011 | 79.7357739 | 69 | 71.0451505 | Before 96  |
| 70.3551261 | 61.2690501 | 69.8456011 | 79.7357739 | 69 | 71.2951505 | Before 97  |
| 70.3551261 | 62.2690501 | 70.8456011 | 79.7357739 | 69 | 71.7951505 | Before 98  |
| 70.3551261 | 65.2690501 | 76.8456011 | 78.7357739 | 69 | 72.0451505 | Before 99  |
| 70.3551261 | 65.2690501 | 76.8456011 | 77.7357739 | 69 | 72.0451505 | Before 100 |
| 71.3551261 | 64.2690501 | 77.8456011 | 77.7357739 | 69 | 71.9201505 | Before 101 |
| 71.3551261 | 64.2690501 | 78.8456011 | 77.7357739 | 69 | 71.9201505 | Before 102 |
| 71.3551261 | 64.2690501 | 79.8456011 | 77.7357739 | 69 | 72.4201505 | Before 103 |
| 71.3551261 | 64.2690501 | 79.8456011 | 77.7357739 | 69 | 72.5451505 | Before 104 |
| 71.3551261 | 64.2690501 | 88.8456011 | 78.7357739 | 69 | 73.7951505 | Before 105 |
| 70.3551261 | 64.2690501 | 85.8456011 | 79.7357739 | 69 | 73.1701505 | Before 106 |
| 70.3551261 | 64.2690501 | 83.8456011 | 80.7357739 | 69 | 72.9201505 | Before 107 |
| 70.3551261 | 63.2690501 | 83.8456011 | 81.7357739 | 69 | 72.9201505 | Before 108 |
| 69.3551261 | 63.2690501 | 83.8456011 | 82.7357739 | 69 | 72.9201505 | Before 109 |
| 68.3551261 | 63.2690501 | 86.8456011 | 82.7357739 | 69 | 73.0451505 | Before 110 |
| 68.3551261 | 63.2690501 | 86.8456011 | 82.7357739 | 69 | 72.6701505 | Before 111 |
| 68.3551261 | 64.2690501 | 86.8456011 | 82.7357739 | 69 | 68.9607192 | Before 112 |
| 67.3551261 | 64.2690501 | 72.5663309 | 83.7357739 | 69 | 68.2107192 | Before 113 |
| 67.3551261 | 64.2690501 | 73.3441087 | 83.7357739 | 69 | 68.4450942 | Before 114 |
| 67.3551261 | 63.2690501 | 73.0107753 | 83.7357739 | 69 | 68.2732192 | Before 115 |
| 67.3551261 | 62.2690501 | 72.677442  | 82.7357739 | 69 | 67.8669692 | Before 116 |
| 67.3551261 | 62.2690501 | 72.677442  | 82.7357739 | 69 | 67.4919692 | Before 117 |
| 68.3551261 | 62.2690501 | 72.1218865 | 82.7357739 | 69 | 67.4138442 | Before 118 |
| 68.3551261 | 61.2690501 | 71.3441087 | 81.7357739 | 69 | 66.5700942 | Before 119 |
| 68.3551261 | 61.2690501 | 70.5663309 | 77.7357739 | 69 | 66.0232192 | Before 120 |
| 68.3551261 | 61.2690501 | 70.2329976 | 73.7357739 | 69 | 65.6638442 | Before 121 |
| 68.3551261 | 61.2690501 | 70.0107753 | 71.7357739 | 69 | 65.7888442 | Before 122 |
| 68.3551261 | 61.2690501 | 69.8996642 | 70.7357739 | 69 | 65.7888442 | Before 123 |
| 68.3551261 | 61.2690501 | 69.677442  | 70.7357739 | 69 | 65.7575942 | Before 124 |
| 69.3551261 | 61.2690501 | 69.677442  | 70.7357739 | 69 | 65.5075942 | Before 125 |
| 69.3551261 | 61.2690501 | 69.5663309 | 69.7357739 | 69 | 65.2575942 | Before 126 |
| 69.3551261 | 61.2690501 | 70.0107753 | 70.7357739 | 69 | 65.3044692 | Before 127 |



|            |            |            |            |    |            |            |
|------------|------------|------------|------------|----|------------|------------|
| 70.3551261 | 61.2690501 | 69.8996642 | 70.7357739 | 69 | 65.6638442 | Before 128 |
| 70.3551261 | 61.2690501 | 70.1218865 | 71.7357739 | 69 | 65.5544692 | Before 129 |
| 69.3551261 | 61.2690501 | 70.3441087 | 71.7357739 | 69 | 65.7107192 | Before 130 |
| 69.3551261 | 61.2690501 | 70.3441087 | 72.7357739 | 69 | 65.9450942 | Before 131 |
| 69.3551261 | 61.2690501 | 70.3441087 | 72.7357739 | 69 | 65.8200942 | Before 132 |
| 69.3551261 | 61.2690501 | 71.2329976 | 72.7357739 | 69 | 65.9450942 | Before 133 |
| 69.3551261 | 70.2690501 | 71.4552198 | 71.7357739 | 69 | 67.2419692 | Before 134 |
| 69.3551261 | 75.2690501 | 71.4552198 | 70.7357739 | 69 | 67.6325942 | Before 135 |
| 70.3551261 | 77.2690501 | 71.5663309 | 69.7357739 | 69 | 67.9138442 | Before 136 |
| 71.3551261 | 79.2690501 | 71.2329976 | 62.7357739 | 69 | 68.3513442 | Before 137 |
| 71.3551261 | 80.2690501 | 71.4552198 | 62.7357739 | 69 | 68.8825942 | Before 138 |
| 71.3551261 | 80.2690501 | 71.3441087 | 61.7357739 | 69 | 69.1325942 | Before 139 |
| 71.3551261 | 80.2690501 | 71.5663309 | 61.7357739 | 69 | 69.2888442 | Before 140 |
| 72.3551261 | 80.2690501 | 71.5663309 | 61.7357739 | 69 | 69.5388442 | Before 141 |
| 72.3551261 | 81.2690501 | 70.8996642 | 62.7357739 | 69 | 69.4294692 | Before 142 |
| 72.3551261 | 80.2690501 | 70.3441087 | 62.7357739 | 69 | 68.9763442 | Before 143 |
| 68.3551261 | 79.2690501 | 70.3441087 | 62.7357739 | 69 | 68.3513442 | Before 144 |
| 66.3551261 | 78.2690501 | 70.8996642 | 65.7357739 | 69 | 68.3825942 | Before 145 |
| 65.3551261 | 78.2690501 | 71.7885531 | 67.7357739 | 63 | 68.7263442 | Before 146 |
| 65.3551261 | 79.2690501 | 72.677442  | 67.7357739 | 63 | 69.7263442 | Before 147 |
| 65.3551261 | 80.2690501 | 73.2329976 | 67.7357739 | 63 | 70.8044692 | Before 148 |
| 65.3551261 | 80.2690501 | 73.677442  | 66.7357739 | 63 | 71.3825942 | Before 149 |
| 65.3551261 | 80.2690501 | 73.7885531 | 66.7357739 | 63 | 72.0232192 | Before 150 |
| 65.3551261 | 80.2690501 | 74.1218865 | 66.7357739 | 63 | 72.0700942 | Before 151 |
| 65.3551261 | 80.2690501 | 73.8996642 | 66.7357739 | 63 | 72.0388442 | Before 152 |
| 65.3551261 | 81.2690501 | 74.0107753 | 66.7357739 | 63 | 71.8044692 | Before 153 |
| 66.3551261 | 81.2690501 | 74.0107753 | 67.7357739 | 63 | 71.6638442 | Before 154 |
| 66.3551261 | 81.2690501 | 74.1218865 | 67.7357739 | 63 | 71.5544692 | Before 155 |
| 66.3551261 | 81.2690501 | 74.0107753 | 68.7357739 | 63 | 71.7732192 | Before 156 |
| 66.3551261 | 81.2690501 | 74.5663309 | 71.7357739 | 63 | 71.5544692 | Before 157 |
| 65.3551261 | 81.2690501 | 75.2329976 | 71.7357739 | 63 | 72.0232192 | Before 158 |
| 65.3551261 | 81.2690501 | 75.1218865 | 69.7357739 | 63 | 73.1638442 | Before 159 |
| 65.3551261 | 80.2690501 | 74.7885531 | 69.7357739 | 63 | 73.3669692 | Before 160 |
| 65.3551261 | 76.2690501 | 75.0107753 | 69.7357739 | 63 | 73.0232192 | Before 161 |
| 66.3551261 | 75.2690501 | 75.2329976 | 69.7357739 | 63 | 73.3044692 | Before 162 |
| 66.3551261 | 76.2690501 | 75.8996642 | 68.7357739 | 63 | 75.9201505 | Before 163 |
| 66.3551261 | 78.2690501 | 75.4552198 | 68.7357739 | 63 | 74.7263442 | Before 164 |
| 66.3551261 | 79.2690501 | 75.3441087 | 68.7357739 | 63 | 76.1701505 | Before 165 |
| 66.3551261 | 79.2690501 | 91.8456011 | 69.7357739 | 63 | 76.1701505 | Before 166 |
| 66.3551261 | 79.2690501 | 90.8456011 | 69.7357739 | 63 | 76.2951505 | Before 167 |
| 66.3551261 | 76.2690501 | 90.8456011 | 69.7357739 | 63 | 76.5451505 | Before 168 |
| 66.3551261 | 75.2690501 | 90.8456011 | 69.7357739 | 63 | 76.7951505 | Before 169 |
| 67.3551261 | 76.2690501 | 90.8456011 | 69.7357739 | 63 | 77.1701505 | Before 170 |
| 67.3551261 | 76.2690501 | 88.8456011 | 69.7357739 | 63 | 76.9201505 | Before 171 |
| 69.3551261 | 76.2690501 | 87.8456011 | 66.7357739 | 63 | 76.9201505 | Before 172 |



|            |            |            |            |    |            |            |
|------------|------------|------------|------------|----|------------|------------|
| 69.3551261 | 76.2690501 | 87.8456011 | 66.7357739 | 63 | 77.1701505 | Before 173 |
| 69.3551261 | 77.2690501 | 87.8456011 | 66.7357739 | 63 | 77.1701505 | Before 174 |
| 69.3551261 | 76.2690501 | 89.8456011 | 64.7357739 | 63 | 77.0451505 | Before 175 |
| 70.3551261 | 76.2690501 | 90.8456011 | 64.7357739 | 63 | 76.5451505 | Before 176 |
| 70.3551261 | 77.2690501 | 74.8996642 | 66.7357739 | 63 | 74.3044692 | Before 177 |
| 70.3551261 | 77.2690501 | 74.677442  | 66.7357739 | 63 | 73.7732192 | Before 178 |
| 69.3551261 | 79.2690501 | 74.7885531 | 67.7357739 | 63 | 73.5232192 | Before 179 |
| 69.3551261 | 79.2690501 | 74.3441087 | 69.7357739 | 63 | 73.4294692 | Before 180 |
| 67.3551261 | 79.2690501 | 74.1218865 | 69.7357739 | 63 | 72.6482192 | Before 181 |
| 67.3551261 | 78.2690501 | 74.0107753 | 69.7357739 | 63 | 72.3825942 | Before 182 |
| 67.3551261 | 77.2690501 | 73.7885531 | 69.7357739 | 63 | 72.2263442 | Before 183 |
| 67.3551261 | 77.2690501 | 74.0107753 | 74.7357739 | 63 | 71.9294692 | Before 184 |
| 67.3551261 | 77.2690501 | 73.677442  | 74.7357739 | 63 | 71.5075942 | Before 185 |
| 67.3551261 | 77.2690501 | 73.7885531 | 75.7357739 | 63 | 71.1325942 | Before 186 |
| 67.3551261 | 77.2690501 | 72.8996642 | 74.7357739 | 63 | 71.0232192 | Before 187 |
| 68.3551261 | 77.2690501 | 72.5663309 | 74.7357739 | 63 | 69.9763442 | Before 188 |
| 68.3551261 | 76.2690501 | 72.3441087 | 74.7357739 | 63 | 69.4450942 | Before 189 |
| 68.3551261 | 76.2690501 | 72.2329976 | 74.7357739 | 63 | 69.1794692 | Before 190 |
| 68.3551261 | 76.2690501 | 71.8996642 | 74.7357739 | 63 | 69.0075942 | Before 191 |
| 68.3551261 | 76.2690501 | 71.8996642 | 73.7357739 | 63 | 68.7732192 | Before 192 |
| 68.3551261 | 78.2690501 | 72.0107753 | 73.7357739 | 63 | 68.9138442 | Before 193 |
| 69.3551261 | 78.2690501 | 71.5663309 | 73.7357739 | 63 | 68.9763442 | Before 194 |
| 69.3551261 | 77.2690501 | 71.8996642 | 74.7357739 | 63 | 68.5075942 | Before 195 |
| 70.3551261 | 76.2690501 | 72.1218865 | 73.7357739 | 63 | 68.8044692 | Before 196 |
| 70.3551261 | 76.2690501 | 72.677442  | 71.7357739 | 63 | 69.4138442 | Before 197 |
| 72.3551261 | 76.2690501 | 73.2329976 | 71.7357739 | 63 | 70.3669692 | Before 198 |
| 73.3551261 | 75.2690501 | 73.3441087 | 70.7357739 | 63 | 71.0232192 | Before 199 |
| 74.3551261 | 75.2690501 | 73.8996642 | 70.7357739 | 63 | 71.3513442 | Before 200 |
| 74.3551261 | 75.2690501 | 73.677442  | 70.7357739 | 63 | 71.8200942 | Before 201 |
| 74.3551261 | 74.2690501 | 73.7885531 | 70.7357739 | 63 | 71.5857192 | Before 202 |
| 73.3551261 | 74.2690501 | 73.2329976 | 67.7357739 | 63 | 71.6794692 | Before 203 |
| 73.3551261 | 73.2690501 | 72.677442  | 66.7357739 | 63 | 71.2419692 | Before 204 |
| 73.3551261 | 73.2690501 | 72.8996642 | 67.7357739 | 63 | 70.7575942 | Before 205 |
| 72.3551261 | 72.2690501 | 73.4552198 | 67.7357739 | 63 | 70.8357192 | Before 206 |
| 72.3551261 | 72.2690501 | 73.7885531 | 66.7357739 | 63 | 71.2732192 | Before 207 |
| 72.3551261 | 72.2690501 | 74.1218865 | 66.7357739 | 63 | 71.8200942 | Before 208 |
| 72.3551261 | 71.2690501 | 73.8996642 | 66.7357739 | 63 | 72.2888442 | Before 209 |
| 71.3551261 | 71.2690501 | 73.5663309 | 67.7357739 | 63 | 72.1013442 | Before 210 |
| 69.3551261 | 69.2690501 | 73.677442  | 70.7357739 | 63 | 71.5700942 | Before 211 |
| 69.3551261 | 69.2690501 | 80.8456011 | 79.7357739 | 63 | 72.2951505 | Before 212 |
| 69.3551261 | 68.2690501 | 80.8456011 | 82.7357739 | 63 | 72.1701505 | Before 213 |
| 69.3551261 | 68.2690501 | 79.8456011 | 82.7357739 | 63 | 71.7951505 | Before 214 |
| 69.3551261 | 68.2690501 | 79.8456011 | 82.7357739 | 63 | 71.6701505 | Before 215 |
| 68.3551261 | 68.2690501 | 78.8456011 | 82.7357739 | 63 | 71.1701505 | Before 216 |
| 69.3551261 | 68.2690501 | 77.8456011 | 82.7357739 | 63 | 71.1701505 | Before 217 |

|            |            |            |            |    |            |            |
|------------|------------|------------|------------|----|------------|------------|
| 69.3551261 | 67.2690501 | 76.8456011 | 82.7357739 | 63 | 71.0451505 | Before 218 |
| 71.3551261 | 67.2690501 | 76.8456011 | 82.7357739 | 63 | 71.4201505 | Before 219 |
| 72.3551261 | 68.2690501 | 76.8456011 | 81.7357739 | 63 | 71.4201505 | Before 220 |
| 72.3551261 | 69.2690501 | 76.8456011 | 81.7357739 | 63 | 70.7951505 | Before 221 |
| 72.3551261 | 68.2690501 | 76.8456011 | 81.7357739 | 63 | 70.4201505 | Before 222 |
| 72.3551261 | 64.2690501 | 78.8456011 | 81.7357739 | 63 | 70.0451505 | Before 223 |
| 72.3551261 | 62.2690501 | 78.8456011 | 81.7357739 | 63 | 69.4201505 | Before 224 |
| 72.3551261 | 61.2690501 | 78.8456011 | 81.7357739 | 63 | 69.4201505 | Before 225 |
| 72.3551261 | 63.2690501 | 79.8456011 | 80.7357739 | 63 | 69.4201505 | Before 226 |
| 71.3551261 | 65.2690501 | 79.8456011 | 80.7357739 | 63 | 69.2951505 | Before 227 |
| 70.3551261 | 69.2690501 | 79.8456011 | 80.7357739 | 63 | 69.5451505 | Before 228 |
| 70.3551261 | 71.2690501 | 79.8456011 | 80.7357739 | 63 | 69.4201505 | Before 229 |
| 68.3551261 | 71.2690501 | 79.8456011 | 80.7357739 | 63 | 68.5451505 | Before 230 |
| 68.3551261 | 67.2690501 | 79.8456011 | 80.7357739 | 63 | 67.7951505 | Before 231 |
| 68.3551261 | 65.2690501 | 79.8456011 | 80.7357739 | 63 | 67.4201505 | Before 232 |
| 69.3551261 | 64.2690501 | 80.8456011 | 79.7357739 | 63 | 67.5451505 | Before 233 |
| 69.3551261 | 63.2690501 | 80.8456011 | 78.7357739 | 63 | 67.5451505 | Before 234 |
| 70.3551261 | 63.2690501 | 72.8456011 | 78.7357739 | 63 | 66.6701505 | Before 235 |
| 70.3551261 | 64.2690501 | 70.8456011 | 77.7357739 | 63 | 66.6701505 | Before 236 |
| 70.3551261 | 65.2690501 | 69.8456011 | 77.7357739 | 63 | 66.9201505 | Before 237 |
| 71.3551261 | 66.2690501 | 68.8456011 | 78.7357739 | 63 | 67.0451505 | Before 238 |
| 71.3551261 | 66.2690501 | 68.8456011 | 78.7357739 | 63 | 67.5451505 | Before 239 |
| 71.3551261 | 66.2690501 | 68.8456011 | 77.7357739 | 63 | 67.2951505 | Before 240 |
| 71.3551261 | 66.2690501 | 68.8456011 | 77.7357739 | 63 | 67.2951505 | minute 1   |
| 71.3551261 | 66.2690501 | 68.8456011 | 79.7357739 | 63 | 67.5451505 | minute 2   |
| 70.3551261 | 66.2690501 | 68.8456011 | 79.7357739 | 63 | 66.9201505 | minute 3   |
| 70.3551261 | 66.2690501 | 68.8456011 | 79.7357739 | 63 | 66.9201505 | minute 4   |
| 70.3551261 | 64.2690501 | 65.8456011 | 78.7357739 | 63 | 66.4201505 | minute 5   |
| 71.3551261 | 64.2690501 | 66.8456011 | 78.7357739 | 63 | 66.7951505 | minute 6   |
| 71.3551261 | 65.2690501 | 65.8456011 | 78.7357739 | 63 | 66.7951505 | minute 7   |
| 71.3551261 | 66.2690501 | 65.8456011 | 77.7357739 | 63 | 66.9201505 | minute 8   |
| 73.3551261 | 66.2690501 | 64.8456011 | 77.7357739 | 63 | 67.0451505 | minute 9   |
| 73.3551261 | 68.2690501 | 64.8456011 | 77.7357739 | 63 | 67.0451505 | minute 10  |
| 74.3551261 | 69.2690501 | 64.8456011 | 75.7357739 | 63 | 67.9201505 | minute 11  |
| 75.3551261 | 69.2690501 | 65.8456011 | 75.7357739 | 63 | 68.4201505 | minute 12  |
| 75.3551261 | 69.2690501 | 65.8456011 | 75.7357739 | 63 | 68.2951505 | minute 13  |
| 75.3551261 | 68.2690501 | 65.8456011 | 68.7357739 | 63 | 67.9201505 | minute 14  |
| 76.3551261 | 68.2690501 | 65.8456011 | 68.7357739 | 63 | 68.1701505 | minute 15  |
| 76.3551261 | 68.2690501 | 65.8456011 | 67.7357739 | 63 | 68.9201505 | minute 16  |
| 79.3551261 | 69.2690501 | 65.8456011 | 67.7357739 | 63 | 70.2951505 | minute 17  |
| 79.3551261 | 70.2690501 | 65.8456011 | 67.7357739 | 63 | 70.7951505 | minute 18  |
| 80.3551261 | 70.2690501 | 65.8456011 | 65.7357739 | 63 | 71.0451505 | minute 19  |
| 87.3551261 | 70.2690501 | 65.8456011 | 66.7357739 | 63 | 72.0451505 | minute 20  |
| 72.9201505 | 70.2690501 | 65.8456011 | 67.7357739 | 63 | 70.6157786 | minute 21  |
| 72.9201505 | 69.2690501 | 65.8456011 | 68.7357739 | 63 | 69.9907786 | minute 22  |

|            |            |            |            |    |            |          |    |
|------------|------------|------------|------------|----|------------|----------|----|
| 72.6701505 | 68.2690501 | 65.8456011 | 68.7357739 | 63 | 69.5845286 | minute   | 23 |
| 72.2951505 | 68.2690501 | 66.8456011 | 70.7357739 | 63 | 69.5376536 | minute   | 24 |
| 72.5451505 | 68.2690501 | 67.8456011 | 72.7357739 | 63 | 69.8189036 | minute   | 25 |
| 83.3551261 | 68.2690501 | 67.8456011 | 74.7357739 | 63 | 71.5451505 | minute   | 26 |
| 75.3551261 | 68.2690501 | 69.8456011 | 75.7357739 | 63 | 70.6701505 | minute   | 27 |
| 75.3551261 | 68.2690501 | 69.8456011 | 77.7357739 | 63 | 70.7951505 | minute   | 28 |
| 75.3551261 | 68.2690501 | 69.8456011 | 78.7357739 | 63 | 70.7951505 | minute   | 29 |
| 69.3551261 | 68.2690501 | 69.8456011 | 80.7357739 | 63 | 70.1701505 | minute   | 30 |
| 69.3551261 | 70.2690501 | 69.8456011 | 80.7357739 | 63 | 70.5451505 | minute   | 31 |
| 69.3551261 | 70.2690501 | 69.8456011 | 80.7357739 | 63 | 70.9201505 | minute   | 32 |
| 68.3551261 | 70.2690501 | 69.8456011 | 80.7357739 | 63 | 71.0451505 | minute   | 33 |
| 68.3551261 | 70.2690501 | 69.8456011 | 77.7357739 | 63 | 71.0451505 | minute   | 34 |
| 68.3551261 | 70.2690501 | 69.8456011 | 75.7357739 | 63 | 70.7951505 | minute   | 35 |
| 68.3551261 | 69.2690501 | 71.8456011 | 74.7357739 | 63 | 70.7951505 | minute   | 36 |
| 68.3551261 | 70.2690501 | 71.8456011 | 73.7357739 | 63 | 70.1701505 | minute   | 37 |
| 68.3551261 | 70.2690501 | 72.8456011 | 73.7357739 | 63 | 70.1701505 | minute   | 38 |
| 69.3551261 | 71.2690501 | 72.8456011 | 73.7357739 | 63 | 70.2951505 | minute   | 39 |
| 68.3551261 | 71.2690501 | 74.8456011 | 71.7357739 | 63 | 71.0451505 | minute   | 40 |
| 68.3551261 | 72.2690501 | 74.8456011 | 70.7357739 | 63 | 71.4201505 | minute   | 41 |
| 68.3551261 | 71.2690501 | 74.8456011 | 69.7357739 | 63 | 71.2951505 | minute   | 42 |
| 68.3551261 | 71.2690501 | 75.8456011 | 69.7357739 | 63 | 71.4201505 | minute   | 43 |
| 68.3551261 | 70.2690501 | 75.8456011 | 67.7357739 | 63 | 70.9201505 | minute   | 44 |
| 68.3551261 | 69.2690501 | 72.8456011 | 67.7357739 | 63 | 69.7951505 | minute   | 45 |
| 69.3551261 | 69.2690501 | 71.8456011 | 67.7357739 | 63 | 70.5451505 | minute   | 46 |
| 69.3551261 | 71.2690501 | 70.8456011 | 67.7357739 | 63 | 68.2610378 | minute   | 47 |
| 69.3551261 | 72.2690501 | 67.8456011 | 66.7357739 | 63 | 67.7922878 | minute   | 48 |
| 69.3551261 | 72.2690501 | 67.8456011 | 67.7357739 | 63 | 67.6204128 | minute   | 49 |
| 69.3551261 | 71.2690501 | 66.8456011 | 67.7357739 | 63 | 67.0891628 | minute   | 50 |
| 69.3551261 | 71.2690501 | 67.8456011 | 67.7357739 | 63 | 67.0735378 | minute   | 51 |
| 70.3551261 | 71.2690501 | 67.8456011 | 69.7357739 | 63 | 67.2454128 | minute   | 52 |
| 71.3551261 | 69.2690501 | 67.8456011 | 72.7357739 | 63 | 67.3860378 | minute   | 53 |
| 71.3551261 | 68.2690501 | 67.8456011 | 72.7357739 | 63 | 67.3704128 | minute   | 54 |
| 71.3551261 | 68.2690501 | 67.8456011 | 71.7357739 | 63 | 67.3704128 | minute   | 55 |
| 71.3551261 | 67.2690501 | 67.8456011 | 70.7357739 | 63 | 70.1701505 | minute   | 56 |
| 71.3551261 | 67.2690501 | 67.8456011 | 70.7357739 | 63 | 70.4201505 | minute   | 57 |
| 71.3551261 | 67.2690501 | 67.8456011 | 71.7357739 | 63 | 70.2951505 | minute   | 58 |
| 71.3551261 | 67.2690501 | 67.8456011 | 73.7357739 | 63 | 70.6701505 | minute   | 59 |
| 71.3551261 | 68.2690501 | 67.8456011 | 73.7357739 | 63 | 70.4201505 | minute   | 60 |
| 69.3551261 | 68.2690501 | 67.8456011 | 73.7357739 | 73 | 70.2951505 | Activity |    |
| 68.3551261 | 68.2690501 | 68.8456011 | 76.7357739 | 73 | 70.0451505 | Activity |    |
| 68.3551261 | 68.2690501 | 73.8456011 | 76.7357739 | 73 | 69.9201505 | Activity |    |
| 68.3551261 | 68.2690501 | 73.8456011 | 76.7357739 | 73 | 69.7951505 | Activity |    |
| 67.3551261 | 69.2690501 | 74.8456011 | 77.7357739 | 73 | 69.9201505 | Activity |    |
| 67.3551261 | 70.2690501 | 75.8456011 | 77.7357739 | 73 | 70.1701505 | Activity |    |
| 67.3551261 | 70.2690501 | 75.8456011 | 79.7357739 | 73 | 70.5451505 | Activity |    |

|            |            |            |            |    |            |          |
|------------|------------|------------|------------|----|------------|----------|
| 67.3551261 | 70.2690501 | 75.8456011 | 78.7357739 | 73 | 70.5451505 | Activity |
| 67.3551261 | 70.2690501 | 74.8456011 | 77.7357739 | 73 | 71.9201505 | Activity |
| 66.3551261 | 70.2690501 | 73.8456011 | 76.7357739 | 73 | 71.4201505 | Activity |
| 66.3551261 | 68.2690501 | 72.8456011 | 74.7357739 | 73 | 69.0677299 | Activity |
| 66.3551261 | 68.2690501 | 72.8456011 | 74.7357739 | 73 | 69.2239799 | Activity |
| 66.3551261 | 68.2690501 | 72.8456011 | 72.7357739 | 73 | 69.8021049 | Activity |
| 66.3551261 | 68.2690501 | 72.8456011 | 72.7357739 | 73 | 69.7083549 | Activity |
| 65.3551261 | 68.2690501 | 73.8456011 | 72.7357739 | 73 | 69.7083549 | Activity |
| 64.3551261 | 67.2690501 | 73.8456011 | 72.7357739 | 73 | 69.3802299 | Activity |
| 63.3551261 | 65.2690501 | 73.8456011 | 72.7357739 | 73 | 71.2951505 | Activity |
| 63.3551261 | 67.2690501 | 74.8456011 | 72.7357739 | 73 | 70.9201505 | Activity |
| 63.3551261 | 67.2690501 | 74.8456011 | 72.7357739 | 73 | 71.2951505 | Activity |
| 63.3551261 | 67.2690501 | 74.8456011 | 73.7357739 | 73 | 71.6701505 | Activity |
| 63.3551261 | 67.2690501 | 75.8456011 | 78.7357739 | 73 | 71.5451505 | Activity |
| 63.3551261 | 66.2690501 | 75.8456011 | 85.7357739 | 73 | 71.2951505 | Activity |
| 65.3551261 | 66.2690501 | 75.8456011 | 87.7357739 | 73 | 71.2951505 | Activity |
| 66.3551261 | 66.2690501 | 76.8456011 | 86.7357739 | 73 | 71.4201505 | Activity |
| 66.3551261 | 66.2690501 | 76.8456011 | 83.7357739 | 73 | 71.4201505 | Activity |
| 64.3551261 | 67.2690501 | 77.8456011 | 81.7357739 | 73 | 72.0451505 | Activity |
| 63.3551261 | 67.2690501 | 77.8456011 | 81.7357739 | 73 | 72.6701505 | Activity |
| 64.3551261 | 67.2690501 | 77.8456011 | 77.7357739 | 73 | 73.0451505 | Activity |
| 65.3551261 | 67.2690501 | 76.8456011 | 77.7357739 | 73 | 73.2951505 | Activity |
| 69.3551261 | 66.2690501 | 76.8456011 | 76.7357739 | 73 | 73.5451505 | Activity |
| 70.3551261 | 67.2690501 | 76.8456011 | 76.7357739 | 73 | 73.7951505 | Activity |
| 70.3551261 | 65.2690501 | 76.8456011 | 76.7357739 | 73 | 73.2951505 | Activity |
| 73.3551261 | 65.2690501 | 76.8456011 | 75.7357739 | 73 | 72.7951505 | Activity |
| 74.3551261 | 64.2690501 | 76.8456011 | 75.7357739 | 73 | 72.7951505 | Activity |
| 75.3551261 | 64.2690501 | 76.8456011 | 75.7357739 | 73 | 72.7951505 | Activity |
| 76.3551261 | 64.2690501 | 76.8456011 | 74.7357739 | 73 | 72.1701505 | Activity |
| 76.3551261 | 63.2690501 | 77.8456011 | 74.7357739 | 73 | 71.9201505 | Activity |
| 79.3551261 | 63.2690501 | 78.8456011 | 74.7357739 | 73 | 72.5451505 | Activity |
| 80.3551261 | 63.2690501 | 79.8456011 | 74.7357739 | 73 | 72.1701505 | Activity |
| 81.3551261 | 63.2690501 | 79.8456011 | 74.7357739 | 73 | 72.1701505 | Activity |
| 81.3551261 | 64.2690501 | 80.8456011 | 75.7357739 | 73 | 72.6701505 | Activity |
| 81.3551261 | 63.2690501 | 80.8456011 | 75.7357739 | 73 | 72.4201505 | Activity |
| 82.3551261 | 63.2690501 | 79.8456011 | 76.7357739 | 73 | 72.9201505 | Activity |
| 81.3551261 | 63.2690501 | 73.8456011 | 78.7357739 | 73 | 72.6701505 | Activity |
| 81.3551261 | 63.2690501 | 69.8456011 | 79.7357739 | 73 | 72.4201505 | Activity |
| 80.3551261 | 63.2690501 | 69.8456011 | 80.7357739 | 73 | 73.6701505 | Activity |
| 79.3551261 | 63.2690501 | 69.8456011 | 82.7357739 | 73 | 72.0521049 | Activity |
| 79.3551261 | 65.2690501 | 69.8456011 | 83.7357739 | 73 | 72.7239799 | Activity |
| 79.3551261 | 65.2690501 | 69.8456011 | 83.7357739 | 73 | 72.7239799 | Activity |
| 79.3551261 | 66.2690501 | 69.8456011 | 84.7357739 | 73 | 72.7552299 | Activity |
| 78.3551261 | 66.2690501 | 69.8456011 | 84.7357739 | 73 | 72.4896049 | Activity |
| 79.3551261 | 66.2690501 | 69.8456011 | 85.7357739 | 73 | 72.6302299 | Activity |

|            |            |            |            |    |            |          |
|------------|------------|------------|------------|----|------------|----------|
| 79.3551261 | 66.2690501 | 69.8456011 | 86.7357739 | 73 | 72.7708549 | Activity |
| 79.3551261 | 68.2690501 | 69.8456011 | 86.7357739 | 73 | 73.0521049 | Activity |
| 80.3551261 | 68.2690501 | 69.8456011 | 87.7357739 | 73 | 73.6146049 | Activity |
| 80.3551261 | 68.2690501 | 67.8456011 | 87.7357739 | 73 | 74.0677299 | Activity |
| 80.3551261 | 68.2690501 | 66.8456011 | 87.7357739 | 73 | 73.3646049 | Activity |
| 80.3551261 | 68.2690501 | 66.8456011 | 87.7357739 | 73 | 73.2083549 | Activity |
| 79.3551261 | 68.2690501 | 66.8456011 | 87.7357739 | 73 | 73.2239799 | Activity |
| 79.3551261 | 68.2690501 | 66.8456011 | 87.7357739 | 73 | 73.5052299 | Activity |
| 79.3551261 | 70.2690501 | 66.8456011 | 87.7357739 | 73 | 74.4896049 | Activity |
| 79.3551261 | 71.2690501 | 67.8456011 | 88.7357739 | 73 | 75.5989799 | Activity |
| 79.3551261 | 73.2690501 | 68.8456011 | 88.7357739 | 73 | 76.8802299 | Activity |
| 79.3551261 | 73.2690501 | 68.8456011 | 89.7357739 | 73 | 78.8646049 | Activity |
| 79.3551261 | 74.2690501 | 68.8456011 | 88.7357739 | 73 | 77.4711172 | Activity |
| 80.3551261 | 74.2690501 | 68.8456011 | 86.7357739 | 73 | 77.4086172 | Activity |
| 80.3551261 | 73.2690501 | 68.8456011 | 84.7357739 | 73 | 77.4398672 | Activity |
| 80.3551261 | 72.2690501 | 68.8456011 | 84.7357739 | 73 | 78.0648672 | Activity |
| 80.3551261 | 71.2690501 | 68.8456011 | 83.7357739 | 73 | 79.0208549 | Activity |
| 80.3551261 | 71.2690501 | 68.8456011 | 83.7357739 | 73 | 78.5364799 | Activity |
| 80.3551261 | 71.2690501 | 69.8456011 | 83.7357739 | 73 | 77.4427299 | Activity |
| 84.3551261 | 71.2690501 | 69.8456011 | 83.7357739 | 73 | 76.1927299 | Activity |
| 84.3551261 | 70.2690501 | 69.8456011 | 83.7357739 | 73 | 75.2083549 | Activity |
| 84.3551261 | 69.2690501 | 69.8456011 | 83.7357739 | 73 | 74.5052299 | Activity |
| 84.3551261 | 68.2690501 | 68.8456011 | 83.7357739 | 73 | 74.5052299 | Activity |
| 85.3551261 | 68.2690501 | 69.8456011 | 82.7357739 | 73 | 74.7552299 | Activity |
| 86.3551261 | 68.2690501 | 69.8456011 | 82.7357739 | 73 | 74.7708549 | Activity |
| 87.3551261 | 68.2690501 | 69.8456011 | 82.7357739 | 73 | 75.1927299 | Activity |
| 88.3551261 | 68.2690501 | 69.8456011 | 79.7357739 | 73 | 74.9896049 | Activity |
| 89.3551261 | 69.2690501 | 69.8456011 | 77.7357739 | 73 | 74.7083549 | Activity |
| 90.3551261 | 69.2690501 | 69.8456011 | 77.7357739 | 73 | 74.9896049 | Activity |
| 94.3551261 | 68.2690501 | 69.8456011 | 77.7357739 | 73 | 75.3958549 | Activity |
| 96.3551261 | 69.2690501 | 68.8456011 | 77.7357739 | 73 | 75.6927299 | Activity |
| 80.0451505 | 68.2690501 | 68.8456011 | 77.7357739 | 73 | 73.357108  | Activity |
| 80.2951505 | 68.2690501 | 68.8456011 | 77.7357739 | 73 | 73.544608  | Activity |
| 80.6701505 | 68.2690501 | 71.8456011 | 77.7357739 | 73 | 74.513358  | Activity |
| 96.3551261 | 68.2690501 | 71.8456011 | 78.7357739 | 73 | 76.7708549 | Activity |
| 96.3551261 | 67.2690501 | 71.8456011 | 79.7357739 | 73 | 76.6146049 | Activity |
| 96.3551261 | 72.2690501 | 71.8456011 | 79.7357739 | 73 | 77.3177299 | Activity |
| 96.3551261 | 73.2690501 | 71.8456011 | 80.7357739 | 73 | 77.5677299 | Activity |
| 82.3551261 | 73.2690501 | 71.8456011 | 83.7357739 | 73 | 75.5989799 | Activity |
| 79.3551261 | 72.2690501 | 71.8456011 | 83.7357739 | 73 | 75.0364799 | Activity |
| 78.3551261 | 71.2690501 | 71.8456011 | 83.7357739 | 73 | 74.6146049 | Activity |
| 78.3551261 | 70.2690501 | 73.8456011 | 84.7357739 | 73 | 74.7239799 | Activity |
| 76.3551261 | 67.2690501 | 73.8456011 | 84.7357739 | 73 | 74.0364799 | Activity |
| 77.3551261 | 65.2690501 | 71.8456011 | 83.7357739 | 73 | 73.7864799 | Activity |
| 77.3551261 | 64.2690501 | 71.8456011 | 83.7357739 | 73 | 73.4583549 | Activity |



|            |            |            |            |    |            |          |
|------------|------------|------------|------------|----|------------|----------|
| 76.3551261 | 64.2690501 | 71.8456011 | 82.7357739 | 73 | 73.0208549 | Activity |
| 76.3551261 | 65.2690501 | 71.8456011 | 82.7357739 | 73 | 72.8802299 | Activity |
| 76.3551261 | 67.2690501 | 71.8456011 | 82.7357739 | 73 | 72.7396049 | Activity |
| 76.3551261 | 70.2690501 | 70.8456011 | 82.7357739 | 73 | 72.9271049 | Activity |
| 76.3551261 | 70.2690501 | 70.8456011 | 82.7357739 | 73 | 73.0833549 | Activity |
| 76.3551261 | 70.2690501 | 71.8456011 | 82.7357739 | 73 | 73.2083549 | Activity |
| 76.3551261 | 73.2690501 | 72.8456011 | 81.7357739 | 73 | 74.2239799 | Activity |
| 77.3551261 | 73.2690501 | 72.8456011 | 80.7357739 | 73 | 74.0989799 | Activity |
| 76.3551261 | 73.2690501 | 72.8456011 | 77.7357739 | 73 | 73.9583549 | Activity |
| 76.3551261 | 72.2690501 | 72.8456011 | 76.7357739 | 73 | 73.8021049 | Activity |
| 76.3551261 | 70.2690501 | 73.8456011 | 76.7357739 | 73 | 74.0677299 | Activity |
| 76.3551261 | 70.2690501 | 73.8456011 | 76.7357739 | 73 | 74.3646049 | Activity |
| 76.3551261 | 70.2690501 | 73.8456011 | 76.7357739 | 73 | 74.3646049 | Activity |
| 74.3551261 | 70.2690501 | 73.8456011 | 75.7357739 | 73 | 73.9739799 | Activity |
| 72.3551261 | 72.2690501 | 74.8456011 | 75.7357739 | 73 | 73.8177299 | Activity |
| 72.3551261 | 74.2690501 | 75.8456011 | 75.7357739 | 73 | 73.9583549 | Activity |
| 72.3551261 | 73.2690501 | 75.8456011 | 75.7357739 | 73 | 73.9739799 | Activity |
| 72.3551261 | 72.2690501 | 75.8456011 | 77.7357739 | 73 | 73.9583549 | Activity |
| 71.3551261 | 71.2690501 | 75.8456011 | 77.7357739 | 73 | 73.6771049 | Activity |
| 71.3551261 | 70.2690501 | 75.8456011 | 77.7357739 | 73 | 73.8177299 | Activity |
| 71.3551261 | 70.2690501 | 75.8456011 | 77.7357739 | 73 | 73.8177299 | Activity |
| 71.3551261 | 71.2690501 | 75.8456011 | 76.7357739 | 73 | 74.1927299 | Activity |
| 71.3551261 | 72.2690501 | 75.8456011 | 72.7357739 | 73 | 74.3021049 | Activity |
| 71.3551261 | 73.2690501 | 76.8456011 | 71.7357739 | 73 | 74.5521049 | Activity |
| 71.3551261 | 74.2690501 | 78.8456011 | 71.7357739 | 73 | 74.5364799 | Activity |
| 71.3551261 | 73.2690501 | 80.8456011 | 71.7357739 | 73 | 74.8021049 | Activity |
| 71.3551261 | 73.2690501 | 78.8456011 | 72.7357739 | 73 | 74.4427299 | Activity |
| 71.3551261 | 73.2690501 | 78.8456011 | 72.7357739 | 73 | 74.4114799 | Activity |
| 71.3551261 | 68.2690501 | 76.8456011 | 73.7357739 | 73 | 73.4583549 | Activity |
| 71.3551261 | 67.2690501 | 76.8456011 | 72.7357739 | 73 | 73.2864799 | Activity |
| 71.3551261 | 67.2690501 | 76.8456011 | 73.7357739 | 73 | 73.8333549 | Activity |
| 71.3551261 | 66.2690501 | 76.8456011 | 74.7357739 | 73 | 74.1146049 | Activity |
| 71.3551261 | 66.2690501 | 76.8456011 | 74.7357739 | 73 | 73.6927299 | Activity |
| 73.3551261 | 65.2690501 | 76.8456011 | 74.7357739 | 73 | 73.8333549 | Activity |
| 76.3551261 | 65.2690501 | 75.8456011 | 74.7357739 | 73 | 74.3958549 | Activity |
| 76.3551261 | 66.2690501 | 72.8456011 | 74.7357739 | 73 | 74.1458549 | Activity |
| 77.3551261 | 66.2690501 | 72.8456011 | 74.7357739 | 73 | 74.3958549 | Activity |
| 76.3551261 | 63.2690501 | 72.8456011 | 74.7357739 | 73 | 73.8489799 | Activity |
| 73.3551261 | 62.2690501 | 72.8456011 | 75.7357739 | 73 | 73.4271049 | Activity |
| 72.3551261 | 62.2690501 | 72.8456011 | 78.7357739 | 73 | 73.4427299 | Activity |
| 70.3551261 | 61.2690501 | 72.8456011 | 78.7357739 | 73 | 72.8802299 | Activity |
| 69.3551261 | 61.2690501 | 70.8456011 | 79.7357739 | 73 | 72.4896049 | Activity |
| 69.3551261 | 63.2690501 | 70.8456011 | 82.7357739 | 73 | 72.6458549 | Activity |
| 69.3551261 | 63.2690501 | 71.8456011 | 84.7357739 | 73 | 72.5208549 | Activity |
| 70.3551261 | 63.2690501 | 71.8456011 | 84.7357739 | 73 | 73.0052299 | Activity |

|            |            |            |            |    |            |          |
|------------|------------|------------|------------|----|------------|----------|
| 72.3551261 | 63.2690501 | 71.8456011 | 84.7357739 | 73 | 73.1614799 | Activity |
| 72.3551261 | 63.2690501 | 67.8456011 | 84.7357739 | 73 | 72.8177299 | Activity |
| 73.3551261 | 63.2690501 | 64.8456011 | 83.7357739 | 73 | 72.3958549 | Activity |
| 73.3551261 | 61.2690501 | 64.8456011 | 83.7357739 | 73 | 72.2083549 | Activity |
| 73.3551261 | 61.2690501 | 64.8456011 | 83.7357739 | 73 | 72.3802299 | Activity |
| 73.3551261 | 59.2690501 | 64.8456011 | 83.7357739 | 73 | 72.0989799 | Activity |
| 73.3551261 | 61.2690501 | 65.8456011 | 82.7357739 | 73 | 72.5052299 | Activity |
| 73.3551261 | 63.2690501 | 65.8456011 | 82.7357739 | 73 | 72.3958549 | Activity |
| 75.3551261 | 65.2690501 | 66.8456011 | 84.7357739 | 73 | 72.2239799 | Activity |
| 76.3551261 | 66.2690501 | 70.8456011 | 84.7357739 | 73 | 73.2864799 | Activity |
| 75.3551261 | 66.2690501 | 71.8456011 | 84.7357739 | 73 | 74.1771049 | Activity |
| 75.3551261 | 65.2690501 | 73.8456011 | 80.7357739 | 73 | 74.4427299 | Activity |
| 74.3551261 | 65.2690501 | 74.8456011 | 79.7357739 | 73 | 74.4583549 | Activity |
| 74.3551261 | 66.2690501 | 74.8456011 | 80.7357739 | 73 | 74.7552299 | Activity |
| 74.3551261 | 66.2690501 | 74.8456011 | 80.7357739 | 73 | 74.7552299 | Activity |
| 74.3551261 | 67.2690501 | 74.8456011 | 80.7357739 | 73 | 74.8958549 | Activity |
| 77.3551261 | 68.2690501 | 74.8456011 | 79.7357739 | 73 | 75.4583549 | Activity |
| 77.3551261 | 69.2690501 | 73.8456011 | 76.7357739 | 73 | 75.7552299 | Activity |
| 77.3551261 | 70.2690501 | 70.8456011 | 72.7357739 | 73 | 75.6458549 | Activity |
| 77.3551261 | 71.2690501 | 66.8456011 | 71.7357739 | 73 | 75.3802299 | Activity |
| 77.3551261 | 72.2690501 | 66.8456011 | 71.7357739 | 73 | 75.4583549 | Activity |
| 77.3551261 | 73.2690501 | 65.8456011 | 71.7357739 | 73 | 75.2083549 | Activity |
| 77.3551261 | 73.2690501 | 65.8456011 | 69.7357739 | 73 | 74.3489799 | Activity |
| 77.3551261 | 74.2690501 | 64.8456011 | 69.7357739 | 73 | 73.6614799 | Activity |
| 77.3551261 | 74.2690501 | 64.8456011 | 71.7357739 | 73 | 73.2239799 | Activity |
| 76.3551261 | 74.2690501 | 63.8456011 | 71.7357739 | 73 | 72.8177299 | Activity |
| 76.3551261 | 75.2690501 | 63.8456011 | 72.7357739 | 73 | 73.2239799 | Activity |
| 76.3551261 | 75.2690501 | 63.8456011 | 72.7357739 | 73 | 73.2239799 | Activity |
| 74.3551261 | 74.2690501 | 63.8456011 | 74.7357739 | 73 | 72.9427299 | Activity |
| 73.3551261 | 72.2690501 | 63.8456011 | 73.7357739 | 73 | 71.8021049 | Activity |
| 73.3551261 | 72.2690501 | 64.8456011 | 73.7357739 | 73 | 71.1771049 | Activity |
| 73.3551261 | 69.2690501 | 64.8456011 | 73.7357739 | 73 | 70.4271049 | Activity |
| 74.3551261 | 69.2690501 | 64.8456011 | 71.7357739 | 73 | 69.8177299 | Activity |
| 74.3551261 | 69.2690501 | 65.8456011 | 70.7357739 | 73 | 70.0677299 | Activity |
| 74.3551261 | 69.2690501 | 65.8456011 | 69.7357739 | 73 | 70.4896049 | Activity |
| 73.3551261 | 69.2690501 | 65.8456011 | 69.7357739 | 73 | 70.3489799 | Activity |
| 73.3551261 | 69.2690501 | 65.8456011 | 69.7357739 | 73 | 70.0677299 | Activity |
| 72.3551261 | 70.2690501 | 65.8456011 | 69.7357739 | 73 | 69.3802299 | Activity |
| 72.3551261 | 70.2690501 | 65.8456011 | 69.7357739 | 73 | 69.5208549 | Activity |
| 72.3551261 | 70.2690501 | 66.8456011 | 69.7357739 | 73 | 69.3646049 | Activity |
| 73.3551261 | 70.2690501 | 67.8456011 | 71.7357739 | 73 | 69.6458549 | Activity |
| 74.3551261 | 72.2690501 | 67.8456011 | 71.7357739 | 73 | 69.3802299 | Activity |
| 75.3551261 | 73.2690501 | 69.8456011 | 70.7357739 | 73 | 69.6146049 | Activity |
| 75.3551261 | 74.2690501 | 69.8456011 | 70.7357739 | 73 | 69.5052299 | Activity |
| 75.3551261 | 74.2690501 | 69.8456011 | 70.7357739 | 73 | 69.6458549 | Activity |

|            |            |            |            |    |            |          |
|------------|------------|------------|------------|----|------------|----------|
| 75.3551261 | 74.2690501 | 69.8456011 | 67.7357739 | 73 | 69.7864799 | Activity |
| 74.3551261 | 74.2690501 | 71.8456011 | 67.7357739 | 73 | 69.7552299 | Activity |
| 74.3551261 | 72.2690501 | 73.8456011 | 67.7357739 | 73 | 69.5208549 | Activity |
| 72.3551261 | 71.2690501 | 73.8456011 | 67.7357739 | 73 | 69.0052299 | Activity |
| 72.3551261 | 62.2690501 | 73.8456011 | 67.7357739 | 73 | 67.5989799 | Activity |
| 71.3551261 | 63.2690501 | 74.8456011 | 66.7357739 | 73 | 67.3021049 | Activity |
| 70.3551261 | 64.2690501 | 75.8456011 | 65.7357739 | 73 | 67.6146049 | Activity |
| 70.3551261 | 65.2690501 | 75.8456011 | 65.7357739 | 73 | 67.7708549 | Activity |
| 70.3551261 | 66.2690501 | 76.8456011 | 65.7357739 | 73 | 67.8333549 | Activity |
| 70.3551261 | 67.2690501 | 76.8456011 | 65.7357739 | 73 | 68.2396049 | Activity |
| 71.3551261 | 67.2690501 | 76.8456011 | 65.7357739 | 73 | 68.6614799 | Activity |
| 71.3551261 | 67.2690501 | 76.8456011 | 65.7357739 | 73 | 68.6458549 | Activity |
| 71.3551261 | 66.2690501 | 76.8456011 | 69.7357739 | 73 | 68.5052299 | Activity |
| 72.3551261 | 66.2690501 | 75.8456011 | 71.7357739 | 73 | 68.6458549 | Activity |
| 72.3551261 | 67.2690501 | 72.8456011 | 74.7357739 | 73 | 68.3646049 | Activity |
| 72.3551261 | 67.2690501 | 70.8456011 | 74.7357739 | 73 | 68.0521049 | Activity |
| 72.3551261 | 67.2690501 | 68.8456011 | 75.7357739 | 73 | 67.6302299 | Activity |
| 72.3551261 | 68.2690501 | 68.8456011 | 74.7357739 | 73 | 67.7396049 | Activity |
| 71.3551261 | 68.2690501 | 68.8456011 | 74.7357739 | 73 | 68.1771049 | Activity |
| 71.3551261 | 69.2690501 | 68.8456011 | 73.7357739 | 73 | 69.0364799 | Activity |
| 71.3551261 | 70.2690501 | 68.8456011 | 73.7357739 | 73 | 69.5989799 | Activity |
| 75.3551261 | 71.2690501 | 68.8456011 | 72.7357739 | 73 | 70.4427299 | Activity |
| 79.3551261 | 71.2690501 | 68.8456011 | 72.7357739 | 73 | 71.1458549 | Activity |
| 79.3551261 | 71.2690501 | 67.8456011 | 72.7357739 | 73 | 71.0208549 | Activity |
| 80.3551261 | 72.2690501 | 67.8456011 | 73.7357739 | 73 | 71.5677299 | Activity |
| 80.3551261 | 72.2690501 | 66.8456011 | 72.7357739 | 73 | 71.7239799 | Activity |
| 73.3551261 | 73.2690501 | 66.8456011 | 71.7357739 | 73 | 71.0052299 | Activity |
| 70.3551261 | 71.2690501 | 66.8456011 | 69.7357739 | 73 | 70.5833549 | Activity |
| 70.3551261 | 70.2690501 | 66.8456011 | 69.7357739 | 73 | 70.1614799 | Activity |
| 70.3551261 | 70.2690501 | 66.8456011 | 69.7357739 | 73 | 70.1458549 | Activity |
| 69.3551261 | 66.2690501 | 61.8456011 | 68.7357739 | 73 | 68.6771049 | Activity |
| 69.3551261 | 65.2690501 | 61.8456011 | 67.7357739 | 73 | 68.4583549 | Activity |
| 69.3551261 | 65.2690501 | 61.8456011 | 67.7357739 | 73 | 68.3021049 | Activity |
| 68.3551261 | 65.2690501 | 62.8456011 | 67.7357739 | 73 | 68.4114799 | Activity |
| 68.3551261 | 65.2690501 | 64.8456011 | 67.7357739 | 73 | 68.6771049 | Activity |
| 69.3551261 | 65.2690501 | 67.8456011 | 64.7357739 | 73 | 69.0521049 | Activity |
| 69.3551261 | 65.2690501 | 67.8456011 | 64.7357739 | 73 | 69.0989799 | Activity |
| 72.3551261 | 66.2690501 | 68.8456011 | 65.7357739 | 73 | 69.7708549 | Activity |
| 76.3551261 | 66.2690501 | 66.8456011 | 66.7357739 | 73 | 70.0989799 | Activity |
| 78.3551261 | 68.2690501 | 65.8456011 | 71.7357739 | 73 | 70.6458549 | Activity |
| 79.3551261 | 68.2690501 | 65.8456011 | 71.7357739 | 73 | 70.8802299 | Activity |
| 80.3551261 | 68.2690501 | 65.8456011 | 72.7357739 | 73 | 70.7396049 | Activity |
| 81.3551261 | 68.2690501 | 65.8456011 | 72.7357739 | 73 | 71.0052299 | Activity |
| 80.3551261 | 68.2690501 | 64.8456011 | 71.7357739 | 73 | 70.1614799 | Activity |
| 79.3551261 | 69.2690501 | 64.8456011 | 71.7357739 | 73 | 69.7083549 | Activity |



|            |            |            |            |    |            |           |
|------------|------------|------------|------------|----|------------|-----------|
| 77.3551261 | 69.2690501 | 64.8456011 | 70.7357739 | 73 | 69.1146049 | Activity  |
| 76.3551261 | 71.2690501 | 64.8456011 | 69.7357739 | 73 | 70.5451505 | Activity  |
| 74.3551261 | 71.2690501 | 64.8456011 | 69.7357739 | 73 | 68.2951505 | Activity  |
| 73.3551261 | 70.2690501 | 66.8456011 | 69.7357739 | 73 | 67.2951505 | Activity  |
| 73.3551261 | 70.2690501 | 66.8456011 | 69.7357739 | 73 | 67.2951505 | Activity  |
| 73.3551261 | 70.2690501 | 66.8456011 | 68.7357739 | 73 | 67.2951505 | Activity  |
| 73.3551261 | 70.2690501 | 67.8456011 | 68.7357739 | 73 | 67.9201505 | Activity  |
| 74.3551261 | 70.2690501 | 67.8456011 | 68.7357739 | 73 | 67.9201505 | Activity  |
| 74.3551261 | 69.2690501 | 67.8456011 | 68.7357739 | 73 | 67.9201505 | Activity  |
| 74.3551261 | 69.2690501 | 67.8456011 | 69.7357739 | 73 | 68.0451505 | Activity  |
| 74.3551261 | 69.2690501 | 67.8456011 | 69.7357739 | 73 | 68.2951505 | Activity  |
| 73.3551261 | 70.2690501 | 67.8456011 | 69.7357739 | 73 | 68.4201505 | Activity  |
| 73.3551261 | 69.2690501 | 68.8456011 | 69.7357739 | 73 | 68.7951505 | Activity  |
| 73.3551261 | 68.2690501 | 68.8456011 | 70.7357739 | 73 | 68.7951505 | Activity  |
| 72.3551261 | 67.2690501 | 68.8456011 | 70.7357739 | 73 | 68.4201505 | Activity  |
| 72.3551261 | 66.2690501 | 67.8456011 | 71.7357739 | 73 | 67.2951505 | minute 1  |
| 72.3551261 | 65.2690501 | 67.8456011 | 71.7357739 | 69 | 67.1701505 | minute 2  |
| 72.3551261 | 65.2690501 | 66.8456011 | 71.7357739 | 69 | 67.1701505 | minute 3  |
| 71.3551261 | 65.2690501 | 66.8456011 | 71.7357739 | 69 | 67.1701505 | minute 4  |
| 71.3551261 | 65.2690501 | 65.8456011 | 71.7357739 | 69 | 66.9201505 | minute 5  |
| 71.3551261 | 66.2690501 | 65.8456011 | 71.7357739 | 69 | 67.1701505 | minute 6  |
| 71.3551261 | 67.2690501 | 63.8456011 | 70.7357739 | 69 | 67.4201505 | minute 7  |
| 72.3551261 | 69.2690501 | 62.8456011 | 69.7357739 | 69 | 68.0451505 | minute 8  |
| 73.3551261 | 72.2690501 | 61.8456011 | 69.7357739 | 69 | 68.6701505 | minute 9  |
| 73.3551261 | 76.2690501 | 61.8456011 | 69.7357739 | 69 | 69.5451505 | minute 10 |
| 73.3551261 | 78.2690501 | 61.8456011 | 71.7357739 | 69 | 69.9201505 | minute 11 |
| 73.3551261 | 78.2690501 | 61.8456011 | 72.7357739 | 69 | 70.0451505 | minute 12 |
| 74.3551261 | 79.2690501 | 60.8456011 | 72.7357739 | 69 | 70.6701505 | minute 13 |
| 75.3551261 | 78.2690501 | 61.8456011 | 72.7357739 | 69 | 70.7951505 | minute 14 |
| 75.3551261 | 78.2690501 | 61.8456011 | 72.7357739 | 69 | 71.2951505 | minute 15 |
| 75.3551261 | 77.2690501 | 61.8456011 | 72.7357739 | 69 | 71.1701505 | minute 16 |
| 76.3551261 | 77.2690501 | 61.8456011 | 71.7357739 | 69 | 71.9201505 | minute 17 |
| 76.3551261 | 77.2690501 | 62.8456011 | 71.7357739 | 69 | 72.0451505 | minute 18 |
| 76.3551261 | 76.2690501 | 62.8456011 | 71.7357739 | 69 | 71.5451505 | minute 19 |
| 77.3551261 | 76.2690501 | 62.8456011 | 70.7357739 | 69 | 71.2951505 | minute 20 |
| 78.3551261 | 76.2690501 | 62.8456011 | 69.7357739 | 69 | 71.0451505 | minute 21 |
| 78.3551261 | 75.2690501 | 64.8456011 | 69.7357739 | 69 | 71.1701505 | minute 22 |
| 73.3551261 | 75.2690501 | 65.8456011 | 76.7357739 | 69 | 70.4201505 | minute 23 |
| 72.3551261 | 75.2690501 | 66.8456011 | 77.7357739 | 69 | 70.7951505 | minute 24 |
| 72.3551261 | 75.2690501 | 67.8456011 | 76.7357739 | 69 | 70.9201505 | minute 25 |
| 72.3551261 | 73.2690501 | 67.8456011 | 76.7357739 | 69 | 70.4201505 | minute 26 |
| 73.3551261 | 73.2690501 | 69.8456011 | 75.7357739 | 69 | 70.5451505 | minute 27 |
| 73.3551261 | 71.2690501 | 70.8456011 | 75.7357739 | 69 | 70.0451505 | minute 28 |
| 72.3551261 | 70.2690501 | 70.8456011 | 75.7357739 | 69 | 69.5451505 | minute 29 |
| 72.3551261 | 69.2690501 | 70.8456011 | 73.7357739 | 69 | 69.5451505 | minute 30 |

|            |            |            |            |    |            |           |
|------------|------------|------------|------------|----|------------|-----------|
| 72.3551261 | 68.2690501 | 69.8456011 | 73.7357739 | 69 | 69.6701505 | minute 31 |
| 72.3551261 | 67.2690501 | 69.8456011 | 72.7357739 | 69 | 69.6701505 | minute 32 |
| 72.3551261 | 65.2690501 | 68.8456011 | 71.7357739 | 69 | 69.4201505 | minute 33 |
| 73.3551261 | 64.2690501 | 67.8456011 | 71.7357739 | 69 | 69.6701505 | minute 34 |
| 72.3551261 | 64.2690501 | 67.8456011 | 73.7357739 | 69 | 69.6701505 | minute 35 |
| 72.3551261 | 63.2690501 | 66.8456011 | 73.7357739 | 69 | 69.5451505 | minute 36 |
| 71.3551261 | 63.2690501 | 66.8456011 | 73.7357739 | 69 | 69.5451505 | minute 37 |
| 71.3551261 | 63.2690501 | 66.8456011 | 72.7357739 | 69 | 69.7951505 | minute 38 |
| 71.3551261 | 62.2690501 | 66.8456011 | 71.7357739 | 69 | 70.1701505 | minute 39 |
| 71.3551261 | 62.2690501 | 66.8456011 | 68.7357739 | 69 | 68.240571  | minute 40 |
| 71.3551261 | 62.2690501 | 66.8456011 | 68.7357739 | 69 | 68.099946  | minute 41 |
| 71.3551261 | 63.2690501 | 66.8456011 | 65.7357739 | 69 | 70.7951505 | minute 42 |
| 71.3551261 | 63.2690501 | 66.8456011 | 64.7357739 | 69 | 69.2951505 | minute 43 |
| 71.3551261 | 62.2690501 | 66.8456011 | 64.7357739 | 69 | 69.1701505 | minute 44 |
| 73.3551261 | 62.2690501 | 66.8456011 | 65.7357739 | 69 | 69.5451505 | minute 45 |
| 75.3551261 | 61.2690501 | 66.8456011 | 67.7357739 | 69 | 69.6701505 | minute 46 |
| 75.3551261 | 62.2690501 | 66.8456011 | 68.7357739 | 69 | 69.5451505 | minute 47 |
| 75.3551261 | 62.2690501 | 66.8456011 | 68.7357739 | 69 | 69.7951505 | minute 48 |
| 75.3551261 | 62.2690501 | 66.8456011 | 68.7357739 | 69 | 69.9201505 | minute 49 |
| 73.3551261 | 62.2690501 | 66.8456011 | 69.7357739 | 69 | 69.5451505 | minute 50 |
| 73.3551261 | 60.2690501 | 67.8456011 | 69.7357739 | 69 | 69.9201505 | minute 51 |
| 73.3551261 | 60.2690501 | 69.8456011 | 69.7357739 | 69 | 70.5451505 | minute 52 |
| 73.3551261 | 60.2690501 | 70.8456011 | 69.7357739 | 69 | 71.0451505 | minute 53 |
| 74.3551261 | 61.2690501 | 70.8456011 | 69.7357739 | 69 | 71.6701505 | minute 54 |
| 74.3551261 | 61.2690501 | 72.8456011 | 68.7357739 | 69 | 72.1701505 | minute 55 |
| 74.3551261 | 61.2690501 | 72.8456011 | 68.7357739 | 69 | 71.9201505 | minute 56 |
| 76.3551261 | 62.2690501 | 72.8456011 | 69.7357739 | 69 | 72.1701505 | minute 57 |
| 76.3551261 | 61.2690501 | 75.8456011 | 69.7357739 | 69 | 72.4201505 | minute 58 |
| 76.3551261 | 60.2690501 | 77.8456011 | 70.7357739 | 69 | 71.9201505 | minute 59 |
| 76.3551261 | 58.2690501 | 77.8456011 | 71.7357739 | 69 | 71.5451505 | minute 60 |
| 75.3551261 | 57.2690501 | 77.8456011 | 72.7357739 | 69 | 70.6701505 | AFTER 1   |
| 75.3551261 | 57.2690501 | 76.8456011 | 72.7357739 | 69 | 70.0451505 | AFTER 2   |
| 74.3551261 | 58.2690501 | 76.8456011 | 70.7357739 | 69 | 69.9201505 | AFTER 3   |
| 74.3551261 | 58.2690501 | 74.8456011 | 69.7357739 | 69 | 69.0451505 | AFTER 4   |
| 74.3551261 | 58.2690501 | 74.8456011 | 68.7357739 | 69 | 68.9201505 | AFTER 5   |
| 75.3551261 | 59.2690501 | 74.8456011 | 68.7357739 | 69 | 69.1701505 | AFTER 6   |
| 75.3551261 | 59.2690501 | 66.8456011 | 65.7357739 | 69 | 67.9201505 | AFTER 7   |
| 75.3551261 | 60.2690501 | 64.8456011 | 66.7357739 | 69 | 67.7951505 | AFTER 8   |
| 75.3551261 | 60.2690501 | 64.8456011 | 66.7357739 | 69 | 67.5451505 | AFTER 9   |
| 76.3551261 | 58.2690501 | 64.8456011 | 67.7357739 | 69 | 67.9201505 | AFTER 10  |
| 78.3551261 | 57.2690501 | 64.8456011 | 67.7357739 | 69 | 68.1701505 | AFTER 11  |
| 78.3551261 | 57.2690501 | 62.8456011 | 68.7357739 | 69 | 67.9201505 | AFTER 12  |
| 78.3551261 | 60.2690501 | 63.8456011 | 68.7357739 | 69 | 69.2951505 | AFTER 13  |
| 81.3551261 | 60.2690501 | 63.8456011 | 69.7357739 | 69 | 69.6701505 | AFTER 14  |
| 83.3551261 | 60.2690501 | 63.8456011 | 69.7357739 | 69 | 69.7951505 | AFTER 15  |

|            |            |            |            |    |            |          |
|------------|------------|------------|------------|----|------------|----------|
| 84.3551261 | 59.2690501 | 63.8456011 | 69.7357739 | 69 | 70.2951505 | AFTER 16 |
| 70.7951505 | 57.2690501 | 63.8456011 | 70.7357739 | 69 | 68.7251536 | AFTER 17 |
| 71.0451505 | 57.2690501 | 63.8456011 | 71.7357739 | 69 | 68.6314036 | AFTER 18 |
| 70.6701505 | 56.2690501 | 63.8456011 | 72.7357739 | 69 | 68.4595286 | AFTER 19 |
| 81.3551261 | 56.2690501 | 63.8456011 | 72.7357739 | 69 | 70.0451505 | AFTER 20 |
| 76.3551261 | 56.2690501 | 63.8456011 | 78.7357739 | 69 | 67.5989799 | AFTER 21 |
| 76.3551261 | 56.2690501 | 63.8456011 | 78.7357739 | 69 | 67.7396049 | AFTER 22 |
| 74.3551261 | 57.2690501 | 63.8456011 | 78.7357739 | 69 | 67.1771049 | AFTER 23 |
| 74.3551261 | 57.2690501 | 63.8456011 | 93.7357739 | 69 | 67.1771049 | AFTER 24 |
| 74.3551261 | 57.2690501 | 63.8456011 | 93.7357739 | 69 | 68.5451505 | AFTER 25 |
| 74.3551261 | 57.2690501 | 63.8456011 | 92.7357739 | 69 | 68.6701505 | AFTER 26 |
| 74.3551261 | 56.2690501 | 63.8456011 | 85.7357739 | 69 | 68.6701505 | AFTER 27 |
| 74.3551261 | 56.2690501 | 64.8456011 | 85.7357739 | 69 | 68.6701505 | AFTER 28 |
| 74.3551261 | 57.2690501 | 64.8456011 | 76.7357739 | 69 | 69.0451505 | AFTER 29 |
| 74.3551261 | 59.2690501 | 64.8456011 | 73.7357739 | 69 | 69.0451505 | AFTER 30 |
| 74.3551261 | 61.2690501 | 65.8456011 | 73.7357739 | 69 | 70.2951505 | AFTER 31 |
| 74.3551261 | 62.2690501 | 65.8456011 | 70.7357739 | 69 | 69.1701505 | AFTER 32 |
| 74.3551261 | 63.2690501 | 65.8456011 | 69.7357739 | 69 | 69.5451505 | AFTER 33 |
| 74.3551261 | 63.2690501 | 65.8456011 | 68.7357739 | 69 | 69.1701505 | AFTER 34 |
| 75.3551261 | 63.2690501 | 65.8456011 | 68.7357739 | 69 | 68.8704128 | AFTER 35 |
| 76.3551261 | 63.2690501 | 65.8456011 | 67.7357739 | 69 | 69.2766628 | AFTER 36 |
| 76.3551261 | 63.2690501 | 65.8456011 | 67.7357739 | 69 | 68.9172878 | AFTER 37 |
| 76.3551261 | 63.2690501 | 65.8456011 | 67.7357739 | 69 | 69.2141628 | AFTER 38 |
| 77.3551261 | 63.2690501 | 65.8456011 | 72.7357739 | 69 | 69.5266628 | AFTER 39 |
| 77.3551261 | 64.2690501 | 65.8456011 | 75.7357739 | 69 | 69.5891628 | AFTER 40 |
| 77.3551261 | 63.2690501 | 67.8456011 | 75.7357739 | 69 | 69.8704128 | AFTER 41 |
| 78.3551261 | 63.2690501 | 70.8456011 | 77.7357739 | 69 | 71.5422878 | AFTER 42 |
| 79.3551261 | 62.2690501 | 70.8456011 | 76.7357739 | 69 | 71.7297878 | AFTER 43 |
| 77.3551261 | 62.2690501 | 70.8456011 | 71.7357739 | 69 | 71.5891628 | AFTER 44 |
| 77.3551261 | 62.2690501 | 70.8456011 | 71.7357739 | 69 | 71.8704128 | AFTER 45 |
| 78.3551261 | 62.2690501 | 71.8456011 | 71.7357739 | 63 | 72.2922878 | AFTER 46 |
| 79.3551261 | 62.2690501 | 71.8456011 | 67.7357739 | 63 | 72.3079128 | AFTER 47 |
| 79.3551261 | 62.2690501 | 71.8456011 | 67.7357739 | 63 | 72.2766628 | AFTER 48 |
| 79.3551261 | 61.2690501 | 71.8456011 | 68.7357739 | 63 | 71.9797878 | AFTER 49 |
| 79.3551261 | 61.2690501 | 71.8456011 | 69.7357739 | 63 | 71.2297878 | AFTER 50 |
| 79.3551261 | 61.2690501 | 68.8456011 | 68.7357739 | 63 | 70.9485378 | AFTER 51 |
| 78.3551261 | 61.2690501 | 68.8456011 | 66.7357739 | 63 | 70.6047878 | AFTER 52 |
| 77.3551261 | 62.2690501 | 67.8456011 | 66.7357739 | 63 | 70.4172878 | AFTER 53 |
| 77.3551261 | 62.2690501 | 66.8456011 | 66.7357739 | 63 | 72.7951505 | AFTER 54 |
| 75.3551261 | 61.2690501 | 64.8456011 | 66.7357739 | 63 | 71.7951505 | AFTER 55 |
| 75.3551261 | 61.2690501 | 64.8456011 | 66.7357739 | 63 | 71.7951505 | AFTER 56 |
| 75.3551261 | 56.2690501 | 63.8456011 | 66.7357739 | 63 | 70.7951505 | AFTER 57 |
| 75.3551261 | 56.2690501 | 63.8456011 | 67.7357739 | 63 | 70.2951505 | AFTER 58 |
| 76.3551261 | 56.2690501 | 63.8456011 | 68.7357739 | 63 | 68.2454128 | AFTER 59 |
| 77.3551261 | 56.2690501 | 63.8456011 | 68.7357739 | 63 | 70.6701505 | AFTER 60 |

|            |            |            |            |    |            |           |
|------------|------------|------------|------------|----|------------|-----------|
| 79.3551261 | 56.2690501 | 63.8456011 | 68.7357739 | 63 | 69.9641628 | AFTER 61  |
| 77.3551261 | 56.2690501 | 63.8456011 | 68.7357739 | 63 | 70.5891628 | AFTER 62  |
| 77.3551261 | 54.2690501 | 64.8456011 | 68.7357739 | 63 | 70.5891628 | AFTER 63  |
| 77.3551261 | 54.2690501 | 64.8456011 | 68.7357739 | 63 | 72.1701505 | AFTER 64  |
| 75.3551261 | 55.2690501 | 64.8456011 | 68.7357739 | 63 | 71.1701505 | AFTER 65  |
| 75.3551261 | 55.2690501 | 64.8456011 | 68.7357739 | 63 | 71.1701505 | AFTER 66  |
| 73.3551261 | 56.2690501 | 64.8456011 | 68.7357739 | 63 | 70.4201505 | AFTER 67  |
| 73.3551261 | 58.2690501 | 64.8456011 | 79.7357739 | 63 | 70.4201505 | AFTER 68  |
| 74.3551261 | 57.2690501 | 64.8456011 | 79.7357739 | 63 | 70.5451505 | AFTER 69  |
| 74.3551261 | 57.2690501 | 64.8456011 | 79.7357739 | 63 | 70.0451505 | AFTER 70  |
| 74.3551261 | 55.2690501 | 63.8456011 | 79.7357739 | 63 | 69.1701505 | AFTER 71  |
| 74.3551261 | 55.2690501 | 63.8456011 | 79.7357739 | 63 | 68.9201505 | AFTER 72  |
| 74.3551261 | 55.2690501 | 63.8456011 | 75.7357739 | 63 | 68.5451505 | AFTER 73  |
| 75.3551261 | 55.2690501 | 64.8456011 | 74.7357739 | 63 | 68.9201505 | AFTER 74  |
| 76.3551261 | 55.2690501 | 68.8456011 | 73.7357739 | 63 | 69.4201505 | AFTER 75  |
| 76.3551261 | 55.2690501 | 68.8456011 | 72.7357739 | 63 | 69.2951505 | AFTER 76  |
| 76.3551261 | 61.2690501 | 69.8456011 | 72.7357739 | 63 | 70.0451505 | AFTER 77  |
| 76.3551261 | 61.2690501 | 70.8456011 | 71.7357739 | 63 | 70.1701505 | AFTER 78  |
| 76.3551261 | 61.2690501 | 71.8456011 | 71.7357739 | 63 | 70.2951505 | AFTER 79  |
| 77.3551261 | 62.2690501 | 71.8456011 | 71.7357739 | 63 | 70.5451505 | AFTER 80  |
| 80.3551261 | 62.2690501 | 73.8456011 | 70.7357739 | 63 | 71.0451505 | AFTER 81  |
| 82.3551261 | 59.2690501 | 74.8456011 | 71.7357739 | 63 | 71.0451505 | AFTER 82  |
| 83.3551261 | 58.2690501 | 76.8456011 | 71.7357739 | 63 | 71.2951505 | AFTER 83  |
| 82.3551261 | 58.2690501 | 77.8456011 | 71.7357739 | 63 | 71.5451505 | AFTER 84  |
| 82.3551261 | 55.2690501 | 77.8456011 | 70.7357739 | 63 | 71.2951505 | AFTER 85  |
| 83.3551261 | 54.2690501 | 79.8456011 | 70.7357739 | 63 | 71.6701505 | AFTER 86  |
| 83.3551261 | 54.2690501 | 80.8456011 | 70.7357739 | 63 | 71.5451505 | AFTER 87  |
| 83.3551261 | 54.2690501 | 80.8456011 | 69.7357739 | 63 | 71.4201505 | AFTER 88  |
| 82.3551261 | 54.2690501 | 80.8456011 | 71.7357739 | 63 | 71.2951505 | AFTER 89  |
| 82.3551261 | 55.2690501 | 80.8456011 | 71.7357739 | 63 | 71.7951505 | AFTER 90  |
| 81.3551261 | 55.2690501 | 80.8456011 | 72.7357739 | 63 | 71.6701505 | AFTER 91  |
| 81.3551261 | 55.2690501 | 80.8456011 | 73.7357739 | 63 | 71.4201505 | AFTER 92  |
| 81.3551261 | 55.2690501 | 80.8456011 | 74.7357739 | 63 | 71.2951505 | AFTER 93  |
| 81.3551261 | 57.2690501 | 78.8456011 | 74.7357739 | 63 | 71.1701505 | AFTER 94  |
| 80.3551261 | 57.2690501 | 75.8456011 | 74.7357739 | 63 | 70.5451505 | AFTER 95  |
| 80.3551261 | 57.2690501 | 75.8456011 | 74.7357739 | 63 | 70.5451505 | AFTER 96  |
| 78.3551261 | 57.2690501 | 75.8456011 | 75.7357739 | 63 | 70.0451505 | AFTER 97  |
| 79.3551261 | 57.2690501 | 75.8456011 | 75.7357739 | 63 | 70.1701505 | AFTER 98  |
| 78.3551261 | 59.2690501 | 75.8456011 | 74.7357739 | 63 | 70.1701505 | AFTER 99  |
| 78.3551261 | 59.2690501 | 74.8456011 | 74.7357739 | 63 | 69.7951505 | AFTER 100 |
| 78.3551261 | 59.2690501 | 75.8456011 | 74.7357739 | 63 | 70.0451505 | AFTER 101 |
| 78.3551261 | 59.2690501 | 75.8456011 | 76.7357739 | 63 | 70.4201505 | AFTER 102 |
| 78.3551261 | 59.2690501 | 75.8456011 | 76.7357739 | 63 | 70.4201505 | AFTER 103 |
| 80.3551261 | 59.2690501 | 75.8456011 | 76.7357739 | 63 | 70.2951505 | AFTER 104 |
| 81.3551261 | 59.2690501 | 75.8456011 | 76.7357739 | 63 | 70.1701505 | AFTER 105 |

|            |            |            |            |    |            |           |
|------------|------------|------------|------------|----|------------|-----------|
| 80.3551261 | 59.2690501 | 75.8456011 | 73.7357739 | 63 | 69.9201505 | AFTER 106 |
| 78.3551261 | 59.2690501 | 75.8456011 | 69.7357739 | 63 | 69.6701505 | AFTER 107 |
| 78.3551261 | 60.2690501 | 75.8456011 | 66.7357739 | 63 | 69.6701505 | AFTER 108 |
| 75.3551261 | 62.2690501 | 77.8456011 | 64.7357739 | 63 | 69.6701505 | AFTER 109 |
| 74.3551261 | 62.2690501 | 79.8456011 | 63.7357739 | 63 | 70.0451505 | AFTER 110 |
| 74.3551261 | 62.2690501 | 79.8456011 | 63.7357739 | 63 | 70.2951505 | AFTER 111 |
| 74.3551261 | 62.2690501 | 79.8456011 | 63.7357739 | 63 | 69.6701505 | AFTER 112 |
| 74.3551261 | 62.2690501 | 73.8456011 | 68.7357739 | 63 | 69.0451505 | AFTER 113 |
| 74.3551261 | 63.2690501 | 73.8456011 | 70.7357739 | 63 | 68.5451505 | AFTER 114 |
| 74.3551261 | 63.2690501 | 71.8456011 | 71.7357739 | 63 | 68.0451505 | AFTER 115 |
| 75.3551261 | 63.2690501 | 70.8456011 | 73.7357739 | 63 | 67.9201505 | AFTER 116 |
| 75.3551261 | 64.2690501 | 69.8456011 | 73.7357739 | 63 | 67.6701505 | AFTER 117 |
| 75.3551261 | 67.2690501 | 69.8456011 | 73.7357739 | 63 | 67.9201505 | AFTER 118 |
| 75.3551261 | 67.2690501 | 69.8456011 | 73.7357739 | 63 | 67.6701505 | AFTER 119 |
| 75.3551261 | 67.2690501 | 69.8456011 | 73.7357739 | 63 | 67.6701505 | AFTER 120 |
| 76.3551261 | 64.2690501 | 68.8456011 | 67.7357739 | 63 | 66.9201505 | AFTER 121 |
| 76.3551261 | 62.2690501 | 68.8456011 | 65.7357739 | 63 | 66.6701505 | AFTER 122 |
| 76.3551261 | 61.2690501 | 67.8456011 | 65.7357739 | 63 | 66.4201505 | AFTER 123 |
| 76.3551261 | 61.2690501 | 67.8456011 | 65.7357739 | 63 | 66.5451505 | AFTER 124 |
| 76.3551261 | 61.2690501 | 67.8456011 | 67.7357739 | 63 | 66.7951505 | AFTER 125 |
| 76.3551261 | 63.2690501 | 67.8456011 | 68.7357739 | 63 | 67.4201505 | AFTER 126 |
| 76.3551261 | 65.2690501 | 68.8456011 | 68.7357739 | 63 | 67.6701505 | AFTER 127 |
| 76.3551261 | 66.2690501 | 69.8456011 | 69.7357739 | 63 | 68.0451505 | AFTER 128 |
| 76.3551261 | 67.2690501 | 70.8456011 | 69.7357739 | 63 | 68.4201505 | AFTER 129 |
| 76.3551261 | 67.2690501 | 70.8456011 | 69.7357739 | 63 | 68.4201505 | AFTER 130 |
| 75.3551261 | 67.2690501 | 71.8456011 | 69.7357739 | 63 | 68.0451505 | AFTER 131 |
| 74.3551261 | 66.2690501 | 71.8456011 | 70.7357739 | 63 | 69.2951505 | AFTER 132 |
| 74.3551261 | 66.2690501 | 71.8456011 | 72.7357739 | 63 | 70.7951505 | AFTER 133 |
| 74.3551261 | 64.2690501 | 71.8456011 | 72.7357739 | 63 | 70.5451505 | AFTER 134 |
| 74.3551261 | 60.2690501 | 71.8456011 | 76.7357739 | 63 | 70.7951505 | AFTER 135 |
| 74.3551261 | 60.2690501 | 70.8456011 | 79.7357739 | 63 | 70.9201505 | AFTER 136 |
| 74.3551261 | 61.2690501 | 69.8456011 | 79.7357739 | 63 | 70.2951505 | AFTER 137 |
| 74.3551261 | 61.2690501 | 69.8456011 | 80.7357739 | 63 | 69.9201505 | AFTER 138 |
| 74.3551261 | 60.2690501 | 69.8456011 | 81.7357739 | 63 | 69.5451505 | AFTER 139 |
| 71.3551261 | 60.2690501 | 68.8456011 | 81.7357739 | 63 | 69.0451505 | AFTER 140 |
| 71.3551261 | 60.2690501 | 68.8456011 | 81.7357739 | 63 | 69.1701505 | AFTER 141 |
| 71.3551261 | 59.2690501 | 68.8456011 | 81.7357739 | 63 | 69.0451505 | AFTER 142 |
| 72.3551261 | 60.2690501 | 68.8456011 | 83.7357739 | 63 | 69.4201505 | AFTER 143 |
| 72.3551261 | 62.2690501 | 68.8456011 | 84.7357739 | 63 | 69.7951505 | AFTER 144 |
| 74.3551261 | 63.2690501 | 68.8456011 | 84.7357739 | 63 | 70.0451505 | AFTER 145 |
| 78.3551261 | 64.2690501 | 68.8456011 | 85.7357739 | 63 | 70.2951505 | AFTER 146 |
| 79.3551261 | 64.2690501 | 69.8456011 | 85.7357739 | 63 | 71.2951505 | AFTER 147 |
| 80.3551261 | 64.2690501 | 70.8456011 | 85.7357739 | 63 | 71.4201505 | AFTER 148 |
| 80.3551261 | 63.2690501 | 70.8456011 | 85.7357739 | 63 | 71.4201505 | AFTER 149 |
| 81.3551261 | 63.2690501 | 71.8456011 | 85.7357739 | 63 | 70.9201505 | AFTER 150 |

|            |            |            |            |    |            |           |
|------------|------------|------------|------------|----|------------|-----------|
| 81.3551261 | 64.2690501 | 70.8456011 | 85.7357739 | 63 | 70.5451505 | AFTER 151 |
| 81.3551261 | 64.2690501 | 68.8456011 | 85.7357739 | 63 | 70.1701505 | AFTER 152 |
| 80.3551261 | 64.2690501 | 68.8456011 | 85.7357739 | 63 | 69.9201505 | AFTER 153 |
| 80.3551261 | 64.2690501 | 68.8456011 | 84.7357739 | 63 | 69.7951505 | AFTER 154 |
| 79.3551261 | 64.2690501 | 68.8456011 | 84.7357739 | 63 | 69.0451505 | AFTER 155 |
| 78.3551261 | 63.2690501 | 68.8456011 | 86.7357739 | 63 | 68.5451505 | AFTER 156 |
| 78.3551261 | 63.2690501 | 67.8456011 | 87.7357739 | 63 | 67.9201505 | AFTER 157 |
| 76.3551261 | 62.2690501 | 66.8456011 | 87.7357739 | 63 | 66.6701505 | AFTER 158 |
| 74.3551261 | 62.2690501 | 66.8456011 | 88.7357739 | 63 | 66.4201505 | AFTER 159 |
| 74.3551261 | 62.2690501 | 65.8456011 | 89.7357739 | 63 | 66.0451505 | AFTER 160 |
| 74.3551261 | 65.2690501 | 65.8456011 | 90.7357739 | 63 | 66.1701505 | AFTER 161 |
| 74.3551261 | 66.2690501 | 65.8456011 | 90.7357739 | 63 | 66.2951505 | AFTER 162 |
| 74.3551261 | 66.2690501 | 65.8456011 | 90.7357739 | 63 | 66.2951505 | AFTER 163 |
| 75.3551261 | 65.2690501 | 65.8456011 | 90.7357739 | 63 | 66.5451505 | AFTER 164 |
| 75.3551261 | 65.2690501 | 65.8456011 | 90.7357739 | 63 | 66.6701505 | AFTER 165 |
| 75.3551261 | 65.2690501 | 65.8456011 | 90.7357739 | 63 | 67.0451505 | AFTER 166 |
| 74.3551261 | 65.2690501 | 65.8456011 | 90.7357739 | 63 | 67.9201505 | AFTER 167 |
| 73.3551261 | 65.2690501 | 65.8456011 | 85.7357739 | 63 | 67.9201505 | AFTER 168 |
| 73.3551261 | 65.2690501 | 65.8456011 | 84.7357739 | 63 | 67.6701505 | AFTER 169 |
| 73.3551261 | 65.2690501 | 67.8456011 | 84.7357739 | 63 | 68.0451505 | AFTER 170 |
| 72.3551261 | 65.2690501 | 70.8456011 | 84.7357739 | 63 | 68.0451505 | AFTER 171 |
| 71.3551261 | 66.2690501 | 71.8456011 | 85.7357739 | 63 | 68.0451505 | AFTER 172 |
| 70.3551261 | 66.2690501 | 71.8456011 | 85.7357739 | 63 | 67.9201505 | AFTER 173 |
| 70.3551261 | 66.2690501 | 72.8456011 | 85.7357739 | 63 | 68.0451505 | AFTER 174 |
| 73.3551261 | 63.2690501 | 74.8456011 | 85.7357739 | 63 | 68.5451505 | AFTER 175 |
| 73.3551261 | 61.2690501 | 74.8456011 | 85.7357739 | 63 | 68.4201505 | AFTER 176 |
| 73.3551261 | 61.2690501 | 75.8456011 | 83.7357739 | 63 | 69.0451505 | AFTER 177 |
| 72.3551261 | 61.2690501 | 76.8456011 | 83.7357739 | 63 | 69.5451505 | AFTER 178 |
| 72.3551261 | 60.2690501 | 71.8456011 | 75.7357739 | 63 | 69.1701505 | AFTER 179 |
| 72.3551261 | 59.2690501 | 69.8456011 | 72.7357739 | 63 | 69.1701505 | AFTER 180 |
| 70.3551261 | 58.2690501 | 69.8456011 | 72.7357739 | 63 | 69.0451505 | AFTER 181 |
| 70.3551261 | 57.2690501 | 68.8456011 | 70.7357739 | 63 | 69.1701505 | AFTER 182 |
| 70.3551261 | 57.2690501 | 67.8456011 | 70.7357739 | 63 | 69.0451505 | AFTER 183 |
| 70.3551261 | 57.2690501 | 67.8456011 | 70.7357739 | 63 | 69.1701505 | AFTER 184 |
| 70.3551261 | 57.2690501 | 67.8456011 | 70.7357739 | 63 | 68.9201505 | AFTER 185 |
| 70.3551261 | 57.2690501 | 67.8456011 | 70.7357739 | 63 | 68.6701505 | AFTER 186 |
| 70.3551261 | 58.2690501 | 67.8456011 | 70.7357739 | 63 | 68.7951505 | AFTER 187 |
| 70.3551261 | 57.2690501 | 66.8456011 | 70.7357739 | 63 | 68.5451505 | AFTER 188 |
| 71.3551261 | 57.2690501 | 66.8456011 | 70.7357739 | 63 | 69.1701505 | AFTER 189 |
| 71.3551261 | 57.2690501 | 65.8456011 | 70.7357739 | 63 | 68.7951505 | AFTER 190 |
| 71.3551261 | 58.2690501 | 64.8456011 | 70.7357739 | 63 | 69.0451505 | AFTER 191 |
| 71.3551261 | 58.2690501 | 64.8456011 | 70.7357739 | 63 | 68.9201505 | AFTER 192 |
| 70.3551261 | 58.2690501 | 64.8456011 | 70.7357739 | 63 | 69.0451505 | AFTER 193 |
| 70.3551261 | 58.2690501 | 64.8456011 | 69.7357739 | 63 | 69.5451505 | AFTER 194 |
| 69.3551261 | 58.2690501 | 64.8456011 | 68.7357739 | 63 | 69.4201505 | AFTER 195 |



|            |            |            |            |    |            |           |
|------------|------------|------------|------------|----|------------|-----------|
| 69.3551261 | 58.2690501 | 64.8456011 | 68.7357739 | 63 | 69.2951505 | AFTER 196 |
| 69.3551261 | 58.2690501 | 65.8456011 | 68.7357739 | 63 | 69.6701505 | AFTER 197 |
| 70.3551261 | 58.2690501 | 65.8456011 | 69.7357739 | 63 | 70.2951505 | AFTER 198 |
| 70.3551261 | 58.2690501 | 68.8456011 | 77.7357739 | 63 | 70.9201505 | AFTER 199 |
| 71.3551261 | 58.2690501 | 68.8456011 | 83.7357739 | 63 | 71.4201505 | AFTER 200 |
| 71.3551261 | 59.2690501 | 68.8456011 | 86.7357739 | 63 | 71.5451505 | AFTER 201 |
| 71.3551261 | 59.2690501 | 70.8456011 | 88.7357739 | 63 | 68.3021049 | AFTER 202 |
| 72.3551261 | 58.2690501 | 71.8456011 | 89.7357739 | 63 | 67.3802299 | AFTER 203 |
| 72.3551261 | 58.2690501 | 71.8456011 | 89.7357739 | 63 | 67.2552299 | AFTER 204 |
| 73.3551261 | 58.2690501 | 71.8456011 | 86.7357739 | 63 | 67.5364799 | AFTER 205 |
| 72.3551261 | 58.2690501 | 71.8456011 | 80.7357739 | 63 | 67.5989799 | AFTER 206 |
| 72.3551261 | 58.2690501 | 72.8456011 | 80.7357739 | 63 | 69.2951505 | AFTER 207 |
| 72.3551261 | 59.2690501 | 73.8456011 | 80.7357739 | 63 | 69.4201505 | AFTER 208 |
| 71.3551261 | 59.2690501 | 73.8456011 | 80.7357739 | 63 | 68.6701505 | AFTER 209 |
| 71.3551261 | 59.2690501 | 74.8456011 | 80.7357739 | 63 | 68.6701505 | AFTER 210 |
| 71.3551261 | 59.2690501 | 74.8456011 | 80.7357739 | 63 | 68.1701505 | AFTER 211 |
| 71.3551261 | 59.2690501 | 74.8456011 | 80.7357739 | 63 | 67.7951505 | AFTER 212 |
| 71.3551261 | 57.2690501 | 74.8456011 | 80.7357739 | 63 | 67.7951505 | AFTER 213 |
| 71.3551261 | 57.2690501 | 74.8456011 | 80.7357739 | 63 | 68.0451505 | AFTER 214 |
| 70.3551261 | 57.2690501 | 74.8456011 | 80.7357739 | 63 | 68.1701505 | AFTER 215 |
| 70.3551261 | 57.2690501 | 76.8456011 | 80.7357739 | 63 | 68.7951505 | AFTER 216 |
| 72.3551261 | 56.2690501 | 76.8456011 | 79.7357739 | 63 | 68.9201505 | AFTER 217 |
| 72.3551261 | 54.2690501 | 76.8456011 | 79.7357739 | 63 | 69.0451505 | AFTER 218 |
| 73.3551261 | 53.2690501 | 74.8456011 | 79.7357739 | 63 | 68.9201505 | AFTER 219 |
| 73.3551261 | 53.2690501 | 68.8456011 | 78.7357739 | 63 | 68.1701505 | AFTER 220 |
| 73.3551261 | 53.2690501 | 68.8456011 | 77.7357739 | 63 | 68.5451505 | AFTER 221 |
| 73.3551261 | 53.2690501 | 67.8456011 | 77.7357739 | 63 | 68.2951505 | AFTER 222 |
| 74.3551261 | 53.2690501 | 67.8456011 | 76.7357739 | 63 | 68.7951505 | AFTER 223 |
| 74.3551261 | 54.2690501 | 67.8456011 | 74.7357739 | 63 | 68.9201505 | AFTER 224 |
| 75.3551261 | 61.2690501 | 67.8456011 | 74.7357739 | 63 | 69.4201505 | AFTER 225 |
| 76.3551261 | 63.2690501 | 67.8456011 | 74.7357739 | 63 | 69.5451505 | AFTER 226 |
| 79.3551261 | 63.2690501 | 67.8456011 | 74.7357739 | 63 | 70.0451505 | AFTER 227 |
| 79.3551261 | 63.2690501 | 66.8456011 | 75.7357739 | 63 | 69.9201505 | AFTER 228 |
| 81.3551261 | 60.2690501 | 66.8456011 | 76.7357739 | 63 | 69.4201505 | AFTER 229 |
| 81.3551261 | 60.2690501 | 65.8456011 | 79.7357739 | 63 | 69.1701505 | AFTER 230 |
| 81.3551261 | 61.2690501 | 65.8456011 | 80.7357739 | 63 | 69.1701505 | AFTER 231 |
| 81.3551261 | 63.2690501 | 64.8456011 | 82.7357739 | 63 | 69.2951505 | AFTER 232 |
| 81.3551261 | 65.2690501 | 64.8456011 | 83.7357739 | 63 | 69.1701505 | AFTER 233 |
| 81.3551261 | 66.2690501 | 63.8456011 | 83.7357739 | 63 | 69.1701505 | AFTER 234 |
| 81.3551261 | 67.2690501 | 64.8456011 | 82.7357739 | 63 | 69.2951505 | AFTER 235 |
| 81.3551261 | 67.2690501 | 64.8456011 | 82.7357739 | 63 | 69.1701505 | AFTER 236 |
| 80.3551261 | 66.2690501 | 64.8456011 | 80.7357739 | 63 | 69.0451505 | AFTER 237 |
| 79.3551261 | 65.2690501 | 64.8456011 | 76.7357739 | 63 | 69.0451505 | AFTER 238 |
| 79.3551261 | 64.2690501 | 65.8456011 | 76.7357739 | 63 | 69.0451505 | AFTER 239 |
| 78.3551261 | 65.2690501 | 65.8456011 | 72.7357739 | 63 | 69.4201505 | AFTER 240 |

|            |            |            |            |    |            |
|------------|------------|------------|------------|----|------------|
| 77.3551261 | 65.2690501 | 65.8456011 | 72.7357739 | 63 | 69.7951505 |
| 77.3551261 | 66.2690501 | 65.8456011 | 73.7357739 | 63 | 70.1701505 |
| 77.3551261 | 67.2690501 | 65.8456011 | 73.7357739 | 63 | 70.1701505 |
| 77.3551261 | 67.2690501 | 65.8456011 | 73.7357739 | 63 | 69.6701505 |
| 75.3551261 | 66.2690501 | 65.8456011 | 74.7357739 | 63 | 69.1701505 |
| 75.3551261 | 66.2690501 | 65.8456011 | 74.7357739 | 63 | 68.9201505 |
| 75.3551261 | 67.2690501 | 65.8456011 | 74.7357739 | 63 | 68.2951505 |
| 75.3551261 | 68.2690501 | 68.8456011 | 70.7357739 | 63 | 68.6701505 |
| 76.3551261 | 69.2690501 | 68.8456011 | 66.7357739 | 63 | 68.6701505 |
| 76.3551261 | 69.2690501 | 67.8456011 | 65.7357739 | 63 | 68.1701505 |
| 76.3551261 | 69.2690501 | 67.8456011 | 65.7357739 | 63 | 68.0451505 |
| 76.3551261 | 69.2690501 | 67.8456011 | 67.7357739 | 63 | 68.1701505 |
| 76.3551261 | 68.2690501 | 67.8456011 | 69.7357739 | 63 | 68.0451505 |
| 75.3551261 | 67.2690501 | 67.8456011 | 70.7357739 | 63 | 67.7951505 |
| 75.3551261 | 66.2690501 | 67.8456011 | 71.7357739 | 63 | 67.6701505 |
| 75.3551261 | 67.2690501 | 67.8456011 | 72.7357739 | 63 | 67.9201505 |
| 76.3551261 | 68.2690501 | 67.8456011 | 74.7357739 | 63 | 68.2951505 |
| 78.3551261 | 68.2690501 | 67.8456011 | 77.7357739 | 63 | 68.6701505 |
| 78.3551261 | 69.2690501 | 67.8456011 | 79.7357739 | 63 | 69.0451505 |
| 79.3551261 | 69.2690501 | 67.8456011 | 79.7357739 | 63 | 68.7951505 |
| 80.3551261 | 68.2690501 | 67.8456011 | 78.7357739 | 63 | 68.4201505 |
| 80.3551261 | 66.2690501 | 67.8456011 | 78.7357739 | 63 | 68.1701505 |
| 80.3551261 | 64.2690501 | 67.8456011 | 78.7357739 | 63 | 67.6701505 |
| 80.3551261 | 61.2690501 | 66.8456011 | 78.7357739 | 63 | 67.1701505 |
| 80.3551261 | 59.2690501 | 66.8456011 | 78.7357739 | 63 | 67.0451505 |
| 80.3551261 | 58.2690501 | 66.8456011 | 78.7357739 | 63 | 66.9201505 |
| 75.3551261 | 58.2690501 | 66.8456011 | 78.7357739 | 63 | 66.4201505 |
| 73.3551261 | 58.2690501 | 66.8456011 | 78.7357739 | 63 | 65.2951505 |
| 72.3551261 | 57.2690501 | 66.8456011 | 78.7357739 | 63 | 64.9201505 |
| 72.3551261 | 57.2690501 | 66.8456011 | 78.7357739 | 63 | 64.5451505 |
| 72.3551261 | 56.2690501 | 65.8456011 | 78.7357739 | 63 | 64.2951505 |
| 72.3551261 | 56.2690501 | 66.8456011 | 79.7357739 | 63 | 64.2951505 |
| 73.3551261 | 56.2690501 | 65.8456011 | 79.7357739 | 63 | 64.1701505 |
| 74.3551261 | 56.2690501 | 65.8456011 | 78.7357739 | 63 | 64.5451505 |
| 75.3551261 | 61.2690501 | 65.8456011 | 76.7357739 | 63 | 64.9201505 |
| 76.3551261 | 63.2690501 | 65.8456011 | 76.7357739 | 63 | 65.2951505 |
| 76.3551261 | 65.2690501 | 64.8456011 | 76.7357739 | 63 | 65.2951505 |
| 76.3551261 | 65.2690501 | 64.8456011 | 74.7357739 | 63 | 65.6701505 |
| 76.3551261 | 65.2690501 | 63.8456011 | 74.7357739 | 63 | 65.9201505 |
| 76.3551261 | 64.2690501 | 62.8456011 | 74.7357739 | 63 | 65.7951505 |
| 76.3551261 | 63.2690501 | 62.8456011 | 73.7357739 | 63 | 65.5451505 |
| 76.3551261 | 63.2690501 | 62.8456011 | 73.7357739 | 63 | 65.5451505 |
| 76.3551261 | 61.2690501 | 62.8456011 | 72.7357739 | 63 | 65.9201505 |
| 77.3551261 | 61.2690501 | 61.8456011 | 72.7357739 | 63 | 65.9201505 |
| 77.3551261 | 62.2690501 | 61.8456011 | 72.7357739 | 63 | 66.2951505 |



|            |            |            |            |    |            |
|------------|------------|------------|------------|----|------------|
| 77.3551261 | 62.2690501 | 61.8456011 | 72.7357739 | 63 | 66.2951505 |
| 78.3551261 | 62.2690501 | 61.8456011 | 72.7357739 | 63 | 66.4201505 |
| 77.3551261 | 62.2690501 | 61.8456011 | 72.7357739 | 63 | 66.4201505 |
| 77.3551261 | 62.2690501 | 61.8456011 | 72.7357739 | 63 | 66.4201505 |
| 77.3551261 | 62.2690501 | 62.8456011 | 73.7357739 | 63 | 67.0451505 |
| 77.3551261 | 62.2690501 | 62.8456011 | 72.7357739 | 63 | 67.0451505 |
| 77.3551261 | 62.2690501 | 62.8456011 | 70.7357739 | 63 | 67.7951505 |
| 77.3551261 | 62.2690501 | 62.8456011 | 70.7357739 | 63 | 69.8547878 |
| 76.3551261 | 62.2690501 | 62.8456011 | 69.7357739 | 63 | 69.9641628 |
| 76.3551261 | 62.2690501 | 62.8456011 | 68.7357739 | 63 | 70.5110378 |
| 76.3551261 | 62.2690501 | 62.8456011 | 68.7357739 | 63 | 70.4172878 |
| 76.3551261 | 62.2690501 | 62.8456011 | 68.7357739 | 63 | 70.3547878 |
| 76.3551261 | 63.2690501 | 64.8456011 | 68.7357739 | 63 | 70.7922878 |
| 76.3551261 | 64.2690501 | 64.8456011 | 69.7357739 | 63 | 71.1204128 |
| 76.3551261 | 65.2690501 | 65.8456011 | 69.7357739 | 63 | 71.2610378 |
| 79.3551261 | 65.2690501 | 66.8456011 | 69.7357739 | 63 | 71.6985378 |
| 80.3551261 | 66.2690501 | 66.8456011 | 70.7357739 | 63 | 71.7141628 |
| 81.3551261 | 64.2690501 | 67.8456011 | 70.7357739 | 63 | 71.4172878 |
| 78.3551261 | 64.2690501 | 68.8456011 | 71.7357739 | 63 | 71.1360378 |
| 76.3551261 | 64.2690501 | 68.8456011 | 72.7357739 | 63 | 71.0266628 |
| 74.3551261 | 65.2690501 | 69.8456011 | 74.7357739 | 63 | 70.8704128 |
| 73.3551261 | 65.2690501 | 69.8456011 | 76.7357739 | 63 | 70.0422878 |
| 73.3551261 | 64.2690501 | 68.8456011 | 76.7357739 | 63 | 68.9485378 |
| 73.3551261 | 64.2690501 | 68.8456011 | 77.7357739 | 63 | 68.4954128 |
| 74.3551261 | 64.2690501 | 67.8456011 | 77.7357739 | 63 | 68.2141628 |
| 74.3551261 | 66.2690501 | 67.8456011 | 78.7357739 | 63 | 68.1829128 |
| 74.3551261 | 67.2690501 | 67.8456011 | 78.7357739 | 63 | 68.0266628 |
| 75.3551261 | 67.2690501 | 67.8456011 | 78.7357739 | 63 | 68.2610378 |
| 75.3551261 | 67.2690501 | 67.8456011 | 78.7357739 | 63 | 68.6360378 |
| 76.3551261 | 66.2690501 | 67.8456011 | 78.7357739 | 63 | 69.8704128 |
| 76.3551261 | 65.2690501 | 66.8456011 | 78.7357739 | 63 | 70.5266628 |
| 78.3551261 | 65.2690501 | 67.8456011 | 78.7357739 | 63 | 70.5422878 |
| 78.3551261 | 65.2690501 | 67.8456011 | 79.7357739 | 63 | 71.3547878 |
| 79.3551261 | 65.2690501 | 66.8456011 | 78.7357739 | 63 | 71.3547878 |
| 79.3551261 | 65.2690501 | 66.8456011 | 78.7357739 | 63 | 73.0451505 |
| 79.3551261 | 66.2690501 | 66.8456011 | 78.7357739 | 63 | 72.5451505 |
| 79.3551261 | 68.2690501 | 66.8456011 | 77.7357739 | 63 | 72.5451505 |
| 78.3551261 | 72.2690501 | 65.8456011 | 76.7357739 | 63 | 70.7552299 |
| 77.3551261 | 75.2690501 | 65.8456011 | 76.7357739 | 63 | 70.3802299 |
| 77.3551261 | 77.2690501 | 65.8456011 | 77.7357739 | 63 | 70.5208549 |
| 77.3551261 | 78.2690501 | 65.8456011 | 77.7357739 | 63 | 69.9739799 |
| 77.3551261 | 78.2690501 | 65.8456011 | 77.7357739 | 63 | 69.8489799 |
| 78.3551261 | 77.2690501 | 65.8456011 | 77.7357739 | 63 | 69.8489799 |
| 77.3551261 | 73.2690501 | 65.8456011 | 81.7357739 | 63 | 68.5677299 |
| 76.3551261 | 69.2690501 | 64.8456011 | 82.7357739 | 63 | 67.4427299 |

|            |            |            |            |    |            |
|------------|------------|------------|------------|----|------------|
| 76.3551261 | 66.2690501 | 64.8456011 | 81.7357739 | 63 | 67.0052299 |
| 75.3551261 | 63.2690501 | 64.8456011 | 81.7357739 | 63 | 66.1458549 |
| 76.3551261 | 63.2690501 | 64.8456011 | 80.7357739 | 63 | 66.1458549 |
| 75.3551261 | 63.2690501 | 65.8456011 | 80.7357739 | 63 | 66.1302299 |
| 75.3551261 | 63.2690501 | 65.8456011 | 80.7357739 | 63 | 66.1458549 |
| 75.3551261 | 63.2690501 | 66.8456011 | 80.7357739 | 63 | 66.2708549 |
| 75.3551261 | 63.2690501 | 67.8456011 | 80.7357739 | 63 | 66.3489799 |
| 76.3551261 | 63.2690501 | 67.8456011 | 84.7357739 | 63 | 66.6302299 |
| 77.3551261 | 62.2690501 | 67.8456011 | 84.7357739 | 63 | 66.7552299 |
| 78.3551261 | 62.2690501 | 67.8456011 | 84.7357739 | 63 | 66.8802299 |
| 79.3551261 | 62.2690501 | 67.8456011 | 84.7357739 | 63 | 69.5451505 |
| 78.3551261 | 62.2690501 | 67.8456011 | 84.7357739 | 63 | 69.0451505 |
| 78.3551261 | 62.2690501 | 66.8456011 | 85.7357739 | 63 | 69.0451505 |
| 76.3551261 | 62.2690501 | 65.8456011 | 85.7357739 | 63 | 69.2951505 |
| 77.3551261 | 67.2690501 | 65.8456011 | 85.7357739 | 63 | 69.9201505 |
| 79.3551261 | 69.2690501 | 65.8456011 | 85.7357739 | 63 | 70.7951505 |
| 81.3551261 | 69.2690501 | 65.8456011 | 85.7357739 | 63 | 71.2951505 |
| 85.3551261 | 64.2690501 | 65.8456011 | 85.7357739 | 63 | 70.9201505 |
| 70.7951505 | 62.2690501 | 65.8456011 | 86.7357739 | 63 | 68.7251536 |
| 71.0451505 | 62.2690501 | 65.8456011 | 86.7357739 | 63 | 68.7564036 |
| 71.2951505 | 62.2690501 | 65.8456011 | 86.7357739 | 63 | 69.0376536 |
| 72.6701505 | 68.2690501 | 64.8456011 | 86.7357739 | 63 | 70.3345286 |
| 73.5451505 | 73.2690501 | 64.8456011 | 85.7357739 | 63 | 71.4439036 |
| 90.3551261 | 76.2690501 | 64.8456011 | 85.7357739 | 63 | 74.2951505 |
| 90.3551261 | 76.2690501 | 64.8456011 | 85.7357739 | 63 | 74.5451505 |
| 91.3551261 | 77.2690501 | 64.8456011 | 85.7357739 | 63 | 75.1701505 |
| 76.0451505 | 77.2690501 | 66.8456011 | 85.7357739 | 63 | 74.0064036 |
| 76.0451505 | 75.2690501 | 67.8456011 | 85.7357739 | 63 | 73.8814036 |
| 76.2951505 | 73.2690501 | 66.8456011 | 84.7357739 | 63 | 73.6626536 |
| 75.4201505 | 73.2690501 | 66.8456011 | 81.7357739 | 63 | 72.5532786 |
| 74.9201505 | 70.2690501 | 65.8456011 | 81.7357739 | 63 | 71.7407786 |
| 73.9201505 | 69.2690501 | 64.8456011 | 78.7357739 | 63 | 70.4907786 |
| 72.9201505 | 67.2690501 | 64.8456011 | 77.7357739 | 63 | 69.6157786 |
| 72.2951505 | 67.2690501 | 64.8456011 | 77.7357739 | 63 | 69.0376536 |
| 71.7951505 | 67.2690501 | 64.8456011 | 75.7357739 | 63 | 68.4751536 |
| 72.2951505 | 69.2690501 | 65.8456011 | 75.7357739 | 63 | 69.0376536 |
| 72.5451505 | 69.2690501 | 66.8456011 | 75.7357739 | 63 | 69.3189036 |
| 72.1701505 | 69.2690501 | 66.8456011 | 76.7357739 | 63 | 68.8970286 |
| 72.0451505 | 69.2690501 | 66.8456011 | 76.7357739 | 63 | 68.8814036 |
| 71.4201505 | 70.2690501 | 66.8456011 | 74.7357739 | 63 | 68.4282786 |
| 71.4201505 | 71.2690501 | 66.8456011 | 73.7357739 | 63 | 68.6782786 |
| 71.0451505 | 71.2690501 | 65.8456011 | 73.7357739 | 63 | 68.3814036 |
| 70.5451505 | 71.2690501 | 64.8456011 | 74.7357739 | 63 | 68.3189036 |
| 84.3551261 | 70.2690501 | 64.8456011 | 75.7357739 | 63 | 70.0451505 |
| 84.3551261 | 71.2690501 | 63.8456011 | 75.7357739 | 63 | 71.0451505 |

|            |            |            |            |    |            |
|------------|------------|------------|------------|----|------------|
| 85.3551261 | 72.2690501 | 63.8456011 | 75.7357739 | 63 | 71.5451505 |
| 85.3551261 | 72.2690501 | 63.8456011 | 76.7357739 | 63 | 72.0451505 |
| 85.3551261 | 71.2690501 | 63.8456011 | 76.7357739 | 63 | 72.0451505 |
| 85.3551261 | 70.2690501 | 64.8456011 | 75.7357739 | 63 | 72.1701505 |
| 85.3551261 | 69.2690501 | 64.8456011 | 73.7357739 | 63 | 70.1927299 |
| 83.3551261 | 69.2690501 | 64.8456011 | 73.7357739 | 63 | 69.6458549 |
| 82.3551261 | 67.2690501 | 63.8456011 | 76.7357739 | 63 | 68.8177299 |
| 82.3551261 | 66.2690501 | 63.8456011 | 76.7357739 | 63 | 68.2552299 |
| 82.3551261 | 66.2690501 | 63.8456011 | 76.7357739 | 63 | 68.5364799 |
| 82.3551261 | 66.2690501 | 62.8456011 | 78.7357739 | 63 | 68.6927299 |
| 82.3551261 | 66.2690501 | 62.8456011 | 77.7357739 | 63 | 68.6927299 |
| 82.3551261 | 66.2690501 | 63.8456011 | 77.7357739 | 63 | 68.8177299 |
| 82.3551261 | 66.2690501 | 63.8456011 | 76.7357739 | 63 | 68.8489799 |
| 82.3551261 | 66.2690501 | 63.8456011 | 76.7357739 | 63 | 68.7083549 |
| 82.3551261 | 66.2690501 | 63.8456011 | 76.7357739 | 63 | 68.7083549 |
| 82.3551261 | 66.2690501 | 63.8456011 | 76.7357739 | 63 | 68.2396049 |
| 83.3551261 | 66.2690501 | 63.8456011 | 76.7357739 | 63 | 68.4739799 |
| 83.3551261 | 66.2690501 | 63.8456011 | 77.7357739 | 63 | 70.1701505 |
| 83.3551261 | 67.2690501 | 63.8456011 | 78.7357739 | 63 | 70.2951505 |
| 83.3551261 | 67.2690501 | 63.8456011 | 79.7357739 | 63 | 69.7951505 |
| 82.3551261 | 67.2690501 | 63.8456011 | 79.7357739 | 63 | 69.2951505 |
| 81.3551261 | 66.2690501 | 63.8456011 | 81.7357739 | 63 | 68.9201505 |
| 81.3551261 | 68.2690501 | 63.8456011 | 82.7357739 | 63 | 69.9201505 |
| 74.3551261 | 68.2690501 | 67.8456011 | 83.7357739 | 63 | 69.5451505 |
| 74.3551261 | 69.2690501 | 69.8456011 | 83.7357739 | 63 | 70.1701505 |
| 73.3551261 | 69.2690501 | 69.8456011 | 83.7357739 | 63 | 70.0451505 |
| 73.3551261 | 69.2690501 | 70.8456011 | 83.7357739 | 63 | 70.9201505 |
| 72.3551261 | 69.2690501 | 69.8456011 | 83.7357739 | 63 | 71.0451505 |
| 71.3551261 | 70.2690501 | 69.8456011 | 84.7357739 | 63 | 70.1701505 |
| 70.3551261 | 71.2690501 | 68.8456011 | 84.7357739 | 63 | 70.0451505 |
| 69.3551261 | 71.2690501 | 67.8456011 | 84.7357739 | 63 | 69.7951505 |
| 68.3551261 | 71.2690501 | 67.8456011 | 84.7357739 | 63 | 69.1701505 |
| 68.3551261 | 70.2690501 | 67.8456011 | 82.7357739 | 63 | 68.5451505 |
| 67.3551261 | 70.2690501 | 66.8456011 | 81.7357739 | 63 | 67.9201505 |
| 66.3551261 | 70.2690501 | 66.8456011 | 81.7357739 | 63 | 67.4201505 |
| 66.3551261 | 71.2690501 | 65.8456011 | 82.7357739 | 63 | 67.2951505 |
| 66.3551261 | 71.2690501 | 65.8456011 | 83.7357739 | 63 | 67.4201505 |
| 66.3551261 | 72.2690501 | 65.8456011 | 84.7357739 | 63 | 67.5451505 |
| 66.3551261 | 74.2690501 | 64.8456011 | 86.7357739 | 63 | 67.6701505 |
| 66.3551261 | 76.2690501 | 63.8456011 | 86.7357739 | 63 | 68.0451505 |
| 66.3551261 | 76.2690501 | 63.8456011 | 86.7357739 | 63 | 67.7951505 |
| 66.3551261 | 76.2690501 | 63.8456011 | 86.7357739 | 63 | 68.0451505 |
| 66.3551261 | 76.2690501 | 62.8456011 | 86.7357739 | 63 | 68.1701505 |
| 64.3551261 | 76.2690501 | 62.8456011 | 86.7357739 | 63 | 67.9201505 |
| 64.3551261 | 76.2690501 | 62.8456011 | 87.7357739 | 63 | 68.2951505 |

|            |            |            |            |    |            |
|------------|------------|------------|------------|----|------------|
| 63.3551261 | 76.2690501 | 62.8456011 | 88.7357739 | 63 | 68.1701505 |
| 64.3551261 | 77.2690501 | 62.8456011 | 89.7357739 | 63 | 68.2951505 |
| 65.3551261 | 76.2690501 | 63.8456011 | 89.7357739 | 63 | 68.1701505 |
| 67.3551261 | 76.2690501 | 63.8456011 | 90.7357739 | 63 | 68.1701505 |
| 68.3551261 | 76.2690501 | 65.8456011 | 90.7357739 | 63 | 68.0451505 |
| 70.3551261 | 76.2690501 | 66.8456011 | 90.7357739 | 63 | 68.6701505 |
| 70.3551261 | 76.2690501 | 68.8456011 | 91.7357739 | 63 | 68.9201505 |
| 70.3551261 | 76.2690501 | 67.8456011 | 91.7357739 | 63 | 68.9201505 |
| 70.3551261 | 75.2690501 | 67.8456011 | 91.7357739 | 63 | 69.1701505 |
| 70.3551261 | 75.2690501 | 67.8456011 | 91.7357739 | 63 | 69.5451505 |
| 68.3551261 | 74.2690501 | 67.8456011 | 91.7357739 | 63 | 69.4201505 |
| 68.3551261 | 74.2690501 | 67.8456011 | 92.7357739 | 63 | 69.5451505 |
| 71.3551261 | 74.2690501 | 67.8456011 | 91.7357739 | 63 | 70.1701505 |
| 71.3551261 | 64.2690501 | 67.8456011 | 91.7357739 | 63 | 68.6701505 |
| 72.3551261 | 64.2690501 | 67.8456011 | 91.7357739 | 63 | 68.5451505 |
| 73.3551261 | 64.2690501 | 67.8456011 | 91.7357739 | 63 | 68.6701505 |
| 74.3551261 | 64.2690501 | 65.8456011 | 85.7357739 | 63 | 68.6701505 |
| 75.3551261 | 65.2690501 | 65.8456011 | 85.7357739 | 63 | 69.0451505 |
| 73.3551261 | 65.2690501 | 68.8456011 | 69.7357739 | 63 | 69.2951505 |
| 73.3551261 | 65.2690501 | 68.8456011 | 68.7357739 | 63 | 68.4201505 |
| 73.3551261 | 64.2690501 | 68.8456011 | 68.7357739 | 63 | 68.9201505 |
| 73.3551261 | 64.2690501 | 69.8456011 | 68.7357739 | 63 | 69.9201505 |
| 73.3551261 | 63.2690501 | 69.8456011 | 68.7357739 | 63 | 70.1701505 |
| 73.3551261 | 63.2690501 | 68.8456011 | 68.7357739 | 63 | 70.0451505 |
| 71.3551261 | 63.2690501 | 67.8456011 | 68.7357739 | 63 | 69.9201505 |
| 71.3551261 | 64.2690501 | 67.8456011 | 68.7357739 | 63 | 70.2951505 |
| 71.3551261 | 64.2690501 | 66.8456011 | 68.7357739 | 63 | 69.6701505 |
| 72.3551261 | 64.2690501 | 65.8456011 | 68.7357739 | 63 | 69.7951505 |
| 72.3551261 | 65.2690501 | 65.8456011 | 68.7357739 | 63 | 69.9201505 |
| 72.3551261 | 65.2690501 | 64.8456011 | 68.7357739 | 63 | 69.6701505 |
| 72.3551261 | 64.2690501 | 64.8456011 | 69.7357739 | 63 | 69.5451505 |
| 72.3551261 | 64.2690501 | 64.8456011 | 69.7357739 | 63 | 68.9201505 |
| 72.3551261 | 64.2690501 | 64.8456011 | 68.7357739 | 63 | 68.5451505 |
| 72.3551261 | 65.2690501 | 63.8456011 | 68.7357739 | 63 | 68.5451505 |
| 72.3551261 | 67.2690501 | 63.8456011 | 68.7357739 | 63 | 68.6701505 |
| 72.3551261 | 68.2690501 | 62.8456011 | 68.7357739 | 63 | 68.2951505 |
| 72.3551261 | 68.2690501 | 62.8456011 | 68.7357739 | 63 | 67.7951505 |
| 72.3551261 | 68.2690501 | 62.8456011 | 68.7357739 | 63 | 67.5451505 |
| 72.3551261 | 68.2690501 | 62.8456011 | 68.7357739 | 63 | 67.4201505 |
| 72.3551261 | 68.2690501 | 62.8456011 | 68.7357739 | 63 | 66.9201505 |
| 73.3551261 | 68.2690501 | 62.8456011 | 68.7357739 | 63 | 66.6701505 |
| 74.3551261 | 69.2690501 | 62.8456011 | 68.7357739 | 63 | 67.0451505 |
| 74.3551261 | 69.2690501 | 62.8456011 | 69.7357739 | 63 | 67.0451505 |
| 74.3551261 | 71.2690501 | 62.8456011 | 69.7357739 | 63 | 67.4201505 |
| 74.3551261 | 72.2690501 | 62.8456011 | 71.7357739 | 63 | 67.7951505 |

|            |            |            |            |    |            |
|------------|------------|------------|------------|----|------------|
| 74.3551261 | 72.2690501 | 62.8456011 | 73.7357739 | 63 | 67.7951505 |
| 74.3551261 | 68.2690501 | 62.8456011 | 74.7357739 | 63 | 67.6701505 |
| 74.3551261 | 67.2690501 | 63.8456011 | 76.7357739 | 63 | 67.6701505 |
| 74.3551261 | 67.2690501 | 63.8456011 | 76.7357739 | 63 | 67.6701505 |
| 74.3551261 | 67.2690501 | 63.8456011 | 77.7357739 | 63 | 68.1701505 |
| 74.3551261 | 66.2690501 | 63.8456011 | 77.7357739 | 63 | 68.2951505 |
| 73.3551261 | 66.2690501 | 63.8456011 | 78.7357739 | 63 | 68.2951505 |
| 73.3551261 | 63.2690501 | 64.8456011 | 78.7357739 | 63 | 68.0451505 |
| 73.3551261 | 62.2690501 | 64.8456011 | 78.7357739 | 63 | 68.1701505 |
| 73.3551261 | 62.2690501 | 64.8456011 | 78.7357739 | 63 | 68.6701505 |
| 74.3551261 | 61.2690501 | 64.8456011 | 78.7357739 | 63 | 68.7951505 |
| 75.3551261 | 61.2690501 | 64.8456011 | 77.7357739 | 63 | 69.0451505 |
| 75.3551261 | 61.2690501 | 64.8456011 | 77.7357739 | 63 | 69.1701505 |
| 75.3551261 | 61.2690501 | 62.8456011 | 77.7357739 | 63 | 69.1701505 |
| 75.3551261 | 62.2690501 | 61.8456011 | 77.7357739 | 63 | 69.4201505 |
| 75.3551261 | 62.2690501 | 61.8456011 | 77.7357739 | 63 | 69.1701505 |
| 75.3551261 | 58.2690501 | 61.8456011 | 77.7357739 | 63 | 68.9201505 |
| 74.3551261 | 56.2690501 | 61.8456011 | 75.7357739 | 63 | 68.6701505 |
| 71.3551261 | 56.2690501 | 62.8456011 | 74.7357739 | 63 | 68.2951505 |
| 70.3551261 | 54.2690501 | 62.8456011 | 74.7357739 | 63 | 67.9201505 |
| 70.3551261 | 56.2690501 | 62.8456011 | 76.7357739 | 63 | 68.2951505 |
| 70.3551261 | 56.2690501 | 62.8456011 | 76.7357739 | 63 | 68.2951505 |
| 69.3551261 | 56.2690501 | 62.8456011 | 76.7357739 | 63 | 68.1701505 |
| 69.3551261 | 56.2690501 | 62.8456011 | 76.7357739 | 63 | 68.5451505 |
| 76.3551261 | 59.2690501 | 64.8456011 | 81.7357739 | 63 | 70.4201505 |
| 75.3551261 | 55.2690501 | 65.8456011 | 81.7357739 | 63 | 69.9201505 |
| 74.3551261 | 55.2690501 | 65.8456011 | 82.7357739 | 63 | 69.7951505 |
| 73.3551261 | 55.2690501 | 65.8456011 | 82.7357739 | 63 | 69.5451505 |
| 73.3551261 | 54.2690501 | 65.8456011 | 82.7357739 | 63 | 69.4201505 |
| 73.3551261 | 54.2690501 | 65.8456011 | 82.7357739 | 63 | 69.4201505 |
| 73.3551261 | 54.2690501 | 65.8456011 | 77.7357739 | 63 | 69.2951505 |
| 73.3551261 | 57.2690501 | 65.8456011 | 77.7357739 | 63 | 69.6701505 |
| 73.3551261 | 57.2690501 | 67.8456011 | 72.7357739 | 63 | 69.9201505 |
| 73.3551261 | 57.2690501 | 68.8456011 | 71.7357739 | 63 | 70.0451505 |
| 73.3551261 | 57.2690501 | 68.8456011 | 71.7357739 | 63 | 69.4201505 |
| 73.3551261 | 58.2690501 | 69.8456011 | 73.7357739 | 63 | 69.6701505 |
| 73.3551261 | 60.2690501 | 70.8456011 | 77.7357739 | 63 | 70.1701505 |
| 76.3551261 | 60.2690501 | 71.8456011 | 80.7357739 | 63 | 70.4201505 |
| 76.3551261 | 60.2690501 | 71.8456011 | 81.7357739 | 63 | 70.4201505 |
| 76.3551261 | 60.2690501 | 72.8456011 | 81.7357739 | 63 | 70.5451505 |
| 76.3551261 | 60.2690501 | 75.8456011 | 81.7357739 | 63 | 70.6701505 |
| 76.3551261 | 60.2690501 | 75.8456011 | 76.7357739 | 63 | 70.5451505 |
| 77.3551261 | 60.2690501 | 75.8456011 | 76.7357739 | 63 | 70.5451505 |
| 77.3551261 | 62.2690501 | 76.8456011 | 76.7357739 | 63 | 71.0451505 |
| 77.3551261 | 63.2690501 | 78.8456011 | 69.7357739 | 63 | 71.5451505 |

|            |            |            |            |    |            |
|------------|------------|------------|------------|----|------------|
| 77.3551261 | 63.2690501 | 78.8456011 | 68.7357739 | 63 | 71.5451505 |
| 76.3551261 | 63.2690501 | 78.8456011 | 67.7357739 | 63 | 71.7951505 |
| 77.3551261 | 63.2690501 | 78.8456011 | 67.7357739 | 63 | 71.9201505 |
| 78.3551261 | 64.2690501 | 77.8456011 | 67.7357739 | 63 | 72.0451505 |
| 79.3551261 | 67.2690501 | 77.8456011 | 67.7357739 | 63 | 72.4201505 |
| 79.3551261 | 67.2690501 | 77.8456011 | 67.7357739 | 63 | 72.2951505 |
| 80.3551261 | 66.2690501 | 76.8456011 | 68.7357739 | 63 | 71.5451505 |
| 81.3551261 | 67.2690501 | 76.8456011 | 68.7357739 | 63 | 71.1701505 |
| 82.3551261 | 67.2690501 | 74.8456011 | 68.7357739 | 63 | 70.9201505 |
| 82.3551261 | 67.2690501 | 74.8456011 | 69.7357739 | 63 | 70.9201505 |
| 83.3551261 | 68.2690501 | 74.8456011 | 69.7357739 | 63 | 71.0451505 |
| 84.3551261 | 68.2690501 | 73.8456011 | 73.7357739 | 63 | 70.9201505 |
| 85.3551261 | 68.2690501 | 72.8456011 | 74.7357739 | 63 | 70.6701505 |
| 85.3551261 | 65.2690501 | 72.8456011 | 75.7357739 | 63 | 70.6701505 |
| 85.3551261 | 64.2690501 | 72.8456011 | 75.7357739 | 63 | 70.7951505 |
| 85.3551261 | 63.2690501 | 72.8456011 | 75.7357739 | 63 | 70.7951505 |
| 85.3551261 | 63.2690501 | 72.8456011 | 75.7357739 | 63 | 71.2951505 |
| 85.3551261 | 65.2690501 | 72.8456011 | 75.7357739 | 63 | 72.0451505 |
| 84.3551261 | 66.2690501 | 71.8456011 | 74.7357739 | 63 | 72.1701505 |
| 84.3551261 | 67.2690501 | 71.8456011 | 73.7357739 | 63 | 72.7951505 |
| 84.3551261 | 67.2690501 | 71.8456011 | 72.7357739 | 63 | 73.0451505 |
| 83.3551261 | 67.2690501 | 71.8456011 | 71.7357739 | 63 | 73.0451505 |
| 82.3551261 | 67.2690501 | 71.8456011 | 71.7357739 | 63 | 72.7951505 |
| 80.3551261 | 66.2690501 | 71.8456011 | 71.7357739 | 63 | 72.0451505 |
| 80.3551261 | 65.2690501 | 71.8456011 | 70.7357739 | 63 | 71.2951505 |
| 80.3551261 | 64.2690501 | 71.8456011 | 68.7357739 | 63 | 70.7951505 |
| 80.3551261 | 64.2690501 | 71.8456011 | 66.7357739 | 63 | 71.2951505 |
| 77.3551261 | 64.2690501 | 71.8456011 | 64.7357739 | 63 | 71.1701505 |
| 75.3551261 | 64.2690501 | 71.8456011 | 64.7357739 | 63 | 70.6701505 |
| 75.3551261 | 63.2690501 | 71.8456011 | 64.7357739 | 63 | 70.5451505 |
| 75.3551261 | 64.2690501 | 71.8456011 | 66.7357739 | 63 | 70.7951505 |
| 74.3551261 | 65.2690501 | 71.8456011 | 67.7357739 | 63 | 70.6701505 |
| 74.3551261 | 65.2690501 | 71.8456011 | 67.7357739 | 63 | 70.9201505 |
| 74.3551261 | 65.2690501 | 71.8456011 | 68.7357739 | 63 | 71.0451505 |
| 74.3551261 | 65.2690501 | 71.8456011 | 69.7357739 | 63 | 70.6701505 |
| 74.3551261 | 66.2690501 | 71.8456011 | 70.7357739 | 63 | 70.5451505 |
| 74.3551261 | 67.2690501 | 72.8456011 | 72.7357739 | 63 | 70.9201505 |
| 74.3551261 | 66.2690501 | 72.8456011 | 73.7357739 | 63 | 70.7951505 |
| 74.3551261 | 66.2690501 | 73.8456011 | 74.7357739 | 63 | 70.7951505 |
| 74.3551261 | 66.2690501 | 73.8456011 | 74.7357739 | 63 | 70.5451505 |
| 74.3551261 | 68.2690501 | 73.8456011 | 75.7357739 | 63 | 71.0451505 |
| 74.3551261 | 68.2690501 | 77.8456011 | 75.7357739 | 63 | 71.5451505 |
| 76.3551261 | 67.2690501 | 78.8456011 | 77.7357739 | 63 | 72.1701505 |
| 76.3551261 | 64.2690501 | 79.8456011 | 77.7357739 | 63 | 72.2951505 |
| 76.3551261 | 63.2690501 | 79.8456011 | 77.7357739 | 63 | 72.0451505 |

|            |            |            |            |    |            |
|------------|------------|------------|------------|----|------------|
| 76.3551261 | 62.2690501 | 80.8456011 | 76.7357739 | 63 | 72.5451505 |
| 76.3551261 | 62.2690501 | 80.8456011 | 72.7357739 | 63 | 72.7951505 |
| 75.3551261 | 62.2690501 | 80.8456011 | 72.7357739 | 63 | 72.9201505 |
| 76.3551261 | 62.2690501 | 80.8456011 | 71.7357739 | 63 | 72.9201505 |
| 77.3551261 | 62.2690501 | 80.8456011 | 71.7357739 | 63 | 71.2951505 |
| 77.3551261 | 64.2690501 | 80.8456011 | 71.7357739 | 63 | 71.0451505 |
| 77.3551261 | 66.2690501 | 80.8456011 | 72.7357739 | 63 | 71.6701505 |
| 76.3551261 | 66.2690501 | 79.8456011 | 72.7357739 | 63 | 71.0451505 |
| 75.3551261 | 67.2690501 | 79.8456011 | 70.7357739 | 63 | 70.2951505 |
| 75.3551261 | 67.2690501 | 79.8456011 | 68.7357739 | 63 | 70.4201505 |
| 75.3551261 | 67.2690501 | 79.8456011 | 67.7357739 | 63 | 70.7951505 |
| 74.3551261 | 67.2690501 | 79.8456011 | 66.7357739 | 63 | 70.9201505 |
| 74.3551261 | 69.2690501 | 79.8456011 | 66.7357739 | 63 | 71.4201505 |
| 74.3551261 | 70.2690501 | 80.8456011 | 65.7357739 | 63 | 72.0451505 |
| 74.3551261 | 70.2690501 | 81.8456011 | 65.7357739 | 63 | 72.1701505 |
| 74.3551261 | 70.2690501 | 82.8456011 | 65.7357739 | 63 | 72.1701505 |
| 75.3551261 | 70.2690501 | 82.8456011 | 65.7357739 | 63 | 72.5451505 |
| 75.3551261 | 71.2690501 | 82.8456011 | 65.7357739 | 63 | 72.1701505 |
| 75.3551261 | 71.2690501 | 82.8456011 | 65.7357739 | 63 | 71.4201505 |
| 75.3551261 | 70.2690501 | 82.8456011 | 69.7357739 | 63 | 71.2951505 |
| 75.3551261 | 69.2690501 | 82.8456011 | 69.7357739 | 63 | 71.2951505 |
| 74.3551261 | 69.2690501 | 82.8456011 | 70.7357739 | 63 | 71.4201505 |
| 74.3551261 | 69.2690501 | 82.8456011 | 68.7357739 | 63 | 72.1701505 |
| 74.3551261 | 69.2690501 | 72.5663309 | 66.7357739 | 63 | 71.1013442 |
| 73.3551261 | 68.2690501 | 73.3441087 | 67.7357739 | 63 | 71.1950942 |
| 73.3551261 | 68.2690501 | 73.8996642 | 68.7357739 | 63 | 71.3825942 |
| 73.3551261 | 68.2690501 | 74.1218865 | 68.7357739 | 63 | 71.5388442 |
| 74.3551261 | 68.2690501 | 73.3441087 | 68.7357739 | 63 | 73.6701505 |
| 74.3551261 | 68.2690501 | 85.8456011 | 68.7357739 | 63 | 73.4201505 |
| 74.3551261 | 68.2690501 | 77.8456011 | 68.7357739 | 63 | 72.4201505 |
| 74.3551261 | 68.2690501 | 71.8456011 | 68.7357739 | 63 | 71.7951505 |
| 74.3551261 | 68.2690501 | 71.8456011 | 70.7357739 | 63 | 71.7951505 |
| 74.3551261 | 68.2690501 | 68.8456011 | 72.7357739 | 63 | 71.4201505 |
| 74.3551261 | 68.2690501 | 66.8456011 | 75.7357739 | 63 | 70.4201505 |
| 73.3551261 | 67.2690501 | 65.8456011 | 77.7357739 | 63 | 69.7951505 |
| 73.3551261 | 67.2690501 | 65.8456011 | 78.7357739 | 63 | 70.1701505 |
| 73.3551261 | 65.2690501 | 65.8456011 | 79.7357739 | 63 | 69.5451505 |
| 73.3551261 | 65.2690501 | 65.8456011 | 80.7357739 | 63 | 69.2951505 |
| 73.3551261 | 64.2690501 | 65.8456011 | 81.7357739 | 63 | 69.1701505 |
| 73.3551261 | 63.2690501 | 65.8456011 | 81.7357739 | 63 | 69.0451505 |
| 73.3551261 | 63.2690501 | 65.8456011 | 81.7357739 | 63 | 69.0451505 |
| 73.3551261 | 63.2690501 | 65.8456011 | 85.7357739 | 63 | 68.7951505 |
| 72.3551261 | 63.2690501 | 65.8456011 | 88.7357739 | 63 | 67.7951505 |
| 72.3551261 | 63.2690501 | 65.8456011 | 90.7357739 | 63 | 67.2951505 |
| 73.3551261 | 64.2690501 | 65.8456011 | 92.7357739 | 63 | 67.0451505 |

|            |            |            |            |    |            |
|------------|------------|------------|------------|----|------------|
| 73.3551261 | 60.2690501 | 65.8456011 | 94.7357739 | 63 | 66.9201505 |
| 72.3551261 | 58.2690501 | 65.8456011 | 94.7357739 | 63 | 66.1701505 |
| 69.3551261 | 58.2690501 | 65.8456011 | 94.7357739 | 63 | 65.1701505 |
| 68.3551261 | 58.2690501 | 65.8456011 | 86.7357739 | 63 | 64.4201505 |
| 69.3551261 | 58.2690501 | 65.8456011 | 80.7357739 | 63 | 64.5451505 |
| 69.3551261 | 58.2690501 | 65.8456011 | 77.7357739 | 63 | 64.5451505 |
| 69.3551261 | 60.2690501 | 69.8456011 | 73.7357739 | 63 | 65.4201505 |
| 69.3551261 | 60.2690501 | 69.8456011 | 69.7357739 | 63 | 65.5451505 |
| 69.3551261 | 60.2690501 | 69.8456011 | 65.7357739 | 63 | 65.6701505 |
| 70.3551261 | 60.2690501 | 69.8456011 | 63.7357739 | 63 | 65.5451505 |
| 70.3551261 | 60.2690501 | 69.8456011 | 63.7357739 | 63 | 66.1701505 |
| 69.3551261 | 60.2690501 | 69.8456011 | 62.7357739 | 63 | 66.2951505 |
| 69.3551261 | 60.2690501 | 70.8456011 | 60.7357739 | 63 | 66.5451505 |
| 69.3551261 | 60.2690501 | 70.8456011 | 60.7357739 | 63 | 66.1701505 |
| 69.3551261 | 59.2690501 | 70.8456011 | 59.7357739 | 63 | 65.7951505 |
| 69.3551261 | 58.2690501 | 71.8456011 | 59.7357739 | 63 | 65.7951505 |
| 69.3551261 | 58.2690501 | 71.8456011 | 59.7357739 | 63 | 65.9201505 |
| 70.3551261 | 58.2690501 | 72.8456011 | 59.7357739 | 63 | 66.1701505 |
| 70.3551261 | 58.2690501 | 72.8456011 | 60.7357739 | 63 | 66.0451505 |
| 72.3551261 | 58.2690501 | 72.8456011 | 63.7357739 | 63 | 66.5451505 |
| 73.3551261 | 58.2690501 | 71.8456011 | 63.7357739 | 63 | 67.0451505 |
| 73.3551261 | 57.2690501 | 69.8456011 | 63.7357739 | 63 | 66.9201505 |
| 75.3551261 | 57.2690501 | 68.8456011 | 63.7357739 | 63 | 67.5451505 |
| 76.3551261 | 61.2690501 | 67.8456011 | 63.7357739 | 63 | 68.4201505 |
| 75.3551261 | 61.2690501 | 67.8456011 | 63.7357739 | 63 | 67.9201505 |
| 71.3551261 | 61.2690501 | 67.8456011 | 63.7357739 | 63 | 67.5451505 |
| 70.3551261 | 61.2690501 | 67.8456011 | 63.7357739 | 63 | 67.2951505 |
| 69.3551261 | 62.2690501 | 67.8456011 | 63.7357739 | 63 | 67.2951505 |
| 70.3551261 | 61.2690501 | 67.8456011 | 63.7357739 | 63 | 67.2951505 |
| 70.3551261 | 57.2690501 | 67.8456011 | 64.7357739 | 63 | 66.7951505 |
| 71.3551261 | 56.2690501 | 67.8456011 | 72.7357739 | 63 | 66.7951505 |
| 72.3551261 | 56.2690501 | 67.8456011 | 73.7357739 | 63 | 67.0451505 |
| 73.3551261 | 57.2690501 | 66.8456011 | 73.7357739 | 63 | 67.1701505 |
| 73.3551261 | 58.2690501 | 65.8456011 | 67.7357739 | 63 | 67.2951505 |
| 73.3551261 | 58.2690501 | 65.8456011 | 65.7357739 | 63 | 67.0451505 |
| 72.3551261 | 58.2690501 | 66.8456011 | 64.7357739 | 63 | 67.4201505 |
| 72.3551261 | 58.2690501 | 66.8456011 | 64.7357739 | 63 | 67.5451505 |
| 72.3551261 | 58.2690501 | 66.8456011 | 65.7357739 | 63 | 67.2951505 |
| 72.3551261 | 56.2690501 | 66.8456011 | 68.7357739 | 63 | 67.2951505 |
| 72.3551261 | 56.2690501 | 66.8456011 | 69.7357739 | 63 | 67.2951505 |
| 72.3551261 | 55.2690501 | 66.8456011 | 70.7357739 | 63 | 67.0451505 |
| 71.3551261 | 55.2690501 | 66.8456011 | 70.7357739 | 63 | 66.6701505 |
| 71.3551261 | 55.2690501 | 66.8456011 | 71.7357739 | 63 | 66.5451505 |
| 71.3551261 | 55.2690501 | 67.8456011 | 70.7357739 | 63 | 66.9201505 |
| 71.3551261 | 59.2690501 | 72.8456011 | 68.7357739 | 63 | 68.0451505 |



|            |            |            |            |    |            |
|------------|------------|------------|------------|----|------------|
| 71.3551261 | 59.2690501 | 70.8456011 | 66.7357739 | 63 | 67.6701505 |
| 71.3551261 | 58.2690501 | 70.8456011 | 66.7357739 | 63 | 67.7951505 |
| 69.3551261 | 58.2690501 | 68.8456011 | 65.7357739 | 63 | 67.9201505 |
| 69.3551261 | 57.2690501 | 63.8456011 | 65.7357739 | 63 | 67.1701505 |
| 69.3551261 | 58.2690501 | 62.8456011 | 65.7357739 | 63 | 66.7951505 |
| 68.3551261 | 59.2690501 | 61.8456011 | 65.7357739 | 63 | 66.5451505 |
| 68.3551261 | 60.2690501 | 61.8456011 | 65.7357739 | 63 | 65.5451505 |
| 68.3551261 | 59.2690501 | 60.8456011 | 65.7357739 | 63 | 64.7951505 |
| 68.3551261 | 59.2690501 | 60.8456011 | 65.7357739 | 63 | 64.7951505 |
| 68.3551261 | 58.2690501 | 60.8456011 | 77.7357739 | 63 | 64.7951505 |
| 69.3551261 | 58.2690501 | 60.8456011 | 82.7357739 | 63 | 64.9201505 |
| 69.3551261 | 58.2690501 | 60.8456011 | 83.7357739 | 63 | 65.0451505 |
| 69.3551261 | 58.2690501 | 60.8456011 | 81.7357739 | 63 | 65.2951505 |
| 69.3551261 | 59.2690501 | 60.8456011 | 80.7357739 | 63 | 65.4201505 |
| 69.3551261 | 59.2690501 | 60.8456011 | 79.7357739 | 63 | 65.4201505 |
| 72.3551261 | 61.2690501 | 60.8456011 | 80.7357739 | 63 | 66.4201505 |
| 72.3551261 | 61.2690501 | 60.8456011 | 81.7357739 | 63 | 67.0451505 |
| 73.3551261 | 61.2690501 | 61.8456011 | 81.7357739 | 63 | 67.4201505 |
| 75.3551261 | 61.2690501 | 62.8456011 | 80.7357739 | 63 | 68.1701505 |
| 75.3551261 | 62.2690501 | 63.8456011 | 78.7357739 | 63 | 68.2951505 |
| 75.3551261 | 62.2690501 | 63.8456011 | 78.7357739 | 63 | 68.2951505 |
| 75.3551261 | 62.2690501 | 63.8456011 | 76.7357739 | 63 | 68.5451505 |
| 75.3551261 | 62.2690501 | 64.8456011 | 73.7357739 | 63 | 68.9201505 |
| 74.3551261 | 62.2690501 | 64.8456011 | 72.7357739 | 63 | 69.1701505 |
| 74.3551261 | 62.2690501 | 64.8456011 | 70.7357739 | 63 | 69.0451505 |
| 74.3551261 | 62.2690501 | 64.8456011 | 70.7357739 | 63 | 69.1701505 |
| 74.3551261 | 60.2690501 | 64.8456011 | 70.7357739 | 63 | 68.9201505 |
| 74.3551261 | 59.2690501 | 64.8456011 | 70.7357739 | 63 | 68.9201505 |
| 74.3551261 | 59.2690501 | 63.8456011 | 71.7357739 | 63 | 68.6701505 |
| 74.3551261 | 59.2690501 | 63.8456011 | 73.7357739 | 63 | 68.6701505 |
| 74.3551261 | 60.2690501 | 63.8456011 | 73.7357739 | 63 | 68.6701505 |
| 73.3551261 | 61.2690501 | 63.8456011 | 73.7357739 | 63 | 68.6701505 |
| 72.3551261 | 63.2690501 | 63.8456011 | 73.7357739 | 63 | 68.9201505 |
| 70.3551261 | 65.2690501 | 63.8456011 | 72.7357739 | 63 | 69.2951505 |
| 69.3551261 | 66.2690501 | 63.8456011 | 71.7357739 | 63 | 69.5451505 |
| 68.3551261 | 65.2690501 | 62.8456011 | 70.7357739 | 63 | 69.0451505 |
| 68.3551261 | 64.2690501 | 61.8456011 | 70.7357739 | 63 | 69.0451505 |
| 69.3551261 | 63.2690501 | 60.8456011 | 71.7357739 | 63 | 69.0451505 |
| 69.3551261 | 62.2690501 | 61.8456011 | 71.7357739 | 63 | 69.6701505 |
| 70.3551261 | 61.2690501 | 62.8456011 | 72.7357739 | 63 | 69.6701505 |
| 71.3551261 | 60.2690501 | 62.8456011 | 72.7357739 | 63 | 69.9201505 |
| 74.3551261 | 59.2690501 | 62.8456011 | 72.7357739 | 63 | 70.1701505 |
| 75.3551261 | 60.2690501 | 62.8456011 | 72.7357739 | 63 | 70.1701505 |
| 75.3551261 | 61.2690501 | 62.8456011 | 73.7357739 | 63 | 70.1701505 |
| 75.3551261 | 60.2690501 | 62.8456011 | 74.7357739 | 63 | 69.9201505 |

|            |            |            |            |    |            |
|------------|------------|------------|------------|----|------------|
| 75.3551261 | 60.2690501 | 63.8456011 | 74.7357739 | 63 | 70.6701505 |
| 75.3551261 | 60.2690501 | 64.8456011 | 73.7357739 | 63 | 70.7951505 |
| 73.3551261 | 58.2690501 | 64.8456011 | 72.7357739 | 63 | 70.2951505 |
| 74.3551261 | 58.2690501 | 64.8456011 | 72.7357739 | 63 | 69.5451505 |
| 73.3551261 | 58.2690501 | 64.8456011 | 72.7357739 | 63 | 69.2951505 |
| 73.3551261 | 58.2690501 | 64.8456011 | 71.7357739 | 63 | 69.6701505 |
| 74.3551261 | 58.2690501 | 64.8456011 | 70.7357739 | 63 | 69.9201505 |
| 74.3551261 | 57.2690501 | 64.8456011 | 70.7357739 | 63 | 69.7951505 |
| 74.3551261 | 55.2690501 | 64.8456011 | 70.7357739 | 63 | 69.2951505 |
| 74.3551261 | 53.2690501 | 64.8456011 | 70.7357739 | 63 | 66.8625084 |
| 74.3551261 | 53.2690501 | 64.8456011 | 76.7357739 | 63 | 68.2951505 |
| 74.3551261 | 51.2690501 | 68.8456011 | 79.7357739 | 63 | 67.9201505 |
| 74.3551261 | 50.2690501 | 71.8456011 | 80.7357739 | 63 | 68.1701505 |
| 73.3551261 | 49.2690501 | 73.8456011 | 80.7357739 | 63 | 68.5451505 |
| 73.3551261 | 49.2690501 | 75.8456011 | 80.7357739 | 63 | 68.7951505 |
| 73.3551261 | 48.2690501 | 75.8456011 | 80.7357739 | 63 | 69.1701505 |
| 73.3551261 | 48.2690501 | 75.8456011 | 80.7357739 | 63 | 69.1701505 |
| 73.3551261 | 48.2690501 | 74.8456011 | 78.7357739 | 63 | 68.5451505 |
| 73.3551261 | 47.2690501 | 73.8456011 | 77.7357739 | 63 | 68.2951505 |
| 73.3551261 | 47.2690501 | 71.8456011 | 75.7357739 | 63 | 68.0451505 |
| 72.3551261 | 47.2690501 | 71.8456011 | 73.7357739 | 63 | 67.7951505 |
| 72.3551261 | 46.2690501 | 71.8456011 | 67.7357739 | 63 | 67.7951505 |
| 72.3551261 | 46.2690501 | 71.8456011 | 65.7357739 | 63 | 67.7951505 |
| 72.3551261 | 46.2690501 | 71.8456011 | 64.7357739 | 63 | 67.7951505 |
| 71.3551261 | 46.2690501 | 71.8456011 | 64.7357739 | 63 | 68.1701505 |
| 72.3551261 | 47.2690501 | 68.8456011 | 65.7357739 | 63 | 68.2951505 |
| 72.3551261 | 49.2690501 | 68.8456011 | 65.7357739 | 63 | 68.6701505 |
| 72.3551261 | 50.2690501 | 67.8456011 | 66.7357739 | 63 | 68.7951505 |
| 72.3551261 | 49.2690501 | 67.8456011 | 67.7357739 | 63 | 69.2951505 |
| 72.3551261 | 48.2690501 | 66.8456011 | 70.7357739 | 63 | 69.2951505 |
| 74.3551261 | 48.2690501 | 66.8456011 | 73.7357739 | 63 | 69.9201505 |
| 75.3551261 | 48.2690501 | 66.8456011 | 74.7357739 | 63 | 70.7951505 |
| 76.3551261 | 50.2690501 | 65.8456011 | 71.7357739 | 63 | 70.5451505 |
| 76.3551261 | 52.2690501 | 65.8456011 | 69.7357739 | 63 | 68.7708549 |
| 78.3551261 | 53.2690501 | 65.8456011 | 69.7357739 | 63 | 68.7864799 |
| 78.3551261 | 53.2690501 | 65.8456011 | 68.7357739 | 63 | 68.6458549 |
| 78.3551261 | 54.2690501 | 65.8456011 | 68.7357739 | 63 | 68.2239799 |
| 78.3551261 | 53.2690501 | 65.8456011 | 68.7357739 | 63 | 67.8021049 |
| 79.3551261 | 53.2690501 | 65.8456011 | 69.7357739 | 63 | 67.9427299 |
| 79.3551261 | 53.2690501 | 66.8456011 | 69.7357739 | 63 | 68.2239799 |
| 79.3551261 | 53.2690501 | 66.8456011 | 70.7357739 | 63 | 68.4114799 |
| 79.3551261 | 53.2690501 | 66.8456011 | 71.7357739 | 63 | 68.3958549 |
| 78.3551261 | 53.2690501 | 66.8456011 | 72.7357739 | 63 | 68.3958549 |
| 78.3551261 | 53.2690501 | 66.8456011 | 73.7357739 | 63 | 68.6771049 |
| 78.3551261 | 54.2690501 | 65.8456011 | 72.7357739 | 63 | 68.6614799 |

|            |            |            |            |    |            |
|------------|------------|------------|------------|----|------------|
| 78.3551261 | 55.2690501 | 65.8456011 | 71.7357739 | 63 | 68.6458549 |
| 78.3551261 | 55.2690501 | 65.8456011 | 69.7357739 | 63 | 68.9271049 |
| 78.3551261 | 56.2690501 | 65.8456011 | 68.7357739 | 63 | 69.4896049 |
| 79.3551261 | 57.2690501 | 65.8456011 | 68.7357739 | 63 | 69.7708549 |
| 81.3551261 | 58.2690501 | 65.8456011 | 68.7357739 | 63 | 69.7864799 |
| 81.3551261 | 59.2690501 | 66.8456011 | 69.7357739 | 63 | 70.3333549 |
| 81.3551261 | 60.2690501 | 66.8456011 | 70.7357739 | 63 | 70.5052299 |
| 82.3551261 | 60.2690501 | 66.8456011 | 71.7357739 | 63 | 70.8021049 |
| 82.3551261 | 63.2690501 | 66.8456011 | 73.7357739 | 63 | 71.0833549 |
| 82.3551261 | 64.2690501 | 66.8456011 | 75.7357739 | 63 | 71.2239799 |
| 82.3551261 | 64.2690501 | 67.8456011 | 75.7357739 | 63 | 71.3646049 |
| 82.3551261 | 64.2690501 | 67.8456011 | 77.7357739 | 63 | 71.2396049 |
| 81.3551261 | 65.2690501 | 67.8456011 | 77.7357739 | 63 | 70.9583549 |
| 79.3551261 | 69.2690501 | 68.8456011 | 75.7357739 | 63 | 70.2552299 |
| 79.3551261 | 70.2690501 | 69.8456011 | 73.7357739 | 63 | 70.3958549 |
| 78.3551261 | 70.2690501 | 69.8456011 | 73.7357739 | 63 | 70.2552299 |
| 78.3551261 | 70.2690501 | 69.8456011 | 72.7357739 | 63 | 70.0989799 |
| 77.3551261 | 67.2690501 | 70.8456011 | 72.7357739 | 63 | 68.6614799 |
| 77.3551261 | 63.2690501 | 75.8456011 | 71.7357739 | 63 | 69.1614799 |
| 77.3551261 | 63.2690501 | 74.8456011 | 71.7357739 | 63 | 69.1146049 |
| 76.3551261 | 62.2690501 | 74.8456011 | 71.7357739 | 63 | 68.9427299 |
| 76.3551261 | 62.2690501 | 74.8456011 | 73.7357739 | 63 | 68.9583549 |
| 76.3551261 | 62.2690501 | 73.8456011 | 73.7357739 | 63 | 68.9896049 |
| 75.3551261 | 61.2690501 | 73.8456011 | 73.7357739 | 63 | 68.6771049 |
| 75.3551261 | 60.2690501 | 72.8456011 | 73.7357739 | 63 | 68.5364799 |
| 74.3551261 | 59.2690501 | 71.8456011 | 74.7357739 | 63 | 68.2552299 |
| 74.3551261 | 59.2690501 | 71.8456011 | 74.7357739 | 63 | 68.3802299 |
| 73.3551261 | 59.2690501 | 71.8456011 | 73.7357739 | 63 | 68.2083549 |
| 72.3551261 | 59.2690501 | 71.8456011 | 71.7357739 | 63 | 68.9114799 |
| 72.3551261 | 56.2690501 | 71.8456011 | 71.7357739 | 63 | 68.6458549 |
| 72.3551261 | 54.2690501 | 71.8456011 | 71.7357739 | 63 | 68.8177299 |
| 72.3551261 | 53.2690501 | 71.8456011 | 71.7357739 | 63 | 68.9583549 |
| 72.3551261 | 53.2690501 | 71.8456011 | 71.7357739 | 63 | 68.9583549 |
| 72.3551261 | 51.2690501 | 71.8456011 | 69.7357739 | 63 | 68.8177299 |
| 72.3551261 | 51.2690501 | 71.8456011 | 69.7357739 | 63 | 68.5677299 |
| 72.3551261 | 52.2690501 | 71.8456011 | 69.7357739 | 63 | 68.8646049 |
| 73.3551261 | 52.2690501 | 71.8456011 | 70.7357739 | 63 | 69.1458549 |
| 73.3551261 | 52.2690501 | 71.8456011 | 71.7357739 | 63 | 69.2864799 |
| 73.3551261 | 52.2690501 | 71.8456011 | 71.7357739 | 63 | 69.0364799 |
| 75.3551261 | 51.2690501 | 69.8456011 | 70.7357739 | 63 | 68.9271049 |
| 74.3551261 | 51.2690501 | 69.8456011 | 69.7357739 | 63 | 68.4739799 |
| 72.3551261 | 52.2690501 | 69.8456011 | 69.7357739 | 63 | 68.4739799 |
| 73.3551261 | 52.2690501 | 69.8456011 | 67.7357739 | 63 | 68.7396049 |
| 73.3551261 | 52.2690501 | 69.8456011 | 67.7357739 | 63 | 68.7239799 |
| 73.3551261 | 53.2690501 | 68.8456011 | 67.7357739 | 63 | 68.5989799 |

|            |            |            |            |    |            |
|------------|------------|------------|------------|----|------------|
| 73.3551261 | 53.2690501 | 68.8456011 | 68.7357739 | 63 | 68.4583549 |
| 73.3551261 | 54.2690501 | 68.8456011 | 68.7357739 | 63 | 68.3333549 |
| 73.3551261 | 54.2690501 | 68.8456011 | 68.7357739 | 63 | 68.1146049 |
| 73.3551261 | 53.2690501 | 68.8456011 | 70.7357739 | 63 | 68.1302299 |
| 73.3551261 | 53.2690501 | 68.8456011 | 70.7357739 | 63 | 68.2708549 |
| 72.3551261 | 52.2690501 | 68.8456011 | 70.7357739 | 63 | 67.9896049 |
| 72.3551261 | 52.2690501 | 67.8456011 | 70.7357739 | 63 | 67.8646049 |
| 71.3551261 | 52.2690501 | 67.8456011 | 69.7357739 | 63 | 67.8489799 |
| 70.3551261 | 53.2690501 | 68.8456011 | 70.7357739 | 63 | 67.2708549 |
| 70.3551261 | 55.2690501 | 68.8456011 | 70.7357739 | 63 | 67.4427299 |
| 70.3551261 | 61.2690501 | 68.8456011 | 70.7357739 | 63 | 68.1771049 |
| 69.3551261 | 69.2690501 | 68.8456011 | 70.7357739 | 63 | 71.2951505 |
| 72.3551261 | 74.2690501 | 68.8456011 | 70.7357739 | 63 | 71.6701505 |
| 72.3551261 | 78.2690501 | 67.8456011 | 70.7357739 | 63 | 71.5451505 |
| 72.3551261 | 79.2690501 | 67.8456011 | 70.7357739 | 63 | 71.6701505 |
| 72.3551261 | 79.2690501 | 67.8456011 | 70.7357739 | 63 | 71.4201505 |
| 72.3551261 | 78.2690501 | 67.8456011 | 70.7357739 | 63 | 71.0451505 |
| 73.3551261 | 75.2690501 | 66.8456011 | 71.7357739 | 63 | 70.6701505 |
| 73.3551261 | 73.2690501 | 66.8456011 | 71.7357739 | 63 | 70.5451505 |
| 73.3551261 | 72.2690501 | 66.8456011 | 69.7357739 | 63 | 70.4201505 |
| 74.3551261 | 71.2690501 | 66.8456011 | 69.7357739 | 63 | 69.6701505 |
| 74.3551261 | 71.2690501 | 66.8456011 | 69.7357739 | 63 | 70.0451505 |
| 74.3551261 | 69.2690501 | 66.8456011 | 67.7357739 | 63 | 69.9201505 |
| 75.3551261 | 69.2690501 | 66.8456011 | 67.7357739 | 63 | 70.1701505 |
| 75.3551261 | 66.2690501 | 66.8456011 | 67.7357739 | 63 | 69.6701505 |
| 76.3551261 | 65.2690501 | 66.8456011 | 66.7357739 | 63 | 69.4201505 |
| 76.3551261 | 64.2690501 | 66.8456011 | 66.7357739 | 63 | 69.5451505 |
| 76.3551261 | 65.2690501 | 66.8456011 | 66.7357739 | 63 | 69.2951505 |
| 76.3551261 | 65.2690501 | 66.8456011 | 66.7357739 | 63 | 69.2951505 |
| 76.3551261 | 65.2690501 | 66.8456011 | 66.7357739 | 63 | 69.6701505 |
| 76.3551261 | 66.2690501 | 66.8456011 | 66.7357739 | 63 | 70.0451505 |
| 76.3551261 | 66.2690501 | 67.8456011 | 69.7357739 | 63 | 70.6701505 |
| 76.3551261 | 66.2690501 | 70.8456011 | 70.7357739 | 63 | 70.7951505 |
| 76.3551261 | 66.2690501 | 70.8456011 | 70.7357739 | 63 | 70.6701505 |
| 78.3551261 | 68.2690501 | 70.8456011 | 64.7357739 | 63 | 70.9201505 |
| 78.3551261 | 69.2690501 | 70.8456011 | 61.7357739 | 63 | 71.2951505 |
| 78.3551261 | 70.2690501 | 70.8456011 | 59.7357739 | 63 | 71.4201505 |
| 78.3551261 | 70.2690501 | 70.8456011 | 59.7357739 | 63 | 71.5451505 |
| 78.3551261 | 70.2690501 | 69.8456011 | 58.7357739 | 63 | 71.0451505 |
| 78.3551261 | 71.2690501 | 68.8456011 | 58.7357739 | 63 | 71.0451505 |
| 78.3551261 | 71.2690501 | 68.8456011 | 58.7357739 | 63 | 71.0451505 |
| 78.3551261 | 71.2690501 | 68.8456011 | 58.7357739 | 63 | 71.0451505 |
| 77.3551261 | 64.2690501 | 68.8456011 | 59.7357739 | 63 | 70.4201505 |
| 77.3551261 | 64.2690501 | 68.8456011 | 61.7357739 | 63 | 70.2951505 |
| 77.3551261 | 62.2690501 | 68.8456011 | 63.7357739 | 63 | 69.7951505 |

|            |            |            |            |    |            |
|------------|------------|------------|------------|----|------------|
| 77.3551261 | 62.2690501 | 68.8456011 | 64.7357739 | 63 | 69.4201505 |
| 78.3551261 | 61.2690501 | 68.8456011 | 64.7357739 | 63 | 68.9201505 |
| 78.3551261 | 61.2690501 | 69.8456011 | 62.7357739 | 63 | 69.2951505 |
| 77.3551261 | 61.2690501 | 72.8456011 | 62.7357739 | 63 | 68.9201505 |
| 76.3551261 | 61.2690501 | 73.8456011 | 64.7357739 | 63 | 69.9201505 |
| 76.3551261 | 56.2690501 | 73.8456011 | 64.7357739 | 63 | 69.1701505 |
| 75.3551261 | 56.2690501 | 73.8456011 | 65.7357739 | 63 | 69.0451505 |
| 75.3551261 | 57.2690501 | 73.8456011 | 65.7357739 | 63 | 69.1701505 |
| 75.3551261 | 57.2690501 | 73.8456011 | 66.7357739 | 63 | 68.1701505 |
| 75.3551261 | 55.2690501 | 74.8456011 | 69.7357739 | 63 | 67.6701505 |
| 75.3551261 | 55.2690501 | 74.8456011 | 69.7357739 | 63 | 67.1701505 |
| 76.3551261 | 56.2690501 | 73.8456011 | 69.7357739 | 63 | 67.4201505 |
| 76.3551261 | 57.2690501 | 70.8456011 | 69.7357739 | 63 | 67.9201505 |
| 76.3551261 | 57.2690501 | 68.8456011 | 69.7357739 | 63 | 67.5451505 |
| 72.3551261 | 59.2690501 | 68.8456011 | 69.7357739 | 63 | 67.4201505 |
| 72.3551261 | 59.2690501 | 67.8456011 | 72.7357739 | 63 | 67.2951505 |
| 72.3551261 | 58.2690501 | 67.8456011 | 77.7357739 | 63 | 67.1701505 |
| 73.3551261 | 57.2690501 | 67.8456011 | 79.7357739 | 63 | 66.9201505 |
| 74.3551261 | 56.2690501 | 67.8456011 | 78.7357739 | 63 | 67.0451505 |
| 74.3551261 | 55.2690501 | 67.8456011 | 77.7357739 | 63 | 67.0451505 |
| 74.3551261 | 54.2690501 | 67.8456011 | 76.7357739 | 63 | 66.9201505 |
| 75.3551261 | 54.2690501 | 65.8456011 | 74.7357739 | 63 | 67.0451505 |
| 75.3551261 | 56.2690501 | 65.8456011 | 74.7357739 | 63 | 67.1701505 |
| 78.3551261 | 58.2690501 | 64.8456011 | 74.7357739 | 63 | 67.6701505 |
| 79.3551261 | 59.2690501 | 64.8456011 | 74.7357739 | 63 | 67.9201505 |
| 79.3551261 | 59.2690501 | 64.8456011 | 73.7357739 | 63 | 67.9201505 |
| 80.3551261 | 61.2690501 | 65.8456011 | 71.7357739 | 63 | 68.2951505 |
| 80.3551261 | 61.2690501 | 65.8456011 | 70.7357739 | 63 | 67.9201505 |
| 80.3551261 | 60.2690501 | 65.8456011 | 70.7357739 | 63 | 67.6701505 |
| 81.3551261 | 60.2690501 | 65.8456011 | 70.7357739 | 63 | 67.5451505 |
| 81.3551261 | 59.2690501 | 65.8456011 | 70.7357739 | 63 | 67.1701505 |
| 81.3551261 | 59.2690501 | 65.8456011 | 69.7357739 | 63 | 67.2951505 |
| 81.3551261 | 59.2690501 | 65.8456011 | 68.7357739 | 63 | 67.4201505 |
| 81.3551261 | 59.2690501 | 65.8456011 | 67.7357739 | 63 | 67.5451505 |
| 81.3551261 | 59.2690501 | 65.8456011 | 67.7357739 | 63 | 67.5451505 |
| 81.3551261 | 59.2690501 | 65.8456011 | 66.7357739 | 63 | 67.5451505 |
| 81.3551261 | 58.2690501 | 65.8456011 | 66.7357739 | 63 | 67.4201505 |
| 81.3551261 | 58.2690501 | 65.8456011 | 66.7357739 | 63 | 67.5451505 |
| 81.3551261 | 59.2690501 | 65.8456011 | 66.7357739 | 63 | 68.1701505 |
| 81.3551261 | 61.2690501 | 65.8456011 | 67.7357739 | 63 | 68.7951505 |
| 81.3551261 | 61.2690501 | 65.8456011 | 66.7357739 | 63 | 68.9201505 |
| 81.3551261 | 65.2690501 | 66.8456011 | 66.7357739 | 63 | 69.5451505 |
| 83.3551261 | 66.2690501 | 66.8456011 | 66.7357739 | 63 | 70.4201505 |
| 83.3551261 | 66.2690501 | 68.8456011 | 66.7357739 | 63 | 71.2951505 |
| 83.3551261 | 67.2690501 | 68.8456011 | 66.7357739 | 63 | 71.2951505 |

|            |            |            |            |    |            |
|------------|------------|------------|------------|----|------------|
| 83.3551261 | 67.2690501 | 67.8456011 | 65.7357739 | 63 | 70.9201505 |
| 83.3551261 | 67.2690501 | 66.8456011 | 65.7357739 | 63 | 70.6701505 |
| 83.3551261 | 69.2690501 | 66.8456011 | 66.7357739 | 63 | 71.1701505 |
| 83.3551261 | 69.2690501 | 66.8456011 | 66.7357739 | 63 | 71.0451505 |
| 84.3551261 | 69.2690501 | 66.8456011 | 66.7357739 | 63 | 71.1701505 |
| 84.3551261 | 69.2690501 | 66.8456011 | 66.7357739 | 63 | 71.1701505 |
| 82.3551261 | 72.2690501 | 65.8456011 | 70.7357739 | 63 | 70.9201505 |
| 82.3551261 | 72.2690501 | 64.8456011 | 70.7357739 | 63 | 70.7951505 |
| 82.3551261 | 68.2690501 | 63.8456011 | 73.7357739 | 63 | 70.4201505 |
| 82.3551261 | 67.2690501 | 62.8456011 | 72.7357739 | 63 | 70.5451505 |
| 81.3551261 | 67.2690501 | 62.8456011 | 70.7357739 | 63 | 71.1701505 |
| 81.3551261 | 70.2690501 | 62.8456011 | 70.7357739 | 63 | 71.4201505 |
| 81.3551261 | 70.2690501 | 62.8456011 | 70.7357739 | 63 | 71.5451505 |
| 80.3551261 | 70.2690501 | 63.8456011 | 70.7357739 | 63 | 71.4201505 |
| 80.3551261 | 67.2690501 | 63.8456011 | 70.7357739 | 63 | 70.7951505 |
| 81.3551261 | 64.2690501 | 64.8456011 | 70.7357739 | 63 | 70.6701505 |
| 81.3551261 | 64.2690501 | 64.8456011 | 70.7357739 | 63 | 70.2951505 |
| 81.3551261 | 61.2690501 | 64.8456011 | 71.7357739 | 63 | 70.0451505 |
| 81.3551261 | 60.2690501 | 64.8456011 | 71.7357739 | 63 | 70.1701505 |
| 82.3551261 | 60.2690501 | 64.8456011 | 70.7357739 | 63 | 70.2951505 |
| 83.3551261 | 58.2690501 | 63.8456011 | 74.7357739 | 63 | 69.9201505 |
| 83.3551261 | 58.2690501 | 63.8456011 | 75.7357739 | 63 | 69.7951505 |
| 85.3551261 | 58.2690501 | 63.8456011 | 74.7357739 | 63 | 70.1701505 |
| 86.3551261 | 57.2690501 | 64.8456011 | 74.7357739 | 63 | 70.2951505 |
| 70.2951505 | 57.2690501 | 64.8456011 | 66.7357739 | 63 | 68.1626536 |
| 70.9201505 | 63.2690501 | 64.8456011 | 66.7357739 | 63 | 68.8657786 |
| 87.3551261 | 63.2690501 | 64.8456011 | 63.7357739 | 63 | 71.2951505 |
| 71.5451505 | 63.2690501 | 64.8456011 | 62.7357739 | 63 | 69.4439036 |
| 71.5451505 | 62.2690501 | 64.8456011 | 61.7357739 | 63 | 69.4439036 |
| 71.1701505 | 60.2690501 | 64.8456011 | 60.7357739 | 63 | 68.8970286 |
| 70.9201505 | 58.2690501 | 64.8456011 | 60.7357739 | 63 | 68.6157786 |
| 71.1701505 | 59.2690501 | 63.8456011 | 60.7357739 | 63 | 68.7720286 |
| 70.9201505 | 61.2690501 | 63.8456011 | 62.7357739 | 63 | 68.6157786 |
| 70.5451505 | 61.2690501 | 63.8456011 | 62.7357739 | 63 | 68.1939036 |
| 70.7951505 | 63.2690501 | 62.8456011 | 66.7357739 | 63 | 68.2251536 |
| 70.7951505 | 64.2690501 | 62.8456011 | 69.7357739 | 63 | 68.2251536 |
| 70.7951505 | 64.2690501 | 62.8456011 | 69.7357739 | 63 | 68.2251536 |
| 70.5451505 | 62.2690501 | 62.8456011 | 74.7357739 | 63 | 67.9439036 |
| 70.2951505 | 60.2690501 | 65.8456011 | 75.7357739 | 63 | 68.0376536 |
| 70.4201505 | 59.2690501 | 65.8456011 | 76.7357739 | 63 | 68.0532786 |
| 70.4201505 | 58.2690501 | 64.8456011 | 76.7357739 | 63 | 67.9282786 |
| 70.1701505 | 57.2690501 | 63.8456011 | 76.7357739 | 63 | 67.7720286 |
| 69.9201505 | 56.2690501 | 63.8456011 | 76.7357739 | 63 | 67.6157786 |
| 69.9201505 | 56.2690501 | 63.8456011 | 76.7357739 | 63 | 67.6157786 |
| 70.2951505 | 56.2690501 | 63.8456011 | 77.7357739 | 63 | 68.1626536 |

|            |            |            |            |    |            |
|------------|------------|------------|------------|----|------------|
| 70.5451505 | 56.2690501 | 63.8456011 | 77.7357739 | 63 | 68.4439036 |
| 70.5451505 | 56.2690501 | 63.8456011 | 77.7357739 | 63 | 68.4439036 |
| 70.5451505 | 56.2690501 | 64.8456011 | 77.7357739 | 63 | 68.5689036 |
| 70.6701505 | 56.2690501 | 66.8456011 | 79.7357739 | 63 | 68.7095286 |
| 70.2951505 | 54.2690501 | 66.8456011 | 79.7357739 | 63 | 68.0376536 |
| 70.2951505 | 52.2690501 | 66.8456011 | 78.7357739 | 63 | 67.9126536 |
| 70.4201505 | 52.2690501 | 65.8456011 | 76.7357739 | 63 | 67.9282786 |
| 70.5451505 | 53.2690501 | 65.8456011 | 74.7357739 | 63 | 68.0689036 |
| 70.6701505 | 53.2690501 | 65.8456011 | 73.7357739 | 63 | 68.2095286 |
| 70.5451505 | 53.2690501 | 66.8456011 | 72.7357739 | 63 | 68.3189036 |
| 70.5451505 | 54.2690501 | 66.8456011 | 72.7357739 | 63 | 68.1939036 |
| 70.6701505 | 55.2690501 | 66.8456011 | 72.7357739 | 63 | 68.3345286 |
| 71.1701505 | 56.2690501 | 66.8456011 | 72.7357739 | 63 | 68.8970286 |
| 71.4201505 | 58.2690501 | 66.8456011 | 72.7357739 | 63 | 69.1782786 |
| 71.4201505 | 58.2690501 | 66.8456011 | 72.7357739 | 63 | 69.1782786 |
| 72.2951505 | 59.2690501 | 66.8456011 | 71.7357739 | 63 | 70.0376536 |
| 71.6701505 | 56.2690501 | 66.8456011 | 71.7357739 | 63 | 69.4595286 |
| 71.4201505 | 54.2690501 | 66.8456011 | 70.7357739 | 63 | 69.3032786 |
| 71.1701505 | 53.2690501 | 66.8456011 | 69.7357739 | 63 | 69.0220286 |
| 70.9201505 | 54.2690501 | 66.8456011 | 69.7357739 | 63 | 68.6157786 |
| 86.3551261 | 56.2690501 | 67.8456011 | 69.7357739 | 63 | 70.7951505 |
| 86.3551261 | 56.2690501 | 67.8456011 | 69.7357739 | 63 | 70.5451505 |
| 83.3551261 | 58.2690501 | 67.8456011 | 69.7357739 | 63 | 70.1701505 |
| 82.3551261 | 59.2690501 | 68.8456011 | 69.7357739 | 63 | 70.5451505 |
| 82.3551261 | 58.2690501 | 68.8456011 | 69.7357739 | 63 | 70.4201505 |
| 82.3551261 | 57.2690501 | 66.8456011 | 69.7357739 | 63 | 70.0451505 |
| 82.3551261 | 56.2690501 | 66.8456011 | 70.7357739 | 63 | 70.1701505 |
| 83.3551261 | 55.2690501 | 65.8456011 | 70.7357739 | 63 | 70.1701505 |
| 84.3551261 | 55.2690501 | 63.8456011 | 71.7357739 | 63 | 70.0451505 |
| 84.3551261 | 56.2690501 | 61.8456011 | 72.7357739 | 63 | 70.0451505 |
| 84.3551261 | 57.2690501 | 61.8456011 | 71.7357739 | 63 | 70.1701505 |
| 84.3551261 | 60.2690501 | 61.8456011 | 70.7357739 | 63 | 70.5451505 |
| 84.3551261 | 61.2690501 | 61.8456011 | 70.7357739 | 63 | 70.7951505 |
| 85.3551261 | 62.2690501 | 60.8456011 | 72.7357739 | 63 | 71.0451505 |
| 86.3551261 | 62.2690501 | 60.8456011 | 75.7357739 | 63 | 71.2951505 |
| 86.3551261 | 61.2690501 | 61.8456011 | 76.7357739 | 63 | 71.2951505 |
| 86.3551261 | 61.2690501 | 61.8456011 | 77.7357739 | 63 | 70.9201505 |
| 86.3551261 | 58.2690501 | 61.8456011 | 77.7357739 | 63 | 70.4201505 |
| 69.9201505 | 58.2690501 | 61.8456011 | 79.7357739 | 63 | 67.8657786 |
| 70.0451505 | 58.2690501 | 64.8456011 | 78.7357739 | 63 | 68.1314036 |
| 70.1701505 | 60.2690501 | 64.8456011 | 78.7357739 | 63 | 67.8970286 |
| 70.9201505 | 62.2690501 | 65.8456011 | 78.7357739 | 63 | 68.8657786 |
| 72.1701505 | 64.2690501 | 65.8456011 | 78.7357739 | 63 | 69.6470286 |
| 72.0451505 | 65.2690501 | 65.8456011 | 78.7357739 | 69 | 69.7564036 |
| 87.3551261 | 66.2690501 | 65.8456011 | 78.7357739 | 69 | 71.7951505 |

|            |            |            |            |    |            |
|------------|------------|------------|------------|----|------------|
| 83.3551261 | 66.2690501 | 65.8456011 | 77.7357739 | 69 | 70.6701505 |
| 81.3551261 | 67.2690501 | 67.8456011 | 77.7357739 | 69 | 70.7951505 |
| 78.3551261 | 67.2690501 | 67.8456011 | 79.7357739 | 69 | 69.9201505 |
| 77.3551261 | 66.2690501 | 67.8456011 | 80.7357739 | 69 | 69.5451505 |
| 77.3551261 | 59.2690501 | 66.8456011 | 82.7357739 | 69 | 68.2951505 |
| 77.3551261 | 57.2690501 | 66.8456011 | 82.7357739 | 69 | 67.9201505 |
| 78.3551261 | 57.2690501 | 66.8456011 | 84.7357739 | 69 | 68.0451505 |
| 79.3551261 | 57.2690501 | 66.8456011 | 84.7357739 | 69 | 68.0451505 |
| 80.3551261 | 58.2690501 | 66.8456011 | 82.7357739 | 69 | 68.6701505 |
| 80.3551261 | 58.2690501 | 66.8456011 | 81.7357739 | 69 | 68.9201505 |
| 80.3551261 | 58.2690501 | 66.8456011 | 81.7357739 | 69 | 69.7951505 |
| 80.3551261 | 58.2690501 | 66.8456011 | 81.7357739 | 69 | 70.0451505 |
| 80.3551261 | 56.2690501 | 65.8456011 | 82.7357739 | 69 | 69.9201505 |
| 80.3551261 | 55.2690501 | 65.8456011 | 82.7357739 | 69 | 71.2951505 |
| 80.3551261 | 54.2690501 | 65.8456011 | 83.7357739 | 69 | 71.0451505 |
| 79.3551261 | 54.2690501 | 64.8456011 | 83.7357739 | 69 | 70.7951505 |
| 79.3551261 | 54.2690501 | 64.8456011 | 83.7357739 | 69 | 70.7951505 |
| 79.3551261 | 53.2690501 | 64.8456011 | 83.7357739 | 69 | 70.5451505 |
| 79.3551261 | 53.2690501 | 64.8456011 | 83.7357739 | 69 | 69.7951505 |
| 78.3551261 | 53.2690501 | 64.8456011 | 84.7357739 | 69 | 69.1701505 |
| 78.3551261 | 53.2690501 | 64.8456011 | 84.7357739 | 69 | 68.6701505 |
| 78.3551261 | 56.2690501 | 64.8456011 | 84.7357739 | 69 | 69.0451505 |
| 78.3551261 | 56.2690501 | 64.8456011 | 85.7357739 | 69 | 68.9201505 |
| 78.3551261 | 56.2690501 | 64.8456011 | 84.7357739 | 69 | 68.9201505 |
| 78.3551261 | 57.2690501 | 64.8456011 | 84.7357739 | 69 | 69.1701505 |
| 78.3551261 | 59.2690501 | 64.8456011 | 84.7357739 | 69 | 68.2951505 |
| 78.3551261 | 59.2690501 | 64.8456011 | 84.7357739 | 69 | 68.0451505 |
| 78.3551261 | 59.2690501 | 65.8456011 | 84.7357739 | 69 | 68.1701505 |
| 80.3551261 | 60.2690501 | 67.8456011 | 83.7357739 | 63 | 69.6701505 |
| 70.6701505 | 60.2690501 | 68.8456011 | 83.7357739 | 63 | 68.7095286 |
| 71.0451505 | 60.2690501 | 69.8456011 | 82.7357739 | 63 | 68.8814036 |
| 70.4201505 | 57.2690501 | 69.8456011 | 82.7357739 | 63 | 68.0532786 |
| 69.6701505 | 55.2690501 | 68.8456011 | 82.7357739 | 63 | 67.0845286 |
| 69.4201505 | 55.2690501 | 68.8456011 | 82.7357739 | 63 | 66.9282786 |
| 68.9201505 | 54.2690501 | 68.8456011 | 82.7357739 | 63 | 66.3657786 |
| 68.6701505 | 54.2690501 | 68.8456011 | 83.7357739 | 63 | 66.0845286 |
| 68.9201505 | 54.2690501 | 68.8456011 | 83.7357739 | 63 | 66.3657786 |
| 68.9201505 | 54.2690501 | 68.8456011 | 82.7357739 | 63 | 66.2407786 |
| 69.0451505 | 54.2690501 | 68.8456011 | 81.7357739 | 63 | 66.3814036 |
| 68.9201505 | 54.2690501 | 68.8456011 | 79.7357739 | 63 | 66.2407786 |
| 68.7951505 | 54.2690501 | 70.8456011 | 79.7357739 | 63 | 66.3501536 |
| 69.1701505 | 53.2690501 | 75.8456011 | 78.7357739 | 63 | 67.0220286 |
| 70.0451505 | 53.2690501 | 76.8456011 | 77.7357739 | 63 | 67.5064036 |
| 70.7951505 | 54.2690501 | 72.8456011 | 77.7357739 | 63 | 67.8501536 |
| 87.3551261 | 55.2690501 | 70.8456011 | 74.7357739 | 63 | 71.1701505 |



|            |            |            |            |    |            |
|------------|------------|------------|------------|----|------------|
| 86.3551261 | 56.2690501 | 67.8456011 | 74.7357739 | 63 | 71.9201505 |
| 85.3551261 | 56.2690501 | 66.8456011 | 75.7357739 | 63 | 71.6701505 |
| 85.3551261 | 56.2690501 | 65.8456011 | 75.7357739 | 63 | 71.1701505 |
| 84.3551261 | 55.2690501 | 65.8456011 | 73.7357739 | 63 | 68.7951505 |
| 84.3551261 | 55.2690501 | 64.8456011 | 72.7357739 | 63 | 68.1701505 |
| 83.3551261 | 55.2690501 | 62.8456011 | 71.7357739 | 63 | 67.5451505 |
| 82.3551261 | 55.2690501 | 62.8456011 | 70.7357739 | 63 | 67.4201505 |
| 81.3551261 | 54.2690501 | 62.8456011 | 69.7357739 | 63 | 67.2951505 |
| 81.3551261 | 54.2690501 | 62.8456011 | 69.7357739 | 63 | 67.1701505 |
| 79.3551261 | 55.2690501 | 61.8456011 | 69.7357739 | 63 | 67.1701505 |
| 79.3551261 | 56.2690501 | 61.8456011 | 71.7357739 | 63 | 67.2951505 |
| 79.3551261 | 57.2690501 | 61.8456011 | 72.7357739 | 63 | 67.6701505 |
| 79.3551261 | 57.2690501 | 61.8456011 | 72.7357739 | 63 | 67.9201505 |
| 78.3551261 | 57.2690501 | 61.8456011 | 72.7357739 | 63 | 67.7951505 |
| 77.3551261 | 57.2690501 | 61.8456011 | 74.7357739 | 63 | 67.5451505 |
| 77.3551261 | 57.2690501 | 61.8456011 | 75.7357739 | 63 | 67.2951505 |
| 76.3551261 | 58.2690501 | 61.8456011 | 75.7357739 | 63 | 67.2951505 |
| 76.3551261 | 58.2690501 | 61.8456011 | 77.7357739 | 63 | 67.1701505 |
| 76.3551261 | 59.2690501 | 61.8456011 | 79.7357739 | 63 | 67.2951505 |
| 74.3551261 | 57.2690501 | 61.8456011 | 82.7357739 | 63 | 66.9201505 |
| 74.3551261 | 56.2690501 | 61.8456011 | 84.7357739 | 63 | 65.5451505 |
| 74.3551261 | 55.2690501 | 61.8456011 | 85.7357739 | 63 | 65.4201505 |
| 74.3551261 | 55.2690501 | 61.8456011 | 84.7357739 | 63 | 64.9201505 |
| 75.3551261 | 55.2690501 | 61.8456011 | 83.7357739 | 63 | 65.2951505 |
| 74.3551261 | 55.2690501 | 61.8456011 | 81.7357739 | 63 | 65.4201505 |
| 74.3551261 | 55.2690501 | 61.8456011 | 80.7357739 | 63 | 65.6701505 |
| 74.3551261 | 55.2690501 | 61.8456011 | 80.7357739 | 63 | 65.7951505 |
| 74.3551261 | 55.2690501 | 61.8456011 | 80.7357739 | 63 | 66.1701505 |
| 72.3551261 | 55.2690501 | 62.8456011 | 81.7357739 | 63 | 66.2951505 |
| 72.3551261 | 54.2690501 | 62.8456011 | 84.7357739 | 63 | 67.0451505 |
| 72.3551261 | 54.2690501 | 63.8456011 | 84.7357739 | 63 | 67.5451505 |
| 72.3551261 | 53.2690501 | 63.8456011 | 85.7357739 | 63 | 65.240571  |
| 72.3551261 | 53.2690501 | 64.8456011 | 85.7357739 | 63 | 65.365571  |
| 72.3551261 | 60.2690501 | 64.8456011 | 84.7357739 | 63 | 67.4201505 |
| 72.3551261 | 61.2690501 | 65.8456011 | 81.7357739 | 63 | 67.7951505 |
| 72.3551261 | 61.2690501 | 65.8456011 | 75.7357739 | 63 | 67.9201505 |
| 72.3551261 | 62.2690501 | 65.8456011 | 68.7357739 | 63 | 67.4201505 |
| 72.3551261 | 62.2690501 | 69.8456011 | 66.7357739 | 63 | 67.7951505 |
| 73.3551261 | 61.2690501 | 71.8456011 | 65.7357739 | 63 | 68.4201505 |
| 73.3551261 | 60.2690501 | 72.8456011 | 65.7357739 | 63 | 68.5451505 |
| 73.3551261 | 59.2690501 | 72.8456011 | 66.7357739 | 63 | 68.2951505 |
| 73.3551261 | 58.2690501 | 72.8456011 | 66.7357739 | 63 | 68.1701505 |
| 72.3551261 | 58.2690501 | 71.8456011 | 67.7357739 | 63 | 67.5451505 |
| 71.3551261 | 57.2690501 | 71.8456011 | 67.7357739 | 63 | 67.2951505 |
| 69.3551261 | 56.2690501 | 74.8456011 | 68.7357739 | 63 | 67.4201505 |

|            |            |            |            |    |            |
|------------|------------|------------|------------|----|------------|
| 68.3551261 | 56.2690501 | 76.8456011 | 67.7357739 | 63 | 67.2951505 |
| 68.3551261 | 57.2690501 | 76.8456011 | 67.7357739 | 63 | 67.5451505 |
| 68.3551261 | 58.2690501 | 76.8456011 | 68.7357739 | 63 | 67.7951505 |
| 68.3551261 | 59.2690501 | 76.8456011 | 71.7357739 | 63 | 68.0451505 |
| 57.3551261 | 59.2690501 | 77.8456011 | 73.7357739 | 63 | 67.0451505 |
| 57.3551261 | 59.2690501 | 77.8456011 | 75.7357739 | 63 | 67.1701505 |
| 56.3551261 | 59.2690501 | 78.8456011 | 75.7357739 | 63 | 67.0451505 |
| 56.3551261 | 59.2690501 | 79.8456011 | 74.7357739 | 63 | 67.0451505 |
| 56.3551261 | 59.2690501 | 80.8456011 | 73.7357739 | 63 | 67.1701505 |
| 55.3551261 | 59.2690501 | 80.8456011 | 73.7357739 | 63 | 66.4201505 |
| 55.3551261 | 59.2690501 | 81.8456011 | 74.7357739 | 63 | 66.2951505 |
| 56.3551261 | 59.2690501 | 81.8456011 | 74.7357739 | 63 | 66.1701505 |
| 58.3551261 | 61.2690501 | 81.8456011 | 75.7357739 | 63 | 66.6701505 |
| 60.3551261 | 62.2690501 | 81.8456011 | 75.7357739 | 63 | 67.4201505 |
| 60.3551261 | 64.2690501 | 80.8456011 | 75.7357739 | 63 | 67.9201505 |
| 61.3551261 | 65.2690501 | 80.8456011 | 75.7357739 | 63 | 68.0451505 |
| 62.3551261 | 65.2690501 | 80.8456011 | 74.7357739 | 63 | 68.2951505 |
| 62.3551261 | 65.2690501 | 81.8456011 | 73.7357739 | 63 | 68.6701505 |
| 62.3551261 | 65.2690501 | 81.8456011 | 72.7357739 | 63 | 68.9201505 |
| 63.3551261 | 64.2690501 | 70.2329976 | 73.7357739 | 63 | 67.7888442 |
| 63.3551261 | 62.2690501 | 70.3441087 | 74.7357739 | 63 | 67.4138442 |
| 64.3551261 | 61.2690501 | 71.0107753 | 77.7357739 | 63 | 67.3357192 |
| 66.3551261 | 61.2690501 | 71.3441087 | 78.7357739 | 63 | 67.7419692 |
| 66.3551261 | 61.2690501 | 72.2329976 | 78.7357739 | 63 | 68.1169692 |
| 72.3551261 | 62.2690501 | 73.0107753 | 78.7357739 | 63 | 69.2263442 |
| 73.3551261 | 63.2690501 | 73.0107753 | 78.7357739 | 63 | 69.7263442 |
| 74.3551261 | 64.2690501 | 72.677442  | 78.7357739 | 63 | 69.5544692 |
| 74.3551261 | 64.2690501 | 72.7885531 | 78.7357739 | 63 | 69.1950942 |
| 74.3551261 | 63.2690501 | 72.677442  | 78.7357739 | 63 | 69.4294692 |
| 74.3551261 | 62.2690501 | 72.4552198 | 78.7357739 | 63 | 69.2732192 |
| 74.3551261 | 61.2690501 | 72.3441087 | 78.7357739 | 63 | 69.0075942 |
| 75.3551261 | 61.2690501 | 72.0107753 | 77.7357739 | 63 | 68.8513442 |
| 74.3551261 | 61.2690501 | 72.3441087 | 77.7357739 | 63 | 68.6482192 |
| 74.3551261 | 62.2690501 | 71.8996642 | 72.7357739 | 63 | 68.9138442 |
| 74.3551261 | 64.2690501 | 71.4552198 | 72.7357739 | 63 | 68.9763442 |
| 73.3551261 | 64.2690501 | 81.8456011 | 72.7357739 | 63 | 69.7951505 |
| 73.3551261 | 64.2690501 | 79.8456011 | 71.7357739 | 63 | 68.9201505 |
| 74.3551261 | 63.2690501 | 78.8456011 | 71.7357739 | 63 | 68.9201505 |
| 74.3551261 | 59.2690501 | 75.8456011 | 72.7357739 | 63 | 67.9201505 |
| 74.3551261 | 57.2690501 | 74.8456011 | 73.7357739 | 63 | 67.5451505 |
| 74.3551261 | 56.2690501 | 74.8456011 | 79.7357739 | 63 | 67.7951505 |
| 74.3551261 | 56.2690501 | 73.8456011 | 80.7357739 | 63 | 67.6701505 |
| 74.3551261 | 57.2690501 | 72.8456011 | 80.7357739 | 63 | 68.5451505 |
| 74.3551261 | 57.2690501 | 72.8456011 | 71.7357739 | 63 | 68.6701505 |
| 74.3551261 | 57.2690501 | 72.8456011 | 68.7357739 | 63 | 68.5451505 |

|            |            |            |            |    |            |
|------------|------------|------------|------------|----|------------|
| 74.3551261 | 58.2690501 | 72.8456011 | 67.7357739 | 63 | 68.4201505 |
| 74.3551261 | 59.2690501 | 72.8456011 | 66.7357739 | 63 | 68.0451505 |
| 74.3551261 | 59.2690501 | 72.8456011 | 64.7357739 | 63 | 67.9201505 |
| 73.3551261 | 59.2690501 | 72.8456011 | 62.7357739 | 63 | 67.7951505 |
| 73.3551261 | 59.2690501 | 72.8456011 | 62.7357739 | 63 | 67.9201505 |
| 73.3551261 | 59.2690501 | 73.8456011 | 61.7357739 | 63 | 68.6701505 |
| 74.3551261 | 58.2690501 | 73.8456011 | 61.7357739 | 63 | 68.7951505 |
| 74.3551261 | 57.2690501 | 76.8456011 | 61.7357739 | 63 | 69.1701505 |
| 74.3551261 | 56.2690501 | 76.8456011 | 60.7357739 | 63 | 68.9201505 |
| 76.3551261 | 55.2690501 | 69.0107753 | 60.7357739 | 63 | 67.5700942 |
| 76.3551261 | 55.2690501 | 69.4552198 | 59.7357739 | 63 | 68.0232192 |
| 76.3551261 | 56.2690501 | 69.7885531 | 59.7357739 | 63 | 68.5700942 |
| 76.3551261 | 57.2690501 | 70.7885531 | 59.7357739 | 63 | 68.8357192 |
| 76.3551261 | 58.2690501 | 72.4552198 | 59.7357739 | 63 | 69.8200942 |
| 76.3551261 | 59.2690501 | 72.8996642 | 59.7357739 | 63 | 70.1325942 |
| 77.3551261 | 60.2690501 | 73.4552198 | 60.7357739 | 63 | 70.6950942 |
| 77.3551261 | 60.2690501 | 73.4552198 | 60.7357739 | 63 | 71.0700942 |
| 78.3551261 | 60.2690501 | 73.677442  | 61.7357739 | 63 | 71.0857192 |
| 78.3551261 | 59.2690501 | 73.677442  | 61.7357739 | 63 | 71.0857192 |
| 78.3551261 | 58.2690501 | 73.677442  | 61.7357739 | 63 | 70.8357192 |
| 78.3551261 | 58.2690501 | 74.7885531 | 61.7357739 |    | 70.8669692 |
| 78.3551261 | 59.2690501 | 74.3441087 | 61.7357739 |    | 71.9294692 |
| 77.3551261 | 60.2690501 | 74.5663309 | 61.7357739 |    | 71.3357192 |
| 76.3551261 | 63.2690501 | 76.3441087 | 68.7357739 |    | 71.6013442 |
| 76.3551261 | 66.2690501 | 73.7885531 | 68.7357739 |    | 72.1169692 |
| 76.3551261 | 67.2690501 | 81.8456011 | 69.7357739 |    | 72.6701505 |
| 75.3551261 | 67.2690501 | 81.8456011 | 69.7357739 |    | 72.5451505 |
| 75.3551261 | 66.2690501 | 74.8456011 | 69.7357739 |    | 71.4201505 |
| 75.3551261 | 62.2690501 | 73.8456011 | 69.7357739 |    | 70.7951505 |
| 75.3551261 | 60.2690501 | 72.8456011 | 70.7357739 |    | 70.2951505 |
| 75.3551261 | 60.2690501 | 71.8456011 | 71.7357739 |    | 70.1701505 |
| 75.3551261 | 60.2690501 | 70.8456011 | 70.7357739 |    | 70.1701505 |
| 76.3551261 | 60.2690501 | 69.8456011 | 69.7357739 |    | 70.1701505 |
| 77.3551261 | 60.2690501 | 69.8456011 | 68.7357739 |    | 70.9201505 |
| 79.3551261 | 60.2690501 | 69.8456011 | 69.7357739 |    | 71.1701505 |
| 78.3551261 | 59.2690501 | 69.8456011 | 71.7357739 |    | 71.0451505 |
| 78.3551261 | 59.2690501 | 69.8456011 | 72.7357739 |    | 71.0451505 |
| 78.3551261 | 61.2690501 | 69.8456011 | 72.7357739 |    | 71.2951505 |
| 77.3551261 | 61.2690501 | 71.8456011 | 72.7357739 |    | 71.1701505 |
| 77.3551261 | 63.2690501 | 71.8456011 | 71.7357739 |    | 71.6701505 |
| 77.3551261 | 64.2690501 | 72.8456011 | 69.7357739 |    | 72.0451505 |
| 76.3551261 | 64.2690501 | 75.8456011 | 68.7357739 |    | 72.4201505 |
| 76.3551261 | 65.2690501 | 76.8456011 | 68.7357739 |    | 72.9201505 |
| 76.3551261 | 66.2690501 | 78.8456011 | 68.7357739 |    | 72.9201505 |
| 75.3551261 | 66.2690501 | 82.8456011 | 69.7357739 |    | 72.9201505 |

|            |            |            |            |            |
|------------|------------|------------|------------|------------|
| 75.3551261 | 66.2690501 | 82.8456011 | 69.7357739 | 72.5451505 |
| 75.3551261 | 68.2690501 | 85.8456011 | 72.7357739 | 72.7951505 |
| 75.3551261 | 68.2690501 | 85.8456011 | 72.7357739 | 72.7951505 |
| 75.3551261 | 67.2690501 | 85.8456011 | 73.7357739 | 72.6701505 |
| 75.3551261 | 65.2690501 | 85.8456011 | 75.7357739 | 72.6701505 |
| 75.3551261 | 65.2690501 | 86.8456011 | 78.7357739 | 72.7951505 |
| 75.3551261 | 63.2690501 | 73.1218865 | 80.7357739 | 70.5857192 |
| 75.3551261 | 60.2690501 | 72.677442  | 82.7357739 | 69.8669692 |
| 74.3551261 | 57.2690501 | 71.8996642 | 82.7357739 | 68.8825942 |
| 73.3551261 | 55.2690501 | 71.5663309 | 84.7357739 | 67.9294692 |
| 73.3551261 | 54.2690501 | 71.677442  | 84.7357739 | 67.3200942 |
| 74.3551261 | 53.2690501 | 71.4552198 | 83.7357739 | 67.3044692 |
| 74.3551261 | 52.2690501 | 84.8456011 | 81.7357739 | 69.0451505 |
| 74.3551261 | 51.2690501 | 76.8456011 | 78.7357739 | 67.9201505 |
| 75.3551261 | 51.2690501 | 74.8456011 | 78.7357739 | 67.6701505 |
| 75.3551261 | 51.2690501 | 74.8456011 | 77.7357739 | 67.6701505 |
| 76.3551261 | 52.2690501 | 74.8456011 | 77.7357739 | 67.9201505 |
| 75.3551261 | 52.2690501 | 73.8456011 | 77.7357739 | 67.6701505 |
| 75.3551261 | 52.2690501 | 73.8456011 | 77.7357739 | 67.5451505 |
| 75.3551261 | 52.2690501 | 73.8456011 | 76.7357739 | 67.1701505 |
| 75.3551261 | 52.2690501 | 72.8456011 | 76.7357739 | 67.0451505 |
| 75.3551261 | 51.2690501 | 71.8456011 | 76.7357739 | 66.5451505 |
| 75.3551261 | 51.2690501 | 71.8456011 | 77.7357739 | 66.7951505 |
| 75.3551261 | 51.2690501 | 70.8456011 | 77.7357739 | 67.0451505 |
| 76.3551261 | 51.2690501 | 69.8456011 | 78.7357739 | 67.4201505 |
| 77.3551261 | 51.2690501 | 69.8456011 | 78.7357739 | 67.0451505 |
| 77.3551261 | 51.2690501 | 69.8456011 | 79.7357739 | 67.1701505 |
| 77.3551261 | 51.2690501 | 68.8456011 | 79.7357739 | 67.2951505 |
| 77.3551261 | 51.2690501 | 68.8456011 | 81.7357739 | 67.2951505 |
| 77.3551261 | 51.2690501 | 67.8456011 | 79.7357739 | 67.2951505 |
| 77.3551261 | 50.2690501 | 67.8456011 | 79.7357739 | 67.5451505 |
| 77.3551261 | 49.2690501 | 66.8456011 | 78.7357739 | 67.1701505 |
| 77.3551261 | 50.2690501 | 65.8456011 | 78.7357739 | 67.2951505 |
| 77.3551261 | 50.2690501 | 65.8456011 | 78.7357739 | 67.6701505 |
| 78.3551261 | 50.2690501 | 65.8456011 | 76.7357739 | 68.0451505 |
| 78.3551261 | 51.2690501 | 65.8456011 | 76.7357739 | 68.4201505 |
| 78.3551261 | 52.2690501 | 65.8456011 | 76.7357739 | 68.6701505 |
| 78.3551261 | 56.2690501 | 65.8456011 | 76.7357739 | 68.9201505 |
| 78.3551261 | 59.2690501 | 65.8456011 | 76.7357739 | 69.6701505 |
| 77.3551261 | 59.2690501 | 65.8456011 | 76.7357739 | 70.0451505 |
| 77.3551261 | 59.2690501 | 65.8456011 | 73.7357739 | 70.6701505 |
| 77.3551261 | 58.2690501 | 71.8456011 | 72.7357739 | 71.9201505 |
| 77.3551261 | 58.2690501 | 71.8456011 | 72.7357739 | 70.7218834 |
| 77.3551261 | 57.2690501 | 71.8456011 | 70.7357739 | 70.4406334 |
| 77.3551261 | 57.2690501 | 71.8456011 | 70.7357739 | 70.5812584 |

|            |            |            |            |            |
|------------|------------|------------|------------|------------|
| 80.3551261 | 58.2690501 | 70.8456011 | 69.7357739 | 73.2951505 |
| 80.3551261 | 61.2690501 | 70.8456011 | 69.7357739 | 74.0451505 |
| 79.3551261 | 61.2690501 | 68.8456011 | 69.7357739 | 73.6701505 |
| 78.3551261 | 61.2690501 | 67.8456011 | 69.7357739 | 73.1701505 |
| 78.3551261 | 61.2690501 | 67.8456011 | 69.7357739 | 73.2951505 |
| 80.3551261 | 61.2690501 | 66.8456011 | 69.7357739 | 73.9201505 |
| 80.3551261 | 62.2690501 | 66.8456011 | 69.7357739 | 74.1701505 |
| 79.3551261 | 62.2690501 | 66.8456011 | 68.7357739 | 74.2951505 |
| 79.3551261 | 61.2690501 | 66.8456011 | 68.7357739 | 74.1701505 |
| 78.3551261 | 57.2690501 | 66.8456011 | 68.7357739 | 73.4201505 |
| 78.3551261 | 57.2690501 | 66.8456011 | 68.7357739 | 73.2951505 |
| 77.3551261 | 56.2690501 | 66.8456011 | 68.7357739 | 73.2951505 |
| 77.3551261 | 56.2690501 | 66.8456011 | 68.7357739 | 73.4201505 |
| 77.3551261 | 56.2690501 | 66.8456011 | 68.7357739 | 73.4201505 |
| 77.3551261 | 56.2690501 | 66.8456011 | 68.7357739 | 73.4201505 |
| 76.3551261 | 61.2690501 | 67.8456011 | 68.7357739 | 74.1701505 |
| 76.3551261 | 65.2690501 | 67.8456011 | 67.7357739 | 74.7951505 |
| 76.3551261 | 65.2690501 | 71.8456011 | 67.7357739 | 74.6701505 |
| 76.3551261 | 64.2690501 | 71.8456011 | 68.7357739 | 74.1701505 |
| 75.3551261 | 62.2690501 | 71.8456011 | 69.7357739 | 74.1701505 |
| 75.3551261 | 60.2690501 | 70.8456011 | 69.7357739 | 74.0451505 |
| 75.3551261 | 58.2690501 | 70.8456011 | 68.7357739 | 73.9201505 |
| 75.3551261 | 56.2690501 | 70.8456011 | 67.7357739 | 73.4201505 |
| 75.3551261 | 56.2690501 | 71.8456011 | 67.7357739 | 73.4201505 |
| 76.3551261 | 56.2690501 | 71.8456011 | 66.7357739 | 73.4201505 |
| 76.3551261 | 57.2690501 | 71.8456011 | 66.7357739 | 72.9201505 |
| 76.3551261 | 57.2690501 | 70.8456011 | 66.7357739 | 72.1701505 |
| 76.3551261 | 57.2690501 | 70.8456011 | 66.7357739 | 71.1701505 |
| 77.3551261 | 56.2690501 | 70.8456011 | 66.7357739 | 70.6701505 |
| 77.3551261 | 55.2690501 | 70.8456011 | 66.7357739 | 70.4201505 |
| 76.3551261 | 54.2690501 | 70.8456011 | 66.7357739 | 70.5451505 |
| 76.3551261 | 54.2690501 | 70.8456011 | 65.7357739 | 70.6701505 |
| 76.3551261 | 54.2690501 | 69.8456011 | 65.7357739 | 70.7951505 |
| 76.3551261 | 54.2690501 | 69.8456011 | 66.7357739 | 68.959321  |
| 76.3551261 | 55.2690501 | 69.8456011 | 66.7357739 | 68.834321  |
| 76.3551261 | 55.2690501 | 69.8456011 | 66.7357739 | 68.849946  |
| 76.3551261 | 57.2690501 | 69.8456011 | 65.7357739 | 69.146821  |
| 75.3551261 | 56.2690501 | 69.8456011 | 65.7357739 | 68.303071  |
| 75.3551261 | 56.2690501 | 69.8456011 | 66.7357739 | 68.303071  |
| 74.3551261 | 56.2690501 | 69.8456011 | 66.7357739 | 68.178071  |
| 74.3551261 | 54.2690501 | 70.8456011 | 66.7357739 | 68.474946  |
| 74.3551261 | 55.2690501 | 71.8456011 | 66.7357739 | 68.896821  |
| 73.3551261 | 58.2690501 | 71.8456011 | 67.7357739 | 68.756196  |
| 73.3551261 | 61.2690501 | 71.8456011 | 67.7357739 | 68.756196  |
| 73.3551261 | 64.2690501 | 71.8456011 | 68.7357739 | 69.053071  |

|            |            |            |            |            |
|------------|------------|------------|------------|------------|
| 73.3551261 | 65.2690501 | 71.8456011 | 68.7357739 | 69.084321  |
| 74.3551261 | 64.2690501 | 71.8456011 | 70.7357739 | 68.553071  |
| 74.3551261 | 62.2690501 | 71.8456011 | 71.7357739 | 67.599946  |
| 74.3551261 | 60.2690501 | 71.8456011 | 70.7357739 | 66.912446  |
| 74.3551261 | 59.2690501 | 72.8456011 | 70.7357739 | 66.193696  |
| 73.3551261 | 59.2690501 | 74.8456011 | 70.7357739 | 65.615571  |
| 74.3551261 | 58.2690501 | 73.8456011 | 70.7357739 | 65.646821  |
| 74.3551261 | 55.2690501 | 73.8456011 | 70.7357739 | 64.912446  |
| 74.3551261 | 55.2690501 | 70.8456011 | 70.7357739 | 64.396821  |
| 74.3551261 | 55.2690501 | 67.8456011 | 69.7357739 | 63.631196  |
| 74.3551261 | 56.2690501 | 66.8456011 | 69.7357739 | 63.318696  |
| 74.3551261 | 57.2690501 | 65.8456011 | 69.7357739 | 63.162446  |
| 73.3551261 | 57.2690501 | 64.8456011 | 72.7357739 | 62.990571  |
| 73.3551261 | 57.2690501 | 64.8456011 | 72.7357739 | 63.256196  |
| 75.3551261 | 57.2690501 | 64.8456011 | 79.7357739 | 64.209321  |
| 75.3551261 | 58.2690501 | 64.8456011 | 81.7357739 | 64.771821  |
| 75.3551261 | 58.2690501 | 64.8456011 | 81.7357739 | 66.5451505 |
| 75.3551261 | 58.2690501 | 64.8456011 | 80.7357739 | 65.6701505 |
| 77.3551261 | 59.2690501 | 64.8456011 | 73.7357739 | 65.0451505 |
| 78.3551261 | 59.2690501 | 64.8456011 | 69.7357739 | 64.7951505 |
| 78.3551261 | 60.2690501 | 65.8456011 | 67.7357739 | 65.4201505 |
| 78.3551261 | 59.2690501 | 67.8456011 | 65.7357739 | 64.365571  |
| 78.3551261 | 59.2690501 | 67.8456011 | 64.7357739 | 64.553071  |
| 78.3551261 | 59.2690501 | 66.8456011 | 63.7357739 | 64.428071  |
| 78.3551261 | 54.2690501 | 65.8456011 | 64.7357739 | 63.490571  |
| 78.3551261 | 52.2690501 | 64.8456011 | 64.7357739 | 63.303071  |
| 78.3551261 | 51.2690501 | 64.8456011 | 66.7357739 | 63.428071  |
| 77.3551261 | 51.2690501 | 64.8456011 | 65.7357739 | 63.021821  |
| 77.3551261 | 51.2690501 | 64.8456011 | 64.7357739 | 62.740571  |
| 76.3551261 | 52.2690501 | 63.8456011 | 63.7357739 | 62.615571  |
| 75.3551261 | 52.2690501 | 63.8456011 | 62.7357739 | 62.740571  |
| 75.3551261 | 54.2690501 | 63.8456011 | 62.7357739 | 63.318696  |
| 75.3551261 | 54.2690501 | 63.8456011 | 62.7357739 | 63.318696  |
| 75.3551261 | 54.2690501 | 64.8456011 | 63.7357739 | 64.021821  |
| 75.3551261 | 57.2690501 | 65.8456011 | 63.7357739 | 64.443696  |
| 74.3551261 | 57.2690501 | 69.8456011 | 64.7357739 | 64.834321  |
| 73.3551261 | 57.2690501 | 70.8456011 | 63.7357739 | 65.443696  |
| 72.3551261 | 56.2690501 | 70.8456011 | 63.7357739 | 65.881196  |
| 72.3551261 | 56.2690501 | 72.8456011 | 62.7357739 | 67.115571  |
| 72.3551261 | 56.2690501 | 76.8456011 | 62.7357739 | 67.631196  |
| 72.3551261 | 57.2690501 | 77.8456011 | 62.7357739 | 67.818696  |
| 72.3551261 | 57.2690501 | 78.8456011 | 63.7357739 | 68.146821  |
| 72.3551261 | 57.2690501 | 75.8456011 | 64.7357739 | 68.209321  |
| 73.3551261 | 56.2690501 | 70.8456011 | 64.7357739 | 68.6701505 |
| 73.3551261 | 56.2690501 | 68.8456011 | 64.7357739 | 67.4201505 |

|            |            |            |            |            |
|------------|------------|------------|------------|------------|
| 73.3551261 | 56.2690501 | 67.8456011 | 64.7357739 | 66.7951505 |
| 77.3551261 | 55.2690501 | 66.8456011 | 64.7357739 | 67.0451505 |
| 77.3551261 | 54.2690501 | 65.8456011 | 64.7357739 | 66.2951505 |
| 77.3551261 | 54.2690501 | 64.8456011 | 64.7357739 | 66.1701505 |
| 77.3551261 | 52.2690501 | 64.8456011 | 69.7357739 | 65.5451505 |
| 77.3551261 | 52.2690501 | 64.8456011 | 72.7357739 | 65.0451505 |
| 77.3551261 | 52.2690501 | 64.8456011 | 73.7357739 | 64.7951505 |
| 77.3551261 | 52.2690501 | 64.8456011 | 71.7357739 | 64.7951505 |
| 77.3551261 | 52.2690501 | 64.8456011 | 70.7357739 | 64.9201505 |
| 76.3551261 | 52.2690501 | 64.8456011 | 68.7357739 | 64.7951505 |
| 76.3551261 | 53.2690501 | 64.8456011 | 68.7357739 | 65.0451505 |
| 76.3551261 | 53.2690501 | 64.8456011 | 67.7357739 | 64.9201505 |
| 76.3551261 | 53.2690501 | 64.8456011 | 67.7357739 | 65.0451505 |
| 76.3551261 | 53.2690501 | 64.8456011 | 68.7357739 | 65.1701505 |
| 76.3551261 | 53.2690501 | 64.8456011 | 69.7357739 | 65.2951505 |
| 76.3551261 | 53.2690501 | 64.8456011 | 70.7357739 | 65.2951505 |
| 76.3551261 | 53.2690501 | 64.8456011 | 70.7357739 | 64.9201505 |
| 76.3551261 | 55.2690501 | 64.8456011 | 71.7357739 | 65.7951505 |
| 76.3551261 | 55.2690501 | 64.8456011 | 71.7357739 | 65.7951505 |

Rolling Avg

Time AZ

|            |             |
|------------|-------------|
| 78.1129433 | 10:59:31 AM |
| 78.2700862 | 10:59:32 AM |
| 78.427229  | 10:59:33 AM |
| 78.577229  | 10:59:34 AM |
| 78.7058004 | 10:59:35 AM |
| 78.8058004 | 10:59:36 AM |
| 78.8879433 | 10:59:37 AM |
| 78.9629433 | 10:59:38 AM |
| 79.0343719 | 10:59:39 AM |
| 79.0950862 | 10:59:40 AM |
| 79.1593719 | 10:59:41 AM |
| 79.202229  | 10:59:42 AM |
| 79.2738378 | 10:59:43 AM |
| 79.3664287 | 10:59:44 AM |
| 79.462591  | 10:59:45 AM |
| 79.5373247 | 10:59:46 AM |
| 79.6562549 | 10:59:47 AM |
| 79.7200051 | 10:59:48 AM |
| 79.76255   | 10:59:49 AM |
| 79.7818805 | 10:59:50 AM |
| 79.7888785 | 10:59:51 AM |
| 79.8017358 | 10:59:52 AM |
| 79.7983543 | 10:59:53 AM |
| 79.7935778 | 10:59:54 AM |
| 79.829203  | 10:59:55 AM |
| 79.8638795 | 10:59:56 AM |
| 79.8973284 | 10:59:57 AM |
| 79.9221277 | 10:59:58 AM |
| 79.9377527 | 10:59:59 AM |
| 79.9103231 | 11:00:00 AM |
| 79.9385822 | 11:00:01 AM |
| 79.9512624 | 11:00:02 AM |
| 79.9483176 | 11:00:03 AM |
| 79.9315335 | 11:00:04 AM |
| 79.8982315 | 11:00:05 AM |
| 79.8229652 | 11:00:06 AM |
| 79.7168954 | 11:00:07 AM |
| 79.5505577 | 11:00:08 AM |
| 79.3788629 | 11:00:09 AM |
| 79.2004717 | 11:00:10 AM |
| 79.0064554 | 11:00:11 AM |
| 78.832082  | 11:00:12 AM |



|            |             |
|------------|-------------|
| 78.6804765 | 11:00:13 AM |
| 78.5360138 | 11:00:14 AM |
| 78.4303904 | 11:00:15 AM |
| 78.3488742 | 11:00:16 AM |
| 78.2615544 | 11:00:17 AM |
| 78.1764667 | 11:00:18 AM |
| 78.0909326 | 11:00:19 AM |
| 78.0094163 | 11:00:20 AM |
| 77.9310251 | 11:00:21 AM |
| 77.8535267 | 11:00:22 AM |
| 77.7441517 | 11:00:23 AM |
| 77.6410267 | 11:00:24 AM |
| 77.5191517 | 11:00:25 AM |
| 77.3785267 | 11:00:26 AM |
| 77.2347767 | 11:00:27 AM |
| 77.1747781 | 11:00:28 AM |
| 77.113217  | 11:00:29 AM |
| 77.0672809 | 11:00:30 AM |
| 77.0225167 | 11:00:31 AM |
| 76.9968931 | 11:00:32 AM |
| 76.9732226 | 11:00:33 AM |
| 76.9429116 | 11:00:34 AM |
| 76.848538  | 11:00:35 AM |
| 76.7443987 | 11:00:36 AM |
| 76.6379158 | 11:00:37 AM |
| 76.5333859 | 11:00:38 AM |
| 76.4304411 | 11:00:39 AM |
| 76.3535866 | 11:00:40 AM |
| 76.2076505 | 11:00:41 AM |
| 76.0732755 | 11:00:42 AM |
| 75.9576505 | 11:00:43 AM |
| 75.8357755 | 11:00:44 AM |
| 75.7389005 | 11:00:45 AM |
| 75.6420255 | 11:00:46 AM |
| 75.5420255 | 11:00:47 AM |
| 75.4143727 | 11:00:48 AM |
| 75.2882824 | 11:00:49 AM |
| 75.1618015 | 11:00:50 AM |
| 75.0509455 | 11:00:51 AM |
| 74.9205583 | 11:00:52 AM |
| 74.7675149 | 11:00:53 AM |
| 74.6706399 | 11:00:54 AM |
| 74.5800149 | 11:00:55 AM |
| 74.4893899 | 11:00:56 AM |
| 74.4112649 | 11:00:57 AM |

|            |             |
|------------|-------------|
| 74.3300149 | 11:00:58 AM |
| 74.2487649 | 11:00:59 AM |
| 74.1831399 | 11:01:00 AM |
| 74.1143899 | 11:01:01 AM |
| 74.0456399 | 11:01:02 AM |
| 73.9862649 | 11:01:03 AM |
| 73.9143899 | 11:01:04 AM |
| 73.8518899 | 11:01:05 AM |
| 73.8206399 | 11:01:06 AM |
| 73.8050149 | 11:01:07 AM |
| 73.7862649 | 11:01:08 AM |
| 73.7893899 | 11:01:09 AM |
| 73.7925149 | 11:01:10 AM |
| 73.7987649 | 11:01:11 AM |
| 73.7425149 | 11:01:12 AM |
| 73.6737649 | 11:01:13 AM |
| 73.6018899 | 11:01:14 AM |
| 73.5675149 | 11:01:15 AM |
| 73.5300149 | 11:01:16 AM |
| 73.4925149 | 11:01:17 AM |
| 73.4518899 | 11:01:18 AM |
| 73.3925149 | 11:01:19 AM |
| 73.3393899 | 11:01:20 AM |
| 73.2987649 | 11:01:21 AM |
| 73.2550149 | 11:01:22 AM |
| 73.2175149 | 11:01:23 AM |
| 73.1831399 | 11:01:24 AM |
| 73.1268899 | 11:01:25 AM |
| 73.0800149 | 11:01:26 AM |
| 73.0393899 | 11:01:27 AM |
| 73.0670427 | 11:01:28 AM |
| 73.108758  | 11:01:29 AM |
| 73.163364  | 11:01:30 AM |
| 73.2398449 | 11:01:31 AM |
| 73.3296071 | 11:01:32 AM |
| 73.4264005 | 11:01:33 AM |
| 73.4639005 | 11:01:34 AM |
| 73.4159352 | 11:01:35 AM |
| 73.3558605 | 11:01:36 AM |
| 73.2985202 | 11:01:37 AM |
| 73.2333674 | 11:01:38 AM |
| 73.1689958 | 11:01:39 AM |
| 73.0886087 | 11:01:40 AM |
| 73.0082215 | 11:01:41 AM |
| 72.9375999 | 11:01:42 AM |

|            |             |
|------------|-------------|
| 72.8712752 | 11:01:43 AM |
| 72.8201849 | 11:01:44 AM |
| 72.7870633 | 11:01:45 AM |
| 72.7738637 | 11:01:46 AM |
| 72.7540233 | 11:01:47 AM |
| 72.7474643 | 11:01:48 AM |
| 72.7627802 | 11:01:49 AM |
| 72.7640337 | 11:01:50 AM |
| 72.7660684 | 11:01:51 AM |
| 72.8122437 | 11:01:52 AM |
| 72.8400596 | 11:01:53 AM |
| 72.8370162 | 11:01:54 AM |
| 72.7978478 | 11:01:55 AM |
| 72.8218791 | 11:01:56 AM |
| 72.8463011 | 11:01:57 AM |
| 72.8820512 | 11:01:58 AM |
| 72.9342075 | 11:01:59 AM |
| 72.9941763 | 11:02:00 AM |
| 73.055317  | 11:02:01 AM |
| 73.1215358 | 11:02:02 AM |
| 73.130805  | 11:02:03 AM |
| 73.2060082 | 11:02:04 AM |
| 73.2488711 | 11:02:05 AM |
| 73.2987652 | 11:02:06 AM |
| 73.4184997 | 11:02:07 AM |
| 73.5140154 | 11:02:08 AM |
| 73.5966404 | 11:02:09 AM |
| 73.6534843 | 11:02:10 AM |
| 73.6369722 | 11:02:11 AM |
| 73.6220225 | 11:02:12 AM |
| 73.6538664 | 11:02:13 AM |
| 73.681804  | 11:02:14 AM |
| 73.7070072 | 11:02:15 AM |
| 73.726351  | 11:02:16 AM |
| 73.7226479 | 11:02:17 AM |
| 73.7017574 | 11:02:18 AM |
| 73.6816481 | 11:02:19 AM |
| 73.6728669 | 11:02:20 AM |
| 73.664867  | 11:02:21 AM |
| 73.6517889 | 11:02:22 AM |
| 73.628164  | 11:02:23 AM |
| 73.5924297 | 11:02:24 AM |
| 73.5551329 | 11:02:25 AM |
| 73.5080705 | 11:02:26 AM |
| 73.4692112 | 11:02:27 AM |

|            |             |
|------------|-------------|
| 73.4186331 | 11:02:28 AM |
| 73.3664926 | 11:02:29 AM |
| 73.333102  | 11:02:30 AM |
| 73.3090865 | 11:02:31 AM |
| 73.2893678 | 11:02:32 AM |
| 73.308321  | 11:02:33 AM |
| 73.3550086 | 11:02:34 AM |
| 73.4511024 | 11:02:35 AM |
| 73.5082152 | 11:02:36 AM |
| 73.5930624 | 11:02:37 AM |
| 73.6978314 | 11:02:38 AM |
| 73.804163  | 11:02:39 AM |
| 73.902682  | 11:02:40 AM |
| 73.9953417 | 11:02:41 AM |
| 74.0907358 | 11:02:42 AM |
| 74.2352671 | 11:02:43 AM |
| 74.3154267 | 11:02:44 AM |
| 74.4302705 | 11:02:45 AM |
| 74.5271455 | 11:02:46 AM |
| 74.5643364 | 11:02:47 AM |
| 74.6038711 | 11:02:48 AM |
| 74.6383277 | 11:02:49 AM |
| 74.6821592 | 11:02:50 AM |
| 74.7743467 | 11:02:51 AM |
| 74.8540342 | 11:02:52 AM |
| 74.8791158 | 11:02:53 AM |
| 74.9104474 | 11:02:54 AM |
| 74.9956036 | 11:02:55 AM |
| 75.0838849 | 11:02:56 AM |
| 75.1995099 | 11:02:57 AM |
| 75.3299786 | 11:02:58 AM |
| 75.4666974 | 11:02:59 AM |
| 75.5987286 | 11:03:00 AM |
| 75.7252911 | 11:03:01 AM |
| 75.8557599 | 11:03:02 AM |
| 75.9776349 | 11:03:03 AM |
| 76.0901349 | 11:03:04 AM |
| 76.1854474 | 11:03:05 AM |
| 76.2752911 | 11:03:06 AM |
| 76.3713849 | 11:03:07 AM |
| 76.4573224 | 11:03:08 AM |
| 76.5237286 | 11:03:09 AM |
| 76.5706036 | 11:03:10 AM |
| 76.6010724 | 11:03:11 AM |
| 76.6174786 | 11:03:12 AM |

|            |             |
|------------|-------------|
| 76.6291974 | 11:03:13 AM |
| 76.6331036 | 11:03:14 AM |
| 76.6073224 | 11:03:15 AM |
| 76.5713849 | 11:03:16 AM |
| 76.5073224 | 11:03:17 AM |
| 76.4010724 | 11:03:18 AM |
| 76.2971661 | 11:03:19 AM |
| 76.1831036 | 11:03:20 AM |
| 76.0698224 | 11:03:21 AM |
| 75.9409161 | 11:03:22 AM |
| 75.8088849 | 11:03:23 AM |
| 75.7181783 | 11:03:24 AM |
| 75.5689596 | 11:03:25 AM |
| 75.4439596 | 11:03:26 AM |
| 75.3228658 | 11:03:27 AM |
| 75.1963033 | 11:03:28 AM |
| 75.0705221 | 11:03:29 AM |
| 74.9439596 | 11:03:30 AM |
| 74.8142721 | 11:03:31 AM |
| 74.6923971 | 11:03:32 AM |
| 74.5830221 | 11:03:33 AM |
| 74.5239561 | 11:03:34 AM |
| 74.4539527 | 11:03:35 AM |
| 74.392543  | 11:03:36 AM |
| 74.3342583 | 11:03:37 AM |
| 74.2826142 | 11:03:38 AM |
| 74.2678763 | 11:03:39 AM |
| 74.2024388 | 11:03:40 AM |
| 74.1252824 | 11:03:41 AM |
| 74.0317199 | 11:03:42 AM |
| 73.9494854 | 11:03:43 AM |
| 73.91756   | 11:03:44 AM |
| 73.8926659 | 11:03:45 AM |
| 73.8755842 | 11:03:46 AM |
| 73.8381901 | 11:03:47 AM |
| 73.7906397 | 11:03:48 AM |
| 73.7329331 | 11:03:49 AM |
| 73.6806952 | 11:03:50 AM |
| 73.6253323 | 11:03:51 AM |
| 73.5605944 | 11:03:52 AM |
| 73.4989815 | 11:03:53 AM |
| 73.4451811 | 11:03:54 AM |
| 73.398412  | 11:03:55 AM |
| 73.3375803 | 11:03:56 AM |
| 73.2673737 | 11:03:57 AM |

|            |             |
|------------|-------------|
| 73.2143546 | 11:03:58 AM |
| 73.1660229 | 11:03:59 AM |
| 73.1403475 | 11:04:00 AM |
| 73.1279534 | 11:04:01 AM |
| 73.1546218 | 11:04:02 AM |
| 73.1953526 | 11:04:03 AM |
| 73.2088213 | 11:04:04 AM |
| 73.2815834 | 11:04:05 AM |
| 73.3348143 | 11:04:06 AM |
| 73.3864826 | 11:04:07 AM |
| 73.4561197 | 11:04:08 AM |
| 73.5366943 | 11:04:09 AM |
| 73.6219565 | 11:04:10 AM |
| 73.7134686 | 11:04:11 AM |
| 73.8081057 | 11:04:12 AM |
| 73.8980553 | 11:04:13 AM |
| 73.9416021 | 11:04:14 AM |
| 73.9960864 | 11:04:15 AM |
| 74.0443207 | 11:04:16 AM |
| 74.0792737 | 11:04:17 AM |
| 74.1146174 | 11:04:18 AM |
| 74.1239924 | 11:04:19 AM |
| 74.1903171 | 11:04:20 AM |
| 74.282423  | 11:04:21 AM |
| 74.3854665 | 11:04:22 AM |
| 74.4826505 | 11:04:23 AM |
| 74.5420255 | 11:04:24 AM |
| 74.6107755 | 11:04:25 AM |
| 74.6795255 | 11:04:26 AM |
| 74.7670255 | 11:04:27 AM |
| 74.8670255 | 11:04:28 AM |
| 74.9732755 | 11:04:29 AM |
| 75.0889005 | 11:04:30 AM |
| 75.1951505 | 11:04:31 AM |
| 75.2889005 | 11:04:32 AM |
| 75.3607755 | 11:04:33 AM |
| 75.4264005 | 11:04:34 AM |
| 75.4982755 | 11:04:35 AM |
| 75.5701505 | 11:04:36 AM |
| 75.6389005 | 11:04:37 AM |
| 75.7201505 | 11:04:38 AM |
| 75.7889005 | 11:04:39 AM |
| 75.8357755 | 11:04:40 AM |
| 75.8545255 | 11:04:41 AM |
| 75.8545255 | 11:04:42 AM |

|            |             |
|------------|-------------|
| 75.8545255 | 11:04:43 AM |
| 75.8545255 | 11:04:44 AM |
| 75.8545255 | 11:04:45 AM |
| 75.8482755 | 11:04:46 AM |
| 75.8357755 | 11:04:47 AM |
| 75.8170255 | 11:04:48 AM |
| 75.8232755 | 11:04:49 AM |
| 75.8295255 | 11:04:50 AM |
| 75.8357755 | 11:04:51 AM |
| 75.8357755 | 11:04:52 AM |
| 75.8326505 | 11:04:53 AM |
| 75.8232755 | 11:04:54 AM |
| 75.8014005 | 11:04:55 AM |
| 75.7920255 | 11:04:56 AM |
| 75.7764005 | 11:04:57 AM |
| 75.7639005 | 11:04:58 AM |
| 75.7326505 | 11:04:59 AM |
| 75.6920255 | 11:05:00 AM |
| 75.6545255 | 11:05:01 AM |
| 75.6139005 | 11:05:02 AM |
| 75.5670255 | 11:05:03 AM |
| 75.5139005 | 11:05:04 AM |
| 75.4576505 | 11:05:05 AM |
| 75.4295255 | 11:05:06 AM |
| 75.4232755 | 11:05:07 AM |
| 75.4295255 | 11:05:08 AM |
| 75.4607755 | 11:05:09 AM |
| 75.4670255 | 11:05:10 AM |
| 75.4857755 | 11:05:11 AM |
| 75.4576505 | 11:05:12 AM |
| 75.4357755 | 11:05:13 AM |
| 75.4201505 | 11:05:14 AM |
| 75.3982755 | 11:05:15 AM |
| 75.3826505 | 11:05:16 AM |
| 75.3732755 | 11:05:17 AM |
| 75.3514005 | 11:05:18 AM |
| 75.3295255 | 11:05:19 AM |
| 75.3357755 | 11:05:20 AM |
| 75.3451505 | 11:05:21 AM |
| 75.3514005 | 11:05:22 AM |
| 75.3389005 | 11:05:23 AM |
| 75.2823415 | 11:05:24 AM |
| 75.2253918 | 11:05:25 AM |
| 75.1637546 | 11:05:26 AM |
| 75.0841486 | 11:05:27 AM |

|            |             |
|------------|-------------|
| 74.9975115 | 11:05:28 AM |
| 74.8889993 | 11:05:29 AM |
| 74.7871277 | 11:05:30 AM |
| 74.6817405 | 11:05:31 AM |
| 74.5728377 | 11:05:32 AM |
| 74.4506537 | 11:05:33 AM |
| 74.3319852 | 11:05:34 AM |
| 74.2398793 | 11:05:35 AM |
| 74.1520702 | 11:05:36 AM |
| 74.0740268 | 11:05:37 AM |
| 73.9580927 | 11:05:38 AM |
| 73.8425493 | 11:05:39 AM |
| 73.7234902 | 11:05:40 AM |
| 73.5919312 | 11:05:41 AM |
| 73.4736534 | 11:05:42 AM |
| 73.3643599 | 11:05:43 AM |
| 73.3143599 | 11:05:44 AM |
| 73.2706099 | 11:05:45 AM |
| 73.2174849 | 11:05:46 AM |
| 73.1456099 | 11:05:47 AM |
| 73.0737349 | 11:05:48 AM |
| 72.9831099 | 11:05:49 AM |
| 72.9174849 | 11:05:50 AM |
| 72.8424849 | 11:05:51 AM |
| 72.8362349 | 11:05:52 AM |
| 72.809065  | 11:05:53 AM |
| 72.7787701 | 11:05:54 AM |
| 72.744569  | 11:05:55 AM |
| 72.7076335 | 11:05:56 AM |
| 72.6664011 | 11:05:57 AM |
| 72.6251687 | 11:05:58 AM |
| 72.5870613 | 11:05:59 AM |
| 72.5512977 | 11:06:00 AM |
| 72.524909  | 11:06:01 AM |
| 72.502036  | 11:06:02 AM |
| 72.4865849 | 11:06:03 AM |
| 72.5194897 | 11:06:04 AM |
| 72.5520038 | 11:06:05 AM |
| 72.5981899 | 11:06:06 AM |
| 72.7184208 | 11:06:07 AM |
| 72.861308  | 11:06:08 AM |
| 73.0073202 | 11:06:09 AM |
| 73.1560668 | 11:06:10 AM |
| 73.3083289 | 11:06:11 AM |
| 73.4484818 | 11:06:12 AM |



|            |             |
|------------|-------------|
| 73.5956658 | 11:06:13 AM |
| 73.7362093 | 11:06:14 AM |
| 73.8626902 | 11:06:15 AM |
| 73.9786243 | 11:06:16 AM |
| 74.0785427 | 11:06:17 AM |
| 74.2069768 | 11:06:18 AM |
| 74.3287702 | 11:06:19 AM |
| 74.4353293 | 11:06:20 AM |
| 74.5481383 | 11:06:21 AM |
| 74.6664161 | 11:06:22 AM |
| 74.7694596 | 11:06:23 AM |
| 74.8194596 | 11:06:24 AM |
| 74.8444596 | 11:06:25 AM |
| 74.8444596 | 11:06:26 AM |
| 74.8413346 | 11:06:27 AM |
| 74.8382096 | 11:06:28 AM |
| 74.8288346 | 11:06:29 AM |
| 74.8132096 | 11:06:30 AM |
| 74.8163346 | 11:06:31 AM |
| 74.8225846 | 11:06:32 AM |
| 74.8622544 | 11:06:33 AM |
| 74.9081743 | 11:06:34 AM |
| 74.9611255 | 11:06:35 AM |
| 75.016811  | 11:06:36 AM |
| 75.0799184 | 11:06:37 AM |
| 75.1492758 | 11:06:38 AM |
| 75.2186332 | 11:06:39 AM |
| 75.2543968 | 11:06:40 AM |
| 75.2620354 | 11:06:41 AM |
| 75.2505335 | 11:06:42 AM |
| 75.2316096 | 11:06:43 AM |
| 75.2240139 | 11:06:44 AM |
| 75.2296994 | 11:06:45 AM |
| 75.2076505 | 11:06:46 AM |
| 75.1107755 | 11:06:47 AM |
| 74.9951505 | 11:06:48 AM |
| 74.8607755 | 11:06:49 AM |
| 74.7170255 | 11:06:50 AM |
| 74.5607755 | 11:06:51 AM |
| 74.4107755 | 11:06:52 AM |
| 74.2701505 | 11:06:53 AM |
| 74.1389005 | 11:06:54 AM |
| 74.0107755 | 11:06:55 AM |
| 73.8920255 | 11:06:56 AM |
| 73.7857755 | 11:06:57 AM |

|            |             |
|------------|-------------|
| 73.6826505 | 11:06:58 AM |
| 73.5920255 | 11:06:59 AM |
| 73.5076505 | 11:07:00 AM |
| 73.4264005 | 11:07:01 AM |
| 73.3357755 | 11:07:02 AM |
| 73.2764005 | 11:07:03 AM |
| 73.2201505 | 11:07:04 AM |
| 73.1732755 | 11:07:05 AM |
| 73.1482755 | 11:07:06 AM |
| 73.1451505 | 11:07:07 AM |
| 73.1482755 | 11:07:08 AM |
| 73.1514005 | 11:07:09 AM |
| 73.1639005 | 11:07:10 AM |
| 73.1184304 | 11:07:11 AM |
| 73.0764758 | 11:07:12 AM |
| 73.0858508 | 11:07:13 AM |
| 73.0560057 | 11:07:14 AM |
| 73.0359261 | 11:07:15 AM |
| 73.0135029 | 11:07:16 AM |
| 72.9934233 | 11:07:17 AM |
| 72.9612344 | 11:07:18 AM |
| 72.9278736 | 11:07:19 AM |
| 72.9195128 | 11:07:20 AM |
| 72.9388864 | 11:07:21 AM |
| 72.961385  | 11:07:22 AM |
| 72.989743  | 11:07:23 AM |
| 72.9927103 | 11:07:24 AM |
| 72.9831777 | 11:07:25 AM |
| 73.0033325 | 11:07:26 AM |
| 73.0547374 | 11:07:27 AM |
| 73.1135641 | 11:07:28 AM |
| 73.1973908 | 11:07:29 AM |
| 73.2819988 | 11:07:30 AM |
| 73.3845755 | 11:07:31 AM |
| 73.4969178 | 11:07:32 AM |
| 73.6123852 | 11:07:33 AM |
| 73.7219931 | 11:07:34 AM |
| 73.829648  | 11:07:35 AM |
| 73.9349591 | 11:07:36 AM |
| 74.0410514 | 11:07:37 AM |
| 74.1483156 | 11:07:38 AM |
| 74.2395642 | 11:07:39 AM |
| 74.3394066 | 11:07:40 AM |
| 74.4353427 | 11:07:41 AM |
| 74.5441694 | 11:07:42 AM |

|            |             |
|------------|-------------|
| 74.6377617 | 11:07:43 AM |
| 74.7278384 | 11:07:44 AM |
| 74.8226026 | 11:07:45 AM |
| 74.9142419 | 11:07:46 AM |
| 74.9734592 | 11:07:47 AM |
| 75.0127547 | 11:07:48 AM |
| 75.0461908 | 11:07:49 AM |
| 75.0761112 | 11:07:50 AM |
| 75.1647831 | 11:07:51 AM |
| 75.3161126 | 11:07:52 AM |
| 75.4161126 | 11:07:53 AM |
| 75.5459578 | 11:07:54 AM |
| 75.7035373 | 11:07:55 AM |
| 75.8697106 | 11:07:56 AM |
| 76.0335401 | 11:07:57 AM |
| 76.2126041 | 11:07:58 AM |
| 76.4084648 | 11:07:59 AM |
| 76.5855756 | 11:08:00 AM |
| 76.766202  | 11:08:01 AM |
| 76.9093284 | 11:08:02 AM |
| 77.0434705 | 11:08:03 AM |
| 77.1717531 | 11:08:04 AM |
| 77.2875358 | 11:08:05 AM |
| 77.4017559 | 11:08:06 AM |
| 77.5034761 | 11:08:07 AM |
| 77.6040244 | 11:08:08 AM |
| 77.6920727 | 11:08:09 AM |
| 77.7762147 | 11:08:10 AM |
| 77.833013  | 11:08:11 AM |
| 77.8644206 | 11:08:12 AM |
| 77.8833283 | 11:08:13 AM |
| 77.8893453 | 11:08:14 AM |
| 77.8848155 | 11:08:15 AM |
| 77.8607544 | 11:08:16 AM |
| 77.8202871 | 11:08:17 AM |
| 77.7630228 | 11:08:18 AM |
| 77.7123992 | 11:08:19 AM |
| 77.6500569 | 11:08:20 AM |
| 77.5791208 | 11:08:21 AM |
| 77.4984191 | 11:08:22 AM |
| 77.4204518 | 11:08:23 AM |
| 77.33975   | 11:08:24 AM |
| 77.2574858 | 11:08:25 AM |
| 77.1752216 | 11:08:26 AM |
| 77.0910043 | 11:08:27 AM |

|            |             |
|------------|-------------|
| 77.0298338 | 11:08:28 AM |
| 76.9776477 | 11:08:29 AM |
| 76.9414772 | 11:08:30 AM |
| 76.9107755 | 11:08:31 AM |
| 76.8139005 | 11:08:32 AM |
| 76.7201505 | 11:08:33 AM |
| 76.6389005 | 11:08:34 AM |
| 76.5170255 | 11:08:35 AM |
| 76.3732755 | 11:08:36 AM |
| 76.2326505 | 11:08:37 AM |
| 76.0826505 | 11:08:38 AM |
| 75.9232755 | 11:08:39 AM |
| 75.7670255 | 11:08:40 AM |
| 75.6076505 | 11:08:41 AM |
| 75.4639005 | 11:08:42 AM |
| 75.3232755 | 11:08:43 AM |
| 75.2170255 | 11:08:44 AM |
| 75.1264005 | 11:08:45 AM |
| 75.0014005 | 11:08:46 AM |
| 74.8857755 | 11:08:47 AM |
| 74.7732755 | 11:08:48 AM |
| 74.6545255 | 11:08:49 AM |
| 74.5264005 | 11:08:50 AM |
| 74.4107755 | 11:08:51 AM |
| 74.3170255 | 11:08:52 AM |
| 74.2326505 | 11:08:53 AM |
| 74.1451505 | 11:08:54 AM |
| 74.0451505 | 11:08:55 AM |
| 73.9451505 | 11:08:56 AM |
| 73.8451505 | 11:08:57 AM |
| 73.7482755 | 11:08:58 AM |
| 73.6420255 | 11:08:59 AM |
| 73.5514005 | 11:09:00 AM |
| 73.4607755 | 11:09:01 AM |
| 73.3732755 | 11:09:02 AM |
| 73.2889005 | 11:09:03 AM |
| 73.2076505 | 11:09:04 AM |
| 73.1357755 | 11:09:05 AM |
| 73.0514005 | 11:09:06 AM |
| 72.9732755 | 11:09:07 AM |
| 72.8795255 | 11:09:08 AM |
| 72.7795255 | 11:09:09 AM |
| 72.6607755 | 11:09:10 AM |
| 72.5357755 | 11:09:11 AM |
| 72.4139005 | 11:09:12 AM |

|            |             |
|------------|-------------|
| 72.2701505 | 11:09:13 AM |
| 72.1295255 | 11:09:14 AM |
| 72.0107755 | 11:09:15 AM |
| 71.8857755 | 11:09:16 AM |
| 71.7482755 | 11:09:17 AM |
| 71.6076505 | 11:09:18 AM |
| 71.4514005 | 11:09:19 AM |
| 71.2982755 | 11:09:20 AM |
| 71.1295255 | 11:09:21 AM |
| 70.9764005 | 11:09:22 AM |
| 70.8326505 | 11:09:23 AM |
| 70.6732755 | 11:09:24 AM |
| 70.5232755 | 11:09:25 AM |
| 70.4139005 | 11:09:26 AM |
| 70.3045255 | 11:09:27 AM |
| 70.1920255 | 11:09:28 AM |
| 70.1045255 | 11:09:29 AM |
| 70.0357755 | 11:09:30 AM |
| 69.9826505 | 11:09:31 AM |
| 69.9357755 | 11:09:32 AM |
| 69.8951505 | 11:09:33 AM |
| 69.8764005 | 11:09:34 AM |
| 69.8857755 | 11:09:35 AM |
| 69.9357755 | 11:09:36 AM |
| 70.0139005 | 11:09:37 AM |
| 70.1420255 | 11:09:38 AM |
| 70.2920255 | 11:09:39 AM |
| 70.4357755 | 11:09:40 AM |
| 70.5857755 | 11:09:41 AM |
| 70.7139005 | 11:09:42 AM |
| 70.8264005 | 11:09:43 AM |
| 70.9357755 | 11:09:44 AM |
| 71.0482755 | 11:09:45 AM |
| 71.1254616 | 11:09:46 AM |
| 71.1995227 | 11:09:47 AM |
| 71.2770994 | 11:09:48 AM |
| 71.3394418 | 11:09:49 AM |
| 71.4068622 | 11:09:50 AM |
| 71.4723296 | 11:09:51 AM |
| 71.5338907 | 11:09:52 AM |
| 71.6059986 | 11:09:53 AM |
| 71.6788878 | 11:09:54 AM |
| 71.7443552 | 11:09:55 AM |
| 71.83951   | 11:09:56 AM |
| 71.9588836 | 11:09:57 AM |

|            |             |
|------------|-------------|
| 72.0790385 | 11:09:58 AM |
| 72.2144277 | 11:09:59 AM |
| 72.3728638 | 11:10:00 AM |
| 72.5500499 | 11:10:01 AM |
| 72.7330953 | 11:10:02 AM |
| 72.9071564 | 11:10:03 AM |
| 73.0706706 | 11:10:04 AM |
| 73.2158255 | 11:10:05 AM |
| 73.3578553 | 11:10:06 AM |
| 73.4901195 | 11:10:07 AM |
| 73.616915  | 11:10:08 AM |
| 73.7085542 | 11:10:09 AM |
| 73.7943341 | 11:10:10 AM |
| 73.8769889 | 11:10:11 AM |
| 73.9537844 | 11:10:12 AM |
| 74.0227673 | 11:10:13 AM |
| 74.0905784 | 11:10:14 AM |
| 74.2062034 | 11:10:15 AM |
| 74.2843284 | 11:10:16 AM |
| 74.3437034 | 11:10:17 AM |
| 74.3593284 | 11:10:18 AM |
| 74.3530784 | 11:10:19 AM |
| 74.3562034 | 11:10:20 AM |
| 74.3593284 | 11:10:21 AM |
| 74.3812034 | 11:10:22 AM |
| 74.4093284 | 11:10:23 AM |
| 74.4374534 | 11:10:24 AM |
| 74.4562034 | 11:10:25 AM |
| 74.5040173 | 11:10:26 AM |
| 74.5455813 | 11:10:27 AM |
| 74.5773795 | 11:10:28 AM |
| 74.6244122 | 11:10:29 AM |
| 74.6538667 | 11:10:30 AM |
| 74.6696494 | 11:10:31 AM |
| 74.6830883 | 11:10:32 AM |
| 74.6922303 | 11:10:33 AM |
| 74.6849661 | 11:10:34 AM |
| 74.6538738 | 11:10:35 AM |
| 74.6024689 | 11:10:36 AM |
| 74.5424703 | 11:10:37 AM |
| 74.4393453 | 11:10:38 AM |
| 74.3307516 | 11:10:39 AM |
| 74.202236  | 11:10:40 AM |
| 74.0721578 | 11:10:41 AM |
| 73.9510641 | 11:10:42 AM |

|            |             |
|------------|-------------|
| 73.8330953 | 11:10:43 AM |
| 73.7346578 | 11:10:44 AM |
| 73.6631735 | 11:10:45 AM |
| 73.608486  | 11:10:46 AM |
| 73.555361  | 11:10:47 AM |
| 73.4924703 | 11:10:48 AM |
| 73.4526266 | 11:10:49 AM |
| 73.4186422 | 11:10:50 AM |
| 73.3807516 | 11:10:51 AM |
| 73.3385641 | 11:10:52 AM |
| 73.2916891 | 11:10:53 AM |
| 73.2424703 | 11:10:54 AM |
| 73.1360627 | 11:10:55 AM |
| 73.035905  | 11:10:56 AM |
| 72.97028   | 11:10:57 AM |
| 72.89528   | 11:10:58 AM |
| 72.817155  | 11:10:59 AM |
| 72.73903   | 11:11:00 AM |
| 72.65153   | 11:11:01 AM |
| 72.55778   | 11:11:02 AM |
| 72.46403   | 11:11:03 AM |
| 72.385905  | 11:11:04 AM |
| 72.310905  | 11:11:05 AM |
| 72.260905  | 11:11:06 AM |
| 72.22028   | 11:11:07 AM |
| 72.198405  | 11:11:08 AM |
| 72.18278   | 11:11:09 AM |
| 72.185905  | 11:11:10 AM |
| 72.198405  | 11:11:11 AM |
| 72.217155  | 11:11:12 AM |
| 72.248405  | 11:11:13 AM |
| 72.27653   | 11:11:14 AM |
| 72.317155  | 11:11:15 AM |
| 72.367155  | 11:11:16 AM |
| 72.410905  | 11:11:17 AM |
| 72.4970002 | 11:11:18 AM |
| 72.5827047 | 11:11:19 AM |
| 72.7027842 | 11:11:20 AM |
| 72.8275513 | 11:11:21 AM |
| 72.9013203 | 11:11:22 AM |
| 72.9746987 | 11:11:23 AM |
| 73.0297177 | 11:11:24 AM |
| 73.0566117 | 11:11:25 AM |
| 73.0737401 | 11:11:26 AM |
| 73.1508509 | 11:11:27 AM |

|            |             |
|------------|-------------|
| 73.189073  | 11:11:28 AM |
| 73.2300296 | 11:11:29 AM |
| 73.2545798 | 11:11:30 AM |
| 73.2697551 | 11:11:31 AM |
| 73.2474304 | 11:11:32 AM |
| 73.2172931 | 11:11:33 AM |
| 73.1906715 | 11:11:34 AM |
| 73.1675655 | 11:11:35 AM |
| 73.1511002 | 11:11:36 AM |
| 73.110649  | 11:11:37 AM |
| 73.0924635 | 11:11:38 AM |
| 73.0801374 | 11:11:39 AM |
| 73.05453   | 11:11:40 AM |
| 73.025407  | 11:11:41 AM |
| 72.993159  | 11:11:42 AM |
| 72.9542703 | 11:11:43 AM |
| 72.9411629 | 11:11:44 AM |
| 72.9503212 | 11:11:45 AM |
| 72.9547919 | 11:11:46 AM |
| 72.9631689 | 11:11:47 AM |
| 72.9899053 | 11:11:48 AM |
| 73.0142979 | 11:11:49 AM |
| 73.0609561 | 11:11:50 AM |
| 73.1181612 | 11:11:51 AM |
| 73.1792726 | 11:11:52 AM |
| 73.2310089 | 11:11:53 AM |
| 73.2245422 | 11:11:54 AM |
| 73.2307922 | 11:11:55 AM |
| 73.2089172 | 11:11:56 AM |
| 73.1870422 | 11:11:57 AM |
| 73.1557922 | 11:11:58 AM |
| 73.1245422 | 11:11:59 AM |
| 73.0526672 | 11:12:00 AM |
| 72.9745422 | 11:12:01 AM |
| 72.9419464 | 11:12:02 AM |
| 72.9124757 | 11:12:03 AM |
| 72.870505  | 11:12:04 AM |
| 72.8386905 | 11:12:05 AM |
| 72.7904697 | 11:12:06 AM |
| 72.6779697 | 11:12:07 AM |
| 72.6195928 | 11:12:08 AM |
| 72.5612158 | 11:12:09 AM |
| 72.519245  | 11:12:10 AM |
| 72.4936805 | 11:12:11 AM |
| 72.5126473 | 11:12:12 AM |



|            |             |
|------------|-------------|
| 72.5488016 | 11:12:13 AM |
| 72.5849558 | 11:12:14 AM |
| 72.6207195 | 11:12:15 AM |
| 72.6623425 | 11:12:16 AM |
| 72.6934186 | 11:12:17 AM |
| 72.7303542 | 11:12:18 AM |
| 72.7708053 | 11:12:19 AM |
| 72.8089127 | 11:12:20 AM |
| 72.8505357 | 11:12:21 AM |
| 72.8890337 | 11:12:22 AM |
| 72.9279224 | 11:12:23 AM |
| 72.9222797 | 11:12:24 AM |
| 72.8724965 | 11:12:25 AM |
| 72.8055258 | 11:12:26 AM |
| 72.7377738 | 11:12:27 AM |
| 72.6485374 | 11:12:28 AM |
| 72.5522698 | 11:12:29 AM |
| 72.4587366 | 11:12:30 AM |
| 72.3577815 | 11:12:31 AM |
| 72.2591701 | 11:12:32 AM |
| 72.1636838 | 11:12:33 AM |
| 72.1232755 | 11:12:34 AM |
| 72.0670255 | 11:12:35 AM |
| 72.0420255 | 11:12:36 AM |
| 72.0232755 | 11:12:37 AM |
| 72.0170255 | 11:12:38 AM |
| 71.9701505 | 11:12:39 AM |
| 71.9232755 | 11:12:40 AM |
| 71.8732755 | 11:12:41 AM |
| 71.8326505 | 11:12:42 AM |
| 71.7982755 | 11:12:43 AM |
| 71.7920255 | 11:12:44 AM |
| 71.7889005 | 11:12:45 AM |
| 71.8076505 | 11:12:46 AM |
| 71.8295255 | 11:12:47 AM |
| 71.8545255 | 11:12:48 AM |
| 71.8610085 | 11:12:49 AM |
| 71.8483508 | 11:12:50 AM |
| 71.8282713 | 11:12:51 AM |
| 71.8492074 | 11:12:52 AM |
| 71.8732685 | 11:12:53 AM |
| 71.8906889 | 11:12:54 AM |
| 71.8799844 | 11:12:55 AM |
| 71.858733  | 11:12:56 AM |
| 71.8374816 | 11:12:57 AM |

|            |             |
|------------|-------------|
| 71.8037302 | 11:12:58 AM |
| 71.7727132 | 11:12:59 AM |
| 71.7506805 | 11:13:00 AM |
| 71.7345072 | 11:13:01 AM |
| 71.7191152 | 11:13:02 AM |
| 71.692395  | 11:13:03 AM |
| 71.6602061 | 11:13:04 AM |
| 71.6727061 | 11:13:05 AM |
| 71.6727061 | 11:13:06 AM |
| 71.6727061 | 11:13:07 AM |
| 71.6633311 | 11:13:08 AM |
| 71.6539561 | 11:13:09 AM |
| 71.6102061 | 11:13:10 AM |
| 71.5602061 | 11:13:11 AM |
| 71.4945811 | 11:13:12 AM |
| 71.4352061 | 11:13:13 AM |
| 71.3945811 | 11:13:14 AM |
| 71.3570811 | 11:13:15 AM |
| 71.3195811 | 11:13:16 AM |
| 71.2758311 | 11:13:17 AM |
| 71.2320811 | 11:13:18 AM |
| 71.2320811 | 11:13:19 AM |
| 71.2227061 | 11:13:20 AM |
| 71.2102061 | 11:13:21 AM |
| 71.1945811 | 11:13:22 AM |
| 71.1664561 | 11:13:23 AM |
| 71.1195811 | 11:13:24 AM |
| 71.0758311 | 11:13:25 AM |
| 71.0164561 | 11:13:26 AM |
| 70.9633311 | 11:13:27 AM |
| 70.9008311 | 11:13:28 AM |
| 70.8380981 | 11:13:29 AM |
| 70.7851308 | 11:13:30 AM |
| 70.7427103 | 11:13:31 AM |
| 70.6686492 | 11:13:32 AM |
| 70.5945882 | 11:13:33 AM |
| 70.5584177 | 11:13:34 AM |
| 70.5847472 | 11:13:35 AM |
| 70.6278736 | 11:13:36 AM |
| 70.692875  | 11:13:37 AM |
| 70.7766264 | 11:13:38 AM |
| 70.7960986 | 11:13:39 AM |
| 70.8093207 | 11:13:40 AM |
| 70.8190272 | 11:13:41 AM |
| 70.8531693 | 11:13:42 AM |

|            |             |
|------------|-------------|
| 70.8955144 | 11:13:43 AM |
| 70.9433283 | 11:13:44 AM |
| 70.9464533 | 11:13:45 AM |
| 70.9527033 | 11:13:46 AM |
| 70.9527033 | 11:13:47 AM |
| 70.9402033 | 11:13:48 AM |
| 70.9214533 | 11:13:49 AM |
| 70.9058283 | 11:13:50 AM |
| 70.8870783 | 11:13:51 AM |
| 70.8902033 | 11:13:52 AM |
| 70.8902033 | 11:13:53 AM |
| 70.8683283 | 11:13:54 AM |
| 70.8370783 | 11:13:55 AM |
| 70.8152033 | 11:13:56 AM |
| 70.7933283 | 11:13:57 AM |
| 70.7870783 | 11:13:58 AM |
| 70.7777033 | 11:13:59 AM |
| 70.7839533 | 11:14:00 AM |
| 70.7902033 | 11:14:01 AM |
| 70.7870783 | 11:14:02 AM |
| 70.7902033 | 11:14:03 AM |
| 70.7902033 | 11:14:04 AM |
| 70.7839533 | 11:14:05 AM |
| 70.7902033 | 11:14:06 AM |
| 70.7870783 | 11:14:07 AM |
| 70.7902033 | 11:14:08 AM |
| 70.8152033 | 11:14:09 AM |
| 70.8433283 | 11:14:10 AM |
| 70.8745783 | 11:14:11 AM |
| 70.8964533 | 11:14:12 AM |
| 70.9152033 | 11:14:13 AM |
| 70.8964533 | 11:14:14 AM |
| 70.8589533 | 11:14:15 AM |
| 70.8370783 | 11:14:16 AM |
| 70.8402033 | 11:14:17 AM |
| 70.7902033 | 11:14:18 AM |
| 70.7892482 | 11:14:19 AM |
| 70.7824338 | 11:14:20 AM |
| 70.7951505 | 11:14:21 AM |
| 70.7764005 | 11:14:22 AM |
| 70.7826505 | 11:14:23 AM |
| 70.8076505 | 11:14:24 AM |
| 70.8576505 | 11:14:25 AM |
| 70.9326505 | 11:14:26 AM |
| 71.0201505 | 11:14:27 AM |

|            |             |
|------------|-------------|
| 71.1264005 | 11:14:28 AM |
| 71.2545255 | 11:14:29 AM |
| 71.3363991 | 11:14:30 AM |
| 71.4167102 | 11:14:31 AM |
| 71.4673338 | 11:14:32 AM |
| 71.5173338 | 11:14:33 AM |
| 71.5673338 | 11:14:34 AM |
| 71.6329588 | 11:14:35 AM |
| 71.6798338 | 11:14:36 AM |
| 71.7235838 | 11:14:37 AM |
| 71.7485838 | 11:14:38 AM |
| 71.7642088 | 11:14:39 AM |
| 71.7673338 | 11:14:40 AM |
| 71.7829588 | 11:14:41 AM |
| 71.8079588 | 11:14:42 AM |
| 71.8423338 | 11:14:43 AM |
| 71.8923338 | 11:14:44 AM |
| 71.9548338 | 11:14:45 AM |
| 72.0173338 | 11:14:46 AM |
| 72.1079588 | 11:14:47 AM |
| 72.1985838 | 11:14:48 AM |
| 72.2673338 | 11:14:49 AM |
| 72.3204588 | 11:14:50 AM |
| 72.3548338 | 11:14:51 AM |
| 72.4017088 | 11:14:52 AM |
| 72.4610838 | 11:14:53 AM |
| 72.5329588 | 11:14:54 AM |
| 72.5892088 | 11:14:55 AM |
| 72.6142088 | 11:14:56 AM |
| 72.5485838 | 11:14:57 AM |
| 72.4892088 | 11:14:58 AM |
| 72.4454588 | 11:14:59 AM |
| 72.3210818 | 11:15:00 AM |
| 72.1740486 | 11:15:01 AM |
| 72.043031  | 11:15:02 AM |
| 71.8924821 | 11:15:03 AM |
| 71.7337301 | 11:15:04 AM |
| 71.5753688 | 11:15:05 AM |
| 71.4534938 | 11:15:06 AM |
| 71.3097438 | 11:15:07 AM |
| 71.1909938 | 11:15:08 AM |
| 71.0597438 | 11:15:09 AM |
| 71.0028702 | 11:15:10 AM |
| 70.9663091 | 11:15:11 AM |
| 70.9500605 | 11:15:12 AM |

|            |             |
|------------|-------------|
| 70.9375605 | 11:15:13 AM |
| 70.9469355 | 11:15:14 AM |
| 70.9594355 | 11:15:15 AM |
| 70.9906855 | 11:15:16 AM |
| 71.0344355 | 11:15:17 AM |
| 71.1038091 | 11:15:18 AM |
| 71.2036514 | 11:15:19 AM |
| 71.3421657 | 11:15:20 AM |
| 71.4783361 | 11:15:21 AM |
| 71.6023972 | 11:15:22 AM |
| 71.7217708 | 11:15:23 AM |
| 71.8317694 | 11:15:24 AM |
| 71.9253617 | 11:15:25 AM |
| 71.9966885 | 11:15:26 AM |
| 72.0348121 | 11:15:27 AM |
| 72.0784044 | 11:15:28 AM |
| 72.1262936 | 11:15:29 AM |
| 72.1765266 | 11:15:30 AM |
| 72.2232439 | 11:15:31 AM |
| 72.2258206 | 11:15:32 AM |
| 72.2080849 | 11:15:33 AM |
| 72.1669116 | 11:15:34 AM |
| 72.1120664 | 11:15:35 AM |
| 72.0482369 | 11:15:36 AM |
| 72.037923  | 11:15:37 AM |
| 72.0612028 | 11:15:38 AM |
| 72.080967  | 11:15:39 AM |
| 72.1813582 | 11:15:40 AM |
| 72.3283915 | 11:15:41 AM |
| 72.4937841 | 11:15:42 AM |
| 72.6630829 | 11:15:43 AM |
| 72.8187099 | 11:15:44 AM |
| 72.9489463 | 11:15:45 AM |
| 73.0176963 | 11:15:46 AM |
| 73.0864463 | 11:15:47 AM |
| 73.1208213 | 11:15:48 AM |
| 73.1520713 | 11:15:49 AM |
| 73.1583213 | 11:15:50 AM |
| 73.1614463 | 11:15:51 AM |
| 73.1645713 | 11:15:52 AM |
| 73.1645713 | 11:15:53 AM |
| 73.1583213 | 11:15:54 AM |
| 73.1395713 | 11:15:55 AM |
| 73.1051963 | 11:15:56 AM |
| 73.0645713 | 11:15:57 AM |

|            |             |
|------------|-------------|
| 72.9983227 | 11:15:58 AM |
| 72.9047303 | 11:15:59 AM |
| 72.7787161 | 11:16:00 AM |
| 72.6550456 | 11:16:01 AM |
| 72.5341096 | 11:16:02 AM |
| 72.411611  | 11:16:03 AM |
| 72.2828624 | 11:16:04 AM |
| 72.14552   | 11:16:05 AM |
| 72.0241933 | 11:16:06 AM |
| 71.8954447 | 11:16:07 AM |
| 71.7612274 | 11:16:08 AM |
| 71.6164632 | 11:16:09 AM |
| 71.4481032 | 11:16:10 AM |
| 71.2926339 | 11:16:11 AM |
| 71.2181822 | 11:16:12 AM |
| 71.1515429 | 11:16:13 AM |
| 71.1020912 | 11:16:14 AM |
| 71.0756864 | 11:16:15 AM |
| 71.0676409 | 11:16:16 AM |
| 71.0717048 | 11:16:17 AM |
| 71.06405   | 11:16:18 AM |
| 71.0692858 | 11:16:19 AM |
| 71.0932716 | 11:16:20 AM |
| 71.0838966 | 11:16:21 AM |
| 71.0401466 | 11:16:22 AM |
| 70.9901466 | 11:16:23 AM |
| 70.9463966 | 11:16:24 AM |
| 70.9213966 | 11:16:25 AM |
| 70.9151466 | 11:16:26 AM |
| 70.9245216 | 11:16:27 AM |
| 70.9432716 | 11:16:28 AM |
| 70.9776466 | 11:16:29 AM |
| 71.0088966 | 11:16:30 AM |
| 71.0213966 | 11:16:31 AM |
| 71.0432716 | 11:16:32 AM |
| 71.0620216 | 11:16:33 AM |
| 71.0807716 | 11:16:34 AM |
| 71.1057716 | 11:16:35 AM |
| 71.1338966 | 11:16:36 AM |
| 71.1526466 | 11:16:37 AM |
| 71.1713966 | 11:16:38 AM |
| 71.1932716 | 11:16:39 AM |
| 71.2213966 | 11:16:40 AM |
| 71.2432716 | 11:16:41 AM |
| 71.2713966 | 11:16:42 AM |

|            |             |
|------------|-------------|
| 71.3057716 | 11:16:43 AM |
| 71.3463966 | 11:16:44 AM |
| 71.3932716 | 11:16:45 AM |
| 71.4432716 | 11:16:46 AM |
| 71.5088966 | 11:16:47 AM |
| 71.5870216 | 11:16:48 AM |
| 71.6870216 | 11:16:49 AM |
| 71.8332735 | 11:16:50 AM |
| 71.9889005 | 11:16:51 AM |
| 72.0982755 | 11:16:52 AM |
| 72.2295255 | 11:16:53 AM |
| 72.3951505 | 11:16:54 AM |
| 72.5576505 | 11:16:55 AM |
| 72.6528054 | 11:16:56 AM |
| 72.7147571 | 11:16:57 AM |
| 72.7884275 | 11:16:58 AM |
| 72.8726449 | 11:16:59 AM |
| 72.9599872 | 11:17:00 AM |
| 73.0481108 | 11:17:01 AM |
| 73.1717813 | 11:17:02 AM |
| 73.3040455 | 11:17:03 AM |
| 73.4050597 | 11:17:04 AM |
| 73.5052927 | 11:17:05 AM |
| 73.5914632 | 11:17:06 AM |
| 73.6561492 | 11:17:07 AM |
| 73.718101  | 11:17:08 AM |
| 73.7445058 | 11:17:09 AM |
| 73.7615356 | 11:17:10 AM |
| 73.7844249 | 11:17:11 AM |
| 73.786611  | 11:17:12 AM |
| 73.8005158 | 11:17:13 AM |
| 73.8093425 | 11:17:14 AM |
| 73.8291067 | 11:17:15 AM |
| 73.8617616 | 11:17:16 AM |
| 73.9065258 | 11:17:17 AM |
| 73.9505088 | 11:17:18 AM |
| 73.9929292 | 11:17:19 AM |
| 74.0435528 | 11:17:20 AM |
| 74.1074577 | 11:17:21 AM |
| 74.1662844 | 11:17:22 AM |
| 74.2212048 | 11:17:23 AM |
| 74.2468284 | 11:17:24 AM |
| 74.2720614 | 11:17:25 AM |
| 74.2871381 | 11:17:26 AM |
| 74.294793  | 11:17:27 AM |

|            |             |
|------------|-------------|
| 74.2794009 | 11:17:28 AM |
| 74.2511183 | 11:17:29 AM |
| 74.2126794 | 11:17:30 AM |
| 74.1562717 | 11:17:31 AM |
| 74.1033797 | 11:17:32 AM |
| 74.0290033 | 11:17:33 AM |
| 73.9261112 | 11:17:34 AM |
| 73.8169692 | 11:17:35 AM |
| 73.766188  | 11:17:36 AM |
| 73.7361098 | 11:17:37 AM |
| 73.7021255 | 11:17:38 AM |
| 73.6603286 | 11:17:39 AM |
| 73.6122817 | 11:17:40 AM |
| 73.5564223 | 11:17:41 AM |
| 73.4704848 | 11:17:42 AM |
| 73.3833755 | 11:17:43 AM |
| 73.3341567 | 11:17:44 AM |
| 73.2915786 | 11:17:45 AM |
| 73.2654067 | 11:17:46 AM |
| 73.3163456 | 11:17:47 AM |
| 73.3731439 | 11:17:48 AM |
| 73.4592391 | 11:17:49 AM |
| 73.5640842 | 11:17:50 AM |
| 73.66307   | 11:17:51 AM |
| 73.7608839 | 11:17:52 AM |
| 73.8532291 | 11:17:53 AM |
| 73.9444023 | 11:17:54 AM |
| 74.0058881 | 11:17:55 AM |
| 74.0357333 | 11:17:56 AM |
| 74.0222191 | 11:17:57 AM |
| 73.9969861 | 11:17:58 AM |
| 73.9733156 | 11:17:59 AM |
| 73.935192  | 11:18:00 AM |
| 73.8837872 | 11:18:01 AM |
| 73.8374605 | 11:18:02 AM |
| 73.78254   | 11:18:03 AM |
| 73.7537914 | 11:18:04 AM |
| 73.7316835 | 11:18:05 AM |
| 73.7197317 | 11:18:06 AM |
| 73.7245769 | 11:18:07 AM |
| 73.7368439 | 11:18:08 AM |
| 73.7620016 | 11:18:09 AM |
| 73.7941905 | 11:18:10 AM |
| 73.7792876 | 11:18:11 AM |
| 73.7573535 | 11:18:12 AM |



|            |             |
|------------|-------------|
| 73.7322944 | 11:18:13 AM |
| 73.7123134 | 11:18:14 AM |
| 73.6962387 | 11:18:15 AM |
| 73.683289  | 11:18:16 AM |
| 73.6636986 | 11:18:17 AM |
| 73.6499676 | 11:18:18 AM |
| 73.6311585 | 11:18:19 AM |
| 73.6185994 | 11:18:20 AM |
| 73.6644602 | 11:18:21 AM |
| 73.7267272 | 11:18:22 AM |
| 73.7971974 | 11:18:23 AM |
| 73.8610269 | 11:18:24 AM |
| 73.9127471 | 11:18:25 AM |
| 73.9621235 | 11:18:26 AM |
| 73.9496235 | 11:18:27 AM |
| 73.9339985 | 11:18:28 AM |
| 73.9152485 | 11:18:29 AM |
| 73.8777485 | 11:18:30 AM |
| 73.8527485 | 11:18:31 AM |
| 73.8371235 | 11:18:32 AM |
| 73.8058735 | 11:18:33 AM |
| 73.7589985 | 11:18:34 AM |
| 73.7339985 | 11:18:35 AM |
| 73.7089985 | 11:18:36 AM |
| 73.6996235 | 11:18:37 AM |
| 73.6933735 | 11:18:38 AM |
| 73.6652485 | 11:18:39 AM |
| 73.6371235 | 11:18:40 AM |
| 73.5902485 | 11:18:41 AM |
| 73.5402485 | 11:18:42 AM |
| 73.5058735 | 11:18:43 AM |
| 73.4871235 | 11:18:44 AM |
| 73.4683735 | 11:18:45 AM |
| 73.4371235 | 11:18:46 AM |
| 73.3964985 | 11:18:47 AM |
| 73.3589985 | 11:18:48 AM |
| 73.3339985 | 11:18:49 AM |
| 73.3089985 | 11:18:50 AM |
| 73.342809  | 11:18:51 AM |
| 73.3863851 | 11:18:52 AM |
| 73.4233207 | 11:18:53 AM |
| 73.4524437 | 11:18:54 AM |
| 73.4807854 | 11:18:55 AM |
| 73.5306116 | 11:18:56 AM |
| 73.5808283 | 11:18:57 AM |

|            |             |
|------------|-------------|
| 73.6173732 | 11:18:58 AM |
| 73.6406369 | 11:18:59 AM |
| 73.6482755 | 11:19:00 AM |
| 73.5732755 | 11:19:01 AM |
| 73.4701505 | 11:19:02 AM |
| 73.3514005 | 11:19:03 AM |
| 73.2264005 | 11:19:04 AM |
| 73.1076505 | 11:19:05 AM |
| 73.0076505 | 11:19:06 AM |
| 72.9264005 | 11:19:07 AM |
| 72.8639005 | 11:19:08 AM |
| 72.8014005 | 11:19:09 AM |
| 72.7545255 | 11:19:10 AM |
| 72.7107755 | 11:19:11 AM |
| 72.6732755 | 11:19:12 AM |
| 72.6545255 | 11:19:13 AM |
| 72.6451505 | 11:19:14 AM |
| 72.6201505 | 11:19:15 AM |
| 72.6201505 | 11:19:16 AM |
| 72.6576505 | 11:19:17 AM |
| 72.7107755 | 11:19:18 AM |
| 72.7982755 | 11:19:19 AM |
| 72.8857755 | 11:19:20 AM |
| 72.9562619 | 11:19:21 AM |
| 73.0271389 | 11:19:22 AM |
| 73.1101252 | 11:19:23 AM |
| 73.1817835 | 11:19:24 AM |
| 73.2530511 | 11:19:25 AM |
| 73.3243187 | 11:19:26 AM |
| 73.4057425 | 11:19:27 AM |
| 73.4981039 | 11:19:28 AM |
| 73.5748403 | 11:19:29 AM |
| 73.6519672 | 11:19:30 AM |
| 73.7457172 | 11:19:31 AM |
| 73.7957172 | 11:19:32 AM |
| 73.8613422 | 11:19:33 AM |
| 73.9300922 | 11:19:34 AM |
| 74.0019672 | 11:19:35 AM |
| 74.0269672 | 11:19:36 AM |
| 74.0009168 | 11:19:37 AM |
| 73.9807258 | 11:19:38 AM |
| 73.9636597 | 11:19:39 AM |
| 73.9594843 | 11:19:40 AM |
| 73.9342151 | 11:19:41 AM |
| 73.9214459 | 11:19:42 AM |

|            |             |
|------------|-------------|
| 73.8789892 | 11:19:43 AM |
| 73.8486419 | 11:19:44 AM |
| 73.8362634 | 11:19:45 AM |
| 73.8063067 | 11:19:46 AM |
| 73.8094317 | 11:19:47 AM |
| 73.7875567 | 11:19:48 AM |
| 73.7688067 | 11:19:49 AM |
| 73.7656817 | 11:19:50 AM |
| 73.7469317 | 11:19:51 AM |
| 73.7219317 | 11:19:52 AM |
| 73.6906817 | 11:19:53 AM |
| 73.6781817 | 11:19:54 AM |
| 73.6531817 | 11:19:55 AM |
| 73.6094317 | 11:19:56 AM |
| 73.5469317 | 11:19:57 AM |
| 73.4241178 | 11:19:58 AM |
| 73.3334928 | 11:19:59 AM |
| 73.2272428 | 11:20:00 AM |
| 73.1692564 | 11:20:01 AM |
| 73.1046295 | 11:20:02 AM |
| 73.0091431 | 11:20:03 AM |
| 72.8937349 | 11:20:04 AM |
| 72.7755923 | 11:20:05 AM |
| 72.6480746 | 11:20:06 AM |
| 72.5229008 | 11:20:07 AM |
| 72.3899144 | 11:20:08 AM |
| 72.2881781 | 11:20:09 AM |
| 72.2110511 | 11:20:10 AM |
| 72.1173011 | 11:20:11 AM |
| 72.0860511 | 11:20:12 AM |
| 72.0516761 | 11:20:13 AM |
| 71.9511278 | 11:20:14 AM |
| 71.8337826 | 11:20:15 AM |
| 71.7195625 | 11:20:16 AM |
| 71.660299  | 11:20:17 AM |
| 71.6162699 | 11:20:18 AM |
| 71.626147  | 11:20:19 AM |
| 71.6371961 | 11:20:20 AM |
| 71.7076201 | 11:20:21 AM |
| 71.7655441 | 11:20:22 AM |
| 71.8633119 | 11:20:23 AM |
| 71.9595171 | 11:20:24 AM |
| 72.0190037 | 11:20:25 AM |
| 72.0460683 | 11:20:26 AM |
| 72.0220825 | 11:20:27 AM |

|            |             |
|------------|-------------|
| 72.0016124 | 11:20:28 AM |
| 71.9776266 | 11:20:29 AM |
| 71.9274689 | 11:20:30 AM |
| 71.8944988 | 11:20:31 AM |
| 71.8757488 | 11:20:32 AM |
| 71.8382488 | 11:20:33 AM |
| 71.7726238 | 11:20:34 AM |
| 71.7007488 | 11:20:35 AM |
| 71.6319988 | 11:20:36 AM |
| 71.5663738 | 11:20:37 AM |
| 71.5516877 | 11:20:38 AM |
| 71.5016877 | 11:20:39 AM |
| 71.4798127 | 11:20:40 AM |
| 71.4579377 | 11:20:41 AM |
| 71.4579377 | 11:20:42 AM |
| 71.4641877 | 11:20:43 AM |
| 71.4766877 | 11:20:44 AM |
| 71.4766877 | 11:20:45 AM |
| 71.4798127 | 11:20:46 AM |
| 71.4516877 | 11:20:47 AM |
| 71.4079377 | 11:20:48 AM |
| 71.3204377 | 11:20:49 AM |
| 71.2016877 | 11:20:50 AM |
| 71.0985627 | 11:20:51 AM |
| 70.9798127 | 11:20:52 AM |
| 70.8641877 | 11:20:53 AM |
| 70.802236  | 11:20:54 AM |
| 70.7508311 | 11:20:55 AM |
| 70.7244263 | 11:20:56 AM |
| 70.7003652 | 11:20:57 AM |
| 70.6770853 | 11:20:58 AM |
| 70.5967742 | 11:20:59 AM |
| 70.5024007 | 11:21:00 AM |
| 70.3884958 | 11:21:01 AM |
| 70.290216  | 11:21:02 AM |
| 70.1880299 | 11:21:03 AM |
| 70.0877969 | 11:21:04 AM |
| 70.0125639 | 11:21:05 AM |
| 69.962331  | 11:21:06 AM |
| 69.9175668 | 11:21:07 AM |
| 69.8724119 | 11:21:08 AM |
| 69.8307727 | 11:21:09 AM |
| 69.7965554 | 11:21:10 AM |
| 69.7451505 | 11:21:11 AM |
| 69.6826505 | 11:21:12 AM |

|            |             |
|------------|-------------|
| 69.6295255 | 11:21:13 AM |
| 69.5951505 | 11:21:14 AM |
| 69.5951505 | 11:21:15 AM |
| 69.6045255 | 11:21:16 AM |
| 69.6170255 | 11:21:17 AM |
| 69.6076505 | 11:21:18 AM |
| 69.5889005 | 11:21:19 AM |
| 69.5514005 | 11:21:20 AM |
| 69.4920255 | 11:21:21 AM |
| 69.4107755 | 11:21:22 AM |
| 69.3295255 | 11:21:23 AM |
| 69.2545255 | 11:21:24 AM |
| 69.1951505 | 11:21:25 AM |
| 69.1482755 | 11:21:26 AM |
| 69.1107755 | 11:21:27 AM |
| 69.0920255 | 11:21:28 AM |
| 69.1139005 | 11:21:29 AM |
| 69.1451505 | 11:21:30 AM |
| 69.1607755 | 11:21:31 AM |
| 69.1701505 | 11:21:32 AM |
| 69.1732755 | 11:21:33 AM |
| 69.1826505 | 11:21:34 AM |
| 69.2076505 | 11:21:35 AM |
| 69.2420255 | 11:21:36 AM |
| 69.2795255 | 11:21:37 AM |
| 69.3045255 | 11:21:38 AM |
| 69.3295255 | 11:21:39 AM |
| 69.3545255 | 11:21:40 AM |
| 69.3795255 | 11:21:41 AM |
| 69.3889005 | 11:21:42 AM |
| 69.3920255 | 11:21:43 AM |
| 69.3857755 | 11:21:44 AM |
| 69.3732755 | 11:21:45 AM |
| 69.3639005 | 11:21:46 AM |
| 69.3545255 | 11:21:47 AM |
| 69.3639005 | 11:21:48 AM |
| 69.3826505 | 11:21:49 AM |
| 69.4201505 | 11:21:50 AM |
| 69.4576505 | 11:21:51 AM |
| 69.4418673 | 11:21:52 AM |
| 69.4327247 | 11:21:53 AM |
| 69.4341289 | 11:21:54 AM |
| 69.4460801 | 11:21:55 AM |
| 69.4623281 | 11:21:56 AM |
| 69.4957636 | 11:21:57 AM |

|            |             |
|------------|-------------|
| 69.5608398 | 11:21:58 AM |
| 69.6577148 | 11:21:59 AM |
| 69.7483398 | 11:22:00 AM |
| 69.8452148 | 11:22:01 AM |
| 69.9483398 | 11:22:02 AM |
| 70.0483398 | 11:22:03 AM |
| 70.1545898 | 11:22:04 AM |
| 70.2827148 | 11:22:05 AM |
| 70.4108398 | 11:22:06 AM |
| 70.4985727 | 11:22:07 AM |
| 70.5796651 | 11:22:08 AM |
| 70.6256012 | 11:22:09 AM |
| 70.6559123 | 11:22:10 AM |
| 70.6799734 | 11:22:11 AM |
| 70.6970032 | 11:22:12 AM |
| 70.704658  | 11:22:13 AM |
| 70.708016  | 11:22:14 AM |
| 70.6871552 | 11:22:15 AM |
| 70.6569194 | 11:22:16 AM |
| 70.6192618 | 11:22:17 AM |
| 70.5691041 | 11:22:18 AM |
| 70.5240246 | 11:22:19 AM |
| 70.4789451 | 11:22:20 AM |
| 70.4408968 | 11:22:21 AM |
| 70.4274579 | 11:22:22 AM |
| 70.4210502 | 11:22:23 AM |
| 70.4185488 | 11:22:24 AM |
| 70.4234693 | 11:22:25 AM |
| 70.432296  | 11:22:26 AM |
| 70.4196383 | 11:22:27 AM |
| 70.3921369 | 11:22:28 AM |
| 70.3533074 | 11:22:29 AM |
| 70.2761966 | 11:22:30 AM |
| 70.1955702 | 11:22:31 AM |
| 70.1572895 | 11:22:32 AM |
| 70.1100245 | 11:22:33 AM |
| 70.0658844 | 11:22:34 AM |
| 70.01901   | 11:22:35 AM |
| 69.9826824 | 11:22:36 AM |
| 69.9463549 | 11:22:37 AM |
| 69.9236992 | 11:22:38 AM |
| 69.9174492 | 11:22:39 AM |
| 69.9080742 | 11:22:40 AM |
| 69.8830742 | 11:22:41 AM |
| 69.8486992 | 11:22:42 AM |

|            |             |
|------------|-------------|
| 69.8236992 | 11:22:43 AM |
| 69.7955742 | 11:22:44 AM |
| 69.7393242 | 11:22:45 AM |
| 69.6799492 | 11:22:46 AM |
| 69.6765912 | 11:22:47 AM |
| 69.6736239 | 11:22:48 AM |
| 69.6683128 | 11:22:49 AM |
| 69.6567517 | 11:22:50 AM |
| 69.6420656 | 11:22:51 AM |
| 69.6344108 | 11:22:52 AM |
| 69.6330059 | 11:22:53 AM |
| 69.654648  | 11:22:54 AM |
| 69.6786338 | 11:22:55 AM |
| 69.7119945 | 11:22:56 AM |
| 69.7527772 | 11:22:57 AM |
| 69.8091849 | 11:22:58 AM |
| 69.8855144 | 11:22:59 AM |
| 69.9837189 | 11:23:00 AM |
| 70.0748922 | 11:23:01 AM |
| 70.1695811 | 11:23:02 AM |
| 70.2634888 | 11:23:03 AM |
| 70.3503652 | 11:23:04 AM |
| 70.4298197 | 11:23:05 AM |
| 70.470993  | 11:23:06 AM |
| 70.5149007 | 11:23:07 AM |
| 70.5392771 | 11:23:08 AM |
| 70.5593566 | 11:23:09 AM |
| 70.5895924 | 11:23:10 AM |
| 70.6327188 | 11:23:11 AM |
| 70.6742827 | 11:23:12 AM |
| 70.7306904 | 11:23:13 AM |
| 70.7640511 | 11:23:14 AM |
| 70.7989744 | 11:23:15 AM |
| 70.825304  | 11:23:16 AM |
| 70.837571  | 11:23:17 AM |
| 70.8295255 | 11:23:18 AM |
| 70.7732755 | 11:23:19 AM |
| 70.7357755 | 11:23:20 AM |
| 70.7326505 | 11:23:21 AM |
| 70.7482755 | 11:23:22 AM |
| 70.7639005 | 11:23:23 AM |
| 70.7920255 | 11:23:24 AM |
| 70.8326505 | 11:23:25 AM |
| 70.8732755 | 11:23:26 AM |
| 70.9045255 | 11:23:27 AM |

|            |             |
|------------|-------------|
| 70.9357755 | 11:23:28 AM |
| 70.9889005 | 11:23:29 AM |
| 71.0607755 | 11:23:30 AM |
| 71.1670255 | 11:23:31 AM |
| 71.2514005 | 11:23:32 AM |
| 71.3295255 | 11:23:33 AM |
| 71.3857755 | 11:23:34 AM |
| 71.4482755 | 11:23:35 AM |
| 71.4982755 | 11:23:36 AM |
| 71.5326505 | 11:23:37 AM |
| 71.4680397 | 11:23:38 AM |
| 71.365929  | 11:23:39 AM |
| 71.2571775 | 11:23:40 AM |
| 71.1503793 | 11:23:41 AM |
| 71.0240497 | 11:23:42 AM |
| 70.8914702 | 11:23:43 AM |
| 70.7631875 | 11:23:44 AM |
| 70.6138111 | 11:23:45 AM |
| 70.4820128 | 11:23:46 AM |
| 70.3537302 | 11:23:47 AM |
| 70.2441975 | 11:23:48 AM |
| 70.1346649 | 11:23:49 AM |
| 70.030601  | 11:23:50 AM |
| 69.9171621 | 11:23:51 AM |
| 69.8037231 | 11:23:52 AM |
| 69.6883311 | 11:23:53 AM |
| 69.5944235 | 11:23:54 AM |
| 69.4852814 | 11:23:55 AM |
| 69.3737956 | 11:23:56 AM |
| 69.2650442 | 11:23:57 AM |
| 69.1562928 | 11:23:58 AM |
| 69.0537914 | 11:23:59 AM |
| 68.9837119 | 11:24:00 AM |
| 68.907773  | 11:24:01 AM |
| 68.8294903 | 11:24:02 AM |
| 68.7558952 | 11:24:03 AM |
| 68.6830813 | 11:24:04 AM |
| 68.6102673 | 11:24:05 AM |
| 68.5413597 | 11:24:06 AM |
| 68.481827  | 11:24:07 AM |
| 68.41956   | 11:24:08 AM |
| 68.3334648 | 11:24:09 AM |
| 68.2286197 | 11:24:10 AM |
| 68.0933058 | 11:24:11 AM |
| 67.9822106 | 11:24:12 AM |



|            |             |
|------------|-------------|
| 67.9023655 | 11:24:13 AM |
| 67.8494734 | 11:24:14 AM |
| 67.8110345 | 11:24:15 AM |
| 67.7854862 | 11:24:16 AM |
| 67.7704848 | 11:24:17 AM |
| 67.847438  | 11:24:18 AM |
| 67.9372817 | 11:24:19 AM |
| 68.0177505 | 11:24:20 AM |
| 68.0997817 | 11:24:21 AM |
| 68.197438  | 11:24:22 AM |
| 68.2990005 | 11:24:23 AM |
| 68.4142348 | 11:24:24 AM |
| 68.5790786 | 11:24:25 AM |
| 68.7626723 | 11:24:26 AM |
| 68.9466567 | 11:24:27 AM |
| 69.1345473 | 11:24:28 AM |
| 69.38783   | 11:24:29 AM |
| 69.6120487 | 11:24:30 AM |
| 69.8786126 | 11:24:31 AM |
| 70.1514266 | 11:24:32 AM |
| 70.4261936 | 11:24:33 AM |
| 70.6982262 | 11:24:34 AM |
| 70.9792433 | 11:24:35 AM |
| 71.2657291 | 11:24:36 AM |
| 71.5401055 | 11:24:37 AM |
| 71.8176069 | 11:24:38 AM |
| 72.0982333 | 11:24:39 AM |
| 72.3464378 | 11:24:40 AM |
| 72.5817517 | 11:24:41 AM |
| 72.7975344 | 11:24:42 AM |
| 72.9463625 | 11:24:43 AM |
| 73.0686281 | 11:24:44 AM |
| 73.1783938 | 11:24:45 AM |
| 73.2819094 | 11:24:46 AM |
| 73.3596438 | 11:24:47 AM |
| 73.4334719 | 11:24:48 AM |
| 73.5147219 | 11:24:49 AM |
| 73.604175  | 11:24:50 AM |
| 73.6823    | 11:24:51 AM |
| 73.7424563 | 11:24:52 AM |
| 73.7748781 | 11:24:53 AM |
| 73.754175  | 11:24:54 AM |
| 73.7057375 | 11:24:55 AM |
| 73.6346438 | 11:24:56 AM |
| 73.5580813 | 11:24:57 AM |

|            |             |
|------------|-------------|
| 73.4764406 | 11:24:58 AM |
| 73.404175  | 11:24:59 AM |
| 73.3369875 | 11:25:00 AM |
| 73.2608156 | 11:25:01 AM |
| 73.1865969 | 11:25:02 AM |
| 73.1330813 | 11:25:03 AM |
| 73.091675  | 11:25:04 AM |
| 73.0381594 | 11:25:05 AM |
| 72.9877688 | 11:25:06 AM |
| 72.9576906 | 11:25:07 AM |
| 72.9147219 | 11:25:08 AM |
| 72.8087048 | 11:25:09 AM |
| 72.7215955 | 11:25:10 AM |
| 72.5862816 | 11:25:11 AM |
| 72.4529208 | 11:25:12 AM |
| 72.3273725 | 11:25:13 AM |
| 72.2092461 | 11:25:14 AM |
| 72.0965884 | 11:25:15 AM |
| 71.9698683 | 11:25:16 AM |
| 71.8361169 | 11:25:17 AM |
| 71.7204919 | 11:25:18 AM |
| 71.5954919 | 11:25:19 AM |
| 71.4611169 | 11:25:20 AM |
| 71.3267419 | 11:25:21 AM |
| 71.1923669 | 11:25:22 AM |
| 71.1140089 | 11:25:23 AM |
| 71.0458072 | 11:25:24 AM |
| 70.9932305 | 11:25:25 AM |
| 70.9429975 | 11:25:26 AM |
| 70.8966708 | 11:25:27 AM |
| 70.8476097 | 11:25:28 AM |
| 70.7930798 | 11:25:29 AM |
| 70.7303469 | 11:25:30 AM |
| 70.6781608 | 11:25:31 AM |
| 70.6353497 | 11:25:32 AM |
| 70.592148  | 11:25:33 AM |
| 70.5813681 | 11:25:34 AM |
| 70.5807445 | 11:25:35 AM |
| 70.5648866 | 11:25:36 AM |
| 70.5345755 | 11:25:37 AM |
| 70.5007488 | 11:25:38 AM |
| 70.4665314 | 11:25:39 AM |
| 70.4307516 | 11:25:40 AM |
| 70.3848155 | 11:25:41 AM |
| 70.3314575 | 11:25:42 AM |

|            |             |
|------------|-------------|
| 70.2691152 | 11:25:43 AM |
| 70.1860697 | 11:25:44 AM |
| 70.099118  | 11:25:45 AM |
| 69.9977132 | 11:25:46 AM |
| 69.8845896 | 11:25:47 AM |
| 69.7835753 | 11:25:48 AM |
| 69.6645924 | 11:25:49 AM |
| 69.5565469 | 11:25:50 AM |
| 69.4481108 | 11:25:51 AM |
| 69.3470966 | 11:25:52 AM |
| 69.2351449 | 11:25:53 AM |
| 69.1126463 | 11:25:54 AM |
| 68.981554  | 11:25:55 AM |
| 68.8551491 | 11:25:56 AM |
| 68.7639005 | 11:25:57 AM |
| 68.6670255 | 11:25:58 AM |
| 68.5701505 | 11:25:59 AM |
| 68.4732755 | 11:26:00 AM |
| 68.3857755 | 11:26:01 AM |
| 68.3295255 | 11:26:02 AM |
| 68.3076505 | 11:26:03 AM |
| 68.3014005 | 11:26:04 AM |
| 68.2920255 | 11:26:05 AM |
| 68.3076505 | 11:26:06 AM |
| 68.3031662 | 11:26:07 AM |
| 68.2924319 | 11:26:08 AM |
| 68.2809164 | 11:26:09 AM |
| 68.2838539 | 11:26:10 AM |
| 68.2938228 | 11:26:11 AM |
| 68.3469478 | 11:26:12 AM |
| 68.3813228 | 11:26:13 AM |
| 68.4125728 | 11:26:14 AM |
| 68.4469478 | 11:26:15 AM |
| 68.4875728 | 11:26:16 AM |
| 68.5563228 | 11:26:17 AM |
| 68.6438228 | 11:26:18 AM |
| 68.7313228 | 11:26:19 AM |
| 68.8188228 | 11:26:20 AM |
| 68.9219478 | 11:26:21 AM |
| 69.0250728 | 11:26:22 AM |
| 69.1063228 | 11:26:23 AM |
| 69.1844478 | 11:26:24 AM |
| 69.2531978 | 11:26:25 AM |
| 69.3469478 | 11:26:26 AM |
| 69.4500728 | 11:26:27 AM |

|            |             |
|------------|-------------|
| 69.5438228 | 11:26:28 AM |
| 69.6563228 | 11:26:29 AM |
| 69.7563228 | 11:26:30 AM |
| 69.8406978 | 11:26:31 AM |
| 69.9344478 | 11:26:32 AM |
| 69.971095  | 11:26:33 AM |
| 69.9928984 | 11:26:34 AM |
| 70.0072799 | 11:26:35 AM |
| 70.0083803 | 11:26:36 AM |
| 69.9872149 | 11:26:37 AM |
| 69.9578465 | 11:26:38 AM |
| 69.9351187 | 11:26:39 AM |
| 69.9213752 | 11:26:40 AM |
| 69.9013818 | 11:26:41 AM |
| 69.9326318 | 11:26:42 AM |
| 69.9357568 | 11:26:43 AM |
| 69.9232568 | 11:26:44 AM |
| 69.9138818 | 11:26:45 AM |
| 69.8732568 | 11:26:46 AM |
| 69.8652411 | 11:26:47 AM |
| 69.8666004 | 11:26:48 AM |
| 69.8749909 | 11:26:49 AM |
| 69.8814284 | 11:26:50 AM |
| 69.8839595 | 11:26:51 AM |
| 69.8495845 | 11:26:52 AM |
| 69.8464595 | 11:26:53 AM |
| 69.8402095 | 11:26:54 AM |
| 69.8683345 | 11:26:55 AM |
| 69.8995845 | 11:26:56 AM |
| 69.862649  | 11:26:57 AM |
| 69.8202447 | 11:26:58 AM |
| 69.7891686 | 11:26:59 AM |
| 69.7557487 | 11:27:00 AM |
| 69.7285788 | 11:27:01 AM |
| 69.6932058 | 11:27:02 AM |
| 69.7213308 | 11:27:03 AM |
| 69.7400808 | 11:27:04 AM |
| 69.7650808 | 11:27:05 AM |
| 69.7807058 | 11:27:06 AM |
| 69.7838308 | 11:27:07 AM |
| 69.7838308 | 11:27:08 AM |
| 69.7807058 | 11:27:09 AM |
| 69.7932058 | 11:27:10 AM |
| 69.8338308 | 11:27:11 AM |
| 69.8713308 | 11:27:12 AM |

|            |             |
|------------|-------------|
| 69.9815586 | 11:27:13 AM |
| 70.1128802 | 11:27:14 AM |
| 70.2547486 | 11:27:15 AM |
| 70.4161483 | 11:27:16 AM |
| 70.5841887 | 11:27:17 AM |
| 70.7354321 | 11:27:18 AM |
| 70.8706599 | 11:27:19 AM |
| 71.0062784 | 11:27:20 AM |
| 71.1418968 | 11:27:21 AM |
| 71.1918968 | 11:27:22 AM |
| 71.2293968 | 11:27:23 AM |
| 71.2856468 | 11:27:24 AM |
| 71.3231468 | 11:27:25 AM |
| 71.3668968 | 11:27:26 AM |
| 71.4262718 | 11:27:27 AM |
| 71.4856468 | 11:27:28 AM |
| 71.5606468 | 11:27:29 AM |
| 71.6325218 | 11:27:30 AM |
| 71.6950218 | 11:27:31 AM |
| 71.7825218 | 11:27:32 AM |
| 71.8201957 | 11:27:33 AM |
| 71.8746664 | 11:27:34 AM |
| 71.8947621 | 11:27:35 AM |
| 71.9281391 | 11:27:36 AM |
| 72.013686  | 11:27:37 AM |
| 72.0988422 | 11:27:38 AM |
| 72.173061  | 11:27:39 AM |
| 72.2566547 | 11:27:40 AM |
| 72.354311  | 11:27:41 AM |
| 72.4714985 | 11:27:42 AM |
| 72.5232349 | 11:27:43 AM |
| 72.58044   | 11:27:44 AM |
| 72.6286607 | 11:27:45 AM |
| 72.6745377 | 11:27:46 AM |
| 72.748149  | 11:27:47 AM |
| 72.8557448 | 11:27:48 AM |
| 72.9953718 | 11:27:49 AM |
| 73.1814831 | 11:27:50 AM |
| 73.3327573 | 11:27:51 AM |
| 73.466844  | 11:27:52 AM |
| 73.5860869 | 11:27:53 AM |
| 73.7115798 | 11:27:54 AM |
| 73.8547224 | 11:27:55 AM |
| 73.9795056 | 11:27:56 AM |
| 74.0706951 | 11:27:57 AM |

|            |             |
|------------|-------------|
| 74.1431346 | 11:27:58 AM |
| 74.2034647 | 11:27:59 AM |
| 74.2462167 | 11:28:00 AM |
| 74.2889687 | 11:28:01 AM |
| 74.3535957 | 11:28:02 AM |
| 74.4248633 | 11:28:03 AM |
| 74.4910528 | 11:28:04 AM |
| 74.5615391 | 11:28:05 AM |
| 74.6249942 | 11:28:06 AM |
| 74.6829806 | 11:28:07 AM |
| 74.7573732 | 11:28:08 AM |
| 74.8266877 | 11:28:09 AM |
| 74.8438616 | 11:28:10 AM |
| 74.8719731 | 11:28:11 AM |
| 74.8930533 | 11:28:12 AM |
| 75.011022  | 11:28:13 AM |
| 75.1082876 | 11:28:14 AM |
| 75.2231314 | 11:28:15 AM |
| 75.3434439 | 11:28:16 AM |
| 75.4211783 | 11:28:17 AM |
| 75.4813345 | 11:28:18 AM |
| 75.5274283 | 11:28:19 AM |
| 75.5692251 | 11:28:20 AM |
| 75.579772  | 11:28:21 AM |
| 75.5727408 | 11:28:22 AM |
| 75.5750845 | 11:28:23 AM |
| 75.570397  | 11:28:24 AM |
| 75.5618033 | 11:28:25 AM |
| 75.5426626 | 11:28:26 AM |
| 75.5036001 | 11:28:27 AM |
| 75.4407095 | 11:28:28 AM |
| 75.3489126 | 11:28:29 AM |
| 75.232897  | 11:28:30 AM |
| 75.1485936 | 11:28:31 AM |
| 75.062337  | 11:28:32 AM |
| 74.971393  | 11:28:33 AM |
| 74.8714645 | 11:28:34 AM |
| 74.7550583 | 11:28:35 AM |
| 74.6507614 | 11:28:36 AM |
| 74.5640426 | 11:28:37 AM |
| 74.5046676 | 11:28:38 AM |
| 74.4734176 | 11:28:39 AM |
| 74.4601364 | 11:28:40 AM |
| 74.4464645 | 11:28:41 AM |
| 74.4195114 | 11:28:42 AM |

|            |             |
|------------|-------------|
| 74.3956833 | 11:28:43 AM |
| 74.3613083 | 11:28:44 AM |
| 74.3413864 | 11:28:45 AM |
| 74.3312301 | 11:28:46 AM |
| 74.3202926 | 11:28:47 AM |
| 74.2988083 | 11:28:48 AM |
| 74.2765426 | 11:28:49 AM |
| 74.3036832 | 11:28:50 AM |
| 74.325355  | 11:28:51 AM |
| 74.2989799 | 11:28:52 AM |
| 74.2118705 | 11:28:53 AM |
| 74.1423393 | 11:28:54 AM |
| 74.0622612 | 11:28:55 AM |
| 73.9653862 | 11:28:56 AM |
| 73.9212455 | 11:28:57 AM |
| 73.9052299 | 11:28:58 AM |
| 73.8935112 | 11:28:59 AM |
| 73.885308  | 11:29:00 AM |
| 73.8806205 | 11:29:01 AM |
| 73.8716362 | 11:29:02 AM |
| 73.8712455 | 11:29:03 AM |
| 73.8677299 | 11:29:04 AM |
| 73.8579643 | 11:29:05 AM |
| 73.8556205 | 11:29:06 AM |
| 73.8454643 | 11:29:07 AM |
| 73.8435112 | 11:29:08 AM |
| 73.8423393 | 11:29:09 AM |
| 73.807183  | 11:29:10 AM |
| 73.7646049 | 11:29:11 AM |
| 73.7208549 | 11:29:12 AM |
| 73.685308  | 11:29:13 AM |
| 73.6360893 | 11:29:14 AM |
| 73.5896049 | 11:29:15 AM |
| 73.5403862 | 11:29:16 AM |
| 73.4966362 | 11:29:17 AM |
| 73.4833549 | 11:29:18 AM |
| 73.4888237 | 11:29:19 AM |
| 73.5005424 | 11:29:20 AM |
| 73.5130424 | 11:29:21 AM |
| 73.5399955 | 11:29:22 AM |
| 73.563433  | 11:29:23 AM |
| 73.5903862 | 11:29:24 AM |
| 73.6220268 | 11:29:25 AM |
| 73.6583549 | 11:29:26 AM |
| 73.6856987 | 11:29:27 AM |

|            |             |
|------------|-------------|
| 73.7067924 | 11:29:28 AM |
| 73.7231987 | 11:29:29 AM |
| 73.7423393 | 11:29:30 AM |
| 73.7407768 | 11:29:31 AM |
| 73.7458549 | 11:29:32 AM |
| 73.7442924 | 11:29:33 AM |
| 73.7189018 | 11:29:34 AM |
| 73.6966362 | 11:29:35 AM |
| 73.6849174 | 11:29:36 AM |
| 73.6626518 | 11:29:37 AM |
| 73.597808  | 11:29:38 AM |
| 73.5235893 | 11:29:39 AM |
| 73.4243705 | 11:29:40 AM |
| 73.3235893 | 11:29:41 AM |
| 73.2396049 | 11:29:42 AM |
| 73.1657768 | 11:29:43 AM |
| 73.1024955 | 11:29:44 AM |
| 73.0419487 | 11:29:45 AM |
| 72.960308  | 11:29:46 AM |
| 72.885308  | 11:29:47 AM |
| 72.7942924 | 11:29:48 AM |
| 72.7064018 | 11:29:49 AM |
| 72.6204643 | 11:29:50 AM |
| 72.550933  | 11:29:51 AM |
| 72.4833549 | 11:29:52 AM |
| 72.4149955 | 11:29:53 AM |
| 72.357183  | 11:29:54 AM |
| 72.288433  | 11:29:55 AM |
| 72.216558  | 11:29:56 AM |
| 72.1360893 | 11:29:57 AM |
| 71.9939018 | 11:29:58 AM |
| 71.8220268 | 11:29:59 AM |
| 71.6513237 | 11:30:00 AM |
| 71.4841362 | 11:30:01 AM |
| 71.3110893 | 11:30:02 AM |
| 71.1481987 | 11:30:03 AM |
| 70.9923393 | 11:30:04 AM |
| 70.8220268 | 11:30:05 AM |
| 70.6407768 | 11:30:06 AM |
| 70.4657768 | 11:30:07 AM |
| 70.2903862 | 11:30:08 AM |
| 70.1052299 | 11:30:09 AM |
| 69.9157768 | 11:30:10 AM |
| 69.7505424 | 11:30:11 AM |
| 69.613433  | 11:30:12 AM |



|            |             |
|------------|-------------|
| 69.5087455 | 11:30:13 AM |
| 69.4282768 | 11:30:14 AM |
| 69.3587455 | 11:30:15 AM |
| 69.3067924 | 11:30:16 AM |
| 69.2587455 | 11:30:17 AM |
| 69.2528862 | 11:30:18 AM |
| 69.266558  | 11:30:19 AM |
| 69.2810112 | 11:30:20 AM |
| 69.3001518 | 11:30:21 AM |
| 69.3024955 | 11:30:22 AM |
| 69.2939018 | 11:30:23 AM |
| 69.2521049 | 11:30:24 AM |
| 69.2118705 | 11:30:25 AM |
| 69.1849174 | 11:30:26 AM |
| 69.157183  | 11:30:27 AM |
| 69.1399955 | 11:30:28 AM |
| 69.1251518 | 11:30:29 AM |
| 69.1181205 | 11:30:30 AM |
| 69.1220268 | 11:30:31 AM |
| 69.1368705 | 11:30:32 AM |
| 69.1618705 | 11:30:33 AM |
| 69.1892143 | 11:30:34 AM |
| 69.2138237 | 11:30:35 AM |
| 69.250933  | 11:30:36 AM |
| 69.2798393 | 11:30:37 AM |
| 69.3325737 | 11:30:38 AM |
| 69.3778862 | 11:30:39 AM |
| 69.4511498 | 11:30:40 AM |
| 69.4642572 | 11:30:41 AM |
| 69.4508021 | 11:30:42 AM |
| 69.4271907 | 11:30:43 AM |
| 69.3930325 | 11:30:44 AM |
| 69.3748899 | 11:30:45 AM |
| 69.3602629 | 11:30:46 AM |
| 69.3421203 | 11:30:47 AM |
| 69.3341339 | 11:30:48 AM |
| 69.3402101 | 11:30:49 AM |
| 69.3599581 | 11:30:50 AM |
| 69.3863467 | 11:30:51 AM |
| 69.4017979 | 11:30:52 AM |
| 69.3863896 | 11:30:53 AM |
| 69.3287939 | 11:30:54 AM |
| 69.2469794 | 11:30:55 AM |
| 69.1475868 | 11:30:56 AM |
| 69.0513192 | 11:30:57 AM |

|            |             |
|------------|-------------|
| 68.9351297 | 11:30:58 AM |
| 68.821284  | 11:30:59 AM |
| 68.731657  | 11:31:00 AM |
| 68.6682019 | 11:31:01 AM |
| 68.6309186 | 11:31:02 AM |
| 68.615901  | 11:31:03 AM |
| 68.6469772 | 11:31:04 AM |
| 68.6866471 | 11:31:05 AM |
| 68.7458482 | 11:31:06 AM |
| 68.80544   | 11:31:07 AM |
| 68.8708911 | 11:31:08 AM |
| 68.9238422 | 11:31:09 AM |
| 68.9943715 | 11:31:10 AM |
| 69.0512289 | 11:31:11 AM |
| 69.0873832 | 11:31:12 AM |
| 69.1036156 | 11:31:13 AM |
| 69.1077386 | 11:31:14 AM |
| 69.1185022 | 11:31:15 AM |
| 69.1038752 | 11:31:16 AM |
| 69.119717  | 11:31:17 AM |
| 69.1500119 | 11:31:18 AM |
| 69.1826505 | 11:31:19 AM |
| 69.1826505 | 11:31:20 AM |
| 69.2264005 | 11:31:21 AM |
| 69.2826505 | 11:31:22 AM |
| 69.3389005 | 11:31:23 AM |
| 69.3982755 | 11:31:24 AM |
| 69.4420255 | 11:31:25 AM |
| 69.4795255 | 11:31:26 AM |
| 69.5232755 | 11:31:27 AM |
| 69.5639005 | 11:31:28 AM |
| 69.5951505 | 11:31:29 AM |
| 69.6232755 | 11:31:30 AM |
| 69.6482755 | 11:31:31 AM |
| 69.6826505 | 11:31:32 AM |
| 69.678161  | 11:31:33 AM |
| 69.6982809 | 11:31:34 AM |
| 69.7889059 | 11:31:35 AM |
| 69.8420309 | 11:31:36 AM |
| 69.8920309 | 11:31:37 AM |
| 69.9576559 | 11:31:38 AM |
| 70.0201559 | 11:31:39 AM |
| 70.0732809 | 11:31:40 AM |
| 70.1170309 | 11:31:41 AM |
| 70.1482809 | 11:31:42 AM |

|            |             |
|------------|-------------|
| 70.1482809 | 11:31:43 AM |
| 70.1482809 | 11:31:44 AM |
| 70.1607809 | 11:31:45 AM |
| 70.1701559 | 11:31:46 AM |
| 70.1920309 | 11:31:47 AM |
| 70.2139059 | 11:31:48 AM |
| 70.2326559 | 11:31:49 AM |
| 70.2389059 | 11:31:50 AM |
| 70.2482809 | 11:31:51 AM |
| 70.2576559 | 11:31:52 AM |
| 70.2639059 | 11:31:53 AM |
| 70.2545309 | 11:31:54 AM |
| 70.2264059 | 11:31:55 AM |
| 70.2139059 | 11:31:56 AM |
| 70.1701559 | 11:31:57 AM |
| 70.1201559 | 11:31:58 AM |
| 70.0889059 | 11:31:59 AM |
| 70.0232809 | 11:32:00 AM |
| 69.9670309 | 11:32:01 AM |
| 69.9170309 | 11:32:02 AM |
| 69.8764059 | 11:32:03 AM |
| 69.8389059 | 11:32:04 AM |
| 69.7951559 | 11:32:05 AM |
| 69.7920309 | 11:32:06 AM |
| 69.7920309 | 11:32:07 AM |
| 69.7951559 | 11:32:08 AM |
| 69.8139059 | 11:32:09 AM |
| 69.793406  | 11:32:10 AM |
| 69.7643123 | 11:32:11 AM |
| 69.7215468 | 11:32:12 AM |
| 69.7666613 | 11:32:13 AM |
| 69.7541371 | 11:32:14 AM |
| 69.6777485 | 11:32:15 AM |
| 69.6247973 | 11:32:16 AM |
| 69.5749712 | 11:32:17 AM |
| 69.5499712 | 11:32:18 AM |
| 69.5249712 | 11:32:19 AM |
| 69.5030962 | 11:32:20 AM |
| 69.4749712 | 11:32:21 AM |
| 69.4530962 | 11:32:22 AM |
| 69.4405962 | 11:32:23 AM |
| 69.4499712 | 11:32:24 AM |
| 69.4155962 | 11:32:25 AM |
| 69.3780962 | 11:32:26 AM |
| 69.3155962 | 11:32:27 AM |

|            |             |
|------------|-------------|
| 69.2331027 | 11:32:28 AM |
| 69.1670156 | 11:32:29 AM |
| 69.085694  | 11:32:30 AM |
| 69.0055443 | 11:32:31 AM |
| 68.9457071 | 11:32:32 AM |
| 68.8968074 | 11:32:33 AM |
| 68.876814  | 11:32:34 AM |
| 68.9142424 | 11:32:35 AM |
| 68.9594833 | 11:32:36 AM |
| 69.0230836 | 11:32:37 AM |
| 69.0968402 | 11:32:38 AM |
| 69.1748936 | 11:32:39 AM |
| 69.2845877 | 11:32:40 AM |
| 69.3966255 | 11:32:41 AM |
| 69.5074914 | 11:32:42 AM |
| 69.5902323 | 11:32:43 AM |
| 69.659692  | 11:32:44 AM |
| 69.726808  | 11:32:45 AM |
| 69.7548614 | 11:32:46 AM |
| 69.8329864 | 11:32:47 AM |
| 69.8829864 | 11:32:48 AM |
| 69.9204864 | 11:32:49 AM |
| 69.9722363 | 11:32:50 AM |
| 70.01383   | 11:32:51 AM |
| 70.0084771 | 11:32:52 AM |
| 70.0241021 | 11:32:53 AM |
| 70.0832317 | 11:32:54 AM |
| 70.1544706 | 11:32:55 AM |
| 70.2397721 | 11:32:56 AM |
| 70.3645982 | 11:32:57 AM |
| 70.4302232 | 11:32:58 AM |
| 70.4927232 | 11:32:59 AM |
| 70.5364732 | 11:33:00 AM |
| 70.5802232 | 11:33:01 AM |
| 70.6177232 | 11:33:02 AM |
| 70.6427232 | 11:33:03 AM |
| 70.6145982 | 11:33:04 AM |
| 70.6083482 | 11:33:05 AM |
| 70.5833482 | 11:33:06 AM |
| 70.5770982 | 11:33:07 AM |
| 70.5908416 | 11:33:08 AM |
| 70.5913038 | 11:33:09 AM |
| 70.6195004 | 11:33:10 AM |
| 70.6434001 | 11:33:11 AM |
| 70.6626123 | 11:33:12 AM |

|            |             |
|------------|-------------|
| 70.686512  | 11:33:13 AM |
| 70.7158804 | 11:33:14 AM |
| 70.703452  | 11:33:15 AM |
| 70.6925861 | 11:33:16 AM |
| 70.6914858 | 11:33:17 AM |
| 70.6771042 | 11:33:18 AM |
| 70.6615508 | 11:33:19 AM |
| 70.6424817 | 11:33:20 AM |
| 70.6210689 | 11:33:21 AM |
| 70.603953  | 11:33:22 AM |
| 70.618087  | 11:33:23 AM |
| 70.6361274 | 11:33:24 AM |
| 70.6565114 | 11:33:25 AM |
| 70.678458  | 11:33:26 AM |
| 70.637833  | 11:33:27 AM |
| 70.606583  | 11:33:28 AM |
| 70.575333  | 11:33:29 AM |
| 70.556583  | 11:33:30 AM |
| 70.553458  | 11:33:31 AM |
| 70.6015764 | 11:33:32 AM |
| 70.5797014 | 11:33:33 AM |
| 70.5817261 | 11:33:34 AM |
| 70.5775008 | 11:33:35 AM |
| 70.5732755 | 11:33:36 AM |
| 70.5264005 | 11:33:37 AM |
| 70.5014005 | 11:33:38 AM |
| 70.4701505 | 11:33:39 AM |
| 70.4514005 | 11:33:40 AM |
| 70.4326505 | 11:33:41 AM |
| 70.4107755 | 11:33:42 AM |
| 70.4107755 | 11:33:43 AM |
| 70.4389005 | 11:33:44 AM |
| 70.4576505 | 11:33:45 AM |
| 70.4701505 | 11:33:46 AM |
| 70.4607755 | 11:33:47 AM |
| 70.4264005 | 11:33:48 AM |
| 70.3920255 | 11:33:49 AM |
| 70.3326505 | 11:33:50 AM |
| 70.2764005 | 11:33:51 AM |
| 70.2107755 | 11:33:52 AM |
| 70.1389005 | 11:33:53 AM |
| 70.0357755 | 11:33:54 AM |
| 69.9264005 | 11:33:55 AM |
| 69.8045255 | 11:33:56 AM |
| 69.6795255 | 11:33:57 AM |

|            |             |
|------------|-------------|
| 69.5670255 | 11:33:58 AM |
| 69.4607755 | 11:33:59 AM |
| 69.3639005 | 11:34:00 AM |
| 69.2795255 | 11:34:01 AM |
| 69.2076505 | 11:34:02 AM |
| 69.1232755 | 11:34:03 AM |
| 69.0326505 | 11:34:04 AM |
| 68.9795255 | 11:34:05 AM |
| 68.9670255 | 11:34:06 AM |
| 68.9514005 | 11:34:07 AM |
| 68.9576505 | 11:34:08 AM |
| 68.9670255 | 11:34:09 AM |
| 68.9732755 | 11:34:10 AM |
| 68.9670255 | 11:34:11 AM |
| 68.9514005 | 11:34:12 AM |
| 68.9326505 | 11:34:13 AM |
| 68.9107755 | 11:34:14 AM |
| 68.8764005 | 11:34:15 AM |
| 68.8514005 | 11:34:16 AM |
| 68.8389005 | 11:34:17 AM |
| 68.8357755 | 11:34:18 AM |
| 68.8451505 | 11:34:19 AM |
| 68.8857755 | 11:34:20 AM |
| 68.9295255 | 11:34:21 AM |
| 68.9732755 | 11:34:22 AM |
| 68.9951505 | 11:34:23 AM |
| 69.0014005 | 11:34:24 AM |
| 69.0139005 | 11:34:25 AM |
| 69.0357755 | 11:34:26 AM |
| 69.0670255 | 11:34:27 AM |
| 69.0920255 | 11:34:28 AM |
| 69.1076505 | 11:34:29 AM |
| 69.1139005 | 11:34:30 AM |
| 69.0826505 | 11:34:31 AM |
| 69.0514005 | 11:34:32 AM |
| 69.0107755 | 11:34:33 AM |
| 68.9920255 | 11:34:34 AM |
| 68.9826505 | 11:34:35 AM |
| 68.9795255 | 11:34:36 AM |
| 68.9795255 | 11:34:37 AM |
| 68.9764005 | 11:34:38 AM |
| 68.9670255 | 11:34:39 AM |
| 68.9732755 | 11:34:40 AM |
| 68.9701505 | 11:34:41 AM |
| 68.9514005 | 11:34:42 AM |

|            |             |
|------------|-------------|
| 68.9420255 | 11:34:43 AM |
| 68.9420255 | 11:34:44 AM |
| 68.9107755 | 11:34:45 AM |
| 68.8389005 | 11:34:46 AM |
| 68.7764005 | 11:34:47 AM |
| 68.7201505 | 11:34:48 AM |
| 68.6576505 | 11:34:49 AM |
| 68.6264005 | 11:34:50 AM |
| 68.6170255 | 11:34:51 AM |
| 68.6076505 | 11:34:52 AM |
| 68.6107755 | 11:34:53 AM |
| 68.6076505 | 11:34:54 AM |
| 68.6107755 | 11:34:55 AM |
| 68.6014005 | 11:34:56 AM |
| 68.5857755 | 11:34:57 AM |
| 68.5576505 | 11:34:58 AM |
| 68.5170255 | 11:34:59 AM |
| 68.4545255 | 11:35:00 AM |
| 68.3826505 | 11:35:01 AM |
| 68.3264005 | 11:35:02 AM |
| 68.2732755 | 11:35:03 AM |
| 68.2357755 | 11:35:04 AM |
| 68.2045255 | 11:35:05 AM |
| 68.1826505 | 11:35:06 AM |
| 68.1764005 | 11:35:07 AM |
| 68.1857755 | 11:35:08 AM |
| 68.2045255 | 11:35:09 AM |
| 68.2482755 | 11:35:10 AM |
| 68.3389005 | 11:35:11 AM |
| 68.4514005 | 11:35:12 AM |
| 68.5857755 | 11:35:13 AM |
| 68.7201505 | 11:35:14 AM |
| 68.7703244 | 11:35:15 AM |
| 68.7974514 | 11:35:16 AM |
| 68.8152033 | 11:35:17 AM |
| 68.8368616 | 11:35:18 AM |
| 68.8507073 | 11:35:19 AM |
| 68.8850823 | 11:35:20 AM |
| 68.9225823 | 11:35:21 AM |
| 68.9475823 | 11:35:22 AM |
| 68.9632073 | 11:35:23 AM |
| 68.9663323 | 11:35:24 AM |
| 68.9600823 | 11:35:25 AM |
| 68.9569573 | 11:35:26 AM |
| 68.9569573 | 11:35:27 AM |

|            |             |
|------------|-------------|
| 68.9475823 | 11:35:28 AM |
| 68.9569573 | 11:35:29 AM |
| 68.9538323 | 11:35:30 AM |
| 68.9413323 | 11:35:31 AM |
| 68.9350823 | 11:35:32 AM |
| 68.9100823 | 11:35:33 AM |
| 68.8975823 | 11:35:34 AM |
| 68.8757073 | 11:35:35 AM |
| 68.8694573 | 11:35:36 AM |
| 68.8632073 | 11:35:37 AM |
| 68.8757073 | 11:35:38 AM |
| 68.8975823 | 11:35:39 AM |
| 68.9288323 | 11:35:40 AM |
| 68.9632073 | 11:35:41 AM |
| 68.9694573 | 11:35:42 AM |
| 68.9788323 | 11:35:43 AM |
| 68.9819573 | 11:35:44 AM |
| 68.9913323 | 11:35:45 AM |
| 68.9944573 | 11:35:46 AM |
| 68.9850823 | 11:35:47 AM |
| 68.9819573 | 11:35:48 AM |
| 68.9788323 | 11:35:49 AM |
| 68.9632073 | 11:35:50 AM |
| 68.9319573 | 11:35:51 AM |
| 68.8850823 | 11:35:52 AM |
| 68.8350823 | 11:35:53 AM |
| 68.7913323 | 11:35:54 AM |
| 68.8380335 | 11:35:55 AM |
| 68.9077815 | 11:35:56 AM |
| 68.9681545 | 11:35:57 AM |
| 69.0089963 | 11:35:58 AM |
| 69.0420255 | 11:35:59 AM |
| 69.0170255 | 11:36:00 AM |
| 68.9982755 | 11:36:01 AM |
| 68.9982755 | 11:36:02 AM |
| 68.9857755 | 11:36:03 AM |
| 68.9826505 | 11:36:04 AM |
| 68.9920255 | 11:36:05 AM |
| 68.9982755 | 11:36:06 AM |
| 68.9920255 | 11:36:07 AM |
| 68.9795255 | 11:36:08 AM |
| 68.9576505 | 11:36:09 AM |
| 68.9420255 | 11:36:10 AM |
| 68.9326505 | 11:36:11 AM |
| 68.9357755 | 11:36:12 AM |



|            |             |
|------------|-------------|
| 68.9514005 | 11:36:13 AM |
| 68.9482755 | 11:36:14 AM |
| 68.9451505 | 11:36:15 AM |
| 68.9170255 | 11:36:16 AM |
| 68.8732755 | 11:36:17 AM |
| 68.8139005 | 11:36:18 AM |
| 68.7482755 | 11:36:19 AM |
| 68.6576505 | 11:36:20 AM |
| 68.5420255 | 11:36:21 AM |
| 68.4295255 | 11:36:22 AM |
| 68.3139005 | 11:36:23 AM |
| 68.1920255 | 11:36:24 AM |
| 68.0670255 | 11:36:25 AM |
| 67.9420255 | 11:36:26 AM |
| 67.8264005 | 11:36:27 AM |
| 67.7170255 | 11:36:28 AM |
| 67.6201505 | 11:36:29 AM |
| 67.5264005 | 11:36:30 AM |
| 67.4420255 | 11:36:31 AM |
| 67.3639005 | 11:36:32 AM |
| 67.2732755 | 11:36:33 AM |
| 67.1670255 | 11:36:34 AM |
| 67.0514005 | 11:36:35 AM |
| 66.9451505 | 11:36:36 AM |
| 66.8514005 | 11:36:37 AM |
| 66.7795255 | 11:36:38 AM |
| 66.7139005 | 11:36:39 AM |
| 66.6670255 | 11:36:40 AM |
| 66.6107755 | 11:36:41 AM |
| 66.5545255 | 11:36:42 AM |
| 66.5264005 | 11:36:43 AM |
| 66.5014005 | 11:36:44 AM |
| 66.4920255 | 11:36:45 AM |
| 66.5372664 | 11:36:46 AM |
| 66.5914918 | 11:36:47 AM |
| 66.6625139 | 11:36:48 AM |
| 66.7249424 | 11:36:49 AM |
| 66.7764333 | 11:36:50 AM |
| 66.8294867 | 11:36:51 AM |
| 66.8813683 | 11:36:52 AM |
| 66.9430155 | 11:36:53 AM |
| 67.0249752 | 11:36:54 AM |
| 67.1135755 | 11:36:55 AM |
| 67.2072539 | 11:36:56 AM |
| 67.3064011 | 11:36:57 AM |

|            |             |
|------------|-------------|
| 67.4059389 | 11:36:58 AM |
| 67.5046954 | 11:36:59 AM |
| 67.5952489 | 11:37:00 AM |
| 67.6865835 | 11:37:01 AM |
| 67.7759651 | 11:37:02 AM |
| 67.8676904 | 11:37:03 AM |
| 67.9648845 | 11:37:04 AM |
| 68.0581723 | 11:37:05 AM |
| 68.1604445 | 11:37:06 AM |
| 68.2627166 | 11:37:07 AM |
| 68.3864732 | 11:37:08 AM |
| 68.517261  | 11:37:09 AM |
| 68.6484394 | 11:37:10 AM |
| 68.7905554 | 11:37:11 AM |
| 68.9264213 | 11:37:12 AM |
| 69.1076713 | 11:37:13 AM |
| 69.2826713 | 11:37:14 AM |
| 69.4576713 | 11:37:15 AM |
| 69.5785483 | 11:37:16 AM |
| 69.6900503 | 11:37:17 AM |
| 69.7956929 | 11:37:18 AM |
| 69.8876636 | 11:37:19 AM |
| 69.9733843 | 11:37:20 AM |
| 70.0591051 | 11:37:21 AM |
| 70.1127946 | 11:37:22 AM |
| 70.122734  | 11:37:23 AM |
| 70.121736  | 11:37:24 AM |
| 70.0805036 | 11:37:25 AM |
| 69.9877803 | 11:37:26 AM |
| 69.891932  | 11:37:27 AM |
| 69.7828024 | 11:37:28 AM |
| 69.6791416 | 11:37:29 AM |
| 69.5789964 | 11:37:30 AM |
| 69.474945  | 11:37:31 AM |
| 69.3658154 | 11:37:32 AM |
| 69.2562952 | 11:37:33 AM |
| 69.2024605 | 11:37:34 AM |
| 69.1357352 | 11:37:35 AM |
| 69.0764318 | 11:37:36 AM |
| 69.0304096 | 11:37:37 AM |
| 69.0027468 | 11:37:38 AM |
| 69.0008652 | 11:37:39 AM |
| 69.0321868 | 11:37:40 AM |
| 69.0814771 | 11:37:41 AM |
| 69.0872206 | 11:37:42 AM |

|            |             |
|------------|-------------|
| 69.1007767 | 11:37:43 AM |
| 69.1221452 | 11:37:44 AM |
| 69.1798418 | 11:37:45 AM |
| 69.2594135 | 11:37:46 AM |
| 69.4008913 | 11:37:47 AM |
| 69.5177597 | 11:37:48 AM |
| 69.6338469 | 11:37:49 AM |
| 69.7204498 | 11:37:50 AM |
| 69.7836152 | 11:37:51 AM |
| 69.8413119 | 11:37:52 AM |
| 69.8290151 | 11:37:53 AM |
| 69.8089058 | 11:37:54 AM |
| 69.7575465 | 11:37:55 AM |
| 69.7290602 | 11:37:56 AM |
| 69.6954958 | 11:37:57 AM |
| 69.6443532 | 11:37:58 AM |
| 69.6209451 | 11:37:59 AM |
| 69.6076932 | 11:38:00 AM |
| 69.5838944 | 11:38:01 AM |
| 69.5917362 | 11:38:02 AM |
| 69.6163749 | 11:38:03 AM |
| 69.6582012 | 11:38:04 AM |
| 69.7140899 | 11:38:05 AM |
| 69.7684161 | 11:38:06 AM |
| 69.8662891 | 11:38:07 AM |
| 69.9887715 | 11:38:08 AM |
| 70.1206289 | 11:38:09 AM |
| 70.2630332 | 11:38:10 AM |
| 70.3984062 | 11:38:11 AM |
| 70.5337792 | 11:38:12 AM |
| 70.6165917 | 11:38:13 AM |
| 70.6191093 | 11:38:14 AM |
| 70.6134238 | 11:38:15 AM |
| 70.5936758 | 11:38:16 AM |
| 70.574709  | 11:38:17 AM |
| 70.5440235 | 11:38:18 AM |
| 70.491463  | 11:38:19 AM |
| 70.4295275 | 11:38:20 AM |
| 70.3777482 | 11:38:21 AM |
| 70.3773282 | 11:38:22 AM |
| 70.376127  | 11:38:23 AM |
| 70.3561758 | 11:38:24 AM |
| 70.3096621 | 11:38:25 AM |
| 70.2778182 | 11:38:26 AM |
| 70.1778182 | 11:38:27 AM |

|            |             |
|------------|-------------|
| 70.0590682 | 11:38:28 AM |
| 69.9121932 | 11:38:29 AM |
| 69.7850369 | 11:38:30 AM |
| 69.6860056 | 11:38:31 AM |
| 69.583068  | 11:38:32 AM |
| 69.5234898 | 11:38:33 AM |
| 69.4810991 | 11:38:34 AM |
| 69.4918334 | 11:38:35 AM |
| 69.5275677 | 11:38:36 AM |
| 69.5558801 | 11:38:37 AM |
| 69.5951301 | 11:38:38 AM |
| 69.6140675 | 11:38:39 AM |
| 69.6103487 | 11:38:40 AM |
| 69.6015517 | 11:38:41 AM |
| 69.5775204 | 11:38:42 AM |
| 69.5523172 | 11:38:43 AM |
| 69.517739  | 11:38:44 AM |
| 69.4937077 | 11:38:45 AM |
| 69.4743638 | 11:38:46 AM |
| 69.4149888 | 11:38:47 AM |
| 69.3399888 | 11:38:48 AM |
| 69.2462388 | 11:38:49 AM |
| 69.1462388 | 11:38:50 AM |
| 69.0493638 | 11:38:51 AM |
| 68.9431138 | 11:38:52 AM |
| 68.8956743 | 11:38:53 AM |
| 68.8587817 | 11:38:54 AM |
| 68.8457172 | 11:38:55 AM |
| 68.8435903 | 11:38:56 AM |
| 68.834432  | 11:38:57 AM |
| 68.8182425 | 11:38:58 AM |
| 68.8176781 | 11:38:59 AM |
| 68.8202386 | 11:39:00 AM |
| 68.8220178 | 11:39:01 AM |
| 68.8335627 | 11:39:02 AM |
| 68.8544826 | 11:39:03 AM |
| 68.8839963 | 11:39:04 AM |
| 68.9107755 | 11:39:05 AM |
| 68.9107755 | 11:39:06 AM |
| 68.8701505 | 11:39:07 AM |
| 68.8389005 | 11:39:08 AM |
| 68.8232755 | 11:39:09 AM |
| 68.8170255 | 11:39:10 AM |
| 68.7951505 | 11:39:11 AM |
| 68.7889005 | 11:39:12 AM |

|            |             |
|------------|-------------|
| 68.7451505 | 11:39:13 AM |
| 68.7170255 | 11:39:14 AM |
| 68.6920255 | 11:39:15 AM |
| 68.6701505 | 11:39:16 AM |
| 68.6670255 | 11:39:17 AM |
| 68.6639005 | 11:39:18 AM |
| 68.6764005 | 11:39:19 AM |
| 68.6889005 | 11:39:20 AM |
| 68.7201505 | 11:39:21 AM |
| 68.7701505 | 11:39:22 AM |
| 68.8264005 | 11:39:23 AM |
| 68.8826505 | 11:39:24 AM |
| 68.9201505 | 11:39:25 AM |
| 68.9451505 | 11:39:26 AM |
| 68.9670255 | 11:39:27 AM |
| 68.9826505 | 11:39:28 AM |
| 68.9951505 | 11:39:29 AM |
| 68.9889005 | 11:39:30 AM |
| 68.9732755 | 11:39:31 AM |
| 68.9607755 | 11:39:32 AM |
| 68.9264005 | 11:39:33 AM |
| 68.8889005 | 11:39:34 AM |
| 68.8576505 | 11:39:35 AM |
| 68.8295255 | 11:39:36 AM |
| 68.8107755 | 11:39:37 AM |
| 68.8045255 | 11:39:38 AM |
| 68.7826505 | 11:39:39 AM |
| 68.7514005 | 11:39:40 AM |
| 68.7201505 | 11:39:41 AM |
| 68.6826505 | 11:39:42 AM |
| 68.6482755 | 11:39:43 AM |
| 68.6201505 | 11:39:44 AM |
| 68.5889005 | 11:39:45 AM |
| 68.5357755 | 11:39:46 AM |
| 68.5232755 | 11:39:47 AM |
| 68.5264005 | 11:39:48 AM |
| 68.5295255 | 11:39:49 AM |
| 68.5389005 | 11:39:50 AM |
| 68.5420255 | 11:39:51 AM |
| 68.5389005 | 11:39:52 AM |
| 68.5639005 | 11:39:53 AM |
| 68.5701505 | 11:39:54 AM |
| 68.5451505 | 11:39:55 AM |
| 68.5076505 | 11:39:56 AM |
| 68.4639005 | 11:39:57 AM |

|            |             |
|------------|-------------|
| 68.4139005 | 11:39:58 AM |
| 68.3639005 | 11:39:59 AM |
| 68.3295255 | 11:40:00 AM |
| 68.2889005 | 11:40:01 AM |
| 68.2545255 | 11:40:02 AM |
| 68.2732755 | 11:40:03 AM |
| 68.2826505 | 11:40:04 AM |
| 68.3045255 | 11:40:05 AM |
| 68.3295255 | 11:40:06 AM |
| 68.3514005 | 11:40:07 AM |
| 68.3701505 | 11:40:08 AM |
| 68.3951505 | 11:40:09 AM |
| 68.4420255 | 11:40:10 AM |
| 68.5014005 | 11:40:11 AM |
| 68.5670255 | 11:40:12 AM |
| 68.6295255 | 11:40:13 AM |
| 68.7045255 | 11:40:14 AM |
| 68.7826505 | 11:40:15 AM |
| 68.8670255 | 11:40:16 AM |
| 68.9420255 | 11:40:17 AM |
| 69.0107755 | 11:40:18 AM |
| 69.0826505 | 11:40:19 AM |
| 69.1545255 | 11:40:20 AM |
| 69.2264005 | 11:40:21 AM |
| 69.3107755 | 11:40:22 AM |
| 69.3951505 | 11:40:23 AM |
| 69.4764005 | 11:40:24 AM |
| 69.5639005 | 11:40:25 AM |
| 69.6607755 | 11:40:26 AM |
| 69.7576505 | 11:40:27 AM |
| 69.8514005 | 11:40:28 AM |
| 69.9389005 | 11:40:29 AM |
| 70.0014005 | 11:40:30 AM |
| 70.0514005 | 11:40:31 AM |
| 70.0951505 | 11:40:32 AM |
| 70.1326505 | 11:40:33 AM |
| 70.1795255 | 11:40:34 AM |
| 70.2295255 | 11:40:35 AM |
| 70.2795255 | 11:40:36 AM |
| 70.3389005 | 11:40:37 AM |
| 70.4107755 | 11:40:38 AM |
| 70.4732755 | 11:40:39 AM |
| 70.5482755 | 11:40:40 AM |
| 70.6451505 | 11:40:41 AM |
| 70.7357755 | 11:40:42 AM |

|            |             |
|------------|-------------|
| 70.7951505 | 11:40:43 AM |
| 70.8732755 | 11:40:44 AM |
| 70.9545255 | 11:40:45 AM |
| 71.0357755 | 11:40:46 AM |
| 71.1014005 | 11:40:47 AM |
| 71.1482755 | 11:40:48 AM |
| 71.1857755 | 11:40:49 AM |
| 71.2264005 | 11:40:50 AM |
| 71.2576505 | 11:40:51 AM |
| 71.2732755 | 11:40:52 AM |
| 71.3014005 | 11:40:53 AM |
| 71.3295255 | 11:40:54 AM |
| 71.3420255 | 11:40:55 AM |
| 71.3545255 | 11:40:56 AM |
| 71.3701505 | 11:40:57 AM |
| 71.3732755 | 11:40:58 AM |
| 71.3701505 | 11:40:59 AM |
| 71.3795255 | 11:41:00 AM |
| 71.3857755 | 11:41:01 AM |
| 71.3795255 | 11:41:02 AM |
| 71.3545255 | 11:41:03 AM |
| 71.3420255 | 11:41:04 AM |
| 71.3357755 | 11:41:05 AM |
| 71.3420255 | 11:41:06 AM |
| 71.3482755 | 11:41:07 AM |
| 71.3389005 | 11:41:08 AM |
| 71.3451505 | 11:41:09 AM |
| 71.3764005 | 11:41:10 AM |
| 71.4201505 | 11:41:11 AM |
| 71.4701505 | 11:41:12 AM |
| 71.4795255 | 11:41:13 AM |
| 71.4795255 | 11:41:14 AM |
| 71.4982755 | 11:41:15 AM |
| 71.5076505 | 11:41:16 AM |
| 71.4982755 | 11:41:17 AM |
| 71.4889005 | 11:41:18 AM |
| 71.4889005 | 11:41:19 AM |
| 71.4795255 | 11:41:20 AM |
| 71.4639005 | 11:41:21 AM |
| 71.4607755 | 11:41:22 AM |
| 71.4451505 | 11:41:23 AM |
| 71.4232755 | 11:41:24 AM |
| 71.4107755 | 11:41:25 AM |
| 71.3951505 | 11:41:26 AM |
| 71.3795255 | 11:41:27 AM |

|            |             |
|------------|-------------|
| 71.3795255 | 11:41:28 AM |
| 71.3920255 | 11:41:29 AM |
| 71.3951505 | 11:41:30 AM |
| 71.4201505 | 11:41:31 AM |
| 71.4309304 | 11:41:32 AM |
| 71.447179  | 11:41:33 AM |
| 71.461865  | 11:41:34 AM |
| 71.4835824 | 11:41:35 AM |
| 71.5523324 | 11:41:36 AM |
| 71.6117074 | 11:41:37 AM |
| 71.6554574 | 11:41:38 AM |
| 71.6867074 | 11:41:39 AM |
| 71.7085824 | 11:41:40 AM |
| 71.7242074 | 11:41:41 AM |
| 71.7148324 | 11:41:42 AM |
| 71.6960824 | 11:41:43 AM |
| 71.6742074 | 11:41:44 AM |
| 71.6242074 | 11:41:45 AM |
| 71.5523324 | 11:41:46 AM |
| 71.4742074 | 11:41:47 AM |
| 71.3992074 | 11:41:48 AM |
| 71.3117074 | 11:41:49 AM |
| 71.2117074 | 11:41:50 AM |
| 71.0835824 | 11:41:51 AM |
| 70.9429574 | 11:41:52 AM |
| 70.8367074 | 11:41:53 AM |
| 70.7335824 | 11:41:54 AM |
| 70.5960824 | 11:41:55 AM |
| 70.4492074 | 11:41:56 AM |
| 70.3023324 | 11:41:57 AM |
| 70.1554574 | 11:41:58 AM |
| 69.9992074 | 11:41:59 AM |
| 69.8617074 | 11:42:00 AM |
| 69.7148324 | 11:42:01 AM |
| 69.5554574 | 11:42:02 AM |
| 69.3898324 | 11:42:03 AM |
| 69.2398324 | 11:42:04 AM |
| 69.0835824 | 11:42:05 AM |
| 68.9429574 | 11:42:06 AM |
| 68.8117074 | 11:42:07 AM |
| 68.6742074 | 11:42:08 AM |
| 68.5367074 | 11:42:09 AM |
| 68.3992074 | 11:42:10 AM |
| 68.2492074 | 11:42:11 AM |
| 68.1228025 | 11:42:12 AM |



|            |             |
|------------|-------------|
| 68.006554  | 11:42:13 AM |
| 67.8981179 | 11:42:14 AM |
| 67.7826505 | 11:42:15 AM |
| 67.6295255 | 11:42:16 AM |
| 67.5045255 | 11:42:17 AM |
| 67.3920255 | 11:42:18 AM |
| 67.2857755 | 11:42:19 AM |
| 67.1732755 | 11:42:20 AM |
| 67.0701505 | 11:42:21 AM |
| 66.9920255 | 11:42:22 AM |
| 66.9170255 | 11:42:23 AM |
| 66.8326505 | 11:42:24 AM |
| 66.7701505 | 11:42:25 AM |
| 66.7170255 | 11:42:26 AM |
| 66.6701505 | 11:42:27 AM |
| 66.6201505 | 11:42:28 AM |
| 66.5795255 | 11:42:29 AM |
| 66.5482755 | 11:42:30 AM |
| 66.5357755 | 11:42:31 AM |
| 66.5357755 | 11:42:32 AM |
| 66.5420255 | 11:42:33 AM |
| 66.5451505 | 11:42:34 AM |
| 66.5576505 | 11:42:35 AM |
| 66.5920255 | 11:42:36 AM |
| 66.6545255 | 11:42:37 AM |
| 66.7420255 | 11:42:38 AM |
| 66.8201505 | 11:42:39 AM |
| 66.8795255 | 11:42:40 AM |
| 66.9389005 | 11:42:41 AM |
| 66.9764005 | 11:42:42 AM |
| 67.0076505 | 11:42:43 AM |
| 67.0170255 | 11:42:44 AM |
| 66.9982755 | 11:42:45 AM |
| 66.9545255 | 11:42:46 AM |
| 66.9201505 | 11:42:47 AM |
| 66.8951505 | 11:42:48 AM |
| 66.8732755 | 11:42:49 AM |
| 66.8514005 | 11:42:50 AM |
| 66.8295255 | 11:42:51 AM |
| 66.8139005 | 11:42:52 AM |
| 66.7857755 | 11:42:53 AM |
| 66.7701505 | 11:42:54 AM |
| 66.7732755 | 11:42:55 AM |
| 66.7701505 | 11:42:56 AM |
| 66.7639005 | 11:42:57 AM |

|            |             |
|------------|-------------|
| 66.7732755 | 11:42:58 AM |
| 66.7920255 | 11:42:59 AM |
| 66.8232755 | 11:43:00 AM |
| 66.8639005 | 11:43:01 AM |
| 66.9107755 | 11:43:02 AM |
| 66.9670255 | 11:43:03 AM |
| 67.0264005 | 11:43:04 AM |
| 67.0732755 | 11:43:05 AM |
| 67.1170255 | 11:43:06 AM |
| 67.1514005 | 11:43:07 AM |
| 67.1920255 | 11:43:08 AM |
| 67.2232755 | 11:43:09 AM |
| 67.2514005 | 11:43:10 AM |
| 67.2920255 | 11:43:11 AM |
| 67.3420255 | 11:43:12 AM |
| 67.3982755 | 11:43:13 AM |
| 67.4482755 | 11:43:14 AM |
| 67.5076505 | 11:43:15 AM |
| 67.5701505 | 11:43:16 AM |
| 67.6389005 | 11:43:17 AM |
| 67.6795255 | 11:43:18 AM |
| 67.7357755 | 11:43:19 AM |
| 67.7951505 | 11:43:20 AM |
| 67.8514005 | 11:43:21 AM |
| 67.9264005 | 11:43:22 AM |
| 68.0045255 | 11:43:23 AM |
| 68.1076505 | 11:43:24 AM |
| 68.2389005 | 11:43:25 AM |
| 68.3764005 | 11:43:26 AM |
| 68.4951505 | 11:43:27 AM |
| 68.6076505 | 11:43:28 AM |
| 68.7264005 | 11:43:29 AM |
| 68.8482755 | 11:43:30 AM |
| 68.9607755 | 11:43:31 AM |
| 69.0576505 | 11:43:32 AM |
| 69.0937095 | 11:43:33 AM |
| 69.1405845 | 11:43:34 AM |
| 69.1624595 | 11:43:35 AM |
| 69.1812095 | 11:43:36 AM |
| 69.1905845 | 11:43:37 AM |
| 69.2030845 | 11:43:38 AM |
| 69.2249595 | 11:43:39 AM |
| 69.2405845 | 11:43:40 AM |
| 69.2312095 | 11:43:41 AM |
| 69.2093345 | 11:43:42 AM |

|            |             |
|------------|-------------|
| 69.1843345 | 11:43:43 AM |
| 69.1499595 | 11:43:44 AM |
| 69.1218345 | 11:43:45 AM |
| 69.0937095 | 11:43:46 AM |
| 69.0718345 | 11:43:47 AM |
| 69.0593345 | 11:43:48 AM |
| 69.0499595 | 11:43:49 AM |
| 69.0499595 | 11:43:50 AM |
| 69.0468345 | 11:43:51 AM |
| 69.0468345 | 11:43:52 AM |
| 69.0405845 | 11:43:53 AM |
| 69.0624595 | 11:43:54 AM |
| 69.1062095 | 11:43:55 AM |
| 69.1437095 | 11:43:56 AM |
| 69.1212271 | 11:43:57 AM |
| 69.0991353 | 11:43:58 AM |
| 69.0672779 | 11:43:59 AM |
| 69.0186237 | 11:44:00 AM |
| 68.9594225 | 11:44:01 AM |
| 68.903737  | 11:44:02 AM |
| 68.8613327 | 11:44:03 AM |
| 68.804866  | 11:44:04 AM |
| 68.7448836 | 11:44:05 AM |
| 68.6974012 | 11:44:06 AM |
| 68.6757001 | 11:44:07 AM |
| 68.6598583 | 11:44:08 AM |
| 68.6342509 | 11:44:09 AM |
| 68.6094248 | 11:44:10 AM |
| 68.6017861 | 11:44:11 AM |
| 68.6136787 | 11:44:12 AM |
| 68.686778  | 11:44:13 AM |
| 68.7377331 | 11:44:14 AM |
| 68.8023601 | 11:44:15 AM |
| 68.868159  | 11:44:16 AM |
| 68.9316141 | 11:44:17 AM |
| 68.9923348 | 11:44:18 AM |
| 69.0471962 | 11:44:19 AM |
| 69.0989325 | 11:44:20 AM |
| 69.1592626 | 11:44:21 AM |
| 69.2082646 | 11:44:22 AM |
| 69.2670322 | 11:44:23 AM |
| 69.3285342 | 11:44:24 AM |
| 69.38613   | 11:44:25 AM |
| 69.4077882 | 11:44:26 AM |
| 69.4419464 | 11:44:27 AM |

|            |             |
|------------|-------------|
| 69.4655578 | 11:44:28 AM |
| 69.4817473 | 11:44:29 AM |
| 69.4889524 | 11:44:30 AM |
| 69.4938137 | 11:44:31 AM |
| 69.4783626 | 11:44:32 AM |
| 69.4593958 | 11:44:33 AM |
| 69.4177728 | 11:44:34 AM |
| 69.3573998 | 11:44:35 AM |
| 69.2989799 | 11:44:36 AM |
| 69.3024955 | 11:44:37 AM |
| 69.2989799 | 11:44:38 AM |
| 69.3032768 | 11:44:39 AM |
| 69.3216362 | 11:44:40 AM |
| 69.3505424 | 11:44:41 AM |
| 69.3724174 | 11:44:42 AM |
| 69.3810112 | 11:44:43 AM |
| 69.3923393 | 11:44:44 AM |
| 69.4110893 | 11:44:45 AM |
| 69.4333549 | 11:44:46 AM |
| 69.4423393 | 11:44:47 AM |
| 69.4489799 | 11:44:48 AM |
| 69.444683  | 11:44:49 AM |
| 69.4333549 | 11:44:50 AM |
| 69.4146049 | 11:44:51 AM |
| 69.388433  | 11:44:52 AM |
| 69.3587455 | 11:44:53 AM |
| 69.3118705 | 11:44:54 AM |
| 69.2575737 | 11:44:55 AM |
| 69.1903862 | 11:44:56 AM |
| 69.116558  | 11:44:57 AM |
| 69.0427299 | 11:44:58 AM |
| 68.9583549 | 11:44:59 AM |
| 68.8739799 | 11:45:00 AM |
| 68.7962455 | 11:45:01 AM |
| 68.7216362 | 11:45:02 AM |
| 68.647808  | 11:45:03 AM |
| 68.5958549 | 11:45:04 AM |
| 68.6257592 | 11:45:05 AM |
| 68.700976  | 11:45:06 AM |
| 68.7605677 | 11:45:07 AM |
| 68.8244564 | 11:45:08 AM |
| 68.8863919 | 11:45:09 AM |
| 68.9385618 | 11:45:10 AM |
| 68.9805754 | 11:45:11 AM |
| 69.0272765 | 11:45:12 AM |

|            |             |
|------------|-------------|
| 69.0743683 | 11:45:13 AM |
| 69.1097413 | 11:45:14 AM |
| 69.1513643 | 11:45:15 AM |
| 69.1941592 | 11:45:16 AM |
| 69.225626  | 11:45:17 AM |
| 69.2512334 | 11:45:18 AM |
| 69.2662939 | 11:45:19 AM |
| 69.2809638 | 11:45:20 AM |
| 69.2893837 | 11:45:21 AM |
| 69.3013192 | 11:45:22 AM |
| 69.3288797 | 11:45:23 AM |
| 69.3583933 | 11:45:24 AM |
| 69.3965007 | 11:45:25 AM |
| 69.4342175 | 11:45:26 AM |
| 69.4750593 | 11:45:27 AM |
| 69.5248854 | 11:45:28 AM |
| 69.5954147 | 11:45:29 AM |
| 69.6690689 | 11:45:30 AM |
| 69.7392076 | 11:45:31 AM |
| 69.7972368 | 11:45:32 AM |
| 69.8583911 | 11:45:33 AM |
| 69.923061  | 11:45:34 AM |
| 69.9908559 | 11:45:35 AM |
| 70.0484945 | 11:45:36 AM |
| 70.1026175 | 11:45:37 AM |
| 70.1407249 | 11:45:38 AM |
| 70.1764886 | 11:45:39 AM |
| 70.2028772 | 11:45:40 AM |
| 70.2390315 | 11:45:41 AM |
| 70.2802639 | 11:45:42 AM |
| 70.3421994 | 11:45:43 AM |
| 70.3670255 | 11:45:44 AM |
| 70.3107755 | 11:45:45 AM |
| 70.2482755 | 11:45:46 AM |
| 70.1639005 | 11:45:47 AM |
| 70.0639005 | 11:45:48 AM |
| 69.9576505 | 11:45:49 AM |
| 69.8670255 | 11:45:50 AM |
| 69.7982755 | 11:45:51 AM |
| 69.7232755 | 11:45:52 AM |
| 69.6482755 | 11:45:53 AM |
| 69.5889005 | 11:45:54 AM |
| 69.5170255 | 11:45:55 AM |
| 69.4420255 | 11:45:56 AM |
| 69.3639005 | 11:45:57 AM |

|            |             |
|------------|-------------|
| 69.2982755 | 11:45:58 AM |
| 69.2357755 | 11:45:59 AM |
| 69.1732755 | 11:46:00 AM |
| 69.1201505 | 11:46:01 AM |
| 69.0795255 | 11:46:02 AM |
| 69.0357755 | 11:46:03 AM |
| 68.9826505 | 11:46:04 AM |
| 68.9232755 | 11:46:05 AM |
| 68.8514005 | 11:46:06 AM |
| 68.7764005 | 11:46:07 AM |
| 68.6920255 | 11:46:08 AM |
| 68.5889005 | 11:46:09 AM |
| 68.4857755 | 11:46:10 AM |
| 68.3826505 | 11:46:11 AM |
| 68.2951505 | 11:46:12 AM |
| 68.2076505 | 11:46:13 AM |
| 68.1201505 | 11:46:14 AM |
| 68.0295255 | 11:46:15 AM |
| 67.9576505 | 11:46:16 AM |
| 67.9045255 | 11:46:17 AM |
| 67.8795255 | 11:46:18 AM |
| 67.8670255 | 11:46:19 AM |
| 67.8826505 | 11:46:20 AM |
| 67.9107755 | 11:46:21 AM |
| 67.9701505 | 11:46:22 AM |
| 68.0045255 | 11:46:23 AM |
| 68.0482755 | 11:46:24 AM |
| 68.0889005 | 11:46:25 AM |
| 68.1389005 | 11:46:26 AM |
| 68.2107755 | 11:46:27 AM |
| 68.2982755 | 11:46:28 AM |
| 68.3982755 | 11:46:29 AM |
| 68.4857755 | 11:46:30 AM |
| 68.5576505 | 11:46:31 AM |
| 68.6295255 | 11:46:32 AM |
| 68.7076505 | 11:46:33 AM |
| 68.8045255 | 11:46:34 AM |
| 68.9107755 | 11:46:35 AM |
| 69.0264005 | 11:46:36 AM |
| 69.1357755 | 11:46:37 AM |
| 69.2295255 | 11:46:38 AM |
| 69.3232755 | 11:46:39 AM |
| 69.4045255 | 11:46:40 AM |
| 69.4764005 | 11:46:41 AM |
| 69.5389005 | 11:46:42 AM |

|            |             |
|------------|-------------|
| 69.5982755 | 11:46:43 AM |
| 69.6482755 | 11:46:44 AM |
| 69.6857755 | 11:46:45 AM |
| 69.7420255 | 11:46:46 AM |
| 69.8076505 | 11:46:47 AM |
| 69.8230881 | 11:46:48 AM |
| 69.8654788 | 11:46:49 AM |
| 69.9654788 | 11:46:50 AM |
| 70.0160726 | 11:46:51 AM |
| 70.0635414 | 11:46:52 AM |
| 70.0973384 | 11:46:53 AM |
| 70.1241041 | 11:46:54 AM |
| 70.1579011 | 11:46:55 AM |
| 70.1846668 | 11:46:56 AM |
| 70.1852606 | 11:46:57 AM |
| 70.1710107 | 11:46:58 AM |
| 70.1536357 | 11:46:59 AM |
| 70.1206358 | 11:47:00 AM |
| 70.0587296 | 11:47:01 AM |
| 69.9772922 | 11:47:02 AM |
| 69.8962454 | 11:47:03 AM |
| 69.8214486 | 11:47:04 AM |
| 69.7489956 | 11:47:05 AM |
| 69.6601363 | 11:47:06 AM |
| 69.574402  | 11:47:07 AM |
| 69.4992145 | 11:47:08 AM |
| 69.4310584 | 11:47:09 AM |
| 69.3691522 | 11:47:10 AM |
| 69.313496  | 11:47:11 AM |
| 69.2707305 | 11:47:12 AM |
| 69.2080431 | 11:47:13 AM |
| 69.1266056 | 11:47:14 AM |
| 69.0393088 | 11:47:15 AM |
| 68.9524027 | 11:47:16 AM |
| 68.8721371 | 11:47:17 AM |
| 68.8102309 | 11:47:18 AM |
| 68.7483248 | 11:47:19 AM |
| 68.6993092 | 11:47:20 AM |
| 68.6706062 | 11:47:21 AM |
| 68.6458094 | 11:47:22 AM |
| 68.6178876 | 11:47:23 AM |
| 68.6208251 | 11:47:24 AM |
| 68.6124346 | 11:47:25 AM |
| 68.5907628 | 11:47:26 AM |
| 68.5589347 | 11:47:27 AM |

|            |             |
|------------|-------------|
| 68.5702629 | 11:47:28 AM |
| 68.6184972 | 11:47:29 AM |
| 68.5997472 | 11:47:30 AM |
| 68.6179033 | 11:47:31 AM |
| 68.6454345 | 11:47:32 AM |
| 68.6835126 | 11:47:33 AM |
| 68.7192469 | 11:47:34 AM |
| 68.7541999 | 11:47:35 AM |
| 68.7930592 | 11:47:36 AM |
| 68.8393404 | 11:47:37 AM |
| 68.8848403 | 11:47:38 AM |
| 68.9334652 | 11:47:39 AM |
| 68.9914652 | 11:47:40 AM |
| 69.0627463 | 11:47:41 AM |
| 69.1379338 | 11:47:42 AM |
| 69.2189806 | 11:47:43 AM |
| 69.3031524 | 11:47:44 AM |
| 69.3818554 | 11:47:45 AM |
| 69.4519647 | 11:47:46 AM |
| 69.4582147 | 11:47:47 AM |
| 69.4574334 | 11:47:48 AM |
| 69.4437616 | 11:47:49 AM |
| 69.4543084 | 11:47:50 AM |
| 69.4812616 | 11:47:51 AM |
| 69.5074334 | 11:47:52 AM |
| 69.6013709 | 11:47:53 AM |
| 69.6703083 | 11:47:54 AM |
| 69.7419801 | 11:47:55 AM |
| 69.7882613 | 11:47:56 AM |
| 69.8216518 | 11:47:57 AM |
| 69.821058  | 11:47:58 AM |
| 69.8142142 | 11:47:59 AM |
| 69.8069797 | 11:48:00 AM |
| 69.7856828 | 11:48:01 AM |
| 69.7729796 | 11:48:02 AM |
| 69.7665264 | 11:48:03 AM |
| 69.7604638 | 11:48:04 AM |
| 69.7751043 | 11:48:05 AM |
| 69.7905261 | 11:48:06 AM |
| 69.8473542 | 11:48:07 AM |
| 69.9080885 | 11:48:08 AM |
| 69.9080885 | 11:48:09 AM |
| 69.9143385 | 11:48:10 AM |
| 69.9237135 | 11:48:11 AM |
| 69.9049635 | 11:48:12 AM |



|            |             |
|------------|-------------|
| 69.8737135 | 11:48:13 AM |
| 69.8393385 | 11:48:14 AM |
| 69.8112135 | 11:48:15 AM |
| 69.7799635 | 11:48:16 AM |
| 69.7518385 | 11:48:17 AM |
| 69.7299635 | 11:48:18 AM |
| 69.6830885 | 11:48:19 AM |
| 69.6205885 | 11:48:20 AM |
| 69.5549635 | 11:48:21 AM |
| 69.5205885 | 11:48:22 AM |
| 69.4559479 | 11:48:23 AM |
| 69.3956043 | 11:48:24 AM |
| 69.3239325 | 11:48:25 AM |
| 69.2405419 | 11:48:26 AM |
| 69.2171044 | 11:48:27 AM |
| 69.1729638 | 11:48:28 AM |
| 69.1276513 | 11:48:29 AM |
| 69.0651513 | 11:48:30 AM |
| 68.979995  | 11:48:31 AM |
| 68.89562   | 11:48:32 AM |
| 68.7567607 | 11:48:33 AM |
| 68.6487608 | 11:48:34 AM |
| 68.5544328 | 11:48:35 AM |
| 68.4940891 | 11:48:36 AM |
| 68.4517142 | 11:48:37 AM |
| 68.5235892 | 11:48:38 AM |
| 68.6235892 | 11:48:39 AM |
| 68.7142142 | 11:48:40 AM |
| 68.7923392 | 11:48:41 AM |
| 68.7954642 | 11:48:42 AM |
| 68.7767142 | 11:48:43 AM |
| 68.7204642 | 11:48:44 AM |
| 68.6548392 | 11:48:45 AM |
| 68.5892142 | 11:48:46 AM |
| 68.4860892 | 11:48:47 AM |
| 68.3892142 | 11:48:48 AM |
| 68.3017142 | 11:48:49 AM |
| 68.2235892 | 11:48:50 AM |
| 68.1579642 | 11:48:51 AM |
| 68.1079642 | 11:48:52 AM |
| 68.0673392 | 11:48:53 AM |
| 68.0329642 | 11:48:54 AM |
| 67.9892142 | 11:48:55 AM |
| 67.9454642 | 11:48:56 AM |
| 67.9048392 | 11:48:57 AM |

|            |             |
|------------|-------------|
| 67.8485892 | 11:48:58 AM |
| 67.7798392 | 11:48:59 AM |
| 67.7142142 | 11:49:00 AM |
| 67.6329642 | 11:49:01 AM |
| 67.5235892 | 11:49:02 AM |
| 67.4413547 | 11:49:03 AM |
| 67.3610734 | 11:49:04 AM |
| 67.3046202 | 11:49:05 AM |
| 67.2817607 | 11:49:06 AM |
| 67.2659325 | 11:49:07 AM |
| 67.2829168 | 11:49:08 AM |
| 67.3194324 | 11:49:09 AM |
| 67.2913022 | 11:49:10 AM |
| 67.269422  | 11:49:11 AM |
| 67.2953907 | 11:49:12 AM |
| 67.33425   | 11:49:13 AM |
| 67.3734999 | 11:49:14 AM |
| 67.3834529 | 11:49:15 AM |
| 67.3906716 | 11:49:16 AM |
| 67.4049215 | 11:49:17 AM |
| 67.3392965 | 11:49:18 AM |
| 67.2486715 | 11:49:19 AM |
| 67.1611715 | 11:49:20 AM |
| 67.0705465 | 11:49:21 AM |
| 67.0330465 | 11:49:22 AM |
| 67.0142965 | 11:49:23 AM |
| 67.0080465 | 11:49:24 AM |
| 67.0111715 | 11:49:25 AM |
| 67.0236715 | 11:49:26 AM |
| 67.0455465 | 11:49:27 AM |
| 67.0424215 | 11:49:28 AM |
| 67.0392965 | 11:49:29 AM |
| 67.0236715 | 11:49:30 AM |
| 67.0017965 | 11:49:31 AM |
| 66.9861715 | 11:49:32 AM |
| 66.9580465 | 11:49:33 AM |
| 66.9330465 | 11:49:34 AM |
| 66.9049215 | 11:49:35 AM |
| 66.8924215 | 11:49:36 AM |
| 66.8955465 | 11:49:37 AM |
| 66.9205465 | 11:49:38 AM |
| 66.9830465 | 11:49:39 AM |
| 67.0549215 | 11:49:40 AM |
| 67.1486715 | 11:49:41 AM |
| 67.2392965 | 11:49:42 AM |

|            |             |
|------------|-------------|
| 67.2985139 | 11:49:43 AM |
| 67.3421062 | 11:49:44 AM |
| 67.3806204 | 11:49:45 AM |
| 67.4199159 | 11:49:46 AM |
| 67.4654614 | 11:49:47 AM |
| 67.5199912 | 11:49:48 AM |
| 67.5745211 | 11:49:49 AM |
| 67.6823685 | 11:49:50 AM |
| 67.7781066 | 11:49:51 AM |
| 67.8283396 | 11:49:52 AM |
| 67.8652913 | 11:49:53 AM |
| 67.8924774 | 11:49:54 AM |
| 67.9282572 | 11:49:55 AM |
| 67.9495839 | 11:49:56 AM |
| 67.9619263 | 11:49:57 AM |
| 67.9727061 | 11:49:58 AM |
| 68.0102061 | 11:49:59 AM |
| 68.0289561 | 11:50:00 AM |
| 68.0633311 | 11:50:01 AM |
| 68.0789561 | 11:50:02 AM |
| 68.0820811 | 11:50:03 AM |
| 68.0945811 | 11:50:04 AM |
| 68.0977061 | 11:50:05 AM |
| 68.1164561 | 11:50:06 AM |
| 68.1320811 | 11:50:07 AM |
| 68.1695811 | 11:50:08 AM |
| 68.2008311 | 11:50:09 AM |
| 68.2258311 | 11:50:10 AM |
| 68.2477061 | 11:50:11 AM |
| 68.2633311 | 11:50:12 AM |
| 68.3008311 | 11:50:13 AM |
| 68.3602061 | 11:50:14 AM |
| 68.4258311 | 11:50:15 AM |
| 68.4883311 | 11:50:16 AM |
| 68.5258311 | 11:50:17 AM |
| 68.5170797 | 11:50:18 AM |
| 68.5165314 | 11:50:19 AM |
| 68.523405  | 11:50:20 AM |
| 68.5275442 | 11:50:21 AM |
| 68.5500428 | 11:50:22 AM |
| 68.6086366 | 11:50:23 AM |
| 68.6906678 | 11:50:24 AM |
| 68.7840272 | 11:50:25 AM |
| 68.867621  | 11:50:26 AM |
| 68.9418397 | 11:50:27 AM |

|            |             |
|------------|-------------|
| 68.9820741 | 11:50:28 AM |
| 69.0105897 | 11:50:29 AM |
| 69.0699647 | 11:50:30 AM |
| 69.1234803 | 11:50:31 AM |
| 69.1777772 | 11:50:32 AM |
| 69.248871  | 11:50:33 AM |
| 69.3404349 | 11:50:34 AM |
| 69.43278   | 11:50:35 AM |
| 69.5020783 | 11:50:36 AM |
| 69.549111  | 11:50:37 AM |
| 69.5820811 | 11:50:38 AM |
| 69.5914561 | 11:50:39 AM |
| 69.6227061 | 11:50:40 AM |
| 69.6539561 | 11:50:41 AM |
| 69.7289561 | 11:50:42 AM |
| 69.8195811 | 11:50:43 AM |
| 69.9008311 | 11:50:44 AM |
| 69.9852061 | 11:50:45 AM |
| 70.0539561 | 11:50:46 AM |
| 70.1164561 | 11:50:47 AM |
| 70.1945811 | 11:50:48 AM |
| 70.2852061 | 11:50:49 AM |
| 70.3945811 | 11:50:50 AM |
| 70.5195811 | 11:50:51 AM |
| 70.6477061 | 11:50:52 AM |
| 70.7727061 | 11:50:53 AM |
| 70.8695811 | 11:50:54 AM |
| 70.9695811 | 11:50:55 AM |
| 71.0602061 | 11:50:56 AM |
| 71.1539561 | 11:50:57 AM |
| 71.2814575 | 11:50:58 AM |
| 71.4007558 | 11:50:59 AM |
| 71.4511464 | 11:51:00 AM |
| 71.4769277 | 11:51:01 AM |
| 71.4534902 | 11:51:02 AM |
| 71.3984121 | 11:51:03 AM |
| 71.3140371 | 11:51:04 AM |
| 71.2198964 | 11:51:05 AM |
| 71.1688822 | 11:51:06 AM |
| 71.089743  | 11:51:07 AM |
| 71.0106038 | 11:51:08 AM |
| 70.9306833 | 11:51:09 AM |
| 70.8304503 | 11:51:10 AM |
| 70.7388111 | 11:51:11 AM |
| 70.6374063 | 11:51:12 AM |

|            |             |
|------------|-------------|
| 70.5137358 | 11:51:13 AM |
| 70.3731108 | 11:51:14 AM |
| 70.2231108 | 11:51:15 AM |
| 70.1074858 | 11:51:16 AM |
| 70.0137358 | 11:51:17 AM |
| 69.9418608 | 11:51:18 AM |
| 69.8637358 | 11:51:19 AM |
| 69.7887358 | 11:51:20 AM |
| 69.7168608 | 11:51:21 AM |
| 69.6262358 | 11:51:22 AM |
| 69.5293608 | 11:51:23 AM |
| 69.4418608 | 11:51:24 AM |
| 69.3449858 | 11:51:25 AM |
| 69.2449858 | 11:51:26 AM |
| 69.1574858 | 11:51:27 AM |
| 69.0668608 | 11:51:28 AM |
| 68.9762358 | 11:51:29 AM |
| 68.8824858 | 11:51:30 AM |
| 68.7824858 | 11:51:31 AM |
| 68.7012358 | 11:51:32 AM |
| 68.6293608 | 11:51:33 AM |
| 68.5824858 | 11:51:34 AM |
| 68.5606108 | 11:51:35 AM |
| 68.5087791 | 11:51:36 AM |
| 68.4530412 | 11:51:37 AM |
| 68.4008189 | 11:51:38 AM |
| 68.4133189 | 11:51:39 AM |
| 68.4998047 | 11:51:40 AM |
| 68.5948842 | 11:51:41 AM |
| 68.7020731 | 11:51:42 AM |
| 68.8362152 | 11:51:43 AM |
| 69.0012166 | 11:51:44 AM |
| 69.1728586 | 11:51:45 AM |
| 69.3041086 | 11:51:46 AM |
| 69.4603586 | 11:51:47 AM |
| 69.6041086 | 11:51:48 AM |
| 69.7447336 | 11:51:49 AM |
| 69.8791086 | 11:51:50 AM |
| 70.0228586 | 11:51:51 AM |
| 70.1697336 | 11:51:52 AM |
| 70.3259836 | 11:51:53 AM |
| 70.5041086 | 11:51:54 AM |
| 70.7103586 | 11:51:55 AM |
| 70.9072336 | 11:51:56 AM |
| 71.0853586 | 11:51:57 AM |

|            |             |
|------------|-------------|
| 71.2541086 | 11:51:58 AM |
| 71.4291086 | 11:51:59 AM |
| 71.5978586 | 11:52:00 AM |
| 71.7509836 | 11:52:01 AM |
| 71.9041086 | 11:52:02 AM |
| 72.0572336 | 11:52:03 AM |
| 72.1916086 | 11:52:04 AM |
| 72.3166086 | 11:52:05 AM |
| 72.4134836 | 11:52:06 AM |
| 72.4884836 | 11:52:07 AM |
| 72.5478586 | 11:52:08 AM |
| 72.6009836 | 11:52:09 AM |
| 72.6509836 | 11:52:10 AM |
| 72.6978586 | 11:52:11 AM |
| 72.6800879 | 11:52:12 AM |
| 72.6498171 | 11:52:13 AM |
| 72.604312  | 11:52:14 AM |
| 72.5349788 | 11:52:15 AM |
| 72.4745085 | 11:52:16 AM |
| 72.4210694 | 11:52:17 AM |
| 72.3609897 | 11:52:18 AM |
| 72.2404846 | 11:52:19 AM |
| 72.1117764 | 11:52:20 AM |
| 71.9889275 | 11:52:21 AM |
| 71.8785786 | 11:52:22 AM |
| 71.7725267 | 11:52:23 AM |
| 71.6516309 | 11:52:24 AM |
| 71.5112039 | 11:52:25 AM |
| 71.3438238 | 11:52:26 AM |
| 71.1623812 | 11:52:27 AM |
| 70.9817198 | 11:52:28 AM |
| 70.7897303 | 11:52:29 AM |
| 70.5985221 | 11:52:30 AM |
| 70.3858295 | 11:52:31 AM |
| 70.1602463 | 11:52:32 AM |
| 69.9155224 | 11:52:33 AM |
| 69.644236  | 11:52:34 AM |
| 69.3534184 | 11:52:35 AM |
| 69.0614289 | 11:52:36 AM |
| 68.7885801 | 11:52:37 AM |
| 68.5395593 | 11:52:38 AM |
| 68.3077261 | 11:52:39 AM |
| 68.1233511 | 11:52:40 AM |
| 67.9296011 | 11:52:41 AM |
| 67.7202261 | 11:52:42 AM |

|            |             |
|------------|-------------|
| 67.5046011 | 11:52:43 AM |
| 67.3171011 | 11:52:44 AM |
| 67.1219866 | 11:52:45 AM |
| 66.9565596 | 11:52:46 AM |
| 66.8005076 | 11:52:47 AM |
| 66.6272681 | 11:52:48 AM |
| 66.4462161 | 11:52:49 AM |
| 66.2651641 | 11:52:50 AM |
| 66.0708309 | 11:52:51 AM |
| 65.9153622 | 11:52:52 AM |
| 65.7598934 | 11:52:53 AM |
| 65.607159  | 11:52:54 AM |
| 65.4614559 | 11:52:55 AM |
| 65.3368465 | 11:52:56 AM |
| 65.2298153 | 11:52:57 AM |
| 65.1364559 | 11:52:58 AM |
| 65.0454403 | 11:52:59 AM |
| 64.9591122 | 11:53:00 AM |
| 64.8872372 | 11:53:01 AM |
| 64.8462215 | 11:53:02 AM |
| 64.8106747 | 11:53:03 AM |
| 64.779034  | 11:53:04 AM |
| 64.7688778 | 11:53:05 AM |
| 64.7841122 | 11:53:06 AM |
| 64.8280548 | 11:53:07 AM |
| 64.8587161 | 11:53:08 AM |
| 64.8882056 | 11:53:09 AM |
| 64.9231639 | 11:53:10 AM |
| 64.9577315 | 11:53:11 AM |
| 65.0020647 | 11:53:12 AM |
| 65.0499136 | 11:53:13 AM |
| 65.0930749 | 11:53:14 AM |
| 65.1338926 | 11:53:15 AM |
| 65.179007  | 11:53:16 AM |
| 65.2206059 | 11:53:17 AM |
| 65.2352516 | 11:53:18 AM |
| 65.2420849 | 11:53:19 AM |
| 65.2014599 | 11:53:20 AM |
| 65.1858349 | 11:53:21 AM |
| 65.1889599 | 11:53:22 AM |
| 65.2014599 | 11:53:23 AM |
| 65.1983349 | 11:53:24 AM |
| 65.2121994 | 11:53:25 AM |
| 65.2432514 | 11:53:26 AM |
| 65.2774284 | 11:53:27 AM |

|            |             |
|------------|-------------|
| 65.3245549 | 11:53:28 AM |
| 65.3799403 | 11:53:29 AM |
| 65.4464864 | 11:53:30 AM |
| 65.5225655 | 11:53:31 AM |
| 65.6056758 | 11:53:32 AM |
| 65.6919111 | 11:53:33 AM |
| 65.7958548 | 11:53:34 AM |
| 65.9056089 | 11:53:35 AM |
| 66.020363  | 11:53:36 AM |
| 66.1452888 | 11:53:37 AM |
| 66.2775834 | 11:53:38 AM |
| 66.4209457 | 11:53:39 AM |
| 66.5490736 | 11:53:40 AM |
| 66.6617126 | 11:53:41 AM |
| 66.7174022 | 11:53:42 AM |
| 66.7105046 | 11:53:43 AM |
| 66.5342459 | 11:53:44 AM |
| 66.2729017 | 11:53:45 AM |
| 66.009995  | 11:53:46 AM |



|          |         | Person 12 | Person 2   | Person 4   | Person 1   | Person 13  |
|----------|---------|-----------|------------|------------|------------|------------|
| Time     |         |           |            |            |            |            |
| 18:02:22 | 0:00:01 | 70.101237 | 81.2842889 | 79.8195316 | 80.8813582 | 88.5172777 |
| 18:02:23 | 0:00:02 | 71.101237 | 81.2842889 | 79.8195316 | 80.8813582 | 87.5172777 |
| 18:02:24 | 0:00:03 | 74.101237 | 81.2842889 | 74.8195316 | 80.8813582 | 86.5172777 |
| 18:02:25 | 0:00:04 | 74.101237 | 81.2842889 | 73.8195316 | 80.8813582 | 86.5172777 |
| 18:02:26 | 0:00:05 | 74.101237 | 81.2842889 | 73.8195316 | 80.8813582 | 84.5172777 |
| 18:02:27 | 0:00:06 | 74.101237 | 81.2842889 | 73.8195316 | 81.8813582 | 83.5172777 |
| 18:02:28 | 0:00:07 | 73.101237 | 80.2842889 | 72.8195316 | 82.8813582 | 82.5172777 |
| 18:02:29 | 0:00:08 | 73.101237 | 80.2842889 | 72.8195316 | 82.8813582 | 82.5172777 |
| 18:02:30 | 0:00:09 | 73.101237 | 80.2842889 | 73.8195316 | 82.8813582 | 82.5172777 |
| 18:02:31 | 0:00:10 | 73.101237 | 79.2842889 | 74.8195316 | 82.8813582 | 82.5172777 |
| 18:02:32 | 0:00:11 | 73.101237 | 79.2842889 | 76.8195316 | 75.8813582 | 82.5172777 |
| 18:02:33 | 0:00:12 | 73.101237 | 78.2842889 | 76.8195316 | 75.8813582 | 82.5172777 |
| 18:02:34 | 0:00:13 | 73.101237 | 78.2842889 | 77.8195316 | 75.8813582 | 83.5172777 |
| 18:02:35 | 0:00:14 | 73.101237 | 78.2842889 | 78.8195316 | 74.8813582 | 83.5172777 |
| 18:02:36 | 0:00:15 | 74.101237 | 78.2842889 | 78.8195316 | 74.8813582 | 83.5172777 |
| 18:02:37 | 0:00:16 | 74.101237 | 77.2842889 | 78.8195316 | 74.8813582 | 84.5172777 |
| 18:02:38 | 0:00:17 | 75.101237 | 76.2842889 | 78.8195316 | 74.8813582 | 84.5172777 |
| 18:02:39 | 0:00:18 | 76.101237 | 76.2842889 | 78.8195316 | 75.8813582 | 85.5172777 |
| 18:02:40 | 0:00:19 | 78.101237 | 75.2842889 | 77.8195316 | 76.8813582 | 82.5172777 |
| 18:02:41 | 0:00:20 | 78.101237 | 75.2842889 | 77.8195316 | 76.8813582 | 79.5172777 |
| 18:02:42 | 0:00:21 | 78.101237 | 75.2842889 | 77.8195316 | 76.8813582 | 79.5172777 |
| 18:02:43 | 0:00:22 | 79.101237 | 75.2842889 | 76.8195316 | 76.8813582 | 79.5172777 |
| 18:02:44 | 0:00:23 | 75.101237 | 75.2842889 | 73.8195316 | 76.8813582 | 77.5172777 |
| 18:02:45 | 0:00:24 | 75.101237 | 75.2842889 | 72.8195316 | 81.8813582 | 77.5172777 |
| 18:02:46 | 0:00:25 | 75.101237 | 74.2842889 | 72.8195316 | 81.8813582 | 77.5172777 |
| 18:02:47 | 0:00:26 | 76.101237 | 73.2842889 | 69.8195316 | 80.8813582 | 77.5172777 |
| 18:02:48 | 0:00:27 | 74.101237 | 70.2842889 | 67.8195316 | 80.8813582 | 77.5172777 |
| 18:02:49 | 0:00:28 | 73.101237 | 70.2842889 | 65.8195316 | 80.8813582 | 77.5172777 |
| 18:02:50 | 0:00:29 | 73.101237 | 69.2842889 | 65.8195316 | 80.8813582 | 71.5172777 |
| 18:02:51 | 0:00:30 | 73.101237 | 69.2842889 | 64.8195316 | 80.8813582 | 69.5172777 |
| 18:02:52 | 0:00:31 | 72.101237 | 68.2842889 | 65.8195316 | 80.8813582 | 69.5172777 |
| 18:02:53 | 0:00:32 | 70.101237 | 68.2842889 | 65.8195316 | 79.8813582 | 67.5172777 |
| 18:02:54 | 0:00:33 | 70.101237 | 68.2842889 | 66.8195316 | 78.8813582 | 66.5172777 |
| 18:02:55 | 0:00:34 | 75.101237 | 68.2842889 | 66.8195316 | 78.8813582 | 66.5172777 |
| 18:02:56 | 0:00:35 | 76.101237 | 68.2842889 | 69.8195316 | 78.8813582 | 66.5172777 |
| 18:02:57 | 0:00:36 | 76.101237 | 68.2842889 | 69.8195316 | 78.8813582 | 66.5172777 |
| 18:02:58 | 0:00:37 | 75.101237 | 68.2842889 | 69.8195316 | 78.8813582 | 64.5172777 |
| 18:02:59 | 0:00:38 | 73.101237 | 68.2842889 | 70.8195316 | 79.8813582 | 64.5172777 |
| 18:03:00 | 0:00:39 | 73.101237 | 68.2842889 | 68.8195316 | 79.8813582 | 64.5172777 |
| 18:03:01 | 0:00:40 | 72.101237 | 68.2842889 | 68.8195316 | 79.8813582 | 64.5172777 |
| 18:03:02 | 0:00:41 | 73.101237 | 68.2842889 | 66.8195316 | 81.8813582 | 65.5172777 |
| 18:03:03 | 0:00:42 | 73.101237 | 68.2842889 | 66.8195316 | 83.8813582 | 64.5172777 |

|          |         |           |            |            |            |            |
|----------|---------|-----------|------------|------------|------------|------------|
| 18:03:04 | 0:00:43 | 74.101237 | 68.2842889 | 66.8195316 | 83.8813582 | 65.5172777 |
| 18:03:05 | 0:00:44 | 75.101237 | 68.2842889 | 66.8195316 | 82.8813582 | 65.5172777 |
| 18:03:06 | 0:00:45 | 75.101237 | 68.2842889 | 66.8195316 | 82.8813582 | 65.5172777 |
| 18:03:07 | 0:00:46 | 75.101237 | 69.2842889 | 64.8195316 | 82.8813582 | 65.5172777 |
| 18:03:08 | 0:00:47 | 75.101237 | 69.2842889 | 63.8195316 | 82.8813582 | 64.5172777 |
| 18:03:09 | 0:00:48 | 76.101237 | 69.2842889 | 63.8195316 | 82.8813582 | 63.5172777 |
| 18:03:10 | 0:00:49 | 77.101237 | 70.2842889 | 63.8195316 | 82.8813582 | 63.5172777 |
| 18:03:11 | 0:00:50 | 77.101237 | 70.2842889 | 63.8195316 | 82.8813582 | 63.5172777 |
| 18:03:12 | 0:00:51 | 78.101237 | 69.2842889 | 63.8195316 | 81.8813582 | 64.5172777 |
| 18:03:13 | 0:00:52 | 78.101237 | 69.2842889 | 63.8195316 | 79.8813582 | 64.5172777 |
| 18:03:14 | 0:00:53 | 78.101237 | 70.2842889 | 63.8195316 | 76.8813582 | 65.5172777 |
| 18:03:15 | 0:00:54 | 78.101237 | 71.2842889 | 63.8195316 | 74.8813582 | 65.5172777 |
| 18:03:16 | 0:00:55 | 78.101237 | 71.2842889 | 63.8195316 | 74.8813582 | 64.5172777 |
| 18:03:17 | 0:00:56 | 77.101237 | 74.2842889 | 63.8195316 | 72.8813582 | 64.5172777 |
| 18:03:18 | 0:00:57 | 77.101237 | 74.2842889 | 62.8195316 | 71.8813582 | 65.5172777 |
| 18:03:19 | 0:00:58 | 74.101237 | 74.2842889 | 62.8195316 | 70.8813582 | 65.5172777 |
| 18:03:20 | 0:00:59 | 74.101237 | 75.2842889 | 62.8195316 | 70.8813582 | 65.5172777 |
| 18:03:21 | 0:01:00 | 73.101237 | 75.2842889 | 62.8195316 | 70.8813582 | 65.5172777 |
| 18:03:22 | 0:01:01 | 73.101237 | 76.2842889 | 61.8195316 | 70.8813582 | 65.5172777 |
| 18:03:23 | 0:01:02 | 72.101237 | 75.2842889 | 61.8195316 | 69.8813582 | 65.5172777 |
| 18:03:24 | 0:01:03 | 69.101237 | 75.2842889 | 62.8195316 | 69.8813582 | 65.5172777 |
| 18:03:25 | 0:01:04 | 69.101237 | 75.2842889 | 62.8195316 | 69.8813582 | 65.5172777 |
| 18:03:26 | 0:01:05 | 66.101237 | 75.2842889 | 62.8195316 | 69.8813582 | 67.5172777 |
| 18:03:27 | 0:01:06 | 61.101237 | 75.2842889 | 62.8195316 | 69.8813582 | 69.5172777 |
| 18:03:28 | 0:01:07 | 60.101237 | 75.2842889 | 62.8195316 | 69.8813582 | 69.5172777 |
| 18:03:29 | 0:01:08 | 60.101237 | 74.2842889 | 62.8195316 | 69.8813582 | 72.5172777 |
| 18:03:30 | 0:01:09 | 61.101237 | 73.2842889 | 62.8195316 | 70.8813582 | 71.5172777 |
| 18:03:31 | 0:01:10 | 62.101237 | 73.2842889 | 62.8195316 | 71.8813582 | 68.5172777 |
| 18:03:32 | 0:01:11 | 64.101237 | 74.2842889 | 62.8195316 | 72.8813582 | 66.5172777 |
| 18:03:33 | 0:01:12 | 67.101237 | 74.2842889 | 62.8195316 | 72.8813582 | 65.5172777 |
| 18:03:34 | 0:01:13 | 68.101237 | 74.2842889 | 62.8195316 | 72.8813582 | 66.5172777 |
| 18:03:35 | 0:01:14 | 68.101237 | 74.2842889 | 62.8195316 | 72.8813582 | 66.5172777 |
| 18:03:36 | 0:01:15 | 68.101237 | 74.2842889 | 62.8195316 | 72.8813582 | 66.5172777 |
| 18:03:37 | 0:01:16 | 68.101237 | 70.2842889 | 62.8195316 | 72.8813582 | 64.5172777 |
| 18:03:38 | 0:01:17 | 67.101237 | 70.2842889 | 62.8195316 | 72.8813582 | 64.5172777 |
| 18:03:39 | 0:01:18 | 67.101237 | 70.2842889 | 63.8195316 | 70.8813582 | 63.5172777 |
| 18:03:40 | 0:01:19 | 67.101237 | 70.2842889 | 64.8195316 | 68.8813582 | 63.5172777 |
| 18:03:41 | 0:01:20 | 68.101237 | 69.2842889 | 64.8195316 | 68.8813582 | 63.5172777 |
| 18:03:42 | 0:01:21 | 68.101237 | 69.2842889 | 64.8195316 | 68.8813582 | 63.5172777 |
| 18:03:43 | 0:01:22 | 68.101237 | 69.2842889 | 63.8195316 | 68.8813582 | 63.5172777 |
| 18:03:44 | 0:01:23 | 69.101237 | 69.2842889 | 64.8195316 | 68.8813582 | 63.5172777 |
| 18:03:45 | 0:01:24 | 69.101237 | 69.2842889 | 67.8195316 | 68.8813582 | 63.5172777 |
| 18:03:46 | 0:01:25 | 70.101237 | 69.2842889 | 67.8195316 | 68.8813582 | 63.5172777 |
| 18:03:47 | 0:01:26 | 70.101237 | 68.2842889 | 67.8195316 | 69.8813582 | 63.5172777 |
| 18:03:48 | 0:01:27 | 70.101237 | 68.2842889 | 65.8195316 | 69.8813582 | 63.5172777 |

|          |         |           |            |            |            |            |
|----------|---------|-----------|------------|------------|------------|------------|
| 18:03:49 | 0:01:28 | 68.101237 | 68.2842889 | 65.8195316 | 69.8813582 | 63.5172777 |
| 18:03:50 | 0:01:29 | 68.101237 | 68.2842889 | 65.8195316 | 69.8813582 | 63.5172777 |
| 18:03:51 | 0:01:30 | 67.101237 | 68.2842889 | 66.8195316 | 69.8813582 | 63.5172777 |
| 18:03:52 | 0:01:31 | 68.101237 | 69.2842889 | 67.8195316 | 68.8813582 | 62.5172777 |
| 18:03:53 | 0:01:32 | 68.101237 | 69.2842889 | 67.8195316 | 67.8813582 | 62.5172777 |
| 18:03:54 | 0:01:33 | 68.101237 | 70.2842889 | 67.8195316 | 68.8813582 | 63.5172777 |
| 18:03:55 | 0:01:34 | 66.101237 | 70.2842889 | 67.8195316 | 68.8813582 | 63.5172777 |
| 18:03:56 | 0:01:35 | 66.101237 | 70.2842889 | 67.8195316 | 68.8813582 | 63.5172777 |
| 18:03:57 | 0:01:36 | 65.101237 | 70.2842889 | 66.8195316 | 68.8813582 | 63.5172777 |
| 18:03:58 | 0:01:37 | 65.101237 | 68.2842889 | 66.8195316 | 67.8813582 | 64.5172777 |
| 18:03:59 | 0:01:38 | 65.101237 | 66.2842889 | 66.8195316 | 66.8813582 | 65.5172777 |
| 18:04:00 | 0:01:39 | 65.101237 | 66.2842889 | 65.8195316 | 66.8813582 | 66.5172777 |
| 18:04:01 | 0:01:40 | 65.101237 | 66.2842889 | 65.8195316 | 65.8813582 | 67.5172777 |
| 18:04:02 | 0:01:41 | 65.101237 | 66.2842889 | 66.8195316 | 65.8813582 | 67.5172777 |
| 18:04:03 | 0:01:42 | 65.101237 | 66.2842889 | 66.8195316 | 65.8813582 | 73.5172777 |
| 18:04:04 | 0:01:43 | 65.101237 | 67.2842889 | 66.8195316 | 64.8813582 | 73.5172777 |
| 18:04:05 | 0:01:44 | 65.101237 | 67.2842889 | 65.8195316 | 65.8813582 | 73.5172777 |
| 18:04:06 | 0:01:45 | 66.101237 | 67.2842889 | 64.8195316 | 65.8813582 | 74.5172777 |
| 18:04:07 | 0:01:46 | 73.101237 | 67.2842889 | 64.8195316 | 65.8813582 | 74.5172777 |
| 18:04:08 | 0:01:47 | 74.101237 | 67.2842889 | 65.8195316 | 65.8813582 | 76.5172777 |
| 18:04:09 | 0:01:48 | 74.101237 | 67.2842889 | 66.8195316 | 63.8813582 | 78.5172777 |
| 18:04:10 | 0:01:49 | 74.101237 | 67.2842889 | 67.8195316 | 64.8813582 | 78.5172777 |
| 18:04:11 | 0:01:50 | 74.101237 | 64.2842889 | 67.8195316 | 64.8813582 | 78.5172777 |
| 18:04:12 | 0:01:51 | 74.101237 | 64.2842889 | 67.8195316 | 64.8813582 | 78.5172777 |
| 18:04:13 | 0:01:52 | 75.101237 | 63.2842889 | 68.8195316 | 65.8813582 | 75.5172777 |
| 18:04:14 | 0:01:53 | 74.101237 | 63.2842889 | 68.8195316 | 66.8813582 | 74.5172777 |
| 18:04:15 | 0:01:54 | 73.101237 | 63.2842889 | 68.8195316 | 66.8813582 | 74.5172777 |
| 18:04:16 | 0:01:55 | 72.101237 | 63.2842889 | 68.8195316 | 66.8813582 | 75.5172777 |
| 18:04:17 | 0:01:56 | 72.101237 | 63.2842889 | 69.8195316 | 66.8813582 | 76.5172777 |
| 18:04:18 | 0:01:57 | 73.101237 | 63.2842889 | 69.8195316 | 67.8813582 | 76.5172777 |
| 18:04:19 | 0:01:58 | 73.101237 | 63.2842889 | 68.8195316 | 67.8813582 | 77.5172777 |
| 18:04:20 | 0:01:59 | 73.101237 | 63.2842889 | 68.8195316 | 67.8813582 | 78.5172777 |
| 18:04:21 | 0:02:00 | 74.101237 | 64.2842889 | 68.8195316 | 66.8813582 | 78.5172777 |
| 18:04:22 | 0:02:01 | 74.101237 | 64.2842889 | 68.8195316 | 66.8813582 | 78.5172777 |
| 18:04:23 | 0:02:02 | 75.101237 | 65.2842889 | 69.8195316 | 66.8813582 | 72.5172777 |
| 18:04:24 | 0:02:03 | 75.101237 | 65.2842889 | 69.8195316 | 66.8813582 | 70.5172777 |
| 18:04:25 | 0:02:04 | 75.101237 | 65.2842889 | 69.8195316 | 66.8813582 | 69.5172777 |
| 18:04:26 | 0:02:05 | 75.101237 | 69.2842889 | 69.8195316 | 67.8813582 | 69.5172777 |
| 18:04:27 | 0:02:06 | 75.101237 | 68.2842889 | 69.8195316 | 67.8813582 | 69.5172777 |
| 18:04:28 | 0:02:07 | 75.101237 | 66.2842889 | 69.8195316 | 68.8813582 | 67.5172777 |
| 18:04:29 | 0:02:08 | 74.101237 | 64.2842889 | 69.8195316 | 67.8813582 | 66.5172777 |
| 18:04:30 | 0:02:09 | 74.101237 | 64.2842889 | 69.8195316 | 67.8813582 | 66.5172777 |
| 18:04:31 | 0:02:10 | 74.101237 | 64.2842889 | 70.8195316 | 67.8813582 | 66.5172777 |
| 18:04:32 | 0:02:11 | 73.101237 | 64.2842889 | 69.8195316 | 67.8813582 | 66.5172777 |
| 18:04:33 | 0:02:12 | 73.101237 | 63.2842889 | 69.8195316 | 67.8813582 | 66.5172777 |

|          |         |           |            |            |            |            |
|----------|---------|-----------|------------|------------|------------|------------|
| 18:04:34 | 0:02:13 | 71.101237 | 64.2842889 | 69.8195316 | 67.8813582 | 67.5172777 |
| 18:04:35 | 0:02:14 | 71.101237 | 64.2842889 | 71.8195316 | 69.8813582 | 66.5172777 |
| 18:04:36 | 0:02:15 | 70.101237 | 64.2842889 | 72.8195316 | 69.8813582 | 66.5172777 |
| 18:04:37 | 0:02:16 | 71.101237 | 64.2842889 | 72.8195316 | 70.8813582 | 66.5172777 |
| 18:04:38 | 0:02:17 | 75.101237 | 65.2842889 | 73.8195316 | 71.8813582 | 68.5172777 |
| 18:04:39 | 0:02:18 | 78.101237 | 65.2842889 | 73.8195316 | 71.8813582 | 68.5172777 |
| 18:04:40 | 0:02:19 | 79.101237 | 65.2842889 | 73.8195316 | 71.8813582 | 68.5172777 |
| 18:04:41 | 0:02:20 | 79.101237 | 64.2842889 | 73.8195316 | 71.8813582 | 67.5172777 |
| 18:04:42 | 0:02:21 | 78.101237 | 64.2842889 | 75.8195316 | 73.8813582 | 68.5172777 |
| 18:04:43 | 0:02:22 | 77.101237 | 63.2842889 | 76.8195316 | 73.8813582 | 68.5172777 |
| 18:04:44 | 0:02:23 | 76.101237 | 64.2842889 | 77.8195316 | 73.8813582 | 67.5172777 |
| 18:04:45 | 0:02:24 | 75.101237 | 64.2842889 | 77.8195316 | 70.8813582 | 67.5172777 |
| 18:04:46 | 0:02:25 | 75.101237 | 64.2842889 | 76.8195316 | 68.8813582 | 67.5172777 |
| 18:04:47 | 0:02:26 | 75.101237 | 64.2842889 | 76.8195316 | 68.8813582 | 66.5172777 |
| 18:04:48 | 0:02:27 | 75.101237 | 64.2842889 | 75.8195316 | 68.8813582 | 67.5172777 |
| 18:04:49 | 0:02:28 | 77.101237 | 64.2842889 | 75.8195316 | 68.8813582 | 68.5172777 |
| 18:04:50 | 0:02:29 | 77.101237 | 64.2842889 | 75.8195316 | 68.8813582 | 68.5172777 |
| 18:04:51 | 0:02:30 | 80.101237 | 64.2842889 | 73.8195316 | 67.8813582 | 68.5172777 |
| 18:04:52 | 0:02:31 | 81.101237 | 64.2842889 | 73.8195316 | 66.8813582 | 68.5172777 |
| 18:04:53 | 0:02:32 | 81.101237 | 64.2842889 | 73.8195316 | 67.8813582 | 69.5172777 |
| 18:04:54 | 0:02:33 | 75.101237 | 65.2842889 | 72.8195316 | 67.8813582 | 69.5172777 |
| 18:04:55 | 0:02:34 | 75.101237 | 65.2842889 | 69.8195316 | 66.8813582 | 68.5172777 |
| 18:04:56 | 0:02:35 | 75.101237 | 64.2842889 | 69.8195316 | 66.8813582 | 67.5172777 |
| 18:04:57 | 0:02:36 | 75.101237 | 63.2842889 | 69.8195316 | 66.8813582 | 66.5172777 |
| 18:04:58 | 0:02:37 | 63.101237 | 62.2842889 | 69.8195316 | 67.8813582 | 66.5172777 |
| 18:04:59 | 0:02:38 | 53.101237 | 62.2842889 | 69.8195316 | 67.8813582 | 65.5172777 |
| 18:05:00 | 0:02:39 | 53.101237 | 62.2842889 | 69.8195316 | 67.8813582 | 65.5172777 |
| 18:05:01 | 0:02:40 | 53.101237 | 62.2842889 | 70.8195316 | 67.8813582 | 65.5172777 |
| 18:05:02 | 0:02:41 | 54.101237 | 62.2842889 | 71.8195316 | 67.8813582 | 65.5172777 |
| 18:05:03 | 0:02:42 | 55.101237 | 62.2842889 | 75.8195316 | 66.8813582 | 67.5172777 |
| 18:05:04 | 0:02:43 | 56.101237 | 64.2842889 | 75.8195316 | 66.8813582 | 67.5172777 |
| 18:05:05 | 0:02:44 | 57.101237 | 65.2842889 | 75.8195316 | 66.8813582 | 67.5172777 |
| 18:05:06 | 0:02:45 | 58.101237 | 65.2842889 | 73.8195316 | 66.8813582 | 67.5172777 |
| 18:05:07 | 0:02:46 | 58.101237 | 65.2842889 | 73.8195316 | 66.8813582 | 66.5172777 |
| 18:05:08 | 0:02:47 | 58.101237 | 65.2842889 | 72.8195316 | 66.8813582 | 66.5172777 |
| 18:05:09 | 0:02:48 | 63.101237 | 66.2842889 | 73.8195316 | 66.8813582 | 66.5172777 |
| 18:05:10 | 0:02:49 | 63.101237 | 66.2842889 | 74.8195316 | 66.8813582 | 65.5172777 |
| 18:05:11 | 0:02:50 | 65.101237 | 66.2842889 | 74.8195316 | 66.8813582 | 65.5172777 |
| 18:05:12 | 0:02:51 | 65.101237 | 66.2842889 | 75.8195316 | 65.8813582 | 65.5172777 |
| 18:05:13 | 0:02:52 | 59.101237 | 68.2842889 | 75.8195316 | 64.8813582 | 66.5172777 |
| 18:05:14 | 0:02:53 | 56.101237 | 69.2842889 | 76.8195316 | 63.8813582 | 67.5172777 |
| 18:05:15 | 0:02:54 | 58.101237 | 70.2842889 | 76.8195316 | 63.8813582 | 67.5172777 |
| 18:05:16 | 0:02:55 | 60.101237 | 71.2842889 | 76.8195316 | 63.8813582 | 67.5172777 |
| 18:05:17 | 0:02:56 | 60.101237 | 71.2842889 | 77.8195316 | 64.8813582 | 66.5172777 |
| 18:05:18 | 0:02:57 | 62.101237 | 71.2842889 | 78.8195316 | 64.8813582 | 66.5172777 |

|          |         |           |            |            |            |            |
|----------|---------|-----------|------------|------------|------------|------------|
| 18:05:19 | 0:02:58 | 63.101237 | 72.2842889 | 77.8195316 | 65.8813582 | 66.5172777 |
| 18:05:20 | 0:02:59 | 66.101237 | 72.2842889 | 76.8195316 | 65.8813582 | 67.5172777 |
| 18:05:21 | 0:03:00 | 66.101237 | 72.2842889 | 76.8195316 | 65.8813582 | 67.5172777 |
| 18:05:22 | 0:03:01 | 66.101237 | 72.2842889 | 76.8195316 | 65.8813582 | 67.5172777 |
| 18:05:23 | 0:03:02 | 75.101237 | 72.2842889 | 76.8195316 | 65.8813582 | 67.5172777 |
| 18:05:24 | 0:03:03 | 75.101237 | 72.2842889 | 76.8195316 | 65.8813582 | 67.5172777 |
| 18:05:25 | 0:03:04 | 76.101237 | 71.2842889 | 76.8195316 | 67.8813582 | 65.5172777 |
| 18:05:26 | 0:03:05 | 75.101237 | 69.2842889 | 76.8195316 | 68.8813582 | 66.5172777 |
| 18:05:27 | 0:03:06 | 73.101237 | 69.2842889 | 76.8195316 | 68.8813582 | 65.5172777 |
| 18:05:28 | 0:03:07 | 72.101237 | 69.2842889 | 80.8195316 | 69.8813582 | 65.5172777 |
| 18:05:29 | 0:03:08 | 72.101237 | 69.2842889 | 84.8195316 | 69.8813582 | 65.5172777 |
| 18:05:30 | 0:03:09 | 72.101237 | 67.2842889 | 84.8195316 | 68.8813582 | 65.5172777 |
| 18:05:31 | 0:03:10 | 65.101237 | 66.2842889 | 72.3428504 | 66.8813582 | 65.5172777 |
| 18:05:32 | 0:03:11 | 64.101237 | 67.2842889 | 72.7428504 | 66.8813582 | 66.5172777 |
| 18:05:33 | 0:03:12 | 64.101237 | 67.2842889 | 72.9428504 | 66.8813582 | 66.5172777 |
| 18:05:34 | 0:03:13 | 65.101237 | 67.2842889 | 73.5428504 | 65.8813582 | 65.5172777 |
| 18:05:35 | 0:03:14 | 67.101237 | 67.2842889 | 74.2428504 | 65.8813582 | 65.5172777 |
| 18:05:36 | 0:03:15 | 68.101237 | 66.2842889 | 74.4428504 | 66.8813582 | 65.5172777 |
| 18:05:37 | 0:03:16 | 70.101237 | 66.2842889 | 85.8195316 | 66.8813582 | 63.5172777 |
| 18:05:38 | 0:03:17 | 71.101237 | 70.2842889 | 75.8195316 | 66.8813582 | 63.5172777 |
| 18:05:39 | 0:03:18 | 72.101237 | 71.2842889 | 75.8195316 | 66.8813582 | 64.5172777 |
| 18:05:40 | 0:03:19 | 72.101237 | 70.2842889 | 75.8195316 | 65.8813582 | 65.5172777 |
| 18:05:41 | 0:03:20 | 72.101237 | 69.2842889 | 74.8195316 | 65.8813582 | 66.5172777 |
| 18:05:42 | 0:03:21 | 73.101237 | 69.2842889 | 73.8195316 | 65.8813582 | 66.5172777 |
| 18:05:43 | 0:03:22 | 73.101237 | 69.2842889 | 71.8195316 | 66.8813582 | 66.5172777 |
| 18:05:44 | 0:03:23 | 75.101237 | 70.2842889 | 71.8195316 | 66.8813582 | 66.5172777 |
| 18:05:45 | 0:03:24 | 76.101237 | 70.2842889 | 68.8195316 | 68.8813582 | 66.5172777 |
| 18:05:46 | 0:03:25 | 76.101237 | 70.2842889 | 67.8195316 | 68.8813582 | 67.5172777 |
| 18:05:47 | 0:03:26 | 74.101237 | 70.2842889 | 66.8195316 | 66.8813582 | 68.5172777 |
| 18:05:48 | 0:03:27 | 74.101237 | 70.2842889 | 66.8195316 | 65.8813582 | 68.5172777 |
| 18:05:49 | 0:03:28 | 74.101237 | 70.2842889 | 65.8195316 | 65.8813582 | 68.5172777 |
| 18:05:50 | 0:03:29 | 75.101237 | 68.2842889 | 65.8195316 | 66.8813582 | 71.5172777 |
| 18:05:51 | 0:03:30 | 75.101237 | 68.2842889 | 65.8195316 | 67.8813582 | 72.5172777 |
| 18:05:52 | 0:03:31 | 76.101237 | 68.2842889 | 67.8195316 | 67.8813582 | 72.5172777 |
| 18:05:53 | 0:03:32 | 78.101237 | 67.2842889 | 68.8195316 | 68.8813582 | 73.5172777 |
| 18:05:54 | 0:03:33 | 78.101237 | 67.2842889 | 69.8195316 | 68.8813582 | 75.5172777 |
| 18:05:55 | 0:03:34 | 78.101237 | 66.2842889 | 69.8195316 | 68.8813582 | 75.5172777 |
| 18:05:56 | 0:03:35 | 74.101237 | 66.2842889 | 69.8195316 | 67.8813582 | 76.5172777 |
| 18:05:57 | 0:03:36 | 69.101237 | 66.2842889 | 69.8195316 | 66.8813582 | 76.5172777 |
| 18:05:58 | 0:03:37 | 66.101237 | 66.2842889 | 69.8195316 | 66.8813582 | 76.5172777 |
| 18:05:59 | 0:03:38 | 66.101237 | 66.2842889 | 69.8195316 | 65.8813582 | 76.5172777 |
| 18:06:00 | 0:03:39 | 65.101237 | 66.2842889 | 69.8195316 | 65.8813582 | 76.5172777 |
| 18:06:01 | 0:03:40 | 65.101237 | 66.2842889 | 69.8195316 | 65.8813582 | 75.5172777 |
| 18:06:02 | 0:03:41 | 66.101237 | 66.2842889 | 69.8195316 | 65.8813582 | 75.5172777 |
| 18:06:03 | 0:03:42 | 70.101237 | 67.2842889 | 70.8195316 | 65.8813582 | 75.5172777 |

|          |         |           |            |            |            |            |
|----------|---------|-----------|------------|------------|------------|------------|
| 18:06:04 | 0:03:43 | 71.101237 | 67.2842889 | 71.8195316 | 66.8813582 | 75.5172777 |
| 18:06:05 | 0:03:44 | 71.101237 | 67.2842889 | 71.8195316 | 66.8813582 | 75.5172777 |
| 18:06:06 | 0:03:45 | 70.101237 | 67.2842889 | 72.8195316 | 66.8813582 | 75.5172777 |
| 18:06:07 | 0:03:46 | 70.101237 | 68.2842889 | 71.8195316 | 67.8813582 | 75.5172777 |
| 18:06:08 | 0:03:47 | 71.101237 | 68.2842889 | 70.8195316 | 67.8813582 | 75.5172777 |
| 18:06:09 | 0:03:48 | 71.101237 | 69.2842889 | 70.8195316 | 68.8813582 | 76.5172777 |
| 18:06:10 | 0:03:49 | 71.101237 | 67.2842889 | 70.8195316 | 69.8813582 | 76.5172777 |
| 18:06:11 | 0:03:50 | 70.101237 | 67.2842889 | 69.8195316 | 69.8813582 | 78.5172777 |
| 18:06:12 | 0:03:51 | 71.101237 | 66.2842889 | 69.8195316 | 70.8813582 | 81.5172777 |
| 18:06:13 | 0:03:52 | 72.101237 | 67.2842889 | 70.8195316 | 70.8813582 | 81.5172777 |
| 18:06:14 | 0:03:53 | 73.101237 | 67.2842889 | 70.8195316 | 70.8813582 | 81.5172777 |
| 18:06:15 | 0:03:54 | 74.101237 | 67.2842889 | 72.8195316 | 70.8813582 | 81.5172777 |
| 18:06:16 | 0:03:55 | 74.101237 | 68.2842889 | 71.8195316 | 70.8813582 | 81.5172777 |
| 18:06:17 | 0:03:56 | 76.101237 | 68.2842889 | 71.8195316 | 70.8813582 | 80.5172777 |
| 18:06:18 | 0:03:57 | 76.101237 | 68.2842889 | 71.8195316 | 70.8813582 | 80.5172777 |
| 18:06:19 | 0:03:58 | 76.101237 | 67.2842889 | 71.8195316 | 70.8813582 | 75.5172777 |
| 18:06:20 | 0:03:59 | 74.101237 | 67.2842889 | 70.8195316 | 69.8813582 | 75.5172777 |
| 18:06:21 | 0:04:00 | 74.101237 | 67.2842889 | 70.8195316 | 68.8813582 | 75.5172777 |
| 18:06:22 | 0:04:01 | 74.101237 | 66.2842889 | 70.8195316 | 68.8813582 | 74.5172777 |
| 18:06:23 | 0:04:02 | 73.101237 | 65.2842889 | 70.8195316 | 68.8813582 | 74.5172777 |
| 18:06:24 | 0:04:03 | 72.101237 | 65.2842889 | 70.8195316 | 68.8813582 | 74.5172777 |
| 18:06:25 | 0:04:04 | 72.101237 | 65.2842889 | 70.8195316 | 68.8813582 | 72.5172777 |
| 18:06:26 | 0:04:05 | 71.101237 | 66.2842889 | 73.8195316 | 70.8813582 | 71.5172777 |
| 18:06:27 | 0:04:06 | 71.101237 | 65.2842889 | 76.8195316 | 70.8813582 | 70.5172777 |
| 18:06:28 | 0:04:07 | 71.101237 | 64.2842889 | 76.8195316 | 69.8813582 | 69.5172777 |
| 18:06:29 | 0:04:08 | 70.101237 | 64.2842889 | 76.8195316 | 67.8813582 | 69.5172777 |
| 18:06:30 | 0:04:09 | 70.101237 | 64.2842889 | 76.8195316 | 66.8813582 | 69.5172777 |
| 18:06:31 | 0:04:10 | 70.101237 | 64.2842889 | 76.8195316 | 66.8813582 | 69.5172777 |
| 18:06:32 | 0:04:11 | 70.101237 | 64.2842889 | 76.8195316 | 65.8813582 | 68.5172777 |
| 18:06:33 | 0:04:12 | 70.101237 | 64.2842889 | 80.8195316 | 65.8813582 | 68.5172777 |
| 18:06:34 | 0:04:13 | 70.101237 | 64.2842889 | 81.8195316 | 65.8813582 | 68.5172777 |
| 18:06:35 | 0:04:14 | 68.101237 | 64.2842889 | 81.8195316 | 65.8813582 | 69.5172777 |
| 18:06:36 | 0:04:15 | 68.101237 | 64.2842889 | 80.8195316 | 64.8813582 | 69.5172777 |
| 18:06:37 | 0:04:16 | 68.101237 | 63.2842889 | 80.8195316 | 64.8813582 | 69.5172777 |
| 18:06:38 | 0:04:17 | 68.101237 | 63.2842889 | 77.8195316 | 65.8813582 | 69.5172777 |
| 18:06:39 | 0:04:18 | 67.101237 | 63.2842889 | 76.8195316 | 65.8813582 | 66.5172777 |
| 18:06:40 | 0:04:19 | 67.101237 | 63.2842889 | 74.8195316 | 65.8813582 | 63.5172777 |
| 18:06:41 | 0:04:20 | 68.101237 | 63.2842889 | 73.8195316 | 65.8813582 | 63.5172777 |
| 18:06:42 | 0:04:21 | 68.101237 | 63.2842889 | 73.8195316 | 65.8813582 | 62.5172777 |
| 18:06:43 | 0:04:22 | 75.101237 | 63.2842889 | 73.8195316 | 65.8813582 | 62.5172777 |
| 18:06:44 | 0:04:23 | 76.101237 | 63.2842889 | 72.8195316 | 65.8813582 | 62.5172777 |
| 18:06:45 | 0:04:24 | 76.101237 | 63.2842889 | 71.8195316 | 65.8813582 | 62.5172777 |
| 18:06:46 | 0:04:25 | 76.101237 | 64.2842889 | 71.8195316 | 65.8813582 | 62.5172777 |
| 18:06:47 | 0:04:26 | 78.101237 | 64.2842889 | 71.8195316 | 65.8813582 | 62.5172777 |
| 18:06:48 | 0:04:27 | 79.101237 | 64.2842889 | 69.8195316 | 65.8813582 | 63.5172777 |

|          |         |           |            |            |            |            |
|----------|---------|-----------|------------|------------|------------|------------|
| 18:06:49 | 0:04:28 | 79.101237 | 64.2842889 | 68.8195316 | 65.8813582 | 63.5172777 |
| 18:06:50 | 0:04:29 | 79.101237 | 63.2842889 | 68.8195316 | 65.8813582 | 63.5172777 |
| 18:06:51 | 0:04:30 | 79.101237 | 63.2842889 | 68.8195316 | 65.8813582 | 63.5172777 |
| 18:06:52 | 0:04:31 | 77.101237 | 63.2842889 | 68.8195316 | 65.8813582 | 63.5172777 |
| 18:06:53 | 0:04:32 | 76.101237 | 63.2842889 | 69.8195316 | 66.8813582 | 63.5172777 |
| 18:06:54 | 0:04:33 | 76.101237 | 63.2842889 | 69.8195316 | 65.8813582 | 63.5172777 |
| 18:06:55 | 0:04:34 | 77.101237 | 63.2842889 | 69.8195316 | 65.8813582 | 63.5172777 |
| 18:06:56 | 0:04:35 | 77.101237 | 63.2842889 | 69.8195316 | 66.8813582 | 63.5172777 |
| 18:06:57 | 0:04:36 | 77.101237 | 63.2842889 | 69.8195316 | 66.8813582 | 64.5172777 |
| 18:06:58 | 0:04:37 | 77.101237 | 63.2842889 | 68.8195316 | 65.8813582 | 65.5172777 |
| 18:06:59 | 0:04:38 | 78.101237 | 63.2842889 | 68.8195316 | 66.8813582 | 65.5172777 |
| 18:07:00 | 0:04:39 | 78.101237 | 66.2842889 | 68.8195316 | 65.8813582 | 67.5172777 |
| 18:07:01 | 0:04:40 | 77.101237 | 66.2842889 | 67.8195316 | 66.8813582 | 67.5172777 |
| 18:07:02 | 0:04:41 | 77.101237 | 69.2842889 | 67.8195316 | 66.8813582 | 67.5172777 |
| 18:07:03 | 0:04:42 | 77.101237 | 71.2842889 | 67.8195316 | 65.8813582 | 67.5172777 |
| 18:07:04 | 0:04:43 | 77.101237 | 71.2842889 | 67.8195316 | 66.8813582 | 67.5172777 |
| 18:07:05 | 0:04:44 | 77.101237 | 71.2842889 | 68.8195316 | 66.8813582 | 67.5172777 |
| 18:07:06 | 0:04:45 | 77.101237 | 70.2842889 | 68.8195316 | 66.8813582 | 66.5172777 |
| 18:07:07 | 0:04:46 | 77.101237 | 69.2842889 | 69.8195316 | 65.8813582 | 66.5172777 |
| 18:07:08 | 0:04:47 | 78.101237 | 69.2842889 | 70.8195316 | 66.8813582 | 66.5172777 |
| 18:07:09 | 0:04:48 | 77.101237 | 69.2842889 | 70.8195316 | 66.8813582 | 67.5172777 |
| 18:07:10 | 0:04:49 | 76.101237 | 69.2842889 | 70.8195316 | 65.8813582 | 67.5172777 |
| 18:07:11 | 0:04:50 | 76.101237 | 69.2842889 | 70.8195316 | 66.8813582 | 67.5172777 |
| 18:07:12 | 0:04:51 | 76.101237 | 69.2842889 | 70.8195316 | 66.8813582 | 67.5172777 |
| 18:07:13 | 0:04:52 | 76.101237 | 69.2842889 | 70.8195316 | 66.8813582 | 65.5172777 |
| 18:07:14 | 0:04:53 | 76.101237 | 68.2842889 | 70.8195316 | 67.8813582 | 65.5172777 |
| 18:07:15 | 0:04:54 | 76.101237 | 67.2842889 | 70.8195316 | 67.8813582 | 64.5172777 |
| 18:07:16 | 0:04:55 | 75.101237 | 67.2842889 | 69.8195316 | 68.8813582 | 64.5172777 |
| 18:07:17 | 0:04:56 | 75.101237 | 67.2842889 | 70.8195316 | 68.8813582 | 63.5172777 |
| 18:07:18 | 0:04:57 | 74.101237 | 68.2842889 | 71.8195316 | 68.8813582 | 63.5172777 |
| 18:07:19 | 0:04:58 | 74.101237 | 68.2842889 | 73.8195316 | 69.8813582 | 63.5172777 |
| 18:07:20 | 0:04:59 | 74.101237 | 68.2842889 | 73.8195316 | 70.8813582 | 63.5172777 |
| 18:07:21 | 0:05:00 | 74.101237 | 68.2842889 | 74.8195316 | 70.8813582 | 63.5172777 |
| 18:07:22 | 0:05:01 | 73.101237 | 68.2842889 | 74.8195316 | 71.8813582 | 64.5172777 |
| 18:07:23 | 0:05:02 | 73.101237 | 68.2842889 | 74.8195316 | 73.8813582 | 65.5172777 |
| 18:07:24 | 0:05:03 | 72.101237 | 68.2842889 | 74.8195316 | 73.8813582 | 65.5172777 |
| 18:07:25 | 0:05:04 | 70.101237 | 67.2842889 | 76.8195316 | 72.8813582 | 66.5172777 |
| 18:07:26 | 0:05:05 | 69.101237 | 67.2842889 | 76.8195316 | 71.8813582 | 67.5172777 |
| 18:07:27 | 0:05:06 | 67.101237 | 67.2842889 | 75.8195316 | 71.8813582 | 67.5172777 |
| 18:07:28 | 0:05:07 | 67.101237 | 66.2842889 | 75.8195316 | 71.8813582 | 68.5172777 |
| 18:07:29 | 0:05:08 | 67.101237 | 65.2842889 | 76.8195316 | 70.8813582 | 71.5172777 |
| 18:07:30 | 0:05:09 | 65.101237 | 65.2842889 | 78.8195316 | 71.8813582 | 71.5172777 |
| 18:07:31 | 0:05:10 | 67.101237 | 64.2842889 | 79.8195316 | 71.8813582 | 76.5172777 |
| 18:07:32 | 0:05:11 | 68.101237 | 64.2842889 | 79.8195316 | 71.8813582 | 77.5172777 |
| 18:07:33 | 0:05:12 | 68.101237 | 63.2842889 | 77.8195316 | 71.8813582 | 77.5172777 |

|          |         |           |            |            |            |            |
|----------|---------|-----------|------------|------------|------------|------------|
| 18:07:34 | 0:05:13 | 69.101237 | 63.2842889 | 74.8195316 | 71.8813582 | 77.5172777 |
| 18:07:35 | 0:05:14 | 70.101237 | 63.2842889 | 74.8195316 | 71.8813582 | 77.5172777 |
| 18:07:36 | 0:05:15 | 71.101237 | 62.2842889 | 71.8195316 | 71.8813582 | 77.5172777 |
| 18:07:37 | 0:05:16 | 71.101237 | 62.2842889 | 71.8195316 | 73.8813582 | 76.5172777 |
| 18:07:38 | 0:05:17 | 71.101237 | 62.2842889 | 71.8195316 | 73.8813582 | 76.5172777 |
| 18:07:39 | 0:05:18 | 72.101237 | 62.2842889 | 71.8195316 | 73.8813582 | 76.5172777 |
| 18:07:40 | 0:05:19 | 73.101237 | 62.2842889 | 73.8195316 | 71.8813582 | 77.5172777 |
| 18:07:41 | 0:05:20 | 74.101237 | 62.2842889 | 74.8195316 | 69.8813582 | 79.5172777 |
| 18:07:42 | 0:05:21 | 75.101237 | 62.2842889 | 74.8195316 | 69.8813582 | 80.5172777 |
| 18:07:43 | 0:05:22 | 76.101237 | 62.2842889 | 73.8195316 | 69.8813582 | 80.5172777 |
| 18:07:44 | 0:05:23 | 76.101237 | 62.2842889 | 73.8195316 | 69.8813582 | 81.5172777 |
| 18:07:45 | 0:05:24 | 76.101237 | 62.2842889 | 73.8195316 | 69.8813582 | 84.5172777 |
| 18:07:46 | 0:05:25 | 77.101237 | 62.2842889 | 72.8195316 | 68.8813582 | 83.5172777 |
| 18:07:47 | 0:05:26 | 77.101237 | 62.2842889 | 72.8195316 | 68.8813582 | 81.5172777 |
| 18:07:48 | 0:05:27 | 77.101237 | 65.2842889 | 72.8195316 | 68.8813582 | 81.5172777 |
| 18:07:49 | 0:05:28 | 77.101237 | 66.2842889 | 72.8195316 | 68.8813582 | 80.5172777 |
| 18:07:50 | 0:05:29 | 76.101237 | 68.2842889 | 72.8195316 | 68.8813582 | 79.5172777 |
| 18:07:51 | 0:05:30 | 76.101237 | 69.2842889 | 72.8195316 | 68.8813582 | 78.5172777 |
| 18:07:52 | 0:05:31 | 72.101237 | 68.2842889 | 71.8195316 | 67.8813582 | 78.5172777 |
| 18:07:53 | 0:05:32 | 71.101237 | 67.2842889 | 72.8195316 | 66.8813582 | 78.5172777 |
| 18:07:54 | 0:05:33 | 71.101237 | 67.2842889 | 73.8195316 | 66.8813582 | 78.5172777 |
| 18:07:55 | 0:05:34 | 71.101237 | 66.2842889 | 74.8195316 | 66.8813582 | 78.5172777 |
| 18:07:56 | 0:05:35 | 71.101237 | 66.2842889 | 74.8195316 | 66.8813582 | 78.5172777 |
| 18:07:57 | 0:05:36 | 71.101237 | 66.2842889 | 74.8195316 | 66.8813582 | 79.5172777 |
| 18:07:58 | 0:05:37 | 71.101237 | 66.2842889 | 74.8195316 | 65.8813582 | 79.5172777 |
| 18:07:59 | 0:05:38 | 71.101237 | 66.2842889 | 74.8195316 | 66.8813582 | 79.5172777 |
| 18:08:00 | 0:05:39 | 71.101237 | 66.2842889 | 73.8195316 | 66.8813582 | 81.5172777 |
| 18:08:01 | 0:05:40 | 71.101237 | 65.2842889 | 73.8195316 | 66.8813582 | 82.5172777 |
| 18:08:02 | 0:05:41 | 71.101237 | 64.2842889 | 73.8195316 | 65.8813582 | 82.5172777 |
| 18:08:03 | 0:05:42 | 72.101237 | 64.2842889 | 73.8195316 | 65.8813582 | 83.5172777 |
| 18:08:04 | 0:05:43 | 72.101237 | 64.2842889 | 73.8195316 | 65.8813582 | 83.5172777 |
| 18:08:05 | 0:05:44 | 72.101237 | 64.2842889 | 73.8195316 | 66.8813582 | 81.5172777 |
| 18:08:06 | 0:05:45 | 72.101237 | 64.2842889 | 73.8195316 | 66.8813582 | 81.5172777 |
| 18:08:07 | 0:05:46 | 72.101237 | 65.2842889 | 72.8195316 | 67.8813582 | 79.5172777 |
| 18:08:08 | 0:05:47 | 72.101237 | 65.2842889 | 72.8195316 | 67.8813582 | 77.5172777 |
| 18:08:09 | 0:05:48 | 72.101237 | 65.2842889 | 72.8195316 | 67.8813582 | 77.5172777 |
| 18:08:10 | 0:05:49 | 78.101237 | 65.2842889 | 72.8195316 | 68.8813582 | 78.5172777 |
| 18:08:11 | 0:05:50 | 78.101237 | 65.2842889 | 72.8195316 | 67.8813582 | 78.5172777 |
| 18:08:12 | 0:05:51 | 76.101237 | 66.2842889 | 71.8195316 | 66.8813582 | 78.5172777 |
| 18:08:13 | 0:05:52 | 67.101237 | 66.2842889 | 71.8195316 | 66.8813582 | 78.5172777 |
| 18:08:14 | 0:05:53 | 64.101237 | 66.2842889 | 71.8195316 | 65.8813582 | 76.5172777 |
| 18:08:15 | 0:05:54 | 64.101237 | 66.2842889 | 71.8195316 | 64.8813582 | 75.5172777 |
| 18:08:16 | 0:05:55 | 64.101237 | 67.2842889 | 71.8195316 | 64.8813582 | 75.5172777 |
| 18:08:17 | 0:05:56 | 64.101237 | 67.2842889 | 71.8195316 | 65.8813582 | 74.5172777 |
| 18:08:18 | 0:05:57 | 65.101237 | 67.2842889 | 71.8195316 | 65.8813582 | 70.5172777 |



|          |         |           |            |            |            |            |
|----------|---------|-----------|------------|------------|------------|------------|
| 18:08:19 | 0:05:58 | 65.101237 | 67.2842889 | 71.8195316 | 66.8813582 | 69.5172777 |
| 18:08:20 | 0:05:59 | 67.101237 | 67.2842889 | 71.8195316 | 67.8813582 | 69.5172777 |
| 18:08:21 | 0:06:00 | 68.101237 | 68.2842889 | 72.8195316 | 67.8813582 | 69.5172777 |
| 18:08:22 | 0:06:01 | 68.101237 | 68.2842889 | 72.8195316 | 67.8813582 | 70.5172777 |
| 18:08:23 | 0:06:02 | 70.101237 | 68.2842889 | 78.8195316 | 67.8813582 | 70.5172777 |
| 18:08:24 | 0:06:03 | 70.101237 | 69.2842889 | 81.8195316 | 67.8813582 | 70.5172777 |
| 18:08:25 | 0:06:04 | 73.101237 | 69.2842889 | 82.8195316 | 67.8813582 | 72.5172777 |
| 18:08:26 | 0:06:05 | 73.101237 | 69.2842889 | 82.8195316 | 65.8813582 | 74.5172777 |
| 18:08:27 | 0:06:06 | 74.101237 | 69.2842889 | 83.8195316 | 66.8813582 | 75.5172777 |
| 18:08:28 | 0:06:07 | 75.101237 | 69.2842889 | 82.8195316 | 66.8813582 | 75.5172777 |
| 18:08:29 | 0:06:08 | 75.101237 | 69.2842889 | 80.8195316 | 66.8813582 | 76.5172777 |
| 18:08:30 | 0:06:09 | 75.101237 | 69.2842889 | 79.8195316 | 66.8813582 | 76.5172777 |
| 18:08:31 | 0:06:10 | 75.101237 | 69.2842889 | 79.8195316 | 68.8813582 | 77.5172777 |
| 18:08:32 | 0:06:11 | 75.101237 | 69.2842889 | 77.8195316 | 68.8813582 | 78.5172777 |
| 18:08:33 | 0:06:12 | 74.101237 | 68.2842889 | 77.8195316 | 68.8813582 | 78.5172777 |
| 18:08:34 | 0:06:13 | 75.101237 | 67.2842889 | 77.8195316 | 69.8813582 | 79.5172777 |
| 18:08:35 | 0:06:14 | 78.101237 | 66.2842889 | 77.8195316 | 69.8813582 | 79.5172777 |
| 18:08:36 | 0:06:15 | 78.101237 | 66.2842889 | 77.8195316 | 69.8813582 | 78.5172777 |
| 18:08:37 | 0:06:16 | 78.101237 | 66.2842889 | 76.8195316 | 69.8813582 | 77.5172777 |
| 18:08:38 | 0:06:17 | 78.101237 | 66.2842889 | 73.8195316 | 69.8813582 | 75.5172777 |
| 18:08:39 | 0:06:18 | 78.101237 | 66.2842889 | 72.8195316 | 70.8813582 | 75.5172777 |
| 18:08:40 | 0:06:19 | 77.101237 | 66.2842889 | 71.8195316 | 69.8813582 | 73.5172777 |
| 18:08:41 | 0:06:20 | 78.101237 | 67.2842889 | 71.8195316 | 69.8813582 | 72.5172777 |
| 18:08:42 | 0:06:21 | 78.101237 | 67.2842889 | 73.8195316 | 69.8813582 | 71.5172777 |
| 18:08:43 | 0:06:22 | 77.101237 | 67.2842889 | 73.8195316 | 69.8813582 | 72.5172777 |
| 18:08:44 | 0:06:23 | 77.101237 | 67.2842889 | 73.8195316 | 69.8813582 | 73.5172777 |
| 18:08:45 | 0:06:24 | 77.101237 | 67.2842889 | 73.8195316 | 69.8813582 | 73.5172777 |
| 18:08:46 | 0:06:25 | 77.101237 | 67.2842889 | 68.8195316 | 69.8813582 | 70.5172777 |
| 18:08:47 | 0:06:26 | 77.101237 | 67.2842889 | 67.8195316 | 71.8813582 | 68.5172777 |
| 18:08:48 | 0:06:27 | 76.101237 | 67.2842889 | 67.8195316 | 71.8813582 | 67.5172777 |
| 18:08:49 | 0:06:28 | 75.101237 | 66.2842889 | 67.8195316 | 71.8813582 | 67.5172777 |
| 18:08:50 | 0:06:29 | 75.101237 | 66.2842889 | 67.8195316 | 71.8813582 | 65.5172777 |
| 18:08:51 | 0:06:30 | 75.101237 | 66.2842889 | 67.8195316 | 72.8813582 | 66.5172777 |
| 18:08:52 | 0:06:31 | 75.101237 | 67.2842889 | 67.8195316 | 72.8813582 | 67.5172777 |
| 18:08:53 | 0:06:32 | 75.101237 | 67.2842889 | 67.8195316 | 73.8813582 | 67.5172777 |
| 18:08:54 | 0:06:33 | 75.101237 | 67.2842889 | 67.8195316 | 74.8813582 | 67.5172777 |
| 18:08:55 | 0:06:34 | 74.101237 | 67.2842889 | 68.8195316 | 74.8813582 | 66.5172777 |
| 18:08:56 | 0:06:35 | 73.101237 | 67.2842889 | 68.8195316 | 75.8813582 | 65.5172777 |
| 18:08:57 | 0:06:36 | 72.101237 | 67.2842889 | 68.8195316 | 75.8813582 | 63.5172777 |
| 18:08:58 | 0:06:37 | 69.101237 | 67.2842889 | 68.8195316 | 75.8813582 | 63.5172777 |
| 18:08:59 | 0:06:38 | 68.101237 | 67.2842889 | 68.8195316 | 77.8813582 | 63.5172777 |
| 18:09:00 | 0:06:39 | 68.101237 | 67.2842889 | 68.8195316 | 77.8813582 | 63.5172777 |
| 18:09:01 | 0:06:40 | 65.101237 | 70.2842889 | 69.8195316 | 79.8813582 | 65.5172777 |
| 18:09:02 | 0:06:41 | 65.101237 | 70.2842889 | 69.8195316 | 78.8813582 | 65.5172777 |
| 18:09:03 | 0:06:42 | 65.101237 | 76.2842889 | 70.8195316 | 76.8813582 | 66.5172777 |

|          |         |            |            |            |            |            |
|----------|---------|------------|------------|------------|------------|------------|
| 18:09:04 | 0:06:43 | 65.101237  | 76.2842889 | 71.8195316 | 76.8813582 | 66.5172777 |
| 18:09:05 | 0:06:44 | 65.101237  | 78.2842889 | 71.8195316 | 73.8813582 | 68.5172777 |
| 18:09:06 | 0:06:45 | 65.101237  | 77.2842889 | 71.8195316 | 70.8813582 | 68.5172777 |
| 18:09:07 | 0:06:46 | 65.101237  | 72.2842889 | 71.8195316 | 70.8813582 | 69.5172777 |
| 18:09:08 | 0:06:47 | 66.101237  | 69.2842889 | 71.8195316 | 67.8813582 | 70.5172777 |
| 18:09:09 | 0:06:48 | 79.101237  | 67.2842889 | 71.8195316 | 66.8813582 | 70.5172777 |
| 18:09:10 | 0:06:49 | 79.101237  | 66.2842889 | 71.8195316 | 66.8813582 | 70.5172777 |
| 18:09:11 | 0:06:50 | 83.101237  | 66.2842889 | 70.8195316 | 66.8813582 | 75.5172777 |
| 18:09:12 | 0:06:51 | 83.101237  | 65.2842889 | 70.8195316 | 66.8813582 | 77.5172777 |
| 18:09:13 | 0:06:52 | 83.101237  | 65.2842889 | 70.8195316 | 66.8813582 | 79.5172777 |
| 18:09:14 | 0:06:53 | 83.101237  | 65.2842889 | 70.8195316 | 66.8813582 | 79.5172777 |
| 18:09:15 | 0:06:54 | 82.101237  | 65.2842889 | 71.8195316 | 66.8813582 | 79.5172777 |
| 18:09:16 | 0:06:55 | 82.101237  | 63.2842889 | 71.8195316 | 66.8813582 | 78.5172777 |
| 18:09:17 | 0:06:56 | 81.101237  | 62.2842889 | 71.8195316 | 66.8813582 | 76.5172777 |
| 18:09:18 | 0:06:57 | 80.101237  | 62.2842889 | 70.8195316 | 67.8813582 | 70.5172777 |
| 18:09:19 | 0:06:58 | 79.101237  | 62.2842889 | 70.8195316 | 67.8813582 | 69.5172777 |
| 18:09:20 | 0:06:59 | 79.101237  | 62.2842889 | 68.8195316 | 67.8813582 | 69.5172777 |
| 18:09:21 | 0:07:00 | 78.101237  | 62.2842889 | 68.8195316 | 68.8813582 | 69.5172777 |
| 18:09:22 | 0:07:01 | 77.101237  | 62.2842889 | 68.8195316 | 68.8813582 | 69.5172777 |
| 18:09:23 | 0:07:02 | 69.101237  | 62.2842889 | 69.8195316 | 68.8813582 | 69.5172777 |
| 18:09:24 | 0:07:03 | 67.101237  | 62.2842889 | 70.8195316 | 68.8813582 | 67.5172777 |
| 18:09:25 | 0:07:04 | 66.101237  | 62.2842889 | 70.8195316 | 68.8813582 | 67.5172777 |
| 18:09:26 | 0:07:05 | 67.101237  | 62.2842889 | 70.8195316 | 71.8813582 | 66.5172777 |
| 18:09:27 | 0:07:06 | 68.101237  | 62.2842889 | 68.8195316 | 71.8813582 | 65.5172777 |
| 18:09:28 | 0:07:07 | 69.101237  | 62.2842889 | 66.8195316 | 71.8813582 | 64.5172777 |
| 18:09:29 | 0:07:08 | 71.101237  | 60.2842889 | 66.8195316 | 71.8813582 | 64.5172777 |
| 18:09:30 | 0:07:09 | 73.101237  | 60.2842889 | 66.8195316 | 71.8813582 | 65.5172777 |
| 18:09:31 | 0:07:10 | 73.101237  | 60.2842889 | 69.8195316 | 73.8813582 | 66.5172777 |
| 18:09:32 | 0:07:11 | 73.101237  | 59.2842889 | 69.8195316 | 74.8813582 | 68.5172777 |
| 18:09:33 | 0:07:12 | 73.101237  | 60.2842889 | 68.8195316 | 74.8813582 | 68.5172777 |
| 18:09:34 | 0:07:13 | 74.101237  | 61.2842889 | 68.8195316 | 75.8813582 | 68.5172777 |
| 18:09:35 | 0:07:14 | 75.101237  | 61.2842889 | 72.8195316 | 75.8813582 | 68.5172777 |
| 18:09:36 | 0:07:15 | 75.101237  | 61.2842889 | 72.8195316 | 76.8813582 | 65.5172777 |
| 18:09:37 | 0:07:16 | 75.101237  | 61.2842889 | 72.8195316 | 79.8813582 | 65.5172777 |
| 18:09:38 | 0:07:17 | 75.101237  | 61.2842889 | 70.8195316 | 72.4872373 | 64.5172777 |
| 18:09:39 | 0:07:18 | 76.101237  | 61.2842889 | 70.8195316 | 71.9417828 | 64.5172777 |
| 18:09:40 | 0:07:19 | 77.101237  | 60.2842889 | 70.8195316 | 71.5781464 | 65.5172777 |
| 18:09:41 | 0:07:20 | 82.101237  | 60.2842889 | 71.8195316 | 71.8508737 | 66.5172777 |
| 18:09:42 | 0:07:21 | 82.101237  | 61.2842889 | 72.8195316 | 72.0326919 | 67.5172777 |
| 18:09:43 | 0:07:22 | 71.8508737 | 62.2842889 | 71.8195316 | 82.8813582 | 67.5172777 |
| 18:09:44 | 0:07:23 | 71.5781464 | 62.2842889 | 71.8195316 | 77.8813582 | 70.5172777 |
| 18:09:45 | 0:07:24 | 71.2145101 | 62.2842889 | 71.8195316 | 74.8813582 | 71.5172777 |
| 18:09:46 | 0:07:25 | 70.8508737 | 62.2842889 | 71.8195316 | 72.8813582 | 72.5172777 |
| 18:09:47 | 0:07:26 | 71.123601  | 65.2842889 | 71.8195316 | 71.8813582 | 73.5172777 |
| 18:09:48 | 0:07:27 | 71.3963282 | 65.2842889 | 71.8195316 | 72.8813582 | 73.5172777 |

|          |         |            |            |            |            |            |
|----------|---------|------------|------------|------------|------------|------------|
| 18:09:49 | 0:07:28 | 71.6690555 | 68.2842889 | 71.8195316 | 72.8813582 | 73.5172777 |
| 18:09:50 | 0:07:29 | 72.4872373 | 70.2842889 | 74.8195316 | 73.8813582 | 73.5172777 |
| 18:09:51 | 0:07:30 | 72.6690555 | 71.2842889 | 74.8195316 | 74.8813582 | 72.5172777 |
| 18:09:52 | 0:07:31 | 72.8508737 | 71.2842889 | 74.8195316 | 74.8813582 | 72.5172777 |
| 18:09:53 | 0:07:32 | 73.0326919 | 73.2842889 | 76.8195316 | 73.8813582 | 71.5172777 |
| 18:09:54 | 0:07:33 | 73.0326919 | 73.2842889 | 76.8195316 | 73.8813582 | 71.5172777 |
| 18:09:55 | 0:07:34 | 72.3963282 | 73.2842889 | 76.8195316 | 73.8813582 | 68.5172777 |
| 18:09:56 | 0:07:35 | 72.5781464 | 73.2842889 | 77.8195316 | 73.8813582 | 68.5172777 |
| 18:09:57 | 0:07:36 | 83.101237  | 73.2842889 | 77.8195316 | 72.8813582 | 68.5172777 |
| 18:09:58 | 0:07:37 | 83.101237  | 73.2842889 | 77.8195316 | 72.8813582 | 68.5172777 |
| 18:09:59 | 0:07:38 | 83.101237  | 73.2842889 | 78.8195316 | 72.8813582 | 68.5172777 |
| 18:10:00 | 0:07:39 | 83.101237  | 73.2842889 | 78.8195316 | 72.8813582 | 68.5172777 |
| 18:10:01 | 0:07:40 | 83.101237  | 73.2842889 | 77.8195316 | 71.8813582 | 68.5172777 |
| 18:10:02 | 0:07:41 | 84.101237  | 73.2842889 | 76.8195316 | 70.8813582 | 71.5172777 |
| 18:10:03 | 0:07:42 | 84.101237  | 73.2842889 | 76.8195316 | 69.8813582 | 72.5172777 |
| 18:10:04 | 0:07:43 | 85.101237  | 73.2842889 | 74.8195316 | 69.8813582 | 73.5172777 |
| 18:10:05 | 0:07:44 | 85.101237  | 75.2842889 | 72.8195316 | 69.8813582 | 73.5172777 |
| 18:10:06 | 0:07:45 | 86.101237  | 76.2842889 | 71.8195316 | 67.8813582 | 73.5172777 |
| 18:10:07 | 0:07:46 | 87.101237  | 76.2842889 | 71.8195316 | 67.8813582 | 73.5172777 |
| 18:10:08 | 0:07:47 | 87.101237  | 76.2842889 | 71.8195316 | 67.8813582 | 72.5172777 |
| 18:10:09 | 0:07:48 | 87.101237  | 75.2842889 | 70.8195316 | 67.8813582 | 72.5172777 |
| 18:10:10 | 0:07:49 | 87.101237  | 75.2842889 | 70.8195316 | 67.8813582 | 72.5172777 |
| 18:10:11 | 0:07:50 | 87.101237  | 75.2842889 | 70.8195316 | 67.8813582 | 72.5172777 |
| 18:10:12 | 0:07:51 | 74.8508737 | 75.2842889 | 71.8195316 | 67.8813582 | 70.5172777 |
| 18:10:13 | 0:07:52 | 75.123601  | 74.2842889 | 71.8195316 | 67.8813582 | 70.5172777 |
| 18:10:14 | 0:07:53 | 75.2145101 | 74.2842889 | 71.8195316 | 67.8813582 | 70.5172777 |
| 18:10:15 | 0:07:54 | 75.0326919 | 73.2842889 | 72.8195316 | 67.8813582 | 70.5172777 |
| 18:10:16 | 0:07:55 | 74.7599646 | 73.2842889 | 70.8195316 | 66.8813582 | 70.5172777 |
| 18:10:17 | 0:07:56 | 75.0326919 | 73.2842889 | 70.8195316 | 66.8813582 | 70.5172777 |
| 18:10:18 | 0:07:57 | 75.123601  | 73.2842889 | 70.8195316 | 66.8813582 | 70.5172777 |
| 18:10:19 | 0:07:58 | 87.101237  | 75.2842889 | 69.8195316 | 66.8813582 | 69.5172777 |
| 18:10:20 | 0:07:59 | 84.101237  | 75.2842889 | 69.8195316 | 67.8813582 | 69.5172777 |
| 18:10:21 | 0:08:00 | 83.101237  | 75.2842889 | 69.8195316 | 67.8813582 | 69.5172777 |
| 18:10:22 | 0:08:01 | 81.101237  | 75.2842889 | 72.8195316 | 78.8813582 | 70.5172777 |
| 18:10:23 | 0:08:02 | 80.101237  | 75.2842889 | 73.8195316 | 81.8813582 | 70.5172777 |
| 18:10:24 | 0:08:03 | 79.101237  | 75.2842889 | 73.8195316 | 85.8813582 | 71.5172777 |
| 18:10:25 | 0:08:04 | 79.101237  | 75.2842889 | 73.8195316 | 86.8813582 | 71.5172777 |
| 18:10:26 | 0:08:05 | 80.101237  | 74.2842889 | 72.8195316 | 86.8813582 | 71.5172777 |
| 18:10:27 | 0:08:06 | 79.101237  | 72.2842889 | 71.8195316 | 79.8813582 | 70.5172777 |
| 18:10:28 | 0:08:07 | 79.101237  | 69.2842889 | 71.8195316 | 75.8813582 | 70.5172777 |
| 18:10:29 | 0:08:08 | 77.101237  | 68.2842889 | 70.8195316 | 72.8813582 | 70.5172777 |
| 18:10:30 | 0:08:09 | 74.101237  | 68.2842889 | 70.8195316 | 71.8813582 | 70.5172777 |
| 18:10:31 | 0:08:10 | 71.101237  | 68.2842889 | 70.8195316 | 70.8813582 | 70.5172777 |
| 18:10:32 | 0:08:11 | 71.101237  | 66.2842889 | 70.8195316 | 70.8813582 | 71.5172777 |
| 18:10:33 | 0:08:12 | 71.101237  | 66.2842889 | 70.8195316 | 70.8813582 | 71.5172777 |

|          |         |           |            |            |            |            |
|----------|---------|-----------|------------|------------|------------|------------|
| 18:10:34 | 0:08:13 | 73.101237 | 65.2842889 | 71.8195316 | 69.8813582 | 71.5172777 |
| 18:10:35 | 0:08:14 | 75.101237 | 65.2842889 | 71.8195316 | 68.8813582 | 71.5172777 |
| 18:10:36 | 0:08:15 | 76.101237 | 65.2842889 | 71.8195316 | 67.8813582 | 71.5172777 |
| 18:10:37 | 0:08:16 | 76.101237 | 68.2842889 | 71.8195316 | 67.8813582 | 71.5172777 |
| 18:10:38 | 0:08:17 | 76.101237 | 68.2842889 | 70.8195316 | 66.8813582 | 70.5172777 |
| 18:10:39 | 0:08:18 | 76.101237 | 67.2842889 | 70.8195316 | 66.8813582 | 70.5172777 |
| 18:10:40 | 0:08:19 | 76.101237 | 66.2842889 | 70.8195316 | 64.8813582 | 69.5172777 |
| 18:10:41 | 0:08:20 | 76.101237 | 66.2842889 | 70.8195316 | 64.8813582 | 69.5172777 |
| 18:10:42 | 0:08:21 | 76.101237 | 65.2842889 | 70.8195316 | 64.8813582 | 69.5172777 |
| 18:10:43 | 0:08:22 | 76.101237 | 65.2842889 | 72.8195316 | 64.8813582 | 69.5172777 |
| 18:10:44 | 0:08:23 | 76.101237 | 64.2842889 | 72.8195316 | 64.8813582 | 70.5172777 |
| 18:10:45 | 0:08:24 | 77.101237 | 64.2842889 | 72.8195316 | 64.8813582 | 71.5172777 |
| 18:10:46 | 0:08:25 | 79.101237 | 65.2842889 | 72.8195316 | 64.8813582 | 71.5172777 |
| 18:10:47 | 0:08:26 | 79.101237 | 65.2842889 | 71.8195316 | 64.8813582 | 72.5172777 |
| 18:10:48 | 0:08:27 | 79.101237 | 65.2842889 | 71.8195316 | 64.8813582 | 72.5172777 |
| 18:10:49 | 0:08:28 | 79.101237 | 66.2842889 | 71.8195316 | 62.8813582 | 71.5172777 |
| 18:10:50 | 0:08:29 | 79.101237 | 66.2842889 | 71.8195316 | 62.8813582 | 72.5172777 |
| 18:10:51 | 0:08:30 | 80.101237 | 66.2842889 | 72.8195316 | 62.8813582 | 74.5172777 |
| 18:10:52 | 0:08:31 | 80.101237 | 66.2842889 | 76.8195316 | 61.8813582 | 74.5172777 |
| 18:10:53 | 0:08:32 | 76.101237 | 67.2842889 | 76.8195316 | 61.8813582 | 76.5172777 |
| 18:10:54 | 0:08:33 | 76.101237 | 67.2842889 | 77.8195316 | 62.8813582 | 76.5172777 |
| 18:10:55 | 0:08:34 | 70.101237 | 67.2842889 | 78.8195316 | 64.8813582 | 74.5172777 |
| 18:10:56 | 0:08:35 | 69.101237 | 67.2842889 | 78.8195316 | 65.8813582 | 75.5172777 |
| 18:10:57 | 0:08:36 | 69.101237 | 67.2842889 | 82.8195316 | 66.8813582 | 75.5172777 |
| 18:10:58 | 0:08:37 | 69.101237 | 67.2842889 | 83.8195316 | 66.8813582 | 75.5172777 |
| 18:10:59 | 0:08:38 | 69.101237 | 67.2842889 | 82.8195316 | 66.8813582 | 75.5172777 |
| 18:11:00 | 0:08:39 | 69.101237 | 68.2842889 | 78.8195316 | 65.8813582 | 72.5172777 |
| 18:11:01 | 0:08:40 | 68.101237 | 70.2842889 | 75.8195316 | 65.8813582 | 72.5172777 |
| 18:11:02 | 0:08:41 | 68.101237 | 70.2842889 | 73.8195316 | 65.8813582 | 73.5172777 |
| 18:11:03 | 0:08:42 | 68.101237 | 74.2842889 | 72.8195316 | 65.8813582 | 74.5172777 |
| 18:11:04 | 0:08:43 | 68.101237 | 74.2842889 | 71.8195316 | 65.8813582 | 74.5172777 |
| 18:11:05 | 0:08:44 | 65.101237 | 74.2842889 | 70.8195316 | 66.8813582 | 75.5172777 |
| 18:11:06 | 0:08:45 | 65.101237 | 77.2842889 | 70.8195316 | 65.8813582 | 75.5172777 |
| 18:11:07 | 0:08:46 | 65.101237 | 77.2842889 | 69.8195316 | 65.8813582 | 75.5172777 |
| 18:11:08 | 0:08:47 | 65.101237 | 77.2842889 | 67.8195316 | 65.8813582 | 72.5172777 |
| 18:11:09 | 0:08:48 | 67.101237 | 77.2842889 | 66.8195316 | 65.8813582 | 71.5172777 |
| 18:11:10 | 0:08:49 | 71.101237 | 77.2842889 | 66.8195316 | 65.8813582 | 70.5172777 |
| 18:11:11 | 0:08:50 | 71.101237 | 77.2842889 | 66.8195316 | 65.8813582 | 69.5172777 |
| 18:11:12 | 0:08:51 | 71.101237 | 77.2842889 | 66.8195316 | 65.8813582 | 70.5172777 |
| 18:11:13 | 0:08:52 | 73.101237 | 71.2842889 | 65.8195316 | 64.8813582 | 70.5172777 |
| 18:11:14 | 0:08:53 | 74.101237 | 71.2842889 | 65.8195316 | 65.8813582 | 70.5172777 |
| 18:11:15 | 0:08:54 | 74.101237 | 69.2842889 | 64.8195316 | 65.8813582 | 72.5172777 |
| 18:11:16 | 0:08:55 | 75.101237 | 68.2842889 | 64.8195316 | 65.8813582 | 73.5172777 |
| 18:11:17 | 0:08:56 | 75.101237 | 68.2842889 | 64.8195316 | 64.8813582 | 72.5172777 |
| 18:11:18 | 0:08:57 | 76.101237 | 68.2842889 | 64.8195316 | 63.8813582 | 72.5172777 |

|          |         |           |            |            |            |            |
|----------|---------|-----------|------------|------------|------------|------------|
| 18:11:19 | 0:08:58 | 76.101237 | 68.2842889 | 65.8195316 | 63.8813582 | 72.5172777 |
| 18:11:20 | 0:08:59 | 77.101237 | 68.2842889 | 66.8195316 | 63.8813582 | 73.5172777 |
| 18:11:21 | 0:09:00 | 77.101237 | 68.2842889 | 66.8195316 | 63.8813582 | 72.5172777 |
| 18:11:22 | 0:09:01 | 77.101237 | 68.2842889 | 66.8195316 | 63.8813582 | 71.5172777 |
| 18:11:23 | 0:09:02 | 77.101237 | 68.2842889 | 67.8195316 | 63.8813582 | 71.5172777 |
| 18:11:24 | 0:09:03 | 75.101237 | 68.2842889 | 67.8195316 | 63.8813582 | 70.5172777 |
| 18:11:25 | 0:09:04 | 75.101237 | 69.2842889 | 67.8195316 | 63.8813582 | 71.5172777 |
| 18:11:26 | 0:09:05 | 74.101237 | 68.2842889 | 67.8195316 | 63.8813582 | 71.5172777 |
| 18:11:27 | 0:09:06 | 74.101237 | 68.2842889 | 67.8195316 | 62.8813582 | 72.5172777 |
| 18:11:28 | 0:09:07 | 75.101237 | 68.2842889 | 67.8195316 | 62.8813582 | 74.5172777 |
| 18:11:29 | 0:09:08 | 75.101237 | 69.2842889 | 67.8195316 | 63.8813582 | 75.5172777 |
| 18:11:30 | 0:09:09 | 75.101237 | 69.2842889 | 67.8195316 | 64.8813582 | 75.5172777 |
| 18:11:31 | 0:09:10 | 76.101237 | 68.2842889 | 67.8195316 | 67.8813582 | 75.5172777 |
| 18:11:32 | 0:09:11 | 79.101237 | 68.2842889 | 67.8195316 | 67.8813582 | 76.5172777 |
| 18:11:33 | 0:09:12 | 79.101237 | 68.2842889 | 67.8195316 | 68.8813582 | 76.5172777 |
| 18:11:34 | 0:09:13 | 79.101237 | 68.2842889 | 68.8195316 | 68.8813582 | 76.5172777 |
| 18:11:35 | 0:09:14 | 80.101237 | 68.2842889 | 68.8195316 | 68.8813582 | 75.5172777 |
| 18:11:36 | 0:09:15 | 82.101237 | 68.2842889 | 67.8195316 | 67.8813582 | 72.5172777 |
| 18:11:37 | 0:09:16 | 82.101237 | 68.2842889 | 67.8195316 | 67.8813582 | 71.5172777 |
| 18:11:38 | 0:09:17 | 83.101237 | 66.2842889 | 69.8195316 | 67.8813582 | 71.5172777 |
| 18:11:39 | 0:09:18 | 84.101237 | 66.2842889 | 71.8195316 | 67.8813582 | 71.5172777 |
| 18:11:40 | 0:09:19 | 84.101237 | 65.2842889 | 70.8195316 | 67.8813582 | 74.5172777 |
| 18:11:41 | 0:09:20 | 84.101237 | 65.2842889 | 70.8195316 | 66.8813582 | 79.5172777 |
| 18:11:42 | 0:09:21 | 84.101237 | 65.2842889 | 70.8195316 | 66.8813582 | 79.5172777 |
| 18:11:43 | 0:09:22 | 84.101237 | 65.2842889 | 71.8195316 | 67.8813582 | 82.5172777 |
| 18:11:44 | 0:09:23 | 84.101237 | 65.2842889 | 71.8195316 | 67.8813582 | 83.5172777 |
| 18:11:45 | 0:09:24 | 84.101237 | 67.2842889 | 71.8195316 | 67.8813582 | 84.5172777 |
| 18:11:46 | 0:09:25 | 84.101237 | 67.2842889 | 72.8195316 | 67.8813582 | 84.5172777 |
| 18:11:47 | 0:09:26 | 85.101237 | 67.2842889 | 71.8195316 | 68.8813582 | 84.5172777 |
| 18:11:48 | 0:09:27 | 85.101237 | 67.2842889 | 71.8195316 | 68.8813582 | 80.5172777 |
| 18:11:49 | 0:09:28 | 84.101237 | 67.2842889 | 71.8195316 | 68.8813582 | 80.5172777 |
| 18:11:50 | 0:09:29 | 84.101237 | 67.2842889 | 71.8195316 | 67.8813582 | 72.5172777 |
| 18:11:51 | 0:09:30 | 83.101237 | 67.2842889 | 71.8195316 | 67.8813582 | 71.5172777 |
| 18:11:52 | 0:09:31 | 83.101237 | 67.2842889 | 72.8195316 | 67.8813582 | 70.5172777 |
| 18:11:53 | 0:09:32 | 83.101237 | 67.2842889 | 72.8195316 | 67.8813582 | 70.5172777 |
| 18:11:54 | 0:09:33 | 83.101237 | 67.2842889 | 73.8195316 | 67.8813582 | 69.5172777 |
| 18:11:55 | 0:09:34 | 79.101237 | 67.2842889 | 73.8195316 | 68.8813582 | 68.5172777 |
| 18:11:56 | 0:09:35 | 75.101237 | 66.2842889 | 73.8195316 | 67.8813582 | 67.5172777 |
| 18:11:57 | 0:09:36 | 70.101237 | 69.2842889 | 74.8195316 | 67.8813582 | 67.5172777 |
| 18:11:58 | 0:09:37 | 67.101237 | 69.2842889 | 75.8195316 | 67.8813582 | 67.5172777 |
| 18:11:59 | 0:09:38 | 65.101237 | 73.2842889 | 75.8195316 | 67.8813582 | 68.5172777 |
| 18:12:00 | 0:09:39 | 65.101237 | 75.2842889 | 75.8195316 | 67.8813582 | 68.5172777 |
| 18:12:01 | 0:09:40 | 63.101237 | 75.2842889 | 74.8195316 | 67.8813582 | 68.5172777 |
| 18:12:02 | 0:09:41 | 61.101237 | 73.2842889 | 74.8195316 | 67.8813582 | 68.5172777 |
| 18:12:03 | 0:09:42 | 61.101237 | 73.2842889 | 74.8195316 | 67.8813582 | 68.5172777 |

|          |         |           |            |            |            |            |
|----------|---------|-----------|------------|------------|------------|------------|
| 18:12:04 | 0:09:43 | 61.101237 | 71.2842889 | 74.8195316 | 67.8813582 | 68.5172777 |
| 18:12:05 | 0:09:44 | 60.101237 | 70.2842889 | 74.8195316 | 67.8813582 | 68.5172777 |
| 18:12:06 | 0:09:45 | 60.101237 | 69.2842889 | 75.8195316 | 67.8813582 | 69.5172777 |
| 18:12:07 | 0:09:46 | 60.101237 | 69.2842889 | 75.8195316 | 67.8813582 | 69.5172777 |
| 18:12:08 | 0:09:47 | 60.101237 | 69.2842889 | 74.8195316 | 67.8813582 | 69.5172777 |
| 18:12:09 | 0:09:48 | 60.101237 | 69.2842889 | 76.8195316 | 67.8813582 | 69.5172777 |
| 18:12:10 | 0:09:49 | 60.101237 | 69.2842889 | 76.8195316 | 67.8813582 | 70.5172777 |
| 18:12:11 | 0:09:50 | 60.101237 | 68.2842889 | 78.8195316 | 67.8813582 | 70.5172777 |
| 18:12:12 | 0:09:51 | 60.101237 | 68.2842889 | 83.8195316 | 67.8813582 | 71.5172777 |
| 18:12:13 | 0:09:52 | 60.101237 | 68.2842889 | 83.8195316 | 67.8813582 | 71.5172777 |
| 18:12:14 | 0:09:53 | 60.101237 | 68.2842889 | 85.8195316 | 67.8813582 | 71.5172777 |
| 18:12:15 | 0:09:54 | 60.101237 | 67.2842889 | 86.8195316 | 67.8813582 | 72.5172777 |
| 18:12:16 | 0:09:55 | 60.101237 | 67.2842889 | 86.8195316 | 67.8813582 | 72.5172777 |
| 18:12:17 | 0:09:56 | 60.101237 | 69.2842889 | 78.8195316 | 68.8813582 | 73.5172777 |
| 18:12:18 | 0:09:57 | 60.101237 | 69.2842889 | 78.8195316 | 68.8813582 | 73.5172777 |
| 18:12:19 | 0:09:58 | 60.101237 | 69.2842889 | 77.8195316 | 68.8813582 | 73.5172777 |
| 18:12:20 | 0:09:59 | 60.101237 | 69.2842889 | 76.8195316 | 68.8813582 | 70.5172777 |
| 18:12:21 | 0:10:00 | 62.101237 | 68.2842889 | 75.8195316 | 68.8813582 | 70.5172777 |
| 18:12:22 | 0:10:01 | 62.101237 | 68.2842889 | 75.8195316 | 69.8813582 | 71.5172777 |
| 18:12:23 | 0:10:02 | 62.101237 | 67.2842889 | 75.8195316 | 69.8813582 | 71.5172777 |
| 18:12:24 | 0:10:03 | 62.101237 | 67.2842889 | 76.8195316 | 68.8813582 | 71.5172777 |
| 18:12:25 | 0:10:04 | 63.101237 | 67.2842889 | 76.8195316 | 68.8813582 | 70.5172777 |
| 18:12:26 | 0:10:05 | 63.101237 | 67.2842889 | 76.8195316 | 68.8813582 | 69.5172777 |
| 18:12:27 | 0:10:06 | 63.101237 | 67.2842889 | 73.8195316 | 68.8813582 | 69.5172777 |
| 18:12:28 | 0:10:07 | 64.101237 | 67.2842889 | 71.8195316 | 66.8813582 | 68.5172777 |
| 18:12:29 | 0:10:08 | 64.101237 | 67.2842889 | 70.8195316 | 66.8813582 | 68.5172777 |
| 18:12:30 | 0:10:09 | 63.101237 | 67.2842889 | 69.8195316 | 65.8813582 | 70.5172777 |
| 18:12:31 | 0:10:10 | 63.101237 | 67.2842889 | 69.8195316 | 65.8813582 | 71.5172777 |
| 18:12:32 | 0:10:11 | 63.101237 | 66.2842889 | 69.8195316 | 64.8813582 | 72.5172777 |
| 18:12:33 | 0:10:12 | 62.101237 | 66.2842889 | 69.8195316 | 64.8813582 | 72.5172777 |
| 18:12:34 | 0:10:13 | 62.101237 | 65.2842889 | 69.8195316 | 64.8813582 | 73.5172777 |
| 18:12:35 | 0:10:14 | 61.101237 | 65.2842889 | 69.8195316 | 65.8813582 | 73.5172777 |
| 18:12:36 | 0:10:15 | 61.101237 | 65.2842889 | 69.8195316 | 65.8813582 | 73.5172777 |
| 18:12:37 | 0:10:16 | 59.101237 | 65.2842889 | 69.8195316 | 65.8813582 | 72.5172777 |
| 18:12:38 | 0:10:17 | 59.101237 | 66.2842889 | 68.8195316 | 66.8813582 | 72.5172777 |
| 18:12:39 | 0:10:18 | 59.101237 | 66.2842889 | 67.8195316 | 66.8813582 | 73.5172777 |
| 18:12:40 | 0:10:19 | 59.101237 | 67.2842889 | 67.8195316 | 66.8813582 | 72.5172777 |
| 18:12:41 | 0:10:20 | 59.101237 | 67.2842889 | 65.8195316 | 65.8813582 | 70.5172777 |
| 18:12:42 | 0:10:21 | 59.101237 | 67.2842889 | 65.8195316 | 64.8813582 | 69.5172777 |
| 18:12:43 | 0:10:22 | 58.101237 | 67.2842889 | 65.8195316 | 64.8813582 | 67.5172777 |
| 18:12:44 | 0:10:23 | 57.101237 | 67.2842889 | 65.8195316 | 65.8813582 | 67.5172777 |
| 18:12:45 | 0:10:24 | 57.101237 | 67.2842889 | 64.8195316 | 66.8813582 | 68.5172777 |
| 18:12:46 | 0:10:25 | 57.101237 | 66.2842889 | 65.8195316 | 66.8813582 | 69.5172777 |
| 18:12:47 | 0:10:26 | 57.101237 | 66.2842889 | 64.8195316 | 66.8813582 | 69.5172777 |
| 18:12:48 | 0:10:27 | 57.101237 | 66.2842889 | 64.8195316 | 65.8813582 | 71.5172777 |

|          |         |           |            |            |            |            |
|----------|---------|-----------|------------|------------|------------|------------|
| 18:12:49 | 0:10:28 | 58.101237 | 65.2842889 | 64.8195316 | 65.8813582 | 72.5172777 |
| 18:12:50 | 0:10:29 | 58.101237 | 65.2842889 | 64.8195316 | 66.8813582 | 73.5172777 |
| 18:12:51 | 0:10:30 | 61.101237 | 64.2842889 | 64.8195316 | 66.8813582 | 73.5172777 |
| 18:12:52 | 0:10:31 | 61.101237 | 64.2842889 | 65.8195316 | 66.8813582 | 74.5172777 |
| 18:12:53 | 0:10:32 | 62.101237 | 64.2842889 | 65.8195316 | 66.8813582 | 74.5172777 |
| 18:12:54 | 0:10:33 | 62.101237 | 64.2842889 | 65.8195316 | 66.8813582 | 75.5172777 |
| 18:12:55 | 0:10:34 | 62.101237 | 64.2842889 | 66.8195316 | 66.8813582 | 75.5172777 |
| 18:12:56 | 0:10:35 | 62.101237 | 64.2842889 | 66.8195316 | 66.8813582 | 75.5172777 |
| 18:12:57 | 0:10:36 | 63.101237 | 64.2842889 | 66.8195316 | 66.8813582 | 74.5172777 |
| 18:12:58 | 0:10:37 | 63.101237 | 64.2842889 | 66.8195316 | 66.8813582 | 74.5172777 |
| 18:12:59 | 0:10:38 | 63.101237 | 64.2842889 | 66.8195316 | 66.8813582 | 74.5172777 |
| 18:13:00 | 0:10:39 | 64.101237 | 65.2842889 | 67.8195316 | 66.8813582 | 74.5172777 |
| 18:13:01 | 0:10:40 | 64.101237 | 65.2842889 | 68.8195316 | 66.8813582 | 74.5172777 |
| 18:13:02 | 0:10:41 | 64.101237 | 65.2842889 | 69.8195316 | 66.8813582 | 74.5172777 |
| 18:13:03 | 0:10:42 | 64.101237 | 65.2842889 | 69.8195316 | 68.8813582 | 74.5172777 |
| 18:13:04 | 0:10:43 | 64.101237 | 65.2842889 | 70.8195316 | 70.8813582 | 73.5172777 |
| 18:13:05 | 0:10:44 | 64.101237 | 65.2842889 | 71.8195316 | 71.8813582 | 71.5172777 |
| 18:13:06 | 0:10:45 | 65.101237 | 65.2842889 | 71.8195316 | 71.8813582 | 72.5172777 |
| 18:13:07 | 0:10:46 | 65.101237 | 65.2842889 | 71.8195316 | 71.8813582 | 72.5172777 |
| 18:13:08 | 0:10:47 | 69.101237 | 65.2842889 | 70.8195316 | 71.8813582 | 72.5172777 |
| 18:13:09 | 0:10:48 | 69.101237 | 65.2842889 | 70.8195316 | 71.8813582 | 71.5172777 |
| 18:13:10 | 0:10:49 | 69.101237 | 65.2842889 | 70.8195316 | 75.8813582 | 71.5172777 |
| 18:13:11 | 0:10:50 | 68.101237 | 65.2842889 | 70.8195316 | 73.8813582 | 70.5172777 |
| 18:13:12 | 0:10:51 | 67.101237 | 65.2842889 | 70.8195316 | 69.8813582 | 70.5172777 |
| 18:13:13 | 0:10:52 | 67.101237 | 65.2842889 | 69.8195316 | 67.8813582 | 71.5172777 |
| 18:13:14 | 0:10:53 | 65.101237 | 65.2842889 | 69.8195316 | 67.8813582 | 71.5172777 |
| 18:13:15 | 0:10:54 | 65.101237 | 65.2842889 | 69.8195316 | 66.8813582 | 71.5172777 |
| 18:13:16 | 0:10:55 | 65.101237 | 66.2842889 | 70.8195316 | 67.8813582 | 71.5172777 |
| 18:13:17 | 0:10:56 | 65.101237 | 66.2842889 | 71.8195316 | 67.8813582 | 72.5172777 |
| 18:13:18 | 0:10:57 | 64.101237 | 66.2842889 | 71.8195316 | 67.8813582 | 74.5172777 |
| 18:13:19 | 0:10:58 | 64.101237 | 66.2842889 | 71.8195316 | 67.8813582 | 73.5172777 |
| 18:13:20 | 0:10:59 | 63.101237 | 66.2842889 | 71.8195316 | 67.8813582 | 73.5172777 |
| 18:13:21 | 0:11:00 | 62.101237 | 66.2842889 | 71.8195316 | 67.8813582 | 74.5172777 |
| 18:13:22 | 0:11:01 | 62.101237 | 66.2842889 | 70.8195316 | 67.8813582 | 74.5172777 |
| 18:13:23 | 0:11:02 | 59.101237 | 66.2842889 | 70.8195316 | 67.8813582 | 74.5172777 |
| 18:13:24 | 0:11:03 | 58.101237 | 66.2842889 | 70.8195316 | 67.8813582 | 75.5172777 |
| 18:13:25 | 0:11:04 | 58.101237 | 66.2842889 | 70.8195316 | 67.8813582 | 76.5172777 |
| 18:13:26 | 0:11:05 | 57.101237 | 64.2842889 | 69.8195316 | 67.8813582 | 76.5172777 |
| 18:13:27 | 0:11:06 | 57.101237 | 64.2842889 | 69.8195316 | 67.8813582 | 75.5172777 |
| 18:13:28 | 0:11:07 | 57.101237 | 64.2842889 | 69.8195316 | 67.8813582 | 73.5172777 |
| 18:13:29 | 0:11:08 | 57.101237 | 64.2842889 | 69.8195316 | 67.8813582 | 72.5172777 |
| 18:13:30 | 0:11:09 | 57.101237 | 64.2842889 | 69.8195316 | 67.8813582 | 72.5172777 |
| 18:13:31 | 0:11:10 | 56.101237 | 65.2842889 | 69.8195316 | 67.8813582 | 72.5172777 |
| 18:13:32 | 0:11:11 | 53.101237 | 65.2842889 | 69.8195316 | 67.8813582 | 68.5172777 |
| 18:13:33 | 0:11:12 | 53.101237 | 65.2842889 | 69.8195316 | 67.8813582 | 68.5172777 |

|          |         |           |            |            |            |            |
|----------|---------|-----------|------------|------------|------------|------------|
| 18:13:34 | 0:11:13 | 53.101237 | 67.2842889 | 70.8195316 | 67.8813582 | 68.5172777 |
| 18:13:35 | 0:11:14 | 52.101237 | 71.2842889 | 71.8195316 | 67.8813582 | 68.5172777 |
| 18:13:36 | 0:11:15 | 51.101237 | 71.2842889 | 71.8195316 | 67.8813582 | 69.5172777 |
| 18:13:37 | 0:11:16 | 51.101237 | 72.2842889 | 72.8195316 | 67.8813582 | 69.5172777 |
| 18:13:38 | 0:11:17 | 51.101237 | 72.2842889 | 72.8195316 | 67.8813582 | 69.5172777 |
| 18:13:39 | 0:11:18 | 51.101237 | 72.2842889 | 72.8195316 | 67.8813582 | 68.5172777 |
| 18:13:40 | 0:11:19 | 51.101237 | 72.2842889 | 72.8195316 | 67.8813582 | 68.5172777 |
| 18:13:41 | 0:11:20 | 52.101237 | 71.2842889 | 72.8195316 | 68.8813582 | 69.5172777 |
| 18:13:42 | 0:11:21 | 53.101237 | 72.2842889 | 73.8195316 | 68.8813582 | 69.5172777 |
| 18:13:43 | 0:11:22 | 56.101237 | 72.2842889 | 73.8195316 | 68.8813582 | 71.5172777 |
| 18:13:44 | 0:11:23 | 60.101237 | 72.2842889 | 73.8195316 | 68.8813582 | 71.5172777 |
| 18:13:45 | 0:11:24 | 62.101237 | 72.2842889 | 73.8195316 | 69.8813582 | 72.5172777 |
| 18:13:46 | 0:11:25 | 64.101237 | 72.2842889 | 75.8195316 | 69.8813582 | 72.5172777 |
| 18:13:47 | 0:11:26 | 65.101237 | 72.2842889 | 77.8195316 | 69.8813582 | 71.5172777 |
| 18:13:48 | 0:11:27 | 67.101237 | 72.2842889 | 78.8195316 | 70.8813582 | 70.5172777 |
| 18:13:49 | 0:11:28 | 68.101237 | 72.2842889 | 79.8195316 | 70.8813582 | 70.5172777 |
| 18:13:50 | 0:11:29 | 69.101237 | 71.2842889 | 81.8195316 | 69.8813582 | 69.5172777 |
| 18:13:51 | 0:11:30 | 69.101237 | 66.2842889 | 81.8195316 | 68.8813582 | 69.5172777 |
| 18:13:52 | 0:11:31 | 70.101237 | 66.2842889 | 81.8195316 | 68.8813582 | 69.5172777 |
| 18:13:53 | 0:11:32 | 71.101237 | 66.2842889 | 81.8195316 | 68.8813582 | 69.5172777 |
| 18:13:54 | 0:11:33 | 73.101237 | 66.2842889 | 78.8195316 | 68.8813582 | 69.5172777 |
| 18:13:55 | 0:11:34 | 74.101237 | 66.2842889 | 77.8195316 | 69.8813582 | 70.5172777 |
| 18:13:56 | 0:11:35 | 76.101237 | 66.2842889 | 76.8195316 | 70.8813582 | 70.5172777 |
| 18:13:57 | 0:11:36 | 76.101237 | 66.2842889 | 76.8195316 | 70.8813582 | 70.5172777 |
| 18:13:58 | 0:11:37 | 77.101237 | 66.2842889 | 76.8195316 | 71.8813582 | 70.5172777 |
| 18:13:59 | 0:11:38 | 77.101237 | 65.2842889 | 76.8195316 | 72.8813582 | 73.5172777 |
| 18:14:00 | 0:11:39 | 77.101237 | 65.2842889 | 76.8195316 | 72.8813582 | 73.5172777 |
| 18:14:01 | 0:11:40 | 76.101237 | 64.2842889 | 76.8195316 | 72.8813582 | 76.5172777 |
| 18:14:02 | 0:11:41 | 75.101237 | 64.2842889 | 76.8195316 | 72.8813582 | 76.5172777 |
| 18:14:03 | 0:11:42 | 74.101237 | 64.2842889 | 76.8195316 | 71.8813582 | 78.5172777 |
| 18:14:04 | 0:11:43 | 73.101237 | 64.2842889 | 73.8195316 | 70.8813582 | 79.5172777 |
| 18:14:05 | 0:11:44 | 70.101237 | 64.2842889 | 72.8195316 | 70.8813582 | 79.5172777 |
| 18:14:06 | 0:11:45 | 69.101237 | 61.2842889 | 72.8195316 | 70.8813582 | 78.5172777 |
| 18:14:07 | 0:11:46 | 69.101237 | 61.2842889 | 71.8195316 | 70.8813582 | 77.5172777 |
| 18:14:08 | 0:11:47 | 69.101237 | 62.2842889 | 71.8195316 | 70.8813582 | 76.5172777 |
| 18:14:09 | 0:11:48 | 68.101237 | 62.2842889 | 73.8195316 | 70.8813582 | 76.5172777 |
| 18:14:10 | 0:11:49 | 72.101237 | 62.2842889 | 73.8195316 | 71.8813582 | 74.5172777 |
| 18:14:11 | 0:11:50 | 72.101237 | 62.2842889 | 72.8195316 | 72.8813582 | 74.5172777 |
| 18:14:12 | 0:11:51 | 71.101237 | 62.2842889 | 71.8195316 | 71.8813582 | 75.5172777 |
| 18:14:13 | 0:11:52 | 70.101237 | 61.2842889 | 71.8195316 | 72.8813582 | 75.5172777 |
| 18:14:14 | 0:11:53 | 70.101237 | 61.2842889 | 71.8195316 | 72.8813582 | 75.5172777 |
| 18:14:15 | 0:11:54 | 70.101237 | 61.2842889 | 72.8195316 | 72.8813582 | 76.5172777 |
| 18:14:16 | 0:11:55 | 70.101237 | 61.2842889 | 71.8195316 | 72.8813582 | 76.5172777 |
| 18:14:17 | 0:11:56 | 69.101237 | 61.2842889 | 71.8195316 | 73.8813582 | 76.5172777 |
| 18:14:18 | 0:11:57 | 69.101237 | 61.2842889 | 73.8195316 | 73.8813582 | 76.5172777 |



|          |         |           |            |            |            |            |
|----------|---------|-----------|------------|------------|------------|------------|
| 18:14:19 | 0:11:58 | 68.101237 | 61.2842889 | 74.8195316 | 73.8813582 | 75.5172777 |
| 18:14:20 | 0:11:59 | 68.101237 | 62.2842889 | 74.8195316 | 72.8813582 | 73.5172777 |
| 18:14:21 | 0:12:00 | 67.101237 | 62.2842889 | 79.8195316 | 72.8813582 | 73.5172777 |
| 18:14:22 | 0:12:01 | 68.101237 | 63.2842889 | 84.8195316 | 72.8813582 | 69.5172777 |
| 18:14:23 | 0:12:02 | 72.101237 | 64.2842889 | 87.8195316 | 71.8813582 | 68.5172777 |
| 18:14:24 | 0:12:03 | 72.101237 | 64.2842889 | 87.8195316 | 71.8813582 | 68.5172777 |
| 18:14:25 | 0:12:04 | 76.101237 | 64.2842889 | 87.8195316 | 74.8813582 | 68.5172777 |
| 18:14:26 | 0:12:05 | 77.101237 | 71.2842889 | 87.8195316 | 74.8813582 | 68.5172777 |
| 18:14:27 | 0:12:06 | 77.101237 | 72.2842889 | 80.8195316 | 76.8813582 | 70.5172777 |
| 18:14:28 | 0:12:07 | 77.101237 | 72.2842889 | 77.8195316 | 78.8813582 | 70.5172777 |
| 18:14:29 | 0:12:08 | 77.101237 | 72.2842889 | 74.8195316 | 77.8813582 | 70.5172777 |
| 18:14:30 | 0:12:09 | 76.101237 | 73.2842889 | 74.8195316 | 76.8813582 | 75.5172777 |
| 18:14:31 | 0:12:10 | 76.101237 | 73.2842889 | 71.8195316 | 74.8813582 | 75.5172777 |
| 18:14:32 | 0:12:11 | 75.101237 | 73.2842889 | 70.8195316 | 73.8813582 | 75.5172777 |
| 18:14:33 | 0:12:12 | 75.101237 | 73.2842889 | 69.8195316 | 73.8813582 | 75.5172777 |
| 18:14:34 | 0:12:13 | 75.101237 | 73.2842889 | 68.8195316 | 72.8813582 | 78.5172777 |
| 18:14:35 | 0:12:14 | 75.101237 | 72.2842889 | 68.8195316 | 71.8813582 | 78.5172777 |
| 18:14:36 | 0:12:15 | 75.101237 | 70.2842889 | 66.8195316 | 72.8813582 | 80.5172777 |
| 18:14:37 | 0:12:16 | 75.101237 | 69.2842889 | 65.8195316 | 72.8813582 | 80.5172777 |
| 18:14:38 | 0:12:17 | 75.101237 | 69.2842889 | 66.8195316 | 72.8813582 | 81.5172777 |
| 18:14:39 | 0:12:18 | 75.101237 | 69.2842889 | 66.8195316 | 72.8813582 | 82.5172777 |
| 18:14:40 | 0:12:19 | 75.101237 | 68.2842889 | 66.8195316 | 72.8813582 | 82.5172777 |
| 18:14:41 | 0:12:20 | 75.101237 | 68.2842889 | 66.8195316 | 72.8813582 | 79.5172777 |
| 18:14:42 | 0:12:21 | 76.101237 | 69.2842889 | 68.8195316 | 72.8813582 | 79.5172777 |
| 18:14:43 | 0:12:22 | 76.101237 | 68.2842889 | 70.8195316 | 72.8813582 | 75.5172777 |
| 18:14:44 | 0:12:23 | 78.101237 | 67.2842889 | 70.8195316 | 72.8813582 | 74.5172777 |
| 18:14:45 | 0:12:24 | 78.101237 | 66.2842889 | 73.8195316 | 73.8813582 | 74.5172777 |
| 18:14:46 | 0:12:25 | 78.101237 | 65.2842889 | 73.8195316 | 73.8813582 | 75.5172777 |
| 18:14:47 | 0:12:26 | 78.101237 | 64.2842889 | 73.8195316 | 73.8813582 | 74.5172777 |
| 18:14:48 | 0:12:27 | 77.101237 | 63.2842889 | 71.8195316 | 73.8813582 | 74.5172777 |
| 18:14:49 | 0:12:28 | 77.101237 | 63.2842889 | 70.8195316 | 71.8813582 | 73.5172777 |
| 18:14:50 | 0:12:29 | 77.101237 | 63.2842889 | 70.8195316 | 70.8813582 | 73.5172777 |
| 18:14:51 | 0:12:30 | 77.101237 | 63.2842889 | 70.8195316 | 70.8813582 | 72.5172777 |
| 18:14:52 | 0:12:31 | 77.101237 | 65.2842889 | 69.8195316 | 70.8813582 | 71.5172777 |
| 18:14:53 | 0:12:32 | 77.101237 | 65.2842889 | 69.8195316 | 70.8813582 | 71.5172777 |
| 18:14:54 | 0:12:33 | 76.101237 | 65.2842889 | 69.8195316 | 70.8813582 | 71.5172777 |
| 18:14:55 | 0:12:34 | 75.101237 | 65.2842889 | 68.8195316 | 70.8813582 | 72.5172777 |
| 18:14:56 | 0:12:35 | 74.101237 | 65.2842889 | 68.8195316 | 69.8813582 | 73.5172777 |
| 18:14:57 | 0:12:36 | 74.101237 | 65.2842889 | 68.8195316 | 69.8813582 | 72.5172777 |
| 18:14:58 | 0:12:37 | 73.101237 | 65.2842889 | 68.8195316 | 67.8813582 | 72.5172777 |
| 18:14:59 | 0:12:38 | 71.101237 | 65.2842889 | 68.8195316 | 67.8813582 | 72.5172777 |
| 18:15:00 | 0:12:39 | 69.101237 | 65.2842889 | 68.8195316 | 67.8813582 | 71.5172777 |
| 18:15:01 | 0:12:40 | 69.101237 | 66.2842889 | 68.8195316 | 66.8813582 | 71.5172777 |
| 18:15:02 | 0:12:41 | 68.101237 | 67.2842889 | 69.8195316 | 66.8813582 | 71.5172777 |
| 18:15:03 | 0:12:42 | 68.101237 | 68.2842889 | 69.8195316 | 66.8813582 | 71.5172777 |

|          |         |           |            |            |            |            |
|----------|---------|-----------|------------|------------|------------|------------|
| 18:15:04 | 0:12:43 | 69.101237 | 68.2842889 | 69.8195316 | 66.8813582 | 72.5172777 |
| 18:15:05 | 0:12:44 | 66.101237 | 68.2842889 | 69.8195316 | 66.8813582 | 73.5172777 |
| 18:15:06 | 0:12:45 | 65.101237 | 68.2842889 | 69.8195316 | 67.8813582 | 75.5172777 |
| 18:15:07 | 0:12:46 | 64.101237 | 66.2842889 | 69.8195316 | 67.8813582 | 75.5172777 |
| 18:15:08 | 0:12:47 | 63.101237 | 66.2842889 | 69.8195316 | 68.8813582 | 75.5172777 |
| 18:15:09 | 0:12:48 | 63.101237 | 66.2842889 | 69.8195316 | 67.8813582 | 75.5172777 |
| 18:15:10 | 0:12:49 | 63.101237 | 66.2842889 | 70.8195316 | 67.8813582 | 73.5172777 |
| 18:15:11 | 0:12:50 | 64.101237 | 66.2842889 | 71.8195316 | 67.8813582 | 71.5172777 |
| 18:15:12 | 0:12:51 | 66.101237 | 66.2842889 | 71.8195316 | 67.8813582 | 70.5172777 |
| 18:15:13 | 0:12:52 | 66.101237 | 67.2842889 | 72.8195316 | 67.8813582 | 70.5172777 |
| 18:15:14 | 0:12:53 | 67.101237 | 67.2842889 | 72.8195316 | 67.8813582 | 69.5172777 |
| 18:15:15 | 0:12:54 | 67.101237 | 67.2842889 | 73.8195316 | 68.8813582 | 70.5172777 |
| 18:15:16 | 0:12:55 | 68.101237 | 67.2842889 | 73.8195316 | 68.8813582 | 70.5172777 |
| 18:15:17 | 0:12:56 | 68.101237 | 67.2842889 | 74.8195316 | 68.8813582 | 70.5172777 |
| 18:15:18 | 0:12:57 | 68.101237 | 67.2842889 | 74.8195316 | 68.8813582 | 70.5172777 |
| 18:15:19 | 0:12:58 | 68.101237 | 66.2842889 | 74.8195316 | 68.8813582 | 70.5172777 |
| 18:15:20 | 0:12:59 | 75.101237 | 66.2842889 | 73.8195316 | 68.8813582 | 70.5172777 |
| 18:15:21 | 0:13:00 | 75.101237 | 65.2842889 | 72.8195316 | 68.8813582 | 70.5172777 |
| 18:15:22 | 0:13:01 | 76.101237 | 65.2842889 | 72.8195316 | 68.8813582 | 70.5172777 |
| 18:15:23 | 0:13:02 | 76.101237 | 65.2842889 | 72.8195316 | 67.8813582 | 70.5172777 |
| 18:15:24 | 0:13:03 | 75.101237 | 65.2842889 | 73.8195316 | 67.8813582 | 70.5172777 |
| 18:15:25 | 0:13:04 | 75.101237 | 66.2842889 | 73.8195316 | 67.8813582 | 70.5172777 |
| 18:15:26 | 0:13:05 | 75.101237 | 67.2842889 | 74.8195316 | 66.8813582 | 70.5172777 |
| 18:15:27 | 0:13:06 | 75.101237 | 66.2842889 | 73.8195316 | 66.8813582 | 70.5172777 |
| 18:15:28 | 0:13:07 | 73.101237 | 66.2842889 | 73.8195316 | 66.8813582 | 71.5172777 |
| 18:15:29 | 0:13:08 | 73.101237 | 66.2842889 | 71.8195316 | 66.8813582 | 71.5172777 |
| 18:15:30 | 0:13:09 | 73.101237 | 65.2842889 | 71.8195316 | 66.8813582 | 71.5172777 |
| 18:15:31 | 0:13:10 | 74.101237 | 65.2842889 | 70.8195316 | 66.8813582 | 71.5172777 |
| 18:15:32 | 0:13:11 | 75.101237 | 65.2842889 | 70.8195316 | 65.8813582 | 70.5172777 |
| 18:15:33 | 0:13:12 | 78.101237 | 66.2842889 | 70.8195316 | 65.8813582 | 68.5172777 |
| 18:15:34 | 0:13:13 | 78.101237 | 66.2842889 | 70.8195316 | 65.8813582 | 68.5172777 |
| 18:15:35 | 0:13:14 | 78.101237 | 66.2842889 | 70.8195316 | 66.8813582 | 66.5172777 |
| 18:15:36 | 0:13:15 | 77.101237 | 66.2842889 | 70.8195316 | 66.8813582 | 65.5172777 |
| 18:15:37 | 0:13:16 | 77.101237 | 66.2842889 | 70.8195316 | 66.8813582 | 64.5172777 |
| 18:15:38 | 0:13:17 | 75.101237 | 67.2842889 | 71.8195316 | 66.8813582 | 64.5172777 |
| 18:15:39 | 0:13:18 | 72.101237 | 67.2842889 | 71.8195316 | 67.8813582 | 64.5172777 |
| 18:15:40 | 0:13:19 | 71.101237 | 67.2842889 | 71.8195316 | 67.8813582 | 67.5172777 |
| 18:15:41 | 0:13:20 | 71.101237 | 67.2842889 | 71.8195316 | 67.8813582 | 68.5172777 |
| 18:15:42 | 0:13:21 | 71.101237 | 67.2842889 | 72.8195316 | 67.8813582 | 69.5172777 |
| 18:15:43 | 0:13:22 | 70.101237 | 67.2842889 | 73.8195316 | 68.8813582 | 69.5172777 |
| 18:15:44 | 0:13:23 | 70.101237 | 67.2842889 | 74.8195316 | 68.8813582 | 70.5172777 |
| 18:15:45 | 0:13:24 | 70.101237 | 67.2842889 | 74.8195316 | 68.8813582 | 72.5172777 |
| 18:15:46 | 0:13:25 | 71.101237 | 65.2842889 | 75.8195316 | 68.8813582 | 73.5172777 |
| 18:15:47 | 0:13:26 | 72.101237 | 63.2842889 | 74.8195316 | 68.8813582 | 74.5172777 |
| 18:15:48 | 0:13:27 | 72.101237 | 62.2842889 | 74.8195316 | 68.8813582 | 74.5172777 |

|          |         |           |            |            |            |            |
|----------|---------|-----------|------------|------------|------------|------------|
| 18:15:49 | 0:13:28 | 72.101237 | 62.2842889 | 74.8195316 | 69.8813582 | 73.5172777 |
| 18:15:50 | 0:13:29 | 73.101237 | 61.2842889 | 74.8195316 | 69.8813582 | 73.5172777 |
| 18:15:51 | 0:13:30 | 73.101237 | 61.2842889 | 74.8195316 | 69.8813582 | 74.5172777 |
| 18:15:52 | 0:13:31 | 73.101237 | 62.2842889 | 75.8195316 | 69.8813582 | 75.5172777 |
| 18:15:53 | 0:13:32 | 73.101237 | 63.2842889 | 75.8195316 | 69.8813582 | 75.5172777 |
| 18:15:54 | 0:13:33 | 67.101237 | 64.2842889 | 75.8195316 | 69.8813582 | 76.5172777 |
| 18:15:55 | 0:13:34 | 68.101237 | 64.2842889 | 75.8195316 | 69.8813582 | 77.5172777 |
| 18:15:56 | 0:13:35 | 68.101237 | 64.2842889 | 74.8195316 | 69.8813582 | 77.5172777 |
| 18:15:57 | 0:13:36 | 69.101237 | 66.2842889 | 73.8195316 | 69.8813582 | 77.5172777 |
| 18:15:58 | 0:13:37 | 69.101237 | 67.2842889 | 73.8195316 | 69.8813582 | 75.5172777 |
| 18:15:59 | 0:13:38 | 69.101237 | 67.2842889 | 72.8195316 | 68.8813582 | 69.5172777 |
| 18:16:00 | 0:13:39 | 69.101237 | 68.2842889 | 73.8195316 | 68.8813582 | 67.5172777 |
| 18:16:01 | 0:13:40 | 69.101237 | 68.2842889 | 73.8195316 | 68.8813582 | 66.5172777 |
| 18:16:02 | 0:13:41 | 70.101237 | 68.2842889 | 73.8195316 | 67.8813582 | 66.5172777 |
| 18:16:03 | 0:13:42 | 73.101237 | 71.2842889 | 75.8195316 | 67.8813582 | 65.5172777 |
| 18:16:04 | 0:13:43 | 74.101237 | 71.2842889 | 74.8195316 | 67.8813582 | 66.5172777 |
| 18:16:05 | 0:13:44 | 73.101237 | 75.2842889 | 74.8195316 | 67.8813582 | 67.5172777 |
| 18:16:06 | 0:13:45 | 72.101237 | 75.2842889 | 74.8195316 | 67.8813582 | 68.5172777 |
| 18:16:07 | 0:13:46 | 70.101237 | 74.2842889 | 74.8195316 | 67.8813582 | 69.5172777 |
| 18:16:08 | 0:13:47 | 64.101237 | 74.2842889 | 74.8195316 | 67.8813582 | 70.5172777 |
| 18:16:09 | 0:13:48 | 64.101237 | 74.2842889 | 74.8195316 | 67.8813582 | 69.5172777 |
| 18:16:10 | 0:13:49 | 64.101237 | 74.2842889 | 75.8195316 | 67.8813582 | 68.5172777 |
| 18:16:11 | 0:13:50 | 64.101237 | 75.2842889 | 75.8195316 | 68.8813582 | 67.5172777 |
| 18:16:12 | 0:13:51 | 64.101237 | 75.2842889 | 75.8195316 | 68.8813582 | 67.5172777 |
| 18:16:13 | 0:13:52 | 64.101237 | 75.2842889 | 73.8195316 | 68.8813582 | 66.5172777 |
| 18:16:14 | 0:13:53 | 65.101237 | 76.2842889 | 73.8195316 | 68.8813582 | 65.5172777 |
| 18:16:15 | 0:13:54 | 65.101237 | 76.2842889 | 74.8195316 | 68.8813582 | 66.5172777 |
| 18:16:16 | 0:13:55 | 68.101237 | 77.2842889 | 76.8195316 | 68.8813582 | 66.5172777 |
| 18:16:17 | 0:13:56 | 70.101237 | 77.2842889 | 76.8195316 | 68.8813582 | 67.5172777 |
| 18:16:18 | 0:13:57 | 69.101237 | 77.2842889 | 76.8195316 | 68.8813582 | 67.5172777 |
| 18:16:19 | 0:13:58 | 68.101237 | 78.2842889 | 78.8195316 | 68.8813582 | 68.5172777 |
| 18:16:20 | 0:13:59 | 64.101237 | 78.2842889 | 80.8195316 | 67.8813582 | 68.5172777 |
| 18:16:21 | 0:14:00 | 63.101237 | 78.2842889 | 80.8195316 | 67.8813582 | 69.5172777 |
| 18:16:22 | 0:14:01 | 65.101237 | 78.2842889 | 82.8195316 | 67.8813582 | 69.5172777 |
| 18:16:23 | 0:14:02 | 65.101237 | 78.2842889 | 83.8195316 | 67.8813582 | 69.5172777 |
| 18:16:24 | 0:14:03 | 65.101237 | 80.2842889 | 83.8195316 | 67.8813582 | 69.5172777 |
| 18:16:25 | 0:14:04 | 67.101237 | 80.2842889 | 85.8195316 | 68.8813582 | 71.5172777 |
| 18:16:26 | 0:14:05 | 67.101237 | 80.2842889 | 86.8195316 | 68.8813582 | 71.5172777 |
| 18:16:27 | 0:14:06 | 67.101237 | 77.2842889 | 86.8195316 | 68.8813582 | 70.5172777 |
| 18:16:28 | 0:14:07 | 67.101237 | 76.2842889 | 86.8195316 | 67.8813582 | 69.5172777 |
| 18:16:29 | 0:14:08 | 67.101237 | 75.2842889 | 86.8195316 | 67.8813582 | 69.5172777 |
| 18:16:30 | 0:14:09 | 70.101237 | 75.2842889 | 86.8195316 | 66.8813582 | 67.5172777 |
| 18:16:31 | 0:14:10 | 70.101237 | 75.2842889 | 83.8195316 | 66.8813582 | 66.5172777 |
| 18:16:32 | 0:14:11 | 72.101237 | 75.2842889 | 83.8195316 | 66.8813582 | 67.5172777 |
| 18:16:33 | 0:14:12 | 72.101237 | 75.2842889 | 83.8195316 | 66.8813582 | 67.5172777 |

|          |         |           |            |            |            |            |
|----------|---------|-----------|------------|------------|------------|------------|
| 18:16:34 | 0:14:13 | 72.101237 | 75.2842889 | 81.8195316 | 66.8813582 | 68.5172777 |
| 18:16:35 | 0:14:14 | 72.101237 | 75.2842889 | 81.8195316 | 66.8813582 | 69.5172777 |
| 18:16:36 | 0:14:15 | 73.101237 | 75.2842889 | 75.8195316 | 66.8813582 | 70.5172777 |
| 18:16:37 | 0:14:16 | 76.101237 | 76.2842889 | 75.8195316 | 66.8813582 | 71.5172777 |
| 18:16:38 | 0:14:17 | 76.101237 | 76.2842889 | 74.8195316 | 66.8813582 | 71.5172777 |
| 18:16:39 | 0:14:18 | 74.101237 | 76.2842889 | 74.8195316 | 66.8813582 | 76.5172777 |
| 18:16:40 | 0:14:19 | 73.101237 | 76.2842889 | 72.8195316 | 66.8813582 | 77.5172777 |
| 18:16:41 | 0:14:20 | 74.101237 | 76.2842889 | 70.8195316 | 66.8813582 | 77.5172777 |
| 18:16:42 | 0:14:21 | 76.101237 | 77.2842889 | 70.8195316 | 66.8813582 | 77.5172777 |
| 18:16:43 | 0:14:22 | 76.101237 | 78.2842889 | 70.8195316 | 66.8813582 | 77.5172777 |
| 18:16:44 | 0:14:23 | 76.101237 | 79.2842889 | 70.8195316 | 66.8813582 | 77.5172777 |
| 18:16:45 | 0:14:24 | 76.101237 | 79.2842889 | 67.8195316 | 66.8813582 | 76.5172777 |
| 18:16:46 | 0:14:25 | 76.101237 | 78.2842889 | 66.8195316 | 67.8813582 | 75.5172777 |
| 18:16:47 | 0:14:26 | 76.101237 | 78.2842889 | 66.8195316 | 67.8813582 | 75.5172777 |
| 18:16:48 | 0:14:27 | 75.101237 | 76.2842889 | 66.8195316 | 67.8813582 | 73.5172777 |
| 18:16:49 | 0:14:28 | 74.101237 | 71.2842889 | 66.8195316 | 67.8813582 | 73.5172777 |
| 18:16:50 | 0:14:29 | 73.101237 | 69.2842889 | 67.8195316 | 67.8813582 | 72.5172777 |
| 18:16:51 | 0:14:30 | 74.101237 | 69.2842889 | 68.8195316 | 67.8813582 | 70.5172777 |
| 18:16:52 | 0:14:31 | 74.101237 | 68.2842889 | 68.8195316 | 67.8813582 | 69.5172777 |
| 18:16:53 | 0:14:32 | 73.101237 | 68.2842889 | 68.8195316 | 67.8813582 | 69.5172777 |
| 18:16:54 | 0:14:33 | 73.101237 | 68.2842889 | 69.8195316 | 67.8813582 | 68.5172777 |
| 18:16:55 | 0:14:34 | 73.101237 | 69.2842889 | 69.8195316 | 71.8813582 | 68.5172777 |
| 18:16:56 | 0:14:35 | 74.101237 | 70.2842889 | 69.8195316 | 72.8813582 | 68.5172777 |
| 18:16:57 | 0:14:36 | 75.101237 | 70.2842889 | 69.8195316 | 72.8813582 | 71.5172777 |
| 18:16:58 | 0:14:37 | 75.101237 | 69.2842889 | 70.8195316 | 71.8813582 | 71.5172777 |
| 18:16:59 | 0:14:38 | 76.101237 | 69.2842889 | 70.8195316 | 70.8813582 | 70.5172777 |
| 18:17:00 | 0:14:39 | 77.101237 | 68.2842889 | 71.8195316 | 69.8813582 | 70.5172777 |
| 18:17:01 | 0:14:40 | 77.101237 | 68.2842889 | 71.8195316 | 69.8813582 | 71.5172777 |
| 18:17:02 | 0:14:41 | 77.101237 | 68.2842889 | 71.8195316 | 68.8813582 | 72.5172777 |
| 18:17:03 | 0:14:42 | 77.101237 | 68.2842889 | 71.8195316 | 68.8813582 | 72.5172777 |
| 18:17:04 | 0:14:43 | 76.101237 | 68.2842889 | 71.8195316 | 68.8813582 | 72.5172777 |
| 18:17:05 | 0:14:44 | 76.101237 | 68.2842889 | 73.8195316 | 67.8813582 | 74.5172777 |
| 18:17:06 | 0:14:45 | 76.101237 | 68.2842889 | 73.8195316 | 67.8813582 | 74.5172777 |
| 18:17:07 | 0:14:46 | 74.101237 | 69.2842889 | 73.8195316 | 66.8813582 | 74.5172777 |
| 18:17:08 | 0:14:47 | 74.101237 | 69.2842889 | 76.8195316 | 66.8813582 | 75.5172777 |
| 18:17:09 | 0:14:48 | 75.101237 | 68.2842889 | 76.8195316 | 66.8813582 | 75.5172777 |
| 18:17:10 | 0:14:49 | 74.101237 | 68.2842889 | 76.8195316 | 67.8813582 | 75.5172777 |
| 18:17:11 | 0:14:50 | 73.101237 | 68.2842889 | 75.8195316 | 66.8813582 | 74.5172777 |
| 18:17:12 | 0:14:51 | 73.101237 | 68.2842889 | 73.8195316 | 67.8813582 | 70.5172777 |
| 18:17:13 | 0:14:52 | 73.101237 | 69.2842889 | 72.8195316 | 67.8813582 | 67.5172777 |
| 18:17:14 | 0:14:53 | 73.101237 | 70.2842889 | 72.8195316 | 67.8813582 | 65.5172777 |
| 18:17:15 | 0:14:54 | 73.101237 | 71.2842889 | 71.8195316 | 67.8813582 | 65.5172777 |
| 18:17:16 | 0:14:55 | 73.101237 | 71.2842889 | 71.8195316 | 67.8813582 | 65.5172777 |
| 18:17:17 | 0:14:56 | 73.101237 | 71.2842889 | 71.8195316 | 67.8813582 | 66.5172777 |
| 18:17:18 | 0:14:57 | 76.101237 | 71.2842889 | 71.8195316 | 67.8813582 | 68.5172777 |

|          |         |           |            |            |            |            |
|----------|---------|-----------|------------|------------|------------|------------|
| 18:17:19 | 0:14:58 | 76.101237 | 71.2842889 | 71.8195316 | 67.8813582 | 72.5172777 |
| 18:17:20 | 0:14:59 | 76.101237 | 72.2842889 | 71.8195316 | 68.8813582 | 73.5172777 |
| 18:17:21 | 0:15:00 | 75.101237 | 73.2842889 | 71.8195316 | 69.8813582 | 73.5172777 |
| 18:17:22 | 0:15:01 | 75.101237 | 71.2842889 | 71.8195316 | 69.8813582 | 73.5172777 |
| 18:17:23 | 0:15:02 | 75.101237 | 71.2842889 | 71.8195316 | 68.8813582 | 71.5172777 |
| 18:17:24 | 0:15:03 | 75.101237 | 72.2842889 | 71.8195316 | 67.8813582 | 70.5172777 |
| 18:17:25 | 0:15:04 | 76.101237 | 72.2842889 | 71.8195316 | 67.8813582 | 69.5172777 |
| 18:17:26 | 0:15:05 | 77.101237 | 72.2842889 | 71.8195316 | 67.8813582 | 69.5172777 |
| 18:17:27 | 0:15:06 | 78.101237 | 71.2842889 | 71.8195316 | 67.8813582 | 68.5172777 |
| 18:17:28 | 0:15:07 | 79.101237 | 71.2842889 | 72.8195316 | 67.8813582 | 68.5172777 |
| 18:17:29 | 0:15:08 | 79.101237 | 71.2842889 | 74.8195316 | 67.8813582 | 68.5172777 |
| 18:17:30 | 0:15:09 | 80.101237 | 71.2842889 | 73.8195316 | 67.8813582 | 69.5172777 |
| 18:17:31 | 0:15:10 | 80.101237 | 70.2842889 | 73.8195316 | 67.8813582 | 70.5172777 |
| 18:17:32 | 0:15:11 | 81.101237 | 70.2842889 | 73.8195316 | 67.8813582 | 70.5172777 |
| 18:17:33 | 0:15:12 | 81.101237 | 70.2842889 | 73.8195316 | 67.8813582 | 70.5172777 |
| 18:17:34 | 0:15:13 | 81.101237 | 69.2842889 | 73.8195316 | 67.8813582 | 70.5172777 |
| 18:17:35 | 0:15:14 | 81.101237 | 68.2842889 | 73.8195316 | 68.8813582 | 70.5172777 |
| 18:17:36 | 0:15:15 | 71.101237 | 68.2842889 | 73.8195316 | 68.8813582 | 69.5172777 |
| 18:17:37 | 0:15:16 | 63.101237 | 68.2842889 | 73.8195316 | 68.8813582 | 68.5172777 |
| 18:17:38 | 0:15:17 | 59.101237 | 68.2842889 | 73.8195316 | 68.8813582 | 68.5172777 |
| 18:17:39 | 0:15:18 | 58.101237 | 68.2842889 | 72.8195316 | 67.8813582 | 67.5172777 |
| 18:17:40 | 0:15:19 | 58.101237 | 68.2842889 | 72.8195316 | 67.8813582 | 68.5172777 |
| 18:17:41 | 0:15:20 | 58.101237 | 68.2842889 | 72.8195316 | 66.8813582 | 69.5172777 |
| 18:17:42 | 0:15:21 | 58.101237 | 68.2842889 | 73.8195316 | 66.8813582 | 69.5172777 |
| 18:17:43 | 0:15:22 | 57.101237 | 68.2842889 | 73.8195316 | 65.8813582 | 71.5172777 |
| 18:17:44 | 0:15:23 | 56.101237 | 68.2842889 | 73.8195316 | 64.8813582 | 72.5172777 |
| 18:17:45 | 0:15:24 | 57.101237 | 68.2842889 | 73.8195316 | 64.8813582 | 72.5172777 |
| 18:17:46 | 0:15:25 | 58.101237 | 68.2842889 | 73.8195316 | 64.8813582 | 72.5172777 |
| 18:17:47 | 0:15:26 | 60.101237 | 68.2842889 | 72.8195316 | 64.8813582 | 72.5172777 |
| 18:17:48 | 0:15:27 | 63.101237 | 68.2842889 | 71.8195316 | 63.8813582 | 73.5172777 |
| 18:17:49 | 0:15:28 | 65.101237 | 68.2842889 | 70.8195316 | 63.8813582 | 73.5172777 |
| 18:17:50 | 0:15:29 | 66.101237 | 68.2842889 | 70.8195316 | 64.8813582 | 70.5172777 |
| 18:17:51 | 0:15:30 | 66.101237 | 68.2842889 | 70.8195316 | 65.8813582 | 69.5172777 |
| 18:17:52 | 0:15:31 | 67.101237 | 68.2842889 | 70.8195316 | 65.8813582 | 67.5172777 |
| 18:17:53 | 0:15:32 | 67.101237 | 68.2842889 | 70.8195316 | 64.8813582 | 67.5172777 |
| 18:17:54 | 0:15:33 | 67.101237 | 68.2842889 | 70.8195316 | 64.8813582 | 67.5172777 |
| 18:17:55 | 0:15:34 | 68.101237 | 68.2842889 | 70.8195316 | 64.8813582 | 67.5172777 |
| 18:17:56 | 0:15:35 | 69.101237 | 68.2842889 | 72.8195316 | 65.8813582 | 67.5172777 |
| 18:17:57 | 0:15:36 | 69.101237 | 68.2842889 | 72.8195316 | 65.8813582 | 67.5172777 |
| 18:17:58 | 0:15:37 | 69.101237 | 68.2842889 | 73.8195316 | 65.8813582 | 67.5172777 |
| 18:17:59 | 0:15:38 | 70.101237 | 68.2842889 | 73.8195316 | 66.8813582 | 66.5172777 |
| 18:18:00 | 0:15:39 | 70.101237 | 68.2842889 | 73.8195316 | 66.8813582 | 66.5172777 |
| 18:18:01 | 0:15:40 | 73.101237 | 68.2842889 | 72.8195316 | 66.8813582 | 67.5172777 |
| 18:18:02 | 0:15:41 | 74.101237 | 68.2842889 | 72.8195316 | 65.8813582 | 67.5172777 |
| 18:18:03 | 0:15:42 | 74.101237 | 68.2842889 | 71.8195316 | 64.8813582 | 67.5172777 |

|          |         |           |            |            |            |            |
|----------|---------|-----------|------------|------------|------------|------------|
| 18:18:04 | 0:15:43 | 74.101237 | 68.2842889 | 73.8195316 | 64.8813582 | 67.5172777 |
| 18:18:05 | 0:15:44 | 74.101237 | 68.2842889 | 73.8195316 | 64.8813582 | 67.5172777 |
| 18:18:06 | 0:15:45 | 75.101237 | 67.2842889 | 73.8195316 | 65.8813582 | 69.5172777 |
| 18:18:07 | 0:15:46 | 75.101237 | 67.2842889 | 73.8195316 | 65.8813582 | 74.5172777 |
| 18:18:08 | 0:15:47 | 75.101237 | 67.2842889 | 72.8195316 | 65.8813582 | 75.5172777 |
| 18:18:09 | 0:15:48 | 73.101237 | 66.2842889 | 71.8195316 | 64.8813582 | 74.5172777 |
| 18:18:10 | 0:15:49 | 71.101237 | 66.2842889 | 71.8195316 | 65.8813582 | 73.5172777 |
| 18:18:11 | 0:15:50 | 71.101237 | 66.2842889 | 71.8195316 | 65.8813582 | 73.5172777 |
| 18:18:12 | 0:15:51 | 70.101237 | 66.2842889 | 71.8195316 | 65.8813582 | 72.5172777 |
| 18:18:13 | 0:15:52 | 70.101237 | 66.2842889 | 70.8195316 | 65.8813582 | 72.5172777 |
| 18:18:14 | 0:15:53 | 71.101237 | 66.2842889 | 70.8195316 | 65.8813582 | 72.5172777 |
| 18:18:15 | 0:15:54 | 70.101237 | 66.2842889 | 70.8195316 | 65.8813582 | 72.5172777 |
| 18:18:16 | 0:15:55 | 70.101237 | 66.2842889 | 72.8195316 | 65.8813582 | 74.5172777 |
| 18:18:17 | 0:15:56 | 69.101237 | 66.2842889 | 72.8195316 | 64.8813582 | 75.5172777 |
| 18:18:18 | 0:15:57 | 69.101237 | 66.2842889 | 74.8195316 | 63.8813582 | 75.5172777 |
| 18:18:19 | 0:15:58 | 69.101237 | 66.2842889 | 77.8195316 | 63.8813582 | 75.5172777 |
| 18:18:20 | 0:15:59 | 68.101237 | 66.2842889 | 77.8195316 | 64.8813582 | 71.5172777 |
| 18:18:21 | 0:16:00 | 68.101237 | 66.2842889 | 77.8195316 | 64.8813582 | 69.5172777 |
| 18:18:22 | 0:16:01 | 69.101237 | 66.2842889 | 76.8195316 | 65.8813582 | 69.5172777 |
| 18:18:23 | 0:16:02 | 70.101237 | 66.2842889 | 75.8195316 | 65.8813582 | 70.5172777 |
| 18:18:24 | 0:16:03 | 72.101237 | 66.2842889 | 73.8195316 | 65.8813582 | 73.5172777 |
| 18:18:25 | 0:16:04 | 73.101237 | 67.2842889 | 73.8195316 | 65.8813582 | 73.5172777 |
| 18:18:26 | 0:16:05 | 73.101237 | 67.2842889 | 73.8195316 | 65.8813582 | 81.5172777 |
| 18:18:27 | 0:16:06 | 73.101237 | 67.2842889 | 74.8195316 | 65.8813582 | 84.5172777 |
| 18:18:28 | 0:16:07 | 74.101237 | 67.2842889 | 76.8195316 | 67.8813582 | 84.5172777 |
| 18:18:29 | 0:16:08 | 74.101237 | 68.2842889 | 78.8195316 | 67.8813582 | 73.4872373 |
| 18:18:30 | 0:16:09 | 74.101237 | 70.2842889 | 78.8195316 | 67.8813582 | 73.5781464 |
| 18:18:31 | 0:16:10 | 74.101237 | 71.2842889 | 78.8195316 | 68.8813582 | 85.5172777 |
| 18:18:32 | 0:16:11 | 74.101237 | 70.2842889 | 76.8195316 | 68.8813582 | 84.5172777 |
| 18:18:33 | 0:16:12 | 74.101237 | 68.2842889 | 74.8195316 | 68.8813582 | 83.5172777 |
| 18:18:34 | 0:16:13 | 74.101237 | 67.2842889 | 72.8195316 | 68.8813582 | 83.5172777 |
| 18:18:35 | 0:16:14 | 74.101237 | 67.2842889 | 72.8195316 | 68.8813582 | 82.5172777 |
| 18:18:36 | 0:16:15 | 74.101237 | 67.2842889 | 72.8195316 | 68.8813582 | 82.5172777 |
| 18:18:37 | 0:16:16 | 74.101237 | 67.2842889 | 71.8195316 | 68.8813582 | 82.5172777 |
| 18:18:38 | 0:16:17 | 74.101237 | 67.2842889 | 71.8195316 | 68.8813582 | 75.5172777 |
| 18:18:39 | 0:16:18 | 74.101237 | 69.2842889 | 71.8195316 | 68.8813582 | 72.5172777 |
| 18:18:40 | 0:16:19 | 75.101237 | 69.2842889 | 70.8195316 | 68.8813582 | 71.5172777 |
| 18:18:41 | 0:16:20 | 75.101237 | 69.2842889 | 69.8195316 | 67.8813582 | 71.5172777 |
| 18:18:42 | 0:16:21 | 75.101237 | 69.2842889 | 69.8195316 | 66.8813582 | 70.5172777 |
| 18:18:43 | 0:16:22 | 74.101237 | 69.2842889 | 68.8195316 | 66.8813582 | 70.5172777 |
| 18:18:44 | 0:16:23 | 74.101237 | 69.2842889 | 68.8195316 | 66.8813582 | 70.5172777 |
| 18:18:45 | 0:16:24 | 72.101237 | 69.2842889 | 69.8195316 | 66.8813582 | 70.5172777 |
| 18:18:46 | 0:16:25 | 70.101237 | 69.2842889 | 69.8195316 | 66.8813582 | 70.5172777 |
| 18:18:47 | 0:16:26 | 68.101237 | 69.2842889 | 70.8195316 | 67.8813582 | 70.5172777 |
| 18:18:48 | 0:16:27 | 68.101237 | 69.2842889 | 70.8195316 | 67.8813582 | 69.5172777 |

|          |         |           |            |            |            |            |
|----------|---------|-----------|------------|------------|------------|------------|
| 18:18:49 | 0:16:28 | 67.101237 | 69.2842889 | 70.8195316 | 68.8813582 | 69.5172777 |
| 18:18:50 | 0:16:29 | 65.101237 | 68.2842889 | 70.8195316 | 68.8813582 | 70.5172777 |
| 18:18:51 | 0:16:30 | 65.101237 | 68.2842889 | 70.8195316 | 68.8813582 | 72.5172777 |
| 18:18:52 | 0:16:31 | 65.101237 | 68.2842889 | 70.8195316 | 68.8813582 | 73.5172777 |
| 18:18:53 | 0:16:32 | 64.101237 | 68.2842889 | 71.8195316 | 68.8813582 | 74.5172777 |
| 18:18:54 | 0:16:33 | 64.101237 | 68.2842889 | 71.8195316 | 68.8813582 | 74.5172777 |
| 18:18:55 | 0:16:34 | 63.101237 | 66.2842889 | 71.8195316 | 68.8813582 | 75.5172777 |
| 18:18:56 | 0:16:35 | 63.101237 | 65.2842889 | 71.8195316 | 68.8813582 | 76.5172777 |
| 18:18:57 | 0:16:36 | 63.101237 | 66.2842889 | 72.8195316 | 68.8813582 | 77.5172777 |
| 18:18:58 | 0:16:37 | 64.101237 | 66.2842889 | 72.8195316 | 68.8813582 | 77.5172777 |
| 18:18:59 | 0:16:38 | 64.101237 | 66.2842889 | 72.8195316 | 69.8813582 | 76.5172777 |
| 18:19:00 | 0:16:39 | 64.101237 | 66.2842889 | 71.8195316 | 69.8813582 | 75.5172777 |
| 18:19:01 | 0:16:40 | 64.101237 | 66.2842889 | 71.8195316 | 69.8813582 | 75.5172777 |
| 18:19:02 | 0:16:41 | 62.101237 | 67.2842889 | 71.8195316 | 69.8813582 | 74.5172777 |
| 18:19:03 | 0:16:42 | 58.101237 | 67.2842889 | 72.8195316 | 69.8813582 | 74.5172777 |
| 18:19:04 | 0:16:43 | 58.101237 | 67.2842889 | 73.8195316 | 70.8813582 | 74.5172777 |
| 18:19:05 | 0:16:44 | 58.101237 | 67.2842889 | 73.8195316 | 70.8813582 | 79.5172777 |
| 18:19:06 | 0:16:45 | 60.101237 | 68.2842889 | 73.8195316 | 71.8813582 | 81.5172777 |
| 18:19:07 | 0:16:46 | 61.101237 | 69.2842889 | 73.8195316 | 70.8813582 | 81.5172777 |
| 18:19:08 | 0:16:47 | 62.101237 | 69.2842889 | 73.8195316 | 70.8813582 | 80.5172777 |
| 18:19:09 | 0:16:48 | 62.101237 | 69.2842889 | 73.8195316 | 69.8813582 | 76.5172777 |
| 18:19:10 | 0:16:49 | 63.101237 | 69.2842889 | 73.8195316 | 69.8813582 | 73.5172777 |
| 18:19:11 | 0:16:50 | 64.101237 | 70.2842889 | 73.8195316 | 69.8813582 | 72.5172777 |
| 18:19:12 | 0:16:51 | 65.101237 | 70.2842889 | 73.8195316 | 66.8813582 | 72.5172777 |
| 18:19:13 | 0:16:52 | 65.101237 | 70.2842889 | 73.8195316 | 67.8813582 | 74.5172777 |
| 18:19:14 | 0:16:53 | 65.101237 | 70.2842889 | 72.8195316 | 67.8813582 | 74.5172777 |
| 18:19:15 | 0:16:54 | 66.101237 | 68.2842889 | 72.8195316 | 66.8813582 | 75.5172777 |
| 18:19:16 | 0:16:55 | 68.101237 | 68.2842889 | 72.8195316 | 65.8813582 | 75.5172777 |
| 18:19:17 | 0:16:56 | 70.101237 | 68.2842889 | 72.8195316 | 65.8813582 | 74.5172777 |
| 18:19:18 | 0:16:57 | 70.101237 | 68.2842889 | 72.8195316 | 65.8813582 | 73.5172777 |
| 18:19:19 | 0:16:58 | 70.101237 | 68.2842889 | 73.8195316 | 65.8813582 | 68.5172777 |
| 18:19:20 | 0:16:59 | 66.101237 | 68.2842889 | 74.8195316 | 65.8813582 | 66.5172777 |
| 18:19:21 | 0:17:00 | 65.101237 | 68.2842889 | 76.8195316 | 66.8813582 | 65.5172777 |
| 18:19:22 | 0:17:01 | 66.101237 | 68.2842889 | 78.8195316 | 66.8813582 | 64.5172777 |
| 18:19:23 | 0:17:02 | 66.101237 | 68.2842889 | 80.8195316 | 66.8813582 | 64.5172777 |
| 18:19:24 | 0:17:03 | 68.101237 | 68.2842889 | 82.8195316 | 66.8813582 | 65.5172777 |
| 18:19:25 | 0:17:04 | 69.101237 | 69.2842889 | 82.8195316 | 65.8813582 | 66.5172777 |
| 18:19:26 | 0:17:05 | 70.101237 | 70.2842889 | 79.8195316 | 65.8813582 | 66.5172777 |
| 18:19:27 | 0:17:06 | 70.101237 | 71.2842889 | 79.8195316 | 65.8813582 | 66.5172777 |
| 18:19:28 | 0:17:07 | 71.101237 | 71.2842889 | 77.8195316 | 65.8813582 | 69.5172777 |
| 18:19:29 | 0:17:08 | 73.101237 | 71.2842889 | 77.8195316 | 65.8813582 | 69.5172777 |
| 18:19:30 | 0:17:09 | 75.101237 | 71.2842889 | 76.8195316 | 65.8813582 | 69.5172777 |
| 18:19:31 | 0:17:10 | 75.101237 | 71.2842889 | 76.8195316 | 65.8813582 | 70.5172777 |
| 18:19:32 | 0:17:11 | 75.101237 | 71.2842889 | 70.8195316 | 65.8813582 | 70.5172777 |
| 18:19:33 | 0:17:12 | 72.101237 | 71.2842889 | 68.8195316 | 65.8813582 | 70.5172777 |

|          |         |           |            |            |            |            |
|----------|---------|-----------|------------|------------|------------|------------|
| 18:19:34 | 0:17:13 | 71.101237 | 71.2842889 | 68.8195316 | 65.8813582 | 69.5172777 |
| 18:19:35 | 0:17:14 | 70.101237 | 72.2842889 | 68.8195316 | 66.8813582 | 68.5172777 |
| 18:19:36 | 0:17:15 | 67.101237 | 72.2842889 | 70.8195316 | 67.8813582 | 67.5172777 |
| 18:19:37 | 0:17:16 | 66.101237 | 73.2842889 | 71.8195316 | 68.8813582 | 68.5172777 |
| 18:19:38 | 0:17:17 | 66.101237 | 72.2842889 | 71.8195316 | 69.8813582 | 68.5172777 |
| 18:19:39 | 0:17:18 | 66.101237 | 72.2842889 | 70.8195316 | 68.8813582 | 71.5172777 |
| 18:19:40 | 0:17:19 | 67.101237 | 70.2842889 | 69.8195316 | 67.8813582 | 72.5172777 |
| 18:19:41 | 0:17:20 | 67.101237 | 68.2842889 | 69.8195316 | 67.8813582 | 73.5172777 |
| 18:19:42 | 0:17:21 | 69.101237 | 67.2842889 | 68.8195316 | 66.8813582 | 68.5172777 |
| 18:19:43 | 0:17:22 | 69.101237 | 67.2842889 | 67.8195316 | 65.8813582 | 68.5172777 |
| 18:19:44 | 0:17:23 | 69.101237 | 67.2842889 | 67.8195316 | 65.8813582 | 67.5172777 |
| 18:19:45 | 0:17:24 | 69.101237 | 67.2842889 | 67.8195316 | 65.8813582 | 67.5172777 |
| 18:19:46 | 0:17:25 | 68.101237 | 67.2842889 | 68.8195316 | 65.8813582 | 68.5172777 |
| 18:19:47 | 0:17:26 | 68.101237 | 67.2842889 | 68.8195316 | 65.8813582 | 68.5172777 |
| 18:19:48 | 0:17:27 | 68.101237 | 67.2842889 | 68.8195316 | 65.8813582 | 68.5172777 |
| 18:19:49 | 0:17:28 | 66.101237 | 67.2842889 | 68.8195316 | 65.8813582 | 69.5172777 |
| 18:19:50 | 0:17:29 | 66.101237 | 67.2842889 | 69.8195316 | 65.8813582 | 69.5172777 |
| 18:19:51 | 0:17:30 | 63.101237 | 67.2842889 | 69.8195316 | 65.8813582 | 69.5172777 |
| 18:19:52 | 0:17:31 | 69.101237 | 67.2842889 | 69.8195316 | 66.8813582 | 69.5172777 |
| 18:19:53 | 0:17:32 | 69.101237 | 67.2842889 | 70.8195316 | 66.8813582 | 68.5172777 |
| 18:19:54 | 0:17:33 | 69.101237 | 67.2842889 | 70.8195316 | 66.8813582 | 68.5172777 |
| 18:19:55 | 0:17:34 | 70.101237 | 67.2842889 | 71.8195316 | 66.8813582 | 68.5172777 |
| 18:19:56 | 0:17:35 | 70.101237 | 67.2842889 | 71.8195316 | 67.8813582 | 68.5172777 |
| 18:19:57 | 0:17:36 | 70.101237 | 67.2842889 | 71.8195316 | 67.8813582 | 68.5172777 |
| 18:19:58 | 0:17:37 | 76.101237 | 66.2842889 | 71.8195316 | 67.8813582 | 68.5172777 |
| 18:19:59 | 0:17:38 | 76.101237 | 66.2842889 | 71.8195316 | 67.8813582 | 68.5172777 |
| 18:20:00 | 0:17:39 | 80.101237 | 66.2842889 | 72.8195316 | 68.8813582 | 68.5172777 |
| 18:20:01 | 0:17:40 | 80.101237 | 66.2842889 | 72.8195316 | 68.8813582 | 68.5172777 |
| 18:20:02 | 0:17:41 | 80.101237 | 67.2842889 | 71.8195316 | 67.8813582 | 68.5172777 |
| 18:20:03 | 0:17:42 | 81.101237 | 66.2842889 | 71.8195316 | 67.8813582 | 68.5172777 |
| 18:20:04 | 0:17:43 | 81.101237 | 67.2842889 | 71.8195316 | 67.8813582 | 68.5172777 |
| 18:20:05 | 0:17:44 | 81.101237 | 67.2842889 | 71.8195316 | 67.8813582 | 68.5172777 |
| 18:20:06 | 0:17:45 | 79.101237 | 67.2842889 | 71.8195316 | 68.8813582 | 68.5172777 |
| 18:20:07 | 0:17:46 | 79.101237 | 68.2842889 | 71.8195316 | 68.8813582 | 68.5172777 |
| 18:20:08 | 0:17:47 | 79.101237 | 68.2842889 | 72.8195316 | 69.8813582 | 69.5172777 |
| 18:20:09 | 0:17:48 | 79.101237 | 68.2842889 | 72.8195316 | 68.8813582 | 69.5172777 |
| 18:20:10 | 0:17:49 | 77.101237 | 68.2842889 | 72.8195316 | 67.8813582 | 69.5172777 |
| 18:20:11 | 0:17:50 | 77.101237 | 67.2842889 | 71.8195316 | 66.8813582 | 70.5172777 |
| 18:20:12 | 0:17:51 | 77.101237 | 68.2842889 | 71.8195316 | 66.8813582 | 70.5172777 |
| 18:20:13 | 0:17:52 | 77.101237 | 68.2842889 | 71.8195316 | 66.8813582 | 70.5172777 |
| 18:20:14 | 0:17:53 | 76.101237 | 68.2842889 | 71.8195316 | 66.8813582 | 71.5172777 |
| 18:20:15 | 0:17:54 | 76.101237 | 68.2842889 | 71.8195316 | 66.8813582 | 71.5172777 |
| 18:20:16 | 0:17:55 | 76.101237 | 67.2842889 | 71.8195316 | 66.8813582 | 71.5172777 |
| 18:20:17 | 0:17:56 | 75.101237 | 67.2842889 | 71.8195316 | 67.8813582 | 73.5172777 |
| 18:20:18 | 0:17:57 | 75.101237 | 67.2842889 | 72.8195316 | 67.8813582 | 73.5172777 |



|          |         |           |            |            |            |            |
|----------|---------|-----------|------------|------------|------------|------------|
| 18:20:19 | 0:17:58 | 74.101237 | 67.2842889 | 72.8195316 | 66.8813582 | 80.5172777 |
| 18:20:20 | 0:17:59 | 73.101237 | 67.2842889 | 73.8195316 | 67.8813582 | 80.5172777 |
| 18:20:21 | 0:18:00 | 72.101237 | 67.2842889 | 73.8195316 | 68.8813582 | 82.5172777 |
| 18:20:22 | 0:18:01 | 72.101237 | 67.2842889 | 73.8195316 | 68.8813582 | 85.5172777 |
| 18:20:23 | 0:18:02 | 73.101237 | 68.2842889 | 74.8195316 | 69.8813582 | 86.5172777 |
| 18:20:24 | 0:18:03 | 73.101237 | 67.2842889 | 74.8195316 | 69.8813582 | 86.5172777 |
| 18:20:25 | 0:18:04 | 73.101237 | 67.2842889 | 75.8195316 | 69.8813582 | 86.5172777 |
| 18:20:26 | 0:18:05 | 73.101237 | 67.2842889 | 75.8195316 | 69.8813582 | 85.5172777 |
| 18:20:27 | 0:18:06 | 73.101237 | 67.2842889 | 79.8195316 | 70.8813582 | 85.5172777 |
| 18:20:28 | 0:18:07 | 73.101237 | 67.2842889 | 80.8195316 | 70.8813582 | 81.5172777 |
| 18:20:29 | 0:18:08 | 73.101237 | 67.2842889 | 79.8195316 | 69.8813582 | 79.5172777 |
| 18:20:30 | 0:18:09 | 73.101237 | 67.2842889 | 79.8195316 | 69.8813582 | 79.5172777 |
| 18:20:31 | 0:18:10 | 72.101237 | 67.2842889 | 80.8195316 | 70.8813582 | 79.5172777 |
| 18:20:32 | 0:18:11 | 72.101237 | 67.2842889 | 80.8195316 | 69.8813582 | 76.5172777 |
| 18:20:33 | 0:18:12 | 73.101237 | 67.2842889 | 79.8195316 | 69.8813582 | 75.5172777 |
| 18:20:34 | 0:18:13 | 74.101237 | 68.2842889 | 77.8195316 | 68.8813582 | 75.5172777 |
| 18:20:35 | 0:18:14 | 74.101237 | 68.2842889 | 77.8195316 | 68.8813582 | 74.5172777 |
| 18:20:36 | 0:18:15 | 77.101237 | 68.2842889 | 73.8195316 | 68.8813582 | 74.5172777 |
| 18:20:37 | 0:18:16 | 78.101237 | 68.2842889 | 73.8195316 | 68.8813582 | 72.5172777 |
| 18:20:38 | 0:18:17 | 81.101237 | 70.2842889 | 73.8195316 | 68.8813582 | 72.5172777 |
| 18:20:39 | 0:18:18 | 84.101237 | 70.2842889 | 72.8195316 | 68.8813582 | 71.5172777 |
| 18:20:40 | 0:18:19 | 85.101237 | 70.2842889 | 72.8195316 | 68.8813582 | 71.5172777 |
| 18:20:41 | 0:18:20 | 85.101237 | 70.2842889 | 72.8195316 | 69.8813582 | 69.5172777 |
| 18:20:42 | 0:18:21 | 85.101237 | 70.2842889 | 72.8195316 | 69.8813582 | 69.5172777 |
| 18:20:43 | 0:18:22 | 85.101237 | 72.2842889 | 70.8195316 | 70.8813582 | 69.5172777 |
| 18:20:44 | 0:18:23 | 86.101237 | 71.2842889 | 69.8195316 | 70.8813582 | 69.5172777 |
| 18:20:45 | 0:18:24 | 86.101237 | 70.2842889 | 69.8195316 | 70.8813582 | 70.5172777 |
| 18:20:46 | 0:18:25 | 85.101237 | 70.2842889 | 69.8195316 | 70.8813582 | 70.5172777 |
| 18:20:47 | 0:18:26 | 85.101237 | 70.2842889 | 70.8195316 | 69.8813582 | 71.5172777 |
| 18:20:48 | 0:18:27 | 68.101237 | 70.2842889 | 70.8195316 | 69.8813582 | 72.5172777 |
| 18:20:49 | 0:18:28 | 64.101237 | 69.2842889 | 70.8195316 | 69.8813582 | 71.5172777 |
| 18:20:50 | 0:18:29 | 64.101237 | 69.2842889 | 70.8195316 | 69.8813582 | 72.5172777 |
| 18:20:51 | 0:18:30 | 61.101237 | 69.2842889 | 69.8195316 | 70.8813582 | 73.5172777 |
| 18:20:52 | 0:18:31 | 61.101237 | 69.2842889 | 69.8195316 | 70.8813582 | 73.5172777 |
| 18:20:53 | 0:18:32 | 62.101237 | 68.2842889 | 69.8195316 | 71.8813582 | 73.5172777 |
| 18:20:54 | 0:18:33 | 63.101237 | 68.2842889 | 69.8195316 | 71.8813582 | 73.5172777 |
| 18:20:55 | 0:18:34 | 63.101237 | 68.2842889 | 69.8195316 | 71.8813582 | 74.5172777 |
| 18:20:56 | 0:18:35 | 67.101237 | 68.2842889 | 69.8195316 | 72.8813582 | 75.5172777 |
| 18:20:57 | 0:18:36 | 70.101237 | 68.2842889 | 71.8195316 | 73.8813582 | 74.5172777 |
| 18:20:58 | 0:18:37 | 72.101237 | 68.2842889 | 73.8195316 | 74.8813582 | 74.5172777 |
| 18:20:59 | 0:18:38 | 72.101237 | 68.2842889 | 73.8195316 | 74.8813582 | 72.5172777 |
| 18:21:00 | 0:18:39 | 74.101237 | 68.2842889 | 73.8195316 | 74.8813582 | 72.5172777 |
| 18:21:01 | 0:18:40 | 75.101237 | 68.2842889 | 73.8195316 | 75.8813582 | 71.5172777 |
| 18:21:02 | 0:18:41 | 75.101237 | 68.2842889 | 73.8195316 | 74.8813582 | 71.5172777 |
| 18:21:03 | 0:18:42 | 76.101237 | 68.2842889 | 72.8195316 | 74.8813582 | 72.5172777 |

|          |         |            |            |            |            |            |
|----------|---------|------------|------------|------------|------------|------------|
| 18:21:04 | 0:18:43 | 76.101237  | 69.2842889 | 72.8195316 | 74.8813582 | 72.5172777 |
| 18:21:05 | 0:18:44 | 75.101237  | 69.2842889 | 73.8195316 | 74.8813582 | 73.5172777 |
| 18:21:06 | 0:18:45 | 75.101237  | 70.2842889 | 79.8195316 | 74.8813582 | 74.5172777 |
| 18:21:07 | 0:18:46 | 71.101237  | 70.2842889 | 83.8195316 | 73.8813582 | 74.5172777 |
| 18:21:08 | 0:18:47 | 68.101237  | 70.2842889 | 83.8195316 | 73.8813582 | 74.5172777 |
| 18:21:09 | 0:18:48 | 68.101237  | 72.2842889 | 75.2145101 | 72.8813582 | 74.5172777 |
| 18:21:10 | 0:18:49 | 69.101237  | 72.2842889 | 75.3963282 | 72.8813582 | 74.5172777 |
| 18:21:11 | 0:18:50 | 71.101237  | 72.2842889 | 75.8508737 | 71.8813582 | 71.5172777 |
| 18:21:12 | 0:18:51 | 71.101237  | 72.2842889 | 75.6690555 | 71.8813582 | 68.5172777 |
| 18:21:13 | 0:18:52 | 72.101237  | 73.2842889 | 75.5781464 | 72.8813582 | 67.5172777 |
| 18:21:14 | 0:18:53 | 72.101237  | 73.2842889 | 75.8508737 | 72.8813582 | 67.5172777 |
| 18:21:15 | 0:18:54 | 72.101237  | 73.2842889 | 75.4872373 | 71.8813582 | 68.5172777 |
| 18:21:16 | 0:18:55 | 71.101237  | 73.2842889 | 75.5781464 | 71.8813582 | 69.5172777 |
| 18:21:17 | 0:18:56 | 72.101237  | 73.2842889 | 82.8195316 | 71.8813582 | 70.5172777 |
| 18:21:18 | 0:18:57 | 73.101237  | 73.2842889 | 79.8195316 | 71.8813582 | 70.5172777 |
| 18:21:19 | 0:18:58 | 74.101237  | 73.2842889 | 72.8195316 | 71.8813582 | 72.5172777 |
| 18:21:20 | 0:18:59 | 75.101237  | 73.2842889 | 69.8195316 | 71.8813582 | 72.5172777 |
| 18:21:21 | 0:19:00 | 74.101237  | 73.2842889 | 68.8195316 | 72.8813582 | 72.5172777 |
| 18:21:22 | 0:19:01 | 74.101237  | 72.2842889 | 68.8195316 | 75.8813582 | 72.5172777 |
| 18:21:23 | 0:19:02 | 74.101237  | 72.2842889 | 66.8195316 | 75.8813582 | 73.5172777 |
| 18:21:24 | 0:19:03 | 73.0258374 | 72.2842889 | 65.8195316 | 77.8813582 | 73.5172777 |
| 18:21:25 | 0:19:04 | 73.1258374 | 72.2842889 | 65.8195316 | 77.8813582 | 73.5172777 |
| 18:21:26 | 0:19:05 | 72.8258374 | 72.2842889 | 65.8195316 | 78.8813582 | 74.5172777 |
| 18:21:27 | 0:19:06 | 73.0258374 | 71.2842889 | 66.8195316 | 79.8813582 | 73.5172777 |
| 18:21:28 | 0:19:07 | 73.4258374 | 75.2842889 | 66.8195316 | 80.8813582 | 73.5172777 |
| 18:21:29 | 0:19:08 | 73.2258374 | 75.2842889 | 66.8195316 | 80.8813582 | 73.5172777 |
| 18:21:30 | 0:19:09 | 73.2258374 | 74.2842889 | 67.8195316 | 80.8813582 | 73.5172777 |
| 18:21:31 | 0:19:10 | 73.4258374 | 74.2842889 | 68.8195316 | 80.8813582 | 73.5172777 |
| 18:21:32 | 0:19:11 | 73.9258374 | 74.2842889 | 69.8195316 | 80.8813582 | 75.5172777 |
| 18:21:33 | 0:19:12 | 74.3258374 | 74.2842889 | 69.8195316 | 80.8813582 | 76.5172777 |
| 18:21:34 | 0:19:13 | 74.2258374 | 74.2842889 | 69.8195316 | 80.8813582 | 76.5172777 |
| 18:21:35 | 0:19:14 | 74.6258374 | 74.2842889 | 70.8195316 | 81.8813582 | 75.5172777 |
| 18:21:36 | 0:19:15 | 74.6258374 | 74.2842889 | 70.8195316 | 81.8813582 | 75.5172777 |
| 18:21:37 | 0:19:16 | 74.3258374 | 73.2842889 | 70.8195316 | 82.8813582 | 75.5172777 |
| 18:21:38 | 0:19:17 | 73.4258374 | 71.2842889 | 70.8195316 | 82.8813582 | 68.5172777 |
| 18:21:39 | 0:19:18 | 72.9258374 | 70.2842889 | 70.8195316 | 82.8813582 | 66.5172777 |
| 18:21:40 | 0:19:19 | 73.0258374 | 70.2842889 | 70.8195316 | 82.8813582 | 67.5172777 |
| 18:21:41 | 0:19:20 | 73.0258374 | 70.2842889 | 70.8195316 | 82.8813582 | 68.5172777 |
| 18:21:42 | 0:19:21 | 73.1258374 | 70.2842889 | 70.8195316 | 82.8813582 | 68.5172777 |
| 18:21:43 | 0:19:22 | 73.0258374 | 70.2842889 | 69.8195316 | 81.8813582 | 69.5172777 |
| 18:21:44 | 0:19:23 | 73.2258374 | 70.2842889 | 70.8195316 | 79.8813582 | 69.5172777 |
| 18:21:45 | 0:19:24 | 73.1258374 | 71.2842889 | 70.8195316 | 78.8813582 | 69.5172777 |
| 18:21:46 | 0:19:25 | 72.7258374 | 71.2842889 | 70.8195316 | 76.8813582 | 69.5172777 |
| 18:21:47 | 0:19:26 | 72.8258374 | 74.2842889 | 72.8195316 | 74.8813582 | 69.5172777 |
| 18:21:48 | 0:19:27 | 72.6258374 | 74.2842889 | 71.8195316 | 73.8813582 | 69.5172777 |

|          |         |            |            |            |            |            |
|----------|---------|------------|------------|------------|------------|------------|
| 18:21:49 | 0:19:28 | 73.2258374 | 72.2842889 | 71.8195316 | 72.8813582 | 69.5172777 |
| 18:21:50 | 0:19:29 | 73.3258374 | 69.2842889 | 71.8195316 | 72.8813582 | 69.5172777 |
| 18:21:51 | 0:19:30 | 73.2258374 | 68.2842889 | 72.8195316 | 71.8813582 | 69.5172777 |
| 18:21:52 | 0:19:31 | 73.5258374 | 68.2842889 | 73.8195316 | 71.8813582 | 69.5172777 |
| 18:21:53 | 0:19:32 | 74.6258374 | 68.2842889 | 73.8195316 | 71.8813582 | 70.5172777 |
| 18:21:54 | 0:19:33 | 74.7258374 | 68.2842889 | 73.8195316 | 71.8813582 | 71.5172777 |
| 18:21:55 | 0:19:34 | 74.3258374 | 68.2842889 | 75.8195316 | 72.8813582 | 72.5172777 |
| 18:21:56 | 0:19:35 | 74.4258374 | 69.2842889 | 76.8195316 | 73.8813582 | 72.5172777 |
| 18:21:57 | 0:19:36 | 73.8258374 | 69.2842889 | 76.8195316 | 74.8813582 | 72.5172777 |
| 18:21:58 | 0:19:37 | 73.6258374 | 69.2842889 | 83.8195316 | 74.8813582 | 72.5172777 |
| 18:21:59 | 0:19:38 | 73.6258374 | 69.2842889 | 85.8195316 | 74.8813582 | 72.5172777 |
| 18:22:00 | 0:19:39 | 73.7258374 | 69.2842889 | 73.7258374 | 74.8813582 | 72.5172777 |
| 18:22:01 | 0:19:40 | 74.0258374 | 69.2842889 | 74.0258374 | 74.8813582 | 71.5172777 |
| 18:22:02 | 0:19:41 | 74.0258374 | 69.2842889 | 74.0258374 | 74.8813582 | 72.5172777 |
| 18:22:03 | 0:19:42 | 74.2258374 | 69.2842889 | 74.2258374 | 75.8813582 | 72.5172777 |
| 18:22:04 | 0:19:43 | 74.1258374 | 69.2842889 | 74.1258374 | 73.8813582 | 72.5172777 |
| 18:22:05 | 0:19:44 | 74.0258374 | 70.2842889 | 74.0258374 | 73.8813582 | 73.5172777 |
| 18:22:06 | 0:19:45 | 73.8258374 | 70.2842889 | 73.8258374 | 72.8813582 | 74.5172777 |
| 18:22:07 | 0:19:46 | 73.1258374 | 70.2842889 | 73.1258374 | 72.8813582 | 74.5172777 |
| 18:22:08 | 0:19:47 | 72.9258374 | 70.2842889 | 72.9258374 | 72.8813582 | 74.5172777 |
| 18:22:09 | 0:19:48 | 72.2258374 | 70.2842889 | 84.8195316 | 72.8813582 | 76.5172777 |
| 18:22:10 | 0:19:49 | 71.4258374 | 70.2842889 | 80.8195316 | 71.8813582 | 77.5172777 |
| 18:22:11 | 0:19:50 | 71.4258374 | 70.2842889 | 78.8195316 | 71.8813582 | 79.5172777 |
| 18:22:12 | 0:19:51 | 71.4258374 | 70.2842889 | 77.8195316 | 71.8813582 | 81.5172777 |
| 18:22:13 | 0:19:52 | 71.3258374 | 70.2842889 | 77.8195316 | 70.8813582 | 81.5172777 |
| 18:22:14 | 0:19:53 | 71.7258374 | 69.2842889 | 78.8195316 | 70.8813582 | 81.5172777 |
| 18:22:15 | 0:19:54 | 71.6258374 | 69.2842889 | 77.8195316 | 70.8813582 | 80.5172777 |
| 18:22:16 | 0:19:55 | 72.6258374 | 69.2842889 | 77.8195316 | 73.8813582 | 77.5172777 |
| 18:22:17 | 0:19:56 | 73.2258374 | 72.2842889 | 77.8195316 | 76.8813582 | 77.5172777 |
| 18:22:18 | 0:19:57 | 73.4258374 | 72.2842889 | 76.8195316 | 76.8813582 | 78.5172777 |
| 18:22:19 | 0:19:58 | 73.7258374 | 75.2842889 | 75.8195316 | 77.8813582 | 77.5172777 |
| 18:22:20 | 0:19:59 | 74.0258374 | 75.2842889 | 75.8195316 | 77.8813582 | 76.5172777 |
| 18:22:21 | 0:20:00 | 74.2258374 | 75.2842889 | 71.8195316 | 77.8813582 | 76.5172777 |
| 18:22:22 | 0:20:01 | 74.1258374 | 75.2842889 | 71.8195316 | 77.8813582 | 74.5172777 |
| 18:22:23 | 0:20:02 | 74.3258374 | 75.2842889 | 71.8195316 | 79.8813582 | 73.5172777 |
| 18:22:24 | 0:20:03 | 74.3258374 | 75.2842889 | 70.8195316 | 80.8813582 | 72.5172777 |
| 18:22:25 | 0:20:04 | 74.1258374 | 75.2842889 | 69.8195316 | 77.8813582 | 73.5172777 |
| 18:22:26 | 0:20:05 | 74.8258374 | 75.2842889 | 69.8195316 | 77.8813582 | 75.5172777 |
| 18:22:27 | 0:20:06 | 74.9258374 | 75.2842889 | 69.8195316 | 77.8813582 | 77.5172777 |
| 18:22:28 | 0:20:07 | 75.0258374 | 75.2842889 | 70.8195316 | 77.8813582 | 77.5172777 |
| 18:22:29 | 0:20:08 | 75.0258374 | 75.2842889 | 70.8195316 | 76.8813582 | 76.5172777 |
| 18:22:30 | 0:20:09 | 75.0258374 | 75.2842889 | 70.8195316 | 76.8813582 | 76.5172777 |
| 18:22:31 | 0:20:10 | 75.1258374 | 75.2842889 | 72.8195316 | 74.8813582 | 74.5172777 |
| 18:22:32 | 0:20:11 | 75.3258374 | 74.2842889 | 73.8195316 | 73.8813582 | 74.5172777 |
| 18:22:33 | 0:20:12 | 75.1258374 | 73.2842889 | 73.8195316 | 73.8813582 | 73.5172777 |

|          |         |            |            |            |            |            |
|----------|---------|------------|------------|------------|------------|------------|
| 18:22:34 | 0:20:13 | 74.7258374 | 73.2842889 | 73.8195316 | 73.8813582 | 72.5172777 |
| 18:22:35 | 0:20:14 | 74.4258374 | 73.2842889 | 74.8195316 | 72.8813582 | 72.5172777 |
| 18:22:36 | 0:20:15 | 74.3258374 | 72.2842889 | 75.8195316 | 73.8813582 | 71.5172777 |
| 18:22:37 | 0:20:16 | 74.9258374 | 72.2842889 | 75.8195316 | 73.8813582 | 72.5172777 |
| 18:22:38 | 0:20:17 | 74.5258374 | 73.2842889 | 74.8195316 | 71.8813582 | 71.5172777 |
| 18:22:39 | 0:20:18 | 75.2258374 | 72.2842889 | 73.8195316 | 71.8813582 | 71.5172777 |
| 18:22:40 | 0:20:19 | 75.7258374 | 72.2842889 | 73.8195316 | 71.8813582 | 71.5172777 |
| 18:22:41 | 0:20:20 | 75.6258374 | 72.2842889 | 75.8195316 | 71.8813582 | 70.5172777 |
| 18:22:42 | 0:20:21 | 76.0258374 | 72.2842889 | 78.8195316 | 71.8813582 | 71.5172777 |
| 18:22:43 | 0:20:22 | 76.5258374 | 72.2842889 | 81.8195316 | 71.8813582 | 71.5172777 |
| 18:22:44 | 0:20:23 | 76.4258374 | 72.2842889 | 81.8195316 | 70.8813582 | 73.5172777 |
| 18:22:45 | 0:20:24 | 76.9258374 | 72.2842889 | 81.8195316 | 69.8813582 | 75.5172777 |
| 18:22:46 | 0:20:25 | 77.1258374 | 71.2842889 | 80.8195316 | 69.8813582 | 78.5172777 |
| 18:22:47 | 0:20:26 | 76.8258374 | 71.2842889 | 79.8195316 | 69.8813582 | 78.5172777 |
| 18:22:48 | 0:20:27 | 76.4258374 | 70.2842889 | 79.8195316 | 69.8813582 | 79.5172777 |
| 18:22:49 | 0:20:28 | 76.6258374 | 69.2842889 | 83.8195316 | 68.8813582 | 78.5172777 |
| 18:22:50 | 0:20:29 | 76.6258374 | 68.2842889 | 86.8195316 | 68.8813582 | 77.5172777 |
| 18:22:51 | 0:20:30 | 76.0258374 | 66.2842889 | 88.8195316 | 69.8813582 | 77.5172777 |
| 18:22:52 | 0:20:31 | 75.7258374 | 65.2842889 | 75.7258374 | 70.8813582 | 77.5172777 |
| 18:22:53 | 0:20:32 | 76.0258374 | 65.2842889 | 88.8195316 | 70.8813582 | 77.5172777 |
| 18:22:54 | 0:20:33 | 76.3258374 | 66.2842889 | 76.3258374 | 69.8813582 | 77.5172777 |
| 18:22:55 | 0:20:34 | 76.3258374 | 66.2842889 | 76.3258374 | 69.8813582 | 77.5172777 |
| 18:22:56 | 0:20:35 | 76.1258374 | 69.2842889 | 76.1258374 | 69.8813582 | 74.5172777 |
| 18:22:57 | 0:20:36 | 75.9258374 | 69.2842889 | 75.9258374 | 69.8813582 | 73.5172777 |
| 18:22:58 | 0:20:37 | 74.5258374 | 70.2842889 | 74.5258374 | 69.8813582 | 72.5172777 |
| 18:22:59 | 0:20:38 | 73.3258374 | 71.2842889 | 73.3258374 | 69.8813582 | 73.5172777 |
| 18:23:00 | 0:20:39 | 73.1258374 | 72.2842889 | 73.1258374 | 70.8813582 | 75.5172777 |
| 18:23:01 | 0:20:40 | 73.0258374 | 72.2842889 | 73.0258374 | 72.8813582 | 77.5172777 |
| 18:23:02 | 0:20:41 | 73.0258374 | 74.2842889 | 73.0258374 | 71.8813582 | 77.5172777 |
| 18:23:03 | 0:20:42 | 72.9258374 | 74.2842889 | 72.9258374 | 69.8813582 | 76.5172777 |
| 18:23:04 | 0:20:43 | 72.7258374 | 73.2842889 | 72.7258374 | 69.8813582 | 75.5172777 |
| 18:23:05 | 0:20:44 | 72.4258374 | 73.2842889 | 80.8195316 | 69.8813582 | 75.5172777 |
| 18:23:06 | 0:20:45 | 71.9258374 | 73.2842889 | 79.8195316 | 69.8813582 | 70.5172777 |
| 18:23:07 | 0:20:46 | 72.6258374 | 73.2842889 | 79.8195316 | 72.8813582 | 69.5172777 |
| 18:23:08 | 0:20:47 | 72.8258374 | 73.2842889 | 79.8195316 | 72.8813582 | 68.5172777 |
| 18:23:09 | 0:20:48 | 73.3258374 | 74.2842889 | 77.8195316 | 73.8813582 | 68.5172777 |
| 18:23:10 | 0:20:49 | 73.5258374 | 74.2842889 | 77.8195316 | 73.8813582 | 69.5172777 |
| 18:23:11 | 0:20:50 | 73.6258374 | 74.2842889 | 76.8195316 | 73.8813582 | 72.5172777 |
| 18:23:12 | 0:20:51 | 73.8258374 | 74.2842889 | 75.8195316 | 73.8813582 | 74.5172777 |
| 18:23:13 | 0:20:52 | 74.0258374 | 74.2842889 | 75.8195316 | 74.8813582 | 74.5172777 |
| 18:23:14 | 0:20:53 | 75.1258374 | 74.2842889 | 79.8195316 | 75.8813582 | 75.5172777 |
| 18:23:15 | 0:20:54 | 75.2258374 | 74.2842889 | 79.8195316 | 75.8813582 | 76.5172777 |
| 18:23:16 | 0:20:55 | 75.1258374 | 74.2842889 | 79.8195316 | 75.8813582 | 76.5172777 |
| 18:23:17 | 0:20:56 | 74.1258374 | 73.2842889 | 75.8195316 | 75.8813582 | 75.5172777 |
| 18:23:18 | 0:20:57 | 73.6258374 | 73.2842889 | 73.8195316 | 76.8813582 | 75.5172777 |

|          |         |            |            |            |            |            |
|----------|---------|------------|------------|------------|------------|------------|
| 18:23:19 | 0:20:58 | 73.8258374 | 74.2842889 | 72.8195316 | 76.8813582 | 75.5172777 |
| 18:23:20 | 0:20:59 | 73.9258374 | 74.2842889 | 71.8195316 | 76.8813582 | 76.5172777 |
| 18:23:21 | 0:21:00 | 74.3258374 | 76.2842889 | 71.8195316 | 76.8813582 | 77.5172777 |
| 18:23:22 | 0:21:01 | 74.5258374 | 76.2842889 | 71.8195316 | 76.8813582 | 78.5172777 |
| 18:23:23 | 0:21:02 | 75.0258374 | 76.2842889 | 73.8195316 | 77.8813582 | 79.5172777 |
| 18:23:24 | 0:21:03 | 75.0258374 | 76.2842889 | 73.8195316 | 77.8813582 | 79.5172777 |
| 18:23:25 | 0:21:04 | 74.4258374 | 69.2842889 | 73.8195316 | 76.8813582 | 79.5172777 |
| 18:23:26 | 0:21:05 | 74.7258374 | 68.2842889 | 77.8195316 | 74.8813582 | 78.5172777 |
| 18:23:27 | 0:21:06 | 75.3258374 | 67.2842889 | 79.8195316 | 74.8813582 | 78.5172777 |
| 18:23:28 | 0:21:07 | 74.9258374 | 67.2842889 | 81.8195316 | 73.8813582 | 72.5172777 |
| 18:23:29 | 0:21:08 | 74.8258374 | 67.2842889 | 81.8195316 | 73.8813582 | 71.5172777 |
| 18:23:30 | 0:21:09 | 74.5258374 | 67.2842889 | 82.8195316 | 73.8813582 | 69.5172777 |
| 18:23:31 | 0:21:10 | 74.2258374 | 67.2842889 | 81.8195316 | 73.8813582 | 69.5172777 |
| 18:23:32 | 0:21:11 | 74.4258374 | 66.2842889 | 84.8195316 | 73.8813582 | 70.5172777 |
| 18:23:33 | 0:21:12 | 74.5258374 | 66.2842889 | 86.8195316 | 73.8813582 | 70.5172777 |
| 18:23:34 | 0:21:13 | 74.7258374 | 66.2842889 | 86.8195316 | 73.8813582 | 72.5172777 |
| 18:23:35 | 0:21:14 | 74.9258374 | 65.2842889 | 74.9258374 | 72.8813582 | 72.5172777 |
| 18:23:36 | 0:21:15 | 75.3258374 | 65.2842889 | 75.3258374 | 72.8813582 | 76.5172777 |
| 18:23:37 | 0:21:16 | 74.6258374 | 64.2842889 | 74.6258374 | 71.8813582 | 76.5172777 |
| 18:23:38 | 0:21:17 | 73.9258374 | 64.2842889 | 73.9258374 | 70.8813582 | 75.5172777 |
| 18:23:39 | 0:21:18 | 73.5258374 | 64.2842889 | 73.5258374 | 69.8813582 | 74.5172777 |
| 18:23:40 | 0:21:19 | 73.3258374 | 64.2842889 | 73.3258374 | 69.8813582 | 74.5172777 |
| 18:23:41 | 0:21:20 | 72.3258374 | 65.2842889 | 72.3258374 | 68.8813582 | 69.5172777 |
| 18:23:42 | 0:21:21 | 72.1258374 | 65.2842889 | 72.1258374 | 68.8813582 | 67.5172777 |
| 18:23:43 | 0:21:22 | 72.0258374 | 65.2842889 | 72.0258374 | 67.8813582 | 67.5172777 |
| 18:23:44 | 0:21:23 | 72.1258374 | 65.2842889 | 72.1258374 | 68.8813582 | 67.5172777 |
| 18:23:45 | 0:21:24 | 72.5258374 | 67.2842889 | 72.5258374 | 70.8813582 | 69.5172777 |
| 18:23:46 | 0:21:25 | 72.4258374 | 66.2842889 | 81.8195316 | 72.8813582 | 71.5172777 |
| 18:23:47 | 0:21:26 | 72.1258374 | 66.2842889 | 76.8195316 | 72.8813582 | 71.5172777 |
| 18:23:48 | 0:21:27 | 71.9258374 | 66.2842889 | 73.8195316 | 72.8813582 | 70.5172777 |
| 18:23:49 | 0:21:28 | 71.2258374 | 66.2842889 | 69.8195316 | 70.8813582 | 69.5172777 |
| 18:23:50 | 0:21:29 | 71.4258374 | 66.2842889 | 68.8195316 | 69.8813582 | 68.5172777 |
| 18:23:51 | 0:21:30 | 71.7258374 | 66.2842889 | 68.8195316 | 69.8813582 | 68.5172777 |
| 18:23:52 | 0:21:31 | 71.9258374 | 66.2842889 | 67.8195316 | 69.8813582 | 68.5172777 |
| 18:23:53 | 0:21:32 | 71.8258374 | 66.2842889 | 67.8195316 | 68.8813582 | 69.5172777 |
| 18:23:54 | 0:21:33 | 72.1258374 | 66.2842889 | 67.8195316 | 68.8813582 | 71.5172777 |
| 18:23:55 | 0:21:34 | 74.7258374 | 66.2842889 | 67.8195316 | 68.8813582 | 73.5172777 |
| 18:23:56 | 0:21:35 | 74.9258374 | 66.2842889 | 67.8195316 | 69.8813582 | 73.5172777 |
| 18:23:57 | 0:21:36 | 75.5258374 | 65.2842889 | 67.8195316 | 70.8813582 | 72.5172777 |
| 18:23:58 | 0:21:37 | 75.4258374 | 64.2842889 | 67.8195316 | 71.8813582 | 69.5172777 |
| 18:23:59 | 0:21:38 | 75.3258374 | 64.2842889 | 67.8195316 | 70.8813582 | 69.5172777 |
| 18:24:00 | 0:21:39 | 75.3258374 | 65.2842889 | 67.8195316 | 70.8813582 | 69.5172777 |
| 18:24:01 | 0:21:40 | 75.1258374 | 65.2842889 | 67.8195316 | 71.8813582 | 69.5172777 |
| 18:24:02 | 0:21:41 | 75.3258374 | 65.2842889 | 68.8195316 | 72.8813582 | 70.5172777 |
| 18:24:03 | 0:21:42 | 73.4258374 | 66.2842889 | 69.8195316 | 72.8813582 | 71.5172777 |

|          |         |            |            |            |            |            |
|----------|---------|------------|------------|------------|------------|------------|
| 18:24:04 | 0:21:43 | 74.0258374 | 66.2842889 | 69.8195316 | 73.8813582 | 73.5172777 |
| 18:24:05 | 0:21:44 | 74.0258374 | 66.2842889 | 72.8195316 | 73.8813582 | 73.5172777 |
| 18:24:06 | 0:21:45 | 73.9258374 | 66.2842889 | 75.8195316 | 73.8813582 | 77.5172777 |
| 18:24:07 | 0:21:46 | 73.9258374 | 66.2842889 | 75.8195316 | 73.8813582 | 80.5172777 |
| 18:24:08 | 0:21:47 | 74.1258374 | 67.2842889 | 74.8195316 | 73.8813582 | 81.5172777 |
| 18:24:09 | 0:21:48 | 73.5258374 | 67.2842889 | 74.8195316 | 73.8813582 | 82.5172777 |
| 18:24:10 | 0:21:49 | 73.5258374 | 67.2842889 | 73.8195316 | 73.8813582 | 82.5172777 |
| 18:24:11 | 0:21:50 | 73.2258374 | 67.2842889 | 71.8195316 | 73.8813582 | 81.5172777 |
| 18:24:12 | 0:21:51 | 73.7258374 | 67.2842889 | 71.8195316 | 73.8813582 | 81.5172777 |
| 18:24:13 | 0:21:52 | 73.2258374 | 65.2842889 | 70.8195316 | 73.8813582 | 80.5172777 |
| 18:24:14 | 0:21:53 | 73.3258374 | 64.2842889 | 70.8195316 | 73.8813582 | 79.5172777 |
| 18:24:15 | 0:21:54 | 73.5258374 | 64.2842889 | 74.8195316 | 73.8813582 | 78.5172777 |
| 18:24:16 | 0:21:55 | 73.4258374 | 64.2842889 | 74.8195316 | 73.8813582 | 76.5172777 |
| 18:24:17 | 0:21:56 | 73.9258374 | 64.2842889 | 78.8195316 | 73.8813582 | 75.5172777 |
| 18:24:18 | 0:21:57 | 73.9258374 | 64.2842889 | 78.8195316 | 73.8813582 | 75.5172777 |
| 18:24:19 | 0:21:58 | 74.4258374 | 65.2842889 | 82.8195316 | 73.8813582 | 76.5172777 |
| 18:24:20 | 0:21:59 | 75.4258374 | 65.2842889 | 86.8195316 | 73.8813582 | 78.5172777 |
| 18:24:21 | 0:22:00 | 75.4258374 | 65.2842889 | 86.8195316 | 73.8813582 | 79.5172777 |
| 18:24:22 | 0:22:01 | 75.6258374 | 65.2842889 | 75.6258374 | 73.8813582 | 79.5172777 |
| 18:24:23 | 0:22:02 | 76.1258374 | 65.2842889 | 76.1258374 | 73.8813582 | 77.5172777 |
| 18:24:24 | 0:22:03 | 75.9258374 | 65.2842889 | 75.9258374 | 73.8813582 | 76.5172777 |
| 18:24:25 | 0:22:04 | 76.1258374 | 65.2842889 | 76.1258374 | 73.8813582 | 76.5172777 |
| 18:24:26 | 0:22:05 | 76.3258374 | 65.2842889 | 76.3258374 | 73.8813582 | 77.5172777 |
| 18:24:27 | 0:22:06 | 76.1258374 | 67.2842889 | 84.8195316 | 72.8813582 | 78.5172777 |
| 18:24:28 | 0:22:07 | 75.8258374 | 67.2842889 | 79.8195316 | 72.8813582 | 78.5172777 |
| 18:24:29 | 0:22:08 | 75.4258374 | 66.2842889 | 76.8195316 | 72.8813582 | 76.5172777 |
| 18:24:30 | 0:22:09 | 75.4258374 | 66.2842889 | 77.8195316 | 71.8813582 | 74.5172777 |
| 18:24:31 | 0:22:10 | 75.1258374 | 66.2842889 | 76.8195316 | 71.8813582 | 74.5172777 |
| 18:24:32 | 0:22:11 | 74.9258374 | 66.2842889 | 75.8195316 | 70.8813582 | 75.5172777 |
| 18:24:33 | 0:22:12 | 74.2258374 | 65.2842889 | 73.8195316 | 70.8813582 | 75.5172777 |
| 18:24:34 | 0:22:13 | 74.0258374 | 65.2842889 | 72.8195316 | 70.8813582 | 76.5172777 |
| 18:24:35 | 0:22:14 | 73.6258374 | 65.2842889 | 72.8195316 | 69.8813582 | 77.5172777 |
| 18:24:36 | 0:22:15 | 73.5258374 | 65.2842889 | 72.8195316 | 69.8813582 | 77.5172777 |
| 18:24:37 | 0:22:16 | 73.9258374 | 66.2842889 | 72.8195316 | 69.8813582 | 76.5172777 |
| 18:24:38 | 0:22:17 | 73.7258374 | 66.2842889 | 71.8195316 | 68.8813582 | 75.5172777 |
| 18:24:39 | 0:22:18 | 74.1258374 | 66.2842889 | 70.8195316 | 68.8813582 | 75.5172777 |
| 18:24:40 | 0:22:19 | 74.1258374 | 67.2842889 | 69.8195316 | 68.8813582 | 73.5172777 |
| 18:24:41 | 0:22:20 | 74.0258374 | 67.2842889 | 69.8195316 | 67.8813582 | 72.5172777 |
| 18:24:42 | 0:22:21 | 73.6258374 | 66.2842889 | 69.8195316 | 67.8813582 | 70.5172777 |
| 18:24:43 | 0:22:22 | 73.5258374 | 66.2842889 | 69.8195316 | 66.8813582 | 70.5172777 |
| 18:24:44 | 0:22:23 | 73.5258374 | 66.2842889 | 69.8195316 | 66.8813582 | 70.5172777 |
| 18:24:45 | 0:22:24 | 73.5258374 | 65.2842889 | 70.8195316 | 66.8813582 | 70.5172777 |
| 18:24:46 | 0:22:25 | 73.5258374 | 65.2842889 | 70.8195316 | 66.8813582 | 70.5172777 |
| 18:24:47 | 0:22:26 | 73.3258374 | 65.2842889 | 70.8195316 | 65.8813582 | 70.5172777 |
| 18:24:48 | 0:22:27 | 73.0258374 | 65.2842889 | 70.8195316 | 65.8813582 | 71.5172777 |

|          |         |            |            |            |            |            |
|----------|---------|------------|------------|------------|------------|------------|
| 18:24:49 | 0:22:28 | 72.5258374 | 65.2842889 | 70.8195316 | 65.8813582 | 70.5172777 |
| 18:24:50 | 0:22:29 | 72.6258374 | 65.2842889 | 71.8195316 | 66.8813582 | 71.5172777 |
| 18:24:51 | 0:22:30 | 73.3258374 | 65.2842889 | 72.8195316 | 66.8813582 | 73.5172777 |
| 18:24:52 | 0:22:31 | 72.9258374 | 67.2842889 | 71.8195316 | 66.8813582 | 73.5172777 |
| 18:24:53 | 0:22:32 | 72.6258374 | 68.2842889 | 71.8195316 | 66.8813582 | 73.5172777 |
| 18:24:54 | 0:22:33 | 72.3258374 | 68.2842889 | 71.8195316 | 66.8813582 | 73.5172777 |
| 18:24:55 | 0:22:34 | 72.4258374 | 68.2842889 | 72.8195316 | 67.8813582 | 72.5172777 |
| 18:24:56 | 0:22:35 | 72.6258374 | 68.2842889 | 74.8195316 | 67.8813582 | 72.5172777 |
| 18:24:57 | 0:22:36 | 72.8258374 | 68.2842889 | 74.8195316 | 67.8813582 | 72.5172777 |
| 18:24:58 | 0:22:37 | 72.9258374 | 67.2842889 | 73.8195316 | 67.8813582 | 74.5172777 |
| 18:24:59 | 0:22:38 | 73.0258374 | 67.2842889 | 72.8195316 | 67.8813582 | 75.5172777 |
| 18:25:00 | 0:22:39 | 73.2258374 | 67.2842889 | 72.8195316 | 68.8813582 | 74.5172777 |
| 18:25:01 | 0:22:40 | 72.5258374 | 67.2842889 | 71.8195316 | 69.8813582 | 73.5172777 |
| 18:25:02 | 0:22:41 | 72.1258374 | 67.2842889 | 70.8195316 | 70.8813582 | 72.5172777 |
| 18:25:03 | 0:22:42 | 72.4258374 | 67.2842889 | 70.8195316 | 70.8813582 | 72.5172777 |
| 18:25:04 | 0:22:43 | 72.3258374 | 67.2842889 | 70.8195316 | 70.8813582 | 71.5172777 |
| 18:25:05 | 0:22:44 | 73.3258374 | 67.2842889 | 71.8195316 | 70.8813582 | 71.5172777 |
| 18:25:06 | 0:22:45 | 73.7258374 | 67.2842889 | 71.8195316 | 74.8813582 | 71.5172777 |
| 18:25:07 | 0:22:46 | 73.5258374 | 67.2842889 | 72.8195316 | 74.8813582 | 70.5172777 |
| 18:25:08 | 0:22:47 | 73.6258374 | 70.2842889 | 72.8195316 | 74.8813582 | 70.5172777 |
| 18:25:09 | 0:22:48 | 73.5258374 | 70.2842889 | 72.8195316 | 75.8813582 | 70.5172777 |
| 18:25:10 | 0:22:49 | 73.1258374 | 70.2842889 | 73.8195316 | 75.8813582 | 70.5172777 |
| 18:25:11 | 0:22:50 | 73.4258374 | 70.2842889 | 75.8195316 | 75.8813582 | 71.5172777 |
| 18:25:12 | 0:22:51 | 73.4258374 | 70.2842889 | 75.8195316 | 75.8813582 | 71.5172777 |
| 18:25:13 | 0:22:52 | 74.5258374 | 70.2842889 | 74.5258374 | 75.8813582 | 73.5172777 |
| 18:25:14 | 0:22:53 | 74.6258374 | 70.2842889 | 74.6258374 | 76.8813582 | 75.5172777 |
| 18:25:15 | 0:22:54 | 75.1258374 | 70.2842889 | 75.1258374 | 76.8813582 | 75.5172777 |
| 18:25:16 | 0:22:55 | 75.1258374 | 70.2842889 | 75.1258374 | 73.8813582 | 76.5172777 |
| 18:25:17 | 0:22:56 | 75.5258374 | 70.2842889 | 75.5258374 | 73.8813582 | 77.5172777 |
| 18:25:18 | 0:22:57 | 75.1258374 | 70.2842889 | 75.1258374 | 73.8813582 | 77.5172777 |
| 18:25:19 | 0:22:58 | 74.4258374 | 71.2842889 | 84.8195316 | 74.8813582 | 77.5172777 |
| 18:25:20 | 0:22:59 | 74.6258374 | 74.2842889 | 81.8195316 | 74.8813582 | 78.5172777 |
| 18:25:21 | 0:23:00 | 74.8258374 | 75.2842889 | 80.8195316 | 75.8813582 | 78.5172777 |
| 18:25:22 | 0:23:01 | 74.6258374 | 74.2842889 | 79.8195316 | 77.8813582 | 78.5172777 |
| 18:25:23 | 0:23:02 | 74.5258374 | 73.2842889 | 78.8195316 | 77.8813582 | 80.5172777 |
| 18:25:24 | 0:23:03 | 74.6258374 | 73.2842889 | 77.8195316 | 77.8813582 | 80.5172777 |
| 18:25:25 | 0:23:04 | 74.2258374 | 73.2842889 | 75.8195316 | 75.8813582 | 79.5172777 |
| 18:25:26 | 0:23:05 | 73.8258374 | 73.2842889 | 73.8195316 | 74.8813582 | 79.5172777 |
| 18:25:27 | 0:23:06 | 73.4258374 | 73.2842889 | 72.8195316 | 72.8813582 | 80.5172777 |
| 18:25:28 | 0:23:07 | 73.1258374 | 73.2842889 | 70.8195316 | 72.8813582 | 81.5172777 |
| 18:25:29 | 0:23:08 | 72.6258374 | 73.2842889 | 69.8195316 | 71.8813582 | 82.5172777 |
| 18:25:30 | 0:23:09 | 72.4258374 | 72.2842889 | 69.8195316 | 71.8813582 | 82.5172777 |
| 18:25:31 | 0:23:10 | 71.9258374 | 72.2842889 | 68.8195316 | 70.8813582 | 83.5172777 |
| 18:25:32 | 0:23:11 | 72.4258374 | 72.2842889 | 68.8195316 | 70.8813582 | 84.5172777 |
| 18:25:33 | 0:23:12 | 72.1258374 | 72.2842889 | 68.8195316 | 70.8813582 | 84.5172777 |

|          |         |            |            |            |            |            |
|----------|---------|------------|------------|------------|------------|------------|
| 18:25:34 | 0:23:13 | 71.5258374 | 71.2842889 | 68.8195316 | 70.8813582 | 82.5172777 |
| 18:25:35 | 0:23:14 | 71.1258374 | 68.2842889 | 68.8195316 | 70.8813582 | 81.5172777 |
| 18:25:36 | 0:23:15 | 70.9258374 | 67.2842889 | 69.8195316 | 70.8813582 | 80.5172777 |
| 18:25:37 | 0:23:16 | 70.9258374 | 67.2842889 | 70.8195316 | 70.8813582 | 78.5172777 |
| 18:25:38 | 0:23:17 | 70.9258374 | 66.2842889 | 73.8195316 | 70.8813582 | 78.5172777 |
| 18:25:39 | 0:23:18 | 71.0258374 | 66.2842889 | 74.8195316 | 70.8813582 | 78.5172777 |
| 18:25:40 | 0:23:19 | 71.3258374 | 66.2842889 | 76.8195316 | 70.8813582 | 78.5172777 |
| 18:25:41 | 0:23:20 | 71.9258374 | 67.2842889 | 79.8195316 | 70.8813582 | 78.5172777 |
| 18:25:42 | 0:23:21 | 71.9258374 | 67.2842889 | 79.8195316 | 70.8813582 | 78.5172777 |
| 18:25:43 | 0:23:22 | 72.0258374 | 67.2842889 | 80.8195316 | 69.8813582 | 77.5172777 |
| 18:25:44 | 0:23:23 | 71.6258374 | 67.2842889 | 77.8195316 | 69.8813582 | 76.5172777 |
| 18:25:45 | 0:23:24 | 71.6258374 | 68.2842889 | 76.8195316 | 69.8813582 | 74.5172777 |
| 18:25:46 | 0:23:25 | 71.7258374 | 69.2842889 | 75.8195316 | 69.8813582 | 73.5172777 |
| 18:25:47 | 0:23:26 | 71.9258374 | 69.2842889 | 75.8195316 | 69.8813582 | 73.5172777 |
| 18:25:48 | 0:23:27 | 72.3258374 | 73.2842889 | 74.8195316 | 69.8813582 | 74.5172777 |
| 18:25:49 | 0:23:28 | 72.1258374 | 73.2842889 | 73.8195316 | 69.8813582 | 74.5172777 |
| 18:25:50 | 0:23:29 | 72.3258374 | 73.2842889 | 73.8195316 | 68.8813582 | 73.5172777 |
| 18:25:51 | 0:23:30 | 71.9258374 | 73.2842889 | 72.8195316 | 68.8813582 | 72.5172777 |
| 18:25:52 | 0:23:31 | 71.5258374 | 73.2842889 | 72.8195316 | 68.8813582 | 70.5172777 |
| 18:25:53 | 0:23:32 | 71.6258374 | 73.2842889 | 72.8195316 | 69.8813582 | 69.5172777 |
| 18:25:54 | 0:23:33 | 71.4258374 | 73.2842889 | 71.8195316 | 69.8813582 | 69.5172777 |
| 18:25:55 | 0:23:34 | 70.9258374 | 73.2842889 | 70.8195316 | 69.8813582 | 69.5172777 |
| 18:25:56 | 0:23:35 | 70.3258374 | 73.2842889 | 71.8195316 | 69.8813582 | 70.5172777 |
| 18:25:57 | 0:23:36 | 70.8258374 | 73.2842889 | 73.8195316 | 70.8813582 | 72.5172777 |
| 18:25:58 | 0:23:37 | 70.0258374 | 62.2842889 | 73.8195316 | 70.8813582 | 73.5172777 |
| 18:25:59 | 0:23:38 | 70.1258374 | 62.2842889 | 75.8195316 | 70.8813582 | 74.5172777 |
| 18:26:00 | 0:23:39 | 70.7258374 | 62.2842889 | 77.8195316 | 71.8813582 | 75.5172777 |
| 18:26:01 | 0:23:40 | 71.8258374 | 62.2842889 | 71.8258374 | 73.8813582 | 75.5172777 |
| 18:26:02 | 0:23:41 | 72.1258374 | 62.2842889 | 72.1258374 | 73.8813582 | 73.5172777 |
| 18:26:03 | 0:23:42 | 72.0258374 | 62.2842889 | 72.0258374 | 73.8813582 | 70.5172777 |
| 18:26:04 | 0:23:43 | 71.7258374 | 62.2842889 | 71.7258374 | 70.8813582 | 69.5172777 |
| 18:26:05 | 0:23:44 | 71.7258374 | 62.2842889 | 71.7258374 | 68.8813582 | 68.5172777 |
| 18:26:06 | 0:23:45 | 71.7258374 | 62.2842889 | 71.7258374 | 68.8813582 | 68.5172777 |
| 18:26:07 | 0:23:46 | 71.9258374 | 67.2842889 | 71.9258374 | 68.8813582 | 67.5172777 |
| 18:26:08 | 0:23:47 | 71.4258374 | 67.2842889 | 81.8195316 | 67.8813582 | 67.5172777 |
| 18:26:09 | 0:23:48 | 71.8258374 | 67.2842889 | 76.8195316 | 67.8813582 | 70.5172777 |
| 18:26:10 | 0:23:49 | 72.4258374 | 67.2842889 | 74.8195316 | 67.8813582 | 70.5172777 |
| 18:26:11 | 0:23:50 | 72.4258374 | 67.2842889 | 73.8195316 | 67.8813582 | 70.5172777 |
| 18:26:12 | 0:23:51 | 72.5258374 | 67.2842889 | 73.8195316 | 67.8813582 | 70.5172777 |
| 18:26:13 | 0:23:52 | 72.6258374 | 67.2842889 | 72.8195316 | 67.8813582 | 67.5172777 |
| 18:26:14 | 0:23:53 | 72.0258374 | 67.2842889 | 70.8195316 | 67.8813582 | 65.5172777 |
| 18:26:15 | 0:23:54 | 71.3258374 | 67.2842889 | 68.8195316 | 67.8813582 | 65.5172777 |
| 18:26:16 | 0:23:55 | 71.2258374 | 68.2842889 | 67.8195316 | 69.8813582 | 64.5172777 |
| 18:26:17 | 0:23:56 | 71.0258374 | 68.2842889 | 67.8195316 | 70.8813582 | 63.5172777 |
| 18:26:18 | 0:23:57 | 71.0258374 | 68.2842889 | 66.8195316 | 71.8813582 | 63.5172777 |



|          |         |            |            |            |            |            |
|----------|---------|------------|------------|------------|------------|------------|
| 18:26:19 | 0:23:58 | 70.2258374 | 68.2842889 | 66.8195316 | 69.8813582 | 63.5172777 |
| 18:26:20 | 0:23:59 | 69.9258374 | 68.2842889 | 66.8195316 | 68.8813582 | 64.5172777 |
| 18:26:21 | 0:24:00 | 70.3258374 | 69.2842889 | 67.8195316 | 68.8813582 | 65.5172777 |
| 18:26:22 | 0:24:01 | 70.7258374 | 70.2842889 | 69.8195316 | 68.8813582 | 65.5172777 |
| 18:26:23 | 0:24:02 | 70.9258374 | 70.2842889 | 69.8195316 | 67.8813582 | 65.5172777 |
| 18:26:24 | 0:24:03 | 71.2258374 | 70.2842889 | 72.8195316 | 67.8813582 | 66.5172777 |
| 18:26:25 | 0:24:04 | 71.2258374 | 69.2842889 | 73.8195316 | 67.8813582 | 65.5172777 |
| 18:26:26 | 0:24:05 | 70.8258374 | 69.2842889 | 73.8195316 | 67.8813582 | 65.5172777 |
| 18:26:27 | 0:24:06 | 70.3258374 | 69.2842889 | 72.8195316 | 67.8813582 | 65.5172777 |
| 18:26:28 | 0:24:07 | 70.1258374 | 69.2842889 | 72.8195316 | 67.8813582 | 64.5172777 |
| 18:26:29 | 0:24:08 | 70.1258374 | 70.2842889 | 70.8195316 | 67.8813582 | 64.5172777 |
| 18:26:30 | 0:24:09 | 70.0258374 | 70.2842889 | 70.8195316 | 67.8813582 | 64.5172777 |
| 18:26:31 | 0:24:10 | 69.7258374 | 68.2842889 | 70.8195316 | 67.8813582 | 64.5172777 |
| 18:26:32 | 0:24:11 | 70.3258374 | 67.2842889 | 70.8195316 | 68.8813582 | 64.5172777 |
| 18:26:33 | 0:24:12 | 70.2258374 | 65.2842889 | 70.8195316 | 69.8813582 | 64.5172777 |
| 18:26:34 | 0:24:13 | 70.4258374 | 64.2842889 | 69.8195316 | 70.8813582 | 65.5172777 |
| 18:26:35 | 0:24:14 | 70.6258374 | 64.2842889 | 69.8195316 | 71.8813582 | 66.5172777 |
| 18:26:36 | 0:24:15 | 70.9258374 | 64.2842889 | 68.8195316 | 71.8813582 | 67.5172777 |
| 18:26:37 | 0:24:16 | 70.8258374 | 64.2842889 | 68.8195316 | 70.8813582 | 67.5172777 |
| 18:26:38 | 0:24:17 | 71.1258374 | 65.2842889 | 67.8195316 | 70.8813582 | 67.5172777 |
| 18:26:39 | 0:24:18 | 71.4258374 | 66.2842889 | 67.8195316 | 70.8813582 | 68.5172777 |
| 18:26:40 | 0:24:19 | 71.4258374 | 66.2842889 | 67.8195316 | 70.8813582 | 68.5172777 |
| 18:26:41 | 0:24:20 | 71.4258374 | 68.2842889 | 68.8195316 | 70.8813582 | 67.5172777 |
| 18:26:42 | 0:24:21 | 71.3258374 | 67.2842889 | 68.8195316 | 69.8813582 | 67.5172777 |
| 18:26:43 | 0:24:22 | 71.2258374 | 66.2842889 | 69.8195316 | 68.8813582 | 67.5172777 |
| 18:26:44 | 0:24:23 | 71.0258374 | 66.2842889 | 69.8195316 | 67.8813582 | 67.5172777 |
| 18:26:45 | 0:24:24 | 71.0258374 | 66.2842889 | 69.8195316 | 67.8813582 | 67.5172777 |
| 18:26:46 | 0:24:25 | 71.1258374 | 66.2842889 | 69.8195316 | 66.8813582 | 67.5172777 |
| 18:26:47 | 0:24:26 | 71.2258374 | 66.2842889 | 68.8195316 | 66.8813582 | 67.5172777 |
| 18:26:48 | 0:24:27 | 71.5258374 | 66.2842889 | 68.8195316 | 67.8813582 | 67.5172777 |
| 18:26:49 | 0:24:28 | 71.4258374 | 66.2842889 | 69.8195316 | 67.8813582 | 67.5172777 |
| 18:26:50 | 0:24:29 | 71.1258374 | 66.2842889 | 69.8195316 | 68.8813582 | 67.5172777 |
| 18:26:51 | 0:24:30 | 71.4258374 | 66.2842889 | 69.8195316 | 68.8813582 | 67.5172777 |
| 18:26:52 | 0:24:31 | 71.1258374 | 66.2842889 | 71.8195316 | 68.8813582 | 65.5172777 |
| 18:26:53 | 0:24:32 | 71.2258374 | 66.2842889 | 72.8195316 | 68.8813582 | 65.5172777 |
| 18:26:54 | 0:24:33 | 71.7258374 | 68.2842889 | 73.8195316 | 68.8813582 | 66.5172777 |
| 18:26:55 | 0:24:34 | 71.7258374 | 69.2842889 | 72.8195316 | 69.8813582 | 66.5172777 |
| 18:26:56 | 0:24:35 | 71.6258374 | 68.2842889 | 73.8195316 | 69.8813582 | 66.5172777 |
| 18:26:57 | 0:24:36 | 71.4258374 | 68.2842889 | 73.8195316 | 69.8813582 | 66.5172777 |
| 18:26:58 | 0:24:37 | 70.7258374 | 68.2842889 | 72.8195316 | 69.8813582 | 66.5172777 |
| 18:26:59 | 0:24:38 | 71.2258374 | 68.2842889 | 72.8195316 | 69.8813582 | 66.5172777 |
| 18:27:00 | 0:24:39 | 71.2258374 | 68.2842889 | 72.8195316 | 69.8813582 | 66.5172777 |
| 18:27:01 | 0:24:40 | 71.8258374 | 68.2842889 | 71.8195316 | 69.8813582 | 65.5172777 |
| 18:27:02 | 0:24:41 | 71.9258374 | 68.2842889 | 71.8195316 | 69.8813582 | 66.5172777 |
| 18:27:03 | 0:24:42 | 72.2258374 | 68.2842889 | 71.8195316 | 69.8813582 | 68.5172777 |

|          |         |            |            |            |            |            |
|----------|---------|------------|------------|------------|------------|------------|
| 18:27:04 | 0:24:43 | 72.1258374 | 68.2842889 | 71.8195316 | 69.8813582 | 68.5172777 |
| 18:27:05 | 0:24:44 | 72.8258374 | 68.2842889 | 71.8195316 | 70.8813582 | 68.5172777 |
| 18:27:06 | 0:24:45 | 73.6258374 | 67.2842889 | 71.8195316 | 71.8813582 | 71.5172777 |
| 18:27:07 | 0:24:46 | 74.0258374 | 66.2842889 | 71.8195316 | 75.8813582 | 72.5172777 |
| 18:27:08 | 0:24:47 | 73.9258374 | 66.2842889 | 72.8195316 | 75.8813582 | 72.5172777 |
| 18:27:09 | 0:24:48 | 73.8258374 | 66.2842889 | 72.8195316 | 75.8813582 | 73.5172777 |
| 18:27:10 | 0:24:49 | 74.0258374 | 66.2842889 | 72.8195316 | 73.8813582 | 73.5172777 |
| 18:27:11 | 0:24:50 | 73.9258374 | 66.2842889 | 71.8195316 | 71.8813582 | 73.5172777 |
| 18:27:12 | 0:24:51 | 74.3258374 | 66.2842889 | 71.8195316 | 70.8813582 | 72.5172777 |
| 18:27:13 | 0:24:52 | 74.2258374 | 66.2842889 | 71.8195316 | 69.8813582 | 71.5172777 |
| 18:27:14 | 0:24:53 | 73.9258374 | 66.2842889 | 71.8195316 | 69.8813582 | 71.5172777 |
| 18:27:15 | 0:24:54 | 73.7258374 | 65.2842889 | 71.8195316 | 69.8813582 | 72.5172777 |
| 18:27:16 | 0:24:55 | 73.7258374 | 64.2842889 | 71.8195316 | 69.8813582 | 73.5172777 |
| 18:27:17 | 0:24:56 | 74.7258374 | 64.2842889 | 72.8195316 | 68.8813582 | 73.5172777 |
| 18:27:18 | 0:24:57 | 75.2258374 | 64.2842889 | 72.8195316 | 68.8813582 | 73.5172777 |
| 18:27:19 | 0:24:58 | 75.4258374 | 64.2842889 | 72.8195316 | 68.8813582 | 74.5172777 |
| 18:27:20 | 0:24:59 | 75.2258374 | 64.2842889 | 72.8195316 | 68.8813582 | 74.5172777 |
| 18:27:21 | 0:25:00 | 74.9258374 | 64.2842889 | 72.8195316 | 68.8813582 | 72.5172777 |
| 18:27:22 | 0:25:01 | 74.1258374 | 63.2842889 | 72.8195316 | 68.8813582 | 69.5172777 |
| 18:27:23 | 0:25:02 | 72.7258374 | 63.2842889 | 72.8195316 | 68.8813582 | 69.5172777 |
| 18:27:24 | 0:25:03 | 72.3258374 | 64.2842889 | 72.8195316 | 67.8813582 | 69.5172777 |
| 18:27:25 | 0:25:04 | 72.2258374 | 64.2842889 | 73.8195316 | 67.8813582 | 70.5172777 |
| 18:27:26 | 0:25:05 | 71.8258374 | 64.2842889 | 74.8195316 | 67.8813582 | 71.5172777 |
| 18:27:27 | 0:25:06 | 71.5258374 | 65.2842889 | 74.8195316 | 67.8813582 | 70.5172777 |
| 18:27:28 | 0:25:07 | 71.0258374 | 65.2842889 | 75.8195316 | 67.8813582 | 68.5172777 |
| 18:27:29 | 0:25:08 | 70.7258374 | 65.2842889 | 75.8195316 | 67.8813582 | 68.5172777 |
| 18:27:30 | 0:25:09 | 70.7258374 | 65.2842889 | 75.8195316 | 67.8813582 | 69.5172777 |
| 18:27:31 | 0:25:10 | 70.9258374 | 65.2842889 | 75.8195316 | 67.8813582 | 69.5172777 |
| 18:27:32 | 0:25:11 | 70.9258374 | 64.2842889 | 75.8195316 | 68.8813582 | 69.5172777 |
| 18:27:33 | 0:25:12 | 70.7258374 | 63.2842889 | 75.8195316 | 68.8813582 | 69.5172777 |
| 18:27:34 | 0:25:13 | 70.6258374 | 64.2842889 | 75.8195316 | 68.8813582 | 69.5172777 |
| 18:27:35 | 0:25:14 | 69.8258374 | 65.2842889 | 74.8195316 | 68.8813582 | 69.5172777 |
| 18:27:36 | 0:25:15 | 69.5258374 | 66.2842889 | 73.8195316 | 68.8813582 | 69.5172777 |
| 18:27:37 | 0:25:16 | 69.2258374 | 66.2842889 | 73.8195316 | 67.8813582 | 67.5172777 |
| 18:27:38 | 0:25:17 | 69.2258374 | 66.2842889 | 73.8195316 | 67.8813582 | 67.5172777 |
| 18:27:39 | 0:25:18 | 69.4258374 | 66.2842889 | 73.8195316 | 67.8813582 | 67.5172777 |
| 18:27:40 | 0:25:19 | 70.0258374 | 66.2842889 | 75.8195316 | 67.8813582 | 67.5172777 |
| 18:27:41 | 0:25:20 | 70.4258374 | 66.2842889 | 75.8195316 | 68.8813582 | 67.5172777 |
| 18:27:42 | 0:25:21 | 70.6258374 | 68.2842889 | 75.8195316 | 68.8813582 | 67.5172777 |
| 18:27:43 | 0:25:22 | 70.7258374 | 69.2842889 | 75.8195316 | 69.8813582 | 68.5172777 |
| 18:27:44 | 0:25:23 | 70.3258374 | 70.2842889 | 74.8195316 | 69.8813582 | 68.5172777 |
| 18:27:45 | 0:25:24 | 70.0258374 | 70.2842889 | 75.8195316 | 69.8813582 | 68.5172777 |
| 18:27:46 | 0:25:25 | 70.6258374 | 69.2842889 | 75.8195316 | 69.8813582 | 70.5172777 |
| 18:27:47 | 0:25:26 | 70.6258374 | 69.2842889 | 75.8195316 | 69.8813582 | 71.5172777 |
| 18:27:48 | 0:25:27 | 70.4258374 | 68.2842889 | 75.8195316 | 69.8813582 | 71.5172777 |

|          |         |            |            |            |            |            |
|----------|---------|------------|------------|------------|------------|------------|
| 18:27:49 | 0:25:28 | 70.5258374 | 68.2842889 | 75.8195316 | 69.8813582 | 73.5172777 |
| 18:27:50 | 0:25:29 | 70.9258374 | 68.2842889 | 76.8195316 | 69.8813582 | 75.5172777 |
| 18:27:51 | 0:25:30 | 71.0258374 | 68.2842889 | 76.8195316 | 69.8813582 | 76.5172777 |
| 18:27:52 | 0:25:31 | 70.7258374 | 68.2842889 | 75.8195316 | 69.8813582 | 76.5172777 |
| 18:27:53 | 0:25:32 | 70.8258374 | 68.2842889 | 75.8195316 | 69.8813582 | 78.5172777 |
| 18:27:54 | 0:25:33 | 70.8258374 | 68.2842889 | 75.8195316 | 69.8813582 | 78.5172777 |
| 18:27:55 | 0:25:34 | 70.5258374 | 68.2842889 | 72.8195316 | 71.8813582 | 78.5172777 |
| 18:27:56 | 0:25:35 | 70.6258374 | 67.2842889 | 71.8195316 | 71.8813582 | 79.5172777 |
| 18:27:57 | 0:25:36 | 71.1258374 | 67.2842889 | 71.8195316 | 71.8813582 | 79.5172777 |
| 18:27:58 | 0:25:37 | 71.1258374 | 67.2842889 | 70.8195316 | 71.8813582 | 78.5172777 |
| 18:27:59 | 0:25:38 | 71.5258374 | 67.2842889 | 71.8195316 | 71.8813582 | 78.5172777 |
| 18:28:00 | 0:25:39 | 71.4258374 | 67.2842889 | 71.8195316 | 70.8813582 | 78.5172777 |
| 18:28:01 | 0:25:40 | 71.6258374 | 67.2842889 | 72.8195316 | 70.8813582 | 78.5172777 |
| 18:28:02 | 0:25:41 | 71.8258374 | 65.2842889 | 72.8195316 | 70.8813582 | 79.5172777 |
| 18:28:03 | 0:25:42 | 72.1258374 | 64.2842889 | 72.8195316 | 70.8813582 | 79.5172777 |
| 18:28:04 | 0:25:43 | 72.1258374 | 64.2842889 | 72.8195316 | 71.8813582 | 78.5172777 |
| 18:28:05 | 0:25:44 | 73.2258374 | 65.2842889 | 71.8195316 | 71.8813582 | 76.5172777 |
| 18:28:06 | 0:25:45 | 73.8258374 | 65.2842889 | 71.8195316 | 71.8813582 | 74.5172777 |
| 18:28:07 | 0:25:46 | 74.0258374 | 65.2842889 | 70.8195316 | 71.8813582 | 74.5172777 |
| 18:28:08 | 0:25:47 | 73.2258374 | 66.2842889 | 70.8195316 | 70.8813582 | 71.5172777 |
| 18:28:09 | 0:25:48 | 73.0258374 | 66.2842889 | 70.8195316 | 70.8813582 | 69.5172777 |
| 18:28:10 | 0:25:49 | 72.5258374 | 66.2842889 | 71.8195316 | 70.8813582 | 68.5172777 |
| 18:28:11 | 0:25:50 | 73.0258374 | 66.2842889 | 72.8195316 | 70.8813582 | 68.5172777 |
| 18:28:12 | 0:25:51 | 73.6258374 | 66.2842889 | 73.8195316 | 69.8813582 | 68.5172777 |
| 18:28:13 | 0:25:52 | 73.6258374 | 66.2842889 | 73.8195316 | 69.8813582 | 69.5172777 |
| 18:28:14 | 0:25:53 | 74.0258374 | 66.2842889 | 76.8195316 | 69.8813582 | 71.5172777 |
| 18:28:15 | 0:25:54 | 74.2258374 | 66.2842889 | 78.8195316 | 68.8813582 | 73.5172777 |
| 18:28:16 | 0:25:55 | 74.1258374 | 66.2842889 | 78.8195316 | 68.8813582 | 74.5172777 |
| 18:28:17 | 0:25:56 | 74.6258374 | 66.2842889 | 78.8195316 | 68.8813582 | 73.5172777 |
| 18:28:18 | 0:25:57 | 74.7258374 | 66.2842889 | 78.8195316 | 68.8813582 | 72.5172777 |
| 18:28:19 | 0:25:58 | 74.2258374 | 66.2842889 | 76.8195316 | 68.8813582 | 70.5172777 |
| 18:28:20 | 0:25:59 | 73.6258374 | 69.2842889 | 76.8195316 | 68.8813582 | 68.5172777 |
| 18:28:21 | 0:26:00 | 74.0258374 | 69.2842889 | 76.8195316 | 74.8813582 | 67.5172777 |
| 18:28:22 | 0:26:01 | 74.0258374 | 70.2842889 | 76.8195316 | 76.8813582 | 67.5172777 |
| 18:28:23 | 0:26:02 | 74.4258374 | 70.2842889 | 77.8195316 | 77.8813582 | 68.5172777 |
| 18:28:24 | 0:26:03 | 74.8258374 | 70.2842889 | 77.8195316 | 79.8813582 | 69.5172777 |
| 18:28:25 | 0:26:04 | 75.3258374 | 70.2842889 | 81.8195316 | 80.8813582 | 71.5172777 |
| 18:28:26 | 0:26:05 | 74.3258374 | 71.2842889 | 81.8195316 | 76.8813582 | 71.5172777 |
| 18:28:27 | 0:26:06 | 73.8258374 | 71.2842889 | 80.8195316 | 75.8813582 | 70.5172777 |
| 18:28:28 | 0:26:07 | 73.6258374 | 72.2842889 | 80.8195316 | 74.8813582 | 70.5172777 |
| 18:28:29 | 0:26:08 | 72.5258374 | 72.2842889 | 76.8195316 | 72.8813582 | 70.5172777 |
| 18:28:30 | 0:26:09 | 72.1258374 | 72.2842889 | 74.8195316 | 71.8813582 | 70.5172777 |
| 18:28:31 | 0:26:10 | 72.6258374 | 73.2842889 | 74.8195316 | 70.8813582 | 71.5172777 |
| 18:28:32 | 0:26:11 | 72.5258374 | 73.2842889 | 73.8195316 | 70.8813582 | 71.5172777 |
| 18:28:33 | 0:26:12 | 72.6258374 | 73.2842889 | 73.8195316 | 70.8813582 | 71.5172777 |

|          |         |            |            |            |            |            |
|----------|---------|------------|------------|------------|------------|------------|
| 18:28:34 | 0:26:13 | 73.1258374 | 73.2842889 | 73.8195316 | 71.8813582 | 74.5172777 |
| 18:28:35 | 0:26:14 | 73.3258374 | 73.2842889 | 74.8195316 | 70.8813582 | 76.5172777 |
| 18:28:36 | 0:26:15 | 73.0258374 | 73.2842889 | 73.8195316 | 70.8813582 | 76.5172777 |
| 18:28:37 | 0:26:16 | 74.0258374 | 80.2842889 | 73.8195316 | 70.8813582 | 75.5172777 |
| 18:28:38 | 0:26:17 | 73.2258374 | 80.2842889 | 71.8195316 | 69.8813582 | 71.5172777 |
| 18:28:39 | 0:26:18 | 73.3258374 | 82.2842889 | 71.8195316 | 69.8813582 | 69.5172777 |
| 18:28:40 | 0:26:19 | 72.9258374 | 83.2842889 | 70.8195316 | 69.8813582 | 67.5172777 |
| 18:28:41 | 0:26:20 | 72.6258374 | 83.2842889 | 70.8195316 | 69.8813582 | 66.5172777 |
| 18:28:42 | 0:26:21 | 72.6258374 | 84.2842889 | 70.8195316 | 69.8813582 | 66.5172777 |
| 18:28:43 | 0:26:22 | 72.6258374 | 84.2842889 | 70.8195316 | 69.8813582 | 67.5172777 |
| 18:28:44 | 0:26:23 | 72.8258374 | 83.2842889 | 70.8195316 | 69.8813582 | 67.5172777 |
| 18:28:45 | 0:26:24 | 72.4258374 | 79.2842889 | 70.8195316 | 69.8813582 | 68.5172777 |
| 18:28:46 | 0:26:25 | 71.9258374 | 71.2842889 | 71.8195316 | 70.8813582 | 68.5172777 |
| 18:28:47 | 0:26:26 | 72.6258374 | 71.2842889 | 71.8195316 | 72.8813582 | 69.5172777 |
| 18:28:48 | 0:26:27 | 72.6258374 | 71.2842889 | 71.8195316 | 72.8813582 | 69.5172777 |
| 18:28:49 | 0:26:28 | 72.5258374 | 71.2842889 | 70.8195316 | 73.8813582 | 70.5172777 |
| 18:28:50 | 0:26:29 | 72.1258374 | 70.2842889 | 70.8195316 | 74.8813582 | 70.5172777 |
| 18:28:51 | 0:26:30 | 72.4258374 | 70.2842889 | 70.8195316 | 74.8813582 | 71.5172777 |
| 18:28:52 | 0:26:31 | 72.6258374 | 73.2842889 | 70.8195316 | 74.8813582 | 70.5172777 |
| 18:28:53 | 0:26:32 | 72.6258374 | 73.2842889 | 70.8195316 | 74.8813582 | 70.5172777 |
| 18:28:54 | 0:26:33 | 72.8258374 | 73.2842889 | 71.8195316 | 74.8813582 | 69.5172777 |
| 18:28:55 | 0:26:34 | 73.2258374 | 74.2842889 | 73.8195316 | 74.8813582 | 69.5172777 |
| 18:28:56 | 0:26:35 | 73.2258374 | 73.2842889 | 73.8195316 | 74.8813582 | 69.5172777 |
| 18:28:57 | 0:26:36 | 73.4258374 | 73.2842889 | 76.8195316 | 74.8813582 | 69.5172777 |
| 18:28:58 | 0:26:37 | 73.6258374 | 73.2842889 | 77.8195316 | 74.8813582 | 69.5172777 |
| 18:28:59 | 0:26:38 | 73.3258374 | 73.2842889 | 76.8195316 | 74.8813582 | 70.5172777 |
| 18:29:00 | 0:26:39 | 73.0258374 | 73.2842889 | 75.8195316 | 74.8813582 | 70.5172777 |
| 18:29:01 | 0:26:40 | 72.5258374 | 73.2842889 | 75.8195316 | 74.8813582 | 70.5172777 |
| 18:29:02 | 0:26:41 | 72.3258374 | 70.2842889 | 75.8195316 | 73.8813582 | 70.5172777 |
| 18:29:03 | 0:26:42 | 71.9258374 | 69.2842889 | 73.8195316 | 71.8813582 | 70.5172777 |
| 18:29:04 | 0:26:43 | 71.5258374 | 69.2842889 | 73.8195316 | 71.8813582 | 69.5172777 |
| 18:29:05 | 0:26:44 | 71.1258374 | 68.2842889 | 72.8195316 | 69.8813582 | 68.5172777 |
| 18:29:06 | 0:26:45 | 70.4258374 | 65.2842889 | 72.8195316 | 69.8813582 | 67.5172777 |
| 18:29:07 | 0:26:46 | 70.3258374 | 64.2842889 | 72.8195316 | 70.8813582 | 66.5172777 |
| 18:29:08 | 0:26:47 | 70.6258374 | 64.2842889 | 73.8195316 | 70.8813582 | 66.5172777 |
| 18:29:09 | 0:26:48 | 70.7258374 | 63.2842889 | 73.8195316 | 70.8813582 | 66.5172777 |
| 18:29:10 | 0:26:49 | 71.1258374 | 63.2842889 | 72.8195316 | 70.8813582 | 66.5172777 |
| 18:29:11 | 0:26:50 | 71.3258374 | 63.2842889 | 72.8195316 | 70.8813582 | 66.5172777 |
| 18:29:12 | 0:26:51 | 71.2258374 | 64.2842889 | 71.8195316 | 70.8813582 | 66.5172777 |
| 18:29:13 | 0:26:52 | 71.2258374 | 65.2842889 | 71.8195316 | 69.8813582 | 67.5172777 |
| 18:29:14 | 0:26:53 | 71.3258374 | 65.2842889 | 71.8195316 | 69.8813582 | 66.5172777 |
| 18:29:15 | 0:26:54 | 71.1258374 | 65.2842889 | 70.8195316 | 69.8813582 | 66.5172777 |
| 18:29:16 | 0:26:55 | 71.1258374 | 65.2842889 | 70.8195316 | 69.8813582 | 65.5172777 |
| 18:29:17 | 0:26:56 | 71.2258374 | 67.2842889 | 70.8195316 | 69.8813582 | 65.5172777 |
| 18:29:18 | 0:26:57 | 71.0258374 | 67.2842889 | 70.8195316 | 69.8813582 | 65.5172777 |

|          |         |            |            |            |            |            |
|----------|---------|------------|------------|------------|------------|------------|
| 18:29:19 | 0:26:58 | 71.0258374 | 66.2842889 | 70.8195316 | 69.8813582 | 66.5172777 |
| 18:29:20 | 0:26:59 | 70.8258374 | 66.2842889 | 70.8195316 | 69.8813582 | 66.5172777 |
| 18:29:21 | 0:27:00 | 70.5258374 | 66.2842889 | 70.8195316 | 69.8813582 | 67.5172777 |
| 18:29:22 | 0:27:01 | 70.6258374 | 67.2842889 | 70.8195316 | 69.8813582 | 67.5172777 |
| 18:29:23 | 0:27:02 | 70.8258374 | 68.2842889 | 69.8195316 | 70.8813582 | 68.5172777 |
| 18:29:24 | 0:27:03 | 70.6258374 | 68.2842889 | 69.8195316 | 70.8813582 | 68.5172777 |
| 18:29:25 | 0:27:04 | 70.6258374 | 68.2842889 | 69.8195316 | 70.8813582 | 68.5172777 |
| 18:29:26 | 0:27:05 | 70.4258374 | 68.2842889 | 69.8195316 | 69.8813582 | 68.5172777 |
| 18:29:27 | 0:27:06 | 70.4258374 | 69.2842889 | 69.8195316 | 69.8813582 | 68.5172777 |
| 18:29:28 | 0:27:07 | 70.4258374 | 69.2842889 | 69.8195316 | 69.8813582 | 68.5172777 |
| 18:29:29 | 0:27:08 | 71.1258374 | 69.2842889 | 72.8195316 | 69.8813582 | 69.5172777 |
| 18:29:30 | 0:27:09 | 71.7258374 | 69.2842889 | 74.8195316 | 69.8813582 | 70.5172777 |
| 18:29:31 | 0:27:10 | 72.1258374 | 69.2842889 | 74.8195316 | 69.8813582 | 73.5172777 |
| 18:29:32 | 0:27:11 | 73.1258374 | 70.2842889 | 77.8195316 | 69.8813582 | 74.5172777 |
| 18:29:33 | 0:27:12 | 73.2258374 | 70.2842889 | 79.8195316 | 69.8813582 | 74.5172777 |
| 18:29:34 | 0:27:13 | 73.0258374 | 69.2842889 | 79.8195316 | 70.8813582 | 75.5172777 |
| 18:29:35 | 0:27:14 | 73.0258374 | 69.2842889 | 79.8195316 | 70.8813582 | 74.5172777 |
| 18:29:36 | 0:27:15 | 73.3258374 | 69.2842889 | 79.8195316 | 70.8813582 | 73.5172777 |
| 18:29:37 | 0:27:16 | 73.1258374 | 69.2842889 | 78.8195316 | 70.8813582 | 72.5172777 |
| 18:29:38 | 0:27:17 | 73.2258374 | 69.2842889 | 78.8195316 | 71.8813582 | 72.5172777 |
| 18:29:39 | 0:27:18 | 72.7258374 | 69.2842889 | 77.8195316 | 72.8813582 | 71.5172777 |
| 18:29:40 | 0:27:19 | 72.3258374 | 63.2842889 | 74.8195316 | 73.8813582 | 71.5172777 |
| 18:29:41 | 0:27:20 | 72.6258374 | 63.2842889 | 74.8195316 | 73.8813582 | 70.5172777 |
| 18:29:42 | 0:27:21 | 72.6258374 | 63.2842889 | 74.8195316 | 73.8813582 | 70.5172777 |
| 18:29:43 | 0:27:22 | 72.4258374 | 63.2842889 | 74.8195316 | 73.8813582 | 69.5172777 |
| 18:29:44 | 0:27:23 | 71.8258374 | 63.2842889 | 74.8195316 | 72.8813582 | 69.5172777 |
| 18:29:45 | 0:27:24 | 71.8258374 | 63.2842889 | 73.8195316 | 72.8813582 | 69.5172777 |
| 18:29:46 | 0:27:25 | 71.9258374 | 63.2842889 | 73.8195316 | 72.8813582 | 68.5172777 |
| 18:29:47 | 0:27:26 | 71.9258374 | 63.2842889 | 74.8195316 | 72.8813582 | 68.5172777 |
| 18:29:48 | 0:27:27 | 72.2258374 | 64.2842889 | 76.8195316 | 72.8813582 | 68.5172777 |
| 18:29:49 | 0:27:28 | 72.1258374 | 64.2842889 | 76.8195316 | 71.8813582 | 68.5172777 |
| 18:29:50 | 0:27:29 | 72.1258374 | 64.2842889 | 76.8195316 | 72.8813582 | 69.5172777 |
| 18:29:51 | 0:27:30 | 71.7258374 | 64.2842889 | 73.8195316 | 73.8813582 | 69.5172777 |
| 18:29:52 | 0:27:31 | 72.0258374 | 64.2842889 | 73.8195316 | 73.8813582 | 69.5172777 |
| 18:29:53 | 0:27:32 | 71.9258374 | 64.2842889 | 72.8195316 | 72.8813582 | 69.5172777 |
| 18:29:54 | 0:27:33 | 71.7258374 | 64.2842889 | 71.8195316 | 71.8813582 | 69.5172777 |
| 18:29:55 | 0:27:34 | 71.6258374 | 64.2842889 | 70.8195316 | 70.8813582 | 69.5172777 |
| 18:29:56 | 0:27:35 | 72.0258374 | 64.2842889 | 70.8195316 | 70.8813582 | 69.5172777 |
| 18:29:57 | 0:27:36 | 72.1258374 | 63.2842889 | 70.8195316 | 70.8813582 | 69.5172777 |
| 18:29:58 | 0:27:37 | 72.0258374 | 63.2842889 | 69.8195316 | 71.8813582 | 68.5172777 |
| 18:29:59 | 0:27:38 | 71.7258374 | 63.2842889 | 69.8195316 | 71.8813582 | 69.5172777 |
| 18:30:00 | 0:27:39 | 71.7258374 | 63.2842889 | 69.8195316 | 72.8813582 | 69.5172777 |
| 18:30:01 | 0:27:40 | 71.7258374 | 63.2842889 | 67.8195316 | 72.8813582 | 69.5172777 |
| 18:30:02 | 0:27:41 | 71.4258374 | 62.2842889 | 67.8195316 | 72.8813582 | 69.5172777 |
| 18:30:03 | 0:27:42 | 71.7258374 | 62.2842889 | 66.8195316 | 72.8813582 | 69.5172777 |

|          |         |            |            |            |            |            |
|----------|---------|------------|------------|------------|------------|------------|
| 18:30:04 | 0:27:43 | 71.9258374 | 62.2842889 | 67.8195316 | 72.8813582 | 69.5172777 |
| 18:30:05 | 0:27:44 | 72.0258374 | 62.2842889 | 67.8195316 | 72.8813582 | 69.5172777 |
| 18:30:06 | 0:27:45 | 72.1258374 | 64.2842889 | 67.8195316 | 73.8813582 | 70.5172777 |
| 18:30:07 | 0:27:46 | 72.6258374 | 63.2842889 | 68.8195316 | 75.8813582 | 71.5172777 |
| 18:30:08 | 0:27:47 | 72.4258374 | 64.2842889 | 68.8195316 | 75.8813582 | 71.5172777 |
| 18:30:09 | 0:27:48 | 72.4258374 | 64.2842889 | 68.8195316 | 75.8813582 | 71.5172777 |
| 18:30:10 | 0:27:49 | 72.6258374 | 64.2842889 | 68.8195316 | 75.8813582 | 73.5172777 |
| 18:30:11 | 0:27:50 | 72.6258374 | 64.2842889 | 68.8195316 | 75.8813582 | 73.5172777 |
| 18:30:12 | 0:27:51 | 72.4258374 | 64.2842889 | 68.8195316 | 75.8813582 | 73.5172777 |
| 18:30:13 | 0:27:52 | 72.2258374 | 64.2842889 | 65.8195316 | 75.8813582 | 73.5172777 |
| 18:30:14 | 0:27:53 | 72.4258374 | 65.2842889 | 65.8195316 | 75.8813582 | 73.5172777 |
| 18:30:15 | 0:27:54 | 72.1258374 | 65.2842889 | 65.8195316 | 75.8813582 | 72.5172777 |
| 18:30:16 | 0:27:55 | 72.0258374 | 65.2842889 | 65.8195316 | 75.8813582 | 72.5172777 |
| 18:30:17 | 0:27:56 | 71.8258374 | 66.2842889 | 65.8195316 | 75.8813582 | 71.5172777 |
| 18:30:18 | 0:27:57 | 72.0258374 | 66.2842889 | 66.8195316 | 75.8813582 | 71.5172777 |
| 18:30:19 | 0:27:58 | 72.5258374 | 65.2842889 | 68.8195316 | 75.8813582 | 71.5172777 |
| 18:30:20 | 0:27:59 | 72.8258374 | 65.2842889 | 69.8195316 | 75.8813582 | 71.5172777 |
| 18:30:21 | 0:28:00 | 73.2258374 | 66.2842889 | 69.8195316 | 75.8813582 | 70.5172777 |
| 18:30:22 | 0:28:01 | 73.3258374 | 66.2842889 | 69.8195316 | 73.8813582 | 70.5172777 |
| 18:30:23 | 0:28:02 | 73.3258374 | 66.2842889 | 69.8195316 | 71.8813582 | 72.5172777 |
| 18:30:24 | 0:28:03 | 73.4258374 | 65.2842889 | 68.8195316 | 70.8813582 | 74.5172777 |
| 18:30:25 | 0:28:04 | 73.3258374 | 62.2842889 | 68.8195316 | 69.8813582 | 75.5172777 |
| 18:30:26 | 0:28:05 | 73.1258374 | 62.2842889 | 68.8195316 | 69.8813582 | 73.5172777 |
| 18:30:27 | 0:28:06 | 73.1258374 | 63.2842889 | 69.8195316 | 69.8813582 | 72.5172777 |
| 18:30:28 | 0:28:07 | 72.8258374 | 64.2842889 | 68.8195316 | 69.8813582 | 72.5172777 |
| 18:30:29 | 0:28:08 | 72.4258374 | 64.2842889 | 68.8195316 | 69.8813582 | 71.5172777 |
| 18:30:30 | 0:28:09 | 71.9258374 | 64.2842889 | 68.8195316 | 70.8813582 | 71.5172777 |
| 18:30:31 | 0:28:10 | 71.5258374 | 66.2842889 | 67.8195316 | 70.8813582 | 71.5172777 |
| 18:30:32 | 0:28:11 | 71.4258374 | 69.2842889 | 66.8195316 | 70.8813582 | 70.5172777 |
| 18:30:33 | 0:28:12 | 71.7258374 | 69.2842889 | 67.8195316 | 70.8813582 | 70.5172777 |
| 18:30:34 | 0:28:13 | 71.8258374 | 70.2842889 | 68.8195316 | 70.8813582 | 70.5172777 |
| 18:30:35 | 0:28:14 | 71.9258374 | 70.2842889 | 68.8195316 | 70.8813582 | 71.5172777 |
| 18:30:36 | 0:28:15 | 71.9258374 | 70.2842889 | 68.8195316 | 70.8813582 | 71.5172777 |
| 18:30:37 | 0:28:16 | 72.3258374 | 72.2842889 | 68.8195316 | 70.8813582 | 71.5172777 |
| 18:30:38 | 0:28:17 | 72.5258374 | 72.2842889 | 69.8195316 | 70.8813582 | 71.5172777 |
| 18:30:39 | 0:28:18 | 72.5258374 | 72.2842889 | 69.8195316 | 70.8813582 | 71.5172777 |
| 18:30:40 | 0:28:19 | 72.2258374 | 72.2842889 | 69.8195316 | 70.8813582 | 71.5172777 |
| 18:30:41 | 0:28:20 | 72.0258374 | 72.2842889 | 69.8195316 | 70.8813582 | 72.5172777 |
| 18:30:42 | 0:28:21 | 72.1258374 | 73.2842889 | 69.8195316 | 70.8813582 | 74.5172777 |
| 18:30:43 | 0:28:22 | 71.7258374 | 69.2842889 | 69.8195316 | 70.8813582 | 74.5172777 |
| 18:30:44 | 0:28:23 | 72.3258374 | 69.2842889 | 69.8195316 | 70.8813582 | 76.5172777 |
| 18:30:45 | 0:28:24 | 72.3258374 | 69.2842889 | 68.8195316 | 70.8813582 | 77.5172777 |
| 18:30:46 | 0:28:25 | 72.2258374 | 68.2842889 | 68.8195316 | 70.8813582 | 78.5172777 |
| 18:30:47 | 0:28:26 | 72.1258374 | 68.2842889 | 68.8195316 | 70.8813582 | 78.5172777 |
| 18:30:48 | 0:28:27 | 71.9258374 | 67.2842889 | 68.8195316 | 71.8813582 | 78.5172777 |

|          |         |            |            |            |            |            |
|----------|---------|------------|------------|------------|------------|------------|
| 18:30:49 | 0:28:28 | 71.6258374 | 67.2842889 | 67.8195316 | 71.8813582 | 77.5172777 |
| 18:30:50 | 0:28:29 | 71.4258374 | 67.2842889 | 67.8195316 | 70.8813582 | 77.5172777 |
| 18:30:51 | 0:28:30 | 70.9258374 | 67.2842889 | 67.8195316 | 70.8813582 | 74.5172777 |
| 18:30:52 | 0:28:31 | 70.7258374 | 67.2842889 | 66.8195316 | 70.8813582 | 73.5172777 |
| 18:30:53 | 0:28:32 | 70.9258374 | 67.2842889 | 66.8195316 | 71.8813582 | 72.5172777 |
| 18:30:54 | 0:28:33 | 71.1258374 | 67.2842889 | 66.8195316 | 70.8813582 | 72.5172777 |
| 18:30:55 | 0:28:34 | 71.1258374 | 66.2842889 | 65.8195316 | 71.8813582 | 72.5172777 |
| 18:30:56 | 0:28:35 | 71.5258374 | 66.2842889 | 65.8195316 | 72.8813582 | 72.5172777 |
| 18:30:57 | 0:28:36 | 71.7258374 | 66.2842889 | 66.8195316 | 72.8813582 | 72.5172777 |
| 18:30:58 | 0:28:37 | 72.0258374 | 66.2842889 | 67.8195316 | 72.8813582 | 73.5172777 |
| 18:30:59 | 0:28:38 | 72.4258374 | 66.2842889 | 70.8195316 | 72.8813582 | 73.5172777 |
| 18:31:00 | 0:28:39 | 72.6258374 | 66.2842889 | 70.8195316 | 72.8813582 | 73.5172777 |
| 18:31:01 | 0:28:40 | 72.7258374 | 66.2842889 | 70.8195316 | 73.8813582 | 71.5172777 |
| 18:31:02 | 0:28:41 | 72.3258374 | 66.2842889 | 70.8195316 | 74.8813582 | 69.5172777 |
| 18:31:03 | 0:28:42 | 71.9258374 | 65.2842889 | 69.8195316 | 74.8813582 | 68.5172777 |
| 18:31:04 | 0:28:43 | 72.5258374 | 65.2842889 | 69.8195316 | 74.8813582 | 66.5172777 |
| 18:31:05 | 0:28:44 | 73.0258374 | 65.2842889 | 69.8195316 | 73.8813582 | 66.5172777 |
| 18:31:06 | 0:28:45 | 72.8258374 | 65.2842889 | 68.8195316 | 73.8813582 | 65.5172777 |
| 18:31:07 | 0:28:46 | 73.0258374 | 66.2842889 | 67.8195316 | 72.8813582 | 65.5172777 |
| 18:31:08 | 0:28:47 | 73.5258374 | 71.2842889 | 67.8195316 | 72.8813582 | 65.5172777 |
| 18:31:09 | 0:28:48 | 73.8258374 | 72.2842889 | 67.8195316 | 72.8813582 | 65.5172777 |
| 18:31:10 | 0:28:49 | 74.1258374 | 71.2842889 | 67.8195316 | 72.8813582 | 65.5172777 |
| 18:31:11 | 0:28:50 | 74.4258374 | 71.2842889 | 68.8195316 | 72.8813582 | 66.5172777 |
| 18:31:12 | 0:28:51 | 74.6258374 | 71.2842889 | 68.8195316 | 72.8813582 | 67.5172777 |
| 18:31:13 | 0:28:52 | 74.5258374 | 70.2842889 | 68.8195316 | 72.8813582 | 67.5172777 |
| 18:31:14 | 0:28:53 | 74.3258374 | 70.2842889 | 67.8195316 | 72.8813582 | 68.5172777 |
| 18:31:15 | 0:28:54 | 74.3258374 | 70.2842889 | 66.8195316 | 73.8813582 | 68.5172777 |
| 18:31:16 | 0:28:55 | 74.5258374 | 69.2842889 | 66.8195316 | 74.8813582 | 68.5172777 |
| 18:31:17 | 0:28:56 | 74.6258374 | 69.2842889 | 67.8195316 | 74.8813582 | 68.5172777 |
| 18:31:18 | 0:28:57 | 74.1258374 | 69.2842889 | 68.8195316 | 74.8813582 | 68.5172777 |
| 18:31:19 | 0:28:58 | 73.8258374 | 69.2842889 | 68.8195316 | 74.8813582 | 69.5172777 |
| 18:31:20 | 0:28:59 | 73.5258374 | 68.2842889 | 68.8195316 | 74.8813582 | 69.5172777 |
| 18:31:21 | 0:29:00 | 73.6258374 | 68.2842889 | 68.8195316 | 74.8813582 | 70.5172777 |
| 18:31:22 | 0:29:01 | 74.3258374 | 68.2842889 | 70.8195316 | 74.8813582 | 70.5172777 |
| 18:31:23 | 0:29:02 | 74.0258374 | 68.2842889 | 70.8195316 | 74.8813582 | 71.5172777 |
| 18:31:24 | 0:29:03 | 73.5258374 | 68.2842889 | 70.8195316 | 74.8813582 | 71.5172777 |
| 18:31:25 | 0:29:04 | 73.2258374 | 69.2842889 | 70.8195316 | 73.8813582 | 71.5172777 |
| 18:31:26 | 0:29:05 | 73.0258374 | 69.2842889 | 70.8195316 | 73.8813582 | 71.5172777 |
| 18:31:27 | 0:29:06 | 73.4258374 | 70.2842889 | 70.8195316 | 72.8813582 | 70.5172777 |
| 18:31:28 | 0:29:07 | 73.0258374 | 70.2842889 | 69.8195316 | 71.8813582 | 70.5172777 |
| 18:31:29 | 0:29:08 | 72.7258374 | 70.2842889 | 69.8195316 | 71.8813582 | 70.5172777 |
| 18:31:30 | 0:29:09 | 72.7258374 | 70.2842889 | 69.8195316 | 71.8813582 | 70.5172777 |
| 18:31:31 | 0:29:10 | 72.4258374 | 70.2842889 | 70.8195316 | 72.8813582 | 70.5172777 |
| 18:31:32 | 0:29:11 | 72.3258374 | 71.2842889 | 70.8195316 | 72.8813582 | 70.5172777 |
| 18:31:33 | 0:29:12 | 72.5258374 | 73.2842889 | 70.8195316 | 71.8813582 | 70.5172777 |

|          |         |            |            |            |            |            |
|----------|---------|------------|------------|------------|------------|------------|
| 18:31:34 | 0:29:13 | 72.3258374 | 74.2842889 | 71.8195316 | 70.8813582 | 70.5172777 |
| 18:31:35 | 0:29:14 | 71.9258374 | 74.2842889 | 71.8195316 | 70.8813582 | 70.5172777 |
| 18:31:36 | 0:29:15 | 71.8258374 | 75.2842889 | 71.8195316 | 69.8813582 | 70.5172777 |
| 18:31:37 | 0:29:16 | 71.6258374 | 76.2842889 | 71.8195316 | 68.8813582 | 70.5172777 |
| 18:31:38 | 0:29:17 | 71.7258374 | 76.2842889 | 71.8195316 | 68.8813582 | 70.5172777 |
| 18:31:39 | 0:29:18 | 72.0258374 | 76.2842889 | 71.8195316 | 68.8813582 | 71.5172777 |
| 18:31:40 | 0:29:19 | 72.2258374 | 76.2842889 | 71.8195316 | 68.8813582 | 71.5172777 |
| 18:31:41 | 0:29:20 | 71.5258374 | 72.2842889 | 71.8195316 | 68.8813582 | 71.5172777 |
| 18:31:42 | 0:29:21 | 71.2258374 | 70.2842889 | 71.8195316 | 68.8813582 | 71.5172777 |
| 18:31:43 | 0:29:22 | 71.0258374 | 70.2842889 | 72.8195316 | 69.8813582 | 71.5172777 |
| 18:31:44 | 0:29:23 | 71.1258374 | 70.2842889 | 74.8195316 | 70.8813582 | 72.5172777 |
| 18:31:45 | 0:29:24 | 70.3258374 | 69.2842889 | 74.8195316 | 70.8813582 | 72.5172777 |
| 18:31:46 | 0:29:25 | 69.9258374 | 69.2842889 | 74.8195316 | 70.8813582 | 71.5172777 |
| 18:31:47 | 0:29:26 | 70.2258374 | 69.2842889 | 73.8195316 | 70.8813582 | 71.5172777 |
| 18:31:48 | 0:29:27 | 70.3258374 | 69.2842889 | 71.8195316 | 70.8813582 | 70.5172777 |
| 18:31:49 | 0:29:28 | 70.2258374 | 69.2842889 | 71.8195316 | 70.8813582 | 69.5172777 |
| 18:31:50 | 0:29:29 | 70.6258374 | 69.2842889 | 71.8195316 | 71.8813582 | 69.5172777 |
| 18:31:51 | 0:29:30 | 70.8258374 | 69.2842889 | 70.8195316 | 72.8813582 | 69.5172777 |
| 18:31:52 | 0:29:31 | 70.8258374 | 68.2842889 | 71.8195316 | 72.8813582 | 69.5172777 |
| 18:31:53 | 0:29:32 | 71.0258374 | 68.2842889 | 71.8195316 | 73.8813582 | 69.5172777 |
| 18:31:54 | 0:29:33 | 70.9258374 | 68.2842889 | 71.8195316 | 73.8813582 | 70.5172777 |
| 18:31:55 | 0:29:34 | 70.5258374 | 67.2842889 | 71.8195316 | 74.8813582 | 70.5172777 |
| 18:31:56 | 0:29:35 | 70.7258374 | 67.2842889 | 71.8195316 | 74.8813582 | 70.5172777 |
| 18:31:57 | 0:29:36 | 70.9258374 | 67.2842889 | 72.8195316 | 74.8813582 | 71.5172777 |
| 18:31:58 | 0:29:37 | 71.5258374 | 67.2842889 | 72.8195316 | 74.8813582 | 71.5172777 |
| 18:31:59 | 0:29:38 | 71.7258374 | 67.2842889 | 72.8195316 | 74.8813582 | 72.5172777 |
| 18:32:00 | 0:29:39 | 72.1258374 | 67.2842889 | 73.8195316 | 75.8813582 | 73.5172777 |
| 18:32:01 | 0:29:40 | 72.2258374 | 68.2842889 | 73.8195316 | 75.8813582 | 73.5172777 |
| 18:32:02 | 0:29:41 | 71.9258374 | 68.2842889 | 75.8195316 | 75.8813582 | 72.5172777 |
| 18:32:03 | 0:29:42 | 71.9258374 | 67.2842889 | 75.8195316 | 75.8813582 | 72.5172777 |
| 18:32:04 | 0:29:43 | 72.2258374 | 67.2842889 | 74.8195316 | 75.8813582 | 73.5172777 |
| 18:32:05 | 0:29:44 | 72.7258374 | 67.2842889 | 74.8195316 | 78.8813582 | 74.5172777 |
| 18:32:06 | 0:29:45 | 72.6258374 | 67.2842889 | 73.8195316 | 80.8813582 | 74.5172777 |
| 18:32:07 | 0:29:46 | 73.0258374 | 67.2842889 | 72.8195316 | 81.8813582 | 76.5172777 |
| 18:32:08 | 0:29:47 | 73.4258374 | 66.2842889 | 72.8195316 | 81.8813582 | 78.5172777 |
| 18:32:09 | 0:29:48 | 73.7258374 | 66.2842889 | 72.8195316 | 81.8813582 | 80.5172777 |
| 18:32:10 | 0:29:49 | 73.7258374 | 66.2842889 | 72.8195316 | 81.8813582 | 81.5172777 |
| 18:32:11 | 0:29:50 | 73.9258374 | 66.2842889 | 73.8195316 | 80.8813582 | 82.5172777 |
| 18:32:12 | 0:29:51 | 75.9258374 | 66.2842889 | 73.8195316 | 80.8813582 | 82.5172777 |
| 18:32:13 | 0:29:52 | 76.1258374 | 65.2842889 | 74.8195316 | 80.8813582 | 82.5172777 |
| 18:32:14 | 0:29:53 | 76.3258374 | 65.2842889 | 74.8195316 | 79.8813582 | 84.5172777 |
| 18:32:15 | 0:29:54 | 76.2258374 | 64.2842889 | 73.8195316 | 78.8813582 | 85.5172777 |
| 18:32:16 | 0:29:55 | 76.5258374 | 64.2842889 | 71.8195316 | 78.8813582 | 88.5172777 |
| 18:32:17 | 0:29:56 | 76.8258374 | 64.2842889 | 70.8195316 | 78.8813582 | 89.5172777 |
| 18:32:18 | 0:29:57 | 76.9258374 | 64.2842889 | 70.8195316 | 77.8813582 | 76.9258374 |



|          |         |            |            |            |            |            |
|----------|---------|------------|------------|------------|------------|------------|
| 18:32:19 | 0:29:58 | 77.1258374 | 64.2842889 | 69.8195316 | 77.8813582 | 77.1258374 |
| 18:32:20 | 0:29:59 | 76.7258374 | 64.2842889 | 67.8195316 | 77.8813582 | 76.7258374 |
| 18:32:21 | 0:30:00 | 75.9258374 | 64.2842889 | 67.8195316 | 76.8813582 | 75.9258374 |
| 18:32:22 | 0:30:01 | 75.8258374 | 64.2842889 | 67.8195316 | 76.8813582 | 75.8258374 |
| 18:32:23 | 0:30:02 | 75.7258374 | 64.2842889 | 67.8195316 | 76.8813582 | 75.7258374 |
| 18:32:24 | 0:30:03 | 75.7258374 | 64.2842889 | 67.8195316 | 76.8813582 | 75.7258374 |
| 18:32:25 | 0:30:04 | 73.8258374 | 63.2842889 | 68.8195316 | 76.8813582 | 73.8258374 |
| 18:32:26 | 0:30:05 | 73.6258374 | 62.2842889 | 67.8195316 | 76.8813582 | 73.6258374 |
| 18:32:27 | 0:30:06 | 73.6258374 | 62.2842889 | 67.8195316 | 76.8813582 | 85.5172777 |
| 18:32:28 | 0:30:07 | 73.5258374 | 62.2842889 | 67.8195316 | 76.8813582 | 83.5172777 |
| 18:32:29 | 0:30:08 | 73.3258374 | 62.2842889 | 67.8195316 | 77.8813582 | 80.5172777 |
| 18:32:30 | 0:30:09 | 72.8258374 | 62.2842889 | 66.8195316 | 77.8813582 | 79.5172777 |
| 18:32:31 | 0:30:10 | 71.8258374 | 62.2842889 | 65.8195316 | 77.8813582 | 78.5172777 |
| 18:32:32 | 0:30:11 | 71.4258374 | 62.2842889 | 65.8195316 | 77.8813582 | 78.5172777 |
| 18:32:33 | 0:30:12 | 71.3258374 | 62.2842889 | 65.8195316 | 77.8813582 | 78.5172777 |
| 18:32:34 | 0:30:13 | 70.6258374 | 62.2842889 | 65.8195316 | 78.8813582 | 78.5172777 |
| 18:32:35 | 0:30:14 | 70.0258374 | 62.2842889 | 65.8195316 | 78.8813582 | 76.5172777 |
| 18:32:36 | 0:30:15 | 69.1258374 | 62.2842889 | 65.8195316 | 78.8813582 | 75.5172777 |
| 18:32:37 | 0:30:16 | 68.9258374 | 62.2842889 | 65.8195316 | 78.8813582 | 74.5172777 |
| 18:32:38 | 0:30:17 | 68.9258374 | 62.2842889 | 66.8195316 | 80.8813582 | 74.5172777 |
| 18:32:39 | 0:30:18 | 68.9258374 | 63.2842889 | 66.8195316 | 80.8813582 | 73.5172777 |
| 18:32:40 | 0:30:19 | 69.0258374 | 63.2842889 | 66.8195316 | 81.8813582 | 73.5172777 |
| 18:32:41 | 0:30:20 | 69.4258374 | 64.2842889 | 65.8195316 | 81.8813582 | 75.5172777 |
| 18:32:42 | 0:30:21 | 69.8258374 | 64.2842889 | 66.8195316 | 81.8813582 | 76.5172777 |
| 18:32:43 | 0:30:22 | 70.4258374 | 64.2842889 | 65.8195316 | 81.8813582 | 79.5172777 |
| 18:32:44 | 0:30:23 | 71.1258374 | 65.2842889 | 66.8195316 | 81.8813582 | 80.5172777 |
| 18:32:45 | 0:30:24 | 71.6258374 | 66.2842889 | 66.8195316 | 80.8813582 | 81.5172777 |
| 18:32:46 | 0:30:25 | 71.5258374 | 66.2842889 | 66.8195316 | 79.8813582 | 79.5172777 |
| 18:32:47 | 0:30:26 | 71.6258374 | 66.2842889 | 67.8195316 | 79.8813582 | 79.5172777 |
| 18:32:48 | 0:30:27 | 71.7258374 | 64.2842889 | 67.8195316 | 79.8813582 | 80.5172777 |
| 18:32:49 | 0:30:28 | 71.8258374 | 62.2842889 | 67.8195316 | 80.8813582 | 80.5172777 |
| 18:32:50 | 0:30:29 | 72.0258374 | 62.2842889 | 67.8195316 | 80.8813582 | 80.5172777 |
| 18:32:51 | 0:30:30 | 72.0258374 | 62.2842889 | 68.8195316 | 79.8813582 | 77.5172777 |
| 18:32:52 | 0:30:31 | 71.6258374 | 62.2842889 | 69.8195316 | 79.8813582 | 77.5172777 |
| 18:32:53 | 0:30:32 | 71.1258374 | 62.2842889 | 71.8195316 | 79.8813582 | 71.5172777 |
| 18:32:54 | 0:30:33 | 71.6258374 | 62.2842889 | 72.8195316 | 79.8813582 | 71.5172777 |
| 18:32:55 | 0:30:34 | 71.4258374 | 63.2842889 | 71.8195316 | 79.8813582 | 68.5172777 |
| 18:32:56 | 0:30:35 | 71.6258374 | 63.2842889 | 71.8195316 | 79.8813582 | 69.5172777 |
| 18:32:57 | 0:30:36 | 71.3258374 | 62.2842889 | 70.8195316 | 79.8813582 | 69.5172777 |
| 18:32:58 | 0:30:37 | 71.0258374 | 62.2842889 | 69.8195316 | 79.8813582 | 69.5172777 |
| 18:32:59 | 0:30:38 | 70.7258374 | 62.2842889 | 68.8195316 | 79.8813582 | 69.5172777 |
| 18:33:00 | 0:30:39 | 70.9258374 | 62.2842889 | 68.8195316 | 80.8813582 | 69.5172777 |
| 18:33:01 | 0:30:40 | 71.0258374 | 62.2842889 | 68.8195316 | 80.8813582 | 69.5172777 |
| 18:33:02 | 0:30:41 | 71.2258374 | 61.2842889 | 68.8195316 | 80.8813582 | 68.5172777 |
| 18:33:03 | 0:30:42 | 70.5258374 | 62.2842889 | 68.8195316 | 80.8813582 | 68.5172777 |

|          |         |            |            |            |            |            |
|----------|---------|------------|------------|------------|------------|------------|
| 18:33:04 | 0:30:43 | 70.4258374 | 62.2842889 | 68.8195316 | 81.8813582 | 68.5172777 |
| 18:33:05 | 0:30:44 | 71.3258374 | 62.2842889 | 70.8195316 | 80.8813582 | 68.5172777 |
| 18:33:06 | 0:30:45 | 71.6258374 | 63.2842889 | 70.8195316 | 80.8813582 | 68.5172777 |
| 18:33:07 | 0:30:46 | 72.6258374 | 63.2842889 | 72.8195316 | 81.8813582 | 68.5172777 |
| 18:33:08 | 0:30:47 | 73.0258374 | 63.2842889 | 73.8195316 | 81.8813582 | 69.5172777 |
| 18:33:09 | 0:30:48 | 72.9258374 | 63.2842889 | 73.8195316 | 80.8813582 | 69.5172777 |
| 18:33:10 | 0:30:49 | 73.0258374 | 67.2842889 | 75.8195316 | 80.8813582 | 71.5172777 |
| 18:33:11 | 0:30:50 | 73.4258374 | 69.2842889 | 75.8195316 | 81.8813582 | 72.5172777 |
| 18:33:12 | 0:30:51 | 73.5258374 | 69.2842889 | 76.8195316 | 83.8813582 | 72.5172777 |
| 18:33:13 | 0:30:52 | 73.4258374 | 70.2842889 | 76.8195316 | 84.8813582 | 72.5172777 |
| 18:33:14 | 0:30:53 | 73.7258374 | 70.2842889 | 80.8195316 | 84.8813582 | 73.5172777 |
| 18:33:15 | 0:30:54 | 73.3258374 | 70.2842889 | 80.8195316 | 84.8813582 | 73.5172777 |
| 18:33:16 | 0:30:55 | 73.7258374 | 70.2842889 | 82.8195316 | 84.8813582 | 73.5172777 |
| 18:33:17 | 0:30:56 | 73.5258374 | 70.2842889 | 82.8195316 | 83.8813582 | 73.5172777 |
| 18:33:18 | 0:30:57 | 73.5258374 | 70.2842889 | 82.8195316 | 83.8813582 | 73.5172777 |
| 18:33:19 | 0:30:58 | 73.1258374 | 70.2842889 | 79.8195316 | 82.8813582 | 73.5172777 |
| 18:33:20 | 0:30:59 | 73.2258374 | 69.2842889 | 78.8195316 | 82.8813582 | 73.5172777 |
| 18:33:21 | 0:31:00 | 73.4258374 | 69.2842889 | 78.8195316 | 82.8813582 | 73.5172777 |
| 18:33:22 | 0:31:01 | 72.8258374 | 68.2842889 | 76.8195316 | 82.8813582 | 72.5172777 |
| 18:33:23 | 0:31:02 | 72.4258374 | 67.2842889 | 75.8195316 | 82.8813582 | 71.5172777 |
| 18:33:24 | 0:31:03 | 71.2258374 | 67.2842889 | 74.8195316 | 82.8813582 | 69.5172777 |
| 18:33:25 | 0:31:04 | 70.5258374 | 66.2842889 | 73.8195316 | 80.8813582 | 68.5172777 |
| 18:33:26 | 0:31:05 | 69.5258374 | 65.2842889 | 72.8195316 | 80.8813582 | 68.5172777 |
| 18:33:27 | 0:31:06 | 69.3258374 | 65.2842889 | 72.8195316 | 80.8813582 | 71.5172777 |
| 18:33:28 | 0:31:07 | 68.9258374 | 65.2842889 | 69.8195316 | 79.8813582 | 71.5172777 |
| 18:33:29 | 0:31:08 | 68.9258374 | 65.2842889 | 69.8195316 | 79.8813582 | 72.5172777 |
| 18:33:30 | 0:31:09 | 68.7258374 | 65.2842889 | 69.8195316 | 68.7258374 | 71.5172777 |
| 18:33:31 | 0:31:10 | 68.7258374 | 65.2842889 | 68.8195316 | 68.7258374 | 71.5172777 |
| 18:33:32 | 0:31:11 | 68.8258374 | 65.2842889 | 68.8195316 | 68.8258374 | 69.5172777 |
| 18:33:33 | 0:31:12 | 68.6258374 | 65.2842889 | 68.8195316 | 68.6258374 | 68.5172777 |
| 18:33:34 | 0:31:13 | 69.1258374 | 65.2842889 | 68.8195316 | 69.1258374 | 68.5172777 |
| 18:33:35 | 0:31:14 | 69.2258374 | 65.2842889 | 67.8195316 | 69.2258374 | 68.5172777 |
| 18:33:36 | 0:31:15 | 69.3258374 | 65.2842889 | 67.8195316 | 69.3258374 | 68.5172777 |
| 18:33:37 | 0:31:16 | 69.2258374 | 65.2842889 | 67.8195316 | 69.2258374 | 68.5172777 |
| 18:33:38 | 0:31:17 | 69.8258374 | 66.2842889 | 68.8195316 | 69.8258374 | 69.5172777 |
| 18:33:39 | 0:31:18 | 69.8258374 | 69.2842889 | 68.8195316 | 81.8813582 | 69.5172777 |
| 18:33:40 | 0:31:19 | 69.5258374 | 69.2842889 | 67.8195316 | 80.8813582 | 69.5172777 |
| 18:33:41 | 0:31:20 | 69.6258374 | 69.2842889 | 67.8195316 | 80.8813582 | 70.5172777 |
| 18:33:42 | 0:31:21 | 69.0258374 | 69.2842889 | 67.8195316 | 77.8813582 | 70.5172777 |
| 18:33:43 | 0:31:22 | 68.6258374 | 66.2842889 | 67.8195316 | 77.8813582 | 70.5172777 |
| 18:33:44 | 0:31:23 | 68.0258374 | 65.2842889 | 67.8195316 | 76.8813582 | 70.5172777 |
| 18:33:45 | 0:31:24 | 68.1258374 | 64.2842889 | 69.8195316 | 76.8813582 | 70.5172777 |
| 18:33:46 | 0:31:25 | 68.5258374 | 64.2842889 | 70.8195316 | 76.8813582 | 70.5172777 |
| 18:33:47 | 0:31:26 | 68.7258374 | 63.2842889 | 71.8195316 | 76.8813582 | 69.5172777 |
| 18:33:48 | 0:31:27 | 68.8258374 | 63.2842889 | 73.8195316 | 77.8813582 | 69.5172777 |

|          |         |            |            |            |            |            |
|----------|---------|------------|------------|------------|------------|------------|
| 18:33:49 | 0:31:28 | 68.8258374 | 63.2842889 | 73.8195316 | 77.8813582 | 69.5172777 |
| 18:33:50 | 0:31:29 | 68.9258374 | 63.2842889 | 74.8195316 | 77.8813582 | 69.5172777 |
| 18:33:51 | 0:31:30 | 69.0258374 | 63.2842889 | 73.8195316 | 76.8813582 | 69.5172777 |
| 18:33:52 | 0:31:31 | 69.3258374 | 63.2842889 | 73.8195316 | 76.8813582 | 69.5172777 |
| 18:33:53 | 0:31:32 | 69.2258374 | 63.2842889 | 73.8195316 | 75.8813582 | 69.5172777 |
| 18:33:54 | 0:31:33 | 69.8258374 | 63.2842889 | 75.8195316 | 75.8813582 | 69.5172777 |
| 18:33:55 | 0:31:34 | 70.6258374 | 63.2842889 | 76.8195316 | 75.8813582 | 72.5172777 |
| 18:33:56 | 0:31:35 | 71.6258374 | 67.2842889 | 77.8195316 | 74.8813582 | 77.5172777 |
| 18:33:57 | 0:31:36 | 71.9258374 | 70.2842889 | 76.8195316 | 74.8813582 | 77.5172777 |
| 18:33:58 | 0:31:37 | 72.4258374 | 70.2842889 | 75.8195316 | 74.8813582 | 80.5172777 |
| 18:33:59 | 0:31:38 | 72.4258374 | 70.2842889 | 74.8195316 | 74.8813582 | 81.5172777 |
| 18:34:00 | 0:31:39 | 72.4258374 | 71.2842889 | 74.8195316 | 74.8813582 | 81.5172777 |
| 18:34:01 | 0:31:40 | 72.3258374 | 71.2842889 | 71.8195316 | 73.8813582 | 83.5172777 |
| 18:34:02 | 0:31:41 | 72.2258374 | 71.2842889 | 70.8195316 | 73.8813582 | 84.5172777 |
| 18:34:03 | 0:31:42 | 72.0258374 | 72.2842889 | 70.8195316 | 73.8813582 | 84.5172777 |
| 18:34:04 | 0:31:43 | 71.1258374 | 71.2842889 | 68.8195316 | 73.8813582 | 81.5172777 |
| 18:34:05 | 0:31:44 | 71.0258374 | 71.2842889 | 68.8195316 | 73.8813582 | 81.5172777 |
| 18:34:06 | 0:31:45 | 71.0258374 | 71.2842889 | 68.8195316 | 73.8813582 | 81.5172777 |
| 18:34:07 | 0:31:46 | 71.6258374 | 71.2842889 | 68.8195316 | 74.8813582 | 81.5172777 |
| 18:34:08 | 0:31:47 | 71.5258374 | 71.2842889 | 68.8195316 | 72.8813582 | 81.5172777 |
| 18:34:09 | 0:31:48 | 71.0258374 | 69.2842889 | 68.8195316 | 71.8813582 | 81.5172777 |
| 18:34:10 | 0:31:49 | 71.4258374 | 68.2842889 | 68.8195316 | 72.8813582 | 81.5172777 |
| 18:34:11 | 0:31:50 | 70.9258374 | 67.2842889 | 66.8195316 | 72.8813582 | 80.5172777 |
| 18:34:12 | 0:31:51 | 70.9258374 | 67.2842889 | 66.8195316 | 72.8813582 | 80.5172777 |
| 18:34:13 | 0:31:52 | 70.9258374 | 67.2842889 | 65.8195316 | 74.8813582 | 80.5172777 |
| 18:34:14 | 0:31:53 | 70.8258374 | 68.2842889 | 65.8195316 | 74.8813582 | 80.5172777 |
| 18:34:15 | 0:31:54 | 71.4258374 | 69.2842889 | 64.8195316 | 74.8813582 | 80.5172777 |
| 18:34:16 | 0:31:55 | 71.6258374 | 69.2842889 | 64.8195316 | 74.8813582 | 80.5172777 |
| 18:34:17 | 0:31:56 | 71.3258374 | 69.2842889 | 64.8195316 | 74.8813582 | 76.5172777 |
| 18:34:18 | 0:31:57 | 70.9258374 | 69.2842889 | 65.8195316 | 73.8813582 | 74.5172777 |
| 18:34:19 | 0:31:58 | 70.3258374 | 68.2842889 | 66.8195316 | 73.8813582 | 72.5172777 |
| 18:34:20 | 0:31:59 | 70.2258374 | 67.2842889 | 66.8195316 | 73.8813582 | 69.5172777 |
| 18:34:21 | 0:32:00 | 70.1258374 | 67.2842889 | 66.8195316 | 73.8813582 | 68.5172777 |
| 18:34:22 | 0:32:01 | 70.0258374 | 66.2842889 | 67.8195316 | 73.8813582 | 67.5172777 |
| 18:34:23 | 0:32:02 | 69.7258374 | 64.2842889 | 68.8195316 | 73.8813582 | 67.5172777 |
| 18:34:24 | 0:32:03 | 69.7258374 | 65.2842889 | 68.8195316 | 72.8813582 | 68.5172777 |
| 18:34:25 | 0:32:04 | 69.8258374 | 65.2842889 | 68.8195316 | 72.8813582 | 68.5172777 |
| 18:34:26 | 0:32:05 | 70.4258374 | 67.2842889 | 68.8195316 | 70.8813582 | 69.5172777 |
| 18:34:27 | 0:32:06 | 70.4258374 | 67.2842889 | 68.8195316 | 70.8813582 | 69.5172777 |
| 18:34:28 | 0:32:07 | 69.5258374 | 67.2842889 | 67.8195316 | 69.8813582 | 67.5172777 |
| 18:34:29 | 0:32:08 | 70.1258374 | 68.2842889 | 67.8195316 | 69.8813582 | 67.5172777 |
| 18:34:30 | 0:32:09 | 70.2258374 | 68.2842889 | 66.8195316 | 68.8813582 | 67.5172777 |
| 18:34:31 | 0:32:10 | 70.4258374 | 69.2842889 | 66.8195316 | 68.8813582 | 66.5172777 |
| 18:34:32 | 0:32:11 | 70.1258374 | 69.2842889 | 66.8195316 | 68.8813582 | 65.5172777 |
| 18:34:33 | 0:32:12 | 70.4258374 | 69.2842889 | 66.8195316 | 68.8813582 | 64.5172777 |

|          |         |            |            |            |            |            |
|----------|---------|------------|------------|------------|------------|------------|
| 18:34:34 | 0:32:13 | 70.7258374 | 73.2842889 | 67.8195316 | 68.8813582 | 63.5172777 |
| 18:34:35 | 0:32:14 | 70.4258374 | 73.2842889 | 68.8195316 | 68.8813582 | 63.5172777 |
| 18:34:36 | 0:32:15 | 69.6258374 | 73.2842889 | 68.8195316 | 67.8813582 | 62.5172777 |
| 18:34:37 | 0:32:16 | 68.9258374 | 68.2842889 | 68.8195316 | 67.8813582 | 63.5172777 |
| 18:34:38 | 0:32:17 | 68.7258374 | 67.2842889 | 69.8195316 | 67.8813582 | 64.5172777 |
| 18:34:39 | 0:32:18 | 68.4258374 | 67.2842889 | 69.8195316 | 67.8813582 | 64.5172777 |
| 18:34:40 | 0:32:19 | 68.4258374 | 67.2842889 | 69.8195316 | 67.8813582 | 68.5172777 |
| 18:34:41 | 0:32:20 | 68.5258374 | 66.2842889 | 69.8195316 | 68.8813582 | 70.5172777 |
| 18:34:42 | 0:32:21 | 68.1258374 | 66.2842889 | 69.8195316 | 68.8813582 | 71.5172777 |
| 18:34:43 | 0:32:22 | 68.1258374 | 65.2842889 | 69.8195316 | 68.8813582 | 71.5172777 |
| 18:34:44 | 0:32:23 | 67.9258374 | 65.2842889 | 69.8195316 | 68.8813582 | 71.5172777 |
| 18:34:45 | 0:32:24 | 68.2258374 | 63.2842889 | 69.8195316 | 69.8813582 | 71.5172777 |
| 18:34:46 | 0:32:25 | 68.0258374 | 62.2842889 | 70.8195316 | 69.8813582 | 70.5172777 |
| 18:34:47 | 0:32:26 | 68.0258374 | 62.2842889 | 70.8195316 | 71.8813582 | 70.5172777 |
| 18:34:48 | 0:32:27 | 67.9258374 | 62.2842889 | 70.8195316 | 71.8813582 | 71.5172777 |
| 18:34:49 | 0:32:28 | 68.4258374 | 62.2842889 | 73.8195316 | 71.8813582 | 72.5172777 |
| 18:34:50 | 0:32:29 | 68.5258374 | 62.2842889 | 73.8195316 | 71.8813582 | 72.5172777 |
| 18:34:51 | 0:32:30 | 68.8258374 | 62.2842889 | 74.8195316 | 69.8813582 | 72.5172777 |
| 18:34:52 | 0:32:31 | 69.1258374 | 62.2842889 | 74.8195316 | 69.8813582 | 71.5172777 |
| 18:34:53 | 0:32:32 | 69.0258374 | 61.2842889 | 74.8195316 | 69.8813582 | 69.5172777 |
| 18:34:54 | 0:32:33 | 68.7258374 | 62.2842889 | 73.8195316 | 68.8813582 | 69.5172777 |
| 18:34:55 | 0:32:34 | 68.8258374 | 62.2842889 | 73.8195316 | 68.8813582 | 68.5172777 |
| 18:34:56 | 0:32:35 | 68.9258374 | 62.2842889 | 72.8195316 | 70.8813582 | 67.5172777 |
| 18:34:57 | 0:32:36 | 68.8258374 | 62.2842889 | 72.8195316 | 70.8813582 | 67.5172777 |
| 18:34:58 | 0:32:37 | 68.9258374 | 62.2842889 | 72.8195316 | 70.8813582 | 67.5172777 |
| 18:34:59 | 0:32:38 | 69.1258374 | 62.2842889 | 73.8195316 | 70.8813582 | 68.5172777 |
| 18:35:00 | 0:32:39 | 69.2258374 | 62.2842889 | 73.8195316 | 70.8813582 | 69.5172777 |
| 18:35:01 | 0:32:40 | 69.9258374 | 62.2842889 | 73.8195316 | 69.8813582 | 69.5172777 |
| 18:35:02 | 0:32:41 | 70.2258374 | 62.2842889 | 72.8195316 | 69.8813582 | 69.5172777 |
| 18:35:03 | 0:32:42 | 70.5258374 | 62.2842889 | 72.8195316 | 68.8813582 | 69.5172777 |
| 18:35:04 | 0:32:43 | 70.5258374 | 62.2842889 | 70.8195316 | 68.8813582 | 70.5172777 |
| 18:35:05 | 0:32:44 | 70.5258374 | 62.2842889 | 69.8195316 | 68.8813582 | 70.5172777 |
| 18:35:06 | 0:32:45 | 70.5258374 | 62.2842889 | 69.8195316 | 68.8813582 | 70.5172777 |
| 18:35:07 | 0:32:46 | 70.2258374 | 63.2842889 | 69.8195316 | 68.8813582 | 70.5172777 |
| 18:35:08 | 0:32:47 | 71.0258374 | 63.2842889 | 67.8195316 | 73.8813582 | 70.5172777 |
| 18:35:09 | 0:32:48 | 70.7258374 | 63.2842889 | 67.8195316 | 75.8813582 | 70.5172777 |
| 18:35:10 | 0:32:49 | 70.6258374 | 64.2842889 | 67.8195316 | 76.8813582 | 70.5172777 |
| 18:35:11 | 0:32:50 | 70.6258374 | 64.2842889 | 68.8195316 | 77.8813582 | 70.5172777 |
| 18:35:12 | 0:32:51 | 70.3258374 | 63.2842889 | 67.8195316 | 78.8813582 | 71.5172777 |
| 18:35:13 | 0:32:52 | 70.1258374 | 63.2842889 | 67.8195316 | 79.8813582 | 71.5172777 |
| 18:35:14 | 0:32:53 | 69.9258374 | 63.2842889 | 67.8195316 | 79.8813582 | 71.5172777 |
| 18:35:15 | 0:32:54 | 70.3258374 | 63.2842889 | 67.8195316 | 81.8813582 | 73.5172777 |
| 18:35:16 | 0:32:55 | 70.8258374 | 63.2842889 | 67.8195316 | 70.8258374 | 74.5172777 |
| 18:35:17 | 0:32:56 | 70.7258374 | 64.2842889 | 67.8195316 | 70.7258374 | 74.5172777 |
| 18:35:18 | 0:32:57 | 70.8258374 | 64.2842889 | 68.8195316 | 70.8258374 | 75.5172777 |

|          |         |            |            |            |            |            |
|----------|---------|------------|------------|------------|------------|------------|
| 18:35:19 | 0:32:58 | 71.0258374 | 64.2842889 | 68.8195316 | 71.0258374 | 75.5172777 |
| 18:35:20 | 0:32:59 | 69.5258374 | 65.2842889 | 68.8195316 | 78.8813582 | 75.5172777 |
| 18:35:21 | 0:33:00 | 69.6258374 | 67.2842889 | 68.8195316 | 76.8813582 | 75.5172777 |
| 18:35:22 | 0:33:01 | 69.4258374 | 67.2842889 | 69.8195316 | 75.8813582 | 73.5172777 |
| 18:35:23 | 0:33:02 | 69.7258374 | 67.2842889 | 70.8195316 | 75.8813582 | 72.5172777 |
| 18:35:24 | 0:33:03 | 69.7258374 | 67.2842889 | 70.8195316 | 76.8813582 | 71.5172777 |
| 18:35:25 | 0:33:04 | 69.7258374 | 67.2842889 | 71.8195316 | 76.8813582 | 72.5172777 |
| 18:35:26 | 0:33:05 | 69.3258374 | 66.2842889 | 71.8195316 | 76.8813582 | 71.5172777 |
| 18:35:27 | 0:33:06 | 69.2258374 | 66.2842889 | 71.8195316 | 76.8813582 | 71.5172777 |
| 18:35:28 | 0:33:07 | 68.8258374 | 66.2842889 | 70.8195316 | 76.8813582 | 71.5172777 |
| 18:35:29 | 0:33:08 | 68.7258374 | 66.2842889 | 69.8195316 | 75.8813582 | 72.5172777 |
| 18:35:30 | 0:33:09 | 68.7258374 | 66.2842889 | 69.8195316 | 74.8813582 | 72.5172777 |
| 18:35:31 | 0:33:10 | 68.7258374 | 66.2842889 | 68.8195316 | 72.8813582 | 71.5172777 |
| 18:35:32 | 0:33:11 | 68.7258374 | 66.2842889 | 68.8195316 | 69.8813582 | 70.5172777 |
| 18:35:33 | 0:33:12 | 68.9258374 | 67.2842889 | 68.8195316 | 68.8813582 | 70.5172777 |
| 18:35:34 | 0:33:13 | 72.0258374 | 68.2842889 | 68.8195316 | 68.8813582 | 70.5172777 |
| 18:35:35 | 0:33:14 | 73.2258374 | 68.2842889 | 68.8195316 | 68.8813582 | 71.5172777 |
| 18:35:36 | 0:33:15 | 73.0258374 | 69.2842889 | 69.8195316 | 68.8813582 | 71.5172777 |
| 18:35:37 | 0:33:16 | 73.7258374 | 69.2842889 | 69.8195316 | 68.8813582 | 71.5172777 |
| 18:35:38 | 0:33:17 | 73.5258374 | 68.2842889 | 69.8195316 | 68.8813582 | 71.5172777 |
| 18:35:39 | 0:33:18 | 73.8258374 | 68.2842889 | 69.8195316 | 68.8813582 | 74.5172777 |
| 18:35:40 | 0:33:19 | 73.8258374 | 68.2842889 | 69.8195316 | 68.8813582 | 73.5172777 |
| 18:35:41 | 0:33:20 | 71.4258374 | 68.2842889 | 68.8195316 | 68.8813582 | 73.5172777 |
| 18:35:42 | 0:33:21 | 71.5258374 | 68.2842889 | 68.8195316 | 67.8813582 | 72.5172777 |
| 18:35:43 | 0:33:22 | 72.3258374 | 68.2842889 | 68.8195316 | 67.8813582 | 72.5172777 |
| 18:35:44 | 0:33:23 | 71.0258374 | 68.2842889 | 68.8195316 | 67.8813582 | 72.5172777 |
| 18:35:45 | 0:33:24 | 70.7258374 | 68.2842889 | 69.8195316 | 67.8813582 | 71.5172777 |
| 18:35:46 | 0:33:25 | 70.3258374 | 68.2842889 | 69.8195316 | 67.8813582 | 71.5172777 |
| 18:35:47 | 0:33:26 | 69.9258374 | 68.2842889 | 69.8195316 | 66.8813582 | 71.5172777 |
| 18:35:48 | 0:33:27 | 69.7258374 | 68.2842889 | 69.8195316 | 66.8813582 | 70.5172777 |
| 18:35:49 | 0:33:28 | 69.5258374 | 68.2842889 | 69.8195316 | 66.8813582 | 70.5172777 |
| 18:35:50 | 0:33:29 | 69.6258374 | 68.2842889 | 69.8195316 | 66.8813582 | 70.5172777 |
| 18:35:51 | 0:33:30 | 69.5258374 | 68.2842889 | 69.8195316 | 65.8813582 | 70.5172777 |
| 18:35:52 | 0:33:31 | 69.5258374 | 68.2842889 | 69.8195316 | 65.8813582 | 70.5172777 |
| 18:35:53 | 0:33:32 | 69.7258374 | 68.2842889 | 69.8195316 | 66.8813582 | 71.5172777 |
| 18:35:54 | 0:33:33 | 69.6258374 | 69.2842889 | 69.8195316 | 66.8813582 | 70.5172777 |
| 18:35:55 | 0:33:34 | 69.9258374 | 69.2842889 | 69.8195316 | 66.8813582 | 70.5172777 |
| 18:35:56 | 0:33:35 | 70.4258374 | 69.2842889 | 71.8195316 | 66.8813582 | 71.5172777 |
| 18:35:57 | 0:33:36 | 71.0258374 | 69.2842889 | 71.8195316 | 68.8813582 | 71.5172777 |
| 18:35:58 | 0:33:37 | 71.9258374 | 69.2842889 | 72.8195316 | 68.8813582 | 71.5172777 |
| 18:35:59 | 0:33:38 | 72.1258374 | 69.2842889 | 72.8195316 | 70.8813582 | 71.5172777 |
| 18:36:00 | 0:33:39 | 72.1258374 | 69.2842889 | 72.8195316 | 70.8813582 | 71.5172777 |
| 18:36:01 | 0:33:40 | 72.1258374 | 68.2842889 | 74.8195316 | 70.8813582 | 71.5172777 |
| 18:36:02 | 0:33:41 | 72.2258374 | 72.2842889 | 75.8195316 | 68.8813582 | 71.5172777 |
| 18:36:03 | 0:33:42 | 72.0258374 | 74.2842889 | 75.8195316 | 68.8813582 | 71.5172777 |

|          |         |            |            |            |            |            |
|----------|---------|------------|------------|------------|------------|------------|
| 18:36:04 | 0:33:43 | 71.8258374 | 77.2842889 | 75.8195316 | 68.8813582 | 72.5172777 |
| 18:36:05 | 0:33:44 | 71.2258374 | 78.2842889 | 72.8195316 | 68.8813582 | 71.5172777 |
| 18:36:06 | 0:33:45 | 70.6258374 | 78.2842889 | 71.8195316 | 68.8813582 | 71.5172777 |
| 18:36:07 | 0:33:46 | 70.2258374 | 76.2842889 | 70.8195316 | 68.8813582 | 71.5172777 |
| 18:36:08 | 0:33:47 | 69.0258374 | 67.2842889 | 69.8195316 | 68.8813582 | 70.5172777 |
| 18:36:09 | 0:33:48 | 69.1258374 | 67.2842889 | 69.8195316 | 68.8813582 | 70.5172777 |
| 18:36:10 | 0:33:49 | 69.6258374 | 66.2842889 | 69.8195316 | 71.8813582 | 69.5172777 |
| 18:36:11 | 0:33:50 | 70.0258374 | 66.2842889 | 70.8195316 | 72.8813582 | 69.5172777 |
| 18:36:12 | 0:33:51 | 69.9258374 | 66.2842889 | 70.8195316 | 72.8813582 | 67.5172777 |
| 18:36:13 | 0:33:52 | 70.2258374 | 66.2842889 | 70.8195316 | 72.8813582 | 68.5172777 |
| 18:36:14 | 0:33:53 | 69.8258374 | 66.2842889 | 70.8195316 | 72.8813582 | 68.5172777 |
| 18:36:15 | 0:33:54 | 69.6258374 | 65.2842889 | 69.8195316 | 71.8813582 | 68.5172777 |
| 18:36:16 | 0:33:55 | 70.7258374 | 64.2842889 | 69.8195316 | 71.8813582 | 69.5172777 |
| 18:36:17 | 0:33:56 | 71.3258374 | 65.2842889 | 69.8195316 | 71.8813582 | 70.5172777 |
| 18:36:18 | 0:33:57 | 72.2258374 | 65.2842889 | 69.8195316 | 71.8813582 | 73.5172777 |
| 18:36:19 | 0:33:58 | 72.3258374 | 66.2842889 | 69.8195316 | 70.8813582 | 72.5172777 |
| 18:36:20 | 0:33:59 | 73.1258374 | 66.2842889 | 67.8195316 | 69.8813582 | 71.5172777 |
| 18:36:21 | 0:34:00 | 73.5258374 | 66.2842889 | 67.8195316 | 69.8813582 | 71.5172777 |
| 18:36:22 | 0:34:01 | 74.0258374 | 68.2842889 | 66.8195316 | 70.8813582 | 71.5172777 |
| 18:36:23 | 0:34:02 | 74.0258374 | 68.2842889 | 66.8195316 | 70.8813582 | 71.5172777 |
| 18:36:24 | 0:34:03 | 73.6258374 | 67.2842889 | 66.8195316 | 69.8813582 | 71.5172777 |
| 18:36:25 | 0:34:04 | 73.2258374 | 64.2842889 | 66.8195316 | 69.8813582 | 71.5172777 |
| 18:36:26 | 0:34:05 | 73.2258374 | 64.2842889 | 66.8195316 | 69.8813582 | 71.5172777 |
| 18:36:27 | 0:34:06 | 72.9258374 | 64.2842889 | 67.8195316 | 68.8813582 | 70.5172777 |
| 18:36:28 | 0:34:07 | 73.0258374 | 64.2842889 | 67.8195316 | 68.8813582 | 70.5172777 |
| 18:36:29 | 0:34:08 | 73.4258374 | 64.2842889 | 67.8195316 | 68.8813582 | 70.5172777 |
| 18:36:30 | 0:34:09 | 73.5258374 | 68.2842889 | 67.8195316 | 68.8813582 | 70.5172777 |
| 18:36:31 | 0:34:10 | 73.4258374 | 67.2842889 | 67.8195316 | 69.8813582 | 70.5172777 |
| 18:36:32 | 0:34:11 | 73.4258374 | 67.2842889 | 67.8195316 | 69.8813582 | 71.5172777 |
| 18:36:33 | 0:34:12 | 73.2258374 | 65.2842889 | 67.8195316 | 68.8813582 | 72.5172777 |
| 18:36:34 | 0:34:13 | 73.3258374 | 64.2842889 | 68.8195316 | 68.8813582 | 74.5172777 |
| 18:36:35 | 0:34:14 | 73.0258374 | 64.2842889 | 68.8195316 | 68.8813582 | 74.5172777 |
| 18:36:36 | 0:34:15 | 72.6258374 | 64.2842889 | 68.8195316 | 67.8813582 | 76.5172777 |
| 18:36:37 | 0:34:16 | 72.3258374 | 64.2842889 | 68.8195316 | 67.8813582 | 75.5172777 |
| 18:36:38 | 0:34:17 | 72.3258374 | 64.2842889 | 68.8195316 | 67.8813582 | 76.5172777 |
| 18:36:39 | 0:34:18 | 72.7258374 | 64.2842889 | 69.8195316 | 67.8813582 | 76.5172777 |
| 18:36:40 | 0:34:19 | 73.1258374 | 63.2842889 | 69.8195316 | 67.8813582 | 77.5172777 |
| 18:36:41 | 0:34:20 | 73.5258374 | 61.2842889 | 69.8195316 | 66.8813582 | 78.5172777 |
| 18:36:42 | 0:34:21 | 73.8258374 | 61.2842889 | 69.8195316 | 67.8813582 | 79.5172777 |
| 18:36:43 | 0:34:22 | 73.9258374 | 61.2842889 | 69.8195316 | 68.8813582 | 80.5172777 |
| 18:36:44 | 0:34:23 | 74.0258374 | 60.2842889 | 69.8195316 | 68.8813582 | 80.5172777 |
| 18:36:45 | 0:34:24 | 74.1258374 | 60.2842889 | 69.8195316 | 68.8813582 | 79.5172777 |
| 18:36:46 | 0:34:25 | 74.4258374 | 60.2842889 | 69.8195316 | 68.8813582 | 79.5172777 |
| 18:36:47 | 0:34:26 | 74.7258374 | 60.2842889 | 70.8195316 | 69.8813582 | 78.5172777 |
| 18:36:48 | 0:34:27 | 75.0258374 | 60.2842889 | 71.8195316 | 69.8813582 | 78.5172777 |

|          |         |            |            |            |            |            |
|----------|---------|------------|------------|------------|------------|------------|
| 18:36:49 | 0:34:28 | 74.1258374 | 60.2842889 | 71.8195316 | 69.8813582 | 76.5172777 |
| 18:36:50 | 0:34:29 | 73.9258374 | 60.2842889 | 71.8195316 | 70.8813582 | 75.5172777 |
| 18:36:51 | 0:34:30 | 74.3258374 | 60.2842889 | 76.8195316 | 71.8813582 | 75.5172777 |
| 18:36:52 | 0:34:31 | 74.1258374 | 60.2842889 | 76.8195316 | 71.8813582 | 74.5172777 |
| 18:36:53 | 0:34:32 | 74.0258374 | 60.2842889 | 76.8195316 | 71.8813582 | 74.5172777 |
| 18:36:54 | 0:34:33 | 74.0258374 | 60.2842889 | 76.8195316 | 71.8813582 | 74.5172777 |
| 18:36:55 | 0:34:34 | 74.1258374 | 60.2842889 | 77.8195316 | 71.8813582 | 76.5172777 |
| 18:36:56 | 0:34:35 | 74.3258374 | 60.2842889 | 77.8195316 | 71.8813582 | 76.5172777 |
| 18:36:57 | 0:34:36 | 74.0258374 | 60.2842889 | 77.8195316 | 71.8813582 | 73.5172777 |
| 18:36:58 | 0:34:37 | 73.8258374 | 61.2842889 | 77.8195316 | 70.8813582 | 71.5172777 |
| 18:36:59 | 0:34:38 | 73.3258374 | 61.2842889 | 76.8195316 | 68.8813582 | 70.5172777 |
| 18:37:00 | 0:34:39 | 72.8258374 | 61.2842889 | 76.8195316 | 67.8813582 | 69.5172777 |
| 18:37:01 | 0:34:40 | 71.6258374 | 68.2842889 | 75.8195316 | 67.8813582 | 70.5172777 |
| 18:37:02 | 0:34:41 | 70.7258374 | 68.2842889 | 73.8195316 | 67.8813582 | 71.5172777 |
| 18:37:03 | 0:34:42 | 70.9258374 | 68.2842889 | 71.8195316 | 67.8813582 | 74.5172777 |
| 18:37:04 | 0:34:43 | 71.0258374 | 68.2842889 | 70.8195316 | 67.8813582 | 77.5172777 |
| 18:37:05 | 0:34:44 | 70.5258374 | 68.2842889 | 70.8195316 | 68.8813582 | 77.5172777 |
| 18:37:06 | 0:34:45 | 70.7258374 | 68.2842889 | 70.8195316 | 68.8813582 | 76.5172777 |
| 18:37:07 | 0:34:46 | 70.6258374 | 68.2842889 | 70.8195316 | 68.8813582 | 75.5172777 |
| 18:37:08 | 0:34:47 | 69.8258374 | 69.2842889 | 70.8195316 | 68.8813582 | 75.5172777 |
| 18:37:09 | 0:34:48 | 69.5258374 | 68.2842889 | 70.8195316 | 67.8813582 | 75.5172777 |
| 18:37:10 | 0:34:49 | 69.2258374 | 67.2842889 | 71.8195316 | 67.8813582 | 75.5172777 |
| 18:37:11 | 0:34:50 | 69.5258374 | 67.2842889 | 72.8195316 | 67.8813582 | 75.5172777 |
| 18:37:12 | 0:34:51 | 70.5258374 | 67.2842889 | 72.8195316 | 67.8813582 | 75.5172777 |
| 18:37:13 | 0:34:52 | 71.1258374 | 67.2842889 | 72.8195316 | 67.8813582 | 76.5172777 |
| 18:37:14 | 0:34:53 | 71.1258374 | 69.2842889 | 72.8195316 | 66.8813582 | 76.5172777 |
| 18:37:15 | 0:34:54 | 71.3258374 | 69.2842889 | 72.8195316 | 66.8813582 | 77.5172777 |
| 18:37:16 | 0:34:55 | 71.8258374 | 69.2842889 | 73.8195316 | 66.8813582 | 77.5172777 |
| 18:37:17 | 0:34:56 | 72.3258374 | 69.2842889 | 75.8195316 | 66.8813582 | 78.5172777 |
| 18:37:18 | 0:34:57 | 72.2258374 | 69.2842889 | 75.8195316 | 66.8813582 | 77.5172777 |
| 18:37:19 | 0:34:58 | 71.9258374 | 69.2842889 | 75.8195316 | 66.8813582 | 77.5172777 |
| 18:37:20 | 0:34:59 | 71.7258374 | 69.2842889 | 75.8195316 | 66.8813582 | 77.5172777 |
| 18:37:21 | 0:35:00 | 71.6258374 | 69.2842889 | 75.8195316 | 66.8813582 | 76.5172777 |
| 18:37:22 | 0:35:01 | 71.3258374 | 69.2842889 | 76.8195316 | 66.8813582 | 74.5172777 |
| 18:37:23 | 0:35:02 | 71.5258374 | 69.2842889 | 76.8195316 | 66.8813582 | 74.5172777 |
| 18:37:24 | 0:35:03 | 71.3258374 | 69.2842889 | 76.8195316 | 66.8813582 | 73.5172777 |
| 18:37:25 | 0:35:04 | 71.1258374 | 71.2842889 | 76.8195316 | 66.8813582 | 72.5172777 |
| 18:37:26 | 0:35:05 | 71.1258374 | 71.2842889 | 74.8195316 | 66.8813582 | 73.5172777 |
| 18:37:27 | 0:35:06 | 71.3258374 | 72.2842889 | 74.8195316 | 66.8813582 | 73.5172777 |
| 18:37:28 | 0:35:07 | 71.6258374 | 72.2842889 | 74.8195316 | 66.8813582 | 73.5172777 |
| 18:37:29 | 0:35:08 | 71.8258374 | 74.2842889 | 73.8195316 | 66.8813582 | 72.5172777 |
| 18:37:30 | 0:35:09 | 71.4258374 | 74.2842889 | 72.8195316 | 65.8813582 | 72.5172777 |
| 18:37:31 | 0:35:10 | 70.9258374 | 74.2842889 | 72.8195316 | 65.8813582 | 71.5172777 |
| 18:37:32 | 0:35:11 | 70.4258374 | 74.2842889 | 72.8195316 | 64.8813582 | 71.5172777 |
| 18:37:33 | 0:35:12 | 70.5258374 | 74.2842889 | 72.8195316 | 64.8813582 | 71.5172777 |

|          |         |            |            |            |            |            |
|----------|---------|------------|------------|------------|------------|------------|
| 18:37:34 | 0:35:13 | 70.3258374 | 74.2842889 | 72.8195316 | 64.8813582 | 70.5172777 |
| 18:37:35 | 0:35:14 | 70.0258374 | 74.2842889 | 69.8195316 | 63.8813582 | 70.5172777 |
| 18:37:36 | 0:35:15 | 70.2258374 | 77.2842889 | 68.8195316 | 63.8813582 | 70.5172777 |
| 18:37:37 | 0:35:16 | 71.2258374 | 71.2258374 | 68.8195316 | 63.8813582 | 70.5172777 |
| 18:37:38 | 0:35:17 | 71.5258374 | 84.2842889 | 68.8195316 | 63.8813582 | 70.5172777 |
| 18:37:39 | 0:35:18 | 71.7258374 | 84.2842889 | 68.8195316 | 63.8813582 | 71.5172777 |
| 18:37:40 | 0:35:19 | 71.6258374 | 84.2842889 | 69.8195316 | 63.8813582 | 71.5172777 |
| 18:37:41 | 0:35:20 | 72.0258374 | 84.2842889 | 69.8195316 | 64.8813582 | 71.5172777 |
| 18:37:42 | 0:35:21 | 72.1258374 | 84.2842889 | 69.8195316 | 68.8813582 | 71.5172777 |
| 18:37:43 | 0:35:22 | 72.3258374 | 84.2842889 | 69.8195316 | 68.8813582 | 72.5172777 |
| 18:37:44 | 0:35:23 | 72.8258374 | 85.2842889 | 70.8195316 | 67.8813582 | 72.5172777 |
| 18:37:45 | 0:35:24 | 73.2258374 | 85.2842889 | 71.8195316 | 67.8813582 | 73.5172777 |
| 18:37:46 | 0:35:25 | 73.4258374 | 85.2842889 | 71.8195316 | 67.8813582 | 73.5172777 |
| 18:37:47 | 0:35:26 | 73.5258374 | 85.2842889 | 71.8195316 | 68.8813582 | 73.5172777 |
| 18:37:48 | 0:35:27 | 73.5258374 | 85.2842889 | 71.8195316 | 68.8813582 | 73.5172777 |
| 18:37:49 | 0:35:28 | 73.4258374 | 85.2842889 | 70.8195316 | 70.8813582 | 73.5172777 |
| 18:37:50 | 0:35:29 | 73.4258374 | 85.2842889 | 71.8195316 | 71.8813582 | 73.5172777 |
| 18:37:51 | 0:35:30 | 73.2258374 | 85.2842889 | 71.8195316 | 72.8813582 | 73.5172777 |
| 18:37:52 | 0:35:31 | 73.4258374 | 84.2842889 | 73.8195316 | 72.8813582 | 74.5172777 |
| 18:37:53 | 0:35:32 | 73.3258374 | 83.2842889 | 72.8195316 | 72.8813582 | 75.5172777 |
| 18:37:54 | 0:35:33 | 72.3258374 | 75.2842889 | 71.8195316 | 72.8813582 | 75.5172777 |
| 18:37:55 | 0:35:34 | 72.6258374 | 75.2842889 | 71.8195316 | 73.8813582 | 75.5172777 |
| 18:37:56 | 0:35:35 | 73.6258374 | 75.2842889 | 71.8195316 | 73.8813582 | 76.5172777 |
| 18:37:57 | 0:35:36 | 73.8258374 | 74.2842889 | 71.8195316 | 73.8813582 | 76.5172777 |
| 18:37:58 | 0:35:37 | 74.1258374 | 73.2842889 | 71.8195316 | 74.8813582 | 76.5172777 |
| 18:37:59 | 0:35:38 | 74.0258374 | 73.2842889 | 70.8195316 | 74.8813582 | 76.5172777 |
| 18:38:00 | 0:35:39 | 74.3258374 | 73.2842889 | 70.8195316 | 74.8813582 | 76.5172777 |
| 18:38:01 | 0:35:40 | 74.6258374 | 72.2842889 | 70.8195316 | 74.8813582 | 75.5172777 |
| 18:38:02 | 0:35:41 | 74.9258374 | 72.2842889 | 70.8195316 | 74.8813582 | 75.5172777 |
| 18:38:03 | 0:35:42 | 75.1258374 | 71.2842889 | 70.8195316 | 75.8813582 | 74.5172777 |
| 18:38:04 | 0:35:43 | 75.4258374 | 70.2842889 | 75.8195316 | 75.8813582 | 74.5172777 |
| 18:38:05 | 0:35:44 | 75.0258374 | 70.2842889 | 75.8195316 | 75.8813582 | 73.5172777 |
| 18:38:06 | 0:35:45 | 74.5258374 | 70.2842889 | 75.8195316 | 74.8813582 | 73.5172777 |
| 18:38:07 | 0:35:46 | 74.3258374 | 70.2842889 | 74.8195316 | 75.8813582 | 73.5172777 |
| 18:38:08 | 0:35:47 | 74.5258374 | 70.2842889 | 73.8195316 | 75.8813582 | 74.5172777 |
| 18:38:09 | 0:35:48 | 74.4258374 | 70.2842889 | 72.8195316 | 75.8813582 | 73.5172777 |
| 18:38:10 | 0:35:49 | 74.5258374 | 70.2842889 | 72.8195316 | 74.8813582 | 73.5172777 |
| 18:38:11 | 0:35:50 | 74.3258374 | 69.2842889 | 71.8195316 | 72.8813582 | 74.5172777 |
| 18:38:12 | 0:35:51 | 74.0258374 | 69.2842889 | 70.8195316 | 71.8813582 | 73.5172777 |
| 18:38:13 | 0:35:52 | 74.0258374 | 69.2842889 | 70.8195316 | 71.8813582 | 72.5172777 |
| 18:38:14 | 0:35:53 | 74.2258374 | 69.2842889 | 71.8195316 | 70.8813582 | 72.5172777 |
| 18:38:15 | 0:35:54 | 74.8258374 | 69.2842889 | 73.8195316 | 70.8813582 | 72.5172777 |
| 18:38:16 | 0:35:55 | 74.8258374 | 69.2842889 | 73.8195316 | 71.8813582 | 71.5172777 |
| 18:38:17 | 0:35:56 | 75.2258374 | 69.2842889 | 73.8195316 | 71.8813582 | 71.5172777 |
| 18:38:18 | 0:35:57 | 75.1258374 | 69.2842889 | 73.8195316 | 71.8813582 | 72.5172777 |



|          |         |            |            |            |            |            |
|----------|---------|------------|------------|------------|------------|------------|
| 18:38:19 | 0:35:58 | 75.1258374 | 69.2842889 | 72.8195316 | 71.8813582 | 73.5172777 |
| 18:38:20 | 0:35:59 | 75.2258374 | 69.2842889 | 72.8195316 | 72.8813582 | 73.5172777 |
| 18:38:21 | 0:36:00 | 74.9258374 | 69.2842889 | 71.8195316 | 72.8813582 | 73.5172777 |
| 18:38:22 | 0:36:01 | 74.7258374 | 69.2842889 | 71.8195316 | 71.8813582 | 72.5172777 |
| 18:38:23 | 0:36:02 | 74.7258374 | 69.2842889 | 71.8195316 | 71.8813582 | 72.5172777 |
| 18:38:24 | 0:36:03 | 75.5258374 | 69.2842889 | 71.8195316 | 71.8813582 | 72.5172777 |
| 18:38:25 | 0:36:04 | 75.3258374 | 69.2842889 | 71.8195316 | 72.8813582 | 72.5172777 |
| 18:38:26 | 0:36:05 | 74.7258374 | 69.2842889 | 71.8195316 | 72.8813582 | 73.5172777 |
| 18:38:27 | 0:36:06 | 74.0258374 | 69.2842889 | 71.8195316 | 72.8813582 | 73.5172777 |
| 18:38:28 | 0:36:07 | 73.9258374 | 68.2842889 | 71.8195316 | 73.8813582 | 74.5172777 |
| 18:38:29 | 0:36:08 | 73.6258374 | 67.2842889 | 71.8195316 | 73.8813582 | 73.5172777 |
| 18:38:30 | 0:36:09 | 73.7258374 | 67.2842889 | 72.8195316 | 73.8813582 | 73.5172777 |
| 18:38:31 | 0:36:10 | 74.3258374 | 68.2842889 | 72.8195316 | 76.8813582 | 73.5172777 |
| 18:38:32 | 0:36:11 | 74.3258374 | 68.2842889 | 72.8195316 | 76.8813582 | 72.5172777 |
| 18:38:33 | 0:36:12 | 74.3258374 | 68.2842889 | 71.8195316 | 77.8813582 | 72.5172777 |
| 18:38:34 | 0:36:13 | 74.4258374 | 68.2842889 | 71.8195316 | 77.8813582 | 72.5172777 |
| 18:38:35 | 0:36:14 | 74.5258374 | 67.2842889 | 71.8195316 | 78.8813582 | 72.5172777 |
| 18:38:36 | 0:36:15 | 74.5258374 | 67.2842889 | 71.8195316 | 78.8813582 | 72.5172777 |
| 18:38:37 | 0:36:16 | 74.6258374 | 67.2842889 | 72.8195316 | 77.8813582 | 71.5172777 |
| 18:38:38 | 0:36:17 | 73.8258374 | 67.2842889 | 73.8195316 | 76.8813582 | 70.5172777 |
| 18:38:39 | 0:36:18 | 73.4258374 | 67.2842889 | 73.8195316 | 75.8813582 | 70.5172777 |
| 18:38:40 | 0:36:19 | 73.6258374 | 67.2842889 | 73.8195316 | 75.8813582 | 70.5172777 |
| 18:38:41 | 0:36:20 | 73.7258374 | 67.2842889 | 73.8195316 | 75.8813582 | 70.5172777 |
| 18:38:42 | 0:36:21 | 73.7258374 | 67.2842889 | 73.8195316 | 75.8813582 | 70.5172777 |
| 18:38:43 | 0:36:22 | 72.9258374 | 66.2842889 | 73.8195316 | 76.8813582 | 70.5172777 |
| 18:38:44 | 0:36:23 | 72.4258374 | 66.2842889 | 70.8195316 | 75.8813582 | 70.5172777 |
| 18:38:45 | 0:36:24 | 72.0258374 | 66.2842889 | 70.8195316 | 75.8813582 | 70.5172777 |
| 18:38:46 | 0:36:25 | 72.0258374 | 66.2842889 | 71.8195316 | 75.8813582 | 71.5172777 |
| 18:38:47 | 0:36:26 | 72.0258374 | 66.2842889 | 71.8195316 | 76.8813582 | 71.5172777 |
| 18:38:48 | 0:36:27 | 72.0258374 | 66.2842889 | 71.8195316 | 78.8813582 | 71.5172777 |
| 18:38:49 | 0:36:28 | 71.5258374 | 66.2842889 | 71.8195316 | 79.8813582 | 71.5172777 |
| 18:38:50 | 0:36:29 | 71.6258374 | 66.2842889 | 73.8195316 | 80.8813582 | 71.5172777 |
| 18:38:51 | 0:36:30 | 71.1258374 | 66.2842889 | 75.8195316 | 81.8813582 | 70.5172777 |
| 18:38:52 | 0:36:31 | 71.2258374 | 67.2842889 | 75.8195316 | 81.8813582 | 71.5172777 |
| 18:38:53 | 0:36:32 | 71.1258374 | 67.2842889 | 75.8195316 | 80.8813582 | 73.5172777 |
| 18:38:54 | 0:36:33 | 71.2258374 | 66.2842889 | 75.8195316 | 80.8813582 | 74.5172777 |
| 18:38:55 | 0:36:34 | 71.0258374 | 65.2842889 | 75.8195316 | 79.8813582 | 74.5172777 |
| 18:38:56 | 0:36:35 | 70.7258374 | 65.2842889 | 74.8195316 | 76.8813582 | 74.5172777 |
| 18:38:57 | 0:36:36 | 70.3258374 | 65.2842889 | 73.8195316 | 75.8813582 | 71.5172777 |
| 18:38:58 | 0:36:37 | 70.4258374 | 64.2842889 | 72.8195316 | 74.8813582 | 69.5172777 |
| 18:38:59 | 0:36:38 | 70.2258374 | 63.2842889 | 70.8195316 | 73.8813582 | 68.5172777 |
| 18:39:00 | 0:36:39 | 70.5258374 | 63.2842889 | 70.8195316 | 71.8813582 | 67.5172777 |
| 18:39:01 | 0:36:40 | 71.0258374 | 68.2842889 | 70.8195316 | 68.8813582 | 67.5172777 |
| 18:39:02 | 0:36:41 | 71.0258374 | 68.2842889 | 70.8195316 | 67.8813582 | 67.5172777 |
| 18:39:03 | 0:36:42 | 70.6258374 | 69.2842889 | 69.8195316 | 66.8813582 | 67.5172777 |

|          |         |            |            |            |            |            |
|----------|---------|------------|------------|------------|------------|------------|
| 18:39:04 | 0:36:43 | 70.9258374 | 70.2842889 | 69.8195316 | 66.8813582 | 68.5172777 |
| 18:39:05 | 0:36:44 | 70.8258374 | 69.2842889 | 69.8195316 | 66.8813582 | 68.5172777 |
| 18:39:06 | 0:36:45 | 70.0258374 | 68.2842889 | 69.8195316 | 67.8813582 | 67.5172777 |
| 18:39:07 | 0:36:46 | 69.2258374 | 67.2842889 | 68.8195316 | 70.8813582 | 67.5172777 |
| 18:39:08 | 0:36:47 | 69.0258374 | 67.2842889 | 68.8195316 | 70.8813582 | 66.5172777 |
| 18:39:09 | 0:36:48 | 68.8258374 | 67.2842889 | 68.8195316 | 70.8813582 | 67.5172777 |
| 18:39:10 | 0:36:49 | 68.9258374 | 67.2842889 | 68.8195316 | 70.8813582 | 68.5172777 |
| 18:39:11 | 0:36:50 | 68.9258374 | 66.2842889 | 68.8195316 | 69.8813582 | 69.5172777 |
| 18:39:12 | 0:36:51 | 68.8258374 | 65.2842889 | 68.8195316 | 69.8813582 | 72.5172777 |
| 18:39:13 | 0:36:52 | 69.3258374 | 64.2842889 | 68.8195316 | 68.8813582 | 75.5172777 |
| 18:39:14 | 0:36:53 | 69.4258374 | 64.2842889 | 68.8195316 | 68.8813582 | 77.5172777 |
| 18:39:15 | 0:36:54 | 69.1258374 | 64.2842889 | 69.8195316 | 67.8813582 | 77.5172777 |
| 18:39:16 | 0:36:55 | 68.9258374 | 63.2842889 | 69.8195316 | 67.8813582 | 77.5172777 |
| 18:39:17 | 0:36:56 | 68.8258374 | 63.2842889 | 69.8195316 | 67.8813582 | 77.5172777 |
| 18:39:18 | 0:36:57 | 69.1258374 | 63.2842889 | 70.8195316 | 71.8813582 | 77.5172777 |
| 18:39:19 | 0:36:58 | 69.7258374 | 63.2842889 | 71.8195316 | 73.8813582 | 78.5172777 |
| 18:39:20 | 0:36:59 | 69.8258374 | 63.2842889 | 71.8195316 | 76.8813582 | 78.5172777 |
| 18:39:21 | 0:37:00 | 69.6258374 | 63.2842889 | 71.8195316 | 78.8813582 | 77.5172777 |
| 18:39:22 | 0:37:01 | 69.6258374 | 63.2842889 | 70.8195316 | 77.8813582 | 77.5172777 |
| 18:39:23 | 0:37:02 | 69.4258374 | 63.2842889 | 70.8195316 | 75.8813582 | 77.5172777 |
| 18:39:24 | 0:37:03 | 69.4258374 | 65.2842889 | 70.8195316 | 75.8813582 | 74.5172777 |
| 18:39:25 | 0:37:04 | 69.6258374 | 67.2842889 | 70.8195316 | 75.8813582 | 72.5172777 |
| 18:39:26 | 0:37:05 | 69.6258374 | 68.2842889 | 69.8195316 | 75.8813582 | 69.5172777 |
| 18:39:27 | 0:37:06 | 69.9258374 | 68.2842889 | 69.8195316 | 74.8813582 | 68.5172777 |
| 18:39:28 | 0:37:07 | 70.3258374 | 69.2842889 | 70.8195316 | 74.8813582 | 68.5172777 |
| 18:39:29 | 0:37:08 | 70.4258374 | 69.2842889 | 70.8195316 | 75.8813582 | 68.5172777 |
| 18:39:30 | 0:37:09 | 71.1258374 | 68.2842889 | 71.8195316 | 76.8813582 | 69.5172777 |
| 18:39:31 | 0:37:10 | 70.9258374 | 68.2842889 | 71.8195316 | 76.8813582 | 69.5172777 |
| 18:39:32 | 0:37:11 | 70.9258374 | 68.2842889 | 71.8195316 | 76.8813582 | 69.5172777 |
| 18:39:33 | 0:37:12 | 71.5258374 | 68.2842889 | 72.8195316 | 76.8813582 | 69.5172777 |
| 18:39:34 | 0:37:13 | 72.4258374 | 68.2842889 | 73.8195316 | 76.8813582 | 70.5172777 |
| 18:39:35 | 0:37:14 | 73.1258374 | 68.2842889 | 74.8195316 | 76.8813582 | 70.5172777 |
| 18:39:36 | 0:37:15 | 73.1258374 | 68.2842889 | 74.8195316 | 76.8813582 | 70.5172777 |
| 18:39:37 | 0:37:16 | 72.7258374 | 66.2842889 | 75.8195316 | 77.8813582 | 72.5172777 |
| 18:39:38 | 0:37:17 | 72.7258374 | 66.2842889 | 75.8195316 | 78.8813582 | 73.5172777 |
| 18:39:39 | 0:37:18 | 72.9258374 | 65.2842889 | 75.8195316 | 78.8813582 | 73.5172777 |
| 18:39:40 | 0:37:19 | 73.1258374 | 65.2842889 | 76.8195316 | 79.8813582 | 73.5172777 |
| 18:39:41 | 0:37:20 | 72.5258374 | 65.2842889 | 76.8195316 | 78.8813582 | 72.5172777 |
| 18:39:42 | 0:37:21 | 72.2258374 | 65.2842889 | 76.8195316 | 76.8813582 | 71.5172777 |
| 18:39:43 | 0:37:22 | 71.6258374 | 65.2842889 | 75.8195316 | 75.8813582 | 72.5172777 |
| 18:39:44 | 0:37:23 | 71.4258374 | 64.2842889 | 74.8195316 | 74.8813582 | 75.5172777 |
| 18:39:45 | 0:37:24 | 71.5258374 | 64.2842889 | 73.8195316 | 74.8813582 | 76.5172777 |
| 18:39:46 | 0:37:25 | 71.5258374 | 64.2842889 | 73.8195316 | 74.8813582 | 77.5172777 |
| 18:39:47 | 0:37:26 | 71.6258374 | 64.2842889 | 73.8195316 | 74.8813582 | 77.5172777 |
| 18:39:48 | 0:37:27 | 72.0258374 | 64.2842889 | 73.8195316 | 74.8813582 | 77.5172777 |

|          |         |            |            |            |            |            |
|----------|---------|------------|------------|------------|------------|------------|
| 18:39:49 | 0:37:28 | 72.1258374 | 64.2842889 | 72.8195316 | 74.8813582 | 77.5172777 |
| 18:39:50 | 0:37:29 | 72.5258374 | 64.2842889 | 72.8195316 | 74.8813582 | 77.5172777 |
| 18:39:51 | 0:37:30 | 72.8258374 | 63.2842889 | 71.8195316 | 75.8813582 | 76.5172777 |
| 18:39:52 | 0:37:31 | 73.1258374 | 63.2842889 | 71.8195316 | 76.8813582 | 76.5172777 |
| 18:39:53 | 0:37:32 | 73.1258374 | 63.2842889 | 71.8195316 | 79.8813582 | 76.5172777 |
| 18:39:54 | 0:37:33 | 72.6258374 | 63.2842889 | 68.8195316 | 80.8813582 | 75.5172777 |
| 18:39:55 | 0:37:34 | 72.2258374 | 63.2842889 | 67.8195316 | 81.8813582 | 74.5172777 |
| 18:39:56 | 0:37:35 | 72.4258374 | 63.2842889 | 67.8195316 | 81.8813582 | 73.5172777 |
| 18:39:57 | 0:37:36 | 72.9258374 | 64.2842889 | 66.8195316 | 81.8813582 | 72.5172777 |
| 18:39:58 | 0:37:37 | 73.1258374 | 64.2842889 | 66.8195316 | 81.8813582 | 73.5172777 |
| 18:39:59 | 0:37:38 | 72.1258374 | 64.2842889 | 67.8195316 | 77.8813582 | 73.5172777 |
| 18:40:00 | 0:37:39 | 71.8258374 | 64.2842889 | 67.8195316 | 74.8813582 | 74.5172777 |
| 18:40:01 | 0:37:40 | 71.5258374 | 63.2842889 | 67.8195316 | 72.8813582 | 74.5172777 |
| 18:40:02 | 0:37:41 | 71.4258374 | 63.2842889 | 69.8195316 | 71.8813582 | 73.5172777 |
| 18:40:03 | 0:37:42 | 71.6258374 | 63.2842889 | 69.8195316 | 71.8813582 | 72.5172777 |
| 18:40:04 | 0:37:43 | 71.8258374 | 63.2842889 | 69.8195316 | 72.8813582 | 71.5172777 |
| 18:40:05 | 0:37:44 | 72.0258374 | 63.2842889 | 69.8195316 | 72.8813582 | 71.5172777 |
| 18:40:06 | 0:37:45 | 71.9258374 | 64.2842889 | 69.8195316 | 72.8813582 | 71.5172777 |
| 18:40:07 | 0:37:46 | 71.2258374 | 64.2842889 | 69.8195316 | 73.8813582 | 71.5172777 |
| 18:40:08 | 0:37:47 | 70.5258374 | 64.2842889 | 69.8195316 | 73.8813582 | 71.5172777 |
| 18:40:09 | 0:37:48 | 69.6258374 | 63.2842889 | 69.8195316 | 71.8813582 | 71.5172777 |
| 18:40:10 | 0:37:49 | 68.8258374 | 63.2842889 | 69.8195316 | 70.8813582 | 71.5172777 |
| 18:40:11 | 0:37:50 | 68.3258374 | 63.2842889 | 69.8195316 | 69.8813582 | 71.5172777 |
| 18:40:12 | 0:37:51 | 68.2258374 | 64.2842889 | 69.8195316 | 68.8813582 | 72.5172777 |
| 18:40:13 | 0:37:52 | 68.1258374 | 64.2842889 | 69.8195316 | 69.8813582 | 72.5172777 |
| 18:40:14 | 0:37:53 | 68.4258374 | 64.2842889 | 69.8195316 | 69.8813582 | 76.5172777 |
| 18:40:15 | 0:37:54 | 68.1258374 | 64.2842889 | 69.8195316 | 69.8813582 | 76.5172777 |
| 18:40:16 | 0:37:55 | 67.9258374 | 64.2842889 | 70.8195316 | 70.8813582 | 73.5172777 |
| 18:40:17 | 0:37:56 | 68.2258374 | 64.2842889 | 70.8195316 | 70.8813582 | 73.5172777 |
| 18:40:18 | 0:37:57 | 68.2258374 | 64.2842889 | 70.8195316 | 70.8813582 | 72.5172777 |
| 18:40:19 | 0:37:58 | 68.1258374 | 64.2842889 | 71.8195316 | 69.8813582 | 72.5172777 |
| 18:40:20 | 0:37:59 | 67.8258374 | 64.2842889 | 71.8195316 | 69.8813582 | 70.5172777 |
| 18:40:21 | 0:38:00 | 68.1258374 | 65.2842889 | 70.8195316 | 70.8813582 | 70.5172777 |
| 18:40:22 | 0:38:01 | 68.0258374 | 65.2842889 | 70.8195316 | 69.8813582 | 72.5172777 |
| 18:40:23 | 0:38:02 | 68.5258374 | 66.2842889 | 70.8195316 | 69.8813582 | 72.5172777 |
| 18:40:24 | 0:38:03 | 69.0258374 | 67.2842889 | 70.8195316 | 69.8813582 | 72.5172777 |
| 18:40:25 | 0:38:04 | 69.3258374 | 67.2842889 | 70.8195316 | 69.8813582 | 71.5172777 |
| 18:40:26 | 0:38:05 | 70.3258374 | 68.2842889 | 72.8195316 | 69.8813582 | 69.5172777 |
| 18:40:27 | 0:38:06 | 70.9258374 | 68.2842889 | 72.8195316 | 69.8813582 | 69.5172777 |
| 18:40:28 | 0:38:07 | 71.3258374 | 68.2842889 | 72.8195316 | 69.8813582 | 69.5172777 |
| 18:40:29 | 0:38:08 | 71.2258374 | 68.2842889 | 72.8195316 | 69.8813582 | 68.5172777 |
| 18:40:30 | 0:38:09 | 71.2258374 | 68.2842889 | 72.8195316 | 69.8813582 | 68.5172777 |
| 18:40:31 | 0:38:10 | 71.5258374 | 68.2842889 | 72.8195316 | 69.8813582 | 69.5172777 |
| 18:40:32 | 0:38:11 | 71.5258374 | 68.2842889 | 73.8195316 | 68.8813582 | 69.5172777 |
| 18:40:33 | 0:38:12 | 71.2258374 | 67.2842889 | 74.8195316 | 68.8813582 | 69.5172777 |

|          |         |            |            |            |            |            |
|----------|---------|------------|------------|------------|------------|------------|
| 18:40:34 | 0:38:13 | 69.8258374 | 65.2842889 | 73.8195316 | 68.8813582 | 70.5172777 |
| 18:40:35 | 0:38:14 | 69.4258374 | 65.2842889 | 73.8195316 | 69.8813582 | 70.5172777 |
| 18:40:36 | 0:38:15 | 69.3258374 | 64.2842889 | 72.8195316 | 70.8813582 | 71.5172777 |
| 18:40:37 | 0:38:16 | 70.2258374 | 63.2842889 | 72.8195316 | 71.8813582 | 71.5172777 |
| 18:40:38 | 0:38:17 | 70.4258374 | 62.2842889 | 73.8195316 | 71.8813582 | 71.5172777 |
| 18:40:39 | 0:38:18 | 70.3258374 | 62.2842889 | 73.8195316 | 72.8813582 | 71.5172777 |
| 18:40:40 | 0:38:19 | 70.5258374 | 62.2842889 | 75.8195316 | 73.8813582 | 72.5172777 |
| 18:40:41 | 0:38:20 | 70.2258374 | 62.2842889 | 75.8195316 | 73.8813582 | 72.5172777 |
| 18:40:42 | 0:38:21 | 70.5258374 | 62.2842889 | 73.8195316 | 73.8813582 | 72.5172777 |
| 18:40:43 | 0:38:22 | 70.8258374 | 63.2842889 | 72.8195316 | 71.8813582 | 74.5172777 |
| 18:40:44 | 0:38:23 | 71.1258374 | 62.2842889 | 71.8195316 | 72.8813582 | 74.5172777 |
| 18:40:45 | 0:38:24 | 71.1258374 | 62.2842889 | 71.8195316 | 72.8813582 | 74.5172777 |
| 18:40:46 | 0:38:25 | 70.7258374 | 62.2842889 | 71.8195316 | 72.8813582 | 73.5172777 |
| 18:40:47 | 0:38:26 | 69.8258374 | 62.2842889 | 71.8195316 | 72.8813582 | 72.5172777 |
| 18:40:48 | 0:38:27 | 68.6258374 | 62.2842889 | 71.8195316 | 71.8813582 | 71.5172777 |
| 18:40:49 | 0:38:28 | 69.0258374 | 62.2842889 | 71.8195316 | 70.8813582 | 71.5172777 |
| 18:40:50 | 0:38:29 | 69.1258374 | 62.2842889 | 71.8195316 | 70.8813582 | 71.5172777 |
| 18:40:51 | 0:38:30 | 69.3258374 | 62.2842889 | 71.8195316 | 70.8813582 | 71.5172777 |
| 18:40:52 | 0:38:31 | 69.4258374 | 62.2842889 | 70.8195316 | 71.8813582 | 70.5172777 |
| 18:40:53 | 0:38:32 | 69.4258374 | 62.2842889 | 71.8195316 | 71.8813582 | 70.5172777 |
| 18:40:54 | 0:38:33 | 69.4258374 | 62.2842889 | 71.8195316 | 71.8813582 | 70.5172777 |
| 18:40:55 | 0:38:34 | 69.3258374 | 62.2842889 | 72.8195316 | 71.8813582 | 69.5172777 |
| 18:40:56 | 0:38:35 | 69.4258374 | 62.2842889 | 72.8195316 | 71.8813582 | 69.5172777 |
| 18:40:57 | 0:38:36 | 69.1258374 | 62.2842889 | 72.8195316 | 71.8813582 | 69.5172777 |
| 18:40:58 | 0:38:37 | 69.2258374 | 62.2842889 | 72.8195316 | 71.8813582 | 69.5172777 |
| 18:40:59 | 0:38:38 | 69.1258374 | 62.2842889 | 72.8195316 | 71.8813582 | 67.5172777 |
| 18:41:00 | 0:38:39 | 69.2258374 | 62.2842889 | 72.8195316 | 71.8813582 | 67.5172777 |
| 18:41:01 | 0:38:40 | 69.2258374 | 62.2842889 | 71.8195316 | 70.8813582 | 68.5172777 |
| 18:41:02 | 0:38:41 | 68.9258374 | 62.2842889 | 71.8195316 | 68.8813582 | 69.5172777 |
| 18:41:03 | 0:38:42 | 69.4258374 | 62.2842889 | 72.8195316 | 67.8813582 | 69.5172777 |
| 18:41:04 | 0:38:43 | 69.9258374 | 62.2842889 | 72.8195316 | 67.8813582 | 71.5172777 |
| 18:41:05 | 0:38:44 | 70.0258374 | 62.2842889 | 73.8195316 | 68.8813582 | 72.5172777 |
| 18:41:06 | 0:38:45 | 70.1258374 | 62.2842889 | 72.8195316 | 68.8813582 | 75.5172777 |
| 18:41:07 | 0:38:46 | 70.2258374 | 62.2842889 | 72.8195316 | 68.8813582 | 75.5172777 |
| 18:41:08 | 0:38:47 | 70.9258374 | 63.2842889 | 73.8195316 | 69.8813582 | 77.5172777 |
| 18:41:09 | 0:38:48 | 71.7258374 | 64.2842889 | 73.8195316 | 72.8813582 | 79.5172777 |
| 18:41:10 | 0:38:49 | 72.3258374 | 64.2842889 | 74.8195316 | 72.8813582 | 79.5172777 |
| 18:41:11 | 0:38:50 | 72.6258374 | 64.2842889 | 74.8195316 | 72.8813582 | 79.5172777 |
| 18:41:12 | 0:38:51 | 73.5258374 | 64.2842889 | 74.8195316 | 72.8813582 | 79.5172777 |
| 18:41:13 | 0:38:52 | 73.9258374 | 64.2842889 | 74.8195316 | 72.8813582 | 77.5172777 |
| 18:41:14 | 0:38:53 | 73.7258374 | 64.2842889 | 73.8195316 | 72.8813582 | 74.5172777 |
| 18:41:15 | 0:38:54 | 73.4258374 | 65.2842889 | 73.8195316 | 71.8813582 | 72.5172777 |
| 18:41:16 | 0:38:55 | 72.9258374 | 65.2842889 | 73.8195316 | 70.8813582 | 70.5172777 |
| 18:41:17 | 0:38:56 | 72.1258374 | 65.2842889 | 73.8195316 | 68.8813582 | 70.5172777 |
| 18:41:18 | 0:38:57 | 72.0258374 | 70.2842889 | 73.8195316 | 68.8813582 | 70.5172777 |

|          |         |            |            |            |            |            |
|----------|---------|------------|------------|------------|------------|------------|
| 18:41:19 | 0:38:58 | 72.5258374 | 78.2842889 | 72.8195316 | 68.8813582 | 70.5172777 |
| 18:41:20 | 0:38:59 | 72.4258374 | 78.2842889 | 72.8195316 | 68.8813582 | 71.5172777 |
| 18:41:21 | 0:39:00 | 73.1258374 | 73.1258374 | 72.8195316 | 68.8813582 | 72.5172777 |
| 18:41:22 | 0:39:01 | 73.1258374 | 73.1258374 | 71.8195316 | 68.8813582 | 72.5172777 |
| 18:41:23 | 0:39:02 | 72.9258374 | 72.9258374 | 71.8195316 | 68.8813582 | 73.5172777 |
| 18:41:24 | 0:39:03 | 72.9258374 | 72.9258374 | 71.8195316 | 68.8813582 | 73.5172777 |
| 18:41:25 | 0:39:04 | 72.6258374 | 72.6258374 | 71.8195316 | 68.8813582 | 72.5172777 |
| 18:41:26 | 0:39:05 | 75.3258374 | 75.3258374 | 72.8195316 | 71.8813582 | 72.5172777 |
| 18:41:27 | 0:39:06 | 77.0258374 | 77.0258374 | 74.8195316 | 72.8813582 | 70.5172777 |
| 18:41:28 | 0:39:07 | 77.9258374 | 89.2842889 | 74.8195316 | 72.8813582 | 70.5172777 |
| 18:41:29 | 0:39:08 | 75.7258374 | 75.7258374 | 76.8195316 | 71.8813582 | 70.5172777 |
| 18:41:30 | 0:39:09 | 75.1258374 | 75.1258374 | 76.8195316 | 70.8813582 | 70.5172777 |
| 18:41:31 | 0:39:10 | 74.3258374 | 74.3258374 | 76.8195316 | 71.8813582 | 70.5172777 |
| 18:41:32 | 0:39:11 | 74.6258374 | 74.6258374 | 76.8195316 | 71.8813582 | 69.5172777 |
| 18:41:33 | 0:39:12 | 74.3258374 | 74.3258374 | 75.8195316 | 70.8813582 | 69.5172777 |
| 18:41:34 | 0:39:13 | 73.9258374 | 73.9258374 | 75.8195316 | 70.8813582 | 69.5172777 |
| 18:41:35 | 0:39:14 | 73.2258374 | 83.2842889 | 75.8195316 | 70.8813582 | 70.5172777 |
| 18:41:36 | 0:39:15 | 73.0258374 | 81.2842889 | 74.8195316 | 70.8813582 | 70.5172777 |
| 18:41:37 | 0:39:16 | 72.7258374 | 80.2842889 | 74.8195316 | 70.8813582 | 70.5172777 |
| 18:41:38 | 0:39:17 | 71.9258374 | 80.2842889 | 73.8195316 | 70.8813582 | 69.5172777 |
| 18:41:39 | 0:39:18 | 71.5258374 | 81.2842889 | 73.8195316 | 69.8813582 | 69.5172777 |
| 18:41:40 | 0:39:19 | 71.6258374 | 84.2842889 | 73.8195316 | 69.8813582 | 70.5172777 |
| 18:41:41 | 0:39:20 | 72.0258374 | 72.0258374 | 74.8195316 | 69.8813582 | 70.5172777 |
| 18:41:42 | 0:39:21 | 72.0258374 | 72.0258374 | 74.8195316 | 68.8813582 | 70.5172777 |
| 18:41:43 | 0:39:22 | 71.9258374 | 71.9258374 | 75.8195316 | 68.8813582 | 70.5172777 |
| 18:41:44 | 0:39:23 | 73.0258374 | 73.0258374 | 75.8195316 | 68.8813582 | 71.5172777 |
| 18:41:45 | 0:39:24 | 73.2258374 | 73.2258374 | 75.8195316 | 69.8813582 | 71.5172777 |
| 18:41:46 | 0:39:25 | 73.5258374 | 73.5258374 | 74.8195316 | 68.8813582 | 73.5172777 |
| 18:41:47 | 0:39:26 | 74.0258374 | 74.0258374 | 74.8195316 | 69.8813582 | 74.5172777 |
| 18:41:48 | 0:39:27 | 74.1258374 | 74.1258374 | 74.8195316 | 69.8813582 | 75.5172777 |
| 18:41:49 | 0:39:28 | 74.1258374 | 74.1258374 | 75.8195316 | 69.8813582 | 75.5172777 |
| 18:41:50 | 0:39:29 | 75.4258374 | 75.4258374 | 75.8195316 | 69.8813582 | 77.5172777 |
| 18:41:51 | 0:39:30 | 76.4258374 | 76.4258374 | 75.8195316 | 69.8813582 | 78.5172777 |
| 18:41:52 | 0:39:31 | 77.2258374 | 77.2258374 | 75.8195316 | 70.8813582 | 78.5172777 |
| 18:41:53 | 0:39:32 | 77.2258374 | 77.2258374 | 74.8195316 | 71.8813582 | 78.5172777 |
| 18:41:54 | 0:39:33 | 77.2258374 | 77.2258374 | 73.8195316 | 71.8813582 | 76.5172777 |
| 18:41:55 | 0:39:34 | 76.1258374 | 76.1258374 | 73.8195316 | 72.8813582 | 77.5172777 |
| 18:41:56 | 0:39:35 | 75.8258374 | 75.8258374 | 73.8195316 | 73.8813582 | 78.5172777 |
| 18:41:57 | 0:39:36 | 75.6258374 | 75.6258374 | 74.8195316 | 73.8813582 | 78.5172777 |
| 18:41:58 | 0:39:37 | 75.1258374 | 75.1258374 | 73.8195316 | 73.8813582 | 77.5172777 |
| 18:41:59 | 0:39:38 | 75.1258374 | 75.1258374 | 73.8195316 | 73.8813582 | 77.5172777 |
| 18:42:00 | 0:39:39 | 75.1258374 | 75.1258374 | 74.8195316 | 73.8813582 | 76.5172777 |
| 18:42:01 | 0:39:40 | 74.8258374 | 74.8258374 | 74.8195316 | 73.8813582 | 74.5172777 |
| 18:42:02 | 0:39:41 | 74.9258374 | 74.9258374 | 74.8195316 | 74.8813582 | 73.5172777 |
| 18:42:03 | 0:39:42 | 75.0258374 | 75.0258374 | 73.8195316 | 74.8813582 | 72.5172777 |

|          |         |            |            |            |            |            |
|----------|---------|------------|------------|------------|------------|------------|
| 18:42:04 | 0:39:43 | 75.0258374 | 75.0258374 | 73.8195316 | 73.8813582 | 72.5172777 |
| 18:42:05 | 0:39:44 | 74.6258374 | 74.6258374 | 74.8195316 | 72.8813582 | 72.5172777 |
| 18:42:06 | 0:39:45 | 74.5258374 | 74.5258374 | 74.8195316 | 72.8813582 | 73.5172777 |
| 18:42:07 | 0:39:46 | 74.2258374 | 74.2258374 | 74.8195316 | 72.8813582 | 74.5172777 |
| 18:42:08 | 0:39:47 | 74.3258374 | 74.3258374 | 74.8195316 | 72.8813582 | 74.5172777 |
| 18:42:09 | 0:39:48 | 74.3258374 | 74.3258374 | 74.8195316 | 73.8813582 | 74.5172777 |
| 18:42:10 | 0:39:49 | 74.7258374 | 74.7258374 | 75.8195316 | 73.8813582 | 74.5172777 |
| 18:42:11 | 0:39:50 | 74.6258374 | 74.6258374 | 75.8195316 | 72.8813582 | 74.5172777 |
| 18:42:12 | 0:39:51 | 73.8258374 | 82.2842889 | 77.8195316 | 72.8813582 | 75.5172777 |
| 18:42:13 | 0:39:52 | 74.5258374 | 82.2842889 | 77.8195316 | 70.8813582 | 77.5172777 |
| 18:42:14 | 0:39:53 | 75.3258374 | 81.2842889 | 77.8195316 | 70.8813582 | 78.5172777 |
| 18:42:15 | 0:39:54 | 75.0258374 | 81.2842889 | 77.8195316 | 69.8813582 | 78.5172777 |
| 18:42:16 | 0:39:55 | 74.9258374 | 81.2842889 | 77.8195316 | 69.8813582 | 80.5172777 |
| 18:42:17 | 0:39:56 | 74.2258374 | 79.2842889 | 77.8195316 | 68.8813582 | 79.5172777 |
| 18:42:18 | 0:39:57 | 74.2258374 | 79.2842889 | 77.8195316 | 68.8813582 | 79.5172777 |
| 18:42:19 | 0:39:58 | 72.7258374 | 72.2842889 | 77.8195316 | 68.8813582 | 79.5172777 |
| 18:42:20 | 0:39:59 | 72.3258374 | 72.2842889 | 76.8195316 | 68.8813582 | 77.5172777 |
| 18:42:21 | 0:40:00 | 72.1258374 | 72.2842889 | 74.8195316 | 68.8813582 | 75.5172777 |
| 18:42:22 | 0:40:01 | 72.0258374 | 73.2842889 | 73.8195316 | 69.8813582 | 75.5172777 |
| 18:42:23 | 0:40:02 | 72.0258374 | 73.2842889 | 73.8195316 | 70.8813582 | 75.5172777 |
| 18:42:24 | 0:40:03 | 71.6258374 | 73.2842889 | 72.8195316 | 70.8813582 | 75.5172777 |
| 18:42:25 | 0:40:04 | 71.4258374 | 72.2842889 | 72.8195316 | 70.8813582 | 76.5172777 |
| 18:42:26 | 0:40:05 | 71.5258374 | 72.2842889 | 72.8195316 | 70.8813582 | 78.5172777 |
| 18:42:27 | 0:40:06 | 71.0258374 | 70.2842889 | 73.8195316 | 70.8813582 | 79.5172777 |
| 18:42:28 | 0:40:07 | 71.0258374 | 69.2842889 | 73.8195316 | 70.8813582 | 80.5172777 |
| 18:42:29 | 0:40:08 | 71.0258374 | 67.2842889 | 72.8195316 | 70.8813582 | 82.5172777 |
| 18:42:30 | 0:40:09 | 71.1258374 | 66.2842889 | 72.8195316 | 71.8813582 | 82.5172777 |
| 18:42:31 | 0:40:10 | 71.2258374 | 66.2842889 | 72.8195316 | 73.8813582 | 83.5172777 |
| 18:42:32 | 0:40:11 | 71.3258374 | 66.2842889 | 72.8195316 | 73.8813582 | 82.5172777 |
| 18:42:33 | 0:40:12 | 71.5258374 | 66.2842889 | 71.8195316 | 73.8813582 | 81.5172777 |
| 18:42:34 | 0:40:13 | 71.8258374 | 66.2842889 | 71.8195316 | 78.8813582 | 80.5172777 |
| 18:42:35 | 0:40:14 | 72.2258374 | 66.2842889 | 71.8195316 | 80.8813582 | 79.5172777 |
| 18:42:36 | 0:40:15 | 72.2258374 | 67.2842889 | 71.8195316 | 80.8813582 | 78.5172777 |
| 18:42:37 | 0:40:16 | 72.8258374 | 67.2842889 | 72.8195316 | 84.8813582 | 76.5172777 |
| 18:42:38 | 0:40:17 | 72.4258374 | 67.2842889 | 72.8195316 | 84.8813582 | 74.5172777 |
| 18:42:39 | 0:40:18 | 72.1258374 | 67.2842889 | 72.8195316 | 82.8813582 | 73.5172777 |
| 18:42:40 | 0:40:19 | 71.8258374 | 67.2842889 | 72.8195316 | 78.8813582 | 73.5172777 |
| 18:42:41 | 0:40:20 | 72.5258374 | 67.2842889 | 72.8195316 | 78.8813582 | 73.5172777 |
| 18:42:42 | 0:40:21 | 72.4258374 | 68.2842889 | 73.8195316 | 78.8813582 | 74.5172777 |
| 18:42:43 | 0:40:22 | 71.2258374 | 68.2842889 | 72.8195316 | 76.8813582 | 75.5172777 |
| 18:42:44 | 0:40:23 | 71.9258374 | 69.2842889 | 73.8195316 | 75.8813582 | 75.5172777 |
| 18:42:45 | 0:40:24 | 72.1258374 | 69.2842889 | 73.8195316 | 76.8813582 | 76.5172777 |
| 18:42:46 | 0:40:25 | 71.8258374 | 70.2842889 | 74.8195316 | 76.8813582 | 76.5172777 |
| 18:42:47 | 0:40:26 | 71.9258374 | 71.2842889 | 74.8195316 | 76.8813582 | 76.5172777 |
| 18:42:48 | 0:40:27 | 71.4258374 | 69.2842889 | 74.8195316 | 77.8813582 | 76.5172777 |

|          |         |            |            |            |            |            |
|----------|---------|------------|------------|------------|------------|------------|
| 18:42:49 | 0:40:28 | 71.2258374 | 69.2842889 | 74.8195316 | 77.8813582 | 76.5172777 |
| 18:42:50 | 0:40:29 | 71.3258374 | 69.2842889 | 74.8195316 | 77.8813582 | 76.5172777 |
| 18:42:51 | 0:40:30 | 71.7258374 | 69.2842889 | 73.8195316 | 77.8813582 | 75.5172777 |
| 18:42:52 | 0:40:31 | 71.8258374 | 69.2842889 | 73.8195316 | 78.8813582 | 75.5172777 |
| 18:42:53 | 0:40:32 | 71.6258374 | 69.2842889 | 73.8195316 | 78.8813582 | 73.5172777 |
| 18:42:54 | 0:40:33 | 71.3258374 | 69.2842889 | 72.8195316 | 78.8813582 | 72.5172777 |
| 18:42:55 | 0:40:34 | 71.4258374 | 70.2842889 | 71.8195316 | 77.8813582 | 72.5172777 |
| 18:42:56 | 0:40:35 | 71.7258374 | 69.2842889 | 72.8195316 | 78.8813582 | 72.5172777 |
| 18:42:57 | 0:40:36 | 71.5258374 | 69.2842889 | 72.8195316 | 78.8813582 | 73.5172777 |
| 18:42:58 | 0:40:37 | 71.2258374 | 68.2842889 | 73.8195316 | 78.8813582 | 74.5172777 |
| 18:42:59 | 0:40:38 | 71.5258374 | 69.2842889 | 73.8195316 | 79.8813582 | 76.5172777 |
| 18:43:00 | 0:40:39 | 72.8258374 | 69.2842889 | 73.8195316 | 72.8258374 | 76.5172777 |
| 18:43:01 | 0:40:40 | 73.3258374 | 69.2842889 | 73.8195316 | 73.3258374 | 76.5172777 |
| 18:43:02 | 0:40:41 | 73.7258374 | 69.2842889 | 73.8195316 | 73.7258374 | 76.5172777 |
| 18:43:03 | 0:40:42 | 74.7258374 | 69.2842889 | 73.8195316 | 74.7258374 | 77.5172777 |
| 18:43:04 | 0:40:43 | 75.3258374 | 68.2842889 | 74.8195316 | 75.3258374 | 77.5172777 |
| 18:43:05 | 0:40:44 | 75.6258374 | 68.2842889 | 74.8195316 | 75.6258374 | 77.5172777 |
| 18:43:06 | 0:40:45 | 75.5258374 | 67.2842889 | 74.8195316 | 75.5258374 | 77.5172777 |
| 18:43:07 | 0:40:46 | 76.0258374 | 66.2842889 | 75.8195316 | 76.0258374 | 79.5172777 |
| 18:43:08 | 0:40:47 | 75.8258374 | 65.2842889 | 75.8195316 | 75.8258374 | 79.5172777 |
| 18:43:09 | 0:40:48 | 75.6258374 | 65.2842889 | 75.8195316 | 75.6258374 | 79.5172777 |
| 18:43:10 | 0:40:49 | 76.0258374 | 64.2842889 | 76.8195316 | 76.0258374 | 79.5172777 |
| 18:43:11 | 0:40:50 | 76.1258374 | 64.2842889 | 76.8195316 | 76.1258374 | 79.5172777 |
| 18:43:12 | 0:40:51 | 76.1258374 | 64.2842889 | 76.8195316 | 76.1258374 | 79.5172777 |
| 18:43:13 | 0:40:52 | 76.9258374 | 64.2842889 | 77.8195316 | 76.9258374 | 78.5172777 |
| 18:43:14 | 0:40:53 | 78.3258374 | 65.2842889 | 77.8195316 | 78.3258374 | 77.5172777 |
| 18:43:15 | 0:40:54 | 79.0258374 | 65.2842889 | 76.8195316 | 79.0258374 | 77.5172777 |
| 18:43:16 | 0:40:55 | 79.3258374 | 65.2842889 | 76.8195316 | 79.3258374 | 76.5172777 |
| 18:43:17 | 0:40:56 | 79.3258374 | 65.2842889 | 75.8195316 | 79.3258374 | 75.5172777 |
| 18:43:18 | 0:40:57 | 79.3258374 | 66.2842889 | 75.8195316 | 79.3258374 | 75.5172777 |
| 18:43:19 | 0:40:58 | 76.8258374 | 66.2842889 | 74.8195316 | 76.8258374 | 74.5172777 |
| 18:43:20 | 0:40:59 | 75.7258374 | 66.2842889 | 74.8195316 | 83.8813582 | 74.5172777 |
| 18:43:21 | 0:41:00 | 75.5258374 | 66.2842889 | 75.8195316 | 80.8813582 | 75.5172777 |
| 18:43:22 | 0:41:01 | 75.0258374 | 66.2842889 | 75.8195316 | 78.8813582 | 75.5172777 |
| 18:43:23 | 0:41:02 | 74.6258374 | 66.2842889 | 75.8195316 | 78.8813582 | 74.5172777 |
| 18:43:24 | 0:41:03 | 74.5258374 | 66.2842889 | 75.8195316 | 78.8813582 | 73.5172777 |
| 18:43:25 | 0:41:04 | 74.2258374 | 66.2842889 | 74.8195316 | 78.8813582 | 74.5172777 |
| 18:43:26 | 0:41:05 | 73.4258374 | 66.2842889 | 72.8195316 | 78.8813582 | 75.5172777 |
| 18:43:27 | 0:41:06 | 73.1258374 | 66.2842889 | 72.8195316 | 78.8813582 | 74.5172777 |
| 18:43:28 | 0:41:07 | 72.5258374 | 66.2842889 | 72.8195316 | 77.8813582 | 73.5172777 |
| 18:43:29 | 0:41:08 | 71.9258374 | 66.2842889 | 72.8195316 | 76.8813582 | 72.5172777 |
| 18:43:30 | 0:41:09 | 70.9258374 | 66.2842889 | 72.8195316 | 75.8813582 | 72.5172777 |
| 18:43:31 | 0:41:10 | 70.2258374 | 66.2842889 | 72.8195316 | 74.8813582 | 71.5172777 |
| 18:43:32 | 0:41:11 | 69.6258374 | 66.2842889 | 72.8195316 | 71.8813582 | 71.5172777 |
| 18:43:33 | 0:41:12 | 69.6258374 | 67.2842889 | 73.8195316 | 69.8813582 | 72.5172777 |

|          |         |            |            |            |            |            |
|----------|---------|------------|------------|------------|------------|------------|
| 18:43:34 | 0:41:13 | 69.5258374 | 67.2842889 | 76.8195316 | 68.8813582 | 73.5172777 |
| 18:43:35 | 0:41:14 | 69.8258374 | 67.2842889 | 76.8195316 | 68.8813582 | 73.5172777 |
| 18:43:36 | 0:41:15 | 70.3258374 | 67.2842889 | 76.8195316 | 68.8813582 | 73.5172777 |
| 18:43:37 | 0:41:16 | 70.2258374 | 68.2842889 | 73.8195316 | 69.8813582 | 74.5172777 |
| 18:43:38 | 0:41:17 | 70.7258374 | 67.2842889 | 73.8195316 | 69.8813582 | 75.5172777 |
| 18:43:39 | 0:41:18 | 71.2258374 | 67.2842889 | 74.8195316 | 69.8813582 | 76.5172777 |
| 18:43:40 | 0:41:19 | 71.7258374 | 66.2842889 | 74.8195316 | 69.8813582 | 76.5172777 |
| 18:43:41 | 0:41:20 | 72.0258374 | 65.2842889 | 76.8195316 | 69.8813582 | 77.5172777 |
| 18:43:42 | 0:41:21 | 72.5258374 | 65.2842889 | 76.8195316 | 69.8813582 | 79.5172777 |
| 18:43:43 | 0:41:22 | 72.2258374 | 65.2842889 | 75.8195316 | 69.8813582 | 82.5172777 |
| 18:43:44 | 0:41:23 | 72.0258374 | 65.2842889 | 75.8195316 | 68.8813582 | 84.5172777 |
| 18:43:45 | 0:41:24 | 71.9258374 | 65.2842889 | 75.8195316 | 68.8813582 | 71.9258374 |
| 18:43:46 | 0:41:25 | 71.3258374 | 65.2842889 | 75.8195316 | 68.8813582 | 71.3258374 |
| 18:43:47 | 0:41:26 | 71.4258374 | 66.2842889 | 75.8195316 | 68.8813582 | 71.4258374 |
| 18:43:48 | 0:41:27 | 71.7258374 | 66.2842889 | 77.8195316 | 68.8813582 | 71.7258374 |
| 18:43:49 | 0:41:28 | 71.9258374 | 66.2842889 | 77.8195316 | 68.8813582 | 71.9258374 |
| 18:43:50 | 0:41:29 | 72.2258374 | 66.2842889 | 77.8195316 | 68.8813582 | 72.2258374 |
| 18:43:51 | 0:41:30 | 72.0258374 | 66.2842889 | 77.8195316 | 68.8813582 | 72.0258374 |
| 18:43:52 | 0:41:31 | 72.0258374 | 66.2842889 | 77.8195316 | 67.8813582 | 72.0258374 |
| 18:43:53 | 0:41:32 | 71.7258374 | 66.2842889 | 77.8195316 | 67.8813582 | 71.7258374 |
| 18:43:54 | 0:41:33 | 71.6258374 | 66.2842889 | 77.8195316 | 67.8813582 | 71.6258374 |
| 18:43:55 | 0:41:34 | 71.8258374 | 66.2842889 | 79.8195316 | 66.8813582 | 71.8258374 |
| 18:43:56 | 0:41:35 | 71.5258374 | 67.2842889 | 80.8195316 | 65.8813582 | 83.5172777 |
| 18:43:57 | 0:41:36 | 71.3258374 | 67.2842889 | 80.8195316 | 64.8813582 | 83.5172777 |
| 18:43:58 | 0:41:37 | 70.4258374 | 67.2842889 | 79.8195316 | 64.8813582 | 74.5172777 |
| 18:43:59 | 0:41:38 | 70.3258374 | 67.2842889 | 78.8195316 | 64.8813582 | 71.5172777 |
| 18:44:00 | 0:41:39 | 69.9258374 | 67.2842889 | 77.8195316 | 64.8813582 | 69.5172777 |
| 18:44:01 | 0:41:40 | 70.3258374 | 68.2842889 | 77.8195316 | 63.8813582 | 68.5172777 |
| 18:44:02 | 0:41:41 | 70.4258374 | 69.2842889 | 77.8195316 | 64.8813582 | 67.5172777 |
| 18:44:03 | 0:41:42 | 70.8258374 | 74.2842889 | 76.8195316 | 65.8813582 | 66.5172777 |
| 18:44:04 | 0:41:43 | 70.7258374 | 74.2842889 | 75.8195316 | 65.8813582 | 66.5172777 |
| 18:44:05 | 0:41:44 | 71.0258374 | 74.2842889 | 75.8195316 | 66.8813582 | 66.5172777 |
| 18:44:06 | 0:41:45 | 71.0258374 | 74.2842889 | 75.8195316 | 66.8813582 | 66.5172777 |
| 18:44:07 | 0:41:46 | 70.6258374 | 72.2842889 | 73.8195316 | 66.8813582 | 66.5172777 |
| 18:44:08 | 0:41:47 | 71.1258374 | 71.2842889 | 74.8195316 | 66.8813582 | 69.5172777 |
| 18:44:09 | 0:41:48 | 71.1258374 | 69.2842889 | 74.8195316 | 66.8813582 | 70.5172777 |
| 18:44:10 | 0:41:49 | 71.3258374 | 68.2842889 | 77.8195316 | 66.8813582 | 70.5172777 |
| 18:44:11 | 0:41:50 | 71.1258374 | 68.2842889 | 79.8195316 | 66.8813582 | 71.5172777 |
| 18:44:12 | 0:41:51 | 70.5258374 | 66.2842889 | 79.8195316 | 66.8813582 | 71.5172777 |
| 18:44:13 | 0:41:52 | 69.4258374 | 66.2842889 | 76.8195316 | 66.8813582 | 71.5172777 |
| 18:44:14 | 0:41:53 | 68.8258374 | 66.2842889 | 75.8195316 | 66.8813582 | 71.5172777 |
| 18:44:15 | 0:41:54 | 68.8258374 | 66.2842889 | 74.8195316 | 67.8813582 | 70.5172777 |
| 18:44:16 | 0:41:55 | 68.9258374 | 66.2842889 | 75.8195316 | 67.8813582 | 70.5172777 |
| 18:44:17 | 0:41:56 | 68.8258374 | 66.2842889 | 75.8195316 | 67.8813582 | 70.5172777 |
| 18:44:18 | 0:41:57 | 68.9258374 | 65.2842889 | 75.8195316 | 67.8813582 | 70.5172777 |



|          |         |            |            |            |            |            |
|----------|---------|------------|------------|------------|------------|------------|
| 18:44:19 | 0:41:58 | 69.2258374 | 64.2842889 | 76.8195316 | 67.8813582 | 69.5172777 |
| 18:44:20 | 0:41:59 | 69.7258374 | 63.2842889 | 76.8195316 | 66.8813582 | 69.5172777 |
| 18:44:21 | 0:42:00 | 69.6258374 | 61.2842889 | 76.8195316 | 66.8813582 | 69.5172777 |
| 18:44:22 | 0:42:01 | 69.6258374 | 61.2842889 | 76.8195316 | 66.8813582 | 67.5172777 |
| 18:44:23 | 0:42:02 | 70.0258374 | 61.2842889 | 76.8195316 | 66.8813582 | 67.5172777 |
| 18:44:24 | 0:42:03 | 70.6258374 | 61.2842889 | 76.8195316 | 67.8813582 | 67.5172777 |
| 18:44:25 | 0:42:04 | 70.8258374 | 61.2842889 | 76.8195316 | 67.8813582 | 67.5172777 |
| 18:44:26 | 0:42:05 | 71.3258374 | 61.2842889 | 76.8195316 | 68.8813582 | 67.5172777 |
| 18:44:27 | 0:42:06 | 71.6258374 | 62.2842889 | 76.8195316 | 68.8813582 | 67.5172777 |
| 18:44:28 | 0:42:07 | 72.0258374 | 62.2842889 | 76.8195316 | 71.8813582 | 68.5172777 |
| 18:44:29 | 0:42:08 | 72.4258374 | 62.2842889 | 77.8195316 | 72.8813582 | 69.5172777 |
| 18:44:30 | 0:42:09 | 72.9258374 | 63.2842889 | 77.8195316 | 73.8813582 | 69.5172777 |
| 18:44:31 | 0:42:10 | 73.0258374 | 64.2842889 | 77.8195316 | 72.8813582 | 69.5172777 |
| 18:44:32 | 0:42:11 | 71.6258374 | 64.2842889 | 77.8195316 | 70.8813582 | 69.5172777 |
| 18:44:33 | 0:42:12 | 71.7258374 | 66.2842889 | 76.8195316 | 70.8813582 | 70.5172777 |
| 18:44:34 | 0:42:13 | 71.5258374 | 69.2842889 | 76.8195316 | 68.8813582 | 70.5172777 |
| 18:44:35 | 0:42:14 | 71.2258374 | 68.2842889 | 76.8195316 | 68.8813582 | 70.5172777 |
| 18:44:36 | 0:42:15 | 70.8258374 | 68.2842889 | 76.8195316 | 68.8813582 | 69.5172777 |
| 18:44:37 | 0:42:16 | 70.8258374 | 68.2842889 | 77.8195316 | 68.8813582 | 69.5172777 |
| 18:44:38 | 0:42:17 | 70.8258374 | 68.2842889 | 77.8195316 | 69.8813582 | 69.5172777 |
| 18:44:39 | 0:42:18 | 70.8258374 | 68.2842889 | 77.8195316 | 69.8813582 | 69.5172777 |
| 18:44:40 | 0:42:19 | 70.9258374 | 68.2842889 | 77.8195316 | 69.8813582 | 69.5172777 |
| 18:44:41 | 0:42:20 | 71.3258374 | 68.2842889 | 77.8195316 | 68.8813582 | 71.5172777 |
| 18:44:42 | 0:42:21 | 70.9258374 | 67.2842889 | 77.8195316 | 68.8813582 | 72.5172777 |
| 18:44:43 | 0:42:22 | 70.6258374 | 67.2842889 | 77.8195316 | 68.8813582 | 73.5172777 |
| 18:44:44 | 0:42:23 | 70.3258374 | 67.2842889 | 77.8195316 | 68.8813582 | 74.5172777 |
| 18:44:45 | 0:42:24 | 70.0258374 | 66.2842889 | 76.8195316 | 68.8813582 | 74.5172777 |
| 18:44:46 | 0:42:25 | 70.0258374 | 66.2842889 | 76.8195316 | 68.8813582 | 73.5172777 |
| 18:44:47 | 0:42:26 | 70.1258374 | 65.2842889 | 76.8195316 | 68.8813582 | 73.5172777 |
| 18:44:48 | 0:42:27 | 69.9258374 | 65.2842889 | 75.8195316 | 68.8813582 | 71.5172777 |
| 18:44:49 | 0:42:28 | 69.8258374 | 65.2842889 | 74.8195316 | 68.8813582 | 71.5172777 |
| 18:44:50 | 0:42:29 | 69.7258374 | 65.2842889 | 74.8195316 | 68.8813582 | 71.5172777 |
| 18:44:51 | 0:42:30 | 69.5258374 | 65.2842889 | 73.8195316 | 69.8813582 | 70.5172777 |
| 18:44:52 | 0:42:31 | 69.2258374 | 65.2842889 | 73.8195316 | 69.8813582 | 69.5172777 |
| 18:44:53 | 0:42:32 | 68.9258374 | 64.2842889 | 72.8195316 | 69.8813582 | 69.5172777 |
| 18:44:54 | 0:42:33 | 69.0258374 | 64.2842889 | 72.8195316 | 69.8813582 | 71.5172777 |
| 18:44:55 | 0:42:34 | 68.7258374 | 64.2842889 | 73.8195316 | 68.8813582 | 73.5172777 |
| 18:44:56 | 0:42:35 | 69.3258374 | 65.2842889 | 73.8195316 | 68.8813582 | 75.5172777 |
| 18:44:57 | 0:42:36 | 69.4258374 | 65.2842889 | 73.8195316 | 68.8813582 | 76.5172777 |
| 18:44:58 | 0:42:37 | 69.3258374 | 66.2842889 | 72.8195316 | 68.8813582 | 76.5172777 |
| 18:44:59 | 0:42:38 | 69.3258374 | 66.2842889 | 72.8195316 | 68.8813582 | 76.5172777 |
| 18:45:00 | 0:42:39 | 69.3258374 | 66.2842889 | 72.8195316 | 68.8813582 | 76.5172777 |
| 18:45:01 | 0:42:40 | 69.1258374 | 66.2842889 | 72.8195316 | 67.8813582 | 77.5172777 |
| 18:45:02 | 0:42:41 | 69.2258374 | 66.2842889 | 69.8195316 | 67.8813582 | 77.5172777 |
| 18:45:03 | 0:42:42 | 69.3258374 | 66.2842889 | 69.8195316 | 67.8813582 | 77.5172777 |

|          |         |            |            |            |            |            |
|----------|---------|------------|------------|------------|------------|------------|
| 18:45:04 | 0:42:43 | 69.3258374 | 66.2842889 | 70.8195316 | 67.8813582 | 77.5172777 |
| 18:45:05 | 0:42:44 | 69.1258374 | 66.2842889 | 72.8195316 | 67.8813582 | 79.5172777 |
| 18:45:06 | 0:42:45 | 69.4258374 | 66.2842889 | 72.8195316 | 67.8813582 | 69.4258374 |
| 18:45:07 | 0:42:46 | 69.9258374 | 66.2842889 | 73.8195316 | 67.8813582 | 69.9258374 |
| 18:45:08 | 0:42:47 | 70.5258374 | 66.2842889 | 77.8195316 | 67.8813582 | 70.5258374 |
| 18:45:09 | 0:42:48 | 70.7258374 | 66.2842889 | 77.8195316 | 67.8813582 | 70.7258374 |
| 18:45:10 | 0:42:49 | 70.7258374 | 66.2842889 | 77.8195316 | 68.8813582 | 70.7258374 |
| 18:45:11 | 0:42:50 | 70.6258374 | 67.2842889 | 77.8195316 | 68.8813582 | 70.6258374 |
| 18:45:12 | 0:42:51 | 70.6258374 | 67.2842889 | 77.8195316 | 68.8813582 | 70.6258374 |
| 18:45:13 | 0:42:52 | 70.6258374 | 67.2842889 | 78.8195316 | 68.8813582 | 70.6258374 |
| 18:45:14 | 0:42:53 | 70.6258374 | 66.2842889 | 78.8195316 | 68.8813582 | 70.6258374 |
| 18:45:15 | 0:42:54 | 70.2258374 | 66.2842889 | 78.8195316 | 68.8813582 | 70.2258374 |
| 18:45:16 | 0:42:55 | 70.2258374 | 66.2842889 | 78.8195316 | 68.8813582 | 70.2258374 |
| 18:45:17 | 0:42:56 | 69.7258374 | 66.2842889 | 77.8195316 | 68.8813582 | 69.7258374 |
| 18:45:18 | 0:42:57 | 69.5258374 | 66.2842889 | 75.8195316 | 68.8813582 | 69.5258374 |
| 18:45:19 | 0:42:58 | 69.9258374 | 66.2842889 | 75.8195316 | 68.8813582 | 69.9258374 |
| 18:45:20 | 0:42:59 | 70.3258374 | 66.2842889 | 74.8195316 | 68.8813582 | 70.3258374 |
| 18:45:21 | 0:43:00 | 70.7258374 | 66.2842889 | 72.8195316 | 68.8813582 | 70.7258374 |
| 18:45:22 | 0:43:01 | 70.7258374 | 66.2842889 | 72.8195316 | 68.8813582 | 70.7258374 |
| 18:45:23 | 0:43:02 | 71.0258374 | 66.2842889 | 72.8195316 | 68.8813582 | 71.0258374 |
| 18:45:24 | 0:43:03 | 71.3258374 | 67.2842889 | 72.8195316 | 68.8813582 | 71.3258374 |
| 18:45:25 | 0:43:04 | 70.9258374 | 67.2842889 | 72.8195316 | 68.8813582 | 70.9258374 |
| 18:45:26 | 0:43:05 | 69.8258374 | 67.2842889 | 73.8195316 | 68.8813582 | 69.8258374 |
| 18:45:27 | 0:43:06 | 70.1258374 | 67.2842889 | 73.8195316 | 68.8813582 | 70.1258374 |
| 18:45:28 | 0:43:07 | 69.3258374 | 68.2842889 | 76.8195316 | 68.8813582 | 77.5172777 |
| 18:45:29 | 0:43:08 | 69.4258374 | 68.2842889 | 76.8195316 | 68.8813582 | 75.5172777 |
| 18:45:30 | 0:43:09 | 69.3258374 | 69.2842889 | 76.8195316 | 68.8813582 | 74.5172777 |
| 18:45:31 | 0:43:10 | 69.3258374 | 70.2842889 | 77.8195316 | 68.8813582 | 73.5172777 |
| 18:45:32 | 0:43:11 | 69.4258374 | 71.2842889 | 77.8195316 | 67.8813582 | 74.5172777 |
| 18:45:33 | 0:43:12 | 69.3258374 | 71.2842889 | 77.8195316 | 67.8813582 | 74.5172777 |
| 18:45:34 | 0:43:13 | 69.7258374 | 71.2842889 | 77.8195316 | 67.8813582 | 74.5172777 |
| 18:45:35 | 0:43:14 | 69.4258374 | 71.2842889 | 76.8195316 | 66.8813582 | 74.5172777 |
| 18:45:36 | 0:43:15 | 69.5258374 | 72.2842889 | 76.8195316 | 66.8813582 | 74.5172777 |
| 18:45:37 | 0:43:16 | 68.8258374 | 71.2842889 | 73.8195316 | 66.8813582 | 74.5172777 |
| 18:45:38 | 0:43:17 | 68.2258374 | 71.2842889 | 71.8195316 | 66.8813582 | 74.5172777 |
| 18:45:39 | 0:43:18 | 67.8258374 | 71.2842889 | 69.8195316 | 67.8813582 | 74.5172777 |
| 18:45:40 | 0:43:19 | 67.3258374 | 70.2842889 | 69.8195316 | 67.8813582 | 75.5172777 |
| 18:45:41 | 0:43:20 | 66.5258374 | 70.2842889 | 68.8195316 | 67.8813582 | 74.5172777 |
| 18:45:42 | 0:43:21 | 66.0258374 | 69.2842889 | 67.8195316 | 67.8813582 | 74.5172777 |
| 18:45:43 | 0:43:22 | 66.1258374 | 68.2842889 | 67.8195316 | 68.8813582 | 75.5172777 |
| 18:45:44 | 0:43:23 | 66.6258374 | 67.2842889 | 67.8195316 | 68.8813582 | 75.5172777 |
| 18:45:45 | 0:43:24 | 67.3258374 | 66.2842889 | 67.8195316 | 69.8813582 | 67.3258374 |
| 18:45:46 | 0:43:25 | 67.3258374 | 66.2842889 | 68.8195316 | 69.8813582 | 67.3258374 |
| 18:45:47 | 0:43:26 | 67.3258374 | 65.2842889 | 68.8195316 | 70.8813582 | 67.3258374 |
| 18:45:48 | 0:43:27 | 67.6258374 | 65.2842889 | 68.8195316 | 70.8813582 | 67.6258374 |

|          |         |            |            |            |            |            |
|----------|---------|------------|------------|------------|------------|------------|
| 18:45:49 | 0:43:28 | 68.0258374 | 65.2842889 | 68.8195316 | 70.8813582 | 68.0258374 |
| 18:45:50 | 0:43:29 | 67.7258374 | 65.2842889 | 68.8195316 | 70.8813582 | 67.7258374 |
| 18:45:51 | 0:43:30 | 67.9258374 | 65.2842889 | 68.8195316 | 72.8813582 | 67.9258374 |
| 18:45:52 | 0:43:31 | 67.0258374 | 64.2842889 | 68.8195316 | 72.8813582 | 78.5172777 |
| 18:45:53 | 0:43:32 | 66.4258374 | 64.2842889 | 67.8195316 | 73.8813582 | 77.5172777 |
| 18:45:54 | 0:43:33 | 66.4258374 | 64.2842889 | 67.8195316 | 73.8813582 | 77.5172777 |
| 18:45:55 | 0:43:34 | 66.2258374 | 63.2842889 | 68.8195316 | 72.8813582 | 77.5172777 |
| 18:45:56 | 0:43:35 | 65.9258374 | 63.2842889 | 69.8195316 | 72.8813582 | 73.5172777 |
| 18:45:57 | 0:43:36 | 65.8258374 | 63.2842889 | 71.8195316 | 72.8813582 | 72.5172777 |
| 18:45:58 | 0:43:37 | 65.4258374 | 64.2842889 | 71.8195316 | 72.8813582 | 71.5172777 |
| 18:45:59 | 0:43:38 | 65.4258374 | 64.2842889 | 73.8195316 | 70.8813582 | 71.5172777 |
| 18:46:00 | 0:43:39 | 65.4258374 | 64.2842889 | 73.8195316 | 70.8813582 | 72.5172777 |
| 18:46:01 | 0:43:40 | 65.4258374 | 64.2842889 | 74.8195316 | 70.8813582 | 71.5172777 |
| 18:46:02 | 0:43:41 | 65.4258374 | 64.2842889 | 74.8195316 | 70.8813582 | 71.5172777 |
| 18:46:03 | 0:43:42 | 65.7258374 | 64.2842889 | 74.8195316 | 70.8813582 | 71.5172777 |
| 18:46:04 | 0:43:43 | 66.0258374 | 64.2842889 | 74.8195316 | 70.8813582 | 70.5172777 |
| 18:46:05 | 0:43:44 | 66.6258374 | 64.2842889 | 75.8195316 | 70.8813582 | 70.5172777 |
| 18:46:06 | 0:43:45 | 67.0258374 | 66.2842889 | 76.8195316 | 69.8813582 | 68.5172777 |
| 18:46:07 | 0:43:46 | 67.1258374 | 66.2842889 | 76.8195316 | 69.8813582 | 69.5172777 |
| 18:46:08 | 0:43:47 | 66.7258374 | 66.2842889 | 74.8195316 | 69.8813582 | 69.5172777 |
| 18:46:09 | 0:43:48 | 66.7258374 | 65.2842889 | 72.8195316 | 69.8813582 | 70.5172777 |
| 18:46:10 | 0:43:49 | 67.1258374 | 65.2842889 | 71.8195316 | 69.8813582 | 72.5172777 |
| 18:46:11 | 0:43:50 | 67.2258374 | 64.2842889 | 71.8195316 | 69.8813582 | 73.5172777 |
| 18:46:12 | 0:43:51 | 67.3258374 | 64.2842889 | 71.8195316 | 67.8813582 | 73.5172777 |
| 18:46:13 | 0:43:52 | 67.6258374 | 64.2842889 | 70.8195316 | 67.8813582 | 74.5172777 |
| 18:46:14 | 0:43:53 | 67.8258374 | 64.2842889 | 70.8195316 | 67.8813582 | 74.5172777 |
| 18:46:15 | 0:43:54 | 67.5258374 | 64.2842889 | 71.8195316 | 67.8813582 | 73.5172777 |
| 18:46:16 | 0:43:55 | 67.6258374 | 64.2842889 | 71.8195316 | 67.8813582 | 73.5172777 |
| 18:46:17 | 0:43:56 | 67.4258374 | 64.2842889 | 71.8195316 | 67.8813582 | 74.5172777 |
| 18:46:18 | 0:43:57 | 67.3258374 | 64.2842889 | 71.8195316 | 67.8813582 | 74.5172777 |
| 18:46:19 | 0:43:58 | 67.2258374 | 65.2842889 | 71.8195316 | 67.8813582 | 75.5172777 |
| 18:46:20 | 0:43:59 | 67.3258374 | 65.2842889 | 71.8195316 | 67.8813582 | 75.5172777 |
| 18:46:21 | 0:44:00 | 67.0258374 | 65.2842889 | 69.8195316 | 67.8813582 | 75.5172777 |
| 18:46:22 | 0:44:01 | 66.6258374 | 64.2842889 | 67.8195316 | 67.8813582 | 75.5172777 |
| 18:46:23 | 0:44:02 | 66.9258374 | 64.2842889 | 67.8195316 | 67.8813582 | 75.5172777 |
| 18:46:24 | 0:44:03 | 67.1258374 | 64.2842889 | 67.8195316 | 67.8813582 | 75.5172777 |
| 18:46:25 | 0:44:04 | 66.9258374 | 64.2842889 | 67.8195316 | 67.8813582 | 74.5172777 |
| 18:46:26 | 0:44:05 | 66.9258374 | 64.2842889 | 68.8195316 | 67.8813582 | 74.5172777 |
| 18:46:27 | 0:44:06 | 66.9258374 | 64.2842889 | 68.8195316 | 67.8813582 | 78.5172777 |
| 18:46:28 | 0:44:07 | 66.8258374 | 63.2842889 | 68.8195316 | 67.8813582 | 66.8258374 |
| 18:46:29 | 0:44:08 | 66.5258374 | 63.2842889 | 68.8195316 | 67.8813582 | 66.5258374 |
| 18:46:30 | 0:44:09 | 66.2258374 | 63.2842889 | 67.8195316 | 67.8813582 | 66.2258374 |
| 18:46:31 | 0:44:10 | 65.7258374 | 63.2842889 | 67.8195316 | 67.8813582 | 65.7258374 |
| 18:46:32 | 0:44:11 | 65.6258374 | 63.2842889 | 66.8195316 | 67.8813582 | 77.5172777 |
| 18:46:33 | 0:44:12 | 65.6258374 | 64.2842889 | 66.8195316 | 67.8813582 | 77.5172777 |

|          |         |            |            |            |            |            |
|----------|---------|------------|------------|------------|------------|------------|
| 18:46:34 | 0:44:13 | 65.9258374 | 65.2842889 | 66.8195316 | 67.8813582 | 76.5172777 |
| 18:46:35 | 0:44:14 | 65.6258374 | 64.2842889 | 66.8195316 | 67.8813582 | 74.5172777 |
| 18:46:36 | 0:44:15 | 65.9258374 | 64.2842889 | 67.8195316 | 67.8813582 | 72.5172777 |
| 18:46:37 | 0:44:16 | 65.8258374 | 63.2842889 | 68.8195316 | 68.8813582 | 73.5172777 |
| 18:46:38 | 0:44:17 | 65.9258374 | 64.2842889 | 69.8195316 | 68.8813582 | 73.5172777 |
| 18:46:39 | 0:44:18 | 66.1258374 | 64.2842889 | 69.8195316 | 70.8813582 | 72.5172777 |
| 18:46:40 | 0:44:19 | 66.3258374 | 64.2842889 | 69.8195316 | 70.8813582 | 72.5172777 |
| 18:46:41 | 0:44:20 | 66.4258374 | 63.2842889 | 70.8195316 | 70.8813582 | 72.5172777 |
| 18:46:42 | 0:44:21 | 66.7258374 | 63.2842889 | 70.8195316 | 70.8813582 | 72.5172777 |
| 18:46:43 | 0:44:22 | 66.7258374 | 63.2842889 | 70.8195316 | 71.8813582 | 72.5172777 |
| 18:46:44 | 0:44:23 | 66.9258374 | 63.2842889 | 70.8195316 | 72.8813582 | 73.5172777 |
| 18:46:45 | 0:44:24 | 66.8258374 | 63.2842889 | 70.8195316 | 72.8813582 | 73.5172777 |
| 18:46:46 | 0:44:25 | 67.6258374 | 63.2842889 | 70.8195316 | 72.8813582 | 74.5172777 |
| 18:46:47 | 0:44:26 | 68.3258374 | 64.2842889 | 72.8195316 | 73.8813582 | 72.5172777 |
| 18:46:48 | 0:44:27 | 68.3258374 | 64.2842889 | 72.8195316 | 73.8813582 | 72.5172777 |
| 18:46:49 | 0:44:28 | 68.6258374 | 64.2842889 | 74.8195316 | 73.8813582 | 71.5172777 |
| 18:46:50 | 0:44:29 | 68.2258374 | 64.2842889 | 74.8195316 | 73.8813582 | 69.5172777 |
| 18:46:51 | 0:44:30 | 68.4258374 | 64.2842889 | 74.8195316 | 73.8813582 | 69.5172777 |
| 18:46:52 | 0:44:31 | 68.4258374 | 63.2842889 | 74.8195316 | 73.8813582 | 69.5172777 |
| 18:46:53 | 0:44:32 | 69.3258374 | 63.2842889 | 74.8195316 | 73.8813582 | 71.5172777 |
| 18:46:54 | 0:44:33 | 69.4258374 | 64.2842889 | 75.8195316 | 73.8813582 | 72.5172777 |
| 18:46:55 | 0:44:34 | 69.7258374 | 65.2842889 | 75.8195316 | 73.8813582 | 75.5172777 |
| 18:46:56 | 0:44:35 | 70.0258374 | 66.2842889 | 76.8195316 | 73.8813582 | 75.5172777 |
| 18:46:57 | 0:44:36 | 69.8258374 | 66.2842889 | 76.8195316 | 73.8813582 | 75.5172777 |
| 18:46:58 | 0:44:37 | 70.3258374 | 66.2842889 | 78.8195316 | 73.8813582 | 75.5172777 |
| 18:46:59 | 0:44:38 | 70.8258374 | 66.2842889 | 78.8195316 | 72.8813582 | 75.5172777 |
| 18:47:00 | 0:44:39 | 71.0258374 | 66.2842889 | 77.8195316 | 72.8813582 | 75.5172777 |
| 18:47:01 | 0:44:40 | 71.2258374 | 67.2842889 | 77.8195316 | 72.8813582 | 75.5172777 |
| 18:47:02 | 0:44:41 | 71.9258374 | 67.2842889 | 77.8195316 | 72.8813582 | 77.5172777 |
| 18:47:03 | 0:44:42 | 72.1258374 | 66.2842889 | 77.8195316 | 72.8813582 | 78.5172777 |
| 18:47:04 | 0:44:43 | 73.0258374 | 66.2842889 | 78.8195316 | 78.8813582 | 78.5172777 |
| 18:47:05 | 0:44:44 | 72.9258374 | 66.2842889 | 78.8195316 | 79.8813582 | 78.5172777 |
| 18:47:06 | 0:44:45 | 72.6258374 | 67.2842889 | 78.8195316 | 78.8813582 | 78.5172777 |
| 18:47:07 | 0:44:46 | 72.5258374 | 67.2842889 | 79.8195316 | 78.8813582 | 77.5172777 |
| 18:47:08 | 0:44:47 | 72.7258374 | 66.2842889 | 81.8195316 | 78.8813582 | 77.5172777 |
| 18:47:09 | 0:44:48 | 72.8258374 | 67.2842889 | 81.8195316 | 78.8813582 | 77.5172777 |
| 18:47:10 | 0:44:49 | 72.8258374 | 66.2842889 | 82.8195316 | 77.8813582 | 77.5172777 |
| 18:47:11 | 0:44:50 | 72.0258374 | 66.2842889 | 81.8195316 | 74.8813582 | 76.5172777 |
| 18:47:12 | 0:44:51 | 71.9258374 | 67.2842889 | 80.8195316 | 74.8813582 | 76.5172777 |
| 18:47:13 | 0:44:52 | 71.6258374 | 67.2842889 | 79.8195316 | 74.8813582 | 76.5172777 |
| 18:47:14 | 0:44:53 | 71.3258374 | 67.2842889 | 78.8195316 | 74.8813582 | 76.5172777 |
| 18:47:15 | 0:44:54 | 71.1258374 | 67.2842889 | 77.8195316 | 74.8813582 | 76.5172777 |
| 18:47:16 | 0:44:55 | 71.0258374 | 67.2842889 | 76.8195316 | 74.8813582 | 76.5172777 |
| 18:47:17 | 0:44:56 | 71.0258374 | 67.2842889 | 76.8195316 | 74.8813582 | 75.5172777 |
| 18:47:18 | 0:44:57 | 71.1258374 | 67.2842889 | 76.8195316 | 74.8813582 | 75.5172777 |

|          |         |            |            |            |            |            |
|----------|---------|------------|------------|------------|------------|------------|
| 18:47:19 | 0:44:58 | 71.1258374 | 67.2842889 | 75.8195316 | 74.8813582 | 75.5172777 |
| 18:47:20 | 0:44:59 | 71.3258374 | 67.2842889 | 75.8195316 | 74.8813582 | 76.5172777 |
| 18:47:21 | 0:45:00 | 71.2258374 | 67.2842889 | 74.8195316 | 74.8813582 | 75.5172777 |
| 18:47:22 | 0:45:01 | 70.9258374 | 67.2842889 | 74.8195316 | 73.8813582 | 75.5172777 |
| 18:47:23 | 0:45:02 | 70.8258374 | 67.2842889 | 75.8195316 | 73.8813582 | 75.5172777 |
| 18:47:24 | 0:45:03 | 70.8258374 | 65.2842889 | 75.8195316 | 73.8813582 | 75.5172777 |
| 18:47:25 | 0:45:04 | 70.3258374 | 65.2842889 | 77.8195316 | 72.8813582 | 77.5172777 |
| 18:47:26 | 0:45:05 | 70.2258374 | 65.2842889 | 77.8195316 | 72.8813582 | 77.5172777 |
| 18:47:27 | 0:45:06 | 70.3258374 | 65.2842889 | 77.8195316 | 72.8813582 | 76.5172777 |
| 18:47:28 | 0:45:07 | 70.3258374 | 65.2842889 | 77.8195316 | 71.8813582 | 76.5172777 |
| 18:47:29 | 0:45:08 | 70.6258374 | 64.2842889 | 79.8195316 | 71.8813582 | 77.5172777 |
| 18:47:30 | 0:45:09 | 70.9258374 | 64.2842889 | 80.8195316 | 72.8813582 | 77.5172777 |
| 18:47:31 | 0:45:10 | 70.6258374 | 63.2842889 | 79.8195316 | 72.8813582 | 79.5172777 |
| 18:47:32 | 0:45:11 | 69.8258374 | 63.2842889 | 79.8195316 | 71.8813582 | 80.5172777 |
| 18:47:33 | 0:45:12 | 69.8258374 | 63.2842889 | 79.8195316 | 71.8813582 | 81.5172777 |
| 18:47:34 | 0:45:13 | 69.9258374 | 62.2842889 | 79.8195316 | 72.8813582 | 81.5172777 |
| 18:47:35 | 0:45:14 | 70.1258374 | 62.2842889 | 79.8195316 | 73.8813582 | 81.5172777 |
| 18:47:36 | 0:45:15 | 70.8258374 | 62.2842889 | 79.8195316 | 73.8813582 | 82.5172777 |
| 18:47:37 | 0:45:16 | 71.0258374 | 62.2842889 | 79.8195316 | 73.8813582 | 71.0258374 |
| 18:47:38 | 0:45:17 | 71.0258374 | 64.2842889 | 75.8195316 | 74.8813582 | 71.0258374 |
| 18:47:39 | 0:45:18 | 70.9258374 | 64.2842889 | 75.8195316 | 74.8813582 | 70.9258374 |
| 18:47:40 | 0:45:19 | 70.6258374 | 64.2842889 | 73.8195316 | 74.8813582 | 70.6258374 |
| 18:47:41 | 0:45:20 | 71.0258374 | 65.2842889 | 73.8195316 | 75.8813582 | 83.5172777 |
| 18:47:42 | 0:45:21 | 71.0258374 | 65.2842889 | 73.8195316 | 75.8813582 | 83.5172777 |
| 18:47:43 | 0:45:22 | 71.9258374 | 65.2842889 | 73.8195316 | 75.8813582 | 83.5172777 |
| 18:47:44 | 0:45:23 | 71.9258374 | 65.2842889 | 72.8195316 | 75.8813582 | 84.5172777 |
| 18:47:45 | 0:45:24 | 72.3258374 | 65.2842889 | 70.8195316 | 75.8813582 | 84.5172777 |
| 18:47:46 | 0:45:25 | 72.2258374 | 65.2842889 | 68.8195316 | 75.8813582 | 82.5172777 |
| 18:47:47 | 0:45:26 | 71.8258374 | 65.2842889 | 66.8195316 | 77.8813582 | 81.5172777 |
| 18:47:48 | 0:45:27 | 72.2258374 | 66.2842889 | 67.8195316 | 77.8813582 | 79.5172777 |
| 18:47:49 | 0:45:28 | 72.4258374 | 67.2842889 | 67.8195316 | 77.8813582 | 79.5172777 |
| 18:47:50 | 0:45:29 | 72.4258374 | 67.2842889 | 67.8195316 | 77.8813582 | 78.5172777 |
| 18:47:51 | 0:45:30 | 72.0258374 | 66.2842889 | 68.8195316 | 77.8813582 | 78.5172777 |
| 18:47:52 | 0:45:31 | 72.2258374 | 66.2842889 | 68.8195316 | 77.8813582 | 78.5172777 |
| 18:47:53 | 0:45:32 | 72.8258374 | 66.2842889 | 68.8195316 | 77.8813582 | 78.5172777 |
| 18:47:54 | 0:45:33 | 73.3258374 | 67.2842889 | 70.8195316 | 76.8813582 | 77.5172777 |
| 18:47:55 | 0:45:34 | 73.2258374 | 67.2842889 | 70.8195316 | 76.8813582 | 75.5172777 |
| 18:47:56 | 0:45:35 | 73.5258374 | 67.2842889 | 74.8195316 | 76.8813582 | 73.5172777 |
| 18:47:57 | 0:45:36 | 73.4258374 | 67.2842889 | 73.8195316 | 76.8813582 | 72.5172777 |
| 18:47:58 | 0:45:37 | 74.2258374 | 71.2842889 | 73.8195316 | 80.8813582 | 72.5172777 |
| 18:47:59 | 0:45:38 | 74.0258374 | 69.2842889 | 72.8195316 | 80.8813582 | 72.5172777 |
| 18:48:00 | 0:45:39 | 74.0258374 | 69.2842889 | 72.8195316 | 80.8813582 | 72.5172777 |
| 18:48:01 | 0:45:40 | 74.0258374 | 70.2842889 | 72.8195316 | 78.8813582 | 72.5172777 |
| 18:48:02 | 0:45:41 | 73.8258374 | 69.2842889 | 72.8195316 | 78.8813582 | 73.5172777 |
| 18:48:03 | 0:45:42 | 73.8258374 | 69.2842889 | 72.8195316 | 77.8813582 | 74.5172777 |

|          |         |            |            |            |            |            |
|----------|---------|------------|------------|------------|------------|------------|
| 18:48:04 | 0:45:43 | 73.5258374 | 69.2842889 | 72.8195316 | 76.8813582 | 75.5172777 |
| 18:48:05 | 0:45:44 | 72.9258374 | 68.2842889 | 72.8195316 | 73.8813582 | 75.5172777 |
| 18:48:06 | 0:45:45 | 72.4258374 | 67.2842889 | 72.8195316 | 73.8813582 | 75.5172777 |
| 18:48:07 | 0:45:46 | 72.0258374 | 67.2842889 | 72.8195316 | 70.8813582 | 75.5172777 |
| 18:48:08 | 0:45:47 | 72.0258374 | 67.2842889 | 73.8195316 | 70.8813582 | 75.5172777 |
| 18:48:09 | 0:45:48 | 71.8258374 | 67.2842889 | 73.8195316 | 70.8813582 | 75.5172777 |
| 18:48:10 | 0:45:49 | 71.6258374 | 67.2842889 | 73.8195316 | 70.8813582 | 74.5172777 |
| 18:48:11 | 0:45:50 | 71.4258374 | 67.2842889 | 72.8195316 | 70.8813582 | 73.5172777 |
| 18:48:12 | 0:45:51 | 71.1258374 | 67.2842889 | 71.8195316 | 69.8813582 | 73.5172777 |
| 18:48:13 | 0:45:52 | 70.4258374 | 64.2842889 | 71.8195316 | 69.8813582 | 72.5172777 |
| 18:48:14 | 0:45:53 | 70.4258374 | 64.2842889 | 71.8195316 | 69.8813582 | 72.5172777 |
| 18:48:15 | 0:45:54 | 70.5258374 | 64.2842889 | 71.8195316 | 69.8813582 | 72.5172777 |
| 18:48:16 | 0:45:55 | 70.6258374 | 65.2842889 | 72.8195316 | 70.8813582 | 72.5172777 |
| 18:48:17 | 0:45:56 | 70.7258374 | 65.2842889 | 72.8195316 | 71.8813582 | 72.5172777 |
| 18:48:18 | 0:45:57 | 71.4258374 | 66.2842889 | 72.8195316 | 71.8813582 | 74.5172777 |
| 18:48:19 | 0:45:58 | 71.9258374 | 66.2842889 | 74.8195316 | 71.8813582 | 75.5172777 |
| 18:48:20 | 0:45:59 | 71.9258374 | 66.2842889 | 73.8195316 | 71.8813582 | 74.5172777 |
| 18:48:21 | 0:46:00 | 72.8258374 | 66.2842889 | 72.8195316 | 70.8813582 | 73.5172777 |
| 18:48:22 | 0:46:01 | 73.0258374 | 66.2842889 | 70.8195316 | 70.8813582 | 73.5172777 |
| 18:48:23 | 0:46:02 | 72.6258374 | 66.2842889 | 70.8195316 | 70.8813582 | 72.5172777 |
| 18:48:24 | 0:46:03 | 72.4258374 | 64.2842889 | 68.8195316 | 70.8813582 | 72.5172777 |
| 18:48:25 | 0:46:04 | 73.5258374 | 64.2842889 | 67.8195316 | 70.8813582 | 74.5172777 |
| 18:48:26 | 0:46:05 | 73.7258374 | 64.2842889 | 66.8195316 | 69.8813582 | 76.5172777 |
| 18:48:27 | 0:46:06 | 73.7258374 | 64.2842889 | 66.8195316 | 69.8813582 | 76.5172777 |
| 18:48:28 | 0:46:07 | 73.6258374 | 64.2842889 | 66.8195316 | 69.8813582 | 76.5172777 |
| 18:48:29 | 0:46:08 | 74.0258374 | 63.2842889 | 66.8195316 | 69.8813582 | 77.5172777 |
| 18:48:30 | 0:46:09 | 74.1258374 | 64.2842889 | 66.8195316 | 69.8813582 | 77.5172777 |
| 18:48:31 | 0:46:10 | 74.7258374 | 65.2842889 | 66.8195316 | 70.8813582 | 78.5172777 |
| 18:48:32 | 0:46:11 | 75.1258374 | 65.2842889 | 66.8195316 | 70.8813582 | 79.5172777 |
| 18:48:33 | 0:46:12 | 75.4258374 | 65.2842889 | 66.8195316 | 69.8813582 | 80.5172777 |
| 18:48:34 | 0:46:13 | 75.4258374 | 65.2842889 | 67.8195316 | 69.8813582 | 80.5172777 |
| 18:48:35 | 0:46:14 | 75.5258374 | 64.2842889 | 68.8195316 | 69.8813582 | 82.5172777 |
| 18:48:36 | 0:46:15 | 75.5258374 | 64.2842889 | 68.8195316 | 69.8813582 | 82.5172777 |
| 18:48:37 | 0:46:16 | 75.5258374 | 64.2842889 | 68.8195316 | 68.8813582 | 85.5172777 |
| 18:48:38 | 0:46:17 | 75.1258374 | 63.2842889 | 68.8195316 | 68.8813582 | 85.5172777 |
| 18:48:39 | 0:46:18 | 74.9258374 | 63.2842889 | 68.8195316 | 68.8813582 | 84.5172777 |
| 18:48:40 | 0:46:19 | 74.1258374 | 63.2842889 | 68.8195316 | 68.8813582 | 80.5172777 |
| 18:48:41 | 0:46:20 | 73.5258374 | 63.2842889 | 68.8195316 | 69.8813582 | 76.5172777 |
| 18:48:42 | 0:46:21 | 73.8258374 | 63.2842889 | 68.8195316 | 70.8813582 | 76.5172777 |
| 18:48:43 | 0:46:22 | 73.6258374 | 63.2842889 | 69.8195316 | 70.8813582 | 76.5172777 |
| 18:48:44 | 0:46:23 | 73.8258374 | 63.2842889 | 69.8195316 | 70.8813582 | 77.5172777 |
| 18:48:45 | 0:46:24 | 74.2258374 | 63.2842889 | 68.8195316 | 70.8813582 | 77.5172777 |
| 18:48:46 | 0:46:25 | 74.5258374 | 63.2842889 | 68.8195316 | 71.8813582 | 78.5172777 |
| 18:48:47 | 0:46:26 | 74.6258374 | 62.2842889 | 68.8195316 | 71.8813582 | 78.5172777 |
| 18:48:48 | 0:46:27 | 75.0258374 | 62.2842889 | 69.8195316 | 72.8813582 | 78.5172777 |

|          |         |            |            |            |            |            |
|----------|---------|------------|------------|------------|------------|------------|
| 18:48:49 | 0:46:28 | 75.7258374 | 62.2842889 | 69.8195316 | 72.8813582 | 77.5172777 |
| 18:48:50 | 0:46:29 | 76.5258374 | 63.2842889 | 70.8195316 | 72.8813582 | 77.5172777 |
| 18:48:51 | 0:46:30 | 76.4258374 | 63.2842889 | 70.8195316 | 72.8813582 | 75.5172777 |
| 18:48:52 | 0:46:31 | 76.4258374 | 63.2842889 | 70.8195316 | 73.8813582 | 75.5172777 |
| 18:48:53 | 0:46:32 | 77.0258374 | 64.2842889 | 70.8195316 | 73.8813582 | 77.5172777 |
| 18:48:54 | 0:46:33 | 76.9258374 | 64.2842889 | 71.8195316 | 74.8813582 | 78.5172777 |
| 18:48:55 | 0:46:34 | 77.5258374 | 64.2842889 | 71.8195316 | 74.8813582 | 79.5172777 |
| 18:48:56 | 0:46:35 | 77.8258374 | 64.2842889 | 73.8195316 | 73.8813582 | 79.5172777 |
| 18:48:57 | 0:46:36 | 77.6258374 | 64.2842889 | 74.8195316 | 73.8813582 | 79.5172777 |
| 18:48:58 | 0:46:37 | 78.1258374 | 64.2842889 | 74.8195316 | 73.8813582 | 80.5172777 |
| 18:48:59 | 0:46:38 | 77.7258374 | 67.2842889 | 74.8195316 | 73.8813582 | 80.5172777 |
| 18:49:00 | 0:46:39 | 76.9258374 | 67.2842889 | 74.8195316 | 71.8813582 | 80.5172777 |
| 18:49:01 | 0:46:40 | 76.0258374 | 66.2842889 | 74.8195316 | 71.8813582 | 80.5172777 |
| 18:49:02 | 0:46:41 | 75.8258374 | 66.2842889 | 74.8195316 | 71.8813582 | 79.5172777 |
| 18:49:03 | 0:46:42 | 76.0258374 | 66.2842889 | 74.8195316 | 72.8813582 | 77.5172777 |
| 18:49:04 | 0:46:43 | 76.1258374 | 66.2842889 | 74.8195316 | 72.8813582 | 77.5172777 |
| 18:49:05 | 0:46:44 | 76.0258374 | 66.2842889 | 74.8195316 | 72.8813582 | 77.5172777 |
| 18:49:06 | 0:46:45 | 75.6258374 | 66.2842889 | 73.8195316 | 71.8813582 | 74.5172777 |
| 18:49:07 | 0:46:46 | 75.1258374 | 66.2842889 | 73.8195316 | 71.8813582 | 72.5172777 |
| 18:49:08 | 0:46:47 | 74.7258374 | 66.2842889 | 72.8195316 | 71.8813582 | 71.5172777 |
| 18:49:09 | 0:46:48 | 74.5258374 | 66.2842889 | 72.8195316 | 72.8813582 | 71.5172777 |
| 18:49:10 | 0:46:49 | 74.4258374 | 67.2842889 | 71.8195316 | 72.8813582 | 71.5172777 |
| 18:49:11 | 0:46:50 | 74.2258374 | 66.2842889 | 71.8195316 | 72.8813582 | 72.5172777 |
| 18:49:12 | 0:46:51 | 74.2258374 | 66.2842889 | 71.8195316 | 73.8813582 | 73.5172777 |
| 18:49:13 | 0:46:52 | 74.1258374 | 66.2842889 | 71.8195316 | 74.8813582 | 73.5172777 |
| 18:49:14 | 0:46:53 | 74.0258374 | 67.2842889 | 71.8195316 | 74.8813582 | 74.5172777 |
| 18:49:15 | 0:46:54 | 74.4258374 | 67.2842889 | 71.8195316 | 74.8813582 | 75.5172777 |
| 18:49:16 | 0:46:55 | 74.8258374 | 67.2842889 | 71.8195316 | 75.8813582 | 76.5172777 |
| 18:49:17 | 0:46:56 | 75.2258374 | 68.2842889 | 71.8195316 | 75.8813582 | 76.5172777 |
| 18:49:18 | 0:46:57 | 75.8258374 | 68.2842889 | 71.8195316 | 75.8813582 | 77.5172777 |
| 18:49:19 | 0:46:58 | 76.4258374 | 72.2842889 | 71.8195316 | 75.8813582 | 77.5172777 |
| 18:49:20 | 0:46:59 | 76.8258374 | 72.2842889 | 72.8195316 | 76.8813582 | 77.5172777 |
| 18:49:21 | 0:47:00 | 76.8258374 | 71.2842889 | 73.8195316 | 76.8813582 | 77.5172777 |
| 18:49:22 | 0:47:01 | 76.6258374 | 68.2842889 | 73.8195316 | 76.8813582 | 77.5172777 |

| Person 6   | Person 3   | Person 5   | Person 10  | Person 11 | Person 8 |
|------------|------------|------------|------------|-----------|----------|
| 75.3734324 | 64.9289015 | 86.421441  |            | 75.928496 |          |
| 75.3734324 | 63.9289015 | 86.421441  |            | 74.928496 |          |
| 75.3734324 | 63.9289015 | 83.421441  |            | 74.928496 |          |
| 74.3734324 | 63.9289015 | 83.421441  |            | 74.928496 |          |
| 74.3734324 | 63.9289015 | 83.421441  |            | 73.928496 |          |
| 74.3734324 | 63.9289015 | 83.421441  |            | 72.928496 |          |
| 74.3734324 | 63.9289015 | 83.421441  |            | 72.928496 |          |
| 74.3734324 | 63.9289015 | 82.421441  |            | 72.928496 |          |
| 73.3734324 | 63.9289015 | 83.421441  |            | 72.928496 |          |
| 73.3734324 | 63.9289015 | 84.421441  |            | 72.928496 |          |
| 74.3734324 | 62.9289015 | 84.421441  |            | 71.928496 |          |
| 74.3734324 | 62.9289015 | 84.421441  |            | 71.928496 |          |
| 72.3734324 | 62.9289015 | 84.421441  |            | 71.928496 |          |
| 73.3734324 | 62.9289015 | 84.421441  | 70.1725398 | 71.928496 |          |
| 73.3734324 | 62.9289015 | 84.421441  | 71.1725398 | 71.928496 |          |
| 73.3734324 | 62.9289015 | 85.421441  | 71.1725398 | 71.928496 |          |
| 73.3734324 | 63.9289015 | 85.421441  | 72.1725398 | 69.928496 |          |
| 73.3734324 | 63.9289015 | 86.421441  | 72.1725398 | 69.928496 |          |
| 73.3734324 | 64.9289015 | 76.1428504 | 72.1725398 | 69.928496 |          |
| 73.3734324 | 65.9289015 | 75.4428504 | 68.1725398 | 68.928496 |          |
| 73.3734324 | 65.9289015 | 75.4428504 | 68.1725398 | 68.928496 |          |
| 74.3734324 | 68.9289015 | 76.2428504 | 68.1725398 | 68.928496 |          |
| 74.3734324 | 68.9289015 | 75.8428504 | 67.1725398 | 68.928496 |          |
| 74.3734324 | 68.9289015 | 76.2428504 | 67.1725398 | 68.928496 |          |
| 74.3734324 | 68.9289015 | 76.1428504 | 67.1725398 | 68.928496 |          |
| 75.3734324 | 71.9289015 | 76.0428504 | 68.1725398 | 68.928496 |          |
| 75.3734324 | 71.9289015 | 75.3428504 | 68.1725398 | 68.928496 |          |
| 75.3734324 | 71.9289015 | 74.7428504 | 67.1725398 | 67.928496 |          |
| 75.3734324 | 71.9289015 | 74.0428504 | 67.1725398 | 67.928496 |          |
| 75.3734324 | 71.9289015 | 74.0428504 | 67.1725398 | 70.928496 |          |
| 77.3734324 | 69.9289015 | 82.421441  | 69.1725398 | 74.928496 |          |
| 77.3734324 | 68.9289015 | 81.421441  | 69.1725398 | 74.928496 |          |
| 76.3734324 | 68.9289015 | 81.421441  | 71.1725398 | 75.928496 |          |
| 76.3734324 | 68.9289015 | 80.421441  | 72.1725398 | 75.928496 |          |
| 75.3734324 | 68.9289015 | 78.421441  | 72.1725398 | 75.928496 |          |
| 75.3734324 | 67.9289015 | 73.421441  | 72.1725398 | 71.928496 |          |
| 75.3734324 | 67.9289015 | 72.421441  | 72.1725398 | 70.928496 |          |
| 75.3734324 | 67.9289015 | 72.421441  | 72.1725398 | 70.928496 |          |
| 75.3734324 | 76.9289015 | 71.421441  | 72.1725398 | 70.928496 |          |
| 75.3734324 | 80.9289015 | 71.421441  | 72.1725398 | 70.928496 |          |
| 75.3734324 | 80.9289015 | 71.421441  | 72.1725398 | 72.928496 |          |
| 74.3734324 | 78.9289015 | 71.421441  | 71.1725398 | 72.928496 |          |



|            |            |            |            |           |
|------------|------------|------------|------------|-----------|
| 74.3734324 | 78.9289015 | 71.421441  | 72.1725398 | 71.928496 |
| 73.3734324 | 76.9289015 | 70.421441  | 72.1725398 | 71.928496 |
| 68.3734324 | 76.9289015 | 70.421441  | 73.1725398 | 71.928496 |
| 69.3734324 | 76.9289015 | 70.421441  | 73.1725398 | 71.928496 |
| 69.3734324 | 76.9289015 | 72.421441  | 73.1725398 | 71.928496 |
| 69.3734324 | 76.9289015 | 73.421441  | 73.1725398 | 70.928496 |
| 69.3734324 | 79.9289015 | 73.421441  | 73.1725398 | 69.928496 |
| 65.3734324 | 80.9289015 | 75.421441  | 73.1725398 | 66.928496 |
| 65.3734324 | 80.9289015 | 76.421441  | 73.1725398 | 66.928496 |
| 65.3734324 | 80.9289015 | 76.421441  | 73.1725398 | 65.928496 |
| 66.3734324 | 80.9289015 | 75.421441  | 71.1725398 | 65.928496 |
| 66.3734324 | 80.9289015 | 75.421441  | 70.1725398 | 65.928496 |
| 66.3734324 | 80.9289015 | 75.421441  | 70.1725398 | 65.928496 |
| 64.3734324 | 80.9289015 | 75.421441  | 70.1725398 | 66.928496 |
| 64.3734324 | 81.9289015 | 76.421441  | 70.1725398 | 67.928496 |
| 64.3734324 | 81.9289015 | 76.421441  | 70.1725398 | 68.928496 |
| 66.3734324 | 81.9289015 | 76.421441  | 70.1725398 | 69.928496 |
| 66.3734324 | 81.9289015 | 77.421441  | 69.1725398 | 73.928496 |
| 66.3734324 | 82.9289015 | 77.421441  | 69.1725398 | 74.928496 |
| 66.3734324 | 82.9289015 | 80.421441  | 71.1725398 | 74.928496 |
| 65.3734324 | 82.9289015 | 81.421441  | 71.1725398 | 74.928496 |
| 65.3734324 | 83.9289015 | 81.421441  | 71.1725398 | 74.928496 |
| 65.3734324 | 83.9289015 | 82.421441  | 69.1725398 | 72.928496 |
| 66.3734324 | 81.9289015 | 82.421441  | 69.1725398 | 72.928496 |
| 66.3734324 | 76.9289015 | 70.6428504 | 69.1725398 | 71.928496 |
| 66.3734324 | 76.9289015 | 71.0428504 | 69.1725398 | 72.928496 |
| 65.3734324 | 75.9289015 | 70.9428504 | 69.1725398 | 73.928496 |
| 64.3734324 | 74.9289015 | 78.421441  | 68.1725398 | 73.928496 |
| 64.3734324 | 73.9289015 | 78.421441  | 68.1725398 | 73.928496 |
| 64.3734324 | 73.9289015 | 77.421441  | 67.1725398 | 73.928496 |
| 64.3734324 | 73.9289015 | 77.421441  | 67.1725398 | 73.928496 |
| 64.3734324 | 72.9289015 | 78.421441  | 68.1725398 | 73.928496 |
| 64.3734324 | 72.9289015 | 78.421441  | 68.1725398 | 73.928496 |
| 63.3734324 | 71.9289015 | 78.421441  | 69.1725398 | 75.928496 |
| 62.3734324 | 71.9289015 | 78.421441  | 69.1725398 | 76.928496 |
| 62.3734324 | 70.9289015 | 78.421441  | 68.1725398 | 76.928496 |
| 62.3734324 | 70.9289015 | 78.421441  | 68.1725398 | 77.928496 |
| 62.3734324 | 71.9289015 | 77.421441  | 68.1725398 | 78.928496 |
| 63.3734324 | 74.9289015 | 77.421441  | 68.1725398 | 77.928496 |
| 64.3734324 | 74.9289015 | 77.421441  | 72.1725398 | 75.928496 |
| 64.3734324 | 74.9289015 | 78.421441  | 73.1725398 | 73.928496 |
| 64.3734324 | 74.9289015 | 79.421441  | 73.1725398 | 72.928496 |
| 65.3734324 | 74.9289015 | 78.421441  | 74.1725398 | 72.928496 |
| 66.3734324 | 73.9289015 | 79.421441  | 74.1725398 | 72.928496 |

|            |            |           |            |           |
|------------|------------|-----------|------------|-----------|
| 66.3734324 | 73.9289015 | 79.421441 | 74.1725398 | 72.928496 |
| 66.3734324 | 75.9289015 | 80.421441 | 74.1725398 | 72.928496 |
| 66.3734324 | 73.9289015 | 79.421441 | 77.1725398 | 71.928496 |
| 67.3734324 | 72.9289015 | 79.421441 | 77.1725398 | 70.928496 |
| 70.3734324 | 72.9289015 | 78.421441 | 77.1725398 | 69.928496 |
| 70.3734324 | 72.9289015 | 78.421441 | 78.1725398 | 69.928496 |
| 70.3734324 | 73.9289015 | 78.421441 | 78.1725398 | 68.928496 |
| 80.3734324 | 73.9289015 | 77.421441 | 78.1725398 | 67.928496 |
| 81.3734324 | 73.9289015 | 77.421441 | 77.1725398 | 66.928496 |
| 81.3734324 | 72.9289015 | 77.421441 | 77.1725398 | 65.928496 |
| 81.3734324 | 72.9289015 | 77.421441 | 77.1725398 | 65.928496 |
| 79.3734324 | 72.9289015 | 77.421441 | 77.1725398 | 65.928496 |
| 77.3734324 | 72.9289015 | 77.421441 | 77.1725398 | 65.928496 |
| 76.3734324 | 72.9289015 | 76.421441 | 77.1725398 | 66.928496 |
| 76.3734324 | 72.9289015 | 72.421441 | 77.1725398 | 67.928496 |
| 75.3734324 | 72.9289015 | 72.421441 | 77.1725398 | 67.928496 |
| 75.3734324 | 72.9289015 | 71.421441 | 77.1725398 | 69.928496 |
| 75.3734324 | 73.9289015 | 71.421441 | 77.1725398 | 69.928496 |
| 75.3734324 | 73.9289015 | 70.421441 | 78.1725398 | 70.928496 |
| 75.3734324 | 73.9289015 | 70.421441 | 82.1725398 | 70.928496 |
| 74.3734324 | 73.9289015 | 69.421441 | 82.1725398 | 69.928496 |
| 74.3734324 | 72.9289015 | 69.421441 | 83.1725398 | 69.928496 |
| 73.3734324 | 72.9289015 | 69.421441 | 83.1725398 | 68.928496 |
| 72.3734324 | 72.9289015 | 69.421441 | 83.1725398 | 68.928496 |
| 72.3734324 | 73.9289015 | 69.421441 | 82.1725398 | 67.928496 |
| 71.3734324 | 80.9289015 | 70.421441 | 81.1725398 | 67.928496 |
| 71.3734324 | 80.9289015 | 70.421441 | 80.1725398 | 68.928496 |
| 71.3734324 | 81.9289015 | 73.421441 | 78.1725398 | 68.928496 |
| 69.3734324 | 81.9289015 | 76.421441 | 77.1725398 | 70.928496 |
| 68.3734324 | 81.9289015 | 76.421441 | 76.1725398 | 72.928496 |
| 68.3734324 | 83.9289015 | 76.421441 | 76.1725398 | 75.928496 |
| 65.3734324 | 83.9289015 | 76.421441 | 74.1725398 | 78.928496 |
| 65.3734324 | 81.9289015 | 75.421441 | 74.1725398 | 78.928496 |
| 65.3734324 | 78.9289015 | 73.421441 | 72.1725398 | 78.928496 |
| 65.3734324 | 75.9289015 | 72.421441 | 72.1725398 | 74.928496 |
| 65.3734324 | 73.9289015 | 72.421441 | 71.1725398 | 72.928496 |
| 65.3734324 | 73.9289015 | 72.421441 | 71.1725398 | 72.928496 |
| 66.3734324 | 72.9289015 | 73.421441 | 72.1725398 | 72.928496 |
| 66.3734324 | 70.9289015 | 73.421441 | 72.1725398 | 72.928496 |
| 66.3734324 | 70.9289015 | 75.421441 | 72.1725398 | 72.928496 |
| 66.3734324 | 71.9289015 | 75.421441 | 72.1725398 | 73.928496 |
| 66.3734324 | 71.9289015 | 75.421441 | 72.1725398 | 73.928496 |
| 66.3734324 | 69.9289015 | 74.421441 | 71.1725398 | 68.928496 |
| 67.3734324 | 70.9289015 | 73.421441 | 70.1725398 | 68.928496 |
| 67.3734324 | 70.9289015 | 74.421441 | 70.1725398 | 68.928496 |

|            |            |           |            |           |
|------------|------------|-----------|------------|-----------|
| 68.3734324 | 71.9289015 | 74.421441 | 70.1725398 | 69.928496 |
| 70.3734324 | 73.9289015 | 76.421441 | 70.1725398 | 69.928496 |
| 70.3734324 | 75.9289015 | 75.421441 | 75.1725398 | 69.928496 |
| 72.3734324 | 79.9289015 | 75.421441 | 76.1725398 | 69.928496 |
| 73.3734324 | 80.9289015 | 77.421441 | 77.1725398 | 68.928496 |
| 73.3734324 | 80.9289015 | 76.421441 | 77.1725398 | 67.928496 |
| 74.3734324 | 79.9289015 | 76.421441 | 77.1725398 | 66.928496 |
| 77.3734324 | 77.9289015 | 76.421441 | 77.1725398 | 66.928496 |
| 77.3734324 | 76.9289015 | 76.421441 | 77.1725398 | 66.928496 |
| 78.3734324 | 75.9289015 | 76.421441 | 77.1725398 | 66.928496 |
| 79.3734324 | 75.9289015 | 76.421441 | 77.1725398 | 65.928496 |
| 79.3734324 | 75.9289015 | 76.421441 | 78.1725398 | 65.928496 |
| 79.3734324 | 75.9289015 | 76.421441 | 77.1725398 | 66.928496 |
| 79.3734324 | 75.9289015 | 76.421441 | 76.1725398 | 67.928496 |
| 79.3734324 | 74.9289015 | 76.421441 | 74.1725398 | 67.928496 |
| 79.3734324 | 77.9289015 | 80.421441 | 74.1725398 | 68.928496 |
| 79.3734324 | 77.9289015 | 81.421441 | 73.1725398 | 69.928496 |
| 79.3734324 | 77.9289015 | 82.421441 | 73.1725398 | 72.928496 |
| 78.3734324 | 76.9289015 | 82.421441 | 74.1725398 | 75.928496 |
| 77.3734324 | 76.9289015 | 82.421441 | 75.1725398 | 75.928496 |
| 73.3734324 | 76.9289015 | 81.421441 | 75.1725398 | 77.928496 |
| 73.3734324 | 76.9289015 | 81.421441 | 75.1725398 | 77.928496 |
| 73.3734324 | 76.9289015 | 81.421441 | 75.1725398 | 75.928496 |
| 73.3734324 | 76.9289015 | 81.421441 | 75.1725398 | 74.928496 |
| 73.3734324 | 76.9289015 | 81.421441 | 75.1725398 | 74.928496 |
| 73.3734324 | 74.9289015 | 81.421441 | 77.1725398 | 74.928496 |
| 73.3734324 | 73.9289015 | 82.421441 | 77.1725398 | 74.928496 |
| 73.3734324 | 71.9289015 | 82.421441 | 77.1725398 | 74.928496 |
| 73.3734324 | 70.9289015 | 82.421441 | 76.1725398 | 71.928496 |
| 73.3734324 | 70.9289015 | 82.421441 | 76.1725398 | 71.928496 |
| 73.3734324 | 69.9289015 | 77.421441 | 74.1725398 | 71.928496 |
| 74.3734324 | 69.9289015 | 77.421441 | 71.1725398 | 70.928496 |
| 72.3734324 | 69.9289015 | 77.421441 | 71.1725398 | 70.928496 |
| 71.3734324 | 69.9289015 | 74.421441 | 72.1725398 | 70.928496 |
| 71.3734324 | 69.9289015 | 74.421441 | 76.1725398 | 69.928496 |
| 71.3734324 | 69.9289015 | 74.421441 | 77.1725398 | 68.928496 |
| 71.3734324 | 69.9289015 | 74.421441 | 76.1725398 | 68.928496 |
| 74.3734324 | 69.9289015 | 73.421441 | 70.1725398 | 66.928496 |
| 74.3734324 | 69.9289015 | 73.421441 | 68.1725398 | 66.928496 |
| 76.3734324 | 69.9289015 | 72.421441 | 68.1725398 | 66.928496 |
| 76.3734324 | 69.9289015 | 72.421441 | 67.1725398 | 64.928496 |
| 76.3734324 | 75.9289015 | 72.421441 | 69.1725398 | 65.928496 |
| 76.3734324 | 75.9289015 | 72.421441 | 70.1725398 | 66.928496 |
| 76.3734324 | 78.9289015 | 72.421441 | 70.1725398 | 69.928496 |

|            |            |           |            |           |
|------------|------------|-----------|------------|-----------|
| 76.3734324 | 79.9289015 | 73.421441 | 70.1725398 | 70.928496 |
| 75.3734324 | 81.9289015 | 74.421441 | 70.1725398 | 70.928496 |
| 75.3734324 | 81.9289015 | 73.421441 | 70.1725398 | 70.928496 |
| 75.3734324 | 81.9289015 | 73.421441 | 70.1725398 | 70.928496 |
| 75.3734324 | 81.9289015 | 73.421441 | 70.1725398 | 70.928496 |
| 75.3734324 | 81.9289015 | 73.421441 | 71.1725398 | 70.928496 |
| 71.3734324 | 81.9289015 | 73.421441 | 72.1725398 | 73.928496 |
| 70.3734324 | 81.9289015 | 73.421441 | 70.1725398 | 73.928496 |
| 69.3734324 | 80.9289015 | 73.421441 | 70.1725398 | 73.928496 |
| 68.3734324 | 80.9289015 | 71.421441 | 69.1725398 | 74.928496 |
| 69.3734324 | 78.9289015 | 71.421441 | 69.1725398 | 75.928496 |
| 69.3734324 | 78.9289015 | 71.421441 | 72.1725398 | 80.928496 |
| 69.3734324 | 78.9289015 | 71.421441 | 72.1725398 | 81.928496 |
| 71.3734324 | 78.9289015 | 70.421441 | 72.1725398 | 81.928496 |
| 72.3734324 | 79.9289015 | 70.421441 | 74.1725398 | 83.928496 |
| 72.3734324 | 81.9289015 | 71.421441 | 76.1725398 | 83.928496 |
| 73.3734324 | 81.9289015 | 72.421441 | 75.1725398 | 83.928496 |
| 72.3734324 | 81.9289015 | 72.421441 | 76.1725398 | 83.928496 |
| 72.3734324 | 81.9289015 | 71.421441 | 76.1725398 | 83.928496 |
| 69.3734324 | 81.9289015 | 70.421441 | 76.1725398 | 82.928496 |
| 69.3734324 | 80.9289015 | 69.421441 | 77.1725398 | 81.928496 |
| 68.3734324 | 80.9289015 | 70.421441 | 77.1725398 | 81.928496 |
| 67.3734324 | 80.9289015 | 70.421441 | 76.1725398 | 81.928496 |
| 67.3734324 | 80.9289015 | 70.421441 | 75.1725398 | 81.928496 |
| 67.3734324 | 80.9289015 | 70.421441 | 75.1725398 | 77.928496 |
| 67.3734324 | 80.9289015 | 70.421441 | 75.1725398 | 75.928496 |
| 67.3734324 | 79.9289015 | 70.421441 | 75.1725398 | 73.928496 |
| 67.3734324 | 79.9289015 | 70.421441 | 74.1725398 | 73.928496 |
| 66.3734324 | 79.9289015 | 70.421441 | 73.1725398 | 74.928496 |
| 65.3734324 | 80.9289015 | 70.421441 | 75.1725398 | 74.928496 |
| 65.3734324 | 80.9289015 | 71.421441 | 75.1725398 | 80.928496 |
| 67.3734324 | 80.9289015 | 71.421441 | 76.1725398 | 81.928496 |
| 67.3734324 | 80.9289015 | 71.421441 | 77.1725398 | 81.928496 |
| 67.3734324 | 80.9289015 | 71.421441 | 76.1725398 | 81.928496 |
| 66.3734324 | 79.9289015 | 72.421441 | 73.1725398 | 81.928496 |
| 66.3734324 | 79.9289015 | 74.421441 | 73.1725398 | 76.928496 |
| 66.3734324 | 79.9289015 | 74.421441 | 72.1725398 | 76.928496 |
| 64.3734324 | 79.9289015 | 74.421441 | 72.1725398 | 72.928496 |
| 64.3734324 | 78.9289015 | 74.421441 | 72.1725398 | 72.928496 |
| 62.3734324 | 77.9289015 | 74.421441 | 72.1725398 | 72.928496 |
| 62.3734324 | 77.9289015 | 74.421441 | 72.1725398 | 72.928496 |
| 61.3734324 | 76.9289015 | 75.421441 | 72.1725398 | 72.928496 |
| 61.3734324 | 73.9289015 | 75.421441 | 71.1725398 | 72.928496 |
| 61.3734324 | 73.9289015 | 76.421441 | 65.1725398 | 71.928496 |

|            |            |           |            |           |            |
|------------|------------|-----------|------------|-----------|------------|
| 61.3734324 | 71.9289015 | 79.421441 | 62.1725398 | 70.928496 |            |
| 58.3734324 | 70.9289015 | 80.421441 | 62.1725398 | 69.928496 |            |
| 59.3734324 | 72.9289015 | 79.421441 | 62.1725398 | 69.928496 |            |
| 60.3734324 | 72.9289015 | 79.421441 | 63.1725398 | 67.928496 |            |
| 60.3734324 | 72.9289015 | 79.421441 | 63.1725398 | 67.928496 |            |
| 61.3734324 | 72.9289015 | 79.421441 | 63.1725398 | 67.928496 |            |
| 62.3734324 | 72.9289015 | 78.421441 | 63.1725398 | 67.928496 |            |
| 62.3734324 | 72.9289015 | 76.421441 | 63.1725398 | 65.928496 |            |
| 61.3734324 | 72.9289015 | 76.421441 | 66.1725398 | 65.928496 |            |
| 61.3734324 | 73.9289015 | 76.421441 | 66.1725398 | 65.928496 |            |
| 62.3734324 | 75.9289015 | 76.421441 | 66.1725398 | 66.928496 |            |
| 62.3734324 | 75.9289015 | 76.421441 | 66.1725398 | 66.928496 |            |
| 62.3734324 | 72.9289015 | 76.421441 | 69.1725398 | 67.928496 |            |
| 62.3734324 | 72.9289015 | 76.421441 | 73.1725398 | 67.928496 |            |
| 62.3734324 | 72.9289015 | 76.421441 | 73.1725398 | 67.928496 |            |
| 62.3734324 | 72.9289015 | 76.421441 | 76.1725398 | 67.928496 |            |
| 62.3734324 | 72.9289015 | 76.421441 | 76.1725398 | 67.928496 |            |
| 71.3734324 | 72.9289015 | 76.421441 | 75.1725398 | 67.928496 | 73.7599646 |
| 71.3734324 | 72.9289015 | 77.421441 | 73.1725398 | 74.928496 | 74.123601  |
| 71.3734324 | 72.9289015 | 77.421441 | 74.1725398 | 78.928496 | 74.3054192 |
| 74.3734324 | 73.9289015 | 77.421441 | 74.1725398 | 80.928496 | 74.5781464 |
| 74.3734324 | 73.9289015 | 77.421441 | 74.1725398 | 80.928496 | 74.3963282 |
| 76.3734324 | 71.9289015 | 78.421441 | 76.1725398 | 78.928496 | 80.9311067 |
| 76.3734324 | 71.9289015 | 78.421441 | 76.1725398 | 77.928496 | 79.9311067 |
| 76.3734324 | 70.9289015 | 78.421441 | 76.1725398 | 76.928496 | 79.9311067 |
| 76.3734324 | 70.9289015 | 78.421441 | 76.1725398 | 75.928496 | 79.9311067 |
| 75.3734324 | 71.9289015 | 78.421441 | 76.1725398 | 75.928496 | 79.9311067 |
| 77.3734324 | 71.9289015 | 77.421441 | 75.1725398 | 75.928496 | 78.9311067 |
| 77.3734324 | 71.9289015 | 78.421441 | 75.1725398 | 78.928496 | 78.9311067 |
| 77.3734324 | 71.9289015 | 78.421441 | 77.1725398 | 81.928496 | 78.9311067 |
| 77.3734324 | 71.9289015 | 78.421441 | 78.1725398 | 81.928496 | 78.9311067 |
| 77.3734324 | 72.9289015 | 78.421441 | 78.1725398 | 81.928496 | 78.9311067 |
| 77.3734324 | 73.9289015 | 78.421441 | 78.1725398 | 80.928496 | 77.9311067 |
| 77.3734324 | 73.9289015 | 78.421441 | 78.1725398 | 73.928496 | 75.9311067 |
| 73.3734324 | 73.9289015 | 78.421441 | 78.1725398 | 70.928496 | 75.9311067 |
| 72.3734324 | 73.9289015 | 78.421441 | 77.1725398 | 68.928496 | 75.9311067 |
| 72.3734324 | 75.9289015 | 78.421441 | 76.1725398 | 67.928496 | 76.9311067 |
| 72.3734324 | 75.9289015 | 78.421441 | 76.1725398 | 67.928496 | 78.9311067 |
| 72.3734324 | 71.9289015 | 78.421441 | 76.1725398 | 67.928496 | 78.9311067 |
| 72.3734324 | 71.9289015 | 78.421441 | 77.1725398 | 67.928496 | 78.9311067 |
| 70.3734324 | 71.9289015 | 77.421441 | 77.1725398 | 67.928496 | 78.9311067 |
| 70.3734324 | 70.9289015 | 77.421441 | 76.1725398 | 67.928496 | 78.9311067 |
| 70.3734324 | 70.9289015 | 77.421441 | 74.1725398 | 68.928496 | 78.9311067 |
| 68.3734324 | 70.9289015 | 77.421441 | 73.1725398 | 68.928496 | 77.9311067 |
| 68.3734324 | 70.9289015 | 77.421441 | 73.1725398 | 68.928496 | 77.9311067 |

|            |            |           |            |           |            |
|------------|------------|-----------|------------|-----------|------------|
| 68.3734324 | 70.9289015 | 77.421441 | 73.1725398 | 67.928496 | 77.9311067 |
| 68.3734324 | 70.9289015 | 77.421441 | 73.1725398 | 66.928496 | 77.9311067 |
| 69.3734324 | 62.9289015 | 77.421441 | 74.1725398 | 65.928496 | 76.9311067 |
| 70.3734324 | 61.9289015 | 78.421441 | 74.1725398 | 64.928496 | 76.9311067 |
| 70.3734324 | 61.9289015 | 78.421441 | 74.1725398 | 64.928496 | 76.9311067 |
| 70.3734324 | 61.9289015 | 78.421441 | 73.1725398 | 65.928496 | 76.9311067 |
| 71.3734324 | 61.9289015 | 79.421441 | 71.1725398 | 66.928496 | 76.9311067 |
| 70.3734324 | 61.9289015 | 79.421441 | 71.1725398 | 67.928496 | 76.9311067 |
| 70.3734324 | 60.9289015 | 79.421441 | 72.1725398 | 67.928496 | 76.9311067 |
| 70.3734324 | 55.9289015 | 79.421441 | 74.1725398 | 68.928496 | 76.9311067 |
| 70.3734324 | 55.9289015 | 79.421441 | 75.1725398 | 68.928496 | 76.9311067 |
| 70.3734324 | 52.9289015 | 78.421441 | 74.1725398 | 67.928496 | 76.9311067 |
| 69.3734324 | 50.9289015 | 76.421441 | 74.1725398 | 65.928496 | 76.9311067 |
| 69.3734324 | 46.9289015 | 72.421441 | 74.1725398 | 65.928496 | 71.9311067 |
| 69.3734324 | 44.9289015 | 72.421441 | 74.1725398 | 64.928496 | 71.9311067 |
| 70.3734324 | 43.9289015 | 70.421441 | 74.1725398 | 64.928496 | 71.9311067 |
| 70.3734324 | 44.9289015 | 71.421441 | 73.1725398 | 65.928496 | 71.9311067 |
| 70.3734324 | 51.9289015 | 71.421441 | 73.1725398 | 66.928496 | 71.9311067 |
| 70.3734324 | 58.9289015 | 71.421441 | 73.1725398 | 67.928496 | 71.9311067 |
| 70.3734324 | 60.9289015 | 71.421441 | 74.1725398 | 68.928496 | 71.9311067 |
| 70.3734324 | 62.9289015 | 71.421441 | 75.1725398 | 68.928496 | 71.9311067 |
| 70.3734324 | 63.9289015 | 71.421441 | 75.1725398 | 71.928496 | 72.9311067 |
| 70.3734324 | 63.9289015 | 72.421441 | 75.1725398 | 74.928496 | 73.9311067 |
| 70.3734324 | 63.9289015 | 72.421441 | 75.1725398 | 74.928496 | 73.9311067 |
| 71.3734324 | 65.9289015 | 74.421441 | 75.1725398 | 74.928496 | 73.9311067 |
| 72.3734324 | 69.9289015 | 75.421441 | 74.1725398 | 73.928496 | 73.9311067 |
| 72.3734324 | 70.9289015 | 75.421441 | 74.1725398 | 70.928496 | 73.9311067 |
| 72.3734324 | 71.9289015 | 74.421441 | 71.1725398 | 69.928496 | 73.9311067 |
| 73.3734324 | 71.9289015 | 72.421441 | 71.1725398 | 69.928496 | 75.9311067 |
| 75.3734324 | 72.9289015 | 72.421441 | 75.1725398 | 69.928496 | 76.9311067 |
| 75.3734324 | 74.9289015 | 72.421441 | 75.1725398 | 69.928496 | 77.9311067 |
| 75.3734324 | 74.9289015 | 72.421441 | 74.1725398 | 69.928496 | 77.9311067 |
| 75.3734324 | 76.9289015 | 72.421441 | 72.1725398 | 69.928496 | 77.9311067 |
| 74.3734324 | 75.9289015 | 72.421441 | 70.1725398 | 69.928496 | 77.9311067 |
| 73.3734324 | 75.9289015 | 70.421441 | 70.1725398 | 69.928496 | 75.9311067 |
| 73.3734324 | 74.9289015 | 70.421441 | 68.1725398 | 69.928496 | 75.9311067 |
| 73.3734324 | 74.9289015 | 73.421441 | 68.1725398 | 69.928496 | 75.9311067 |
| 72.3734324 | 74.9289015 | 73.421441 | 69.1725398 | 69.928496 | 75.9311067 |
| 73.3734324 | 74.9289015 | 76.421441 | 71.1725398 | 71.928496 | 75.9311067 |
| 75.3734324 | 74.9289015 | 78.421441 | 72.1725398 | 74.928496 | 75.9311067 |
| 75.3734324 | 74.9289015 | 79.421441 | 72.1725398 | 77.928496 | 75.9311067 |
| 75.3734324 | 73.9289015 | 79.421441 | 73.1725398 | 79.928496 | 76.9311067 |
| 76.3734324 | 71.9289015 | 79.421441 | 72.1725398 | 79.928496 | 76.9311067 |
| 76.3734324 | 71.9289015 | 79.421441 | 72.1725398 | 80.928496 | 76.9311067 |
| 76.3734324 | 71.9289015 | 79.421441 | 72.1725398 | 81.928496 | 70.9311067 |

|            |            |            |            |           |            |
|------------|------------|------------|------------|-----------|------------|
| 76.3734324 | 70.9289015 | 78.421441  | 72.1725398 | 81.928496 | 70.9311067 |
| 76.3734324 | 71.9289015 | 78.421441  | 72.1725398 | 81.928496 | 68.9311067 |
| 78.3734324 | 71.9289015 | 77.421441  | 72.1725398 | 82.928496 | 68.9311067 |
| 78.3734324 | 71.9289015 | 76.421441  | 72.1725398 | 84.928496 | 68.9311067 |
| 78.3734324 | 71.9289015 | 76.421441  | 72.1725398 | 84.928496 | 68.9311067 |
| 78.3734324 | 71.9289015 | 76.421441  | 73.1725398 | 84.928496 | 68.9311067 |
| 75.3734324 | 72.9289015 | 75.421441  | 73.1725398 | 83.928496 | 67.9311067 |
| 74.3734324 | 73.9289015 | 81.421441  | 73.1725398 | 83.928496 | 68.9311067 |
| 72.3734324 | 74.9289015 | 85.421441  | 73.1725398 | 83.928496 | 68.9311067 |
| 72.3734324 | 74.9289015 | 75.4872373 | 79.1725398 | 83.928496 | 68.9311067 |
| 70.3734324 | 74.9289015 | 75.7599646 | 79.1725398 | 83.928496 | 68.9311067 |
| 69.3734324 | 75.9289015 | 76.123601  | 80.1725398 | 83.928496 | 66.9311067 |
| 69.3734324 | 78.9289015 | 76.123601  | 80.1725398 | 83.928496 | 65.9311067 |
| 69.3734324 | 79.9289015 | 76.2145101 | 80.1725398 | 83.928496 | 66.9311067 |
| 69.3734324 | 79.9289015 | 77.0326919 | 80.1725398 | 84.928496 | 66.9311067 |
| 69.3734324 | 79.9289015 | 77.4872373 | 81.1725398 | 84.928496 | 66.9311067 |
| 69.3734324 | 79.9289015 | 77.123601  | 82.1725398 | 84.928496 | 66.9311067 |
| 68.3734324 | 78.9289015 | 77.0326919 | 83.1725398 | 84.928496 | 67.9311067 |
| 68.3734324 | 78.9289015 | 76.123601  | 81.1725398 | 83.928496 | 68.9311067 |
| 68.3734324 | 78.9289015 | 75.6690555 | 78.1725398 | 83.928496 | 68.9311067 |
| 67.3734324 | 78.9289015 | 75.6690555 | 78.1725398 | 83.928496 | 68.9311067 |
| 66.3734324 | 77.9289015 | 75.4872373 | 77.1725398 | 82.928496 | 70.9311067 |
| 66.3734324 | 73.9289015 | 74.6690555 | 74.1725398 | 80.928496 | 70.9311067 |
| 66.3734324 | 73.9289015 | 74.3054192 | 73.1725398 | 71.928496 | 71.9311067 |
| 66.3734324 | 68.9289015 | 73.3963282 | 73.1725398 | 67.928496 | 71.9311067 |
| 66.3734324 | 68.9289015 | 73.3963282 | 73.1725398 | 66.928496 | 71.9311067 |
| 66.3734324 | 68.9289015 | 74.123601  | 78.1725398 | 67.928496 | 71.9311067 |
| 65.3734324 | 67.9289015 | 73.8508737 | 82.1725398 | 68.928496 | 71.9311067 |
| 65.3734324 | 67.9289015 | 73.7599646 | 82.1725398 | 68.928496 | 72.9311067 |
| 65.3734324 | 67.9289015 | 77.421441  | 83.1725398 | 69.928496 | 72.9311067 |
| 65.3734324 | 71.9289015 | 74.421441  | 83.1725398 | 70.928496 | 72.9311067 |
| 65.3734324 | 74.9289015 | 74.421441  | 77.1725398 | 73.928496 | 72.9311067 |
| 65.3734324 | 74.9289015 | 74.421441  | 77.1725398 | 73.928496 | 72.9311067 |
| 67.3734324 | 72.9289015 | 73.421441  | 73.1725398 | 73.928496 | 72.9311067 |
| 67.3734324 | 72.9289015 | 73.421441  | 73.1725398 | 74.928496 | 72.9311067 |
| 67.3734324 | 72.9289015 | 73.421441  | 76.1725398 | 67.928496 | 73.9311067 |
| 68.3734324 | 72.9289015 | 72.421441  | 76.1725398 | 65.928496 | 73.9311067 |
| 68.3734324 | 72.9289015 | 71.421441  | 78.1725398 | 65.928496 | 72.9311067 |
| 68.3734324 | 72.9289015 | 71.421441  | 78.1725398 | 65.928496 | 72.9311067 |
| 67.3734324 | 72.9289015 | 71.421441  | 77.1725398 | 64.928496 | 73.9311067 |
| 65.3734324 | 72.9289015 | 71.421441  | 75.1725398 | 64.928496 | 74.9311067 |
| 65.3734324 | 72.9289015 | 72.421441  | 74.1725398 | 63.928496 | 75.9311067 |
| 65.3734324 | 72.9289015 | 74.421441  | 72.1725398 | 66.928496 | 75.9311067 |
| 65.3734324 | 75.9289015 | 75.421441  | 72.1725398 | 66.928496 | 75.9311067 |

|            |            |            |            |           |            |
|------------|------------|------------|------------|-----------|------------|
| 67.3734324 | 77.9289015 | 75.421441  | 73.1725398 | 66.928496 | 75.9311067 |
| 67.3734324 | 78.9289015 | 75.421441  | 73.1725398 | 68.928496 | 75.9311067 |
| 67.3734324 | 78.9289015 | 75.421441  | 73.1725398 | 69.928496 | 76.9311067 |
| 68.3734324 | 78.9289015 | 75.421441  | 75.1725398 | 69.928496 | 76.9311067 |
| 69.3734324 | 79.9289015 | 75.421441  | 75.1725398 | 72.928496 | 77.9311067 |
| 69.3734324 | 81.9289015 | 74.421441  | 76.1725398 | 73.928496 | 77.9311067 |
| 70.3734324 | 83.9289015 | 74.421441  | 74.1725398 | 71.928496 | 78.9311067 |
| 70.3734324 | 83.9289015 | 72.421441  | 70.1725398 | 71.928496 | 78.9311067 |
| 71.3734324 | 83.9289015 | 72.421441  | 69.1725398 | 70.928496 | 78.9311067 |
| 71.3734324 | 83.9289015 | 73.421441  | 68.1725398 | 70.928496 | 77.9311067 |
| 70.3734324 | 83.9289015 | 73.421441  | 68.1725398 | 70.928496 | 77.9311067 |
| 72.3734324 | 84.9289015 | 74.421441  | 68.1725398 | 70.928496 | 76.9311067 |
| 72.3734324 | 86.9289015 | 72.421441  | 71.1725398 | 70.928496 | 76.9311067 |
| 72.3734324 | 86.9289015 | 72.421441  | 73.1725398 | 70.928496 | 76.9311067 |
| 71.3734324 | 86.9289015 | 68.421441  | 73.1725398 | 70.928496 | 76.9311067 |
| 71.3734324 | 85.9289015 | 68.421441  | 73.1725398 | 70.928496 | 75.9311067 |
| 70.3734324 | 85.9289015 | 68.421441  | 73.1725398 | 70.928496 | 75.9311067 |
| 70.3734324 | 84.9289015 | 68.421441  | 70.1725398 | 70.928496 | 75.9311067 |
| 70.3734324 | 84.9289015 | 70.421441  | 69.1725398 | 71.928496 | 75.9311067 |
| 72.3734324 | 80.9289015 | 72.421441  | 66.1725398 | 74.928496 | 72.9311067 |
| 72.3734324 | 81.9289015 | 73.421441  | 64.1725398 | 74.928496 | 72.9311067 |
| 72.3734324 | 80.9289015 | 72.421441  | 63.1725398 | 74.928496 | 72.9311067 |
| 73.3734324 | 79.9289015 | 72.421441  | 63.1725398 | 75.928496 | 72.9311067 |
| 73.3734324 | 79.9289015 | 70.421441  | 64.1725398 | 74.928496 | 72.9311067 |
| 74.3734324 | 79.9289015 | 70.421441  | 65.1725398 | 73.928496 | 70.9311067 |
| 72.3734324 | 79.9289015 | 71.421441  | 68.1725398 | 72.928496 | 71.9311067 |
| 72.3734324 | 76.9289015 | 71.421441  | 69.1725398 | 72.928496 | 80.9311067 |
| 72.3734324 | 75.9289015 | 73.421441  | 69.1725398 | 72.928496 | 80.9311067 |
| 72.3734324 | 75.9289015 | 75.421441  | 69.1725398 | 72.928496 | 85.9311067 |
| 72.3734324 | 74.9289015 | 79.421441  | 73.1725398 | 72.928496 | 84.9311067 |
| 72.3734324 | 75.9289015 | 80.421441  | 73.1725398 | 73.928496 | 78.9311067 |
| 72.3734324 | 75.9289015 | 80.421441  | 73.1725398 | 74.928496 | 75.9311067 |
| 70.3734324 | 77.9289015 | 84.421441  | 71.1725398 | 73.928496 | 74.9311067 |
| 65.3734324 | 79.9289015 | 72.8508737 | 71.1725398 | 72.928496 | 74.9311067 |
| 64.3734324 | 79.9289015 | 72.7599646 | 71.1725398 | 71.928496 | 74.9311067 |
| 64.3734324 | 81.9289015 | 85.421441  | 71.1725398 | 70.928496 | 74.9311067 |
| 64.3734324 | 81.9289015 | 81.421441  | 71.1725398 | 70.928496 | 74.9311067 |
| 62.3734324 | 81.9289015 | 75.421441  | 77.1725398 | 71.928496 | 74.9311067 |
| 62.3734324 | 80.9289015 | 75.421441  | 80.1725398 | 71.928496 | 74.9311067 |
| 62.3734324 | 80.9289015 | 73.421441  | 81.1725398 | 74.928496 | 75.9311067 |
| 63.3734324 | 80.9289015 | 71.421441  | 81.1725398 | 76.928496 | 75.9311067 |
| 63.3734324 | 80.9289015 | 71.421441  | 81.1725398 | 76.928496 | 75.9311067 |
| 63.3734324 | 79.9289015 | 69.421441  | 81.1725398 | 76.928496 | 75.9311067 |
| 72.3734324 | 79.9289015 | 69.421441  | 80.1725398 | 77.928496 | 76.9311067 |
| 74.3734324 | 78.9289015 | 69.421441  | 79.1725398 | 75.928496 | 76.9311067 |



|            |            |            |            |           |            |
|------------|------------|------------|------------|-----------|------------|
| 75.3734324 | 78.9289015 | 68.421441  | 79.1725398 | 76.928496 | 76.9311067 |
| 75.3734324 | 79.9289015 | 67.421441  | 71.1725398 | 76.928496 | 77.9311067 |
| 75.3734324 | 79.9289015 | 67.421441  | 67.1725398 | 76.928496 | 77.9311067 |
| 75.3734324 | 84.9289015 | 67.421441  | 67.1725398 | 76.928496 | 77.9311067 |
| 75.3734324 | 72.3963282 | 67.421441  | 66.1725398 | 77.928496 | 77.9311067 |
| 78.3734324 | 85.9289015 | 68.421441  | 67.1725398 | 75.928496 | 76.9311067 |
| 78.3734324 | 85.9289015 | 68.421441  | 67.1725398 | 74.928496 | 76.9311067 |
| 79.3734324 | 85.9289015 | 68.421441  | 66.1725398 | 73.928496 | 74.9311067 |
| 80.3734324 | 85.9289015 | 68.421441  | 66.1725398 | 70.928496 | 74.9311067 |
| 80.3734324 | 85.9289015 | 75.421441  | 64.1725398 | 67.928496 | 74.9311067 |
| 81.3734324 | 85.9289015 | 75.4872373 | 63.1725398 | 66.928496 | 73.9311067 |
| 81.3734324 | 84.9289015 | 75.8508737 | 63.1725398 | 65.928496 | 73.9311067 |
| 80.3734324 | 85.9289015 | 75.5781464 | 63.1725398 | 65.928496 | 73.9311067 |
| 80.3734324 | 85.9289015 | 76.0326919 | 65.1725398 | 66.928496 | 74.9311067 |
| 81.3734324 | 85.9289015 | 75.7599646 | 65.1725398 | 66.928496 | 74.9311067 |
| 81.3734324 | 86.9289015 | 76.6690555 | 68.1725398 | 73.928496 | 74.9311067 |
| 81.3734324 | 86.9289015 | 76.5781464 | 68.1725398 | 73.928496 | 75.9311067 |
| 81.3734324 | 86.9289015 | 76.5781464 | 68.1725398 | 74.928496 | 75.9311067 |
| 79.3734324 | 86.9289015 | 76.123601  | 67.1725398 | 73.928496 | 75.9311067 |
| 78.3734324 | 84.9289015 | 73.3054192 | 67.1725398 | 72.928496 | 76.9311067 |
| 78.3734324 | 72.0326919 | 75.421441  | 67.1725398 | 71.928496 | 77.9311067 |
| 76.3734324 | 71.6690555 | 75.421441  | 67.1725398 | 69.928496 | 78.9311067 |
| 76.3734324 | 71.8508737 | 75.421441  | 66.1725398 | 68.928496 | 79.9311067 |
| 76.3734324 | 83.9289015 | 76.421441  | 66.1725398 | 69.928496 | 81.9311067 |
| 76.3734324 | 82.9289015 | 76.421441  | 66.1725398 | 69.928496 | 81.9311067 |
| 76.3734324 | 79.9289015 | 77.421441  | 66.1725398 | 70.928496 | 80.9311067 |
| 76.3734324 | 79.9289015 | 76.421441  | 66.1725398 | 70.928496 | 80.9311067 |
| 75.3734324 | 74.9289015 | 76.421441  | 66.1725398 | 70.928496 | 80.9311067 |
| 73.3734324 | 71.9289015 | 75.421441  | 66.1725398 | 71.928496 | 80.9311067 |
| 74.3734324 | 70.9289015 | 75.421441  | 66.1725398 | 74.928496 | 80.9311067 |
| 74.3734324 | 70.9289015 | 75.421441  | 66.1725398 | 77.928496 | 80.9311067 |
| 74.3734324 | 70.9289015 | 75.421441  | 68.1725398 | 79.928496 | 80.9311067 |
| 75.3734324 | 69.9289015 | 74.421441  | 68.1725398 | 80.928496 | 73.9311067 |
| 76.3734324 | 69.9289015 | 72.421441  | 67.1725398 | 80.928496 | 73.9311067 |
| 76.3734324 | 69.9289015 | 72.421441  | 66.1725398 | 80.928496 | 73.9311067 |
| 76.3734324 | 69.9289015 | 70.421441  | 66.1725398 | 75.928496 | 72.9311067 |
| 76.3734324 | 70.9289015 | 70.421441  | 67.1725398 | 71.928496 | 69.9311067 |
| 76.3734324 | 68.9289015 | 70.421441  | 67.1725398 | 70.928496 | 68.9311067 |
| 76.3734324 | 66.9289015 | 69.421441  | 69.1725398 | 70.928496 | 68.9311067 |
| 76.3734324 | 66.9289015 | 69.421441  | 69.1725398 | 69.928496 | 68.9311067 |
| 76.3734324 | 64.9289015 | 69.421441  | 69.1725398 | 69.928496 | 67.9311067 |
| 75.3734324 | 64.9289015 | 68.421441  | 69.1725398 | 69.928496 | 67.9311067 |
| 76.3734324 | 64.9289015 | 67.421441  | 69.1725398 | 68.928496 | 64.9311067 |
| 77.3734324 | 64.9289015 | 66.421441  | 67.1725398 | 68.928496 | 64.9311067 |
| 77.3734324 | 64.9289015 | 66.421441  | 67.1725398 | 69.928496 | 64.9311067 |

|            |            |           |            |           |            |
|------------|------------|-----------|------------|-----------|------------|
| 77.3734324 | 64.9289015 | 66.421441 | 67.1725398 | 69.928496 | 64.9311067 |
| 79.3734324 | 64.9289015 | 66.421441 | 68.1725398 | 69.928496 | 64.9311067 |
| 79.3734324 | 64.9289015 | 65.421441 | 68.1725398 | 68.928496 | 68.9311067 |
| 79.3734324 | 64.9289015 | 65.421441 | 70.1725398 | 69.928496 | 68.9311067 |
| 79.3734324 | 64.9289015 | 65.421441 | 70.1725398 | 69.928496 | 68.9311067 |
| 79.3734324 | 64.9289015 | 65.421441 | 70.1725398 | 69.928496 | 68.9311067 |
| 76.3734324 | 67.9289015 | 65.421441 | 70.1725398 | 67.928496 | 67.9311067 |
| 75.3734324 | 67.9289015 | 65.421441 | 72.1725398 | 67.928496 | 68.9311067 |
| 75.3734324 | 68.9289015 | 65.421441 | 75.1725398 | 67.928496 | 67.9311067 |
| 75.3734324 | 70.9289015 | 65.421441 | 76.1725398 | 68.928496 | 67.9311067 |
| 74.3734324 | 70.9289015 | 65.421441 | 76.1725398 | 69.928496 | 66.9311067 |
| 74.3734324 | 71.9289015 | 65.421441 | 77.1725398 | 70.928496 | 65.9311067 |
| 73.3734324 | 72.9289015 | 65.421441 | 77.1725398 | 72.928496 | 65.9311067 |
| 73.3734324 | 72.9289015 | 74.421441 | 81.1725398 | 72.928496 | 65.9311067 |
| 72.3734324 | 73.9289015 | 74.421441 | 83.1725398 | 75.928496 | 65.9311067 |
| 71.3734324 | 73.9289015 | 74.421441 | 84.1725398 | 76.928496 | 65.9311067 |
| 71.3734324 | 73.9289015 | 77.421441 | 85.1725398 | 76.928496 | 64.9311067 |
| 70.3734324 | 73.9289015 | 77.421441 | 85.1725398 | 75.928496 | 64.9311067 |
| 69.3734324 | 73.9289015 | 81.421441 | 85.1725398 | 73.928496 | 67.9311067 |
| 66.3734324 | 74.9289015 | 81.421441 | 85.1725398 | 71.928496 | 69.9311067 |
| 66.3734324 | 72.9289015 | 81.421441 | 85.1725398 | 69.928496 | 69.9311067 |
| 66.3734324 | 70.9289015 | 80.421441 | 85.1725398 | 69.928496 | 70.9311067 |
| 66.3734324 | 70.9289015 | 80.421441 | 85.1725398 | 68.928496 | 78.9311067 |
| 66.3734324 | 70.9289015 | 78.421441 | 85.1725398 | 68.928496 | 78.9311067 |
| 66.3734324 | 71.9289015 | 78.421441 | 85.1725398 | 68.928496 | 81.9311067 |
| 66.3734324 | 72.9289015 | 78.421441 | 84.1725398 | 68.928496 | 81.9311067 |
| 68.3734324 | 72.9289015 | 75.421441 | 84.1725398 | 67.928496 | 81.9311067 |
| 69.3734324 | 72.9289015 | 74.421441 | 84.1725398 | 67.928496 | 81.9311067 |
| 69.3734324 | 74.9289015 | 75.421441 | 84.1725398 | 67.928496 | 81.9311067 |
| 69.3734324 | 75.9289015 | 76.421441 | 83.1725398 | 67.928496 | 81.9311067 |
| 68.3734324 | 75.9289015 | 76.421441 | 83.1725398 | 67.928496 | 81.9311067 |
| 67.3734324 | 74.9289015 | 78.421441 | 81.1725398 | 68.928496 | 81.9311067 |
| 67.3734324 | 73.9289015 | 78.421441 | 81.1725398 | 68.928496 | 83.9311067 |
| 67.3734324 | 74.9289015 | 77.421441 | 81.1725398 | 67.928496 | 83.9311067 |
| 66.3734324 | 74.9289015 | 77.421441 | 81.1725398 | 67.928496 | 83.9311067 |
| 66.3734324 | 74.9289015 | 77.421441 | 81.1725398 | 66.928496 | 83.9311067 |
| 63.3734324 | 75.9289015 | 74.421441 | 81.1725398 | 66.928496 | 83.9311067 |
| 63.3734324 | 75.9289015 | 74.421441 | 80.1725398 | 67.928496 | 83.9311067 |
| 63.3734324 | 75.9289015 | 74.421441 | 80.1725398 | 67.928496 | 83.9311067 |
| 62.3734324 | 75.9289015 | 73.421441 | 78.1725398 | 73.928496 | 83.9311067 |
| 62.3734324 | 75.9289015 | 73.421441 | 77.1725398 | 79.928496 | 83.9311067 |
| 62.3734324 | 75.9289015 | 73.421441 | 77.1725398 | 81.928496 | 83.9311067 |
| 62.3734324 | 75.9289015 | 73.421441 | 77.1725398 | 80.928496 | 77.9311067 |
| 62.3734324 | 75.9289015 | 73.421441 | 77.1725398 | 76.928496 | 77.9311067 |
| 62.3734324 | 75.9289015 | 73.421441 | 76.1725398 | 73.928496 | 77.9311067 |

|            |            |           |            |           |            |
|------------|------------|-----------|------------|-----------|------------|
| 62.3734324 | 75.9289015 | 77.421441 | 75.1725398 | 70.928496 | 77.9311067 |
| 62.3734324 | 75.9289015 | 78.421441 | 75.1725398 | 69.928496 | 77.9311067 |
| 64.3734324 | 76.9289015 | 79.421441 | 75.1725398 | 69.928496 | 76.9311067 |
| 64.3734324 | 76.9289015 | 80.421441 | 75.1725398 | 69.928496 | 75.9311067 |
| 64.3734324 | 76.9289015 | 79.421441 | 75.1725398 | 69.928496 | 75.9311067 |
| 66.3734324 | 78.9289015 | 78.421441 | 77.1725398 | 69.928496 | 75.9311067 |
| 67.3734324 | 79.9289015 | 78.421441 | 76.1725398 | 68.928496 | 75.9311067 |
| 67.3734324 | 79.9289015 | 78.421441 | 76.1725398 | 68.928496 | 75.9311067 |
| 67.3734324 | 79.9289015 | 78.421441 | 76.1725398 | 68.928496 | 76.9311067 |
| 67.3734324 | 80.9289015 | 80.421441 | 78.1725398 | 68.928496 | 78.9311067 |
| 67.3734324 | 80.9289015 | 80.421441 | 79.1725398 | 67.928496 | 78.9311067 |
| 67.3734324 | 80.9289015 | 81.421441 | 79.1725398 | 66.928496 | 77.9311067 |
| 67.3734324 | 80.9289015 | 80.421441 | 79.1725398 | 66.928496 | 77.9311067 |
| 67.3734324 | 79.9289015 | 80.421441 | 78.1725398 | 65.928496 | 77.9311067 |
| 67.3734324 | 79.9289015 | 80.421441 | 78.1725398 | 65.928496 | 77.9311067 |
| 67.3734324 | 81.9289015 | 80.421441 | 77.1725398 | 65.928496 | 77.9311067 |
| 68.3734324 | 81.9289015 | 78.421441 | 77.1725398 | 64.928496 | 77.9311067 |
| 68.3734324 | 81.9289015 | 78.421441 | 79.1725398 | 64.928496 | 77.9311067 |
| 68.3734324 | 80.9289015 | 79.421441 | 79.1725398 | 64.928496 | 77.9311067 |
| 68.3734324 | 80.9289015 | 79.421441 | 79.1725398 | 64.928496 | 77.9311067 |
| 67.3734324 | 81.9289015 | 79.421441 | 79.1725398 | 64.928496 | 78.9311067 |
| 68.3734324 | 79.9289015 | 78.421441 | 79.1725398 | 64.928496 | 78.9311067 |
| 68.3734324 | 77.9289015 | 77.421441 | 79.1725398 | 65.928496 | 79.9311067 |
| 69.3734324 | 75.9289015 | 78.421441 | 80.1725398 | 65.928496 | 79.9311067 |
| 69.3734324 | 75.9289015 | 78.421441 | 80.1725398 | 66.928496 | 78.9311067 |
| 69.3734324 | 74.9289015 | 79.421441 | 80.1725398 | 67.928496 | 78.9311067 |
| 69.3734324 | 74.9289015 | 81.421441 | 80.1725398 | 66.928496 | 77.9311067 |
| 70.3734324 | 74.9289015 | 81.421441 | 80.1725398 | 66.928496 | 77.9311067 |
| 72.3734324 | 74.9289015 | 82.421441 | 80.1725398 | 67.928496 | 77.9311067 |
| 74.3734324 | 74.9289015 | 81.421441 | 78.1725398 | 67.928496 | 77.9311067 |
| 74.3734324 | 74.9289015 | 80.421441 | 78.1725398 | 67.928496 | 77.9311067 |
| 74.3734324 | 74.9289015 | 80.421441 | 77.1725398 | 67.928496 | 76.9311067 |
| 74.3734324 | 75.9289015 | 77.421441 | 76.1725398 | 67.928496 | 76.9311067 |
| 74.3734324 | 75.9289015 | 74.421441 | 76.1725398 | 68.928496 | 76.9311067 |
| 74.3734324 | 75.9289015 | 74.421441 | 74.1725398 | 68.928496 | 76.9311067 |
| 73.3734324 | 75.9289015 | 74.421441 | 75.1725398 | 68.928496 | 78.9311067 |
| 72.3734324 | 75.9289015 | 74.421441 | 76.1725398 | 68.928496 | 78.9311067 |
| 72.3734324 | 75.9289015 | 74.421441 | 77.1725398 | 69.928496 | 78.9311067 |
| 72.3734324 | 75.9289015 | 74.421441 | 78.1725398 | 74.928496 | 78.9311067 |
| 70.3734324 | 75.9289015 | 71.421441 | 78.1725398 | 77.928496 | 78.9311067 |
| 70.3734324 | 75.9289015 | 70.421441 | 78.1725398 | 78.928496 | 78.9311067 |
| 71.3734324 | 78.9289015 | 70.421441 | 74.1725398 | 78.928496 | 82.9311067 |
| 71.3734324 | 82.9289015 | 70.421441 | 72.1725398 | 78.928496 | 83.9311067 |
| 71.3734324 | 81.9289015 | 71.421441 | 70.1725398 | 78.928496 | 83.9311067 |
| 70.3734324 | 79.9289015 | 71.421441 | 69.1725398 | 78.928496 | 84.9311067 |

|            |            |           |            |           |            |
|------------|------------|-----------|------------|-----------|------------|
| 70.3734324 | 79.9289015 | 71.421441 | 70.1725398 | 78.928496 | 73.0326919 |
| 70.3734324 | 73.9289015 | 71.421441 | 72.1725398 | 79.928496 | 82.9311067 |
| 70.3734324 | 69.9289015 | 71.421441 | 73.1725398 | 79.928496 | 82.9311067 |
| 70.3734324 | 67.9289015 | 71.421441 | 75.1725398 | 80.928496 | 81.9311067 |
| 68.3734324 | 67.9289015 | 71.421441 | 76.1725398 | 80.928496 | 79.9311067 |
| 68.3734324 | 69.9289015 | 71.421441 | 76.1725398 | 68.928496 | 79.9311067 |
| 65.3734324 | 70.9289015 | 70.421441 | 76.1725398 | 66.928496 | 77.9311067 |
| 64.3734324 | 70.9289015 | 67.421441 | 74.1725398 | 65.928496 | 77.9311067 |
| 64.3734324 | 72.9289015 | 65.421441 | 74.1725398 | 65.928496 | 77.9311067 |
| 64.3734324 | 74.9289015 | 65.421441 | 71.1725398 | 65.928496 | 77.9311067 |
| 64.3734324 | 75.9289015 | 59.421441 | 70.1725398 | 64.928496 | 77.9311067 |
| 64.3734324 | 75.9289015 | 58.421441 | 70.1725398 | 63.928496 | 77.9311067 |
| 64.3734324 | 74.9289015 | 57.421441 | 71.1725398 | 63.928496 | 77.9311067 |
| 64.3734324 | 74.9289015 | 57.421441 | 71.1725398 | 63.928496 | 77.9311067 |
| 64.3734324 | 74.9289015 | 57.421441 | 72.1725398 | 63.928496 | 77.9311067 |
| 64.3734324 | 74.9289015 | 58.421441 | 74.1725398 | 63.928496 | 77.9311067 |
| 64.3734324 | 74.9289015 | 56.421441 | 76.1725398 | 63.928496 | 79.9311067 |
| 72.3734324 | 74.9289015 | 56.421441 | 77.1725398 | 63.928496 | 79.9311067 |
| 73.3734324 | 74.9289015 | 56.421441 | 77.1725398 | 63.928496 | 79.9311067 |
| 73.3734324 | 74.9289015 | 55.421441 | 75.1725398 | 63.928496 | 79.9311067 |
| 73.3734324 | 74.9289015 | 56.421441 | 75.1725398 | 68.928496 | 80.9311067 |
| 74.3734324 | 74.9289015 | 56.421441 | 74.1725398 | 69.928496 | 80.9311067 |
| 75.3734324 | 74.9289015 | 58.421441 | 74.1725398 | 71.928496 | 82.9311067 |
| 75.3734324 | 74.9289015 | 58.421441 | 74.1725398 | 71.928496 | 82.9311067 |
| 75.3734324 | 75.9289015 | 60.421441 | 74.1725398 | 76.928496 | 74.9417828 |
| 75.3734324 | 75.9289015 | 63.421441 | 73.1725398 | 77.928496 | 75.3963282 |
| 74.3734324 | 77.9289015 | 63.421441 | 73.1725398 | 75.928496 | 75.5781464 |
| 74.3734324 | 77.9289015 | 67.421441 | 73.1725398 | 75.928496 | 76.0326919 |
| 74.3734324 | 77.9289015 | 68.421441 | 73.1725398 | 75.928496 | 76.3054192 |
| 74.3734324 | 77.9289015 | 68.421441 | 72.1725398 | 75.928496 | 75.8508737 |
| 73.3734324 | 77.9289015 | 73.421441 | 72.1725398 | 73.928496 | 75.9417828 |
| 73.3734324 | 78.9289015 | 73.421441 | 72.1725398 | 73.928496 | 75.2145101 |
| 72.3734324 | 78.9289015 | 73.421441 | 72.1725398 | 72.928496 | 74.5781464 |
| 72.3734324 | 78.9289015 | 74.421441 | 72.1725398 | 72.928496 | 74.6690555 |
| 72.3734324 | 78.9289015 | 74.421441 | 72.1725398 | 72.928496 | 74.6690555 |
| 73.3734324 | 78.9289015 | 75.421441 | 71.1725398 | 72.928496 | 74.6690555 |
| 73.3734324 | 78.9289015 | 77.421441 | 69.1725398 | 72.928496 | 86.9311067 |
| 74.3734324 | 77.9289015 | 80.421441 | 68.1725398 | 73.928496 | 73.9417828 |
| 75.3734324 | 77.9289015 | 80.421441 | 68.1725398 | 74.928496 | 74.0326919 |
| 75.3734324 | 75.9289015 | 81.421441 | 68.1725398 | 77.928496 | 73.9417828 |
| 75.3734324 | 74.9289015 | 81.421441 | 68.1725398 | 79.928496 | 86.9311067 |
| 75.3734324 | 73.9289015 | 81.421441 | 68.1725398 | 79.928496 | 86.9311067 |
| 76.3734324 | 73.9289015 | 82.421441 | 68.1725398 | 79.928496 | 86.9311067 |
| 76.3734324 | 73.9289015 | 82.421441 | 69.1725398 | 74.928496 | 73.5781464 |
| 76.3734324 | 73.9289015 | 84.421441 | 69.1725398 | 73.928496 | 73.6690555 |

|            |            |            |            |           |            |
|------------|------------|------------|------------|-----------|------------|
| 76.3734324 | 74.9289015 | 85.421441  | 70.1725398 | 71.928496 | 73.5781464 |
| 76.3734324 | 74.9289015 | 85.421441  | 73.1725398 | 70.928496 | 73.5781464 |
| 76.3734324 | 73.9289015 | 73.7599646 | 73.1725398 | 70.928496 | 73.7599646 |
| 75.3734324 | 73.9289015 | 73.8508737 | 74.1725398 | 71.928496 | 73.8508737 |
| 74.3734324 | 74.9289015 | 85.421441  | 74.1725398 | 71.928496 | 73.6690555 |
| 74.3734324 | 77.9289015 | 79.421441  | 74.1725398 | 72.928496 | 73.7599646 |
| 74.3734324 | 82.9289015 | 78.421441  | 73.1725398 | 72.928496 | 74.123601  |
| 75.3734324 | 85.9289015 | 78.421441  | 73.1725398 | 75.928496 | 74.8508737 |
| 74.3734324 | 85.9289015 | 78.421441  | 73.1725398 | 77.928496 | 75.5781464 |
| 74.3734324 | 86.9289015 | 78.421441  | 73.1725398 | 78.928496 | 86.9311067 |
| 74.3734324 | 86.9289015 | 79.421441  | 72.1725398 | 80.928496 | 84.9311067 |
| 74.3734324 | 86.9289015 | 80.421441  | 72.1725398 | 81.928496 | 84.9311067 |
| 71.3734324 | 75.8508737 | 80.421441  | 72.1725398 | 81.928496 | 84.9311067 |
| 71.3734324 | 75.3054192 | 80.421441  | 73.1725398 | 78.928496 | 82.9311067 |
| 71.3734324 | 74.9417828 | 79.421441  | 75.1725398 | 75.928496 | 81.9311067 |
| 71.3734324 | 74.6690555 | 80.421441  | 75.1725398 | 74.928496 | 81.9311067 |
| 71.3734324 | 74.123601  | 80.421441  | 75.1725398 | 74.928496 | 79.9311067 |
| 71.3734324 | 85.9289015 | 81.421441  | 76.1725398 | 76.928496 | 79.9311067 |
| 71.3734324 | 85.9289015 | 84.421441  | 76.1725398 | 78.928496 | 80.9311067 |
| 71.3734324 | 85.9289015 | 84.421441  | 76.1725398 | 79.928496 | 81.9311067 |
| 76.3734324 | 85.9289015 | 85.421441  | 76.1725398 | 79.928496 | 77.9311067 |
| 79.3734324 | 85.9289015 | 85.421441  | 76.1725398 | 79.928496 | 77.9311067 |
| 81.3734324 | 85.9289015 | 84.421441  | 75.1725398 | 77.928496 | 75.9311067 |
| 81.3734324 | 85.9289015 | 82.421441  | 76.1725398 | 77.928496 | 75.9311067 |
| 82.3734324 | 86.9289015 | 82.421441  | 76.1725398 | 77.928496 | 75.9311067 |
| 83.3734324 | 86.9289015 | 80.421441  | 81.1725398 | 75.928496 | 73.9311067 |
| 83.3734324 | 74.0326919 | 79.421441  | 81.1725398 | 72.928496 | 73.9311067 |
| 85.3734324 | 73.8508737 | 78.421441  | 79.1725398 | 70.928496 | 73.9311067 |
| 85.3734324 | 73.5781464 | 78.421441  | 79.1725398 | 69.928496 | 72.9311067 |
| 85.3734324 | 72.9417828 | 76.421441  | 78.1725398 | 68.928496 | 70.9311067 |
| 85.3734324 | 72.7599646 | 74.421441  | 78.1725398 | 67.928496 | 70.9311067 |
| 72.3963282 | 72.3963282 | 72.421441  | 78.1725398 | 66.928496 | 69.9311067 |
| 72.3963282 | 72.3963282 | 72.421441  | 78.1725398 | 66.928496 | 69.9311067 |
| 83.3734324 | 71.2145101 | 70.421441  | 77.1725398 | 64.928496 | 69.9311067 |
| 81.3734324 | 81.9289015 | 70.421441  | 79.1725398 | 64.928496 | 69.9311067 |
| 81.3734324 | 75.9289015 | 67.421441  | 78.1725398 | 64.928496 | 69.9311067 |
| 81.3734324 | 69.9289015 | 66.421441  | 76.1725398 | 64.928496 | 69.9311067 |
| 80.3734324 | 68.9289015 | 66.421441  | 76.1725398 | 64.928496 | 68.9311067 |
| 80.3734324 | 69.9289015 | 66.421441  | 75.1725398 | 69.928496 | 66.9311067 |
| 80.3734324 | 71.9289015 | 66.421441  | 75.1725398 | 74.928496 | 64.9311067 |
| 79.3734324 | 73.9289015 | 66.421441  | 75.1725398 | 74.928496 | 63.9311067 |
| 79.3734324 | 73.9289015 | 66.421441  | 75.1725398 | 78.928496 | 63.9311067 |
| 79.3734324 | 74.9289015 | 67.421441  | 75.1725398 | 78.928496 | 64.9311067 |
| 79.3734324 | 76.9289015 | 67.421441  | 75.1725398 | 74.928496 | 64.9311067 |
| 81.3734324 | 77.9289015 | 67.421441  | 75.1725398 | 71.928496 | 63.9311067 |

|            |            |           |            |           |            |
|------------|------------|-----------|------------|-----------|------------|
| 81.3734324 | 77.9289015 | 67.421441 | 75.1725398 | 70.928496 | 63.9311067 |
| 81.3734324 | 76.9289015 | 67.421441 | 72.1725398 | 69.928496 | 63.9311067 |
| 80.3734324 | 76.9289015 | 68.421441 | 71.1725398 | 69.928496 | 66.9311067 |
| 80.3734324 | 76.9289015 | 69.421441 | 70.1725398 | 69.928496 | 66.9311067 |
| 80.3734324 | 76.9289015 | 68.421441 | 69.1725398 | 69.928496 | 67.9311067 |
| 80.3734324 | 76.9289015 | 68.421441 | 69.1725398 | 69.928496 | 67.9311067 |
| 80.3734324 | 76.9289015 | 68.421441 | 67.1725398 | 74.928496 | 67.9311067 |
| 80.3734324 | 76.9289015 | 71.421441 | 67.1725398 | 75.928496 | 67.9311067 |
| 79.3734324 | 75.9289015 | 72.421441 | 67.1725398 | 75.928496 | 67.9311067 |
| 79.3734324 | 75.9289015 | 72.421441 | 67.1725398 | 75.928496 | 72.9311067 |
| 74.3734324 | 75.9289015 | 72.421441 | 69.1725398 | 73.928496 | 72.9311067 |
| 73.3734324 | 77.9289015 | 73.421441 | 69.1725398 | 72.928496 | 72.9311067 |
| 73.3734324 | 77.9289015 | 74.421441 | 69.1725398 | 72.928496 | 72.9311067 |
| 73.3734324 | 77.9289015 | 74.421441 | 70.1725398 | 72.928496 | 72.9311067 |
| 72.3734324 | 77.9289015 | 74.421441 | 70.1725398 | 71.928496 | 72.9311067 |
| 72.3734324 | 77.9289015 | 69.421441 | 71.1725398 | 70.928496 | 70.9311067 |
| 72.3734324 | 77.9289015 | 69.421441 | 73.1725398 | 71.928496 | 68.9311067 |
| 72.3734324 | 79.9289015 | 65.421441 | 75.1725398 | 71.928496 | 67.9311067 |
| 72.3734324 | 79.9289015 | 65.421441 | 74.1725398 | 71.928496 | 67.9311067 |
| 72.3734324 | 80.9289015 | 66.421441 | 74.1725398 | 71.928496 | 66.9311067 |
| 72.3734324 | 80.9289015 | 66.421441 | 73.1725398 | 71.928496 | 66.9311067 |
| 72.3734324 | 78.9289015 | 66.421441 | 73.1725398 | 71.928496 | 66.9311067 |
| 72.3734324 | 78.9289015 | 66.421441 | 72.1725398 | 72.928496 | 66.9311067 |
| 72.3734324 | 76.9289015 | 66.421441 | 71.1725398 | 72.928496 | 66.9311067 |
| 72.3734324 | 76.9289015 | 67.421441 | 71.1725398 | 73.928496 | 66.9311067 |
| 72.3734324 | 76.9289015 | 67.421441 | 71.1725398 | 73.928496 | 69.9311067 |
| 72.3734324 | 79.9289015 | 67.421441 | 74.1725398 | 74.928496 | 69.9311067 |
| 72.3734324 | 79.9289015 | 68.421441 | 77.1725398 | 75.928496 | 67.9311067 |
| 72.3734324 | 79.9289015 | 69.421441 | 77.1725398 | 78.928496 | 67.9311067 |
| 70.3734324 | 78.9289015 | 71.421441 | 75.1725398 | 80.928496 | 67.9311067 |
| 70.3734324 | 78.9289015 | 71.421441 | 74.1725398 | 82.928496 | 67.9311067 |
| 70.3734324 | 75.9289015 | 72.421441 | 74.1725398 | 83.928496 | 67.9311067 |
| 70.3734324 | 75.9289015 | 73.421441 | 73.1725398 | 82.928496 | 69.9311067 |
| 72.3734324 | 75.9289015 | 73.421441 | 73.1725398 | 75.928496 | 70.9311067 |
| 73.3734324 | 74.9289015 | 81.421441 | 73.1725398 | 73.928496 | 70.9311067 |
| 73.3734324 | 76.9289015 | 81.421441 | 73.1725398 | 73.928496 | 70.9311067 |
| 72.3734324 | 76.9289015 | 81.421441 | 75.1725398 | 72.928496 | 70.9311067 |
| 72.3734324 | 76.9289015 | 80.421441 | 76.1725398 | 71.928496 | 70.9311067 |
| 73.3734324 | 76.9289015 | 80.421441 | 75.1725398 | 71.928496 | 71.9311067 |
| 73.3734324 | 76.9289015 | 80.421441 | 75.1725398 | 71.928496 | 73.9311067 |
| 73.3734324 | 76.9289015 | 80.421441 | 75.1725398 | 71.928496 | 73.9311067 |
| 73.3734324 | 72.9289015 | 80.421441 | 74.1725398 | 71.928496 | 73.9311067 |
| 74.3734324 | 72.9289015 | 80.421441 | 74.1725398 | 71.928496 | 72.9311067 |
| 74.3734324 | 73.9289015 | 80.421441 | 74.1725398 | 71.928496 | 71.9311067 |

|            |            |           |            |           |            |
|------------|------------|-----------|------------|-----------|------------|
| 74.3734324 | 73.9289015 | 80.421441 | 73.1725398 | 71.928496 | 71.9311067 |
| 74.3734324 | 74.9289015 | 79.421441 | 74.1725398 | 70.928496 | 72.9311067 |
| 75.3734324 | 76.9289015 | 79.421441 | 75.1725398 | 71.928496 | 73.9311067 |
| 75.3734324 | 76.9289015 | 79.421441 | 77.1725398 | 71.928496 | 73.9311067 |
| 75.3734324 | 76.9289015 | 79.421441 | 77.1725398 | 75.928496 | 74.9311067 |
| 75.3734324 | 77.9289015 | 79.421441 | 77.1725398 | 76.928496 | 74.9311067 |
| 76.3734324 | 77.9289015 | 79.421441 | 76.1725398 | 76.928496 | 74.9311067 |
| 76.3734324 | 77.9289015 | 78.421441 | 74.1725398 | 73.928496 | 74.9311067 |
| 80.3734324 | 76.9289015 | 77.421441 | 73.1725398 | 72.928496 | 74.9311067 |
| 81.3734324 | 77.9289015 | 77.421441 | 74.1725398 | 72.928496 | 74.9311067 |
| 83.3734324 | 78.9289015 | 76.421441 | 74.1725398 | 72.928496 | 74.9311067 |
| 83.3734324 | 78.9289015 | 76.421441 | 74.1725398 | 72.928496 | 74.9311067 |
| 74.5781464 | 78.9289015 | 76.421441 | 75.1725398 | 71.928496 | 74.9311067 |
| 74.7599646 | 78.9289015 | 76.421441 | 75.1725398 | 71.928496 | 73.9311067 |
| 74.8508737 | 78.9289015 | 76.421441 | 75.1725398 | 71.928496 | 71.9311067 |
| 74.9417828 | 77.9289015 | 76.421441 | 76.1725398 | 71.928496 | 69.9311067 |
| 75.0326919 | 77.9289015 | 75.421441 | 76.1725398 | 71.928496 | 69.9311067 |
| 74.7599646 | 78.9289015 | 76.421441 | 76.1725398 | 72.928496 | 69.9311067 |
| 75.0326919 | 78.9289015 | 76.421441 | 76.1725398 | 72.928496 | 69.9311067 |
| 75.3054192 | 78.9289015 | 76.421441 | 78.1725398 | 72.928496 | 69.9311067 |
| 75.3054192 | 78.9289015 | 73.421441 | 78.1725398 | 73.928496 | 70.9311067 |
| 75.2145101 | 77.9289015 | 73.421441 | 79.1725398 | 71.928496 | 69.9311067 |
| 75.2145101 | 77.9289015 | 71.421441 | 79.1725398 | 69.928496 | 69.9311067 |
| 75.2145101 | 77.9289015 | 71.421441 | 77.1725398 | 69.928496 | 70.9311067 |
| 75.2145101 | 77.9289015 | 71.421441 | 76.1725398 | 69.928496 | 69.9311067 |
| 75.3054192 | 77.9289015 | 71.421441 | 74.1725398 | 69.928496 | 69.9311067 |
| 75.4872373 | 76.9289015 | 71.421441 | 74.1725398 | 70.928496 | 70.9311067 |
| 75.6690555 | 78.9289015 | 71.421441 | 74.1725398 | 70.928496 | 69.9311067 |
| 75.6690555 | 78.9289015 | 71.421441 | 73.1725398 | 70.928496 | 70.9311067 |
| 75.6690555 | 79.9289015 | 71.421441 | 73.1725398 | 69.928496 | 70.9311067 |
| 75.2145101 | 79.9289015 | 71.421441 | 73.1725398 | 69.928496 | 69.9311067 |
| 74.5781464 | 79.9289015 | 69.421441 | 73.1725398 | 70.928496 | 69.9311067 |
| 73.7599646 | 79.9289015 | 66.421441 | 73.1725398 | 70.928496 | 68.9311067 |
| 73.4872373 | 79.9289015 | 64.421441 | 72.1725398 | 72.928496 | 69.9311067 |
| 74.123601  | 79.9289015 | 69.421441 | 71.1725398 | 73.928496 | 72.9311067 |
| 74.2145101 | 79.9289015 | 69.421441 | 71.1725398 | 73.928496 | 72.9311067 |
| 74.7599646 | 80.9289015 | 73.421441 | 71.1725398 | 71.928496 | 72.9311067 |
| 75.0326919 | 80.9289015 | 73.421441 | 72.1725398 | 71.928496 | 74.9311067 |
| 74.6690555 | 82.9289015 | 72.421441 | 72.1725398 | 68.928496 | 74.9311067 |
| 74.6690555 | 84.9289015 | 71.421441 | 72.1725398 | 68.928496 | 74.9311067 |
| 75.123601  | 84.9289015 | 71.421441 | 73.1725398 | 70.928496 | 76.9311067 |
| 75.3054192 | 80.9289015 | 72.421441 | 73.1725398 | 72.928496 | 77.9311067 |
| 76.0326919 | 79.9289015 | 75.421441 | 74.1725398 | 75.928496 | 81.9311067 |
| 76.2145101 | 77.9289015 | 75.421441 | 77.1725398 | 76.928496 | 81.9311067 |
| 76.2145101 | 77.9289015 | 76.421441 | 77.1725398 | 78.928496 | 83.9311067 |

|            |            |           |            |           |            |
|------------|------------|-----------|------------|-----------|------------|
| 86.3734324 | 77.9289015 | 77.421441 | 76.1725398 | 79.928496 | 84.9311067 |
| 84.3734324 | 77.9289015 | 77.421441 | 74.1725398 | 80.928496 | 84.9311067 |
| 84.3734324 | 77.9289015 | 78.421441 | 72.1725398 | 80.928496 | 84.9311067 |
| 84.3734324 | 77.9289015 | 78.421441 | 72.1725398 | 79.928496 | 84.9311067 |
| 83.3734324 | 76.9289015 | 79.421441 | 71.1725398 | 74.928496 | 83.9311067 |
| 83.3734324 | 76.9289015 | 79.421441 | 71.1725398 | 74.928496 | 83.9311067 |
| 83.3734324 | 76.9289015 | 79.421441 | 72.1725398 | 70.928496 | 80.9311067 |
| 82.3734324 | 82.9289015 | 80.421441 | 72.1725398 | 69.928496 | 80.9311067 |
| 82.3734324 | 84.9289015 | 79.421441 | 72.1725398 | 69.928496 | 78.9311067 |
| 82.3734324 | 84.9289015 | 79.421441 | 70.1725398 | 69.928496 | 75.9311067 |
| 84.3734324 | 84.9289015 | 79.421441 | 69.1725398 | 69.928496 | 73.9311067 |
| 84.3734324 | 84.9289015 | 78.421441 | 68.1725398 | 69.928496 | 73.9311067 |
| 84.3734324 | 84.9289015 | 78.421441 | 69.1725398 | 68.928496 | 70.9311067 |
| 85.3734324 | 84.9289015 | 78.421441 | 69.1725398 | 68.928496 | 70.9311067 |
| 85.3734324 | 83.9289015 | 78.421441 | 71.1725398 | 68.928496 | 71.9311067 |
| 85.3734324 | 83.9289015 | 78.421441 | 72.1725398 | 69.928496 | 71.9311067 |
| 85.3734324 | 83.9289015 | 77.421441 | 73.1725398 | 69.928496 | 71.9311067 |
| 85.3734324 | 83.9289015 | 79.421441 | 74.1725398 | 69.928496 | 71.9311067 |
| 76.3054192 | 84.9289015 | 82.421441 | 74.1725398 | 68.928496 | 72.9311067 |
| 76.5781464 | 85.9289015 | 82.421441 | 74.1725398 | 66.928496 | 74.9311067 |
| 76.8508737 | 85.9289015 | 85.421441 | 74.1725398 | 65.928496 | 74.9311067 |
| 77.2145101 | 85.9289015 | 88.421441 | 74.1725398 | 64.928496 | 77.9311067 |
| 77.3054192 | 86.9289015 | 87.421441 | 76.1725398 | 63.928496 | 80.9311067 |
| 77.7599646 | 86.9289015 | 86.421441 | 76.1725398 | 63.928496 | 82.9311067 |
| 77.0326919 | 86.9289015 | 80.421441 | 77.1725398 | 63.928496 | 82.9311067 |
| 77.0326919 | 86.9289015 | 80.421441 | 76.1725398 | 63.928496 | 84.9311067 |
| 76.7599646 | 85.9289015 | 75.421441 | 76.1725398 | 63.928496 | 84.9311067 |
| 86.3734324 | 85.9289015 | 74.421441 | 76.1725398 | 63.928496 | 85.9311067 |
| 78.3734324 | 85.9289015 | 74.421441 | 76.1725398 | 63.928496 | 85.9311067 |
| 77.3734324 | 86.9289015 | 73.421441 | 75.1725398 | 63.928496 | 85.9311067 |
| 77.3734324 | 74.5781464 | 72.421441 | 75.1725398 | 64.928496 | 85.9311067 |
| 76.3734324 | 74.3963282 | 71.421441 | 75.1725398 | 64.928496 | 86.9311067 |
| 76.3734324 | 74.8508737 | 71.421441 | 76.1725398 | 67.928496 | 74.8508737 |
| 76.3734324 | 74.7599646 | 70.421441 | 76.1725398 | 67.928496 | 74.7599646 |
| 76.3734324 | 74.8508737 | 71.421441 | 75.1725398 | 67.928496 | 74.8508737 |
| 75.3734324 | 74.9417828 | 72.421441 | 76.1725398 | 68.928496 | 74.9417828 |
| 77.3734324 | 75.3963282 | 73.421441 | 76.1725398 | 68.928496 | 75.3963282 |
| 77.3734324 | 75.5781464 | 73.421441 | 77.1725398 | 68.928496 | 75.5781464 |
| 78.3734324 | 76.2145101 | 73.421441 | 79.1725398 | 69.928496 | 76.2145101 |
| 79.3734324 | 76.0326919 | 72.421441 | 80.1725398 | 69.928496 | 76.0326919 |
| 79.3734324 | 76.123601  | 72.421441 | 80.1725398 | 71.928496 | 76.123601  |
| 79.3734324 | 75.7599646 | 72.421441 | 80.1725398 | 72.928496 | 75.7599646 |
| 79.3734324 | 75.7599646 | 73.421441 | 80.1725398 | 72.928496 | 75.7599646 |
| 79.3734324 | 75.5781464 | 73.421441 | 80.1725398 | 72.928496 | 75.5781464 |
| 79.3734324 | 87.9289015 | 73.421441 | 76.1725398 | 72.928496 | 75.2145101 |



|            |            |           |            |           |            |
|------------|------------|-----------|------------|-----------|------------|
| 80.3734324 | 85.9289015 | 73.421441 | 76.1725398 | 72.928496 | 75.3054192 |
| 80.3734324 | 83.9289015 | 73.421441 | 77.1725398 | 73.928496 | 75.123601  |
| 80.3734324 | 82.9289015 | 73.421441 | 77.1725398 | 75.928496 | 75.3054192 |
| 80.3734324 | 81.9289015 | 73.421441 | 75.1725398 | 75.928496 | 74.6690555 |
| 82.3734324 | 81.9289015 | 73.421441 | 75.1725398 | 76.928496 | 74.9417828 |
| 82.3734324 | 81.9289015 | 73.421441 | 74.1725398 | 73.928496 | 74.3963282 |
| 82.3734324 | 82.9289015 | 72.421441 | 74.1725398 | 73.928496 | 74.3054192 |
| 80.3734324 | 81.9289015 | 72.421441 | 73.1725398 | 73.928496 | 74.123601  |
| 79.3734324 | 80.9289015 | 72.421441 | 73.1725398 | 70.928496 | 73.7599646 |
| 79.3734324 | 79.9289015 | 72.421441 | 74.1725398 | 70.928496 | 73.9417828 |
| 78.3734324 | 78.9289015 | 71.421441 | 74.1725398 | 71.928496 | 73.8508737 |
| 76.3734324 | 78.9289015 | 71.421441 | 75.1725398 | 70.928496 | 73.9417828 |
| 76.3734324 | 79.9289015 | 70.421441 | 75.1725398 | 70.928496 | 74.0326919 |
| 76.3734324 | 80.9289015 | 70.421441 | 75.1725398 | 69.928496 | 83.9311067 |
| 76.3734324 | 80.9289015 | 70.421441 | 75.1725398 | 69.928496 | 83.9311067 |
| 75.3734324 | 80.9289015 | 70.421441 | 75.1725398 | 68.928496 | 77.9311067 |
| 75.3734324 | 79.9289015 | 69.421441 | 75.1725398 | 68.928496 | 76.9311067 |
| 75.3734324 | 79.9289015 | 69.421441 | 75.1725398 | 73.928496 | 75.9311067 |
| 75.3734324 | 80.9289015 | 69.421441 | 75.1725398 | 74.928496 | 74.9311067 |
| 75.3734324 | 80.9289015 | 68.421441 | 75.1725398 | 74.928496 | 74.9311067 |
| 75.3734324 | 80.9289015 | 68.421441 | 75.1725398 | 74.928496 | 74.9311067 |
| 75.3734324 | 80.9289015 | 68.421441 | 75.1725398 | 74.928496 | 74.9311067 |
| 76.3734324 | 80.9289015 | 68.421441 | 74.1725398 | 74.928496 | 74.9311067 |
| 75.3734324 | 80.9289015 | 68.421441 | 73.1725398 | 74.928496 | 74.9311067 |
| 75.3734324 | 80.9289015 | 72.421441 | 73.1725398 | 71.928496 | 74.9311067 |
| 75.3734324 | 80.9289015 | 72.421441 | 73.1725398 | 69.928496 | 75.9311067 |
| 75.3734324 | 81.9289015 | 73.421441 | 72.1725398 | 68.928496 | 75.9311067 |
| 75.3734324 | 81.9289015 | 75.421441 | 72.1725398 | 68.928496 | 76.9311067 |
| 75.3734324 | 82.9289015 | 75.421441 | 72.1725398 | 68.928496 | 75.9311067 |
| 76.3734324 | 82.9289015 | 77.421441 | 72.1725398 | 68.928496 | 75.9311067 |
| 76.3734324 | 84.9289015 | 77.421441 | 73.1725398 | 68.928496 | 75.9311067 |
| 76.3734324 | 84.9289015 | 77.421441 | 73.1725398 | 68.928496 | 75.9311067 |
| 76.3734324 | 84.9289015 | 77.421441 | 75.1725398 | 68.928496 | 78.9311067 |
| 76.3734324 | 84.9289015 | 77.421441 | 81.1725398 | 69.928496 | 79.9311067 |
| 76.3734324 | 82.9289015 | 75.421441 | 81.1725398 | 69.928496 | 79.9311067 |
| 76.3734324 | 82.9289015 | 75.421441 | 81.1725398 | 71.928496 | 78.9311067 |
| 76.3734324 | 82.9289015 | 75.421441 | 77.1725398 | 72.928496 | 78.9311067 |
| 77.3734324 | 83.9289015 | 74.421441 | 76.1725398 | 73.928496 | 75.9311067 |
| 77.3734324 | 83.9289015 | 74.421441 | 75.1725398 | 73.928496 | 75.9311067 |
| 77.3734324 | 84.9289015 | 72.421441 | 75.1725398 | 73.928496 | 76.9311067 |
| 77.3734324 | 84.9289015 | 72.421441 | 75.1725398 | 72.928496 | 76.9311067 |
| 77.3734324 | 84.9289015 | 71.421441 | 75.1725398 | 69.928496 | 76.9311067 |
| 77.3734324 | 84.9289015 | 71.421441 | 77.1725398 | 69.928496 | 76.9311067 |
| 77.3734324 | 82.9289015 | 71.421441 | 78.1725398 | 69.928496 | 76.9311067 |
| 78.3734324 | 81.9289015 | 71.421441 | 78.1725398 | 69.928496 | 76.9311067 |

|            |            |           |            |           |            |
|------------|------------|-----------|------------|-----------|------------|
| 78.3734324 | 81.9289015 | 71.421441 | 78.1725398 | 69.928496 | 77.9311067 |
| 77.3734324 | 81.9289015 | 72.421441 | 78.1725398 | 69.928496 | 77.9311067 |
| 72.3734324 | 78.9289015 | 72.421441 | 78.1725398 | 69.928496 | 82.9311067 |
| 72.3734324 | 76.9289015 | 72.421441 | 77.1725398 | 70.928496 | 83.9311067 |
| 71.3734324 | 75.9289015 | 73.421441 | 78.1725398 | 75.928496 | 85.9311067 |
| 71.3734324 | 75.9289015 | 73.421441 | 79.1725398 | 77.928496 | 85.9311067 |
| 71.3734324 | 74.9289015 | 73.421441 | 79.1725398 | 77.928496 | 85.9311067 |
| 71.3734324 | 74.9289015 | 73.421441 | 78.1725398 | 77.928496 | 85.9311067 |
| 70.3734324 | 75.9289015 | 74.421441 | 75.1725398 | 77.928496 | 84.9311067 |
| 70.3734324 | 77.9289015 | 71.421441 | 74.1725398 | 76.928496 | 84.9311067 |
| 67.3734324 | 79.9289015 | 71.421441 | 74.1725398 | 75.928496 | 80.9311067 |
| 68.3734324 | 80.9289015 | 71.421441 | 74.1725398 | 75.928496 | 71.9311067 |
| 70.3734324 | 79.9289015 | 71.421441 | 73.1725398 | 73.928496 | 70.9311067 |
| 71.3734324 | 77.9289015 | 71.421441 | 73.1725398 | 73.928496 | 70.9311067 |
| 71.3734324 | 76.9289015 | 71.421441 | 74.1725398 | 73.928496 | 70.9311067 |
| 79.3734324 | 76.9289015 | 71.421441 | 73.1725398 | 73.928496 | 70.9311067 |
| 80.3734324 | 75.9289015 | 71.421441 | 73.1725398 | 73.928496 | 70.9311067 |
| 80.3734324 | 75.9289015 | 71.421441 | 67.1725398 | 73.928496 | 70.9311067 |
| 80.3734324 | 75.9289015 | 72.421441 | 66.1725398 | 74.928496 | 70.9311067 |
| 80.3734324 | 75.9289015 | 72.421441 | 65.1725398 | 76.928496 | 70.9311067 |
| 80.3734324 | 75.9289015 | 72.421441 | 65.1725398 | 76.928496 | 70.9311067 |
| 80.3734324 | 75.9289015 | 72.421441 | 65.1725398 | 76.928496 | 70.9311067 |
| 80.3734324 | 77.9289015 | 72.421441 | 64.1725398 | 76.928496 | 71.9311067 |
| 80.3734324 | 77.9289015 | 72.421441 | 64.1725398 | 76.928496 | 71.9311067 |
| 82.3734324 | 77.9289015 | 72.421441 | 66.1725398 | 73.928496 | 73.9311067 |
| 82.3734324 | 79.9289015 | 73.421441 | 66.1725398 | 71.928496 | 73.9311067 |
| 81.3734324 | 77.9289015 | 73.421441 | 67.1725398 | 71.928496 | 74.9311067 |
| 81.3734324 | 74.9289015 | 73.421441 | 68.1725398 | 71.928496 | 74.9311067 |
| 81.3734324 | 72.9289015 | 75.421441 | 69.1725398 | 71.928496 | 74.9311067 |
| 81.3734324 | 72.9289015 | 77.421441 | 71.1725398 | 71.928496 | 74.9311067 |
| 80.3734324 | 72.9289015 | 79.421441 | 72.1725398 | 71.928496 | 74.9311067 |
| 80.3734324 | 72.9289015 | 79.421441 | 75.1725398 | 71.928496 | 75.9311067 |
| 79.3734324 | 72.9289015 | 79.421441 | 77.1725398 | 71.928496 | 75.9311067 |
| 79.3734324 | 72.9289015 | 75.421441 | 77.1725398 | 71.928496 | 74.9311067 |
| 79.3734324 | 72.9289015 | 74.421441 | 76.1725398 | 71.928496 | 74.9311067 |
| 77.3734324 | 78.9289015 | 74.421441 | 75.1725398 | 70.928496 | 72.9311067 |
| 80.3734324 | 78.9289015 | 73.421441 | 75.1725398 | 70.928496 | 72.9311067 |
| 85.3734324 | 79.9289015 | 73.421441 | 76.1725398 | 70.928496 | 72.9311067 |
| 85.3734324 | 79.9289015 | 74.421441 | 76.1725398 | 71.928496 | 72.9311067 |
| 87.3734324 | 82.9289015 | 74.421441 | 76.1725398 | 73.928496 | 70.9311067 |
| 87.3734324 | 83.9289015 | 74.421441 | 76.1725398 | 74.928496 | 70.9311067 |
| 88.3734324 | 85.9289015 | 73.421441 | 76.1725398 | 75.928496 | 69.9311067 |
| 76.123601  | 86.9289015 | 73.421441 | 77.1725398 | 75.928496 | 69.9311067 |
| 76.3054192 | 87.9289015 | 71.421441 | 76.1725398 | 76.928496 | 68.9311067 |
| 76.3054192 | 87.9289015 | 70.421441 | 77.1725398 | 76.928496 | 68.9311067 |

|            |            |           |            |           |            |
|------------|------------|-----------|------------|-----------|------------|
| 76.3054192 | 86.9289015 | 70.421441 | 77.1725398 | 77.928496 | 69.9311067 |
| 76.3054192 | 85.9289015 | 70.421441 | 76.1725398 | 77.928496 | 69.9311067 |
| 75.4872373 | 81.9289015 | 70.421441 | 75.1725398 | 77.928496 | 69.9311067 |
| 76.0326919 | 80.9289015 | 70.421441 | 75.1725398 | 78.928496 | 69.9311067 |
| 75.9417828 | 80.9289015 | 70.421441 | 75.1725398 | 78.928496 | 69.9311067 |
| 76.3963282 | 78.9289015 | 70.421441 | 79.1725398 | 78.928496 | 70.9311067 |
| 76.0326919 | 78.9289015 | 70.421441 | 79.1725398 | 76.928496 | 71.9311067 |
| 75.9417828 | 78.9289015 | 70.421441 | 79.1725398 | 76.928496 | 71.9311067 |
| 76.3054192 | 78.9289015 | 70.421441 | 79.1725398 | 78.928496 | 71.9311067 |
| 76.4872373 | 78.9289015 | 69.421441 | 78.1725398 | 79.928496 | 73.9311067 |
| 76.3963282 | 78.9289015 | 68.421441 | 77.1725398 | 80.928496 | 73.9311067 |
| 75.9417828 | 78.9289015 | 68.421441 | 75.1725398 | 81.928496 | 73.9311067 |
| 75.5781464 | 78.9289015 | 67.421441 | 75.1725398 | 81.928496 | 73.9311067 |
| 75.5781464 | 78.9289015 | 66.421441 | 75.1725398 | 80.928496 | 74.9311067 |
| 74.4872373 | 78.9289015 | 66.421441 | 77.1725398 | 72.928496 | 73.9311067 |
| 73.8508737 | 78.9289015 | 66.421441 | 77.1725398 | 72.928496 | 72.9311067 |
| 73.3054192 | 78.9289015 | 66.421441 | 78.1725398 | 68.928496 | 72.9311067 |
| 82.3734324 | 78.9289015 | 66.421441 | 78.1725398 | 68.928496 | 72.9311067 |
| 78.3734324 | 78.9289015 | 66.421441 | 78.1725398 | 67.928496 | 72.9311067 |
| 78.3734324 | 77.9289015 | 66.421441 | 78.1725398 | 67.928496 | 71.9311067 |
| 78.3734324 | 77.9289015 | 66.421441 | 78.1725398 | 67.928496 | 71.9311067 |
| 77.3734324 | 75.9289015 | 66.421441 | 77.1725398 | 67.928496 | 71.9311067 |
| 76.3734324 | 73.9289015 | 66.421441 | 77.1725398 | 68.928496 | 71.9311067 |
| 75.3734324 | 72.9289015 | 66.421441 | 76.1725398 | 68.928496 | 70.9311067 |
| 74.3734324 | 72.9289015 | 66.421441 | 76.1725398 | 68.928496 | 70.9311067 |
| 74.3734324 | 71.9289015 | 66.421441 | 78.1725398 | 68.928496 | 69.9311067 |
| 74.3734324 | 71.9289015 | 66.421441 | 78.1725398 | 68.928496 | 68.9311067 |
| 74.3734324 | 71.9289015 | 66.421441 | 78.1725398 | 69.928496 | 67.9311067 |
| 75.3734324 | 71.9289015 | 66.421441 | 79.1725398 | 71.928496 | 67.9311067 |
| 75.3734324 | 71.9289015 | 65.421441 | 79.1725398 | 74.928496 | 63.9311067 |
| 76.3734324 | 71.9289015 | 65.421441 | 76.1725398 | 74.928496 | 61.9311067 |
| 76.3734324 | 69.9289015 | 66.421441 | 76.1725398 | 74.928496 | 61.9311067 |
| 76.3734324 | 69.9289015 | 66.421441 | 76.1725398 | 74.928496 | 61.9311067 |
| 77.3734324 | 69.9289015 | 67.421441 | 74.1725398 | 72.928496 | 60.9311067 |
| 77.3734324 | 67.9289015 | 67.421441 | 74.1725398 | 71.928496 | 60.9311067 |
| 77.3734324 | 67.9289015 | 68.421441 | 74.1725398 | 72.928496 | 60.9311067 |
| 79.3734324 | 67.9289015 | 68.421441 | 76.1725398 | 72.928496 | 60.9311067 |
| 82.3734324 | 67.9289015 | 68.421441 | 79.1725398 | 73.928496 | 61.9311067 |
| 82.3734324 | 68.9289015 | 68.421441 | 79.1725398 | 79.928496 | 61.9311067 |
| 82.3734324 | 69.9289015 | 69.421441 | 79.1725398 | 80.928496 | 63.9311067 |
| 82.3734324 | 70.9289015 | 69.421441 | 77.1725398 | 81.928496 | 66.9311067 |
| 83.3734324 | 69.9289015 | 70.421441 | 77.1725398 | 82.928496 | 70.9311067 |
| 83.3734324 | 69.9289015 | 72.421441 | 74.1725398 | 82.928496 | 71.9311067 |
| 83.3734324 | 69.9289015 | 75.421441 | 74.1725398 | 81.928496 | 71.9311067 |
| 83.3734324 | 70.9289015 | 75.421441 | 75.1725398 | 77.928496 | 72.9311067 |

|            |            |            |            |           |            |
|------------|------------|------------|------------|-----------|------------|
| 84.3734324 | 72.9289015 | 76.421441  | 77.1725398 | 77.928496 | 73.9311067 |
| 85.3734324 | 73.9289015 | 79.421441  | 78.1725398 | 74.928496 | 73.9311067 |
| 85.3734324 | 73.9289015 | 80.421441  | 78.1725398 | 73.928496 | 74.9311067 |
| 81.3734324 | 73.9289015 | 80.421441  | 78.1725398 | 73.928496 | 74.9311067 |
| 82.3734324 | 73.9289015 | 80.421441  | 78.1725398 | 75.928496 | 77.9311067 |
| 82.3734324 | 75.9289015 | 79.421441  | 78.1725398 | 75.928496 | 81.9311067 |
| 80.3734324 | 76.9289015 | 74.421441  | 78.1725398 | 76.928496 | 81.9311067 |
| 78.3734324 | 76.9289015 | 74.421441  | 79.1725398 | 72.928496 | 81.9311067 |
| 78.3734324 | 74.9289015 | 74.421441  | 79.1725398 | 72.928496 | 81.9311067 |
| 78.3734324 | 74.9289015 | 73.421441  | 85.1725398 | 68.928496 | 80.9311067 |
| 78.3734324 | 74.9289015 | 73.421441  | 84.1725398 | 67.928496 | 80.9311067 |
| 77.3734324 | 74.9289015 | 73.421441  | 83.1725398 | 66.928496 | 81.9311067 |
| 77.3734324 | 74.9289015 | 73.421441  | 82.1725398 | 67.928496 | 81.9311067 |
| 76.3734324 | 74.9289015 | 74.421441  | 81.1725398 | 68.928496 | 81.9311067 |
| 76.3734324 | 74.9289015 | 75.421441  | 81.1725398 | 69.928496 | 81.9311067 |
| 76.3734324 | 75.9289015 | 76.421441  | 81.1725398 | 69.928496 | 81.9311067 |
| 76.3734324 | 76.9289015 | 76.421441  | 81.1725398 | 69.928496 | 80.9311067 |
| 76.3734324 | 76.9289015 | 81.421441  | 82.1725398 | 69.928496 | 80.9311067 |
| 76.3734324 | 76.9289015 | 85.421441  | 82.1725398 | 69.928496 | 79.9311067 |
| 76.3734324 | 69.9289015 | 73.2145101 | 82.1725398 | 69.928496 | 79.9311067 |
| 76.3734324 | 69.9289015 | 73.0326919 | 83.1725398 | 69.928496 | 79.9311067 |
| 76.3734324 | 68.9289015 | 73.123601  | 83.1725398 | 69.928496 | 79.9311067 |
| 76.3734324 | 69.9289015 | 72.8508737 | 83.1725398 | 69.928496 | 79.9311067 |
| 75.3734324 | 70.9289015 | 72.8508737 | 82.1725398 | 69.928496 | 79.9311067 |
| 75.3734324 | 70.9289015 | 85.421441  | 83.1725398 | 69.928496 | 80.9311067 |
| 77.3734324 | 74.9289015 | 85.421441  | 83.1725398 | 68.928496 | 80.9311067 |
| 77.3734324 | 77.9289015 | 85.421441  | 83.1725398 | 68.928496 | 80.9311067 |
| 78.3734324 | 79.9289015 | 85.421441  | 81.1725398 | 68.928496 | 82.9311067 |
| 78.3734324 | 77.9289015 | 85.421441  | 81.1725398 | 68.928496 | 83.9311067 |
| 79.3734324 | 77.9289015 | 85.421441  | 81.1725398 | 69.928496 | 83.9311067 |
| 79.3734324 | 76.9289015 | 85.421441  | 80.1725398 | 70.928496 | 85.9311067 |
| 79.3734324 | 76.9289015 | 84.421441  | 80.1725398 | 70.928496 | 85.9311067 |
| 74.7599646 | 76.9289015 | 83.421441  | 75.1725398 | 71.928496 | 85.9311067 |
| 74.5781464 | 76.9289015 | 82.421441  | 75.1725398 | 71.928496 | 85.9311067 |
| 74.5781464 | 76.9289015 | 82.421441  | 76.1725398 | 71.928496 | 85.9311067 |
| 74.2145101 | 75.9289015 | 78.421441  | 75.1725398 | 72.928496 | 86.9311067 |
| 74.2145101 | 75.9289015 | 77.421441  | 76.1725398 | 73.928496 | 85.9311067 |
| 85.3734324 | 75.9289015 | 75.421441  | 76.1725398 | 78.928496 | 81.9311067 |
| 84.3734324 | 74.9289015 | 75.421441  | 76.1725398 | 81.928496 | 74.9311067 |
| 84.3734324 | 74.9289015 | 75.421441  | 76.1725398 | 82.928496 | 74.9311067 |
| 81.3734324 | 73.9289015 | 75.421441  | 76.1725398 | 82.928496 | 74.9311067 |
| 81.3734324 | 73.9289015 | 75.421441  | 76.1725398 | 82.928496 | 74.9311067 |
| 81.3734324 | 72.9289015 | 75.421441  | 77.1725398 | 82.928496 | 72.9311067 |
| 80.3734324 | 72.9289015 | 74.421441  | 76.1725398 | 81.928496 | 67.9311067 |
| 81.3734324 | 72.9289015 | 74.421441  | 75.1725398 | 77.928496 | 67.9311067 |

|            |            |           |            |           |            |
|------------|------------|-----------|------------|-----------|------------|
| 81.3734324 | 71.9289015 | 74.421441 | 75.1725398 | 73.928496 | 64.9311067 |
| 81.3734324 | 71.9289015 | 74.421441 | 75.1725398 | 72.928496 | 64.9311067 |
| 81.3734324 | 70.9289015 | 74.421441 | 76.1725398 | 71.928496 | 63.9311067 |
| 80.3734324 | 70.9289015 | 75.421441 | 76.1725398 | 71.928496 | 62.9311067 |
| 80.3734324 | 70.9289015 | 75.421441 | 76.1725398 | 71.928496 | 62.9311067 |
| 79.3734324 | 70.9289015 | 75.421441 | 75.1725398 | 72.928496 | 62.9311067 |
| 77.3734324 | 69.9289015 | 75.421441 | 74.1725398 | 72.928496 | 61.9311067 |
| 77.3734324 | 69.9289015 | 76.421441 | 74.1725398 | 72.928496 | 63.9311067 |
| 77.3734324 | 69.9289015 | 76.421441 | 74.1725398 | 73.928496 | 66.9311067 |
| 76.3734324 | 71.9289015 | 76.421441 | 75.1725398 | 73.928496 | 69.9311067 |
| 75.3734324 | 71.9289015 | 76.421441 | 75.1725398 | 73.928496 | 69.9311067 |
| 75.3734324 | 72.9289015 | 76.421441 | 75.1725398 | 72.928496 | 66.9311067 |
| 75.3734324 | 73.9289015 | 74.421441 | 74.1725398 | 69.928496 | 66.9311067 |
| 75.3734324 | 74.9289015 | 73.421441 | 74.1725398 | 67.928496 | 66.9311067 |
| 75.3734324 | 75.9289015 | 73.421441 | 74.1725398 | 65.928496 | 65.9311067 |
| 75.3734324 | 75.9289015 | 73.421441 | 71.1725398 | 65.928496 | 64.9311067 |
| 74.3734324 | 75.9289015 | 71.421441 | 70.1725398 | 65.928496 | 62.9311067 |
| 74.3734324 | 75.9289015 | 71.421441 | 70.1725398 | 65.928496 | 62.9311067 |
| 74.3734324 | 73.9289015 | 71.421441 | 70.1725398 | 65.928496 | 61.9311067 |
| 74.3734324 | 73.9289015 | 71.421441 | 69.1725398 | 65.928496 | 59.9311067 |
| 74.3734324 | 72.9289015 | 71.421441 | 70.1725398 | 66.928496 | 58.9311067 |
| 78.3734324 | 71.9289015 | 71.421441 | 74.1725398 | 66.928496 | 58.9311067 |
| 78.3734324 | 72.9289015 | 71.421441 | 74.1725398 | 66.928496 | 56.9311067 |
| 81.3734324 | 72.9289015 | 71.421441 | 74.1725398 | 66.928496 | 56.9311067 |
| 84.3734324 | 74.9289015 | 71.421441 | 74.1725398 | 66.928496 | 56.9311067 |
| 73.4872373 | 74.9289015 | 71.421441 | 74.1725398 | 66.928496 | 56.9311067 |
| 73.5781464 | 74.9289015 | 71.421441 | 73.1725398 | 66.928496 | 56.9311067 |
| 74.0326919 | 74.9289015 | 75.421441 | 73.1725398 | 66.928496 | 56.9311067 |
| 73.7599646 | 74.9289015 | 74.421441 | 73.1725398 | 66.928496 | 57.9311067 |
| 73.3963282 | 75.9289015 | 73.421441 | 74.1725398 | 66.928496 | 57.9311067 |
| 73.3963282 | 75.9289015 | 73.421441 | 76.1725398 | 66.928496 | 58.9311067 |
| 74.123601  | 75.9289015 | 72.421441 | 77.1725398 | 68.928496 | 65.9311067 |
| 73.9417828 | 74.9289015 | 70.421441 | 78.1725398 | 67.928496 | 66.9311067 |
| 73.6690555 | 74.9289015 | 70.421441 | 75.1725398 | 66.928496 | 67.9311067 |
| 72.8508737 | 74.9289015 | 68.421441 | 75.1725398 | 66.928496 | 67.9311067 |
| 72.7599646 | 74.9289015 | 68.421441 | 74.1725398 | 66.928496 | 67.9311067 |
| 72.6690555 | 74.9289015 | 68.421441 | 74.1725398 | 66.928496 | 67.9311067 |
| 73.0326919 | 74.9289015 | 68.421441 | 75.1725398 | 68.928496 | 67.9311067 |
| 73.2145101 | 74.9289015 | 69.421441 | 75.1725398 | 71.928496 | 67.9311067 |
| 73.6690555 | 74.9289015 | 69.421441 | 75.1725398 | 75.928496 | 67.9311067 |
| 73.6690555 | 76.9289015 | 70.421441 | 72.1725398 | 76.928496 | 68.9311067 |
| 73.4872373 | 76.9289015 | 71.421441 | 71.1725398 | 76.928496 | 68.9311067 |
| 73.3054192 | 76.9289015 | 71.421441 | 71.1725398 | 75.928496 | 69.9311067 |
| 73.2145101 | 75.9289015 | 71.421441 | 70.1725398 | 76.928496 | 69.9311067 |
| 73.123601  | 74.9289015 | 70.421441 | 70.1725398 | 77.928496 | 70.9311067 |

|            |            |           |            |            |            |
|------------|------------|-----------|------------|------------|------------|
| 72.8508737 | 73.9289015 | 68.421441 | 70.1725398 | 78.928496  | 70.9311067 |
| 72.3054192 | 72.9289015 | 65.421441 | 70.1725398 | 78.928496  | 70.9311067 |
| 72.4872373 | 74.9289015 | 65.421441 | 71.1725398 | 78.928496  | 70.9311067 |
| 72.5781464 | 74.9289015 | 64.421441 | 71.1725398 | 79.928496  | 70.9311067 |
| 72.6690555 | 74.9289015 | 63.421441 | 71.1725398 | 81.928496  | 70.9311067 |
| 72.6690555 | 74.9289015 | 63.421441 | 71.1725398 | 81.928496  | 70.9311067 |
| 72.3054192 | 75.9289015 | 61.421441 | 72.1725398 | 80.928496  | 69.9311067 |
| 72.3054192 | 75.9289015 | 61.421441 | 75.1725398 | 79.928496  | 69.9311067 |
| 72.123601  | 75.9289015 | 59.421441 | 72.1725398 | 79.928496  | 69.9311067 |
| 72.2145101 | 75.9289015 | 58.421441 | 71.1725398 | 80.928496  | 70.9311067 |
| 72.4872373 | 75.9289015 | 59.421441 | 72.1725398 | 81.928496  | 70.9311067 |
| 72.5781464 | 76.9289015 | 59.421441 | 72.1725398 | 82.928496  | 71.9311067 |
| 80.3734324 | 75.9289015 | 57.421441 | 75.1725398 | 84.928496  | 71.9311067 |
| 77.3734324 | 75.9289015 | 57.421441 | 77.1725398 | 72.0326919 | 71.9311067 |
| 77.3734324 | 75.9289015 | 57.421441 | 78.1725398 | 72.0326919 | 72.9311067 |
| 77.3734324 | 74.9289015 | 57.421441 | 80.1725398 | 72.3963282 | 72.9311067 |
| 75.3734324 | 74.9289015 | 58.421441 | 80.1725398 | 72.7599646 | 72.9311067 |
| 74.3734324 | 80.9289015 | 58.421441 | 81.1725398 | 77.928496  | 72.9311067 |
| 74.3734324 | 80.9289015 | 59.421441 | 81.1725398 | 71.928496  | 72.9311067 |
| 74.3734324 | 80.9289015 | 59.421441 | 78.1725398 | 71.928496  | 71.9311067 |
| 74.3734324 | 81.9289015 | 62.421441 | 76.1725398 | 64.928496  | 71.9311067 |
| 74.3734324 | 81.9289015 | 62.421441 | 76.1725398 | 62.928496  | 71.9311067 |
| 74.3734324 | 81.9289015 | 62.421441 | 75.1725398 | 61.928496  | 73.9311067 |
| 71.3734324 | 81.9289015 | 64.421441 | 75.1725398 | 60.928496  | 74.9311067 |
| 71.3734324 | 81.9289015 | 64.421441 | 74.1725398 | 60.928496  | 74.9311067 |
| 71.3734324 | 80.9289015 | 65.421441 | 74.1725398 | 60.928496  | 73.9311067 |
| 71.3734324 | 80.9289015 | 66.421441 | 74.1725398 | 60.928496  | 73.9311067 |
| 71.3734324 | 80.9289015 | 67.421441 | 74.1725398 | 60.928496  | 72.9311067 |
| 71.3734324 | 81.9289015 | 67.421441 | 73.1725398 | 60.928496  | 73.9311067 |
| 70.3734324 | 80.9289015 | 71.421441 | 73.1725398 | 61.928496  | 73.9311067 |
| 70.3734324 | 80.9289015 | 71.421441 | 72.1725398 | 62.928496  | 74.9311067 |
| 73.3734324 | 79.9289015 | 72.421441 | 72.1725398 | 62.928496  | 74.9311067 |
| 74.3734324 | 79.9289015 | 72.421441 | 72.1725398 | 61.928496  | 74.9311067 |
| 74.3734324 | 78.9289015 | 73.421441 | 73.1725398 | 60.928496  | 75.9311067 |
| 74.3734324 | 78.9289015 | 73.421441 | 73.1725398 | 59.928496  | 75.9311067 |
| 75.3734324 | 79.9289015 | 73.421441 | 73.1725398 | 59.928496  | 73.9311067 |
| 75.3734324 | 77.9289015 | 72.421441 | 72.1725398 | 61.928496  | 72.9311067 |
| 74.3734324 | 77.9289015 | 72.421441 | 72.1725398 | 62.928496  | 70.9311067 |
| 74.3734324 | 77.9289015 | 72.421441 | 72.1725398 | 64.928496  | 70.9311067 |
| 74.3734324 | 78.9289015 | 71.421441 | 73.1725398 | 65.928496  | 68.9311067 |
| 74.3734324 | 79.9289015 | 71.421441 | 72.1725398 | 65.928496  | 66.9311067 |
| 74.3734324 | 80.9289015 | 71.421441 | 74.1725398 | 66.928496  | 66.9311067 |
| 74.3734324 | 80.9289015 | 71.421441 | 75.1725398 | 67.928496  | 67.9311067 |
| 74.3734324 | 79.9289015 | 71.421441 | 74.1725398 | 68.928496  | 67.9311067 |
| 74.3734324 | 78.9289015 | 71.421441 | 74.1725398 | 72.928496  | 67.9311067 |

|            |            |           |            |            |            |
|------------|------------|-----------|------------|------------|------------|
| 74.3734324 | 78.9289015 | 71.421441 | 73.1725398 | 75.928496  | 68.9311067 |
| 74.3734324 | 77.9289015 | 71.421441 | 73.1725398 | 75.928496  | 68.9311067 |
| 74.3734324 | 76.9289015 | 71.421441 | 73.1725398 | 75.928496  | 69.9311067 |
| 75.3734324 | 76.9289015 | 71.421441 | 73.1725398 | 75.928496  | 69.9311067 |
| 76.3734324 | 76.9289015 | 71.421441 | 73.1725398 | 76.928496  | 69.9311067 |
| 76.3734324 | 77.9289015 | 70.421441 | 74.1725398 | 76.928496  | 70.9311067 |
| 76.3734324 | 78.9289015 | 70.421441 | 74.1725398 | 76.928496  | 70.9311067 |
| 76.3734324 | 78.9289015 | 70.421441 | 74.1725398 | 72.928496  | 70.9311067 |
| 78.3734324 | 79.9289015 | 70.421441 | 74.1725398 | 69.928496  | 70.9311067 |
| 78.3734324 | 80.9289015 | 70.421441 | 73.1725398 | 68.928496  | 71.9311067 |
| 77.3734324 | 81.9289015 | 70.421441 | 74.1725398 | 68.928496  | 71.9311067 |
| 76.3734324 | 81.9289015 | 70.421441 | 74.1725398 | 68.928496  | 71.9311067 |
| 75.3734324 | 81.9289015 | 70.421441 | 73.1725398 | 70.928496  | 71.9311067 |
| 75.3734324 | 81.9289015 | 70.421441 | 72.1725398 | 70.928496  | 71.9311067 |
| 75.3734324 | 81.9289015 | 70.421441 | 72.1725398 | 70.928496  | 71.9311067 |
| 75.3734324 | 80.9289015 | 68.421441 | 72.1725398 | 69.928496  | 71.9311067 |
| 75.3734324 | 79.9289015 | 66.421441 | 72.1725398 | 68.928496  | 71.9311067 |
| 75.3734324 | 79.9289015 | 66.421441 | 72.1725398 | 68.928496  | 71.9311067 |
| 75.3734324 | 79.9289015 | 66.421441 | 72.1725398 | 69.928496  | 73.9311067 |
| 75.3734324 | 79.9289015 | 65.421441 | 75.1725398 | 72.928496  | 73.9311067 |
| 75.3734324 | 79.9289015 | 65.421441 | 75.1725398 | 72.928496  | 74.9311067 |
| 73.3734324 | 77.9289015 | 65.421441 | 75.1725398 | 72.928496  | 74.9311067 |
| 68.3734324 | 76.9289015 | 65.421441 | 74.1725398 | 73.928496  | 73.9311067 |
| 66.3734324 | 76.9289015 | 65.421441 | 74.1725398 | 76.928496  | 73.9311067 |
| 66.3734324 | 74.9289015 | 65.421441 | 72.1725398 | 79.928496  | 72.9311067 |
| 66.3734324 | 74.9289015 | 65.421441 | 72.1725398 | 82.928496  | 73.9311067 |
| 65.3734324 | 74.9289015 | 65.421441 | 72.1725398 | 83.928496  | 74.9311067 |
| 67.3734324 | 73.9289015 | 67.421441 | 73.1725398 | 84.928496  | 74.9311067 |
| 67.3734324 | 73.9289015 | 67.421441 | 73.1725398 | 84.928496  | 74.9311067 |
| 67.3734324 | 73.9289015 | 67.421441 | 72.1725398 | 84.928496  | 75.9311067 |
| 67.3734324 | 74.9289015 | 67.421441 | 72.1725398 | 72.9417828 | 77.9311067 |
| 69.3734324 | 75.9289015 | 69.421441 | 72.1725398 | 85.928496  | 78.9311067 |
| 72.3734324 | 75.9289015 | 69.421441 | 72.1725398 | 85.928496  | 78.9311067 |
| 73.3734324 | 75.9289015 | 71.421441 | 72.1725398 | 84.928496  | 80.9311067 |
| 73.3734324 | 75.9289015 | 71.421441 | 73.1725398 | 84.928496  | 83.9311067 |
| 73.3734324 | 75.9289015 | 71.421441 | 76.1725398 | 86.928496  | 83.9311067 |
| 73.3734324 | 76.9289015 | 71.421441 | 77.1725398 | 86.928496  | 83.9311067 |
| 73.3734324 | 76.9289015 | 71.421441 | 76.1725398 | 86.928496  | 84.9311067 |
| 73.3734324 | 76.9289015 | 71.421441 | 76.1725398 | 85.928496  | 84.9311067 |
| 72.3734324 | 77.9289015 | 72.421441 | 75.1725398 | 84.928496  | 83.9311067 |
| 69.3734324 | 78.9289015 | 73.421441 | 73.1725398 | 83.928496  | 82.9311067 |
| 68.3734324 | 78.9289015 | 73.421441 | 71.1725398 | 82.928496  | 82.9311067 |
| 68.3734324 | 80.9289015 | 73.421441 | 71.1725398 | 78.928496  | 82.9311067 |
| 68.3734324 | 80.9289015 | 73.421441 | 72.1725398 | 77.928496  | 82.9311067 |
| 69.3734324 | 81.9289015 | 73.421441 | 72.1725398 | 76.928496  | 80.9311067 |

|            |            |           |            |           |            |
|------------|------------|-----------|------------|-----------|------------|
| 69.3734324 | 83.9289015 | 73.421441 | 75.1725398 | 77.928496 | 77.9311067 |
| 69.3734324 | 84.9289015 | 73.421441 | 77.1725398 | 80.928496 | 77.9311067 |
| 69.3734324 | 84.9289015 | 70.421441 | 73.1725398 | 72.928496 | 73.9311067 |
| 70.3734324 | 85.9289015 | 70.421441 | 72.1725398 | 69.928496 | 73.9311067 |
| 70.3734324 | 85.9289015 | 70.421441 | 72.1725398 | 69.928496 | 73.9311067 |
| 70.3734324 | 86.9289015 | 70.421441 | 72.1725398 | 69.928496 | 73.9311067 |
| 70.3734324 | 74.0326919 | 70.421441 | 71.1725398 | 69.928496 | 72.9311067 |
| 71.3734324 | 74.3963282 | 70.421441 | 72.1725398 | 71.928496 | 72.9311067 |
| 70.3734324 | 75.0326919 | 70.421441 | 73.1725398 | 73.928496 | 72.9311067 |
| 70.3734324 | 75.123601  | 70.421441 | 74.1725398 | 74.928496 | 72.9311067 |
| 70.3734324 | 74.5781464 | 70.421441 | 74.1725398 | 75.928496 | 69.9311067 |
| 69.3734324 | 74.6690555 | 70.421441 | 75.1725398 | 75.928496 | 70.9311067 |
| 71.3734324 | 75.123601  | 70.421441 | 76.1725398 | 75.928496 | 70.9311067 |
| 72.3734324 | 75.123601  | 70.421441 | 77.1725398 | 75.928496 | 71.9311067 |
| 78.3734324 | 75.8508737 | 70.421441 | 78.1725398 | 76.928496 | 71.9311067 |
| 78.3734324 | 75.7599646 | 70.421441 | 78.1725398 | 76.928496 | 71.9311067 |
| 81.3734324 | 76.4872373 | 71.421441 | 78.1725398 | 81.928496 | 71.9311067 |
| 81.3734324 | 76.3963282 | 71.421441 | 76.1725398 | 81.928496 | 73.9311067 |
| 81.3734324 | 76.2145101 | 71.421441 | 75.1725398 | 80.928496 | 73.9311067 |
| 82.3734324 | 82.9289015 | 70.421441 | 74.1725398 | 80.928496 | 73.9311067 |
| 83.3734324 | 81.9289015 | 70.421441 | 74.1725398 | 80.928496 | 73.9311067 |
| 83.3734324 | 81.9289015 | 71.421441 | 74.1725398 | 80.928496 | 73.9311067 |
| 83.3734324 | 81.9289015 | 70.421441 | 74.1725398 | 79.928496 | 74.9311067 |
| 83.3734324 | 81.9289015 | 70.421441 | 74.1725398 | 79.928496 | 74.9311067 |
| 81.3734324 | 79.9289015 | 67.421441 | 74.1725398 | 78.928496 | 74.9311067 |
| 80.3734324 | 79.9289015 | 67.421441 | 74.1725398 | 77.928496 | 75.9311067 |
| 80.3734324 | 78.9289015 | 66.421441 | 74.1725398 | 77.928496 | 75.9311067 |
| 80.3734324 | 78.9289015 | 65.421441 | 73.1725398 | 76.928496 | 75.9311067 |
| 80.3734324 | 78.9289015 | 65.421441 | 73.1725398 | 76.928496 | 75.9311067 |
| 80.3734324 | 75.9289015 | 64.421441 | 73.1725398 | 76.928496 | 75.9311067 |
| 76.3734324 | 73.9289015 | 63.421441 | 74.1725398 | 74.928496 | 75.9311067 |
| 76.3734324 | 72.9289015 | 63.421441 | 76.1725398 | 73.928496 | 75.9311067 |
| 71.3734324 | 72.9289015 | 63.421441 | 76.1725398 | 70.928496 | 75.9311067 |
| 71.3734324 | 72.9289015 | 63.421441 | 76.1725398 | 68.928496 | 76.9311067 |
| 71.3734324 | 72.9289015 | 62.421441 | 76.1725398 | 69.928496 | 75.9311067 |
| 71.3734324 | 72.9289015 | 62.421441 | 76.1725398 | 69.928496 | 75.9311067 |
| 70.3734324 | 72.9289015 | 62.421441 | 76.1725398 | 69.928496 | 75.9311067 |
| 70.3734324 | 72.9289015 | 62.421441 | 75.1725398 | 69.928496 | 75.9311067 |
| 70.3734324 | 72.9289015 | 62.421441 | 74.1725398 | 69.928496 | 75.9311067 |
| 70.3734324 | 73.9289015 | 64.421441 | 74.1725398 | 76.928496 | 75.9311067 |
| 70.3734324 | 73.9289015 | 64.421441 | 74.1725398 | 81.928496 | 75.9311067 |
| 69.3734324 | 73.9289015 | 64.421441 | 73.1725398 | 81.928496 | 75.9311067 |
| 70.3734324 | 73.9289015 | 65.421441 | 73.1725398 | 80.928496 | 75.9311067 |
| 70.3734324 | 74.9289015 | 65.421441 | 72.1725398 | 76.928496 | 76.9311067 |
| 70.3734324 | 73.9289015 | 65.421441 | 72.1725398 | 76.928496 | 78.9311067 |



|            |            |           |            |           |            |
|------------|------------|-----------|------------|-----------|------------|
| 70.3734324 | 73.9289015 | 65.421441 | 73.1725398 | 74.928496 | 80.9311067 |
| 70.3734324 | 74.9289015 | 66.421441 | 74.1725398 | 73.928496 | 81.9311067 |
| 70.3734324 | 74.9289015 | 68.421441 | 74.1725398 | 72.928496 | 82.9311067 |
| 70.3734324 | 74.9289015 | 71.421441 | 74.1725398 | 72.928496 | 82.9311067 |
| 67.3734324 | 75.9289015 | 71.421441 | 74.1725398 | 73.928496 | 82.9311067 |
| 67.3734324 | 75.9289015 | 71.421441 | 75.1725398 | 73.928496 | 83.9311067 |
| 67.3734324 | 74.9289015 | 71.421441 | 75.1725398 | 73.928496 | 83.9311067 |
| 71.3734324 | 74.9289015 | 71.421441 | 77.1725398 | 74.928496 | 83.9311067 |
| 72.3734324 | 74.9289015 | 69.421441 | 77.1725398 | 76.928496 | 83.9311067 |
| 72.3734324 | 72.9289015 | 69.421441 | 77.1725398 | 77.928496 | 83.9311067 |
| 73.3734324 | 72.9289015 | 69.421441 | 77.1725398 | 80.928496 | 83.9311067 |
| 73.3734324 | 72.9289015 | 67.421441 | 75.1725398 | 82.928496 | 82.9311067 |
| 76.3734324 | 71.9289015 | 67.421441 | 74.1725398 | 82.928496 | 82.9311067 |
| 76.3734324 | 74.9289015 | 64.421441 | 74.1725398 | 82.928496 | 81.9311067 |
| 76.3734324 | 74.9289015 | 64.421441 | 76.1725398 | 81.928496 | 81.9311067 |
| 76.3734324 | 73.9289015 | 64.421441 | 77.1725398 | 82.928496 | 74.9311067 |
| 76.3734324 | 73.9289015 | 63.421441 | 79.1725398 | 78.928496 | 72.9311067 |
| 77.3734324 | 73.9289015 | 63.421441 | 81.1725398 | 76.928496 | 71.9311067 |
| 76.3734324 | 73.9289015 | 63.421441 | 82.1725398 | 75.928496 | 71.9311067 |
| 75.3734324 | 73.9289015 | 63.421441 | 81.1725398 | 76.928496 | 70.9311067 |
| 75.3734324 | 73.9289015 | 64.421441 | 78.1725398 | 77.928496 | 70.9311067 |
| 75.3734324 | 74.9289015 | 64.421441 | 78.1725398 | 78.928496 | 69.9311067 |
| 76.3734324 | 74.9289015 | 64.421441 | 75.1725398 | 78.928496 | 66.9311067 |
| 76.3734324 | 77.9289015 | 65.421441 | 73.1725398 | 78.928496 | 66.9311067 |
| 76.3734324 | 78.9289015 | 66.421441 | 71.1725398 | 77.928496 | 66.9311067 |
| 76.3734324 | 79.9289015 | 66.421441 | 71.1725398 | 76.928496 | 64.9311067 |
| 77.3734324 | 79.9289015 | 67.421441 | 71.1725398 | 74.928496 | 64.9311067 |
| 77.3734324 | 80.9289015 | 67.421441 | 72.1725398 | 73.928496 | 64.9311067 |
| 77.3734324 | 80.9289015 | 67.421441 | 73.1725398 | 73.928496 | 65.9311067 |
| 78.3734324 | 80.9289015 | 68.421441 | 74.1725398 | 73.928496 | 65.9311067 |
| 77.3734324 | 80.9289015 | 70.421441 | 74.1725398 | 71.928496 | 65.9311067 |
| 77.3734324 | 81.9289015 | 70.421441 | 75.1725398 | 71.928496 | 66.9311067 |
| 77.3734324 | 81.9289015 | 70.421441 | 75.1725398 | 71.928496 | 66.9311067 |
| 77.3734324 | 78.9289015 | 70.421441 | 74.1725398 | 71.928496 | 67.9311067 |
| 78.3734324 | 75.9289015 | 71.421441 | 73.1725398 | 72.928496 | 68.9311067 |
| 78.3734324 | 73.9289015 | 71.421441 | 73.1725398 | 72.928496 | 68.9311067 |
| 78.3734324 | 71.9289015 | 71.421441 | 73.1725398 | 72.928496 | 70.9311067 |
| 78.3734324 | 70.9289015 | 71.421441 | 73.1725398 | 71.928496 | 71.9311067 |
| 78.3734324 | 69.9289015 | 71.421441 | 73.1725398 | 71.928496 | 73.9311067 |
| 78.3734324 | 69.9289015 | 71.421441 | 74.1725398 | 70.928496 | 73.9311067 |
| 78.3734324 | 71.9289015 | 71.421441 | 76.1725398 | 69.928496 | 73.9311067 |
| 76.3734324 | 71.9289015 | 71.421441 | 76.1725398 | 69.928496 | 74.9311067 |
| 76.3734324 | 74.9289015 | 70.421441 | 75.1725398 | 66.928496 | 74.9311067 |
| 77.3734324 | 74.9289015 | 70.421441 | 72.1725398 | 66.928496 | 74.9311067 |
| 77.3734324 | 74.9289015 | 70.421441 | 72.1725398 | 66.928496 | 74.9311067 |

|            |            |           |            |           |            |
|------------|------------|-----------|------------|-----------|------------|
| 76.3734324 | 73.9289015 | 73.421441 | 71.1725398 | 67.928496 | 82.9311067 |
| 76.3734324 | 72.9289015 | 73.421441 | 71.1725398 | 68.928496 | 73.3258374 |
| 76.3734324 | 71.9289015 | 73.421441 | 72.1725398 | 68.928496 | 73.2258374 |
| 76.3734324 | 70.9289015 | 73.421441 | 73.1725398 | 71.928496 | 85.9311067 |
| 78.3734324 | 70.9289015 | 76.421441 | 74.1725398 | 75.928496 | 85.9311067 |
| 78.3734324 | 70.9289015 | 80.421441 | 74.1725398 | 75.928496 | 81.9311067 |
| 78.3734324 | 70.9289015 | 80.421441 | 74.1725398 | 76.928496 | 72.9311067 |
| 78.3734324 | 70.9289015 | 82.421441 | 72.1725398 | 74.928496 | 72.9311067 |
| 78.3734324 | 70.9289015 | 83.421441 | 72.1725398 | 74.928496 | 64.9311067 |
| 78.3734324 | 70.9289015 | 81.421441 | 68.1725398 | 71.928496 | 64.9311067 |
| 78.3734324 | 70.9289015 | 80.421441 | 68.1725398 | 70.928496 | 64.9311067 |
| 78.3734324 | 70.9289015 | 79.421441 | 67.1725398 | 70.928496 | 65.9311067 |
| 82.3734324 | 70.9289015 | 79.421441 | 67.1725398 | 70.928496 | 65.9311067 |
| 82.3734324 | 70.9289015 | 79.421441 | 67.1725398 | 70.928496 | 63.9311067 |
| 82.3734324 | 70.9289015 | 79.421441 | 69.1725398 | 70.928496 | 62.9311067 |
| 81.3734324 | 70.9289015 | 78.421441 | 71.1725398 | 70.928496 | 61.9311067 |
| 78.3734324 | 71.9289015 | 75.421441 | 71.1725398 | 70.928496 | 61.9311067 |
| 78.3734324 | 71.9289015 | 74.421441 | 71.1725398 | 70.928496 | 60.9311067 |
| 72.3734324 | 71.9289015 | 74.421441 | 72.1725398 | 70.928496 | 58.9311067 |
| 71.3734324 | 71.9289015 | 73.421441 | 73.1725398 | 70.928496 | 58.9311067 |
| 71.3734324 | 69.9289015 | 73.421441 | 74.1725398 | 70.928496 | 57.9311067 |
| 71.3734324 | 67.9289015 | 71.421441 | 74.1725398 | 70.928496 | 57.9311067 |
| 71.3734324 | 67.9289015 | 70.421441 | 74.1725398 | 71.928496 | 57.9311067 |
| 71.3734324 | 67.9289015 | 69.421441 | 75.1725398 | 71.928496 | 56.9311067 |
| 71.3734324 | 67.9289015 | 68.421441 | 75.1725398 | 72.928496 | 56.9311067 |
| 71.3734324 | 69.9289015 | 68.421441 | 76.1725398 | 72.928496 | 57.9311067 |
| 71.3734324 | 70.9289015 | 69.421441 | 76.1725398 | 71.928496 | 57.9311067 |
| 73.3734324 | 73.9289015 | 75.421441 | 76.1725398 | 71.928496 | 56.9311067 |
| 73.3734324 | 75.9289015 | 75.421441 | 75.1725398 | 70.928496 | 56.9311067 |
| 73.3734324 | 77.9289015 | 75.421441 | 75.1725398 | 70.928496 | 56.9311067 |
| 73.3734324 | 77.9289015 | 75.421441 | 75.1725398 | 71.928496 | 56.9311067 |
| 73.3734324 | 78.9289015 | 75.421441 | 79.1725398 | 71.928496 | 55.9311067 |
| 77.3734324 | 78.9289015 | 76.421441 | 80.1725398 | 71.928496 | 55.9311067 |
| 77.3734324 | 79.9289015 | 76.421441 | 80.1725398 | 71.928496 | 55.9311067 |
| 76.3734324 | 80.9289015 | 77.421441 | 79.1725398 | 71.928496 | 56.9311067 |
| 76.3734324 | 80.9289015 | 77.421441 | 79.1725398 | 72.928496 | 56.9311067 |
| 76.3734324 | 80.9289015 | 77.421441 | 73.1725398 | 79.928496 | 56.9311067 |
| 76.3734324 | 80.9289015 | 77.421441 | 72.1725398 | 83.928496 | 58.9311067 |
| 76.3734324 | 79.9289015 | 77.421441 | 72.1725398 | 83.928496 | 58.9311067 |
| 76.3734324 | 78.9289015 | 77.421441 | 72.1725398 | 83.928496 | 59.9311067 |
| 76.3734324 | 78.9289015 | 77.421441 | 73.1725398 | 84.928496 | 59.9311067 |
| 76.3734324 | 78.9289015 | 77.421441 | 73.1725398 | 84.928496 | 59.9311067 |
| 75.3734324 | 77.9289015 | 77.421441 | 74.1725398 | 85.928496 | 62.9311067 |
| 75.3734324 | 77.9289015 | 78.421441 | 74.1725398 | 87.928496 | 62.9311067 |
| 75.3734324 | 77.9289015 | 78.421441 | 74.1725398 | 85.928496 | 64.9311067 |

|            |            |           |            |           |            |
|------------|------------|-----------|------------|-----------|------------|
| 75.3734324 | 75.9289015 | 78.421441 | 74.1725398 | 84.928496 | 64.9311067 |
| 73.3734324 | 74.9289015 | 77.421441 | 75.1725398 | 84.928496 | 64.9311067 |
| 73.3734324 | 74.9289015 | 76.421441 | 75.1725398 | 84.928496 | 64.9311067 |
| 73.3734324 | 73.9289015 | 76.421441 | 79.1725398 | 85.928496 | 65.9311067 |
| 72.3734324 | 70.9289015 | 75.421441 | 79.1725398 | 85.928496 | 69.9311067 |
| 72.3734324 | 70.9289015 | 75.421441 | 83.1725398 | 85.928496 | 74.9311067 |
| 72.3734324 | 70.9289015 | 76.421441 | 83.1725398 | 86.928496 | 77.9311067 |
| 71.3734324 | 70.9289015 | 76.421441 | 82.1725398 | 86.928496 | 77.9311067 |
| 71.3734324 | 69.9289015 | 76.421441 | 83.1725398 | 85.928496 | 78.9311067 |
| 72.3734324 | 68.9289015 | 76.421441 | 85.1725398 | 85.928496 | 78.9311067 |
| 74.3734324 | 66.9289015 | 76.421441 | 85.1725398 | 82.928496 | 79.9311067 |
| 74.3734324 | 67.9289015 | 76.421441 | 87.1725398 | 82.928496 | 80.9311067 |
| 74.3734324 | 68.9289015 | 76.421441 | 87.1725398 | 82.928496 | 80.9311067 |
| 74.3734324 | 67.9289015 | 76.421441 | 87.1725398 | 81.928496 | 80.9311067 |
| 72.3734324 | 67.9289015 | 76.421441 | 85.1725398 | 81.928496 | 80.9311067 |
| 72.3734324 | 67.9289015 | 77.421441 | 85.1725398 | 81.928496 | 80.9311067 |
| 72.3734324 | 67.9289015 | 79.421441 | 82.1725398 | 81.928496 | 80.9311067 |
| 70.3734324 | 67.9289015 | 79.421441 | 82.1725398 | 76.928496 | 80.9311067 |
| 70.3734324 | 69.9289015 | 79.421441 | 81.1725398 | 70.928496 | 82.9311067 |
| 70.3734324 | 71.9289015 | 80.421441 | 81.1725398 | 69.928496 | 83.9311067 |
| 70.3734324 | 72.9289015 | 81.421441 | 80.1725398 | 68.928496 | 84.9311067 |
| 70.3734324 | 72.9289015 | 81.421441 | 80.1725398 | 68.928496 | 84.9311067 |
| 70.3734324 | 72.9289015 | 80.421441 | 79.1725398 | 68.928496 | 84.9311067 |
| 70.3734324 | 71.9289015 | 80.421441 | 79.1725398 | 68.928496 | 84.9311067 |
| 69.3734324 | 68.9289015 | 77.421441 | 75.1725398 | 68.928496 | 81.9311067 |
| 64.3734324 | 66.9289015 | 76.421441 | 73.1725398 | 68.928496 | 79.9311067 |
| 63.3734324 | 66.9289015 | 76.421441 | 71.1725398 | 68.928496 | 76.9311067 |
| 63.3734324 | 66.9289015 | 75.421441 | 69.1725398 | 68.928496 | 75.9311067 |
| 63.3734324 | 66.9289015 | 75.421441 | 69.1725398 | 68.928496 | 75.9311067 |
| 63.3734324 | 69.9289015 | 75.421441 | 68.1725398 | 68.928496 | 75.9311067 |
| 63.3734324 | 70.9289015 | 77.421441 | 67.1725398 | 68.928496 | 74.9311067 |
| 63.3734324 | 70.9289015 | 78.421441 | 68.1725398 | 68.928496 | 74.9311067 |
| 63.3734324 | 70.9289015 | 78.421441 | 68.1725398 | 69.928496 | 74.9311067 |
| 63.3734324 | 70.9289015 | 78.421441 | 71.1725398 | 73.928496 | 72.9311067 |
| 63.3734324 | 71.9289015 | 78.421441 | 71.1725398 | 75.928496 | 72.9311067 |
| 64.3734324 | 72.9289015 | 78.421441 | 71.1725398 | 78.928496 | 72.9311067 |
| 65.3734324 | 72.9289015 | 78.421441 | 71.1725398 | 79.928496 | 71.9311067 |
| 64.3734324 | 72.9289015 | 77.421441 | 71.1725398 | 81.928496 | 70.9311067 |
| 64.3734324 | 72.9289015 | 77.421441 | 72.1725398 | 81.928496 | 70.9311067 |
| 64.3734324 | 72.9289015 | 77.421441 | 74.1725398 | 81.928496 | 69.9311067 |
| 64.3734324 | 72.9289015 | 77.421441 | 75.1725398 | 83.928496 | 71.9311067 |
| 64.3734324 | 72.9289015 | 77.421441 | 75.1725398 | 83.928496 | 71.9311067 |
| 66.3734324 | 72.9289015 | 76.421441 | 73.1725398 | 83.928496 | 71.9311067 |
| 66.3734324 | 73.9289015 | 76.421441 | 69.1725398 | 82.928496 | 71.9311067 |
| 67.3734324 | 75.9289015 | 75.421441 | 69.1725398 | 75.928496 | 72.9311067 |

|            |            |           |            |           |            |
|------------|------------|-----------|------------|-----------|------------|
| 74.3734324 | 75.9289015 | 75.421441 | 69.1725398 | 70.928496 | 72.9311067 |
| 74.3734324 | 77.9289015 | 75.421441 | 69.1725398 | 68.928496 | 73.9311067 |
| 74.3734324 | 78.9289015 | 75.421441 | 69.1725398 | 68.928496 | 73.9311067 |
| 74.3734324 | 79.9289015 | 75.421441 | 69.1725398 | 68.928496 | 73.9311067 |
| 74.3734324 | 79.9289015 | 75.421441 | 69.1725398 | 68.928496 | 74.9311067 |
| 74.3734324 | 79.9289015 | 75.421441 | 69.1725398 | 68.928496 | 74.9311067 |
| 74.3734324 | 80.9289015 | 75.421441 | 68.1725398 | 69.928496 | 75.9311067 |
| 75.3734324 | 80.9289015 | 76.421441 | 68.1725398 | 70.928496 | 75.9311067 |
| 75.3734324 | 80.9289015 | 76.421441 | 68.1725398 | 76.928496 | 74.9311067 |
| 75.3734324 | 81.9289015 | 76.421441 | 68.1725398 | 76.928496 | 74.9311067 |
| 75.3734324 | 81.9289015 | 80.421441 | 68.1725398 | 73.928496 | 73.9311067 |
| 75.3734324 | 81.9289015 | 79.421441 | 68.1725398 | 72.928496 | 73.9311067 |
| 75.3734324 | 80.9289015 | 79.421441 | 68.1725398 | 71.928496 | 73.9311067 |
| 75.3734324 | 81.9289015 | 77.421441 | 67.1725398 | 72.928496 | 73.9311067 |
| 75.3734324 | 81.9289015 | 76.421441 | 67.1725398 | 72.928496 | 73.9311067 |
| 76.3734324 | 81.9289015 | 76.421441 | 67.1725398 | 71.928496 | 73.9311067 |
| 77.3734324 | 82.9289015 | 73.421441 | 67.1725398 | 71.928496 | 76.9311067 |
| 75.3734324 | 80.9289015 | 72.421441 | 67.1725398 | 70.928496 | 79.9311067 |
| 72.3734324 | 80.9289015 | 73.421441 | 67.1725398 | 69.928496 | 78.9311067 |
| 69.3734324 | 81.9289015 | 73.421441 | 68.1725398 | 68.928496 | 76.9311067 |
| 67.3734324 | 82.9289015 | 75.421441 | 68.1725398 | 68.928496 | 73.9311067 |
| 66.3734324 | 81.9289015 | 75.421441 | 69.1725398 | 68.928496 | 73.9311067 |
| 66.3734324 | 81.9289015 | 75.421441 | 69.1725398 | 67.928496 | 71.9311067 |
| 66.3734324 | 81.9289015 | 75.421441 | 69.1725398 | 67.928496 | 71.9311067 |
| 66.3734324 | 81.9289015 | 75.421441 | 71.1725398 | 66.928496 | 71.9311067 |
| 65.3734324 | 81.9289015 | 75.421441 | 71.1725398 | 66.928496 | 72.9311067 |
| 65.3734324 | 81.9289015 | 75.421441 | 69.1725398 | 67.928496 | 71.9311067 |
| 65.3734324 | 81.9289015 | 75.421441 | 70.1725398 | 67.928496 | 70.9311067 |
| 68.3734324 | 81.9289015 | 75.421441 | 70.1725398 | 67.928496 | 69.9311067 |
| 71.3734324 | 80.9289015 | 75.421441 | 70.1725398 | 67.928496 | 69.9311067 |
| 71.3734324 | 79.9289015 | 75.421441 | 71.1725398 | 67.928496 | 69.9311067 |
| 76.3734324 | 79.9289015 | 75.421441 | 71.1725398 | 67.928496 | 69.9311067 |
| 76.3734324 | 79.9289015 | 75.421441 | 75.1725398 | 66.928496 | 69.9311067 |
| 77.3734324 | 79.9289015 | 74.421441 | 76.1725398 | 66.928496 | 71.9311067 |
| 77.3734324 | 79.9289015 | 74.421441 | 76.1725398 | 66.928496 | 70.9311067 |
| 78.3734324 | 79.9289015 | 74.421441 | 76.1725398 | 68.928496 | 68.9311067 |
| 78.3734324 | 79.9289015 | 74.421441 | 74.7258374 | 71.928496 | 65.9311067 |
| 78.3734324 | 79.9289015 | 74.421441 | 74.9258374 | 72.928496 | 65.9311067 |
| 78.3734324 | 79.9289015 | 74.421441 | 75.5258374 | 74.928496 | 65.9311067 |
| 79.3734324 | 80.9289015 | 73.421441 | 75.4258374 | 74.928496 | 66.9311067 |
| 79.3734324 | 80.9289015 | 73.421441 | 75.3258374 | 74.928496 | 66.9311067 |
| 80.3734324 | 81.9289015 | 73.421441 | 75.3258374 | 74.928496 | 66.9311067 |
| 80.3734324 | 81.9289015 | 72.421441 | 75.1258374 | 74.928496 | 65.9311067 |
| 80.3734324 | 81.9289015 | 71.421441 | 75.3258374 | 74.928496 | 65.9311067 |
| 76.3734324 | 67.9289015 | 71.421441 | 73.4258374 | 74.928496 | 65.9311067 |

|            |            |           |            |            |            |
|------------|------------|-----------|------------|------------|------------|
| 76.3734324 | 68.9289015 | 70.421441 | 74.0258374 | 77.928496  | 65.9311067 |
| 72.3734324 | 69.9289015 | 69.421441 | 74.0258374 | 78.928496  | 65.9311067 |
| 72.3734324 | 69.9289015 | 69.421441 | 73.9258374 | 76.928496  | 65.9311067 |
| 72.3734324 | 69.9289015 | 69.421441 | 73.9258374 | 75.928496  | 66.9311067 |
| 72.3734324 | 69.9289015 | 69.421441 | 74.1258374 | 76.928496  | 66.9311067 |
| 73.3734324 | 68.9289015 | 69.421441 | 81.1725398 | 76.928496  | 66.9311067 |
| 73.3734324 | 68.9289015 | 70.421441 | 81.1725398 | 76.928496  | 66.9311067 |
| 73.3734324 | 68.9289015 | 70.421441 | 82.1725398 | 76.928496  | 65.9311067 |
| 73.3734324 | 68.9289015 | 76.421441 | 81.1725398 | 76.928496  | 65.9311067 |
| 73.3734324 | 67.9289015 | 74.421441 | 80.1725398 | 80.928496  | 64.9311067 |
| 73.3734324 | 67.9289015 | 75.421441 | 80.1725398 | 80.928496  | 66.9311067 |
| 75.3734324 | 67.9289015 | 75.421441 | 77.1725398 | 79.928496  | 67.9311067 |
| 76.3734324 | 67.9289015 | 77.421441 | 76.1725398 | 78.928496  | 67.9311067 |
| 76.3734324 | 67.9289015 | 78.421441 | 75.1725398 | 80.928496  | 67.9311067 |
| 76.3734324 | 67.9289015 | 78.421441 | 75.1725398 | 80.928496  | 67.9311067 |
| 76.3734324 | 67.9289015 | 78.421441 | 73.1725398 | 81.928496  | 67.9311067 |
| 77.3734324 | 69.9289015 | 78.421441 | 73.1725398 | 82.928496  | 67.9311067 |
| 77.3734324 | 70.9289015 | 78.421441 | 71.1725398 | 82.928496  | 67.9311067 |
| 77.3734324 | 71.9289015 | 78.421441 | 70.1725398 | 82.928496  | 67.9311067 |
| 78.3734324 | 72.9289015 | 78.421441 | 70.1725398 | 83.928496  | 68.9311067 |
| 78.3734324 | 72.9289015 | 78.421441 | 69.1725398 | 83.928496  | 68.9311067 |
| 78.3734324 | 73.9289015 | 78.421441 | 69.1725398 | 83.928496  | 69.9311067 |
| 79.3734324 | 73.9289015 | 78.421441 | 69.1725398 | 83.928496  | 69.9311067 |
| 80.3734324 | 73.9289015 | 78.421441 | 66.1725398 | 88.928496  | 69.9311067 |
| 81.3734324 | 76.9289015 | 77.421441 | 66.1725398 | 75.8258374 | 68.9311067 |
| 81.3734324 | 78.9289015 | 77.421441 | 66.1725398 | 75.4258374 | 68.9311067 |
| 82.3734324 | 78.9289015 | 76.421441 | 70.1725398 | 87.928496  | 67.9311067 |
| 82.3734324 | 79.9289015 | 74.421441 | 72.1725398 | 85.928496  | 66.9311067 |
| 81.3734324 | 79.9289015 | 74.421441 | 71.1725398 | 82.928496  | 70.9311067 |
| 81.3734324 | 79.9289015 | 72.421441 | 70.1725398 | 79.928496  | 72.9311067 |
| 81.3734324 | 79.9289015 | 71.421441 | 66.1725398 | 79.928496  | 75.9311067 |
| 81.3734324 | 79.9289015 | 71.421441 | 63.1725398 | 78.928496  | 75.9311067 |
| 81.3734324 | 79.9289015 | 70.421441 | 63.1725398 | 78.928496  | 75.9311067 |
| 81.3734324 | 81.9289015 | 70.421441 | 64.1725398 | 78.928496  | 76.9311067 |
| 81.3734324 | 81.9289015 | 71.421441 | 64.1725398 | 78.928496  | 76.9311067 |
| 82.3734324 | 83.9289015 | 71.421441 | 65.1725398 | 77.928496  | 78.9311067 |
| 82.3734324 | 83.9289015 | 72.421441 | 67.1725398 | 76.928496  | 78.9311067 |
| 82.3734324 | 83.9289015 | 73.421441 | 68.1725398 | 75.928496  | 78.9311067 |
| 82.3734324 | 83.9289015 | 73.421441 | 71.1725398 | 75.928496  | 74.9311067 |
| 82.3734324 | 83.9289015 | 73.421441 | 73.1725398 | 74.928496  | 73.9311067 |
| 82.3734324 | 83.9289015 | 73.421441 | 73.1725398 | 74.928496  | 73.9311067 |
| 82.3734324 | 84.9289015 | 72.421441 | 73.1725398 | 74.928496  | 73.9311067 |
| 82.3734324 | 84.9289015 | 72.421441 | 73.1725398 | 74.928496  | 73.9311067 |
| 82.3734324 | 84.9289015 | 72.421441 | 73.1725398 | 74.928496  | 72.9311067 |
| 82.3734324 | 77.9289015 | 75.421441 | 73.1725398 | 74.928496  | 72.9311067 |

|            |            |           |            |           |            |
|------------|------------|-----------|------------|-----------|------------|
| 82.3734324 | 70.9289015 | 75.421441 | 73.1725398 | 77.928496 | 72.9311067 |
| 81.3734324 | 65.9289015 | 76.421441 | 73.1725398 | 80.928496 | 72.9311067 |
| 81.3734324 | 63.9289015 | 77.421441 | 77.1725398 | 80.928496 | 73.9311067 |
| 81.3734324 | 63.9289015 | 77.421441 | 78.1725398 | 74.928496 | 73.9311067 |
| 81.3734324 | 63.9289015 | 76.421441 | 78.1725398 | 71.928496 | 73.9311067 |
| 81.3734324 | 63.9289015 | 76.421441 | 78.1725398 | 69.928496 | 72.9311067 |
| 81.3734324 | 63.9289015 | 76.421441 | 80.1725398 | 68.928496 | 71.9311067 |
| 80.3734324 | 63.9289015 | 74.421441 | 82.1725398 | 69.928496 | 71.9311067 |
| 79.3734324 | 63.9289015 | 74.421441 | 83.1725398 | 71.928496 | 71.9311067 |
| 79.3734324 | 63.9289015 | 73.421441 | 83.1725398 | 72.928496 | 72.9311067 |
| 79.3734324 | 64.9289015 | 73.421441 | 83.1725398 | 72.928496 | 72.9311067 |
| 79.3734324 | 66.9289015 | 73.421441 | 83.1725398 | 71.928496 | 73.9311067 |
| 73.3734324 | 66.9289015 | 73.421441 | 83.1725398 | 71.928496 | 73.9311067 |
| 68.3734324 | 67.9289015 | 73.421441 | 72.1258374 | 71.928496 | 72.9311067 |
| 68.3734324 | 67.9289015 | 73.421441 | 72.4258374 | 71.928496 | 72.9311067 |
| 67.3734324 | 69.9289015 | 73.421441 | 72.3258374 | 71.928496 | 71.9311067 |
| 66.3734324 | 76.9289015 | 74.421441 | 73.3258374 | 71.928496 | 73.9311067 |
| 66.3734324 | 76.9289015 | 74.421441 | 73.7258374 | 72.928496 | 73.9311067 |
| 66.3734324 | 75.9289015 | 74.421441 | 86.1725398 | 72.928496 | 73.9311067 |
| 66.3734324 | 75.9289015 | 74.421441 | 84.1725398 | 72.928496 | 73.9311067 |
| 66.3734324 | 75.9289015 | 74.421441 | 82.1725398 | 72.928496 | 73.9311067 |
| 66.3734324 | 75.9289015 | 72.421441 | 80.1725398 | 71.928496 | 73.9311067 |
| 65.3734324 | 75.9289015 | 72.421441 | 79.1725398 | 73.928496 | 73.9311067 |
| 65.3734324 | 75.9289015 | 72.421441 | 79.1725398 | 73.928496 | 73.9311067 |
| 65.3734324 | 75.9289015 | 70.421441 | 80.1725398 | 76.928496 | 68.9311067 |
| 66.3734324 | 75.9289015 | 69.421441 | 80.1725398 | 76.928496 | 66.9311067 |
| 69.3734324 | 76.9289015 | 66.421441 | 80.1725398 | 76.928496 | 66.9311067 |
| 69.3734324 | 76.9289015 | 66.421441 | 80.1725398 | 77.928496 | 66.9311067 |
| 71.3734324 | 75.9289015 | 64.421441 | 81.1725398 | 77.928496 | 68.9311067 |
| 71.3734324 | 75.9289015 | 64.421441 | 81.1725398 | 77.928496 | 68.9311067 |
| 71.3734324 | 65.9289015 | 64.421441 | 84.1725398 | 76.928496 | 72.9311067 |
| 74.3734324 | 61.9289015 | 64.421441 | 84.1725398 | 76.928496 | 74.9311067 |
| 74.3734324 | 61.9289015 | 65.421441 | 84.1725398 | 76.928496 | 74.9311067 |
| 74.3734324 | 62.9289015 | 65.421441 | 83.1725398 | 75.928496 | 73.9311067 |
| 74.3734324 | 62.9289015 | 65.421441 | 83.1725398 | 74.928496 | 73.9311067 |
| 75.3734324 | 62.9289015 | 68.421441 | 81.1725398 | 74.928496 | 73.9311067 |
| 75.3734324 | 62.9289015 | 70.421441 | 80.1725398 | 74.928496 | 73.9311067 |
| 75.3734324 | 62.9289015 | 71.421441 | 80.1725398 | 73.928496 | 72.9311067 |
| 73.3734324 | 62.9289015 | 72.421441 | 79.1725398 | 73.928496 | 72.9311067 |
| 71.3734324 | 63.9289015 | 72.421441 | 79.1725398 | 73.928496 | 71.9311067 |
| 70.3734324 | 63.9289015 | 71.421441 | 78.1725398 | 73.928496 | 70.9311067 |
| 70.3734324 | 67.9289015 | 71.421441 | 73.1725398 | 73.928496 | 70.9311067 |
| 70.3734324 | 67.9289015 | 70.421441 | 69.1725398 | 74.928496 | 70.9311067 |
| 69.3734324 | 75.9289015 | 69.421441 | 67.1725398 | 75.928496 | 69.9311067 |
| 68.3734324 | 77.9289015 | 69.421441 | 67.1725398 | 75.928496 | 65.9311067 |

|            |            |           |            |           |            |
|------------|------------|-----------|------------|-----------|------------|
| 67.3734324 | 76.9289015 | 69.421441 | 66.1725398 | 75.928496 | 65.9311067 |
| 67.3734324 | 76.9289015 | 68.421441 | 66.1725398 | 76.928496 | 65.9311067 |
| 67.3734324 | 76.9289015 | 67.421441 | 66.1725398 | 76.928496 | 65.9311067 |
| 68.3734324 | 76.9289015 | 67.421441 | 67.1725398 | 75.928496 | 65.9311067 |
| 68.3734324 | 76.9289015 | 67.421441 | 68.1725398 | 72.928496 | 65.9311067 |
| 69.3734324 | 76.9289015 | 67.421441 | 68.1725398 | 71.928496 | 65.9311067 |
| 70.3734324 | 75.9289015 | 68.421441 | 68.1725398 | 71.928496 | 65.9311067 |
| 72.3734324 | 75.9289015 | 68.421441 | 68.1725398 | 71.928496 | 65.9311067 |
| 72.3734324 | 75.9289015 | 68.421441 | 68.1725398 | 71.928496 | 65.9311067 |
| 71.3734324 | 75.9289015 | 68.421441 | 70.1725398 | 71.928496 | 66.9311067 |
| 71.3734324 | 75.9289015 | 67.421441 | 70.1725398 | 72.928496 | 66.9311067 |
| 71.3734324 | 75.9289015 | 67.421441 | 71.1725398 | 73.928496 | 66.9311067 |
| 71.3734324 | 75.9289015 | 67.421441 | 74.1725398 | 72.928496 | 66.9311067 |
| 71.3734324 | 75.9289015 | 67.421441 | 75.1725398 | 71.928496 | 68.9311067 |
| 71.3734324 | 75.9289015 | 67.421441 | 76.1725398 | 70.928496 | 68.9311067 |
| 71.3734324 | 75.9289015 | 67.421441 | 78.1725398 | 67.928496 | 68.9311067 |
| 72.3734324 | 78.9289015 | 67.421441 | 78.1725398 | 66.928496 | 69.9311067 |
| 72.3734324 | 76.9289015 | 67.421441 | 78.1725398 | 66.928496 | 69.9311067 |
| 72.3734324 | 76.9289015 | 67.421441 | 78.1725398 | 66.928496 | 67.9311067 |
| 72.3734324 | 75.9289015 | 69.421441 | 79.1725398 | 66.928496 | 66.9311067 |
| 72.3734324 | 74.9289015 | 69.421441 | 79.1725398 | 66.928496 | 66.9311067 |
| 72.3734324 | 71.9289015 | 69.421441 | 78.1725398 | 66.928496 | 66.9311067 |
| 71.3734324 | 67.9289015 | 69.421441 | 75.1725398 | 66.928496 | 66.9311067 |
| 71.3734324 | 67.9289015 | 68.421441 | 75.1725398 | 67.928496 | 66.9311067 |
| 71.3734324 | 67.9289015 | 68.421441 | 75.1725398 | 68.928496 | 67.9311067 |
| 70.3734324 | 67.9289015 | 70.421441 | 75.1725398 | 65.928496 | 67.9311067 |
| 73.3734324 | 67.9289015 | 70.421441 | 75.1725398 | 64.928496 | 67.9311067 |
| 73.3734324 | 67.9289015 | 70.421441 | 76.1725398 | 64.928496 | 68.9311067 |
| 75.3734324 | 67.9289015 | 69.421441 | 76.1725398 | 65.928496 | 68.9311067 |
| 75.3734324 | 66.9289015 | 69.421441 | 76.1725398 | 65.928496 | 68.9311067 |
| 76.3734324 | 66.9289015 | 69.421441 | 75.1725398 | 66.928496 | 68.9311067 |
| 77.3734324 | 66.9289015 | 68.421441 | 74.1725398 | 67.928496 | 69.9311067 |
| 77.3734324 | 66.9289015 | 68.421441 | 74.1725398 | 67.928496 | 69.9311067 |
| 79.3734324 | 65.9289015 | 68.421441 | 74.1725398 | 68.928496 | 69.9311067 |
| 80.3734324 | 65.9289015 | 68.421441 | 74.1725398 | 69.928496 | 70.9311067 |
| 80.3734324 | 65.9289015 | 68.421441 | 74.1725398 | 70.928496 | 75.9311067 |
| 72.4258374 | 66.9289015 | 67.421441 | 76.1725398 | 71.928496 | 75.9311067 |
| 72.4258374 | 66.9289015 | 67.421441 | 76.1725398 | 71.928496 | 76.9311067 |
| 85.3734324 | 65.9289015 | 67.421441 | 77.1725398 | 71.928496 | 77.9311067 |
| 85.3734324 | 65.9289015 | 68.421441 | 79.1725398 | 71.928496 | 79.9311067 |
| 83.3734324 | 64.9289015 | 69.421441 | 81.1725398 | 68.928496 | 80.9311067 |
| 83.3734324 | 63.9289015 | 69.421441 | 81.1725398 | 65.928496 | 79.9311067 |
| 82.3734324 | 63.9289015 | 70.421441 | 81.1725398 | 63.928496 | 79.9311067 |
| 81.3734324 | 62.9289015 | 70.421441 | 81.1725398 | 63.928496 | 79.9311067 |
| 81.3734324 | 62.9289015 | 70.421441 | 81.1725398 | 63.928496 | 79.9311067 |

|            |            |           |            |           |            |
|------------|------------|-----------|------------|-----------|------------|
| 76.3734324 | 62.9289015 | 70.421441 | 79.1725398 | 64.928496 | 79.9311067 |
| 75.3734324 | 63.9289015 | 70.421441 | 75.1725398 | 65.928496 | 79.9311067 |
| 75.3734324 | 63.9289015 | 70.421441 | 72.1725398 | 69.928496 | 79.9311067 |
| 75.3734324 | 63.9289015 | 70.421441 | 72.1725398 | 70.928496 | 79.9311067 |
| 75.3734324 | 64.9289015 | 70.421441 | 72.1725398 | 70.928496 | 81.9311067 |
| 75.3734324 | 64.9289015 | 71.421441 | 72.1725398 | 69.928496 | 80.9311067 |
| 75.3734324 | 65.9289015 | 72.421441 | 74.1725398 | 67.928496 | 79.9311067 |
| 75.3734324 | 64.9289015 | 72.421441 | 74.1725398 | 67.928496 | 76.9311067 |
| 75.3734324 | 64.9289015 | 71.421441 | 74.1725398 | 66.928496 | 74.9311067 |
| 75.3734324 | 65.9289015 | 70.421441 | 74.1725398 | 66.928496 | 73.9311067 |
| 75.3734324 | 65.9289015 | 70.421441 | 73.1725398 | 68.928496 | 73.9311067 |
| 75.3734324 | 65.9289015 | 70.421441 | 71.1725398 | 69.928496 | 73.9311067 |
| 75.3734324 | 65.9289015 | 71.421441 | 69.1725398 | 70.928496 | 72.9311067 |
| 78.3734324 | 64.9289015 | 72.421441 | 70.1725398 | 72.928496 | 72.9311067 |
| 78.3734324 | 64.9289015 | 72.421441 | 70.1725398 | 72.928496 | 72.9311067 |
| 79.3734324 | 66.9289015 | 72.421441 | 70.1725398 | 72.928496 | 71.9311067 |
| 79.3734324 | 67.9289015 | 71.421441 | 71.1725398 | 71.928496 | 71.9311067 |
| 80.3734324 | 66.9289015 | 71.421441 | 72.1725398 | 72.928496 | 72.9311067 |
| 81.3734324 | 65.9289015 | 71.421441 | 72.1725398 | 72.928496 | 72.9311067 |
| 82.3734324 | 65.9289015 | 71.421441 | 73.1725398 | 72.928496 | 73.9311067 |
| 82.3734324 | 64.9289015 | 71.421441 | 75.1725398 | 72.928496 | 73.9311067 |
| 83.3734324 | 64.9289015 | 69.421441 | 76.1725398 | 72.928496 | 73.9311067 |
| 80.3734324 | 64.9289015 | 69.421441 | 77.1725398 | 72.928496 | 73.9311067 |
| 80.3734324 | 64.9289015 | 69.421441 | 76.1725398 | 72.928496 | 75.9311067 |
| 80.3734324 | 64.9289015 | 70.421441 | 76.1725398 | 71.928496 | 75.9311067 |
| 78.3734324 | 63.9289015 | 71.421441 | 76.1725398 | 71.928496 | 76.9311067 |
| 78.3734324 | 62.9289015 | 71.421441 | 76.1725398 | 71.928496 | 77.9311067 |
| 79.3734324 | 63.9289015 | 72.421441 | 76.1725398 | 70.928496 | 77.9311067 |
| 81.3734324 | 63.9289015 | 72.421441 | 76.1725398 | 69.928496 | 78.9311067 |
| 80.3734324 | 66.9289015 | 72.421441 | 77.1725398 | 69.928496 | 77.9311067 |
| 80.3734324 | 66.9289015 | 72.421441 | 78.1725398 | 69.928496 | 74.9311067 |
| 78.3734324 | 66.9289015 | 72.421441 | 78.1725398 | 70.928496 | 71.9311067 |
| 78.3734324 | 69.9289015 | 72.421441 | 77.1725398 | 71.928496 | 71.9311067 |
| 75.3734324 | 69.9289015 | 71.421441 | 77.1725398 | 74.928496 | 69.9311067 |
| 75.3734324 | 69.9289015 | 71.421441 | 77.1725398 | 74.928496 | 69.9311067 |
| 75.3734324 | 69.9289015 | 71.421441 | 77.1725398 | 75.928496 | 69.9311067 |
| 74.3734324 | 69.9289015 | 71.421441 | 77.1725398 | 75.928496 | 69.9311067 |
| 73.3734324 | 69.9289015 | 71.421441 | 76.1725398 | 76.928496 | 69.9311067 |
| 73.3734324 | 68.9289015 | 72.421441 | 76.1725398 | 75.928496 | 68.9311067 |
| 72.3734324 | 68.9289015 | 72.421441 | 76.1725398 | 70.928496 | 68.9311067 |
| 73.3734324 | 68.9289015 | 77.421441 | 76.1725398 | 69.928496 | 68.9311067 |
| 73.3734324 | 68.9289015 | 77.421441 | 76.1725398 | 69.928496 | 68.9311067 |
| 74.3734324 | 71.9289015 | 78.421441 | 76.1725398 | 69.928496 | 71.9311067 |
| 74.3734324 | 71.9289015 | 78.421441 | 75.1725398 | 69.928496 | 72.9311067 |
| 74.3734324 | 72.9289015 | 78.421441 | 75.1725398 | 70.928496 | 71.9311067 |



|            |            |           |            |           |            |
|------------|------------|-----------|------------|-----------|------------|
| 75.3734324 | 72.9289015 | 78.421441 | 75.1725398 | 70.928496 | 69.9311067 |
| 75.3734324 | 74.9289015 | 78.421441 | 75.1725398 | 75.928496 | 68.9311067 |
| 75.3734324 | 74.9289015 | 78.421441 | 77.1725398 | 78.928496 | 68.9311067 |
| 75.3734324 | 73.9289015 | 79.421441 | 76.1725398 | 79.928496 | 68.9311067 |
| 74.3734324 | 73.9289015 | 81.421441 | 75.1725398 | 77.928496 | 68.9311067 |
| 74.3734324 | 73.9289015 | 79.421441 | 75.1725398 | 77.928496 | 68.9311067 |
| 74.3734324 | 75.9289015 | 79.421441 | 78.1725398 | 76.928496 | 68.9311067 |
| 74.3734324 | 75.9289015 | 79.421441 | 80.1725398 | 76.928496 | 68.9311067 |
| 74.3734324 | 80.9289015 | 79.421441 | 80.1725398 | 77.928496 | 68.9311067 |
| 74.3734324 | 80.9289015 | 79.421441 | 80.1725398 | 78.928496 | 68.9311067 |
| 74.3734324 | 80.9289015 | 79.421441 | 79.1725398 | 79.928496 | 65.9311067 |
| 74.3734324 | 80.9289015 | 79.421441 | 77.1725398 | 79.928496 | 65.9311067 |
| 74.3734324 | 80.9289015 | 79.421441 | 77.1725398 | 79.928496 | 65.9311067 |
| 82.3734324 | 82.9289015 | 79.421441 | 76.1725398 | 80.928496 | 65.9311067 |
| 82.3734324 | 82.9289015 | 79.421441 | 78.1725398 | 83.928496 | 65.9311067 |
| 82.3734324 | 82.9289015 | 79.421441 | 78.1725398 | 82.928496 | 67.9311067 |
| 82.3734324 | 82.9289015 | 79.421441 | 78.1725398 | 80.928496 | 67.9311067 |
| 82.3734324 | 82.9289015 | 80.421441 | 77.1725398 | 79.928496 | 67.9311067 |
| 82.3734324 | 85.9289015 | 80.421441 | 75.1725398 | 78.928496 | 63.9311067 |
| 72.3734324 | 72.7258374 | 80.421441 | 72.1725398 | 78.928496 | 62.9311067 |
| 70.3734324 | 72.3258374 | 79.421441 | 70.1725398 | 78.928496 | 62.9311067 |
| 70.3734324 | 72.2258374 | 79.421441 | 69.1725398 | 77.928496 | 61.9311067 |
| 71.3734324 | 83.9289015 | 77.421441 | 69.1725398 | 75.928496 | 61.9311067 |
| 72.3734324 | 80.9289015 | 77.421441 | 69.1725398 | 73.928496 | 62.9311067 |
| 72.3734324 | 78.9289015 | 77.421441 | 68.1725398 | 71.928496 | 63.9311067 |
| 72.3734324 | 77.9289015 | 78.421441 | 67.1725398 | 69.928496 | 63.9311067 |
| 72.3734324 | 77.9289015 | 78.421441 | 67.1725398 | 68.928496 | 63.9311067 |
| 72.3734324 | 77.9289015 | 79.421441 | 67.1725398 | 69.928496 | 63.9311067 |
| 72.3734324 | 77.9289015 | 79.421441 | 67.1725398 | 69.928496 | 63.9311067 |
| 72.3734324 | 77.9289015 | 78.421441 | 67.1725398 | 69.928496 | 63.9311067 |
| 72.3734324 | 76.9289015 | 78.421441 | 67.1725398 | 68.928496 | 63.9311067 |
| 72.3734324 | 72.9289015 | 76.421441 | 66.1725398 | 67.928496 | 63.9311067 |
| 73.3734324 | 70.9289015 | 74.421441 | 66.1725398 | 66.928496 | 64.9311067 |
| 73.3734324 | 69.9289015 | 74.421441 | 65.1725398 | 66.928496 | 66.9311067 |
| 73.3734324 | 68.9289015 | 74.421441 | 65.1725398 | 67.928496 | 66.9311067 |
| 73.3734324 | 68.9289015 | 74.421441 | 65.1725398 | 67.928496 | 68.9311067 |
| 74.3734324 | 68.9289015 | 74.421441 | 65.1725398 | 67.928496 | 71.9311067 |
| 74.3734324 | 68.9289015 | 74.421441 | 65.1725398 | 68.928496 | 73.9311067 |
| 74.3734324 | 69.9289015 | 73.421441 | 65.1725398 | 68.928496 | 73.9311067 |
| 74.3734324 | 69.9289015 | 73.421441 | 65.1725398 | 67.928496 | 72.9311067 |
| 73.3734324 | 69.9289015 | 73.421441 | 66.1725398 | 68.928496 | 67.9311067 |
| 73.3734324 | 69.9289015 | 71.421441 | 66.1725398 | 68.928496 | 65.9311067 |
| 73.3734324 | 71.9289015 | 73.421441 | 68.1725398 | 67.928496 | 65.9311067 |
| 73.3734324 | 71.9289015 | 73.421441 | 68.1725398 | 66.928496 | 65.9311067 |
| 73.3734324 | 71.9289015 | 73.421441 | 68.1725398 | 65.928496 | 65.9311067 |

|            |            |           |            |            |            |
|------------|------------|-----------|------------|------------|------------|
| 73.3734324 | 71.9289015 | 73.421441 | 67.1725398 | 65.928496  | 65.9311067 |
| 73.3734324 | 71.9289015 | 73.421441 | 68.1725398 | 65.928496  | 65.9311067 |
| 73.3734324 | 70.9289015 | 73.421441 | 68.1725398 | 66.928496  | 65.9311067 |
| 74.3734324 | 66.9289015 | 73.421441 | 69.1725398 | 66.928496  | 65.9311067 |
| 74.3734324 | 65.9289015 | 73.421441 | 69.1725398 | 66.928496  | 65.9311067 |
| 74.3734324 | 65.9289015 | 73.421441 | 69.1725398 | 66.928496  | 65.9311067 |
| 74.3734324 | 65.9289015 | 73.421441 | 69.1725398 | 65.928496  | 64.9311067 |
| 75.3734324 | 65.9289015 | 74.421441 | 69.1725398 | 65.928496  | 64.9311067 |
| 75.3734324 | 65.9289015 | 75.421441 | 69.1725398 | 66.928496  | 67.9311067 |
| 75.3734324 | 65.9289015 | 75.421441 | 70.1725398 | 66.928496  | 68.9311067 |
| 75.3734324 | 65.9289015 | 76.421441 | 70.1725398 | 66.928496  | 70.9311067 |
| 75.3734324 | 65.9289015 | 76.421441 | 70.1725398 | 66.928496  | 70.9311067 |
| 76.3734324 | 65.9289015 | 74.421441 | 69.1725398 | 67.928496  | 72.9311067 |
| 76.3734324 | 64.9289015 | 72.421441 | 69.1725398 | 67.928496  | 78.9311067 |
| 77.3734324 | 64.9289015 | 72.421441 | 69.1725398 | 68.928496  | 80.9311067 |
| 77.3734324 | 61.9289015 | 72.421441 | 69.1725398 | 71.928496  | 80.9311067 |
| 78.3734324 | 60.9289015 | 72.421441 | 68.1725398 | 79.928496  | 73.2258374 |
| 78.3734324 | 59.9289015 | 73.421441 | 70.1725398 | 85.928496  | 73.8258374 |
| 78.3734324 | 59.9289015 | 73.421441 | 70.1725398 | 74.0258374 | 74.0258374 |
| 77.3734324 | 55.9289015 | 73.421441 | 70.1725398 | 73.2258374 | 73.2258374 |
| 76.3734324 | 55.9289015 | 73.421441 | 70.1725398 | 73.0258374 | 73.0258374 |
| 75.3734324 | 55.9289015 | 73.421441 | 67.1725398 | 72.5258374 | 72.5258374 |
| 75.3734324 | 58.9289015 | 74.421441 | 67.1725398 | 73.0258374 | 73.0258374 |
| 75.3734324 | 63.9289015 | 74.421441 | 66.1725398 | 73.6258374 | 73.6258374 |
| 75.3734324 | 63.9289015 | 74.421441 | 66.1725398 | 73.6258374 | 73.6258374 |
| 74.3734324 | 63.9289015 | 74.421441 | 66.1725398 | 74.0258374 | 74.0258374 |
| 74.3734324 | 62.9289015 | 74.421441 | 66.1725398 | 74.2258374 | 74.2258374 |
| 74.3734324 | 62.9289015 | 74.421441 | 66.1725398 | 85.928496  | 74.1258374 |
| 73.3734324 | 65.9289015 | 76.421441 | 66.1725398 | 84.928496  | 74.6258374 |
| 74.3734324 | 66.9289015 | 76.421441 | 66.1725398 | 84.928496  | 74.7258374 |
| 74.3734324 | 65.9289015 | 76.421441 | 66.1725398 | 84.928496  | 74.2258374 |
| 74.3734324 | 64.9289015 | 76.421441 | 65.1725398 | 82.928496  | 73.6258374 |
| 74.3734324 | 64.9289015 | 76.421441 | 65.1725398 | 82.928496  | 74.0258374 |
| 74.3734324 | 64.9289015 | 74.421441 | 65.1725398 | 82.928496  | 74.0258374 |
| 75.3734324 | 64.9289015 | 74.421441 | 65.1725398 | 82.928496  | 86.9311067 |
| 77.3734324 | 64.9289015 | 74.421441 | 65.1725398 | 81.928496  | 86.9311067 |
| 76.3734324 | 64.9289015 | 73.421441 | 65.1725398 | 81.928496  | 86.9311067 |
| 76.3734324 | 64.9289015 | 72.421441 | 65.1725398 | 77.928496  | 84.9311067 |
| 76.3734324 | 64.9289015 | 72.421441 | 65.1725398 | 76.928496  | 83.9311067 |
| 76.3734324 | 64.9289015 | 70.421441 | 65.1725398 | 76.928496  | 83.9311067 |
| 77.3734324 | 64.9289015 | 70.421441 | 65.1725398 | 74.928496  | 79.9311067 |
| 77.3734324 | 65.9289015 | 70.421441 | 65.1725398 | 74.928496  | 77.9311067 |
| 77.3734324 | 69.9289015 | 72.421441 | 65.1725398 | 74.928496  | 75.9311067 |
| 77.3734324 | 70.9289015 | 72.421441 | 65.1725398 | 73.928496  | 75.9311067 |
| 77.3734324 | 71.9289015 | 72.421441 | 65.1725398 | 73.928496  | 75.9311067 |

|            |            |           |            |           |            |
|------------|------------|-----------|------------|-----------|------------|
| 76.3734324 | 72.9289015 | 72.421441 | 66.1725398 | 73.928496 | 75.9311067 |
| 76.3734324 | 72.9289015 | 72.421441 | 66.1725398 | 73.928496 | 75.9311067 |
| 74.3734324 | 72.9289015 | 72.421441 | 66.1725398 | 73.928496 | 75.9311067 |
| 74.3734324 | 72.9289015 | 72.421441 | 67.1725398 | 76.928496 | 75.9311067 |
| 73.3734324 | 71.9289015 | 73.421441 | 67.1725398 | 76.928496 | 75.9311067 |
| 73.3734324 | 71.9289015 | 73.421441 | 68.1725398 | 76.928496 | 75.9311067 |
| 73.3734324 | 71.9289015 | 74.421441 | 69.1725398 | 72.928496 | 75.9311067 |
| 73.3734324 | 71.9289015 | 74.421441 | 69.1725398 | 70.928496 | 75.9311067 |
| 73.3734324 | 70.9289015 | 74.421441 | 69.1725398 | 70.928496 | 75.9311067 |
| 73.3734324 | 72.9289015 | 73.421441 | 69.1725398 | 70.928496 | 73.9311067 |
| 74.3734324 | 76.9289015 | 73.421441 | 68.1725398 | 70.928496 | 72.9311067 |
| 75.3734324 | 77.9289015 | 71.421441 | 67.1725398 | 70.928496 | 72.9311067 |
| 75.3734324 | 79.9289015 | 72.421441 | 67.1725398 | 71.928496 | 69.9311067 |
| 81.3734324 | 79.9289015 | 72.421441 | 66.1725398 | 69.928496 | 70.9311067 |
| 81.3734324 | 79.9289015 | 72.421441 | 66.1725398 | 69.928496 | 70.9311067 |
| 79.3734324 | 79.9289015 | 72.421441 | 66.1725398 | 69.928496 | 70.9311067 |
| 79.3734324 | 77.9289015 | 71.421441 | 65.1725398 | 69.928496 | 70.9311067 |
| 79.3734324 | 76.9289015 | 74.421441 | 65.1725398 | 69.928496 | 70.9311067 |
| 79.3734324 | 75.9289015 | 74.421441 | 65.1725398 | 69.928496 | 71.9311067 |
| 79.3734324 | 75.9289015 | 74.421441 | 65.1725398 | 71.928496 | 71.9311067 |
| 79.3734324 | 75.9289015 | 74.421441 | 66.1725398 | 71.928496 | 71.9311067 |
| 79.3734324 | 75.9289015 | 74.421441 | 66.1725398 | 72.928496 | 71.9311067 |
| 79.3734324 | 74.9289015 | 73.421441 | 68.1725398 | 71.928496 | 71.9311067 |
| 78.3734324 | 74.9289015 | 73.421441 | 68.1725398 | 72.928496 | 72.9311067 |
| 78.3734324 | 73.9289015 | 73.421441 | 67.1725398 | 72.928496 | 71.9311067 |
| 78.3734324 | 73.9289015 | 73.421441 | 65.1725398 | 72.928496 | 71.9311067 |
| 77.3734324 | 72.9289015 | 70.421441 | 64.1725398 | 72.928496 | 72.9311067 |
| 76.3734324 | 71.9289015 | 70.421441 | 64.1725398 | 76.928496 | 72.9311067 |
| 76.3734324 | 69.9289015 | 70.421441 | 64.1725398 | 79.928496 | 72.9311067 |
| 75.3734324 | 67.9289015 | 68.421441 | 64.1725398 | 81.928496 | 72.9311067 |
| 73.3734324 | 67.9289015 | 68.421441 | 64.1725398 | 83.928496 | 73.9311067 |
| 73.3734324 | 65.9289015 | 68.421441 | 64.1725398 | 82.928496 | 73.9311067 |
| 73.3734324 | 65.9289015 | 68.421441 | 64.1725398 | 82.928496 | 73.9311067 |
| 74.3734324 | 66.9289015 | 69.421441 | 64.1725398 | 81.928496 | 73.9311067 |
| 74.3734324 | 67.9289015 | 69.421441 | 64.1725398 | 81.928496 | 74.9311067 |
| 74.3734324 | 69.9289015 | 69.421441 | 65.1725398 | 81.928496 | 76.9311067 |
| 74.3734324 | 70.9289015 | 69.421441 | 65.1725398 | 81.928496 | 77.9311067 |
| 74.3734324 | 70.9289015 | 69.421441 | 65.1725398 | 79.928496 | 78.9311067 |
| 74.3734324 | 69.9289015 | 69.421441 | 65.1725398 | 77.928496 | 80.9311067 |
| 74.3734324 | 68.9289015 | 70.421441 | 65.1725398 | 79.928496 | 80.9311067 |
| 74.3734324 | 67.9289015 | 70.421441 | 65.1725398 | 79.928496 | 80.9311067 |
| 76.3734324 | 66.9289015 | 70.421441 | 65.1725398 | 79.928496 | 80.9311067 |
| 76.3734324 | 66.9289015 | 70.421441 | 65.1725398 | 79.928496 | 79.9311067 |
| 76.3734324 | 66.9289015 | 71.421441 | 66.1725398 | 78.928496 | 76.9311067 |

|            |            |           |            |           |            |
|------------|------------|-----------|------------|-----------|------------|
| 74.3734324 | 66.9289015 | 72.421441 | 67.1725398 | 78.928496 | 76.9311067 |
| 73.3734324 | 66.9289015 | 72.421441 | 66.1725398 | 78.928496 | 76.9311067 |
| 71.3734324 | 66.9289015 | 72.421441 | 66.1725398 | 78.928496 | 74.9311067 |
| 71.3734324 | 66.9289015 | 73.421441 | 66.1725398 | 77.928496 | 74.9311067 |
| 71.3734324 | 67.9289015 | 73.421441 | 66.1725398 | 77.928496 | 73.9311067 |
| 70.3734324 | 67.9289015 | 73.421441 | 66.1725398 | 76.928496 | 73.9311067 |
| 70.3734324 | 69.9289015 | 73.421441 | 66.1725398 | 76.928496 | 71.9311067 |
| 70.3734324 | 69.9289015 | 73.421441 | 66.1725398 | 76.928496 | 70.9311067 |
| 70.3734324 | 69.9289015 | 73.421441 | 67.1725398 | 76.928496 | 68.9311067 |
| 70.3734324 | 70.9289015 | 73.421441 | 67.1725398 | 76.928496 | 67.9311067 |
| 70.3734324 | 71.9289015 | 73.421441 | 68.1725398 | 76.928496 | 68.9311067 |
| 71.3734324 | 72.9289015 | 73.421441 | 70.1725398 | 75.928496 | 68.9311067 |
| 71.3734324 | 72.9289015 | 72.421441 | 70.1725398 | 77.928496 | 68.9311067 |
| 71.3734324 | 73.9289015 | 72.421441 | 74.1725398 | 77.928496 | 68.9311067 |
| 70.3734324 | 73.9289015 | 72.421441 | 75.1725398 | 76.928496 | 68.9311067 |
| 68.3734324 | 72.9289015 | 72.421441 | 75.1725398 | 76.928496 | 68.9311067 |
| 69.3734324 | 71.9289015 | 72.421441 | 76.1725398 | 76.928496 | 68.9311067 |
| 70.3734324 | 71.9289015 | 72.421441 | 78.1725398 | 77.928496 | 68.9311067 |
| 70.3734324 | 71.9289015 | 73.421441 | 78.1725398 | 76.928496 | 68.9311067 |
| 70.3734324 | 71.9289015 | 73.421441 | 78.1725398 | 76.928496 | 68.9311067 |
| 68.3734324 | 70.9289015 | 73.421441 | 78.1725398 | 75.928496 | 68.9311067 |
| 71.3734324 | 71.9289015 | 73.421441 | 77.1725398 | 74.928496 | 70.9311067 |
| 72.3734324 | 72.9289015 | 74.421441 | 76.1725398 | 73.928496 | 73.9311067 |
| 72.3734324 | 72.9289015 | 74.421441 | 76.1725398 | 73.928496 | 73.9311067 |
| 72.3734324 | 73.9289015 | 74.421441 | 74.1725398 | 73.928496 | 73.9311067 |
| 71.3734324 | 74.9289015 | 73.421441 | 73.1725398 | 73.928496 | 70.9311067 |
| 72.3734324 | 74.9289015 | 73.421441 | 72.1725398 | 73.928496 | 71.9311067 |
| 75.3734324 | 75.9289015 | 73.421441 | 70.1725398 | 73.928496 | 71.9311067 |
| 76.3734324 | 75.9289015 | 73.421441 | 69.1725398 | 73.928496 | 70.9311067 |
| 76.3734324 | 76.9289015 | 74.421441 | 67.1725398 | 73.928496 | 70.9311067 |
| 76.3734324 | 76.9289015 | 74.421441 | 67.1725398 | 73.928496 | 70.9311067 |
| 77.3734324 | 75.9289015 | 74.421441 | 65.1725398 | 73.928496 | 70.9311067 |
| 77.3734324 | 74.9289015 | 74.421441 | 64.1725398 | 73.928496 | 70.9311067 |
| 79.3734324 | 73.9289015 | 75.421441 | 64.1725398 | 74.928496 | 70.9311067 |
| 79.3734324 | 73.9289015 | 75.421441 | 64.1725398 | 75.928496 | 70.9311067 |
| 79.3734324 | 73.9289015 | 75.421441 | 64.1725398 | 75.928496 | 70.9311067 |
| 79.3734324 | 74.9289015 | 75.421441 | 64.1725398 | 75.928496 | 70.9311067 |
| 79.3734324 | 75.9289015 | 76.421441 | 64.1725398 | 75.928496 | 72.9311067 |
| 79.3734324 | 76.9289015 | 76.421441 | 63.1725398 | 75.928496 | 74.9311067 |
| 79.3734324 | 76.9289015 | 76.421441 | 63.1725398 | 74.928496 | 75.9311067 |
| 78.3734324 | 76.9289015 | 75.421441 | 63.1725398 | 71.928496 | 76.9311067 |
| 77.3734324 | 75.9289015 | 75.421441 | 63.1725398 | 71.928496 | 77.9311067 |
| 76.3734324 | 74.9289015 | 75.421441 | 67.1725398 | 71.928496 | 77.9311067 |
| 74.3734324 | 75.9289015 | 75.421441 | 67.1725398 | 70.928496 | 77.9311067 |
| 74.3734324 | 75.9289015 | 75.421441 | 67.1725398 | 73.928496 | 78.9311067 |

|            |            |           |            |           |            |
|------------|------------|-----------|------------|-----------|------------|
| 73.3734324 | 76.9289015 | 75.421441 | 67.1725398 | 74.928496 | 78.9311067 |
| 72.3734324 | 76.9289015 | 75.421441 | 67.1725398 | 79.928496 | 75.9311067 |
| 72.3734324 | 75.9289015 | 73.421441 | 67.1725398 | 81.928496 | 73.9311067 |
| 72.3734324 | 75.9289015 | 73.421441 | 69.1725398 | 81.928496 | 73.9311067 |
| 72.3734324 | 75.9289015 | 70.421441 | 69.1725398 | 81.928496 | 73.9311067 |
| 72.3734324 | 75.9289015 | 70.421441 | 69.1725398 | 81.928496 | 73.9311067 |
| 72.3734324 | 75.9289015 | 70.421441 | 69.1725398 | 81.928496 | 73.9311067 |
| 72.3734324 | 75.9289015 | 69.421441 | 70.1725398 | 79.928496 | 73.9311067 |
| 72.3734324 | 75.9289015 | 70.421441 | 70.1725398 | 79.928496 | 73.9311067 |
| 72.3734324 | 76.9289015 | 70.421441 | 71.1725398 | 79.928496 | 72.9311067 |
| 72.3734324 | 76.9289015 | 70.421441 | 72.1725398 | 76.928496 | 72.9311067 |
| 71.3734324 | 76.9289015 | 70.421441 | 72.1725398 | 76.928496 | 72.9311067 |
| 71.3734324 | 76.9289015 | 70.421441 | 71.1725398 | 75.928496 | 72.9311067 |
| 71.3734324 | 78.9289015 | 71.421441 | 70.1725398 | 74.928496 | 72.9311067 |
| 72.3734324 | 82.9289015 | 72.421441 | 69.1725398 | 73.928496 | 72.9311067 |
| 73.3734324 | 84.9289015 | 72.421441 | 68.1725398 | 73.928496 | 72.9311067 |
| 76.3734324 | 84.9289015 | 74.421441 | 68.1725398 | 72.928496 | 72.9311067 |
| 78.3734324 | 84.9289015 | 74.421441 | 68.1725398 | 72.928496 | 73.9311067 |
| 79.3734324 | 84.9289015 | 74.421441 | 68.1725398 | 70.928496 | 74.9311067 |
| 79.3734324 | 84.9289015 | 76.421441 | 68.1725398 | 70.928496 | 74.9311067 |
| 82.3734324 | 83.9289015 | 76.421441 | 68.1725398 | 70.928496 | 74.9311067 |
| 82.3734324 | 83.9289015 | 76.421441 | 68.1725398 | 70.928496 | 74.9311067 |
| 82.3734324 | 82.9289015 | 76.421441 | 68.1725398 | 70.928496 | 74.9311067 |
| 82.3734324 | 80.9289015 | 73.421441 | 70.1725398 | 70.928496 | 74.9311067 |
| 82.3734324 | 78.9289015 | 73.421441 | 70.1725398 | 69.928496 | 74.9311067 |
| 82.3734324 | 71.9289015 | 73.421441 | 70.1725398 | 69.928496 | 75.9311067 |
| 79.3734324 | 68.9289015 | 73.421441 | 71.1725398 | 69.928496 | 75.9311067 |
| 79.3734324 | 65.9289015 | 73.421441 | 71.1725398 | 70.928496 | 75.9311067 |
| 76.3734324 | 65.9289015 | 76.421441 | 71.1725398 | 72.928496 | 75.9311067 |
| 75.3734324 | 63.9289015 | 77.421441 | 71.1725398 | 73.928496 | 75.9311067 |
| 76.3734324 | 62.9289015 | 77.421441 | 72.1725398 | 73.928496 | 74.9311067 |
| 76.3734324 | 62.9289015 | 77.421441 | 72.1725398 | 73.928496 | 74.9311067 |
| 77.3734324 | 61.9289015 | 78.421441 | 71.1725398 | 74.928496 | 75.9311067 |
| 77.3734324 | 61.9289015 | 78.421441 | 72.1725398 | 74.928496 | 75.9311067 |
| 77.3734324 | 61.9289015 | 80.421441 | 71.1725398 | 70.928496 | 75.9311067 |
| 77.3734324 | 60.9289015 | 80.421441 | 70.1725398 | 69.928496 | 75.9311067 |
| 76.3734324 | 60.9289015 | 80.421441 | 70.1725398 | 68.928496 | 75.9311067 |
| 76.3734324 | 62.9289015 | 80.421441 | 69.1725398 | 69.928496 | 73.9311067 |
| 76.3734324 | 64.9289015 | 80.421441 | 69.1725398 | 75.928496 | 69.9311067 |
| 75.3734324 | 64.9289015 | 79.421441 | 69.1725398 | 78.928496 | 68.9311067 |
| 75.3734324 | 62.9289015 | 79.421441 | 69.1725398 | 80.928496 | 67.9311067 |
| 75.3734324 | 61.9289015 | 79.421441 | 70.1725398 | 78.928496 | 68.9311067 |
| 75.3734324 | 61.9289015 | 78.421441 | 70.1725398 | 77.928496 | 68.9311067 |

|            |            |            |            |            |            |
|------------|------------|------------|------------|------------|------------|
| 78.3734324 | 61.9289015 | 78.421441  | 68.1725398 | 75.928496  | 68.9311067 |
| 78.3734324 | 62.9289015 | 78.421441  | 67.1725398 | 74.928496  | 68.9311067 |
| 78.3734324 | 62.9289015 | 78.421441  | 67.1725398 | 72.928496  | 68.9311067 |
| 80.3734324 | 63.9289015 | 77.421441  | 66.1725398 | 71.928496  | 68.9311067 |
| 80.3734324 | 64.9289015 | 79.421441  | 66.1725398 | 70.928496  | 68.9311067 |
| 80.3734324 | 64.9289015 | 79.421441  | 66.1725398 | 70.928496  | 71.9311067 |
| 78.3734324 | 64.9289015 | 80.421441  | 67.1725398 | 71.928496  | 71.9311067 |
| 78.3734324 | 64.9289015 | 82.421441  | 68.1725398 | 71.928496  | 71.9311067 |
| 77.3734324 | 63.9289015 | 83.421441  | 69.1725398 | 72.928496  | 71.9311067 |
| 77.3734324 | 63.9289015 | 83.421441  | 70.1725398 | 72.928496  | 71.9311067 |
| 76.3734324 | 65.9289015 | 83.421441  | 70.1725398 | 72.928496  | 71.9311067 |
| 76.3734324 | 66.9289015 | 83.421441  | 68.1725398 | 73.928496  | 73.9311067 |
| 74.3734324 | 67.9289015 | 85.421441  | 67.1725398 | 74.928496  | 74.9311067 |
| 68.3734324 | 70.9289015 | 72.3258374 | 66.1725398 | 75.928496  | 74.9311067 |
| 63.3734324 | 72.9289015 | 83.421441  | 66.1725398 | 79.928496  | 74.9311067 |
| 63.3734324 | 77.9289015 | 83.421441  | 67.1725398 | 82.928496  | 73.9311067 |
| 63.3734324 | 81.9289015 | 82.421441  | 68.1725398 | 84.928496  | 73.9311067 |
| 63.3734324 | 81.9289015 | 81.421441  | 69.1725398 | 84.928496  | 73.9311067 |
| 63.3734324 | 82.9289015 | 81.421441  | 69.1725398 | 73.0258374 | 74.9311067 |
| 63.3734324 | 82.9289015 | 81.421441  | 68.1725398 | 85.928496  | 75.9311067 |
| 63.3734324 | 83.9289015 | 81.421441  | 68.1725398 | 73.8258374 | 75.9311067 |
| 63.3734324 | 84.9289015 | 81.421441  | 70.1725398 | 74.1258374 | 75.9311067 |
| 63.3734324 | 85.9289015 | 81.421441  | 70.1725398 | 74.4258374 | 75.9311067 |
| 63.3734324 | 74.6258374 | 81.421441  | 70.1725398 | 74.6258374 | 73.9311067 |
| 63.3734324 | 74.5258374 | 81.421441  | 70.1725398 | 74.5258374 | 72.9311067 |
| 63.3734324 | 74.3258374 | 81.421441  | 68.1725398 | 74.3258374 | 72.9311067 |
| 63.3734324 | 74.3258374 | 80.421441  | 67.1725398 | 74.3258374 | 72.9311067 |
| 63.3734324 | 74.5258374 | 80.421441  | 67.1725398 | 74.5258374 | 72.9311067 |
| 63.3734324 | 74.6258374 | 80.421441  | 66.1725398 | 74.6258374 | 72.9311067 |
| 63.3734324 | 74.1258374 | 80.421441  | 65.1725398 | 82.928496  | 72.9311067 |
| 63.3734324 | 73.8258374 | 80.421441  | 66.1725398 | 81.928496  | 68.9311067 |
| 63.3734324 | 73.5258374 | 80.421441  | 66.1725398 | 79.928496  | 68.9311067 |
| 64.3734324 | 73.6258374 | 80.421441  | 66.1725398 | 79.928496  | 67.9311067 |
| 67.3734324 | 74.3258374 | 80.421441  | 66.1725398 | 79.928496  | 71.9311067 |
| 66.3734324 | 74.0258374 | 82.421441  | 66.1725398 | 79.928496  | 71.9311067 |
| 66.3734324 | 84.9289015 | 82.421441  | 66.1725398 | 77.928496  | 71.9311067 |
| 66.3734324 | 82.9289015 | 83.421441  | 66.1725398 | 75.928496  | 71.9311067 |
| 65.3734324 | 82.9289015 | 83.421441  | 66.1725398 | 75.928496  | 70.9311067 |
| 65.3734324 | 82.9289015 | 73.4258374 | 67.1725398 | 74.928496  | 71.9311067 |
| 64.3734324 | 81.9289015 | 73.0258374 | 67.1725398 | 73.928496  | 72.9311067 |
| 64.3734324 | 80.9289015 | 72.7258374 | 66.1725398 | 72.928496  | 72.9311067 |
| 64.3734324 | 80.9289015 | 72.7258374 | 66.1725398 | 72.928496  | 72.9311067 |
| 64.3734324 | 78.9289015 | 72.4258374 | 65.1725398 | 71.928496  | 71.9311067 |
| 63.3734324 | 78.9289015 | 72.3258374 | 64.1725398 | 71.928496  | 71.9311067 |
| 63.3734324 | 80.9289015 | 72.5258374 | 64.1725398 | 71.928496  | 70.9311067 |

|            |            |            |            |            |            |
|------------|------------|------------|------------|------------|------------|
| 62.3734324 | 80.9289015 | 72.3258374 | 65.1725398 | 70.928496  | 69.9311067 |
| 62.3734324 | 80.9289015 | 84.421441  | 65.1725398 | 70.928496  | 67.9311067 |
| 62.3734324 | 82.9289015 | 84.421441  | 66.1725398 | 70.928496  | 63.9311067 |
| 62.3734324 | 82.9289015 | 83.421441  | 66.1725398 | 70.928496  | 62.9311067 |
| 64.3734324 | 82.9289015 | 83.421441  | 65.1725398 | 70.928496  | 62.9311067 |
| 64.3734324 | 82.9289015 | 83.421441  | 65.1725398 | 71.928496  | 63.9311067 |
| 65.3734324 | 82.9289015 | 83.421441  | 65.1725398 | 71.928496  | 64.9311067 |
| 64.3734324 | 81.9289015 | 80.421441  | 65.1725398 | 72.928496  | 65.9311067 |
| 64.3734324 | 78.9289015 | 80.421441  | 66.1725398 | 73.928496  | 65.9311067 |
| 64.3734324 | 76.9289015 | 78.421441  | 66.1725398 | 73.928496  | 65.9311067 |
| 63.3734324 | 74.9289015 | 78.421441  | 66.1725398 | 73.928496  | 65.9311067 |
| 63.3734324 | 72.9289015 | 70.421441  | 66.1725398 | 77.928496  | 64.9311067 |
| 63.3734324 | 71.9289015 | 69.421441  | 65.1725398 | 77.928496  | 64.9311067 |
| 66.3734324 | 71.9289015 | 69.421441  | 65.1725398 | 78.928496  | 64.9311067 |
| 67.3734324 | 72.9289015 | 69.421441  | 66.1725398 | 79.928496  | 64.9311067 |
| 67.3734324 | 73.9289015 | 69.421441  | 66.1725398 | 79.928496  | 63.9311067 |
| 67.3734324 | 75.9289015 | 70.421441  | 66.1725398 | 79.928496  | 63.9311067 |
| 67.3734324 | 75.9289015 | 70.421441  | 66.1725398 | 79.928496  | 65.9311067 |
| 68.3734324 | 75.9289015 | 70.421441  | 66.1725398 | 79.928496  | 64.9311067 |
| 69.3734324 | 74.9289015 | 72.421441  | 66.1725398 | 79.928496  | 63.9311067 |
| 69.3734324 | 72.9289015 | 72.421441  | 66.1725398 | 79.928496  | 63.9311067 |
| 69.3734324 | 70.9289015 | 72.421441  | 66.1725398 | 79.928496  | 61.9311067 |
| 70.3734324 | 68.9289015 | 72.421441  | 68.1725398 | 79.928496  | 62.9311067 |
| 70.3734324 | 69.9289015 | 72.421441  | 69.1725398 | 77.928496  | 62.9311067 |
| 70.3734324 | 70.9289015 | 73.421441  | 72.1725398 | 77.928496  | 63.9311067 |
| 70.3734324 | 72.9289015 | 73.421441  | 72.1725398 | 76.928496  | 63.9311067 |
| 70.3734324 | 73.9289015 | 74.421441  | 72.1725398 | 76.928496  | 62.9311067 |
| 70.3734324 | 73.9289015 | 74.421441  | 72.1725398 | 76.928496  | 62.9311067 |
| 70.3734324 | 73.9289015 | 74.421441  | 72.1725398 | 71.928496  | 63.9311067 |
| 70.3734324 | 73.9289015 | 75.421441  | 72.1725398 | 71.928496  | 63.9311067 |
| 71.3734324 | 73.9289015 | 75.421441  | 72.1725398 | 71.928496  | 65.9311067 |
| 71.3734324 | 73.9289015 | 75.421441  | 72.1725398 | 70.928496  | 67.9311067 |
| 71.3734324 | 70.9289015 | 75.421441  | 72.1725398 | 70.928496  | 68.9311067 |
| 71.3734324 | 69.9289015 | 77.421441  | 72.1725398 | 70.928496  | 69.9311067 |
| 73.3734324 | 68.9289015 | 78.421441  | 73.1725398 | 70.928496  | 69.9311067 |
| 74.3734324 | 68.9289015 | 78.421441  | 73.1725398 | 70.928496  | 69.9311067 |
| 74.3734324 | 68.9289015 | 78.421441  | 74.1725398 | 70.928496  | 67.9311067 |
| 74.3734324 | 68.9289015 | 78.421441  | 75.1725398 | 70.928496  | 67.9311067 |
| 74.3734324 | 68.9289015 | 78.421441  | 76.1725398 | 75.9258374 | 67.9311067 |
| 73.3734324 | 68.9289015 | 78.421441  | 77.1725398 | 76.1258374 | 67.9311067 |
| 73.3734324 | 68.9289015 | 78.421441  | 78.1725398 | 76.3258374 | 67.9311067 |
| 73.3734324 | 68.9289015 | 79.421441  | 78.1725398 | 76.2258374 | 66.9311067 |
| 73.3734324 | 68.9289015 | 81.421441  | 78.1725398 | 76.5258374 | 66.9311067 |
| 74.3734324 | 69.9289015 | 81.421441  | 78.1725398 | 76.8258374 | 66.9311067 |
| 76.3734324 | 68.9289015 | 81.421441  | 79.1725398 | 76.9258374 | 64.9311067 |

|            |            |           |            |            |            |
|------------|------------|-----------|------------|------------|------------|
| 76.3734324 | 68.9289015 | 84.421441 | 79.1725398 | 77.1258374 | 63.9311067 |
| 75.3734324 | 68.9289015 | 84.421441 | 79.1725398 | 76.7258374 | 63.9311067 |
| 76.3734324 | 69.9289015 | 78.421441 | 78.1725398 | 75.9258374 | 62.9311067 |
| 78.3734324 | 69.9289015 | 78.421441 | 78.1725398 | 75.8258374 | 60.9311067 |
| 80.3734324 | 69.9289015 | 77.421441 | 78.1725398 | 75.7258374 | 58.9311067 |
| 80.3734324 | 69.9289015 | 77.421441 | 78.1725398 | 75.7258374 | 58.9311067 |
| 80.3734324 | 70.9289015 | 77.421441 | 78.1725398 | 73.928496  | 57.9311067 |
| 81.3734324 | 70.9289015 | 79.421441 | 78.1725398 | 72.928496  | 57.9311067 |
| 81.3734324 | 73.9289015 | 78.421441 | 78.1725398 | 72.928496  | 58.9311067 |
| 81.3734324 | 74.9289015 | 78.421441 | 78.1725398 | 71.928496  | 59.9311067 |
| 81.3734324 | 74.9289015 | 78.421441 | 77.1725398 | 71.928496  | 60.9311067 |
| 78.3734324 | 74.9289015 | 79.421441 | 75.1725398 | 71.928496  | 61.9311067 |
| 77.3734324 | 74.9289015 | 79.421441 | 73.1725398 | 65.928496  | 62.9311067 |
| 76.3734324 | 72.9289015 | 81.421441 | 71.1725398 | 64.928496  | 62.9311067 |
| 76.3734324 | 71.9289015 | 81.421441 | 70.1725398 | 64.928496  | 63.9311067 |
| 76.3734324 | 66.9289015 | 81.421441 | 70.1725398 | 62.928496  | 62.9311067 |
| 76.3734324 | 66.9289015 | 79.421441 | 69.1725398 | 60.928496  | 63.9311067 |
| 72.3734324 | 65.9289015 | 77.421441 | 68.1725398 | 60.928496  | 63.9311067 |
| 72.3734324 | 65.9289015 | 76.421441 | 68.1725398 | 60.928496  | 63.9311067 |
| 72.3734324 | 65.9289015 | 76.421441 | 67.1725398 | 59.928496  | 62.9311067 |
| 71.3734324 | 66.9289015 | 76.421441 | 66.1725398 | 60.928496  | 62.9311067 |
| 70.3734324 | 67.9289015 | 75.421441 | 67.1725398 | 60.928496  | 62.9311067 |
| 70.3734324 | 67.9289015 | 75.421441 | 68.1725398 | 61.928496  | 62.9311067 |
| 70.3734324 | 67.9289015 | 75.421441 | 68.1725398 | 63.928496  | 62.9311067 |
| 70.3734324 | 68.9289015 | 75.421441 | 70.1725398 | 64.928496  | 62.9311067 |
| 70.3734324 | 70.9289015 | 74.421441 | 73.1725398 | 64.928496  | 62.9311067 |
| 70.3734324 | 70.9289015 | 74.421441 | 75.1725398 | 65.928496  | 63.9311067 |
| 70.3734324 | 72.9289015 | 74.421441 | 75.1725398 | 65.928496  | 63.9311067 |
| 71.3734324 | 72.9289015 | 73.421441 | 75.1725398 | 65.928496  | 63.9311067 |
| 71.3734324 | 74.9289015 | 73.421441 | 75.1725398 | 65.928496  | 63.9311067 |
| 71.3734324 | 76.9289015 | 72.421441 | 72.1725398 | 69.928496  | 63.9311067 |
| 71.3734324 | 78.9289015 | 72.421441 | 70.1725398 | 71.928496  | 63.9311067 |
| 74.3734324 | 77.9289015 | 71.421441 | 70.1725398 | 72.928496  | 64.9311067 |
| 74.3734324 | 75.9289015 | 70.421441 | 70.1725398 | 72.928496  | 62.9311067 |
| 74.3734324 | 74.9289015 | 70.421441 | 71.1725398 | 72.928496  | 61.9311067 |
| 77.3734324 | 74.9289015 | 70.421441 | 71.1725398 | 73.928496  | 61.9311067 |
| 78.3734324 | 73.9289015 | 70.421441 | 71.1725398 | 74.928496  | 61.9311067 |
| 78.3734324 | 73.9289015 | 70.421441 | 70.1725398 | 76.928496  | 61.9311067 |
| 78.3734324 | 73.9289015 | 69.421441 | 67.1725398 | 79.928496  | 61.9311067 |
| 77.3734324 | 72.9289015 | 69.421441 | 67.1725398 | 79.928496  | 61.9311067 |
| 76.3734324 | 70.9289015 | 68.421441 | 68.1725398 | 80.928496  | 61.9311067 |
| 76.3734324 | 70.9289015 | 67.421441 | 68.1725398 | 82.928496  | 61.9311067 |
| 76.3734324 | 70.9289015 | 67.421441 | 69.1725398 | 71.0258374 | 60.9311067 |
| 76.3734324 | 70.9289015 | 67.421441 | 73.1725398 | 83.928496  | 60.9311067 |
| 76.3734324 | 69.9289015 | 68.421441 | 73.1725398 | 75.928496  | 60.9311067 |



|            |            |           |            |           |            |
|------------|------------|-----------|------------|-----------|------------|
| 77.3734324 | 69.9289015 | 68.421441 | 73.1725398 | 70.928496 | 62.9311067 |
| 77.3734324 | 69.9289015 | 68.421441 | 72.1725398 | 69.928496 | 72.9311067 |
| 77.3734324 | 68.9289015 | 69.421441 | 70.1725398 | 69.928496 | 76.9311067 |
| 77.3734324 | 68.9289015 | 69.421441 | 69.1725398 | 73.928496 | 80.9311067 |
| 76.3734324 | 70.9289015 | 69.421441 | 69.1725398 | 73.928496 | 81.9311067 |
| 76.3734324 | 70.9289015 | 69.421441 | 69.1725398 | 73.928496 | 81.9311067 |
| 73.3734324 | 70.9289015 | 68.421441 | 69.1725398 | 70.928496 | 81.9311067 |
| 73.3734324 | 70.9289015 | 69.421441 | 68.1725398 | 70.928496 | 81.9311067 |
| 71.3734324 | 70.9289015 | 70.421441 | 68.1725398 | 69.928496 | 81.9311067 |
| 69.3734324 | 71.9289015 | 70.421441 | 67.1725398 | 68.928496 | 81.9311067 |
| 69.3734324 | 71.9289015 | 70.421441 | 66.1725398 | 67.928496 | 81.9311067 |
| 69.3734324 | 71.9289015 | 68.421441 | 66.1725398 | 66.928496 | 80.9311067 |
| 69.3734324 | 73.9289015 | 68.421441 | 67.1725398 | 65.928496 | 80.9311067 |
| 69.3734324 | 73.9289015 | 68.421441 | 67.1725398 | 65.928496 | 79.9311067 |
| 69.3734324 | 73.9289015 | 68.421441 | 67.1725398 | 65.928496 | 79.9311067 |
| 69.3734324 | 74.9289015 | 67.421441 | 67.1725398 | 65.928496 | 79.9311067 |
| 69.3734324 | 75.9289015 | 68.421441 | 67.1725398 | 65.928496 | 80.9311067 |
| 68.3734324 | 78.9289015 | 69.421441 | 67.1725398 | 64.928496 | 80.9311067 |
| 67.3734324 | 78.9289015 | 69.421441 | 66.1725398 | 64.928496 | 80.9311067 |
| 67.3734324 | 78.9289015 | 70.421441 | 66.1725398 | 64.928496 | 78.9311067 |
| 66.3734324 | 75.9289015 | 70.421441 | 65.1725398 | 63.928496 | 75.9311067 |
| 65.3734324 | 75.9289015 | 72.421441 | 66.1725398 | 63.928496 | 71.9311067 |
| 64.3734324 | 72.9289015 | 73.421441 | 67.1725398 | 63.928496 | 65.9311067 |
| 61.3734324 | 67.9289015 | 73.421441 | 71.1725398 | 64.928496 | 63.9311067 |
| 61.3734324 | 66.9289015 | 72.421441 | 73.1725398 | 65.928496 | 62.9311067 |
| 60.3734324 | 66.9289015 | 72.421441 | 73.1725398 | 65.928496 | 62.9311067 |
| 60.3734324 | 66.9289015 | 71.421441 | 74.1725398 | 65.928496 | 59.9311067 |
| 60.3734324 | 68.9289015 | 71.421441 | 73.1725398 | 65.928496 | 59.9311067 |
| 59.3734324 | 68.9289015 | 71.421441 | 73.1725398 | 66.928496 | 59.9311067 |
| 59.3734324 | 70.9289015 | 70.421441 | 72.1725398 | 66.928496 | 58.9311067 |
| 64.3734324 | 70.9289015 | 71.421441 | 70.1725398 | 66.928496 | 58.9311067 |
| 66.3734324 | 70.9289015 | 71.421441 | 70.1725398 | 66.928496 | 58.9311067 |
| 66.3734324 | 70.9289015 | 71.421441 | 70.1725398 | 67.928496 | 58.9311067 |
| 64.3734324 | 70.9289015 | 71.421441 | 70.1725398 | 68.928496 | 58.9311067 |
| 64.3734324 | 70.9289015 | 72.421441 | 70.1725398 | 68.928496 | 61.9311067 |
| 63.3734324 | 70.9289015 | 72.421441 | 70.1725398 | 68.928496 | 62.9311067 |
| 63.3734324 | 70.9289015 | 72.421441 | 70.1725398 | 68.928496 | 61.9311067 |
| 63.3734324 | 70.9289015 | 72.421441 | 69.1725398 | 69.928496 | 61.9311067 |
| 62.3734324 | 69.9289015 | 72.421441 | 68.1725398 | 69.928496 | 61.9311067 |
| 62.3734324 | 68.9289015 | 72.421441 | 68.1725398 | 69.928496 | 61.9311067 |
| 62.3734324 | 66.9289015 | 71.421441 | 67.1725398 | 69.928496 | 61.9311067 |
| 62.3734324 | 66.9289015 | 71.421441 | 67.1725398 | 69.928496 | 61.9311067 |
| 65.3734324 | 66.9289015 | 71.421441 | 67.1725398 | 69.928496 | 61.9311067 |
| 66.3734324 | 66.9289015 | 71.421441 | 70.1725398 | 68.928496 | 61.9311067 |
| 66.3734324 | 66.9289015 | 69.421441 | 70.1725398 | 67.928496 | 62.9311067 |

|            |            |           |            |           |            |
|------------|------------|-----------|------------|-----------|------------|
| 68.3734324 | 64.9289015 | 68.421441 | 70.1725398 | 67.928496 | 63.9311067 |
| 68.3734324 | 64.9289015 | 68.421441 | 70.1725398 | 67.928496 | 63.9311067 |
| 68.3734324 | 66.9289015 | 69.421441 | 69.1725398 | 67.928496 | 64.9311067 |
| 69.3734324 | 66.9289015 | 69.421441 | 69.1725398 | 68.928496 | 65.9311067 |
| 71.3734324 | 65.9289015 | 69.421441 | 66.1725398 | 68.928496 | 67.9311067 |
| 73.3734324 | 65.9289015 | 70.421441 | 66.1725398 | 69.928496 | 67.9311067 |
| 73.3734324 | 65.9289015 | 70.421441 | 66.1725398 | 71.928496 | 69.9311067 |
| 73.3734324 | 65.9289015 | 70.421441 | 67.1725398 | 71.928496 | 69.9311067 |
| 73.3734324 | 65.9289015 | 70.421441 | 69.1725398 | 70.928496 | 69.9311067 |
| 72.3734324 | 65.9289015 | 70.421441 | 72.1725398 | 69.928496 | 71.9311067 |
| 72.3734324 | 61.9289015 | 71.421441 | 74.1725398 | 68.928496 | 73.9311067 |
| 72.3734324 | 60.9289015 | 71.421441 | 75.1725398 | 67.928496 | 73.9311067 |
| 72.3734324 | 61.9289015 | 71.421441 | 74.1725398 | 67.928496 | 74.9311067 |
| 72.3734324 | 61.9289015 | 71.421441 | 74.1725398 | 66.928496 | 74.9311067 |
| 72.3734324 | 61.9289015 | 71.421441 | 72.1725398 | 66.928496 | 73.9311067 |
| 71.3734324 | 61.9289015 | 71.421441 | 70.1725398 | 66.928496 | 73.9311067 |
| 71.3734324 | 62.9289015 | 72.421441 | 68.1725398 | 66.928496 | 72.9311067 |
| 71.3734324 | 62.9289015 | 72.421441 | 67.1725398 | 67.928496 | 72.9311067 |
| 70.3734324 | 65.9289015 | 72.421441 | 68.1725398 | 67.928496 | 74.9311067 |
| 70.3734324 | 65.9289015 | 72.421441 | 69.1725398 | 67.928496 | 74.9311067 |
| 68.3734324 | 65.9289015 | 72.421441 | 69.1725398 | 67.928496 | 74.9311067 |
| 68.3734324 | 67.9289015 | 72.421441 | 69.1725398 | 68.928496 | 75.9311067 |
| 68.3734324 | 67.9289015 | 71.421441 | 69.1725398 | 68.928496 | 75.9311067 |
| 68.3734324 | 67.9289015 | 71.421441 | 69.1725398 | 68.928496 | 75.9311067 |
| 70.3734324 | 68.9289015 | 66.421441 | 69.1725398 | 69.928496 | 75.9311067 |
| 70.3734324 | 68.9289015 | 62.421441 | 71.1725398 | 69.928496 | 75.9311067 |
| 70.3734324 | 71.9289015 | 62.421441 | 71.1725398 | 72.928496 | 75.9311067 |
| 69.3734324 | 71.9289015 | 61.421441 | 72.1725398 | 74.928496 | 76.9311067 |
| 69.3734324 | 70.9289015 | 60.421441 | 72.1725398 | 76.928496 | 77.9311067 |
| 69.3734324 | 70.9289015 | 58.421441 | 72.1725398 | 76.928496 | 77.9311067 |
| 65.3734324 | 69.9289015 | 57.421441 | 72.1725398 | 76.928496 | 79.9311067 |
| 65.3734324 | 69.9289015 | 57.421441 | 72.1725398 | 76.928496 | 82.9311067 |
| 65.3734324 | 69.9289015 | 54.421441 | 75.1725398 | 76.928496 | 82.9311067 |
| 64.3734324 | 69.9289015 | 54.421441 | 75.1725398 | 76.928496 | 70.0258374 |
| 64.3734324 | 70.9289015 | 53.421441 | 73.1725398 | 76.928496 | 69.7258374 |
| 64.3734324 | 71.9289015 | 55.421441 | 73.1725398 | 78.928496 | 77.9311067 |
| 64.3734324 | 71.9289015 | 57.421441 | 73.1725398 | 78.928496 | 76.9311067 |
| 64.3734324 | 72.9289015 | 67.421441 | 68.1725398 | 78.928496 | 75.9311067 |
| 68.3734324 | 72.9289015 | 70.421441 | 68.1725398 | 72.928496 | 74.9311067 |
| 68.3734324 | 72.9289015 | 72.421441 | 66.1725398 | 72.928496 | 69.9311067 |
| 68.3734324 | 72.9289015 | 79.421441 | 67.1725398 | 69.928496 | 69.9311067 |
| 70.3734324 | 72.9289015 | 80.421441 | 68.1725398 | 69.928496 | 68.9311067 |
| 70.3734324 | 72.9289015 | 81.421441 | 68.1725398 | 70.928496 | 68.9311067 |
| 70.3734324 | 71.9289015 | 80.421441 | 68.1725398 | 70.928496 | 68.9311067 |
| 73.3734324 | 71.9289015 | 80.421441 | 70.1725398 | 69.928496 | 68.9311067 |

|            |            |           |            |           |            |
|------------|------------|-----------|------------|-----------|------------|
| 72.3734324 | 71.9289015 | 79.421441 | 71.1725398 | 69.928496 | 68.9311067 |
| 71.3734324 | 71.9289015 | 79.421441 | 71.1725398 | 68.928496 | 66.9311067 |
| 71.3734324 | 71.9289015 | 76.421441 | 70.1725398 | 67.928496 | 65.9311067 |
| 70.3734324 | 70.9289015 | 75.421441 | 70.1725398 | 67.928496 | 65.9311067 |
| 70.3734324 | 69.9289015 | 74.421441 | 70.1725398 | 66.928496 | 65.9311067 |
| 69.3734324 | 68.9289015 | 74.421441 | 70.1725398 | 66.928496 | 64.9311067 |
| 68.3734324 | 65.9289015 | 74.421441 | 69.1725398 | 67.928496 | 64.9311067 |
| 67.3734324 | 65.9289015 | 74.421441 | 69.1725398 | 67.928496 | 64.9311067 |
| 66.3734324 | 63.9289015 | 74.421441 | 68.1725398 | 67.928496 | 63.9311067 |
| 65.3734324 | 63.9289015 | 75.421441 | 68.1725398 | 67.928496 | 64.9311067 |
| 63.3734324 | 63.9289015 | 75.421441 | 69.1725398 | 66.928496 | 64.9311067 |
| 63.3734324 | 64.9289015 | 75.421441 | 70.1725398 | 66.928496 | 66.9311067 |
| 62.3734324 | 66.9289015 | 74.421441 | 70.1725398 | 67.928496 | 64.9311067 |
| 63.3734324 | 68.9289015 | 72.421441 | 71.1725398 | 67.928496 | 60.9311067 |
| 64.3734324 | 68.9289015 | 70.421441 | 71.1725398 | 67.928496 | 59.9311067 |
| 64.3734324 | 69.9289015 | 70.421441 | 71.1725398 | 67.928496 | 59.9311067 |
| 65.3734324 | 70.9289015 | 69.421441 | 70.1725398 | 68.928496 | 59.9311067 |
| 66.3734324 | 70.9289015 | 69.421441 | 69.1725398 | 69.928496 | 62.9311067 |
| 67.3734324 | 70.9289015 | 69.421441 | 69.1725398 | 69.928496 | 65.9311067 |
| 67.3734324 | 70.9289015 | 69.421441 | 70.1725398 | 69.928496 | 66.9311067 |
| 67.3734324 | 71.9289015 | 69.421441 | 70.1725398 | 69.928496 | 63.9311067 |
| 67.3734324 | 72.9289015 | 69.421441 | 71.1725398 | 69.928496 | 63.9311067 |
| 68.3734324 | 71.9289015 | 69.421441 | 72.1725398 | 69.928496 | 63.9311067 |
| 68.3734324 | 70.9289015 | 69.421441 | 73.1725398 | 70.928496 | 61.9311067 |
| 68.3734324 | 71.9289015 | 69.421441 | 73.1725398 | 71.928496 | 60.9311067 |
| 68.3734324 | 71.9289015 | 71.421441 | 72.1725398 | 71.928496 | 59.9311067 |
| 68.3734324 | 71.9289015 | 71.421441 | 71.1725398 | 71.928496 | 60.9311067 |
| 68.3734324 | 71.9289015 | 77.421441 | 72.1725398 | 72.928496 | 60.9311067 |
| 68.3734324 | 71.9289015 | 79.421441 | 72.1725398 | 73.928496 | 61.9311067 |
| 68.3734324 | 71.9289015 | 81.421441 | 72.1725398 | 73.928496 | 63.9311067 |
| 68.3734324 | 71.9289015 | 81.421441 | 72.1725398 | 73.928496 | 64.9311067 |
| 68.3734324 | 71.9289015 | 81.421441 | 72.1725398 | 74.928496 | 64.9311067 |
| 68.3734324 | 71.9289015 | 81.421441 | 72.1725398 | 74.928496 | 64.9311067 |
| 68.3734324 | 70.9289015 | 77.421441 | 73.1725398 | 74.928496 | 64.9311067 |
| 68.3734324 | 70.9289015 | 76.421441 | 74.1725398 | 79.928496 | 64.9311067 |
| 68.3734324 | 69.9289015 | 76.421441 | 74.1725398 | 75.928496 | 64.9311067 |
| 68.3734324 | 69.9289015 | 73.421441 | 74.1725398 | 75.928496 | 64.9311067 |
| 68.3734324 | 73.9289015 | 72.421441 | 73.1725398 | 71.928496 | 64.9311067 |
| 68.3734324 | 73.9289015 | 71.421441 | 72.1725398 | 70.928496 | 64.9311067 |
| 68.3734324 | 72.9289015 | 71.421441 | 72.1725398 | 68.928496 | 64.9311067 |
| 68.3734324 | 71.9289015 | 71.421441 | 72.1725398 | 67.928496 | 64.9311067 |
| 68.3734324 | 71.9289015 | 71.421441 | 71.1725398 | 67.928496 | 65.9311067 |
| 69.3734324 | 70.9289015 | 71.421441 | 70.1725398 | 65.928496 | 69.9311067 |
| 68.3734324 | 70.9289015 | 71.421441 | 69.1725398 | 65.928496 | 69.9311067 |
| 68.3734324 | 69.9289015 | 71.421441 | 69.1725398 | 65.928496 | 69.9311067 |

|            |            |           |            |           |            |
|------------|------------|-----------|------------|-----------|------------|
| 68.3734324 | 69.9289015 | 70.421441 | 69.1725398 | 65.928496 | 72.9311067 |
| 67.3734324 | 69.9289015 | 70.421441 | 68.1725398 | 65.928496 | 64.9311067 |
| 67.3734324 | 69.9289015 | 71.421441 | 68.1725398 | 65.928496 | 64.9311067 |
| 67.3734324 | 69.9289015 | 71.421441 | 68.1725398 | 65.928496 | 64.9311067 |
| 68.3734324 | 69.9289015 | 71.421441 | 68.1725398 | 66.928496 | 65.9311067 |
| 68.3734324 | 69.9289015 | 71.421441 | 68.1725398 | 66.928496 | 65.9311067 |
| 67.3734324 | 69.9289015 | 71.421441 | 67.1725398 | 66.928496 | 65.9311067 |
| 67.3734324 | 67.9289015 | 71.421441 | 68.1725398 | 66.928496 | 64.9311067 |
| 67.3734324 | 67.9289015 | 70.421441 | 68.1725398 | 66.928496 | 64.9311067 |
| 66.3734324 | 66.9289015 | 68.421441 | 69.1725398 | 65.928496 | 65.9311067 |
| 66.3734324 | 67.9289015 | 67.421441 | 68.1725398 | 65.928496 | 66.9311067 |
| 67.3734324 | 67.9289015 | 67.421441 | 68.1725398 | 65.928496 | 66.9311067 |
| 70.3734324 | 67.9289015 | 67.421441 | 68.1725398 | 65.928496 | 67.9311067 |
| 73.3734324 | 67.9289015 | 67.421441 | 68.1725398 | 66.928496 | 67.9311067 |
| 73.3734324 | 68.9289015 | 67.421441 | 69.1725398 | 66.928496 | 67.9311067 |
| 72.0258374 | 70.9289015 | 67.421441 | 72.1725398 | 65.928496 | 67.9311067 |
| 73.2258374 | 70.9289015 | 67.421441 | 73.1725398 | 65.928496 | 67.9311067 |
| 73.0258374 | 69.9289015 | 64.421441 | 73.1725398 | 65.928496 | 67.9311067 |
| 73.7258374 | 68.9289015 | 63.421441 | 73.1725398 | 65.928496 | 67.9311067 |
| 73.5258374 | 67.9289015 | 62.421441 | 69.1725398 | 65.928496 | 67.9311067 |
| 73.8258374 | 67.9289015 | 63.421441 | 67.1725398 | 65.928496 | 67.9311067 |
| 73.8258374 | 68.9289015 | 63.421441 | 66.1725398 | 64.928496 | 69.9311067 |
| 71.4258374 | 69.9289015 | 66.421441 | 65.1725398 | 65.928496 | 71.9311067 |
| 71.5258374 | 70.9289015 | 72.421441 | 65.1725398 | 65.928496 | 73.9311067 |
| 72.3258374 | 71.9289015 | 76.421441 | 66.1725398 | 65.928496 | 75.9311067 |
| 76.3734324 | 72.9289015 | 76.421441 | 66.1725398 | 65.928496 | 74.9311067 |
| 73.3734324 | 72.9289015 | 76.421441 | 66.1725398 | 65.928496 | 74.9311067 |
| 70.3734324 | 71.9289015 | 76.421441 | 66.1725398 | 65.928496 | 74.9311067 |
| 68.3734324 | 70.9289015 | 77.421441 | 66.1725398 | 65.928496 | 73.9311067 |
| 68.3734324 | 70.9289015 | 77.421441 | 66.1725398 | 65.928496 | 72.9311067 |
| 67.3734324 | 69.9289015 | 78.421441 | 66.1725398 | 65.928496 | 71.9311067 |
| 67.3734324 | 69.9289015 | 79.421441 | 66.1725398 | 65.928496 | 71.9311067 |
| 67.3734324 | 69.9289015 | 81.421441 | 65.1725398 | 64.928496 | 71.9311067 |
| 68.3734324 | 69.9289015 | 81.421441 | 64.1725398 | 65.928496 | 70.9311067 |
| 68.3734324 | 69.9289015 | 81.421441 | 64.1725398 | 65.928496 | 70.9311067 |
| 68.3734324 | 68.9289015 | 81.421441 | 64.1725398 | 65.928496 | 70.9311067 |
| 68.3734324 | 69.9289015 | 81.421441 | 65.1725398 | 65.928496 | 71.9311067 |
| 68.3734324 | 69.9289015 | 81.421441 | 66.1725398 | 65.928496 | 72.9311067 |
| 68.3734324 | 69.9289015 | 81.421441 | 66.1725398 | 65.928496 | 76.9311067 |
| 69.3734324 | 74.9289015 | 81.421441 | 66.1725398 | 66.928496 | 77.9311067 |
| 69.3734324 | 75.9289015 | 81.421441 | 66.1725398 | 66.928496 | 76.9311067 |
| 69.3734324 | 75.9289015 | 81.421441 | 66.1725398 | 66.928496 | 76.9311067 |
| 69.3734324 | 76.9289015 | 77.421441 | 69.1725398 | 67.928496 | 74.9311067 |
| 69.3734324 | 75.9289015 | 75.421441 | 70.1725398 | 67.928496 | 74.9311067 |
| 69.3734324 | 75.9289015 | 71.421441 | 70.1725398 | 67.928496 | 74.9311067 |

|            |            |           |            |            |            |
|------------|------------|-----------|------------|------------|------------|
| 69.3734324 | 74.9289015 | 66.421441 | 69.1725398 | 68.928496  | 74.9311067 |
| 69.3734324 | 74.9289015 | 65.421441 | 68.1725398 | 68.928496  | 73.9311067 |
| 69.3734324 | 74.9289015 | 64.421441 | 65.1725398 | 67.928496  | 73.9311067 |
| 69.3734324 | 73.9289015 | 64.421441 | 65.1725398 | 67.928496  | 73.9311067 |
| 69.3734324 | 73.9289015 | 63.421441 | 65.1725398 | 68.928496  | 72.9311067 |
| 69.3734324 | 71.9289015 | 63.421441 | 67.1725398 | 68.928496  | 73.9311067 |
| 71.3734324 | 70.9289015 | 63.421441 | 70.1725398 | 68.928496  | 73.9311067 |
| 72.3734324 | 70.9289015 | 63.421441 | 70.1725398 | 69.928496  | 73.9311067 |
| 72.3734324 | 71.9289015 | 63.421441 | 70.1725398 | 69.928496  | 73.9311067 |
| 72.3734324 | 72.9289015 | 63.421441 | 70.1725398 | 69.928496  | 74.9311067 |
| 72.3734324 | 72.9289015 | 63.421441 | 65.1725398 | 70.928496  | 74.9311067 |
| 72.3734324 | 72.9289015 | 63.421441 | 63.1725398 | 70.928496  | 77.9311067 |
| 75.3734324 | 72.9289015 | 64.421441 | 63.1725398 | 77.928496  | 77.9311067 |
| 75.3734324 | 72.9289015 | 64.421441 | 63.1725398 | 80.928496  | 78.9311067 |
| 75.3734324 | 73.9289015 | 64.421441 | 66.1725398 | 82.928496  | 78.9311067 |
| 75.3734324 | 73.9289015 | 65.421441 | 66.1725398 | 82.928496  | 79.9311067 |
| 75.3734324 | 77.9289015 | 65.421441 | 72.1725398 | 85.928496  | 78.9311067 |
| 75.3734324 | 79.9289015 | 65.421441 | 73.1725398 | 73.5258374 | 78.9311067 |
| 75.3734324 | 80.9289015 | 66.421441 | 73.1725398 | 74.0258374 | 77.9311067 |
| 75.3734324 | 80.9289015 | 67.421441 | 73.1725398 | 74.0258374 | 73.9311067 |
| 76.3734324 | 81.9289015 | 67.421441 | 70.1725398 | 73.6258374 | 72.9311067 |
| 76.3734324 | 81.9289015 | 67.421441 | 68.1725398 | 73.2258374 | 73.9311067 |
| 77.3734324 | 81.9289015 | 67.421441 | 68.1725398 | 73.2258374 | 74.9311067 |
| 76.3734324 | 81.9289015 | 67.421441 | 68.1725398 | 72.9258374 | 74.9311067 |
| 76.3734324 | 82.9289015 | 67.421441 | 68.1725398 | 73.0258374 | 74.9311067 |
| 76.3734324 | 81.9289015 | 68.421441 | 72.1725398 | 73.4258374 | 74.9311067 |
| 76.3734324 | 77.9289015 | 68.421441 | 74.1725398 | 73.5258374 | 74.9311067 |
| 76.3734324 | 74.9289015 | 68.421441 | 74.1725398 | 73.4258374 | 76.9311067 |
| 74.3734324 | 74.9289015 | 68.421441 | 75.1725398 | 73.4258374 | 76.9311067 |
| 74.3734324 | 74.9289015 | 68.421441 | 75.1725398 | 73.2258374 | 76.9311067 |
| 74.3734324 | 73.9289015 | 68.421441 | 75.1725398 | 73.3258374 | 76.9311067 |
| 74.3734324 | 72.9289015 | 68.421441 | 73.1725398 | 73.0258374 | 76.9311067 |
| 74.3734324 | 70.9289015 | 68.421441 | 70.1725398 | 72.6258374 | 76.9311067 |
| 74.3734324 | 68.9289015 | 68.421441 | 70.1725398 | 72.3258374 | 76.9311067 |
| 75.3734324 | 66.9289015 | 68.421441 | 70.1725398 | 72.3258374 | 76.9311067 |
| 75.3734324 | 65.9289015 | 68.421441 | 70.1725398 | 72.7258374 | 75.9311067 |
| 75.3734324 | 64.9289015 | 68.421441 | 70.1725398 | 73.1258374 | 75.9311067 |
| 74.3734324 | 65.9289015 | 68.421441 | 70.1725398 | 73.5258374 | 81.9311067 |
| 74.3734324 | 67.9289015 | 68.421441 | 68.1725398 | 73.8258374 | 81.9311067 |
| 74.3734324 | 67.9289015 | 69.421441 | 67.1725398 | 73.9258374 | 80.9311067 |
| 74.3734324 | 70.9289015 | 69.421441 | 67.1725398 | 74.0258374 | 79.9311067 |
| 74.3734324 | 73.9289015 | 69.421441 | 66.1725398 | 74.1258374 | 78.9311067 |
| 74.3734324 | 75.9289015 | 70.421441 | 65.1725398 | 74.4258374 | 78.9311067 |
| 74.3734324 | 75.9289015 | 70.421441 | 66.1725398 | 74.7258374 | 77.9311067 |
| 74.3734324 | 74.9289015 | 69.421441 | 67.1725398 | 75.0258374 | 76.9311067 |

|            |            |           |            |            |            |
|------------|------------|-----------|------------|------------|------------|
| 69.3734324 | 72.9289015 | 68.421441 | 68.1725398 | 74.1258374 | 75.9311067 |
| 66.3734324 | 72.9289015 | 68.421441 | 69.1725398 | 73.9258374 | 75.9311067 |
| 65.3734324 | 70.9289015 | 65.421441 | 72.1725398 | 74.3258374 | 74.9311067 |
| 65.3734324 | 69.9289015 | 64.421441 | 73.1725398 | 74.1258374 | 74.9311067 |
| 65.3734324 | 69.9289015 | 63.421441 | 73.1725398 | 74.0258374 | 74.9311067 |
| 65.3734324 | 69.9289015 | 63.421441 | 73.1725398 | 74.0258374 | 74.9311067 |
| 65.3734324 | 72.9289015 | 63.421441 | 72.1725398 | 74.1258374 | 71.9311067 |
| 65.3734324 | 72.9289015 | 65.421441 | 73.1725398 | 74.3258374 | 70.9311067 |
| 65.3734324 | 73.9289015 | 66.421441 | 74.1725398 | 74.0258374 | 68.9311067 |
| 65.3734324 | 72.9289015 | 67.421441 | 74.1725398 | 73.8258374 | 68.9311067 |
| 65.3734324 | 71.9289015 | 67.421441 | 75.1725398 | 73.3258374 | 67.9311067 |
| 66.3734324 | 70.9289015 | 67.421441 | 74.1725398 | 72.8258374 | 67.9311067 |
| 66.3734324 | 68.9289015 | 67.421441 | 74.1725398 | 71.6258374 | 67.9311067 |
| 66.3734324 | 68.9289015 | 66.421441 | 72.1725398 | 70.7258374 | 67.9311067 |
| 68.3734324 | 67.9289015 | 66.421441 | 72.1725398 | 70.9258374 | 67.9311067 |
| 72.3734324 | 67.9289015 | 65.421441 | 72.1725398 | 81.928496  | 65.9311067 |
| 72.3734324 | 66.9289015 | 63.421441 | 69.1725398 | 81.928496  | 65.9311067 |
| 73.3734324 | 66.9289015 | 65.421441 | 70.1725398 | 81.928496  | 64.9311067 |
| 74.3734324 | 65.9289015 | 65.421441 | 70.1725398 | 81.928496  | 64.9311067 |
| 74.3734324 | 65.9289015 | 65.421441 | 69.1725398 | 73.928496  | 64.9311067 |
| 74.3734324 | 65.9289015 | 65.421441 | 68.1725398 | 73.928496  | 64.9311067 |
| 74.3734324 | 65.9289015 | 65.421441 | 68.1725398 | 69.928496  | 65.9311067 |
| 74.3734324 | 68.9289015 | 66.421441 | 68.1725398 | 67.928496  | 65.9311067 |
| 75.3734324 | 76.9289015 | 68.421441 | 68.1725398 | 66.928496  | 65.9311067 |
| 77.3734324 | 78.9289015 | 70.421441 | 68.1725398 | 65.928496  | 65.9311067 |
| 77.3734324 | 79.9289015 | 70.421441 | 66.1725398 | 65.928496  | 65.9311067 |
| 77.3734324 | 79.9289015 | 70.421441 | 65.1725398 | 67.928496  | 65.9311067 |
| 77.3734324 | 80.9289015 | 71.421441 | 65.1725398 | 68.928496  | 66.9311067 |
| 76.3734324 | 79.9289015 | 72.421441 | 66.1725398 | 70.928496  | 66.9311067 |
| 75.3734324 | 78.9289015 | 74.421441 | 65.1725398 | 71.928496  | 66.9311067 |
| 71.3734324 | 76.9289015 | 77.421441 | 65.1725398 | 71.928496  | 66.9311067 |
| 71.3734324 | 74.9289015 | 79.421441 | 65.1725398 | 69.928496  | 66.9311067 |
| 71.3734324 | 72.9289015 | 79.421441 | 66.1725398 | 67.928496  | 69.9311067 |
| 71.3734324 | 71.9289015 | 79.421441 | 66.1725398 | 66.928496  | 69.9311067 |
| 71.3734324 | 71.9289015 | 79.421441 | 68.1725398 | 66.928496  | 69.9311067 |
| 71.3734324 | 71.9289015 | 79.421441 | 68.1725398 | 65.928496  | 69.9311067 |
| 70.3734324 | 71.9289015 | 77.421441 | 68.1725398 | 65.928496  | 69.9311067 |
| 70.3734324 | 71.9289015 | 76.421441 | 68.1725398 | 66.928496  | 70.9311067 |
| 68.3734324 | 71.9289015 | 76.421441 | 68.1725398 | 69.928496  | 70.9311067 |
| 67.3734324 | 71.9289015 | 72.421441 | 68.1725398 | 70.928496  | 77.9311067 |
| 67.3734324 | 71.9289015 | 70.421441 | 73.1725398 | 70.928496  | 76.9311067 |
| 67.3734324 | 71.9289015 | 69.421441 | 74.1725398 | 68.928496  | 76.9311067 |
| 66.3734324 | 70.9289015 | 69.421441 | 74.1725398 | 65.928496  | 77.9311067 |
| 66.3734324 | 69.9289015 | 69.421441 | 72.1725398 | 64.928496  | 77.9311067 |
| 66.3734324 | 69.9289015 | 69.421441 | 72.1725398 | 64.928496  | 78.9311067 |

|            |            |           |            |           |            |
|------------|------------|-----------|------------|-----------|------------|
| 66.3734324 | 68.9289015 | 70.421441 | 69.1725398 | 66.928496 | 78.9311067 |
| 66.3734324 | 69.9289015 | 71.421441 | 68.1725398 | 67.928496 | 77.9311067 |
| 66.3734324 | 69.9289015 | 71.421441 | 68.1725398 | 68.928496 | 76.9311067 |
| 66.3734324 | 69.9289015 | 72.421441 | 70.1725398 | 68.928496 | 76.9311067 |
| 66.3734324 | 69.9289015 | 72.421441 | 72.1725398 | 68.928496 | 77.9311067 |
| 66.3734324 | 69.9289015 | 71.421441 | 74.1725398 | 67.928496 | 78.9311067 |
| 66.3734324 | 68.9289015 | 69.421441 | 74.1725398 | 67.928496 | 79.9311067 |
| 68.3734324 | 68.9289015 | 69.421441 | 74.1725398 | 68.928496 | 79.9311067 |
| 68.3734324 | 67.9289015 | 68.421441 | 72.1725398 | 69.928496 | 79.9311067 |
| 68.3734324 | 66.9289015 | 69.421441 | 70.1725398 | 71.928496 | 80.9311067 |
| 70.3734324 | 66.9289015 | 69.421441 | 69.1725398 | 72.928496 | 82.9311067 |
| 70.3734324 | 66.9289015 | 69.421441 | 69.1725398 | 72.928496 | 84.9311067 |
| 70.3734324 | 67.9289015 | 69.421441 | 70.1725398 | 72.928496 | 84.9311067 |
| 70.3734324 | 67.9289015 | 67.421441 | 71.1725398 | 72.928496 | 85.9311067 |
| 70.3734324 | 67.9289015 | 67.421441 | 71.1725398 | 72.928496 | 85.9311067 |
| 69.3734324 | 67.9289015 | 67.421441 | 70.1725398 | 71.928496 | 73.4258374 |
| 70.3734324 | 67.9289015 | 66.421441 | 69.1725398 | 70.928496 | 73.4258374 |
| 70.3734324 | 67.9289015 | 67.421441 | 68.1725398 | 68.928496 | 85.9311067 |
| 70.3734324 | 67.9289015 | 68.421441 | 68.1725398 | 67.928496 | 85.9311067 |
| 70.3734324 | 67.9289015 | 68.421441 | 68.1725398 | 67.928496 | 85.9311067 |
| 70.3734324 | 67.9289015 | 68.421441 | 68.1725398 | 66.928496 | 72.3258374 |
| 70.3734324 | 67.9289015 | 69.421441 | 68.1725398 | 66.928496 | 72.6258374 |
| 70.3734324 | 68.9289015 | 69.421441 | 68.1725398 | 66.928496 | 73.6258374 |
| 72.3734324 | 69.9289015 | 69.421441 | 68.1725398 | 66.928496 | 73.8258374 |
| 72.3734324 | 69.9289015 | 70.421441 | 68.1725398 | 67.928496 | 74.1258374 |
| 73.3734324 | 68.9289015 | 70.421441 | 68.1725398 | 67.928496 | 74.0258374 |
| 74.3734324 | 68.9289015 | 70.421441 | 69.1725398 | 68.928496 | 74.3258374 |
| 76.3734324 | 68.9289015 | 71.421441 | 69.1725398 | 68.928496 | 74.6258374 |
| 76.3734324 | 68.9289015 | 71.421441 | 70.1725398 | 70.928496 | 74.9258374 |
| 78.3734324 | 68.9289015 | 71.421441 | 70.1725398 | 71.928496 | 75.1258374 |
| 78.3734324 | 68.9289015 | 70.421441 | 70.1725398 | 71.928496 | 75.4258374 |
| 78.3734324 | 68.9289015 | 70.421441 | 69.1725398 | 69.928496 | 75.0258374 |
| 78.3734324 | 68.9289015 | 70.421441 | 69.1725398 | 69.928496 | 74.5258374 |
| 79.3734324 | 68.9289015 | 70.421441 | 70.1725398 | 67.928496 | 74.3258374 |
| 79.3734324 | 67.9289015 | 71.421441 | 73.1725398 | 66.928496 | 74.5258374 |
| 80.3734324 | 67.9289015 | 71.421441 | 73.1725398 | 66.928496 | 74.4258374 |
| 79.3734324 | 67.9289015 | 71.421441 | 76.1725398 | 67.928496 | 74.5258374 |
| 78.3734324 | 67.9289015 | 71.421441 | 76.1725398 | 68.928496 | 74.3258374 |
| 78.3734324 | 67.9289015 | 71.421441 | 76.1725398 | 68.928496 | 74.0258374 |
| 78.3734324 | 67.9289015 | 71.421441 | 77.1725398 | 68.928496 | 74.0258374 |
| 79.3734324 | 68.9289015 | 71.421441 | 77.1725398 | 68.928496 | 74.2258374 |
| 79.3734324 | 71.9289015 | 71.421441 | 77.1725398 | 68.928496 | 74.8258374 |
| 79.3734324 | 72.9289015 | 71.421441 | 77.1725398 | 67.928496 | 74.8258374 |
| 79.3734324 | 75.9289015 | 71.421441 | 77.1725398 | 67.928496 | 75.2258374 |
| 77.3734324 | 75.9289015 | 72.421441 | 76.1725398 | 67.928496 | 75.1258374 |

|            |            |           |            |           |            |
|------------|------------|-----------|------------|-----------|------------|
| 76.3734324 | 75.9289015 | 72.421441 | 77.1725398 | 67.928496 | 75.1258374 |
| 76.3734324 | 71.9289015 | 72.421441 | 79.1725398 | 68.928496 | 75.2258374 |
| 74.3734324 | 71.9289015 | 72.421441 | 79.1725398 | 68.928496 | 74.9258374 |
| 74.3734324 | 72.9289015 | 72.421441 | 79.1725398 | 68.928496 | 74.7258374 |
| 73.3734324 | 72.9289015 | 72.421441 | 80.1725398 | 68.928496 | 74.7258374 |
| 73.3734324 | 73.9289015 | 71.421441 | 78.1725398 | 78.928496 | 75.5258374 |
| 73.3734324 | 72.9289015 | 71.421441 | 74.1725398 | 79.928496 | 75.3258374 |
| 73.3734324 | 71.9289015 | 71.421441 | 70.1725398 | 79.928496 | 74.7258374 |
| 73.3734324 | 69.9289015 | 69.421441 | 70.1725398 | 76.928496 | 74.0258374 |
| 73.3734324 | 68.9289015 | 69.421441 | 71.1725398 | 74.928496 | 73.9258374 |
| 73.3734324 | 67.9289015 | 69.421441 | 73.1725398 | 73.928496 | 73.6258374 |
| 73.3734324 | 67.9289015 | 68.421441 | 75.1725398 | 72.928496 | 73.7258374 |
| 74.3734324 | 67.9289015 | 68.421441 | 76.1725398 | 72.928496 | 74.3258374 |
| 75.3734324 | 67.9289015 | 68.421441 | 76.1725398 | 72.928496 | 74.3258374 |
| 75.3734324 | 67.9289015 | 68.421441 | 75.1725398 | 73.928496 | 74.3258374 |
| 77.3734324 | 66.9289015 | 69.421441 | 74.1725398 | 74.928496 | 74.4258374 |
| 77.3734324 | 66.9289015 | 70.421441 | 73.1725398 | 76.928496 | 74.5258374 |
| 77.3734324 | 66.9289015 | 70.421441 | 73.1725398 | 78.928496 | 74.5258374 |
| 77.3734324 | 66.9289015 | 70.421441 | 73.1725398 | 80.928496 | 74.6258374 |
| 77.3734324 | 67.9289015 | 70.421441 | 73.1725398 | 81.928496 | 78.9311067 |
| 76.3734324 | 67.9289015 | 71.421441 | 74.1725398 | 81.928496 | 74.9311067 |
| 76.3734324 | 67.9289015 | 70.421441 | 74.1725398 | 84.928496 | 74.9311067 |
| 76.3734324 | 67.9289015 | 71.421441 | 74.1725398 | 84.928496 | 74.9311067 |
| 76.3734324 | 67.9289015 | 71.421441 | 74.1725398 | 84.928496 | 74.9311067 |
| 74.3734324 | 67.9289015 | 71.421441 | 69.1725398 | 83.928496 | 74.9311067 |
| 74.3734324 | 69.9289015 | 70.421441 | 67.1725398 | 83.928496 | 74.9311067 |
| 73.3734324 | 68.9289015 | 70.421441 | 66.1725398 | 82.928496 | 74.9311067 |
| 71.3734324 | 68.9289015 | 70.421441 | 66.1725398 | 82.928496 | 74.9311067 |
| 70.3734324 | 68.9289015 | 70.421441 | 66.1725398 | 82.928496 | 74.9311067 |
| 69.3734324 | 68.9289015 | 70.421441 | 67.1725398 | 82.928496 | 72.9311067 |
| 69.3734324 | 68.9289015 | 70.421441 | 67.1725398 | 82.928496 | 66.9311067 |
| 69.3734324 | 70.9289015 | 71.421441 | 67.1725398 | 77.928496 | 66.9311067 |
| 69.3734324 | 71.9289015 | 71.421441 | 67.1725398 | 76.928496 | 59.9311067 |
| 69.3734324 | 71.9289015 | 72.421441 | 67.1725398 | 74.928496 | 59.9311067 |
| 69.3734324 | 71.9289015 | 72.421441 | 66.1725398 | 73.928496 | 59.9311067 |
| 69.3734324 | 71.9289015 | 73.421441 | 66.1725398 | 73.928496 | 59.9311067 |
| 70.3734324 | 71.9289015 | 73.421441 | 66.1725398 | 73.928496 | 58.9311067 |
| 70.3734324 | 71.9289015 | 74.421441 | 66.1725398 | 73.928496 | 58.9311067 |
| 70.3734324 | 72.9289015 | 73.421441 | 66.1725398 | 75.928496 | 57.9311067 |
| 73.3734324 | 72.9289015 | 71.421441 | 68.1725398 | 78.928496 | 57.9311067 |
| 74.3734324 | 72.9289015 | 70.421441 | 68.1725398 | 80.928496 | 58.9311067 |
| 74.3734324 | 72.9289015 | 70.421441 | 70.1725398 | 81.928496 | 61.9311067 |
| 74.3734324 | 72.9289015 | 70.421441 | 71.1725398 | 81.928496 | 63.9311067 |
| 73.3734324 | 72.9289015 | 68.421441 | 74.1725398 | 82.928496 | 63.9311067 |
| 72.3734324 | 76.9289015 | 60.421441 | 76.1725398 | 82.928496 | 63.9311067 |



|            |            |           |            |           |            |
|------------|------------|-----------|------------|-----------|------------|
| 71.3734324 | 78.9289015 | 60.421441 | 76.1725398 | 81.928496 | 64.9311067 |
| 71.3734324 | 78.9289015 | 60.421441 | 75.1725398 | 80.928496 | 66.9311067 |
| 71.3734324 | 78.9289015 | 58.421441 | 71.1725398 | 78.928496 | 67.9311067 |
| 68.3734324 | 79.9289015 | 58.421441 | 70.1725398 | 71.928496 | 68.9311067 |
| 68.3734324 | 79.9289015 | 56.421441 | 71.1725398 | 71.928496 | 68.9311067 |
| 68.3734324 | 79.9289015 | 56.421441 | 72.1725398 | 66.928496 | 69.9311067 |
| 67.3734324 | 79.9289015 | 55.421441 | 74.1725398 | 66.928496 | 69.9311067 |
| 67.3734324 | 79.9289015 | 55.421441 | 75.1725398 | 66.928496 | 69.9311067 |
| 67.3734324 | 76.9289015 | 54.421441 | 75.1725398 | 66.928496 | 70.9311067 |
| 67.3734324 | 76.9289015 | 53.421441 | 77.1725398 | 67.928496 | 72.9311067 |
| 67.3734324 | 74.9289015 | 53.421441 | 77.1725398 | 68.928496 | 72.9311067 |
| 67.3734324 | 73.9289015 | 52.421441 | 76.1725398 | 68.928496 | 72.9311067 |
| 69.3734324 | 72.9289015 | 52.421441 | 74.1725398 | 68.928496 | 72.9311067 |
| 69.3734324 | 71.9289015 | 53.421441 | 73.1725398 | 68.928496 | 72.9311067 |
| 69.3734324 | 71.9289015 | 55.421441 | 70.1725398 | 67.928496 | 72.9311067 |
| 69.3734324 | 71.9289015 | 59.421441 | 69.1725398 | 66.928496 | 72.9311067 |
| 69.3734324 | 70.9289015 | 59.421441 | 68.1725398 | 66.928496 | 72.9311067 |
| 69.3734324 | 69.9289015 | 59.421441 | 67.1725398 | 65.928496 | 72.9311067 |
| 70.3734324 | 69.9289015 | 60.421441 | 68.1725398 | 64.928496 | 72.9311067 |
| 71.3734324 | 70.9289015 | 60.421441 | 68.1725398 | 63.928496 | 71.9311067 |
| 71.3734324 | 70.9289015 | 60.421441 | 70.1725398 | 63.928496 | 70.9311067 |
| 71.3734324 | 70.9289015 | 60.421441 | 73.1725398 | 63.928496 | 69.9311067 |
| 71.3734324 | 71.9289015 | 61.421441 | 74.1725398 | 63.928496 | 69.9311067 |
| 75.3734324 | 69.9289015 | 64.421441 | 74.1725398 | 64.928496 | 68.9311067 |
| 75.3734324 | 69.9289015 | 65.421441 | 74.1725398 | 65.928496 | 68.9311067 |
| 76.3734324 | 70.9289015 | 65.421441 | 71.1725398 | 66.928496 | 68.9311067 |
| 76.3734324 | 70.9289015 | 70.421441 | 71.1725398 | 66.928496 | 68.9311067 |
| 75.3734324 | 70.9289015 | 71.421441 | 68.1725398 | 67.928496 | 68.9311067 |
| 71.3734324 | 70.9289015 | 73.421441 | 67.1725398 | 70.928496 | 68.9311067 |
| 71.3734324 | 70.9289015 | 73.421441 | 68.1725398 | 73.928496 | 69.9311067 |
| 71.3734324 | 72.9289015 | 73.421441 | 71.1725398 | 74.928496 | 70.9311067 |
| 72.3734324 | 72.9289015 | 73.421441 | 76.1725398 | 74.928496 | 70.9311067 |
| 72.3734324 | 72.9289015 | 73.421441 | 76.1725398 | 74.928496 | 70.9311067 |
| 72.3734324 | 72.9289015 | 65.421441 | 75.1725398 | 73.928496 | 74.9311067 |
| 72.3734324 | 72.9289015 | 64.421441 | 72.1725398 | 73.928496 | 76.9311067 |
| 72.3734324 | 72.9289015 | 64.421441 | 72.1725398 | 73.928496 | 79.9311067 |
| 71.3734324 | 72.9289015 | 64.421441 | 69.1725398 | 73.928496 | 83.9311067 |
| 71.3734324 | 71.9289015 | 64.421441 | 66.1725398 | 73.928496 | 83.9311067 |
| 71.3734324 | 71.9289015 | 64.421441 | 64.1725398 | 73.928496 | 72.2258374 |
| 71.3734324 | 68.9289015 | 64.421441 | 64.1725398 | 73.928496 | 83.9311067 |
| 71.3734324 | 66.9289015 | 64.421441 | 64.1725398 | 73.928496 | 83.9311067 |
| 71.3734324 | 65.9289015 | 64.421441 | 66.1725398 | 73.928496 | 83.9311067 |
| 71.3734324 | 65.9289015 | 64.421441 | 66.1725398 | 73.928496 | 82.9311067 |
| 71.3734324 | 65.9289015 | 64.421441 | 67.1725398 | 74.928496 | 81.9311067 |
| 71.3734324 | 65.9289015 | 66.421441 | 69.1725398 | 74.928496 | 81.9311067 |

|            |            |           |            |            |            |
|------------|------------|-----------|------------|------------|------------|
| 71.3734324 | 65.9289015 | 66.421441 | 70.1725398 | 75.928496  | 81.9311067 |
| 71.3734324 | 65.9289015 | 67.421441 | 70.1725398 | 75.928496  | 84.9311067 |
| 71.3734324 | 66.9289015 | 68.421441 | 71.1725398 | 76.928496  | 72.8258374 |
| 69.3734324 | 70.9289015 | 68.421441 | 70.1725398 | 77.928496  | 85.9311067 |
| 67.3734324 | 72.9289015 | 70.421441 | 65.1725398 | 77.928496  | 85.9311067 |
| 67.3734324 | 71.9289015 | 71.421441 | 65.1725398 | 77.928496  | 83.9311067 |
| 65.3734324 | 71.9289015 | 71.421441 | 65.1725398 | 77.928496  | 82.9311067 |
| 64.3734324 | 71.9289015 | 71.421441 | 65.1725398 | 81.928496  | 82.9311067 |
| 65.3734324 | 71.9289015 | 73.421441 | 67.1725398 | 84.928496  | 80.9311067 |
| 66.3734324 | 71.9289015 | 73.421441 | 70.1725398 | 84.928496  | 77.9311067 |
| 66.3734324 | 70.9289015 | 73.421441 | 70.1725398 | 84.928496  | 71.9311067 |
| 66.3734324 | 71.9289015 | 73.421441 | 70.1725398 | 71.8258374 | 69.9311067 |
| 67.3734324 | 71.9289015 | 73.421441 | 70.1725398 | 71.5258374 | 68.9311067 |
| 67.3734324 | 68.9289015 | 73.421441 | 70.1725398 | 71.4258374 | 68.9311067 |
| 70.3734324 | 67.9289015 | 73.421441 | 71.1725398 | 71.6258374 | 66.9311067 |
| 71.3734324 | 67.9289015 | 73.421441 | 73.1725398 | 71.8258374 | 66.9311067 |
| 71.3734324 | 67.9289015 | 73.421441 | 75.1725398 | 72.0258374 | 66.9311067 |
| 72.3734324 | 67.9289015 | 72.421441 | 76.1725398 | 71.9258374 | 66.9311067 |
| 72.3734324 | 67.9289015 | 72.421441 | 72.1725398 | 81.928496  | 65.9311067 |
| 71.3734324 | 65.9289015 | 72.421441 | 70.1725398 | 80.928496  | 64.9311067 |
| 71.3734324 | 65.9289015 | 71.421441 | 68.1725398 | 78.928496  | 63.9311067 |
| 71.3734324 | 64.9289015 | 70.421441 | 68.1725398 | 73.928496  | 63.9311067 |
| 71.3734324 | 64.9289015 | 69.421441 | 68.1725398 | 70.928496  | 63.9311067 |
| 70.3734324 | 64.9289015 | 69.421441 | 69.1725398 | 69.928496  | 62.9311067 |
| 70.3734324 | 63.9289015 | 69.421441 | 69.1725398 | 68.928496  | 62.9311067 |
| 69.3734324 | 63.9289015 | 69.421441 | 69.1725398 | 68.928496  | 62.9311067 |
| 69.3734324 | 63.9289015 | 69.421441 | 68.1725398 | 68.928496  | 60.9311067 |
| 69.3734324 | 62.9289015 | 69.421441 | 68.1725398 | 68.928496  | 60.9311067 |
| 70.3734324 | 61.9289015 | 69.421441 | 68.1725398 | 69.928496  | 62.9311067 |
| 70.3734324 | 61.9289015 | 69.421441 | 68.1725398 | 69.928496  | 63.9311067 |
| 70.3734324 | 57.9289015 | 69.421441 | 69.1725398 | 68.928496  | 66.9311067 |
| 70.3734324 | 55.9289015 | 69.421441 | 70.1725398 | 67.928496  | 67.9311067 |
| 71.3734324 | 55.9289015 | 69.421441 | 70.1725398 | 67.928496  | 68.9311067 |
| 71.3734324 | 54.9289015 | 69.421441 | 70.1725398 | 65.928496  | 69.9311067 |
| 75.3734324 | 54.9289015 | 71.421441 | 68.1725398 | 65.928496  | 69.9311067 |
| 76.3734324 | 54.9289015 | 71.421441 | 66.1725398 | 68.928496  | 71.9311067 |
| 76.3734324 | 54.9289015 | 72.421441 | 66.1725398 | 68.928496  | 74.9311067 |
| 77.3734324 | 55.9289015 | 72.421441 | 66.1725398 | 75.928496  | 74.9311067 |
| 77.3734324 | 57.9289015 | 72.421441 | 67.1725398 | 77.928496  | 75.9311067 |
| 77.3734324 | 58.9289015 | 72.421441 | 69.1725398 | 77.928496  | 76.9311067 |
| 77.3734324 | 58.9289015 | 72.421441 | 69.1725398 | 77.928496  | 76.9311067 |
| 77.3734324 | 58.9289015 | 72.421441 | 69.1725398 | 77.928496  | 76.9311067 |
| 77.3734324 | 60.9289015 | 73.421441 | 69.1725398 | 73.928496  | 79.9311067 |
| 77.3734324 | 60.9289015 | 73.421441 | 70.1725398 | 72.928496  | 79.9311067 |
| 77.3734324 | 60.9289015 | 73.421441 | 70.1725398 | 70.928496  | 78.9311067 |

|            |            |           |            |           |            |
|------------|------------|-----------|------------|-----------|------------|
| 70.3734324 | 59.9289015 | 73.421441 | 69.1725398 | 67.928496 | 78.9311067 |
| 70.3734324 | 59.9289015 | 71.421441 | 68.1725398 | 65.928496 | 78.9311067 |
| 70.3734324 | 59.9289015 | 69.421441 | 68.1725398 | 65.928496 | 79.9311067 |
| 73.3734324 | 65.9289015 | 69.421441 | 67.1725398 | 66.928496 | 79.9311067 |
| 73.3734324 | 66.9289015 | 69.421441 | 67.1725398 | 67.928496 | 79.9311067 |
| 73.3734324 | 66.9289015 | 67.421441 | 66.1725398 | 68.928496 | 79.9311067 |
| 73.3734324 | 65.9289015 | 66.421441 | 67.1725398 | 67.928496 | 79.9311067 |
| 72.3734324 | 65.9289015 | 66.421441 | 68.1725398 | 65.928496 | 78.9311067 |
| 72.3734324 | 65.9289015 | 66.421441 | 74.1725398 | 64.928496 | 78.9311067 |
| 72.3734324 | 65.9289015 | 65.421441 | 75.1725398 | 64.928496 | 81.9311067 |
| 72.3734324 | 65.9289015 | 65.421441 | 75.1725398 | 65.928496 | 71.1258374 |
| 71.3734324 | 65.9289015 | 65.421441 | 75.1725398 | 65.928496 | 71.1258374 |
| 70.3734324 | 65.9289015 | 63.421441 | 75.1725398 | 66.928496 | 70.7258374 |
| 68.3734324 | 66.9289015 | 62.421441 | 71.1725398 | 66.928496 | 69.8258374 |
| 68.3734324 | 66.9289015 | 60.421441 | 70.1725398 | 64.928496 | 77.9311067 |
| 68.3734324 | 66.9289015 | 68.421441 | 70.1725398 | 62.928496 | 76.9311067 |
| 68.3734324 | 66.9289015 | 68.421441 | 71.1725398 | 62.928496 | 76.9311067 |
| 68.3734324 | 67.9289015 | 69.421441 | 73.1725398 | 61.928496 | 75.9311067 |
| 68.3734324 | 67.9289015 | 69.421441 | 75.1725398 | 61.928496 | 75.9311067 |
| 68.3734324 | 68.9289015 | 69.421441 | 75.1725398 | 60.928496 | 74.9311067 |
| 68.3734324 | 69.9289015 | 69.421441 | 75.1725398 | 59.928496 | 74.9311067 |
| 67.3734324 | 69.9289015 | 69.421441 | 74.1725398 | 60.928496 | 74.9311067 |
| 69.3734324 | 69.9289015 | 69.421441 | 73.1725398 | 60.928496 | 74.9311067 |
| 68.3734324 | 68.9289015 | 69.421441 | 70.1725398 | 62.928496 | 74.9311067 |
| 68.3734324 | 68.9289015 | 69.421441 | 69.1725398 | 63.928496 | 75.9311067 |
| 68.3734324 | 68.9289015 | 70.421441 | 68.1725398 | 64.928496 | 75.9311067 |
| 68.3734324 | 68.9289015 | 70.421441 | 68.1725398 | 64.928496 | 76.9311067 |
| 68.3734324 | 68.9289015 | 71.421441 | 68.1725398 | 64.928496 | 76.9311067 |
| 68.3734324 | 66.9289015 | 71.421441 | 68.1725398 | 64.928496 | 76.9311067 |
| 69.3734324 | 65.9289015 | 71.421441 | 71.1725398 | 65.928496 | 77.9311067 |
| 69.3734324 | 65.9289015 | 71.421441 | 72.1725398 | 66.928496 | 78.9311067 |
| 69.3734324 | 65.9289015 | 70.421441 | 72.1725398 | 67.928496 | 76.9311067 |
| 69.3734324 | 65.9289015 | 69.421441 | 72.1725398 | 68.928496 | 75.9311067 |
| 69.3734324 | 65.9289015 | 69.421441 | 72.1725398 | 68.928496 | 76.9311067 |
| 69.3734324 | 65.9289015 | 69.421441 | 72.1725398 | 68.928496 | 78.9311067 |
| 70.3734324 | 65.9289015 | 70.421441 | 71.1725398 | 68.928496 | 79.9311067 |
| 71.3734324 | 65.9289015 | 70.421441 | 73.1725398 | 68.928496 | 81.9311067 |
| 71.3734324 | 66.9289015 | 69.421441 | 74.1725398 | 68.928496 | 83.9311067 |
| 72.3734324 | 66.9289015 | 68.421441 | 75.1725398 | 76.928496 | 83.9311067 |
| 72.3734324 | 68.9289015 | 68.421441 | 75.1725398 | 80.928496 | 83.9311067 |
| 72.3734324 | 68.9289015 | 68.421441 | 75.1725398 | 82.928496 | 83.9311067 |
| 72.3734324 | 68.9289015 | 68.421441 | 74.1725398 | 82.928496 | 83.9311067 |
| 72.3734324 | 68.9289015 | 68.421441 | 72.1725398 | 82.928496 | 83.9311067 |
| 72.3734324 | 68.9289015 | 68.421441 | 72.1725398 | 79.928496 | 80.9311067 |
| 71.3734324 | 68.9289015 | 71.421441 | 72.1725398 | 78.928496 | 73.9311067 |

|            |            |           |            |           |            |
|------------|------------|-----------|------------|-----------|------------|
| 71.3734324 | 68.9289015 | 71.421441 | 72.1725398 | 77.928496 | 72.9311067 |
| 71.3734324 | 68.9289015 | 71.421441 | 72.1725398 | 75.928496 | 72.9311067 |
| 71.3734324 | 68.9289015 | 71.421441 | 71.1725398 | 72.928496 | 73.9311067 |
| 71.3734324 | 70.9289015 | 68.421441 | 69.1725398 | 72.928496 | 76.9311067 |
| 71.3734324 | 69.9289015 | 67.421441 | 69.1725398 | 70.928496 | 76.9311067 |
| 71.3734324 | 69.9289015 | 67.421441 | 69.1725398 | 70.928496 | 76.9311067 |
| 69.3734324 | 70.9289015 | 67.421441 | 69.1725398 | 68.928496 | 76.9311067 |
| 75.3258374 | 72.9289015 | 67.421441 | 70.1725398 | 67.928496 | 75.9311067 |
| 77.0258374 | 72.9289015 | 67.421441 | 70.1725398 | 66.928496 | 75.9311067 |
| 77.9258374 | 72.9289015 | 67.421441 | 70.1725398 | 65.928496 | 75.9311067 |
| 75.7258374 | 71.9289015 | 67.421441 | 70.1725398 | 64.928496 | 75.9311067 |
| 75.1258374 | 68.9289015 | 66.421441 | 70.1725398 | 64.928496 | 74.9311067 |
| 74.3258374 | 67.9289015 | 66.421441 | 70.1725398 | 64.928496 | 73.9311067 |
| 74.6258374 | 67.9289015 | 71.421441 | 71.1725398 | 64.928496 | 73.9311067 |
| 74.3258374 | 66.9289015 | 71.421441 | 73.1725398 | 64.928496 | 73.9311067 |
| 86.3734324 | 65.9289015 | 69.421441 | 74.1725398 | 64.928496 | 73.9311067 |
| 84.3734324 | 64.9289015 | 69.421441 | 74.1725398 | 64.928496 | 73.9311067 |
| 84.3734324 | 62.9289015 | 69.421441 | 74.1725398 | 65.928496 | 75.9311067 |
| 81.3734324 | 61.9289015 | 69.421441 | 73.1725398 | 66.928496 | 77.9311067 |
| 77.3734324 | 61.9289015 | 67.421441 | 72.1725398 | 67.928496 | 77.9311067 |
| 77.3734324 | 60.9289015 | 65.421441 | 70.1725398 | 69.928496 | 76.9311067 |
| 76.3734324 | 60.9289015 | 65.421441 | 69.1725398 | 69.928496 | 75.9311067 |
| 75.3734324 | 60.9289015 | 65.421441 | 70.1725398 | 70.928496 | 75.9311067 |
| 75.3734324 | 59.9289015 | 67.421441 | 70.1725398 | 70.928496 | 74.9311067 |
| 74.3734324 | 59.9289015 | 68.421441 | 71.1725398 | 65.928496 | 67.9311067 |
| 75.3734324 | 58.9289015 | 69.421441 | 76.1725398 | 65.928496 | 64.9311067 |
| 75.3734324 | 57.9289015 | 69.421441 | 76.1725398 | 63.928496 | 64.9311067 |
| 76.3734324 | 57.9289015 | 69.421441 | 77.1725398 | 63.928496 | 63.9311067 |
| 77.3734324 | 57.9289015 | 70.421441 | 77.1725398 | 62.928496 | 64.9311067 |
| 79.3734324 | 57.9289015 | 69.421441 | 74.1725398 | 62.928496 | 66.9311067 |
| 79.3734324 | 57.9289015 | 69.421441 | 72.1725398 | 62.928496 | 66.9311067 |
| 79.3734324 | 64.9289015 | 71.421441 | 72.1725398 | 64.928496 | 66.9311067 |
| 79.3734324 | 66.9289015 | 77.421441 | 69.1725398 | 67.928496 | 67.9311067 |
| 79.3734324 | 68.9289015 | 80.421441 | 70.1725398 | 68.928496 | 67.9311067 |
| 79.3734324 | 70.9289015 | 80.421441 | 70.1725398 | 67.928496 | 66.9311067 |
| 79.3734324 | 71.9289015 | 81.421441 | 71.1725398 | 67.928496 | 66.9311067 |
| 79.3734324 | 71.9289015 | 72.421441 | 70.1725398 | 67.928496 | 65.9311067 |
| 80.3734324 | 71.9289015 | 68.421441 | 69.1725398 | 67.928496 | 65.9311067 |
| 80.3734324 | 69.9289015 | 67.421441 | 69.1725398 | 67.928496 | 65.9311067 |
| 80.3734324 | 68.9289015 | 67.421441 | 67.1725398 | 67.928496 | 65.9311067 |
| 81.3734324 | 67.9289015 | 69.421441 | 67.1725398 | 65.928496 | 65.9311067 |
| 81.3734324 | 67.9289015 | 71.421441 | 66.1725398 | 64.928496 | 65.9311067 |
| 81.3734324 | 67.9289015 | 71.421441 | 66.1725398 | 64.928496 | 65.9311067 |
| 81.3734324 | 67.9289015 | 72.421441 | 66.1725398 | 64.928496 | 65.9311067 |
| 83.3734324 | 67.9289015 | 72.421441 | 66.1725398 | 65.928496 | 65.9311067 |

|            |            |           |            |            |            |
|------------|------------|-----------|------------|------------|------------|
| 83.3734324 | 67.9289015 | 73.421441 | 66.1725398 | 65.928496  | 65.9311067 |
| 78.3734324 | 67.9289015 | 73.421441 | 66.1725398 | 66.928496  | 65.9311067 |
| 76.3734324 | 68.9289015 | 73.421441 | 66.1725398 | 66.928496  | 64.9311067 |
| 72.3734324 | 68.9289015 | 73.421441 | 66.1725398 | 66.928496  | 64.9311067 |
| 72.3734324 | 68.9289015 | 72.421441 | 68.1725398 | 66.928496  | 64.9311067 |
| 72.3734324 | 69.9289015 | 71.421441 | 68.1725398 | 66.928496  | 64.9311067 |
| 72.3734324 | 69.9289015 | 71.421441 | 68.1725398 | 67.928496  | 69.9311067 |
| 72.3734324 | 69.9289015 | 71.421441 | 69.1725398 | 72.928496  | 69.9311067 |
| 72.3734324 | 68.9289015 | 72.421441 | 70.1725398 | 72.928496  | 72.9311067 |
| 72.3734324 | 68.9289015 | 72.421441 | 70.1725398 | 78.928496  | 73.9311067 |
| 72.3734324 | 73.9289015 | 72.421441 | 72.1725398 | 79.928496  | 73.9311067 |
| 72.3734324 | 75.9289015 | 69.421441 | 71.1725398 | 78.928496  | 74.9311067 |
| 72.3734324 | 76.9289015 | 67.421441 | 69.1725398 | 78.928496  | 74.9311067 |
| 69.3734324 | 76.9289015 | 67.421441 | 68.1725398 | 78.928496  | 75.9311067 |
| 69.3734324 | 76.9289015 | 67.421441 | 68.1725398 | 78.928496  | 75.9311067 |
| 64.3734324 | 75.9289015 | 64.421441 | 67.1725398 | 78.928496  | 77.9311067 |
| 64.3734324 | 75.9289015 | 63.421441 | 67.1725398 | 78.928496  | 77.9311067 |
| 65.3734324 | 75.9289015 | 63.421441 | 67.1725398 | 79.928496  | 77.9311067 |
| 65.3734324 | 73.9289015 | 63.421441 | 67.1725398 | 79.928496  | 77.9311067 |
| 65.3734324 | 70.9289015 | 63.421441 | 68.1725398 | 80.928496  | 77.9311067 |
| 65.3734324 | 69.9289015 | 62.421441 | 67.1725398 | 80.928496  | 77.9311067 |
| 65.3734324 | 69.9289015 | 61.421441 | 66.1725398 | 80.928496  | 77.9311067 |
| 65.3734324 | 68.9289015 | 60.421441 | 67.1725398 | 80.928496  | 77.9311067 |
| 61.3734324 | 68.9289015 | 60.421441 | 67.1725398 | 80.928496  | 76.9311067 |
| 59.3734324 | 67.9289015 | 61.421441 | 69.1725398 | 81.928496  | 75.9311067 |
| 57.3734324 | 67.9289015 | 61.421441 | 70.1725398 | 71.0258374 | 75.9311067 |
| 57.3734324 | 66.9289015 | 62.421441 | 71.1725398 | 83.928496  | 75.9311067 |
| 54.3734324 | 65.9289015 | 62.421441 | 72.1725398 | 71.2258374 | 74.9311067 |
| 54.3734324 | 65.9289015 | 62.421441 | 73.1725398 | 71.3258374 | 74.9311067 |
| 54.3734324 | 65.9289015 | 62.421441 | 74.1725398 | 71.5258374 | 75.9311067 |
| 53.3734324 | 65.9289015 | 62.421441 | 74.1725398 | 71.8258374 | 75.9311067 |
| 53.3734324 | 65.9289015 | 62.421441 | 75.1725398 | 72.2258374 | 76.9311067 |
| 53.3734324 | 65.9289015 | 61.421441 | 76.1725398 | 72.2258374 | 75.9311067 |
| 53.3734324 | 66.9289015 | 62.421441 | 76.1725398 | 72.8258374 | 75.9311067 |
| 52.3734324 | 66.9289015 | 62.421441 | 76.1725398 | 72.4258374 | 74.9311067 |
| 51.3734324 | 66.9289015 | 62.421441 | 77.1725398 | 72.1258374 | 74.9311067 |
| 50.3734324 | 66.9289015 | 64.421441 | 77.1725398 | 71.8258374 | 74.9311067 |
| 50.3734324 | 70.9289015 | 65.421441 | 80.1725398 | 72.5258374 | 74.9311067 |
| 50.3734324 | 70.9289015 | 65.421441 | 82.1725398 | 72.4258374 | 73.9311067 |
| 50.3734324 | 71.9289015 | 65.421441 | 82.1725398 | 78.928496  | 69.9311067 |
| 49.3734324 | 72.9289015 | 73.421441 | 82.1725398 | 78.928496  | 67.9311067 |
| 49.3734324 | 72.9289015 | 75.421441 | 82.1725398 | 76.928496  | 67.9311067 |
| 50.3734324 | 72.9289015 | 76.421441 | 81.1725398 | 71.928496  | 66.9311067 |
| 51.3734324 | 72.9289015 | 77.421441 | 81.1725398 | 70.928496  | 65.9311067 |
| 54.3734324 | 71.9289015 | 77.421441 | 80.1725398 | 71.928496  | 59.9311067 |

|            |            |           |            |           |            |
|------------|------------|-----------|------------|-----------|------------|
| 54.3734324 | 71.9289015 | 77.421441 | 80.1725398 | 71.928496 | 57.9311067 |
| 55.3734324 | 70.9289015 | 77.421441 | 80.1725398 | 72.928496 | 57.9311067 |
| 62.3734324 | 69.9289015 | 79.421441 | 78.1725398 | 72.928496 | 57.9311067 |
| 62.3734324 | 70.9289015 | 78.421441 | 77.1725398 | 73.928496 | 57.9311067 |
| 62.3734324 | 71.9289015 | 78.421441 | 76.1725398 | 74.928496 | 56.9311067 |
| 63.3734324 | 72.9289015 | 77.421441 | 74.1725398 | 74.928496 | 56.9311067 |
| 64.3734324 | 72.9289015 | 77.421441 | 74.1725398 | 75.928496 | 56.9311067 |
| 64.3734324 | 72.9289015 | 76.421441 | 73.1725398 | 79.928496 | 56.9311067 |
| 64.3734324 | 71.9289015 | 75.421441 | 72.1725398 | 79.928496 | 56.9311067 |
| 63.3734324 | 70.9289015 | 75.421441 | 72.1725398 | 79.928496 | 54.9311067 |
| 63.3734324 | 70.9289015 | 75.421441 | 71.1725398 | 79.928496 | 54.9311067 |
| 63.3734324 | 70.9289015 | 75.421441 | 70.1725398 | 80.928496 | 54.9311067 |
| 64.3734324 | 70.9289015 | 75.421441 | 70.1725398 | 80.928496 | 54.9311067 |
| 64.3734324 | 70.9289015 | 75.421441 | 69.1725398 | 80.928496 | 54.9311067 |
| 64.3734324 | 72.9289015 | 75.421441 | 68.1725398 | 80.928496 | 61.9311067 |
| 65.3734324 | 73.9289015 | 75.421441 | 69.1725398 | 80.928496 | 63.9311067 |
| 66.3734324 | 73.9289015 | 75.421441 | 71.1725398 | 79.928496 | 64.9311067 |
| 66.3734324 | 74.9289015 | 75.421441 | 71.1725398 | 78.928496 | 64.9311067 |
| 69.3734324 | 74.9289015 | 75.421441 | 72.1725398 | 77.928496 | 64.9311067 |
| 69.3734324 | 73.9289015 | 75.421441 | 72.1725398 | 77.928496 | 64.9311067 |
| 69.3734324 | 71.9289015 | 75.421441 | 72.1725398 | 76.928496 | 65.9311067 |
| 70.3734324 | 71.9289015 | 75.421441 | 73.1725398 | 76.928496 | 66.9311067 |
| 69.3734324 | 71.9289015 | 75.421441 | 74.1725398 | 75.928496 | 66.9311067 |
| 69.3734324 | 71.9289015 | 75.421441 | 74.1725398 | 75.928496 | 66.9311067 |
| 69.3734324 | 73.9289015 | 79.421441 | 74.1725398 | 72.928496 | 70.9311067 |
| 68.3734324 | 73.9289015 | 79.421441 | 89.1725398 | 71.928496 | 71.9311067 |
| 68.3734324 | 74.9289015 | 82.421441 | 79.0258374 | 70.928496 | 71.9311067 |
| 71.3734324 | 73.9289015 | 82.421441 | 79.3258374 | 70.928496 | 72.9311067 |
| 71.3734324 | 72.9289015 | 84.421441 | 79.3258374 | 68.928496 | 71.9311067 |
| 71.3734324 | 70.9289015 | 84.421441 | 79.3258374 | 67.928496 | 71.9311067 |
| 72.3734324 | 68.9289015 | 84.421441 | 76.8258374 | 67.928496 | 71.9311067 |
| 72.3734324 | 66.9289015 | 83.421441 | 75.7258374 | 67.928496 | 71.9311067 |
| 72.3734324 | 66.9289015 | 83.421441 | 75.5258374 | 66.928496 | 72.9311067 |
| 72.3734324 | 66.9289015 | 80.421441 | 75.0258374 | 66.928496 | 72.9311067 |
| 72.3734324 | 66.9289015 | 80.421441 | 74.6258374 | 67.928496 | 72.9311067 |
| 71.3734324 | 68.9289015 | 80.421441 | 74.5258374 | 67.928496 | 72.9311067 |
| 70.3734324 | 68.9289015 | 80.421441 | 74.2258374 | 68.928496 | 69.9311067 |
| 68.3734324 | 70.9289015 | 79.421441 | 85.1725398 | 68.928496 | 67.9311067 |
| 68.3734324 | 70.9289015 | 79.421441 | 83.1725398 | 68.928496 | 67.9311067 |
| 68.3734324 | 70.9289015 | 79.421441 | 81.1725398 | 66.928496 | 67.9311067 |
| 68.3734324 | 70.9289015 | 78.421441 | 79.1725398 | 65.928496 | 67.9311067 |
| 68.3734324 | 69.9289015 | 73.421441 | 76.1725398 | 65.928496 | 67.9311067 |
| 68.3734324 | 69.9289015 | 68.421441 | 76.1725398 | 65.928496 | 67.9311067 |
| 68.3734324 | 69.9289015 | 68.421441 | 71.1725398 | 65.928496 | 69.9311067 |
| 67.3734324 | 69.9289015 | 68.421441 | 71.1725398 | 65.928496 | 69.9311067 |

|            |            |           |            |           |            |
|------------|------------|-----------|------------|-----------|------------|
| 67.3734324 | 69.9289015 | 68.421441 | 67.1725398 | 65.928496 | 69.9311067 |
| 68.3734324 | 69.9289015 | 68.421441 | 67.1725398 | 66.928496 | 70.9311067 |
| 71.3734324 | 69.9289015 | 68.421441 | 67.1725398 | 67.928496 | 71.9311067 |
| 71.3734324 | 67.9289015 | 69.421441 | 67.1725398 | 66.928496 | 72.9311067 |
| 72.3734324 | 66.9289015 | 69.421441 | 71.1725398 | 66.928496 | 73.9311067 |
| 72.3734324 | 66.9289015 | 69.421441 | 73.1725398 | 65.928496 | 75.9311067 |
| 72.3734324 | 67.9289015 | 69.421441 | 74.1725398 | 65.928496 | 79.9311067 |
| 72.3734324 | 67.9289015 | 70.421441 | 73.1725398 | 65.928496 | 80.9311067 |
| 70.3734324 | 69.9289015 | 72.421441 | 73.1725398 | 65.928496 | 81.9311067 |
| 69.3734324 | 71.9289015 | 72.421441 | 68.1725398 | 64.928496 | 81.9311067 |
| 69.3734324 | 71.9289015 | 72.421441 | 65.1725398 | 64.928496 | 81.9311067 |
| 68.3734324 | 70.9289015 | 72.421441 | 65.1725398 | 64.928496 | 81.9311067 |
| 66.3734324 | 69.9289015 | 71.421441 | 63.1725398 | 64.928496 | 81.9311067 |
| 66.3734324 | 69.9289015 | 71.421441 | 63.1725398 | 64.928496 | 81.9311067 |
| 66.3734324 | 68.9289015 | 71.421441 | 63.1725398 | 65.928496 | 81.9311067 |
| 66.3734324 | 69.9289015 | 71.421441 | 63.1725398 | 65.928496 | 81.9311067 |
| 66.3734324 | 69.9289015 | 71.421441 | 64.1725398 | 66.928496 | 81.9311067 |
| 65.3734324 | 69.9289015 | 71.421441 | 64.1725398 | 66.928496 | 81.9311067 |
| 65.3734324 | 69.9289015 | 71.421441 | 65.1725398 | 67.928496 | 80.9311067 |
| 64.3734324 | 68.9289015 | 69.421441 | 65.1725398 | 68.928496 | 80.9311067 |
| 64.3734324 | 68.9289015 | 71.421441 | 65.1725398 | 68.928496 | 77.9311067 |
| 64.3734324 | 68.9289015 | 71.421441 | 66.1725398 | 68.928496 | 77.9311067 |
| 64.3734324 | 68.9289015 | 71.421441 | 67.1725398 | 68.928496 | 76.9311067 |
| 64.3734324 | 67.9289015 | 71.421441 | 67.1725398 | 68.928496 | 76.9311067 |
| 64.3734324 | 67.9289015 | 71.421441 | 68.1725398 | 68.928496 | 76.9311067 |
| 64.3734324 | 68.9289015 | 71.421441 | 70.1725398 | 68.928496 | 76.9311067 |
| 65.3734324 | 67.9289015 | 70.421441 | 70.1725398 | 68.928496 | 76.9311067 |
| 65.3734324 | 67.9289015 | 70.421441 | 74.1725398 | 68.928496 | 77.9311067 |
| 65.3734324 | 67.9289015 | 70.421441 | 74.1725398 | 68.928496 | 77.9311067 |
| 65.3734324 | 67.9289015 | 70.421441 | 74.1725398 | 68.928496 | 77.9311067 |
| 66.3734324 | 67.9289015 | 69.421441 | 74.1725398 | 68.928496 | 77.9311067 |
| 68.3734324 | 68.9289015 | 67.421441 | 72.1725398 | 71.928496 | 77.9311067 |
| 68.3734324 | 68.9289015 | 67.421441 | 72.1725398 | 71.928496 | 77.9311067 |
| 70.3734324 | 69.9289015 | 67.421441 | 69.1725398 | 72.928496 | 76.9311067 |
| 70.3734324 | 69.9289015 | 67.421441 | 70.1725398 | 72.928496 | 77.9311067 |
| 70.3734324 | 68.9289015 | 68.421441 | 70.1725398 | 72.928496 | 78.9311067 |
| 71.3734324 | 66.9289015 | 67.421441 | 72.1725398 | 72.928496 | 78.9311067 |
| 71.3734324 | 66.9289015 | 65.421441 | 71.1725398 | 70.928496 | 78.9311067 |
| 72.3734324 | 66.9289015 | 64.421441 | 71.1725398 | 66.928496 | 78.9311067 |
| 72.3734324 | 66.9289015 | 62.421441 | 66.1725398 | 65.928496 | 78.9311067 |
| 72.3734324 | 66.9289015 | 59.421441 | 64.1725398 | 65.928496 | 78.9311067 |
| 72.3734324 | 66.9289015 | 59.421441 | 64.1725398 | 66.928496 | 78.9311067 |
| 72.3734324 | 67.9289015 | 60.421441 | 65.1725398 | 66.928496 | 75.9311067 |
| 72.3734324 | 68.9289015 | 60.421441 | 65.1725398 | 66.928496 | 73.9311067 |
| 72.3734324 | 68.9289015 | 60.421441 | 66.1725398 | 68.928496 | 72.9311067 |

|            |            |           |            |           |            |
|------------|------------|-----------|------------|-----------|------------|
| 75.3734324 | 68.9289015 | 60.421441 | 66.1725398 | 69.928496 | 72.9311067 |
| 75.3734324 | 69.9289015 | 61.421441 | 67.1725398 | 73.928496 | 72.9311067 |
| 75.3734324 | 69.9289015 | 61.421441 | 67.1725398 | 74.928496 | 72.9311067 |
| 74.3734324 | 70.9289015 | 63.421441 | 67.1725398 | 74.928496 | 72.9311067 |
| 74.3734324 | 72.9289015 | 66.421441 | 67.1725398 | 73.928496 | 72.9311067 |
| 74.3734324 | 74.9289015 | 68.421441 | 67.1725398 | 73.928496 | 73.9311067 |
| 74.3734324 | 75.9289015 | 68.421441 | 67.1725398 | 73.928496 | 74.9311067 |
| 74.3734324 | 76.9289015 | 70.421441 | 67.1725398 | 73.928496 | 75.9311067 |
| 74.3734324 | 77.9289015 | 71.421441 | 66.1725398 | 74.928496 | 75.9311067 |
| 74.3734324 | 77.9289015 | 71.421441 | 66.1725398 | 74.928496 | 75.9311067 |
| 74.3734324 | 78.9289015 | 71.421441 | 66.1725398 | 74.928496 | 75.9311067 |
| 74.3734324 | 78.9289015 | 71.421441 | 69.1725398 | 74.928496 | 75.9311067 |
| 74.3734324 | 78.9289015 | 71.421441 | 71.1725398 | 74.928496 | 74.9311067 |
| 74.3734324 | 72.9289015 | 71.421441 | 72.1725398 | 73.928496 | 68.9311067 |
| 74.3734324 | 72.9289015 | 71.421441 | 73.1725398 | 73.928496 | 66.9311067 |
| 73.3734324 | 68.9289015 | 71.421441 | 74.1725398 | 74.928496 | 66.9311067 |
| 73.3734324 | 66.9289015 | 71.421441 | 74.1725398 | 74.928496 | 66.9311067 |
| 73.3734324 | 65.9289015 | 70.421441 | 73.1725398 | 74.928496 | 66.9311067 |
| 74.3734324 | 64.9289015 | 70.421441 | 72.1725398 | 74.928496 | 66.9311067 |
| 74.3734324 | 63.9289015 | 70.421441 | 71.1725398 | 75.928496 | 66.9311067 |
| 74.3734324 | 63.9289015 | 70.421441 | 70.1725398 | 76.928496 | 66.9311067 |
| 74.3734324 | 63.9289015 | 70.421441 | 70.1725398 | 77.928496 | 66.9311067 |
| 74.3734324 | 63.9289015 | 70.421441 | 71.1725398 | 78.928496 | 67.9311067 |
| 74.3734324 | 62.9289015 | 66.421441 | 72.1725398 | 78.928496 | 67.9311067 |
| 74.3734324 | 61.9289015 | 62.421441 | 74.1725398 | 78.928496 | 66.9311067 |
| 75.3734324 | 61.9289015 | 61.421441 | 75.1725398 | 78.928496 | 61.9311067 |
| 75.3734324 | 61.9289015 | 61.421441 | 76.1725398 | 78.928496 | 59.9311067 |
| 75.3734324 | 61.9289015 | 62.421441 | 77.1725398 | 78.928496 | 58.9311067 |
| 75.3734324 | 63.9289015 | 62.421441 | 78.1725398 | 77.928496 | 58.9311067 |
| 76.3734324 | 64.9289015 | 62.421441 | 78.1725398 | 76.928496 | 58.9311067 |
| 77.3734324 | 64.9289015 | 62.421441 | 77.1725398 | 76.928496 | 58.9311067 |
| 77.3734324 | 64.9289015 | 63.421441 | 74.1725398 | 76.928496 | 59.9311067 |
| 77.3734324 | 63.9289015 | 63.421441 | 73.1725398 | 77.928496 | 59.9311067 |
| 77.3734324 | 63.9289015 | 64.421441 | 72.1725398 | 77.928496 | 57.9311067 |
| 76.3734324 | 63.9289015 | 65.421441 | 71.1725398 | 77.928496 | 57.9311067 |
| 75.3734324 | 63.9289015 | 65.421441 | 72.1725398 | 76.928496 | 57.9311067 |
| 74.3734324 | 64.9289015 | 65.421441 | 72.1725398 | 71.928496 | 57.9311067 |
| 74.3734324 | 65.9289015 | 66.421441 | 74.1725398 | 70.928496 | 57.9311067 |
| 74.3734324 | 64.9289015 | 67.421441 | 75.1725398 | 68.928496 | 58.9311067 |
| 74.3734324 | 63.9289015 | 66.421441 | 76.1725398 | 68.928496 | 58.9311067 |
| 74.3734324 | 62.9289015 | 66.421441 | 76.1725398 | 68.928496 | 59.9311067 |
| 74.3734324 | 62.9289015 | 66.421441 | 76.1725398 | 68.928496 | 59.9311067 |
| 72.3734324 | 61.9289015 | 66.421441 | 74.1725398 | 70.928496 | 60.9311067 |
| 71.3734324 | 61.9289015 | 66.421441 | 74.1725398 | 71.928496 | 64.9311067 |
| 69.3734324 | 61.9289015 | 66.421441 | 74.1725398 | 73.928496 | 65.9311067 |



|            |            |           |            |           |            |
|------------|------------|-----------|------------|-----------|------------|
| 69.3734324 | 59.9289015 | 66.421441 | 75.1725398 | 73.928496 | 65.9311067 |
| 69.3734324 | 58.9289015 | 65.421441 | 75.1725398 | 73.928496 | 61.9311067 |
| 68.3734324 | 59.9289015 | 63.421441 | 75.1725398 | 76.928496 | 59.9311067 |
| 70.3734324 | 64.9289015 | 62.421441 | 75.1725398 | 76.928496 | 57.9311067 |
| 70.3734324 | 64.9289015 | 62.421441 | 75.1725398 | 73.928496 | 57.9311067 |
| 73.3734324 | 64.9289015 | 60.421441 | 75.1725398 | 72.928496 | 57.9311067 |
| 74.3734324 | 64.9289015 | 60.421441 | 75.1725398 | 69.928496 | 58.9311067 |
| 74.3734324 | 64.9289015 | 60.421441 | 75.1725398 | 66.928496 | 59.9311067 |
| 74.3734324 | 65.9289015 | 60.421441 | 75.1725398 | 64.928496 | 59.9311067 |
| 75.3734324 | 65.9289015 | 60.421441 | 74.1725398 | 63.928496 | 58.9311067 |
| 76.3734324 | 65.9289015 | 60.421441 | 75.1725398 | 63.928496 | 57.9311067 |
| 76.3734324 | 65.9289015 | 56.421441 | 75.1725398 | 63.928496 | 57.9311067 |
| 76.3734324 | 66.9289015 | 55.421441 | 75.1725398 | 63.928496 | 57.9311067 |
| 76.3734324 | 66.9289015 | 53.421441 | 77.1725398 | 63.928496 | 56.9311067 |
| 76.3734324 | 66.9289015 | 53.421441 | 77.1725398 | 63.928496 | 57.9311067 |
| 78.3734324 | 66.9289015 | 51.421441 | 79.1725398 | 63.928496 | 57.9311067 |
| 78.3734324 | 65.9289015 | 54.421441 | 79.1725398 | 63.928496 | 59.9311067 |
| 77.3734324 | 65.9289015 | 58.421441 | 80.1725398 | 63.928496 | 61.9311067 |
| 77.3734324 | 65.9289015 | 58.421441 | 80.1725398 | 63.928496 | 61.9311067 |
| 77.3734324 | 65.9289015 | 61.421441 | 80.1725398 | 63.928496 | 61.9311067 |
| 77.3734324 | 65.9289015 | 62.421441 | 78.1725398 | 65.928496 | 62.9311067 |
| 76.3734324 | 65.9289015 | 62.421441 | 77.1725398 | 65.928496 | 62.9311067 |
| 70.3734324 | 66.9289015 | 62.421441 | 75.1725398 | 65.928496 | 62.9311067 |
| 70.3734324 | 66.9289015 | 62.421441 | 72.1725398 | 67.928496 | 66.9311067 |
| 65.3734324 | 66.9289015 | 62.421441 | 70.1725398 | 69.928496 | 66.9311067 |
| 65.3734324 | 69.9289015 | 62.421441 | 69.1725398 | 70.928496 | 66.9311067 |
| 65.3734324 | 69.9289015 | 61.421441 | 69.1725398 | 70.928496 | 66.9311067 |
| 63.3734324 | 69.9289015 | 61.421441 | 69.1725398 | 70.928496 | 67.9311067 |
| 63.3734324 | 69.9289015 | 61.421441 | 70.1725398 | 69.928496 | 67.9311067 |
| 62.3734324 | 70.9289015 | 61.421441 | 70.1725398 | 68.928496 | 67.9311067 |
| 62.3734324 | 73.9289015 | 61.421441 | 71.1725398 | 68.928496 | 67.9311067 |
| 61.3734324 | 73.9289015 | 61.421441 | 71.1725398 | 68.928496 | 67.9311067 |
| 61.3734324 | 73.9289015 | 60.421441 | 72.1725398 | 68.928496 | 67.9311067 |
| 61.3734324 | 73.9289015 | 60.421441 | 72.1725398 | 67.928496 | 65.9311067 |
| 60.3734324 | 73.9289015 | 60.421441 | 72.1725398 | 67.928496 | 62.9311067 |
| 60.3734324 | 73.9289015 | 60.421441 | 71.1725398 | 67.928496 | 60.9311067 |
| 57.3734324 | 72.9289015 | 59.421441 | 71.1725398 | 67.928496 | 60.9311067 |
| 56.3734324 | 69.9289015 | 59.421441 | 71.1725398 | 64.928496 | 61.9311067 |
| 56.3734324 | 68.9289015 | 59.421441 | 71.1725398 | 63.928496 | 60.9311067 |
| 56.3734324 | 67.9289015 | 59.421441 | 72.1725398 | 63.928496 | 60.9311067 |
| 54.3734324 | 68.9289015 | 59.421441 | 75.1725398 | 65.928496 | 62.9311067 |
| 53.3734324 | 67.9289015 | 59.421441 | 75.1725398 | 67.928496 | 62.9311067 |
| 51.3734324 | 67.9289015 | 57.421441 | 75.1725398 | 68.928496 | 61.9311067 |
| 50.3734324 | 66.9289015 | 57.421441 | 75.1725398 | 69.928496 | 60.9311067 |
| 49.3734324 | 66.9289015 | 57.421441 | 75.1725398 | 73.928496 | 60.9311067 |

|            |            |           |            |           |            |
|------------|------------|-----------|------------|-----------|------------|
| 49.3734324 | 65.9289015 | 57.421441 | 75.1725398 | 76.928496 | 62.9311067 |
| 47.3734324 | 64.9289015 | 57.421441 | 76.1725398 | 76.928496 | 63.9311067 |
| 47.3734324 | 63.9289015 | 59.421441 | 77.1725398 | 77.928496 | 64.9311067 |
| 46.3734324 | 62.9289015 | 59.421441 | 78.1725398 | 73.928496 | 64.9311067 |
| 46.3734324 | 62.9289015 | 59.421441 | 78.1725398 | 69.928496 | 63.9311067 |
| 46.3734324 | 62.9289015 | 59.421441 | 78.1725398 | 69.928496 | 63.9311067 |
| 45.3734324 | 63.9289015 | 60.421441 | 78.1725398 | 67.928496 | 63.9311067 |
| 45.3734324 | 64.9289015 | 60.421441 | 76.1725398 | 67.928496 | 64.9311067 |
| 46.3734324 | 64.9289015 | 57.421441 | 76.1725398 | 67.928496 | 64.9311067 |
| 46.3734324 | 64.9289015 | 56.421441 | 74.1725398 | 66.928496 | 64.9311067 |
| 46.3734324 | 64.9289015 | 57.421441 | 74.1725398 | 65.928496 | 64.9311067 |
| 47.3734324 | 63.9289015 | 57.421441 | 74.1725398 | 64.928496 | 64.9311067 |
| 47.3734324 | 62.9289015 | 57.421441 | 74.1725398 | 65.928496 | 64.9311067 |
| 47.3734324 | 62.9289015 | 58.421441 | 74.1725398 | 65.928496 | 63.9311067 |
| 48.3734324 | 62.9289015 | 59.421441 | 74.1725398 | 66.928496 | 63.9311067 |
| 48.3734324 | 64.9289015 | 61.421441 | 74.1725398 | 65.928496 | 64.9311067 |
| 50.3734324 | 66.9289015 | 61.421441 | 74.1725398 | 66.928496 | 64.9311067 |
| 53.3734324 | 66.9289015 | 61.421441 | 75.1725398 | 66.928496 | 64.9311067 |
| 55.3734324 | 66.9289015 | 60.421441 | 75.1725398 | 67.928496 | 62.9311067 |
| 54.3734324 | 66.9289015 | 60.421441 | 75.1725398 | 67.928496 | 61.9311067 |
| 54.3734324 | 69.9289015 | 61.421441 | 74.1725398 | 67.928496 | 60.9311067 |
| 54.3734324 | 72.9289015 | 63.421441 | 72.1725398 | 67.928496 | 60.9311067 |
| 55.3734324 | 72.9289015 | 63.421441 | 71.1725398 | 68.928496 | 60.9311067 |
| 56.3734324 | 72.9289015 | 63.421441 | 72.1725398 | 69.928496 | 60.9311067 |
| 56.3734324 | 73.9289015 | 64.421441 | 73.1725398 | 69.928496 | 60.9311067 |
| 59.3734324 | 70.9289015 | 64.421441 | 75.1725398 | 69.928496 | 60.9311067 |
| 59.3734324 | 67.9289015 | 64.421441 | 75.1725398 | 69.928496 | 60.9311067 |
| 57.3734324 | 66.9289015 | 66.421441 | 77.1725398 | 69.928496 | 60.9311067 |
| 56.3734324 | 64.9289015 | 66.421441 | 77.1725398 | 69.928496 | 60.9311067 |
| 56.3734324 | 63.9289015 | 66.421441 | 77.1725398 | 69.928496 | 60.9311067 |
| 56.3734324 | 63.9289015 | 65.421441 | 75.1725398 | 69.928496 | 60.9311067 |
| 57.3734324 | 63.9289015 | 65.421441 | 75.1725398 | 69.928496 | 60.9311067 |
| 57.3734324 | 63.9289015 | 64.421441 | 75.1725398 | 69.928496 | 60.9311067 |
| 58.3734324 | 62.9289015 | 64.421441 | 74.1725398 | 69.928496 | 60.9311067 |
| 61.3734324 | 62.9289015 | 64.421441 | 71.1725398 | 71.928496 | 61.9311067 |
| 64.3734324 | 62.9289015 | 65.421441 | 70.1725398 | 71.928496 | 60.9311067 |
| 64.3734324 | 62.9289015 | 65.421441 | 70.1725398 | 72.928496 | 58.9311067 |
| 64.3734324 | 62.9289015 | 65.421441 | 70.1725398 | 71.928496 | 58.9311067 |
| 63.3734324 | 62.9289015 | 63.421441 | 69.1725398 | 71.928496 | 58.9311067 |
| 63.3734324 | 62.9289015 | 61.421441 | 69.1725398 | 71.928496 | 58.9311067 |
| 62.3734324 | 61.9289015 | 61.421441 | 69.1725398 | 70.928496 | 58.9311067 |
| 60.3734324 | 61.9289015 | 61.421441 | 69.1725398 | 70.928496 | 58.9311067 |
| 59.3734324 | 56.9289015 | 61.421441 | 70.1725398 | 71.928496 | 58.9311067 |
| 59.3734324 | 56.9289015 | 62.421441 | 71.1725398 | 71.928496 | 58.9311067 |
| 59.3734324 | 55.9289015 | 62.421441 | 71.1725398 | 71.928496 | 58.9311067 |

|            |            |           |            |           |            |
|------------|------------|-----------|------------|-----------|------------|
| 59.3734324 | 55.9289015 | 62.421441 | 72.1725398 | 72.928496 | 59.9311067 |
| 58.3734324 | 55.9289015 | 62.421441 | 72.1725398 | 73.928496 | 59.9311067 |
| 58.3734324 | 55.9289015 | 66.421441 | 72.1725398 | 73.928496 | 59.9311067 |
| 56.3734324 | 55.9289015 | 66.421441 | 72.1725398 | 72.928496 | 59.9311067 |
| 55.3734324 | 56.9289015 | 66.421441 | 72.1725398 | 71.928496 | 59.9311067 |
| 55.3734324 | 56.9289015 | 68.421441 | 72.1725398 | 70.928496 | 59.9311067 |
| 54.3734324 | 59.9289015 | 69.421441 | 73.1725398 | 68.928496 | 59.9311067 |
| 54.3734324 | 60.9289015 | 69.421441 | 73.1725398 | 68.928496 | 59.9311067 |
| 54.3734324 | 60.9289015 | 67.421441 | 77.1725398 | 68.928496 | 60.9311067 |
| 54.3734324 | 59.9289015 | 66.421441 | 77.1725398 | 69.928496 | 60.9311067 |
| 54.3734324 | 59.9289015 | 65.421441 | 77.1725398 | 69.928496 | 61.9311067 |
| 54.3734324 | 59.9289015 | 63.421441 | 77.1725398 | 69.928496 | 62.9311067 |
| 59.3734324 | 59.9289015 | 63.421441 | 77.1725398 | 71.928496 | 62.9311067 |
| 60.3734324 | 62.9289015 | 62.421441 | 78.1725398 | 72.928496 | 62.9311067 |
| 60.3734324 | 62.9289015 | 62.421441 | 78.1725398 | 72.928496 | 62.9311067 |
| 62.3734324 | 62.9289015 | 60.421441 | 80.1725398 | 72.928496 | 62.9311067 |
| 62.3734324 | 62.9289015 | 59.421441 | 80.1725398 | 70.928496 | 63.9311067 |
| 62.3734324 | 62.9289015 | 59.421441 | 68.4258374 | 69.928496 | 64.9311067 |
| 62.3734324 | 62.9289015 | 59.421441 | 68.4258374 | 68.928496 | 66.9311067 |
| 63.3734324 | 68.9289015 | 59.421441 | 82.1725398 | 67.928496 | 67.9311067 |
| 63.3734324 | 68.9289015 | 59.421441 | 80.1725398 | 67.928496 | 67.9311067 |
| 63.3734324 | 71.9289015 | 58.421441 | 77.1725398 | 68.928496 | 66.9311067 |
| 63.3734324 | 72.9289015 | 58.421441 | 77.1725398 | 68.928496 | 66.9311067 |
| 63.3734324 | 72.9289015 | 58.421441 | 75.1725398 | 68.928496 | 66.9311067 |
| 63.3734324 | 76.9289015 | 58.421441 | 74.1725398 | 67.928496 | 67.9311067 |
| 64.3734324 | 77.9289015 | 63.421441 | 73.1725398 | 67.928496 | 67.9311067 |
| 64.3734324 | 77.9289015 | 66.421441 | 73.1725398 | 67.928496 | 67.9311067 |
| 66.3734324 | 76.9289015 | 66.421441 | 74.1725398 | 67.928496 | 66.9311067 |
| 72.3734324 | 76.9289015 | 67.421441 | 74.1725398 | 66.928496 | 65.9311067 |
| 75.3734324 | 76.9289015 | 67.421441 | 74.1725398 | 66.928496 | 64.9311067 |
| 75.3734324 | 76.9289015 | 69.421441 | 75.1725398 | 66.928496 | 63.9311067 |
| 73.3734324 | 75.9289015 | 70.421441 | 74.1725398 | 67.928496 | 63.9311067 |
| 72.3734324 | 73.9289015 | 70.421441 | 74.1725398 | 68.928496 | 62.9311067 |
| 72.3734324 | 71.9289015 | 70.421441 | 75.1725398 | 68.928496 | 62.9311067 |
| 72.3734324 | 70.9289015 | 70.421441 | 76.1725398 | 69.928496 | 62.9311067 |
| 72.3734324 | 70.9289015 | 70.421441 | 76.1725398 | 69.928496 | 62.9311067 |
| 73.3734324 | 70.9289015 | 70.421441 | 77.1725398 | 68.928496 | 62.9311067 |
| 73.3734324 | 70.9289015 | 68.421441 | 77.1725398 | 67.928496 | 62.9311067 |
| 73.3734324 | 69.9289015 | 68.421441 | 77.1725398 | 67.928496 | 62.9311067 |
| 73.3734324 | 66.9289015 | 68.421441 | 78.1725398 | 67.928496 | 62.9311067 |
| 73.3734324 | 64.9289015 | 68.421441 | 78.1725398 | 67.928496 | 62.9311067 |
| 73.3734324 | 62.9289015 | 68.421441 | 78.1725398 | 67.928496 | 63.9311067 |
| 74.3734324 | 62.9289015 | 68.421441 | 76.1725398 | 68.928496 | 63.9311067 |
| 74.3734324 | 62.9289015 | 68.421441 | 77.1725398 | 68.928496 | 63.9311067 |
| 74.3734324 | 62.9289015 | 67.421441 | 78.1725398 | 69.928496 | 63.9311067 |

|            |            |           |            |           |            |
|------------|------------|-----------|------------|-----------|------------|
| 74.3734324 | 63.9289015 | 66.421441 | 78.1725398 | 70.928496 | 63.9311067 |
| 74.3734324 | 63.9289015 | 66.421441 | 77.1725398 | 72.928496 | 63.9311067 |
| 75.3734324 | 62.9289015 | 65.421441 | 77.1725398 | 74.928496 | 63.9311067 |
| 75.3734324 | 62.9289015 | 65.421441 | 75.1725398 | 75.928496 | 62.9311067 |
| 75.3734324 | 63.9289015 | 63.421441 | 75.1725398 | 74.928496 | 62.9311067 |
| 75.3734324 | 64.9289015 | 63.421441 | 75.1725398 | 74.928496 | 63.9311067 |
| 64.3734324 | 65.9289015 | 63.421441 | 75.1725398 | 74.928496 | 65.9311067 |
| 64.3734324 | 66.9289015 | 63.421441 | 75.1725398 | 73.928496 | 64.9311067 |
| 65.3734324 | 66.9289015 | 63.421441 | 77.1725398 | 73.928496 | 63.9311067 |
| 66.3734324 | 66.9289015 | 64.421441 | 77.1725398 | 72.928496 | 63.9311067 |
| 66.3734324 | 66.9289015 | 63.421441 | 78.1725398 | 72.928496 | 64.9311067 |
| 65.3734324 | 68.9289015 | 63.421441 | 78.1725398 | 72.928496 | 64.9311067 |
| 65.3734324 | 68.9289015 | 63.421441 | 76.1725398 | 71.928496 | 64.9311067 |
| 62.3734324 | 68.9289015 | 61.421441 | 74.1725398 | 70.928496 | 64.9311067 |
| 62.3734324 | 67.9289015 | 61.421441 | 74.1725398 | 70.928496 | 64.9311067 |
| 62.3734324 | 67.9289015 | 61.421441 | 75.1725398 | 70.928496 | 64.9311067 |
| 63.3734324 | 67.9289015 | 61.421441 | 75.1725398 | 70.928496 | 64.9311067 |
| 63.3734324 | 68.9289015 | 66.421441 | 75.1725398 | 70.928496 | 64.9311067 |
| 63.3734324 | 68.9289015 | 66.421441 | 74.1725398 | 70.928496 | 65.9311067 |
| 64.3734324 | 71.9289015 | 64.421441 | 73.1725398 | 70.928496 | 65.9311067 |
| 64.3734324 | 71.9289015 | 63.421441 | 73.1725398 | 70.928496 | 65.9311067 |
| 64.3734324 | 70.9289015 | 62.421441 | 73.1725398 | 70.928496 | 67.9311067 |
| 64.3734324 | 70.9289015 | 62.421441 | 74.1725398 | 70.928496 | 68.9311067 |
| 64.3734324 | 70.9289015 | 62.421441 | 74.1725398 | 70.928496 | 68.9311067 |
| 67.3734324 | 69.9289015 | 63.421441 | 77.1725398 | 70.928496 | 71.9311067 |
| 67.3734324 | 69.9289015 | 63.421441 | 77.1725398 | 70.928496 | 71.9311067 |
| 72.3734324 | 69.9289015 | 63.421441 | 77.1725398 | 70.928496 | 72.9311067 |
| 72.3734324 | 69.9289015 | 64.421441 | 77.1725398 | 70.928496 | 74.9311067 |
| 72.3734324 | 69.9289015 | 64.421441 | 74.1725398 | 70.928496 | 74.9311067 |
| 73.3734324 | 70.9289015 | 66.421441 | 73.1725398 | 70.928496 | 75.9311067 |
| 73.3734324 | 70.9289015 | 67.421441 | 73.1725398 | 70.928496 | 75.9311067 |
| 73.3734324 | 69.9289015 | 67.421441 | 73.1725398 | 71.928496 | 76.9311067 |
| 73.3734324 | 68.9289015 | 66.421441 | 73.1725398 | 71.928496 | 74.9311067 |
| 74.3734324 | 67.9289015 | 67.421441 | 74.1725398 | 70.928496 | 75.9311067 |
| 80.3734324 | 66.9289015 | 67.421441 | 74.1725398 | 70.928496 | 76.9311067 |
| 81.3734324 | 65.9289015 | 70.421441 | 74.1725398 | 70.928496 | 77.9311067 |
| 83.3734324 | 64.9289015 | 70.421441 | 74.1725398 | 70.928496 | 77.9311067 |
| 83.3734324 | 64.9289015 | 70.421441 | 75.1725398 | 70.928496 | 77.9311067 |
| 83.3734324 | 65.9289015 | 70.421441 | 75.1725398 | 70.928496 | 77.9311067 |
| 83.3734324 | 65.9289015 | 70.421441 | 75.1725398 | 70.928496 | 77.9311067 |
| 83.3734324 | 65.9289015 | 70.421441 | 75.1725398 | 72.928496 | 76.9311067 |
| 82.3734324 | 67.9289015 | 70.421441 | 74.1725398 | 72.928496 | 76.9311067 |
| 82.3734324 | 68.9289015 | 70.421441 | 74.1725398 | 72.928496 | 76.9311067 |
| 82.3734324 | 68.9289015 | 70.421441 | 74.1725398 | 71.928496 | 75.9311067 |
| 81.3734324 | 69.9289015 | 70.421441 | 75.1725398 | 70.928496 | 75.9311067 |

|            |            |           |            |           |            |
|------------|------------|-----------|------------|-----------|------------|
| 80.3734324 | 69.9289015 | 70.421441 | 75.1725398 | 69.928496 | 74.9311067 |
| 80.3734324 | 69.9289015 | 70.421441 | 73.1725398 | 69.928496 | 74.9311067 |
| 80.3734324 | 68.9289015 | 70.421441 | 71.1725398 | 69.928496 | 73.9311067 |
| 80.3734324 | 68.9289015 | 71.421441 | 71.1725398 | 69.928496 | 71.9311067 |
| 80.3734324 | 68.9289015 | 69.421441 | 71.1725398 | 69.928496 | 72.9311067 |
| 78.3734324 | 68.9289015 | 68.421441 | 71.1725398 | 69.928496 | 73.9311067 |
| 78.3734324 | 67.9289015 | 68.421441 | 71.1725398 | 69.928496 | 73.9311067 |
| 78.3734324 | 67.9289015 | 68.421441 | 70.1725398 | 69.928496 | 74.9311067 |
| 78.3734324 | 66.9289015 | 68.421441 | 71.1725398 | 69.928496 | 73.9311067 |
| 78.3734324 | 66.9289015 | 67.421441 | 70.1725398 | 68.928496 | 73.9311067 |
| 78.3734324 | 66.9289015 | 67.421441 | 70.1725398 | 68.928496 | 73.9311067 |
| 78.3734324 | 66.9289015 | 67.421441 | 70.1725398 | 68.928496 | 74.9311067 |
| 77.3734324 | 66.9289015 | 66.421441 | 70.1725398 | 68.928496 | 74.9311067 |
| 77.3734324 | 66.9289015 | 66.421441 | 70.1725398 | 68.928496 | 74.9311067 |
| 77.3734324 | 66.9289015 | 67.421441 | 72.1725398 | 68.928496 | 75.9311067 |
| 77.3734324 | 65.9289015 | 69.421441 | 73.1725398 | 68.928496 | 75.9311067 |
| 77.3734324 | 65.9289015 | 69.421441 | 74.1725398 | 69.928496 | 75.9311067 |
| 77.3734324 | 75.9289015 | 70.421441 | 73.1725398 | 69.928496 | 77.9311067 |
| 77.3734324 | 79.9289015 | 71.421441 | 72.1725398 | 69.928496 | 77.9311067 |
| 74.3734324 | 79.9289015 | 71.421441 | 73.1725398 | 69.928496 | 76.9311067 |
| 73.3734324 | 79.9289015 | 71.421441 | 75.1725398 | 70.928496 | 76.9311067 |
| 73.3734324 | 77.9289015 | 79.421441 | 77.1725398 | 70.928496 | 78.9311067 |
| 73.3734324 | 74.9289015 | 80.421441 | 79.1725398 | 72.928496 | 78.9311067 |
| 73.3734324 | 72.9289015 | 82.421441 | 78.1725398 | 72.928496 | 79.9311067 |
| 73.3734324 | 71.9289015 | 82.421441 | 77.1725398 | 72.928496 | 80.9311067 |
| 73.3734324 | 71.9289015 | 85.421441 | 76.1725398 | 73.928496 | 81.9311067 |
| 73.3734324 | 71.9289015 | 85.421441 | 75.1725398 | 74.928496 | 81.9311067 |
| 73.3734324 | 71.9289015 | 87.421441 | 74.1725398 | 75.928496 | 82.9311067 |
| 74.3734324 | 71.9289015 | 87.421441 | 74.1725398 | 75.928496 | 84.9311067 |
| 74.3734324 | 71.9289015 | 87.421441 | 75.1725398 | 75.928496 | 86.9311067 |
| 74.3734324 | 71.9289015 | 85.421441 | 75.1725398 | 76.928496 | 86.9311067 |
| 74.3734324 | 70.9289015 | 85.421441 | 76.1725398 | 76.928496 | 85.9311067 |
| 74.3734324 | 70.9289015 | 85.421441 | 76.1725398 | 76.928496 | 85.9311067 |
| 74.3734324 | 70.9289015 | 84.421441 | 76.1725398 | 75.928496 | 85.9311067 |
| 74.3734324 | 69.9289015 | 82.421441 | 76.1725398 | 75.928496 | 85.9311067 |
| 74.3734324 | 69.9289015 | 83.421441 | 75.1725398 | 74.928496 | 85.9311067 |
| 74.3734324 | 69.9289015 | 83.421441 | 73.1725398 | 74.928496 | 83.9311067 |
| 74.3734324 | 69.9289015 | 83.421441 | 72.1725398 | 72.928496 | 83.9311067 |
| 74.3734324 | 71.9289015 | 83.421441 | 72.1725398 | 72.928496 | 83.9311067 |
| 74.3734324 | 71.9289015 | 83.421441 | 72.1725398 | 69.928496 | 83.9311067 |
| 75.3734324 | 71.9289015 | 84.421441 | 72.1725398 | 68.928496 | 83.9311067 |
| 75.3734324 | 73.9289015 | 84.421441 | 75.1725398 | 68.928496 | 83.9311067 |
| 76.3734324 | 73.9289015 | 84.421441 | 75.1725398 | 68.928496 | 83.9311067 |
| 78.3734324 | 73.9289015 | 84.421441 | 75.1725398 | 68.928496 | 83.9311067 |
| 78.3734324 | 76.9289015 | 84.421441 | 74.1725398 | 68.928496 | 83.9311067 |

|            |            |            |            |           |            |
|------------|------------|------------|------------|-----------|------------|
| 80.3734324 | 80.9289015 | 87.421441  | 74.1725398 | 69.928496 | 81.9311067 |
| 80.3734324 | 80.9289015 | 76.5258374 | 74.1725398 | 69.928496 | 81.9311067 |
| 81.3734324 | 81.9289015 | 76.4258374 | 73.1725398 | 69.928496 | 76.9311067 |
| 81.3734324 | 81.9289015 | 76.4258374 | 73.1725398 | 69.928496 | 75.9311067 |
| 83.3734324 | 81.9289015 | 77.0258374 | 76.1725398 | 69.928496 | 73.9311067 |
| 82.3734324 | 81.9289015 | 76.9258374 | 79.1725398 | 69.928496 | 71.9311067 |
| 82.3734324 | 81.9289015 | 77.5258374 | 79.1725398 | 75.928496 | 70.9311067 |
| 81.3734324 | 81.9289015 | 77.8258374 | 80.1725398 | 78.928496 | 69.9311067 |
| 79.3734324 | 81.9289015 | 77.6258374 | 79.1725398 | 78.928496 | 69.9311067 |
| 78.3734324 | 83.9289015 | 78.1258374 | 79.1725398 | 82.928496 | 69.9311067 |
| 77.3734324 | 78.9289015 | 77.7258374 | 79.1725398 | 82.928496 | 69.9311067 |
| 77.3734324 | 76.9289015 | 76.9258374 | 78.1725398 | 79.928496 | 70.9311067 |
| 76.3734324 | 74.9289015 | 76.0258374 | 78.1725398 | 73.928496 | 71.9311067 |
| 76.3734324 | 74.9289015 | 75.8258374 | 78.1725398 | 72.928496 | 71.9311067 |
| 76.3734324 | 74.9289015 | 76.0258374 | 82.1725398 | 71.928496 | 73.9311067 |
| 77.3734324 | 73.9289015 | 88.421441  | 82.1725398 | 71.928496 | 75.9311067 |
| 77.3734324 | 73.9289015 | 88.421441  | 81.1725398 | 71.928496 | 75.9311067 |
| 75.3734324 | 72.9289015 | 88.421441  | 81.1725398 | 73.928496 | 77.9311067 |
| 73.3734324 | 72.9289015 | 87.421441  | 79.1725398 | 75.928496 | 77.9311067 |
| 73.3734324 | 70.9289015 | 87.421441  | 77.1725398 | 77.928496 | 77.9311067 |
| 72.3734324 | 69.9289015 | 74.5258374 | 75.1725398 | 78.928496 | 77.9311067 |
| 71.3734324 | 69.9289015 | 74.4258374 | 74.1725398 | 75.928496 | 79.9311067 |
| 71.3734324 | 69.9289015 | 74.2258374 | 73.1725398 | 75.928496 | 76.9311067 |
| 71.3734324 | 69.9289015 | 74.2258374 | 73.1725398 | 73.928496 | 76.9311067 |
| 70.3734324 | 69.9289015 | 74.1258374 | 73.1725398 | 73.928496 | 75.9311067 |
| 66.3734324 | 70.9289015 | 74.0258374 | 73.1725398 | 72.928496 | 73.9311067 |
| 66.3734324 | 73.9289015 | 74.4258374 | 73.1725398 | 72.928496 | 73.9311067 |
| 66.3734324 | 74.9289015 | 74.8258374 | 73.1725398 | 73.928496 | 73.9311067 |
| 66.3734324 | 74.9289015 | 75.2258374 | 74.1725398 | 73.928496 | 73.9311067 |
| 67.3734324 | 74.9289015 | 75.8258374 | 77.1725398 | 74.928496 | 73.9311067 |
| 66.3734324 | 73.9289015 | 76.4258374 | 79.1725398 | 74.928496 | 73.9311067 |
| 66.3734324 | 72.9289015 | 76.8258374 | 81.1725398 | 74.928496 | 73.9311067 |
| 66.3734324 | 72.9289015 | 76.8258374 | 81.1725398 | 75.928496 | 72.9311067 |
| 66.3734324 | 72.9289015 | 76.6258374 | 82.1725398 | 75.928496 | 72.9311067 |

| Behavior | Activity       |    |                |
|----------|----------------|----|----------------|
|          | average of all | 63 | moving average |
|          | 78.1395516     | 63 | 72.3738001     |
|          | 77.9173294     | 63 | 72.5700121     |
|          | 77.2506627     | 63 | 72.7517797     |
|          | 77.0284405     | 63 | 72.9046584     |
|          | 76.6951071     | 63 | 73.0697593     |
|          | 76.583996      | 63 | 73.2318047     |
|          | 76.2506627     | 63 | 73.3963501     |
|          | 76.1395516     | 63 | 73.5395065     |
|          | 76.2506627     | 63 | 73.6671075     |
|          | 76.3617738     | 63 | 73.7733195     |
|          | 75.6951071     | 63 | 73.9073093     |
|          | 75.583996      | 63 | 74.0784619     |
|          | 75.583996      | 63 | 74.23017       |
|          | 75.1428504     | 63 | 74.3568781     |
|          | 75.3428504     | 63 | 74.4974751     |
|          | 75.4428504     | 63 | 74.6130721     |
|          | 75.4428504     | 63 | 74.7008913     |
|          | 75.8428504     | 63 | 74.6155389     |
|          | 74.7149913     | 63 | 74.5346786     |
|          | 73.9449913     | 63 | 74.4733497     |
|          | 73.9449913     | 63 | 74.4225872     |
|          | 74.4249913     | 63 | 74.2901697     |
|          | 73.3849913     | 63 | 74.1558077     |
|          | 73.8249913     | 63 | 74.0431124     |
|          | 73.7149913     | 63 | 73.9259727     |
|          | 73.8049913     | 63 | 73.8071663     |
|          | 73.0349913     | 63 | 73.6911376     |
|          | 72.4749913     | 63 | 73.5834423     |
|          | 71.7049913     | 63 | 73.4785248     |
|          | 71.7049913     | 63 | 73.3808295     |
|          | 73.0428504     | 63 | 73.2703564     |
|          | 72.3428504     | 63 | 73.17905       |
|          | 72.4428504     | 63 | 73.0830213     |
|          | 72.9428504     | 63 | 72.9794927     |
|          | 73.0428504     | 63 | 72.8819927     |
|          | 72.0428504     | 63 | 72.7769927     |
|          | 71.5428504     | 63 | 72.6669927     |
|          | 71.5428504     | 63 | 72.5619927     |
|          | 72.1428504     | 63 | 72.4394927     |
|          | 72.4428504     | 63 | 72.3551892     |
|          | 72.8428504     | 63 | 72.2976356     |
|          | 72.5428504     | 63 | 72.2450821     |

|            |    |            |
|------------|----|------------|
| 72.7428504 | 63 | 72.1855286 |
| 72.3428504 | 63 | 72.1469751 |
| 71.9428504 | 63 | 72.0999215 |
| 71.9428504 | 63 | 72.045618  |
| 71.9428504 | 63 | 71.9790645 |
| 71.9428504 | 63 | 71.8848145 |
| 72.3428504 | 63 | 71.8130645 |
| 71.9428504 | 63 | 71.7578145 |
| 72.0428504 | 63 | 71.711261  |
| 71.7428504 | 63 | 71.633761  |
| 71.4428504 | 63 | 71.573761  |
| 71.2428504 | 63 | 71.516261  |
| 71.1428504 | 63 | 71.448761  |
| 71.0428504 | 63 | 71.378761  |
| 71.2428504 | 63 | 71.321261  |
| 70.9428504 | 63 | 71.273761  |
| 71.3428504 | 63 | 71.221261  |
| 71.6428504 | 63 | 71.146261  |
| 71.8428504 | 63 | 71.066261  |
| 72.0428504 | 63 | 70.978761  |
| 71.8428504 | 63 | 70.903761  |
| 71.9428504 | 63 | 70.836261  |
| 71.5428504 | 63 | 70.786261  |
| 71.1428504 | 63 | 70.748761  |
| 69.2649913 | 63 | 70.713761  |
| 69.6049913 | 63 | 70.676261  |
| 69.4949913 | 63 | 70.633761  |
| 69.8428504 | 63 | 70.588761  |
| 69.9428504 | 63 | 70.551261  |
| 69.9428504 | 63 | 70.511261  |
| 70.1428504 | 63 | 70.478761  |
| 70.2428504 | 63 | 70.463761  |
| 70.2428504 | 63 | 70.448761  |
| 69.7428504 | 63 | 70.456261  |
| 69.6428504 | 63 | 70.458761  |
| 69.4428504 | 63 | 70.446261  |
| 69.1428504 | 63 | 70.436261  |
| 69.2428504 | 63 | 70.411261  |
| 69.3428504 | 63 | 70.373761  |
| 69.5428504 | 63 | 70.331261  |
| 70.0428504 | 63 | 70.291261  |
| 70.3428504 | 63 | 70.253761  |
| 70.4428504 | 63 | 70.216261  |
| 70.5428504 | 63 | 70.193761  |
| 70.4428504 | 63 | 70.201261  |



|            |    |            |
|------------|----|------------|
| 70.2428504 | 63 | 70.2757074 |
| 70.5428504 | 63 | 70.3366539 |
| 70.4428504 | 63 | 70.4053504 |
| 70.4428504 | 63 | 70.4528504 |
| 70.4428504 | 63 | 70.4953504 |
| 70.8428504 | 63 | 70.5328504 |
| 70.6428504 | 63 | 70.5778504 |
| 71.4428504 | 63 | 70.6178504 |
| 71.1428504 | 63 | 70.6628504 |
| 70.7428504 | 63 | 70.7303504 |
| 70.5428504 | 63 | 70.8053504 |
| 70.3428504 | 63 | 70.8978504 |
| 70.1428504 | 63 | 70.9953504 |
| 70.1428504 | 63 | 71.0853504 |
| 70.4428504 | 63 | 71.1553504 |
| 70.3428504 | 63 | 71.1928504 |
| 70.4428504 | 63 | 71.2003504 |
| 70.6428504 | 63 | 71.1978504 |
| 71.4428504 | 63 | 71.2103504 |
| 72.2428504 | 63 | 71.2128504 |
| 72.0428504 | 63 | 71.2153504 |
| 72.2428504 | 63 | 71.2153504 |
| 71.7428504 | 63 | 71.2078504 |
| 71.6428504 | 63 | 71.1828504 |
| 71.4428504 | 63 | 71.1528504 |
| 71.9428504 | 63 | 71.1228504 |
| 71.8428504 | 63 | 71.0903504 |
| 72.0428504 | 63 | 71.0853504 |
| 72.4428504 | 63 | 71.0753504 |
| 72.6428504 | 63 | 71.0953504 |
| 73.1428504 | 63 | 71.1578504 |
| 73.0428504 | 63 | 71.2278504 |
| 72.8428504 | 63 | 71.3028504 |
| 72.1428504 | 63 | 71.3803504 |
| 71.0428504 | 63 | 71.4653504 |
| 70.3428504 | 63 | 71.5403504 |
| 70.2428504 | 63 | 71.6178504 |
| 70.9428504 | 63 | 71.6853504 |
| 70.6428504 | 63 | 71.7403504 |
| 70.5428504 | 63 | 71.7728504 |
| 70.2428504 | 63 | 71.7778504 |
| 70.2428504 | 63 | 71.8153504 |
| 69.4428504 | 63 | 71.8503504 |
| 69.2428504 | 71 | 71.9078504 |
| 69.2428504 | 71 | 71.9728504 |

|            |    |            |
|------------|----|------------|
| 69.5428504 | 71 | 72.0478504 |
| 70.4428504 | 71 | 72.0878504 |
| 71.0428504 | 71 | 72.1178504 |
| 71.9428504 | 71 | 72.1328504 |
| 73.2428504 | 71 | 72.1303504 |
| 73.3428504 | 71 | 72.0928504 |
| 73.3428504 | 71 | 72.0153504 |
| 73.2428504 | 71 | 71.9403504 |
| 73.5428504 | 71 | 71.8678504 |
| 73.4428504 | 71 | 71.8053504 |
| 73.4428504 | 71 | 71.7853504 |
| 73.1428504 | 71 | 71.7703504 |
| 72.8428504 | 71 | 71.7553504 |
| 72.7428504 | 71 | 71.7153504 |
| 72.4428504 | 71 | 71.6728504 |
| 73.5428504 | 71 | 71.6378504 |
| 73.6428504 | 71 | 71.6253504 |
| 74.0428504 | 71 | 71.6153504 |
| 74.2428504 | 71 | 71.6253504 |
| 74.4428504 | 71 | 71.6278504 |
| 73.5428504 | 71 | 71.6153504 |
| 73.0428504 | 71 | 71.5953504 |
| 72.6428504 | 71 | 71.5528504 |
| 72.3428504 | 71 | 71.5253504 |
| 71.1428504 | 71 | 71.4828504 |
| 70.0428504 | 71 | 71.4303504 |
| 70.0428504 | 71 | 71.3878504 |
| 69.9428504 | 71 | 71.3578504 |
| 69.6428504 | 71 | 71.3278504 |
| 70.2428504 | 71 | 71.2903504 |
| 69.7428504 | 71 | 71.2778504 |
| 69.6428504 | 71 | 71.2653504 |
| 69.3428504 | 71 | 71.2628504 |
| 68.9428504 | 71 | 71.2653504 |
| 69.1428504 | 71 | 71.2553504 |
| 69.7428504 | 71 | 71.2578504 |
| 69.8428504 | 71 | 71.2353504 |
| 69.8428504 | 63 | 71.2028504 |
| 69.3428504 | 63 | 71.1241587 |
| 68.7428504 | 63 | 71.046467  |
| 68.7428504 | 63 | 70.9667753 |
| 68.7428504 | 63 | 70.9235836 |
| 69.9428504 | 63 | 70.9121419 |
| 70.2428504 | 63 | 70.9162002 |
| 71.1428504 | 63 | 70.9562002 |

|            |    |            |
|------------|----|------------|
| 71.6428504 | 63 | 71.0112002 |
| 72.1428504 | 63 | 71.0887002 |
| 72.0428504 | 63 | 71.1587002 |
| 72.0428504 | 63 | 71.2287002 |
| 72.9428504 | 63 | 71.3012002 |
| 72.9428504 | 63 | 71.3537002 |
| 73.0428504 | 63 | 71.4162002 |
| 72.9428504 | 63 | 71.4762002 |
| 72.3428504 | 63 | 71.5362002 |
| 72.5428504 | 63 | 71.5937002 |
| 72.6428504 | 63 | 71.6412002 |
| 72.3428504 | 63 | 71.6762002 |
| 70.8951823 | 63 | 71.7337002 |
| 71.1351823 | 63 | 71.8062002 |
| 71.2551823 | 63 | 71.9012002 |
| 71.8151823 | 63 | 72.0187002 |
| 72.5851823 | 63 | 72.1337002 |
| 72.8051823 | 63 | 72.2387002 |
| 73.9428504 | 63 | 72.3012002 |
| 73.3428504 | 63 | 72.3262002 |
| 73.1428504 | 63 | 72.3187002 |
| 72.8428504 | 63 | 72.2887002 |
| 72.7428504 | 63 | 72.2437002 |
| 72.5428504 | 63 | 72.1962002 |
| 72.3428504 | 63 | 72.1412002 |
| 72.2428504 | 63 | 72.0637002 |
| 72.0428504 | 63 | 71.9862002 |
| 71.7428504 | 63 | 71.8962002 |
| 71.2428504 | 63 | 71.8137002 |
| 71.0428504 | 63 | 71.7487002 |
| 71.1428504 | 63 | 71.6787002 |
| 72.1428504 | 63 | 71.6162002 |
| 72.7428504 | 63 | 71.5587002 |
| 73.1428504 | 63 | 71.5273919 |
| 73.4428504 | 63 | 71.5050836 |
| 73.3428504 | 63 | 71.4897753 |
| 72.9428504 | 63 | 71.472967  |
| 72.4428504 | 63 | 71.4444087 |
| 71.2428504 | 63 | 71.4128504 |
| 70.8428504 | 63 | 71.3653504 |
| 70.4428504 | 63 | 71.3328504 |
| 70.3428504 | 63 | 71.2978504 |
| 70.1428504 | 63 | 71.2603504 |
| 69.8428504 | 63 | 71.2467529 |
| 69.8428504 | 63 | 71.2480728 |

|            |    |            |
|------------|----|------------|
| 69.8428504 | 63 | 71.2616241 |
| 69.4428504 | 63 | 71.2896589 |
| 69.6428504 | 63 | 71.317735  |
| 69.7428504 | 63 | 71.3795265 |
| 69.7428504 | 63 | 71.4515452 |
| 70.1428504 | 63 | 71.5172003 |
| 70.0428504 | 63 | 71.5712646 |
| 69.6428504 | 63 | 71.5980561 |
| 70.2428504 | 63 | 71.6075748 |
| 70.6428504 | 63 | 71.611639  |
| 71.1428504 | 63 | 71.6286578 |
| 71.4428504 | 63 | 71.652722  |
| 71.5428504 | 63 | 71.6867862 |
| 72.0428504 | 63 | 71.7265323 |
| 72.0428504 | 63 | 71.773551  |
| 71.7428504 | 63 | 71.8101153 |
| 71.3428504 | 63 | 71.8362249 |
| 72.1989517 | 63 | 71.8557437 |
| 72.5956459 | 63 | 71.8848079 |
| 72.8849021 | 63 | 71.9100085 |
| 73.3642409 | 63 | 71.9533909 |
| 73.1658938 | 63 | 71.9899551 |
| 74.2145101 | 63 | 72.0297012 |
| 74.123601  | 63 | 72.0644472 |
| 73.6690555 | 63 | 72.0921478 |
| 73.3054192 | 63 | 72.1198484 |
| 73.2145101 | 63 | 72.1330035 |
| 73.123601  | 63 | 72.1441132 |
| 73.3054192 | 63 | 72.147041  |
| 74.123601  | 63 | 72.1304234 |
| 74.3054192 | 63 | 72.1060785 |
| 74.3054192 | 63 | 72.0669609 |
| 74.0326919 | 63 | 72.0248888 |
| 73.123601  | 63 | 71.9825894 |
| 72.3054192 | 63 | 71.9300627 |
| 71.4872373 | 63 | 71.8707178 |
| 71.123601  | 63 | 71.8256911 |
| 71.3054192 | 63 | 71.786119  |
| 70.8508737 | 63 | 71.7069625 |
| 71.5781464 | 63 | 71.5951614 |
| 71.3054192 | 63 | 71.4715834 |
| 71.0326919 | 63 | 71.3337492 |
| 71.0326919 | 63 | 71.2076919 |
| 70.8508737 | 63 | 71.0690555 |
| 70.8508737 | 63 | 70.948601  |

|            |    |            |
|------------|----|------------|
| 70.6690555 | 63 | 70.8554192 |
| 70.4872373 | 63 | 70.7781464 |
| 69.7599646 | 63 | 70.7099646 |
| 69.5781464 | 63 | 70.6576919 |
| 69.6690555 | 63 | 70.6008737 |
| 69.5781464 | 63 | 70.5304192 |
| 69.7599646 | 63 | 70.4645101 |
| 69.8508737 | 63 | 70.3895101 |
| 69.9417828 | 63 | 70.3099646 |
| 69.6690555 | 63 | 70.2554192 |
| 69.9417828 | 63 | 70.2417828 |
| 69.7599646 | 63 | 70.2622373 |
| 69.0326919 | 63 | 70.2917828 |
| 68.123601  | 63 | 70.3190555 |
| 67.9417828 | 63 | 70.3508737 |
| 67.8508737 | 63 | 70.3599646 |
| 68.123601  | 63 | 70.3667828 |
| 68.6690555 | 63 | 70.3849646 |
| 69.3054192 | 63 | 70.4008737 |
| 69.9417828 | 63 | 70.4326919 |
| 70.2145101 | 63 | 70.4826919 |
| 70.4872373 | 63 | 70.5508737 |
| 71.0326919 | 63 | 70.6326919 |
| 71.0326919 | 63 | 70.7440555 |
| 71.3054192 | 63 | 70.8667828 |
| 71.6690555 | 63 | 70.9690555 |
| 71.3054192 | 63 | 71.0645101 |
| 70.8508737 | 63 | 71.1554192 |
| 70.9417828 | 63 | 71.2417828 |
| 71.7599646 | 63 | 71.3304192 |
| 72.3054192 | 63 | 71.4258737 |
| 72.3054192 | 63 | 71.5190555 |
| 72.3963282 | 63 | 71.6099646 |
| 72.123601  | 63 | 71.7395101 |
| 71.9417828 | 63 | 71.9031464 |
| 71.5781464 | 63 | 72.0623869 |
| 71.7599646 | 63 | 72.2222472 |
| 71.6690555 | 63 | 72.3806612 |
| 72.123601  | 63 | 72.5254388 |
| 72.8508737 | 63 | 72.6545139 |
| 73.3963282 | 63 | 72.7786304 |
| 73.7599646 | 63 | 72.8992345 |
| 74.2145101 | 63 | 73.0144667 |
| 74.4872373 | 63 | 73.1158559 |
| 73.7599646 | 63 | 73.1947244 |

|            |    |            |
|------------|----|------------|
| 73.3963282 | 63 | 73.2543781 |
| 73.3963282 | 63 | 73.3049409 |
| 73.3054192 | 63 | 73.3596359 |
| 73.4872373 | 63 | 73.4033804 |
| 73.4872373 | 63 | 73.425844  |
| 73.6690555 | 63 | 73.4030597 |
| 73.3963282 | 63 | 73.366639  |
| 74.2145101 | 63 | 73.3477802 |
| 74.6690555 | 63 | 73.3328471 |
| 74.3114006 | 63 | 73.3222529 |
| 74.2452849 | 63 | 73.3336165 |
| 74.460161  | 63 | 73.3586165 |
| 74.460161  | 63 | 73.3767983 |
| 74.4684254 | 63 | 73.3972529 |
| 74.906442  | 63 | 73.3927074 |
| 75.0386734 | 63 | 73.3677074 |
| 75.0965246 | 63 | 73.3290711 |
| 75.0882601 | 63 | 73.2927074 |
| 74.1874337 | 63 | 73.238162  |
| 73.6915659 | 63 | 73.1699801 |
| 73.6915659 | 63 | 73.0995256 |
| 73.4932188 | 63 | 73.0199801 |
| 72.6006568 | 63 | 72.9290711 |
| 71.8403263 | 63 | 72.8427074 |
| 70.8485907 | 63 | 72.7586165 |
| 70.8485907 | 63 | 72.6767983 |
| 71.5510701 | 63 | 72.6017983 |
| 71.7990039 | 63 | 72.5472529 |
| 71.6998304 | 63 | 72.4836165 |
| 72.3963282 | 63 | 72.4177074 |
| 72.5781464 | 63 | 72.3925579 |
| 72.4872373 | 63 | 72.3849703 |
| 72.4872373 | 63 | 72.3856472 |
| 71.9417828 | 63 | 72.3726878 |
| 71.8508737 | 63 | 72.3663399 |
| 71.8508737 | 63 | 72.3467689 |
| 72.3054192 | 63 | 72.3193466 |
| 72.0326919 | 63 | 72.2950235 |
| 71.7599646 | 63 | 72.2845434 |
| 70.9417828 | 63 | 72.2988567 |
| 70.2145101 | 63 | 72.3096576 |
| 69.7599646 | 63 | 72.3204584 |
| 69.8508737 | 63 | 72.3384907 |
| 70.123601  | 63 | 72.3674734 |
| 70.2145101 | 63 | 72.4154644 |

|            |    |            |
|------------|----|------------|
| 70.6690555 | 63 | 72.4700669 |
| 71.2145101 | 63 | 72.5246694 |
| 71.6690555 | 63 | 72.5435281 |
| 72.0326919 | 63 | 72.560734  |
| 73.3054192 | 63 | 72.5781464 |
| 73.9417828 | 63 | 72.5758737 |
| 74.4872373 | 63 | 72.5758737 |
| 73.9417828 | 63 | 72.5940555 |
| 74.2145101 | 63 | 72.5963282 |
| 74.123601  | 63 | 72.6258737 |
| 73.9417828 | 63 | 72.6667828 |
| 74.123601  | 63 | 72.6963282 |
| 74.6690555 | 63 | 72.7054192 |
| 74.7599646 | 63 | 72.7258737 |
| 74.123601  | 63 | 72.7223042 |
| 74.123601  | 63 | 72.73671   |
| 74.2145101 | 63 | 72.8026191 |
| 73.7599646 | 63 | 72.8685281 |
| 73.7599646 | 63 | 72.9276191 |
| 73.0326919 | 63 | 72.9776191 |
| 73.0326919 | 63 | 73.0253463 |
| 72.3054192 | 63 | 73.0662554 |
| 72.4872373 | 63 | 73.0935281 |
| 72.3963282 | 63 | 73.1139827 |
| 72.3054192 | 63 | 73.1458009 |
| 72.5781464 | 63 | 73.1548918 |
| 73.2145101 | 63 | 73.1526191 |
| 72.5781464 | 63 | 73.1230736 |
| 73.123601  | 63 | 73.0889827 |
| 73.4872373 | 63 | 73.0503463 |
| 73.0326919 | 63 | 72.9764087 |
| 72.6690555 | 63 | 72.965045  |
| 72.8508737 | 63 | 72.9445905 |
| 71.6171858 | 63 | 72.9218632 |
| 71.5180122 | 63 | 72.8945905 |
| 72.8508737 | 63 | 72.8923178 |
| 72.3963282 | 63 | 72.8856491 |
| 72.2145101 | 63 | 72.8729887 |
| 72.123601  | 63 | 72.864254  |
| 72.123601  | 63 | 72.8565523 |
| 72.3054192 | 63 | 72.8527762 |
| 72.3054192 | 63 | 72.8715208 |
| 72.4872373 | 63 | 72.9059678 |
| 73.3054192 | 63 | 72.9381421 |
| 73.6690555 | 63 | 72.9601925 |

|            |    |            |
|------------|----|------------|
| 73.8508737 | 63 | 72.9553834 |
| 73.3054192 | 63 | 72.9124374 |
| 72.5781464 | 63 | 72.8436651 |
| 72.6690555 | 63 | 72.7957605 |
| 71.1660943 | 63 | 72.766215  |
| 73.4872373 | 63 | 72.7207605 |
| 73.3054192 | 63 | 72.6821241 |
| 73.7599646 | 63 | 72.6571241 |
| 73.6690555 | 63 | 72.6275786 |
| 74.0326919 | 63 | 72.6220572 |
| 73.8568552 | 63 | 72.6258333 |
| 73.7080949 | 63 | 72.6099242 |
| 73.4105742 | 63 | 72.6258333 |
| 73.4518965 | 63 | 72.6258333 |
| 72.8816486 | 63 | 72.6303787 |
| 73.782475  | 63 | 72.6090285 |
| 73.6833015 | 63 | 72.565984  |
| 73.7742106 | 63 | 72.5130221 |
| 73.2783428 | 63 | 72.4629528 |
| 72.1130535 | 63 | 72.3973877 |
| 70.8603092 | 63 | 72.3218187 |
| 70.463615  | 63 | 72.2297208 |
| 70.6619621 | 63 | 72.1413418 |
| 71.9417828 | 63 | 72.0589546 |
| 71.6690555 | 63 | 71.9771873 |
| 71.4872373 | 63 | 71.9381592 |
| 71.6690555 | 63 | 71.8485407 |
| 71.6690555 | 63 | 71.7857816 |
| 71.3963282 | 63 | 71.7188902 |
| 71.6690555 | 63 | 71.6615031 |
| 72.2145101 | 63 | 71.5999836 |
| 73.0326919 | 63 | 71.5428601 |
| 72.2145101 | 63 | 71.474373  |
| 72.3054192 | 63 | 71.4205553 |
| 71.26959   | 63 | 71.3941661 |
| 70.5836396 | 63 | 71.391124  |
| 70.1869454 | 63 | 71.3655612 |
| 70.484466  | 63 | 71.3470232 |
| 70.6828131 | 63 | 71.3262125 |
| 70.6462952 | 63 | 71.3518895 |
| 70.1669564 | 63 | 71.4180622 |
| 69.7702622 | 63 | 71.5178263 |
| 69.2826589 | 63 | 71.634326  |
| 69.3983613 | 63 | 71.7390488 |
| 69.6049729 | 63 | 71.8231397 |



|            |    |            |
|------------|----|------------|
| 69.9024936 | 63 | 71.9072306 |
| 70.7950555 | 63 | 71.9822306 |
| 71.0843117 | 63 | 72.0481397 |
| 71.3735679 | 63 | 72.1299579 |
| 71.5719151 | 63 | 72.1839343 |
| 71.5719151 | 63 | 72.2385306 |
| 70.9686093 | 63 | 72.2796971 |
| 71.2578655 | 63 | 72.2954504 |
| 72.3963282 | 63 | 72.3242203 |
| 72.7599646 | 63 | 72.3581554 |
| 72.7599646 | 63 | 72.4204656 |
| 72.9417828 | 63 | 72.5248737 |
| 72.9417828 | 63 | 72.632381  |
| 74.3054192 | 63 | 72.7324503 |
| 74.7599646 | 63 | 72.8548336 |
| 74.8508737 | 63 | 72.9826754 |
| 75.123601  | 63 | 73.1293188 |
| 74.8508737 | 63 | 73.2767886 |
| 75.3054192 | 63 | 73.4341758 |
| 75.0326919 | 63 | 73.5613977 |
| 74.4872373 | 63 | 73.6720907 |
| 74.3054192 | 63 | 73.7708002 |
| 74.9417828 | 63 | 73.8426502 |
| 73.5553861 | 63 | 73.8822687 |
| 73.8529068 | 63 | 73.9032923 |
| 73.8611712 | 63 | 73.9102663 |
| 73.6628241 | 63 | 73.919513  |
| 73.3653035 | 63 | 73.946115  |
| 73.6628241 | 63 | 73.9723039 |
| 73.7619977 | 63 | 73.9768493 |
| 74.7599646 | 63 | 73.963213  |
| 74.4872373 | 63 | 73.9586675 |
| 74.4872373 | 63 | 73.9404857 |
| 75.5781464 | 63 | 73.9223039 |
| 75.7599646 | 63 | 73.8700311 |
| 76.0326919 | 63 | 73.8268493 |
| 75.6690555 | 63 | 73.7813948 |
| 75.5781464 | 63 | 73.7313948 |
| 74.4872373 | 63 | 73.6927584 |
| 74.0326919 | 63 | 73.6359402 |
| 73.8508737 | 63 | 73.5859402 |
| 73.6690555 | 63 | 73.5473039 |
| 72.6690555 | 63 | 73.5109402 |
| 72.2145101 | 63 | 73.4723039 |
| 71.8508737 | 63 | 73.4751456 |

|            |    |            |
|------------|----|------------|
| 71.9417828 | 63 | 73.4682766 |
| 72.0326919 | 63 | 73.4680192 |
| 72.3054192 | 63 | 73.4568113 |
| 72.5781464 | 63 | 73.4530415 |
| 72.2145101 | 63 | 73.45547   |
| 72.5781464 | 63 | 73.4576919 |
| 72.2145101 | 63 | 73.4349646 |
| 72.2145101 | 63 | 73.4031464 |
| 72.2145101 | 63 | 73.3690555 |
| 73.0326919 | 63 | 73.3145101 |
| 73.0326919 | 63 | 73.2622373 |
| 73.123601  | 63 | 73.198601  |
| 73.3054192 | 63 | 73.1349646 |
| 73.0326919 | 63 | 73.0713282 |
| 73.0326919 | 63 | 73.0281464 |
| 72.9417828 | 63 | 72.9804192 |
| 72.8508737 | 63 | 72.9417828 |
| 73.3963282 | 63 | 72.9145101 |
| 73.6690555 | 63 | 72.9145101 |
| 73.5781464 | 63 | 72.9417828 |
| 73.8508737 | 63 | 72.9599646 |
| 73.2145101 | 63 | 72.9804192 |
| 73.2145101 | 63 | 73.0054192 |
| 73.7599646 | 63 | 73.0326919 |
| 73.8508737 | 63 | 73.0440555 |
| 73.8508737 | 63 | 73.0576919 |
| 73.2145101 | 63 | 73.0397409 |
| 73.123601  | 63 | 73.0533773 |
| 73.3963282 | 63 | 73.0579228 |
| 73.6690555 | 63 | 73.0601955 |
| 73.4872373 | 63 | 73.0374682 |
| 73.123601  | 63 | 72.9851955 |
| 73.0326919 | 63 | 72.9192864 |
| 72.7599646 | 63 | 72.8283773 |
| 72.123601  | 63 | 72.7442864 |
| 72.3054192 | 63 | 72.6647409 |
| 72.5781464 | 63 | 72.5783773 |
| 72.6690555 | 63 | 72.4920137 |
| 73.3054192 | 63 | 72.3965591 |
| 72.5781464 | 63 | 72.3033773 |
| 72.7599646 | 63 | 72.2170137 |
| 73.0326919 | 63 | 72.1329228 |
| 73.3963282 | 63 | 72.0692864 |
| 73.0326919 | 63 | 72.0192864 |
| 72.7599646 | 63 | 71.95565   |

|            |    |            |
|------------|----|------------|
| 71.8601087 | 63 | 71.8851955 |
| 72.7599646 | 63 | 71.8374682 |
| 72.3963282 | 63 | 71.8101955 |
| 72.3054192 | 63 | 71.8101955 |
| 72.123601  | 63 | 71.8033773 |
| 70.9417828 | 63 | 71.8011288 |
| 70.4872373 | 63 | 71.8135498 |
| 69.6690555 | 63 | 71.8400203 |
| 69.6690555 | 63 | 71.8811603 |
| 69.8508737 | 63 | 71.9342837 |
| 69.4872373 | 63 | 71.9909196 |
| 69.3963282 | 63 | 72.0454893 |
| 69.5781464 | 63 | 72.0734061 |
| 69.9417828 | 63 | 72.088513  |
| 70.123601  | 63 | 72.0901902 |
| 70.4872373 | 63 | 72.1100492 |
| 70.6690555 | 63 | 72.1276354 |
| 71.2145101 | 63 | 72.1571809 |
| 71.2145101 | 63 | 72.1390233 |
| 71.0326919 | 63 | 72.132436  |
| 71.9417828 | 63 | 72.1324603 |
| 72.123601  | 63 | 72.193593  |
| 73.123601  | 63 | 72.2345021 |
| 73.123601  | 63 | 72.2822294 |
| 73.579117  | 63 | 72.2836999 |
| 73.9840757 | 63 | 72.2921953 |
| 74.1824228 | 63 | 72.3277567 |
| 74.6782905 | 63 | 72.3746818 |
| 74.8849021 | 63 | 72.4159713 |
| 74.3890343 | 63 | 72.4599468 |
| 74.4882079 | 63 | 72.5229876 |
| 73.6948195 | 63 | 72.5953259 |
| 73.2733319 | 63 | 72.6798543 |
| 73.3725054 | 63 | 72.7796719 |
| 73.3725054 | 63 | 72.8879607 |
| 73.4634145 | 63 | 73.0220516 |
| 74.2145101 | 63 | 73.151597  |
| 72.6700261 | 63 | 73.2834152 |
| 72.7691996 | 63 | 73.3696015 |
| 72.7609352 | 63 | 73.4363663 |
| 74.3054192 | 63 | 73.500032  |
| 74.3963282 | 63 | 73.5380778 |
| 74.3054192 | 63 | 73.5567021 |
| 72.3642409 | 63 | 73.5862475 |
| 72.4634145 | 63 | 73.6339748 |

|            |    |            |
|------------|----|------------|
| 72.3642409 | 63 | 73.6725869 |
| 72.3642409 | 63 | 73.7056205 |
| 71.3206357 | 63 | 73.7405136 |
| 71.4280737 | 63 | 73.7516463 |
| 72.3725054 | 63 | 73.7485229 |
| 72.3807699 | 63 | 73.7532507 |
| 72.7774641 | 63 | 73.7532264 |
| 73.5708525 | 63 | 73.7323637 |
| 74.2733319 | 63 | 73.7170794 |
| 75.4872373 | 63 | 73.6918778 |
| 75.6690555 | 63 | 73.6493209 |
| 75.9417828 | 63 | 73.5972598 |
| 74.6619621 | 63 | 73.4870105 |
| 73.8851026 | 63 | 73.4153733 |
| 73.5793175 | 63 | 73.345337  |
| 73.463615  | 63 | 73.3021309 |
| 72.8685737 | 63 | 73.1975855 |
| 74.3054192 | 63 | 73.0703128 |
| 75.0326919 | 63 | 72.9271309 |
| 75.123601  | 63 | 72.8347513 |
| 75.3054192 | 63 | 72.7444378 |
| 75.5781464 | 63 | 72.6566036 |
| 75.123601  | 63 | 72.5801331 |
| 74.7599646 | 63 | 72.5388436 |
| 74.5781464 | 63 | 72.4880499 |
| 74.4872373 | 63 | 72.4136455 |
| 72.8603092 | 63 | 72.3390345 |
| 72.6619621 | 63 | 72.2476879 |
| 72.3644414 | 63 | 72.1455975 |
| 71.6702265 | 63 | 72.0304906 |
| 71.3809703 | 63 | 71.885036  |
| 69.8045394 | 63 | 71.7373088 |
| 69.8045394 | 63 | 71.5895815 |
| 69.9677472 | 63 | 71.4761225 |
| 71.0326919 | 63 | 71.3911758 |
| 70.123601  | 63 | 71.3116011 |
| 69.3054192 | 63 | 71.2462826 |
| 68.5781464 | 63 | 71.1912946 |
| 68.6690555 | 63 | 71.104931  |
| 68.8508737 | 63 | 71.004931  |
| 68.8508737 | 63 | 70.9094764 |
| 69.3054192 | 63 | 70.8094764 |
| 69.6690555 | 63 | 70.6867492 |
| 69.3963282 | 63 | 70.5822037 |
| 69.3963282 | 63 | 70.4844764 |

|            |    |            |
|------------|----|------------|
| 69.3963282 | 63 | 70.3958401 |
| 69.123601  | 63 | 70.3094764 |
| 69.4872373 | 63 | 70.2706042 |
| 69.6690555 | 63 | 70.2230543 |
| 69.6690555 | 63 | 70.1715787 |
| 69.7599646 | 63 | 70.1260949 |
| 70.0326919 | 63 | 70.0878425 |
| 70.123601  | 63 | 70.0935463 |
| 70.4872373 | 63 | 70.1219774 |
| 70.3963282 | 63 | 70.1576919 |
| 70.8508737 | 63 | 70.1781464 |
| 70.6690555 | 63 | 70.2167828 |
| 70.8508737 | 63 | 70.2758737 |
| 71.0326919 | 63 | 70.3508737 |
| 71.3054192 | 63 | 70.423601  |
| 71.3054192 | 63 | 70.4758737 |
| 70.6690555 | 63 | 70.5417828 |
| 70.9417828 | 63 | 70.6031464 |
| 70.8508737 | 63 | 70.6463282 |
| 71.0326919 | 63 | 70.6917828 |
| 71.0326919 | 63 | 70.7349646 |
| 71.3054192 | 63 | 70.7804192 |
| 70.7599646 | 63 | 70.8326919 |
| 70.3054192 | 63 | 70.8645101 |
| 69.8508737 | 63 | 70.8758737 |
| 69.8508737 | 63 | 70.8872373 |
| 70.0326919 | 63 | 70.9008737 |
| 70.9417828 | 63 | 70.9190555 |
| 71.3963282 | 63 | 70.948601  |
| 71.8508737 | 63 | 70.9781464 |
| 71.6690555 | 63 | 71.0213282 |
| 71.6690555 | 63 | 71.0554192 |
| 71.5781464 | 63 | 71.0940555 |
| 71.5781464 | 63 | 71.1190555 |
| 70.9417828 | 63 | 71.1463282 |
| 71.4872373 | 63 | 71.1849646 |
| 71.7599646 | 63 | 71.2372373 |
| 71.3963282 | 63 | 71.3145101 |
| 71.2145101 | 63 | 71.3740662 |
| 71.123601  | 63 | 71.4385811 |
| 71.2145101 | 63 | 71.5010298 |
| 71.2145101 | 63 | 71.5636851 |
| 70.7599646 | 63 | 71.6174562 |
| 70.123601  | 63 | 71.6774256 |
| 70.123601  | 63 | 71.7516512 |

|            |    |            |
|------------|----|------------|
| 70.3054192 | 63 | 71.8446784 |
| 70.7599646 | 63 | 71.9331602 |
| 71.3054192 | 63 | 72.0146172 |
| 71.6690555 | 63 | 72.0688015 |
| 72.123601  | 63 | 72.1093494 |
| 72.2145101 | 63 | 72.1385336 |
| 72.2145101 | 63 | 72.1747427 |
| 71.8508737 | 63 | 72.2136377 |
| 72.123601  | 63 | 72.2597641 |
| 72.8508737 | 63 | 72.3036178 |
| 73.3963282 | 63 | 72.3633806 |
| 73.7599646 | 63 | 72.3971103 |
| 73.3240295 | 63 | 72.4112119 |
| 73.4314675 | 63 | 72.4120904 |
| 73.5306411 | 63 | 72.4123491 |
| 73.5389056 | 63 | 72.4345085 |
| 73.4562609 | 63 | 72.4568746 |
| 73.1587403 | 63 | 72.4941168 |
| 73.2744427 | 63 | 72.5501605 |
| 73.5719634 | 63 | 72.612196  |
| 73.3901452 | 63 | 72.6742315 |
| 73.2909717 | 63 | 72.7441183 |
| 73.1091535 | 63 | 72.8076001 |
| 73.0182444 | 63 | 72.8795529 |
| 73.0182444 | 63 | 72.9473736 |
| 73.117418  | 63 | 73.0197397 |
| 73.224856  | 63 | 73.1151942 |
| 73.4232031 | 63 | 73.1992851 |
| 73.332294  | 63 | 73.2992851 |
| 73.332294  | 63 | 73.3970124 |
| 72.8364262 | 63 | 73.4720124 |
| 72.3240295 | 63 | 73.533376  |
| 71.4314675 | 63 | 73.5879215 |
| 71.224856  | 63 | 73.6829108 |
| 72.0099799 | 63 | 73.7683959 |
| 72.1091535 | 63 | 73.8377654 |
| 72.7041948 | 63 | 73.8955646 |
| 73.0017155 | 63 | 73.9599753 |
| 72.6050213 | 63 | 74.0136423 |
| 72.6050213 | 63 | 74.0598713 |
| 73.100889  | 63 | 74.1009349 |
| 73.2992361 | 63 | 74.1533622 |
| 74.1835337 | 63 | 74.2037234 |
| 74.3818808 | 63 | 74.2631755 |
| 75.0182444 | 63 | 74.3088367 |

|            |    |            |
|------------|----|------------|
| 76.0326919 | 63 | 74.3619358 |
| 75.5781464 | 63 | 74.4199937 |
| 75.8508737 | 63 | 74.485283  |
| 76.0326919 | 63 | 74.5480929 |
| 75.8508737 | 63 | 74.6255722 |
| 75.8508737 | 63 | 74.6832168 |
| 75.9417828 | 63 | 74.7555309 |
| 77.123601  | 63 | 74.8332168 |
| 76.8508737 | 63 | 74.9550656 |
| 76.3054192 | 63 | 75.0593524 |
| 75.8508737 | 63 | 75.1303748 |
| 76.0326919 | 63 | 75.161757  |
| 75.3054192 | 63 | 75.1733045 |
| 75.123601  | 63 | 75.1578101 |
| 75.2145101 | 63 | 75.1495471 |
| 75.4872373 | 63 | 75.1416974 |
| 75.3054192 | 63 | 75.1241369 |
| 75.4872373 | 63 | 75.1082293 |
| 74.8446907 | 63 | 75.0710408 |
| 75.1422113 | 63 | 75.0386042 |
| 75.439732  | 63 | 74.9848867 |
| 75.8364262 | 63 | 74.9062213 |
| 75.9355998 | 63 | 74.8327211 |
| 76.4314675 | 63 | 74.7546755 |
| 75.6380791 | 63 | 74.6735307 |
| 75.7289882 | 63 | 74.6173566 |
| 75.4314675 | 63 | 74.5636618 |
| 76.3054192 | 63 | 74.5027357 |
| 75.3963282 | 63 | 74.4194955 |
| 74.8508737 | 63 | 74.3279908 |
| 73.3644414 | 63 | 74.2575605 |
| 73.1660943 | 63 | 74.1858906 |
| 72.3819409 | 63 | 74.1071958 |
| 72.2745029 | 63 | 74.0371788 |
| 72.2910318 | 63 | 73.9617898 |
| 72.3984698 | 63 | 73.8890868 |
| 72.6629326 | 63 | 73.8048136 |
| 72.6959905 | 63 | 73.7275651 |
| 73.0844202 | 63 | 73.6482505 |
| 72.8695442 | 63 | 73.6097687 |
| 72.8860731 | 63 | 73.5638489 |
| 72.6381392 | 63 | 73.4900366 |
| 72.7290483 | 63 | 73.413125  |
| 72.7868996 | 63 | 73.3382796 |
| 73.6039104 | 63 | 73.2555829 |

|            |    |            |
|------------|----|------------|
| 73.7030839 | 63 | 73.1881755 |
| 73.5047368 | 63 | 73.1184954 |
| 73.793993  | 63 | 73.058526  |
| 73.1906872 | 63 | 72.9789805 |
| 73.4882079 | 63 | 72.9130714 |
| 72.9840757 | 63 | 72.8607987 |
| 72.8849021 | 63 | 72.8388686 |
| 72.5047368 | 63 | 72.8196245 |
| 72.1080426 | 63 | 72.8268023 |
| 72.3063897 | 63 | 72.8343934 |
| 72.1163071 | 63 | 72.8529349 |
| 72.2154806 | 63 | 72.8756087 |
| 72.3146542 | 63 | 72.8893981 |
| 73.3054192 | 63 | 72.9091793 |
| 73.3054192 | 63 | 72.9351588 |
| 72.4872373 | 63 | 72.9574193 |
| 72.7599646 | 63 | 72.9769938 |
| 72.9417828 | 63 | 73.000494  |
| 73.123601  | 63 | 73.0194488 |
| 72.9417828 | 63 | 73.0392299 |
| 72.9417828 | 63 | 73.0408586 |
| 73.0326919 | 63 | 73.0422806 |
| 73.123601  | 63 | 73.0441158 |
| 72.7599646 | 63 | 73.0455378 |
| 72.7599646 | 63 | 73.057497  |
| 72.4872373 | 63 | 73.0597455 |
| 72.3963282 | 63 | 73.07687   |
| 72.6690555 | 63 | 73.0964738 |
| 72.5781464 | 63 | 73.1210363 |
| 73.0326919 | 63 | 73.1600617 |
| 73.3054192 | 63 | 73.2123101 |
| 73.2145101 | 63 | 73.2670379 |
| 73.4872373 | 63 | 73.3215591 |
| 74.123601  | 63 | 73.3690555 |
| 73.7599646 | 63 | 73.3895101 |
| 73.6690555 | 63 | 73.4008737 |
| 73.5781464 | 63 | 73.4008737 |
| 73.4872373 | 63 | 73.3781464 |
| 73.5781464 | 63 | 73.3417828 |
| 73.6690555 | 63 | 73.298601  |
| 73.7599646 | 63 | 73.2758737 |
| 73.5781464 | 63 | 73.2713282 |
| 73.8508737 | 63 | 73.273601  |
| 73.6690555 | 63 | 73.2599646 |
| 73.5781464 | 63 | 73.2531464 |



|            |    |            |
|------------|----|------------|
| 73.6690555 | 63 | 73.2372373 |
| 73.6690555 | 63 | 73.2258737 |
| 73.4872373 | 63 | 73.2167828 |
| 73.6690555 | 63 | 73.2076919 |
| 74.3963282 | 63 | 73.2008737 |
| 74.3054192 | 63 | 73.1826919 |
| 74.3963282 | 63 | 73.1622373 |
| 74.2145101 | 63 | 73.1463282 |
| 74.123601  | 63 | 73.1326919 |
| 73.7599646 | 63 | 73.1122373 |
| 72.4872373 | 63 | 73.1076919 |
| 71.8508737 | 63 | 73.1167828 |
| 71.4872373 | 63 | 73.1304192 |
| 71.3963282 | 63 | 73.148601  |
| 72.0326919 | 63 | 73.1622373 |
| 72.7599646 | 63 | 73.1713282 |
| 73.123601  | 63 | 73.1826919 |
| 72.5781464 | 63 | 73.2190555 |
| 72.4872373 | 63 | 73.2667828 |
| 72.123601  | 63 | 73.3145101 |
| 72.0326919 | 63 | 73.3690555 |
| 72.0326919 | 63 | 73.423601  |
| 72.3054192 | 63 | 73.4826919 |
| 72.3054192 | 63 | 73.5139423 |
| 72.3054192 | 63 | 73.5433331 |
| 72.4872373 | 63 | 73.5545422 |
| 72.5781464 | 63 | 73.568024  |
| 72.9417828 | 63 | 73.5769603 |
| 73.3054192 | 63 | 73.5681281 |
| 73.5781464 | 63 | 73.5741718 |
| 74.0326919 | 63 | 73.5868272 |
| 74.123601  | 63 | 73.6459701 |
| 74.2145101 | 63 | 73.7133775 |
| 74.123601  | 63 | 73.7873965 |
| 74.0326919 | 63 | 73.8758783 |
| 74.2145101 | 63 | 73.9534097 |
| 75.0326919 | 63 | 74.0125526 |
| 75.7599646 | 63 | 74.050208  |
| 75.5781464 | 63 | 74.093855  |
| 75.7599646 | 63 | 74.1375021 |
| 75.8508737 | 63 | 74.160488  |
| 76.0326919 | 63 | 74.1683913 |
| 74.7372527 | 63 | 74.1614186 |
| 74.8446907 | 63 | 74.1682367 |
| 74.8446907 | 63 | 74.1591458 |

|            |    |            |
|------------|----|------------|
| 74.8446907 | 63 | 74.1432367 |
| 74.7537816 | 63 | 74.1227822 |
| 73.8612196 | 63 | 74.1023276 |
| 74.3653518 | 63 | 74.0750549 |
| 74.2661783 | 63 | 74.0386913 |
| 74.8529551 | 63 | 73.990964  |
| 74.54717   | 63 | 73.9296004 |
| 74.4479965 | 63 | 73.8636913 |
| 74.9355998 | 63 | 73.7977822 |
| 75.1339469 | 63 | 73.7432367 |
| 75.1256824 | 63 | 73.6864186 |
| 74.6298146 | 63 | 73.6136913 |
| 74.3240295 | 63 | 73.5250549 |
| 74.2331204 | 63 | 73.4182367 |
| 73.0430378 | 63 | 73.3046004 |
| 72.3488229 | 63 | 73.1886913 |
| 71.7537816 | 63 | 73.0750549 |
| 72.5781464 | 63 | 72.965964  |
| 71.9417828 | 63 | 72.89835   |
| 71.6690555 | 63 | 72.8325955 |
| 71.6690555 | 63 | 72.7713864 |
| 71.7599646 | 63 | 72.7147228 |
| 71.8508737 | 63 | 72.6739683 |
| 71.8508737 | 63 | 72.6555278 |
| 71.6690555 | 63 | 72.6313022 |
| 71.5781464 | 63 | 72.6186469 |
| 71.4872373 | 63 | 72.6163221 |
| 71.5781464 | 63 | 72.6352784 |
| 71.9417828 | 63 | 72.6612594 |
| 71.7599646 | 63 | 72.661414  |
| 71.3054192 | 63 | 72.663428  |
| 71.4872373 | 63 | 72.6747396 |
| 71.4872373 | 63 | 72.6870843 |
| 71.0326919 | 63 | 72.6979827 |
| 71.123601  | 63 | 72.7043356 |
| 71.3054192 | 63 | 72.744986  |
| 71.6690555 | 63 | 72.8029919 |
| 72.0326919 | 63 | 72.873601  |
| 72.2145101 | 63 | 72.923601  |
| 72.3963282 | 63 | 72.9917828 |
| 72.5781464 | 63 | 73.0713282 |
| 73.123601  | 63 | 73.1531464 |
| 73.123601  | 63 | 73.2326919 |
| 73.3963282 | 63 | 73.298601  |
| 73.7599646 | 63 | 73.3508737 |

|        |            |    |            |
|--------|------------|----|------------|
|        | 74.7599646 | 63 | 73.3549489 |
|        | 75.3054192 | 63 | 73.3540653 |
|        | 75.4872373 | 63 | 73.3556612 |
|        | 74.9417828 | 63 | 73.3566371 |
|        | 75.2145101 | 63 | 73.3485222 |
|        | 75.5781464 | 63 | 73.3780677 |
|        | 75.123601  | 63 | 73.4280677 |
|        | 74.7599646 | 63 | 73.4826131 |
|        | 74.4872373 | 63 | 73.5462495 |
|        | 74.6690555 | 63 | 73.6212495 |
|        | 74.6690555 | 63 | 73.7030677 |
|        | 74.5781464 | 63 | 73.7848858 |
|        | 74.5781464 | 63 | 73.8530677 |
|        | 74.6690555 | 63 | 73.8903098 |
|        | 74.8508737 | 63 | 73.9180478 |
|        | 74.9417828 | 63 | 73.9412403 |
|        | 74.9417828 | 63 | 73.94997   |
|        | 74.4872373 | 63 | 73.9473361 |
|        | 73.9417828 | 63 | 73.9768816 |
| BEFORE | 71.8320618 | 63 | 73.9859725 |
| BEFORE | 71.5428056 | 63 | 73.9905179 |
| BEFORE | 71.5510701 | 63 | 73.9632452 |
| BEFORE | 71.6171858 | 63 | 73.9223361 |
| BEFORE | 71.6171858 | 63 | 73.8791543 |
| BEFORE | 72.9417828 | 63 | 73.8291543 |
| BEFORE | 73.3054192 | 63 | 73.7586997 |
| BEFORE | 73.6690555 | 63 | 73.6655179 |
| BEFORE | 74.0326919 | 63 | 73.581427  |
| BEFORE | 74.0326919 | 63 | 73.5086997 |
| BEFORE | 74.3963282 | 63 | 73.4518816 |
| BEFORE | 74.5781464 | 63 | 73.3905179 |
| BEFORE | 74.3963282 | 63 | 73.3132452 |
| BEFORE | 73.5223766 | 63 | 73.2223361 |
| BEFORE | 73.3240295 | 63 | 73.1382452 |
| BEFORE | 73.3240295 | 63 | 73.056427  |
| BEFORE | 72.9273353 | 63 | 72.9791543 |
| BEFORE | 73.0182444 | 63 | 72.8996088 |
| BEFORE | 74.3054192 | 63 | 72.8109725 |
| BEFORE | 73.7599646 | 63 | 72.731427  |
| BEFORE | 73.9417828 | 63 | 72.6586997 |
| BEFORE | 73.6690555 | 63 | 72.6364428 |
| BEFORE | 73.6690555 | 63 | 72.6191445 |
| BEFORE | 73.7599646 | 63 | 72.5789123 |
| BEFORE | 72.9417828 | 63 | 72.5324818 |
| BEFORE | 72.3963282 | 63 | 72.4815058 |

|        |            |    |            |
|--------|------------|----|------------|
| BEFORE | 71.8508737 | 63 | 72.3928694 |
| BEFORE | 71.7599646 | 63 | 72.3019603 |
| BEFORE | 71.8508737 | 63 | 72.2224149 |
| BEFORE | 72.2145101 | 63 | 72.1496876 |
| BEFORE | 72.2145101 | 63 | 72.0928694 |
| BEFORE | 71.5781464 | 63 | 72.0496876 |
| BEFORE | 70.9417828 | 63 | 71.9589689 |
| BEFORE | 71.2145101 | 63 | 71.8754816 |
| BEFORE | 71.3963282 | 63 | 71.8556469 |
| BEFORE | 71.7599646 | 63 | 71.8310601 |
| BEFORE | 71.7599646 | 63 | 71.796556  |
| BEFORE | 71.3963282 | 63 | 71.7719692 |
| BEFORE | 71.3054192 | 63 | 71.7649444 |
| BEFORE | 71.0326919 | 63 | 71.7207815 |
| BEFORE | 70.9417828 | 63 | 71.6805443 |
| BEFORE | 70.8508737 | 63 | 71.6134476 |
| BEFORE | 69.9417828 | 63 | 71.548417  |
| BEFORE | 69.7599646 | 63 | 71.480907  |
| BEFORE | 69.5781464 | 63 | 71.4142235 |
| BEFORE | 69.3963282 | 63 | 71.3729533 |
| BEFORE | 69.6690555 | 63 | 71.3508979 |
| BEFORE | 70.4872373 | 63 | 71.3470243 |
| BEFORE | 71.123601  | 63 | 71.3427375 |
| BEFORE | 71.7599646 | 63 | 71.3312193 |
| BEFORE | 72.6690555 | 63 | 71.3081308 |
| BEFORE | 70.9493978 | 63 | 71.282563  |
| BEFORE | 71.0568358 | 63 | 71.267739  |
| BEFORE | 72.7289882 | 63 | 71.2539481 |
| BEFORE | 72.3405584 | 63 | 71.2451158 |
| BEFORE | 71.9438642 | 63 | 71.2342174 |
| BEFORE | 71.9438642 | 63 | 71.2189802 |
| BEFORE | 72.7372527 | 63 | 71.203743  |
| BEFORE | 72.5389056 | 63 | 71.1876793 |
| BEFORE | 72.1504758 | 63 | 71.1784338 |
| BEFORE | 71.2579138 | 63 | 71.1710479 |
| BEFORE | 71.0678312 | 63 | 71.1684139 |
| BEFORE | 70.9686576 | 63 | 71.1754908 |
| BEFORE | 71.0926246 | 63 | 71.2077742 |
| BEFORE | 71.2909717 | 63 | 71.2668651 |
| BEFORE | 71.5141122 | 63 | 71.2943747 |
| BEFORE | 71.6959303 | 63 | 71.3241569 |
| BEFORE | 71.5884923 | 63 | 71.3547656 |
| BEFORE | 71.3901452 | 63 | 71.3748371 |
| BEFORE | 71.2909717 | 63 | 71.418019  |
| BEFORE | 71.1917981 | 63 | 71.4362008 |

|        |            |    |            |
|--------|------------|----|------------|
| BEFORE | 70.9851865 | 63 | 71.4225644 |
| BEFORE | 70.3901452 | 63 | 71.4291922 |
| BEFORE | 70.8612196 | 63 | 71.4240432 |
| BEFORE | 70.9603932 | 63 | 71.379363  |
| BEFORE | 71.1504758 | 63 | 71.3375755 |
| BEFORE | 71.1504758 | 63 | 71.3102507 |
| BEFORE | 70.7537816 | 63 | 71.2783805 |
| BEFORE | 70.9355998 | 63 | 71.2266756 |
| BEFORE | 70.7372527 | 63 | 71.182202  |
| BEFORE | 70.8364262 | 63 | 71.1519847 |
| BEFORE | 71.1339469 | 63 | 71.1486269 |
| BEFORE | 71.2331204 | 63 | 71.1432029 |
| BEFORE | 72.123601  | 63 | 71.1357129 |
| BEFORE | 70.6785279 | 63 | 71.1273964 |
| BEFORE | 70.5876188 | 63 | 71.1209394 |
| BEFORE | 70.8934039 | 63 | 71.1111766 |
| BEFORE | 71.2900981 | 63 | 71.108232  |
| BEFORE | 72.8508737 | 63 | 71.1057006 |
| BEFORE | 72.4872373 | 63 | 71.1013098 |
| BEFORE | 72.123601  | 63 | 71.1062164 |
| BEFORE | 71.2145101 | 63 | 71.1181478 |
| BEFORE | 70.8508737 | 63 | 71.1352446 |
| BEFORE | 70.9417828 | 63 | 71.178581  |
| BEFORE | 70.6690555 | 63 | 71.2192314 |
| BEFORE | 70.8508737 | 63 | 71.2414934 |
| BEFORE | 70.6690555 | 63 | 71.2544579 |
| BEFORE | 70.6690555 | 63 | 71.2696951 |
| BEFORE | 70.7599646 | 63 | 71.292577  |
| BEFORE | 70.9417828 | 63 | 71.3086406 |
| BEFORE | 71.123601  | 63 | 71.3387539 |
| BEFORE | 70.8508737 | 63 | 71.3709333 |
| BEFORE | 70.6690555 | 63 | 71.4024928 |
| BEFORE | 70.7599646 | 63 | 71.4293003 |
| BEFORE | 71.0326919 | 63 | 71.4224821 |
| BEFORE | 71.123601  | 63 | 71.4381544 |
| BEFORE | 71.5781464 | 63 | 71.4515539 |
| BEFORE | 71.4872373 | 63 | 71.4573089 |
| BEFORE | 71.2145101 | 63 | 71.4508737 |
| BEFORE | 71.4872373 | 63 | 71.4076919 |
| BEFORE | 71.6690555 | 63 | 71.3713282 |
| BEFORE | 71.6690555 | 63 | 71.3440555 |
| BEFORE | 72.123601  | 63 | 71.3281464 |
| BEFORE | 72.4872373 | 63 | 71.3145101 |
| BEFORE | 71.8508737 | 63 | 71.2917828 |
| BEFORE | 71.6690555 | 63 | 71.298601  |

|        |            |    |            |
|--------|------------|----|------------|
| BEFORE | 71.7599646 | 63 | 71.3122373 |
| BEFORE | 71.6690555 | 63 | 71.3326919 |
| BEFORE | 71.5781464 | 63 | 71.348601  |
| BEFORE | 71.9417828 | 63 | 71.348601  |
| BEFORE | 72.123601  | 63 | 71.3463282 |
| BEFORE | 72.3963282 | 63 | 71.3463282 |
| BEFORE | 72.3054192 | 63 | 71.3622373 |
| BEFORE | 71.8508737 | 63 | 71.398601  |
| BEFORE | 71.3054192 | 63 | 71.4440555 |
| BEFORE | 71.123601  | 63 | 71.4804192 |
| BEFORE | 71.123601  | 63 | 71.5145101 |
| BEFORE | 71.0326919 | 63 | 71.5190857 |
| BEFORE | 71.123601  | 63 | 71.5690857 |
| BEFORE | 71.0326919 | 63 | 71.6304494 |
| BEFORE | 71.0326919 | 63 | 71.6963584 |
| BEFORE | 70.5781464 | 63 | 71.7736312 |
| BEFORE | 70.3054192 | 63 | 71.8599948 |
| BEFORE | 70.0326919 | 63 | 71.9327221 |
| BEFORE | 70.9417828 | 63 | 71.991813  |
| BEFORE | 71.3963282 | 63 | 72.066813  |
| BEFORE | 71.4872373 | 63 | 72.141813  |
| BEFORE | 71.3054192 | 63 | 72.2031766 |
| BEFORE | 70.7599646 | 63 | 72.2577221 |
| BEFORE | 70.8508737 | 63 | 72.3077221 |
| BEFORE | 71.123601  | 63 | 72.3531766 |
| BEFORE | 71.4872373 | 63 | 72.3940857 |
| BEFORE | 72.123601  | 63 | 72.4463584 |
| BEFORE | 72.5781464 | 63 | 72.516813  |
| BEFORE | 72.4872373 | 63 | 72.5599948 |
| BEFORE | 72.4872373 | 63 | 72.6190857 |
| BEFORE | 71.7611725 | 63 | 72.6940857 |
| BEFORE | 73.4872373 | 63 | 72.7690857 |
| BEFORE | 73.6690555 | 63 | 72.8147761 |
| BEFORE | 74.123601  | 63 | 72.8658385 |
| BEFORE | 74.7599646 | 63 | 72.9365289 |
| BEFORE | 75.123601  | 63 | 73.0051532 |
| BEFORE | 75.0326919 | 63 | 73.0702652 |
| BEFORE | 74.8508737 | 63 | 73.1446746 |
| BEFORE | 74.8508737 | 63 | 73.2360262 |
| BEFORE | 74.6690555 | 63 | 73.3023778 |
| BEFORE | 74.2145101 | 63 | 73.3749277 |
| BEFORE | 73.8508737 | 63 | 73.4427256 |
| BEFORE | 73.5781464 | 63 | 73.5349036 |
| BEFORE | 73.7599646 | 63 | 73.6382387 |
| BEFORE | 73.7599646 | 63 | 73.7320696 |

|        |            |    |            |
|--------|------------|----|------------|
| BEFORE | 74.4872373 | 63 | 73.8434332 |
| BEFORE | 75.123601  | 63 | 73.9479787 |
| BEFORE | 73.5781464 | 63 | 74.0411605 |
| BEFORE | 73.6690555 | 63 | 74.1184332 |
| BEFORE | 74.123601  | 63 | 74.1979787 |
| BEFORE | 74.123601  | 63 | 74.2616151 |
| BEFORE | 72.8603092 | 63 | 74.3388576 |
| BEFORE | 73.1660943 | 63 | 74.368403  |
| BEFORE | 73.8603092 | 63 | 74.3843121 |
| BEFORE | 73.7776646 | 63 | 74.3911303 |
| BEFORE | 73.1826232 | 63 | 74.3365849 |
| BEFORE | 73.2817968 | 63 | 74.2411303 |
| BEFORE | 73.6867555 | 63 | 74.1502212 |
| BEFORE | 73.5958464 | 63 | 74.0411303 |
| BEFORE | 74.2983257 | 63 | 73.9297667 |
| BEFORE | 74.1991522 | 63 | 73.8229485 |
| BEFORE | 74.9925406 | 63 | 73.7297667 |
| BEFORE | 74.893367  | 63 | 73.6456758 |
| BEFORE | 74.6041108 | 63 | 73.5797667 |
| BEFORE | 75.5781464 | 63 | 73.518403  |
| BEFORE | 75.6690555 | 63 | 73.4911303 |
| BEFORE | 75.8508737 | 63 | 73.452494  |
| BEFORE | 75.6690555 | 63 | 73.3979485 |
| BEFORE | 75.6690555 | 63 | 73.3865849 |
| BEFORE | 75.0326919 | 63 | 73.3638576 |
| BEFORE | 74.8508737 | 63 | 73.3343121 |
| BEFORE | 74.6690555 | 63 | 73.3093121 |
| BEFORE | 74.3054192 | 63 | 73.3249853 |
| BEFORE | 74.3963282 | 63 | 73.3557412 |
| BEFORE | 72.5781464 | 63 | 73.3736871 |
| BEFORE | 71.3054192 | 63 | 73.3846083 |
| BEFORE | 71.3963282 | 63 | 73.3976667 |
| BEFORE | 70.4872373 | 63 | 73.4086591 |
| BEFORE | 70.3963282 | 63 | 73.4219242 |
| BEFORE | 70.3963282 | 63 | 73.4325034 |
| BEFORE | 70.4872373 | 63 | 73.4275866 |
| BEFORE | 70.4872373 | 63 | 73.43486   |
| BEFORE | 70.9417828 | 63 | 73.414654  |
| BEFORE | 71.3054192 | 63 | 73.3994067 |
| BEFORE | 72.6690555 | 63 | 73.4101212 |
| BEFORE | 72.9417828 | 63 | 73.3942122 |
| BEFORE | 72.9417828 | 63 | 73.3533031 |
| BEFORE | 73.123601  | 63 | 73.2919394 |
| BEFORE | 72.7599646 | 63 | 73.2328485 |
| BEFORE | 72.9417828 | 63 | 73.1760303 |

|        |            |    |            |
|--------|------------|----|------------|
| BEFORE | 73.123601  | 63 | 73.1283031 |
| BEFORE | 73.4872373 | 63 | 73.0826772 |
| BEFORE | 74.3963282 | 63 | 73.0440967 |
| BEFORE | 74.5781464 | 63 | 73.0071072 |
| BEFORE | 74.2145101 | 63 | 72.9728449 |
| BEFORE | 73.7049626 | 63 | 72.9940372 |
| BEFORE | 73.7214916 | 63 | 73.0420476 |
| BEFORE | 74.2173593 | 63 | 73.0877853 |
| BEFORE | 74.0190122 | 63 | 73.1612503 |
| BEFORE | 74.1016569 | 63 | 73.2494881 |
| BEFORE | 74.4900866 | 63 | 73.3477258 |
| BEFORE | 74.1843015 | 63 | 73.4411908 |
| BEFORE | 74.283475  | 63 | 73.5446558 |
| BEFORE | 75.0326919 | 63 | 73.6367572 |
| BEFORE | 74.9417828 | 63 | 73.7122676 |
| BEFORE | 74.0326919 | 63 | 73.7311872 |
| BEFORE | 73.3963282 | 63 | 73.7307885 |
| BEFORE | 73.3054192 | 63 | 73.7328899 |
| BEFORE | 73.3963282 | 63 | 73.7304458 |
| BEFORE | 73.123601  | 63 | 73.7395926 |
| BEFORE | 73.0258374 | 63 | 73.741694  |
| BEFORE | 73.1258374 | 63 | 73.7442499 |
| BEFORE | 72.8258374 | 63 | 73.7352149 |
| BEFORE | 73.0258374 | 63 | 73.6934526 |
| BEFORE | 73.4258374 | 63 | 73.6496449 |
| BEFORE | 73.2258374 | 63 | 73.6099281 |
| BEFORE | 73.2258374 | 63 | 73.5979499 |
| BEFORE | 73.4258374 | 63 | 73.5571375 |
| BEFORE | 73.9258374 | 63 | 73.5012011 |
| BEFORE | 74.3258374 | 63 | 73.4888718 |
| BEFORE | 74.2258374 | 63 | 73.5019763 |
| BEFORE | 74.6258374 | 63 | 73.50787   |
| BEFORE | 74.6258374 | 63 | 73.5114084 |
| BEFORE | 74.3258374 | 63 | 73.5149675 |
| BEFORE | 73.4258374 | 63 | 73.4847961 |
| Minute | 72.9258374 | 63 | 73.4518975 |
| Minute | 73.0258374 | 63 | 73.4417261 |
| Minute | 73.0258374 | 63 | 73.4179327 |
| Minute | 73.1258374 | 63 | 73.4045939 |
| Minute | 73.0258374 | 63 | 73.3867096 |
| Minute | 73.2258374 | 63 | 73.381098  |
| Minute | 73.1258374 | 63 | 73.3706578 |
| Minute | 72.7258374 | 63 | 73.3504449 |
| Minute | 72.8258374 | 63 | 73.3322774 |
| Minute | 72.6258374 | 63 | 73.290019  |



|        |            |    |            |
|--------|------------|----|------------|
| Minute | 73.2258374 | 63 | 73.2345788 |
| Minute | 72.0889947 | 63 | 73.2095788 |
| Minute | 71.9799038 | 63 | 73.1645788 |
| Minute | 73.5258374 | 63 | 73.1145788 |
| Minute | 74.6258374 | 63 | 73.0520788 |
| Minute | 74.7258374 | 63 | 72.9770788 |
| Minute | 74.3258374 | 63 | 72.9145788 |
| Minute | 74.4258374 | 63 | 72.8395788 |
| Minute | 73.8258374 | 63 | 72.7895788 |
| Minute | 73.6258374 | 63 | 72.7620788 |
| Minute | 73.6258374 | 63 | 72.7620788 |
| Minute | 72.4445924 | 63 | 72.7820788 |
| Minute | 72.7718652 | 63 | 72.8070788 |
| Minute | 72.6809561 | 63 | 72.8370788 |
| Minute | 72.8991379 | 63 | 72.8620788 |
| Minute | 72.6082288 | 63 | 72.8945788 |
| Minute | 72.3173197 | 63 | 72.9220788 |
| Minute | 72.0991379 | 63 | 72.9470788 |
| Minute | 71.3355015 | 63 | 72.9995788 |
| Minute | 71.2082288 | 63 | 73.0520788 |
| Minute | 72.2258374 | 63 | 73.1120788 |
| Minute | 71.4258374 | 63 | 73.1570788 |
| Minute | 71.4258374 | 63 | 73.2304998 |
| Minute | 71.4258374 | 63 | 73.3091482 |
| Minute | 71.3258374 | 63 | 73.3541482 |
| Minute | 71.7258374 | 63 | 73.3666482 |
| Minute | 71.6258374 | 63 | 73.3666482 |
| Minute | 72.6258374 | 63 | 73.3691482 |
| Minute | 73.2258374 | 63 | 73.3666482 |
| Minute | 73.4258374 | 63 | 73.3941482 |
| Minute | 73.7258374 | 63 | 73.4166482 |
| Minute | 74.0258374 | 63 | 73.4566482 |
| Minute | 74.2258374 | 63 | 73.5386793 |
| Minute | 74.1258374 | 63 | 73.6100286 |
| Minute | 74.3258374 | 63 | 73.6936506 |
| Minute | 74.3258374 | 63 | 73.7843181 |
| Minute | 74.1258374 | 63 | 73.8797583 |
| Minute | 74.8258374 | 63 | 73.9949713 |
| Minute | 74.9258374 | 63 | 74.1206388 |
| Minute | 75.0258374 | 63 | 74.2578972 |
| Minute | 75.0258374 | 63 | 74.3883374 |
| Minute | 75.0258374 | 63 | 74.4983374 |
| Minute | 75.1258374 | 63 | 74.6283374 |
| Minute | 75.3258374 | 63 | 74.7433374 |
| Minute | 75.1258374 | 63 | 74.821079  |

|          |            |    |            |
|----------|------------|----|------------|
| Minute   | 74.7258374 | 63 | 74.938579  |
| Minute   | 74.4258374 | 63 | 75.0206388 |
| Minute   | 74.3258374 | 63 | 75.1051985 |
| Minute   | 74.9258374 | 63 | 75.1593038 |
| Minute   | 74.5258374 | 63 | 75.1929545 |
| Activity | 75.2258374 | 73 | 75.1834234 |
| Activity | 75.7258374 | 73 | 75.1382104 |
| Activity | 75.6258374 | 73 | 75.0800429 |
| Activity | 76.0258374 | 73 | 75.0164209 |
| Activity | 76.5258374 | 73 | 74.9575716 |
| Activity | 76.4258374 | 73 | 74.890995  |
| Activity | 76.9258374 | 73 | 74.8212366 |
| Activity | 77.1258374 | 73 | 74.7787366 |
| Activity | 76.8258374 | 73 | 74.7062366 |
| Activity | 76.4258374 | 73 | 74.6487366 |
| Activity | 76.6258374 | 73 | 74.5937366 |
| Activity | 76.6258374 | 73 | 74.5512366 |
| Activity | 76.0258374 | 73 | 74.5137366 |
| Activity | 74.5355015 | 73 | 74.4762366 |
| Activity | 76.0258374 | 73 | 74.4387366 |
| Activity | 75.0082288 | 73 | 74.4112366 |
| Activity | 75.0082288 | 73 | 74.4212366 |
| Activity | 74.790047  | 73 | 74.4412366 |
| Activity | 74.5718652 | 73 | 74.4612366 |
| Activity | 73.0445924 | 73 | 74.4412366 |
| Activity | 71.9173197 | 73 | 74.4187366 |
| Activity | 71.6991379 | 73 | 74.3837366 |
| Activity | 71.6809561 | 73 | 74.3387366 |
| Activity | 71.7718652 | 73 | 74.3062366 |
| Activity | 71.6627743 | 73 | 74.2687366 |
| Activity | 71.5355015 | 73 | 74.2312366 |
| Activity | 72.4258374 | 73 | 74.1962366 |
| Activity | 71.9258374 | 73 | 74.1337366 |
| Activity | 72.6258374 | 73 | 74.0737366 |
| Activity | 72.8258374 | 73 | 74.0362366 |
| Activity | 73.3258374 | 73 | 73.9987366 |
| Activity | 73.5258374 | 73 | 73.9537366 |
| Activity | 73.6258374 | 73 | 73.9012366 |
| Activity | 73.8258374 | 73 | 73.8562366 |
| Activity | 74.0258374 | 73 | 73.853495  |
| Activity | 75.1258374 | 73 | 73.815995  |
| Activity | 75.2258374 | 73 | 73.8089352 |
| Activity | 75.1258374 | 73 | 73.7752989 |
| Activity | 74.1258374 | 73 | 73.751208  |
| Activity | 73.6258374 | 73 | 73.7157534 |

|          |            |    |            |
|----------|------------|----|------------|
| Activity | 73.8258374 | 73 | 73.7016625 |
| Activity | 73.9258374 | 73 | 73.7048443 |
| Activity | 74.3258374 | 73 | 73.7102989 |
| Activity | 74.5258374 | 73 | 73.6934807 |
| Activity | 75.0258374 | 73 | 73.6689352 |
| Activity | 75.0258374 | 73 | 73.6466625 |
| Activity | 74.4258374 | 73 | 73.6302989 |
| Activity | 74.7258374 | 73 | 73.6025859 |
| Activity | 75.3258374 | 73 | 73.6150859 |
| Activity | 74.9258374 | 73 | 73.6025859 |
| Activity | 74.8258374 | 73 | 73.5800859 |
| Activity | 74.5258374 | 73 | 73.5275859 |
| Activity | 74.2258374 | 73 | 73.4750859 |
| Activity | 74.4258374 | 73 | 73.4275859 |
| Activity | 74.5258374 | 73 | 73.3800859 |
| Activity | 74.7258374 | 73 | 73.3250859 |
| Activity | 73.6627743 | 73 | 73.2500859 |
| Activity | 73.8264106 | 73 | 73.1797525 |
| Activity | 73.1536833 | 73 | 73.1173736 |
| Activity | 72.4809561 | 73 | 73.0849948 |
| Activity | 72.0445924 | 73 | 73.0623886 |
| Activity | 71.9173197 | 73 | 73.0320552 |
| Activity | 71.0082288 | 73 | 73.00604   |
| Activity | 70.790047  | 73 | 72.9668429 |
| Activity | 70.7718652 | 73 | 72.9281004 |
| Activity | 70.8809561 | 73 | 72.8341306 |
| Activity | 71.3173197 | 73 | 72.7565245 |
| Activity | 72.4258374 | 73 | 72.6939184 |
| Activity | 72.1258374 | 73 | 72.6347213 |
| Activity | 71.9258374 | 73 | 72.5673424 |
| Activity | 71.2258374 | 73 | 72.5154181 |
| Activity | 71.4258374 | 73 | 72.4829181 |
| Activity | 71.7258374 | 73 | 72.4579181 |
| Activity | 71.9258374 | 73 | 72.4329181 |
| Activity | 71.8258374 | 73 | 72.4154181 |
| Activity | 72.1258374 | 73 | 72.3829181 |
| Activity | 72.4125008 | 73 | 72.3479181 |
| Activity | 72.6306826 | 73 | 72.3444947 |
| Activity | 72.8306826 | 73 | 72.3344804 |
| Activity | 72.7215917 | 73 | 72.3537842 |
| Activity | 72.6125008 | 73 | 72.3899062 |
| Activity | 72.8852281 | 73 | 72.4494374 |
| Activity | 72.7579553 | 73 | 72.5371503 |
| Activity | 72.9761371 | 73 | 72.6475905 |
| Activity | 71.2670462 | 73 | 72.7384996 |

|          |            |    |            |
|----------|------------|----|------------|
| Activity | 71.9215917 | 73 | 72.8366814 |
| Activity | 71.9215917 | 73 | 72.9266814 |
| Activity | 72.3579553 | 73 | 73.0112269 |
| Activity | 72.6306826 | 73 | 73.0735139 |
| Activity | 72.8488644 | 73 | 73.1735139 |
| Activity | 73.5258374 | 73 | 73.2412352 |
| Activity | 73.5258374 | 73 | 73.3155473 |
| Activity | 73.2258374 | 73 | 73.4155473 |
| Activity | 73.7258374 | 73 | 73.5005473 |
| Activity | 73.2258374 | 73 | 73.5755473 |
| Activity | 73.3258374 | 73 | 73.6355473 |
| Activity | 73.5258374 | 73 | 73.6830473 |
| Activity | 73.4258374 | 73 | 73.7133807 |
| Activity | 73.9258374 | 73 | 73.7357596 |
| Activity | 73.9258374 | 73 | 73.7631385 |
| Activity | 74.4258374 | 73 | 73.7882446 |
| Activity | 75.4258374 | 73 | 73.826078  |
| Activity | 75.4258374 | 73 | 73.8570933 |
| Activity | 74.4264106 | 73 | 73.8887903 |
| Activity | 74.6991379 | 73 | 73.9050328 |
| Activity | 74.4809561 | 73 | 73.9615026 |
| Activity | 74.6991379 | 73 | 74.0016087 |
| Activity | 74.9173197 | 73 | 74.0417149 |
| Activity | 76.1258374 | 73 | 74.0709119 |
| Activity | 74.6346866 | 73 | 74.0882908 |
| Activity | 74.198323  | 73 | 74.0927151 |
| Activity | 75.4258374 | 73 | 74.0677151 |
| Activity | 75.1258374 | 73 | 74.0452151 |
| Activity | 74.9258374 | 73 | 74.0477151 |
| Activity | 74.2258374 | 73 | 74.0277151 |
| Activity | 74.0258374 | 73 | 74.0127151 |
| Activity | 73.6258374 | 73 | 73.9877151 |
| Activity | 73.5258374 | 73 | 73.9602151 |
| Activity | 73.9258374 | 73 | 73.9402151 |
| Activity | 73.7258374 | 73 | 73.9127151 |
| Activity | 74.1258374 | 73 | 73.8877151 |
| Activity | 74.1258374 | 73 | 73.8527151 |
| Activity | 74.0258374 | 73 | 73.7977151 |
| Activity | 73.6258374 | 73 | 73.7252151 |
| Activity | 73.5258374 | 73 | 73.6380492 |
| Activity | 73.5258374 | 73 | 73.5454287 |
| Activity | 73.5258374 | 73 | 73.4555355 |
| Activity | 73.5258374 | 73 | 73.3874605 |
| Activity | 73.3258374 | 73 | 73.3271128 |
| Activity | 73.0258374 | 73 | 73.2621128 |

|          |            |    |            |
|----------|------------|----|------------|
| Activity | 72.5258374 | 73 | 73.2368915 |
| Activity | 72.6258374 | 73 | 73.2200794 |
| Activity | 73.3258374 | 73 | 73.1625794 |
| Activity | 72.9258374 | 73 | 73.1200794 |
| Activity | 72.6258374 | 73 | 73.0825794 |
| Activity | 72.3258374 | 73 | 73.0598664 |
| Activity | 72.4258374 | 73 | 73.0448808 |
| Activity | 72.6258374 | 73 | 73.0444406 |
| Activity | 72.8258374 | 73 | 73.0442276 |
| Activity | 72.9258374 | 73 | 73.042651  |
| Activity | 73.0258374 | 73 | 73.0442563 |
| Activity | 73.2258374 | 73 | 73.0517563 |
| Activity | 72.5258374 | 73 | 73.0642563 |
| Activity | 70.9397735 | 73 | 73.0842563 |
| Activity | 70.994319  | 73 | 73.1092563 |
| Activity | 70.8852281 | 73 | 73.1342563 |
| Activity | 71.9761371 | 73 | 73.1617563 |
| Activity | 72.5034099 | 73 | 73.1792563 |
| Activity | 73.5258374 | 73 | 73.1867563 |
| Activity | 73.6258374 | 73 | 73.1892563 |
| Activity | 73.5258374 | 73 | 73.1917563 |
| Activity | 73.1258374 | 73 | 73.1942563 |
| Activity | 73.4258374 | 73 | 73.1892563 |
| Activity | 73.4258374 | 73 | 73.1542563 |
| Activity | 73.3173197 | 73 | 73.1417563 |
| Activity | 73.4264106 | 73 | 73.1292563 |
| Activity | 73.6082288 | 73 | 73.1092563 |
| Activity | 73.5173197 | 73 | 73.0767563 |
| Activity | 73.8627743 | 73 | 73.0342563 |
| Activity | 73.790047  | 73 | 72.9867563 |
| Activity | 74.4258374 | 73 | 72.9367563 |
| Activity | 74.6258374 | 73 | 72.8867563 |
| Activity | 74.8258374 | 73 | 72.8392563 |
| Activity | 74.6258374 | 73 | 72.8242563 |
| Activity | 74.5258374 | 73 | 72.8489079 |
| Activity | 74.6258374 | 73 | 72.8746958 |
| Activity | 74.2258374 | 73 | 72.8932111 |
| Activity | 73.8258374 | 73 | 72.8844536 |
| Activity | 73.4258374 | 73 | 72.8650143 |
| Activity | 73.1258374 | 73 | 72.8250143 |
| Activity | 72.6258374 | 73 | 72.7925143 |
| Activity | 72.4258374 | 73 | 72.7575143 |
| Activity | 71.9258374 | 73 | 72.7375143 |
| Activity | 72.4258374 | 73 | 72.7000143 |
| Activity | 72.1258374 | 73 | 72.6525143 |

|          |            |    |            |
|----------|------------|----|------------|
| Activity | 71.5258374 | 73 | 72.6102272 |
| Activity | 71.1258374 | 73 | 72.5602129 |
| Activity | 70.9258374 | 73 | 72.4931531 |
| Activity | 70.9258374 | 73 | 72.413366  |
| Activity | 70.9258374 | 73 | 72.3374426 |
| Activity | 71.0258374 | 73 | 72.2433374 |
| Activity | 71.3258374 | 73 | 72.1358374 |
| Activity | 71.9258374 | 73 | 72.0383374 |
| Activity | 71.9258374 | 73 | 71.9338062 |
| Activity | 72.0258374 | 73 | 71.8356388 |
| Activity | 71.6258374 | 73 | 71.7304258 |
| Activity | 71.6258374 | 73 | 71.6145311 |
| Activity | 71.7258374 | 73 | 71.5040908 |
| Activity | 71.9258374 | 73 | 71.4036506 |
| Activity | 72.3258374 | 73 | 71.3277559 |
| Activity | 72.1258374 | 73 | 71.2852559 |
| Activity | 72.3258374 | 73 | 71.2652559 |
| Activity | 71.9258374 | 73 | 71.2358295 |
| Activity | 71.5258374 | 73 | 71.2189032 |
| Activity | 71.6258374 | 73 | 71.2214032 |
| minute   | 71.4258374 | 63 | 71.2339032 |
| minute   | 70.9258374 | 63 | 71.2464032 |
| minute   | 70.3258374 | 63 | 71.2514032 |
| minute   | 70.8258374 | 63 | 71.2589032 |
| minute   | 70.0258374 | 63 | 71.2614032 |
| minute   | 70.1258374 | 63 | 71.2639032 |
| minute   | 70.7258374 | 63 | 71.2439032 |
| minute   | 70.6445924 | 63 | 71.2089032 |
| minute   | 70.6991379 | 63 | 71.1689032 |
| minute   | 70.3173197 | 63 | 71.1389032 |
| minute   | 69.990047  | 63 | 71.1114032 |
| minute   | 69.8082288 | 63 | 71.1014032 |
| minute   | 69.8082288 | 63 | 71.0914032 |
| minute   | 70.390047  | 63 | 71.0689032 |
| minute   | 71.4258374 | 63 | 71.0289032 |
| minute   | 71.8258374 | 63 | 70.9739032 |
| minute   | 71.2487833 | 63 | 70.9239032 |
| minute   | 71.2487833 | 63 | 70.8664032 |
| minute   | 72.5258374 | 63 | 70.8114032 |
| minute   | 72.6258374 | 63 | 70.7814032 |
| minute   | 72.0258374 | 63 | 70.7464032 |
| minute   | 71.3258374 | 63 | 70.7214032 |
| minute   | 71.2258374 | 63 | 70.7139032 |
| minute   | 71.0258374 | 63 | 70.7289032 |
| minute   | 71.0258374 | 63 | 70.7289032 |

|        |            |    |            |
|--------|------------|----|------------|
| minute | 70.2258374 | 63 | 70.7564032 |
| minute | 69.9258374 | 63 | 70.7889032 |
| minute | 70.3258374 | 63 | 70.8064032 |
| minute | 70.7258374 | 63 | 70.8259343 |
| minute | 70.9258374 | 63 | 70.8416018 |
| minute | 71.2258374 | 63 | 70.8643147 |
| minute | 71.2258374 | 63 | 70.8902095 |
| minute | 70.8258374 | 63 | 70.9206497 |
| minute | 70.3258374 | 63 | 70.9535899 |
| minute | 70.1258374 | 63 | 70.9744847 |
| minute | 70.1258374 | 63 | 70.9769847 |
| minute | 70.0258374 | 63 | 70.9669847 |
| minute | 69.7258374 | 63 | 70.963911  |
| minute | 70.3258374 | 63 | 70.9683374 |
| minute | 70.2258374 | 63 | 70.9333374 |
| minute | 70.4258374 | 63 | 70.8983374 |
| minute | 70.6258374 | 63 | 70.8908374 |
| minute | 70.9258374 | 63 | 70.9008374 |
| minute | 70.8258374 | 63 | 70.9108374 |
| minute | 71.1258374 | 63 | 70.9208374 |
| minute | 71.4258374 | 63 | 70.9133374 |
| minute | 71.4258374 | 63 | 70.9383374 |
| minute | 71.4258374 | 63 | 70.9708374 |
| minute | 71.3258374 | 63 | 71.0083374 |
| minute | 71.2258374 | 63 | 71.0383374 |
| minute | 71.0258374 | 63 | 71.0708374 |
| minute | 71.0258374 | 63 | 71.0933374 |
| minute | 71.1258374 | 63 | 71.1333374 |
| minute | 71.2258374 | 63 | 71.2033374 |
| minute | 71.5258374 | 63 | 71.2958374 |
| minute | 71.4258374 | 63 | 71.3908374 |
| minute | 71.1258374 | 63 | 71.4833374 |
| minute | 71.4258374 | 63 | 71.5833374 |
| minute | 71.1258374 | 63 | 71.6883374 |
| minute | 71.2258374 | 63 | 71.7883374 |
| AFTER  | 71.7258374 | 63 | 71.8883374 |
| AFTER  | 71.7258374 | 63 | 71.9758374 |
| AFTER  | 71.6258374 | 63 | 72.0533374 |
| AFTER  | 71.4258374 | 63 | 72.1233374 |
| AFTER  | 70.7258374 | 63 | 72.2208374 |
| AFTER  | 71.2258374 | 63 | 72.3233374 |
| AFTER  | 71.2258374 | 63 | 72.4233374 |
| AFTER  | 71.8258374 | 63 | 72.5183374 |
| AFTER  | 71.9258374 | 63 | 72.6058374 |
| AFTER  | 72.2258374 | 63 | 72.6758374 |

|       |            |    |            |
|-------|------------|----|------------|
| AFTER | 72.1258374 | 63 | 72.6833304 |
| AFTER | 72.8258374 | 63 | 72.6826416 |
| AFTER | 73.6258374 | 63 | 72.6792256 |
| AFTER | 74.0258374 | 63 | 72.6967256 |
| AFTER | 73.9258374 | 63 | 72.7042256 |
| AFTER | 73.8258374 | 63 | 72.6917256 |
| AFTER | 74.0258374 | 63 | 72.6742256 |
| AFTER | 73.9258374 | 63 | 72.6642256 |
| AFTER | 74.3258374 | 63 | 72.6517256 |
| AFTER | 74.2258374 | 63 | 72.6467256 |
| AFTER | 73.9258374 | 63 | 72.6342256 |
| AFTER | 73.7258374 | 63 | 72.6067256 |
| AFTER | 73.7258374 | 63 | 72.5592256 |
| AFTER | 74.7258374 | 63 | 72.5067256 |
| AFTER | 75.2258374 | 63 | 72.4517256 |
| AFTER | 75.4258374 | 63 | 72.4142256 |
| AFTER | 75.2258374 | 63 | 72.3692256 |
| AFTER | 74.9258374 | 63 | 72.3392256 |
| AFTER | 74.1258374 | 63 | 72.3042256 |
| AFTER | 71.5255588 | 63 | 72.2717256 |
| AFTER | 70.9982861 | 63 | 72.2342256 |
| AFTER | 70.8891952 | 63 | 72.1892256 |
| AFTER | 71.8258374 | 63 | 72.1192256 |
| AFTER | 71.5258374 | 63 | 72.0442256 |
| AFTER | 71.0258374 | 63 | 71.9592256 |
| AFTER | 70.7258374 | 63 | 71.8717256 |
| AFTER | 70.7258374 | 63 | 71.7892256 |
| AFTER | 70.9258374 | 63 | 71.7117256 |
| AFTER | 70.9258374 | 63 | 71.6392256 |
| AFTER | 70.7258374 | 63 | 71.5492256 |
| AFTER | 70.6258374 | 63 | 71.4642256 |
| AFTER | 69.8258374 | 63 | 71.3867256 |
| AFTER | 69.5258374 | 63 | 71.3067256 |
| AFTER | 69.2258374 | 63 | 71.2292256 |
| AFTER | 69.2258374 | 63 | 71.1392256 |
| AFTER | 69.4258374 | 63 | 71.0367256 |
| AFTER | 70.0258374 | 63 | 70.9392256 |
| AFTER | 70.4258374 | 63 | 70.8442256 |
| AFTER | 70.6258374 | 63 | 70.7617256 |
| AFTER | 70.7258374 | 63 | 70.7042256 |
| AFTER | 70.3258374 | 63 | 70.7192325 |
| AFTER | 70.0258374 | 63 | 70.7474213 |
| AFTER | 70.6258374 | 63 | 70.774689  |
| AFTER | 70.6258374 | 63 | 70.7949043 |
| AFTER | 70.4258374 | 63 | 70.7942045 |



|       |            |    |            |
|-------|------------|----|------------|
| AFTER | 70.5258374 | 63 | 70.7823683 |
| AFTER | 70.9258374 | 63 | 70.7698503 |
| AFTER | 71.0258374 | 63 | 70.7448323 |
| AFTER | 70.7258374 | 63 | 70.729587  |
| AFTER | 70.8258374 | 63 | 70.7275235 |
| AFTER | 70.8258374 | 63 | 70.7327327 |
| AFTER | 70.5258374 | 63 | 70.7522602 |
| AFTER | 70.6258374 | 63 | 70.7976967 |
| AFTER | 71.1258374 | 63 | 70.8790484 |
| AFTER | 71.1258374 | 63 | 70.9747182 |
| AFTER | 71.5258374 | 63 | 71.0731153 |
| AFTER | 71.4258374 | 63 | 71.1528761 |
| AFTER | 71.6258374 | 63 | 71.2080914 |
| AFTER | 71.8258374 | 63 | 71.2664885 |
| AFTER | 72.1258374 | 63 | 71.3221583 |
| AFTER | 72.1258374 | 63 | 71.4146583 |
| AFTER | 71.9799038 | 63 | 71.5271583 |
| AFTER | 72.6344492 | 63 | 71.6596583 |
| AFTER | 71.4978439 | 63 | 71.7521583 |
| AFTER | 70.5523894 | 63 | 71.8321583 |
| AFTER | 70.2251167 | 63 | 71.9121583 |
| AFTER | 69.7251167 | 63 | 71.9621583 |
| AFTER | 70.3160257 | 63 | 71.9921583 |
| AFTER | 70.8432985 | 63 | 72.0321583 |
| AFTER | 70.9342076 | 63 | 72.0771583 |
| AFTER | 71.4069348 | 63 | 72.1221583 |
| AFTER | 71.6432985 | 63 | 72.1796583 |
| AFTER | 72.7799038 | 63 | 72.2496583 |
| AFTER | 73.0526311 | 63 | 72.3096583 |
| AFTER | 73.161722  | 63 | 72.3821583 |
| AFTER | 72.6162674 | 63 | 72.4346583 |
| AFTER | 72.2344492 | 63 | 72.4796583 |
| AFTER | 72.761722  | 63 | 72.5171583 |
| AFTER | 72.8526311 | 63 | 72.5421583 |
| AFTER | 74.4258374 | 63 | 72.5621583 |
| AFTER | 74.8258374 | 63 | 72.5746583 |
| AFTER | 75.3258374 | 63 | 72.5921583 |
| AFTER | 74.3258374 | 63 | 72.6033067 |
| AFTER | 73.8258374 | 63 | 72.5855914 |
| AFTER | 73.6258374 | 63 | 72.6137912 |
| AFTER | 72.5258374 | 63 | 72.6656274 |
| AFTER | 72.1258374 | 63 | 72.7231454 |
| AFTER | 72.6258374 | 63 | 72.7831634 |
| AFTER | 72.5258374 | 63 | 72.8359087 |
| AFTER | 72.6258374 | 63 | 72.8804722 |

|       |            |    |            |
|-------|------------|----|------------|
| AFTER | 73.1258374 | 63 | 72.922763  |
| AFTER | 73.3258374 | 63 | 72.9582355 |
| AFTER | 73.0258374 | 63 | 72.997799  |
| AFTER | 74.0258374 | 63 | 73.0089473 |
| AFTER | 73.2258374 | 63 | 73.0182775 |
| AFTER | 73.3258374 | 63 | 73.0298804 |
| AFTER | 72.9258374 | 63 | 73.0476196 |
| AFTER | 72.6258374 | 63 | 73.0674043 |
| AFTER | 72.6258374 | 63 | 73.0615072 |
| AFTER | 72.6258374 | 63 | 73.0483374 |
| AFTER | 72.8258374 | 63 | 72.9858374 |
| AFTER | 72.4258374 | 63 | 72.9033374 |
| AFTER | 71.9258374 | 63 | 72.7983374 |
| AFTER | 72.6258374 | 63 | 72.7008374 |
| AFTER | 72.6258374 | 63 | 72.6133374 |
| AFTER | 72.5258374 | 63 | 72.5383374 |
| AFTER | 72.1258374 | 63 | 72.4933374 |
| AFTER | 72.4258374 | 63 | 72.4683374 |
| AFTER | 72.6258374 | 63 | 72.4358374 |
| AFTER | 72.6258374 | 63 | 72.4033374 |
| AFTER | 72.8258374 | 63 | 72.3683374 |
| AFTER | 73.2258374 | 63 | 72.3233374 |
| AFTER | 73.2258374 | 63 | 72.2683374 |
| AFTER | 73.4258374 | 63 | 72.2208374 |
| AFTER | 73.6258374 | 63 | 72.1508374 |
| AFTER | 73.3258374 | 63 | 72.0958374 |
| AFTER | 73.0258374 | 63 | 72.0383374 |
| AFTER | 72.5258374 | 63 | 71.9858374 |
| AFTER | 72.3258374 | 63 | 71.9333374 |
| AFTER | 71.9258374 | 63 | 71.8833374 |
| AFTER | 71.5258374 | 63 | 71.8383374 |
| AFTER | 71.1258374 | 63 | 71.7833374 |
| AFTER | 70.4258374 | 63 | 71.7383374 |
| AFTER | 70.3258374 | 63 | 71.7008374 |
| AFTER | 70.6258374 | 63 | 71.6458374 |
| AFTER | 70.7258374 | 63 | 71.5908374 |
| AFTER | 71.1258374 | 63 | 71.5558374 |
| AFTER | 71.3258374 | 63 | 71.5458374 |
| AFTER | 71.2258374 | 63 | 71.5383374 |
| AFTER | 71.2258374 | 63 | 71.5508374 |
| AFTER | 71.3258374 | 63 | 71.5658374 |
| AFTER | 71.1258374 | 63 | 71.5708374 |
| AFTER | 71.1258374 | 63 | 71.5658374 |
| AFTER | 71.2258374 | 63 | 71.5683374 |
| AFTER | 71.0258374 | 63 | 71.5608374 |

|       |            |    |            |
|-------|------------|----|------------|
| AFTER | 71.0258374 | 63 | 71.5508374 |
| AFTER | 70.8258374 | 63 | 71.5358374 |
| AFTER | 70.5258374 | 63 | 71.5183374 |
| AFTER | 70.6258374 | 63 | 71.5208374 |
| AFTER | 70.8258374 | 63 | 71.5283374 |
| AFTER | 70.6258374 | 63 | 71.5408374 |
| AFTER | 70.6258374 | 63 | 71.5483374 |
| AFTER | 70.4258374 | 63 | 71.5658374 |
| AFTER | 70.4258374 | 63 | 71.6033374 |
| AFTER | 70.4258374 | 63 | 71.6433374 |
| AFTER | 71.1258374 | 63 | 71.6833374 |
| AFTER | 71.7258374 | 63 | 71.7183374 |
| AFTER | 72.1258374 | 63 | 71.7433374 |
| AFTER | 73.1258374 | 63 | 71.7533374 |
| AFTER | 73.2258374 | 63 | 71.7733374 |
| AFTER | 73.0258374 | 63 | 71.7908374 |
| AFTER | 73.0258374 | 63 | 71.8008374 |
| AFTER | 73.3258374 | 63 | 71.8133374 |
| AFTER | 73.1258374 | 63 | 71.8358374 |
| AFTER | 73.2258374 | 63 | 71.8583374 |
| AFTER | 72.7258374 | 63 | 71.8833374 |
| AFTER | 72.3258374 | 63 | 71.9008374 |
| AFTER | 72.6258374 | 63 | 71.9233374 |
| AFTER | 72.6258374 | 63 | 71.9533374 |
| AFTER | 72.4258374 | 63 | 71.9733374 |
| AFTER | 71.8258374 | 63 | 71.9958374 |
| AFTER | 71.8258374 | 63 | 72.0283374 |
| AFTER | 71.9258374 | 63 | 72.0633374 |
| AFTER | 71.9258374 | 63 | 72.1058374 |
| AFTER | 72.2258374 | 63 | 72.1608374 |
| AFTER | 72.1258374 | 63 | 72.2108374 |
| AFTER | 72.1258374 | 63 | 72.2433374 |
| AFTER | 71.7258374 | 63 | 72.2658374 |
| AFTER | 72.0258374 | 63 | 72.2783374 |
| AFTER | 71.9258374 | 63 | 72.2608374 |
| AFTER | 71.7258374 | 63 | 72.2358374 |
| AFTER | 71.6258374 | 63 | 72.2208374 |
| AFTER | 72.0258374 | 63 | 72.1983374 |
| AFTER | 72.1258374 | 63 | 72.1658374 |
| AFTER | 72.0258374 | 63 | 72.1333374 |
| AFTER | 71.7258374 | 63 | 72.1033374 |
| AFTER | 71.7258374 | 63 | 72.0983374 |
| AFTER | 71.7258374 | 63 | 72.1108374 |
| AFTER | 71.4258374 | 63 | 72.1258374 |
| AFTER | 71.7258374 | 63 | 72.1433374 |

|       |            |    |            |
|-------|------------|----|------------|
| AFTER | 71.9258374 | 63 | 72.1658374 |
| AFTER | 72.0258374 | 63 | 72.2058374 |
| AFTER | 72.1258374 | 63 | 72.2433374 |
| AFTER | 72.6258374 | 63 | 72.2733374 |
| AFTER | 72.4258374 | 63 | 72.3033374 |
| AFTER | 72.4258374 | 63 | 72.3183374 |
| AFTER | 72.6258374 | 63 | 72.3258374 |
| AFTER | 72.6258374 | 63 | 72.3208374 |
| AFTER | 72.4258374 | 63 | 72.3158374 |
| AFTER | 72.2258374 | 63 | 72.3008374 |
| AFTER | 72.4258374 | 63 | 72.2958374 |
| AFTER | 72.1258374 | 63 | 72.2983374 |
| AFTER | 72.0258374 | 63 | 72.3058374 |
| AFTER | 71.8258374 | 63 | 72.3033374 |
| AFTER | 72.0258374 | 63 | 72.3083374 |
| AFTER | 72.5258374 | 63 | 72.3208374 |
| AFTER | 72.8258374 | 63 | 72.3408374 |
| AFTER | 73.2258374 | 63 | 72.3533374 |
| AFTER | 73.3258374 | 63 | 72.3608374 |
| AFTER | 73.3258374 | 63 | 72.3783374 |
| AFTER | 73.4258374 | 63 | 72.3783374 |
| AFTER | 73.3258374 | 63 | 72.3883374 |
| AFTER | 73.1258374 | 63 | 72.3958374 |
| AFTER | 73.1258374 | 63 | 72.3983374 |
| AFTER | 72.8258374 | 63 | 72.3858374 |
| AFTER | 72.4258374 | 63 | 72.3733374 |
| AFTER | 71.9258374 | 63 | 72.3533374 |
| AFTER | 71.5258374 | 63 | 72.3233374 |
| AFTER | 71.4258374 | 63 | 72.2808374 |
| AFTER | 71.7258374 | 63 | 72.2383374 |
| AFTER | 71.8258374 | 63 | 72.2058374 |
| AFTER | 71.9258374 | 63 | 72.1733374 |
| AFTER | 71.9258374 | 63 | 72.1483374 |
| AFTER | 72.3258374 | 63 | 72.1358374 |
| AFTER | 72.5258374 | 63 | 72.1333374 |
| AFTER | 72.5258374 | 63 | 72.1333374 |
| AFTER | 72.2258374 | 63 | 72.1308374 |
| AFTER | 72.0258374 | 63 | 72.1258374 |
| AFTER | 72.1258374 | 63 | 72.1133374 |
| AFTER | 71.7258374 | 63 | 72.0585746 |
| AFTER | 72.3258374 | 63 | 72.0235746 |
| AFTER | 72.3258374 | 63 | 72.0010746 |
| AFTER | 72.2258374 | 63 | 71.9935746 |
| AFTER | 72.1258374 | 63 | 71.9860746 |
| AFTER | 71.9258374 | 63 | 71.9542504 |

|       |            |    |            |
|-------|------------|----|------------|
| AFTER | 71.6258374 | 63 | 71.9717504 |
| AFTER | 71.4258374 | 63 | 71.9769716 |
| AFTER | 70.9258374 | 63 | 72.000602  |
| AFTER | 70.7258374 | 63 | 72.0424141 |
| AFTER | 70.9258374 | 63 | 72.0596738 |
| AFTER | 71.1258374 | 63 | 72.0642063 |
|       | 71.1258374 | 63 | 72.0603296 |
|       | 71.5258374 | 63 | 72.0494075 |
|       | 71.7258374 | 63 | 72.0398491 |
|       | 72.0258374 | 63 | 72.0209724 |
|       | 72.4258374 | 63 | 72.0136927 |
|       | 72.6258374 | 63 | 71.9982312 |
|       | 72.7258374 | 63 | 71.9820879 |
|       | 71.1353279 | 63 | 71.9736718 |
|       | 71.9258374 | 63 | 71.9863922 |
|       | 72.5258374 | 63 | 72.0122943 |
|       | 73.0258374 | 63 | 72.0422943 |
|       | 72.8258374 | 63 | 72.0647943 |
|       | 71.8528684 | 63 | 72.0847943 |
|       | 73.5258374 | 63 | 72.0854861 |
|       | 72.6346866 | 63 | 72.0802688 |
|       | 72.8710502 | 63 | 72.0743697 |
|       | 73.198323  | 63 | 72.0734706 |
|       | 72.1162262 | 63 | 72.0768897 |
|       | 71.9071353 | 63 | 72.0825815 |
|       | 71.6707717 | 63 | 72.0887279 |
|       | 71.4889535 | 63 | 72.0866924 |
|       | 71.5434989 | 63 | 72.1066924 |
|       | 71.5707717 | 63 | 72.1141924 |
|       | 72.2346497 | 63 | 72.1116924 |
|       | 71.907377  | 63 | 72.1041924 |
|       | 71.5801043 | 63 | 72.0941924 |
|       | 71.6891952 | 63 | 72.0841924 |
|       | 72.6346497 | 63 | 72.0541924 |
|       | 72.7619224 | 63 | 72.0564551 |
|       | 73.5258374 | 63 | 72.0339551 |
|       | 73.2258374 | 63 | 71.9989551 |
|       | 73.0258374 | 63 | 71.9314551 |
|       | 72.1535098 | 63 | 71.8589551 |
|       | 71.7171461 | 63 | 71.8182794 |
|       | 71.3898734 | 63 | 71.7382794 |
|       | 71.3898734 | 63 | 71.6780581 |
|       | 71.0626007 | 63 | 71.6219278 |
|       | 70.9535098 | 63 | 71.5626157 |
|       | 71.1716916 | 63 | 71.5303559 |

|            |    |            |
|------------|----|------------|
| 71.0444189 | 63 | 71.5083235 |
| 71.9258374 | 63 | 71.4897001 |
| 71.8258374 | 63 | 71.4656222 |
| 71.6258374 | 63 | 71.4451807 |
| 71.7258374 | 63 | 71.4290573 |
| 72.0258374 | 63 | 71.411337  |
| 72.2258374 | 63 | 71.4067985 |
| 71.5258374 | 63 | 71.4204419 |
| 71.2258374 | 63 | 71.4338579 |
| 71.0258374 | 63 | 71.4161376 |
| 71.1258374 | 63 | 71.3952355 |
| 70.3258374 | 63 | 71.3627355 |
| 69.9258374 | 63 | 71.3502355 |
| 70.2258374 | 63 | 71.3402355 |
| 70.3258374 | 63 | 71.3620437 |
| 70.2258374 | 63 | 71.404761  |
| 70.6258374 | 63 | 71.4631601 |
| 70.8258374 | 63 | 71.5215592 |
| 70.8258374 | 63 | 71.5931401 |
| 71.0258374 | 63 | 71.685624  |
| 70.9258374 | 63 | 71.7735625 |
| 70.5258374 | 63 | 71.8701374 |
| 70.7258374 | 63 | 71.9396768 |
| 70.9258374 | 63 | 72.0198981 |
| 71.5258374 | 63 | 72.1110284 |
| 71.7258374 | 63 | 72.1692236 |
| 72.1258374 | 63 | 72.2235552 |
| 72.2258374 | 63 | 72.2633413 |
| 71.9258374 | 63 | 72.2992639 |
| 71.9258374 | 63 | 72.3420045 |
| 72.2258374 | 63 | 72.3867907 |
| 72.7258374 | 63 | 72.4290768 |
| 72.6258374 | 63 | 72.4786417 |
| 73.0258374 | 63 | 72.5372975 |
| 73.4258374 | 63 | 72.6222975 |
| 73.7258374 | 69 | 72.7022975 |
| 73.7258374 | 69 | 72.7797975 |
| 73.9258374 | 69 | 72.8347975 |
| 74.6528684 | 69 | 72.8597975 |
| 74.689232  | 69 | 72.8747975 |
| 74.9074139 | 69 | 72.8822975 |
| 74.7074139 | 69 | 72.8747975 |
| 75.0346866 | 69 | 72.8622975 |
| 75.2710502 | 69 | 72.8222975 |
| 74.0536466 | 69 | 72.7722975 |

|            |    |            |
|------------|----|------------|
| 74.1991011 | 69 | 72.7072975 |
| 73.8172829 | 69 | 72.6372975 |
| 72.9627375 | 69 | 72.5597975 |
| 72.9354647 | 69 | 72.4897975 |
| 72.8172829 | 69 | 72.4372975 |
| 72.8172829 | 69 | 72.3997975 |
| 72.3084337 | 69 | 72.3722975 |
| 72.2720701 | 69 | 72.3447975 |
| 73.6258374 | 69 | 72.3172975 |
| 73.5258374 | 69 | 72.2822975 |
| 73.3258374 | 69 | 72.2397975 |
| 72.8258374 | 69 | 72.1922975 |
| 71.8258374 | 69 | 72.1497975 |
| 71.4258374 | 69 | 72.1022975 |
| 71.3258374 | 69 | 72.0266218 |
| 70.6258374 | 69 | 71.9375369 |
| 70.0258374 | 69 | 71.8554975 |
| 69.1258374 | 69 | 71.7734581 |
| 68.9258374 | 69 | 71.6882368 |
| 68.9258374 | 69 | 71.5896065 |
| 68.9258374 | 69 | 71.5139113 |
| 69.0258374 | 69 | 71.4270797 |
| 69.4258374 | 69 | 71.3547936 |
| 69.8258374 | 69 | 71.2770468 |
| 70.4258374 | 69 | 71.2343061 |
| 71.1258374 | 69 | 71.17702   |
| 71.6258374 | 69 | 71.1172339 |
| 71.5258374 | 69 | 71.092669  |
| 71.6258374 | 69 | 71.0765131 |
| 71.7258374 | 69 | 71.0515131 |
| 71.8258374 | 69 | 71.0390131 |
| 72.0258374 | 69 | 71.0290131 |
| 72.0258374 | 69 | 71.0340131 |
| 71.6258374 | 69 | 71.0740131 |
| 71.1258374 | 69 | 71.1265131 |
| 71.6258374 | 69 | 71.1790131 |
| 71.4258374 | 69 | 71.2565131 |
| 71.6258374 | 69 | 71.3390131 |
| 71.3258374 | 69 | 71.4540131 |
| 71.0258374 | 69 | 71.5690131 |
| 70.7258374 | 69 | 71.6840131 |
| 70.9258374 | 69 | 71.7890131 |
| 69.8528684 | 69 | 71.8940131 |
| 71.2258374 | 69 | 71.9940131 |
| 70.5258374 | 69 | 72.0690131 |

|            |    |            |
|------------|----|------------|
| 70.4258374 | 69 | 72.1190131 |
| 71.3258374 | 69 | 72.1215131 |
| 71.6258374 | 69 | 72.0940131 |
| 72.6258374 | 69 | 72.0440131 |
| 73.0258374 | 69 | 71.9865131 |
| 72.9258374 | 69 | 71.9165131 |
| 73.0258374 | 69 | 71.8440131 |
| 73.4258374 | 69 | 71.7316142 |
| 73.5258374 | 69 | 71.6192153 |
| 73.4258374 | 69 | 71.5127255 |
| 73.7258374 | 69 | 71.4132811 |
| 73.3258374 | 69 | 71.3127004 |
| 73.7258374 | 69 | 71.219847  |
| 73.5258374 | 69 | 71.1247208 |
| 73.5258374 | 69 | 71.0343673 |
| 73.1258374 | 69 | 70.9701502 |
| 73.2258374 | 69 | 70.9476502 |
| 73.4258374 | 69 | 70.9126502 |
| 72.8258374 | 69 | 70.9069744 |
| 72.4258374 | 69 | 70.8519744 |
| 71.2258374 | 69 | 70.8044744 |
| 70.5258374 | 69 | 70.7444744 |
| 69.5258374 | 69 | 70.6644744 |
| 69.3258374 | 69 | 70.5869744 |
| 68.9258374 | 69 | 70.4894744 |
| 68.9258374 | 69 | 70.3844744 |
| 67.5298809 | 69 | 70.2819744 |
| 67.5298809 | 69 | 70.1794744 |
| 67.3662446 | 69 | 70.0694744 |
| 67.1480627 | 69 | 69.9644744 |
| 67.6026082 | 69 | 69.8594744 |
| 67.7116991 | 69 | 69.7619744 |
| 67.82079   | 69 | 69.6944744 |
| 67.7116991 | 69 | 69.6419744 |
| 68.4571537 | 69 | 69.6019744 |
| 69.8258374 | 69 | 69.5744744 |
| 69.5258374 | 69 | 69.5569744 |
| 69.6258374 | 69 | 69.5369744 |
| 69.0258374 | 69 | 69.5094744 |
| 68.6258374 | 69 | 69.4944744 |
| 68.0258374 | 69 | 69.4844744 |
| 68.1258374 | 69 | 69.4819744 |
| 68.5258374 | 69 | 69.4944744 |
| 68.7258374 | 69 | 69.5319744 |
| 68.8258374 | 69 | 69.5894744 |



|            |               |
|------------|---------------|
| 68.8258374 | 69 69.6544744 |
| 68.9258374 | 69 69.7069744 |
| 69.0258374 | 69 69.8043734 |
| 69.3258374 | 69 69.8892723 |
| 69.2258374 | 69 69.9782621 |
| 69.8258374 | 69 70.0727064 |
| 70.6258374 | 69 70.1532872 |
| 71.6258374 | 69 70.2461406 |
| 71.9258374 | 69 70.3412668 |
| 72.4258374 | 69 70.4316203 |
| 72.4258374 | 69 70.4933374 |
| 72.4258374 | 69 70.5058374 |
| 72.3258374 | 69 70.5233374 |
| 72.2258374 | 69 70.5358374 |
| 72.0258374 | 69 70.5292345 |
| 71.1258374 | 69 70.5244498 |
| 71.0258374 | 69 70.5669498 |
| 71.0258374 | 69 70.6094498 |
| 71.6258374 | 69 70.6569498 |
| 71.5258374 | 69 70.6994498 |
| 71.0258374 | 69 70.7169498 |
| 71.4258374 | 69 70.7494498 |
| 70.9258374 | 69 70.7819498 |
| 70.9258374 | 69 70.8169498 |
| 70.9258374 | 69 70.8369498 |
| 70.8258374 | 69 70.8669498 |
| 71.4258374 | 69 70.8894498 |
| 71.6258374 | 69 70.8844498 |
| 71.3258374 | 69 70.8344498 |
| 70.9258374 | 69 70.7594498 |
| 70.3258374 | 69 70.6669498 |
| 70.2258374 | 69 70.5669498 |
| 70.1258374 | 69 70.4669498 |
| 68.761722  | 69 70.3719498 |
| 68.4344492 | 69 70.2694498 |
| 69.7258374 | 69 70.1719498 |
| 69.8258374 | 69 70.0919498 |
| 70.4258374 | 69 70.0219498 |
| 70.4258374 | 69 69.9469498 |
| 69.5258374 | 69 69.8569498 |
| 70.1258374 | 69 69.7669498 |
| 70.2258374 | 69 69.7019498 |
| 70.4258374 | 69 69.6294498 |
| 70.1258374 | 69 69.5769498 |
| 70.4258374 | 69 69.5319498 |

|            |    |            |
|------------|----|------------|
| 70.7258374 | 69 | 69.4844498 |
| 70.4258374 | 69 | 69.4319498 |
| 69.6258374 | 69 | 69.3669498 |
| 68.9258374 | 69 | 69.2994498 |
| 68.7258374 | 69 | 69.2369498 |
| 68.4258374 | 69 | 69.1869498 |
| 68.4258374 | 69 | 69.1569498 |
| 68.5258374 | 69 | 69.1319498 |
| 68.1258374 | 69 | 69.1269498 |
| 68.1258374 | 69 | 69.1635527 |
| 67.9258374 | 69 | 69.2158374 |
| 68.2258374 | 69 | 69.2358374 |
| 68.0258374 | 69 | 69.2533374 |
| 68.0258374 | 69 | 69.2558374 |
| 67.9258374 | 69 | 69.2508374 |
| 68.4258374 | 69 | 69.2883374 |
| 68.5258374 | 69 | 69.3033374 |
| 68.8258374 | 69 | 69.3133374 |
| 69.1258374 | 69 | 69.3183374 |
| 69.0258374 | 69 | 69.3233374 |
| 68.7258374 | 69 | 69.3158374 |
| 68.8258374 | 69 | 69.2958374 |
| 68.9258374 | 69 | 69.2933374 |
| 68.8258374 | 69 | 69.291393  |
| 68.9258374 | 69 | 69.3042214 |
| 69.1258374 | 69 | 69.324777  |
| 69.2258374 | 69 | 69.3582872 |
| 69.9258374 | 69 | 69.3857872 |
| 70.2258374 | 69 | 69.4132872 |
| 70.5258374 | 69 | 69.4457872 |
| 70.5258374 | 69 | 69.4857872 |
| 70.5258374 | 69 | 69.5307872 |
| 70.5258374 | 69 | 69.5682872 |
| 70.2258374 | 69 | 69.6007872 |
| 71.0258374 | 69 | 69.6307872 |
| 70.7258374 | 69 | 69.6532872 |
| 70.6258374 | 69 | 69.6607872 |
| 70.6258374 | 69 | 69.6657872 |
| 70.3258374 | 69 | 69.6632872 |
| 70.1258374 | 69 | 69.6532872 |
| 69.9258374 | 69 | 69.6507872 |
| 70.3258374 | 69 | 69.6711336 |
| 69.5480627 | 69 | 69.6989799 |
| 69.4389718 | 69 | 69.7188718 |
| 69.5480627 | 69 | 69.7399    |

|            |    |            |
|------------|----|------------|
| 69.7662446 | 69 | 69.74161   |
| 69.5258374 | 69 | 69.7442291 |
| 69.6258374 | 69 | 69.7443482 |
| 69.4258374 | 69 | 69.7274218 |
| 69.7258374 | 69 | 69.7193591 |
| 69.7258374 | 69 | 69.7256146 |
| 69.7258374 | 69 | 69.7381146 |
| 69.3258374 | 69 | 69.7431146 |
| 69.2258374 | 69 | 69.7381146 |
| 68.8258374 | 69 | 69.7306146 |
| 68.7258374 | 69 | 69.6981146 |
| 68.7258374 | 69 | 69.6681146 |
| 68.7258374 | 69 | 69.6431146 |
| 68.7258374 | 69 | 69.6156146 |
| 68.9258374 | 69 | 69.5956146 |
| 69.5396924 | 69 | 69.5856146 |
| 69.9396924 | 69 | 69.5781146 |
| 69.7215106 | 69 | 69.5681146 |
| 69.6669651 | 69 | 69.5900589 |
| 68.9942378 | 69 | 69.6297306 |
| 69.2306015 | 63 | 69.6891749 |
| 69.2306015 | 63 | 69.7481648 |
| 69.2487833 | 63 | 69.8131648 |
| 69.9033287 | 63 | 69.8756648 |
| 70.776056  | 63 | 69.9456648 |
| 71.0258374 | 63 | 70.0031648 |
| 70.7258374 | 63 | 70.0556648 |
| 70.3258374 | 63 | 70.0931648 |
| 69.9258374 | 63 | 70.1256648 |
| 69.7258374 | 63 | 70.1506648 |
| 69.5258374 | 63 | 70.1556648 |
| 69.6258374 | 63 | 70.1656648 |
| 69.5258374 | 63 | 70.1881648 |
| 69.5258374 | 63 | 70.2206648 |
| 69.7258374 | 63 | 70.2506648 |
| 69.6258374 | 63 | 70.2831648 |
| 69.9258374 | 63 | 70.2903184 |
| 70.4258374 | 63 | 70.282472  |
| 71.0258374 | 63 | 70.3075802 |
| 71.9258374 | 63 | 70.349052  |
| 72.1258374 | 63 | 70.429842  |
| 72.1258374 | 63 | 70.5072229 |
| 72.1258374 | 63 | 70.6046038 |
| 72.2258374 | 63 | 70.6810695 |
| 72.0258374 | 63 | 70.7502626 |

|            |    |            |
|------------|----|------------|
| 71.8258374 | 63 | 70.7908192 |
| 71.2258374 | 63 | 70.8142223 |
| 70.6258374 | 63 | 70.8342162 |
| 70.2258374 | 63 | 70.8687557 |
| 69.0258374 | 63 | 70.907386  |
| 69.1258374 | 63 | 70.9537436 |
| 69.6258374 | 63 | 71.0160103 |
| 70.0258374 | 63 | 71.0807769 |
| 69.9258374 | 63 | 71.1453164 |
| 70.2258374 | 63 | 71.2098558 |
| 69.8258374 | 63 | 71.2639406 |
| 69.6258374 | 63 | 71.3232528 |
| 70.7258374 | 63 | 71.3668831 |
| 71.3258374 | 63 | 71.3871043 |
| 72.2258374 | 63 | 71.3841437 |
| 72.3258374 | 63 | 71.3586832 |
| 73.1258374 | 63 | 71.327768  |
| 72.3074139 | 63 | 71.2963983 |
| 72.6710502 | 63 | 71.2759378 |
| 72.398323  | 63 | 71.2588863 |
| 71.9619593 | 63 | 71.249562  |
| 71.5255957 | 63 | 71.2479651 |
| 71.7074139 | 63 | 71.2618227 |
| 71.4710502 | 63 | 71.2965894 |
| 71.5801411 | 63 | 71.3449924 |
| 72.0165048 | 63 | 71.4224864 |
| 72.2165048 | 63 | 71.4706621 |
| 72.1074139 | 63 | 71.5008834 |
| 72.1074139 | 63 | 71.5274682 |
| 71.889232  | 63 | 71.5510986 |
| 71.998323  | 63 | 71.5645016 |
| 71.6710502 | 63 | 71.5879047 |
| 71.2346866 | 63 | 71.6213077 |
| 70.9074139 | 63 | 71.6326653 |
| 70.9074139 | 63 | 71.6231138 |
| 70.889232  | 63 | 71.5856078 |
| 70.8710502 | 63 | 71.5319654 |
| 71.3074139 | 63 | 71.449232  |
| 71.5437775 | 63 | 71.3928684 |
| 71.6528684 | 63 | 71.314232  |
| 71.7619593 | 63 | 71.2478684 |
| 71.7801411 | 63 | 71.2244654 |
| 72.0165048 | 63 | 71.1994714 |
| 72.1619593 | 63 | 71.174932  |
| 72.1255957 | 63 | 71.1538017 |

|            |    |            |
|------------|----|------------|
| 71.0528684 | 63 | 71.1099441 |
| 70.8346866 | 63 | 71.0476774 |
| 71.089232  | 63 | 70.9729107 |
| 70.8710502 | 63 | 70.9083713 |
| 70.7619593 | 63 | 70.8688319 |
| 70.7619593 | 63 | 70.849747  |
| 70.9619593 | 63 | 70.8279349 |
| 71.1801411 | 63 | 70.8193045 |
| 70.9437775 | 63 | 70.8340833 |
| 70.7255957 | 63 | 70.8695439 |
| 70.1801411 | 63 | 70.9025045 |
| 69.8165048 | 63 | 70.9284196 |
| 70.0528684 | 63 | 70.9497893 |
| 69.5255957 | 63 | 70.9577499 |
| 69.7437775 | 63 | 70.9523014 |
| 71.0258374 | 63 | 70.9491256 |
| 70.5258374 | 63 | 70.9382226 |
| 70.7258374 | 63 | 70.921865  |
| 70.6258374 | 63 | 70.8995983 |
| 69.8258374 | 63 | 70.8786952 |
| 69.5258374 | 63 | 70.8662013 |
| 69.2258374 | 63 | 70.8855255 |
| 69.5258374 | 63 | 70.9003043 |
| 70.5258374 | 63 | 70.8962194 |
| 71.1258374 | 63 | 70.8850891 |
| 71.1258374 | 63 | 70.879186  |
| 71.3258374 | 63 | 70.868283  |
| 71.8258374 | 63 | 70.8448799 |
| 72.3258374 | 63 | 70.8210223 |
| 72.2258374 | 63 | 70.7983955 |
| 71.9258374 | 63 | 70.8184016 |
| 71.7258374 | 63 | 70.857044  |
| 71.6258374 | 63 | 70.9022773 |
| 71.3258374 | 63 | 70.9516015 |
| 71.5258374 | 63 | 71.0166076 |
| 71.3258374 | 63 | 71.0811591 |
| 71.1258374 | 63 | 71.1261591 |
| 71.1258374 | 63 | 71.1936591 |
| 71.3258374 | 63 | 71.2611591 |
| 71.6258374 | 63 | 71.3336591 |
| 71.8258374 | 63 | 71.4261591 |
| 71.4258374 | 63 | 71.4929653 |
| 70.9258374 | 63 | 71.5672715 |
| 70.4258374 | 63 | 71.6597715 |
| 70.5258374 | 63 | 71.7322715 |

|            |    |            |
|------------|----|------------|
| 70.3258374 | 63 | 71.7872715 |
| 70.0258374 | 63 | 71.7863504 |
| 70.2258374 | 63 | 71.7863384 |
| 70.0387054 | 63 | 71.7829174 |
| 71.5258374 | 63 | 71.7724509 |
| 71.7258374 | 63 | 71.7703934 |
| 71.6258374 | 63 | 71.7731087 |
| 72.0258374 | 63 | 71.7890058 |
| 72.1258374 | 63 | 71.8110393 |
| 72.3258374 | 63 | 71.8487546 |
| 72.8258374 | 63 | 71.8869245 |
| 73.2258374 | 63 | 71.9382761 |
| 73.4258374 | 63 | 71.9837187 |
| 73.5258374 | 63 | 72.0246158 |
| 73.5258374 | 63 | 72.0596038 |
| 72.1980856 | 63 | 72.0925464 |
| 72.1980856 | 63 | 72.1177617 |
| 73.2258374 | 63 | 72.157977  |
| 73.4258374 | 63 | 72.202965  |
| 73.3258374 | 63 | 72.2522712 |
| 71.0889947 | 63 | 72.2990774 |
| 71.3253583 | 63 | 72.3563382 |
| 71.6889947 | 63 | 72.4351898 |
| 71.9071765 | 63 | 72.5090415 |
| 72.1435402 | 63 | 72.5962078 |
| 72.0344492 | 63 | 72.6434686 |
| 72.361722  | 63 | 72.6857293 |
| 72.5071765 | 63 | 72.7309446 |
| 72.8344492 | 63 | 72.7579781 |
| 73.0526311 | 63 | 72.7793298 |
| 73.3799038 | 63 | 72.7956814 |
| 72.9435402 | 63 | 72.8213513 |
| 72.761722  | 63 | 72.8292938 |
| 72.7253583 | 63 | 72.8204182 |
| 72.9435402 | 63 | 72.7899517 |
| 72.8344492 | 63 | 72.7567579 |
| 73.0344492 | 63 | 72.7508488 |
| 72.7253583 | 63 | 72.747667  |
| 72.3980856 | 63 | 72.735155  |
| 72.3980856 | 63 | 72.717643  |
| 72.6162674 | 63 | 72.7026311 |
| 73.1799038 | 63 | 72.7485402 |
| 73.1799038 | 63 | 72.7935402 |
| 73.5253583 | 63 | 72.8339947 |
| 73.4162674 | 63 | 72.871722  |

|            |    |            |
|------------|----|------------|
| 73.4162674 | 63 | 72.9137794 |
| 73.4344492 | 63 | 72.9485641 |
| 73.1071765 | 63 | 72.980167  |
| 72.9799038 | 63 | 73.0106335 |
| 72.9799038 | 63 | 73.0329182 |
| 73.8526311 | 63 | 73.0297484 |
| 73.5435402 | 63 | 73.0058967 |
| 73.0708129 | 63 | 72.9829541 |
| 72.3071765 | 63 | 72.964557  |
| 72.1980856 | 63 | 72.947069  |
| 71.961722  | 63 | 72.9241264 |
| 72.0708129 | 63 | 72.8914111 |
| 72.7253583 | 63 | 72.8561958 |
| 72.7253583 | 63 | 72.8162078 |
| 72.7253583 | 63 | 72.7869016 |
| 72.9253583 | 63 | 72.7550954 |
| 73.1253583 | 63 | 72.7203347 |
| 73.3071765 | 63 | 72.666483  |
| 73.4162674 | 63 | 72.6051313 |
| 73.8258374 | 63 | 72.5251433 |
| 73.4258374 | 63 | 72.4503826 |
| 73.6258374 | 63 | 72.3706218 |
| 73.7258374 | 63 | 72.2979065 |
| 73.7258374 | 63 | 72.245873  |
| 72.9258374 | 63 | 72.1970214 |
| 72.4258374 | 63 | 72.1381697 |
| 72.0258374 | 63 | 72.0649999 |
| 72.0258374 | 63 | 71.9970573 |
| 72.0258374 | 63 | 71.9209329 |
| 72.0258374 | 63 | 71.8438994 |
| 71.5258374 | 63 | 71.7645932 |
| 71.6258374 | 63 | 71.6861961 |
| 71.1258374 | 63 | 71.6075717 |
| 71.2258374 | 63 | 71.5125837 |
| 71.1258374 | 63 | 71.4150957 |
| 71.2258374 | 63 | 71.3301076 |
| 71.0258374 | 63 | 71.2426196 |
| 70.7258374 | 63 | 71.1426316 |
| 70.3258374 | 63 | 71.0330981 |
| 70.4258374 | 63 | 70.9183374 |
| 70.2258374 | 63 | 70.8008374 |
| 70.5258374 | 63 | 70.7083374 |
| 71.0258374 | 63 | 70.6133374 |
| 71.0258374 | 63 | 70.5108374 |
| 70.6258374 | 63 | 70.4083374 |

|           |            |    |            |
|-----------|------------|----|------------|
|           | 70.9258374 | 63 | 70.3208374 |
|           | 70.8258374 | 63 | 70.2458374 |
|           | 70.0258374 | 63 | 70.1858374 |
|           | 69.2258374 | 63 | 70.1258374 |
|           | 69.0258374 | 63 | 70.0733374 |
|           | 68.8258374 | 63 | 70.0308374 |
|           | 68.9258374 | 63 | 70.0033374 |
|           | 68.9258374 | 63 | 69.9908374 |
|           | 68.8258374 | 63 | 69.9858374 |
|           | 69.3258374 | 63 | 69.9783374 |
|           | 69.4258374 | 63 | 69.9883374 |
|           | 69.1258374 | 63 | 70.0183374 |
|           | 68.9258374 | 63 | 70.0708374 |
|           | 68.8258374 | 63 | 70.1308374 |
|           | 69.1258374 | 63 | 70.1908374 |
|           | 69.7258374 | 63 | 70.2483374 |
|           | 69.8258374 | 63 | 70.3158374 |
|           | 69.6258374 | 63 | 70.3808374 |
|           | 69.6258374 | 63 | 70.4183374 |
|           | 69.4258374 | 63 | 70.417189  |
|           | 69.4258374 | 63 | 70.442189  |
|           | 69.6258374 | 63 | 70.454689  |
|           | 69.6258374 | 63 | 70.472189  |
|           | 69.9258374 | 63 | 70.509689  |
|           | 70.3258374 | 63 | 70.569689  |
|           | 70.4258374 | 63 | 70.644689  |
|           | 71.1258374 | 63 | 70.727189  |
|           | 70.9258374 | 63 | 70.817189  |
|           | 70.9258374 | 63 | 70.8849043 |
|           | 71.5258374 | 63 | 70.9924043 |
| Before 1  | 72.4258374 | 63 | 71.0874043 |
| Before 2  | 73.1258374 | 63 | 71.1674043 |
| Before 3  | 73.1258374 | 63 | 71.2449043 |
| Before 4  | 72.7258374 | 63 | 71.3324043 |
| Before 5  | 72.7258374 | 63 | 71.4349043 |
| Before 6  | 72.9258374 | 63 | 71.5349043 |
| Before 7  | 73.1258374 | 63 | 71.5949043 |
| Before 8  | 72.5258374 | 63 | 71.6151256 |
| Before 9  | 70.9799038 | 63 | 71.632165  |
| Before 10 | 71.6258374 | 63 | 71.6419317 |
| Before 11 | 71.4258374 | 63 | 71.6576074 |
| Before 12 | 71.5258374 | 63 | 71.6810105 |
| Before 13 | 71.5258374 | 63 | 71.7048681 |
| Before 14 | 71.6258374 | 63 | 71.7328166 |
| Before 15 | 72.0258374 | 63 | 71.7653166 |



|           |            |    |            |
|-----------|------------|----|------------|
| Before 16 | 72.1258374 | 63 | 71.7703166 |
| Before 17 | 72.5258374 | 63 | 71.7503166 |
| Before 18 | 71.6344492 | 63 | 71.6928166 |
| Before 19 | 73.1258374 | 63 | 71.6278166 |
| Before 20 | 73.1258374 | 63 | 71.5603166 |
| Before 21 | 72.6258374 | 63 | 71.4753166 |
| Before 22 | 72.2258374 | 63 | 71.3753166 |
| Before 23 | 72.4258374 | 63 | 71.2503166 |
| Before 24 | 72.9258374 | 63 | 71.1203166 |
| Before 25 | 73.1258374 | 63 | 71.0078166 |
| Before 26 | 72.1258374 | 63 | 70.8953166 |
| Before 27 | 70.6346866 | 63 | 70.7753166 |
| Before 28 | 70.3074139 | 63 | 70.6428166 |
| Before 29 | 70.0165048 | 63 | 70.5328166 |
| Before 30 | 70.0528684 | 63 | 70.4589649 |
| Before 31 | 70.3619593 | 63 | 70.3814649 |
| Before 32 | 70.5801411 | 63 | 70.3214649 |
| Before 33 | 70.7437775 | 63 | 70.2664649 |
| Before 34 | 71.2258374 | 63 | 70.2364649 |
| Before 35 | 70.5258374 | 63 | 70.2189649 |
| Before 36 | 69.6258374 | 63 | 70.2014649 |
| Before 37 | 68.8258374 | 63 | 70.1789649 |
| Before 38 | 68.3258374 | 63 | 70.1464649 |
| Before 39 | 68.2258374 | 63 | 70.1437496 |
| Before 40 | 68.1258374 | 63 | 70.1037496 |
| Before 41 | 68.4258374 | 63 | 70.0562496 |
| Before 42 | 68.1258374 | 63 | 69.9862496 |
| Before 43 | 67.9258374 | 63 | 69.9162496 |
| Before 44 | 68.2258374 | 63 | 69.8387496 |
| Before 45 | 68.2258374 | 63 | 69.7712496 |
| Before 46 | 68.1258374 | 63 | 69.7037496 |
| Before 47 | 67.8258374 | 63 | 69.6587496 |
| Before 48 | 68.1258374 | 63 | 69.6560284 |
| Before 49 | 68.0258374 | 63 | 69.653989  |
| Before 50 | 68.5258374 | 63 | 69.6667223 |
| Before 51 | 69.0258374 | 63 | 69.6860465 |
| Before 52 | 69.3258374 | 63 | 69.6737679 |
| Before 53 | 70.3258374 | 63 | 69.6537619 |
| Before 54 | 70.9258374 | 63 | 69.6210287 |
| Before 55 | 71.3258374 | 63 | 69.556244  |
| Before 56 | 71.2258374 | 63 | 69.508744  |
| Before 57 | 71.2258374 | 63 | 69.493744  |
| Before 58 | 71.5258374 | 63 | 69.501244  |
| Before 59 | 71.5258374 | 63 | 69.526244  |
| Before 60 | 71.2258374 | 63 | 69.556244  |

|            |            |    |            |
|------------|------------|----|------------|
| Before 61  | 69.8258374 | 63 | 69.588744  |
| Before 62  | 69.4258374 | 63 | 69.613744  |
| Before 63  | 69.3258374 | 63 | 69.643744  |
| Before 64  | 70.2258374 | 63 | 69.681244  |
| Before 65  | 70.4258374 | 63 | 69.703744  |
| Before 66  | 70.3258374 | 63 | 69.728744  |
| Before 67  | 70.5258374 | 63 | 69.753744  |
| Before 68  | 70.2258374 | 63 | 69.788744  |
| Before 69  | 70.5258374 | 63 | 69.816244  |
| Before 70  | 70.8258374 | 63 | 69.838744  |
| Before 71  | 69.8708129 | 63 | 69.861244  |
| Before 72  | 69.7799038 | 63 | 69.883744  |
| Before 73  | 69.4344492 | 63 | 69.901244  |
| Before 74  | 68.6344492 | 63 | 69.896244  |
| Before 75  | 68.6258374 | 63 | 69.878744  |
| Before 76  | 69.0258374 | 63 | 69.868744  |
| Before 77  | 69.1258374 | 63 | 69.881244  |
| Before 78  | 69.3258374 | 63 | 69.908744  |
| Before 79  | 69.4258374 | 63 | 69.936244  |
| Before 80  | 69.4258374 | 63 | 69.986244  |
| Before 81  | 69.4258374 | 63 | 70.053744  |
| Before 82  | 69.3258374 | 63 | 70.151244  |
| Before 83  | 69.4258374 | 63 | 70.251244  |
| Before 84  | 69.1258374 | 63 | 70.341244  |
| Before 85  | 69.2258374 | 63 | 70.388744  |
| Before 86  | 69.1258374 | 63 | 70.428744  |
| Before 87  | 69.2258374 | 63 | 70.483744  |
| Before 88  | 69.2258374 | 63 | 70.531244  |
| Before 89  | 68.9258374 | 63 | 70.5715657 |
| Before 90  | 69.4258374 | 63 | 70.6021147 |
| Before 91  | 69.9258374 | 63 | 70.6174364 |
| Before 92  | 70.0258374 | 63 | 70.6566337 |
| Before 93  | 70.1258374 | 63 | 70.6876492 |
| Before 94  | 70.2258374 | 63 | 70.7644656 |
| Before 95  | 70.9258374 | 63 | 70.8728729 |
| Before 96  | 71.7258374 | 63 | 71.0111739 |
| Before 97  | 72.3258374 | 63 | 71.0963874 |
| Before 98  | 72.6258374 | 63 | 71.1613736 |
| Before 99  | 73.5258374 | 63 | 71.2136326 |
| Before 100 | 73.9258374 | 63 | 71.2768007 |
| Before 101 | 73.7258374 | 69 | 71.3356506 |
| Before 102 | 73.4258374 | 69 | 71.4155178 |
| Before 103 | 72.9258374 | 69 | 71.5130178 |
| Before 104 | 72.1258374 | 69 | 71.6030178 |
| Before 105 | 72.0258374 | 69 | 71.6930178 |

|            |            |    |            |
|------------|------------|----|------------|
| Before 106 | 72.5258374 | 69 | 71.7605178 |
| Before 107 | 72.4258374 | 69 | 71.8205178 |
| Before 108 | 71.8387054 | 69 | 71.8805178 |
| Before 109 | 71.7477963 | 69 | 71.9181122 |
| Before 110 | 71.4387054 | 69 | 71.9609339 |
| Before 111 | 71.4387054 | 69 | 71.9680738 |
| Before 112 | 71.0205236 | 69 | 71.9768046 |
| Before 113 | 72.5071059 | 69 | 71.979399  |
| Before 114 | 72.9707422 | 69 | 71.9831298 |
| Before 115 | 74.1578742 | 69 | 71.9957242 |
| Before 116 | 72.4343786 | 69 | 71.9935459 |
| Before 117 | 71.7252877 | 69 | 71.9690949 |
| Before 118 | 71.4161968 | 69 | 71.9650984 |
| Before 119 | 71.9525604 | 69 | 71.9808746 |
| Before 120 | 71.7798331 | 69 | 71.9959691 |
| Before 121 | 72.6205236 | 69 | 72.0010635 |
| Before 122 | 73.2258374 | 69 | 72.0111579 |
| Before 123 | 73.0258374 | 69 | 72.0032978 |
| Before 124 | 72.7258374 | 69 | 72.0020286 |
| Before 125 | 71.9258374 | 69 | 72.0153049 |
| Before 126 | 71.5258374 | 69 | 72.0174447 |
| Before 127 | 71.6258374 | 69 | 72.0070846 |
| Before 128 | 70.7296145 | 69 | 71.9992245 |
| Before 129 | 70.6387054 | 69 | 72.0001336 |
| Before 130 | 69.7114327 | 69 | 72.0060427 |
| Before 131 | 70.275069  | 69 | 72.0224063 |
| Before 132 | 70.1296145 | 69 | 72.03877   |
| Before 133 | 70.275069  | 69 | 72.054679  |
| Before 134 | 70.7296145 | 69 | 72.0306963 |
| Before 135 | 70.8387054 | 69 | 71.9869408 |
| Before 136 | 70.7477963 | 63 | 71.9162344 |
| Before 137 | 72.1659781 | 63 | 71.890888  |
| Before 138 | 73.2568872 | 63 | 71.9009961 |
| Before 139 | 74.1296145 | 63 | 71.9297407 |
| Before 140 | 74.1296145 | 63 | 71.9765726 |
| Before 141 | 74.1296145 | 63 | 72.0452227 |
| Before 142 | 73.1114327 | 63 | 72.1128556 |
| Before 143 | 72.875069  | 63 | 72.1578556 |
| Before 144 | 72.6568872 | 63 | 72.2053556 |
| Before 145 | 72.1114327 | 63 | 72.2428556 |
| Before 146 | 72.1114327 | 63 | 72.3003556 |
| Before 147 | 72.1114327 | 63 | 72.3303556 |
| Before 148 | 71.875069  | 63 | 72.3478556 |
| Before 149 | 71.98416   | 63 | 72.3827611 |
| Before 150 | 72.0932509 | 63 | 72.4174394 |

|            |            |    |            |
|------------|------------|----|------------|
| Before 151 | 72.0932509 | 63 | 72.4752995 |
| Before 152 | 71.6568872 | 63 | 72.5090688 |
| Before 153 | 71.5477963 | 63 | 72.5414743 |
| Before 154 | 71.2205236 | 63 | 72.5727435 |
| Before 155 | 71.3296145 | 63 | 72.5801491 |
| Before 156 | 71.4205236 | 63 | 72.5848274 |
| Before 157 | 72.1296145 | 63 | 72.5624542 |
| Before 158 | 72.5659781 | 63 | 72.5364507 |
| Before 159 | 73.8258374 | 63 | 72.4522593 |
| Before 160 | 74.5258374 | 63 | 72.3467043 |
| Before 161 | 75.3258374 | 63 | 72.2420584 |
| Before 162 | 75.0258374 | 63 | 72.1455943 |
| Before 163 | 74.9258374 | 63 | 72.0832211 |
| Before 164 | 74.2258374 | 63 | 72.0244842 |
| Before 165 | 74.2258374 | 63 | 71.9852928 |
| Before 166 | 72.7258374 | 63 | 71.9488287 |
| Before 167 | 72.3258374 | 63 | 71.9041828 |
| Before 168 | 72.1258374 | 63 | 71.8513551 |
| Before 169 | 72.0258374 | 63 | 71.8258001 |
| Before 170 | 72.0258374 | 63 | 71.8061541 |
| Before 171 | 71.6258374 | 63 | 71.7844688 |
| Before 172 | 71.4258374 | 63 | 71.7802835 |
| Before 173 | 71.5258374 | 63 | 71.7920072 |
| Before 174 | 71.0258374 | 63 | 71.7989582 |
| Before 175 | 71.0258374 | 63 | 71.8165911 |
| Before 176 | 69.8528684 | 63 | 71.8189966 |
| Before 177 | 71.1258374 | 63 | 71.8141295 |
| Before 178 | 69.889232  | 63 | 71.7940351 |
| Before 179 | 69.9074139 | 63 | 71.7730315 |
| Before 180 | 69.9437775 | 63 | 71.7230315 |
| Before 181 | 70.2710502 | 63 | 71.6505315 |
| Before 182 | 70.6165048 | 63 | 71.5505315 |
| Before 183 | 70.5255957 | 63 | 71.4605315 |
| Before 184 | 71.089232  | 63 | 71.3805315 |
| Before 185 | 70.6528684 | 63 | 71.3130315 |
| Before 186 | 70.3255957 | 63 | 71.2380315 |
| Before 187 | 69.998323  | 63 | 71.2080315 |
| Before 188 | 70.8528684 | 63 | 71.1749508 |
| Before 189 | 71.198323  | 63 | 71.1514155 |
| Before 190 | 71.2258374 | 63 | 71.1299257 |
| Before 191 | 71.9258374 | 63 | 71.1334359 |
| Before 192 | 72.1258374 | 63 | 71.161037  |
| Before 193 | 71.8258374 | 63 | 71.2018199 |
| Before 194 | 71.9258374 | 63 | 71.2373755 |
| Before 195 | 71.4258374 | 63 | 71.2990675 |

|            |            |    |            |
|------------|------------|----|------------|
| Before 196 | 71.2258374 | 63 | 71.355305  |
| Before 197 | 71.3258374 | 63 | 71.4354121 |
| Before 198 | 71.7258374 | 63 | 71.4923314 |
| Before 199 | 71.8258374 | 63 | 71.5783476 |
| Before 200 | 71.6258374 | 63 | 71.6639093 |
| Before 201 | 71.3258374 | 63 | 71.7681073 |
| Before 202 | 71.4258374 | 63 | 71.9023054 |
| Before 203 | 71.7258374 | 63 | 72.0125336 |
| Before 204 | 71.5258374 | 63 | 72.1316255 |
| Before 205 | 71.2258374 | 63 | 72.2275356 |
| Before 206 | 71.5258374 | 63 | 72.3298093 |
| Before 207 | 71.0026082 | 63 | 72.4164012 |
| Before 208 | 71.1844264 | 63 | 72.515392  |
| Before 209 | 71.1662446 | 63 | 72.5898374 |
| Before 210 | 72.1662446 | 63 | 72.64201   |
| Before 211 | 72.7298809 | 63 | 72.6916766 |
| Before 212 | 73.0571537 | 63 | 72.7233886 |
| Before 213 | 72.9480627 | 63 | 72.7419189 |
| Before 214 | 73.4935173 | 63 | 72.7819189 |
| Before 215 | 73.2753355 | 63 | 72.8119189 |
| Before 216 | 73.0571537 | 63 | 72.8394189 |
| Before 217 | 73.4026082 | 63 | 72.8569189 |
| Before 218 | 73.3298809 | 63 | 72.8469189 |
| Before 219 | 73.3298809 | 63 | 72.8094189 |
| Before 220 | 74.1116991 | 63 | 72.7544189 |
| Before 221 | 75.6389718 | 63 | 72.7044189 |
| Before 222 | 75.0256353 | 63 | 72.6594189 |
| Before 223 | 75.2892716 | 63 | 72.6194189 |
| Before 224 | 74.9256353 | 63 | 72.5844189 |
| Before 225 | 74.7438171 | 63 | 72.5519189 |
| Before 226 | 73.7892716 | 63 | 72.5394189 |
| Before 227 | 73.9579553 | 63 | 72.5319189 |
| Before 228 | 73.8306826 | 63 | 72.5499996 |
| Before 229 | 73.2852281 | 63 | 72.5710349 |
| Before 230 | 73.2125008 | 63 | 72.6050247 |
| Before 231 | 73.194319  | 63 | 72.6065145 |
| Before 232 | 72.8670462 | 63 | 72.5889134 |
| Before 233 | 73.4258374 | 63 | 72.5297409 |
| Before 234 | 73.1258374 | 63 | 72.456932  |
| Before 235 | 72.5258374 | 63 | 72.373214  |
| Before 236 | 71.9258374 | 63 | 72.3008596 |
| Before 237 | 70.9258374 | 63 | 72.2371416 |
| Before 238 | 70.2258374 | 63 | 72.1706963 |
| Before 239 | 69.6258374 | 63 | 72.1028874 |
| Before 240 | 69.6258374 | 63 | 72.0350785 |

|           |            |    |            |
|-----------|------------|----|------------|
| Minute 1  | 69.5258374 | 63 | 71.9395423 |
| Minute 2  | 69.8258374 | 63 | 71.8030971 |
| Minute 3  | 70.3258374 | 63 | 71.6874398 |
| Minute 4  | 70.2258374 | 63 | 71.5933539 |
| Minute 5  | 70.7258374 | 63 | 71.5033589 |
| Minute 6  | 71.2258374 | 63 | 71.3954095 |
| Minute 7  | 71.7258374 | 63 | 71.3088236 |
| Minute 8  | 72.0258374 | 63 | 71.2080207 |
| Minute 9  | 72.5258374 | 63 | 71.1203995 |
| Minute 10 | 72.2258374 | 63 | 71.0489148 |
| Minute 11 | 72.0258374 | 63 | 70.9892482 |
| Minute 12 | 70.6902519 | 63 | 70.9275361 |
| Minute 13 | 70.0357064 | 63 | 70.8815059 |
| Minute 14 | 70.1447973 | 63 | 70.8215059 |
| Minute 15 | 70.381161  | 63 | 70.7590059 |
| Minute 16 | 70.5084337 | 63 | 70.7240059 |
| Minute 17 | 70.7447973 | 63 | 70.7040059 |
| Minute 18 | 70.6175246 | 63 | 70.7140059 |
| Minute 19 | 70.6175246 | 63 | 70.7365059 |
| Minute 20 | 70.2902519 | 63 | 70.7590059 |
| Minute 21 | 70.181161  | 63 | 70.7540059 |
| Minute 22 | 70.3993428 | 63 | 70.7365059 |
| Minute 23 | 71.5258374 | 63 | 70.7115059 |
| Minute 24 | 71.3258374 | 63 | 70.6765059 |
| Minute 25 | 70.4258374 | 63 | 70.6415059 |
| Minute 26 | 70.3258374 | 63 | 70.5965059 |
| Minute 27 | 69.9258374 | 63 | 70.5465059 |
| Minute 28 | 70.3258374 | 63 | 70.4965059 |
| Minute 29 | 70.4258374 | 63 | 70.4365059 |
| Minute 30 | 70.8258374 | 63 | 70.3640059 |
| Minute 31 | 70.7258374 | 63 | 70.3090059 |
| Minute 32 | 71.0258374 | 63 | 70.2740059 |
| Minute 33 | 71.0258374 | 63 | 70.2773955 |
| Minute 34 | 70.6258374 | 63 | 70.3096488 |
| Minute 35 | 71.1258374 | 63 | 70.3466748 |
| Minute 36 | 71.1258374 | 63 | 70.3877917 |
| Minute 37 | 71.3258374 | 63 | 70.4357268 |
| Minute 38 | 71.1258374 | 63 | 70.4902528 |
| Minute 39 | 70.5258374 | 63 | 70.5504606 |
| Minute 40 | 69.4258374 | 63 | 70.5756685 |
| Minute 41 | 68.8258374 | 63 | 70.6115581 |
| Minute 42 | 68.8258374 | 63 | 70.645175  |
| Minute 43 | 68.9258374 | 63 | 70.6658374 |
| Minute 44 | 68.8258374 | 63 | 70.6483374 |
| Minute 45 | 68.9258374 | 63 | 70.6358374 |

|           |            |    |            |
|-----------|------------|----|------------|
| Minute 46 | 69.2258374 | 63 | 70.6458374 |
| Minute 47 | 69.7258374 | 63 | 70.6583374 |
| Minute 48 | 69.6258374 | 63 | 70.6833374 |
| Minute 49 | 69.6258374 | 63 | 70.7083374 |
| Minute 50 | 70.0258374 | 63 | 70.7208374 |
| Minute 51 | 70.6258374 | 63 | 70.7158374 |
| Minute 52 | 70.8258374 | 63 | 70.7058374 |
| Minute 53 | 71.3258374 | 63 | 70.6808374 |
| Minute 54 | 71.6258374 | 63 | 70.6558374 |
| Minute 55 | 72.0258374 | 63 | 70.6433374 |
| Minute 56 | 72.4258374 | 63 | 70.6133374 |
| Minute 57 | 72.9258374 | 63 | 70.5808374 |
| Minute 58 | 73.0258374 | 63 | 70.5408374 |
| Minute 59 | 71.6258374 | 63 | 70.5008374 |
| Minute 60 | 71.7258374 | 63 | 70.4683374 |
| Movie 1   | 71.5258374 | 65 | 70.4558374 |
| Movie 2   | 71.2258374 | 65 | 70.4608374 |
| Movie 3   | 70.8258374 | 65 | 70.4583374 |
| Movie 4   | 70.8258374 | 65 | 70.4683374 |
| Movie 5   | 70.8258374 | 65 | 70.4833374 |
| Movie 6   | 70.8258374 | 65 | 70.4933374 |
| Movie 7   | 70.9258374 | 65 | 70.4958374 |
| Movie 8   | 71.3258374 | 65 | 70.4858374 |
| Movie 9   | 70.9258374 | 65 | 70.4733374 |
| Movie 10  | 70.6258374 | 65 | 70.4633374 |
| Movie 11  | 70.3258374 | 65 | 70.4458374 |
| Movie 12  | 70.0258374 | 65 | 70.4133374 |
| Movie 13  | 70.0258374 | 65 | 70.3708374 |
| Movie 14  | 70.1258374 | 65 | 70.2913114 |
| Movie 15  | 69.9258374 | 65 | 70.2179217 |
| Movie 16  | 69.8258374 | 65 | 70.1395321 |
| Movie 17  | 69.7258374 | 65 | 70.0520515 |
| Movie 18  | 69.5258374 | 65 | 69.952071  |
| Movie 19  | 69.2258374 | 65 | 69.8468632 |
| Movie 20  | 68.9258374 | 65 | 69.7743826 |
| Movie 21  | 69.0258374 | 65 | 69.6971294 |
| Movie 22  | 68.7258374 | 65 | 69.6248761 |
| Movie 23  | 69.3258374 | 65 | 69.5492137 |
| Movie 24  | 69.4258374 | 65 | 69.4835514 |
| Movie 25  | 69.3258374 | 65 | 69.4110708 |
| Movie 26  | 69.3258374 | 65 | 69.3354084 |
| Movie 27  | 69.3258374 | 65 | 69.2661097 |
| Movie 28  | 69.1258374 | 65 | 69.2029474 |
| Movie 29  | 69.2258374 | 65 | 69.1406941 |
| Movie 30  | 69.3258374 | 65 | 69.0884408 |

|          |            |    |            |
|----------|------------|----|------------|
| Movie 31 | 69.3258374 | 65 | 69.0518694 |
| Movie 32 | 69.1258374 | 65 | 69.0309797 |
| Movie 33 | 68.1447973 | 65 | 69.0112264 |
| Movie 34 | 68.6902519 | 65 | 68.9728368 |
| Movie 35 | 68.8902519 | 65 | 68.940129  |
| Movie 36 | 68.9266155 | 65 | 68.925129  |
| Movie 37 | 68.9266155 | 65 | 68.915129  |
| Movie 38 | 68.8175246 | 65 | 68.905129  |
| Movie 39 | 68.7266155 | 65 | 68.900129  |
| Movie 40 | 68.6357064 | 65 | 68.905129  |
| Movie 41 | 68.6357064 | 65 | 68.915129  |
| Movie 42 | 68.1993428 | 65 | 68.932629  |
| Movie 43 | 68.1993428 | 65 | 68.950129  |
| Movie 44 | 67.9266155 | 65 | 68.955129  |
| Movie 45 | 67.7993428 | 65 | 68.940129  |
| Movie 46 | 68.0538882 | 65 | 68.912629  |
| Movie 47 | 68.3993428 | 65 | 68.875129  |
| Movie 48 | 68.8357064 | 65 | 68.825129  |
| Movie 49 | 68.8357064 | 65 | 68.760129  |
| Movie 50 | 69.1629792 | 65 | 68.680129  |
| Movie 51 | 69.4902519 | 65 | 68.600129  |
| Movie 52 | 69.2357064 | 65 | 68.532629  |
| Movie 53 | 68.4902519 | 65 | 68.453103  |
| Movie 54 | 68.8175246 | 65 | 68.3912848 |
| Movie 55 | 69.3258374 | 65 | 68.3112848 |
| Movie 56 | 69.4258374 | 65 | 68.2344666 |
| Movie 57 | 69.3258374 | 65 | 68.1676484 |
| Movie 58 | 69.3258374 | 65 | 68.0971939 |
| Movie 59 | 69.4258374 | 65 | 68.0440121 |
| Movie 60 | 69.3258374 | 65 | 68.0014926 |
| Movie 61 | 69.7258374 | 65 | 67.9462459 |
| Movie 62 | 69.4258374 | 65 | 67.8909992 |
| Movie 63 | 69.5258374 | 65 | 67.8416615 |
| Movie 64 | 68.8258374 | 65 | 67.7848239 |
| Movie 65 | 68.2258374 | 65 | 67.7323044 |
| Movie 66 | 67.8258374 | 65 | 67.6729668 |
| Movie 67 | 67.3258374 | 65 | 67.6072655 |
| Movie 68 | 66.5258374 | 65 | 67.5329279 |
| Movie 69 | 66.0258374 | 65 | 67.4476812 |
| Movie 70 | 66.1258374 | 65 | 67.3624345 |
| Movie 71 | 66.6258374 | 65 | 67.2765059 |
| Movie 72 | 65.9447973 | 65 | 67.1898955 |
| Movie 73 | 65.6720701 | 65 | 67.1246488 |
| Movie 74 | 65.4902519 | 65 | 67.0880385 |
| Movie 75 | 65.8175246 | 65 | 67.0457463 |



|           |            |    |            |
|-----------|------------|----|------------|
| Movie 76  | 66.2538882 | 65 | 66.9807463 |
| Movie 77  | 66.1084337 | 65 | 66.9132463 |
| Movie 78  | 66.6902519 | 65 | 66.8582463 |
| Movie 79  | 67.0258374 | 65 | 66.8057463 |
| Movie 80  | 66.4258374 | 65 | 66.7532463 |
| Movie 81  | 66.4258374 | 65 | 66.7107463 |
| Movie 82  | 66.2258374 | 65 | 66.6632463 |
| Movie 83  | 65.9258374 | 65 | 66.6157463 |
| Movie 84  | 65.8258374 | 65 | 66.5682463 |
| Movie 85  | 65.4258374 | 65 | 66.5332463 |
| Movie 86  | 65.4258374 | 65 | 66.5107463 |
| Movie 87  | 65.4258374 | 65 | 66.4957463 |
| Movie 88  | 65.4258374 | 65 | 66.4957463 |
| Movie 89  | 65.4258374 | 65 | 66.5082463 |
| Movie 90  | 65.7258374 | 65 | 66.5232463 |
| Movie 91  | 66.0258374 | 65 | 66.5432463 |
| Movie 92  | 66.6258374 | 65 | 66.5557463 |
| Movie 93  | 67.0258374 | 65 | 66.5802723 |
| Movie 94  | 67.1258374 | 65 | 66.6116165 |
| Movie 95  | 66.7258374 | 65 | 66.6475061 |
| Movie 96  | 66.7258374 | 65 | 66.641597  |
| Movie 97  | 67.1258374 | 65 | 66.616597  |
| Movie 98  | 67.2258374 | 65 | 66.5870515 |
| Movie 99  | 67.3258374 | 65 | 66.531597  |
| Movie 100 | 67.6258374 | 65 | 66.496597  |
| Movie 101 | 67.8258374 | 65 | 66.476597  |
| Movie 102 | 67.5258374 | 65 | 66.464097  |
| Movie 103 | 67.6258374 | 65 | 66.449097  |
| Movie 104 | 67.4258374 | 65 | 66.449097  |
| Movie 105 | 67.3258374 | 65 | 66.449097  |
| Movie 106 | 67.2258374 | 65 | 66.461597  |
| Movie 107 | 67.3258374 | 65 | 66.479097  |
| Movie 108 | 67.0258374 | 65 | 66.501597  |
| Movie 109 | 66.6258374 | 65 | 66.526597  |
| Movie 110 | 66.9258374 | 65 | 66.559097  |
| Movie 111 | 67.1258374 | 65 | 66.584097  |
| Movie 112 | 66.9258374 | 65 | 66.606597  |
| Movie 113 | 66.9258374 | 65 | 66.611597  |
| Movie 114 | 66.9258374 | 65 | 66.626597  |
| Movie 115 | 65.581161  | 65 | 66.656597  |
| Movie 116 | 65.2538882 | 65 | 66.696597  |
| Movie 117 | 64.9266155 | 65 | 66.744097  |
| Movie 118 | 64.4720701 | 65 | 66.771597  |
| Movie 119 | 65.6258374 | 65 | 66.7703545 |
| Movie 120 | 65.6258374 | 65 | 66.766612  |

|           |            |    |            |
|-----------|------------|----|------------|
| Movie 121 | 65.9258374 | 65 | 66.809112  |
| Movie 122 | 65.6258374 | 65 | 66.849112  |
| Movie 123 | 65.9258374 | 65 | 66.904112  |
| Movie 124 | 65.8258374 | 65 | 66.964112  |
| Movie 125 | 65.9258374 | 65 | 67.024112  |
| Movie 126 | 66.1258374 | 65 | 67.099112  |
| Movie 127 | 66.3258374 | 65 | 67.189112  |
| Movie 128 | 66.4258374 | 65 | 67.281612  |
| Movie 129 | 66.7258374 | 65 | 67.386612  |
| Movie 130 | 66.7258374 | 65 | 67.519112  |
| Movie 131 | 66.9258374 | 65 | 67.649112  |
| Movie 132 | 66.8258374 | 65 | 67.796612  |
| Movie 133 | 67.6258374 | 65 | 67.946612  |
| Movie 134 | 68.3258374 | 65 | 68.089112  |
| Movie 135 | 68.3258374 | 65 | 68.229112  |
| Movie 136 | 68.6258374 | 65 | 68.4077289 |
| Movie 137 | 68.2258374 | 65 | 68.5970276 |
| Movie 138 | 67.1761371 | 65 | 68.7945082 |
| Movie 139 | 67.1761371 | 65 | 68.9833524 |
| Movie 140 | 69.3258374 | 65 | 69.1408524 |
| Movie 141 | 69.4258374 | 65 | 69.2908524 |
| Movie 142 | 69.7258374 | 65 | 69.4258524 |
| Movie 143 | 70.0258374 | 65 | 69.5633524 |
| Movie 144 | 69.8258374 | 65 | 69.6908524 |
| Movie 145 | 70.3258374 | 65 | 69.8208524 |
| Movie 146 | 70.8258374 | 65 | 69.9508524 |
| Movie 147 | 71.0258374 | 65 | 70.0758524 |
| Movie 148 | 71.2258374 | 65 | 70.2008524 |
| Movie 149 | 71.9258374 | 65 | 70.3208524 |
| Movie 150 | 72.1258374 | 65 | 70.4258524 |
| Minute 1  | 73.0258374 | 63 | 70.5283524 |
| Minute 2  | 72.9258374 | 63 | 70.6258524 |
| Minute 3  | 72.6258374 | 63 | 70.7133524 |
| Minute 4  | 72.5258374 | 63 | 70.7783524 |
| Minute 5  | 72.7258374 | 63 | 70.8283524 |
| Minute 6  | 72.8258374 | 63 | 70.8783524 |
| Minute 7  | 72.8258374 | 63 | 70.9283524 |
| Minute 8  | 72.0258374 | 63 | 70.9958524 |
| Minute 9  | 71.9258374 | 63 | 71.0820949 |
| Minute 10 | 71.6258374 | 63 | 71.1483374 |
| Minute 11 | 71.3258374 | 63 | 71.1608374 |
| Minute 12 | 71.1258374 | 63 | 71.1733374 |
| Minute 13 | 71.0258374 | 63 | 71.1833374 |
| Minute 14 | 71.0258374 | 63 | 71.2033374 |
| Minute 15 | 71.1258374 | 63 | 71.202675  |

|           |            |    |            |
|-----------|------------|----|------------|
| Minute 16 | 71.1258374 | 63 | 71.1895126 |
| Minute 17 | 71.3258374 | 63 | 71.161123  |
| Minute 18 | 71.2258374 | 63 | 71.1218243 |
| Minute 19 | 70.9258374 | 63 | 71.1168243 |
| Minute 20 | 70.8258374 | 63 | 71.0943243 |
| Minute 21 | 70.8258374 | 63 | 71.0893243 |
| Minute 22 | 70.3258374 | 63 | 71.0618243 |
| Minute 23 | 70.2258374 | 63 | 71.0468243 |
| Minute 24 | 70.3258374 | 63 | 71.0368243 |
| Minute 25 | 70.3258374 | 63 | 71.0193243 |
| Minute 26 | 70.6258374 | 63 | 71.0068243 |
| Minute 27 | 70.9258374 | 63 | 70.9968243 |
| Minute 28 | 70.6258374 | 63 | 70.9868243 |
| Minute 29 | 69.8258374 | 63 | 70.9868243 |
| Minute 30 | 69.8258374 | 63 | 70.9943243 |
| Minute 31 | 69.9258374 | 63 | 71.0243243 |
| Minute 32 | 70.1258374 | 63 | 71.0743243 |
| Minute 33 | 70.8258374 | 63 | 71.1268243 |
| Minute 34 | 69.7993428 | 63 | 71.1893243 |
| Minute 35 | 69.7993428 | 63 | 71.2493243 |
| Minute 36 | 69.6902519 | 63 | 71.3268243 |
| Minute 37 | 69.4538882 | 63 | 71.3993243 |
| Minute 38 | 71.0258374 | 63 | 71.4668243 |
| Minute 39 | 71.0258374 | 63 | 71.5368243 |
| Minute 40 | 71.9258374 | 63 | 71.6093243 |
| Minute 41 | 71.9258374 | 63 | 71.6843243 |
| Minute 42 | 72.3258374 | 63 | 71.7518243 |
| Minute 43 | 72.2258374 | 63 | 71.8168243 |
| Minute 44 | 71.8258374 | 63 | 71.8718243 |
| Minute 45 | 72.2258374 | 63 | 71.9143243 |
| Minute 46 | 72.4258374 | 63 | 71.9568243 |
| Minute 47 | 72.4258374 | 63 | 71.9868243 |
| Minute 48 | 72.0258374 | 63 | 72.0043243 |
| Minute 49 | 72.2258374 | 63 | 72.0243243 |
| Minute 50 | 72.8258374 | 63 | 72.0568243 |
| Minute 51 | 73.3258374 | 63 | 72.0718243 |
| Minute 52 | 73.2258374 | 63 | 72.0843243 |
| Minute 53 | 73.5258374 | 63 | 72.0943243 |
| Minute 54 | 73.4258374 | 63 | 72.0893243 |
| Minute 55 | 74.2258374 | 63 | 72.1124866 |
| Minute 56 | 74.0258374 | 63 | 72.153149  |
| Minute 57 | 74.0258374 | 63 | 72.2090386 |
| Minute 58 | 74.0258374 | 63 | 72.2708374 |
| Minute 59 | 73.8258374 | 63 | 72.3158374 |
| Minute 60 | 73.8258374 | 63 | 72.3658374 |

|          |            |    |            |
|----------|------------|----|------------|
| After 1  | 73.5258374 | 63 | 72.3833374 |
| After 2  | 72.9258374 | 63 | 72.3958374 |
| After 3  | 72.4258374 | 63 | 72.4258374 |
| After 4  | 72.0258374 | 63 | 72.4633374 |
| After 5  | 72.0258374 | 63 | 72.5108374 |
| After 6  | 71.8258374 | 63 | 72.5458374 |
| After 7  | 71.6258374 | 63 | 72.5858374 |
| After 8  | 71.4258374 | 63 | 72.6283374 |
| After 9  | 71.1258374 | 63 | 72.6958374 |
| After 10 | 70.4258374 | 63 | 72.7683374 |
| After 11 | 70.4258374 | 63 | 72.8333374 |
| After 12 | 70.5258374 | 63 | 72.8858374 |
| After 13 | 70.6258374 | 63 | 72.9433374 |
| After 14 | 70.7258374 | 63 | 72.9933374 |
| After 15 | 71.4258374 | 63 | 73.0458374 |
| After 16 | 71.9258374 | 63 | 73.0683374 |
| After 17 | 71.9258374 | 63 | 73.0908374 |
| After 18 | 72.8258374 | 63 | 73.0933374 |
| After 19 | 73.0258374 | 63 | 73.0808374 |
| After 20 | 72.6258374 | 63 | 73.0808374 |
| After 21 | 72.4258374 | 63 | 73.0758374 |
| After 22 | 73.5258374 | 63 | 73.0833374 |
| After 23 | 73.7258374 | 63 | 73.1158374 |
| After 24 | 73.7258374 | 63 | 73.1683374 |
| After 25 | 73.6258374 | 63 | 73.2333374 |
| After 26 | 74.0258374 | 63 | 73.3083374 |
| After 27 | 74.1258374 | 63 | 73.4058374 |
| After 28 | 74.7258374 | 63 | 73.4899383 |
| After 29 | 75.1258374 | 63 | 73.5649483 |
| After 30 | 75.4258374 | 63 | 73.6474583 |
| After 31 | 75.4258374 | 63 | 73.7638319 |
| After 32 | 75.5258374 | 63 | 73.8865691 |
| After 33 | 75.5258374 | 63 | 74.02317   |
| After 34 | 75.5258374 | 63 | 74.1654528 |
| After 35 | 75.1258374 | 63 | 74.2997809 |
| After 36 | 74.9258374 | 63 | 74.4325182 |
| After 37 | 74.1258374 | 63 | 74.5441191 |
| After 38 | 73.5258374 | 63 | 74.6361746 |
| After 39 | 73.8258374 | 63 | 74.6811845 |
| After 40 | 73.6258374 | 63 | 74.71574   |
| After 41 | 73.8258374 | 63 | 74.7702954 |
| After 42 | 74.2258374 | 63 | 74.8627954 |
| After 43 | 74.5258374 | 63 | 74.9252954 |
| After 44 | 74.6258374 | 63 | 74.9727954 |
| After 45 | 75.0258374 | 63 | 75.0077954 |

|          |            |    |            |
|----------|------------|----|------------|
| After 46 | 75.7258374 | 63 | 75.0352954 |
| After 47 | 74.9898734 | 63 | 75.0184872 |
| After 48 | 74.426237  | 63 | 74.9919063 |
| After 49 | 74.426237  | 63 | 74.9403254 |
| After 50 | 75.0807825 | 63 | 74.8787445 |
| After 51 | 75.3353279 | 63 | 74.8069363 |
| After 52 | 75.9898734 | 63 | 74.7255827 |
| After 53 | 76.3171461 | 63 | 74.6526381 |
| After 54 | 76.0989643 | 63 | 74.5906026 |
| After 55 | 76.7353279 | 63 | 74.5349308 |
| After 56 | 76.3898734 | 63 | 74.5056226 |
| After 57 | 75.6080552 | 63 | 74.4931326 |
| After 58 | 74.626237  | 63 | 74.509279  |
| After 59 | 74.4080552 | 63 | 74.5404253 |
| After 60 | 74.8080552 | 63 | 74.5586171 |
| After 61 | 76.1258374 | 63 | 74.5825346 |
| After 62 | 76.0258374 | 63 | 74.5332569 |
| After 63 | 75.6258374 | 63 | 74.5413469 |
| After 64 | 75.1258374 | 63 | 74.5417661 |
| After 65 | 74.7258374 | 63 | 74.5394308 |
| After 66 | 73.3535098 | 63 | 74.5255334 |
| After 67 | 73.0626007 | 63 | 74.4902304 |
| After 68 | 72.6626007 | 63 | 74.4750897 |
| After 69 | 72.6626007 | 63 | 74.5545811 |
| After 70 | 72.5535098 | 63 | 74.5585918 |
| After 71 | 72.1716916 | 63 | 74.8640011 |
| After 72 | 72.6080552 | 63 | 75.1614559 |
| After 73 | 73.0444189 | 63 | 75.4509561 |
| After 74 | 73.2989643 | 63 | 75.7302291 |
| After 75 | 73.9535098 | 63 | 76.0163202 |
| After 76 | 74.426237  | 63 | 76.288775  |
| After 77 | 74.7716916 | 63 | 76.634378  |
| After 78 | 74.7716916 | 63 | 77.0044128 |
| After 79 | 74.5535098 | 63 | 77.4051294 |

|          | Person 2 | Person 1   | Person 7   | Person 5  | Person 10  |
|----------|----------|------------|------------|-----------|------------|
| Time     |          |            |            |           |            |
| 20:02:50 | 0:00:01  |            | 72.8813582 | 88.421441 | 87.1725398 |
| 20:02:51 | 0:00:02  |            | 72.8813582 | 88.421441 | 87.1725398 |
| 20:02:52 | 0:00:03  |            | 72.8813582 | 88.421441 | 88.1725398 |
| 20:02:53 | 0:00:04  |            | 72.8813582 | 88.421441 | 88.1725398 |
| 20:02:54 | 0:00:05  |            | 72.8813582 | 88.421441 | 88.1725398 |
| 20:02:55 | 0:00:06  |            | 73.8813582 | 87.421441 | 89.1725398 |
| 20:02:56 | 0:00:07  | 95.4256152 | 73.8813582 | 87.421441 | 90.1725398 |
| 20:02:57 | 0:00:08  | 95.4256152 | 73.8813582 | 87.421441 | 90.1725398 |
| 20:02:58 | 0:00:09  | 95.4256152 | 75.8813582 | 87.421441 | 89.1725398 |
| 20:02:59 | 0:00:10  | 95.7589485 | 77.8813582 | 87.421441 | 89.1725398 |
| 20:03:00 | 0:00:11  | 96.0922819 | 79.8813582 | 87.421441 | 89.1725398 |
| 20:03:01 | 0:00:12  | 95.7589485 | 79.8813582 | 86.421441 | 89.1725398 |
| 20:03:02 | 0:00:13  | 95.7589485 | 79.8813582 | 86.421441 | 89.1725398 |
| 20:03:03 | 0:00:14  | 96.0922819 | 81.8813582 | 86.421441 | 89.1725398 |
| 20:03:04 | 0:00:15  | 96.4256152 | 81.8813582 | 86.421441 | 90.1725398 |
| 20:03:05 | 0:00:16  | 96.2589485 | 81.8813582 | 86.421441 | 90.1725398 |
| 20:03:06 | 0:00:17  | 98.0922819 | 82.8813582 | 86.421441 | 95.1725398 |
| 20:03:07 | 0:00:18  | 103.258949 | 82.8813582 | 87.421441 | 109.17254  |
| 20:03:08 | 0:00:19  | 104.425615 | 82.8813582 | 88.421441 | 112.17254  |
| 20:03:09 | 0:00:20  | 104.592282 | 82.8813582 | 88.421441 | 112.17254  |
| 20:03:10 | 0:00:21  | 105.925615 | 82.8813582 | 89.421441 | 115.17254  |
| 20:03:11 | 0:00:22  | 106.258949 | 81.8813582 | 89.421441 | 117.17254  |
| 20:03:12 | 0:00:23  | 106.925615 | 81.8813582 | 90.421441 | 118.17254  |
| 20:03:13 | 0:00:24  | 107.925615 | 81.8813582 | 91.421441 | 120.17254  |
| 20:03:14 | 0:00:25  | 108.758949 | 81.8813582 | 91.421441 | 120.17254  |
| 20:03:15 | 0:00:26  | 108.258949 | 75.8813582 | 91.421441 | 120.17254  |
| 20:03:16 | 0:00:27  | 107.925615 | 71.8813582 | 91.421441 | 120.17254  |
| 20:03:17 | 0:00:28  | 108.425615 | 71.8813582 | 91.421441 | 120.17254  |
| 20:03:18 | 0:00:29  | 108.925615 | 71.8813582 | 91.421441 | 120.17254  |
| 20:03:19 | 0:00:30  | 109.258949 | 69.8813582 | 91.421441 | 121.17254  |
| 20:03:20 | 0:00:31  | 109.592282 | 69.8813582 | 92.421441 | 121.17254  |
| 20:03:21 | 0:00:32  | 110.258949 | 71.8813582 | 92.421441 | 121.17254  |
| 20:03:22 | 0:00:33  | 110.092282 | 72.8813582 | 92.421441 | 120.17254  |
| 20:03:23 | 0:00:34  | 109.592282 | 73.8813582 | 91.421441 | 119.17254  |
| 20:03:24 | 0:00:35  | 109.425615 | 73.8813582 | 90.421441 | 119.17254  |
| 20:03:25 | 0:00:36  | 108.758949 | 72.8813582 | 90.421441 | 117.17254  |
| 20:03:26 | 0:00:37  | 108.758949 | 72.8813582 | 90.421441 | 117.17254  |
| 20:03:27 | 0:00:38  | 107.258949 | 70.8813582 | 91.421441 | 112.17254  |
| 20:03:28 | 0:00:39  | 107.925615 | 69.8813582 | 93.421441 | 112.17254  |
| 20:03:29 | 0:00:40  | 107.592282 | 69.8813582 | 94.421441 | 110.17254  |
| 20:03:30 | 0:00:41  | 107.925615 | 69.8813582 | 95.421441 | 110.17254  |
| 20:03:31 | 0:00:42  | 107.925615 | 69.8813582 | 95.421441 | 110.17254  |

|          |         |            |            |           |            |
|----------|---------|------------|------------|-----------|------------|
| 20:03:32 | 0:00:43 | 107.925615 | 69.8813582 | 95.421441 | 110.17254  |
| 20:03:33 | 0:00:44 | 108.425615 | 69.8813582 | 95.421441 | 111.17254  |
| 20:03:34 | 0:00:45 | 108.092282 | 69.8813582 | 94.421441 | 111.17254  |
| 20:03:35 | 0:00:46 | 108.092282 | 69.8813582 | 94.421441 | 111.17254  |
| 20:03:36 | 0:00:47 | 107.925615 | 69.8813582 | 93.421441 | 111.17254  |
| 20:03:37 | 0:00:48 | 107.592282 | 69.8813582 | 93.421441 | 110.17254  |
| 20:03:38 | 0:00:49 | 107.258949 | 69.8813582 | 93.421441 | 109.17254  |
| 20:03:39 | 0:00:50 | 106.925615 | 69.8813582 | 93.421441 | 108.17254  |
| 20:03:40 | 0:00:51 | 106.758949 | 68.8813582 | 93.421441 | 108.17254  |
| 20:03:41 | 0:00:52 | 106.425615 | 68.8813582 | 92.421441 | 108.17254  |
| 20:03:42 | 0:00:53 | 106.258949 | 68.8813582 | 91.421441 | 108.17254  |
| 20:03:43 | 0:00:54 | 106.758949 | 68.8813582 | 93.421441 | 107.17254  |
| 20:03:44 | 0:00:55 | 107.592282 | 71.8813582 | 93.421441 | 108.17254  |
| 20:03:45 | 0:00:56 | 108.592282 | 71.8813582 | 93.421441 | 110.17254  |
| 20:03:46 | 0:00:57 | 108.592282 | 71.8813582 | 93.421441 | 110.17254  |
| 20:03:47 | 0:00:58 | 108.592282 | 71.8813582 | 93.421441 | 110.17254  |
| 20:03:48 | 0:00:59 | 108.758949 | 72.8813582 | 93.421441 | 110.17254  |
| 20:03:49 | 0:01:00 | 109.258949 | 75.8813582 | 93.421441 | 110.17254  |
| 20:03:50 | 0:01:01 | 109.925615 | 79.8813582 | 93.421441 | 110.17254  |
| 20:03:51 | 0:01:02 | 109.425615 | 79.8813582 | 95.421441 | 107.17254  |
| 20:03:52 | 0:01:03 | 109.925615 | 82.8813582 | 95.421441 | 107.17254  |
| 20:03:53 | 0:01:04 | 110.425615 | 83.8813582 | 97.421441 | 106.17254  |
| 20:03:54 | 0:01:05 | 109.925615 | 82.8813582 | 97.421441 | 105.17254  |
| 20:03:55 | 0:01:06 | 109.925615 | 80.8813582 | 98.421441 | 105.17254  |
| 20:03:56 | 0:01:07 | 108.592282 | 74.8813582 | 98.421441 | 104.17254  |
| 20:03:57 | 0:01:08 | 107.925615 | 74.8813582 | 99.421441 | 103.17254  |
| 20:03:58 | 0:01:09 | 106.092282 | 73.8813582 | 99.421441 | 98.1725398 |
| 20:03:59 | 0:01:10 | 105.592282 | 73.8813582 | 99.421441 | 98.1725398 |
| 20:04:00 | 0:01:11 | 104.425615 | 73.8813582 | 98.421441 | 96.1725398 |
| 20:04:01 | 0:01:12 | 102.758949 | 73.8813582 | 96.421441 | 93.1725398 |
| 20:04:02 | 0:01:13 | 102.092282 | 73.8813582 | 96.421441 | 91.1725398 |
| 20:04:03 | 0:01:14 | 100.925615 | 73.8813582 | 94.421441 | 90.1725398 |
| 20:04:04 | 0:01:15 | 100.425615 | 72.8813582 | 93.421441 | 90.1725398 |
| 20:04:05 | 0:01:16 | 100.425615 | 72.8813582 | 93.421441 | 90.1725398 |
| 20:04:06 | 0:01:17 | 99.2589485 | 69.8813582 | 91.421441 | 90.1725398 |
| 20:04:07 | 0:01:18 | 99.2589485 | 69.8813582 | 91.421441 | 90.1725398 |
| 20:04:08 | 0:01:19 | 98.0922819 | 68.8813582 | 89.421441 | 89.1725398 |
| 20:04:09 | 0:01:20 | 97.9256152 | 67.8813582 | 89.421441 | 89.1725398 |
| 20:04:10 | 0:01:21 | 97.9256152 | 67.8813582 | 89.421441 | 89.1725398 |
| 20:04:11 | 0:01:22 | 97.5922819 | 67.8813582 | 88.421441 | 89.1725398 |
| 20:04:12 | 0:01:23 | 97.5922819 | 67.8813582 | 88.421441 | 89.1725398 |
| 20:04:13 | 0:01:24 | 93.4256152 | 68.8813582 | 88.421441 | 76.1725398 |
| 20:04:14 | 0:01:25 | 92.9256152 | 68.8813582 | 87.421441 | 76.1725398 |
| 20:04:15 | 0:01:26 | 93.2589485 | 70.8813582 | 88.421441 | 75.1725398 |
| 20:04:16 | 0:01:27 | 93.9256152 | 70.8813582 | 89.421441 | 76.1725398 |

|          |         |            |            |           |            |
|----------|---------|------------|------------|-----------|------------|
| 20:04:17 | 0:01:28 | 93.4256152 | 71.8813582 | 89.421441 | 75.1725398 |
| 20:04:18 | 0:01:29 | 93.7589485 | 73.8813582 | 89.421441 | 75.1725398 |
| 20:04:19 | 0:01:30 | 94.2589485 | 74.8813582 | 91.421441 | 75.1725398 |
| 20:04:20 | 0:01:31 | 93.4256152 | 74.8813582 | 91.421441 | 73.1725398 |
| 20:04:21 | 0:01:32 | 93.5922819 | 75.8813582 | 91.421441 | 73.1725398 |
| 20:04:22 | 0:01:33 | 92.7589485 | 75.8813582 | 91.421441 | 73.1725398 |
| 20:04:23 | 0:01:34 | 92.4256152 | 75.8813582 | 90.421441 | 73.1725398 |
| 20:04:24 | 0:01:35 | 92.7589485 | 77.8813582 | 90.421441 | 73.1725398 |
| 20:04:25 | 0:01:36 | 92.2589485 | 77.8813582 | 90.421441 | 73.1725398 |
| 20:04:26 | 0:01:37 | 92.5922819 | 77.8813582 | 90.421441 | 74.1725398 |
| 20:04:27 | 0:01:38 | 93.5922819 | 76.8813582 | 92.421441 | 74.1725398 |
| 20:04:28 | 0:01:39 | 93.9256152 | 76.8813582 | 92.421441 | 74.1725398 |
| 20:04:29 | 0:01:40 | 93.2589485 | 74.8813582 | 91.421441 | 74.1725398 |
| 20:04:30 | 0:01:41 | 92.7589485 | 73.8813582 | 91.421441 | 73.1725398 |
| 20:04:31 | 0:01:42 | 92.4256152 | 73.8813582 | 91.421441 | 72.1725398 |
| 20:04:32 | 0:01:43 | 92.2589485 | 72.8813582 | 91.421441 | 72.1725398 |
| 20:04:33 | 0:01:44 | 92.0922819 | 71.8813582 | 90.421441 | 72.1725398 |
| 20:04:34 | 0:01:45 | 92.0922819 | 71.8813582 | 90.421441 | 72.1725398 |
| 20:04:35 | 0:01:46 | 92.4256152 | 71.8813582 | 90.421441 | 73.1725398 |
| 20:04:36 | 0:01:47 | 92.7589485 | 71.8813582 | 91.421441 | 73.1725398 |
| 20:04:37 | 0:01:48 | 93.2589485 | 71.8813582 | 92.421441 | 73.1725398 |
| 20:04:38 | 0:01:49 | 93.0922819 | 70.8813582 | 92.421441 | 73.1725398 |
| 20:04:39 | 0:01:50 | 93.4256152 | 70.8813582 | 93.421441 | 73.1725398 |
| 20:04:40 | 0:01:51 | 93.9256152 | 70.8813582 | 94.421441 | 73.1725398 |
| 20:04:41 | 0:01:52 | 93.5922819 | 70.8813582 | 94.421441 | 71.1725398 |
| 20:04:42 | 0:01:53 | 93.2589485 | 70.8813582 | 93.421441 | 71.1725398 |
| 20:04:43 | 0:01:54 | 93.4256152 | 70.8813582 | 93.421441 | 71.1725398 |
| 20:04:44 | 0:01:55 | 92.7589485 | 70.8813582 | 92.421441 | 70.1725398 |
| 20:04:45 | 0:01:56 | 91.9256152 | 69.8813582 | 91.421441 | 69.1725398 |
| 20:04:46 | 0:01:57 | 91.0922819 | 68.8813582 | 89.421441 | 69.1725398 |
| 20:04:47 | 0:01:58 | 90.7589485 | 68.8813582 | 88.421441 | 69.1725398 |
| 20:04:48 | 0:01:59 | 90.5922819 | 67.8813582 | 88.421441 | 69.1725398 |
| 20:04:49 | 0:02:00 | 89.9256152 | 67.8813582 | 86.421441 | 69.1725398 |
| 20:04:50 | 0:02:01 | 89.5922819 | 67.8813582 | 85.421441 | 69.1725398 |
| 20:04:51 | 0:02:02 | 89.9256152 | 68.8813582 | 85.421441 | 70.1725398 |
| 20:04:52 | 0:02:03 | 89.5922819 | 68.8813582 | 83.421441 | 71.1725398 |
| 20:04:53 | 0:02:04 | 89.0922819 | 68.8813582 | 83.421441 | 71.1725398 |
| 20:04:54 | 0:02:05 | 89.7589485 | 68.8813582 | 83.421441 | 73.1725398 |
| 20:04:55 | 0:02:06 | 89.9256152 | 68.8813582 | 83.421441 | 74.1725398 |
| 20:04:56 | 0:02:07 | 89.9256152 | 68.8813582 | 83.421441 | 74.1725398 |
| 20:04:57 | 0:02:08 | 89.5922819 | 68.8813582 | 82.421441 | 74.1725398 |
| 20:04:58 | 0:02:09 | 89.7589485 | 68.8813582 | 82.421441 | 75.1725398 |
| 20:04:59 | 0:02:10 | 89.5922819 | 68.8813582 | 82.421441 | 75.1725398 |
| 20:05:00 | 0:02:11 | 88.9256152 | 68.8813582 | 80.421441 | 75.1725398 |
| 20:05:01 | 0:02:12 | 89.0922819 | 70.8813582 | 80.421441 | 75.1725398 |



|          |         |            |            |           |            |
|----------|---------|------------|------------|-----------|------------|
| 20:05:02 | 0:02:13 | 91.2589485 | 71.8813582 | 82.421441 | 79.1725398 |
| 20:05:03 | 0:02:14 | 91.2589485 | 71.8813582 | 82.421441 | 79.1725398 |
| 20:05:04 | 0:02:15 | 91.0922819 | 72.8813582 | 81.421441 | 79.1725398 |
| 20:05:05 | 0:02:16 | 92.5922819 | 71.8813582 | 81.421441 | 84.1725398 |
| 20:05:06 | 0:02:17 | 92.5922819 | 71.8813582 | 81.421441 | 84.1725398 |
| 20:05:07 | 0:02:18 | 92.5922819 | 71.8813582 | 81.421441 | 84.1725398 |
| 20:05:08 | 0:02:19 | 92.9256152 | 72.8813582 | 81.421441 | 84.1725398 |
| 20:05:09 | 0:02:20 | 93.5922819 | 73.8813582 | 81.421441 | 85.1725398 |
| 20:05:10 | 0:02:21 | 94.9256152 | 73.8813582 | 82.421441 | 88.1725398 |
| 20:05:11 | 0:02:22 | 96.9256152 | 75.8813582 | 85.421441 | 90.1725398 |
| 20:05:12 | 0:02:23 | 97.0922819 | 75.8813582 | 85.421441 | 91.1725398 |
| 20:05:13 | 0:02:24 | 97.0922819 | 75.8813582 | 85.421441 | 91.1725398 |
| 20:05:14 | 0:02:25 | 97.5922819 | 76.8813582 | 86.421441 | 91.1725398 |
| 20:05:15 | 0:02:26 | 98.0922819 | 77.8813582 | 87.421441 | 91.1725398 |
| 20:05:16 | 0:02:27 | 97.7589485 | 77.8813582 | 87.421441 | 90.1725398 |
| 20:05:17 | 0:02:28 | 97.0922819 | 77.8813582 | 88.421441 | 87.1725398 |
| 20:05:18 | 0:02:29 | 97.5922819 | 78.8813582 | 89.421441 | 87.1725398 |
| 20:05:19 | 0:02:30 | 97.5922819 | 78.8813582 | 89.421441 | 87.1725398 |
| 20:05:20 | 0:02:31 | 97.7589485 | 79.8813582 | 89.421441 | 87.1725398 |
| 20:05:21 | 0:02:32 | 96.5922819 | 80.8813582 | 89.421441 | 83.1725398 |
| 20:05:22 | 0:02:33 | 96.5922819 | 80.8813582 | 89.421441 | 83.1725398 |
| 20:05:23 | 0:02:34 | 96.4256152 | 77.8813582 | 90.421441 | 83.1725398 |
| 20:05:24 | 0:02:35 | 95.7589485 | 77.8813582 | 90.421441 | 81.1725398 |
| 20:05:25 | 0:02:36 | 94.7589485 | 76.8813582 | 90.421441 | 79.1725398 |
| 20:05:26 | 0:02:37 | 94.9256152 | 76.8813582 | 90.421441 | 79.1725398 |
| 20:05:27 | 0:02:38 | 94.4256152 | 74.8813582 | 89.421441 | 79.1725398 |
| 20:05:28 | 0:02:39 | 93.7589485 | 74.8813582 | 87.421441 | 79.1725398 |
| 20:05:29 | 0:02:40 | 93.9256152 | 74.8813582 | 87.421441 | 79.1725398 |
| 20:05:30 | 0:02:41 | 93.9256152 | 74.8813582 | 87.421441 | 79.1725398 |
| 20:05:31 | 0:02:42 | 93.5922819 | 73.8813582 | 87.421441 | 79.1725398 |
| 20:05:32 | 0:02:43 | 92.9256152 | 73.8813582 | 87.421441 | 77.1725398 |
| 20:05:33 | 0:02:44 | 93.2589485 | 77.8813582 | 87.421441 | 76.1725398 |
| 20:05:34 | 0:02:45 | 90.7589485 | 77.8813582 | 87.421441 | 69.1725398 |
| 20:05:35 | 0:02:46 | 90.0922819 | 77.8813582 | 87.421441 | 67.1725398 |
| 20:05:36 | 0:02:47 | 90.0922819 | 77.8813582 | 87.421441 | 67.1725398 |
| 20:05:37 | 0:02:48 | 89.9256152 | 80.8813582 | 87.421441 | 66.1725398 |
| 20:05:38 | 0:02:49 | 89.7589485 | 78.8813582 | 88.421441 | 66.1725398 |
| 20:05:39 | 0:02:50 | 90.2589485 | 78.8813582 | 89.421441 | 67.1725398 |
| 20:05:40 | 0:02:51 | 90.9256152 | 78.8813582 | 91.421441 | 67.1725398 |
| 20:05:41 | 0:02:52 | 90.5922819 | 78.8813582 | 91.421441 | 66.1725398 |
| 20:05:42 | 0:02:53 | 90.9256152 | 78.8813582 | 92.421441 | 66.1725398 |
| 20:05:43 | 0:02:54 | 91.2589485 | 78.8813582 | 93.421441 | 66.1725398 |
| 20:05:44 | 0:02:55 | 92.9256152 | 80.8813582 | 97.421441 | 66.1725398 |
| 20:05:45 | 0:02:56 | 91.7589485 | 81.8813582 | 97.421441 | 62.1725398 |
| 20:05:46 | 0:02:57 | 91.7589485 | 81.8813582 | 97.421441 | 62.1725398 |

|          |         |            |            |           |            |
|----------|---------|------------|------------|-----------|------------|
| 20:05:47 | 0:02:58 | 90.9256152 | 81.8813582 | 97.421441 | 60.1725398 |
| 20:05:48 | 0:02:59 | 91.2842889 | 81.8813582 | 96.421441 | 60.1725398 |
| 20:05:49 | 0:03:00 | 78.2842889 | 78.8813582 | 93.421441 | 60.1725398 |
| 20:05:50 | 0:03:01 | 73.2842889 | 76.8813582 | 92.421441 | 60.1725398 |
| 20:05:51 | 0:03:02 | 70.2842889 | 76.8813582 | 92.421441 | 60.1725398 |
| 20:05:52 | 0:03:03 | 68.2842889 | 76.8813582 | 92.421441 | 59.1725398 |
| 20:05:53 | 0:03:04 | 68.2842889 | 76.8813582 | 92.421441 | 60.1725398 |
| 20:05:54 | 0:03:05 | 67.2842889 | 75.8813582 | 92.421441 | 60.1725398 |
| 20:05:55 | 0:03:06 | 67.2842889 | 75.8813582 | 91.421441 | 60.1725398 |
| 20:05:56 | 0:03:07 | 66.2842889 | 74.8813582 | 91.421441 | 60.1725398 |
| 20:05:57 | 0:03:08 | 66.2842889 | 74.8813582 | 92.421441 | 60.1725398 |
| 20:05:58 | 0:03:09 | 66.2842889 | 74.8813582 | 91.421441 | 60.1725398 |
| 20:05:59 | 0:03:10 | 65.2842889 | 73.8813582 | 91.421441 | 60.1725398 |
| 20:06:00 | 0:03:11 | 65.2842889 | 73.8813582 | 91.421441 | 60.1725398 |
| 20:06:01 | 0:03:12 | 65.2842889 | 73.8813582 | 91.421441 | 59.1725398 |
| 20:06:02 | 0:03:13 | 65.2842889 | 73.8813582 | 91.421441 | 59.1725398 |
| 20:06:03 | 0:03:14 | 64.2842889 | 73.8813582 | 89.421441 | 59.1725398 |
| 20:06:04 | 0:03:15 | 64.2842889 | 71.8813582 | 86.421441 | 59.1725398 |
| 20:06:05 | 0:03:16 | 63.2842889 | 70.8813582 | 86.421441 | 59.1725398 |
| 20:06:06 | 0:03:17 | 64.2842889 | 70.8813582 | 86.421441 | 59.1725398 |
| 20:06:07 | 0:03:18 | 64.2842889 | 69.8813582 | 82.421441 | 59.1725398 |
| 20:06:08 | 0:03:19 | 65.2842889 | 67.8813582 | 81.421441 | 59.1725398 |
| 20:06:09 | 0:03:20 | 65.2842889 | 67.8813582 | 81.421441 | 59.1725398 |
| 20:06:10 | 0:03:21 | 65.2842889 | 67.8813582 | 82.421441 | 58.1725398 |
| 20:06:11 | 0:03:22 | 65.2842889 | 67.8813582 | 83.421441 | 58.1725398 |
| 20:06:12 | 0:03:23 | 65.2842889 | 67.8813582 | 84.421441 | 58.1725398 |
| 20:06:13 | 0:03:24 | 65.2842889 | 67.8813582 | 84.421441 | 58.1725398 |
| 20:06:14 | 0:03:25 | 65.2842889 | 67.8813582 | 84.421441 | 58.1725398 |
| 20:06:15 | 0:03:26 | 65.2842889 | 67.8813582 | 83.421441 | 59.1725398 |
| 20:06:16 | 0:03:27 | 65.2842889 | 68.8813582 | 82.421441 | 59.1725398 |
| 20:06:17 | 0:03:28 | 65.2842889 | 68.8813582 | 82.421441 | 59.1725398 |
| 20:06:18 | 0:03:29 | 65.2842889 | 70.8813582 | 82.421441 | 59.1725398 |
| 20:06:19 | 0:03:30 | 65.2842889 | 70.8813582 | 82.421441 | 59.1725398 |
| 20:06:20 | 0:03:31 | 64.2842889 | 71.8813582 | 82.421441 | 59.1725398 |
| 20:06:21 | 0:03:32 | 65.2842889 | 71.8813582 | 81.421441 | 60.1725398 |
| 20:06:22 | 0:03:33 | 66.2842889 | 73.8813582 | 82.421441 | 60.1725398 |
| 20:06:23 | 0:03:34 | 66.2842889 | 75.8813582 | 83.421441 | 61.1725398 |
| 20:06:24 | 0:03:35 | 66.2842889 | 79.8813582 | 84.421441 | 64.1725398 |
| 20:06:25 | 0:03:36 | 63.2842889 | 79.8813582 | 84.421441 | 64.1725398 |
| 20:06:26 | 0:03:37 | 63.2842889 | 79.8813582 | 85.421441 | 64.1725398 |
| 20:06:27 | 0:03:38 | 62.2842889 | 76.8813582 | 86.421441 | 64.1725398 |
| 20:06:28 | 0:03:39 | 63.2842889 | 71.8813582 | 86.421441 | 64.1725398 |
| 20:06:29 | 0:03:40 | 63.2842889 | 69.8813582 | 87.421441 | 64.1725398 |
| 20:06:30 | 0:03:41 | 63.2842889 | 69.8813582 | 87.421441 | 65.1725398 |
| 20:06:31 | 0:03:42 | 63.2842889 | 67.8813582 | 88.421441 | 65.1725398 |

|          |         |            |            |           |           |            |
|----------|---------|------------|------------|-----------|-----------|------------|
| 20:06:32 | 0:03:43 | 64.2842889 | 67.8813582 |           | 89.421441 | 65.1725398 |
| 20:06:33 | 0:03:44 | 65.2842889 | 67.8813582 |           | 89.421441 | 65.1725398 |
| 20:06:34 | 0:03:45 | 65.2842889 | 67.8813582 |           | 89.421441 | 66.1725398 |
| 20:06:35 | 0:03:46 | 67.2842889 | 67.8813582 |           | 89.421441 | 66.1725398 |
| 20:06:36 | 0:03:47 | 68.2842889 | 67.8813582 |           | 88.421441 | 66.1725398 |
| 20:06:37 | 0:03:48 | 68.2842889 | 67.8813582 |           | 88.421441 | 67.1725398 |
| 20:06:38 | 0:03:49 | 68.2842889 | 67.8813582 |           | 86.421441 | 67.1725398 |
| 20:06:39 | 0:03:50 | 68.2842889 | 67.8813582 |           | 85.421441 | 67.1725398 |
| 20:06:40 | 0:03:51 | 69.2842889 | 68.8813582 |           | 85.421441 | 68.1725398 |
| 20:06:41 | 0:03:52 | 70.2842889 | 69.8813582 | 75.846326 | 85.421441 | 68.1725398 |
| 20:06:42 | 0:03:53 | 70.2842889 | 70.8813582 | 75.846326 | 84.421441 | 69.1725398 |
| 20:06:43 | 0:03:54 | 70.2842889 | 70.8813582 | 74.846326 | 86.421441 | 70.1725398 |
| 20:06:44 | 0:03:55 | 71.2842889 | 70.8813582 | 76.846326 | 86.421441 | 69.1725398 |
| 20:06:45 | 0:03:56 | 71.2842889 | 71.8813582 | 75.846326 | 87.421441 | 68.1725398 |
| 20:06:46 | 0:03:57 | 71.2842889 | 71.8813582 | 74.846326 | 87.421441 | 68.1725398 |
| 20:06:47 | 0:03:58 | 71.2842889 | 71.8813582 | 74.846326 | 88.421441 | 68.1725398 |
| 20:06:48 | 0:03:59 | 71.2842889 | 70.8813582 | 74.846326 | 89.421441 | 68.1725398 |
| 20:06:49 | 0:04:00 | 69.2842889 | 69.8813582 | 74.846326 | 90.421441 | 68.1725398 |
| 20:06:50 | 0:04:01 | 66.2842889 | 69.8813582 | 74.846326 | 90.421441 | 68.1725398 |
| 20:06:51 | 0:04:02 | 65.2842889 | 69.8813582 | 74.846326 | 92.421441 | 78.1725398 |
| 20:06:52 | 0:04:03 | 64.2842889 | 69.8813582 | 73.846326 | 93.421441 | 95.1725398 |
| 20:06:53 | 0:04:04 | 63.2842889 | 70.8813582 | 73.846326 | 94.421441 | 95.1725398 |
| 20:06:54 | 0:04:05 | 63.2842889 | 70.8813582 | 73.846326 | 94.421441 | 95.1725398 |
| 20:06:55 | 0:04:06 | 63.2842889 | 70.8813582 | 73.846326 | 96.421441 | 100.17254  |
| 20:06:56 | 0:04:07 | 63.2842889 | 70.8813582 | 72.846326 | 96.421441 | 100.17254  |
| 20:06:57 | 0:04:08 | 63.2842889 | 71.8813582 | 71.846326 | 96.421441 | 100.17254  |
| 20:06:58 | 0:04:09 | 63.2842889 | 70.8813582 | 71.846326 | 96.421441 | 101.17254  |
| 20:06:59 | 0:04:10 | 62.2842889 | 69.8813582 | 71.846326 | 96.421441 | 101.17254  |
| 20:07:00 | 0:04:11 | 62.2842889 | 69.8813582 | 71.846326 | 96.421441 | 101.17254  |
| 20:07:01 | 0:04:12 | 62.2842889 | 70.8813582 | 72.846326 | 96.421441 | 102.17254  |
| 20:07:02 | 0:04:13 | 61.2842889 | 69.8813582 | 72.846326 | 95.421441 | 102.17254  |
| 20:07:03 | 0:04:14 | 61.2842889 | 70.8813582 | 72.846326 | 95.421441 | 102.17254  |
| 20:07:04 | 0:04:15 | 61.2842889 | 70.8813582 | 72.846326 | 87.421441 | 103.17254  |
| 20:07:05 | 0:04:16 | 61.2842889 | 70.8813582 | 73.846326 | 87.421441 | 103.17254  |
| 20:07:06 | 0:04:17 | 61.2842889 | 72.8813582 | 74.846326 | 86.421441 | 103.17254  |
| 20:07:07 | 0:04:18 | 61.2842889 | 73.8813582 | 78.846326 | 86.421441 | 103.17254  |
| 20:07:08 | 0:04:19 | 61.2842889 | 74.8813582 | 78.846326 | 86.421441 | 103.17254  |
| 20:07:09 | 0:04:20 | 61.2842889 | 74.8813582 | 78.846326 | 86.421441 | 104.17254  |
| 20:07:10 | 0:04:21 | 61.2842889 | 75.8813582 | 77.846326 | 84.421441 | 105.17254  |
| 20:07:11 | 0:04:22 | 61.2842889 | 75.8813582 | 77.846326 | 84.421441 | 105.17254  |
| 20:07:12 | 0:04:23 | 61.2842889 | 78.8813582 | 75.846326 | 82.421441 | 106.17254  |
| 20:07:13 | 0:04:24 | 61.2842889 | 79.8813582 | 74.846326 | 80.421441 | 106.17254  |
| 20:07:14 | 0:04:25 | 61.2842889 | 79.8813582 | 74.846326 | 69.421441 | 81.3428596 |
| 20:07:15 | 0:04:26 | 61.2842889 | 79.8813582 | 74.846326 | 69.421441 | 81.3428596 |
| 20:07:16 | 0:04:27 | 61.2842889 | 82.8813582 | 74.846326 | 69.421441 | 81.771431  |

|          |         |            |            |           |           |            |
|----------|---------|------------|------------|-----------|-----------|------------|
| 20:07:17 | 0:04:28 | 61.2842889 | 82.8813582 | 74.846326 | 68.421441 | 104.17254  |
| 20:07:18 | 0:04:29 | 61.2842889 | 82.8813582 | 76.846326 | 68.421441 | 104.17254  |
| 20:07:19 | 0:04:30 | 61.2842889 | 82.8813582 | 77.846326 | 68.421441 | 104.17254  |
| 20:07:20 | 0:04:31 | 61.2842889 | 82.8813582 | 76.846326 | 68.421441 | 87.1725398 |
| 20:07:21 | 0:04:32 | 61.2842889 | 83.8813582 | 76.846326 | 68.421441 | 84.1725398 |
| 20:07:22 | 0:04:33 | 61.2842889 | 83.8813582 | 75.846326 | 68.421441 | 82.1725398 |
| 20:07:23 | 0:04:34 | 61.2842889 | 88.8813582 | 73.846326 | 66.421441 | 82.1725398 |
| 20:07:24 | 0:04:35 | 61.2842889 | 93.8813582 | 72.846326 | 66.421441 | 80.1725398 |
| 20:07:25 | 0:04:36 | 62.2842889 | 95.8813582 | 72.846326 | 64.421441 | 80.1725398 |
| 20:07:26 | 0:04:37 | 62.2842889 | 95.8813582 | 72.846326 | 65.421441 | 80.1725398 |
| 20:07:27 | 0:04:38 | 62.2842889 | 95.8813582 | 74.846326 | 66.421441 | 80.1725398 |
| 20:07:28 | 0:04:39 | 63.2842889 | 99.8813582 | 77.846326 | 66.421441 | 83.1725398 |
| 20:07:29 | 0:04:40 | 63.2842889 | 100.881358 | 77.846326 | 67.421441 | 84.1725398 |
| 20:07:30 | 0:04:41 | 62.2842889 | 100.881358 | 77.846326 | 70.421441 | 85.1725398 |
| 20:07:31 | 0:04:42 | 62.2842889 | 88.8813582 | 77.846326 | 69.421441 | 85.1725398 |
| 20:07:32 | 0:04:43 | 62.2842889 | 80.8813582 | 77.846326 | 69.421441 | 86.1725398 |
| 20:07:33 | 0:04:44 | 63.2842889 | 77.8813582 | 77.846326 | 69.421441 | 86.1725398 |
| 20:07:34 | 0:04:45 | 64.2842889 | 77.8813582 | 76.846326 | 69.421441 | 87.1725398 |
| 20:07:35 | 0:04:46 | 64.2842889 | 73.8813582 | 76.846326 | 82.421441 | 87.1725398 |
| 20:07:36 | 0:04:47 | 64.2842889 | 72.8813582 | 79.846326 | 86.421441 | 86.1725398 |
| 20:07:37 | 0:04:48 | 64.2842889 | 72.8813582 | 79.846326 | 86.421441 | 84.1725398 |
| 20:07:38 | 0:04:49 | 64.2842889 | 70.8813582 | 86.846326 | 86.421441 | 83.1725398 |
| 20:07:39 | 0:04:50 | 64.2842889 | 70.8813582 | 87.846326 | 87.421441 | 83.1725398 |
| 20:07:40 | 0:04:51 | 64.2842889 | 70.8813582 | 87.846326 | 87.421441 | 83.1725398 |
| 20:07:41 | 0:04:52 | 64.2842889 | 69.8813582 | 87.846326 | 86.421441 | 83.1725398 |
| 20:07:42 | 0:04:53 | 65.2842889 | 69.8813582 | 88.846326 | 86.421441 | 83.1725398 |
| 20:07:43 | 0:04:54 | 64.2842889 | 69.8813582 | 88.846326 | 85.421441 | 83.1725398 |
| 20:07:44 | 0:04:55 | 64.2842889 | 69.8813582 | 88.846326 | 85.421441 | 82.1725398 |
| 20:07:45 | 0:04:56 | 64.2842889 | 69.8813582 | 89.846326 | 86.421441 | 84.1725398 |
| 20:07:46 | 0:04:57 | 64.2842889 | 69.8813582 | 89.846326 | 86.421441 | 84.1725398 |
| 20:07:47 | 0:04:58 | 64.2842889 | 69.8813582 | 91.846326 | 86.421441 | 83.1725398 |
| 20:07:48 | 0:04:59 | 62.2842889 | 69.8813582 | 91.846326 | 86.421441 | 83.1725398 |
| 20:07:49 | 0:05:00 | 62.2842889 | 69.8813582 | 93.846326 | 86.421441 | 80.1725398 |
| 20:07:50 | 0:05:01 | 62.2842889 | 67.8813582 | 93.846326 | 81.421441 | 80.1725398 |
| 20:07:51 | 0:05:02 | 62.2842889 | 67.8813582 | 94.846326 | 81.421441 | 80.1725398 |
| 20:07:52 | 0:05:03 | 62.2842889 | 67.8813582 | 94.846326 | 80.421441 | 80.1725398 |
| 20:07:53 | 0:05:04 | 61.2842889 | 67.8813582 | 95.846326 | 79.421441 | 79.1725398 |
| 20:07:54 | 0:05:05 | 61.2842889 | 68.8813582 | 95.846326 | 79.421441 | 78.1725398 |
| 20:07:55 | 0:05:06 | 61.2842889 | 68.8813582 | 95.846326 | 85.421441 | 78.1725398 |
| 20:07:56 | 0:05:07 | 61.2842889 | 68.8813582 | 95.846326 | 88.421441 | 78.1725398 |
| 20:07:57 | 0:05:08 | 61.2842889 | 68.8813582 | 94.846326 | 92.421441 | 79.1725398 |
| 20:07:58 | 0:05:09 | 61.2842889 | 68.8813582 | 94.846326 | 93.421441 | 78.1725398 |
| 20:07:59 | 0:05:10 | 61.2842889 | 68.8813582 | 94.846326 | 94.421441 | 78.1725398 |
| 20:08:00 | 0:05:11 | 61.2842889 | 68.8813582 | 94.846326 | 94.421441 | 79.1725398 |
| 20:08:01 | 0:05:12 | 61.2842889 | 69.8813582 | 94.846326 | 94.421441 | 79.1725398 |

|          |         |            |            |           |           |            |
|----------|---------|------------|------------|-----------|-----------|------------|
| 20:08:02 | 0:05:13 | 61.2842889 | 69.8813582 | 90.846326 | 93.421441 | 79.1725398 |
| 20:08:03 | 0:05:14 | 62.2842889 | 68.8813582 | 90.846326 | 90.421441 | 79.1725398 |
| 20:08:04 | 0:05:15 | 62.2842889 | 68.8813582 | 90.846326 | 87.421441 | 79.1725398 |
| 20:08:05 | 0:05:16 | 61.2842889 | 68.8813582 | 90.846326 | 86.421441 | 80.1725398 |
| 20:08:06 | 0:05:17 | 61.2842889 | 68.8813582 | 90.846326 | 86.421441 | 80.1725398 |
| 20:08:07 | 0:05:18 | 61.2842889 | 68.8813582 | 88.846326 | 83.421441 | 80.1725398 |
| 20:08:08 | 0:05:19 | 61.2842889 | 69.8813582 | 87.846326 | 82.421441 | 80.1725398 |
| 20:08:09 | 0:05:20 | 61.2842889 | 70.8813582 | 87.846326 | 83.421441 | 78.1725398 |
| 20:08:10 | 0:05:21 | 61.2842889 | 70.8813582 | 86.846326 | 83.421441 | 78.1725398 |
| 20:08:11 | 0:05:22 | 61.2842889 | 72.8813582 | 85.846326 | 83.421441 | 77.1725398 |
| 20:08:12 | 0:05:23 | 61.2842889 | 72.8813582 | 84.846326 | 81.421441 | 77.1725398 |
| 20:08:13 | 0:05:24 | 61.2842889 | 74.8813582 | 84.846326 | 80.421441 | 78.1725398 |
| 20:08:14 | 0:05:25 | 60.2842889 | 75.8813582 | 80.846326 | 80.421441 | 78.1725398 |
| 20:08:15 | 0:05:26 | 60.2842889 | 75.8813582 | 79.846326 | 79.421441 | 78.1725398 |
| 20:08:16 | 0:05:27 | 61.2842889 | 74.8813582 | 79.846326 | 79.421441 | 77.1725398 |
| 20:08:17 | 0:05:28 | 61.2842889 | 74.8813582 | 79.846326 | 78.421441 | 77.1725398 |
| 20:08:18 | 0:05:29 | 61.2842889 | 74.8813582 | 83.846326 | 78.421441 | 76.1725398 |
| 20:08:19 | 0:05:30 | 62.2842889 | 74.8813582 | 83.846326 | 79.421441 | 75.1725398 |
| 20:08:20 | 0:05:31 | 62.2842889 | 73.8813582 | 83.846326 | 79.421441 | 75.1725398 |
| 20:08:21 | 0:05:32 | 62.2842889 | 73.8813582 | 83.846326 | 79.421441 | 75.1725398 |
| 20:08:22 | 0:05:33 | 61.2842889 | 72.8813582 | 83.846326 | 81.421441 | 75.1725398 |
| 20:08:23 | 0:05:34 | 61.2842889 | 72.8813582 | 84.846326 | 80.421441 | 75.1725398 |
| 20:08:24 | 0:05:35 | 60.2842889 | 72.8813582 | 84.846326 | 80.421441 | 75.1725398 |
| 20:08:25 | 0:05:36 | 60.2842889 | 76.8813582 | 85.846326 | 81.421441 | 75.1725398 |
| 20:08:26 | 0:05:37 | 61.2842889 | 78.8813582 | 87.846326 | 82.421441 | 73.1725398 |
| 20:08:27 | 0:05:38 | 61.2842889 | 78.8813582 | 87.846326 | 83.421441 | 73.1725398 |
| 20:08:28 | 0:05:39 | 61.2842889 | 78.8813582 | 86.846326 | 83.421441 | 73.1725398 |
| 20:08:29 | 0:05:40 | 61.2842889 | 79.8813582 | 86.846326 | 84.421441 | 73.1725398 |
| 20:08:30 | 0:05:41 | 61.2842889 | 80.8813582 | 85.846326 | 85.421441 | 75.1725398 |
| 20:08:31 | 0:05:42 | 61.2842889 | 81.8813582 | 82.846326 | 87.421441 | 78.1725398 |
| 20:08:32 | 0:05:43 | 61.2842889 | 81.8813582 | 82.846326 | 87.421441 | 79.1725398 |
| 20:08:33 | 0:05:44 | 61.2842889 | 81.8813582 | 81.846326 | 88.421441 | 79.1725398 |
| 20:08:34 | 0:05:45 | 62.2842889 | 81.8813582 | 78.846326 | 88.421441 | 77.1725398 |
| 20:08:35 | 0:05:46 | 62.2842889 | 81.8813582 | 78.846326 | 91.421441 | 74.1725398 |
| 20:08:36 | 0:05:47 | 62.2842889 | 81.8813582 | 78.846326 | 91.421441 | 74.1725398 |
| 20:08:37 | 0:05:48 | 62.2842889 | 81.8813582 | 78.846326 | 91.421441 | 74.1725398 |
| 20:08:38 | 0:05:49 | 62.2842889 | 81.8813582 | 80.846326 | 92.421441 | 77.1725398 |
| 20:08:39 | 0:05:50 | 62.2842889 | 81.8813582 | 83.846326 | 93.421441 | 80.1725398 |
| 20:08:40 | 0:05:51 | 62.2842889 | 81.8813582 | 83.846326 | 93.421441 | 80.1725398 |
| 20:08:41 | 0:05:52 | 62.2842889 | 78.8813582 | 83.846326 | 94.421441 | 80.1725398 |
| 20:08:42 | 0:05:53 | 61.2842889 | 78.8813582 | 83.846326 | 94.421441 | 80.1725398 |
| 20:08:43 | 0:05:54 | 61.2842889 | 75.8813582 | 82.846326 | 95.421441 | 78.1725398 |
| 20:08:44 | 0:05:55 | 61.2842889 | 74.8813582 | 79.846326 | 95.421441 | 78.1725398 |
| 20:08:45 | 0:05:56 | 61.2842889 | 74.8813582 | 79.846326 | 92.421441 | 76.1725398 |
| 20:08:46 | 0:05:57 | 61.2842889 | 73.8813582 | 79.846326 | 90.421441 | 76.1725398 |

|          |         |            |            |           |           |            |
|----------|---------|------------|------------|-----------|-----------|------------|
| 20:08:47 | 0:05:58 | 61.2842889 | 73.8813582 | 79.846326 | 83.421441 | 74.1725398 |
| 20:08:48 | 0:05:59 | 61.2842889 | 73.8813582 | 79.846326 | 83.421441 | 74.1725398 |
| 20:08:49 | 0:06:00 | 60.2842889 | 73.8813582 | 77.846326 | 82.421441 | 73.1725398 |
| 20:08:50 | 0:06:01 | 60.2842889 | 73.8813582 | 76.846326 | 81.421441 | 73.1725398 |
| 20:08:51 | 0:06:02 | 60.2842889 | 74.8813582 | 76.846326 | 80.421441 | 73.1725398 |
| 20:08:52 | 0:06:03 | 60.2842889 | 74.8813582 | 76.846326 | 80.421441 | 74.1725398 |
| 20:08:53 | 0:06:04 | 60.2842889 | 75.8813582 | 76.846326 | 84.421441 | 75.1725398 |
| 20:08:54 | 0:06:05 | 60.2842889 | 75.8813582 | 76.846326 | 85.421441 | 74.1725398 |
| 20:08:55 | 0:06:06 | 60.2842889 | 76.8813582 | 76.846326 | 85.421441 | 74.1725398 |
| 20:08:56 | 0:06:07 | 60.2842889 | 76.8813582 | 77.846326 | 85.421441 | 72.1725398 |
| 20:08:57 | 0:06:08 | 61.2842889 | 76.8813582 | 77.846326 | 85.421441 | 72.1725398 |
| 20:08:58 | 0:06:09 | 61.2842889 | 76.8813582 | 78.846326 | 85.421441 | 72.1725398 |
| 20:08:59 | 0:06:10 | 61.2842889 | 77.8813582 | 78.846326 | 85.421441 | 73.1725398 |
| 20:09:00 | 0:06:11 | 61.2842889 | 78.8813582 | 77.846326 | 84.421441 | 73.1725398 |
| 20:09:01 | 0:06:12 | 61.2842889 | 79.8813582 | 76.846326 | 84.421441 | 73.1725398 |
| 20:09:02 | 0:06:13 | 61.2842889 | 83.8813582 | 76.846326 | 82.421441 | 73.1725398 |
| 20:09:03 | 0:06:14 | 61.2842889 | 83.8813582 | 76.846326 | 82.421441 | 74.1725398 |
| 20:09:04 | 0:06:15 | 61.2842889 | 85.8813582 | 75.846326 | 82.421441 | 74.1725398 |
| 20:09:05 | 0:06:16 | 62.2842889 | 86.8813582 | 75.846326 | 82.421441 | 74.1725398 |
| 20:09:06 | 0:06:17 | 62.2842889 | 83.8813582 | 73.846326 | 82.421441 | 76.1725398 |
| 20:09:07 | 0:06:18 | 64.2842889 | 77.8813582 | 72.846326 | 82.421441 | 74.1725398 |
| 20:09:08 | 0:06:19 | 66.2842889 | 74.8813582 | 72.846326 | 82.421441 | 73.1725398 |
| 20:09:09 | 0:06:20 | 67.2842889 | 72.8813582 | 72.846326 | 83.421441 | 73.1725398 |
| 20:09:10 | 0:06:21 | 62.2842889 | 71.8813582 | 71.846326 | 84.421441 | 73.1725398 |
| 20:09:11 | 0:06:22 | 61.2842889 | 71.8813582 | 71.846326 | 86.421441 | 73.1725398 |
| 20:09:12 | 0:06:23 | 61.2842889 | 70.8813582 | 71.846326 | 85.421441 | 74.1725398 |
| 20:09:13 | 0:06:24 | 61.2842889 | 70.8813582 | 69.846326 | 84.421441 | 74.1725398 |
| 20:09:14 | 0:06:25 | 61.2842889 | 69.8813582 | 67.846326 | 84.421441 | 73.1725398 |
| 20:09:15 | 0:06:26 | 60.2842889 | 68.8813582 | 65.846326 | 82.421441 | 73.1725398 |
| 20:09:16 | 0:06:27 | 61.2842889 | 67.8813582 | 65.846326 | 82.421441 | 73.1725398 |
| 20:09:17 | 0:06:28 | 61.2842889 | 67.8813582 | 68.846326 | 81.421441 | 73.1725398 |
| 20:09:18 | 0:06:29 | 61.2842889 | 68.8813582 | 69.846326 | 81.421441 | 73.1725398 |
| 20:09:19 | 0:06:30 | 61.2842889 | 68.8813582 | 69.846326 | 79.421441 | 75.1725398 |
| 20:09:20 | 0:06:31 | 60.2842889 | 67.8813582 | 70.846326 | 79.421441 | 75.1725398 |
| 20:09:21 | 0:06:32 | 60.2842889 | 67.8813582 | 70.846326 | 78.421441 | 75.1725398 |
| 20:09:22 | 0:06:33 | 60.2842889 | 67.8813582 | 70.846326 | 78.421441 | 75.1725398 |
| 20:09:23 | 0:06:34 | 60.2842889 | 66.8813582 | 70.846326 | 78.421441 | 75.1725398 |
| 20:09:24 | 0:06:35 | 60.2842889 | 66.8813582 | 71.846326 | 76.421441 | 75.1725398 |
| 20:09:25 | 0:06:36 | 59.2842889 | 66.8813582 | 72.846326 | 76.421441 | 73.1725398 |
| 20:09:26 | 0:06:37 | 58.2842889 | 66.8813582 | 72.846326 | 75.421441 | 72.1725398 |
| 20:09:27 | 0:06:38 | 58.2842889 | 66.8813582 | 75.846326 | 75.421441 | 74.1725398 |
| 20:09:28 | 0:06:39 | 59.2842889 | 66.8813582 | 76.846326 | 76.421441 | 76.1725398 |
| 20:09:29 | 0:06:40 | 63.2842889 | 67.8813582 | 76.846326 | 76.421441 | 77.1725398 |
| 20:09:30 | 0:06:41 | 63.2842889 | 67.8813582 | 76.846326 | 77.421441 | 77.1725398 |
| 20:09:31 | 0:06:42 | 65.2842889 | 67.8813582 | 76.846326 | 77.421441 | 77.1725398 |

|          |         |            |            |           |           |            |
|----------|---------|------------|------------|-----------|-----------|------------|
| 20:09:32 | 0:06:43 | 65.2842889 | 67.8813582 | 74.846326 | 78.421441 | 78.1725398 |
| 20:09:33 | 0:06:44 | 65.2842889 | 67.8813582 | 73.846326 | 78.421441 | 79.1725398 |
| 20:09:34 | 0:06:45 | 64.2842889 | 68.8813582 | 72.846326 | 78.421441 | 79.1725398 |
| 20:09:35 | 0:06:46 | 64.2842889 | 68.8813582 | 69.846326 | 78.421441 | 79.1725398 |
| 20:09:36 | 0:06:47 | 64.2842889 | 68.8813582 | 69.846326 | 78.421441 | 79.1725398 |
| 20:09:37 | 0:06:48 | 64.2842889 | 68.8813582 | 76.846326 | 79.421441 | 80.1725398 |
| 20:09:38 | 0:06:49 | 63.2842889 | 69.8813582 | 79.846326 | 79.421441 | 80.1725398 |
| 20:09:39 | 0:06:50 | 62.2842889 | 69.8813582 | 79.846326 | 79.421441 | 80.1725398 |
| 20:09:40 | 0:06:51 | 62.2842889 | 69.8813582 | 80.846326 | 78.421441 | 82.1725398 |
| 20:09:41 | 0:06:52 | 61.2842889 | 69.8813582 | 80.846326 | 78.421441 | 81.1725398 |
| 20:09:42 | 0:06:53 | 60.2842889 | 70.8813582 | 80.846326 | 77.421441 | 77.1725398 |
| 20:09:43 | 0:06:54 | 60.2842889 | 70.8813582 | 80.846326 | 77.421441 | 74.1725398 |
| 20:09:44 | 0:06:55 | 60.2842889 | 69.8813582 | 80.846326 | 77.421441 | 73.1725398 |
| 20:09:45 | 0:06:56 | 60.2842889 | 69.8813582 | 80.846326 | 77.421441 | 73.1725398 |
| 20:09:46 | 0:06:57 | 60.2842889 | 69.8813582 | 79.846326 | 78.421441 | 72.1725398 |
| 20:09:47 | 0:06:58 | 60.2842889 | 69.8813582 | 79.846326 | 78.421441 | 72.1725398 |
| 20:09:48 | 0:06:59 | 60.2842889 | 68.8813582 | 79.846326 | 78.421441 | 72.1725398 |
| 20:09:49 | 0:07:00 | 60.2842889 | 68.8813582 | 79.846326 | 78.421441 | 72.1725398 |
| 20:09:50 | 0:07:01 | 61.2842889 | 68.8813582 | 79.846326 | 78.421441 | 72.1725398 |
| 20:09:51 | 0:07:02 | 61.2842889 | 68.8813582 | 78.846326 | 78.421441 | 70.1725398 |
| 20:09:52 | 0:07:03 | 61.2842889 | 69.8813582 | 78.846326 | 78.421441 | 70.1725398 |
| 20:09:53 | 0:07:04 | 61.2842889 | 69.8813582 | 78.846326 | 78.421441 | 69.1725398 |
| 20:09:54 | 0:07:05 | 60.2842889 | 69.8813582 | 79.846326 | 78.421441 | 68.1725398 |
| 20:09:55 | 0:07:06 | 60.2842889 | 69.8813582 | 79.846326 | 76.421441 | 68.1725398 |
| 20:09:56 | 0:07:07 | 60.2842889 | 69.8813582 | 79.846326 | 75.421441 | 68.1725398 |
| 20:09:57 | 0:07:08 | 61.2842889 | 70.8813582 | 82.846326 | 75.421441 | 69.1725398 |
| 20:09:58 | 0:07:09 | 60.2842889 | 75.8813582 | 82.846326 | 75.421441 | 70.1725398 |
| 20:09:59 | 0:07:10 | 60.2842889 | 75.8813582 | 85.846326 | 75.421441 | 71.1725398 |
| 20:10:00 | 0:07:11 | 59.2842889 | 75.8813582 | 85.846326 | 74.421441 | 71.1725398 |
| 20:10:01 | 0:07:12 | 59.2842889 | 82.8813582 | 86.846326 | 74.421441 | 71.1725398 |
| 20:10:02 | 0:07:13 | 59.2842889 | 83.8813582 | 84.846326 | 74.421441 | 71.1725398 |
| 20:10:03 | 0:07:14 | 58.2842889 | 83.8813582 | 84.846326 | 74.421441 | 72.1725398 |
| 20:10:04 | 0:07:15 | 58.2842889 | 87.8813582 | 84.846326 | 73.421441 | 72.1725398 |
| 20:10:05 | 0:07:16 | 58.2842889 | 91.8813582 | 79.846326 | 74.421441 | 72.1725398 |
| 20:10:06 | 0:07:17 | 58.2842889 | 100.881358 | 79.846326 | 79.421441 | 72.1725398 |
| 20:10:07 | 0:07:18 | 58.2842889 | 78.2000025 | 78.846326 | 81.421441 | 72.1725398 |
| 20:10:08 | 0:07:19 | 57.2842889 | 77.771431  | 78.846326 | 81.421441 | 71.1725398 |
| 20:10:09 | 0:07:20 | 57.2842889 | 79.6285739 | 78.846326 | 84.421441 | 71.1725398 |
| 20:10:10 | 0:07:21 | 57.2842889 | 79.6285739 | 78.846326 | 84.421441 | 71.1725398 |
| 20:10:11 | 0:07:22 | 57.2842889 | 79.6285739 | 78.846326 | 84.421441 | 71.1725398 |
| 20:10:12 | 0:07:23 | 57.2842889 | 79.6285739 | 78.846326 | 84.421441 | 71.1725398 |
| 20:10:13 | 0:07:24 | 60.2842889 | 80.3428596 | 78.846326 | 84.421441 | 71.1725398 |
| 20:10:14 | 0:07:25 | 61.2842889 | 81.3428596 | 78.846326 | 86.421441 | 72.1725398 |
| 20:10:15 | 0:07:26 | 61.2842889 | 81.6285739 | 78.846326 | 86.421441 | 73.1725398 |
| 20:10:16 | 0:07:27 | 61.2842889 | 100.881358 | 77.846326 | 86.421441 | 73.1725398 |

|          |         |            |            |           |            |            |
|----------|---------|------------|------------|-----------|------------|------------|
| 20:10:17 | 0:07:28 | 61.2842889 | 96.8813582 | 76.846326 | 86.421441  | 75.1725398 |
| 20:10:18 | 0:07:29 | 61.2842889 | 94.8813582 | 76.846326 | 86.421441  | 75.1725398 |
| 20:10:19 | 0:07:30 | 61.2842889 | 93.8813582 | 77.846326 | 86.421441  | 75.1725398 |
| 20:10:20 | 0:07:31 | 61.2842889 | 91.8813582 | 77.846326 | 86.421441  | 76.1725398 |
| 20:10:21 | 0:07:32 | 61.2842889 | 91.8813582 | 77.846326 | 85.421441  | 76.1725398 |
| 20:10:22 | 0:07:33 | 62.2842889 | 89.8813582 | 77.846326 | 85.421441  | 77.1725398 |
| 20:10:23 | 0:07:34 | 62.2842889 | 81.8813582 | 77.846326 | 83.421441  | 78.1725398 |
| 20:10:24 | 0:07:35 | 62.2842889 | 76.8813582 | 77.846326 | 83.421441  | 78.1725398 |
| 20:10:25 | 0:07:36 | 62.2842889 | 73.8813582 | 78.846326 | 85.421441  | 73.1725398 |
| 20:10:26 | 0:07:37 | 62.2842889 | 71.8813582 | 75.846326 | 84.421441  | 71.1725398 |
| 20:10:27 | 0:07:38 | 62.2842889 | 70.8813582 | 75.846326 | 83.421441  | 71.1725398 |
| 20:10:28 | 0:07:39 | 62.2842889 | 70.8813582 | 75.846326 | 83.421441  | 70.1725398 |
| 20:10:29 | 0:07:40 | 61.2842889 | 68.8813582 | 75.846326 | 81.421441  | 69.1725398 |
| 20:10:30 | 0:07:41 | 61.2842889 | 68.8813582 | 75.846326 | 81.421441  | 69.1725398 |
| 20:10:31 | 0:07:42 | 62.2842889 | 68.8813582 | 75.846326 | 82.421441  | 69.1725398 |
| 20:10:32 | 0:07:43 | 61.2842889 | 67.8813582 | 76.846326 | 82.421441  | 71.1725398 |
| 20:10:33 | 0:07:44 | 61.2842889 | 67.8813582 | 76.846326 | 88.421441  | 71.1725398 |
| 20:10:34 | 0:07:45 | 61.2842889 | 67.8813582 | 74.846326 | 91.421441  | 72.1725398 |
| 20:10:35 | 0:07:46 | 61.2842889 | 67.8813582 | 74.846326 | 93.421441  | 72.1725398 |
| 20:10:36 | 0:07:47 | 61.2842889 | 67.8813582 | 74.846326 | 96.421441  | 73.1725398 |
| 20:10:37 | 0:07:48 | 61.2842889 | 67.8813582 | 74.846326 | 96.421441  | 74.1725398 |
| 20:10:38 | 0:07:49 | 62.2842889 | 67.8813582 | 74.846326 | 99.421441  | 74.1725398 |
| 20:10:39 | 0:07:50 | 62.2842889 | 67.8813582 | 74.846326 | 103.421441 | 75.1725398 |
| 20:10:40 | 0:07:51 | 62.2842889 | 67.8813582 | 74.846326 | 81.771431  | 75.1725398 |
| 20:10:41 | 0:07:52 | 62.2842889 | 67.8813582 | 76.846326 | 82.6285739 | 75.1725398 |
| 20:10:42 | 0:07:53 | 62.2842889 | 67.8813582 | 76.846326 | 82.9142882 | 76.1725398 |
| 20:10:43 | 0:07:54 | 62.2842889 | 67.8813582 | 76.846326 | 83.4857167 | 77.1725398 |
| 20:10:44 | 0:07:55 | 62.2842889 | 68.8813582 | 75.846326 | 83.771431  | 78.1725398 |
| 20:10:45 | 0:07:56 | 62.2842889 | 68.8813582 | 75.846326 | 83.771431  | 78.1725398 |
| 20:10:46 | 0:07:57 | 62.2842889 | 68.8813582 | 75.846326 | 84.6285739 | 77.1725398 |
| 20:10:47 | 0:07:58 | 62.2842889 | 67.8813582 | 75.846326 | 83.9142882 | 75.1725398 |
| 20:10:48 | 0:07:59 | 62.2842889 | 67.8813582 | 75.846326 | 84.4857167 | 75.1725398 |
| 20:10:49 | 0:08:00 | 62.2842889 | 67.8813582 | 77.846326 | 85.0571453 | 76.1725398 |
| 20:10:50 | 0:08:01 | 62.2842889 | 67.8813582 | 79.846326 | 85.6285739 | 77.1725398 |
| 20:10:51 | 0:08:02 | 62.2842889 | 67.8813582 | 79.846326 | 85.3428596 | 76.1725398 |
| 20:10:52 | 0:08:03 | 63.2842889 | 67.8813582 | 79.846326 | 85.2000025 | 76.1725398 |
| 20:10:53 | 0:08:04 | 63.2842889 | 67.8813582 | 77.846326 | 84.6285739 | 75.1725398 |
| 20:10:54 | 0:08:05 | 63.2842889 | 67.8813582 | 77.846326 | 84.6285739 | 75.1725398 |
| 20:10:55 | 0:08:06 | 63.2842889 | 67.8813582 | 77.846326 | 84.3428596 | 75.1725398 |
| 20:10:56 | 0:08:07 | 63.2842889 | 68.8813582 | 77.846326 | 84.4857167 | 75.1725398 |
| 20:10:57 | 0:08:08 | 63.2842889 | 68.8813582 | 77.846326 | 84.771431  | 76.1725398 |
| 20:10:58 | 0:08:09 | 65.2842889 | 68.8813582 | 77.846326 | 84.771431  | 76.1725398 |
| 20:10:59 | 0:08:10 | 65.2842889 | 68.8813582 | 76.846326 | 84.0571453 | 75.1725398 |
| 20:11:00 | 0:08:11 | 67.2842889 | 70.8813582 | 75.846326 | 83.9142882 | 73.1725398 |
| 20:11:01 | 0:08:12 | 70.2842889 | 72.8813582 | 74.846326 | 83.9142882 | 72.1725398 |



|          |         |            |            |           |            |            |
|----------|---------|------------|------------|-----------|------------|------------|
| 20:11:02 | 0:08:13 | 70.2842889 | 73.8813582 | 76.846326 | 84.0571453 | 72.1725398 |
| 20:11:03 | 0:08:14 | 70.2842889 | 73.8813582 | 76.846326 | 84.0571453 | 72.1725398 |
| 20:11:04 | 0:08:15 | 70.2842889 | 74.8813582 | 76.846326 | 85.3428596 | 73.1725398 |
| 20:11:05 | 0:08:16 | 70.2842889 | 75.8813582 | 74.846326 | 86.0571453 | 74.1725398 |
| 20:11:06 | 0:08:17 | 70.2842889 | 74.8813582 | 74.846326 | 87.0571453 | 74.1725398 |
| 20:11:07 | 0:08:18 | 71.2842889 | 72.8813582 | 73.846326 | 87.6285739 | 74.1725398 |
| 20:11:08 | 0:08:19 |            | 70.8813582 | 73.846326 | 87.771431  | 74.1725398 |
| 20:11:09 | 0:08:20 |            | 70.8813582 | 73.846326 | 87.771431  | 74.1725398 |
| 20:11:10 | 0:08:21 |            | 70.8813582 | 73.846326 | 87.771431  | 73.1725398 |
| 20:11:11 | 0:08:22 |            | 70.8813582 | 75.846326 | 89.0571453 | 73.1725398 |
| 20:11:12 | 0:08:23 |            | 70.8813582 | 77.846326 | 89.771431  | 73.1725398 |
| 20:11:13 | 0:08:24 |            | 70.8813582 | 79.846326 | 90.771431  | 73.1725398 |
| 20:11:14 | 0:08:25 |            | 70.8813582 | 79.846326 | 90.771431  | 73.1725398 |
| 20:11:15 | 0:08:26 |            | 69.8813582 | 79.846326 | 90.6285739 | 73.1725398 |
| 20:11:16 | 0:08:27 |            | 70.8813582 | 80.846326 | 92.4857167 | 76.1725398 |
| 20:11:17 | 0:08:28 |            | 70.8813582 | 80.846326 | 93.6285739 | 78.1725398 |
| 20:11:18 | 0:08:29 |            | 71.8813582 | 80.846326 | 93.9142882 | 77.1725398 |
| 20:11:19 | 0:08:30 |            | 71.8813582 | 80.846326 | 94.9142882 | 78.1725398 |
| 20:11:20 | 0:08:31 |            | 69.8813582 | 80.846326 | 95.4857167 | 79.1725398 |
| 20:11:21 | 0:08:32 |            | 69.8813582 | 82.846326 | 95.9142882 | 79.1725398 |
| 20:11:22 | 0:08:33 |            | 72.8813582 | 81.846326 | 96.4857167 | 79.1725398 |
| 20:11:23 | 0:08:34 |            | 72.8813582 | 81.846326 | 96.771431  | 79.1725398 |
| 20:11:24 | 0:08:35 |            | 72.8813582 | 81.846326 | 96.771431  | 79.1725398 |
| 20:11:25 | 0:08:36 |            | 72.8813582 | 80.846326 | 96.9142882 | 80.1725398 |
| 20:11:26 | 0:08:37 |            | 71.8813582 | 79.846326 | 96.771431  | 80.1725398 |
| 20:11:27 | 0:08:38 |            | 71.8813582 | 80.846326 | 97.4857167 | 83.1725398 |
| 20:11:28 | 0:08:39 |            | 70.8813582 | 80.846326 | 95.2000025 | 84.1725398 |
| 20:11:29 | 0:08:40 |            | 70.8813582 | 80.846326 | 95.771431  | 86.1725398 |
| 20:11:30 | 0:08:41 |            | 70.8813582 | 80.846326 | 95.771431  | 87.1725398 |
| 20:11:31 | 0:08:42 |            | 70.8813582 | 82.846326 | 96.0571453 | 87.1725398 |
| 20:11:32 | 0:08:43 |            | 70.8813582 | 83.846326 | 95.771431  | 86.1725398 |
| 20:11:33 | 0:08:44 |            | 70.8813582 | 81.846326 | 84.421441  | 83.1725398 |
| 20:11:34 | 0:08:45 |            | 70.8813582 | 80.846326 | 75.421441  | 82.1725398 |
| 20:11:35 | 0:08:46 |            | 70.8813582 | 80.846326 | 73.421441  | 82.1725398 |
| 20:11:36 | 0:08:47 |            | 71.8813582 | 79.846326 | 73.421441  | 81.1725398 |
| 20:11:37 | 0:08:48 |            | 70.8813582 | 79.846326 | 73.421441  | 80.1725398 |
| 20:11:38 | 0:08:49 |            | 70.8813582 | 79.846326 | 73.421441  | 78.1725398 |
| 20:11:39 | 0:08:50 |            | 69.8813582 | 79.846326 | 73.421441  | 77.1725398 |
| 20:11:40 | 0:08:51 |            | 67.8813582 | 78.846326 | 73.421441  | 77.1725398 |
| 20:11:41 | 0:08:52 |            | 67.8813582 | 77.846326 | 73.421441  | 77.1725398 |
| 20:11:42 | 0:08:53 |            | 67.8813582 | 77.846326 | 73.421441  | 77.1725398 |
| 20:11:43 | 0:08:54 |            | 66.8813582 | 77.846326 | 72.421441  | 77.1725398 |
| 20:11:44 | 0:08:55 |            | 66.8813582 | 76.846326 | 72.421441  | 77.1725398 |
| 20:11:45 | 0:08:56 |            | 66.8813582 | 76.846326 | 72.421441  | 77.1725398 |
| 20:11:46 | 0:08:57 |            | 67.8813582 | 76.846326 | 72.421441  | 77.1725398 |

|          |         |            |           |           |            |
|----------|---------|------------|-----------|-----------|------------|
| 20:11:47 | 0:08:58 | 67.8813582 | 77.846326 | 72.421441 | 78.1725398 |
| 20:11:48 | 0:08:59 | 67.8813582 | 77.846326 | 72.421441 | 79.1725398 |
| 20:11:49 | 0:09:00 | 68.8813582 | 77.846326 | 72.421441 | 79.1725398 |
| 20:11:50 | 0:09:01 | 69.8813582 | 76.846326 | 72.421441 | 78.1725398 |
| 20:11:51 | 0:09:02 | 69.8813582 | 76.846326 | 72.421441 | 75.1725398 |
| 20:11:52 | 0:09:03 | 71.8813582 | 76.846326 | 72.421441 | 76.1725398 |
| 20:11:53 | 0:09:04 | 71.8813582 | 79.846326 | 72.421441 | 77.1725398 |
| 20:11:54 | 0:09:05 | 70.8813582 | 80.846326 | 71.421441 | 77.1725398 |
| 20:11:55 | 0:09:06 | 69.8813582 | 80.846326 | 70.421441 | 77.1725398 |
| 20:11:56 | 0:09:07 | 69.8813582 | 80.846326 | 69.421441 | 77.1725398 |
| 20:11:57 | 0:09:08 | 69.8813582 | 80.846326 | 69.421441 | 77.1725398 |
| 20:11:58 | 0:09:09 | 68.8813582 | 80.846326 | 70.421441 | 76.1725398 |
| 20:11:59 | 0:09:10 | 68.8813582 | 79.846326 | 70.421441 | 75.1725398 |
| 20:12:00 | 0:09:11 | 69.8813582 | 79.846326 | 70.421441 | 74.1725398 |
| 20:12:01 | 0:09:12 | 69.8813582 | 79.846326 | 70.421441 | 73.1725398 |
| 20:12:02 | 0:09:13 | 70.8813582 | 80.846326 | 71.421441 | 73.1725398 |
| 20:12:03 | 0:09:14 | 70.8813582 | 79.846326 | 72.421441 | 73.1725398 |
| 20:12:04 | 0:09:15 | 69.8813582 | 79.846326 | 73.421441 | 73.1725398 |
| 20:12:05 | 0:09:16 | 69.8813582 | 79.846326 | 75.421441 | 73.1725398 |
| 20:12:06 | 0:09:17 | 69.8813582 | 78.846326 | 77.421441 | 74.1725398 |
| 20:12:07 | 0:09:18 | 70.8813582 | 78.846326 | 77.421441 | 74.1725398 |
| 20:12:08 | 0:09:19 | 69.8813582 | 77.846326 | 78.421441 | 74.1725398 |
| 20:12:09 | 0:09:20 | 69.8813582 | 78.846326 | 80.421441 | 75.1725398 |
| 20:12:10 | 0:09:21 | 69.8813582 | 78.846326 | 81.421441 | 74.1725398 |
| 20:12:11 | 0:09:22 | 69.8813582 | 78.846326 | 81.421441 | 74.1725398 |
| 20:12:12 | 0:09:23 | 69.8813582 | 78.846326 | 81.421441 | 72.1725398 |
| 20:12:13 | 0:09:24 | 69.8813582 | 78.846326 | 82.421441 | 73.1725398 |
| 20:12:14 | 0:09:25 | 69.8813582 | 79.846326 | 83.421441 | 75.1725398 |
| 20:12:15 | 0:09:26 | 69.8813582 | 80.846326 | 84.421441 | 75.1725398 |
| 20:12:16 | 0:09:27 | 69.8813582 | 80.846326 | 85.421441 | 76.1725398 |
| 20:12:17 | 0:09:28 | 69.8813582 | 81.846326 | 85.421441 | 75.1725398 |
| 20:12:18 | 0:09:29 | 69.8813582 | 81.846326 | 85.421441 | 75.1725398 |
| 20:12:19 | 0:09:30 | 70.8813582 | 80.846326 | 85.421441 | 75.1725398 |
| 20:12:20 | 0:09:31 | 69.8813582 | 80.846326 | 85.421441 | 74.1725398 |
| 20:12:21 | 0:09:32 | 69.8813582 | 79.846326 | 85.421441 | 72.1725398 |
| 20:12:22 | 0:09:33 | 69.8813582 | 78.846326 | 85.421441 | 72.1725398 |
| 20:12:23 | 0:09:34 | 69.8813582 | 78.846326 | 85.421441 | 72.1725398 |
| 20:12:24 | 0:09:35 | 69.8813582 | 78.846326 | 85.421441 | 73.1725398 |
| 20:12:25 | 0:09:36 | 68.8813582 | 78.846326 | 86.421441 | 74.1725398 |
| 20:12:26 | 0:09:37 | 68.8813582 | 78.846326 | 86.421441 | 74.1725398 |
| 20:12:27 | 0:09:38 | 68.8813582 | 76.846326 | 86.421441 | 74.1725398 |
| 20:12:28 | 0:09:39 | 68.8813582 | 75.846326 | 87.421441 | 74.1725398 |
| 20:12:29 | 0:09:40 | 68.8813582 | 75.846326 | 88.421441 | 74.1725398 |
| 20:12:30 | 0:09:41 | 68.8813582 | 74.846326 | 87.421441 | 74.1725398 |
| 20:12:31 | 0:09:42 | 68.8813582 | 72.846326 | 87.421441 | 74.1725398 |

|          |         |            |           |           |            |
|----------|---------|------------|-----------|-----------|------------|
| 20:12:32 | 0:09:43 | 66.8813582 | 71.846326 | 87.421441 | 73.1725398 |
| 20:12:33 | 0:09:44 | 66.8813582 | 71.846326 | 87.421441 | 74.1725398 |
| 20:12:34 | 0:09:45 | 67.8813582 | 73.846326 | 87.421441 | 74.1725398 |
| 20:12:35 | 0:09:46 | 69.8813582 | 73.846326 | 86.421441 | 75.1725398 |
| 20:12:36 | 0:09:47 | 71.8813582 | 73.846326 | 86.421441 | 74.1725398 |
| 20:12:37 | 0:09:48 | 71.8813582 | 75.846326 | 85.421441 | 74.1725398 |
| 20:12:38 | 0:09:49 | 72.8813582 | 75.846326 | 85.421441 | 72.1725398 |
| 20:12:39 | 0:09:50 | 72.8813582 | 75.846326 | 83.421441 | 72.1725398 |
| 20:12:40 | 0:09:51 | 73.8813582 | 75.846326 | 82.421441 | 72.1725398 |
| 20:12:41 | 0:09:52 | 73.8813582 | 76.846326 | 82.421441 | 72.1725398 |
| 20:12:42 | 0:09:53 | 73.8813582 | 76.846326 | 84.421441 | 72.1725398 |
| 20:12:43 | 0:09:54 | 73.8813582 | 76.846326 | 84.421441 | 72.1725398 |
| 20:12:44 | 0:09:55 | 73.8813582 | 76.846326 | 89.421441 | 74.1725398 |
| 20:12:45 | 0:09:56 | 73.8813582 | 77.846326 | 90.421441 | 75.1725398 |
| 20:12:46 | 0:09:57 | 73.8813582 | 77.846326 | 92.421441 | 75.1725398 |
| 20:12:47 | 0:09:58 | 74.8813582 | 74.846326 | 79.421441 | 77.1725398 |
| 20:12:48 | 0:09:59 | 73.8813582 | 72.846326 | 76.421441 | 77.1725398 |
| 20:12:49 | 0:10:00 | 73.8813582 | 72.846326 | 72.421441 | 77.1725398 |
| 20:12:50 | 0:10:01 | 74.8813582 | 71.846326 | 69.421441 | 77.1725398 |
| 20:12:51 | 0:10:02 | 74.8813582 | 72.846326 | 69.421441 | 77.1725398 |
| 20:12:52 | 0:10:03 | 75.8813582 | 74.846326 | 67.421441 | 77.1725398 |
| 20:12:53 | 0:10:04 | 76.8813582 | 74.846326 | 66.421441 | 76.1725398 |
| 20:12:54 | 0:10:05 | 77.8813582 | 79.846326 | 65.421441 | 75.1725398 |
| 20:12:55 | 0:10:06 | 78.8813582 | 81.846326 | 64.421441 | 75.1725398 |
| 20:12:56 | 0:10:07 | 76.8813582 | 82.846326 | 64.421441 | 75.1725398 |
| 20:12:57 | 0:10:08 | 75.8813582 | 81.846326 | 64.421441 | 76.1725398 |
| 20:12:58 | 0:10:09 | 75.8813582 | 81.846326 | 63.421441 | 78.1725398 |
| 20:12:59 | 0:10:10 | 74.8813582 | 78.846326 | 62.421441 | 78.1725398 |
| 20:13:00 | 0:10:11 | 75.8813582 | 76.846326 | 61.421441 | 83.1725398 |
| 20:13:01 | 0:10:12 | 75.8813582 | 75.846326 | 61.421441 | 83.1725398 |
| 20:13:02 | 0:10:13 | 75.8813582 | 74.846326 | 63.421441 | 83.1725398 |
| 20:13:03 | 0:10:14 | 76.8813582 | 74.846326 | 63.421441 | 83.1725398 |
| 20:13:04 | 0:10:15 | 76.8813582 | 75.846326 | 67.421441 | 82.1725398 |
| 20:13:05 | 0:10:16 | 77.8813582 | 75.846326 | 67.421441 | 82.1725398 |
| 20:13:06 | 0:10:17 | 77.8813582 | 76.846326 | 71.421441 | 81.1725398 |
| 20:13:07 | 0:10:18 | 77.8813582 | 77.846326 | 72.421441 | 80.1725398 |
| 20:13:08 | 0:10:19 | 76.8813582 | 78.846326 | 72.421441 | 79.1725398 |
| 20:13:09 | 0:10:20 | 74.8813582 | 78.846326 | 74.421441 | 78.1725398 |
| 20:13:10 | 0:10:21 | 74.8813582 | 78.846326 | 89.421441 | 78.1725398 |
| 20:13:11 | 0:10:22 | 73.8813582 | 78.846326 | 90.421441 | 78.1725398 |
| 20:13:12 | 0:10:23 | 73.8813582 | 78.846326 | 90.421441 | 78.1725398 |
| 20:13:13 | 0:10:24 | 72.8813582 | 77.846326 | 88.421441 | 78.1725398 |
| 20:13:14 | 0:10:25 | 70.8813582 | 77.846326 | 85.421441 | 79.1725398 |
| 20:13:15 | 0:10:26 | 70.8813582 | 77.846326 | 81.421441 | 78.1725398 |
| 20:13:16 | 0:10:27 | 70.8813582 | 77.846326 | 80.421441 | 77.1725398 |

|          |         |            |           |           |            |
|----------|---------|------------|-----------|-----------|------------|
| 20:13:17 | 0:10:28 | 70.8813582 | 77.846326 | 79.421441 | 76.1725398 |
| 20:13:18 | 0:10:29 | 70.8813582 | 80.846326 | 80.421441 | 75.1725398 |
| 20:13:19 | 0:10:30 | 69.8813582 | 80.846326 | 80.421441 | 74.1725398 |
| 20:13:20 | 0:10:31 | 69.8813582 | 79.846326 | 80.421441 | 74.1725398 |
| 20:13:21 | 0:10:32 | 69.8813582 | 79.846326 | 78.421441 | 74.1725398 |
| 20:13:22 | 0:10:33 | 70.8813582 | 79.846326 | 77.421441 | 73.1725398 |
| 20:13:23 | 0:10:34 | 70.8813582 | 79.846326 | 76.421441 | 73.1725398 |
| 20:13:24 | 0:10:35 | 71.8813582 | 79.846326 | 75.421441 | 73.1725398 |
| 20:13:25 | 0:10:36 | 71.8813582 | 79.846326 | 77.421441 | 73.1725398 |
| 20:13:26 | 0:10:37 | 71.8813582 | 79.846326 | 77.421441 | 73.1725398 |
| 20:13:27 | 0:10:38 | 71.8813582 | 79.846326 | 78.421441 | 73.1725398 |
| 20:13:28 | 0:10:39 | 70.8813582 | 79.846326 | 79.421441 | 74.1725398 |
| 20:13:29 | 0:10:40 | 69.8813582 | 78.846326 | 79.421441 | 75.1725398 |
| 20:13:30 | 0:10:41 | 69.8813582 | 79.846326 | 79.421441 | 75.1725398 |
| 20:13:31 | 0:10:42 | 69.8813582 | 79.846326 | 78.421441 | 74.1725398 |
| 20:13:32 | 0:10:43 | 69.8813582 | 80.846326 | 78.421441 | 74.1725398 |
| 20:13:33 | 0:10:44 | 68.8813582 | 78.846326 | 78.421441 | 73.1725398 |
| 20:13:34 | 0:10:45 | 65.8813582 | 78.846326 | 78.421441 | 73.1725398 |
| 20:13:35 | 0:10:46 | 64.8813582 | 77.846326 | 78.421441 | 73.1725398 |
| 20:13:36 | 0:10:47 | 65.8813582 | 78.846326 | 78.421441 | 73.1725398 |
| 20:13:37 | 0:10:48 | 65.8813582 | 78.846326 | 77.421441 | 74.1725398 |
| 20:13:38 | 0:10:49 | 65.8813582 | 78.846326 | 78.421441 | 74.1725398 |
| 20:13:39 | 0:10:50 | 67.8813582 | 79.846326 | 78.421441 | 74.1725398 |
| 20:13:40 | 0:10:51 | 67.8813582 | 79.846326 | 78.421441 | 74.1725398 |
| 20:13:41 | 0:10:52 | 70.8813582 | 79.846326 | 78.421441 | 76.1725398 |
| 20:13:42 | 0:10:53 | 70.8813582 | 80.846326 | 78.421441 | 78.1725398 |
| 20:13:43 | 0:10:54 | 70.8813582 | 80.846326 | 78.421441 | 78.1725398 |
| 20:13:44 | 0:10:55 | 69.8813582 | 80.846326 | 78.421441 | 76.1725398 |
| 20:13:45 | 0:10:56 | 69.8813582 | 78.846326 | 79.421441 | 75.1725398 |
| 20:13:46 | 0:10:57 | 69.8813582 | 78.846326 | 81.421441 | 75.1725398 |
| 20:13:47 | 0:10:58 | 69.8813582 | 78.846326 | 82.421441 | 75.1725398 |
| 20:13:48 | 0:10:59 | 70.8813582 | 77.846326 | 83.421441 | 75.1725398 |
| 20:13:49 | 0:11:00 | 78.8813582 | 77.846326 | 83.421441 | 74.1725398 |
| 20:13:50 | 0:11:01 | 82.8813582 | 77.846326 | 84.421441 | 74.1725398 |
| 20:13:51 | 0:11:02 | 86.8813582 | 77.846326 | 85.421441 | 74.1725398 |
| 20:13:52 | 0:11:03 | 87.8813582 | 77.846326 | 85.421441 | 75.1725398 |
| 20:13:53 | 0:11:04 | 88.8813582 | 77.846326 | 84.421441 | 76.1725398 |
| 20:13:54 | 0:11:05 | 89.8813582 | 79.846326 | 84.421441 | 78.1725398 |
| 20:13:55 | 0:11:06 | 87.8813582 | 80.846326 | 84.421441 | 78.1725398 |
| 20:13:56 | 0:11:07 | 81.8813582 | 81.846326 | 83.421441 | 78.1725398 |
| 20:13:57 | 0:11:08 | 75.8813582 | 81.846326 | 82.421441 | 77.1725398 |
| 20:13:58 | 0:11:09 | 75.8813582 | 82.846326 | 80.421441 | 75.1725398 |
| 20:13:59 | 0:11:10 | 72.8813582 | 82.846326 | 80.421441 | 73.1725398 |
| 20:14:00 | 0:11:11 | 71.8813582 | 84.846326 | 81.421441 | 72.1725398 |
| 20:14:01 | 0:11:12 | 71.8813582 | 84.846326 | 82.421441 | 72.1725398 |

|          |         |            |           |           |            |
|----------|---------|------------|-----------|-----------|------------|
| 20:14:02 | 0:11:13 | 72.8813582 | 83.846326 | 82.421441 | 72.1725398 |
| 20:14:03 | 0:11:14 | 72.8813582 | 80.846326 | 85.421441 | 72.1725398 |
| 20:14:04 | 0:11:15 | 72.8813582 | 78.846326 | 86.421441 | 73.1725398 |
| 20:14:05 | 0:11:16 | 72.8813582 | 77.846326 | 88.421441 | 73.1725398 |
| 20:14:06 | 0:11:17 | 72.8813582 | 77.846326 | 88.421441 | 73.1725398 |
| 20:14:07 | 0:11:18 | 71.8813582 | 79.846326 | 91.421441 | 72.1725398 |
| 20:14:08 | 0:11:19 | 70.8813582 | 79.846326 | 91.421441 | 73.1725398 |
| 20:14:09 | 0:11:20 | 69.8813582 | 79.846326 | 90.421441 | 73.1725398 |
| 20:14:10 | 0:11:21 | 69.8813582 | 79.846326 | 90.421441 | 73.1725398 |
| 20:14:11 | 0:11:22 | 69.8813582 | 79.846326 | 89.421441 | 76.1725398 |
| 20:14:12 | 0:11:23 | 71.8813582 | 78.846326 | 88.421441 | 76.1725398 |
| 20:14:13 | 0:11:24 | 72.8813582 | 77.846326 | 88.421441 | 75.1725398 |
| 20:14:14 | 0:11:25 | 72.8813582 | 75.846326 | 88.421441 | 75.1725398 |
| 20:14:15 | 0:11:26 | 73.8813582 | 75.846326 | 89.421441 | 70.1725398 |
| 20:14:16 | 0:11:27 | 74.8813582 | 73.846326 | 89.421441 | 69.1725398 |
| 20:14:17 | 0:11:28 | 74.8813582 | 71.846326 | 89.421441 | 69.1725398 |
| 20:14:18 | 0:11:29 | 73.8813582 | 71.846326 | 89.421441 | 68.1725398 |
| 20:14:19 | 0:11:30 | 72.8813582 | 71.846326 | 88.421441 | 69.1725398 |
| 20:14:20 | 0:11:31 | 72.8813582 | 71.846326 | 85.421441 | 71.1725398 |
| 20:14:21 | 0:11:32 | 73.8813582 | 71.846326 | 82.421441 | 71.1725398 |
| 20:14:22 | 0:11:33 | 73.8813582 | 71.846326 | 81.421441 | 71.1725398 |
| 20:14:23 | 0:11:34 | 74.8813582 | 71.846326 | 83.421441 | 72.1725398 |
| 20:14:24 | 0:11:35 | 74.8813582 | 71.846326 | 83.421441 | 72.1725398 |
| 20:14:25 | 0:11:36 | 74.8813582 | 71.846326 | 84.421441 | 71.1725398 |
| 20:14:26 | 0:11:37 | 74.8813582 | 73.846326 | 85.421441 | 71.1725398 |
| 20:14:27 | 0:11:38 | 74.8813582 | 76.846326 | 85.421441 | 71.1725398 |
| 20:14:28 | 0:11:39 | 74.8813582 | 76.846326 | 85.421441 | 71.1725398 |
| 20:14:29 | 0:11:40 | 74.8813582 | 76.846326 | 81.421441 | 70.1725398 |
| 20:14:30 | 0:11:41 | 73.8813582 | 76.846326 | 81.421441 | 69.1725398 |
| 20:14:31 | 0:11:42 | 74.8813582 | 77.846326 | 81.421441 | 69.1725398 |
| 20:14:32 | 0:11:43 | 74.8813582 | 80.846326 | 81.421441 | 67.1725398 |
| 20:14:33 | 0:11:44 | 74.8813582 | 80.846326 | 81.421441 | 67.1725398 |
| 20:14:34 | 0:11:45 | 74.8813582 | 82.846326 | 80.421441 | 68.1725398 |
| 20:14:35 | 0:11:46 | 75.8813582 | 83.846326 | 79.421441 | 68.1725398 |
| 20:14:36 | 0:11:47 | 76.8813582 | 83.846326 | 79.421441 | 69.1725398 |
| 20:14:37 | 0:11:48 | 76.8813582 | 83.846326 | 79.421441 | 70.1725398 |
| 20:14:38 | 0:11:49 | 76.8813582 | 83.846326 | 78.421441 | 70.1725398 |
| 20:14:39 | 0:11:50 | 76.8813582 | 83.846326 | 78.421441 | 68.1725398 |
| 20:14:40 | 0:11:51 | 76.8813582 | 82.846326 | 79.421441 | 68.1725398 |
| 20:14:41 | 0:11:52 | 74.8813582 | 82.846326 | 79.421441 | 68.1725398 |
| 20:14:42 | 0:11:53 | 74.8813582 | 82.846326 | 79.421441 | 67.1725398 |
| 20:14:43 | 0:11:54 | 70.8813582 | 82.846326 | 79.421441 | 68.1725398 |
| 20:14:44 | 0:11:55 | 69.8813582 | 78.846326 | 79.421441 | 69.1725398 |
| 20:14:45 | 0:11:56 | 70.8813582 | 78.846326 | 79.421441 | 70.1725398 |
| 20:14:46 | 0:11:57 | 71.8813582 | 70.846326 | 79.421441 | 70.1725398 |

|          |         |            |           |           |            |
|----------|---------|------------|-----------|-----------|------------|
| 20:14:47 | 0:11:58 | 72.8813582 | 69.846326 | 79.421441 | 70.1725398 |
| 20:14:48 | 0:11:59 | 72.8813582 | 68.846326 | 80.421441 | 70.1725398 |
| 20:14:49 | 0:12:00 | 74.8813582 | 68.846326 | 81.421441 | 70.1725398 |
| 20:14:50 | 0:12:01 | 75.8813582 | 68.846326 | 81.421441 | 70.1725398 |
| 20:14:51 | 0:12:02 | 75.8813582 | 68.846326 | 82.421441 | 69.1725398 |
| 20:14:52 | 0:12:03 | 73.8813582 | 69.846326 | 83.421441 | 67.1725398 |
| 20:14:53 | 0:12:04 | 72.8813582 | 69.846326 | 84.421441 | 66.1725398 |
| 20:14:54 | 0:12:05 | 71.8813582 | 69.846326 | 84.421441 | 66.1725398 |
| 20:14:55 | 0:12:06 | 70.8813582 | 69.846326 | 83.421441 | 65.1725398 |
| 20:14:56 | 0:12:07 | 69.8813582 | 69.846326 | 83.421441 | 65.1725398 |
| 20:14:57 | 0:12:08 | 69.8813582 | 69.846326 | 83.421441 | 65.1725398 |
| 20:14:58 | 0:12:09 | 69.8813582 | 69.846326 | 83.421441 | 65.1725398 |
| 20:14:59 | 0:12:10 | 69.8813582 | 69.846326 | 83.421441 | 65.1725398 |
| 20:15:00 | 0:12:11 | 69.8813582 | 69.846326 | 83.421441 | 65.1725398 |
| 20:15:01 | 0:12:12 | 69.8813582 | 69.846326 | 82.421441 | 67.1725398 |
| 20:15:02 | 0:12:13 | 69.8813582 | 70.846326 | 81.421441 | 67.1725398 |
| 20:15:03 | 0:12:14 | 69.8813582 | 71.846326 | 81.421441 | 70.1725398 |
| 20:15:04 | 0:12:15 | 69.8813582 | 72.846326 | 80.421441 | 71.1725398 |
| 20:15:05 | 0:12:16 | 69.8813582 | 73.846326 | 79.421441 | 68.1725398 |
| 20:15:06 | 0:12:17 | 69.8813582 | 73.846326 | 76.421441 | 69.1725398 |
| 20:15:07 | 0:12:18 | 69.8813582 | 74.846326 | 76.421441 | 69.1725398 |
| 20:15:08 | 0:12:19 | 69.8813582 | 74.846326 | 74.421441 | 71.1725398 |
| 20:15:09 | 0:12:20 | 68.8813582 | 74.846326 | 70.421441 | 71.1725398 |
| 20:15:10 | 0:12:21 | 68.8813582 | 74.846326 | 70.421441 | 71.1725398 |
| 20:15:11 | 0:12:22 | 68.8813582 | 74.846326 | 70.421441 | 71.1725398 |
| 20:15:12 | 0:12:23 | 68.8813582 | 74.846326 | 73.421441 | 69.1725398 |
| 20:15:13 | 0:12:24 | 68.8813582 | 72.846326 | 75.421441 | 69.1725398 |
| 20:15:14 | 0:12:25 | 68.8813582 | 70.846326 | 75.421441 | 68.1725398 |
| 20:15:15 | 0:12:26 | 69.8813582 | 70.846326 | 76.421441 | 68.1725398 |
| 20:15:16 | 0:12:27 | 72.8813582 | 70.846326 | 76.421441 | 69.1725398 |
| 20:15:17 | 0:12:28 | 73.8813582 | 70.846326 | 78.421441 | 71.1725398 |
| 20:15:18 | 0:12:29 | 74.8813582 | 71.846326 | 78.421441 | 71.1725398 |
| 20:15:19 | 0:12:30 | 75.8813582 | 73.846326 | 77.421441 | 71.1725398 |
| 20:15:20 | 0:12:31 | 75.8813582 | 73.846326 | 77.421441 | 73.1725398 |
| 20:15:21 | 0:12:32 | 75.8813582 | 74.846326 | 77.421441 | 73.1725398 |
| 20:15:22 | 0:12:33 | 74.8813582 | 74.846326 | 77.421441 | 73.1725398 |
| 20:15:23 | 0:12:34 | 74.8813582 | 74.846326 | 78.421441 | 73.1725398 |
| 20:15:24 | 0:12:35 | 74.8813582 | 74.846326 | 81.421441 | 74.1725398 |
| 20:15:25 | 0:12:36 | 73.8813582 | 73.846326 | 82.421441 | 75.1725398 |
| 20:15:26 | 0:12:37 | 72.8813582 | 73.846326 | 82.421441 | 75.1725398 |
| 20:15:27 | 0:12:38 | 73.8813582 | 74.846326 | 82.421441 | 75.1725398 |
| 20:15:28 | 0:12:39 | 74.8813582 | 74.846326 | 82.421441 | 74.1725398 |
| 20:15:29 | 0:12:40 | 74.8813582 | 76.846326 | 82.421441 | 74.1725398 |
| 20:15:30 | 0:12:41 | 73.8813582 | 72.846326 | 82.421441 | 71.1725398 |
| 20:15:31 | 0:12:42 | 73.8813582 | 71.846326 | 81.421441 | 70.1725398 |

|          |         |            |           |           |            |
|----------|---------|------------|-----------|-----------|------------|
| 20:15:32 | 0:12:43 | 73.8813582 | 71.846326 | 81.421441 | 70.1725398 |
| 20:15:33 | 0:12:44 | 72.8813582 | 71.846326 | 82.421441 | 70.1725398 |
| 20:15:34 | 0:12:45 | 71.8813582 | 69.846326 | 81.421441 | 70.1725398 |
| 20:15:35 | 0:12:46 | 71.8813582 | 68.846326 | 81.421441 | 70.1725398 |
| 20:15:36 | 0:12:47 | 71.8813582 | 67.846326 | 81.421441 | 70.1725398 |
| 20:15:37 | 0:12:48 | 71.8813582 | 67.846326 | 82.421441 | 70.1725398 |
| 20:15:38 | 0:12:49 | 71.8813582 | 67.846326 | 83.421441 | 71.1725398 |
| 20:15:39 | 0:12:50 | 70.8813582 | 67.846326 | 83.421441 | 71.1725398 |
| 20:15:40 | 0:12:51 | 70.8813582 | 66.846326 | 83.421441 | 71.1725398 |
| 20:15:41 | 0:12:52 | 70.8813582 | 67.846326 | 82.421441 | 71.1725398 |
| 20:15:42 | 0:12:53 | 70.8813582 | 67.846326 | 82.421441 | 70.1725398 |
| 20:15:43 | 0:12:54 | 70.8813582 | 68.846326 | 82.421441 | 69.1725398 |
| 20:15:44 | 0:12:55 | 71.8813582 | 69.846326 | 82.421441 | 69.1725398 |
| 20:15:45 | 0:12:56 | 72.8813582 | 69.846326 | 82.421441 | 69.1725398 |
| 20:15:46 | 0:12:57 | 72.8813582 | 69.846326 | 81.421441 | 68.1725398 |
| 20:15:47 | 0:12:58 | 72.8813582 | 70.846326 | 81.421441 | 68.1725398 |
| 20:15:48 | 0:12:59 | 72.8813582 | 70.846326 | 80.421441 | 67.1725398 |
| 20:15:49 | 0:13:00 | 72.8813582 | 70.846326 | 79.421441 | 67.1725398 |
| 20:15:50 | 0:13:01 | 72.8813582 | 70.846326 | 79.421441 | 67.1725398 |
| 20:15:51 | 0:13:02 | 72.8813582 | 70.846326 | 79.421441 | 67.1725398 |
| 20:15:52 | 0:13:03 | 73.8813582 | 70.846326 | 80.421441 | 67.1725398 |
| 20:15:53 | 0:13:04 | 73.8813582 | 69.846326 | 80.421441 | 67.1725398 |
| 20:15:54 | 0:13:05 | 73.8813582 | 69.846326 | 80.421441 | 67.1725398 |
| 20:15:55 | 0:13:06 | 69.8813582 | 69.846326 | 82.421441 | 67.1725398 |
| 20:15:56 | 0:13:07 | 69.8813582 | 69.846326 | 82.421441 | 67.1725398 |
| 20:15:57 | 0:13:08 | 69.8813582 | 69.846326 | 82.421441 | 67.1725398 |
| 20:15:58 | 0:13:09 | 69.8813582 | 69.846326 | 82.421441 | 67.1725398 |
| 20:15:59 | 0:13:10 | 69.8813582 | 69.846326 | 81.421441 | 68.1725398 |
| 20:16:00 | 0:13:11 | 69.8813582 | 69.846326 | 81.421441 | 68.1725398 |
| 20:16:01 | 0:13:12 | 69.8813582 | 69.846326 | 81.421441 | 69.1725398 |
| 20:16:02 | 0:13:13 | 68.8813582 | 69.846326 | 81.421441 | 69.1725398 |
| 20:16:03 | 0:13:14 | 69.8813582 | 69.846326 | 82.421441 | 69.1725398 |
| 20:16:04 | 0:13:15 | 70.8813582 | 69.846326 | 83.421441 | 69.1725398 |
| 20:16:05 | 0:13:16 | 72.8813582 | 69.846326 | 83.421441 | 69.1725398 |
| 20:16:06 | 0:13:17 | 72.8813582 | 69.846326 | 83.421441 | 69.1725398 |
| 20:16:07 | 0:13:18 | 75.8813582 | 69.846326 | 85.421441 | 69.1725398 |
| 20:16:08 | 0:13:19 | 77.8813582 | 69.846326 | 85.421441 | 70.1725398 |
| 20:16:09 | 0:13:20 | 78.8813582 | 70.846326 | 85.421441 | 70.1725398 |
| 20:16:10 | 0:13:21 | 80.8813582 | 71.846326 | 85.421441 | 70.1725398 |
| 20:16:11 | 0:13:22 | 76.8813582 | 72.846326 | 85.421441 | 70.1725398 |
| 20:16:12 | 0:13:23 | 72.8813582 | 72.846326 | 85.421441 | 71.1725398 |
| 20:16:13 | 0:13:24 | 69.8813582 | 72.846326 | 85.421441 | 71.1725398 |
| 20:16:14 | 0:13:25 | 68.8813582 | 72.846326 | 86.421441 | 70.1725398 |
| 20:16:15 | 0:13:26 | 68.8813582 | 72.846326 | 86.421441 | 71.1725398 |
| 20:16:16 | 0:13:27 | 67.8813582 | 72.846326 | 87.421441 | 74.1725398 |

|          |         |            |           |            |            |
|----------|---------|------------|-----------|------------|------------|
| 20:16:17 | 0:13:28 | 67.8813582 | 72.846326 | 87.421441  | 75.1725398 |
| 20:16:18 | 0:13:29 | 69.8813582 | 72.846326 | 88.421441  | 75.1725398 |
| 20:16:19 | 0:13:30 | 69.8813582 | 71.846326 | 89.421441  | 76.1725398 |
| 20:16:20 | 0:13:31 | 70.8813582 | 71.846326 | 90.421441  | 75.1725398 |
| 20:16:21 | 0:13:32 | 70.8813582 | 70.846326 | 86.421441  | 75.1725398 |
| 20:16:22 | 0:13:33 | 69.8813582 | 70.846326 | 90.421441  | 71.1725398 |
| 20:16:23 | 0:13:34 | 69.8813582 | 69.846326 | 94.421441  | 69.1725398 |
| 20:16:24 | 0:13:35 | 69.8813582 | 68.846326 | 95.421441  | 69.1725398 |
| 20:16:25 | 0:13:36 | 69.8813582 | 68.846326 | 95.421441  | 70.1725398 |
| 20:16:26 | 0:13:37 | 69.8813582 | 70.846326 | 96.421441  | 71.1725398 |
| 20:16:27 | 0:13:38 | 69.8813582 | 70.846326 | 96.421441  | 71.1725398 |
| 20:16:28 | 0:13:39 | 69.8813582 | 69.846326 | 96.421441  | 71.1725398 |
| 20:16:29 | 0:13:40 | 69.8813582 | 69.846326 | 96.421441  | 71.1725398 |
| 20:16:30 | 0:13:41 | 69.8813582 | 69.846326 | 96.421441  | 69.1725398 |
| 20:16:31 | 0:13:42 | 69.8813582 | 68.846326 | 96.421441  | 69.1725398 |
| 20:16:32 | 0:13:43 | 69.8813582 | 68.846326 | 96.421441  | 68.1725398 |
| 20:16:33 | 0:13:44 | 69.8813582 | 68.846326 | 97.421441  | 69.1725398 |
| 20:16:34 | 0:13:45 | 70.8813582 | 68.846326 | 97.421441  | 69.1725398 |
| 20:16:35 | 0:13:46 | 70.8813582 | 68.846326 | 98.421441  | 69.1725398 |
| 20:16:36 | 0:13:47 | 69.8813582 | 69.846326 | 102.421441 | 71.1725398 |
| 20:16:37 | 0:13:48 | 69.8813582 | 69.846326 | 102.421441 | 71.1725398 |
| 20:16:38 | 0:13:49 | 69.8813582 | 68.846326 | 102.421441 | 71.1725398 |
| 20:16:39 | 0:13:50 | 69.8813582 | 68.846326 | 103.421441 | 71.1725398 |
| 20:16:40 | 0:13:51 | 70.8813582 | 68.846326 | 103.421441 | 71.1725398 |
| 20:16:41 | 0:13:52 | 70.8813582 | 68.846326 | 103.421441 | 70.1725398 |
| 20:16:42 | 0:13:53 | 70.8813582 | 69.846326 | 103.421441 | 70.1725398 |
| 20:16:43 | 0:13:54 | 70.8813582 | 69.846326 | 103.421441 | 71.1725398 |
| 20:16:44 | 0:13:55 | 69.8813582 | 71.846326 | 101.421441 | 73.1725398 |
| 20:16:45 | 0:13:56 | 69.8813582 | 71.846326 | 101.421441 | 75.1725398 |
| 20:16:46 | 0:13:57 | 69.8813582 | 71.846326 | 101.421441 | 78.1725398 |
| 20:16:47 | 0:13:58 | 69.8813582 | 71.846326 | 100.421441 | 78.1725398 |
| 20:16:48 | 0:13:59 | 69.8813582 | 71.846326 | 100.421441 | 78.1725398 |
| 20:16:49 | 0:14:00 | 69.8813582 | 71.846326 | 101.421441 | 77.1725398 |
| 20:16:50 | 0:14:01 | 69.8813582 | 74.846326 | 101.421441 | 76.1725398 |
| 20:16:51 | 0:14:02 | 69.8813582 | 75.846326 | 101.421441 | 75.1725398 |
| 20:16:52 | 0:14:03 | 69.8813582 | 77.846326 | 101.421441 | 72.1725398 |
| 20:16:53 | 0:14:04 | 69.8813582 | 79.846326 | 101.421441 | 71.1725398 |
| 20:16:54 | 0:14:05 | 69.8813582 | 79.846326 | 101.421441 | 73.1725398 |
| 20:16:55 | 0:14:06 | 70.8813582 | 81.846326 | 101.421441 | 74.1725398 |
| 20:16:56 | 0:14:07 | 70.8813582 | 85.846326 | 101.421441 | 74.1725398 |
| 20:16:57 | 0:14:08 | 70.8813582 | 87.846326 | 101.421441 | 74.1725398 |
| 20:16:58 | 0:14:09 | 71.8813582 | 87.846326 | 101.421441 | 74.1725398 |
| 20:16:59 | 0:14:10 | 71.8813582 | 83.846326 | 103.421441 | 75.1725398 |
| 20:17:00 | 0:14:11 | 70.8813582 | 76.846326 | 103.421441 | 76.1725398 |
| 20:17:01 | 0:14:12 | 69.8813582 | 73.846326 | 103.421441 | 76.1725398 |



|          |         |            |           |            |            |
|----------|---------|------------|-----------|------------|------------|
| 20:17:02 | 0:14:13 | 69.8813582 | 73.846326 | 103.421441 | 75.1725398 |
| 20:17:03 | 0:14:14 | 70.8813582 | 72.846326 | 103.421441 | 73.1725398 |
| 20:17:04 | 0:14:15 | 71.8813582 | 67.846326 | 103.421441 | 73.1725398 |
| 20:17:05 | 0:14:16 | 71.8813582 | 64.846326 | 102.421441 | 73.1725398 |
| 20:17:06 | 0:14:17 | 71.8813582 | 64.846326 | 101.421441 | 73.1725398 |
| 20:17:07 | 0:14:18 | 71.8813582 | 63.846326 | 102.421441 | 73.1725398 |
| 20:17:08 | 0:14:19 | 71.8813582 | 63.846326 | 103.421441 | 74.1725398 |
| 20:17:09 | 0:14:20 | 69.8813582 | 63.846326 | 103.421441 | 74.1725398 |
| 20:17:10 | 0:14:21 | 68.8813582 | 64.846326 | 103.421441 | 78.1725398 |
| 20:17:11 | 0:14:22 | 67.8813582 | 64.846326 | 103.421441 | 78.1725398 |
| 20:17:12 | 0:14:23 | 67.8813582 | 65.846326 | 103.421441 | 79.1725398 |
| 20:17:13 | 0:14:24 | 67.8813582 | 66.846326 | 103.421441 | 77.1725398 |
| 20:17:14 | 0:14:25 | 68.8813582 | 66.846326 | 104.421441 | 75.1725398 |
| 20:17:15 | 0:14:26 | 69.8813582 | 66.846326 | 104.421441 | 75.1725398 |
| 20:17:16 | 0:14:27 | 69.8813582 | 66.846326 | 104.421441 | 75.1725398 |
| 20:17:17 | 0:14:28 | 70.8813582 | 66.846326 | 104.421441 | 75.1725398 |
| 20:17:18 | 0:14:29 | 70.8813582 | 68.846326 | 104.421441 | 77.1725398 |
| 20:17:19 | 0:14:30 | 71.8813582 | 69.846326 | 104.421441 | 77.1725398 |
| 20:17:20 | 0:14:31 | 73.8813582 | 69.846326 | 103.421441 | 78.1725398 |
| 20:17:21 | 0:14:32 | 73.8813582 | 68.846326 | 102.421441 | 78.1725398 |
| 20:17:22 | 0:14:33 | 73.8813582 | 68.846326 | 103.421441 | 78.1725398 |
| 20:17:23 | 0:14:34 | 73.8813582 | 67.846326 | 103.421441 | 78.1725398 |
| 20:17:24 | 0:14:35 | 73.8813582 | 67.846326 | 103.421441 | 77.1725398 |
| 20:17:25 | 0:14:36 | 72.8813582 | 67.846326 | 102.421441 | 75.1725398 |
| 20:17:26 | 0:14:37 | 71.8813582 | 65.846326 | 102.421441 | 74.1725398 |
| 20:17:27 | 0:14:38 | 70.8813582 | 66.846326 | 102.421441 | 76.1725398 |
| 20:17:28 | 0:14:39 | 69.8813582 | 66.846326 | 101.421441 | 80.1725398 |
| 20:17:29 | 0:14:40 | 69.8813582 | 66.846326 | 99.421441  | 80.1725398 |
| 20:17:30 | 0:14:41 | 69.8813582 | 66.846326 | 99.421441  | 80.1725398 |
| 20:17:31 | 0:14:42 | 68.8813582 | 66.846326 | 99.421441  | 80.1725398 |
| 20:17:32 | 0:14:43 | 68.8813582 | 66.846326 | 97.421441  | 78.1725398 |
| 20:17:33 | 0:14:44 | 70.8813582 | 66.846326 | 97.421441  | 76.1725398 |
| 20:17:34 | 0:14:45 | 71.8813582 | 66.846326 | 97.421441  | 76.1725398 |
| 20:17:35 | 0:14:46 | 70.8813582 | 66.846326 | 96.421441  | 75.1725398 |
| 20:17:36 | 0:14:47 | 70.8813582 | 66.846326 | 96.421441  | 76.1725398 |
| 20:17:37 | 0:14:48 | 70.8813582 | 67.846326 | 96.421441  | 76.1725398 |
| 20:17:38 | 0:14:49 | 70.8813582 | 67.846326 | 99.421441  | 78.1725398 |
| 20:17:39 | 0:14:50 | 69.8813582 | 66.846326 | 99.421441  | 78.1725398 |
| 20:17:40 | 0:14:51 | 69.8813582 | 66.846326 | 100.421441 | 80.1725398 |
| 20:17:41 | 0:14:52 | 69.8813582 | 66.846326 | 101.421441 | 80.1725398 |
| 20:17:42 | 0:14:53 | 69.8813582 | 66.846326 | 101.421441 | 80.1725398 |
| 20:17:43 | 0:14:54 | 69.8813582 | 65.846326 | 104.421441 | 84.1725398 |
| 20:17:44 | 0:14:55 | 69.8813582 | 65.846326 | 105.421441 | 85.1725398 |
| 20:17:45 | 0:14:56 | 69.8813582 | 68.846326 | 105.421441 | 87.1725398 |
| 20:17:46 | 0:14:57 | 69.8813582 | 68.846326 | 109.421441 | 88.1725398 |

|          |         |            |           |            |            |
|----------|---------|------------|-----------|------------|------------|
| 20:17:47 | 0:14:58 | 70.8813582 | 68.846326 | 109.421441 | 88.1725398 |
| 20:17:48 | 0:14:59 | 73.8813582 | 68.846326 | 110.421441 | 88.1725398 |
| 20:17:49 | 0:15:00 | 73.8813582 | 68.846326 | 110.421441 | 88.1725398 |
| 20:17:50 | 0:15:01 | 75.8813582 | 68.846326 | 110.421441 | 88.1725398 |
| 20:17:51 | 0:15:02 | 75.8813582 | 68.846326 | 110.421441 | 88.1725398 |
| 20:17:52 | 0:15:03 | 77.8813582 | 68.846326 | 110.421441 | 88.1725398 |
| 20:17:53 | 0:15:04 | 77.8813582 | 68.846326 | 110.421441 | 87.1725398 |
| 20:17:54 | 0:15:05 | 78.8813582 | 70.846326 | 109.421441 | 86.1725398 |
| 20:17:55 | 0:15:06 | 78.8813582 | 72.846326 | 109.421441 | 86.1725398 |
| 20:17:56 | 0:15:07 | 77.8813582 | 72.846326 | 109.421441 | 84.1725398 |
| 20:17:57 | 0:15:08 | 77.8813582 | 75.846326 | 108.421441 | 82.1725398 |
| 20:17:58 | 0:15:09 | 77.8813582 | 75.846326 | 107.421441 | 80.1725398 |
| 20:17:59 | 0:15:10 | 77.8813582 | 74.846326 | 107.421441 | 82.1725398 |
| 20:18:00 | 0:15:11 | 76.8813582 | 74.846326 | 107.421441 | 82.1725398 |
| 20:18:01 | 0:15:12 | 76.8813582 | 73.846326 | 105.421441 | 82.1725398 |
| 20:18:02 | 0:15:13 | 76.8813582 | 71.846326 | 105.421441 | 81.1725398 |
| 20:18:03 | 0:15:14 | 76.8813582 | 70.846326 | 105.421441 | 77.1725398 |
| 20:18:04 | 0:15:15 | 78.8813582 | 69.846326 | 102.421441 | 77.1725398 |
| 20:18:05 | 0:15:16 | 80.8813582 | 69.846326 | 102.421441 | 75.1725398 |
| 20:18:06 | 0:15:17 | 82.8813582 | 69.846326 | 102.421441 | 75.1725398 |
| 20:18:07 | 0:15:18 | 82.8813582 | 68.846326 | 103.421441 | 75.1725398 |
| 20:18:08 | 0:15:19 | 85.8813582 | 67.846326 | 103.421441 | 76.1725398 |
| 20:18:09 | 0:15:20 | 85.8813582 | 66.846326 | 103.421441 | 76.1725398 |
| 20:18:10 | 0:15:21 | 85.8813582 | 66.846326 | 101.421441 | 76.1725398 |
| 20:18:11 | 0:15:22 | 85.8813582 | 66.846326 | 101.421441 | 76.1725398 |
| 20:18:12 | 0:15:23 | 86.8813582 | 66.846326 | 101.421441 | 76.1725398 |
| 20:18:13 | 0:15:24 | 89.8813582 | 66.846326 | 101.421441 | 75.1725398 |
| 20:18:14 | 0:15:25 | 91.8813582 | 67.846326 | 101.421441 | 75.1725398 |
| 20:18:15 | 0:15:26 | 92.8813582 | 67.846326 | 101.421441 | 75.1725398 |
| 20:18:16 | 0:15:27 | 93.8813582 | 67.846326 | 100.421441 | 75.1725398 |
| 20:18:17 | 0:15:28 | 91.8813582 | 66.846326 | 100.421441 | 74.1725398 |
| 20:18:18 | 0:15:29 | 84.8813582 | 66.846326 | 99.421441  | 74.1725398 |
| 20:18:19 | 0:15:30 | 83.8813582 | 66.846326 | 98.421441  | 75.1725398 |
| 20:18:20 | 0:15:31 | 83.8813582 | 65.846326 | 98.421441  | 74.1725398 |
| 20:18:21 | 0:15:32 | 82.8813582 | 65.846326 | 98.421441  | 74.1725398 |
| 20:18:22 | 0:15:33 | 82.8813582 | 64.846326 | 96.421441  | 73.1725398 |
| 20:18:23 | 0:15:34 | 82.8813582 | 64.846326 | 96.421441  | 71.1725398 |
| 20:18:24 | 0:15:35 | 79.8813582 | 66.846326 | 96.421441  | 71.1725398 |
| 20:18:25 | 0:15:36 | 78.8813582 | 67.846326 | 93.421441  | 71.1725398 |
| 20:18:26 | 0:15:37 | 77.8813582 | 67.846326 | 92.421441  | 71.1725398 |
| 20:18:27 | 0:15:38 | 77.8813582 | 67.846326 | 92.421441  | 70.1725398 |
| 20:18:28 | 0:15:39 | 77.8813582 | 69.846326 | 92.421441  | 70.1725398 |
| 20:18:29 | 0:15:40 | 79.8813582 | 69.846326 | 92.421441  | 67.1725398 |
| 20:18:30 | 0:15:41 | 79.8813582 | 69.846326 | 92.421441  | 67.1725398 |
| 20:18:31 | 0:15:42 | 79.8813582 | 69.846326 | 92.421441  | 67.1725398 |

|          |         |            |           |            |            |
|----------|---------|------------|-----------|------------|------------|
| 20:18:32 | 0:15:43 | 80.8813582 | 67.846326 | 92.421441  | 66.1725398 |
| 20:18:33 | 0:15:44 | 80.8813582 | 66.846326 | 92.421441  | 65.1725398 |
| 20:18:34 | 0:15:45 | 80.8813582 | 66.846326 | 92.421441  | 64.1725398 |
| 20:18:35 | 0:15:46 | 79.8813582 | 66.846326 | 91.421441  | 64.1725398 |
| 20:18:36 | 0:15:47 | 79.8813582 | 66.846326 | 91.421441  | 64.1725398 |
| 20:18:37 | 0:15:48 | 74.8813582 | 66.846326 | 91.421441  | 63.1725398 |
| 20:18:38 | 0:15:49 | 74.8813582 | 67.846326 | 91.421441  | 64.1725398 |
| 20:18:39 | 0:15:50 | 73.8813582 | 71.846326 | 91.421441  | 64.1725398 |
| 20:18:40 | 0:15:51 | 73.8813582 | 73.846326 | 91.421441  | 64.1725398 |
| 20:18:41 | 0:15:52 | 73.8813582 | 73.846326 | 91.421441  | 64.1725398 |
| 20:18:42 | 0:15:53 | 73.8813582 | 74.846326 | 92.421441  | 63.1725398 |
| 20:18:43 | 0:15:54 | 71.8813582 | 74.846326 | 92.421441  | 63.1725398 |
| 20:18:44 | 0:15:55 | 70.8813582 | 74.846326 | 94.421441  | 63.1725398 |
| 20:18:45 | 0:15:56 | 69.8813582 | 74.846326 | 95.421441  | 64.1725398 |
| 20:18:46 | 0:15:57 | 68.8813582 | 74.846326 | 96.421441  | 64.1725398 |
| 20:18:47 | 0:15:58 | 69.8813582 | 68.846326 | 98.421441  | 64.1725398 |
| 20:18:48 | 0:15:59 | 70.8813582 | 68.846326 | 98.421441  | 69.1725398 |
| 20:18:49 | 0:16:00 | 70.8813582 | 67.846326 | 98.421441  | 70.1725398 |
| 20:18:50 | 0:16:01 | 70.8813582 | 65.846326 | 98.421441  | 70.1725398 |
| 20:18:51 | 0:16:02 | 71.8813582 | 65.846326 | 98.421441  | 71.1725398 |
| 20:18:52 | 0:16:03 | 71.8813582 | 65.846326 | 100.421441 | 71.1725398 |
| 20:18:53 | 0:16:04 | 70.8813582 | 65.846326 | 100.421441 | 71.1725398 |
| 20:18:54 | 0:16:05 | 70.8813582 | 65.846326 | 100.421441 | 72.1725398 |
| 20:18:55 | 0:16:06 | 71.8813582 | 65.846326 | 99.421441  | 73.1725398 |
| 20:18:56 | 0:16:07 | 71.8813582 | 65.846326 | 99.421441  | 73.1725398 |
| 20:18:57 | 0:16:08 | 72.8813582 | 66.846326 | 99.421441  | 73.1725398 |
| 20:18:58 | 0:16:09 | 71.8813582 | 67.846326 | 99.421441  | 73.1725398 |
| 20:18:59 | 0:16:10 | 71.8813582 | 67.846326 | 99.421441  | 73.1725398 |
| 20:19:00 | 0:16:11 | 71.8813582 | 65.846326 | 99.421441  | 73.1725398 |
| 20:19:01 | 0:16:12 | 71.8813582 | 63.846326 | 97.421441  | 73.1725398 |
| 20:19:02 | 0:16:13 | 71.8813582 | 63.846326 | 97.421441  | 75.1725398 |
| 20:19:03 | 0:16:14 | 70.8813582 | 63.846326 | 97.421441  | 75.1725398 |
| 20:19:04 | 0:16:15 | 70.8813582 | 64.846326 | 97.421441  | 82.1725398 |
| 20:19:05 | 0:16:16 | 70.8813582 | 64.846326 | 98.421441  | 83.1725398 |
| 20:19:06 | 0:16:17 | 69.8813582 | 66.846326 | 97.421441  | 80.1725398 |
| 20:19:07 | 0:16:18 | 68.8813582 | 67.846326 | 97.421441  | 80.1725398 |
| 20:19:08 | 0:16:19 | 68.8813582 | 67.846326 | 98.421441  | 80.1725398 |
| 20:19:09 | 0:16:20 | 67.8813582 | 67.846326 | 98.421441  | 77.1725398 |
| 20:19:10 | 0:16:21 | 67.8813582 | 67.846326 | 98.421441  | 76.1725398 |
| 20:19:11 | 0:16:22 | 67.8813582 | 68.846326 | 100.421441 | 76.1725398 |
| 20:19:12 | 0:16:23 | 67.8813582 | 68.846326 | 101.421441 | 75.1725398 |
| 20:19:13 | 0:16:24 | 67.8813582 | 67.846326 | 101.421441 | 75.1725398 |
| 20:19:14 | 0:16:25 | 68.8813582 | 67.846326 | 101.421441 | 71.1725398 |
| 20:19:15 | 0:16:26 | 68.8813582 | 66.846326 | 101.421441 | 71.1725398 |
| 20:19:16 | 0:16:27 | 68.8813582 | 66.846326 | 101.421441 | 70.1725398 |

|          |         |            |           |            |            |
|----------|---------|------------|-----------|------------|------------|
| 20:19:17 | 0:16:28 | 69.8813582 | 66.846326 | 100.421441 | 70.1725398 |
| 20:19:18 | 0:16:29 | 69.8813582 | 66.846326 | 97.421441  | 72.1725398 |
| 20:19:19 | 0:16:30 | 69.8813582 | 68.846326 | 96.421441  | 72.1725398 |
| 20:19:20 | 0:16:31 | 69.8813582 | 70.846326 | 94.421441  | 72.1725398 |
| 20:19:21 | 0:16:32 | 69.8813582 | 70.846326 | 94.421441  | 74.1725398 |
| 20:19:22 | 0:16:33 | 69.8813582 | 71.846326 | 90.421441  | 74.1725398 |
| 20:19:23 | 0:16:34 | 68.8813582 | 70.846326 | 88.421441  | 74.1725398 |
| 20:19:24 | 0:16:35 | 67.8813582 | 67.846326 | 88.421441  | 72.1725398 |
| 20:19:25 | 0:16:36 | 67.8813582 | 67.846326 | 88.421441  | 71.1725398 |
| 20:19:26 | 0:16:37 | 67.8813582 | 64.846326 | 87.421441  | 72.1725398 |
| 20:19:27 | 0:16:38 | 67.8813582 | 65.846326 | 87.421441  | 73.1725398 |
| 20:19:28 | 0:16:39 | 67.8813582 | 66.846326 | 87.421441  | 73.1725398 |
| 20:19:29 | 0:16:40 | 67.8813582 | 66.846326 | 87.421441  | 76.1725398 |
| 20:19:30 | 0:16:41 | 67.8813582 | 66.846326 | 87.421441  | 76.1725398 |
| 20:19:31 | 0:16:42 | 67.8813582 | 68.846326 | 86.421441  | 77.1725398 |
| 20:19:32 | 0:16:43 | 67.8813582 | 68.846326 | 85.421441  | 77.1725398 |
| 20:19:33 | 0:16:44 | 67.8813582 | 68.846326 | 84.421441  | 77.1725398 |
| 20:19:34 | 0:16:45 | 67.8813582 | 67.846326 | 85.421441  | 77.1725398 |
| 20:19:35 | 0:16:46 | 67.8813582 | 67.846326 | 85.421441  | 77.1725398 |
| 20:19:36 | 0:16:47 | 67.8813582 | 67.846326 | 85.421441  | 77.1725398 |
| 20:19:37 | 0:16:48 | 67.8813582 | 67.846326 | 87.421441  | 77.1725398 |
| 20:19:38 | 0:16:49 | 67.8813582 | 68.846326 | 87.421441  | 76.1725398 |
| 20:19:39 | 0:16:50 | 67.8813582 | 68.846326 | 87.421441  | 75.1725398 |
| 20:19:40 | 0:16:51 | 67.8813582 | 68.846326 | 87.421441  | 74.1725398 |
| 20:19:41 | 0:16:52 | 67.8813582 | 69.846326 | 96.421441  | 73.1725398 |
| 20:19:42 | 0:16:53 | 67.8813582 | 69.846326 | 97.421441  | 71.1725398 |
| 20:19:43 | 0:16:54 | 67.8813582 | 69.846326 | 98.421441  | 70.1725398 |
| 20:19:44 | 0:16:55 | 67.8813582 | 69.846326 | 98.421441  | 70.1725398 |
| 20:19:45 | 0:16:56 | 66.8813582 | 69.846326 | 96.421441  | 70.1725398 |
| 20:19:46 | 0:16:57 | 66.8813582 | 69.846326 | 96.421441  | 70.1725398 |
| 20:19:47 | 0:16:58 | 66.8813582 | 69.846326 | 96.421441  | 72.1725398 |
| 20:19:48 | 0:16:59 | 66.8813582 | 69.846326 | 95.421441  | 71.1725398 |
| 20:19:49 | 0:17:00 | 66.8813582 | 70.846326 | 95.421441  | 70.1725398 |
| 20:19:50 | 0:17:01 | 66.8813582 | 71.846326 | 92.421441  | 70.1725398 |
| 20:19:51 | 0:17:02 | 66.8813582 | 71.846326 | 91.421441  | 70.1725398 |
| 20:19:52 | 0:17:03 | 66.8813582 | 70.846326 | 90.421441  | 70.1725398 |
| 20:19:53 | 0:17:04 | 66.8813582 | 70.846326 | 87.421441  | 70.1725398 |
| 20:19:54 | 0:17:05 | 66.8813582 | 70.846326 | 82.421441  | 70.1725398 |
| 20:19:55 | 0:17:06 | 66.8813582 | 69.846326 | 82.421441  | 70.1725398 |
| 20:19:56 | 0:17:07 | 66.8813582 | 69.846326 | 79.421441  | 71.1725398 |
| 20:19:57 | 0:17:08 | 66.8813582 | 69.846326 | 74.421441  | 71.1725398 |
| 20:19:58 | 0:17:09 | 66.8813582 | 69.846326 | 74.421441  | 71.1725398 |
| 20:19:59 | 0:17:10 | 66.8813582 | 69.846326 | 74.421441  | 71.1725398 |
| 20:20:00 | 0:17:11 | 67.8813582 | 70.846326 | 75.421441  | 71.1725398 |
| 20:20:01 | 0:17:12 | 68.8813582 | 70.846326 | 76.421441  | 71.1725398 |

|          |         |            |           |            |            |
|----------|---------|------------|-----------|------------|------------|
| 20:20:02 | 0:17:13 | 69.8813582 | 70.846326 | 76.421441  | 71.1725398 |
| 20:20:03 | 0:17:14 | 70.8813582 | 71.846326 | 77.421441  | 71.1725398 |
| 20:20:04 | 0:17:15 | 71.8813582 | 72.846326 | 78.421441  | 71.1725398 |
| 20:20:05 | 0:17:16 | 72.8813582 | 73.846326 | 78.421441  | 71.1725398 |
| 20:20:06 | 0:17:17 | 73.8813582 | 73.846326 | 80.421441  | 72.1725398 |
| 20:20:07 | 0:17:18 | 73.8813582 | 73.846326 | 86.421441  | 76.1725398 |
| 20:20:08 | 0:17:19 | 73.8813582 | 72.846326 | 86.421441  | 76.1725398 |
| 20:20:09 | 0:17:20 | 74.8813582 | 72.846326 | 94.421441  | 76.1725398 |
| 20:20:10 | 0:17:21 | 73.8813582 | 71.846326 | 100.421441 | 75.1725398 |
| 20:20:11 | 0:17:22 | 73.8813582 | 71.846326 | 100.421441 | 75.1725398 |
| 20:20:12 | 0:17:23 | 73.8813582 | 70.846326 | 101.421441 | 74.1725398 |
| 20:20:13 | 0:17:24 | 73.8813582 | 69.846326 | 102.421441 | 74.1725398 |
| 20:20:14 | 0:17:25 | 73.8813582 | 69.846326 | 100.421441 | 76.1725398 |
| 20:20:15 | 0:17:26 | 73.8813582 | 69.846326 | 100.421441 | 80.1725398 |
| 20:20:16 | 0:17:27 | 74.8813582 | 73.846326 | 99.421441  | 80.1725398 |
| 20:20:17 | 0:17:28 | 74.8813582 | 79.846326 | 99.421441  | 80.1725398 |
| 20:20:18 | 0:17:29 | 74.8813582 | 79.846326 | 89.421441  | 82.1725398 |
| 20:20:19 | 0:17:30 | 74.8813582 | 79.846326 | 89.421441  | 83.1725398 |
| 20:20:20 | 0:17:31 | 73.8813582 | 80.846326 | 89.421441  | 83.1725398 |
| 20:20:21 | 0:17:32 | 73.8813582 | 80.846326 | 88.421441  | 81.1725398 |
| 20:20:22 | 0:17:33 | 73.8813582 | 80.846326 | 88.421441  | 81.1725398 |
| 20:20:23 | 0:17:34 | 72.8813582 | 81.846326 | 88.421441  | 81.1725398 |
| 20:20:24 | 0:17:35 | 72.8813582 | 81.846326 | 88.421441  | 81.1725398 |
| 20:20:25 | 0:17:36 | 72.8813582 | 81.846326 | 88.421441  | 79.1725398 |
| 20:20:26 | 0:17:37 | 71.8813582 | 80.846326 | 88.421441  | 78.1725398 |
| 20:20:27 | 0:17:38 | 71.8813582 | 76.846326 | 88.421441  | 78.1725398 |
| 20:20:28 | 0:17:39 | 71.8813582 | 75.846326 | 87.421441  | 79.1725398 |
| 20:20:29 | 0:17:40 | 71.8813582 | 75.846326 | 86.421441  | 79.1725398 |
| 20:20:30 | 0:17:41 | 69.8813582 | 75.846326 | 86.421441  | 78.1725398 |
| 20:20:31 | 0:17:42 | 69.8813582 | 74.846326 | 87.421441  | 78.1725398 |
| 20:20:32 | 0:17:43 | 69.8813582 | 74.846326 | 87.421441  | 76.1725398 |
| 20:20:33 | 0:17:44 | 69.8813582 | 72.846326 | 87.421441  | 76.1725398 |
| 20:20:34 | 0:17:45 | 68.8813582 | 72.846326 | 88.421441  | 76.1725398 |
| 20:20:35 | 0:17:46 | 68.8813582 | 72.846326 | 88.421441  | 76.1725398 |
| 20:20:36 | 0:17:47 | 68.8813582 | 72.846326 | 88.421441  | 76.1725398 |
| 20:20:37 | 0:17:48 | 68.8813582 | 71.846326 | 88.421441  | 76.1725398 |
| 20:20:38 | 0:17:49 | 68.8813582 | 71.846326 | 88.421441  | 76.1725398 |
| 20:20:39 | 0:17:50 | 68.8813582 | 71.846326 | 85.421441  | 76.1725398 |
| 20:20:40 | 0:17:51 | 70.8813582 | 69.846326 | 83.421441  | 76.1725398 |
| 20:20:41 | 0:17:52 | 69.8813582 | 69.846326 | 83.421441  | 76.1725398 |
| 20:20:42 | 0:17:53 | 69.8813582 | 66.846326 | 83.421441  | 79.1725398 |
| 20:20:43 | 0:17:54 | 69.8813582 | 65.846326 | 83.421441  | 79.1725398 |
| 20:20:44 | 0:17:55 | 69.8813582 | 65.846326 | 79.421441  | 78.1725398 |
| 20:20:45 | 0:17:56 | 68.8813582 | 64.846326 | 76.421441  | 77.1725398 |
| 20:20:46 | 0:17:57 | 68.8813582 | 62.846326 | 75.421441  | 77.1725398 |

|          |         |            |           |           |            |
|----------|---------|------------|-----------|-----------|------------|
| 20:20:47 | 0:17:58 | 68.8813582 | 60.846326 | 75.421441 | 77.1725398 |
| 20:20:48 | 0:17:59 | 69.8813582 | 60.846326 | 75.421441 | 77.1725398 |
| 20:20:49 | 0:18:00 | 69.8813582 | 60.846326 | 76.421441 | 77.1725398 |
| 20:20:50 | 0:18:01 | 69.8813582 | 60.846326 | 78.421441 | 76.1725398 |
| 20:20:51 | 0:18:02 | 69.8813582 | 60.846326 | 78.421441 | 76.1725398 |
| 20:20:52 | 0:18:03 | 69.8813582 | 62.846326 | 77.421441 | 75.1725398 |
| 20:20:53 | 0:18:04 | 69.8813582 | 62.846326 | 77.421441 | 74.1725398 |
| 20:20:54 | 0:18:05 | 69.8813582 | 64.846326 | 77.421441 | 74.1725398 |
| 20:20:55 | 0:18:06 | 69.8813582 | 64.846326 | 77.421441 | 74.1725398 |
| 20:20:56 | 0:18:07 | 69.8813582 | 67.846326 | 72.421441 | 74.1725398 |
| 20:20:57 | 0:18:08 | 70.8813582 | 68.846326 | 72.421441 | 74.1725398 |
| 20:20:58 | 0:18:09 | 70.8813582 | 68.846326 | 73.421441 | 73.1725398 |
| 20:20:59 | 0:18:10 | 70.8813582 | 69.846326 | 73.421441 | 72.1725398 |
| 20:21:00 | 0:18:11 | 71.8813582 | 69.846326 | 73.421441 | 72.1725398 |
| 20:21:01 | 0:18:12 | 70.8813582 | 69.846326 | 73.421441 | 70.1725398 |
| 20:21:02 | 0:18:13 | 70.8813582 | 69.846326 | 74.421441 | 70.1725398 |
| 20:21:03 | 0:18:14 | 70.8813582 | 72.846326 | 74.421441 | 69.1725398 |
| 20:21:04 | 0:18:15 | 70.8813582 | 72.846326 | 72.421441 | 69.1725398 |
| 20:21:05 | 0:18:16 | 70.8813582 | 73.846326 | 72.421441 | 69.1725398 |
| 20:21:06 | 0:18:17 | 71.8813582 | 73.846326 | 74.421441 | 71.1725398 |
| 20:21:07 | 0:18:18 | 71.8813582 | 73.846326 | 75.421441 | 71.1725398 |
| 20:21:08 | 0:18:19 | 71.8813582 | 74.846326 | 75.421441 | 77.1725398 |
| 20:21:09 | 0:18:20 | 72.8813582 | 74.846326 | 76.421441 | 83.1725398 |
| 20:21:10 | 0:18:21 | 73.8813582 | 75.846326 | 73.421441 | 85.1725398 |
| 20:21:11 | 0:18:22 | 74.8813582 | 75.846326 | 73.421441 | 85.1725398 |
| 20:21:12 | 0:18:23 | 74.8813582 | 75.846326 | 72.421441 | 84.1725398 |
| 20:21:13 | 0:18:24 | 76.8813582 | 74.846326 | 72.421441 | 82.1725398 |
| 20:21:14 | 0:18:25 | 76.8813582 | 73.846326 | 72.421441 | 81.1725398 |
| 20:21:15 | 0:18:26 | 76.8813582 | 73.846326 | 72.421441 | 81.1725398 |
| 20:21:16 | 0:18:27 | 76.8813582 | 71.846326 | 75.421441 | 81.1725398 |
| 20:21:17 | 0:18:28 | 76.8813582 | 70.846326 | 78.421441 | 81.1725398 |
| 20:21:18 | 0:18:29 | 76.8813582 | 70.846326 | 78.421441 | 81.1725398 |
| 20:21:19 | 0:18:30 | 77.8813582 | 70.846326 | 82.421441 | 82.1725398 |
| 20:21:20 | 0:18:31 | 77.8813582 | 70.846326 | 82.421441 | 80.1725398 |
| 20:21:21 | 0:18:32 | 77.8813582 | 70.846326 | 82.421441 | 78.1725398 |
| 20:21:22 | 0:18:33 | 77.8813582 | 70.846326 | 83.421441 | 77.1725398 |
| 20:21:23 | 0:18:34 | 78.8813582 | 70.846326 | 84.421441 | 78.1725398 |
| 20:21:24 | 0:18:35 | 79.8813582 | 70.846326 | 84.421441 | 79.1725398 |
| 20:21:25 | 0:18:36 | 76.8813582 | 70.846326 | 85.421441 | 81.1725398 |
| 20:21:26 | 0:18:37 | 75.8813582 | 69.846326 | 86.421441 | 81.1725398 |
| 20:21:27 | 0:18:38 | 75.8813582 | 69.846326 | 86.421441 | 80.1725398 |
| 20:21:28 | 0:18:39 | 74.8813582 | 68.846326 | 86.421441 | 79.1725398 |
| 20:21:29 | 0:18:40 | 73.8813582 | 69.846326 | 84.421441 | 78.1725398 |
| 20:21:30 | 0:18:41 | 73.8813582 | 72.846326 | 84.421441 | 78.1725398 |
| 20:21:31 | 0:18:42 | 72.8813582 | 72.846326 | 84.421441 | 78.1725398 |

|          |         |            |           |           |            |
|----------|---------|------------|-----------|-----------|------------|
| 20:21:32 | 0:18:43 | 71.8813582 | 73.846326 | 84.421441 | 80.1725398 |
| 20:21:33 | 0:18:44 | 71.8813582 | 72.846326 | 84.421441 | 80.1725398 |
| 20:21:34 | 0:18:45 | 72.8813582 | 72.846326 | 84.421441 | 81.1725398 |
| 20:21:35 | 0:18:46 | 72.8813582 | 71.846326 | 84.421441 | 82.1725398 |
| 20:21:36 | 0:18:47 | 72.8813582 | 71.846326 | 84.421441 | 81.1725398 |
| 20:21:37 | 0:18:48 | 71.8813582 | 71.846326 | 84.421441 | 79.1725398 |
| 20:21:38 | 0:18:49 | 71.8813582 | 71.846326 | 83.421441 | 77.1725398 |
| 20:21:39 | 0:18:50 | 70.8813582 | 74.846326 | 84.421441 | 76.1725398 |
| 20:21:40 | 0:18:51 | 69.8813582 | 74.846326 | 85.421441 | 77.1725398 |
| 20:21:41 | 0:18:52 | 69.8813582 | 75.846326 | 85.421441 | 77.1725398 |
| 20:21:42 | 0:18:53 | 68.8813582 | 79.846326 | 86.421441 | 78.1725398 |
| 20:21:43 | 0:18:54 | 68.8813582 | 78.846326 | 86.421441 | 78.1725398 |
| 20:21:44 | 0:18:55 | 68.8813582 | 78.846326 | 87.421441 | 78.1725398 |
| 20:21:45 | 0:18:56 | 68.8813582 | 78.846326 | 89.421441 | 78.1725398 |
| 20:21:46 | 0:18:57 | 68.8813582 | 76.846326 | 89.421441 | 84.1725398 |
| 20:21:47 | 0:18:58 | 67.8813582 | 76.846326 | 89.421441 | 83.1725398 |
| 20:21:48 | 0:18:59 | 68.8813582 | 76.846326 | 89.421441 | 80.1725398 |
| 20:21:49 | 0:19:00 | 69.8813582 | 70.846326 | 89.421441 | 80.1725398 |
| 20:21:50 | 0:19:01 | 70.8813582 | 66.846326 | 89.421441 | 77.1725398 |
| 20:21:51 | 0:19:02 | 69.8813582 | 64.846326 | 88.421441 | 76.1725398 |
| 20:21:52 | 0:19:03 | 69.8813582 | 64.846326 | 88.421441 | 75.1725398 |
| 20:21:53 | 0:19:04 | 70.8813582 | 64.846326 | 86.421441 | 75.1725398 |
| 20:21:54 | 0:19:05 | 70.8813582 | 65.846326 | 86.421441 | 74.1725398 |
| 20:21:55 | 0:19:06 | 70.8813582 | 66.846326 | 88.421441 | 72.1725398 |
| 20:21:56 | 0:19:07 | 70.8813582 | 66.846326 | 88.421441 | 72.1725398 |
| 20:21:57 | 0:19:08 | 70.8813582 | 66.846326 | 89.421441 | 71.1725398 |
| 20:21:58 | 0:19:09 | 71.8813582 | 67.846326 | 92.421441 | 71.1725398 |
| 20:21:59 | 0:19:10 | 71.8813582 | 67.846326 | 93.421441 | 72.1725398 |
| 20:22:00 | 0:19:11 | 71.8813582 | 67.846326 | 93.421441 | 73.1725398 |
| 20:22:01 | 0:19:12 | 71.8813582 | 67.846326 | 93.421441 | 73.1725398 |
| 20:22:02 | 0:19:13 | 71.8813582 | 67.846326 | 93.421441 | 73.1725398 |
| 20:22:03 | 0:19:14 | 71.8813582 | 67.846326 | 93.421441 | 73.1725398 |
| 20:22:04 | 0:19:15 | 70.8813582 | 67.846326 | 93.421441 | 71.1725398 |
| 20:22:05 | 0:19:16 | 70.8813582 | 68.846326 | 93.421441 | 70.1725398 |
| 20:22:06 | 0:19:17 | 71.8813582 | 68.846326 | 93.421441 | 70.1725398 |
| 20:22:07 | 0:19:18 | 72.8813582 | 69.846326 | 92.421441 | 70.1725398 |
| 20:22:08 | 0:19:19 | 72.8813582 | 72.846326 | 78.421441 | 70.1725398 |
| 20:22:09 | 0:19:20 | 72.8813582 | 72.846326 | 78.421441 | 71.1725398 |
| 20:22:10 | 0:19:21 | 72.8813582 | 74.846326 | 78.421441 | 70.1725398 |
| 20:22:11 | 0:19:22 | 72.8813582 | 80.846326 | 78.421441 | 69.1725398 |
| 20:22:12 | 0:19:23 | 72.8813582 | 80.846326 | 78.421441 | 69.1725398 |
| 20:22:13 | 0:19:24 | 72.8813582 | 80.846326 | 79.421441 | 69.1725398 |
| 20:22:14 | 0:19:25 | 72.8813582 | 84.846326 | 79.421441 | 70.1725398 |
| 20:22:15 | 0:19:26 | 73.8813582 | 85.846326 | 80.421441 | 70.1725398 |
| 20:22:16 | 0:19:27 | 72.8813582 | 85.846326 | 80.421441 | 70.1725398 |

|          |         |            |           |           |            |
|----------|---------|------------|-----------|-----------|------------|
| 20:22:17 | 0:19:28 | 70.8813582 | 82.846326 | 80.421441 | 71.1725398 |
| 20:22:18 | 0:19:29 | 69.8813582 | 81.846326 | 79.421441 | 71.1725398 |
| 20:22:19 | 0:19:30 | 68.8813582 | 80.846326 | 79.421441 | 72.1725398 |
| 20:22:20 | 0:19:31 | 68.8813582 | 82.846326 | 79.421441 | 72.1725398 |
| 20:22:21 | 0:19:32 | 68.8813582 | 82.846326 | 79.421441 | 71.1725398 |
| 20:22:22 | 0:19:33 | 68.8813582 | 84.846326 | 79.421441 | 72.1725398 |
| 20:22:23 | 0:19:34 | 68.8813582 | 84.846326 | 79.421441 | 71.1725398 |
| 20:22:24 | 0:19:35 | 67.8813582 | 83.846326 | 78.421441 | 71.1725398 |
| 20:22:25 | 0:19:36 | 67.8813582 | 79.846326 | 76.421441 | 71.1725398 |
| 20:22:26 | 0:19:37 | 68.8813582 | 79.846326 | 76.421441 | 71.1725398 |
| 20:22:27 | 0:19:38 | 68.8813582 | 74.846326 | 76.421441 | 72.1725398 |
| 20:22:28 | 0:19:39 | 68.8813582 | 72.846326 | 75.421441 | 72.1725398 |
| 20:22:29 | 0:19:40 | 68.8813582 | 71.846326 | 74.421441 | 71.1725398 |
| 20:22:30 | 0:19:41 | 69.8813582 | 71.846326 | 74.421441 | 71.1725398 |
| 20:22:31 | 0:19:42 | 72.8813582 | 71.846326 | 75.421441 | 71.1725398 |
| 20:22:32 | 0:19:43 | 73.8813582 | 71.846326 | 75.421441 | 71.1725398 |
| 20:22:33 | 0:19:44 | 74.8813582 | 71.846326 | 74.421441 | 71.1725398 |
| 20:22:34 | 0:19:45 | 75.8813582 | 71.846326 | 72.421441 | 72.1725398 |
| 20:22:35 | 0:19:46 | 75.8813582 | 69.846326 | 71.421441 | 75.1725398 |
| 20:22:36 | 0:19:47 | 75.8813582 | 68.846326 | 71.421441 | 76.1725398 |
| 20:22:37 | 0:19:48 | 75.8813582 | 68.846326 | 71.421441 | 76.1725398 |
| 20:22:38 | 0:19:49 | 75.8813582 | 68.846326 | 70.421441 | 73.1725398 |
| 20:22:39 | 0:19:50 | 75.8813582 | 68.846326 | 70.421441 | 69.1725398 |
| 20:22:40 | 0:19:51 | 73.8813582 | 68.846326 | 70.421441 | 68.1725398 |
| 20:22:41 | 0:19:52 | 72.8813582 | 68.846326 | 70.421441 | 69.1725398 |
| 20:22:42 | 0:19:53 | 72.8813582 | 68.846326 | 70.421441 | 70.1725398 |
| 20:22:43 | 0:19:54 | 72.8813582 | 70.846326 | 72.421441 | 72.1725398 |
| 20:22:44 | 0:19:55 | 71.8813582 | 70.846326 | 72.421441 | 73.1725398 |
| 20:22:45 | 0:19:56 | 71.8813582 | 73.846326 | 72.421441 | 73.1725398 |
| 20:22:46 | 0:19:57 | 72.8813582 | 74.846326 | 73.421441 | 74.1725398 |
| 20:22:47 | 0:19:58 | 72.8813582 | 74.846326 | 73.421441 | 74.1725398 |
| 20:22:48 | 0:19:59 | 72.8813582 | 74.846326 | 85.421441 | 74.1725398 |
| 20:22:49 | 0:20:00 | 71.8813582 | 74.846326 | 86.421441 | 75.1725398 |
| 20:22:50 | 0:20:01 | 71.8813582 | 73.846326 | 86.421441 | 75.1725398 |
| 20:22:51 | 0:20:02 | 70.8813582 | 73.846326 | 86.421441 | 75.1725398 |
| 20:22:52 | 0:20:03 | 70.8813582 | 73.846326 | 86.421441 | 75.1725398 |
| 20:22:53 | 0:20:04 | 70.8813582 | 73.846326 | 88.421441 | 75.1725398 |
| 20:22:54 | 0:20:05 | 70.8813582 | 75.846326 | 89.421441 | 74.1725398 |
| 20:22:55 | 0:20:06 | 70.8813582 | 75.846326 | 89.421441 | 74.1725398 |
| 20:22:56 | 0:20:07 | 70.8813582 | 76.846326 | 90.421441 | 76.1725398 |
| 20:22:57 | 0:20:08 | 71.8813582 | 76.846326 | 89.421441 | 77.1725398 |
| 20:22:58 | 0:20:09 | 71.8813582 | 77.846326 | 88.421441 | 78.1725398 |
| 20:22:59 | 0:20:10 | 71.8813582 | 78.846326 | 88.421441 | 79.1725398 |
| 20:23:00 | 0:20:11 | 72.8813582 | 79.846326 | 86.421441 | 79.1725398 |
| 20:23:01 | 0:20:12 | 73.8813582 | 79.846326 | 85.421441 | 78.1725398 |



|          |         |            |           |           |            |
|----------|---------|------------|-----------|-----------|------------|
| 20:23:02 | 0:20:13 | 74.8813582 | 81.846326 | 85.421441 | 78.1725398 |
| 20:23:03 | 0:20:14 | 73.8813582 | 78.846326 | 85.421441 | 78.1725398 |
| 20:23:04 | 0:20:15 | 70.8813582 | 77.846326 | 85.421441 | 78.1725398 |
| 20:23:05 | 0:20:16 | 69.8813582 | 76.846326 | 84.421441 | 77.1725398 |
| 20:23:06 | 0:20:17 | 69.8813582 | 76.846326 | 84.421441 | 77.1725398 |
| 20:23:07 | 0:20:18 | 69.8813582 | 74.846326 | 88.421441 | 80.1725398 |
| 20:23:08 | 0:20:19 | 71.8813582 | 74.846326 | 88.421441 | 79.1725398 |
| 20:23:09 | 0:20:20 | 72.8813582 | 73.846326 | 88.421441 | 73.1725398 |
| 20:23:10 | 0:20:21 | 72.8813582 | 73.846326 | 88.421441 | 69.1725398 |
| 20:23:11 | 0:20:22 | 73.8813582 | 73.846326 | 89.421441 | 69.1725398 |
| 20:23:12 | 0:20:23 | 73.8813582 | 73.846326 | 90.421441 | 68.1725398 |
| 20:23:13 | 0:20:24 | 73.8813582 | 72.846326 | 91.421441 | 69.1725398 |
| 20:23:14 | 0:20:25 | 72.8813582 | 72.846326 | 91.421441 | 69.1725398 |
| 20:23:15 | 0:20:26 | 72.8813582 | 72.846326 | 90.421441 | 69.1725398 |
| 20:23:16 | 0:20:27 | 72.8813582 | 72.846326 | 89.421441 | 69.1725398 |
| 20:23:17 | 0:20:28 | 74.8813582 | 72.846326 | 88.421441 | 69.1725398 |
| 20:23:18 | 0:20:29 | 73.8813582 | 71.846326 | 89.421441 | 69.1725398 |
| 20:23:19 | 0:20:30 | 73.8813582 | 72.846326 | 89.421441 | 69.1725398 |
| 20:23:20 | 0:20:31 | 73.8813582 | 72.846326 | 89.421441 | 69.1725398 |
| 20:23:21 | 0:20:32 | 74.8813582 | 72.846326 | 89.421441 | 69.1725398 |
| 20:23:22 | 0:20:33 | 74.8813582 | 74.846326 | 89.421441 | 69.1725398 |
| 20:23:23 | 0:20:34 | 74.8813582 | 75.846326 | 89.421441 | 68.1725398 |
| 20:23:24 | 0:20:35 | 74.8813582 | 76.846326 | 88.421441 | 68.1725398 |
| 20:23:25 | 0:20:36 | 74.8813582 | 76.846326 | 81.421441 | 69.1725398 |
| 20:23:26 | 0:20:37 | 74.8813582 | 75.846326 | 80.421441 | 69.1725398 |
| 20:23:27 | 0:20:38 | 74.8813582 | 74.846326 | 81.421441 | 70.1725398 |
| 20:23:28 | 0:20:39 | 74.8813582 | 73.846326 | 81.421441 | 71.1725398 |
| 20:23:29 | 0:20:40 | 73.8813582 | 73.846326 | 81.421441 | 71.1725398 |
| 20:23:30 | 0:20:41 | 72.8813582 | 74.846326 | 82.421441 | 71.1725398 |
| 20:23:31 | 0:20:42 | 72.8813582 | 73.846326 | 83.421441 | 71.1725398 |
| 20:23:32 | 0:20:43 | 72.8813582 | 73.846326 | 84.421441 | 71.1725398 |
| 20:23:33 | 0:20:44 | 72.8813582 | 72.846326 | 84.421441 | 71.1725398 |
| 20:23:34 | 0:20:45 | 72.8813582 | 70.846326 | 84.421441 | 70.1725398 |
| 20:23:35 | 0:20:46 | 71.8813582 | 65.846326 | 84.421441 | 70.1725398 |
| 20:23:36 | 0:20:47 | 71.8813582 | 65.846326 | 84.421441 | 69.1725398 |
| 20:23:37 | 0:20:48 | 71.8813582 | 61.846326 | 83.421441 | 69.1725398 |
| 20:23:38 | 0:20:49 | 69.8813582 | 61.846326 | 83.421441 | 69.1725398 |
| 20:23:39 | 0:20:50 | 68.8813582 | 67.846326 | 83.421441 | 71.1725398 |
| 20:23:40 | 0:20:51 | 68.8813582 | 67.846326 | 84.421441 | 71.1725398 |
| 20:23:41 | 0:20:52 | 68.8813582 | 67.846326 | 84.421441 | 70.1725398 |
| 20:23:42 | 0:20:53 | 68.8813582 | 66.846326 | 84.421441 | 68.1725398 |
| 20:23:43 | 0:20:54 | 68.8813582 | 66.846326 | 84.421441 | 65.1725398 |
| 20:23:44 | 0:20:55 | 69.8813582 | 66.846326 | 84.421441 | 64.1725398 |
| 20:23:45 | 0:20:56 | 69.8813582 | 66.846326 | 84.421441 | 64.1725398 |
| 20:23:46 | 0:20:57 | 69.8813582 | 67.846326 | 84.421441 | 64.1725398 |

|          |         |            |           |           |            |
|----------|---------|------------|-----------|-----------|------------|
| 20:23:47 | 0:20:58 | 70.8813582 | 67.846326 | 84.421441 | 65.1725398 |
| 20:23:48 | 0:20:59 | 70.8813582 | 68.846326 | 84.421441 | 66.1725398 |
| 20:23:49 | 0:21:00 | 70.8813582 | 68.846326 | 84.421441 | 67.1725398 |
| 20:23:50 | 0:21:01 | 71.8813582 | 68.846326 | 84.421441 | 67.1725398 |
| 20:23:51 | 0:21:02 | 71.8813582 | 70.846326 | 83.421441 | 66.1725398 |
| 20:23:52 | 0:21:03 | 71.8813582 | 70.846326 | 83.421441 | 66.1725398 |
| 20:23:53 | 0:21:04 | 71.8813582 | 70.846326 | 84.421441 | 65.1725398 |
| 20:23:54 | 0:21:05 | 69.8813582 | 69.846326 | 86.421441 | 65.1725398 |
| 20:23:55 | 0:21:06 | 67.8813582 | 69.846326 | 86.421441 | 65.1725398 |
| 20:23:56 | 0:21:07 | 67.8813582 | 69.846326 | 87.421441 | 65.1725398 |
| 20:23:57 | 0:21:08 | 66.8813582 | 69.846326 | 88.421441 | 67.1725398 |
| 20:23:58 | 0:21:09 | 66.8813582 | 69.846326 | 88.421441 | 68.1725398 |
| 20:23:59 | 0:21:10 | 66.8813582 | 70.846326 | 88.421441 | 70.1725398 |
| 20:24:00 | 0:21:11 | 66.8813582 | 70.846326 | 88.421441 | 70.1725398 |
| 20:24:01 | 0:21:12 | 67.8813582 | 70.846326 | 88.421441 | 70.1725398 |
| 20:24:02 | 0:21:13 | 67.8813582 | 72.846326 | 90.421441 | 70.1725398 |
| 20:24:03 | 0:21:14 | 67.8813582 | 73.846326 | 92.421441 | 70.1725398 |
| 20:24:04 | 0:21:15 | 67.8813582 | 73.846326 | 91.421441 | 70.1725398 |
| 20:24:05 | 0:21:16 | 67.8813582 | 74.846326 | 91.421441 | 70.1725398 |
| 20:24:06 | 0:21:17 | 67.8813582 | 74.846326 | 91.421441 | 70.1725398 |
| 20:24:07 | 0:21:18 | 67.8813582 | 75.846326 | 91.421441 | 71.1725398 |
| 20:24:08 | 0:21:19 | 67.8813582 | 75.846326 | 91.421441 | 71.1725398 |
| 20:24:09 | 0:21:20 | 67.8813582 | 75.846326 | 91.421441 | 72.1725398 |
| 20:24:10 | 0:21:21 | 67.8813582 | 77.846326 | 91.421441 | 73.1725398 |
| 20:24:11 | 0:21:22 | 67.8813582 | 77.846326 | 91.421441 | 73.1725398 |
| 20:24:12 | 0:21:23 | 67.8813582 | 78.846326 | 91.421441 | 73.1725398 |
| 20:24:13 | 0:21:24 | 67.8813582 | 77.846326 | 91.421441 | 74.1725398 |
| 20:24:14 | 0:21:25 | 67.8813582 | 76.846326 | 91.421441 | 74.1725398 |
| 20:24:15 | 0:21:26 | 67.8813582 | 74.846326 | 90.421441 | 74.1725398 |
| 20:24:16 | 0:21:27 | 67.8813582 | 74.846326 | 90.421441 | 72.1725398 |
| 20:24:17 | 0:21:28 | 67.8813582 | 76.846326 | 90.421441 | 71.1725398 |
| 20:24:18 | 0:21:29 | 67.8813582 | 76.846326 | 89.421441 | 71.1725398 |
| 20:24:19 | 0:21:30 | 68.8813582 | 76.846326 | 89.421441 | 71.1725398 |
| 20:24:20 | 0:21:31 | 67.8813582 | 74.846326 | 89.421441 | 75.1725398 |
| 20:24:21 | 0:21:32 | 67.8813582 | 75.846326 | 89.421441 | 80.1725398 |
| 20:24:22 | 0:21:33 | 68.8813582 | 75.846326 | 89.421441 | 80.1725398 |
| 20:24:23 | 0:21:34 | 68.8813582 | 75.846326 | 88.421441 | 77.1725398 |
| 20:24:24 | 0:21:35 | 68.8813582 | 75.846326 | 88.421441 | 75.1725398 |
| 20:24:25 | 0:21:36 | 67.8813582 | 75.846326 | 86.421441 | 73.1725398 |
| 20:24:26 | 0:21:37 | 67.8813582 | 75.846326 | 86.421441 | 74.1725398 |
| 20:24:27 | 0:21:38 | 68.8813582 | 76.846326 | 82.421441 | 74.1725398 |
| 20:24:28 | 0:21:39 | 68.8813582 | 76.846326 | 82.421441 | 73.1725398 |
| 20:24:29 | 0:21:40 | 68.8813582 | 76.846326 | 81.421441 | 70.1725398 |
| 20:24:30 | 0:21:41 | 68.8813582 | 76.846326 | 82.421441 | 70.1725398 |
| 20:24:31 | 0:21:42 | 68.8813582 | 74.846326 | 82.421441 | 68.1725398 |

|          |         |            |           |           |            |
|----------|---------|------------|-----------|-----------|------------|
| 20:24:32 | 0:21:43 | 68.8813582 | 74.846326 | 82.421441 | 67.1725398 |
| 20:24:33 | 0:21:44 | 69.8813582 | 72.846326 | 82.421441 | 67.1725398 |
| 20:24:34 | 0:21:45 | 70.8813582 | 72.846326 | 82.421441 | 67.1725398 |
| 20:24:35 | 0:21:46 | 70.8813582 | 72.846326 | 82.421441 | 66.1725398 |
| 20:24:36 | 0:21:47 | 71.8813582 | 72.846326 | 81.421441 | 66.1725398 |
| 20:24:37 | 0:21:48 | 71.8813582 | 72.846326 | 81.421441 | 66.1725398 |
| 20:24:38 | 0:21:49 | 71.8813582 | 75.846326 | 82.421441 | 66.1725398 |
| 20:24:39 | 0:21:50 | 71.8813582 | 76.846326 | 81.421441 | 68.1725398 |
| 20:24:40 | 0:21:51 | 71.8813582 | 76.846326 | 80.421441 | 68.1725398 |
| 20:24:41 | 0:21:52 | 71.8813582 | 76.846326 | 80.421441 | 68.1725398 |
| 20:24:42 | 0:21:53 | 71.8813582 | 74.846326 | 80.421441 | 66.1725398 |
| 20:24:43 | 0:21:54 | 71.8813582 | 72.846326 | 81.421441 | 66.1725398 |
| 20:24:44 | 0:21:55 | 71.8813582 | 71.846326 | 81.421441 | 66.1725398 |
| 20:24:45 | 0:21:56 | 70.8813582 | 71.846326 | 81.421441 | 66.1725398 |
| 20:24:46 | 0:21:57 | 70.8813582 | 71.846326 | 81.421441 | 63.1725398 |
| 20:24:47 | 0:21:58 | 70.8813582 | 71.846326 | 81.421441 | 63.1725398 |
| 20:24:48 | 0:21:59 | 70.8813582 | 72.846326 | 81.421441 | 63.1725398 |
| 20:24:49 | 0:22:00 | 70.8813582 | 72.846326 | 84.421441 | 63.1725398 |
| 20:24:50 | 0:22:01 | 70.8813582 | 72.846326 | 84.421441 | 65.1725398 |
| 20:24:51 | 0:22:02 | 70.8813582 | 72.846326 | 83.421441 | 68.1725398 |
| 20:24:52 | 0:22:03 | 70.8813582 | 72.846326 | 83.421441 | 69.1725398 |
| 20:24:53 | 0:22:04 | 71.8813582 | 72.846326 | 83.421441 | 69.1725398 |
| 20:24:54 | 0:22:05 | 71.8813582 | 72.846326 | 83.421441 | 69.1725398 |
| 20:24:55 | 0:22:06 | 71.8813582 | 71.846326 | 83.421441 | 71.1725398 |
| 20:24:56 | 0:22:07 | 72.8813582 | 71.846326 | 85.421441 | 73.1725398 |
| 20:24:57 | 0:22:08 | 73.8813582 | 72.846326 | 86.421441 | 75.1725398 |
| 20:24:58 | 0:22:09 | 73.8813582 | 72.846326 | 85.421441 | 75.1725398 |
| 20:24:59 | 0:22:10 | 74.8813582 | 72.846326 | 85.421441 | 76.1725398 |
| 20:25:00 | 0:22:11 | 74.8813582 | 75.846326 | 85.421441 | 77.1725398 |
| 20:25:01 | 0:22:12 | 74.8813582 | 75.846326 | 85.421441 | 69.1725398 |
| 20:25:02 | 0:22:13 | 74.8813582 | 75.846326 | 85.421441 | 61.1725398 |
| 20:25:03 | 0:22:14 | 74.8813582 | 76.846326 | 86.421441 | 61.1725398 |
| 20:25:04 | 0:22:15 | 73.8813582 | 74.846326 | 86.421441 | 62.1725398 |
| 20:25:05 | 0:22:16 | 73.8813582 | 76.846326 | 86.421441 | 65.1725398 |
| 20:25:06 | 0:22:17 | 74.8813582 | 77.846326 | 89.421441 | 66.1725398 |
| 20:25:07 | 0:22:18 | 74.8813582 | 77.846326 | 90.421441 | 66.1725398 |
| 20:25:08 | 0:22:19 | 73.8813582 | 77.846326 | 90.421441 | 66.1725398 |
| 20:25:09 | 0:22:20 | 73.8813582 | 77.846326 | 89.421441 | 66.1725398 |
| 20:25:10 | 0:22:21 | 73.8813582 | 78.846326 | 88.421441 | 67.1725398 |
| 20:25:11 | 0:22:22 | 73.8813582 | 78.846326 | 88.421441 | 73.1725398 |
| 20:25:12 | 0:22:23 | 73.8813582 | 77.846326 | 88.421441 | 75.1725398 |
| 20:25:13 | 0:22:24 | 72.8813582 | 75.846326 | 90.421441 | 75.1725398 |
| 20:25:14 | 0:22:25 | 71.8813582 | 75.846326 | 90.421441 | 74.1725398 |
| 20:25:15 | 0:22:26 | 70.8813582 | 70.846326 | 90.421441 | 74.1725398 |
| 20:25:16 | 0:22:27 | 70.8813582 | 68.846326 | 90.421441 | 74.1725398 |

|          |         |            |           |           |            |
|----------|---------|------------|-----------|-----------|------------|
| 20:25:17 | 0:22:28 | 72.8813582 | 68.846326 | 90.421441 | 74.1725398 |
| 20:25:18 | 0:22:29 | 71.8813582 | 68.846326 | 90.421441 | 74.1725398 |
| 20:25:19 | 0:22:30 | 70.8813582 | 68.846326 | 90.421441 | 74.1725398 |
| 20:25:20 | 0:22:31 | 71.8813582 | 68.846326 | 87.421441 | 73.1725398 |
| 20:25:21 | 0:22:32 | 71.8813582 | 68.846326 | 87.421441 | 73.1725398 |
| 20:25:22 | 0:22:33 | 70.8813582 | 68.846326 | 87.421441 | 73.1725398 |
| 20:25:23 | 0:22:34 | 70.8813582 | 68.846326 | 87.421441 | 72.1725398 |
| 20:25:24 | 0:22:35 | 70.8813582 | 68.846326 | 86.421441 | 72.1725398 |
| 20:25:25 | 0:22:36 | 71.8813582 | 66.846326 | 86.421441 | 72.1725398 |
| 20:25:26 | 0:22:37 | 71.8813582 | 66.846326 | 86.421441 | 72.1725398 |
| 20:25:27 | 0:22:38 | 71.8813582 | 66.846326 | 87.421441 | 73.1725398 |
| 20:25:28 | 0:22:39 | 71.8813582 | 66.846326 | 87.421441 | 78.1725398 |
| 20:25:29 | 0:22:40 | 72.8813582 | 66.846326 | 88.421441 | 78.1725398 |
| 20:25:30 | 0:22:41 | 72.8813582 | 67.846326 | 88.421441 | 78.1725398 |
| 20:25:31 | 0:22:42 | 72.8813582 | 67.846326 | 88.421441 | 78.1725398 |
| 20:25:32 | 0:22:43 | 72.8813582 | 67.846326 | 86.421441 | 76.1725398 |
| 20:25:33 | 0:22:44 | 72.8813582 | 67.846326 | 86.421441 | 77.1725398 |
| 20:25:34 | 0:22:45 | 73.8813582 | 67.846326 | 85.421441 | 79.1725398 |
| 20:25:35 | 0:22:46 | 73.8813582 | 66.846326 | 85.421441 | 79.1725398 |
| 20:25:36 | 0:22:47 | 74.8813582 | 66.846326 | 84.421441 | 79.1725398 |
| 20:25:37 | 0:22:48 | 75.8813582 | 66.846326 | 84.421441 | 80.1725398 |
| 20:25:38 | 0:22:49 | 77.8813582 | 67.846326 | 83.421441 | 80.1725398 |
| 20:25:39 | 0:22:50 | 79.8813582 | 67.846326 | 83.421441 | 80.1725398 |
| 20:25:40 | 0:22:51 | 78.8813582 | 67.846326 | 83.421441 | 78.1725398 |
| 20:25:41 | 0:22:52 | 78.8813582 | 67.846326 | 83.421441 | 78.1725398 |
| 20:25:42 | 0:22:53 | 77.8813582 | 67.846326 | 83.421441 | 76.1725398 |
| 20:25:43 | 0:22:54 | 75.8813582 | 67.846326 | 82.421441 | 76.1725398 |
| 20:25:44 | 0:22:55 | 72.8813582 | 64.846326 | 80.421441 | 75.1725398 |
| 20:25:45 | 0:22:56 | 72.8813582 | 66.846326 | 81.421441 | 75.1725398 |
| 20:25:46 | 0:22:57 | 70.8813582 | 69.846326 | 81.421441 | 75.1725398 |
| 20:25:47 | 0:22:58 | 70.8813582 | 69.846326 | 82.421441 | 75.1725398 |
| 20:25:48 | 0:22:59 | 70.8813582 | 69.846326 | 82.421441 | 75.1725398 |
| 20:25:49 | 0:23:00 | 69.8813582 | 70.846326 | 83.421441 | 75.1725398 |
| 20:25:50 | 0:23:01 | 70.8813582 | 68.846326 | 83.421441 | 75.1725398 |
| 20:25:51 | 0:23:02 | 70.8813582 | 68.846326 | 83.421441 | 75.1725398 |
| 20:25:52 | 0:23:03 | 70.8813582 | 67.846326 | 84.421441 | 77.1725398 |
| 20:25:53 | 0:23:04 | 70.8813582 | 68.846326 | 85.421441 | 73.1725398 |
| 20:25:54 | 0:23:05 | 69.8813582 | 68.846326 | 88.421441 | 71.1725398 |
| 20:25:55 | 0:23:06 | 69.8813582 | 68.846326 | 90.421441 | 71.1725398 |
| 20:25:56 | 0:23:07 | 70.8813582 | 68.846326 | 91.421441 | 70.1725398 |
| 20:25:57 | 0:23:08 | 71.8813582 | 68.846326 | 92.421441 | 69.1725398 |
| 20:25:58 | 0:23:09 | 70.8813582 | 68.846326 | 92.421441 | 69.1725398 |
| 20:25:59 | 0:23:10 | 69.8813582 | 69.846326 | 93.421441 | 69.1725398 |
| 20:26:00 | 0:23:11 | 68.8813582 | 70.846326 | 93.421441 | 69.1725398 |
| 20:26:01 | 0:23:12 | 68.8813582 | 72.846326 | 93.421441 | 69.1725398 |

|          |         |            |           |            |            |
|----------|---------|------------|-----------|------------|------------|
| 20:26:02 | 0:23:13 | 67.8813582 | 72.846326 | 93.421441  | 72.1725398 |
| 20:26:03 | 0:23:14 | 68.8813582 | 74.846326 | 93.421441  | 72.1725398 |
| 20:26:04 | 0:23:15 | 68.8813582 | 73.846326 | 94.421441  | 72.1725398 |
| 20:26:05 | 0:23:16 | 69.8813582 | 73.846326 | 95.421441  | 72.1725398 |
| 20:26:06 | 0:23:17 | 70.8813582 | 73.846326 | 95.421441  | 71.1725398 |
| 20:26:07 | 0:23:18 | 70.8813582 | 73.846326 | 96.421441  | 71.1725398 |
| 20:26:08 | 0:23:19 | 70.8813582 | 73.846326 | 98.421441  | 70.1725398 |
| 20:26:09 | 0:23:20 | 70.8813582 | 70.846326 | 102.421441 | 71.1725398 |
| 20:26:10 | 0:23:21 | 70.8813582 | 70.846326 | 103.421441 | 71.1725398 |
| 20:26:11 | 0:23:22 | 69.8813582 | 70.846326 | 103.421441 | 72.1725398 |
| 20:26:12 | 0:23:23 | 69.8813582 | 70.846326 | 105.421441 | 71.1725398 |
| 20:26:13 | 0:23:24 | 69.8813582 | 72.846326 | 104.421441 | 69.1725398 |
| 20:26:14 | 0:23:25 | 69.8813582 | 73.846326 | 104.421441 | 68.1725398 |
| 20:26:15 | 0:23:26 | 69.8813582 | 74.846326 | 103.421441 | 67.1725398 |
| 20:26:16 | 0:23:27 | 69.8813582 | 73.846326 | 103.421441 | 67.1725398 |
| 20:26:17 | 0:23:28 | 69.8813582 | 73.846326 | 97.421441  | 68.1725398 |
| 20:26:18 | 0:23:29 | 70.8813582 | 69.846326 | 97.421441  | 68.1725398 |
| 20:26:19 | 0:23:30 | 70.8813582 | 67.846326 | 97.421441  | 70.1725398 |
| 20:26:20 | 0:23:31 | 70.8813582 | 65.846326 | 97.421441  | 72.1725398 |
| 20:26:21 | 0:23:32 | 70.8813582 | 65.846326 | 95.421441  | 75.1725398 |
| 20:26:22 | 0:23:33 | 71.8813582 | 65.846326 | 94.421441  | 76.1725398 |
| 20:26:23 | 0:23:34 | 71.8813582 | 65.846326 | 93.421441  | 76.1725398 |
| 20:26:24 | 0:23:35 | 70.8813582 | 65.846326 | 93.421441  | 72.1725398 |
| 20:26:25 | 0:23:36 | 69.8813582 | 65.846326 | 93.421441  | 71.1725398 |
| 20:26:26 | 0:23:37 | 69.8813582 | 66.846326 | 93.421441  | 70.1725398 |
| 20:26:27 | 0:23:38 | 68.8813582 | 67.846326 | 93.421441  | 70.1725398 |
| 20:26:28 | 0:23:39 | 68.8813582 | 67.846326 | 93.421441  | 71.1725398 |
| 20:26:29 | 0:23:40 | 68.8813582 | 68.846326 | 91.421441  | 72.1725398 |
| 20:26:30 | 0:23:41 | 67.8813582 | 68.846326 | 88.421441  | 75.1725398 |
| 20:26:31 | 0:23:42 | 67.8813582 | 68.846326 | 88.421441  | 77.1725398 |
| 20:26:32 | 0:23:43 | 67.8813582 | 67.846326 | 86.421441  | 76.1725398 |
| 20:26:33 | 0:23:44 | 67.8813582 | 67.846326 | 85.421441  | 75.1725398 |
| 20:26:34 | 0:23:45 | 67.8813582 | 67.846326 | 84.421441  | 75.1725398 |
| 20:26:35 | 0:23:46 | 68.8813582 | 67.846326 | 84.421441  | 75.1725398 |
| 20:26:36 | 0:23:47 | 68.8813582 | 70.846326 | 80.421441  | 75.1725398 |
| 20:26:37 | 0:23:48 | 68.8813582 | 70.846326 | 78.421441  | 75.1725398 |
| 20:26:38 | 0:23:49 | 68.8813582 | 70.846326 | 78.421441  | 78.1725398 |
| 20:26:39 | 0:23:50 | 68.8813582 | 70.846326 | 78.421441  | 78.1725398 |
| 20:26:40 | 0:23:51 | 68.8813582 | 68.846326 | 81.421441  | 78.1725398 |
| 20:26:41 | 0:23:52 | 68.8813582 | 68.846326 | 83.421441  | 78.1725398 |
| 20:26:42 | 0:23:53 | 68.8813582 | 68.846326 | 83.421441  | 78.1725398 |
| 20:26:43 | 0:23:54 | 68.8813582 | 68.846326 | 83.421441  | 74.1725398 |
| 20:26:44 | 0:23:55 | 69.8813582 | 69.846326 | 84.421441  | 69.1725398 |
| 20:26:45 | 0:23:56 | 69.8813582 | 69.846326 | 86.421441  | 69.1725398 |
| 20:26:46 | 0:23:57 | 69.8813582 | 70.846326 | 86.421441  | 69.1725398 |

|          |         |            |           |           |            |
|----------|---------|------------|-----------|-----------|------------|
| 20:26:47 | 0:23:58 | 69.8813582 | 70.846326 | 87.421441 | 69.1725398 |
| 20:26:48 | 0:23:59 | 69.8813582 | 70.846326 | 87.421441 | 69.1725398 |
| 20:26:49 | 0:24:00 | 69.8813582 | 70.846326 | 87.421441 | 69.1725398 |
| 20:26:50 | 0:24:01 | 69.8813582 | 70.846326 | 87.421441 | 70.1725398 |
| 20:26:51 | 0:24:02 | 69.8813582 | 71.846326 | 87.421441 | 70.1725398 |
| 20:26:52 | 0:24:03 | 69.8813582 | 71.846326 | 87.421441 | 71.1725398 |
| 20:26:53 | 0:24:04 | 71.8813582 | 72.846326 | 87.421441 | 71.1725398 |
| 20:26:54 | 0:24:05 | 72.8813582 | 72.846326 | 87.421441 | 70.1725398 |
| 20:26:55 | 0:24:06 | 72.8813582 | 72.846326 | 87.421441 | 70.1725398 |
| 20:26:56 | 0:24:07 | 73.8813582 | 72.846326 | 87.421441 | 70.1725398 |
| 20:26:57 | 0:24:08 | 73.8813582 | 73.846326 | 86.421441 | 70.1725398 |
| 20:26:58 | 0:24:09 | 73.8813582 | 73.846326 | 77.421441 | 70.1725398 |
| 20:26:59 | 0:24:10 | 73.8813582 | 73.846326 | 77.421441 | 71.1725398 |
| 20:27:00 | 0:24:11 | 73.8813582 | 73.846326 | 75.421441 | 73.1725398 |
| 20:27:01 | 0:24:12 | 73.8813582 | 73.846326 | 72.421441 | 75.1725398 |
| 20:27:02 | 0:24:13 | 73.8813582 | 71.846326 | 71.421441 | 76.1725398 |
| 20:27:03 | 0:24:14 | 71.8813582 | 70.846326 | 71.421441 | 77.1725398 |
| 20:27:04 | 0:24:15 | 70.8813582 | 71.846326 | 72.421441 | 77.1725398 |
| 20:27:05 | 0:24:16 | 70.8813582 | 71.846326 | 75.421441 | 77.1725398 |
| 20:27:06 | 0:24:17 | 71.8813582 | 71.846326 | 76.421441 | 76.1725398 |
| 20:27:07 | 0:24:18 | 72.8813582 | 71.846326 | 76.421441 | 76.1725398 |
| 20:27:08 | 0:24:19 | 73.8813582 | 71.846326 | 76.421441 | 75.1725398 |
| 20:27:09 | 0:24:20 | 73.8813582 | 71.846326 | 78.421441 | 75.1725398 |
| 20:27:10 | 0:24:21 | 74.8813582 | 71.846326 | 78.421441 | 78.1725398 |
| 20:27:11 | 0:24:22 | 74.8813582 | 71.846326 | 78.421441 | 80.1725398 |
| 20:27:12 | 0:24:23 | 74.8813582 | 71.846326 | 78.421441 | 81.1725398 |
| 20:27:13 | 0:24:24 | 73.8813582 | 70.846326 | 78.421441 | 81.1725398 |
| 20:27:14 | 0:24:25 | 74.8813582 | 74.846326 | 78.421441 | 81.1725398 |
| 20:27:15 | 0:24:26 | 74.8813582 | 74.846326 | 78.421441 | 81.1725398 |
| 20:27:16 | 0:24:27 | 74.8813582 | 76.846326 | 79.421441 | 75.1725398 |
| 20:27:17 | 0:24:28 | 74.8813582 | 75.846326 | 82.421441 | 72.1725398 |
| 20:27:18 | 0:24:29 | 74.8813582 | 75.846326 | 81.421441 | 71.1725398 |
| 20:27:19 | 0:24:30 | 75.8813582 | 73.846326 | 81.421441 | 71.1725398 |
| 20:27:20 | 0:24:31 | 75.8813582 | 72.846326 | 81.421441 | 71.1725398 |
| 20:27:21 | 0:24:32 | 75.8813582 | 72.846326 | 81.421441 | 70.1725398 |
| 20:27:22 | 0:24:33 | 77.8813582 | 72.846326 | 81.421441 | 70.1725398 |
| 20:27:23 | 0:24:34 | 79.8813582 | 73.846326 | 81.421441 | 70.1725398 |
| 20:27:24 | 0:24:35 | 79.8813582 | 73.846326 | 79.421441 | 71.1725398 |
| 20:27:25 | 0:24:36 | 78.8813582 | 71.846326 | 80.421441 | 71.1725398 |
| 20:27:26 | 0:24:37 | 78.8813582 | 70.846326 | 81.421441 | 72.1725398 |
| 20:27:27 | 0:24:38 | 76.8813582 | 69.846326 | 79.421441 | 71.1725398 |
| 20:27:28 | 0:24:39 | 76.8813582 | 69.846326 | 78.421441 | 71.1725398 |
| 20:27:29 | 0:24:40 | 77.8813582 | 69.846326 | 78.421441 | 70.1725398 |
| 20:27:30 | 0:24:41 | 78.8813582 | 68.846326 | 79.421441 | 70.1725398 |
| 20:27:31 | 0:24:42 | 78.8813582 | 68.846326 | 80.421441 | 71.1725398 |

|          |         |            |           |           |            |
|----------|---------|------------|-----------|-----------|------------|
| 20:27:32 | 0:24:43 | 78.8813582 | 67.846326 | 81.421441 | 71.1725398 |
| 20:27:33 | 0:24:44 | 78.8813582 | 68.846326 | 81.421441 | 72.1725398 |
| 20:27:34 | 0:24:45 | 79.8813582 | 68.846326 | 82.421441 | 72.1725398 |
| 20:27:35 | 0:24:46 | 78.8813582 | 68.846326 | 82.421441 | 72.1725398 |
| 20:27:36 | 0:24:47 | 78.8813582 | 68.846326 | 82.421441 | 72.1725398 |
| 20:27:37 | 0:24:48 | 78.8813582 | 68.846326 | 83.421441 | 72.1725398 |
| 20:27:38 | 0:24:49 | 78.8813582 | 68.846326 | 82.421441 | 73.1725398 |
| 20:27:39 | 0:24:50 | 78.8813582 | 68.846326 | 82.421441 | 73.1725398 |
| 20:27:40 | 0:24:51 | 78.8813582 | 68.846326 | 82.421441 | 73.1725398 |
| 20:27:41 | 0:24:52 | 78.8813582 | 68.846326 | 82.421441 | 73.1725398 |
| 20:27:42 | 0:24:53 | 78.8813582 | 68.846326 | 83.421441 | 74.1725398 |
| 20:27:43 | 0:24:54 | 80.8813582 | 68.846326 | 83.421441 | 74.1725398 |
| 20:27:44 | 0:24:55 | 81.8813582 | 66.846326 | 82.421441 | 74.1725398 |
| 20:27:45 | 0:24:56 | 83.8813582 | 67.846326 | 82.421441 | 74.1725398 |
| 20:27:46 | 0:24:57 | 84.8813582 | 67.846326 | 83.421441 | 74.1725398 |
| 20:27:47 | 0:24:58 | 85.8813582 | 67.846326 | 83.421441 | 74.1725398 |
| 20:27:48 | 0:24:59 | 87.8813582 | 67.846326 | 83.421441 | 76.1725398 |
| 20:27:49 | 0:25:00 | 87.8813582 | 66.846326 | 83.421441 | 84.1725398 |
| 20:27:50 | 0:25:01 | 89.8813582 | 66.846326 | 83.421441 | 86.1725398 |
| 20:27:51 | 0:25:02 | 90.8813582 | 69.846326 | 83.421441 | 86.1725398 |
| 20:27:52 | 0:25:03 | 91.8813582 | 69.846326 | 83.421441 | 84.1725398 |
| 20:27:53 | 0:25:04 | 91.8813582 | 69.846326 | 83.421441 | 78.1725398 |
| 20:27:54 | 0:25:05 | 92.8813582 | 69.846326 | 83.421441 | 75.1725398 |
| 20:27:55 | 0:25:06 | 94.8813582 | 69.846326 | 83.421441 | 73.1725398 |
| 20:27:56 | 0:25:07 | 94.8813582 | 69.846326 | 82.421441 | 71.1725398 |
| 20:27:57 | 0:25:08 | 94.8813582 | 69.846326 | 80.421441 | 70.1725398 |
| 20:27:58 | 0:25:09 | 94.8813582 | 69.846326 | 80.421441 | 70.1725398 |
| 20:27:59 | 0:25:10 | 95.8813582 | 69.846326 | 80.421441 | 69.1725398 |
| 20:28:00 | 0:25:11 | 95.8813582 | 70.846326 | 78.421441 | 69.1725398 |
| 20:28:01 | 0:25:12 | 95.8813582 | 70.846326 | 78.421441 | 69.1725398 |
| 20:28:02 | 0:25:13 | 95.8813582 | 70.846326 | 76.421441 | 69.1725398 |
| 20:28:03 | 0:25:14 | 97.8813582 | 70.846326 | 75.421441 | 70.1725398 |
| 20:28:04 | 0:25:15 | 98.8813582 | 70.846326 | 75.421441 | 70.1725398 |
| 20:28:05 | 0:25:16 | 93.8813582 | 69.846326 | 73.421441 | 66.1725398 |
| 20:28:06 | 0:25:17 | 90.8813582 | 69.846326 | 73.421441 | 65.1725398 |
| 20:28:07 | 0:25:18 | 84.8813582 | 68.846326 | 73.421441 | 66.1725398 |
| 20:28:08 | 0:25:19 | 78.8813582 | 68.846326 | 73.421441 | 66.1725398 |
| 20:28:09 | 0:25:20 | 75.8813582 | 70.846326 | 72.421441 | 68.1725398 |
| 20:28:10 | 0:25:21 | 73.8813582 | 70.846326 | 72.421441 | 68.1725398 |
| 20:28:11 | 0:25:22 | 71.8813582 | 70.846326 | 70.421441 | 68.1725398 |
| 20:28:12 | 0:25:23 | 70.8813582 | 69.846326 | 70.421441 | 68.1725398 |
| 20:28:13 | 0:25:24 | 69.8813582 | 69.846326 | 70.421441 | 72.1725398 |
| 20:28:14 | 0:25:25 | 69.8813582 | 69.846326 | 71.421441 | 75.1725398 |
| 20:28:15 | 0:25:26 | 70.8813582 | 68.846326 | 72.421441 | 76.1725398 |
| 20:28:16 | 0:25:27 | 72.8813582 | 69.846326 | 73.421441 | 76.1725398 |

|          |         |            |           |           |            |
|----------|---------|------------|-----------|-----------|------------|
| 20:28:17 | 0:25:28 | 76.8813582 | 69.846326 | 81.421441 | 75.1725398 |
| 20:28:18 | 0:25:29 | 79.8813582 | 71.846326 | 83.421441 | 74.1725398 |
| 20:28:19 | 0:25:30 | 80.8813582 | 72.846326 | 83.421441 | 74.1725398 |
| 20:28:20 | 0:25:31 | 81.8813582 | 72.846326 | 84.421441 | 74.1725398 |
| 20:28:21 | 0:25:32 | 81.8813582 | 72.846326 | 84.421441 | 74.1725398 |
| 20:28:22 | 0:25:33 | 81.8813582 | 72.846326 | 84.421441 | 74.1725398 |
| 20:28:23 | 0:25:34 | 83.8813582 | 71.846326 | 84.421441 | 74.1725398 |
| 20:28:24 | 0:25:35 | 84.8813582 | 71.846326 | 84.421441 | 74.1725398 |
| 20:28:25 | 0:25:36 | 90.8813582 | 69.846326 | 85.421441 | 73.1725398 |
| 20:28:26 | 0:25:37 | 93.8813582 | 69.846326 | 84.421441 | 71.1725398 |
| 20:28:27 | 0:25:38 | 92.8813582 | 69.846326 | 84.421441 | 70.1725398 |
| 20:28:28 | 0:25:39 | 90.8813582 | 69.846326 | 83.421441 | 69.1725398 |
| 20:28:29 | 0:25:40 | 89.8813582 | 71.846326 | 83.421441 | 69.1725398 |
| 20:28:30 | 0:25:41 | 89.8813582 | 71.846326 | 83.421441 | 69.1725398 |
| 20:28:31 | 0:25:42 | 87.8813582 | 72.846326 | 82.421441 | 70.1725398 |
| 20:28:32 | 0:25:43 | 87.8813582 | 73.846326 | 82.421441 | 70.1725398 |
| 20:28:33 | 0:25:44 | 87.8813582 | 71.846326 | 81.421441 | 75.1725398 |
| 20:28:34 | 0:25:45 | 85.8813582 | 70.846326 | 81.421441 | 75.1725398 |
| 20:28:35 | 0:25:46 | 84.8813582 | 70.846326 | 80.421441 | 75.1725398 |
| 20:28:36 | 0:25:47 | 81.8813582 | 70.846326 | 80.421441 | 75.1725398 |
| 20:28:37 | 0:25:48 | 77.8813582 | 70.846326 | 79.421441 | 74.1725398 |
| 20:28:38 | 0:25:49 | 75.8813582 | 70.846326 | 79.421441 | 74.1725398 |
| 20:28:39 | 0:25:50 | 75.8813582 | 71.846326 | 79.421441 | 73.1725398 |
| 20:28:40 | 0:25:51 | 75.8813582 | 70.846326 | 79.421441 | 72.1725398 |
| 20:28:41 | 0:25:52 | 75.8813582 | 70.846326 | 79.421441 | 72.1725398 |
| 20:28:42 | 0:25:53 | 75.8813582 | 70.846326 | 79.421441 | 72.1725398 |
| 20:28:43 | 0:25:54 | 75.8813582 | 70.846326 | 81.421441 | 72.1725398 |
| 20:28:44 | 0:25:55 | 75.8813582 | 69.846326 | 85.421441 | 71.1725398 |
| 20:28:45 | 0:25:56 | 75.8813582 | 68.846326 | 85.421441 | 71.1725398 |
| 20:28:46 | 0:25:57 | 75.8813582 | 67.846326 | 87.421441 | 71.1725398 |
| 20:28:47 | 0:25:58 | 75.8813582 | 67.846326 | 88.421441 | 70.1725398 |
| 20:28:48 | 0:25:59 | 74.8813582 | 67.846326 | 89.421441 | 71.1725398 |
| 20:28:49 | 0:26:00 | 74.8813582 | 66.846326 | 89.421441 | 73.1725398 |
| 20:28:50 | 0:26:01 | 74.8813582 | 70.846326 | 89.421441 | 75.1725398 |
| 20:28:51 | 0:26:02 | 74.8813582 | 70.846326 | 89.421441 | 75.1725398 |
| 20:28:52 | 0:26:03 | 74.8813582 | 70.846326 | 90.421441 | 73.1725398 |
| 20:28:53 | 0:26:04 | 75.8813582 | 70.846326 | 90.421441 | 70.1725398 |
| 20:28:54 | 0:26:05 | 75.8813582 | 70.846326 | 90.421441 | 69.1725398 |
| 20:28:55 | 0:26:06 | 75.8813582 | 70.846326 | 93.421441 | 69.1725398 |
| 20:28:56 | 0:26:07 | 76.8813582 | 70.846326 | 93.421441 | 71.1725398 |
| 20:28:57 | 0:26:08 | 77.8813582 | 70.846326 | 93.421441 | 73.1725398 |
| 20:28:58 | 0:26:09 | 78.8813582 | 70.846326 | 88.421441 | 74.1725398 |
| 20:28:59 | 0:26:10 | 78.8813582 | 70.846326 | 88.421441 | 73.1725398 |
| 20:29:00 | 0:26:11 | 78.8813582 | 70.846326 | 87.421441 | 72.1725398 |
| 20:29:01 | 0:26:12 | 77.8813582 | 67.846326 | 87.421441 | 71.1725398 |



|          |         |            |           |           |            |
|----------|---------|------------|-----------|-----------|------------|
| 20:29:02 | 0:26:13 | 77.8813582 | 66.846326 | 87.421441 | 71.1725398 |
| 20:29:03 | 0:26:14 | 77.8813582 | 66.846326 | 87.421441 | 71.1725398 |
| 20:29:04 | 0:26:15 | 77.8813582 | 66.846326 | 87.421441 | 71.1725398 |
| 20:29:05 | 0:26:16 | 77.8813582 | 68.846326 | 87.421441 | 70.1725398 |
| 20:29:06 | 0:26:17 | 77.8813582 | 68.846326 | 86.421441 | 70.1725398 |
| 20:29:07 | 0:26:18 | 77.8813582 | 68.846326 | 86.421441 | 71.1725398 |
| 20:29:08 | 0:26:19 | 76.8813582 | 68.846326 | 86.421441 | 71.1725398 |
| 20:29:09 | 0:26:20 | 74.8813582 | 68.846326 | 85.421441 | 72.1725398 |
| 20:29:10 | 0:26:21 | 72.8813582 | 67.846326 | 84.421441 | 72.1725398 |
| 20:29:11 | 0:26:22 | 70.8813582 | 67.846326 | 84.421441 | 73.1725398 |
| 20:29:12 | 0:26:23 | 68.8813582 | 67.846326 | 84.421441 | 74.1725398 |
| 20:29:13 | 0:26:24 | 68.8813582 | 64.846326 | 84.421441 | 74.1725398 |
| 20:29:14 | 0:26:25 | 68.8813582 | 64.846326 | 83.421441 | 75.1725398 |
| 20:29:15 | 0:26:26 | 68.8813582 | 63.846326 | 83.421441 | 75.1725398 |
| 20:29:16 | 0:26:27 | 68.8813582 | 63.846326 | 81.421441 | 75.1725398 |
| 20:29:17 | 0:26:28 | 68.8813582 | 64.846326 | 83.421441 | 76.1725398 |
| 20:29:18 | 0:26:29 | 68.8813582 | 65.846326 | 85.421441 | 76.1725398 |
| 20:29:19 | 0:26:30 | 68.8813582 | 65.846326 | 85.421441 | 76.1725398 |
| 20:29:20 | 0:26:31 | 68.8813582 | 70.846326 | 86.421441 | 72.1725398 |
| 20:29:21 | 0:26:32 | 68.8813582 | 72.846326 | 85.421441 | 70.1725398 |
| 20:29:22 | 0:26:33 | 68.8813582 | 73.846326 | 86.421441 | 70.1725398 |
| 20:29:23 | 0:26:34 | 69.8813582 | 72.846326 | 86.421441 | 71.1725398 |
| 20:29:24 | 0:26:35 | 69.8813582 | 72.846326 | 86.421441 | 71.1725398 |
| 20:29:25 | 0:26:36 | 70.8813582 | 71.846326 | 88.421441 | 71.1725398 |
| 20:29:26 | 0:26:37 | 69.8813582 | 71.846326 | 88.421441 | 71.1725398 |
| 20:29:27 | 0:26:38 | 68.8813582 | 70.846326 | 88.421441 | 71.1725398 |
| 20:29:28 | 0:26:39 | 68.8813582 | 70.846326 | 86.421441 | 72.1725398 |
| 20:29:29 | 0:26:40 | 68.8813582 | 70.846326 | 86.421441 | 73.1725398 |
| 20:29:30 | 0:26:41 | 69.8813582 | 71.846326 | 86.421441 | 73.1725398 |
| 20:29:31 | 0:26:42 | 70.8813582 | 72.846326 | 86.421441 | 74.1725398 |
| 20:29:32 | 0:26:43 | 71.8813582 | 72.846326 | 86.421441 | 74.1725398 |
| 20:29:33 | 0:26:44 | 71.8813582 | 72.846326 | 86.421441 | 75.1725398 |
| 20:29:34 | 0:26:45 | 71.8813582 | 72.846326 | 86.421441 | 77.1725398 |
| 20:29:35 | 0:26:46 | 71.8813582 | 70.846326 | 86.421441 | 77.1725398 |
| 20:29:36 | 0:26:47 | 70.8813582 | 69.846326 | 86.421441 | 78.1725398 |
| 20:29:37 | 0:26:48 | 69.8813582 | 69.846326 | 84.421441 | 78.1725398 |
| 20:29:38 | 0:26:49 | 69.8813582 | 71.846326 | 82.421441 | 78.1725398 |
| 20:29:39 | 0:26:50 | 69.8813582 | 72.846326 | 81.421441 | 78.1725398 |
| 20:29:40 | 0:26:51 | 69.8813582 | 73.846326 | 80.421441 | 78.1725398 |
| 20:29:41 | 0:26:52 | 68.8813582 | 74.846326 | 80.421441 | 78.1725398 |
| 20:29:42 | 0:26:53 | 68.8813582 | 74.846326 | 81.421441 | 78.1725398 |
| 20:29:43 | 0:26:54 | 68.8813582 | 73.846326 | 82.421441 | 77.1725398 |
| 20:29:44 | 0:26:55 | 68.8813582 | 73.846326 | 83.421441 | 75.1725398 |
| 20:29:45 | 0:26:56 | 68.8813582 | 73.846326 | 82.421441 | 75.1725398 |
| 20:29:46 | 0:26:57 | 68.8813582 | 73.846326 | 81.421441 | 74.1725398 |

|          |         |            |           |           |            |
|----------|---------|------------|-----------|-----------|------------|
| 20:29:47 | 0:26:58 | 68.8813582 | 73.846326 | 81.421441 | 73.1725398 |
| 20:29:48 | 0:26:59 | 68.8813582 | 72.846326 | 81.421441 | 74.1725398 |
| 20:29:49 | 0:27:00 | 68.8813582 | 71.846326 | 81.421441 | 74.1725398 |
| 20:29:50 | 0:27:01 | 68.8813582 | 71.846326 | 81.421441 | 74.1725398 |
| 20:29:51 | 0:27:02 | 68.8813582 | 71.846326 | 79.421441 | 74.1725398 |
| 20:29:52 | 0:27:03 | 68.8813582 | 71.846326 | 79.421441 | 73.1725398 |
| 20:29:53 | 0:27:04 | 69.8813582 | 71.846326 | 79.421441 | 73.1725398 |
| 20:29:54 | 0:27:05 | 69.8813582 | 71.846326 | 79.421441 | 73.1725398 |
| 20:29:55 | 0:27:06 | 72.8813582 | 71.846326 | 79.421441 | 72.1725398 |
| 20:29:56 | 0:27:07 | 72.8813582 | 71.846326 | 79.421441 | 72.1725398 |
| 20:29:57 | 0:27:08 | 72.8813582 | 71.846326 | 79.421441 | 72.1725398 |
| 20:29:58 | 0:27:09 | 73.8813582 | 72.846326 | 79.421441 | 71.1725398 |
| 20:29:59 | 0:27:10 | 73.8813582 | 72.846326 | 79.421441 | 73.1725398 |
| 20:30:00 | 0:27:11 | 73.8813582 | 72.846326 | 80.421441 | 74.1725398 |
| 20:30:01 | 0:27:12 | 75.8813582 | 69.846326 | 80.421441 | 75.1725398 |
| 20:30:02 | 0:27:13 | 76.8813582 | 69.846326 | 81.421441 | 75.1725398 |
| 20:30:03 | 0:27:14 | 76.8813582 | 69.846326 | 83.421441 | 77.1725398 |
| 20:30:04 | 0:27:15 | 77.8813582 | 69.846326 | 85.421441 | 76.1725398 |
| 20:30:05 | 0:27:16 | 78.8813582 | 68.846326 | 85.421441 | 76.1725398 |
| 20:30:06 | 0:27:17 | 78.8813582 | 68.846326 | 88.421441 | 76.1725398 |
| 20:30:07 | 0:27:18 | 79.8813582 | 68.846326 | 89.421441 | 76.1725398 |
| 20:30:08 | 0:27:19 | 79.8813582 | 68.846326 | 89.421441 | 76.1725398 |
| 20:30:09 | 0:27:20 | 79.8813582 | 68.846326 | 89.421441 | 77.1725398 |
| 20:30:10 | 0:27:21 | 79.8813582 | 67.846326 | 88.421441 | 77.1725398 |
| 20:30:11 | 0:27:22 | 75.8813582 | 67.846326 | 88.421441 | 77.1725398 |
| 20:30:12 | 0:27:23 | 75.8813582 | 67.846326 | 87.421441 | 77.1725398 |
| 20:30:13 | 0:27:24 | 75.8813582 | 68.846326 | 87.421441 | 74.1725398 |
| 20:30:14 | 0:27:25 | 75.8813582 | 68.846326 | 86.421441 | 74.1725398 |
| 20:30:15 | 0:27:26 | 75.8813582 | 68.846326 | 86.421441 | 73.1725398 |
| 20:30:16 | 0:27:27 | 75.8813582 | 68.846326 | 85.421441 | 72.1725398 |
| 20:30:17 | 0:27:28 | 75.8813582 | 69.846326 | 86.421441 | 72.1725398 |
| 20:30:18 | 0:27:29 | 75.8813582 | 69.846326 | 86.421441 | 72.1725398 |
| 20:30:19 | 0:27:30 | 72.8813582 | 72.846326 | 85.421441 | 72.1725398 |
| 20:30:20 | 0:27:31 | 72.8813582 | 72.846326 | 85.421441 | 72.1725398 |
| 20:30:21 | 0:27:32 | 72.8813582 | 72.846326 | 86.421441 | 73.1725398 |
| 20:30:22 | 0:27:33 | 73.8813582 | 76.846326 | 85.421441 | 74.1725398 |
| 20:30:23 | 0:27:34 | 72.8813582 | 77.846326 | 85.421441 | 74.1725398 |
| 20:30:24 | 0:27:35 | 72.8813582 | 77.846326 | 83.421441 | 74.1725398 |
| 20:30:25 | 0:27:36 | 69.8813582 | 77.846326 | 83.421441 | 74.1725398 |
| 20:30:26 | 0:27:37 | 69.8813582 | 73.846326 | 82.421441 | 74.1725398 |
| 20:30:27 | 0:27:38 | 69.8813582 | 72.846326 | 82.421441 | 74.1725398 |
| 20:30:28 | 0:27:39 | 69.8813582 | 70.846326 | 83.421441 | 74.1725398 |
| 20:30:29 | 0:27:40 | 69.8813582 | 70.846326 | 85.421441 | 75.1725398 |
| 20:30:30 | 0:27:41 | 69.8813582 | 70.846326 | 85.421441 | 76.1725398 |
| 20:30:31 | 0:27:42 | 70.8813582 | 70.846326 | 84.421441 | 77.1725398 |

|          |         |            |           |            |            |
|----------|---------|------------|-----------|------------|------------|
| 20:30:32 | 0:27:43 | 70.8813582 | 71.846326 | 85.421441  | 77.1725398 |
| 20:30:33 | 0:27:44 | 70.8813582 | 71.846326 | 85.421441  | 77.1725398 |
| 20:30:34 | 0:27:45 | 70.8813582 | 71.846326 | 85.421441  | 77.1725398 |
| 20:30:35 | 0:27:46 | 71.8813582 | 72.846326 | 87.421441  | 77.1725398 |
| 20:30:36 | 0:27:47 | 71.8813582 | 72.846326 | 88.421441  | 80.1725398 |
| 20:30:37 | 0:27:48 | 71.8813582 | 72.846326 | 88.421441  | 81.1725398 |
| 20:30:38 | 0:27:49 | 71.8813582 | 71.846326 | 88.421441  | 81.1725398 |
| 20:30:39 | 0:27:50 | 71.8813582 | 71.846326 | 90.421441  | 82.1725398 |
| 20:30:40 | 0:27:51 | 71.8813582 | 71.846326 | 93.421441  | 82.1725398 |
| 20:30:41 | 0:27:52 | 71.8813582 | 71.846326 | 93.421441  | 85.1725398 |
| 20:30:42 | 0:27:53 | 72.8813582 | 70.846326 | 99.421441  | 81.1725398 |
| 20:30:43 | 0:27:54 | 73.8813582 | 69.846326 | 100.421441 | 81.1725398 |
| 20:30:44 | 0:27:55 | 73.8813582 | 69.846326 | 100.421441 | 79.1725398 |
| 20:30:45 | 0:27:56 | 73.8813582 | 69.846326 | 101.421441 | 78.1725398 |
| 20:30:46 | 0:27:57 | 73.8813582 | 68.846326 | 104.421441 | 78.1725398 |
| 20:30:47 | 0:27:58 | 73.8813582 | 67.846326 | 104.421441 | 77.1725398 |
| 20:30:48 | 0:27:59 | 73.8813582 | 67.846326 | 108.421441 | 77.1725398 |
| 20:30:49 | 0:28:00 | 73.8813582 | 64.846326 | 108.421441 | 77.1725398 |
| 20:30:50 | 0:28:01 | 73.8813582 | 64.846326 | 108.421441 | 78.1725398 |
| 20:30:51 | 0:28:02 | 73.8813582 | 64.846326 | 107.421441 | 78.1725398 |
| 20:30:52 | 0:28:03 | 72.8813582 | 64.846326 | 106.421441 | 78.1725398 |
| 20:30:53 | 0:28:04 | 72.8813582 | 65.846326 | 106.421441 | 78.1725398 |
| 20:30:54 | 0:28:05 | 72.8813582 | 66.846326 | 106.421441 | 78.1725398 |
| 20:30:55 | 0:28:06 | 73.8813582 | 66.846326 | 104.421441 | 78.1725398 |
| 20:30:56 | 0:28:07 | 73.8813582 | 67.846326 | 104.421441 | 77.1725398 |
| 20:30:57 | 0:28:08 | 73.8813582 | 67.846326 | 103.421441 | 77.1725398 |
| 20:30:58 | 0:28:09 | 73.8813582 | 67.846326 | 98.421441  | 75.1725398 |
| 20:30:59 | 0:28:10 | 74.8813582 | 67.846326 | 98.421441  | 71.1725398 |
| 20:31:00 | 0:28:11 | 74.8813582 | 67.846326 | 94.421441  | 71.1725398 |
| 20:31:01 | 0:28:12 | 74.8813582 | 67.846326 | 94.421441  | 68.1725398 |
| 20:31:02 | 0:28:13 | 74.8813582 | 67.846326 | 94.421441  | 66.1725398 |
| 20:31:03 | 0:28:14 | 74.8813582 | 67.846326 | 94.421441  | 66.1725398 |
| 20:31:04 | 0:28:15 | 74.8813582 | 67.846326 | 94.421441  | 65.1725398 |
| 20:31:05 | 0:28:16 | 74.8813582 | 67.846326 | 94.421441  | 65.1725398 |
| 20:31:06 | 0:28:17 | 74.8813582 | 67.846326 | 92.421441  | 65.1725398 |
| 20:31:07 | 0:28:18 | 73.8813582 | 67.846326 | 89.421441  | 65.1725398 |
| 20:31:08 | 0:28:19 | 73.8813582 | 69.846326 | 89.421441  | 64.1725398 |
| 20:31:09 | 0:28:20 | 73.8813582 | 69.846326 | 86.421441  | 64.1725398 |
| 20:31:10 | 0:28:21 | 73.8813582 | 69.846326 | 86.421441  | 64.1725398 |
| 20:31:11 | 0:28:22 | 73.8813582 | 69.846326 | 86.421441  | 68.1725398 |
| 20:31:12 | 0:28:23 | 73.8813582 | 69.846326 | 86.421441  | 68.1725398 |
| 20:31:13 | 0:28:24 | 73.8813582 | 69.846326 | 86.421441  | 71.1725398 |
| 20:31:14 | 0:28:25 | 73.8813582 | 69.846326 | 86.421441  | 71.1725398 |
| 20:31:15 | 0:28:26 | 75.8813582 | 68.846326 | 88.421441  | 71.1725398 |
| 20:31:16 | 0:28:27 | 75.8813582 | 69.846326 | 88.421441  | 71.1725398 |

|          |         |            |           |           |            |
|----------|---------|------------|-----------|-----------|------------|
| 20:31:17 | 0:28:28 | 75.8813582 | 69.846326 | 88.421441 | 70.1725398 |
| 20:31:18 | 0:28:29 | 75.8813582 | 69.846326 | 86.421441 | 69.1725398 |
| 20:31:19 | 0:28:30 | 75.8813582 | 69.846326 | 85.421441 | 68.1725398 |
| 20:31:20 | 0:28:31 | 75.8813582 | 70.846326 | 85.421441 | 69.1725398 |
| 20:31:21 | 0:28:32 | 75.8813582 | 71.846326 | 83.421441 | 69.1725398 |
| 20:31:22 | 0:28:33 | 75.8813582 | 70.846326 | 83.421441 | 69.1725398 |
| 20:31:23 | 0:28:34 | 75.8813582 | 70.846326 | 82.421441 | 68.1725398 |
| 20:31:24 | 0:28:35 | 74.8813582 | 70.846326 | 81.421441 | 68.1725398 |
| 20:31:25 | 0:28:36 | 74.8813582 | 70.846326 | 81.421441 | 68.1725398 |
| 20:31:26 | 0:28:37 | 73.8813582 | 69.846326 | 80.421441 | 67.1725398 |
| 20:31:27 | 0:28:38 | 73.8813582 | 69.846326 | 79.421441 | 66.1725398 |
| 20:31:28 | 0:28:39 | 73.8813582 | 68.846326 | 79.421441 | 66.1725398 |
| 20:31:29 | 0:28:40 | 72.8813582 | 69.846326 | 79.421441 | 66.1725398 |
| 20:31:30 | 0:28:41 | 71.8813582 | 69.846326 | 78.421441 | 66.1725398 |
| 20:31:31 | 0:28:42 | 71.8813582 | 69.846326 | 79.421441 | 67.1725398 |
| 20:31:32 | 0:28:43 | 70.8813582 | 74.846326 | 80.421441 | 67.1725398 |
| 20:31:33 | 0:28:44 | 70.8813582 | 74.846326 | 83.421441 | 67.1725398 |
| 20:31:34 | 0:28:45 | 69.8813582 | 74.846326 | 83.421441 | 67.1725398 |
| 20:31:35 | 0:28:46 | 69.8813582 | 73.846326 | 83.421441 | 68.1725398 |
| 20:31:36 | 0:28:47 | 69.8813582 | 73.846326 | 83.421441 | 68.1725398 |
| 20:31:37 | 0:28:48 | 70.8813582 | 67.846326 | 83.421441 | 69.1725398 |
| 20:31:38 | 0:28:49 | 70.8813582 | 65.846326 | 82.421441 | 66.1725398 |
| 20:31:39 | 0:28:50 | 70.8813582 | 64.846326 | 80.421441 | 64.1725398 |
| 20:31:40 | 0:28:51 | 70.8813582 | 64.846326 | 80.421441 | 64.1725398 |
| 20:31:41 | 0:28:52 | 71.8813582 | 63.846326 | 80.421441 | 65.1725398 |
| 20:31:42 | 0:28:53 | 71.8813582 | 63.846326 | 80.421441 | 67.1725398 |
| 20:31:43 | 0:28:54 | 72.8813582 | 62.846326 | 80.421441 | 68.1725398 |
| 20:31:44 | 0:28:55 | 73.8813582 | 62.846326 | 80.421441 | 69.1725398 |
| 20:31:45 | 0:28:56 | 73.8813582 | 62.846326 | 80.421441 | 70.1725398 |
| 20:31:46 | 0:28:57 | 73.8813582 | 65.846326 | 80.421441 | 71.1725398 |
| 20:31:47 | 0:28:58 | 73.8813582 | 66.846326 | 80.421441 | 71.1725398 |
| 20:31:48 | 0:28:59 | 73.8813582 | 66.846326 | 83.421441 | 71.1725398 |
| 20:31:49 | 0:29:00 | 72.8813582 | 65.846326 | 85.421441 | 71.1725398 |
| 20:31:50 | 0:29:01 | 71.8813582 | 65.846326 | 86.421441 | 72.1725398 |
| 20:31:51 | 0:29:02 | 71.8813582 | 64.846326 | 86.421441 | 71.1725398 |
| 20:31:52 | 0:29:03 | 72.8813582 | 66.846326 | 86.421441 | 70.1725398 |
| 20:31:53 | 0:29:04 | 73.8813582 | 67.846326 | 86.421441 | 70.1725398 |
| 20:31:54 | 0:29:05 | 73.8813582 | 69.846326 | 86.421441 | 70.1725398 |
| 20:31:55 | 0:29:06 | 74.8813582 | 69.846326 | 87.421441 | 70.1725398 |
| 20:31:56 | 0:29:07 | 75.8813582 | 70.846326 | 87.421441 | 69.1725398 |
| 20:31:57 | 0:29:08 | 76.8813582 | 70.846326 | 86.421441 | 68.1725398 |
| 20:31:58 | 0:29:09 | 77.8813582 | 70.846326 | 80.421441 | 68.1725398 |
| 20:31:59 | 0:29:10 | 77.8813582 | 70.846326 | 80.421441 | 68.1725398 |
| 20:32:00 | 0:29:11 | 77.8813582 | 69.846326 | 77.421441 | 69.1725398 |
| 20:32:01 | 0:29:12 | 77.8813582 | 68.846326 | 71.421441 | 69.1725398 |

|          |         |            |           |           |            |
|----------|---------|------------|-----------|-----------|------------|
| 20:32:02 | 0:29:13 | 78.8813582 | 67.846326 | 71.421441 | 71.1725398 |
| 20:32:03 | 0:29:14 | 80.8813582 | 67.846326 | 70.421441 | 71.1725398 |
| 20:32:04 | 0:29:15 | 87.8813582 | 67.846326 | 81.421441 | 71.1725398 |
| 20:32:05 | 0:29:16 | 97.8813582 | 67.846326 | 86.421441 | 71.1725398 |
| 20:32:06 | 0:29:17 | 97.8813582 | 67.846326 | 86.421441 | 71.1725398 |
| 20:32:07 | 0:29:18 | 101.881358 | 67.846326 | 88.421441 | 73.1725398 |
| 20:32:08 | 0:29:19 | 101.881358 | 67.846326 | 89.421441 | 75.1725398 |
| 20:32:09 | 0:29:20 | 101.881358 | 67.846326 | 88.421441 | 75.1725398 |
| 20:32:10 | 0:29:21 | 102.881358 | 67.846326 | 88.421441 | 75.1725398 |
| 20:32:11 | 0:29:22 | 102.881358 | 68.846326 | 85.421441 | 79.1725398 |
| 20:32:12 | 0:29:23 | 102.881358 | 68.846326 | 84.421441 | 79.1725398 |
| 20:32:13 | 0:29:24 | 83.0192881 | 68.846326 | 82.421441 | 78.1725398 |
| 20:32:14 | 0:29:25 | 104.881358 | 67.846326 | 79.421441 | 78.1725398 |
| 20:32:15 | 0:29:26 | 80.8526214 | 66.846326 | 78.421441 | 78.1725398 |
| 20:32:16 | 0:29:27 | 80.5192881 | 64.846326 | 78.421441 | 78.1725398 |
| 20:32:17 | 0:29:28 | 80.5192881 | 64.846326 | 77.421441 | 78.1725398 |
| 20:32:18 | 0:29:29 | 82.0192881 | 64.846326 | 75.421441 | 80.1725398 |
| 20:32:19 | 0:29:30 | 82.8526214 | 64.846326 | 74.421441 | 82.1725398 |
| 20:32:20 | 0:29:31 | 83.0192881 | 64.846326 | 73.421441 | 82.1725398 |
| 20:32:21 | 0:29:32 | 83.1859547 | 64.846326 | 73.421441 | 82.1725398 |
| 20:32:22 | 0:29:33 | 83.6859547 | 64.846326 | 73.421441 | 83.1725398 |
| 20:32:23 | 0:29:34 | 84.5192881 | 66.846326 | 74.421441 | 83.1725398 |
| 20:32:24 | 0:29:35 | 84.5192881 | 68.846326 | 74.421441 | 82.1725398 |
| 20:32:25 | 0:29:36 | 87.0192881 | 68.846326 | 77.421441 | 86.1725398 |
| 20:32:26 | 0:29:37 | 90.0192881 | 68.846326 | 79.421441 | 93.1725398 |
| 20:32:27 | 0:29:38 | 92.1859547 | 67.846326 | 79.421441 | 100.17254  |
| 20:32:28 | 0:29:39 | 93.6859547 | 67.846326 | 84.421441 | 100.17254  |
| 20:32:29 | 0:29:40 | 85.6859547 | 67.846326 | 84.421441 | 79.1725398 |
| 20:32:30 | 0:29:41 | 84.1859547 | 65.846326 | 83.421441 | 77.1725398 |
| 20:32:31 | 0:29:42 | 83.6859547 | 65.846326 | 82.421441 | 77.1725398 |
| 20:32:32 | 0:29:43 | 83.5192881 | 65.846326 | 82.421441 | 77.1725398 |
| 20:32:33 | 0:29:44 | 82.3526214 | 65.846326 | 80.421441 | 77.1725398 |
| 20:32:34 | 0:29:45 | 83.1859547 | 65.846326 | 79.421441 | 81.1725398 |
| 20:32:35 | 0:29:46 | 82.3526214 | 65.846326 | 77.421441 | 81.1725398 |
| 20:32:36 | 0:29:47 | 83.5192881 | 66.846326 | 77.421441 | 84.1725398 |
| 20:32:37 | 0:29:48 | 82.3526214 | 67.846326 | 74.421441 | 84.1725398 |
| 20:32:38 | 0:29:49 | 78.1859547 | 67.846326 | 72.421441 | 74.1725398 |
| 20:32:39 | 0:29:50 | 77.3526214 | 70.846326 | 70.421441 | 72.1725398 |
| 20:32:40 | 0:29:51 | 76.5192881 | 70.846326 | 68.421441 | 72.1725398 |
| 20:32:41 | 0:29:52 | 76.8526214 | 71.846326 | 68.421441 | 72.1725398 |
| 20:32:42 | 0:29:53 | 76.0192881 | 72.846326 | 67.421441 | 70.1725398 |
| 20:32:43 | 0:29:54 | 76.0192881 | 72.846326 | 70.421441 | 70.1725398 |
| 20:32:44 | 0:29:55 | 75.1859547 | 69.846326 | 70.421441 | 70.1725398 |
| 20:32:45 | 0:29:56 | 99.8813582 | 69.846326 | 83.421441 | 69.1725398 |
| 20:32:46 | 0:29:57 | 97.8813582 | 68.846326 | 85.421441 | 68.1725398 |

|          |         |            |           |           |            |
|----------|---------|------------|-----------|-----------|------------|
| 20:32:47 | 0:29:58 | 88.8813582 | 68.846326 | 85.421441 | 68.1725398 |
| 20:32:48 | 0:29:59 | 83.8813582 | 67.846326 | 85.421441 | 66.1725398 |
| 20:32:49 | 0:30:00 | 80.8813582 | 67.846326 | 85.421441 | 66.1725398 |
| 20:32:50 | 0:30:01 | 77.8813582 | 67.846326 | 85.421441 | 66.1725398 |
| 20:32:51 | 0:30:02 | 74.8813582 | 67.846326 | 84.421441 | 66.1725398 |
| 20:32:52 | 0:30:03 | 73.8813582 | 67.846326 | 84.421441 | 66.1725398 |
| 20:32:53 | 0:30:04 | 74.8813582 | 67.846326 | 85.421441 | 66.1725398 |
| 20:32:54 | 0:30:05 | 79.8813582 | 67.846326 | 86.421441 | 66.1725398 |
| 20:32:55 | 0:30:06 | 84.8813582 | 67.846326 | 86.421441 | 66.1725398 |
| 20:32:56 | 0:30:07 | 86.8813582 | 67.846326 | 87.421441 | 67.1725398 |
| 20:32:57 | 0:30:08 | 88.8813582 | 67.846326 | 88.421441 | 69.1725398 |
| 20:32:58 | 0:30:09 | 93.8813582 | 66.846326 | 88.421441 | 73.1725398 |
| 20:32:59 | 0:30:10 | 98.8813582 | 66.846326 | 92.421441 | 74.1725398 |
| 20:33:00 | 0:30:11 | 98.8813582 | 66.846326 | 92.421441 | 74.1725398 |
| 20:33:01 | 0:30:12 | 102.881358 | 66.846326 | 94.421441 | 72.1725398 |
| 20:33:02 | 0:30:13 | 103.881358 | 66.846326 | 93.421441 | 71.1725398 |
| 20:33:03 | 0:30:14 | 103.881358 | 66.846326 | 92.421441 | 71.1725398 |
| 20:33:04 | 0:30:15 | 103.881358 | 66.846326 | 91.421441 | 71.1725398 |
| 20:33:05 | 0:30:16 | 102.881358 | 66.846326 | 91.421441 | 72.1725398 |
| 20:33:06 | 0:30:17 | 103.881358 | 66.846326 | 91.421441 | 72.1725398 |
| 20:33:07 | 0:30:18 | 104.881358 | 66.846326 | 91.421441 | 73.1725398 |
| 20:33:08 | 0:30:19 | 104.881358 | 66.846326 | 91.421441 | 75.1725398 |
| 20:33:09 | 0:30:20 | 103.881358 | 71.846326 | 88.421441 | 75.1725398 |
| 20:33:10 | 0:30:21 | 102.881358 | 72.846326 | 88.421441 | 75.1725398 |
| 20:33:11 | 0:30:22 | 100.881358 | 72.846326 | 88.421441 | 75.1725398 |
| 20:33:12 | 0:30:23 | 98.8813582 | 72.846326 | 87.421441 | 75.1725398 |
| 20:33:13 | 0:30:24 | 96.8813582 | 76.846326 | 87.421441 | 75.1725398 |
| 20:33:14 | 0:30:25 | 96.8813582 | 76.846326 | 86.421441 | 75.1725398 |
| 20:33:15 | 0:30:26 | 95.8813582 | 76.846326 | 86.421441 | 75.1725398 |
| 20:33:16 | 0:30:27 | 83.8813582 | 73.846326 | 86.421441 | 77.1725398 |
| 20:33:17 | 0:30:28 | 83.8813582 | 70.846326 | 86.421441 | 76.1725398 |
| 20:33:18 | 0:30:29 | 74.8813582 | 70.846326 | 86.421441 | 76.1725398 |
| 20:33:19 | 0:30:30 | 70.8813582 | 69.846326 | 86.421441 | 75.1725398 |
| 20:33:20 | 0:30:31 | 68.8813582 | 68.846326 | 90.421441 | 75.1725398 |
| 20:33:21 | 0:30:32 | 67.8813582 | 68.846326 | 95.421441 | 77.1725398 |
| 20:33:22 | 0:30:33 | 66.8813582 | 68.846326 | 95.421441 | 79.1725398 |
| 20:33:23 | 0:30:34 | 66.8813582 | 67.846326 | 95.421441 | 79.1725398 |
| 20:33:24 | 0:30:35 | 66.8813582 | 65.846326 | 95.421441 | 80.1725398 |
| 20:33:25 | 0:30:36 | 66.8813582 | 65.846326 | 95.421441 | 81.1725398 |
| 20:33:26 | 0:30:37 | 66.8813582 | 65.846326 | 95.421441 | 81.1725398 |
| 20:33:27 | 0:30:38 | 67.8813582 | 65.846326 | 95.421441 | 81.1725398 |
| 20:33:28 | 0:30:39 | 67.8813582 | 65.846326 | 95.421441 | 81.1725398 |
| 20:33:29 | 0:30:40 | 67.8813582 | 65.846326 | 95.421441 | 82.1725398 |
| 20:33:30 | 0:30:41 | 67.8813582 | 65.846326 | 96.421441 | 82.1725398 |
| 20:33:31 | 0:30:42 | 67.8813582 | 65.846326 | 96.421441 | 82.1725398 |

|          |         |            |           |           |            |
|----------|---------|------------|-----------|-----------|------------|
| 20:33:32 | 0:30:43 | 68.8813582 | 65.846326 | 96.421441 | 81.1725398 |
| 20:33:33 | 0:30:44 | 69.8813582 | 65.846326 | 96.421441 | 79.1725398 |
| 20:33:34 | 0:30:45 | 71.8813582 | 65.846326 | 96.421441 | 78.1725398 |
| 20:33:35 | 0:30:46 | 72.8813582 | 65.846326 | 95.421441 | 77.1725398 |
| 20:33:36 | 0:30:47 | 70.8813582 | 65.846326 | 94.421441 | 77.1725398 |
| 20:33:37 | 0:30:48 | 69.8813582 | 66.846326 | 95.421441 | 77.1725398 |
| 20:33:38 | 0:30:49 | 68.8813582 | 66.846326 | 95.421441 | 75.1725398 |
| 20:33:39 | 0:30:50 | 68.8813582 | 66.846326 | 96.421441 | 75.1725398 |
| 20:33:40 | 0:30:51 | 68.8813582 | 66.846326 | 98.421441 | 75.1725398 |
| 20:33:41 | 0:30:52 | 69.8813582 | 64.846326 | 98.421441 | 75.1725398 |
| 20:33:42 | 0:30:53 | 69.8813582 | 64.846326 | 98.421441 | 75.1725398 |
| 20:33:43 | 0:30:54 | 69.8813582 | 64.846326 | 98.421441 | 75.1725398 |
| 20:33:44 | 0:30:55 | 69.8813582 | 64.846326 | 98.421441 | 75.1725398 |
| 20:33:45 | 0:30:56 | 69.8813582 | 66.846326 | 95.421441 | 77.1725398 |
| 20:33:46 | 0:30:57 | 69.8813582 | 66.846326 | 95.421441 | 78.1725398 |
| 20:33:47 | 0:30:58 | 71.8813582 | 66.846326 | 95.421441 | 79.1725398 |
| 20:33:48 | 0:30:59 | 71.8813582 | 65.846326 | 95.421441 | 79.1725398 |
| 20:33:49 | 0:31:00 | 72.8813582 | 66.846326 | 95.421441 | 81.1725398 |
| 20:33:50 | 0:31:01 | 73.8813582 | 67.846326 | 95.421441 | 81.1725398 |
| 20:33:51 | 0:31:02 | 74.8813582 | 67.846326 | 95.421441 | 81.1725398 |
| 20:33:52 | 0:31:03 | 74.8813582 | 67.846326 | 95.421441 | 78.1725398 |
| 20:33:53 | 0:31:04 | 75.8813582 | 67.846326 | 95.421441 | 78.1725398 |
| 20:33:54 | 0:31:05 | 75.8813582 | 67.846326 | 95.421441 | 78.1725398 |
| 20:33:55 | 0:31:06 | 80.8813582 | 67.846326 | 95.421441 | 73.1725398 |
| 20:33:56 | 0:31:07 | 81.8813582 | 66.846326 | 88.421441 | 74.1725398 |
| 20:33:57 | 0:31:08 | 82.8813582 | 66.846326 | 87.421441 | 74.1725398 |
| 20:33:58 | 0:31:09 | 82.8813582 | 66.846326 | 86.421441 | 74.1725398 |
| 20:33:59 | 0:31:10 | 82.8813582 | 66.846326 | 86.421441 | 74.1725398 |
| 20:34:00 | 0:31:11 | 79.8813582 | 66.846326 | 86.421441 | 75.1725398 |
| 20:34:01 | 0:31:12 | 78.8813582 | 66.846326 | 86.421441 | 75.1725398 |
| 20:34:02 | 0:31:13 | 78.8813582 | 66.846326 | 89.421441 | 74.1725398 |
| 20:34:03 | 0:31:14 | 77.8813582 | 66.846326 | 89.421441 | 74.1725398 |
| 20:34:04 | 0:31:15 | 75.8813582 | 66.846326 | 89.421441 | 73.1725398 |
| 20:34:05 | 0:31:16 | 75.8813582 | 66.846326 | 89.421441 | 73.1725398 |
| 20:34:06 | 0:31:17 | 72.8813582 | 66.846326 | 89.421441 | 73.1725398 |
| 20:34:07 | 0:31:18 | 70.8813582 | 66.846326 | 91.421441 | 73.1725398 |
| 20:34:08 | 0:31:19 | 71.8813582 | 66.846326 | 91.421441 | 73.1725398 |
| 20:34:09 | 0:31:20 | 72.8813582 | 66.846326 | 92.421441 | 73.1725398 |
| 20:34:10 | 0:31:21 | 73.8813582 | 66.846326 | 92.421441 | 73.1725398 |
| 20:34:11 | 0:31:22 | 75.8813582 | 65.846326 | 97.421441 | 73.1725398 |
| 20:34:12 | 0:31:23 | 77.8813582 | 65.846326 | 97.421441 | 79.1725398 |
| 20:34:13 | 0:31:24 | 77.8813582 | 67.846326 | 97.421441 | 85.1725398 |
| 20:34:14 | 0:31:25 | 79.8813582 | 68.846326 | 97.421441 | 86.1725398 |
| 20:34:15 | 0:31:26 | 79.8813582 | 68.846326 | 97.421441 | 86.1725398 |
| 20:34:16 | 0:31:27 | 80.8813582 | 67.846326 | 97.421441 | 86.1725398 |

|          |         |            |           |           |            |
|----------|---------|------------|-----------|-----------|------------|
| 20:34:17 | 0:31:28 | 80.8813582 | 67.846326 | 97.421441 | 87.1725398 |
| 20:34:18 | 0:31:29 | 81.8813582 | 67.846326 | 96.421441 | 87.1725398 |
| 20:34:19 | 0:31:30 | 79.8813582 | 65.846326 | 94.421441 | 87.1725398 |
| 20:34:20 | 0:31:31 | 78.8813582 | 66.846326 | 94.421441 | 88.1725398 |
| 20:34:21 | 0:31:32 | 77.8813582 | 66.846326 | 91.421441 | 88.1725398 |
| 20:34:22 | 0:31:33 | 77.8813582 | 66.846326 | 87.421441 | 88.1725398 |
| 20:34:23 | 0:31:34 | 76.8813582 | 66.846326 | 87.421441 | 86.1725398 |
| 20:34:24 | 0:31:35 | 76.8813582 | 66.846326 | 85.421441 | 84.1725398 |
| 20:34:25 | 0:31:36 | 76.8813582 | 66.846326 | 85.421441 | 83.1725398 |
| 20:34:26 | 0:31:37 | 77.8813582 | 67.846326 | 82.421441 | 82.1725398 |
| 20:34:27 | 0:31:38 | 76.8813582 | 69.846326 | 81.421441 | 80.1725398 |
| 20:34:28 | 0:31:39 | 75.8813582 | 71.846326 | 80.421441 | 79.1725398 |
| 20:34:29 | 0:31:40 | 73.8813582 | 71.846326 | 80.421441 | 79.1725398 |
| 20:34:30 | 0:31:41 | 73.8813582 | 72.846326 | 79.421441 | 79.1725398 |
| 20:34:31 | 0:31:42 | 71.8813582 | 72.846326 | 78.421441 | 79.1725398 |
| 20:34:32 | 0:31:43 | 69.8813582 | 72.846326 | 78.421441 | 79.1725398 |
| 20:34:33 | 0:31:44 | 68.8813582 | 72.846326 | 78.421441 | 78.1725398 |
| 20:34:34 | 0:31:45 | 68.8813582 | 72.846326 | 79.421441 | 78.1725398 |
| 20:34:35 | 0:31:46 | 68.8813582 | 71.846326 | 79.421441 | 77.1725398 |
| 20:34:36 | 0:31:47 | 68.8813582 | 71.846326 | 79.421441 | 75.1725398 |
| 20:34:37 | 0:31:48 | 69.8813582 | 70.846326 | 80.421441 | 73.1725398 |
| 20:34:38 | 0:31:49 | 69.8813582 | 70.846326 | 80.421441 | 73.1725398 |
| 20:34:39 | 0:31:50 | 70.8813582 | 69.846326 | 81.421441 | 73.1725398 |
| 20:34:40 | 0:31:51 | 70.8813582 | 67.846326 | 80.421441 | 73.1725398 |
| 20:34:41 | 0:31:52 | 70.8813582 | 67.846326 | 79.421441 | 75.1725398 |
| 20:34:42 | 0:31:53 | 70.8813582 | 66.846326 | 79.421441 | 76.1725398 |
| 20:34:43 | 0:31:54 | 69.8813582 | 66.846326 | 79.421441 | 76.1725398 |
| 20:34:44 | 0:31:55 | 69.8813582 | 65.846326 | 79.421441 | 78.1725398 |
| 20:34:45 | 0:31:56 | 69.8813582 | 65.846326 | 80.421441 | 78.1725398 |
| 20:34:46 | 0:31:57 | 70.8813582 | 64.846326 | 80.421441 | 79.1725398 |
| 20:34:47 | 0:31:58 | 70.8813582 | 64.846326 | 79.421441 | 79.1725398 |
| 20:34:48 | 0:31:59 | 70.8813582 | 64.846326 | 79.421441 | 79.1725398 |
| 20:34:49 | 0:32:00 | 72.8813582 | 64.846326 | 80.421441 | 75.1725398 |
| 20:34:50 | 0:32:01 | 73.8813582 | 65.846326 | 80.421441 | 74.1725398 |
| 20:34:51 | 0:32:02 | 73.8813582 | 65.846326 | 81.421441 | 74.1725398 |
| 20:34:52 | 0:32:03 | 71.8813582 | 67.846326 | 81.421441 | 74.1725398 |
| 20:34:53 | 0:32:04 | 70.8813582 | 66.846326 | 81.421441 | 73.1725398 |
| 20:34:54 | 0:32:05 | 70.8813582 | 65.846326 | 77.421441 | 73.1725398 |
| 20:34:55 | 0:32:06 | 69.8813582 | 63.846326 | 75.421441 | 72.1725398 |
| 20:34:56 | 0:32:07 | 69.8813582 | 61.846326 | 68.421441 | 72.1725398 |
| 20:34:57 | 0:32:08 | 69.8813582 | 61.846326 | 66.421441 | 72.1725398 |
| 20:34:58 | 0:32:09 | 69.8813582 | 60.846326 | 61.421441 | 72.1725398 |
| 20:34:59 | 0:32:10 | 70.8813582 | 57.846326 | 60.421441 | 70.1725398 |
| 20:35:00 | 0:32:11 | 70.8813582 | 56.846326 | 60.421441 | 70.1725398 |
| 20:35:01 | 0:32:12 | 71.8813582 | 56.846326 | 60.421441 | 70.1725398 |



|          |         |            |           |           |            |
|----------|---------|------------|-----------|-----------|------------|
| 20:35:02 | 0:32:13 | 77.8813582 | 65.846326 | 59.421441 | 70.1725398 |
| 20:35:03 | 0:32:14 | 75.8813582 | 72.846326 | 59.421441 | 70.1725398 |
| 20:35:04 | 0:32:15 | 73.8813582 | 79.846326 | 59.421441 | 70.1725398 |
| 20:35:05 | 0:32:16 | 72.8813582 | 79.846326 | 59.421441 | 70.1725398 |
| 20:35:06 | 0:32:17 | 69.8813582 | 79.846326 | 61.421441 | 69.1725398 |
| 20:35:07 | 0:32:18 | 69.8813582 | 79.846326 | 63.421441 | 69.1725398 |
| 20:35:08 | 0:32:19 | 67.8813582 | 79.846326 | 63.421441 | 69.1725398 |
| 20:35:09 | 0:32:20 | 66.8813582 | 79.846326 | 63.421441 | 69.1725398 |
| 20:35:10 | 0:32:21 | 66.8813582 | 79.846326 | 65.421441 | 70.1725398 |
| 20:35:11 | 0:32:22 | 66.8813582 | 82.846326 | 65.421441 | 71.1725398 |
| 20:35:12 | 0:32:23 | 67.8813582 | 82.846326 | 65.421441 | 71.1725398 |
| 20:35:13 | 0:32:24 | 67.8813582 | 81.846326 | 66.421441 | 70.1725398 |
| 20:35:14 | 0:32:25 | 67.8813582 | 81.846326 | 66.421441 | 69.1725398 |
| 20:35:15 | 0:32:26 | 66.8813582 | 81.846326 | 66.421441 | 69.1725398 |
| 20:35:16 | 0:32:27 | 66.8813582 | 81.846326 | 64.421441 | 69.1725398 |
| 20:35:17 | 0:32:28 | 66.8813582 | 81.846326 | 64.421441 | 69.1725398 |
| 20:35:18 | 0:32:29 | 66.8813582 | 81.846326 | 64.421441 | 69.1725398 |
| 20:35:19 | 0:32:30 | 67.8813582 | 81.846326 | 63.421441 | 69.1725398 |
| 20:35:20 | 0:32:31 | 67.8813582 | 79.846326 | 63.421441 | 69.1725398 |
| 20:35:21 | 0:32:32 | 68.8813582 | 72.846326 | 63.421441 | 69.1725398 |
| 20:35:22 | 0:32:33 | 69.8813582 | 70.846326 | 63.421441 | 69.1725398 |
| 20:35:23 | 0:32:34 | 70.8813582 | 68.846326 | 64.421441 | 69.1725398 |
| 20:35:24 | 0:32:35 | 71.8813582 | 68.846326 | 64.421441 | 70.1725398 |
| 20:35:25 | 0:32:36 | 71.8813582 | 68.846326 | 65.421441 | 71.1725398 |
| 20:35:26 | 0:32:37 | 71.8813582 | 68.846326 | 65.421441 | 79.1725398 |
| 20:35:27 | 0:32:38 | 74.8813582 | 69.846326 | 65.421441 | 79.1725398 |
| 20:35:28 | 0:32:39 | 74.8813582 | 70.846326 | 65.421441 | 82.1725398 |
| 20:35:29 | 0:32:40 | 76.8813582 | 71.846326 | 66.421441 | 82.1725398 |
| 20:35:30 | 0:32:41 | 76.8813582 | 71.846326 | 67.421441 | 82.1725398 |
| 20:35:31 | 0:32:42 | 75.8813582 | 71.846326 | 67.421441 | 82.1725398 |
| 20:35:32 | 0:32:43 | 74.8813582 | 71.846326 | 67.421441 | 82.1725398 |
| 20:35:33 | 0:32:44 | 72.8813582 | 70.846326 | 67.421441 | 82.1725398 |
| 20:35:34 | 0:32:45 | 72.8813582 | 70.846326 | 66.421441 | 81.1725398 |
| 20:35:35 | 0:32:46 | 72.8813582 | 70.846326 | 66.421441 | 81.1725398 |
| 20:35:36 | 0:32:47 | 71.8813582 | 71.846326 | 66.421441 | 81.1725398 |
| 20:35:37 | 0:32:48 | 69.8813582 | 69.846326 | 66.421441 | 81.1725398 |
| 20:35:38 | 0:32:49 | 69.8813582 | 69.846326 | 66.421441 | 81.1725398 |
| 20:35:39 | 0:32:50 | 69.8813582 | 68.846326 | 66.421441 | 81.1725398 |
| 20:35:40 | 0:32:51 | 68.8813582 | 67.846326 | 67.421441 | 80.1725398 |
| 20:35:41 | 0:32:52 | 69.8813582 | 67.846326 | 68.421441 | 79.1725398 |
| 20:35:42 | 0:32:53 | 69.8813582 | 67.846326 | 68.421441 | 79.1725398 |
| 20:35:43 | 0:32:54 | 69.8813582 | 64.846326 | 71.421441 | 76.1725398 |
| 20:35:44 | 0:32:55 | 69.8813582 | 64.846326 | 71.421441 | 75.1725398 |
| 20:35:45 | 0:32:56 | 68.8813582 | 63.846326 | 73.421441 | 75.1725398 |
| 20:35:46 | 0:32:57 | 68.8813582 | 63.846326 | 74.421441 | 74.1725398 |

|          |         |            |           |           |            |
|----------|---------|------------|-----------|-----------|------------|
| 20:35:47 | 0:32:58 | 67.8813582 | 64.846326 | 74.421441 | 75.1725398 |
| 20:35:48 | 0:32:59 | 67.8813582 | 65.846326 | 74.421441 | 76.1725398 |
| 20:35:49 | 0:33:00 | 66.8813582 | 65.846326 | 74.421441 | 76.1725398 |
| 20:35:50 | 0:33:01 | 66.8813582 | 66.846326 | 74.421441 | 75.1725398 |
| 20:35:51 | 0:33:02 | 66.8813582 | 66.846326 | 74.421441 | 74.1725398 |
| 20:35:52 | 0:33:03 | 67.8813582 | 66.846326 | 77.421441 | 73.1725398 |
| 20:35:53 | 0:33:04 | 67.8813582 | 66.846326 | 77.421441 | 71.1725398 |
| 20:35:54 | 0:33:05 | 68.8813582 | 66.846326 | 77.421441 | 70.1725398 |
| 20:35:55 | 0:33:06 | 69.8813582 | 67.846326 | 77.421441 | 70.1725398 |
| 20:35:56 | 0:33:07 | 69.8813582 | 69.846326 | 77.421441 | 74.1725398 |
| 20:35:57 | 0:33:08 | 71.8813582 | 69.846326 | 77.421441 | 74.1725398 |
| 20:35:58 | 0:33:09 | 72.8813582 | 70.846326 | 77.421441 | 74.1725398 |
| 20:35:59 | 0:33:10 | 72.8813582 | 69.846326 | 77.421441 | 73.1725398 |
| 20:36:00 | 0:33:11 | 72.8813582 | 69.846326 | 78.421441 | 73.1725398 |
| 20:36:01 | 0:33:12 | 72.8813582 | 68.846326 | 78.421441 | 74.1725398 |
| 20:36:02 | 0:33:13 | 73.8813582 | 68.846326 | 78.421441 | 75.1725398 |
| 20:36:03 | 0:33:14 | 73.8813582 | 68.846326 | 81.421441 | 77.1725398 |
| 20:36:04 | 0:33:15 | 74.8813582 | 68.846326 | 81.421441 | 78.1725398 |
| 20:36:05 | 0:33:16 | 74.8813582 | 68.846326 | 81.421441 | 78.1725398 |
| 20:36:06 | 0:33:17 | 75.8813582 | 68.846326 | 81.421441 | 78.1725398 |
| 20:36:07 | 0:33:18 | 76.8813582 | 68.846326 | 82.421441 | 78.1725398 |
| 20:36:08 | 0:33:19 | 76.8813582 | 68.846326 | 82.421441 | 77.1725398 |
| 20:36:09 | 0:33:20 | 77.8813582 | 67.846326 | 85.421441 | 76.1725398 |
| 20:36:10 | 0:33:21 | 77.8813582 | 76.846326 | 85.421441 | 76.1725398 |
| 20:36:11 | 0:33:22 | 77.8813582 | 77.846326 | 85.421441 | 75.1725398 |
| 20:36:12 | 0:33:23 | 77.8813582 | 77.846326 | 85.421441 | 76.1725398 |
| 20:36:13 | 0:33:24 | 77.8813582 | 78.846326 | 86.421441 | 77.1725398 |
| 20:36:14 | 0:33:25 | 77.8813582 | 79.846326 | 86.421441 | 77.1725398 |
| 20:36:15 | 0:33:26 | 76.8813582 | 79.846326 | 87.421441 | 77.1725398 |
| 20:36:16 | 0:33:27 | 76.8813582 | 79.846326 | 87.421441 | 77.1725398 |
| 20:36:17 | 0:33:28 | 73.8813582 | 77.846326 | 87.421441 | 77.1725398 |
| 20:36:18 | 0:33:29 | 72.8813582 | 75.846326 | 87.421441 | 77.1725398 |
| 20:36:19 | 0:33:30 | 71.8813582 | 73.846326 | 86.421441 | 81.1725398 |
| 20:36:20 | 0:33:31 | 71.8813582 | 71.846326 | 86.421441 | 80.1725398 |
| 20:36:21 | 0:33:32 | 71.8813582 | 71.846326 | 86.421441 | 79.1725398 |
| 20:36:22 | 0:33:33 | 71.8813582 | 67.846326 | 86.421441 | 79.1725398 |
| 20:36:23 | 0:33:34 | 71.8813582 | 67.846326 | 92.421441 | 77.1725398 |
| 20:36:24 | 0:33:35 | 72.8813582 | 66.846326 | 95.421441 | 76.1725398 |
| 20:36:25 | 0:33:36 | 71.8813582 | 65.846326 | 94.421441 | 74.1725398 |
| 20:36:26 | 0:33:37 | 70.8813582 | 65.846326 | 94.421441 | 74.1725398 |
| 20:36:27 | 0:33:38 | 70.8813582 | 64.846326 | 94.421441 | 74.1725398 |
| 20:36:28 | 0:33:39 | 70.8813582 | 64.846326 | 93.421441 | 74.1725398 |
| 20:36:29 | 0:33:40 | 69.8813582 | 64.846326 | 93.421441 | 74.1725398 |
| 20:36:30 | 0:33:41 | 68.8813582 | 67.846326 | 93.421441 | 74.1725398 |
| 20:36:31 | 0:33:42 | 68.8813582 | 67.846326 | 92.421441 | 75.1725398 |

|          |         |            |           |            |            |
|----------|---------|------------|-----------|------------|------------|
| 20:36:32 | 0:33:43 | 67.8813582 | 67.846326 | 90.421441  | 75.1725398 |
| 20:36:33 | 0:33:44 | 67.8813582 | 67.846326 | 90.421441  | 74.1725398 |
| 20:36:34 | 0:33:45 | 66.8813582 | 68.846326 | 89.421441  | 71.1725398 |
| 20:36:35 | 0:33:46 | 66.8813582 | 69.846326 | 89.421441  | 70.1725398 |
| 20:36:36 | 0:33:47 | 66.8813582 | 69.846326 | 89.421441  | 70.1725398 |
| 20:36:37 | 0:33:48 | 66.8813582 | 69.846326 | 88.421441  | 70.1725398 |
| 20:36:38 | 0:33:49 | 66.8813582 | 71.846326 | 88.421441  | 73.1725398 |
| 20:36:39 | 0:33:50 | 66.8813582 | 70.846326 | 88.421441  | 73.1725398 |
| 20:36:40 | 0:33:51 | 65.8813582 | 69.846326 | 88.421441  | 74.1725398 |
| 20:36:41 | 0:33:52 | 65.8813582 | 71.846326 | 88.421441  | 74.1725398 |
| 20:36:42 | 0:33:53 | 65.8813582 | 72.846326 | 88.421441  | 74.1725398 |
| 20:36:43 | 0:33:54 | 66.8813582 | 74.846326 | 88.421441  | 73.1725398 |
| 20:36:44 | 0:33:55 | 66.8813582 | 76.846326 | 87.421441  | 72.1725398 |
| 20:36:45 | 0:33:56 | 66.8813582 | 76.846326 | 87.421441  | 71.1725398 |
| 20:36:46 | 0:33:57 | 66.8813582 | 77.846326 | 87.421441  | 69.1725398 |
| 20:36:47 | 0:33:58 | 66.8813582 | 76.846326 | 87.421441  | 68.1725398 |
| 20:36:48 | 0:33:59 | 65.8813582 | 74.846326 | 87.421441  | 68.1725398 |
| 20:36:49 | 0:34:00 | 66.8813582 | 69.846326 | 87.421441  | 68.1725398 |
| 20:36:50 | 0:34:01 | 66.8813582 | 69.846326 | 87.421441  | 68.1725398 |
| 20:36:51 | 0:34:02 | 66.8813582 | 68.846326 | 87.421441  | 68.1725398 |
| 20:36:52 | 0:34:03 | 66.8813582 | 67.846326 | 87.421441  | 67.1725398 |
| 20:36:53 | 0:34:04 | 66.8813582 | 69.846326 | 87.421441  | 67.1725398 |
| 20:36:54 | 0:34:05 | 66.8813582 | 69.846326 | 87.421441  | 67.1725398 |
| 20:36:55 | 0:34:06 | 66.8813582 | 69.846326 | 88.421441  | 66.1725398 |
| 20:36:56 | 0:34:07 | 66.8813582 | 69.846326 | 88.421441  | 66.1725398 |
| 20:36:57 | 0:34:08 | 67.8813582 | 69.846326 | 88.421441  | 66.1725398 |
| 20:36:58 | 0:34:09 | 67.8813582 | 69.846326 | 88.421441  | 66.1725398 |
| 20:36:59 | 0:34:10 | 67.8813582 | 67.846326 | 88.421441  | 66.1725398 |
| 20:37:00 | 0:34:11 | 69.8813582 | 65.846326 | 88.421441  | 65.1725398 |
| 20:37:01 | 0:34:12 | 68.8813582 | 65.846326 | 89.421441  | 65.1725398 |
| 20:37:02 | 0:34:13 | 68.8813582 | 64.846326 | 90.421441  | 67.1725398 |
| 20:37:03 | 0:34:14 | 69.8813582 | 64.846326 | 95.421441  | 67.1725398 |
| 20:37:04 | 0:34:15 | 69.8813582 | 65.846326 | 96.421441  | 67.1725398 |
| 20:37:05 | 0:34:16 | 69.8813582 | 65.846326 | 96.421441  | 67.1725398 |
| 20:37:06 | 0:34:17 | 69.8813582 | 65.846326 | 98.421441  | 67.1725398 |
| 20:37:07 | 0:34:18 | 70.8813582 | 65.846326 | 99.421441  | 67.1725398 |
| 20:37:08 | 0:34:19 | 70.8813582 | 64.846326 | 99.421441  | 67.1725398 |
| 20:37:09 | 0:34:20 | 69.8813582 | 64.846326 | 76.2953836 | 67.1725398 |
| 20:37:10 | 0:34:21 | 69.8813582 | 64.846326 | 76.2953836 | 67.1725398 |
| 20:37:11 | 0:34:22 | 69.8813582 | 65.846326 | 97.421441  | 70.1725398 |
| 20:37:12 | 0:34:23 | 69.8813582 | 65.846326 | 97.421441  | 71.1725398 |
| 20:37:13 | 0:34:24 | 68.8813582 | 67.846326 | 89.421441  | 71.1725398 |
| 20:37:14 | 0:34:25 | 68.8813582 | 67.846326 | 89.421441  | 71.1725398 |
| 20:37:15 | 0:34:26 | 69.8813582 | 68.846326 | 87.421441  | 71.1725398 |
| 20:37:16 | 0:34:27 | 69.8813582 | 70.846326 | 90.421441  | 69.1725398 |

|          |         |            |           |           |            |
|----------|---------|------------|-----------|-----------|------------|
| 20:37:17 | 0:34:28 | 68.8813582 | 70.846326 | 91.421441 | 68.1725398 |
| 20:37:18 | 0:34:29 | 68.8813582 | 74.846326 | 91.421441 | 69.1725398 |
| 20:37:19 | 0:34:30 | 69.8813582 | 73.846326 | 90.421441 | 70.1725398 |
| 20:37:20 | 0:34:31 | 69.8813582 | 73.846326 | 87.421441 | 70.1725398 |
| 20:37:21 | 0:34:32 | 69.8813582 | 72.846326 | 86.421441 | 70.1725398 |
| 20:37:22 | 0:34:33 | 69.8813582 | 71.846326 | 84.421441 | 72.1725398 |
| 20:37:23 | 0:34:34 | 69.8813582 | 71.846326 | 83.421441 | 71.1725398 |
| 20:37:24 | 0:34:35 | 69.8813582 | 71.846326 | 83.421441 | 71.1725398 |
| 20:37:25 | 0:34:36 | 69.8813582 | 70.846326 | 83.421441 | 71.1725398 |
| 20:37:26 | 0:34:37 | 69.8813582 | 70.846326 | 83.421441 | 71.1725398 |
| 20:37:27 | 0:34:38 | 69.8813582 | 70.846326 | 83.421441 | 71.1725398 |
| 20:37:28 | 0:34:39 | 70.8813582 | 69.846326 | 83.421441 | 71.1725398 |
| 20:37:29 | 0:34:40 | 71.8813582 | 68.846326 | 83.421441 | 75.1725398 |
| 20:37:30 | 0:34:41 | 71.8813582 | 68.846326 | 83.421441 | 75.1725398 |
| 20:37:31 | 0:34:42 | 70.8813582 | 70.846326 | 83.421441 | 80.1725398 |
| 20:37:32 | 0:34:43 | 69.8813582 | 70.846326 | 83.421441 | 80.1725398 |
| 20:37:33 | 0:34:44 | 68.8813582 | 70.846326 | 88.421441 | 83.1725398 |
| 20:37:34 | 0:34:45 | 68.8813582 | 71.846326 | 92.421441 | 83.1725398 |
| 20:37:35 | 0:34:46 | 68.8813582 | 71.846326 | 94.421441 | 83.1725398 |
| 20:37:36 | 0:34:47 | 68.8813582 | 73.846326 | 95.421441 | 82.1725398 |
| 20:37:37 | 0:34:48 | 69.8813582 | 73.846326 | 98.421441 | 79.1725398 |
| 20:37:38 | 0:34:49 | 69.8813582 | 71.846326 | 98.421441 | 78.1725398 |
| 20:37:39 | 0:34:50 | 69.8813582 | 69.846326 | 97.421441 | 76.1725398 |
| 20:37:40 | 0:34:51 | 70.8813582 | 68.846326 | 93.421441 | 76.1725398 |
| 20:37:41 | 0:34:52 | 71.8813582 | 68.846326 | 92.421441 | 73.1725398 |
| 20:37:42 | 0:34:53 | 71.8813582 | 67.846326 | 91.421441 | 71.1725398 |
| 20:37:43 | 0:34:54 | 72.8813582 | 67.846326 | 90.421441 | 71.1725398 |
| 20:37:44 | 0:34:55 | 72.8813582 | 67.846326 | 89.421441 | 72.1725398 |
| 20:37:45 | 0:34:56 | 72.8813582 | 67.846326 | 89.421441 | 72.1725398 |
| 20:37:46 | 0:34:57 | 71.8813582 | 67.846326 | 89.421441 | 73.1725398 |
| 20:37:47 | 0:34:58 | 71.8813582 | 68.846326 | 89.421441 | 74.1725398 |
| 20:37:48 | 0:34:59 | 71.8813582 | 68.846326 | 90.421441 | 73.1725398 |
| 20:37:49 | 0:35:00 | 71.8813582 | 68.846326 | 91.421441 | 73.1725398 |
| 20:37:50 | 0:35:01 | 71.8813582 | 68.846326 | 91.421441 | 73.1725398 |
| 20:37:51 | 0:35:02 | 70.8813582 | 69.846326 | 91.421441 | 73.1725398 |
| 20:37:52 | 0:35:03 | 70.8813582 | 69.846326 | 91.421441 | 77.1725398 |
| 20:37:53 | 0:35:04 | 70.8813582 | 71.846326 | 91.421441 | 79.1725398 |
| 20:37:54 | 0:35:05 | 70.8813582 | 71.846326 | 91.421441 | 80.1725398 |
| 20:37:55 | 0:35:06 | 70.8813582 | 70.846326 | 91.421441 | 80.1725398 |
| 20:37:56 | 0:35:07 | 70.8813582 | 69.846326 | 91.421441 | 81.1725398 |
| 20:37:57 | 0:35:08 | 71.8813582 | 70.846326 | 91.421441 | 81.1725398 |
| 20:37:58 | 0:35:09 | 71.8813582 | 70.846326 | 90.421441 | 78.1725398 |
| 20:37:59 | 0:35:10 | 71.8813582 | 70.846326 | 89.421441 | 76.1725398 |
| 20:38:00 | 0:35:11 | 72.8813582 | 70.846326 | 89.421441 | 76.1725398 |
| 20:38:01 | 0:35:12 | 72.8813582 | 71.846326 | 88.421441 | 75.1725398 |

|          |         |            |           |           |            |
|----------|---------|------------|-----------|-----------|------------|
| 20:38:02 | 0:35:13 | 73.8813582 | 71.846326 | 88.421441 | 75.1725398 |
| 20:38:03 | 0:35:14 | 73.8813582 | 71.846326 | 87.421441 | 75.1725398 |
| 20:38:04 | 0:35:15 | 72.8813582 | 71.846326 | 87.421441 | 78.1725398 |
| 20:38:05 | 0:35:16 | 71.8813582 | 70.846326 | 87.421441 | 80.1725398 |
| 20:38:06 | 0:35:17 | 71.8813582 | 70.846326 | 87.421441 | 80.1725398 |
| 20:38:07 | 0:35:18 | 71.8813582 | 68.846326 | 87.421441 | 80.1725398 |
| 20:38:08 | 0:35:19 | 70.8813582 | 68.846326 | 88.421441 | 79.1725398 |
| 20:38:09 | 0:35:20 | 70.8813582 | 68.846326 | 88.421441 | 79.1725398 |
| 20:38:10 | 0:35:21 | 70.8813582 | 67.846326 | 89.421441 | 79.1725398 |
| 20:38:11 | 0:35:22 | 70.8813582 | 67.846326 | 89.421441 | 78.1725398 |
| 20:38:12 | 0:35:23 | 71.8813582 | 67.846326 | 89.421441 | 77.1725398 |
| 20:38:13 | 0:35:24 | 72.8813582 | 67.846326 | 89.421441 | 75.1725398 |
| 20:38:14 | 0:35:25 | 72.8813582 | 68.846326 | 89.421441 | 75.1725398 |
| 20:38:15 | 0:35:26 | 72.8813582 | 69.846326 | 89.421441 | 75.1725398 |
| 20:38:16 | 0:35:27 | 73.8813582 | 71.846326 | 89.421441 | 74.1725398 |
| 20:38:17 | 0:35:28 | 72.8813582 | 71.846326 | 89.421441 | 74.1725398 |
| 20:38:18 | 0:35:29 | 72.8813582 | 71.846326 | 89.421441 | 70.1725398 |
| 20:38:19 | 0:35:30 | 72.8813582 | 70.846326 | 89.421441 | 69.1725398 |
| 20:38:20 | 0:35:31 | 72.8813582 | 68.846326 | 89.421441 | 68.1725398 |
| 20:38:21 | 0:35:32 | 72.8813582 | 68.846326 | 90.421441 | 69.1725398 |
| 20:38:22 | 0:35:33 | 72.8813582 | 68.846326 | 90.421441 | 69.1725398 |
| 20:38:23 | 0:35:34 | 72.8813582 | 69.846326 | 90.421441 | 69.1725398 |
| 20:38:24 | 0:35:35 | 72.8813582 | 69.846326 | 90.421441 | 69.1725398 |
| 20:38:25 | 0:35:36 | 72.8813582 | 72.846326 | 89.421441 | 69.1725398 |
| 20:38:26 | 0:35:37 | 73.8813582 | 73.846326 | 89.421441 | 69.1725398 |
| 20:38:27 | 0:35:38 | 74.8813582 | 73.846326 | 89.421441 | 69.1725398 |
| 20:38:28 | 0:35:39 | 74.8813582 | 73.846326 | 89.421441 | 73.1725398 |
| 20:38:29 | 0:35:40 | 74.8813582 | 74.846326 | 89.421441 | 73.1725398 |
| 20:38:30 | 0:35:41 | 74.8813582 | 74.846326 | 88.421441 | 73.1725398 |
| 20:38:31 | 0:35:42 | 74.8813582 | 73.846326 | 88.421441 | 76.1725398 |
| 20:38:32 | 0:35:43 | 74.8813582 | 72.846326 | 88.421441 | 74.1725398 |
| 20:38:33 | 0:35:44 | 75.8813582 | 70.846326 | 88.421441 | 73.1725398 |
| 20:38:34 | 0:35:45 | 76.8813582 | 69.846326 | 88.421441 | 74.1725398 |
| 20:38:35 | 0:35:46 | 73.8813582 | 69.846326 | 88.421441 | 74.1725398 |
| 20:38:36 | 0:35:47 | 72.8813582 | 69.846326 | 88.421441 | 75.1725398 |
| 20:38:37 | 0:35:48 | 72.8813582 | 68.846326 | 88.421441 | 75.1725398 |
| 20:38:38 | 0:35:49 | 72.8813582 | 68.846326 | 88.421441 | 76.1725398 |
| 20:38:39 | 0:35:50 | 72.8813582 | 71.846326 | 85.421441 | 75.1725398 |
| 20:38:40 | 0:35:51 | 72.8813582 | 71.846326 | 85.421441 | 75.1725398 |
| 20:38:41 | 0:35:52 | 72.8813582 | 71.846326 | 84.421441 | 75.1725398 |
| 20:38:42 | 0:35:53 | 72.8813582 | 72.846326 | 84.421441 | 75.1725398 |
| 20:38:43 | 0:35:54 | 72.8813582 | 72.846326 | 83.421441 | 75.1725398 |
| 20:38:44 | 0:35:55 | 72.8813582 | 72.846326 | 83.421441 | 75.1725398 |
| 20:38:45 | 0:35:56 | 73.8813582 | 72.846326 | 83.421441 | 75.1725398 |
| 20:38:46 | 0:35:57 | 73.8813582 | 72.846326 | 82.421441 | 76.1725398 |

|          |         |            |           |           |            |
|----------|---------|------------|-----------|-----------|------------|
| 20:38:47 | 0:35:58 | 74.8813582 | 72.846326 | 79.421441 | 74.1725398 |
| 20:38:48 | 0:35:59 | 74.8813582 | 72.846326 | 79.421441 | 70.1725398 |
| 20:38:49 | 0:36:00 | 75.8813582 | 72.846326 | 79.421441 | 69.1725398 |
| 20:38:50 | 0:36:01 | 76.8813582 | 72.846326 | 79.421441 | 69.1725398 |
| 20:38:51 | 0:36:02 | 77.8813582 | 72.846326 | 79.421441 | 69.1725398 |
| 20:38:52 | 0:36:03 | 78.8813582 | 71.846326 | 79.421441 | 69.1725398 |
| 20:38:53 | 0:36:04 | 79.8813582 | 71.846326 | 78.421441 | 69.1725398 |
| 20:38:54 | 0:36:05 | 78.8813582 | 71.846326 | 78.421441 | 69.1725398 |
| 20:38:55 | 0:36:06 | 77.8813582 | 70.846326 | 78.421441 | 69.1725398 |
| 20:38:56 | 0:36:07 | 78.8813582 | 69.846326 | 78.421441 | 68.1725398 |
| 20:38:57 | 0:36:08 | 79.8813582 | 67.846326 | 79.421441 | 66.1725398 |
| 20:38:58 | 0:36:09 | 79.8813582 | 67.846326 | 79.421441 | 66.1725398 |
| 20:38:59 | 0:36:10 | 82.8813582 | 67.846326 | 79.421441 | 66.1725398 |
| 20:39:00 | 0:36:11 | 83.8813582 | 67.846326 | 79.421441 | 66.1725398 |
| 20:39:01 | 0:36:12 | 83.8813582 | 67.846326 | 80.421441 | 66.1725398 |
| 20:39:02 | 0:36:13 | 89.8813582 | 66.846326 | 80.421441 | 66.1725398 |
| 20:39:03 | 0:36:14 | 91.8813582 | 66.846326 | 80.421441 | 66.1725398 |
| 20:39:04 | 0:36:15 | 95.8813582 | 67.846326 | 80.421441 | 66.1725398 |
| 20:39:05 | 0:36:16 | 79.8953836 | 67.846326 | 79.421441 | 66.1725398 |
| 20:39:06 | 0:36:17 | 80.0953836 | 67.846326 | 79.421441 | 66.1725398 |
| 20:39:07 | 0:36:18 | 80.6953836 | 68.846326 | 78.421441 | 67.1725398 |
| 20:39:08 | 0:36:19 | 81.0953836 | 68.846326 | 78.421441 | 68.1725398 |
| 20:39:09 | 0:36:20 | 80.6953836 | 68.846326 | 76.421441 | 68.1725398 |
| 20:39:10 | 0:36:21 | 80.6953836 | 68.846326 | 76.421441 | 68.1725398 |
| 20:39:11 | 0:36:22 | 81.8953836 | 68.846326 | 76.421441 | 70.1725398 |
| 20:39:12 | 0:36:23 | 96.8813582 | 70.846326 | 76.421441 | 73.1725398 |
| 20:39:13 | 0:36:24 | 93.8813582 | 70.846326 | 76.421441 | 73.1725398 |
| 20:39:14 | 0:36:25 | 83.8813582 | 72.846326 | 77.421441 | 69.1725398 |
| 20:39:15 | 0:36:26 | 81.8813582 | 71.846326 | 77.421441 | 69.1725398 |
| 20:39:16 | 0:36:27 | 79.8813582 | 71.846326 | 77.421441 | 67.1725398 |
| 20:39:17 | 0:36:28 | 78.8813582 | 71.846326 | 77.421441 | 66.1725398 |
| 20:39:18 | 0:36:29 | 78.8813582 | 71.846326 | 77.421441 | 66.1725398 |
| 20:39:19 | 0:36:30 | 76.8813582 | 70.846326 | 78.421441 | 66.1725398 |
| 20:39:20 | 0:36:31 | 76.8813582 | 70.846326 | 79.421441 | 65.1725398 |
| 20:39:21 | 0:36:32 | 75.8813582 | 70.846326 | 79.421441 | 65.1725398 |
| 20:39:22 | 0:36:33 | 74.8813582 | 70.846326 | 80.421441 | 65.1725398 |
| 20:39:23 | 0:36:34 | 74.8813582 | 70.846326 | 80.421441 | 65.1725398 |
| 20:39:24 | 0:36:35 | 74.8813582 | 70.846326 | 80.421441 | 65.1725398 |
| 20:39:25 | 0:36:36 | 74.8813582 | 70.846326 | 81.421441 | 72.1725398 |
| 20:39:26 | 0:36:37 | 75.8813582 | 70.846326 | 81.421441 | 73.1725398 |
| 20:39:27 | 0:36:38 | 76.8813582 | 69.846326 | 81.421441 | 73.1725398 |
| 20:39:28 | 0:36:39 | 76.8813582 | 67.846326 | 81.421441 | 73.1725398 |
| 20:39:29 | 0:36:40 | 76.8813582 | 67.846326 | 81.421441 | 73.1725398 |
| 20:39:30 | 0:36:41 | 74.8813582 | 67.846326 | 81.421441 | 73.1725398 |
| 20:39:31 | 0:36:42 | 71.8813582 | 67.846326 | 81.421441 | 73.1725398 |

|          |         |            |           |           |            |
|----------|---------|------------|-----------|-----------|------------|
| 20:39:32 | 0:36:43 | 70.8813582 | 67.846326 | 81.421441 | 73.1725398 |
| 20:39:33 | 0:36:44 | 70.8813582 | 67.846326 | 80.421441 | 73.1725398 |
| 20:39:34 | 0:36:45 | 70.8813582 | 67.846326 | 81.421441 | 72.1725398 |
| 20:39:35 | 0:36:46 | 70.8813582 | 68.846326 | 82.421441 | 72.1725398 |
| 20:39:36 | 0:36:47 | 70.8813582 | 68.846326 | 82.421441 | 74.1725398 |
| 20:39:37 | 0:36:48 | 71.8813582 | 69.846326 | 82.421441 | 79.1725398 |
| 20:39:38 | 0:36:49 | 71.8813582 | 69.846326 | 82.421441 | 80.1725398 |
| 20:39:39 | 0:36:50 | 69.8813582 | 69.846326 | 82.421441 | 80.1725398 |
| 20:39:40 | 0:36:51 | 69.8813582 | 70.846326 | 82.421441 | 79.1725398 |
| 20:39:41 | 0:36:52 | 69.8813582 | 70.846326 | 82.421441 | 81.1725398 |
| 20:39:42 | 0:36:53 | 68.8813582 | 70.846326 | 82.421441 | 82.1725398 |
| 20:39:43 | 0:36:54 | 67.8813582 | 70.846326 | 82.421441 | 84.1725398 |
| 20:39:44 | 0:36:55 | 67.8813582 | 70.846326 | 82.421441 | 84.1725398 |
| 20:39:45 | 0:36:56 | 66.8813582 | 70.846326 | 82.421441 | 84.1725398 |
| 20:39:46 | 0:36:57 | 66.8813582 | 71.846326 | 82.421441 | 83.1725398 |
| 20:39:47 | 0:36:58 | 66.8813582 | 72.846326 | 83.421441 | 79.1725398 |
| 20:39:48 | 0:36:59 | 67.8813582 | 73.846326 | 84.421441 | 79.1725398 |
| 20:39:49 | 0:37:00 | 67.8813582 | 73.846326 | 84.421441 | 76.1725398 |
| 20:39:50 | 0:37:01 | 66.8813582 | 73.846326 | 84.421441 | 77.1725398 |
| 20:39:51 | 0:37:02 | 66.8813582 | 73.846326 | 85.421441 | 77.1725398 |
| 20:39:52 | 0:37:03 | 66.8813582 | 73.846326 | 84.421441 | 78.1725398 |
| 20:39:53 | 0:37:04 | 66.8813582 | 72.846326 | 84.421441 | 79.1725398 |
| 20:39:54 | 0:37:05 | 66.8813582 | 71.846326 | 82.421441 | 78.1725398 |
| 20:39:55 | 0:37:06 | 66.8813582 | 71.846326 | 82.421441 | 77.1725398 |
| 20:39:56 | 0:37:07 | 66.8813582 | 70.846326 | 83.421441 | 74.1725398 |
| 20:39:57 | 0:37:08 | 66.8813582 | 71.846326 | 85.421441 | 73.1725398 |
| 20:39:58 | 0:37:09 | 66.8813582 | 72.846326 | 85.421441 | 73.1725398 |
| 20:39:59 | 0:37:10 | 66.8813582 | 72.846326 | 86.421441 | 73.1725398 |
| 20:40:00 | 0:37:11 | 66.8813582 | 73.846326 | 86.421441 | 72.1725398 |
| 20:40:01 | 0:37:12 | 66.8813582 | 75.846326 | 86.421441 | 74.1725398 |
| 20:40:02 | 0:37:13 | 66.8813582 | 75.846326 | 86.421441 | 75.1725398 |
| 20:40:03 | 0:37:14 | 66.8813582 | 75.846326 | 89.421441 | 75.1725398 |
| 20:40:04 | 0:37:15 | 66.8813582 | 74.846326 | 89.421441 | 73.1725398 |
| 20:40:05 | 0:37:16 | 67.8813582 | 73.846326 | 89.421441 | 70.1725398 |
| 20:40:06 | 0:37:17 | 67.8813582 | 73.846326 | 89.421441 | 70.1725398 |
| 20:40:07 | 0:37:18 | 67.8813582 | 72.846326 | 90.421441 | 68.1725398 |
| 20:40:08 | 0:37:19 | 68.8813582 | 73.846326 | 89.421441 | 68.1725398 |
| 20:40:09 | 0:37:20 | 68.8813582 | 73.846326 | 89.421441 | 69.1725398 |
| 20:40:10 | 0:37:21 | 68.8813582 | 73.846326 | 89.421441 | 70.1725398 |
| 20:40:11 | 0:37:22 | 68.8813582 | 73.846326 | 88.421441 | 70.1725398 |
| 20:40:12 | 0:37:23 | 68.8813582 | 73.846326 | 88.421441 | 70.1725398 |
| 20:40:13 | 0:37:24 | 67.8813582 | 74.846326 | 88.421441 | 70.1725398 |
| 20:40:14 | 0:37:25 | 68.8813582 | 74.846326 | 88.421441 | 71.1725398 |
| 20:40:15 | 0:37:26 | 68.8813582 | 74.846326 | 87.421441 | 71.1725398 |
| 20:40:16 | 0:37:27 | 69.8813582 | 74.846326 | 87.421441 | 72.1725398 |

|          |         |            |           |           |            |
|----------|---------|------------|-----------|-----------|------------|
| 20:40:17 | 0:37:28 | 68.8813582 | 74.846326 | 87.421441 | 74.1725398 |
| 20:40:18 | 0:37:29 | 67.8813582 | 74.846326 | 87.421441 | 74.1725398 |
| 20:40:19 | 0:37:30 | 67.8813582 | 74.846326 | 86.421441 | 74.1725398 |
| 20:40:20 | 0:37:31 | 69.8813582 | 71.846326 | 85.421441 | 74.1725398 |
| 20:40:21 | 0:37:32 | 70.8813582 | 71.846326 | 83.421441 | 74.1725398 |
| 20:40:22 | 0:37:33 | 71.8813582 | 69.846326 | 82.421441 | 74.1725398 |
| 20:40:23 | 0:37:34 | 71.8813582 | 67.846326 | 82.421441 | 74.1725398 |
| 20:40:24 | 0:37:35 | 72.8813582 | 67.846326 | 81.421441 | 73.1725398 |
| 20:40:25 | 0:37:36 | 72.8813582 | 66.846326 | 81.421441 | 74.1725398 |
| 20:40:26 | 0:37:37 | 72.8813582 | 65.846326 | 80.421441 | 73.1725398 |
| 20:40:27 | 0:37:38 | 73.8813582 | 64.846326 | 80.421441 | 72.1725398 |
| 20:40:28 | 0:37:39 | 72.8813582 | 64.846326 | 80.421441 | 72.1725398 |
| 20:40:29 | 0:37:40 | 69.8813582 | 64.846326 | 80.421441 | 72.1725398 |
| 20:40:30 | 0:37:41 | 68.8813582 | 64.846326 | 82.421441 | 72.1725398 |
| 20:40:31 | 0:37:42 | 67.8813582 | 64.846326 | 81.421441 | 71.1725398 |
| 20:40:32 | 0:37:43 | 67.8813582 | 64.846326 | 81.421441 | 70.1725398 |
| 20:40:33 | 0:37:44 | 67.8813582 | 64.846326 | 81.421441 | 70.1725398 |
| 20:40:34 | 0:37:45 | 67.8813582 | 65.846326 | 84.421441 | 70.1725398 |
| 20:40:35 | 0:37:46 | 66.8813582 | 66.846326 | 84.421441 | 70.1725398 |
| 20:40:36 | 0:37:47 | 66.8813582 | 68.846326 | 84.421441 | 70.1725398 |
| 20:40:37 | 0:37:48 | 67.8813582 | 68.846326 | 84.421441 | 71.1725398 |
| 20:40:38 | 0:37:49 | 67.8813582 | 70.846326 | 83.421441 | 71.1725398 |
| 20:40:39 | 0:37:50 | 67.8813582 | 74.846326 | 83.421441 | 70.1725398 |
| 20:40:40 | 0:37:51 | 69.8813582 | 74.846326 | 83.421441 | 69.1725398 |
| 20:40:41 | 0:37:52 | 70.8813582 | 74.846326 | 83.421441 | 69.1725398 |
| 20:40:42 | 0:37:53 | 71.8813582 | 72.846326 | 83.421441 | 69.1725398 |
| 20:40:43 | 0:37:54 | 72.8813582 | 70.846326 | 83.421441 | 71.1725398 |
| 20:40:44 | 0:37:55 | 70.8813582 | 70.846326 | 81.421441 | 72.1725398 |
| 20:40:45 | 0:37:56 | 69.8813582 | 70.846326 | 81.421441 | 72.1725398 |
| 20:40:46 | 0:37:57 | 67.8813582 | 69.846326 | 81.421441 | 74.1725398 |
| 20:40:47 | 0:37:58 | 66.8813582 | 69.846326 | 81.421441 | 73.1725398 |
| 20:40:48 | 0:37:59 | 66.8813582 | 69.846326 | 81.421441 | 73.1725398 |
| 20:40:49 | 0:38:00 | 66.8813582 | 71.846326 | 84.421441 | 72.1725398 |
| 20:40:50 | 0:38:01 | 66.8813582 | 71.846326 | 87.421441 | 71.1725398 |
| 20:40:51 | 0:38:02 | 67.8813582 | 71.846326 | 87.421441 | 71.1725398 |
| 20:40:52 | 0:38:03 | 67.8813582 | 71.846326 | 89.421441 | 71.1725398 |
| 20:40:53 | 0:38:04 | 68.8813582 | 71.846326 | 87.421441 | 71.1725398 |
| 20:40:54 | 0:38:05 | 68.8813582 | 71.846326 | 87.421441 | 72.1725398 |
| 20:40:55 | 0:38:06 | 69.8813582 | 71.846326 | 88.421441 | 73.1725398 |
| 20:40:56 | 0:38:07 | 69.8813582 | 71.846326 | 88.421441 | 72.1725398 |
| 20:40:57 | 0:38:08 | 69.8813582 | 71.846326 | 89.421441 | 71.1725398 |
| 20:40:58 | 0:38:09 | 69.8813582 | 71.846326 | 89.421441 | 71.1725398 |
| 20:40:59 | 0:38:10 | 69.8813582 | 72.846326 | 88.421441 | 71.1725398 |
| 20:41:00 | 0:38:11 | 68.8813582 | 72.846326 | 88.421441 | 70.1725398 |
| 20:41:01 | 0:38:12 | 69.8813582 | 73.846326 | 88.421441 | 69.1725398 |



|          |         |            |           |            |            |
|----------|---------|------------|-----------|------------|------------|
| 20:41:02 | 0:38:13 | 70.8813582 | 74.846326 | 88.421441  | 68.1725398 |
| 20:41:03 | 0:38:14 | 70.8813582 | 75.846326 | 89.421441  | 68.1725398 |
| 20:41:04 | 0:38:15 | 71.8813582 | 75.846326 | 88.421441  | 67.1725398 |
| 20:41:05 | 0:38:16 | 71.8813582 | 75.846326 | 88.421441  | 68.1725398 |
| 20:41:06 | 0:38:17 | 71.8813582 | 75.846326 | 88.421441  | 68.1725398 |
| 20:41:07 | 0:38:18 | 71.8813582 | 72.846326 | 89.421441  | 68.1725398 |
| 20:41:08 | 0:38:19 | 71.8813582 | 70.846326 | 89.421441  | 68.1725398 |
| 20:41:09 | 0:38:20 | 71.8813582 | 69.846326 | 89.421441  | 68.1725398 |
| 20:41:10 | 0:38:21 | 70.8813582 | 69.846326 | 89.421441  | 68.1725398 |
| 20:41:11 | 0:38:22 | 70.8813582 | 67.846326 | 89.421441  | 69.1725398 |
| 20:41:12 | 0:38:23 | 69.8813582 | 67.846326 | 89.421441  | 68.1725398 |
| 20:41:13 | 0:38:24 | 68.8813582 | 67.846326 | 89.421441  | 68.1725398 |
| 20:41:14 | 0:38:25 | 68.8813582 | 67.846326 | 89.421441  | 68.1725398 |
| 20:41:15 | 0:38:26 | 67.8813582 | 67.846326 | 89.421441  | 69.1725398 |
| 20:41:16 | 0:38:27 | 67.8813582 | 67.846326 | 88.421441  | 68.1725398 |
| 20:41:17 | 0:38:28 | 68.8813582 | 66.846326 | 88.421441  | 66.1725398 |
| 20:41:18 | 0:38:29 | 69.8813582 | 66.846326 | 88.421441  | 66.1725398 |
| 20:41:19 | 0:38:30 | 69.8813582 | 63.846326 | 88.421441  | 66.1725398 |
| 20:41:20 | 0:38:31 | 69.8813582 | 62.846326 | 88.421441  | 67.1725398 |
| 20:41:21 | 0:38:32 | 69.8813582 | 62.846326 | 92.421441  | 69.1725398 |
| 20:41:22 | 0:38:33 | 69.8813582 | 62.846326 | 92.421441  | 71.1725398 |
| 20:41:23 | 0:38:34 | 69.8813582 | 61.846326 | 92.421441  | 71.1725398 |
| 20:41:24 | 0:38:35 | 69.8813582 | 61.846326 | 96.421441  | 71.1725398 |
| 20:41:25 | 0:38:36 | 69.8813582 | 61.846326 | 98.421441  | 69.1725398 |
| 20:41:26 | 0:38:37 | 68.8813582 | 60.846326 | 74.8953836 | 67.1725398 |
| 20:41:27 | 0:38:38 | 68.8813582 | 60.846326 | 74.4953836 | 66.1725398 |
| 20:41:28 | 0:38:39 | 68.8813582 | 60.846326 | 74.6953836 | 66.1725398 |
| 20:41:29 | 0:38:40 | 68.8813582 | 60.846326 | 74.8953836 | 67.1725398 |
| 20:41:30 | 0:38:41 | 69.8813582 | 60.846326 | 96.421441  | 67.1725398 |
| 20:41:31 | 0:38:42 | 69.8813582 | 61.846326 | 96.421441  | 69.1725398 |
| 20:41:32 | 0:38:43 | 69.8813582 | 61.846326 | 95.421441  | 68.1725398 |
| 20:41:33 | 0:38:44 | 69.8813582 | 71.846326 | 89.421441  | 68.1725398 |
| 20:41:34 | 0:38:45 | 69.8813582 | 72.846326 | 89.421441  | 66.1725398 |
| 20:41:35 | 0:38:46 | 69.8813582 | 72.846326 | 87.421441  | 66.1725398 |
| 20:41:36 | 0:38:47 | 69.8813582 | 72.846326 | 86.421441  | 66.1725398 |
| 20:41:37 | 0:38:48 | 68.8813582 | 74.846326 | 86.421441  | 66.1725398 |
| 20:41:38 | 0:38:49 | 67.8813582 | 74.846326 | 92.421441  | 66.1725398 |
| 20:41:39 | 0:38:50 | 67.8813582 | 77.846326 | 97.421441  | 66.1725398 |
| 20:41:40 | 0:38:51 | 67.8813582 | 77.846326 | 97.421441  | 67.1725398 |
| 20:41:41 | 0:38:52 | 67.8813582 | 79.846326 | 97.421441  | 70.1725398 |
| 20:41:42 | 0:38:53 | 67.8813582 | 79.846326 | 101.421441 | 72.1725398 |
| 20:41:43 | 0:38:54 | 68.8813582 | 76.846326 | 103.421441 | 72.1725398 |
| 20:41:44 | 0:38:55 | 68.8813582 | 76.846326 | 103.421441 | 71.1725398 |
| 20:41:45 | 0:38:56 | 69.8813582 | 73.846326 | 79.2953836 | 68.1725398 |
| 20:41:46 | 0:38:57 | 69.8813582 | 71.846326 | 78.4953836 | 67.1725398 |

|          |         |            |           |            |            |
|----------|---------|------------|-----------|------------|------------|
| 20:41:47 | 0:38:58 | 68.8813582 | 71.846326 | 78.6953836 | 68.1725398 |
| 20:41:48 | 0:38:59 | 68.8813582 | 69.846326 | 78.6953836 | 69.1725398 |
| 20:41:49 | 0:39:00 | 68.8813582 | 69.846326 | 78.8953836 | 70.1725398 |
| 20:41:50 | 0:39:01 | 68.8813582 | 68.846326 | 78.6953836 | 70.1725398 |
| 20:41:51 | 0:39:02 | 68.8813582 | 68.846326 | 78.4953836 | 70.1725398 |
| 20:41:52 | 0:39:03 | 69.8813582 | 67.846326 | 78.2953836 | 70.1725398 |
| 20:41:53 | 0:39:04 | 69.8813582 | 67.846326 | 77.8953836 | 69.1725398 |
| 20:41:54 | 0:39:05 | 69.8813582 | 67.846326 | 101.421441 | 69.1725398 |
| 20:41:55 | 0:39:06 | 69.8813582 | 68.846326 | 98.421441  | 69.1725398 |
| 20:41:56 | 0:39:07 | 70.8813582 | 67.846326 | 98.421441  | 69.1725398 |
| 20:41:57 | 0:39:08 | 71.8813582 | 67.846326 | 98.421441  | 69.1725398 |
| 20:41:58 | 0:39:09 | 69.8813582 | 67.846326 | 98.421441  | 69.1725398 |
| 20:41:59 | 0:39:10 | 69.8813582 | 66.846326 | 99.421441  | 69.1725398 |
| 20:42:00 | 0:39:11 | 69.8813582 | 66.846326 | 99.421441  | 69.1725398 |
| 20:42:01 | 0:39:12 | 68.8813582 | 66.846326 | 99.421441  | 67.1725398 |
| 20:42:02 | 0:39:13 | 68.8813582 | 66.846326 | 76.4953836 | 67.1725398 |
| 20:42:03 | 0:39:14 | 68.8813582 | 66.846326 | 76.8953836 | 68.1725398 |
| 20:42:04 | 0:39:15 | 68.8813582 | 65.846326 | 86.421441  | 71.1725398 |
| 20:42:05 | 0:39:16 | 67.8813582 | 65.846326 | 86.421441  | 72.1725398 |
| 20:42:06 | 0:39:17 | 67.8813582 | 65.846326 | 85.421441  | 73.1725398 |
| 20:42:07 | 0:39:18 | 67.8813582 | 65.846326 | 85.421441  | 73.1725398 |
| 20:42:08 | 0:39:19 | 68.8813582 | 65.846326 | 85.421441  | 74.1725398 |
| 20:42:09 | 0:39:20 | 69.8813582 | 67.846326 | 87.421441  | 75.1725398 |
| 20:42:10 | 0:39:21 | 69.8813582 | 67.846326 | 89.421441  | 75.1725398 |
| 20:42:11 | 0:39:22 | 69.8813582 | 69.846326 | 89.421441  | 77.1725398 |
| 20:42:12 | 0:39:23 | 69.8813582 | 69.846326 | 91.421441  | 77.1725398 |
| 20:42:13 | 0:39:24 | 71.8813582 | 69.846326 | 92.421441  | 77.1725398 |
| 20:42:14 | 0:39:25 | 74.8813582 | 69.846326 | 97.421441  | 76.1725398 |
| 20:42:15 | 0:39:26 | 74.8813582 | 73.846326 | 97.421441  | 75.1725398 |
| 20:42:16 | 0:39:27 | 74.8813582 | 73.846326 | 99.421441  | 74.1725398 |
| 20:42:17 | 0:39:28 | 74.8813582 | 72.846326 | 100.421441 | 73.1725398 |
| 20:42:18 | 0:39:29 | 74.8813582 | 71.846326 | 100.421441 | 73.1725398 |
| 20:42:19 | 0:39:30 | 74.8813582 | 71.846326 | 101.421441 | 73.1725398 |
| 20:42:20 | 0:39:31 | 74.8813582 | 71.846326 | 103.421441 | 72.1725398 |
| 20:42:21 | 0:39:32 | 74.8813582 | 72.846326 | 105.421441 | 72.1725398 |
| 20:42:22 | 0:39:33 | 74.8813582 | 72.846326 | 81.8953836 | 72.1725398 |
| 20:42:23 | 0:39:34 | 74.8813582 | 72.846326 | 82.0953836 | 72.1725398 |
| 20:42:24 | 0:39:35 | 76.8813582 | 69.846326 | 81.0953836 | 70.1725398 |
| 20:42:25 | 0:39:36 | 77.8813582 | 69.846326 | 81.0953836 | 69.1725398 |
| 20:42:26 | 0:39:37 | 75.8813582 | 69.846326 | 80.4953836 | 68.1725398 |
| 20:42:27 | 0:39:38 | 74.8813582 | 69.846326 | 80.2953836 | 68.1725398 |
| 20:42:28 | 0:39:39 | 73.8813582 | 69.846326 | 79.2953836 | 68.1725398 |
| 20:42:29 | 0:39:40 | 71.8813582 | 78.846326 | 101.421441 | 69.1725398 |
| 20:42:30 | 0:39:41 | 71.8813582 | 80.846326 | 96.421441  | 68.1725398 |
| 20:42:31 | 0:39:42 | 71.8813582 | 80.846326 | 94.421441  | 68.1725398 |

|          |         |            |           |           |            |
|----------|---------|------------|-----------|-----------|------------|
| 20:42:32 | 0:39:43 | 72.8813582 | 82.846326 | 94.421441 | 68.1725398 |
| 20:42:33 | 0:39:44 | 72.8813582 | 82.846326 | 91.421441 | 68.1725398 |
| 20:42:34 | 0:39:45 | 72.8813582 | 82.846326 | 90.421441 | 67.1725398 |
| 20:42:35 | 0:39:46 | 73.8813582 | 82.846326 | 90.421441 | 67.1725398 |
| 20:42:36 | 0:39:47 | 73.8813582 | 82.846326 | 89.421441 | 67.1725398 |
| 20:42:37 | 0:39:48 | 74.8813582 | 86.846326 | 89.421441 | 68.1725398 |
| 20:42:38 | 0:39:49 | 74.8813582 | 88.846326 | 88.421441 | 69.1725398 |
| 20:42:39 | 0:39:50 | 74.8813582 | 90.846326 | 85.421441 | 69.1725398 |
| 20:42:40 | 0:39:51 | 74.8813582 | 90.846326 | 85.421441 | 68.1725398 |
| 20:42:41 | 0:39:52 | 74.8813582 | 91.846326 | 80.421441 | 68.1725398 |
| 20:42:42 | 0:39:53 | 74.8813582 | 93.846326 | 76.421441 | 68.1725398 |
| 20:42:43 | 0:39:54 | 71.8813582 | 94.846326 | 74.421441 | 67.1725398 |
| 20:42:44 | 0:39:55 | 71.8813582 | 94.846326 | 74.421441 | 67.1725398 |
| 20:42:45 | 0:39:56 | 71.8813582 | 82.846326 | 72.421441 | 67.1725398 |
| 20:42:46 | 0:39:57 | 72.8813582 | 74.846326 | 71.421441 | 68.1725398 |
| 20:42:47 | 0:39:58 | 72.8813582 | 72.846326 | 71.421441 | 69.1725398 |
| 20:42:48 | 0:39:59 | 72.8813582 | 72.846326 | 71.421441 | 69.1725398 |
| 20:42:49 | 0:40:00 | 72.8813582 | 72.846326 | 69.421441 | 70.1725398 |
| 20:42:50 | 0:40:01 | 71.8813582 | 73.846326 | 69.421441 | 70.1725398 |
| 20:42:51 | 0:40:02 | 71.8813582 | 73.846326 | 67.421441 | 70.1725398 |
| 20:42:52 | 0:40:03 | 72.8813582 | 71.846326 | 67.421441 | 69.1725398 |
| 20:42:53 | 0:40:04 | 72.8813582 | 71.846326 | 65.421441 | 69.1725398 |
| 20:42:54 | 0:40:05 | 72.8813582 | 71.846326 | 65.421441 | 69.1725398 |
| 20:42:55 | 0:40:06 | 72.8813582 | 70.846326 | 65.421441 | 69.1725398 |
| 20:42:56 | 0:40:07 | 72.8813582 | 69.846326 | 59.421441 | 69.1725398 |
| 20:42:57 | 0:40:08 | 72.8813582 | 69.846326 | 58.421441 | 69.1725398 |
| 20:42:58 | 0:40:09 | 72.8813582 | 70.846326 | 50.421441 | 70.1725398 |
| 20:42:59 | 0:40:10 | 72.8813582 | 70.846326 | 49.421441 | 70.1725398 |
| 20:43:00 | 0:40:11 | 72.8813582 | 71.846326 | 49.421441 | 70.1725398 |
| 20:43:01 | 0:40:12 | 71.8813582 | 71.846326 | 48.421441 | 71.1725398 |
| 20:43:02 | 0:40:13 | 70.8813582 | 70.846326 | 48.421441 | 70.1725398 |
| 20:43:03 | 0:40:14 | 70.8813582 | 70.846326 | 49.421441 | 71.1725398 |
| 20:43:04 | 0:40:15 | 69.8813582 | 70.846326 | 57.421441 | 72.1725398 |
| 20:43:05 | 0:40:16 | 66.8813582 | 70.846326 | 57.421441 | 73.1725398 |
| 20:43:06 | 0:40:17 | 65.8813582 | 70.846326 | 58.421441 | 75.1725398 |
| 20:43:07 | 0:40:18 | 65.8813582 | 70.846326 | 58.421441 | 75.1725398 |
| 20:43:08 | 0:40:19 | 66.8813582 | 70.846326 | 58.421441 | 76.1725398 |
| 20:43:09 | 0:40:20 | 66.8813582 | 70.846326 | 58.421441 | 74.1725398 |
| 20:43:10 | 0:40:21 | 67.8813582 | 69.846326 | 59.421441 | 72.1725398 |
| 20:43:11 | 0:40:22 | 67.8813582 | 68.846326 | 60.421441 | 70.1725398 |
| 20:43:12 | 0:40:23 | 68.8813582 | 68.846326 | 60.421441 | 70.1725398 |
| 20:43:13 | 0:40:24 | 68.8813582 | 68.846326 | 59.421441 | 70.1725398 |
| 20:43:14 | 0:40:25 | 69.8813582 | 69.846326 | 58.421441 | 70.1725398 |
| 20:43:15 | 0:40:26 | 71.8813582 | 69.846326 | 58.421441 | 69.1725398 |
| 20:43:16 | 0:40:27 | 72.8813582 | 69.846326 | 58.421441 | 67.1725398 |

|          |         |            |           |           |            |
|----------|---------|------------|-----------|-----------|------------|
| 20:43:17 | 0:40:28 | 73.8813582 | 70.846326 | 58.421441 | 67.1725398 |
| 20:43:18 | 0:40:29 | 74.8813582 | 71.846326 | 58.421441 | 65.1725398 |
| 20:43:19 | 0:40:30 | 74.8813582 | 73.846326 | 58.421441 | 65.1725398 |
| 20:43:20 | 0:40:31 | 74.8813582 | 73.846326 | 57.421441 | 66.1725398 |
| 20:43:21 | 0:40:32 | 74.8813582 | 71.846326 | 57.421441 | 68.1725398 |
| 20:43:22 | 0:40:33 | 75.8813582 | 69.846326 | 57.421441 | 70.1725398 |
| 20:43:23 | 0:40:34 | 75.8813582 | 69.846326 | 57.421441 | 71.1725398 |
| 20:43:24 | 0:40:35 | 74.8813582 | 68.846326 | 57.421441 | 71.1725398 |
| 20:43:25 | 0:40:36 | 74.8813582 | 68.846326 | 56.421441 | 71.1725398 |
| 20:43:26 | 0:40:37 | 73.8813582 | 70.846326 | 56.421441 | 71.1725398 |
| 20:43:27 | 0:40:38 | 72.8813582 | 72.846326 | 56.421441 | 71.1725398 |
| 20:43:28 | 0:40:39 | 72.8813582 | 72.846326 | 56.421441 | 70.1725398 |
| 20:43:29 | 0:40:40 | 72.8813582 | 72.846326 | 56.421441 | 69.1725398 |
| 20:43:30 | 0:40:41 | 72.8813582 | 73.846326 | 57.421441 | 69.1725398 |
| 20:43:31 | 0:40:42 | 72.8813582 | 80.846326 | 57.421441 | 71.1725398 |
| 20:43:32 | 0:40:43 | 72.8813582 | 83.846326 | 57.421441 | 71.1725398 |
| 20:43:33 | 0:40:44 | 72.8813582 | 86.846326 | 57.421441 | 71.1725398 |
| 20:43:34 | 0:40:45 | 72.8813582 | 86.846326 | 57.421441 | 71.1725398 |
| 20:43:35 | 0:40:46 | 73.8813582 | 86.846326 | 57.421441 | 71.1725398 |
| 20:43:36 | 0:40:47 | 73.8813582 | 86.846326 | 57.421441 | 71.1725398 |
| 20:43:37 | 0:40:48 | 73.8813582 | 83.846326 | 57.421441 | 70.1725398 |
| 20:43:38 | 0:40:49 | 73.8813582 | 78.846326 | 57.421441 | 70.1725398 |
| 20:43:39 | 0:40:50 | 74.8813582 | 72.846326 | 57.421441 | 70.1725398 |
| 20:43:40 | 0:40:51 | 74.8813582 | 71.846326 | 57.421441 | 71.1725398 |
| 20:43:41 | 0:40:52 | 76.8813582 | 71.846326 | 57.421441 | 71.1725398 |
| 20:43:42 | 0:40:53 | 76.8813582 | 71.846326 | 57.421441 | 71.1725398 |
| 20:43:43 | 0:40:54 | 76.8813582 | 72.846326 | 57.421441 | 71.1725398 |
| 20:43:44 | 0:40:55 | 76.8813582 | 72.846326 | 59.421441 | 71.1725398 |
| 20:43:45 | 0:40:56 | 76.8813582 | 71.846326 | 60.421441 | 71.1725398 |
| 20:43:46 | 0:40:57 | 76.8813582 | 72.846326 | 62.421441 | 70.1725398 |
| 20:43:47 | 0:40:58 | 73.8813582 | 72.846326 | 62.421441 | 69.1725398 |
| 20:43:48 | 0:40:59 | 73.8813582 | 72.846326 | 62.421441 | 69.1725398 |
| 20:43:49 | 0:41:00 | 73.8813582 | 74.846326 | 62.421441 | 70.1725398 |
| 20:43:50 | 0:41:01 | 72.8813582 | 74.846326 | 62.421441 | 70.1725398 |
| 20:43:51 | 0:41:02 | 72.8813582 | 74.846326 | 62.421441 | 70.1725398 |
| 20:43:52 | 0:41:03 | 73.8813582 | 73.846326 | 62.421441 | 70.1725398 |
| 20:43:53 | 0:41:04 | 73.8813582 | 71.846326 | 62.421441 | 70.1725398 |
| 20:43:54 | 0:41:05 | 72.8813582 | 71.846326 | 62.421441 | 68.1725398 |
| 20:43:55 | 0:41:06 | 72.8813582 | 70.846326 | 62.421441 | 68.1725398 |
| 20:43:56 | 0:41:07 | 72.8813582 | 69.846326 | 62.421441 | 68.1725398 |
| 20:43:57 | 0:41:08 | 72.8813582 | 69.846326 | 62.421441 | 68.1725398 |
| 20:43:58 | 0:41:09 | 71.8813582 | 69.846326 | 62.421441 | 67.1725398 |
| 20:43:59 | 0:41:10 | 72.8813582 | 69.846326 | 66.421441 | 66.1725398 |
| 20:44:00 | 0:41:11 | 72.8813582 | 69.846326 | 66.421441 | 66.1725398 |
| 20:44:01 | 0:41:12 | 73.8813582 | 68.846326 | 67.421441 | 66.1725398 |

|          |         |            |           |           |            |
|----------|---------|------------|-----------|-----------|------------|
| 20:44:02 | 0:41:13 | 73.8813582 | 67.846326 | 67.421441 | 67.1725398 |
| 20:44:03 | 0:41:14 | 73.8813582 | 67.846326 | 68.421441 | 67.1725398 |
| 20:44:04 | 0:41:15 | 73.8813582 | 67.846326 | 70.421441 | 67.1725398 |
| 20:44:05 | 0:41:16 | 74.8813582 | 67.846326 | 71.421441 | 66.1725398 |
| 20:44:06 | 0:41:17 | 74.8813582 | 67.846326 | 72.421441 | 65.1725398 |
| 20:44:07 | 0:41:18 | 73.8813582 | 68.846326 | 73.421441 | 65.1725398 |
| 20:44:08 | 0:41:19 | 74.8813582 | 67.846326 | 73.421441 | 65.1725398 |
| 20:44:09 | 0:41:20 | 74.8813582 | 67.846326 | 73.421441 | 64.1725398 |
| 20:44:10 | 0:41:21 | 74.8813582 | 67.846326 | 74.421441 | 65.1725398 |
| 20:44:11 | 0:41:22 | 74.8813582 | 69.846326 | 74.421441 | 65.1725398 |
| 20:44:12 | 0:41:23 | 74.8813582 | 69.846326 | 75.421441 | 65.1725398 |
| 20:44:13 | 0:41:24 | 73.8813582 | 73.846326 | 78.421441 | 65.1725398 |
| 20:44:14 | 0:41:25 | 73.8813582 | 77.846326 | 81.421441 | 65.1725398 |
| 20:44:15 | 0:41:26 | 73.8813582 | 77.846326 | 85.421441 | 65.1725398 |
| 20:44:16 | 0:41:27 | 73.8813582 | 79.846326 | 86.421441 | 65.1725398 |
| 20:44:17 | 0:41:28 | 73.8813582 | 77.846326 | 86.421441 | 67.1725398 |
| 20:44:18 | 0:41:29 | 73.8813582 | 75.846326 | 85.421441 | 67.1725398 |
| 20:44:19 | 0:41:30 | 73.8813582 | 72.846326 | 85.421441 | 68.1725398 |
| 20:44:20 | 0:41:31 | 73.8813582 | 71.846326 | 85.421441 | 69.1725398 |
| 20:44:21 | 0:41:32 | 73.8813582 | 70.846326 | 85.421441 | 68.1725398 |
| 20:44:22 | 0:41:33 | 73.8813582 | 69.846326 | 85.421441 | 68.1725398 |
| 20:44:23 | 0:41:34 | 73.8813582 | 69.846326 | 84.421441 | 68.1725398 |
| 20:44:24 | 0:41:35 | 73.8813582 | 69.846326 | 85.421441 | 68.1725398 |
| 20:44:25 | 0:41:36 | 72.8813582 | 70.846326 | 86.421441 | 70.1725398 |
| 20:44:26 | 0:41:37 | 72.8813582 | 70.846326 | 86.421441 | 73.1725398 |
| 20:44:27 | 0:41:38 | 72.8813582 | 72.846326 | 87.421441 | 73.1725398 |
| 20:44:28 | 0:41:39 | 70.8813582 | 78.846326 | 86.421441 | 73.1725398 |
| 20:44:29 | 0:41:40 | 69.8813582 | 81.846326 | 84.421441 | 71.1725398 |
| 20:44:30 | 0:41:41 | 69.8813582 | 82.846326 | 89.421441 | 68.1725398 |
| 20:44:31 | 0:41:42 | 69.8813582 | 82.846326 | 93.421441 | 68.1725398 |
| 20:44:32 | 0:41:43 | 69.8813582 | 82.846326 | 95.421441 | 68.1725398 |
| 20:44:33 | 0:41:44 | 70.8813582 | 82.846326 | 95.421441 | 69.1725398 |
| 20:44:34 | 0:41:45 | 70.8813582 | 84.846326 | 83.421441 | 70.1725398 |
| 20:44:35 | 0:41:46 | 70.8813582 | 84.846326 | 79.421441 | 70.1725398 |
| 20:44:36 | 0:41:47 | 70.8813582 | 85.846326 | 77.421441 | 69.1725398 |
| 20:44:37 | 0:41:48 | 71.8813582 | 85.846326 | 75.421441 | 69.1725398 |
| 20:44:38 | 0:41:49 | 71.8813582 | 87.846326 | 73.421441 | 65.1725398 |
| 20:44:39 | 0:41:50 | 72.8813582 | 87.846326 | 73.421441 | 63.1725398 |
| 20:44:40 | 0:41:51 | 72.8813582 | 87.846326 | 72.421441 | 63.1725398 |
| 20:44:41 | 0:41:52 | 72.8813582 | 88.846326 | 73.421441 | 63.1725398 |
| 20:44:42 | 0:41:53 | 72.8813582 | 88.846326 | 73.421441 | 63.1725398 |
| 20:44:43 | 0:41:54 | 72.8813582 | 88.846326 | 73.421441 | 64.1725398 |
| 20:44:44 | 0:41:55 | 72.8813582 | 74.846326 | 76.421441 | 66.1725398 |
| 20:44:45 | 0:41:56 | 72.8813582 | 74.846326 | 78.421441 | 67.1725398 |
| 20:44:46 | 0:41:57 | 73.8813582 | 68.846326 | 78.421441 | 67.1725398 |

|          |         |            |           |            |            |
|----------|---------|------------|-----------|------------|------------|
| 20:44:47 | 0:41:58 | 73.8813582 | 67.846326 | 81.421441  | 66.1725398 |
| 20:44:48 | 0:41:59 | 73.8813582 | 67.846326 | 83.421441  | 66.1725398 |
| 20:44:49 | 0:42:00 | 71.8813582 | 65.846326 | 86.421441  | 66.1725398 |
| 20:44:50 | 0:42:01 | 71.8813582 | 65.846326 | 86.421441  | 65.1725398 |
| 20:44:51 | 0:42:02 | 71.8813582 | 65.846326 | 86.421441  | 64.1725398 |
| 20:44:52 | 0:42:03 | 71.8813582 | 64.846326 | 84.421441  | 65.1725398 |
| 20:44:53 | 0:42:04 | 70.8813582 | 63.846326 | 84.421441  | 66.1725398 |
| 20:44:54 | 0:42:05 | 70.8813582 | 66.846326 | 84.421441  | 66.1725398 |
| 20:44:55 | 0:42:06 | 70.8813582 | 67.846326 | 84.421441  | 66.1725398 |
| 20:44:56 | 0:42:07 | 71.8813582 | 67.846326 | 84.421441  | 67.1725398 |
| 20:44:57 | 0:42:08 | 71.8813582 | 66.846326 | 88.421441  | 68.1725398 |
| 20:44:58 | 0:42:09 | 71.8813582 | 67.846326 | 90.421441  | 67.1725398 |
| 20:44:59 | 0:42:10 | 72.8813582 | 68.846326 | 90.421441  | 67.1725398 |
| 20:45:00 | 0:42:11 | 72.8813582 | 69.846326 | 90.421441  | 67.1725398 |
| 20:45:01 | 0:42:12 | 71.8813582 | 69.846326 | 91.421441  | 66.1725398 |
| 20:45:02 | 0:42:13 | 71.8813582 | 69.846326 | 91.421441  | 67.1725398 |
| 20:45:03 | 0:42:14 | 71.8813582 | 69.846326 | 91.421441  | 68.1725398 |
| 20:45:04 | 0:42:15 | 71.8813582 | 69.846326 | 92.421441  | 69.1725398 |
| 20:45:05 | 0:42:16 | 73.8813582 | 69.846326 | 92.421441  | 68.1725398 |
| 20:45:06 | 0:42:17 | 74.8813582 | 69.846326 | 93.421441  | 66.1725398 |
| 20:45:07 | 0:42:18 | 75.8813582 | 69.846326 | 93.421441  | 64.1725398 |
| 20:45:08 | 0:42:19 | 75.8813582 | 69.846326 | 97.421441  | 62.1725398 |
| 20:45:09 | 0:42:20 | 75.8813582 | 69.846326 | 98.421441  | 62.1725398 |
| 20:45:10 | 0:42:21 | 75.8813582 | 69.846326 | 76.2953836 | 62.1725398 |
| 20:45:11 | 0:42:22 | 75.8813582 | 69.846326 | 101.421441 | 65.1725398 |
| 20:45:12 | 0:42:23 | 75.8813582 | 70.846326 | 101.421441 | 67.1725398 |
| 20:45:13 | 0:42:24 | 75.8813582 | 73.846326 | 101.421441 | 68.1725398 |
| 20:45:14 | 0:42:25 | 75.8813582 | 73.846326 | 101.421441 | 68.1725398 |
| 20:45:15 | 0:42:26 | 76.8813582 | 75.846326 | 101.421441 | 68.1725398 |
| 20:45:16 | 0:42:27 | 78.8813582 | 75.846326 | 101.421441 | 66.1725398 |
| 20:45:17 | 0:42:28 | 78.8813582 | 74.846326 | 100.421441 | 66.1725398 |
| 20:45:18 | 0:42:29 | 77.8813582 | 74.846326 | 98.421441  | 66.1725398 |
| 20:45:19 | 0:42:30 | 76.8813582 | 74.846326 | 98.421441  | 66.1725398 |
| 20:45:20 | 0:42:31 | 75.8813582 | 74.846326 | 92.421441  | 68.1725398 |
| 20:45:21 | 0:42:32 | 74.8813582 | 74.846326 | 89.421441  | 69.1725398 |
| 20:45:22 | 0:42:33 | 72.8813582 | 74.846326 | 87.421441  | 70.1725398 |
| 20:45:23 | 0:42:34 | 71.8813582 | 73.846326 | 86.421441  | 71.1725398 |
| 20:45:24 | 0:42:35 | 71.8813582 | 70.846326 | 85.421441  | 72.1725398 |
| 20:45:25 | 0:42:36 | 70.8813582 | 70.846326 | 84.421441  | 73.1725398 |
| 20:45:26 | 0:42:37 | 70.8813582 | 70.846326 | 84.421441  | 73.1725398 |
| 20:45:27 | 0:42:38 | 70.8813582 | 71.846326 | 83.421441  | 73.1725398 |
| 20:45:28 | 0:42:39 | 69.8813582 | 71.846326 | 81.421441  | 73.1725398 |
| 20:45:29 | 0:42:40 | 68.8813582 | 70.846326 | 81.421441  | 73.1725398 |
| 20:45:30 | 0:42:41 | 68.8813582 | 70.846326 | 81.421441  | 71.1725398 |
| 20:45:31 | 0:42:42 | 68.8813582 | 70.846326 | 80.421441  | 71.1725398 |

|          |         |            |           |           |            |
|----------|---------|------------|-----------|-----------|------------|
| 20:45:32 | 0:42:43 | 68.8813582 | 71.846326 | 80.421441 | 71.1725398 |
| 20:45:33 | 0:42:44 | 68.8813582 | 72.846326 | 79.421441 | 71.1725398 |
| 20:45:34 | 0:42:45 | 68.8813582 | 74.846326 | 79.421441 | 74.1725398 |
| 20:45:35 | 0:42:46 | 68.8813582 | 74.846326 | 79.421441 | 74.1725398 |
| 20:45:36 | 0:42:47 | 68.8813582 | 74.846326 | 79.421441 | 74.1725398 |
| 20:45:37 | 0:42:48 | 69.8813582 | 73.846326 | 79.421441 | 74.1725398 |
| 20:45:38 | 0:42:49 | 69.8813582 | 73.846326 | 79.421441 | 74.1725398 |
| 20:45:39 | 0:42:50 | 69.8813582 | 73.846326 | 79.421441 | 70.1725398 |
| 20:45:40 | 0:42:51 | 69.8813582 | 73.846326 | 79.421441 | 69.1725398 |
| 20:45:41 | 0:42:52 | 69.8813582 | 73.846326 | 81.421441 | 69.1725398 |
| 20:45:42 | 0:42:53 | 68.8813582 | 71.846326 | 81.421441 | 69.1725398 |
| 20:45:43 | 0:42:54 | 68.8813582 | 69.846326 | 81.421441 | 71.1725398 |
| 20:45:44 | 0:42:55 | 68.8813582 | 70.846326 | 80.421441 | 71.1725398 |
| 20:45:45 | 0:42:56 | 68.8813582 | 70.846326 | 78.421441 | 73.1725398 |
| 20:45:46 | 0:42:57 | 70.8813582 | 70.846326 | 78.421441 | 72.1725398 |
| 20:45:47 | 0:42:58 | 71.8813582 | 70.846326 | 78.421441 | 72.1725398 |
| 20:45:48 | 0:42:59 | 70.8813582 | 78.846326 | 77.421441 | 68.1725398 |
| 20:45:49 | 0:43:00 | 70.8813582 | 78.846326 | 75.421441 | 66.1725398 |
| 20:45:50 | 0:43:01 | 70.8813582 | 78.846326 | 75.421441 | 66.1725398 |
| 20:45:51 | 0:43:02 | 70.8813582 | 75.846326 | 74.421441 | 66.1725398 |
| 20:45:52 | 0:43:03 | 70.8813582 | 73.846326 | 74.421441 | 66.1725398 |
| 20:45:53 | 0:43:04 | 71.8813582 | 73.846326 | 74.421441 | 66.1725398 |
| 20:45:54 | 0:43:05 | 71.8813582 | 70.846326 | 74.421441 | 66.1725398 |
| 20:45:55 | 0:43:06 | 73.8813582 | 71.846326 | 75.421441 | 66.1725398 |
| 20:45:56 | 0:43:07 | 73.8813582 | 71.846326 | 75.421441 | 65.1725398 |
| 20:45:57 | 0:43:08 | 74.8813582 | 72.846326 | 75.421441 | 66.1725398 |
| 20:45:58 | 0:43:09 | 74.8813582 | 72.846326 | 75.421441 | 66.1725398 |
| 20:45:59 | 0:43:10 | 73.8813582 | 71.846326 | 81.421441 | 67.1725398 |
| 20:46:00 | 0:43:11 | 73.8813582 | 71.846326 | 83.421441 | 67.1725398 |
| 20:46:01 | 0:43:12 | 74.8813582 | 71.846326 | 83.421441 | 67.1725398 |
| 20:46:02 | 0:43:13 | 75.8813582 | 71.846326 | 84.421441 | 69.1725398 |
| 20:46:03 | 0:43:14 | 76.8813582 | 71.846326 | 84.421441 | 70.1725398 |
| 20:46:04 | 0:43:15 | 74.8813582 | 71.846326 | 84.421441 | 70.1725398 |
| 20:46:05 | 0:43:16 | 73.8813582 | 71.846326 | 84.421441 | 70.1725398 |
| 20:46:06 | 0:43:17 | 73.8813582 | 71.846326 | 84.421441 | 70.1725398 |
| 20:46:07 | 0:43:18 | 73.8813582 | 70.846326 | 84.421441 | 70.1725398 |
| 20:46:08 | 0:43:19 | 73.8813582 | 70.846326 | 86.421441 | 73.1725398 |
| 20:46:09 | 0:43:20 | 74.8813582 | 73.846326 | 83.421441 | 73.1725398 |
| 20:46:10 | 0:43:21 | 76.8813582 | 77.846326 | 81.421441 | 73.1725398 |
| 20:46:11 | 0:43:22 | 77.8813582 | 77.846326 | 81.421441 | 73.1725398 |
| 20:46:12 | 0:43:23 | 76.8813582 | 77.846326 | 80.421441 | 73.1725398 |
| 20:46:13 | 0:43:24 | 72.8813582 | 77.846326 | 80.421441 | 73.1725398 |
| 20:46:14 | 0:43:25 | 69.8813582 | 77.846326 | 80.421441 | 74.1725398 |
| 20:46:15 | 0:43:26 | 69.8813582 | 77.846326 | 80.421441 | 74.1725398 |
| 20:46:16 | 0:43:27 | 67.8813582 | 76.846326 | 81.421441 | 80.1725398 |

|          |         |            |           |           |            |
|----------|---------|------------|-----------|-----------|------------|
| 20:46:17 | 0:43:28 | 68.8813582 | 75.846326 | 81.421441 | 81.1725398 |
| 20:46:18 | 0:43:29 | 68.8813582 | 75.846326 | 81.421441 | 81.1725398 |
| 20:46:19 | 0:43:30 | 68.8813582 | 73.846326 | 81.421441 | 81.1725398 |
| 20:46:20 | 0:43:31 | 68.8813582 | 70.846326 | 81.421441 | 96.1725398 |
| 20:46:21 | 0:43:32 | 68.8813582 | 70.846326 | 82.421441 | 96.1725398 |
| 20:46:22 | 0:43:33 | 69.8813582 | 67.846326 | 82.421441 | 96.1725398 |
| 20:46:23 | 0:43:34 | 69.8813582 | 65.846326 | 82.421441 | 96.1725398 |
| 20:46:24 | 0:43:35 | 69.8813582 | 65.846326 | 82.421441 | 89.1725398 |
| 20:46:25 | 0:43:36 | 69.8813582 | 64.846326 | 82.421441 | 89.1725398 |
| 20:46:26 | 0:43:37 | 70.8813582 | 64.846326 | 82.421441 | 89.1725398 |
| 20:46:27 | 0:43:38 | 75.8813582 | 64.846326 | 82.421441 | 71.1725398 |
| 20:46:28 | 0:43:39 | 79.8813582 | 67.846326 | 82.421441 | 65.1725398 |
| 20:46:29 | 0:43:40 | 80.8813582 | 68.846326 | 82.421441 | 64.1725398 |
| 20:46:30 | 0:43:41 | 80.8813582 | 68.846326 | 82.421441 | 64.1725398 |
| 20:46:31 | 0:43:42 | 83.8813582 | 72.846326 | 84.421441 | 63.1725398 |
| 20:46:32 | 0:43:43 | 84.8813582 | 74.846326 | 83.421441 | 64.1725398 |
| 20:46:33 | 0:43:44 | 84.8813582 | 74.846326 | 83.421441 | 64.1725398 |
| 20:46:34 | 0:43:45 | 83.8813582 | 74.846326 | 83.421441 | 65.1725398 |
| 20:46:35 | 0:43:46 | 80.8813582 | 72.846326 | 83.421441 | 65.1725398 |
| 20:46:36 | 0:43:47 | 78.8813582 | 72.846326 | 83.421441 | 64.1725398 |
| 20:46:37 | 0:43:48 | 78.8813582 | 70.846326 | 83.421441 | 64.1725398 |
| 20:46:38 | 0:43:49 | 78.8813582 | 68.846326 | 83.421441 | 65.1725398 |
| 20:46:39 | 0:43:50 | 78.8813582 | 65.846326 | 90.421441 | 65.1725398 |
| 20:46:40 | 0:43:51 | 77.8813582 | 65.846326 | 91.421441 | 65.1725398 |
| 20:46:41 | 0:43:52 | 76.8813582 | 65.846326 | 92.421441 | 65.1725398 |
| 20:46:42 | 0:43:53 | 76.8813582 | 65.846326 | 92.421441 | 66.1725398 |
| 20:46:43 | 0:43:54 | 74.8813582 | 66.846326 | 92.421441 | 67.1725398 |
| 20:46:44 | 0:43:55 | 74.8813582 | 66.846326 | 90.421441 | 67.1725398 |
| 20:46:45 | 0:43:56 | 74.8813582 | 66.846326 | 86.421441 | 67.1725398 |
| 20:46:46 | 0:43:57 | 73.8813582 | 69.846326 | 86.421441 | 67.1725398 |
| 20:46:47 | 0:43:58 | 73.8813582 | 71.846326 | 87.421441 | 66.1725398 |
| 20:46:48 | 0:43:59 | 73.8813582 | 72.846326 | 88.421441 | 66.1725398 |
| 20:46:49 | 0:44:00 | 73.8813582 | 73.846326 | 88.421441 | 65.1725398 |
| 20:46:50 | 0:44:01 | 73.8813582 | 73.846326 | 88.421441 | 65.1725398 |
| 20:46:51 | 0:44:02 | 73.8813582 | 73.846326 | 88.421441 | 65.1725398 |
| 20:46:52 | 0:44:03 | 73.8813582 | 73.846326 | 85.421441 | 66.1725398 |
| 20:46:53 | 0:44:04 | 75.8813582 | 72.846326 | 84.421441 | 66.1725398 |
| 20:46:54 | 0:44:05 | 75.8813582 | 72.846326 | 82.421441 | 67.1725398 |
| 20:46:55 | 0:44:06 | 75.8813582 | 72.846326 | 82.421441 | 67.1725398 |
| 20:46:56 | 0:44:07 | 75.8813582 | 76.846326 | 82.421441 | 69.1725398 |
| 20:46:57 | 0:44:08 | 75.8813582 | 76.846326 | 81.421441 | 69.1725398 |
| 20:46:58 | 0:44:09 | 76.8813582 | 76.846326 | 81.421441 | 74.1725398 |
| 20:46:59 | 0:44:10 | 77.8813582 | 76.846326 | 81.421441 | 78.1725398 |
| 20:47:00 | 0:44:11 | 78.8813582 | 73.846326 | 81.421441 | 78.1725398 |
| 20:47:01 | 0:44:12 | 75.8813582 | 70.846326 | 82.421441 | 80.1725398 |



|          |         |            |           |           |            |
|----------|---------|------------|-----------|-----------|------------|
| 20:47:02 | 0:44:13 | 72.8813582 | 68.846326 | 85.421441 | 81.1725398 |
| 20:47:03 | 0:44:14 | 71.8813582 | 68.846326 | 88.421441 | 85.1725398 |
| 20:47:04 | 0:44:15 | 71.8813582 | 69.846326 | 88.421441 | 87.1725398 |
| 20:47:05 | 0:44:16 | 71.8813582 | 72.846326 | 88.421441 | 87.1725398 |
| 20:47:06 | 0:44:17 | 71.8813582 | 72.846326 | 89.421441 | 87.1725398 |
| 20:47:07 | 0:44:18 | 71.8813582 | 72.846326 | 89.421441 | 87.1725398 |
| 20:47:08 | 0:44:19 | 71.8813582 | 72.846326 | 88.421441 | 87.1725398 |
| 20:47:09 | 0:44:20 | 72.8813582 | 70.846326 | 88.421441 | 87.1725398 |
| 20:47:10 | 0:44:21 | 73.8813582 | 69.846326 | 88.421441 | 86.1725398 |
| 20:47:11 | 0:44:22 | 75.8813582 | 70.846326 | 88.421441 | 86.1725398 |
| 20:47:12 | 0:44:23 | 76.8813582 | 70.846326 | 89.421441 | 85.1725398 |
| 20:47:13 | 0:44:24 | 76.8813582 | 67.846326 | 89.421441 | 84.1725398 |
| 20:47:14 | 0:44:25 | 77.8813582 | 66.846326 | 90.421441 | 84.1725398 |
| 20:47:15 | 0:44:26 | 77.8813582 | 66.846326 | 89.421441 | 84.1725398 |
| 20:47:16 | 0:44:27 | 77.8813582 | 66.846326 | 89.421441 | 84.1725398 |
| 20:47:17 | 0:44:28 | 77.8813582 | 69.846326 | 89.421441 | 84.1725398 |
| 20:47:18 | 0:44:29 | 77.8813582 | 70.846326 | 89.421441 | 84.1725398 |
| 20:47:19 | 0:44:30 | 76.8813582 | 72.846326 | 89.421441 | 83.1725398 |
| 20:47:20 | 0:44:31 | 75.8813582 | 73.846326 | 91.421441 | 83.1725398 |
| 20:47:21 | 0:44:32 | 75.8813582 | 73.846326 | 91.421441 | 83.1725398 |
| 20:47:22 | 0:44:33 | 75.8813582 | 72.846326 | 92.421441 | 83.1725398 |
| 20:47:23 | 0:44:34 | 76.8813582 | 69.846326 | 92.421441 | 83.1725398 |
| 20:47:24 | 0:44:35 | 76.8813582 | 69.846326 | 92.421441 | 83.1725398 |
| 20:47:25 | 0:44:36 | 78.8813582 | 64.846326 | 93.421441 | 90.1725398 |
| 20:47:26 | 0:44:37 | 78.8813582 | 64.846326 | 94.421441 | 92.1725398 |
| 20:47:27 | 0:44:38 | 78.8813582 | 65.846326 | 94.421441 | 93.1725398 |
| 20:47:28 | 0:44:39 | 78.8813582 | 65.846326 | 94.421441 | 93.1725398 |
| 20:47:29 | 0:44:40 | 79.8813582 | 67.846326 | 96.421441 | 93.1725398 |
| 20:47:30 | 0:44:41 | 80.8813582 | 68.846326 | 95.421441 | 93.1725398 |
| 20:47:31 | 0:44:42 | 81.8813582 | 68.846326 | 95.421441 | 94.1725398 |
| 20:47:32 | 0:44:43 | 81.8813582 | 71.846326 | 95.421441 | 93.1725398 |
| 20:47:33 | 0:44:44 | 81.8813582 | 72.846326 | 95.421441 | 93.1725398 |
| 20:47:34 | 0:44:45 | 81.8813582 | 72.846326 | 95.421441 | 93.1725398 |
| 20:47:35 | 0:44:46 | 81.8813582 | 71.846326 | 95.421441 | 92.1725398 |
| 20:47:36 | 0:44:47 | 79.8813582 | 70.846326 | 95.421441 | 80.1725398 |
| 20:47:37 | 0:44:48 | 79.8813582 | 70.846326 | 95.421441 | 72.1725398 |
| 20:47:38 | 0:44:49 | 78.8813582 | 70.846326 | 91.421441 | 71.1725398 |
| 20:47:39 | 0:44:50 | 79.8813582 | 73.846326 | 90.421441 | 71.1725398 |
| 20:47:40 | 0:44:51 | 79.8813582 | 74.846326 | 89.421441 | 71.1725398 |
| 20:47:41 | 0:44:52 | 82.8813582 | 75.846326 | 88.421441 | 70.1725398 |
| 20:47:42 | 0:44:53 | 81.8813582 | 74.846326 | 88.421441 | 69.1725398 |
| 20:47:43 | 0:44:54 | 76.8813582 | 74.846326 | 86.421441 | 69.1725398 |
| 20:47:44 | 0:44:55 | 72.8813582 | 72.846326 | 86.421441 | 70.1725398 |
| 20:47:45 | 0:44:56 | 72.8813582 | 71.846326 | 84.421441 | 71.1725398 |
| 20:47:46 | 0:44:57 | 69.8813582 | 71.846326 | 83.421441 | 70.1725398 |

|          |         |            |           |           |            |
|----------|---------|------------|-----------|-----------|------------|
| 20:47:47 | 0:44:58 | 69.8813582 | 70.846326 | 81.421441 | 69.1725398 |
| 20:47:48 | 0:44:59 | 69.8813582 | 70.846326 | 79.421441 | 68.1725398 |
| 20:47:49 | 0:45:00 | 69.8813582 | 71.846326 | 79.421441 | 67.1725398 |
| 20:47:50 | 0:45:01 | 69.8813582 | 71.846326 | 78.421441 | 68.1725398 |
| 20:47:51 | 0:45:02 | 69.8813582 | 71.846326 | 77.421441 | 69.1725398 |
| 20:47:52 | 0:45:03 | 69.8813582 | 72.846326 | 76.421441 | 70.1725398 |
| 20:47:53 | 0:45:04 | 69.8813582 | 72.846326 | 76.421441 | 70.1725398 |
| 20:47:54 | 0:45:05 | 69.8813582 | 72.846326 | 76.421441 | 70.1725398 |
| 20:47:55 | 0:45:06 | 70.8813582 | 70.846326 | 76.421441 | 69.1725398 |
| 20:47:56 | 0:45:07 | 70.8813582 | 68.846326 | 76.421441 | 68.1725398 |
| 20:47:57 | 0:45:08 | 70.8813582 | 68.846326 | 76.421441 | 68.1725398 |
| 20:47:58 | 0:45:09 | 70.8813582 | 66.846326 | 76.421441 | 68.1725398 |
| 20:47:59 | 0:45:10 | 70.8813582 | 64.846326 | 76.421441 | 70.1725398 |
| 20:48:00 | 0:45:11 | 71.8813582 | 64.846326 | 76.421441 | 71.1725398 |
| 20:48:01 | 0:45:12 | 72.8813582 | 64.846326 | 77.421441 | 74.1725398 |
| 20:48:02 | 0:45:13 | 72.8813582 | 61.846326 | 77.421441 | 77.1725398 |
| 20:48:03 | 0:45:14 | 71.8813582 | 61.846326 | 78.421441 | 78.1725398 |
| 20:48:04 | 0:45:15 | 70.8813582 | 64.846326 | 78.421441 | 81.1725398 |
| 20:48:05 | 0:45:16 | 69.8813582 | 65.846326 | 76.421441 | 81.1725398 |
| 20:48:06 | 0:45:17 | 69.8813582 | 65.846326 | 76.421441 | 81.1725398 |
| 20:48:07 | 0:45:18 | 69.8813582 | 67.846326 | 76.421441 | 82.1725398 |
| 20:48:08 | 0:45:19 | 69.8813582 | 68.846326 | 76.421441 | 84.1725398 |
| 20:48:09 | 0:45:20 | 69.8813582 | 68.846326 | 75.421441 | 85.1725398 |
| 20:48:10 | 0:45:21 | 69.8813582 | 68.846326 | 74.421441 | 86.1725398 |
| 20:48:11 | 0:45:22 | 69.8813582 | 68.846326 | 73.421441 | 86.1725398 |
| 20:48:12 | 0:45:23 | 68.8813582 | 68.846326 | 73.421441 | 88.1725398 |
| 20:48:13 | 0:45:24 | 68.8813582 | 68.846326 | 72.421441 | 88.1725398 |
| 20:48:14 | 0:45:25 | 68.8813582 | 68.846326 | 72.421441 | 91.1725398 |
| 20:48:15 | 0:45:26 | 68.8813582 | 69.846326 | 72.421441 | 92.1725398 |
| 20:48:16 | 0:45:27 | 67.8813582 | 69.846326 | 71.421441 | 94.1725398 |
| 20:48:17 | 0:45:28 | 67.8813582 | 69.846326 | 71.421441 | 95.1725398 |
| 20:48:18 | 0:45:29 | 67.8813582 | 69.846326 | 71.421441 | 95.1725398 |
| 20:48:19 | 0:45:30 | 67.8813582 | 70.846326 | 72.421441 | 95.1725398 |
| 20:48:20 | 0:45:31 | 67.8813582 | 70.846326 | 75.421441 | 96.1725398 |
| 20:48:21 | 0:45:32 | 68.8813582 | 70.846326 | 75.421441 | 93.1725398 |
| 20:48:22 | 0:45:33 | 70.8813582 | 70.846326 | 75.421441 | 90.1725398 |
| 20:48:23 | 0:45:34 | 70.8813582 | 72.846326 | 75.421441 | 90.1725398 |
| 20:48:24 | 0:45:35 | 71.8813582 | 73.846326 | 74.421441 | 87.1725398 |
| 20:48:25 | 0:45:36 | 72.8813582 | 75.846326 | 72.421441 | 84.1725398 |
| 20:48:26 | 0:45:37 | 75.8813582 | 75.846326 | 72.421441 | 83.1725398 |
| 20:48:27 | 0:45:38 | 77.8813582 | 76.846326 | 72.421441 | 83.1725398 |
| 20:48:28 | 0:45:39 | 77.8813582 | 76.846326 | 71.421441 | 83.1725398 |
| 20:48:29 | 0:45:40 | 76.8813582 | 76.846326 | 71.421441 | 83.1725398 |
| 20:48:30 | 0:45:41 | 75.8813582 | 79.846326 | 71.421441 | 83.1725398 |
| 20:48:31 | 0:45:42 | 74.8813582 | 79.846326 | 72.421441 | 83.1725398 |

|          |         |            |           |           |            |
|----------|---------|------------|-----------|-----------|------------|
| 20:48:32 | 0:45:43 | 73.8813582 | 79.846326 | 71.421441 | 84.1725398 |
| 20:48:33 | 0:45:44 | 72.8813582 | 79.846326 | 70.421441 | 84.1725398 |
| 20:48:34 | 0:45:45 | 72.8813582 | 80.846326 | 70.421441 | 84.1725398 |
| 20:48:35 | 0:45:46 | 72.8813582 | 81.846326 | 68.421441 | 84.1725398 |
| 20:48:36 | 0:45:47 | 71.8813582 | 81.846326 | 68.421441 | 84.1725398 |
| 20:48:37 | 0:45:48 | 71.8813582 | 81.846326 | 68.421441 | 83.1725398 |
| 20:48:38 | 0:45:49 | 71.8813582 | 81.846326 | 68.421441 | 81.1725398 |
| 20:48:39 | 0:45:50 | 71.8813582 | 81.846326 | 68.421441 | 81.1725398 |
| 20:48:40 | 0:45:51 | 69.8813582 | 81.846326 | 69.421441 | 82.1725398 |
| 20:48:41 | 0:45:52 | 67.8813582 | 81.846326 | 71.421441 | 82.1725398 |
| 20:48:42 | 0:45:53 | 67.8813582 | 82.846326 | 72.421441 | 82.1725398 |
| 20:48:43 | 0:45:54 | 70.8813582 | 82.846326 | 72.421441 | 82.1725398 |
| 20:48:44 | 0:45:55 | 72.8813582 | 82.846326 | 72.421441 | 82.1725398 |
| 20:48:45 | 0:45:56 | 73.8813582 | 82.846326 | 72.421441 | 83.1725398 |
| 20:48:46 | 0:45:57 | 74.8813582 | 82.846326 | 72.421441 | 86.1725398 |
| 20:48:47 | 0:45:58 | 74.8813582 | 82.846326 | 72.421441 | 87.1725398 |
| 20:48:48 | 0:45:59 | 74.8813582 | 83.846326 | 73.421441 | 88.1725398 |
| 20:48:49 | 0:46:00 | 75.8813582 | 84.846326 | 73.421441 | 88.1725398 |
| 20:48:50 | 0:46:01 | 75.8813582 | 84.846326 | 73.421441 | 88.1725398 |
| 20:48:51 | 0:46:02 | 76.8813582 | 84.846326 | 73.421441 | 88.1725398 |
| 20:48:52 | 0:46:03 | 76.8813582 | 85.846326 | 73.421441 | 89.1725398 |
| 20:48:53 | 0:46:04 | 76.8813582 | 82.846326 | 72.421441 | 90.1725398 |
| 20:48:54 | 0:46:05 | 75.8813582 | 77.846326 | 72.421441 | 91.1725398 |
| 20:48:55 | 0:46:06 | 73.8813582 | 77.846326 | 71.421441 | 92.1725398 |
| 20:48:56 | 0:46:07 | 72.8813582 | 77.846326 | 71.421441 | 92.1725398 |
| 20:48:57 | 0:46:08 | 71.8813582 | 76.846326 | 72.421441 | 92.1725398 |
| 20:48:58 | 0:46:09 | 71.8813582 | 75.846326 | 73.421441 | 92.1725398 |
| 20:48:59 | 0:46:10 | 71.8813582 | 73.846326 | 74.421441 | 93.1725398 |
| 20:49:00 | 0:46:11 | 72.8813582 | 73.846326 | 74.421441 | 92.1725398 |
| 20:49:01 | 0:46:12 | 72.8813582 | 69.846326 | 75.421441 | 86.1725398 |
| 20:49:02 | 0:46:13 | 72.8813582 | 69.846326 | 75.421441 | 83.1725398 |
| 20:49:03 | 0:46:14 | 73.8813582 | 69.846326 | 77.421441 | 80.1725398 |
| 20:49:04 | 0:46:15 | 73.8813582 | 69.846326 | 77.421441 | 77.1725398 |
| 20:49:05 | 0:46:16 | 74.8813582 | 68.846326 | 77.421441 | 73.1725398 |
| 20:49:06 | 0:46:17 | 76.8813582 | 64.846326 | 77.421441 | 73.1725398 |
| 20:49:07 | 0:46:18 | 77.8813582 | 61.846326 | 77.421441 | 73.1725398 |
| 20:49:08 | 0:46:19 | 77.8813582 | 60.846326 | 79.421441 | 69.1725398 |
| 20:49:09 | 0:46:20 | 76.8813582 | 60.846326 | 79.421441 | 69.1725398 |
| 20:49:10 | 0:46:21 | 74.8813582 | 60.846326 | 81.421441 | 67.1725398 |
| 20:49:11 | 0:46:22 | 73.8813582 | 60.846326 | 81.421441 | 68.1725398 |
| 20:49:12 | 0:46:23 | 73.8813582 | 60.846326 | 81.421441 | 68.1725398 |
| 20:49:13 | 0:46:24 | 72.8813582 | 59.846326 | 80.421441 | 68.1725398 |
| 20:49:14 | 0:46:25 | 72.8813582 | 59.846326 | 80.421441 | 68.1725398 |
| 20:49:15 | 0:46:26 | 73.8813582 | 59.846326 | 80.421441 | 72.1725398 |
| 20:49:16 | 0:46:27 | 73.8813582 | 60.846326 | 81.421441 | 72.1725398 |

|          |         |            |           |            |            |
|----------|---------|------------|-----------|------------|------------|
| 20:49:17 | 0:46:28 | 73.8813582 | 60.846326 | 81.421441  | 71.1725398 |
| 20:49:18 | 0:46:29 | 74.8813582 | 60.846326 | 82.421441  | 70.1725398 |
| 20:49:19 | 0:46:30 | 76.8813582 | 60.846326 | 82.421441  | 69.1725398 |
| 20:49:20 | 0:46:31 | 76.8813582 | 60.846326 | 83.421441  | 69.1725398 |
| 20:49:21 | 0:46:32 | 77.8813582 | 60.846326 | 83.421441  | 69.1725398 |
| 20:49:22 | 0:46:33 | 77.8813582 | 61.846326 | 83.421441  | 69.1725398 |
| 20:49:23 | 0:46:34 | 72.8813582 | 61.846326 | 83.421441  | 70.1725398 |
| 20:49:24 | 0:46:35 | 68.8813582 | 64.846326 | 83.421441  | 70.1725398 |
| 20:49:25 | 0:46:36 | 66.8813582 | 66.846326 | 84.421441  | 69.1725398 |
| 20:49:26 | 0:46:37 | 65.8813582 | 66.846326 | 84.421441  | 69.1725398 |
| 20:49:27 | 0:46:38 | 64.8813582 | 66.846326 | 85.421441  | 68.1725398 |
| 20:49:28 | 0:46:39 | 63.8813582 | 62.846326 | 85.421441  | 69.1725398 |
| 20:49:29 | 0:46:40 | 63.8813582 | 61.846326 | 85.421441  | 69.1725398 |
| 20:49:30 | 0:46:41 | 63.8813582 | 62.846326 | 90.421441  | 72.1725398 |
| 20:49:31 | 0:46:42 | 63.8813582 | 63.846326 | 92.421441  | 72.1725398 |
| 20:49:32 | 0:46:43 | 63.8813582 | 63.846326 | 93.421441  | 71.1725398 |
| 20:49:33 | 0:46:44 | 63.8813582 | 66.846326 | 96.421441  | 69.1725398 |
| 20:49:34 | 0:46:45 | 63.8813582 | 67.846326 | 96.421441  | 69.1725398 |
| 20:49:35 | 0:46:46 | 63.8813582 | 68.846326 | 98.421441  | 69.1725398 |
| 20:49:36 | 0:46:47 | 62.8813582 | 68.846326 | 98.421441  | 73.1725398 |
| 20:49:37 | 0:46:48 | 62.8813582 | 68.846326 | 98.421441  | 74.1725398 |
| 20:49:38 | 0:46:49 | 62.8813582 | 69.846326 | 98.421441  | 74.1725398 |
| 20:49:39 | 0:46:50 | 62.8813582 | 69.846326 | 98.421441  | 73.1725398 |
| 20:49:40 | 0:46:51 | 62.8813582 | 69.846326 | 98.421441  | 73.1725398 |
| 20:49:41 | 0:46:52 | 62.8813582 | 69.846326 | 99.421441  | 73.1725398 |
| 20:49:42 | 0:46:53 | 62.8813582 | 69.846326 | 101.421441 | 73.1725398 |
| 20:49:43 | 0:46:54 | 62.8813582 | 69.846326 | 78.4953836 | 73.1725398 |
| 20:49:44 | 0:46:55 | 62.8813582 | 69.846326 | 78.4953836 | 73.1725398 |
| 20:49:45 | 0:46:56 | 62.8813582 | 69.846326 | 78.4953836 | 73.1725398 |
| 20:49:46 | 0:46:57 | 62.8813582 | 74.846326 | 102.421441 | 72.1725398 |
| 20:49:47 | 0:46:58 | 62.8813582 | 75.846326 | 79.4953836 | 72.1725398 |
| 20:49:48 | 0:46:59 | 63.8813582 | 77.846326 | 103.421441 | 72.1725398 |
| 20:49:49 | 0:47:00 | 63.8813582 | 77.846326 | 103.421441 | 73.1725398 |
| 20:49:50 | 0:47:01 | 63.8813582 | 77.846326 | 101.421441 | 73.1725398 |
| 20:49:51 | 0:47:02 | 63.8813582 | 78.846326 | 100.421441 | 74.1725398 |
| 20:49:52 | 0:47:03 | 63.8813582 | 78.846326 | 100.421441 | 73.1725398 |
| 20:49:53 | 0:47:04 | 63.8813582 | 78.846326 | 100.421441 | 73.1725398 |
| 20:49:54 | 0:47:05 | 63.8813582 | 78.846326 | 100.421441 | 72.1725398 |
| 20:49:55 | 0:47:06 | 64.8813582 | 79.846326 | 100.421441 | 72.1725398 |
| 20:49:56 | 0:47:07 | 65.8813582 | 79.846326 | 98.421441  | 72.1725398 |
| 20:49:57 | 0:47:08 | 65.8813582 | 79.846326 | 98.421441  | 72.1725398 |
| 20:49:58 | 0:47:09 | 64.8813582 | 80.846326 | 98.421441  | 75.1725398 |
| 20:49:59 | 0:47:10 | 64.8813582 | 80.846326 | 98.421441  | 76.1725398 |
| 20:50:00 | 0:47:11 | 64.8813582 | 80.846326 | 97.421441  | 77.1725398 |
| 20:50:01 | 0:47:12 | 64.8813582 | 80.846326 | 97.421441  | 76.1725398 |

|          |         |            |           |           |            |
|----------|---------|------------|-----------|-----------|------------|
| 20:50:02 | 0:47:13 | 64.8813582 | 81.846326 | 97.421441 | 75.1725398 |
| 20:50:03 | 0:47:14 | 64.8813582 | 81.846326 | 93.421441 | 72.1725398 |
| 20:50:04 | 0:47:15 | 64.8813582 | 81.846326 | 90.421441 | 70.1725398 |
| 20:50:05 | 0:47:16 | 63.8813582 | 83.846326 | 90.421441 | 69.1725398 |
| 20:50:06 | 0:47:17 | 63.8813582 | 83.846326 | 90.421441 | 69.1725398 |
| 20:50:07 | 0:47:18 | 64.8813582 | 83.846326 | 88.421441 | 70.1725398 |
| 20:50:08 | 0:47:19 | 64.8813582 | 83.846326 | 87.421441 | 70.1725398 |
| 20:50:09 | 0:47:20 | 64.8813582 | 83.846326 | 87.421441 | 70.1725398 |
| 20:50:10 | 0:47:21 | 63.8813582 | 83.846326 | 87.421441 | 70.1725398 |
| 20:50:11 | 0:47:22 | 63.8813582 | 83.846326 | 80.421441 | 70.1725398 |
| 20:50:12 | 0:47:23 | 63.8813582 | 83.846326 | 79.421441 | 72.1725398 |
| 20:50:13 | 0:47:24 | 63.8813582 | 83.846326 | 79.421441 | 74.1725398 |
| 20:50:14 | 0:47:25 | 63.8813582 | 83.846326 | 79.421441 | 76.1725398 |
| 20:50:15 | 0:47:26 | 63.8813582 | 86.846326 | 77.421441 | 76.1725398 |
| 20:50:16 | 0:47:27 | 63.8813582 | 90.846326 | 76.421441 | 76.1725398 |
| 20:50:17 | 0:47:28 | 62.8813582 | 91.846326 | 76.421441 | 74.1725398 |
| 20:50:18 | 0:47:29 | 62.8813582 | 91.846326 | 74.421441 | 74.1725398 |
| 20:50:19 | 0:47:30 | 61.8813582 | 91.846326 | 73.421441 | 74.1725398 |
| 20:50:20 | 0:47:31 | 61.8813582 | 91.846326 | 73.421441 | 74.1725398 |
| 20:50:21 | 0:47:32 | 61.8813582 | 93.846326 | 73.421441 | 78.1725398 |
| 20:50:22 | 0:47:33 | 61.8813582 | 85.846326 | 73.421441 | 80.1725398 |
| 20:50:23 | 0:47:34 | 61.8813582 | 81.846326 | 73.421441 | 81.1725398 |
| 20:50:24 | 0:47:35 | 61.8813582 | 80.846326 | 82.421441 | 81.1725398 |
| 20:50:25 | 0:47:36 | 59.8813582 | 80.846326 | 86.421441 | 83.1725398 |
| 20:50:26 | 0:47:37 | 59.8813582 | 80.846326 | 88.421441 | 85.1725398 |
| 20:50:27 | 0:47:38 | 59.8813582 | 80.846326 | 87.421441 | 86.1725398 |
| 20:50:28 | 0:47:39 | 58.8813582 | 79.846326 | 86.421441 | 88.1725398 |
| 20:50:29 | 0:47:40 | 58.8813582 | 78.846326 | 85.421441 | 88.1725398 |
| 20:50:30 | 0:47:41 | 59.8813582 | 78.846326 | 85.421441 | 90.1725398 |
| 20:50:31 | 0:47:42 | 59.8813582 | 78.846326 | 83.421441 | 91.1725398 |
| 20:50:32 | 0:47:43 | 59.8813582 | 79.846326 | 82.421441 | 91.1725398 |
| 20:50:33 | 0:47:44 | 60.8813582 | 79.846326 | 80.421441 | 91.1725398 |
| 20:50:34 | 0:47:45 | 60.8813582 | 78.846326 | 80.421441 | 90.1725398 |
| 20:50:35 | 0:47:46 | 60.8813582 | 78.846326 | 80.421441 | 90.1725398 |
| 20:50:36 | 0:47:47 | 60.8813582 | 69.846326 | 79.421441 | 89.1725398 |
| 20:50:37 | 0:47:48 | 60.8813582 | 65.846326 | 79.421441 | 89.1725398 |
| 20:50:38 | 0:47:49 | 60.8813582 | 64.846326 | 79.421441 | 88.1725398 |
| 20:50:39 | 0:47:50 | 60.8813582 | 63.846326 | 79.421441 | 87.1725398 |
| 20:50:40 | 0:47:51 | 60.8813582 | 63.846326 | 79.421441 | 85.1725398 |
| 20:50:41 | 0:47:52 | 60.8813582 | 63.846326 | 79.421441 | 83.1725398 |
| 20:50:42 | 0:47:53 | 60.8813582 | 63.846326 | 79.421441 | 82.1725398 |
| 20:50:43 | 0:47:54 | 60.8813582 | 63.846326 | 79.421441 | 77.1725398 |
| 20:50:44 | 0:47:55 | 60.8813582 | 63.846326 | 79.421441 | 73.1725398 |
| 20:50:45 | 0:47:56 | 60.8813582 | 63.846326 | 79.421441 | 71.1725398 |
| 20:50:46 | 0:47:57 | 60.8813582 | 63.846326 | 86.421441 | 70.1725398 |

|          |         |            |           |           |            |
|----------|---------|------------|-----------|-----------|------------|
| 20:50:47 | 0:47:58 | 60.8813582 | 63.846326 | 88.421441 | 69.1725398 |
| 20:50:48 | 0:47:59 | 61.8813582 | 62.846326 | 88.421441 | 68.1725398 |
| 20:50:49 | 0:48:00 | 62.8813582 | 62.846326 | 89.421441 | 68.1725398 |
| 20:50:50 | 0:48:01 | 62.8813582 | 61.846326 | 89.421441 | 68.1725398 |
| 20:50:51 | 0:48:02 | 62.8813582 | 61.846326 | 89.421441 | 67.1725398 |
| 20:50:52 | 0:48:03 | 62.8813582 | 60.846326 | 89.421441 | 67.1725398 |
| 20:50:53 | 0:48:04 | 62.8813582 | 60.846326 | 89.421441 | 67.1725398 |
| 20:50:54 | 0:48:05 | 62.8813582 | 60.846326 | 89.421441 | 67.1725398 |
| 20:50:55 | 0:48:06 | 62.8813582 | 63.846326 | 89.421441 | 67.1725398 |
| 20:50:56 | 0:48:07 | 62.8813582 | 64.846326 | 89.421441 | 67.1725398 |
| 20:50:57 | 0:48:08 | 63.8813582 | 64.846326 | 88.421441 | 67.1725398 |
| 20:50:58 | 0:48:09 | 63.8813582 | 64.846326 | 88.421441 | 69.1725398 |
| 20:50:59 | 0:48:10 | 64.8813582 | 63.846326 | 88.421441 | 71.1725398 |
| 20:51:00 | 0:48:11 | 64.8813582 | 63.846326 | 88.421441 | 71.1725398 |
| 20:51:01 | 0:48:12 | 64.8813582 | 62.846326 | 88.421441 | 71.1725398 |
| 20:51:02 | 0:48:13 | 64.8813582 | 62.846326 | 88.421441 | 70.1725398 |
| 20:51:03 | 0:48:14 | 64.8813582 | 62.846326 | 88.421441 | 72.1725398 |
| 20:51:04 | 0:48:15 | 64.8813582 | 61.846326 | 88.421441 | 73.1725398 |
| 20:51:05 | 0:48:16 | 64.8813582 | 62.846326 | 88.421441 | 74.1725398 |
| 20:51:06 | 0:48:17 | 64.8813582 | 62.846326 | 88.421441 | 75.1725398 |
| 20:51:07 | 0:48:18 | 64.8813582 | 63.846326 | 88.421441 | 76.1725398 |
| 20:51:08 | 0:48:19 | 64.8813582 | 64.846326 | 88.421441 | 76.1725398 |
| 20:51:09 | 0:48:20 | 64.8813582 | 64.846326 | 88.421441 | 76.1725398 |
| 20:51:10 | 0:48:21 | 64.8813582 | 64.846326 | 89.421441 | 76.1725398 |
| 20:51:11 | 0:48:22 | 64.8813582 | 66.846326 | 89.421441 | 77.1725398 |
| 20:51:12 | 0:48:23 | 64.8813582 | 67.846326 | 89.421441 | 80.1725398 |
| 20:51:13 | 0:48:24 | 64.8813582 | 67.846326 | 89.421441 | 82.1725398 |
| 20:51:14 | 0:48:25 | 64.8813582 | 67.846326 | 91.421441 | 83.1725398 |
| 20:51:15 | 0:48:26 | 64.8813582 | 63.846326 | 91.421441 | 83.1725398 |
| 20:51:16 | 0:48:27 |            | 63.846326 | 91.421441 | 85.1725398 |
| 20:51:17 | 0:48:28 |            | 62.846326 | 90.421441 | 85.1725398 |
| 20:51:18 | 0:48:29 |            | 62.846326 | 90.421441 | 85.1725398 |
| 20:51:19 | 0:48:30 |            | 62.846326 | 86.421441 | 85.1725398 |
| 20:51:20 | 0:48:31 |            | 62.846326 | 86.421441 | 83.1725398 |
| 20:51:21 | 0:48:32 |            | 61.846326 | 86.421441 | 83.1725398 |
| 20:51:22 | 0:48:33 |            | 61.846326 | 87.421441 | 83.1725398 |
| 20:51:23 | 0:48:34 |            | 61.846326 | 87.421441 | 85.1725398 |
| 20:51:24 | 0:48:35 |            | 61.846326 | 87.421441 | 85.1725398 |
| 20:51:25 | 0:48:36 |            | 61.846326 | 87.421441 | 86.1725398 |
| 20:51:26 | 0:48:37 |            | 61.846326 | 89.421441 | 86.1725398 |
| 20:51:27 | 0:48:38 |            | 61.846326 | 89.421441 | 88.1725398 |
| 20:51:28 | 0:48:39 |            | 60.846326 | 89.421441 | 89.1725398 |
| 20:51:29 | 0:48:40 |            | 61.846326 | 88.421441 | 89.1725398 |
| 20:51:30 | 0:48:41 |            | 62.846326 | 87.421441 | 88.1725398 |
| 20:51:31 | 0:48:42 |            | 62.846326 | 87.421441 | 86.1725398 |

|          |         |            |           |           |            |
|----------|---------|------------|-----------|-----------|------------|
| 20:51:32 | 0:48:43 |            | 62.846326 | 87.421441 | 84.1725398 |
| 20:51:33 | 0:48:44 |            | 63.846326 | 88.421441 | 82.1725398 |
| 20:51:34 | 0:48:45 |            | 63.846326 | 90.421441 | 82.1725398 |
| 20:51:35 | 0:48:46 |            | 64.846326 | 90.421441 | 82.1725398 |
| 20:51:36 | 0:48:47 |            | 64.846326 | 90.421441 | 82.1725398 |
| 20:51:37 | 0:48:48 |            | 64.846326 | 92.421441 | 81.1725398 |
| 20:51:38 | 0:48:49 |            | 65.846326 | 92.421441 | 80.1725398 |
| 20:51:39 | 0:48:50 |            | 68.846326 | 92.421441 | 78.1725398 |
| 20:51:40 | 0:48:51 |            | 69.846326 | 92.421441 | 76.1725398 |
| 20:51:41 | 0:48:52 |            | 69.846326 | 92.421441 | 75.1725398 |
| 20:51:42 | 0:48:53 |            | 69.846326 | 91.421441 | 73.1725398 |
| 20:51:43 | 0:48:54 |            | 68.846326 | 90.421441 | 73.1725398 |
| 20:51:44 | 0:48:55 |            | 68.846326 | 88.421441 | 73.1725398 |
| 20:51:45 | 0:48:56 |            | 68.846326 | 88.421441 | 73.1725398 |
| 20:51:46 | 0:48:57 |            | 68.846326 | 88.421441 | 73.1725398 |
| 20:51:47 | 0:48:58 |            | 68.846326 | 88.421441 | 73.1725398 |
| 20:51:48 | 0:48:59 |            | 70.846326 | 88.421441 | 72.1725398 |
| 20:51:49 | 0:49:00 |            | 73.846326 | 88.421441 | 74.1725398 |
| 20:51:50 | 0:49:01 |            | 72.846326 | 88.421441 | 74.1725398 |
| 20:51:51 | 0:49:02 |            | 72.846326 | 88.421441 | 73.1725398 |
| 20:51:52 | 0:49:03 |            | 72.846326 | 89.421441 | 72.1725398 |
| 20:51:53 | 0:49:04 |            | 71.846326 | 89.421441 | 72.1725398 |
| 20:51:54 | 0:49:05 |            | 71.846326 | 89.421441 | 72.1725398 |
| 20:51:55 | 0:49:06 |            | 71.846326 | 89.421441 | 75.1725398 |
| 20:51:56 | 0:49:07 | 64.8813582 | 71.846326 | 89.421441 | 76.1725398 |
| 20:51:57 | 0:49:08 | 64.8813582 | 71.846326 | 89.421441 | 76.1725398 |
| 20:51:58 | 0:49:09 | 64.8813582 | 70.846326 | 89.421441 | 77.1725398 |
| 20:51:59 | 0:49:10 | 64.8813582 | 70.846326 | 89.421441 | 78.1725398 |
| 20:52:00 | 0:49:11 | 64.8813582 | 70.846326 | 89.421441 | 78.1725398 |
| 20:52:01 | 0:49:12 | 78.8813582 | 70.846326 | 88.421441 | 76.1725398 |
| 20:52:02 | 0:49:13 | 79.8813582 | 70.846326 | 86.421441 | 75.1725398 |
| 20:52:03 | 0:49:14 | 79.8813582 | 69.846326 | 86.421441 | 75.1725398 |
| 20:52:04 | 0:49:15 | 79.8813582 | 69.846326 | 86.421441 | 74.1725398 |
| 20:52:05 | 0:49:16 | 79.8813582 | 69.846326 | 86.421441 | 75.1725398 |
| 20:52:06 | 0:49:17 | 79.8813582 | 68.846326 | 86.421441 | 75.1725398 |
| 20:52:07 | 0:49:18 | 79.8813582 | 68.846326 | 86.421441 | 77.1725398 |
| 20:52:08 | 0:49:19 | 80.8813582 | 68.846326 | 86.421441 | 77.1725398 |
| 20:52:09 | 0:49:20 | 80.8813582 | 68.846326 | 86.421441 | 79.1725398 |
| 20:52:10 | 0:49:21 | 80.8813582 | 68.846326 | 86.421441 | 79.1725398 |
| 20:52:11 | 0:49:22 | 81.8813582 | 68.846326 | 86.421441 | 79.1725398 |
| 20:52:12 | 0:49:23 | 81.8813582 | 71.846326 | 85.421441 | 79.1725398 |
| 20:52:13 | 0:49:24 | 81.8813582 | 72.846326 | 85.421441 | 76.1725398 |
| 20:52:14 | 0:49:25 | 85.8813582 | 72.846326 | 85.421441 | 74.1725398 |
| 20:52:15 | 0:49:26 | 85.8813582 | 72.846326 | 85.421441 | 74.1725398 |
| 20:52:16 | 0:49:27 | 85.8813582 | 72.846326 | 84.421441 | 74.1725398 |

|          |         |            |           |            |            |
|----------|---------|------------|-----------|------------|------------|
| 20:52:17 | 0:49:28 | 85.8813582 | 73.846326 | 84.421441  | 74.1725398 |
| 20:52:18 | 0:49:29 | 85.8813582 | 73.846326 | 80.421441  | 74.1725398 |
| 20:52:19 | 0:49:30 | 85.8813582 | 72.846326 | 80.421441  | 78.1725398 |
| 20:52:20 | 0:49:31 | 88.8813582 | 71.846326 | 80.421441  | 79.1725398 |
| 20:52:21 | 0:49:32 | 88.8813582 | 69.846326 | 80.421441  | 79.1725398 |
| 20:52:22 | 0:49:33 | 89.8813582 | 67.846326 | 80.421441  | 79.1725398 |
| 20:52:23 | 0:49:34 | 90.8813582 | 67.846326 | 80.421441  | 79.1725398 |
| 20:52:24 | 0:49:35 | 91.8813582 | 65.846326 | 79.421441  | 79.1725398 |
| 20:52:25 | 0:49:36 | 91.8813582 | 64.846326 | 81.421441  | 82.1725398 |
| 20:52:26 | 0:49:37 | 93.8813582 | 64.846326 | 82.421441  | 82.1725398 |
| 20:52:27 | 0:49:38 | 93.8813582 | 64.846326 | 83.421441  | 81.1725398 |
| 20:52:28 | 0:49:39 | 93.8813582 | 64.846326 | 83.421441  | 80.1725398 |
| 20:52:29 | 0:49:40 | 95.8813582 | 68.846326 | 83.421441  | 80.1725398 |
| 20:52:30 | 0:49:41 | 96.8813582 | 68.846326 | 88.421441  | 80.1725398 |
| 20:52:31 | 0:49:42 | 98.8813582 | 68.846326 | 88.421441  | 80.1725398 |
| 20:52:32 | 0:49:43 | 94.8813582 | 67.846326 | 89.421441  | 80.1725398 |
| 20:52:33 | 0:49:44 | 93.8813582 | 66.846326 | 89.421441  | 80.1725398 |
| 20:52:34 | 0:49:45 | 88.8813582 | 66.846326 | 89.421441  | 79.1725398 |
| 20:52:35 | 0:49:46 | 85.8813582 | 65.846326 | 89.421441  | 79.1725398 |
| 20:52:36 | 0:49:47 | 87.8813582 | 65.846326 | 89.421441  | 79.1725398 |
| 20:52:37 | 0:49:48 | 91.8813582 | 65.846326 | 91.421441  | 78.1725398 |
| 20:52:38 | 0:49:49 | 95.8813582 | 64.846326 | 91.421441  | 76.1725398 |
| 20:52:39 | 0:49:50 | 99.8813582 | 64.846326 | 91.421441  | 76.1725398 |
| 20:52:40 | 0:49:51 | 92.8813582 | 64.846326 | 92.421441  | 76.1725398 |
| 20:52:41 | 0:49:52 | 89.8813582 | 64.846326 | 91.421441  | 76.1725398 |
| 20:52:42 | 0:49:53 | 87.8813582 | 64.846326 | 91.421441  | 77.1725398 |
| 20:52:43 | 0:49:54 | 85.8813582 | 64.846326 | 91.421441  | 77.1725398 |
| 20:52:44 | 0:49:55 | 84.8813582 | 63.846326 | 90.421441  | 77.1725398 |
| 20:52:45 | 0:49:56 | 84.8813582 | 63.846326 | 93.421441  | 77.1725398 |
| 20:52:46 | 0:49:57 | 83.8813582 | 63.846326 | 94.421441  | 77.1725398 |
| 20:52:47 | 0:49:58 | 83.8813582 | 70.846326 | 94.421441  | 77.1725398 |
| 20:52:48 | 0:49:59 | 83.8813582 | 70.846326 | 94.421441  | 77.1725398 |
| 20:52:49 | 0:50:00 | 82.8813582 | 70.846326 | 96.421441  | 78.1725398 |
| 20:52:50 | 0:50:01 | 83.8813582 | 74.846326 | 96.421441  | 77.1725398 |
| 20:52:51 | 0:50:02 | 83.8813582 | 74.846326 | 93.421441  | 77.1725398 |
| 20:52:52 | 0:50:03 | 85.8813582 | 74.846326 | 93.421441  | 75.1725398 |
| 20:52:53 | 0:50:04 | 85.8813582 | 73.846326 | 92.421441  | 75.1725398 |
| 20:52:54 | 0:50:05 | 85.8813582 | 73.846326 | 91.421441  | 75.1725398 |
| 20:52:55 | 0:50:06 | 85.8813582 | 73.846326 | 91.421441  | 75.1725398 |
| 20:52:56 | 0:50:07 | 85.8813582 | 73.846326 | 90.421441  | 75.1725398 |
| 20:52:57 | 0:50:08 | 85.8813582 | 73.846326 | 90.421441  | 75.1725398 |
| 20:52:58 | 0:50:09 | 85.8813582 | 73.846326 | 91.421441  | 75.1725398 |
| 20:52:59 | 0:50:10 | 82.8813582 | 74.846326 | 100.421441 | 75.1725398 |
| 20:53:00 | 0:50:11 | 83.8813582 | 74.846326 | 101.421441 | 74.1725398 |
| 20:53:01 | 0:50:12 | 82.8813582 | 75.846326 | 101.421441 | 74.1725398 |



|          |         |            |           |            |            |
|----------|---------|------------|-----------|------------|------------|
| 20:53:02 | 0:50:13 | 79.8813582 | 75.846326 | 101.421441 | 74.1725398 |
| 20:53:03 | 0:50:14 | 78.8813582 | 76.846326 | 101.421441 | 73.1725398 |
| 20:53:04 | 0:50:15 | 76.8813582 | 78.846326 | 102.421441 | 73.1725398 |
| 20:53:05 | 0:50:16 | 74.8813582 | 78.846326 | 103.421441 | 74.1725398 |
| 20:53:06 | 0:50:17 | 69.8813582 | 78.846326 | 103.421441 | 74.1725398 |
| 20:53:07 | 0:50:18 | 68.8813582 | 78.846326 | 103.421441 | 73.1725398 |
| 20:53:08 | 0:50:19 | 67.8813582 | 78.846326 | 103.421441 | 73.1725398 |
| 20:53:09 | 0:50:20 | 67.8813582 | 79.846326 | 102.421441 | 73.1725398 |
| 20:53:10 | 0:50:21 | 67.8813582 | 79.846326 | 101.421441 | 72.1725398 |
| 20:53:11 | 0:50:22 | 67.8813582 | 79.846326 | 101.421441 | 71.1725398 |
| 20:53:12 | 0:50:23 | 67.8813582 | 80.846326 | 101.421441 | 71.1725398 |
| 20:53:13 | 0:50:24 | 66.8813582 | 74.846326 | 99.421441  | 71.1725398 |
| 20:53:14 | 0:50:25 | 66.8813582 | 73.846326 | 96.421441  | 71.1725398 |
| 20:53:15 | 0:50:26 | 66.8813582 | 70.846326 | 93.421441  | 72.1725398 |
| 20:53:16 | 0:50:27 | 66.8813582 | 70.846326 | 93.421441  | 72.1725398 |
| 20:53:17 | 0:50:28 | 66.8813582 | 68.846326 | 92.421441  | 75.1725398 |
| 20:53:18 | 0:50:29 | 66.8813582 | 65.846326 | 92.421441  | 76.1725398 |
| 20:53:19 | 0:50:30 | 66.8813582 | 65.846326 | 93.421441  | 76.1725398 |
| 20:53:20 | 0:50:31 | 65.8813582 | 65.846326 | 94.421441  | 76.1725398 |
| 20:53:21 | 0:50:32 | 66.8813582 | 64.846326 | 94.421441  | 76.1725398 |
| 20:53:22 | 0:50:33 | 66.8813582 | 63.846326 | 94.421441  | 75.1725398 |
| 20:53:23 | 0:50:34 | 66.8813582 | 62.846326 | 95.421441  | 75.1725398 |
| 20:53:24 | 0:50:35 | 66.8813582 | 62.846326 | 96.421441  | 75.1725398 |
| 20:53:25 | 0:50:36 | 66.8813582 | 62.846326 | 96.421441  | 75.1725398 |
| 20:53:26 | 0:50:37 | 66.8813582 | 61.846326 | 96.421441  | 75.1725398 |
| 20:53:27 | 0:50:38 | 66.8813582 | 61.846326 | 97.421441  | 75.1725398 |
| 20:53:28 | 0:50:39 | 65.8813582 | 61.846326 | 98.421441  | 76.1725398 |
| 20:53:29 | 0:50:40 | 64.8813582 | 63.846326 | 98.421441  | 76.1725398 |
| 20:53:30 | 0:50:41 | 65.8813582 | 64.846326 | 98.421441  | 76.1725398 |
| 20:53:31 | 0:50:42 | 65.8813582 | 64.846326 | 96.421441  | 80.1725398 |
| 20:53:32 | 0:50:43 | 65.8813582 | 64.846326 | 95.421441  | 80.1725398 |
| 20:53:33 | 0:50:44 | 66.8813582 | 65.846326 | 92.421441  | 77.1725398 |
| 20:53:34 | 0:50:45 | 65.8813582 | 65.846326 | 92.421441  | 74.1725398 |
| 20:53:35 | 0:50:46 | 65.8813582 | 64.846326 | 91.421441  | 74.1725398 |
| 20:53:36 | 0:50:47 | 65.8813582 | 62.846326 | 89.421441  | 71.1725398 |
| 20:53:37 | 0:50:48 | 64.8813582 | 63.846326 | 89.421441  | 71.1725398 |
| 20:53:38 | 0:50:49 | 64.8813582 | 62.846326 | 89.421441  | 72.1725398 |
| 20:53:39 | 0:50:50 | 63.8813582 | 62.846326 | 89.421441  | 73.1725398 |
| 20:53:40 | 0:50:51 | 63.8813582 | 62.846326 | 88.421441  | 73.1725398 |
| 20:53:41 | 0:50:52 | 63.8813582 | 62.846326 | 88.421441  | 73.1725398 |
| 20:53:42 | 0:50:53 | 63.8813582 | 62.846326 | 88.421441  | 73.1725398 |
| 20:53:43 | 0:50:54 | 63.8813582 | 62.846326 | 88.421441  | 73.1725398 |
| 20:53:44 | 0:50:55 | 63.8813582 | 62.846326 | 87.421441  | 72.1725398 |
| 20:53:45 | 0:50:56 | 64.8813582 | 61.846326 | 86.421441  | 72.1725398 |
| 20:53:46 | 0:50:57 | 64.8813582 | 60.846326 | 87.421441  | 71.1725398 |

|          |         |            |           |           |            |
|----------|---------|------------|-----------|-----------|------------|
| 20:53:47 | 0:50:58 | 64.8813582 | 60.846326 | 87.421441 | 72.1725398 |
| 20:53:48 | 0:50:59 | 63.8813582 | 60.846326 | 88.421441 | 72.1725398 |
| 20:53:49 | 0:51:00 | 63.8813582 | 61.846326 | 88.421441 | 92.1725398 |
| 20:53:50 | 0:51:01 | 64.8813582 | 61.846326 | 88.421441 | 95.1725398 |
| 20:53:51 | 0:51:02 | 64.8813582 | 61.846326 | 88.421441 | 96.1725398 |
| 20:53:52 | 0:51:03 | 66.8813582 | 61.846326 | 89.421441 | 96.1725398 |
| 20:53:53 | 0:51:04 | 66.8813582 | 63.846326 | 88.421441 | 97.1725398 |
| 20:53:54 | 0:51:05 | 66.8813582 | 65.846326 | 88.421441 | 98.1725398 |
| 20:53:55 | 0:51:06 | 65.8813582 | 66.846326 | 88.421441 | 99.1725398 |
| 20:53:56 | 0:51:07 | 65.8813582 | 66.846326 | 88.421441 | 99.1725398 |
| 20:53:57 | 0:51:08 | 65.8813582 | 68.846326 | 88.421441 | 102.17254  |
| 20:53:58 | 0:51:09 | 65.8813582 | 69.846326 | 92.421441 | 102.17254  |
| 20:53:59 | 0:51:10 | 65.8813582 | 68.846326 | 94.421441 | 102.17254  |
| 20:54:00 | 0:51:11 | 65.8813582 | 68.846326 | 94.421441 | 102.17254  |
| 20:54:01 | 0:51:12 | 65.8813582 | 64.846326 | 87.421441 | 102.17254  |
| 20:54:02 | 0:51:13 | 65.8813582 | 63.846326 | 86.421441 | 103.17254  |
| 20:54:03 | 0:51:14 | 64.8813582 | 62.846326 | 86.421441 | 104.17254  |
| 20:54:04 | 0:51:15 | 63.8813582 | 60.846326 | 86.421441 | 104.17254  |
| 20:54:05 | 0:51:16 | 63.8813582 | 60.846326 | 86.421441 | 105.17254  |
| 20:54:06 | 0:51:17 | 63.8813582 | 59.846326 | 86.421441 | 105.17254  |
| 20:54:07 | 0:51:18 | 63.8813582 | 59.846326 | 86.421441 | 105.17254  |
| 20:54:08 | 0:51:19 | 63.8813582 | 59.846326 | 83.421441 | 105.17254  |
| 20:54:09 | 0:51:20 | 63.8813582 | 59.846326 | 83.421441 | 105.17254  |
| 20:54:10 | 0:51:21 | 63.8813582 | 59.846326 | 82.421441 | 105.17254  |
| 20:54:11 | 0:51:22 | 63.8813582 | 60.846326 | 83.421441 | 104.17254  |
| 20:54:12 | 0:51:23 | 63.8813582 | 61.846326 | 85.421441 | 103.17254  |
| 20:54:13 | 0:51:24 | 65.8813582 | 61.846326 | 85.421441 | 103.17254  |
| 20:54:14 | 0:51:25 | 65.8813582 | 62.846326 | 86.421441 | 103.17254  |
| 20:54:15 | 0:51:26 | 65.8813582 | 62.846326 | 86.421441 | 100.17254  |
| 20:54:16 | 0:51:27 | 65.8813582 | 62.846326 | 86.421441 | 96.1725398 |
| 20:54:17 | 0:51:28 | 67.8813582 | 62.846326 | 86.421441 | 94.1725398 |
| 20:54:18 | 0:51:29 | 68.8813582 | 63.846326 | 87.421441 | 91.1725398 |
| 20:54:19 | 0:51:30 | 68.8813582 | 63.846326 | 87.421441 | 89.1725398 |
| 20:54:20 | 0:51:31 | 68.8813582 | 64.846326 | 87.421441 | 89.1725398 |
| 20:54:21 | 0:51:32 | 68.8813582 | 64.846326 | 87.421441 | 88.1725398 |
| 20:54:22 | 0:51:33 | 69.8813582 | 65.846326 | 85.421441 | 87.1725398 |
| 20:54:23 | 0:51:34 | 69.8813582 | 65.846326 | 86.421441 | 85.1725398 |
| 20:54:24 | 0:51:35 | 70.8813582 | 66.846326 | 86.421441 | 84.1725398 |
| 20:54:25 | 0:51:36 | 72.8813582 | 67.846326 | 89.421441 | 85.1725398 |
| 20:54:26 | 0:51:37 | 73.8813582 | 67.846326 | 91.421441 | 84.1725398 |
| 20:54:27 | 0:51:38 | 74.8813582 | 67.846326 | 92.421441 | 83.1725398 |
| 20:54:28 | 0:51:39 | 74.8813582 | 67.846326 | 91.421441 | 84.1725398 |
| 20:54:29 | 0:51:40 | 77.8813582 | 66.846326 | 91.421441 | 84.1725398 |
| 20:54:30 | 0:51:41 | 77.8813582 | 67.846326 | 91.421441 | 86.1725398 |
| 20:54:31 | 0:51:42 | 81.8813582 | 69.846326 | 90.421441 | 86.1725398 |

|          |         |            |           |           |            |
|----------|---------|------------|-----------|-----------|------------|
| 20:54:32 | 0:51:43 | 84.8813582 | 71.846326 | 90.421441 | 88.1725398 |
| 20:54:33 | 0:51:44 | 82.8813582 | 72.846326 | 90.421441 | 90.1725398 |
| 20:54:34 | 0:51:45 | 81.8813582 | 72.846326 | 91.421441 | 92.1725398 |
| 20:54:35 | 0:51:46 | 81.8813582 | 72.846326 | 91.421441 | 93.1725398 |
| 20:54:36 | 0:51:47 | 81.8813582 | 72.846326 | 91.421441 | 93.1725398 |
| 20:54:37 | 0:51:48 | 79.8813582 | 72.846326 | 91.421441 | 93.1725398 |
| 20:54:38 | 0:51:49 | 79.8813582 | 72.846326 | 89.421441 | 92.1725398 |
| 20:54:39 | 0:51:50 | 79.8813582 | 65.846326 | 88.421441 | 92.1725398 |
| 20:54:40 | 0:51:51 | 79.8813582 | 65.846326 | 87.421441 | 88.1725398 |
| 20:54:41 | 0:51:52 | 79.8813582 | 63.846326 | 87.421441 | 85.1725398 |
| 20:54:42 | 0:51:53 | 79.8813582 | 63.846326 | 83.421441 | 84.1725398 |
| 20:54:43 | 0:51:54 | 79.8813582 | 63.846326 | 82.421441 | 82.1725398 |
| 20:54:44 | 0:51:55 | 79.8813582 | 64.846326 | 80.421441 | 81.1725398 |
| 20:54:45 | 0:51:56 | 79.8813582 | 65.846326 | 78.421441 | 81.1725398 |
| 20:54:46 | 0:51:57 | 81.8813582 | 65.846326 | 78.421441 | 80.1725398 |
| 20:54:47 | 0:51:58 | 82.8813582 | 67.846326 | 77.421441 | 79.1725398 |
| 20:54:48 | 0:51:59 | 82.8813582 | 69.846326 | 77.421441 | 78.1725398 |
| 20:54:49 | 0:52:00 | 83.8813582 | 70.846326 | 77.421441 | 78.1725398 |
| 20:54:50 | 0:52:01 | 83.8813582 | 69.846326 | 77.421441 | 78.1725398 |
| 20:54:51 | 0:52:02 | 83.8813582 | 69.846326 | 77.421441 | 75.1725398 |
| 20:54:52 | 0:52:03 | 83.8813582 | 69.846326 | 77.421441 | 75.1725398 |
| 20:54:53 | 0:52:04 | 83.8813582 | 68.846326 | 78.421441 | 75.1725398 |
| 20:54:54 | 0:52:05 | 84.8813582 | 66.846326 | 78.421441 | 75.1725398 |
| 20:54:55 | 0:52:06 | 84.8813582 | 65.846326 | 79.421441 | 75.1725398 |
| 20:54:56 | 0:52:07 | 84.8813582 | 65.846326 | 79.421441 | 76.1725398 |
| 20:54:57 | 0:52:08 | 84.8813582 | 66.846326 | 81.421441 | 76.1725398 |
| 20:54:58 | 0:52:09 | 84.8813582 | 66.846326 | 81.421441 | 78.1725398 |
| 20:54:59 | 0:52:10 | 85.8813582 | 66.846326 | 81.421441 | 78.1725398 |
| 20:55:00 | 0:52:11 | 84.8813582 | 66.846326 | 81.421441 | 78.1725398 |
| 20:55:01 | 0:52:12 | 83.8813582 | 66.846326 | 82.421441 | 79.1725398 |
| 20:55:02 | 0:52:13 | 83.8813582 | 66.846326 | 82.421441 | 78.1725398 |
| 20:55:03 | 0:52:14 | 82.8813582 | 66.846326 | 82.421441 | 76.1725398 |
| 20:55:04 | 0:52:15 | 81.8813582 | 66.846326 | 85.421441 | 72.1725398 |
| 20:55:05 | 0:52:16 | 80.8813582 | 67.846326 | 85.421441 | 72.1725398 |
| 20:55:06 | 0:52:17 | 80.8813582 | 67.846326 | 86.421441 | 73.1725398 |
| 20:55:07 | 0:52:18 | 80.8813582 | 67.846326 | 86.421441 | 73.1725398 |
| 20:55:08 | 0:52:19 | 79.8813582 | 68.846326 | 89.421441 | 73.1725398 |
| 20:55:09 | 0:52:20 | 79.8813582 | 68.846326 | 89.421441 | 73.1725398 |
| 20:55:10 | 0:52:21 | 77.8813582 | 69.846326 | 89.421441 | 72.1725398 |
| 20:55:11 | 0:52:22 | 74.8813582 | 70.846326 | 89.421441 | 70.1725398 |
| 20:55:12 | 0:52:23 | 73.8813582 | 70.846326 | 89.421441 | 69.1725398 |
| 20:55:13 | 0:52:24 | 74.8813582 | 75.846326 | 89.421441 | 69.1725398 |
| 20:55:14 | 0:52:25 | 74.8813582 | 75.846326 | 91.421441 | 69.1725398 |
| 20:55:15 | 0:52:26 | 76.8813582 | 73.846326 | 94.421441 | 69.1725398 |
| 20:55:16 | 0:52:27 | 75.8813582 | 71.846326 | 96.421441 | 69.1725398 |

|          |         |            |           |            |            |
|----------|---------|------------|-----------|------------|------------|
| 20:55:17 | 0:52:28 | 73.8813582 | 71.846326 | 96.421441  | 76.1725398 |
| 20:55:18 | 0:52:29 | 71.8813582 | 71.846326 | 97.421441  | 79.1725398 |
| 20:55:19 | 0:52:30 | 69.8813582 | 71.846326 | 97.421441  | 80.1725398 |
| 20:55:20 | 0:52:31 | 69.8813582 | 71.846326 | 96.421441  | 79.1725398 |
| 20:55:21 | 0:52:32 | 69.8813582 | 72.846326 | 93.421441  | 77.1725398 |
| 20:55:22 | 0:52:33 | 68.8813582 | 73.846326 | 93.421441  | 75.1725398 |
| 20:55:23 | 0:52:34 | 68.8813582 | 75.846326 | 92.421441  | 73.1725398 |
| 20:55:24 | 0:52:35 | 67.8813582 | 75.846326 | 93.421441  | 73.1725398 |
| 20:55:25 | 0:52:36 | 67.8813582 | 76.846326 | 93.421441  | 73.1725398 |
| 20:55:26 | 0:52:37 | 67.8813582 | 77.846326 | 93.421441  | 73.1725398 |
| 20:55:27 | 0:52:38 | 68.8813582 | 77.846326 | 93.421441  | 73.1725398 |
| 20:55:28 | 0:52:39 | 69.8813582 | 77.846326 | 93.421441  | 73.1725398 |
| 20:55:29 | 0:52:40 | 69.8813582 | 77.846326 | 93.421441  | 73.1725398 |
| 20:55:30 | 0:52:41 | 69.8813582 | 77.846326 | 93.421441  | 73.1725398 |
| 20:55:31 | 0:52:42 | 71.8813582 | 76.846326 | 100.421441 | 74.1725398 |
| 20:55:32 | 0:52:43 | 71.8813582 | 76.846326 | 103.421441 | 73.1725398 |
| 20:55:33 | 0:52:44 | 70.8813582 | 76.846326 | 103.421441 | 73.1725398 |
| 20:55:34 | 0:52:45 | 70.8813582 | 76.846326 | 105.421441 | 73.1725398 |
| 20:55:35 | 0:52:46 | 70.8813582 | 76.846326 | 104.421441 | 73.1725398 |
| 20:55:36 | 0:52:47 | 69.8813582 | 77.846326 | 101.421441 | 72.1725398 |
| 20:55:37 | 0:52:48 | 69.8813582 | 78.846326 | 101.421441 | 71.1725398 |
| 20:55:38 | 0:52:49 | 69.8813582 | 79.846326 | 91.421441  | 72.1725398 |
| 20:55:39 | 0:52:50 | 69.8813582 | 79.846326 | 89.421441  | 74.1725398 |
| 20:55:40 | 0:52:51 | 68.8813582 | 80.846326 | 87.421441  | 74.1725398 |
| 20:55:41 | 0:52:52 | 68.8813582 | 81.846326 | 87.421441  | 74.1725398 |
| 20:55:42 | 0:52:53 | 68.8813582 | 82.846326 | 87.421441  | 73.1725398 |
| 20:55:43 | 0:52:54 | 68.8813582 | 85.846326 | 86.421441  | 71.1725398 |
| 20:55:44 | 0:52:55 | 68.8813582 | 85.846326 | 84.421441  | 71.1725398 |
| 20:55:45 | 0:52:56 | 68.8813582 | 88.846326 | 84.421441  | 71.1725398 |
| 20:55:46 | 0:52:57 | 68.8813582 | 89.846326 | 83.421441  | 70.1725398 |
| 20:55:47 | 0:52:58 | 68.8813582 | 90.846326 | 83.421441  | 70.1725398 |
| 20:55:48 | 0:52:59 | 68.8813582 | 90.846326 | 83.421441  | 71.1725398 |
| 20:55:49 | 0:53:00 | 68.8813582 | 90.846326 | 83.421441  | 72.1725398 |
| 20:55:50 | 0:53:01 | 70.8813582 | 90.846326 | 84.421441  | 72.1725398 |
| 20:55:51 | 0:53:02 | 70.8813582 | 91.846326 | 84.421441  | 77.1725398 |
| 20:55:52 | 0:53:03 | 71.8813582 | 86.846326 | 85.421441  | 76.1725398 |
| 20:55:53 | 0:53:04 | 71.8813582 | 76.846326 | 85.421441  | 75.1725398 |
| 20:55:54 | 0:53:05 | 72.8813582 | 76.846326 | 84.421441  | 75.1725398 |
| 20:55:55 | 0:53:06 | 73.8813582 | 71.846326 | 85.421441  | 76.1725398 |
| 20:55:56 | 0:53:07 | 72.8813582 | 71.846326 | 85.421441  | 76.1725398 |
| 20:55:57 | 0:53:08 | 72.8813582 | 71.846326 | 85.421441  | 75.1725398 |
| 20:55:58 | 0:53:09 | 72.8813582 | 72.846326 | 85.421441  | 74.1725398 |
| 20:55:59 | 0:53:10 | 73.8813582 | 74.846326 | 85.421441  | 72.1725398 |
| 20:56:00 | 0:53:11 | 73.8813582 | 76.846326 | 85.421441  | 70.1725398 |
| 20:56:01 | 0:53:12 | 74.8813582 | 76.846326 | 86.421441  | 71.1725398 |

|          |         |            |           |           |            |
|----------|---------|------------|-----------|-----------|------------|
| 20:56:02 | 0:53:13 | 74.8813582 | 74.846326 | 86.421441 | 72.1725398 |
| 20:56:03 | 0:53:14 | 75.8813582 | 73.846326 | 86.421441 | 72.1725398 |
| 20:56:04 | 0:53:15 | 76.8813582 | 71.846326 | 86.421441 | 73.1725398 |
| 20:56:05 | 0:53:16 | 77.8813582 | 69.846326 | 86.421441 | 73.1725398 |
| 20:56:06 | 0:53:17 | 78.8813582 | 69.846326 | 86.421441 | 71.1725398 |
| 20:56:07 | 0:53:18 | 77.8813582 | 67.846326 | 86.421441 | 71.1725398 |
| 20:56:08 | 0:53:19 | 76.8813582 | 67.846326 | 86.421441 | 70.1725398 |
| 20:56:09 | 0:53:20 | 75.8813582 | 67.846326 | 85.421441 | 69.1725398 |
| 20:56:10 | 0:53:21 | 75.8813582 | 67.846326 | 85.421441 | 70.1725398 |
| 20:56:11 | 0:53:22 | 75.8813582 | 67.846326 | 83.421441 | 71.1725398 |
| 20:56:12 | 0:53:23 | 75.8813582 | 68.846326 | 83.421441 | 73.1725398 |
| 20:56:13 | 0:53:24 | 75.8813582 | 68.846326 | 83.421441 | 74.1725398 |
| 20:56:14 | 0:53:25 | 75.8813582 | 68.846326 | 83.421441 | 74.1725398 |
| 20:56:15 | 0:53:26 | 75.8813582 | 68.846326 | 83.421441 | 74.1725398 |
| 20:56:16 | 0:53:27 | 75.8813582 | 68.846326 | 82.421441 | 73.1725398 |
| 20:56:17 | 0:53:28 | 75.8813582 | 67.846326 | 82.421441 | 71.1725398 |
| 20:56:18 | 0:53:29 | 75.8813582 | 67.846326 | 82.421441 | 71.1725398 |
| 20:56:19 | 0:53:30 | 75.8813582 | 67.846326 | 83.421441 | 70.1725398 |
| 20:56:20 | 0:53:31 | 75.8813582 | 68.846326 | 84.421441 | 70.1725398 |
| 20:56:21 | 0:53:32 | 73.8813582 | 69.846326 | 84.421441 | 70.1725398 |
| 20:56:22 | 0:53:33 | 72.8813582 | 69.846326 | 84.421441 | 72.1725398 |
| 20:56:23 | 0:53:34 | 72.8813582 | 69.846326 | 83.421441 | 73.1725398 |
| 20:56:24 | 0:53:35 | 72.8813582 | 69.846326 | 83.421441 | 73.1725398 |
| 20:56:25 | 0:53:36 | 70.8813582 | 72.846326 | 83.421441 | 74.1725398 |
| 20:56:26 | 0:53:37 | 69.8813582 | 72.846326 | 83.421441 | 73.1725398 |
| 20:56:27 | 0:53:38 | 69.8813582 | 72.846326 | 83.421441 | 71.1725398 |
| 20:56:28 | 0:53:39 | 68.8813582 | 71.846326 | 81.421441 | 68.1725398 |
| 20:56:29 | 0:53:40 | 68.8813582 | 70.846326 | 81.421441 | 66.1725398 |
| 20:56:30 | 0:53:41 | 68.8813582 | 71.846326 | 81.421441 | 66.1725398 |
| 20:56:31 | 0:53:42 | 70.8813582 | 71.846326 | 81.421441 | 67.1725398 |
| 20:56:32 | 0:53:43 | 70.8813582 | 71.846326 | 81.421441 | 67.1725398 |
| 20:56:33 | 0:53:44 | 70.8813582 | 68.846326 | 81.421441 | 68.1725398 |
| 20:56:34 | 0:53:45 | 69.8813582 | 66.846326 | 80.421441 | 69.1725398 |
| 20:56:35 | 0:53:46 | 69.8813582 | 65.846326 | 80.421441 | 69.1725398 |
| 20:56:36 | 0:53:47 | 69.8813582 | 65.846326 | 81.421441 | 69.1725398 |
| 20:56:37 | 0:53:48 | 68.8813582 | 65.846326 | 81.421441 | 70.1725398 |
| 20:56:38 | 0:53:49 | 67.8813582 | 65.846326 | 81.421441 | 70.1725398 |
| 20:56:39 | 0:53:50 | 67.8813582 | 65.846326 | 82.421441 | 69.1725398 |
| 20:56:40 | 0:53:51 | 66.8813582 | 64.846326 | 82.421441 | 69.1725398 |
| 20:56:41 | 0:53:52 | 66.8813582 | 64.846326 | 82.421441 | 69.1725398 |
| 20:56:42 | 0:53:53 | 66.8813582 | 64.846326 | 82.421441 | 69.1725398 |
| 20:56:43 | 0:53:54 | 66.8813582 | 64.846326 | 83.421441 | 70.1725398 |
| 20:56:44 | 0:53:55 | 66.8813582 | 65.846326 | 84.421441 | 71.1725398 |
| 20:56:45 | 0:53:56 | 66.8813582 | 65.846326 | 84.421441 | 71.1725398 |
| 20:56:46 | 0:53:57 | 66.8813582 | 66.846326 | 84.421441 | 71.1725398 |

|          |         |            |           |           |            |
|----------|---------|------------|-----------|-----------|------------|
| 20:56:47 | 0:53:58 | 65.8813582 | 66.846326 | 84.421441 | 72.1725398 |
| 20:56:48 | 0:53:59 | 65.8813582 | 66.846326 | 84.421441 | 72.1725398 |
| 20:56:49 | 0:54:00 | 66.8813582 | 67.846326 | 84.421441 | 70.1725398 |
| 20:56:50 | 0:54:01 | 66.8813582 | 67.846326 | 84.421441 | 70.1725398 |
| 20:56:51 | 0:54:02 | 65.8813582 | 67.846326 | 84.421441 | 70.1725398 |
| 20:56:52 | 0:54:03 | 65.8813582 | 67.846326 | 84.421441 | 72.1725398 |
| 20:56:53 | 0:54:04 | 63.8813582 | 67.846326 | 84.421441 | 72.1725398 |
| 20:56:54 | 0:54:05 | 60.8813582 | 68.846326 | 84.421441 | 72.1725398 |
| 20:56:55 | 0:54:06 | 60.8813582 | 68.846326 | 83.421441 | 73.1725398 |
| 20:56:56 | 0:54:07 | 60.8813582 | 68.846326 | 81.421441 | 74.1725398 |
| 20:56:57 | 0:54:08 | 60.8813582 | 67.846326 | 80.421441 | 74.1725398 |
| 20:56:58 | 0:54:09 | 60.8813582 | 66.846326 | 80.421441 | 74.1725398 |
| 20:56:59 | 0:54:10 | 60.8813582 | 64.846326 | 80.421441 | 74.1725398 |
| 20:57:00 | 0:54:11 | 60.8813582 | 61.846326 | 81.421441 | 73.1725398 |
| 20:57:01 | 0:54:12 | 60.8813582 | 61.846326 | 83.421441 | 71.1725398 |
| 20:57:02 | 0:54:13 | 60.8813582 | 61.846326 | 85.421441 | 71.1725398 |
| 20:57:03 | 0:54:14 | 59.8813582 | 64.846326 | 85.421441 | 70.1725398 |
| 20:57:04 | 0:54:15 | 59.8813582 | 64.846326 | 85.421441 | 69.1725398 |
| 20:57:05 | 0:54:16 | 59.8813582 | 64.846326 | 85.421441 | 70.1725398 |
| 20:57:06 | 0:54:17 | 58.8813582 | 64.846326 | 86.421441 | 71.1725398 |
| 20:57:07 | 0:54:18 | 58.8813582 | 66.846326 | 87.421441 | 72.1725398 |
| 20:57:08 | 0:54:19 | 58.8813582 | 70.846326 | 87.421441 | 73.1725398 |
| 20:57:09 | 0:54:20 | 58.8813582 | 72.846326 | 87.421441 | 73.1725398 |
| 20:57:10 | 0:54:21 | 58.8813582 | 72.846326 | 88.421441 | 74.1725398 |
| 20:57:11 | 0:54:22 | 57.8813582 | 71.846326 | 88.421441 | 74.1725398 |
| 20:57:12 | 0:54:23 | 57.8813582 | 71.846326 | 89.421441 | 71.1725398 |
| 20:57:13 | 0:54:24 | 57.8813582 | 72.846326 | 89.421441 | 71.1725398 |
| 20:57:14 | 0:54:25 | 57.8813582 | 72.846326 | 89.421441 | 66.1725398 |
| 20:57:15 | 0:54:26 | 57.8813582 | 72.846326 | 89.421441 | 66.1725398 |
| 20:57:16 | 0:54:27 | 59.8813582 | 72.846326 | 89.421441 | 65.1725398 |
| 20:57:17 | 0:54:28 | 59.8813582 | 72.846326 | 89.421441 | 65.1725398 |
| 20:57:18 | 0:54:29 | 59.8813582 | 72.846326 | 89.421441 | 65.1725398 |
| 20:57:19 | 0:54:30 | 60.8813582 | 75.846326 | 81.421441 | 68.1725398 |
| 20:57:20 | 0:54:31 | 60.8813582 | 76.846326 | 80.421441 | 68.1725398 |
| 20:57:21 | 0:54:32 | 61.8813582 | 76.846326 | 80.421441 | 68.1725398 |
| 20:57:22 | 0:54:33 | 62.8813582 | 76.846326 | 77.421441 | 65.1725398 |
| 20:57:23 | 0:54:34 | 63.8813582 | 76.846326 | 77.421441 | 62.1725398 |
| 20:57:24 | 0:54:35 | 64.8813582 | 75.846326 | 77.421441 | 62.1725398 |
| 20:57:25 | 0:54:36 | 64.8813582 | 74.846326 | 77.421441 | 62.1725398 |
| 20:57:26 | 0:54:37 | 64.8813582 | 73.846326 | 77.421441 | 61.1725398 |
| 20:57:27 | 0:54:38 | 66.8813582 | 73.846326 | 76.421441 | 61.1725398 |
| 20:57:28 | 0:54:39 | 66.8813582 | 73.846326 | 76.421441 | 61.1725398 |
| 20:57:29 | 0:54:40 | 67.8813582 | 74.846326 | 76.421441 | 61.1725398 |
| 20:57:30 | 0:54:41 | 66.8813582 | 74.846326 | 75.421441 | 61.1725398 |
| 20:57:31 | 0:54:42 | 67.8813582 | 74.846326 | 75.421441 | 61.1725398 |

|          |         |            |            |           |            |
|----------|---------|------------|------------|-----------|------------|
| 20:57:32 | 0:54:43 | 67.8813582 | 74.846326  | 74.421441 | 61.1725398 |
| 20:57:33 | 0:54:44 | 68.8813582 | 74.846326  | 74.421441 | 62.1725398 |
| 20:57:34 | 0:54:45 | 68.8813582 | 74.846326  | 74.421441 | 62.1725398 |
| 20:57:35 | 0:54:46 | 69.8813582 | 74.846326  | 73.421441 | 62.1725398 |
| 20:57:36 | 0:54:47 | 70.8813582 | 74.846326  | 73.421441 | 65.1725398 |
| 20:57:37 | 0:54:48 | 69.8813582 | 75.846326  | 73.421441 | 77.1725398 |
| 20:57:38 | 0:54:49 | 68.8813582 | 75.846326  | 73.421441 | 77.1725398 |
| 20:57:39 | 0:54:50 | 67.8813582 | 76.846326  | 72.421441 | 76.1725398 |
| 20:57:40 | 0:54:51 | 66.8813582 | 76.846326  | 73.421441 | 74.1725398 |
| 20:57:41 | 0:54:52 | 66.8813582 | 77.846326  | 73.421441 | 73.1725398 |
| 20:57:42 | 0:54:53 | 66.8813582 | 89.846326  | 74.421441 | 71.1725398 |
| 20:57:43 | 0:54:54 | 66.8813582 | 89.846326  | 74.421441 | 69.1725398 |
| 20:57:44 | 0:54:55 | 67.8813582 | 94.846326  | 74.421441 | 67.1725398 |
| 20:57:45 | 0:54:56 | 68.8813582 | 95.846326  | 79.421441 | 66.1725398 |
| 20:57:46 | 0:54:57 | 69.8813582 | 95.846326  | 81.421441 | 67.1725398 |
| 20:57:47 | 0:54:58 | 71.8813582 | 100.846326 | 83.421441 | 69.1725398 |
| 20:57:48 | 0:54:59 | 73.8813582 | 102.846326 | 83.421441 | 69.1725398 |
| 20:57:49 | 0:55:00 | 73.8813582 | 102.846326 | 83.421441 | 69.1725398 |
| 20:57:50 | 0:55:01 | 73.8813582 | 102.846326 | 83.421441 | 68.1725398 |
| 20:57:51 | 0:55:02 | 72.8813582 | 102.846326 | 83.421441 | 68.1725398 |
| 20:57:52 | 0:55:03 | 72.8813582 | 102.846326 | 83.421441 | 67.1725398 |
| 20:57:53 | 0:55:04 | 70.8813582 | 102.846326 | 83.421441 | 65.1725398 |
| 20:57:54 | 0:55:05 | 68.8813582 | 78.8953836 | 83.421441 | 64.1725398 |
| 20:57:55 | 0:55:06 | 67.8813582 | 78.2953836 | 81.421441 | 64.1725398 |
| 20:57:56 | 0:55:07 | 67.8813582 | 78.6953836 | 81.421441 | 65.1725398 |
| 20:57:57 | 0:55:08 | 66.8813582 | 78.4953836 | 80.421441 | 65.1725398 |
| 20:57:58 | 0:55:09 | 67.8813582 | 77.6953836 | 73.421441 | 66.1725398 |
| 20:57:59 | 0:55:10 | 67.8813582 | 77.8953836 | 73.421441 | 67.1725398 |
| 20:58:00 | 0:55:11 | 67.8813582 | 102.846326 | 73.421441 | 74.1725398 |
| 20:58:01 | 0:55:12 | 67.8813582 | 98.846326  | 71.421441 | 74.1725398 |
| 20:58:02 | 0:55:13 | 67.8813582 | 97.846326  | 71.421441 | 78.1725398 |
| 20:58:03 | 0:55:14 | 67.8813582 | 97.846326  | 71.421441 | 79.1725398 |
| 20:58:04 | 0:55:15 | 68.8813582 | 97.846326  | 75.421441 | 79.1725398 |
| 20:58:05 | 0:55:16 | 69.8813582 | 97.846326  | 83.421441 | 77.1725398 |
| 20:58:06 | 0:55:17 | 69.8813582 | 98.846326  | 84.421441 | 70.1725398 |
| 20:58:07 | 0:55:18 | 68.8813582 | 97.846326  | 84.421441 | 67.1725398 |
| 20:58:08 | 0:55:19 | 67.8813582 | 93.846326  | 83.421441 | 67.1725398 |
| 20:58:09 | 0:55:20 | 67.8813582 | 91.846326  | 84.421441 | 66.1725398 |
| 20:58:10 | 0:55:21 | 67.8813582 | 88.846326  | 84.421441 | 66.1725398 |
| 20:58:11 | 0:55:22 | 66.8813582 | 87.846326  | 84.421441 | 66.1725398 |
| 20:58:12 | 0:55:23 | 66.8813582 | 87.846326  | 84.421441 | 66.1725398 |
| 20:58:13 | 0:55:24 | 66.8813582 | 87.846326  | 81.421441 | 66.1725398 |
| 20:58:14 | 0:55:25 | 66.8813582 | 84.846326  | 81.421441 | 66.1725398 |
| 20:58:15 | 0:55:26 | 66.8813582 | 84.846326  | 79.421441 | 66.1725398 |
| 20:58:16 | 0:55:27 | 66.8813582 | 83.846326  | 80.421441 | 66.1725398 |

|          |         |            |           |           |            |
|----------|---------|------------|-----------|-----------|------------|
| 20:58:17 | 0:55:28 | 66.8813582 | 82.846326 | 81.421441 | 69.1725398 |
| 20:58:18 | 0:55:29 | 66.8813582 | 81.846326 | 81.421441 | 69.1725398 |
| 20:58:19 | 0:55:30 | 66.8813582 | 81.846326 | 80.421441 | 69.1725398 |
| 20:58:20 | 0:55:31 | 66.8813582 | 81.846326 | 80.421441 | 69.1725398 |
| 20:58:21 | 0:55:32 | 65.8813582 | 81.846326 | 79.421441 | 69.1725398 |
| 20:58:22 | 0:55:33 | 65.8813582 | 81.846326 | 80.421441 | 67.1725398 |
| 20:58:23 | 0:55:34 | 66.8813582 | 81.846326 | 80.421441 | 74.1725398 |
| 20:58:24 | 0:55:35 | 66.8813582 | 81.846326 | 80.421441 | 74.1725398 |
| 20:58:25 | 0:55:36 | 66.8813582 | 81.846326 | 80.421441 | 73.1725398 |
| 20:58:26 | 0:55:37 | 66.8813582 | 81.846326 | 81.421441 | 72.1725398 |
| 20:58:27 | 0:55:38 | 66.8813582 | 81.846326 | 81.421441 | 72.1725398 |
| 20:58:28 | 0:55:39 | 67.8813582 | 80.846326 | 82.421441 | 72.1725398 |
| 20:58:29 | 0:55:40 | 67.8813582 | 79.846326 | 83.421441 | 72.1725398 |
| 20:58:30 | 0:55:41 | 67.8813582 | 79.846326 | 84.421441 | 72.1725398 |
| 20:58:31 | 0:55:42 | 67.8813582 | 79.846326 | 85.421441 | 72.1725398 |
| 20:58:32 | 0:55:43 | 66.8813582 | 79.846326 | 85.421441 | 70.1725398 |
| 20:58:33 | 0:55:44 | 66.8813582 | 79.846326 | 86.421441 | 69.1725398 |
| 20:58:34 | 0:55:45 | 66.8813582 | 79.846326 | 85.421441 | 69.1725398 |
| 20:58:35 | 0:55:46 | 66.8813582 | 79.846326 | 85.421441 | 69.1725398 |
| 20:58:36 | 0:55:47 | 66.8813582 | 79.846326 | 85.421441 | 68.1725398 |
| 20:58:37 | 0:55:48 | 66.8813582 | 78.846326 | 85.421441 | 68.1725398 |
| 20:58:38 | 0:55:49 | 65.8813582 | 78.846326 | 84.421441 | 67.1725398 |
| 20:58:39 | 0:55:50 | 65.8813582 | 78.846326 | 82.421441 | 67.1725398 |
| 20:58:40 | 0:55:51 | 65.8813582 | 78.846326 | 82.421441 | 67.1725398 |
| 20:58:41 | 0:55:52 | 65.8813582 | 78.846326 | 82.421441 | 67.1725398 |
| 20:58:42 | 0:55:53 | 65.8813582 | 80.846326 | 82.421441 | 67.1725398 |
| 20:58:43 | 0:55:54 | 65.8813582 | 77.846326 | 82.421441 | 66.1725398 |
| 20:58:44 | 0:55:55 | 66.8813582 | 77.846326 | 82.421441 | 66.1725398 |
| 20:58:45 | 0:55:56 | 66.8813582 | 76.846326 | 82.421441 | 66.1725398 |
| 20:58:46 | 0:55:57 | 66.8813582 | 75.846326 | 82.421441 | 64.1725398 |
| 20:58:47 | 0:55:58 | 67.8813582 | 75.846326 | 82.421441 | 64.1725398 |
| 20:58:48 | 0:55:59 | 67.8813582 | 75.846326 | 82.421441 | 64.1725398 |
| 20:58:49 | 0:56:00 | 67.8813582 | 77.846326 | 82.421441 | 64.1725398 |
| 20:58:50 | 0:56:01 | 68.8813582 | 77.846326 | 82.421441 | 64.1725398 |
| 20:58:51 | 0:56:02 | 68.8813582 | 77.846326 | 81.421441 | 64.1725398 |
| 20:58:52 | 0:56:03 | 69.8813582 | 76.846326 | 81.421441 | 64.1725398 |
| 20:58:53 | 0:56:04 | 70.8813582 | 75.846326 | 81.421441 | 64.1725398 |
| 20:58:54 | 0:56:05 | 70.8813582 | 74.846326 | 81.421441 | 66.1725398 |
| 20:58:55 | 0:56:06 | 72.8813582 | 74.846326 | 81.421441 | 66.1725398 |
| 20:58:56 | 0:56:07 | 71.8813582 | 73.846326 | 81.421441 | 63.1725398 |
| 20:58:57 | 0:56:08 | 71.8813582 | 72.846326 | 81.421441 | 63.1725398 |
| 20:58:58 | 0:56:09 | 67.8813582 | 72.846326 | 80.421441 | 63.1725398 |
| 20:58:59 | 0:56:10 | 67.8813582 | 72.846326 | 79.421441 | 68.1725398 |
| 20:59:00 | 0:56:11 | 67.8813582 | 72.846326 | 79.421441 | 68.1725398 |
| 20:59:01 | 0:56:12 | 67.8813582 | 71.846326 | 79.421441 | 68.1725398 |



|          |         |            |            |           |            |
|----------|---------|------------|------------|-----------|------------|
| 20:59:02 | 0:56:13 | 67.8813582 | 71.846326  | 83.421441 | 74.1725398 |
| 20:59:03 | 0:56:14 | 67.8813582 | 71.846326  | 84.421441 | 74.1725398 |
| 20:59:04 | 0:56:15 | 66.8813582 | 71.846326  | 85.421441 | 71.1725398 |
| 20:59:05 | 0:56:16 | 66.8813582 | 70.846326  | 85.421441 | 71.1725398 |
| 20:59:06 | 0:56:17 | 66.8813582 | 70.846326  | 85.421441 | 71.1725398 |
| 20:59:07 | 0:56:18 | 66.8813582 | 70.846326  | 85.421441 | 70.1725398 |
| 20:59:08 | 0:56:19 | 66.8813582 | 67.846326  | 86.421441 | 70.1725398 |
| 20:59:09 | 0:56:20 | 66.8813582 | 70.846326  | 87.421441 | 70.1725398 |
| 20:59:10 | 0:56:21 | 67.8813582 | 70.846326  | 87.421441 | 70.1725398 |
| 20:59:11 | 0:56:22 | 67.8813582 | 71.846326  | 87.421441 | 70.1725398 |
| 20:59:12 | 0:56:23 | 67.8813582 | 71.846326  | 87.421441 | 75.1725398 |
| 20:59:13 | 0:56:24 | 67.8813582 | 71.846326  | 87.421441 | 76.1725398 |
| 20:59:14 | 0:56:25 | 68.8813582 | 71.846326  | 87.421441 | 72.1725398 |
| 20:59:15 | 0:56:26 | 68.8813582 | 74.846326  | 87.421441 | 72.1725398 |
| 20:59:16 | 0:56:27 | 68.8813582 | 76.846326  | 89.421441 | 69.1725398 |
| 20:59:17 | 0:56:28 | 68.8813582 | 76.846326  | 91.421441 | 69.1725398 |
| 20:59:18 | 0:56:29 | 68.8813582 | 77.846326  | 91.421441 | 66.1725398 |
| 20:59:19 | 0:56:30 | 68.8813582 | 82.846326  | 91.421441 | 66.1725398 |
| 20:59:20 | 0:56:31 | 69.8813582 | 82.846326  | 90.421441 | 66.1725398 |
| 20:59:21 | 0:56:32 | 69.8813582 | 96.846326  | 90.421441 | 70.1725398 |
| 20:59:22 | 0:56:33 | 69.8813582 | 99.846326  | 90.421441 | 71.1725398 |
| 20:59:23 | 0:56:34 | 70.8813582 | 99.846326  | 90.421441 | 71.1725398 |
| 20:59:24 | 0:56:35 | 71.8813582 | 102.846326 | 88.421441 | 72.1725398 |
| 20:59:25 | 0:56:36 | 70.8813582 | 102.846326 | 88.421441 | 73.1725398 |
| 20:59:26 | 0:56:37 | 69.8813582 | 102.846326 | 90.421441 | 73.1725398 |
| 20:59:27 | 0:56:38 | 69.8813582 | 103.846326 | 89.421441 | 72.1725398 |
| 20:59:28 | 0:56:39 | 68.8813582 | 103.846326 | 89.421441 | 71.1725398 |
| 20:59:29 | 0:56:40 | 68.8813582 | 103.846326 | 89.421441 | 71.1725398 |
| 20:59:30 | 0:56:41 | 67.8813582 | 103.846326 | 89.421441 | 71.1725398 |
| 20:59:31 | 0:56:42 | 67.8813582 | 99.846326  | 89.421441 | 71.1725398 |
| 20:59:32 | 0:56:43 | 66.8813582 | 99.846326  | 89.421441 | 71.1725398 |
| 20:59:33 | 0:56:44 | 66.8813582 | 98.846326  | 90.421441 | 75.1725398 |
| 20:59:34 | 0:56:45 | 66.8813582 | 98.846326  | 89.421441 | 75.1725398 |
| 20:59:35 | 0:56:46 | 67.8813582 | 98.846326  | 89.421441 | 75.1725398 |
| 20:59:36 | 0:56:47 | 67.8813582 | 96.846326  | 88.421441 | 70.1725398 |
| 20:59:37 | 0:56:48 | 67.8813582 | 95.846326  | 89.421441 | 69.1725398 |
| 20:59:38 | 0:56:49 | 67.8813582 | 95.846326  | 94.421441 | 69.1725398 |
| 20:59:39 | 0:56:50 | 67.8813582 | 94.846326  | 94.421441 | 71.1725398 |
| 20:59:40 | 0:56:51 | 68.8813582 | 94.846326  | 95.421441 | 76.1725398 |
| 20:59:41 | 0:56:52 | 67.8813582 | 100.846326 | 96.421441 | 79.1725398 |
| 20:59:42 | 0:56:53 | 67.8813582 | 102.846326 | 96.421441 | 80.1725398 |
| 20:59:43 | 0:56:54 | 67.8813582 | 89.846326  | 95.421441 | 79.1725398 |
| 20:59:44 | 0:56:55 | 67.8813582 | 87.846326  | 95.421441 | 76.1725398 |
| 20:59:45 | 0:56:56 | 67.8813582 | 87.846326  | 95.421441 | 72.1725398 |
| 20:59:46 | 0:56:57 | 67.8813582 | 87.846326  | 94.421441 | 71.1725398 |

|          |         |            |           |           |            |
|----------|---------|------------|-----------|-----------|------------|
| 20:59:47 | 0:56:58 | 67.8813582 | 85.846326 | 92.421441 | 71.1725398 |
| 20:59:48 | 0:56:59 | 67.8813582 | 79.846326 | 92.421441 | 71.1725398 |
| 20:59:49 | 0:57:00 | 67.8813582 | 76.846326 | 90.421441 | 70.1725398 |
| 20:59:50 | 0:57:01 | 67.8813582 | 72.846326 | 90.421441 | 72.1725398 |
| 20:59:51 | 0:57:02 | 66.8813582 | 66.846326 | 90.421441 | 73.1725398 |
| 20:59:52 | 0:57:03 | 66.8813582 | 66.846326 | 92.421441 | 72.1725398 |
| 20:59:53 | 0:57:04 | 65.8813582 | 65.846326 | 93.421441 | 70.1725398 |
| 20:59:54 | 0:57:05 | 65.8813582 | 64.846326 | 94.421441 | 69.1725398 |
| 20:59:55 | 0:57:06 | 66.8813582 | 64.846326 | 94.421441 | 69.1725398 |
| 20:59:56 | 0:57:07 | 66.8813582 | 63.846326 | 94.421441 | 70.1725398 |
| 20:59:57 | 0:57:08 | 66.8813582 | 63.846326 | 94.421441 | 70.1725398 |
| 20:59:58 | 0:57:09 | 66.8813582 | 63.846326 | 94.421441 | 71.1725398 |
| 20:59:59 | 0:57:10 | 66.8813582 | 63.846326 | 94.421441 | 70.1725398 |
| 21:00:00 | 0:57:11 | 66.8813582 | 63.846326 | 94.421441 | 70.1725398 |
| 21:00:01 | 0:57:12 | 65.8813582 | 61.846326 | 94.421441 | 69.1725398 |
| 21:00:02 | 0:57:13 | 65.8813582 | 61.846326 | 93.421441 | 68.1725398 |
| 21:00:03 | 0:57:14 | 65.8813582 | 61.846326 | 93.421441 | 69.1725398 |
| 21:00:04 | 0:57:15 | 64.8813582 | 63.846326 | 93.421441 | 69.1725398 |
| 21:00:05 | 0:57:16 | 64.8813582 | 63.846326 | 93.421441 | 71.1725398 |
| 21:00:06 | 0:57:17 | 64.8813582 | 66.846326 | 93.421441 | 71.1725398 |
| 21:00:07 | 0:57:18 | 64.8813582 | 67.846326 | 93.421441 | 71.1725398 |
| 21:00:08 | 0:57:19 | 65.8813582 | 67.846326 | 93.421441 | 69.1725398 |
| 21:00:09 | 0:57:20 | 66.8813582 | 67.846326 | 93.421441 | 68.1725398 |
| 21:00:10 | 0:57:21 | 66.8813582 | 71.846326 | 94.421441 | 67.1725398 |
| 21:00:11 | 0:57:22 | 66.8813582 | 74.846326 | 95.421441 | 66.1725398 |
| 21:00:12 | 0:57:23 | 66.8813582 | 74.846326 | 96.421441 | 67.1725398 |
| 21:00:13 | 0:57:24 | 65.8813582 | 74.846326 | 96.421441 | 67.1725398 |
| 21:00:14 | 0:57:25 | 65.8813582 | 74.846326 | 96.421441 | 68.1725398 |
| 21:00:15 | 0:57:26 | 65.8813582 | 72.846326 | 96.421441 | 69.1725398 |
| 21:00:16 | 0:57:27 | 65.8813582 | 71.846326 | 96.421441 | 69.1725398 |
| 21:00:17 | 0:57:28 | 65.8813582 | 70.846326 | 96.421441 | 70.1725398 |
| 21:00:18 | 0:57:29 | 66.8813582 | 70.846326 | 96.421441 | 68.1725398 |
| 21:00:19 | 0:57:30 | 68.8813582 | 70.846326 | 95.421441 | 67.1725398 |
| 21:00:20 | 0:57:31 | 68.8813582 | 70.846326 | 93.421441 | 67.1725398 |
| 21:00:21 | 0:57:32 | 68.8813582 | 71.846326 | 91.421441 | 66.1725398 |
| 21:00:22 | 0:57:33 | 69.8813582 | 71.846326 | 90.421441 | 66.1725398 |
| 21:00:23 | 0:57:34 | 70.8813582 | 72.846326 | 89.421441 | 66.1725398 |
| 21:00:24 | 0:57:35 | 70.8813582 | 73.846326 | 88.421441 | 66.1725398 |
| 21:00:25 | 0:57:36 | 69.8813582 | 75.846326 | 86.421441 | 66.1725398 |
| 21:00:26 | 0:57:37 | 69.8813582 | 73.846326 | 83.421441 | 66.1725398 |
| 21:00:27 | 0:57:38 | 69.8813582 | 73.846326 | 82.421441 | 65.1725398 |
| 21:00:28 | 0:57:39 | 69.8813582 | 73.846326 | 81.421441 | 65.1725398 |
| 21:00:29 | 0:57:40 | 69.8813582 | 74.846326 | 80.421441 | 65.1725398 |
| 21:00:30 | 0:57:41 | 69.8813582 | 74.846326 | 80.421441 | 65.1725398 |
| 21:00:31 | 0:57:42 | 68.8813582 | 73.846326 | 79.421441 | 65.1725398 |

|          |         |            |           |           |            |
|----------|---------|------------|-----------|-----------|------------|
| 21:00:32 | 0:57:43 | 68.8813582 | 68.846326 | 79.421441 | 65.1725398 |
| 21:00:33 | 0:57:44 | 67.8813582 | 66.846326 | 78.421441 | 65.1725398 |
| 21:00:34 | 0:57:45 | 67.8813582 | 66.846326 | 78.421441 | 65.1725398 |
| 21:00:35 | 0:57:46 | 66.8813582 | 66.846326 | 78.421441 | 64.1725398 |
| 21:00:36 | 0:57:47 | 67.8813582 | 65.846326 | 77.421441 | 65.1725398 |
| 21:00:37 | 0:57:48 | 67.8813582 | 62.846326 | 77.421441 | 66.1725398 |
| 21:00:38 | 0:57:49 | 67.8813582 | 62.846326 | 78.421441 | 67.1725398 |
| 21:00:39 | 0:57:50 | 67.8813582 | 62.846326 | 78.421441 | 68.1725398 |
| 21:00:40 | 0:57:51 | 67.8813582 | 62.846326 | 78.421441 | 68.1725398 |
| 21:00:41 | 0:57:52 | 67.8813582 | 62.846326 | 79.421441 | 68.1725398 |
| 21:00:42 | 0:57:53 | 67.8813582 | 62.846326 | 78.421441 | 67.1725398 |
| 21:00:43 | 0:57:54 | 67.8813582 | 62.846326 | 78.421441 | 66.1725398 |
| 21:00:44 | 0:57:55 | 67.8813582 | 62.846326 | 77.421441 | 65.1725398 |
| 21:00:45 | 0:57:56 | 67.8813582 | 62.846326 | 77.421441 | 65.1725398 |
| 21:00:46 | 0:57:57 | 67.8813582 | 62.846326 | 77.421441 | 66.1725398 |
| 21:00:47 | 0:57:58 | 67.8813582 | 62.846326 | 78.421441 | 66.1725398 |
| 21:00:48 | 0:57:59 | 67.8813582 | 62.846326 | 80.421441 | 66.1725398 |
| 21:00:49 | 0:58:00 | 67.8813582 | 62.846326 | 80.421441 | 67.1725398 |
| 21:00:50 | 0:58:01 | 67.8813582 | 62.846326 | 81.421441 | 68.1725398 |
| 21:00:51 | 0:58:02 | 67.8813582 | 62.846326 | 81.421441 | 68.1725398 |
| 21:00:52 | 0:58:03 | 67.8813582 | 62.846326 | 79.421441 | 66.1725398 |
| 21:00:53 | 0:58:04 | 67.8813582 | 62.846326 | 79.421441 | 65.1725398 |
| 21:00:54 | 0:58:05 | 67.8813582 | 62.846326 | 79.421441 | 65.1725398 |
| 21:00:55 | 0:58:06 | 67.8813582 | 62.846326 | 77.421441 | 65.1725398 |
| 21:00:56 | 0:58:07 | 67.8813582 | 62.846326 | 79.421441 | 67.1725398 |
| 21:00:57 | 0:58:08 | 69.8813582 | 62.846326 | 80.421441 | 70.1725398 |
| 21:00:58 | 0:58:09 | 69.8813582 | 61.846326 | 80.421441 | 72.1725398 |
| 21:00:59 | 0:58:10 | 69.8813582 | 62.846326 | 80.421441 | 72.1725398 |
| 21:01:00 | 0:58:11 | 71.8813582 | 62.846326 | 79.421441 | 73.1725398 |
| 21:01:01 | 0:58:12 | 71.8813582 | 62.846326 | 79.421441 | 73.1725398 |
| 21:01:02 | 0:58:13 | 72.8813582 | 62.846326 | 80.421441 | 74.1725398 |
| 21:01:03 | 0:58:14 | 72.8813582 | 62.846326 | 80.421441 | 76.1725398 |
| 21:01:04 | 0:58:15 | 72.8813582 | 62.846326 | 80.421441 | 76.1725398 |
| 21:01:05 | 0:58:16 | 71.8813582 | 62.846326 | 81.421441 | 76.1725398 |
| 21:01:06 | 0:58:17 | 69.8813582 | 62.846326 | 82.421441 | 74.1725398 |
| 21:01:07 | 0:58:18 | 68.8813582 | 61.846326 | 83.421441 | 73.1725398 |
| 21:01:08 | 0:58:19 | 67.8813582 | 62.846326 | 83.421441 | 73.1725398 |
| 21:01:09 | 0:58:20 | 66.8813582 | 62.846326 | 85.421441 | 75.1725398 |
| 21:01:10 | 0:58:21 | 66.8813582 | 62.846326 | 86.421441 | 76.1725398 |
| 21:01:11 | 0:58:22 | 65.8813582 | 62.846326 | 86.421441 | 77.1725398 |
| 21:01:12 | 0:58:23 | 66.8813582 | 65.846326 | 86.421441 | 78.1725398 |
| 21:01:13 | 0:58:24 | 66.8813582 | 65.846326 | 87.421441 | 78.1725398 |
| 21:01:14 | 0:58:25 | 66.8813582 | 65.846326 | 87.421441 | 79.1725398 |
| 21:01:15 | 0:58:26 | 66.8813582 | 65.846326 | 86.421441 | 79.1725398 |
| 21:01:16 | 0:58:27 | 66.8813582 | 69.846326 | 85.421441 | 78.1725398 |

|          |         |            |           |           |            |
|----------|---------|------------|-----------|-----------|------------|
| 21:01:17 | 0:58:28 | 66.8813582 | 78.846326 | 85.421441 | 78.1725398 |
| 21:01:18 | 0:58:29 | 66.8813582 | 79.846326 | 85.421441 | 76.1725398 |
| 21:01:19 | 0:58:30 | 66.8813582 | 79.846326 | 84.421441 | 75.1725398 |
| 21:01:20 | 0:58:31 | 66.8813582 | 81.846326 | 84.421441 | 76.1725398 |
| 21:01:21 | 0:58:32 | 66.8813582 | 81.846326 | 83.421441 | 77.1725398 |
| 21:01:22 | 0:58:33 | 66.8813582 | 81.846326 | 82.421441 | 77.1725398 |
| 21:01:23 | 0:58:34 | 65.8813582 | 81.846326 | 81.421441 | 78.1725398 |
| 21:01:24 | 0:58:35 | 65.8813582 | 81.846326 | 82.421441 | 78.1725398 |
| 21:01:25 | 0:58:36 | 65.8813582 | 81.846326 | 82.421441 | 78.1725398 |
| 21:01:26 | 0:58:37 | 65.8813582 | 80.846326 | 82.421441 | 77.1725398 |
| 21:01:27 | 0:58:38 | 65.8813582 | 80.846326 | 82.421441 | 77.1725398 |
| 21:01:28 | 0:58:39 | 65.8813582 | 80.846326 | 82.421441 | 77.1725398 |
| 21:01:29 | 0:58:40 | 65.8813582 | 79.846326 | 83.421441 | 80.1725398 |
| 21:01:30 | 0:58:41 | 63.8813582 | 79.846326 | 83.421441 | 80.1725398 |
| 21:01:31 | 0:58:42 | 63.8813582 | 79.846326 | 84.421441 | 80.1725398 |
| 21:01:32 | 0:58:43 | 62.8813582 | 78.846326 | 84.421441 | 79.1725398 |
| 21:01:33 | 0:58:44 | 63.8813582 | 76.846326 | 85.421441 | 78.1725398 |
| 21:01:34 | 0:58:45 | 63.8813582 | 75.846326 | 85.421441 | 76.1725398 |
| 21:01:35 | 0:58:46 | 63.8813582 | 75.846326 | 86.421441 | 76.1725398 |
| 21:01:36 | 0:58:47 | 63.8813582 | 75.846326 | 86.421441 | 77.1725398 |
| 21:01:37 | 0:58:48 | 62.8813582 | 72.846326 | 86.421441 | 78.1725398 |
| 21:01:38 | 0:58:49 | 63.8813582 | 71.846326 | 85.421441 | 78.1725398 |
| 21:01:39 | 0:58:50 | 63.8813582 | 71.846326 | 86.421441 | 78.1725398 |
| 21:01:40 | 0:58:51 | 64.8813582 | 71.846326 | 86.421441 | 77.1725398 |
| 21:01:41 | 0:58:52 | 64.8813582 | 71.846326 | 86.421441 | 77.1725398 |
| 21:01:42 | 0:58:53 | 64.8813582 | 69.846326 | 86.421441 | 77.1725398 |
| 21:01:43 | 0:58:54 | 64.8813582 | 69.846326 | 86.421441 | 77.1725398 |
| 21:01:44 | 0:58:55 | 64.8813582 | 68.846326 | 86.421441 | 76.1725398 |
| 21:01:45 | 0:58:56 | 64.8813582 | 67.846326 | 86.421441 | 76.1725398 |
| 21:01:46 | 0:58:57 | 64.8813582 | 67.846326 | 86.421441 | 76.1725398 |
| 21:01:47 | 0:58:58 | 64.8813582 | 66.846326 | 87.421441 | 76.1725398 |
| 21:01:48 | 0:58:59 | 64.8813582 | 66.846326 | 87.421441 | 76.1725398 |
| 21:01:49 | 0:59:00 | 64.8813582 | 67.846326 | 87.421441 | 76.1725398 |
| 21:01:50 | 0:59:01 | 65.8813582 | 67.846326 | 87.421441 | 77.1725398 |
| 21:01:51 | 0:59:02 | 65.8813582 | 67.846326 | 87.421441 | 77.1725398 |
| 21:01:52 | 0:59:03 | 65.8813582 | 68.846326 | 87.421441 | 80.1725398 |
| 21:01:53 | 0:59:04 | 65.8813582 | 68.846326 | 87.421441 | 80.1725398 |
| 21:01:54 | 0:59:05 | 65.8813582 | 67.846326 | 87.421441 | 79.1725398 |
| 21:01:55 | 0:59:06 | 66.8813582 | 67.846326 | 90.421441 | 79.1725398 |
| 21:01:56 | 0:59:07 | 66.8813582 | 67.846326 | 90.421441 | 78.1725398 |
| 21:01:57 | 0:59:08 | 67.8813582 | 67.846326 | 92.421441 | 75.1725398 |
| 21:01:58 | 0:59:09 | 67.8813582 | 67.846326 | 90.421441 | 68.1725398 |
| 21:01:59 | 0:59:10 | 67.8813582 | 68.846326 | 90.421441 | 66.1725398 |
| 21:02:00 | 0:59:11 | 67.8813582 | 68.846326 | 89.421441 | 66.1725398 |
| 21:02:01 | 0:59:12 | 67.8813582 | 71.846326 | 88.421441 | 66.1725398 |

|          |         |            |           |           |            |
|----------|---------|------------|-----------|-----------|------------|
| 21:02:02 | 0:59:13 | 67.8813582 | 72.846326 | 87.421441 | 67.1725398 |
| 21:02:03 | 0:59:14 | 67.8813582 | 72.846326 | 86.421441 | 68.1725398 |
| 21:02:04 | 0:59:15 | 67.8813582 | 72.846326 | 86.421441 | 68.1725398 |
| 21:02:05 | 0:59:16 | 66.8813582 | 72.846326 | 84.421441 | 68.1725398 |
| 21:02:06 | 0:59:17 | 66.8813582 | 73.846326 | 84.421441 | 65.1725398 |
| 21:02:07 | 0:59:18 | 66.8813582 | 74.846326 | 84.421441 | 63.1725398 |
| 21:02:08 | 0:59:19 | 66.8813582 | 77.846326 | 84.421441 | 61.1725398 |
| 21:02:09 | 0:59:20 | 64.8813582 | 79.846326 | 84.421441 | 61.1725398 |
| 21:02:10 | 0:59:21 | 64.8813582 | 82.846326 | 83.421441 | 61.1725398 |
| 21:02:11 | 0:59:22 | 63.8813582 | 82.846326 | 83.421441 | 62.1725398 |
| 21:02:12 | 0:59:23 | 64.8813582 | 82.846326 | 83.421441 | 63.1725398 |
| 21:02:13 | 0:59:24 | 65.8813582 | 83.846326 | 82.421441 | 63.1725398 |
| 21:02:14 | 0:59:25 | 65.8813582 | 83.846326 | 82.421441 | 64.1725398 |
| 21:02:15 | 0:59:26 | 65.8813582 | 83.846326 | 81.421441 | 65.1725398 |
| 21:02:16 | 0:59:27 | 65.8813582 | 83.846326 | 81.421441 | 67.1725398 |
| 21:02:17 | 0:59:28 | 65.8813582 | 83.846326 | 78.421441 | 68.1725398 |
| 21:02:18 | 0:59:29 | 66.8813582 | 86.846326 | 77.421441 | 68.1725398 |
| 21:02:19 | 0:59:30 | 65.8813582 | 82.846326 | 76.421441 | 67.1725398 |
| 21:02:20 | 0:59:31 | 65.8813582 | 81.846326 | 76.421441 | 67.1725398 |
| 21:02:21 | 0:59:32 | 65.8813582 | 81.846326 | 76.421441 | 66.1725398 |
| 21:02:22 | 0:59:33 | 65.8813582 | 81.846326 | 76.421441 | 65.1725398 |
| 21:02:23 | 0:59:34 | 65.8813582 | 81.846326 | 75.421441 | 65.1725398 |
| 21:02:24 | 0:59:35 | 65.8813582 | 80.846326 | 75.421441 | 66.1725398 |
| 21:02:25 | 0:59:36 | 65.8813582 | 80.846326 | 75.421441 | 69.1725398 |
| 21:02:26 | 0:59:37 | 65.8813582 | 80.846326 | 75.421441 | 70.1725398 |
| 21:02:27 | 0:59:38 | 65.8813582 | 80.846326 | 73.421441 | 68.1725398 |
| 21:02:28 | 0:59:39 | 65.8813582 | 80.846326 | 73.421441 | 67.1725398 |
| 21:02:29 | 0:59:40 | 64.8813582 | 80.846326 | 73.421441 | 66.1725398 |
| 21:02:30 | 0:59:41 | 64.8813582 | 80.846326 | 72.421441 | 66.1725398 |
| 21:02:31 | 0:59:42 | 64.8813582 | 80.846326 | 72.421441 | 67.1725398 |
| 21:02:32 | 0:59:43 | 64.8813582 | 80.846326 | 72.421441 | 67.1725398 |
| 21:02:33 | 0:59:44 | 64.8813582 | 80.846326 | 72.421441 | 68.1725398 |
| 21:02:34 | 0:59:45 | 65.8813582 | 80.846326 | 72.421441 | 68.1725398 |
| 21:02:35 | 0:59:46 | 65.8813582 | 79.846326 | 72.421441 | 67.1725398 |
| 21:02:36 | 0:59:47 | 65.8813582 | 75.846326 | 74.421441 | 68.1725398 |
| 21:02:37 | 0:59:48 | 65.8813582 | 71.846326 | 75.421441 | 69.1725398 |
| 21:02:38 | 0:59:49 | 65.8813582 | 67.846326 | 75.421441 | 69.1725398 |
| 21:02:39 | 0:59:50 | 65.8813582 | 67.846326 | 76.421441 | 70.1725398 |
| 21:02:40 | 0:59:51 | 65.8813582 | 66.846326 | 76.421441 | 71.1725398 |
| 21:02:41 | 0:59:52 | 65.8813582 | 66.846326 | 76.421441 | 72.1725398 |
| 21:02:42 | 0:59:53 | 65.8813582 | 66.846326 | 76.421441 | 72.1725398 |
| 21:02:43 | 0:59:54 | 66.8813582 | 66.846326 | 80.421441 | 71.1725398 |
| 21:02:44 | 0:59:55 | 66.8813582 | 66.846326 | 80.421441 | 71.1725398 |
| 21:02:45 | 0:59:56 | 65.8813582 | 67.846326 | 80.421441 | 71.1725398 |
| 21:02:46 | 0:59:57 | 66.8813582 | 67.846326 | 80.421441 | 70.1725398 |

|          |         |            |           |           |            |
|----------|---------|------------|-----------|-----------|------------|
| 21:02:47 | 0:59:58 | 66.8813582 | 68.846326 | 79.421441 | 70.1725398 |
| 21:02:48 | 0:59:59 | 67.8813582 | 68.846326 | 78.421441 | 70.1725398 |
| 21:02:49 | 1:00:00 | 66.8813582 | 68.846326 | 78.421441 | 70.1725398 |
| 21:02:50 | 1:00:01 | 67.8813582 | 69.846326 | 78.421441 | 70.1725398 |
| 21:02:51 | 1:00:02 | 67.8813582 | 69.846326 | 78.421441 | 69.1725398 |
| 21:02:52 | 1:00:03 | 67.8813582 | 69.846326 | 78.421441 | 68.1725398 |
| 21:02:53 | 1:00:04 | 68.8813582 | 69.846326 | 78.421441 | 68.1725398 |
| 21:02:54 | 1:00:05 | 69.8813582 | 69.846326 | 81.421441 | 67.1725398 |
| 21:02:55 | 1:00:06 | 70.8813582 | 69.846326 | 83.421441 | 66.1725398 |
| 21:02:56 | 1:00:07 | 68.8813582 | 68.846326 | 85.421441 | 66.1725398 |
| 21:02:57 | 1:00:08 | 67.8813582 | 68.846326 | 85.421441 | 67.1725398 |
| 21:02:58 | 1:00:09 | 67.8813582 | 68.846326 | 85.421441 | 68.1725398 |
| 21:02:59 | 1:00:10 | 67.8813582 | 68.846326 | 86.421441 | 69.1725398 |
| 21:03:00 | 1:00:11 | 67.8813582 | 69.846326 | 87.421441 | 70.1725398 |
| 21:03:01 | 1:00:12 | 67.8813582 | 70.846326 | 87.421441 | 70.1725398 |
| 21:03:02 | 1:00:13 | 66.8813582 | 71.846326 | 87.421441 | 70.1725398 |
| 21:03:03 | 1:00:14 | 66.8813582 | 71.846326 | 87.421441 | 70.1725398 |
| 21:03:04 | 1:00:15 | 66.8813582 | 72.846326 | 88.421441 | 70.1725398 |
| 21:03:05 | 1:00:16 | 66.8813582 | 72.846326 | 88.421441 | 71.1725398 |
| 21:03:06 | 1:00:17 | 66.8813582 | 72.846326 | 91.421441 | 71.1725398 |
| 21:03:07 | 1:00:18 | 66.8813582 | 73.846326 | 91.421441 | 71.1725398 |
| 21:03:08 | 1:00:19 | 66.8813582 | 73.846326 | 94.421441 | 72.1725398 |
| 21:03:09 | 1:00:20 | 65.8813582 | 73.846326 | 94.421441 | 72.1725398 |
| 21:03:10 | 1:00:21 | 65.8813582 | 69.846326 | 97.421441 | 72.1725398 |
| 21:03:11 | 1:00:22 | 65.8813582 | 69.846326 | 97.421441 | 75.1725398 |
| 21:03:12 | 1:00:23 | 65.8813582 | 68.846326 | 95.421441 | 76.1725398 |
| 21:03:13 | 1:00:24 | 65.8813582 | 68.846326 | 95.421441 | 76.1725398 |
| 21:03:14 | 1:00:25 | 65.8813582 | 67.846326 | 95.421441 | 76.1725398 |
| 21:03:15 | 1:00:26 | 65.8813582 | 66.846326 | 94.421441 | 76.1725398 |
| 21:03:16 | 1:00:27 | 65.8813582 | 66.846326 | 93.421441 | 76.1725398 |
| 21:03:17 | 1:00:28 | 65.8813582 | 66.846326 | 92.421441 | 76.1725398 |
| 21:03:18 | 1:00:29 | 65.8813582 | 66.846326 | 92.421441 | 76.1725398 |
| 21:03:19 | 1:00:30 | 65.8813582 | 66.846326 | 92.421441 | 76.1725398 |
| 21:03:20 | 1:00:31 | 66.8813582 | 66.846326 | 91.421441 | 74.1725398 |
| 21:03:21 | 1:00:32 | 65.8813582 | 66.846326 | 91.421441 | 68.1725398 |
| 21:03:22 | 1:00:33 | 65.8813582 | 64.846326 | 88.421441 | 67.1725398 |
| 21:03:23 | 1:00:34 | 65.8813582 | 64.846326 | 87.421441 | 66.1725398 |
| 21:03:24 | 1:00:35 | 65.8813582 | 63.846326 | 84.421441 | 65.1725398 |
| 21:03:25 | 1:00:36 | 65.8813582 | 63.846326 | 84.421441 | 65.1725398 |
| 21:03:26 | 1:00:37 | 65.8813582 | 62.846326 | 84.421441 | 64.1725398 |
| 21:03:27 | 1:00:38 | 64.8813582 | 62.846326 | 84.421441 | 64.1725398 |
| 21:03:28 | 1:00:39 | 64.8813582 | 61.846326 | 84.421441 | 66.1725398 |
| 21:03:29 | 1:00:40 | 64.8813582 | 61.846326 | 83.421441 | 68.1725398 |
| 21:03:30 | 1:00:41 | 64.8813582 | 60.846326 | 83.421441 | 67.1725398 |
| 21:03:31 | 1:00:42 | 64.8813582 | 60.846326 | 83.421441 | 67.1725398 |

|          |         |            |           |           |            |
|----------|---------|------------|-----------|-----------|------------|
| 21:03:32 | 1:00:43 | 64.8813582 | 60.846326 | 83.421441 | 65.1725398 |
| 21:03:33 | 1:00:44 | 64.8813582 | 60.846326 | 82.421441 | 64.1725398 |
| 21:03:34 | 1:00:45 | 64.8813582 | 60.846326 | 82.421441 | 64.1725398 |
| 21:03:35 | 1:00:46 | 64.8813582 | 61.846326 | 82.421441 | 64.1725398 |
| 21:03:36 | 1:00:47 | 64.8813582 | 61.846326 | 82.421441 | 64.1725398 |
| 21:03:37 | 1:00:48 | 65.8813582 | 64.846326 | 82.421441 | 67.1725398 |
| 21:03:38 | 1:00:49 | 65.8813582 | 62.846326 | 82.421441 | 67.1725398 |
| 21:03:39 | 1:00:50 | 65.8813582 | 61.846326 | 83.421441 | 67.1725398 |
| 21:03:40 | 1:00:51 | 65.8813582 | 61.846326 | 84.421441 | 65.1725398 |
| 21:03:41 | 1:00:52 | 66.8813582 | 61.846326 | 84.421441 | 65.1725398 |
| 21:03:42 | 1:00:53 | 67.8813582 | 62.846326 | 84.421441 | 65.1725398 |
| 21:03:43 | 1:00:54 | 67.8813582 | 62.846326 | 83.421441 | 65.1725398 |
| 21:03:44 | 1:00:55 | 66.8813582 | 64.846326 | 86.421441 | 65.1725398 |
| 21:03:45 | 1:00:56 | 66.8813582 | 65.846326 | 82.421441 | 65.1725398 |
| 21:03:46 | 1:00:57 | 66.8813582 | 65.846326 | 80.421441 | 66.1725398 |
| 21:03:47 | 1:00:58 | 66.8813582 | 65.846326 | 80.421441 | 66.1725398 |
| 21:03:48 | 1:00:59 | 67.8813582 | 66.846326 | 80.421441 | 68.1725398 |
| 21:03:49 | 1:01:00 | 68.8813582 | 66.846326 | 80.421441 | 71.1725398 |
| 21:03:50 | 1:01:01 | 68.8813582 | 66.846326 | 80.421441 | 71.1725398 |
| 21:03:51 | 1:01:02 | 68.8813582 | 67.846326 | 80.421441 | 69.1725398 |
| 21:03:52 | 1:01:03 | 68.8813582 | 69.846326 | 80.421441 | 69.1725398 |
| 21:03:53 | 1:01:04 | 70.8813582 | 71.846326 | 80.421441 | 68.1725398 |
| 21:03:54 | 1:01:05 | 71.8813582 | 71.846326 | 80.421441 | 68.1725398 |
| 21:03:55 | 1:01:06 | 72.8813582 | 71.846326 | 81.421441 | 68.1725398 |
| 21:03:56 | 1:01:07 | 72.8813582 | 71.846326 | 81.421441 | 69.1725398 |
| 21:03:57 | 1:01:08 | 73.8813582 | 71.846326 | 81.421441 | 70.1725398 |
| 21:03:58 | 1:01:09 | 73.8813582 | 70.846326 | 82.421441 | 64.1725398 |
| 21:03:59 | 1:01:10 | 73.8813582 | 70.846326 | 82.421441 | 62.1725398 |
| 21:04:00 | 1:01:11 | 72.8813582 | 70.846326 | 82.421441 | 62.1725398 |
| 21:04:01 | 1:01:12 | 69.8813582 | 70.846326 | 82.421441 | 62.1725398 |
| 21:04:02 | 1:01:13 | 69.8813582 | 69.846326 | 82.421441 | 62.1725398 |
| 21:04:03 | 1:01:14 | 69.8813582 | 69.846326 | 82.421441 | 63.1725398 |
| 21:04:04 | 1:01:15 | 68.8813582 | 69.846326 | 83.421441 | 65.1725398 |
| 21:04:05 | 1:01:16 | 68.8813582 | 68.846326 | 83.421441 | 67.1725398 |
| 21:04:06 | 1:01:17 | 68.8813582 | 68.846326 | 83.421441 | 73.1725398 |
| 21:04:07 | 1:01:18 | 68.8813582 | 68.846326 | 81.421441 | 73.1725398 |
| 21:04:08 | 1:01:19 | 67.8813582 | 67.846326 | 79.421441 | 73.1725398 |
| 21:04:09 | 1:01:20 | 67.8813582 | 67.846326 | 78.421441 | 73.1725398 |
| 21:04:10 | 1:01:21 | 67.8813582 | 78.846326 | 78.421441 | 72.1725398 |
| 21:04:11 | 1:01:22 | 66.8813582 | 81.846326 | 78.421441 | 71.1725398 |
| 21:04:12 | 1:01:23 | 66.8813582 | 80.846326 | 78.421441 | 71.1725398 |
| 21:04:13 | 1:01:24 | 66.8813582 | 77.846326 | 78.421441 | 71.1725398 |
| 21:04:14 | 1:01:25 | 67.8813582 | 76.846326 | 75.421441 | 71.1725398 |
| 21:04:15 | 1:01:26 | 67.8813582 | 76.846326 | 75.421441 | 72.1725398 |
| 21:04:16 | 1:01:27 | 67.8813582 | 76.846326 | 75.421441 | 71.1725398 |

|          |         |            |           |           |            |
|----------|---------|------------|-----------|-----------|------------|
| 21:04:17 | 1:01:28 | 67.8813582 | 76.846326 | 75.421441 | 69.1725398 |
| 21:04:18 | 1:01:29 | 68.8813582 | 76.846326 | 75.421441 | 69.1725398 |
| 21:04:19 | 1:01:30 | 69.8813582 | 76.846326 | 77.421441 | 69.1725398 |
| 21:04:20 | 1:01:31 | 72.8813582 | 75.846326 | 78.421441 | 68.1725398 |
| 21:04:21 | 1:01:32 | 77.8813582 | 74.846326 | 77.421441 | 67.1725398 |
| 21:04:22 | 1:01:33 | 80.8813582 | 73.846326 | 74.421441 | 66.1725398 |
| 21:04:23 | 1:01:34 | 83.8813582 | 73.846326 | 74.421441 | 66.1725398 |
| 21:04:24 | 1:01:35 | 85.8813582 | 70.846326 | 74.421441 | 65.1725398 |
| 21:04:25 | 1:01:36 | 86.8813582 | 70.846326 | 74.421441 | 65.1725398 |
| 21:04:26 | 1:01:37 | 88.8813582 | 70.846326 | 76.421441 | 66.1725398 |
| 21:04:27 | 1:01:38 | 89.8813582 | 70.846326 | 76.421441 | 67.1725398 |
| 21:04:28 | 1:01:39 | 89.8813582 | 70.846326 | 76.421441 | 70.1725398 |
| 21:04:29 | 1:01:40 | 91.8813582 | 70.846326 | 76.421441 | 70.1725398 |
| 21:04:30 | 1:01:41 | 91.8813582 | 70.846326 | 76.421441 | 70.1725398 |
| 21:04:31 | 1:01:42 | 99.8813582 | 69.846326 | 78.421441 | 72.1725398 |
| 21:04:32 | 1:01:43 | 100.881358 | 69.846326 | 76.421441 | 72.1725398 |
| 21:04:33 | 1:01:44 | 101.881358 | 69.846326 | 76.421441 | 70.1725398 |
| 21:04:34 | 1:01:45 | 78.0953836 | 69.846326 | 76.421441 | 65.1725398 |
| 21:04:35 | 1:01:46 | 97.8813582 | 70.846326 | 81.421441 | 62.1725398 |
| 21:04:36 | 1:01:47 | 97.8813582 | 68.846326 | 84.421441 | 62.1725398 |
| 21:04:37 | 1:01:48 | 79.8813582 | 67.846326 | 87.421441 | 63.1725398 |
| 21:04:38 | 1:01:49 | 74.8813582 | 67.846326 | 87.421441 | 63.1725398 |
| 21:04:39 | 1:01:50 | 73.8813582 | 67.846326 | 87.421441 | 65.1725398 |
| 21:04:40 | 1:01:51 | 71.8813582 | 66.846326 | 87.421441 | 66.1725398 |
| 21:04:41 | 1:01:52 | 69.8813582 | 66.846326 | 87.421441 | 66.1725398 |
| 21:04:42 | 1:01:53 | 67.8813582 | 66.846326 | 85.421441 | 67.1725398 |
| 21:04:43 | 1:01:54 | 65.8813582 | 66.846326 | 82.421441 | 66.1725398 |
| 21:04:44 | 1:01:55 | 65.8813582 | 66.846326 | 81.421441 | 66.1725398 |
| 21:04:45 | 1:01:56 | 65.8813582 | 66.846326 | 81.421441 | 65.1725398 |
| 21:04:46 | 1:01:57 | 64.8813582 | 65.846326 | 79.421441 | 65.1725398 |
| 21:04:47 | 1:01:58 | 64.8813582 | 65.846326 | 79.421441 | 65.1725398 |
| 21:04:48 | 1:01:59 | 64.8813582 | 66.846326 | 79.421441 | 66.1725398 |
| 21:04:49 | 1:02:00 | 64.8813582 | 66.846326 | 79.421441 | 68.1725398 |
| 21:04:50 | 1:02:01 | 64.8813582 | 66.846326 | 79.421441 | 68.1725398 |
| 21:04:51 | 1:02:02 | 64.8813582 | 66.846326 | 83.421441 | 68.1725398 |
| 21:04:52 | 1:02:03 | 65.8813582 | 66.846326 | 84.421441 | 66.1725398 |
| 21:04:53 | 1:02:04 | 65.8813582 | 66.846326 | 84.421441 | 64.1725398 |
| 21:04:54 | 1:02:05 | 64.8813582 | 65.846326 | 84.421441 | 63.1725398 |
| 21:04:55 | 1:02:06 | 64.8813582 | 63.846326 | 84.421441 | 63.1725398 |
| 21:04:56 | 1:02:07 | 64.8813582 | 63.846326 | 84.421441 | 65.1725398 |
| 21:04:57 | 1:02:08 | 64.8813582 | 63.846326 | 83.421441 | 67.1725398 |
| 21:04:58 | 1:02:09 | 64.8813582 | 63.846326 | 83.421441 | 68.1725398 |
| 21:04:59 | 1:02:10 | 64.8813582 | 63.846326 | 82.421441 | 68.1725398 |
| 21:05:00 | 1:02:11 | 64.8813582 | 63.846326 | 83.421441 | 68.1725398 |
| 21:05:01 | 1:02:12 | 64.8813582 | 63.846326 | 83.421441 | 69.1725398 |



|          |         |            |           |           |            |
|----------|---------|------------|-----------|-----------|------------|
| 21:05:02 | 1:02:13 | 63.8813582 | 65.846326 | 83.421441 | 68.1725398 |
| 21:05:03 | 1:02:14 | 63.8813582 | 65.846326 | 82.421441 | 68.1725398 |
| 21:05:04 | 1:02:15 | 63.8813582 | 66.846326 | 83.421441 | 67.1725398 |
| 21:05:05 | 1:02:16 | 63.8813582 | 66.846326 | 83.421441 | 66.1725398 |
| 21:05:06 | 1:02:17 | 62.8813582 | 66.846326 | 83.421441 | 66.1725398 |
| 21:05:07 | 1:02:18 | 62.8813582 | 65.846326 | 82.421441 | 67.1725398 |
| 21:05:08 | 1:02:19 | 62.8813582 | 65.846326 | 81.421441 | 69.1725398 |
| 21:05:09 | 1:02:20 | 62.8813582 | 65.846326 | 81.421441 | 70.1725398 |
| 21:05:10 | 1:02:21 | 62.8813582 | 65.846326 | 81.421441 | 71.1725398 |
| 21:05:11 | 1:02:22 | 64.8813582 | 65.846326 | 79.421441 | 72.1725398 |
| 21:05:12 | 1:02:23 | 64.8813582 | 65.846326 | 79.421441 | 71.1725398 |
| 21:05:13 | 1:02:24 | 62.8813582 | 65.846326 | 79.421441 | 71.1725398 |
| 21:05:14 | 1:02:25 | 61.8813582 | 65.846326 | 79.421441 | 72.1725398 |
| 21:05:15 | 1:02:26 | 62.8813582 | 65.846326 | 78.421441 | 73.1725398 |
| 21:05:16 | 1:02:27 | 63.8813582 | 65.846326 | 78.421441 | 76.1725398 |
| 21:05:17 | 1:02:28 | 63.8813582 | 65.846326 | 78.421441 | 79.1725398 |
| 21:05:18 | 1:02:29 | 63.8813582 | 65.846326 | 78.421441 | 81.1725398 |
| 21:05:19 | 1:02:30 | 63.8813582 | 65.846326 | 78.421441 | 82.1725398 |
| 21:05:20 | 1:02:31 | 63.8813582 | 66.846326 | 78.421441 | 81.1725398 |
| 21:05:21 | 1:02:32 | 63.8813582 | 66.846326 | 78.421441 | 80.1725398 |
| 21:05:22 | 1:02:33 | 64.8813582 | 66.846326 | 79.421441 | 78.1725398 |
| 21:05:23 | 1:02:34 | 64.8813582 | 66.846326 | 79.421441 | 78.1725398 |
| 21:05:24 | 1:02:35 | 64.8813582 | 66.846326 | 79.421441 | 78.1725398 |
| 21:05:25 | 1:02:36 | 64.8813582 | 65.846326 | 80.421441 | 75.1725398 |
| 21:05:26 | 1:02:37 | 64.8813582 | 65.846326 | 81.421441 | 75.1725398 |
| 21:05:27 | 1:02:38 | 64.8813582 | 64.846326 | 82.421441 | 74.1725398 |
| 21:05:28 | 1:02:39 | 64.8813582 | 63.846326 | 82.421441 | 74.1725398 |
| 21:05:29 | 1:02:40 | 64.8813582 | 62.846326 | 82.421441 | 74.1725398 |
| 21:05:30 | 1:02:41 | 64.8813582 | 61.846326 | 84.421441 | 74.1725398 |
| 21:05:31 | 1:02:42 | 64.8813582 | 61.846326 | 84.421441 | 73.1725398 |
| 21:05:32 | 1:02:43 | 64.8813582 | 61.846326 | 84.421441 | 72.1725398 |
| 21:05:33 | 1:02:44 | 64.8813582 | 61.846326 | 84.421441 | 72.1725398 |
| 21:05:34 | 1:02:45 | 63.8813582 | 61.846326 | 84.421441 | 68.1725398 |
| 21:05:35 | 1:02:46 | 63.8813582 | 61.846326 | 84.421441 | 68.1725398 |
| 21:05:36 | 1:02:47 | 63.8813582 | 61.846326 | 85.421441 | 68.1725398 |
| 21:05:37 | 1:02:48 | 63.8813582 | 66.846326 | 85.421441 | 67.1725398 |
| 21:05:38 | 1:02:49 | 63.8813582 | 66.846326 | 81.421441 | 67.1725398 |
| 21:05:39 | 1:02:50 | 63.8813582 | 65.846326 | 80.421441 | 67.1725398 |
| 21:05:40 | 1:02:51 | 63.8813582 | 64.846326 | 80.421441 | 67.1725398 |
| 21:05:41 | 1:02:52 | 63.8813582 | 64.846326 | 80.421441 | 67.1725398 |
| 21:05:42 | 1:02:53 | 63.8813582 | 64.846326 | 80.421441 | 69.1725398 |
| 21:05:43 | 1:02:54 | 64.8813582 | 64.846326 | 81.421441 | 70.1725398 |
| 21:05:44 | 1:02:55 | 64.8813582 | 64.846326 | 81.421441 | 70.1725398 |
| 21:05:45 | 1:02:56 | 65.8813582 | 64.846326 | 80.421441 | 68.1725398 |
| 21:05:46 | 1:02:57 | 65.8813582 | 64.846326 | 79.421441 | 68.1725398 |

|          |         |            |           |           |            |
|----------|---------|------------|-----------|-----------|------------|
| 21:05:47 | 1:02:58 | 65.8813582 | 65.846326 | 79.421441 | 68.1725398 |
| 21:05:48 | 1:02:59 | 69.8813582 | 66.846326 | 79.421441 | 68.1725398 |
| 21:05:49 | 1:03:00 | 72.8813582 | 66.846326 | 79.421441 | 69.1725398 |
| 21:05:50 | 1:03:01 | 73.8813582 | 66.846326 | 79.421441 | 69.1725398 |
| 21:05:51 | 1:03:02 | 75.8813582 | 66.846326 | 79.421441 | 68.1725398 |
| 21:05:52 | 1:03:03 | 73.8813582 | 66.846326 | 79.421441 | 68.1725398 |
| 21:05:53 | 1:03:04 | 69.8813582 | 66.846326 | 80.421441 | 68.1725398 |
| 21:05:54 | 1:03:05 | 67.8813582 | 67.846326 | 78.421441 | 68.1725398 |
| 21:05:55 | 1:03:06 | 66.8813582 | 67.846326 | 77.421441 | 68.1725398 |
| 21:05:56 | 1:03:07 | 65.8813582 | 67.846326 | 76.421441 | 67.1725398 |
| 21:05:57 | 1:03:08 | 65.8813582 | 65.846326 | 76.421441 | 67.1725398 |
| 21:05:58 | 1:03:09 | 65.8813582 | 66.846326 | 76.421441 | 66.1725398 |
| 21:05:59 | 1:03:10 | 66.8813582 | 66.846326 | 77.421441 | 66.1725398 |
| 21:06:00 | 1:03:11 | 66.8813582 | 68.846326 | 77.421441 | 65.1725398 |
| 21:06:01 | 1:03:12 | 66.8813582 | 69.846326 | 79.421441 | 65.1725398 |
| 21:06:02 | 1:03:13 | 65.8813582 | 69.846326 | 79.421441 | 67.1725398 |
| 21:06:03 | 1:03:14 | 65.8813582 | 69.846326 | 79.421441 | 71.1725398 |
| 21:06:04 | 1:03:15 | 64.8813582 | 67.846326 | 79.421441 | 71.1725398 |
| 21:06:05 | 1:03:16 | 64.8813582 | 65.846326 | 80.421441 | 72.1725398 |
| 21:06:06 | 1:03:17 | 64.8813582 | 65.846326 | 80.421441 | 70.1725398 |
| 21:06:07 | 1:03:18 | 64.8813582 | 64.846326 | 79.421441 | 70.1725398 |
| 21:06:08 | 1:03:19 | 64.8813582 | 63.846326 | 79.421441 | 70.1725398 |
| 21:06:09 | 1:03:20 | 64.8813582 | 62.846326 | 79.421441 | 67.1725398 |
| 21:06:10 | 1:03:21 | 65.8813582 | 62.846326 | 79.421441 | 69.1725398 |
| 21:06:11 | 1:03:22 | 64.8813582 | 62.846326 | 79.421441 | 69.1725398 |
| 21:06:12 | 1:03:23 | 64.8813582 | 62.846326 | 79.421441 | 74.1725398 |
| 21:06:13 | 1:03:24 | 64.8813582 | 62.846326 | 82.421441 | 74.1725398 |
| 21:06:14 | 1:03:25 | 64.8813582 | 62.846326 | 83.421441 | 74.1725398 |
| 21:06:15 | 1:03:26 | 64.8813582 | 62.846326 | 83.421441 | 70.1725398 |
| 21:06:16 | 1:03:27 | 65.8813582 | 62.846326 | 83.421441 | 69.1725398 |
| 21:06:17 | 1:03:28 | 65.8813582 | 62.846326 | 83.421441 | 68.1725398 |
| 21:06:18 | 1:03:29 | 65.8813582 | 62.846326 | 83.421441 | 68.1725398 |
| 21:06:19 | 1:03:30 | 65.8813582 | 60.846326 | 82.421441 | 68.1725398 |
| 21:06:20 | 1:03:31 | 65.8813582 | 60.846326 | 81.421441 | 68.1725398 |
| 21:06:21 | 1:03:32 | 66.8813582 | 60.846326 | 81.421441 | 68.1725398 |
| 21:06:22 | 1:03:33 | 65.8813582 | 60.846326 | 81.421441 | 68.1725398 |
| 21:06:23 | 1:03:34 | 65.8813582 | 61.846326 | 81.421441 | 68.1725398 |
| 21:06:24 | 1:03:35 | 64.8813582 | 61.846326 | 78.421441 | 68.1725398 |
| 21:06:25 | 1:03:36 | 64.8813582 | 62.846326 | 78.421441 | 77.1725398 |
| 21:06:26 | 1:03:37 | 64.8813582 | 62.846326 | 78.421441 | 79.1725398 |
| 21:06:27 | 1:03:38 | 64.8813582 | 63.846326 | 83.421441 | 78.1725398 |
| 21:06:28 | 1:03:39 | 64.8813582 | 64.846326 | 83.421441 | 77.1725398 |
| 21:06:29 | 1:03:40 | 64.8813582 | 66.846326 | 83.421441 | 76.1725398 |
| 21:06:30 | 1:03:41 | 64.8813582 | 69.846326 | 79.421441 | 75.1725398 |
| 21:06:31 | 1:03:42 | 65.8813582 | 69.846326 | 79.421441 | 75.1725398 |

|          |         |            |           |           |            |
|----------|---------|------------|-----------|-----------|------------|
| 21:06:32 | 1:03:43 | 65.8813582 | 69.846326 | 79.421441 | 75.1725398 |
| 21:06:33 | 1:03:44 | 67.8813582 | 70.846326 | 81.421441 | 74.1725398 |
| 21:06:34 | 1:03:45 | 67.8813582 | 70.846326 | 81.421441 | 74.1725398 |
| 21:06:35 | 1:03:46 | 68.8813582 | 71.846326 | 81.421441 | 73.1725398 |
| 21:06:36 | 1:03:47 | 68.8813582 | 71.846326 | 81.421441 | 72.1725398 |
| 21:06:37 | 1:03:48 | 68.8813582 | 72.846326 | 81.421441 | 72.1725398 |
| 21:06:38 | 1:03:49 | 67.8813582 | 73.846326 | 81.421441 | 71.1725398 |
| 21:06:39 | 1:03:50 | 66.8813582 | 73.846326 | 81.421441 | 72.1725398 |
| 21:06:40 | 1:03:51 | 65.8813582 | 73.846326 | 81.421441 | 71.1725398 |
| 21:06:41 | 1:03:52 | 64.8813582 | 73.846326 | 81.421441 | 71.1725398 |
| 21:06:42 | 1:03:53 | 64.8813582 | 72.846326 | 81.421441 | 71.1725398 |
| 21:06:43 | 1:03:54 | 65.8813582 | 70.846326 | 81.421441 | 71.1725398 |
| 21:06:44 | 1:03:55 | 64.8813582 | 69.846326 | 82.421441 | 70.1725398 |
| 21:06:45 | 1:03:56 | 64.8813582 | 69.846326 | 82.421441 | 69.1725398 |
| 21:06:46 | 1:03:57 | 64.8813582 | 66.846326 | 83.421441 | 68.1725398 |
| 21:06:47 | 1:03:58 | 64.8813582 | 66.846326 | 84.421441 | 68.1725398 |
| 21:06:48 | 1:03:59 | 64.8813582 | 64.846326 | 84.421441 | 69.1725398 |
| 21:06:49 | 1:04:00 | 68.8813582 | 63.846326 | 85.421441 | 69.1725398 |
| 21:06:50 | 1:04:01 | 70.8813582 | 63.846326 | 85.421441 | 69.1725398 |
| 21:06:51 | 1:04:02 | 70.8813582 | 63.846326 | 85.421441 | 69.1725398 |
| 21:06:52 | 1:04:03 | 71.8813582 | 63.846326 | 85.421441 | 71.1725398 |
| 21:06:53 | 1:04:04 | 73.8813582 | 64.846326 | 85.421441 | 71.1725398 |
| 21:06:54 | 1:04:05 | 76.8813582 | 64.846326 | 85.421441 | 71.1725398 |
| 21:06:55 | 1:04:06 | 77.8813582 | 62.846326 | 85.421441 | 71.1725398 |
| 21:06:56 | 1:04:07 | 78.8813582 | 61.846326 | 85.421441 | 71.1725398 |
| 21:06:57 | 1:04:08 | 78.8813582 | 61.846326 | 85.421441 | 68.1725398 |
| 21:06:58 | 1:04:09 | 79.8813582 | 61.846326 | 84.421441 | 68.1725398 |
| 21:06:59 | 1:04:10 | 79.8813582 | 61.846326 | 84.421441 | 68.1725398 |
| 21:07:00 | 1:04:11 | 76.8813582 | 61.846326 | 84.421441 | 69.1725398 |
| 21:07:01 | 1:04:12 | 72.8813582 | 61.846326 | 84.421441 | 69.1725398 |
| 21:07:02 | 1:04:13 | 70.8813582 | 61.846326 | 81.421441 | 70.1725398 |
| 21:07:03 | 1:04:14 | 68.8813582 | 61.846326 | 80.421441 | 69.1725398 |
| 21:07:04 | 1:04:15 | 68.8813582 | 61.846326 | 80.421441 | 67.1725398 |
| 21:07:05 | 1:04:16 | 67.8813582 | 60.846326 | 80.421441 | 67.1725398 |
| 21:07:06 | 1:04:17 | 66.8813582 | 60.846326 | 80.421441 | 64.1725398 |
| 21:07:07 | 1:04:18 | 66.8813582 | 60.846326 | 80.421441 | 63.1725398 |
| 21:07:08 | 1:04:19 | 67.8813582 | 61.846326 | 84.421441 | 64.1725398 |
| 21:07:09 | 1:04:20 | 67.8813582 | 62.846326 | 84.421441 | 65.1725398 |
| 21:07:10 | 1:04:21 | 66.8813582 | 63.846326 | 85.421441 | 66.1725398 |
| 21:07:11 | 1:04:22 | 66.8813582 | 64.846326 | 85.421441 | 67.1725398 |
| 21:07:12 | 1:04:23 | 66.8813582 | 64.846326 | 85.421441 | 67.1725398 |
| 21:07:13 | 1:04:24 | 67.8813582 | 64.846326 | 85.421441 | 68.1725398 |
| 21:07:14 | 1:04:25 | 67.8813582 | 64.846326 | 85.421441 | 69.1725398 |
| 21:07:15 | 1:04:26 | 68.8813582 | 64.846326 | 83.421441 | 69.1725398 |
| 21:07:16 | 1:04:27 | 68.8813582 | 64.846326 | 80.421441 | 70.1725398 |

|          |         |            |           |           |            |
|----------|---------|------------|-----------|-----------|------------|
| 21:07:17 | 1:04:28 | 67.8813582 | 64.846326 | 79.421441 | 71.1725398 |
| 21:07:18 | 1:04:29 | 67.8813582 | 64.846326 | 78.421441 | 71.1725398 |
| 21:07:19 | 1:04:30 | 67.8813582 | 64.846326 | 78.421441 | 72.1725398 |
| 21:07:20 | 1:04:31 | 66.8813582 | 64.846326 | 77.421441 | 71.1725398 |
| 21:07:21 | 1:04:32 | 66.8813582 | 64.846326 | 77.421441 | 70.1725398 |
| 21:07:22 | 1:04:33 | 65.8813582 | 65.846326 | 77.421441 | 70.1725398 |
| 21:07:23 | 1:04:34 | 65.8813582 | 65.846326 | 76.421441 | 71.1725398 |
| 21:07:24 | 1:04:35 | 65.8813582 | 66.846326 | 76.421441 | 72.1725398 |
| 21:07:25 | 1:04:36 | 65.8813582 | 66.846326 | 76.421441 | 72.1725398 |
| 21:07:26 | 1:04:37 | 66.8813582 | 66.846326 | 77.421441 | 75.1725398 |
| 21:07:27 | 1:04:38 | 66.8813582 | 66.846326 | 78.421441 | 74.1725398 |
| 21:07:28 | 1:04:39 | 67.8813582 | 66.846326 | 78.421441 | 75.1725398 |
| 21:07:29 | 1:04:40 | 67.8813582 | 66.846326 | 79.421441 | 75.1725398 |
| 21:07:30 | 1:04:41 | 67.8813582 | 66.846326 | 79.421441 | 75.1725398 |
| 21:07:31 | 1:04:42 | 67.8813582 | 67.846326 | 79.421441 | 75.1725398 |
| 21:07:32 | 1:04:43 | 66.8813582 | 68.846326 | 76.421441 | 75.1725398 |
| 21:07:33 | 1:04:44 | 66.8813582 | 68.846326 | 75.421441 | 73.1725398 |
| 21:07:34 | 1:04:45 | 66.8813582 | 68.846326 | 73.421441 | 70.1725398 |
| 21:07:35 | 1:04:46 | 66.8813582 | 68.846326 | 72.421441 | 69.1725398 |
| 21:07:36 | 1:04:47 | 66.8813582 | 67.846326 | 71.421441 | 69.1725398 |
| 21:07:37 | 1:04:48 | 66.8813582 | 67.846326 | 70.421441 | 69.1725398 |
| 21:07:38 | 1:04:49 | 66.8813582 | 67.846326 | 70.421441 | 70.1725398 |
| 21:07:39 | 1:04:50 | 66.8813582 | 64.846326 | 70.421441 | 76.1725398 |
| 21:07:40 | 1:04:51 | 66.8813582 | 64.846326 | 69.421441 | 79.1725398 |
| 21:07:41 | 1:04:52 | 66.8813582 | 64.846326 | 70.421441 | 81.1725398 |
| 21:07:42 | 1:04:53 | 66.8813582 | 65.846326 | 71.421441 | 81.1725398 |
| 21:07:43 | 1:04:54 | 66.8813582 | 66.846326 | 73.421441 | 79.1725398 |
| 21:07:44 | 1:04:55 | 66.8813582 | 66.846326 | 73.421441 | 77.1725398 |
| 21:07:45 | 1:04:56 | 66.8813582 | 67.846326 | 76.421441 | 74.1725398 |
| 21:07:46 | 1:04:57 | 66.8813582 | 67.846326 | 80.421441 | 71.1725398 |
| 21:07:47 | 1:04:58 | 66.8813582 | 68.846326 | 80.421441 | 70.1725398 |
| 21:07:48 | 1:04:59 | 67.8813582 | 69.846326 | 80.421441 | 71.1725398 |
| 21:07:49 | 1:05:00 | 70.8813582 | 69.846326 | 80.421441 | 72.1725398 |
| 21:07:50 | 1:05:01 | 71.8813582 | 69.846326 | 79.421441 | 74.1725398 |
| 21:07:51 | 1:05:02 | 71.8813582 | 69.846326 | 79.421441 | 74.1725398 |
| 21:07:52 | 1:05:03 | 73.8813582 | 69.846326 | 79.421441 | 73.1725398 |
| 21:07:53 | 1:05:04 | 73.8813582 | 66.846326 | 79.421441 | 71.1725398 |
| 21:07:54 | 1:05:05 | 75.8813582 | 64.846326 | 79.421441 | 69.1725398 |
| 21:07:55 | 1:05:06 | 75.8813582 | 64.846326 | 79.421441 | 68.1725398 |
| 21:07:56 | 1:05:07 | 75.8813582 | 64.846326 | 79.421441 | 69.1725398 |
| 21:07:57 | 1:05:08 | 75.8813582 | 64.846326 | 79.421441 | 70.1725398 |
| 21:07:58 | 1:05:09 | 75.8813582 | 63.846326 | 79.421441 | 71.1725398 |
| 21:07:59 | 1:05:10 | 74.8813582 | 63.846326 | 80.421441 | 71.1725398 |
| 21:08:00 | 1:05:11 | 74.8813582 | 63.846326 | 80.421441 | 69.1725398 |
| 21:08:01 | 1:05:12 | 71.8813582 | 66.846326 | 80.421441 | 68.1725398 |

|          |         |            |           |           |            |
|----------|---------|------------|-----------|-----------|------------|
| 21:08:02 | 1:05:13 | 69.8813582 | 66.846326 | 80.421441 | 68.1725398 |
| 21:08:03 | 1:05:14 | 69.8813582 | 66.846326 | 80.421441 | 68.1725398 |
| 21:08:04 | 1:05:15 | 70.8813582 | 67.846326 | 81.421441 | 69.1725398 |
| 21:08:05 | 1:05:16 | 70.8813582 | 67.846326 | 81.421441 | 72.1725398 |
| 21:08:06 | 1:05:17 | 70.8813582 | 67.846326 | 81.421441 | 72.1725398 |
| 21:08:07 | 1:05:18 | 70.8813582 | 68.846326 | 81.421441 | 71.1725398 |
| 21:08:08 | 1:05:19 | 70.8813582 | 68.846326 | 81.421441 | 69.1725398 |
| 21:08:09 | 1:05:20 | 70.8813582 | 68.846326 | 82.421441 | 68.1725398 |
| 21:08:10 | 1:05:21 | 69.8813582 | 68.846326 | 82.421441 | 68.1725398 |
| 21:08:11 | 1:05:22 | 68.8813582 | 68.846326 | 81.421441 | 70.1725398 |
| 21:08:12 | 1:05:23 | 67.8813582 | 68.846326 | 82.421441 | 72.1725398 |
| 21:08:13 | 1:05:24 | 67.8813582 | 68.846326 | 83.421441 | 72.1725398 |
| 21:08:14 | 1:05:25 | 66.8813582 | 66.846326 | 82.421441 | 72.1725398 |
| 21:08:15 | 1:05:26 | 66.8813582 | 66.846326 | 81.421441 | 73.1725398 |
| 21:08:16 | 1:05:27 | 65.8813582 | 66.846326 | 81.421441 | 74.1725398 |
| 21:08:17 | 1:05:28 | 65.8813582 | 66.846326 | 81.421441 | 74.1725398 |
| 21:08:18 | 1:05:29 | 65.8813582 | 65.846326 | 80.421441 | 74.1725398 |
| 21:08:19 | 1:05:30 | 65.8813582 | 65.846326 | 78.421441 | 74.1725398 |
| 21:08:20 | 1:05:31 | 65.8813582 | 65.846326 | 78.421441 | 74.1725398 |
| 21:08:21 | 1:05:32 | 65.8813582 | 64.846326 | 78.421441 | 74.1725398 |
| 21:08:22 | 1:05:33 | 65.8813582 | 63.846326 | 77.421441 | 74.1725398 |
| 21:08:23 | 1:05:34 | 65.8813582 | 63.846326 | 77.421441 | 75.1725398 |
| 21:08:24 | 1:05:35 | 65.8813582 | 63.846326 | 76.421441 | 75.1725398 |
| 21:08:25 | 1:05:36 | 64.8813582 | 62.846326 | 75.421441 | 76.1725398 |
| 21:08:26 | 1:05:37 | 63.8813582 | 61.846326 | 75.421441 | 76.1725398 |
| 21:08:27 | 1:05:38 | 63.8813582 | 61.846326 | 75.421441 | 72.1725398 |
| 21:08:28 | 1:05:39 | 63.8813582 | 62.846326 | 71.421441 | 70.1725398 |
| 21:08:29 | 1:05:40 | 63.8813582 | 62.846326 | 71.421441 | 69.1725398 |
| 21:08:30 | 1:05:41 | 63.8813582 | 62.846326 | 73.421441 | 68.1725398 |
| 21:08:31 | 1:05:42 | 64.8813582 | 62.846326 | 82.421441 | 69.1725398 |
| 21:08:32 | 1:05:43 | 64.8813582 | 62.846326 | 87.421441 | 70.1725398 |
| 21:08:33 | 1:05:44 | 63.8813582 | 64.846326 | 89.421441 | 70.1725398 |
| 21:08:34 | 1:05:45 | 63.8813582 | 65.846326 | 88.421441 | 69.1725398 |
| 21:08:35 | 1:05:46 | 63.8813582 | 64.846326 | 86.421441 | 68.1725398 |
| 21:08:36 | 1:05:47 | 63.8813582 | 63.846326 | 86.421441 | 68.1725398 |
| 21:08:37 | 1:05:48 | 63.8813582 | 62.846326 | 85.421441 | 68.1725398 |
| 21:08:38 | 1:05:49 | 63.8813582 | 62.846326 | 85.421441 | 69.1725398 |
| 21:08:39 | 1:05:50 | 66.8813582 | 62.846326 | 86.421441 | 69.1725398 |
| 21:08:40 | 1:05:51 | 69.8813582 | 62.846326 | 86.421441 | 68.1725398 |
| 21:08:41 | 1:05:52 | 70.8813582 | 62.846326 | 87.421441 | 68.1725398 |
| 21:08:42 | 1:05:53 | 70.8813582 | 62.846326 | 87.421441 | 68.1725398 |
| 21:08:43 | 1:05:54 | 69.8813582 | 62.846326 | 87.421441 | 65.1725398 |
| 21:08:44 | 1:05:55 | 70.8813582 | 62.846326 | 86.421441 | 64.1725398 |
| 21:08:45 | 1:05:56 | 70.8813582 | 62.846326 | 83.421441 | 63.1725398 |
| 21:08:46 | 1:05:57 | 71.8813582 | 62.846326 | 82.421441 | 63.1725398 |

|          |         |            |           |           |            |
|----------|---------|------------|-----------|-----------|------------|
| 21:08:47 | 1:05:58 | 71.8813582 | 62.846326 | 83.421441 | 63.1725398 |
| 21:08:48 | 1:05:59 | 71.8813582 | 62.846326 | 84.421441 | 63.1725398 |
| 21:08:49 | 1:06:00 | 72.8813582 | 63.846326 | 84.421441 | 65.1725398 |
| 21:08:50 | 1:06:01 | 75.8813582 | 64.846326 | 86.421441 | 66.1725398 |
| 21:08:51 | 1:06:02 | 76.8813582 | 65.846326 | 87.421441 | 67.1725398 |
| 21:08:52 | 1:06:03 | 76.8813582 | 66.846326 | 87.421441 | 67.1725398 |
| 21:08:53 | 1:06:04 | 76.8813582 | 66.846326 | 84.421441 | 67.1725398 |
| 21:08:54 | 1:06:05 | 77.8813582 | 65.846326 | 84.421441 | 67.1725398 |
| 21:08:55 | 1:06:06 | 76.8813582 | 65.846326 | 80.421441 | 67.1725398 |
| 21:08:56 | 1:06:07 | 75.8813582 | 66.846326 | 79.421441 | 70.1725398 |
| 21:08:57 | 1:06:08 | 74.8813582 | 66.846326 | 79.421441 | 72.1725398 |
| 21:08:58 | 1:06:09 | 72.8813582 | 71.846326 | 80.421441 | 74.1725398 |
| 21:08:59 | 1:06:10 | 72.8813582 | 73.846326 | 81.421441 | 76.1725398 |
| 21:09:00 | 1:06:11 | 72.8813582 | 73.846326 | 81.421441 | 76.1725398 |
| 21:09:01 | 1:06:12 | 71.8813582 | 73.846326 | 81.421441 | 77.1725398 |
| 21:09:02 | 1:06:13 | 70.8813582 | 69.846326 | 84.421441 | 75.1725398 |
| 21:09:03 | 1:06:14 | 69.8813582 | 66.846326 | 84.421441 | 73.1725398 |
| 21:09:04 | 1:06:15 | 69.8813582 | 66.846326 | 82.421441 | 71.1725398 |
| 21:09:05 | 1:06:16 | 69.8813582 | 66.846326 | 81.421441 | 71.1725398 |
| 21:09:06 | 1:06:17 | 68.8813582 | 66.846326 | 81.421441 | 69.1725398 |
| 21:09:07 | 1:06:18 | 68.8813582 | 65.846326 | 80.421441 | 69.1725398 |
| 21:09:08 | 1:06:19 | 68.8813582 | 64.846326 | 80.421441 | 69.1725398 |
| 21:09:09 | 1:06:20 | 67.8813582 | 63.846326 | 82.421441 | 69.1725398 |
| 21:09:10 | 1:06:21 | 67.8813582 | 61.846326 | 82.421441 | 67.1725398 |
| 21:09:11 | 1:06:22 | 69.8813582 | 61.846326 | 82.421441 | 67.1725398 |
| 21:09:12 | 1:06:23 | 70.8813582 | 61.846326 | 81.421441 | 67.1725398 |
| 21:09:13 | 1:06:24 | 70.8813582 | 60.846326 | 82.421441 | 66.1725398 |
| 21:09:14 | 1:06:25 | 68.8813582 | 60.846326 | 82.421441 | 65.1725398 |
| 21:09:15 | 1:06:26 | 66.8813582 | 61.846326 | 82.421441 | 65.1725398 |
| 21:09:16 | 1:06:27 | 65.8813582 | 62.846326 | 82.421441 | 65.1725398 |
| 21:09:17 | 1:06:28 | 65.8813582 | 62.846326 | 82.421441 | 65.1725398 |
| 21:09:18 | 1:06:29 | 64.8813582 | 63.846326 | 82.421441 | 65.1725398 |
| 21:09:19 | 1:06:30 | 64.8813582 | 62.846326 | 81.421441 | 69.1725398 |
| 21:09:20 | 1:06:31 | 64.8813582 | 62.846326 | 80.421441 | 72.1725398 |
| 21:09:21 | 1:06:32 | 64.8813582 | 62.846326 | 81.421441 | 73.1725398 |
| 21:09:22 | 1:06:33 | 62.8813582 | 62.846326 | 83.421441 | 73.1725398 |
| 21:09:23 | 1:06:34 | 61.8813582 | 62.846326 | 83.421441 | 72.1725398 |
| 21:09:24 | 1:06:35 | 61.8813582 | 63.846326 | 84.421441 | 72.1725398 |
| 21:09:25 | 1:06:36 | 61.8813582 | 63.846326 | 84.421441 | 74.1725398 |
| 21:09:26 | 1:06:37 | 61.8813582 | 63.846326 | 84.421441 | 74.1725398 |
| 21:09:27 | 1:06:38 | 61.8813582 | 64.846326 | 84.421441 | 74.1725398 |
| 21:09:28 | 1:06:39 | 60.8813582 | 64.846326 | 85.421441 | 73.1725398 |
| 21:09:29 | 1:06:40 | 60.8813582 | 64.846326 | 85.421441 | 71.1725398 |
| 21:09:30 | 1:06:41 | 60.8813582 | 65.846326 | 84.421441 | 71.1725398 |
| 21:09:31 | 1:06:42 | 61.8813582 | 65.846326 | 84.421441 | 68.1725398 |

|          |         |            |           |           |            |
|----------|---------|------------|-----------|-----------|------------|
| 21:09:32 | 1:06:43 | 60.8813582 | 65.846326 | 83.421441 | 68.1725398 |
| 21:09:33 | 1:06:44 | 60.8813582 | 65.846326 | 82.421441 | 68.1725398 |
| 21:09:34 | 1:06:45 | 61.8813582 | 65.846326 | 83.421441 | 69.1725398 |
| 21:09:35 | 1:06:46 | 62.8813582 | 66.846326 | 84.421441 | 70.1725398 |
| 21:09:36 | 1:06:47 | 62.8813582 | 66.846326 | 85.421441 | 69.1725398 |
| 21:09:37 | 1:06:48 | 64.8813582 | 66.846326 | 85.421441 | 69.1725398 |
| 21:09:38 | 1:06:49 | 64.8813582 | 66.846326 | 85.421441 | 69.1725398 |
| 21:09:39 | 1:06:50 | 65.8813582 | 66.846326 | 85.421441 | 69.1725398 |
| 21:09:40 | 1:06:51 | 65.8813582 | 66.846326 | 82.421441 | 70.1725398 |
| 21:09:41 | 1:06:52 | 65.8813582 | 66.846326 | 82.421441 | 70.1725398 |
| 21:09:42 | 1:06:53 | 65.8813582 | 66.846326 | 82.421441 | 69.1725398 |
| 21:09:43 | 1:06:54 | 65.8813582 | 66.846326 | 81.421441 | 68.1725398 |
| 21:09:44 | 1:06:55 | 65.8813582 | 66.846326 | 81.421441 | 67.1725398 |
| 21:09:45 | 1:06:56 | 66.8813582 | 66.846326 | 81.421441 | 67.1725398 |
| 21:09:46 | 1:06:57 | 66.8813582 | 66.846326 | 83.421441 | 68.1725398 |
| 21:09:47 | 1:06:58 | 66.8813582 | 66.846326 | 84.421441 | 69.1725398 |
| 21:09:48 | 1:06:59 | 66.8813582 | 66.846326 | 85.421441 | 72.1725398 |
| 21:09:49 | 1:07:00 | 67.8813582 | 68.846326 | 85.421441 | 72.1725398 |
| 21:09:50 | 1:07:01 | 67.8813582 | 69.846326 | 85.421441 | 72.1725398 |
| 21:09:51 | 1:07:02 | 67.8813582 | 69.846326 | 85.421441 | 70.1725398 |
| 21:09:52 | 1:07:03 | 68.8813582 | 71.846326 | 85.421441 | 70.1725398 |
| 21:09:53 | 1:07:04 | 68.8813582 | 70.846326 | 85.421441 | 70.1725398 |
| 21:09:54 | 1:07:05 | 68.8813582 | 70.846326 | 85.421441 | 70.1725398 |
| 21:09:55 | 1:07:06 | 66.8813582 | 70.846326 | 85.421441 | 71.1725398 |
| 21:09:56 | 1:07:07 | 65.8813582 | 64.846326 | 85.421441 | 72.1725398 |
| 21:09:57 | 1:07:08 | 65.8813582 | 61.846326 | 85.421441 | 72.1725398 |
| 21:09:58 | 1:07:09 | 65.8813582 | 61.846326 | 84.421441 | 72.1725398 |
| 21:09:59 | 1:07:10 | 65.8813582 | 61.846326 | 84.421441 | 73.1725398 |
| 21:10:00 | 1:07:11 | 65.8813582 | 61.846326 | 83.421441 | 74.1725398 |
| 21:10:01 | 1:07:12 | 64.8813582 | 61.846326 | 83.421441 | 74.1725398 |
| 21:10:02 | 1:07:13 | 64.8813582 | 61.846326 | 84.421441 | 79.1725398 |
| 21:10:03 | 1:07:14 | 64.8813582 | 63.846326 | 85.421441 | 79.1725398 |
| 21:10:04 | 1:07:15 | 64.8813582 | 63.846326 | 85.421441 | 79.1725398 |
| 21:10:05 | 1:07:16 | 64.8813582 | 64.846326 | 85.421441 | 77.1725398 |
| 21:10:06 | 1:07:17 | 64.8813582 | 64.846326 | 85.421441 | 76.1725398 |
| 21:10:07 | 1:07:18 | 64.8813582 | 65.846326 | 86.421441 | 73.1725398 |
| 21:10:08 | 1:07:19 | 65.8813582 | 65.846326 | 86.421441 | 71.1725398 |
| 21:10:09 | 1:07:20 | 65.8813582 | 65.846326 | 86.421441 | 70.1725398 |
| 21:10:10 | 1:07:21 | 65.8813582 | 65.846326 | 87.421441 | 68.1725398 |
| 21:10:11 | 1:07:22 | 66.8813582 | 66.846326 | 87.421441 | 68.1725398 |
| 21:10:12 | 1:07:23 | 66.8813582 | 66.846326 | 89.421441 | 68.1725398 |
| 21:10:13 | 1:07:24 | 66.8813582 | 66.846326 | 89.421441 | 68.1725398 |
| 21:10:14 | 1:07:25 | 66.8813582 | 66.846326 | 90.421441 | 68.1725398 |
| 21:10:15 | 1:07:26 | 66.8813582 | 66.846326 | 90.421441 | 69.1725398 |
| 21:10:16 | 1:07:27 | 66.8813582 | 66.846326 | 90.421441 | 70.1725398 |

|          |         |            |           |           |            |
|----------|---------|------------|-----------|-----------|------------|
| 21:10:17 | 1:07:28 | 66.8813582 | 67.846326 | 89.421441 | 71.1725398 |
| 21:10:18 | 1:07:29 | 67.8813582 | 67.846326 | 88.421441 | 71.1725398 |
| 21:10:19 | 1:07:30 | 68.8813582 | 67.846326 | 88.421441 | 71.1725398 |
| 21:10:20 | 1:07:31 | 68.8813582 | 67.846326 | 90.421441 | 63.1725398 |
| 21:10:21 | 1:07:32 | 69.8813582 | 67.846326 | 93.421441 | 63.1725398 |
| 21:10:22 | 1:07:33 | 68.8813582 | 67.846326 | 94.421441 | 63.1725398 |
| 21:10:23 | 1:07:34 | 68.8813582 | 66.846326 | 94.421441 | 63.1725398 |
| 21:10:24 | 1:07:35 | 68.8813582 | 66.846326 | 94.421441 | 63.1725398 |
| 21:10:25 | 1:07:36 | 68.8813582 | 66.846326 | 94.421441 | 63.1725398 |
| 21:10:26 | 1:07:37 | 67.8813582 | 66.846326 | 93.421441 | 63.1725398 |
| 21:10:27 | 1:07:38 | 67.8813582 | 66.846326 | 93.421441 | 63.1725398 |
| 21:10:28 | 1:07:39 | 68.8813582 | 66.846326 | 90.421441 | 63.1725398 |
| 21:10:29 | 1:07:40 | 69.8813582 | 65.846326 | 88.421441 | 63.1725398 |
| 21:10:30 | 1:07:41 | 69.8813582 | 65.846326 | 88.421441 | 63.1725398 |
| 21:10:31 | 1:07:42 | 71.8813582 | 65.846326 | 86.421441 | 64.1725398 |
| 21:10:32 | 1:07:43 | 73.8813582 | 63.846326 | 86.421441 | 64.1725398 |
| 21:10:33 | 1:07:44 | 76.8813582 | 63.846326 | 85.421441 | 64.1725398 |
| 21:10:34 | 1:07:45 | 78.8813582 | 63.846326 | 85.421441 | 65.1725398 |
| 21:10:35 | 1:07:46 | 78.8813582 | 63.846326 | 82.421441 | 68.1725398 |
| 21:10:36 | 1:07:47 | 78.8813582 | 62.846326 | 80.421441 | 68.1725398 |
| 21:10:37 | 1:07:48 | 76.8813582 | 62.846326 | 80.421441 | 77.1725398 |
| 21:10:38 | 1:07:49 | 76.8813582 | 63.846326 | 79.421441 | 79.1725398 |
| 21:10:39 | 1:07:50 | 76.8813582 | 63.846326 | 80.421441 | 79.1725398 |
| 21:10:40 | 1:07:51 | 76.8813582 | 62.846326 | 81.421441 | 79.1725398 |
| 21:10:41 | 1:07:52 | 76.8813582 | 62.846326 | 82.421441 | 80.1725398 |
| 21:10:42 | 1:07:53 | 76.8813582 | 61.846326 | 83.421441 | 81.1725398 |
| 21:10:43 | 1:07:54 | 76.8813582 | 61.846326 | 83.421441 | 82.1725398 |
| 21:10:44 | 1:07:55 | 76.8813582 | 61.846326 | 82.421441 | 81.1725398 |
| 21:10:45 | 1:07:56 | 77.8813582 | 60.846326 | 81.421441 | 80.1725398 |
| 21:10:46 | 1:07:57 | 77.8813582 | 62.846326 | 79.421441 | 78.1725398 |
| 21:10:47 | 1:07:58 | 77.8813582 | 64.846326 | 77.421441 | 77.1725398 |
| 21:10:48 | 1:07:59 | 77.8813582 | 64.846326 | 77.421441 | 77.1725398 |
| 21:10:49 | 1:08:00 | 76.8813582 | 66.846326 | 77.421441 | 74.1725398 |
| 21:10:50 | 1:08:01 | 75.8813582 | 67.846326 | 76.421441 | 73.1725398 |
| 21:10:51 | 1:08:02 | 74.8813582 | 67.846326 | 76.421441 | 73.1725398 |
| 21:10:52 | 1:08:03 | 74.8813582 | 67.846326 | 76.421441 | 71.1725398 |
| 21:10:53 | 1:08:04 | 74.8813582 | 65.846326 | 76.421441 | 69.1725398 |
| 21:10:54 | 1:08:05 | 74.8813582 | 64.846326 | 76.421441 | 66.1725398 |
| 21:10:55 | 1:08:06 | 74.8813582 | 64.846326 | 76.421441 | 65.1725398 |
| 21:10:56 | 1:08:07 | 74.8813582 | 64.846326 | 77.421441 | 66.1725398 |
| 21:10:57 | 1:08:08 | 71.8813582 | 63.846326 | 78.421441 | 66.1725398 |
| 21:10:58 | 1:08:09 | 70.8813582 | 63.846326 | 78.421441 | 65.1725398 |
| 21:10:59 | 1:08:10 | 70.8813582 | 63.846326 | 78.421441 | 65.1725398 |
| 21:11:00 | 1:08:11 | 70.8813582 | 61.846326 | 78.421441 | 64.1725398 |
| 21:11:01 | 1:08:12 | 70.8813582 | 61.846326 | 78.421441 | 64.1725398 |



|          |         |            |           |           |            |
|----------|---------|------------|-----------|-----------|------------|
| 21:11:02 | 1:08:13 | 70.8813582 | 61.846326 | 78.421441 | 64.1725398 |
| 21:11:03 | 1:08:14 | 71.8813582 | 60.846326 | 79.421441 | 64.1725398 |
| 21:11:04 | 1:08:15 | 71.8813582 | 60.846326 | 79.421441 | 64.1725398 |
| 21:11:05 | 1:08:16 | 73.8813582 | 59.846326 | 77.421441 | 65.1725398 |
| 21:11:06 | 1:08:17 | 73.8813582 | 59.846326 | 77.421441 | 65.1725398 |
| 21:11:07 | 1:08:18 | 75.8813582 | 59.846326 | 76.421441 | 65.1725398 |
| 21:11:08 | 1:08:19 | 77.8813582 | 59.846326 | 76.421441 | 65.1725398 |
| 21:11:09 | 1:08:20 | 82.8813582 | 58.846326 | 75.421441 | 65.1725398 |
| 21:11:10 | 1:08:21 | 87.8813582 | 58.846326 | 71.421441 | 62.1725398 |
| 21:11:11 | 1:08:22 | 91.8813582 | 59.846326 | 71.421441 | 62.1725398 |
| 21:11:12 | 1:08:23 | 73.2953836 | 60.846326 | 71.421441 | 62.1725398 |
| 21:11:13 | 1:08:24 | 74.0953836 | 60.846326 | 69.421441 | 63.1725398 |
| 21:11:14 | 1:08:25 | 74.4953836 | 60.846326 | 66.421441 | 65.1725398 |
| 21:11:15 | 1:08:26 | 74.2953836 | 60.846326 | 65.421441 | 65.1725398 |
| 21:11:16 | 1:08:27 | 74.0953836 | 60.846326 | 64.421441 | 64.1725398 |
| 21:11:17 | 1:08:28 | 73.4953836 | 60.846326 | 64.421441 | 64.1725398 |
| 21:11:18 | 1:08:29 | 72.0953836 | 60.846326 | 62.421441 | 63.1725398 |
| 21:11:19 | 1:08:30 | 72.0953836 | 61.846326 | 62.421441 | 63.1725398 |
| 21:11:20 | 1:08:31 | 71.8953836 | 61.846326 | 62.421441 | 63.1725398 |
| 21:11:21 | 1:08:32 | 72.4953836 | 62.846326 | 62.421441 | 64.1725398 |
| 21:11:22 | 1:08:33 | 97.8813582 | 62.846326 | 62.421441 | 71.1725398 |
| 21:11:23 | 1:08:34 | 94.8813582 | 66.846326 | 62.421441 | 72.1725398 |
| 21:11:24 | 1:08:35 | 92.8813582 | 66.846326 | 62.421441 | 71.1725398 |
| 21:11:25 | 1:08:36 | 88.8813582 | 66.846326 | 63.421441 | 71.1725398 |
| 21:11:26 | 1:08:37 | 84.8813582 | 71.846326 | 63.421441 | 71.1725398 |
| 21:11:27 | 1:08:38 | 82.8813582 | 73.846326 | 63.421441 | 70.1725398 |
| 21:11:28 | 1:08:39 | 79.8813582 | 73.846326 | 65.421441 | 70.1725398 |
| 21:11:29 | 1:08:40 | 76.8813582 | 73.846326 | 66.421441 | 69.1725398 |
| 21:11:30 | 1:08:41 | 73.8813582 | 74.846326 | 66.421441 | 69.1725398 |
| 21:11:31 | 1:08:42 | 71.8813582 | 78.846326 | 64.421441 | 69.1725398 |
| 21:11:32 | 1:08:43 | 70.8813582 | 79.846326 | 62.421441 | 70.1725398 |
| 21:11:33 | 1:08:44 | 69.8813582 | 72.846326 | 62.421441 | 71.1725398 |
| 21:11:34 | 1:08:45 | 69.8813582 | 68.846326 | 62.421441 | 71.1725398 |
| 21:11:35 | 1:08:46 | 68.8813582 | 66.846326 | 62.421441 | 74.1725398 |
| 21:11:36 | 1:08:47 | 68.8813582 | 65.846326 | 62.421441 | 72.1725398 |
| 21:11:37 | 1:08:48 | 67.8813582 | 65.846326 | 62.421441 | 72.1725398 |
| 21:11:38 | 1:08:49 | 67.8813582 | 65.846326 | 62.421441 | 68.1725398 |
| 21:11:39 | 1:08:50 | 67.8813582 | 65.846326 | 58.421441 | 67.1725398 |
| 21:11:40 | 1:08:51 | 67.8813582 | 65.846326 | 56.421441 | 67.1725398 |
| 21:11:41 | 1:08:52 | 67.8813582 | 66.846326 | 53.421441 | 66.1725398 |
| 21:11:42 | 1:08:53 | 67.8813582 | 66.846326 | 53.421441 | 66.1725398 |
| 21:11:43 | 1:08:54 | 67.8813582 | 66.846326 | 53.421441 | 66.1725398 |
| 21:11:44 | 1:08:55 | 67.8813582 | 67.846326 | 53.421441 | 66.1725398 |
| 21:11:45 | 1:08:56 | 66.8813582 | 67.846326 | 52.421441 | 66.1725398 |
| 21:11:46 | 1:08:57 | 66.8813582 | 67.846326 | 52.421441 | 66.1725398 |

|          |         |            |           |           |            |
|----------|---------|------------|-----------|-----------|------------|
| 21:11:47 | 1:08:58 | 66.8813582 | 68.846326 | 52.421441 | 65.1725398 |
| 21:11:48 | 1:08:59 | 67.8813582 | 68.846326 | 52.421441 | 65.1725398 |
| 21:11:49 | 1:09:00 | 67.8813582 | 68.846326 | 52.421441 | 65.1725398 |
| 21:11:50 | 1:09:01 | 68.8813582 | 68.846326 | 53.421441 | 67.1725398 |
| 21:11:51 | 1:09:02 | 68.8813582 | 69.846326 | 57.421441 | 68.1725398 |
| 21:11:52 | 1:09:03 | 68.8813582 | 69.846326 | 69.421441 | 68.1725398 |
| 21:11:53 | 1:09:04 | 69.8813582 | 69.846326 | 69.421441 | 67.1725398 |
| 21:11:54 | 1:09:05 | 69.8813582 | 69.846326 | 73.421441 | 65.1725398 |
| 21:11:55 | 1:09:06 | 69.8813582 | 67.846326 | 77.421441 | 65.1725398 |
| 21:11:56 | 1:09:07 | 71.8813582 | 67.846326 | 81.421441 | 64.1725398 |
| 21:11:57 | 1:09:08 | 74.8813582 | 66.846326 | 81.421441 | 64.1725398 |
| 21:11:58 | 1:09:09 | 76.8813582 | 66.846326 | 82.421441 | 64.1725398 |
| 21:11:59 | 1:09:10 | 76.8813582 | 66.846326 | 83.421441 | 64.1725398 |
| 21:12:00 | 1:09:11 | 77.8813582 | 66.846326 | 87.421441 | 63.1725398 |
| 21:12:01 | 1:09:12 | 77.8813582 | 66.846326 | 87.421441 | 63.1725398 |
| 21:12:02 | 1:09:13 | 77.8813582 | 68.846326 | 88.421441 | 62.1725398 |
| 21:12:03 | 1:09:14 | 78.8813582 | 68.846326 | 89.421441 | 62.1725398 |
| 21:12:04 | 1:09:15 | 79.8813582 | 67.846326 | 88.421441 | 62.1725398 |
| 21:12:05 | 1:09:16 | 79.8813582 | 67.846326 | 88.421441 | 62.1725398 |
| 21:12:06 | 1:09:17 | 81.8813582 | 66.846326 | 87.421441 | 64.1725398 |
| 21:12:07 | 1:09:18 | 80.8813582 | 66.846326 | 87.421441 | 65.1725398 |
| 21:12:08 | 1:09:19 | 80.8813582 | 65.846326 | 87.421441 | 65.1725398 |
| 21:12:09 | 1:09:20 | 77.8813582 | 65.846326 | 87.421441 | 65.1725398 |
| 21:12:10 | 1:09:21 | 77.8813582 | 62.846326 | 87.421441 | 65.1725398 |
| 21:12:11 | 1:09:22 | 73.8813582 | 62.846326 | 85.421441 | 65.1725398 |
| 21:12:12 | 1:09:23 | 70.8813582 | 62.846326 | 84.421441 | 66.1725398 |
| 21:12:13 | 1:09:24 | 69.8813582 | 62.846326 | 83.421441 | 66.1725398 |
| 21:12:14 | 1:09:25 | 69.8813582 | 61.846326 | 84.421441 | 67.1725398 |
| 21:12:15 | 1:09:26 | 68.8813582 | 59.846326 | 84.421441 | 68.1725398 |
| 21:12:16 | 1:09:27 | 68.8813582 | 59.846326 | 84.421441 | 69.1725398 |
| 21:12:17 | 1:09:28 | 68.8813582 | 58.846326 | 86.421441 | 69.1725398 |
| 21:12:18 | 1:09:29 | 67.8813582 | 58.846326 | 86.421441 | 69.1725398 |
| 21:12:19 | 1:09:30 | 67.8813582 | 58.846326 | 88.421441 | 70.1725398 |
| 21:12:20 | 1:09:31 | 67.8813582 | 59.846326 | 88.421441 | 72.1725398 |
| 21:12:21 | 1:09:32 | 66.8813582 | 59.846326 | 88.421441 | 72.1725398 |
| 21:12:22 | 1:09:33 | 66.8813582 | 64.846326 | 87.421441 | 73.1725398 |
| 21:12:23 | 1:09:34 | 66.8813582 | 65.846326 | 87.421441 | 73.1725398 |
| 21:12:24 | 1:09:35 | 67.8813582 | 66.846326 | 87.421441 | 74.1725398 |
| 21:12:25 | 1:09:36 | 67.8813582 | 66.846326 | 87.421441 | 75.1725398 |
| 21:12:26 | 1:09:37 | 67.8813582 | 66.846326 | 89.421441 | 76.1725398 |
| 21:12:27 | 1:09:38 | 68.8813582 | 66.846326 | 89.421441 | 77.1725398 |
| 21:12:28 | 1:09:39 | 68.8813582 | 68.846326 | 89.421441 | 77.1725398 |
| 21:12:29 | 1:09:40 | 68.8813582 | 70.846326 | 90.421441 | 78.1725398 |
| 21:12:30 | 1:09:41 | 68.8813582 | 70.846326 | 90.421441 | 78.1725398 |
| 21:12:31 | 1:09:42 | 69.8813582 | 70.846326 | 90.421441 | 79.1725398 |

|          |         |            |           |           |            |
|----------|---------|------------|-----------|-----------|------------|
| 21:12:32 | 1:09:43 | 68.8813582 | 69.846326 | 90.421441 | 81.1725398 |
| 21:12:33 | 1:09:44 | 68.8813582 | 68.846326 | 90.421441 | 82.1725398 |
| 21:12:34 | 1:09:45 | 68.8813582 | 67.846326 | 90.421441 | 83.1725398 |
| 21:12:35 | 1:09:46 | 68.8813582 | 67.846326 | 88.421441 | 83.1725398 |
| 21:12:36 | 1:09:47 | 68.8813582 | 67.846326 | 88.421441 | 83.1725398 |
| 21:12:37 | 1:09:48 | 68.8813582 | 65.846326 | 88.421441 | 83.1725398 |
| 21:12:38 | 1:09:49 | 67.8813582 | 65.846326 | 88.421441 | 83.1725398 |
| 21:12:39 | 1:09:50 | 67.8813582 | 64.846326 | 88.421441 | 82.1725398 |
| 21:12:40 | 1:09:51 | 67.8813582 | 64.846326 | 85.421441 | 80.1725398 |
| 21:12:41 | 1:09:52 | 67.8813582 | 64.846326 | 85.421441 | 79.1725398 |
| 21:12:42 | 1:09:53 | 67.8813582 | 64.846326 | 85.421441 | 79.1725398 |
| 21:12:43 | 1:09:54 | 67.8813582 | 64.846326 | 85.421441 | 80.1725398 |
| 21:12:44 | 1:09:55 | 67.8813582 | 64.846326 | 84.421441 | 80.1725398 |
| 21:12:45 | 1:09:56 | 67.8813582 | 64.846326 | 84.421441 | 81.1725398 |
| 21:12:46 | 1:09:57 | 67.8813582 | 64.846326 | 84.421441 | 81.1725398 |
| 21:12:47 | 1:09:58 | 67.8813582 | 64.846326 | 82.421441 | 81.1725398 |
| 21:12:48 | 1:09:59 | 67.8813582 | 64.846326 | 78.421441 | 82.1725398 |
| 21:12:49 | 1:10:00 | 67.8813582 | 64.846326 | 78.421441 | 85.1725398 |
| 21:12:50 | 1:10:01 | 69.8813582 | 64.846326 | 77.421441 | 84.1725398 |
| 21:12:51 | 1:10:02 | 69.8813582 | 64.846326 | 75.421441 | 83.1725398 |
| 21:12:52 | 1:10:03 | 70.8813582 | 66.846326 | 75.421441 | 82.1725398 |
| 21:12:53 | 1:10:04 | 73.8813582 | 66.846326 | 74.421441 | 80.1725398 |
| 21:12:54 | 1:10:05 | 73.8813582 | 67.846326 | 74.421441 | 79.1725398 |
| 21:12:55 | 1:10:06 | 73.8813582 | 70.846326 | 74.421441 | 79.1725398 |
| 21:12:56 | 1:10:07 | 72.8813582 | 70.846326 | 74.421441 | 79.1725398 |
| 21:12:57 | 1:10:08 | 72.8813582 | 88.846326 | 74.421441 | 79.1725398 |
| 21:12:58 | 1:10:09 | 72.8813582 | 88.846326 | 73.421441 | 79.1725398 |
| 21:12:59 | 1:10:10 | 73.8813582 | 74.846326 | 73.421441 | 82.1725398 |
| 21:13:00 | 1:10:11 | 73.8813582 | 71.846326 | 73.421441 | 84.1725398 |
| 21:13:01 | 1:10:12 | 72.8813582 | 71.846326 | 73.421441 | 85.1725398 |
| 21:13:02 | 1:10:13 | 70.8813582 | 71.846326 | 73.421441 | 86.1725398 |
| 21:13:03 | 1:10:14 | 69.8813582 | 71.846326 | 75.421441 | 87.1725398 |
| 21:13:04 | 1:10:15 | 68.8813582 | 72.846326 | 77.421441 | 88.1725398 |
| 21:13:05 | 1:10:16 | 67.8813582 | 72.846326 | 78.421441 | 88.1725398 |
| 21:13:06 | 1:10:17 | 67.8813582 | 70.846326 | 78.421441 | 88.1725398 |
| 21:13:07 | 1:10:18 | 67.8813582 | 70.846326 | 78.421441 | 87.1725398 |
| 21:13:08 | 1:10:19 | 67.8813582 | 69.846326 | 79.421441 | 86.1725398 |
| 21:13:09 | 1:10:20 | 67.8813582 | 67.846326 | 81.421441 | 86.1725398 |
| 21:13:10 | 1:10:21 | 67.8813582 | 67.846326 | 88.421441 | 84.1725398 |
| 21:13:11 | 1:10:22 | 67.8813582 | 67.846326 | 93.421441 | 83.1725398 |
| 21:13:12 | 1:10:23 | 68.8813582 | 68.846326 | 93.421441 | 83.1725398 |
| 21:13:13 | 1:10:24 | 68.8813582 | 68.846326 | 93.421441 | 79.1725398 |
| 21:13:14 | 1:10:25 | 69.8813582 | 68.846326 | 93.421441 | 77.1725398 |
| 21:13:15 | 1:10:26 | 70.8813582 | 68.846326 | 95.421441 | 76.1725398 |
| 21:13:16 | 1:10:27 | 72.8813582 | 68.846326 | 95.421441 | 75.1725398 |

|          |         |            |           |           |            |
|----------|---------|------------|-----------|-----------|------------|
| 21:13:17 | 1:10:28 | 72.8813582 | 69.846326 | 94.421441 | 75.1725398 |
| 21:13:18 | 1:10:29 | 72.8813582 | 69.846326 | 94.421441 | 74.1725398 |
| 21:13:19 | 1:10:30 | 72.8813582 | 69.846326 | 94.421441 | 74.1725398 |
| 21:13:20 | 1:10:31 | 78.8813582 | 70.846326 | 94.421441 | 76.1725398 |
| 21:13:21 | 1:10:32 | 81.8813582 | 70.846326 | 93.421441 | 77.1725398 |
| 21:13:22 | 1:10:33 | 81.8813582 | 71.846326 | 93.421441 | 76.1725398 |
| 21:13:23 | 1:10:34 | 81.8813582 | 72.846326 | 93.421441 | 73.1725398 |
| 21:13:24 | 1:10:35 | 78.8813582 | 72.846326 | 92.421441 | 70.1725398 |
| 21:13:25 | 1:10:36 | 77.8813582 | 72.846326 | 92.421441 | 69.1725398 |
| 21:13:26 | 1:10:37 | 76.8813582 | 72.846326 | 92.421441 | 69.1725398 |
| 21:13:27 | 1:10:38 | 76.8813582 | 73.846326 | 92.421441 | 68.1725398 |
| 21:13:28 | 1:10:39 | 73.8813582 | 73.846326 | 92.421441 | 68.1725398 |
| 21:13:29 | 1:10:40 | 71.8813582 | 73.846326 | 91.421441 | 68.1725398 |
| 21:13:30 | 1:10:41 | 71.8813582 | 73.846326 | 91.421441 | 68.1725398 |
| 21:13:31 | 1:10:42 | 68.8813582 | 73.846326 | 89.421441 | 66.1725398 |
| 21:13:32 | 1:10:43 | 68.8813582 | 72.846326 | 88.421441 | 65.1725398 |
| 21:13:33 | 1:10:44 | 68.8813582 | 72.846326 | 88.421441 | 65.1725398 |
| 21:13:34 | 1:10:45 | 68.8813582 | 72.846326 | 87.421441 | 67.1725398 |
| 21:13:35 | 1:10:46 | 67.8813582 | 71.846326 | 86.421441 | 72.1725398 |
| 21:13:36 | 1:10:47 | 67.8813582 | 70.846326 | 82.421441 | 75.1725398 |
| 21:13:37 | 1:10:48 | 67.8813582 | 69.846326 | 78.421441 | 75.1725398 |
| 21:13:38 | 1:10:49 | 66.8813582 | 68.846326 | 78.421441 | 75.1725398 |
| 21:13:39 | 1:10:50 | 66.8813582 | 68.846326 | 76.421441 | 75.1725398 |
| 21:13:40 | 1:10:51 | 66.8813582 | 67.846326 | 73.421441 | 75.1725398 |
| 21:13:41 | 1:10:52 | 65.8813582 | 66.846326 | 69.421441 | 77.1725398 |
| 21:13:42 | 1:10:53 | 65.8813582 | 65.846326 | 69.421441 | 80.1725398 |
| 21:13:43 | 1:10:54 | 68.8813582 | 65.846326 | 66.421441 | 80.1725398 |
| 21:13:44 | 1:10:55 | 69.8813582 | 65.846326 | 63.421441 | 81.1725398 |
| 21:13:45 | 1:10:56 | 70.8813582 | 65.846326 | 62.421441 | 80.1725398 |
| 21:13:46 | 1:10:57 | 71.8813582 | 63.846326 | 62.421441 | 79.1725398 |
| 21:13:47 | 1:10:58 | 73.8813582 | 63.846326 | 62.421441 | 78.1725398 |
| 21:13:48 | 1:10:59 | 73.8813582 | 63.846326 | 62.421441 | 77.1725398 |
| 21:13:49 | 1:11:00 | 73.8813582 | 63.846326 | 67.421441 | 77.1725398 |
| 21:13:50 | 1:11:01 | 73.8813582 | 63.846326 | 70.421441 | 77.1725398 |
| 21:13:51 | 1:11:02 | 73.8813582 | 63.846326 | 73.421441 | 78.1725398 |
| 21:13:52 | 1:11:03 | 73.8813582 | 63.846326 | 73.421441 | 78.1725398 |
| 21:13:53 | 1:11:04 | 73.8813582 | 63.846326 | 75.421441 | 78.1725398 |
| 21:13:54 | 1:11:05 | 73.8813582 | 62.846326 | 76.421441 | 78.1725398 |
| 21:13:55 | 1:11:06 | 73.8813582 | 61.846326 | 79.421441 | 78.1725398 |
| 21:13:56 | 1:11:07 | 75.8813582 | 61.846326 | 84.421441 | 79.1725398 |
| 21:13:57 | 1:11:08 | 75.8813582 | 63.846326 | 84.421441 | 78.1725398 |
| 21:13:58 | 1:11:09 | 76.8813582 | 64.846326 | 86.421441 | 76.1725398 |
| 21:13:59 | 1:11:10 | 77.8813582 | 65.846326 | 87.421441 | 76.1725398 |
| 21:14:00 | 1:11:11 | 75.8813582 | 66.846326 | 88.421441 | 78.1725398 |
| 21:14:01 | 1:11:12 | 75.8813582 | 68.846326 | 88.421441 | 78.1725398 |

|          |         |            |           |           |            |
|----------|---------|------------|-----------|-----------|------------|
| 21:14:02 | 1:11:13 | 75.8813582 | 68.846326 | 88.421441 | 79.1725398 |
| 21:14:03 | 1:11:14 | 75.8813582 | 71.846326 | 88.421441 | 80.1725398 |
| 21:14:04 | 1:11:15 | 75.8813582 | 71.846326 | 88.421441 | 79.1725398 |
| 21:14:05 | 1:11:16 | 74.8813582 | 72.846326 | 88.421441 | 79.1725398 |
| 21:14:06 | 1:11:17 | 74.8813582 | 72.846326 | 89.421441 | 79.1725398 |
| 21:14:07 | 1:11:18 | 74.8813582 | 70.846326 | 90.421441 | 78.1725398 |
| 21:14:08 | 1:11:19 | 73.8813582 | 70.846326 | 90.421441 | 78.1725398 |
| 21:14:09 | 1:11:20 | 73.8813582 | 69.846326 | 88.421441 | 79.1725398 |
| 21:14:10 | 1:11:21 | 73.8813582 | 69.846326 | 87.421441 | 79.1725398 |
| 21:14:11 | 1:11:22 | 73.8813582 | 69.846326 | 88.421441 | 80.1725398 |
| 21:14:12 | 1:11:23 | 72.8813582 | 70.846326 | 88.421441 | 81.1725398 |
| 21:14:13 | 1:11:24 | 72.8813582 | 71.846326 | 88.421441 | 81.1725398 |
| 21:14:14 | 1:11:25 | 71.8813582 | 71.846326 | 89.421441 | 81.1725398 |
| 21:14:15 | 1:11:26 | 70.8813582 | 72.846326 | 88.421441 | 81.1725398 |
| 21:14:16 | 1:11:27 | 70.8813582 | 72.846326 | 87.421441 | 81.1725398 |
| 21:14:17 | 1:11:28 | 69.8813582 | 72.846326 | 87.421441 | 81.1725398 |
| 21:14:18 | 1:11:29 | 69.8813582 | 74.846326 | 87.421441 | 81.1725398 |
| 21:14:19 | 1:11:30 | 70.8813582 | 75.846326 | 87.421441 | 76.1725398 |
| 21:14:20 | 1:11:31 | 70.8813582 | 75.846326 | 86.421441 | 76.1725398 |
| 21:14:21 | 1:11:32 | 71.8813582 | 74.846326 | 86.421441 | 72.1725398 |
| 21:14:22 | 1:11:33 | 71.8813582 | 74.846326 | 86.421441 | 68.1725398 |
| 21:14:23 | 1:11:34 | 72.8813582 | 73.846326 | 85.421441 | 69.1725398 |
| 21:14:24 | 1:11:35 | 72.8813582 | 73.846326 | 85.421441 | 69.1725398 |
| 21:14:25 | 1:11:36 | 71.8813582 | 73.846326 | 84.421441 | 69.1725398 |
| 21:14:26 | 1:11:37 | 69.8813582 | 73.846326 | 79.421441 | 69.1725398 |
| 21:14:27 | 1:11:38 | 67.8813582 | 73.846326 | 78.421441 | 68.1725398 |
| 21:14:28 | 1:11:39 | 66.8813582 | 75.846326 | 78.421441 | 68.1725398 |
| 21:14:29 | 1:11:40 | 65.8813582 | 79.846326 | 78.421441 | 68.1725398 |
| 21:14:30 | 1:11:41 | 65.8813582 | 79.846326 | 81.421441 | 67.1725398 |
| 21:14:31 | 1:11:42 | 65.8813582 | 81.846326 | 80.421441 | 64.1725398 |
| 21:14:32 | 1:11:43 | 64.8813582 | 81.846326 | 81.421441 | 62.1725398 |
| 21:14:33 | 1:11:44 | 64.8813582 | 75.846326 | 81.421441 | 61.1725398 |
| 21:14:34 | 1:11:45 | 64.8813582 | 71.846326 | 81.421441 | 61.1725398 |
| 21:14:35 | 1:11:46 | 64.8813582 | 70.846326 | 81.421441 | 59.1725398 |
| 21:14:36 | 1:11:47 | 64.8813582 | 69.846326 | 81.421441 | 57.1725398 |
| 21:14:37 | 1:11:48 | 65.8813582 | 69.846326 | 81.421441 | 55.1725398 |
| 21:14:38 | 1:11:49 | 65.8813582 | 70.846326 | 81.421441 | 52.1725398 |
| 21:14:39 | 1:11:50 | 65.8813582 | 75.846326 | 81.421441 | 40.1725398 |
| 21:14:40 | 1:11:51 | 66.8813582 | 77.846326 | 82.421441 | 39.1725398 |
| 21:14:41 | 1:11:52 | 66.8813582 | 75.846326 | 85.421441 | 40.1725398 |
| 21:14:42 | 1:11:53 | 66.8813582 | 74.846326 | 85.421441 | 41.1725398 |
| 21:14:43 | 1:11:54 | 66.8813582 | 74.846326 | 85.421441 | 42.1725398 |
| 21:14:44 | 1:11:55 | 66.8813582 | 73.846326 | 85.421441 | 44.1725398 |
| 21:14:45 | 1:11:56 | 66.8813582 | 72.846326 | 87.421441 | 46.1725398 |
| 21:14:46 | 1:11:57 | 66.8813582 | 71.846326 | 87.421441 | 53.1725398 |

|          |         |            |           |           |            |
|----------|---------|------------|-----------|-----------|------------|
| 21:14:47 | 1:11:58 | 67.8813582 | 71.846326 | 87.421441 | 54.1725398 |
| 21:14:48 | 1:11:59 | 68.8813582 | 70.846326 | 88.421441 | 56.1725398 |
| 21:14:49 | 1:12:00 | 69.8813582 | 70.846326 | 89.421441 | 58.1725398 |
| 21:14:50 | 1:12:01 | 69.8813582 | 70.846326 | 89.421441 | 59.1725398 |
| 21:14:51 | 1:12:02 | 69.8813582 | 70.846326 | 89.421441 | 60.1725398 |
| 21:14:52 | 1:12:03 | 69.8813582 | 70.846326 | 89.421441 | 62.1725398 |
| 21:14:53 | 1:12:04 | 72.8813582 | 71.846326 | 90.421441 | 62.1725398 |
| 21:14:54 | 1:12:05 | 76.8813582 | 71.846326 | 90.421441 | 67.1725398 |
| 21:14:55 | 1:12:06 | 73.8813582 | 70.846326 | 90.421441 | 67.1725398 |
| 21:14:56 | 1:12:07 | 72.8813582 | 68.846326 | 88.421441 | 68.1725398 |
| 21:14:57 | 1:12:08 | 69.8813582 | 68.846326 | 88.421441 | 70.1725398 |
| 21:14:58 | 1:12:09 | 68.8813582 | 68.846326 | 88.421441 | 70.1725398 |
| 21:14:59 | 1:12:10 | 67.8813582 | 67.846326 | 90.421441 | 71.1725398 |
| 21:15:00 | 1:12:11 | 66.8813582 | 67.846326 | 92.421441 | 75.1725398 |
| 21:15:01 | 1:12:12 | 66.8813582 | 67.846326 | 92.421441 | 84.1725398 |
| 21:15:02 | 1:12:13 | 65.8813582 | 68.846326 | 92.421441 | 89.1725398 |
| 21:15:03 | 1:12:14 | 65.8813582 | 68.846326 | 92.421441 | 91.1725398 |
| 21:15:04 | 1:12:15 | 64.8813582 | 68.846326 | 93.421441 | 91.1725398 |
| 21:15:05 | 1:12:16 | 64.8813582 | 69.846326 | 93.421441 | 90.1725398 |
| 21:15:06 | 1:12:17 | 64.8813582 | 70.846326 | 93.421441 | 90.1725398 |
| 21:15:07 | 1:12:18 | 64.8813582 | 70.846326 | 93.421441 | 90.1725398 |
| 21:15:08 | 1:12:19 | 64.8813582 | 71.846326 | 93.421441 | 92.1725398 |
| 21:15:09 | 1:12:20 | 64.8813582 | 71.846326 | 93.421441 | 92.1725398 |
| 21:15:10 | 1:12:21 | 64.8813582 | 71.846326 | 93.421441 | 92.1725398 |
| 21:15:11 | 1:12:22 | 63.8813582 | 71.846326 | 93.421441 | 92.1725398 |
| 21:15:12 | 1:12:23 | 63.8813582 | 70.846326 | 93.421441 | 87.1725398 |
| 21:15:13 | 1:12:24 | 63.8813582 | 70.846326 | 93.421441 | 82.1725398 |
| 21:15:14 | 1:12:25 | 63.8813582 | 70.846326 | 91.421441 | 80.1725398 |
| 21:15:15 | 1:12:26 | 63.8813582 | 69.846326 | 89.421441 | 75.1725398 |
| 21:15:16 | 1:12:27 | 63.8813582 | 69.846326 | 89.421441 | 74.1725398 |
| 21:15:17 | 1:12:28 | 62.8813582 | 68.846326 | 89.421441 | 74.1725398 |
| 21:15:18 | 1:12:29 | 62.8813582 | 68.846326 | 89.421441 | 74.1725398 |
| 21:15:19 | 1:12:30 | 62.8813582 | 68.846326 | 88.421441 | 76.1725398 |
| 21:15:20 | 1:12:31 | 62.8813582 | 70.846326 | 88.421441 | 77.1725398 |
| 21:15:21 | 1:12:32 | 62.8813582 | 71.846326 | 88.421441 | 77.1725398 |
| 21:15:22 | 1:12:33 | 62.8813582 | 70.846326 | 88.421441 | 77.1725398 |
| 21:15:23 | 1:12:34 | 62.8813582 | 70.846326 | 90.421441 | 77.1725398 |
| 21:15:24 | 1:12:35 | 62.8813582 | 71.846326 | 90.421441 | 78.1725398 |
| 21:15:25 | 1:12:36 | 62.8813582 | 71.846326 | 91.421441 | 80.1725398 |
| 21:15:26 | 1:12:37 | 62.8813582 | 71.846326 | 91.421441 | 82.1725398 |
| 21:15:27 | 1:12:38 | 62.8813582 | 70.846326 | 91.421441 | 84.1725398 |
| 21:15:28 | 1:12:39 | 63.8813582 | 70.846326 | 92.421441 | 84.1725398 |
| 21:15:29 | 1:12:40 | 63.8813582 | 68.846326 | 92.421441 | 84.1725398 |
| 21:15:30 | 1:12:41 | 63.8813582 | 68.846326 | 93.421441 | 83.1725398 |
| 21:15:31 | 1:12:42 | 63.8813582 | 68.846326 | 93.421441 | 80.1725398 |

|          |         |            |           |           |            |
|----------|---------|------------|-----------|-----------|------------|
| 21:15:32 | 1:12:43 | 63.8813582 | 68.846326 | 93.421441 | 78.1725398 |
| 21:15:33 | 1:12:44 | 63.8813582 | 68.846326 | 92.421441 | 77.1725398 |
| 21:15:34 | 1:12:45 | 63.8813582 | 68.846326 | 92.421441 | 77.1725398 |
| 21:15:35 | 1:12:46 | 63.8813582 | 66.846326 | 92.421441 | 77.1725398 |
| 21:15:36 | 1:12:47 | 63.8813582 | 66.846326 | 91.421441 | 76.1725398 |
| 21:15:37 | 1:12:48 | 62.8813582 | 65.846326 | 90.421441 | 76.1725398 |
| 21:15:38 | 1:12:49 | 63.8813582 | 65.846326 | 89.421441 | 77.1725398 |
| 21:15:39 | 1:12:50 | 63.8813582 | 65.846326 | 90.421441 | 77.1725398 |
| 21:15:40 | 1:12:51 | 63.8813582 | 63.846326 | 90.421441 | 78.1725398 |
| 21:15:41 | 1:12:52 | 63.8813582 | 62.846326 | 90.421441 | 78.1725398 |
| 21:15:42 | 1:12:53 | 63.8813582 | 62.846326 | 91.421441 | 80.1725398 |
| 21:15:43 | 1:12:54 | 63.8813582 | 62.846326 | 91.421441 | 80.1725398 |
| 21:15:44 | 1:12:55 | 66.8813582 | 62.846326 | 89.421441 | 80.1725398 |
| 21:15:45 | 1:12:56 | 67.8813582 | 62.846326 | 89.421441 | 81.1725398 |
| 21:15:46 | 1:12:57 | 67.8813582 | 62.846326 | 88.421441 | 81.1725398 |
| 21:15:47 | 1:12:58 | 66.8813582 | 62.846326 | 88.421441 | 81.1725398 |
| 21:15:48 | 1:12:59 | 66.8813582 | 63.846326 | 88.421441 | 82.1725398 |
| 21:15:49 | 1:13:00 | 66.8813582 | 66.846326 | 88.421441 | 84.1725398 |
| 21:15:50 | 1:13:01 | 68.8813582 | 66.846326 | 88.421441 | 84.1725398 |
| 21:15:51 | 1:13:02 | 68.8813582 | 66.846326 | 88.421441 | 83.1725398 |
| 21:15:52 | 1:13:03 | 68.8813582 | 71.846326 | 88.421441 | 77.1725398 |
| 21:15:53 | 1:13:04 | 67.8813582 | 71.846326 | 88.421441 | 77.1725398 |
| 21:15:54 | 1:13:05 | 66.8813582 | 68.846326 | 88.421441 | 75.1725398 |
| 21:15:55 | 1:13:06 | 65.8813582 | 67.846326 | 87.421441 | 75.1725398 |
| 21:15:56 | 1:13:07 | 64.8813582 | 67.846326 | 87.421441 | 75.1725398 |
| 21:15:57 | 1:13:08 | 64.8813582 | 67.846326 | 87.421441 | 75.1725398 |
| 21:15:58 | 1:13:09 | 64.8813582 | 67.846326 | 87.421441 | 79.1725398 |
| 21:15:59 | 1:13:10 | 63.8813582 | 68.846326 | 88.421441 | 84.1725398 |
| 21:16:00 | 1:13:11 | 63.8813582 | 69.846326 | 88.421441 | 85.1725398 |
| 21:16:01 | 1:13:12 | 63.8813582 | 71.846326 | 89.421441 | 85.1725398 |
| 21:16:02 | 1:13:13 | 64.8813582 | 71.846326 | 89.421441 | 85.1725398 |
| 21:16:03 | 1:13:14 | 64.8813582 | 73.846326 | 90.421441 | 85.1725398 |
| 21:16:04 | 1:13:15 | 64.8813582 | 74.846326 | 90.421441 | 85.1725398 |
| 21:16:05 | 1:13:16 | 64.8813582 | 74.846326 | 90.421441 | 82.1725398 |
| 21:16:06 | 1:13:17 | 64.8813582 | 75.846326 | 90.421441 | 81.1725398 |
| 21:16:07 | 1:13:18 | 64.8813582 | 75.846326 | 88.421441 | 81.1725398 |
| 21:16:08 | 1:13:19 | 64.8813582 | 75.846326 | 87.421441 | 82.1725398 |
| 21:16:09 | 1:13:20 | 64.8813582 | 76.846326 | 86.421441 | 83.1725398 |
| 21:16:10 | 1:13:21 | 64.8813582 | 77.846326 | 86.421441 | 84.1725398 |
| 21:16:11 | 1:13:22 | 63.8813582 | 78.846326 | 86.421441 | 84.1725398 |
| 21:16:12 | 1:13:23 | 63.8813582 | 78.846326 | 86.421441 | 84.1725398 |
| 21:16:13 | 1:13:24 | 63.8813582 | 78.846326 | 86.421441 | 82.1725398 |
| 21:16:14 | 1:13:25 | 64.8813582 | 78.846326 | 85.421441 | 74.1725398 |
| 21:16:15 | 1:13:26 | 64.8813582 | 77.846326 | 85.421441 | 70.1725398 |
| 21:16:16 | 1:13:27 | 64.8813582 | 73.846326 | 85.421441 | 69.1725398 |

|          |         |            |           |           |            |
|----------|---------|------------|-----------|-----------|------------|
| 21:16:17 | 1:13:28 | 64.8813582 | 72.846326 | 85.421441 | 69.1725398 |
| 21:16:18 | 1:13:29 | 64.8813582 | 70.846326 | 86.421441 | 68.1725398 |
| 21:16:19 | 1:13:30 | 64.8813582 | 70.846326 | 86.421441 | 68.1725398 |
| 21:16:20 | 1:13:31 | 64.8813582 | 72.846326 | 86.421441 | 68.1725398 |
| 21:16:21 | 1:13:32 | 63.8813582 | 72.846326 | 85.421441 | 68.1725398 |
| 21:16:22 | 1:13:33 | 63.8813582 | 74.846326 | 85.421441 | 68.1725398 |
| 21:16:23 | 1:13:34 | 63.8813582 | 74.846326 | 82.421441 | 68.1725398 |
| 21:16:24 | 1:13:35 | 63.8813582 | 76.846326 | 82.421441 | 69.1725398 |
| 21:16:25 | 1:13:36 | 63.8813582 | 76.846326 | 81.421441 | 70.1725398 |
| 21:16:26 | 1:13:37 | 64.8813582 | 76.846326 | 81.421441 | 72.1725398 |
| 21:16:27 | 1:13:38 | 64.8813582 | 77.846326 | 81.421441 | 72.1725398 |
| 21:16:28 | 1:13:39 | 65.8813582 | 77.846326 | 81.421441 | 71.1725398 |
| 21:16:29 | 1:13:40 | 65.8813582 | 77.846326 | 81.421441 | 71.1725398 |
| 21:16:30 | 1:13:41 | 65.8813582 | 78.846326 | 80.421441 | 71.1725398 |
| 21:16:31 | 1:13:42 | 65.8813582 | 78.846326 | 79.421441 | 71.1725398 |
| 21:16:32 | 1:13:43 | 65.8813582 | 79.846326 | 79.421441 | 71.1725398 |
| 21:16:33 | 1:13:44 | 65.8813582 | 80.846326 | 79.421441 | 71.1725398 |
| 21:16:34 | 1:13:45 | 64.8813582 | 80.846326 | 79.421441 | 71.1725398 |
| 21:16:35 | 1:13:46 | 64.8813582 | 80.846326 | 79.421441 | 71.1725398 |
| 21:16:36 | 1:13:47 | 63.8813582 | 81.846326 | 79.421441 | 71.1725398 |
| 21:16:37 | 1:13:48 | 63.8813582 | 81.846326 | 79.421441 | 71.1725398 |
| 21:16:38 | 1:13:49 | 63.8813582 | 81.846326 | 79.421441 | 72.1725398 |
| 21:16:39 | 1:13:50 | 63.8813582 | 81.846326 | 79.421441 | 78.1725398 |
| 21:16:40 | 1:13:51 | 63.8813582 | 81.846326 | 79.421441 | 87.1725398 |
| 21:16:41 | 1:13:52 | 63.8813582 | 81.846326 | 80.421441 | 91.1725398 |
| 21:16:42 | 1:13:53 | 63.8813582 | 81.846326 | 80.421441 | 92.1725398 |
| 21:16:43 | 1:13:54 | 63.8813582 | 81.846326 | 80.421441 | 93.1725398 |
| 21:16:44 | 1:13:55 | 63.8813582 | 80.846326 | 79.421441 | 94.1725398 |
| 21:16:45 | 1:13:56 | 63.8813582 | 80.846326 | 79.421441 | 95.1725398 |
| 21:16:46 | 1:13:57 | 63.8813582 | 80.846326 | 80.421441 | 95.1725398 |
| 21:16:47 | 1:13:58 | 64.8813582 | 80.846326 | 80.421441 | 95.1725398 |
| 21:16:48 | 1:13:59 | 64.8813582 | 80.846326 | 80.421441 | 96.1725398 |
| 21:16:49 | 1:14:00 | 64.8813582 | 80.846326 | 81.421441 | 96.1725398 |
| 21:16:50 | 1:14:01 | 65.8813582 | 79.846326 | 81.421441 | 96.1725398 |
| 21:16:51 | 1:14:02 | 65.8813582 | 79.846326 | 81.421441 | 94.1725398 |
| 21:16:52 | 1:14:03 | 66.8813582 | 79.846326 | 82.421441 | 89.1725398 |
| 21:16:53 | 1:14:04 | 67.8813582 | 80.846326 | 81.421441 | 87.1725398 |
| 21:16:54 | 1:14:05 | 73.8813582 | 80.846326 | 81.421441 | 87.1725398 |
| 21:16:55 | 1:14:06 | 76.8813582 | 85.846326 | 81.421441 | 86.1725398 |
| 21:16:56 | 1:14:07 | 77.8813582 | 86.846326 | 81.421441 | 86.1725398 |
| 21:16:57 | 1:14:08 | 77.8813582 | 86.846326 | 80.421441 | 86.1725398 |
| 21:16:58 | 1:14:09 | 76.8813582 | 85.846326 | 80.421441 | 85.1725398 |
| 21:16:59 | 1:14:10 | 75.8813582 | 81.846326 | 81.421441 | 88.1725398 |
| 21:17:00 | 1:14:11 | 74.8813582 | 81.846326 | 81.421441 | 94.1725398 |
| 21:17:01 | 1:14:12 | 70.8813582 | 81.846326 | 81.421441 | 96.1725398 |



|          |         |            |           |           |            |
|----------|---------|------------|-----------|-----------|------------|
| 21:17:02 | 1:14:13 | 70.8813582 | 79.846326 | 81.421441 | 96.1725398 |
| 21:17:03 | 1:14:14 | 70.8813582 | 73.846326 | 82.421441 | 95.1725398 |
| 21:17:04 | 1:14:15 | 70.8813582 | 71.846326 | 83.421441 | 82.1725398 |
| 21:17:05 | 1:14:16 | 69.8813582 | 70.846326 | 84.421441 | 73.1725398 |
| 21:17:06 | 1:14:17 | 69.8813582 | 70.846326 | 84.421441 | 73.1725398 |
| 21:17:07 | 1:14:18 | 68.8813582 | 70.846326 | 86.421441 | 64.1725398 |
| 21:17:08 | 1:14:19 | 68.8813582 | 73.846326 | 85.421441 | 64.1725398 |
| 21:17:09 | 1:14:20 | 68.8813582 | 73.846326 | 85.421441 | 64.1725398 |
| 21:17:10 | 1:14:21 | 68.8813582 | 74.846326 | 85.421441 | 64.1725398 |
| 21:17:11 | 1:14:22 | 67.8813582 | 75.846326 | 86.421441 | 68.1725398 |
| 21:17:12 | 1:14:23 | 67.8813582 | 76.846326 | 86.421441 | 71.1725398 |
| 21:17:13 | 1:14:24 | 67.8813582 | 76.846326 | 87.421441 | 74.1725398 |
| 21:17:14 | 1:14:25 | 66.8813582 | 77.846326 | 87.421441 | 75.1725398 |
| 21:17:15 | 1:14:26 | 68.8813582 | 77.846326 | 87.421441 | 75.1725398 |
| 21:17:16 | 1:14:27 | 70.8813582 | 78.846326 | 88.421441 | 74.1725398 |
| 21:17:17 | 1:14:28 | 70.8813582 | 78.846326 | 89.421441 | 72.1725398 |
| 21:17:18 | 1:14:29 | 68.8813582 | 75.846326 | 90.421441 | 70.1725398 |
| 21:17:19 | 1:14:30 | 67.8813582 | 71.846326 | 90.421441 | 70.1725398 |
| 21:17:20 | 1:14:31 | 67.8813582 | 69.846326 | 91.421441 | 71.1725398 |
| 21:17:21 | 1:14:32 | 66.8813582 | 68.846326 | 91.421441 | 71.1725398 |
| 21:17:22 | 1:14:33 | 66.8813582 | 68.846326 | 91.421441 | 72.1725398 |
| 21:17:23 | 1:14:34 | 66.8813582 | 72.846326 | 92.421441 | 73.1725398 |
| 21:17:24 | 1:14:35 | 65.8813582 | 72.846326 | 92.421441 | 74.1725398 |
| 21:17:25 | 1:14:36 | 65.8813582 | 75.846326 | 92.421441 | 75.1725398 |
| 21:17:26 | 1:14:37 | 66.8813582 | 75.846326 | 92.421441 | 76.1725398 |
| 21:17:27 | 1:14:38 | 68.8813582 | 75.846326 | 91.421441 | 77.1725398 |
| 21:17:28 | 1:14:39 | 70.8813582 | 69.846326 | 91.421441 | 79.1725398 |
| 21:17:29 | 1:14:40 | 70.8813582 | 65.846326 | 91.421441 | 80.1725398 |
| 21:17:30 | 1:14:41 | 70.8813582 | 64.846326 | 89.421441 | 80.1725398 |
| 21:17:31 | 1:14:42 | 68.8813582 | 64.846326 | 89.421441 | 81.1725398 |
| 21:17:32 | 1:14:43 | 67.8813582 | 66.846326 | 89.421441 | 81.1725398 |
| 21:17:33 | 1:14:44 | 66.8813582 | 68.846326 | 89.421441 | 81.1725398 |
| 21:17:34 | 1:14:45 | 66.8813582 | 70.846326 | 88.421441 | 81.1725398 |
| 21:17:35 | 1:14:46 | 66.8813582 | 70.846326 | 86.421441 | 81.1725398 |
| 21:17:36 | 1:14:47 | 66.8813582 | 70.846326 | 82.421441 | 81.1725398 |
| 21:17:37 | 1:14:48 | 65.8813582 | 70.846326 | 80.421441 | 82.1725398 |
| 21:17:38 | 1:14:49 | 65.8813582 | 72.846326 | 80.421441 | 90.1725398 |
| 21:17:39 | 1:14:50 | 66.8813582 | 72.846326 | 79.421441 | 91.1725398 |
| 21:17:40 | 1:14:51 | 66.8813582 | 71.846326 | 79.421441 | 91.1725398 |
| 21:17:41 | 1:14:52 | 66.8813582 | 71.846326 | 79.421441 | 91.1725398 |
| 21:17:42 | 1:14:53 | 65.8813582 | 71.846326 | 79.421441 | 91.1725398 |
| 21:17:43 | 1:14:54 | 64.8813582 | 69.846326 | 79.421441 | 91.1725398 |
| 21:17:44 | 1:14:55 | 64.8813582 | 68.846326 | 78.421441 | 91.1725398 |
| 21:17:45 | 1:14:56 | 64.8813582 | 68.846326 | 77.421441 | 92.1725398 |
| 21:17:46 | 1:14:57 | 64.8813582 | 68.846326 | 77.421441 | 92.1725398 |

|          |         |            |           |            |            |
|----------|---------|------------|-----------|------------|------------|
| 21:17:47 | 1:14:58 | 64.8813582 | 68.846326 | 76.421441  | 92.1725398 |
| 21:17:48 | 1:14:59 | 64.8813582 | 74.846326 | 76.421441  | 92.1725398 |
| 21:17:49 | 1:15:00 | 64.8813582 | 74.846326 | 76.421441  | 92.1725398 |
| 21:17:50 | 1:15:01 | 64.8813582 | 68.846326 | 76.421441  | 92.1725398 |
| 21:17:51 | 1:15:02 | 65.8813582 | 68.846326 | 78.421441  | 90.1725398 |
| 21:17:52 | 1:15:03 | 65.8813582 | 63.846326 | 78.421441  | 87.1725398 |
| 21:17:53 | 1:15:04 | 67.8813582 | 62.846326 | 78.421441  | 87.1725398 |
| 21:17:54 | 1:15:05 | 67.8813582 | 62.846326 | 78.421441  | 87.1725398 |
| 21:17:55 | 1:15:06 | 67.8813582 | 63.846326 | 80.421441  | 85.1725398 |
| 21:17:56 | 1:15:07 | 66.8813582 | 63.846326 | 82.421441  | 85.1725398 |
| 21:17:57 | 1:15:08 | 66.8813582 | 63.846326 | 82.421441  | 87.1725398 |
| 21:17:58 | 1:15:09 | 67.8813582 | 69.846326 | 82.421441  | 88.1725398 |
| 21:17:59 | 1:15:10 | 67.8813582 | 68.846326 | 83.421441  | 88.1725398 |
| 21:18:00 | 1:15:11 | 67.8813582 | 68.846326 | 83.421441  | 88.1725398 |
| 21:18:01 | 1:15:12 | 73.8813582 | 68.846326 | 83.421441  | 88.1725398 |
| 21:18:02 | 1:15:13 | 73.8813582 | 66.846326 | 84.421441  | 88.1725398 |
| 21:18:03 | 1:15:14 | 73.8813582 | 64.846326 | 85.421441  | 88.1725398 |
| 21:18:04 | 1:15:15 | 73.8813582 | 64.846326 | 88.421441  | 88.1725398 |
| 21:18:05 | 1:15:16 | 73.8813582 | 64.846326 | 89.421441  | 87.1725398 |
| 21:18:06 | 1:15:17 | 72.8813582 | 64.846326 | 89.421441  | 87.1725398 |
| 21:18:07 | 1:15:18 | 72.8813582 | 65.846326 | 92.421441  | 86.1725398 |
| 21:18:08 | 1:15:19 | 72.8813582 | 66.846326 | 93.421441  | 83.1725398 |
| 21:18:09 | 1:15:20 | 72.8813582 | 66.846326 | 93.421441  | 83.1725398 |
| 21:18:10 | 1:15:21 | 71.8813582 | 69.846326 | 93.421441  | 75.1725398 |
| 21:18:11 | 1:15:22 | 70.8813582 | 71.846326 | 95.421441  | 67.1725398 |
| 21:18:12 | 1:15:23 | 69.8813582 | 73.846326 | 95.421441  | 67.1725398 |
| 21:18:13 | 1:15:24 | 68.8813582 | 73.846326 | 95.421441  | 65.1725398 |
| 21:18:14 | 1:15:25 | 67.8813582 | 72.846326 | 98.421441  | 64.1725398 |
| 21:18:15 | 1:15:26 | 66.8813582 | 69.846326 | 98.421441  | 64.1725398 |
| 21:18:16 | 1:15:27 | 65.8813582 | 67.846326 | 74.2953836 | 64.1725398 |
| 21:18:17 | 1:15:28 | 65.8813582 | 67.846326 | 74.2953836 | 64.1725398 |
| 21:18:18 | 1:15:29 | 65.8813582 | 67.846326 | 74.4953836 | 64.1725398 |
| 21:18:19 | 1:15:30 | 65.8813582 | 67.846326 | 74.4953836 | 64.1725398 |
| 21:18:20 | 1:15:31 | 65.8813582 | 67.846326 | 74.4953836 | 64.1725398 |
| 21:18:21 | 1:15:32 | 64.8813582 | 67.846326 | 93.421441  | 69.1725398 |
| 21:18:22 | 1:15:33 | 64.8813582 | 67.846326 | 93.421441  | 74.1725398 |
| 21:18:23 | 1:15:34 | 64.8813582 | 66.846326 | 89.421441  | 74.1725398 |
| 21:18:24 | 1:15:35 | 63.8813582 | 66.846326 | 89.421441  | 80.1725398 |
| 21:18:25 | 1:15:36 | 63.8813582 | 64.846326 | 89.421441  | 80.1725398 |
| 21:18:26 | 1:15:37 | 63.8813582 | 63.846326 | 89.421441  | 80.1725398 |
| 21:18:27 | 1:15:38 | 63.8813582 | 63.846326 | 89.421441  | 80.1725398 |
| 21:18:28 | 1:15:39 | 63.8813582 | 63.846326 | 88.421441  | 79.1725398 |
| 21:18:29 | 1:15:40 | 63.8813582 | 63.846326 | 87.421441  | 78.1725398 |
| 21:18:30 | 1:15:41 | 63.8813582 | 63.846326 | 87.421441  | 78.1725398 |
| 21:18:31 | 1:15:42 | 64.8813582 | 65.846326 | 86.421441  | 87.1725398 |

|          |         |            |           |           |            |
|----------|---------|------------|-----------|-----------|------------|
| 21:18:32 | 1:15:43 | 65.8813582 | 66.846326 | 85.421441 | 87.1725398 |
| 21:18:33 | 1:15:44 | 66.8813582 | 65.846326 | 84.421441 | 87.1725398 |
| 21:18:34 | 1:15:45 | 66.8813582 | 65.846326 | 84.421441 | 76.1725398 |
| 21:18:35 | 1:15:46 | 68.8813582 | 64.846326 | 83.421441 | 75.1725398 |
| 21:18:36 | 1:15:47 | 69.8813582 | 62.846326 | 82.421441 | 75.1725398 |
| 21:18:37 | 1:15:48 | 70.8813582 | 61.846326 | 82.421441 | 73.1725398 |
| 21:18:38 | 1:15:49 | 70.8813582 | 61.846326 | 82.421441 | 73.1725398 |
| 21:18:39 | 1:15:50 | 70.8813582 | 62.846326 | 82.421441 | 72.1725398 |
| 21:18:40 | 1:15:51 | 69.8813582 | 64.846326 | 82.421441 | 71.1725398 |
| 21:18:41 | 1:15:52 | 68.8813582 | 64.846326 | 81.421441 | 71.1725398 |
| 21:18:42 | 1:15:53 | 68.8813582 | 66.846326 | 81.421441 | 71.1725398 |
| 21:18:43 | 1:15:54 | 66.8813582 | 66.846326 | 79.421441 | 68.1725398 |
| 21:18:44 | 1:15:55 | 65.8813582 | 68.846326 | 78.421441 | 68.1725398 |
| 21:18:45 | 1:15:56 | 65.8813582 | 68.846326 | 78.421441 | 68.1725398 |
| 21:18:46 | 1:15:57 | 64.8813582 | 69.846326 | 78.421441 | 67.1725398 |
| 21:18:47 | 1:15:58 | 64.8813582 | 67.846326 | 78.421441 | 67.1725398 |
| 21:18:48 | 1:15:59 | 64.8813582 | 65.846326 | 78.421441 | 67.1725398 |
| 21:18:49 | 1:16:00 | 64.8813582 | 65.846326 | 79.421441 | 67.1725398 |
| 21:18:50 | 1:16:01 | 64.8813582 | 62.846326 | 79.421441 | 68.1725398 |
| 21:18:51 | 1:16:02 | 64.8813582 | 62.846326 | 79.421441 | 68.1725398 |
| 21:18:52 | 1:16:03 | 65.8813582 | 62.846326 | 79.421441 | 68.1725398 |
| 21:18:53 | 1:16:04 | 65.8813582 | 62.846326 | 80.421441 | 68.1725398 |
| 21:18:54 | 1:16:05 | 65.8813582 | 62.846326 | 80.421441 | 68.1725398 |
| 21:18:55 | 1:16:06 | 64.8813582 | 64.846326 | 80.421441 | 68.1725398 |
| 21:18:56 | 1:16:07 | 64.8813582 | 63.846326 | 80.421441 | 69.1725398 |
| 21:18:57 | 1:16:08 | 64.8813582 | 63.846326 | 81.421441 | 69.1725398 |
| 21:18:58 | 1:16:09 | 63.8813582 | 62.846326 | 81.421441 | 69.1725398 |
| 21:18:59 | 1:16:10 | 63.8813582 | 61.846326 | 81.421441 | 70.1725398 |
| 21:19:00 | 1:16:11 | 63.8813582 | 61.846326 | 81.421441 | 78.1725398 |
| 21:19:01 | 1:16:12 | 62.8813582 | 61.846326 | 82.421441 | 78.1725398 |
| 21:19:02 | 1:16:13 | 62.8813582 | 62.846326 | 83.421441 | 78.1725398 |
| 21:19:03 | 1:16:14 | 62.8813582 | 61.846326 | 82.421441 | 76.1725398 |
| 21:19:04 | 1:16:15 | 63.8813582 | 61.846326 | 81.421441 | 75.1725398 |
| 21:19:05 | 1:16:16 | 64.8813582 | 61.846326 | 81.421441 | 75.1725398 |
| 21:19:06 | 1:16:17 | 64.8813582 | 60.846326 | 81.421441 | 75.1725398 |
| 21:19:07 | 1:16:18 | 64.8813582 | 59.846326 | 79.421441 | 75.1725398 |
| 21:19:08 | 1:16:19 | 64.8813582 | 59.846326 | 79.421441 | 75.1725398 |
| 21:19:09 | 1:16:20 | 64.8813582 | 60.846326 | 79.421441 | 76.1725398 |
| 21:19:10 | 1:16:21 | 64.8813582 | 61.846326 | 79.421441 | 76.1725398 |
| 21:19:11 | 1:16:22 | 63.8813582 | 62.846326 | 79.421441 | 75.1725398 |
| 21:19:12 | 1:16:23 | 63.8813582 | 63.846326 | 82.421441 | 75.1725398 |
| 21:19:13 | 1:16:24 | 64.8813582 | 63.846326 | 83.421441 | 69.1725398 |
| 21:19:14 | 1:16:25 | 64.8813582 | 63.846326 | 84.421441 | 66.1725398 |
| 21:19:15 | 1:16:26 | 64.8813582 | 62.846326 | 82.421441 | 67.1725398 |
| 21:19:16 | 1:16:27 | 64.8813582 | 62.846326 | 81.421441 | 68.1725398 |

|          |         |            |           |           |            |
|----------|---------|------------|-----------|-----------|------------|
| 21:19:17 | 1:16:28 | 64.8813582 | 62.846326 | 81.421441 | 68.1725398 |
| 21:19:18 | 1:16:29 | 64.8813582 | 62.846326 | 81.421441 | 68.1725398 |
| 21:19:19 | 1:16:30 | 64.8813582 | 62.846326 | 81.421441 | 68.1725398 |
| 21:19:20 | 1:16:31 | 63.8813582 | 62.846326 | 81.421441 | 69.1725398 |
| 21:19:21 | 1:16:32 | 63.8813582 | 63.846326 | 81.421441 | 69.1725398 |
| 21:19:22 | 1:16:33 | 63.8813582 | 64.846326 | 80.421441 | 69.1725398 |
| 21:19:23 | 1:16:34 | 63.8813582 | 64.846326 | 80.421441 | 69.1725398 |
| 21:19:24 | 1:16:35 | 63.8813582 | 64.846326 | 80.421441 | 69.1725398 |
| 21:19:25 | 1:16:36 | 63.8813582 | 63.846326 | 80.421441 | 69.1725398 |
| 21:19:26 | 1:16:37 | 64.8813582 | 63.846326 | 80.421441 | 69.1725398 |
| 21:19:27 | 1:16:38 | 64.8813582 | 63.846326 | 80.421441 | 69.1725398 |
| 21:19:28 | 1:16:39 | 64.8813582 | 63.846326 | 77.421441 | 69.1725398 |
| 21:19:29 | 1:16:40 | 64.8813582 | 63.846326 | 77.421441 | 68.1725398 |
| 21:19:30 | 1:16:41 | 64.8813582 | 63.846326 | 78.421441 | 68.1725398 |
| 21:19:31 | 1:16:42 | 63.8813582 | 64.846326 | 78.421441 | 67.1725398 |
| 21:19:32 | 1:16:43 | 63.8813582 | 63.846326 | 79.421441 | 66.1725398 |
| 21:19:33 | 1:16:44 | 63.8813582 | 63.846326 | 78.421441 | 66.1725398 |
| 21:19:34 | 1:16:45 | 63.8813582 | 62.846326 | 78.421441 | 66.1725398 |
| 21:19:35 | 1:16:46 | 63.8813582 | 62.846326 | 77.421441 | 66.1725398 |
| 21:19:36 | 1:16:47 | 63.8813582 | 61.846326 | 78.421441 | 68.1725398 |
| 21:19:37 | 1:16:48 | 63.8813582 | 61.846326 | 78.421441 | 68.1725398 |
| 21:19:38 | 1:16:49 | 64.8813582 | 61.846326 | 78.421441 | 69.1725398 |
| 21:19:39 | 1:16:50 | 64.8813582 | 62.846326 | 78.421441 | 69.1725398 |
| 21:19:40 | 1:16:51 | 65.8813582 | 62.846326 | 78.421441 | 68.1725398 |
| 21:19:41 | 1:16:52 | 65.8813582 | 62.846326 | 81.421441 | 67.1725398 |
| 21:19:42 | 1:16:53 | 65.8813582 | 62.846326 | 82.421441 | 66.1725398 |
| 21:19:43 | 1:16:54 | 65.8813582 | 62.846326 | 81.421441 | 66.1725398 |
| 21:19:44 | 1:16:55 | 65.8813582 | 62.846326 | 81.421441 | 66.1725398 |
| 21:19:45 | 1:16:56 | 64.8813582 | 61.846326 | 79.421441 | 66.1725398 |
| 21:19:46 | 1:16:57 | 64.8813582 | 61.846326 | 78.421441 | 68.1725398 |
| 21:19:47 | 1:16:58 | 64.8813582 | 61.846326 | 77.421441 | 69.1725398 |
| 21:19:48 | 1:16:59 | 64.8813582 | 61.846326 | 77.421441 | 69.1725398 |
| 21:19:49 | 1:17:00 | 64.8813582 | 61.846326 | 80.421441 | 71.1725398 |
| 21:19:50 | 1:17:01 | 64.8813582 | 61.846326 | 81.421441 | 71.1725398 |
| 21:19:51 | 1:17:02 | 64.8813582 | 60.846326 | 81.421441 | 71.1725398 |
| 21:19:52 | 1:17:03 | 64.8813582 | 61.846326 | 81.421441 | 71.1725398 |
| 21:19:53 | 1:17:04 | 63.8813582 | 61.846326 | 80.421441 | 71.1725398 |
| 21:19:54 | 1:17:05 | 62.8813582 | 61.846326 | 80.421441 | 70.1725398 |
| 21:19:55 | 1:17:06 | 63.8813582 | 62.846326 | 80.421441 | 71.1725398 |
| 21:19:56 | 1:17:07 | 63.8813582 | 62.846326 | 80.421441 | 73.1725398 |
| 21:19:57 | 1:17:08 | 63.8813582 | 62.846326 | 83.421441 | 75.1725398 |
| 21:19:58 | 1:17:09 | 64.8813582 | 62.846326 | 83.421441 | 75.1725398 |
| 21:19:59 | 1:17:10 | 64.8813582 | 62.846326 | 83.421441 | 73.1725398 |
| 21:20:00 | 1:17:11 | 64.8813582 | 63.846326 | 81.421441 | 70.1725398 |
| 21:20:01 | 1:17:12 | 65.8813582 | 63.846326 | 79.421441 | 68.1725398 |

|          |         |            |           |           |            |
|----------|---------|------------|-----------|-----------|------------|
| 21:20:02 | 1:17:13 | 65.8813582 | 63.846326 | 79.421441 | 69.1725398 |
| 21:20:03 | 1:17:14 | 66.8813582 | 63.846326 | 79.421441 | 69.1725398 |
| 21:20:04 | 1:17:15 | 67.8813582 | 65.846326 | 79.421441 | 70.1725398 |
| 21:20:05 | 1:17:16 | 67.8813582 | 67.846326 | 79.421441 | 70.1725398 |
| 21:20:06 | 1:17:17 | 67.8813582 | 68.846326 | 78.421441 | 70.1725398 |
| 21:20:07 | 1:17:18 | 67.8813582 | 68.846326 | 78.421441 | 67.1725398 |
| 21:20:08 | 1:17:19 | 67.8813582 | 68.846326 | 77.421441 | 64.1725398 |
| 21:20:09 | 1:17:20 | 67.8813582 | 68.846326 | 75.421441 | 63.1725398 |
| 21:20:10 | 1:17:21 | 66.8813582 | 68.846326 | 75.421441 | 63.1725398 |
| 21:20:11 | 1:17:22 | 65.8813582 | 68.846326 | 75.421441 | 63.1725398 |
| 21:20:12 | 1:17:23 | 65.8813582 | 68.846326 | 72.421441 | 63.1725398 |
| 21:20:13 | 1:17:24 | 65.8813582 | 68.846326 | 70.421441 | 63.1725398 |
| 21:20:14 | 1:17:25 | 65.8813582 | 67.846326 | 69.421441 | 63.1725398 |
| 21:20:15 | 1:17:26 | 65.8813582 | 67.846326 | 65.421441 | 64.1725398 |
| 21:20:16 | 1:17:27 | 65.8813582 | 67.846326 | 64.421441 | 65.1725398 |
| 21:20:17 | 1:17:28 | 65.8813582 | 67.846326 | 63.421441 | 65.1725398 |
| 21:20:18 | 1:17:29 | 63.8813582 | 67.846326 | 62.421441 | 66.1725398 |
| 21:20:19 | 1:17:30 | 62.8813582 | 67.846326 | 62.421441 | 66.1725398 |
| 21:20:20 | 1:17:31 | 63.8813582 | 67.846326 | 61.421441 | 65.1725398 |
| 21:20:21 | 1:17:32 | 64.8813582 | 67.846326 | 59.421441 | 66.1725398 |
| 21:20:22 | 1:17:33 | 64.8813582 | 67.846326 | 60.421441 | 67.1725398 |
| 21:20:23 | 1:17:34 | 64.8813582 | 68.846326 | 60.421441 | 67.1725398 |
| 21:20:24 | 1:17:35 | 63.8813582 | 68.846326 | 61.421441 | 69.1725398 |
| 21:20:25 | 1:17:36 | 63.8813582 | 67.846326 | 61.421441 | 73.1725398 |
| 21:20:26 | 1:17:37 | 63.8813582 | 68.846326 | 60.421441 | 73.1725398 |
| 21:20:27 | 1:17:38 | 64.8813582 | 67.846326 | 60.421441 | 74.1725398 |
| 21:20:28 | 1:17:39 | 64.8813582 | 65.846326 | 60.421441 | 74.1725398 |
| 21:20:29 | 1:17:40 | 64.8813582 | 61.846326 | 60.421441 | 74.1725398 |
| 21:20:30 | 1:17:41 | 64.8813582 | 61.846326 | 60.421441 | 77.1725398 |
| 21:20:31 | 1:17:42 | 64.8813582 | 60.846326 | 59.421441 | 79.1725398 |
| 21:20:32 | 1:17:43 | 64.8813582 | 60.846326 | 59.421441 | 80.1725398 |
| 21:20:33 | 1:17:44 | 64.8813582 | 59.846326 | 57.421441 | 80.1725398 |
| 21:20:34 | 1:17:45 | 65.8813582 | 59.846326 | 42.421441 | 80.1725398 |
| 21:20:35 | 1:17:46 | 66.8813582 | 59.846326 | 42.421441 | 69.1725398 |
| 21:20:36 | 1:17:47 | 66.8813582 | 60.846326 | 63.421441 | 64.1725398 |
| 21:20:37 | 1:17:48 | 66.8813582 | 60.846326 | 66.421441 | 64.1725398 |
| 21:20:38 | 1:17:49 | 67.8813582 | 61.846326 | 68.421441 | 61.1725398 |
| 21:20:39 | 1:17:50 | 68.8813582 | 62.846326 | 70.421441 | 61.1725398 |
| 21:20:40 | 1:17:51 | 68.8813582 | 63.846326 | 70.421441 | 61.1725398 |
| 21:20:41 | 1:17:52 | 68.8813582 | 64.846326 | 70.421441 | 62.1725398 |
| 21:20:42 | 1:17:53 | 68.8813582 | 64.846326 | 70.421441 | 62.1725398 |
| 21:20:43 | 1:17:54 | 68.8813582 | 65.846326 | 70.421441 | 62.1725398 |
| 21:20:44 | 1:17:55 | 68.8813582 | 69.846326 | 70.421441 | 62.1725398 |
| 21:20:45 | 1:17:56 | 67.8813582 | 69.846326 | 70.421441 | 62.1725398 |
| 21:20:46 | 1:17:57 | 68.8813582 | 70.846326 | 70.421441 | 62.1725398 |

|          |         |            |            |           |            |
|----------|---------|------------|------------|-----------|------------|
| 21:20:47 | 1:17:58 | 68.8813582 | 70.846326  | 70.421441 | 62.1725398 |
| 21:20:48 | 1:17:59 | 69.8813582 | 70.846326  | 71.421441 | 62.1725398 |
| 21:20:49 | 1:18:00 | 69.8813582 | 74.846326  | 71.421441 | 65.1725398 |
| 21:20:50 | 1:18:01 | 70.8813582 | 74.846326  | 71.421441 | 64.1725398 |
| 21:20:51 | 1:18:02 | 70.8813582 | 86.846326  | 71.421441 | 64.1725398 |
| 21:20:52 | 1:18:03 | 71.8813582 | 92.846326  | 71.421441 | 63.1725398 |
| 21:20:53 | 1:18:04 | 72.8813582 | 94.846326  | 71.421441 | 63.1725398 |
| 21:20:54 | 1:18:05 | 73.8813582 | 96.846326  | 71.421441 | 64.1725398 |
| 21:20:55 | 1:18:06 | 69.8813582 | 96.846326  | 71.421441 | 64.1725398 |
| 21:20:56 | 1:18:07 | 67.8813582 | 96.846326  | 71.421441 | 65.1725398 |
| 21:20:57 | 1:18:08 | 66.8813582 | 96.846326  | 70.421441 | 65.1725398 |
| 21:20:58 | 1:18:09 | 66.8813582 | 94.846326  | 70.421441 | 64.1725398 |
| 21:20:59 | 1:18:10 | 66.8813582 | 94.846326  | 71.421441 | 64.1725398 |
| 21:21:00 | 1:18:11 | 66.8813582 | 94.846326  | 71.421441 | 63.1725398 |
| 21:21:01 | 1:18:12 | 66.8813582 | 93.846326  | 71.421441 | 63.1725398 |
| 21:21:02 | 1:18:13 | 66.8813582 | 93.846326  | 71.421441 | 63.1725398 |
| 21:21:03 | 1:18:14 | 66.8813582 | 82.846326  | 71.421441 | 64.1725398 |
| 21:21:04 | 1:18:15 | 67.8813582 | 86.846326  | 71.421441 | 67.1725398 |
| 21:21:05 | 1:18:16 | 67.8813582 | 86.846326  | 71.421441 | 67.1725398 |
| 21:21:06 | 1:18:17 | 67.8813582 | 87.846326  | 71.421441 | 67.1725398 |
| 21:21:07 | 1:18:18 | 66.8813582 | 86.846326  | 71.421441 | 67.1725398 |
| 21:21:08 | 1:18:19 | 66.8813582 | 84.846326  | 76.421441 | 66.1725398 |
| 21:21:09 | 1:18:20 | 67.8813582 | 82.846326  | 79.421441 | 66.1725398 |
| 21:21:10 | 1:18:21 | 68.8813582 | 79.846326  | 79.421441 | 65.1725398 |
| 21:21:11 | 1:18:22 | 70.8813582 | 79.846326  | 81.421441 | 65.1725398 |
| 21:21:12 | 1:18:23 | 70.8813582 | 75.846326  | 82.421441 | 65.1725398 |
| 21:21:13 | 1:18:24 | 72.8813582 | 73.846326  | 80.421441 | 65.1725398 |
| 21:21:14 | 1:18:25 | 72.8813582 | 75.846326  | 80.421441 | 65.1725398 |
| 21:21:15 | 1:18:26 | 72.8813582 | 85.846326  | 80.421441 | 65.1725398 |
| 21:21:16 | 1:18:27 | 72.8813582 | 85.846326  | 80.421441 | 64.1725398 |
| 21:21:17 | 1:18:28 | 73.8813582 | 89.846326  | 80.421441 | 64.1725398 |
| 21:21:18 | 1:18:29 | 73.8813582 | 89.846326  | 80.421441 | 64.1725398 |
| 21:21:19 | 1:18:30 | 73.8813582 | 96.846326  | 75.421441 | 64.1725398 |
| 21:21:20 | 1:18:31 | 73.8813582 | 96.846326  | 74.421441 | 64.1725398 |
| 21:21:21 | 1:18:32 | 70.8813582 | 77.4953836 | 70.421441 | 64.1725398 |
| 21:21:22 | 1:18:33 | 69.8813582 | 79.2953836 | 70.421441 | 65.1725398 |
| 21:21:23 | 1:18:34 | 69.8813582 | 79.4953836 | 70.421441 | 65.1725398 |
| 21:21:24 | 1:18:35 | 70.8813582 | 79.4953836 | 69.421441 | 65.1725398 |
| 21:21:25 | 1:18:36 | 71.8813582 | 78.6953836 | 64.421441 | 65.1725398 |
| 21:21:26 | 1:18:37 | 71.8813582 | 77.8953836 | 60.421441 | 65.1725398 |
| 21:21:27 | 1:18:38 | 71.8813582 | 77.8953836 | 60.421441 | 65.1725398 |
| 21:21:28 | 1:18:39 | 71.8813582 | 78.4953836 | 58.421441 | 67.1725398 |
| 21:21:29 | 1:18:40 | 70.8813582 | 79.2953836 | 58.421441 | 69.1725398 |
| 21:21:30 | 1:18:41 | 70.8813582 | 79.2953836 | 58.421441 | 69.1725398 |
| 21:21:31 | 1:18:42 | 70.8813582 | 77.8953836 | 59.421441 | 65.1725398 |

|          |         |            |            |           |            |
|----------|---------|------------|------------|-----------|------------|
| 21:21:32 | 1:18:43 | 69.8813582 | 80.6953836 | 74.421441 | 65.1725398 |
| 21:21:33 | 1:18:44 | 68.8813582 | 80.4953836 | 77.421441 | 63.1725398 |
| 21:21:34 | 1:18:45 | 66.8813582 | 79.4953836 | 76.421441 | 62.1725398 |
| 21:21:35 | 1:18:46 | 65.8813582 | 79.8953836 | 76.421441 | 63.1725398 |
| 21:21:36 | 1:18:47 | 65.8813582 | 79.8953836 | 76.421441 | 63.1725398 |
| 21:21:37 | 1:18:48 | 65.8813582 | 80.6953836 | 76.421441 | 65.1725398 |
| 21:21:38 | 1:18:49 | 65.8813582 | 80.8953836 | 77.421441 | 65.1725398 |
| 21:21:39 | 1:18:50 | 65.8813582 | 81.8953836 | 78.421441 | 67.1725398 |
| 21:21:40 | 1:18:51 | 65.8813582 | 99.846326  | 78.421441 | 69.1725398 |
| 21:21:41 | 1:18:52 | 66.8813582 | 99.846326  | 78.421441 | 71.1725398 |
| 21:21:42 | 1:18:53 | 66.8813582 | 99.846326  | 78.421441 | 71.1725398 |
| 21:21:43 | 1:18:54 | 66.8813582 | 75.846326  | 78.421441 | 72.1725398 |
| 21:21:44 | 1:18:55 | 66.8813582 | 69.846326  | 78.421441 | 72.1725398 |
| 21:21:45 | 1:18:56 | 66.8813582 | 67.846326  | 77.421441 | 73.1725398 |
| 21:21:46 | 1:18:57 | 66.8813582 | 67.846326  | 77.421441 | 75.1725398 |
| 21:21:47 | 1:18:58 | 66.8813582 | 66.846326  | 77.421441 | 76.1725398 |
| 21:21:48 | 1:18:59 | 65.8813582 | 66.846326  | 76.421441 | 77.1725398 |
| 21:21:49 | 1:19:00 | 65.8813582 | 66.846326  | 76.421441 | 79.1725398 |
| 21:21:50 | 1:19:01 | 64.8813582 | 64.846326  | 76.421441 | 81.1725398 |
| 21:21:51 | 1:19:02 | 64.8813582 | 62.846326  | 77.421441 | 81.1725398 |
| 21:21:52 | 1:19:03 | 64.8813582 | 60.846326  | 78.421441 | 88.1725398 |
| 21:21:53 | 1:19:04 | 64.8813582 | 60.846326  | 78.421441 | 88.1725398 |
| 21:21:54 | 1:19:05 | 64.8813582 | 56.846326  | 78.421441 | 88.1725398 |
| 21:21:55 | 1:19:06 | 64.8813582 | 58.846326  | 78.421441 | 89.1725398 |
| 21:21:56 | 1:19:07 | 63.8813582 | 58.846326  | 78.421441 | 89.1725398 |
| 21:21:57 | 1:19:08 | 63.8813582 | 61.846326  | 78.421441 | 90.1725398 |
| 21:21:58 | 1:19:09 | 63.8813582 | 61.846326  | 78.421441 | 90.1725398 |
| 21:21:59 | 1:19:10 | 62.8813582 | 61.846326  | 78.421441 | 90.1725398 |
| 21:22:00 | 1:19:11 | 63.8813582 | 61.846326  | 78.421441 | 89.1725398 |
| 21:22:01 | 1:19:12 | 63.8813582 | 59.846326  | 77.421441 | 87.1725398 |
| 21:22:02 | 1:19:13 | 63.8813582 | 58.846326  | 73.421441 | 84.1725398 |
| 21:22:03 | 1:19:14 | 63.8813582 | 58.846326  | 72.421441 | 82.1725398 |
| 21:22:04 | 1:19:15 | 63.8813582 | 58.846326  | 72.421441 | 80.1725398 |
| 21:22:05 | 1:19:16 | 63.8813582 | 58.846326  | 71.421441 | 78.1725398 |
| 21:22:06 | 1:19:17 | 63.8813582 | 58.846326  | 72.421441 | 77.1725398 |
| 21:22:07 | 1:19:18 | 63.8813582 | 58.846326  | 71.421441 | 76.1725398 |
| 21:22:08 | 1:19:19 | 63.8813582 | 58.846326  | 71.421441 | 76.1725398 |
| 21:22:09 | 1:19:20 | 63.8813582 | 58.846326  | 70.421441 | 76.1725398 |
| 21:22:10 | 1:19:21 | 62.8813582 | 58.846326  | 68.421441 | 77.1725398 |
| 21:22:11 | 1:19:22 | 62.8813582 | 58.846326  | 67.421441 | 77.1725398 |
| 21:22:12 | 1:19:23 | 62.8813582 | 59.846326  | 67.421441 | 73.1725398 |
| 21:22:13 | 1:19:24 | 63.8813582 | 60.846326  | 68.421441 | 70.1725398 |
| 21:22:14 | 1:19:25 | 63.8813582 | 61.846326  | 68.421441 | 69.1725398 |
| 21:22:15 | 1:19:26 | 63.8813582 | 61.846326  | 67.421441 | 69.1725398 |
| 21:22:16 | 1:19:27 | 62.8813582 | 61.846326  | 67.421441 | 69.1725398 |

|          |         |            |           |            |            |
|----------|---------|------------|-----------|------------|------------|
| 21:22:17 | 1:19:28 | 62.8813582 | 61.846326 | 67.421441  | 70.1725398 |
| 21:22:18 | 1:19:29 | 62.8813582 | 61.846326 | 67.421441  | 72.1725398 |
| 21:22:19 | 1:19:30 | 62.8813582 | 61.846326 | 67.421441  | 72.1725398 |
| 21:22:20 | 1:19:31 | 62.8813582 | 61.846326 | 68.421441  | 70.1725398 |
| 21:22:21 | 1:19:32 | 62.8813582 | 61.846326 | 68.421441  | 67.1725398 |
| 21:22:22 | 1:19:33 | 62.8813582 | 61.846326 | 69.421441  | 67.1725398 |
| 21:22:23 | 1:19:34 | 62.8813582 | 61.846326 | 69.421441  | 65.1725398 |
| 21:22:24 | 1:19:35 | 62.8813582 | 61.846326 | 69.421441  | 65.1725398 |
| 21:22:25 | 1:19:36 | 62.8813582 | 61.846326 | 69.421441  | 65.1725398 |
| 21:22:26 | 1:19:37 | 62.8813582 | 61.846326 | 70.421441  | 65.1725398 |
| 21:22:27 | 1:19:38 | 62.8813582 | 60.846326 | 70.421441  | 65.1725398 |
| 21:22:28 | 1:19:39 | 62.8813582 | 60.846326 | 72.421441  | 69.1725398 |
| 21:22:29 | 1:19:40 | 62.8813582 | 60.846326 | 96.421441  | 70.1725398 |
| 21:22:30 | 1:19:41 | 62.8813582 | 60.846326 | 96.421441  | 70.1725398 |
| 21:22:31 | 1:19:42 | 62.8813582 | 61.846326 | 72.4953836 | 64.1725398 |
| 21:22:32 | 1:19:43 | 62.8813582 | 61.846326 | 71.2953836 | 62.1725398 |
| 21:22:33 | 1:19:44 | 62.8813582 | 63.846326 | 94.421441  | 62.1725398 |
| 21:22:34 | 1:19:45 | 63.8813582 | 63.846326 | 82.421441  | 63.1725398 |
| 21:22:35 | 1:19:46 | 63.8813582 | 64.846326 | 82.421441  | 64.1725398 |
| 21:22:36 | 1:19:47 | 63.8813582 | 65.846326 | 80.421441  | 65.1725398 |
| 21:22:37 | 1:19:48 | 63.8813582 | 65.846326 | 78.421441  | 65.1725398 |
| 21:22:38 | 1:19:49 | 64.8813582 | 67.846326 | 78.421441  | 65.1725398 |
| 21:22:39 | 1:19:50 | 64.8813582 | 69.846326 | 80.421441  | 65.1725398 |
| 21:22:40 | 1:19:51 | 64.8813582 | 74.846326 | 82.421441  | 65.1725398 |
| 21:22:41 | 1:19:52 | 64.8813582 | 74.846326 | 82.421441  | 65.1725398 |
| 21:22:42 | 1:19:53 | 66.8813582 | 81.846326 | 82.421441  | 64.1725398 |
| 21:22:43 | 1:19:54 | 70.8813582 | 81.846326 | 82.421441  | 64.1725398 |
| 21:22:44 | 1:19:55 | 72.8813582 | 81.846326 | 82.421441  | 64.1725398 |
| 21:22:45 | 1:19:56 | 71.8813582 | 88.846326 | 81.421441  | 64.1725398 |
| 21:22:46 | 1:19:57 | 71.8813582 | 91.846326 | 81.421441  | 64.1725398 |
| 21:22:47 | 1:19:58 | 71.8813582 | 91.846326 | 81.421441  | 64.1725398 |
| 21:22:48 | 1:19:59 | 72.8813582 | 97.846326 | 81.421441  | 64.1725398 |
| 21:22:49 | 1:20:00 | 74.8813582 | 73.846326 | 81.421441  | 64.1725398 |
| 21:22:50 | 1:20:01 | 75.8813582 | 72.846326 | 81.421441  | 65.1725398 |
| 21:22:51 | 1:20:02 | 76.8813582 | 72.846326 | 81.421441  | 65.1725398 |
| 21:22:52 | 1:20:03 | 76.8813582 | 69.846326 | 81.421441  | 67.1725398 |
| 21:22:53 | 1:20:04 | 76.8813582 | 68.846326 | 81.421441  | 67.1725398 |
| 21:22:54 | 1:20:05 | 77.8813582 | 62.846326 | 81.421441  | 66.1725398 |
| 21:22:55 | 1:20:06 | 78.8813582 | 60.846326 | 80.421441  | 67.1725398 |
| 21:22:56 | 1:20:07 | 79.8813582 | 60.846326 | 80.421441  | 67.1725398 |
| 21:22:57 | 1:20:08 | 80.8813582 | 60.846326 | 80.421441  | 67.1725398 |
| 21:22:58 | 1:20:09 | 81.8813582 | 60.846326 | 79.421441  | 67.1725398 |
| 21:22:59 | 1:20:10 | 81.8813582 | 60.846326 | 79.421441  | 67.1725398 |
| 21:23:00 | 1:20:11 | 81.8813582 | 60.846326 | 79.421441  | 68.1725398 |
| 21:23:01 | 1:20:12 | 81.8813582 | 60.846326 | 79.421441  | 68.1725398 |



|          |         |            |            |            |            |
|----------|---------|------------|------------|------------|------------|
| 21:23:02 | 1:20:13 | 82.8813582 | 60.846326  | 71.421441  | 73.1725398 |
| 21:23:03 | 1:20:14 | 82.8813582 | 59.846326  | 71.421441  | 77.1725398 |
| 21:23:04 | 1:20:15 | 84.8813582 | 59.846326  | 70.421441  | 78.1725398 |
| 21:23:05 | 1:20:16 | 84.8813582 | 59.846326  | 79.421441  | 78.1725398 |
| 21:23:06 | 1:20:17 | 85.8813582 | 58.846326  | 82.421441  | 78.1725398 |
| 21:23:07 | 1:20:18 | 85.8813582 | 58.846326  | 82.421441  | 78.1725398 |
| 21:23:08 | 1:20:19 | 85.8813582 | 58.846326  | 82.421441  | 78.1725398 |
| 21:23:09 | 1:20:20 | 85.8813582 | 58.846326  | 82.421441  | 78.1725398 |
| 21:23:10 | 1:20:21 | 86.8813582 | 59.846326  | 83.421441  | 78.1725398 |
| 21:23:11 | 1:20:22 | 89.8813582 | 60.846326  | 83.421441  | 79.1725398 |
| 21:23:12 | 1:20:23 | 91.8813582 | 67.846326  | 84.421441  | 79.1725398 |
| 21:23:13 | 1:20:24 | 92.8813582 | 70.846326  | 86.421441  | 79.1725398 |
| 21:23:14 | 1:20:25 | 95.8813582 | 72.846326  | 86.421441  | 79.1725398 |
| 21:23:15 | 1:20:26 | 96.8813582 | 72.846326  | 86.421441  | 78.1725398 |
| 21:23:16 | 1:20:27 | 96.8813582 | 78.846326  | 87.421441  | 75.1725398 |
| 21:23:17 | 1:20:28 | 97.8813582 | 80.846326  | 87.421441  | 70.1725398 |
| 21:23:18 | 1:20:29 | 97.8813582 | 80.846326  | 87.421441  | 70.1725398 |
| 21:23:19 | 1:20:30 | 97.8813582 | 80.846326  | 88.421441  | 67.1725398 |
| 21:23:20 | 1:20:31 | 97.8813582 | 80.846326  | 89.421441  | 66.1725398 |
| 21:23:21 | 1:20:32 | 97.8813582 | 80.846326  | 89.421441  | 66.1725398 |
| 21:23:22 | 1:20:33 | 100.881358 | 81.846326  | 89.421441  | 66.1725398 |
| 21:23:23 | 1:20:34 | 101.881358 | 81.846326  | 89.421441  | 66.1725398 |
| 21:23:24 | 1:20:35 | 101.881358 | 81.846326  | 89.421441  | 66.1725398 |
| 21:23:25 | 1:20:36 | 100.881358 | 85.846326  | 90.421441  | 67.1725398 |
| 21:23:26 | 1:20:37 | 100.881358 | 88.846326  | 91.421441  | 67.1725398 |
| 21:23:27 | 1:20:38 | 100.881358 | 89.846326  | 92.421441  | 66.1725398 |
| 21:23:28 | 1:20:39 | 99.8813582 | 89.846326  | 92.421441  | 65.1725398 |
| 21:23:29 | 1:20:40 | 98.8813582 | 89.846326  | 95.421441  | 65.1725398 |
| 21:23:30 | 1:20:41 | 96.8813582 | 90.846326  | 96.421441  | 65.1725398 |
| 21:23:31 | 1:20:42 | 95.8813582 | 96.846326  | 96.421441  | 65.1725398 |
| 21:23:32 | 1:20:43 | 95.8813582 | 103.846326 | 99.421441  | 65.1725398 |
| 21:23:33 | 1:20:44 | 94.8813582 | 104.846326 | 99.421441  | 65.1725398 |
| 21:23:34 | 1:20:45 | 93.8813582 | 105.846326 | 99.421441  | 65.1725398 |
| 21:23:35 | 1:20:46 | 93.8813582 | 105.846326 | 99.421441  | 65.1725398 |
| 21:23:36 | 1:20:47 | 92.8813582 | 106.846326 | 99.421441  | 67.1725398 |
| 21:23:37 | 1:20:48 | 92.8813582 | 107.846326 | 99.421441  | 67.1725398 |
| 21:23:38 | 1:20:49 | 92.8813582 | 107.846326 | 98.421441  | 68.1725398 |
| 21:23:39 | 1:20:50 | 91.8813582 | 109.846326 | 100.421441 | 69.1725398 |
| 21:23:40 | 1:20:51 | 91.8813582 | 109.846326 | 100.421441 | 67.1725398 |
| 21:23:41 | 1:20:52 | 90.8813582 | 109.846326 | 104.421441 | 67.1725398 |
| 21:23:42 | 1:20:53 | 90.8813582 | 109.846326 | 105.421441 | 61.1725398 |
| 21:23:43 | 1:20:54 | 90.8813582 | 109.846326 | 106.421441 | 61.1725398 |

Person 12    Person 4

|            | behavior   | average of al | Activity   | moving average |
|------------|------------|---------------|------------|----------------|
| 77.6388103 | 98.155253  | 73            | 84.8538805 | 83.0976236     |
| 77.6388103 | 98.155253  | 73            | 84.8538805 | 83.9459254     |
| 77.6388103 | 99.155253  | 73            | 85.2538805 | 84.8235202     |
| 77.6388103 | 99.155253  | 73            | 85.2538805 | 85.7117842     |
| 77.6388103 | 99.155253  | 73            | 85.2538805 | 86.6228702     |
| 76.6388103 | 100.155253 | 73            | 85.4538805 | 87.5303419     |
| 76.6388103 | 101.155253 | 73            | 87.4491696 | 88.3835049     |
| 76.6388103 | 101.155253 | 73            | 87.4491696 | 89.1993257     |
| 76.6388103 | 100.155253 | 73            | 87.4491696 | 90.0069552     |
| 76.6388103 | 100.155253 | 73            | 87.8380585 | 90.8171889     |
| 76.6388103 | 100.155253 | 73            | 88.2269474 | 91.6359769     |
| 75.6388103 | 100.155253 | 73            | 87.8380585 | 91.9190366     |
| 75.6388103 | 100.155253 | 73            | 87.8380585 | 92.8185532     |
| 75.6388103 | 100.155253 | 73            | 88.2269474 | 93.0707609     |
| 75.6388103 | 101.155253 | 73            | 88.6158363 | 93.29189       |
| 75.6388103 | 101.155253 | 73            | 88.5880585 | 93.4907034     |
| 75.6388103 | 106.155253 | 73            | 90.7269474 | 93.6532445     |
| 76.6388103 | 120.155253 | 73            | 96.5880585 | 93.8072308     |
| 77.6388103 | 123.155253 | 73            | 98.1158363 | 93.9041751     |
| 77.6388103 | 123.155253 | 73            | 98.143614  | 94.4464755     |
| 78.6388103 | 126.155253 | 73            | 99.6991696 | 94.5305707     |
| 78.6388103 | 128.155253 | 73            | 100.254725 | 94.8642029     |
| 79.6388103 | 129.155253 | 73            | 101.032503 | 95.1978351     |
| 80.6388103 | 131.155253 | 73            | 102.19917  | 95.5214674     |
| 80.6388103 | 131.155253 | 73            | 102.338058 | 95.8555162     |
| 80.6388103 | 131.155253 | 73            | 101.254725 | 96.1798429     |
| 80.6388103 | 131.155253 | 73            | 100.532503 | 96.4991696     |
| 80.6388103 | 131.155253 | 73            | 100.615836 | 96.7595863     |
| 80.6388103 | 131.155253 | 73            | 100.69917  | 97.0102807     |
| 80.6388103 | 132.155253 | 73            | 100.754725 | 97.2512529     |
| 80.6388103 | 132.155253 | 73            | 100.976947 | 97.4727807     |
| 81.6388103 | 132.155253 | 73            | 101.588058 | 97.6797252     |
| 81.6388103 | 131.155253 | 73            | 101.393614 | 97.8866696     |
| 80.6388103 | 130.155253 | 73            | 100.810281 | 98.0845863     |
| 79.6388103 | 130.155253 | 73            | 100.44917  | 98.2831974     |
| 79.6388103 | 128.155253 | 73            | 99.5047252 | 98.4963918     |
| 79.6388103 | 128.155253 | 73            | 99.5047252 | 98.731114      |
| 80.6388103 | 123.155253 | 73            | 97.5880585 | 98.912364      |
| 82.6388103 | 123.155253 | 73            | 98.1991696 | 98.9470863     |
| 83.6388103 | 121.155253 | 73            | 97.8102807 | 98.9484752     |
| 84.6388103 | 121.155253 | 73            | 98.1991696 | 98.9637529     |
| 84.6388103 | 121.155253 | 73            | 98.1991696 | 98.9595863     |

|            |            |    |            |            |
|------------|------------|----|------------|------------|
| 84.6388103 | 121.155253 | 73 | 98.1991696 | 98.931114  |
| 84.6388103 | 122.155253 | 73 | 98.6158363 | 98.8977807 |
| 83.6388103 | 122.155253 | 73 | 98.2269474 | 98.849864  |
| 83.6388103 | 122.155253 | 73 | 98.2269474 | 98.7838918 |
| 82.6388103 | 122.155253 | 73 | 97.8658363 | 98.7450029 |
| 82.6388103 | 121.155253 | 73 | 97.4769474 | 98.6852807 |
| 82.6388103 | 120.155253 | 73 | 97.0880585 | 98.6206974 |
| 82.6388103 | 119.155253 | 73 | 96.6991696 | 98.5005585 |
| 82.6388103 | 119.155253 | 73 | 96.5047252 | 98.3769474 |
| 81.6388103 | 119.155253 | 73 | 96.1158363 | 98.2179196 |
| 80.6388103 | 119.155253 | 73 | 95.7547252 | 97.9950029 |
| 82.6388103 | 118.155253 | 73 | 96.1713918 | 97.7575029 |
| 82.6388103 | 119.155253 | 73 | 97.143614  | 97.5047252 |
| 82.6388103 | 121.155253 | 73 | 97.9769474 | 97.2463918 |
| 82.6388103 | 121.155253 | 73 | 97.9769474 | 97.0116696 |
| 82.6388103 | 121.155253 | 73 | 97.9769474 | 96.7429196 |
| 82.6388103 | 121.155253 | 73 | 98.1713918 | 96.5220863 |
| 82.6388103 | 121.155253 | 73 | 98.7547252 | 96.2519474 |
| 82.6388103 | 121.155253 | 73 | 99.5325029 | 95.9866696 |
| 84.6388103 | 118.155253 | 73 | 99.1158363 | 95.7116696 |
| 84.6388103 | 118.155253 | 73 | 99.6991696 | 95.4269474 |
| 86.6388103 | 117.155253 | 73 | 100.282503 | 95.1422252 |
| 86.6388103 | 116.155253 | 73 | 99.6991696 | 94.7255585 |
| 87.6388103 | 116.155253 | 73 | 99.6991696 | 94.3081974 |
| 87.6388103 | 115.155253 | 73 | 98.143614  | 93.9005585 |
| 88.6388103 | 114.155253 | 73 | 98.0325029 | 93.5213918 |
| 88.6388103 | 109.155253 | 73 | 95.893614  | 93.1456974 |
| 88.6388103 | 109.155253 | 73 | 95.8102807 | 92.7894474 |
| 87.6388103 | 107.155253 | 73 | 94.6158363 | 92.4658363 |
| 85.6388103 | 104.155253 | 73 | 92.6713918 | 92.1269474 |
| 85.6388103 | 102.155253 | 73 | 91.893614  | 91.8026418 |
| 83.6388103 | 101.155253 | 73 | 90.6991696 | 91.4838918 |
| 82.6388103 | 101.155253 | 73 | 90.1158363 | 91.1450029 |
| 82.6388103 | 101.155253 | 73 | 90.1158363 | 90.7915307 |
| 80.6388103 | 101.155253 | 73 | 88.7547252 | 90.4151418 |
| 80.6388103 | 101.155253 | 73 | 88.7547252 | 90.0484752 |
| 78.6388103 | 100.155253 | 73 | 87.393614  | 89.6984752 |
| 78.6388103 | 100.155253 | 73 | 87.1991696 | 89.3450029 |
| 78.6388103 | 100.155253 | 73 | 87.1991696 | 88.9575029 |
| 77.6388103 | 100.155253 | 73 | 86.8102807 | 88.5359752 |
| 77.6388103 | 100.155253 | 73 | 86.8102807 | 88.1151418 |
| 77.6388103 | 87.155253  | 73 | 81.9491696 | 87.674864  |
| 76.6388103 | 87.155253  | 73 | 81.5325029 | 87.2068085 |
| 77.6388103 | 86.155253  | 73 | 81.9213918 | 86.7533363 |
| 78.6388103 | 87.155253  | 73 | 82.6991696 | 86.3095863 |

|            |           |    |            |            |
|------------|-----------|----|------------|------------|
| 78.6388103 | 86.155253 | 73 | 82.4491696 | 85.9144474 |
| 78.6388103 | 86.155253 | 73 | 82.8380585 | 85.5325029 |
| 80.6388103 | 86.155253 | 73 | 83.7547252 | 85.1991696 |
| 80.6388103 | 84.155253 | 73 | 82.9491696 | 84.8776418 |
| 80.6388103 | 84.155253 | 73 | 83.143614  | 84.5963918 |
| 80.6388103 | 84.155253 | 73 | 83.0047252 | 84.3456974 |
| 79.6388103 | 84.155253 | 73 | 82.6158363 | 84.1047252 |
| 79.6388103 | 84.155253 | 73 | 83.0047252 | 83.8943085 |
| 79.6388103 | 84.155253 | 73 | 82.9213918 | 83.6790307 |
| 79.6388103 | 85.155253 | 73 | 83.3102807 | 83.4394474 |
| 81.6388103 | 85.155253 | 73 | 83.9769474 | 83.2095863 |
| 81.6388103 | 85.155253 | 73 | 84.0325029 | 82.9700029 |
| 80.6388103 | 85.155253 | 73 | 83.2547252 | 82.7595863 |
| 80.6388103 | 84.155253 | 73 | 82.6713918 | 82.5345863 |
| 80.6388103 | 83.155253 | 73 | 82.2825029 | 82.299864  |
| 80.6388103 | 83.155253 | 73 | 82.0880585 | 82.0887529 |
| 79.6388103 | 83.155253 | 73 | 81.5602807 | 81.8679196 |
| 79.6388103 | 83.155253 | 73 | 81.5602807 | 81.7665307 |
| 79.6388103 | 84.155253 | 73 | 81.9491696 | 81.6950029 |
| 80.6388103 | 84.155253 | 73 | 82.3380585 | 81.6227807 |
| 81.6388103 | 84.155253 | 73 | 82.7547252 | 81.531114  |
| 81.6388103 | 84.155253 | 73 | 82.5602807 | 81.4359752 |
| 82.6388103 | 84.155253 | 73 | 82.9491696 | 81.3401418 |
| 83.6388103 | 84.155253 | 73 | 83.3658363 | 81.2206974 |
| 83.6388103 | 82.155253 | 73 | 82.643614  | 81.1019474 |
| 82.6388103 | 82.155253 | 73 | 82.2547252 | 80.987364  |
| 82.6388103 | 82.155253 | 73 | 82.2825029 | 80.9394474 |
| 81.6388103 | 81.155253 | 73 | 81.5047252 | 80.9012529 |
| 80.6388103 | 80.155253 | 73 | 80.5325029 | 80.8484752 |
| 78.6388103 | 80.155253 | 73 | 79.5602807 | 80.8415307 |
| 77.6388103 | 80.155253 | 73 | 79.1713918 | 80.824864  |
| 77.6388103 | 80.155253 | 73 | 78.9769474 | 80.7915307 |
| 75.6388103 | 80.155253 | 73 | 78.1991696 | 80.762364  |
| 74.6388103 | 80.155253 | 73 | 77.8102807 | 80.7679196 |
| 74.6388103 | 81.155253 | 73 | 78.3658363 | 80.8269474 |
| 72.6388103 | 82.155253 | 69 | 77.9769474 | 80.9540307 |
| 72.6388103 | 82.155253 | 69 | 77.893614  | 81.0950029 |
| 72.6388103 | 84.155253 | 69 | 78.6713918 | 81.2491696 |
| 72.6388103 | 85.155253 | 69 | 79.0325029 | 81.4179196 |
| 72.6388103 | 85.155253 | 69 | 79.0325029 | 81.5915307 |
| 71.6388103 | 85.155253 | 69 | 78.643614  | 81.7456974 |
| 71.6388103 | 86.155253 | 69 | 79.0047252 | 81.8700029 |
| 71.6388103 | 86.155253 | 69 | 78.9769474 | 82.0137529 |
| 69.6388103 | 86.155253 | 69 | 78.1991696 | 82.1477807 |
| 69.6388103 | 86.155253 | 69 | 78.5602807 | 82.2762529 |

|            |            |    |            |            |
|------------|------------|----|------------|------------|
| 71.6388103 | 90.155253  | 69 | 81.0880585 | 82.3887529 |
| 71.6388103 | 90.155253  | 69 | 81.0880585 | 82.5109752 |
| 70.6388103 | 90.155253  | 69 | 80.893614  | 82.6276418 |
| 70.6388103 | 95.155253  | 69 | 82.643614  | 82.7443085 |
| 70.6388103 | 95.155253  | 69 | 82.643614  | 82.8602807 |
| 70.6388103 | 95.155253  | 69 | 82.643614  | 83.0012529 |
| 70.6388103 | 95.155253  | 69 | 82.8658363 | 83.1331974 |
| 70.6388103 | 96.155253  | 69 | 83.4769474 | 83.2505585 |
| 71.6388103 | 99.155253  | 69 | 85.0325029 | 83.3880585 |
| 74.6388103 | 101.155253 | 69 | 87.3658363 | 83.5352807 |
| 74.6388103 | 102.155253 | 69 | 87.7269474 | 83.6630585 |
| 74.6388103 | 102.155253 | 69 | 87.7269474 | 83.781114  |
| 75.6388103 | 102.155253 | 69 | 88.3102807 | 83.9109752 |
| 76.6388103 | 102.155253 | 69 | 88.893614  | 83.9526418 |
| 76.6388103 | 101.155253 | 69 | 88.5047252 | 83.9658363 |
| 77.6388103 | 98.155253  | 69 | 87.7269474 | 83.9790307 |
| 78.6388103 | 98.155253  | 69 | 88.3102807 | 84.0054196 |
| 78.6388103 | 98.155253  | 69 | 88.3102807 | 84.0220863 |
| 78.6388103 | 98.155253  | 69 | 88.5047252 | 84.0581974 |
| 78.6388103 | 94.155253  | 69 | 87.143614  | 84.1331974 |
| 78.6388103 | 94.155253  | 69 | 87.143614  | 84.1894474 |
| 79.6388103 | 94.155253  | 69 | 86.9491696 | 84.1922252 |
| 79.6388103 | 92.155253  | 69 | 86.1713918 | 84.2047252 |
| 79.6388103 | 90.155253  | 69 | 85.1713918 | 84.2706974 |
| 79.6388103 | 90.155253  | 69 | 85.1991696 | 84.2588918 |
| 78.6388103 | 90.155253  | 69 | 84.4491696 | 84.2470863 |
| 76.6388103 | 90.155253  | 69 | 83.6713918 | 84.2151418 |
| 76.6388103 | 90.155253  | 69 | 83.6991696 | 84.170803  |
| 76.6388103 | 90.155253  | 69 | 83.6991696 | 84.0195197 |
| 76.6388103 | 90.155253  | 69 | 83.4769474 | 83.7918475 |
| 76.6388103 | 88.155253  | 69 | 82.6991696 | 83.4933419 |
| 76.6388103 | 87.155253  | 69 | 83.0880585 | 83.169142  |
| 76.6388103 | 80.155253  | 69 | 80.3380585 | 82.8532753 |
| 76.6388103 | 78.155253  | 69 | 79.5602807 | 82.514492  |
| 76.6388103 | 78.155253  | 69 | 79.5602807 | 82.1527921 |
| 76.6388103 | 77.155253  | 69 | 79.6991696 | 81.792481  |
| 77.6388103 | 77.155253  | 69 | 79.6713918 | 81.4599477 |
| 78.6388103 | 78.155253  | 69 | 80.4213918 | 81.1044977 |
| 80.6388103 | 78.155253  | 69 | 81.1991696 | 80.7407144 |
| 80.6388103 | 77.155253  | 69 | 80.8102807 | 80.37207   |
| 81.6388103 | 77.155253  | 69 | 81.1991696 | 80.02912   |
| 82.6388103 | 77.155253  | 69 | 81.5880585 | 79.68617   |
| 86.6388103 | 77.155253  | 69 | 83.5325029 | 79.3272478 |
| 86.6388103 | 73.155253  | 69 | 82.1713918 | 78.9544368 |
| 86.6388103 | 73.155253  | 69 | 82.1713918 | 78.5982923 |

|            |           |    |            |            |
|------------|-----------|----|------------|------------|
| 86.6388103 | 71.155253 | 69 | 81.3658363 | 78.2456202 |
| 85.6388103 | 71.155253 | 69 | 81.0922819 | 77.874198  |
| 82.6388103 | 71.155253 | 69 | 77.4256152 | 77.5097202 |
| 81.6388103 | 71.155253 | 69 | 75.9256152 | 77.144548  |
| 81.6388103 | 71.155253 | 69 | 75.4256152 | 76.7793758 |
| 81.6388103 | 70.155253 | 69 | 74.7589485 | 76.4280925 |
| 81.6388103 | 71.155253 | 69 | 75.0922819 | 76.104587  |
| 81.6388103 | 71.155253 | 69 | 74.7589485 | 75.7713592 |
| 80.6388103 | 71.155253 | 69 | 74.4256152 | 75.5068815 |
| 80.6388103 | 71.155253 | 69 | 74.0922819 | 75.2618482 |
| 81.6388103 | 71.155253 | 69 | 74.4256152 | 75.0126482 |
| 80.6388103 | 71.155253 | 69 | 74.0922819 | 74.759976  |
| 80.6388103 | 71.155253 | 69 | 73.7589485 | 74.5163316 |
| 80.6388103 | 71.155253 | 69 | 73.7589485 | 74.2539372 |
| 80.6388103 | 70.155253 | 69 | 73.4256152 | 73.9720983 |
| 80.6388103 | 70.155253 | 69 | 73.4256152 | 73.7041484 |
| 78.6388103 | 70.155253 | 69 | 72.5922819 | 73.4473095 |
| 75.6388103 | 70.155253 | 69 | 71.2589485 | 73.2057484 |
| 75.6388103 | 70.155253 | 69 | 70.9256152 | 72.9655762 |
| 75.6388103 | 70.155253 | 69 | 71.0922819 | 72.7469318 |
| 71.6388103 | 70.155253 | 69 | 69.5922819 | 72.5366207 |
| 70.6388103 | 70.155253 | 69 | 69.0922819 | 72.3381152 |
| 70.6388103 | 70.155253 | 69 | 69.0922819 | 72.1297819 |
| 71.6388103 | 69.155253 | 69 | 69.0922819 | 72.0131152 |
| 72.6388103 | 69.155253 | 69 | 69.4256152 | 71.9422819 |
| 73.6388103 | 69.155253 | 69 | 69.7589485 | 71.8839485 |
| 73.6388103 | 69.155253 | 69 | 69.7589485 | 71.8547819 |
| 73.6388103 | 69.155253 | 69 | 69.7589485 | 71.8214485 |
| 72.6388103 | 70.155253 | 69 | 69.7589485 | 71.8047819 |
| 71.6388103 | 70.155253 | 69 | 69.5922819 | 71.8047819 |
| 71.6388103 | 70.155253 | 69 | 69.5922819 | 71.8089485 |
| 71.6388103 | 70.155253 | 69 | 69.9256152 | 71.8131152 |
| 71.6388103 | 70.155253 | 69 | 69.9256152 | 71.8089485 |
| 71.6388103 | 70.155253 | 69 | 69.9256152 | 71.8047819 |
| 70.6388103 | 71.155253 | 69 | 70.0922819 | 71.8172819 |
| 71.6388103 | 71.155253 | 69 | 70.9256152 | 71.8509273 |
| 72.6388103 | 72.155253 | 69 | 71.9256152 | 71.8881441 |
| 73.6388103 | 75.155253 | 69 | 73.9256152 | 71.9640514 |
| 73.6388103 | 75.155253 | 69 | 73.4256152 | 72.0768635 |
| 74.6388103 | 75.155253 | 69 | 73.7589485 | 72.1980089 |
| 75.6388103 | 75.155253 | 69 | 73.4256152 | 72.3114162 |
| 75.6388103 | 75.155253 | 69 | 72.7589485 | 72.4694663 |
| 76.6388103 | 75.155253 | 69 | 72.7589485 | 72.6435879 |
| 76.6388103 | 76.155253 | 69 | 73.0922819 | 72.8141381 |
| 77.6388103 | 76.155253 | 69 | 73.0922819 | 72.9739739 |

|            |            |    |            |            |
|------------|------------|----|------------|------------|
| 78.6388103 | 76.155253  | 69 | 73.5922819 | 73.2076193 |
| 78.6388103 | 76.155253  | 69 | 73.7589485 | 73.55436   |
| 78.6388103 | 77.155253  | 69 | 74.0922819 | 73.9082434 |
| 78.6388103 | 77.155253  | 69 | 74.4256152 | 74.2621269 |
| 77.6388103 | 77.155253  | 69 | 74.2589485 | 74.5758641 |
| 77.6388103 | 78.155253  | 69 | 74.5922819 | 74.8896863 |
| 75.6388103 | 78.155253  | 69 | 73.9256152 | 75.2035086 |
| 74.6388103 | 78.155253  | 69 | 73.5922819 | 75.5095077 |
| 74.6388103 | 79.155253  | 69 | 74.2589485 | 75.8073435 |
| 74.6388103 | 79.155253  | 69 | 74.771431  | 76.1051793 |
| 73.6388103 | 80.155253  | 69 | 74.9142882 | 76.4116036 |
| 75.6388103 | 81.155253  | 69 | 75.6285739 | 76.680868  |
| 75.6388103 | 80.155253  | 69 | 75.771431  | 76.929214  |
| 76.6388103 | 79.155253  | 69 | 75.771431  | 77.0668458 |
| 76.6388103 | 79.155253  | 69 | 75.6285739 | 77.2210591 |
| 77.6388103 | 79.155253  | 69 | 75.9142882 | 77.3710208 |
| 78.6388103 | 79.155253  | 69 | 76.0571453 | 77.549724  |
| 79.6388103 | 79.155253  | 69 | 75.9142882 | 77.7491755 |
| 79.6388103 | 79.155253  | 69 | 75.4857167 | 77.9532188 |
| 81.6388103 | 89.155253  | 69 | 78.771431  | 78.1371941 |
| 82.6388103 | 106.155253 | 69 | 83.6285739 | 78.3211693 |
| 83.6388103 | 106.155253 | 69 | 83.9142882 | 78.4849916 |
| 83.6388103 | 106.155253 | 69 | 83.9142882 | 78.6283206 |
| 85.6388103 | 85.9142882 | 69 | 82.3084361 | 78.5858633 |
| 85.6388103 | 85.771431  | 69 | 82.1451707 | 78.5350727 |
| 85.6388103 | 85.771431  | 69 | 82.1451707 | 78.5022243 |
| 85.6388103 | 85.9142882 | 69 | 82.1655789 | 78.5298221 |
| 85.6388103 | 85.6285739 | 69 | 81.8390483 | 78.5822497 |
| 85.6388103 | 85.6285739 | 69 | 81.8390483 | 78.6470924 |
| 85.6388103 | 86.2000025 | 69 | 82.3492524 | 78.6920473 |
| 84.6388103 | 85.6285739 | 69 | 81.6961912 | 78.706333  |
| 84.6388103 | 85.771431  | 69 | 81.8594565 | 78.6991901 |
| 76.6388103 | 83.771431  | 69 | 79.430885  | 78.6706187 |
| 76.6388103 | 83.9142882 | 69 | 79.5941503 | 78.6384759 |
| 75.6388103 | 84.0571453 | 69 | 79.7574156 | 78.6027616 |
| 75.6388103 | 84.771431  | 69 | 80.5737422 | 78.5777616 |
| 75.6388103 | 84.9142882 | 69 | 80.7370075 | 78.5599044 |
| 75.6388103 | 85.2000025 | 69 | 80.920681  | 78.5884759 |
| 73.6388103 | 84.9142882 | 69 | 80.4512932 | 78.6384759 |
| 73.6388103 | 84.9142882 | 69 | 80.4512932 | 78.7241901 |
| 71.6388103 | 84.771431  | 69 | 80.1451707 | 78.6777616 |
| 69.6388103 | 84.2000025 | 69 | 79.4921095 | 78.4884759 |
| 58.6388103 | 81.3428596 | 69 | 72.3939919 | 78.2849044 |
| 58.6388103 | 81.3428596 | 69 | 72.3939919 | 78.0884759 |
| 58.6388103 | 81.771431  | 69 | 72.9450124 | 78.010765  |

|            |            |    |            |            |
|------------|------------|----|------------|------------|
| 57.6388103 | 80.6285739 | 69 | 75.6961912 | 77.9657072 |
| 57.6388103 | 80.9142882 | 69 | 76.0227218 | 77.9063638 |
| 57.6388103 | 81.0571453 | 69 | 76.1859871 | 77.8572243 |
| 57.6388103 | 98.155253  | 69 | 76.0571453 | 77.8269625 |
| 57.6388103 | 95.155253  | 69 | 75.3428596 | 77.7967006 |
| 57.6388103 | 93.155253  | 69 | 74.6285739 | 77.7429694 |
| 55.6388103 | 93.155253  | 69 | 74.4857167 | 77.7127075 |
| 55.6388103 | 91.155253  | 69 | 74.4857167 | 77.6676497 |
| 53.6388103 | 91.155253  | 69 | 74.3428596 | 77.6761634 |
| 54.6388103 | 91.155253  | 69 | 74.6285739 | 77.7055954 |
| 55.6388103 | 91.155253  | 69 | 75.2000025 | 77.7309458 |
| 55.6388103 | 94.155253  | 69 | 77.2000025 | 77.735888  |
| 56.6388103 | 95.155253  | 69 | 77.9142882 | 77.7296057 |
| 59.6388103 | 96.155253  | 69 | 78.9142882 | 77.7044459 |
| 58.6388103 | 96.155253  | 69 | 76.9142882 | 77.6481636 |
| 58.6388103 | 97.155253  | 69 | 76.0571453 | 77.5954528 |
| 58.6388103 | 97.155253  | 69 | 75.771431  | 77.5432522 |
| 58.6388103 | 98.155253  | 69 | 76.0571453 | 77.4930924 |
| 71.6388103 | 98.155253  | 69 | 79.2000025 | 77.616814  |
| 75.6388103 | 97.155253  | 69 | 80.3428596 | 77.7833929 |
| 75.6388103 | 95.155253  | 69 | 79.771431  | 77.9576248 |
| 75.6388103 | 94.155253  | 69 | 80.2000025 | 78.0952201 |
| 76.6388103 | 94.155253  | 69 | 80.6285739 | 78.2246521 |
| 76.6388103 | 94.155253  | 69 | 80.6285739 | 78.3571453 |
| 75.6388103 | 94.155253  | 69 | 80.2000025 | 78.5000025 |
| 75.6388103 | 94.155253  | 69 | 80.4857167 | 78.6642882 |
| 74.6388103 | 94.155253  | 69 | 80.0571453 | 78.8250025 |
| 74.6388103 | 93.155253  | 69 | 79.771431  | 78.9678596 |
| 75.6388103 | 95.155253  | 69 | 80.771431  | 79.0892882 |
| 75.6388103 | 95.155253  | 69 | 80.771431  | 79.2107167 |
| 75.6388103 | 94.155253  | 69 | 80.771431  | 79.3250025 |
| 75.6388103 | 94.155253  | 69 | 80.4857167 | 79.396431  |
| 75.6388103 | 91.155253  | 69 | 79.9142882 | 79.4107167 |
| 70.6388103 | 91.155253  | 69 | 78.2000025 | 79.4035739 |
| 70.6388103 | 91.155253  | 69 | 78.3428596 | 79.3678596 |
| 69.6388103 | 91.155253  | 69 | 78.0571453 | 79.3785739 |
| 68.6388103 | 90.155253  | 69 | 77.4857167 | 79.3928596 |
| 68.6388103 | 89.155253  | 69 | 77.3428596 | 79.421431  |
| 74.6388103 | 89.155253  | 69 | 79.0571453 | 79.4285739 |
| 77.6388103 | 89.155253  | 63 | 79.9142882 | 79.346431  |
| 81.6388103 | 90.155253  | 63 | 81.2000025 | 79.2285739 |
| 82.6388103 | 89.155253  | 63 | 81.2000025 | 79.1178596 |
| 83.6388103 | 89.155253  | 63 | 81.4857167 | 79.0035739 |
| 83.6388103 | 90.155253  | 63 | 81.771431  | 78.8821453 |
| 83.6388103 | 90.155253  | 63 | 81.9142882 | 78.7571453 |



|            |           |    |            |            |
|------------|-----------|----|------------|------------|
| 82.6388103 | 90.155253 | 63 | 81.0571453 | 78.6428596 |
| 79.6388103 | 90.155253 | 63 | 80.2000025 | 78.5285739 |
| 76.6388103 | 90.155253 | 63 | 79.3428596 | 78.421431  |
| 75.6388103 | 91.155253 | 63 | 79.2000025 | 78.3178596 |
| 75.6388103 | 91.155253 | 63 | 79.2000025 | 78.2142882 |
| 72.6388103 | 91.155253 | 63 | 78.0571453 | 78.121431  |
| 71.6388103 | 91.155253 | 63 | 77.771431  | 78.0357167 |
| 72.6388103 | 89.155253 | 63 | 77.6285739 | 77.9535739 |
| 72.6388103 | 89.155253 | 63 | 77.4857167 | 77.896431  |
| 72.6388103 | 88.155253 | 63 | 77.3428596 | 77.9035739 |
| 70.6388103 | 88.155253 | 63 | 76.6285739 | 77.9357167 |
| 69.6388103 | 89.155253 | 63 | 76.9142882 | 77.9821453 |
| 69.6388103 | 89.155253 | 63 | 76.3428596 | 78.046431  |
| 68.6388103 | 89.155253 | 63 | 75.9142882 | 78.0928596 |
| 68.6388103 | 88.155253 | 63 | 75.6285739 | 78.096431  |
| 67.6388103 | 88.155253 | 63 | 75.3428596 | 78.0785739 |
| 67.6388103 | 87.155253 | 63 | 75.6285739 | 78.0285739 |
| 68.6388103 | 86.155253 | 63 | 75.771431  | 78.0142882 |
| 68.6388103 | 86.155253 | 63 | 75.6285739 | 78.0321453 |
| 68.6388103 | 86.155253 | 63 | 75.6285739 | 78.0428596 |
| 70.6388103 | 86.155253 | 63 | 75.9142882 | 78.046431  |
| 69.6388103 | 86.155253 | 63 | 75.771431  | 78.0678596 |
| 69.6388103 | 86.155253 | 63 | 75.6285739 | 78.0892882 |
| 70.6388103 | 86.155253 | 63 | 76.6285739 | 78.1178596 |
| 71.6388103 | 84.155253 | 63 | 77.0571453 | 78.1142882 |
| 72.6388103 | 84.155253 | 63 | 77.3428596 | 78.0928596 |
| 72.6388103 | 84.155253 | 63 | 77.2000025 | 78.0357167 |
| 73.6388103 | 84.155253 | 63 | 77.6285739 | 77.9857167 |
| 74.6388103 | 86.155253 | 63 | 78.4857167 | 77.9142882 |
| 76.6388103 | 89.155253 | 63 | 79.6285739 | 77.8357167 |
| 76.6388103 | 90.155253 | 63 | 79.9142882 | 77.7571453 |
| 77.6388103 | 90.155253 | 63 | 80.0571453 | 77.7035739 |
| 77.6388103 | 88.155253 | 63 | 79.2000025 | 77.6821453 |
| 80.6388103 | 85.155253 | 63 | 79.2000025 | 77.6750025 |
| 80.6388103 | 85.155253 | 63 | 79.2000025 | 77.6821453 |
| 80.6388103 | 85.155253 | 63 | 79.2000025 | 77.6857167 |
| 81.6388103 | 88.155253 | 63 | 80.6285739 | 77.7000025 |
| 82.6388103 | 91.155253 | 63 | 82.2000025 | 77.7107167 |
| 82.6388103 | 91.155253 | 63 | 82.2000025 | 77.7285739 |
| 83.6388103 | 91.155253 | 63 | 82.0571453 | 77.7428596 |
| 83.6388103 | 91.155253 | 63 | 81.9142882 | 77.7571453 |
| 84.6388103 | 89.155253 | 63 | 81.0571453 | 77.7642882 |
| 84.6388103 | 89.155253 | 63 | 80.4857167 | 77.7821453 |
| 81.6388103 | 87.155253 | 63 | 79.0571453 | 77.8071453 |
| 79.6388103 | 87.155253 | 63 | 78.3428596 | 77.8142882 |

|            |           |    |            |            |
|------------|-----------|----|------------|------------|
| 72.6388103 | 85.155253 | 63 | 75.771431  | 77.8071453 |
| 72.6388103 | 85.155253 | 63 | 75.771431  | 77.7607167 |
| 71.6388103 | 84.155253 | 63 | 74.771431  | 77.7071453 |
| 70.6388103 | 84.155253 | 63 | 74.3428596 | 77.646431  |
| 69.6388103 | 84.155253 | 63 | 74.2000025 | 77.546431  |
| 69.6388103 | 85.155253 | 63 | 74.4857167 | 77.4285739 |
| 73.6388103 | 86.155253 | 63 | 76.0571453 | 77.3000025 |
| 74.6388103 | 85.155253 | 63 | 76.0571453 | 77.1535739 |
| 74.6388103 | 85.155253 | 63 | 76.2000025 | 77.0107167 |
| 74.6388103 | 83.155253 | 63 | 75.771431  | 76.8392882 |
| 74.6388103 | 83.155253 | 63 | 75.9142882 | 76.6678596 |
| 74.6388103 | 83.155253 | 63 | 76.0571453 | 76.5000025 |
| 74.6388103 | 84.155253 | 63 | 76.4857167 | 76.3035739 |
| 73.6388103 | 84.155253 | 63 | 76.2000025 | 76.0678596 |
| 73.6388103 | 84.155253 | 63 | 76.2000025 | 75.8285739 |
| 71.6388103 | 84.155253 | 63 | 76.2000025 | 75.5857167 |
| 71.6388103 | 85.155253 | 63 | 76.4857167 | 75.346431  |
| 71.6388103 | 85.155253 | 63 | 76.6285739 | 75.1250025 |
| 71.6388103 | 85.155253 | 63 | 76.9142882 | 74.9071453 |
| 71.6388103 | 87.155253 | 63 | 76.771431  | 74.7107167 |
| 71.6388103 | 85.155253 | 63 | 75.4857167 | 74.5142882 |
| 71.6388103 | 84.155253 | 63 | 75.0571453 | 74.4071453 |
| 72.6388103 | 84.155253 | 63 | 75.2000025 | 74.3285739 |
| 73.6388103 | 84.155253 | 63 | 74.4857167 | 74.3000025 |
| 75.6388103 | 84.155253 | 63 | 74.9142882 | 74.2892882 |
| 74.6388103 | 85.155253 | 63 | 74.771431  | 74.2892882 |
| 73.6388103 | 85.155253 | 63 | 74.2000025 | 74.2892882 |
| 73.6388103 | 84.155253 | 63 | 73.4857167 | 74.2535739 |
| 71.6388103 | 84.155253 | 63 | 72.3428596 | 74.2142882 |
| 71.6388103 | 84.155253 | 63 | 72.3428596 | 74.1607167 |
| 70.6388103 | 84.155253 | 63 | 72.4857167 | 74.1178596 |
| 70.6388103 | 84.155253 | 63 | 72.771431  | 74.1107167 |
| 68.6388103 | 86.155253 | 63 | 72.771431  | 74.1107167 |
| 68.6388103 | 86.155253 | 63 | 72.6285739 | 74.096431  |
| 67.6388103 | 86.155253 | 63 | 72.3428596 | 74.1000025 |
| 67.6388103 | 86.155253 | 63 | 72.3428596 | 74.0928596 |
| 67.6388103 | 86.155253 | 63 | 72.2000025 | 74.0500025 |
| 65.6388103 | 86.155253 | 63 | 71.771431  | 73.9785739 |
| 65.6388103 | 84.155253 | 63 | 71.2000025 | 73.8928596 |
| 64.6388103 | 83.155253 | 63 | 70.4857167 | 73.8000025 |
| 64.6388103 | 85.155253 | 63 | 71.4857167 | 73.7071453 |
| 65.6388103 | 87.155253 | 63 | 72.6285739 | 73.646431  |
| 65.6388103 | 88.155253 | 63 | 73.6285739 | 73.5928596 |
| 66.6388103 | 88.155253 | 63 | 73.9142882 | 73.5357167 |
| 66.6388103 | 88.155253 | 63 | 74.2000025 | 73.5000025 |

|            |           |    |            |            |
|------------|-----------|----|------------|------------|
| 67.6388103 | 89.155253 | 63 | 74.4857167 | 73.4357167 |
| 67.6388103 | 90.155253 | 63 | 74.6285739 | 73.3785739 |
| 67.6388103 | 90.155253 | 63 | 74.4857167 | 73.3285739 |
| 67.6388103 | 90.155253 | 63 | 74.0571453 | 73.2892882 |
| 67.6388103 | 90.155253 | 63 | 74.0571453 | 73.2642882 |
| 68.6388103 | 91.155253 | 63 | 75.6285739 | 73.2321453 |
| 68.6388103 | 91.155253 | 63 | 76.0571453 | 73.221431  |
| 68.6388103 | 91.155253 | 63 | 75.9142882 | 73.2250025 |
| 67.6388103 | 93.155253 | 63 | 76.3428596 | 73.246431  |
| 67.6388103 | 92.155253 | 63 | 75.9142882 | 73.2607167 |
| 66.6388103 | 88.155253 | 63 | 74.4857167 | 73.3107167 |
| 66.6388103 | 85.155253 | 63 | 73.6285739 | 73.3571453 |
| 66.6388103 | 84.155253 | 63 | 73.2000025 | 73.4107167 |
| 66.6388103 | 84.155253 | 63 | 73.2000025 | 73.4821453 |
| 67.6388103 | 83.155253 | 63 | 73.0571453 | 73.571431  |
| 67.6388103 | 83.155253 | 63 | 73.0571453 | 73.746431  |
| 67.6388103 | 83.155253 | 63 | 72.9142882 | 73.8261405 |
| 67.6388103 | 83.155253 | 63 | 72.9142882 | 73.8650336 |
| 67.6388103 | 83.155253 | 63 | 73.0571453 | 73.9069879 |
| 67.6388103 | 81.155253 | 63 | 72.3428596 | 73.9417994 |
| 67.6388103 | 81.155253 | 63 | 72.4857167 | 73.969468  |
| 67.6388103 | 80.155253 | 63 | 72.2000025 | 73.9899938 |
| 67.6388103 | 79.155253 | 63 | 71.9142882 | 74.0202135 |
| 65.6388103 | 79.155253 | 63 | 71.3428596 | 74.082576  |
| 64.6388103 | 79.155253 | 63 | 71.0571453 | 74.163816  |
| 64.6388103 | 80.155253 | 63 | 72.0571453 | 74.3102446 |
| 64.6388103 | 81.155253 | 63 | 72.9142882 | 74.413816  |
| 64.6388103 | 82.155253 | 63 | 73.6285739 | 74.4995303 |
| 63.6388103 | 82.155253 | 63 | 73.2000025 | 74.588816  |
| 63.6388103 | 82.155253 | 63 | 74.3428596 | 74.6673875 |
| 63.6388103 | 82.155253 | 63 | 74.2000025 | 74.7495303 |
| 63.6388103 | 83.155253 | 63 | 74.3428596 | 74.8709589 |
| 62.6388103 | 83.155253 | 63 | 74.6285739 | 74.9781017 |
| 63.6388103 | 83.155253 | 63 | 74.771431  | 75.0781017 |
| 68.6388103 | 83.155253 | 63 | 77.4857167 | 75.1495303 |
| 70.6388103 | 83.155253 | 63 | 74.6740945 | 75.1852446 |
| 70.6388103 | 82.155253 | 63 | 74.1842986 | 75.2102446 |
| 73.6388103 | 82.155253 | 63 | 75.3067476 | 75.2316732 |
| 73.6388103 | 82.155253 | 63 | 75.3067476 | 75.2209589 |
| 73.6388103 | 82.155253 | 63 | 75.3067476 | 75.2066732 |
| 73.6388103 | 82.155253 | 63 | 75.3067476 | 75.2209589 |
| 73.6388103 | 82.155253 | 63 | 75.8373598 | 75.2423875 |
| 75.6388103 | 83.155253 | 63 | 76.9802169 | 75.313816  |
| 75.6388103 | 84.155253 | 63 | 77.3067476 | 75.413816  |
| 75.6388103 | 84.155253 | 63 | 79.9142882 | 75.5423875 |

|            |           |    |            |            |
|------------|-----------|----|------------|------------|
| 75.6388103 | 86.155253 | 63 | 79.771431  | 75.7066732 |
| 75.6388103 | 86.155253 | 63 | 79.4857167 | 75.8531017 |
| 75.6388103 | 86.155253 | 63 | 79.4857167 | 76.0031017 |
| 75.6388103 | 87.155253 | 63 | 79.4857167 | 76.1709589 |
| 74.6388103 | 87.155253 | 63 | 79.2000025 | 76.290066  |
| 74.6388103 | 88.155253 | 63 | 79.3428596 | 76.3979486 |
| 72.6388103 | 89.155253 | 63 | 77.9142882 | 76.5175659 |
| 72.6388103 | 89.155253 | 63 | 77.2000025 | 76.6463669 |
| 74.6388103 | 84.155253 | 63 | 76.0571453 | 76.7761883 |
| 73.6388103 | 82.155253 | 63 | 74.4857167 | 76.9024383 |
| 72.6388103 | 82.155253 | 63 | 74.0571453 | 76.9710352 |
| 72.6388103 | 81.155253 | 63 | 73.771431  | 77.0895145 |
| 70.6388103 | 80.155253 | 63 | 72.4857167 | 77.2294223 |
| 70.6388103 | 80.155253 | 63 | 72.4857167 | 77.3575955 |
| 71.6388103 | 80.155253 | 63 | 72.9142882 | 77.5020952 |
| 71.6388103 | 82.155253 | 63 | 73.3428596 | 77.6384316 |
| 77.6388103 | 82.155253 | 63 | 75.0571453 | 77.7742579 |
| 80.6388103 | 83.155253 | 63 | 75.9142882 | 77.8804923 |
| 82.6388103 | 83.155253 | 63 | 76.4857167 | 77.9581552 |
| 85.6388103 | 84.155253 | 63 | 77.6285739 | 78.0230631 |
| 85.6388103 | 85.155253 | 63 | 77.9142882 | 78.0268641 |
| 88.6388103 | 85.155253 | 63 | 78.9142882 | 78.0423998 |
| 92.6388103 | 86.155253 | 63 | 80.3428596 | 78.0686497 |
| 97.6388103 | 86.155253 | 63 | 77.9642868 | 78.078063  |
| 99.6388103 | 86.155253 | 63 | 78.6581643 | 78.0833946 |
| 99.6388103 | 87.155253 | 63 | 78.9846949 | 78.0994405 |
| 100.63881  | 88.155253 | 63 | 79.494899  | 78.119568  |
| 100.63881  | 89.155253 | 63 | 79.8214296 | 78.1754098 |
| 100.63881  | 89.155253 | 63 | 79.8214296 | 78.2751291 |
| 104.63881  | 88.155253 | 63 | 80.2295929 | 78.4166852 |
| 104.63881  | 86.155253 | 63 | 79.4132663 | 78.6118127 |
| 106.63881  | 86.155253 | 63 | 79.7806133 | 78.7339445 |
| 106.63881  | 87.155253 | 63 | 80.4336745 | 78.8879851 |
| 106.63881  | 88.155253 | 63 | 81.0867357 | 79.0741686 |
| 106.63881  | 87.155253 | 63 | 80.7602051 | 79.2520188 |
| 105.63881  | 87.155253 | 63 | 80.739797  | 79.4382023 |
| 105.63881  | 86.155253 | 63 | 80.0867357 | 79.6279572 |
| 105.63881  | 86.155253 | 63 | 80.0867357 | 79.7915217 |
| 104.63881  | 86.155253 | 63 | 79.9030623 | 79.9336575 |
| 104.63881  | 86.155253 | 63 | 80.0663276 | 80.0561505 |
| 104.63881  | 87.155253 | 63 | 80.3928582 | 80.1988817 |
| 103.63881  | 87.155253 | 63 | 80.5357153 | 80.3606604 |
| 102.63881  | 86.155253 | 63 | 79.8622459 | 80.4956534 |
| 102.63881  | 84.155253 | 63 | 79.6989806 | 80.6115988 |
| 101.63881  | 83.155253 | 63 | 79.8418378 | 80.7917704 |

|            |           |    |            |            |
|------------|-----------|----|------------|------------|
| 100.63881  | 83.155253 | 63 | 80.1479602 | 81.0653521 |
| 100.63881  | 83.155253 | 63 | 80.1479602 | 81.2450135 |
| 103.63881  | 84.155253 | 63 | 81.1887765 | 81.5137482 |
| 105.63881  | 85.155253 | 63 | 81.7193888 | 81.7743196 |
| 109.63881  | 85.155253 | 63 | 82.2908174 | 82.0396529 |
| 87.6285739 | 85.155253 | 63 | 78.9424162 | 82.2858536 |
| 87.771431  | 85.155253 | 63 | 79.9330565 | 82.5804386 |
| 87.771431  | 85.155253 | 63 | 79.9330565 | 82.8313161 |
| 87.771431  | 84.155253 | 63 | 79.5997232 | 83.0849148 |
| 89.0571453 | 84.155253 | 63 | 80.3616279 | 83.3263535 |
| 89.771431  | 84.155253 | 63 | 80.9330565 | 83.5854794 |
| 90.771431  | 84.155253 | 63 | 81.5997232 | 83.8397583 |
| 90.771431  | 84.155253 | 63 | 81.5997232 | 83.8714054 |
| 90.6285739 | 84.155253 | 63 | 81.3854375 | 83.8155526 |
| 92.4857167 | 87.155253 | 63 | 83.3378184 | 83.7476249 |
| 93.6285739 | 89.155253 | 63 | 84.3854375 | 83.6672822 |
| 93.9142882 | 88.155253 | 63 | 84.3140089 | 83.5662763 |
| 94.9142882 | 89.155253 | 63 | 84.9806756 | 83.4450323 |
| 95.4857167 | 90.155253 | 63 | 85.1711518 | 83.328125  |
| 119.63881  | 90.155253 | 63 | 89.6014293 | 83.2027994 |
| 96.4857167 | 90.155253 | 63 | 86.1711518 | 83.0697356 |
| 120.63881  | 90.155253 | 63 | 90.2442864 | 82.9290188 |
| 120.63881  | 90.155253 | 63 | 90.2442864 | 82.775802  |
| 120.63881  | 91.155253 | 63 | 90.4347626 | 82.5923981 |
| 120.63881  | 91.155253 | 63 | 90.0776197 | 82.3957289 |
| 119.63881  | 94.155253 | 63 | 91.1966673 | 82.1889407 |
| 112.63881  | 95.155253 | 63 | 89.815715  | 82.0783625 |
| 112.63881  | 97.155253 | 63 | 90.5776197 | 81.9513516 |
| 111.63881  | 98.155253 | 63 | 90.7442864 | 81.8285074 |
| 111.63881  | 98.155253 | 63 | 91.1252388 | 81.7056632 |
| 111.63881  | 97.155253 | 63 | 90.9109531 | 81.5387714 |
| 73.6388103 | 94.155253 | 63 | 81.3526214 | 81.3742605 |
| 64.6388103 | 93.155253 | 63 | 77.8526214 | 81.2139163 |
| 62.6388103 | 93.155253 | 63 | 77.1859547 | 81.0452387 |
| 62.6388103 | 92.155253 | 63 | 76.8526214 | 80.8694183 |
| 62.6388103 | 91.155253 | 63 | 76.3526214 | 80.6364551 |
| 62.6388103 | 89.155253 | 63 | 75.6859547 | 80.3773013 |
| 62.6388103 | 88.155253 | 63 | 75.1859547 | 80.1157667 |
| 62.6388103 | 88.155253 | 63 | 74.6859547 | 79.8250653 |
| 62.6388103 | 88.155253 | 63 | 74.5192881 | 79.5254354 |
| 62.6388103 | 88.155253 | 63 | 74.5192881 | 79.1067152 |
| 61.6388103 | 88.155253 | 63 | 74.0192881 | 78.7904186 |
| 61.6388103 | 88.155253 | 63 | 73.8526214 | 78.3764603 |
| 61.6388103 | 88.155253 | 63 | 73.8526214 | 77.9666687 |
| 61.6388103 | 88.155253 | 63 | 74.0192881 | 77.5687818 |

|            |           |    |            |            |
|------------|-----------|----|------------|------------|
| 61.6388103 | 89.155253 | 63 | 74.5192881 | 77.2006569 |
| 61.6388103 | 90.155253 | 63 | 74.8526214 | 76.8087224 |
| 61.6388103 | 90.155253 | 63 | 75.0192881 | 76.4513117 |
| 61.6388103 | 89.155253 | 63 | 74.6859547 | 76.1040201 |
| 61.6388103 | 86.155253 | 63 | 73.6859547 | 75.7525618 |
| 61.6388103 | 87.155253 | 63 | 74.3526214 | 75.3915797 |
| 61.6388103 | 88.155253 | 63 | 75.1859547 | 75.0192881 |
| 60.6388103 | 88.155253 | 63 | 74.8526214 | 74.9026214 |
| 59.6388103 | 88.155253 | 63 | 74.3526214 | 74.9026214 |
| 58.6388103 | 88.155253 | 63 | 74.0192881 | 74.9317881 |
| 58.6388103 | 88.155253 | 63 | 74.0192881 | 74.9859547 |
| 59.6388103 | 87.155253 | 63 | 73.8526214 | 75.0484547 |
| 59.6388103 | 86.155253 | 63 | 73.3526214 | 75.1276214 |
| 59.6388103 | 85.155253 | 63 | 73.1859547 | 75.2192881 |
| 59.6388103 | 84.155253 | 63 | 72.8526214 | 75.3109547 |
| 60.6388103 | 84.155253 | 63 | 73.5192881 | 75.3859547 |
| 61.6388103 | 84.155253 | 63 | 73.6859547 | 75.4567881 |
| 62.6388103 | 84.155253 | 63 | 73.8526214 | 75.5401214 |
| 64.6388103 | 84.155253 | 63 | 74.5192881 | 75.6359547 |
| 66.6388103 | 85.155253 | 63 | 75.3526214 | 75.7442881 |
| 66.6388103 | 85.155253 | 63 | 75.5192881 | 75.8484547 |
| 67.6388103 | 85.155253 | 63 | 75.5192881 | 75.9317881 |
| 69.6388103 | 86.155253 | 63 | 76.6859547 | 76.0109547 |
| 70.6388103 | 85.155253 | 63 | 76.6859547 | 76.0942881 |
| 70.6388103 | 85.155253 | 63 | 76.6859547 | 76.1734547 |
| 70.6388103 | 83.155253 | 63 | 76.0192881 | 76.2692881 |
| 71.6388103 | 84.155253 | 63 | 76.6859547 | 76.3276214 |
| 72.6388103 | 86.155253 | 63 | 77.8526214 | 76.3734547 |
| 73.6388103 | 86.155253 | 63 | 78.3526214 | 76.4401214 |
| 74.6388103 | 87.155253 | 63 | 79.0192881 | 76.5276214 |
| 74.6388103 | 86.155253 | 63 | 78.8526214 | 76.6234547 |
| 74.6388103 | 86.155253 | 63 | 78.8526214 | 76.7192881 |
| 74.6388103 | 86.155253 | 63 | 78.8526214 | 76.8067881 |
| 74.6388103 | 85.155253 | 63 | 78.3526214 | 76.8901214 |
| 74.6388103 | 83.155253 | 63 | 77.5192881 | 76.9734547 |
| 74.6388103 | 83.155253 | 63 | 77.3526214 | 77.0692881 |
| 74.6388103 | 83.155253 | 63 | 77.3526214 | 77.1651214 |
| 74.6388103 | 84.155253 | 63 | 77.6859547 | 77.2567881 |
| 75.6388103 | 85.155253 | 63 | 78.1859547 | 77.4026214 |
| 75.6388103 | 85.155253 | 63 | 78.1859547 | 77.5526214 |
| 75.6388103 | 85.155253 | 63 | 77.8526214 | 77.6984547 |
| 76.6388103 | 85.155253 | 63 | 78.0192881 | 77.7401214 |
| 77.6388103 | 85.155253 | 63 | 78.3526214 | 77.7442881 |
| 76.6388103 | 85.155253 | 63 | 77.8526214 | 77.6859547 |
| 76.6388103 | 85.155253 | 63 | 77.5192881 | 77.6026214 |

|            |           |    |            |            |
|------------|-----------|----|------------|------------|
| 76.6388103 | 84.155253 | 63 | 76.6859547 | 77.5234547 |
| 76.6388103 | 85.155253 | 63 | 77.0192881 | 77.4567881 |
| 76.6388103 | 85.155253 | 63 | 77.5192881 | 77.3609547 |
| 75.6388103 | 86.155253 | 63 | 77.8526214 | 77.2442881 |
| 75.6388103 | 85.155253 | 63 | 77.8526214 | 77.1192881 |
| 74.6388103 | 85.155253 | 63 | 77.8526214 | 76.9734547 |
| 74.6388103 | 83.155253 | 63 | 77.3526214 | 76.8317881 |
| 72.6388103 | 83.155253 | 63 | 76.6859547 | 76.6984547 |
| 71.6388103 | 83.155253 | 63 | 76.5192881 | 76.5401214 |
| 71.6388103 | 83.155253 | 63 | 76.6859547 | 76.4234547 |
| 73.6388103 | 83.155253 | 63 | 77.3526214 | 76.3234547 |
| 73.6388103 | 83.155253 | 63 | 77.3526214 | 76.2401214 |
| 78.6388103 | 85.155253 | 63 | 79.6859547 | 76.1609547 |
| 79.6388103 | 86.155253 | 63 | 80.5192881 | 76.1026214 |
| 81.6388103 | 86.155253 | 63 | 81.1859547 | 76.0359547 |
| 68.6388103 | 88.155253 | 63 | 77.1859547 | 75.9984547 |
| 65.6388103 | 88.155253 | 63 | 75.6859547 | 75.9734547 |
| 61.6388103 | 88.155253 | 63 | 74.3526214 | 75.9359547 |
| 58.6388103 | 88.155253 | 63 | 73.3526214 | 75.8901214 |
| 58.6388103 | 88.155253 | 63 | 73.5192881 | 75.9817881 |
| 56.6388103 | 88.155253 | 63 | 73.3526214 | 76.0859547 |
| 55.6388103 | 87.155253 | 63 | 72.8526214 | 76.2109547 |
| 54.6388103 | 86.155253 | 63 | 73.1859547 | 76.3026214 |
| 53.6388103 | 86.155253 | 63 | 73.3526214 | 76.3567881 |
| 53.6388103 | 86.155253 | 63 | 73.1859547 | 76.3609547 |
| 53.6388103 | 87.155253 | 63 | 73.1859547 | 76.3484547 |
| 52.6388103 | 89.155253 | 63 | 73.5192881 | 76.3192881 |
| 51.6388103 | 89.155253 | 63 | 72.5192881 | 76.3151214 |
| 50.6388103 | 94.155253 | 63 | 73.6859547 | 76.3151214 |
| 50.6388103 | 94.155253 | 63 | 73.5192881 | 76.3151214 |
| 52.6388103 | 94.155253 | 63 | 74.0192881 | 76.2942881 |
| 52.6388103 | 94.155253 | 63 | 74.1859547 | 76.2442881 |
| 56.6388103 | 93.155253 | 63 | 75.3526214 | 76.1859547 |
| 56.6388103 | 93.155253 | 63 | 75.5192881 | 76.0651214 |
| 60.6388103 | 92.155253 | 63 | 76.6859547 | 75.9401214 |
| 61.6388103 | 91.155253 | 63 | 76.8526214 | 75.7984547 |
| 61.6388103 | 90.155253 | 63 | 76.5192881 | 75.7651214 |
| 63.6388103 | 89.155253 | 63 | 76.5192881 | 75.7817881 |
| 78.6388103 | 89.155253 | 63 | 81.5192881 | 75.8317881 |
| 79.6388103 | 89.155253 | 63 | 81.6859547 | 75.9109547 |
| 79.6388103 | 89.155253 | 63 | 81.6859547 | 75.9692881 |
| 77.6388103 | 89.155253 | 63 | 80.6859547 | 76.0359547 |
| 74.6388103 | 90.155253 | 63 | 79.6859547 | 76.0942881 |
| 70.6388103 | 89.155253 | 63 | 78.0192881 | 76.1317881 |
| 69.6388103 | 88.155253 | 63 | 77.3526214 | 76.1567881 |

|            |           |    |            |            |
|------------|-----------|----|------------|------------|
| 68.6388103 | 87.155253 | 63 | 76.6859547 | 76.1942881 |
| 69.6388103 | 86.155253 | 63 | 77.1859547 | 76.2317881 |
| 69.6388103 | 85.155253 | 63 | 76.6859547 | 76.2692881 |
| 69.6388103 | 85.155253 | 63 | 76.5192881 | 76.3442881 |
| 67.6388103 | 85.155253 | 63 | 75.8526214 | 76.3901214 |
| 66.6388103 | 84.155253 | 63 | 75.3526214 | 76.4692881 |
| 65.6388103 | 84.155253 | 63 | 75.0192881 | 76.5567881 |
| 64.6388103 | 84.155253 | 63 | 74.8526214 | 76.6401214 |
| 66.6388103 | 84.155253 | 63 | 75.5192881 | 76.6734547 |
| 66.6388103 | 84.155253 | 63 | 75.5192881 | 76.6942881 |
| 67.6388103 | 84.155253 | 63 | 75.8526214 | 76.7026214 |
| 68.6388103 | 85.155253 | 63 | 76.3526214 | 76.7151214 |
| 68.6388103 | 86.155253 | 63 | 76.3526214 | 76.7442881 |
| 68.6388103 | 86.155253 | 63 | 76.5192881 | 76.7984547 |
| 67.6388103 | 85.155253 | 63 | 75.8526214 | 76.7526214 |
| 67.6388103 | 85.155253 | 63 | 76.0192881 | 76.7276214 |
| 67.6388103 | 84.155253 | 63 | 75.1859547 | 76.7151214 |
| 67.6388103 | 84.155253 | 63 | 74.6859547 | 76.7317881 |
| 67.6388103 | 84.155253 | 63 | 74.3526214 | 76.8026214 |
| 67.6388103 | 84.155253 | 63 | 74.6859547 | 76.9109547 |
| 66.6388103 | 85.155253 | 63 | 74.6859547 | 77.0067881 |
| 67.6388103 | 85.155253 | 63 | 75.0192881 | 77.0776214 |
| 67.6388103 | 85.155253 | 63 | 75.5192881 | 77.1067881 |
| 67.6388103 | 85.155253 | 63 | 75.5192881 | 77.1192881 |
| 67.6388103 | 87.155253 | 63 | 76.6859547 | 77.1401214 |
| 67.6388103 | 89.155253 | 63 | 77.5192881 | 77.1859547 |
| 67.6388103 | 89.155253 | 63 | 77.5192881 | 77.2442881 |
| 67.6388103 | 87.155253 | 63 | 76.6859547 | 77.3234547 |
| 68.6388103 | 86.155253 | 63 | 76.3526214 | 77.4151214 |
| 70.6388103 | 86.155253 | 63 | 77.0192881 | 77.5026214 |
| 71.6388103 | 86.155253 | 63 | 77.3526214 | 77.5901214 |
| 72.6388103 | 86.155253 | 63 | 77.6859547 | 77.6901214 |
| 72.6388103 | 85.155253 | 63 | 78.6859547 | 77.7817881 |
| 73.6388103 | 85.155253 | 63 | 79.6859547 | 77.8609547 |
| 74.6388103 | 85.155253 | 63 | 80.6859547 | 77.9359547 |
| 74.6388103 | 86.155253 | 63 | 81.1859547 | 78.0442881 |
| 73.6388103 | 87.155253 | 63 | 81.3526214 | 78.1442881 |
| 73.6388103 | 89.155253 | 63 | 82.5192881 | 78.2567881 |
| 73.6388103 | 89.155253 | 63 | 82.3526214 | 78.3734547 |
| 72.6388103 | 89.155253 | 63 | 81.1859547 | 78.4692881 |
| 71.6388103 | 88.155253 | 63 | 79.5192881 | 78.5442881 |
| 69.6388103 | 86.155253 | 63 | 78.3526214 | 78.6109547 |
| 69.6388103 | 84.155253 | 63 | 77.1859547 | 78.6567881 |
| 70.6388103 | 83.155253 | 63 | 77.3526214 | 78.6859547 |
| 71.6388103 | 83.155253 | 63 | 77.6859547 | 78.7067881 |



|            |           |    |            |            |
|------------|-----------|----|------------|------------|
| 71.6388103 | 83.155253 | 63 | 77.6859547 | 78.6776214 |
| 74.6388103 | 83.155253 | 63 | 78.1859547 | 78.6192881 |
| 75.6388103 | 84.155253 | 63 | 78.5192881 | 78.5901214 |
| 77.6388103 | 84.155253 | 63 | 79.0192881 | 78.5817881 |
| 77.6388103 | 84.155253 | 63 | 79.0192881 | 78.5817881 |
| 80.6388103 | 83.155253 | 63 | 79.8526214 | 78.5817881 |
| 80.6388103 | 84.155253 | 63 | 80.0192881 | 78.5859547 |
| 79.6388103 | 84.155253 | 63 | 79.5192881 | 78.5817881 |
| 79.6388103 | 84.155253 | 63 | 79.5192881 | 78.5109547 |
| 78.6388103 | 87.155253 | 63 | 80.1859547 | 78.4026214 |
| 77.6388103 | 87.155253 | 63 | 80.0192881 | 78.2776214 |
| 77.6388103 | 86.155253 | 63 | 79.6859547 | 78.1359547 |
| 77.6388103 | 86.155253 | 63 | 79.3526214 | 77.9901214 |
| 78.6388103 | 81.155253 | 63 | 78.1859547 | 77.8234547 |
| 78.6388103 | 80.155253 | 63 | 77.6859547 | 77.6609547 |
| 78.6388103 | 80.155253 | 63 | 77.3526214 | 77.5401214 |
| 78.6388103 | 79.155253 | 63 | 76.8526214 | 77.4692881 |
| 77.6388103 | 80.155253 | 63 | 76.6859547 | 77.4192881 |
| 74.6388103 | 82.155253 | 63 | 76.3526214 | 77.3817881 |
| 71.6388103 | 82.155253 | 63 | 75.5192881 | 77.3442881 |
| 70.6388103 | 82.155253 | 63 | 75.1859547 | 77.2901214 |
| 72.6388103 | 83.155253 | 63 | 76.3526214 | 77.2276214 |
| 72.6388103 | 83.155253 | 63 | 76.3526214 | 77.1442881 |
| 73.6388103 | 82.155253 | 63 | 76.3526214 | 77.0401214 |
| 74.6388103 | 82.155253 | 63 | 77.0192881 | 76.9359547 |
| 74.6388103 | 82.155253 | 63 | 77.5192881 | 76.8026214 |
| 74.6388103 | 82.155253 | 63 | 77.5192881 | 76.6484547 |
| 70.6388103 | 81.155253 | 63 | 75.8526214 | 76.4942881 |
| 70.6388103 | 80.155253 | 63 | 75.3526214 | 76.3692881 |
| 70.6388103 | 80.155253 | 63 | 75.6859547 | 76.2484547 |
| 70.6388103 | 78.155253 | 63 | 75.5192881 | 76.1109547 |
| 70.6388103 | 78.155253 | 63 | 75.5192881 | 75.9651214 |
| 69.6388103 | 79.155253 | 63 | 75.8526214 | 75.8234547 |
| 68.6388103 | 79.155253 | 63 | 75.8526214 | 75.6859547 |
| 68.6388103 | 80.155253 | 63 | 76.3526214 | 75.5567881 |
| 68.6388103 | 81.155253 | 63 | 76.6859547 | 75.4359547 |
| 67.6388103 | 81.155253 | 63 | 76.3526214 | 75.3234547 |
| 67.6388103 | 79.155253 | 63 | 75.6859547 | 75.2234547 |
| 68.6388103 | 79.155253 | 63 | 75.8526214 | 75.1276214 |
| 68.6388103 | 79.155253 | 63 | 75.5192881 | 75.0401214 |
| 68.6388103 | 78.155253 | 63 | 75.1859547 | 74.9817881 |
| 68.6388103 | 79.155253 | 63 | 74.8526214 | 74.9276214 |
| 68.6388103 | 80.155253 | 63 | 74.3526214 | 74.8734547 |
| 68.6388103 | 81.155253 | 63 | 74.8526214 | 74.8234547 |
| 68.6388103 | 81.155253 | 63 | 73.6859547 | 74.7442881 |

|            |           |    |            |            |
|------------|-----------|----|------------|------------|
| 68.6388103 | 81.155253 | 63 | 73.6859547 | 74.6317881 |
| 69.6388103 | 81.155253 | 63 | 73.8526214 | 74.5109547 |
| 70.6388103 | 81.155253 | 63 | 74.5192881 | 74.3901214 |
| 70.6388103 | 81.155253 | 63 | 74.6859547 | 74.2734547 |
| 71.6388103 | 80.155253 | 63 | 74.6859547 | 74.1692881 |
| 72.6388103 | 78.155253 | 63 | 74.1859547 | 74.0567881 |
| 73.6388103 | 77.155253 | 63 | 74.0192881 | 73.9567881 |
| 73.6388103 | 77.155253 | 63 | 73.8526214 | 73.8651214 |
| 72.6388103 | 76.155253 | 63 | 73.0192881 | 73.7484547 |
| 72.6388103 | 76.155253 | 63 | 72.8526214 | 73.6442881 |
| 72.6388103 | 76.155253 | 63 | 72.8526214 | 73.5484547 |
| 72.6388103 | 76.155253 | 63 | 72.8526214 | 73.4817881 |
| 72.6388103 | 76.155253 | 63 | 72.8526214 | 73.4317881 |
| 72.6388103 | 76.155253 | 63 | 72.8526214 | 73.4026214 |
| 71.6388103 | 78.155253 | 63 | 73.1859547 | 73.3859547 |
| 70.6388103 | 78.155253 | 63 | 73.0192881 | 73.3817881 |
| 70.6388103 | 81.155253 | 63 | 74.1859547 | 73.3817881 |
| 69.6388103 | 82.155253 | 63 | 74.3526214 | 73.3984547 |
| 68.6388103 | 79.155253 | 63 | 73.1859547 | 73.4609547 |
| 65.6388103 | 80.155253 | 63 | 72.5192881 | 73.5192881 |
| 65.6388103 | 80.155253 | 63 | 72.6859547 | 73.6026214 |
| 63.6388103 | 82.155253 | 63 | 72.6859547 | 73.6942881 |
| 59.6388103 | 82.155253 | 63 | 71.1859547 | 73.7776214 |
| 59.6388103 | 82.155253 | 63 | 71.1859547 | 73.8526214 |
| 59.6388103 | 82.155253 | 63 | 71.1859547 | 73.8776214 |
| 62.6388103 | 80.155253 | 63 | 71.5192881 | 73.8817881 |
| 64.6388103 | 80.155253 | 63 | 71.8526214 | 73.8984547 |
| 64.6388103 | 79.155253 | 63 | 71.1859547 | 73.9234547 |
| 65.6388103 | 79.155253 | 63 | 71.6859547 | 73.9317881 |
| 65.6388103 | 80.155253 | 63 | 72.5192881 | 73.9567881 |
| 67.6388103 | 82.155253 | 63 | 74.0192881 | 73.9817881 |
| 67.6388103 | 82.155253 | 63 | 74.3526214 | 74.0151214 |
| 66.6388103 | 82.155253 | 63 | 74.5192881 | 74.0651214 |
| 66.6388103 | 84.155253 | 63 | 75.1859547 | 74.1109547 |
| 66.6388103 | 84.155253 | 63 | 75.3526214 | 74.1526214 |
| 66.6388103 | 84.155253 | 63 | 75.1859547 | 74.1817881 |
| 67.6388103 | 84.155253 | 63 | 75.5192881 | 74.2067881 |
| 70.6388103 | 85.155253 | 63 | 76.8526214 | 74.1984547 |
| 71.6388103 | 86.155253 | 63 | 77.1859547 | 74.1942881 |
| 71.6388103 | 86.155253 | 63 | 77.0192881 | 74.2234547 |
| 71.6388103 | 86.155253 | 63 | 77.3526214 | 74.2526214 |
| 71.6388103 | 85.155253 | 63 | 77.1859547 | 74.2817881 |
| 71.6388103 | 85.155253 | 63 | 77.5192881 | 74.2942881 |
| 71.6388103 | 82.155253 | 63 | 75.6859547 | 74.3359547 |
| 70.6388103 | 81.155253 | 63 | 74.8526214 | 74.3776214 |

|            |           |    |            |            |
|------------|-----------|----|------------|------------|
| 70.6388103 | 81.155253 | 63 | 74.8526214 | 74.4192881 |
| 71.6388103 | 81.155253 | 63 | 75.0192881 | 74.4651214 |
| 70.6388103 | 81.155253 | 63 | 74.1859547 | 74.4984547 |
| 70.6388103 | 81.155253 | 63 | 74.0192881 | 74.5484547 |
| 70.6388103 | 81.155253 | 63 | 73.8526214 | 74.5859547 |
| 71.6388103 | 81.155253 | 63 | 74.1859547 | 74.6026214 |
| 72.6388103 | 82.155253 | 63 | 74.8526214 | 74.5817881 |
| 72.6388103 | 82.155253 | 63 | 74.6859547 | 74.5526214 |
| 72.6388103 | 82.155253 | 63 | 74.5192881 | 74.5192881 |
| 71.6388103 | 82.155253 | 63 | 74.3526214 | 74.4692881 |
| 71.6388103 | 81.155253 | 63 | 74.0192881 | 74.4234547 |
| 71.6388103 | 80.155253 | 63 | 73.8526214 | 74.3776214 |
| 71.6388103 | 80.155253 | 63 | 74.1859547 | 74.3359547 |
| 71.6388103 | 80.155253 | 63 | 74.3526214 | 74.2734547 |
| 70.6388103 | 79.155253 | 63 | 73.6859547 | 74.2109547 |
| 70.6388103 | 79.155253 | 63 | 73.8526214 | 74.1526214 |
| 69.6388103 | 78.155253 | 63 | 73.1859547 | 74.1151214 |
| 68.6388103 | 78.155253 | 63 | 72.8526214 | 74.0984547 |
| 68.6388103 | 78.155253 | 63 | 72.8526214 | 74.0817881 |
| 68.6388103 | 78.155253 | 63 | 72.8526214 | 74.1234547 |
| 69.6388103 | 78.155253 | 63 | 73.3526214 | 74.1734547 |
| 69.6388103 | 78.155253 | 63 | 73.1859547 | 74.2151214 |
| 69.6388103 | 78.155253 | 63 | 73.1859547 | 74.2401214 |
| 71.6388103 | 78.155253 | 63 | 73.1859547 | 74.2817881 |
| 71.6388103 | 78.155253 | 63 | 73.1859547 | 74.3359547 |
| 71.6388103 | 78.155253 | 63 | 73.1859547 | 74.4234547 |
| 71.6388103 | 78.155253 | 63 | 73.1859547 | 74.5109547 |
| 70.6388103 | 79.155253 | 63 | 73.1859547 | 74.5984547 |
| 70.6388103 | 79.155253 | 63 | 73.1859547 | 74.7026214 |
| 70.6388103 | 80.155253 | 63 | 73.5192881 | 74.8151214 |
| 70.6388103 | 80.155253 | 63 | 73.3526214 | 74.8942881 |
| 71.6388103 | 80.155253 | 63 | 73.8526214 | 74.9776214 |
| 72.6388103 | 80.155253 | 63 | 74.3526214 | 75.0776214 |
| 72.6388103 | 80.155253 | 63 | 74.6859547 | 75.1734547 |
| 72.6388103 | 80.155253 | 63 | 74.6859547 | 75.2734547 |
| 74.6388103 | 80.155253 | 63 | 75.8526214 | 75.4151214 |
| 74.6388103 | 81.155253 | 63 | 76.5192881 | 75.5526214 |
| 74.6388103 | 81.155253 | 63 | 76.8526214 | 75.7026214 |
| 74.6388103 | 81.155253 | 63 | 77.3526214 | 75.8609547 |
| 74.6388103 | 81.155253 | 63 | 76.8526214 | 76.0026214 |
| 74.6388103 | 82.155253 | 63 | 76.5192881 | 76.1401214 |
| 74.6388103 | 82.155253 | 63 | 76.0192881 | 76.2567881 |
| 75.6388103 | 81.155253 | 63 | 75.8526214 | 76.3942881 |
| 75.6388103 | 82.155253 | 63 | 76.1859547 | 76.5359547 |
| 76.6388103 | 85.155253 | 63 | 77.3526214 | 76.6859547 |

|            |           |    |            |            |
|------------|-----------|----|------------|------------|
| 76.6388103 | 86.155253 | 63 | 77.6859547 | 76.8859547 |
| 77.6388103 | 86.155253 | 63 | 78.3526214 | 77.0859547 |
| 78.6388103 | 87.155253 | 63 | 78.8526214 | 77.2817881 |
| 79.6388103 | 86.155253 | 63 | 79.0192881 | 77.4859547 |
| 75.6388103 | 86.155253 | 63 | 77.5192881 | 77.6942881 |
| 79.6388103 | 82.155253 | 63 | 77.3526214 | 77.8859547 |
| 83.6388103 | 80.155253 | 63 | 77.8526214 | 78.0859547 |
| 84.6388103 | 80.155253 | 63 | 78.0192881 | 78.2817881 |
| 84.6388103 | 81.155253 | 63 | 78.3526214 | 78.4692881 |
| 85.6388103 | 82.155253 | 63 | 79.3526214 | 78.6651214 |
| 85.6388103 | 82.155253 | 63 | 79.3526214 | 78.8859547 |
| 85.6388103 | 82.155253 | 63 | 79.1859547 | 79.0692881 |
| 85.6388103 | 82.155253 | 63 | 79.1859547 | 79.2359547 |
| 85.6388103 | 80.155253 | 63 | 78.5192881 | 79.3942881 |
| 85.6388103 | 80.155253 | 63 | 78.3526214 | 79.5442881 |
| 85.6388103 | 79.155253 | 63 | 78.0192881 | 79.7026214 |
| 86.6388103 | 80.155253 | 63 | 78.6859547 | 79.8526214 |
| 86.6388103 | 80.155253 | 63 | 78.8526214 | 80.0151214 |
| 87.6388103 | 80.155253 | 63 | 79.1859547 | 80.1984547 |
| 91.6388103 | 82.155253 | 63 | 81.1859547 | 80.3942881 |
| 91.6388103 | 82.155253 | 63 | 81.1859547 | 80.5776214 |
| 91.6388103 | 82.155253 | 63 | 81.0192881 | 80.7609547 |
| 92.6388103 | 82.155253 | 63 | 81.3526214 | 80.9317881 |
| 92.6388103 | 82.155253 | 63 | 81.5192881 | 81.0984547 |
| 92.6388103 | 81.155253 | 63 | 81.1859547 | 81.2359547 |
| 92.6388103 | 81.155253 | 63 | 81.3526214 | 81.3942881 |
| 92.6388103 | 82.155253 | 63 | 81.6859547 | 81.5484547 |
| 90.6388103 | 84.155253 | 63 | 81.8526214 | 81.6734547 |
| 90.6388103 | 86.155253 | 63 | 82.5192881 | 81.7776214 |
| 90.6388103 | 89.155253 | 63 | 83.5192881 | 81.8526214 |
| 89.6388103 | 89.155253 | 63 | 83.1859547 | 81.8942881 |
| 89.6388103 | 89.155253 | 63 | 83.1859547 | 81.9401214 |
| 90.6388103 | 88.155253 | 63 | 83.1859547 | 82.0067881 |
| 90.6388103 | 87.155253 | 63 | 83.3526214 | 82.0651214 |
| 90.6388103 | 86.155253 | 63 | 83.1859547 | 82.1734547 |
| 90.6388103 | 83.155253 | 63 | 82.5192881 | 82.2817881 |
| 90.6388103 | 82.155253 | 63 | 82.5192881 | 82.4109547 |
| 90.6388103 | 84.155253 | 63 | 83.1859547 | 82.5109547 |
| 90.6388103 | 85.155253 | 63 | 84.0192881 | 82.6026214 |
| 90.6388103 | 85.155253 | 63 | 84.6859547 | 82.6901214 |
| 90.6388103 | 85.155253 | 63 | 85.0192881 | 82.7276214 |
| 90.6388103 | 85.155253 | 63 | 85.1859547 | 82.7692881 |
| 92.6388103 | 86.155253 | 63 | 85.5192881 | 82.8401214 |
| 92.6388103 | 87.155253 | 63 | 84.5192881 | 82.9109547 |
| 92.6388103 | 87.155253 | 63 | 83.8526214 | 82.9859547 |

|            |           |    |            |            |
|------------|-----------|----|------------|------------|
| 92.6388103 | 86.155253 | 63 | 83.5192881 | 83.0567881 |
| 92.6388103 | 84.155253 | 63 | 82.8526214 | 83.1317881 |
| 92.6388103 | 84.155253 | 63 | 82.1859547 | 83.1942881 |
| 91.6388103 | 84.155253 | 63 | 81.3526214 | 83.2442881 |
| 90.6388103 | 84.155253 | 63 | 81.0192881 | 83.2484547 |
| 91.6388103 | 84.155253 | 63 | 81.1859547 | 83.2067881 |
| 92.6388103 | 85.155253 | 63 | 81.8526214 | 83.1901214 |
| 92.6388103 | 85.155253 | 63 | 81.5192881 | 83.1942881 |
| 92.6388103 | 89.155253 | 63 | 82.8526214 | 83.1817881 |
| 92.6388103 | 89.155253 | 63 | 82.6859547 | 83.1651214 |
| 92.6388103 | 90.155253 | 63 | 83.1859547 | 83.1484547 |
| 92.6388103 | 88.155253 | 63 | 82.6859547 | 83.1151214 |
| 93.6388103 | 86.155253 | 63 | 82.5192881 | 83.0734547 |
| 93.6388103 | 86.155253 | 63 | 82.6859547 | 83.0192881 |
| 93.6388103 | 86.155253 | 69 | 82.6859547 | 82.9234547 |
| 93.6388103 | 86.155253 | 69 | 82.8526214 | 82.8192881 |
| 93.6388103 | 88.155253 | 69 | 83.8526214 | 82.7109547 |
| 93.6388103 | 88.155253 | 69 | 84.1859547 | 82.6401214 |
| 92.6388103 | 89.155253 | 69 | 84.5192881 | 82.5526214 |
| 91.6388103 | 89.155253 | 69 | 84.0192881 | 82.5151214 |
| 92.6388103 | 89.155253 | 69 | 84.3526214 | 82.5026214 |
| 92.6388103 | 89.155253 | 69 | 84.1859547 | 82.4984547 |
| 92.6388103 | 88.155253 | 69 | 83.8526214 | 82.5651214 |
| 91.6388103 | 86.155253 | 69 | 82.6859547 | 82.6651214 |
| 91.6388103 | 85.155253 | 69 | 81.8526214 | 82.8151214 |
| 91.6388103 | 87.155253 | 69 | 82.5192881 | 83.0151214 |
| 90.6388103 | 91.155253 | 69 | 83.3526214 | 83.2151214 |
| 88.6388103 | 91.155253 | 69 | 82.6859547 | 83.4192881 |
| 88.6388103 | 91.155253 | 69 | 82.6859547 | 83.6317881 |
| 88.6388103 | 91.155253 | 69 | 82.5192881 | 83.8192881 |
| 86.6388103 | 89.155253 | 69 | 81.1859547 | 84.0109547 |
| 86.6388103 | 87.155253 | 69 | 80.8526214 | 84.1984547 |
| 86.6388103 | 87.155253 | 69 | 81.0192881 | 84.3901214 |
| 85.6388103 | 86.155253 | 69 | 80.1859547 | 84.5817881 |
| 85.6388103 | 87.155253 | 69 | 80.5192881 | 84.7776214 |
| 85.6388103 | 87.155253 | 69 | 80.6859547 | 84.9526214 |
| 88.6388103 | 89.155253 | 69 | 82.3526214 | 85.1109547 |
| 88.6388103 | 89.155253 | 69 | 82.0192881 | 85.2192881 |
| 89.6388103 | 91.155253 | 69 | 83.0192881 | 85.3317881 |
| 90.6388103 | 91.155253 | 69 | 83.3526214 | 85.4317881 |
| 90.6388103 | 91.155253 | 69 | 83.3526214 | 85.5234547 |
| 93.6388103 | 95.155253 | 69 | 85.5192881 | 85.5901214 |
| 94.6388103 | 96.155253 | 69 | 86.1859547 | 85.6234547 |
| 94.6388103 | 98.155253 | 63 | 87.3526214 | 85.6442881 |
| 98.6388103 | 99.155253 | 63 | 89.0192881 | 85.6859547 |

|            |           |    |            |            |
|------------|-----------|----|------------|------------|
| 98.6388103 | 99.155253 | 63 | 89.1859547 | 85.7567881 |
| 99.6388103 | 99.155253 | 63 | 90.0192881 | 85.8151214 |
| 99.6388103 | 99.155253 | 63 | 90.0192881 | 85.8692881 |
| 99.6388103 | 99.155253 | 63 | 90.3526214 | 85.9359547 |
| 99.6388103 | 99.155253 | 63 | 90.3526214 | 85.9859547 |
| 99.6388103 | 99.155253 | 63 | 90.6859547 | 86.0401214 |
| 99.6388103 | 98.155253 | 63 | 90.3526214 | 86.1317881 |
| 98.6388103 | 97.155253 | 63 | 90.1859547 | 86.2359547 |
| 98.6388103 | 97.155253 | 63 | 90.5192881 | 86.3484547 |
| 98.6388103 | 95.155253 | 63 | 89.6859547 | 86.4859547 |
| 97.6388103 | 93.155253 | 63 | 89.1859547 | 86.6109547 |
| 96.6388103 | 91.155253 | 63 | 88.1859547 | 86.7109547 |
| 96.6388103 | 93.155253 | 63 | 88.6859547 | 86.7317881 |
| 96.6388103 | 93.155253 | 63 | 88.5192881 | 86.7567881 |
| 94.6388103 | 93.155253 | 63 | 87.6859547 | 86.7442881 |
| 94.6388103 | 92.155253 | 63 | 87.0192881 | 86.7192881 |
| 94.6388103 | 88.155253 | 63 | 85.5192881 | 86.6651214 |
| 91.6388103 | 88.155253 | 63 | 84.6859547 | 86.5401214 |
| 91.6388103 | 86.155253 | 63 | 84.3526214 | 86.3942881 |
| 91.6388103 | 86.155253 | 63 | 84.6859547 | 86.1942881 |
| 92.6388103 | 86.155253 | 63 | 84.8526214 | 85.9401214 |
| 92.6388103 | 87.155253 | 63 | 85.5192881 | 85.6734547 |
| 92.6388103 | 87.155253 | 63 | 85.3526214 | 85.3942881 |
| 90.6388103 | 87.155253 | 63 | 84.6859547 | 85.0984547 |
| 90.6388103 | 87.155253 | 63 | 84.6859547 | 84.7942881 |
| 90.6388103 | 87.155253 | 63 | 84.8526214 | 84.4901214 |
| 90.6388103 | 86.155253 | 63 | 85.0192881 | 84.1651214 |
| 90.6388103 | 86.155253 | 63 | 85.5192881 | 83.8359547 |
| 90.6388103 | 86.155253 | 63 | 85.6859547 | 83.5026214 |
| 89.6388103 | 86.155253 | 63 | 85.5192881 | 83.1484547 |
| 89.6388103 | 85.155253 | 63 | 84.6859547 | 82.8151214 |
| 88.6388103 | 85.155253 | 63 | 83.1859547 | 82.4651214 |
| 87.6388103 | 86.155253 | 63 | 83.0192881 | 82.1526214 |
| 87.6388103 | 85.155253 | 63 | 82.5192881 | 81.8401214 |
| 87.6388103 | 85.155253 | 63 | 82.3526214 | 81.5401214 |
| 85.6388103 | 84.155253 | 63 | 81.1859547 | 81.2609547 |
| 85.6388103 | 82.155253 | 63 | 80.5192881 | 81.0026214 |
| 85.6388103 | 82.155253 | 63 | 80.3526214 | 80.7734547 |
| 82.6388103 | 82.155253 | 63 | 79.3526214 | 80.5776214 |
| 81.6388103 | 82.155253 | 63 | 78.8526214 | 80.4026214 |
| 81.6388103 | 81.155253 | 63 | 78.5192881 | 80.2234547 |
| 81.6388103 | 81.155253 | 63 | 78.8526214 | 80.0359547 |
| 81.6388103 | 78.155253 | 63 | 78.1859547 | 79.8776214 |
| 81.6388103 | 78.155253 | 63 | 78.1859547 | 79.7276214 |
| 81.6388103 | 78.155253 | 63 | 78.1859547 | 79.5859547 |

|            |           |    |            |            |
|------------|-----------|----|------------|------------|
| 81.6388103 | 77.155253 | 63 | 77.6859547 | 79.4567881 |
| 81.6388103 | 76.155253 | 63 | 77.1859547 | 79.3401214 |
| 81.6388103 | 75.155253 | 63 | 76.8526214 | 79.2151214 |
| 80.6388103 | 75.155253 | 63 | 76.3526214 | 79.0859547 |
| 80.6388103 | 75.155253 | 63 | 76.3526214 | 78.9567881 |
| 80.6388103 | 74.155253 | 63 | 75.1859547 | 78.8317881 |
| 80.6388103 | 75.155253 | 63 | 75.6859547 | 78.7359547 |
| 80.6388103 | 75.155253 | 63 | 76.1859547 | 78.6776214 |
| 80.6388103 | 75.155253 | 63 | 76.5192881 | 78.6234547 |
| 80.6388103 | 75.155253 | 63 | 76.5192881 | 78.5734547 |
| 81.6388103 | 74.155253 | 63 | 76.6859547 | 78.5026214 |
| 81.6388103 | 74.155253 | 63 | 76.3526214 | 78.4776214 |
| 83.6388103 | 74.155253 | 63 | 76.8526214 | 78.4651214 |
| 84.6388103 | 75.155253 | 63 | 77.3526214 | 78.5192881 |
| 85.6388103 | 75.155253 | 63 | 77.5192881 | 78.6151214 |
| 87.6388103 | 75.155253 | 63 | 77.3526214 | 78.6942881 |
| 87.6388103 | 80.155253 | 63 | 79.1859547 | 78.7817881 |
| 87.6388103 | 81.155253 | 63 | 79.3526214 | 78.8692881 |
| 87.6388103 | 81.155253 | 63 | 79.0192881 | 78.9442881 |
| 87.6388103 | 82.155253 | 63 | 79.5192881 | 79.0109547 |
| 89.6388103 | 82.155253 | 63 | 80.1859547 | 79.0984547 |
| 89.6388103 | 82.155253 | 63 | 80.0192881 | 79.1984547 |
| 89.6388103 | 83.155253 | 63 | 80.3526214 | 79.3067881 |
| 88.6388103 | 84.155253 | 63 | 80.5192881 | 79.3942881 |
| 88.6388103 | 84.155253 | 63 | 80.5192881 | 79.4901214 |
| 88.6388103 | 84.155253 | 63 | 80.8526214 | 79.5776214 |
| 88.6388103 | 84.155253 | 63 | 80.8526214 | 79.6901214 |
| 88.6388103 | 84.155253 | 63 | 80.8526214 | 79.7817881 |
| 88.6388103 | 84.155253 | 63 | 80.5192881 | 79.8609547 |
| 86.6388103 | 84.155253 | 63 | 79.5192881 | 79.9234547 |
| 86.6388103 | 86.155253 | 63 | 80.1859547 | 80.0026214 |
| 86.6388103 | 86.155253 | 63 | 80.0192881 | 80.0484547 |
| 86.6388103 | 93.155253 | 63 | 82.5192881 | 80.0776214 |
| 87.6388103 | 94.155253 | 63 | 83.1859547 | 80.0609547 |
| 86.6388103 | 91.155253 | 63 | 82.0192881 | 80.0234547 |
| 86.6388103 | 91.155253 | 63 | 82.0192881 | 79.9692881 |
| 87.6388103 | 91.155253 | 63 | 82.3526214 | 79.9317881 |
| 87.6388103 | 88.155253 | 63 | 81.1859547 | 79.8526214 |
| 87.6388103 | 87.155253 | 63 | 80.8526214 | 79.7942881 |
| 89.6388103 | 87.155253 | 63 | 81.6859547 | 79.7442881 |
| 90.6388103 | 86.155253 | 63 | 81.6859547 | 79.6901214 |
| 90.6388103 | 86.155253 | 63 | 81.5192881 | 79.6109547 |
| 90.6388103 | 82.155253 | 63 | 80.3526214 | 79.5276214 |
| 90.6388103 | 82.155253 | 63 | 80.1859547 | 79.4401214 |
| 90.6388103 | 81.155253 | 63 | 79.8526214 | 79.3484547 |

|            |           |    |            |            |
|------------|-----------|----|------------|------------|
| 89.6388103 | 81.155253 | 63 | 79.6859547 | 79.2567881 |
| 86.6388103 | 83.155253 | 63 | 79.3526214 | 79.1734547 |
| 85.6388103 | 83.155253 | 63 | 79.3526214 | 79.0859547 |
| 83.6388103 | 83.155253 | 63 | 79.0192881 | 78.9901214 |
| 83.6388103 | 85.155253 | 63 | 79.6859547 | 78.8942881 |
| 79.6388103 | 85.155253 | 63 | 78.5192881 | 78.8942881 |
| 77.6388103 | 85.155253 | 63 | 77.5192881 | 78.8692881 |
| 77.6388103 | 83.155253 | 63 | 76.1859547 | 78.8484547 |
| 77.6388103 | 82.155253 | 63 | 75.8526214 | 78.7651214 |
| 76.6388103 | 83.155253 | 63 | 75.3526214 | 78.6442881 |
| 76.6388103 | 84.155253 | 63 | 75.8526214 | 78.5526214 |
| 76.6388103 | 84.155253 | 63 | 76.0192881 | 78.4776214 |
| 76.6388103 | 87.155253 | 63 | 77.0192881 | 78.3776214 |
| 76.6388103 | 87.155253 | 63 | 77.0192881 | 78.3026214 |
| 75.6388103 | 88.155253 | 63 | 77.3526214 | 78.2151214 |
| 74.6388103 | 88.155253 | 63 | 77.0192881 | 78.0984547 |
| 73.6388103 | 88.155253 | 63 | 76.6859547 | 77.9692881 |
| 74.6388103 | 88.155253 | 63 | 76.8526214 | 77.8192881 |
| 74.6388103 | 88.155253 | 63 | 76.8526214 | 77.6567881 |
| 74.6388103 | 88.155253 | 63 | 76.8526214 | 77.4942881 |
| 76.6388103 | 88.155253 | 63 | 77.5192881 | 77.3234547 |
| 76.6388103 | 87.155253 | 63 | 77.3526214 | 77.1151214 |
| 76.6388103 | 86.155253 | 63 | 77.0192881 | 76.9151214 |
| 76.6388103 | 85.155253 | 63 | 76.6859547 | 76.7151214 |
| 85.6388103 | 84.155253 | 63 | 79.5192881 | 76.5401214 |
| 86.6388103 | 82.155253 | 63 | 79.1859547 | 76.3609547 |
| 87.6388103 | 81.155253 | 63 | 79.1859547 | 76.2151214 |
| 87.6388103 | 81.155253 | 63 | 79.1859547 | 76.1109547 |
| 85.6388103 | 81.155253 | 63 | 78.3526214 | 76.0567881 |
| 85.6388103 | 81.155253 | 63 | 78.3526214 | 76.0192881 |
| 85.6388103 | 83.155253 | 63 | 79.0192881 | 76.0234547 |
| 84.6388103 | 82.155253 | 63 | 78.3526214 | 76.0984547 |
| 84.6388103 | 81.155253 | 63 | 78.1859547 | 76.1651214 |
| 81.6388103 | 81.155253 | 63 | 77.3526214 | 76.2776214 |
| 80.6388103 | 81.155253 | 63 | 77.0192881 | 76.4234547 |
| 79.6388103 | 81.155253 | 63 | 76.5192881 | 76.5609547 |
| 76.6388103 | 81.155253 | 63 | 75.5192881 | 76.7026214 |
| 71.6388103 | 81.155253 | 63 | 73.8526214 | 76.8567881 |
| 71.6388103 | 81.155253 | 63 | 73.6859547 | 77.0067881 |
| 68.6388103 | 82.155253 | 63 | 73.0192881 | 77.1901214 |
| 63.6388103 | 82.155253 | 63 | 71.3526214 | 77.3859547 |
| 63.6388103 | 82.155253 | 63 | 71.3526214 | 77.5901214 |
| 63.6388103 | 82.155253 | 63 | 71.3526214 | 77.7317881 |
| 64.6388103 | 82.155253 | 63 | 72.0192881 | 77.8901214 |
| 65.6388103 | 82.155253 | 63 | 72.5192881 | 78.0567881 |



|            |           |    |            |            |
|------------|-----------|----|------------|------------|
| 65.6388103 | 82.155253 | 63 | 72.6859547 | 78.1276214 |
| 66.6388103 | 82.155253 | 63 | 73.3526214 | 78.2067881 |
| 67.6388103 | 82.155253 | 63 | 74.0192881 | 78.2859547 |
| 67.6388103 | 82.155253 | 63 | 74.3526214 | 78.3651214 |
| 69.6388103 | 83.155253 | 63 | 75.5192881 | 78.4484547 |
| 75.6388103 | 87.155253 | 63 | 78.8526214 | 78.5151214 |
| 75.6388103 | 87.155253 | 63 | 78.6859547 | 78.5484547 |
| 83.6388103 | 87.155253 | 63 | 81.5192881 | 78.5942881 |
| 89.6388103 | 86.155253 | 63 | 82.8526214 | 78.6359547 |
| 89.6388103 | 86.155253 | 63 | 82.8526214 | 78.6817881 |
| 90.6388103 | 85.155253 | 63 | 82.6859547 | 78.7401214 |
| 91.6388103 | 85.155253 | 63 | 82.8526214 | 78.7942881 |
| 89.6388103 | 87.155253 | 63 | 82.8526214 | 78.8651214 |
| 89.6388103 | 91.155253 | 63 | 84.1859547 | 78.9817881 |
| 88.6388103 | 91.155253 | 63 | 84.6859547 | 79.1026214 |
| 88.6388103 | 91.155253 | 63 | 85.6859547 | 79.2401214 |
| 78.6388103 | 93.155253 | 63 | 83.0192881 | 79.4151214 |
| 78.6388103 | 94.155253 | 63 | 83.3526214 | 79.5901214 |
| 78.6388103 | 94.155253 | 63 | 83.3526214 | 79.7401214 |
| 77.6388103 | 92.155253 | 63 | 82.3526214 | 79.8567881 |
| 77.6388103 | 92.155253 | 63 | 82.3526214 | 79.9567881 |
| 77.6388103 | 92.155253 | 63 | 82.3526214 | 80.0651214 |
| 77.6388103 | 92.155253 | 63 | 82.3526214 | 80.1526214 |
| 77.6388103 | 90.155253 | 63 | 81.6859547 | 80.1817881 |
| 77.6388103 | 89.155253 | 63 | 81.0192881 | 80.1609547 |
| 77.6388103 | 89.155253 | 63 | 80.3526214 | 80.0942881 |
| 76.6388103 | 90.155253 | 63 | 80.1859547 | 79.9359547 |
| 75.6388103 | 90.155253 | 63 | 79.8526214 | 79.7859547 |
| 75.6388103 | 89.155253 | 63 | 79.1859547 | 79.5734547 |
| 76.6388103 | 89.155253 | 63 | 79.3526214 | 79.3359547 |
| 76.6388103 | 87.155253 | 63 | 78.6859547 | 79.0984547 |
| 76.6388103 | 87.155253 | 63 | 78.3526214 | 78.8567881 |
| 77.6388103 | 87.155253 | 63 | 78.5192881 | 78.6026214 |
| 77.6388103 | 87.155253 | 63 | 78.5192881 | 78.3567881 |
| 77.6388103 | 87.155253 | 63 | 78.5192881 | 78.0776214 |
| 77.6388103 | 87.155253 | 63 | 78.3526214 | 77.7567881 |
| 77.6388103 | 87.155253 | 63 | 78.3526214 | 77.4192881 |
| 74.6388103 | 87.155253 | 63 | 77.3526214 | 77.1484547 |
| 72.6388103 | 87.155253 | 63 | 76.6859547 | 76.8651214 |
| 72.6388103 | 87.155253 | 63 | 76.5192881 | 76.5859547 |
| 72.6388103 | 90.155253 | 63 | 77.0192881 | 76.3109547 |
| 72.6388103 | 90.155253 | 63 | 76.8526214 | 76.0442881 |
| 68.6388103 | 89.155253 | 63 | 75.1859547 | 75.7817881 |
| 65.6388103 | 88.155253 | 63 | 73.5192881 | 75.5026214 |
| 64.6388103 | 88.155253 | 63 | 72.8526214 | 75.2442881 |

|            |           |    |            |            |
|------------|-----------|----|------------|------------|
| 64.6388103 | 88.155253 | 63 | 72.5192881 | 75.0401214 |
| 64.6388103 | 88.155253 | 63 | 72.6859547 | 74.8609547 |
| 65.6388103 | 88.155253 | 63 | 73.0192881 | 74.7401214 |
| 67.6388103 | 87.155253 | 63 | 73.3526214 | 74.6901214 |
| 67.6388103 | 87.155253 | 63 | 73.3526214 | 74.6567881 |
| 66.6388103 | 86.155253 | 63 | 73.0192881 | 74.6234547 |
| 66.6388103 | 85.155253 | 63 | 72.6859547 | 74.5901214 |
| 66.6388103 | 85.155253 | 63 | 73.0192881 | 74.5526214 |
| 66.6388103 | 85.155253 | 63 | 73.0192881 | 74.4984547 |
| 61.6388103 | 85.155253 | 63 | 71.8526214 | 74.4442881 |
| 61.6388103 | 85.155253 | 63 | 72.1859547 | 74.4067881 |
| 62.6388103 | 84.155253 | 63 | 72.1859547 | 74.3942881 |
| 62.6388103 | 83.155253 | 63 | 72.0192881 | 74.3817881 |
| 62.6388103 | 83.155253 | 63 | 72.1859547 | 74.4401214 |
| 62.6388103 | 81.155253 | 63 | 71.3526214 | 74.4984547 |
| 63.6388103 | 81.155253 | 63 | 71.6859547 | 74.5442881 |
| 63.6388103 | 80.155253 | 63 | 71.8526214 | 74.5776214 |
| 61.6388103 | 80.155253 | 63 | 71.1859547 | 74.6359547 |
| 61.6388103 | 80.155253 | 63 | 71.3526214 | 74.7484547 |
| 63.6388103 | 82.155253 | 63 | 72.8526214 | 74.9151214 |
| 64.6388103 | 82.155253 | 63 | 73.1859547 | 75.0984547 |
| 64.6388103 | 88.155253 | 63 | 75.3526214 | 75.2817881 |
| 65.6388103 | 94.155253 | 63 | 77.8526214 | 75.4442881 |
| 62.6388103 | 96.155253 | 63 | 77.8526214 | 75.5734547 |
| 62.6388103 | 96.155253 | 63 | 78.0192881 | 75.7067881 |
| 61.6388103 | 95.155253 | 63 | 77.3526214 | 75.8359547 |
| 61.6388103 | 93.155253 | 63 | 76.8526214 | 75.9901214 |
| 61.6388103 | 92.155253 | 63 | 76.3526214 | 76.1484547 |
| 61.6388103 | 92.155253 | 63 | 76.3526214 | 76.3109547 |
| 64.6388103 | 92.155253 | 63 | 77.0192881 | 76.4776214 |
| 67.6388103 | 92.155253 | 63 | 77.8526214 | 76.6651214 |
| 67.6388103 | 92.155253 | 63 | 77.8526214 | 76.8234547 |
| 71.6388103 | 93.155253 | 63 | 79.6859547 | 76.9567881 |
| 71.6388103 | 91.155253 | 63 | 79.0192881 | 77.1026214 |
| 71.6388103 | 89.155253 | 63 | 78.3526214 | 77.2567881 |
| 72.6388103 | 88.155253 | 63 | 78.3526214 | 77.4359547 |
| 73.6388103 | 89.155253 | 63 | 79.1859547 | 77.6359547 |
| 73.6388103 | 90.155253 | 63 | 79.6859547 | 77.8276214 |
| 74.6388103 | 92.155253 | 63 | 80.1859547 | 78.0442881 |
| 75.6388103 | 92.155253 | 63 | 80.1859547 | 78.2734547 |
| 75.6388103 | 91.155253 | 63 | 79.8526214 | 78.5067881 |
| 75.6388103 | 90.155253 | 63 | 79.1859547 | 78.7192881 |
| 73.6388103 | 89.155253 | 63 | 78.1859547 | 78.8567881 |
| 73.6388103 | 89.155253 | 63 | 78.6859547 | 78.9109547 |
| 73.6388103 | 89.155253 | 63 | 78.5192881 | 78.9276214 |

|            |           |    |            |            |
|------------|-----------|----|------------|------------|
| 73.6388103 | 91.155253 | 63 | 79.1859547 | 78.9109547 |
| 73.6388103 | 91.155253 | 63 | 79.0192881 | 78.9026214 |
| 73.6388103 | 92.155253 | 63 | 79.5192881 | 78.8942881 |
| 73.6388103 | 93.155253 | 63 | 79.6859547 | 78.8942881 |
| 73.6388103 | 92.155253 | 63 | 79.3526214 | 78.8984547 |
| 73.6388103 | 90.155253 | 63 | 78.5192881 | 78.8859547 |
| 72.6388103 | 88.155253 | 63 | 77.5192881 | 78.8526214 |
| 73.6388103 | 87.155253 | 63 | 77.8526214 | 78.8526214 |
| 74.6388103 | 88.155253 | 63 | 78.3526214 | 78.8234547 |
| 74.6388103 | 88.155253 | 63 | 78.5192881 | 78.8192881 |
| 75.6388103 | 89.155253 | 63 | 79.6859547 | 78.8317881 |
| 75.6388103 | 89.155253 | 63 | 79.5192881 | 78.8442881 |
| 76.6388103 | 89.155253 | 63 | 79.8526214 | 78.8359547 |
| 78.6388103 | 89.155253 | 63 | 80.5192881 | 78.7942881 |
| 78.6388103 | 95.155253 | 63 | 82.1859547 | 78.7359547 |
| 78.6388103 | 94.155253 | 63 | 81.6859547 | 78.6817881 |
| 78.6388103 | 91.155253 | 63 | 80.8526214 | 78.6359547 |
| 78.6388103 | 91.155253 | 63 | 80.0192881 | 78.5026214 |
| 78.6388103 | 88.155253 | 63 | 78.5192881 | 78.4026214 |
| 77.6388103 | 87.155253 | 63 | 77.3526214 | 78.2901214 |
| 77.6388103 | 86.155253 | 63 | 77.0192881 | 78.1984547 |
| 75.6388103 | 86.155253 | 63 | 76.5192881 | 78.0901214 |
| 75.6388103 | 85.155253 | 63 | 76.3526214 | 77.9942881 |
| 77.6388103 | 83.155253 | 63 | 76.5192881 | 77.9109547 |
| 77.6388103 | 83.155253 | 63 | 76.5192881 | 77.8401214 |
| 78.6388103 | 82.155253 | 63 | 76.5192881 | 77.7734547 |
| 81.6388103 | 82.155253 | 63 | 77.8526214 | 77.7151214 |
| 82.6388103 | 83.155253 | 63 | 78.5192881 | 77.6651214 |
| 82.6388103 | 84.155253 | 63 | 78.8526214 | 77.6067881 |
| 82.6388103 | 84.155253 | 63 | 78.8526214 | 77.5442881 |
| 82.6388103 | 84.155253 | 63 | 78.8526214 | 77.4692881 |
| 82.6388103 | 84.155253 | 63 | 78.8526214 | 77.3817881 |
| 82.6388103 | 82.155253 | 63 | 78.0192881 | 77.2901214 |
| 82.6388103 | 81.155253 | 63 | 77.8526214 | 77.1734547 |
| 82.6388103 | 81.155253 | 63 | 78.0192881 | 77.0067881 |
| 81.6388103 | 81.155253 | 63 | 78.0192881 | 76.8026214 |
| 67.6388103 | 81.155253 | 63 | 73.8526214 | 76.5984547 |
| 67.6388103 | 82.155253 | 63 | 74.1859547 | 76.3984547 |
| 67.6388103 | 81.155253 | 63 | 74.1859547 | 76.1984547 |
| 67.6388103 | 80.155253 | 63 | 74.8526214 | 76.0401214 |
| 67.6388103 | 80.155253 | 63 | 74.8526214 | 75.9317881 |
| 68.6388103 | 80.155253 | 63 | 75.1859547 | 75.8359547 |
| 68.6388103 | 81.155253 | 63 | 76.1859547 | 75.7484547 |
| 69.6388103 | 81.155253 | 63 | 76.8526214 | 75.6609547 |
| 69.6388103 | 81.155253 | 63 | 76.6859547 | 75.5776214 |

|            |           |    |            |            |
|------------|-----------|----|------------|------------|
| 69.6388103 | 82.155253 | 63 | 76.1859547 | 75.4984547 |
| 68.6388103 | 82.155253 | 63 | 75.5192881 | 75.4192881 |
| 68.6388103 | 83.155253 | 63 | 75.5192881 | 75.2734547 |
| 68.6388103 | 83.155253 | 63 | 75.8526214 | 75.0776214 |
| 68.6388103 | 82.155253 | 63 | 75.5192881 | 74.8567881 |
| 68.6388103 | 83.155253 | 63 | 76.1859547 | 74.6401214 |
| 68.6388103 | 82.155253 | 63 | 75.8526214 | 74.4317881 |
| 67.6388103 | 82.155253 | 63 | 75.1859547 | 74.2651214 |
| 65.6388103 | 82.155253 | 63 | 73.8526214 | 74.1234547 |
| 65.6388103 | 82.155253 | 63 | 74.0192881 | 73.9984547 |
| 65.6388103 | 83.155253 | 63 | 73.5192881 | 73.8942881 |
| 64.6388103 | 83.155253 | 63 | 72.8526214 | 73.7901214 |
| 63.6388103 | 82.155253 | 63 | 72.0192881 | 73.8901214 |
| 63.6388103 | 82.155253 | 63 | 72.1859547 | 73.9942881 |
| 64.6388103 | 82.155253 | 63 | 73.0192881 | 74.0942881 |
| 64.6388103 | 82.155253 | 63 | 73.1859547 | 74.1734547 |
| 63.6388103 | 82.155253 | 63 | 73.0192881 | 74.2526214 |
| 61.6388103 | 83.155253 | 63 | 72.8526214 | 74.3401214 |
| 60.6388103 | 86.155253 | 63 | 73.1859547 | 74.4109547 |
| 60.6388103 | 87.155253 | 63 | 73.3526214 | 74.4651214 |
| 60.6388103 | 87.155253 | 63 | 73.3526214 | 74.5526214 |
| 59.6388103 | 84.155253 | 63 | 72.0192881 | 74.6567881 |
| 59.6388103 | 80.155253 | 63 | 70.6859547 | 74.7817881 |
| 59.6388103 | 79.155253 | 63 | 70.0192881 | 74.9192881 |
| 59.6388103 | 80.155253 | 63 | 70.1859547 | 75.0401214 |
| 59.6388103 | 81.155253 | 63 | 70.5192881 | 75.1567881 |
| 61.6388103 | 83.155253 | 63 | 72.1859547 | 75.2692881 |
| 61.6388103 | 84.155253 | 63 | 72.3526214 | 75.3734547 |
| 61.6388103 | 84.155253 | 63 | 72.8526214 | 75.4776214 |
| 62.6388103 | 85.155253 | 63 | 73.8526214 | 75.5901214 |
| 62.6388103 | 85.155253 | 63 | 73.8526214 | 75.6984547 |
| 74.6388103 | 85.155253 | 63 | 77.8526214 | 75.8692881 |
| 75.6388103 | 86.155253 | 63 | 78.3526214 | 76.0567881 |
| 75.6388103 | 86.155253 | 63 | 78.1859547 | 76.2151214 |
| 75.6388103 | 86.155253 | 63 | 78.0192881 | 76.3359547 |
| 75.6388103 | 86.155253 | 63 | 78.0192881 | 76.4484547 |
| 77.6388103 | 86.155253 | 63 | 78.6859547 | 76.5567881 |
| 78.6388103 | 85.155253 | 63 | 79.0192881 | 76.6817881 |
| 78.6388103 | 85.155253 | 63 | 79.0192881 | 76.8067881 |
| 79.6388103 | 87.155253 | 63 | 80.1859547 | 76.9151214 |
| 78.6388103 | 88.155253 | 63 | 80.3526214 | 77.0109547 |
| 77.6388103 | 89.155253 | 63 | 80.5192881 | 77.1067881 |
| 77.6388103 | 90.155253 | 63 | 81.0192881 | 77.2359547 |
| 75.6388103 | 90.155253 | 63 | 80.6859547 | 77.4026214 |
| 74.6388103 | 89.155253 | 63 | 80.1859547 | 77.5859547 |

|            |           |    |            |            |
|------------|-----------|----|------------|------------|
| 74.6388103 | 89.155253 | 63 | 80.6859547 | 77.7692881 |
| 74.6388103 | 89.155253 | 63 | 80.0192881 | 77.9526214 |
| 74.6388103 | 89.155253 | 63 | 79.3526214 | 78.0901214 |
| 73.6388103 | 88.155253 | 63 | 78.3526214 | 78.2192881 |
| 73.6388103 | 88.155253 | 63 | 78.3526214 | 78.2859547 |
| 77.6388103 | 91.155253 | 63 | 80.3526214 | 78.3151214 |
| 77.6388103 | 90.155253 | 63 | 80.3526214 | 78.3567881 |
| 77.6388103 | 84.155253 | 63 | 78.3526214 | 78.3026214 |
| 77.6388103 | 80.155253 | 63 | 77.0192881 | 78.2317881 |
| 78.6388103 | 80.155253 | 63 | 77.5192881 | 78.1734547 |
| 79.6388103 | 79.155253 | 63 | 77.5192881 | 78.1234547 |
| 80.6388103 | 80.155253 | 63 | 78.0192881 | 78.0817881 |
| 80.6388103 | 80.155253 | 63 | 77.8526214 | 78.0192881 |
| 79.6388103 | 80.155253 | 63 | 77.5192881 | 77.9317881 |
| 78.6388103 | 80.155253 | 63 | 77.1859547 | 77.8192881 |
| 77.6388103 | 80.155253 | 63 | 77.1859547 | 77.6692881 |
| 78.6388103 | 80.155253 | 63 | 77.1859547 | 77.4901214 |
| 78.6388103 | 80.155253 | 63 | 77.3526214 | 77.2984547 |
| 78.6388103 | 80.155253 | 63 | 77.3526214 | 77.1317881 |
| 78.6388103 | 80.155253 | 63 | 77.5192881 | 76.9817881 |
| 78.6388103 | 80.155253 | 63 | 77.8526214 | 76.8359547 |
| 78.6388103 | 79.155253 | 63 | 77.6859547 | 76.6567881 |
| 77.6388103 | 79.155253 | 63 | 77.5192881 | 76.4692881 |
| 70.6388103 | 80.155253 | 63 | 75.5192881 | 76.2942881 |
| 69.6388103 | 80.155253 | 63 | 75.0192881 | 76.1442881 |
| 70.6388103 | 81.155253 | 63 | 75.5192881 | 75.9984547 |
| 70.6388103 | 82.155253 | 63 | 75.6859547 | 75.8151214 |
| 70.6388103 | 82.155253 | 63 | 75.5192881 | 75.6442881 |
| 71.6388103 | 82.155253 | 63 | 75.8526214 | 75.5317881 |
| 72.6388103 | 82.155253 | 63 | 76.0192881 | 75.4567881 |
| 73.6388103 | 82.155253 | 63 | 76.3526214 | 75.3609547 |
| 73.6388103 | 82.155253 | 63 | 76.1859547 | 75.2651214 |
| 73.6388103 | 81.155253 | 63 | 75.5192881 | 75.1567881 |
| 73.6388103 | 81.155253 | 63 | 74.5192881 | 75.0567881 |
| 73.6388103 | 80.155253 | 63 | 74.1859547 | 74.9567881 |
| 72.6388103 | 80.155253 | 63 | 73.1859547 | 74.8734547 |
| 72.6388103 | 80.155253 | 63 | 72.8526214 | 74.8109547 |
| 72.6388103 | 82.155253 | 63 | 74.3526214 | 74.7567881 |
| 73.6388103 | 82.155253 | 63 | 74.6859547 | 74.7192881 |
| 73.6388103 | 81.155253 | 63 | 74.3526214 | 74.6817881 |
| 73.6388103 | 79.155253 | 63 | 73.5192881 | 74.6442881 |
| 73.6388103 | 76.155253 | 63 | 72.5192881 | 74.6234547 |
| 73.6388103 | 75.155253 | 63 | 72.3526214 | 74.6276214 |
| 73.6388103 | 75.155253 | 63 | 72.3526214 | 74.6276214 |
| 73.6388103 | 75.155253 | 63 | 72.5192881 | 74.6817881 |

|            |           |    |            |            |
|------------|-----------|----|------------|------------|
| 73.6388103 | 76.155253 | 63 | 73.0192881 | 74.7484547 |
| 73.6388103 | 77.155253 | 63 | 73.5192881 | 74.8151214 |
| 73.6388103 | 78.155253 | 63 | 73.8526214 | 74.8776214 |
| 73.6388103 | 78.155253 | 63 | 74.0192881 | 74.9526214 |
| 72.6388103 | 77.155253 | 63 | 73.6859547 | 75.0359547 |
| 72.6388103 | 77.155253 | 63 | 73.6859547 | 75.1151214 |
| 73.6388103 | 76.155253 | 63 | 73.6859547 | 75.1901214 |
| 75.6388103 | 76.155253 | 63 | 73.8526214 | 75.2734547 |
| 75.6388103 | 76.155253 | 63 | 73.5192881 | 75.3692881 |
| 76.6388103 | 76.155253 | 63 | 73.8526214 | 75.4734547 |
| 77.6388103 | 78.155253 | 63 | 74.6859547 | 75.5692881 |
| 77.6388103 | 79.155253 | 63 | 75.0192881 | 75.6901214 |
| 77.6388103 | 81.155253 | 63 | 75.8526214 | 75.8109547 |
| 77.6388103 | 81.155253 | 63 | 75.8526214 | 75.8984547 |
| 77.6388103 | 81.155253 | 63 | 76.0192881 | 75.9984547 |
| 79.6388103 | 81.155253 | 63 | 77.0192881 | 76.1526214 |
| 81.6388103 | 81.155253 | 63 | 77.8526214 | 76.3317881 |
| 80.6388103 | 81.155253 | 63 | 77.5192881 | 76.5026214 |
| 80.6388103 | 81.155253 | 63 | 77.6859547 | 76.6609547 |
| 80.6388103 | 81.155253 | 63 | 77.6859547 | 76.7817881 |
| 80.6388103 | 82.155253 | 63 | 78.1859547 | 76.9067881 |
| 80.6388103 | 82.155253 | 63 | 78.1859547 | 76.9942881 |
| 80.6388103 | 83.155253 | 63 | 78.5192881 | 77.0609547 |
| 80.6388103 | 84.155253 | 63 | 79.1859547 | 77.0859547 |
| 80.6388103 | 84.155253 | 63 | 79.1859547 | 77.1151214 |
| 80.6388103 | 84.155253 | 63 | 79.3526214 | 77.1276214 |
| 80.6388103 | 85.155253 | 63 | 79.5192881 | 77.1317881 |
| 80.6388103 | 85.155253 | 63 | 79.3526214 | 77.1317881 |
| 79.6388103 | 85.155253 | 63 | 78.6859547 | 77.1317881 |
| 79.6388103 | 83.155253 | 63 | 78.0192881 | 77.1317881 |
| 79.6388103 | 82.155253 | 63 | 78.0192881 | 77.1192881 |
| 78.6388103 | 82.155253 | 63 | 77.6859547 | 77.0859547 |
| 78.6388103 | 82.155253 | 63 | 77.8526214 | 77.0651214 |
| 78.6388103 | 86.155253 | 63 | 78.6859547 | 77.0359547 |
| 78.6388103 | 91.155253 | 63 | 80.5192881 | 76.9984547 |
| 78.6388103 | 91.155253 | 63 | 80.6859547 | 76.9567881 |
| 77.6388103 | 88.155253 | 63 | 79.3526214 | 76.8651214 |
| 77.6388103 | 86.155253 | 63 | 78.6859547 | 76.7526214 |
| 75.6388103 | 84.155253 | 63 | 77.1859547 | 76.6442881 |
| 75.6388103 | 85.155253 | 63 | 77.5192881 | 76.5276214 |
| 71.6388103 | 85.155253 | 63 | 76.5192881 | 76.3859547 |
| 71.6388103 | 84.155253 | 63 | 76.1859547 | 76.2317881 |
| 70.6388103 | 81.155253 | 63 | 74.8526214 | 76.0817881 |
| 71.6388103 | 81.155253 | 63 | 75.1859547 | 75.9484547 |
| 71.6388103 | 79.155253 | 63 | 74.1859547 | 75.8151214 |

|            |           |    |            |            |
|------------|-----------|----|------------|------------|
| 71.6388103 | 78.155253 | 63 | 73.8526214 | 75.6984547 |
| 71.6388103 | 78.155253 | 63 | 73.6859547 | 75.5859547 |
| 71.6388103 | 78.155253 | 63 | 73.8526214 | 75.4734547 |
| 71.6388103 | 77.155253 | 63 | 73.5192881 | 75.3651214 |
| 70.6388103 | 77.155253 | 63 | 73.3526214 | 75.2859547 |
| 70.6388103 | 77.155253 | 63 | 73.3526214 | 75.2609547 |
| 71.6388103 | 77.155253 | 63 | 74.1859547 | 75.2692881 |
| 70.6388103 | 79.155253 | 63 | 74.6859547 | 75.2776214 |
| 69.6388103 | 79.155253 | 63 | 74.3526214 | 75.2942881 |
| 69.6388103 | 79.155253 | 63 | 74.3526214 | 75.3109547 |
| 69.6388103 | 77.155253 | 63 | 73.3526214 | 75.2151214 |
| 70.6388103 | 77.155253 | 63 | 73.3526214 | 75.0484547 |
| 70.6388103 | 77.155253 | 63 | 73.1859547 | 74.9276214 |
| 70.6388103 | 77.155253 | 63 | 73.0192881 | 74.8192881 |
| 70.6388103 | 74.155253 | 63 | 72.0192881 | 74.7817881 |
| 70.6388103 | 74.155253 | 63 | 72.0192881 | 74.7776214 |
| 70.6388103 | 74.155253 | 63 | 72.1859547 | 74.8067881 |
| 73.6388103 | 74.155253 | 63 | 73.1859547 | 74.8401214 |
| 73.6388103 | 76.155253 | 63 | 73.8526214 | 74.8984547 |
| 72.6388103 | 79.155253 | 63 | 74.5192881 | 74.9526214 |
| 72.6388103 | 80.155253 | 63 | 74.8526214 | 75.0817881 |
| 72.6388103 | 80.155253 | 63 | 75.0192881 | 75.2317881 |
| 72.6388103 | 80.155253 | 63 | 75.0192881 | 75.3901214 |
| 72.6388103 | 82.155253 | 63 | 75.5192881 | 75.5317881 |
| 74.6388103 | 84.155253 | 63 | 77.0192881 | 75.6567881 |
| 75.6388103 | 86.155253 | 63 | 78.3526214 | 75.7776214 |
| 74.6388103 | 86.155253 | 63 | 78.0192881 | 75.9067881 |
| 74.6388103 | 87.155253 | 63 | 78.5192881 | 76.0109547 |
| 74.6388103 | 88.155253 | 63 | 79.3526214 | 76.0984547 |
| 74.6388103 | 80.155253 | 63 | 76.6859547 | 76.1651214 |
| 74.6388103 | 72.155253 | 63 | 74.0192881 | 76.2317881 |
| 75.6388103 | 72.155253 | 63 | 74.5192881 | 76.3192881 |
| 75.6388103 | 73.155253 | 63 | 74.3526214 | 76.3984547 |
| 75.6388103 | 76.155253 | 63 | 75.6859547 | 76.4734547 |
| 78.6388103 | 77.155253 | 63 | 77.3526214 | 76.5484547 |
| 79.6388103 | 77.155253 | 63 | 77.6859547 | 76.6484547 |
| 79.6388103 | 77.155253 | 63 | 77.5192881 | 76.7651214 |
| 78.6388103 | 77.155253 | 63 | 77.1859547 | 76.9192881 |
| 77.6388103 | 78.155253 | 63 | 77.3526214 | 77.0609547 |
| 77.6388103 | 84.155253 | 63 | 79.3526214 | 77.1901214 |
| 77.6388103 | 86.155253 | 63 | 79.8526214 | 77.3026214 |
| 79.6388103 | 86.155253 | 63 | 80.0192881 | 77.3734547 |
| 79.6388103 | 85.155253 | 63 | 79.5192881 | 77.4484547 |
| 79.6388103 | 85.155253 | 63 | 78.5192881 | 77.5359547 |
| 79.6388103 | 85.155253 | 63 | 78.1859547 | 77.6067881 |

|            |           |    |            |            |
|------------|-----------|----|------------|------------|
| 79.6388103 | 85.155253 | 63 | 78.5192881 | 77.6359547 |
| 79.6388103 | 85.155253 | 63 | 78.3526214 | 77.6442881 |
| 79.6388103 | 85.155253 | 63 | 78.1859547 | 77.6651214 |
| 76.6388103 | 84.155253 | 63 | 77.0192881 | 77.6817881 |
| 76.6388103 | 84.155253 | 63 | 77.0192881 | 77.6567881 |
| 76.6388103 | 84.155253 | 63 | 76.8526214 | 77.6984547 |
| 76.6388103 | 83.155253 | 63 | 76.5192881 | 77.7859547 |
| 75.6388103 | 83.155253 | 63 | 76.1859547 | 77.8442881 |
| 75.6388103 | 83.155253 | 63 | 76.0192881 | 77.8567881 |
| 75.6388103 | 83.155253 | 63 | 76.0192881 | 77.8526214 |
| 76.6388103 | 84.155253 | 63 | 76.6859547 | 77.8109547 |
| 76.6388103 | 89.155253 | 63 | 78.3526214 | 77.7692881 |
| 77.6388103 | 89.155253 | 63 | 78.8526214 | 77.7317881 |
| 77.6388103 | 89.155253 | 63 | 79.0192881 | 77.7109547 |
| 77.6388103 | 89.155253 | 63 | 79.0192881 | 77.6817881 |
| 75.6388103 | 87.155253 | 63 | 77.6859547 | 77.6026214 |
| 75.6388103 | 88.155253 | 63 | 78.0192881 | 77.5317881 |
| 74.6388103 | 90.155253 | 63 | 78.5192881 | 77.4359547 |
| 74.6388103 | 90.155253 | 63 | 78.3526214 | 77.3567881 |
| 73.6388103 | 90.155253 | 63 | 78.1859547 | 77.3192881 |
| 73.6388103 | 91.155253 | 63 | 78.6859547 | 77.2942881 |
| 72.6388103 | 91.155253 | 63 | 78.8526214 | 77.2651214 |
| 72.6388103 | 91.155253 | 63 | 79.1859547 | 77.2359547 |
| 72.6388103 | 89.155253 | 63 | 78.3526214 | 77.2192881 |
| 72.6388103 | 89.155253 | 63 | 78.3526214 | 77.2317881 |
| 72.6388103 | 87.155253 | 63 | 77.5192881 | 77.2526214 |
| 71.6388103 | 87.155253 | 63 | 76.8526214 | 77.2984547 |
| 69.6388103 | 86.155253 | 63 | 74.8526214 | 77.3651214 |
| 70.6388103 | 86.155253 | 63 | 75.5192881 | 77.4442881 |
| 70.6388103 | 86.155253 | 63 | 75.6859547 | 77.5401214 |
| 71.6388103 | 86.155253 | 63 | 76.0192881 | 77.6317881 |
| 71.6388103 | 86.155253 | 63 | 76.0192881 | 77.7151214 |
| 72.6388103 | 86.155253 | 63 | 76.3526214 | 77.7651214 |
| 72.6388103 | 86.155253 | 63 | 76.1859547 | 77.8317881 |
| 72.6388103 | 86.155253 | 63 | 76.1859547 | 77.9026214 |
| 73.6388103 | 88.155253 | 63 | 77.0192881 | 77.9776214 |
| 74.6388103 | 84.155253 | 63 | 76.1859547 | 78.0942881 |
| 77.6388103 | 82.155253 | 63 | 76.3526214 | 78.1859547 |
| 79.6388103 | 82.155253 | 63 | 77.0192881 | 78.2609547 |
| 80.6388103 | 81.155253 | 63 | 77.1859547 | 78.3276214 |
| 81.6388103 | 80.155253 | 63 | 77.3526214 | 78.3942881 |
| 81.6388103 | 80.155253 | 63 | 77.1859547 | 78.4067881 |
| 82.6388103 | 80.155253 | 63 | 77.5192881 | 78.4026214 |
| 82.6388103 | 80.155253 | 63 | 77.5192881 | 78.3984547 |
| 82.6388103 | 80.155253 | 63 | 77.8526214 | 78.4234547 |



|            |           |    |            |            |
|------------|-----------|----|------------|------------|
| 82.6388103 | 83.155253 | 63 | 78.6859547 | 78.4567881 |
| 82.6388103 | 83.155253 | 63 | 79.1859547 | 78.5151214 |
| 83.6388103 | 83.155253 | 63 | 79.3526214 | 78.5817881 |
| 84.6388103 | 83.155253 | 63 | 79.8526214 | 78.6609547 |
| 84.6388103 | 82.155253 | 63 | 79.6859547 | 78.7109547 |
| 85.6388103 | 82.155253 | 63 | 80.0192881 | 78.7526214 |
| 87.6388103 | 81.155253 | 63 | 80.3526214 | 78.7859547 |
| 91.6388103 | 82.155253 | 63 | 81.5192881 | 78.8276214 |
| 92.6388103 | 82.155253 | 63 | 81.8526214 | 78.8567881 |
| 92.6388103 | 83.155253 | 63 | 82.0192881 | 78.8859547 |
| 94.6388103 | 82.155253 | 63 | 82.3526214 | 78.9317881 |
| 93.6388103 | 80.155253 | 63 | 81.6859547 | 78.9276214 |
| 93.6388103 | 79.155253 | 63 | 81.5192881 | 78.9276214 |
| 92.6388103 | 78.155253 | 63 | 81.0192881 | 78.9151214 |
| 92.6388103 | 78.155253 | 63 | 80.8526214 | 78.8901214 |
| 86.6388103 | 79.155253 | 63 | 79.1859547 | 78.8401214 |
| 86.6388103 | 79.155253 | 63 | 78.6859547 | 78.7692881 |
| 86.6388103 | 81.155253 | 63 | 79.0192881 | 78.7276214 |
| 86.6388103 | 83.155253 | 63 | 79.3526214 | 78.6776214 |
| 84.6388103 | 86.155253 | 63 | 79.6859547 | 78.6442881 |
| 83.6388103 | 87.155253 | 63 | 79.8526214 | 78.6192881 |
| 82.6388103 | 87.155253 | 63 | 79.5192881 | 78.5734547 |
| 82.6388103 | 83.155253 | 63 | 78.0192881 | 78.4817881 |
| 82.6388103 | 82.155253 | 63 | 77.5192881 | 78.3609547 |
| 82.6388103 | 81.155253 | 63 | 77.3526214 | 78.2442881 |
| 82.6388103 | 81.155253 | 63 | 77.3526214 | 78.1359547 |
| 82.6388103 | 82.155253 | 63 | 77.6859547 | 78.0276214 |
| 80.6388103 | 83.155253 | 63 | 77.5192881 | 77.9109547 |
| 77.6388103 | 86.155253 | 63 | 77.3526214 | 77.7651214 |
| 77.6388103 | 88.155253 | 63 | 78.0192881 | 77.6192881 |
| 75.6388103 | 87.155253 | 63 | 76.8526214 | 77.4734547 |
| 74.6388103 | 86.155253 | 63 | 76.1859547 | 77.3276214 |
| 73.6388103 | 86.155253 | 63 | 75.8526214 | 77.2109547 |
| 73.6388103 | 86.155253 | 63 | 76.0192881 | 77.0942881 |
| 69.6388103 | 86.155253 | 63 | 75.1859547 | 76.9901214 |
| 67.6388103 | 86.155253 | 63 | 74.5192881 | 76.8942881 |
| 67.6388103 | 89.155253 | 63 | 75.5192881 | 76.8359547 |
| 67.6388103 | 89.155253 | 63 | 75.5192881 | 76.7151214 |
| 70.6388103 | 89.155253 | 63 | 76.1859547 | 76.5942881 |
| 72.6388103 | 89.155253 | 63 | 76.8526214 | 76.4651214 |
| 72.6388103 | 89.155253 | 63 | 76.8526214 | 76.3192881 |
| 72.6388103 | 85.155253 | 63 | 75.5192881 | 76.1609547 |
| 73.6388103 | 80.155253 | 63 | 74.5192881 | 76.0067881 |
| 75.6388103 | 80.155253 | 63 | 75.1859547 | 75.8984547 |
| 75.6388103 | 80.155253 | 63 | 75.3526214 | 75.8276214 |

|            |           |    |            |            |
|------------|-----------|----|------------|------------|
| 76.6388103 | 80.155253 | 63 | 75.6859547 | 75.7651214 |
| 76.6388103 | 80.155253 | 63 | 75.6859547 | 75.7067881 |
| 76.6388103 | 80.155253 | 63 | 75.6859547 | 75.6359547 |
| 76.6388103 | 81.155253 | 63 | 76.0192881 | 75.5859547 |
| 76.6388103 | 81.155253 | 63 | 76.1859547 | 75.5692881 |
| 76.6388103 | 82.155253 | 63 | 76.5192881 | 75.5526214 |
| 76.6388103 | 82.155253 | 63 | 77.0192881 | 75.5734547 |
| 76.6388103 | 81.155253 | 63 | 76.8526214 | 75.6026214 |
| 76.6388103 | 81.155253 | 63 | 76.8526214 | 75.6609547 |
| 76.6388103 | 81.155253 | 63 | 77.0192881 | 75.7151214 |
| 75.6388103 | 81.155253 | 63 | 76.8526214 | 75.7567881 |
| 66.6388103 | 81.155253 | 63 | 73.8526214 | 75.8109547 |
| 66.6388103 | 82.155253 | 63 | 74.1859547 | 75.8234547 |
| 64.6388103 | 84.155253 | 63 | 74.1859547 | 75.8317881 |
| 61.6388103 | 86.155253 | 63 | 73.8526214 | 75.8192881 |
| 60.6388103 | 87.155253 | 63 | 73.5192881 | 75.7817881 |
| 60.6388103 | 88.155253 | 63 | 73.3526214 | 75.7526214 |
| 61.6388103 | 88.155253 | 63 | 73.6859547 | 75.7692881 |
| 64.6388103 | 88.155253 | 63 | 74.6859547 | 75.8026214 |
| 65.6388103 | 87.155253 | 63 | 74.8526214 | 75.8151214 |
| 65.6388103 | 87.155253 | 63 | 75.0192881 | 75.8359547 |
| 65.6388103 | 86.155253 | 63 | 74.8526214 | 75.8109547 |
| 67.6388103 | 86.155253 | 63 | 75.5192881 | 75.7776214 |
| 67.6388103 | 89.155253 | 63 | 76.6859547 | 75.7401214 |
| 67.6388103 | 91.155253 | 63 | 77.3526214 | 75.7026214 |
| 67.6388103 | 92.155253 | 63 | 77.6859547 | 75.6776214 |
| 67.6388103 | 92.155253 | 63 | 77.3526214 | 75.6484547 |
| 67.6388103 | 92.155253 | 63 | 78.1859547 | 75.6192881 |
| 67.6388103 | 92.155253 | 63 | 78.1859547 | 75.6067881 |
| 68.6388103 | 86.155253 | 63 | 76.8526214 | 75.5901214 |
| 71.6388103 | 83.155253 | 63 | 76.6859547 | 75.5692881 |
| 70.6388103 | 82.155253 | 63 | 76.0192881 | 75.5609547 |
| 70.6388103 | 82.155253 | 63 | 75.8526214 | 75.6276214 |
| 70.6388103 | 82.155253 | 63 | 75.6859547 | 75.6859547 |
| 70.6388103 | 81.155253 | 63 | 75.3526214 | 75.7442881 |
| 70.6388103 | 81.155253 | 63 | 75.6859547 | 75.8109547 |
| 70.6388103 | 81.155253 | 63 | 76.1859547 | 75.9026214 |
| 68.6388103 | 82.155253 | 63 | 75.8526214 | 76.0067881 |
| 69.6388103 | 82.155253 | 63 | 75.6859547 | 76.0901214 |
| 70.6388103 | 83.155253 | 63 | 76.1859547 | 76.1609547 |
| 68.6388103 | 82.155253 | 63 | 74.6859547 | 76.2401214 |
| 67.6388103 | 82.155253 | 63 | 74.3526214 | 76.3192881 |
| 67.6388103 | 81.155253 | 63 | 74.1859547 | 76.4276214 |
| 68.6388103 | 81.155253 | 63 | 74.5192881 | 76.5817881 |
| 69.6388103 | 82.155253 | 63 | 75.1859547 | 76.7317881 |

|            |           |    |            |            |
|------------|-----------|----|------------|------------|
| 70.6388103 | 82.155253 | 63 | 75.3526214 | 76.8817881 |
| 70.6388103 | 83.155253 | 63 | 75.8526214 | 77.0109547 |
| 71.6388103 | 83.155253 | 63 | 76.3526214 | 77.0984547 |
| 71.6388103 | 83.155253 | 63 | 76.1859547 | 77.1442881 |
| 71.6388103 | 83.155253 | 63 | 76.1859547 | 77.1817881 |
| 72.6388103 | 83.155253 | 63 | 76.5192881 | 77.2276214 |
| 71.6388103 | 84.155253 | 63 | 76.5192881 | 77.2526214 |
| 71.6388103 | 84.155253 | 63 | 76.5192881 | 77.2942881 |
| 71.6388103 | 84.155253 | 63 | 76.5192881 | 77.3359547 |
| 71.6388103 | 84.155253 | 63 | 76.5192881 | 77.3692881 |
| 72.6388103 | 85.155253 | 63 | 77.1859547 | 77.4109547 |
| 72.6388103 | 85.155253 | 63 | 77.5192881 | 77.4276214 |
| 71.6388103 | 85.155253 | 63 | 77.0192881 | 77.4401214 |
| 71.6388103 | 85.155253 | 63 | 77.5192881 | 77.4651214 |
| 72.6388103 | 85.155253 | 63 | 78.0192881 | 77.4192881 |
| 72.6388103 | 85.155253 | 63 | 78.1859547 | 77.3401214 |
| 72.6388103 | 87.155253 | 63 | 79.1859547 | 77.2776214 |
| 72.6388103 | 95.155253 | 63 | 81.6859547 | 77.1984547 |
| 72.6388103 | 97.155253 | 63 | 82.6859547 | 77.1276214 |
| 72.6388103 | 97.155253 | 63 | 83.3526214 | 77.0401214 |
| 72.6388103 | 95.155253 | 63 | 82.8526214 | 76.9109547 |
| 72.6388103 | 89.155253 | 63 | 80.8526214 | 76.7692881 |
| 72.6388103 | 86.155253 | 63 | 80.0192881 | 76.6442881 |
| 72.6388103 | 84.155253 | 63 | 79.6859547 | 76.5401214 |
| 71.6388103 | 82.155253 | 63 | 78.6859547 | 76.4567881 |
| 69.6388103 | 81.155253 | 63 | 77.6859547 | 76.3942881 |
| 69.6388103 | 81.155253 | 63 | 77.6859547 | 76.3984547 |
| 69.6388103 | 80.155253 | 63 | 77.5192881 | 76.4317881 |
| 67.6388103 | 80.155253 | 63 | 77.0192881 | 76.4734547 |
| 67.6388103 | 80.155253 | 63 | 77.0192881 | 76.5276214 |
| 65.6388103 | 80.155253 | 63 | 76.3526214 | 76.5817881 |
| 64.6388103 | 81.155253 | 63 | 76.6859547 | 76.6192881 |
| 64.6388103 | 81.155253 | 63 | 76.8526214 | 76.6526214 |
| 62.6388103 | 77.155253 | 63 | 73.8526214 | 76.7026214 |
| 62.6388103 | 76.155253 | 63 | 73.0192881 | 76.7567881 |
| 62.6388103 | 77.155253 | 63 | 72.1859547 | 76.7859547 |
| 62.6388103 | 77.155253 | 63 | 71.1859547 | 76.7984547 |
| 61.6388103 | 79.155253 | 63 | 71.3526214 | 76.7609547 |
| 61.6388103 | 79.155253 | 63 | 71.0192881 | 76.6651214 |
| 59.6388103 | 79.155253 | 63 | 70.0192881 | 76.5442881 |
| 59.6388103 | 79.155253 | 63 | 69.6859547 | 76.4026214 |
| 59.6388103 | 83.155253 | 63 | 70.8526214 | 76.2776214 |
| 60.6388103 | 86.155253 | 63 | 72.1859547 | 76.2276214 |
| 61.6388103 | 87.155253 | 63 | 72.8526214 | 76.1859547 |
| 62.6388103 | 87.155253 | 63 | 73.6859547 | 76.1401214 |

|            |           |    |            |            |
|------------|-----------|----|------------|------------|
| 70.6388103 | 86.155253 | 63 | 76.6859547 | 76.1067881 |
| 72.6388103 | 85.155253 | 63 | 77.8526214 | 76.0651214 |
| 72.6388103 | 85.155253 | 63 | 78.1859547 | 76.0151214 |
| 73.6388103 | 85.155253 | 63 | 78.6859547 | 75.9651214 |
| 73.6388103 | 85.155253 | 63 | 78.6859547 | 75.9151214 |
| 73.6388103 | 85.155253 | 63 | 78.6859547 | 75.8651214 |
| 73.6388103 | 85.155253 | 63 | 78.8526214 | 75.8317881 |
| 73.6388103 | 85.155253 | 63 | 79.0192881 | 75.8067881 |
| 74.6388103 | 84.155253 | 63 | 79.6859547 | 75.7984547 |
| 73.6388103 | 82.155253 | 63 | 79.1859547 | 75.8609547 |
| 73.6388103 | 81.155253 | 63 | 78.6859547 | 75.9567881 |
| 72.6388103 | 80.155253 | 63 | 77.6859547 | 76.0734547 |
| 72.6388103 | 80.155253 | 63 | 77.8526214 | 76.2276214 |
| 72.6388103 | 80.155253 | 63 | 77.8526214 | 76.3901214 |
| 71.6388103 | 81.155253 | 63 | 77.6859547 | 76.5942881 |
| 71.6388103 | 81.155253 | 63 | 77.8526214 | 76.8234547 |
| 70.6388103 | 86.155253 | 63 | 78.8526214 | 77.0526214 |
| 70.6388103 | 86.155253 | 63 | 78.3526214 | 77.2317881 |
| 69.6388103 | 86.155253 | 63 | 77.8526214 | 77.3692881 |
| 69.6388103 | 86.155253 | 63 | 77.3526214 | 77.5151214 |
| 68.6388103 | 85.155253 | 63 | 76.0192881 | 77.6609547 |
| 68.6388103 | 85.155253 | 63 | 75.6859547 | 77.7526214 |
| 68.6388103 | 84.155253 | 63 | 75.5192881 | 77.7859547 |
| 68.6388103 | 83.155253 | 63 | 75.0192881 | 77.8026214 |
| 68.6388103 | 83.155253 | 63 | 75.0192881 | 77.7901214 |
| 68.6388103 | 83.155253 | 63 | 75.0192881 | 77.7526214 |
| 70.6388103 | 83.155253 | 63 | 75.6859547 | 77.7109547 |
| 74.6388103 | 82.155253 | 63 | 76.5192881 | 77.6651214 |
| 74.6388103 | 82.155253 | 63 | 76.3526214 | 77.6151214 |
| 76.6388103 | 82.155253 | 63 | 76.8526214 | 77.5484547 |
| 77.6388103 | 81.155253 | 63 | 76.8526214 | 77.4859547 |
| 78.6388103 | 82.155253 | 63 | 77.3526214 | 77.4442881 |
| 78.6388103 | 84.155253 | 63 | 77.8526214 | 77.4234547 |
| 78.6388103 | 86.155253 | 63 | 79.1859547 | 77.3901214 |
| 78.6388103 | 86.155253 | 63 | 79.1859547 | 77.3359547 |
| 79.6388103 | 84.155253 | 63 | 78.8526214 | 77.2859547 |
| 79.6388103 | 81.155253 | 63 | 78.0192881 | 77.2317881 |
| 79.6388103 | 80.155253 | 63 | 77.6859547 | 77.1401214 |
| 82.6388103 | 80.155253 | 63 | 78.6859547 | 77.0609547 |
| 82.6388103 | 82.155253 | 63 | 79.5192881 | 76.9901214 |
| 82.6388103 | 84.155253 | 63 | 80.3526214 | 76.9151214 |
| 77.6388103 | 85.155253 | 63 | 79.1859547 | 76.9026214 |
| 77.6388103 | 84.155253 | 63 | 78.8526214 | 76.9192881 |
| 76.6388103 | 83.155253 | 63 | 78.1859547 | 76.9401214 |
| 76.6388103 | 82.155253 | 63 | 77.1859547 | 76.9692881 |

|            |           |    |            |            |
|------------|-----------|----|------------|------------|
| 76.6388103 | 82.155253 | 63 | 77.0192881 | 76.9817881 |
| 76.6388103 | 82.155253 | 63 | 77.0192881 | 77.0067881 |
| 76.6388103 | 82.155253 | 63 | 77.0192881 | 77.0234547 |
| 76.6388103 | 81.155253 | 63 | 77.0192881 | 77.0192881 |
| 75.6388103 | 81.155253 | 63 | 76.6859547 | 77.0359547 |
| 75.6388103 | 82.155253 | 63 | 77.0192881 | 77.0359547 |
| 75.6388103 | 82.155253 | 63 | 76.8526214 | 77.0276214 |
| 74.6388103 | 83.155253 | 63 | 76.5192881 | 76.9984547 |
| 73.6388103 | 83.155253 | 63 | 75.6859547 | 76.9651214 |
| 73.6388103 | 84.155253 | 63 | 75.6859547 | 76.9067881 |
| 73.6388103 | 85.155253 | 63 | 75.6859547 | 76.8651214 |
| 73.6388103 | 85.155253 | 63 | 75.1859547 | 76.8359547 |
| 72.6388103 | 86.155253 | 63 | 75.1859547 | 76.8359547 |
| 72.6388103 | 86.155253 | 63 | 75.0192881 | 76.8609547 |
| 70.6388103 | 86.155253 | 63 | 74.3526214 | 76.8526214 |
| 72.6388103 | 87.155253 | 63 | 75.5192881 | 76.8234547 |
| 74.6388103 | 87.155253 | 63 | 76.3526214 | 76.7526214 |
| 74.6388103 | 87.155253 | 63 | 76.3526214 | 76.7026214 |
| 75.6388103 | 83.155253 | 63 | 76.1859547 | 76.6567881 |
| 74.6388103 | 81.155253 | 63 | 75.5192881 | 76.6234547 |
| 75.6388103 | 81.155253 | 63 | 76.0192881 | 76.6151214 |
| 75.6388103 | 82.155253 | 63 | 76.3526214 | 76.6192881 |
| 75.6388103 | 82.155253 | 63 | 76.3526214 | 76.6192881 |
| 77.6388103 | 82.155253 | 63 | 77.0192881 | 76.6109547 |
| 77.6388103 | 82.155253 | 63 | 76.8526214 | 76.5942881 |
| 77.6388103 | 82.155253 | 63 | 76.5192881 | 76.5692881 |
| 75.6388103 | 83.155253 | 63 | 76.1859547 | 76.5276214 |
| 75.6388103 | 84.155253 | 63 | 76.5192881 | 76.4942881 |
| 75.6388103 | 84.155253 | 63 | 76.8526214 | 76.4651214 |
| 75.6388103 | 85.155253 | 63 | 77.5192881 | 76.4567881 |
| 75.6388103 | 85.155253 | 63 | 77.6859547 | 76.4317881 |
| 75.6388103 | 86.155253 | 63 | 78.0192881 | 76.3984547 |
| 75.6388103 | 88.155253 | 63 | 78.6859547 | 76.3817881 |
| 75.6388103 | 88.155253 | 63 | 78.3526214 | 76.3651214 |
| 75.6388103 | 89.155253 | 63 | 78.3526214 | 76.3567881 |
| 73.6388103 | 89.155253 | 63 | 77.5192881 | 76.3651214 |
| 71.6388103 | 89.155253 | 63 | 77.1859547 | 76.3442881 |
| 70.6388103 | 89.155253 | 63 | 77.0192881 | 76.3026214 |
| 69.6388103 | 89.155253 | 63 | 76.8526214 | 76.2776214 |
| 69.6388103 | 89.155253 | 63 | 76.8526214 | 76.2734547 |
| 70.6388103 | 89.155253 | 63 | 77.1859547 | 76.2901214 |
| 71.6388103 | 88.155253 | 63 | 77.0192881 | 76.3067881 |
| 72.6388103 | 86.155253 | 63 | 76.6859547 | 76.3484547 |
| 71.6388103 | 86.155253 | 63 | 76.3526214 | 76.4026214 |
| 70.6388103 | 85.155253 | 63 | 75.6859547 | 76.4401214 |

|            |           |    |            |            |
|------------|-----------|----|------------|------------|
| 70.6388103 | 84.155253 | 63 | 75.3526214 | 76.5067881 |
| 70.6388103 | 85.155253 | 63 | 75.5192881 | 76.5942881 |
| 70.6388103 | 85.155253 | 63 | 75.3526214 | 76.6901214 |
| 70.6388103 | 85.155253 | 63 | 75.3526214 | 76.7859547 |
| 68.6388103 | 85.155253 | 63 | 74.6859547 | 76.8609547 |
| 68.6388103 | 84.155253 | 63 | 74.3526214 | 76.9026214 |
| 68.6388103 | 84.155253 | 63 | 74.5192881 | 76.9317881 |
| 68.6388103 | 84.155253 | 63 | 74.5192881 | 76.9317881 |
| 68.6388103 | 83.155253 | 63 | 74.6859547 | 76.9067881 |
| 68.6388103 | 83.155253 | 63 | 74.6859547 | 76.8817881 |
| 68.6388103 | 83.155253 | 63 | 74.6859547 | 76.8401214 |
| 68.6388103 | 82.155253 | 63 | 74.6859547 | 76.8317881 |
| 68.6388103 | 84.155253 | 63 | 75.3526214 | 76.8317881 |
| 69.6388103 | 85.155253 | 63 | 76.0192881 | 76.8276214 |
| 69.6388103 | 86.155253 | 63 | 76.1859547 | 76.8276214 |
| 70.6388103 | 86.155253 | 63 | 76.6859547 | 76.8442881 |
| 72.6388103 | 88.155253 | 63 | 78.0192881 | 76.8734547 |
| 74.6388103 | 87.155253 | 63 | 78.5192881 | 76.9067881 |
| 74.6388103 | 87.155253 | 63 | 78.5192881 | 76.9317881 |
| 77.6388103 | 87.155253 | 63 | 79.5192881 | 76.9526214 |
| 78.6388103 | 87.155253 | 63 | 80.0192881 | 76.9651214 |
| 78.6388103 | 87.155253 | 63 | 80.0192881 | 76.9817881 |
| 78.6388103 | 88.155253 | 63 | 80.3526214 | 76.9942881 |
| 77.6388103 | 88.155253 | 63 | 79.8526214 | 77.0359547 |
| 77.6388103 | 88.155253 | 63 | 79.1859547 | 77.0859547 |
| 76.6388103 | 88.155253 | 63 | 78.8526214 | 77.1567881 |
| 76.6388103 | 85.155253 | 69 | 78.0192881 | 77.2484547 |
| 75.6388103 | 85.155253 | 69 | 77.6859547 | 77.3359547 |
| 75.6388103 | 84.155253 | 69 | 77.3526214 | 77.4234547 |
| 74.6388103 | 83.155253 | 69 | 76.6859547 | 77.5317881 |
| 75.6388103 | 83.155253 | 69 | 77.1859547 | 77.6734547 |
| 75.6388103 | 83.155253 | 69 | 77.1859547 | 77.8234547 |
| 74.6388103 | 83.155253 | 69 | 76.8526214 | 77.9692881 |
| 74.6388103 | 83.155253 | 69 | 76.8526214 | 78.1234547 |
| 75.6388103 | 84.155253 | 69 | 77.5192881 | 78.2859547 |
| 74.6388103 | 85.155253 | 69 | 78.3526214 | 78.4692881 |
| 74.6388103 | 85.155253 | 69 | 78.3526214 | 78.6567881 |
| 72.6388103 | 85.155253 | 69 | 77.6859547 | 78.8192881 |
| 72.6388103 | 85.155253 | 69 | 77.1859547 | 78.9526214 |
| 71.6388103 | 85.155253 | 69 | 76.1859547 | 79.0859547 |
| 71.6388103 | 85.155253 | 69 | 76.0192881 | 79.2151214 |
| 72.6388103 | 85.155253 | 63 | 76.0192881 | 79.3192881 |
| 74.6388103 | 86.155253 | 63 | 77.0192881 | 79.4567881 |
| 74.6388103 | 87.155253 | 63 | 77.3526214 | 79.5734547 |
| 73.6388103 | 88.155253 | 63 | 77.5192881 | 79.7109547 |

|            |           |    |            |            |
|------------|-----------|----|------------|------------|
| 74.6388103 | 88.155253 | 63 | 78.0192881 | 79.8567881 |
| 74.6388103 | 88.155253 | 63 | 78.0192881 | 79.9984547 |
| 74.6388103 | 88.155253 | 63 | 78.0192881 | 80.1651214 |
| 76.6388103 | 88.155253 | 63 | 79.0192881 | 80.3442881 |
| 77.6388103 | 91.155253 | 63 | 80.3526214 | 80.5192881 |
| 77.6388103 | 92.155253 | 63 | 80.6859547 | 80.7067881 |
| 77.6388103 | 92.155253 | 63 | 80.5192881 | 80.8734547 |
| 79.6388103 | 93.155253 | 63 | 81.5192881 | 80.9817881 |
| 82.6388103 | 93.155253 | 63 | 82.5192881 | 81.0692881 |
| 82.6388103 | 96.155253 | 63 | 83.5192881 | 81.1234547 |
| 88.6388103 | 92.155253 | 63 | 84.1859547 | 81.1359547 |
| 89.6388103 | 92.155253 | 63 | 84.5192881 | 81.1109547 |
| 89.6388103 | 90.155253 | 63 | 83.8526214 | 81.0859547 |
| 90.6388103 | 89.155253 | 63 | 83.8526214 | 81.0692881 |
| 93.6388103 | 89.155253 | 63 | 84.6859547 | 81.0651214 |
| 93.6388103 | 88.155253 | 63 | 84.1859547 | 81.0692881 |
| 97.6388103 | 88.155253 | 63 | 85.5192881 | 81.0484547 |
| 97.6388103 | 88.155253 | 63 | 85.0192881 | 81.0276214 |
| 97.6388103 | 89.155253 | 63 | 85.3526214 | 80.9567881 |
| 96.6388103 | 89.155253 | 63 | 85.0192881 | 80.8776214 |
| 95.6388103 | 89.155253 | 63 | 84.5192881 | 80.8276214 |
| 95.6388103 | 89.155253 | 63 | 84.6859547 | 80.7651214 |
| 95.6388103 | 89.155253 | 63 | 84.8526214 | 80.7276214 |
| 93.6388103 | 89.155253 | 63 | 84.3526214 | 80.6901214 |
| 93.6388103 | 88.155253 | 63 | 84.1859547 | 80.6484547 |
| 92.6388103 | 88.155253 | 63 | 83.8526214 | 80.5776214 |
| 87.6388103 | 86.155253 | 63 | 81.5192881 | 80.4901214 |
| 87.6388103 | 82.155253 | 63 | 80.3526214 | 80.3817881 |
| 83.6388103 | 82.155253 | 63 | 79.0192881 | 80.2317881 |
| 83.6388103 | 79.155253 | 63 | 78.0192881 | 80.0692881 |
| 83.6388103 | 77.155253 | 63 | 77.3526214 | 79.8692881 |
| 83.6388103 | 77.155253 | 63 | 77.3526214 | 79.6484547 |
| 83.6388103 | 76.155253 | 63 | 77.0192881 | 79.4026214 |
| 83.6388103 | 76.155253 | 63 | 77.0192881 | 79.1609547 |
| 81.6388103 | 76.155253 | 63 | 76.3526214 | 78.9192881 |
| 78.6388103 | 76.155253 | 63 | 75.1859547 | 78.6317881 |
| 78.6388103 | 75.155253 | 63 | 75.1859547 | 78.3401214 |
| 75.6388103 | 75.155253 | 63 | 74.1859547 | 78.0109547 |
| 75.6388103 | 75.155253 | 63 | 74.1859547 | 77.6942881 |
| 75.6388103 | 79.155253 | 63 | 75.5192881 | 77.3567881 |
| 75.6388103 | 79.155253 | 63 | 75.5192881 | 77.0442881 |
| 75.6388103 | 82.155253 | 63 | 76.5192881 | 76.7692881 |
| 75.6388103 | 82.155253 | 63 | 76.5192881 | 76.5151214 |
| 77.6388103 | 82.155253 | 63 | 77.3526214 | 76.2526214 |
| 77.6388103 | 82.155253 | 63 | 77.5192881 | 76.0067881 |

|            |           |    |            |            |
|------------|-----------|----|------------|------------|
| 77.6388103 | 81.155253 | 63 | 77.1859547 | 75.7651214 |
| 75.6388103 | 80.155253 | 69 | 76.1859547 | 75.5192881 |
| 74.6388103 | 79.155253 | 69 | 75.5192881 | 75.2901214 |
| 74.6388103 | 80.155253 | 69 | 76.0192881 | 75.0526214 |
| 72.6388103 | 80.155253 | 69 | 75.5192881 | 74.8484547 |
| 72.6388103 | 80.155253 | 69 | 75.3526214 | 74.6776214 |
| 71.6388103 | 79.155253 | 69 | 74.6859547 | 74.5401214 |
| 70.6388103 | 79.155253 | 69 | 74.1859547 | 74.4109547 |
| 70.6388103 | 79.155253 | 69 | 74.1859547 | 74.3026214 |
| 69.6388103 | 78.155253 | 69 | 73.1859547 | 74.2026214 |
| 68.6388103 | 77.155253 | 69 | 72.5192881 | 74.1401214 |
| 68.6388103 | 77.155253 | 69 | 72.3526214 | 74.1109547 |
| 68.6388103 | 77.155253 | 69 | 72.3526214 | 74.1067881 |
| 67.6388103 | 77.155253 | 69 | 71.8526214 | 74.1359547 |
| 68.6388103 | 78.155253 | 69 | 72.5192881 | 74.1776214 |
| 69.6388103 | 78.155253 | 69 | 73.5192881 | 74.1734547 |
| 72.6388103 | 78.155253 | 69 | 74.5192881 | 74.1734547 |
| 72.6388103 | 78.155253 | 69 | 74.3526214 | 74.1567881 |
| 72.6388103 | 79.155253 | 69 | 74.5192881 | 74.1484547 |
| 72.6388103 | 79.155253 | 69 | 74.5192881 | 74.1317881 |
| 72.6388103 | 80.155253 | 69 | 74.0192881 | 74.1109547 |
| 71.6388103 | 77.155253 | 63 | 72.3526214 | 74.0859547 |
| 69.6388103 | 75.155253 | 63 | 70.8526214 | 74.0401214 |
| 69.6388103 | 75.155253 | 63 | 70.8526214 | 74.0109547 |
| 69.6388103 | 76.155253 | 63 | 71.1859547 | 73.9484547 |
| 69.6388103 | 78.155253 | 63 | 71.8526214 | 73.8442881 |
| 69.6388103 | 79.155253 | 63 | 72.1859547 | 73.7609547 |
| 69.6388103 | 80.155253 | 63 | 72.6859547 | 73.6942881 |
| 69.6388103 | 81.155253 | 63 | 73.0192881 | 73.7609547 |
| 69.6388103 | 82.155253 | 63 | 73.8526214 | 73.9109547 |
| 69.6388103 | 82.155253 | 63 | 74.0192881 | 74.0859547 |
| 72.6388103 | 82.155253 | 63 | 75.0192881 | 74.3276214 |
| 74.6388103 | 82.155253 | 63 | 75.3526214 | 74.5984547 |
| 75.6388103 | 83.155253 | 63 | 75.8526214 | 74.8609547 |
| 75.6388103 | 82.155253 | 63 | 75.3526214 | 75.1401214 |
| 75.6388103 | 81.155253 | 63 | 75.5192881 | 75.4151214 |
| 75.6388103 | 81.155253 | 63 | 75.8526214 | 75.6567881 |
| 75.6388103 | 81.155253 | 63 | 76.1859547 | 75.7656961 |
| 76.6388103 | 81.155253 | 63 | 76.6859547 | 75.9406961 |
| 76.6388103 | 80.155253 | 63 | 76.6859547 | 75.9989097 |
| 75.6388103 | 79.155253 | 63 | 76.1859547 | 76.0474011 |
| 69.6388103 | 79.155253 | 63 | 74.3526214 | 76.1000591 |
| 69.6388103 | 79.155253 | 63 | 74.3526214 | 76.2006338 |
| 66.6388103 | 80.155253 | 63 | 73.5192881 | 76.3505141 |
| 60.6388103 | 80.155253 | 63 | 71.3526214 | 76.4927555 |



|            |            |    |            |            |
|------------|------------|----|------------|------------|
| 60.6388103 | 82.155253  | 63 | 72.0192881 | 76.6273579 |
| 59.6388103 | 82.155253  | 63 | 72.0192881 | 76.7557104 |
| 70.6388103 | 82.155253  | 63 | 76.8526214 | 76.8958685 |
| 75.6388103 | 82.155253  | 63 | 80.1859547 | 77.0235265 |
| 75.6388103 | 82.155253  | 63 | 80.1859547 | 77.2116012 |
| 77.6388103 | 84.155253  | 63 | 82.1859547 | 77.4663426 |
| 78.6388103 | 86.155253  | 63 | 83.1859547 | 77.7801117 |
| 77.6388103 | 86.155253  | 63 | 82.8526214 | 78.1167976 |
| 77.6388103 | 86.155253  | 63 | 83.0192881 | 78.2368167 |
| 74.6388103 | 90.155253  | 63 | 83.5192881 | 78.3047525 |
| 73.6388103 | 90.155253  | 63 | 83.1859547 | 78.3747717 |
| 71.6388103 | 89.155253  | 63 | 78.8756097 | 78.4399297 |
| 68.6388103 | 89.155253  | 63 | 81.3526214 | 78.4752266 |
| 67.6388103 | 89.155253  | 63 | 76.8478319 | 78.5306625 |
| 67.6388103 | 89.155253  | 63 | 76.458943  | 78.5534594 |
| 66.6388103 | 89.155253  | 63 | 76.1256097 | 78.6102841 |
| 64.6388103 | 91.155253  | 63 | 76.3756097 | 78.6539144 |
| 63.6388103 | 93.155253  | 63 | 76.8478319 | 78.6260169 |
| 62.6388103 | 93.155253  | 63 | 76.5422764 | 78.5738138 |
| 62.6388103 | 93.155253  | 63 | 76.5700541 | 78.5223052 |
| 62.6388103 | 94.155253  | 63 | 76.9867208 | 78.5305188 |
| 63.6388103 | 94.155253  | 63 | 77.7922764 | 78.4977601 |
| 63.6388103 | 93.155253  | 63 | 77.7922764 | 78.4900015 |
| 66.6388103 | 97.155253  | 63 | 80.5422764 | 78.3454373 |
| 68.6388103 | 104.155253 | 63 | 84.0422764 | 78.3204373 |
| 68.6388103 | 111.155253 | 63 | 86.5700541 | 78.2912707 |
| 73.6388103 | 111.155253 | 63 | 88.4867208 | 78.174604  |
| 73.6388103 | 90.155253  | 63 | 80.1533875 | 77.9912707 |
| 72.6388103 | 88.155253  | 63 | 78.5700541 | 77.8037707 |
| 71.6388103 | 88.155253  | 63 | 78.1533875 | 77.599604  |
| 71.6388103 | 88.155253  | 63 | 78.1256097 | 77.362104  |
| 69.6388103 | 88.155253  | 63 | 77.2644986 | 77.1287707 |
| 68.6388103 | 92.155253  | 63 | 78.4033875 | 77.0156959 |
| 66.6388103 | 92.155253  | 63 | 77.5978319 | 76.8698626 |
| 66.6388103 | 95.155253  | 63 | 78.958943  | 76.8574824 |
| 63.6388103 | 95.155253  | 63 | 77.9311652 | 76.8798243 |
| 61.6388103 | 85.155253  | 63 | 73.2367208 | 76.9438329 |
| 59.6388103 | 83.155253  | 63 | 72.2644986 | 77.0515916 |
| 57.6388103 | 83.155253  | 63 | 71.458943  | 77.2100446 |
| 57.6388103 | 83.155253  | 63 | 71.6811652 | 77.3761366 |
| 56.6388103 | 81.155253  | 63 | 70.708943  | 77.5582008 |
| 59.6388103 | 81.155253  | 63 | 71.708943  | 77.7173483 |
| 59.6388103 | 81.155253  | 63 | 71.0700541 | 77.8480236 |
| 72.6388103 | 80.155253  | 63 | 79.1859547 | 77.9703655 |
| 74.6388103 | 79.155253  | 63 | 79.0192881 | 78.0281242 |

|            |           |    |            |            |
|------------|-----------|----|------------|------------|
| 74.6388103 | 79.155253 | 63 | 77.5192881 | 78.0025495 |
| 74.6388103 | 77.155253 | 63 | 75.8526214 | 77.9262803 |
| 74.6388103 | 77.155253 | 63 | 75.3526214 | 77.8187612 |
| 74.6388103 | 77.155253 | 63 | 74.8526214 | 77.911242  |
| 73.6388103 | 77.155253 | 63 | 74.0192881 | 78.0433062 |
| 73.6388103 | 77.155253 | 63 | 73.8526214 | 78.1774537 |
| 74.6388103 | 77.155253 | 63 | 74.3526214 | 78.295629  |
| 75.6388103 | 77.155253 | 63 | 75.5192881 | 78.4436654 |
| 75.6388103 | 77.155253 | 63 | 76.3526214 | 78.5548962 |
| 76.6388103 | 78.155253 | 63 | 77.3526214 | 78.6820993 |
| 77.6388103 | 80.155253 | 63 | 78.6859547 | 78.7294413 |
| 77.6388103 | 84.155253 | 63 | 80.6859547 | 78.7816443 |
| 81.6388103 | 85.155253 | 63 | 83.1859547 | 78.9137085 |
| 81.6388103 | 85.155253 | 63 | 83.1859547 | 79.0409116 |
| 83.6388103 | 83.155253 | 63 | 83.8526214 | 79.2090869 |
| 82.6388103 | 82.155253 | 63 | 83.3526214 | 79.4044423 |
| 81.6388103 | 82.155253 | 63 | 83.0192881 | 79.6391034 |
| 80.6388103 | 82.155253 | 63 | 82.6859547 | 79.8437644 |
| 80.6388103 | 83.155253 | 63 | 82.8526214 | 80.0643976 |
| 80.6388103 | 83.155253 | 63 | 83.0192881 | 80.0921333 |
| 80.6388103 | 84.155253 | 63 | 83.5192881 | 80.1240357 |
| 80.6388103 | 86.155253 | 63 | 84.1859547 | 80.1984381 |
| 77.6388103 | 86.155253 | 63 | 83.8526214 | 80.3145072 |
| 77.6388103 | 86.155253 | 63 | 83.8526214 | 80.4530762 |
| 77.6388103 | 86.155253 | 63 | 83.5192881 | 80.6091453 |
| 76.6388103 | 86.155253 | 63 | 82.8526214 | 80.7860477 |
| 76.6388103 | 86.155253 | 63 | 83.1859547 | 80.9621167 |
| 75.6388103 | 86.155253 | 63 | 82.8526214 | 81.1106858 |
| 75.6388103 | 86.155253 | 63 | 82.6859547 | 81.2300882 |
| 75.6388103 | 88.155253 | 63 | 80.8526214 | 81.3186572 |
| 75.6388103 | 87.155253 | 63 | 80.0192881 | 81.3672263 |
| 75.6388103 | 87.155253 | 63 | 78.5192881 | 81.387462  |
| 75.6388103 | 86.155253 | 63 | 77.3526214 | 81.3326977 |
| 79.6388103 | 86.155253 | 63 | 78.1859547 | 81.2204334 |
|            | 88.155253 | 63 | 79.4953836 | 81.1181692 |
|            | 90.155253 | 63 | 80.0953836 | 80.9942382 |
|            | 90.155253 | 63 | 79.8953836 | 80.8828073 |
|            | 91.155253 | 63 | 79.8953836 | 80.7797097 |
|            | 92.155253 | 63 | 80.2953836 | 80.6849454 |
|            | 92.155253 | 63 | 80.2953836 | 80.6010144 |
|            | 92.155253 | 63 | 80.4953836 | 80.5229168 |
|            | 92.155253 | 63 | 80.4953836 | 80.4523192 |
|            | 93.155253 | 63 | 80.8953836 | 80.3600549 |
|            | 93.155253 | 63 | 81.0953836 | 80.306124  |
|            | 93.155253 | 63 | 81.0953836 | 80.262193  |

|           |    |            |            |
|-----------|----|------------|------------|
| 92.155253 | 63 | 80.8953836 | 80.2315954 |
| 90.155253 | 63 | 80.2953836 | 80.1876645 |
| 89.155253 | 63 | 80.2953836 | 80.1404002 |
| 88.155253 | 63 | 79.8953836 | 80.1014693 |
| 88.155253 | 63 | 79.2953836 | 80.041705  |
| 88.155253 | 63 | 79.4953836 | 80.002774  |
| 86.155253 | 63 | 78.4953836 | 79.9846764 |
| 86.155253 | 63 | 78.6953836 | 79.9990788 |
| 86.155253 | 63 | 79.0953836 | 80.0426479 |
| 86.155253 | 63 | 78.8953836 | 80.0603836 |
| 86.155253 | 63 | 78.8953836 | 80.0403836 |
| 86.155253 | 63 | 78.8953836 | 80.0103836 |
| 86.155253 | 63 | 78.8953836 | 79.9803836 |
| 88.155253 | 63 | 79.4953836 | 79.9303836 |
| 89.155253 | 63 | 79.8953836 | 79.8703836 |
| 90.155253 | 63 | 80.6953836 | 79.7953836 |
| 90.155253 | 63 | 80.4953836 | 79.7153836 |
| 92.155253 | 63 | 81.6953836 | 79.6403836 |
| 92.155253 | 63 | 82.0953836 | 79.5653836 |
| 92.155253 | 63 | 82.2953836 | 79.4903836 |
| 89.155253 | 63 | 81.0953836 | 79.4453836 |
| 89.155253 | 63 | 81.2953836 | 79.4753836 |
| 89.155253 | 63 | 81.2953836 | 79.5903836 |
| 84.155253 | 63 | 80.2953836 | 79.7303836 |
| 85.155253 | 63 | 79.2953836 | 79.8803836 |
| 85.155253 | 63 | 79.2953836 | 80.0453836 |
| 85.155253 | 63 | 79.0953836 | 80.2153836 |
| 85.155253 | 63 | 79.0953836 | 80.4103836 |
| 86.155253 | 63 | 78.8953836 | 80.5703836 |
| 86.155253 | 63 | 78.6953836 | 80.7303836 |
| 85.155253 | 63 | 78.8953836 | 80.8753836 |
| 85.155253 | 63 | 78.6953836 | 81.0003836 |
| 84.155253 | 63 | 77.8953836 | 81.1003836 |
| 84.155253 | 63 | 77.8953836 | 81.1703836 |
| 84.155253 | 63 | 77.2953836 | 81.2153836 |
| 84.155253 | 63 | 77.2953836 | 81.2353836 |
| 84.155253 | 63 | 77.4953836 | 81.2153836 |
| 84.155253 | 63 | 77.8953836 | 81.1903836 |
| 84.155253 | 63 | 78.0953836 | 81.1253836 |
| 84.155253 | 63 | 79.2953836 | 81.0503836 |
| 90.155253 | 63 | 82.0953836 | 80.9553836 |
| 96.155253 | 63 | 84.8953836 | 80.8803836 |
| 97.155253 | 63 | 85.8953836 | 80.7853836 |
| 97.155253 | 63 | 85.8953836 | 80.6953836 |
| 97.155253 | 63 | 85.8953836 | 80.6153836 |

|           |    |            |            |
|-----------|----|------------|------------|
| 98.155253 | 63 | 86.2953836 | 80.5403836 |
| 98.155253 | 63 | 86.2953836 | 80.4503836 |
| 98.155253 | 63 | 85.0953836 | 80.3653836 |
| 99.155253 | 63 | 85.4953836 | 80.2853836 |
| 99.155253 | 63 | 84.6953836 | 80.1953836 |
| 99.155253 | 63 | 83.8953836 | 80.1253836 |
| 97.155253 | 63 | 82.8953836 | 80.0553836 |
| 95.155253 | 63 | 81.6953836 | 79.9853836 |
| 94.155253 | 63 | 81.2953836 | 79.9503836 |
| 93.155253 | 63 | 80.6953836 | 79.9203836 |
| 91.155253 | 63 | 79.8953836 | 79.9153836 |
| 90.155253 | 63 | 79.4953836 | 79.9053836 |
| 90.155253 | 63 | 79.0953836 | 79.8903836 |
| 90.155253 | 63 | 79.0953836 | 79.8403836 |
| 90.155253 | 63 | 78.4953836 | 79.7853836 |
| 90.155253 | 63 | 78.0953836 | 79.7053836 |
| 89.155253 | 63 | 77.4953836 | 79.5553836 |
| 89.155253 | 63 | 77.6953836 | 79.3153836 |
| 88.155253 | 63 | 77.0953836 | 79.0253836 |
| 86.155253 | 63 | 76.2953836 | 78.7003836 |
| 84.155253 | 63 | 75.6953836 | 78.3303836 |
| 84.155253 | 63 | 75.6953836 | 77.9403836 |
| 84.155253 | 63 | 75.8953836 | 77.5203836 |
| 84.155253 | 63 | 75.2953836 | 77.0953836 |
| 86.155253 | 63 | 75.8953836 | 76.6553836 |
| 87.155253 | 63 | 76.0953836 | 76.2403836 |
| 87.155253 | 63 | 75.8953836 | 75.9153836 |
| 89.155253 | 63 | 76.4953836 | 75.6403836 |
| 89.155253 | 63 | 76.6953836 | 75.4203836 |
| 90.155253 | 63 | 77.0953836 | 75.2053836 |
| 90.155253 | 63 | 76.8953836 | 74.9903836 |
| 90.155253 | 63 | 76.8953836 | 74.8053836 |
| 86.155253 | 63 | 75.8953836 | 74.6203836 |
| 85.155253 | 63 | 75.8953836 | 74.4403836 |
| 85.155253 | 63 | 76.0953836 | 74.2803836 |
| 85.155253 | 63 | 76.0953836 | 74.1603836 |
| 84.155253 | 63 | 75.2953836 | 74.0553836 |
| 84.155253 | 63 | 74.2953836 | 73.9553836 |
| 83.155253 | 63 | 72.8953836 | 73.8403836 |
| 83.155253 | 63 | 71.0953836 | 73.7353836 |
| 83.155253 | 63 | 70.6953836 | 73.6403836 |
| 83.155253 | 63 | 69.4953836 | 73.5603836 |
| 81.155253 | 63 | 68.0953836 | 73.4803836 |
| 81.155253 | 63 | 67.8953836 | 73.3953836 |
| 81.155253 | 63 | 68.0953836 | 73.3153836 |

|           |    |            |            |
|-----------|----|------------|------------|
| 81.155253 | 63 | 70.8953836 | 73.1903836 |
| 81.155253 | 63 | 71.8953836 | 73.0553836 |
| 81.155253 | 63 | 72.8953836 | 72.9253836 |
| 81.155253 | 63 | 72.6953836 | 72.7953836 |
| 80.155253 | 63 | 72.0953836 | 72.6753836 |
| 80.155253 | 63 | 72.4953836 | 72.6253836 |
| 80.155253 | 63 | 72.0953836 | 72.6003836 |
| 80.155253 | 63 | 71.8953836 | 72.6103836 |
| 81.155253 | 63 | 72.6953836 | 72.6653836 |
| 82.155253 | 63 | 73.6953836 | 72.7253836 |
| 82.155253 | 63 | 73.8953836 | 72.7753836 |
| 81.155253 | 63 | 73.4953836 | 72.8203836 |
| 80.155253 | 63 | 73.0953836 | 72.8703836 |
| 80.155253 | 63 | 72.8953836 | 72.9303836 |
| 80.155253 | 63 | 72.4953836 | 73.0253836 |
| 80.155253 | 63 | 72.4953836 | 73.1653836 |
| 80.155253 | 63 | 72.4953836 | 73.2953836 |
| 80.155253 | 63 | 72.4953836 | 73.4553836 |
| 80.155253 | 63 | 72.0953836 | 73.6453836 |
| 80.155253 | 63 | 70.8953836 | 73.8253836 |
| 80.155253 | 63 | 70.6953836 | 74.0003836 |
| 80.155253 | 63 | 70.6953836 | 74.1053836 |
| 81.155253 | 63 | 71.2953836 | 74.1553836 |
| 82.155253 | 63 | 71.8953836 | 74.1703836 |
| 90.155253 | 63 | 75.0953836 | 74.1903836 |
| 90.155253 | 63 | 75.8953836 | 74.2203836 |
| 93.155253 | 63 | 77.2953836 | 74.2503836 |
| 93.155253 | 63 | 78.0953836 | 74.3053836 |
| 93.155253 | 63 | 78.2953836 | 74.3603836 |
| 93.155253 | 63 | 78.0953836 | 74.3903836 |
| 93.155253 | 63 | 77.8953836 | 74.3853836 |
| 93.155253 | 63 | 77.2953836 | 74.3853836 |
| 92.155253 | 63 | 76.6953836 | 74.3753836 |
| 92.155253 | 63 | 76.6953836 | 74.3703836 |
| 92.155253 | 63 | 76.6953836 | 74.3803836 |
| 92.155253 | 63 | 75.8953836 | 74.4503836 |
| 92.155253 | 63 | 75.8953836 | 74.5303836 |
| 92.155253 | 63 | 75.6953836 | 74.6203836 |
| 91.155253 | 63 | 75.0953836 | 74.6953836 |
| 90.155253 | 63 | 75.0953836 | 74.7853836 |
| 90.155253 | 63 | 75.0953836 | 74.9103836 |
| 87.155253 | 63 | 73.8953836 | 75.0553836 |
| 86.155253 | 63 | 73.4953836 | 75.2353836 |
| 86.155253 | 63 | 73.4953836 | 75.4153836 |
| 85.155253 | 63 | 73.2953836 | 75.5803836 |

|           |    |            |            |
|-----------|----|------------|------------|
| 86.155253 | 63 | 73.6953836 | 75.6703836 |
| 87.155253 | 63 | 74.2953836 | 75.7503836 |
| 87.155253 | 63 | 74.0953836 | 75.7853836 |
| 86.155253 | 63 | 73.8953836 | 75.8053836 |
| 85.155253 | 63 | 73.4953836 | 75.8653836 |
| 84.155253 | 63 | 73.8953836 | 75.9253836 |
| 82.155253 | 63 | 73.0953836 | 76.0003836 |
| 81.155253 | 63 | 72.8953836 | 76.1103836 |
| 81.155253 | 63 | 73.2953836 | 76.2403836 |
| 85.155253 | 63 | 75.2953836 | 76.3703836 |
| 85.155253 | 63 | 75.6953836 | 76.5003836 |
| 85.155253 | 63 | 76.0953836 | 76.6253836 |
| 84.155253 | 63 | 75.4953836 | 76.7353836 |
| 84.155253 | 63 | 75.6953836 | 76.8703836 |
| 85.155253 | 63 | 75.8953836 | 77.0003836 |
| 86.155253 | 63 | 76.4953836 | 77.1203836 |
| 88.155253 | 63 | 77.8953836 | 77.2203836 |
| 89.155253 | 63 | 78.4953836 | 77.3603836 |
| 89.155253 | 63 | 78.4953836 | 77.5153836 |
| 89.155253 | 63 | 78.6953836 | 77.6353836 |
| 89.155253 | 63 | 79.0953836 | 77.7553836 |
| 88.155253 | 63 | 78.6953836 | 77.8603836 |
| 87.155253 | 63 | 78.8953836 | 77.9453836 |
| 87.155253 | 63 | 80.6953836 | 78.0303836 |
| 86.155253 | 63 | 80.4953836 | 78.1303836 |
| 87.155253 | 63 | 80.8953836 | 78.2453836 |
| 88.155253 | 63 | 81.6953836 | 78.3353836 |
| 88.155253 | 63 | 81.8953836 | 78.4353836 |
| 88.155253 | 63 | 81.8953836 | 78.5053836 |
| 88.155253 | 63 | 81.8953836 | 78.5603836 |
| 88.155253 | 63 | 80.8953836 | 78.5653836 |
| 88.155253 | 63 | 80.2953836 | 78.5553836 |
| 92.155253 | 63 | 81.0953836 | 78.5753836 |
| 91.155253 | 63 | 80.2953836 | 78.6053836 |
| 90.155253 | 63 | 79.8953836 | 78.6303836 |
| 90.155253 | 63 | 79.0953836 | 78.6603836 |
| 88.155253 | 63 | 79.4953836 | 78.6803836 |
| 87.155253 | 63 | 79.6953836 | 78.6703836 |
| 85.155253 | 63 | 78.2953836 | 78.6403836 |
| 85.155253 | 69 | 78.0953836 | 78.6003836 |
| 85.155253 | 69 | 77.8953836 | 78.5403836 |
| 85.155253 | 69 | 77.6953836 | 78.4553836 |
| 85.155253 | 69 | 77.4953836 | 78.3653836 |
| 85.155253 | 69 | 77.8953836 | 78.2503836 |
| 86.155253 | 69 | 78.0953836 | 78.0903836 |

|           |    |            |            |
|-----------|----|------------|------------|
| 86.155253 | 69 | 77.4953836 | 77.9303836 |
| 85.155253 | 69 | 77.0953836 | 77.7453836 |
| 82.155253 | 69 | 75.6953836 | 77.5503836 |
| 81.155253 | 69 | 75.4953836 | 77.3503836 |
| 81.155253 | 69 | 75.4953836 | 77.1453836 |
| 81.155253 | 69 | 75.2953836 | 76.9403836 |
| 84.155253 | 63 | 76.8953836 | 76.7653836 |
| 84.155253 | 63 | 76.6953836 | 76.6053836 |
| 85.155253 | 63 | 76.6953836 | 76.4153836 |
| 85.155253 | 63 | 77.0953836 | 76.2353836 |
| 85.155253 | 63 | 77.2953836 | 76.0653836 |
| 84.155253 | 63 | 77.4953836 | 75.9353836 |
| 83.155253 | 63 | 77.2953836 | 75.8253836 |
| 82.155253 | 63 | 76.8953836 | 75.7203836 |
| 80.155253 | 63 | 76.2953836 | 75.6503836 |
| 79.155253 | 63 | 75.6953836 | 75.5953836 |
| 79.155253 | 63 | 75.0953836 | 75.5553836 |
| 79.155253 | 63 | 74.2953836 | 75.5153836 |
| 79.155253 | 63 | 74.2953836 | 75.3597533 |
| 79.155253 | 63 | 74.0953836 | 75.194123  |
| 78.155253 | 63 | 73.4953836 | 75.164123  |
| 78.155253 | 63 | 73.8953836 | 75.159123  |
| 78.155253 | 63 | 73.8953836 | 75.129123  |
| 77.155253 | 63 | 73.6953836 | 75.134123  |
| 77.155253 | 63 | 73.6953836 | 75.144123  |
| 77.155253 | 63 | 73.8953836 | 75.159123  |
| 77.155253 | 63 | 73.8953836 | 75.169123  |
| 77.155253 | 63 | 73.4953836 | 75.169123  |
| 76.155253 | 63 | 73.0953836 | 75.179123  |
| 76.155253 | 63 | 73.0953836 | 75.174123  |
| 78.155253 | 63 | 73.8953836 | 75.149123  |
| 78.155253 | 63 | 75.0953836 | 75.124123  |
| 78.155253 | 63 | 75.4953836 | 75.079123  |
| 78.155253 | 63 | 75.4953836 | 75.039123  |
| 78.155253 | 63 | 75.8953836 | 75.004123  |
| 78.155253 | 63 | 76.2953836 | 74.984123  |
| 78.155253 | 63 | 76.0953836 | 74.979123  |
| 78.155253 | 63 | 71.2701721 | 74.989123  |
| 78.155253 | 63 | 71.2701721 | 75.059123  |
| 81.155253 | 63 | 76.8953836 | 75.129123  |
| 82.155253 | 63 | 77.2953836 | 75.259123  |
| 82.155253 | 63 | 75.8953836 | 75.399123  |
| 82.155253 | 63 | 75.8953836 | 75.579123  |
| 82.155253 | 63 | 75.8953836 | 75.784123  |
| 80.155253 | 63 | 76.0953836 | 76.004123  |

|           |    |            |            |
|-----------|----|------------|------------|
| 79.155253 | 63 | 75.6953836 | 76.229123  |
| 80.155253 | 63 | 76.8953836 | 76.439123  |
| 81.155253 | 63 | 77.0953836 | 76.629123  |
| 81.155253 | 63 | 76.4953836 | 76.794123  |
| 81.155253 | 63 | 76.0953836 | 76.949123  |
| 83.155253 | 63 | 76.2953836 | 77.074123  |
| 82.155253 | 63 | 75.6953836 | 77.149123  |
| 82.155253 | 63 | 75.6953836 | 77.194123  |
| 82.155253 | 63 | 75.4953836 | 77.234123  |
| 82.155253 | 63 | 75.4953836 | 77.274123  |
| 82.155253 | 63 | 75.4953836 | 77.309123  |
| 82.155253 | 63 | 75.4953836 | 77.349123  |
| 86.155253 | 63 | 77.0953836 | 77.389123  |
| 86.155253 | 63 | 77.0953836 | 77.5547533 |
| 91.155253 | 63 | 79.2953836 | 77.7203836 |
| 91.155253 | 63 | 79.0953836 | 77.7453836 |
| 94.155253 | 63 | 81.0953836 | 77.8003836 |
| 94.155253 | 63 | 82.0953836 | 77.9203836 |
| 94.155253 | 63 | 82.4953836 | 78.0503836 |
| 93.155253 | 63 | 82.6953836 | 78.1753836 |
| 90.155253 | 63 | 82.2953836 | 78.3003836 |
| 89.155253 | 69 | 81.4953836 | 78.4453836 |
| 87.155253 | 69 | 80.0953836 | 78.5253836 |
| 87.155253 | 69 | 79.2953836 | 78.5753836 |
| 84.155253 | 69 | 78.0953836 | 78.6453836 |
| 82.155253 | 69 | 76.8953836 | 78.7153836 |
| 82.155253 | 69 | 76.8953836 | 78.7853836 |
| 83.155253 | 69 | 77.0953836 | 78.8653836 |
| 83.155253 | 69 | 77.0953836 | 78.9703836 |
| 84.155253 | 69 | 77.2953836 | 79.0903836 |
| 85.155253 | 69 | 77.8953836 | 79.2103836 |
| 84.155253 | 69 | 77.6953836 | 79.3203836 |
| 84.155253 | 69 | 77.8953836 | 79.4203836 |
| 84.155253 | 69 | 77.8953836 | 79.4803836 |
| 84.155253 | 69 | 77.8953836 | 79.5403836 |
| 88.155253 | 69 | 79.4953836 | 79.5353836 |
| 90.155253 | 69 | 80.6953836 | 79.5303836 |
| 91.155253 | 69 | 81.0953836 | 79.4603836 |
| 91.155253 | 69 | 80.8953836 | 79.3703836 |
| 92.155253 | 69 | 81.0953836 | 79.2753836 |
| 92.155253 | 69 | 81.4953836 | 79.1803836 |
| 89.155253 | 69 | 80.0953836 | 79.0903836 |
| 87.155253 | 69 | 79.0953836 | 78.9803836 |
| 87.155253 | 69 | 79.2953836 | 78.8903836 |
| 86.155253 | 69 | 78.8953836 | 78.8003836 |



|           |    |            |            |
|-----------|----|------------|------------|
| 86.155253 | 69 | 79.0953836 | 78.7553836 |
| 86.155253 | 69 | 78.8953836 | 78.7403836 |
| 89.155253 | 69 | 79.8953836 | 78.7303836 |
| 91.155253 | 69 | 80.2953836 | 78.7153836 |
| 91.155253 | 69 | 80.2953836 | 78.7103836 |
| 91.155253 | 69 | 79.8953836 | 78.7103836 |
| 90.155253 | 63 | 79.4953836 | 78.7003836 |
| 90.155253 | 63 | 79.4953836 | 78.7353836 |
| 90.155253 | 63 | 79.4953836 | 78.7703836 |
| 89.155253 | 63 | 79.0953836 | 78.8003836 |
| 88.155253 | 63 | 78.8953836 | 78.8553836 |
| 86.155253 | 63 | 78.2953836 | 78.8453836 |
| 86.155253 | 63 | 78.4953836 | 78.7903836 |
| 86.155253 | 63 | 78.6953836 | 78.7353836 |
| 85.155253 | 63 | 78.8953836 | 78.6703836 |
| 85.155253 | 63 | 78.6953836 | 78.6053836 |
| 81.155253 | 63 | 77.0953836 | 78.5253836 |
| 80.155253 | 63 | 76.4953836 | 78.4903836 |
| 79.155253 | 63 | 75.6953836 | 78.4703836 |
| 80.155253 | 63 | 76.2953836 | 78.4453836 |
| 80.155253 | 63 | 76.2953836 | 78.4253836 |
| 80.155253 | 63 | 76.4953836 | 78.4053836 |
| 80.155253 | 63 | 76.4953836 | 78.3853836 |
| 80.155253 | 63 | 76.8953836 | 78.3403836 |
| 80.155253 | 63 | 77.2953836 | 78.2903836 |
| 80.155253 | 63 | 77.4953836 | 78.2453836 |
| 84.155253 | 63 | 79.0953836 | 78.1803836 |
| 84.155253 | 63 | 79.2953836 | 78.0853836 |
| 84.155253 | 63 | 79.0953836 | 77.9853836 |
| 87.155253 | 63 | 80.0953836 | 77.8903836 |
| 85.155253 | 63 | 79.0953836 | 77.8103836 |
| 84.155253 | 63 | 78.4953836 | 77.7353836 |
| 85.155253 | 63 | 78.8953836 | 77.6753836 |
| 85.155253 | 63 | 78.2953836 | 77.6053836 |
| 86.155253 | 63 | 78.4953836 | 77.5203836 |
| 86.155253 | 63 | 78.2953836 | 77.4203836 |
| 87.155253 | 63 | 78.6953836 | 77.3053836 |
| 86.155253 | 63 | 78.2953836 | 77.2303836 |
| 86.155253 | 63 | 78.2953836 | 77.1853836 |
| 86.155253 | 63 | 78.0953836 | 77.1653836 |
| 86.155253 | 63 | 78.2953836 | 77.1353836 |
| 86.155253 | 63 | 78.0953836 | 77.1303836 |
| 86.155253 | 63 | 78.0953836 | 77.1303836 |
| 86.155253 | 63 | 78.2953836 | 77.1553836 |
| 87.155253 | 63 | 78.4953836 | 77.0854537 |

|           |    |            |            |
|-----------|----|------------|------------|
| 85.155253 | 63 | 77.2953836 | 77.0065239 |
| 81.155253 | 63 | 75.6953836 | 76.935594  |
| 80.155253 | 63 | 75.4953836 | 76.8366641 |
| 80.155253 | 63 | 75.6953836 | 76.7207342 |
| 80.155253 | 63 | 75.8953836 | 76.6098044 |
| 80.155253 | 63 | 75.8953836 | 76.4998745 |
| 80.155253 | 63 | 75.8953836 | 76.5298745 |
| 80.155253 | 63 | 75.6953836 | 76.5598745 |
| 80.155253 | 63 | 75.2953836 | 76.5048745 |
| 79.155253 | 63 | 74.8953836 | 76.4498745 |
| 77.155253 | 63 | 74.0953836 | 76.3598745 |
| 77.155253 | 63 | 74.0953836 | 76.2598745 |
| 77.155253 | 63 | 74.6953836 | 76.1498745 |
| 77.155253 | 63 | 74.8953836 | 76.0398745 |
| 77.155253 | 63 | 75.0953836 | 75.9248745 |
| 77.155253 | 63 | 76.0953836 | 75.8098745 |
| 77.155253 | 63 | 76.4953836 | 75.6898745 |
| 77.155253 | 63 | 77.4953836 | 75.5748745 |
| 77.155253 | 63 | 74.0981887 | 75.4598745 |
| 77.155253 | 63 | 74.1381887 | 75.4148745 |
| 78.155253 | 63 | 74.6581887 | 75.3798745 |
| 79.155253 | 63 | 75.1381887 | 75.3748745 |
| 79.155253 | 63 | 74.6581887 | 75.3998745 |
| 79.155253 | 63 | 74.6581887 | 75.4298745 |
| 81.155253 | 63 | 75.6981887 | 75.4448745 |
| 84.155253 | 63 | 80.2953836 | 75.4398745 |
| 84.155253 | 63 | 79.6953836 | 75.4298745 |
| 80.155253 | 63 | 76.6953836 | 75.4148745 |
| 80.155253 | 63 | 76.0953836 | 75.3998745 |
| 78.155253 | 63 | 74.8953836 | 75.4048745 |
| 77.155253 | 63 | 74.2953836 | 75.4398745 |
| 77.155253 | 63 | 74.2953836 | 75.5548745 |
| 77.155253 | 63 | 73.8953836 | 75.6798745 |
| 76.155253 | 63 | 73.6953836 | 75.7798745 |
| 76.155253 | 63 | 73.4953836 | 75.8698745 |
| 76.155253 | 63 | 73.4953836 | 75.9748745 |
| 76.155253 | 63 | 73.4953836 | 76.0598745 |
| 76.155253 | 63 | 73.4953836 | 76.1498745 |
| 83.155253 | 63 | 76.4953836 | 76.2148745 |
| 84.155253 | 63 | 77.0953836 | 76.3598044 |
| 84.155253 | 63 | 77.0953836 | 76.4987342 |
| 84.155253 | 63 | 76.6953836 | 76.5946641 |
| 84.155253 | 63 | 76.6953836 | 76.693594  |
| 84.155253 | 63 | 76.2953836 | 76.7745239 |
| 84.155253 | 63 | 75.6953836 | 76.8604537 |

|           |    |            |            |
|-----------|----|------------|------------|
| 84.155253 | 63 | 75.4953836 | 76.9253836 |
| 84.155253 | 63 | 75.2953836 | 76.8803836 |
| 83.155253 | 63 | 75.0953836 | 76.8553836 |
| 83.155253 | 63 | 75.4953836 | 76.8803836 |
| 85.155253 | 63 | 76.2953836 | 76.9103836 |
| 90.155253 | 63 | 78.6953836 | 76.9403836 |
| 91.155253 | 63 | 79.0953836 | 76.9903836 |
| 91.155253 | 63 | 78.6953836 | 77.0453836 |
| 90.155253 | 63 | 78.4953836 | 77.1153836 |
| 92.155253 | 63 | 79.2953836 | 77.1853836 |
| 93.155253 | 63 | 79.4953836 | 77.2903836 |
| 95.155253 | 63 | 80.0953836 | 77.4053836 |
| 95.155253 | 63 | 80.0953836 | 77.5353836 |
| 95.155253 | 63 | 79.8953836 | 77.6403836 |
| 94.155253 | 63 | 79.6953836 | 77.6403836 |
| 90.155253 | 63 | 78.4953836 | 77.6253836 |
| 90.155253 | 63 | 79.0953836 | 77.5903836 |
| 87.155253 | 63 | 77.8953836 | 77.5703836 |
| 88.155253 | 63 | 78.0953836 | 77.5603836 |
| 88.155253 | 63 | 78.2953836 | 77.5703836 |
| 89.155253 | 63 | 78.4953836 | 77.5903836 |
| 90.155253 | 63 | 78.6953836 | 77.6153836 |
| 89.155253 | 63 | 77.6953836 | 77.6453836 |
| 88.155253 | 63 | 77.2953836 | 77.6953836 |
| 85.155253 | 63 | 76.0953836 | 77.7303836 |
| 84.155253 | 63 | 76.2953836 | 77.7603836 |
| 84.155253 | 63 | 76.4953836 | 77.7453836 |
| 84.155253 | 63 | 76.6953836 | 77.7153836 |
| 83.155253 | 63 | 76.4953836 | 77.6903836 |
| 85.155253 | 63 | 77.6953836 | 77.6603836 |
| 86.155253 | 63 | 78.0953836 | 77.6053836 |
| 86.155253 | 63 | 78.6953836 | 77.5353836 |
| 84.155253 | 63 | 77.6953836 | 77.4403836 |
| 81.155253 | 63 | 76.4953836 | 77.3353836 |
| 81.155253 | 63 | 76.4953836 | 77.2403836 |
| 79.155253 | 63 | 75.6953836 | 77.1303836 |
| 79.155253 | 63 | 75.8953836 | 77.0403836 |
| 80.155253 | 63 | 76.2953836 | 76.9303836 |
| 81.155253 | 63 | 76.6953836 | 76.8353836 |
| 81.155253 | 63 | 76.4953836 | 76.7403836 |
| 81.155253 | 63 | 76.4953836 | 76.6203836 |
| 81.155253 | 63 | 76.4953836 | 76.4853836 |
| 82.155253 | 63 | 77.0953836 | 76.3453836 |
| 82.155253 | 63 | 76.8953836 | 76.2503836 |
| 83.155253 | 63 | 77.4953836 | 76.1653836 |

|           |    |                      |            |
|-----------|----|----------------------|------------|
| 85.155253 | 63 | 78.0953836           | 76.1203836 |
| 85.155253 | 63 | 77.8953836           | 76.0853836 |
| 85.155253 | 63 | 77.6953836           | 76.0503836 |
| 85.155253 | 63 | 77.2953836           | 76.0203836 |
| 85.155253 | 63 | 77.0953836           | 75.9953836 |
| 85.155253 | 63 | 76.6953836           | 75.9453836 |
| 85.155253 | 63 | 76.2953836           | 75.8803836 |
| 84.155253 | 63 | 75.8953836           | 75.8153836 |
| 85.155253 | 63 | 76.0953836           | 75.7653836 |
| 84.155253 | 63 | 75.2953836           | 75.7403836 |
| 83.155253 | 63 | 74.8953836           | 75.7203836 |
| 83.155253 | 63 | 74.6953836           | 75.7053836 |
| 83.155253 | 63 | 74.0953836           | 75.6853836 |
| 83.155253 | 63 | 74.2953836           | 75.6703836 |
| 82.155253 | 63 | 73.4953836           | 75.6503836 |
| 81.155253 | 63 | 73.0953836           | 75.6403836 |
| 81.155253 | 63 | 73.0953836           | 75.6403836 |
| 81.155253 | 63 | 73.8953836           | 75.6353836 |
| 81.155253 | 63 | 73.8953836           | 75.6253836 |
| 81.155253 | 63 | 74.2953836           | 75.6403836 |
| 82.155253 | 63 | 74.8953836 Before 1  | 75.6303836 |
| 82.155253 | 63 | 75.0953836 Before 2  | 75.6003836 |
| 81.155253 | 63 | 75.4953836 Before 3  | 75.5753836 |
| 80.155253 | 63 | 75.4953836 Before 4  | 75.5553836 |
| 80.155253 | 63 | 75.6953836 Before 5  | 75.5303836 |
| 80.155253 | 63 | 75.4953836 Before 6  | 75.5103836 |
| 82.155253 | 63 | 76.0953836 Before 7  | 75.5003836 |
| 83.155253 | 63 | 75.6953836 Before 8  | 75.5103836 |
| 83.155253 | 63 | 75.4953836 Before 9  | 75.5203836 |
| 85.155253 | 63 | 75.6953836 Before 10 | 75.5353836 |
| 84.155253 | 63 | 75.0953836 Before 11 | 75.5703836 |
| 84.155253 | 63 | 75.0953836 Before 12 | 75.6053836 |
| 83.155253 | 63 | 75.6953836 Before 13 | 75.6353836 |
| 82.155253 | 63 | 75.8953836 Before 14 | 75.6753836 |
| 82.155253 | 63 | 76.0953836 Before 15 | 75.7053836 |
| 82.155253 | 63 | 76.4953836 Before 16 | 75.7553836 |
| 82.155253 | 63 | 76.2953836 Before 17 | 75.8003836 |
| 83.155253 | 63 | 76.6953836 Before 18 | 75.8403836 |
| 84.155253 | 63 | 77.4953836 Before 19 | 75.8603836 |
| 83.155253 | 63 | 77.0953836 Before 20 | 75.8853836 |
| 82.155253 | 63 | 76.8953836 Before 21 | 75.8853836 |
| 82.155253 | 63 | 76.8953836 Before 22 | 75.8503836 |
| 82.155253 | 63 | 76.8953836 Before 23 | 75.8153836 |
| 81.155253 | 63 | 76.2953836 Before 24 | 75.7553836 |
| 80.155253 | 63 | 76.2953836 Before 25 | 75.7003836 |

|           |    |            |           |            |
|-----------|----|------------|-----------|------------|
| 79.155253 | 63 | 76.2953836 | Before 26 | 75.6803836 |
| 79.155253 | 63 | 76.6953836 | Before 27 | 75.6853836 |
| 78.155253 | 63 | 76.2953836 | Before 28 | 75.6703836 |
| 79.155253 | 63 | 76.6953836 | Before 29 | 75.6853836 |
| 79.155253 | 63 | 76.6953836 | Before 30 | 75.6953836 |
| 79.155253 | 63 | 76.2953836 | Before 31 | 75.5527533 |
| 79.155253 | 63 | 75.8953836 | Before 32 | 75.413123  |
| 79.155253 | 63 | 75.6953836 | Before 33 | 75.2744927 |
| 79.155253 | 63 | 75.4953836 | Before 34 | 75.1318625 |
| 80.155253 | 63 | 75.4953836 | Before 35 | 75.0968625 |
| 79.155253 | 63 | 74.8953836 | Before 36 | 75.0818625 |
| 79.155253 | 63 | 74.6953836 | Before 37 | 75.0418625 |
| 79.155253 | 63 | 74.6953836 | Before 38 | 75.0268625 |
| 80.155253 | 63 | 74.8953836 | Before 39 | 74.9868625 |
| 79.155253 | 63 | 74.2953836 | Before 40 | 74.9168625 |
| 77.155253 | 63 | 73.4953836 | Before 41 | 74.8518625 |
| 77.155253 | 63 | 73.6953836 | Before 42 | 74.7968625 |
| 77.155253 | 63 | 73.0953836 | Before 43 | 74.7668625 |
| 78.155253 | 63 | 73.2953836 | Before 44 | 74.7768625 |
| 80.155253 | 63 | 74.8953836 | Before 45 | 74.8118625 |
| 82.155253 | 63 | 75.6953836 | Before 46 | 74.8868625 |
| 82.155253 | 63 | 75.4953836 | Before 47 | 75.0018625 |
| 82.155253 | 63 | 76.2953836 | Before 48 | 75.1068625 |
| 80.155253 | 63 | 75.8953836 | Before 49 | 75.2118625 |
| 78.155253 | 63 | 69.9901721 | Before 50 | 75.1462322 |
| 77.155253 | 63 | 69.5101721 | Before 51 | 75.0566019 |
| 77.155253 | 63 | 69.5501721 | Before 52 | 74.9829716 |
| 78.155253 | 63 | 69.9901721 | Before 53 | 74.9193413 |
| 78.155253 | 63 | 74.4953836 | Before 54 | 74.871711  |
| 80.155253 | 63 | 75.4953836 | Before 55 | 74.8230807 |
| 79.155253 | 63 | 74.8953836 | Before 56 | 74.7734504 |
| 79.155253 | 63 | 75.6953836 | Before 57 | 74.7378202 |
| 77.155253 | 63 | 75.0953836 | Before 58 | 74.6951899 |
| 77.155253 | 63 | 74.6953836 | Before 59 | 74.7701899 |
| 77.155253 | 63 | 74.4953836 | Before 60 | 74.8301899 |
| 77.155253 | 63 | 74.6953836 | Before 61 | 74.9051899 |
| 77.155253 | 63 | 75.6953836 | Before 62 | 75.0051899 |
| 77.155253 | 63 | 77.2953836 | Before 63 | 75.0901899 |
| 78.155253 | 63 | 77.6953836 | Before 64 | 75.1901899 |
| 81.155253 | 63 | 79.2953836 | Before 65 | 75.2851899 |
| 83.155253 | 63 | 80.8953836 | Before 66 | 75.3151899 |
| 83.155253 | 63 | 80.8953836 | Before 67 | 75.2105596 |
| 82.155253 | 63 | 80.4953836 | Before 68 | 75.1229293 |
| 79.155253 | 63 | 74.0701721 | Before 69 | 75.0879293 |
| 78.155253 | 63 | 73.1101721 | Before 70 | 75.0679293 |

|           |    |            |            |            |
|-----------|----|------------|------------|------------|
| 79.155253 | 63 | 73.3501721 | Before 71  | 75.2005596 |
| 80.155253 | 63 | 73.3501721 | Before 72  | 75.3451899 |
| 81.155253 | 63 | 73.7901721 | Before 73  | 75.5038202 |
| 81.155253 | 63 | 73.5501721 | Before 74  | 75.6864504 |
| 81.155253 | 63 | 73.5101721 | Before 75  | 75.7664504 |
| 81.155253 | 63 | 73.4701721 | Before 76  | 75.8514504 |
| 80.155253 | 63 | 72.9901721 | Before 77  | 75.9614504 |
| 80.155253 | 63 | 77.6953836 | Before 78  | 76.0664504 |
| 80.155253 | 63 | 77.2953836 | Before 79  | 76.2164504 |
| 80.155253 | 63 | 77.2953836 | Before 80  | 76.3864504 |
| 80.155253 | 63 | 77.4953836 | Before 81  | 76.5614504 |
| 80.155253 | 63 | 77.0953836 | Before 82  | 76.7214504 |
| 80.155253 | 63 | 77.0953836 | Before 83  | 76.8514504 |
| 80.155253 | 63 | 77.0953836 | Before 84  | 76.9464504 |
| 78.155253 | 63 | 76.0953836 | Before 85  | 77.0314504 |
| 78.155253 | 63 | 71.5101721 | Before 86  | 77.0914504 |
| 79.155253 | 63 | 71.9901721 | Before 87  | 76.9938202 |
| 82.155253 | 63 | 74.8953836 | Before 88  | 76.8971899 |
| 83.155253 | 63 | 75.0953836 | Before 89  | 76.7805596 |
| 84.155253 | 63 | 75.2953836 | Before 90  | 76.8195596 |
| 84.155253 | 63 | 75.2953836 | Before 91  | 76.8595596 |
| 85.155253 | 63 | 75.8953836 | Before 92  | 76.8875596 |
| 86.155253 | 63 | 77.2953836 | Before 93  | 76.9055596 |
| 86.155253 | 63 | 77.6953836 | Before 94  | 77.0681899 |
| 88.155253 | 63 | 78.8953836 | Before 95  | 77.2118202 |
| 88.155253 | 63 | 79.2953836 | Before 96  | 77.3464504 |
| 88.155253 | 63 | 79.8953836 | Before 97  | 77.4970807 |
| 87.155253 | 63 | 81.0953836 | Before 98  | 77.644711  |
| 86.155253 | 63 | 81.4953836 | Before 99  | 77.659711  |
| 85.155253 | 63 | 81.4953836 | Before 100 | 77.689711  |
| 84.155253 | 63 | 81.0953836 | Before 101 | 77.714711  |
| 84.155253 | 63 | 80.8953836 | Before 102 | 77.769711  |
| 84.155253 | 63 | 81.0953836 | Before 103 | 77.849711  |
| 83.155253 | 63 | 81.0953836 | Before 104 | 77.924711  |
| 83.155253 | 63 | 81.6953836 | Before 105 | 77.989711  |
| 83.155253 | 63 | 76.9901721 | Before 106 | 78.059711  |
| 83.155253 | 63 | 77.0301721 | Before 107 | 78.2343413 |
| 81.155253 | 63 | 75.8301721 | Before 108 | 78.3669716 |
| 80.155253 | 63 | 75.6301721 | Before 109 | 78.4269716 |
| 79.155253 | 63 | 74.7101721 | Before 110 | 78.4119716 |
| 79.155253 | 63 | 74.4701721 | Before 111 | 78.3619716 |
| 79.155253 | 63 | 74.0701721 | Before 112 | 78.3119716 |
| 80.155253 | 63 | 80.2953836 | Before 113 | 78.2469716 |
| 79.155253 | 63 | 79.2953836 | Before 114 | 78.1469716 |
| 79.155253 | 63 | 78.8953836 | Before 115 | 78.0369716 |

|           |    |            |            |            |
|-----------|----|------------|------------|------------|
| 79.155253 | 63 | 79.4953836 | Before 116 | 77.8869716 |
| 79.155253 | 63 | 78.8953836 | Before 117 | 77.7119716 |
| 78.155253 | 63 | 78.2953836 | Before 118 | 77.5119716 |
| 78.155253 | 63 | 78.4953836 | Before 119 | 77.2819716 |
| 78.155253 | 63 | 78.2953836 | Before 120 | 77.0369716 |
| 79.155253 | 63 | 79.6953836 | Before 121 | 76.7569716 |
| 80.155253 | 63 | 80.2953836 | Before 122 | 76.4819716 |
| 80.155253 | 63 | 80.0953836 | Before 123 | 76.1869716 |
| 79.155253 | 63 | 79.6953836 | Before 124 | 75.8819716 |
| 79.155253 | 63 | 78.8953836 | Before 125 | 75.5819716 |
| 79.155253 | 63 | 78.4953836 | Before 126 | 75.2669716 |
| 78.155253 | 63 | 77.2953836 | Before 127 | 75.0496019 |
| 78.155253 | 63 | 77.2953836 | Before 128 | 74.8462322 |
| 78.155253 | 63 | 74.4953836 | Before 129 | 74.7178625 |
| 79.155253 | 63 | 73.2953836 | Before 130 | 74.5894927 |
| 80.155253 | 63 | 73.2953836 | Before 131 | 74.504123  |
| 80.155253 | 63 | 73.2953836 | Before 132 | 74.4247533 |
| 81.155253 | 63 | 73.2953836 | Before 133 | 74.3703836 |
| 81.155253 | 63 | 73.2953836 | Before 134 | 74.1403836 |
| 81.155253 | 63 | 72.8953836 | Before 135 | 73.9203836 |
| 80.155253 | 63 | 72.2953836 | Before 136 | 73.6903836 |
| 80.155253 | 63 | 71.8953836 | Before 137 | 73.4503836 |
| 80.155253 | 63 | 71.8953836 | Before 138 | 73.2203836 |
| 80.155253 | 63 | 71.6953836 | Before 139 | 73.0103836 |
| 80.155253 | 63 | 70.2953836 | Before 140 | 72.7953836 |
| 80.155253 | 63 | 70.0953836 | Before 141 | 72.5703836 |
| 81.155253 | 63 | 69.0953836 | Before 142 | 72.3203836 |
| 81.155253 | 63 | 68.8953836 | Before 143 | 72.0453836 |
| 81.155253 | 63 | 69.0953836 | Before 144 | 71.7853836 |
| 82.155253 | 63 | 69.0953836 | Before 145 | 71.5403836 |
| 81.155253 | 63 | 68.2953836 | Before 146 | 71.3253836 |
| 82.155253 | 63 | 68.8953836 | Before 147 | 71.1353836 |
| 83.155253 | 63 | 70.6953836 | Before 148 | 70.9853836 |
| 84.155253 | 63 | 70.4953836 | Before 149 | 70.8253836 |
| 86.155253 | 63 | 71.2953836 | Before 150 | 70.7303836 |
| 86.155253 | 63 | 71.2953836 | Before 151 | 70.6703836 |
| 87.155253 | 63 | 71.8953836 | Before 152 | 70.6153836 |
| 85.155253 | 63 | 71.0953836 | Before 153 | 70.5503836 |
| 83.155253 | 63 | 70.4953836 | Before 154 | 70.4753836 |
| 81.155253 | 63 | 69.6953836 | Before 155 | 70.4103836 |
| 81.155253 | 63 | 69.8953836 | Before 156 | 70.4103836 |
| 81.155253 | 63 | 69.6953836 | Before 157 | 70.4403836 |
| 81.155253 | 63 | 69.8953836 | Before 158 | 70.4953836 |
| 80.155253 | 63 | 69.8953836 | Before 159 | 70.5503836 |
| 78.155253 | 63 | 69.2953836 | Before 160 | 70.6153836 |

|           |    |            |            |            |
|-----------|----|------------|------------|------------|
| 78.155253 | 63 | 69.6953836 | Before 161 | 70.7153836 |
| 76.155253 | 63 | 69.2953836 | Before 162 | 70.7953836 |
| 76.155253 | 63 | 69.6953836 | Before 163 | 70.8753836 |
| 77.155253 | 63 | 69.8953836 | Before 164 | 70.9353836 |
| 79.155253 | 63 | 70.2953836 | Before 165 | 70.9953836 |
| 81.155253 | 63 | 70.8953836 | Before 166 | 71.0653836 |
| 82.155253 | 63 | 71.2953836 | Before 167 | 71.1553836 |
| 82.155253 | 63 | 70.8953836 | Before 168 | 71.2353836 |
| 82.155253 | 63 | 70.6953836 | Before 169 | 71.2803836 |
| 82.155253 | 63 | 70.8953836 | Before 170 | 71.3303836 |
| 82.155253 | 63 | 71.0953836 | Before 171 | 71.3653836 |
| 81.155253 | 63 | 70.6953836 | Before 172 | 71.3753836 |
| 80.155253 | 63 | 70.2953836 | Before 173 | 71.3703836 |
| 80.155253 | 63 | 70.6953836 | Before 174 | 71.4053836 |
| 82.155253 | 63 | 72.8953836 | Before 175 | 71.4503836 |
| 82.155253 | 63 | 73.4953836 | Before 176 | 71.5153836 |
| 82.155253 | 63 | 74.0953836 | Before 177 | 71.5753836 |
| 82.155253 | 63 | 74.0953836 | Before 178 | 71.6303836 |
| 82.155253 | 63 | 74.2953836 | Before 179 | 71.6553836 |
| 82.155253 | 63 | 74.2953836 | Before 180 | 71.6753836 |
| 81.155253 | 63 | 73.2953836 | Before 181 | 71.7053836 |
| 81.155253 | 63 | 72.2953836 | Before 182 | 71.7253836 |
| 81.155253 | 63 | 71.2953836 | Before 183 | 71.7403836 |
| 82.155253 | 63 | 71.4953836 | Before 184 | 71.7603836 |
| 82.155253 | 63 | 71.8953836 | Before 185 | 71.7753836 |
| 82.155253 | 63 | 71.8953836 | Before 186 | 71.7853836 |
| 82.155253 | 63 | 72.0953836 | Before 187 | 71.7853836 |
| 82.155253 | 63 | 72.4953836 | Before 188 | 71.7803836 |
| 82.155253 | 63 | 72.4953836 | Before 189 | 71.7953836 |
| 81.155253 | 63 | 72.6953836 | Before 190 | 71.8153836 |
| 80.155253 | 63 | 71.6953836 | Before 191 | 71.8253836 |
| 80.155253 | 63 | 71.6953836 | Before 192 | 71.8353836 |
| 81.155253 | 63 | 72.4953836 | Before 193 | 71.8553836 |
| 81.155253 | 63 | 72.2953836 | Before 194 | 71.8753836 |
| 81.155253 | 63 | 72.2953836 | Before 195 | 71.9003836 |
| 81.155253 | 63 | 72.2953836 | Before 196 | 71.8803836 |
| 81.155253 | 63 | 71.8953836 | Before 197 | 71.8503836 |
| 79.155253 | 63 | 70.8953836 | Before 198 | 71.8353836 |
| 79.155253 | 63 | 70.6953836 | Before 199 | 71.8553836 |
| 79.155253 | 63 | 70.4953836 | Before 200 | 71.8903836 |
| 79.155253 | 63 | 70.4953836 | Before 201 | 71.9403836 |
| 78.155253 | 63 | 69.8953836 | Before 202 | 72.0253836 |
| 77.155253 | 63 | 70.4953836 | Before 203 | 72.1203836 |
| 77.155253 | 63 | 70.4953836 | Before 204 | 72.2353836 |
| 77.155253 | 63 | 70.6953836 | Before 205 | 72.3503836 |



|           |    |            |            |            |
|-----------|----|------------|------------|------------|
| 78.155253 | 63 | 70.8953836 | Before 206 | 72.4403836 |
| 78.155253 | 63 | 71.0953836 | Before 207 | 72.5253836 |
| 78.155253 | 63 | 71.4953836 | Before 208 | 72.6003836 |
| 77.155253 | 63 | 71.4953836 | Before 209 | 72.6703836 |
| 76.155253 | 63 | 71.2953836 | Before 210 | 72.7653836 |
| 76.155253 | 63 | 71.4953836 | Before 211 | 72.8853836 |
| 76.155253 | 63 | 71.4953836 | Before 212 | 73.0453836 |
| 75.155253 | 63 | 71.0953836 | Before 213 | 73.2203836 |
| 76.155253 | 63 | 71.6953836 | Before 214 | 73.3553836 |
| 76.155253 | 63 | 72.0953836 | Before 215 | 73.4953836 |
| 76.155253 | 63 | 72.2953836 | Before 216 | 73.6553836 |
| 76.155253 | 63 | 73.4953836 | Before 217 | 73.8253836 |
| 76.155253 | 63 | 74.8953836 | Before 218 | 74.0203836 |
| 76.155253 | 63 | 75.6953836 | Before 219 | 74.2003836 |
| 76.155253 | 63 | 76.2953836 | Before 220 | 74.3653836 |
| 78.155253 | 63 | 76.6953836 | Before 221 | 74.5203836 |
| 78.155253 | 63 | 76.0953836 | Before 222 | 74.6703836 |
| 79.155253 | 63 | 75.8953836 | Before 223 | 74.7953836 |
| 80.155253 | 63 | 76.0953836 | Before 224 | 74.8903836 |
| 79.155253 | 63 | 75.4953836 | Before 225 | 74.9803836 |
| 79.155253 | 63 | 75.2953836 | Before 226 | 75.0753836 |
| 79.155253 | 63 | 75.0953836 | Before 227 | 75.1653836 |
| 79.155253 | 63 | 75.2953836 | Before 228 | 75.2603836 |
| 81.155253 | 63 | 76.2953836 | Before 229 | 75.3103836 |
| 84.155253 | 63 | 77.4953836 | Before 230 | 75.3803836 |
| 84.155253 | 63 | 78.0953836 | Before 231 | 75.4303836 |
| 84.155253 | 63 | 78.6953836 | Before 232 | 75.4753836 |
| 82.155253 | 63 | 77.8953836 | Before 233 | 75.5303836 |
| 79.155253 | 63 | 77.8953836 | Before 234 | 75.5903836 |
| 79.155253 | 63 | 78.6953836 | Before 235 | 75.6253836 |
| 79.155253 | 63 | 79.0953836 | Before 236 | 75.6403836 |
| 80.155253 | 63 | 79.6953836 | Before 237 | 75.6453836 |
| 81.155253 | 63 | 78.0953836 | Before 238 | 75.6203836 |
| 81.155253 | 63 | 77.2953836 | Before 239 | 75.5753836 |
| 80.155253 | 63 | 76.6953836 | Before 240 | 75.5153836 |
| 80.155253 | 63 | 76.4953836 | minute 0   | 75.4553836 |
| 76.155253 | 63 | 74.8953836 | minute 1   | 75.4103836 |
| 74.155253 | 63 | 74.2953836 | minute 2   | 75.3853836 |
| 74.155253 | 63 | 74.0953836 | minute 3   | 75.3753836 |
| 74.155253 | 63 | 74.4953836 | minute 4   | 75.3653836 |
| 74.155253 | 63 | 74.4953836 | minute 5   | 75.3603836 |
| 75.155253 | 63 | 74.8953836 | minute 6   | 75.3703836 |
| 77.155253 | 63 | 73.4953836 | minute 7   | 75.3953836 |
| 78.155253 | 63 | 74.2953836 | minute 8   | 75.4303836 |
| 78.155253 | 63 | 73.2953836 | minute 9   | 75.4403836 |

|           |    |            |           |            |
|-----------|----|------------|-----------|------------|
| 77.155253 | 63 | 73.2953836 | minute 10 | 75.4103836 |
| 77.155253 | 63 | 73.6953836 | minute 11 | 75.3503836 |
| 77.155253 | 63 | 73.4953836 | minute 12 | 75.2753836 |
| 76.155253 | 63 | 73.0953836 | minute 13 | 75.2253836 |
| 75.155253 | 63 | 72.6953836 | minute 14 | 75.0647533 |
| 76.155253 | 63 | 72.4953836 | minute 15 | 75.0397533 |
| 77.155253 | 63 | 72.4953836 | minute 16 | 75.0297533 |
| 77.155253 | 63 | 73.0953836 | minute 17 | 75.0297533 |
| 77.155253 | 63 | 73.2953836 | minute 18 | 75.0697533 |
| 78.155253 | 63 | 73.8953836 | minute 19 | 75.1447533 |
| 79.155253 | 63 | 74.8953836 | minute 20 | 75.2247533 |
| 78.155253 | 63 | 75.0953836 | minute 21 | 75.2997533 |
| 78.155253 | 63 | 75.4953836 | minute 22 | 75.3997533 |
| 78.155253 | 63 | 75.6953836 | minute 23 | 75.5097533 |
| 77.155253 | 63 | 75.2953836 | minute 24 | 75.6097533 |
| 78.155253 | 63 | 75.6953836 | minute 25 | 75.6897533 |
| 79.155253 | 63 | 76.0953836 | minute 26 | 75.7597533 |
| 80.155253 | 63 | 76.6953836 | minute 27 | 75.8147533 |
| 79.155253 | 63 | 76.6953836 | minute 28 | 75.8947533 |
| 77.155253 | 63 | 76.2953836 | minute 29 | 75.9547533 |
| 75.155253 | 63 | 75.6953836 | minute 30 | 76.0397533 |
| 73.155253 | 63 | 75.6953836 | minute 31 | 76.1247533 |
| 73.155253 | 63 | 75.8953836 | minute 32 | 76.1847533 |
| 73.155253 | 63 | 71.4701721 | minute 33 | 76.2397533 |
| 76.155253 | 63 | 77.6953836 | minute 34 | 76.2847533 |
| 78.155253 | 63 | 78.6953836 | minute 35 | 76.3347533 |
| 79.155253 | 63 | 79.6953836 | minute 36 | 76.3947533 |
| 79.155253 | 63 | 79.6953836 | minute 37 | 76.4547533 |
| 79.155253 | 63 | 80.2953836 | minute 38 | 76.5397533 |
| 77.155253 | 63 | 79.8953836 | minute 39 | 76.6197533 |
| 77.155253 | 63 | 79.4953836 | minute 40 | 76.6847533 |
| 77.155253 | 63 | 78.8953836 | minute 41 | 76.7247533 |
| 77.155253 | 63 | 78.6953836 | minute 42 | 76.7597533 |
| 79.155253 | 63 | 78.0953836 | minute 43 | 76.7447533 |
| 80.155253 | 63 | 77.6953836 | minute 44 | 76.7147533 |
| 81.155253 | 63 | 77.2953836 | minute 45 | 76.7047533 |
| 82.155253 | 63 | 77.0953836 | minute 46 | 76.6697533 |
| 83.155253 | 63 | 76.6953836 | minute 47 | 76.6347533 |
| 84.155253 | 63 | 76.6953836 | minute 48 | 76.5847533 |
| 84.155253 | 63 | 76.6953836 | minute 49 | 76.5447533 |
| 84.155253 | 63 | 76.6953836 | minute 50 | 76.5147533 |
| 84.155253 | 63 | 76.0953836 | minute 51 | 76.5047533 |
| 84.155253 | 63 | 75.6953836 | minute 52 | 76.4847533 |
| 82.155253 | 63 | 74.8953836 | minute 53 | 76.4297533 |
| 82.155253 | 63 | 74.6953836 | minute 54 | 76.4853836 |

|           |    |            |           |            |
|-----------|----|------------|-----------|------------|
| 82.155253 | 63 | 74.8953836 | minute 55 | 76.3653836 |
| 82.155253 | 63 | 74.8953836 | minute 56 | 76.2103836 |
| 85.155253 | 63 | 76.4953836 | minute 57 | 76.0353836 |
| 85.155253 | 63 | 76.4953836 | minute 58 | 75.8453836 |
| 85.155253 | 63 | 76.4953836 | minute 59 | 75.6603836 |
| 85.155253 | 63 | 76.4953836 | minute 60 | 75.4753836 |
| 85.155253 | 73 | 76.4953836 | Activity  | 75.3203836 |
| 81.155253 | 73 | 74.8953836 | Activity  | 75.1803836 |
| 80.155253 | 73 | 74.4953836 | Activity  | 75.0753836 |
| 80.155253 | 73 | 74.8953836 | Activity  | 74.9953836 |
| 80.155253 | 73 | 74.2953836 | Activity  | 74.9303836 |
| 82.155253 | 73 | 74.6953836 | Activity  | 74.9053836 |
| 82.155253 | 73 | 74.6953836 | Activity  | 74.9003836 |
| 84.155253 | 73 | 75.0953836 | Activity  | 74.8953836 |
| 83.155253 | 73 | 75.0953836 | Activity  | 74.8853836 |
| 83.155253 | 73 | 75.2953836 | Activity  | 74.8753836 |
| 79.155253 | 73 | 74.8953836 | Activity  | 74.8603836 |
| 77.155253 | 73 | 73.6953836 | Activity  | 74.9003836 |
| 77.155253 | 73 | 73.6953836 | Activity  | 74.9553836 |
| 77.155253 | 73 | 72.8953836 | Activity  | 75.0503836 |
| 77.155253 | 73 | 72.4953836 | Activity  | 75.1553836 |
| 77.155253 | 73 | 72.6953836 | Activity  | 75.2453836 |
| 77.155253 | 73 | 72.0953836 | Activity  | 75.3153836 |
| 77.155253 | 73 | 72.8953836 | Activity  | 75.3403836 |
| 76.155253 | 73 | 72.4953836 | Activity  | 75.3653836 |
| 77.155253 | 73 | 73.2953836 | Activity  | 75.4403836 |
| 77.155253 | 73 | 73.2953836 | Activity  | 75.5253836 |
| 78.155253 | 73 | 74.4953836 | Activity  | 75.6103836 |
| 78.155253 | 73 | 74.8953836 | Activity  | 75.7253836 |
| 78.155253 | 73 | 75.0953836 | Activity  | 75.9853836 |
| 80.155253 | 73 | 76.2953836 | Activity  | 76.2403836 |
| 81.155253 | 73 | 76.8953836 | Activity  | 76.5003836 |
| 81.155253 | 73 | 76.4953836 | Activity  | 76.7403836 |
| 81.155253 | 73 | 76.2953836 | Activity  | 76.9103836 |
| 81.155253 | 73 | 76.2953836 | Activity  | 77.0653836 |
| 81.155253 | 73 | 76.0953836 | Activity  | 77.2253836 |
| 84.155253 | 73 | 77.6953836 | Activity  | 77.2253836 |
| 84.155253 | 73 | 77.8953836 | Activity  | 77.2103836 |
| 84.155253 | 73 | 78.6953836 | Activity  | 77.2253836 |
| 84.155253 | 73 | 78.8953836 | Activity  | 77.2403836 |
| 84.155253 | 73 | 78.4953836 | Activity  | 77.3103836 |
| 84.155253 | 73 | 77.6953836 | Activity  | 77.4103836 |
| 85.155253 | 73 | 77.4953836 | Activity  | 77.5053836 |
| 85.155253 | 73 | 77.4953836 | Activity  | 77.6203836 |
| 91.155253 | 73 | 79.4953836 | Activity  | 77.6903836 |

|            |    |            |          |            |
|------------|----|------------|----------|------------|
| 92.155253  | 73 | 79.8953836 | Activity | 77.7503836 |
| 92.155253  | 73 | 79.8953836 | Activity | 77.7803836 |
| 92.155253  | 73 | 79.4953836 | Activity | 77.8103836 |
| 107.155253 | 73 | 84.8953836 | Activity | 77.8303836 |
| 107.155253 | 73 | 85.0953836 | Activity | 77.8403836 |
| 107.155253 | 73 | 84.6953836 | Activity | 77.8453836 |
| 107.155253 | 73 | 84.2953836 | Activity | 77.8303836 |
| 100.155253 | 73 | 81.4953836 | Activity | 77.8053836 |
| 100.155253 | 73 | 81.2953836 | Activity | 77.7803836 |
| 100.155253 | 73 | 81.4953836 | Activity | 77.7403836 |
| 82.155253  | 73 | 75.2953836 | Activity | 77.7103836 |
| 76.155253  | 73 | 74.2953836 | Activity | 77.6903836 |
| 75.155253  | 73 | 74.2953836 | Activity | 77.6403836 |
| 75.155253  | 73 | 74.2953836 | Activity | 77.5803836 |
| 74.155253  | 73 | 75.6953836 | Activity | 77.5003836 |
| 75.155253  | 73 | 76.4953836 | Activity | 77.4153836 |
| 75.155253  | 73 | 76.4953836 | Activity | 77.3353836 |
| 76.155253  | 73 | 76.6953836 | Activity | 77.2753836 |
| 76.155253  | 73 | 75.6953836 | Activity | 77.2203836 |
| 75.155253  | 73 | 74.8953836 | Activity | 77.1653836 |
| 75.155253  | 73 | 74.4953836 | Activity | 77.1003836 |
| 76.155253  | 73 | 74.4953836 | Activity | 77.0203836 |
| 76.155253  | 73 | 75.2953836 | Activity | 76.9953836 |
| 76.155253  | 73 | 75.2953836 | Activity | 77.0253836 |
| 76.155253  | 73 | 75.2953836 | Activity | 76.9103836 |
| 77.155253  | 73 | 75.6953836 | Activity | 76.7853836 |
| 78.155253  | 73 | 75.8953836 | Activity | 76.6703836 |
| 78.155253  | 73 | 75.4953836 | Activity | 76.6153836 |
| 78.155253  | 73 | 74.6953836 | Activity | 76.6553836 |
| 78.155253  | 73 | 75.0953836 | Activity | 76.7153836 |
| 77.155253  | 73 | 75.2953836 | Activity | 76.7753836 |
| 77.155253  | 73 | 75.6953836 | Activity | 76.9903836 |
| 76.155253  | 73 | 75.4953836 | Activity | 77.2253836 |
| 76.155253  | 73 | 75.4953836 | Activity | 77.4553836 |
| 76.155253  | 73 | 75.4953836 | Activity | 77.6753836 |
| 77.155253  | 73 | 75.2953836 | Activity | 77.8753836 |
| 77.155253  | 73 | 75.2953836 | Activity | 78.0553836 |
| 78.155253  | 73 | 75.2953836 | Activity | 78.2103836 |
| 78.155253  | 73 | 75.2953836 | Activity | 78.3653836 |
| 80.155253  | 73 | 76.8953836 | Activity | 78.5403836 |
| 80.155253  | 73 | 76.6953836 | Activity | 78.7353836 |
| 85.155253  | 73 | 78.8953836 | Activity | 78.9553836 |
| 89.155253  | 73 | 80.6953836 | Activity | 79.1803836 |
| 89.155253  | 73 | 80.2953836 | Activity | 79.3803836 |
| 91.155253  | 73 | 80.0953836 | Activity | 79.5903836 |

|            |    |            |          |            |
|------------|----|------------|----------|------------|
| 92.155253  | 73 | 80.0953836 | Activity | 79.8003836 |
| 96.155253  | 73 | 82.0953836 | Activity | 80.0003836 |
| 98.155253  | 73 | 83.0953836 | Activity | 80.1853836 |
| 98.155253  | 73 | 83.6953836 | Activity | 80.3803836 |
| 98.155253  | 73 | 83.8953836 | Activity | 80.6553836 |
| 98.155253  | 73 | 83.8953836 | Activity | 80.9453836 |
| 98.155253  | 73 | 83.6953836 | Activity | 81.2453836 |
| 98.155253  | 73 | 83.4953836 | Activity | 81.5353836 |
| 97.155253  | 73 | 83.0953836 | Activity | 81.8553836 |
| 97.155253  | 73 | 83.6953836 | Activity | 82.1803836 |
| 96.155253  | 73 | 83.6953836 | Activity | 82.5203836 |
| 95.155253  | 73 | 82.6953836 | Activity | 82.8703836 |
| 95.155253  | 73 | 82.8953836 | Activity | 83.2253836 |
| 95.155253  | 73 | 82.6953836 | Activity | 83.5803836 |
| 95.155253  | 73 | 82.6953836 | Activity | 83.9203836 |
| 95.155253  | 73 | 83.2953836 | Activity | 84.0853836 |
| 95.155253  | 73 | 83.4953836 | Activity | 84.1753836 |
| 94.155253  | 73 | 83.2953836 | Activity | 84.1753836 |
| 94.155253  | 73 | 83.6953836 | Activity | 84.1453836 |
| 94.155253  | 73 | 83.6953836 | Activity | 84.1253836 |
| 94.155253  | 73 | 83.6953836 | Activity | 84.1153836 |
| 94.155253  | 73 | 83.2953836 | Activity | 84.0853836 |
| 94.155253  | 73 | 83.2953836 | Activity | 83.9703836 |
| 101.155253 | 73 | 85.6953836 | Activity | 83.8103836 |
| 103.155253 | 73 | 86.6953836 | Activity | 83.6303836 |
| 104.155253 | 73 | 87.2953836 | Activity | 83.4153836 |
| 104.155253 | 73 | 87.2953836 | Activity | 83.1753836 |
| 104.155253 | 73 | 88.2953836 | Activity | 82.9203836 |
| 104.155253 | 73 | 88.4953836 | Activity | 82.6653836 |
| 105.155253 | 73 | 89.0953836 | Activity | 82.4253836 |
| 104.155253 | 73 | 89.2953836 | Activity | 82.1753836 |
| 104.155253 | 73 | 89.4953836 | Activity | 81.9353836 |
| 104.155253 | 73 | 89.4953836 | Activity | 81.7203836 |
| 103.155253 | 73 | 88.8953836 | Activity | 81.5003836 |
| 91.155253  | 73 | 83.4953836 | Activity | 81.2703836 |
| 83.155253  | 73 | 80.2953836 | Activity | 81.0203836 |
| 82.155253  | 73 | 78.8953836 | Activity | 80.7553836 |
| 82.155253  | 73 | 79.4953836 | Activity | 80.4753836 |
| 82.155253  | 73 | 79.4953836 | Activity | 80.2103836 |
| 81.155253  | 73 | 79.6953836 | Activity | 79.9503836 |
| 80.155253  | 73 | 78.8953836 | Activity | 79.7303836 |
| 80.155253  | 73 | 77.4953836 | Activity | 79.5253836 |
| 81.155253  | 73 | 76.6953836 | Activity | 79.3403836 |
| 82.155253  | 73 | 76.4953836 | Activity | 79.1953836 |
| 81.155253  | 73 | 75.2953836 | Activity | 78.9803836 |

|            |    |            |          |            |
|------------|----|------------|----------|------------|
| 80.155253  | 73 | 74.2953836 | Activity | 78.7403836 |
| 79.155253  | 73 | 73.4953836 | Activity | 78.5053836 |
| 78.155253  | 73 | 73.2953836 | Activity | 78.2953836 |
| 79.155253  | 73 | 73.4953836 | Activity | 78.0653836 |
| 80.155253  | 73 | 73.6953836 | Activity | 77.8353836 |
| 81.155253  | 73 | 74.0953836 | Activity | 77.5853836 |
| 81.155253  | 73 | 74.0953836 | Activity | 77.3453836 |
| 81.155253  | 73 | 74.0953836 | Activity | 77.0953836 |
| 80.155253  | 73 | 73.4953836 | Activity | 76.8753836 |
| 79.155253  | 73 | 72.6953836 | Activity | 76.6853836 |
| 79.155253  | 73 | 72.6953836 | Activity | 76.6403836 |
| 79.155253  | 73 | 72.2953836 | Activity | 76.5650843 |
| 81.155253  | 73 | 72.6953836 | Activity | 76.5247849 |
| 82.155253  | 73 | 73.2953836 | Activity | 76.5997849 |
| 85.155253  | 73 | 74.8953836 | Activity | 76.6997849 |
| 88.155253  | 73 | 75.4953836 | Activity | 76.7697849 |
| 89.155253  | 73 | 75.8953836 | Activity | 76.8397849 |
| 92.155253  | 73 | 77.4953836 | Activity | 76.9547849 |
| 92.155253  | 73 | 77.0953836 | Activity | 77.0647849 |
| 92.155253  | 73 | 77.0953836 | Activity | 77.1547849 |
| 93.155253  | 73 | 77.8953836 | Activity | 77.2797849 |
| 95.155253  | 73 | 78.8953836 | Activity | 77.4447849 |
| 96.155253  | 73 | 79.0953836 | Activity | 77.6247849 |
| 97.155253  | 73 | 79.2953836 | Activity | 77.8047849 |
| 97.155253  | 73 | 79.0953836 | Activity | 77.9897849 |
| 99.155253  | 73 | 79.6953836 | Activity | 78.1697849 |
| 99.155253  | 73 | 79.4953836 | Activity | 78.3397849 |
| 102.155253 | 73 | 80.6953836 | Activity | 78.4997849 |
| 103.155253 | 73 | 81.2953836 | Activity | 78.6647849 |
| 105.155253 | 73 | 81.6953836 | Activity | 78.8397849 |
| 82.0953836 | 73 | 77.2834097 | Activity | 79.0297849 |
| 82.0953836 | 73 | 77.2834097 | Activity | 79.2097849 |
| 106.155253 | 73 | 82.4953836 | Activity | 79.3797849 |
| 107.155253 | 73 | 83.4953836 | Activity | 79.5397849 |
| 104.155253 | 73 | 82.4953836 | Activity | 79.6897849 |
| 101.155253 | 73 | 81.6953836 | Activity | 79.7997849 |
| 101.155253 | 73 | 82.0953836 | Activity | 79.9047849 |
| 98.155253  | 73 | 81.0953836 | Activity | 80.0147849 |
| 95.155253  | 73 | 80.0953836 | Activity | 80.0947849 |
| 94.155253  | 73 | 80.2953836 | Activity | 80.1997849 |
| 94.155253  | 73 | 80.8953836 | Activity | 80.3397849 |
| 94.155253  | 73 | 80.6953836 | Activity | 80.4697849 |
| 94.155253  | 73 | 80.4953836 | Activity | 80.5947849 |
| 94.155253  | 73 | 80.8953836 | Activity | 80.7247849 |
| 94.155253  | 73 | 80.8953836 | Activity | 80.8497849 |

|            |    |            |          |            |
|------------|----|------------|----------|------------|
| 95.155253  | 73 | 80.8953836 | Activity | 80.9847849 |
| 95.155253  | 73 | 80.4953836 | Activity | 81.1197849 |
| 95.155253  | 73 | 80.6953836 | Activity | 81.2497849 |
| 95.155253  | 73 | 80.4953836 | Activity | 81.3297849 |
| 95.155253  | 73 | 80.2953836 | Activity | 81.3897849 |
| 94.155253  | 73 | 79.8953836 | Activity | 81.4347849 |
| 92.155253  | 73 | 79.0953836 | Activity | 81.5850843 |
| 92.155253  | 73 | 79.0953836 | Activity | 81.7353836 |
| 93.155253  | 73 | 79.2953836 | Activity | 81.7603836 |
| 93.155253  | 73 | 79.2953836 | Activity | 81.7553836 |
| 93.155253  | 73 | 79.6953836 | Activity | 81.7003836 |
| 93.155253  | 73 | 80.2953836 | Activity | 81.6353836 |
| 93.155253  | 73 | 80.6953836 | Activity | 81.5453836 |
| 94.155253  | 73 | 81.2953836 | Activity | 81.4503836 |
| 97.155253  | 73 | 82.6953836 | Activity | 81.3403836 |
| 98.155253  | 73 | 83.0953836 | Activity | 81.2153836 |
| 99.155253  | 73 | 83.8953836 | Activity | 81.0653836 |
| 99.155253  | 73 | 84.2953836 | Activity | 80.8853836 |
| 99.155253  | 73 | 84.2953836 | Activity | 80.7053836 |
| 99.155253  | 73 | 84.4953836 | Activity | 80.4953836 |
| 100.155253 | 73 | 85.0953836 | Activity | 80.2903836 |
| 101.155253 | 73 | 84.6953836 | Activity | 80.0853836 |
| 102.155253 | 73 | 83.8953836 | Activity | 79.8753836 |
| 103.155253 | 73 | 83.6953836 | Activity | 79.6603836 |
| 103.155253 | 73 | 83.4953836 | Activity | 79.4953836 |
| 103.155253 | 73 | 83.2953836 | Activity | 79.3453836 |
| 103.155253 | 73 | 83.2953836 | Activity | 79.1953836 |
| 104.155253 | 73 | 83.4953836 | Activity | 79.0653836 |
| 103.155253 | 73 | 83.2953836 | Activity | 78.9353836 |
| 97.155253  | 73 | 80.2953836 | Activity | 78.8053836 |
| 94.155253  | 73 | 79.0953836 | Activity | 78.6803836 |
| 91.155253  | 73 | 78.4953836 | Activity | 78.5503836 |
| 88.155253  | 73 | 77.2953836 | Activity | 78.3903836 |
| 84.155253  | 73 | 75.6953836 | Activity | 78.2153836 |
| 84.155253  | 73 | 75.2953836 | Activity | 78.0203836 |
| 84.155253  | 73 | 74.8953836 | Activity | 77.7853836 |
| 80.155253  | 73 | 73.4953836 | Activity | 77.5303836 |
| 80.155253  | 73 | 73.2953836 | Activity | 77.2403836 |
| 78.155253  | 73 | 72.4953836 | Activity | 76.9353836 |
| 79.155253  | 73 | 72.6953836 | Activity | 76.6903836 |
| 79.155253  | 73 | 72.6953836 | Activity | 76.4553836 |
| 79.155253  | 73 | 72.0953836 | Activity | 76.2003836 |
| 79.155253  | 73 | 72.0953836 | Activity | 75.9653836 |
| 83.155253  | 73 | 73.8953836 | Activity | 75.7553836 |
| 83.155253  | 73 | 74.2953836 | Activity | 75.5653836 |

|           |    |                     |            |
|-----------|----|---------------------|------------|
| 82.155253 | 73 | 73.8953836 Activity | 75.4153836 |
| 81.155253 | 73 | 73.8953836 Activity | 75.2803836 |
| 80.155253 | 73 | 73.8953836 Activity | 75.1503836 |
| 80.155253 | 73 | 74.0953836 Activity | 75.0053836 |
| 80.155253 | 73 | 74.2953836 Activity | 74.8653836 |
| 80.155253 | 73 | 74.4953836 Activity | 74.8053836 |
| 81.155253 | 73 | 73.8953836 Activity | 74.7853836 |
| 81.155253 | 73 | 73.6953836 Activity | 74.6657533 |
| 80.155253 | 73 | 73.4953836 Activity | 74.576123  |
| 80.155253 | 73 | 73.2953836 Activity | 74.5264927 |
| 79.155253 | 73 | 72.8953836 Activity | 74.6214927 |
| 80.155253 | 73 | 72.2953836 Activity | 74.6168625 |
| 80.155253 | 73 | 72.0953836 Activity | 74.7818625 |
| 83.155253 | 73 | 74.4953836 Activity | 74.9618625 |
| 83.155253 | 73 | 75.0953836 Activity | 75.1518625 |
| 82.155253 | 73 | 74.8953836 Activity | 75.3468625 |
| 80.155253 | 73 | 75.2953836 Activity | 75.5318625 |
| 80.155253 | 73 | 75.4953836 Activity | 75.7318625 |
| 80.155253 | 73 | 76.0953836 Activity | 75.9218625 |
| 84.155253 | 73 | 77.4953836 Activity | 76.0768625 |
| 85.155253 | 73 | 77.8953836 Activity | 76.2168625 |
| 85.155253 | 73 | 78.0953836 Activity | 76.3668625 |
| 84.155253 | 73 | 77.6953836 Activity | 76.5468625 |
| 84.155253 | 73 | 77.6953836 Activity | 76.7368625 |
| 84.155253 | 73 | 77.8953836 Activity | 76.9268625 |
| 84.155253 | 73 | 78.2953836 Activity | 77.1018625 |
| 84.155253 | 73 | 73.7101721 Activity | 77.2668625 |
| 84.155253 | 73 | 73.7101721 Activity | 77.3968625 |
| 84.155253 | 73 | 73.7101721 Activity | 77.4968625 |
| 83.155253 | 73 | 79.0953836 Activity | 77.5968625 |
| 83.155253 | 73 | 74.7101721 Activity | 77.7018625 |
| 83.155253 | 73 | 80.0953836 Activity | 77.8218625 |
| 84.155253 | 73 | 80.4953836 Activity | 77.9518625 |
| 84.155253 | 73 | 80.0953836 Activity | 78.0868625 |
| 85.155253 | 73 | 80.4953836 Activity | 78.1568625 |
| 84.155253 | 73 | 80.0953836 Activity | 78.1768625 |
| 84.155253 | 73 | 80.0953836 Activity | 78.2168625 |
| 83.155253 | 73 | 79.6953836 Activity | 78.2668625 |
| 83.155253 | 73 | 80.0953836 Activity | 78.3318625 |
| 83.155253 | 73 | 79.8953836 Activity | 78.3868625 |
| 83.155253 | 73 | 79.8953836 Activity | 78.4218625 |
| 86.155253 | 73 | 81.0953836 Activity | 78.4268625 |
| 87.155253 | 73 | 81.4953836 Activity | 78.4168625 |
| 88.155253 | 73 | 81.6953836 Activity | 78.4068625 |
| 87.155253 | 73 | 81.2953836 Activity | 78.3968625 |



|            |    |                     |            |
|------------|----|---------------------|------------|
| 86.155253  | 73 | 81.0953836 Activity | 78.4318625 |
| 83.155253  | 73 | 79.0953836 Activity | 78.4368625 |
| 81.155253  | 73 | 77.6953836 Activity | 78.5464927 |
| 80.155253  | 73 | 77.4953836 Activity | 78.696123  |
| 80.155253  | 73 | 77.4953836 Activity | 78.8757533 |
| 81.155253  | 73 | 77.6953836 Activity | 78.9507533 |
| 81.155253  | 73 | 77.4953836 Activity | 79.1403836 |
| 81.155253  | 73 | 77.4953836 Activity | 79.2003836 |
| 81.155253  | 73 | 77.2953836 Activity | 79.2403836 |
| 81.155253  | 73 | 75.8953836 Activity | 79.3153836 |
| 83.155253  | 73 | 76.4953836 Activity | 79.3803836 |
| 85.155253  | 73 | 77.2953836 Activity | 79.4553836 |
| 87.155253  | 73 | 78.0953836 Activity | 79.5253836 |
| 87.155253  | 73 | 78.2953836 Activity | 79.5903836 |
| 87.155253  | 73 | 78.8953836 Activity | 79.6453836 |
| 85.155253  | 73 | 78.0953836 Activity | 79.6453836 |
| 85.155253  | 73 | 77.6953836 Activity | 79.6253836 |
| 85.155253  | 73 | 77.2953836 Activity | 79.5603836 |
| 85.155253  | 73 | 77.2953836 Activity | 79.4703836 |
| 89.155253  | 73 | 79.2953836 Activity | 79.3553836 |
| 91.155253  | 73 | 78.4953836 Activity | 79.2303836 |
| 92.155253  | 73 | 78.0953836 Activity | 79.1003836 |
| 92.155253  | 73 | 79.6953836 Activity | 78.9703836 |
| 94.155253  | 73 | 80.8953836 Activity | 78.8353836 |
| 96.155253  | 73 | 82.0953836 Activity | 78.6853836 |
| 97.155253  | 73 | 82.2953836 Activity | 78.5603836 |
| 99.155253  | 73 | 82.4953836 Activity | 78.4303836 |
| 99.155253  | 73 | 82.0953836 Activity | 78.2953836 |
| 101.155253 | 73 | 83.0953836 Activity | 78.1703836 |
| 102.155253 | 73 | 83.0953836 Activity | 78.0453836 |
| 102.155253 | 73 | 83.0953836 Activity | 77.9453836 |
| 102.155253 | 73 | 82.8953836 Activity | 77.8253836 |
| 101.155253 | 73 | 82.2953836 Activity | 77.6853836 |
| 101.155253 | 73 | 82.2953836 Activity | 77.5253836 |
| 100.155253 | 73 | 79.8953836 Activity | 77.3753836 |
| 100.155253 | 73 | 79.0953836 Activity | 77.2153836 |
| 99.155253  | 73 | 78.4953836 Activity | 77.0753836 |
| 98.155253  | 73 | 77.8953836 Activity | 76.9653836 |
| 96.155253  | 73 | 77.0953836 Activity | 76.8853836 |
| 94.155253  | 73 | 76.2953836 Activity | 76.8053836 |
| 93.155253  | 73 | 75.8953836 Activity | 76.6703836 |
| 88.155253  | 73 | 73.8953836 Activity | 76.5453836 |
| 84.155253  | 73 | 72.2953836 Activity | 76.4503836 |
| 82.155253  | 73 | 71.4953836 Activity | 76.3203836 |
| 81.155253  | 73 | 72.4953836 Activity | 76.1753836 |

|            |    |                     |            |
|------------|----|---------------------|------------|
| 80.155253  | 73 | 72.4953836 Activity | 76.0103836 |
| 79.155253  | 73 | 72.0953836 Activity | 75.8553836 |
| 79.155253  | 73 | 72.4953836 Activity | 75.7003836 |
| 79.155253  | 73 | 72.2953836 Activity | 75.5553836 |
| 78.155253  | 73 | 71.8953836 Activity | 75.3903836 |
| 78.155253  | 73 | 71.6953836 Activity | 75.2453836 |
| 78.155253  | 73 | 71.6953836 Activity | 75.1353836 |
| 78.155253  | 73 | 71.6953836 Activity | 75.0503836 |
| 78.155253  | 73 | 72.2953836 Activity | 75.0003836 |
| 78.155253  | 73 | 72.4953836 Activity | 74.9303836 |
| 78.155253  | 73 | 72.4953836 Activity | 75.0367213 |
| 80.155253  | 73 | 73.2953836 Activity | 75.1505589 |
| 82.155253  | 73 | 74.0953836 Activity | 75.2793966 |
| 82.155253  | 73 | 74.0953836 Activity | 75.3982342 |
| 82.155253  | 73 | 73.8953836 Activity | 75.5120719 |
| 81.155253  | 73 | 73.4953836 Activity | 75.6396596 |
| 83.155253  | 73 | 74.2953836 Activity | 75.7834972 |
| 84.155253  | 73 | 74.4953836 Activity | 76.0023349 |
| 85.155253  | 73 | 75.0953836 Activity | 76.2611725 |
| 86.155253  | 73 | 75.4953836 Activity | 76.5525102 |
| 87.155253  | 73 | 76.0953836 Activity | 76.8313478 |
| 87.155253  | 73 | 76.2953836 Activity | 77.1351855 |
| 87.155253  | 73 | 76.2953836 Activity | 77.4552732 |
| 87.155253  | 73 | 76.4953836 Activity | 77.7653608 |
| 88.155253  | 73 | 77.2953836 Activity | 78.0679485 |
| 91.155253  | 73 | 78.6953836 Activity | 78.3555361 |
| 93.155253  | 73 | 79.4953836 Activity | 78.6231238 |
| 94.155253  | 73 | 80.2953836 Activity | 78.8782115 |
| 94.155253  | 73 | 79.4953836 Activity | 79.1457991 |
| 96.155253  | 73 | 84.1488899 Activity | 79.4046368 |
| 96.155253  | 73 | 83.6488899 Activity | 79.6584744 |
| 96.155253  | 73 | 83.6488899 Activity | 79.9123121 |
| 96.155253  | 73 | 82.6488899 Activity | 80.1398997 |
| 94.155253  | 73 | 81.6488899 Activity | 80.3412374 |
| 94.155253  | 73 | 81.3988899 Activity | 80.5238251 |
| 94.155253  | 73 | 81.6488899 Activity | 80.6989127 |
| 96.155253  | 73 | 82.6488899 Activity | 80.8527504 |
| 96.155253  | 73 | 82.6488899 Activity | 80.974088  |
| 97.155253  | 73 | 83.1488899 Activity | 81.0779257 |
| 97.155253  | 73 | 83.6488899 Activity | 81.1667634 |
| 99.155253  | 73 | 84.6488899 Activity | 81.245601  |
| 100.155253 | 73 | 84.8988899 Activity | 81.3094387 |
| 100.155253 | 73 | 84.8988899 Activity | 81.3682763 |
| 99.155253  | 73 | 84.3988899 Activity | 81.470864  |
| 97.155253  | 73 | 83.3988899 Activity | 81.5622016 |

|           |    |            |          |            |
|-----------|----|------------|----------|------------|
| 95.155253 | 73 | 82.3988899 | Activity | 81.6210393 |
| 93.155253 | 73 | 81.8988899 | Activity | 81.638627  |
| 93.155253 | 73 | 82.3988899 | Activity | 81.6299646 |
| 93.155253 | 73 | 82.6488899 | Activity | 81.6013023 |
| 93.155253 | 73 | 82.6488899 | Activity | 81.6301399 |
| 92.155253 | 73 | 82.6488899 | Activity | 81.4738023 |
| 91.155253 | 73 | 82.3988899 | Activity | 81.3299646 |
| 89.155253 | 73 | 82.1488899 | Activity | 81.191127  |
| 87.155253 | 73 | 81.3988899 | Activity | 81.0872893 |
| 86.155253 | 73 | 80.8988899 | Activity | 81.0084516 |
| 84.155253 | 73 | 79.6488899 | Activity | 80.980864  |
| 84.155253 | 73 | 79.1488899 | Activity | 80.9320263 |
| 84.155253 | 73 | 78.6488899 | Activity | 80.8531887 |
| 84.155253 | 73 | 78.6488899 | Activity | 80.764351  |
| 84.155253 | 73 | 78.6488899 | Activity | 80.6730134 |
| 84.155253 | 73 | 78.6488899 | Activity | 80.5641757 |
| 83.155253 | 73 | 78.6488899 | Activity | 80.450338  |
| 85.155253 | 73 | 80.3988899 | Activity | 80.3352504 |
| 85.155253 | 73 | 80.1488899 | Activity | 80.2401627 |
| 84.155253 | 73 | 79.6488899 | Activity | 80.1575751 |
| 83.155253 | 73 | 79.3988899 | Activity | 80.1049874 |
| 83.155253 | 73 | 79.1488899 | Activity | 80.0873997 |
| 83.155253 | 73 | 79.1488899 | Activity | 80.0573121 |
| 86.155253 | 73 | 80.6488899 | Activity | 80.0147244 |
| 87.155253 | 73 | 77.8953836 | Activity | 79.9658868 |
| 87.155253 | 73 | 77.8953836 | Activity | 79.9120491 |
| 88.155253 | 73 | 78.0953836 | Activity | 79.8632115 |
| 89.155253 | 73 | 78.4953836 | Activity | 79.8006238 |
| 89.155253 | 73 | 78.4953836 | Activity | 79.7792861 |
| 87.155253 | 73 | 80.2953836 | Activity | 79.7966985 |
| 86.155253 | 73 | 79.6953836 | Activity | 79.8166108 |
| 86.155253 | 73 | 79.4953836 | Activity | 79.8627732 |
| 85.155253 | 73 | 79.0953836 | Activity | 79.9264355 |
| 86.155253 | 73 | 79.4953836 | Activity | 79.9925978 |
| 86.155253 | 73 | 79.2953836 | Activity | 80.0937602 |
| 88.155253 | 73 | 80.0953836 | Activity | 80.2099225 |
| 88.155253 | 73 | 80.2953836 | Activity | 80.3210849 |
| 90.155253 | 73 | 81.0953836 | Activity | 80.4222472 |
| 90.155253 | 73 | 81.0953836 | Activity | 80.5096596 |
| 90.155253 | 73 | 81.2953836 | Activity | 80.6333219 |
| 90.155253 | 73 | 81.6953836 | Activity | 80.7794842 |
| 87.155253 | 73 | 80.6953836 | Activity | 80.9118966 |
| 85.155253 | 73 | 80.6953836 | Activity | 81.0405589 |
| 85.155253 | 73 | 80.6953836 | Activity | 81.1342213 |
| 85.155253 | 73 | 80.4953836 | Activity | 81.1703836 |

|           |    |            |          |            |
|-----------|----|------------|----------|------------|
| 85.155253 | 73 | 80.6953836 | Activity | 81.2853836 |
| 85.155253 | 73 | 79.8953836 | Activity | 81.4203836 |
| 89.155253 | 73 | 81.2953836 | Activity | 81.5453836 |
| 90.155253 | 73 | 82.0953836 | Activity | 81.6803836 |
| 90.155253 | 73 | 81.6953836 | Activity | 81.7853836 |
| 90.155253 | 73 | 81.4953836 | Activity | 81.8253836 |
| 90.155253 | 73 | 81.6953836 | Activity | 81.8803836 |
| 90.155253 | 73 | 81.2953836 | Activity | 81.9303836 |
| 93.155253 | 73 | 82.6953836 | Activity | 81.9753836 |
| 93.155253 | 73 | 83.2953836 | Activity | 82.0253836 |
| 92.155253 | 73 | 83.0953836 | Activity | 82.0803836 |
| 91.155253 | 73 | 82.6953836 | Activity | 82.1503836 |
| 91.155253 | 73 | 83.8953836 | Activity | 82.2153836 |
| 91.155253 | 73 | 85.0953836 | Activity | 82.2753836 |
| 91.155253 | 73 | 85.4953836 | Activity | 82.3503836 |
| 91.155253 | 73 | 84.6953836 | Activity | 82.4053836 |
| 91.155253 | 73 | 84.2953836 | Activity | 82.4403836 |
| 90.155253 | 73 | 82.8953836 | Activity | 82.4903836 |
| 90.155253 | 73 | 82.0953836 | Activity | 82.5353836 |
| 90.155253 | 73 | 82.4953836 | Activity | 82.5803836 |
| 89.155253 | 73 | 83.2953836 | Activity | 82.6253836 |
| 87.155253 | 73 | 83.0953836 | Activity | 82.6653836 |
| 87.155253 | 73 | 83.8953836 | Activity | 82.7303836 |
| 87.155253 | 73 | 82.6953836 | Activity | 82.7953836 |
| 87.155253 | 73 | 81.8953836 | Activity | 82.8403836 |
| 88.155253 | 73 | 81.8953836 | Activity | 82.8953836 |
| 88.155253 | 73 | 81.4953836 | Activity | 82.9403836 |
| 88.155253 | 73 | 80.8953836 | Activity | 82.9703836 |
| 88.155253 | 73 | 81.4953836 | Activity | 83.0153836 |
| 88.155253 | 73 | 81.4953836 | Activity | 83.0303836 |
| 88.155253 | 73 | 82.8953836 | Activity | 83.0053836 |
| 88.155253 | 73 | 82.8953836 | Activity | 82.9703836 |
| 89.155253 | 73 | 83.4953836 | Activity | 82.9403836 |
| 88.155253 | 73 | 84.0953836 | Activity | 82.8803836 |
| 88.155253 | 73 | 83.4953836 | Activity | 82.7753836 |
| 86.155253 | 73 | 83.0953836 | Activity | 82.6503836 |
| 86.155253 | 73 | 82.6953836 | Activity | 82.5503836 |
| 86.155253 | 73 | 82.4953836 | Activity | 82.4153836 |
| 86.155253 | 73 | 82.4953836 | Activity | 82.2953836 |
| 86.155253 | 73 | 82.2953836 | Activity | 82.1753836 |
| 86.155253 | 73 | 82.2953836 | Activity | 82.0453836 |
| 86.155253 | 73 | 82.4953836 | Activity | 81.9103836 |
| 86.155253 | 73 | 83.8953836 | Activity | 81.7753836 |
| 85.155253 | 73 | 83.8953836 | Activity | 81.6253836 |
| 85.155253 | 73 | 83.8953836 | Activity | 81.5053836 |

|           |    |                     |            |
|-----------|----|---------------------|------------|
| 85.155253 | 73 | 83.2953836 Activity | 81.4053836 |
| 84.155253 | 73 | 82.8953836 Activity | 81.2903836 |
| 84.155253 | 73 | 83.0953836 Activity | 81.1853836 |
| 85.155253 | 73 | 83.2953836 Activity | 81.1003836 |
| 85.155253 | 73 | 82.2953836 Activity | 81.0003836 |
| 84.155253 | 73 | 81.6953836 Activity | 80.8953836 |
| 84.155253 | 73 | 81.4953836 Activity | 80.7603836 |
| 84.155253 | 73 | 81.4953836 Activity | 80.6353836 |
| 83.155253 | 73 | 80.8953836 Activity | 80.5003836 |
| 82.155253 | 73 | 80.4953836 Activity | 80.3603836 |
| 82.155253 | 73 | 80.6953836 Activity | 80.2653836 |
| 82.155253 | 73 | 78.8953836 Activity | 80.1753836 |
| 82.155253 | 73 | 78.0953836 Activity | 80.0603836 |
| 83.155253 | 73 | 77.2953836 Activity | 79.9153836 |
| 83.155253 | 73 | 77.2953836 Activity | 79.7603836 |
| 86.155253 | 73 | 77.8953836 Activity | 79.5603836 |
| 87.155253 | 73 | 77.6953836 Activity | 79.3603836 |
| 87.155253 | 73 | 77.8953836 Activity | 79.1603836 |
| 87.155253 | 73 | 77.8953836 Activity | 78.9303836 |
| 87.155253 | 73 | 77.8953836 Activity | 78.6953836 |
| 86.155253 | 73 | 77.2953836 Activity | 78.4603836 |
| 86.155253 | 71 | 77.2953836 stop     | 78.2403836 |
| 86.155253 | 71 | 77.4953836 stop     | 78.0303836 |
| 86.155253 | 71 | 77.4953836 stop     | 77.8003836 |
| 86.155253 | 71 | 77.2953836 stop     | 77.5603836 |
| 86.155253 | 71 | 77.4953836 stop     | 77.3353836 |
| 87.155253 | 71 | 77.8953836 stop     | 77.1353836 |
| 87.155253 | 71 | 78.0953836 stop     | 76.9403836 |
| 87.155253 | 71 | 78.4953836 stop     | 76.9503836 |
| 91.155253 | 71 | 79.6953836 stop     | 77.0103836 |
| 91.155253 | 71 | 79.4953836 stop     | 77.0903836 |
| 88.155253 | 71 | 78.0953836 stop     | 77.1803836 |
| 85.155253 | 71 | 76.6953836 stop     | 77.3303836 |
| 85.155253 | 71 | 76.2953836 stop     | 77.5203836 |
| 82.155253 | 71 | 74.2953836 stop     | 77.6200843 |
| 82.155253 | 71 | 74.2953836 stop     | 77.7197849 |
| 83.155253 | 71 | 74.4953836 stop     | 77.8374856 |
| 84.155253 | 71 | 74.6953836 stop     | 77.9901862 |
| 84.155253 | 71 | 74.4953836 stop     | 78.1438869 |
| 84.155253 | 71 | 74.4953836 stop     | 78.2975875 |
| 84.155253 | 71 | 74.4953836 stop     | 78.3852882 |
| 84.155253 | 71 | 74.4953836 stop     | 78.4829888 |
| 83.155253 | 71 | 73.8953836 stop     | 78.5756895 |
| 83.155253 | 71 | 73.6953836 stop     | 78.6453901 |
| 82.155253 | 71 | 73.2953836 stop     | 78.7220908 |

|            |    |                     |            |
|------------|----|---------------------|------------|
| 83.155253  | 71 | 73.6953836 stop     | 78.7977914 |
| 83.155253  | 71 | 73.6953836 stop     | 78.8684921 |
| 103.155253 | 71 | 81.8953836 stop     | 78.9111927 |
| 106.155253 | 71 | 83.2953836 stop     | 78.9488934 |
| 107.155253 | 71 | 83.6953836 stop     | 78.970594  |
| 107.155253 | 71 | 84.2953836 stop     | 78.9672947 |
| 108.155253 | 71 | 84.8953836 stop     | 78.9799954 |
| 109.155253 | 71 | 85.6953836 stop     | 79.039696  |
| 86.0953836 | 71 | 81.2834097 stop     | 79.1463967 |
| 86.0953836 | 71 | 81.2834097 stop     | 79.2420973 |
| 87.6953836 | 71 | 82.6034097 stop     | 79.4770973 |
| 88.6953836 | 71 | 83.8034097 stop     | 79.7020973 |
| 88.8953836 | 71 | 84.0434097 stop     | 79.9070973 |
| 88.8953836 | 71 | 84.0434097 stop     | 80.0870973 |
| 86.6953836 | 71 | 81.4034097 stop     | 80.2770973 |
| 86.6953836 | 71 | 81.2034097 stop     | 80.4570973 |
| 86.6953836 | 71 | 81.0034097 stop     | 80.6270973 |
| 86.0953836 | 71 | 80.2834097 stop     | 80.7820973 |
| 86.4953836 | 71 | 80.5634097 stop     | 80.9520973 |
| 86.2953836 | 71 | 80.3234097 stop     | 81.1670973 |
| 86.2953836 | 71 | 80.3234097 stop     | 81.3970973 |
| 85.6953836 | 71 | 79.6034097 stop     | 81.6170973 |
| 85.6953836 | 71 | 79.6034097 stop     | 81.8420973 |
| 85.4953836 | 71 | 79.3634097 stop     | 81.8720973 |
| 85.4953836 | 71 | 79.5634097 stop     | 81.8920973 |
| 85.6953836 | 71 | 80.0034097 stop     | 81.9270973 |
| 86.0953836 | 71 | 80.4834097 stop     | 81.9920973 |
| 86.4953836 | 71 | 80.9634097 stop     | 82.0570973 |
| 85.2953836 | 71 | 80.1234097 stop     | 82.1220973 |
| 107.155253 | 71 | 83.6953836 stop     | 82.3073967 |
| 105.155253 | 71 | 83.2953836 stop     | 82.492696  |
| 102.155253 | 73 | 82.6953836 activity | 82.6349954 |
| 100.155253 | 73 | 81.8953836 activity | 82.7272947 |
| 100.155253 | 73 | 82.0953836 activity | 82.773594  |
| 99.155253  | 73 | 81.6953836 activity | 82.7748934 |
| 98.155253  | 73 | 81.2953836 activity | 82.8021927 |
| 96.155253  | 73 | 80.6953836 activity | 82.8044921 |
| 95.155253  | 73 | 80.6953836 activity | 82.7867914 |
| 96.155253  | 73 | 82.2953836 activity | 82.7720908 |
| 95.155253  | 73 | 82.4953836 activity | 82.7453901 |
| 94.155253  | 73 | 82.4953836 activity | 82.7246895 |
| 95.155253  | 73 | 82.6953836 activity | 82.7039888 |
| 95.155253  | 73 | 83.0953836 activity | 82.7012882 |
| 97.155253  | 73 | 84.0953836 activity | 82.7085875 |
| 97.155253  | 73 | 85.0953836 activity | 82.7168869 |

|            |    |            |          |            |
|------------|----|------------|----------|------------|
| 99.155253  | 73 | 86.8953836 | activity | 82.6901862 |
| 101.155253 | 73 | 87.4953836 | activity | 82.6524856 |
| 103.155253 | 73 | 88.2953836 | activity | 82.6027849 |
| 104.155253 | 73 | 88.6953836 | activity | 82.5360843 |
| 104.155253 | 73 | 88.6953836 | activity | 82.4903836 |
| 104.155253 | 73 | 88.2953836 | activity | 82.3653836 |
| 103.155253 | 73 | 87.4953836 | activity | 82.2653836 |
| 103.155253 | 73 | 85.8953836 | activity | 82.2003836 |
| 99.155253  | 73 | 84.0953836 | activity | 82.1603836 |
| 96.155253  | 73 | 82.4953836 | activity | 82.1103836 |
| 95.155253  | 73 | 81.2953836 | activity | 82.0803836 |
| 93.155253  | 73 | 80.2953836 | activity | 82.0503836 |
| 92.155253  | 73 | 79.6953836 | activity | 82.0103836 |
| 92.155253  | 73 | 79.4953836 | activity | 81.9403836 |
| 91.155253  | 73 | 79.4953836 | activity | 81.8303836 |
| 90.155253  | 73 | 79.4953836 | activity | 81.7303836 |
| 89.155253  | 73 | 79.4953836 | activity | 81.6303836 |
| 89.155253  | 73 | 79.8953836 | activity | 81.5403836 |
| 89.155253  | 73 | 79.6953836 | activity | 81.4403836 |
| 86.155253  | 73 | 78.4953836 | activity | 81.3003836 |
| 86.155253  | 73 | 78.4953836 | activity | 81.1053836 |
| 86.155253  | 73 | 78.4953836 | activity | 80.8503836 |
| 86.155253  | 73 | 78.2953836 | activity | 80.6103836 |
| 86.155253  | 73 | 78.2953836 | activity | 80.3603836 |
| 87.155253  | 73 | 78.6953836 | activity | 80.1153836 |
| 87.155253  | 73 | 79.2953836 | activity | 79.8653836 |
| 89.155253  | 73 | 80.0953836 | activity | 79.6853836 |
| 89.155253  | 73 | 80.2953836 | activity | 79.5503836 |
| 89.155253  | 73 | 80.0953836 | activity | 79.4553836 |
| 90.155253  | 73 | 80.4953836 | activity | 79.3903836 |
| 89.155253  | 73 | 80.0953836 | activity | 79.3353836 |
| 87.155253  | 73 | 79.0953836 | activity | 79.2903836 |
| 83.155253  | 73 | 77.8953836 | activity | 79.2553836 |
| 83.155253  | 73 | 77.8953836 | activity | 79.2353836 |
| 84.155253  | 73 | 78.4953836 | activity | 79.2253836 |
| 84.155253  | 73 | 78.4953836 | activity | 79.2203836 |
| 84.155253  | 73 | 79.0953836 | activity | 79.2203836 |
| 84.155253  | 73 | 79.0953836 | activity | 79.2253836 |
| 83.155253  | 73 | 78.4953836 | activity | 79.2203836 |
| 81.155253  | 73 | 77.2953836 | activity | 79.2203836 |
| 80.155253  | 73 | 76.6953836 | activity | 79.3003836 |
| 80.155253  | 73 | 77.8953836 | activity | 79.3853836 |
| 80.155253  | 73 | 78.2953836 | activity | 79.4653836 |
| 80.155253  | 73 | 78.8953836 | activity | 79.5603836 |
| 80.155253  | 73 | 78.6953836 | activity | 79.6503836 |

|           |    |            |          |            |
|-----------|----|------------|----------|------------|
| 87.155253 | 73 | 81.0953836 | activity | 79.7053836 |
| 90.155253 | 73 | 82.0953836 | activity | 79.7403836 |
| 91.155253 | 73 | 82.0953836 | activity | 79.7203836 |
| 90.155253 | 73 | 81.4953836 | activity | 79.7053836 |
| 88.155253 | 73 | 80.2953836 | activity | 79.6853836 |
| 86.155253 | 73 | 79.4953836 | activity | 79.6603836 |
| 84.155253 | 73 | 78.8953836 | activity | 79.6403836 |
| 84.155253 | 73 | 78.8953836 | activity | 79.6353836 |
| 84.155253 | 73 | 79.0953836 | activity | 79.6503836 |
| 84.155253 | 73 | 79.2953836 | activity | 79.6803836 |
| 84.155253 | 73 | 79.4953836 | activity | 79.6853836 |
| 84.155253 | 73 | 79.6953836 | activity | 79.6953836 |
| 84.155253 | 73 | 79.6953836 | activity | 79.7003836 |
| 84.155253 | 73 | 79.6953836 | activity | 79.7153836 |
| 85.155253 | 73 | 81.6953836 | activity | 79.7603836 |
| 84.155253 | 73 | 81.8953836 | activity | 79.8903836 |
| 84.155253 | 73 | 81.6953836 | activity | 80.0103836 |
| 84.155253 | 73 | 82.0953836 | activity | 80.0403836 |
| 84.155253 | 73 | 81.8953836 | activity | 80.0603836 |
| 83.155253 | 73 | 80.8953836 | activity | 80.0603836 |
| 82.155253 | 73 | 80.6953836 | activity | 80.0603836 |
| 83.155253 | 73 | 79.2953836 | activity | 79.9903836 |
| 85.155253 | 73 | 79.6953836 | activity | 79.8903836 |
| 85.155253 | 73 | 79.2953836 | activity | 79.7853836 |
| 85.155253 | 73 | 79.4953836 | activity | 79.6853836 |
| 84.155253 | 73 | 79.2953836 | activity | 79.6353836 |
| 82.155253 | 73 | 78.8953836 | activity | 79.6053836 |
| 82.155253 | 73 | 78.4953836 | activity | 79.5903836 |
| 82.155253 | 73 | 79.0953836 | activity | 79.5803836 |
| 81.155253 | 73 | 78.6953836 | activity | 79.5603836 |
| 81.155253 | 73 | 78.8953836 | activity | 79.5203836 |
| 82.155253 | 73 | 79.2953836 | activity | 79.4603836 |
| 83.155253 | 73 | 79.6953836 | activity | 79.3803836 |
| 83.155253 | 73 | 80.2953836 | activity | 79.2803836 |
| 88.155253 | 73 | 82.4953836 | activity | 79.1903836 |
| 87.155253 | 73 | 81.4953836 | activity | 79.0503836 |
| 86.155253 | 73 | 79.0953836 | activity | 78.9303836 |
| 86.155253 | 73 | 79.0953836 | activity | 78.8253836 |
| 87.155253 | 73 | 78.8953836 | activity | 78.7103836 |
| 87.155253 | 73 | 78.6953836 | activity | 78.6003836 |
| 86.155253 | 73 | 78.2953836 | activity | 78.5003836 |
| 85.155253 | 73 | 78.0953836 | activity | 78.3803836 |
| 83.155253 | 73 | 77.8953836 | activity | 78.2953836 |
| 81.155253 | 73 | 77.4953836 | activity | 78.1953836 |
| 82.155253 | 73 | 78.2953836 | activity | 78.1153836 |



|           |    |                     |            |
|-----------|----|---------------------|------------|
| 83.155253 | 73 | 78.2953836 activity | 78.0253836 |
| 83.155253 | 73 | 78.2953836 activity | 77.9553836 |
| 84.155253 | 73 | 78.4953836 activity | 77.9003836 |
| 84.155253 | 73 | 78.2953836 activity | 77.8553836 |
| 82.155253 | 73 | 77.6953836 activity | 77.8103836 |
| 82.155253 | 73 | 77.0953836 activity | 77.7603836 |
| 81.155253 | 73 | 76.4953836 activity | 77.6853836 |
| 80.155253 | 73 | 75.6953836 activity | 77.5503836 |
| 81.155253 | 73 | 76.0953836 activity | 77.3803836 |
| 82.155253 | 73 | 76.0953836 activity | 77.2003836 |
| 84.155253 | 73 | 77.0953836 activity | 76.9853836 |
| 85.155253 | 73 | 77.4953836 activity | 76.7953836 |
| 85.155253 | 73 | 77.4953836 activity | 76.6603836 |
| 85.155253 | 73 | 77.4953836 activity | 76.5153836 |
| 84.155253 | 73 | 76.8953836 activity | 76.3703836 |
| 82.155253 | 73 | 75.8953836 activity | 76.2353836 |
| 82.155253 | 73 | 75.8953836 activity | 76.1153836 |
| 81.155253 | 73 | 75.6953836 activity | 75.9953836 |
| 81.155253 | 73 | 76.0953836 activity | 75.8753836 |
| 81.155253 | 73 | 75.8953836 activity | 75.7553836 |
| 83.155253 | 73 | 76.4953836 activity | 75.6153836 |
| 84.155253 | 73 | 76.6953836 activity | 75.4753836 |
| 84.155253 | 73 | 76.6953836 activity | 75.3503836 |
| 85.155253 | 73 | 77.2953836 activity | 75.2403836 |
| 84.155253 | 73 | 76.6953836 activity | 75.1353836 |
| 82.155253 | 73 | 75.8953836 activity | 75.0503836 |
| 79.155253 | 73 | 73.8953836 activity | 74.9853836 |
| 77.155253 | 73 | 72.8953836 activity | 74.9353836 |
| 77.155253 | 73 | 73.0953836 activity | 74.8953836 |
| 78.155253 | 73 | 73.8953836 activity | 74.8453836 |
| 78.155253 | 73 | 73.8953836 activity | 74.7903836 |
| 79.155253 | 73 | 73.6953836 activity | 74.7303836 |
| 80.155253 | 73 | 73.2953836 activity | 74.6503836 |
| 80.155253 | 73 | 73.0953836 activity | 74.5603836 |
| 80.155253 | 73 | 73.2953836 activity | 74.4753836 |
| 81.155253 | 73 | 73.4953836 activity | 74.4053836 |
| 81.155253 | 73 | 73.2953836 activity | 74.3503836 |
| 80.155253 | 73 | 73.0953836 activity | 74.2903836 |
| 80.155253 | 73 | 72.6953836 activity | 74.2253836 |
| 80.155253 | 73 | 72.6953836 activity | 74.1303836 |
| 80.155253 | 73 | 72.6953836 activity | 74.0303836 |
| 81.155253 | 73 | 73.2953836 activity | 73.9253836 |
| 82.155253 | 73 | 74.0953836 activity | 73.8153836 |
| 82.155253 | 73 | 74.0953836 activity | 73.6953836 |
| 82.155253 | 73 | 74.2953836 activity | 73.5703836 |

|           |    |            |          |            |
|-----------|----|------------|----------|------------|
| 83.155253 | 73 | 74.4953836 | activity | 73.4703836 |
| 83.155253 | 73 | 74.4953836 | activity | 73.4153836 |
| 81.155253 | 73 | 74.0953836 | activity | 73.4403836 |
| 81.155253 | 71 | 74.0953836 | minute1  | 73.5003836 |
| 81.155253 | 71 | 73.8953836 | minute2  | 73.5703836 |
| 83.155253 | 71 | 74.6953836 | minute3  | 73.6103836 |
| 83.155253 | 71 | 74.2953836 | minute4  | 73.6253836 |
| 83.155253 | 71 | 73.8953836 | minute5  | 73.6503836 |
| 84.155253 | 71 | 74.0953836 | minute6  | 73.6353836 |
| 85.155253 | 71 | 74.0953836 | minute7  | 73.6253836 |
| 85.155253 | 71 | 73.6953836 | minute8  | 73.6103836 |
| 85.155253 | 71 | 73.4953836 | minute9  | 73.5903836 |
| 85.155253 | 71 | 73.0953836 | minute10 | 73.5753836 |
| 84.155253 | 71 | 72.2953836 | minute11 | 73.5753836 |
| 82.155253 | 71 | 71.8953836 | minute12 | 73.5853836 |
| 82.155253 | 71 | 72.2953836 | minute13 | 73.6003836 |
| 81.155253 | 71 | 72.2953836 | minute14 | 73.5753836 |
| 80.155253 | 71 | 71.8953836 | minute15 | 73.5103836 |
| 81.155253 | 71 | 72.2953836 | minute16 | 73.4253836 |
| 82.155253 | 71 | 72.6953836 | minute17 | 73.3353836 |
| 83.155253 | 71 | 73.6953836 | minute18 | 73.2253836 |
| 84.155253 | 71 | 74.8953836 | minute19 | 73.1153836 |
| 84.155253 | 71 | 75.2953836 | minute20 | 73.0053836 |
| 85.155253 | 71 | 75.8953836 | minute21 | 72.9153836 |
| 85.155253 | 71 | 75.4953836 | minute22 | 72.8153836 |
| 82.155253 | 71 | 74.4953836 | minute23 | 72.7253836 |
| 82.155253 | 71 | 74.6953836 | minute24 | 72.6103836 |
| 77.155253 | 71 | 72.6953836 | minute25 | 72.5203836 |
| 77.155253 | 71 | 72.6953836 | minute26 | 72.4403836 |
| 76.155253 | 71 | 72.6953836 | minute27 | 72.3553836 |
| 76.155253 | 71 | 72.6953836 | minute28 | 72.3053836 |
| 76.155253 | 71 | 72.6953836 | minute29 | 72.3853836 |
| 79.155253 | 71 | 73.0953836 | minute30 | 72.4653836 |
| 79.155253 | 71 | 73.0953836 | minute31 | 72.5403836 |
| 79.155253 | 71 | 73.2953836 | minute32 | 72.6153836 |
| 76.155253 | 71 | 71.6953836 | minute33 | 72.6953836 |
| 73.155253 | 71 | 70.6953836 | minute34 | 72.8103836 |
| 73.155253 | 71 | 70.6953836 | minute35 | 72.9053836 |
| 73.155253 | 71 | 70.4953836 | minute36 | 73.0203836 |
| 72.155253 | 71 | 69.8953836 | minute37 | 73.1503836 |
| 72.155253 | 71 | 70.0953836 | minute38 | 73.2953836 |
| 72.155253 | 71 | 70.0953836 | minute39 | 73.4803836 |
| 72.155253 | 71 | 70.4953836 | minute40 | 73.6553836 |
| 72.155253 | 71 | 70.0953836 | minute41 | 73.8203836 |
| 72.155253 | 71 | 70.2953836 | minute42 | 73.9603836 |

|           |    |            |          |            |
|-----------|----|------------|----------|------------|
| 72.155253 | 71 | 70.0953836 | minute43 | 74.1053836 |
| 73.155253 | 71 | 70.6953836 | minute44 | 74.2653836 |
| 73.155253 | 71 | 70.6953836 | minute45 | 74.3903836 |
| 73.155253 | 71 | 70.6953836 | minute46 | 74.4256289 |
| 76.155253 | 71 | 72.0953836 | minute47 | 74.4428742 |
| 88.155253 | 71 | 76.8953836 | minute48 | 74.4721195 |
| 88.155253 | 71 | 76.6953836 | minute49 | 74.4903648 |
| 87.155253 | 71 | 76.0953836 | minute50 | 74.48461   |
| 85.155253 | 71 | 75.2953836 | minute51 | 74.4798553 |
| 84.155253 | 71 | 75.0953836 | minute52 | 74.6698553 |
| 82.155253 | 71 | 76.8953836 | minute53 | 74.8248553 |
| 80.155253 | 71 | 76.0953836 | minute54 | 75.0548553 |
| 78.155253 | 71 | 76.4953836 | minute55 | 75.3198553 |
| 77.155253 | 71 | 77.4953836 | minute56 | 75.6098553 |
| 78.155253 | 71 | 78.4953836 | minute57 | 75.9298553 |
| 80.155253 | 71 | 81.0953836 | minute58 | 76.2048553 |
| 80.155253 | 71 | 81.8953836 | minute59 | 76.4348553 |
| 80.155253 | 71 | 81.8953836 | minute60 | 76.6348553 |
| 79.155253 | 71 | 81.4953836 | AFTER1   | 76.8098553 |
| 79.155253 | 71 | 81.2953836 | AFTER2   | 76.9798553 |
| 78.155253 | 71 | 80.8953836 | AFTER3   | 77.1348553 |
| 76.155253 | 71 | 79.6953836 | AFTER4   | 77.2948553 |
| 75.155253 | 71 | 74.1051951 | AFTER5   | 77.4248553 |
| 75.155253 | 71 | 73.3851951 | AFTER6   | 77.5398553 |
| 76.155253 | 71 | 73.8651951 | AFTER7   | 77.6448553 |
| 76.155253 | 71 | 73.4251951 | AFTER8   | 77.7148553 |
| 77.155253 | 71 | 72.4651951 | AFTER9   | 77.6948553 |
| 78.155253 | 71 | 72.9051951 | AFTER10  | 77.6748553 |
| 85.155253 | 71 | 80.6953836 | AFTER11  | 77.6648553 |
| 85.155253 | 71 | 79.4953836 | AFTER12  | 77.6748553 |
| 89.155253 | 71 | 80.8953836 | AFTER13  | 77.6798553 |
| 90.155253 | 71 | 81.2953836 | AFTER14  | 77.6248553 |
| 90.155253 | 71 | 82.2953836 | AFTER15  | 77.6648553 |
| 88.155253 | 71 | 83.2953836 | AFTER16  | 77.6948553 |
| 81.155253 | 71 | 80.8953836 | AFTER17  | 77.6898553 |
| 78.155253 | 71 | 79.2953836 | AFTER18  | 77.6548553 |
| 78.155253 | 71 | 78.0953836 | AFTER19  | 77.5548553 |
| 77.155253 | 71 | 77.4953836 | AFTER20  | 77.4398553 |
| 77.155253 | 71 | 76.8953836 | AFTER21  | 77.3248553 |
| 77.155253 | 71 | 76.4953836 | AFTER22  | 77.2248553 |
| 77.155253 | 71 | 76.4953836 | AFTER23  | 77.1348553 |
| 77.155253 | 71 | 75.8953836 | AFTER24  | 77.0298553 |
| 77.155253 | 71 | 75.2953836 | AFTER25  | 76.9498553 |
| 77.155253 | 71 | 74.8953836 | AFTER26  | 77.00461   |
| 77.155253 | 71 | 74.8953836 | AFTER27  | 77.0773648 |

|           |    |            |         |            |
|-----------|----|------------|---------|------------|
| 80.155253 | 71 | 76.0953836 | AFTER28 | 77.1281195 |
| 80.155253 | 71 | 75.8953836 | AFTER29 | 77.1848742 |
| 80.155253 | 71 | 75.6953836 | AFTER30 | 77.2456289 |
| 80.155253 | 71 | 75.6953836 | AFTER31 | 77.2853836 |
| 80.155253 | 71 | 75.2953836 | AFTER32 | 77.1303836 |
| 78.155253 | 71 | 74.6953836 | AFTER33 | 77.0053836 |
| 85.155253 | 71 | 77.6953836 | AFTER34 | 76.8553836 |
| 85.155253 | 71 | 77.6953836 | AFTER35 | 76.6703836 |
| 84.155253 | 71 | 77.2953836 | AFTER36 | 76.4653836 |
| 83.155253 | 71 | 77.0953836 | AFTER37 | 76.2303836 |
| 83.155253 | 71 | 77.0953836 | AFTER38 | 76.0303836 |
| 83.155253 | 71 | 77.2953836 | AFTER39 | 75.8753836 |
| 83.155253 | 71 | 77.2953836 | AFTER40 | 75.7503836 |
| 83.155253 | 71 | 77.4953836 | AFTER41 | 75.6503836 |
| 83.155253 | 71 | 77.6953836 | AFTER42 | 75.5703836 |
| 81.155253 | 71 | 76.6953836 | AFTER43 | 75.4953836 |
| 80.155253 | 71 | 76.4953836 | AFTER44 | 75.4203836 |
| 80.155253 | 71 | 76.2953836 | AFTER45 | 75.3603836 |
| 80.155253 | 71 | 76.2953836 | AFTER46 | 75.3303836 |
| 79.155253 | 71 | 75.8953836 | AFTER47 | 75.3203836 |
| 79.155253 | 71 | 75.6953836 | AFTER48 | 75.2703836 |
| 78.155253 | 71 | 74.8953836 | AFTER49 | 75.1853836 |
| 78.155253 | 71 | 74.4953836 | AFTER50 | 75.0803836 |
| 78.155253 | 71 | 74.4953836 | AFTER51 | 75.0253836 |
| 78.155253 | 71 | 74.4953836 | AFTER52 | 74.9703836 |
| 78.155253 | 71 | 74.8953836 | AFTER53 | 74.9203836 |
| 77.155253 | 71 | 73.8953836 | AFTER54 | 74.9653836 |
| 77.155253 | 71 | 74.0953836 | AFTER55 | 74.9403836 |
| 77.155253 | 71 | 73.8953836 | AFTER56 | 74.8853836 |
| 75.155253 | 71 | 72.8953836 | AFTER57 | 74.8353836 |
| 75.155253 | 71 | 73.0953836 | AFTER58 | 74.7903836 |
| 75.155253 | 71 | 73.0953836 | AFTER59 | 74.7353836 |
| 75.155253 | 71 | 73.4953836 | AFTER60 | 74.6653836 |
| 75.155253 | 71 | 73.6953836 | AFTER61 | 74.6153836 |
| 75.155253 | 71 | 73.4953836 | AFTER62 | 74.5653836 |
| 75.155253 | 71 | 73.4953836 | AFTER63 | 74.5153836 |
| 75.155253 | 71 | 73.4953836 | AFTER64 | 74.5403836 |
| 77.155253 | 71 | 74.0953836 | AFTER65 | 74.5803836 |
| 77.155253 | 71 | 74.4953836 | AFTER66 | 74.5903836 |
| 74.155253 | 71 | 72.8953836 | AFTER67 | 74.6153836 |
| 74.155253 | 71 | 72.6953836 | AFTER68 | 74.6403836 |
| 74.155253 | 71 | 71.6953836 | AFTER69 | 74.6803836 |
| 79.155253 | 71 | 73.4953836 | AFTER70 | 74.7153836 |
| 79.155253 | 71 | 73.4953836 | AFTER71 | 74.7853836 |
| 79.155253 | 71 | 73.2953836 | AFTER72 | 74.8553836 |

|           |    |            |          |            |
|-----------|----|------------|----------|------------|
| 85.155253 | 71 | 76.4953836 | AFTER73  | 75.0353836 |
| 85.155253 | 71 | 76.6953836 | AFTER74  | 75.2303836 |
| 82.155253 | 71 | 75.4953836 | AFTER75  | 75.4553836 |
| 82.155253 | 71 | 75.2953836 | AFTER76  | 75.6953836 |
| 82.155253 | 71 | 75.2953836 | AFTER77  | 75.9453836 |
| 81.155253 | 71 | 74.8953836 | AFTER78  | 76.2253836 |
| 81.155253 | 71 | 74.4953836 | AFTER79  | 76.4903836 |
| 81.155253 | 71 | 75.2953836 | AFTER80  | 76.7403836 |
| 81.155253 | 71 | 75.4953836 | AFTER81  | 76.9803836 |
| 81.155253 | 71 | 75.6953836 | AFTER82  | 77.2103836 |
| 86.155253 | 71 | 77.6953836 | AFTER83  | 77.4253836 |
| 87.155253 | 71 | 78.0953836 | AFTER84  | 77.6353836 |
| 83.155253 | 71 | 76.6953836 | AFTER85  | 77.8853836 |
| 83.155253 | 71 | 77.2953836 | AFTER86  | 78.1153836 |
| 80.155253 | 71 | 76.8953836 | AFTER87  | 78.3403836 |
| 80.155253 | 71 | 77.2953836 | AFTER88  | 78.5403836 |
| 77.155253 | 71 | 76.2953836 | AFTER89  | 78.7353836 |
| 77.155253 | 71 | 77.2953836 | AFTER90  | 78.9803836 |
| 77.155253 | 71 | 77.2953836 | AFTER91  | 79.1953836 |
| 81.155253 | 71 | 81.6953836 | AFTER92  | 79.4703836 |
| 82.155253 | 71 | 82.6953836 | AFTER93  | 79.8103836 |
| 82.155253 | 71 | 82.8953836 | AFTER94  | 80.0903836 |
| 83.155253 | 71 | 83.6953836 | AFTER95  | 80.2853836 |
| 84.155253 | 71 | 83.8953836 | AFTER96  | 80.4703836 |
| 84.155253 | 71 | 84.0953836 | AFTER97  | 80.6203836 |
| 83.155253 | 71 | 83.6953836 | AFTER98  | 80.7553836 |
| 82.155253 | 71 | 83.0953836 | AFTER99  | 80.8803836 |
| 82.155253 | 71 | 83.0953836 | AFTER100 | 80.9853836 |
| 82.155253 | 71 | 82.8953836 | AFTER101 | 81.0353836 |
| 82.155253 | 71 | 82.0953836 | AFTER102 | 81.0803836 |
| 82.155253 | 71 | 81.8953836 | AFTER103 | 81.0953836 |
| 86.155253 | 71 | 83.4953836 | AFTER104 | 81.0603836 |
| 86.155253 | 71 | 83.2953836 | AFTER105 | 80.9903836 |
| 86.155253 | 71 | 83.4953836 | AFTER106 | 80.9453836 |
| 81.155253 | 71 | 80.8953836 | AFTER107 | 80.8903836 |
| 80.155253 | 71 | 80.4953836 | AFTER108 | 80.8503836 |
| 80.155253 | 71 | 81.4953836 | AFTER109 | 80.8003836 |
| 82.155253 | 71 | 82.0953836 | AFTER110 | 80.7853836 |
| 87.155253 | 71 | 84.4953836 | AFTER111 | 80.7353836 |
| 90.155253 | 71 | 86.8953836 | AFTER112 | 80.6853836 |
| 91.155253 | 71 | 87.6953836 | AFTER113 | 80.5003836 |
| 90.155253 | 71 | 84.4953836 | AFTER114 | 80.2753836 |
| 87.155253 | 71 | 82.8953836 | AFTER115 | 80.0553836 |
| 83.155253 | 71 | 81.2953836 | AFTER116 | 79.8203836 |
| 82.155253 | 71 | 80.6953836 | AFTER117 | 79.6003836 |

|           |    |            |          |            |
|-----------|----|------------|----------|------------|
| 82.155253 | 71 | 79.8953836 | AFTER118 | 79.3903836 |
| 82.155253 | 71 | 78.6953836 | AFTER119 | 79.1953836 |
| 81.155253 | 71 | 77.2953836 | AFTER120 | 79.0003836 |
| 83.155253 | 71 | 77.2953836 | AFTER121 | 78.8003836 |
| 84.155253 | 71 | 76.2953836 | AFTER122 | 78.6203836 |
| 83.155253 | 71 | 76.2953836 | AFTER123 | 78.4703836 |
| 81.155253 | 71 | 75.2953836 | AFTER124 | 78.3403836 |
| 80.155253 | 71 | 74.8953836 | AFTER125 | 78.1653836 |
| 80.155253 | 71 | 75.0953836 | AFTER126 | 78.0053836 |
| 81.155253 | 71 | 75.2953836 | AFTER127 | 77.8403836 |
| 81.155253 | 71 | 75.2953836 | AFTER128 | 77.7353836 |
| 82.155253 | 71 | 75.6953836 | AFTER129 | 77.6453836 |
| 81.155253 | 71 | 75.2953836 | AFTER130 | 77.5153836 |
| 81.155253 | 71 | 75.2953836 | AFTER131 | 77.3653836 |
| 80.155253 | 71 | 74.2953836 | AFTER132 | 77.1453836 |
| 79.155253 | 71 | 73.6953836 | AFTER133 | 76.8503836 |
| 80.155253 | 71 | 74.0953836 | AFTER134 | 76.5353836 |
| 80.155253 | 71 | 74.2953836 | AFTER135 | 76.3053836 |
| 82.155253 | 71 | 75.0953836 | AFTER136 | 76.1153836 |
| 82.155253 | 71 | 75.6953836 | AFTER137 | 75.9603836 |
| 82.155253 | 71 | 75.8953836 | AFTER138 | 75.7953836 |
| 80.155253 | 71 | 75.2953836 | AFTER139 | 75.6353836 |
| 79.155253 | 71 | 75.0953836 | AFTER140 | 75.5003836 |
| 78.155253 | 71 | 75.6953836 | AFTER141 | 75.4003836 |
| 77.155253 | 71 | 76.0953836 | AFTER142 | 75.3003836 |
| 78.155253 | 71 | 76.6953836 | AFTER143 | 75.2103836 |
| 78.155253 | 63 | 76.4953836 | AFTER144 | 75.0953836 |
| 79.155253 | 63 | 76.8953836 | AFTER145 | 74.9853836 |
| 80.155253 | 63 | 76.8953836 | AFTER146 | 74.8853836 |
| 80.155253 | 63 | 76.6953836 | AFTER147 | 74.7653836 |
| 81.155253 | 63 | 76.8953836 | AFTER148 | 74.6453836 |
| 79.155253 | 63 | 76.2953836 | AFTER149 | 74.5203836 |
| 78.155253 | 63 | 76.0953836 | AFTER150 | 74.4003836 |
| 78.155253 | 63 | 75.6953836 | AFTER151 | 74.3003836 |
| 77.155253 | 63 | 75.0953836 | AFTER152 | 74.2003836 |
| 77.155253 | 63 | 75.0953836 | AFTER153 | 74.1303836 |
| 77.155253 | 63 | 75.2953836 | AFTER154 | 74.0603836 |
| 77.155253 | 63 | 75.2953836 | AFTER155 | 73.9703836 |
| 77.155253 | 63 | 75.0953836 | AFTER156 | 73.8603836 |
| 77.155253 | 63 | 74.0953836 | AFTER157 | 73.7303836 |
| 76.155253 | 63 | 73.4953836 | AFTER158 | 73.5953836 |
| 76.155253 | 63 | 73.2953836 | AFTER159 | 73.4603836 |
| 76.155253 | 63 | 73.2953836 | AFTER160 | 73.3503836 |
| 76.155253 | 63 | 73.2953836 | AFTER161 | 73.2553836 |
| 76.155253 | 63 | 72.6953836 | AFTER162 | 73.1603836 |

|           |    |                     |            |
|-----------|----|---------------------|------------|
| 76.155253 | 63 | 71.6953836 AFTER163 | 73.0553836 |
| 76.155253 | 63 | 70.8953836 AFTER164 | 72.9053836 |
| 76.155253 | 63 | 70.8953836 AFTER165 | 72.7503836 |
| 75.155253 | 63 | 70.2953836 AFTER166 | 72.5853836 |
| 76.155253 | 63 | 70.4953836 AFTER167 | 72.4103836 |
| 77.155253 | 63 | 70.2953836 AFTER168 | 72.2703836 |
| 78.155253 | 63 | 70.8953836 AFTER169 | 72.1703836 |
| 79.155253 | 63 | 71.2953836 AFTER170 | 72.1003836 |
| 79.155253 | 63 | 71.2953836 AFTER171 | 72.0403836 |
| 79.155253 | 63 | 71.4953836 AFTER172 | 72.0053836 |
| 78.155253 | 63 | 70.8953836 AFTER173 | 71.9853836 |
| 77.155253 | 63 | 70.4953836 AFTER174 | 71.9853836 |
| 76.155253 | 63 | 69.8953836 AFTER175 | 72.0003836 |
| 76.155253 | 63 | 69.8953836 AFTER176 | 72.0153836 |
| 77.155253 | 63 | 70.2953836 AFTER177 | 72.0353836 |
| 77.155253 | 63 | 70.4953836 AFTER178 | 72.0553836 |
| 77.155253 | 63 | 70.8953836 AFTER179 | 72.0753836 |
| 78.155253 | 63 | 71.2953836 AFTER180 | 72.1003836 |
| 79.155253 | 63 | 71.8953836 AFTER181 | 72.1503836 |
| 79.155253 | 63 | 71.8953836 AFTER182 | 72.2153836 |
| 77.155253 | 63 | 70.6953836 AFTER183 | 72.3003836 |
| 76.155253 | 63 | 70.2953836 AFTER184 | 72.4403836 |
| 76.155253 | 63 | 70.2953836 AFTER185 | 72.6053836 |
| 76.155253 | 63 | 69.8953836 AFTER186 | 72.7803836 |
| 78.155253 | 63 | 71.0953836 AFTER187 | 72.9653836 |
| 81.155253 | 63 | 72.8953836 AFTER188 | 73.1503836 |
| 83.155253 | 63 | 73.4953836 AFTER189 | 73.3853836 |
| 83.155253 | 63 | 73.6953836 AFTER190 | 73.5903836 |
| 84.155253 | 63 | 74.2953836 AFTER191 | 73.7703836 |
| 84.155253 | 63 | 74.2953836 AFTER192 | 73.9703836 |
| 85.155253 | 63 | 75.0953836 AFTER193 | 74.1703836 |
| 87.155253 | 63 | 75.8953836 AFTER194 | 74.3803836 |
| 87.155253 | 63 | 75.8953836 AFTER195 | 74.6003836 |
| 87.155253 | 63 | 75.8953836 AFTER196 | 74.8403836 |
| 85.155253 | 63 | 74.8953836 AFTER197 | 75.0803836 |
| 84.155253 | 63 | 74.2953836 AFTER198 | 75.2953836 |
| 84.155253 | 63 | 74.2953836 AFTER199 | 75.5053836 |
| 86.155253 | 63 | 75.2953836 AFTER200 | 75.7053836 |
| 87.155253 | 63 | 75.8953836 AFTER201 | 75.9253836 |
| 88.155253 | 63 | 76.0953836 AFTER202 | 76.1203836 |
| 89.155253 | 63 | 77.2953836 AFTER203 | 76.3203836 |
| 89.155253 | 63 | 77.4953836 AFTER204 | 76.5303836 |
| 90.155253 | 63 | 77.8953836 AFTER205 | 76.7403836 |
| 90.155253 | 63 | 77.6953836 AFTER206 | 76.9253836 |
| 89.155253 | 63 | 77.8953836 AFTER207 | 77.1253836 |

|           |    |                     |            |
|-----------|----|---------------------|------------|
| 89.155253 | 63 | 79.6953836 AFTER208 | 77.3053836 |
| 87.155253 | 63 | 79.0953836 AFTER209 | 77.4303836 |
| 86.155253 | 63 | 78.4953836 AFTER210 | 77.5353836 |
| 87.155253 | 63 | 79.2953836 AFTER211 | 77.6403836 |
| 88.155253 | 63 | 79.4953836 AFTER212 | 77.7253836 |
| 88.155253 | 63 | 79.2953836 AFTER213 | 77.8103836 |
| 89.155253 | 63 | 79.2953836 AFTER214 | 77.8653836 |
| 89.155253 | 63 | 79.4953836 AFTER215 | 77.9003836 |
| 89.155253 | 63 | 79.4953836 AFTER216 | 77.9203836 |
| 88.155253 | 63 | 78.8953836 AFTER217 | 77.9353836 |
| 88.155253 | 63 | 78.8953836 AFTER218 | 77.9753836 |
| 88.155253 | 63 | 78.8953836 AFTER219 | 78.0303836 |
| 91.155253 | 63 | 80.0953836 AFTER220 | 78.0853836 |
| 91.155253 | 63 | 79.6953836 AFTER221 | 78.1203836 |
| 91.155253 | 63 | 79.8953836 AFTER222 | 78.1553836 |
| 90.155253 | 63 | 79.0953836 AFTER223 | 78.1853836 |
| 89.155253 | 63 | 78.6953836 AFTER224 | 78.2203836 |
| 87.155253 | 63 | 77.6953836 AFTER225 | 78.2503836 |
| 87.155253 | 63 | 77.8953836 AFTER226 | 78.2553836 |
| 88.155253 | 63 | 78.2953836 AFTER227 | 78.2853836 |
| 89.155253 | 63 | 77.8953836 AFTER228 | 78.3003836 |
| 89.155253 | 63 | 77.6953836 AFTER229 | 78.2553836 |
| 89.155253 | 63 | 77.8953836 AFTER230 | 78.1453836 |
| 88.155253 | 63 | 77.6953836 AFTER231 | 78.0353836 |
| 88.155253 | 63 | 77.6953836 AFTER232 | 77.9003836 |
| 88.155253 | 63 | 77.2953836 AFTER233 | 77.7703836 |
| 88.155253 | 63 | 77.2953836 AFTER234 | 77.6553836 |
| 87.155253 | 63 | 76.6953836 AFTER235 | 77.5453836 |
| 87.155253 | 63 | 76.4953836 AFTER236 | 77.4303836 |
| 87.155253 | 63 | 76.4953836 AFTER237 | 77.3003836 |
| 87.155253 | 63 | 76.4953836 AFTER238 | 77.1603836 |
| 87.155253 | 63 | 76.4953836 AFTER239 | 77.0053836 |
| 87.155253 | 63 | 76.6953836 AFTER240 | 76.8453836 |
| 88.155253 | 63 | 77.2953836          | 76.6553836 |
| 88.155253 | 63 | 77.2953836          | 76.4853836 |
| 91.155253 | 63 | 78.6953836          | 76.3153836 |
| 91.155253 | 63 | 78.6953836          | 76.1803836 |
| 90.155253 | 63 | 78.0953836          | 76.0603836 |
| 90.155253 | 63 | 78.8953836          | 75.9753836 |
| 89.155253 | 63 | 78.4953836          | 75.8903836 |
| 86.155253 | 63 | 77.8953836          | 75.8153836 |
| 79.155253 | 63 | 74.6953836          | 75.7453836 |
| 77.155253 | 63 | 74.0953836          | 75.6953836 |
| 77.155253 | 63 | 73.8953836          | 75.6003836 |
| 77.155253 | 63 | 74.2953836          | 75.5053836 |



|           |    |            |            |
|-----------|----|------------|------------|
| 78.155253 | 63 | 74.6953836 | 75.4003836 |
| 79.155253 | 63 | 74.8953836 | 75.2953836 |
| 79.155253 | 63 | 74.8953836 | 75.1853836 |
| 79.155253 | 63 | 74.2953836 | 75.0953836 |
| 76.155253 | 63 | 73.2953836 | 75.0403836 |
| 74.155253 | 63 | 72.6953836 | 74.9953836 |
| 72.155253 | 63 | 72.4953836 | 74.9203836 |
| 72.155253 | 63 | 72.4953836 | 74.8353836 |
| 72.155253 | 63 | 72.8953836 | 74.7303836 |
| 73.155253 | 63 | 73.0953836 | 74.6053836 |
| 74.155253 | 63 | 73.6953836 | 74.4903836 |
| 74.155253 | 63 | 73.8953836 | 74.3403836 |
| 75.155253 | 63 | 74.2953836 | 74.2003836 |
| 76.155253 | 63 | 74.4953836 | 74.0803836 |
| 78.155253 | 63 | 75.2953836 | 73.9253836 |
| 79.155253 | 63 | 75.0953836 | 73.7803836 |
| 79.155253 | 63 | 75.6953836 | 73.6453836 |
| 78.155253 | 63 | 74.0953836 | 73.5703836 |
| 78.155253 | 63 | 73.8953836 | 73.5253836 |
| 77.155253 | 63 | 73.4953836 | 73.4903836 |
| 76.155253 | 63 | 73.0953836 | 73.4553836 |
| 76.155253 | 63 | 72.8953836 | 73.4103836 |
| 77.155253 | 63 | 73.0953836 | 73.3753836 |
| 80.155253 | 63 | 74.2953836 | 73.3403836 |
| 81.155253 | 63 | 74.6953836 | 73.3203836 |
| 79.155253 | 63 | 73.4953836 | 73.3203836 |
| 78.155253 | 63 | 73.0953836 | 73.3353836 |
| 77.155253 | 63 | 72.4953836 | 73.3553836 |
| 77.155253 | 63 | 72.2953836 | 73.3703836 |
| 78.155253 | 63 | 72.6953836 | 73.3853836 |
| 78.155253 | 63 | 72.6953836 | 73.3853836 |
| 79.155253 | 63 | 73.0953836 | 73.3603836 |
| 79.155253 | 63 | 73.2953836 | 73.3353836 |
| 78.155253 | 63 | 72.6953836 | 73.3103836 |
| 79.155253 | 63 | 72.6953836 | 73.2853836 |
| 80.155253 | 63 | 72.4953836 | 73.2353836 |
| 80.155253 | 63 | 71.6953836 | 73.1953836 |
| 81.155253 | 63 | 72.2953836 | 73.1503836 |
| 82.155253 | 63 | 72.4953836 | 73.1603836 |
| 83.155253 | 63 | 72.8953836 | 73.1953836 |
| 83.155253 | 63 | 72.8953836 | 73.2453836 |
| 82.155253 | 63 | 73.4953836 | 73.3053836 |
| 82.155253 | 63 | 73.4953836 | 73.3703836 |
| 82.155253 | 63 | 73.4953836 | 73.4403836 |
| 81.155253 | 63 | 73.2953836 | 73.4903836 |

|           |    |            |            |
|-----------|----|------------|------------|
| 81.155253 | 63 | 73.2953836 | 73.5453836 |
| 81.155253 | 63 | 73.2953836 | 73.6353836 |
| 81.155253 | 63 | 73.0953836 | 73.7603836 |
| 81.155253 | 63 | 73.4953836 | 73.8953836 |
| 80.155253 | 63 | 73.0953836 | 74.0303836 |
| 79.155253 | 63 | 72.6953836 | 74.1853836 |
| 79.155253 | 63 | 72.8953836 | 74.3353836 |
| 78.155253 | 63 | 73.2953836 | 74.4753836 |
| 77.155253 | 63 | 73.4953836 | 74.6053836 |
| 77.155253 | 63 | 73.2953836 | 74.7403836 |
| 78.155253 | 63 | 73.4953836 | 74.8703836 |
| 79.155253 | 63 | 73.8953836 | 75.0003836 |
| 80.155253 | 63 | 74.4953836 | 75.1503836 |
| 81.155253 | 63 | 75.2953836 | 75.2853836 |
| 81.155253 | 63 | 75.4953836 | 75.3953836 |
| 81.155253 | 63 | 75.4953836 | 75.4303836 |
| 81.155253 | 63 | 75.4953836 | 75.4303836 |
| 81.155253 | 63 | 75.8953836 | 75.4003836 |
| 82.155253 | 63 | 76.2953836 | 75.3403836 |
| 82.155253 | 63 | 76.8953836 | 75.2803836 |
| 82.155253 | 63 | 77.0953836 | 75.2103836 |
| 83.155253 | 63 | 78.0953836 | 75.1353836 |
| 83.155253 | 63 | 77.8953836 | 75.0753836 |
| 83.155253 | 63 | 77.6953836 | 75.0353836 |
| 86.155253 | 63 | 78.8953836 | 74.9703836 |
| 87.155253 | 63 | 78.6953836 | 74.9153836 |
| 87.155253 | 63 | 78.6953836 | 74.8503836 |
| 87.155253 | 63 | 78.4953836 | 74.7653836 |
| 87.155253 | 63 | 78.0953836 | 74.6703836 |
| 87.155253 | 63 | 77.8953836 | 74.5753836 |
| 87.155253 | 63 | 77.6953836 | 74.4853836 |
| 87.155253 | 63 | 77.6953836 | 74.4403836 |
| 87.155253 | 63 | 77.6953836 | 74.3753836 |
| 85.155253 | 63 | 76.8953836 | 74.2953836 |
| 79.155253 | 63 | 74.2953836 | 74.1803836 |
| 78.155253 | 63 | 72.8953836 | 74.0653836 |
| 77.155253 | 63 | 72.2953836 | 73.9603836 |
| 76.155253 | 63 | 71.0953836 | 73.8503836 |
| 76.155253 | 63 | 71.0953836 | 73.7503836 |
| 75.155253 | 63 | 70.4953836 | 73.6253836 |
| 75.155253 | 63 | 70.2953836 | 73.4853836 |
| 77.155253 | 63 | 70.8953836 | 73.3403836 |
| 79.155253 | 63 | 71.4953836 | 73.2003836 |
| 78.155253 | 63 | 70.8953836 | 73.1003836 |
| 78.155253 | 63 | 70.8953836 | 73.0053836 |

|           |    |            |            |
|-----------|----|------------|------------|
| 76.155253 | 63 | 70.0953836 | 72.8653836 |
| 75.155253 | 63 | 69.4953836 | 72.7403836 |
| 75.155253 | 63 | 69.4953836 | 72.6253836 |
| 75.155253 | 63 | 69.6953836 | 72.5203836 |
| 75.155253 | 63 | 69.6953836 | 72.4353836 |
| 78.155253 | 63 | 71.6953836 | 72.3653836 |
| 78.155253 | 63 | 71.2953836 | 72.3153836 |
| 78.155253 | 63 | 71.2953836 | 72.2053836 |
| 76.155253 | 63 | 70.6953836 | 72.0753836 |
| 76.155253 | 63 | 70.8953836 | 71.9603836 |
| 76.155253 | 63 | 71.2953836 | 71.8953836 |
| 76.155253 | 63 | 71.0953836 | 71.8603836 |
| 76.155253 | 63 | 71.8953836 | 71.8503836 |
| 76.155253 | 63 | 71.2953836 | 71.8903836 |
| 77.155253 | 63 | 71.2953836 | 71.9453836 |
| 77.155253 | 63 | 71.2953836 | 72.0753836 |
| 79.155253 | 63 | 72.4953836 | 72.2003836 |
| 82.155253 | 63 | 73.8953836 | 72.2903836 |
| 82.155253 | 63 | 73.8953836 | 72.3603836 |
| 80.155253 | 63 | 73.2953836 | 72.4903836 |
| 80.155253 | 63 | 73.6953836 | 72.6203836 |
| 79.155253 | 63 | 74.0953836 | 72.7653836 |
| 79.155253 | 63 | 74.2953836 | 72.9103836 |
| 79.155253 | 63 | 74.6953836 | 73.0403836 |
| 80.155253 | 63 | 75.0953836 | 73.1753836 |
| 81.155253 | 63 | 75.6953836 | 73.3003836 |
| 75.155253 | 63 | 73.2953836 | 73.3553836 |
| 73.155253 | 63 | 72.4953836 | 73.4253836 |
| 73.155253 | 63 | 72.2953836 | 73.5103836 |
| 73.155253 | 63 | 71.6953836 | 73.6153836 |
| 73.155253 | 63 | 71.4953836 | 73.7203836 |
| 74.155253 | 63 | 71.8953836 | 73.8003836 |
| 76.155253 | 63 | 72.6953836 | 73.9003836 |
| 78.155253 | 63 | 73.2953836 | 73.9653836 |
| 84.155253 | 63 | 75.6953836 | 74.0503836 |
| 84.155253 | 63 | 75.2953836 | 74.1653836 |
| 84.155253 | 63 | 74.4953836 | 74.2953836 |
| 84.155253 | 63 | 74.2953836 | 74.4253836 |
| 83.155253 | 63 | 76.0953836 | 74.5303836 |
| 82.155253 | 63 | 76.0953836 | 74.6353836 |
| 82.155253 | 63 | 75.8953836 | 74.8203836 |
| 82.155253 | 63 | 75.2953836 | 74.9903836 |
| 82.155253 | 63 | 74.6953836 | 75.1353836 |
| 83.155253 | 63 | 75.0953836 | 75.1064537 |
| 82.155253 | 63 | 74.6953836 | 75.1664537 |

|           |    |            |            |
|-----------|----|------------|------------|
| 80.155253 | 63 | 73.8953836 | 75.2214537 |
| 80.155253 | 63 | 74.0953836 | 75.1914537 |
| 80.155253 | 63 | 74.6953836 | 75.1964537 |
| 79.155253 | 63 | 74.8953836 | 75.2364537 |
| 78.155253 | 63 | 75.0953836 | 75.2764537 |
| 77.155253 | 63 | 74.4953836 | 75.3214537 |
| 77.155253 | 63 | 75.0953836 | 75.3614537 |
| 76.155253 | 63 | 74.4953836 | 75.3564537 |
| 76.155253 | 63 | 74.6953836 | 75.3264537 |
| 77.155253 | 63 | 75.8953836 | 75.2714537 |
| 78.155253 | 63 | 76.4953836 | 75.1364537 |
| 81.155253 | 63 | 77.6953836 | 75.0114537 |
| 81.155253 | 63 | 78.0953836 | 74.9214537 |
| 81.155253 | 63 | 78.0953836 | 74.8564537 |
| 83.155253 | 63 | 80.6953836 | 74.7464537 |
| 83.155253 | 63 | 80.4953836 | 74.6564537 |
| 81.155253 | 63 | 79.8953836 | 74.5614537 |
| 76.155253 | 63 | 73.1381887 | 74.4614537 |
| 73.155253 | 63 | 77.0953836 | 74.3564537 |
| 73.155253 | 63 | 77.2953836 | 74.2314537 |
| 74.155253 | 63 | 74.4953836 | 74.1364537 |
| 74.155253 | 63 | 73.4953836 | 74.0764537 |
| 76.155253 | 63 | 74.0953836 | 74.0214537 |
| 77.155253 | 63 | 73.8953836 | 73.9464537 |
| 77.155253 | 63 | 73.4953836 | 73.8714537 |
| 78.155253 | 63 | 73.0953836 | 73.8014537 |
| 77.155253 | 63 | 71.6953836 | 73.7414537 |
| 77.155253 | 63 | 71.4953836 | 73.6614537 |
| 76.155253 | 63 | 71.0953836 | 73.5964537 |
| 76.155253 | 63 | 70.2953836 | 73.5164537 |
| 76.155253 | 63 | 70.2953836 | 73.4014537 |
| 77.155253 | 63 | 70.8953836 | 73.2714537 |
| 79.155253 | 63 | 71.6953836 | 73.1264537 |
| 79.155253 | 63 | 71.6953836 | 72.9814537 |
| 79.155253 | 63 | 72.4953836 | 72.8464537 |
| 77.155253 | 63 | 72.0953836 | 72.6564537 |
| 75.155253 | 63 | 71.2953836 | 72.4614537 |
| 74.155253 | 63 | 70.4953836 | 72.2714537 |
| 74.155253 | 63 | 70.0953836 | 72.2553836 |
| 76.155253 | 63 | 70.8953836 | 72.1503836 |
| 78.155253 | 63 | 71.4953836 | 72.0753836 |
| 79.155253 | 63 | 71.8953836 | 72.1003836 |
| 79.155253 | 63 | 71.6953836 | 72.1703836 |
| 79.155253 | 63 | 71.8953836 | 72.2353836 |
| 80.155253 | 63 | 72.2953836 | 72.3003836 |

|           |    |            |            |
|-----------|----|------------|------------|
| 79.155253 | 63 | 72.0953836 | 72.3653836 |
| 79.155253 | 63 | 71.8953836 | 72.4303836 |
| 78.155253 | 63 | 71.8953836 | 72.5303836 |
| 77.155253 | 63 | 71.4953836 | 72.6353836 |
| 77.155253 | 63 | 71.2953836 | 72.7203836 |
| 78.155253 | 63 | 71.2953836 | 72.8303836 |
| 80.155253 | 63 | 71.8953836 | 72.9303836 |
| 81.155253 | 63 | 72.2953836 | 73.0103836 |
| 82.155253 | 63 | 72.6953836 | 73.0653836 |
| 83.155253 | 63 | 73.0953836 | 73.1253836 |
| 82.155253 | 63 | 72.6953836 | 73.1553836 |
| 82.155253 | 63 | 72.2953836 | 73.1853836 |
| 83.155253 | 63 | 72.4953836 | 73.2353836 |
| 84.155253 | 63 | 72.8953836 | 73.2603836 |
| 87.155253 | 63 | 74.2953836 | 73.2953836 |
| 90.155253 | 63 | 75.4953836 | 73.3153836 |
| 92.155253 | 63 | 76.2953836 | 73.3353836 |
| 93.155253 | 63 | 76.6953836 | 73.3253836 |
| 92.155253 | 63 | 76.4953836 | 73.3103836 |
| 91.155253 | 63 | 76.0953836 | 73.2853836 |
| 89.155253 | 63 | 75.6953836 | 73.2503836 |
| 89.155253 | 63 | 75.6953836 | 73.2403836 |
| 89.155253 | 63 | 75.6953836 | 73.2553836 |
| 86.155253 | 63 | 74.4953836 | 73.2703836 |
| 86.155253 | 63 | 74.6953836 | 73.2753836 |
| 85.155253 | 63 | 74.2953836 | 73.2803836 |
| 85.155253 | 63 | 74.0953836 | 73.2903836 |
| 85.155253 | 63 | 73.8953836 | 73.3103836 |
| 85.155253 | 63 | 74.0953836 | 73.3453836 |
| 84.155253 | 63 | 73.6953836 | 73.3753836 |
| 83.155253 | 63 | 73.2953836 | 73.3953836 |
| 83.155253 | 63 | 73.2953836 | 73.4153836 |
| 79.155253 | 63 | 71.4953836 | 73.4303836 |
| 79.155253 | 63 | 71.4953836 | 73.4253836 |
| 79.155253 | 63 | 71.6953836 | 73.4003836 |
| 78.155253 | 63 | 72.2953836 | 73.3203836 |
| 78.155253 | 63 | 71.4953836 | 73.2003836 |
| 78.155253 | 63 | 71.0953836 | 73.0553836 |
| 78.155253 | 63 | 70.8953836 | 72.9103836 |
| 78.155253 | 63 | 70.8953836 | 72.7703836 |
| 80.155253 | 63 | 71.6953836 | 72.6553836 |
| 81.155253 | 63 | 72.4953836 | 72.5653836 |
| 81.155253 | 63 | 72.4953836 | 72.5153836 |
| 79.155253 | 63 | 71.6953836 | 72.4503836 |
| 79.155253 | 63 | 71.4953836 | 72.4203836 |

|           |    |            |            |
|-----------|----|------------|------------|
| 79.155253 | 63 | 71.6953836 | 72.3653836 |
| 79.155253 | 63 | 72.6953836 | 72.3103836 |
| 80.155253 | 63 | 73.6953836 | 72.2553836 |
| 80.155253 | 63 | 73.8953836 | 72.1703836 |
| 79.155253 | 63 | 73.8953836 | 72.1053836 |
| 79.155253 | 63 | 73.4953836 | 72.0453836 |
| 79.155253 | 63 | 72.8953836 | 72.0453836 |
| 79.155253 | 63 | 72.2953836 | 72.0603836 |
| 79.155253 | 63 | 71.8953836 | 72.1253836 |
| 78.155253 | 63 | 71.0953836 | 72.1503836 |
| 78.155253 | 63 | 70.6953836 | 72.1653836 |
| 77.155253 | 63 | 70.4953836 | 72.1553836 |
| 77.155253 | 63 | 70.8953836 | 72.1653836 |
| 76.155253 | 63 | 70.8953836 | 72.1703836 |
| 76.155253 | 63 | 71.4953836 | 72.1753836 |
| 78.155253 | 63 | 72.0953836 | 72.1853836 |
| 82.155253 | 63 | 73.6953836 | 72.1703836 |
| 82.155253 | 63 | 73.0953836 | 72.1403836 |
| 83.155253 | 63 | 73.2953836 | 72.0903836 |
| 81.155253 | 63 | 72.4953836 | 72.1553836 |
| 81.155253 | 63 | 72.0953836 | 72.2453836 |
| 81.155253 | 63 | 71.8953836 | 72.3503836 |
| 78.155253 | 63 | 70.4953836 | 72.4253836 |
| 80.155253 | 63 | 71.4953836 | 72.4753836 |
| 80.155253 | 63 | 71.2953836 | 72.5053836 |
| 85.155253 | 63 | 73.2953836 | 72.5403836 |
| 85.155253 | 63 | 73.8953836 | 72.5853836 |
| 85.155253 | 63 | 74.0953836 | 72.6603836 |
| 81.155253 | 63 | 72.4953836 | 72.7503836 |
| 80.155253 | 63 | 72.2953836 | 72.8503836 |
| 79.155253 | 63 | 71.8953836 | 72.9603836 |
| 79.155253 | 63 | 71.8953836 | 73.0853836 |
| 79.155253 | 63 | 71.2953836 | 73.2053836 |
| 79.155253 | 63 | 71.0953836 | 73.3203836 |
| 79.155253 | 63 | 71.2953836 | 73.4203836 |
| 79.155253 | 63 | 71.0953836 | 73.5003836 |
| 79.155253 | 63 | 71.2953836 | 73.5603836 |
| 79.155253 | 63 | 70.4953836 | 73.5753836 |
| 88.155253 | 63 | 74.2953836 | 73.5903836 |
| 90.155253 | 63 | 75.0953836 | 73.5903836 |
| 89.155253 | 63 | 75.8953836 | 73.5903836 |
| 88.155253 | 63 | 75.6953836 | 73.6053836 |
| 87.155253 | 63 | 75.6953836 | 73.6253836 |
| 86.155253 | 63 | 75.0953836 | 73.7003836 |
| 86.155253 | 63 | 75.2953836 | 73.7603836 |

|           |    |            |            |
|-----------|----|------------|------------|
| 86.155253 | 63 | 75.2953836 | 73.8253836 |
| 85.155253 | 63 | 75.8953836 | 73.8653836 |
| 85.155253 | 63 | 75.8953836 | 73.9053836 |
| 84.155253 | 63 | 75.8953836 | 73.9553836 |
| 83.155253 | 63 | 75.4953836 | 74.0403836 |
| 83.155253 | 63 | 75.6953836 | 74.1303836 |
| 82.155253 | 63 | 75.2953836 | 74.2003836 |
| 83.155253 | 63 | 75.4953836 | 74.2703836 |
| 82.155253 | 63 | 74.8953836 | 74.3553836 |
| 82.155253 | 63 | 74.6953836 | 74.4403836 |
| 82.155253 | 63 | 74.4953836 | 74.5003836 |
| 82.155253 | 63 | 74.2953836 | 74.5503836 |
| 81.155253 | 63 | 73.6953836 | 74.5703836 |
| 80.155253 | 63 | 73.2953836 | 74.5903836 |
| 79.155253 | 63 | 72.4953836 | 74.5053836 |
| 79.155253 | 63 | 72.6953836 | 74.3653836 |
| 80.155253 | 63 | 72.6953836 | 74.1953836 |
| 80.155253 | 63 | 73.4953836 | 74.0703836 |
| 80.155253 | 63 | 73.8953836 | 73.9603836 |
| 80.155253 | 63 | 73.8953836 | 73.8803836 |
| 82.155253 | 63 | 74.8953836 | 73.8103836 |
| 82.155253 | 63 | 75.4953836 | 73.7403836 |
| 82.155253 | 63 | 76.0953836 | 73.6703836 |
| 82.155253 | 63 | 75.8953836 | 73.6103836 |
| 82.155253 | 63 | 75.8953836 | 73.5453836 |
| 79.155253 | 63 | 74.6953836 | 73.4853836 |
| 79.155253 | 63 | 74.6953836 | 73.4203836 |
| 79.155253 | 63 | 74.6953836 | 73.3603836 |
| 80.155253 | 63 | 74.4953836 | 73.3053836 |
| 80.155253 | 63 | 73.6953836 | 73.2453836 |
| 81.155253 | 63 | 73.0953836 | 73.1803836 |
| 80.155253 | 63 | 72.0953836 | 73.1203836 |
| 78.155253 | 63 | 71.2953836 | 73.0703836 |
| 78.155253 | 63 | 70.8953836 | 73.0503836 |
| 75.155253 | 63 | 69.4953836 | 73.0403836 |
| 74.155253 | 63 | 69.0953836 | 73.0903836 |
| 75.155253 | 63 | 70.6953836 | 73.1303836 |
| 76.155253 | 63 | 71.2953836 | 73.1853836 |
| 77.155253 | 63 | 71.8953836 | 73.2253836 |
| 78.155253 | 63 | 72.4953836 | 73.2553836 |
| 78.155253 | 63 | 72.4953836 | 73.2903836 |
| 79.155253 | 63 | 73.0953836 | 73.2853836 |
| 80.155253 | 63 | 73.4953836 | 73.2403836 |
| 80.155253 | 63 | 73.2953836 | 73.1403836 |
| 81.155253 | 63 | 73.0953836 | 73.0303836 |

|           |    |                   |            |
|-----------|----|-------------------|------------|
| 82.155253 | 63 | 73.0953836        | 72.9103836 |
| 82.155253 | 63 | 72.8953836        | 72.8153836 |
| 83.155253 | 63 | 73.2953836 BEFORE | 72.7303836 |
| 82.155253 | 63 | 72.4953836 BEFORE | 72.6903836 |
| 81.155253 | 63 | 72.0953836 BEFORE | 72.6803836 |
| 81.155253 | 63 | 72.0953836 BEFORE | 72.7153836 |
| 82.155253 | 63 | 72.2953836 BEFORE | 72.7753836 |
| 83.155253 | 63 | 72.8953836 BEFORE | 72.8553836 |
| 83.155253 | 63 | 72.8953836 BEFORE | 72.9353836 |
| 86.155253 | 63 | 74.4953836 BEFORE | 73.0153836 |
| 85.155253 | 63 | 74.2953836 BEFORE | 73.1203836 |
| 86.155253 | 63 | 74.8953836 BEFORE | 73.2303836 |
| 86.155253 | 63 | 75.0953836 BEFORE | 73.3203836 |
| 86.155253 | 63 | 75.0953836 BEFORE | 73.4203836 |
| 86.155253 | 63 | 75.2953836 BEFORE | 73.5253836 |
| 86.155253 | 63 | 74.6953836 BEFORE | 73.6153836 |
| 84.155253 | 63 | 73.6953836 BEFORE | 73.7053836 |
| 81.155253 | 63 | 72.0953836 BEFORE | 73.7453836 |
| 80.155253 | 63 | 71.4953836 BEFORE | 73.7553836 |
| 80.155253 | 63 | 71.0953836 BEFORE | 73.7603836 |
| 80.155253 | 63 | 70.8953836 BEFORE | 73.7803836 |
| 81.155253 | 63 | 71.2953836 BEFORE | 73.8103836 |
| 87.155253 | 63 | 73.0953836 BEFORE | 73.8503836 |
| 90.155253 | 63 | 74.0953836 BEFORE | 73.8803836 |
| 92.155253 | 63 | 75.0953836 BEFORE | 73.9103836 |
| 92.155253 | 63 | 75.4953836 BEFORE | 73.9403836 |
| 90.155253 | 63 | 75.2953836 BEFORE | 73.9603836 |
| 88.155253 | 63 | 74.4953836 BEFORE | 73.9753836 |
| 85.155253 | 63 | 74.0953836 BEFORE | 74.0003836 |
| 82.155253 | 63 | 73.6953836 BEFORE | 74.0553836 |
| 81.155253 | 63 | 73.4953836 BEFORE | 74.0703836 |
| 82.155253 | 63 | 74.2953836 BEFORE | 74.0853836 |
| 83.155253 | 63 | 75.2953836 BEFORE | 74.0653836 |
| 85.155253 | 63 | 76.0953836 BEFORE | 74.0353836 |
| 85.155253 | 63 | 76.0953836 BEFORE | 74.0003836 |
| 84.155253 | 63 | 76.0953836 BEFORE | 73.9703836 |
| 82.155253 | 63 | 74.6953836 BEFORE | 73.9753836 |
| 80.155253 | 63 | 73.8953836 BEFORE | 74.0103836 |
| 79.155253 | 63 | 73.4953836 BEFORE | 74.0653836 |
| 80.155253 | 63 | 73.8953836 BEFORE | 74.1403836 |
| 81.155253 | 63 | 74.2953836 BEFORE | 74.2303836 |
| 82.155253 | 63 | 74.4953836 BEFORE | 74.3253836 |
| 82.155253 | 63 | 74.4953836 BEFORE | 74.4003836 |
| 80.155253 | 63 | 73.6953836 BEFORE | 74.4203836 |
| 79.155253 | 63 | 73.2953836 BEFORE | 74.4153836 |



|           |    |            |        |            |
|-----------|----|------------|--------|------------|
| 79.155253 | 63 | 72.8953836 | BEFORE | 74.3803836 |
| 79.155253 | 63 | 72.8953836 | BEFORE | 74.3253836 |
| 80.155253 | 63 | 73.8953836 | BEFORE | 74.2853836 |
| 83.155253 | 63 | 75.0953836 | BEFORE | 74.2603836 |
| 83.155253 | 63 | 75.0953836 | BEFORE | 74.2403836 |
| 82.155253 | 63 | 74.8953836 | BEFORE | 74.2203836 |
| 80.155253 | 63 | 74.0953836 | BEFORE | 74.1653836 |
| 79.155253 | 63 | 73.8953836 | BEFORE | 74.0553836 |
| 79.155253 | 63 | 73.6953836 | BEFORE | 73.9103836 |
| 81.155253 | 63 | 74.0953836 | BEFORE | 73.7453836 |
| 83.155253 | 63 | 74.8953836 | BEFORE | 73.6403836 |
| 83.155253 | 63 | 75.0953836 | BEFORE | 73.5703836 |
| 83.155253 | 63 | 74.2953836 | BEFORE | 73.5503836 |
| 84.155253 | 63 | 74.4953836 | BEFORE | 73.5403836 |
| 85.155253 | 63 | 74.6953836 | BEFORE | 73.5153836 |
| 85.155253 | 63 | 74.6953836 | BEFORE | 73.4753836 |
| 85.155253 | 63 | 74.2953836 | BEFORE | 73.4153836 |
| 85.155253 | 63 | 73.8953836 | BEFORE | 73.3603836 |
| 85.155253 | 63 | 73.8953836 | BEFORE | 73.3253836 |
| 85.155253 | 63 | 73.6953836 | BEFORE | 73.3153836 |
| 85.155253 | 63 | 73.2953836 | BEFORE | 73.3253836 |
| 86.155253 | 63 | 73.6953836 | BEFORE | 73.3453836 |
| 86.155253 | 63 | 73.4953836 | BEFORE | 73.3303836 |
| 87.155253 | 63 | 73.2953836 | BEFORE | 73.2803836 |
| 87.155253 | 63 | 72.8953836 | BEFORE | 73.1753836 |
| 83.155253 | 63 | 71.2953836 | BEFORE | 73.0703836 |
| 81.155253 | 63 | 69.8953836 | BEFORE | 72.9753836 |
| 80.155253 | 63 | 69.4953836 | BEFORE | 72.9053836 |
| 79.155253 | 63 | 69.4953836 | BEFORE | 72.8703836 |
| 80.155253 | 63 | 71.8953836 | BEFORE | 72.8803836 |
| 81.155253 | 63 | 73.2953836 | BEFORE | 72.9053836 |
| 81.155253 | 63 | 73.8953836 | BEFORE | 72.9153836 |
| 80.155253 | 63 | 73.4953836 | BEFORE | 72.9053836 |
| 79.155253 | 63 | 72.4953836 | BEFORE | 72.9153836 |
| 79.155253 | 63 | 72.2953836 | BEFORE | 72.8953836 |
| 79.155253 | 63 | 71.8953836 | BEFORE | 72.8953836 |
| 80.155253 | 63 | 72.2953836 | BEFORE | 72.9103836 |
| 80.155253 | 63 | 73.0953836 | BEFORE | 72.9753836 |
| 79.155253 | 63 | 73.2953836 | BEFORE | 73.0853836 |
| 79.155253 | 63 | 73.6953836 | BEFORE | 73.1953836 |
| 79.155253 | 63 | 73.6953836 | BEFORE | 73.3153836 |
| 76.155253 | 63 | 72.2953836 | BEFORE | 73.4153836 |
| 75.155253 | 63 | 71.8953836 | BEFORE | 73.4653836 |
| 74.155253 | 63 | 70.8953836 | BEFORE | 73.4903836 |
| 74.155253 | 63 | 70.8953836 | BEFORE | 73.5153836 |

|           |    |            |        |            |
|-----------|----|------------|--------|------------|
| 74.155253 | 63 | 71.0953836 | BEFORE | 73.5253836 |
| 74.155253 | 63 | 71.2953836 | BEFORE | 73.5653836 |
| 76.155253 | 63 | 72.4953836 | BEFORE | 73.6353836 |
| 77.155253 | 63 | 74.0953836 | BEFORE | 73.7153836 |
| 78.155253 | 63 | 75.0953836 | BEFORE | 73.7653836 |
| 78.155253 | 63 | 75.2953836 | BEFORE | 73.7653836 |
| 78.155253 | 63 | 74.6953836 | BEFORE | 73.7303836 |
| 78.155253 | 63 | 74.6953836 | BEFORE | 73.6703836 |
| 78.155253 | 63 | 73.6953836 | BEFORE | 73.6003836 |
| 81.155253 | 63 | 74.6953836 | BEFORE | 73.5503836 |
| 83.155253 | 63 | 75.2953836 | BEFORE | 73.5053836 |
| 85.155253 | 63 | 76.8953836 | BEFORE | 73.4703836 |
| 87.155253 | 63 | 78.2953836 | BEFORE | 73.4253836 |
| 87.155253 | 63 | 78.2953836 | BEFORE | 73.3903836 |
| 88.155253 | 63 | 78.4953836 | BEFORE | 73.3753836 |
| 86.155253 | 63 | 77.2953836 | BEFORE | 73.3653836 |
| 84.155253 | 63 | 75.6953836 | BEFORE | 73.3553836 |
| 82.155253 | 63 | 74.4953836 | BEFORE | 73.3653836 |
| 82.155253 | 63 | 74.2953836 | BEFORE | 73.3953836 |
| 80.155253 | 63 | 73.2953836 | BEFORE | 73.4703836 |
| 80.155253 | 63 | 72.8953836 | BEFORE | 73.5453836 |
| 80.155253 | 71 | 72.6953836 | BEFORE | 73.6203836 |
| 80.155253 | 71 | 72.6953836 | BEFORE | 73.6803836 |
| 78.155253 | 71 | 71.4953836 | BEFORE | 73.6903836 |
| 78.155253 | 71 | 71.8953836 | BEFORE | 73.6603836 |
| 78.155253 | 71 | 71.8953836 | BEFORE | 73.5803836 |
| 77.155253 | 71 | 71.4953836 | BEFORE | 73.4853836 |
| 76.155253 | 71 | 70.6953836 | BEFORE | 73.4003836 |
| 76.155253 | 71 | 70.4953836 | BEFORE | 73.3353836 |
| 76.155253 | 71 | 70.4953836 | BEFORE | 73.3203836 |
| 76.155253 | 71 | 70.4953836 | BEFORE | 73.2753836 |
| 76.155253 | 71 | 70.4953836 | BEFORE | 73.2253836 |
| 80.155253 | 71 | 71.6953836 | BEFORE | 73.1353836 |
| 83.155253 | 71 | 72.6953836 | BEFORE | 73.0153836 |
| 84.155253 | 71 | 73.2953836 | BEFORE | 72.8903836 |
| 84.155253 | 71 | 73.2953836 | BEFORE | 72.7603836 |
| 83.155253 | 71 | 72.6953836 | BEFORE | 72.6503836 |
| 83.155253 | 71 | 73.0953836 | BEFORE | 72.5653836 |
| 85.155253 | 71 | 73.8953836 | BEFORE | 72.5003836 |
| 85.155253 | 71 | 73.8953836 | BEFORE | 72.4453836 |
| 85.155253 | 71 | 74.0953836 | BEFORE | 72.4353836 |
| 84.155253 | 71 | 73.6953836 | BEFORE | 72.4503836 |
| 82.155253 | 71 | 72.8953836 | BEFORE | 72.5053836 |
| 82.155253 | 71 | 72.8953836 | BEFORE | 72.5753836 |
| 79.155253 | 71 | 71.8953836 | BEFORE | 72.6803836 |

|           |    |            |        |            |
|-----------|----|------------|--------|------------|
| 79.155253 | 71 | 71.4953836 | BEFORE | 72.7553836 |
| 79.155253 | 71 | 71.2953836 | BEFORE | 72.8453836 |
| 80.155253 | 71 | 72.0953836 | BEFORE | 72.9403836 |
| 81.155253 | 71 | 73.0953836 | BEFORE | 73.0553836 |
| 80.155253 | 71 | 72.8953836 | BEFORE | 73.1753836 |
| 80.155253 | 71 | 73.2953836 | BEFORE | 73.2703836 |
| 80.155253 | 71 | 73.2953836 | BEFORE | 73.3503836 |
| 80.155253 | 71 | 73.4953836 | BEFORE | 73.4253836 |
| 81.155253 | 71 | 73.2953836 | BEFORE | 73.4803836 |
| 81.155253 | 71 | 73.2953836 | BEFORE | 73.5153836 |
| 80.155253 | 71 | 72.8953836 | BEFORE | 73.5303836 |
| 79.155253 | 71 | 72.2953836 | BEFORE | 73.6003836 |
| 78.155253 | 71 | 71.8953836 | BEFORE | 73.7003836 |
| 78.155253 | 71 | 72.0953836 | BEFORE | 73.7903836 |
| 79.155253 | 71 | 72.8953836 | BEFORE | 73.8453836 |
| 80.155253 | 71 | 73.4953836 | BEFORE | 73.8903836 |
| 83.155253 | 71 | 74.8953836 | BEFORE | 73.9103836 |
| 83.155253 | 71 | 75.4953836 | BEFORE | 73.9253836 |
| 83.155253 | 71 | 75.6953836 | BEFORE | 73.9503836 |
| 81.155253 | 71 | 74.8953836 | BEFORE | 73.9603836 |
| 81.155253 | 71 | 75.4953836 | BEFORE | 74.0053836 |
| 81.155253 | 71 | 75.2953836 | BEFORE | 74.0703836 |
| 81.155253 | 71 | 75.2953836 | BEFORE | 74.1403836 |
| 82.155253 | 71 | 75.2953836 | BEFORE | 74.1953836 |
| 83.155253 | 71 | 74.2953836 | BEFORE | 74.2353836 |
| 83.155253 | 71 | 73.6953836 | BEFORE | 74.2903836 |
| 83.155253 | 71 | 73.4953836 | BEFORE | 74.3453836 |
| 84.155253 | 71 | 73.8953836 | BEFORE | 74.4003836 |
| 85.155253 | 71 | 74.0953836 | BEFORE | 74.4553836 |
| 85.155253 | 71 | 73.8953836 | BEFORE | 74.4453836 |
| 90.155253 | 71 | 76.0953836 | BEFORE | 74.4553836 |
| 90.155253 | 71 | 76.6953836 | BEFORE | 74.4753836 |
| 90.155253 | 71 | 76.6953836 | BEFORE | 74.5053836 |
| 88.155253 | 71 | 76.0953836 | BEFORE | 74.5453836 |
| 87.155253 | 71 | 75.6953836 | BEFORE | 74.5803836 |
| 84.155253 | 71 | 74.8953836 | BEFORE | 74.5853836 |
| 82.155253 | 71 | 74.2953836 | BEFORE | 74.5753836 |
| 81.155253 | 71 | 73.8953836 | BEFORE | 74.5203836 |
| 79.155253 | 71 | 73.2953836 | BEFORE | 74.4403836 |
| 79.155253 | 71 | 73.6953836 | BEFORE | 74.3553836 |
| 79.155253 | 71 | 74.0953836 | BEFORE | 74.3003836 |
| 79.155253 | 71 | 74.0953836 | BEFORE | 74.2303836 |
| 79.155253 | 71 | 74.2953836 | BEFORE | 74.1753836 |
| 80.155253 | 71 | 74.6953836 | BEFORE | 74.1403836 |
| 81.155253 | 71 | 75.0953836 | BEFORE | 74.1203836 |

|           |    |            |        |            |
|-----------|----|------------|--------|------------|
| 82.155253 | 71 | 75.4953836 | BEFORE | 74.1103836 |
| 82.155253 | 71 | 75.4953836 | BEFORE | 74.1953836 |
| 82.155253 | 71 | 75.6953836 | BEFORE | 74.3053836 |
| 74.155253 | 71 | 72.8953836 | BEFORE | 74.4103836 |
| 74.155253 | 71 | 73.6953836 | BEFORE | 74.5103836 |
| 74.155253 | 71 | 73.6953836 | BEFORE | 74.6303836 |
| 74.155253 | 71 | 73.4953836 | BEFORE | 74.7053836 |
| 74.155253 | 71 | 73.4953836 | BEFORE | 74.7753836 |
| 74.155253 | 71 | 73.4953836 | BEFORE | 74.8303836 |
| 74.155253 | 71 | 73.0953836 | BEFORE | 74.8853836 |
| 74.155253 | 71 | 73.0953836 | BEFORE | 74.9303836 |
| 74.155253 | 63 | 72.6953836 | BEFORE | 74.9853836 |
| 74.155253 | 63 | 72.2953836 | BEFORE | 75.0553836 |
| 74.155253 | 63 | 72.2953836 | BEFORE | 75.1103836 |
| 75.155253 | 63 | 72.6953836 | BEFORE | 75.1653836 |
| 75.155253 | 63 | 72.6953836 | BEFORE | 75.2053836 |
| 75.155253 | 63 | 73.0953836 | BEFORE | 75.2153836 |
| 76.155253 | 63 | 73.8953836 | BEFORE | 75.1953836 |
| 79.155253 | 63 | 74.4953836 | BEFORE | 75.1353836 |
| 79.155253 | 63 | 73.8953836 | BEFORE | 75.0553836 |
| 88.155253 | 63 | 77.0953836 | BEFORE | 74.9803836 |
| 90.155253 | 63 | 77.8953836 | BEFORE | 74.8803836 |
| 90.155253 | 63 | 78.0953836 | BEFORE | 74.7653836 |
| 90.155253 | 63 | 78.0953836 | BEFORE | 74.6453836 |
| 91.155253 | 63 | 78.6953836 | BEFORE | 74.5753836 |
| 92.155253 | 63 | 79.0953836 | BEFORE | 74.4853836 |
| 93.155253 | 63 | 79.4953836 | BEFORE | 74.3953836 |
| 92.155253 | 63 | 78.8953836 | BEFORE | 74.3153836 |
| 91.155253 | 63 | 78.2953836 | BEFORE | 74.2353836 |
| 89.155253 | 63 | 77.4953836 | BEFORE | 74.1603836 |
| 88.155253 | 63 | 77.0953836 | BEFORE | 74.0953836 |
| 88.155253 | 63 | 77.0953836 | BEFORE | 74.0353836 |
| 85.155253 | 63 | 76.0953836 | BEFORE | 73.9953836 |
| 84.155253 | 63 | 75.4953836 | BEFORE | 73.9803836 |
| 84.155253 | 63 | 75.2953836 | BEFORE | 73.9403836 |
| 82.155253 | 63 | 74.4953836 | BEFORE | 73.9153836 |
| 80.155253 | 63 | 73.2953836 | BEFORE | 73.8024537 |
| 77.155253 | 63 | 71.8953836 | BEFORE | 73.6835239 |
| 76.155253 | 63 | 71.4953836 | BEFORE | 73.551594  |
| 77.155253 | 63 | 72.0953836 | BEFORE | 73.3986641 |
| 77.155253 | 63 | 71.4953836 | BEFORE | 73.2447342 |
| 76.155253 | 63 | 70.8953836 | BEFORE | 73.0078044 |
| 76.155253 | 63 | 70.8953836 | BEFORE | 72.7238745 |
| 75.155253 | 63 | 70.0953836 | BEFORE | 72.4399446 |
| 75.155253 | 63 | 70.0953836 | BEFORE | 72.1550147 |

|           |    |                   |            |
|-----------|----|-------------------|------------|
| 75.155253 | 63 | 70.0953836 BEFORE | 71.8730849 |
| 75.155253 | 63 | 70.2953836 BEFORE | 71.7780849 |
| 75.155253 | 63 | 70.2953836 BEFORE | 71.6880849 |
| 76.155253 | 63 | 70.4953836 BEFORE | 71.5930849 |
| 76.155253 | 63 | 70.4953836 BEFORE | 71.4980849 |
| 76.155253 | 63 | 70.6953836 BEFORE | 71.4280849 |
| 76.155253 | 63 | 71.0953836 BEFORE | 71.3580849 |
| 76.155253 | 63 | 71.6953836 BEFORE | 71.2830849 |
| 73.155253 | 63 | 70.6953836 BEFORE | 71.2130849 |
| 73.155253 | 63 | 71.6953836 BEFORE | 71.1480849 |
| 73.155253 | 63 | 68.1781887 BEFORE | 71.0880849 |
| 74.155253 | 63 | 68.3381887 BEFORE | 71.0480849 |
| 76.155253 | 63 | 68.6181887 BEFORE | 71.0080849 |
| 76.155253 | 63 | 68.3781887 BEFORE | 70.9830849 |
| 75.155253 | 63 | 67.7381887 BEFORE | 70.9830849 |
| 75.155253 | 63 | 67.6181887 BEFORE | 70.9430849 |
| 74.155253 | 63 | 66.5381887 BEFORE | 70.9130849 |
| 74.155253 | 63 | 66.7381887 minute | 70.8580849 |
| 74.155253 | 63 | 66.6981887 minute | 70.7730849 |
| 75.155253 | 63 | 67.4181887 minute | 70.6980849 |
| 82.155253 | 63 | 75.2953836 minute | 70.6030849 |
| 83.155253 | 63 | 75.8953836 minute | 70.5080849 |
| 82.155253 | 63 | 75.0953836 minute | 70.4080849 |
| 82.155253 | 63 | 74.4953836 minute | 70.3130849 |
| 82.155253 | 63 | 74.6953836 minute | 70.2030849 |
| 81.155253 | 63 | 74.2953836 minute | 70.0930849 |
| 81.155253 | 63 | 74.0953836 minute | 69.9730849 |
| 80.155253 | 63 | 73.2953836 minute | 69.8480849 |
| 80.155253 | 63 | 72.8953836 minute | 69.7080849 |
| 80.155253 | 63 | 72.8953836 minute | 69.6230849 |
| 81.155253 | 63 | 72.8953836 minute | 69.5480849 |
| 82.155253 | 63 | 71.6953836 minute | 69.6210147 |
| 82.155253 | 63 | 70.8953836 minute | 69.6849446 |
| 85.155253 | 63 | 71.4953836 minute | 69.7418745 |
| 83.155253 | 63 | 70.4953836 minute | 69.8148044 |
| 83.155253 | 63 | 70.2953836 minute | 69.9237342 |
| 79.155253 | 63 | 68.6953836 minute | 70.0456641 |
| 78.155253 | 63 | 67.4953836 minute | 70.209594  |
| 78.155253 | 63 | 67.0953836 minute | 70.3735239 |
| 77.155253 | 63 | 66.2953836 minute | 70.5534537 |
| 77.155253 | 63 | 66.2953836 minute | 70.7153836 |
| 77.155253 | 63 | 66.2953836 minute | 70.6853836 |
| 77.155253 | 63 | 66.4953836 minute | 70.6503836 |
| 77.155253 | 63 | 66.0953836 minute | 70.6303836 |
| 77.155253 | 63 | 66.0953836 minute | 70.6253836 |

|           |    |                     |            |
|-----------|----|---------------------|------------|
| 76.155253 | 63 | 65.8953836 minute   | 70.6353836 |
| 76.155253 | 63 | 66.0953836 minute   | 70.6603836 |
| 76.155253 | 63 | 66.0953836 minute   | 70.6853836 |
| 78.155253 | 63 | 67.2953836 minute   | 70.7153836 |
| 79.155253 | 63 | 68.6953836 minute   | 70.7403836 |
| 79.155253 | 63 | 71.0953836 minute   | 70.7353836 |
| 78.155253 | 63 | 70.8953836 minute   | 70.7203836 |
| 76.155253 | 63 | 70.8953836 minute   | 70.7253836 |
| 76.155253 | 63 | 71.2953836 minute   | 70.7603836 |
| 75.155253 | 63 | 72.0953836 minute   | 70.7753836 |
| 75.155253 | 63 | 72.4953836 minute   | 70.8253836 |
| 75.155253 | 63 | 73.0953836 minute   | 70.8853836 |
| 75.155253 | 63 | 73.2953836 minute   | 70.9803836 |
| 74.155253 | 63 | 73.8953836 minute   | 71.1253836 |
| 74.155253 | 63 | 73.8953836 minute   | 71.3053836 |
| 73.155253 | 63 | 74.0953836 minute   | 71.5003836 |
| 73.155253 | 63 | 74.4953836 minute   | 71.7253836 |
| 73.155253 | 63 | 74.2953836 minute   | 71.9553836 |
| 73.155253 | 63 | 74.2953836 minute   | 72.2003836 |
| 75.155253 | 63 | 75.0953836 minute   | 72.4653836 |
| 76.155253 | 63 | 75.2953836 minute   | 72.7503836 |
| 76.155253 | 63 | 75.0953836 minute   | 73.0553836 |
| 76.155253 | 63 | 74.4953836 minute   | 73.3653836 |
| 76.155253 | 63 | 73.8953836 minute   | 73.7003836 |
| 76.155253 | 63 | 72.6953836 minute   | 74.0053836 |
| 77.155253 | 63 | 72.2953836 minute   | 74.2903836 |
| 77.155253 | 63 | 71.8953836 minute   | 74.5253836 |
| 78.155253 | 63 | 72.2953836 minute   | 74.7703836 |
| 79.155253 | 63 | 72.0953836 minute   | 75.0203836 |
| 80.155253 | 63 | 72.4953836 minute   | 75.2503836 |
| 80.155253 | 63 | 72.6953836 minute   | 75.4603836 |
| 80.155253 | 73 | 72.4953836 minute   | 75.6503836 |
| 81.155253 | 73 | 73.2953836 Activity | 75.8203836 |
| 83.155253 | 73 | 74.2953836 Activity | 75.9703836 |
| 83.155253 | 73 | 74.0953836 Activity | 76.0703836 |
| 84.155253 | 73 | 75.2953836 Activity | 76.1603836 |
| 84.155253 | 73 | 75.4953836 Activity | 76.2453836 |
| 85.155253 | 73 | 76.2953836 Activity | 76.3303836 |
| 86.155253 | 73 | 76.6953836 Activity | 76.4153836 |
| 87.155253 | 73 | 77.4953836 Activity | 76.5103836 |
| 88.155253 | 73 | 78.0953836 Activity | 76.5853836 |
| 88.155253 | 73 | 78.4953836 Activity | 76.6453836 |
| 89.155253 | 73 | 79.4953836 Activity | 76.7003836 |
| 89.155253 | 73 | 79.4953836 Activity | 76.8003836 |
| 90.155253 | 73 | 80.0953836 Activity | 76.9103836 |

|           |    |            |          |            |
|-----------|----|------------|----------|------------|
| 92.155253 | 73 | 80.4953836 | Activity | 77.0303836 |
| 93.155253 | 73 | 80.6953836 | Activity | 77.1653836 |
| 94.155253 | 73 | 80.8953836 | Activity | 77.3003836 |
| 94.155253 | 73 | 80.4953836 | Activity | 77.4203836 |
| 94.155253 | 73 | 80.4953836 | Activity | 77.5603836 |
| 94.155253 | 73 | 80.0953836 | Activity | 77.6853836 |
| 94.155253 | 73 | 79.8953836 | Activity | 77.8953836 |
| 93.155253 | 73 | 79.2953836 | Activity | 78.1053836 |
| 91.155253 | 73 | 77.8953836 | Activity | 78.2603836 |
| 90.155253 | 73 | 77.4953836 | Activity | 78.3953836 |
| 90.155253 | 73 | 77.4953836 | Activity | 78.5403836 |
| 91.155253 | 73 | 77.8953836 | Activity | 78.6553836 |
| 91.155253 | 73 | 77.6953836 | Activity | 78.7803836 |
| 92.155253 | 73 | 78.0953836 | Activity | 78.9053836 |
| 92.155253 | 73 | 78.0953836 | Activity | 79.0203836 |
| 92.155253 | 73 | 77.6953836 | Activity | 79.1053836 |
| 93.155253 | 73 | 77.2953836 | Activity | 79.1653836 |
| 96.155253 | 73 | 78.4953836 | Activity | 79.2053836 |
| 95.155253 | 73 | 78.2953836 | Activity | 79.2203836 |
| 94.155253 | 73 | 77.4953836 | Activity | 79.2503836 |
| 93.155253 | 73 | 77.6953836 | Activity | 79.2803836 |
| 91.155253 | 73 | 77.2953836 | Activity | 79.3103836 |
| 90.155253 | 73 | 77.0953836 | Activity | 79.2953836 |
| 90.155253 | 73 | 77.6953836 | Activity | 79.2603836 |
| 90.155253 | 73 | 77.4953836 | Activity | 79.2403836 |
| 90.155253 | 73 | 81.0953836 | Activity | 79.2203836 |
| 90.155253 | 73 | 80.8953836 | Activity | 79.2103836 |
| 93.155253 | 73 | 79.4953836 | Activity | 79.1953836 |
| 95.155253 | 73 | 79.6953836 | Activity | 79.1953836 |
| 96.155253 | 73 | 79.8953836 | Activity | 79.2853836 |
| 97.155253 | 73 | 79.8953836 | Activity | 79.4053836 |
| 98.155253 | 73 | 80.4953836 | Activity | 79.5203836 |
| 99.155253 | 73 | 81.2953836 | Activity | 79.6003836 |
| 99.155253 | 73 | 81.2953836 | Activity | 79.6353836 |
| 99.155253 | 73 | 80.8953836 | Activity | 79.6453836 |
| 98.155253 | 73 | 80.4953836 | Activity | 79.6503836 |
| 97.155253 | 73 | 80.0953836 | Activity | 79.6603836 |
| 97.155253 | 73 | 80.0953836 | Activity | 79.6653836 |
| 95.155253 | 73 | 80.6953836 | Activity | 79.6253836 |
| 94.155253 | 73 | 81.2953836 | Activity | 79.5903836 |
| 94.155253 | 73 | 81.6953836 | Activity | 79.5303836 |
| 90.155253 | 73 | 80.0953836 | Activity | 79.4453836 |
| 88.155253 | 73 | 79.4953836 | Activity | 79.3703836 |
| 87.155253 | 73 | 79.6953836 | Activity | 79.3153836 |
| 86.155253 | 73 | 79.6953836 | Activity | 79.2803836 |

|           |    |                     |            |
|-----------|----|---------------------|------------|
| 86.155253 | 73 | 79.6953836 Activity | 79.2553836 |
| 85.155253 | 73 | 79.2953836 Activity | 79.1153836 |
| 85.155253 | 73 | 79.2953836 Activity | 78.9703836 |
| 87.155253 | 73 | 81.4953836 Activity | 78.8503836 |
| 88.155253 | 73 | 82.2953836 Activity | 78.7053836 |
| 87.155253 | 73 | 82.0953836 Activity | 78.5453836 |
| 84.155253 | 73 | 81.0953836 Activity | 78.4103836 |
| 81.155253 | 73 | 79.0953836 Activity | 78.2603836 |
| 80.155253 | 73 | 78.4953836 Activity | 78.0903836 |
| 80.155253 | 73 | 78.2953836 Activity | 77.9103836 |
| 79.155253 | 73 | 78.0953836 Activity | 77.7253836 |
| 79.155253 | 73 | 77.4953836 Activity | 77.5503836 |
| 79.155253 | 73 | 76.8953836 Activity | 77.3753836 |
| 79.155253 | 73 | 76.8953836 Activity | 77.2253836 |
| 77.155253 | 73 | 75.0953836 Activity | 77.0753836 |
| 76.155253 | 73 | 74.2953836 Activity | 76.9353836 |
| 76.155253 | 73 | 74.2953836 Activity | 76.7853836 |
| 78.155253 | 73 | 74.8953836 Activity | 76.6853836 |
| 83.155253 | 73 | 76.2953836 Activity | 76.6003836 |
| 86.155253 | 73 | 76.4953836 Activity | 76.5203836 |
| 86.155253 | 73 | 75.4953836 Activity | 76.4853836 |
| 86.155253 | 73 | 75.0953836 Activity | 76.4503836 |
| 86.155253 | 73 | 74.6953836 Activity | 76.4253836 |
| 86.155253 | 73 | 73.8953836 Activity | 76.4153836 |
| 88.155253 | 73 | 73.4953836 Activity | 76.3703836 |
| 91.155253 | 73 | 74.4953836 Activity | 76.3153836 |
| 91.155253 | 73 | 74.4953836 Activity | 76.2753836 |
| 92.155253 | 73 | 74.4953836 Activity | 76.2853836 |
| 91.155253 | 73 | 74.0953836 Activity | 76.3353836 |
| 90.155253 | 73 | 73.4953836 Activity | 76.4003836 |
| 89.155253 | 73 | 73.4953836 Activity | 76.4753836 |
| 88.155253 | 73 | 73.0953836 Activity | 76.5403836 |
| 88.155253 | 73 | 74.0953836 Activity | 76.6153836 |
| 88.155253 | 73 | 74.6953836 Activity | 76.7003836 |
| 89.155253 | 73 | 75.6953836 Activity | 76.7803836 |
| 89.155253 | 73 | 75.6953836 Activity | 76.9203836 |
| 89.155253 | 73 | 76.0953836 Activity | 77.0903836 |
| 89.155253 | 73 | 76.0953836 Activity | 77.2653836 |
| 89.155253 | 73 | 76.4953836 Activity | 77.4253836 |
| 90.155253 | 73 | 78.2953836 Activity | 77.5453836 |
| 89.155253 | 73 | 78.2953836 Activity | 77.6553836 |
| 87.155253 | 73 | 78.2953836 Activity | 77.7853836 |
| 87.155253 | 73 | 78.8953836 Activity | 77.9353836 |
| 89.155253 | 73 | 79.6953836 Activity | 78.0553836 |
| 89.155253 | 73 | 80.0953836 Activity | 78.1903836 |



|           |    |            |          |            |
|-----------|----|------------|----------|------------|
| 90.155253 | 73 | 80.4953836 | Activity | 78.2953836 |
| 91.155253 | 73 | 81.4953836 | Activity | 78.3353836 |
| 90.155253 | 73 | 81.0953836 | Activity | 78.3803836 |
| 90.155253 | 73 | 81.0953836 | Activity | 78.4253836 |
| 90.155253 | 73 | 81.2953836 | Activity | 78.4703836 |
| 89.155253 | 73 | 80.6953836 | Activity | 78.4953836 |
| 89.155253 | 73 | 80.4953836 | Activity | 78.4953836 |
| 90.155253 | 73 | 80.2953836 | Activity | 78.5103836 |
| 90.155253 | 73 | 80.0953836 | Activity | 78.5153836 |
| 91.155253 | 73 | 80.6953836 | Activity | 78.5103836 |
| 92.155253 | 73 | 81.0953836 | Activity | 78.4553836 |
| 92.155253 | 73 | 81.2953836 | Activity | 78.3803836 |
| 92.155253 | 73 | 81.2953836 | Activity | 78.2553836 |
| 92.155253 | 73 | 81.0953836 | Activity | 78.1103836 |
| 92.155253 | 73 | 80.8953836 | Activity | 77.9303836 |
| 92.155253 | 73 | 80.6953836 | Activity | 77.6803836 |
| 92.155253 | 73 | 81.0953836 | Activity | 77.4153836 |
| 87.155253 | 73 | 79.4953836 | Activity | 77.1253836 |
| 87.155253 | 73 | 79.2953836 | Activity | 76.7253836 |
| 83.155253 | 73 | 77.6953836 | Activity | 76.3153836 |
| 79.155253 | 73 | 76.0953836 | Activity | 75.9103836 |
| 80.155253 | 73 | 76.2953836 | Activity | 75.5003836 |
| 80.155253 | 73 | 76.2953836 | Activity | 75.0753836 |
| 80.155253 | 73 | 75.8953836 | Activity | 74.6753836 |
| 80.155253 | 73 | 74.4953836 | Activity | 74.3003836 |
| 79.155253 | 73 | 73.4953836 | Activity | 73.9853836 |
| 79.155253 | 73 | 73.6953836 | Activity | 73.7003836 |
| 79.155253 | 73 | 74.2953836 | Activity | 73.4453836 |
| 78.155253 | 73 | 74.4953836 | Activity | 73.2253836 |
| 75.155253 | 73 | 73.4953836 | Activity | 73.0203836 |
| 73.155253 | 73 | 72.6953836 | Activity | 72.8103836 |
| 72.155253 | 73 | 71.0953836 | Activity | 72.6103836 |
| 72.155253 | 73 | 70.2953836 | Activity | 72.4303836 |
| 70.155253 | 73 | 69.2953836 | Activity | 72.3203836 |
| 68.155253 | 73 | 68.2953836 | Activity | 72.1953836 |
| 66.155253 | 73 | 67.6953836 | Activity | 72.0603836 |
| 63.155253 | 73 | 66.6953836 | Activity | 71.9353836 |
| 51.155253 | 73 | 62.8953836 | Activity | 71.7953836 |
| 50.155253 | 73 | 63.2953836 | Activity | 71.7053836 |
| 51.155253 | 73 | 63.8953836 | Activity | 71.6653836 |
| 52.155253 | 73 | 64.0953836 | Activity | 71.7553836 |
| 53.155253 | 73 | 64.4953836 | Activity | 71.9353836 |
| 55.155253 | 73 | 65.0953836 | Activity | 72.1303836 |
| 57.155253 | 73 | 66.0953836 | Activity | 72.3253836 |
| 64.155253 | 73 | 68.6953836 | Activity | 72.5253836 |

|            |    |                     |            |
|------------|----|---------------------|------------|
| 65.155253  | 73 | 69.2953836 Activity | 72.7653836 |
| 67.155253  | 73 | 70.2953836 Activity | 73.0303836 |
| 69.155253  | 73 | 71.4953836 Activity | 73.3153836 |
| 70.155253  | 73 | 71.8953836 Activity | 73.5853836 |
| 71.155253  | 73 | 72.2953836 Activity | 73.8503836 |
| 73.155253  | 73 | 73.0953836 Activity | 74.1353836 |
| 73.155253  | 73 | 74.0953836 Activity | 74.3853836 |
| 78.155253  | 73 | 76.8953836 Activity | 74.6253836 |
| 78.155253  | 73 | 76.0953836 Activity | 74.8553836 |
| 79.155253  | 73 | 75.4953836 Activity | 75.0453836 |
| 81.155253  | 73 | 75.6953836 Activity | 75.2503836 |
| 81.155253  | 73 | 75.4953836 Activity | 75.4603836 |
| 82.155253  | 73 | 75.8953836 Activity | 75.6953836 |
| 86.155253  | 73 | 77.6953836 Activity | 76.0403836 |
| 95.155253  | 73 | 81.2953836 Activity | 76.3953836 |
| 100.155253 | 73 | 83.2953836 Activity | 76.7403836 |
| 102.155253 | 73 | 84.0953836 Activity | 77.0753836 |
| 102.155253 | 73 | 84.0953836 Activity | 77.4103836 |
| 101.155253 | 73 | 83.8953836 Activity | 77.7453836 |
| 101.155253 | 73 | 84.0953836 Activity | 78.0803836 |
| 101.155253 | 73 | 84.0953836 Activity | 78.3703836 |
| 103.155253 | 73 | 85.0953836 Activity | 78.6603836 |
| 103.155253 | 73 | 85.0953836 Activity | 78.9353836 |
| 103.155253 | 73 | 85.0953836 Activity | 79.1703836 |
| 103.155253 | 73 | 84.8953836 Activity | 79.3903836 |
| 98.155253  | 73 | 82.6953836 Activity | 79.5703836 |
| 93.155253  | 73 | 80.6953836 Activity | 79.7103836 |
| 91.155253  | 73 | 79.4953836 Activity | 79.8103836 |
| 86.155253  | 73 | 76.8953836 Activity | 79.8403836 |
| 85.155253  | 73 | 76.4953836 Activity | 79.8803836 |
| 85.155253  | 73 | 76.0953836 Activity | 79.9203836 |
| 85.155253  | 73 | 76.0953836 Activity | 79.9403836 |
| 87.155253  | 73 | 76.6953836 Activity | 79.9753836 |
| 88.155253  | 73 | 77.4953836 Activity | 80.0053836 |
| 88.155253  | 73 | 77.6953836 Activity | 79.9903836 |
| 88.155253  | 73 | 77.4953836 Activity | 79.8803836 |
| 88.155253  | 73 | 77.8953836 Activity | 79.7453836 |
| 89.155253  | 73 | 78.4953836 Activity | 79.5903836 |
| 91.155253  | 73 | 79.4953836 Activity | 79.4403836 |
| 93.155253  | 73 | 80.2953836 Activity | 79.3103836 |
| 95.155253  | 73 | 80.8953836 Activity | 79.1703836 |
| 95.155253  | 73 | 81.2953836 Activity | 79.0253836 |
| 95.155253  | 73 | 80.8953836 Activity | 78.8703836 |
| 94.155253  | 73 | 80.6953836 Activity | 78.7503836 |
| 91.155253  | 73 | 79.4953836 Activity | 78.6403836 |

|           |    |            |          |            |
|-----------|----|------------|----------|------------|
| 89.155253 | 73 | 78.6953836 | Activity | 78.5253836 |
| 88.155253 | 73 | 78.0953836 | Activity | 78.4303836 |
| 88.155253 | 73 | 78.0953836 | Activity | 78.3803836 |
| 88.155253 | 73 | 77.6953836 | Activity | 78.3203836 |
| 87.155253 | 73 | 77.0953836 | Activity | 78.3103836 |
| 87.155253 | 73 | 76.4953836 | Activity | 78.3053836 |
| 88.155253 | 73 | 76.8953836 | Activity | 78.3103836 |
| 88.155253 | 73 | 77.0953836 | Activity | 78.3553836 |
| 89.155253 | 73 | 77.0953836 | Activity | 78.4403836 |
| 89.155253 | 73 | 76.8953836 | Activity | 78.5203836 |
| 91.155253 | 73 | 77.8953836 | Activity | 78.6103836 |
| 91.155253 | 73 | 77.8953836 | Activity | 78.7103836 |
| 91.155253 | 73 | 78.0953836 | Activity | 78.8153836 |
| 92.155253 | 73 | 78.6953836 | Activity | 78.9103836 |
| 92.155253 | 73 | 78.4953836 | Activity | 78.9503836 |
| 92.155253 | 73 | 78.2953836 | Activity | 78.9653836 |
| 93.155253 | 73 | 78.8953836 | Activity | 78.9553836 |
| 95.155253 | 73 | 80.2953836 | Activity | 78.9403836 |
| 95.155253 | 73 | 80.6953836 | Activity | 78.9453836 |
| 94.155253 | 73 | 80.2953836 | Activity | 78.9703836 |
| 88.155253 | 73 | 78.8953836 | Activity | 79.0253836 |
| 88.155253 | 73 | 78.6953836 | Activity | 79.1003836 |
| 86.155253 | 73 | 77.0953836 | Activity | 79.1703836 |
| 86.155253 | 73 | 76.4953836 | Activity | 79.1603836 |
| 86.155253 | 73 | 76.2953836 | Activity | 79.1153836 |
| 86.155253 | 73 | 76.2953836 | Activity | 79.0553836 |
| 90.155253 | 73 | 77.8953836 | Activity | 79.0053836 |
| 95.155253 | 73 | 80.0953836 | Activity | 78.9303836 |
| 96.155253 | 73 | 80.6953836 | Activity | 78.8503836 |
| 96.155253 | 73 | 81.2953836 | Activity | 78.7803836 |
| 96.155253 | 73 | 81.4953836 | Activity | 78.7053836 |
| 96.155253 | 73 | 82.0953836 | Activity | 78.6153836 |
| 96.155253 | 73 | 82.2953836 | Activity | 78.5103836 |
| 93.155253 | 73 | 81.0953836 | Activity | 78.4203836 |
| 92.155253 | 73 | 80.8953836 | Activity | 78.3203836 |
| 92.155253 | 73 | 80.4953836 | Activity | 78.2503836 |
| 93.155253 | 73 | 80.6953836 | Activity | 78.1903836 |
| 94.155253 | 73 | 81.0953836 | Activity | 78.1103836 |
| 95.155253 | 73 | 81.6953836 | Activity | 77.9953836 |
| 95.155253 | 73 | 81.6953836 | Activity | 77.8703836 |
| 95.155253 | 73 | 81.6953836 | Activity | 77.7503836 |
| 93.155253 | 73 | 80.8953836 | Activity | 77.6703836 |
| 85.155253 | 73 | 77.6953836 | Activity | 77.6003836 |
| 81.155253 | 73 | 75.8953836 | Activity | 77.5653836 |
| 80.155253 | 73 | 74.6953836 | Activity | 77.5453836 |

|            |    |            |          |            |
|------------|----|------------|----------|------------|
| 80.155253  | 73 | 74.4953836 | Activity | 77.5303836 |
| 79.155253  | 73 | 73.8953836 | Activity | 77.5153836 |
| 79.155253  | 73 | 73.8953836 | Activity | 77.4703836 |
| 79.155253  | 73 | 74.2953836 | Activity | 77.4303836 |
| 79.155253  | 73 | 73.8953836 | Activity | 77.4653836 |
| 79.155253  | 73 | 74.2953836 | Activity | 77.5303836 |
| 79.155253  | 73 | 73.6953836 | Activity | 77.6003836 |
| 80.155253  | 73 | 74.4953836 | Activity | 77.6653836 |
| 81.155253  | 73 | 74.6953836 | Activity | 77.7253836 |
| 83.155253  | 73 | 75.6953836 | Activity | 77.8253836 |
| 83.155253  | 73 | 75.8953836 | Activity | 77.9353836 |
| 82.155253  | 73 | 75.6953836 | Activity | 78.0603836 |
| 82.155253  | 73 | 75.6953836 | Activity | 78.1903836 |
| 82.155253  | 73 | 75.6953836 | Activity | 78.3153836 |
| 82.155253  | 73 | 75.4953836 | Activity | 78.4253836 |
| 82.155253  | 73 | 75.6953836 | Activity | 78.5153836 |
| 82.155253  | 73 | 75.8953836 | Activity | 78.5653836 |
| 82.155253  | 73 | 75.6953836 | Activity | 78.6203836 |
| 82.155253  | 73 | 75.6953836 | Activity | 78.7853836 |
| 82.155253  | 73 | 75.6953836 | Activity | 79.0253836 |
| 82.155253  | 73 | 75.6953836 | Activity | 79.3053836 |
| 83.155253  | 73 | 76.0953836 | Activity | 79.5853836 |
| 89.155253  | 73 | 78.4953836 | Activity | 79.8603836 |
| 98.155253  | 73 | 82.0953836 | Activity | 80.1453836 |
| 102.155253 | 73 | 83.8953836 | Activity | 80.4753836 |
| 103.155253 | 73 | 84.2953836 | Activity | 80.8153836 |
| 104.155253 | 73 | 84.6953836 | Activity | 81.1353836 |
| 105.155253 | 73 | 84.6953836 | Activity | 81.4353836 |
| 106.155253 | 73 | 85.0953836 | Activity | 81.5803836 |
| 106.155253 | 73 | 85.2953836 | Activity | 81.6253836 |
| 106.155253 | 73 | 85.4953836 | Activity | 81.6453836 |
| 107.155253 | 73 | 85.8953836 | Activity | 81.5753836 |
| 107.155253 | 73 | 86.0953836 | Activity | 81.5203836 |
| 107.155253 | 73 | 86.0953836 | Activity | 81.4653836 |
| 105.155253 | 73 | 85.2953836 | Activity | 81.4153836 |
| 100.155253 | 73 | 83.6953836 | Activity | 81.4153836 |
| 98.155253  | 73 | 83.0953836 | Activity | 81.4453836 |
| 98.155253  | 73 | 84.2953836 | Activity | 81.5053836 |
| 97.155253  | 73 | 85.4953836 | Activity | 81.5803836 |
| 97.155253  | 73 | 85.8953836 | Activity | 81.6653836 |
| 97.155253  | 73 | 85.6953836 | Activity | 81.7603836 |
| 96.155253  | 73 | 84.8953836 | Activity | 81.8403836 |
| 99.155253  | 73 | 85.2953836 | Activity | 81.8703836 |
| 105.155253 | 73 | 87.4953836 | Activity | 81.8153836 |
| 107.155253 | 73 | 87.4953836 | Activity | 81.6753836 |

|            |    |            |          |            |
|------------|----|------------|----------|------------|
| 107.155253 | 73 | 87.0953836 | Activity | 81.4803836 |
| 106.155253 | 73 | 85.6953836 | Activity | 81.2853836 |
| 93.155253  | 73 | 80.2953836 | Activity | 81.1153836 |
| 84.155253  | 73 | 76.4953836 | Activity | 80.9503836 |
| 84.155253  | 73 | 76.4953836 | Activity | 80.8003836 |
| 75.155253  | 73 | 73.0953836 | Activity | 80.6603836 |
| 75.155253  | 73 | 73.4953836 | Activity | 80.5303836 |
| 75.155253  | 73 | 73.4953836 | Activity | 80.3903836 |
| 75.155253  | 73 | 73.6953836 | Activity | 80.2353836 |
| 79.155253  | 73 | 75.4953836 | Activity | 80.0653836 |
| 82.155253  | 73 | 76.8953836 | Activity | 79.9153836 |
| 85.155253  | 73 | 78.2953836 | Activity | 79.8103836 |
| 86.155253  | 73 | 78.6953836 | Activity | 79.7253836 |
| 86.155253  | 73 | 79.0953836 | Activity | 79.6153836 |
| 85.155253  | 73 | 79.4953836 | Activity | 79.4653836 |
| 83.155253  | 73 | 78.8953836 | Activity | 79.2853836 |
| 81.155253  | 73 | 77.2953836 | Activity | 79.1053836 |
| 81.155253  | 73 | 76.2953836 | Activity | 79.0353836 |
| 82.155253  | 73 | 76.4953836 | Activity | 78.9653836 |
| 82.155253  | 73 | 76.0953836 | Activity | 78.8353836 |
| 83.155253  | 73 | 76.4953836 | Activity | 78.7053836 |
| 84.155253  | 73 | 77.8953836 | Activity | 78.5803836 |
| 85.155253  | 73 | 78.0953836 | Activity | 78.4753836 |
| 86.155253  | 73 | 79.0953836 | Activity | 78.4953836 |
| 87.155253  | 73 | 79.6953836 | Activity | 78.6153836 |
| 88.155253  | 73 | 80.2953836 | Activity | 78.7353836 |
| 90.155253  | 73 | 80.2953836 | Activity | 78.9353836 |
| 91.155253  | 73 | 79.8953836 | Activity | 79.1553836 |
| 91.155253  | 73 | 79.2953836 | Activity | 79.3753836 |
| 92.155253  | 73 | 79.2953836 | Activity | 79.5603836 |
| 92.155253  | 73 | 79.4953836 | Activity | 79.6953836 |
| 92.155253  | 73 | 79.6953836 | Activity | 79.7403836 |
| 92.155253  | 73 | 79.8953836 | Activity | 79.7553836 |
| 92.155253  | 73 | 79.4953836 | Activity | 79.7603836 |
| 92.155253  | 73 | 78.6953836 | Activity | 79.7503836 |
| 93.155253  | 73 | 78.4953836 | Activity | 79.7353836 |
| 101.155253 | 73 | 82.0953836 | Activity | 79.7553836 |
| 102.155253 | 73 | 82.4953836 | Activity | 79.8603836 |
| 102.155253 | 73 | 82.2953836 | Activity | 79.9903836 |
| 102.155253 | 73 | 82.2953836 | Activity | 80.1153836 |
| 102.155253 | 73 | 82.0953836 | Activity | 80.2803836 |
| 102.155253 | 73 | 81.4953836 | Activity | 80.4303836 |
| 102.155253 | 73 | 81.0953836 | Activity | 80.5403836 |
| 103.155253 | 73 | 81.2953836 | Activity | 80.6603836 |
| 103.155253 | 73 | 81.2953836 | Activity | 80.7503836 |

|            |    |            |          |            |
|------------|----|------------|----------|------------|
| 103.155253 | 73 | 81.0953836 | Activity | 80.8203836 |
| 103.155253 | 73 | 82.2953836 | Activity | 80.8853836 |
| 103.155253 | 73 | 82.2953836 | Activity | 80.9303836 |
| 103.155253 | 73 | 81.0953836 | Activity | 80.9853836 |
| 101.155253 | 73 | 80.8953836 | Activity | 80.9853836 |
| 98.155253  | 73 | 78.6953836 | Activity | 80.9203836 |
| 98.155253  | 73 | 78.8953836 | Activity | 80.8553836 |
| 98.155253  | 73 | 78.8953836 | Activity | 80.7603836 |
| 96.155253  | 73 | 78.6953836 | Activity | 80.6553836 |
| 96.155253  | 73 | 78.8953836 | Activity | 80.5403836 |
| 98.155253  | 73 | 79.6953836 | Activity | 80.3097533 |
| 99.155253  | 73 | 81.4953836 | Activity | 80.084123  |
| 99.155253  | 73 | 81.4953836 | Activity | 79.7694927 |
| 99.155253  | 73 | 81.4953836 | Activity | 79.4448625 |
| 99.155253  | 73 | 82.6953836 | Activity | 79.1252322 |
| 99.155253  | 73 | 82.4953836 | Activity | 78.9452322 |
| 99.155253  | 73 | 82.2953836 | Activity | 78.8202322 |
| 99.155253  | 73 | 82.8953836 | Activity | 78.6852322 |
| 98.155253  | 73 | 82.6953836 | Activity | 78.6152322 |
| 98.155253  | 73 | 82.4953836 | Activity | 78.5302322 |
| 97.155253  | 73 | 82.8953836 | Activity | 78.4402322 |
| 94.155253  | 73 | 82.0953836 | Activity | 78.3552322 |
| 94.155253  | 73 | 82.0953836 | Activity | 78.2252322 |
| 86.155253  | 73 | 79.2953836 | Activity | 78.0802322 |
| 78.155253  | 73 | 76.6953836 | Activity | 77.9652322 |
| 78.155253  | 73 | 76.8953836 | Activity | 77.9552322 |
| 76.155253  | 73 | 75.8953836 | Activity | 78.0052322 |
| 75.155253  | 73 | 75.6953836 | Activity | 78.0452322 |
| 75.155253  | 73 | 74.8953836 | Activity | 77.9752322 |
| 75.155253  | 73 | 69.4701721 | Activity | 77.9002322 |
| 75.155253  | 73 | 69.4701721 | Activity | 77.8102322 |
| 75.155253  | 73 | 69.5101721 | Activity | 77.6802322 |
| 75.155253  | 73 | 69.5101721 | Activity | 77.5052322 |
| 75.155253  | 73 | 69.5101721 | Activity | 77.3252322 |
| 80.155253  | 73 | 75.0953836 | Activity | 77.1402322 |
| 85.155253  | 73 | 77.0953836 | Activity | 76.9152322 |
| 85.155253  | 73 | 76.0953836 | Activity | 76.7052322 |
| 91.155253  | 73 | 78.2953836 | Activity | 76.4502322 |
| 91.155253  | 73 | 77.8953836 | Activity | 76.1802322 |
| 91.155253  | 73 | 77.6953836 | Activity | 75.9152322 |
| 91.155253  | 73 | 77.6953836 | Activity | 75.6452322 |
| 90.155253  | 73 | 77.0953836 | Activity | 75.3552322 |
| 89.155253  | 73 | 76.4953836 | Activity | 75.0752322 |
| 89.155253  | 73 | 76.4953836 | Activity | 74.8002322 |
| 98.155253  | 73 | 80.4953836 | Activity | 74.5902322 |

|           |    |                     |            |
|-----------|----|---------------------|------------|
| 98.155253 | 73 | 80.6953836 Activity | 74.4452322 |
| 98.155253 | 73 | 80.4953836 Activity | 74.3002322 |
| 87.155253 | 73 | 76.0953836 Activity | 74.1852322 |
| 86.155253 | 73 | 75.6953836 Activity | 74.0752322 |
| 86.155253 | 73 | 75.2953836 Activity | 73.9902322 |
| 84.155253 | 73 | 74.4953836 Activity | 74.0458625 |
| 84.155253 | 73 | 74.4953836 Activity | 74.1064927 |
| 83.155253 | 73 | 74.2953836 Activity | 74.156123  |
| 82.155253 | 73 | 74.0953836 Activity | 74.2107533 |
| 82.155253 | 73 | 73.6953836 Activity | 74.3453836 |
| 82.155253 | 73 | 74.0953836 Activity | 74.3403836 |
| 79.155253 | 71 | 72.0953836 Activity | 74.2953836 |
| 79.155253 | 71 | 72.0953836 minute   | 74.2453836 |
| 79.155253 | 71 | 72.0953836 minute   | 74.1303836 |
| 78.155253 | 71 | 71.6953836 minute   | 74.0303836 |
| 78.155253 | 71 | 71.2953836 minute   | 73.9303836 |
| 78.155253 | 71 | 70.8953836 minute   | 73.8153836 |
| 78.155253 | 71 | 71.0953836 minute   | 73.7153836 |
| 79.155253 | 71 | 70.8953836 minute   | 73.6453836 |
| 79.155253 | 71 | 70.8953836 minute   | 73.5803836 |
| 79.155253 | 71 | 71.0953836 minute   | 73.4053836 |
| 79.155253 | 71 | 71.2953836 minute   | 73.2453836 |
| 79.155253 | 71 | 71.2953836 minute   | 73.0403836 |
| 79.155253 | 71 | 71.4953836 minute   | 72.9203836 |
| 80.155253 | 71 | 71.6953836 minute   | 72.8053836 |
| 80.155253 | 71 | 71.8953836 minute   | 72.7053836 |
| 80.155253 | 71 | 71.4953836 minute   | 72.6253836 |
| 81.155253 | 71 | 71.6953836 minute   | 72.5453836 |
| 89.155253 | 71 | 74.8953836 minute   | 72.4703836 |
| 89.155253 | 71 | 74.8953836 minute   | 72.4053836 |
| 89.155253 | 71 | 75.2953836 minute   | 72.3553836 |
| 87.155253 | 71 | 74.0953836 minute   | 72.2953836 |
| 86.155253 | 71 | 73.6953836 minute   | 72.2853836 |
| 86.155253 | 71 | 73.8953836 minute   | 72.2753836 |
| 86.155253 | 71 | 73.6953836 minute   | 72.2603836 |
| 86.155253 | 71 | 73.0953836 minute   | 72.2603836 |
| 86.155253 | 71 | 73.0953836 minute   | 72.2703836 |
| 87.155253 | 71 | 73.6953836 minute   | 72.2753836 |
| 87.155253 | 71 | 73.8953836 minute   | 72.2653836 |
| 86.155253 | 71 | 73.4953836 minute   | 72.2653836 |
| 86.155253 | 71 | 74.2953836 minute   | 72.2553836 |
| 80.155253 | 71 | 72.2953836 minute   | 72.2303836 |
| 77.155253 | 71 | 71.2953836 minute   | 72.1953836 |
| 78.155253 | 71 | 71.0953836 minute   | 72.1553836 |
| 79.155253 | 71 | 71.2953836 minute   | 72.1053836 |

|           |                       |            |
|-----------|-----------------------|------------|
| 79.155253 | 71 71.2953836 minute  | 72.0703836 |
| 79.155253 | 71 71.2953836 minute  | 72.0303836 |
| 79.155253 | 71 71.2953836 minute  | 72.0153836 |
| 80.155253 | 71 71.4953836 minute  | 72.0003836 |
| 80.155253 | 71 71.6953836 minute  | 71.9003836 |
| 80.155253 | 71 71.6953836 minute  | 71.8053836 |
| 80.155253 | 71 71.6953836 minute  | 71.6953836 |
| 80.155253 | 71 71.6953836 minute  | 71.6103836 |
| 80.155253 | 71 71.4953836 minute  | 71.5353836 |
| 80.155253 | 71 71.6953836 minute  | 71.4353836 |
| 80.155253 | 71 71.6953836 minute  | 71.3553836 |
| 80.155253 | 71 71.0953836 minute  | 71.2953836 |
| 79.155253 | 71 70.6953836 minute  | 71.2353836 |
| 79.155253 | 71 70.8953836 minute  | 71.1953836 |
| 78.155253 | 71 70.4953836 minute  | 71.1553836 |
| 77.155253 | 71 70.0953836 minute  | 71.1203836 |
| 77.155253 | 71 69.8953836 minute  | 71.0703836 |
| 77.155253 | 71 69.6953836 minute  | 71.0603836 |
| 77.155253 | 71 69.4953836 minute  | 71.0603836 |
| 79.155253 | 71 70.2953836 minute  | 71.0853836 |
| 79.155253 | 71 70.2953836 minute  | 71.1253836 |
| 80.155253 | 71 70.8953836 minute  | 71.2003836 |
| 80.155253 | 71 71.0953836 minute  | 71.2803836 |
| 79.155253 | 71 70.8953836 minute  | 71.3403836 |
| 78.155253 | 71 71.0953836 minute  | 71.3603836 |
| 77.155253 | 71 70.8953836 minute  | 71.3503836 |
| 77.155253 | 71 70.6953836 minute  | 71.3503836 |
| 77.155253 | 71 70.6953836 AFTER1  | 71.3553836 |
| 77.155253 | 71 69.8953836 AFTER2  | 71.3853836 |
| 79.155253 | 71 70.4953836 AFTER3  | 71.4303836 |
| 80.155253 | 71 70.6953836 AFTER4  | 71.4703836 |
| 80.155253 | 71 70.6953836 AFTER5  | 71.4803836 |
| 82.155253 | 71 72.0953836 AFTER6  | 71.4703836 |
| 82.155253 | 71 72.2953836 AFTER7  | 71.4503836 |
| 82.155253 | 71 72.0953836 AFTER8  | 71.4203836 |
| 82.155253 | 71 72.2953836 AFTER9  | 71.3953836 |
| 82.155253 | 71 71.8953836 AFTER10 | 71.3653836 |
| 81.155253 | 71 71.2953836 AFTER11 | 71.3303836 |
| 82.155253 | 71 72.0953836 AFTER12 | 71.2903836 |
| 84.155253 | 71 72.8953836 AFTER13 | 71.2453836 |
| 86.155253 | 71 74.2953836 AFTER14 | 71.1853836 |
| 86.155253 | 71 74.4953836 AFTER15 | 71.1203836 |
| 84.155253 | 71 73.6953836 AFTER16 | 71.0353836 |
| 81.155253 | 71 72.2953836 AFTER17 | 70.9403836 |
| 79.155253 | 71 71.2953836 AFTER18 | 70.8403836 |



|           |    |                    |            |
|-----------|----|--------------------|------------|
| 80.155253 | 71 | 71.6953836 AFTER19 | 70.7403836 |
| 80.155253 | 71 | 71.8953836 AFTER20 | 70.6603836 |
| 81.155253 | 71 | 72.8953836 AFTER21 | 70.5903836 |
| 81.155253 | 71 | 73.2953836 AFTER22 | 70.5403836 |
| 81.155253 | 71 | 73.2953836 AFTER23 | 70.5453836 |
| 78.155253 | 71 | 72.0953836 AFTER24 | 70.5353836 |
| 75.155253 | 71 | 70.6953836 AFTER25 | 70.5303836 |
| 74.155253 | 71 | 69.8953836 AFTER26 | 70.5153836 |
| 74.155253 | 71 | 69.6953836 AFTER27 | 70.4453836 |
| 74.155253 | 71 | 69.4953836 AFTER28 | 70.4003836 |
| 74.155253 | 71 | 68.8953836 AFTER29 | 70.3703836 |
| 74.155253 | 71 | 68.4953836 AFTER30 | 70.3453836 |
| 74.155253 | 71 | 68.0953836 AFTER31 | 70.3153836 |
| 75.155253 | 71 | 67.6953836 AFTER32 | 70.2303836 |
| 76.155253 | 71 | 67.8953836 AFTER33 | 70.0203836 |
| 76.155253 | 71 | 67.6953836 AFTER34 | 69.8503836 |
| 77.155253 | 71 | 67.4953836 AFTER35 | 69.6603836 |
| 77.155253 | 71 | 67.2953836 AFTER36 | 69.4553836 |
| 76.155253 | 71 | 66.8953836 AFTER37 | 69.2903836 |
| 77.155253 | 71 | 67.0953836 AFTER38 | 69.1653836 |
| 78.155253 | 71 | 67.6953836 AFTER39 | 69.0803836 |
| 78.155253 | 71 | 67.8953836 AFTER40 | 68.9853836 |
| 80.155253 | 71 | 68.6953836 AFTER41 | 68.8903836 |
| 84.155253 | 71 | 70.0953836 AFTER42 | 68.7903836 |
| 84.155253 | 71 | 70.0953836 AFTER43 | 68.6753836 |
| 85.155253 | 71 | 70.4953836 AFTER44 | 68.5703836 |
| 85.155253 | 71 | 70.0953836 AFTER45 | 68.4953836 |
| 85.155253 | 71 | 69.2953836 AFTER46 | 68.4653836 |
| 88.155253 | 71 | 70.4953836 AFTER47 | 68.5053836 |
| 90.155253 | 71 | 70.8953836 AFTER48 | 68.5453836 |
| 91.155253 | 71 | 71.2953836 AFTER49 | 68.6503836 |
| 91.155253 | 71 | 70.6953836 AFTER50 | 68.7953836 |
| 91.155253 | 71 | 67.8953836 AFTER51 | 68.9653836 |
| 80.155253 | 71 | 63.6953836 AFTER52 | 69.1703836 |
| 75.155253 | 71 | 66.0953836 AFTER53 | 69.3653836 |
| 75.155253 | 71 | 66.6953836 AFTER54 | 69.5553836 |
| 72.155253 | 71 | 66.2953836 AFTER55 | 69.7403836 |
| 72.155253 | 71 | 67.0953836 AFTER56 | 69.9103836 |
| 72.155253 | 71 | 67.2953836 AFTER57 | 70.0903836 |
| 73.155253 | 71 | 67.8953836 AFTER58 | 70.2703836 |
| 73.155253 | 71 | 67.8953836 AFTER59 | 70.4403836 |
| 73.155253 | 71 | 68.0953836 AFTER60 | 70.5953836 |
| 73.155253 | 71 | 68.8953836 AFTER61 | 70.7003836 |
| 73.155253 | 71 | 68.6953836 AFTER62 | 70.8403836 |
| 73.155253 | 71 | 69.0953836 AFTER63 | 70.9453836 |

|           |                        |            |
|-----------|------------------------|------------|
| 73.155253 | 71 69.0953836 AFTER64  | 71.0553836 |
| 73.155253 | 71 69.4953836 AFTER65  | 71.1453836 |
| 76.155253 | 71 71.4953836 AFTER66  | 71.2503836 |
| 75.155253 | 71 71.2953836 AFTER67  | 71.3853836 |
| 75.155253 | 71 73.6953836 AFTER68  | 71.4703836 |
| 74.155253 | 71 74.6953836 AFTER69  | 71.5653836 |
| 74.155253 | 71 75.2953836 AFTER70  | 71.6353836 |
| 75.155253 | 71 76.2953836 AFTER71  | 71.7103836 |
| 75.155253 | 71 75.4953836 AFTER72  | 71.8653836 |
| 76.155253 | 71 75.4953836 AFTER73  | 72.1753836 |
| 76.155253 | 71 75.0953836 AFTER74  | 72.4153836 |
| 75.155253 | 71 74.2953836 AFTER75  | 72.6653836 |
| 75.155253 | 71 74.4953836 AFTER76  | 72.9253836 |
| 74.155253 | 71 74.0953836 AFTER77  | 73.1753836 |
| 74.155253 | 71 73.8953836 AFTER78  | 73.4153836 |
| 74.155253 | 71 73.8953836 AFTER79  | 73.5086289 |
| 75.155253 | 71 72.0953836 AFTER80  | 73.6158742 |
| 78.155253 | 71 74.2953836 AFTER81  | 73.7191195 |
| 78.155253 | 71 74.2953836 AFTER82  | 73.8023648 |
| 78.155253 | 71 74.4953836 AFTER83  | 73.86661   |
| 78.155253 | 71 74.0953836 AFTER84  | 73.8968553 |
| 77.155253 | 71 74.2953836 AFTER85  | 73.9271006 |
| 77.155253 | 71 74.6953836 AFTER86  | 73.9603459 |
| 76.155253 | 71 73.8953836 AFTER87  | 73.9625912 |
| 76.155253 | 71 74.6953836 AFTER88  | 73.9698365 |
| 76.155253 | 71 74.0953836 AFTER89  | 73.8750818 |
| 76.155253 | 71 73.6953836 AFTER90  | 73.8393271 |
| 76.155253 | 71 74.0953836 AFTER91  | 73.7775723 |
| 76.155253 | 71 76.0953836 AFTER92  | 73.6608176 |
| 75.155253 | 71 75.6953836 AFTER93  | 73.5710629 |
| 75.155253 | 71 76.6953836 AFTER94  | 73.4813082 |
| 75.155253 | 71 76.6953836 AFTER95  | 73.4255535 |
| 75.155253 | 71 77.0953836 AFTER96  | 73.3957988 |
| 75.155253 | 71 76.8953836 AFTER97  | 73.3910441 |
| 75.155253 | 71 71.6251951 AFTER98  | 73.5060441 |
| 76.155253 | 71 72.1851951 AFTER99  | 73.6510441 |
| 76.155253 | 71 72.2251951 AFTER100 | 73.7960441 |
| 76.155253 | 71 72.2251951 AFTER101 | 73.8760441 |
| 76.155253 | 71 71.2651951 AFTER102 | 73.8710441 |
| 76.155253 | 71 70.3051951 AFTER103 | 73.8610441 |
| 76.155253 | 71 70.3051951 AFTER104 | 73.8660441 |
| 78.155253 | 71 70.8251951 AFTER105 | 73.8860441 |
| 80.155253 | 71 71.5851951 AFTER106 | 73.9010441 |
| 80.155253 | 71 71.5851951 AFTER107 | 73.9260441 |
| 76.155253 | 71 69.9051951 AFTER108 | 73.9760441 |

|            |    |            |          |            |
|------------|----|------------|----------|------------|
| 76.155253  | 71 | 73.2651951 | AFTER109 | 74.0010441 |
| 74.155253  | 71 | 72.8251951 | AFTER110 | 74.1060441 |
| 73.155253  | 71 | 71.6251951 | AFTER111 | 74.2210441 |
| 74.155253  | 71 | 71.9051951 | AFTER112 | 74.3060441 |
| 74.155253  | 71 | 71.9051951 | AFTER113 | 74.3610441 |
| 76.155253  | 71 | 72.8651951 | AFTER114 | 74.4210441 |
| 76.155253  | 71 | 73.1051951 | AFTER115 | 74.4810441 |
| 78.155253  | 71 | 74.3051951 | AFTER116 | 74.5410441 |
| 80.155253  | 71 | 78.6953836 | AFTER117 | 74.5860441 |
| 82.155253  | 71 | 79.6953836 | AFTER118 | 74.6310441 |
| 82.155253  | 71 | 79.6953836 | AFTER119 | 74.7727988 |
| 83.155253  | 71 | 75.2953836 | AFTER120 | 74.8455535 |
| 83.155253  | 71 | 74.0953836 | AFTER121 | 74.8923082 |
| 84.155253  | 71 | 73.8953836 | AFTER122 | 74.9190629 |
| 86.155253  | 71 | 74.6953836 | AFTER123 | 74.9448176 |
| 87.155253  | 71 | 74.8953836 | AFTER124 | 74.9895723 |
| 88.155253  | 71 | 74.8953836 | AFTER125 | 75.0193271 |
| 90.155253  | 71 | 75.6953836 | AFTER126 | 75.0360818 |
| 92.155253  | 71 | 75.8953836 | AFTER127 | 75.0288365 |
| 92.155253  | 71 | 75.6953836 | AFTER128 | 75.0165912 |
| 99.155253  | 71 | 78.2953836 | AFTER129 | 75.0413459 |
| 99.155253  | 71 | 78.2953836 | AFTER130 | 74.9471006 |
| 99.155253  | 71 | 77.4953836 | AFTER131 | 74.8488553 |
| 100.155253 | 71 | 78.2953836 | AFTER132 | 74.77561   |
| 100.155253 | 71 | 78.0953836 | AFTER133 | 74.6903648 |
| 101.155253 | 71 | 79.0953836 | AFTER134 | 74.6001195 |
| 101.155253 | 71 | 79.0953836 | AFTER135 | 74.4958742 |
| 101.155253 | 71 | 78.8953836 | AFTER136 | 74.4056289 |
| 100.155253 | 71 | 78.6953836 | AFTER137 | 74.2853836 |
| 98.155253  | 71 | 77.2953836 | AFTER138 | 74.0403836 |
| 95.155253  | 71 | 75.0953836 | AFTER139 | 73.7403836 |
| 93.155253  | 71 | 74.0953836 | AFTER140 | 73.4453836 |
| 91.155253  | 71 | 73.2953836 | AFTER141 | 73.2403836 |
| 89.155253  | 71 | 72.2953836 | AFTER142 | 73.0653836 |
| 88.155253  | 71 | 72.0953836 | AFTER143 | 72.8953836 |
| 87.155253  | 71 | 71.4953836 | AFTER144 | 72.7103836 |
| 87.155253  | 71 | 71.4953836 | AFTER145 | 72.5153836 |
| 87.155253  | 71 | 71.2953836 | AFTER146 | 72.3703836 |
| 88.155253  | 71 | 71.0953836 | AFTER147 | 72.3353836 |
| 88.155253  | 71 | 70.8953836 | AFTER148 | 72.2953836 |
| 84.155253  | 71 | 69.4953836 | AFTER149 | 72.0857533 |
| 81.155253  | 71 | 68.8953836 | AFTER150 | 71.785123  |
| 80.155253  | 71 | 68.6953836 | AFTER151 | 71.610123  |
| 80.155253  | 71 | 68.4953836 | AFTER152 | 71.410123  |
| 80.155253  | 71 | 68.2953836 | AFTER153 | 71.205123  |

|           |                        |            |
|-----------|------------------------|------------|
| 81.155253 | 71 68.6953836 AFTER154 | 71.010123  |
| 83.155253 | 71 69.4953836 AFTER155 | 70.780123  |
| 83.155253 | 71 69.4953836 AFTER156 | 70.565123  |
| 81.155253 | 71 68.8953836 AFTER157 | 70.375123  |
| 78.155253 | 71 67.6953836 AFTER158 | 70.225123  |
| 78.155253 | 71 67.8953836 AFTER159 | 70.110123  |
| 76.155253 | 71 67.0953836 AFTER160 | 70.085123  |
| 76.155253 | 71 67.0953836 AFTER161 | 70.105123  |
| 76.155253 | 71 67.0953836 AFTER162 | 70.155123  |
| 76.155253 | 71 67.2953836 AFTER163 | 70.255123  |
| 76.155253 | 71 67.0953836 AFTER164 | 70.375123  |
| 80.155253 | 71 69.0953836 AFTER165 | 70.510123  |
| 81.155253 | 71 74.2953836 AFTER166 | 70.680123  |
| 81.155253 | 71 74.2953836 AFTER167 | 70.745123  |
| 75.155253 | 71 67.3101721 AFTER168 | 70.825123  |
| 73.155253 | 71 66.2701721 AFTER169 | 70.915123  |
| 73.155253 | 71 71.2953836 AFTER170 | 71.045123  |
| 74.155253 | 71 69.4953836 AFTER171 | 71.185123  |
| 75.155253 | 71 70.0953836 AFTER172 | 71.295123  |
| 76.155253 | 71 70.2953836 AFTER173 | 71.410123  |
| 76.155253 | 71 69.8953836 AFTER174 | 71.535123  |
| 76.155253 | 71 70.4953836 AFTER175 | 71.655123  |
| 76.155253 | 71 71.2953836 AFTER176 | 71.755123  |
| 76.155253 | 71 72.6953836 AFTER177 | 71.855123  |
| 76.155253 | 71 72.6953836 AFTER178 | 71.980123  |
| 75.155253 | 71 74.0953836 AFTER179 | 72.135123  |
| 75.155253 | 71 74.8953836 AFTER180 | 72.300123  |
| 75.155253 | 75.2953836 AFTER181    | 72.520123  |
| 75.155253 | 76.2953836 AFTER182    | 72.755123  |
| 75.155253 | 76.8953836 AFTER183    | 73.035123  |
| 75.155253 | 76.8953836 AFTER184    | 73.325123  |
| 75.155253 | 78.2953836 AFTER185    | 73.620123  |
| 75.155253 | 73.8953836 AFTER186    | 73.865123  |
| 76.155253 | 74.2953836 AFTER187    | 73.980123  |
| 76.155253 | 74.4953836 AFTER188    | 74.110123  |
| 78.155253 | 74.6953836 AFTER189    | 74.4447533 |
| 78.155253 | 74.4953836 AFTER190    | 74.8553836 |
| 77.155253 | 73.0953836 AFTER191    | 75.1703836 |
| 78.155253 | 73.0953836 AFTER192    | 75.5553836 |
| 78.155253 | 73.2953836 AFTER193    | 75.9203836 |
| 78.155253 | 73.4953836 AFTER194    | 76.2853836 |
| 78.155253 | 73.4953836 AFTER195    | 76.6253836 |
| 78.155253 | 73.4953836 AFTER196    | 76.9503836 |
| 79.155253 | 73.8953836 AFTER197    | 77.2303836 |
| 79.155253 | 73.8953836 AFTER198    | 77.4703836 |

|           |                     |            |
|-----------|---------------------|------------|
| 84.155253 | 74.4953836 AFTER199 | 77.7103836 |
| 88.155253 | 75.8953836 AFTER200 | 77.9353836 |
| 89.155253 | 76.4953836 AFTER201 | 78.1453836 |
| 89.155253 | 78.2953836 AFTER202 | 78.3453836 |
| 89.155253 | 78.8953836 AFTER203 | 78.5503836 |
| 89.155253 | 78.8953836 AFTER204 | 78.7603836 |
| 89.155253 | 78.8953836 AFTER205 | 78.9703836 |
| 89.155253 | 78.8953836 AFTER206 | 79.1303836 |
| 89.155253 | 79.4953836 AFTER207 | 79.4103836 |
| 90.155253 | 80.6953836 AFTER208 | 79.6803836 |
| 90.155253 | 82.6953836 AFTER209 | 79.9703836 |
| 90.155253 | 83.8953836 AFTER210 | 80.3053836 |
| 90.155253 | 84.8953836 AFTER211 | 80.6453836 |
| 89.155253 | 84.6953836 AFTER212 | 81.0203836 |
| 86.155253 | 84.8953836 AFTER213 | 81.3953836 |
| 81.155253 | 83.4953836 AFTER214 | 81.7853836 |
| 81.155253 | 83.4953836 AFTER215 | 82.1753836 |
| 78.155253 | 82.4953836 AFTER216 | 82.5703836 |
| 77.155253 | 82.2953836 AFTER217 | 82.9903836 |
| 77.155253 | 82.2953836 AFTER218 | 83.3803836 |
| 77.155253 | 83.0953836 AFTER219 | 83.7853836 |
| 77.155253 | 83.2953836 AFTER220 | 84.1203836 |
| 77.155253 | 83.2953836 AFTER221 | 84.4253836 |
| 78.155253 | 84.4953836 AFTER222 | 84.6287169 |
| 78.155253 | 85.2953836 AFTER223 | 84.7953836 |
| 77.155253 | 85.2953836 AFTER224 | 84.9548431 |
| 76.155253 | 84.6953836 AFTER225 | 85.1231614 |
| 76.155253 | 85.0953836 AFTER226 | 85.3010979 |
| 76.155253 | 85.0953836 AFTER227 | 85.4895012 |
| 76.155253 | 86.0953836 AFTER228 | 85.6711412 |
| 76.155253 | 88.0953836 AFTER229 | 85.8266336 |
| 76.155253 | 88.0953836 AFTER230 | 85.9276417 |
| 76.155253 | 88.0953836 AFTER231 | 85.9953836 |
| 76.155253 | 88.0953836 AFTER232 | 86.0333146 |
| 78.155253 | 88.8953836 AFTER233 | 86.0810979 |
| 78.155253 | 89.0953836 AFTER234 | 86.1250132 |
| 79.155253 | 89.2953836 AFTER235 | 86.2261528 |
| 80.155253 | 90.2953836 AFTER236 | 86.3353836 |
| 78.155253 | 89.4953836 AFTER237 | 86.4953836 |
| 78.155253 | 90.0953836 AFTER238 | 86.6779923 |
| 72.155253 | 87.8953836 AFTER239 | 86.8772018 |
| 72.155253 | 88.0953836 AFTER240 | 87.0572884 |

don't count this one, first 3 minutes



















































































































































































































































| Time     |         | Person 9   | Person 12  | Person 4   | Person 3   | Person 5   |
|----------|---------|------------|------------|------------|------------|------------|
| 15:59:44 | 0:00:04 | 77.7694868 | 72.3026603 | 71.1015175 | 75.2605634 | 76.7715278 |
| 15:59:45 | 0:00:05 | 77.7694868 | 73.3026603 | 74.1015175 | 75.2605634 | 75.7715278 |
| 15:59:46 | 0:00:06 | 76.7694868 | 74.3026603 | 74.1015175 | 76.2605634 | 75.7715278 |
| 15:59:47 | 0:00:07 | 75.7694868 | 74.3026603 | 74.1015175 | 77.2605634 | 74.7715278 |
| 15:59:48 | 0:00:08 | 75.7694868 | 72.3026603 | 74.1015175 | 77.2605634 | 74.7715278 |
| 15:59:49 | 0:00:09 | 74.7694868 | 72.3026603 | 74.1015175 | 77.2605634 | 74.7715278 |
| 15:59:50 | 0:00:10 | 74.7694868 | 70.3026603 | 74.1015175 | 77.2605634 | 77.7715278 |
| 15:59:51 | 0:00:11 | 74.7694868 | 69.3026603 | 73.1015175 | 75.2605634 | 77.7715278 |
| 15:59:52 | 0:00:12 | 73.7694868 | 70.3026603 | 73.1015175 | 73.2605634 | 78.7715278 |
| 15:59:53 | 0:00:13 | 74.7694868 | 72.3026603 | 73.1015175 | 73.2605634 | 78.7715278 |
| 15:59:54 | 0:00:14 | 74.7694868 | 72.3026603 | 70.1015175 | 73.2605634 | 79.7715278 |
| 15:59:55 | 0:00:15 | 74.7694868 | 73.3026603 | 68.1015175 | 73.2605634 | 79.7715278 |
| 15:59:56 | 0:00:16 | 75.7694868 | 75.3026603 | 68.1015175 | 73.2605634 | 80.7715278 |
| 15:59:57 | 0:00:17 | 75.7694868 | 75.3026603 | 68.1015175 | 74.2605634 | 81.7715278 |
| 15:59:58 | 0:00:18 | 75.7694868 | 75.3026603 | 70.1015175 | 74.2605634 | 82.7715278 |
| 15:59:59 | 0:00:19 | 75.7694868 | 75.3026603 | 74.1015175 | 74.2605634 | 82.7715278 |
| 16:00:00 | 0:00:20 | 75.7694868 | 76.3026603 | 74.1015175 | 74.2605634 | 81.7715278 |
| 16:00:01 | 0:00:21 | 75.7694868 | 76.3026603 | 74.1015175 | 73.2605634 | 79.7715278 |
| 16:00:02 | 0:00:22 | 76.7694868 | 76.3026603 | 74.1015175 | 73.2605634 | 78.7715278 |
| 16:00:03 | 0:00:23 | 76.7694868 | 75.3026603 | 72.1015175 | 73.2605634 | 77.7715278 |
| 16:00:04 | 0:00:24 | 76.7694868 | 75.3026603 | 72.1015175 | 72.2605634 | 77.7715278 |
| 16:00:05 | 0:00:25 | 76.7694868 | 82.3026603 | 71.1015175 | 72.2605634 | 77.7715278 |
| 16:00:06 | 0:00:26 | 75.7694868 | 87.3026603 | 71.1015175 | 72.2605634 | 76.7715278 |
| 16:00:07 | 0:00:27 | 74.7694868 | 87.3026603 | 72.1015175 | 70.2605634 | 77.7715278 |
| 16:00:08 | 0:00:28 | 73.7694868 | 87.3026603 | 73.1015175 | 70.2605634 | 76.7715278 |
| 16:00:09 | 0:00:29 | 72.7694868 | 87.3026603 | 73.1015175 | 72.2605634 | 76.7715278 |
| 16:00:10 | 0:00:30 | 72.7694868 | 85.3026603 | 75.1015175 | 72.2605634 | 76.7715278 |
| 16:00:11 | 0:00:31 | 72.7694868 | 82.3026603 | 76.1015175 | 74.2605634 | 76.7715278 |
| 16:00:12 | 0:00:32 | 72.7694868 | 83.3026603 | 76.1015175 | 72.2605634 | 76.7715278 |
| 16:00:13 | 0:00:33 | 72.7694868 | 83.3026603 | 76.1015175 | 71.2605634 | 76.7715278 |
| 16:00:14 | 0:00:34 | 72.7694868 | 83.3026603 | 77.1015175 | 72.2605634 | 77.7715278 |
| 16:00:15 | 0:00:35 | 72.7694868 | 83.3026603 | 78.1015175 | 72.2605634 | 76.7715278 |
| 16:00:16 | 0:00:36 | 72.7694868 | 82.3026603 | 78.1015175 | 75.2605634 | 76.7715278 |
| 16:00:17 | 0:00:37 | 72.7694868 | 82.3026603 | 78.1015175 | 76.2605634 | 76.7715278 |
| 16:00:18 | 0:00:38 | 72.7694868 | 82.3026603 | 78.1015175 | 76.2605634 | 76.7715278 |
| 16:00:19 | 0:00:39 | 72.7694868 | 83.3026603 | 82.1015175 | 75.2605634 | 75.7715278 |
| 16:00:20 | 0:00:40 | 71.7694868 | 84.3026603 | 84.1015175 | 75.2605634 | 75.7715278 |
| 16:00:21 | 0:00:41 | 71.7694868 | 82.3026603 | 85.1015175 | 74.2605634 | 73.7715278 |
| 16:00:22 | 0:00:42 | 71.7694868 | 81.3026603 | 85.1015175 | 75.2605634 | 73.7715278 |
| 16:00:23 | 0:00:43 | 71.7694868 | 80.3026603 | 83.1015175 | 75.2605634 | 74.7715278 |
| 16:00:24 | 0:00:44 | 70.7694868 | 80.3026603 | 83.1015175 | 76.2605634 | 79.7715278 |
| 16:00:25 | 0:00:45 | 70.7694868 | 80.3026603 | 82.1015175 | 76.2605634 | 80.7715278 |

|          |         |            |            |            |            |            |
|----------|---------|------------|------------|------------|------------|------------|
| 16:00:26 | 0:00:46 | 70.7694868 | 81.3026603 | 82.1015175 | 76.2605634 | 83.7715278 |
| 16:00:27 | 0:00:47 | 71.7694868 | 82.3026603 | 82.1015175 | 76.2605634 | 83.7715278 |
| 16:00:28 | 0:00:48 | 72.7694868 | 82.3026603 | 81.1015175 | 76.2605634 | 84.7715278 |
| 16:00:29 | 0:00:49 | 72.7694868 | 81.3026603 | 79.1015175 | 76.2605634 | 84.7715278 |
| 16:00:30 | 0:00:50 | 71.7694868 | 79.3026603 | 78.1015175 | 76.2605634 | 84.7715278 |
| 16:00:31 | 0:00:51 | 70.7694868 | 77.3026603 | 78.1015175 | 75.2605634 | 84.7715278 |
| 16:00:32 | 0:00:52 | 69.7694868 | 77.3026603 | 78.1015175 | 75.2605634 | 83.7715278 |
| 16:00:33 | 0:00:53 | 69.7694868 | 75.3026603 | 79.1015175 | 75.2605634 | 83.7715278 |
| 16:00:34 | 0:00:54 | 69.7694868 | 73.3026603 | 79.1015175 | 75.2605634 | 83.7715278 |
| 16:00:35 | 0:00:55 | 69.7694868 | 76.3026603 | 79.1015175 | 75.2605634 | 83.7715278 |
| 16:00:36 | 0:00:56 | 69.7694868 | 76.3026603 | 79.1015175 | 75.2605634 | 83.7715278 |
| 16:00:37 | 0:00:57 | 69.7694868 | 75.3026603 | 79.1015175 | 74.2605634 | 83.7715278 |
| 16:00:38 | 0:00:58 | 71.7694868 | 75.3026603 | 80.1015175 | 74.2605634 | 83.7715278 |
| 16:00:39 | 0:00:59 | 71.7694868 | 72.3026603 | 80.1015175 | 74.2605634 | 81.7715278 |
| 16:00:40 | 0:01:00 | 71.7694868 | 68.3026603 | 80.1015175 | 74.2605634 | 81.7715278 |
| 16:00:41 | 0:01:01 | 72.7694868 | 68.3026603 | 81.1015175 | 73.2605634 | 81.7715278 |
| 16:00:42 | 0:01:02 | 73.7694868 | 68.3026603 | 82.1015175 | 72.2605634 | 82.7715278 |
| 16:00:43 | 0:01:03 | 73.7694868 | 69.3026603 | 83.1015175 | 71.2605634 | 83.7715278 |
| 16:00:44 | 0:01:04 | 74.7694868 | 70.3026603 | 83.1015175 | 72.2605634 | 84.7715278 |
| 16:00:45 | 0:01:05 | 75.7694868 | 70.3026603 | 84.1015175 | 72.2605634 | 84.7715278 |
| 16:00:46 | 0:01:06 | 75.7694868 | 70.3026603 | 86.1015175 | 74.2605634 | 85.7715278 |
| 16:00:47 | 0:01:07 | 72.7694868 | 70.3026603 | 86.1015175 | 75.2605634 | 87.7715278 |
| 16:00:48 | 0:01:08 | 73.7694868 | 71.3026603 | 89.1015175 | 75.2605634 | 87.7715278 |
| 16:00:49 | 0:01:09 | 74.7694868 | 71.3026603 | 92.1015175 | 75.2605634 | 85.7715278 |
| 16:00:50 | 0:01:10 | 74.7694868 | 72.3026603 | 77.5735122 | 75.2605634 | 84.7715278 |
| 16:00:51 | 0:01:11 | 75.7694868 | 72.3026603 | 77.4485122 | 75.2605634 | 84.7715278 |
| 16:00:52 | 0:01:12 | 75.7694868 | 73.3026603 | 77.4485122 | 76.2605634 | 82.7715278 |
| 16:00:53 | 0:01:13 | 75.7694868 | 73.3026603 | 89.1015175 | 76.2605634 | 82.7715278 |
| 16:00:54 | 0:01:14 | 75.7694868 | 74.3026603 | 82.1015175 | 76.2605634 | 82.7715278 |
| 16:00:55 | 0:01:15 | 76.7694868 | 74.3026603 | 78.1015175 | 76.2605634 | 82.7715278 |
| 16:00:56 | 0:01:16 | 76.7694868 | 74.3026603 | 77.1015175 | 75.2605634 | 82.7715278 |
| 16:00:57 | 0:01:17 | 76.7694868 | 73.3026603 | 77.1015175 | 75.2605634 | 82.7715278 |
| 16:00:58 | 0:01:18 | 76.7694868 | 73.3026603 | 74.1015175 | 75.2605634 | 82.7715278 |
| 16:00:59 | 0:01:19 | 76.7694868 | 72.3026603 | 71.1015175 | 75.2605634 | 80.7715278 |
| 16:01:00 | 0:01:20 | 76.7694868 | 72.3026603 | 71.1015175 | 75.2605634 | 78.7715278 |
| 16:01:01 | 0:01:21 | 76.7694868 | 72.3026603 | 71.1015175 | 75.2605634 | 78.7715278 |
| 16:01:02 | 0:01:22 | 76.7694868 | 72.3026603 | 70.1015175 | 75.2605634 | 78.7715278 |
| 16:01:03 | 0:01:23 | 76.7694868 | 72.3026603 | 70.1015175 | 75.2605634 | 80.7715278 |
| 16:01:04 | 0:01:24 | 75.7694868 | 72.3026603 | 70.1015175 | 74.2605634 | 80.7715278 |
| 16:01:05 | 0:01:25 | 75.7694868 | 72.3026603 | 70.1015175 | 73.2605634 | 80.7715278 |
| 16:01:06 | 0:01:26 | 75.7694868 | 72.3026603 | 73.1015175 | 73.2605634 | 78.7715278 |
| 16:01:07 | 0:01:27 | 75.7694868 | 72.3026603 | 74.1015175 | 72.2605634 | 76.7715278 |
| 16:01:08 | 0:01:28 | 75.7694868 | 72.3026603 | 74.1015175 | 71.2605634 | 75.7715278 |
| 16:01:09 | 0:01:29 | 75.7694868 | 71.3026603 | 74.1015175 | 71.2605634 | 75.7715278 |
| 16:01:10 | 0:01:30 | 75.7694868 | 71.3026603 | 75.1015175 | 71.2605634 | 77.7715278 |

|          |         |            |            |            |            |            |
|----------|---------|------------|------------|------------|------------|------------|
| 16:01:11 | 0:01:31 | 75.7694868 | 71.3026603 | 75.1015175 | 70.2605634 | 78.7715278 |
| 16:01:12 | 0:01:32 | 75.7694868 | 71.3026603 | 75.1015175 | 70.2605634 | 78.7715278 |
| 16:01:13 | 0:01:33 | 73.7694868 | 71.3026603 | 76.1015175 | 70.2605634 | 78.7715278 |
| 16:01:14 | 0:01:34 | 73.7694868 | 71.3026603 | 76.1015175 | 70.2605634 | 80.7715278 |
| 16:01:15 | 0:01:35 | 75.7694868 | 71.3026603 | 76.1015175 | 70.2605634 | 81.7715278 |
| 16:01:16 | 0:01:36 | 75.7694868 | 71.3026603 | 77.1015175 | 70.2605634 | 82.7715278 |
| 16:01:17 | 0:01:37 | 75.7694868 | 71.3026603 | 78.1015175 | 69.2605634 | 82.7715278 |
| 16:01:18 | 0:01:38 | 74.7694868 | 71.3026603 | 77.1015175 | 69.2605634 | 82.7715278 |
| 16:01:19 | 0:01:39 | 74.7694868 | 74.3026603 | 76.1015175 | 68.2605634 | 83.7715278 |
| 16:01:20 | 0:01:40 | 73.7694868 | 74.3026603 | 77.1015175 | 69.2605634 | 84.7715278 |
| 16:01:21 | 0:01:41 | 73.7694868 | 75.3026603 | 76.1015175 | 69.2605634 | 84.7715278 |
| 16:01:22 | 0:01:42 | 73.7694868 | 75.3026603 | 74.1015175 | 69.2605634 | 85.7715278 |
| 16:01:23 | 0:01:43 | 73.7694868 | 75.3026603 | 73.1015175 | 70.2605634 | 85.7715278 |
| 16:01:24 | 0:01:44 | 73.7694868 | 75.3026603 | 70.1015175 | 70.2605634 | 86.7715278 |
| 16:01:25 | 0:01:45 | 72.7694868 | 76.3026603 | 69.1015175 | 72.2605634 | 85.7715278 |
| 16:01:26 | 0:01:46 | 72.7694868 | 76.3026603 | 69.1015175 | 73.2605634 | 83.7715278 |
| 16:01:27 | 0:01:47 | 72.7694868 | 76.3026603 | 69.1015175 | 73.2605634 | 83.7715278 |
| 16:01:28 | 0:01:48 | 73.7694868 | 76.3026603 | 69.1015175 | 73.2605634 | 81.7715278 |
| 16:01:29 | 0:01:49 | 73.7694868 | 77.3026603 | 70.1015175 | 73.2605634 | 81.7715278 |
| 16:01:30 | 0:01:50 | 73.7694868 | 76.3026603 | 70.1015175 | 74.2605634 | 80.7715278 |
| 16:01:31 | 0:01:51 | 73.7694868 | 77.3026603 | 71.1015175 | 76.2605634 | 78.7715278 |
| 16:01:32 | 0:01:52 | 73.7694868 | 77.3026603 | 70.1015175 | 76.2605634 | 77.7715278 |
| 16:01:33 | 0:01:53 | 76.7694868 | 77.3026603 | 70.1015175 | 76.2605634 | 77.7715278 |
| 16:01:34 | 0:01:54 | 77.7694868 | 78.3026603 | 70.1015175 | 75.2605634 | 77.7715278 |
| 16:01:35 | 0:01:55 | 77.7694868 | 78.3026603 | 70.1015175 | 75.2605634 | 77.7715278 |
| 16:01:36 | 0:01:56 | 80.7694868 | 78.3026603 | 71.1015175 | 75.2605634 | 77.7715278 |
| 16:01:37 | 0:01:57 | 79.7694868 | 79.3026603 | 71.1015175 | 75.2605634 | 78.7715278 |
| 16:01:38 | 0:01:58 | 79.7694868 | 80.3026603 | 71.1015175 | 75.2605634 | 79.7715278 |
| 16:01:39 | 0:01:59 | 77.7694868 | 80.3026603 | 73.1015175 | 74.2605634 | 79.7715278 |
| 16:01:40 | 0:02:00 | 76.7694868 | 80.3026603 | 77.1015175 | 74.2605634 | 78.7715278 |
| 16:01:41 | 0:02:01 | 76.7694868 | 83.3026603 | 77.1015175 | 72.2605634 | 75.7715278 |
| 16:01:42 | 0:02:02 | 76.7694868 | 82.3026603 | 77.1015175 | 72.2605634 | 73.7715278 |
| 16:01:43 | 0:02:03 | 76.7694868 | 81.3026603 | 76.1015175 | 72.2605634 | 73.7715278 |
| 16:01:44 | 0:02:04 | 76.7694868 | 81.3026603 | 77.1015175 | 71.2605634 | 71.7715278 |
| 16:01:45 | 0:02:05 | 76.7694868 | 79.3026603 | 77.1015175 | 70.2605634 | 71.7715278 |
| 16:01:46 | 0:02:06 | 76.7694868 | 79.3026603 | 78.1015175 | 70.2605634 | 72.7715278 |
| 16:01:47 | 0:02:07 | 76.7694868 | 76.3026603 | 81.1015175 | 70.2605634 | 72.7715278 |
| 16:01:48 | 0:02:08 | 76.7694868 | 75.3026603 | 86.1015175 | 70.2605634 | 72.7715278 |
| 16:01:49 | 0:02:09 | 75.7694868 | 74.3026603 | 89.1015175 | 70.2605634 | 72.7715278 |
| 16:01:50 | 0:02:10 | 75.7694868 | 73.3026603 | 89.1015175 | 69.2605634 | 72.7715278 |
| 16:01:51 | 0:02:11 | 75.7694868 | 73.3026603 | 89.1015175 | 69.2605634 | 72.7715278 |
| 16:01:52 | 0:02:12 | 75.7694868 | 74.3026603 | 89.1015175 | 70.2605634 | 72.7715278 |
| 16:01:53 | 0:02:13 | 75.7694868 | 73.3026603 | 84.1015175 | 71.2605634 | 72.7715278 |
| 16:01:54 | 0:02:14 | 75.7694868 | 73.3026603 | 84.1015175 | 71.2605634 | 72.7715278 |
| 16:01:55 | 0:02:15 | 76.7694868 | 73.3026603 | 83.1015175 | 71.2605634 | 72.7715278 |

|          |         |            |            |            |            |            |
|----------|---------|------------|------------|------------|------------|------------|
| 16:01:56 | 0:02:16 | 76.7694868 | 74.3026603 | 83.1015175 | 73.2605634 | 72.7715278 |
| 16:01:57 | 0:02:17 | 76.7694868 | 74.3026603 | 86.1015175 | 74.2605634 | 72.7715278 |
| 16:01:58 | 0:02:18 | 76.7694868 | 73.3026603 | 86.1015175 | 74.2605634 | 71.7715278 |
| 16:01:59 | 0:02:19 | 76.7694868 | 72.3026603 | 89.1015175 | 74.2605634 | 71.7715278 |
| 16:02:00 | 0:02:20 | 76.7694868 | 72.3026603 | 76.3821932 | 74.2605634 | 71.7715278 |
| 16:02:01 | 0:02:21 | 76.7694868 | 71.3026603 | 76.2821932 | 74.2605634 | 71.7715278 |
| 16:02:02 | 0:02:22 | 76.7694868 | 71.3026603 | 76.1821932 | 74.2605634 | 70.7715278 |
| 16:02:03 | 0:02:23 | 76.7694868 | 71.3026603 | 75.9821932 | 75.2605634 | 69.7715278 |
| 16:02:04 | 0:02:24 | 76.7694868 | 72.3026603 | 76.2821932 | 75.2605634 | 71.7715278 |
| 16:02:05 | 0:02:25 | 76.7694868 | 72.3026603 | 91.1015175 | 75.2605634 | 73.7715278 |
| 16:02:06 | 0:02:26 | 76.7694868 | 72.3026603 | 91.1015175 | 75.2605634 | 73.7715278 |
| 16:02:07 | 0:02:27 | 80.7694868 | 72.3026603 | 80.1015175 | 76.2605634 | 74.7715278 |
| 16:02:08 | 0:02:28 | 76.7694868 | 72.3026603 | 78.1015175 | 76.2605634 | 75.7715278 |
| 16:02:09 | 0:02:29 | 75.7694868 | 71.3026603 | 78.1015175 | 76.2605634 | 75.7715278 |
| 16:02:10 | 0:02:30 | 75.7694868 | 72.3026603 | 75.1015175 | 75.2605634 | 75.7715278 |
| 16:02:11 | 0:02:31 | 75.7694868 | 73.3026603 | 74.1015175 | 76.2605634 | 75.7715278 |
| 16:02:12 | 0:02:32 | 75.7694868 | 73.3026603 | 74.1015175 | 77.2605634 | 71.7715278 |
| 16:02:13 | 0:02:33 | 75.7694868 | 72.3026603 | 74.1015175 | 77.2605634 | 71.7715278 |
| 16:02:14 | 0:02:34 | 75.7694868 | 72.3026603 | 74.1015175 | 77.2605634 | 68.7715278 |
| 16:02:15 | 0:02:35 | 73.7694868 | 72.3026603 | 74.1015175 | 77.2605634 | 60.7715278 |
| 16:02:16 | 0:02:36 | 72.7694868 | 73.3026603 | 74.1015175 | 77.2605634 | 58.7715278 |
| 16:02:17 | 0:02:37 | 71.7694868 | 73.3026603 | 74.1015175 | 75.2605634 | 57.7715278 |
| 16:02:18 | 0:02:38 | 71.7694868 | 80.3026603 | 80.1015175 | 74.2605634 | 57.7715278 |
| 16:02:19 | 0:02:39 | 71.7694868 | 83.3026603 | 84.1015175 | 73.2605634 | 65.7715278 |
| 16:02:20 | 0:02:40 | 71.7694868 | 83.3026603 | 88.1015175 | 74.2605634 | 68.7715278 |
| 16:02:21 | 0:02:41 | 70.7694868 | 83.3026603 | 90.1015175 | 76.2605634 | 70.7715278 |
| 16:02:22 | 0:02:42 | 69.7694868 | 77.3026603 | 76.0821932 | 76.2605634 | 70.7715278 |
| 16:02:23 | 0:02:43 | 69.7694868 | 72.3026603 | 75.7821932 | 77.2605634 | 70.7715278 |
| 16:02:24 | 0:02:44 | 68.7694868 | 68.3026603 | 75.8821932 | 77.2605634 | 70.7715278 |
| 16:02:25 | 0:02:45 | 68.7694868 | 67.3026603 | 75.8821932 | 77.2605634 | 70.7715278 |
| 16:02:26 | 0:02:46 | 77.7694868 | 67.3026603 | 76.6821932 | 77.2605634 | 70.7715278 |
| 16:02:27 | 0:02:47 | 78.7694868 | 67.3026603 | 90.1015175 | 77.2605634 | 70.7715278 |
| 16:02:28 | 0:02:48 | 79.7694868 | 66.3026603 | 90.1015175 | 77.2605634 | 71.7715278 |
| 16:02:29 | 0:02:49 | 79.7694868 | 66.3026603 | 83.1015175 | 77.2605634 | 71.7715278 |
| 16:02:30 | 0:02:50 | 77.7694868 | 66.3026603 | 74.1015175 | 77.2605634 | 71.7715278 |
| 16:02:31 | 0:02:51 | 76.7694868 | 66.3026603 | 72.1015175 | 77.2605634 | 71.7715278 |
| 16:02:32 | 0:02:52 | 76.7694868 | 77.3026603 | 71.1015175 | 77.2605634 | 71.7715278 |
| 16:02:33 | 0:02:53 | 75.7694868 | 77.3026603 | 71.1015175 | 80.2605634 | 70.7715278 |
| 16:02:34 | 0:02:54 | 74.7694868 | 82.3026603 | 69.1015175 | 80.2605634 | 70.7715278 |
| 16:02:35 | 0:02:55 | 74.7694868 | 82.3026603 | 69.1015175 | 79.2605634 | 71.7715278 |
| 16:02:36 | 0:02:56 | 73.7694868 | 82.3026603 | 69.1015175 | 76.2605634 | 71.7715278 |
| 16:02:37 | 0:02:57 | 73.7694868 | 79.3026603 | 69.1015175 | 75.2605634 | 72.7715278 |
| 16:02:38 | 0:02:58 | 73.7694868 | 77.3026603 | 69.1015175 | 75.2605634 | 72.7715278 |
| 16:02:39 | 0:02:59 | 73.7694868 | 77.3026603 | 68.1015175 | 74.2605634 | 72.7715278 |
| 16:02:40 | 0:03:00 | 73.7694868 | 77.3026603 | 68.1015175 | 73.2605634 | 72.7715278 |

|          |         |            |            |            |            |            |
|----------|---------|------------|------------|------------|------------|------------|
| 16:02:41 | 0:03:01 | 73.7694868 | 76.3026603 | 68.1015175 | 73.2605634 | 73.7715278 |
| 16:02:42 | 0:03:02 | 75.7694868 | 75.3026603 | 68.1015175 | 73.2605634 | 73.7715278 |
| 16:02:43 | 0:03:03 | 75.7694868 | 75.3026603 | 68.1015175 | 72.2605634 | 75.7715278 |
| 16:02:44 | 0:03:04 | 75.7694868 | 75.3026603 | 70.1015175 | 71.2605634 | 77.7715278 |
| 16:02:45 | 0:03:05 | 75.7694868 | 78.3026603 | 70.1015175 | 71.2605634 | 78.7715278 |
| 16:02:46 | 0:03:06 | 75.7694868 | 79.3026603 | 71.1015175 | 71.2605634 | 79.7715278 |
| 16:02:47 | 0:03:07 | 76.7694868 | 79.3026603 | 75.1015175 | 71.2605634 | 79.7715278 |
| 16:02:48 | 0:03:08 | 76.7694868 | 79.3026603 | 76.1015175 | 71.2605634 | 78.7715278 |
| 16:02:49 | 0:03:09 | 76.7694868 | 79.3026603 | 74.1015175 | 70.2605634 | 78.7715278 |
| 16:02:50 | 0:03:10 | 76.7694868 | 78.3026603 | 74.1015175 | 70.2605634 | 78.7715278 |
| 16:02:51 | 0:03:11 | 76.7694868 | 78.3026603 | 74.1015175 | 70.2605634 | 78.7715278 |
| 16:02:52 | 0:03:12 | 76.7694868 | 78.3026603 | 74.1015175 | 73.2605634 | 79.7715278 |
| 16:02:53 | 0:03:13 | 76.7694868 | 79.3026603 | 76.1015175 | 72.2605634 | 79.7715278 |
| 16:02:54 | 0:03:14 | 77.7694868 | 80.3026603 | 76.1015175 | 71.2605634 | 81.7715278 |
| 16:02:55 | 0:03:15 | 77.7694868 | 81.3026603 | 75.1015175 | 71.2605634 | 81.7715278 |
| 16:02:56 | 0:03:16 | 76.7694868 | 82.3026603 | 73.1015175 | 71.2605634 | 85.7715278 |
| 16:02:57 | 0:03:17 | 76.7694868 | 82.3026603 | 73.1015175 | 71.2605634 | 85.7715278 |
| 16:02:58 | 0:03:18 | 76.7694868 | 82.3026603 | 68.1015175 | 71.2605634 | 84.7715278 |
| 16:02:59 | 0:03:19 | 76.7694868 | 82.3026603 | 68.1015175 | 72.2605634 | 84.7715278 |
| 16:03:00 | 0:03:20 | 76.7694868 | 82.3026603 | 68.1015175 | 72.2605634 | 84.7715278 |
| 16:03:01 | 0:03:21 | 76.7694868 | 82.3026603 | 70.1015175 | 72.2605634 | 83.7715278 |
| 16:03:02 | 0:03:22 | 75.7694868 | 78.3026603 | 71.1015175 | 73.2605634 | 83.7715278 |
| 16:03:03 | 0:03:23 | 75.7694868 | 77.3026603 | 71.1015175 | 79.2605634 | 83.7715278 |
| 16:03:04 | 0:03:24 | 75.7694868 | 77.3026603 | 72.1015175 | 80.2605634 | 81.7715278 |
| 16:03:05 | 0:03:25 | 75.7694868 | 77.3026603 | 72.1015175 | 80.2605634 | 81.7715278 |
| 16:03:06 | 0:03:26 | 75.7694868 | 77.3026603 | 72.1015175 | 80.2605634 | 81.7715278 |
| 16:03:07 | 0:03:27 | 75.7694868 | 77.3026603 | 72.1015175 | 80.2605634 | 81.7715278 |
| 16:03:08 | 0:03:28 | 75.7694868 | 77.3026603 | 72.1015175 | 80.2605634 | 81.7715278 |
| 16:03:09 | 0:03:29 | 75.7694868 | 80.3026603 | 72.1015175 | 79.2605634 | 85.7715278 |
| 16:03:10 | 0:03:30 | 75.7694868 | 80.3026603 | 73.1015175 | 79.2605634 | 88.7715278 |
| 16:03:11 | 0:03:31 | 76.7694868 | 77.3026603 | 75.1015175 | 78.2605634 | 90.7715278 |
| 16:03:12 | 0:03:32 | 76.7694868 | 74.3026603 | 75.1015175 | 78.2605634 | 90.7715278 |
| 16:03:13 | 0:03:33 | 76.7694868 | 72.3026603 | 77.1015175 | 77.2605634 | 90.7715278 |
| 16:03:14 | 0:03:34 | 75.7694868 | 72.3026603 | 77.1015175 | 77.2605634 | 90.7715278 |
| 16:03:15 | 0:03:35 | 75.7694868 | 70.3026603 | 77.1015175 | 77.2605634 | 76.0821932 |
| 16:03:16 | 0:03:36 | 73.7694868 | 69.3026603 | 77.1015175 | 77.2605634 | 75.9821932 |
| 16:03:17 | 0:03:37 | 74.7694868 | 69.3026603 | 77.1015175 | 77.2605634 | 76.2821932 |
| 16:03:18 | 0:03:38 | 73.7694868 | 69.3026603 | 75.1015175 | 77.2605634 | 89.7715278 |
| 16:03:19 | 0:03:39 | 73.7694868 | 70.3026603 | 73.1015175 | 76.2605634 | 89.7715278 |
| 16:03:20 | 0:03:40 | 74.7694868 | 72.3026603 | 73.1015175 | 77.2605634 | 87.7715278 |
| 16:03:21 | 0:03:41 | 74.7694868 | 73.3026603 | 73.1015175 | 77.2605634 | 85.7715278 |
| 16:03:22 | 0:03:42 | 75.7694868 | 73.3026603 | 73.1015175 | 77.2605634 | 84.7715278 |
| 16:03:23 | 0:03:43 | 75.7694868 | 72.3026603 | 73.1015175 | 77.2605634 | 83.7715278 |
| 16:03:24 | 0:03:44 | 75.7694868 | 72.3026603 | 72.1015175 | 76.2605634 | 83.7715278 |
| 16:03:25 | 0:03:45 | 75.7694868 | 72.3026603 | 72.1015175 | 76.2605634 | 83.7715278 |

|          |         |            |            |            |            |            |
|----------|---------|------------|------------|------------|------------|------------|
| 16:03:26 | 0:03:46 | 76.7694868 | 72.3026603 | 70.1015175 | 75.2605634 | 83.7715278 |
| 16:03:27 | 0:03:47 | 76.7694868 | 72.3026603 | 69.1015175 | 74.2605634 | 83.7715278 |
| 16:03:28 | 0:03:48 | 76.7694868 | 72.3026603 | 69.1015175 | 74.2605634 | 84.7715278 |
| 16:03:29 | 0:03:49 | 76.7694868 | 72.3026603 | 70.1015175 | 73.2605634 | 84.7715278 |
| 16:03:30 | 0:03:50 | 76.7694868 | 72.3026603 | 72.1015175 | 73.2605634 | 84.7715278 |
| 16:03:31 | 0:03:51 | 76.7694868 | 71.3026603 | 72.1015175 | 73.2605634 | 84.7715278 |
| 16:03:32 | 0:03:52 | 76.7694868 | 70.3026603 | 72.1015175 | 73.2605634 | 84.7715278 |
| 16:03:33 | 0:03:53 | 78.7694868 | 69.3026603 | 72.1015175 | 73.2605634 | 84.7715278 |
| 16:03:34 | 0:03:54 | 79.7694868 | 69.3026603 | 72.1015175 | 73.2605634 | 84.7715278 |
| 16:03:35 | 0:03:55 | 79.7694868 | 66.3026603 | 72.1015175 | 73.2605634 | 84.7715278 |
| 16:03:36 | 0:03:56 | 80.7694868 | 66.3026603 | 72.1015175 | 73.2605634 | 85.7715278 |
| 16:03:37 | 0:03:57 | 81.7694868 | 65.3026603 | 73.1015175 | 74.2605634 | 85.7715278 |
| 16:03:38 | 0:03:58 | 81.7694868 | 65.3026603 | 74.1015175 | 74.2605634 | 85.7715278 |
| 16:03:39 | 0:03:59 | 81.7694868 | 65.3026603 | 75.1015175 | 74.2605634 | 85.7715278 |
| 16:03:40 | 0:04:00 | 81.7694868 | 65.3026603 | 75.1015175 | 73.2605634 | 85.7715278 |
| 16:03:41 | 0:04:01 | 82.7694868 | 68.3026603 | 75.1015175 | 73.2605634 | 85.7715278 |
| 16:03:42 | 0:04:02 | 82.7694868 | 68.3026603 | 77.1015175 | 75.2605634 | 86.7715278 |
| 16:03:43 | 0:04:03 | 82.7694868 | 78.3026603 | 82.1015175 | 75.2605634 | 86.7715278 |
| 16:03:44 | 0:04:04 | 82.7694868 | 78.3026603 | 82.1015175 | 75.2605634 | 86.7715278 |
| 16:03:45 | 0:04:05 | 83.7694868 | 77.3026603 | 86.1015175 | 75.2605634 | 86.7715278 |
| 16:03:46 | 0:04:06 | 83.7694868 | 76.3026603 | 85.1015175 | 75.2605634 | 87.7715278 |
| 16:03:47 | 0:04:07 | 85.7694868 | 74.3026603 | 84.1015175 | 73.2605634 | 87.7715278 |
| 16:03:48 | 0:04:08 | 86.7694868 | 74.3026603 | 80.1015175 | 72.2605634 | 87.7715278 |
| 16:03:49 | 0:04:09 | 87.7694868 | 72.3026603 | 80.1015175 | 72.2605634 | 87.7715278 |
| 16:03:50 | 0:04:10 | 87.7694868 | 71.3026603 | 72.1015175 | 72.2605634 | 88.7715278 |
| 16:03:51 | 0:04:11 | 88.7694868 | 71.3026603 | 71.1015175 | 74.2605634 | 88.7715278 |
| 16:03:52 | 0:04:12 | 87.7694868 | 71.3026603 | 71.1015175 | 75.2605634 | 89.7715278 |
| 16:03:53 | 0:04:13 | 85.7694868 | 71.3026603 | 69.1015175 | 75.2605634 | 89.7715278 |
| 16:03:54 | 0:04:14 | 85.7694868 | 71.3026603 | 69.1015175 | 75.2605634 | 89.7715278 |
| 16:03:55 | 0:04:15 | 85.7694868 | 71.3026603 | 68.1015175 | 75.2605634 | 85.7715278 |
| 16:03:56 | 0:04:16 | 86.7694868 | 72.3026603 | 69.1015175 | 75.2605634 | 85.7715278 |
| 16:03:57 | 0:04:17 | 80.7694868 | 72.3026603 | 69.1015175 | 75.2605634 | 84.7715278 |
| 16:03:58 | 0:04:18 | 78.7694868 | 73.3026603 | 70.1015175 | 75.2605634 | 84.7715278 |
| 16:03:59 | 0:04:19 | 77.7694868 | 74.3026603 | 69.1015175 | 75.2605634 | 84.7715278 |
| 16:04:00 | 0:04:20 | 75.7694868 | 74.3026603 | 69.1015175 | 75.2605634 | 84.7715278 |
| 16:04:01 | 0:04:21 | 75.7694868 | 75.3026603 | 69.1015175 | 76.2605634 | 84.7715278 |
| 16:04:02 | 0:04:22 | 76.7694868 | 76.3026603 | 71.1015175 | 76.2605634 | 84.7715278 |
| 16:04:03 | 0:04:23 | 76.7694868 | 76.3026603 | 72.1015175 | 76.2605634 | 81.7715278 |
| 16:04:04 | 0:04:24 | 76.7694868 | 76.3026603 | 72.1015175 | 76.2605634 | 80.7715278 |
| 16:04:05 | 0:04:25 | 77.7694868 | 75.3026603 | 73.1015175 | 74.2605634 | 80.7715278 |
| 16:04:06 | 0:04:26 | 76.7694868 | 75.3026603 | 71.1015175 | 74.2605634 | 80.7715278 |
| 16:04:07 | 0:04:27 | 75.7694868 | 75.3026603 | 69.1015175 | 73.2605634 | 80.7715278 |
| 16:04:08 | 0:04:28 | 75.7694868 | 75.3026603 | 69.1015175 | 73.2605634 | 80.7715278 |
| 16:04:09 | 0:04:29 | 75.7694868 | 75.3026603 | 70.1015175 | 74.2605634 | 80.7715278 |
| 16:04:10 | 0:04:30 | 75.7694868 | 75.3026603 | 70.1015175 | 75.2605634 | 80.7715278 |

|          |         |            |            |            |            |            |
|----------|---------|------------|------------|------------|------------|------------|
| 16:04:11 | 0:04:31 | 75.7694868 | 76.3026603 | 72.1015175 | 76.2605634 | 79.7715278 |
| 16:04:12 | 0:04:32 | 75.7694868 | 76.3026603 | 73.1015175 | 76.2605634 | 79.7715278 |
| 16:04:13 | 0:04:33 | 76.7694868 | 76.3026603 | 73.1015175 | 76.2605634 | 79.7715278 |
| 16:04:14 | 0:04:34 | 76.7694868 | 76.3026603 | 73.1015175 | 76.2605634 | 79.7715278 |
| 16:04:15 | 0:04:35 | 76.7694868 | 76.3026603 | 73.1015175 | 75.2605634 | 78.7715278 |
| 16:04:16 | 0:04:36 | 80.7694868 | 77.3026603 | 73.1015175 | 75.2605634 | 78.7715278 |
| 16:04:17 | 0:04:37 | 80.7694868 | 78.3026603 | 73.1015175 | 75.2605634 | 78.7715278 |
| 16:04:18 | 0:04:38 | 84.7694868 | 78.3026603 | 72.1015175 | 76.2605634 | 77.7715278 |
| 16:04:19 | 0:04:39 | 84.7694868 | 77.3026603 | 72.1015175 | 76.2605634 | 77.7715278 |
| 16:04:20 | 0:04:40 | 84.7694868 | 76.3026603 | 71.1015175 | 76.2605634 | 77.7715278 |
| 16:04:21 | 0:04:41 | 81.7694868 | 74.3026603 | 71.1015175 | 75.2605634 | 77.7715278 |
| 16:04:22 | 0:04:42 | 80.7694868 | 73.3026603 | 71.1015175 | 73.2605634 | 74.7715278 |
| 16:04:23 | 0:04:43 | 79.7694868 | 73.3026603 | 71.1015175 | 73.2605634 | 74.7715278 |
| 16:04:24 | 0:04:44 | 79.7694868 | 72.3026603 | 71.1015175 | 72.2605634 | 73.7715278 |
| 16:04:25 | 0:04:45 | 78.7694868 | 72.3026603 | 71.1015175 | 72.2605634 | 72.7715278 |
| 16:04:26 | 0:04:46 | 78.7694868 | 73.3026603 | 75.1015175 | 72.2605634 | 72.7715278 |
| 16:04:27 | 0:04:47 | 78.7694868 | 74.3026603 | 74.1015175 | 72.2605634 | 72.7715278 |
| 16:04:28 | 0:04:48 | 78.7694868 | 74.3026603 | 74.1015175 | 72.2605634 | 73.7715278 |
| 16:04:29 | 0:04:49 | 78.7694868 | 74.3026603 | 72.1015175 | 72.2605634 | 73.7715278 |
| 16:04:30 | 0:04:50 | 80.7694868 | 74.3026603 | 72.1015175 | 71.2605634 | 73.7715278 |
| 16:04:31 | 0:04:51 | 81.7694868 | 72.3026603 | 73.1015175 | 71.2605634 | 73.7715278 |
| 16:04:32 | 0:04:52 | 79.7694868 | 70.3026603 | 73.1015175 | 73.2605634 | 74.7715278 |
| 16:04:33 | 0:04:53 | 78.7694868 | 68.3026603 | 73.1015175 | 74.2605634 | 73.7715278 |
| 16:04:34 | 0:04:54 | 77.7694868 | 67.3026603 | 72.1015175 | 74.2605634 | 73.7715278 |
| 16:04:35 | 0:04:55 | 76.7694868 | 67.3026603 | 72.1015175 | 75.2605634 | 72.7715278 |
| 16:04:36 | 0:04:56 | 75.7694868 | 66.3026603 | 72.1015175 | 75.2605634 | 72.7715278 |
| 16:04:37 | 0:04:57 | 76.7694868 | 66.3026603 | 71.1015175 | 75.2605634 | 72.7715278 |
| 16:04:38 | 0:04:58 | 76.7694868 | 66.3026603 | 70.1015175 | 75.2605634 | 71.7715278 |
| 16:04:39 | 0:04:59 | 76.7694868 | 66.3026603 | 69.1015175 | 73.2605634 | 71.7715278 |
| 16:04:40 | 0:05:00 | 75.7694868 | 66.3026603 | 69.1015175 | 74.2605634 | 71.7715278 |
| 16:04:41 | 0:05:01 | 75.7694868 | 66.3026603 | 69.1015175 | 74.2605634 | 71.7715278 |
| 16:04:42 | 0:05:02 | 75.7694868 | 70.3026603 | 69.1015175 | 74.2605634 | 71.7715278 |
| 16:04:43 | 0:05:03 | 76.7694868 | 70.3026603 | 69.1015175 | 75.2605634 | 71.7715278 |
| 16:04:44 | 0:05:04 | 76.7694868 | 76.3026603 | 69.1015175 | 75.2605634 | 71.7715278 |
| 16:04:45 | 0:05:05 | 76.7694868 | 75.3026603 | 68.1015175 | 74.2605634 | 70.7715278 |
| 16:04:46 | 0:05:06 | 75.7694868 | 75.3026603 | 68.1015175 | 73.2605634 | 70.7715278 |
| 16:04:47 | 0:05:07 | 74.7694868 | 74.3026603 | 68.1015175 | 73.2605634 | 70.7715278 |
| 16:04:48 | 0:05:08 | 74.7694868 | 74.3026603 | 68.1015175 | 73.2605634 | 70.7715278 |
| 16:04:49 | 0:05:09 | 72.7694868 | 73.3026603 | 68.1015175 | 73.2605634 | 69.7715278 |
| 16:04:50 | 0:05:10 | 72.7694868 | 73.3026603 | 68.1015175 | 72.2605634 | 69.7715278 |
| 16:04:51 | 0:05:11 | 73.7694868 | 75.3026603 | 69.1015175 | 72.2605634 | 69.7715278 |
| 16:04:52 | 0:05:12 | 73.7694868 | 76.3026603 | 70.1015175 | 72.2605634 | 69.7715278 |
| 16:04:53 | 0:05:13 | 72.7694868 | 78.3026603 | 71.1015175 | 72.2605634 | 69.7715278 |
| 16:04:54 | 0:05:14 | 73.7694868 | 79.3026603 | 71.1015175 | 72.2605634 | 69.7715278 |
| 16:04:55 | 0:05:15 | 73.7694868 | 79.3026603 | 73.1015175 | 72.2605634 | 68.7715278 |



|          |         |            |            |            |            |            |
|----------|---------|------------|------------|------------|------------|------------|
| 16:04:56 | 0:05:16 | 73.7694868 | 79.3026603 | 73.1015175 | 71.2605634 | 69.7715278 |
| 16:04:57 | 0:05:17 | 73.7694868 | 77.3026603 | 75.1015175 | 71.2605634 | 69.7715278 |
| 16:04:58 | 0:05:18 | 73.7694868 | 74.3026603 | 76.1015175 | 72.2605634 | 68.7715278 |
| 16:04:59 | 0:05:19 | 74.7694868 | 72.3026603 | 76.1015175 | 73.2605634 | 66.7715278 |
| 16:05:00 | 0:05:20 | 74.7694868 | 71.3026603 | 76.1015175 | 72.2605634 | 66.7715278 |
| 16:05:01 | 0:05:21 | 74.7694868 | 70.3026603 | 77.1015175 | 72.2605634 | 66.7715278 |
| 16:05:02 | 0:05:22 | 74.7694868 | 70.3026603 | 76.1015175 | 71.2605634 | 66.7715278 |
| 16:05:03 | 0:05:23 | 74.7694868 | 70.3026603 | 76.1015175 | 71.2605634 | 66.7715278 |
| 16:05:04 | 0:05:24 | 74.7694868 | 70.3026603 | 77.1015175 | 71.2605634 | 67.7715278 |
| 16:05:05 | 0:05:25 | 74.7694868 | 71.3026603 | 77.1015175 | 71.2605634 | 67.7715278 |
| 16:05:06 | 0:05:26 | 74.7694868 | 73.3026603 | 77.1015175 | 71.2605634 | 67.7715278 |
| 16:05:07 | 0:05:27 | 74.7694868 | 74.3026603 | 77.1015175 | 70.2605634 | 67.7715278 |
| 16:05:08 | 0:05:28 | 75.7694868 | 75.3026603 | 70.1015175 | 69.2605634 | 67.7715278 |
| 16:05:09 | 0:05:29 | 75.7694868 | 75.3026603 | 69.1015175 | 69.2605634 | 67.7715278 |
| 16:05:10 | 0:05:30 | 75.7694868 | 75.3026603 | 69.1015175 | 68.2605634 | 67.7715278 |
| 16:05:11 | 0:05:31 | 75.7694868 | 75.3026603 | 69.1015175 | 67.2605634 | 67.7715278 |
| 16:05:12 | 0:05:32 | 76.7694868 | 76.3026603 | 70.1015175 | 67.2605634 | 68.7715278 |
| 16:05:13 | 0:05:33 | 76.7694868 | 75.3026603 | 70.1015175 | 67.2605634 | 68.7715278 |
| 16:05:14 | 0:05:34 | 76.7694868 | 75.3026603 | 70.1015175 | 67.2605634 | 68.7715278 |
| 16:05:15 | 0:05:35 | 77.7694868 | 76.3026603 | 70.1015175 | 67.2605634 | 68.7715278 |
| 16:05:16 | 0:05:36 | 78.7694868 | 76.3026603 | 70.1015175 | 67.2605634 | 68.7715278 |
| 16:05:17 | 0:05:37 | 78.7694868 | 76.3026603 | 70.1015175 | 67.2605634 | 68.7715278 |
| 16:05:18 | 0:05:38 | 79.7694868 | 77.3026603 | 70.1015175 | 69.2605634 | 75.7715278 |
| 16:05:19 | 0:05:39 | 80.7694868 | 79.3026603 | 70.1015175 | 70.2605634 | 75.7715278 |
| 16:05:20 | 0:05:40 | 80.7694868 | 79.3026603 | 71.1015175 | 70.2605634 | 74.7715278 |
| 16:05:21 | 0:05:41 | 80.7694868 | 79.3026603 | 71.1015175 | 70.2605634 | 73.7715278 |
| 16:05:22 | 0:05:42 | 80.7694868 | 78.3026603 | 71.1015175 | 70.2605634 | 72.7715278 |
| 16:05:23 | 0:05:43 | 81.7694868 | 77.3026603 | 72.1015175 | 70.2605634 | 69.7715278 |
| 16:05:24 | 0:05:44 | 81.7694868 | 74.3026603 | 72.1015175 | 70.2605634 | 64.7715278 |
| 16:05:25 | 0:05:45 | 81.7694868 | 70.3026603 | 72.1015175 | 70.2605634 | 64.7715278 |
| 16:05:26 | 0:05:46 | 81.7694868 | 67.3026603 | 71.1015175 | 71.2605634 | 64.7715278 |
| 16:05:27 | 0:05:47 | 82.7694868 | 65.3026603 | 71.1015175 | 71.2605634 | 62.7715278 |
| 16:05:28 | 0:05:48 | 82.7694868 | 65.3026603 | 71.1015175 | 71.2605634 | 60.7715278 |
| 16:05:29 | 0:05:49 | 82.7694868 | 65.3026603 | 70.1015175 | 72.2605634 | 59.7715278 |
| 16:05:30 | 0:05:50 | 79.7694868 | 65.3026603 | 71.1015175 | 71.2605634 | 59.7715278 |
| 16:05:31 | 0:05:51 | 78.7694868 | 66.3026603 | 72.1015175 | 71.2605634 | 59.7715278 |
| 16:05:32 | 0:05:52 | 77.7694868 | 68.3026603 | 72.1015175 | 71.2605634 | 59.7715278 |
| 16:05:33 | 0:05:53 | 77.7694868 | 70.3026603 | 75.1015175 | 71.2605634 | 58.7715278 |
| 16:05:34 | 0:05:54 | 77.7694868 | 71.3026603 | 75.1015175 | 71.2605634 | 58.7715278 |
| 16:05:35 | 0:05:55 | 78.7694868 | 72.3026603 | 74.1015175 | 71.2605634 | 58.7715278 |
| 16:05:36 | 0:05:56 | 79.7694868 | 72.3026603 | 73.1015175 | 71.2605634 | 59.7715278 |
| 16:05:37 | 0:05:57 | 78.7694868 | 70.3026603 | 73.1015175 | 71.2605634 | 60.7715278 |
| 16:05:38 | 0:05:58 | 78.7694868 | 69.3026603 | 71.1015175 | 71.2605634 | 60.7715278 |
| 16:05:39 | 0:05:59 | 78.7694868 | 68.3026603 | 72.1015175 | 72.2605634 | 60.7715278 |
| 16:05:40 | 0:06:00 | 78.7694868 | 68.3026603 | 73.1015175 | 72.2605634 | 58.7715278 |

|          |         |            |            |            |            |            |
|----------|---------|------------|------------|------------|------------|------------|
| 16:05:41 | 0:06:01 | 78.7694868 | 69.3026603 | 73.1015175 | 71.2605634 | 58.7715278 |
| 16:05:42 | 0:06:02 | 78.7694868 | 69.3026603 | 73.1015175 | 71.2605634 | 58.7715278 |
| 16:05:43 | 0:06:03 | 77.7694868 | 69.3026603 | 73.1015175 | 71.2605634 | 58.7715278 |
| 16:05:44 | 0:06:04 | 77.7694868 | 69.3026603 | 77.1015175 | 71.2605634 | 58.7715278 |
| 16:05:45 | 0:06:05 | 77.7694868 | 69.3026603 | 77.1015175 | 71.2605634 | 59.7715278 |
| 16:05:46 | 0:06:06 | 78.7694868 | 71.3026603 | 79.1015175 | 72.2605634 | 59.7715278 |
| 16:05:47 | 0:06:07 | 77.7694868 | 76.3026603 | 83.1015175 | 73.2605634 | 59.7715278 |
| 16:05:48 | 0:06:08 | 77.7694868 | 76.3026603 | 83.1015175 | 73.2605634 | 59.7715278 |
| 16:05:49 | 0:06:09 | 77.7694868 | 76.3026603 | 83.1015175 | 74.2605634 | 62.7715278 |
| 16:05:50 | 0:06:10 | 77.7694868 | 72.3026603 | 82.1015175 | 75.2605634 | 63.7715278 |
| 16:05:51 | 0:06:11 | 77.7694868 | 69.3026603 | 79.1015175 | 75.2605634 | 63.7715278 |
| 16:05:52 | 0:06:12 | 75.7694868 | 67.3026603 | 79.1015175 | 75.2605634 | 68.7715278 |
| 16:05:53 | 0:06:13 | 75.7694868 | 67.3026603 | 78.1015175 | 76.2605634 | 68.7715278 |
| 16:05:54 | 0:06:14 | 75.7694868 | 68.3026603 | 76.1015175 | 76.2605634 | 74.7715278 |
| 16:05:55 | 0:06:15 | 75.7694868 | 69.3026603 | 75.1015175 | 76.2605634 | 76.7715278 |
| 16:05:56 | 0:06:16 | 75.7694868 | 69.3026603 | 73.1015175 | 77.2605634 | 76.7715278 |
| 16:05:57 | 0:06:17 | 75.7694868 | 69.3026603 | 73.1015175 | 77.2605634 | 76.7715278 |
| 16:05:58 | 0:06:18 | 74.7694868 | 70.3026603 | 70.1015175 | 76.2605634 | 74.7715278 |
| 16:05:59 | 0:06:19 | 74.7694868 | 68.3026603 | 70.1015175 | 75.2605634 | 74.7715278 |
| 16:06:00 | 0:06:20 | 74.7694868 | 67.3026603 | 67.1015175 | 75.2605634 | 74.7715278 |
| 16:06:01 | 0:06:21 | 74.7694868 | 66.3026603 | 67.1015175 | 72.2605634 | 71.7715278 |
| 16:06:02 | 0:06:22 | 74.7694868 | 68.3026603 | 67.1015175 | 71.2605634 | 71.7715278 |
| 16:06:03 | 0:06:23 | 74.7694868 | 69.3026603 | 67.1015175 | 71.2605634 | 71.7715278 |
| 16:06:04 | 0:06:24 | 74.7694868 | 70.3026603 | 67.1015175 | 71.2605634 | 70.7715278 |
| 16:06:05 | 0:06:25 | 74.7694868 | 70.3026603 | 68.1015175 | 71.2605634 | 69.7715278 |
| 16:06:06 | 0:06:26 | 74.7694868 | 71.3026603 | 68.1015175 | 71.2605634 | 69.7715278 |
| 16:06:07 | 0:06:27 | 75.7694868 | 71.3026603 | 68.1015175 | 71.2605634 | 69.7715278 |
| 16:06:08 | 0:06:28 | 75.7694868 | 71.3026603 | 68.1015175 | 72.2605634 | 70.7715278 |
| 16:06:09 | 0:06:29 | 75.7694868 | 71.3026603 | 67.1015175 | 71.2605634 | 70.7715278 |
| 16:06:10 | 0:06:30 | 75.7694868 | 71.3026603 | 67.1015175 | 71.2605634 | 70.7715278 |
| 16:06:11 | 0:06:31 | 75.7694868 | 71.3026603 | 67.1015175 | 70.2605634 | 70.7715278 |
| 16:06:12 | 0:06:32 | 75.7694868 | 74.3026603 | 70.1015175 | 70.2605634 | 70.7715278 |
| 16:06:13 | 0:06:33 | 75.7694868 | 75.3026603 | 70.1015175 | 70.2605634 | 70.7715278 |
| 16:06:14 | 0:06:34 | 75.7694868 | 76.3026603 | 69.1015175 | 69.2605634 | 70.7715278 |
| 16:06:15 | 0:06:35 | 75.7694868 | 78.3026603 | 68.1015175 | 69.2605634 | 69.7715278 |
| 16:06:16 | 0:06:36 | 75.7694868 | 78.3026603 | 68.1015175 | 69.2605634 | 69.7715278 |
| 16:06:17 | 0:06:37 | 76.7694868 | 78.3026603 | 68.1015175 | 74.2605634 | 69.7715278 |
| 16:06:18 | 0:06:38 | 76.7694868 | 76.3026603 | 66.1015175 | 73.2605634 | 69.7715278 |
| 16:06:19 | 0:06:39 | 78.7694868 | 74.3026603 | 66.1015175 | 73.2605634 | 70.7715278 |
| 16:06:20 | 0:06:40 | 78.7694868 | 72.3026603 | 68.1015175 | 74.2605634 | 70.7715278 |
| 16:06:21 | 0:06:41 | 79.7694868 | 71.3026603 | 68.1015175 | 74.2605634 | 70.7715278 |
| 16:06:22 | 0:06:42 | 80.7694868 | 72.3026603 | 69.1015175 | 74.2605634 | 71.7715278 |
| 16:06:23 | 0:06:43 | 81.7694868 | 73.3026603 | 69.1015175 | 75.2605634 | 71.7715278 |
| 16:06:24 | 0:06:44 | 82.7694868 | 73.3026603 | 69.1015175 | 76.2605634 | 71.7715278 |
| 16:06:25 | 0:06:45 | 82.7694868 | 74.3026603 | 69.1015175 | 76.2605634 | 71.7715278 |

|          |         |            |            |            |            |            |
|----------|---------|------------|------------|------------|------------|------------|
| 16:06:26 | 0:06:46 | 83.7694868 | 73.3026603 | 70.1015175 | 76.2605634 | 71.7715278 |
| 16:06:27 | 0:06:47 | 83.7694868 | 71.3026603 | 71.1015175 | 72.2605634 | 71.7715278 |
| 16:06:28 | 0:06:48 | 84.7694868 | 69.3026603 | 74.1015175 | 71.2605634 | 70.7715278 |
| 16:06:29 | 0:06:49 | 83.7694868 | 67.3026603 | 74.1015175 | 71.2605634 | 70.7715278 |
| 16:06:30 | 0:06:50 | 82.7694868 | 67.3026603 | 74.1015175 | 70.2605634 | 67.7715278 |
| 16:06:31 | 0:06:51 | 81.7694868 | 67.3026603 | 74.1015175 | 70.2605634 | 67.7715278 |
| 16:06:32 | 0:06:52 | 81.7694868 | 69.3026603 | 73.1015175 | 70.2605634 | 64.7715278 |
| 16:06:33 | 0:06:53 | 81.7694868 | 70.3026603 | 71.1015175 | 71.2605634 | 64.7715278 |
| 16:06:34 | 0:06:54 | 79.7694868 | 71.3026603 | 72.1015175 | 71.2605634 | 65.7715278 |
| 16:06:35 | 0:06:55 | 78.7694868 | 73.3026603 | 72.1015175 | 71.2605634 | 65.7715278 |
| 16:06:36 | 0:06:56 | 78.7694868 | 73.3026603 | 72.1015175 | 71.2605634 | 65.7715278 |
| 16:06:37 | 0:06:57 | 77.7694868 | 75.3026603 | 75.1015175 | 71.2605634 | 69.7715278 |
| 16:06:38 | 0:06:58 | 76.7694868 | 75.3026603 | 75.1015175 | 71.2605634 | 69.7715278 |
| 16:06:39 | 0:06:59 | 75.7694868 | 75.3026603 | 75.1015175 | 70.2605634 | 70.7715278 |
| 16:06:40 | 0:07:00 | 74.7694868 | 75.3026603 | 75.1015175 | 70.2605634 | 71.7715278 |
| 16:06:41 | 0:07:01 | 74.7694868 | 74.3026603 | 76.1015175 | 70.2605634 | 76.7715278 |
| 16:06:42 | 0:07:02 | 74.7694868 | 73.3026603 | 75.1015175 | 70.2605634 | 79.7715278 |
| 16:06:43 | 0:07:03 | 72.7694868 | 73.3026603 | 74.1015175 | 70.2605634 | 81.7715278 |
| 16:06:44 | 0:07:04 | 70.7694868 | 71.3026603 | 73.1015175 | 71.2605634 | 81.7715278 |
| 16:06:45 | 0:07:05 | 70.7694868 | 71.3026603 | 73.1015175 | 71.2605634 | 81.7715278 |
| 16:06:46 | 0:07:06 | 69.7694868 | 71.3026603 | 72.1015175 | 71.2605634 | 81.7715278 |
| 16:06:47 | 0:07:07 | 68.7694868 | 71.3026603 | 72.1015175 | 70.2605634 | 81.7715278 |
| 16:06:48 | 0:07:08 | 68.7694868 | 71.3026603 | 72.1015175 | 69.2605634 | 81.7715278 |
| 16:06:49 | 0:07:09 | 68.7694868 | 72.3026603 | 72.1015175 | 68.2605634 | 79.7715278 |
| 16:06:50 | 0:07:10 | 69.7694868 | 73.3026603 | 72.1015175 | 68.2605634 | 79.7715278 |
| 16:06:51 | 0:07:11 | 69.7694868 | 75.3026603 | 72.1015175 | 68.2605634 | 76.7715278 |
| 16:06:52 | 0:07:12 | 70.7694868 | 76.3026603 | 69.1015175 | 71.2605634 | 72.7715278 |
| 16:06:53 | 0:07:13 | 70.7694868 | 76.3026603 | 69.1015175 | 72.2605634 | 72.7715278 |
| 16:06:54 | 0:07:14 | 70.7694868 | 74.3026603 | 68.1015175 | 72.2605634 | 71.7715278 |
| 16:06:55 | 0:07:15 | 70.7694868 | 73.3026603 | 69.1015175 | 73.2605634 | 70.7715278 |
| 16:06:56 | 0:07:16 | 70.7694868 | 72.3026603 | 71.1015175 | 73.2605634 | 71.7715278 |
| 16:06:57 | 0:07:17 | 70.7694868 | 72.3026603 | 73.1015175 | 74.2605634 | 71.7715278 |
| 16:06:58 | 0:07:18 | 70.7694868 | 72.3026603 | 73.1015175 | 74.2605634 | 73.7715278 |
| 16:06:59 | 0:07:19 | 70.7694868 | 72.3026603 | 73.1015175 | 74.2605634 | 75.7715278 |
| 16:07:00 | 0:07:20 | 70.7694868 | 74.3026603 | 69.1015175 | 74.2605634 | 77.7715278 |
| 16:07:01 | 0:07:21 | 71.7694868 | 74.3026603 | 67.1015175 | 74.2605634 | 77.7715278 |
| 16:07:02 | 0:07:22 | 71.7694868 | 74.3026603 | 67.1015175 | 74.2605634 | 75.7715278 |
| 16:07:03 | 0:07:23 | 72.7694868 | 75.3026603 | 66.1015175 | 71.2605634 | 75.7715278 |
| 16:07:04 | 0:07:24 | 72.7694868 | 75.3026603 | 65.1015175 | 70.2605634 | 76.7715278 |
| 16:07:05 | 0:07:25 | 72.7694868 | 76.3026603 | 66.1015175 | 70.2605634 | 76.7715278 |
| 16:07:06 | 0:07:26 | 71.7694868 | 76.3026603 | 66.1015175 | 69.2605634 | 76.7715278 |
| 16:07:07 | 0:07:27 | 72.7694868 | 77.3026603 | 67.1015175 | 69.2605634 | 76.7715278 |
| 16:07:08 | 0:07:28 | 72.7694868 | 77.3026603 | 68.1015175 | 70.2605634 | 76.7715278 |
| 16:07:09 | 0:07:29 | 72.7694868 | 79.3026603 | 68.1015175 | 73.2605634 | 76.7715278 |
| 16:07:10 | 0:07:30 | 73.7694868 | 80.3026603 | 69.1015175 | 75.2605634 | 76.7715278 |

|          |         |            |            |            |            |            |
|----------|---------|------------|------------|------------|------------|------------|
| 16:07:11 | 0:07:31 | 73.7694868 | 84.3026603 | 69.1015175 | 75.2605634 | 75.7715278 |
| 16:07:12 | 0:07:32 | 74.7694868 | 86.3026603 | 69.1015175 | 74.2605634 | 76.7715278 |
| 16:07:13 | 0:07:33 | 74.7694868 | 86.3026603 | 68.1015175 | 73.2605634 | 75.7715278 |
| 16:07:14 | 0:07:34 | 75.7694868 | 86.3026603 | 68.1015175 | 72.2605634 | 74.7715278 |
| 16:07:15 | 0:07:35 | 77.7694868 | 86.3026603 | 68.1015175 | 71.2605634 | 74.7715278 |
| 16:07:16 | 0:07:36 | 79.7694868 | 86.3026603 | 68.1015175 | 71.2605634 | 74.7715278 |
| 16:07:17 | 0:07:37 | 80.7694868 | 86.3026603 | 69.1015175 | 70.2605634 | 74.7715278 |
| 16:07:18 | 0:07:38 | 80.7694868 | 86.3026603 | 69.1015175 | 70.2605634 | 76.7715278 |
| 16:07:19 | 0:07:39 | 80.7694868 | 85.3026603 | 70.1015175 | 70.2605634 | 76.7715278 |
| 16:07:20 | 0:07:40 | 79.7694868 | 84.3026603 | 71.1015175 | 70.2605634 | 76.7715278 |
| 16:07:21 | 0:07:41 | 78.7694868 | 82.3026603 | 72.1015175 | 71.2605634 | 76.7715278 |
| 16:07:22 | 0:07:42 | 78.7694868 | 81.3026603 | 72.1015175 | 72.2605634 | 76.7715278 |
| 16:07:23 | 0:07:43 | 77.7694868 | 81.3026603 | 72.1015175 | 72.2605634 | 76.7715278 |
| 16:07:24 | 0:07:44 | 77.7694868 | 82.3026603 | 71.1015175 | 72.2605634 | 76.7715278 |
| 16:07:25 | 0:07:45 | 79.7694868 | 82.3026603 | 71.1015175 | 71.2605634 | 89.7715278 |
| 16:07:26 | 0:07:46 | 79.7694868 | 82.3026603 | 70.1015175 | 71.2605634 | 89.7715278 |
| 16:07:27 | 0:07:47 | 79.7694868 | 82.3026603 | 70.1015175 | 69.2605634 | 78.535756  |
| 16:07:28 | 0:07:48 | 79.7694868 | 81.3026603 | 69.1015175 | 69.2605634 | 78.535756  |
| 16:07:29 | 0:07:49 | 79.7694868 | 78.3026603 | 70.1015175 | 69.2605634 | 78.2630288 |
| 16:07:30 | 0:07:50 | 79.7694868 | 78.3026603 | 70.1015175 | 69.2605634 | 78.2630288 |
| 16:07:31 | 0:07:51 | 79.7694868 | 77.3026603 | 71.1015175 | 70.2605634 | 77.7175742 |
| 16:07:32 | 0:07:52 | 79.7694868 | 78.3026603 | 72.1015175 | 71.2605634 | 77.535756  |
| 16:07:33 | 0:07:53 | 79.7694868 | 78.3026603 | 71.1015175 | 72.2605634 | 77.8993924 |
| 16:07:34 | 0:07:54 | 79.7694868 | 79.3026603 | 71.1015175 | 71.2605634 | 77.9903015 |
| 16:07:35 | 0:07:55 | 78.7694868 | 79.3026603 | 70.1015175 | 71.2605634 | 77.9903015 |
| 16:07:36 | 0:07:56 | 78.7694868 | 79.3026603 | 69.1015175 | 68.2605634 | 77.9903015 |
| 16:07:37 | 0:07:57 | 78.7694868 | 79.3026603 | 70.1015175 | 68.2605634 | 78.4448469 |
| 16:07:38 | 0:07:58 | 78.7694868 | 80.3026603 | 73.1015175 | 68.2605634 | 78.6266651 |
| 16:07:39 | 0:07:59 | 79.7694868 | 81.3026603 | 75.1015175 | 67.2605634 | 78.9903015 |
| 16:07:40 | 0:08:00 | 79.7694868 | 81.3026603 | 75.1015175 | 67.2605634 | 78.8084833 |
| 16:07:41 | 0:08:01 | 78.7694868 | 81.3026603 | 76.1015175 | 70.2605634 | 78.8993924 |
| 16:07:42 | 0:08:02 | 78.7694868 | 81.3026603 | 75.1015175 | 71.2605634 | 78.9903015 |
| 16:07:43 | 0:08:03 | 78.7694868 | 81.3026603 | 73.1015175 | 71.2605634 | 79.0812106 |
| 16:07:44 | 0:08:04 | 79.7694868 | 82.3026603 | 72.1015175 | 72.2605634 | 79.4448469 |
| 16:07:45 | 0:08:05 | 79.7694868 | 82.3026603 | 72.1015175 | 72.2605634 | 79.6266651 |
| 16:07:46 | 0:08:06 | 80.7694868 | 84.3026603 | 72.1015175 | 72.2605634 | 79.9903015 |
| 16:07:47 | 0:08:07 | 72.7694868 | 84.3026603 | 73.1015175 | 72.2605634 | 79.6266651 |
| 16:07:48 | 0:08:08 | 68.7694868 | 85.3026603 | 73.1015175 | 72.2605634 | 78.9903015 |
| 16:07:49 | 0:08:09 | 66.7694868 | 84.3026603 | 73.1015175 | 73.2605634 | 78.535756  |
| 16:07:50 | 0:08:10 | 66.7694868 | 84.3026603 | 73.1015175 | 73.2605634 | 78.7175742 |
| 16:07:51 | 0:08:11 | 66.7694868 | 83.3026603 | 73.1015175 | 72.2605634 | 78.4448469 |
| 16:07:52 | 0:08:12 | 67.7694868 | 83.3026603 | 71.1015175 | 72.2605634 | 78.1721197 |
| 16:07:53 | 0:08:13 | 69.7694868 | 83.3026603 | 71.1015175 | 72.2605634 | 78.4448469 |
| 16:07:54 | 0:08:14 | 74.7694868 | 79.3026603 | 71.1015175 | 72.2605634 | 77.8993924 |
| 16:07:55 | 0:08:15 | 74.7694868 | 79.3026603 | 71.1015175 | 65.2605634 | 77.2630288 |

|          |         |            |            |            |            |            |
|----------|---------|------------|------------|------------|------------|------------|
| 16:07:56 | 0:08:16 | 79.7694868 | 79.3026603 | 73.1015175 | 64.2605634 | 78.0812106 |
| 16:07:57 | 0:08:17 | 79.7694868 | 78.3026603 | 74.1015175 | 65.2605634 | 78.6266651 |
| 16:07:58 | 0:08:18 | 79.7694868 | 78.3026603 | 75.1015175 | 65.2605634 | 78.3539378 |
| 16:07:59 | 0:08:19 | 79.7694868 | 78.3026603 | 75.1015175 | 65.2605634 | 77.9903015 |
| 16:08:00 | 0:08:20 | 79.7694868 | 79.3026603 | 74.1015175 | 67.2605634 | 77.6266651 |
| 16:08:01 | 0:08:21 | 79.7694868 | 79.3026603 | 74.1015175 | 68.2605634 | 76.7175742 |
| 16:08:02 | 0:08:22 | 79.7694868 | 79.3026603 | 73.1015175 | 69.2605634 | 76.4448469 |
| 16:08:03 | 0:08:23 | 79.7694868 | 75.3026603 | 73.1015175 | 68.2605634 | 76.1721197 |
| 16:08:04 | 0:08:24 | 79.7694868 | 73.3026603 | 73.1015175 | 66.2605634 | 75.7175742 |
| 16:08:05 | 0:08:25 | 78.7694868 | 73.3026603 | 73.1015175 | 65.2605634 | 75.9903015 |
| 16:08:06 | 0:08:26 | 79.7694868 | 72.3026603 | 74.1015175 | 65.2605634 | 76.7175742 |
| 16:08:07 | 0:08:27 | 81.7694868 | 73.3026603 | 75.1015175 | 64.2605634 | 76.8084833 |
| 16:08:08 | 0:08:28 | 81.7694868 | 73.3026603 | 75.1015175 | 65.2605634 | 76.8084833 |
| 16:08:09 | 0:08:29 | 81.7694868 | 74.3026603 | 76.1015175 | 66.2605634 | 77.0812106 |
| 16:08:10 | 0:08:30 | 81.7694868 | 74.3026603 | 76.1015175 | 66.2605634 | 76.9903015 |
| 16:08:11 | 0:08:31 | 81.7694868 | 74.3026603 | 77.1015175 | 66.2605634 | 76.9903015 |
| 16:08:12 | 0:08:32 | 79.7694868 | 74.3026603 | 77.1015175 | 66.2605634 | 76.8084833 |
| 16:08:13 | 0:08:33 | 79.7694868 | 75.3026603 | 78.1015175 | 65.2605634 | 76.535756  |
| 16:08:14 | 0:08:34 | 77.7694868 | 75.3026603 | 80.1015175 | 65.2605634 | 77.1721197 |
| 16:08:15 | 0:08:35 | 76.7694868 | 75.3026603 | 80.1015175 | 65.2605634 | 77.8993924 |
| 16:08:16 | 0:08:36 | 76.7694868 | 75.3026603 | 80.1015175 | 66.2605634 | 78.535756  |
| 16:08:17 | 0:08:37 | 75.7694868 | 74.3026603 | 81.1015175 | 66.2605634 | 78.8993924 |
| 16:08:18 | 0:08:38 | 75.7694868 | 73.3026603 | 82.1015175 | 66.2605634 | 78.8084833 |
| 16:08:19 | 0:08:39 | 75.7694868 | 73.3026603 | 85.1015175 | 66.2605634 | 78.8993924 |
| 16:08:20 | 0:08:40 | 75.7694868 | 73.3026603 | 85.1015175 | 66.2605634 | 78.8084833 |
| 16:08:21 | 0:08:41 | 75.7694868 | 73.3026603 | 86.1015175 | 68.2605634 | 79.2630288 |
| 16:08:22 | 0:08:42 | 75.7694868 | 74.3026603 | 86.1015175 | 69.2605634 | 79.1721197 |
| 16:08:23 | 0:08:43 | 75.7694868 | 76.3026603 | 85.1015175 | 70.2605634 | 79.4448469 |
| 16:08:24 | 0:08:44 | 75.7694868 | 76.3026603 | 85.1015175 | 70.2605634 | 79.4448469 |
| 16:08:25 | 0:08:45 | 74.7694868 | 77.3026603 | 85.1015175 | 71.2605634 | 79.7175742 |
| 16:08:26 | 0:08:46 | 74.7694868 | 78.3026603 | 82.1015175 | 71.2605634 | 80.1721197 |
| 16:08:27 | 0:08:47 | 74.7694868 | 78.3026603 | 81.1015175 | 71.2605634 | 80.6266651 |
| 16:08:28 | 0:08:48 | 73.7694868 | 78.3026603 | 80.1015175 | 71.2605634 | 80.7175742 |
| 16:08:29 | 0:08:49 | 71.7694868 | 78.3026603 | 74.1015175 | 70.2605634 | 79.4448469 |
| 16:08:30 | 0:08:50 | 71.7694868 | 78.3026603 | 74.1015175 | 70.2605634 | 79.7175742 |
| 16:08:31 | 0:08:51 | 71.7694868 | 78.3026603 | 72.1015175 | 70.2605634 | 78.9903015 |
| 16:08:32 | 0:08:52 | 71.7694868 | 79.3026603 | 71.1015175 | 70.2605634 | 78.9903015 |
| 16:08:33 | 0:08:53 | 71.7694868 | 80.3026603 | 71.1015175 | 70.2605634 | 79.1721197 |
| 16:08:34 | 0:08:54 | 71.7694868 | 81.3026603 | 73.1015175 | 71.2605634 | 79.2630288 |
| 16:08:35 | 0:08:55 | 71.7694868 | 82.3026603 | 73.1015175 | 71.2605634 | 78.9903015 |
| 16:08:36 | 0:08:56 | 71.7694868 | 83.3026603 | 74.1015175 | 72.2605634 | 78.9903015 |
| 16:08:37 | 0:08:57 | 72.7694868 | 83.3026603 | 77.1015175 | 73.2605634 | 79.4448469 |
| 16:08:38 | 0:08:58 | 82.0812106 | 83.3026603 | 77.1015175 | 73.2605634 | 82.0812106 |
| 16:08:39 | 0:08:59 | 82.1721197 | 83.3026603 | 77.1015175 | 73.2605634 | 82.1721197 |
| 16:08:40 | 0:09:00 | 82.3539378 | 84.3026603 | 78.1015175 | 73.2605634 | 82.3539378 |

|          |         |            |            |            |            |            |
|----------|---------|------------|------------|------------|------------|------------|
| 16:08:41 | 0:09:01 | 82.0812106 | 83.3026603 | 78.1015175 | 74.2605634 | 82.0812106 |
| 16:08:42 | 0:09:02 | 82.1721197 | 83.3026603 | 79.1015175 | 75.2605634 | 82.1721197 |
| 16:08:43 | 0:09:03 | 81.9903015 | 80.3026603 | 79.1015175 | 75.2605634 | 81.9903015 |
| 16:08:44 | 0:09:04 | 81.9903015 | 78.3026603 | 79.1015175 | 74.2605634 | 81.9903015 |
| 16:08:45 | 0:09:05 | 82.6266651 | 78.3026603 | 80.1015175 | 74.2605634 | 82.6266651 |
| 16:08:46 | 0:09:06 | 82.3539378 | 76.3026603 | 81.1015175 | 70.2605634 | 82.3539378 |
| 16:08:47 | 0:09:07 | 82.7175742 | 76.3026603 | 81.1015175 | 70.2605634 | 82.7175742 |
| 16:08:48 | 0:09:08 | 82.0812106 | 76.3026603 | 81.1015175 | 70.2605634 | 82.0812106 |
| 16:08:49 | 0:09:09 | 82.4448469 | 77.3026603 | 81.1015175 | 72.2605634 | 82.4448469 |
| 16:08:50 | 0:09:10 | 82.7175742 | 77.3026603 | 84.1015175 | 73.2605634 | 82.7175742 |
| 16:08:51 | 0:09:11 | 82.4448469 | 77.3026603 | 86.1015175 | 73.2605634 | 82.4448469 |
| 16:08:52 | 0:09:12 | 85.7694868 | 78.3026603 | 87.1015175 | 73.2605634 | 81.4448469 |
| 16:08:53 | 0:09:13 | 80.7694868 | 79.3026603 | 87.1015175 | 72.2605634 | 81.4448469 |
| 16:08:54 | 0:09:14 | 78.7694868 | 78.3026603 | 87.1015175 | 71.2605634 | 80.9903015 |
| 16:08:55 | 0:09:15 | 77.7694868 | 77.3026603 | 89.1015175 | 71.2605634 | 80.8084833 |
| 16:08:56 | 0:09:16 | 76.7694868 | 76.3026603 | 90.1015175 | 71.2605634 | 80.8084833 |
| 16:08:57 | 0:09:17 | 76.7694868 | 76.3026603 | 90.1015175 | 72.2605634 | 80.6266651 |
| 16:08:58 | 0:09:18 | 76.7694868 | 73.3026603 | 89.1015175 | 72.2605634 | 80.6266651 |
| 16:08:59 | 0:09:19 | 76.7694868 | 71.3026603 | 86.1015175 | 72.2605634 | 79.7175742 |
| 16:09:00 | 0:09:20 | 76.7694868 | 71.3026603 | 86.1015175 | 71.2605634 | 79.8084833 |
| 16:09:01 | 0:09:21 | 77.7694868 | 73.3026603 | 84.1015175 | 71.2605634 | 79.8993924 |
| 16:09:02 | 0:09:22 | 77.7694868 | 74.3026603 | 83.1015175 | 71.2605634 | 79.8993924 |
| 16:09:03 | 0:09:23 | 76.7694868 | 76.3026603 | 80.1015175 | 72.2605634 | 79.7175742 |
| 16:09:04 | 0:09:24 | 76.7694868 | 77.3026603 | 80.1015175 | 71.2605634 | 79.6266651 |
| 16:09:05 | 0:09:25 | 76.7694868 | 77.3026603 | 80.1015175 | 73.2605634 | 79.6266651 |
| 16:09:06 | 0:09:26 | 75.7694868 | 78.3026603 | 77.1015175 | 73.2605634 | 78.9903015 |
| 16:09:07 | 0:09:27 | 74.7694868 | 79.3026603 | 72.1015175 | 73.2605634 | 78.1721197 |
| 16:09:08 | 0:09:28 | 74.7694868 | 78.3026603 | 72.1015175 | 73.2605634 | 77.8993924 |
| 16:09:09 | 0:09:29 | 72.7694868 | 76.3026603 | 70.1015175 | 73.2605634 | 77.0812106 |
| 16:09:10 | 0:09:30 | 71.7694868 | 76.3026603 | 70.1015175 | 78.2605634 | 77.1721197 |
| 16:09:11 | 0:09:31 | 71.7694868 | 73.3026603 | 72.1015175 | 79.2605634 | 77.1721197 |
| 16:09:12 | 0:09:32 | 69.7694868 | 73.3026603 | 72.1015175 | 80.2605634 | 80.7715278 |
| 16:09:13 | 0:09:33 | 68.7694868 | 73.3026603 | 72.1015175 | 80.2605634 | 80.7715278 |
| 16:09:14 | 0:09:34 | 68.7694868 | 75.3026603 | 72.1015175 | 80.2605634 | 78.7715278 |
| 16:09:15 | 0:09:35 | 67.7694868 | 76.3026603 | 72.1015175 | 75.2605634 | 78.7715278 |
| 16:09:16 | 0:09:36 | 67.7694868 | 77.3026603 | 71.1015175 | 75.2605634 | 79.7715278 |
| 16:09:17 | 0:09:37 | 67.7694868 | 77.3026603 | 71.1015175 | 75.2605634 | 79.7715278 |
| 16:09:18 | 0:09:38 | 67.7694868 | 77.3026603 | 71.1015175 | 75.2605634 | 79.7715278 |
| 16:09:19 | 0:09:39 | 67.7694868 | 76.3026603 | 71.1015175 | 76.2605634 | 79.7715278 |
| 16:09:20 | 0:09:40 | 67.7694868 | 75.3026603 | 72.1015175 | 74.2605634 | 79.7715278 |
| 16:09:21 | 0:09:41 | 67.7694868 | 75.3026603 | 73.1015175 | 73.2605634 | 79.7715278 |
| 16:09:22 | 0:09:42 | 67.7694868 | 73.3026603 | 73.1015175 | 71.2605634 | 77.7715278 |
| 16:09:23 | 0:09:43 | 67.7694868 | 72.3026603 | 73.1015175 | 70.2605634 | 76.7715278 |
| 16:09:24 | 0:09:44 | 67.7694868 | 72.3026603 | 72.1015175 | 69.2605634 | 76.7715278 |
| 16:09:25 | 0:09:45 | 72.7694868 | 72.3026603 | 72.1015175 | 68.2605634 | 76.7715278 |

|          |         |            |            |            |            |            |
|----------|---------|------------|------------|------------|------------|------------|
| 16:09:26 | 0:09:46 | 72.7694868 | 73.3026603 | 71.1015175 | 68.2605634 | 76.7715278 |
| 16:09:27 | 0:09:47 | 71.7694868 | 75.3026603 | 70.1015175 | 68.2605634 | 76.7715278 |
| 16:09:28 | 0:09:48 | 71.7694868 | 75.3026603 | 68.1015175 | 68.2605634 | 76.7715278 |
| 16:09:29 | 0:09:49 | 70.7694868 | 75.3026603 | 68.1015175 | 68.2605634 | 76.7715278 |
| 16:09:30 | 0:09:50 | 69.7694868 | 74.3026603 | 66.1015175 | 68.2605634 | 74.7715278 |
| 16:09:31 | 0:09:51 | 69.7694868 | 74.3026603 | 66.1015175 | 68.2605634 | 74.7715278 |
| 16:09:32 | 0:09:52 | 69.7694868 | 74.3026603 | 67.1015175 | 68.2605634 | 75.7715278 |
| 16:09:33 | 0:09:53 | 69.7694868 | 75.3026603 | 67.1015175 | 67.2605634 | 75.7715278 |
| 16:09:34 | 0:09:54 | 69.7694868 | 76.3026603 | 68.1015175 | 66.2605634 | 75.7715278 |
| 16:09:35 | 0:09:55 | 69.7694868 | 77.3026603 | 67.1015175 | 66.2605634 | 75.7715278 |
| 16:09:36 | 0:09:56 | 69.7694868 | 77.3026603 | 67.1015175 | 66.2605634 | 74.7715278 |
| 16:09:37 | 0:09:57 | 69.7694868 | 76.3026603 | 66.1015175 | 67.2605634 | 74.7715278 |
| 16:09:38 | 0:09:58 | 69.7694868 | 76.3026603 | 67.1015175 | 68.2605634 | 74.7715278 |
| 16:09:39 | 0:09:59 | 69.7694868 | 74.3026603 | 67.1015175 | 68.2605634 | 73.7715278 |
| 16:09:40 | 0:10:00 | 69.7694868 | 74.3026603 | 67.1015175 | 68.2605634 | 73.7715278 |
| 16:09:41 | 0:10:01 | 69.7694868 | 74.3026603 | 67.1015175 | 68.2605634 | 73.7715278 |
| 16:09:42 | 0:10:02 | 69.7694868 | 72.3026603 | 67.1015175 | 68.2605634 | 73.7715278 |
| 16:09:43 | 0:10:03 | 69.7694868 | 71.3026603 | 67.1015175 | 67.2605634 | 73.7715278 |
| 16:09:44 | 0:10:04 | 69.7694868 | 71.3026603 | 67.1015175 | 68.2605634 | 72.7715278 |
| 16:09:45 | 0:10:05 | 69.7694868 | 70.3026603 | 67.1015175 | 70.2605634 | 73.7715278 |
| 16:09:46 | 0:10:06 | 69.7694868 | 69.3026603 | 68.1015175 | 70.2605634 | 72.7715278 |
| 16:09:47 | 0:10:07 | 69.7694868 | 69.3026603 | 68.1015175 | 70.2605634 | 72.7715278 |
| 16:09:48 | 0:10:08 | 69.7694868 | 68.3026603 | 68.1015175 | 70.2605634 | 72.7715278 |
| 16:09:49 | 0:10:09 | 70.7694868 | 66.3026603 | 69.1015175 | 69.2605634 | 72.7715278 |
| 16:09:50 | 0:10:10 | 70.7694868 | 66.3026603 | 68.1015175 | 69.2605634 | 72.7715278 |
| 16:09:51 | 0:10:11 | 73.7694868 | 66.3026603 | 67.1015175 | 70.2605634 | 72.7715278 |
| 16:09:52 | 0:10:12 | 73.7694868 | 66.3026603 | 66.1015175 | 70.2605634 | 72.7715278 |
| 16:09:53 | 0:10:13 | 73.7694868 | 66.3026603 | 66.1015175 | 70.2605634 | 72.7715278 |
| 16:09:54 | 0:10:14 | 73.7694868 | 76.3026603 | 65.1015175 | 70.2605634 | 71.7715278 |
| 16:09:55 | 0:10:15 | 73.7694868 | 85.3026603 | 65.1015175 | 70.2605634 | 71.7715278 |
| 16:09:56 | 0:10:16 | 74.7694868 | 74.0812106 | 65.1015175 | 70.2605634 | 71.7715278 |
| 16:09:57 | 0:10:17 | 75.7694868 | 74.6266651 | 65.1015175 | 71.2605634 | 72.7715278 |
| 16:09:58 | 0:10:18 | 77.7694868 | 74.7175742 | 65.1015175 | 72.2605634 | 72.7715278 |
| 16:09:59 | 0:10:19 | 80.7694868 | 73.535756  | 65.1015175 | 69.2605634 | 72.7715278 |
| 16:10:00 | 0:10:20 | 83.7694868 | 72.8084833 | 65.1015175 | 65.2605634 | 72.7715278 |
| 16:10:01 | 0:10:21 | 84.7694868 | 83.3026603 | 65.1015175 | 65.2605634 | 73.7715278 |
| 16:10:02 | 0:10:22 | 72.7175742 | 79.3026603 | 66.1015175 | 64.2605634 | 72.7715278 |
| 16:10:03 | 0:10:23 | 72.1721197 | 76.3026603 | 67.1015175 | 65.2605634 | 72.7715278 |
| 16:10:04 | 0:10:24 | 72.9903015 | 76.3026603 | 67.1015175 | 65.2605634 | 72.7715278 |
| 16:10:05 | 0:10:25 | 73.0812106 | 77.3026603 | 67.1015175 | 66.2605634 | 72.7715278 |
| 16:10:06 | 0:10:26 | 73.535756  | 77.3026603 | 67.1015175 | 66.2605634 | 71.7715278 |
| 16:10:07 | 0:10:27 | 73.8084833 | 77.3026603 | 68.1015175 | 66.2605634 | 70.7715278 |
| 16:10:08 | 0:10:28 | 73.9903015 | 77.3026603 | 69.1015175 | 67.2605634 | 70.7715278 |
| 16:10:09 | 0:10:29 | 74.535756  | 78.3026603 | 69.1015175 | 68.2605634 | 70.7715278 |
| 16:10:10 | 0:10:30 | 74.3539378 | 78.3026603 | 69.1015175 | 68.2605634 | 67.7715278 |

|          |         |            |            |            |            |            |
|----------|---------|------------|------------|------------|------------|------------|
| 16:10:11 | 0:10:31 | 74.1721197 | 78.3026603 | 71.1015175 | 67.2605634 | 66.7715278 |
| 16:10:12 | 0:10:32 | 74.1721197 | 78.3026603 | 71.1015175 | 67.2605634 | 66.7715278 |
| 16:10:13 | 0:10:33 | 87.7694868 | 80.3026603 | 72.1015175 | 65.2605634 | 66.7715278 |
| 16:10:14 | 0:10:34 | 86.7694868 | 82.3026603 | 72.1015175 | 65.2605634 | 66.7715278 |
| 16:10:15 | 0:10:35 | 86.7694868 | 83.3026603 | 72.1015175 | 65.2605634 | 66.7715278 |
| 16:10:16 | 0:10:36 | 86.7694868 | 83.3026603 | 73.1015175 | 65.2605634 | 66.7715278 |
| 16:10:17 | 0:10:37 | 85.7694868 | 83.3026603 | 74.1015175 | 65.2605634 | 67.7715278 |
| 16:10:18 | 0:10:38 | 76.7694868 | 83.3026603 | 74.1015175 | 65.2605634 | 71.7715278 |
| 16:10:19 | 0:10:39 | 73.7694868 | 84.3026603 | 74.1015175 | 65.2605634 | 76.7715278 |
| 16:10:20 | 0:10:40 | 73.7694868 | 84.3026603 | 75.1015175 | 64.2605634 | 77.7715278 |
| 16:10:21 | 0:10:41 | 72.7694868 | 83.3026603 | 75.1015175 | 64.2605634 | 77.7715278 |
| 16:10:22 | 0:10:42 | 72.7694868 | 81.3026603 | 78.1015175 | 64.2605634 | 76.7715278 |
| 16:10:23 | 0:10:43 | 72.7694868 | 79.3026603 | 78.1015175 | 64.2605634 | 78.7715278 |
| 16:10:24 | 0:10:44 | 72.7694868 | 79.3026603 | 82.1015175 | 64.2605634 | 79.7715278 |
| 16:10:25 | 0:10:45 | 71.7694868 | 77.3026603 | 85.1015175 | 64.2605634 | 79.7715278 |
| 16:10:26 | 0:10:46 | 71.7694868 | 75.3026603 | 88.1015175 | 66.2605634 | 80.7715278 |
| 16:10:27 | 0:10:47 | 71.7694868 | 73.3026603 | 74.2630288 | 66.2605634 | 81.7715278 |
| 16:10:28 | 0:10:48 | 71.7694868 | 73.3026603 | 74.0812106 | 66.2605634 | 81.7715278 |
| 16:10:29 | 0:10:49 | 71.7694868 | 72.3026603 | 74.535756  | 66.2605634 | 82.7715278 |
| 16:10:30 | 0:10:50 | 71.7694868 | 72.3026603 | 74.8993924 | 74.2605634 | 82.7715278 |
| 16:10:31 | 0:10:51 | 71.7694868 | 72.3026603 | 74.0812106 | 66.2605634 | 82.7715278 |
| 16:10:32 | 0:10:52 | 77.7694868 | 72.3026603 | 86.1015175 | 65.2605634 | 81.7715278 |
| 16:10:33 | 0:10:53 | 78.7694868 | 74.3026603 | 84.1015175 | 65.2605634 | 81.7715278 |
| 16:10:34 | 0:10:54 | 78.7694868 | 76.3026603 | 84.1015175 | 65.2605634 | 81.7715278 |
| 16:10:35 | 0:10:55 | 77.7694868 | 77.3026603 | 81.1015175 | 64.2605634 | 81.7715278 |
| 16:10:36 | 0:10:56 | 77.7694868 | 78.3026603 | 80.1015175 | 64.2605634 | 81.7715278 |
| 16:10:37 | 0:10:57 | 77.7694868 | 78.3026603 | 79.1015175 | 64.2605634 | 80.7715278 |
| 16:10:38 | 0:10:58 | 77.7694868 | 79.3026603 | 76.1015175 | 66.2605634 | 80.7715278 |
| 16:10:39 | 0:10:59 | 77.7694868 | 79.3026603 | 76.1015175 | 66.2605634 | 80.7715278 |
| 16:10:40 | 0:11:00 | 77.7694868 | 79.3026603 | 69.1015175 | 68.2605634 | 80.7715278 |
| 16:10:41 | 0:11:01 | 77.7694868 | 78.3026603 | 67.1015175 | 68.2605634 | 80.7715278 |
| 16:10:42 | 0:11:02 | 76.7694868 | 76.3026603 | 66.1015175 | 68.2605634 | 80.7715278 |
| 16:10:43 | 0:11:03 | 75.7694868 | 75.3026603 | 65.1015175 | 68.2605634 | 80.7715278 |
| 16:10:44 | 0:11:04 | 75.7694868 | 75.3026603 | 65.1015175 | 69.2605634 | 80.7715278 |
| 16:10:45 | 0:11:05 | 74.7694868 | 75.3026603 | 66.1015175 | 69.2605634 | 79.7715278 |
| 16:10:46 | 0:11:06 | 74.7694868 | 76.3026603 | 66.1015175 | 70.2605634 | 79.7715278 |
| 16:10:47 | 0:11:07 | 74.7694868 | 77.3026603 | 66.1015175 | 71.2605634 | 79.7715278 |
| 16:10:48 | 0:11:08 | 75.7694868 | 78.3026603 | 66.1015175 | 71.2605634 | 79.7715278 |
| 16:10:49 | 0:11:09 | 75.7694868 | 78.3026603 | 66.1015175 | 70.2605634 | 88.7715278 |
| 16:10:50 | 0:11:10 | 75.7694868 | 78.3026603 | 66.1015175 | 70.2605634 | 78.1721197 |
| 16:10:51 | 0:11:11 | 74.7694868 | 78.3026603 | 67.1015175 | 70.2605634 | 78.3539378 |
| 16:10:52 | 0:11:12 | 74.7694868 | 78.3026603 | 68.1015175 | 70.2605634 | 78.2630288 |
| 16:10:53 | 0:11:13 | 74.7694868 | 78.3026603 | 68.1015175 | 70.2605634 | 78.1721197 |
| 16:10:54 | 0:11:14 | 75.7694868 | 78.3026603 | 68.1015175 | 69.2605634 | 77.9903015 |
| 16:10:55 | 0:11:15 | 75.7694868 | 78.3026603 | 68.1015175 | 68.2605634 | 77.535756  |



|          |         |            |            |            |            |            |
|----------|---------|------------|------------|------------|------------|------------|
| 16:10:56 | 0:11:16 | 73.7694868 | 79.3026603 | 68.1015175 | 68.2605634 | 77.535756  |
| 16:10:57 | 0:11:17 | 73.7694868 | 79.3026603 | 70.1015175 | 68.2605634 | 77.2630288 |
| 16:10:58 | 0:11:18 | 73.7694868 | 80.3026603 | 72.1015175 | 69.2605634 | 77.2630288 |
| 16:10:59 | 0:11:19 | 73.7694868 | 80.3026603 | 72.1015175 | 68.2605634 | 76.9903015 |
| 16:11:00 | 0:11:20 | 73.7694868 | 80.3026603 | 73.1015175 | 69.2605634 | 76.6266651 |
| 16:11:01 | 0:11:21 | 73.7694868 | 79.3026603 | 73.1015175 | 69.2605634 | 76.4448469 |
| 16:11:02 | 0:11:22 | 73.7694868 | 78.3026603 | 74.1015175 | 70.2605634 | 75.2630288 |
| 16:11:03 | 0:11:23 | 74.7694868 | 77.3026603 | 74.1015175 | 69.2605634 | 89.7715278 |
| 16:11:04 | 0:11:24 | 74.7694868 | 75.3026603 | 73.1015175 | 69.2605634 | 84.7715278 |
| 16:11:05 | 0:11:25 | 76.7694868 | 74.3026603 | 73.1015175 | 69.2605634 | 80.7715278 |
| 16:11:06 | 0:11:26 | 76.7694868 | 74.3026603 | 73.1015175 | 69.2605634 | 80.7715278 |
| 16:11:07 | 0:11:27 | 76.7694868 | 73.3026603 | 73.1015175 | 68.2605634 | 78.7715278 |
| 16:11:08 | 0:11:28 | 76.7694868 | 72.3026603 | 73.1015175 | 67.2605634 | 78.7715278 |
| 16:11:09 | 0:11:29 | 75.7694868 | 73.3026603 | 73.1015175 | 67.2605634 | 78.7715278 |
| 16:11:10 | 0:11:30 | 75.7694868 | 74.3026603 | 73.1015175 | 68.2605634 | 77.7715278 |
| 16:11:11 | 0:11:31 | 75.7694868 | 77.3026603 | 73.1015175 | 68.2605634 | 76.7715278 |
| 16:11:12 | 0:11:32 | 75.7694868 | 81.3026603 | 73.1015175 | 68.2605634 | 76.7715278 |
| 16:11:13 | 0:11:33 | 75.7694868 | 83.3026603 | 73.1015175 | 68.2605634 | 75.7715278 |
| 16:11:14 | 0:11:34 | 75.7694868 | 84.3026603 | 73.1015175 | 69.2605634 | 75.7715278 |
| 16:11:15 | 0:11:35 | 75.7694868 | 85.3026603 | 73.1015175 | 69.2605634 | 73.7715278 |
| 16:11:16 | 0:11:36 | 75.7694868 | 86.3026603 | 75.1015175 | 69.2605634 | 70.7715278 |
| 16:11:17 | 0:11:37 | 75.7694868 | 86.3026603 | 75.1015175 | 75.2605634 | 70.7715278 |
| 16:11:18 | 0:11:38 | 75.7694868 | 86.3026603 | 76.1015175 | 78.2605634 | 70.7715278 |
| 16:11:19 | 0:11:39 | 75.7694868 | 85.3026603 | 75.1015175 | 80.2605634 | 70.7715278 |
| 16:11:20 | 0:11:40 | 75.7694868 | 85.3026603 | 73.1015175 | 80.2605634 | 69.7715278 |
| 16:11:21 | 0:11:41 | 75.7694868 | 85.3026603 | 72.1015175 | 81.2605634 | 68.7715278 |
| 16:11:22 | 0:11:42 | 75.7694868 | 84.3026603 | 72.1015175 | 80.2605634 | 68.7715278 |
| 16:11:23 | 0:11:43 | 76.7694868 | 84.3026603 | 72.1015175 | 79.2605634 | 66.7715278 |
| 16:11:24 | 0:11:44 | 76.7694868 | 83.3026603 | 73.1015175 | 77.2605634 | 66.7715278 |
| 16:11:25 | 0:11:45 | 76.7694868 | 76.3026603 | 74.1015175 | 76.2605634 | 65.7715278 |
| 16:11:26 | 0:11:46 | 76.7694868 | 72.3026603 | 74.1015175 | 76.2605634 | 65.7715278 |
| 16:11:27 | 0:11:47 | 76.7694868 | 69.3026603 | 74.1015175 | 74.2605634 | 65.7715278 |
| 16:11:28 | 0:11:48 | 76.7694868 | 67.3026603 | 73.1015175 | 75.2605634 | 65.7715278 |
| 16:11:29 | 0:11:49 | 76.7694868 | 67.3026603 | 71.1015175 | 75.2605634 | 64.7715278 |
| 16:11:30 | 0:11:50 | 76.7694868 | 66.3026603 | 70.1015175 | 75.2605634 | 64.7715278 |
| 16:11:31 | 0:11:51 | 76.7694868 | 66.3026603 | 70.1015175 | 76.2605634 | 64.7715278 |
| 16:11:32 | 0:11:52 | 75.7694868 | 71.3026603 | 71.1015175 | 76.2605634 | 64.7715278 |
| 16:11:33 | 0:11:53 | 75.7694868 | 72.3026603 | 73.1015175 | 76.2605634 | 64.7715278 |
| 16:11:34 | 0:11:54 | 75.7694868 | 72.3026603 | 74.1015175 | 76.2605634 | 65.7715278 |
| 16:11:35 | 0:11:55 | 73.7694868 | 72.3026603 | 75.1015175 | 75.2605634 | 65.7715278 |
| 16:11:36 | 0:11:56 | 73.7694868 | 73.3026603 | 75.1015175 | 74.2605634 | 65.7715278 |
| 16:11:37 | 0:11:57 | 72.7694868 | 75.3026603 | 76.1015175 | 73.2605634 | 65.7715278 |
| 16:11:38 | 0:11:58 | 71.7694868 | 76.3026603 | 74.1015175 | 73.2605634 | 66.7715278 |
| 16:11:39 | 0:11:59 | 71.7694868 | 77.3026603 | 74.1015175 | 72.2605634 | 69.7715278 |
| 16:11:40 | 0:12:00 | 73.7694868 | 77.3026603 | 74.1015175 | 72.2605634 | 69.7715278 |

|          |         |            |            |            |            |            |
|----------|---------|------------|------------|------------|------------|------------|
| 16:11:41 | 0:12:01 | 75.7694868 | 75.3026603 | 74.1015175 | 71.2605634 | 69.7715278 |
| 16:11:42 | 0:12:02 | 75.7694868 | 71.3026603 | 73.1015175 | 70.2605634 | 68.7715278 |
| 16:11:43 | 0:12:03 | 74.7694868 | 69.3026603 | 72.1015175 | 69.2605634 | 68.7715278 |
| 16:11:44 | 0:12:04 | 74.7694868 | 66.3026603 | 72.1015175 | 69.2605634 | 68.7715278 |
| 16:11:45 | 0:12:05 | 74.7694868 | 65.3026603 | 70.1015175 | 69.2605634 | 69.7715278 |
| 16:11:46 | 0:12:06 | 73.7694868 | 65.3026603 | 70.1015175 | 69.2605634 | 67.7715278 |
| 16:11:47 | 0:12:07 | 73.7694868 | 65.3026603 | 71.1015175 | 70.2605634 | 66.7715278 |
| 16:11:48 | 0:12:08 | 73.7694868 | 64.3026603 | 72.1015175 | 70.2605634 | 66.7715278 |
| 16:11:49 | 0:12:09 | 73.7694868 | 63.3026603 | 72.1015175 | 71.2605634 | 66.7715278 |
| 16:11:50 | 0:12:10 | 73.7694868 | 63.3026603 | 73.1015175 | 71.2605634 | 64.7715278 |
| 16:11:51 | 0:12:11 | 73.7694868 | 63.3026603 | 73.1015175 | 71.2605634 | 63.7715278 |
| 16:11:52 | 0:12:12 | 72.7694868 | 62.3026603 | 73.1015175 | 69.2605634 | 63.7715278 |
| 16:11:53 | 0:12:13 | 72.7694868 | 62.3026603 | 72.1015175 | 69.2605634 | 63.7715278 |
| 16:11:54 | 0:12:14 | 71.7694868 | 73.3026603 | 72.1015175 | 69.2605634 | 63.7715278 |
| 16:11:55 | 0:12:15 | 71.7694868 | 73.3026603 | 73.1015175 | 69.2605634 | 56.7715278 |
| 16:11:56 | 0:12:16 | 69.7694868 | 73.3026603 | 73.1015175 | 69.2605634 | 56.7715278 |
| 16:11:57 | 0:12:17 | 70.7694868 | 75.3026603 | 73.1015175 | 69.2605634 | 56.7715278 |
| 16:11:58 | 0:12:18 | 73.7694868 | 75.3026603 | 72.1015175 | 69.2605634 | 56.7715278 |
| 16:11:59 | 0:12:19 | 74.7694868 | 75.3026603 | 72.1015175 | 69.2605634 | 54.7715278 |
| 16:12:00 | 0:12:20 | 74.7694868 | 75.3026603 | 72.1015175 | 69.2605634 | 54.7715278 |
| 16:12:01 | 0:12:21 | 74.7694868 | 77.3026603 | 69.1015175 | 69.2605634 | 52.7715278 |
| 16:12:02 | 0:12:22 | 75.7694868 | 75.3026603 | 68.1015175 | 69.2605634 | 51.7715278 |
| 16:12:03 | 0:12:23 | 75.7694868 | 72.3026603 | 68.1015175 | 70.2605634 | 51.7715278 |
| 16:12:04 | 0:12:24 | 76.7694868 | 70.3026603 | 67.1015175 | 71.2605634 | 51.7715278 |
| 16:12:05 | 0:12:25 | 76.7694868 | 68.3026603 | 67.1015175 | 71.2605634 | 51.7715278 |
| 16:12:06 | 0:12:26 | 76.7694868 | 67.3026603 | 67.1015175 | 71.2605634 | 52.7715278 |
| 16:12:07 | 0:12:27 | 76.7694868 | 66.3026603 | 67.1015175 | 70.2605634 | 50.7715278 |
| 16:12:08 | 0:12:28 | 78.7694868 | 66.3026603 | 69.1015175 | 69.2605634 | 49.7715278 |
| 16:12:09 | 0:12:29 | 81.7694868 | 67.3026603 | 68.1015175 | 69.2605634 | 49.7715278 |
| 16:12:10 | 0:12:30 | 81.7694868 | 68.3026603 | 68.1015175 | 68.2605634 | 48.7715278 |
| 16:12:11 | 0:12:31 | 81.7694868 | 70.3026603 | 68.1015175 | 68.2605634 | 48.7715278 |
| 16:12:12 | 0:12:32 | 81.7694868 | 71.3026603 | 69.1015175 | 69.2605634 | 48.7715278 |
| 16:12:13 | 0:12:33 | 82.7694868 | 72.3026603 | 69.1015175 | 69.2605634 | 45.7715278 |
| 16:12:14 | 0:12:34 | 82.7694868 | 74.3026603 | 69.1015175 | 70.2605634 | 45.7715278 |
| 16:12:15 | 0:12:35 | 83.7694868 | 75.3026603 | 69.1015175 | 71.2605634 | 44.7715278 |
| 16:12:16 | 0:12:36 | 83.7694868 | 75.3026603 | 68.1015175 | 71.2605634 | 43.7715278 |
| 16:12:17 | 0:12:37 | 83.7694868 | 74.3026603 | 68.1015175 | 72.2605634 | 43.7715278 |
| 16:12:18 | 0:12:38 | 85.7694868 | 73.3026603 | 67.1015175 | 73.2605634 | 41.7715278 |
| 16:12:19 | 0:12:39 | 84.7694868 | 73.3026603 | 67.1015175 | 74.2605634 | 41.7715278 |
| 16:12:20 | 0:12:40 | 84.7694868 | 72.3026603 | 66.1015175 | 74.2605634 | 40.7715278 |
| 16:12:21 | 0:12:41 | 85.7694868 | 72.3026603 | 66.1015175 | 74.2605634 | 40.7715278 |
| 16:12:22 | 0:12:42 | 85.7694868 | 72.3026603 | 66.1015175 | 74.2605634 | 39.7715278 |
| 16:12:23 | 0:12:43 | 77.7694868 | 72.3026603 | 66.1015175 | 74.2605634 | 42.7715278 |
| 16:12:24 | 0:12:44 | 76.7694868 | 72.3026603 | 66.1015175 | 75.2605634 | 42.7715278 |
| 16:12:25 | 0:12:45 | 76.7694868 | 72.3026603 | 71.1015175 | 75.2605634 | 44.7715278 |

|          |         |            |            |            |            |            |
|----------|---------|------------|------------|------------|------------|------------|
| 16:12:26 | 0:12:46 | 76.7694868 | 72.3026603 | 76.1015175 | 75.2605634 | 47.7715278 |
| 16:12:27 | 0:12:47 | 76.7694868 | 78.3026603 | 76.1015175 | 75.2605634 | 48.7715278 |
| 16:12:28 | 0:12:48 | 76.7694868 | 82.3026603 | 76.1015175 | 74.2605634 | 48.7715278 |
| 16:12:29 | 0:12:49 | 76.7694868 | 83.3026603 | 76.1015175 | 73.2605634 | 48.7715278 |
| 16:12:30 | 0:12:50 | 78.7694868 | 83.3026603 | 77.1015175 | 73.2605634 | 50.7715278 |
| 16:12:31 | 0:12:51 | 78.7694868 | 84.3026603 | 76.1015175 | 73.2605634 | 52.7715278 |
| 16:12:32 | 0:12:52 | 80.7694868 | 84.3026603 | 76.1015175 | 73.2605634 | 54.7715278 |
| 16:12:33 | 0:12:53 | 80.7694868 | 85.3026603 | 76.1015175 | 72.2605634 | 55.7715278 |
| 16:12:34 | 0:12:54 | 80.7694868 | 85.3026603 | 75.1015175 | 73.2605634 | 55.7715278 |
| 16:12:35 | 0:12:55 | 81.7694868 | 85.3026603 | 75.1015175 | 73.2605634 | 56.7715278 |
| 16:12:36 | 0:12:56 | 81.7694868 | 83.3026603 | 74.1015175 | 73.2605634 | 57.7715278 |
| 16:12:37 | 0:12:57 | 81.7694868 | 81.3026603 | 74.1015175 | 72.2605634 | 57.7715278 |
| 16:12:38 | 0:12:58 | 83.7694868 | 77.3026603 | 74.1015175 | 72.2605634 | 57.7715278 |
| 16:12:39 | 0:12:59 | 83.7694868 | 74.3026603 | 74.1015175 | 72.2605634 | 53.7715278 |
| 16:12:40 | 0:13:00 | 83.7694868 | 74.3026603 | 74.1015175 | 72.2605634 | 52.7715278 |
| 16:12:41 | 0:13:01 | 83.7694868 | 72.3026603 | 74.1015175 | 73.2605634 | 52.7715278 |
| 16:12:42 | 0:13:02 | 82.7694868 | 72.3026603 | 74.1015175 | 73.2605634 | 51.7715278 |
| 16:12:43 | 0:13:03 | 79.7694868 | 71.3026603 | 74.1015175 | 73.2605634 | 51.7715278 |
| 16:12:44 | 0:13:04 | 78.7694868 | 71.3026603 | 74.1015175 | 73.2605634 | 51.7715278 |
| 16:12:45 | 0:13:05 | 77.7694868 | 71.3026603 | 74.1015175 | 73.2605634 | 50.7715278 |
| 16:12:46 | 0:13:06 | 76.7694868 | 70.3026603 | 74.1015175 | 73.2605634 | 52.7715278 |
| 16:12:47 | 0:13:07 | 76.7694868 | 69.3026603 | 74.1015175 | 73.2605634 | 52.7715278 |
| 16:12:48 | 0:13:08 | 77.7694868 | 69.3026603 | 73.1015175 | 73.2605634 | 66.7715278 |
| 16:12:49 | 0:13:09 | 76.7694868 | 69.3026603 | 72.1015175 | 72.2605634 | 68.7715278 |
| 16:12:50 | 0:13:10 | 76.7694868 | 69.3026603 | 72.1015175 | 72.2605634 | 69.7715278 |
| 16:12:51 | 0:13:11 | 76.7694868 | 68.3026603 | 72.1015175 | 72.2605634 | 69.7715278 |
| 16:12:52 | 0:13:12 | 76.7694868 | 68.3026603 | 72.1015175 | 72.2605634 | 69.7715278 |
| 16:12:53 | 0:13:13 | 76.7694868 | 67.3026603 | 72.1015175 | 75.2605634 | 68.7715278 |
| 16:12:54 | 0:13:14 | 76.7694868 | 67.3026603 | 72.1015175 | 75.2605634 | 68.7715278 |
| 16:12:55 | 0:13:15 | 79.7694868 | 66.3026603 | 72.1015175 | 75.2605634 | 68.7715278 |
| 16:12:56 | 0:13:16 | 81.7694868 | 67.3026603 | 72.1015175 | 75.2605634 | 68.7715278 |
| 16:12:57 | 0:13:17 | 80.7694868 | 68.3026603 | 74.1015175 | 71.2605634 | 68.7715278 |
| 16:12:58 | 0:13:18 | 79.7694868 | 69.3026603 | 74.1015175 | 67.2605634 | 68.7715278 |
| 16:12:59 | 0:13:19 | 79.7694868 | 68.3026603 | 74.1015175 | 65.2605634 | 68.7715278 |
| 16:13:00 | 0:13:20 | 78.7694868 | 68.3026603 | 72.1015175 | 65.2605634 | 68.7715278 |
| 16:13:01 | 0:13:21 | 78.7694868 | 68.3026603 | 71.1015175 | 64.2605634 | 63.7715278 |
| 16:13:02 | 0:13:22 | 78.7694868 | 69.3026603 | 71.1015175 | 64.2605634 | 62.7715278 |
| 16:13:03 | 0:13:23 | 78.7694868 | 69.3026603 | 70.1015175 | 63.2605634 | 62.7715278 |
| 16:13:04 | 0:13:24 | 78.7694868 | 69.3026603 | 70.1015175 | 63.2605634 | 62.7715278 |
| 16:13:05 | 0:13:25 | 76.7694868 | 70.3026603 | 70.1015175 | 63.2605634 | 59.7715278 |
| 16:13:06 | 0:13:26 | 74.7694868 | 70.3026603 | 71.1015175 | 62.2605634 | 58.7715278 |
| 16:13:07 | 0:13:27 | 73.7694868 | 70.3026603 | 71.1015175 | 62.2605634 | 58.7715278 |
| 16:13:08 | 0:13:28 | 72.7694868 | 70.3026603 | 71.1015175 | 62.2605634 | 58.7715278 |
| 16:13:09 | 0:13:29 | 71.7694868 | 70.3026603 | 70.1015175 | 62.2605634 | 58.7715278 |
| 16:13:10 | 0:13:30 | 71.7694868 | 70.3026603 | 68.1015175 | 62.2605634 | 58.7715278 |

|          |         |            |            |            |            |            |
|----------|---------|------------|------------|------------|------------|------------|
| 16:13:11 | 0:13:31 | 71.7694868 | 70.3026603 | 68.1015175 | 62.2605634 | 58.7715278 |
| 16:13:12 | 0:13:32 | 71.7694868 | 71.3026603 | 67.1015175 | 65.2605634 | 58.7715278 |
| 16:13:13 | 0:13:33 | 71.7694868 | 73.3026603 | 66.1015175 | 67.2605634 | 58.7715278 |
| 16:13:14 | 0:13:34 | 72.7694868 | 75.3026603 | 66.1015175 | 69.2605634 | 62.7715278 |
| 16:13:15 | 0:13:35 | 72.7694868 | 76.3026603 | 67.1015175 | 71.2605634 | 62.7715278 |
| 16:13:16 | 0:13:36 | 72.7694868 | 76.3026603 | 67.1015175 | 71.2605634 | 64.7715278 |
| 16:13:17 | 0:13:37 | 72.7694868 | 76.3026603 | 69.1015175 | 73.2605634 | 64.7715278 |
| 16:13:18 | 0:13:38 | 72.7694868 | 75.3026603 | 69.1015175 | 73.2605634 | 64.7715278 |
| 16:13:19 | 0:13:39 | 72.7694868 | 73.3026603 | 69.1015175 | 71.2605634 | 66.7715278 |
| 16:13:20 | 0:13:40 | 72.7694868 | 71.3026603 | 70.1015175 | 70.2605634 | 66.7715278 |
| 16:13:21 | 0:13:41 | 71.7694868 | 71.3026603 | 71.1015175 | 69.2605634 | 66.7715278 |
| 16:13:22 | 0:13:42 | 71.7694868 | 70.3026603 | 70.1015175 | 69.2605634 | 68.7715278 |
| 16:13:23 | 0:13:43 | 71.7694868 | 70.3026603 | 70.1015175 | 69.2605634 | 69.7715278 |
| 16:13:24 | 0:13:44 | 76.7694868 | 71.3026603 | 70.1015175 | 69.2605634 | 69.7715278 |
| 16:13:25 | 0:13:45 | 76.7694868 | 71.3026603 | 70.1015175 | 69.2605634 | 69.7715278 |
| 16:13:26 | 0:13:46 | 76.7694868 | 70.3026603 | 71.1015175 | 69.2605634 | 70.7715278 |
| 16:13:27 | 0:13:47 | 75.7694868 | 69.3026603 | 71.1015175 | 69.2605634 | 70.7715278 |
| 16:13:28 | 0:13:48 | 75.7694868 | 68.3026603 | 71.1015175 | 69.2605634 | 70.7715278 |
| 16:13:29 | 0:13:49 | 75.7694868 | 68.3026603 | 72.1015175 | 72.2605634 | 71.7715278 |
| 16:13:30 | 0:13:50 | 75.7694868 | 69.3026603 | 72.1015175 | 72.2605634 | 71.7715278 |
| 16:13:31 | 0:13:51 | 76.7694868 | 71.3026603 | 73.1015175 | 72.2605634 | 71.7715278 |
| 16:13:32 | 0:13:52 | 76.7694868 | 72.3026603 | 72.1015175 | 72.2605634 | 71.7715278 |
| 16:13:33 | 0:13:53 | 76.7694868 | 72.3026603 | 69.1015175 | 71.2605634 | 71.7715278 |
| 16:13:34 | 0:13:54 | 76.7694868 | 72.3026603 | 69.1015175 | 70.2605634 | 71.7715278 |
| 16:13:35 | 0:13:55 | 75.7694868 | 72.3026603 | 69.1015175 | 70.2605634 | 72.7715278 |
| 16:13:36 | 0:13:56 | 75.7694868 | 72.3026603 | 69.1015175 | 70.2605634 | 72.7715278 |
| 16:13:37 | 0:13:57 | 75.7694868 | 72.3026603 | 70.1015175 | 70.2605634 | 72.7715278 |
| 16:13:38 | 0:13:58 | 75.7694868 | 72.3026603 | 71.1015175 | 70.2605634 | 74.7715278 |
| 16:13:39 | 0:13:59 | 76.7694868 | 67.3026603 | 72.1015175 | 70.2605634 | 74.7715278 |
| 16:13:40 | 0:14:00 | 76.7694868 | 65.3026603 | 74.1015175 | 70.2605634 | 74.7715278 |
| 16:13:41 | 0:14:01 | 76.7694868 | 64.3026603 | 74.1015175 | 70.2605634 | 74.7715278 |
| 16:13:42 | 0:14:02 | 76.7694868 | 62.3026603 | 74.1015175 | 70.2605634 | 74.7715278 |
| 16:13:43 | 0:14:03 | 76.7694868 | 62.3026603 | 74.1015175 | 69.2605634 | 73.7715278 |
| 16:13:44 | 0:14:04 | 76.7694868 | 62.3026603 | 74.1015175 | 69.2605634 | 73.7715278 |
| 16:13:45 | 0:14:05 | 76.7694868 | 61.3026603 | 75.1015175 | 70.2605634 | 73.7715278 |
| 16:13:46 | 0:14:06 | 76.7694868 | 63.3026603 | 75.1015175 | 70.2605634 | 73.7715278 |
| 16:13:47 | 0:14:07 | 76.7694868 | 65.3026603 | 77.1015175 | 70.2605634 | 73.7715278 |
| 16:13:48 | 0:14:08 | 76.7694868 | 65.3026603 | 77.1015175 | 70.2605634 | 73.7715278 |
| 16:13:49 | 0:14:09 | 76.7694868 | 71.3026603 | 78.1015175 | 74.2605634 | 55.7715278 |
| 16:13:50 | 0:14:10 | 76.7694868 | 72.3026603 | 77.1015175 | 73.2605634 | 53.7715278 |
| 16:13:51 | 0:14:11 | 78.7694868 | 72.3026603 | 76.1015175 | 72.2605634 | 53.7715278 |
| 16:13:52 | 0:14:12 | 78.7694868 | 71.3026603 | 73.1015175 | 72.2605634 | 52.7715278 |
| 16:13:53 | 0:14:13 | 78.7694868 | 71.3026603 | 72.1015175 | 72.2605634 | 51.7715278 |
| 16:13:54 | 0:14:14 | 77.7694868 | 70.3026603 | 71.1015175 | 72.2605634 | 48.7715278 |
| 16:13:55 | 0:14:15 | 78.7694868 | 70.3026603 | 71.1015175 | 73.2605634 | 47.7715278 |

|          |         |            |            |            |            |            |
|----------|---------|------------|------------|------------|------------|------------|
| 16:13:56 | 0:14:16 | 78.7694868 | 68.3026603 | 71.1015175 | 74.2605634 | 47.7715278 |
| 16:13:57 | 0:14:17 | 78.7694868 | 68.3026603 | 71.1015175 | 75.2605634 | 47.7715278 |
| 16:13:58 | 0:14:18 | 78.7694868 | 68.3026603 | 71.1015175 | 75.2605634 | 45.7715278 |
| 16:13:59 | 0:14:19 | 78.7694868 | 68.3026603 | 70.1015175 | 76.2605634 | 45.7715278 |
| 16:14:00 | 0:14:20 | 78.7694868 | 67.3026603 | 70.1015175 | 76.2605634 | 44.7715278 |
| 16:14:01 | 0:14:21 | 77.7694868 | 67.3026603 | 71.1015175 | 76.2605634 | 44.7715278 |
| 16:14:02 | 0:14:22 | 77.7694868 | 68.3026603 | 71.1015175 | 75.2605634 | 44.7715278 |
| 16:14:03 | 0:14:23 | 77.7694868 | 68.3026603 | 72.1015175 | 76.2605634 | 44.7715278 |
| 16:14:04 | 0:14:24 | 77.7694868 | 69.3026603 | 72.1015175 | 76.2605634 | 44.7715278 |
| 16:14:05 | 0:14:25 | 77.7694868 | 69.3026603 | 72.1015175 | 76.2605634 | 44.7715278 |
| 16:14:06 | 0:14:26 | 76.7694868 | 69.3026603 | 72.1015175 | 76.2605634 | 45.7715278 |
| 16:14:07 | 0:14:27 | 74.7694868 | 69.3026603 | 73.1015175 | 75.2605634 | 45.7715278 |
| 16:14:08 | 0:14:28 | 74.7694868 | 70.3026603 | 73.1015175 | 74.2605634 | 45.7715278 |
| 16:14:09 | 0:14:29 | 73.7694868 | 70.3026603 | 73.1015175 | 74.2605634 | 44.7715278 |
| 16:14:10 | 0:14:30 | 73.7694868 | 70.3026603 | 72.1015175 | 73.2605634 | 44.7715278 |
| 16:14:11 | 0:14:31 | 73.7694868 | 71.3026603 | 72.1015175 | 73.2605634 | 44.7715278 |
| 16:14:12 | 0:14:32 | 73.7694868 | 71.3026603 | 71.1015175 | 73.2605634 | 43.7715278 |
| 16:14:13 | 0:14:33 | 73.7694868 | 70.3026603 | 71.1015175 | 73.2605634 | 43.7715278 |
| 16:14:14 | 0:14:34 | 74.7694868 | 70.3026603 | 71.1015175 | 73.2605634 | 43.7715278 |
| 16:14:15 | 0:14:35 | 74.7694868 | 70.3026603 | 71.1015175 | 72.2605634 | 42.7715278 |
| 16:14:16 | 0:14:36 | 74.7694868 | 69.3026603 | 71.1015175 | 72.2605634 | 43.7715278 |
| 16:14:17 | 0:14:37 | 74.7694868 | 67.3026603 | 72.1015175 | 73.2605634 | 44.7715278 |
| 16:14:18 | 0:14:38 | 74.7694868 | 66.3026603 | 73.1015175 | 73.2605634 | 44.7715278 |
| 16:14:19 | 0:14:39 | 75.7694868 | 65.3026603 | 78.1015175 | 74.2605634 | 47.7715278 |
| 16:14:20 | 0:14:40 | 75.7694868 | 65.3026603 | 78.1015175 | 74.2605634 | 47.7715278 |
| 16:14:21 | 0:14:41 | 75.7694868 | 65.3026603 | 78.1015175 | 75.2605634 | 48.7715278 |
| 16:14:22 | 0:14:42 | 78.7694868 | 65.3026603 | 78.1015175 | 75.2605634 | 48.7715278 |
| 16:14:23 | 0:14:43 | 78.7694868 | 65.3026603 | 76.1015175 | 74.2605634 | 48.7715278 |
| 16:14:24 | 0:14:44 | 76.7694868 | 65.3026603 | 75.1015175 | 74.2605634 | 47.7715278 |
| 16:14:25 | 0:14:45 | 74.7694868 | 65.3026603 | 73.1015175 | 74.2605634 | 47.7715278 |
| 16:14:26 | 0:14:46 | 74.7694868 | 64.3026603 | 73.1015175 | 74.2605634 | 47.7715278 |
| 16:14:27 | 0:14:47 | 73.7694868 | 64.3026603 | 73.1015175 | 77.2605634 | 47.7715278 |
| 16:14:28 | 0:14:48 | 73.7694868 | 63.3026603 | 73.1015175 | 80.2605634 | 47.7715278 |
| 16:14:29 | 0:14:49 | 73.7694868 | 63.3026603 | 73.1015175 | 81.2605634 | 48.7715278 |
| 16:14:30 | 0:14:50 | 72.7694868 | 63.3026603 | 73.1015175 | 83.2605634 | 49.7715278 |
| 16:14:31 | 0:14:51 | 72.7694868 | 64.3026603 | 73.1015175 | 83.2605634 | 50.7715278 |
| 16:14:32 | 0:14:52 | 73.7694868 | 64.3026603 | 73.1015175 | 84.2605634 | 50.7715278 |
| 16:14:33 | 0:14:53 | 73.7694868 | 62.3026603 | 73.1015175 | 83.2605634 | 50.7715278 |
| 16:14:34 | 0:14:54 | 73.7694868 | 62.3026603 | 74.1015175 | 83.2605634 | 50.7715278 |
| 16:14:35 | 0:14:55 | 73.7694868 | 62.3026603 | 74.1015175 | 81.2605634 | 51.7715278 |
| 16:14:36 | 0:14:56 | 74.7694868 | 71.3026603 | 74.1015175 | 79.2605634 | 51.7715278 |
| 16:14:37 | 0:14:57 | 77.7694868 | 78.3026603 | 74.1015175 | 79.2605634 | 51.7715278 |
| 16:14:38 | 0:14:58 | 77.7694868 | 81.3026603 | 74.1015175 | 79.2605634 | 67.7715278 |
| 16:14:39 | 0:14:59 | 80.7694868 | 81.3026603 | 77.1015175 | 78.2605634 | 70.7715278 |
| 16:14:40 | 0:15:00 | 81.7694868 | 81.3026603 | 77.1015175 | 78.2605634 | 71.7715278 |

|          |         |            |            |            |            |            |
|----------|---------|------------|------------|------------|------------|------------|
| 16:14:41 | 0:15:01 | 81.7694868 | 72.3026603 | 78.1015175 | 78.2605634 | 71.7715278 |
| 16:14:42 | 0:15:02 | 81.7694868 | 72.3026603 | 78.1015175 | 78.2605634 | 71.7715278 |
| 16:14:43 | 0:15:03 | 82.7694868 | 70.3026603 | 78.1015175 | 76.2605634 | 71.7715278 |
| 16:14:44 | 0:15:04 | 82.7694868 | 70.3026603 | 80.1015175 | 75.2605634 | 70.7715278 |
| 16:14:45 | 0:15:05 | 80.7694868 | 67.3026603 | 80.1015175 | 74.2605634 | 71.7715278 |
| 16:14:46 | 0:15:06 | 78.7694868 | 67.3026603 | 80.1015175 | 75.2605634 | 71.7715278 |
| 16:14:47 | 0:15:07 | 77.7694868 | 67.3026603 | 80.1015175 | 75.2605634 | 73.7715278 |
| 16:14:48 | 0:15:08 | 77.7694868 | 69.3026603 | 77.1015175 | 76.2605634 | 73.7715278 |
| 16:14:49 | 0:15:09 | 76.7694868 | 69.3026603 | 75.1015175 | 76.2605634 | 73.7715278 |
| 16:14:50 | 0:15:10 | 76.7694868 | 70.3026603 | 74.1015175 | 76.2605634 | 73.7715278 |
| 16:14:51 | 0:15:11 | 76.7694868 | 71.3026603 | 73.1015175 | 76.2605634 | 72.7715278 |
| 16:14:52 | 0:15:12 | 76.7694868 | 71.3026603 | 76.1015175 | 77.2605634 | 72.7715278 |
| 16:14:53 | 0:15:13 | 75.7694868 | 71.3026603 | 77.1015175 | 77.2605634 | 71.7715278 |
| 16:14:54 | 0:15:14 | 75.7694868 | 71.3026603 | 77.1015175 | 77.2605634 | 71.7715278 |
| 16:14:55 | 0:15:15 | 74.7694868 | 73.3026603 | 78.1015175 | 77.2605634 | 71.7715278 |
| 16:14:56 | 0:15:16 | 74.7694868 | 74.3026603 | 77.1015175 | 77.2605634 | 70.7715278 |
| 16:14:57 | 0:15:17 | 72.7694868 | 75.3026603 | 77.1015175 | 77.2605634 | 69.7715278 |
| 16:14:58 | 0:15:18 | 72.7694868 | 76.3026603 | 77.1015175 | 77.2605634 | 69.7715278 |
| 16:14:59 | 0:15:19 | 70.7694868 | 78.3026603 | 77.1015175 | 77.2605634 | 68.7715278 |
| 16:15:00 | 0:15:20 | 70.7694868 | 80.3026603 | 77.1015175 | 77.2605634 | 67.7715278 |
| 16:15:01 | 0:15:21 | 72.7694868 | 80.3026603 | 77.1015175 | 77.2605634 | 67.7715278 |
| 16:15:02 | 0:15:22 | 71.7694868 | 78.3026603 | 77.1015175 | 75.2605634 | 66.7715278 |
| 16:15:03 | 0:15:23 | 71.7694868 | 76.3026603 | 77.1015175 | 75.2605634 | 66.7715278 |
| 16:15:04 | 0:15:24 | 71.7694868 | 76.3026603 | 78.1015175 | 75.2605634 | 65.7715278 |
| 16:15:05 | 0:15:25 | 72.7694868 | 75.3026603 | 78.1015175 | 74.2605634 | 65.7715278 |
| 16:15:06 | 0:15:26 | 74.7694868 | 72.3026603 | 78.1015175 | 73.2605634 | 65.7715278 |
| 16:15:07 | 0:15:27 | 76.7694868 | 71.3026603 | 77.1015175 | 70.2605634 | 68.7715278 |
| 16:15:08 | 0:15:28 | 81.7694868 | 70.3026603 | 79.1015175 | 68.2605634 | 68.7715278 |
| 16:15:09 | 0:15:29 | 83.7694868 | 68.3026603 | 80.1015175 | 67.2605634 | 69.7715278 |
| 16:15:10 | 0:15:30 | 82.7694868 | 67.3026603 | 82.1015175 | 68.2605634 | 70.7715278 |
| 16:15:11 | 0:15:31 | 80.7694868 | 66.3026603 | 82.1015175 | 69.2605634 | 68.7715278 |
| 16:15:12 | 0:15:32 | 78.7694868 | 67.3026603 | 84.1015175 | 69.2605634 | 68.7715278 |
| 16:15:13 | 0:15:33 | 77.7694868 | 67.3026603 | 86.1015175 | 70.2605634 | 68.7715278 |
| 16:15:14 | 0:15:34 | 77.7694868 | 66.3026603 | 86.1015175 | 70.2605634 | 68.7715278 |
| 16:15:15 | 0:15:35 | 77.7694868 | 66.3026603 | 86.1015175 | 69.2605634 | 71.7715278 |
| 16:15:16 | 0:15:36 | 78.7694868 | 65.3026603 | 78.1015175 | 69.2605634 | 71.7715278 |
| 16:15:17 | 0:15:37 | 78.7694868 | 65.3026603 | 77.1015175 | 69.2605634 | 72.7715278 |
| 16:15:18 | 0:15:38 | 77.7694868 | 66.3026603 | 77.1015175 | 68.2605634 | 73.7715278 |
| 16:15:19 | 0:15:39 | 76.7694868 | 66.3026603 | 78.1015175 | 68.2605634 | 74.7715278 |
| 16:15:20 | 0:15:40 | 75.7694868 | 66.3026603 | 79.1015175 | 68.2605634 | 74.7715278 |
| 16:15:21 | 0:15:41 | 74.7694868 | 66.3026603 | 79.1015175 | 68.2605634 | 74.7715278 |
| 16:15:22 | 0:15:42 | 73.7694868 | 67.3026603 | 79.1015175 | 69.2605634 | 74.7715278 |
| 16:15:23 | 0:15:43 | 73.7694868 | 67.3026603 | 77.1015175 | 69.2605634 | 74.7715278 |
| 16:15:24 | 0:15:44 | 73.7694868 | 66.3026603 | 77.1015175 | 71.2605634 | 74.7715278 |
| 16:15:25 | 0:15:45 | 73.7694868 | 66.3026603 | 73.1015175 | 72.2605634 | 74.7715278 |

|          |         |            |            |            |            |            |
|----------|---------|------------|------------|------------|------------|------------|
| 16:15:26 | 0:15:46 | 73.7694868 | 66.3026603 | 69.1015175 | 72.2605634 | 74.7715278 |
| 16:15:27 | 0:15:47 | 72.7694868 | 67.3026603 | 68.1015175 | 67.2605634 | 74.7715278 |
| 16:15:28 | 0:15:48 | 72.7694868 | 67.3026603 | 68.1015175 | 67.2605634 | 74.7715278 |
| 16:15:29 | 0:15:49 | 72.7694868 | 68.3026603 | 68.1015175 | 67.2605634 | 75.7715278 |
| 16:15:30 | 0:15:50 | 72.7694868 | 68.3026603 | 67.1015175 | 67.2605634 | 75.7715278 |
| 16:15:31 | 0:15:51 | 72.7694868 | 68.3026603 | 67.1015175 | 67.2605634 | 75.7715278 |
| 16:15:32 | 0:15:52 | 71.7694868 | 69.3026603 | 67.1015175 | 69.2605634 | 76.7715278 |
| 16:15:33 | 0:15:53 | 70.7694868 | 70.3026603 | 67.1015175 | 69.2605634 | 76.7715278 |
| 16:15:34 | 0:15:54 | 72.7694868 | 70.3026603 | 68.1015175 | 69.2605634 | 76.7715278 |
| 16:15:35 | 0:15:55 | 72.7694868 | 70.3026603 | 68.1015175 | 67.2605634 | 76.7715278 |
| 16:15:36 | 0:15:56 | 72.7694868 | 70.3026603 | 68.1015175 | 67.2605634 | 76.7715278 |
| 16:15:37 | 0:15:57 | 75.7694868 | 70.3026603 | 68.1015175 | 65.2605634 | 79.7715278 |
| 16:15:38 | 0:15:58 | 77.7694868 | 70.3026603 | 69.1015175 | 65.2605634 | 79.7715278 |
| 16:15:39 | 0:15:59 | 79.7694868 | 70.3026603 | 74.1015175 | 66.2605634 | 82.7715278 |
| 16:15:40 | 0:16:00 | 80.7694868 | 70.3026603 | 77.1015175 | 67.2605634 | 82.7715278 |
| 16:15:41 | 0:16:01 | 80.7694868 | 70.3026603 | 77.1015175 | 68.2605634 | 84.7715278 |
| 16:15:42 | 0:16:02 | 80.7694868 | 70.3026603 | 80.1015175 | 68.2605634 | 88.7715278 |
| 16:15:43 | 0:16:03 | 80.7694868 | 70.3026603 | 86.1015175 | 69.2605634 | 88.7715278 |
| 16:15:44 | 0:16:04 | 80.7694868 | 70.3026603 | 88.1015175 | 70.2605634 | 89.7715278 |
| 16:15:45 | 0:16:05 | 80.7694868 | 71.3026603 | 89.1015175 | 70.2605634 | 88.7715278 |
| 16:15:46 | 0:16:06 | 80.7694868 | 71.3026603 | 89.1015175 | 70.2605634 | 82.7715278 |
| 16:15:47 | 0:16:07 | 78.7694868 | 72.3026603 | 74.3539378 | 70.2605634 | 78.7715278 |
| 16:15:48 | 0:16:08 | 77.7694868 | 71.3026603 | 74.2630288 | 71.2605634 | 76.7715278 |
| 16:15:49 | 0:16:09 | 77.7694868 | 68.3026603 | 74.1721197 | 71.2605634 | 76.7715278 |
| 16:15:50 | 0:16:10 | 76.7694868 | 67.3026603 | 74.3539378 | 72.2605634 | 76.7715278 |
| 16:15:51 | 0:16:11 | 76.7694868 | 66.3026603 | 86.1015175 | 73.2605634 | 76.7715278 |
| 16:15:52 | 0:16:12 | 76.7694868 | 67.3026603 | 86.1015175 | 73.2605634 | 75.7715278 |
| 16:15:53 | 0:16:13 | 75.7694868 | 68.3026603 | 86.1015175 | 73.2605634 | 77.7715278 |
| 16:15:54 | 0:16:14 | 75.7694868 | 68.3026603 | 82.1015175 | 72.2605634 | 77.7715278 |
| 16:15:55 | 0:16:15 | 74.7694868 | 68.3026603 | 81.1015175 | 72.2605634 | 79.7715278 |
| 16:15:56 | 0:16:16 | 74.7694868 | 68.3026603 | 73.1015175 | 71.2605634 | 79.7715278 |
| 16:15:57 | 0:16:17 | 75.7694868 | 68.3026603 | 69.1015175 | 71.2605634 | 80.7715278 |
| 16:15:58 | 0:16:18 | 75.7694868 | 68.3026603 | 69.1015175 | 71.2605634 | 81.7715278 |
| 16:15:59 | 0:16:19 | 75.7694868 | 68.3026603 | 63.1015175 | 71.2605634 | 81.7715278 |
| 16:16:00 | 0:16:20 | 75.7694868 | 68.3026603 | 62.1015175 | 71.2605634 | 82.7715278 |
| 16:16:01 | 0:16:21 | 75.7694868 | 69.3026603 | 62.1015175 | 73.2605634 | 83.7715278 |
| 16:16:02 | 0:16:22 | 75.7694868 | 69.3026603 | 62.1015175 | 75.2605634 | 83.7715278 |
| 16:16:03 | 0:16:23 | 75.7694868 | 73.3026603 | 62.1015175 | 75.2605634 | 83.7715278 |
| 16:16:04 | 0:16:24 | 75.7694868 | 81.3026603 | 63.1015175 | 76.2605634 | 83.7715278 |
| 16:16:05 | 0:16:25 | 75.7694868 | 84.3026603 | 64.1015175 | 76.2605634 | 83.7715278 |
| 16:16:06 | 0:16:26 | 75.7694868 | 84.3026603 | 64.1015175 | 74.2605634 | 83.7715278 |
| 16:16:07 | 0:16:27 | 75.7694868 | 84.3026603 | 67.1015175 | 73.2605634 | 83.7715278 |
| 16:16:08 | 0:16:28 | 74.7694868 | 83.3026603 | 67.1015175 | 73.2605634 | 82.7715278 |
| 16:16:09 | 0:16:29 | 74.7694868 | 77.3026603 | 67.1015175 | 72.2605634 | 82.7715278 |
| 16:16:10 | 0:16:30 | 73.7694868 | 77.3026603 | 67.1015175 | 72.2605634 | 81.7715278 |

|          |         |            |            |            |            |            |
|----------|---------|------------|------------|------------|------------|------------|
| 16:16:11 | 0:16:31 | 73.7694868 | 72.3026603 | 67.1015175 | 72.2605634 | 81.7715278 |
| 16:16:12 | 0:16:32 | 72.7694868 | 71.3026603 | 65.1015175 | 72.2605634 | 81.7715278 |
| 16:16:13 | 0:16:33 | 71.7694868 | 70.3026603 | 65.1015175 | 72.2605634 | 84.7715278 |
| 16:16:14 | 0:16:34 | 71.7694868 | 69.3026603 | 65.1015175 | 71.2605634 | 85.7715278 |
| 16:16:15 | 0:16:35 | 70.7694868 | 69.3026603 | 65.1015175 | 70.2605634 | 85.7715278 |
| 16:16:16 | 0:16:36 | 70.7694868 | 70.3026603 | 65.1015175 | 70.2605634 | 87.7715278 |
| 16:16:17 | 0:16:37 | 68.7694868 | 71.3026603 | 67.1015175 | 70.2605634 | 88.7715278 |
| 16:16:18 | 0:16:38 | 68.7694868 | 71.3026603 | 71.1015175 | 71.2605634 | 88.7715278 |
| 16:16:19 | 0:16:39 | 68.7694868 | 72.3026603 | 72.1015175 | 71.2605634 | 88.7715278 |
| 16:16:20 | 0:16:40 | 70.7694868 | 73.3026603 | 72.1015175 | 71.2605634 | 88.7715278 |
| 16:16:21 | 0:16:41 | 74.7694868 | 73.3026603 | 74.1015175 | 71.2605634 | 88.7715278 |
| 16:16:22 | 0:16:42 | 74.7694868 | 73.3026603 | 74.1015175 | 71.2605634 | 88.7715278 |
| 16:16:23 | 0:16:43 | 75.7694868 | 72.3026603 | 74.1015175 | 71.2605634 | 89.7715278 |
| 16:16:24 | 0:16:44 | 75.7694868 | 72.3026603 | 74.1015175 | 72.2605634 | 77.1721197 |
| 16:16:25 | 0:16:45 | 76.7694868 | 72.3026603 | 75.1015175 | 72.2605634 | 77.1721197 |
| 16:16:26 | 0:16:46 | 76.7694868 | 72.3026603 | 75.1015175 | 71.2605634 | 77.2630288 |
| 16:16:27 | 0:16:47 | 76.7694868 | 71.3026603 | 77.1015175 | 71.2605634 | 77.6266651 |
| 16:16:28 | 0:16:48 | 76.7694868 | 72.3026603 | 78.1015175 | 70.2605634 | 78.2630288 |
| 16:16:29 | 0:16:49 | 77.7694868 | 74.3026603 | 79.1015175 | 69.2605634 | 78.2630288 |
| 16:16:30 | 0:16:50 | 77.7694868 | 74.3026603 | 79.1015175 | 69.2605634 | 78.2630288 |
| 16:16:31 | 0:16:51 | 81.7694868 | 77.3026603 | 79.1015175 | 69.2605634 | 77.9903015 |
| 16:16:32 | 0:16:52 | 81.7694868 | 77.3026603 | 79.1015175 | 69.2605634 | 91.7715278 |
| 16:16:33 | 0:16:53 | 80.7694868 | 76.3026603 | 79.1015175 | 70.2605634 | 77.0812106 |
| 16:16:34 | 0:16:54 | 80.7694868 | 74.3026603 | 78.1015175 | 70.2605634 | 76.7175742 |
| 16:16:35 | 0:16:55 | 79.7694868 | 72.3026603 | 77.1015175 | 70.2605634 | 76.0812106 |
| 16:16:36 | 0:16:56 | 78.7694868 | 71.3026603 | 77.1015175 | 70.2605634 | 75.7175742 |
| 16:16:37 | 0:16:57 | 77.7694868 | 71.3026603 | 77.1015175 | 70.2605634 | 75.1721197 |
| 16:16:38 | 0:16:58 | 77.7694868 | 71.3026603 | 80.1015175 | 71.2605634 | 75.535756  |
| 16:16:39 | 0:16:59 | 77.7694868 | 70.3026603 | 80.1015175 | 71.2605634 | 89.7715278 |
| 16:16:40 | 0:17:00 | 76.7694868 | 70.3026603 | 87.1015175 | 72.2605634 | 88.7715278 |
| 16:16:41 | 0:17:01 | 76.7694868 | 71.3026603 | 88.1015175 | 73.2605634 | 88.7715278 |
| 16:16:42 | 0:17:02 | 76.7694868 | 75.3026603 | 88.1015175 | 73.2605634 | 88.7715278 |
| 16:16:43 | 0:17:03 | 76.7694868 | 76.3026603 | 89.1015175 | 74.2605634 | 85.7715278 |
| 16:16:44 | 0:17:04 | 76.7694868 | 76.3026603 | 89.1015175 | 74.2605634 | 85.7715278 |
| 16:16:45 | 0:17:05 | 76.7694868 | 74.3026603 | 89.1015175 | 73.2605634 | 83.7715278 |
| 16:16:46 | 0:17:06 | 76.7694868 | 69.3026603 | 89.1015175 | 73.2605634 | 80.7715278 |
| 16:16:47 | 0:17:07 | 76.7694868 | 66.3026603 | 87.1015175 | 73.2605634 | 80.7715278 |
| 16:16:48 | 0:17:08 | 76.7694868 | 63.3026603 | 87.1015175 | 73.2605634 | 79.7715278 |
| 16:16:49 | 0:17:09 | 76.7694868 | 62.3026603 | 87.1015175 | 74.2605634 | 79.7715278 |
| 16:16:50 | 0:17:10 | 76.7694868 | 61.3026603 | 84.1015175 | 74.2605634 | 79.7715278 |
| 16:16:51 | 0:17:11 | 77.7694868 | 62.3026603 | 84.1015175 | 74.2605634 | 78.7715278 |
| 16:16:52 | 0:17:12 | 77.7694868 | 64.3026603 | 81.1015175 | 74.2605634 | 78.7715278 |
| 16:16:53 | 0:17:13 | 77.7694868 | 66.3026603 | 81.1015175 | 74.2605634 | 78.7715278 |
| 16:16:54 | 0:17:14 | 77.7694868 | 67.3026603 | 80.1015175 | 75.2605634 | 77.7715278 |
| 16:16:55 | 0:17:15 | 78.7694868 | 69.3026603 | 78.1015175 | 75.2605634 | 77.7715278 |



|          |         |            |            |            |            |            |
|----------|---------|------------|------------|------------|------------|------------|
| 16:16:56 | 0:17:16 | 78.7694868 | 70.3026603 | 78.1015175 | 75.2605634 | 77.7715278 |
| 16:16:57 | 0:17:17 | 78.7694868 | 71.3026603 | 77.1015175 | 76.2605634 | 77.7715278 |
| 16:16:58 | 0:17:18 | 78.7694868 | 72.3026603 | 77.1015175 | 75.2605634 | 77.7715278 |
| 16:16:59 | 0:17:19 | 78.7694868 | 72.3026603 | 77.1015175 | 75.2605634 | 78.7715278 |
| 16:17:00 | 0:17:20 | 78.7694868 | 73.3026603 | 72.1015175 | 72.2605634 | 79.7715278 |
| 16:17:01 | 0:17:21 | 79.7694868 | 74.3026603 | 72.1015175 | 72.2605634 | 80.7715278 |
| 16:17:02 | 0:17:22 | 79.7694868 | 74.3026603 | 72.1015175 | 72.2605634 | 82.7715278 |
| 16:17:03 | 0:17:23 | 79.7694868 | 73.3026603 | 72.1015175 | 71.2605634 | 82.7715278 |
| 16:17:04 | 0:17:24 | 79.7694868 | 72.3026603 | 70.1015175 | 71.2605634 | 84.7715278 |
| 16:17:05 | 0:17:25 | 79.7694868 | 71.3026603 | 69.1015175 | 71.2605634 | 86.7715278 |
| 16:17:06 | 0:17:26 | 79.7694868 | 71.3026603 | 68.1015175 | 71.2605634 | 72.8084833 |
| 16:17:07 | 0:17:27 | 79.7694868 | 71.3026603 | 69.1015175 | 71.2605634 | 72.6266651 |
| 16:17:08 | 0:17:28 | 79.7694868 | 70.3026603 | 69.1015175 | 71.2605634 | 72.535756  |
| 16:17:09 | 0:17:29 | 79.7694868 | 70.3026603 | 71.1015175 | 71.2605634 | 72.8993924 |
| 16:17:10 | 0:17:30 | 79.7694868 | 67.3026603 | 71.1015175 | 71.2605634 | 72.7175742 |
| 16:17:11 | 0:17:31 | 79.7694868 | 66.3026603 | 71.1015175 | 70.2605634 | 72.8993924 |
| 16:17:12 | 0:17:32 | 79.7694868 | 67.3026603 | 70.1015175 | 70.2605634 | 73.0812106 |
| 16:17:13 | 0:17:33 | 79.7694868 | 68.3026603 | 69.1015175 | 71.2605634 | 73.4448469 |
| 16:17:14 | 0:17:34 | 79.7694868 | 70.3026603 | 69.1015175 | 71.2605634 | 73.535756  |
| 16:17:15 | 0:17:35 | 79.7694868 | 71.3026603 | 68.1015175 | 71.2605634 | 73.8993924 |
| 16:17:16 | 0:17:36 | 79.7694868 | 71.3026603 | 69.1015175 | 70.2605634 | 74.0812106 |
| 16:17:17 | 0:17:37 | 76.7694868 | 71.3026603 | 70.1015175 | 70.2605634 | 73.8993924 |
| 16:17:18 | 0:17:38 | 76.7694868 | 71.3026603 | 70.1015175 | 70.2605634 | 73.8084833 |
| 16:17:19 | 0:17:39 | 76.7694868 | 69.3026603 | 70.1015175 | 75.2605634 | 74.1721197 |
| 16:17:20 | 0:17:40 | 77.7694868 | 67.3026603 | 71.1015175 | 75.2605634 | 74.4448469 |
| 16:17:21 | 0:17:41 | 78.7694868 | 66.3026603 | 71.1015175 | 75.2605634 | 74.7175742 |
| 16:17:22 | 0:17:42 | 78.7694868 | 66.3026603 | 71.1015175 | 72.2605634 | 74.6266651 |
| 16:17:23 | 0:17:43 | 78.7694868 | 67.3026603 | 69.1015175 | 71.2605634 | 74.4448469 |
| 16:17:24 | 0:17:44 | 78.7694868 | 67.3026603 | 69.1015175 | 71.2605634 | 74.4448469 |
| 16:17:25 | 0:17:45 | 78.7694868 | 70.3026603 | 68.1015175 | 70.2605634 | 74.3539378 |
| 16:17:26 | 0:17:46 | 78.7694868 | 71.3026603 | 68.1015175 | 70.2605634 | 74.7175742 |
| 16:17:27 | 0:17:47 | 79.7694868 | 72.3026603 | 69.1015175 | 70.2605634 | 74.8084833 |
| 16:17:28 | 0:17:48 | 79.7694868 | 72.3026603 | 69.1015175 | 71.2605634 | 74.8084833 |
| 16:17:29 | 0:17:49 | 79.7694868 | 72.3026603 | 69.1015175 | 71.2605634 | 88.7715278 |
| 16:17:30 | 0:17:50 | 79.7694868 | 72.3026603 | 70.1015175 | 71.2605634 | 87.7715278 |
| 16:17:31 | 0:17:51 | 79.7694868 | 72.3026603 | 70.1015175 | 71.2605634 | 87.7715278 |
| 16:17:32 | 0:17:52 | 79.7694868 | 72.3026603 | 70.1015175 | 70.2605634 | 86.7715278 |
| 16:17:33 | 0:17:53 | 79.7694868 | 71.3026603 | 71.1015175 | 70.2605634 | 85.7715278 |
| 16:17:34 | 0:17:54 | 78.7694868 | 71.3026603 | 71.1015175 | 70.2605634 | 76.7715278 |
| 16:17:35 | 0:17:55 | 78.7694868 | 71.3026603 | 71.1015175 | 70.2605634 | 72.7715278 |
| 16:17:36 | 0:17:56 | 77.7694868 | 71.3026603 | 78.1015175 | 70.2605634 | 72.7715278 |
| 16:17:37 | 0:17:57 | 77.7694868 | 71.3026603 | 79.1015175 | 70.2605634 | 71.7715278 |
| 16:17:38 | 0:17:58 | 76.7694868 | 71.3026603 | 79.1015175 | 71.2605634 | 71.7715278 |
| 16:17:39 | 0:17:59 | 76.7694868 | 71.3026603 | 79.1015175 | 71.2605634 | 71.7715278 |
| 16:17:40 | 0:18:00 | 76.7694868 | 72.3026603 | 79.1015175 | 71.2605634 | 71.7715278 |

|          |         |            |            |            |            |            |
|----------|---------|------------|------------|------------|------------|------------|
| 16:17:41 | 0:18:01 | 76.7694868 | 75.3026603 | 79.1015175 | 71.2605634 | 71.7715278 |
| 16:17:42 | 0:18:02 | 76.7694868 | 77.3026603 | 79.1015175 | 71.2605634 | 71.7715278 |
| 16:17:43 | 0:18:03 | 76.7694868 | 79.3026603 | 79.1015175 | 71.2605634 | 72.7715278 |
| 16:17:44 | 0:18:04 | 76.7694868 | 79.3026603 | 78.1015175 | 71.2605634 | 72.7715278 |
| 16:17:45 | 0:18:05 | 76.7694868 | 80.3026603 | 76.1015175 | 73.2605634 | 73.7715278 |
| 16:17:46 | 0:18:06 | 77.7694868 | 80.3026603 | 74.1015175 | 74.2605634 | 76.7715278 |
| 16:17:47 | 0:18:07 | 76.7694868 | 79.3026603 | 74.1015175 | 75.2605634 | 76.7715278 |
| 16:17:48 | 0:18:08 | 76.7694868 | 79.3026603 | 72.1015175 | 77.2605634 | 73.7715278 |
| 16:17:49 | 0:18:09 | 76.7694868 | 78.3026603 | 72.1015175 | 79.2605634 | 72.7715278 |
| 16:17:50 | 0:18:10 | 76.7694868 | 77.3026603 | 71.1015175 | 79.2605634 | 72.7715278 |
| 16:17:51 | 0:18:11 | 75.7694868 | 71.3026603 | 70.1015175 | 79.2605634 | 70.7715278 |
| 16:17:52 | 0:18:12 | 75.7694868 | 66.3026603 | 70.1015175 | 79.2605634 | 70.7715278 |
| 16:17:53 | 0:18:13 | 74.7694868 | 65.3026603 | 68.1015175 | 80.2605634 | 69.7715278 |
| 16:17:54 | 0:18:14 | 74.7694868 | 66.3026603 | 68.1015175 | 80.2605634 | 69.7715278 |
| 16:17:55 | 0:18:15 | 74.7694868 | 67.3026603 | 69.1015175 | 80.2605634 | 69.7715278 |
| 16:17:56 | 0:18:16 | 74.7694868 | 68.3026603 | 70.1015175 | 80.2605634 | 69.7715278 |
| 16:17:57 | 0:18:17 | 74.7694868 | 70.3026603 | 70.1015175 | 80.2605634 | 69.7715278 |
| 16:17:58 | 0:18:18 | 74.7694868 | 71.3026603 | 70.1015175 | 81.2605634 | 69.7715278 |
| 16:17:59 | 0:18:19 | 74.7694868 | 71.3026603 | 69.1015175 | 83.2605634 | 69.7715278 |
| 16:18:00 | 0:18:20 | 74.7694868 | 70.3026603 | 67.1015175 | 82.2605634 | 69.7715278 |
| 16:18:01 | 0:18:21 | 74.7694868 | 68.3026603 | 67.1015175 | 82.2605634 | 69.7715278 |
| 16:18:02 | 0:18:22 | 74.7694868 | 67.3026603 | 67.1015175 | 81.2605634 | 69.7715278 |
| 16:18:03 | 0:18:23 | 74.7694868 | 66.3026603 | 69.1015175 | 79.2605634 | 69.7715278 |
| 16:18:04 | 0:18:24 | 74.7694868 | 67.3026603 | 69.1015175 | 77.2605634 | 70.7715278 |
| 16:18:05 | 0:18:25 | 73.7694868 | 68.3026603 | 69.1015175 | 73.2605634 | 71.7715278 |
| 16:18:06 | 0:18:26 | 72.7694868 | 68.3026603 | 70.1015175 | 70.2605634 | 71.7715278 |
| 16:18:07 | 0:18:27 | 72.7694868 | 68.3026603 | 70.1015175 | 70.2605634 | 71.7715278 |
| 16:18:08 | 0:18:28 | 72.7694868 | 68.3026603 | 71.1015175 | 70.2605634 | 71.7715278 |
| 16:18:09 | 0:18:29 | 72.7694868 | 68.3026603 | 70.1015175 | 69.2605634 | 71.7715278 |
| 16:18:10 | 0:18:30 | 72.7694868 | 68.3026603 | 70.1015175 | 68.2605634 | 71.7715278 |
| 16:18:11 | 0:18:31 | 72.7694868 | 70.3026603 | 70.1015175 | 68.2605634 | 71.7715278 |
| 16:18:12 | 0:18:32 | 70.7694868 | 70.3026603 | 71.1015175 | 68.2605634 | 71.7715278 |
| 16:18:13 | 0:18:33 | 70.7694868 | 71.3026603 | 73.1015175 | 68.2605634 | 72.7715278 |
| 16:18:14 | 0:18:34 | 68.7694868 | 71.3026603 | 74.1015175 | 68.2605634 | 72.7715278 |
| 16:18:15 | 0:18:35 | 67.7694868 | 72.3026603 | 74.1015175 | 68.2605634 | 72.7715278 |
| 16:18:16 | 0:18:36 | 66.7694868 | 72.3026603 | 74.1015175 | 68.2605634 | 73.7715278 |
| 16:18:17 | 0:18:37 | 65.7694868 | 72.3026603 | 74.1015175 | 68.2605634 | 73.7715278 |
| 16:18:18 | 0:18:38 | 65.7694868 | 72.3026603 | 74.1015175 | 68.2605634 | 73.7715278 |
| 16:18:19 | 0:18:39 | 65.7694868 | 73.3026603 | 71.1015175 | 68.2605634 | 73.7715278 |
| 16:18:20 | 0:18:40 | 65.7694868 | 73.3026603 | 71.1015175 | 68.2605634 | 73.7715278 |
| 16:18:21 | 0:18:41 | 65.7694868 | 72.3026603 | 71.1015175 | 68.2605634 | 75.7715278 |
| 16:18:22 | 0:18:42 | 64.7694868 | 71.3026603 | 71.1015175 | 68.2605634 | 78.7715278 |
| 16:18:23 | 0:18:43 | 64.7694868 | 71.3026603 | 71.1015175 | 68.2605634 | 78.7715278 |
| 16:18:24 | 0:18:44 | 64.7694868 | 71.3026603 | 74.1015175 | 68.2605634 | 78.7715278 |
| 16:18:25 | 0:18:45 | 64.7694868 | 71.3026603 | 74.1015175 | 69.2605634 | 79.7715278 |

|          |         |            |            |            |            |            |
|----------|---------|------------|------------|------------|------------|------------|
| 16:18:26 | 0:18:46 | 64.7694868 | 72.3026603 | 75.1015175 | 69.2605634 | 79.7715278 |
| 16:18:27 | 0:18:47 | 64.7694868 | 73.3026603 | 74.1015175 | 70.2605634 | 79.7715278 |
| 16:18:28 | 0:18:48 | 64.7694868 | 72.3026603 | 74.1015175 | 70.2605634 | 75.7715278 |
| 16:18:29 | 0:18:49 | 64.7694868 | 71.3026603 | 74.1015175 | 71.2605634 | 74.7715278 |
| 16:18:30 | 0:18:50 | 64.7694868 | 70.3026603 | 74.1015175 | 71.2605634 | 74.7715278 |
| 16:18:31 | 0:18:51 | 65.7694868 | 70.3026603 | 74.1015175 | 71.2605634 | 74.7715278 |
| 16:18:32 | 0:18:52 | 65.7694868 | 71.3026603 | 73.1015175 | 71.2605634 | 74.7715278 |
| 16:18:33 | 0:18:53 | 65.7694868 | 72.3026603 | 76.1015175 | 71.2605634 | 74.7715278 |
| 16:18:34 | 0:18:54 | 66.7694868 | 73.3026603 | 77.1015175 | 71.2605634 | 71.7715278 |
| 16:18:35 | 0:18:55 | 66.7694868 | 74.3026603 | 77.1015175 | 71.2605634 | 71.7715278 |
| 16:18:36 | 0:18:56 | 67.7694868 | 75.3026603 | 78.1015175 | 70.2605634 | 72.7715278 |
| 16:18:37 | 0:18:57 | 72.7694868 | 74.3026603 | 78.1015175 | 72.2605634 | 72.7715278 |
| 16:18:38 | 0:18:58 | 72.7694868 | 74.3026603 | 79.1015175 | 74.2605634 | 71.7715278 |
| 16:18:39 | 0:18:59 | 73.7694868 | 73.3026603 | 79.1015175 | 74.2605634 | 71.7715278 |
| 16:18:40 | 0:19:00 | 73.7694868 | 72.3026603 | 77.1015175 | 73.2605634 | 71.7715278 |
| 16:18:41 | 0:19:01 | 74.7694868 | 72.3026603 | 74.1015175 | 71.2605634 | 70.7715278 |
| 16:18:42 | 0:19:02 | 74.7694868 | 72.3026603 | 71.1015175 | 71.2605634 | 69.7715278 |
| 16:18:43 | 0:19:03 | 74.7694868 | 72.3026603 | 71.1015175 | 71.2605634 | 69.7715278 |
| 16:18:44 | 0:19:04 | 74.7694868 | 73.3026603 | 69.1015175 | 70.2605634 | 69.7715278 |
| 16:18:45 | 0:19:05 | 75.7694868 | 73.3026603 | 70.1015175 | 70.2605634 | 70.7715278 |
| 16:18:46 | 0:19:06 | 75.7694868 | 73.3026603 | 72.1015175 | 69.2605634 | 71.7715278 |
| 16:18:47 | 0:19:07 | 76.7694868 | 73.3026603 | 74.1015175 | 68.2605634 | 71.7715278 |
| 16:18:48 | 0:19:08 | 76.7694868 | 73.3026603 | 74.1015175 | 67.2605634 | 71.7715278 |
| 16:18:49 | 0:19:09 | 76.7694868 | 74.3026603 | 74.1015175 | 67.2605634 | 71.7715278 |
| 16:18:50 | 0:19:10 | 76.7694868 | 78.3026603 | 74.1015175 | 67.2605634 | 71.7715278 |
| 16:18:51 | 0:19:11 | 76.7694868 | 79.3026603 | 73.1015175 | 66.2605634 | 71.7715278 |
| 16:18:52 | 0:19:12 | 75.7694868 | 80.3026603 | 73.1015175 | 66.2605634 | 71.7715278 |
| 16:18:53 | 0:19:13 | 75.7694868 | 79.3026603 | 71.1015175 | 66.2605634 | 71.7715278 |
| 16:18:54 | 0:19:14 | 75.7694868 | 77.3026603 | 71.1015175 | 66.2605634 | 72.7715278 |
| 16:18:55 | 0:19:15 | 75.7694868 | 75.3026603 | 70.1015175 | 65.2605634 | 72.7715278 |
| 16:18:56 | 0:19:16 | 75.7694868 | 74.3026603 | 70.1015175 | 65.2605634 | 72.7715278 |
| 16:18:57 | 0:19:17 | 75.7694868 | 75.3026603 | 70.1015175 | 65.2605634 | 72.7715278 |
| 16:18:58 | 0:19:18 | 78.7694868 | 75.3026603 | 67.1015175 | 66.2605634 | 70.7715278 |
| 16:18:59 | 0:19:19 | 78.7694868 | 76.3026603 | 67.1015175 | 67.2605634 | 70.7715278 |
| 16:19:00 | 0:19:20 | 78.7694868 | 76.3026603 | 67.1015175 | 67.2605634 | 70.7715278 |
| 16:19:01 | 0:19:21 | 76.7694868 | 77.3026603 | 67.1015175 | 67.2605634 | 70.7715278 |
| 16:19:02 | 0:19:22 | 76.7694868 | 76.3026603 | 67.1015175 | 68.2605634 | 70.7715278 |
| 16:19:03 | 0:19:23 | 76.7694868 | 76.3026603 | 67.1015175 | 69.2605634 | 68.7715278 |
| 16:19:04 | 0:19:24 | 76.7694868 | 76.3026603 | 67.1015175 | 71.2605634 | 66.7715278 |
| 16:19:05 | 0:19:25 | 76.7694868 | 76.3026603 | 67.1015175 | 72.2605634 | 66.7715278 |
| 16:19:06 | 0:19:26 | 76.7694868 | 76.3026603 | 67.1015175 | 73.2605634 | 67.7715278 |
| 16:19:07 | 0:19:27 | 76.7694868 | 76.3026603 | 68.1015175 | 73.2605634 | 67.7715278 |
| 16:19:08 | 0:19:28 | 75.7694868 | 76.3026603 | 68.1015175 | 72.2605634 | 67.7715278 |
| 16:19:09 | 0:19:29 | 75.7694868 | 76.3026603 | 68.1015175 | 71.2605634 | 67.7715278 |
| 16:19:10 | 0:19:30 | 75.7694868 | 75.3026603 | 69.1015175 | 70.2605634 | 66.7715278 |

|          |         |            |            |            |            |            |
|----------|---------|------------|------------|------------|------------|------------|
| 16:19:11 | 0:19:31 | 75.7694868 | 75.3026603 | 69.1015175 | 69.2605634 | 66.7715278 |
| 16:19:12 | 0:19:32 | 75.7694868 | 75.3026603 | 69.1015175 | 69.2605634 | 66.7715278 |
| 16:19:13 | 0:19:33 | 74.7694868 | 81.3026603 | 67.1015175 | 68.2605634 | 66.7715278 |
| 16:19:14 | 0:19:34 | 74.7694868 | 83.3026603 | 67.1015175 | 68.2605634 | 67.7715278 |
| 16:19:15 | 0:19:35 | 74.7694868 | 83.3026603 | 67.1015175 | 68.2605634 | 67.7715278 |
| 16:19:16 | 0:19:36 | 74.7694868 | 80.3026603 | 67.1015175 | 68.2605634 | 67.7715278 |
| 16:19:17 | 0:19:37 | 73.7694868 | 78.3026603 | 67.1015175 | 68.2605634 | 67.7715278 |
| 16:19:18 | 0:19:38 | 72.7694868 | 77.3026603 | 67.1015175 | 68.2605634 | 67.7715278 |
| 16:19:19 | 0:19:39 | 71.7694868 | 75.3026603 | 68.1015175 | 69.2605634 | 65.7715278 |
| 16:19:20 | 0:19:40 | 71.7694868 | 75.3026603 | 68.1015175 | 69.2605634 | 64.7715278 |
| 16:19:21 | 0:19:41 | 71.7694868 | 75.3026603 | 69.1015175 | 69.2605634 | 63.7715278 |
| 16:19:22 | 0:19:42 | 71.7694868 | 75.3026603 | 69.1015175 | 69.2605634 | 62.7715278 |
| 16:19:23 | 0:19:43 | 75.7694868 | 75.3026603 | 69.1015175 | 70.2605634 | 62.7715278 |
| 16:19:24 | 0:19:44 | 76.7694868 | 75.3026603 | 69.1015175 | 76.2605634 | 63.7715278 |
| 16:19:25 | 0:19:45 | 76.7694868 | 75.3026603 | 70.1015175 | 78.2605634 | 65.7715278 |
| 16:19:26 | 0:19:46 | 76.7694868 | 75.3026603 | 70.1015175 | 78.2605634 | 67.7715278 |
| 16:19:27 | 0:19:47 | 76.7694868 | 76.3026603 | 70.1015175 | 78.2605634 | 68.7715278 |
| 16:19:28 | 0:19:48 | 76.7694868 | 71.3026603 | 74.1015175 | 78.2605634 | 68.7715278 |
| 16:19:29 | 0:19:49 | 76.7694868 | 69.3026603 | 74.1015175 | 77.2605634 | 71.7715278 |
| 16:19:30 | 0:19:50 | 76.7694868 | 68.3026603 | 74.1015175 | 77.2605634 | 71.7715278 |
| 16:19:31 | 0:19:51 | 76.7694868 | 67.3026603 | 74.1015175 | 76.2605634 | 71.7715278 |
| 16:19:32 | 0:19:52 | 76.7694868 | 68.3026603 | 74.1015175 | 75.2605634 | 71.7715278 |
| 16:19:33 | 0:19:53 | 77.7694868 | 68.3026603 | 74.1015175 | 73.2605634 | 71.7715278 |
| 16:19:34 | 0:19:54 | 77.7694868 | 71.3026603 | 74.1015175 | 72.2605634 | 71.7715278 |
| 16:19:35 | 0:19:55 | 76.7694868 | 73.3026603 | 73.1015175 | 71.2605634 | 71.7715278 |
| 16:19:36 | 0:19:56 | 76.7694868 | 73.3026603 | 73.1015175 | 70.2605634 | 70.7715278 |
| 16:19:37 | 0:19:57 | 76.7694868 | 73.3026603 | 70.1015175 | 70.2605634 | 69.7715278 |
| 16:19:38 | 0:19:58 | 76.7694868 | 73.3026603 | 69.1015175 | 70.2605634 | 69.7715278 |
| 16:19:39 | 0:19:59 | 76.7694868 | 72.3026603 | 69.1015175 | 71.2605634 | 66.7715278 |
| 16:19:40 | 0:20:00 | 76.7694868 | 72.3026603 | 69.1015175 | 72.2605634 | 65.7715278 |
| 16:19:41 | 0:20:01 | 76.7694868 | 72.3026603 | 69.1015175 | 73.2605634 | 64.7715278 |
| 16:19:42 | 0:20:02 | 76.7694868 | 72.3026603 | 69.1015175 | 73.2605634 | 64.7715278 |
| 16:19:43 | 0:20:03 | 77.7694868 | 72.3026603 | 69.1015175 | 74.2605634 | 64.7715278 |
| 16:19:44 | 0:20:04 | 77.7694868 | 72.3026603 | 69.1015175 | 74.2605634 | 64.7715278 |
| 16:19:45 | 0:20:05 | 76.7694868 | 72.3026603 | 69.1015175 | 74.2605634 | 63.7715278 |
| 16:19:46 | 0:20:06 | 76.7694868 | 73.3026603 | 70.1015175 | 75.2605634 | 63.7715278 |
| 16:19:47 | 0:20:07 | 75.7694868 | 73.3026603 | 70.1015175 | 76.2605634 | 65.7715278 |
| 16:19:48 | 0:20:08 | 75.7694868 | 73.3026603 | 70.1015175 | 77.2605634 | 70.7715278 |
| 16:19:49 | 0:20:09 | 76.7694868 | 71.3026603 | 70.1015175 | 77.2605634 | 69.7715278 |
| 16:19:50 | 0:20:10 | 76.7694868 | 66.3026603 | 70.1015175 | 77.2605634 | 69.7715278 |
| 16:19:51 | 0:20:11 | 75.7694868 | 66.3026603 | 70.1015175 | 76.2605634 | 68.7715278 |
| 16:19:52 | 0:20:12 | 74.7694868 | 66.3026603 | 70.1015175 | 73.2605634 | 68.7715278 |
| 16:19:53 | 0:20:13 | 74.7694868 | 66.3026603 | 70.1015175 | 72.2605634 | 68.7715278 |
| 16:19:54 | 0:20:14 | 74.7694868 | 66.3026603 | 71.1015175 | 71.2605634 | 68.7715278 |
| 16:19:55 | 0:20:15 | 73.7694868 | 68.3026603 | 71.1015175 | 69.2605634 | 69.7715278 |

|          |         |            |            |            |            |            |
|----------|---------|------------|------------|------------|------------|------------|
| 16:19:56 | 0:20:16 | 72.7694868 | 68.3026603 | 71.1015175 | 69.2605634 | 69.7715278 |
| 16:19:57 | 0:20:17 | 72.7694868 | 70.3026603 | 71.1015175 | 67.2605634 | 69.7715278 |
| 16:19:58 | 0:20:18 | 72.7694868 | 70.3026603 | 71.1015175 | 67.2605634 | 69.7715278 |
| 16:19:59 | 0:20:19 | 71.7694868 | 70.3026603 | 72.1015175 | 67.2605634 | 69.7715278 |
| 16:20:00 | 0:20:20 | 71.7694868 | 74.3026603 | 71.1015175 | 66.2605634 | 69.7715278 |
| 16:20:01 | 0:20:21 | 71.7694868 | 75.3026603 | 70.1015175 | 66.2605634 | 69.7715278 |
| 16:20:02 | 0:20:22 | 71.7694868 | 74.3026603 | 70.1015175 | 66.2605634 | 69.7715278 |
| 16:20:03 | 0:20:23 | 71.7694868 | 72.3026603 | 70.1015175 | 65.2605634 | 69.7715278 |
| 16:20:04 | 0:20:24 | 73.7694868 | 71.3026603 | 70.1015175 | 65.2605634 | 69.7715278 |
| 16:20:05 | 0:20:25 | 74.7694868 | 70.3026603 | 70.1015175 | 64.2605634 | 70.7715278 |
| 16:20:06 | 0:20:26 | 74.7694868 | 70.3026603 | 70.1015175 | 64.2605634 | 70.7715278 |
| 16:20:07 | 0:20:27 | 74.7694868 | 70.3026603 | 70.1015175 | 64.2605634 | 70.7715278 |
| 16:20:08 | 0:20:28 | 74.7694868 | 69.3026603 | 70.1015175 | 68.2605634 | 70.7715278 |
| 16:20:09 | 0:20:29 | 74.7694868 | 69.3026603 | 70.1015175 | 70.2605634 | 69.7715278 |
| 16:20:10 | 0:20:30 | 73.7694868 | 68.3026603 | 70.1015175 | 70.2605634 | 69.7715278 |
| 16:20:11 | 0:20:31 | 73.7694868 | 68.3026603 | 70.1015175 | 70.2605634 | 69.7715278 |
| 16:20:12 | 0:20:32 | 73.7694868 | 70.3026603 | 70.1015175 | 71.2605634 | 69.7715278 |
| 16:20:13 | 0:20:33 | 73.7694868 | 72.3026603 | 71.1015175 | 71.2605634 | 68.7715278 |
| 16:20:14 | 0:20:34 | 73.7694868 | 72.3026603 | 70.1015175 | 71.2605634 | 68.7715278 |
| 16:20:15 | 0:20:35 | 73.7694868 | 74.3026603 | 68.1015175 | 72.2605634 | 67.7715278 |
| 16:20:16 | 0:20:36 | 73.7694868 | 70.3026603 | 68.1015175 | 73.2605634 | 68.7715278 |
| 16:20:17 | 0:20:37 | 73.7694868 | 70.3026603 | 68.1015175 | 73.2605634 | 69.7715278 |
| 16:20:18 | 0:20:38 | 73.7694868 | 66.3026603 | 67.1015175 | 73.2605634 | 69.7715278 |
| 16:20:19 | 0:20:39 | 73.7694868 | 63.3026603 | 67.1015175 | 74.2605634 | 68.7715278 |
| 16:20:20 | 0:20:40 | 73.7694868 | 62.3026603 | 67.1015175 | 74.2605634 | 68.7715278 |
| 16:20:21 | 0:20:41 | 74.7694868 | 61.3026603 | 67.1015175 | 74.2605634 | 68.7715278 |
| 16:20:22 | 0:20:42 | 74.7694868 | 61.3026603 | 67.1015175 | 76.2605634 | 68.7715278 |
| 16:20:23 | 0:20:43 | 73.7694868 | 61.3026603 | 67.1015175 | 76.2605634 | 68.7715278 |
| 16:20:24 | 0:20:44 | 73.7694868 | 61.3026603 | 67.1015175 | 76.2605634 | 68.7715278 |
| 16:20:25 | 0:20:45 | 73.7694868 | 62.3026603 | 67.1015175 | 85.2605634 | 68.7715278 |
| 16:20:26 | 0:20:46 | 73.7694868 | 63.3026603 | 68.1015175 | 71.3539378 | 67.7715278 |
| 16:20:27 | 0:20:47 | 73.7694868 | 63.3026603 | 69.1015175 | 71.1721197 | 67.7715278 |
| 16:20:28 | 0:20:48 | 73.7694868 | 63.3026603 | 69.1015175 | 70.7175742 | 68.7715278 |
| 16:20:29 | 0:20:49 | 74.7694868 | 63.3026603 | 69.1015175 | 70.8993924 | 68.7715278 |
| 16:20:30 | 0:20:50 | 75.7694868 | 63.3026603 | 69.1015175 | 85.2605634 | 70.7715278 |
| 16:20:31 | 0:20:51 | 73.7694868 | 63.3026603 | 71.1015175 | 82.2605634 | 70.7715278 |
| 16:20:32 | 0:20:52 | 72.7694868 | 66.3026603 | 71.1015175 | 79.2605634 | 70.7715278 |
| 16:20:33 | 0:20:53 | 72.7694868 | 66.3026603 | 70.1015175 | 78.2605634 | 70.7715278 |
| 16:20:34 | 0:20:54 | 71.7694868 | 65.3026603 | 67.1015175 | 76.2605634 | 71.7715278 |
| 16:20:35 | 0:20:55 | 72.7694868 | 65.3026603 | 67.1015175 | 75.2605634 | 71.7715278 |
| 16:20:36 | 0:20:56 | 72.7694868 | 65.3026603 | 67.1015175 | 75.2605634 | 72.7715278 |
| 16:20:37 | 0:20:57 | 73.7694868 | 65.3026603 | 67.1015175 | 75.2605634 | 72.7715278 |
| 16:20:38 | 0:20:58 | 73.7694868 | 65.3026603 | 68.1015175 | 75.2605634 | 72.7715278 |
| 16:20:39 | 0:20:59 | 73.7694868 | 65.3026603 | 68.1015175 | 74.2605634 | 71.7715278 |
| 16:20:40 | 0:21:00 | 73.7694868 | 65.3026603 | 68.1015175 | 73.2605634 | 71.7715278 |

|          |         |            |            |            |            |            |
|----------|---------|------------|------------|------------|------------|------------|
| 16:20:41 | 0:21:01 | 73.7694868 | 64.3026603 | 67.1015175 | 70.2605634 | 70.7715278 |
| 16:20:42 | 0:21:02 | 73.7694868 | 63.3026603 | 67.1015175 | 69.2605634 | 70.7715278 |
| 16:20:43 | 0:21:03 | 73.7694868 | 63.3026603 | 68.1015175 | 69.2605634 | 70.7715278 |
| 16:20:44 | 0:21:04 | 74.7694868 | 62.3026603 | 68.1015175 | 71.2605634 | 70.7715278 |
| 16:20:45 | 0:21:05 | 73.7694868 | 61.3026603 | 69.1015175 | 73.2605634 | 70.7715278 |
| 16:20:46 | 0:21:06 | 73.7694868 | 61.3026603 | 69.1015175 | 74.2605634 | 70.7715278 |
| 16:20:47 | 0:21:07 | 73.7694868 | 59.3026603 | 69.1015175 | 75.2605634 | 70.7715278 |
| 16:20:48 | 0:21:08 | 74.7694868 | 60.3026603 | 70.1015175 | 75.2605634 | 70.7715278 |
| 16:20:49 | 0:21:09 | 74.7694868 | 67.3026603 | 70.1015175 | 75.2605634 | 71.7715278 |
| 16:20:50 | 0:21:10 | 74.7694868 | 69.3026603 | 70.1015175 | 75.2605634 | 71.7715278 |
| 16:20:51 | 0:21:11 | 74.7694868 | 70.3026603 | 70.1015175 | 75.2605634 | 72.7715278 |
| 16:20:52 | 0:21:12 | 74.7694868 | 70.3026603 | 70.1015175 | 75.2605634 | 72.7715278 |
| 16:20:53 | 0:21:13 | 74.7694868 | 70.3026603 | 70.1015175 | 75.2605634 | 73.7715278 |
| 16:20:54 | 0:21:14 | 75.7694868 | 70.3026603 | 70.1015175 | 74.2605634 | 73.7715278 |
| 16:20:55 | 0:21:15 | 75.7694868 | 69.3026603 | 71.1015175 | 73.2605634 | 73.7715278 |
| 16:20:56 | 0:21:16 | 75.7694868 | 69.3026603 | 70.1015175 | 70.2605634 | 73.7715278 |
| 16:20:57 | 0:21:17 | 76.7694868 | 69.3026603 | 70.1015175 | 70.2605634 | 73.7715278 |
| 16:20:58 | 0:21:18 | 76.7694868 | 69.3026603 | 70.1015175 | 70.2605634 | 73.7715278 |
| 16:20:59 | 0:21:19 | 76.7694868 | 68.3026603 | 70.1015175 | 70.2605634 | 73.7715278 |
| 16:21:00 | 0:21:20 | 76.7694868 | 68.3026603 | 70.1015175 | 70.2605634 | 73.7715278 |
| 16:21:01 | 0:21:21 | 77.7694868 | 68.3026603 | 70.1015175 | 70.2605634 | 73.7715278 |
| 16:21:02 | 0:21:22 | 76.7694868 | 68.3026603 | 69.1015175 | 70.2605634 | 73.7715278 |
| 16:21:03 | 0:21:23 | 75.7694868 | 68.3026603 | 69.1015175 | 70.2605634 | 73.7715278 |
| 16:21:04 | 0:21:24 | 74.7694868 | 68.3026603 | 69.1015175 | 70.2605634 | 73.7715278 |
| 16:21:05 | 0:21:25 | 74.7694868 | 67.3026603 | 69.1015175 | 70.2605634 | 72.7715278 |
| 16:21:06 | 0:21:26 | 73.7694868 | 67.3026603 | 69.1015175 | 70.2605634 | 72.7715278 |
| 16:21:07 | 0:21:27 | 73.7694868 | 67.3026603 | 68.1015175 | 70.2605634 | 71.7715278 |
| 16:21:08 | 0:21:28 | 73.7694868 | 67.3026603 | 68.1015175 | 71.2605634 | 71.7715278 |
| 16:21:09 | 0:21:29 | 73.7694868 | 64.3026603 | 68.1015175 | 71.2605634 | 67.7715278 |
| 16:21:10 | 0:21:30 | 72.7694868 | 64.3026603 | 68.1015175 | 72.2605634 | 67.7715278 |
| 16:21:11 | 0:21:31 | 72.7694868 | 64.3026603 | 68.1015175 | 73.2605634 | 65.7715278 |
| 16:21:12 | 0:21:32 | 72.7694868 | 64.3026603 | 68.1015175 | 73.2605634 | 64.7715278 |
| 16:21:13 | 0:21:33 | 71.7694868 | 66.3026603 | 69.1015175 | 73.2605634 | 63.7715278 |
| 16:21:14 | 0:21:34 | 71.7694868 | 66.3026603 | 70.1015175 | 74.2605634 | 63.7715278 |
| 16:21:15 | 0:21:35 | 71.7694868 | 66.3026603 | 70.1015175 | 74.2605634 | 63.7715278 |
| 16:21:16 | 0:21:36 | 70.7694868 | 67.3026603 | 70.1015175 | 74.2605634 | 67.7715278 |
| 16:21:17 | 0:21:37 | 70.7694868 | 69.3026603 | 70.1015175 | 76.2605634 | 67.7715278 |
| 16:21:18 | 0:21:38 | 71.7694868 | 71.3026603 | 69.1015175 | 77.2605634 | 70.7715278 |
| 16:21:19 | 0:21:39 | 72.7694868 | 70.3026603 | 69.1015175 | 79.2605634 | 71.7715278 |
| 16:21:20 | 0:21:40 | 73.7694868 | 70.3026603 | 69.1015175 | 79.2605634 | 72.7715278 |
| 16:21:21 | 0:21:41 | 74.7694868 | 70.3026603 | 69.1015175 | 78.2605634 | 72.7715278 |
| 16:21:22 | 0:21:42 | 75.7694868 | 70.3026603 | 70.1015175 | 77.2605634 | 72.7715278 |
| 16:21:23 | 0:21:43 | 75.7694868 | 70.3026603 | 70.1015175 | 76.2605634 | 73.7715278 |
| 16:21:24 | 0:21:44 | 75.7694868 | 70.3026603 | 71.1015175 | 77.2605634 | 73.7715278 |
| 16:21:25 | 0:21:45 | 76.7694868 | 73.3026603 | 71.1015175 | 78.2605634 | 73.7715278 |

|          |         |            |            |            |            |            |
|----------|---------|------------|------------|------------|------------|------------|
| 16:21:26 | 0:21:46 | 76.7694868 | 73.3026603 | 71.1015175 | 79.2605634 | 74.7715278 |
| 16:21:27 | 0:21:47 | 76.7694868 | 73.3026603 | 71.1015175 | 81.2605634 | 74.7715278 |
| 16:21:28 | 0:21:48 | 76.7694868 | 74.3026603 | 71.1015175 | 82.2605634 | 74.7715278 |
| 16:21:29 | 0:21:49 | 74.7694868 | 74.3026603 | 71.1015175 | 83.2605634 | 77.7715278 |
| 16:21:30 | 0:21:50 | 75.7694868 | 77.3026603 | 72.1015175 | 84.2605634 | 77.7715278 |
| 16:21:31 | 0:21:51 | 75.7694868 | 78.3026603 | 72.1015175 | 84.2605634 | 78.7715278 |
| 16:21:32 | 0:21:52 | 75.7694868 | 78.3026603 | 73.1015175 | 84.2605634 | 80.7715278 |
| 16:21:33 | 0:21:53 | 75.7694868 | 78.3026603 | 73.1015175 | 85.2605634 | 83.7715278 |
| 16:21:34 | 0:21:54 | 75.7694868 | 78.3026603 | 74.1015175 | 85.2605634 | 83.7715278 |
| 16:21:35 | 0:21:55 | 75.7694868 | 78.3026603 | 77.1015175 | 85.2605634 | 83.7715278 |
| 16:21:36 | 0:21:56 | 75.7694868 | 78.3026603 | 78.1015175 | 85.2605634 | 83.7715278 |
| 16:21:37 | 0:21:57 | 75.7694868 | 78.3026603 | 78.1015175 | 85.2605634 | 83.7715278 |
| 16:21:38 | 0:21:58 | 74.7694868 | 81.3026603 | 79.1015175 | 83.2605634 | 84.7715278 |
| 16:21:39 | 0:21:59 | 74.7694868 | 81.3026603 | 80.1015175 | 84.2605634 | 84.7715278 |
| 16:21:40 | 0:22:00 | 74.7694868 | 81.3026603 | 81.1015175 | 85.2605634 | 84.7715278 |
| 16:21:41 | 0:22:01 | 74.7694868 | 80.3026603 | 81.1015175 | 85.2605634 | 83.7715278 |
| 16:21:42 | 0:22:02 | 73.7694868 | 80.3026603 | 79.1015175 | 85.2605634 | 82.7715278 |
| 16:21:43 | 0:22:03 | 73.7694868 | 79.3026603 | 78.1015175 | 84.2605634 | 82.7715278 |
| 16:21:44 | 0:22:04 | 73.7694868 | 79.3026603 | 78.1015175 | 84.2605634 | 82.7715278 |
| 16:21:45 | 0:22:05 | 72.7694868 | 79.3026603 | 76.1015175 | 83.2605634 | 82.7715278 |
| 16:21:46 | 0:22:06 | 72.7694868 | 79.3026603 | 75.1015175 | 81.2605634 | 82.7715278 |
| 16:21:47 | 0:22:07 | 72.7694868 | 79.3026603 | 74.1015175 | 79.2605634 | 83.7715278 |
| 16:21:48 | 0:22:08 | 72.7694868 | 79.3026603 | 74.1015175 | 75.2605634 | 84.7715278 |
| 16:21:49 | 0:22:09 | 73.7694868 | 79.3026603 | 73.1015175 | 75.2605634 | 84.7715278 |
| 16:21:50 | 0:22:10 | 75.7694868 | 78.3026603 | 72.1015175 | 72.2605634 | 85.7715278 |
| 16:21:51 | 0:22:11 | 75.7694868 | 78.3026603 | 72.1015175 | 72.2605634 | 85.7715278 |
| 16:21:52 | 0:22:12 | 76.7694868 | 78.3026603 | 72.1015175 | 75.2605634 | 85.7715278 |
| 16:21:53 | 0:22:13 | 76.7694868 | 77.3026603 | 72.1015175 | 76.2605634 | 85.7715278 |
| 16:21:54 | 0:22:14 | 76.7694868 | 77.3026603 | 72.1015175 | 76.2605634 | 85.7715278 |
| 16:21:55 | 0:22:15 | 76.7694868 | 79.3026603 | 71.1015175 | 80.2605634 | 84.7715278 |
| 16:21:56 | 0:22:16 | 76.7694868 | 79.3026603 | 71.1015175 | 80.2605634 | 84.7715278 |
| 16:21:57 | 0:22:17 | 75.7694868 | 78.3026603 | 69.1015175 | 80.2605634 | 84.7715278 |
| 16:21:58 | 0:22:18 | 75.7694868 | 77.3026603 | 69.1015175 | 79.2605634 | 83.7715278 |
| 16:21:59 | 0:22:19 | 75.7694868 | 73.3026603 | 69.1015175 | 78.2605634 | 78.7715278 |
| 16:22:00 | 0:22:20 | 75.7694868 | 68.3026603 | 68.1015175 | 78.2605634 | 78.7715278 |
| 16:22:01 | 0:22:21 | 75.7694868 | 66.3026603 | 68.1015175 | 78.2605634 | 78.7715278 |
| 16:22:02 | 0:22:22 | 76.7694868 | 65.3026603 | 69.1015175 | 76.2605634 | 78.7715278 |
| 16:22:03 | 0:22:23 | 77.7694868 | 65.3026603 | 69.1015175 | 76.2605634 | 78.7715278 |
| 16:22:04 | 0:22:24 | 77.7694868 | 66.3026603 | 68.1015175 | 76.2605634 | 78.7715278 |
| 16:22:05 | 0:22:25 | 77.7694868 | 67.3026603 | 68.1015175 | 75.2605634 | 79.7715278 |
| 16:22:06 | 0:22:26 | 76.7694868 | 68.3026603 | 68.1015175 | 75.2605634 | 79.7715278 |
| 16:22:07 | 0:22:27 | 76.7694868 | 68.3026603 | 68.1015175 | 75.2605634 | 81.7715278 |
| 16:22:08 | 0:22:28 | 75.7694868 | 69.3026603 | 68.1015175 | 75.2605634 | 82.7715278 |
| 16:22:09 | 0:22:29 | 75.7694868 | 67.3026603 | 68.1015175 | 76.2605634 | 82.7715278 |
| 16:22:10 | 0:22:30 | 75.7694868 | 67.3026603 | 70.1015175 | 76.2605634 | 82.7715278 |

|          |         |            |            |            |            |            |
|----------|---------|------------|------------|------------|------------|------------|
| 16:22:11 | 0:22:31 | 75.7694868 | 67.3026603 | 70.1015175 | 76.2605634 | 82.7715278 |
| 16:22:12 | 0:22:32 | 74.7694868 | 68.3026603 | 71.1015175 | 76.2605634 | 82.7715278 |
| 16:22:13 | 0:22:33 | 74.7694868 | 69.3026603 | 72.1015175 | 76.2605634 | 82.7715278 |
| 16:22:14 | 0:22:34 | 75.7694868 | 69.3026603 | 72.1015175 | 76.2605634 | 82.7715278 |
| 16:22:15 | 0:22:35 | 75.7694868 | 70.3026603 | 72.1015175 | 76.2605634 | 82.7715278 |
| 16:22:16 | 0:22:36 | 75.7694868 | 70.3026603 | 71.1015175 | 78.2605634 | 82.7715278 |
| 16:22:17 | 0:22:37 | 76.7694868 | 71.3026603 | 70.1015175 | 78.2605634 | 82.7715278 |
| 16:22:18 | 0:22:38 | 76.7694868 | 71.3026603 | 70.1015175 | 78.2605634 | 83.7715278 |
| 16:22:19 | 0:22:39 | 76.7694868 | 71.3026603 | 70.1015175 | 77.2605634 | 83.7715278 |
| 16:22:20 | 0:22:40 | 76.7694868 | 70.3026603 | 70.1015175 | 75.2605634 | 83.7715278 |
| 16:22:21 | 0:22:41 | 76.7694868 | 67.3026603 | 70.1015175 | 75.2605634 | 83.7715278 |
| 16:22:22 | 0:22:42 | 76.7694868 | 66.3026603 | 70.1015175 | 75.2605634 | 82.7715278 |
| 16:22:23 | 0:22:43 | 76.7694868 | 65.3026603 | 70.1015175 | 75.2605634 | 81.7715278 |
| 16:22:24 | 0:22:44 | 75.7694868 | 64.3026603 | 70.1015175 | 76.2605634 | 81.7715278 |
| 16:22:25 | 0:22:45 | 79.7694868 | 63.3026603 | 70.1015175 | 77.2605634 | 80.7715278 |
| 16:22:26 | 0:22:46 | 79.7694868 | 63.3026603 | 70.1015175 | 77.2605634 | 80.7715278 |
| 16:22:27 | 0:22:47 | 79.7694868 | 66.3026603 | 71.1015175 | 77.2605634 | 81.7715278 |
| 16:22:28 | 0:22:48 | 79.7694868 | 66.3026603 | 71.1015175 | 76.2605634 | 81.7715278 |
| 16:22:29 | 0:22:49 | 80.7694868 | 66.3026603 | 71.1015175 | 76.2605634 | 80.7715278 |
| 16:22:30 | 0:22:50 | 79.7694868 | 69.3026603 | 71.1015175 | 76.2605634 | 80.7715278 |
| 16:22:31 | 0:22:51 | 78.7694868 | 69.3026603 | 70.1015175 | 76.2605634 | 80.7715278 |
| 16:22:32 | 0:22:52 | 77.7694868 | 69.3026603 | 70.1015175 | 77.2605634 | 80.7715278 |
| 16:22:33 | 0:22:53 | 77.7694868 | 69.3026603 | 70.1015175 | 78.2605634 | 79.7715278 |
| 16:22:34 | 0:22:54 | 77.7694868 | 69.3026603 | 71.1015175 | 79.2605634 | 79.7715278 |
| 16:22:35 | 0:22:55 | 76.7694868 | 68.3026603 | 72.1015175 | 82.2605634 | 79.7715278 |
| 16:22:36 | 0:22:56 | 76.7694868 | 67.3026603 | 72.1015175 | 82.2605634 | 79.7715278 |
| 16:22:37 | 0:22:57 | 76.7694868 | 67.3026603 | 72.1015175 | 81.2605634 | 79.7715278 |
| 16:22:38 | 0:22:58 | 76.7694868 | 67.3026603 | 71.1015175 | 81.2605634 | 79.7715278 |
| 16:22:39 | 0:22:59 | 76.7694868 | 68.3026603 | 70.1015175 | 78.2605634 | 79.7715278 |
| 16:22:40 | 0:23:00 | 75.7694868 | 68.3026603 | 70.1015175 | 78.2605634 | 79.7715278 |
| 16:22:41 | 0:23:01 | 76.7694868 | 70.3026603 | 69.1015175 | 78.2605634 | 80.7715278 |
| 16:22:42 | 0:23:02 | 76.7694868 | 72.3026603 | 69.1015175 | 78.2605634 | 81.7715278 |
| 16:22:43 | 0:23:03 | 76.7694868 | 71.3026603 | 69.1015175 | 79.2605634 | 82.7715278 |
| 16:22:44 | 0:23:04 | 75.7694868 | 69.3026603 | 69.1015175 | 79.2605634 | 81.7715278 |
| 16:22:45 | 0:23:05 | 75.7694868 | 69.3026603 | 67.1015175 | 78.2605634 | 81.7715278 |
| 16:22:46 | 0:23:06 | 75.7694868 | 69.3026603 | 66.1015175 | 77.2605634 | 72.7715278 |
| 16:22:47 | 0:23:07 | 75.7694868 | 71.3026603 | 66.1015175 | 77.2605634 | 70.7715278 |
| 16:22:48 | 0:23:08 | 75.7694868 | 71.3026603 | 66.1015175 | 77.2605634 | 70.7715278 |
| 16:22:49 | 0:23:09 | 75.7694868 | 71.3026603 | 66.1015175 | 76.2605634 | 68.7715278 |
| 16:22:50 | 0:23:10 | 75.7694868 | 70.3026603 | 65.1015175 | 76.2605634 | 66.7715278 |
| 16:22:51 | 0:23:11 | 75.7694868 | 68.3026603 | 65.1015175 | 76.2605634 | 66.7715278 |
| 16:22:52 | 0:23:12 | 75.7694868 | 68.3026603 | 65.1015175 | 76.2605634 | 66.7715278 |
| 16:22:53 | 0:23:13 | 75.7694868 | 67.3026603 | 65.1015175 | 76.2605634 | 66.7715278 |
| 16:22:54 | 0:23:14 | 75.7694868 | 68.3026603 | 65.1015175 | 76.2605634 | 66.7715278 |
| 16:22:55 | 0:23:15 | 73.7694868 | 69.3026603 | 65.1015175 | 76.2605634 | 67.7715278 |



|          |         |            |            |            |            |            |
|----------|---------|------------|------------|------------|------------|------------|
| 16:22:56 | 0:23:16 | 74.7694868 | 70.3026603 | 66.1015175 | 77.2605634 | 67.7715278 |
| 16:22:57 | 0:23:17 | 75.7694868 | 70.3026603 | 66.1015175 | 77.2605634 | 67.7715278 |
| 16:22:58 | 0:23:18 | 75.7694868 | 70.3026603 | 69.1015175 | 77.2605634 | 67.7715278 |
| 16:22:59 | 0:23:19 | 75.7694868 | 69.3026603 | 69.1015175 | 78.2605634 | 65.7715278 |
| 16:23:00 | 0:23:20 | 75.7694868 | 68.3026603 | 69.1015175 | 78.2605634 | 65.7715278 |
| 16:23:01 | 0:23:21 | 75.7694868 | 68.3026603 | 69.1015175 | 78.2605634 | 66.7715278 |
| 16:23:02 | 0:23:22 | 75.7694868 | 68.3026603 | 69.1015175 | 78.2605634 | 67.7715278 |
| 16:23:03 | 0:23:23 | 75.7694868 | 69.3026603 | 68.1015175 | 77.2605634 | 67.7715278 |
| 16:23:04 | 0:23:24 | 76.7694868 | 69.3026603 | 68.1015175 | 77.2605634 | 67.7715278 |
| 16:23:05 | 0:23:25 | 76.7694868 | 69.3026603 | 69.1015175 | 76.2605634 | 67.7715278 |
| 16:23:06 | 0:23:26 | 75.7694868 | 69.3026603 | 69.1015175 | 76.2605634 | 66.7715278 |
| 16:23:07 | 0:23:27 | 75.7694868 | 70.3026603 | 72.1015175 | 77.2605634 | 65.7715278 |
| 16:23:08 | 0:23:28 | 75.7694868 | 74.3026603 | 72.1015175 | 78.2605634 | 68.7715278 |
| 16:23:09 | 0:23:29 | 75.7694868 | 75.3026603 | 72.1015175 | 78.2605634 | 68.7715278 |
| 16:23:10 | 0:23:30 | 75.7694868 | 74.3026603 | 71.1015175 | 78.2605634 | 70.7715278 |
| 16:23:11 | 0:23:31 | 75.7694868 | 72.3026603 | 71.1015175 | 78.2605634 | 73.7715278 |
| 16:23:12 | 0:23:32 | 75.7694868 | 70.3026603 | 71.1015175 | 78.2605634 | 73.7715278 |
| 16:23:13 | 0:23:33 | 76.7694868 | 70.3026603 | 71.1015175 | 78.2605634 | 72.7715278 |
| 16:23:14 | 0:23:34 | 76.7694868 | 66.3026603 | 71.1015175 | 79.2605634 | 72.7715278 |
| 16:23:15 | 0:23:35 | 76.7694868 | 65.3026603 | 72.1015175 | 79.2605634 | 70.7715278 |
| 16:23:16 | 0:23:36 | 77.7694868 | 65.3026603 | 77.1015175 | 79.2605634 | 70.7715278 |
| 16:23:17 | 0:23:37 | 76.7694868 | 65.3026603 | 81.1015175 | 79.2605634 | 70.7715278 |
| 16:23:18 | 0:23:38 | 76.7694868 | 66.3026603 | 81.1015175 | 79.2605634 | 70.7715278 |
| 16:23:19 | 0:23:39 | 75.7694868 | 69.3026603 | 82.1015175 | 82.2605634 | 70.7715278 |
| 16:23:20 | 0:23:40 | 75.7694868 | 72.3026603 | 82.1015175 | 82.2605634 | 69.7715278 |
| 16:23:21 | 0:23:41 | 74.7694868 | 73.3026603 | 82.1015175 | 83.2605634 | 69.7715278 |
| 16:23:22 | 0:23:42 | 74.7694868 | 74.3026603 | 77.1015175 | 83.2605634 | 69.7715278 |
| 16:23:23 | 0:23:43 | 74.7694868 | 73.3026603 | 77.1015175 | 84.2605634 | 70.7715278 |
| 16:23:24 | 0:23:44 | 74.7694868 | 73.3026603 | 77.1015175 | 84.2605634 | 69.7715278 |
| 16:23:25 | 0:23:45 | 73.7694868 | 72.3026603 | 78.1015175 | 85.2605634 | 69.7715278 |
| 16:23:26 | 0:23:46 | 73.7694868 | 71.3026603 | 78.1015175 | 86.2605634 | 70.7715278 |
| 16:23:27 | 0:23:47 | 73.7694868 | 70.3026603 | 79.1015175 | 86.2605634 | 71.7715278 |
| 16:23:28 | 0:23:48 | 73.7694868 | 69.3026603 | 79.1015175 | 86.2605634 | 71.7715278 |
| 16:23:29 | 0:23:49 | 73.7694868 | 68.3026603 | 79.1015175 | 86.2605634 | 71.7715278 |
| 16:23:30 | 0:23:50 | 73.7694868 | 68.3026603 | 79.1015175 | 86.2605634 | 72.7715278 |
| 16:23:31 | 0:23:51 | 73.7694868 | 68.3026603 | 78.1015175 | 86.2605634 | 72.7715278 |
| 16:23:32 | 0:23:52 | 72.7694868 | 70.3026603 | 78.1015175 | 87.2605634 | 72.7715278 |
| 16:23:33 | 0:23:53 | 72.7694868 | 71.3026603 | 79.1015175 | 87.2605634 | 72.7715278 |
| 16:23:34 | 0:23:54 | 73.7694868 | 71.3026603 | 79.1015175 | 87.2605634 | 73.7715278 |
| 16:23:35 | 0:23:55 | 73.7694868 | 71.3026603 | 79.1015175 | 87.2605634 | 74.7715278 |
| 16:23:36 | 0:23:56 | 73.7694868 | 71.3026603 | 79.1015175 | 84.2605634 | 74.7715278 |
| 16:23:37 | 0:23:57 | 73.7694868 | 71.3026603 | 77.1015175 | 80.2605634 | 74.7715278 |
| 16:23:38 | 0:23:58 | 74.7694868 | 72.3026603 | 74.1015175 | 80.2605634 | 74.7715278 |
| 16:23:39 | 0:23:59 | 75.7694868 | 72.3026603 | 74.1015175 | 78.2605634 | 74.7715278 |
| 16:23:40 | 0:24:00 | 75.7694868 | 71.3026603 | 74.1015175 | 77.2605634 | 75.7715278 |

|          |         |            |            |            |            |            |
|----------|---------|------------|------------|------------|------------|------------|
| 16:23:41 | 0:24:01 | 76.7694868 | 69.3026603 | 71.1015175 | 74.2605634 | 75.7715278 |
| 16:23:42 | 0:24:02 | 76.7694868 | 69.3026603 | 71.1015175 | 74.2605634 | 75.7715278 |
| 16:23:43 | 0:24:03 | 76.7694868 | 67.3026603 | 68.1015175 | 73.2605634 | 75.7715278 |
| 16:23:44 | 0:24:04 | 77.7694868 | 67.3026603 | 68.1015175 | 71.2605634 | 75.7715278 |
| 16:23:45 | 0:24:05 | 81.7694868 | 67.3026603 | 68.1015175 | 69.2605634 | 72.7715278 |
| 16:23:46 | 0:24:06 | 83.7694868 | 67.3026603 | 68.1015175 | 69.2605634 | 72.7715278 |
| 16:23:47 | 0:24:07 | 83.7694868 | 72.3026603 | 69.1015175 | 69.2605634 | 72.7715278 |
| 16:23:48 | 0:24:08 | 84.7694868 | 74.3026603 | 69.1015175 | 69.2605634 | 70.7715278 |
| 16:23:49 | 0:24:09 | 84.7694868 | 74.3026603 | 69.1015175 | 69.2605634 | 70.7715278 |
| 16:23:50 | 0:24:10 | 85.7694868 | 72.3026603 | 69.1015175 | 69.2605634 | 70.7715278 |
| 16:23:51 | 0:24:11 | 85.7694868 | 70.3026603 | 68.1015175 | 67.2605634 | 69.7715278 |
| 16:23:52 | 0:24:12 | 87.7694868 | 68.3026603 | 68.1015175 | 67.2605634 | 68.7715278 |
| 16:23:53 | 0:24:13 | 87.7694868 | 67.3026603 | 68.1015175 | 68.2605634 | 68.7715278 |
| 16:23:54 | 0:24:14 | 87.7694868 | 67.3026603 | 68.1015175 | 68.2605634 | 67.7715278 |
| 16:23:55 | 0:24:15 | 87.7694868 | 67.3026603 | 68.1015175 | 67.2605634 | 67.7715278 |
| 16:23:56 | 0:24:16 | 87.7694868 | 67.3026603 | 68.1015175 | 67.2605634 | 67.7715278 |
| 16:23:57 | 0:24:17 | 87.7694868 | 67.3026603 | 67.1015175 | 68.2605634 | 67.7715278 |
| 16:23:58 | 0:24:18 | 87.7694868 | 68.3026603 | 65.1015175 | 69.2605634 | 67.7715278 |
| 16:23:59 | 0:24:19 | 81.7694868 | 68.3026603 | 65.1015175 | 69.2605634 | 67.7715278 |
| 16:24:00 | 0:24:20 | 81.7694868 | 69.3026603 | 65.1015175 | 71.2605634 | 67.7715278 |
| 16:24:01 | 0:24:21 | 81.7694868 | 70.3026603 | 65.1015175 | 71.2605634 | 67.7715278 |
| 16:24:02 | 0:24:22 | 75.7694868 | 70.3026603 | 65.1015175 | 71.2605634 | 67.7715278 |
| 16:24:03 | 0:24:23 | 75.7694868 | 70.3026603 | 65.1015175 | 71.2605634 | 67.7715278 |
| 16:24:04 | 0:24:24 | 75.7694868 | 70.3026603 | 65.1015175 | 71.2605634 | 67.7715278 |
| 16:24:05 | 0:24:25 | 77.7694868 | 70.3026603 | 65.1015175 | 73.2605634 | 68.7715278 |
| 16:24:06 | 0:24:26 | 77.7694868 | 70.3026603 | 65.1015175 | 74.2605634 | 69.7715278 |
| 16:24:07 | 0:24:27 | 77.7694868 | 70.3026603 | 65.1015175 | 74.2605634 | 69.7715278 |
| 16:24:08 | 0:24:28 | 77.7694868 | 70.3026603 | 64.1015175 | 74.2605634 | 69.7715278 |
| 16:24:09 | 0:24:29 | 77.7694868 | 69.3026603 | 64.1015175 | 74.2605634 | 68.7715278 |
| 16:24:10 | 0:24:30 | 77.7694868 | 68.3026603 | 65.1015175 | 74.2605634 | 67.7715278 |
| 16:24:11 | 0:24:31 | 77.7694868 | 69.3026603 | 65.1015175 | 74.2605634 | 67.7715278 |
| 16:24:12 | 0:24:32 | 76.7694868 | 70.3026603 | 65.1015175 | 75.2605634 | 67.7715278 |
| 16:24:13 | 0:24:33 | 76.7694868 | 71.3026603 | 65.1015175 | 75.2605634 | 66.7715278 |
| 16:24:14 | 0:24:34 | 76.7694868 | 72.3026603 | 66.1015175 | 75.2605634 | 66.7715278 |
| 16:24:15 | 0:24:35 | 76.7694868 | 72.3026603 | 66.1015175 | 75.2605634 | 65.7715278 |
| 16:24:16 | 0:24:36 | 76.7694868 | 72.3026603 | 65.1015175 | 75.2605634 | 66.7715278 |
| 16:24:17 | 0:24:37 | 76.7694868 | 71.3026603 | 65.1015175 | 75.2605634 | 66.7715278 |
| 16:24:18 | 0:24:38 | 76.7694868 | 70.3026603 | 65.1015175 | 75.2605634 | 67.7715278 |
| 16:24:19 | 0:24:39 | 76.7694868 | 70.3026603 | 65.1015175 | 76.2605634 | 67.7715278 |
| 16:24:20 | 0:24:40 | 76.7694868 | 70.3026603 | 65.1015175 | 76.2605634 | 68.7715278 |
| 16:24:21 | 0:24:41 | 77.7694868 | 69.3026603 | 65.1015175 | 73.2605634 | 68.7715278 |
| 16:24:22 | 0:24:42 | 76.7694868 | 68.3026603 | 65.1015175 | 71.2605634 | 68.7715278 |
| 16:24:23 | 0:24:43 | 74.7694868 | 67.3026603 | 65.1015175 | 71.2605634 | 68.7715278 |
| 16:24:24 | 0:24:44 | 73.7694868 | 67.3026603 | 65.1015175 | 72.2605634 | 67.7715278 |
| 16:24:25 | 0:24:45 | 70.7694868 | 66.3026603 | 65.1015175 | 73.2605634 | 67.7715278 |

|          |         |            |            |            |            |            |
|----------|---------|------------|------------|------------|------------|------------|
| 16:24:26 | 0:24:46 | 70.7694868 | 66.3026603 | 65.1015175 | 74.2605634 | 67.7715278 |
| 16:24:27 | 0:24:47 | 69.7694868 | 66.3026603 | 66.1015175 | 74.2605634 | 67.7715278 |
| 16:24:28 | 0:24:48 | 69.7694868 | 66.3026603 | 66.1015175 | 73.2605634 | 67.7715278 |
| 16:24:29 | 0:24:49 | 68.7694868 | 66.3026603 | 66.1015175 | 73.2605634 | 67.7715278 |
| 16:24:30 | 0:24:50 | 68.7694868 | 66.3026603 | 67.1015175 | 72.2605634 | 67.7715278 |
| 16:24:31 | 0:24:51 | 68.7694868 | 64.3026603 | 68.1015175 | 71.2605634 | 65.7715278 |
| 16:24:32 | 0:24:52 | 67.7694868 | 64.3026603 | 69.1015175 | 72.2605634 | 65.7715278 |
| 16:24:33 | 0:24:53 | 67.7694868 | 64.3026603 | 69.1015175 | 73.2605634 | 63.7715278 |
| 16:24:34 | 0:24:54 | 67.7694868 | 64.3026603 | 70.1015175 | 75.2605634 | 63.7715278 |
| 16:24:35 | 0:24:55 | 67.7694868 | 64.3026603 | 70.1015175 | 79.2605634 | 63.7715278 |
| 16:24:36 | 0:24:56 | 67.7694868 | 64.3026603 | 70.1015175 | 79.2605634 | 63.7715278 |
| 16:24:37 | 0:24:57 | 67.7694868 | 64.3026603 | 72.1015175 | 78.2605634 | 63.7715278 |
| 16:24:38 | 0:24:58 | 67.7694868 | 64.3026603 | 72.1015175 | 77.2605634 | 63.7715278 |
| 16:24:39 | 0:24:59 | 67.7694868 | 65.3026603 | 72.1015175 | 76.2605634 | 63.7715278 |
| 16:24:40 | 0:25:00 | 67.7694868 | 66.3026603 | 72.1015175 | 75.2605634 | 63.7715278 |
| 16:24:41 | 0:25:01 | 68.7694868 | 66.3026603 | 72.1015175 | 75.2605634 | 63.7715278 |
| 16:24:42 | 0:25:02 | 69.7694868 | 66.3026603 | 72.1015175 | 75.2605634 | 64.7715278 |
| 16:24:43 | 0:25:03 | 70.7694868 | 66.3026603 | 72.1015175 | 75.2605634 | 64.7715278 |
| 16:24:44 | 0:25:04 | 70.7694868 | 66.3026603 | 70.1015175 | 75.2605634 | 65.7715278 |
| 16:24:45 | 0:25:05 | 70.7694868 | 66.3026603 | 70.1015175 | 76.2605634 | 62.7715278 |
| 16:24:46 | 0:25:06 | 70.7694868 | 66.3026603 | 69.1015175 | 80.2605634 | 62.7715278 |
| 16:24:47 | 0:25:07 | 70.7694868 | 66.3026603 | 69.1015175 | 82.2605634 | 63.7715278 |
| 16:24:48 | 0:25:08 | 70.7694868 | 66.3026603 | 68.1015175 | 81.2605634 | 63.7715278 |
| 16:24:49 | 0:25:09 | 71.7694868 | 66.3026603 | 66.1015175 | 81.2605634 | 63.7715278 |
| 16:24:50 | 0:25:10 | 71.7694868 | 69.3026603 | 66.1015175 | 80.2605634 | 64.7715278 |
| 16:24:51 | 0:25:11 | 70.7694868 | 70.3026603 | 66.1015175 | 80.2605634 | 64.7715278 |
| 16:24:52 | 0:25:12 | 70.7694868 | 70.3026603 | 66.1015175 | 80.2605634 | 65.7715278 |
| 16:24:53 | 0:25:13 | 69.7694868 | 70.3026603 | 67.1015175 | 80.2605634 | 65.7715278 |
| 16:24:54 | 0:25:14 | 70.7694868 | 70.3026603 | 67.1015175 | 80.2605634 | 65.7715278 |
| 16:24:55 | 0:25:15 | 70.7694868 | 70.3026603 | 67.1015175 | 80.2605634 | 65.7715278 |
| 16:24:56 | 0:25:16 | 70.7694868 | 70.3026603 | 67.1015175 | 80.2605634 | 65.7715278 |
| 16:24:57 | 0:25:17 | 70.7694868 | 70.3026603 | 67.1015175 | 79.2605634 | 64.7715278 |
| 16:24:58 | 0:25:18 | 69.7694868 | 70.3026603 | 67.1015175 | 77.2605634 | 63.7715278 |
| 16:24:59 | 0:25:19 | 69.7694868 | 74.3026603 | 66.1015175 | 75.2605634 | 63.7715278 |
| 16:25:00 | 0:25:20 | 69.7694868 | 75.3026603 | 65.1015175 | 74.2605634 | 63.7715278 |
| 16:25:01 | 0:25:21 | 70.7694868 | 75.3026603 | 65.1015175 | 74.2605634 | 63.7715278 |
| 16:25:02 | 0:25:22 | 70.7694868 | 74.3026603 | 65.1015175 | 74.2605634 | 63.7715278 |
| 16:25:03 | 0:25:23 | 70.7694868 | 74.3026603 | 65.1015175 | 74.2605634 | 63.7715278 |
| 16:25:04 | 0:25:24 | 70.7694868 | 71.3026603 | 65.1015175 | 74.2605634 | 63.7715278 |
| 16:25:05 | 0:25:25 | 70.7694868 | 69.3026603 | 65.1015175 | 73.2605634 | 63.7715278 |
| 16:25:06 | 0:25:26 | 70.7694868 | 69.3026603 | 66.1015175 | 72.2605634 | 63.7715278 |
| 16:25:07 | 0:25:27 | 70.7694868 | 69.3026603 | 67.1015175 | 72.2605634 | 63.7715278 |
| 16:25:08 | 0:25:28 | 70.7694868 | 68.3026603 | 67.1015175 | 72.2605634 | 61.7715278 |
| 16:25:09 | 0:25:29 | 70.7694868 | 68.3026603 | 67.1015175 | 72.2605634 | 61.7715278 |
| 16:25:10 | 0:25:30 | 70.7694868 | 68.3026603 | 67.1015175 | 72.2605634 | 60.7715278 |

|          |         |            |            |            |            |            |
|----------|---------|------------|------------|------------|------------|------------|
| 16:25:11 | 0:25:31 | 71.7694868 | 66.3026603 | 67.1015175 | 72.2605634 | 60.7715278 |
| 16:25:12 | 0:25:32 | 72.7694868 | 66.3026603 | 67.1015175 | 72.2605634 | 57.7715278 |
| 16:25:13 | 0:25:33 | 71.7694868 | 66.3026603 | 67.1015175 | 73.2605634 | 54.7715278 |
| 16:25:14 | 0:25:34 | 70.7694868 | 66.3026603 | 67.1015175 | 75.2605634 | 53.7715278 |
| 16:25:15 | 0:25:35 | 70.7694868 | 63.3026603 | 67.1015175 | 75.2605634 | 52.7715278 |
| 16:25:16 | 0:25:36 | 70.7694868 | 62.3026603 | 69.1015175 | 74.2605634 | 52.7715278 |
| 16:25:17 | 0:25:37 | 70.7694868 | 61.3026603 | 69.1015175 | 73.2605634 | 52.7715278 |
| 16:25:18 | 0:25:38 | 69.7694868 | 60.3026603 | 69.1015175 | 74.2605634 | 52.7715278 |
| 16:25:19 | 0:25:39 | 69.7694868 | 62.3026603 | 69.1015175 | 75.2605634 | 51.7715278 |
| 16:25:20 | 0:25:40 | 70.7694868 | 65.3026603 | 69.1015175 | 75.2605634 | 51.7715278 |
| 16:25:21 | 0:25:41 | 71.7694868 | 66.3026603 | 69.1015175 | 76.2605634 | 51.7715278 |
| 16:25:22 | 0:25:42 | 73.7694868 | 67.3026603 | 69.1015175 | 76.2605634 | 51.7715278 |
| 16:25:23 | 0:25:43 | 74.7694868 | 67.3026603 | 68.1015175 | 77.2605634 | 57.7715278 |
| 16:25:24 | 0:25:44 | 74.7694868 | 68.3026603 | 68.1015175 | 77.2605634 | 63.7715278 |
| 16:25:25 | 0:25:45 | 74.7694868 | 68.3026603 | 69.1015175 | 78.2605634 | 63.7715278 |
| 16:25:26 | 0:25:46 | 74.7694868 | 68.3026603 | 70.1015175 | 78.2605634 | 63.7715278 |
| 16:25:27 | 0:25:47 | 73.7694868 | 67.3026603 | 70.1015175 | 78.2605634 | 63.7715278 |
| 16:25:28 | 0:25:48 | 72.7694868 | 68.3026603 | 70.1015175 | 78.2605634 | 67.7715278 |
| 16:25:29 | 0:25:49 | 72.7694868 | 68.3026603 | 72.1015175 | 78.2605634 | 68.7715278 |
| 16:25:30 | 0:25:50 | 72.7694868 | 68.3026603 | 72.1015175 | 78.2605634 | 68.7715278 |
| 16:25:31 | 0:25:51 | 73.7694868 | 68.3026603 | 68.1015175 | 78.2605634 | 70.7715278 |
| 16:25:32 | 0:25:52 | 74.7694868 | 68.3026603 | 67.1015175 | 78.2605634 | 70.7715278 |
| 16:25:33 | 0:25:53 | 74.7694868 | 68.3026603 | 67.1015175 | 79.2605634 | 70.7715278 |
| 16:25:34 | 0:25:54 | 74.7694868 | 68.3026603 | 66.1015175 | 78.2605634 | 70.7715278 |
| 16:25:35 | 0:25:55 | 74.7694868 | 67.3026603 | 66.1015175 | 77.2605634 | 70.7715278 |
| 16:25:36 | 0:25:56 | 74.7694868 | 67.3026603 | 68.1015175 | 77.2605634 | 71.7715278 |
| 16:25:37 | 0:25:57 | 75.7694868 | 67.3026603 | 69.1015175 | 77.2605634 | 71.7715278 |
| 16:25:38 | 0:25:58 | 75.7694868 | 67.3026603 | 69.1015175 | 77.2605634 | 71.7715278 |
| 16:25:39 | 0:25:59 | 75.7694868 | 67.3026603 | 67.1015175 | 77.2605634 | 71.7715278 |
| 16:25:40 | 0:26:00 | 75.7694868 | 67.3026603 | 67.1015175 | 75.2605634 | 72.7715278 |
| 16:25:41 | 0:26:01 | 76.7694868 | 67.3026603 | 67.1015175 | 74.2605634 | 75.7715278 |
| 16:25:42 | 0:26:02 | 76.7694868 | 67.3026603 | 68.1015175 | 74.2605634 | 77.7715278 |
| 16:25:43 | 0:26:03 | 77.7694868 | 67.3026603 | 68.1015175 | 74.2605634 | 78.7715278 |
| 16:25:44 | 0:26:04 | 76.7694868 | 67.3026603 | 69.1015175 | 74.2605634 | 78.7715278 |
| 16:25:45 | 0:26:05 | 76.7694868 | 67.3026603 | 69.1015175 | 74.2605634 | 82.7715278 |
| 16:25:46 | 0:26:06 | 74.7694868 | 67.3026603 | 69.1015175 | 74.2605634 | 83.7715278 |
| 16:25:47 | 0:26:07 | 73.7694868 | 67.3026603 | 71.1015175 | 77.2605634 | 83.7715278 |
| 16:25:48 | 0:26:08 | 73.7694868 | 67.3026603 | 71.1015175 | 79.2605634 | 83.7715278 |
| 16:25:49 | 0:26:09 | 72.7694868 | 67.3026603 | 71.1015175 | 79.2605634 | 83.7715278 |
| 16:25:50 | 0:26:10 | 71.7694868 | 67.3026603 | 71.1015175 | 78.2605634 | 84.7715278 |
| 16:25:51 | 0:26:11 | 71.7694868 | 66.3026603 | 69.1015175 | 78.2605634 | 84.7715278 |
| 16:25:52 | 0:26:12 | 71.7694868 | 66.3026603 | 69.1015175 | 78.2605634 | 84.7715278 |
| 16:25:53 | 0:26:13 | 72.7694868 | 65.3026603 | 69.1015175 | 79.2605634 | 85.7715278 |
| 16:25:54 | 0:26:14 | 72.7694868 | 65.3026603 | 69.1015175 | 79.2605634 | 85.7715278 |
| 16:25:55 | 0:26:15 | 72.7694868 | 66.3026603 | 70.1015175 | 78.2605634 | 85.7715278 |

|          |         |            |            |            |            |            |
|----------|---------|------------|------------|------------|------------|------------|
| 16:25:56 | 0:26:16 | 72.7694868 | 66.3026603 | 71.1015175 | 77.2605634 | 85.7715278 |
| 16:25:57 | 0:26:17 | 72.7694868 | 66.3026603 | 71.1015175 | 76.2605634 | 85.7715278 |
| 16:25:58 | 0:26:18 | 72.7694868 | 66.3026603 | 71.1015175 | 75.2605634 | 86.7715278 |
| 16:25:59 | 0:26:19 | 72.7694868 | 66.3026603 | 71.1015175 | 74.2605634 | 86.7715278 |
| 16:26:00 | 0:26:20 | 72.7694868 | 66.3026603 | 70.1015175 | 73.2605634 | 86.7715278 |
| 16:26:01 | 0:26:21 | 71.7694868 | 66.3026603 | 69.1015175 | 73.2605634 | 86.7715278 |
| 16:26:02 | 0:26:22 | 71.7694868 | 66.3026603 | 68.1015175 | 72.2605634 | 72.2630288 |
| 16:26:03 | 0:26:23 | 71.7694868 | 66.3026603 | 68.1015175 | 72.2605634 | 72.0812106 |
| 16:26:04 | 0:26:24 | 71.7694868 | 66.3026603 | 68.1015175 | 71.2605634 | 85.7715278 |
| 16:26:05 | 0:26:25 | 71.7694868 | 67.3026603 | 68.1015175 | 70.2605634 | 85.7715278 |
| 16:26:06 | 0:26:26 | 71.7694868 | 67.3026603 | 68.1015175 | 70.2605634 | 85.7715278 |
| 16:26:07 | 0:26:27 | 71.7694868 | 67.3026603 | 66.1015175 | 70.2605634 | 71.8993924 |
| 16:26:08 | 0:26:28 | 71.7694868 | 67.3026603 | 66.1015175 | 70.2605634 | 71.6266651 |
| 16:26:09 | 0:26:29 | 71.7694868 | 67.3026603 | 67.1015175 | 70.2605634 | 72.1721197 |
| 16:26:10 | 0:26:30 | 71.7694868 | 67.3026603 | 67.1015175 | 71.2605634 | 72.7175742 |
| 16:26:11 | 0:26:31 | 71.7694868 | 69.3026603 | 67.1015175 | 71.2605634 | 73.1721197 |
| 16:26:12 | 0:26:32 | 70.7694868 | 74.3026603 | 66.1015175 | 71.2605634 | 86.7715278 |
| 16:26:13 | 0:26:33 | 70.7694868 | 77.3026603 | 66.1015175 | 71.2605634 | 85.7715278 |
| 16:26:14 | 0:26:34 | 70.7694868 | 78.3026603 | 66.1015175 | 71.2605634 | 85.7715278 |
| 16:26:15 | 0:26:35 | 70.7694868 | 78.3026603 | 66.1015175 | 70.2605634 | 84.7715278 |
| 16:26:16 | 0:26:36 | 70.7694868 | 78.3026603 | 66.1015175 | 70.2605634 | 81.7715278 |
| 16:26:17 | 0:26:37 | 70.7694868 | 78.3026603 | 70.1015175 | 69.2605634 | 81.7715278 |
| 16:26:18 | 0:26:38 | 70.7694868 | 78.3026603 | 70.1015175 | 70.2605634 | 73.6266651 |
| 16:26:19 | 0:26:39 | 68.7694868 | 76.3026603 | 74.1015175 | 70.2605634 | 73.7175742 |
| 16:26:20 | 0:26:40 | 71.7694868 | 76.3026603 | 74.1015175 | 70.2605634 | 73.8993924 |
| 16:26:21 | 0:26:41 | 72.7694868 | 75.3026603 | 74.1015175 | 72.2605634 | 74.0812106 |
| 16:26:22 | 0:26:42 | 72.7694868 | 75.3026603 | 73.1015175 | 72.2605634 | 73.7175742 |
| 16:26:23 | 0:26:43 | 70.7694868 | 74.3026603 | 72.1015175 | 72.2605634 | 72.8993924 |
| 16:26:24 | 0:26:44 | 70.7694868 | 74.3026603 | 72.1015175 | 72.2605634 | 72.8993924 |
| 16:26:25 | 0:26:45 | 69.7694868 | 76.3026603 | 72.1015175 | 72.2605634 | 85.7715278 |
| 16:26:26 | 0:26:46 | 69.7694868 | 76.3026603 | 71.1015175 | 72.2605634 | 85.7715278 |
| 16:26:27 | 0:26:47 | 69.7694868 | 76.3026603 | 71.1015175 | 73.2605634 | 71.7715278 |
| 16:26:28 | 0:26:48 | 69.7694868 | 75.3026603 | 66.1015175 | 73.2605634 | 70.7715278 |
| 16:26:29 | 0:26:49 | 69.7694868 | 72.3026603 | 66.1015175 | 74.2605634 | 68.7715278 |
| 16:26:30 | 0:26:50 | 69.7694868 | 69.3026603 | 66.1015175 | 74.2605634 | 68.7715278 |
| 16:26:31 | 0:26:51 | 69.7694868 | 69.3026603 | 65.1015175 | 74.2605634 | 68.7715278 |
| 16:26:32 | 0:26:52 | 69.7694868 | 67.3026603 | 65.1015175 | 74.2605634 | 67.7715278 |
| 16:26:33 | 0:26:53 | 70.7694868 | 66.3026603 | 65.1015175 | 74.2605634 | 65.7715278 |
| 16:26:34 | 0:26:54 | 71.7694868 | 67.3026603 | 66.1015175 | 75.2605634 | 65.7715278 |
| 16:26:35 | 0:26:55 | 71.7694868 | 68.3026603 | 67.1015175 | 76.2605634 | 65.7715278 |
| 16:26:36 | 0:26:56 | 71.7694868 | 69.3026603 | 67.1015175 | 77.2605634 | 65.7715278 |
| 16:26:37 | 0:26:57 | 71.7694868 | 71.3026603 | 67.1015175 | 75.2605634 | 68.7715278 |
| 16:26:38 | 0:26:58 | 69.7694868 | 71.3026603 | 67.1015175 | 73.2605634 | 69.7715278 |
| 16:26:39 | 0:26:59 | 69.7694868 | 71.3026603 | 67.1015175 | 72.2605634 | 69.7715278 |
| 16:26:40 | 0:27:00 | 69.7694868 | 70.3026603 | 67.1015175 | 72.2605634 | 69.7715278 |

|          |         |            |            |            |            |            |
|----------|---------|------------|------------|------------|------------|------------|
| 16:26:41 | 0:27:01 | 69.7694868 | 68.3026603 | 68.1015175 | 71.2605634 | 69.7715278 |
| 16:26:42 | 0:27:02 | 69.7694868 | 68.3026603 | 70.1015175 | 71.2605634 | 69.7715278 |
| 16:26:43 | 0:27:03 | 68.7694868 | 64.3026603 | 72.1015175 | 71.2605634 | 69.7715278 |
| 16:26:44 | 0:27:04 | 68.7694868 | 62.3026603 | 72.1015175 | 71.2605634 | 69.7715278 |
| 16:26:45 | 0:27:05 | 68.7694868 | 62.3026603 | 73.1015175 | 71.2605634 | 68.7715278 |
| 16:26:46 | 0:27:06 | 68.7694868 | 63.3026603 | 73.1015175 | 74.2605634 | 67.7715278 |
| 16:26:47 | 0:27:07 | 69.7694868 | 63.3026603 | 80.1015175 | 74.2605634 | 67.7715278 |
| 16:26:48 | 0:27:08 | 69.7694868 | 63.3026603 | 79.1015175 | 73.2605634 | 66.7715278 |
| 16:26:49 | 0:27:09 | 70.7694868 | 63.3026603 | 78.1015175 | 73.2605634 | 66.7715278 |
| 16:26:50 | 0:27:10 | 70.7694868 | 63.3026603 | 78.1015175 | 73.2605634 | 67.7715278 |
| 16:26:51 | 0:27:11 | 70.7694868 | 63.3026603 | 78.1015175 | 74.2605634 | 69.7715278 |
| 16:26:52 | 0:27:12 | 70.7694868 | 63.3026603 | 78.1015175 | 74.2605634 | 71.7715278 |
| 16:26:53 | 0:27:13 | 71.7694868 | 65.3026603 | 79.1015175 | 74.2605634 | 74.7715278 |
| 16:26:54 | 0:27:14 | 73.7694868 | 65.3026603 | 79.1015175 | 76.2605634 | 74.7715278 |
| 16:26:55 | 0:27:15 | 74.7694868 | 65.3026603 | 79.1015175 | 76.2605634 | 74.7715278 |
| 16:26:56 | 0:27:16 | 74.7694868 | 64.3026603 | 79.1015175 | 76.2605634 | 74.7715278 |
| 16:26:57 | 0:27:17 | 73.7694868 | 64.3026603 | 80.1015175 | 75.2605634 | 74.7715278 |
| 16:26:58 | 0:27:18 | 73.7694868 | 64.3026603 | 80.1015175 | 76.2605634 | 74.7715278 |
| 16:26:59 | 0:27:19 | 73.7694868 | 67.3026603 | 81.1015175 | 76.2605634 | 73.7715278 |
| 16:27:00 | 0:27:20 | 73.7694868 | 67.3026603 | 82.1015175 | 77.2605634 | 73.7715278 |
| 16:27:01 | 0:27:21 | 73.7694868 | 66.3026603 | 82.1015175 | 77.2605634 | 72.7715278 |
| 16:27:02 | 0:27:22 | 72.7694868 | 65.3026603 | 81.1015175 | 77.2605634 | 72.7715278 |
| 16:27:03 | 0:27:23 | 74.7694868 | 64.3026603 | 81.1015175 | 77.2605634 | 73.7715278 |
| 16:27:04 | 0:27:24 | 74.7694868 | 64.3026603 | 81.1015175 | 77.2605634 | 73.7715278 |
| 16:27:05 | 0:27:25 | 74.7694868 | 64.3026603 | 74.1015175 | 77.2605634 | 73.7715278 |
| 16:27:06 | 0:27:26 | 74.7694868 | 65.3026603 | 74.1015175 | 77.2605634 | 73.7715278 |
| 16:27:07 | 0:27:27 | 74.7694868 | 65.3026603 | 71.1015175 | 76.2605634 | 72.7715278 |
| 16:27:08 | 0:27:28 | 75.7694868 | 65.3026603 | 66.1015175 | 76.2605634 | 72.7715278 |
| 16:27:09 | 0:27:29 | 75.7694868 | 65.3026603 | 65.1015175 | 75.2605634 | 72.7715278 |
| 16:27:10 | 0:27:30 | 75.7694868 | 64.3026603 | 65.1015175 | 75.2605634 | 73.7715278 |
| 16:27:11 | 0:27:31 | 75.7694868 | 64.3026603 | 65.1015175 | 74.2605634 | 73.7715278 |
| 16:27:12 | 0:27:32 | 75.7694868 | 64.3026603 | 65.1015175 | 74.2605634 | 70.7715278 |
| 16:27:13 | 0:27:33 | 75.7694868 | 64.3026603 | 66.1015175 | 75.2605634 | 69.7715278 |
| 16:27:14 | 0:27:34 | 75.7694868 | 65.3026603 | 66.1015175 | 76.2605634 | 68.7715278 |
| 16:27:15 | 0:27:35 | 75.7694868 | 65.3026603 | 66.1015175 | 76.2605634 | 68.7715278 |
| 16:27:16 | 0:27:36 | 72.7694868 | 65.3026603 | 66.1015175 | 77.2605634 | 66.7715278 |
| 16:27:17 | 0:27:37 | 73.7694868 | 65.3026603 | 66.1015175 | 76.2605634 | 67.7715278 |
| 16:27:18 | 0:27:38 | 73.7694868 | 65.3026603 | 66.1015175 | 76.2605634 | 67.7715278 |
| 16:27:19 | 0:27:39 | 73.7694868 | 65.3026603 | 66.1015175 | 76.2605634 | 67.7715278 |
| 16:27:20 | 0:27:40 | 74.7694868 | 65.3026603 | 67.1015175 | 76.2605634 | 66.7715278 |
| 16:27:21 | 0:27:41 | 74.7694868 | 65.3026603 | 69.1015175 | 76.2605634 | 66.7715278 |
| 16:27:22 | 0:27:42 | 74.7694868 | 68.3026603 | 69.1015175 | 76.2605634 | 66.7715278 |
| 16:27:23 | 0:27:43 | 72.7694868 | 74.3026603 | 69.1015175 | 76.2605634 | 64.7715278 |
| 16:27:24 | 0:27:44 | 73.7694868 | 77.3026603 | 69.1015175 | 77.2605634 | 64.7715278 |
| 16:27:25 | 0:27:45 | 73.7694868 | 78.3026603 | 69.1015175 | 77.2605634 | 64.7715278 |

|          |         |            |            |            |            |            |
|----------|---------|------------|------------|------------|------------|------------|
| 16:27:26 | 0:27:46 | 73.7694868 | 78.3026603 | 69.1015175 | 77.2605634 | 64.7715278 |
| 16:27:27 | 0:27:47 | 72.7694868 | 78.3026603 | 68.1015175 | 77.2605634 | 64.7715278 |
| 16:27:28 | 0:27:48 | 72.7694868 | 79.3026603 | 68.1015175 | 77.2605634 | 64.7715278 |
| 16:27:29 | 0:27:49 | 71.7694868 | 79.3026603 | 69.1015175 | 77.2605634 | 64.7715278 |
| 16:27:30 | 0:27:50 | 71.7694868 | 79.3026603 | 69.1015175 | 76.2605634 | 67.7715278 |
| 16:27:31 | 0:27:51 | 72.7694868 | 79.3026603 | 69.1015175 | 76.2605634 | 67.7715278 |
| 16:27:32 | 0:27:52 | 72.7694868 | 79.3026603 | 70.1015175 | 76.2605634 | 70.7715278 |
| 16:27:33 | 0:27:53 | 73.7694868 | 79.3026603 | 70.1015175 | 76.2605634 | 70.7715278 |
| 16:27:34 | 0:27:54 | 73.7694868 | 78.3026603 | 70.1015175 | 76.2605634 | 70.7715278 |
| 16:27:35 | 0:27:55 | 73.7694868 | 78.3026603 | 70.1015175 | 76.2605634 | 70.7715278 |
| 16:27:36 | 0:27:56 | 73.7694868 | 77.3026603 | 70.1015175 | 76.2605634 | 70.7715278 |
| 16:27:37 | 0:27:57 | 73.7694868 | 76.3026603 | 70.1015175 | 76.2605634 | 70.7715278 |
| 16:27:38 | 0:27:58 | 74.7694868 | 76.3026603 | 69.1015175 | 77.2605634 | 70.7715278 |
| 16:27:39 | 0:27:59 | 74.7694868 | 74.3026603 | 69.1015175 | 78.2605634 | 70.7715278 |
| 16:27:40 | 0:28:00 | 76.7694868 | 76.3026603 | 68.1015175 | 79.2605634 | 70.7715278 |
| 16:27:41 | 0:28:01 | 76.7694868 | 77.3026603 | 69.1015175 | 79.2605634 | 70.7715278 |
| 16:27:42 | 0:28:02 | 76.7694868 | 78.3026603 | 69.1015175 | 79.2605634 | 70.7715278 |
| 16:27:43 | 0:28:03 | 76.7694868 | 80.3026603 | 70.1015175 | 79.2605634 | 74.7715278 |
| 16:27:44 | 0:28:04 | 76.7694868 | 80.3026603 | 72.1015175 | 79.2605634 | 74.7715278 |
| 16:27:45 | 0:28:05 | 76.7694868 | 81.3026603 | 73.1015175 | 79.2605634 | 74.7715278 |
| 16:27:46 | 0:28:06 | 76.7694868 | 81.3026603 | 73.1015175 | 79.2605634 | 75.7715278 |
| 16:27:47 | 0:28:07 | 74.7694868 | 82.3026603 | 75.1015175 | 80.2605634 | 75.7715278 |
| 16:27:48 | 0:28:08 | 74.7694868 | 82.3026603 | 75.1015175 | 80.2605634 | 75.7715278 |
| 16:27:49 | 0:28:09 | 76.7694868 | 82.3026603 | 76.1015175 | 81.2605634 | 75.7715278 |
| 16:27:50 | 0:28:10 | 77.7694868 | 83.3026603 | 79.1015175 | 81.2605634 | 75.7715278 |
| 16:27:51 | 0:28:11 | 77.7694868 | 83.3026603 | 84.1015175 | 83.2605634 | 75.7715278 |
| 16:27:52 | 0:28:12 | 78.7694868 | 83.3026603 | 84.1015175 | 83.2605634 | 75.7715278 |
| 16:27:53 | 0:28:13 | 78.7694868 | 79.3026603 | 86.1015175 | 83.2605634 | 76.7715278 |
| 16:27:54 | 0:28:14 | 78.7694868 | 79.3026603 | 91.1015175 | 70.2605634 | 76.7715278 |
| 16:27:55 | 0:28:15 | 78.7694868 | 79.3026603 | 76.8993924 | 67.2605634 | 76.7715278 |
| 16:27:56 | 0:28:16 | 78.7694868 | 78.3026603 | 77.535756  | 67.2605634 | 77.7715278 |
| 16:27:57 | 0:28:17 | 78.7694868 | 78.3026603 | 77.3539378 | 66.2605634 | 78.7715278 |
| 16:27:58 | 0:28:18 | 78.7694868 | 77.3026603 | 90.1015175 | 66.2605634 | 78.7715278 |
| 16:27:59 | 0:28:19 | 78.7694868 | 77.3026603 | 90.1015175 | 67.2605634 | 79.7715278 |
| 16:28:00 | 0:28:20 | 77.7694868 | 75.3026603 | 90.1015175 | 68.2605634 | 80.7715278 |
| 16:28:01 | 0:28:21 | 77.7694868 | 75.3026603 | 88.1015175 | 71.2605634 | 81.7715278 |
| 16:28:02 | 0:28:22 | 78.7694868 | 77.3026603 | 86.1015175 | 73.2605634 | 81.7715278 |
| 16:28:03 | 0:28:23 | 79.7694868 | 79.3026603 | 82.1015175 | 75.2605634 | 81.7715278 |
| 16:28:04 | 0:28:24 | 80.7694868 | 79.3026603 | 79.1015175 | 75.2605634 | 82.7715278 |
| 16:28:05 | 0:28:25 | 80.7694868 | 78.3026603 | 77.1015175 | 76.2605634 | 82.7715278 |
| 16:28:06 | 0:28:26 | 80.7694868 | 78.3026603 | 73.1015175 | 76.2605634 | 83.7715278 |
| 16:28:07 | 0:28:27 | 80.7694868 | 77.3026603 | 73.1015175 | 77.2605634 | 84.7715278 |
| 16:28:08 | 0:28:28 | 81.7694868 | 77.3026603 | 73.1015175 | 77.2605634 | 85.7715278 |
| 16:28:09 | 0:28:29 | 82.7694868 | 77.3026603 | 72.1015175 | 78.2605634 | 85.7715278 |
| 16:28:10 | 0:28:30 | 85.7694868 | 77.3026603 | 72.1015175 | 78.2605634 | 85.7715278 |

|          |         |            |            |            |            |            |
|----------|---------|------------|------------|------------|------------|------------|
| 16:28:11 | 0:28:31 | 85.7694868 | 78.3026603 | 72.1015175 | 78.2605634 | 86.7715278 |
| 16:28:12 | 0:28:32 | 85.7694868 | 78.3026603 | 72.1015175 | 78.2605634 | 86.7715278 |
| 16:28:13 | 0:28:33 | 84.7694868 | 78.3026603 | 73.1015175 | 77.2605634 | 86.7715278 |
| 16:28:14 | 0:28:34 | 84.7694868 | 78.3026603 | 73.1015175 | 74.2605634 | 86.7715278 |
| 16:28:15 | 0:28:35 | 83.7694868 | 77.3026603 | 73.1015175 | 72.2605634 | 85.7715278 |
| 16:28:16 | 0:28:36 | 81.7694868 | 77.3026603 | 72.1015175 | 70.2605634 | 86.7715278 |
| 16:28:17 | 0:28:37 | 80.7694868 | 77.3026603 | 72.1015175 | 69.2605634 | 86.7715278 |
| 16:28:18 | 0:28:38 | 79.7694868 | 76.3026603 | 72.1015175 | 69.2605634 | 86.7715278 |
| 16:28:19 | 0:28:39 | 78.7694868 | 75.3026603 | 72.1015175 | 69.2605634 | 87.7715278 |
| 16:28:20 | 0:28:40 | 78.7694868 | 75.3026603 | 72.1015175 | 70.2605634 | 87.7715278 |
| 16:28:21 | 0:28:41 | 78.7694868 | 73.3026603 | 72.1015175 | 70.2605634 | 86.7715278 |
| 16:28:22 | 0:28:42 | 77.7694868 | 71.3026603 | 72.1015175 | 70.2605634 | 86.7715278 |
| 16:28:23 | 0:28:43 | 76.7694868 | 71.3026603 | 72.1015175 | 72.2605634 | 86.7715278 |
| 16:28:24 | 0:28:44 | 74.7694868 | 71.3026603 | 73.1015175 | 74.2605634 | 85.7715278 |
| 16:28:25 | 0:28:45 | 74.7694868 | 73.3026603 | 73.1015175 | 76.2605634 | 85.7715278 |
| 16:28:26 | 0:28:46 | 74.7694868 | 73.3026603 | 75.1015175 | 77.2605634 | 83.7715278 |
| 16:28:27 | 0:28:47 | 74.7694868 | 74.3026603 | 75.1015175 | 77.2605634 | 83.7715278 |
| 16:28:28 | 0:28:48 | 74.7694868 | 71.3026603 | 77.1015175 | 77.2605634 | 83.7715278 |
| 16:28:29 | 0:28:49 | 75.7694868 | 69.3026603 | 78.1015175 | 77.2605634 | 83.7715278 |
| 16:28:30 | 0:28:50 | 78.7694868 | 69.3026603 | 78.1015175 | 77.2605634 | 83.7715278 |
| 16:28:31 | 0:28:51 | 79.7694868 | 66.3026603 | 80.1015175 | 77.2605634 | 83.7715278 |
| 16:28:32 | 0:28:52 | 80.7694868 | 66.3026603 | 80.1015175 | 78.2605634 | 83.7715278 |
| 16:28:33 | 0:28:53 | 80.7694868 | 66.3026603 | 80.1015175 | 78.2605634 | 83.7715278 |
| 16:28:34 | 0:28:54 | 80.7694868 | 65.3026603 | 80.1015175 | 78.2605634 | 83.7715278 |
| 16:28:35 | 0:28:55 | 80.7694868 | 65.3026603 | 79.1015175 | 79.2605634 | 83.7715278 |
| 16:28:36 | 0:28:56 | 80.7694868 | 65.3026603 | 75.1015175 | 79.2605634 | 83.7715278 |
| 16:28:37 | 0:28:57 | 81.7694868 | 66.3026603 | 74.1015175 | 79.2605634 | 83.7715278 |
| 16:28:38 | 0:28:58 | 81.7694868 | 66.3026603 | 74.1015175 | 79.2605634 | 83.7715278 |
| 16:28:39 | 0:28:59 | 80.7694868 | 66.3026603 | 75.1015175 | 79.2605634 | 83.7715278 |
| 16:28:40 | 0:29:00 | 80.7694868 | 66.3026603 | 75.1015175 | 79.2605634 | 84.7715278 |
| 16:28:41 | 0:29:01 | 80.7694868 | 67.3026603 | 75.1015175 | 78.2605634 | 84.7715278 |
| 16:28:42 | 0:29:02 | 79.7694868 | 69.3026603 | 77.1015175 | 78.2605634 | 84.7715278 |
| 16:28:43 | 0:29:03 | 78.7694868 | 69.3026603 | 75.1015175 | 79.2605634 | 84.7715278 |
| 16:28:44 | 0:29:04 | 78.7694868 | 73.3026603 | 75.1015175 | 82.2605634 | 84.7715278 |
| 16:28:45 | 0:29:05 | 78.7694868 | 73.3026603 | 74.1015175 | 84.2605634 | 84.7715278 |
| 16:28:46 | 0:29:06 | 78.7694868 | 73.3026603 | 74.1015175 | 85.2605634 | 82.7715278 |
| 16:28:47 | 0:29:07 | 78.7694868 | 73.3026603 | 74.1015175 | 84.2605634 | 82.7715278 |
| 16:28:48 | 0:29:08 | 78.7694868 | 73.3026603 | 76.1015175 | 77.2605634 | 82.7715278 |
| 16:28:49 | 0:29:09 | 77.7694868 | 73.3026603 | 76.1015175 | 71.2605634 | 82.7715278 |
| 16:28:50 | 0:29:10 | 79.7694868 | 73.3026603 | 76.1015175 | 70.2605634 | 82.7715278 |
| 16:28:51 | 0:29:11 | 81.7694868 | 73.3026603 | 75.1015175 | 70.2605634 | 82.7715278 |
| 16:28:52 | 0:29:12 | 81.7694868 | 72.3026603 | 75.1015175 | 71.2605634 | 82.7715278 |
| 16:28:53 | 0:29:13 | 81.7694868 | 72.3026603 | 76.1015175 | 71.2605634 | 82.7715278 |
| 16:28:54 | 0:29:14 | 81.7694868 | 72.3026603 | 76.1015175 | 71.2605634 | 81.7715278 |
| 16:28:55 | 0:29:15 | 81.7694868 | 71.3026603 | 75.1015175 | 70.2605634 | 81.7715278 |



|          |         |            |            |            |            |            |
|----------|---------|------------|------------|------------|------------|------------|
| 16:28:56 | 0:29:16 | 80.7694868 | 71.3026603 | 75.1015175 | 70.2605634 | 81.7715278 |
| 16:28:57 | 0:29:17 | 80.7694868 | 72.3026603 | 75.1015175 | 71.2605634 | 82.7715278 |
| 16:28:58 | 0:29:18 | 80.7694868 | 72.3026603 | 75.1015175 | 72.2605634 | 82.7715278 |
| 16:28:59 | 0:29:19 | 80.7694868 | 72.3026603 | 75.1015175 | 72.2605634 | 81.7715278 |
| 16:29:00 | 0:29:20 | 79.7694868 | 73.3026603 | 74.1015175 | 72.2605634 | 81.7715278 |
| 16:29:01 | 0:29:21 | 79.7694868 | 71.3026603 | 80.1015175 | 72.2605634 | 81.7715278 |
| 16:29:02 | 0:29:22 | 79.7694868 | 71.3026603 | 80.1015175 | 73.2605634 | 81.7715278 |
| 16:29:03 | 0:29:23 | 80.7694868 | 68.3026603 | 80.1015175 | 77.2605634 | 80.7715278 |
| 16:29:04 | 0:29:24 | 80.7694868 | 68.3026603 | 80.1015175 | 79.2605634 | 79.7715278 |
| 16:29:05 | 0:29:25 | 79.7694868 | 69.3026603 | 80.1015175 | 79.2605634 | 78.7715278 |
| 16:29:06 | 0:29:26 | 79.7694868 | 69.3026603 | 80.1015175 | 79.2605634 | 78.7715278 |
| 16:29:07 | 0:29:27 | 79.7694868 | 69.3026603 | 78.1015175 | 84.2605634 | 78.7715278 |
| 16:29:08 | 0:29:28 | 78.7694868 | 68.3026603 | 76.1015175 | 86.2605634 | 78.7715278 |
| 16:29:09 | 0:29:29 | 78.7694868 | 68.3026603 | 76.1015175 | 86.2605634 | 77.7715278 |
| 16:29:10 | 0:29:30 | 78.7694868 | 67.3026603 | 77.1015175 | 84.2605634 | 76.7715278 |
| 16:29:11 | 0:29:31 | 78.7694868 | 67.3026603 | 77.1015175 | 82.2605634 | 74.7715278 |
| 16:29:12 | 0:29:32 | 77.7694868 | 68.3026603 | 77.1015175 | 82.2605634 | 72.7715278 |
| 16:29:13 | 0:29:33 | 77.7694868 | 69.3026603 | 77.1015175 | 82.2605634 | 71.7715278 |
| 16:29:14 | 0:29:34 | 77.7694868 | 68.3026603 | 78.1015175 | 83.2605634 | 71.7715278 |
| 16:29:15 | 0:29:35 | 76.7694868 | 68.3026603 | 77.1015175 | 83.2605634 | 71.7715278 |
| 16:29:16 | 0:29:36 | 76.7694868 | 66.3026603 | 74.1015175 | 83.2605634 | 71.7715278 |
| 16:29:17 | 0:29:37 | 76.7694868 | 66.3026603 | 74.1015175 | 82.2605634 | 70.7715278 |
| 16:29:18 | 0:29:38 | 75.7694868 | 65.3026603 | 73.1015175 | 82.2605634 | 70.7715278 |
| 16:29:19 | 0:29:39 | 75.7694868 | 65.3026603 | 73.1015175 | 78.2605634 | 70.7715278 |
| 16:29:20 | 0:29:40 | 75.7694868 | 64.3026603 | 73.1015175 | 77.2605634 | 70.7715278 |
| 16:29:21 | 0:29:41 | 75.7694868 | 64.3026603 | 73.1015175 | 76.2605634 | 70.7715278 |
| 16:29:22 | 0:29:42 | 74.7694868 | 64.3026603 | 71.1015175 | 75.2605634 | 71.7715278 |
| 16:29:23 | 0:29:43 | 75.7694868 | 65.3026603 | 69.1015175 | 75.2605634 | 71.7715278 |
| 16:29:24 | 0:29:44 | 75.7694868 | 65.3026603 | 69.1015175 | 76.2605634 | 71.7715278 |
| 16:29:25 | 0:29:45 | 75.7694868 | 65.3026603 | 69.1015175 | 76.2605634 | 71.7715278 |
| 16:29:26 | 0:29:46 | 75.7694868 | 65.3026603 | 76.1015175 | 76.2605634 | 71.7715278 |
| 16:29:27 | 0:29:47 | 75.7694868 | 65.3026603 | 77.1015175 | 76.2605634 | 71.7715278 |
| 16:29:28 | 0:29:48 | 75.7694868 | 65.3026603 | 77.1015175 | 76.2605634 | 71.7715278 |
| 16:29:29 | 0:29:49 | 75.7694868 | 64.3026603 | 76.1015175 | 74.2605634 | 73.7715278 |
| 16:29:30 | 0:29:50 | 75.7694868 | 61.3026603 | 74.1015175 | 71.2605634 | 73.7715278 |
| 16:29:31 | 0:29:51 | 75.7694868 | 58.3026603 | 74.1015175 | 71.2605634 | 73.7715278 |
| 16:29:32 | 0:29:52 | 75.7694868 | 57.3026603 | 74.1015175 | 71.2605634 | 73.7715278 |
| 16:29:33 | 0:29:53 | 75.7694868 | 56.3026603 | 74.1015175 | 71.2605634 | 74.7715278 |
| 16:29:34 | 0:29:54 | 75.7694868 | 55.3026603 | 74.1015175 | 71.2605634 | 74.7715278 |
| 16:29:35 | 0:29:55 | 75.7694868 | 55.3026603 | 76.1015175 | 71.2605634 | 74.7715278 |
| 16:29:36 | 0:29:56 | 77.7694868 | 55.3026603 | 76.1015175 | 71.2605634 | 76.7715278 |
| 16:29:37 | 0:29:57 | 77.7694868 | 55.3026603 | 76.1015175 | 71.2605634 | 76.7715278 |
| 16:29:38 | 0:29:58 | 77.7694868 | 55.3026603 | 75.1015175 | 71.2605634 | 77.7715278 |
| 16:29:39 | 0:29:59 | 76.7694868 | 51.3026603 | 71.1015175 | 71.2605634 | 77.7715278 |
| 16:29:40 | 0:30:00 | 75.7694868 | 51.3026603 | 70.1015175 | 71.2605634 | 77.7715278 |

|          |         |            |            |            |            |            |
|----------|---------|------------|------------|------------|------------|------------|
| 16:29:41 | 0:30:01 | 75.7694868 | 51.3026603 | 69.1015175 | 71.2605634 | 77.7715278 |
| 16:29:42 | 0:30:02 | 74.7694868 | 51.3026603 | 69.1015175 | 71.2605634 | 77.7715278 |
| 16:29:43 | 0:30:03 | 74.7694868 | 51.3026603 | 73.1015175 | 72.2605634 | 77.7715278 |
| 16:29:44 | 0:30:04 | 74.7694868 | 51.3026603 | 76.1015175 | 72.2605634 | 80.7715278 |
| 16:29:45 | 0:30:05 | 74.7694868 | 50.3026603 | 79.1015175 | 72.2605634 | 83.7715278 |
| 16:29:46 | 0:30:06 | 74.7694868 | 50.3026603 | 81.1015175 | 72.2605634 | 83.7715278 |
| 16:29:47 | 0:30:07 | 75.7694868 | 51.3026603 | 83.1015175 | 71.2605634 | 85.7715278 |
| 16:29:48 | 0:30:08 | 75.7694868 | 51.3026603 | 83.1015175 | 71.2605634 | 87.7715278 |
| 16:29:49 | 0:30:09 | 76.7694868 | 51.3026603 | 87.1015175 | 71.2605634 | 88.7715278 |
| 16:29:50 | 0:30:10 | 77.7694868 | 52.3026603 | 87.1015175 | 71.2605634 | 75.0812106 |
| 16:29:51 | 0:30:11 | 77.7694868 | 52.3026603 | 87.1015175 | 72.2605634 | 75.1721197 |
| 16:29:52 | 0:30:12 | 77.7694868 | 51.3026603 | 87.1015175 | 72.2605634 | 75.1721197 |
| 16:29:53 | 0:30:13 | 78.7694868 | 49.3026603 | 85.1015175 | 72.2605634 | 74.8993924 |
| 16:29:54 | 0:30:14 | 77.7694868 | 48.3026603 | 83.1015175 | 72.2605634 | 74.535756  |
| 16:29:55 | 0:30:15 | 77.7694868 | 50.3026603 | 83.1015175 | 77.2605634 | 89.7715278 |
| 16:29:56 | 0:30:16 | 77.7694868 | 51.3026603 | 84.1015175 | 74.2605634 | 85.7715278 |
| 16:29:57 | 0:30:17 | 77.7694868 | 56.3026603 | 84.1015175 | 72.2605634 | 81.7715278 |
| 16:29:58 | 0:30:18 | 77.7694868 | 59.3026603 | 87.1015175 | 69.2605634 | 80.7715278 |
| 16:29:59 | 0:30:19 | 76.7694868 | 61.3026603 | 87.1015175 | 67.2605634 | 80.7715278 |
| 16:30:00 | 0:30:20 | 76.7694868 | 61.3026603 | 87.1015175 | 67.2605634 | 80.7715278 |
| 16:30:01 | 0:30:21 | 76.7694868 | 61.3026603 | 73.1015175 | 67.2605634 | 80.7715278 |
| 16:30:02 | 0:30:22 | 78.7694868 | 62.3026603 | 73.1015175 | 67.2605634 | 80.7715278 |
| 16:30:03 | 0:30:23 | 78.7694868 | 68.3026603 | 73.1015175 | 67.2605634 | 80.7715278 |
| 16:30:04 | 0:30:24 | 77.7694868 | 70.3026603 | 66.1015175 | 67.2605634 | 79.7715278 |
| 16:30:05 | 0:30:25 | 75.7694868 | 70.3026603 | 65.1015175 | 67.2605634 | 79.7715278 |
| 16:30:06 | 0:30:26 | 75.7694868 | 71.3026603 | 65.1015175 | 68.2605634 | 79.7715278 |
| 16:30:07 | 0:30:27 | 73.7694868 | 72.3026603 | 66.1015175 | 68.2605634 | 78.7715278 |
| 16:30:08 | 0:30:28 | 71.7694868 | 73.3026603 | 66.1015175 | 68.2605634 | 78.7715278 |
| 16:30:09 | 0:30:29 | 70.7694868 | 74.3026603 | 66.1015175 | 70.2605634 | 78.7715278 |
| 16:30:10 | 0:30:30 | 68.7694868 | 75.3026603 | 66.1015175 | 70.2605634 | 79.7715278 |
| 16:30:11 | 0:30:31 | 68.7694868 | 77.3026603 | 67.1015175 | 70.2605634 | 80.7715278 |
| 16:30:12 | 0:30:32 | 68.7694868 | 78.3026603 | 69.1015175 | 70.2605634 | 70.7715278 |
| 16:30:13 | 0:30:33 | 68.7694868 | 79.3026603 | 70.1015175 | 77.2605634 | 62.7715278 |
| 16:30:14 | 0:30:34 | 69.7694868 | 79.3026603 | 70.1015175 | 77.2605634 | 62.7715278 |
| 16:30:15 | 0:30:35 | 71.7694868 | 80.3026603 | 71.1015175 | 78.2605634 | 62.7715278 |
| 16:30:16 | 0:30:36 | 72.7694868 | 80.3026603 | 71.1015175 | 79.2605634 | 61.7715278 |
| 16:30:17 | 0:30:37 | 72.7694868 | 80.3026603 | 72.1015175 | 81.2605634 | 61.7715278 |
| 16:30:18 | 0:30:38 | 72.7694868 | 80.3026603 | 74.1015175 | 81.2605634 | 59.7715278 |
| 16:30:19 | 0:30:39 | 72.7694868 | 80.3026603 | 74.1015175 | 80.2605634 | 59.7715278 |
| 16:30:20 | 0:30:40 | 72.7694868 | 80.3026603 | 78.1015175 | 80.2605634 | 61.7715278 |
| 16:30:21 | 0:30:41 | 72.7694868 | 80.3026603 | 82.1015175 | 79.2605634 | 64.7715278 |
| 16:30:22 | 0:30:42 | 73.7694868 | 80.3026603 | 86.1015175 | 77.2605634 | 64.7715278 |
| 16:30:23 | 0:30:43 | 73.7694868 | 81.3026603 | 87.1015175 | 77.2605634 | 64.7715278 |
| 16:30:24 | 0:30:44 | 74.7694868 | 81.3026603 | 87.1015175 | 76.2605634 | 64.7715278 |
| 16:30:25 | 0:30:45 | 74.7694868 | 81.3026603 | 87.1015175 | 76.2605634 | 66.7715278 |

|          |         |            |            |            |            |            |
|----------|---------|------------|------------|------------|------------|------------|
| 16:30:26 | 0:30:46 | 75.7694868 | 81.3026603 | 87.1015175 | 76.2605634 | 65.7715278 |
| 16:30:27 | 0:30:47 | 75.7694868 | 81.3026603 | 86.1015175 | 75.2605634 | 69.7715278 |
| 16:30:28 | 0:30:48 | 75.7694868 | 81.3026603 | 84.1015175 | 78.2605634 | 71.7715278 |
| 16:30:29 | 0:30:49 | 75.7694868 | 81.3026603 | 83.1015175 | 78.2605634 | 71.7715278 |
| 16:30:30 | 0:30:50 | 74.7694868 | 81.3026603 | 83.1015175 | 80.2605634 | 71.7715278 |
| 16:30:31 | 0:30:51 | 74.7694868 | 79.3026603 | 81.1015175 | 80.2605634 | 71.7715278 |
| 16:30:32 | 0:30:52 | 75.7694868 | 79.3026603 | 81.1015175 | 80.2605634 | 71.7715278 |
| 16:30:33 | 0:30:53 | 74.7694868 | 79.3026603 | 79.1015175 | 80.2605634 | 71.7715278 |
| 16:30:34 | 0:30:54 | 74.7694868 | 80.3026603 | 77.1015175 | 81.2605634 | 71.7715278 |
| 16:30:35 | 0:30:55 | 74.7694868 | 81.3026603 | 77.1015175 | 81.2605634 | 71.7715278 |
| 16:30:36 | 0:30:56 | 74.7694868 | 82.3026603 | 75.1015175 | 81.2605634 | 74.7715278 |
| 16:30:37 | 0:30:57 | 74.7694868 | 82.3026603 | 73.1015175 | 80.2605634 | 74.7715278 |
| 16:30:38 | 0:30:58 | 74.7694868 | 82.3026603 | 73.1015175 | 82.2605634 | 77.7715278 |
| 16:30:39 | 0:30:59 | 74.7694868 | 82.3026603 | 73.1015175 | 81.2605634 | 76.7715278 |
| 16:30:40 | 0:31:00 | 74.7694868 | 83.3026603 | 76.1015175 | 81.2605634 | 76.7715278 |
| 16:30:41 | 0:31:01 | 75.7694868 | 83.3026603 | 75.1015175 | 81.2605634 | 75.7715278 |
| 16:30:42 | 0:31:02 | 75.7694868 | 83.3026603 | 71.1015175 | 76.2605634 | 74.7715278 |
| 16:30:43 | 0:31:03 | 75.7694868 | 83.3026603 | 69.1015175 | 74.2605634 | 71.7715278 |
| 16:30:44 | 0:31:04 | 75.7694868 | 84.3026603 | 66.1015175 | 74.2605634 | 71.7715278 |
| 16:30:45 | 0:31:05 | 75.7694868 | 84.3026603 | 65.1015175 | 72.2605634 | 70.7715278 |
| 16:30:46 | 0:31:06 | 74.7694868 | 84.3026603 | 65.1015175 | 71.2605634 | 70.7715278 |
| 16:30:47 | 0:31:07 | 74.7694868 | 85.3026603 | 64.1015175 | 70.2605634 | 70.7715278 |
| 16:30:48 | 0:31:08 | 73.7694868 | 85.3026603 | 65.1015175 | 69.2605634 | 69.7715278 |
| 16:30:49 | 0:31:09 | 73.7694868 | 86.3026603 | 66.1015175 | 69.2605634 | 68.7715278 |
| 16:30:50 | 0:31:10 | 73.7694868 | 73.3539378 | 66.1015175 | 69.2605634 | 68.7715278 |
| 16:30:51 | 0:31:11 | 73.7694868 | 73.4448469 | 66.1015175 | 69.2605634 | 68.7715278 |
| 16:30:52 | 0:31:12 | 73.7694868 | 88.3026603 | 66.1015175 | 69.2605634 | 69.7715278 |
| 16:30:53 | 0:31:13 | 73.7694868 | 88.3026603 | 66.1015175 | 68.2605634 | 69.7715278 |
| 16:30:54 | 0:31:14 | 73.7694868 | 88.3026603 | 66.1015175 | 68.2605634 | 69.7715278 |
| 16:30:55 | 0:31:15 | 72.7694868 | 73.7175742 | 69.1015175 | 67.2605634 | 69.7715278 |
| 16:30:56 | 0:31:16 | 72.7694868 | 73.8993924 | 69.1015175 | 67.2605634 | 69.7715278 |
| 16:30:57 | 0:31:17 | 77.7694868 | 73.9903015 | 67.1015175 | 67.2605634 | 70.7715278 |
| 16:30:58 | 0:31:18 | 77.7694868 | 73.9903015 | 68.1015175 | 68.2605634 | 70.7715278 |
| 16:30:59 | 0:31:19 | 77.7694868 | 73.9903015 | 69.1015175 | 68.2605634 | 70.7715278 |
| 16:31:00 | 0:31:20 | 78.7694868 | 74.0812106 | 69.1015175 | 68.2605634 | 70.7715278 |
| 16:31:01 | 0:31:21 | 79.7694868 | 74.3539378 | 69.1015175 | 68.2605634 | 72.7715278 |
| 16:31:02 | 0:31:22 | 79.7694868 | 88.3026603 | 69.1015175 | 67.2605634 | 73.7715278 |
| 16:31:03 | 0:31:23 | 80.7694868 | 87.3026603 | 68.1015175 | 66.2605634 | 74.7715278 |
| 16:31:04 | 0:31:24 | 79.7694868 | 87.3026603 | 66.1015175 | 66.2605634 | 75.7715278 |
| 16:31:05 | 0:31:25 | 79.7694868 | 88.3026603 | 65.1015175 | 66.2605634 | 77.7715278 |
| 16:31:06 | 0:31:26 | 79.7694868 | 74.3539378 | 65.1015175 | 66.2605634 | 77.7715278 |
| 16:31:07 | 0:31:27 | 79.7694868 | 74.535756  | 66.1015175 | 67.2605634 | 77.7715278 |
| 16:31:08 | 0:31:28 | 79.7694868 | 75.0812106 | 66.1015175 | 71.2605634 | 76.7715278 |
| 16:31:09 | 0:31:29 | 79.7694868 | 75.2630288 | 66.1015175 | 71.2605634 | 76.7715278 |
| 16:31:10 | 0:31:30 | 80.7694868 | 75.535756  | 66.1015175 | 72.2605634 | 76.7715278 |

|          |         |            |            |            |            |            |
|----------|---------|------------|------------|------------|------------|------------|
| 16:31:11 | 0:31:31 | 81.7694868 | 76.1721197 | 66.1015175 | 72.2605634 | 76.7715278 |
| 16:31:12 | 0:31:32 | 82.7694868 | 75.6266651 | 66.1015175 | 69.2605634 | 75.7715278 |
| 16:31:13 | 0:31:33 | 83.7694868 | 75.3539378 | 67.1015175 | 68.2605634 | 75.7715278 |
| 16:31:14 | 0:31:34 | 85.7694868 | 75.535756  | 68.1015175 | 68.2605634 | 75.7715278 |
| 16:31:15 | 0:31:35 | 85.7694868 | 75.535756  | 68.1015175 | 67.2605634 | 74.7715278 |
| 16:31:16 | 0:31:36 | 85.7694868 | 75.8084833 | 69.1015175 | 68.2605634 | 74.7715278 |
| 16:31:17 | 0:31:37 | 84.7694868 | 75.6266651 | 68.1015175 | 68.2605634 | 73.7715278 |
| 16:31:18 | 0:31:38 | 77.7694868 | 75.3539378 | 68.1015175 | 69.2605634 | 73.7715278 |
| 16:31:19 | 0:31:39 | 75.7694868 | 75.1721197 | 68.1015175 | 69.2605634 | 72.7715278 |
| 16:31:20 | 0:31:40 | 74.7694868 | 75.9903015 | 69.1015175 | 70.2605634 | 72.7715278 |
| 16:31:21 | 0:31:41 | 73.7694868 | 75.9903015 | 69.1015175 | 71.2605634 | 72.7715278 |
| 16:31:22 | 0:31:42 | 73.7694868 | 76.3539378 | 72.1015175 | 71.2605634 | 72.7715278 |
| 16:31:23 | 0:31:43 | 73.7694868 | 90.3026603 | 74.1015175 | 71.2605634 | 75.7715278 |
| 16:31:24 | 0:31:44 | 73.7694868 | 90.3026603 | 74.1015175 | 70.2605634 | 75.7715278 |
| 16:31:25 | 0:31:45 | 73.7694868 | 89.3026603 | 74.1015175 | 70.2605634 | 76.7715278 |
| 16:31:26 | 0:31:46 | 73.7694868 | 89.3026603 | 74.1015175 | 70.2605634 | 77.7715278 |
| 16:31:27 | 0:31:47 | 72.7694868 | 79.3026603 | 75.1015175 | 68.2605634 | 77.7715278 |
| 16:31:28 | 0:31:48 | 70.7694868 | 76.3026603 | 74.1015175 | 67.2605634 | 78.7715278 |
| 16:31:29 | 0:31:49 | 68.7694868 | 73.3026603 | 74.1015175 | 67.2605634 | 79.7715278 |
| 16:31:30 | 0:31:50 | 66.7694868 | 70.3026603 | 74.1015175 | 67.2605634 | 79.7715278 |
| 16:31:31 | 0:31:51 | 65.7694868 | 69.3026603 | 74.1015175 | 66.2605634 | 79.7715278 |
| 16:31:32 | 0:31:52 | 73.7694868 | 68.3026603 | 74.1015175 | 66.2605634 | 79.7715278 |
| 16:31:33 | 0:31:53 | 75.7694868 | 68.3026603 | 74.1015175 | 66.2605634 | 79.7715278 |
| 16:31:34 | 0:31:54 | 76.7694868 | 67.3026603 | 72.1015175 | 66.2605634 | 77.7715278 |
| 16:31:35 | 0:31:55 | 77.7694868 | 67.3026603 | 72.1015175 | 66.2605634 | 77.7715278 |
| 16:31:36 | 0:31:56 | 77.7694868 | 67.3026603 | 72.1015175 | 68.2605634 | 77.7715278 |
| 16:31:37 | 0:31:57 | 77.7694868 | 67.3026603 | 72.1015175 | 69.2605634 | 77.7715278 |
| 16:31:38 | 0:31:58 | 78.7694868 | 67.3026603 | 72.1015175 | 69.2605634 | 77.7715278 |
| 16:31:39 | 0:31:59 | 77.7694868 | 67.3026603 | 71.1015175 | 69.2605634 | 77.7715278 |
| 16:31:40 | 0:32:00 | 77.7694868 | 68.3026603 | 71.1015175 | 69.2605634 | 76.7715278 |
| 16:31:41 | 0:32:01 | 77.7694868 | 69.3026603 | 71.1015175 | 69.2605634 | 76.7715278 |
| 16:31:42 | 0:32:02 | 77.7694868 | 69.3026603 | 72.1015175 | 69.2605634 | 76.7715278 |
| 16:31:43 | 0:32:03 | 74.7694868 | 69.3026603 | 72.1015175 | 70.2605634 | 76.7715278 |
| 16:31:44 | 0:32:04 | 74.7694868 | 70.3026603 | 73.1015175 | 71.2605634 | 76.7715278 |
| 16:31:45 | 0:32:05 | 74.7694868 | 70.3026603 | 73.1015175 | 72.2605634 | 76.7715278 |
| 16:31:46 | 0:32:06 | 73.7694868 | 70.3026603 | 72.1015175 | 74.2605634 | 76.7715278 |
| 16:31:47 | 0:32:07 | 73.7694868 | 71.3026603 | 71.1015175 | 74.2605634 | 75.7715278 |
| 16:31:48 | 0:32:08 | 73.7694868 | 71.3026603 | 71.1015175 | 74.2605634 | 75.7715278 |
| 16:31:49 | 0:32:09 | 73.7694868 | 73.3026603 | 69.1015175 | 77.2605634 | 75.7715278 |
| 16:31:50 | 0:32:10 | 73.7694868 | 72.3026603 | 68.1015175 | 77.2605634 | 75.7715278 |
| 16:31:51 | 0:32:11 | 78.7694868 | 72.3026603 | 67.1015175 | 77.2605634 | 75.7715278 |
| 16:31:52 | 0:32:12 | 80.7694868 | 71.3026603 | 67.1015175 | 77.2605634 | 75.7715278 |
| 16:31:53 | 0:32:13 | 81.7694868 | 71.3026603 | 67.1015175 | 77.2605634 | 74.7715278 |
| 16:31:54 | 0:32:14 | 81.7694868 | 72.3026603 | 67.1015175 | 77.2605634 | 74.7715278 |
| 16:31:55 | 0:32:15 | 81.7694868 | 72.3026603 | 67.1015175 | 76.2605634 | 70.7715278 |

|          |         |            |            |            |            |            |
|----------|---------|------------|------------|------------|------------|------------|
| 16:31:56 | 0:32:16 | 81.7694868 | 75.3026603 | 67.1015175 | 76.2605634 | 70.7715278 |
| 16:31:57 | 0:32:17 | 81.7694868 | 73.3026603 | 67.1015175 | 77.2605634 | 70.7715278 |
| 16:31:58 | 0:32:18 | 81.7694868 | 71.3026603 | 67.1015175 | 79.2605634 | 69.7715278 |
| 16:31:59 | 0:32:19 | 82.7694868 | 69.3026603 | 66.1015175 | 79.2605634 | 68.7715278 |
| 16:32:00 | 0:32:20 | 82.7694868 | 66.3026603 | 66.1015175 | 79.2605634 | 65.7715278 |
| 16:32:01 | 0:32:21 | 82.7694868 | 64.3026603 | 66.1015175 | 79.2605634 | 64.7715278 |
| 16:32:02 | 0:32:22 | 82.7694868 | 63.3026603 | 66.1015175 | 80.2605634 | 64.7715278 |
| 16:32:03 | 0:32:23 | 82.7694868 | 63.3026603 | 68.1015175 | 80.2605634 | 64.7715278 |
| 16:32:04 | 0:32:24 | 82.7694868 | 66.3026603 | 68.1015175 | 81.2605634 | 63.7715278 |
| 16:32:05 | 0:32:25 | 80.7694868 | 68.3026603 | 69.1015175 | 81.2605634 | 62.7715278 |
| 16:32:06 | 0:32:26 | 80.7694868 | 69.3026603 | 70.1015175 | 80.2605634 | 61.7715278 |
| 16:32:07 | 0:32:27 | 80.7694868 | 70.3026603 | 70.1015175 | 79.2605634 | 61.7715278 |
| 16:32:08 | 0:32:28 | 80.7694868 | 70.3026603 | 70.1015175 | 77.2605634 | 61.7715278 |
| 16:32:09 | 0:32:29 | 80.7694868 | 71.3026603 | 70.1015175 | 77.2605634 | 61.7715278 |
| 16:32:10 | 0:32:30 | 79.7694868 | 71.3026603 | 70.1015175 | 77.2605634 | 56.7715278 |
| 16:32:11 | 0:32:31 | 78.7694868 | 73.3026603 | 70.1015175 | 77.2605634 | 56.7715278 |
| 16:32:12 | 0:32:32 | 78.7694868 | 74.3026603 | 70.1015175 | 77.2605634 | 56.7715278 |
| 16:32:13 | 0:32:33 | 77.7694868 | 75.3026603 | 70.1015175 | 77.2605634 | 56.7715278 |
| 16:32:14 | 0:32:34 | 76.7694868 | 75.3026603 | 70.1015175 | 76.2605634 | 56.7715278 |
| 16:32:15 | 0:32:35 | 76.7694868 | 73.3026603 | 72.1015175 | 74.2605634 | 57.7715278 |
| 16:32:16 | 0:32:36 | 74.7694868 | 72.3026603 | 73.1015175 | 72.2605634 | 59.7715278 |
| 16:32:17 | 0:32:37 | 74.7694868 | 72.3026603 | 72.1015175 | 69.2605634 | 60.7715278 |
| 16:32:18 | 0:32:38 | 74.7694868 | 72.3026603 | 72.1015175 | 67.2605634 | 61.7715278 |
| 16:32:19 | 0:32:39 | 73.7694868 | 73.3026603 | 70.1015175 | 66.2605634 | 60.7715278 |
| 16:32:20 | 0:32:40 | 73.7694868 | 73.3026603 | 70.1015175 | 65.2605634 | 60.7715278 |
| 16:32:21 | 0:32:41 | 73.7694868 | 73.3026603 | 70.1015175 | 66.2605634 | 60.7715278 |
| 16:32:22 | 0:32:42 | 73.7694868 | 71.3026603 | 70.1015175 | 67.2605634 | 61.7715278 |
| 16:32:23 | 0:32:43 | 73.7694868 | 69.3026603 | 68.1015175 | 67.2605634 | 61.7715278 |
| 16:32:24 | 0:32:44 | 73.7694868 | 67.3026603 | 69.1015175 | 68.2605634 | 61.7715278 |
| 16:32:25 | 0:32:45 | 72.7694868 | 66.3026603 | 69.1015175 | 69.2605634 | 61.7715278 |
| 16:32:26 | 0:32:46 | 71.7694868 | 66.3026603 | 70.1015175 | 69.2605634 | 60.7715278 |
| 16:32:27 | 0:32:47 | 71.7694868 | 66.3026603 | 72.1015175 | 68.2605634 | 60.7715278 |
| 16:32:28 | 0:32:48 | 72.7694868 | 66.3026603 | 72.1015175 | 67.2605634 | 60.7715278 |
| 16:32:29 | 0:32:49 | 71.7694868 | 66.3026603 | 72.1015175 | 67.2605634 | 60.7715278 |
| 16:32:30 | 0:32:50 | 70.7694868 | 68.3026603 | 72.1015175 | 66.2605634 | 60.7715278 |
| 16:32:31 | 0:32:51 | 70.7694868 | 70.3026603 | 72.1015175 | 66.2605634 | 59.7715278 |
| 16:32:32 | 0:32:52 | 70.7694868 | 71.3026603 | 72.1015175 | 66.2605634 | 59.7715278 |
| 16:32:33 | 0:32:53 | 70.7694868 | 71.3026603 | 72.1015175 | 68.2605634 | 59.7715278 |
| 16:32:34 | 0:32:54 | 70.7694868 | 71.3026603 | 71.1015175 | 68.2605634 | 57.7715278 |
| 16:32:35 | 0:32:55 | 70.7694868 | 71.3026603 | 71.1015175 | 71.2605634 | 55.7715278 |
| 16:32:36 | 0:32:56 | 70.7694868 | 70.3026603 | 70.1015175 | 73.2605634 | 53.7715278 |
| 16:32:37 | 0:32:57 | 69.7694868 | 68.3026603 | 70.1015175 | 73.2605634 | 49.7715278 |
| 16:32:38 | 0:32:58 | 68.7694868 | 67.3026603 | 68.1015175 | 72.2605634 | 49.7715278 |
| 16:32:39 | 0:32:59 | 68.7694868 | 66.3026603 | 68.1015175 | 72.2605634 | 49.7715278 |
| 16:32:40 | 0:33:00 | 68.7694868 | 64.3026603 | 67.1015175 | 72.2605634 | 48.7715278 |

|          |         |            |            |            |            |            |
|----------|---------|------------|------------|------------|------------|------------|
| 16:32:41 | 0:33:01 | 67.7694868 | 64.3026603 | 68.1015175 | 72.2605634 | 48.7715278 |
| 16:32:42 | 0:33:02 | 67.7694868 | 64.3026603 | 68.1015175 | 72.2605634 | 48.7715278 |
| 16:32:43 | 0:33:03 | 66.7694868 | 62.3026603 | 68.1015175 | 74.2605634 | 51.7715278 |
| 16:32:44 | 0:33:04 | 66.7694868 | 62.3026603 | 69.1015175 | 75.2605634 | 51.7715278 |
| 16:32:45 | 0:33:05 | 64.7694868 | 62.3026603 | 69.1015175 | 75.2605634 | 51.7715278 |
| 16:32:46 | 0:33:06 | 64.7694868 | 63.3026603 | 69.1015175 | 74.2605634 | 51.7715278 |
| 16:32:47 | 0:33:07 | 64.7694868 | 65.3026603 | 68.1015175 | 73.2605634 | 51.7715278 |
| 16:32:48 | 0:33:08 | 65.7694868 | 67.3026603 | 68.1015175 | 73.2605634 | 51.7715278 |
| 16:32:49 | 0:33:09 | 66.7694868 | 68.3026603 | 68.1015175 | 73.2605634 | 57.7715278 |
| 16:32:50 | 0:33:10 | 66.7694868 | 69.3026603 | 68.1015175 | 73.2605634 | 58.7715278 |
| 16:32:51 | 0:33:11 | 66.7694868 | 69.3026603 | 68.1015175 | 74.2605634 | 59.7715278 |
| 16:32:52 | 0:33:12 | 66.7694868 | 68.3026603 | 68.1015175 | 74.2605634 | 59.7715278 |
| 16:32:53 | 0:33:13 | 66.7694868 | 66.3026603 | 68.1015175 | 74.2605634 | 59.7715278 |
| 16:32:54 | 0:33:14 | 67.7694868 | 64.3026603 | 68.1015175 | 74.2605634 | 61.7715278 |
| 16:32:55 | 0:33:15 | 67.7694868 | 63.3026603 | 68.1015175 | 75.2605634 | 62.7715278 |
| 16:32:56 | 0:33:16 | 67.7694868 | 63.3026603 | 65.1015175 | 75.2605634 | 61.7715278 |
| 16:32:57 | 0:33:17 | 69.7694868 | 63.3026603 | 65.1015175 | 75.2605634 | 60.7715278 |
| 16:32:58 | 0:33:18 | 70.7694868 | 64.3026603 | 65.1015175 | 74.2605634 | 60.7715278 |
| 16:32:59 | 0:33:19 | 70.7694868 | 65.3026603 | 66.1015175 | 74.2605634 | 59.7715278 |
| 16:33:00 | 0:33:20 | 70.7694868 | 66.3026603 | 67.1015175 | 73.2605634 | 59.7715278 |
| 16:33:01 | 0:33:21 | 70.7694868 | 67.3026603 | 67.1015175 | 73.2605634 | 59.7715278 |
| 16:33:02 | 0:33:22 | 71.7694868 | 68.3026603 | 69.1015175 | 73.2605634 | 58.7715278 |
| 16:33:03 | 0:33:23 | 72.7694868 | 68.3026603 | 69.1015175 | 73.2605634 | 63.7715278 |
| 16:33:04 | 0:33:24 | 71.7694868 | 69.3026603 | 69.1015175 | 73.2605634 | 63.7715278 |
| 16:33:05 | 0:33:25 | 71.7694868 | 68.3026603 | 68.1015175 | 73.2605634 | 63.7715278 |
| 16:33:06 | 0:33:26 | 71.7694868 | 67.3026603 | 68.1015175 | 73.2605634 | 65.7715278 |
| 16:33:07 | 0:33:27 | 71.7694868 | 67.3026603 | 68.1015175 | 73.2605634 | 65.7715278 |
| 16:33:08 | 0:33:28 | 71.7694868 | 66.3026603 | 68.1015175 | 73.2605634 | 65.7715278 |
| 16:33:09 | 0:33:29 | 71.7694868 | 65.3026603 | 68.1015175 | 73.2605634 | 66.7715278 |
| 16:33:10 | 0:33:30 | 71.7694868 | 65.3026603 | 68.1015175 | 73.2605634 | 66.7715278 |
| 16:33:11 | 0:33:31 | 70.7694868 | 65.3026603 | 68.1015175 | 73.2605634 | 66.7715278 |
| 16:33:12 | 0:33:32 | 70.7694868 | 65.3026603 | 68.1015175 | 72.2605634 | 66.7715278 |
| 16:33:13 | 0:33:33 | 71.7694868 | 67.3026603 | 68.1015175 | 71.2605634 | 66.7715278 |
| 16:33:14 | 0:33:34 | 72.7694868 | 72.3026603 | 69.1015175 | 71.2605634 | 66.7715278 |
| 16:33:15 | 0:33:35 | 73.7694868 | 73.3026603 | 71.1015175 | 72.2605634 | 67.7715278 |
| 16:33:16 | 0:33:36 | 73.7694868 | 74.3026603 | 71.1015175 | 73.2605634 | 67.7715278 |
| 16:33:17 | 0:33:37 | 73.7694868 | 75.3026603 | 71.1015175 | 73.2605634 | 67.7715278 |
| 16:33:18 | 0:33:38 | 73.7694868 | 75.3026603 | 69.1015175 | 73.2605634 | 67.7715278 |
| 16:33:19 | 0:33:39 | 73.7694868 | 75.3026603 | 69.1015175 | 73.2605634 | 67.7715278 |
| 16:33:20 | 0:33:40 | 73.7694868 | 76.3026603 | 68.1015175 | 72.2605634 | 67.7715278 |
| 16:33:21 | 0:33:41 | 73.7694868 | 76.3026603 | 68.1015175 | 72.2605634 | 67.7715278 |
| 16:33:22 | 0:33:42 | 73.7694868 | 76.3026603 | 68.1015175 | 72.2605634 | 67.7715278 |
| 16:33:23 | 0:33:43 | 72.7694868 | 77.3026603 | 68.1015175 | 72.2605634 | 67.7715278 |
| 16:33:24 | 0:33:44 | 73.7694868 | 79.3026603 | 69.1015175 | 73.2605634 | 67.7715278 |
| 16:33:25 | 0:33:45 | 73.7694868 | 81.3026603 | 69.1015175 | 74.2605634 | 67.7715278 |

|          |         |            |            |            |            |            |
|----------|---------|------------|------------|------------|------------|------------|
| 16:33:26 | 0:33:46 | 74.7694868 | 81.3026603 | 69.1015175 | 74.2605634 | 67.7715278 |
| 16:33:27 | 0:33:47 | 74.7694868 | 81.3026603 | 70.1015175 | 74.2605634 | 67.7715278 |
| 16:33:28 | 0:33:48 | 74.7694868 | 80.3026603 | 69.1015175 | 74.2605634 | 70.7715278 |
| 16:33:29 | 0:33:49 | 74.7694868 | 76.3026603 | 68.1015175 | 74.2605634 | 70.7715278 |
| 16:33:30 | 0:33:50 | 70.7694868 | 76.3026603 | 68.1015175 | 76.2605634 | 70.7715278 |
| 16:33:31 | 0:33:51 | 68.7694868 | 75.3026603 | 68.1015175 | 77.2605634 | 71.7715278 |
| 16:33:32 | 0:33:52 | 67.7694868 | 75.3026603 | 68.1015175 | 77.2605634 | 72.7715278 |
| 16:33:33 | 0:33:53 | 66.7694868 | 75.3026603 | 68.1015175 | 76.2605634 | 71.7715278 |
| 16:33:34 | 0:33:54 | 66.7694868 | 75.3026603 | 68.1015175 | 75.2605634 | 71.7715278 |
| 16:33:35 | 0:33:55 | 66.7694868 | 75.3026603 | 68.1015175 | 74.2605634 | 70.7715278 |
| 16:33:36 | 0:33:56 | 66.7694868 | 75.3026603 | 68.1015175 | 74.2605634 | 70.7715278 |
| 16:33:37 | 0:33:57 | 66.7694868 | 74.3026603 | 69.1015175 | 73.2605634 | 65.7715278 |
| 16:33:38 | 0:33:58 | 66.7694868 | 74.3026603 | 69.1015175 | 73.2605634 | 65.7715278 |
| 16:33:39 | 0:33:59 | 66.7694868 | 72.3026603 | 69.1015175 | 73.2605634 | 65.7715278 |
| 16:33:40 | 0:34:00 | 65.7694868 | 73.3026603 | 69.1015175 | 72.2605634 | 64.7715278 |
| 16:33:41 | 0:34:01 | 66.7694868 | 73.3026603 | 70.1015175 | 70.2605634 | 64.7715278 |
| 16:33:42 | 0:34:02 | 67.7694868 | 76.3026603 | 70.1015175 | 69.2605634 | 64.7715278 |
| 16:33:43 | 0:34:03 | 68.7694868 | 76.3026603 | 70.1015175 | 69.2605634 | 64.7715278 |
| 16:33:44 | 0:34:04 | 68.7694868 | 76.3026603 | 71.1015175 | 68.2605634 | 64.7715278 |
| 16:33:45 | 0:34:05 | 70.7694868 | 76.3026603 | 71.1015175 | 69.2605634 | 64.7715278 |
| 16:33:46 | 0:34:06 | 70.7694868 | 78.3026603 | 72.1015175 | 69.2605634 | 64.7715278 |
| 16:33:47 | 0:34:07 | 70.7694868 | 78.3026603 | 72.1015175 | 69.2605634 | 62.7715278 |
| 16:33:48 | 0:34:08 | 69.7694868 | 79.3026603 | 73.1015175 | 69.2605634 | 61.7715278 |
| 16:33:49 | 0:34:09 | 69.7694868 | 79.3026603 | 73.1015175 | 69.2605634 | 62.7715278 |
| 16:33:50 | 0:34:10 | 68.7694868 | 79.3026603 | 74.1015175 | 69.2605634 | 66.7715278 |
| 16:33:51 | 0:34:11 | 68.7694868 | 78.3026603 | 74.1015175 | 70.2605634 | 66.7715278 |
| 16:33:52 | 0:34:12 | 68.7694868 | 78.3026603 | 74.1015175 | 71.2605634 | 70.7715278 |
| 16:33:53 | 0:34:13 | 69.7694868 | 78.3026603 | 74.1015175 | 74.2605634 | 70.7715278 |
| 16:33:54 | 0:34:14 | 69.7694868 | 78.3026603 | 73.1015175 | 73.2605634 | 71.7715278 |
| 16:33:55 | 0:34:15 | 68.7694868 | 79.3026603 | 69.1015175 | 72.2605634 | 71.7715278 |
| 16:33:56 | 0:34:16 | 68.7694868 | 78.3026603 | 69.1015175 | 71.2605634 | 71.7715278 |
| 16:33:57 | 0:34:17 | 68.7694868 | 76.3026603 | 68.1015175 | 72.2605634 | 70.7715278 |
| 16:33:58 | 0:34:18 | 70.7694868 | 76.3026603 | 67.1015175 | 73.2605634 | 70.7715278 |
| 16:33:59 | 0:34:19 | 70.7694868 | 76.3026603 | 66.1015175 | 73.2605634 | 66.7715278 |
| 16:34:00 | 0:34:20 | 70.7694868 | 76.3026603 | 67.1015175 | 73.2605634 | 65.7715278 |
| 16:34:01 | 0:34:21 | 71.7694868 | 76.3026603 | 67.1015175 | 72.2605634 | 63.7715278 |
| 16:34:02 | 0:34:22 | 71.7694868 | 77.3026603 | 68.1015175 | 72.2605634 | 63.7715278 |
| 16:34:03 | 0:34:23 | 71.7694868 | 77.3026603 | 68.1015175 | 72.2605634 | 62.7715278 |
| 16:34:04 | 0:34:24 | 71.7694868 | 77.3026603 | 69.1015175 | 72.2605634 | 62.7715278 |
| 16:34:05 | 0:34:25 | 70.7694868 | 78.3026603 | 70.1015175 | 71.2605634 | 60.7715278 |
| 16:34:06 | 0:34:26 | 70.7694868 | 82.3026603 | 71.1015175 | 71.2605634 | 60.7715278 |
| 16:34:07 | 0:34:27 | 70.7694868 | 82.3026603 | 72.1015175 | 71.2605634 | 60.7715278 |
| 16:34:08 | 0:34:28 | 70.7694868 | 82.3026603 | 72.1015175 | 72.2605634 | 60.7715278 |
| 16:34:09 | 0:34:29 | 70.7694868 | 81.3026603 | 72.1015175 | 72.2605634 | 60.7715278 |
| 16:34:10 | 0:34:30 | 70.7694868 | 74.3026603 | 72.1015175 | 72.2605634 | 60.7715278 |

|          |         |            |            |            |            |            |
|----------|---------|------------|------------|------------|------------|------------|
| 16:34:11 | 0:34:31 | 69.7694868 | 69.3026603 | 71.1015175 | 72.2605634 | 61.7715278 |
| 16:34:12 | 0:34:32 | 69.7694868 | 66.3026603 | 71.1015175 | 72.2605634 | 61.7715278 |
| 16:34:13 | 0:34:33 | 68.7694868 | 64.3026603 | 71.1015175 | 72.2605634 | 62.7715278 |
| 16:34:14 | 0:34:34 | 68.7694868 | 61.3026603 | 71.1015175 | 73.2605634 | 62.7715278 |
| 16:34:15 | 0:34:35 | 67.7694868 | 60.3026603 | 70.1015175 | 73.2605634 | 62.7715278 |
| 16:34:16 | 0:34:36 | 67.7694868 | 60.3026603 | 70.1015175 | 72.2605634 | 61.7715278 |
| 16:34:17 | 0:34:37 | 67.7694868 | 63.3026603 | 70.1015175 | 73.2605634 | 61.7715278 |
| 16:34:18 | 0:34:38 | 67.7694868 | 66.3026603 | 71.1015175 | 73.2605634 | 61.7715278 |
| 16:34:19 | 0:34:39 | 67.7694868 | 69.3026603 | 71.1015175 | 73.2605634 | 61.7715278 |
| 16:34:20 | 0:34:40 | 67.7694868 | 71.3026603 | 73.1015175 | 74.2605634 | 61.7715278 |
| 16:34:21 | 0:34:41 | 67.7694868 | 71.3026603 | 73.1015175 | 76.2605634 | 61.7715278 |
| 16:34:22 | 0:34:42 | 67.7694868 | 71.3026603 | 72.1015175 | 79.2605634 | 61.7715278 |
| 16:34:23 | 0:34:43 | 68.7694868 | 70.3026603 | 69.1015175 | 80.2605634 | 61.7715278 |
| 16:34:24 | 0:34:44 | 68.7694868 | 70.3026603 | 68.1015175 | 80.2605634 | 61.7715278 |
| 16:34:25 | 0:34:45 | 68.7694868 | 69.3026603 | 69.1015175 | 79.2605634 | 61.7715278 |
| 16:34:26 | 0:34:46 | 70.7694868 | 69.3026603 | 69.1015175 | 77.2605634 | 62.7715278 |
| 16:34:27 | 0:34:47 | 71.7694868 | 69.3026603 | 69.1015175 | 75.2605634 | 64.7715278 |
| 16:34:28 | 0:34:48 | 71.7694868 | 69.3026603 | 69.1015175 | 74.2605634 | 64.7715278 |
| 16:34:29 | 0:34:49 | 72.7694868 | 71.3026603 | 68.1015175 | 75.2605634 | 65.7715278 |
| 16:34:30 | 0:34:50 | 72.7694868 | 71.3026603 | 68.1015175 | 75.2605634 | 65.7715278 |
| 16:34:31 | 0:34:51 | 70.7694868 | 73.3026603 | 65.1015175 | 79.2605634 | 66.7715278 |
| 16:34:32 | 0:34:52 | 70.7694868 | 75.3026603 | 65.1015175 | 80.2605634 | 66.7715278 |
| 16:34:33 | 0:34:53 | 70.7694868 | 75.3026603 | 65.1015175 | 81.2605634 | 67.7715278 |
| 16:34:34 | 0:34:54 | 70.7694868 | 75.3026603 | 64.1015175 | 81.2605634 | 67.7715278 |
| 16:34:35 | 0:34:55 | 70.7694868 | 76.3026603 | 65.1015175 | 81.2605634 | 69.7715278 |
| 16:34:36 | 0:34:56 | 70.7694868 | 77.3026603 | 67.1015175 | 81.2605634 | 70.7715278 |
| 16:34:37 | 0:34:57 | 71.7694868 | 77.3026603 | 68.1015175 | 81.2605634 | 69.7715278 |
| 16:34:38 | 0:34:58 | 73.7694868 | 76.3026603 | 68.1015175 | 80.2605634 | 69.7715278 |
| 16:34:39 | 0:34:59 | 74.7694868 | 73.3026603 | 68.1015175 | 78.2605634 | 68.7715278 |
| 16:34:40 | 0:35:00 | 74.7694868 | 73.3026603 | 67.1015175 | 76.2605634 | 68.7715278 |
| 16:34:41 | 0:35:01 | 75.7694868 | 72.3026603 | 66.1015175 | 76.2605634 | 68.7715278 |
| 16:34:42 | 0:35:02 | 77.7694868 | 73.3026603 | 66.1015175 | 76.2605634 | 67.7715278 |
| 16:34:43 | 0:35:03 | 78.7694868 | 73.3026603 | 66.1015175 | 75.2605634 | 66.7715278 |
| 16:34:44 | 0:35:04 | 79.7694868 | 75.3026603 | 65.1015175 | 75.2605634 | 69.7715278 |
| 16:34:45 | 0:35:05 | 79.7694868 | 75.3026603 | 65.1015175 | 75.2605634 | 69.7715278 |
| 16:34:46 | 0:35:06 | 78.7694868 | 75.3026603 | 67.1015175 | 75.2605634 | 71.7715278 |
| 16:34:47 | 0:35:07 | 77.7694868 | 75.3026603 | 67.1015175 | 73.2605634 | 70.7715278 |
| 16:34:48 | 0:35:08 | 75.7694868 | 75.3026603 | 67.1015175 | 72.2605634 | 69.7715278 |
| 16:34:49 | 0:35:09 | 75.7694868 | 75.3026603 | 66.1015175 | 72.2605634 | 69.7715278 |
| 16:34:50 | 0:35:10 | 75.7694868 | 76.3026603 | 66.1015175 | 72.2605634 | 69.7715278 |
| 16:34:51 | 0:35:11 | 75.7694868 | 76.3026603 | 65.1015175 | 72.2605634 | 69.7715278 |
| 16:34:52 | 0:35:12 | 74.7694868 | 76.3026603 | 65.1015175 | 72.2605634 | 69.7715278 |
| 16:34:53 | 0:35:13 | 74.7694868 | 74.3026603 | 66.1015175 | 73.2605634 | 69.7715278 |
| 16:34:54 | 0:35:14 | 74.7694868 | 74.3026603 | 66.1015175 | 73.2605634 | 68.7715278 |
| 16:34:55 | 0:35:15 | 74.7694868 | 74.3026603 | 66.1015175 | 73.2605634 | 68.7715278 |



|          |         |            |            |            |            |            |
|----------|---------|------------|------------|------------|------------|------------|
| 16:34:56 | 0:35:16 | 73.7694868 | 74.3026603 | 66.1015175 | 74.2605634 | 67.7715278 |
| 16:34:57 | 0:35:17 | 71.7694868 | 74.3026603 | 66.1015175 | 74.2605634 | 66.7715278 |
| 16:34:58 | 0:35:18 | 71.7694868 | 74.3026603 | 66.1015175 | 74.2605634 | 65.7715278 |
| 16:34:59 | 0:35:19 | 72.7694868 | 74.3026603 | 67.1015175 | 74.2605634 | 62.7715278 |
| 16:35:00 | 0:35:20 | 74.7694868 | 74.3026603 | 67.1015175 | 74.2605634 | 57.7715278 |
| 16:35:01 | 0:35:21 | 76.7694868 | 74.3026603 | 67.1015175 | 74.2605634 | 48.7715278 |
| 16:35:02 | 0:35:22 | 76.7694868 | 74.3026603 | 67.1015175 | 75.2605634 | 48.7715278 |
| 16:35:03 | 0:35:23 | 75.7694868 | 74.3026603 | 67.1015175 | 76.2605634 | 56.7715278 |
| 16:35:04 | 0:35:24 | 74.7694868 | 74.3026603 | 66.1015175 | 77.2605634 | 56.7715278 |
| 16:35:05 | 0:35:25 | 74.7694868 | 74.3026603 | 66.1015175 | 77.2605634 | 62.7715278 |
| 16:35:06 | 0:35:26 | 74.7694868 | 74.3026603 | 66.1015175 | 77.2605634 | 64.7715278 |
| 16:35:07 | 0:35:27 | 74.7694868 | 74.3026603 | 66.1015175 | 78.2605634 | 66.7715278 |
| 16:35:08 | 0:35:28 | 74.7694868 | 74.3026603 | 66.1015175 | 78.2605634 | 68.7715278 |
| 16:35:09 | 0:35:29 | 74.7694868 | 74.3026603 | 66.1015175 | 77.2605634 | 70.7715278 |
| 16:35:10 | 0:35:30 | 74.7694868 | 74.3026603 | 65.1015175 | 76.2605634 | 71.7715278 |
| 16:35:11 | 0:35:31 | 74.7694868 | 75.3026603 | 65.1015175 | 76.2605634 | 71.7715278 |
| 16:35:12 | 0:35:32 | 75.7694868 | 76.3026603 | 65.1015175 | 76.2605634 | 71.7715278 |
| 16:35:13 | 0:35:33 | 75.7694868 | 76.3026603 | 65.1015175 | 77.2605634 | 68.7715278 |
| 16:35:14 | 0:35:34 | 75.7694868 | 75.3026603 | 65.1015175 | 78.2605634 | 68.7715278 |
| 16:35:15 | 0:35:35 | 75.7694868 | 75.3026603 | 64.1015175 | 78.2605634 | 68.7715278 |
| 16:35:16 | 0:35:36 | 75.7694868 | 75.3026603 | 66.1015175 | 79.2605634 | 68.7715278 |
| 16:35:17 | 0:35:37 | 75.7694868 | 74.3026603 | 66.1015175 | 79.2605634 | 68.7715278 |
| 16:35:18 | 0:35:38 | 75.7694868 | 71.3026603 | 66.1015175 | 80.2605634 | 68.7715278 |
| 16:35:19 | 0:35:39 | 74.7694868 | 71.3026603 | 67.1015175 | 80.2605634 | 71.7715278 |
| 16:35:20 | 0:35:40 | 74.7694868 | 71.3026603 | 68.1015175 | 79.2605634 | 71.7715278 |
| 16:35:21 | 0:35:41 | 75.7694868 | 75.3026603 | 68.1015175 | 78.2605634 | 72.7715278 |
| 16:35:22 | 0:35:42 | 76.7694868 | 77.3026603 | 68.1015175 | 77.2605634 | 72.7715278 |
| 16:35:23 | 0:35:43 | 76.7694868 | 80.3026603 | 69.1015175 | 77.2605634 | 72.7715278 |
| 16:35:24 | 0:35:44 | 76.7694868 | 80.3026603 | 69.1015175 | 77.2605634 | 72.7715278 |
| 16:35:25 | 0:35:45 | 80.7694868 | 83.3026603 | 69.1015175 | 78.2605634 | 72.7715278 |
| 16:35:26 | 0:35:46 | 81.7694868 | 84.3026603 | 71.1015175 | 78.2605634 | 72.7715278 |
| 16:35:27 | 0:35:47 | 81.7694868 | 85.3026603 | 70.1015175 | 76.2605634 | 73.7715278 |
| 16:35:28 | 0:35:48 | 81.7694868 | 85.3026603 | 70.1015175 | 75.2605634 | 75.7715278 |
| 16:35:29 | 0:35:49 | 81.7694868 | 84.3026603 | 70.1015175 | 75.2605634 | 76.7715278 |
| 16:35:30 | 0:35:50 | 81.7694868 | 80.3026603 | 70.1015175 | 76.2605634 | 78.7715278 |
| 16:35:31 | 0:35:51 | 81.7694868 | 75.3026603 | 70.1015175 | 76.2605634 | 78.7715278 |
| 16:35:32 | 0:35:52 | 81.7694868 | 73.3026603 | 70.1015175 | 77.2605634 | 74.7715278 |
| 16:35:33 | 0:35:53 | 81.7694868 | 73.3026603 | 69.1015175 | 77.2605634 | 74.7715278 |
| 16:35:34 | 0:35:54 | 81.7694868 | 73.3026603 | 68.1015175 | 77.2605634 | 74.7715278 |
| 16:35:35 | 0:35:55 | 82.7694868 | 74.3026603 | 69.1015175 | 77.2605634 | 75.7715278 |
| 16:35:36 | 0:35:56 | 82.7694868 | 74.3026603 | 69.1015175 | 77.2605634 | 75.7715278 |
| 16:35:37 | 0:35:57 | 83.7694868 | 73.3026603 | 67.1015175 | 77.2605634 | 74.7715278 |
| 16:35:38 | 0:35:58 | 83.7694868 | 73.3026603 | 67.1015175 | 77.2605634 | 71.7715278 |
| 16:35:39 | 0:35:59 | 83.7694868 | 73.3026603 | 66.1015175 | 77.2605634 | 71.7715278 |
| 16:35:40 | 0:36:00 | 78.7694868 | 73.3026603 | 66.1015175 | 77.2605634 | 68.7715278 |

|          |         |            |            |            |            |            |
|----------|---------|------------|------------|------------|------------|------------|
| 16:35:41 | 0:36:01 | 76.7694868 | 73.3026603 | 66.1015175 | 77.2605634 | 68.7715278 |
| 16:35:42 | 0:36:02 | 76.7694868 | 71.3026603 | 66.1015175 | 76.2605634 | 66.7715278 |
| 16:35:43 | 0:36:03 | 75.7694868 | 71.3026603 | 65.1015175 | 76.2605634 | 64.7715278 |
| 16:35:44 | 0:36:04 | 75.7694868 | 71.3026603 | 65.1015175 | 76.2605634 | 64.7715278 |
| 16:35:45 | 0:36:05 | 75.7694868 | 71.3026603 | 65.1015175 | 76.2605634 | 65.7715278 |
| 16:35:46 | 0:36:06 | 75.7694868 | 71.3026603 | 65.1015175 | 77.2605634 | 66.7715278 |
| 16:35:47 | 0:36:07 | 75.7694868 | 73.3026603 | 65.1015175 | 78.2605634 | 66.7715278 |
| 16:35:48 | 0:36:08 | 73.7694868 | 74.3026603 | 65.1015175 | 78.2605634 | 66.7715278 |
| 16:35:49 | 0:36:09 | 73.7694868 | 74.3026603 | 66.1015175 | 78.2605634 | 66.7715278 |
| 16:35:50 | 0:36:10 | 72.7694868 | 76.3026603 | 66.1015175 | 78.2605634 | 67.7715278 |
| 16:35:51 | 0:36:11 | 72.7694868 | 77.3026603 | 66.1015175 | 78.2605634 | 67.7715278 |
| 16:35:52 | 0:36:12 | 72.7694868 | 76.3026603 | 64.1015175 | 78.2605634 | 68.7715278 |
| 16:35:53 | 0:36:13 | 71.7694868 | 76.3026603 | 64.1015175 | 79.2605634 | 68.7715278 |
| 16:35:54 | 0:36:14 | 71.7694868 | 73.3026603 | 64.1015175 | 79.2605634 | 68.7715278 |
| 16:35:55 | 0:36:15 | 72.7694868 | 70.3026603 | 65.1015175 | 80.2605634 | 68.7715278 |
| 16:35:56 | 0:36:16 | 72.7694868 | 67.3026603 | 65.1015175 | 80.2605634 | 68.7715278 |
| 16:35:57 | 0:36:17 | 72.7694868 | 64.3026603 | 65.1015175 | 79.2605634 | 68.7715278 |
| 16:35:58 | 0:36:18 | 72.7694868 | 62.3026603 | 66.1015175 | 78.2605634 | 68.7715278 |
| 16:35:59 | 0:36:19 | 72.7694868 | 62.3026603 | 66.1015175 | 78.2605634 | 69.7715278 |
| 16:36:00 | 0:36:20 | 72.7694868 | 63.3026603 | 68.1015175 | 77.2605634 | 70.7715278 |
| 16:36:01 | 0:36:21 | 71.7694868 | 64.3026603 | 68.1015175 | 77.2605634 | 72.7715278 |
| 16:36:02 | 0:36:22 | 69.7694868 | 66.3026603 | 69.1015175 | 77.2605634 | 72.7715278 |
| 16:36:03 | 0:36:23 | 68.7694868 | 67.3026603 | 69.1015175 | 76.2605634 | 72.7715278 |
| 16:36:04 | 0:36:24 | 68.7694868 | 67.3026603 | 70.1015175 | 77.2605634 | 73.7715278 |
| 16:36:05 | 0:36:25 | 67.7694868 | 67.3026603 | 71.1015175 | 77.2605634 | 73.7715278 |
| 16:36:06 | 0:36:26 | 67.7694868 | 67.3026603 | 71.1015175 | 77.2605634 | 70.7715278 |
| 16:36:07 | 0:36:27 | 68.7694868 | 67.3026603 | 69.1015175 | 77.2605634 | 67.7715278 |
| 16:36:08 | 0:36:28 | 68.7694868 | 66.3026603 | 69.1015175 | 76.2605634 | 66.7715278 |
| 16:36:09 | 0:36:29 | 67.7694868 | 66.3026603 | 70.1015175 | 76.2605634 | 67.7715278 |
| 16:36:10 | 0:36:30 | 67.7694868 | 65.3026603 | 70.1015175 | 77.2605634 | 70.7715278 |
| 16:36:11 | 0:36:31 | 67.7694868 | 66.3026603 | 70.1015175 | 78.2605634 | 70.7715278 |
| 16:36:12 | 0:36:32 | 67.7694868 | 66.3026603 | 70.1015175 | 78.2605634 | 73.7715278 |
| 16:36:13 | 0:36:33 | 67.7694868 | 66.3026603 | 69.1015175 | 79.2605634 | 73.7715278 |
| 16:36:14 | 0:36:34 | 67.7694868 | 67.3026603 | 69.1015175 | 79.2605634 | 73.7715278 |
| 16:36:15 | 0:36:35 | 68.7694868 | 68.3026603 | 67.1015175 | 79.2605634 | 73.7715278 |
| 16:36:16 | 0:36:36 | 68.7694868 | 68.3026603 | 66.1015175 | 78.2605634 | 71.7715278 |
| 16:36:17 | 0:36:37 | 68.7694868 | 68.3026603 | 65.1015175 | 78.2605634 | 71.7715278 |
| 16:36:18 | 0:36:38 | 68.7694868 | 68.3026603 | 65.1015175 | 78.2605634 | 71.7715278 |
| 16:36:19 | 0:36:39 | 68.7694868 | 69.3026603 | 67.1015175 | 76.2605634 | 61.7715278 |
| 16:36:20 | 0:36:40 | 68.7694868 | 72.3026603 | 67.1015175 | 75.2605634 | 61.7715278 |
| 16:36:21 | 0:36:41 | 68.7694868 | 72.3026603 | 68.1015175 | 75.2605634 | 60.7715278 |
| 16:36:22 | 0:36:42 | 68.7694868 | 72.3026603 | 69.1015175 | 74.2605634 | 59.7715278 |
| 16:36:23 | 0:36:43 | 68.7694868 | 72.3026603 | 70.1015175 | 75.2605634 | 59.7715278 |
| 16:36:24 | 0:36:44 | 69.7694868 | 71.3026603 | 69.1015175 | 75.2605634 | 59.7715278 |
| 16:36:25 | 0:36:45 | 71.7694868 | 69.3026603 | 69.1015175 | 76.2605634 | 65.7715278 |

|          |         |            |            |            |            |            |
|----------|---------|------------|------------|------------|------------|------------|
| 16:36:26 | 0:36:46 | 72.7694868 | 70.3026603 | 69.1015175 | 76.2605634 | 66.7715278 |
| 16:36:27 | 0:36:47 | 73.7694868 | 71.3026603 | 69.1015175 | 76.2605634 | 66.7715278 |
| 16:36:28 | 0:36:48 | 74.7694868 | 71.3026603 | 70.1015175 | 76.2605634 | 66.7715278 |
| 16:36:29 | 0:36:49 | 75.7694868 | 72.3026603 | 69.1015175 | 74.2605634 | 64.7715278 |
| 16:36:30 | 0:36:50 | 73.7694868 | 72.3026603 | 69.1015175 | 74.2605634 | 63.7715278 |
| 16:36:31 | 0:36:51 | 73.7694868 | 72.3026603 | 69.1015175 | 73.2605634 | 61.7715278 |
| 16:36:32 | 0:36:52 | 73.7694868 | 71.3026603 | 69.1015175 | 73.2605634 | 61.7715278 |
| 16:36:33 | 0:36:53 | 73.7694868 | 70.3026603 | 69.1015175 | 74.2605634 | 61.7715278 |
| 16:36:34 | 0:36:54 | 73.7694868 | 69.3026603 | 71.1015175 | 74.2605634 | 61.7715278 |
| 16:36:35 | 0:36:55 | 73.7694868 | 68.3026603 | 71.1015175 | 75.2605634 | 62.7715278 |
| 16:36:36 | 0:36:56 | 73.7694868 | 66.3026603 | 70.1015175 | 75.2605634 | 62.7715278 |
| 16:36:37 | 0:36:57 | 72.7694868 | 65.3026603 | 71.1015175 | 74.2605634 | 63.7715278 |
| 16:36:38 | 0:36:58 | 73.7694868 | 66.3026603 | 73.1015175 | 74.2605634 | 63.7715278 |
| 16:36:39 | 0:36:59 | 73.7694868 | 68.3026603 | 73.1015175 | 73.2605634 | 64.7715278 |
| 16:36:40 | 0:37:00 | 73.7694868 | 69.3026603 | 77.1015175 | 73.2605634 | 65.7715278 |
| 16:36:41 | 0:37:01 | 73.7694868 | 71.3026603 | 78.1015175 | 74.2605634 | 65.7715278 |
| 16:36:42 | 0:37:02 | 73.7694868 | 71.3026603 | 80.1015175 | 75.2605634 | 64.7715278 |
| 16:36:43 | 0:37:03 | 71.7694868 | 71.3026603 | 81.1015175 | 76.2605634 | 65.7715278 |
| 16:36:44 | 0:37:04 | 70.7694868 | 70.3026603 | 83.1015175 | 77.2605634 | 65.7715278 |
| 16:36:45 | 0:37:05 | 70.7694868 | 69.3026603 | 84.1015175 | 78.2605634 | 64.7715278 |
| 16:36:46 | 0:37:06 | 70.7694868 | 68.3026603 | 85.1015175 | 78.2605634 | 64.7715278 |
| 16:36:47 | 0:37:07 | 70.7694868 | 66.3026603 | 85.1015175 | 76.2605634 | 64.7715278 |
| 16:36:48 | 0:37:08 | 71.7694868 | 64.3026603 | 85.1015175 | 74.2605634 | 68.7715278 |
| 16:36:49 | 0:37:09 | 73.7694868 | 64.3026603 | 85.1015175 | 73.2605634 | 71.7715278 |
| 16:36:50 | 0:37:10 | 73.7694868 | 66.3026603 | 85.1015175 | 72.2605634 | 71.7715278 |
| 16:36:51 | 0:37:11 | 73.7694868 | 68.3026603 | 85.1015175 | 73.2605634 | 71.7715278 |
| 16:36:52 | 0:37:12 | 73.7694868 | 69.3026603 | 86.1015175 | 74.2605634 | 73.7715278 |
| 16:36:53 | 0:37:13 | 73.7694868 | 69.3026603 | 86.1015175 | 75.2605634 | 73.7715278 |
| 16:36:54 | 0:37:14 | 73.7694868 | 68.3026603 | 86.1015175 | 75.2605634 | 73.7715278 |
| 16:36:55 | 0:37:15 | 74.7694868 | 68.3026603 | 86.1015175 | 76.2605634 | 75.7715278 |
| 16:36:56 | 0:37:16 | 75.7694868 | 69.3026603 | 86.1015175 | 77.2605634 | 75.7715278 |
| 16:36:57 | 0:37:17 | 75.7694868 | 70.3026603 | 88.1015175 | 77.2605634 | 75.7715278 |
| 16:36:58 | 0:37:18 | 75.7694868 | 70.3026603 | 73.9903015 | 80.2605634 | 71.7715278 |
| 16:36:59 | 0:37:19 | 75.7694868 | 70.3026603 | 74.4448469 | 80.2605634 | 71.7715278 |
| 16:37:00 | 0:37:20 | 74.7694868 | 63.3026603 | 73.535756  | 81.2605634 | 68.7715278 |
| 16:37:01 | 0:37:21 | 73.7694868 | 59.3026603 | 72.7175742 | 81.2605634 | 68.7715278 |
| 16:37:02 | 0:37:22 | 71.7694868 | 56.3026603 | 72.8993924 | 84.2605634 | 69.7715278 |
| 16:37:03 | 0:37:23 | 71.7694868 | 54.3026603 | 73.2630288 | 84.2605634 | 69.7715278 |
| 16:37:04 | 0:37:24 | 70.7694868 | 54.3026603 | 73.2630288 | 84.2605634 | 69.7715278 |
| 16:37:05 | 0:37:25 | 70.7694868 | 54.3026603 | 73.4448469 | 82.2605634 | 68.7715278 |
| 16:37:06 | 0:37:26 | 70.7694868 | 54.3026603 | 73.4448469 | 78.2605634 | 68.7715278 |
| 16:37:07 | 0:37:27 | 70.7694868 | 54.3026603 | 73.3539378 | 78.2605634 | 66.7715278 |
| 16:37:08 | 0:37:28 | 70.7694868 | 54.3026603 | 73.4448469 | 76.2605634 | 66.7715278 |
| 16:37:09 | 0:37:29 | 70.7694868 | 54.3026603 | 73.4448469 | 76.2605634 | 63.7715278 |
| 16:37:10 | 0:37:30 | 70.7694868 | 54.3026603 | 83.1015175 | 76.2605634 | 62.7715278 |

|          |         |            |            |            |            |            |
|----------|---------|------------|------------|------------|------------|------------|
| 16:37:11 | 0:37:31 | 69.7694868 | 55.3026603 | 79.1015175 | 75.2605634 | 62.7715278 |
| 16:37:12 | 0:37:32 | 69.7694868 | 55.3026603 | 79.1015175 | 75.2605634 | 62.7715278 |
| 16:37:13 | 0:37:33 | 67.7694868 | 63.3026603 | 71.1015175 | 73.2605634 | 62.7715278 |
| 16:37:14 | 0:37:34 | 67.7694868 | 64.3026603 | 71.1015175 | 68.2605634 | 62.7715278 |
| 16:37:15 | 0:37:35 | 67.7694868 | 64.3026603 | 70.1015175 | 67.2605634 | 62.7715278 |
| 16:37:16 | 0:37:36 | 67.7694868 | 73.3026603 | 70.1015175 | 65.2605634 | 62.7715278 |
| 16:37:17 | 0:37:37 | 66.7694868 | 73.3026603 | 71.1015175 | 66.2605634 | 62.7715278 |
| 16:37:18 | 0:37:38 | 66.7694868 | 71.3026603 | 71.1015175 | 66.2605634 | 62.7715278 |
| 16:37:19 | 0:37:39 | 66.7694868 | 69.3026603 | 69.1015175 | 66.2605634 | 62.7715278 |
| 16:37:20 | 0:37:40 | 66.7694868 | 68.3026603 | 69.1015175 | 72.2605634 | 63.7715278 |
| 16:37:21 | 0:37:41 | 66.7694868 | 67.3026603 | 68.1015175 | 72.2605634 | 63.7715278 |
| 16:37:22 | 0:37:42 | 66.7694868 | 67.3026603 | 67.1015175 | 71.2605634 | 65.7715278 |
| 16:37:23 | 0:37:43 | 66.7694868 | 68.3026603 | 67.1015175 | 69.2605634 | 67.7715278 |
| 16:37:24 | 0:37:44 | 66.7694868 | 69.3026603 | 67.1015175 | 69.2605634 | 67.7715278 |
| 16:37:25 | 0:37:45 | 66.7694868 | 71.3026603 | 66.1015175 | 68.2605634 | 67.7715278 |
| 16:37:26 | 0:37:46 | 66.7694868 | 71.3026603 | 66.1015175 | 69.2605634 | 67.7715278 |
| 16:37:27 | 0:37:47 | 72.7694868 | 71.3026603 | 65.1015175 | 69.2605634 | 67.7715278 |
| 16:37:28 | 0:37:48 | 77.7694868 | 69.3026603 | 65.1015175 | 70.2605634 | 67.7715278 |
| 16:37:29 | 0:37:49 | 77.7694868 | 67.3026603 | 65.1015175 | 71.2605634 | 71.7715278 |
| 16:37:30 | 0:37:50 | 77.7694868 | 65.3026603 | 65.1015175 | 71.2605634 | 73.7715278 |
| 16:37:31 | 0:37:51 | 77.7694868 | 64.3026603 | 65.1015175 | 71.2605634 | 74.7715278 |
| 16:37:32 | 0:37:52 | 77.7694868 | 64.3026603 | 64.1015175 | 72.2605634 | 74.7715278 |
| 16:37:33 | 0:37:53 | 77.7694868 | 65.3026603 | 64.1015175 | 72.2605634 | 75.7715278 |
| 16:37:34 | 0:37:54 | 78.7694868 | 66.3026603 | 63.1015175 | 72.2605634 | 74.7715278 |
| 16:37:35 | 0:37:55 | 78.7694868 | 67.3026603 | 63.1015175 | 70.2605634 | 74.7715278 |
| 16:37:36 | 0:37:56 | 74.7694868 | 68.3026603 | 63.1015175 | 69.2605634 | 73.7715278 |
| 16:37:37 | 0:37:57 | 75.7694868 | 68.3026603 | 63.1015175 | 68.2605634 | 73.7715278 |
| 16:37:38 | 0:37:58 | 75.7694868 | 68.3026603 | 63.1015175 | 68.2605634 | 73.7715278 |
| 16:37:39 | 0:37:59 | 75.7694868 | 65.3026603 | 64.1015175 | 67.2605634 | 71.7715278 |
| 16:37:40 | 0:38:00 | 74.7694868 | 64.3026603 | 64.1015175 | 66.2605634 | 69.7715278 |
| 16:37:41 | 0:38:01 | 74.7694868 | 63.3026603 | 64.1015175 | 66.2605634 | 69.7715278 |
| 16:37:42 | 0:38:02 | 74.7694868 | 63.3026603 | 64.1015175 | 66.2605634 | 70.7715278 |
| 16:37:43 | 0:38:03 | 74.7694868 | 65.3026603 | 63.1015175 | 66.2605634 | 68.7715278 |
| 16:37:44 | 0:38:04 | 74.7694868 | 66.3026603 | 63.1015175 | 67.2605634 | 67.7715278 |
| 16:37:45 | 0:38:05 | 74.7694868 | 67.3026603 | 63.1015175 | 69.2605634 | 67.7715278 |
| 16:37:46 | 0:38:06 | 74.7694868 | 67.3026603 | 63.1015175 | 69.2605634 | 66.7715278 |
| 16:37:47 | 0:38:07 | 74.7694868 | 67.3026603 | 63.1015175 | 67.2605634 | 66.7715278 |
| 16:37:48 | 0:38:08 | 74.7694868 | 67.3026603 | 63.1015175 | 66.2605634 | 66.7715278 |
| 16:37:49 | 0:38:09 | 74.7694868 | 67.3026603 | 63.1015175 | 65.2605634 | 67.7715278 |
| 16:37:50 | 0:38:10 | 73.7694868 | 67.3026603 | 63.1015175 | 64.2605634 | 66.7715278 |
| 16:37:51 | 0:38:11 | 73.7694868 | 67.3026603 | 63.1015175 | 63.2605634 | 65.7715278 |
| 16:37:52 | 0:38:12 | 72.7694868 | 66.3026603 | 63.1015175 | 63.2605634 | 65.7715278 |
| 16:37:53 | 0:38:13 | 72.7694868 | 66.3026603 | 64.1015175 | 63.2605634 | 66.7715278 |
| 16:37:54 | 0:38:14 | 70.7694868 | 66.3026603 | 64.1015175 | 63.2605634 | 66.7715278 |
| 16:37:55 | 0:38:15 | 69.7694868 | 66.3026603 | 64.1015175 | 63.2605634 | 67.7715278 |

|          |         |            |            |            |            |            |
|----------|---------|------------|------------|------------|------------|------------|
| 16:37:56 | 0:38:16 | 68.7694868 | 68.3026603 | 62.1015175 | 63.2605634 | 68.7715278 |
| 16:37:57 | 0:38:17 | 68.7694868 | 69.3026603 | 62.1015175 | 63.2605634 | 70.7715278 |
| 16:37:58 | 0:38:18 | 69.7694868 | 70.3026603 | 62.1015175 | 65.2605634 | 71.7715278 |
| 16:37:59 | 0:38:19 | 69.7694868 | 70.3026603 | 62.1015175 | 67.2605634 | 71.7715278 |
| 16:38:00 | 0:38:20 | 70.7694868 | 68.3026603 | 63.1015175 | 67.2605634 | 71.7715278 |
| 16:38:01 | 0:38:21 | 70.7694868 | 66.3026603 | 64.1015175 | 68.2605634 | 71.7715278 |
| 16:38:02 | 0:38:22 | 70.7694868 | 64.3026603 | 64.1015175 | 69.2605634 | 71.7715278 |
| 16:38:03 | 0:38:23 | 70.7694868 | 62.3026603 | 63.1015175 | 69.2605634 | 71.7715278 |
| 16:38:04 | 0:38:24 | 70.7694868 | 61.3026603 | 64.1015175 | 69.2605634 | 71.7715278 |
| 16:38:05 | 0:38:25 | 69.7694868 | 60.3026603 | 64.1015175 | 69.2605634 | 70.7715278 |
| 16:38:06 | 0:38:26 | 69.7694868 | 60.3026603 | 64.1015175 | 69.2605634 | 70.7715278 |
| 16:38:07 | 0:38:27 | 68.7694868 | 60.3026603 | 64.1015175 | 70.2605634 | 68.7715278 |
| 16:38:08 | 0:38:28 | 68.7694868 | 63.3026603 | 64.1015175 | 71.2605634 | 64.7715278 |
| 16:38:09 | 0:38:29 | 68.7694868 | 65.3026603 | 64.1015175 | 72.2605634 | 64.7715278 |
| 16:38:10 | 0:38:30 | 68.7694868 | 66.3026603 | 64.1015175 | 72.2605634 | 60.7715278 |
| 16:38:11 | 0:38:31 | 68.7694868 | 67.3026603 | 65.1015175 | 71.2605634 | 57.7715278 |
| 16:38:12 | 0:38:32 | 68.7694868 | 68.3026603 | 66.1015175 | 71.2605634 | 60.7715278 |
| 16:38:13 | 0:38:33 | 68.7694868 | 69.3026603 | 66.1015175 | 72.2605634 | 67.7715278 |
| 16:38:14 | 0:38:34 | 68.7694868 | 70.3026603 | 66.1015175 | 72.2605634 | 70.7715278 |
| 16:38:15 | 0:38:35 | 68.7694868 | 71.3026603 | 65.1015175 | 72.2605634 | 70.7715278 |
| 16:38:16 | 0:38:36 | 68.7694868 | 71.3026603 | 65.1015175 | 74.2605634 | 74.7715278 |
| 16:38:17 | 0:38:37 | 68.7694868 | 71.3026603 | 65.1015175 | 74.2605634 | 80.7715278 |
| 16:38:18 | 0:38:38 | 68.7694868 | 71.3026603 | 65.1015175 | 74.2605634 | 82.7715278 |
| 16:38:19 | 0:38:39 | 68.7694868 | 72.3026603 | 65.1015175 | 74.2605634 | 75.3539378 |
| 16:38:20 | 0:38:40 | 68.7694868 | 72.3026603 | 65.1015175 | 74.2605634 | 75.6266651 |
| 16:38:21 | 0:38:41 | 66.7694868 | 71.3026603 | 66.1015175 | 72.2605634 | 75.535756  |
| 16:38:22 | 0:38:42 | 66.7694868 | 71.3026603 | 65.1015175 | 71.2605634 | 75.2630288 |
| 16:38:23 | 0:38:43 | 65.7694868 | 69.3026603 | 65.1015175 | 71.2605634 | 75.2630288 |
| 16:38:24 | 0:38:44 | 65.7694868 | 69.3026603 | 64.1015175 | 74.2605634 | 74.8084833 |
| 16:38:25 | 0:38:45 | 68.7694868 | 69.3026603 | 64.1015175 | 75.2605634 | 75.2630288 |
| 16:38:26 | 0:38:46 | 68.7694868 | 70.3026603 | 64.1015175 | 75.2605634 | 73.2630288 |
| 16:38:27 | 0:38:47 | 71.7694868 | 70.3026603 | 64.1015175 | 76.2605634 | 73.7175742 |
| 16:38:28 | 0:38:48 | 71.7694868 | 70.3026603 | 65.1015175 | 76.2605634 | 77.7715278 |
| 16:38:29 | 0:38:49 | 71.7694868 | 70.3026603 | 65.1015175 | 76.2605634 | 69.7715278 |
| 16:38:30 | 0:38:50 | 71.7694868 | 69.3026603 | 67.1015175 | 76.2605634 | 66.7715278 |
| 16:38:31 | 0:38:51 | 71.7694868 | 68.3026603 | 66.1015175 | 76.2605634 | 61.7715278 |
| 16:38:32 | 0:38:52 | 71.7694868 | 67.3026603 | 65.1015175 | 75.2605634 | 60.7715278 |
| 16:38:33 | 0:38:53 | 71.7694868 | 66.3026603 | 65.1015175 | 75.2605634 | 60.7715278 |
| 16:38:34 | 0:38:54 | 72.7694868 | 65.3026603 | 65.1015175 | 75.2605634 | 60.7715278 |
| 16:38:35 | 0:38:55 | 72.7694868 | 65.3026603 | 65.1015175 | 75.2605634 | 58.7715278 |
| 16:38:36 | 0:38:56 | 73.7694868 | 65.3026603 | 65.1015175 | 75.2605634 | 58.7715278 |
| 16:38:37 | 0:38:57 | 73.7694868 | 65.3026603 | 65.1015175 | 75.2605634 | 57.7715278 |
| 16:38:38 | 0:38:58 | 74.7694868 | 61.3026603 | 65.1015175 | 75.2605634 | 56.7715278 |
| 16:38:39 | 0:38:59 | 74.7694868 | 58.3026603 | 65.1015175 | 75.2605634 | 56.7715278 |
| 16:38:40 | 0:39:00 | 74.7694868 | 57.3026603 | 65.1015175 | 76.2605634 | 57.7715278 |

|          |         |            |            |            |            |            |
|----------|---------|------------|------------|------------|------------|------------|
| 16:38:41 | 0:39:01 | 74.7694868 | 57.3026603 | 65.1015175 | 76.2605634 | 59.7715278 |
| 16:38:42 | 0:39:02 | 74.7694868 | 58.3026603 | 65.1015175 | 78.2605634 | 59.7715278 |
| 16:38:43 | 0:39:03 | 74.7694868 | 58.3026603 | 65.1015175 | 78.2605634 | 59.7715278 |
| 16:38:44 | 0:39:04 | 75.7694868 | 60.3026603 | 64.1015175 | 79.2605634 | 59.7715278 |
| 16:38:45 | 0:39:05 | 74.7694868 | 62.3026603 | 65.1015175 | 79.2605634 | 59.7715278 |
| 16:38:46 | 0:39:06 | 74.7694868 | 62.3026603 | 68.1015175 | 80.2605634 | 59.7715278 |
| 16:38:47 | 0:39:07 | 74.7694868 | 61.3026603 | 68.1015175 | 81.2605634 | 59.7715278 |
| 16:38:48 | 0:39:08 | 74.7694868 | 63.3026603 | 70.1015175 | 81.2605634 | 59.7715278 |
| 16:38:49 | 0:39:09 | 74.7694868 | 63.3026603 | 70.1015175 | 82.2605634 | 59.7715278 |
| 16:38:50 | 0:39:10 | 74.7694868 | 63.3026603 | 71.1015175 | 81.2605634 | 59.7715278 |
| 16:38:51 | 0:39:11 | 74.7694868 | 63.3026603 | 71.1015175 | 79.2605634 | 59.7715278 |
| 16:38:52 | 0:39:12 | 73.7694868 | 63.3026603 | 71.1015175 | 77.2605634 | 59.7715278 |
| 16:38:53 | 0:39:13 | 73.7694868 | 61.3026603 | 71.1015175 | 75.2605634 | 58.7715278 |
| 16:38:54 | 0:39:14 | 71.7694868 | 61.3026603 | 73.1015175 | 74.2605634 | 58.7715278 |
| 16:38:55 | 0:39:15 | 70.7694868 | 61.3026603 | 74.1015175 | 73.2605634 | 58.7715278 |
| 16:38:56 | 0:39:16 | 70.7694868 | 62.3026603 | 74.1015175 | 72.2605634 | 59.7715278 |
| 16:38:57 | 0:39:17 | 70.7694868 | 63.3026603 | 72.1015175 | 72.2605634 | 59.7715278 |
| 16:38:58 | 0:39:18 | 70.7694868 | 64.3026603 | 71.1015175 | 72.2605634 | 61.7715278 |
| 16:38:59 | 0:39:19 | 70.7694868 | 64.3026603 | 71.1015175 | 72.2605634 | 62.7715278 |
| 16:39:00 | 0:39:20 | 70.7694868 | 64.3026603 | 71.1015175 | 72.2605634 | 62.7715278 |
| 16:39:01 | 0:39:21 | 67.7694868 | 63.3026603 | 72.1015175 | 72.2605634 | 67.7715278 |
| 16:39:02 | 0:39:22 | 70.7694868 | 63.3026603 | 72.1015175 | 72.2605634 | 67.7715278 |
| 16:39:03 | 0:39:23 | 70.7694868 | 64.3026603 | 72.1015175 | 72.2605634 | 68.7715278 |
| 16:39:04 | 0:39:24 | 70.7694868 | 64.3026603 | 72.1015175 | 74.2605634 | 70.7715278 |
| 16:39:05 | 0:39:25 | 70.7694868 | 63.3026603 | 71.1015175 | 75.2605634 | 71.7715278 |
| 16:39:06 | 0:39:26 | 70.7694868 | 62.3026603 | 70.1015175 | 76.2605634 | 71.7715278 |
| 16:39:07 | 0:39:27 | 70.7694868 | 61.3026603 | 69.1015175 | 77.2605634 | 71.7715278 |
| 16:39:08 | 0:39:28 | 70.7694868 | 60.3026603 | 69.1015175 | 77.2605634 | 71.7715278 |
| 16:39:09 | 0:39:29 | 70.7694868 | 61.3026603 | 69.1015175 | 77.2605634 | 72.7715278 |
| 16:39:10 | 0:39:30 | 70.7694868 | 62.3026603 | 69.1015175 | 77.2605634 | 73.7715278 |
| 16:39:11 | 0:39:31 | 69.7694868 | 63.3026603 | 69.1015175 | 74.2605634 | 74.7715278 |
| 16:39:12 | 0:39:32 | 68.7694868 | 64.3026603 | 69.1015175 | 73.2605634 | 74.7715278 |
| 16:39:13 | 0:39:33 | 68.7694868 | 63.3026603 | 69.1015175 | 72.2605634 | 75.7715278 |
| 16:39:14 | 0:39:34 | 67.7694868 | 63.3026603 | 69.1015175 | 71.2605634 | 75.7715278 |
| 16:39:15 | 0:39:35 | 67.7694868 | 63.3026603 | 70.1015175 | 71.2605634 | 77.7715278 |
| 16:39:16 | 0:39:36 | 67.7694868 | 63.3026603 | 70.1015175 | 70.2605634 | 79.7715278 |
| 16:39:17 | 0:39:37 | 67.7694868 | 64.3026603 | 70.1015175 | 69.2605634 | 79.7715278 |
| 16:39:18 | 0:39:38 | 69.7694868 | 64.3026603 | 70.1015175 | 69.2605634 | 79.7715278 |
| 16:39:19 | 0:39:39 | 71.7694868 | 65.3026603 | 70.1015175 | 70.2605634 | 78.7715278 |
| 16:39:20 | 0:39:40 | 72.7694868 | 65.3026603 | 71.1015175 | 71.2605634 | 78.7715278 |
| 16:39:21 | 0:39:41 | 73.7694868 | 65.3026603 | 71.1015175 | 71.2605634 | 78.7715278 |
| 16:39:22 | 0:39:42 | 72.7694868 | 66.3026603 | 71.1015175 | 71.2605634 | 77.7715278 |
| 16:39:23 | 0:39:43 | 71.7694868 | 65.3026603 | 71.1015175 | 71.2605634 | 76.7715278 |
| 16:39:24 | 0:39:44 | 71.7694868 | 64.3026603 | 71.1015175 | 69.2605634 | 75.7715278 |
| 16:39:25 | 0:39:45 | 71.7694868 | 63.3026603 | 71.1015175 | 68.2605634 | 75.7715278 |

|          |         |            |            |            |            |            |
|----------|---------|------------|------------|------------|------------|------------|
| 16:39:26 | 0:39:46 | 70.7694868 | 62.3026603 | 71.1015175 | 66.2605634 | 74.7715278 |
| 16:39:27 | 0:39:47 | 70.7694868 | 63.3026603 | 73.1015175 | 66.2605634 | 74.7715278 |
| 16:39:28 | 0:39:48 | 70.7694868 | 64.3026603 | 73.1015175 | 66.2605634 | 72.7715278 |
| 16:39:29 | 0:39:49 | 69.7694868 | 66.3026603 | 69.1015175 | 67.2605634 | 68.7715278 |
| 16:39:30 | 0:39:50 | 68.7694868 | 68.3026603 | 68.1015175 | 69.2605634 | 68.7715278 |
| 16:39:31 | 0:39:51 | 68.7694868 | 68.3026603 | 68.1015175 | 70.2605634 | 66.7715278 |
| 16:39:32 | 0:39:52 | 67.7694868 | 70.3026603 | 68.1015175 | 70.2605634 | 66.7715278 |
| 16:39:33 | 0:39:53 | 67.7694868 | 74.3026603 | 69.1015175 | 70.2605634 | 66.7715278 |
| 16:39:34 | 0:39:54 | 67.7694868 | 74.3026603 | 69.1015175 | 70.2605634 | 66.7715278 |
| 16:39:35 | 0:39:55 | 67.7694868 | 74.3026603 | 69.1015175 | 72.2605634 | 66.7715278 |
| 16:39:36 | 0:39:56 | 66.7694868 | 74.3026603 | 70.1015175 | 74.2605634 | 66.7715278 |
| 16:39:37 | 0:39:57 | 67.7694868 | 74.3026603 | 68.1015175 | 75.2605634 | 66.7715278 |
| 16:39:38 | 0:39:58 | 67.7694868 | 73.3026603 | 67.1015175 | 75.2605634 | 66.7715278 |
| 16:39:39 | 0:39:59 | 67.7694868 | 73.3026603 | 67.1015175 | 75.2605634 | 66.7715278 |
| 16:39:40 | 0:40:00 | 68.7694868 | 73.3026603 | 67.1015175 | 74.2605634 | 66.7715278 |
| 16:39:41 | 0:40:01 | 68.7694868 | 74.3026603 | 67.1015175 | 74.2605634 | 66.7715278 |
| 16:39:42 | 0:40:02 | 68.7694868 | 75.3026603 | 67.1015175 | 72.2605634 | 66.7715278 |
| 16:39:43 | 0:40:03 | 68.7694868 | 75.3026603 | 66.1015175 | 71.2605634 | 66.7715278 |
| 16:39:44 | 0:40:04 | 68.7694868 | 77.3026603 | 72.1015175 | 70.2605634 | 66.7715278 |
| 16:39:45 | 0:40:05 | 68.7694868 | 78.3026603 | 76.1015175 | 70.2605634 | 66.7715278 |
| 16:39:46 | 0:40:06 | 67.7694868 | 78.3026603 | 76.1015175 | 70.2605634 | 66.7715278 |
| 16:39:47 | 0:40:07 | 67.7694868 | 78.3026603 | 80.1015175 | 70.2605634 | 66.7715278 |
| 16:39:48 | 0:40:08 | 67.7694868 | 76.3026603 | 80.1015175 | 70.2605634 | 67.7715278 |
| 16:39:49 | 0:40:09 | 66.7694868 | 63.3026603 | 81.1015175 | 70.2605634 | 67.7715278 |
| 16:39:50 | 0:40:10 | 66.7694868 | 61.3026603 | 78.1015175 | 71.2605634 | 68.7715278 |
| 16:39:51 | 0:40:11 | 66.7694868 | 60.3026603 | 78.1015175 | 71.2605634 | 69.7715278 |
| 16:39:52 | 0:40:12 | 66.7694868 | 60.3026603 | 77.1015175 | 70.2605634 | 69.7715278 |
| 16:39:53 | 0:40:13 | 66.7694868 | 63.3026603 | 77.1015175 | 69.2605634 | 69.7715278 |
| 16:39:54 | 0:40:14 | 66.7694868 | 63.3026603 | 77.1015175 | 69.2605634 | 69.7715278 |
| 16:39:55 | 0:40:15 | 66.7694868 | 65.3026603 | 77.1015175 | 69.2605634 | 68.7715278 |
| 16:39:56 | 0:40:16 | 67.7694868 | 66.3026603 | 74.1015175 | 68.2605634 | 68.7715278 |
| 16:39:57 | 0:40:17 | 67.7694868 | 67.3026603 | 73.1015175 | 68.2605634 | 69.7715278 |
| 16:39:58 | 0:40:18 | 67.7694868 | 68.3026603 | 73.1015175 | 69.2605634 | 69.7715278 |
| 16:39:59 | 0:40:19 | 67.7694868 | 69.3026603 | 72.1015175 | 69.2605634 | 69.7715278 |
| 16:40:00 | 0:40:20 | 67.7694868 | 72.3026603 | 70.1015175 | 69.2605634 | 69.7715278 |
| 16:40:01 | 0:40:21 | 68.7694868 | 73.3026603 | 68.1015175 | 70.2605634 | 70.7715278 |
| 16:40:02 | 0:40:22 | 68.7694868 | 73.3026603 | 67.1015175 | 71.2605634 | 70.7715278 |
| 16:40:03 | 0:40:23 | 68.7694868 | 73.3026603 | 68.1015175 | 73.2605634 | 71.7715278 |
| 16:40:04 | 0:40:24 | 68.7694868 | 71.3026603 | 68.1015175 | 76.2605634 | 72.7715278 |
| 16:40:05 | 0:40:25 | 68.7694868 | 71.3026603 | 68.1015175 | 76.2605634 | 72.7715278 |
| 16:40:06 | 0:40:26 | 68.7694868 | 72.3026603 | 69.1015175 | 76.2605634 | 72.7715278 |
| 16:40:07 | 0:40:27 | 68.7694868 | 72.3026603 | 69.1015175 | 74.2605634 | 71.7715278 |
| 16:40:08 | 0:40:28 | 67.7694868 | 72.3026603 | 69.1015175 | 74.2605634 | 70.7715278 |
| 16:40:09 | 0:40:29 | 67.7694868 | 72.3026603 | 69.1015175 | 74.2605634 | 70.7715278 |
| 16:40:10 | 0:40:30 | 67.7694868 | 72.3026603 | 69.1015175 | 74.2605634 | 70.7715278 |

|          |         |            |            |            |            |            |
|----------|---------|------------|------------|------------|------------|------------|
| 16:40:11 | 0:40:31 | 67.7694868 | 70.3026603 | 67.1015175 | 74.2605634 | 70.7715278 |
| 16:40:12 | 0:40:32 | 67.7694868 | 69.3026603 | 67.1015175 | 74.2605634 | 70.7715278 |
| 16:40:13 | 0:40:33 | 67.7694868 | 69.3026603 | 67.1015175 | 75.2605634 | 69.7715278 |
| 16:40:14 | 0:40:34 | 67.7694868 | 69.3026603 | 66.1015175 | 75.2605634 | 69.7715278 |
| 16:40:15 | 0:40:35 | 67.7694868 | 69.3026603 | 66.1015175 | 75.2605634 | 69.7715278 |
| 16:40:16 | 0:40:36 | 67.7694868 | 69.3026603 | 66.1015175 | 75.2605634 | 70.7715278 |
| 16:40:17 | 0:40:37 | 66.7694868 | 68.3026603 | 66.1015175 | 78.2605634 | 70.7715278 |
| 16:40:18 | 0:40:38 | 66.7694868 | 68.3026603 | 66.1015175 | 79.2605634 | 71.7715278 |
| 16:40:19 | 0:40:39 | 66.7694868 | 67.3026603 | 66.1015175 | 81.2605634 | 71.7715278 |
| 16:40:20 | 0:40:40 | 65.7694868 | 66.3026603 | 66.1015175 | 82.2605634 | 68.7715278 |
| 16:40:21 | 0:40:41 | 65.7694868 | 66.3026603 | 67.1015175 | 83.2605634 | 68.7715278 |
| 16:40:22 | 0:40:42 | 65.7694868 | 65.3026603 | 67.1015175 | 83.2605634 | 68.7715278 |
| 16:40:23 | 0:40:43 | 64.7694868 | 68.3026603 | 67.1015175 | 81.2605634 | 68.7715278 |
| 16:40:24 | 0:40:44 | 63.7694868 | 69.3026603 | 67.1015175 | 81.2605634 | 68.7715278 |
| 16:40:25 | 0:40:45 | 63.7694868 | 69.3026603 | 67.1015175 | 77.2605634 | 68.7715278 |
| 16:40:26 | 0:40:46 | 61.7694868 | 69.3026603 | 66.1015175 | 73.2605634 | 68.7715278 |
| 16:40:27 | 0:40:47 | 61.7694868 | 69.3026603 | 66.1015175 | 73.2605634 | 68.7715278 |
| 16:40:28 | 0:40:48 | 62.7694868 | 70.3026603 | 65.1015175 | 69.2605634 | 67.7715278 |
| 16:40:29 | 0:40:49 | 63.7694868 | 69.3026603 | 65.1015175 | 69.2605634 | 68.7715278 |
| 16:40:30 | 0:40:50 | 63.7694868 | 69.3026603 | 66.1015175 | 68.2605634 | 68.7715278 |
| 16:40:31 | 0:40:51 | 65.7694868 | 70.3026603 | 66.1015175 | 68.2605634 | 68.7715278 |
| 16:40:32 | 0:40:52 | 65.7694868 | 70.3026603 | 66.1015175 | 68.2605634 | 67.7715278 |
| 16:40:33 | 0:40:53 | 65.7694868 | 70.3026603 | 65.1015175 | 69.2605634 | 66.7715278 |
| 16:40:34 | 0:40:54 | 64.7694868 | 76.3026603 | 65.1015175 | 69.2605634 | 66.7715278 |
| 16:40:35 | 0:40:55 | 64.7694868 | 76.3026603 | 65.1015175 | 68.2605634 | 65.7715278 |
| 16:40:36 | 0:40:56 | 64.7694868 | 74.3026603 | 65.1015175 | 67.2605634 | 66.7715278 |
| 16:40:37 | 0:40:57 | 64.7694868 | 68.3026603 | 65.1015175 | 67.2605634 | 66.7715278 |
| 16:40:38 | 0:40:58 | 64.7694868 | 68.3026603 | 65.1015175 | 67.2605634 | 66.7715278 |
| 16:40:39 | 0:40:59 | 64.7694868 | 66.3026603 | 67.1015175 | 67.2605634 | 66.7715278 |
| 16:40:40 | 0:41:00 | 64.7694868 | 66.3026603 | 69.1015175 | 67.2605634 | 66.7715278 |
| 16:40:41 | 0:41:01 | 64.7694868 | 66.3026603 | 71.1015175 | 67.2605634 | 66.7715278 |
| 16:40:42 | 0:41:02 | 64.7694868 | 66.3026603 | 71.1015175 | 67.2605634 | 67.7715278 |
| 16:40:43 | 0:41:03 | 64.7694868 | 66.3026603 | 70.1015175 | 67.2605634 | 68.7715278 |
| 16:40:44 | 0:41:04 | 64.7694868 | 64.3026603 | 70.1015175 | 67.2605634 | 66.7715278 |
| 16:40:45 | 0:41:05 | 64.7694868 | 63.3026603 | 69.1015175 | 69.2605634 | 66.7715278 |
| 16:40:46 | 0:41:06 | 64.7694868 | 63.3026603 | 68.1015175 | 72.2605634 | 63.7715278 |
| 16:40:47 | 0:41:07 | 63.7694868 | 61.3026603 | 67.1015175 | 72.2605634 | 61.7715278 |
| 16:40:48 | 0:41:08 | 63.7694868 | 61.3026603 | 67.1015175 | 72.2605634 | 61.7715278 |
| 16:40:49 | 0:41:09 | 63.7694868 | 60.3026603 | 67.1015175 | 72.2605634 | 60.7715278 |
| 16:40:50 | 0:41:10 | 64.7694868 | 61.3026603 | 67.1015175 | 73.2605634 | 59.7715278 |
| 16:40:51 | 0:41:11 | 64.7694868 | 62.3026603 | 68.1015175 | 74.2605634 | 59.7715278 |
| 16:40:52 | 0:41:12 | 64.7694868 | 64.3026603 | 69.1015175 | 75.2605634 | 59.7715278 |
| 16:40:53 | 0:41:13 | 64.7694868 | 65.3026603 | 69.1015175 | 74.2605634 | 59.7715278 |
| 16:40:54 | 0:41:14 | 64.7694868 | 66.3026603 | 69.1015175 | 74.2605634 | 59.7715278 |
| 16:40:55 | 0:41:15 | 64.7694868 | 66.3026603 | 69.1015175 | 73.2605634 | 58.7715278 |



|          |         |            |            |            |            |            |
|----------|---------|------------|------------|------------|------------|------------|
| 16:40:56 | 0:41:16 | 64.7694868 | 66.3026603 | 69.1015175 | 72.2605634 | 58.7715278 |
| 16:40:57 | 0:41:17 | 65.7694868 | 63.3026603 | 68.1015175 | 71.2605634 | 58.7715278 |
| 16:40:58 | 0:41:18 | 65.7694868 | 60.3026603 | 68.1015175 | 71.2605634 | 61.7715278 |
| 16:40:59 | 0:41:19 | 65.7694868 | 58.3026603 | 68.1015175 | 71.2605634 | 63.7715278 |
| 16:41:00 | 0:41:20 | 65.7694868 | 58.3026603 | 68.1015175 | 69.2605634 | 63.7715278 |
| 16:41:01 | 0:41:21 | 66.7694868 | 57.3026603 | 67.1015175 | 69.2605634 | 64.7715278 |
| 16:41:02 | 0:41:22 | 66.7694868 | 57.3026603 | 67.1015175 | 69.2605634 | 64.7715278 |
| 16:41:03 | 0:41:23 | 66.7694868 | 57.3026603 | 67.1015175 | 69.2605634 | 63.7715278 |
| 16:41:04 | 0:41:24 | 65.7694868 | 61.3026603 | 67.1015175 | 70.2605634 | 62.7715278 |
| 16:41:05 | 0:41:25 | 65.7694868 | 62.3026603 | 67.1015175 | 70.2605634 | 62.7715278 |
| 16:41:06 | 0:41:26 | 66.7694868 | 61.3026603 | 67.1015175 | 69.2605634 | 63.7715278 |
| 16:41:07 | 0:41:27 | 66.7694868 | 60.3026603 | 67.1015175 | 69.2605634 | 63.7715278 |
| 16:41:08 | 0:41:28 | 67.7694868 | 60.3026603 | 67.1015175 | 70.2605634 | 63.7715278 |
| 16:41:09 | 0:41:29 | 67.7694868 | 59.3026603 | 67.1015175 | 70.2605634 | 67.7715278 |
| 16:41:10 | 0:41:30 | 67.7694868 | 59.3026603 | 67.1015175 | 71.2605634 | 69.7715278 |
| 16:41:11 | 0:41:31 | 67.7694868 | 59.3026603 | 68.1015175 | 72.2605634 | 70.7715278 |
| 16:41:12 | 0:41:32 | 68.7694868 | 59.3026603 | 68.1015175 | 72.2605634 | 70.7715278 |
| 16:41:13 | 0:41:33 | 68.7694868 | 62.3026603 | 67.1015175 | 72.2605634 | 70.7715278 |
| 16:41:14 | 0:41:34 | 68.7694868 | 62.3026603 | 67.1015175 | 71.2605634 | 70.7715278 |
| 16:41:15 | 0:41:35 | 69.7694868 | 62.3026603 | 67.1015175 | 70.2605634 | 69.7715278 |
| 16:41:16 | 0:41:36 | 69.7694868 | 61.3026603 | 64.1015175 | 70.2605634 | 65.7715278 |
| 16:41:17 | 0:41:37 | 71.7694868 | 60.3026603 | 63.1015175 | 70.2605634 | 65.7715278 |
| 16:41:18 | 0:41:38 | 72.7694868 | 59.3026603 | 65.1015175 | 70.2605634 | 67.7715278 |
| 16:41:19 | 0:41:39 | 71.7694868 | 59.3026603 | 65.1015175 | 71.2605634 | 71.7715278 |
| 16:41:20 | 0:41:40 | 69.7694868 | 58.3026603 | 66.1015175 | 71.2605634 | 71.7715278 |
| 16:41:21 | 0:41:41 | 69.7694868 | 58.3026603 | 66.1015175 | 71.2605634 | 72.7715278 |
| 16:41:22 | 0:41:42 | 69.7694868 | 58.3026603 | 66.1015175 | 71.2605634 | 72.7715278 |
| 16:41:23 | 0:41:43 | 68.7694868 | 58.3026603 | 68.1015175 | 71.2605634 | 72.7715278 |
| 16:41:24 | 0:41:44 | 68.7694868 | 60.3026603 | 68.1015175 | 70.2605634 | 72.7715278 |
| 16:41:25 | 0:41:45 | 67.7694868 | 62.3026603 | 68.1015175 | 70.2605634 | 73.7715278 |
| 16:41:26 | 0:41:46 | 67.7694868 | 62.3026603 | 69.1015175 | 70.2605634 | 73.7715278 |
| 16:41:27 | 0:41:47 | 67.7694868 | 63.3026603 | 70.1015175 | 71.2605634 | 71.7715278 |
| 16:41:28 | 0:41:48 | 66.7694868 | 63.3026603 | 70.1015175 | 71.2605634 | 71.7715278 |
| 16:41:29 | 0:41:49 | 65.7694868 | 61.3026603 | 70.1015175 | 71.2605634 | 62.7715278 |
| 16:41:30 | 0:41:50 | 65.7694868 | 61.3026603 | 69.1015175 | 70.2605634 | 60.7715278 |
| 16:41:31 | 0:41:51 | 65.7694868 | 61.3026603 | 69.1015175 | 69.2605634 | 60.7715278 |
| 16:41:32 | 0:41:52 | 65.7694868 | 62.3026603 | 69.1015175 | 68.2605634 | 61.7715278 |
| 16:41:33 | 0:41:53 | 65.7694868 | 62.3026603 | 69.1015175 | 68.2605634 | 63.7715278 |
| 16:41:34 | 0:41:54 | 65.7694868 | 63.3026603 | 70.1015175 | 69.2605634 | 64.7715278 |
| 16:41:35 | 0:41:55 | 65.7694868 | 63.3026603 | 69.1015175 | 69.2605634 | 64.7715278 |
| 16:41:36 | 0:41:56 | 66.7694868 | 64.3026603 | 69.1015175 | 69.2605634 | 64.7715278 |
| 16:41:37 | 0:41:57 | 67.7694868 | 64.3026603 | 68.1015175 | 70.2605634 | 64.7715278 |
| 16:41:38 | 0:41:58 | 68.7694868 | 64.3026603 | 67.1015175 | 70.2605634 | 64.7715278 |
| 16:41:39 | 0:41:59 | 69.7694868 | 64.3026603 | 67.1015175 | 69.2605634 | 64.7715278 |
| 16:41:40 | 0:42:00 | 70.7694868 | 65.3026603 | 67.1015175 | 69.2605634 | 65.7715278 |

|          |         |            |            |            |            |            |
|----------|---------|------------|------------|------------|------------|------------|
| 16:41:41 | 0:42:01 | 70.7694868 | 66.3026603 | 68.1015175 | 69.2605634 | 66.7715278 |
| 16:41:42 | 0:42:02 | 70.7694868 | 66.3026603 | 68.1015175 | 69.2605634 | 66.7715278 |
| 16:41:43 | 0:42:03 | 75.7694868 | 65.3026603 | 68.1015175 | 69.2605634 | 66.7715278 |
| 16:41:44 | 0:42:04 | 74.7694868 | 65.3026603 | 69.1015175 | 69.2605634 | 67.7715278 |
| 16:41:45 | 0:42:05 | 74.7694868 | 65.3026603 | 68.1015175 | 69.2605634 | 72.7715278 |
| 16:41:46 | 0:42:06 | 72.7694868 | 65.3026603 | 67.1015175 | 69.2605634 | 72.7715278 |
| 16:41:47 | 0:42:07 | 70.7694868 | 63.3026603 | 66.1015175 | 69.2605634 | 72.7715278 |
| 16:41:48 | 0:42:08 | 69.7694868 | 62.3026603 | 66.1015175 | 69.2605634 | 71.7715278 |
| 16:41:49 | 0:42:09 | 68.7694868 | 62.3026603 | 66.1015175 | 69.2605634 | 70.7715278 |
| 16:41:50 | 0:42:10 | 68.7694868 | 61.3026603 | 67.1015175 | 69.2605634 | 69.7715278 |
| 16:41:51 | 0:42:11 | 68.7694868 | 60.3026603 | 67.1015175 | 69.2605634 | 69.7715278 |
| 16:41:52 | 0:42:12 | 68.7694868 | 59.3026603 | 67.1015175 | 69.2605634 | 69.7715278 |
| 16:41:53 | 0:42:13 | 69.7694868 | 59.3026603 | 66.1015175 | 70.2605634 | 71.7715278 |
| 16:41:54 | 0:42:14 | 71.7694868 | 59.3026603 | 65.1015175 | 71.2605634 | 71.7715278 |
| 16:41:55 | 0:42:15 | 71.7694868 | 59.3026603 | 65.1015175 | 71.2605634 | 71.7715278 |
| 16:41:56 | 0:42:16 | 72.7694868 | 58.3026603 | 65.1015175 | 73.2605634 | 70.7715278 |
| 16:41:57 | 0:42:17 | 73.7694868 | 58.3026603 | 66.1015175 | 74.2605634 | 68.7715278 |
| 16:41:58 | 0:42:18 | 73.7694868 | 58.3026603 | 66.1015175 | 75.2605634 | 67.7715278 |
| 16:41:59 | 0:42:19 | 72.7694868 | 64.3026603 | 67.1015175 | 74.2605634 | 67.7715278 |
| 16:42:00 | 0:42:20 | 71.7694868 | 66.3026603 | 67.1015175 | 75.2605634 | 65.7715278 |
| 16:42:01 | 0:42:21 | 70.7694868 | 64.3026603 | 68.1015175 | 75.2605634 | 64.7715278 |
| 16:42:02 | 0:42:22 | 69.7694868 | 62.3026603 | 70.1015175 | 76.2605634 | 63.7715278 |
| 16:42:03 | 0:42:23 | 69.7694868 | 61.3026603 | 70.1015175 | 77.2605634 | 63.7715278 |
| 16:42:04 | 0:42:24 | 69.7694868 | 62.3026603 | 70.1015175 | 76.2605634 | 63.7715278 |
| 16:42:05 | 0:42:25 | 69.7694868 | 64.3026603 | 70.1015175 | 76.2605634 | 63.7715278 |
| 16:42:06 | 0:42:26 | 69.7694868 | 64.3026603 | 69.1015175 | 75.2605634 | 64.7715278 |
| 16:42:07 | 0:42:27 | 70.7694868 | 64.3026603 | 70.1015175 | 75.2605634 | 64.7715278 |
| 16:42:08 | 0:42:28 | 70.7694868 | 65.3026603 | 70.1015175 | 74.2605634 | 65.7715278 |
| 16:42:09 | 0:42:29 | 70.7694868 | 65.3026603 | 70.1015175 | 74.2605634 | 64.7715278 |
| 16:42:10 | 0:42:30 | 70.7694868 | 65.3026603 | 70.1015175 | 74.2605634 | 64.7715278 |
| 16:42:11 | 0:42:31 | 70.7694868 | 67.3026603 | 70.1015175 | 74.2605634 | 63.7715278 |
| 16:42:12 | 0:42:32 | 72.7694868 | 66.3026603 | 70.1015175 | 74.2605634 | 63.7715278 |
| 16:42:13 | 0:42:33 | 72.7694868 | 65.3026603 | 69.1015175 | 74.2605634 | 63.7715278 |
| 16:42:14 | 0:42:34 | 72.7694868 | 64.3026603 | 68.1015175 | 73.2605634 | 63.7715278 |
| 16:42:15 | 0:42:35 | 64.7694868 | 64.3026603 | 68.1015175 | 73.2605634 | 65.7715278 |
| 16:42:16 | 0:42:36 | 62.7694868 | 65.3026603 | 67.1015175 | 72.2605634 | 65.7715278 |
| 16:42:17 | 0:42:37 | 62.7694868 | 65.3026603 | 67.1015175 | 72.2605634 | 66.7715278 |
| 16:42:18 | 0:42:38 | 61.7694868 | 66.3026603 | 67.1015175 | 72.2605634 | 66.7715278 |
| 16:42:19 | 0:42:39 | 62.7694868 | 66.3026603 | 67.1015175 | 72.2605634 | 65.7715278 |
| 16:42:20 | 0:42:40 | 67.7694868 | 70.3026603 | 69.1015175 | 73.2605634 | 64.7715278 |
| 16:42:21 | 0:42:41 | 67.7694868 | 73.3026603 | 71.1015175 | 73.2605634 | 64.7715278 |
| 16:42:22 | 0:42:42 | 67.7694868 | 76.3026603 | 71.1015175 | 73.2605634 | 64.7715278 |
| 16:42:23 | 0:42:43 | 67.7694868 | 77.3026603 | 72.1015175 | 74.2605634 | 64.7715278 |
| 16:42:24 | 0:42:44 | 67.7694868 | 77.3026603 | 71.1015175 | 74.2605634 | 65.7715278 |
| 16:42:25 | 0:42:45 | 67.7694868 | 76.3026603 | 68.1015175 | 75.2605634 | 65.7715278 |

|          |         |            |            |            |            |            |
|----------|---------|------------|------------|------------|------------|------------|
| 16:42:26 | 0:42:46 | 67.7694868 | 71.3026603 | 68.1015175 | 76.2605634 | 67.7715278 |
| 16:42:27 | 0:42:47 | 66.7694868 | 66.3026603 | 68.1015175 | 75.2605634 | 66.7715278 |
| 16:42:28 | 0:42:48 | 66.7694868 | 66.3026603 | 70.1015175 | 75.2605634 | 64.7715278 |
| 16:42:29 | 0:42:49 | 66.7694868 | 61.3026603 | 70.1015175 | 75.2605634 | 64.7715278 |
| 16:42:30 | 0:42:50 | 66.7694868 | 60.3026603 | 76.1015175 | 76.2605634 | 64.7715278 |
| 16:42:31 | 0:42:51 | 65.7694868 | 60.3026603 | 76.1015175 | 76.2605634 | 65.7715278 |
| 16:42:32 | 0:42:52 | 64.7694868 | 60.3026603 | 77.1015175 | 76.2605634 | 67.7715278 |
| 16:42:33 | 0:42:53 | 63.7694868 | 61.3026603 | 77.1015175 | 76.2605634 | 68.7715278 |
| 16:42:34 | 0:42:54 | 62.7694868 | 62.3026603 | 76.1015175 | 76.2605634 | 68.7715278 |
| 16:42:35 | 0:42:55 | 62.7694868 | 63.3026603 | 76.1015175 | 76.2605634 | 70.7715278 |
| 16:42:36 | 0:42:56 | 62.7694868 | 63.3026603 | 76.1015175 | 76.2605634 | 70.7715278 |
| 16:42:37 | 0:42:57 | 66.7694868 | 62.3026603 | 74.1015175 | 75.2605634 | 69.7715278 |
| 16:42:38 | 0:42:58 | 67.7694868 | 61.3026603 | 73.1015175 | 74.2605634 | 70.7715278 |
| 16:42:39 | 0:42:59 | 67.7694868 | 61.3026603 | 72.1015175 | 73.2605634 | 70.7715278 |
| 16:42:40 | 0:43:00 | 67.7694868 | 61.3026603 | 72.1015175 | 72.2605634 | 70.7715278 |
| 16:42:41 | 0:43:01 | 68.7694868 | 61.3026603 | 70.1015175 | 71.2605634 | 70.7715278 |
| 16:42:42 | 0:43:02 | 68.7694868 | 61.3026603 | 69.1015175 | 71.2605634 | 71.7715278 |
| 16:42:43 | 0:43:03 | 68.7694868 | 61.3026603 | 69.1015175 | 71.2605634 | 71.7715278 |
| 16:42:44 | 0:43:04 | 68.7694868 | 61.3026603 | 70.1015175 | 71.2605634 | 71.7715278 |
| 16:42:45 | 0:43:05 | 68.7694868 | 62.3026603 | 70.1015175 | 71.2605634 | 70.7715278 |
| 16:42:46 | 0:43:06 | 69.7694868 | 62.3026603 | 69.1015175 | 71.2605634 | 69.7715278 |
| 16:42:47 | 0:43:07 | 70.7694868 | 62.3026603 | 69.1015175 | 70.2605634 | 69.7715278 |
| 16:42:48 | 0:43:08 | 70.7694868 | 62.3026603 | 68.1015175 | 69.2605634 | 68.7715278 |
| 16:42:49 | 0:43:09 | 70.7694868 | 63.3026603 | 68.1015175 | 68.2605634 | 68.7715278 |
| 16:42:50 | 0:43:10 | 70.7694868 | 63.3026603 | 69.1015175 | 68.2605634 | 69.7715278 |
| 16:42:51 | 0:43:11 | 71.7694868 | 63.3026603 | 69.1015175 | 67.2605634 | 69.7715278 |
| 16:42:52 | 0:43:12 | 72.7694868 | 63.3026603 | 69.1015175 | 66.2605634 | 69.7715278 |
| 16:42:53 | 0:43:13 | 74.7694868 | 65.3026603 | 69.1015175 | 66.2605634 | 66.7715278 |
| 16:42:54 | 0:43:14 | 75.7694868 | 65.3026603 | 69.1015175 | 66.2605634 | 64.7715278 |
| 16:42:55 | 0:43:15 | 75.7694868 | 65.3026603 | 67.1015175 | 66.2605634 | 64.7715278 |
| 16:42:56 | 0:43:16 | 72.7694868 | 66.3026603 | 66.1015175 | 66.2605634 | 64.7715278 |
| 16:42:57 | 0:43:17 | 71.7694868 | 66.3026603 | 66.1015175 | 70.2605634 | 64.7715278 |
| 16:42:58 | 0:43:18 | 71.7694868 | 66.3026603 | 66.1015175 | 71.2605634 | 64.7715278 |
| 16:42:59 | 0:43:19 | 70.7694868 | 66.3026603 | 66.1015175 | 72.2605634 | 66.7715278 |
| 16:43:00 | 0:43:20 | 70.7694868 | 66.3026603 | 65.1015175 | 67.2605634 | 66.7715278 |
| 16:43:01 | 0:43:21 | 70.7694868 | 66.3026603 | 65.1015175 | 65.2605634 | 65.7715278 |
| 16:43:02 | 0:43:22 | 70.7694868 | 70.3026603 | 65.1015175 | 65.2605634 | 65.7715278 |
| 16:43:03 | 0:43:23 | 69.7694868 | 70.3026603 | 64.1015175 | 64.2605634 | 64.7715278 |
| 16:43:04 | 0:43:24 | 69.7694868 | 69.3026603 | 64.1015175 | 64.2605634 | 64.7715278 |
| 16:43:05 | 0:43:25 | 69.7694868 | 65.3026603 | 64.1015175 | 64.2605634 | 65.7715278 |
| 16:43:06 | 0:43:26 | 69.7694868 | 61.3026603 | 64.1015175 | 64.2605634 | 65.7715278 |
| 16:43:07 | 0:43:27 | 70.7694868 | 61.3026603 | 66.1015175 | 62.2605634 | 65.7715278 |
| 16:43:08 | 0:43:28 | 70.7694868 | 58.3026603 | 66.1015175 | 61.2605634 | 66.7715278 |
| 16:43:09 | 0:43:29 | 70.7694868 | 59.3026603 | 66.1015175 | 60.2605634 | 66.7715278 |
| 16:43:10 | 0:43:30 | 69.7694868 | 60.3026603 | 66.1015175 | 59.2605634 | 70.7715278 |

|          |         |            |            |            |            |            |
|----------|---------|------------|------------|------------|------------|------------|
| 16:43:11 | 0:43:31 | 68.7694868 | 62.3026603 | 66.1015175 | 58.2605634 | 70.7715278 |
| 16:43:12 | 0:43:32 | 68.7694868 | 65.3026603 | 66.1015175 | 58.2605634 | 70.7715278 |
| 16:43:13 | 0:43:33 | 67.7694868 | 67.3026603 | 65.1015175 | 58.2605634 | 69.7715278 |
| 16:43:14 | 0:43:34 | 67.7694868 | 68.3026603 | 66.1015175 | 58.2605634 | 68.7715278 |
| 16:43:15 | 0:43:35 | 67.7694868 | 68.3026603 | 66.1015175 | 59.2605634 | 67.7715278 |
| 16:43:16 | 0:43:36 | 66.7694868 | 68.3026603 | 66.1015175 | 60.2605634 | 67.7715278 |
| 16:43:17 | 0:43:37 | 66.7694868 | 68.3026603 | 66.1015175 | 61.2605634 | 68.7715278 |
| 16:43:18 | 0:43:38 | 66.7694868 | 66.3026603 | 66.1015175 | 63.2605634 | 70.7715278 |
| 16:43:19 | 0:43:39 | 69.7694868 | 66.3026603 | 65.1015175 | 63.2605634 | 70.7715278 |
| 16:43:20 | 0:43:40 | 69.7694868 | 65.3026603 | 65.1015175 | 64.2605634 | 71.7715278 |
| 16:43:21 | 0:43:41 | 69.7694868 | 65.3026603 | 68.1015175 | 64.2605634 | 71.7715278 |
| 16:43:22 | 0:43:42 | 69.7694868 | 65.3026603 | 70.1015175 | 64.2605634 | 70.7715278 |
| 16:43:23 | 0:43:43 | 69.7694868 | 65.3026603 | 70.1015175 | 64.2605634 | 70.7715278 |
| 16:43:24 | 0:43:44 | 70.7694868 | 65.3026603 | 70.1015175 | 64.2605634 | 70.7715278 |
| 16:43:25 | 0:43:45 | 70.7694868 | 65.3026603 | 70.1015175 | 64.2605634 | 69.7715278 |
| 16:43:26 | 0:43:46 | 70.7694868 | 65.3026603 | 67.1015175 | 64.2605634 | 71.7715278 |
| 16:43:27 | 0:43:47 | 71.7694868 | 65.3026603 | 66.1015175 | 64.2605634 | 72.7715278 |
| 16:43:28 | 0:43:48 | 71.7694868 | 65.3026603 | 66.1015175 | 68.2605634 | 73.7715278 |
| 16:43:29 | 0:43:49 | 71.7694868 | 66.3026603 | 66.1015175 | 70.2605634 | 73.7715278 |
| 16:43:30 | 0:43:50 | 71.7694868 | 66.3026603 | 66.1015175 | 70.2605634 | 73.7715278 |
| 16:43:31 | 0:43:51 | 71.7694868 | 67.3026603 | 68.1015175 | 71.2605634 | 73.7715278 |
| 16:43:32 | 0:43:52 | 71.7694868 | 74.3026603 | 68.1015175 | 71.2605634 | 73.7715278 |
| 16:43:33 | 0:43:53 | 71.7694868 | 82.3026603 | 68.1015175 | 71.2605634 | 74.7715278 |
| 16:43:34 | 0:43:54 | 71.7694868 | 84.3026603 | 68.1015175 | 71.2605634 | 74.7715278 |
| 16:43:35 | 0:43:55 | 71.7694868 | 86.3026603 | 66.1015175 | 71.2605634 | 75.7715278 |
| 16:43:36 | 0:43:56 | 71.7694868 | 87.3026603 | 66.1015175 | 71.2605634 | 77.7715278 |
| 16:43:37 | 0:43:57 | 72.7694868 | 73.7175742 | 65.1015175 | 71.2605634 | 77.7715278 |
| 16:43:38 | 0:43:58 | 72.7694868 | 88.3026603 | 65.1015175 | 71.2605634 | 77.7715278 |
| 16:43:39 | 0:43:59 | 73.7694868 | 88.3026603 | 65.1015175 | 71.2605634 | 78.7715278 |
| 16:43:40 | 0:44:00 | 73.7694868 | 88.3026603 | 66.1015175 | 70.2605634 | 79.7715278 |
| 16:43:41 | 0:44:01 | 73.7694868 | 87.3026603 | 67.1015175 | 70.2605634 | 81.7715278 |
| 16:43:42 | 0:44:02 | 74.7694868 | 79.3026603 | 67.1015175 | 70.2605634 | 81.7715278 |
| 16:43:43 | 0:44:03 | 76.7694868 | 71.3026603 | 68.1015175 | 69.2605634 | 81.7715278 |
| 16:43:44 | 0:44:04 | 76.7694868 | 66.3026603 | 68.1015175 | 68.2605634 | 79.7715278 |
| 16:43:45 | 0:44:05 | 76.7694868 | 63.3026603 | 68.1015175 | 67.2605634 | 77.7715278 |
| 16:43:46 | 0:44:06 | 76.7694868 | 63.3026603 | 67.1015175 | 67.2605634 | 77.7715278 |
| 16:43:47 | 0:44:07 | 76.7694868 | 64.3026603 | 67.1015175 | 67.2605634 | 77.7715278 |
| 16:43:48 | 0:44:08 | 76.7694868 | 68.3026603 | 67.1015175 | 67.2605634 | 75.7715278 |
| 16:43:49 | 0:44:09 | 77.7694868 | 71.3026603 | 67.1015175 | 67.2605634 | 73.7715278 |
| 16:43:50 | 0:44:10 | 78.7694868 | 74.3026603 | 68.1015175 | 67.2605634 | 71.7715278 |
| 16:43:51 | 0:44:11 | 78.7694868 | 76.3026603 | 68.1015175 | 65.2605634 | 71.7715278 |
| 16:43:52 | 0:44:12 | 79.7694868 | 77.3026603 | 67.1015175 | 64.2605634 | 71.7715278 |
| 16:43:53 | 0:44:13 | 80.7694868 | 77.3026603 | 67.1015175 | 64.2605634 | 71.7715278 |
| 16:43:54 | 0:44:14 | 80.7694868 | 70.3026603 | 67.1015175 | 63.2605634 | 71.7715278 |
| 16:43:55 | 0:44:15 | 80.7694868 | 65.3026603 | 65.1015175 | 62.2605634 | 71.7715278 |

|          |         |            |            |            |            |            |
|----------|---------|------------|------------|------------|------------|------------|
| 16:43:56 | 0:44:16 | 71.7694868 | 65.3026603 | 65.1015175 | 62.2605634 | 69.7715278 |
| 16:43:57 | 0:44:17 | 70.7694868 | 58.3026603 | 65.1015175 | 63.2605634 | 69.7715278 |
| 16:43:58 | 0:44:18 | 69.7694868 | 57.3026603 | 65.1015175 | 64.2605634 | 69.7715278 |
| 16:43:59 | 0:44:19 | 68.7694868 | 55.3026603 | 65.1015175 | 64.2605634 | 67.7715278 |
| 16:44:00 | 0:44:20 | 68.7694868 | 54.3026603 | 66.1015175 | 64.2605634 | 66.7715278 |
| 16:44:01 | 0:44:21 | 68.7694868 | 53.3026603 | 67.1015175 | 66.2605634 | 66.7715278 |
| 16:44:02 | 0:44:22 | 68.7694868 | 53.3026603 | 67.1015175 | 66.2605634 | 66.7715278 |
| 16:44:03 | 0:44:23 | 67.7694868 | 53.3026603 | 67.1015175 | 66.2605634 | 66.7715278 |
| 16:44:04 | 0:44:24 | 66.7694868 | 53.3026603 | 67.1015175 | 65.2605634 | 66.7715278 |
| 16:44:05 | 0:44:25 | 66.7694868 | 53.3026603 | 67.1015175 | 64.2605634 | 66.7715278 |
| 16:44:06 | 0:44:26 | 66.7694868 | 53.3026603 | 67.1015175 | 64.2605634 | 66.7715278 |
| 16:44:07 | 0:44:27 | 66.7694868 | 53.3026603 | 66.1015175 | 64.2605634 | 62.7715278 |
| 16:44:08 | 0:44:28 | 66.7694868 | 53.3026603 | 65.1015175 | 64.2605634 | 61.7715278 |
| 16:44:09 | 0:44:29 | 66.7694868 | 54.3026603 | 65.1015175 | 64.2605634 | 61.7715278 |
| 16:44:10 | 0:44:30 | 66.7694868 | 54.3026603 | 65.1015175 | 65.2605634 | 61.7715278 |
| 16:44:11 | 0:44:31 | 66.7694868 | 55.3026603 | 65.1015175 | 65.2605634 | 61.7715278 |
| 16:44:12 | 0:44:32 | 66.7694868 | 56.3026603 | 65.1015175 | 65.2605634 | 61.7715278 |
| 16:44:13 | 0:44:33 | 66.7694868 | 58.3026603 | 65.1015175 | 66.2605634 | 61.7715278 |
| 16:44:14 | 0:44:34 | 66.7694868 | 59.3026603 | 66.1015175 | 69.2605634 | 61.7715278 |
| 16:44:15 | 0:44:35 | 66.7694868 | 59.3026603 | 66.1015175 | 69.2605634 | 61.7715278 |
| 16:44:16 | 0:44:36 | 67.7694868 | 60.3026603 | 66.1015175 | 71.2605634 | 61.7715278 |
| 16:44:17 | 0:44:37 | 67.7694868 | 61.3026603 | 66.1015175 | 74.2605634 | 60.7715278 |
| 16:44:18 | 0:44:38 | 66.7694868 | 61.3026603 | 67.1015175 | 75.2605634 | 60.7715278 |
| 16:44:19 | 0:44:39 | 66.7694868 | 62.3026603 | 67.1015175 | 76.2605634 | 60.7715278 |
| 16:44:20 | 0:44:40 | 65.7694868 | 62.3026603 | 66.1015175 | 76.2605634 | 59.7715278 |
| 16:44:21 | 0:44:41 | 65.7694868 | 62.3026603 | 66.1015175 | 75.2605634 | 59.7715278 |
| 16:44:22 | 0:44:42 | 65.7694868 | 63.3026603 | 66.1015175 | 75.2605634 | 60.7715278 |
| 16:44:23 | 0:44:43 | 65.7694868 | 63.3026603 | 66.1015175 | 75.2605634 | 62.7715278 |
| 16:44:24 | 0:44:44 | 65.7694868 | 63.3026603 | 66.1015175 | 75.2605634 | 62.7715278 |
| 16:44:25 | 0:44:45 | 66.7694868 | 65.3026603 | 66.1015175 | 75.2605634 | 68.7715278 |
| 16:44:26 | 0:44:46 | 66.7694868 | 65.3026603 | 68.1015175 | 74.2605634 | 68.7715278 |
| 16:44:27 | 0:44:47 | 66.7694868 | 66.3026603 | 69.1015175 | 71.2605634 | 69.7715278 |
| 16:44:28 | 0:44:48 | 67.7694868 | 68.3026603 | 69.1015175 | 71.2605634 | 69.7715278 |
| 16:44:29 | 0:44:49 | 67.7694868 | 69.3026603 | 69.1015175 | 70.2605634 | 70.7715278 |
| 16:44:30 | 0:44:50 | 67.7694868 | 69.3026603 | 70.1015175 | 69.2605634 | 73.7715278 |
| 16:44:31 | 0:44:51 | 67.7694868 | 70.3026603 | 71.1015175 | 68.2605634 | 73.7715278 |
| 16:44:32 | 0:44:52 | 67.7694868 | 70.3026603 | 71.1015175 | 68.2605634 | 74.7715278 |
| 16:44:33 | 0:44:53 | 67.7694868 | 70.3026603 | 72.1015175 | 68.2605634 | 74.7715278 |
| 16:44:34 | 0:44:54 | 67.7694868 | 70.3026603 | 73.1015175 | 68.2605634 | 74.7715278 |
| 16:44:35 | 0:44:55 | 67.7694868 | 71.3026603 | 73.1015175 | 68.2605634 | 73.7715278 |
| 16:44:36 | 0:44:56 | 67.7694868 | 71.3026603 | 72.1015175 | 68.2605634 | 72.7715278 |
| 16:44:37 | 0:44:57 | 68.7694868 | 71.3026603 | 70.1015175 | 68.2605634 | 72.7715278 |
| 16:44:38 | 0:44:58 | 68.7694868 | 71.3026603 | 70.1015175 | 68.2605634 | 71.7715278 |
| 16:44:39 | 0:44:59 | 68.7694868 | 71.3026603 | 69.1015175 | 68.2605634 | 70.7715278 |
| 16:44:40 | 0:45:00 | 68.7694868 | 71.3026603 | 69.1015175 | 68.2605634 | 70.7715278 |

|          |         |            |            |            |            |            |
|----------|---------|------------|------------|------------|------------|------------|
| 16:44:41 | 0:45:01 | 68.7694868 | 71.3026603 | 69.1015175 | 69.2605634 | 70.7715278 |
| 16:44:42 | 0:45:02 | 68.7694868 | 71.3026603 | 68.1015175 | 69.2605634 | 70.7715278 |
| 16:44:43 | 0:45:03 | 68.7694868 | 71.3026603 | 66.1015175 | 69.2605634 | 69.7715278 |
| 16:44:44 | 0:45:04 | 69.7694868 | 72.3026603 | 66.1015175 | 71.2605634 | 68.7715278 |
| 16:44:45 | 0:45:05 | 68.7694868 | 72.3026603 | 65.1015175 | 72.2605634 | 68.7715278 |
| 16:44:46 | 0:45:06 | 68.7694868 | 70.3026603 | 64.1015175 | 74.2605634 | 65.7715278 |
| 16:44:47 | 0:45:07 | 68.7694868 | 68.3026603 | 64.1015175 | 75.2605634 | 67.7715278 |
| 16:44:48 | 0:45:08 | 68.7694868 | 68.3026603 | 63.1015175 | 76.2605634 | 68.7715278 |
| 16:44:49 | 0:45:09 | 68.7694868 | 67.3026603 | 63.1015175 | 76.2605634 | 69.7715278 |
| 16:44:50 | 0:45:10 | 67.7694868 | 68.3026603 | 63.1015175 | 76.2605634 | 70.7715278 |
| 16:44:51 | 0:45:11 | 67.7694868 | 68.3026603 | 63.1015175 | 76.2605634 | 70.7715278 |
| 16:44:52 | 0:45:12 | 67.7694868 | 71.3026603 | 63.1015175 | 74.2605634 | 70.7715278 |
| 16:44:53 | 0:45:13 | 69.7694868 | 71.3026603 | 64.1015175 | 72.2605634 | 71.7715278 |
| 16:44:54 | 0:45:14 | 72.7694868 | 71.3026603 | 64.1015175 | 71.2605634 | 71.7715278 |
| 16:44:55 | 0:45:15 | 77.7694868 | 73.3026603 | 65.1015175 | 70.2605634 | 72.7715278 |
| 16:44:56 | 0:45:16 | 77.7694868 | 73.3026603 | 65.1015175 | 70.2605634 | 72.7715278 |
| 16:44:57 | 0:45:17 | 78.7694868 | 72.3026603 | 64.1015175 | 70.2605634 | 72.7715278 |
| 16:44:58 | 0:45:18 | 78.7694868 | 72.3026603 | 64.1015175 | 71.2605634 | 73.7715278 |
| 16:44:59 | 0:45:19 | 78.7694868 | 73.3026603 | 65.1015175 | 71.2605634 | 73.7715278 |
| 16:45:00 | 0:45:20 | 78.7694868 | 74.3026603 | 65.1015175 | 72.2605634 | 73.7715278 |
| 16:45:01 | 0:45:21 | 79.7694868 | 74.3026603 | 65.1015175 | 72.2605634 | 74.7715278 |
| 16:45:02 | 0:45:22 | 79.7694868 | 74.3026603 | 66.1015175 | 72.2605634 | 74.7715278 |
| 16:45:03 | 0:45:23 | 80.7694868 | 74.3026603 | 66.1015175 | 72.2605634 | 74.7715278 |
| 16:45:04 | 0:45:24 | 80.7694868 | 70.3026603 | 66.1015175 | 72.2605634 | 73.7715278 |
| 16:45:05 | 0:45:25 | 80.7694868 | 68.3026603 | 66.1015175 | 72.2605634 | 73.7715278 |
| 16:45:06 | 0:45:26 | 80.7694868 | 67.3026603 | 66.1015175 | 73.2605634 | 71.7715278 |
| 16:45:07 | 0:45:27 | 80.7694868 | 66.3026603 | 67.1015175 | 73.2605634 | 71.7715278 |
| 16:45:08 | 0:45:28 | 80.7694868 | 67.3026603 | 68.1015175 | 73.2605634 | 71.7715278 |
| 16:45:09 | 0:45:29 | 80.7694868 | 68.3026603 | 68.1015175 | 73.2605634 | 71.7715278 |
| 16:45:10 | 0:45:30 | 80.7694868 | 70.3026603 | 68.1015175 | 74.2605634 | 71.7715278 |
| 16:45:11 | 0:45:31 | 83.7694868 | 72.3026603 | 67.1015175 | 74.2605634 | 70.7715278 |
| 16:45:12 | 0:45:32 | 71.9903015 | 73.3026603 | 66.1015175 | 75.2605634 | 70.7715278 |
| 16:45:13 | 0:45:33 | 71.8993924 | 73.3026603 | 68.1015175 | 75.2605634 | 69.7715278 |
| 16:45:14 | 0:45:34 | 71.9903015 | 73.3026603 | 68.1015175 | 76.2605634 | 67.7715278 |
| 16:45:15 | 0:45:35 | 71.535756  | 73.3026603 | 68.1015175 | 76.2605634 | 62.7715278 |
| 16:45:16 | 0:45:36 | 70.8993924 | 68.3026603 | 68.1015175 | 76.2605634 | 62.7715278 |
| 16:45:17 | 0:45:37 | 69.9903015 | 66.3026603 | 68.1015175 | 75.2605634 | 61.7715278 |
| 16:45:18 | 0:45:38 | 69.9903015 | 66.3026603 | 68.1015175 | 75.2605634 | 61.7715278 |
| 16:45:19 | 0:45:39 | 69.4448469 | 65.3026603 | 67.1015175 | 73.2605634 | 61.7715278 |
| 16:45:20 | 0:45:40 | 68.8084833 | 66.3026603 | 67.1015175 | 72.2605634 | 61.7715278 |
| 16:45:21 | 0:45:41 | 68.4448469 | 67.3026603 | 68.1015175 | 71.2605634 | 61.7715278 |
| 16:45:22 | 0:45:42 | 77.7694868 | 68.3026603 | 69.1015175 | 71.2605634 | 61.7715278 |
| 16:45:23 | 0:45:43 | 75.7694868 | 69.3026603 | 69.1015175 | 71.2605634 | 61.7715278 |
| 16:45:24 | 0:45:44 | 75.7694868 | 69.3026603 | 71.1015175 | 71.2605634 | 61.7715278 |
| 16:45:25 | 0:45:45 | 75.7694868 | 70.3026603 | 72.1015175 | 71.2605634 | 61.7715278 |

|          |         |            |            |            |            |            |
|----------|---------|------------|------------|------------|------------|------------|
| 16:45:26 | 0:45:46 | 75.7694868 | 70.3026603 | 74.1015175 | 71.2605634 | 63.7715278 |
| 16:45:27 | 0:45:47 | 75.7694868 | 70.3026603 | 74.1015175 | 71.2605634 | 64.7715278 |
| 16:45:28 | 0:45:48 | 76.7694868 | 70.3026603 | 77.1015175 | 72.2605634 | 65.7715278 |
| 16:45:29 | 0:45:49 | 77.7694868 | 65.3026603 | 78.1015175 | 72.2605634 | 66.7715278 |
| 16:45:30 | 0:45:50 | 77.7694868 | 62.3026603 | 78.1015175 | 72.2605634 | 66.7715278 |
| 16:45:31 | 0:45:51 | 76.7694868 | 60.3026603 | 81.1015175 | 72.2605634 | 66.7715278 |
| 16:45:32 | 0:45:52 | 76.7694868 | 59.3026603 | 80.1015175 | 71.2605634 | 67.7715278 |
| 16:45:33 | 0:45:53 | 76.7694868 | 58.3026603 | 80.1015175 | 72.2605634 | 69.7715278 |
| 16:45:34 | 0:45:54 | 76.7694868 | 58.3026603 | 79.1015175 | 74.2605634 | 69.7715278 |
| 16:45:35 | 0:45:55 | 75.7694868 | 58.3026603 | 75.1015175 | 75.2605634 | 69.7715278 |
| 16:45:36 | 0:45:56 | 75.7694868 | 62.3026603 | 75.1015175 | 73.2605634 | 69.7715278 |
| 16:45:37 | 0:45:57 | 75.7694868 | 66.3026603 | 71.1015175 | 71.2605634 | 70.7715278 |
| 16:45:38 | 0:45:58 | 74.7694868 | 66.3026603 | 70.1015175 | 71.2605634 | 70.7715278 |
| 16:45:39 | 0:45:59 | 74.7694868 | 67.3026603 | 69.1015175 | 69.2605634 | 70.7715278 |
| 16:45:40 | 0:46:00 | 74.7694868 | 68.3026603 | 69.1015175 | 69.2605634 | 70.7715278 |
| 16:45:41 | 0:46:01 | 72.7694868 | 68.3026603 | 68.1015175 | 69.2605634 | 69.7715278 |
| 16:45:42 | 0:46:02 | 71.7694868 | 67.3026603 | 68.1015175 | 70.2605634 | 69.7715278 |
| 16:45:43 | 0:46:03 | 70.7694868 | 66.3026603 | 68.1015175 | 70.2605634 | 68.7715278 |
| 16:45:44 | 0:46:04 | 69.7694868 | 64.3026603 | 69.1015175 | 70.2605634 | 69.7715278 |
| 16:45:45 | 0:46:05 | 69.7694868 | 63.3026603 | 69.1015175 | 70.2605634 | 69.7715278 |
| 16:45:46 | 0:46:06 | 68.7694868 | 63.3026603 | 67.1015175 | 71.2605634 | 69.7715278 |
| 16:45:47 | 0:46:07 | 68.7694868 | 62.3026603 | 66.1015175 | 72.2605634 | 68.7715278 |
| 16:45:48 | 0:46:08 | 68.7694868 | 62.3026603 | 66.1015175 | 73.2605634 | 67.7715278 |
| 16:45:49 | 0:46:09 | 68.7694868 | 63.3026603 | 67.1015175 | 73.2605634 | 67.7715278 |
| 16:45:50 | 0:46:10 | 69.7694868 | 64.3026603 | 68.1015175 | 70.2605634 | 67.7715278 |
| 16:45:51 | 0:46:11 | 69.7694868 | 63.3026603 | 68.1015175 | 67.2605634 | 70.7715278 |
| 16:45:52 | 0:46:12 | 69.7694868 | 62.3026603 | 73.1015175 | 66.2605634 | 70.7715278 |
| 16:45:53 | 0:46:13 | 69.7694868 | 61.3026603 | 73.1015175 | 65.2605634 | 70.7715278 |
| 16:45:54 | 0:46:14 | 69.7694868 | 62.3026603 | 73.1015175 | 65.2605634 | 70.7715278 |
| 16:45:55 | 0:46:15 | 68.7694868 | 62.3026603 | 73.1015175 | 65.2605634 | 70.7715278 |
| 16:45:56 | 0:46:16 | 68.7694868 | 62.3026603 | 66.1015175 | 65.2605634 | 69.7715278 |
| 16:45:57 | 0:46:17 | 68.7694868 | 62.3026603 | 65.1015175 | 65.2605634 | 69.7715278 |
| 16:45:58 | 0:46:18 | 68.7694868 | 61.3026603 | 65.1015175 | 65.2605634 | 69.7715278 |
| 16:45:59 | 0:46:19 | 68.7694868 | 61.3026603 | 64.1015175 | 66.2605634 | 69.7715278 |
| 16:46:00 | 0:46:20 | 68.7694868 | 61.3026603 | 65.1015175 | 67.2605634 | 68.7715278 |
| 16:46:01 | 0:46:21 | 68.7694868 | 60.3026603 | 68.1015175 | 67.2605634 | 68.7715278 |
| 16:46:02 | 0:46:22 | 68.7694868 | 61.3026603 | 71.1015175 | 68.2605634 | 66.7715278 |
| 16:46:03 | 0:46:23 | 68.7694868 | 62.3026603 | 72.1015175 | 68.2605634 | 65.7715278 |
| 16:46:04 | 0:46:24 | 68.7694868 | 63.3026603 | 71.1015175 | 69.2605634 | 65.7715278 |
| 16:46:05 | 0:46:25 | 68.7694868 | 63.3026603 | 71.1015175 | 72.2605634 | 66.7715278 |
| 16:46:06 | 0:46:26 | 68.7694868 | 64.3026603 | 71.1015175 | 73.2605634 | 69.7715278 |
| 16:46:07 | 0:46:27 | 68.7694868 | 64.3026603 | 71.1015175 | 73.2605634 | 69.7715278 |
| 16:46:08 | 0:46:28 | 68.7694868 | 64.3026603 | 72.1015175 | 73.2605634 | 70.7715278 |
| 16:46:09 | 0:46:29 | 68.7694868 | 64.3026603 | 72.1015175 | 73.2605634 | 70.7715278 |
| 16:46:10 | 0:46:30 | 69.7694868 | 65.3026603 | 72.1015175 | 73.2605634 | 70.7715278 |

|          |         |            |            |            |            |            |
|----------|---------|------------|------------|------------|------------|------------|
| 16:46:11 | 0:46:31 | 69.7694868 | 66.3026603 | 72.1015175 | 73.2605634 | 71.7715278 |
| 16:46:12 | 0:46:32 | 69.7694868 | 66.3026603 | 72.1015175 | 73.2605634 | 71.7715278 |
| 16:46:13 | 0:46:33 | 68.7694868 | 70.3026603 | 70.1015175 | 72.2605634 | 71.7715278 |
| 16:46:14 | 0:46:34 | 68.7694868 | 71.3026603 | 69.1015175 | 72.2605634 | 71.7715278 |
| 16:46:15 | 0:46:35 | 68.7694868 | 71.3026603 | 68.1015175 | 72.2605634 | 72.7715278 |
| 16:46:16 | 0:46:36 | 68.7694868 | 71.3026603 | 68.1015175 | 70.2605634 | 73.7715278 |
| 16:46:17 | 0:46:37 | 68.7694868 | 71.3026603 | 68.1015175 | 69.2605634 | 73.7715278 |
| 16:46:18 | 0:46:38 | 68.7694868 | 71.3026603 | 67.1015175 | 68.2605634 | 73.7715278 |
| 16:46:19 | 0:46:39 | 68.7694868 | 71.3026603 | 67.1015175 | 69.2605634 | 73.7715278 |
| 16:46:20 | 0:46:40 | 67.7694868 | 71.3026603 | 67.1015175 | 69.2605634 | 73.7715278 |
| 16:46:21 | 0:46:41 | 67.7694868 | 71.3026603 | 63.1015175 | 70.2605634 | 74.7715278 |
| 16:46:22 | 0:46:42 | 68.7694868 | 70.3026603 | 63.1015175 | 71.2605634 | 74.7715278 |
| 16:46:23 | 0:46:43 | 68.7694868 | 69.3026603 | 63.1015175 | 70.2605634 | 76.7715278 |
| 16:46:24 | 0:46:44 | 68.7694868 | 69.3026603 | 60.1015175 | 70.2605634 | 77.7715278 |
| 16:46:25 | 0:46:45 | 68.7694868 | 75.3026603 | 61.1015175 | 70.2605634 | 78.7715278 |
| 16:46:26 | 0:46:46 | 68.7694868 | 78.3026603 | 64.1015175 | 70.2605634 | 78.7715278 |
| 16:46:27 | 0:46:47 | 67.7694868 | 78.3026603 | 64.1015175 | 70.2605634 | 78.7715278 |
| 16:46:28 | 0:46:48 | 67.7694868 | 78.3026603 | 67.1015175 | 70.2605634 | 79.7715278 |
| 16:46:29 | 0:46:49 | 67.7694868 | 77.3026603 | 71.1015175 | 70.2605634 | 80.7715278 |
| 16:46:30 | 0:46:50 | 65.7694868 | 77.3026603 | 71.1015175 | 71.2605634 | 80.7715278 |
| 16:46:31 | 0:46:51 | 65.7694868 | 72.3026603 | 72.1015175 | 71.2605634 | 81.7715278 |
| 16:46:32 | 0:46:52 | 65.7694868 | 67.3026603 | 72.1015175 | 71.2605634 | 83.7715278 |
| 16:46:33 | 0:46:53 | 65.7694868 | 64.3026603 | 72.1015175 | 71.2605634 | 83.7715278 |
| 16:46:34 | 0:46:54 | 65.7694868 | 64.3026603 | 71.1015175 | 73.2605634 | 83.7715278 |
| 16:46:35 | 0:46:55 | 65.7694868 | 64.3026603 | 71.1015175 | 74.2605634 | 83.7715278 |
| 16:46:36 | 0:46:56 | 64.7694868 | 62.3026603 | 67.1015175 | 73.2605634 | 83.7715278 |
| 16:46:37 | 0:46:57 | 64.7694868 | 60.3026603 | 67.1015175 | 72.2605634 | 83.7715278 |
| 16:46:38 | 0:46:58 | 63.7694868 | 60.3026603 | 67.1015175 | 71.2605634 | 82.7715278 |
| 16:46:39 | 0:46:59 | 63.7694868 | 61.3026603 | 70.1015175 | 71.2605634 | 81.7715278 |
| 16:46:40 | 0:47:00 | 64.7694868 | 61.3026603 | 70.1015175 | 71.2605634 | 80.7715278 |
| 16:46:41 | 0:47:01 | 65.7694868 | 61.3026603 | 70.1015175 | 71.2605634 | 78.7715278 |
| 16:46:42 | 0:47:02 | 66.7694868 | 60.3026603 | 68.1015175 | 71.2605634 | 76.7715278 |
| 16:46:43 | 0:47:03 | 66.7694868 | 61.3026603 | 66.1015175 | 71.2605634 | 70.7715278 |
| 16:46:44 | 0:47:04 | 66.7694868 | 61.3026603 | 66.1015175 | 71.2605634 | 68.7715278 |
| 16:46:45 | 0:47:05 | 67.7694868 | 61.3026603 | 66.1015175 | 71.2605634 | 68.7715278 |
| 16:46:46 | 0:47:06 | 67.7694868 | 61.3026603 | 66.1015175 | 71.2605634 | 68.7715278 |
| 16:46:47 | 0:47:07 | 67.7694868 | 61.3026603 | 66.1015175 | 71.2605634 | 67.7715278 |
| 16:46:48 | 0:47:08 | 66.7694868 | 61.3026603 | 65.1015175 | 75.2605634 | 64.7715278 |
| 16:46:49 | 0:47:09 | 66.7694868 | 62.3026603 | 65.1015175 | 76.2605634 | 64.7715278 |
| 16:46:50 | 0:47:10 | 66.7694868 | 62.3026603 | 65.1015175 | 78.2605634 | 65.7715278 |
| 16:46:51 | 0:47:11 | 65.7694868 | 62.3026603 | 65.1015175 | 80.2605634 | 65.7715278 |
| 16:46:52 | 0:47:12 | 65.7694868 | 62.3026603 | 66.1015175 | 80.2605634 | 65.7715278 |
| 16:46:53 | 0:47:13 | 64.7694868 | 62.3026603 | 67.1015175 | 83.2605634 | 65.7715278 |
| 16:46:54 | 0:47:14 | 69.7694868 | 62.3026603 | 67.1015175 | 83.2605634 | 65.7715278 |
| 16:46:55 | 0:47:15 | 73.7694868 | 62.3026603 | 66.1015175 | 83.2605634 | 64.7715278 |



|          |         |            |            |            |            |            |
|----------|---------|------------|------------|------------|------------|------------|
| 16:46:56 | 0:47:16 | 74.7694868 | 60.3026603 | 65.1015175 | 82.2605634 | 64.7715278 |
| 16:46:57 | 0:47:17 | 74.7694868 | 58.3026603 | 65.1015175 | 82.2605634 | 64.7715278 |
| 16:46:58 | 0:47:18 | 74.7694868 | 58.3026603 | 64.1015175 | 82.2605634 | 64.7715278 |
| 16:46:59 | 0:47:19 | 75.7694868 | 64.3026603 | 64.1015175 | 80.2605634 | 65.7715278 |
| 16:47:00 | 0:47:20 | 75.7694868 | 64.3026603 | 64.1015175 | 80.2605634 | 65.7715278 |
| 16:47:01 | 0:47:21 | 75.7694868 | 71.3026603 | 64.1015175 | 79.2605634 | 65.7715278 |
| 16:47:02 | 0:47:22 | 74.7694868 | 75.3026603 | 65.1015175 | 78.2605634 | 67.7715278 |
| 16:47:03 | 0:47:23 | 74.7694868 | 75.3026603 | 65.1015175 | 80.2605634 | 68.7715278 |
| 16:47:04 | 0:47:24 | 72.7694868 | 75.3026603 | 66.1015175 | 81.2605634 | 68.7715278 |
| 16:47:05 | 0:47:25 | 70.7694868 | 77.3026603 | 69.1015175 | 82.2605634 | 68.7715278 |
| 16:47:06 | 0:47:26 | 70.7694868 | 77.3026603 | 69.1015175 | 82.2605634 | 68.7715278 |
| 16:47:07 | 0:47:27 | 70.7694868 | 77.3026603 | 69.1015175 | 82.2605634 | 68.7715278 |
| 16:47:08 | 0:47:28 | 73.7694868 | 67.3026603 | 69.1015175 | 82.2605634 | 68.7715278 |
| 16:47:09 | 0:47:29 | 73.7694868 | 65.3026603 | 68.1015175 | 82.2605634 | 68.7715278 |
| 16:47:10 | 0:47:30 | 76.7694868 | 65.3026603 | 68.1015175 | 78.2605634 | 68.7715278 |
| 16:47:11 | 0:47:31 | 76.7694868 | 65.3026603 | 68.1015175 | 75.2605634 | 68.7715278 |
| 16:47:12 | 0:47:32 | 76.7694868 | 65.3026603 | 68.1015175 | 75.2605634 | 68.7715278 |
| 16:47:13 | 0:47:33 | 76.7694868 | 65.3026603 | 69.1015175 | 75.2605634 | 68.7715278 |
| 16:47:14 | 0:47:34 | 76.7694868 | 65.3026603 | 69.1015175 | 75.2605634 | 69.7715278 |
| 16:47:15 | 0:47:35 | 76.7694868 | 65.3026603 | 69.1015175 | 76.2605634 | 68.7715278 |
| 16:47:16 | 0:47:36 | 76.7694868 | 66.3026603 | 71.1015175 | 75.2605634 | 68.7715278 |
| 16:47:17 | 0:47:37 | 76.7694868 | 67.3026603 | 74.1015175 | 73.2605634 | 69.7715278 |
| 16:47:18 | 0:47:38 | 75.7694868 | 67.3026603 | 74.1015175 | 73.2605634 | 75.7715278 |
| 16:47:19 | 0:47:39 | 75.7694868 | 72.3026603 | 74.1015175 | 74.2605634 | 75.7715278 |
| 16:47:20 | 0:47:40 | 75.7694868 | 73.3026603 | 76.1015175 | 74.2605634 | 84.7715278 |
| 16:47:21 | 0:47:41 | 75.7694868 | 77.3026603 | 76.1015175 | 74.2605634 | 85.7715278 |
| 16:47:22 | 0:47:42 | 75.7694868 | 77.3026603 | 75.1015175 | 74.2605634 | 86.7715278 |
| 16:47:23 | 0:47:43 | 75.7694868 | 77.3026603 | 75.1015175 | 74.2605634 | 86.7715278 |
| 16:47:24 | 0:47:44 | 76.7694868 | 76.3026603 | 75.1015175 | 74.2605634 | 86.7715278 |
| 16:47:25 | 0:47:45 | 76.7694868 | 76.3026603 | 75.1015175 | 74.2605634 | 72.9903015 |
| 16:47:26 | 0:47:46 | 76.7694868 | 77.3026603 | 73.1015175 | 75.2605634 | 72.8993924 |
| 16:47:27 | 0:47:47 | 78.7694868 | 77.3026603 | 72.1015175 | 76.2605634 | 73.1721197 |
| 16:47:28 | 0:47:48 | 82.7694868 | 81.3026603 | 68.1015175 | 77.2605634 | 73.8084833 |
| 16:47:29 | 0:47:49 | 83.7694868 | 83.3026603 | 67.1015175 | 77.2605634 | 74.1721197 |
| 16:47:30 | 0:47:50 | 85.7694868 | 83.3026603 | 65.1015175 | 77.2605634 | 74.2630288 |
| 16:47:31 | 0:47:51 | 86.7694868 | 83.3026603 | 65.1015175 | 80.2605634 | 74.9903015 |
| 16:47:32 | 0:47:52 | 87.7694868 | 82.3026603 | 64.1015175 | 82.2605634 | 75.1721197 |
| 16:47:33 | 0:47:53 | 88.7694868 | 82.3026603 | 63.1015175 | 84.2605634 | 75.4448469 |
| 16:47:34 | 0:47:54 | 88.7694868 | 81.3026603 | 63.1015175 | 85.2605634 | 75.6266651 |
| 16:47:35 | 0:47:55 | 88.7694868 | 81.3026603 | 63.1015175 | 85.2605634 | 75.1721197 |
| 16:47:36 | 0:47:56 | 74.8993924 | 81.3026603 | 63.1015175 | 85.2605634 | 74.8993924 |
| 16:47:37 | 0:47:57 | 74.3539378 | 81.3026603 | 63.1015175 | 81.2605634 | 74.3539378 |
| 16:47:38 | 0:47:58 | 73.8993924 | 79.3026603 | 64.1015175 | 80.2605634 | 73.8993924 |
| 16:47:39 | 0:47:59 | 73.8084833 | 79.3026603 | 64.1015175 | 78.2605634 | 73.8084833 |
| 16:47:40 | 0:48:00 | 73.8084833 | 79.3026603 | 64.1015175 | 77.2605634 | 73.8084833 |

|          |         |            |            |            |            |            |
|----------|---------|------------|------------|------------|------------|------------|
| 16:47:41 | 0:48:01 | 73.8993924 | 78.3026603 | 65.1015175 | 77.2605634 | 73.8993924 |
| 16:47:42 | 0:48:02 | 73.2630288 | 74.3026603 | 66.1015175 | 76.2605634 | 73.2630288 |
| 16:47:43 | 0:48:03 | 72.9903015 | 74.3026603 | 66.1015175 | 74.2605634 | 72.9903015 |
| 16:47:44 | 0:48:04 | 72.9903015 | 73.3026603 | 65.1015175 | 74.2605634 | 72.9903015 |
| 16:47:45 | 0:48:05 | 85.7694868 | 72.3026603 | 65.1015175 | 75.2605634 | 72.7175742 |
| 16:47:46 | 0:48:06 | 81.7694868 | 73.3026603 | 66.1015175 | 76.2605634 | 72.7175742 |
| 16:47:47 | 0:48:07 | 75.7694868 | 73.3026603 | 66.1015175 | 76.2605634 | 71.9903015 |
| 16:47:48 | 0:48:08 | 72.7694868 | 74.3026603 | 66.1015175 | 79.2605634 | 72.3539378 |
| 16:47:49 | 0:48:09 | 72.7694868 | 75.3026603 | 66.1015175 | 80.2605634 | 72.3539378 |
| 16:47:50 | 0:48:10 | 72.7694868 | 77.3026603 | 66.1015175 | 80.2605634 | 72.8084833 |
| 16:47:51 | 0:48:11 | 71.7694868 | 76.3026603 | 66.1015175 | 79.2605634 | 72.9903015 |
| 16:47:52 | 0:48:12 | 70.7694868 | 76.3026603 | 66.1015175 | 79.2605634 | 72.8993924 |
| 16:47:53 | 0:48:13 | 69.7694868 | 75.3026603 | 66.1015175 | 79.2605634 | 72.4448469 |
| 16:47:54 | 0:48:14 | 67.7694868 | 75.3026603 | 65.1015175 | 79.2605634 | 72.1721197 |
| 16:47:55 | 0:48:15 | 67.7694868 | 75.3026603 | 65.1015175 | 80.2605634 | 72.1721197 |
| 16:47:56 | 0:48:16 | 67.7694868 | 75.3026603 | 65.1015175 | 82.2605634 | 71.8084833 |
| 16:47:57 | 0:48:17 | 67.7694868 | 75.3026603 | 65.1015175 | 83.2605634 | 71.6266651 |
| 16:47:58 | 0:48:18 | 66.7694868 | 75.3026603 | 66.1015175 | 84.2605634 | 71.7175742 |
| 16:47:59 | 0:48:19 | 66.7694868 | 75.3026603 | 67.1015175 | 85.2605634 | 71.4448469 |
| 16:48:00 | 0:48:20 | 66.7694868 | 75.3026603 | 67.1015175 | 85.2605634 | 71.4448469 |
| 16:48:01 | 0:48:21 | 66.7694868 | 75.3026603 | 67.1015175 | 84.2605634 | 72.2630288 |
| 16:48:02 | 0:48:22 | 66.7694868 | 75.3026603 | 67.1015175 | 84.2605634 | 72.3539378 |
| 16:48:03 | 0:48:23 | 66.7694868 | 74.3026603 | 67.1015175 | 80.2605634 | 72.0812106 |
| 16:48:04 | 0:48:24 | 67.7694868 | 67.3026603 | 66.1015175 | 76.2605634 | 71.2630288 |
| 16:48:05 | 0:48:25 | 67.7694868 | 66.3026603 | 66.1015175 | 72.2605634 | 70.6266651 |
| 16:48:06 | 0:48:26 | 68.7694868 | 63.3026603 | 66.1015175 | 72.2605634 | 70.535756  |
| 16:48:07 | 0:48:27 | 69.7694868 | 63.3026603 | 66.1015175 | 71.2605634 | 69.9903015 |
| 16:48:08 | 0:48:28 | 69.7694868 | 63.3026603 | 67.1015175 | 70.2605634 | 68.8084833 |
| 16:48:09 | 0:48:29 | 68.7694868 | 63.3026603 | 67.1015175 | 70.2605634 | 82.7715278 |
| 16:48:10 | 0:48:30 | 68.7694868 | 63.3026603 | 67.1015175 | 70.2605634 | 80.7715278 |
| 16:48:11 | 0:48:31 | 68.7694868 | 62.3026603 | 67.1015175 | 70.2605634 | 77.7715278 |
| 16:48:12 | 0:48:32 | 68.7694868 | 62.3026603 | 67.1015175 | 70.2605634 | 77.7715278 |
| 16:48:13 | 0:48:33 | 68.7694868 | 63.3026603 | 67.1015175 | 69.2605634 | 81.7715278 |
| 16:48:14 | 0:48:34 | 68.7694868 | 63.3026603 | 67.1015175 | 61.2605634 | 82.7715278 |
| 16:48:15 | 0:48:35 | 68.7694868 | 65.3026603 | 67.1015175 | 59.2605634 | 82.7715278 |
| 16:48:16 | 0:48:36 | 69.7694868 | 66.3026603 | 67.1015175 | 58.2605634 | 82.7715278 |
| 16:48:17 | 0:48:37 | 69.7694868 | 68.3026603 | 67.1015175 | 57.2605634 | 80.7715278 |
| 16:48:18 | 0:48:38 | 69.7694868 | 68.3026603 | 67.1015175 | 57.2605634 | 78.7715278 |
| 16:48:19 | 0:48:39 | 69.7694868 | 68.3026603 | 67.1015175 | 57.2605634 | 78.7715278 |
| 16:48:20 | 0:48:40 | 68.7694868 | 68.3026603 | 67.1015175 | 58.2605634 | 80.7715278 |
| 16:48:21 | 0:48:41 | 68.7694868 | 67.3026603 | 68.1015175 | 59.2605634 | 81.7715278 |
| 16:48:22 | 0:48:42 | 68.7694868 | 68.3026603 | 68.1015175 | 60.2605634 | 81.7715278 |
| 16:48:23 | 0:48:43 | 68.7694868 | 68.3026603 | 68.1015175 | 61.2605634 | 81.7715278 |
| 16:48:24 | 0:48:44 | 68.7694868 | 68.3026603 | 70.1015175 | 61.2605634 | 82.7715278 |
| 16:48:25 | 0:48:45 | 68.7694868 | 67.3026603 | 70.1015175 | 61.2605634 | 83.7715278 |

|          |         |            |            |            |            |            |
|----------|---------|------------|------------|------------|------------|------------|
| 16:48:26 | 0:48:46 | 69.7694868 | 65.3026603 | 70.1015175 | 61.2605634 | 83.7715278 |
| 16:48:27 | 0:48:47 | 70.7694868 | 66.3026603 | 70.1015175 | 61.2605634 | 69.9903015 |
| 16:48:28 | 0:48:48 | 70.7694868 | 65.3026603 | 70.1015175 | 62.2605634 | 69.8993924 |
| 16:48:29 | 0:48:49 | 70.7694868 | 65.3026603 | 70.1015175 | 63.2605634 | 69.8993924 |
| 16:48:30 | 0:48:50 | 71.7694868 | 65.3026603 | 71.1015175 | 63.2605634 | 69.9903015 |
| 16:48:31 | 0:48:51 | 71.7694868 | 65.3026603 | 71.1015175 | 63.2605634 | 81.7715278 |
| 16:48:32 | 0:48:52 | 70.7694868 | 65.3026603 | 71.1015175 | 63.2605634 | 81.7715278 |
| 16:48:33 | 0:48:53 | 70.7694868 | 66.3026603 | 71.1015175 | 65.2605634 | 67.7715278 |
| 16:48:34 | 0:48:54 | 70.7694868 | 66.3026603 | 71.1015175 | 66.2605634 | 64.7715278 |
| 16:48:35 | 0:48:55 | 70.7694868 | 66.3026603 | 71.1015175 | 66.2605634 | 63.7715278 |
| 16:48:36 | 0:48:56 | 70.7694868 | 69.3026603 | 72.1015175 | 66.2605634 | 63.7715278 |
| 16:48:37 | 0:48:57 | 69.7694868 | 70.3026603 | 74.1015175 | 66.2605634 | 62.7715278 |
| 16:48:38 | 0:48:58 | 70.7694868 | 70.3026603 | 75.1015175 | 67.2605634 | 60.7715278 |
| 16:48:39 | 0:48:59 | 70.7694868 | 70.3026603 | 76.1015175 | 69.2605634 | 58.7715278 |
| 16:48:40 | 0:49:00 | 69.7694868 | 71.3026603 | 77.1015175 | 68.2605634 | 56.7715278 |
| 16:48:41 | 0:49:01 | 68.7694868 | 76.3026603 | 77.1015175 | 67.2605634 | 56.7715278 |
| 16:48:42 | 0:49:02 | 68.7694868 | 76.3026603 | 77.1015175 | 66.2605634 | 51.7715278 |
| 16:48:43 | 0:49:03 | 68.7694868 | 79.3026603 | 78.1015175 | 65.2605634 | 51.7715278 |
| 16:48:44 | 0:49:04 | 68.7694868 | 81.3026603 | 79.1015175 | 63.2605634 | 51.7715278 |
| 16:48:45 | 0:49:05 | 68.7694868 | 80.3026603 | 79.1015175 | 62.2605634 | 51.7715278 |
| 16:48:46 | 0:49:06 | 68.7694868 | 78.3026603 | 69.3539378 | 61.2605634 | 57.7715278 |
| 16:48:47 | 0:49:07 | 67.7694868 | 76.3026603 | 69.4448469 | 60.2605634 | 58.7715278 |
| 16:48:48 | 0:49:08 | 67.7694868 | 75.3026603 | 69.4448469 | 59.2605634 | 60.7715278 |
| 16:48:49 | 0:49:09 | 66.7694868 | 75.3026603 | 68.8084833 | 58.2605634 | 61.7715278 |
| 16:48:50 | 0:49:10 | 65.7694868 | 75.3026603 | 68.0812106 | 58.2605634 | 61.7715278 |
| 16:48:51 | 0:49:11 | 65.7694868 | 75.3026603 | 67.535756  | 57.2605634 | 61.7715278 |
| 16:48:52 | 0:49:12 | 65.7694868 | 72.3026603 | 66.8993924 | 57.2605634 | 64.7715278 |
| 16:48:53 | 0:49:13 | 65.7694868 | 72.3026603 | 66.2630288 | 57.2605634 | 64.7715278 |
| 16:48:54 | 0:49:14 | 65.7694868 | 72.3026603 | 66.2630288 | 57.2605634 | 64.7715278 |
| 16:48:55 | 0:49:15 | 64.7694868 | 70.3026603 | 66.0812106 | 58.2605634 | 64.7715278 |
| 16:48:56 | 0:49:16 | 64.7694868 | 71.3026603 | 66.0812106 | 58.2605634 | 59.7715278 |
| 16:48:57 | 0:49:17 | 65.7694868 | 72.3026603 | 66.4448469 | 58.2605634 | 58.7715278 |
| 16:48:58 | 0:49:18 | 65.7694868 | 74.3026603 | 66.3539378 | 57.2605634 | 58.7715278 |
| 16:48:59 | 0:49:19 | 65.7694868 | 76.3026603 | 66.6266651 | 57.2605634 | 60.7715278 |
| 16:49:00 | 0:49:20 | 65.7694868 | 76.3026603 | 66.7175742 | 57.2605634 | 67.7715278 |
| 16:49:01 | 0:49:21 | 65.7694868 | 76.3026603 | 66.8084833 | 57.2605634 | 68.7715278 |
| 16:49:02 | 0:49:22 | 65.7694868 | 72.3026603 | 66.1721197 | 57.2605634 | 68.7715278 |
| 16:49:03 | 0:49:23 | 65.7694868 | 67.3026603 | 79.1015175 | 59.2605634 | 69.7715278 |
| 16:49:04 | 0:49:24 | 65.7694868 | 67.3026603 | 79.1015175 | 59.2605634 | 69.7715278 |
| 16:49:05 | 0:49:25 | 65.7694868 | 62.3026603 | 78.1015175 | 61.2605634 | 69.7715278 |
| 16:49:06 | 0:49:26 | 66.7694868 | 62.3026603 | 75.1015175 | 62.2605634 | 69.7715278 |
| 16:49:07 | 0:49:27 | 66.7694868 | 63.3026603 | 75.1015175 | 63.2605634 | 69.7715278 |
| 16:49:08 | 0:49:28 | 66.7694868 | 66.3026603 | 73.1015175 | 63.2605634 | 69.7715278 |
| 16:49:09 | 0:49:29 | 66.7694868 | 67.3026603 | 72.1015175 | 64.2605634 | 69.7715278 |
| 16:49:10 | 0:49:30 | 66.7694868 | 67.3026603 | 70.1015175 | 65.2605634 | 69.7715278 |

|          |         |            |            |            |            |            |
|----------|---------|------------|------------|------------|------------|------------|
| 16:49:11 | 0:49:31 | 66.7694868 | 65.3026603 | 69.1015175 | 65.2605634 | 68.7715278 |
| 16:49:12 | 0:49:32 | 66.7694868 | 64.3026603 | 66.1015175 | 66.2605634 | 67.7715278 |
| 16:49:13 | 0:49:33 | 67.7694868 | 64.3026603 | 65.1015175 | 67.2605634 | 66.7715278 |
| 16:49:14 | 0:49:34 | 67.7694868 | 64.3026603 | 65.1015175 | 68.2605634 | 67.7715278 |
| 16:49:15 | 0:49:35 | 67.7694868 | 64.3026603 | 64.1015175 | 68.2605634 | 68.7715278 |
| 16:49:16 | 0:49:36 | 67.7694868 | 64.3026603 | 64.1015175 | 69.2605634 | 67.7715278 |
| 16:49:17 | 0:49:37 | 66.7694868 | 65.3026603 | 64.1015175 | 69.2605634 | 67.7715278 |
| 16:49:18 | 0:49:38 | 66.7694868 | 67.3026603 | 65.1015175 | 69.2605634 | 67.7715278 |
| 16:49:19 | 0:49:39 | 66.7694868 | 68.3026603 | 65.1015175 | 69.2605634 | 67.7715278 |
| 16:49:20 | 0:49:40 | 66.7694868 | 67.3026603 | 65.1015175 | 68.2605634 | 67.7715278 |
| 16:49:21 | 0:49:41 | 66.7694868 | 66.3026603 | 64.1015175 | 67.2605634 | 68.7715278 |
| 16:49:22 | 0:49:42 | 67.7694868 | 66.3026603 | 64.1015175 | 67.2605634 | 67.7715278 |
| 16:49:23 | 0:49:43 | 68.7694868 | 66.3026603 | 64.1015175 | 67.2605634 | 67.7715278 |
| 16:49:24 | 0:49:44 | 68.7694868 | 66.3026603 | 64.1015175 | 67.2605634 | 65.7715278 |
| 16:49:25 | 0:49:45 | 68.7694868 | 66.3026603 | 64.1015175 | 68.2605634 | 63.7715278 |
| 16:49:26 | 0:49:46 | 69.7694868 | 66.3026603 | 64.1015175 | 68.2605634 | 63.7715278 |
| 16:49:27 | 0:49:47 | 69.7694868 | 73.3026603 | 65.1015175 | 68.2605634 | 63.7715278 |
| 16:49:28 | 0:49:48 | 69.7694868 | 73.3026603 | 66.1015175 | 69.2605634 | 63.7715278 |
| 16:49:29 | 0:49:49 | 74.7694868 | 73.3026603 | 66.1015175 | 70.2605634 | 62.7715278 |
| 16:49:30 | 0:49:50 | 76.7694868 | 70.3026603 | 66.1015175 | 70.2605634 | 62.7715278 |
| 16:49:31 | 0:49:51 | 77.7694868 | 69.3026603 | 66.1015175 | 69.2605634 | 62.7715278 |
| 16:49:32 | 0:49:52 | 77.7694868 | 68.3026603 | 67.1015175 | 69.2605634 | 62.7715278 |
| 16:49:33 | 0:49:53 | 77.7694868 | 67.3026603 | 67.1015175 | 69.2605634 | 62.7715278 |
| 16:49:34 | 0:49:54 | 78.7694868 | 66.3026603 | 67.1015175 | 69.2605634 | 62.7715278 |
| 16:49:35 | 0:49:55 | 77.7694868 | 66.3026603 | 67.1015175 | 69.2605634 | 61.7715278 |
| 16:49:36 | 0:49:56 | 75.7694868 | 68.3026603 | 67.1015175 | 69.2605634 | 61.7715278 |
| 16:49:37 | 0:49:57 | 74.7694868 | 70.3026603 | 68.1015175 | 71.2605634 | 61.7715278 |
| 16:49:38 | 0:49:58 | 74.7694868 | 71.3026603 | 68.1015175 | 71.2605634 | 60.7715278 |
| 16:49:39 | 0:49:59 | 73.7694868 | 71.3026603 | 68.1015175 | 79.2605634 | 59.7715278 |
| 16:49:40 | 0:50:00 | 71.7694868 | 71.3026603 | 68.1015175 | 79.2605634 | 62.7715278 |
| 16:49:41 | 0:50:01 | 71.7694868 | 71.3026603 | 68.1015175 | 79.2605634 | 62.7715278 |
| 16:49:42 | 0:50:02 | 71.7694868 | 71.3026603 | 68.1015175 | 79.2605634 | 62.7715278 |
| 16:49:43 | 0:50:03 | 71.7694868 | 72.3026603 | 70.1015175 | 79.2605634 | 62.7715278 |
| 16:49:44 | 0:50:04 | 72.7694868 | 72.3026603 | 71.1015175 | 78.2605634 | 63.7715278 |
| 16:49:45 | 0:50:05 | 73.7694868 | 72.3026603 | 71.1015175 | 78.2605634 | 63.7715278 |
| 16:49:46 | 0:50:06 | 73.7694868 | 72.3026603 | 73.1015175 | 78.2605634 | 63.7715278 |
| 16:49:47 | 0:50:07 | 74.7694868 | 73.3026603 | 73.1015175 | 75.2605634 | 64.7715278 |
| 16:49:48 | 0:50:08 | 74.7694868 | 73.3026603 | 73.1015175 | 75.2605634 | 64.7715278 |
| 16:49:49 | 0:50:09 | 75.7694868 | 73.3026603 | 75.1015175 | 72.2605634 | 64.7715278 |
| 16:49:50 | 0:50:10 | 75.7694868 | 74.3026603 | 75.1015175 | 72.2605634 | 65.7715278 |
| 16:49:51 | 0:50:11 | 74.7694868 | 74.3026603 | 73.1015175 | 60.2605634 | 65.7715278 |
| 16:49:52 | 0:50:12 | 74.7694868 | 73.3026603 | 72.1015175 | 59.2605634 | 63.7715278 |
| 16:49:53 | 0:50:13 | 75.7694868 | 68.3026603 | 73.1015175 | 59.2605634 | 63.7715278 |
| 16:49:54 | 0:50:14 | 73.7694868 | 67.3026603 | 73.1015175 | 59.2605634 | 63.7715278 |
| 16:49:55 | 0:50:15 | 72.7694868 | 66.3026603 | 74.1015175 | 60.2605634 | 63.7715278 |

|          |         |            |            |            |            |            |
|----------|---------|------------|------------|------------|------------|------------|
| 16:49:56 | 0:50:16 | 72.7694868 | 66.3026603 | 74.1015175 | 60.2605634 | 62.7715278 |
| 16:49:57 | 0:50:17 | 72.7694868 | 66.3026603 | 74.1015175 | 61.2605634 | 61.7715278 |
| 16:49:58 | 0:50:18 | 72.7694868 | 66.3026603 | 73.1015175 | 61.2605634 | 62.7715278 |
| 16:49:59 | 0:50:19 | 72.7694868 | 66.3026603 | 70.1015175 | 61.2605634 | 63.7715278 |
| 16:50:00 | 0:50:20 | 70.7694868 | 72.3026603 | 68.1015175 | 60.2605634 | 63.7715278 |
| 16:50:01 | 0:50:21 | 69.7694868 | 73.3026603 | 67.1015175 | 59.2605634 | 63.7715278 |
| 16:50:02 | 0:50:22 | 69.7694868 | 72.3026603 | 67.1015175 | 59.2605634 | 65.7715278 |
| 16:50:03 | 0:50:23 | 68.7694868 | 72.3026603 | 65.1015175 | 59.2605634 | 67.7715278 |
| 16:50:04 | 0:50:24 | 68.7694868 | 71.3026603 | 65.1015175 | 59.2605634 | 67.7715278 |
| 16:50:05 | 0:50:25 | 68.7694868 | 71.3026603 | 64.1015175 | 59.2605634 | 68.7715278 |
| 16:50:06 | 0:50:26 | 68.7694868 | 71.3026603 | 64.1015175 | 59.2605634 | 68.7715278 |
| 16:50:07 | 0:50:27 | 68.7694868 | 71.3026603 | 64.1015175 | 62.2605634 | 68.7715278 |
| 16:50:08 | 0:50:28 | 67.7694868 | 70.3026603 | 63.1015175 | 63.2605634 | 68.7715278 |
| 16:50:09 | 0:50:29 | 67.7694868 | 70.3026603 | 62.1015175 | 63.2605634 | 68.7715278 |
| 16:50:10 | 0:50:30 | 68.7694868 | 70.3026603 | 62.1015175 | 63.2605634 | 71.7715278 |
| 16:50:11 | 0:50:31 | 68.7694868 | 70.3026603 | 63.1015175 | 64.2605634 | 71.7715278 |
| 16:50:12 | 0:50:32 | 68.7694868 | 72.3026603 | 63.1015175 | 64.2605634 | 72.7715278 |
| 16:50:13 | 0:50:33 | 68.7694868 | 80.3026603 | 63.1015175 | 64.2605634 | 76.7715278 |
| 16:50:14 | 0:50:34 | 68.7694868 | 82.3026603 | 64.1015175 | 65.2605634 | 76.7715278 |
| 16:50:15 | 0:50:35 | 68.7694868 | 81.3026603 | 64.1015175 | 64.2605634 | 75.7715278 |
| 16:50:16 | 0:50:36 | 68.7694868 | 81.3026603 | 64.1015175 | 64.2605634 | 75.7715278 |
| 16:50:17 | 0:50:37 | 63.7694868 | 79.3026603 | 64.1015175 | 64.2605634 | 74.7715278 |
| 16:50:18 | 0:50:38 | 63.7694868 | 76.3026603 | 64.1015175 | 65.2605634 | 73.7715278 |
| 16:50:19 | 0:50:39 | 63.7694868 | 75.3026603 | 65.1015175 | 65.2605634 | 72.7715278 |
| 16:50:20 | 0:50:40 | 63.7694868 | 74.3026603 | 65.1015175 | 65.2605634 | 71.7715278 |
| 16:50:21 | 0:50:41 | 63.7694868 | 74.3026603 | 64.1015175 | 65.2605634 | 71.7715278 |
| 16:50:22 | 0:50:42 | 64.7694868 | 75.3026603 | 64.1015175 | 64.2605634 | 70.7715278 |
| 16:50:23 | 0:50:43 | 64.7694868 | 75.3026603 | 64.1015175 | 65.2605634 | 69.7715278 |
| 16:50:24 | 0:50:44 | 65.7694868 | 76.3026603 | 65.1015175 | 66.2605634 | 68.7715278 |
| 16:50:25 | 0:50:45 | 66.7694868 | 76.3026603 | 65.1015175 | 66.2605634 | 66.7715278 |
| 16:50:26 | 0:50:46 | 66.7694868 | 77.3026603 | 65.1015175 | 65.2605634 | 66.7715278 |
| 16:50:27 | 0:50:47 | 67.7694868 | 77.3026603 | 66.1015175 | 64.2605634 | 66.7715278 |
| 16:50:28 | 0:50:48 | 67.7694868 | 77.3026603 | 66.1015175 | 63.2605634 | 65.7715278 |
| 16:50:29 | 0:50:49 | 67.7694868 | 76.3026603 | 67.1015175 | 63.2605634 | 65.7715278 |
| 16:50:30 | 0:50:50 | 68.7694868 | 75.3026603 | 66.1015175 | 63.2605634 | 64.7715278 |
| 16:50:31 | 0:50:51 | 68.7694868 | 74.3026603 | 66.1015175 | 62.2605634 | 64.7715278 |
| 16:50:32 | 0:50:52 | 68.7694868 | 74.3026603 | 67.1015175 | 62.2605634 | 60.7715278 |
| 16:50:33 | 0:50:53 | 68.7694868 | 74.3026603 | 67.1015175 | 62.2605634 | 59.7715278 |
| 16:50:34 | 0:50:54 | 68.7694868 | 75.3026603 | 68.1015175 | 62.2605634 | 57.7715278 |
| 16:50:35 | 0:50:55 | 68.7694868 | 75.3026603 | 68.1015175 | 62.2605634 | 56.7715278 |
| 16:50:36 | 0:50:56 | 68.7694868 | 76.3026603 | 67.1015175 | 62.2605634 | 55.7715278 |
| 16:50:37 | 0:50:57 | 68.7694868 | 76.3026603 | 66.1015175 | 62.2605634 | 55.7715278 |
| 16:50:38 | 0:50:58 | 68.7694868 | 76.3026603 | 66.1015175 | 73.2605634 | 55.7715278 |
| 16:50:39 | 0:50:59 | 67.7694868 | 77.3026603 | 66.1015175 | 76.2605634 | 56.7715278 |
| 16:50:40 | 0:51:00 | 66.7694868 | 77.3026603 | 67.1015175 | 76.2605634 | 57.7715278 |

|          |         |            |            |            |            |            |
|----------|---------|------------|------------|------------|------------|------------|
| 16:50:41 | 0:51:01 | 65.7694868 | 77.3026603 | 68.1015175 | 76.2605634 | 57.7715278 |
| 16:50:42 | 0:51:02 | 65.7694868 | 77.3026603 | 68.1015175 | 76.2605634 | 57.7715278 |
| 16:50:43 | 0:51:03 | 65.7694868 | 77.3026603 | 68.1015175 | 77.2605634 | 58.7715278 |
| 16:50:44 | 0:51:04 | 64.7694868 | 73.3026603 | 69.1015175 | 78.2605634 | 58.7715278 |
| 16:50:45 | 0:51:05 | 63.7694868 | 70.3026603 | 69.1015175 | 80.2605634 | 58.7715278 |
| 16:50:46 | 0:51:06 | 63.7694868 | 69.3026603 | 71.1015175 | 80.2605634 | 57.7715278 |
| 16:50:47 | 0:51:07 | 62.7694868 | 70.3026603 | 71.1015175 | 79.2605634 | 57.7715278 |
| 16:50:48 | 0:51:08 | 62.7694868 | 71.3026603 | 71.1015175 | 75.2605634 | 55.7715278 |
| 16:50:49 | 0:51:09 | 62.7694868 | 71.3026603 | 72.1015175 | 71.2605634 | 55.7715278 |
| 16:50:50 | 0:51:10 | 62.7694868 | 72.3026603 | 72.1015175 | 68.2605634 | 55.7715278 |
| 16:50:51 | 0:51:11 | 63.7694868 | 73.3026603 | 72.1015175 | 66.2605634 | 56.7715278 |
| 16:50:52 | 0:51:12 | 64.7694868 | 74.3026603 | 72.1015175 | 64.2605634 | 56.7715278 |
| 16:50:53 | 0:51:13 | 64.7694868 | 75.3026603 | 71.1015175 | 64.2605634 | 58.7715278 |
| 16:50:54 | 0:51:14 | 64.7694868 | 75.3026603 | 72.1015175 | 64.2605634 | 60.7715278 |
| 16:50:55 | 0:51:15 | 64.7694868 | 75.3026603 | 72.1015175 | 65.2605634 | 62.7715278 |
| 16:50:56 | 0:51:16 | 65.7694868 | 75.3026603 | 72.1015175 | 66.2605634 | 62.7715278 |
| 16:50:57 | 0:51:17 | 68.7694868 | 74.3026603 | 72.1015175 | 66.2605634 | 63.7715278 |
| 16:50:58 | 0:51:18 | 68.7694868 | 73.3026603 | 72.1015175 | 68.2605634 | 61.7715278 |
| 16:50:59 | 0:51:19 | 67.7694868 | 73.3026603 | 74.1015175 | 68.2605634 | 60.7715278 |
| 16:51:00 | 0:51:20 | 67.7694868 | 72.3026603 | 75.1015175 | 71.2605634 | 61.7715278 |
| 16:51:01 | 0:51:21 | 66.7694868 | 71.3026603 | 76.1015175 | 73.2605634 | 61.7715278 |
| 16:51:02 | 0:51:22 | 66.7694868 | 69.3026603 | 75.1015175 | 74.2605634 | 61.7715278 |
| 16:51:03 | 0:51:23 | 66.7694868 | 67.3026603 | 74.1015175 | 72.2605634 | 58.7715278 |
| 16:51:04 | 0:51:24 | 66.7694868 | 65.3026603 | 74.1015175 | 71.2605634 | 58.7715278 |
| 16:51:05 | 0:51:25 | 66.7694868 | 65.3026603 | 73.1015175 | 70.2605634 | 58.7715278 |
| 16:51:06 | 0:51:26 | 65.7694868 | 66.3026603 | 73.1015175 | 70.2605634 | 57.7715278 |
| 16:51:07 | 0:51:27 | 65.7694868 | 67.3026603 | 73.1015175 | 70.2605634 | 56.7715278 |
| 16:51:08 | 0:51:28 | 64.7694868 | 67.3026603 | 73.1015175 | 70.2605634 | 56.7715278 |
| 16:51:09 | 0:51:29 | 65.7694868 | 68.3026603 | 73.1015175 | 71.2605634 | 56.7715278 |
| 16:51:10 | 0:51:30 | 65.7694868 | 68.3026603 | 72.1015175 | 71.2605634 | 57.7715278 |
| 16:51:11 | 0:51:31 | 64.7694868 | 68.3026603 | 72.1015175 | 71.2605634 | 57.7715278 |
| 16:51:12 | 0:51:32 | 64.7694868 | 68.3026603 | 72.1015175 | 72.2605634 | 57.7715278 |
| 16:51:13 | 0:51:33 | 64.7694868 | 68.3026603 | 71.1015175 | 73.2605634 | 56.7715278 |
| 16:51:14 | 0:51:34 | 65.7694868 | 67.3026603 | 70.1015175 | 73.2605634 | 54.7715278 |
| 16:51:15 | 0:51:35 | 66.7694868 | 67.3026603 | 69.1015175 | 73.2605634 | 54.7715278 |
| 16:51:16 | 0:51:36 | 67.7694868 | 67.3026603 | 69.1015175 | 72.2605634 | 56.7715278 |
| 16:51:17 | 0:51:37 | 66.7694868 | 66.3026603 | 66.1015175 | 71.2605634 | 56.7715278 |
| 16:51:18 | 0:51:38 | 66.7694868 | 66.3026603 | 66.1015175 | 71.2605634 | 56.7715278 |
| 16:51:19 | 0:51:39 | 66.7694868 | 66.3026603 | 67.1015175 | 70.2605634 | 59.7715278 |
| 16:51:20 | 0:51:40 | 66.7694868 | 66.3026603 | 67.1015175 | 69.2605634 | 59.7715278 |
| 16:51:21 | 0:51:41 | 66.7694868 | 65.3026603 | 67.1015175 | 69.2605634 | 61.7715278 |
| 16:51:22 | 0:51:42 | 66.7694868 | 65.3026603 | 67.1015175 | 68.2605634 | 62.7715278 |
| 16:51:23 | 0:51:43 | 66.7694868 | 65.3026603 | 68.1015175 | 68.2605634 | 62.7715278 |
| 16:51:24 | 0:51:44 | 67.7694868 | 66.3026603 | 68.1015175 | 69.2605634 | 63.7715278 |
| 16:51:25 | 0:51:45 | 67.7694868 | 67.3026603 | 68.1015175 | 69.2605634 | 63.7715278 |

|          |         |            |            |            |            |            |
|----------|---------|------------|------------|------------|------------|------------|
| 16:51:26 | 0:51:46 | 67.7694868 | 72.3026603 | 71.1015175 | 67.2605634 | 63.7715278 |
| 16:51:27 | 0:51:47 | 67.7694868 | 72.3026603 | 71.1015175 | 62.2605634 | 62.7715278 |
| 16:51:28 | 0:51:48 | 66.7694868 | 80.3026603 | 72.1015175 | 60.2605634 | 61.7715278 |
| 16:51:29 | 0:51:49 | 66.7694868 | 80.3026603 | 72.1015175 | 58.2605634 | 61.7715278 |
| 16:51:30 | 0:51:50 | 66.7694868 | 76.3026603 | 72.1015175 | 57.2605634 | 60.7715278 |
| 16:51:31 | 0:51:51 | 66.7694868 | 72.3026603 | 73.1015175 | 57.2605634 | 61.7715278 |
| 16:51:32 | 0:51:52 | 67.7694868 | 71.3026603 | 73.1015175 | 57.2605634 | 61.7715278 |
| 16:51:33 | 0:51:53 | 67.7694868 | 71.3026603 | 74.1015175 | 59.2605634 | 61.7715278 |
| 16:51:34 | 0:51:54 | 67.7694868 | 71.3026603 | 74.1015175 | 61.2605634 | 61.7715278 |
| 16:51:35 | 0:51:55 | 68.7694868 | 71.3026603 | 74.1015175 | 65.2605634 | 62.7715278 |
| 16:51:36 | 0:51:56 | 68.7694868 | 71.3026603 | 74.1015175 | 65.2605634 | 62.7715278 |
| 16:51:37 | 0:51:57 | 68.7694868 | 73.3026603 | 73.1015175 | 66.2605634 | 62.7715278 |
| 16:51:38 | 0:51:58 | 68.7694868 | 73.3026603 | 73.1015175 | 65.2605634 | 61.7715278 |
| 16:51:39 | 0:51:59 | 68.7694868 | 74.3026603 | 71.1015175 | 64.2605634 | 61.7715278 |
| 16:51:40 | 0:52:00 | 68.7694868 | 78.3026603 | 71.1015175 | 64.2605634 | 61.7715278 |
| 16:51:41 | 0:52:01 | 68.7694868 | 79.3026603 | 71.1015175 | 63.2605634 | 61.7715278 |
| 16:51:42 | 0:52:02 | 68.7694868 | 79.3026603 | 72.1015175 | 63.2605634 | 61.7715278 |
| 16:51:43 | 0:52:03 | 68.7694868 | 80.3026603 | 72.1015175 | 64.2605634 | 61.7715278 |
| 16:51:44 | 0:52:04 | 67.7694868 | 80.3026603 | 72.1015175 | 65.2605634 | 61.7715278 |
| 16:51:45 | 0:52:05 | 69.7694868 | 80.3026603 | 71.1015175 | 64.2605634 | 62.7715278 |
| 16:51:46 | 0:52:06 | 70.7694868 | 79.3026603 | 70.1015175 | 63.2605634 | 65.7715278 |
| 16:51:47 | 0:52:07 | 71.7694868 | 79.3026603 | 68.1015175 | 62.2605634 | 65.7715278 |
| 16:51:48 | 0:52:08 | 71.7694868 | 79.3026603 | 68.1015175 | 62.2605634 | 65.7715278 |
| 16:51:49 | 0:52:09 | 71.7694868 | 79.3026603 | 66.1015175 | 62.2605634 | 65.7715278 |
| 16:51:50 | 0:52:10 | 71.7694868 | 78.3026603 | 66.1015175 | 62.2605634 | 64.7715278 |
| 16:51:51 | 0:52:11 | 72.7694868 | 78.3026603 | 66.1015175 | 62.2605634 | 62.7715278 |
| 16:51:52 | 0:52:12 | 73.7694868 | 78.3026603 |            | 64.2605634 | 63.7715278 |
| 16:51:53 | 0:52:13 | 73.7694868 | 78.3026603 |            | 64.2605634 | 65.7715278 |
| 16:51:54 | 0:52:14 | 74.7694868 | 78.3026603 |            | 64.2605634 | 67.7715278 |
| 16:51:55 | 0:52:15 | 74.7694868 | 78.3026603 |            | 67.2605634 | 68.7715278 |
| 16:51:56 | 0:52:16 | 73.7694868 | 77.3026603 |            | 67.2605634 | 68.7715278 |
| 16:51:57 | 0:52:17 | 73.7694868 | 77.3026603 |            | 67.2605634 | 66.7715278 |
| 16:51:58 | 0:52:18 | 73.7694868 | 77.3026603 |            | 68.2605634 | 65.7715278 |
| 16:51:59 | 0:52:19 | 73.7694868 | 76.3026603 |            | 68.2605634 | 65.7715278 |
| 16:52:00 | 0:52:20 | 73.7694868 | 76.3026603 |            | 69.2605634 | 65.7715278 |
| 16:52:01 | 0:52:21 | 74.7694868 | 76.3026603 |            | 70.2605634 | 65.7715278 |
| 16:52:02 | 0:52:22 | 74.7694868 | 76.3026603 |            | 70.2605634 | 64.7715278 |
| 16:52:03 | 0:52:23 | 75.7694868 | 77.3026603 |            | 69.2605634 | 63.7715278 |
| 16:52:04 | 0:52:24 | 76.7694868 | 76.3026603 |            | 69.2605634 | 62.7715278 |
| 16:52:05 | 0:52:25 | 76.7694868 | 77.3026603 |            | 69.2605634 | 62.7715278 |
| 16:52:06 | 0:52:26 | 76.7694868 | 77.3026603 |            | 68.2605634 | 61.7715278 |
| 16:52:07 | 0:52:27 | 76.7694868 | 75.3026603 |            | 67.2605634 | 61.7715278 |
| 16:52:08 | 0:52:28 | 76.7694868 | 74.3026603 |            | 67.2605634 | 63.7715278 |
| 16:52:09 | 0:52:29 | 76.7694868 | 74.3026603 |            | 70.2605634 | 63.7715278 |
| 16:52:10 | 0:52:30 | 76.7694868 | 73.3026603 |            | 72.2605634 | 63.7715278 |

|          |         |            |            |            |            |
|----------|---------|------------|------------|------------|------------|
| 16:52:11 | 0:52:31 | 76.7694868 | 72.3026603 | 72.2605634 | 62.7715278 |
| 16:52:12 | 0:52:32 | 76.7694868 | 72.3026603 | 74.2605634 | 62.7715278 |
| 16:52:13 | 0:52:33 | 76.7694868 | 75.3026603 | 75.2605634 | 62.7715278 |
| 16:52:14 | 0:52:34 | 76.7694868 | 76.3026603 | 75.2605634 | 63.7715278 |
| 16:52:15 | 0:52:35 | 76.7694868 | 77.3026603 | 75.2605634 | 63.7715278 |
| 16:52:16 | 0:52:36 | 76.7694868 | 78.3026603 | 75.2605634 | 64.7715278 |
| 16:52:17 | 0:52:37 | 76.7694868 | 78.3026603 | 76.2605634 | 64.7715278 |
| 16:52:18 | 0:52:38 | 77.7694868 |            | 76.2605634 | 65.7715278 |
| 16:52:19 | 0:52:39 | 78.7694868 |            | 76.2605634 | 66.7715278 |
| 16:52:20 | 0:52:40 | 78.7694868 |            | 79.2605634 | 66.7715278 |
| 16:52:21 | 0:52:41 | 78.7694868 |            | 79.2605634 | 68.7715278 |
| 16:52:22 | 0:52:42 | 78.7694868 |            | 79.2605634 | 68.7715278 |
| 16:52:23 | 0:52:43 | 78.7694868 |            | 81.2605634 | 69.7715278 |
| 16:52:24 | 0:52:44 | 78.7694868 |            | 81.2605634 | 71.7715278 |
| 16:52:25 | 0:52:45 | 78.7694868 |            | 82.2605634 | 71.7715278 |
| 16:52:26 | 0:52:46 | 78.7694868 |            | 82.2605634 | 66.7715278 |
| 16:52:27 | 0:52:47 | 78.7694868 |            | 82.2605634 | 66.7715278 |
| 16:52:28 | 0:52:48 | 78.7694868 |            | 82.2605634 | 65.7715278 |
| 16:52:29 | 0:52:49 | 78.7694868 |            | 81.2605634 | 65.7715278 |
| 16:52:30 | 0:52:50 | 78.7694868 |            | 81.2605634 | 65.7715278 |
| 16:52:31 | 0:52:51 | 78.7694868 |            | 81.2605634 | 62.7715278 |
| 16:52:32 | 0:52:52 | 78.7694868 |            | 82.2605634 | 61.7715278 |



Person 13    Person 2    Person 6    Person 11    Person 1    Person 7

71.6061284 70.9682631  
70.6061284 71.9682631  
70.6061284 71.9682631  
69.6061284 71.9682631  
71.6061284 72.9682631  
72.6061284 73.9682631  
72.6061284 73.9682631  
72.6061284 72.9682631  
72.6061284 73.9682631  
75.6061284 74.9682631  
76.6061284 74.9682631  
76.6061284 74.9682631  
76.6061284 73.9682631  
77.6061284 73.9682631  
77.6061284 72.9682631  
77.6061284 72.9682631  
77.6061284 73.9682631  
77.6061284 73.9682631  
77.6061284 75.9682631  
79.6061284 77.9682631  
80.6061284 75.9682631  
81.6061284 75.9682631  
82.6061284 74.9682631  
82.6061284 73.9682631  
82.6061284 73.9682631  
81.6061284 73.9682631  
77.6061284 74.9682631  
77.6061284 75.9682631  
77.6061284 75.9682631  
80.6061284 76.9682631  
81.6061284 76.9682631  
80.6061284 74.9682631  
80.6061284 74.9682631  
80.6061284 71.9682631  
80.6061284 71.9682631  
80.6061284 71.9682631  
80.6061284 73.9682631  
77.6061284 73.9682631  
77.6061284 74.9682631  
77.6061284 74.9682631  
76.6061284 75.9682631  
76.6061284 75.9682631

76.6061284 75.9682631  
76.6061284 75.9682631 79.8079507  
74.6061284 75.9682631 78.8079507  
73.6061284 77.9682631 78.8079507  
73.6061284 77.9682631 78.8079507  
72.6061284 77.9682631 78.8079507  
73.6061284 77.9682631 78.8079507  
73.6061284 77.9682631 78.8079507  
73.6061284 77.9682631 78.8079507  
73.6061284 78.9682631 78.8079507  
73.6061284 78.9682631 77.8079507  
77.6061284 78.9682631 77.8079507  
75.6061284 78.9682631 77.8079507  
75.6061284 79.9682631 77.8079507  
73.6061284 80.9682631 76.8079507  
74.6061284 80.9682631 75.8079507  
74.6061284 80.9682631 75.8079507  
74.6061284 80.9682631 76.8079507  
74.6061284 80.9682631 76.8079507  
74.6061284 80.9682631 76.8079507  
74.6061284 81.9682631 77.8079507  
74.6061284 81.9682631 77.8079507  
74.6061284 80.9682631 76.8079507  
69.6061284 80.9682631 76.8079507  
66.6061284 78.9682631 75.8079507  
65.6061284 77.9682631 75.8079507  
65.6061284 77.9682631 75.8079507  
66.6061284 77.9682631 75.8079507  
66.6061284 77.9682631 78.8079507  
68.6061284 77.9682631 79.8079507  
68.6061284 80.9682631 79.8079507  
68.6061284 81.9682631 79.8079507 77.1859046  
68.6061284 83.9682631 80.8079507 77.1859046  
70.6061284 83.9682631 79.8079507 73.1859046  
72.6061284 83.9682631 79.8079507 73.1859046  
73.6061284 83.9682631 79.8079507 73.1859046  
73.6061284 83.9682631 79.8079507 73.1859046  
74.6061284 83.9682631 79.8079507 73.1859046  
76.6061284 83.9682631 80.8079507 73.1859046  
76.6061284 83.9682631 80.8079507 73.1859046  
76.6061284 83.9682631 80.8079507 73.1859046  
78.6061284 83.9682631 80.8079507 73.1859046  
78.6061284 84.9682631 80.8079507 73.1859046  
78.6061284 83.9682631 80.8079507 73.1859046  
78.6061284 78.9682631 80.8079507 76.1859046

|            |            |            |            |            |
|------------|------------|------------|------------|------------|
| 78.6061284 | 78.9682631 | 81.8079507 | 80.1859046 |            |
| 78.6061284 | 78.9682631 | 81.8079507 | 80.1859046 |            |
| 76.6061284 | 74.9682631 | 81.8079507 | 80.1859046 |            |
| 74.6061284 | 76.9682631 | 81.8079507 | 86.1859046 |            |
| 71.6061284 | 76.9682631 | 81.8079507 | 86.1859046 |            |
| 70.6061284 | 76.9682631 | 80.8079507 | 82.1859046 |            |
| 70.6061284 | 75.9682631 | 80.8079507 | 82.1859046 |            |
| 68.6061284 | 72.9682631 | 80.8079507 | 80.1859046 |            |
| 68.6061284 | 72.9682631 | 84.8079507 | 79.1859046 |            |
| 69.6061284 | 71.9682631 | 84.8079507 | 78.1859046 |            |
| 68.6061284 | 69.9682631 | 84.8079507 | 78.1859046 |            |
| 68.6061284 | 68.9682631 | 84.8079507 | 79.1859046 |            |
| 67.6061284 | 68.9682631 | 84.8079507 | 79.1859046 |            |
| 66.6061284 | 66.9682631 | 84.8079507 | 80.1859046 |            |
| 66.6061284 | 66.9682631 | 84.8079507 | 80.1859046 | 74.0479295 |
| 66.6061284 | 66.9682631 | 84.8079507 | 80.1859046 | 73.0479295 |
| 66.6061284 | 67.9682631 | 84.8079507 | 81.1859046 | 73.0479295 |
| 69.6061284 | 67.9682631 | 83.8079507 | 81.1859046 | 73.0479295 |
| 69.6061284 | 68.9682631 | 83.8079507 | 81.1859046 | 73.0479295 |
| 69.6061284 | 68.9682631 | 83.8079507 | 81.1859046 | 73.0479295 |
| 69.6061284 | 68.9682631 | 83.8079507 | 81.1859046 | 73.0479295 |
| 69.6061284 | 68.9682631 | 84.8079507 | 81.1859046 | 73.0479295 |
| 69.6061284 | 69.9682631 | 84.8079507 | 84.1859046 | 73.0479295 |
| 69.6061284 | 69.9682631 | 84.8079507 | 87.1859046 | 73.0479295 |
| 69.6061284 | 69.9682631 | 87.8079507 | 87.1859046 | 76.0479295 |
| 69.6061284 | 69.9682631 | 88.8079507 | 87.1859046 | 77.0479295 |
| 69.6061284 | 69.9682631 | 88.8079507 | 92.1859046 | 77.0479295 |
| 69.6061284 | 69.9682631 | 89.8079507 | 92.1859046 | 78.0479295 |
| 68.6061284 | 74.9682631 | 89.8079507 | 93.1859046 | 79.0479295 |
| 68.6061284 | 74.9682631 | 90.8079507 | 93.1859046 | 79.0479295 |
| 68.6061284 | 74.9682631 | 90.8079507 | 93.1859046 | 81.0479295 |
| 68.6061284 | 74.9682631 | 90.8079507 | 93.1859046 | 81.0479295 |
| 68.6061284 | 74.9682631 | 90.8079507 | 93.1859046 | 80.0479295 |
| 68.6061284 | 74.9682631 | 89.8079507 | 92.1859046 | 77.0479295 |
| 68.6061284 | 70.9682631 | 87.8079507 | 87.1859046 | 77.0479295 |
| 70.6061284 | 70.9682631 | 87.8079507 | 87.1859046 | 77.0479295 |
| 70.6061284 | 68.9682631 | 87.8079507 | 87.1859046 | 77.0479295 |
| 71.6061284 | 67.9682631 | 86.8079507 | 88.1859046 | 76.0479295 |
| 71.6061284 | 67.9682631 | 82.8079507 | 88.1859046 | 72.0479295 |
| 71.6061284 | 70.9682631 | 82.8079507 | 87.1859046 | 72.0479295 |
| 73.6061284 | 70.9682631 | 81.8079507 | 87.1859046 | 72.0479295 |
| 74.6061284 | 72.9682631 | 81.8079507 | 77.1859046 | 72.0479295 |
| 75.6061284 | 75.9682631 | 82.8079507 | 71.1859046 | 72.0479295 |
| 76.6061284 | 78.9682631 | 82.8079507 | 71.1859046 | 72.0479295 |
| 76.6061284 | 77.9682631 | 83.8079507 | 71.1859046 | 72.0479295 |

|            |            |            |            |            |
|------------|------------|------------|------------|------------|
| 79.6061284 | 77.9682631 | 83.8079507 | 71.1859046 | 72.0479295 |
| 80.6061284 | 75.9682631 | 83.8079507 | 71.1859046 | 72.0479295 |
| 80.6061284 | 74.9682631 | 83.8079507 | 71.1859046 | 72.0479295 |
| 80.6061284 | 74.9682631 | 83.8079507 | 68.1859046 | 72.0479295 |
| 80.6061284 | 74.9682631 | 82.8079507 | 67.1859046 | 72.0479295 |
| 80.6061284 | 74.9682631 | 82.8079507 | 67.1859046 | 72.0479295 |
| 79.6061284 | 75.9682631 | 82.8079507 | 67.1859046 | 72.0479295 |
| 79.6061284 | 75.9682631 | 82.8079507 | 65.1859046 | 72.0479295 |
| 79.6061284 | 75.9682631 | 82.8079507 | 65.1859046 | 72.0479295 |
| 81.6061284 | 74.9682631 | 82.8079507 | 66.1859046 | 73.0479295 |
| 81.6061284 | 74.9682631 | 82.8079507 | 66.1859046 | 73.0479295 |
| 82.6061284 | 69.9682631 | 82.8079507 | 67.1859046 | 73.0479295 |
| 82.6061284 | 67.9682631 | 82.8079507 | 67.1859046 | 74.0479295 |
| 82.6061284 | 67.9682631 | 82.8079507 | 67.1859046 | 75.0479295 |
| 80.6061284 | 68.9682631 | 82.8079507 | 68.1859046 | 75.0479295 |
| 78.6061284 | 69.9682631 | 82.8079507 | 68.1859046 | 77.0479295 |
| 77.6061284 | 71.9682631 | 82.8079507 | 68.1859046 | 77.0479295 |
| 77.6061284 | 72.9682631 | 81.8079507 | 69.1859046 | 77.0479295 |
| 77.6061284 | 72.9682631 | 80.8079507 | 71.1859046 | 71.0479295 |
| 72.6061284 | 72.9682631 | 80.8079507 | 72.1859046 | 71.0479295 |
| 68.6061284 | 72.9682631 | 80.8079507 | 72.1859046 | 71.0479295 |
| 68.6061284 | 71.9682631 | 79.8079507 | 73.1859046 | 71.0479295 |
| 67.6061284 | 71.9682631 | 80.8079507 | 74.1859046 | 72.0479295 |
| 67.6061284 | 71.9682631 | 82.8079507 | 74.1859046 | 72.0479295 |
| 67.6061284 | 71.9682631 | 82.8079507 | 75.1859046 | 72.0479295 |
| 69.6061284 | 71.9682631 | 81.8079507 | 75.1859046 | 72.0479295 |
| 70.6061284 | 71.9682631 | 82.8079507 | 78.1859046 | 72.0479295 |
| 69.6061284 | 71.9682631 | 82.8079507 | 78.1859046 | 73.0479295 |
| 69.6061284 | 75.9682631 | 82.8079507 | 79.1859046 | 74.0479295 |
| 69.6061284 | 75.9682631 | 83.8079507 | 79.1859046 | 74.0479295 |
| 69.6061284 | 75.9682631 | 83.8079507 | 78.1859046 | 74.0479295 |
| 69.6061284 | 72.9682631 | 83.8079507 | 77.1859046 | 72.0479295 |
| 68.6061284 | 73.9682631 | 83.8079507 | 77.1859046 | 71.0479295 |
| 68.6061284 | 73.9682631 | 83.8079507 | 75.1859046 | 72.0479295 |
| 68.6061284 | 73.9682631 | 83.8079507 | 73.1859046 | 71.0479295 |
| 68.6061284 | 73.9682631 | 82.8079507 | 73.1859046 | 71.0479295 |
| 69.6061284 | 73.9682631 | 82.8079507 | 73.1859046 | 71.0479295 |
| 70.6061284 | 73.9682631 | 82.8079507 | 75.1859046 | 71.0479295 |
| 70.6061284 | 73.9682631 | 82.8079507 | 77.1859046 | 71.0479295 |
| 71.6061284 | 73.9682631 | 81.8079507 | 77.1859046 | 71.0479295 |
| 73.6061284 | 72.9682631 | 82.8079507 | 77.1859046 | 71.0479295 |
| 73.6061284 | 71.9682631 | 82.8079507 | 77.1859046 | 71.0479295 |
| 75.6061284 | 70.9682631 | 83.8079507 | 77.1859046 | 70.0479295 |
| 75.6061284 | 70.9682631 | 85.8079507 | 77.1859046 | 69.0479295 |
| 74.6061284 | 69.9682631 | 86.8079507 | 77.1859046 | 69.0479295 |

|            |            |            |            |            |
|------------|------------|------------|------------|------------|
| 74.6061284 | 69.9682631 | 86.8079507 | 77.1859046 | 69.0479295 |
| 72.6061284 | 69.9682631 | 86.8079507 | 77.1859046 | 70.0479295 |
| 70.6061284 | 69.9682631 | 86.8079507 | 77.1859046 | 69.0479295 |
| 70.6061284 | 69.9682631 | 86.8079507 | 77.1859046 | 69.0479295 |
| 70.6061284 | 69.9682631 | 86.8079507 | 78.1859046 | 69.0479295 |
| 70.6061284 | 69.9682631 | 86.8079507 | 78.1859046 | 69.0479295 |
| 70.6061284 | 69.9682631 | 78.8079507 | 78.1859046 | 69.0479295 |
| 73.6061284 | 69.9682631 | 78.8079507 | 77.1859046 | 69.0479295 |
| 72.6061284 | 69.9682631 | 78.8079507 | 75.1859046 | 70.0479295 |
| 72.6061284 | 70.9682631 | 77.8079507 | 74.1859046 | 70.0479295 |
| 72.6061284 | 70.9682631 | 78.8079507 | 74.1859046 | 71.0479295 |
| 73.6061284 | 71.9682631 | 78.8079507 | 75.1859046 | 72.0479295 |
| 73.6061284 | 74.9682631 | 78.8079507 | 76.1859046 | 72.0479295 |
| 73.6061284 | 76.9682631 | 79.8079507 | 76.1859046 | 72.0479295 |
| 73.6061284 | 77.9682631 | 79.8079507 | 76.1859046 | 71.0479295 |
| 73.6061284 | 77.9682631 | 79.8079507 | 76.1859046 | 71.0479295 |
| 73.6061284 | 77.9682631 | 79.8079507 | 76.1859046 | 70.0479295 |
| 73.6061284 | 77.9682631 | 80.8079507 | 75.1859046 | 70.0479295 |
| 73.6061284 | 76.9682631 | 80.8079507 | 75.1859046 | 70.0479295 |
| 73.6061284 | 76.9682631 | 80.8079507 | 75.1859046 | 70.0479295 |
| 70.6061284 | 76.9682631 | 80.8079507 | 75.1859046 | 72.0479295 |
| 70.6061284 | 76.9682631 | 80.8079507 | 76.1859046 | 73.0479295 |
| 70.6061284 | 76.9682631 | 79.8079507 | 77.1859046 | 73.0479295 |
| 70.6061284 | 76.9682631 | 77.8079507 | 77.1859046 | 73.0479295 |
| 69.6061284 | 75.9682631 | 76.8079507 | 79.1859046 | 74.0479295 |
| 69.6061284 | 75.9682631 | 76.8079507 | 80.1859046 | 74.0479295 |
| 70.6061284 | 72.9682631 | 76.8079507 | 82.1859046 | 73.0479295 |
| 71.6061284 | 70.9682631 | 77.8079507 | 83.1859046 | 73.0479295 |
| 72.6061284 | 70.9682631 | 77.8079507 | 83.1859046 | 74.0479295 |
| 73.6061284 | 70.9682631 | 77.8079507 | 83.1859046 | 74.0479295 |
| 72.6061284 | 70.9682631 | 77.8079507 | 83.1859046 | 74.0479295 |
| 72.6061284 | 70.9682631 | 75.8079507 | 85.1859046 | 72.0479295 |
| 71.6061284 | 70.9682631 | 75.8079507 | 85.1859046 | 72.0479295 |
| 70.6061284 | 71.9682631 | 75.8079507 | 81.1859046 | 72.0479295 |
| 70.6061284 | 71.9682631 | 75.8079507 | 79.1859046 | 72.0479295 |
| 70.6061284 | 73.9682631 | 75.8079507 | 79.1859046 | 72.0479295 |
| 70.6061284 | 74.9682631 | 75.8079507 | 80.1859046 | 72.0479295 |
| 70.6061284 | 74.9682631 | 75.8079507 | 80.1859046 | 72.0479295 |
| 71.6061284 | 74.9682631 | 75.8079507 | 79.1859046 | 72.0479295 |
| 71.6061284 | 73.9682631 | 75.8079507 | 75.1859046 | 72.0479295 |
| 72.6061284 | 72.9682631 | 75.8079507 | 72.1859046 | 72.0479295 |
| 72.6061284 | 72.9682631 | 77.8079507 | 70.1859046 | 72.0479295 |
| 72.6061284 | 71.9682631 | 77.8079507 | 69.1859046 | 72.0479295 |
| 72.6061284 | 71.9682631 | 79.8079507 | 69.1859046 | 72.0479295 |
| 72.6061284 | 71.9682631 | 79.8079507 | 69.1859046 | 72.0479295 |

|            |            |            |            |            |
|------------|------------|------------|------------|------------|
| 73.6061284 | 72.9682631 | 79.8079507 | 68.1859046 | 71.0479295 |
| 73.6061284 | 73.9682631 | 79.8079507 | 67.1859046 | 71.0479295 |
| 73.6061284 | 73.9682631 | 80.8079507 | 67.1859046 | 71.0479295 |
| 73.6061284 | 73.9682631 | 80.8079507 | 68.1859046 | 71.0479295 |
| 72.6061284 | 73.9682631 | 80.8079507 | 68.1859046 | 71.0479295 |
| 72.6061284 | 73.9682631 | 81.8079507 | 68.1859046 | 70.0479295 |
| 72.6061284 | 70.9682631 | 81.8079507 | 68.1859046 | 69.0479295 |
| 72.6061284 | 69.9682631 | 81.8079507 | 68.1859046 | 72.0479295 |
| 75.6061284 | 70.9682631 | 78.8079507 | 68.1859046 | 72.0479295 |
| 77.6061284 | 70.9682631 | 78.8079507 | 67.1859046 | 74.0479295 |
| 77.6061284 | 70.9682631 | 78.8079507 | 67.1859046 | 74.0479295 |
| 80.6061284 | 70.9682631 | 78.8079507 | 67.1859046 | 74.0479295 |
| 80.6061284 | 71.9682631 | 78.8079507 | 67.1859046 | 74.0479295 |
| 80.6061284 | 71.9682631 | 78.8079507 | 67.1859046 | 74.0479295 |
| 79.6061284 | 73.9682631 | 78.8079507 | 67.1859046 | 74.0479295 |
| 78.6061284 | 74.9682631 | 75.8079507 | 69.1859046 | 74.0479295 |
| 78.6061284 | 74.9682631 | 75.8079507 | 70.1859046 | 74.0479295 |
| 78.6061284 | 74.9682631 | 75.8079507 | 71.1859046 | 72.0479295 |
| 77.6061284 | 74.9682631 | 75.8079507 | 72.1859046 | 72.0479295 |
| 76.6061284 | 75.9682631 | 76.8079507 | 73.1859046 | 72.0479295 |
| 76.6061284 | 75.9682631 | 77.8079507 | 74.1859046 | 71.0479295 |
| 76.6061284 | 75.9682631 | 77.8079507 | 75.1859046 | 71.0479295 |
| 76.6061284 | 75.9682631 | 77.8079507 | 75.1859046 | 71.0479295 |
| 75.6061284 | 75.9682631 | 78.8079507 | 75.1859046 | 72.0479295 |
| 76.6061284 | 75.9682631 | 76.8079507 | 75.1859046 | 72.0479295 |
| 78.6061284 | 75.9682631 | 76.8079507 | 77.1859046 | 72.0479295 |
| 78.6061284 | 75.9682631 | 76.8079507 | 79.1859046 | 71.0479295 |
| 80.6061284 | 72.9682631 | 76.8079507 | 79.1859046 | 71.0479295 |
| 80.6061284 | 72.9682631 | 76.8079507 | 79.1859046 | 71.0479295 |
| 80.6061284 | 72.9682631 | 76.8079507 | 79.1859046 | 71.0479295 |
| 80.6061284 | 72.9682631 | 83.8079507 | 79.1859046 | 71.0479295 |
| 79.6061284 | 74.9682631 | 84.8079507 | 82.1859046 | 70.0479295 |
| 78.6061284 | 76.9682631 | 84.8079507 | 85.1859046 | 70.0479295 |
| 77.6061284 | 76.9682631 | 80.8079507 | 85.1859046 | 71.0479295 |
| 77.6061284 | 75.9682631 | 80.8079507 | 87.1859046 | 71.0479295 |
| 78.6061284 | 75.9682631 | 79.8079507 | 88.1859046 | 72.0479295 |
| 78.6061284 | 75.9682631 | 79.8079507 | 88.1859046 | 72.0479295 |
| 78.6061284 | 75.9682631 | 78.8079507 | 88.1859046 | 72.0479295 |
| 76.6061284 | 75.9682631 | 76.8079507 | 88.1859046 | 72.0479295 |
| 74.6061284 | 75.9682631 | 77.8079507 | 88.1859046 | 72.0479295 |
| 74.6061284 | 75.9682631 | 77.8079507 | 86.1859046 | 72.0479295 |
| 74.6061284 | 75.9682631 | 77.8079507 | 84.1859046 | 72.0479295 |
| 74.6061284 | 75.9682631 | 76.8079507 | 83.1859046 | 72.0479295 |
| 75.6061284 | 76.9682631 | 75.8079507 | 83.1859046 | 73.0479295 |
| 75.6061284 | 76.9682631 | 73.8079507 | 82.1859046 | 73.0479295 |

|            |            |            |            |            |
|------------|------------|------------|------------|------------|
| 78.6061284 | 76.9682631 | 73.8079507 | 82.1859046 | 73.0479295 |
| 79.6061284 | 76.9682631 | 74.8079507 | 82.1859046 | 73.0479295 |
| 79.6061284 | 78.9682631 | 77.8079507 | 81.1859046 | 71.0479295 |
| 78.6061284 | 78.9682631 | 77.8079507 | 81.1859046 | 71.0479295 |
| 77.6061284 | 78.9682631 | 77.8079507 | 80.1859046 | 71.0479295 |
| 77.6061284 | 77.9682631 | 77.8079507 | 80.1859046 | 72.0479295 |
| 77.6061284 | 76.9682631 | 77.8079507 | 77.1859046 | 72.0479295 |
| 77.6061284 | 74.9682631 | 77.8079507 | 76.1859046 | 72.0479295 |
| 77.6061284 | 73.9682631 | 77.8079507 | 74.1859046 | 71.0479295 |
| 74.6061284 | 72.9682631 | 77.8079507 | 74.1859046 | 71.0479295 |
| 72.6061284 | 72.9682631 | 77.8079507 | 73.1859046 | 71.0479295 |
| 69.6061284 | 73.9682631 | 77.8079507 | 72.1859046 | 69.0479295 |
| 69.6061284 | 74.9682631 | 77.8079507 | 71.1859046 | 68.0479295 |
| 69.6061284 | 74.9682631 | 77.8079507 | 72.1859046 | 68.0479295 |
| 69.6061284 | 74.9682631 | 77.8079507 | 73.1859046 | 68.0479295 |
| 70.6061284 | 74.9682631 | 77.8079507 | 73.1859046 | 68.0479295 |
| 70.6061284 | 74.9682631 | 77.8079507 | 73.1859046 | 68.0479295 |
| 70.6061284 | 74.9682631 | 76.8079507 | 72.1859046 | 68.0479295 |
| 70.6061284 | 74.9682631 | 75.8079507 | 71.1859046 | 69.0479295 |
| 70.6061284 | 72.9682631 | 75.8079507 | 70.1859046 | 69.0479295 |
| 72.6061284 | 71.9682631 | 75.8079507 | 70.1859046 | 69.0479295 |
| 72.6061284 | 71.9682631 | 75.8079507 | 70.1859046 | 69.0479295 |
| 72.6061284 | 71.9682631 | 75.8079507 | 70.1859046 | 70.0479295 |
| 72.6061284 | 72.9682631 | 79.8079507 | 70.1859046 | 70.0479295 |
| 72.6061284 | 73.9682631 | 80.8079507 | 74.1859046 | 69.0479295 |
| 72.6061284 | 73.9682631 | 81.8079507 | 76.1859046 | 69.0479295 |
| 72.6061284 | 73.9682631 | 81.8079507 | 76.1859046 | 69.0479295 |
| 72.6061284 | 74.9682631 | 81.8079507 | 75.1859046 | 69.0479295 |
| 72.6061284 | 74.9682631 | 81.8079507 | 75.1859046 | 69.0479295 |
| 72.6061284 | 76.9682631 | 81.8079507 | 75.1859046 | 69.0479295 |
| 70.6061284 | 76.9682631 | 80.8079507 | 75.1859046 | 69.0479295 |
| 70.6061284 | 78.9682631 | 80.8079507 | 75.1859046 | 69.0479295 |
| 66.6061284 | 79.9682631 | 80.8079507 | 76.1859046 | 69.0479295 |
| 64.6061284 | 78.9682631 | 81.8079507 | 76.1859046 | 68.0479295 |
| 65.6061284 | 78.9682631 | 80.8079507 | 76.1859046 | 68.0479295 |
| 65.6061284 | 78.9682631 | 80.8079507 | 76.1859046 | 68.0479295 |
| 66.6061284 | 76.9682631 | 80.8079507 | 72.1859046 | 68.0479295 |
| 66.6061284 | 76.9682631 | 80.8079507 | 72.1859046 | 68.0479295 |
| 67.6061284 | 75.9682631 | 80.8079507 | 72.1859046 | 67.0479295 |
| 67.6061284 | 76.9682631 | 80.8079507 | 71.1859046 | 67.0479295 |
| 67.6061284 | 76.9682631 | 79.8079507 | 70.1859046 | 67.0479295 |
| 65.6061284 | 76.9682631 | 79.8079507 | 70.1859046 | 68.0479295 |
| 65.6061284 | 76.9682631 | 80.8079507 | 70.1859046 | 68.0479295 |
| 65.6061284 | 76.9682631 | 81.8079507 | 69.1859046 | 68.0479295 |
| 66.6061284 | 76.9682631 | 81.8079507 | 69.1859046 | 68.0479295 |

|            |            |            |            |            |
|------------|------------|------------|------------|------------|
| 70.6061284 | 75.9682631 | 80.8079507 | 69.1859046 | 68.0479295 |
| 70.6061284 | 73.9682631 | 80.8079507 | 69.1859046 | 68.0479295 |
| 70.6061284 | 73.9682631 | 80.8079507 | 69.1859046 | 69.0479295 |
| 69.6061284 | 73.9682631 | 80.8079507 | 69.1859046 | 69.0479295 |
| 68.6061284 | 73.9682631 | 80.8079507 | 73.1859046 | 70.0479295 |
| 67.6061284 | 73.9682631 | 80.8079507 | 72.1859046 | 70.0479295 |
| 67.6061284 | 73.9682631 | 79.8079507 | 70.1859046 | 70.0479295 |
| 70.6061284 | 72.9682631 | 79.8079507 | 70.1859046 | 70.0479295 |
| 72.6061284 | 72.9682631 | 79.8079507 | 70.1859046 | 71.0479295 |
| 75.6061284 | 73.9682631 | 79.8079507 | 70.1859046 | 72.0479295 |
| 75.6061284 | 73.9682631 | 79.8079507 | 71.1859046 | 73.0479295 |
| 78.6061284 | 74.9682631 | 79.8079507 | 72.1859046 | 74.0479295 |
| 80.6061284 | 75.9682631 | 81.8079507 | 72.1859046 | 74.0479295 |
| 81.6061284 | 75.9682631 | 82.8079507 | 72.1859046 | 73.0479295 |
| 77.6061284 | 73.9682631 | 82.8079507 | 72.1859046 | 73.0479295 |
| 77.6061284 | 72.9682631 | 82.8079507 | 72.1859046 | 73.0479295 |
| 74.6061284 | 72.9682631 | 82.8079507 | 72.1859046 | 74.0479295 |
| 70.6061284 | 71.9682631 | 82.8079507 | 72.1859046 | 74.0479295 |
| 68.6061284 | 71.9682631 | 79.8079507 | 73.1859046 | 74.0479295 |
| 68.6061284 | 72.9682631 | 79.8079507 | 75.1859046 | 71.0479295 |
| 68.6061284 | 72.9682631 | 78.8079507 | 76.1859046 | 71.0479295 |
| 68.6061284 | 73.9682631 | 78.8079507 | 76.1859046 | 69.0479295 |
| 68.6061284 | 74.9682631 | 77.8079507 | 76.1859046 | 68.0479295 |
| 67.6061284 | 74.9682631 | 77.8079507 | 77.1859046 | 69.0479295 |
| 68.6061284 | 73.9682631 | 77.8079507 | 77.1859046 | 69.0479295 |
| 68.6061284 | 72.9682631 | 76.8079507 | 77.1859046 | 69.0479295 |
| 71.6061284 | 72.9682631 | 76.8079507 | 77.1859046 | 69.0479295 |
| 71.6061284 | 72.9682631 | 75.8079507 | 80.1859046 | 70.0479295 |
| 74.6061284 | 72.9682631 | 74.8079507 | 81.1859046 | 71.0479295 |
| 74.6061284 | 72.9682631 | 73.8079507 | 80.1859046 | 72.0479295 |
| 75.6061284 | 73.9682631 | 73.8079507 | 77.1859046 | 72.0479295 |
| 75.6061284 | 73.9682631 | 76.8079507 | 76.1859046 | 72.0479295 |
| 75.6061284 | 73.9682631 | 77.8079507 | 76.1859046 | 72.0479295 |
| 75.6061284 | 72.9682631 | 77.8079507 | 75.1859046 | 73.0479295 |
| 74.6061284 | 72.9682631 | 77.8079507 | 73.1859046 | 74.0479295 |
| 74.6061284 | 72.9682631 | 76.8079507 | 71.1859046 | 74.0479295 |
| 74.6061284 | 73.9682631 | 76.8079507 | 69.1859046 | 74.0479295 |
| 74.6061284 | 74.9682631 | 76.8079507 | 69.1859046 | 74.0479295 |
| 74.6061284 | 75.9682631 | 75.8079507 | 69.1859046 | 75.0479295 |
| 74.6061284 | 75.9682631 | 75.8079507 | 69.1859046 | 74.0479295 |
| 74.6061284 | 74.9682631 | 75.8079507 | 73.1859046 | 74.0479295 |
| 74.6061284 | 74.9682631 | 76.8079507 | 74.1859046 | 72.0479295 |
| 74.6061284 | 74.9682631 | 76.8079507 | 74.1859046 | 72.0479295 |
| 74.6061284 | 74.9682631 | 76.8079507 | 73.1859046 | 71.0479295 |
| 75.6061284 | 73.9682631 | 76.8079507 | 73.1859046 | 71.0479295 |



|            |            |            |            |            |            |
|------------|------------|------------|------------|------------|------------|
| 75.6061284 | 73.9682631 | 76.8079507 | 73.1859046 | 72.0479295 |            |
| 75.6061284 | 73.9682631 | 76.8079507 | 73.1859046 | 72.0479295 |            |
| 76.6061284 | 73.9682631 | 76.8079507 | 73.1859046 | 72.0479295 |            |
| 76.6061284 | 73.9682631 | 77.8079507 | 74.1859046 | 73.0479295 |            |
| 76.6061284 | 73.9682631 | 80.8079507 | 74.1859046 | 73.0479295 |            |
| 76.6061284 | 74.9682631 | 80.8079507 | 74.1859046 | 73.0479295 |            |
| 76.6061284 | 74.9682631 | 80.8079507 | 74.1859046 | 73.0479295 |            |
| 75.6061284 | 74.9682631 | 81.8079507 | 74.1859046 | 74.0479295 |            |
| 75.6061284 | 74.9682631 | 81.8079507 | 74.1859046 | 73.0479295 |            |
| 74.6061284 | 75.9682631 | 80.8079507 | 74.1859046 | 73.0479295 |            |
| 75.6061284 | 75.9682631 | 80.8079507 | 74.1859046 | 72.0479295 |            |
| 75.6061284 | 75.9682631 | 80.8079507 | 74.1859046 | 71.0479295 |            |
| 75.6061284 | 76.9682631 | 80.8079507 | 74.1859046 | 71.0479295 |            |
| 75.6061284 | 76.9682631 | 80.8079507 | 74.1859046 | 70.0479295 |            |
| 75.6061284 | 76.9682631 | 78.8079507 | 80.1859046 | 70.0479295 |            |
| 75.6061284 | 76.9682631 | 76.8079507 | 84.1859046 | 70.0479295 |            |
| 75.6061284 | 78.9682631 | 76.8079507 | 84.1859046 | 69.0479295 |            |
| 85.6061284 | 78.9682631 | 74.8079507 | 84.1859046 | 69.0479295 |            |
| 85.6061284 | 77.9682631 | 74.8079507 | 82.1859046 | 69.0479295 |            |
| 83.6061284 | 77.9682631 | 74.8079507 | 81.1859046 | 69.0479295 | 70.0713843 |
| 80.6061284 | 74.9682631 | 73.8079507 | 81.1859046 | 69.0479295 | 71.0713843 |
| 78.6061284 | 74.9682631 | 74.8079507 | 80.1859046 | 69.0479295 | 71.0713843 |
| 78.6061284 | 74.9682631 | 74.8079507 | 78.1859046 | 69.0479295 | 71.0713843 |
| 78.6061284 | 74.9682631 | 77.8079507 | 77.1859046 | 69.0479295 | 71.0713843 |
| 80.6061284 | 74.9682631 | 77.8079507 | 77.1859046 | 69.0479295 | 71.0713843 |
| 81.6061284 | 68.9682631 | 78.8079507 | 77.1859046 | 69.0479295 | 71.0713843 |
| 82.6061284 | 64.9682631 | 76.8079507 | 79.1859046 | 69.0479295 | 71.0713843 |
| 77.6061284 | 63.9682631 | 72.8079507 | 79.1859046 | 69.0479295 | 71.0713843 |
| 77.6061284 | 62.9682631 | 72.8079507 | 79.1859046 | 69.0479295 | 71.0713843 |
| 71.6061284 | 62.9682631 | 72.8079507 | 77.1859046 | 69.0479295 | 71.0713843 |
| 66.6061284 | 62.9682631 | 70.8079507 | 77.1859046 | 69.0479295 | 73.0713843 |
| 64.6061284 | 62.9682631 | 71.8079507 | 75.1859046 | 70.0479295 | 74.0713843 |
| 64.6061284 | 62.9682631 | 71.8079507 | 72.1859046 | 71.0479295 | 74.0713843 |
| 64.6061284 | 67.9682631 | 71.8079507 | 71.1859046 | 71.0479295 | 77.0713843 |
| 63.6061284 | 69.9682631 | 73.8079507 | 72.1859046 | 71.0479295 | 77.0713843 |
| 63.6061284 | 68.9682631 | 74.8079507 | 72.1859046 | 71.0479295 | 76.0713843 |
| 65.6061284 | 68.9682631 | 79.8079507 | 73.1859046 | 71.0479295 | 76.0713843 |
| 65.6061284 | 68.9682631 | 79.8079507 | 74.1859046 | 71.0479295 | 75.0713843 |
| 64.6061284 | 68.9682631 | 79.8079507 | 74.1859046 | 71.0479295 | 74.0713843 |
| 63.6061284 | 67.9682631 | 79.8079507 | 74.1859046 | 71.0479295 | 73.0713843 |
| 63.6061284 | 67.9682631 | 80.8079507 | 74.1859046 | 70.0479295 | 73.0713843 |
| 62.6061284 | 69.9682631 | 80.8079507 | 75.1859046 | 70.0479295 | 74.0713843 |
| 62.6061284 | 70.9682631 | 80.8079507 | 75.1859046 | 70.0479295 | 77.0713843 |
| 62.6061284 | 71.9682631 | 80.8079507 | 74.1859046 | 70.0479295 | 78.0713843 |
| 62.6061284 | 71.9682631 | 80.8079507 | 73.1859046 | 70.0479295 | 74.0713843 |

|            |            |            |            |            |            |
|------------|------------|------------|------------|------------|------------|
| 62.6061284 | 71.9682631 | 80.8079507 | 72.1859046 | 70.0479295 | 74.0713843 |
| 68.6061284 | 71.9682631 | 81.8079507 | 72.1859046 | 70.0479295 | 71.0713843 |
| 70.6061284 | 71.9682631 | 81.8079507 | 71.1859046 | 70.0479295 | 68.0713843 |
| 70.6061284 | 71.9682631 | 83.8079507 | 70.1859046 | 70.0479295 | 68.0713843 |
| 70.6061284 | 71.9682631 | 83.8079507 | 70.1859046 | 70.0479295 | 68.0713843 |
| 70.6061284 | 71.9682631 | 83.8079507 | 69.1859046 | 70.0479295 | 68.0713843 |
| 69.6061284 | 71.9682631 | 82.8079507 | 69.1859046 | 70.0479295 | 68.0713843 |
| 69.6061284 | 71.9682631 | 82.8079507 | 67.1859046 | 69.0479295 | 69.0713843 |
| 69.6061284 | 72.9682631 | 81.8079507 | 66.1859046 | 69.0479295 | 69.0713843 |
| 69.6061284 | 72.9682631 | 82.8079507 | 67.1859046 | 69.0479295 | 69.0713843 |
| 69.6061284 | 72.9682631 | 82.8079507 | 67.1859046 | 69.0479295 | 69.0713843 |
| 68.6061284 | 75.9682631 | 82.8079507 | 72.1859046 | 69.0479295 | 69.0713843 |
| 65.6061284 | 75.9682631 | 85.8079507 | 74.1859046 | 70.0479295 | 69.0713843 |
| 63.6061284 | 76.9682631 | 85.8079507 | 76.1859046 | 70.0479295 | 67.0713843 |
| 62.6061284 | 76.9682631 | 84.8079507 | 77.1859046 | 71.0479295 | 66.0713843 |
| 62.6061284 | 76.9682631 | 84.8079507 | 77.1859046 | 71.0479295 | 66.0713843 |
| 62.6061284 | 76.9682631 | 83.8079507 | 77.1859046 | 71.0479295 | 66.0713843 |
| 62.6061284 | 76.9682631 | 82.8079507 | 78.1859046 | 71.0479295 | 66.0713843 |
| 62.6061284 | 74.9682631 | 81.8079507 | 79.1859046 | 72.0479295 | 66.0713843 |
| 67.6061284 | 72.9682631 | 81.8079507 | 79.1859046 | 72.0479295 | 66.0713843 |
| 69.6061284 | 71.9682631 | 80.8079507 | 78.1859046 | 71.0479295 | 66.0713843 |
| 69.6061284 | 71.9682631 | 79.8079507 | 78.1859046 | 71.0479295 | 66.0713843 |
| 70.6061284 | 72.9682631 | 78.8079507 | 78.1859046 | 71.0479295 | 67.0713843 |
| 70.6061284 | 72.9682631 | 78.8079507 | 80.1859046 | 70.0479295 | 66.0713843 |
| 67.6061284 | 72.9682631 | 78.8079507 | 81.1859046 | 70.0479295 | 66.0713843 |
| 67.6061284 | 72.9682631 | 78.8079507 | 81.1859046 | 70.0479295 | 66.0713843 |
| 65.6061284 | 72.9682631 | 79.8079507 | 81.1859046 | 70.0479295 | 66.0713843 |
| 63.6061284 | 71.9682631 | 82.8079507 | 81.1859046 | 70.0479295 | 65.0713843 |
| 63.6061284 | 71.9682631 | 84.8079507 | 82.1859046 | 70.0479295 | 65.0713843 |
| 63.6061284 | 71.9682631 | 84.8079507 | 81.1859046 | 70.0479295 | 66.0713843 |
| 64.6061284 | 69.9682631 | 72.535756  | 80.1859046 | 70.0479295 | 66.0713843 |
| 65.6061284 | 69.9682631 | 72.8084833 | 80.1859046 | 69.0479295 | 66.0713843 |
| 69.6061284 | 69.9682631 | 73.3539378 | 80.1859046 | 69.0479295 | 66.0713843 |
| 73.6061284 | 69.9682631 | 86.8079507 | 80.1859046 | 69.0479295 | 67.0713843 |
| 73.6061284 | 71.9682631 | 85.8079507 | 80.1859046 | 69.0479295 | 67.0713843 |
| 76.6061284 | 72.9682631 | 84.8079507 | 80.1859046 | 69.0479295 | 68.0713843 |
| 77.6061284 | 72.9682631 | 83.8079507 | 79.1859046 | 69.0479295 | 67.0713843 |
| 77.6061284 | 72.9682631 | 83.8079507 | 79.1859046 | 69.0479295 | 67.0713843 |
| 69.6061284 | 72.9682631 | 83.8079507 | 79.1859046 | 70.0479295 | 66.0713843 |
| 66.6061284 | 72.9682631 | 82.8079507 | 79.1859046 | 72.0479295 | 66.0713843 |
| 65.6061284 | 72.9682631 | 82.8079507 | 79.1859046 | 72.0479295 | 66.0713843 |
| 65.6061284 | 72.9682631 | 82.8079507 | 80.1859046 | 72.0479295 | 66.0713843 |
| 66.6061284 | 74.9682631 | 81.8079507 | 81.1859046 | 73.0479295 | 66.0713843 |
| 70.6061284 | 74.9682631 | 73.8079507 | 81.1859046 | 74.0479295 | 66.0713843 |
| 70.6061284 | 75.9682631 | 72.8079507 | 81.1859046 | 74.0479295 | 67.0713843 |

|            |            |            |            |            |            |
|------------|------------|------------|------------|------------|------------|
| 71.6061284 | 76.9682631 | 72.8079507 | 81.1859046 | 74.0479295 | 68.0713843 |
| 69.6061284 | 76.9682631 | 72.8079507 | 81.1859046 | 74.0479295 | 69.0713843 |
| 69.6061284 | 76.9682631 | 73.8079507 | 81.1859046 | 74.0479295 | 68.0713843 |
| 67.6061284 | 76.9682631 | 74.8079507 | 82.1859046 | 74.0479295 | 68.0713843 |
| 67.6061284 | 76.9682631 | 74.8079507 | 83.1859046 | 73.0479295 | 69.0713843 |
| 68.6061284 | 76.9682631 | 75.8079507 | 83.1859046 | 72.0479295 | 69.0713843 |
| 68.6061284 | 76.9682631 | 75.8079507 | 85.1859046 | 72.0479295 | 69.0713843 |
| 70.6061284 | 75.9682631 | 74.8079507 | 85.1859046 | 71.0479295 | 73.0713843 |
| 70.6061284 | 75.9682631 | 74.8079507 | 86.1859046 | 71.0479295 | 74.0713843 |
| 70.6061284 | 75.9682631 | 76.8079507 | 86.1859046 | 72.0479295 | 75.0713843 |
| 67.6061284 | 74.9682631 | 77.8079507 | 86.1859046 | 72.0479295 | 74.0713843 |
| 65.6061284 | 74.9682631 | 78.8079507 | 86.1859046 | 72.0479295 | 74.0713843 |
| 64.6061284 | 74.9682631 | 78.8079507 | 86.1859046 | 73.0479295 | 73.0713843 |
| 66.6061284 | 74.9682631 | 78.8079507 | 86.1859046 | 73.0479295 | 73.0713843 |
| 66.6061284 | 73.9682631 | 80.8079507 | 86.1859046 | 72.0479295 | 73.0713843 |
| 68.6061284 | 73.9682631 | 81.8079507 | 86.1859046 | 73.0479295 | 73.0713843 |
| 68.6061284 | 72.9682631 | 81.8079507 | 86.1859046 | 73.0479295 | 73.0713843 |
| 68.6061284 | 72.9682631 | 81.8079507 | 86.1859046 | 72.0479295 | 73.0713843 |
| 68.6061284 | 73.9682631 | 80.8079507 | 86.1859046 | 72.0479295 | 70.0713843 |
| 68.6061284 | 73.9682631 | 80.8079507 | 86.1859046 | 72.0479295 | 70.0713843 |
| 65.6061284 | 73.9682631 | 77.8079507 | 86.1859046 | 72.0479295 | 69.0713843 |
| 64.6061284 | 71.9682631 | 76.8079507 | 86.1859046 | 71.0479295 | 69.0713843 |
| 63.6061284 | 72.9682631 | 76.8079507 | 89.1859046 | 72.0479295 | 69.0713843 |
| 62.6061284 | 72.9682631 | 79.8079507 | 89.1859046 | 72.0479295 | 69.0713843 |
| 62.6061284 | 74.9682631 | 79.8079507 | 88.1859046 | 72.0479295 | 70.0713843 |
| 65.6061284 | 74.9682631 | 80.8079507 | 88.1859046 | 72.0479295 | 70.0713843 |
| 66.6061284 | 76.9682631 | 80.8079507 | 88.1859046 | 72.0479295 | 70.0713843 |
| 68.6061284 | 76.9682631 | 78.8079507 | 88.1859046 | 72.0479295 | 68.0713843 |
| 70.6061284 | 76.9682631 | 78.8079507 | 89.1859046 | 72.0479295 | 67.0713843 |
| 70.6061284 | 75.9682631 | 76.8079507 | 89.1859046 | 72.0479295 | 67.0713843 |
| 69.6061284 | 75.9682631 | 75.8079507 | 89.1859046 | 72.0479295 | 67.0713843 |
| 68.6061284 | 74.9682631 | 75.8079507 | 90.1859046 | 71.0479295 | 66.0713843 |
| 68.6061284 | 74.9682631 | 75.8079507 | 90.1859046 | 72.0479295 | 68.0713843 |
| 68.6061284 | 74.9682631 | 75.8079507 | 90.1859046 | 72.0479295 | 69.0713843 |
| 68.6061284 | 75.9682631 | 75.8079507 | 91.1859046 | 72.0479295 | 69.0713843 |
| 68.6061284 | 75.9682631 | 76.8079507 | 91.1859046 | 72.0479295 | 69.0713843 |
| 68.6061284 | 75.9682631 | 76.8079507 | 92.1859046 | 72.0479295 | 69.0713843 |
| 65.6061284 | 74.9682631 | 76.8079507 | 92.1859046 | 72.0479295 | 69.0713843 |
| 64.6061284 | 72.9682631 | 76.8079507 | 92.1859046 | 72.0479295 | 69.0713843 |
| 64.6061284 | 72.9682631 | 77.8079507 | 92.1859046 | 72.0479295 | 69.0713843 |
| 66.6061284 | 72.9682631 | 77.8079507 | 88.1859046 | 73.0479295 | 69.0713843 |
| 66.6061284 | 72.9682631 | 76.8079507 | 88.1859046 | 73.0479295 | 68.0713843 |
| 67.6061284 | 73.9682631 | 77.8079507 | 88.1859046 | 72.0479295 | 67.0713843 |
| 67.6061284 | 73.9682631 | 78.8079507 | 82.1859046 | 72.0479295 | 66.0713843 |
| 69.6061284 | 73.9682631 | 78.8079507 | 82.1859046 | 71.0479295 | 66.0713843 |

|            |            |            |            |            |            |
|------------|------------|------------|------------|------------|------------|
| 69.6061284 | 74.9682631 | 79.8079507 | 83.1859046 | 71.0479295 | 66.0713843 |
| 72.6061284 | 74.9682631 | 81.8079507 | 83.1859046 | 71.0479295 | 66.0713843 |
| 71.6061284 | 73.9682631 | 81.8079507 | 83.1859046 | 70.0479295 | 66.0713843 |
| 71.6061284 | 72.9682631 | 80.8079507 | 81.1859046 | 70.0479295 | 66.0713843 |
| 70.6061284 | 72.9682631 | 80.8079507 | 75.1859046 | 70.0479295 | 67.0713843 |
| 70.6061284 | 72.9682631 | 76.8079507 | 69.1859046 | 70.0479295 | 67.0713843 |
| 70.6061284 | 71.9682631 | 73.8079507 | 67.1859046 | 70.0479295 | 69.0713843 |
| 70.6061284 | 73.9682631 | 73.8079507 | 66.1859046 | 70.0479295 | 69.0713843 |
| 70.6061284 | 73.9682631 | 73.8079507 | 66.1859046 | 70.0479295 | 68.0713843 |
| 71.6061284 | 75.9682631 | 75.8079507 | 66.1859046 | 70.0479295 | 67.0713843 |
| 73.6061284 | 78.9682631 | 75.8079507 | 67.1859046 | 70.0479295 | 67.0713843 |
| 73.6061284 | 78.9682631 | 74.8079507 | 68.1859046 | 69.0479295 | 66.0713843 |
| 73.6061284 | 76.9682631 | 74.8079507 | 68.1859046 | 70.0479295 | 66.0713843 |
| 74.6061284 | 74.9682631 | 74.8079507 | 68.1859046 | 71.0479295 | 66.0713843 |
| 73.6061284 | 74.9682631 | 75.8079507 | 68.1859046 | 71.0479295 | 66.0713843 |
| 72.6061284 | 74.9682631 | 76.8079507 | 67.1859046 | 71.0479295 | 66.0713843 |
| 72.6061284 | 74.9682631 | 75.8079507 | 67.1859046 | 71.0479295 | 67.0713843 |
| 69.6061284 | 74.9682631 | 75.8079507 | 67.1859046 | 71.0479295 | 67.0713843 |
| 69.6061284 | 78.9682631 | 75.8079507 | 67.1859046 | 72.0479295 | 69.0713843 |
| 69.6061284 | 79.9682631 | 78.8079507 | 67.1859046 | 73.0479295 | 73.0713843 |
| 70.6061284 | 79.9682631 | 81.8079507 | 67.1859046 | 74.0479295 | 74.0713843 |
| 70.6061284 | 79.9682631 | 82.8079507 | 72.1859046 | 74.0479295 | 72.0713843 |
| 70.6061284 | 78.9682631 | 82.8079507 | 72.1859046 | 74.0479295 | 72.0713843 |
| 67.6061284 | 78.9682631 | 83.8079507 | 72.1859046 | 73.0479295 | 73.0713843 |
| 67.6061284 | 76.9682631 | 83.8079507 | 72.1859046 | 73.0479295 | 75.0713843 |
| 67.6061284 | 76.9682631 | 84.8079507 | 72.1859046 | 74.0479295 | 76.0713843 |
| 66.6061284 | 75.9682631 | 83.8079507 | 72.1859046 | 74.0479295 | 76.0713843 |
| 67.6061284 | 75.9682631 | 83.8079507 | 73.1859046 | 73.0479295 | 77.0713843 |
| 67.6061284 | 75.9682631 | 83.8079507 | 73.1859046 | 73.0479295 | 77.0713843 |
| 65.6061284 | 76.9682631 | 84.8079507 | 76.1859046 | 73.0479295 | 78.0713843 |
| 65.6061284 | 76.9682631 | 84.8079507 | 76.1859046 | 74.0479295 | 84.0713843 |
| 65.6061284 | 77.9682631 | 84.8079507 | 76.1859046 | 75.0479295 | 86.0713843 |
| 65.6061284 | 77.9682631 | 84.8079507 | 78.1859046 | 76.0479295 | 86.0713843 |
| 64.6061284 | 76.9682631 | 83.8079507 | 78.1859046 | 74.0479295 | 86.0713843 |
| 65.6061284 | 76.9682631 | 83.8079507 | 81.1859046 | 73.0479295 | 86.0713843 |
| 65.6061284 | 76.9682631 | 83.8079507 | 81.1859046 | 72.0479295 | 81.0713843 |
| 65.6061284 | 75.9682631 | 83.8079507 | 82.1859046 | 73.0479295 | 80.0713843 |
| 67.6061284 | 75.9682631 | 82.8079507 | 82.1859046 | 73.0479295 | 80.0713843 |
| 68.6061284 | 75.9682631 | 82.8079507 | 82.1859046 | 73.0479295 | 76.0713843 |
| 69.6061284 | 75.9682631 | 78.8079507 | 82.1859046 | 73.0479295 | 73.0713843 |
| 69.6061284 | 75.9682631 | 76.8079507 | 82.1859046 | 73.0479295 | 73.0713843 |
| 69.6061284 | 75.9682631 | 75.8079507 | 85.1859046 | 74.0479295 | 70.0713843 |
| 69.6061284 | 75.9682631 | 75.8079507 | 85.1859046 | 74.0479295 | 70.0713843 |
| 70.6061284 | 75.9682631 | 74.8079507 | 86.1859046 | 74.0479295 | 69.0713843 |
| 70.6061284 | 75.9682631 | 74.8079507 | 86.1859046 | 74.0479295 | 67.0713843 |

|            |            |            |            |            |            |
|------------|------------|------------|------------|------------|------------|
| 69.6061284 | 75.9682631 | 73.8079507 | 86.1859046 | 74.0479295 | 66.0713843 |
| 69.6061284 | 75.9682631 | 73.8079507 | 86.1859046 | 73.0479295 | 66.0713843 |
| 69.6061284 | 75.9682631 | 73.8079507 | 86.1859046 | 72.0479295 | 67.0713843 |
| 70.6061284 | 75.9682631 | 75.8079507 | 86.1859046 | 72.0479295 | 67.0713843 |
| 71.6061284 | 77.9682631 | 77.8079507 | 86.1859046 | 71.0479295 | 68.0713843 |
| 72.6061284 | 77.9682631 | 77.8079507 | 85.1859046 | 71.0479295 | 70.0713843 |
| 74.6061284 | 76.9682631 | 80.8079507 | 83.1859046 | 71.0479295 | 72.0713843 |
| 74.6061284 | 71.9682631 | 81.8079507 | 80.1859046 | 71.0479295 | 72.0713843 |
| 75.6061284 | 71.9682631 | 84.8079507 | 78.1859046 | 71.0479295 | 71.0713843 |
| 75.6061284 | 73.9682631 | 85.8079507 | 76.1859046 | 71.0479295 | 71.0713843 |
| 75.6061284 | 73.9682631 | 86.8079507 | 76.1859046 | 70.0479295 | 71.0713843 |
| 76.6061284 | 74.9682631 | 87.8079507 | 75.1859046 | 70.0479295 | 70.0713843 |
| 80.6061284 | 75.9682631 | 88.8079507 | 75.1859046 | 70.0479295 | 70.0713843 |
| 81.6061284 | 75.9682631 | 88.8079507 | 75.1859046 | 70.0479295 | 69.0713843 |
| 83.6061284 | 75.9682631 | 88.8079507 | 75.1859046 | 70.0479295 | 68.0713843 |
| 84.6061284 | 75.9682631 | 88.8079507 | 75.1859046 | 70.0479295 | 68.0713843 |
| 84.6061284 | 75.9682631 | 88.8079507 | 76.1859046 | 70.0479295 | 68.0713843 |
| 85.6061284 | 75.9682631 | 92.8079507 | 76.1859046 | 71.0479295 | 68.0713843 |
| 85.6061284 | 74.9682631 | 92.8079507 | 73.1859046 | 71.0479295 | 69.0713843 |
| 86.6061284 | 74.9682631 | 79.8084833 | 73.1859046 | 70.0479295 | 69.0713843 |
| 86.6061284 | 74.9682631 | 79.8993924 | 73.1859046 | 70.0479295 | 71.0713843 |
| 86.6061284 | 74.9682631 | 93.8079507 | 74.1859046 | 70.0479295 | 72.0713843 |
| 86.6061284 | 74.9682631 | 93.8079507 | 74.1859046 | 70.0479295 | 72.0713843 |
| 85.6061284 | 74.9682631 | 91.8079507 | 76.1859046 | 70.0479295 | 73.0713843 |
| 81.6061284 | 74.9682631 | 91.8079507 | 77.1859046 | 71.0479295 | 73.0713843 |
| 79.6061284 | 74.9682631 | 90.8079507 | 77.1859046 | 71.0479295 | 72.0713843 |
| 77.6061284 | 74.9682631 | 88.8079507 | 78.1859046 | 71.0479295 | 71.0713843 |
| 76.6061284 | 77.9682631 | 87.8079507 | 79.1859046 | 71.0479295 | 70.0713843 |
| 76.6061284 | 78.9682631 | 86.8079507 | 79.1859046 | 71.0479295 | 70.0713843 |
| 77.6061284 | 78.9682631 | 86.8079507 | 79.1859046 | 70.0479295 | 68.0713843 |
| 79.6061284 | 78.9682631 | 85.8079507 | 78.1859046 | 70.0479295 | 68.0713843 |
| 80.6061284 | 78.9682631 | 85.8079507 | 77.1859046 | 70.0479295 | 68.0713843 |
| 80.6061284 | 77.9682631 | 85.8079507 | 77.1859046 | 70.0479295 | 68.0713843 |
| 80.6061284 | 76.9682631 | 84.8079507 | 75.1859046 | 70.0479295 | 69.0713843 |
| 80.6061284 | 74.9682631 | 84.8079507 | 75.1859046 | 71.0479295 | 69.0713843 |
| 80.6061284 | 74.9682631 | 83.8079507 | 77.1859046 | 71.0479295 | 72.0713843 |
| 80.6061284 | 72.9682631 | 82.8079507 | 77.1859046 | 71.0479295 | 72.0713843 |
| 80.6061284 | 72.9682631 | 82.8079507 | 77.1859046 | 71.0479295 | 72.0713843 |
| 82.6061284 | 68.9682631 | 79.8079507 | 75.1859046 | 72.0479295 | 72.0713843 |
| 82.6061284 | 67.9682631 | 79.8079507 | 73.1859046 | 72.0479295 | 70.0713843 |
| 81.6061284 | 67.9682631 | 79.8079507 | 73.1859046 | 72.0479295 | 70.0713843 |
| 81.6061284 | 67.9682631 | 79.8079507 | 70.1859046 | 72.0479295 | 69.0713843 |
| 81.6061284 | 67.9682631 | 78.8079507 | 69.1859046 | 72.0479295 | 68.0713843 |
| 79.6061284 | 67.9682631 | 78.8079507 | 68.1859046 | 71.0479295 | 68.0713843 |
| 78.6061284 | 66.9682631 | 78.8079507 | 68.1859046 | 71.0479295 | 67.0713843 |

|            |            |            |            |            |            |
|------------|------------|------------|------------|------------|------------|
| 78.6061284 | 65.9682631 | 78.8079507 | 69.1859046 | 71.0479295 | 68.0713843 |
| 77.6061284 | 65.9682631 | 78.8079507 | 70.1859046 | 71.0479295 | 68.0713843 |
| 74.6061284 | 67.9682631 | 77.8079507 | 73.1859046 | 71.0479295 | 68.0713843 |
| 71.6061284 | 69.9682631 | 77.8079507 | 73.1859046 | 71.0479295 | 68.0713843 |
| 69.6061284 | 69.9682631 | 77.8079507 | 74.1859046 | 71.0479295 | 68.0713843 |
| 68.6061284 | 69.9682631 | 74.8079507 | 74.1859046 | 71.0479295 | 68.0713843 |
| 66.6061284 | 69.9682631 | 75.8079507 | 73.1859046 | 70.0479295 | 68.0713843 |
| 65.6061284 | 69.9682631 | 76.8079507 | 74.1859046 | 70.0479295 | 70.0713843 |
| 65.6061284 | 70.9682631 | 76.8079507 | 74.1859046 | 70.0479295 | 69.0713843 |
| 65.6061284 | 70.9682631 | 76.8079507 | 74.1859046 | 70.0479295 | 69.0713843 |
| 65.6061284 | 70.9682631 | 76.8079507 | 75.1859046 | 70.0479295 | 69.0713843 |
| 65.6061284 | 70.9682631 | 76.8079507 | 76.1859046 | 70.0479295 | 69.0713843 |
| 68.6061284 | 70.9682631 | 75.8079507 | 77.1859046 | 70.0479295 | 69.0713843 |
| 68.6061284 | 71.9682631 | 75.8079507 | 77.1859046 | 70.0479295 | 70.0713843 |
| 68.6061284 | 72.9682631 | 73.8079507 | 78.1859046 | 70.0479295 | 70.0713843 |
| 68.6061284 | 72.9682631 | 73.8079507 | 78.1859046 | 71.0479295 | 69.0713843 |
| 68.6061284 | 73.9682631 | 70.8079507 | 78.1859046 | 71.0479295 | 69.0713843 |
| 66.6061284 | 75.9682631 | 70.8079507 | 78.1859046 | 72.0479295 | 67.0713843 |
| 63.6061284 | 75.9682631 | 70.8079507 | 79.1859046 | 73.0479295 | 67.0713843 |
| 63.6061284 | 76.9682631 | 70.8079507 | 79.1859046 | 73.0479295 | 67.0713843 |
| 63.6061284 | 73.9682631 | 71.8079507 | 78.1859046 | 73.0479295 | 67.0713843 |
| 64.6061284 | 73.9682631 | 71.8079507 | 78.1859046 | 72.0479295 | 68.0713843 |
| 65.6061284 | 74.9682631 | 71.8079507 | 78.1859046 | 72.0479295 | 69.0713843 |
| 66.6061284 | 74.9682631 | 71.8079507 | 78.1859046 | 72.0479295 | 69.0713843 |
| 66.6061284 | 75.9682631 | 71.8079507 | 78.1859046 | 72.0479295 | 69.0713843 |
| 65.6061284 | 75.9682631 | 71.8079507 | 78.1859046 | 71.0479295 | 69.0713843 |
| 66.6061284 | 75.9682631 | 73.8079507 | 78.1859046 | 71.0479295 | 69.0713843 |
| 66.6061284 | 75.9682631 | 73.8079507 | 77.1859046 | 71.0479295 | 69.0713843 |
| 66.6061284 | 75.9682631 | 74.8079507 | 77.1859046 | 71.0479295 | 69.0713843 |
| 67.6061284 | 77.9682631 | 74.8079507 | 76.1859046 | 72.0479295 | 73.0713843 |
| 67.6061284 | 77.9682631 | 75.8079507 | 75.1859046 | 72.0479295 | 75.0713843 |
| 67.6061284 | 78.9682631 | 78.8079507 | 73.1859046 | 72.0479295 | 75.0713843 |
| 67.6061284 | 78.9682631 | 78.8079507 | 72.1859046 | 72.0479295 | 74.0713843 |
| 67.6061284 | 70.9682631 | 79.8079507 | 69.1859046 | 72.0479295 | 72.0713843 |
| 68.6061284 | 68.9682631 | 79.8079507 | 67.1859046 | 71.0479295 | 71.0713843 |
| 69.6061284 | 68.9682631 | 79.8079507 | 66.1859046 | 71.0479295 | 71.0713843 |
| 69.6061284 | 69.9682631 | 82.8079507 | 65.1859046 | 71.0479295 | 71.0713843 |
| 69.6061284 | 69.9682631 | 79.8079507 | 65.1859046 | 69.0479295 | 71.0713843 |
| 71.6061284 | 74.9682631 | 79.8079507 | 66.1859046 | 70.0479295 | 71.0713843 |
| 73.6061284 | 74.9682631 | 74.8079507 | 66.1859046 | 70.0479295 | 71.0713843 |
| 73.6061284 | 75.9682631 | 74.8079507 | 71.1859046 | 70.0479295 | 71.0713843 |
| 73.6061284 | 75.9682631 | 73.8079507 | 74.1859046 | 70.0479295 | 72.0713843 |
| 72.6061284 | 76.9682631 | 71.8079507 | 76.1859046 | 70.0479295 | 72.0713843 |
| 72.6061284 | 76.9682631 | 71.8079507 | 78.1859046 | 71.0479295 | 72.0713843 |
| 72.6061284 | 76.9682631 | 71.8079507 | 79.1859046 | 71.0479295 | 72.0713843 |

|            |            |            |            |            |            |
|------------|------------|------------|------------|------------|------------|
| 73.6061284 | 74.9682631 | 71.8079507 | 80.1859046 | 71.0479295 | 71.0713843 |
| 73.6061284 | 74.9682631 | 71.8079507 | 80.1859046 | 71.0479295 | 71.0713843 |
| 72.6061284 | 72.9682631 | 71.8079507 | 80.1859046 | 71.0479295 | 71.0713843 |
| 72.6061284 | 73.9682631 | 76.8079507 | 78.1859046 | 71.0479295 | 71.0713843 |
| 72.6061284 | 73.9682631 | 78.8079507 | 78.1859046 | 70.0479295 | 71.0713843 |
| 70.6061284 | 77.9682631 | 78.8079507 | 78.1859046 | 70.0479295 | 71.0713843 |
| 70.6061284 | 78.9682631 | 77.8079507 | 78.1859046 | 70.0479295 | 69.0713843 |
| 70.6061284 | 79.9682631 | 77.8079507 | 82.1859046 | 71.0479295 | 69.0713843 |
| 70.6061284 | 79.9682631 | 77.8079507 | 82.1859046 | 71.0479295 | 67.0713843 |
| 70.6061284 | 79.9682631 | 77.8079507 | 85.1859046 | 71.0479295 | 67.0713843 |
| 69.6061284 | 79.9682631 | 77.8079507 | 86.1859046 | 71.0479295 | 66.0713843 |
| 69.6061284 | 79.9682631 | 77.8079507 | 87.1859046 | 70.0479295 | 66.0713843 |
| 68.6061284 | 79.9682631 | 77.8079507 | 87.1859046 | 70.0479295 | 66.0713843 |
| 67.6061284 | 79.9682631 | 77.8079507 | 85.1859046 | 69.0479295 | 67.0713843 |
| 68.6061284 | 79.9682631 | 76.8079507 | 83.1859046 | 69.0479295 | 67.0713843 |
| 68.6061284 | 77.9682631 | 73.8079507 | 82.1859046 | 69.0479295 | 67.0713843 |
| 68.6061284 | 77.9682631 | 73.8079507 | 78.1859046 | 69.0479295 | 67.0713843 |
| 69.6061284 | 77.9682631 | 73.8079507 | 75.1859046 | 69.0479295 | 67.0713843 |
| 71.6061284 | 77.9682631 | 73.8079507 | 75.1859046 | 70.0479295 | 67.0713843 |
| 72.6061284 | 76.9682631 | 73.8079507 | 72.1859046 | 70.0479295 | 67.0713843 |
| 73.6061284 | 76.9682631 | 73.8079507 | 72.1859046 | 69.0479295 | 67.0713843 |
| 73.6061284 | 76.9682631 | 73.8079507 | 74.1859046 | 70.0479295 | 68.0713843 |
| 72.6061284 | 76.9682631 | 73.8079507 | 75.1859046 | 70.0479295 | 68.0713843 |
| 71.6061284 | 75.9682631 | 73.8079507 | 76.1859046 | 71.0479295 | 69.0713843 |
| 71.6061284 | 74.9682631 | 73.8079507 | 78.1859046 | 70.0479295 | 69.0713843 |
| 71.6061284 | 73.9682631 | 73.8079507 | 80.1859046 | 70.0479295 | 70.0713843 |
| 71.6061284 | 74.9682631 | 73.8079507 | 81.1859046 | 70.0479295 | 70.0713843 |
| 71.6061284 | 75.9682631 | 74.8079507 | 81.1859046 | 69.0479295 | 70.0713843 |
| 72.6061284 | 75.9682631 | 74.8079507 | 81.1859046 | 69.0479295 | 71.0713843 |
| 72.6061284 | 75.9682631 | 74.8079507 | 74.1859046 | 69.0479295 | 72.0713843 |
| 72.6061284 | 74.9682631 | 79.8079507 | 74.1859046 | 69.0479295 | 72.0713843 |
| 75.6061284 | 74.9682631 | 79.8079507 | 74.1859046 | 69.0479295 | 73.0713843 |
| 76.6061284 | 75.9682631 | 79.8079507 | 74.1859046 | 70.0479295 | 74.0713843 |
| 76.6061284 | 75.9682631 | 79.8079507 | 73.1859046 | 70.0479295 | 75.0713843 |
| 77.6061284 | 76.9682631 | 79.8079507 | 73.1859046 | 69.0479295 | 75.0713843 |
| 77.6061284 | 76.9682631 | 78.8079507 | 73.1859046 | 69.0479295 | 75.0713843 |
| 77.6061284 | 75.9682631 | 78.8079507 | 78.1859046 | 70.0479295 | 75.0713843 |
| 77.6061284 | 74.9682631 | 77.8079507 | 81.1859046 | 69.0479295 | 79.0713843 |
| 77.6061284 | 73.9682631 | 77.8079507 | 82.1859046 | 69.0479295 | 81.0713843 |
| 77.6061284 | 72.9682631 | 76.8079507 | 83.1859046 | 70.0479295 | 84.0713843 |
| 76.6061284 | 72.9682631 | 77.8079507 | 84.1859046 | 70.0479295 | 81.0713843 |
| 76.6061284 | 70.9682631 | 76.8079507 | 83.1859046 | 70.0479295 | 81.0713843 |
| 75.6061284 | 69.9682631 | 76.8079507 | 82.1859046 | 70.0479295 | 80.0713843 |
| 75.6061284 | 68.9682631 | 77.8079507 | 80.1859046 | 70.0479295 | 79.0713843 |
| 71.6061284 | 68.9682631 | 76.8079507 | 78.1859046 | 70.0479295 | 82.0713843 |

|            |            |            |            |            |            |
|------------|------------|------------|------------|------------|------------|
| 71.6061284 | 68.9682631 | 76.8079507 | 77.1859046 | 70.0479295 | 82.0713843 |
| 70.6061284 | 68.9682631 | 75.8079507 | 75.1859046 | 70.0479295 | 84.0713843 |
| 70.6061284 | 67.9682631 | 75.8079507 | 73.1859046 | 70.0479295 | 85.0713843 |
| 71.6061284 | 67.9682631 | 75.8079507 | 73.1859046 | 70.0479295 | 84.0713843 |
| 71.6061284 | 67.9682631 | 75.8079507 | 73.1859046 | 69.0479295 | 79.0713843 |
| 71.6061284 | 67.9682631 | 75.8079507 | 72.1859046 | 69.0479295 | 79.0713843 |
| 72.6061284 | 67.9682631 | 75.8079507 | 72.1859046 | 68.0479295 | 78.0713843 |
| 72.6061284 | 79.9682631 | 75.8079507 | 72.1859046 | 68.0479295 | 79.0713843 |
| 72.6061284 | 81.9682631 | 76.8079507 | 78.1859046 | 67.0479295 | 80.0713843 |
| 72.6061284 | 81.9682631 | 76.8079507 | 78.1859046 | 67.0479295 | 80.0713843 |
| 72.6061284 | 81.9682631 | 76.8079507 | 78.1859046 | 67.0479295 | 80.0713843 |
| 73.6061284 | 81.9682631 | 75.8079507 | 82.1859046 | 67.0479295 | 80.0713843 |
| 74.6061284 | 81.9682631 | 75.8079507 | 83.1859046 | 67.0479295 | 81.0713843 |
| 74.6061284 | 81.9682631 | 75.8079507 | 84.1859046 | 68.0479295 | 81.0713843 |
| 74.6061284 | 81.9682631 | 75.8079507 | 86.1859046 | 68.0479295 | 81.0713843 |
| 74.6061284 | 80.9682631 | 75.8079507 | 86.1859046 | 69.0479295 | 84.0713843 |
| 75.6061284 | 80.9682631 | 76.8079507 | 86.1859046 | 69.0479295 | 85.0713843 |
| 75.6061284 | 79.9682631 | 80.8079507 | 86.1859046 | 69.0479295 | 85.0713843 |
| 75.6061284 | 78.9682631 | 80.8079507 | 86.1859046 | 69.0479295 | 84.0713843 |
| 75.6061284 | 78.9682631 | 80.8079507 | 87.1859046 | 70.0479295 | 84.0713843 |
| 75.6061284 | 77.9682631 | 80.8079507 | 89.1859046 | 71.0479295 | 83.0713843 |
| 74.6061284 | 77.9682631 | 67.8079507 | 89.1859046 | 71.0479295 | 83.0713843 |
| 74.6061284 | 77.9682631 | 67.8079507 | 89.1859046 | 70.0479295 | 81.0713843 |
| 74.6061284 | 77.9682631 | 65.8079507 | 90.1859046 | 71.0479295 | 80.0713843 |
| 73.6061284 | 77.9682631 | 65.8079507 | 90.1859046 | 71.0479295 | 79.0713843 |
| 73.6061284 | 77.9682631 | 67.8079507 | 76.9903015 | 71.0479295 | 79.0713843 |
| 71.6061284 | 77.9682631 | 68.8079507 | 76.9903015 | 71.0479295 | 79.0713843 |
| 71.6061284 | 77.9682631 | 69.8079507 | 76.9903015 | 72.0479295 | 78.0713843 |
| 71.6061284 | 78.9682631 | 69.8079507 | 76.9903015 | 72.0479295 | 78.0713843 |
| 71.6061284 | 77.9682631 | 70.8079507 | 76.3539378 | 72.0479295 | 78.0713843 |
| 70.6061284 | 76.9682631 | 70.8079507 | 75.8993924 | 72.0479295 | 77.0713843 |
| 71.6061284 | 76.9682631 | 69.8079507 | 75.0812106 | 72.0479295 | 75.0713843 |
| 71.6061284 | 76.9682631 | 69.8079507 | 74.535756  | 72.0479295 | 75.0713843 |
| 71.6061284 | 76.9682631 | 71.8079507 | 74.3539378 | 73.0479295 | 73.0713843 |
| 72.6061284 | 76.9682631 | 71.8079507 | 73.8084833 | 72.0479295 | 72.0713843 |
| 72.6061284 | 76.9682631 | 71.8079507 | 81.1859046 | 71.0479295 | 71.0713843 |
| 71.6061284 | 77.9682631 | 72.8079507 | 72.1859046 | 70.0479295 | 71.0713843 |
| 72.6061284 | 77.9682631 | 72.8079507 | 70.1859046 | 70.0479295 | 71.0713843 |
| 72.6061284 | 77.9682631 | 72.8079507 | 69.1859046 | 69.0479295 | 74.0713843 |
| 73.6061284 | 78.9682631 | 72.8079507 | 72.1859046 | 70.0479295 | 75.0713843 |
| 73.6061284 | 76.9682631 | 73.8079507 | 74.1859046 | 70.0479295 | 75.0713843 |
| 74.6061284 | 77.9682631 | 75.8079507 | 75.1859046 | 70.0479295 | 76.0713843 |
| 74.6061284 | 76.9682631 | 78.8079507 | 74.1859046 | 70.0479295 | 76.0713843 |
| 74.6061284 | 76.9682631 | 79.8079507 | 74.1859046 | 70.0479295 | 76.0713843 |
| 74.6061284 | 76.9682631 | 79.8079507 | 74.1859046 | 70.0479295 | 76.0713843 |



|            |            |            |            |            |            |
|------------|------------|------------|------------|------------|------------|
| 74.6061284 | 74.9682631 | 76.8079507 | 74.1859046 | 70.0479295 | 75.0713843 |
| 74.6061284 | 74.9682631 | 76.8079507 | 74.1859046 | 70.0479295 | 74.0713843 |
| 75.6061284 | 74.9682631 | 75.8079507 | 73.1859046 | 70.0479295 | 74.0713843 |
| 75.6061284 | 74.9682631 | 75.8079507 | 72.1859046 | 69.0479295 | 74.0713843 |
| 75.6061284 | 74.9682631 | 75.8079507 | 72.1859046 | 69.0479295 | 73.0713843 |
| 76.6061284 | 74.9682631 | 76.8079507 | 73.1859046 | 70.0479295 | 75.0713843 |
| 77.6061284 | 73.9682631 | 77.8079507 | 73.1859046 | 70.0479295 | 76.0713843 |
| 80.6061284 | 73.9682631 | 77.8079507 | 72.1859046 | 70.0479295 | 76.0713843 |
| 80.6061284 | 73.9682631 | 78.8079507 | 71.1859046 | 70.0479295 | 77.0713843 |
| 80.6061284 | 73.9682631 | 78.8079507 | 71.1859046 | 70.0479295 | 77.0713843 |
| 81.6061284 | 75.9682631 | 78.8079507 | 71.1859046 | 70.0479295 | 78.0713843 |
| 82.6061284 | 75.9682631 | 78.8079507 | 71.1859046 | 69.0479295 | 78.0713843 |
| 82.6061284 | 81.9682631 | 78.8079507 | 75.1859046 | 69.0479295 | 78.0713843 |
| 84.6061284 | 81.9682631 | 78.8079507 | 77.1859046 | 69.0479295 | 78.0713843 |
| 84.6061284 | 81.9682631 | 78.8079507 | 78.1859046 | 69.0479295 | 78.0713843 |
| 84.6061284 | 81.9682631 | 79.8079507 | 78.1859046 | 69.0479295 | 78.0713843 |
| 84.6061284 | 81.9682631 | 79.8079507 | 76.1859046 | 69.0479295 | 79.0713843 |
| 82.6061284 | 79.9682631 | 79.8079507 | 75.1859046 | 69.0479295 | 79.0713843 |
| 80.6061284 | 79.9682631 | 79.8079507 | 74.1859046 | 69.0479295 | 79.0713843 |
| 80.6061284 | 79.9682631 | 79.8079507 | 74.1859046 | 69.0479295 | 79.0713843 |
| 79.6061284 | 79.9682631 | 79.8079507 | 72.1859046 | 69.0479295 | 80.0713843 |
| 78.6061284 | 78.9682631 | 80.8079507 | 72.1859046 | 69.0479295 | 80.0713843 |
| 78.6061284 | 78.9682631 | 80.8079507 | 71.1859046 | 70.0479295 | 80.0713843 |
| 78.6061284 | 78.9682631 | 80.8079507 | 70.1859046 | 70.0479295 | 80.0713843 |
| 78.6061284 | 78.9682631 | 79.8079507 | 68.1859046 | 70.0479295 | 80.0713843 |
| 77.6061284 | 78.9682631 | 78.8079507 | 68.1859046 | 70.0479295 | 80.0713843 |
| 77.6061284 | 78.9682631 | 75.8079507 | 68.1859046 | 70.0479295 | 81.0713843 |
| 77.6061284 | 78.9682631 | 75.8079507 | 68.1859046 | 71.0479295 | 82.0713843 |
| 77.6061284 | 78.9682631 | 74.8079507 | 68.1859046 | 71.0479295 | 82.0713843 |
| 76.6061284 | 78.9682631 | 74.8079507 | 67.1859046 | 69.0479295 | 83.0713843 |
| 74.6061284 | 78.9682631 | 74.8079507 | 67.1859046 | 68.0479295 | 85.0713843 |
| 74.6061284 | 78.9682631 | 74.8079507 | 67.1859046 | 68.0479295 | 71.8993924 |
| 73.6061284 | 78.9682631 | 74.8079507 | 68.1859046 | 67.0479295 | 71.7175742 |
| 74.6061284 | 79.9682631 | 74.8079507 | 68.1859046 | 67.0479295 | 72.1721197 |
| 75.6061284 | 79.9682631 | 74.8079507 | 68.1859046 | 68.0479295 | 86.0713843 |
| 75.6061284 | 79.9682631 | 75.8079507 | 67.1859046 | 68.0479295 | 86.0713843 |
| 75.6061284 | 79.9682631 | 75.8079507 | 67.1859046 | 69.0479295 | 86.0713843 |
| 72.6061284 | 79.9682631 | 75.8079507 | 67.1859046 | 70.0479295 | 86.0713843 |
| 72.6061284 | 80.9682631 | 75.8079507 | 67.1859046 | 71.0479295 | 85.0713843 |
| 71.6061284 | 81.9682631 | 75.8079507 | 67.1859046 | 71.0479295 | 82.0713843 |
| 69.6061284 | 81.9682631 | 74.8079507 | 68.1859046 | 72.0479295 | 82.0713843 |
| 69.6061284 | 80.9682631 | 74.8079507 | 68.1859046 | 73.0479295 | 80.0713843 |
| 68.6061284 | 80.9682631 | 74.8079507 | 68.1859046 | 72.0479295 | 80.0713843 |
| 68.6061284 | 81.9682631 | 71.8079507 | 68.1859046 | 73.0479295 | 80.0713843 |
| 69.6061284 | 80.9682631 | 70.8079507 | 68.1859046 | 73.0479295 | 80.0713843 |

|            |            |            |            |            |            |
|------------|------------|------------|------------|------------|------------|
| 69.6061284 | 79.9682631 | 70.8079507 | 68.1859046 | 73.0479295 | 80.0713843 |
| 69.6061284 | 77.9682631 | 70.8079507 | 68.1859046 | 73.0479295 | 81.0713843 |
| 68.6061284 | 77.9682631 | 70.8079507 | 69.1859046 | 73.0479295 | 81.0713843 |
| 68.6061284 | 77.9682631 | 70.8079507 | 70.1859046 | 73.0479295 | 81.0713843 |
| 67.6061284 | 78.9682631 | 67.8079507 | 72.1859046 | 72.0479295 | 81.0713843 |
| 68.6061284 | 78.9682631 | 69.8079507 | 71.1859046 | 72.0479295 | 79.0713843 |
| 68.6061284 | 80.9682631 | 69.8079507 | 70.1859046 | 72.0479295 | 78.0713843 |
| 68.6061284 | 81.9682631 | 68.8079507 | 70.1859046 | 72.0479295 | 78.0713843 |
| 68.6061284 | 82.9682631 | 69.8079507 | 70.1859046 | 71.0479295 | 78.0713843 |
| 68.6061284 | 82.9682631 | 69.8079507 | 70.1859046 | 71.0479295 | 78.0713843 |
| 68.6061284 | 82.9682631 | 70.8079507 | 70.1859046 | 71.0479295 | 78.0713843 |
| 68.6061284 | 81.9682631 | 70.8079507 | 70.1859046 | 70.0479295 | 78.0713843 |
| 68.6061284 | 81.9682631 | 75.8079507 | 70.1859046 | 70.0479295 | 78.0713843 |
| 69.6061284 | 82.9682631 | 75.8079507 | 70.1859046 | 71.0479295 | 77.0713843 |
| 71.6061284 | 82.9682631 | 75.8079507 | 70.1859046 | 71.0479295 | 76.0713843 |
| 73.6061284 | 82.9682631 | 76.8079507 | 71.1859046 | 71.0479295 | 76.0713843 |
| 73.6061284 | 81.9682631 | 76.8079507 | 70.1859046 | 71.0479295 | 76.0713843 |
| 73.6061284 | 81.9682631 | 76.8079507 | 70.1859046 | 71.0479295 | 78.0713843 |
| 73.6061284 | 81.9682631 | 76.8079507 | 70.1859046 | 71.0479295 | 78.0713843 |
| 73.6061284 | 81.9682631 | 75.8079507 | 71.1859046 | 71.0479295 | 79.0713843 |
| 73.6061284 | 81.9682631 | 75.8079507 | 73.1859046 | 70.0479295 | 79.0713843 |
| 73.6061284 | 81.9682631 | 73.8079507 | 73.1859046 | 70.0479295 | 81.0713843 |
| 73.6061284 | 81.9682631 | 73.8079507 | 73.1859046 | 69.0479295 | 82.0713843 |
| 73.6061284 | 81.9682631 | 73.8079507 | 73.1859046 | 69.0479295 | 83.0713843 |
| 73.6061284 | 83.9682631 | 74.8079507 | 73.1859046 | 69.0479295 | 83.0713843 |
| 73.6061284 | 84.9682631 | 75.8079507 | 74.1859046 | 69.0479295 | 82.0713843 |
| 73.6061284 | 84.9682631 | 75.8079507 | 74.1859046 | 69.0479295 | 79.0713843 |
| 75.6061284 | 83.9682631 | 76.8079507 | 74.1859046 | 70.0479295 | 78.0713843 |
| 75.6061284 | 83.9682631 | 76.8079507 | 74.1859046 | 70.0479295 | 78.0713843 |
| 75.6061284 | 83.9682631 | 77.8079507 | 73.1859046 | 70.0479295 | 78.0713843 |
| 71.6061284 | 83.9682631 | 77.8079507 | 71.1859046 | 70.0479295 | 77.0713843 |
| 68.6061284 | 76.9682631 | 76.8079507 | 70.1859046 | 70.0479295 | 76.0713843 |
| 68.6061284 | 76.9682631 | 76.8079507 | 69.1859046 | 71.0479295 | 76.0713843 |
| 68.6061284 | 76.9682631 | 76.8079507 | 68.1859046 | 73.0479295 | 76.0713843 |
| 69.6061284 | 75.9682631 | 76.8079507 | 68.1859046 | 75.0479295 | 76.0713843 |
| 70.6061284 | 75.9682631 | 77.8079507 | 69.1859046 | 79.0479295 | 76.0713843 |
| 69.6061284 | 76.9682631 | 76.8079507 | 70.1859046 | 79.0479295 | 76.0713843 |
| 68.6061284 | 77.9682631 | 76.8079507 | 70.1859046 | 80.0479295 | 76.0713843 |
| 68.6061284 | 76.9682631 | 74.8079507 | 70.1859046 | 81.0479295 | 75.0713843 |
| 68.6061284 | 74.9682631 | 74.8079507 | 72.1859046 | 81.0479295 | 75.0713843 |
| 68.6061284 | 74.9682631 | 74.8079507 | 73.1859046 | 81.0479295 | 74.0713843 |
| 68.6061284 | 69.9682631 | 74.8079507 | 73.1859046 | 81.0479295 | 74.0713843 |
| 69.6061284 | 69.9682631 | 75.8079507 | 73.1859046 | 79.0479295 | 74.0713843 |
| 70.6061284 | 69.9682631 | 75.8079507 | 70.1859046 | 77.0479295 | 73.0713843 |
| 71.6061284 | 70.9682631 | 75.8079507 | 68.1859046 | 75.0479295 | 73.0713843 |

|            |            |            |            |            |            |
|------------|------------|------------|------------|------------|------------|
| 71.6061284 | 70.9682631 | 75.8079507 | 68.1859046 | 74.0479295 | 74.0713843 |
| 72.6061284 | 74.9682631 | 75.8079507 | 68.1859046 | 74.0479295 | 73.0713843 |
| 73.6061284 | 75.9682631 | 74.8079507 | 68.1859046 | 74.0479295 | 73.0713843 |
| 72.6061284 | 75.9682631 | 75.8079507 | 69.1859046 | 74.0479295 | 73.0713843 |
| 72.6061284 | 75.9682631 | 75.8079507 | 72.1859046 | 73.0479295 | 73.0713843 |
| 72.6061284 | 74.9682631 | 76.8079507 | 72.1859046 | 73.0479295 | 74.0713843 |
| 72.6061284 | 74.9682631 | 76.8079507 | 72.1859046 | 72.0479295 | 75.0713843 |
| 72.6061284 | 74.9682631 | 75.8079507 | 72.1859046 | 72.0479295 | 75.0713843 |
| 72.6061284 | 73.9682631 | 75.8079507 | 73.1859046 | 72.0479295 | 75.0713843 |
| 72.6061284 | 73.9682631 | 75.8079507 | 75.1859046 | 72.0479295 | 76.0713843 |
| 72.6061284 | 73.9682631 | 75.8079507 | 75.1859046 | 75.0479295 | 76.0713843 |
| 72.6061284 | 73.9682631 | 76.8079507 | 77.1859046 | 75.0479295 | 76.0713843 |
| 72.6061284 | 74.9682631 | 76.8079507 | 78.1859046 | 75.0479295 | 76.0713843 |
| 74.6061284 | 74.9682631 | 77.8079507 | 80.1859046 | 76.0479295 | 76.0713843 |
| 74.6061284 | 75.9682631 | 77.8079507 | 82.1859046 | 76.0479295 | 76.0713843 |
| 75.6061284 | 75.9682631 | 77.8079507 | 84.1859046 | 76.0479295 | 76.0713843 |
| 78.6061284 | 74.9682631 | 76.8079507 | 84.1859046 | 76.0479295 | 76.0713843 |
| 78.6061284 | 73.9682631 | 76.8079507 | 84.1859046 | 76.0479295 | 75.0713843 |
| 80.6061284 | 72.9682631 | 75.8079507 | 84.1859046 | 76.0479295 | 74.0713843 |
| 80.6061284 | 72.9682631 | 74.8079507 | 83.1859046 | 75.0479295 | 74.0713843 |
| 78.6061284 | 72.9682631 | 74.8079507 | 83.1859046 | 74.0479295 | 74.0713843 |
| 77.6061284 | 73.9682631 | 74.8079507 | 83.1859046 | 74.0479295 | 74.0713843 |
| 78.6061284 | 73.9682631 | 74.8079507 | 83.1859046 | 74.0479295 | 74.0713843 |
| 78.6061284 | 73.9682631 | 74.8079507 | 82.1859046 | 73.0479295 | 74.0713843 |
| 79.6061284 | 73.9682631 | 74.8079507 | 82.1859046 | 72.0479295 | 74.0713843 |
| 79.6061284 | 74.9682631 | 76.8079507 | 82.1859046 | 72.0479295 | 74.0713843 |
| 79.6061284 | 75.9682631 | 79.8079507 | 82.1859046 | 72.0479295 | 75.0713843 |
| 78.6061284 | 75.9682631 | 80.8079507 | 80.1859046 | 72.0479295 | 77.0713843 |
| 76.6061284 | 75.9682631 | 80.8079507 | 79.1859046 | 72.0479295 | 77.0713843 |
| 74.6061284 | 75.9682631 | 81.8079507 | 78.1859046 | 72.0479295 | 78.0713843 |
| 73.6061284 | 75.9682631 | 82.8079507 | 76.1859046 | 72.0479295 | 78.0713843 |
| 73.6061284 | 75.9682631 | 82.8079507 | 76.1859046 | 72.0479295 | 78.0713843 |
| 75.6061284 | 77.9682631 | 84.8079507 | 75.1859046 | 72.0479295 | 78.0713843 |
| 75.6061284 | 77.9682631 | 84.8079507 | 74.1859046 | 72.0479295 | 75.0713843 |
| 75.6061284 | 78.9682631 | 86.8079507 | 73.1859046 | 73.0479295 | 75.0713843 |
| 74.6061284 | 78.9682631 | 83.8079507 | 73.1859046 | 73.0479295 | 75.0713843 |
| 73.6061284 | 78.9682631 | 83.8079507 | 74.1859046 | 73.0479295 | 74.0713843 |
| 73.6061284 | 78.9682631 | 83.8079507 | 74.1859046 | 73.0479295 | 74.0713843 |
| 72.6061284 | 73.9682631 | 83.8079507 | 74.1859046 | 74.0479295 | 73.0713843 |
| 72.6061284 | 72.9682631 | 82.8079507 | 74.1859046 | 75.0479295 | 73.0713843 |
| 72.6061284 | 72.9682631 | 82.8079507 | 74.1859046 | 75.0479295 | 72.0713843 |
| 77.6061284 | 71.9682631 | 82.8079507 | 74.1859046 | 75.0479295 | 72.0713843 |
| 77.6061284 | 71.9682631 | 82.8079507 | 73.1859046 | 75.0479295 | 72.0713843 |
| 75.6061284 | 71.9682631 | 82.8079507 | 72.1859046 | 76.0479295 | 72.0713843 |
| 75.6061284 | 70.9682631 | 81.8079507 | 71.1859046 | 76.0479295 | 72.0713843 |

|            |            |            |            |            |            |
|------------|------------|------------|------------|------------|------------|
| 74.6061284 | 70.9682631 | 81.8079507 | 72.1859046 | 76.0479295 | 74.0713843 |
| 73.6061284 | 70.9682631 | 78.8079507 | 72.1859046 | 76.0479295 | 75.0713843 |
| 73.6061284 | 70.9682631 | 78.8079507 | 73.1859046 | 76.0479295 | 74.0713843 |
| 74.6061284 | 70.9682631 | 78.8079507 | 73.1859046 | 75.0479295 | 74.0713843 |
| 75.6061284 | 70.9682631 | 78.8079507 | 73.1859046 | 74.0479295 | 74.0713843 |
| 77.6061284 | 69.9682631 | 78.8079507 | 73.1859046 | 74.0479295 | 74.0713843 |
| 78.6061284 | 69.9682631 | 78.8079507 | 73.1859046 | 73.0479295 | 73.0713843 |
| 78.6061284 | 69.9682631 | 76.8079507 | 73.1859046 | 73.0479295 | 73.0713843 |
| 78.6061284 | 69.9682631 | 75.8079507 | 72.1859046 | 72.0479295 | 73.0713843 |
| 77.6061284 | 69.9682631 | 76.8079507 | 72.1859046 | 73.0479295 | 72.0713843 |
| 74.6061284 | 69.9682631 | 76.8079507 | 72.1859046 | 73.0479295 | 72.0713843 |
| 71.6061284 | 69.9682631 | 77.8079507 | 72.1859046 | 72.0479295 | 72.0713843 |
| 68.6061284 | 68.9682631 | 79.8079507 | 72.1859046 | 72.0479295 | 73.0713843 |
| 63.6061284 | 72.9682631 | 81.8079507 | 73.1859046 | 73.0479295 | 73.0713843 |
| 62.6061284 | 72.9682631 | 81.8079507 | 73.1859046 | 73.0479295 | 75.0713843 |
| 62.6061284 | 75.9682631 | 81.8079507 | 72.1859046 | 72.0479295 | 75.0713843 |
| 62.6061284 | 77.9682631 | 81.8079507 | 72.1859046 | 72.0479295 | 75.0713843 |
| 65.6061284 | 77.9682631 | 82.8079507 | 72.1859046 | 71.0479295 | 75.0713843 |
| 67.6061284 | 77.9682631 | 82.8079507 | 71.1859046 | 71.0479295 | 74.0713843 |
| 69.6061284 | 77.9682631 | 82.8079507 | 71.1859046 | 71.0479295 | 73.0713843 |
| 71.6061284 | 77.9682631 | 82.8079507 | 71.1859046 | 71.0479295 | 73.0713843 |
| 72.6061284 | 77.9682631 | 82.8079507 | 72.1859046 | 71.0479295 | 73.0713843 |
| 72.6061284 | 77.9682631 | 82.8079507 | 72.1859046 | 72.0479295 | 72.0713843 |
| 72.6061284 | 77.9682631 | 81.8079507 | 74.1859046 | 72.0479295 | 72.0713843 |
| 73.6061284 | 76.9682631 | 81.8079507 | 75.1859046 | 71.0479295 | 71.0713843 |
| 74.6061284 | 76.9682631 | 80.8079507 | 75.1859046 | 71.0479295 | 71.0713843 |
| 73.6061284 | 76.9682631 | 80.8079507 | 76.1859046 | 71.0479295 | 71.0713843 |
| 73.6061284 | 76.9682631 | 76.8079507 | 77.1859046 | 71.0479295 | 71.0713843 |
| 70.6061284 | 78.9682631 | 76.8079507 | 77.1859046 | 71.0479295 | 70.0713843 |
| 68.6061284 | 78.9682631 | 77.8079507 | 77.1859046 | 71.0479295 | 70.0713843 |
| 67.6061284 | 78.9682631 | 78.8079507 | 77.1859046 | 70.0479295 | 70.0713843 |
| 67.6061284 | 78.9682631 | 77.8079507 | 77.1859046 | 70.0479295 | 70.0713843 |
| 67.6061284 | 78.9682631 | 77.8079507 | 78.1859046 | 71.0479295 | 71.0713843 |
| 66.6061284 | 78.9682631 | 77.8079507 | 78.1859046 | 71.0479295 | 72.0713843 |
| 66.6061284 | 78.9682631 | 75.8079507 | 78.1859046 | 70.0479295 | 77.0713843 |
| 68.6061284 | 78.9682631 | 74.8079507 | 78.1859046 | 71.0479295 | 77.0713843 |
| 68.6061284 | 79.9682631 | 74.8079507 | 78.1859046 | 71.0479295 | 80.0713843 |
| 69.6061284 | 80.9682631 | 74.8079507 | 79.1859046 | 72.0479295 | 82.0713843 |
| 69.6061284 | 79.9682631 | 74.8079507 | 79.1859046 | 72.0479295 | 82.0713843 |
| 70.6061284 | 79.9682631 | 71.8079507 | 80.1859046 | 72.0479295 | 82.0713843 |
| 70.6061284 | 79.9682631 | 71.8079507 | 81.1859046 | 72.0479295 | 82.0713843 |
| 70.6061284 | 78.9682631 | 71.8079507 | 85.1859046 | 71.0479295 | 82.0713843 |
| 69.6061284 | 77.9682631 | 71.8079507 | 85.1859046 | 71.0479295 | 83.0713843 |
| 70.6061284 | 77.9682631 | 69.8079507 | 85.1859046 | 71.0479295 | 84.0713843 |
| 72.6061284 | 77.9682631 | 69.8079507 | 85.1859046 | 70.0479295 | 85.0713843 |

|            |            |            |            |            |            |
|------------|------------|------------|------------|------------|------------|
| 73.6061284 | 77.9682631 | 69.8079507 | 87.1859046 | 70.0479295 | 86.0713843 |
| 73.6061284 | 77.9682631 | 69.8079507 | 87.1859046 | 70.0479295 | 86.0713843 |
| 73.6061284 | 77.9682631 | 69.8079507 | 88.1859046 | 70.0479295 | 87.0713843 |
| 79.6061284 | 77.9682631 | 68.8079507 | 88.1859046 | 70.0479295 | 87.0713843 |
| 80.6061284 | 77.9682631 | 68.8079507 | 88.1859046 | 71.0479295 | 87.0713843 |
| 80.6061284 | 77.9682631 | 68.8079507 | 89.1859046 | 72.0479295 | 88.0713843 |
| 81.6061284 | 77.9682631 | 69.8079507 | 89.1859046 | 73.0479295 | 89.0713843 |
| 81.6061284 | 76.9682631 | 69.8079507 | 89.1859046 | 73.0479295 | 89.0713843 |
| 80.6061284 | 75.9682631 | 69.8079507 | 88.1859046 | 74.0479295 | 89.0713843 |
| 80.6061284 | 75.9682631 | 69.8079507 | 83.1859046 | 74.0479295 | 87.0713843 |
| 75.6061284 | 76.9682631 | 68.8079507 | 82.1859046 | 75.0479295 | 83.0713843 |
| 74.6061284 | 76.9682631 | 68.8079507 | 81.1859046 | 74.0479295 | 81.0713843 |
| 73.6061284 | 79.9682631 | 69.8079507 | 81.1859046 | 74.0479295 | 80.0713843 |
| 72.6061284 | 80.9682631 | 70.8079507 | 82.1859046 | 74.0479295 | 80.0713843 |
| 69.6061284 | 80.9682631 | 70.8079507 | 82.1859046 | 75.0479295 | 76.0713843 |
| 69.6061284 | 78.9682631 | 75.8079507 | 82.1859046 | 75.0479295 | 75.0713843 |
| 65.6061284 | 77.9682631 | 75.8079507 | 83.1859046 | 75.0479295 | 72.0713843 |
| 64.6061284 | 77.9682631 | 75.8079507 | 83.1859046 | 76.0479295 | 70.0713843 |
| 64.6061284 | 77.9682631 | 75.8079507 | 83.1859046 | 76.0479295 | 70.0713843 |
| 65.6061284 | 77.9682631 | 76.8079507 | 82.1859046 | 76.0479295 | 70.0713843 |
| 65.6061284 | 78.9682631 | 76.8079507 | 78.1859046 | 77.0479295 | 70.0713843 |
| 65.6061284 | 78.9682631 | 76.8079507 | 76.1859046 | 77.0479295 | 72.0713843 |
| 65.6061284 | 78.9682631 | 75.8079507 | 74.1859046 | 77.0479295 | 73.0713843 |
| 64.6061284 | 77.9682631 | 75.8079507 | 72.1859046 | 78.0479295 | 73.0713843 |
| 64.6061284 | 77.9682631 | 75.8079507 | 72.1859046 | 78.0479295 | 72.0713843 |
| 65.6061284 | 74.9682631 | 75.8079507 | 71.1859046 | 78.0479295 | 72.0713843 |
| 67.6061284 | 73.9682631 | 76.8079507 | 70.1859046 | 76.0479295 | 72.0713843 |
| 67.6061284 | 73.9682631 | 76.8079507 | 70.1859046 | 74.0479295 | 73.0713843 |
| 65.6061284 | 73.9682631 | 76.8079507 | 70.1859046 | 73.0479295 | 73.0713843 |
| 63.6061284 | 73.9682631 | 76.8079507 | 71.1859046 | 72.0479295 | 73.0713843 |
| 63.6061284 | 75.9682631 | 77.8079507 | 71.1859046 | 72.0479295 | 74.0713843 |
| 63.6061284 | 75.9682631 | 77.8079507 | 70.1859046 | 73.0479295 | 74.0713843 |
| 63.6061284 | 76.9682631 | 78.8079507 | 70.1859046 | 73.0479295 | 74.0713843 |
| 63.6061284 | 76.9682631 | 80.8079507 | 70.1859046 | 73.0479295 | 76.0713843 |
| 64.6061284 | 76.9682631 | 78.8079507 | 69.1859046 | 72.0479295 | 76.0713843 |
| 68.6061284 | 75.9682631 | 78.8079507 | 69.1859046 | 72.0479295 | 76.0713843 |
| 70.6061284 | 75.9682631 | 75.8079507 | 71.1859046 | 71.0479295 | 79.0713843 |
| 70.6061284 | 75.9682631 | 74.8079507 | 72.1859046 | 70.0479295 | 79.0713843 |
| 73.6061284 | 75.9682631 | 74.8079507 | 73.1859046 | 69.0479295 | 80.0713843 |
| 75.6061284 | 75.9682631 | 73.8079507 | 73.1859046 | 69.0479295 | 81.0713843 |
| 75.6061284 | 75.9682631 | 73.8079507 | 73.1859046 | 69.0479295 | 81.0713843 |
| 76.6061284 | 75.9682631 | 73.8079507 | 73.1859046 | 68.0479295 | 74.0713843 |
| 77.6061284 | 75.9682631 | 74.8079507 | 73.1859046 | 69.0479295 | 72.0713843 |
| 78.6061284 | 76.9682631 | 74.8079507 | 73.1859046 | 69.0479295 | 71.0713843 |
| 78.6061284 | 76.9682631 | 75.8079507 | 74.1859046 | 69.0479295 | 71.0713843 |

|            |            |            |            |            |            |
|------------|------------|------------|------------|------------|------------|
| 82.6061284 | 76.9682631 | 75.8079507 | 74.1859046 | 69.0479295 | 68.0713843 |
| 84.6061284 | 76.9682631 | 75.8079507 | 74.1859046 | 69.0479295 | 67.0713843 |
| 86.6061284 | 72.9682631 | 74.8079507 | 74.1859046 | 70.0479295 | 67.0713843 |
| 86.6061284 | 72.9682631 | 74.8079507 | 74.1859046 | 70.0479295 | 66.0713843 |
| 72.6266651 | 72.9682631 | 73.8079507 | 76.1859046 | 70.0479295 | 67.0713843 |
| 85.6061284 | 74.9682631 | 73.8079507 | 78.1859046 | 69.0479295 | 69.0713843 |
| 81.6061284 | 75.9682631 | 73.8079507 | 78.1859046 | 69.0479295 | 69.0713843 |
| 81.6061284 | 75.9682631 | 73.8079507 | 79.1859046 | 69.0479295 | 71.0713843 |
| 76.6061284 | 75.9682631 | 73.8079507 | 80.1859046 | 69.0479295 | 72.0713843 |
| 75.6061284 | 75.9682631 | 74.8079507 | 82.1859046 | 69.0479295 | 72.0713843 |
| 75.6061284 | 75.9682631 | 74.8079507 | 82.1859046 | 69.0479295 | 72.0713843 |
| 75.6061284 | 73.9682631 | 72.8079507 | 85.1859046 | 70.0479295 | 73.0713843 |
| 75.6061284 | 73.9682631 | 72.8079507 | 85.1859046 | 70.0479295 | 73.0713843 |
| 75.6061284 | 74.9682631 | 73.8079507 | 85.1859046 | 70.0479295 | 74.0713843 |
| 75.6061284 | 74.9682631 | 73.8079507 | 81.1859046 | 70.0479295 | 73.0713843 |
| 75.6061284 | 75.9682631 | 73.8079507 | 79.1859046 | 70.0479295 | 72.0713843 |
| 75.6061284 | 75.9682631 | 73.8079507 | 77.1859046 | 70.0479295 | 72.0713843 |
| 73.6061284 | 75.9682631 | 73.8079507 | 75.1859046 | 70.0479295 | 69.0713843 |
| 72.6061284 | 74.9682631 | 73.8079507 | 73.1859046 | 70.0479295 | 69.0713843 |
| 71.6061284 | 73.9682631 | 73.8079507 | 71.1859046 | 71.0479295 | 69.0713843 |
| 71.6061284 | 73.9682631 | 73.8079507 | 70.1859046 | 71.0479295 | 70.0713843 |
| 68.6061284 | 73.9682631 | 73.8079507 | 70.1859046 | 71.0479295 | 71.0713843 |
| 68.6061284 | 74.9682631 | 73.8079507 | 71.1859046 | 71.0479295 | 71.0713843 |
| 70.6061284 | 74.9682631 | 73.8079507 | 71.1859046 | 71.0479295 | 71.0713843 |
| 71.6061284 | 75.9682631 | 74.8079507 | 72.1859046 | 70.0479295 | 71.0713843 |
| 73.6061284 | 75.9682631 | 74.8079507 | 72.1859046 | 70.0479295 | 71.0713843 |
| 73.6061284 | 75.9682631 | 74.8079507 | 72.1859046 | 70.0479295 | 69.0713843 |
| 74.6061284 | 75.9682631 | 74.8079507 | 72.1859046 | 70.0479295 | 67.0713843 |
| 74.6061284 | 75.9682631 | 74.8079507 | 69.1859046 | 70.0479295 | 65.0713843 |
| 75.6061284 | 77.9682631 | 73.8079507 | 69.1859046 | 70.0479295 | 65.0713843 |
| 74.6061284 | 81.9682631 | 73.8079507 | 69.1859046 | 71.0479295 | 64.0713843 |
| 74.6061284 | 82.9682631 | 73.8079507 | 70.1859046 | 71.0479295 | 64.0713843 |
| 74.6061284 | 82.9682631 | 74.8079507 | 73.1859046 | 71.0479295 | 64.0713843 |
| 74.6061284 | 82.9682631 | 74.8079507 | 75.1859046 | 71.0479295 | 64.0713843 |
| 74.6061284 | 84.9682631 | 74.8079507 | 76.1859046 | 71.0479295 | 64.0713843 |
| 74.6061284 | 84.9682631 | 74.8079507 | 77.1859046 | 71.0479295 | 70.0713843 |
| 74.6061284 | 84.9682631 | 74.8079507 | 77.1859046 | 72.0479295 | 70.0713843 |
| 76.6061284 | 84.9682631 | 74.8079507 | 78.1859046 | 72.0479295 | 72.0713843 |
| 77.6061284 | 84.9682631 | 74.8079507 | 79.1859046 | 73.0479295 | 72.0713843 |
| 79.6061284 | 79.9682631 | 73.8079507 | 80.1859046 | 74.0479295 | 69.0713843 |
| 79.6061284 | 78.9682631 | 74.8079507 | 81.1859046 | 75.0479295 | 67.0713843 |
| 79.6061284 | 76.9682631 | 75.8079507 | 81.1859046 | 75.0479295 | 67.0713843 |
| 77.6061284 | 76.9682631 | 77.8079507 | 81.1859046 | 75.0479295 | 68.0713843 |
| 77.6061284 | 74.9682631 | 77.8079507 | 82.1859046 | 75.0479295 | 69.0713843 |
| 72.6061284 | 71.9682631 | 78.8079507 | 83.1859046 | 75.0479295 | 69.0713843 |

|            |            |            |            |            |            |
|------------|------------|------------|------------|------------|------------|
| 70.6061284 | 72.9682631 | 84.8079507 | 85.1859046 | 74.0479295 | 69.0713843 |
| 69.6061284 | 72.9682631 | 87.8079507 | 86.1859046 | 73.0479295 | 69.0713843 |
| 69.6061284 | 72.9682631 | 87.8079507 | 87.1859046 | 73.0479295 | 69.0713843 |
| 69.6061284 | 72.9682631 | 88.8079507 | 87.1859046 | 73.0479295 | 69.0713843 |
| 69.6061284 | 72.9682631 | 88.8079507 | 88.1859046 | 73.0479295 | 69.0713843 |
| 69.6061284 | 72.9682631 | 88.8079507 | 75.4448469 | 72.0479295 | 69.0713843 |
| 71.6061284 | 73.9682631 | 76.2630288 | 76.2630288 | 73.0479295 | 69.0713843 |
| 71.6061284 | 73.9682631 | 76.9903015 | 76.9903015 | 73.0479295 | 69.0713843 |
| 71.6061284 | 73.9682631 | 76.9903015 | 76.9903015 | 72.0479295 | 68.0713843 |
| 71.6061284 | 73.9682631 | 77.3539378 | 77.3539378 | 72.0479295 | 68.0713843 |
| 68.6061284 | 74.9682631 | 77.3539378 | 89.1859046 | 72.0479295 | 68.0713843 |
| 67.6061284 | 74.9682631 | 76.8993924 | 85.1859046 | 72.0479295 | 68.0713843 |
| 66.6061284 | 74.9682631 | 76.7175742 | 83.1859046 | 72.0479295 | 67.0713843 |
| 66.6061284 | 74.9682631 | 77.1721197 | 83.1859046 | 72.0479295 | 68.0713843 |
| 65.6061284 | 76.9682631 | 77.1721197 | 79.1859046 | 72.0479295 | 68.0713843 |
| 66.6061284 | 76.9682631 | 77.2630288 | 79.1859046 | 72.0479295 | 69.0713843 |
| 70.6061284 | 75.9682631 | 77.6266651 | 79.1859046 | 72.0479295 | 69.0713843 |
| 71.6061284 | 76.9682631 | 78.2630288 | 80.1859046 | 73.0479295 | 71.0713843 |
| 72.6061284 | 76.9682631 | 91.8079507 | 81.1859046 | 74.0479295 | 71.0713843 |
| 72.6061284 | 76.9682631 | 91.8079507 | 81.1859046 | 74.0479295 | 71.0713843 |
| 73.6061284 | 75.9682631 | 83.8079507 | 80.1859046 | 74.0479295 | 70.0713843 |
| 73.6061284 | 74.9682631 | 81.8079507 | 80.1859046 | 74.0479295 | 70.0713843 |
| 73.6061284 | 74.9682631 | 79.8079507 | 77.1859046 | 74.0479295 | 70.0713843 |
| 74.6061284 | 74.9682631 | 79.8079507 | 75.1859046 | 74.0479295 | 70.0713843 |
| 73.6061284 | 74.9682631 | 78.8079507 | 74.1859046 | 74.0479295 | 70.0713843 |
| 72.6061284 | 75.9682631 | 78.8079507 | 71.1859046 | 75.0479295 | 70.0713843 |
| 71.6061284 | 75.9682631 | 77.8079507 | 70.1859046 | 75.0479295 | 69.0713843 |
| 71.6061284 | 75.9682631 | 77.8079507 | 71.1859046 | 75.0479295 | 68.0713843 |
| 70.6061284 | 75.9682631 | 76.8079507 | 71.1859046 | 78.0479295 | 67.0713843 |
| 70.6061284 | 75.9682631 | 76.8079507 | 70.1859046 | 78.0479295 | 66.0713843 |
| 70.6061284 | 74.9682631 | 76.8079507 | 70.1859046 | 78.0479295 | 66.0713843 |
| 70.6061284 | 74.9682631 | 76.8079507 | 70.1859046 | 78.0479295 | 65.0713843 |
| 72.6061284 | 73.9682631 | 76.8079507 | 70.1859046 | 78.0479295 | 65.0713843 |
| 73.6061284 | 73.9682631 | 76.8079507 | 70.1859046 | 78.0479295 | 65.0713843 |
| 74.6061284 | 73.9682631 | 77.8079507 | 70.1859046 | 78.0479295 | 65.0713843 |
| 75.6061284 | 73.9682631 | 78.8079507 | 70.1859046 | 78.0479295 | 68.0713843 |
| 76.6061284 | 72.9682631 | 79.8079507 | 70.1859046 | 78.0479295 | 69.0713843 |
| 76.6061284 | 72.9682631 | 81.8079507 | 71.1859046 | 78.0479295 | 70.0713843 |
| 76.6061284 | 72.9682631 | 81.8079507 | 72.1859046 | 78.0479295 | 70.0713843 |
| 76.6061284 | 72.9682631 | 81.8079507 | 72.1859046 | 75.0479295 | 70.0713843 |
| 73.6061284 | 72.9682631 | 76.8079507 | 71.1859046 | 73.0479295 | 69.0713843 |
| 71.6061284 | 72.9682631 | 72.8079507 | 67.1859046 | 73.0479295 | 69.0713843 |
| 71.6061284 | 72.9682631 | 70.8079507 | 66.1859046 | 73.0479295 | 67.0713843 |
| 71.6061284 | 72.9682631 | 70.8079507 | 66.1859046 | 73.0479295 | 66.0713843 |
| 72.6061284 | 72.9682631 | 70.8079507 | 65.1859046 | 73.0479295 | 66.0713843 |

|            |            |            |            |            |            |
|------------|------------|------------|------------|------------|------------|
| 74.6061284 | 72.9682631 | 71.8079507 | 65.1859046 | 73.0479295 | 66.0713843 |
| 75.6061284 | 72.9682631 | 73.8079507 | 68.1859046 | 73.0479295 | 65.0713843 |
| 75.6061284 | 72.9682631 | 75.8079507 | 69.1859046 | 73.0479295 | 65.0713843 |
| 77.6061284 | 72.9682631 | 75.8079507 | 69.1859046 | 72.0479295 | 65.0713843 |
| 77.6061284 | 72.9682631 | 75.8079507 | 69.1859046 | 72.0479295 | 65.0713843 |
| 77.6061284 | 72.9682631 | 73.8079507 | 67.1859046 | 72.0479295 | 65.0713843 |
| 77.6061284 | 72.9682631 | 72.8079507 | 67.1859046 | 72.0479295 | 65.0713843 |
| 76.6061284 | 70.9682631 | 72.8079507 | 65.1859046 | 72.0479295 | 65.0713843 |
| 75.6061284 | 70.9682631 | 73.8079507 | 64.1859046 | 72.0479295 | 65.0713843 |
| 74.6061284 | 70.9682631 | 74.8079507 | 64.1859046 | 72.0479295 | 66.0713843 |
| 74.6061284 | 70.9682631 | 74.8079507 | 64.1859046 | 72.0479295 | 66.0713843 |
| 74.6061284 | 70.9682631 | 74.8079507 | 62.1859046 | 72.0479295 | 65.0713843 |
| 74.6061284 | 70.9682631 | 75.8079507 | 62.1859046 | 71.0479295 | 65.0713843 |
| 75.6061284 | 70.9682631 | 74.8079507 | 61.1859046 | 71.0479295 | 65.0713843 |
| 75.6061284 | 70.9682631 | 74.8079507 | 61.1859046 | 72.0479295 | 65.0713843 |
| 75.6061284 | 70.9682631 | 74.8079507 | 62.1859046 | 72.0479295 | 66.0713843 |
| 75.6061284 | 70.9682631 | 74.8079507 | 64.1859046 | 72.0479295 | 66.0713843 |
| 75.6061284 | 70.9682631 | 74.8079507 | 65.1859046 | 72.0479295 | 66.0713843 |
| 75.6061284 | 69.9682631 | 74.8079507 | 66.1859046 | 72.0479295 | 65.0713843 |
| 75.6061284 | 70.9682631 | 73.8079507 | 66.1859046 | 72.0479295 | 65.0713843 |
| 72.6061284 | 72.9682631 | 73.8079507 | 68.1859046 | 72.0479295 | 65.0713843 |
| 71.6061284 | 71.9682631 | 74.8079507 | 69.1859046 | 72.0479295 | 65.0713843 |
| 70.6061284 | 70.9682631 | 74.8079507 | 69.1859046 | 72.0479295 | 65.0713843 |
| 71.6061284 | 69.9682631 | 75.8079507 | 69.1859046 | 72.0479295 | 65.0713843 |
| 72.6061284 | 69.9682631 | 76.8079507 | 70.1859046 | 72.0479295 | 65.0713843 |
| 72.6061284 | 69.9682631 | 76.8079507 | 73.1859046 | 72.0479295 | 66.0713843 |
| 73.6061284 | 70.9682631 | 76.8079507 | 73.1859046 | 72.0479295 | 66.0713843 |
| 73.6061284 | 70.9682631 | 78.8079507 | 71.1859046 | 72.0479295 | 66.0713843 |
| 73.6061284 | 70.9682631 | 78.8079507 | 71.1859046 | 72.0479295 | 66.0713843 |
| 74.6061284 | 71.9682631 | 79.8079507 | 69.1859046 | 72.0479295 | 66.0713843 |
| 75.6061284 | 71.9682631 | 77.8079507 | 69.1859046 | 73.0479295 | 69.0713843 |
| 76.6061284 | 71.9682631 | 76.8079507 | 68.1859046 | 73.0479295 | 69.0713843 |
| 76.6061284 | 70.9682631 | 75.8079507 | 68.1859046 | 73.0479295 | 72.0713843 |
| 76.6061284 | 70.9682631 | 75.8079507 | 69.1859046 | 73.0479295 | 72.0713843 |
| 76.6061284 | 69.9682631 | 75.8079507 | 70.1859046 | 76.0479295 | 68.0713843 |
| 75.6061284 | 69.9682631 | 75.8079507 | 70.1859046 | 77.0479295 | 67.0713843 |
| 74.6061284 | 66.9682631 | 74.8079507 | 71.1859046 | 77.0479295 | 67.0713843 |
| 74.6061284 | 65.9682631 | 72.8079507 | 71.1859046 | 77.0479295 | 67.0713843 |
| 74.6061284 | 64.9682631 | 72.8079507 | 71.1859046 | 79.0479295 | 67.0713843 |
| 74.6061284 | 64.9682631 | 72.8079507 | 70.1859046 | 80.0479295 | 67.0713843 |
| 75.6061284 | 64.9682631 | 72.8079507 | 69.1859046 | 80.0479295 | 66.0713843 |
| 75.6061284 | 63.9682631 | 73.8079507 | 69.1859046 | 80.0479295 | 66.0713843 |
| 75.6061284 | 63.9682631 | 72.8079507 | 69.1859046 | 78.0479295 | 66.0713843 |
| 75.6061284 | 63.9682631 | 70.8079507 | 69.1859046 | 77.0479295 | 67.0713843 |
| 75.6061284 | 63.9682631 | 70.8079507 | 69.1859046 | 77.0479295 | 67.0713843 |



|            |            |            |            |            |            |
|------------|------------|------------|------------|------------|------------|
| 74.6061284 | 69.9682631 | 70.8079507 | 73.1859046 | 75.0479295 | 68.0713843 |
| 74.6061284 | 70.9682631 | 70.8079507 | 75.1859046 | 75.0479295 | 69.0713843 |
| 74.6061284 | 70.9682631 | 71.8079507 | 75.1859046 | 75.0479295 | 69.0713843 |
| 74.6061284 | 73.9682631 | 73.8079507 | 74.1859046 | 75.0479295 | 69.0713843 |
| 74.6061284 | 74.9682631 | 73.8079507 | 73.1859046 | 75.0479295 | 69.0713843 |
| 75.6061284 | 74.9682631 | 74.8079507 | 73.1859046 | 75.0479295 | 69.0713843 |
| 75.6061284 | 76.9682631 | 74.8079507 | 72.1859046 | 75.0479295 | 73.0713843 |
| 75.6061284 | 77.9682631 | 74.8079507 | 71.1859046 | 75.0479295 | 73.0713843 |
| 75.6061284 | 76.9682631 | 75.8079507 | 71.1859046 | 74.0479295 | 74.0713843 |
| 75.6061284 | 76.9682631 | 75.8079507 | 71.1859046 | 74.0479295 | 74.0713843 |
| 75.6061284 | 77.9682631 | 75.8079507 | 71.1859046 | 74.0479295 | 76.0713843 |
| 76.6061284 | 77.9682631 | 75.8079507 | 71.1859046 | 74.0479295 | 76.0713843 |
| 77.6061284 | 75.9682631 | 75.8079507 | 71.1859046 | 74.0479295 | 75.0713843 |
| 77.6061284 | 74.9682631 | 77.8079507 | 70.1859046 | 74.0479295 | 75.0713843 |
| 80.6061284 | 74.9682631 | 77.8079507 | 70.1859046 | 74.0479295 | 78.0713843 |
| 81.6061284 | 74.9682631 | 78.8079507 | 70.1859046 | 75.0479295 | 81.0713843 |
| 81.6061284 | 74.9682631 | 78.8079507 | 70.1859046 | 75.0479295 | 82.0713843 |
| 78.6061284 | 74.9682631 | 79.8079507 | 70.1859046 | 75.0479295 | 83.0713843 |
| 75.6061284 | 72.9682631 | 80.8079507 | 70.1859046 | 76.0479295 | 83.0713843 |
| 75.6061284 | 71.9682631 | 80.8079507 | 71.1859046 | 76.0479295 | 85.0713843 |
| 69.6061284 | 70.9682631 | 80.8079507 | 71.1859046 | 78.0479295 | 86.0713843 |
| 66.6061284 | 70.9682631 | 83.8079507 | 71.1859046 | 78.0479295 | 87.0713843 |
| 66.6061284 | 70.9682631 | 84.8079507 | 71.1859046 | 79.0479295 | 88.0713843 |
| 64.6061284 | 71.9682631 | 84.8079507 | 71.1859046 | 79.0479295 | 88.0713843 |
| 64.6061284 | 73.9682631 | 85.8079507 | 72.1859046 | 81.0479295 | 89.0713843 |
| 64.6061284 | 74.9682631 | 85.8079507 | 72.1859046 | 81.0479295 | 72.0713843 |
| 67.6061284 | 75.9682631 | 85.8079507 | 73.1859046 | 78.0479295 | 70.0713843 |
| 67.6061284 | 75.9682631 | 85.8079507 | 73.1859046 | 78.0479295 | 68.0713843 |
| 68.6061284 | 75.9682631 | 85.8079507 | 73.1859046 | 78.0479295 | 68.0713843 |
| 69.6061284 | 74.9682631 | 84.8079507 | 74.1859046 | 77.0479295 | 68.0713843 |
| 69.6061284 | 74.9682631 | 84.8079507 | 74.1859046 | 77.0479295 | 68.0713843 |
| 69.6061284 | 73.9682631 | 83.8079507 | 78.1859046 | 77.0479295 | 67.0713843 |
| 69.6061284 | 73.9682631 | 83.8079507 | 79.1859046 | 77.0479295 | 67.0713843 |
| 69.6061284 | 75.9682631 | 84.8079507 | 79.1859046 | 76.0479295 | 69.0713843 |
| 69.6061284 | 76.9682631 | 84.8079507 | 80.1859046 | 76.0479295 | 69.0713843 |
| 70.6061284 | 77.9682631 | 84.8079507 | 81.1859046 | 76.0479295 | 70.0713843 |
| 71.6061284 | 77.9682631 | 86.8079507 | 82.1859046 | 75.0479295 | 70.0713843 |
| 71.6061284 | 77.9682631 | 86.8079507 | 82.1859046 | 75.0479295 | 70.0713843 |
| 70.6061284 | 77.9682631 | 87.8079507 | 74.8084833 | 75.0479295 | 69.0713843 |
| 70.6061284 | 77.9682631 | 87.8079507 | 74.8084833 | 75.0479295 | 69.0713843 |
| 69.6061284 | 77.9682631 | 78.8079507 | 73.8993924 | 74.0479295 | 69.0713843 |
| 69.6061284 | 77.9682631 | 77.8079507 | 83.1859046 | 75.0479295 | 69.0713843 |
| 69.6061284 | 77.9682631 | 76.8079507 | 75.1859046 | 75.0479295 | 69.0713843 |
| 69.6061284 | 77.9682631 | 75.8079507 | 72.1859046 | 76.0479295 | 69.0713843 |
| 68.6061284 | 77.9682631 | 75.8079507 | 69.1859046 | 75.0479295 | 68.0713843 |

|            |            |            |            |            |            |
|------------|------------|------------|------------|------------|------------|
| 68.6061284 | 77.9682631 | 77.8079507 | 67.1859046 | 75.0479295 | 68.0713843 |
| 69.6061284 | 78.9682631 | 78.8079507 | 66.1859046 | 75.0479295 | 68.0713843 |
| 69.6061284 | 79.9682631 | 78.8079507 | 65.1859046 | 76.0479295 | 68.0713843 |
| 69.6061284 | 79.9682631 | 78.8079507 | 69.1859046 | 76.0479295 | 68.0713843 |
| 68.6061284 | 77.9682631 | 81.8079507 | 70.1859046 | 76.0479295 | 67.0713843 |
| 67.6061284 | 76.9682631 | 80.8079507 | 71.1859046 | 76.0479295 | 67.0713843 |
| 70.6061284 | 76.9682631 | 80.8079507 | 71.1859046 | 74.0479295 | 67.0713843 |
| 70.6061284 | 74.9682631 | 79.8079507 | 72.1859046 | 73.0479295 | 68.0713843 |
| 72.6061284 | 74.9682631 | 79.8079507 | 73.1859046 | 73.0479295 | 68.0713843 |
| 74.6061284 | 74.9682631 | 79.8079507 | 73.1859046 | 71.0479295 | 72.0713843 |
| 77.6061284 | 74.9682631 | 79.8079507 | 74.1859046 | 71.0479295 | 71.0713843 |
| 78.6061284 | 75.9682631 | 79.8079507 | 74.1859046 | 71.0479295 | 71.0713843 |
| 77.6061284 | 75.9682631 | 79.8079507 | 73.1859046 | 71.0479295 | 68.0713843 |
| 76.6061284 | 75.9682631 | 79.8079507 | 71.1859046 | 71.0479295 | 67.0713843 |
| 76.6061284 | 75.9682631 | 79.8079507 | 70.1859046 | 71.0479295 | 66.0713843 |
| 75.6061284 | 76.9682631 | 79.8079507 | 68.1859046 | 71.0479295 | 66.0713843 |
| 74.6061284 | 76.9682631 | 79.8079507 | 67.1859046 | 71.0479295 | 66.0713843 |
| 74.6061284 | 76.9682631 | 80.8079507 | 66.1859046 | 71.0479295 | 66.0713843 |
| 72.6061284 | 74.9682631 | 80.8079507 | 66.1859046 | 72.0479295 | 66.0713843 |
| 72.6061284 | 73.9682631 | 80.8079507 | 65.1859046 | 72.0479295 | 66.0713843 |
| 72.6061284 | 72.9682631 | 80.8079507 | 65.1859046 | 72.0479295 | 66.0713843 |
| 72.6061284 | 72.9682631 | 81.8079507 | 64.1859046 | 73.0479295 | 66.0713843 |
| 70.6061284 | 73.9682631 | 81.8079507 | 64.1859046 | 73.0479295 | 66.0713843 |
| 71.6061284 | 73.9682631 | 81.8079507 | 65.1859046 | 73.0479295 | 67.0713843 |
| 71.6061284 | 73.9682631 | 81.8079507 | 65.1859046 | 73.0479295 | 68.0713843 |
| 70.6061284 | 73.9682631 | 81.8079507 | 64.1859046 | 74.0479295 | 69.0713843 |
| 70.6061284 | 73.9682631 | 81.8079507 | 63.1859046 | 74.0479295 | 69.0713843 |
| 71.6061284 | 73.9682631 | 77.8079507 | 62.1859046 | 74.0479295 | 70.0713843 |
| 72.6061284 | 73.9682631 | 74.8079507 | 61.1859046 | 74.0479295 | 71.0713843 |
| 72.6061284 | 73.9682631 | 74.8079507 | 61.1859046 | 75.0479295 | 72.0713843 |
| 73.6061284 | 73.9682631 | 73.8079507 | 60.1859046 | 75.0479295 | 73.0713843 |
| 74.6061284 | 69.9682631 | 73.8079507 | 60.1859046 | 75.0479295 | 74.0713843 |
| 74.6061284 | 69.9682631 | 73.8079507 | 61.1859046 | 75.0479295 | 74.0713843 |
| 74.6061284 | 69.9682631 | 73.8079507 | 62.1859046 | 75.0479295 | 75.0713843 |
| 75.6061284 | 69.9682631 | 73.8079507 | 62.1859046 | 74.0479295 | 75.0713843 |
| 74.6061284 | 70.9682631 | 73.8079507 | 63.1859046 | 73.0479295 | 78.0713843 |
| 75.6061284 | 70.9682631 | 73.8079507 | 64.1859046 | 73.0479295 | 80.0713843 |
| 75.6061284 | 71.9682631 | 71.8079507 | 64.1859046 | 73.0479295 | 79.0713843 |
| 76.6061284 | 71.9682631 | 70.8079507 | 64.1859046 | 73.0479295 | 77.0713843 |
| 77.6061284 | 72.9682631 | 70.8079507 | 65.1859046 | 73.0479295 | 73.0713843 |
| 77.6061284 | 72.9682631 | 70.8079507 | 65.1859046 | 73.0479295 | 73.0713843 |
| 77.6061284 | 71.9682631 | 70.8079507 | 67.1859046 | 74.0479295 | 72.0713843 |
| 77.6061284 | 70.9682631 | 69.8079507 | 68.1859046 | 74.0479295 | 72.0713843 |
| 77.6061284 | 70.9682631 | 70.8079507 | 69.1859046 | 73.0479295 | 72.0713843 |
| 77.6061284 | 69.9682631 | 70.8079507 | 69.1859046 | 73.0479295 | 72.0713843 |

|            |            |            |            |            |            |
|------------|------------|------------|------------|------------|------------|
| 76.6061284 | 71.9682631 | 70.8079507 | 69.1859046 | 73.0479295 | 72.0713843 |
| 76.6061284 | 71.9682631 | 70.8079507 | 69.1859046 | 73.0479295 | 72.0713843 |
| 76.6061284 | 72.9682631 | 71.8079507 | 69.1859046 | 73.0479295 | 72.0713843 |
| 76.6061284 | 72.9682631 | 71.8079507 | 69.1859046 | 74.0479295 | 75.0713843 |
| 76.6061284 | 74.9682631 | 71.8079507 | 69.1859046 | 74.0479295 | 75.0713843 |
| 77.6061284 | 75.9682631 | 71.8079507 | 69.1859046 | 75.0479295 | 72.0713843 |
| 76.6061284 | 75.9682631 | 72.8079507 | 71.1859046 | 75.0479295 | 66.0713843 |
| 76.6061284 | 77.9682631 | 72.8079507 | 75.1859046 | 75.0479295 | 66.0713843 |
| 76.6061284 | 78.9682631 | 72.8079507 | 77.1859046 | 75.0479295 | 65.0713843 |
| 77.6061284 | 77.9682631 | 72.8079507 | 77.1859046 | 77.0479295 | 65.0713843 |
| 79.6061284 | 74.9682631 | 72.8079507 | 76.1859046 | 78.0479295 | 65.0713843 |
| 79.6061284 | 74.9682631 | 74.8079507 | 76.1859046 | 79.0479295 | 65.0713843 |
| 80.6061284 | 71.9682631 | 76.8079507 | 74.1859046 | 85.0479295 | 65.0713843 |
| 80.6061284 | 70.9682631 | 77.8079507 | 72.1859046 | 74.2630288 | 65.0713843 |
| 80.6061284 | 70.9682631 | 77.8079507 | 71.1859046 | 83.0479295 | 65.0713843 |
| 80.6061284 | 70.9682631 | 77.8079507 | 70.1859046 | 78.0479295 | 66.0713843 |
| 82.6061284 | 69.9682631 | 77.8079507 | 69.1859046 | 75.0479295 | 66.0713843 |
| 82.6061284 | 68.9682631 | 78.8079507 | 67.1859046 | 74.0479295 | 66.0713843 |
| 82.6061284 | 68.9682631 | 77.8079507 | 67.1859046 | 74.0479295 | 67.0713843 |
| 77.6061284 | 68.9682631 | 77.8079507 | 67.1859046 | 73.0479295 | 67.0713843 |
| 74.6061284 | 68.9682631 | 77.8079507 | 67.1859046 | 73.0479295 | 67.0713843 |
| 73.6061284 | 68.9682631 | 74.8079507 | 66.1859046 | 72.0479295 | 67.0713843 |
| 73.6061284 | 68.9682631 | 74.8079507 | 64.1859046 | 72.0479295 | 66.0713843 |
| 72.6061284 | 68.9682631 | 73.8079507 | 62.1859046 | 71.0479295 | 69.0713843 |
| 70.6061284 | 68.9682631 | 73.8079507 | 61.1859046 | 72.0479295 | 69.0713843 |
| 70.6061284 | 68.9682631 | 73.8079507 | 61.1859046 | 71.0479295 | 70.0713843 |
| 69.6061284 | 68.9682631 | 69.8079507 | 62.1859046 | 71.0479295 | 71.0713843 |
| 69.6061284 | 69.9682631 | 66.8079507 | 62.1859046 | 72.0479295 | 71.0713843 |
| 69.6061284 | 70.9682631 | 72.8079507 | 62.1859046 | 72.0479295 | 71.0713843 |
| 69.6061284 | 71.9682631 | 73.8079507 | 63.1859046 | 72.0479295 | 70.0713843 |
| 69.6061284 | 71.9682631 | 73.8079507 | 64.1859046 | 71.0479295 | 72.0713843 |
| 70.6061284 | 72.9682631 | 73.8079507 | 66.1859046 | 71.0479295 | 74.0713843 |
| 71.6061284 | 73.9682631 | 74.8079507 | 67.1859046 | 71.0479295 | 78.0713843 |
| 72.6061284 | 73.9682631 | 77.8079507 | 68.1859046 | 72.0479295 | 78.0713843 |
| 78.6061284 | 73.9682631 | 77.8079507 | 68.1859046 | 72.0479295 | 78.0713843 |
| 79.6061284 | 73.9682631 | 79.8079507 | 68.1859046 | 72.0479295 | 78.0713843 |
| 79.6061284 | 74.9682631 | 79.8079507 | 67.1859046 | 72.0479295 | 78.0713843 |
| 79.6061284 | 76.9682631 | 79.8079507 | 66.1859046 | 72.0479295 | 76.0713843 |
| 79.6061284 | 77.9682631 | 78.8079507 | 66.1859046 | 71.0479295 | 74.0713843 |
| 78.6061284 | 77.9682631 | 75.8079507 | 65.1859046 | 71.0479295 | 75.0713843 |
| 77.6061284 | 79.9682631 | 75.8079507 | 66.1859046 | 72.0479295 | 75.0713843 |
| 76.6061284 | 79.9682631 | 71.8079507 | 68.1859046 | 72.0479295 | 75.0713843 |
| 76.6061284 | 79.9682631 | 70.8079507 | 69.1859046 | 73.0479295 | 75.0713843 |
| 75.6061284 | 79.9682631 | 70.8079507 | 69.1859046 | 73.0479295 | 75.0713843 |
| 73.6061284 | 80.9682631 | 70.8079507 | 69.1859046 | 72.0479295 | 74.0713843 |

|            |            |            |            |            |            |
|------------|------------|------------|------------|------------|------------|
| 72.6061284 | 77.9682631 | 70.8079507 | 70.1859046 | 73.0479295 | 74.0713843 |
| 72.6061284 | 77.9682631 | 70.8079507 | 70.1859046 | 72.0479295 | 73.0713843 |
| 72.6061284 | 78.9682631 | 71.8079507 | 72.1859046 | 72.0479295 | 73.0713843 |
| 74.6061284 | 79.9682631 | 71.8079507 | 73.1859046 | 72.0479295 | 73.0713843 |
| 76.6061284 | 79.9682631 | 71.8079507 | 74.1859046 | 73.0479295 | 73.0713843 |
| 79.6061284 | 79.9682631 | 71.8079507 | 74.1859046 | 74.0479295 | 73.0713843 |
| 79.6061284 | 79.9682631 | 69.8079507 | 72.1859046 | 74.0479295 | 72.0713843 |
| 80.6061284 | 78.9682631 | 69.8079507 | 71.1859046 | 75.0479295 | 71.0713843 |
| 80.6061284 | 77.9682631 | 69.8079507 | 71.1859046 | 76.0479295 | 71.0713843 |
| 81.6061284 | 76.9682631 | 69.8079507 | 71.1859046 | 77.0479295 | 70.0713843 |
| 81.6061284 | 76.9682631 | 69.8079507 | 71.1859046 | 77.0479295 | 70.0713843 |
| 81.6061284 | 76.9682631 | 69.8079507 | 71.1859046 | 78.0479295 | 71.0713843 |
| 82.6061284 | 76.9682631 | 69.8079507 | 71.1859046 | 79.0479295 | 71.0713843 |
| 84.6061284 | 76.9682631 | 70.8079507 | 74.1859046 | 80.0479295 | 70.0713843 |
| 87.6061284 | 77.9682631 | 71.8079507 | 75.1859046 | 80.0479295 | 70.0713843 |
| 73.8993924 | 77.9682631 | 69.8079507 | 76.1859046 | 77.0479295 | 70.0713843 |
| 74.0812106 | 77.9682631 | 69.8079507 | 75.1859046 | 76.0479295 | 69.0713843 |
| 73.8993924 | 77.9682631 | 68.8079507 | 73.1859046 | 75.0479295 | 69.0713843 |
| 73.0812106 | 77.9682631 | 67.8079507 | 70.1859046 | 74.0479295 | 70.0713843 |
| 83.6061284 | 77.9682631 | 67.8079507 | 67.1859046 | 74.0479295 | 70.0713843 |
| 79.6061284 | 76.9682631 | 65.8079507 | 66.1859046 | 74.0479295 | 69.0713843 |
| 79.6061284 | 76.9682631 | 65.8079507 | 66.1859046 | 73.0479295 | 69.0713843 |
| 79.6061284 | 76.9682631 | 65.8079507 | 66.1859046 | 72.0479295 | 69.0713843 |
| 79.6061284 | 76.9682631 | 66.8079507 | 66.1859046 | 72.0479295 | 69.0713843 |
| 79.6061284 | 75.9682631 | 66.8079507 | 66.1859046 | 73.0479295 | 70.0713843 |
| 79.6061284 | 75.9682631 | 69.8079507 | 65.1859046 | 72.0479295 | 70.0713843 |
| 79.6061284 | 74.9682631 | 70.8079507 | 66.1859046 | 72.0479295 | 70.0713843 |
| 76.6061284 | 74.9682631 | 70.8079507 | 67.1859046 | 72.0479295 | 71.0713843 |
| 75.6061284 | 74.9682631 | 70.8079507 | 67.1859046 | 71.0479295 | 71.0713843 |
| 73.6061284 | 72.9682631 | 70.8079507 | 66.1859046 | 71.0479295 | 71.0713843 |
| 73.6061284 | 72.9682631 | 70.8079507 | 65.1859046 | 71.0479295 | 72.0713843 |
| 69.6061284 | 72.9682631 | 70.8079507 | 65.1859046 | 71.0479295 | 72.0713843 |
| 64.6061284 | 69.9682631 | 71.8079507 | 64.1859046 | 71.0479295 | 74.0713843 |
| 64.6061284 | 69.9682631 | 71.8079507 | 63.1859046 | 71.0479295 | 76.0713843 |
| 64.6061284 | 70.9682631 | 71.8079507 | 62.1859046 | 70.0479295 | 77.0713843 |
| 64.6061284 | 70.9682631 | 71.8079507 | 62.1859046 | 70.0479295 | 77.0713843 |
| 67.6061284 | 70.9682631 | 74.8079507 | 62.1859046 | 70.0479295 | 77.0713843 |
| 67.6061284 | 70.9682631 | 74.8079507 | 63.1859046 | 70.0479295 | 77.0713843 |
| 67.6061284 | 70.9682631 | 74.8079507 | 64.1859046 | 70.0479295 | 76.0713843 |
| 68.6061284 | 70.9682631 | 74.8079507 | 66.1859046 | 70.0479295 | 74.0713843 |
| 68.6061284 | 70.9682631 | 75.8079507 | 67.1859046 | 70.0479295 | 74.0713843 |
| 71.6061284 | 70.9682631 | 75.8079507 | 68.1859046 | 70.0479295 | 73.0713843 |
| 77.6061284 | 72.9682631 | 75.8079507 | 69.1859046 | 71.0479295 | 73.0713843 |
| 77.6061284 | 72.9682631 | 75.8079507 | 69.1859046 | 71.0479295 | 73.0713843 |
| 77.6061284 | 76.9682631 | 76.8079507 | 69.1859046 | 71.0479295 | 72.0713843 |



|            |            |            |            |            |            |
|------------|------------|------------|------------|------------|------------|
| 74.6061284 | 76.9682631 | 82.8079507 | 65.1859046 | 71.0479295 | 67.0713843 |
| 75.6061284 | 76.9682631 | 88.8079507 | 67.1859046 | 71.0479295 | 67.0713843 |
| 77.6061284 | 75.9682631 | 88.8079507 | 67.1859046 | 71.0479295 | 67.0713843 |
| 77.6061284 | 75.9682631 | 89.8079507 | 67.1859046 | 71.0479295 | 69.0713843 |
| 77.6061284 | 74.9682631 | 88.8079507 | 65.1859046 | 71.0479295 | 73.0713843 |
| 77.6061284 | 74.9682631 | 87.8079507 | 64.1859046 | 71.0479295 | 74.0713843 |
| 77.6061284 | 72.9682631 | 85.8079507 | 64.1859046 | 71.0479295 | 75.0713843 |
| 75.6061284 | 71.9682631 | 85.8079507 | 63.1859046 | 71.0479295 | 75.0713843 |
| 73.6061284 | 69.9682631 | 84.8079507 | 62.1859046 | 71.0479295 | 75.0713843 |
| 72.6061284 | 67.9682631 | 84.8079507 | 62.1859046 | 71.0479295 | 74.0713843 |
| 72.6061284 | 68.9682631 | 83.8079507 | 62.1859046 | 71.0479295 | 74.0713843 |
| 72.6061284 | 72.9682631 | 83.8079507 | 62.1859046 | 70.0479295 | 75.0713843 |
| 73.6061284 | 73.9682631 | 83.8079507 | 61.1859046 | 70.0479295 | 75.0713843 |
| 73.6061284 | 73.9682631 | 83.8079507 | 61.1859046 | 70.0479295 | 75.0713843 |
| 76.6061284 | 71.9682631 | 83.8079507 | 61.1859046 | 70.0479295 | 74.0713843 |
| 76.6061284 | 71.9682631 | 83.8079507 | 62.1859046 | 71.0479295 | 74.0713843 |
| 76.6061284 | 71.9682631 | 83.8079507 | 63.1859046 | 71.0479295 | 74.0713843 |
| 75.6061284 | 68.9682631 | 83.8079507 | 63.1859046 | 71.0479295 | 74.0713843 |
| 73.6061284 | 68.9682631 | 82.8079507 | 62.1859046 | 71.0479295 | 73.0713843 |
| 73.6061284 | 68.9682631 | 81.8079507 | 62.1859046 | 71.0479295 | 73.0713843 |
| 70.6061284 | 68.9682631 | 81.8079507 | 62.1859046 | 71.0479295 | 73.0713843 |
| 69.6061284 | 68.9682631 | 81.8079507 | 62.1859046 | 71.0479295 | 72.0713843 |
| 69.6061284 | 68.9682631 | 81.8079507 | 62.1859046 | 71.0479295 | 71.0713843 |
| 69.6061284 | 67.9682631 | 80.8079507 | 62.1859046 | 71.0479295 | 71.0713843 |
| 72.6061284 | 67.9682631 | 79.8079507 | 62.1859046 | 71.0479295 | 71.0713843 |
| 73.6061284 | 67.9682631 | 79.8079507 | 62.1859046 | 71.0479295 | 69.0713843 |
| 75.6061284 | 66.9682631 | 79.8079507 | 62.1859046 | 70.0479295 | 69.0713843 |
| 75.6061284 | 66.9682631 | 80.8079507 | 61.1859046 | 70.0479295 | 71.0713843 |
| 75.6061284 | 66.9682631 | 80.8079507 | 61.1859046 | 70.0479295 | 71.0713843 |
| 75.6061284 | 67.9682631 | 79.8079507 | 61.1859046 | 69.0479295 | 72.0713843 |
| 71.6061284 | 67.9682631 | 79.8079507 | 74.1859046 | 69.0479295 | 71.0713843 |
| 71.6061284 | 69.9682631 | 80.8079507 | 82.1859046 | 69.0479295 | 70.0713843 |
| 71.6061284 | 70.9682631 | 77.8079507 | 86.1859046 | 70.0479295 | 70.0713843 |
| 72.6061284 | 70.9682631 | 74.8079507 | 86.1859046 | 70.0479295 | 69.0713843 |
| 72.6061284 | 70.9682631 | 70.8079507 | 85.1859046 | 70.0479295 | 69.0713843 |
| 72.6061284 | 70.9682631 | 70.8079507 | 83.1859046 | 71.0479295 | 69.0713843 |
| 72.6061284 | 70.9682631 | 68.8079507 | 81.1859046 | 71.0479295 | 70.0713843 |
| 73.6061284 | 70.9682631 | 67.8079507 | 80.1859046 | 71.0479295 | 70.0713843 |
| 75.6061284 | 70.9682631 | 67.8079507 | 79.1859046 | 71.0479295 | 70.0713843 |
| 75.6061284 | 70.9682631 | 69.8079507 | 79.1859046 | 71.0479295 | 70.0713843 |
| 76.6061284 | 70.9682631 | 69.8079507 | 77.1859046 | 70.0479295 | 71.0713843 |
| 75.6061284 | 70.9682631 | 69.8079507 | 75.1859046 | 70.0479295 | 70.0713843 |
| 75.6061284 | 70.9682631 | 70.8079507 | 74.1859046 | 70.0479295 | 70.0713843 |
| 75.6061284 | 70.9682631 | 71.8079507 | 72.1859046 | 70.0479295 | 70.0713843 |
| 75.6061284 | 74.9682631 | 71.8079507 | 72.1859046 | 70.0479295 | 68.0713843 |

|            |            |            |            |            |            |
|------------|------------|------------|------------|------------|------------|
| 75.6061284 | 74.9682631 | 73.8079507 | 71.1859046 | 70.0479295 | 67.0713843 |
| 76.6061284 | 72.9682631 | 73.8079507 | 68.1859046 | 70.0479295 | 68.0713843 |
| 76.6061284 | 71.9682631 | 73.8079507 | 66.1859046 | 70.0479295 | 68.0713843 |
| 77.6061284 | 68.9682631 | 73.8079507 | 65.1859046 | 69.0479295 | 69.0713843 |
| 78.6061284 | 68.9682631 | 73.8079507 | 64.1859046 | 69.0479295 | 70.0713843 |
| 80.6061284 | 66.9682631 | 73.8079507 | 64.1859046 | 70.0479295 | 70.0713843 |
| 82.6061284 | 65.9682631 | 73.8079507 | 64.1859046 | 70.0479295 | 70.0713843 |
| 82.6061284 | 65.9682631 | 75.8079507 | 64.1859046 | 70.0479295 | 69.0713843 |
| 82.6061284 | 65.9682631 | 75.8079507 | 64.1859046 | 70.0479295 | 69.0713843 |
| 80.6061284 | 65.9682631 | 75.8079507 | 64.1859046 | 71.0479295 | 67.0713843 |
| 79.6061284 | 65.9682631 | 75.8079507 | 70.1859046 | 71.0479295 | 66.0713843 |
| 77.6061284 | 66.9682631 | 75.8079507 | 70.1859046 | 70.0479295 | 65.0713843 |
| 76.6061284 | 66.9682631 | 74.8079507 | 70.1859046 | 70.0479295 | 65.0713843 |
| 74.6061284 | 66.9682631 | 74.8079507 | 71.1859046 | 70.0479295 | 66.0713843 |
| 74.6061284 | 66.9682631 | 74.8079507 | 73.1859046 | 70.0479295 | 66.0713843 |
| 74.6061284 | 66.9682631 | 74.8079507 | 73.1859046 | 70.0479295 | 66.0713843 |
| 74.6061284 | 66.9682631 | 74.8079507 | 70.1859046 | 70.0479295 | 67.0713843 |
| 75.6061284 | 67.9682631 | 76.8079507 | 70.1859046 | 70.0479295 | 68.0713843 |
| 75.6061284 | 69.9682631 | 78.8079507 | 70.1859046 | 70.0479295 | 68.0713843 |
| 74.6061284 | 69.9682631 | 79.8079507 | 71.1859046 | 70.0479295 | 69.0713843 |
| 73.6061284 | 69.9682631 | 78.8079507 | 71.1859046 | 70.0479295 | 69.0713843 |
| 73.6061284 | 70.9682631 | 78.8079507 | 71.1859046 | 70.0479295 | 69.0713843 |
| 73.6061284 | 69.9682631 | 78.8079507 | 70.1859046 | 71.0479295 | 69.0713843 |
| 73.6061284 | 69.9682631 | 77.8079507 | 70.1859046 | 71.0479295 | 69.0713843 |
| 73.6061284 | 69.9682631 | 78.8079507 | 70.1859046 | 70.0479295 | 71.0713843 |
| 74.6061284 | 69.9682631 | 78.8079507 | 70.1859046 | 70.0479295 | 72.0713843 |
| 74.6061284 | 69.9682631 | 76.8079507 | 69.1859046 | 70.0479295 | 72.0713843 |
| 74.6061284 | 71.9682631 | 75.8079507 | 70.1859046 | 69.0479295 | 72.0713843 |
| 74.6061284 | 72.9682631 | 73.8079507 | 70.1859046 | 70.0479295 | 71.0713843 |
| 75.6061284 | 72.9682631 | 73.8079507 | 71.1859046 | 70.0479295 | 70.0713843 |
| 74.6061284 | 72.9682631 | 73.8079507 | 70.1859046 | 70.0479295 | 69.0713843 |
| 74.6061284 | 72.9682631 | 73.8079507 | 70.1859046 | 70.0479295 | 69.0713843 |
| 74.6061284 | 72.9682631 | 74.8079507 | 70.1859046 | 70.0479295 | 68.0713843 |
| 74.6061284 | 72.9682631 | 74.8079507 | 70.1859046 | 70.0479295 | 68.0713843 |
| 74.6061284 | 71.9682631 | 75.8079507 | 69.1859046 | 70.0479295 | 69.0713843 |
| 75.6061284 | 69.9682631 | 75.8079507 | 68.1859046 | 69.0479295 | 69.0713843 |
| 77.6061284 | 70.9682631 | 73.8079507 | 68.1859046 | 69.0479295 | 69.0713843 |
| 77.6061284 | 70.9682631 | 73.8079507 | 68.1859046 | 69.0479295 | 69.0713843 |
| 77.6061284 | 71.9682631 | 73.8079507 | 69.1859046 | 70.0479295 | 69.0713843 |
| 77.6061284 | 71.9682631 | 73.8079507 | 69.1859046 | 70.0479295 | 69.0713843 |
| 77.6061284 | 71.9682631 | 72.8079507 | 69.1859046 | 70.0479295 | 69.0713843 |
| 77.6061284 | 72.9682631 | 71.8079507 | 69.1859046 | 70.0479295 | 69.0713843 |
| 75.6061284 | 72.9682631 | 72.8079507 | 70.1859046 | 70.0479295 | 67.0713843 |
| 75.6061284 | 72.9682631 | 72.8079507 | 70.1859046 | 70.0479295 | 67.0713843 |
| 71.6061284 | 72.9682631 | 72.8079507 | 70.1859046 | 70.0479295 | 67.0713843 |

|            |            |            |            |            |            |
|------------|------------|------------|------------|------------|------------|
| 68.6061284 | 72.9682631 | 72.8079507 | 70.1859046 | 70.0479295 | 66.0713843 |
| 66.6061284 | 72.9682631 | 72.8079507 | 71.1859046 | 70.0479295 | 65.0713843 |
| 67.6061284 | 73.9682631 | 72.8079507 | 71.1859046 | 70.0479295 | 65.0713843 |
| 67.6061284 | 74.9682631 | 72.8079507 | 71.1859046 | 70.0479295 | 65.0713843 |
| 68.6061284 | 74.9682631 | 73.8079507 | 71.1859046 | 72.0479295 | 65.0713843 |
| 68.6061284 | 74.9682631 | 74.8079507 | 70.1859046 | 73.0479295 | 66.0713843 |
| 69.6061284 | 75.9682631 | 74.8079507 | 71.1859046 | 73.0479295 | 68.0713843 |
| 71.6061284 | 75.9682631 | 74.8079507 | 71.1859046 | 73.0479295 | 68.0713843 |
| 72.6061284 | 74.9682631 | 75.8079507 | 72.1859046 | 73.0479295 | 68.0713843 |
| 71.6061284 | 70.9682631 | 75.8079507 | 72.1859046 | 73.0479295 | 69.0713843 |
| 71.6061284 | 70.9682631 | 75.8079507 | 72.1859046 | 74.0479295 | 68.0713843 |
| 72.6061284 | 71.9682631 | 75.8079507 | 72.1859046 | 74.0479295 | 69.0713843 |
| 72.6061284 | 71.9682631 | 75.8079507 | 73.1859046 | 73.0479295 | 69.0713843 |
| 72.6061284 | 71.9682631 | 75.8079507 | 75.1859046 | 72.0479295 | 70.0713843 |
| 72.6061284 | 72.9682631 | 75.8079507 | 75.1859046 | 72.0479295 | 71.0713843 |
| 73.6061284 | 72.9682631 | 75.8079507 | 73.1859046 | 71.0479295 | 71.0713843 |
| 74.6061284 | 74.9682631 | 75.8079507 | 72.1859046 | 70.0479295 | 71.0713843 |
| 74.6061284 | 74.9682631 | 76.8079507 | 72.1859046 | 70.0479295 | 71.0713843 |
| 71.6061284 | 74.9682631 | 75.8079507 | 72.1859046 | 70.0479295 | 71.0713843 |
| 70.6061284 | 74.9682631 | 75.8079507 | 72.1859046 | 70.0479295 | 71.0713843 |
| 70.6061284 | 74.9682631 | 76.8079507 | 72.1859046 | 69.0479295 | 71.0713843 |
| 69.6061284 | 75.9682631 | 76.8079507 | 72.1859046 | 69.0479295 | 70.0713843 |
| 67.6061284 | 74.9682631 | 76.8079507 | 71.1859046 | 69.0479295 | 70.0713843 |
| 67.6061284 | 74.9682631 | 76.8079507 | 72.1859046 | 69.0479295 | 70.0713843 |
| 67.6061284 | 73.9682631 | 76.8079507 | 73.1859046 | 69.0479295 | 70.0713843 |
| 67.6061284 | 72.9682631 | 76.8079507 | 73.1859046 | 69.0479295 | 70.0713843 |
| 66.6061284 | 72.9682631 | 76.8079507 | 73.1859046 | 69.0479295 | 70.0713843 |
| 67.6061284 | 72.9682631 | 76.8079507 | 73.1859046 | 69.0479295 | 70.0713843 |
| 68.6061284 | 73.9682631 | 75.8079507 | 73.1859046 | 69.0479295 | 70.0713843 |
| 69.6061284 | 74.9682631 | 75.8079507 | 74.1859046 | 69.0479295 | 70.0713843 |
| 69.6061284 | 74.9682631 | 76.8079507 | 73.1859046 | 69.0479295 | 69.0713843 |
| 72.6061284 | 74.9682631 | 77.8079507 | 72.1859046 | 69.0479295 | 69.0713843 |
| 74.6061284 | 86.9682631 | 77.8079507 | 71.1859046 | 69.0479295 | 69.0713843 |
| 76.6061284 | 87.9682631 | 77.8079507 | 70.1859046 | 69.0479295 | 69.0713843 |
| 79.6061284 | 89.9682631 | 77.8079507 | 71.1859046 | 69.0479295 | 69.0713843 |
| 80.6061284 | 89.9682631 | 79.8079507 | 70.1859046 | 69.0479295 | 69.0713843 |
| 80.6061284 | 76.4448469 | 79.8079507 | 70.1859046 | 69.0479295 | 69.0713843 |
| 80.6061284 | 90.9682631 | 80.8079507 | 69.1859046 | 69.0479295 | 69.0713843 |
| 81.6061284 | 90.9682631 | 80.8079507 | 70.1859046 | 69.0479295 | 69.0713843 |
| 82.6061284 | 90.9682631 | 80.8079507 | 70.1859046 | 69.0479295 | 67.0713843 |
| 82.6061284 | 90.9682631 | 80.8079507 | 70.1859046 | 70.0479295 | 67.0713843 |
| 82.6061284 | 76.4448469 | 81.8079507 | 71.1859046 | 70.0479295 | 67.0713843 |
| 82.6061284 | 76.4448469 | 81.8079507 | 71.1859046 | 70.0479295 | 68.0713843 |
| 82.6061284 | 89.9682631 | 82.8079507 | 71.1859046 | 69.0479295 | 70.0713843 |
| 81.6061284 | 89.9682631 | 82.8079507 | 73.1859046 | 69.0479295 | 70.0713843 |



|            |            |            |            |            |            |
|------------|------------|------------|------------|------------|------------|
| 81.6061284 | 89.9682631 | 83.8079507 | 73.1859046 | 69.0479295 | 75.0713843 |
| 81.6061284 | 89.9682631 | 83.8079507 | 73.1859046 | 69.0479295 | 75.0713843 |
| 81.6061284 | 83.9682631 | 83.8079507 | 73.1859046 | 70.0479295 | 75.0713843 |
| 81.6061284 | 81.9682631 | 83.8079507 | 72.1859046 | 70.0479295 | 74.0713843 |
| 81.6061284 | 80.9682631 | 84.8079507 | 72.1859046 | 70.0479295 | 74.0713843 |
| 79.6061284 | 80.9682631 | 84.8079507 | 73.1859046 | 71.0479295 | 71.0713843 |
| 79.6061284 | 80.9682631 | 84.8079507 | 73.1859046 | 71.0479295 | 70.0713843 |
| 79.6061284 | 79.9682631 | 84.8079507 | 73.1859046 | 71.0479295 | 69.0713843 |
| 79.6061284 | 79.9682631 | 83.8079507 | 73.1859046 | 71.0479295 | 69.0713843 |
| 79.6061284 | 79.9682631 | 82.8079507 | 73.1859046 | 71.0479295 | 69.0713843 |
| 80.6061284 | 79.9682631 | 80.8079507 | 73.1859046 | 71.0479295 | 69.0713843 |
| 80.6061284 | 78.9682631 | 80.8079507 | 73.1859046 | 70.0479295 | 69.0713843 |
| 80.6061284 | 84.9682631 | 80.8079507 | 73.1859046 | 70.0479295 | 70.0713843 |
| 80.6061284 | 84.9682631 | 79.8079507 | 72.1859046 | 70.0479295 | 70.0713843 |
| 82.6061284 | 85.9682631 | 79.8079507 | 72.1859046 | 70.0479295 | 70.0713843 |
| 83.6061284 | 85.9682631 | 79.8079507 | 73.1859046 | 70.0479295 | 70.0713843 |
| 84.6061284 | 86.9682631 | 78.8079507 | 73.1859046 | 70.0479295 | 69.0713843 |
| 85.6061284 | 86.9682631 | 76.8079507 | 73.1859046 | 70.0479295 | 69.0713843 |
| 85.6061284 | 86.9682631 | 76.8079507 | 73.1859046 | 70.0479295 | 69.0713843 |
| 85.6061284 | 86.9682631 | 75.8079507 | 74.1859046 | 70.0479295 | 69.0713843 |
| 85.6061284 | 86.9682631 | 74.8079507 | 74.1859046 | 70.0479295 | 70.0713843 |
| 85.6061284 | 86.9682631 | 74.8079507 | 74.1859046 | 71.0479295 | 71.0713843 |
| 87.6061284 | 87.9682631 | 74.8079507 | 74.1859046 | 71.0479295 | 71.0713843 |
| 88.6061284 | 86.9682631 | 74.8079507 | 74.1859046 | 70.0479295 | 72.0713843 |
| 87.6061284 | 82.9682631 | 74.8079507 | 69.1859046 | 70.0479295 | 71.0713843 |
| 87.6061284 | 82.9682631 | 74.8079507 | 69.1859046 | 70.0479295 | 71.0713843 |
| 85.6061284 | 82.9682631 | 75.8079507 | 69.1859046 | 70.0479295 | 71.0713843 |
| 84.6061284 | 81.9682631 | 75.8079507 | 71.1859046 | 72.0479295 | 71.0713843 |
| 84.6061284 | 80.9682631 | 75.8079507 | 73.1859046 | 73.0479295 | 71.0713843 |
| 79.6061284 | 77.9682631 | 76.8079507 | 73.1859046 | 72.0479295 | 71.0713843 |
| 79.6061284 | 74.9682631 | 76.8079507 | 74.1859046 | 71.0479295 | 71.0713843 |
| 73.6061284 | 72.9682631 | 76.8079507 | 74.1859046 | 71.0479295 | 71.0713843 |
| 73.6061284 | 70.9682631 | 75.8079507 | 72.1859046 | 71.0479295 | 71.0713843 |
| 73.6061284 | 69.9682631 | 75.8079507 | 72.1859046 | 70.0479295 | 71.0713843 |
| 72.6061284 | 69.9682631 | 75.8079507 | 71.1859046 | 70.0479295 | 71.0713843 |
| 71.6061284 | 69.9682631 | 75.8079507 | 70.1859046 | 69.0479295 | 71.0713843 |
| 71.6061284 | 67.9682631 | 75.8079507 | 70.1859046 | 70.0479295 | 71.0713843 |
| 68.6061284 | 64.9682631 | 76.8079507 | 69.1859046 | 70.0479295 | 71.0713843 |
| 68.6061284 | 63.9682631 | 76.8079507 | 68.1859046 | 69.0479295 | 71.0713843 |
| 68.6061284 | 62.9682631 | 74.8079507 | 66.1859046 | 69.0479295 | 71.0713843 |
| 68.6061284 | 62.9682631 | 74.8079507 | 65.1859046 | 70.0479295 | 71.0713843 |
| 68.6061284 | 61.9682631 | 70.8079507 | 65.1859046 | 70.0479295 | 70.0713843 |
| 68.6061284 | 61.9682631 | 69.8079507 | 65.1859046 | 70.0479295 | 71.0713843 |
| 70.6061284 | 61.9682631 | 70.8079507 | 65.1859046 | 70.0479295 | 71.0713843 |
| 70.6061284 | 61.9682631 | 71.8079507 | 65.1859046 | 70.0479295 | 72.0713843 |

|            |            |            |            |            |            |
|------------|------------|------------|------------|------------|------------|
| 70.6061284 | 61.9682631 | 71.8079507 | 65.1859046 | 70.0479295 | 72.0713843 |
| 69.6061284 | 61.9682631 | 71.8079507 | 65.1859046 | 70.0479295 | 73.0713843 |
| 71.6061284 | 61.9682631 | 72.8079507 | 66.1859046 | 70.0479295 | 74.0713843 |
| 71.6061284 | 61.9682631 | 72.8079507 | 66.1859046 | 70.0479295 | 74.0713843 |
| 73.6061284 | 62.9682631 | 73.8079507 | 67.1859046 | 70.0479295 | 73.0713843 |
| 73.6061284 | 63.9682631 | 75.8079507 | 67.1859046 | 70.0479295 | 73.0713843 |
| 73.6061284 | 64.9682631 | 76.8079507 | 68.1859046 | 70.0479295 | 72.0713843 |
| 72.6061284 | 64.9682631 | 76.8079507 | 67.1859046 | 70.0479295 | 71.0713843 |
| 71.6061284 | 64.9682631 | 76.8079507 | 67.1859046 | 71.0479295 | 70.0713843 |
| 71.6061284 | 64.9682631 | 75.8079507 | 67.1859046 | 72.0479295 | 69.0713843 |
| 71.6061284 | 64.9682631 | 75.8079507 | 67.1859046 | 72.0479295 | 69.0713843 |
| 73.6061284 | 66.9682631 | 75.8079507 | 67.1859046 | 72.0479295 | 68.0713843 |
| 71.6061284 | 66.9682631 | 75.8079507 | 67.1859046 | 72.0479295 | 68.0713843 |
| 71.6061284 | 66.9682631 | 75.8079507 | 67.1859046 | 72.0479295 | 69.0713843 |
| 67.6061284 | 67.9682631 | 76.8079507 | 67.1859046 | 71.0479295 | 70.0713843 |
| 67.6061284 | 69.9682631 | 77.8079507 | 67.1859046 | 71.0479295 | 73.0713843 |
| 64.6061284 | 69.9682631 | 78.8079507 | 71.1859046 | 71.0479295 | 74.0713843 |
| 64.6061284 | 68.9682631 | 78.8079507 | 73.1859046 | 72.0479295 | 74.0713843 |
| 66.6061284 | 68.9682631 | 79.8079507 | 74.1859046 | 72.0479295 | 74.0713843 |
| 66.6061284 | 68.9682631 | 78.8079507 | 76.1859046 | 71.0479295 | 73.0713843 |
| 67.6061284 | 68.9682631 | 78.8079507 | 78.1859046 | 71.0479295 | 72.0713843 |
| 67.6061284 | 66.9682631 | 77.8079507 | 80.1859046 | 71.0479295 | 71.0713843 |
| 65.6061284 | 65.9682631 | 77.8079507 | 81.1859046 | 72.0479295 | 70.0713843 |
| 65.6061284 | 62.9682631 | 77.8079507 | 81.1859046 | 72.0479295 | 70.0713843 |
| 66.6061284 | 61.9682631 | 75.8079507 | 81.1859046 | 73.0479295 | 69.0713843 |
| 67.6061284 | 61.9682631 | 74.8079507 | 82.1859046 | 74.0479295 | 69.0713843 |
| 67.6061284 | 61.9682631 | 74.8079507 | 82.1859046 | 74.0479295 | 69.0713843 |
| 68.6061284 | 61.9682631 | 73.8079507 | 81.1859046 | 74.0479295 | 69.0713843 |
| 68.6061284 | 61.9682631 | 74.8079507 | 81.1859046 | 73.0479295 | 69.0713843 |
| 69.6061284 | 61.9682631 | 74.8079507 | 82.1859046 | 73.0479295 | 68.0713843 |
| 70.6061284 | 62.9682631 | 76.8079507 | 82.1859046 | 72.0479295 | 68.0713843 |
| 71.6061284 | 62.9682631 | 75.8079507 | 82.1859046 | 72.0479295 | 68.0713843 |
| 73.6061284 | 64.9682631 | 74.8079507 | 83.1859046 | 72.0479295 | 67.0713843 |
| 74.6061284 | 64.9682631 | 74.8079507 | 83.1859046 | 72.0479295 | 66.0713843 |
| 74.6061284 | 65.9682631 | 69.8079507 | 71.0812106 | 71.0479295 | 66.0713843 |
| 74.6061284 | 65.9682631 | 68.8079507 | 71.1721197 | 71.0479295 | 66.0713843 |
| 75.6061284 | 66.9682631 | 68.8079507 | 71.3539378 | 71.0479295 | 66.0713843 |
| 78.6061284 | 66.9682631 | 68.8079507 | 71.7175742 | 71.0479295 | 66.0713843 |
| 78.6061284 | 66.9682631 | 68.8079507 | 71.535756  | 71.0479295 | 66.0713843 |
| 77.6061284 | 66.9682631 | 68.8079507 | 71.0812106 | 70.0479295 | 66.0713843 |
| 76.6061284 | 68.9682631 | 68.8079507 | 71.1721197 | 70.0479295 | 65.0713843 |
| 77.6061284 | 69.9682631 | 68.8079507 | 71.4448469 | 70.0479295 | 65.0713843 |
| 78.6061284 | 70.9682631 | 68.8079507 | 71.4448469 | 70.0479295 | 66.0713843 |
| 78.6061284 | 70.9682631 | 71.8079507 | 71.7175742 | 70.0479295 | 67.0713843 |
| 82.6061284 | 70.9682631 | 74.8079507 | 72.2630288 | 70.0479295 | 67.0713843 |

|            |            |            |            |            |            |
|------------|------------|------------|------------|------------|------------|
| 84.6061284 | 70.9682631 | 75.8079507 | 72.535756  | 70.0479295 | 68.0713843 |
| 86.6061284 | 71.9682631 | 75.8079507 | 72.535756  | 70.0479295 | 68.0713843 |
| 86.6061284 | 71.9682631 | 77.8079507 | 72.3539378 | 69.0479295 | 68.0713843 |
| 86.6061284 | 72.9682631 | 77.8079507 | 72.4448469 | 69.0479295 | 68.0713843 |
| 72.3539378 | 75.9682631 | 77.8079507 | 72.3539378 | 69.0479295 | 68.0713843 |
| 72.535756  | 76.9682631 | 78.8079507 | 72.535756  | 69.0479295 | 68.0713843 |
| 72.0812106 | 76.9682631 | 78.8079507 | 72.0812106 | 67.0479295 | 68.0713843 |
| 80.6061284 | 75.9682631 | 78.8079507 | 71.4448469 | 67.0479295 | 69.0713843 |
| 80.6061284 | 75.9682631 | 78.8079507 | 71.7175742 | 68.0479295 | 69.0713843 |
| 73.6061284 | 71.9682631 | 78.8079507 | 71.1721197 | 69.0479295 | 69.0713843 |
| 70.6061284 | 69.9682631 | 78.8079507 | 70.8084833 | 69.0479295 | 68.0713843 |
| 70.6061284 | 68.9682631 | 78.8079507 | 70.8993924 | 69.0479295 | 68.0713843 |
| 69.6061284 | 68.9682631 | 78.8079507 | 68.1859046 | 70.0479295 | 68.0713843 |
| 68.6061284 | 66.9682631 | 78.8079507 | 65.1859046 | 70.0479295 | 67.0713843 |
| 68.6061284 | 65.9682631 | 77.8079507 | 65.1859046 | 70.0479295 | 68.0713843 |
| 65.6061284 | 65.9682631 | 77.8079507 | 67.1859046 | 70.0479295 | 68.0713843 |
| 63.6061284 | 66.9682631 | 74.8079507 | 71.1859046 | 70.0479295 | 69.0713843 |
| 61.6061284 | 66.9682631 | 74.8079507 | 73.1859046 | 70.0479295 | 69.0713843 |
| 61.6061284 | 67.9682631 | 74.8079507 | 72.1859046 | 70.0479295 | 70.0713843 |
| 61.6061284 | 67.9682631 | 74.8079507 | 72.1859046 | 70.0479295 | 70.0713843 |
| 59.6061284 | 68.9682631 | 74.8079507 | 70.1859046 | 69.0479295 | 70.0713843 |
| 59.6061284 | 68.9682631 | 74.8079507 | 69.1859046 | 69.0479295 | 70.0713843 |
| 58.6061284 | 70.9682631 | 75.8079507 | 69.1859046 | 69.0479295 | 69.0713843 |
| 59.6061284 | 72.9682631 | 75.8079507 | 71.1859046 | 69.0479295 | 68.0713843 |
| 60.6061284 | 73.9682631 | 73.8079507 | 72.1859046 | 68.0479295 | 68.0713843 |
| 60.6061284 | 73.9682631 | 73.8079507 | 72.1859046 | 68.0479295 | 68.0713843 |
| 61.6061284 | 75.9682631 | 73.8079507 | 71.1859046 | 68.0479295 | 68.0713843 |
| 63.6061284 | 75.9682631 | 71.8079507 | 71.1859046 | 69.0479295 | 70.0713843 |
| 68.6061284 | 74.9682631 | 71.8079507 | 71.1859046 | 70.0479295 | 70.0713843 |
| 70.6061284 | 73.9682631 | 71.8079507 | 71.1859046 | 70.0479295 | 70.0713843 |
| 71.6061284 | 71.9682631 | 71.8079507 | 68.1859046 | 71.0479295 | 69.0713843 |
| 71.6061284 | 70.9682631 | 70.8079507 | 67.1859046 | 72.0479295 | 66.0713843 |
| 71.6061284 | 69.9682631 | 70.8079507 | 68.1859046 | 72.0479295 | 66.0713843 |
| 69.6061284 | 69.9682631 | 74.8079507 | 68.1859046 | 72.0479295 | 66.0713843 |
| 68.6061284 | 69.9682631 | 77.8079507 | 69.1859046 | 72.0479295 | 66.0713843 |
| 68.6061284 | 70.9682631 | 80.8079507 | 69.1859046 | 72.0479295 | 66.0713843 |
| 67.6061284 | 70.9682631 | 80.8079507 | 70.1859046 | 72.0479295 | 66.0713843 |
| 67.6061284 | 72.9682631 | 80.8079507 | 71.1859046 | 72.0479295 | 65.0713843 |
| 67.6061284 | 72.9682631 | 82.8079507 | 71.1859046 | 74.0479295 | 65.0713843 |
| 67.6061284 | 72.9682631 | 82.8079507 | 70.1859046 | 74.0479295 | 65.0713843 |
| 68.6061284 | 72.9682631 | 83.8079507 | 70.1859046 | 74.0479295 | 65.0713843 |
| 69.6061284 | 71.9682631 | 80.8079507 | 70.1859046 | 74.0479295 | 65.0713843 |
| 70.6061284 | 71.9682631 | 80.8079507 | 69.1859046 | 74.0479295 | 65.0713843 |
| 71.6061284 | 70.9682631 | 80.8079507 | 70.1859046 | 74.0479295 | 66.0713843 |
| 71.6061284 | 70.9682631 | 76.8079507 | 71.1859046 | 75.0479295 | 66.0713843 |

|            |            |            |            |            |            |
|------------|------------|------------|------------|------------|------------|
| 72.6061284 | 70.9682631 | 73.8079507 | 73.1859046 | 77.0479295 | 67.0713843 |
| 73.6061284 | 70.9682631 | 73.8079507 | 74.1859046 | 78.0479295 | 70.0713843 |
| 73.6061284 | 70.9682631 | 71.8079507 | 75.1859046 | 78.0479295 | 71.0713843 |
| 73.6061284 | 69.9682631 | 71.8079507 | 75.1859046 | 77.0479295 | 71.0713843 |
| 72.6061284 | 69.9682631 | 71.8079507 | 77.1859046 | 75.0479295 | 71.0713843 |
| 71.6061284 | 67.9682631 | 70.8079507 | 78.1859046 | 74.0479295 | 69.0713843 |
| 71.6061284 | 67.9682631 | 70.8079507 | 78.1859046 | 74.0479295 | 67.0713843 |
| 71.6061284 | 66.9682631 | 69.8079507 | 78.1859046 | 74.0479295 | 67.0713843 |
| 71.6061284 | 70.9682631 | 69.8079507 | 78.1859046 | 74.0479295 | 67.0713843 |
| 71.6061284 | 71.9682631 | 68.8079507 | 78.1859046 | 74.0479295 | 67.0713843 |
| 72.6061284 | 71.9682631 | 67.8079507 | 77.1859046 | 73.0479295 | 67.0713843 |
| 73.6061284 | 70.9682631 | 67.8079507 | 76.1859046 | 73.0479295 | 67.0713843 |
| 74.6061284 | 70.9682631 | 67.8079507 | 74.1859046 | 72.0479295 | 66.0713843 |
| 74.6061284 | 69.9682631 | 75.8079507 | 74.1859046 | 70.0479295 | 66.0713843 |
| 74.6061284 | 72.9682631 | 75.8079507 | 76.1859046 | 69.0479295 | 66.0713843 |
| 74.6061284 | 73.9682631 | 76.8079507 | 77.1859046 | 69.0479295 | 66.0713843 |
| 72.6061284 | 73.9682631 | 75.8079507 | 77.1859046 | 69.0479295 | 65.0713843 |
| 71.6061284 | 73.9682631 | 73.8079507 | 76.1859046 | 71.0479295 | 65.0713843 |
| 72.6061284 | 73.9682631 | 73.8079507 | 75.1859046 | 71.0479295 | 65.0713843 |
| 72.6061284 | 73.9682631 | 73.8079507 | 71.1859046 | 72.0479295 | 65.0713843 |
| 75.6061284 | 72.9682631 | 73.8079507 | 69.1859046 | 73.0479295 | 65.0713843 |
| 75.6061284 | 72.9682631 | 73.8079507 | 67.1859046 | 74.0479295 | 65.0713843 |
| 76.6061284 | 72.9682631 | 73.8079507 | 66.1859046 | 74.0479295 | 66.0713843 |
| 76.6061284 | 72.9682631 | 73.8079507 | 66.1859046 | 74.0479295 | 66.0713843 |
| 78.6061284 | 71.9682631 | 72.8079507 | 67.1859046 | 75.0479295 | 66.0713843 |
| 79.6061284 | 71.9682631 | 71.8079507 | 68.1859046 | 75.0479295 | 65.0713843 |
| 78.6061284 | 69.9682631 | 71.8079507 | 69.1859046 | 76.0479295 | 63.0713843 |
| 78.6061284 | 64.9682631 | 71.8079507 | 70.1859046 | 76.0479295 | 63.0713843 |
| 78.6061284 | 64.9682631 | 71.8079507 | 70.1859046 | 76.0479295 | 63.0713843 |
| 74.6061284 | 64.9682631 | 71.8079507 | 70.1859046 | 76.0479295 | 64.0713843 |
| 73.6061284 | 66.9682631 | 72.8079507 | 70.1859046 | 74.0479295 | 65.0713843 |
| 72.6061284 | 67.9682631 | 72.8079507 | 71.1859046 | 73.0479295 | 65.0713843 |
| 71.6061284 | 67.9682631 | 72.8079507 | 71.1859046 | 72.0479295 | 65.0713843 |
| 71.6061284 | 70.9682631 | 72.8079507 | 71.1859046 | 72.0479295 | 66.0713843 |
| 70.6061284 | 70.9682631 | 72.8079507 | 71.1859046 | 71.0479295 | 67.0713843 |
| 71.6061284 | 70.9682631 | 73.8079507 | 70.1859046 | 71.0479295 | 66.0713843 |
| 71.6061284 | 70.9682631 | 73.8079507 | 70.1859046 | 71.0479295 | 66.0713843 |
| 71.6061284 | 68.9682631 | 73.8079507 | 72.1859046 | 73.0479295 | 68.0713843 |
| 72.6061284 | 68.9682631 | 73.8079507 | 74.1859046 | 74.0479295 | 71.0713843 |
| 72.6061284 | 69.9682631 | 66.8079507 | 75.1859046 | 74.0479295 | 71.0713843 |
| 72.6061284 | 70.9682631 | 66.8079507 | 75.1859046 | 72.0479295 | 71.0713843 |
| 73.6061284 | 71.9682631 | 65.8079507 | 75.1859046 | 72.0479295 | 69.0713843 |
| 72.6061284 | 72.9682631 | 65.8079507 | 74.1859046 | 72.0479295 | 68.0713843 |
| 73.6061284 | 72.9682631 | 65.8079507 | 74.1859046 | 72.0479295 | 68.0713843 |
| 74.6061284 | 73.9682631 | 65.8079507 | 74.1859046 | 72.0479295 | 66.0713843 |

|            |            |            |            |            |            |
|------------|------------|------------|------------|------------|------------|
| 74.6061284 | 73.9682631 | 65.8079507 | 75.1859046 | 72.0479295 | 67.0713843 |
| 74.6061284 | 73.9682631 | 65.8079507 | 76.1859046 | 71.0479295 | 68.0713843 |
| 74.6061284 | 73.9682631 | 65.8079507 | 76.1859046 | 71.0479295 | 69.0713843 |
| 76.6061284 | 73.9682631 | 65.8079507 | 77.1859046 | 72.0479295 | 69.0713843 |
| 76.6061284 | 72.9682631 | 65.8079507 | 77.1859046 | 72.0479295 | 69.0713843 |
| 77.6061284 | 72.9682631 | 65.8079507 | 77.1859046 | 73.0479295 | 69.0713843 |
| 77.6061284 | 72.9682631 | 65.8079507 | 77.1859046 | 73.0479295 | 70.0713843 |
| 78.6061284 | 71.9682631 | 66.8079507 | 77.1859046 | 73.0479295 | 70.0713843 |
| 79.6061284 | 70.9682631 | 69.8079507 | 77.1859046 | 72.0479295 | 70.0713843 |
| 79.6061284 | 69.9682631 | 70.8079507 | 77.1859046 | 72.0479295 | 70.0713843 |
| 79.6061284 | 69.9682631 | 70.8079507 | 77.1859046 | 72.0479295 | 70.0713843 |
| 79.6061284 | 65.9682631 | 70.8079507 | 78.1859046 | 72.0479295 | 70.0713843 |
| 76.6061284 | 65.9682631 | 71.8079507 | 78.1859046 | 72.0479295 | 70.0713843 |
| 72.6061284 | 64.9682631 | 74.8079507 | 79.1859046 | 72.0479295 | 69.0713843 |
| 72.6061284 | 63.9682631 | 74.8079507 | 81.1859046 | 72.0479295 | 68.0713843 |
| 70.6061284 | 66.9682631 | 75.8079507 | 82.1859046 | 73.0479295 | 68.0713843 |
| 70.6061284 | 67.9682631 | 75.8079507 | 82.1859046 | 73.0479295 | 67.0713843 |
| 71.6061284 | 66.9682631 | 75.8079507 | 81.1859046 | 73.0479295 | 67.0713843 |
| 71.6061284 | 65.9682631 | 76.8079507 | 80.1859046 | 73.0479295 | 66.0713843 |
| 71.6061284 | 63.9682631 | 73.8079507 | 77.1859046 | 73.0479295 | 66.0713843 |
| 71.6061284 | 63.9682631 | 73.8079507 | 75.1859046 | 73.0479295 | 65.0713843 |
| 71.6061284 | 63.9682631 | 70.8079507 | 74.1859046 | 73.0479295 | 65.0713843 |
| 68.6061284 | 63.9682631 | 71.8079507 | 74.1859046 | 72.0479295 | 66.0713843 |
| 68.6061284 | 63.9682631 | 71.8079507 | 73.1859046 | 72.0479295 | 66.0713843 |
| 68.6061284 | 63.9682631 | 70.8079507 | 73.1859046 | 72.0479295 | 67.0713843 |
| 68.6061284 | 63.9682631 | 69.8079507 | 73.1859046 | 72.0479295 | 68.0713843 |
| 67.6061284 | 63.9682631 | 68.8079507 | 73.1859046 | 73.0479295 | 68.0713843 |
| 68.6061284 | 63.9682631 | 67.8079507 | 73.1859046 | 75.0479295 | 69.0713843 |
| 71.6061284 | 63.9682631 | 66.8079507 | 74.1859046 | 75.0479295 | 68.0713843 |
| 75.6061284 | 63.9682631 | 66.8079507 | 74.1859046 | 74.0479295 | 68.0713843 |
| 76.6061284 | 61.9682631 | 66.8079507 | 74.1859046 | 74.0479295 | 68.0713843 |
| 77.6061284 | 60.9682631 | 66.8079507 | 73.1859046 | 74.0479295 | 67.0713843 |
| 77.6061284 | 60.9682631 | 66.8079507 | 73.1859046 | 73.0479295 | 67.0713843 |
| 77.6061284 | 60.9682631 | 66.8079507 | 72.1859046 | 73.0479295 | 68.0713843 |
| 76.6061284 | 60.9682631 | 66.8079507 | 71.1859046 | 72.0479295 | 68.0713843 |
| 76.6061284 | 59.9682631 | 66.8079507 | 71.1859046 | 71.0479295 | 68.0713843 |
| 75.6061284 | 58.9682631 | 66.8079507 | 71.1859046 | 71.0479295 | 68.0713843 |
| 75.6061284 | 58.9682631 | 66.8079507 | 71.1859046 | 71.0479295 | 68.0713843 |
| 75.6061284 | 58.9682631 | 66.8079507 | 71.1859046 | 71.0479295 | 68.0713843 |
| 72.6061284 | 58.9682631 | 66.8079507 | 72.1859046 | 71.0479295 | 68.0713843 |
| 71.6061284 | 58.9682631 | 66.8079507 | 72.1859046 | 71.0479295 | 68.0713843 |
| 72.6061284 | 60.9682631 | 66.8079507 | 71.1859046 | 71.0479295 | 67.0713843 |
| 72.6061284 | 62.9682631 | 67.8079507 | 70.1859046 | 71.0479295 | 68.0713843 |
| 72.6061284 | 63.9682631 | 67.8079507 | 70.1859046 | 71.0479295 | 69.0713843 |
| 72.6061284 | 64.9682631 | 67.8079507 | 68.1859046 | 71.0479295 | 71.0713843 |

|            |            |            |            |            |            |
|------------|------------|------------|------------|------------|------------|
| 71.6061284 | 66.9682631 | 66.8079507 | 66.1859046 | 72.0479295 | 71.0713843 |
| 71.6061284 | 72.9682631 | 66.8079507 | 65.1859046 | 72.0479295 | 71.0713843 |
| 72.6061284 | 74.9682631 | 66.8079507 | 65.1859046 | 72.0479295 | 72.0713843 |
| 72.6061284 | 75.9682631 | 67.8079507 | 65.1859046 | 72.0479295 | 73.0713843 |
| 72.6061284 | 75.9682631 | 67.8079507 | 66.1859046 | 72.0479295 | 73.0713843 |
| 74.6061284 | 75.9682631 | 67.8079507 | 66.1859046 | 72.0479295 | 73.0713843 |
| 78.6061284 | 75.9682631 | 67.8079507 | 66.1859046 | 72.0479295 | 73.0713843 |
| 83.6061284 | 75.9682631 | 67.8079507 | 66.1859046 | 71.0479295 | 73.0713843 |
| 84.6061284 | 74.9682631 | 67.8079507 | 66.1859046 | 71.0479295 | 73.0713843 |
| 84.6061284 | 73.9682631 | 67.8079507 | 66.1859046 | 71.0479295 | 74.0713843 |
| 80.6061284 | 73.9682631 | 67.8079507 | 66.1859046 | 71.0479295 | 76.0713843 |
| 78.6061284 | 71.9682631 | 67.8079507 | 66.1859046 | 72.0479295 | 80.0713843 |
| 78.6061284 | 71.9682631 | 80.8079507 | 66.1859046 | 72.0479295 | 80.0713843 |
| 77.6061284 | 71.9682631 | 82.8079507 | 66.1859046 | 72.0479295 | 81.0713843 |
| 77.6061284 | 71.9682631 | 82.8079507 | 66.1859046 | 72.0479295 | 82.0713843 |
| 77.6061284 | 71.9682631 | 83.8079507 | 65.1859046 | 72.0479295 | 85.0713843 |
| 77.6061284 | 71.9682631 | 85.8079507 | 65.1859046 | 72.0479295 | 85.0713843 |
| 78.6061284 | 70.9682631 | 85.8079507 | 67.1859046 | 71.0479295 | 86.0713843 |
| 79.6061284 | 70.9682631 | 86.8079507 | 70.1859046 | 74.0479295 | 87.0713843 |
| 78.6061284 | 70.9682631 | 82.8079507 | 70.1859046 | 77.0479295 | 86.0713843 |
| 76.6061284 | 70.9682631 | 82.8079507 | 72.1859046 | 79.0479295 | 86.0713843 |
| 76.6061284 | 69.9682631 | 81.8079507 | 73.1859046 | 81.0479295 | 84.0713843 |
| 77.6061284 | 69.9682631 | 79.8079507 | 73.1859046 | 82.0479295 | 82.0713843 |
| 79.6061284 | 67.9682631 | 79.8079507 | 79.1859046 | 83.0479295 | 73.0713843 |
| 79.6061284 | 67.9682631 | 79.8079507 | 81.1859046 | 84.0479295 | 72.0713843 |
| 79.6061284 | 65.9682631 | 78.8079507 | 81.1859046 | 84.0479295 | 72.0713843 |
| 75.6061284 | 65.9682631 | 78.8079507 | 83.1859046 | 85.0479295 | 70.0713843 |
| 71.6061284 | 65.9682631 | 77.8079507 | 83.1859046 | 84.0479295 | 69.0713843 |
| 70.6061284 | 65.9682631 | 77.8079507 | 83.1859046 | 84.0479295 | 68.0713843 |
| 70.6061284 | 67.9682631 | 78.8079507 | 83.1859046 | 83.0479295 | 68.0713843 |
| 74.6061284 | 67.9682631 | 78.8079507 | 83.1859046 | 82.0479295 | 72.0713843 |
| 75.6061284 | 66.9682631 | 78.8079507 | 83.1859046 | 80.0479295 | 72.0713843 |
| 77.6061284 | 66.9682631 | 78.8079507 | 83.1859046 | 79.0479295 | 74.0713843 |
| 78.6061284 | 67.9682631 | 78.8079507 | 85.1859046 | 78.0479295 | 74.0713843 |
| 79.6061284 | 67.9682631 | 78.8079507 | 85.1859046 | 77.0479295 | 73.0713843 |
| 79.6061284 | 70.9682631 | 79.8079507 | 86.1859046 | 77.0479295 | 72.0713843 |
| 79.6061284 | 70.9682631 | 79.8079507 | 86.1859046 | 76.0479295 | 72.0713843 |
| 79.6061284 | 70.9682631 | 78.8079507 | 86.1859046 | 75.0479295 | 71.0713843 |
| 79.6061284 | 70.9682631 | 78.8079507 | 85.1859046 | 75.0479295 | 69.0713843 |
| 80.6061284 | 70.9682631 | 78.8079507 | 85.1859046 | 75.0479295 | 69.0713843 |
| 80.6061284 | 66.9682631 | 78.8079507 | 84.1859046 | 75.0479295 | 69.0713843 |
| 78.6061284 | 66.9682631 | 77.8079507 | 76.1859046 | 75.0479295 | 70.0713843 |
| 76.6061284 | 66.9682631 | 76.8079507 | 73.1859046 | 76.0479295 | 70.0713843 |
| 76.6061284 | 66.9682631 | 75.8079507 | 72.1859046 | 76.0479295 | 70.0713843 |
| 76.6061284 | 65.9682631 | 75.8079507 | 72.1859046 | 76.0479295 | 70.0713843 |

|            |            |            |            |            |            |
|------------|------------|------------|------------|------------|------------|
| 76.6061284 | 68.9682631 | 74.8079507 | 73.1859046 | 76.0479295 | 69.0713843 |
| 76.6061284 | 68.9682631 | 74.8079507 | 73.1859046 | 76.0479295 | 69.0713843 |
| 76.6061284 | 73.9682631 | 78.8079507 | 73.1859046 | 76.0479295 | 69.0713843 |
| 77.6061284 | 73.9682631 | 78.8079507 | 73.1859046 | 77.0479295 | 70.0713843 |
| 77.6061284 | 73.9682631 | 77.8079507 | 73.1859046 | 76.0479295 | 70.0713843 |
| 77.6061284 | 73.9682631 | 77.8079507 | 73.1859046 | 74.0479295 | 70.0713843 |
| 77.6061284 | 72.9682631 | 76.8079507 | 74.1859046 | 72.0479295 | 70.0713843 |
| 77.6061284 | 70.9682631 | 76.8079507 | 74.1859046 | 71.0479295 | 70.0713843 |
| 76.6061284 | 70.9682631 | 76.8079507 | 76.1859046 | 69.0479295 | 68.0713843 |
| 76.6061284 | 70.9682631 | 76.8079507 | 75.1859046 | 68.0479295 | 68.0713843 |
| 75.6061284 | 69.9682631 | 77.8079507 | 75.1859046 | 68.0479295 | 68.0713843 |
| 75.6061284 | 71.9682631 | 77.8079507 | 75.1859046 | 67.0479295 | 68.0713843 |
| 75.6061284 | 73.9682631 | 77.8079507 | 75.1859046 | 68.0479295 | 68.0713843 |
| 75.6061284 | 74.9682631 | 75.8079507 | 74.1859046 | 68.0479295 | 68.0713843 |
| 75.6061284 | 73.9682631 | 75.8079507 | 74.1859046 | 69.0479295 | 68.0713843 |
| 76.6061284 | 73.9682631 | 76.8079507 | 74.1859046 | 70.0479295 | 69.0713843 |
| 76.6061284 | 73.9682631 | 77.8079507 | 74.1859046 | 72.0479295 | 69.0713843 |
| 79.6061284 | 72.9682631 | 76.8079507 | 75.1859046 | 72.0479295 | 69.0713843 |
| 79.6061284 | 69.9682631 | 74.8079507 | 76.1859046 | 71.0479295 | 69.0713843 |
| 78.6061284 | 68.9682631 | 74.8079507 | 77.1859046 | 71.0479295 | 69.0713843 |
| 76.6061284 | 68.9682631 | 74.8079507 | 78.1859046 | 71.0479295 | 71.0713843 |
| 75.6061284 | 68.9682631 | 75.8079507 | 79.1859046 | 71.0479295 | 71.0713843 |
| 74.6061284 | 70.9682631 | 75.8079507 | 79.1859046 | 71.0479295 | 71.0713843 |
| 75.6061284 | 70.9682631 | 75.8079507 | 81.1859046 | 71.0479295 | 71.0713843 |
| 77.6061284 | 72.9682631 | 76.8079507 | 82.1859046 | 71.0479295 | 71.0713843 |
| 79.6061284 | 71.9682631 | 76.8079507 | 83.1859046 | 71.0479295 | 74.0713843 |
| 79.6061284 | 69.9682631 | 76.8079507 | 85.1859046 | 71.0479295 | 74.0713843 |
| 77.6061284 | 68.9682631 | 76.8079507 | 85.1859046 | 71.0479295 | 74.0713843 |
| 76.6061284 | 66.9682631 | 76.8079507 | 85.1859046 | 72.0479295 | 72.0713843 |
| 74.6061284 | 66.9682631 | 75.8079507 | 86.1859046 | 72.0479295 | 72.0713843 |
| 73.6061284 | 66.9682631 | 75.8079507 | 86.1859046 | 73.0479295 | 68.0713843 |
| 72.6061284 | 66.9682631 | 72.8079507 | 86.1859046 | 71.0479295 | 68.0713843 |
| 72.6061284 | 66.9682631 | 69.8079507 | 86.1859046 | 71.0479295 | 68.0713843 |
| 72.6061284 | 66.9682631 | 69.8079507 | 87.1859046 | 70.0479295 | 67.0713843 |
| 72.6061284 | 66.9682631 | 69.8079507 | 87.1859046 | 70.0479295 | 67.0713843 |
| 72.6061284 | 65.9682631 | 69.8079507 | 88.1859046 | 70.0479295 | 67.0713843 |
| 74.6061284 | 65.9682631 | 69.8079507 | 88.1859046 | 70.0479295 | 67.0713843 |
| 75.6061284 | 64.9682631 | 70.8079507 | 88.1859046 | 70.0479295 | 66.0713843 |
| 75.6061284 | 64.9682631 | 70.8079507 | 88.1859046 | 69.0479295 | 64.0713843 |
| 74.6061284 | 64.9682631 | 73.8079507 | 86.1859046 | 69.0479295 | 64.0713843 |
| 74.6061284 | 63.9682631 | 73.8079507 | 84.1859046 | 69.0479295 | 62.0713843 |
| 75.6061284 | 71.9682631 | 74.8079507 | 82.1859046 | 69.0479295 | 63.0713843 |
| 77.6061284 | 73.9682631 | 74.8079507 | 82.1859046 | 69.0479295 | 63.0713843 |
| 77.6061284 | 74.9682631 | 74.8079507 | 80.1859046 | 69.0479295 | 63.0713843 |
| 81.6061284 | 74.9682631 | 74.8079507 | 76.1859046 | 69.0479295 | 63.0713843 |

|            |            |            |            |            |            |
|------------|------------|------------|------------|------------|------------|
| 81.6061284 | 74.9682631 | 75.8079507 | 75.1859046 | 69.0479295 | 63.0713843 |
| 80.6061284 | 75.9682631 | 75.8079507 | 75.1859046 | 69.0479295 | 64.0713843 |
| 80.6061284 | 75.9682631 | 75.8079507 | 73.1859046 | 68.0479295 | 65.0713843 |
| 78.6061284 | 75.9682631 | 75.8079507 | 73.1859046 | 68.0479295 | 66.0713843 |
| 76.6061284 | 75.9682631 | 75.8079507 | 73.1859046 | 68.0479295 | 66.0713843 |
| 74.6061284 | 75.9682631 | 75.8079507 | 73.1859046 | 68.0479295 | 67.0713843 |
| 72.6061284 | 76.9682631 | 75.8079507 | 74.1859046 | 68.0479295 | 66.0713843 |
| 72.6061284 | 77.9682631 | 76.8079507 | 74.1859046 | 66.0479295 | 66.0713843 |
| 66.6061284 | 78.9682631 | 76.8079507 | 77.1859046 | 66.0479295 | 65.0713843 |
| 65.6061284 | 77.9682631 | 77.8079507 | 78.1859046 | 66.0479295 | 66.0713843 |
| 65.6061284 | 77.9682631 | 77.8079507 | 78.1859046 | 66.0479295 | 66.0713843 |
| 65.6061284 | 77.9682631 | 77.8079507 | 78.1859046 | 66.0479295 | 71.0713843 |
| 65.6061284 | 77.9682631 | 77.8079507 | 78.1859046 | 66.0479295 | 73.0713843 |
| 65.6061284 | 77.9682631 | 77.8079507 | 79.1859046 | 65.0479295 | 73.0713843 |
| 65.6061284 | 77.9682631 | 81.8079507 | 79.1859046 | 65.0479295 | 73.0713843 |
| 64.6061284 | 77.9682631 | 81.8079507 | 79.1859046 | 67.0479295 | 73.0713843 |
| 65.6061284 | 77.9682631 | 81.8079507 | 79.1859046 | 69.0479295 | 73.0713843 |
| 65.6061284 | 79.9682631 | 80.8079507 | 80.1859046 | 69.0479295 | 73.0713843 |
| 68.6061284 | 80.9682631 | 80.8079507 | 81.1859046 | 69.0479295 | 73.0713843 |
| 69.6061284 | 80.9682631 | 80.8079507 | 78.1859046 | 68.0479295 | 72.0713843 |
| 69.6061284 | 80.9682631 | 79.8079507 | 78.1859046 | 68.0479295 | 72.0713843 |
| 69.6061284 | 80.9682631 | 79.8079507 | 79.1859046 | 68.0479295 | 72.0713843 |
| 70.6061284 | 79.9682631 | 79.8079507 | 80.1859046 | 67.0479295 | 72.0713843 |
| 69.6061284 | 73.9682631 | 80.8079507 | 81.1859046 | 67.0479295 | 72.0713843 |
| 69.6061284 | 67.9682631 | 79.8079507 | 81.1859046 | 66.0479295 | 73.0713843 |
| 70.6061284 | 66.9682631 | 79.8079507 | 80.1859046 | 66.0479295 | 75.0713843 |
| 73.6061284 | 65.9682631 | 79.8079507 | 80.1859046 | 66.0479295 | 75.0713843 |
| 74.6061284 | 65.9682631 | 78.8079507 | 80.1859046 | 67.0479295 | 75.0713843 |
| 74.6061284 | 65.9682631 | 78.8079507 | 80.1859046 | 67.0479295 | 74.0713843 |
| 74.6061284 | 65.9682631 | 78.8079507 | 80.1859046 | 67.0479295 | 73.0713843 |
| 74.6061284 | 65.9682631 | 77.8079507 | 80.1859046 | 66.0479295 | 73.0713843 |
| 74.6061284 | 65.9682631 | 76.8079507 | 80.1859046 | 66.0479295 | 72.0713843 |
| 75.6061284 | 63.9682631 | 75.8079507 | 80.1859046 | 66.0479295 | 71.0713843 |
| 77.6061284 | 62.9682631 | 74.8079507 | 79.1859046 | 66.0479295 | 71.0713843 |
| 78.6061284 | 62.9682631 | 74.8079507 | 79.1859046 | 66.0479295 | 71.0713843 |
| 78.6061284 | 62.9682631 | 73.8079507 | 79.1859046 | 66.0479295 | 72.0713843 |
| 77.6061284 | 62.9682631 | 72.8079507 | 79.1859046 | 66.0479295 | 71.0713843 |
| 75.6061284 | 63.9682631 | 73.8079507 | 79.1859046 | 67.0479295 | 71.0713843 |
| 75.6061284 | 63.9682631 | 73.8079507 | 79.1859046 | 67.0479295 | 71.0713843 |
| 75.6061284 | 64.9682631 | 75.8079507 | 79.1859046 | 67.0479295 | 71.0713843 |
| 75.6061284 | 64.9682631 | 76.8079507 | 79.1859046 | 67.0479295 | 70.0713843 |
| 76.6061284 | 64.9682631 | 76.8079507 | 79.1859046 | 67.0479295 | 69.0713843 |
| 76.6061284 | 65.9682631 | 76.8079507 | 79.1859046 | 67.0479295 | 68.0713843 |
| 76.6061284 | 67.9682631 | 76.8079507 | 79.1859046 | 66.0479295 | 68.0713843 |
| 76.6061284 | 69.9682631 | 77.8079507 | 79.1859046 | 65.0479295 | 67.0713843 |



|            |            |            |            |            |            |
|------------|------------|------------|------------|------------|------------|
| 76.6061284 | 72.9682631 | 77.8079507 | 79.1859046 | 65.0479295 | 67.0713843 |
| 76.6061284 | 72.9682631 | 77.8079507 | 79.1859046 | 72.0479295 | 66.0713843 |
| 74.6061284 | 74.9682631 | 76.8079507 | 79.1859046 | 73.0479295 | 67.0713843 |
| 73.6061284 | 77.9682631 | 75.8079507 | 79.1859046 | 74.0479295 | 67.0713843 |
| 72.6061284 | 77.9682631 | 75.8079507 | 79.1859046 | 74.0479295 | 68.0713843 |
| 70.6061284 | 78.9682631 | 75.8079507 | 80.1859046 | 73.0479295 | 75.0713843 |
| 67.6061284 | 78.9682631 | 75.8079507 | 79.1859046 | 73.0479295 | 78.0713843 |
| 65.6061284 | 78.9682631 | 74.8079507 | 79.1859046 | 73.0479295 | 79.0713843 |
| 64.6061284 | 79.9682631 | 74.8079507 | 79.1859046 | 73.0479295 | 79.0713843 |
| 62.6061284 | 80.9682631 | 74.8079507 | 77.1859046 | 73.0479295 | 79.0713843 |
| 62.6061284 | 80.9682631 | 75.8079507 | 76.1859046 | 73.0479295 | 79.0713843 |
| 62.6061284 | 80.9682631 | 75.8079507 | 76.1859046 | 73.0479295 | 80.0713843 |
| 61.6061284 | 81.9682631 | 75.8079507 | 76.1859046 | 73.0479295 | 80.0713843 |
| 60.6061284 | 81.9682631 | 75.8079507 | 75.1859046 | 73.0479295 | 82.0713843 |
| 61.6061284 | 82.9682631 | 77.8079507 | 75.1859046 | 73.0479295 | 84.0713843 |
| 62.6061284 | 82.9682631 | 77.8079507 | 75.1859046 | 72.0479295 | 86.0713843 |
| 63.6061284 | 82.9682631 | 78.8079507 | 76.1859046 | 71.0479295 | 86.0713843 |
| 64.6061284 | 81.9682631 | 78.8079507 | 76.1859046 | 70.0479295 | 89.0713843 |
| 64.6061284 | 81.9682631 | 78.8079507 | 76.1859046 | 70.0479295 | 90.0713843 |
| 64.6061284 | 81.9682631 | 78.8079507 | 76.1859046 | 70.0479295 | 90.0713843 |
| 64.6061284 | 70.9682631 | 75.8079507 | 76.1859046 | 69.0479295 | 73.2630288 |
| 64.6061284 | 68.9682631 | 74.8079507 | 76.1859046 | 69.0479295 | 73.3539378 |
| 67.6061284 | 68.9682631 | 74.8079507 | 75.1859046 | 69.0479295 | 74.0812106 |
| 67.6061284 | 68.9682631 | 74.8079507 | 75.1859046 | 69.0479295 | 73.8084833 |
| 66.6061284 | 68.9682631 | 72.8079507 | 73.1859046 | 69.0479295 | 72.9903015 |
| 65.6061284 | 68.9682631 | 72.8079507 | 72.1859046 | 70.0479295 | 72.9903015 |
| 64.6061284 | 67.9682631 | 72.8079507 | 72.1859046 | 70.0479295 | 72.7175742 |
| 64.6061284 | 67.9682631 | 72.8079507 | 72.1859046 | 71.0479295 | 72.1721197 |
| 64.6061284 | 67.9682631 | 72.8079507 | 72.1859046 | 71.0479295 | 83.0713843 |
| 65.6061284 | 66.9682631 | 74.8079507 | 72.1859046 | 71.0479295 | 83.0713843 |
| 67.6061284 | 66.9682631 | 76.8079507 | 72.1859046 | 71.0479295 | 81.0713843 |
| 70.6061284 | 66.9682631 | 76.8079507 | 72.1859046 | 71.0479295 | 80.0713843 |
| 73.6061284 | 67.9682631 | 76.8079507 | 72.1859046 | 72.0479295 | 78.0713843 |
| 74.6061284 | 68.9682631 | 72.8079507 | 72.1859046 | 73.0479295 | 76.0713843 |
| 74.6061284 | 68.9682631 | 72.8079507 | 72.1859046 | 73.0479295 | 74.0713843 |
| 74.6061284 | 71.9682631 | 71.8079507 | 72.1859046 | 73.0479295 | 74.0713843 |
| 75.6061284 | 74.9682631 | 71.8079507 | 73.1859046 | 73.0479295 | 74.0713843 |
| 75.6061284 | 75.9682631 | 71.8079507 | 73.1859046 | 73.0479295 | 74.0713843 |
| 76.6061284 | 75.9682631 | 70.8079507 | 73.1859046 | 73.0479295 | 73.0713843 |
| 76.6061284 | 75.9682631 | 71.8079507 | 73.1859046 | 73.0479295 | 73.0713843 |
| 76.6061284 | 74.9682631 | 70.8079507 | 72.1859046 | 73.0479295 | 69.0713843 |
| 81.6061284 | 68.9682631 | 70.8079507 | 72.1859046 | 73.0479295 | 68.0713843 |
| 82.6061284 | 68.9682631 | 70.8079507 | 72.1859046 | 71.0479295 | 68.0713843 |
| 82.6061284 | 68.9682631 | 71.8079507 | 72.1859046 | 71.0479295 | 66.0713843 |

|            |            |            |            |            |            |
|------------|------------|------------|------------|------------|------------|
| 82.6061284 | 67.9682631 | 71.8079507 | 72.1859046 | 71.0479295 | 66.0713843 |
| 82.6061284 | 70.9682631 | 71.8079507 | 75.1859046 | 71.0479295 | 66.0713843 |
| 82.6061284 | 70.9682631 | 71.8079507 | 76.1859046 | 71.0479295 | 66.0713843 |
| 81.6061284 | 70.9682631 | 71.8079507 | 76.1859046 | 69.0479295 | 66.0713843 |
| 81.6061284 | 70.9682631 | 71.8079507 | 76.1859046 | 69.0479295 | 66.0713843 |
| 81.6061284 | 70.9682631 | 71.8079507 | 76.1859046 | 69.0479295 | 66.0713843 |
| 80.6061284 | 71.9682631 | 71.8079507 | 76.1859046 | 69.0479295 | 66.0713843 |
| 80.6061284 | 77.9682631 | 71.8079507 | 76.1859046 | 69.0479295 | 67.0713843 |
| 80.6061284 | 79.9682631 | 71.8079507 | 76.1859046 | 69.0479295 | 71.0713843 |
| 80.6061284 | 79.9682631 | 75.8079507 | 76.1859046 | 70.0479295 | 71.0713843 |
| 80.6061284 | 79.9682631 | 74.8079507 | 76.1859046 | 70.0479295 | 73.0713843 |
| 80.6061284 | 79.9682631 | 74.8079507 | 76.1859046 | 71.0479295 | 73.0713843 |
| 79.6061284 | 79.9682631 | 75.8079507 | 76.1859046 | 71.0479295 | 73.0713843 |
| 79.6061284 | 79.9682631 | 77.8079507 | 76.1859046 | 72.0479295 | 71.0713843 |
| 77.6061284 | 79.9682631 | 77.8079507 | 76.1859046 | 72.0479295 | 71.0713843 |
| 72.6061284 | 80.9682631 | 77.8079507 | 76.1859046 | 72.0479295 | 70.0713843 |
| 70.6061284 | 80.9682631 | 77.8079507 | 76.1859046 | 72.0479295 | 74.0713843 |
| 68.6061284 | 80.9682631 | 77.8079507 | 76.1859046 | 72.0479295 | 74.0713843 |
| 68.6061284 | 80.9682631 | 77.8079507 | 75.1859046 | 72.0479295 | 76.0713843 |
| 68.6061284 | 80.9682631 | 76.8079507 | 75.1859046 | 72.0479295 | 77.0713843 |
| 68.6061284 | 80.9682631 | 76.8079507 | 74.1859046 | 72.0479295 | 73.0713843 |
| 68.6061284 | 80.9682631 | 76.8079507 | 74.1859046 | 72.0479295 | 73.0713843 |
| 68.6061284 | 79.9682631 | 76.8079507 | 74.1859046 | 71.0479295 | 71.0713843 |
| 70.6061284 | 79.9682631 | 74.8079507 | 73.1859046 | 71.0479295 | 69.0713843 |
| 71.6061284 | 80.9682631 | 73.8079507 | 74.1859046 | 71.0479295 | 69.0713843 |
| 71.6061284 | 80.9682631 | 73.8079507 | 76.1859046 | 71.0479295 | 68.0713843 |
| 72.6061284 | 80.9682631 | 74.8079507 | 81.1859046 | 71.0479295 | 67.0713843 |
| 73.6061284 | 80.9682631 | 75.8079507 | 81.1859046 | 71.0479295 | 67.0713843 |
| 73.6061284 | 80.9682631 | 75.8079507 | 81.1859046 | 71.0479295 | 67.0713843 |
| 74.6061284 | 71.9682631 | 75.8079507 | 83.1859046 | 70.0479295 | 67.0713843 |
| 75.6061284 | 71.9682631 | 75.8079507 | 83.1859046 | 70.0479295 | 68.0713843 |
| 74.6061284 | 71.9682631 | 74.8079507 | 80.1859046 | 70.0479295 | 70.0713843 |
| 74.6061284 | 70.9682631 | 74.8079507 | 79.1859046 | 70.0479295 | 70.0713843 |
| 74.6061284 | 70.9682631 | 73.8079507 | 78.1859046 | 70.0479295 | 71.0713843 |
| 74.6061284 | 70.9682631 | 73.8079507 | 78.1859046 | 70.0479295 | 71.0713843 |
| 75.6061284 | 68.9682631 | 73.8079507 | 79.1859046 | 70.0479295 | 71.0713843 |
| 75.6061284 | 66.9682631 | 73.8079507 | 81.1859046 | 71.0479295 | 71.0713843 |
| 75.6061284 | 65.9682631 | 72.8079507 | 83.1859046 | 70.0479295 | 71.0713843 |
| 75.6061284 | 64.9682631 | 74.8079507 | 83.1859046 | 70.0479295 | 72.0713843 |
| 75.6061284 | 63.9682631 | 74.8079507 | 84.1859046 | 69.0479295 | 72.0713843 |
| 75.6061284 | 63.9682631 | 74.8079507 | 84.1859046 | 70.0479295 | 71.0713843 |
| 74.6061284 | 63.9682631 | 74.8079507 | 84.1859046 | 71.0479295 | 71.0713843 |
| 74.6061284 | 62.9682631 | 75.8079507 | 84.1859046 | 71.0479295 | 72.0713843 |
| 73.6061284 | 62.9682631 | 77.8079507 | 85.1859046 | 70.0479295 | 72.0713843 |
| 70.6061284 | 62.9682631 | 78.8079507 | 85.1859046 | 68.0479295 | 76.0713843 |

|            |            |            |            |            |            |
|------------|------------|------------|------------|------------|------------|
| 70.6061284 | 62.9682631 | 78.8079507 | 83.1859046 | 67.0479295 | 83.0713843 |
| 68.6061284 | 62.9682631 | 77.8079507 | 82.1859046 | 67.0479295 | 84.0713843 |
| 64.6061284 | 64.9682631 | 75.8079507 | 82.1859046 | 67.0479295 | 84.0713843 |
| 64.6061284 | 66.9682631 | 73.8079507 | 82.1859046 | 67.0479295 | 84.0713843 |
| 61.6061284 | 66.9682631 | 73.8079507 | 82.1859046 | 67.0479295 | 89.0713843 |
| 60.6061284 | 67.9682631 | 73.8079507 | 81.1859046 | 67.0479295 | 75.8084833 |
| 60.6061284 | 67.9682631 | 75.8079507 | 81.1859046 | 67.0479295 | 75.6266651 |
| 61.6061284 | 67.9682631 | 76.8079507 | 80.1859046 | 67.0479295 | 75.3539378 |
| 62.6061284 | 67.9682631 | 78.8079507 | 78.1859046 | 67.0479295 | 75.1721197 |
| 67.6061284 | 69.9682631 | 80.8079507 | 77.1859046 | 68.0479295 | 75.9903015 |
| 67.6061284 | 69.9682631 | 82.8079507 | 76.1859046 | 68.0479295 | 75.9903015 |
| 71.6061284 | 69.9682631 | 83.8079507 | 76.1859046 | 68.0479295 | 89.0713843 |
| 73.6061284 | 71.9682631 | 83.8079507 | 75.1859046 | 68.0479295 | 85.0713843 |
| 73.6061284 | 71.9682631 | 80.8079507 | 77.1859046 | 68.0479295 | 81.0713843 |
| 74.6061284 | 71.9682631 | 79.8079507 | 79.1859046 | 67.0479295 | 77.0713843 |
| 76.6061284 | 71.9682631 | 78.8079507 | 79.1859046 | 67.0479295 | 76.0713843 |
| 76.6061284 | 71.9682631 | 77.8079507 | 79.1859046 | 67.0479295 | 76.0713843 |
| 75.6061284 | 71.9682631 | 78.8079507 | 79.1859046 | 68.0479295 | 77.0713843 |
| 75.6061284 | 72.9682631 | 78.8079507 | 79.1859046 | 69.0479295 | 83.0713843 |
| 74.6061284 | 73.9682631 | 77.8079507 | 79.1859046 | 69.0479295 | 86.0713843 |
| 73.6061284 | 73.9682631 | 76.8079507 | 84.1859046 | 70.0479295 | 86.0713843 |
| 71.6061284 | 73.9682631 | 75.8079507 | 84.1859046 | 70.0479295 | 86.0713843 |
| 71.6061284 | 75.9682631 | 75.8079507 | 86.1859046 | 71.0479295 | 86.0713843 |
| 70.6061284 | 76.9682631 | 75.8079507 | 86.1859046 | 71.0479295 | 86.0713843 |
| 71.6061284 | 77.9682631 | 77.8079507 | 86.1859046 | 71.0479295 | 86.0713843 |
| 74.6061284 | 77.9682631 | 78.8079507 | 85.1859046 | 71.0479295 | 85.0713843 |
| 77.6061284 | 77.9682631 | 79.8079507 | 85.1859046 | 71.0479295 | 84.0713843 |
| 76.6061284 | 77.9682631 | 80.8079507 | 86.1859046 | 70.0479295 | 84.0713843 |
| 75.6061284 | 77.9682631 | 81.8079507 | 86.1859046 | 70.0479295 | 84.0713843 |
| 74.6061284 | 77.9682631 | 81.8079507 | 86.1859046 | 71.0479295 | 83.0713843 |
| 73.6061284 | 77.9682631 | 81.8079507 | 86.1859046 | 71.0479295 | 83.0713843 |
| 73.6061284 | 77.9682631 | 81.8079507 | 86.1859046 | 71.0479295 | 83.0713843 |
| 70.6061284 | 77.9682631 | 81.8079507 | 87.1859046 | 71.0479295 | 79.0713843 |
| 67.6061284 | 77.9682631 | 81.8079507 | 87.1859046 | 72.0479295 | 76.0713843 |
| 64.6061284 | 77.9682631 | 81.8079507 | 87.1859046 | 72.0479295 | 76.0713843 |
| 64.6061284 | 77.9682631 | 82.8079507 | 87.1859046 | 74.0479295 | 73.0713843 |
| 64.6061284 | 77.9682631 | 82.8079507 | 88.1859046 | 74.0479295 | 72.0713843 |
| 64.6061284 | 77.9682631 | 82.8079507 | 88.1859046 | 74.0479295 | 72.0713843 |
| 63.6061284 | 77.9682631 | 82.8079507 | 89.1859046 | 73.0479295 | 74.0713843 |
| 64.6061284 | 77.9682631 | 84.8079507 | 89.1859046 | 72.0479295 | 74.0713843 |
| 64.6061284 | 77.9682631 | 84.8079507 | 89.1859046 | 71.0479295 | 76.0713843 |
| 65.6061284 | 78.9682631 | 80.8079507 | 89.1859046 | 72.0479295 | 76.0713843 |
| 65.6061284 | 78.9682631 | 74.8079507 | 88.1859046 | 72.0479295 | 75.0713843 |
| 65.6061284 | 78.9682631 | 70.8079507 | 87.1859046 | 71.0479295 | 74.0713843 |
| 65.6061284 | 78.9682631 | 70.8079507 | 87.1859046 | 70.0479295 | 73.0713843 |

|            |            |            |            |            |            |
|------------|------------|------------|------------|------------|------------|
| 64.6061284 | 77.9682631 | 71.8079507 | 86.1859046 | 70.0479295 | 73.0713843 |
| 64.6061284 | 76.9682631 | 74.8079507 | 86.1859046 | 70.0479295 | 73.0713843 |
| 64.6061284 | 76.9682631 | 74.8079507 | 86.1859046 | 70.0479295 | 73.0713843 |
| 62.6061284 | 75.9682631 | 76.8079507 | 84.1859046 | 70.0479295 | 73.0713843 |
| 63.6061284 | 76.9682631 | 79.8079507 | 82.1859046 | 70.0479295 | 73.0713843 |
| 63.6061284 | 76.9682631 | 79.8079507 | 78.1859046 | 70.0479295 | 73.0713843 |
| 63.6061284 | 76.9682631 | 80.8079507 | 77.1859046 | 70.0479295 | 74.0713843 |
| 63.6061284 | 76.9682631 | 80.8079507 | 76.1859046 | 70.0479295 | 74.0713843 |
| 63.6061284 | 77.9682631 | 71.8079507 | 75.1859046 | 70.0479295 | 74.0713843 |
| 62.6061284 | 78.9682631 | 71.8079507 | 74.1859046 | 70.0479295 | 74.0713843 |
| 61.6061284 | 78.9682631 | 67.8079507 | 74.1859046 | 70.0479295 | 74.0713843 |
| 61.6061284 | 80.9682631 | 63.8079507 | 74.1859046 | 70.0479295 | 77.0713843 |
| 61.6061284 | 80.9682631 | 63.8079507 | 74.1859046 | 70.0479295 | 75.0713843 |
| 62.6061284 | 80.9682631 | 62.8079507 | 74.1859046 | 70.0479295 | 74.0713843 |
| 65.6061284 | 80.9682631 | 63.8079507 | 74.1859046 | 70.0479295 | 74.0713843 |
| 65.6061284 | 79.9682631 | 64.8079507 | 74.1859046 | 70.0479295 | 74.0713843 |
| 65.6061284 | 78.9682631 | 65.8079507 | 74.1859046 | 70.0479295 | 74.0713843 |
| 64.6061284 | 78.9682631 | 65.8079507 | 74.1859046 | 69.0479295 | 74.0713843 |
| 64.6061284 | 79.9682631 | 67.8079507 | 75.1859046 | 69.0479295 | 74.0713843 |
| 65.6061284 | 79.9682631 | 67.8079507 | 74.1859046 | 70.0479295 | 74.0713843 |
| 64.6061284 | 79.9682631 | 65.8079507 | 73.1859046 | 70.0479295 | 74.0713843 |
| 65.6061284 | 79.9682631 | 65.8079507 | 73.1859046 | 70.0479295 | 75.0713843 |
| 65.6061284 | 78.9682631 | 67.8079507 | 73.1859046 | 71.0479295 | 72.0713843 |
| 66.6061284 | 78.9682631 | 68.8079507 | 73.1859046 | 72.0479295 | 66.0713843 |
| 67.6061284 | 78.9682631 | 68.8079507 | 73.1859046 | 72.0479295 | 66.0713843 |
| 68.6061284 | 78.9682631 | 70.8079507 | 73.1859046 | 77.0479295 | 64.0713843 |
| 70.6061284 | 78.9682631 | 72.8079507 | 73.1859046 | 78.0479295 | 63.0713843 |
| 71.6061284 | 78.9682631 | 76.8079507 | 73.1859046 | 79.0479295 | 63.0713843 |
| 72.6061284 | 78.9682631 | 77.8079507 | 73.1859046 | 79.0479295 | 63.0713843 |
| 72.6061284 | 78.9682631 | 78.8079507 | 73.1859046 | 79.0479295 | 64.0713843 |
| 72.6061284 | 70.9682631 | 78.8079507 | 74.1859046 | 79.0479295 | 65.0713843 |
| 72.6061284 | 70.9682631 | 78.8079507 | 74.1859046 | 79.0479295 | 65.0713843 |
| 69.6061284 | 63.9682631 | 78.8079507 | 72.1859046 | 79.0479295 | 67.0713843 |
| 69.6061284 | 63.9682631 | 78.8079507 | 68.1859046 | 79.0479295 | 70.0713843 |
| 68.6061284 | 63.9682631 | 78.8079507 | 65.1859046 | 78.0479295 | 70.0713843 |
| 67.6061284 | 63.9682631 | 78.8079507 | 65.1859046 | 78.0479295 | 71.0713843 |
| 66.6061284 | 64.9682631 | 78.8079507 | 65.1859046 | 78.0479295 | 69.0713843 |
| 65.6061284 | 65.9682631 | 75.8079507 | 65.1859046 | 78.0479295 | 69.0713843 |
| 66.6061284 | 66.9682631 | 75.8079507 | 65.1859046 | 78.0479295 | 67.0713843 |
| 67.6061284 | 65.9682631 | 75.8079507 | 65.1859046 | 78.0479295 | 67.0713843 |
| 67.6061284 | 65.9682631 | 75.8079507 | 65.1859046 | 77.0479295 | 67.0713843 |
| 67.6061284 | 62.9682631 | 75.8079507 | 66.1859046 | 77.0479295 | 67.0713843 |
| 67.6061284 | 61.9682631 | 75.8079507 | 66.1859046 | 75.0479295 | 68.0713843 |
| 67.6061284 | 61.9682631 | 75.8079507 | 65.1859046 | 75.0479295 | 68.0713843 |
| 67.6061284 | 61.9682631 | 74.8079507 | 65.1859046 | 74.0479295 | 67.0713843 |

|            |            |            |            |            |            |
|------------|------------|------------|------------|------------|------------|
| 67.6061284 | 61.9682631 | 73.8079507 | 65.1859046 | 74.0479295 | 66.0713843 |
| 67.6061284 | 61.9682631 | 73.8079507 | 65.1859046 | 74.0479295 | 66.0713843 |
| 67.6061284 | 62.9682631 | 72.8079507 | 65.1859046 | 75.0479295 | 66.0713843 |
| 65.6061284 | 62.9682631 | 72.8079507 | 64.1859046 | 74.0479295 | 66.0713843 |
| 65.6061284 | 62.9682631 | 73.8079507 | 64.1859046 | 74.0479295 | 66.0713843 |
| 65.6061284 | 62.9682631 | 73.8079507 | 65.1859046 | 74.0479295 | 65.0713843 |
| 65.6061284 | 64.9682631 | 74.8079507 | 65.1859046 | 74.0479295 | 65.0713843 |
| 65.6061284 | 64.9682631 | 75.8079507 | 65.1859046 | 74.0479295 | 64.0713843 |
| 65.6061284 | 65.9682631 | 77.8079507 | 65.1859046 | 73.0479295 | 64.0713843 |
| 65.6061284 | 67.9682631 | 77.8079507 | 65.1859046 | 72.0479295 | 64.0713843 |
| 65.6061284 | 67.9682631 | 79.8079507 | 66.1859046 | 72.0479295 | 64.0713843 |
| 65.6061284 | 68.9682631 | 80.8079507 | 69.1859046 | 72.0479295 | 64.0713843 |
| 66.6061284 | 68.9682631 | 80.8079507 | 72.1859046 | 72.0479295 | 64.0713843 |
| 66.6061284 | 68.9682631 | 81.8079507 | 73.1859046 | 71.0479295 | 64.0713843 |
| 66.6061284 | 68.9682631 | 82.8079507 | 73.1859046 | 71.0479295 | 64.0713843 |
| 67.6061284 | 68.9682631 | 82.8079507 | 74.1859046 | 70.0479295 | 64.0713843 |
| 67.6061284 | 67.9682631 | 82.8079507 | 74.1859046 | 70.0479295 | 64.0713843 |
| 67.6061284 | 63.9682631 | 82.8079507 | 74.1859046 | 70.0479295 | 63.0713843 |
| 67.6061284 | 63.9682631 | 81.8079507 | 74.1859046 | 70.0479295 | 63.0713843 |
| 67.6061284 | 63.9682631 | 81.8079507 | 75.1859046 | 70.0479295 | 63.0713843 |
| 67.6061284 | 63.9682631 | 77.8079507 | 75.1859046 | 70.0479295 | 63.0713843 |
| 67.6061284 | 63.9682631 | 75.8079507 | 74.1859046 | 70.0479295 | 63.0713843 |
| 69.6061284 | 63.9682631 | 74.8079507 | 71.1859046 | 70.0479295 | 64.0713843 |
| 69.6061284 | 63.9682631 | 74.8079507 | 71.1859046 | 71.0479295 | 63.0713843 |
| 68.6061284 | 63.9682631 | 74.8079507 | 74.1859046 | 71.0479295 | 63.0713843 |
| 68.6061284 | 67.9682631 | 74.8079507 | 75.1859046 | 70.0479295 | 63.0713843 |
| 66.6061284 | 67.9682631 | 74.8079507 | 74.1859046 | 70.0479295 | 63.0713843 |
| 65.6061284 | 67.9682631 | 75.8079507 | 74.1859046 | 70.0479295 | 64.0713843 |
| 66.6061284 | 67.9682631 | 76.8079507 | 73.1859046 | 70.0479295 | 64.0713843 |
| 67.6061284 | 67.9682631 | 76.8079507 | 73.1859046 | 70.0479295 | 64.0713843 |
| 69.6061284 | 68.9682631 | 75.8079507 | 73.1859046 | 70.0479295 | 66.0713843 |
| 71.6061284 | 68.9682631 | 73.8079507 | 74.1859046 | 71.0479295 | 66.0713843 |
| 71.6061284 | 68.9682631 | 73.8079507 | 73.1859046 | 71.0479295 | 67.0713843 |
| 72.6061284 | 68.9682631 | 73.8079507 | 73.1859046 | 71.0479295 | 68.0713843 |
| 70.6061284 | 69.9682631 | 73.8079507 | 73.1859046 | 71.0479295 | 70.0713843 |
| 70.6061284 | 69.9682631 | 73.8079507 | 72.1859046 | 71.0479295 | 70.0713843 |
| 69.6061284 | 69.9682631 | 73.8079507 | 70.1859046 | 71.0479295 | 73.0713843 |
| 66.6061284 | 69.9682631 | 73.8079507 | 69.1859046 | 71.0479295 | 74.0713843 |
| 66.6061284 | 69.9682631 | 74.8079507 | 70.1859046 | 71.0479295 | 75.0713843 |
| 66.6061284 | 70.9682631 | 74.8079507 | 72.1859046 | 71.0479295 | 75.0713843 |
| 66.6061284 | 72.9682631 | 74.8079507 | 73.1859046 | 71.0479295 | 76.0713843 |
| 66.6061284 | 76.9682631 | 75.8079507 | 74.1859046 | 71.0479295 | 77.0713843 |
| 70.6061284 | 76.9682631 | 75.8079507 | 74.1859046 | 72.0479295 | 77.0713843 |
| 73.6061284 | 76.9682631 | 74.8079507 | 74.1859046 | 72.0479295 | 77.0713843 |
| 74.6061284 | 77.9682631 | 74.8079507 | 74.1859046 | 72.0479295 | 80.0713843 |

|            |            |            |            |            |            |
|------------|------------|------------|------------|------------|------------|
| 74.6061284 | 77.9682631 | 74.8079507 | 74.1859046 | 71.0479295 | 84.0713843 |
| 74.6061284 | 76.9682631 | 74.8079507 | 74.1859046 | 71.0479295 | 84.0713843 |
| 74.6061284 | 75.9682631 | 73.8079507 | 74.1859046 | 71.0479295 | 84.0713843 |
| 74.6061284 | 75.9682631 | 73.8079507 | 74.1859046 | 71.0479295 | 84.0713843 |
| 74.6061284 | 75.9682631 | 72.8079507 | 74.1859046 | 71.0479295 | 84.0713843 |
| 73.6061284 | 75.9682631 | 74.8079507 | 75.1859046 | 71.0479295 | 86.0713843 |
| 72.6061284 | 75.9682631 | 75.8079507 | 75.1859046 | 71.0479295 | 83.0713843 |
| 71.6061284 | 68.9682631 | 75.8079507 | 75.1859046 | 71.0479295 | 82.0713843 |
| 73.6061284 | 67.9682631 | 78.8079507 | 75.1859046 | 71.0479295 | 80.0713843 |
| 73.6061284 | 69.9682631 | 79.8079507 | 76.1859046 | 71.0479295 | 80.0713843 |
| 73.6061284 | 69.9682631 | 79.8079507 | 76.1859046 | 71.0479295 | 80.0713843 |
| 69.6061284 | 71.9682631 | 81.8079507 | 77.1859046 | 71.0479295 | 71.0713843 |
| 66.6061284 | 72.9682631 | 81.8079507 | 77.1859046 | 72.0479295 | 71.0713843 |
| 64.6061284 | 73.9682631 | 79.8079507 | 77.1859046 | 73.0479295 | 71.0713843 |
| 63.6061284 | 73.9682631 | 72.8079507 | 79.1859046 | 72.0479295 | 71.0713843 |
| 62.6061284 | 72.9682631 | 68.8079507 | 79.1859046 | 72.0479295 | 71.0713843 |
| 65.6061284 | 69.9682631 | 68.8079507 | 73.1859046 | 71.0479295 | 71.0713843 |
| 67.6061284 | 69.9682631 | 64.8079507 | 68.1859046 | 70.0479295 | 71.0713843 |
| 69.6061284 | 66.9682631 | 65.8079507 | 65.1859046 | 70.0479295 | 72.0713843 |
| 69.6061284 | 63.9682631 | 65.8079507 | 63.1859046 | 70.0479295 | 72.0713843 |
| 67.6061284 | 62.9682631 | 65.8079507 | 61.1859046 | 70.0479295 | 72.0713843 |
| 67.6061284 | 62.9682631 | 65.8079507 | 60.1859046 | 70.0479295 | 71.0713843 |
| 68.6061284 | 62.9682631 | 65.8079507 | 60.1859046 | 70.0479295 | 69.0713843 |
| 69.6061284 | 62.9682631 | 65.8079507 | 60.1859046 | 70.0479295 | 69.0713843 |
| 70.6061284 | 62.9682631 | 63.8079507 | 60.1859046 | 70.0479295 | 64.0713843 |
| 70.6061284 | 61.9682631 | 63.8079507 | 60.1859046 | 70.0479295 | 64.0713843 |
| 69.6061284 | 61.9682631 | 63.8079507 | 61.1859046 | 70.0479295 | 64.0713843 |
| 67.6061284 | 61.9682631 | 64.8079507 | 67.1859046 | 70.0479295 | 64.0713843 |
| 66.6061284 | 61.9682631 | 66.8079507 | 71.1859046 | 71.0479295 | 64.0713843 |
| 65.6061284 | 60.9682631 | 68.8079507 | 73.1859046 | 72.0479295 | 63.0713843 |
| 65.6061284 | 60.9682631 | 68.8079507 | 73.1859046 | 73.0479295 | 63.0713843 |
| 67.6061284 | 60.9682631 | 68.8079507 | 73.1859046 | 73.0479295 | 63.0713843 |
| 67.6061284 | 67.9682631 | 70.8079507 | 72.1859046 | 73.0479295 | 64.0713843 |
| 67.6061284 | 67.9682631 | 70.8079507 | 67.1859046 | 73.0479295 | 64.0713843 |
| 68.6061284 | 67.9682631 | 70.8079507 | 63.1859046 | 73.0479295 | 66.0713843 |
| 69.6061284 | 67.9682631 | 71.8079507 | 62.1859046 | 72.0479295 | 69.0713843 |
| 69.6061284 | 67.9682631 | 71.8079507 | 62.1859046 | 72.0479295 | 69.0713843 |
| 69.6061284 | 67.9682631 | 73.8079507 | 62.1859046 | 72.0479295 | 69.0713843 |
| 70.6061284 | 65.9682631 | 74.8079507 | 63.1859046 | 73.0479295 | 68.0713843 |
| 71.6061284 | 66.9682631 | 75.8079507 | 65.1859046 | 73.0479295 | 68.0713843 |
| 72.6061284 | 68.9682631 | 75.8079507 | 66.1859046 | 73.0479295 | 68.0713843 |
| 73.6061284 | 69.9682631 | 75.8079507 | 68.1859046 | 73.0479295 | 68.0713843 |
| 72.6061284 | 68.9682631 | 75.8079507 | 68.1859046 | 72.0479295 | 68.0713843 |
| 72.6061284 | 67.9682631 | 75.8079507 | 70.1859046 | 72.0479295 | 67.0713843 |
| 71.6061284 | 67.9682631 | 75.8079507 | 70.1859046 | 71.0479295 | 67.0713843 |

|            |            |            |            |            |            |
|------------|------------|------------|------------|------------|------------|
| 69.6061284 | 67.9682631 | 74.8079507 | 71.1859046 | 71.0479295 | 67.0713843 |
| 68.6061284 | 67.9682631 | 74.8079507 | 71.1859046 | 71.0479295 | 67.0713843 |
| 67.6061284 | 67.9682631 | 73.8079507 | 71.1859046 | 71.0479295 | 67.0713843 |
| 66.6061284 | 67.9682631 | 70.8079507 | 71.1859046 | 71.0479295 | 68.0713843 |
| 66.6061284 | 67.9682631 | 69.8079507 | 71.1859046 | 71.0479295 | 66.0713843 |
| 67.6061284 | 66.9682631 | 69.8079507 | 71.1859046 | 72.0479295 | 66.0713843 |
| 66.6061284 | 66.9682631 | 70.8079507 | 71.1859046 | 71.0479295 | 66.0713843 |
| 65.6061284 | 66.9682631 | 70.8079507 | 73.1859046 | 71.0479295 | 66.0713843 |
| 65.6061284 | 66.9682631 | 73.8079507 | 75.1859046 | 72.0479295 | 66.0713843 |
| 64.6061284 | 62.9682631 | 75.8079507 | 77.1859046 | 72.0479295 | 66.0713843 |
| 63.6061284 | 61.9682631 | 75.8079507 | 78.1859046 | 72.0479295 | 66.0713843 |
| 62.6061284 | 61.9682631 | 76.8079507 | 78.1859046 | 72.0479295 | 66.0713843 |
| 64.6061284 | 61.9682631 | 78.8079507 | 78.1859046 | 72.0479295 | 66.0713843 |
| 64.6061284 | 61.9682631 | 78.8079507 | 78.1859046 | 72.0479295 | 67.0713843 |
| 65.6061284 | 59.9682631 | 78.8079507 | 78.1859046 | 72.0479295 | 67.0713843 |
| 66.6061284 | 60.9682631 | 76.8079507 | 78.1859046 | 72.0479295 | 67.0713843 |
| 66.6061284 | 60.9682631 | 75.8079507 | 81.1859046 | 72.0479295 | 71.0713843 |
| 65.6061284 | 61.9682631 | 75.8079507 | 82.1859046 | 73.0479295 | 71.0713843 |
| 66.6061284 | 61.9682631 | 74.8079507 | 82.1859046 | 74.0479295 | 71.0713843 |
| 66.6061284 | 61.9682631 | 74.8079507 | 82.1859046 | 74.0479295 | 71.0713843 |
| 66.6061284 | 61.9682631 | 74.8079507 | 83.1859046 | 74.0479295 | 71.0713843 |
| 67.6061284 | 65.9682631 | 70.8079507 | 83.1859046 | 75.0479295 | 70.0713843 |
| 67.6061284 | 65.9682631 | 70.8079507 | 83.1859046 | 76.0479295 | 70.0713843 |
| 67.6061284 | 65.9682631 | 70.8079507 | 83.1859046 | 75.0479295 | 72.0713843 |
| 67.6061284 | 65.9682631 | 70.8079507 | 83.1859046 | 74.0479295 | 72.0713843 |
| 67.6061284 | 65.9682631 | 70.8079507 | 84.1859046 | 74.0479295 | 72.0713843 |
| 67.6061284 | 65.9682631 | 69.8079507 | 85.1859046 | 74.0479295 | 72.0713843 |
| 67.6061284 | 65.9682631 | 69.8079507 | 85.1859046 | 73.0479295 | 73.0713843 |
| 68.6061284 | 65.9682631 | 78.8079507 | 86.1859046 | 72.0479295 | 73.0713843 |
| 68.6061284 | 65.9682631 | 80.8079507 | 86.1859046 | 72.0479295 | 73.0713843 |
| 68.6061284 | 65.9682631 | 80.8079507 | 86.1859046 | 72.0479295 | 73.0713843 |
| 68.6061284 | 65.9682631 | 80.8079507 | 73.7175742 | 70.0479295 | 74.0713843 |
| 68.6061284 | 65.9682631 | 78.8079507 | 73.535756  | 70.0479295 | 74.0713843 |
| 69.6061284 | 65.9682631 | 77.8079507 | 74.1721197 | 70.0479295 | 74.0713843 |
| 69.6061284 | 65.9682631 | 77.8079507 | 74.2630288 | 70.0479295 | 75.0713843 |
| 69.6061284 | 63.9682631 | 77.8079507 | 74.535756  | 70.0479295 | 77.0713843 |
| 69.6061284 | 63.9682631 | 78.8079507 | 74.2630288 | 70.0479295 | 77.0713843 |
| 68.6061284 | 63.9682631 | 79.8079507 | 73.6266651 | 70.0479295 | 78.0713843 |
| 67.6061284 | 63.9682631 | 79.8079507 | 73.4448469 | 70.0479295 | 78.0713843 |
| 67.6061284 | 62.9682631 | 78.8079507 | 78.1859046 | 69.0479295 | 77.0713843 |
| 67.6061284 | 62.9682631 | 77.8079507 | 76.1859046 | 69.0479295 | 73.0713843 |
| 67.6061284 | 63.9682631 | 77.8079507 | 76.1859046 | 68.0479295 | 74.0713843 |
| 68.6061284 | 64.9682631 | 77.8079507 | 75.1859046 | 68.0479295 | 74.0713843 |
| 69.6061284 | 64.9682631 | 77.8079507 | 76.1859046 | 68.0479295 | 74.0713843 |
| 69.6061284 | 64.9682631 | 78.8079507 | 78.1859046 | 68.0479295 | 74.0713843 |

|            |            |            |            |            |            |
|------------|------------|------------|------------|------------|------------|
| 68.6061284 | 64.9682631 | 78.8079507 | 80.1859046 | 68.0479295 | 66.0713843 |
| 68.6061284 | 64.9682631 | 79.8079507 | 81.1859046 | 69.0479295 | 64.0713843 |
| 70.6061284 | 64.9682631 | 79.8079507 | 81.1859046 | 69.0479295 | 64.0713843 |
| 71.6061284 | 64.9682631 | 79.8079507 | 81.1859046 | 70.0479295 | 64.0713843 |
| 72.6061284 | 64.9682631 | 79.8079507 | 80.1859046 | 71.0479295 | 64.0713843 |
| 72.6061284 | 64.9682631 | 79.8079507 | 73.1859046 | 70.0479295 | 64.0713843 |
| 73.6061284 | 64.9682631 | 79.8079507 | 68.1859046 | 70.0479295 | 64.0713843 |
| 74.6061284 | 66.9682631 | 79.8079507 | 68.1859046 | 70.0479295 | 64.0713843 |
| 74.6061284 | 67.9682631 | 79.8079507 | 67.1859046 | 70.0479295 | 64.0713843 |
| 74.6061284 | 67.9682631 | 79.8079507 | 68.1859046 | 69.0479295 | 64.0713843 |
| 74.6061284 | 67.9682631 | 78.8079507 | 70.1859046 | 70.0479295 | 64.0713843 |
| 75.6061284 | 67.9682631 | 76.8079507 | 71.1859046 | 70.0479295 | 64.0713843 |
| 76.6061284 | 67.9682631 | 76.8079507 | 72.1859046 | 71.0479295 | 64.0713843 |
| 77.6061284 | 67.9682631 | 76.8079507 | 73.1859046 | 71.0479295 | 63.0713843 |
| 77.6061284 | 72.9682631 | 75.8079507 | 73.1859046 | 72.0479295 | 63.0713843 |
| 76.6061284 | 74.9682631 | 75.8079507 | 73.1859046 | 72.0479295 | 63.0713843 |
| 76.6061284 | 74.9682631 | 75.8079507 | 72.1859046 | 73.0479295 | 63.0713843 |
| 73.6061284 | 74.9682631 | 75.8079507 | 70.1859046 | 73.0479295 | 63.0713843 |
| 72.6061284 | 74.9682631 | 76.8079507 | 69.1859046 | 74.0479295 | 63.0713843 |
| 72.6061284 | 74.9682631 | 76.8079507 | 68.1859046 | 74.0479295 | 63.0713843 |
| 71.6061284 | 75.9682631 | 76.8079507 | 68.1859046 | 74.0479295 | 62.0713843 |
| 70.6061284 | 75.9682631 | 76.8079507 | 67.1859046 | 76.0479295 | 62.0713843 |
| 70.6061284 | 75.9682631 | 77.8079507 | 68.1859046 | 72.0479295 | 62.0713843 |
| 71.6061284 | 75.9682631 | 80.8079507 | 68.1859046 | 72.0479295 | 62.0713843 |
| 72.6061284 | 75.9682631 | 80.8079507 | 69.1859046 | 72.0479295 | 62.0713843 |
| 73.6061284 | 75.9682631 | 79.8079507 | 70.1859046 | 72.0479295 | 62.0713843 |
| 74.6061284 | 74.9682631 | 79.8079507 | 73.1859046 | 72.0479295 | 62.0713843 |
| 75.6061284 | 74.9682631 | 79.8079507 | 74.1859046 | 72.0479295 | 65.0713843 |
| 75.6061284 | 74.9682631 | 79.8079507 | 74.1859046 | 72.0479295 | 65.0713843 |
| 76.6061284 | 74.9682631 | 79.8079507 | 74.1859046 | 71.0479295 | 68.0713843 |
| 75.6061284 | 74.9682631 | 78.8079507 | 71.1859046 | 72.0479295 | 70.0713843 |
| 74.6061284 | 74.9682631 | 77.8079507 | 70.1859046 | 73.0479295 | 70.0713843 |
| 73.6061284 | 74.9682631 | 77.8079507 | 70.1859046 | 73.0479295 | 70.0713843 |
| 73.6061284 | 75.9682631 | 77.8079507 | 70.1859046 | 73.0479295 | 63.0713843 |
| 72.6061284 | 71.9682631 | 76.8079507 | 70.1859046 | 73.0479295 | 62.0713843 |
| 71.6061284 | 70.9682631 | 76.8079507 | 71.1859046 | 73.0479295 | 62.0713843 |
| 71.6061284 | 70.9682631 | 76.8079507 | 73.1859046 | 72.0479295 | 62.0713843 |
| 71.6061284 | 70.9682631 | 76.8079507 | 74.1859046 | 71.0479295 | 62.0713843 |
| 70.6061284 | 70.9682631 | 76.8079507 | 75.1859046 | 71.0479295 | 62.0713843 |
| 70.6061284 | 70.9682631 | 76.8079507 | 74.1859046 | 71.0479295 | 62.0713843 |
| 70.6061284 | 70.9682631 | 75.8079507 | 73.1859046 | 71.0479295 | 63.0713843 |
| 68.6061284 | 70.9682631 | 75.8079507 | 73.1859046 | 70.0479295 | 64.0713843 |
| 66.6061284 | 70.9682631 | 75.8079507 | 73.1859046 | 71.0479295 | 64.0713843 |
| 67.6061284 | 67.9682631 | 74.8079507 | 71.1859046 | 71.0479295 | 65.0713843 |
| 68.6061284 | 67.9682631 | 74.8079507 | 70.1859046 | 71.0479295 | 64.0713843 |



|            |            |            |            |            |            |
|------------|------------|------------|------------|------------|------------|
| 70.6061284 | 66.9682631 | 75.8079507 | 69.1859046 | 72.0479295 | 64.0713843 |
| 70.6061284 | 67.9682631 | 78.8079507 | 70.1859046 | 73.0479295 | 64.0713843 |
| 72.6061284 | 68.9682631 | 78.8079507 | 70.1859046 | 73.0479295 | 64.0713843 |
| 72.6061284 | 68.9682631 | 79.8079507 | 70.1859046 | 73.0479295 | 64.0713843 |
| 72.6061284 | 69.9682631 | 80.8079507 | 69.1859046 | 73.0479295 | 64.0713843 |
| 73.6061284 | 69.9682631 | 84.8079507 | 70.1859046 | 73.0479295 | 66.0713843 |
| 73.6061284 | 69.9682631 | 84.8079507 | 70.1859046 | 73.0479295 | 65.0713843 |
| 75.6061284 | 71.9682631 | 84.8079507 | 69.1859046 | 72.0479295 | 65.0713843 |
| 74.6061284 | 71.9682631 | 83.8079507 | 68.1859046 | 72.0479295 | 65.0713843 |
| 71.6061284 | 71.9682631 | 83.8079507 | 68.1859046 | 72.0479295 | 66.0713843 |
| 70.6061284 | 71.9682631 | 83.8079507 | 68.1859046 | 72.0479295 | 65.0713843 |
| 68.6061284 | 71.9682631 | 83.8079507 | 67.1859046 | 71.0479295 | 63.0713843 |
| 67.6061284 | 71.9682631 | 83.8079507 | 66.1859046 | 71.0479295 | 62.0713843 |
| 68.6061284 | 71.9682631 | 83.8079507 | 65.1859046 | 72.0479295 | 62.0713843 |
| 70.6061284 | 71.9682631 | 84.8079507 | 65.1859046 | 72.0479295 | 62.0713843 |
| 70.6061284 | 71.9682631 | 84.8079507 | 65.1859046 | 72.0479295 | 62.0713843 |
| 70.6061284 | 71.9682631 | 84.8079507 | 64.1859046 | 72.0479295 | 62.0713843 |
| 70.6061284 | 69.9682631 | 83.8079507 | 63.1859046 | 72.0479295 | 62.0713843 |
| 69.6061284 | 63.9682631 | 83.8079507 | 63.1859046 | 72.0479295 | 62.0713843 |
| 68.6061284 | 60.9682631 | 83.8079507 | 63.1859046 | 72.0479295 | 63.0713843 |
| 67.6061284 | 58.9682631 | 69.2630288 | 62.1859046 | 72.0479295 | 63.0713843 |
| 66.6061284 | 58.9682631 | 69.1721197 | 62.1859046 | 72.0479295 | 62.0713843 |
| 67.6061284 | 58.9682631 | 69.2630288 | 62.1859046 | 72.0479295 | 63.0713843 |
| 67.6061284 | 60.9682631 | 83.8079507 | 63.1859046 | 72.0479295 | 64.0713843 |
| 68.6061284 | 61.9682631 | 70.0812106 | 63.1859046 | 71.0479295 | 64.0713843 |
| 69.6061284 | 62.9682631 | 82.8079507 | 63.1859046 | 71.0479295 | 64.0713843 |
| 69.6061284 | 62.9682631 | 81.8079507 | 64.1859046 | 71.0479295 | 63.0713843 |
| 70.6061284 | 63.9682631 | 74.8079507 | 65.1859046 | 71.0479295 | 63.0713843 |
| 71.6061284 | 63.9682631 | 74.8079507 | 67.1859046 | 72.0479295 | 63.0713843 |
| 72.6061284 | 63.9682631 | 74.8079507 | 67.1859046 | 71.0479295 | 63.0713843 |
| 72.6061284 | 64.9682631 | 73.8079507 | 67.1859046 | 71.0479295 | 64.0713843 |
| 72.6061284 | 64.9682631 | 73.8079507 | 66.1859046 | 71.0479295 | 64.0713843 |
| 72.6061284 | 65.9682631 | 70.8079507 | 66.1859046 | 74.0479295 | 64.0713843 |
| 72.6061284 | 66.9682631 | 70.8079507 | 66.1859046 | 75.0479295 | 64.0713843 |
| 70.6061284 | 66.9682631 | 69.8079507 | 66.1859046 | 75.0479295 | 64.0713843 |
| 70.6061284 | 67.9682631 | 68.8079507 | 66.1859046 | 75.0479295 | 64.0713843 |
| 70.6061284 | 68.9682631 | 68.8079507 | 69.1859046 | 76.0479295 | 64.0713843 |
| 70.6061284 | 68.9682631 | 68.8079507 | 69.1859046 | 76.0479295 | 64.0713843 |
| 71.6061284 | 68.9682631 | 68.8079507 | 71.1859046 | 74.0479295 | 64.0713843 |
| 73.6061284 | 68.9682631 | 71.8079507 | 71.1859046 | 74.0479295 | 64.0713843 |
| 75.6061284 | 68.9682631 | 72.8079507 | 72.1859046 | 73.0479295 | 66.0713843 |
| 77.6061284 | 68.9682631 | 72.8079507 | 72.1859046 | 72.0479295 | 66.0713843 |
| 79.6061284 | 69.9682631 | 72.8079507 | 72.1859046 | 72.0479295 | 68.0713843 |
| 80.6061284 | 70.9682631 | 72.8079507 | 71.1859046 | 71.0479295 | 71.0713843 |
| 81.6061284 | 72.9682631 | 73.8079507 | 72.1859046 | 71.0479295 | 71.0713843 |

|            |            |            |            |            |            |
|------------|------------|------------|------------|------------|------------|
| 81.6061284 | 73.9682631 | 74.8079507 | 73.1859046 | 72.0479295 | 72.0713843 |
| 81.6061284 | 73.9682631 | 74.8079507 | 73.1859046 | 72.0479295 | 75.0713843 |
| 80.6061284 | 72.9682631 | 74.8079507 | 73.1859046 | 72.0479295 | 76.0713843 |
| 80.6061284 | 71.9682631 | 74.8079507 | 74.1859046 | 71.0479295 | 77.0713843 |
| 78.6061284 | 69.9682631 | 73.8079507 | 74.1859046 | 72.0479295 | 77.0713843 |
| 78.6061284 | 69.9682631 | 72.8079507 | 74.1859046 | 71.0479295 | 77.0713843 |
| 71.6061284 | 68.9682631 | 72.8079507 | 73.1859046 | 71.0479295 | 77.0713843 |
| 70.6061284 | 68.9682631 | 72.8079507 | 72.1859046 | 71.0479295 | 75.0713843 |
| 70.6061284 | 69.9682631 | 74.8079507 | 72.1859046 | 71.0479295 | 75.0713843 |
| 70.6061284 | 70.9682631 | 76.8079507 | 71.1859046 | 70.0479295 | 75.0713843 |
| 71.6061284 | 69.9682631 | 77.8079507 | 70.1859046 | 70.0479295 | 72.0713843 |
| 71.6061284 | 69.9682631 | 77.8079507 | 68.1859046 | 70.0479295 | 72.0713843 |
| 71.6061284 | 70.9682631 | 77.8079507 | 67.1859046 | 70.0479295 | 66.0713843 |
| 71.6061284 | 71.9682631 | 77.8079507 | 65.1859046 | 70.0479295 | 66.0713843 |
| 68.6061284 | 71.9682631 | 75.8079507 | 65.1859046 | 69.0479295 | 65.0713843 |
| 67.6061284 | 72.9682631 | 75.8079507 | 65.1859046 | 70.0479295 | 65.0713843 |
| 66.6061284 | 72.9682631 | 73.8079507 | 66.1859046 | 70.0479295 | 65.0713843 |
| 66.6061284 | 72.9682631 | 74.8079507 | 69.1859046 | 72.0479295 | 65.0713843 |
| 65.6061284 | 74.9682631 | 76.8079507 | 71.1859046 | 73.0479295 | 64.0713843 |
| 66.6061284 | 75.9682631 | 76.8079507 | 72.1859046 | 73.0479295 | 64.0713843 |
| 66.6061284 | 75.9682631 | 76.8079507 | 71.1859046 | 74.0479295 | 63.0713843 |
| 67.6061284 | 76.9682631 | 76.8079507 | 71.1859046 | 74.0479295 | 63.0713843 |
| 67.6061284 | 76.9682631 | 76.8079507 | 70.1859046 | 74.0479295 | 63.0713843 |
| 67.6061284 | 76.9682631 | 76.8079507 | 70.1859046 | 74.0479295 | 63.0713843 |
| 67.6061284 | 76.9682631 | 78.8079507 | 70.1859046 | 74.0479295 | 63.0713843 |
| 66.6061284 | 77.9682631 | 76.8079507 | 70.1859046 | 75.0479295 | 63.0713843 |
| 65.6061284 | 78.9682631 | 76.8079507 | 70.1859046 | 74.0479295 | 64.0713843 |
| 65.6061284 | 78.9682631 | 76.8079507 | 70.1859046 | 74.0479295 | 64.0713843 |
| 66.6061284 | 78.9682631 | 76.8079507 | 71.1859046 | 73.0479295 | 64.0713843 |
| 66.6061284 | 75.9682631 | 76.8079507 | 71.1859046 | 72.0479295 | 64.0713843 |
| 66.6061284 | 75.9682631 | 76.8079507 | 71.1859046 | 72.0479295 | 64.0713843 |
| 67.6061284 | 75.9682631 | 76.8079507 | 71.1859046 | 71.0479295 | 64.0713843 |
| 67.6061284 | 75.9682631 | 76.8079507 | 71.1859046 | 71.0479295 | 64.0713843 |
| 67.6061284 | 75.9682631 | 76.8079507 | 71.1859046 | 71.0479295 | 64.0713843 |
| 67.6061284 | 76.9682631 | 77.8079507 | 71.1859046 | 71.0479295 | 67.0713843 |
| 66.6061284 | 76.9682631 | 77.8079507 | 71.1859046 | 71.0479295 | 68.0713843 |
| 65.6061284 | 73.9682631 | 77.8079507 | 71.1859046 | 71.0479295 | 68.0713843 |
| 65.6061284 | 71.9682631 | 77.8079507 | 73.1859046 | 71.0479295 | 69.0713843 |
| 65.6061284 | 71.9682631 | 77.8079507 | 74.1859046 | 74.0479295 | 71.0713843 |
| 65.6061284 | 71.9682631 | 77.8079507 | 74.1859046 | 74.0479295 | 71.0713843 |
| 69.6061284 | 71.9682631 | 77.8079507 | 75.1859046 | 74.0479295 | 71.0713843 |
| 70.6061284 | 71.9682631 | 77.8079507 | 77.1859046 | 74.0479295 | 73.0713843 |
| 71.6061284 | 71.9682631 | 77.8079507 | 77.1859046 | 73.0479295 | 73.0713843 |
| 72.6061284 | 71.9682631 | 77.8079507 | 79.1859046 | 73.0479295 | 73.0713843 |
| 74.6061284 | 71.9682631 | 76.8079507 | 80.1859046 | 73.0479295 | 74.0713843 |
| 75.6061284 | 71.9682631 | 74.8079507 | 81.1859046 | 73.0479295 | 74.0713843 |

|            |            |            |            |            |            |
|------------|------------|------------|------------|------------|------------|
| 76.6061284 | 72.9682631 | 74.8079507 | 81.1859046 | 73.0479295 | 74.0713843 |
| 76.6061284 | 72.9682631 | 74.8079507 | 81.1859046 | 73.0479295 | 74.0713843 |
| 77.6061284 | 72.9682631 | 73.8079507 | 81.1859046 | 74.0479295 | 76.0713843 |
| 77.6061284 | 72.9682631 | 73.8079507 | 83.1859046 | 74.0479295 | 76.0713843 |
| 76.6061284 | 78.9682631 | 80.8079507 | 85.1859046 | 72.0479295 | 76.0713843 |
| 76.6061284 | 79.9682631 | 81.8079507 | 85.1859046 | 72.0479295 | 74.0713843 |
| 74.6061284 | 79.9682631 | 81.8079507 | 86.1859046 | 72.0479295 | 73.0713843 |
| 71.6061284 | 78.9682631 | 81.8079507 | 87.1859046 | 72.0479295 | 72.0713843 |
| 68.6061284 | 76.9682631 | 82.8079507 | 72.0812106 | 71.0479295 | 72.0713843 |
| 65.6061284 | 74.9682631 | 82.8079507 | 72.1721197 | 71.0479295 | 72.0713843 |
| 64.6061284 | 70.9682631 | 82.8079507 | 71.535756  | 71.0479295 | 72.0713843 |
| 64.6061284 | 68.9682631 | 82.8079507 | 83.1859046 | 71.0479295 | 73.0713843 |
| 63.6061284 | 66.9682631 | 82.8079507 | 82.1859046 | 71.0479295 | 73.0713843 |
| 62.6061284 | 66.9682631 | 82.8079507 | 75.1859046 | 72.0479295 | 75.0713843 |
| 62.6061284 | 63.9682631 | 80.8079507 | 71.1859046 | 73.0479295 | 75.0713843 |
| 64.6061284 | 63.9682631 | 78.8079507 | 70.1859046 | 74.0479295 | 77.0713843 |
| 63.6061284 | 63.9682631 | 77.8079507 | 69.1859046 | 75.0479295 | 77.0713843 |
| 63.6061284 | 63.9682631 | 77.8079507 | 69.1859046 | 75.0479295 | 77.0713843 |
| 63.6061284 | 63.9682631 | 73.8079507 | 69.1859046 | 75.0479295 | 78.0713843 |
| 63.6061284 | 63.9682631 | 72.8079507 | 69.1859046 | 75.0479295 | 83.0713843 |
| 62.6061284 | 64.9682631 | 72.8079507 | 68.1859046 | 75.0479295 | 85.0713843 |
| 62.6061284 | 65.9682631 | 72.8079507 | 69.1859046 | 75.0479295 | 80.0713843 |
| 63.6061284 | 66.9682631 | 72.8079507 | 71.1859046 | 75.0479295 | 80.0713843 |
| 64.6061284 | 64.9682631 | 72.8079507 | 71.1859046 | 76.0479295 | 79.0713843 |
| 64.6061284 | 64.9682631 | 72.8079507 | 71.1859046 | 76.0479295 | 76.0713843 |
| 67.6061284 | 64.9682631 | 72.8079507 | 72.1859046 | 75.0479295 | 75.0713843 |
| 69.6061284 | 64.9682631 | 71.8079507 | 72.1859046 | 74.0479295 | 70.0713843 |
| 68.6061284 | 64.9682631 | 70.8079507 | 73.1859046 | 74.0479295 | 70.0713843 |
| 67.6061284 | 64.9682631 | 64.8079507 | 73.1859046 | 74.0479295 | 69.0713843 |
| 67.6061284 | 64.9682631 | 62.8079507 | 73.1859046 | 74.0479295 | 69.0713843 |
| 67.6061284 | 64.9682631 | 62.8079507 | 70.1859046 | 75.0479295 | 69.0713843 |
| 67.6061284 | 65.9682631 | 62.8079507 | 69.1859046 | 75.0479295 | 69.0713843 |
| 68.6061284 | 69.9682631 | 61.8079507 | 69.1859046 | 75.0479295 | 69.0713843 |
| 68.6061284 | 69.9682631 | 61.8079507 | 69.1859046 | 75.0479295 | 68.0713843 |
| 69.6061284 | 70.9682631 | 60.8079507 | 69.1859046 | 76.0479295 | 68.0713843 |
| 69.6061284 | 70.9682631 | 59.8079507 | 69.1859046 | 78.0479295 | 67.0713843 |
| 70.6061284 | 70.9682631 | 58.8079507 | 71.1859046 | 80.0479295 | 67.0713843 |
| 70.6061284 | 70.9682631 | 58.8079507 | 71.1859046 | 81.0479295 | 67.0713843 |
| 70.6061284 | 71.9682631 | 58.8079507 | 75.1859046 | 82.0479295 | 66.0713843 |
| 70.6061284 | 71.9682631 | 58.8079507 | 78.1859046 | 80.0479295 | 66.0713843 |
| 70.6061284 | 73.9682631 | 58.8079507 | 80.1859046 | 77.0479295 | 66.0713843 |
| 70.6061284 | 73.9682631 | 58.8079507 | 80.1859046 | 75.0479295 | 65.0713843 |
| 71.6061284 | 73.9682631 | 59.8079507 | 80.1859046 | 73.0479295 | 64.0713843 |
| 72.6061284 | 73.9682631 | 63.8079507 | 75.1859046 | 71.0479295 | 63.0713843 |
| 72.6061284 | 73.9682631 | 63.8079507 | 69.1859046 | 71.0479295 | 63.0713843 |

|            |            |            |            |            |            |
|------------|------------|------------|------------|------------|------------|
| 71.6061284 | 72.9682631 | 63.8079507 | 66.1859046 | 71.0479295 | 63.0713843 |
| 71.6061284 | 70.9682631 | 64.8079507 | 65.1859046 | 71.0479295 | 64.0713843 |
| 71.6061284 | 68.9682631 | 64.8079507 | 64.1859046 | 71.0479295 | 64.0713843 |
| 71.6061284 | 67.9682631 | 64.8079507 | 64.1859046 | 71.0479295 | 64.0713843 |
| 71.6061284 | 66.9682631 | 68.8079507 | 64.1859046 | 71.0479295 | 64.0713843 |
| 73.6061284 | 66.9682631 | 72.8079507 | 65.1859046 | 72.0479295 | 64.0713843 |
| 73.6061284 | 67.9682631 | 72.8079507 | 65.1859046 | 72.0479295 | 64.0713843 |
| 73.6061284 | 67.9682631 | 73.8079507 | 66.1859046 | 72.0479295 | 64.0713843 |
| 74.6061284 | 67.9682631 | 71.8079507 | 66.1859046 | 73.0479295 | 64.0713843 |
| 74.6061284 | 67.9682631 | 71.8079507 | 70.1859046 | 73.0479295 | 64.0713843 |
| 74.6061284 | 67.9682631 | 71.8079507 | 70.1859046 | 73.0479295 | 64.0713843 |
| 75.6061284 | 66.9682631 | 71.8079507 | 73.1859046 | 73.0479295 | 65.0713843 |
| 75.6061284 | 66.9682631 | 71.8079507 | 73.1859046 | 73.0479295 | 65.0713843 |
| 74.6061284 | 65.9682631 | 70.8079507 | 75.1859046 | 74.0479295 | 65.0713843 |
| 73.6061284 | 63.9682631 | 73.8079507 | 76.1859046 | 74.0479295 | 65.0713843 |
| 73.6061284 | 64.9682631 | 73.8079507 | 77.1859046 | 74.0479295 | 64.0713843 |
| 72.6061284 | 64.9682631 | 75.8079507 | 78.1859046 | 74.0479295 | 64.0713843 |
| 71.6061284 | 65.9682631 | 76.8079507 | 78.1859046 | 73.0479295 | 64.0713843 |
| 70.6061284 | 65.9682631 | 77.8079507 | 78.1859046 | 73.0479295 | 64.0713843 |
| 70.6061284 | 67.9682631 | 78.8079507 | 79.1859046 | 73.0479295 | 64.0713843 |
| 71.6061284 | 67.9682631 | 78.8079507 | 79.1859046 | 73.0479295 | 64.0713843 |
| 72.6061284 | 67.9682631 | 78.8079507 | 79.1859046 | 73.0479295 | 64.0713843 |
| 73.6061284 | 67.9682631 | 78.8079507 | 81.1859046 | 73.0479295 | 64.0713843 |
| 75.6061284 | 68.9682631 | 77.8079507 | 82.1859046 | 73.0479295 | 64.0713843 |
| 76.6061284 | 68.9682631 | 77.8079507 | 80.1859046 | 74.0479295 | 64.0713843 |
| 78.6061284 | 68.9682631 | 77.8079507 | 79.1859046 | 73.0479295 | 65.0713843 |
| 79.6061284 | 67.9682631 | 77.8079507 | 77.1859046 | 73.0479295 | 65.0713843 |
| 79.6061284 | 67.9682631 | 76.8079507 | 76.1859046 | 75.0479295 | 68.0713843 |
| 78.6061284 | 68.9682631 | 76.8079507 | 69.1859046 | 75.0479295 | 68.0713843 |
| 78.6061284 | 69.9682631 | 76.8079507 | 67.1859046 | 75.0479295 | 69.0713843 |
| 79.6061284 | 69.9682631 | 76.8079507 | 66.1859046 | 75.0479295 | 69.0713843 |
| 80.6061284 | 70.9682631 | 75.8079507 | 66.1859046 | 75.0479295 | 69.0713843 |
| 79.6061284 | 71.9682631 | 73.8079507 | 66.1859046 | 76.0479295 | 69.0713843 |
| 78.6061284 | 70.9682631 | 73.8079507 | 66.1859046 | 76.0479295 | 69.0713843 |
| 74.6061284 | 69.9682631 | 72.8079507 | 66.1859046 | 76.0479295 | 69.0713843 |
| 71.6061284 | 68.9682631 | 72.8079507 | 66.1859046 | 76.0479295 | 70.0713843 |
| 69.6061284 | 67.9682631 | 71.8079507 | 69.1859046 | 77.0479295 | 70.0713843 |
| 69.6061284 | 67.9682631 | 70.8079507 | 70.1859046 | 78.0479295 | 71.0713843 |
| 69.6061284 | 67.9682631 | 69.8079507 | 69.1859046 | 78.0479295 | 71.0713843 |
| 69.6061284 | 67.9682631 | 68.8079507 | 69.1859046 | 78.0479295 | 71.0713843 |
| 69.6061284 | 68.9682631 | 68.8079507 | 69.1859046 | 77.0479295 | 71.0713843 |
| 69.6061284 | 68.9682631 | 66.8079507 | 69.1859046 | 77.0479295 | 69.0713843 |
| 74.6061284 | 69.9682631 | 66.8079507 | 69.1859046 | 77.0479295 | 68.0713843 |
| 74.6061284 | 69.9682631 | 66.8079507 | 68.1859046 | 77.0479295 | 68.0713843 |
| 72.6061284 | 69.9682631 | 66.8079507 | 68.1859046 | 78.0479295 | 66.0713843 |

|            |            |            |            |            |            |
|------------|------------|------------|------------|------------|------------|
| 71.6061284 | 69.9682631 | 65.8079507 | 68.1859046 | 78.0479295 | 65.0713843 |
| 68.6061284 | 71.9682631 | 65.8079507 | 68.1859046 | 77.0479295 | 65.0713843 |
| 65.6061284 | 71.9682631 | 65.8079507 | 68.1859046 | 77.0479295 | 65.0713843 |
| 65.6061284 | 71.9682631 | 64.8079507 | 68.1859046 | 77.0479295 | 65.0713843 |
| 65.6061284 | 70.9682631 | 64.8079507 | 69.1859046 | 77.0479295 | 66.0713843 |
| 66.6061284 | 69.9682631 | 64.8079507 | 69.1859046 | 77.0479295 | 66.0713843 |
| 67.6061284 | 69.9682631 | 63.8079507 | 69.1859046 | 77.0479295 | 66.0713843 |
| 68.6061284 | 69.9682631 | 61.8079507 | 71.1859046 | 78.0479295 | 65.0713843 |
| 68.6061284 | 68.9682631 | 59.8079507 | 72.1859046 | 78.0479295 | 65.0713843 |
| 68.6061284 | 68.9682631 | 59.8079507 | 72.1859046 | 79.0479295 | 65.0713843 |
| 68.6061284 | 68.9682631 | 59.8079507 | 73.1859046 | 79.0479295 | 65.0713843 |
| 68.6061284 | 68.9682631 | 58.8079507 | 73.1859046 | 79.0479295 | 64.0713843 |
| 67.6061284 | 68.9682631 | 58.8079507 | 73.1859046 | 80.0479295 | 64.0713843 |
| 66.6061284 | 66.9682631 | 58.8079507 | 74.1859046 | 80.0479295 | 64.0713843 |
| 65.6061284 | 66.9682631 | 60.8079507 | 76.1859046 | 80.0479295 | 64.0713843 |
| 65.6061284 | 65.9682631 | 60.8079507 | 79.1859046 | 81.0479295 | 64.0713843 |
| 65.6061284 | 64.9682631 | 60.8079507 | 82.1859046 | 81.0479295 | 65.0713843 |
| 65.6061284 | 63.9682631 | 70.8079507 | 83.1859046 | 79.0479295 | 65.0713843 |
| 65.6061284 | 64.9682631 | 71.8079507 | 83.1859046 | 79.0479295 | 66.0713843 |
| 65.6061284 | 64.9682631 | 71.8079507 | 83.1859046 | 79.0479295 | 66.0713843 |
| 66.6061284 | 65.9682631 | 75.8079507 | 82.1859046 | 76.0479295 | 72.0713843 |
| 66.6061284 | 66.9682631 | 76.8079507 | 82.1859046 | 75.0479295 | 74.0713843 |
| 66.6061284 | 65.9682631 | 76.8079507 | 81.1859046 | 75.0479295 | 75.0713843 |
| 66.6061284 | 65.9682631 | 79.8079507 | 81.1859046 | 75.0479295 | 76.0713843 |
| 65.6061284 | 65.9682631 | 79.8079507 | 81.1859046 | 74.0479295 | 73.0713843 |
| 66.6061284 | 69.9682631 | 80.8079507 | 81.1859046 | 74.0479295 | 73.0713843 |
| 67.6061284 | 71.9682631 | 80.8079507 | 81.1859046 | 75.0479295 | 71.0713843 |
| 67.6061284 | 72.9682631 | 80.8079507 | 82.1859046 | 75.0479295 | 67.0713843 |
| 68.6061284 | 72.9682631 | 80.8079507 | 83.1859046 | 74.0479295 | 66.0713843 |
| 69.6061284 | 72.9682631 | 80.8079507 | 83.1859046 | 73.0479295 | 66.0713843 |
| 71.6061284 | 71.9682631 | 80.8079507 | 82.1859046 | 73.0479295 | 66.0713843 |
| 71.6061284 | 71.9682631 | 79.8079507 | 80.1859046 | 72.0479295 | 66.0713843 |
| 72.6061284 | 71.9682631 | 79.8079507 | 80.1859046 | 71.0479295 | 66.0713843 |
| 74.6061284 | 70.9682631 | 79.8079507 | 79.1859046 | 70.0479295 | 65.0713843 |
| 76.6061284 | 69.9682631 | 79.8079507 | 79.1859046 | 70.0479295 | 65.0713843 |
| 78.6061284 | 69.9682631 | 79.8079507 | 78.1859046 | 69.0479295 | 66.0713843 |
| 79.6061284 | 69.9682631 | 84.8079507 | 77.1859046 | 69.0479295 | 66.0713843 |
| 78.6061284 | 68.9682631 | 84.8079507 | 74.1859046 | 69.0479295 | 66.0713843 |
| 78.6061284 | 67.9682631 | 84.8079507 | 72.1859046 | 69.0479295 | 66.0713843 |
| 78.6061284 | 66.9682631 | 78.8079507 | 71.1859046 | 69.0479295 | 66.0713843 |
| 77.6061284 | 65.9682631 | 78.8079507 | 71.1859046 | 69.0479295 | 68.0713843 |
| 75.6061284 | 65.9682631 | 75.8079507 | 72.1859046 | 69.0479295 | 68.0713843 |
| 74.6061284 | 64.9682631 | 72.8079507 | 72.1859046 | 69.0479295 | 69.0713843 |
| 75.6061284 | 64.9682631 | 72.8079507 | 72.1859046 | 69.0479295 | 70.0713843 |
| 75.6061284 | 64.9682631 | 72.8079507 | 72.1859046 | 69.0479295 | 70.0713843 |

|            |            |            |            |            |            |
|------------|------------|------------|------------|------------|------------|
| 74.6061284 | 64.9682631 | 70.8079507 | 72.1859046 | 69.0479295 | 71.0713843 |
| 72.6061284 | 64.9682631 | 70.8079507 | 72.1859046 | 69.0479295 | 71.0713843 |
| 71.6061284 | 64.9682631 | 69.8079507 | 72.1859046 | 69.0479295 | 71.0713843 |
| 69.6061284 | 64.9682631 | 69.8079507 | 71.1859046 | 69.0479295 | 71.0713843 |
| 67.6061284 | 65.9682631 | 69.8079507 | 71.1859046 | 69.0479295 | 73.0713843 |
| 65.6061284 | 66.9682631 | 69.8079507 | 71.1859046 | 69.0479295 | 73.0713843 |
| 64.6061284 | 66.9682631 | 69.8079507 | 71.1859046 | 69.0479295 | 75.0713843 |
| 63.6061284 | 67.9682631 | 69.8079507 | 71.1859046 | 69.0479295 | 75.0713843 |
| 63.6061284 | 68.9682631 | 67.8079507 | 73.1859046 | 69.0479295 | 77.0713843 |
| 64.6061284 | 69.9682631 | 67.8079507 | 75.1859046 | 69.0479295 | 77.0713843 |
| 64.6061284 | 69.9682631 | 68.8079507 | 76.1859046 | 69.0479295 | 77.0713843 |
| 64.6061284 | 69.9682631 | 68.8079507 | 80.1859046 | 70.0479295 | 78.0713843 |
| 64.6061284 | 69.9682631 | 69.8079507 | 82.1859046 | 70.0479295 | 78.0713843 |
| 64.6061284 | 68.9682631 | 69.8079507 | 84.1859046 | 76.0479295 | 77.0713843 |
| 64.6061284 | 68.9682631 | 69.8079507 | 82.1859046 | 76.0479295 | 77.0713843 |
| 64.6061284 | 67.9682631 | 70.8079507 | 79.1859046 | 76.0479295 | 77.0713843 |
| 63.6061284 | 67.9682631 | 70.8079507 | 77.1859046 | 74.0479295 | 77.0713843 |
| 62.6061284 | 67.9682631 | 70.8079507 | 75.1859046 | 72.0479295 | 77.0713843 |
| 62.6061284 | 67.9682631 | 74.8079507 | 73.1859046 | 71.0479295 | 76.0713843 |
| 62.6061284 | 68.9682631 | 73.8079507 | 72.1859046 | 70.0479295 | 71.0713843 |
| 62.6061284 | 67.9682631 | 73.8079507 | 70.1859046 | 70.0479295 | 71.0713843 |
| 62.6061284 | 67.9682631 | 73.8079507 | 69.1859046 | 70.0479295 | 67.0713843 |
| 62.6061284 | 67.9682631 | 71.8079507 | 69.1859046 | 70.0479295 | 66.0713843 |
| 63.6061284 | 67.9682631 | 72.8079507 | 69.1859046 | 71.0479295 | 65.0713843 |
| 63.6061284 | 67.9682631 | 72.8079507 | 69.1859046 | 71.0479295 | 65.0713843 |
| 63.6061284 | 67.9682631 | 73.8079507 | 69.1859046 | 71.0479295 | 66.0713843 |
| 63.6061284 | 67.9682631 | 76.8079507 | 70.1859046 | 71.0479295 | 65.0713843 |
| 63.6061284 | 67.9682631 | 76.8079507 | 71.1859046 | 71.0479295 | 65.0713843 |
| 63.6061284 | 67.9682631 | 76.8079507 | 71.1859046 | 71.0479295 | 65.0713843 |
| 68.6061284 | 67.9682631 | 76.8079507 | 75.1859046 | 71.0479295 | 65.0713843 |
| 71.6061284 | 68.9682631 | 77.8079507 | 76.1859046 | 71.0479295 | 65.0713843 |
| 74.6061284 | 68.9682631 | 76.8079507 | 77.1859046 | 71.0479295 | 66.0713843 |
| 77.6061284 | 68.9682631 | 77.8079507 | 77.1859046 | 71.0479295 | 67.0713843 |
| 80.6061284 | 68.9682631 | 77.8079507 | 77.1859046 | 72.0479295 | 67.0713843 |
| 81.6061284 | 69.9682631 | 77.8079507 | 74.1859046 | 72.0479295 | 67.0713843 |
| 81.6061284 | 70.9682631 | 78.8079507 | 70.1859046 | 72.0479295 | 67.0713843 |
| 81.6061284 | 70.9682631 | 78.8079507 | 70.1859046 | 75.0479295 | 67.0713843 |
| 80.6061284 | 70.9682631 | 78.8079507 | 70.1859046 | 80.0479295 | 67.0713843 |
| 80.6061284 | 70.9682631 | 77.8079507 | 70.1859046 | 84.0479295 | 67.0713843 |
| 80.6061284 | 68.9682631 | 75.8079507 | 69.1859046 | 73.535756  | 67.0713843 |
| 78.6061284 | 69.9682631 | 75.8079507 | 72.1859046 | 88.0479295 | 67.0713843 |
| 78.6061284 | 69.9682631 | 75.8079507 | 72.1859046 | 86.0479295 | 67.0713843 |
| 78.6061284 | 70.9682631 | 75.8079507 | 71.1859046 | 80.0479295 | 67.0713843 |
| 77.6061284 | 70.9682631 | 75.8079507 | 69.1859046 | 76.0479295 | 68.0713843 |
| 74.6061284 | 73.9682631 | 75.8079507 | 68.1859046 | 76.0479295 | 68.0713843 |

|            |            |            |            |            |            |
|------------|------------|------------|------------|------------|------------|
| 73.6061284 | 75.9682631 | 75.8079507 | 67.1859046 | 74.0479295 | 68.0713843 |
| 73.6061284 | 75.9682631 | 77.8079507 | 66.1859046 | 73.0479295 | 69.0713843 |
| 72.6061284 | 75.9682631 | 78.8079507 | 65.1859046 | 72.0479295 | 68.0713843 |
| 72.6061284 | 75.9682631 | 78.8079507 | 64.1859046 | 72.0479295 | 68.0713843 |
| 72.6061284 | 75.9682631 | 79.8079507 | 64.1859046 | 72.0479295 | 68.0713843 |
| 71.6061284 | 72.9682631 | 79.8079507 | 64.1859046 | 71.0479295 | 68.0713843 |
| 70.6061284 | 68.9682631 | 80.8079507 | 64.1859046 | 71.0479295 | 67.0713843 |
| 69.6061284 | 68.9682631 | 80.8079507 | 65.1859046 | 71.0479295 | 67.0713843 |
| 70.6061284 | 68.9682631 | 80.8079507 | 66.1859046 | 71.0479295 | 66.0713843 |
| 71.6061284 | 68.9682631 | 82.8079507 | 67.1859046 | 71.0479295 | 66.0713843 |
| 73.6061284 | 70.9682631 | 83.8079507 | 66.1859046 | 71.0479295 | 66.0713843 |
| 73.6061284 | 71.9682631 | 84.8079507 | 64.1859046 | 71.0479295 | 67.0713843 |
| 72.6061284 | 71.9682631 | 71.0812106 | 63.1859046 | 71.0479295 | 66.0713843 |
| 69.6061284 | 70.9682631 | 70.8084833 | 62.1859046 | 71.0479295 | 66.0713843 |
| 67.6061284 | 70.9682631 | 70.535756  | 62.1859046 | 72.0479295 | 66.0713843 |
| 67.6061284 | 69.9682631 | 69.7175742 | 62.1859046 | 72.0479295 | 65.0713843 |
| 68.6061284 | 68.9682631 | 69.4448469 | 61.1859046 | 71.0479295 | 65.0713843 |
| 68.6061284 | 68.9682631 | 69.0812106 | 61.1859046 | 71.0479295 | 65.0713843 |
| 69.6061284 | 67.9682631 | 69.2630288 | 62.1859046 | 71.0479295 | 65.0713843 |
| 69.6061284 | 67.9682631 | 69.3539378 | 63.1859046 | 71.0479295 | 65.0713843 |
| 68.6061284 | 68.9682631 | 69.7175742 | 64.1859046 | 70.0479295 | 66.0713843 |
| 68.6061284 | 68.9682631 | 69.7175742 | 65.1859046 | 70.0479295 | 66.0713843 |
| 68.6061284 | 69.9682631 | 69.8993924 | 66.1859046 | 70.0479295 | 67.0713843 |
| 68.6061284 | 69.9682631 | 70.1721197 | 66.1859046 | 70.0479295 | 68.0713843 |
| 69.6061284 | 68.9682631 | 69.9903015 | 66.1859046 | 70.0479295 | 68.0713843 |
| 69.6061284 | 68.9682631 | 69.6266651 | 65.1859046 | 70.0479295 | 69.0713843 |
| 69.6061284 | 68.9682631 | 79.8079507 | 65.1859046 | 71.0479295 | 71.0713843 |
| 69.6061284 | 68.9682631 | 77.8079507 | 65.1859046 | 72.0479295 | 71.0713843 |
| 77.6061284 | 68.9682631 | 76.8079507 | 65.1859046 | 72.0479295 | 72.0713843 |
| 80.6061284 | 68.9682631 | 76.8079507 | 65.1859046 | 73.0479295 | 73.0713843 |
| 81.6061284 | 68.9682631 | 75.8079507 | 64.1859046 | 74.0479295 | 73.0713843 |
| 81.6061284 | 68.9682631 | 74.8079507 | 64.1859046 | 74.0479295 | 73.0713843 |
| 81.6061284 | 69.9682631 | 74.8079507 | 64.1859046 | 74.0479295 | 73.0713843 |
| 78.6061284 | 69.9682631 | 74.8079507 | 64.1859046 | 74.0479295 | 71.0713843 |
| 75.6061284 | 69.9682631 | 74.8079507 | 64.1859046 | 75.0479295 | 71.0713843 |
| 73.6061284 | 69.9682631 | 72.8079507 | 64.1859046 | 74.0479295 | 71.0713843 |
| 72.6061284 | 68.9682631 | 72.8079507 | 64.1859046 | 74.0479295 | 71.0713843 |
| 72.6061284 | 68.9682631 | 72.8079507 | 64.1859046 | 74.0479295 | 71.0713843 |
| 72.6061284 | 68.9682631 | 72.8079507 | 64.1859046 | 75.0479295 | 71.0713843 |
| 73.6061284 | 67.9682631 | 72.8079507 | 65.1859046 | 74.0479295 | 73.0713843 |
| 74.6061284 | 66.9682631 | 70.8079507 | 66.1859046 | 74.0479295 | 74.0713843 |
| 79.6061284 | 66.9682631 | 69.8079507 | 67.1859046 | 75.0479295 | 74.0713843 |
| 79.6061284 | 66.9682631 | 69.8079507 | 69.1859046 | 76.0479295 | 74.0713843 |
| 80.6061284 | 66.9682631 | 69.8079507 | 69.1859046 | 76.0479295 | 74.0713843 |
| 79.6061284 | 67.9682631 | 68.8079507 | 69.1859046 | 76.0479295 | 74.0713843 |

|            |            |            |            |            |            |
|------------|------------|------------|------------|------------|------------|
| 75.6061284 | 67.9682631 | 68.8079507 | 69.1859046 | 76.0479295 | 74.0713843 |
| 73.6061284 | 67.9682631 | 68.8079507 | 69.1859046 | 76.0479295 | 74.0713843 |
| 71.6061284 | 67.9682631 | 68.8079507 | 68.1859046 | 74.0479295 | 70.0713843 |
| 71.6061284 | 67.9682631 | 68.8079507 | 66.1859046 | 73.0479295 | 70.0713843 |
| 70.6061284 | 69.9682631 | 68.8079507 | 67.1859046 | 71.0479295 | 68.0713843 |
| 70.6061284 | 70.9682631 | 68.8079507 | 67.1859046 | 70.0479295 | 67.0713843 |
| 69.6061284 | 69.9682631 | 67.8079507 | 68.1859046 | 70.0479295 | 66.0713843 |
| 67.6061284 | 68.9682631 | 67.8079507 | 69.1859046 | 70.0479295 | 67.0713843 |
| 65.6061284 | 68.9682631 | 68.8079507 | 71.1859046 | 70.0479295 | 67.0713843 |
| 64.6061284 | 69.9682631 | 68.8079507 | 71.1859046 | 70.0479295 | 67.0713843 |
| 62.6061284 | 70.9682631 | 68.8079507 | 72.1859046 | 70.0479295 | 67.0713843 |
| 60.6061284 | 70.9682631 | 69.8079507 | 72.1859046 | 70.0479295 | 67.0713843 |
| 60.6061284 | 71.9682631 | 72.8079507 | 72.1859046 | 70.0479295 | 67.0713843 |
| 61.6061284 | 71.9682631 | 72.8079507 | 71.1859046 | 70.0479295 | 67.0713843 |
| 61.6061284 | 70.9682631 | 74.8079507 | 71.1859046 | 70.0479295 | 67.0713843 |
| 62.6061284 | 69.9682631 | 75.8079507 | 71.1859046 | 71.0479295 | 67.0713843 |
| 65.6061284 | 69.9682631 | 76.8079507 | 72.1859046 | 71.0479295 | 69.0713843 |
| 67.6061284 | 67.9682631 | 75.8079507 | 75.1859046 | 71.0479295 | 69.0713843 |
| 67.6061284 | 65.9682631 | 75.8079507 | 75.1859046 | 71.0479295 | 69.0713843 |
| 67.6061284 | 64.9682631 | 75.8079507 | 79.1859046 | 71.0479295 | 68.0713843 |
| 67.6061284 | 64.9682631 | 75.8079507 | 79.1859046 | 71.0479295 | 68.0713843 |
| 65.6061284 | 65.9682631 | 75.8079507 | 79.1859046 | 71.0479295 | 69.0713843 |
| 65.6061284 | 66.9682631 | 75.8079507 | 79.1859046 | 70.0479295 | 69.0713843 |
| 65.6061284 | 67.9682631 | 75.8079507 | 80.1859046 | 70.0479295 | 69.0713843 |
| 65.6061284 | 68.9682631 | 75.8079507 | 80.1859046 | 70.0479295 | 69.0713843 |
| 66.6061284 | 69.9682631 | 75.8079507 | 81.1859046 | 70.0479295 | 70.0713843 |
| 67.6061284 | 69.9682631 | 76.8079507 | 83.1859046 | 70.0479295 | 69.0713843 |
| 68.6061284 | 68.9682631 | 75.8079507 | 83.1859046 | 70.0479295 | 69.0713843 |
| 68.6061284 | 67.9682631 | 75.8079507 | 83.1859046 | 69.0479295 | 69.0713843 |
| 69.6061284 | 67.9682631 | 76.8079507 | 84.1859046 | 67.0479295 | 69.0713843 |
| 70.6061284 | 67.9682631 | 76.8079507 | 84.1859046 | 67.0479295 | 69.0713843 |
| 70.6061284 | 67.9682631 | 76.8079507 | 84.1859046 | 67.0479295 | 70.0713843 |
| 71.6061284 | 68.9682631 | 76.8079507 | 84.1859046 | 67.0479295 | 70.0713843 |
| 72.6061284 | 68.9682631 | 76.8079507 | 84.1859046 | 67.0479295 | 70.0713843 |
| 71.6061284 | 68.9682631 | 76.8079507 | 69.7175742 | 67.0479295 | 71.0713843 |
| 70.6061284 | 69.9682631 | 76.8079507 | 69.7175742 | 67.0479295 | 71.0713843 |
| 70.6061284 | 69.9682631 | 78.8079507 | 70.1721197 | 67.0479295 | 73.0713843 |
| 69.6061284 | 68.9682631 | 78.8079507 | 70.0812106 | 67.0479295 | 72.0713843 |
| 69.6061284 | 68.9682631 | 78.8079507 | 84.1859046 | 67.0479295 | 70.0713843 |
| 69.6061284 | 68.9682631 | 78.8079507 | 84.1859046 | 67.0479295 | 69.0713843 |
| 69.6061284 | 67.9682631 | 78.8079507 | 84.1859046 | 67.0479295 | 69.0713843 |
| 70.6061284 | 67.9682631 | 78.8079507 | 84.1859046 | 67.0479295 | 69.0713843 |
| 70.6061284 | 67.9682631 | 77.8079507 | 84.1859046 | 68.0479295 | 69.0713843 |
| 71.6061284 | 67.9682631 | 73.8079507 | 70.1721197 | 68.0479295 | 69.0713843 |
| 72.6061284 | 67.9682631 | 73.8079507 | 70.535756  | 67.0479295 | 69.0713843 |



|            |            |            |            |            |            |
|------------|------------|------------|------------|------------|------------|
| 73.6061284 | 67.9682631 | 73.8079507 | 70.8993924 | 66.0479295 | 70.0713843 |
| 73.6061284 | 67.9682631 | 73.8079507 | 70.8993924 | 66.0479295 | 70.0713843 |
| 73.6061284 | 67.9682631 | 73.8079507 | 71.3539378 | 67.0479295 | 70.0713843 |
| 74.6061284 | 66.9682631 | 73.8079507 | 71.4448469 | 67.0479295 | 70.0713843 |
| 74.6061284 | 66.9682631 | 73.8079507 | 71.7175742 | 67.0479295 | 70.0713843 |
| 75.6061284 | 66.9682631 | 73.8079507 | 71.535756  | 67.0479295 | 70.0713843 |
| 74.6061284 | 66.9682631 | 73.8079507 | 84.1859046 | 68.0479295 | 69.0713843 |
| 73.6061284 | 67.9682631 | 73.8079507 | 84.1859046 | 68.0479295 | 69.0713843 |
| 73.6061284 | 68.9682631 | 73.8079507 | 84.1859046 | 68.0479295 | 69.0713843 |
| 72.6061284 | 69.9682631 | 73.8079507 | 76.1859046 | 67.0479295 | 69.0713843 |
| 71.6061284 | 69.9682631 | 74.8079507 | 73.1859046 | 67.0479295 | 68.0713843 |
| 70.6061284 | 69.9682631 | 74.8079507 | 69.1859046 | 67.0479295 | 68.0713843 |
| 71.6061284 | 69.9682631 | 75.8079507 | 68.1859046 | 67.0479295 | 68.0713843 |
| 72.6061284 | 69.9682631 | 75.8079507 | 67.1859046 | 68.0479295 | 69.0713843 |
| 71.6061284 | 69.9682631 | 74.8079507 | 67.1859046 | 69.0479295 | 70.0713843 |
| 71.6061284 | 72.9682631 | 72.8079507 | 67.1859046 | 71.0479295 | 72.0713843 |
| 71.6061284 | 73.9682631 | 72.8079507 | 68.1859046 | 72.0479295 | 72.0713843 |
| 72.6061284 | 74.9682631 | 70.8079507 | 68.1859046 | 71.0479295 | 72.0713843 |
| 73.6061284 | 74.9682631 | 69.8079507 | 68.1859046 | 71.0479295 | 72.0713843 |
| 74.6061284 | 74.9682631 | 69.8079507 | 68.1859046 | 69.0479295 | 72.0713843 |
| 73.6061284 | 73.9682631 | 69.8079507 | 68.1859046 | 69.0479295 | 72.0713843 |
| 73.6061284 | 73.9682631 | 68.8079507 | 68.1859046 | 69.0479295 | 68.0713843 |
| 74.6061284 | 72.9682631 | 68.8079507 | 68.1859046 | 68.0479295 | 68.0713843 |
| 74.6061284 | 72.9682631 | 68.8079507 | 67.1859046 | 68.0479295 | 69.0713843 |
| 73.6061284 | 72.9682631 | 68.8079507 | 67.1859046 | 68.0479295 | 69.0713843 |
| 73.6061284 | 71.9682631 | 67.8079507 | 68.1859046 | 68.0479295 | 70.0713843 |
| 73.6061284 | 71.9682631 | 67.8079507 | 68.1859046 | 68.0479295 | 70.0713843 |
| 72.6061284 | 70.9682631 | 67.8079507 | 69.1859046 | 68.0479295 | 70.0713843 |
| 70.6061284 | 70.9682631 | 67.8079507 | 69.1859046 | 68.0479295 | 70.0713843 |
| 69.6061284 | 70.9682631 | 67.8079507 | 69.1859046 | 68.0479295 | 70.0713843 |
| 69.6061284 | 69.9682631 | 67.8079507 | 71.1859046 | 68.0479295 | 70.0713843 |
| 69.6061284 | 69.9682631 | 71.8079507 | 72.1859046 | 68.0479295 | 70.0713843 |
| 69.6061284 | 69.9682631 | 71.8079507 | 73.1859046 | 68.0479295 | 71.0713843 |
| 69.6061284 | 68.9682631 | 71.8079507 | 74.1859046 | 68.0479295 | 68.0713843 |
| 69.6061284 | 68.9682631 | 71.8079507 | 74.1859046 | 68.0479295 | 67.0713843 |
| 69.6061284 | 68.9682631 | 71.8079507 | 75.1859046 | 68.0479295 | 66.0713843 |
| 68.6061284 | 68.9682631 | 71.8079507 | 75.1859046 | 68.0479295 | 66.0713843 |
| 68.6061284 | 67.9682631 | 71.8079507 | 75.1859046 | 69.0479295 | 66.0713843 |
| 68.6061284 | 68.9682631 | 73.8079507 | 73.1859046 | 70.0479295 | 66.0713843 |
| 67.6061284 | 68.9682631 | 74.8079507 | 69.1859046 | 70.0479295 | 66.0713843 |
| 68.6061284 | 69.9682631 | 74.8079507 | 68.1859046 | 70.0479295 | 68.0713843 |
| 68.6061284 | 69.9682631 | 74.8079507 | 68.1859046 | 70.0479295 | 68.0713843 |
| 68.6061284 | 70.9682631 | 74.8079507 | 69.1859046 | 70.0479295 | 68.0713843 |
| 69.6061284 | 69.9682631 | 74.8079507 | 69.1859046 | 70.0479295 | 68.0713843 |
| 69.6061284 | 69.9682631 | 75.8079507 | 70.1859046 | 70.0479295 | 69.0713843 |

|            |            |            |            |            |            |
|------------|------------|------------|------------|------------|------------|
| 68.6061284 | 69.9682631 | 75.8079507 | 74.1859046 | 71.0479295 | 68.0713843 |
| 67.6061284 | 71.9682631 | 75.8079507 | 76.1859046 | 72.0479295 | 68.0713843 |
| 68.6061284 | 74.9682631 | 75.8079507 | 77.1859046 | 72.0479295 | 68.0713843 |
| 68.6061284 | 74.9682631 | 75.8079507 | 77.1859046 | 72.0479295 | 68.0713843 |
| 67.6061284 | 74.9682631 | 75.8079507 | 79.1859046 | 72.0479295 | 67.0713843 |
| 67.6061284 | 74.9682631 | 75.8079507 | 79.1859046 | 72.0479295 | 67.0713843 |
| 67.6061284 | 74.9682631 | 75.8079507 | 80.1859046 | 71.0479295 | 68.0713843 |
| 68.6061284 | 74.9682631 | 75.8079507 | 80.1859046 | 70.0479295 | 67.0713843 |
| 69.6061284 | 72.9682631 | 76.8079507 | 80.1859046 | 69.0479295 | 67.0713843 |
| 69.6061284 | 67.9682631 | 76.8079507 | 80.1859046 | 69.0479295 | 67.0713843 |
| 69.6061284 | 67.9682631 | 76.8079507 | 80.1859046 | 69.0479295 | 67.0713843 |
| 71.6061284 | 68.9682631 | 79.8079507 | 76.1859046 | 69.0479295 | 66.0713843 |
| 73.6061284 | 68.9682631 | 79.8079507 | 73.1859046 | 69.0479295 | 66.0713843 |
| 74.6061284 | 68.9682631 | 80.8079507 | 70.1859046 | 69.0479295 | 66.0713843 |
| 74.6061284 | 68.9682631 | 80.8079507 | 70.1859046 | 70.0479295 | 67.0713843 |
| 72.6061284 | 68.9682631 | 81.8079507 | 70.1859046 | 69.0479295 | 69.0713843 |
| 72.6061284 | 67.9682631 | 77.8079507 | 70.1859046 | 69.0479295 | 69.0713843 |
| 71.6061284 | 67.9682631 | 77.8079507 | 70.1859046 | 69.0479295 | 69.0713843 |
| 71.6061284 | 67.9682631 | 74.8079507 | 70.1859046 | 69.0479295 | 69.0713843 |
| 70.6061284 | 66.9682631 | 72.8079507 | 68.1859046 | 69.0479295 | 69.0713843 |
| 70.6061284 | 64.9682631 | 71.8079507 | 65.1859046 | 69.0479295 | 71.0713843 |
| 69.6061284 | 62.9682631 | 71.8079507 | 64.1859046 | 70.0479295 | 71.0713843 |
| 69.6061284 | 63.9682631 | 71.8079507 | 64.1859046 | 71.0479295 | 73.0713843 |
| 68.6061284 | 63.9682631 | 71.8079507 | 63.1859046 | 71.0479295 | 72.0713843 |
| 68.6061284 | 64.9682631 | 71.8079507 | 63.1859046 | 71.0479295 | 72.0713843 |
| 67.6061284 | 64.9682631 | 72.8079507 | 67.1859046 | 71.0479295 | 71.0713843 |
| 66.6061284 | 64.9682631 | 72.8079507 | 68.1859046 | 70.0479295 | 69.0713843 |
| 65.6061284 | 63.9682631 | 73.8079507 | 70.1859046 | 70.0479295 | 68.0713843 |
| 65.6061284 | 64.9682631 | 73.8079507 | 71.1859046 | 70.0479295 | 68.0713843 |
| 65.6061284 | 64.9682631 | 73.8079507 | 71.1859046 | 69.0479295 | 68.0713843 |
| 64.6061284 | 64.9682631 | 73.8079507 | 72.1859046 | 68.0479295 | 68.0713843 |
| 64.6061284 | 64.9682631 | 73.8079507 | 72.1859046 | 68.0479295 | 68.0713843 |
| 64.6061284 | 65.9682631 | 75.8079507 | 71.1859046 | 68.0479295 | 68.0713843 |
| 64.6061284 | 65.9682631 | 75.8079507 | 70.1859046 | 68.0479295 | 69.0713843 |
| 64.6061284 | 65.9682631 | 75.8079507 | 70.1859046 | 68.0479295 | 70.0713843 |
| 65.6061284 | 64.9682631 | 76.8079507 | 70.1859046 | 68.0479295 | 70.0713843 |
| 65.6061284 | 64.9682631 | 76.8079507 | 70.1859046 | 69.0479295 | 70.0713843 |
| 65.6061284 | 64.9682631 | 76.8079507 | 72.1859046 | 68.0479295 | 70.0713843 |
| 65.6061284 | 64.9682631 | 76.8079507 | 72.1859046 | 68.0479295 | 70.0713843 |
| 67.6061284 | 65.9682631 | 75.8079507 | 72.1859046 | 68.0479295 | 72.0713843 |
| 67.6061284 | 65.9682631 | 75.8079507 | 72.1859046 | 68.0479295 | 73.0713843 |
| 68.6061284 | 65.9682631 | 75.8079507 | 72.1859046 | 68.0479295 | 75.0713843 |
| 69.6061284 | 65.9682631 | 75.8079507 | 72.1859046 | 69.0479295 | 75.0713843 |
| 70.6061284 | 65.9682631 | 75.8079507 | 73.1859046 | 69.0479295 | 77.0713843 |
| 71.6061284 | 65.9682631 | 75.8079507 | 73.1859046 | 70.0479295 | 77.0713843 |

|            |            |            |            |            |            |
|------------|------------|------------|------------|------------|------------|
| 72.6061284 | 68.9682631 | 72.8079507 | 74.1859046 | 70.0479295 | 76.0713843 |
| 72.6061284 | 70.9682631 | 72.8079507 | 77.1859046 | 70.0479295 | 73.0713843 |
| 71.6061284 | 70.9682631 | 72.8079507 | 78.1859046 | 70.0479295 | 70.0713843 |
| 71.6061284 | 69.9682631 | 73.8079507 | 80.1859046 | 69.0479295 | 70.0713843 |
| 71.6061284 | 69.9682631 | 74.8079507 | 80.1859046 | 69.0479295 | 70.0713843 |
| 71.6061284 | 69.9682631 | 74.8079507 | 80.1859046 | 69.0479295 | 70.0713843 |
| 70.6061284 | 68.9682631 | 74.8079507 | 80.1859046 | 69.0479295 | 71.0713843 |
| 71.6061284 | 65.9682631 | 71.8079507 | 82.1859046 | 69.0479295 | 71.0713843 |
| 71.6061284 | 64.9682631 | 71.8079507 | 83.1859046 | 69.0479295 | 70.0713843 |
| 70.6061284 | 64.9682631 | 71.8079507 | 83.1859046 | 70.0479295 | 71.0713843 |
| 70.6061284 | 64.9682631 | 70.8079507 | 83.1859046 | 70.0479295 | 71.0713843 |
| 69.6061284 | 63.9682631 | 70.8079507 | 84.1859046 | 70.0479295 | 71.0713843 |
| 69.6061284 | 60.9682631 | 70.8079507 | 84.1859046 | 70.0479295 | 73.0713843 |
| 69.6061284 | 60.9682631 | 70.8079507 | 70.1721197 | 70.0479295 | 74.0713843 |
| 70.6061284 | 59.9682631 | 69.8079507 | 70.3539378 | 70.0479295 | 75.0713843 |
| 71.6061284 | 60.9682631 | 70.8079507 | 70.7175742 | 70.0479295 | 74.0713843 |
| 71.6061284 | 60.9682631 | 70.8079507 | 70.7175742 | 69.0479295 | 74.0713843 |
| 70.6061284 | 60.9682631 | 71.8079507 | 71.1721197 | 69.0479295 | 71.0713843 |
| 70.6061284 | 60.9682631 | 71.8079507 | 71.6266651 | 70.0479295 | 71.0713843 |
| 70.6061284 | 60.9682631 | 71.8079507 | 71.6266651 | 70.0479295 | 71.0713843 |
| 69.6061284 | 62.9682631 | 68.8079507 | 71.8084833 | 70.0479295 | 71.0713843 |
| 68.6061284 | 64.9682631 | 68.8079507 | 72.2630288 | 70.0479295 | 70.0713843 |
| 68.6061284 | 64.9682631 | 67.8079507 | 72.8084833 | 70.0479295 | 70.0713843 |
| 69.6061284 | 64.9682631 | 66.8079507 | 72.9903015 | 72.0479295 | 70.0713843 |
| 69.6061284 | 65.9682631 | 66.8079507 | 73.1721197 | 73.0479295 | 70.0713843 |
| 70.6061284 | 65.9682631 | 66.8079507 | 87.1859046 | 73.0479295 | 70.0713843 |
| 70.6061284 | 67.9682631 | 72.8079507 | 83.1859046 | 71.0479295 | 70.0713843 |
| 72.6061284 | 71.9682631 | 76.8079507 | 82.1859046 | 70.0479295 | 69.0713843 |
| 73.6061284 | 72.9682631 | 78.8079507 | 82.1859046 | 70.0479295 | 68.0713843 |
| 74.6061284 | 71.9682631 | 78.8079507 | 82.1859046 | 70.0479295 | 67.0713843 |
| 74.6061284 | 67.9682631 | 79.8079507 | 81.1859046 | 70.0479295 | 67.0713843 |
| 74.6061284 | 65.9682631 | 79.8079507 | 81.1859046 | 70.0479295 | 65.0713843 |
| 74.6061284 | 65.9682631 | 79.8079507 | 81.1859046 | 71.0479295 | 65.0713843 |
| 74.6061284 | 63.9682631 | 79.8079507 | 81.1859046 | 71.0479295 | 65.0713843 |
| 73.6061284 | 62.9682631 | 79.8079507 | 81.1859046 | 71.0479295 | 65.0713843 |
| 73.6061284 | 62.9682631 | 80.8079507 | 82.1859046 | 70.0479295 | 66.0713843 |
| 73.6061284 | 62.9682631 | 80.8079507 | 85.1859046 | 70.0479295 | 67.0713843 |
| 73.6061284 | 62.9682631 | 80.8079507 | 86.1859046 | 70.0479295 | 67.0713843 |
| 73.6061284 | 62.9682631 | 82.8079507 | 73.2630288 | 72.0479295 | 67.0713843 |
| 74.6061284 | 63.9682631 | 82.8079507 | 73.535756  | 72.0479295 | 67.0713843 |
| 75.6061284 | 64.9682631 | 82.8079507 | 79.1859046 | 72.0479295 | 67.0713843 |
| 75.6061284 | 64.9682631 | 82.8079507 | 73.1859046 | 72.0479295 | 68.0713843 |
| 75.6061284 | 64.9682631 | 82.8079507 | 71.1859046 | 73.0479295 | 68.0713843 |
| 75.6061284 | 64.9682631 | 82.8079507 | 69.1859046 | 73.0479295 | 68.0713843 |
| 75.6061284 | 64.9682631 | 82.8079507 | 67.1859046 | 73.0479295 | 69.0713843 |

|            |            |            |            |            |            |
|------------|------------|------------|------------|------------|------------|
| 76.6061284 | 62.9682631 | 82.8079507 | 66.1859046 | 73.0479295 | 68.0713843 |
| 75.6061284 | 62.9682631 | 81.8079507 | 67.1859046 | 73.0479295 | 68.0713843 |
| 76.6061284 | 62.9682631 | 81.8079507 | 67.1859046 | 73.0479295 | 68.0713843 |
| 76.6061284 | 62.9682631 | 81.8079507 | 66.1859046 | 73.0479295 | 68.0713843 |
| 76.6061284 | 61.9682631 | 80.8079507 | 65.1859046 | 73.0479295 | 68.0713843 |
| 76.6061284 | 61.9682631 | 79.8079507 | 65.1859046 | 73.0479295 | 68.0713843 |
| 75.6061284 | 61.9682631 | 78.8079507 | 66.1859046 | 73.0479295 | 68.0713843 |
| 75.6061284 | 61.9682631 | 77.8079507 | 66.1859046 | 74.0479295 | 68.0713843 |
| 75.6061284 | 61.9682631 | 77.8079507 | 66.1859046 | 75.0479295 | 68.0713843 |
| 76.6061284 | 60.9682631 | 75.8079507 | 66.1859046 | 75.0479295 | 69.0713843 |
| 76.6061284 | 60.9682631 | 75.8079507 | 67.1859046 | 75.0479295 | 67.0713843 |
| 75.6061284 | 60.9682631 | 75.8079507 | 69.1859046 | 77.0479295 | 66.0713843 |
| 76.6061284 | 60.9682631 | 75.8079507 | 69.1859046 | 77.0479295 | 65.0713843 |
| 76.6061284 | 60.9682631 | 75.8079507 | 69.1859046 | 77.0479295 | 65.0713843 |
| 76.6061284 | 60.9682631 | 74.8079507 | 69.1859046 | 77.0479295 | 66.0713843 |
| 75.6061284 | 63.9682631 | 74.8079507 | 69.1859046 | 77.0479295 | 66.0713843 |
| 75.6061284 | 66.9682631 | 74.8079507 | 69.1859046 | 77.0479295 | 66.0713843 |
| 73.6061284 | 67.9682631 | 74.8079507 | 73.1859046 | 75.0479295 | 66.0713843 |
| 72.6061284 | 70.9682631 | 74.8079507 | 74.1859046 | 75.0479295 | 66.0713843 |
| 72.6061284 | 70.9682631 | 74.8079507 | 74.1859046 | 75.0479295 | 67.0713843 |
| 72.6061284 | 72.9682631 | 74.8079507 | 76.1859046 | 74.0479295 | 69.0713843 |
| 71.6061284 | 72.9682631 | 73.8079507 | 76.1859046 | 70.0479295 | 69.0713843 |
| 71.6061284 | 72.9682631 | 73.8079507 | 76.1859046 | 68.0479295 | 69.0713843 |
| 72.6061284 | 72.9682631 | 73.8079507 | 77.1859046 | 68.0479295 | 68.0713843 |
| 74.6061284 | 68.9682631 | 74.8079507 | 77.1859046 | 68.0479295 | 67.0713843 |
| 74.6061284 | 66.9682631 | 74.8079507 | 76.1859046 | 68.0479295 | 67.0713843 |
| 75.6061284 | 65.9682631 | 74.8079507 | 74.1859046 | 67.0479295 | 67.0713843 |
| 75.6061284 | 65.9682631 | 75.8079507 | 74.1859046 | 67.0479295 | 67.0713843 |
| 75.6061284 | 65.9682631 | 75.8079507 | 74.1859046 | 67.0479295 | 67.0713843 |
| 76.6061284 | 66.9682631 | 76.8079507 | 74.1859046 | 67.0479295 | 67.0713843 |
| 76.6061284 | 67.9682631 | 76.8079507 | 74.1859046 | 67.0479295 | 69.0713843 |
| 77.6061284 | 67.9682631 | 77.8079507 | 74.1859046 | 67.0479295 | 70.0713843 |
| 78.6061284 | 67.9682631 | 77.8079507 | 74.1859046 | 68.0479295 | 71.0713843 |
| 79.6061284 | 67.9682631 | 77.8079507 | 74.1859046 | 68.0479295 | 71.0713843 |
| 80.6061284 | 67.9682631 | 77.8079507 | 79.1859046 | 67.0479295 | 72.0713843 |
| 80.6061284 | 67.9682631 | 77.8079507 | 81.1859046 | 67.0479295 | 72.0713843 |
| 80.6061284 | 68.9682631 | 69.8079507 | 81.1859046 | 67.0479295 | 72.0713843 |
| 80.6061284 | 67.9682631 | 68.8079507 | 81.1859046 | 67.0479295 | 72.0713843 |
| 80.6061284 | 65.9682631 | 67.8079507 | 81.1859046 | 67.0479295 | 72.0713843 |
| 80.6061284 | 65.9682631 | 67.8079507 | 81.1859046 | 67.0479295 | 72.0713843 |
| 79.6061284 | 64.9682631 | 69.8079507 | 80.1859046 | 68.0479295 | 71.0713843 |
| 77.6061284 | 64.9682631 | 71.8079507 | 76.1859046 | 68.0479295 | 70.0713843 |
| 76.6061284 | 64.9682631 | 71.8079507 | 74.1859046 | 68.0479295 | 69.0713843 |
| 75.6061284 | 64.9682631 | 73.8079507 | 74.1859046 | 69.0479295 | 69.0713843 |
| 75.6061284 | 64.9682631 | 73.8079507 | 74.1859046 | 69.0479295 | 69.0713843 |

|            |            |            |            |            |            |
|------------|------------|------------|------------|------------|------------|
| 74.6061284 | 64.9682631 | 73.8079507 | 74.1859046 | 68.0479295 | 69.0713843 |
| 73.6061284 | 64.9682631 | 72.8079507 | 74.1859046 | 69.0479295 | 70.0713843 |
| 73.6061284 | 65.9682631 | 72.8079507 | 74.1859046 | 69.0479295 | 70.0713843 |
| 73.6061284 | 65.9682631 | 72.8079507 | 75.1859046 | 69.0479295 | 73.0713843 |
| 73.6061284 | 65.9682631 | 72.8079507 | 78.1859046 | 69.0479295 | 73.0713843 |
| 73.6061284 | 65.9682631 | 70.8079507 | 80.1859046 | 68.0479295 | 72.0713843 |
| 73.6061284 | 67.9682631 | 72.8079507 | 80.1859046 | 69.0479295 | 71.0713843 |
| 75.6061284 | 67.9682631 | 77.8079507 | 80.1859046 | 69.0479295 | 70.0713843 |
| 75.6061284 | 67.9682631 | 77.8079507 | 80.1859046 | 68.0479295 | 70.0713843 |
| 75.6061284 | 66.9682631 | 80.8079507 | 80.1859046 | 67.0479295 | 66.0713843 |
| 69.6061284 | 66.9682631 | 83.8079507 | 80.1859046 | 67.0479295 | 65.0713843 |
| 69.6061284 | 66.9682631 | 84.8079507 | 78.1859046 | 67.0479295 | 65.0713843 |
| 64.6061284 | 66.9682631 | 70.3539378 | 76.1859046 | 67.0479295 | 65.0713843 |
| 63.6061284 | 66.9682631 | 70.1721197 | 74.1859046 | 66.0479295 | 65.0713843 |
| 63.6061284 | 66.9682631 | 84.8079507 | 74.1859046 | 67.0479295 | 66.0713843 |
| 63.6061284 | 66.9682631 | 84.8079507 | 75.1859046 | 68.0479295 | 66.0713843 |
| 65.6061284 | 66.9682631 | 84.8079507 | 75.1859046 | 68.0479295 | 66.0713843 |
| 67.6061284 | 65.9682631 | 84.8079507 | 74.1859046 | 69.0479295 | 66.0713843 |
| 68.6061284 | 65.9682631 | 81.8079507 | 70.1859046 | 69.0479295 | 66.0713843 |
| 68.6061284 | 65.9682631 | 80.8079507 | 67.1859046 | 69.0479295 | 66.0713843 |
| 66.6061284 | 65.9682631 | 80.8079507 | 66.1859046 | 69.0479295 | 67.0713843 |
| 66.6061284 | 65.9682631 | 80.8079507 | 65.1859046 | 68.0479295 | 68.0713843 |
| 67.6061284 | 64.9682631 | 78.8079507 | 65.1859046 | 68.0479295 | 68.0713843 |
| 68.6061284 | 64.9682631 | 78.8079507 | 65.1859046 | 67.0479295 | 68.0713843 |
| 67.6061284 | 64.9682631 | 75.8079507 | 65.1859046 | 67.0479295 | 68.0713843 |
| 65.6061284 | 64.9682631 | 74.8079507 | 64.1859046 | 67.0479295 | 68.0713843 |
| 65.6061284 | 65.9682631 | 74.8079507 | 64.1859046 | 67.0479295 | 68.0713843 |
| 66.6061284 | 65.9682631 | 74.8079507 | 65.1859046 | 67.0479295 | 68.0713843 |
| 69.6061284 | 66.9682631 | 74.8079507 | 66.1859046 | 67.0479295 | 68.0713843 |
| 69.6061284 | 66.9682631 | 74.8079507 | 67.1859046 | 67.0479295 | 67.0713843 |
| 69.6061284 | 66.9682631 | 74.8079507 | 68.1859046 | 68.0479295 | 67.0713843 |
| 71.6061284 | 66.9682631 | 74.8079507 | 69.1859046 | 68.0479295 | 68.0713843 |
| 72.6061284 | 63.9682631 | 73.8079507 | 69.1859046 | 68.0479295 | 68.0713843 |
| 72.6061284 | 63.9682631 | 73.8079507 | 69.1859046 | 68.0479295 | 68.0713843 |
| 72.6061284 | 63.9682631 | 73.8079507 | 69.1859046 | 68.0479295 | 68.0713843 |
| 70.6061284 | 64.9682631 | 69.8079507 | 69.1859046 | 69.0479295 | 69.0713843 |
| 66.6061284 | 64.9682631 | 67.8079507 | 69.1859046 | 69.0479295 | 69.0713843 |
| 66.6061284 | 64.9682631 | 67.8079507 | 69.1859046 | 69.0479295 | 69.0713843 |
| 64.6061284 | 64.9682631 | 67.8079507 | 69.1859046 | 69.0479295 | 69.0713843 |
| 64.6061284 | 63.9682631 | 62.8079507 | 69.1859046 | 69.0479295 | 69.0713843 |
| 63.6061284 | 62.9682631 | 62.8079507 | 70.1859046 | 69.0479295 | 69.0713843 |
| 63.6061284 | 62.9682631 | 61.8079507 | 70.1859046 | 69.0479295 | 70.0713843 |
| 64.6061284 | 62.9682631 | 60.8079507 | 71.1859046 | 69.0479295 | 70.0713843 |
| 64.6061284 | 62.9682631 | 60.8079507 | 72.1859046 | 69.0479295 | 70.0713843 |
| 65.6061284 | 62.9682631 | 59.8079507 | 73.1859046 | 69.0479295 | 71.0713843 |

|            |            |            |            |            |            |
|------------|------------|------------|------------|------------|------------|
| 65.6061284 | 62.9682631 | 59.8079507 | 73.1859046 | 69.0479295 | 71.0713843 |
| 66.6061284 | 63.9682631 | 59.8079507 | 74.1859046 | 69.0479295 | 71.0713843 |
| 66.6061284 | 64.9682631 | 59.8079507 | 74.1859046 | 69.0479295 | 73.0713843 |
| 66.6061284 | 64.9682631 | 59.8079507 | 73.1859046 | 68.0479295 | 73.0713843 |
| 65.6061284 | 65.9682631 | 59.8079507 | 71.1859046 | 68.0479295 | 77.0713843 |
| 65.6061284 | 65.9682631 | 59.8079507 | 71.1859046 | 68.0479295 | 76.0713843 |
| 65.6061284 | 65.9682631 | 64.8079507 | 71.1859046 | 68.0479295 | 75.0713843 |
| 65.6061284 | 65.9682631 | 67.8079507 | 71.1859046 | 68.0479295 | 75.0713843 |
| 67.6061284 | 65.9682631 | 68.8079507 | 71.1859046 | 69.0479295 | 75.0713843 |
| 69.6061284 | 65.9682631 | 68.8079507 | 71.1859046 | 69.0479295 | 75.0713843 |
| 70.6061284 | 65.9682631 | 68.8079507 | 71.1859046 | 70.0479295 | 75.0713843 |
| 70.6061284 | 65.9682631 | 68.8079507 | 71.1859046 | 70.0479295 | 74.0713843 |
| 70.6061284 | 65.9682631 | 68.8079507 | 71.1859046 | 71.0479295 | 75.0713843 |
| 69.6061284 | 65.9682631 | 68.8079507 | 71.1859046 | 71.0479295 | 75.0713843 |
| 69.6061284 | 65.9682631 | 69.8079507 | 74.1859046 | 71.0479295 | 75.0713843 |
| 68.6061284 | 65.9682631 | 70.8079507 | 73.1859046 | 70.0479295 | 75.0713843 |
| 68.6061284 | 65.9682631 | 69.8079507 | 73.1859046 | 70.0479295 | 77.0713843 |
| 70.6061284 | 65.9682631 | 68.8079507 | 72.1859046 | 70.0479295 | 77.0713843 |
| 66.6061284 | 65.9682631 | 68.8079507 | 71.1859046 | 70.0479295 | 77.0713843 |
| 63.6061284 | 65.9682631 | 69.8079507 | 70.1859046 | 70.0479295 | 77.0713843 |
| 62.6061284 | 65.9682631 | 68.8079507 | 70.1859046 | 69.0479295 | 78.0713843 |
| 62.6061284 | 65.9682631 | 66.8079507 | 69.1859046 | 69.0479295 | 80.0713843 |
| 62.6061284 | 65.9682631 | 66.8079507 | 69.1859046 | 69.0479295 | 78.0713843 |
| 62.6061284 | 65.9682631 | 66.8079507 | 69.1859046 | 68.0479295 | 77.0713843 |
| 63.6061284 | 65.9682631 | 72.8079507 | 69.1859046 | 68.0479295 | 77.0713843 |
| 62.6061284 | 65.9682631 | 76.8079507 | 69.1859046 | 69.0479295 | 75.0713843 |
| 61.6061284 | 63.9682631 | 78.8079507 | 70.1859046 | 69.0479295 | 74.0713843 |
| 61.6061284 | 64.9682631 | 79.8079507 | 71.1859046 | 69.0479295 | 69.0713843 |
| 61.6061284 | 65.9682631 | 79.8079507 | 72.1859046 | 69.0479295 | 67.0713843 |
| 60.6061284 | 65.9682631 | 79.8079507 | 73.1859046 | 70.0479295 | 66.0713843 |
| 60.6061284 | 65.9682631 | 80.8079507 | 75.1859046 | 70.0479295 | 66.0713843 |
| 61.6061284 | 64.9682631 | 80.8079507 | 76.1859046 | 70.0479295 | 65.0713843 |
| 62.6061284 | 64.9682631 | 80.8079507 | 75.1859046 | 71.0479295 | 64.0713843 |
| 63.6061284 | 64.9682631 | 80.8079507 | 75.1859046 | 72.0479295 | 65.0713843 |
| 64.6061284 | 64.9682631 | 80.8079507 | 71.1859046 | 72.0479295 | 66.0713843 |
| 65.6061284 | 66.9682631 | 80.8079507 | 71.1859046 | 71.0479295 | 66.0713843 |
| 66.6061284 | 67.9682631 | 80.8079507 | 70.1859046 | 70.0479295 | 66.0713843 |
| 67.6061284 | 67.9682631 | 80.8079507 | 71.1859046 | 69.0479295 | 66.0713843 |
| 67.6061284 | 67.9682631 | 80.8079507 | 71.1859046 | 69.0479295 | 66.0713843 |
| 69.6061284 | 66.9682631 | 80.8079507 | 71.1859046 | 69.0479295 | 67.0713843 |
| 69.6061284 | 64.9682631 | 80.8079507 | 68.1859046 | 69.0479295 | 73.0713843 |
| 66.6061284 | 63.9682631 | 81.8079507 | 67.1859046 | 69.0479295 | 75.0713843 |
| 65.6061284 | 63.9682631 | 81.8079507 | 66.1859046 | 69.0479295 | 75.0713843 |
| 65.6061284 | 61.9682631 | 80.8079507 | 65.1859046 | 69.0479295 | 76.0713843 |
| 66.6061284 | 58.9682631 | 80.8079507 | 65.1859046 | 69.0479295 | 77.0713843 |

|            |            |            |            |            |            |
|------------|------------|------------|------------|------------|------------|
| 66.6061284 | 57.9682631 | 80.8079507 | 66.1859046 | 68.0479295 | 78.0713843 |
| 66.6061284 | 57.9682631 | 80.8079507 | 66.1859046 | 68.0479295 | 78.0713843 |
| 68.6061284 | 57.9682631 | 74.8079507 | 67.1859046 | 69.0479295 | 81.0713843 |
| 69.6061284 | 57.9682631 | 69.8079507 | 66.1859046 | 69.0479295 | 82.0713843 |
| 69.6061284 | 57.9682631 | 68.8079507 | 64.1859046 | 68.0479295 | 83.0713843 |
| 68.6061284 | 57.9682631 | 68.8079507 | 64.1859046 | 68.0479295 | 83.0713843 |
| 66.6061284 | 57.9682631 | 67.8079507 | 64.1859046 | 68.0479295 | 69.0812106 |
| 66.6061284 | 57.9682631 | 67.8079507 | 63.1859046 | 68.0479295 | 68.8993924 |
| 67.6061284 | 58.9682631 | 67.8079507 | 62.1859046 | 68.0479295 | 69.2630288 |
| 68.6061284 | 58.9682631 | 67.8079507 | 62.1859046 | 68.0479295 | 69.2630288 |
| 69.6061284 | 58.9682631 | 67.8079507 | 62.1859046 | 68.0479295 | 69.1721197 |
| 69.6061284 | 58.9682631 | 67.8079507 | 62.1859046 | 69.0479295 | 69.3539378 |
| 69.6061284 | 59.9682631 | 67.8079507 | 62.1859046 | 69.0479295 | 69.4448469 |
| 68.6061284 | 61.9682631 | 67.8079507 | 61.1859046 | 69.0479295 | 69.2630288 |
| 67.6061284 | 61.9682631 | 65.8079507 | 69.1859046 | 69.0479295 | 70.3539378 |
| 66.6061284 | 61.9682631 | 60.8079507 | 70.1859046 | 69.0479295 | 70.4448469 |
| 65.6061284 | 61.9682631 | 60.8079507 | 70.1859046 | 69.0479295 | 70.2630288 |
| 66.6061284 | 61.9682631 | 61.8079507 | 71.1859046 | 68.0479295 | 78.0713843 |
| 66.6061284 | 61.9682631 | 61.8079507 | 71.1859046 | 69.0479295 | 73.0713843 |
| 67.6061284 | 61.9682631 | 62.8079507 | 72.1859046 | 70.0479295 | 70.0713843 |
| 67.6061284 | 61.9682631 | 62.8079507 | 72.1859046 | 70.0479295 | 70.0713843 |
| 67.6061284 | 62.9682631 | 64.8079507 | 72.1859046 | 70.0479295 | 69.0713843 |
| 67.6061284 | 63.9682631 | 64.8079507 | 75.1859046 | 70.0479295 | 70.0713843 |
| 67.6061284 | 62.9682631 | 65.8079507 | 78.1859046 | 70.0479295 | 70.0713843 |
| 67.6061284 | 61.9682631 | 66.8079507 | 81.1859046 | 70.0479295 | 73.0713843 |
| 67.6061284 | 61.9682631 | 66.8079507 | 82.1859046 | 70.0479295 | 73.0713843 |
| 67.6061284 | 61.9682631 | 66.8079507 | 82.1859046 | 70.0479295 | 73.0713843 |
| 68.6061284 | 61.9682631 | 66.8079507 | 80.1859046 | 71.0479295 | 73.0713843 |
| 68.6061284 | 61.9682631 | 66.8079507 | 75.1859046 | 71.0479295 | 74.0713843 |
| 70.6061284 | 61.9682631 | 67.8079507 | 73.1859046 | 71.0479295 | 74.0713843 |
| 70.6061284 | 62.9682631 | 70.8079507 | 70.1859046 | 70.0479295 | 75.0713843 |
| 71.6061284 | 64.9682631 | 70.8079507 | 66.1859046 | 70.0479295 | 76.0713843 |
| 71.6061284 | 65.9682631 | 71.8079507 | 66.1859046 | 70.0479295 | 75.0713843 |
| 71.6061284 | 65.9682631 | 71.8079507 | 66.1859046 | 70.0479295 | 75.0713843 |
| 71.6061284 | 65.9682631 | 71.8079507 | 66.1859046 | 70.0479295 | 75.0713843 |
| 70.6061284 | 65.9682631 | 71.8079507 | 67.1859046 | 70.0479295 | 75.0713843 |
| 70.6061284 | 65.9682631 | 71.8079507 | 66.1859046 | 69.0479295 | 75.0713843 |
| 71.6061284 | 64.9682631 | 72.8079507 | 66.1859046 | 69.0479295 | 73.0713843 |
| 72.6061284 | 64.9682631 | 72.8079507 | 66.1859046 | 69.0479295 | 74.0713843 |
| 73.6061284 | 64.9682631 | 72.8079507 | 66.1859046 | 69.0479295 | 76.0713843 |
| 74.6061284 | 65.9682631 | 72.8079507 | 67.1859046 | 69.0479295 | 76.0713843 |
| 76.6061284 | 66.9682631 | 72.8079507 | 67.1859046 | 69.0479295 | 83.0713843 |
| 78.6061284 | 66.9682631 | 72.8079507 | 69.1859046 | 69.0479295 | 71.9903015 |
| 81.6061284 | 67.9682631 | 74.8079507 | 70.1859046 | 69.0479295 | 75.3539378 |
| 81.6061284 | 67.9682631 | 75.8079507 | 70.1859046 | 69.0479295 | 74.1721197 |

|            |            |            |            |            |            |
|------------|------------|------------|------------|------------|------------|
| 84.6061284 | 67.9682631 | 75.8079507 | 70.1859046 | 69.0479295 | 74.1721197 |
| 85.6061284 | 67.9682631 | 75.8079507 | 70.1859046 | 69.0479295 | 74.7175742 |
| 85.6061284 | 67.9682631 | 76.8079507 | 70.1859046 | 69.0479295 | 75.0812106 |
| 85.6061284 | 67.9682631 | 76.8079507 | 70.1859046 | 70.0479295 | 75.8084833 |
| 85.6061284 | 65.9682631 | 76.8079507 | 70.1859046 | 70.0479295 | 75.6266651 |
| 82.6061284 | 65.9682631 | 76.8079507 | 73.1859046 | 70.0479295 | 76.2630288 |
| 80.6061284 | 64.9682631 | 75.8079507 | 74.1859046 | 71.0479295 | 76.535756  |
| 78.6061284 | 64.9682631 | 75.8079507 | 75.1859046 | 71.0479295 | 76.8084833 |
| 76.6061284 | 64.9682631 | 74.8079507 | 75.1859046 | 70.0479295 | 76.4448469 |
| 75.6061284 | 64.9682631 | 74.8079507 | 75.1859046 | 71.0479295 | 76.8084833 |
| 75.6061284 | 64.9682631 | 74.8079507 | 75.1859046 | 71.0479295 | 76.8084833 |
| 70.6061284 | 63.9682631 | 72.8079507 | 76.1859046 | 71.0479295 | 76.0812106 |
| 69.6061284 | 63.9682631 | 72.8079507 | 76.1859046 | 70.0479295 | 74.9903015 |
| 69.6061284 | 63.9682631 | 72.8079507 | 76.1859046 | 70.0479295 | 74.7175742 |
| 69.6061284 | 64.9682631 | 72.8079507 | 76.1859046 | 70.0479295 | 74.7175742 |
| 70.6061284 | 64.9682631 | 72.8079507 | 73.1859046 | 70.0479295 | 74.2630288 |
| 70.6061284 | 64.9682631 | 72.8079507 | 70.1859046 | 70.0479295 | 73.9903015 |
| 70.6061284 | 64.9682631 | 72.8079507 | 68.1859046 | 69.0479295 | 73.8084833 |
| 70.6061284 | 62.9682631 | 72.8079507 | 67.1859046 | 69.0479295 | 73.535756  |
| 70.6061284 | 62.9682631 | 72.8079507 | 66.1859046 | 69.0479295 | 73.4448469 |
| 70.6061284 | 62.9682631 | 72.8079507 | 66.1859046 | 68.0479295 | 73.535756  |
| 70.6061284 | 60.9682631 | 72.8079507 | 68.1859046 | 67.0479295 | 73.8084833 |
| 68.6061284 | 60.9682631 | 72.8079507 | 69.1859046 | 67.0479295 | 74.1721197 |
| 68.6061284 | 61.9682631 | 72.8079507 | 71.1859046 | 67.0479295 | 73.1721197 |
| 68.6061284 | 61.9682631 | 72.8079507 | 72.1859046 | 67.0479295 | 74.3539378 |
| 68.6061284 | 61.9682631 | 72.8079507 | 72.1859046 | 68.0479295 | 77.0713843 |
| 70.6061284 | 61.9682631 | 72.8079507 | 72.1859046 | 68.0479295 | 71.0713843 |
| 71.6061284 | 61.9682631 | 74.8079507 | 70.1859046 | 68.0479295 | 68.0713843 |
| 70.6061284 | 60.9682631 | 74.8079507 | 65.1859046 | 68.0479295 | 69.0713843 |
| 69.6061284 | 60.9682631 | 75.8079507 | 64.1859046 | 69.0479295 | 72.0713843 |
| 68.6061284 | 60.9682631 | 74.8079507 | 65.1859046 | 69.0479295 | 72.0713843 |
| 67.6061284 | 59.9682631 | 75.8079507 | 65.1859046 | 69.0479295 | 72.0713843 |
| 65.6061284 | 60.9682631 | 75.8079507 | 66.1859046 | 69.0479295 | 73.0713843 |
| 64.6061284 | 60.9682631 | 75.8079507 | 68.1859046 | 69.0479295 | 73.0713843 |
| 64.6061284 | 60.9682631 | 75.8079507 | 70.1859046 | 68.0479295 | 73.0713843 |
| 65.6061284 | 61.9682631 | 75.8079507 | 70.1859046 | 68.0479295 | 73.0713843 |
| 66.6061284 | 61.9682631 | 75.8079507 | 70.1859046 | 68.0479295 | 73.0713843 |
| 68.6061284 | 65.9682631 | 74.8079507 | 66.1859046 | 68.0479295 | 72.0713843 |
| 68.6061284 | 65.9682631 | 75.8079507 | 66.1859046 | 69.0479295 | 72.0713843 |
| 68.6061284 | 65.9682631 | 75.8079507 | 63.1859046 | 68.0479295 | 71.0713843 |
| 68.6061284 | 65.9682631 | 75.8079507 | 62.1859046 | 68.0479295 | 69.0713843 |
| 67.6061284 | 65.9682631 | 75.8079507 | 61.1859046 | 68.0479295 | 69.0713843 |
| 65.6061284 | 66.9682631 | 74.8079507 | 61.1859046 | 68.0479295 | 68.0713843 |
| 65.6061284 | 66.9682631 | 74.8079507 | 62.1859046 | 68.0479295 | 67.0713843 |
| 65.6061284 | 67.9682631 | 74.8079507 | 63.1859046 | 68.0479295 | 67.0713843 |



|            |            |            |            |            |            |
|------------|------------|------------|------------|------------|------------|
| 65.6061284 | 68.9682631 | 73.8079507 | 64.1859046 | 68.0479295 | 67.0713843 |
| 65.6061284 | 68.9682631 | 72.8079507 | 65.1859046 | 67.0479295 | 66.0713843 |
| 63.6061284 | 69.9682631 | 72.8079507 | 66.1859046 | 67.0479295 | 66.0713843 |
| 64.6061284 | 69.9682631 | 73.8079507 | 66.1859046 | 67.0479295 | 66.0713843 |
| 64.6061284 | 68.9682631 | 73.8079507 | 67.1859046 | 67.0479295 | 66.0713843 |
| 65.6061284 | 68.9682631 | 73.8079507 | 67.1859046 | 67.0479295 | 66.0713843 |
| 66.6061284 | 67.9682631 | 73.8079507 | 67.1859046 | 67.0479295 | 65.0713843 |
| 66.6061284 | 67.9682631 | 72.8079507 | 67.1859046 | 67.0479295 | 69.0713843 |
| 66.6061284 | 67.9682631 | 72.8079507 | 67.1859046 | 67.0479295 | 69.0713843 |
| 66.6061284 | 67.9682631 | 72.8079507 | 67.1859046 | 66.0479295 | 73.0713843 |
| 67.6061284 | 66.9682631 | 72.8079507 | 74.1859046 | 66.0479295 | 71.0713843 |
| 66.6061284 | 66.9682631 | 71.8079507 | 77.1859046 | 66.0479295 | 71.0713843 |
| 65.6061284 | 65.9682631 | 71.8079507 | 77.1859046 | 66.0479295 | 70.0713843 |
| 65.6061284 | 64.9682631 | 71.8079507 | 77.1859046 | 66.0479295 | 70.0713843 |
| 65.6061284 | 64.9682631 | 70.8079507 | 77.1859046 | 66.0479295 | 69.0713843 |
| 64.6061284 | 62.9682631 | 70.8079507 | 77.1859046 | 65.0479295 | 67.0713843 |
| 63.6061284 | 61.9682631 | 70.8079507 | 77.1859046 | 65.0479295 | 66.0713843 |
| 63.6061284 | 61.9682631 | 70.8079507 | 77.1859046 | 65.0479295 | 66.0713843 |
| 62.6061284 | 60.9682631 | 70.8079507 | 75.1859046 | 65.0479295 | 66.0713843 |
| 62.6061284 | 60.9682631 | 70.8079507 | 75.1859046 | 65.0479295 | 66.0713843 |
| 64.6061284 | 60.9682631 | 71.8079507 | 74.1859046 | 75.0479295 | 65.0713843 |
| 66.6061284 | 58.9682631 | 72.8079507 | 72.1859046 | 77.0479295 | 65.0713843 |
| 67.6061284 | 58.9682631 | 73.8079507 | 72.1859046 | 77.0479295 | 65.0713843 |
| 67.6061284 | 58.9682631 | 76.8079507 | 71.1859046 | 77.0479295 | 65.0713843 |
| 68.6061284 | 58.9682631 | 76.8079507 | 71.1859046 | 74.0479295 | 64.0713843 |
| 69.6061284 | 58.9682631 | 76.8079507 | 71.1859046 | 73.0479295 | 64.0713843 |
| 70.6061284 | 58.9682631 | 76.8079507 | 67.1859046 | 71.0479295 | 63.0713843 |
| 70.6061284 | 58.9682631 | 75.8079507 | 65.1859046 | 69.0479295 | 62.0713843 |
| 75.6061284 | 58.9682631 | 74.8079507 | 65.1859046 | 67.0479295 | 62.0713843 |
| 79.6061284 | 58.9682631 | 74.8079507 | 65.1859046 | 67.0479295 | 62.0713843 |
| 80.6061284 | 58.9682631 | 74.8079507 | 63.1859046 | 67.0479295 | 62.0713843 |
| 80.6061284 | 59.9682631 | 77.8079507 | 62.1859046 | 67.0479295 | 62.0713843 |
| 79.6061284 | 60.9682631 | 80.8079507 | 62.1859046 | 67.0479295 | 62.0713843 |
| 79.6061284 | 60.9682631 | 80.8079507 | 61.1859046 | 67.0479295 | 62.0713843 |
| 79.6061284 | 60.9682631 | 79.8079507 | 61.1859046 | 67.0479295 | 62.0713843 |
| 78.6061284 | 60.9682631 | 78.8079507 | 61.1859046 | 67.0479295 | 62.0713843 |
| 78.6061284 | 60.9682631 | 78.8079507 | 62.1859046 | 67.0479295 | 62.0713843 |
| 79.6061284 | 60.9682631 | 77.8079507 | 62.1859046 | 67.0479295 | 67.0713843 |
| 79.6061284 | 61.9682631 | 77.8079507 | 64.1859046 | 67.0479295 | 69.0713843 |
| 77.6061284 | 61.9682631 | 76.8079507 | 65.1859046 | 68.0479295 | 69.0713843 |
| 76.6061284 | 62.9682631 | 76.8079507 | 66.1859046 | 68.0479295 | 67.0713843 |
| 76.6061284 | 63.9682631 | 76.8079507 | 68.1859046 | 68.0479295 | 64.0713843 |
| 75.6061284 | 62.9682631 | 76.8079507 | 69.1859046 | 67.0479295 | 64.0713843 |
| 73.6061284 | 62.9682631 | 78.8079507 | 69.1859046 | 67.0479295 | 64.0713843 |
| 70.6061284 | 62.9682631 | 80.8079507 | 68.1859046 | 67.0479295 | 64.0713843 |

|            |            |            |            |            |            |
|------------|------------|------------|------------|------------|------------|
| 70.6061284 | 62.9682631 | 80.8079507 | 67.1859046 | 67.0479295 | 64.0713843 |
| 70.6061284 | 62.9682631 | 78.8079507 | 65.1859046 | 68.0479295 | 66.0713843 |
| 70.6061284 | 61.9682631 | 78.8079507 | 64.1859046 | 69.0479295 | 66.0713843 |
| 70.6061284 | 61.9682631 | 79.8079507 | 63.1859046 | 68.0479295 | 65.0713843 |
| 70.6061284 | 61.9682631 | 79.8079507 | 63.1859046 | 68.0479295 | 64.0713843 |
| 70.6061284 | 61.9682631 | 79.8079507 | 63.1859046 | 68.0479295 | 63.0713843 |
| 71.6061284 | 62.9682631 | 80.8079507 | 63.1859046 | 68.0479295 | 63.0713843 |
| 74.6061284 | 62.9682631 | 80.8079507 | 63.1859046 | 68.0479295 | 63.0713843 |
| 75.6061284 | 63.9682631 | 80.8079507 | 62.1859046 | 68.0479295 | 63.0713843 |
| 76.6061284 | 63.9682631 | 80.8079507 | 62.1859046 | 68.0479295 | 64.0713843 |
| 78.6061284 | 62.9682631 | 80.8079507 | 62.1859046 | 69.0479295 | 64.0713843 |
| 80.6061284 | 61.9682631 | 80.8079507 | 63.1859046 | 68.0479295 | 63.0713843 |
| 80.6061284 | 61.9682631 | 80.8079507 | 65.1859046 | 68.0479295 | 63.0713843 |
| 79.6061284 | 61.9682631 | 79.8079507 | 65.1859046 | 67.0479295 | 63.0713843 |
| 79.6061284 | 61.9682631 | 79.8079507 | 64.1859046 | 67.0479295 | 63.0713843 |
| 78.6061284 | 62.9682631 | 71.8079507 | 64.1859046 | 67.0479295 | 64.0713843 |
| 78.6061284 | 63.9682631 | 70.8079507 | 64.1859046 | 67.0479295 | 65.0713843 |
| 78.6061284 | 63.9682631 | 71.8079507 | 63.1859046 | 67.0479295 | 65.0713843 |
| 78.6061284 | 64.9682631 | 72.8079507 | 63.1859046 | 67.0479295 | 65.0713843 |
| 78.6061284 | 64.9682631 | 72.8079507 | 62.1859046 | 68.0479295 | 64.0713843 |
| 78.6061284 | 64.9682631 | 73.8079507 | 61.1859046 | 69.0479295 | 64.0713843 |
| 79.6061284 | 65.9682631 | 73.8079507 | 61.1859046 | 69.0479295 | 64.0713843 |
| 80.6061284 | 64.9682631 | 73.8079507 | 61.1859046 | 70.0479295 | 63.0713843 |
| 78.6061284 | 63.9682631 | 72.8079507 | 60.1859046 | 70.0479295 | 63.0713843 |
| 74.6061284 | 63.9682631 | 72.8079507 | 60.1859046 | 69.0479295 | 63.0713843 |
| 71.6061284 | 61.9682631 | 72.8079507 | 60.1859046 | 69.0479295 | 63.0713843 |
| 66.6061284 | 60.9682631 | 69.8079507 | 61.1859046 | 70.0479295 | 63.0713843 |
| 64.6061284 | 60.9682631 | 64.8079507 | 61.1859046 | 70.0479295 | 63.0713843 |
| 64.6061284 | 60.9682631 | 64.8079507 | 61.1859046 | 70.0479295 | 63.0713843 |
| 65.6061284 | 60.9682631 | 60.8079507 | 63.1859046 | 70.0479295 | 63.0713843 |
| 66.6061284 | 60.9682631 | 60.8079507 | 63.1859046 | 70.0479295 | 63.0713843 |
| 66.6061284 | 62.9682631 | 60.8079507 | 63.1859046 | 70.0479295 | 64.0713843 |
| 66.6061284 | 63.9682631 | 58.8079507 | 63.1859046 | 70.0479295 | 64.0713843 |
| 66.6061284 | 63.9682631 | 58.8079507 | 63.1859046 | 70.0479295 | 63.0713843 |
| 66.6061284 | 62.9682631 | 56.8079507 | 63.1859046 | 70.0479295 | 63.0713843 |
| 66.6061284 | 62.9682631 | 56.8079507 | 63.1859046 | 70.0479295 | 63.0713843 |
| 66.6061284 | 60.9682631 | 54.8079507 | 65.1859046 | 70.0479295 | 63.0713843 |
| 67.6061284 | 59.9682631 | 53.8079507 | 67.1859046 | 70.0479295 | 63.0713843 |
| 67.6061284 | 59.9682631 | 53.8079507 | 70.1859046 | 70.0479295 | 63.0713843 |
| 68.6061284 | 59.9682631 | 50.8079507 | 70.1859046 | 70.0479295 | 63.0713843 |
| 67.6061284 | 60.9682631 | 50.8079507 | 71.1859046 | 70.0479295 | 64.0713843 |
| 65.6061284 | 62.9682631 | 50.8079507 | 72.1859046 | 71.0479295 | 64.0713843 |
| 64.6061284 | 63.9682631 | 49.8079507 | 72.1859046 | 71.0479295 | 64.0713843 |
| 64.6061284 | 64.9682631 | 51.8079507 | 73.1859046 | 71.0479295 | 64.0713843 |
| 64.6061284 | 64.9682631 | 51.8079507 | 75.1859046 | 71.0479295 | 66.0713843 |

|            |            |            |            |            |            |
|------------|------------|------------|------------|------------|------------|
| 62.6061284 | 64.9682631 | 56.8079507 | 75.1859046 | 70.0479295 | 66.0713843 |
| 63.6061284 | 64.9682631 | 58.8079507 | 75.1859046 | 70.0479295 | 66.0713843 |
| 64.6061284 | 64.9682631 | 62.8079507 | 72.1859046 | 70.0479295 | 66.0713843 |
| 66.6061284 | 63.9682631 | 62.8079507 | 72.1859046 | 70.0479295 | 66.0713843 |
| 66.6061284 | 63.9682631 | 64.8079507 | 70.1859046 | 70.0479295 | 67.0713843 |
| 67.6061284 | 63.9682631 | 64.8079507 | 69.1859046 | 71.0479295 | 67.0713843 |
| 67.6061284 | 63.9682631 | 65.8079507 | 69.1859046 | 71.0479295 | 67.0713843 |
| 69.6061284 | 63.9682631 | 66.8079507 | 68.1859046 | 71.0479295 | 67.0713843 |
| 70.6061284 | 64.9682631 | 68.8079507 | 68.1859046 | 69.0479295 | 66.0713843 |
| 71.6061284 | 64.9682631 | 68.8079507 | 67.1859046 | 69.0479295 | 66.0713843 |
| 71.6061284 | 64.9682631 | 69.8079507 | 65.1859046 | 69.0479295 | 66.0713843 |
| 71.6061284 | 64.9682631 | 70.8079507 | 65.1859046 | 67.0479295 | 66.0713843 |
| 71.6061284 | 63.9682631 | 71.8079507 | 65.1859046 | 67.0479295 | 64.0713843 |
| 72.6061284 | 62.9682631 | 71.8079507 | 64.1859046 | 67.0479295 | 64.0713843 |
| 71.6061284 | 61.9682631 | 71.8079507 | 64.1859046 | 66.0479295 | 64.0713843 |
| 70.6061284 | 61.9682631 | 71.8079507 | 64.1859046 | 66.0479295 | 64.0713843 |
| 69.6061284 | 61.9682631 | 71.8079507 | 64.1859046 | 67.0479295 | 64.0713843 |
| 69.6061284 | 61.9682631 | 70.8079507 | 63.1859046 | 67.0479295 | 66.0713843 |
| 69.6061284 | 61.9682631 | 67.8079507 | 60.1859046 | 67.0479295 | 66.0713843 |
| 69.6061284 | 62.9682631 | 63.8079507 | 60.1859046 | 67.0479295 | 66.0713843 |
| 70.6061284 | 62.9682631 | 63.8079507 | 57.1859046 | 67.0479295 | 66.0713843 |
| 68.6061284 | 62.9682631 | 63.8079507 | 56.1859046 | 67.0479295 | 66.0713843 |
| 67.6061284 | 62.9682631 | 62.8079507 | 56.1859046 | 68.0479295 | 66.0713843 |
| 66.6061284 | 62.9682631 | 62.8079507 | 56.1859046 | 68.0479295 | 66.0713843 |
| 65.6061284 | 61.9682631 | 64.8079507 | 56.1859046 | 68.0479295 | 67.0713843 |
| 64.6061284 | 61.9682631 | 68.8079507 | 57.1859046 | 68.0479295 | 66.0713843 |
| 64.6061284 | 62.9682631 | 68.8079507 | 57.1859046 | 68.0479295 | 66.0713843 |
| 63.6061284 | 62.9682631 | 70.8079507 | 60.1859046 | 67.0479295 | 65.0713843 |
| 64.6061284 | 62.9682631 | 73.8079507 | 60.1859046 | 67.0479295 | 66.0713843 |
| 64.6061284 | 62.9682631 | 74.8079507 | 60.1859046 | 67.0479295 | 67.0713843 |
| 64.6061284 | 62.9682631 | 74.8079507 | 60.1859046 | 67.0479295 | 67.0713843 |
| 65.6061284 | 62.9682631 | 74.8079507 | 61.1859046 | 68.0479295 | 68.0713843 |
| 65.6061284 | 62.9682631 | 76.8079507 | 63.1859046 | 69.0479295 | 68.0713843 |
| 65.6061284 | 62.9682631 | 76.8079507 | 64.1859046 | 69.0479295 | 68.0713843 |
| 65.6061284 | 61.9682631 | 77.8079507 | 64.1859046 | 69.0479295 | 68.0713843 |
| 65.6061284 | 61.9682631 | 78.8079507 | 65.1859046 | 69.0479295 | 68.0713843 |
| 65.6061284 | 61.9682631 | 78.8079507 | 69.1859046 | 69.0479295 | 68.0713843 |
| 65.6061284 | 61.9682631 | 78.8079507 | 69.1859046 | 69.0479295 | 68.0713843 |
| 67.6061284 | 62.9682631 | 77.8079507 | 74.1859046 | 68.0479295 | 68.0713843 |
| 69.6061284 | 62.9682631 | 74.8079507 | 75.1859046 | 68.0479295 | 68.0713843 |
| 70.6061284 | 62.9682631 | 74.8079507 | 77.1859046 | 68.0479295 | 68.0713843 |
| 72.6061284 | 62.9682631 | 69.8079507 | 77.1859046 | 68.0479295 | 68.0713843 |
| 74.6061284 | 62.9682631 | 69.8079507 | 77.1859046 | 68.0479295 | 68.0713843 |
| 75.6061284 | 62.9682631 | 70.8079507 | 76.1859046 | 68.0479295 | 68.0713843 |
| 75.6061284 | 62.9682631 | 70.8079507 | 76.1859046 | 68.0479295 | 68.0713843 |

|            |            |            |            |            |            |
|------------|------------|------------|------------|------------|------------|
| 73.6061284 | 63.9682631 | 70.8079507 | 74.1859046 | 68.0479295 | 68.0713843 |
| 72.6061284 | 63.9682631 | 70.8079507 | 70.1859046 | 68.0479295 | 69.0713843 |
| 71.6061284 | 64.9682631 | 70.8079507 | 69.1859046 | 68.0479295 | 71.0713843 |
| 69.6061284 | 64.9682631 | 70.8079507 | 68.1859046 | 69.0479295 | 71.0713843 |
| 69.6061284 | 63.9682631 | 71.8079507 | 67.1859046 | 69.0479295 | 75.0713843 |
| 68.6061284 | 63.9682631 | 72.8079507 | 65.1859046 | 68.0479295 | 75.0713843 |
| 68.6061284 | 62.9682631 | 72.8079507 | 63.1859046 | 69.0479295 | 75.0713843 |
| 67.6061284 | 62.9682631 | 72.8079507 | 61.1859046 | 69.0479295 | 75.0713843 |
| 68.6061284 | 62.9682631 | 72.8079507 | 61.1859046 | 69.0479295 | 75.0713843 |
| 68.6061284 | 62.9682631 | 72.8079507 | 62.1859046 | 70.0479295 | 74.0713843 |
| 66.6061284 | 63.9682631 | 72.8079507 | 62.1859046 | 71.0479295 | 74.0713843 |
| 64.6061284 | 63.9682631 | 72.8079507 | 63.1859046 | 71.0479295 | 74.0713843 |
| 64.6061284 | 64.9682631 | 72.8079507 | 64.1859046 | 71.0479295 | 75.0713843 |
| 64.6061284 | 64.9682631 | 72.8079507 | 65.1859046 | 71.0479295 | 75.0713843 |
| 63.6061284 | 65.9682631 | 70.8079507 | 65.1859046 | 71.0479295 | 75.0713843 |
| 64.6061284 | 65.9682631 | 66.8079507 | 65.1859046 | 71.0479295 | 76.0713843 |
| 64.6061284 | 65.9682631 | 65.8079507 | 63.1859046 | 71.0479295 | 74.0713843 |
| 64.6061284 | 64.9682631 | 65.8079507 | 61.1859046 | 71.0479295 | 70.0713843 |
| 63.6061284 | 63.9682631 | 65.8079507 | 60.1859046 | 71.0479295 | 70.0713843 |
| 63.6061284 | 63.9682631 | 65.8079507 | 59.1859046 | 71.0479295 | 70.0713843 |
| 64.6061284 | 62.9682631 | 65.8079507 | 58.1859046 | 71.0479295 | 69.0713843 |
| 64.6061284 | 62.9682631 | 65.8079507 | 58.1859046 | 71.0479295 | 68.0713843 |
| 64.6061284 | 63.9682631 | 65.8079507 | 58.1859046 | 72.0479295 | 68.0713843 |
| 65.6061284 | 64.9682631 | 65.8079507 | 58.1859046 | 72.0479295 | 68.0713843 |
| 64.6061284 | 66.9682631 | 66.8079507 | 58.1859046 | 73.0479295 | 68.0713843 |
| 63.6061284 | 66.9682631 | 66.8079507 | 58.1859046 | 71.0479295 | 68.0713843 |
| 64.6061284 | 66.9682631 | 66.8079507 | 58.1859046 | 71.0479295 | 69.0713843 |
| 64.6061284 | 66.9682631 | 66.8079507 | 58.1859046 | 69.0479295 | 69.0713843 |
| 63.6061284 | 67.9682631 | 66.8079507 | 58.1859046 | 69.0479295 | 70.0713843 |
| 63.6061284 | 67.9682631 | 66.8079507 | 60.1859046 | 69.0479295 | 70.0713843 |
| 64.6061284 | 67.9682631 | 66.8079507 | 61.1859046 | 69.0479295 | 69.0713843 |
| 65.6061284 | 67.9682631 | 66.8079507 | 60.1859046 | 69.0479295 | 69.0713843 |
| 66.6061284 | 67.9682631 | 67.8079507 | 61.1859046 | 69.0479295 | 69.0713843 |
| 66.6061284 | 67.9682631 | 67.8079507 | 61.1859046 | 69.0479295 | 69.0713843 |
| 67.6061284 | 67.9682631 | 67.8079507 | 60.1859046 | 69.0479295 | 69.0713843 |
| 66.6061284 | 66.9682631 | 67.8079507 | 59.1859046 | 69.0479295 | 69.0713843 |
| 66.6061284 | 69.9682631 | 68.8079507 | 58.1859046 | 69.0479295 | 69.0713843 |
| 67.6061284 | 71.9682631 | 68.8079507 | 58.1859046 | 68.0479295 | 70.0713843 |
| 67.6061284 | 72.9682631 | 70.8079507 | 57.1859046 | 68.0479295 | 70.0713843 |
| 67.6061284 | 73.9682631 | 70.8079507 | 57.1859046 | 67.0479295 | 70.0713843 |
| 69.6061284 | 73.9682631 | 70.8079507 | 57.1859046 | 68.0479295 | 70.0713843 |
| 69.6061284 | 73.9682631 | 70.8079507 | 58.1859046 | 68.0479295 | 69.0713843 |
| 67.6061284 | 73.9682631 | 71.8079507 | 58.1859046 | 69.0479295 | 69.0713843 |
| 65.6061284 | 73.9682631 | 72.8079507 | 57.1859046 | 68.0479295 | 69.0713843 |
| 64.6061284 | 71.9682631 | 72.8079507 | 57.1859046 | 68.0479295 | 69.0713843 |

|            |            |            |            |            |            |
|------------|------------|------------|------------|------------|------------|
| 63.6061284 | 65.9682631 | 71.8079507 | 56.1859046 | 68.0479295 | 69.0713843 |
| 63.6061284 | 65.9682631 | 71.8079507 | 56.1859046 | 68.0479295 | 69.0713843 |
| 67.6061284 | 62.9682631 | 71.8079507 | 57.1859046 | 68.0479295 | 69.0713843 |
| 67.6061284 | 59.9682631 | 71.8079507 | 59.1859046 | 67.0479295 | 68.0713843 |
| 67.6061284 | 57.9682631 | 71.8079507 | 60.1859046 | 67.0479295 | 81.0713843 |
| 70.6061284 | 55.9682631 | 71.8079507 | 60.1859046 | 67.0479295 | 68.2630288 |
| 71.6061284 | 54.9682631 | 71.8079507 | 59.1859046 | 67.0479295 | 68.535756  |
| 70.6061284 | 54.9682631 | 67.8079507 | 58.1859046 | 67.0479295 | 80.0713843 |
| 69.6061284 | 54.9682631 | 68.8079507 | 57.1859046 | 66.0479295 | 80.0713843 |
| 69.6061284 | 56.9682631 | 68.8079507 | 57.1859046 | 66.0479295 | 70.0713843 |
| 68.6061284 | 56.9682631 | 68.8079507 | 57.1859046 | 65.0479295 | 70.0713843 |
| 68.6061284 | 58.9682631 | 70.8079507 | 57.1859046 | 65.0479295 | 70.0713843 |
| 65.6061284 | 59.9682631 | 70.8079507 | 58.1859046 | 65.0479295 | 70.0713843 |
| 62.6061284 | 61.9682631 | 68.8079507 | 59.1859046 | 65.0479295 | 64.0713843 |
| 61.6061284 | 61.9682631 | 68.8079507 | 61.1859046 | 66.0479295 | 65.0713843 |
| 62.6061284 | 61.9682631 | 68.8079507 | 61.1859046 | 66.0479295 | 65.0713843 |
| 62.6061284 | 61.9682631 | 68.8079507 | 61.1859046 | 66.0479295 | 65.0713843 |
| 62.6061284 | 62.9682631 | 68.8079507 | 61.1859046 | 67.0479295 | 65.0713843 |
| 61.6061284 | 62.9682631 | 71.8079507 | 62.1859046 | 66.0479295 | 65.0713843 |
| 61.6061284 | 63.9682631 | 71.8079507 | 62.1859046 | 66.0479295 | 65.0713843 |
| 59.6061284 | 63.9682631 | 71.8079507 | 63.1859046 | 66.0479295 | 65.0713843 |
| 59.6061284 | 64.9682631 | 71.8079507 | 63.1859046 | 66.0479295 | 65.0713843 |
| 59.6061284 | 64.9682631 | 71.8079507 | 65.1859046 | 67.0479295 | 65.0713843 |
| 60.6061284 | 65.9682631 | 71.8079507 | 66.1859046 | 67.0479295 | 64.0713843 |
| 62.6061284 | 66.9682631 | 71.8079507 | 65.1859046 | 67.0479295 | 64.0713843 |
| 62.6061284 | 66.9682631 | 72.8079507 | 64.1859046 | 67.0479295 | 65.0713843 |
| 62.6061284 | 66.9682631 | 71.8079507 | 64.1859046 | 67.0479295 | 65.0713843 |
| 60.6061284 | 66.9682631 | 71.8079507 | 64.1859046 | 67.0479295 | 65.0713843 |
| 60.6061284 | 66.9682631 | 71.8079507 | 65.1859046 | 67.0479295 | 65.0713843 |
| 59.6061284 | 67.9682631 | 70.8079507 | 67.1859046 | 67.0479295 | 66.0713843 |
| 60.6061284 | 67.9682631 | 71.8079507 | 67.1859046 | 67.0479295 | 68.0713843 |
| 60.6061284 | 68.9682631 | 71.8079507 | 67.1859046 | 68.0479295 | 69.0713843 |
| 60.6061284 | 69.9682631 | 69.8079507 | 68.1859046 | 67.0479295 | 70.0713843 |
| 60.6061284 | 68.9682631 | 64.8079507 | 68.1859046 | 67.0479295 | 71.0713843 |
| 57.6061284 | 68.9682631 | 64.8079507 | 67.1859046 | 66.0479295 | 73.0713843 |
| 55.6061284 | 68.9682631 | 63.8079507 | 65.1859046 | 67.0479295 | 69.0713843 |
| 55.6061284 | 68.9682631 | 63.8079507 | 64.1859046 | 67.0479295 | 63.0713843 |
| 54.6061284 | 68.9682631 | 64.8079507 | 63.1859046 | 66.0479295 | 63.0713843 |
| 53.6061284 | 68.9682631 | 64.8079507 | 63.1859046 | 66.0479295 | 60.0713843 |
| 53.6061284 | 68.9682631 | 64.8079507 | 63.1859046 | 66.0479295 | 60.0713843 |
| 55.6061284 | 68.9682631 | 64.8079507 | 65.1859046 | 67.0479295 | 60.0713843 |
| 58.6061284 | 68.9682631 | 64.8079507 | 66.1859046 | 67.0479295 | 61.0713843 |
| 58.6061284 | 66.9682631 | 64.8079507 | 66.1859046 | 67.0479295 | 62.0713843 |
| 58.6061284 | 65.9682631 | 66.8079507 | 66.1859046 | 68.0479295 | 63.0713843 |
| 59.6061284 | 65.9682631 | 69.8079507 | 64.1859046 | 68.0479295 | 65.0713843 |

|            |            |            |            |            |            |
|------------|------------|------------|------------|------------|------------|
| 59.6061284 | 65.9682631 | 69.8079507 | 63.1859046 | 69.0479295 | 65.0713843 |
| 59.6061284 | 65.9682631 | 69.8079507 | 64.1859046 | 68.0479295 | 67.0713843 |
| 68.6061284 | 64.9682631 | 69.8079507 | 65.1859046 | 68.0479295 | 67.0713843 |
| 73.6061284 | 63.9682631 | 70.8079507 | 66.1859046 | 69.0479295 | 68.0713843 |
| 73.6061284 | 63.9682631 | 70.8079507 | 67.1859046 | 69.0479295 | 69.0713843 |
| 74.6061284 | 62.9682631 | 70.8079507 | 68.1859046 | 69.0479295 | 69.0713843 |
| 72.6061284 | 62.9682631 | 70.8079507 | 67.1859046 | 69.0479295 | 69.0713843 |
| 71.6061284 | 63.9682631 | 70.8079507 | 66.1859046 | 69.0479295 | 69.0713843 |
| 71.6061284 | 63.9682631 | 70.8079507 | 66.1859046 | 69.0479295 | 66.0713843 |
| 72.6061284 | 65.9682631 | 70.8079507 | 65.1859046 | 69.0479295 | 66.0713843 |
| 72.6061284 | 65.9682631 | 70.8079507 | 65.1859046 | 69.0479295 | 66.0713843 |
| 77.6061284 | 65.9682631 | 70.8079507 | 64.1859046 | 69.0479295 | 65.0713843 |
| 77.6061284 | 66.9682631 | 70.8079507 | 64.1859046 | 68.0479295 | 65.0713843 |
| 76.6061284 | 68.9682631 | 71.8079507 | 65.1859046 | 67.0479295 | 66.0713843 |
| 76.6061284 | 68.9682631 | 72.8079507 | 67.1859046 | 67.0479295 | 66.0713843 |
| 75.6061284 | 68.9682631 | 73.8079507 | 70.1859046 | 68.0479295 | 65.0713843 |
| 73.6061284 | 67.9682631 | 75.8079507 | 70.1859046 | 68.0479295 | 66.0713843 |
| 72.6061284 | 64.9682631 | 75.8079507 | 70.1859046 | 67.0479295 | 66.0713843 |
| 71.6061284 | 63.9682631 | 76.8079507 | 69.1859046 | 67.0479295 | 68.0713843 |
| 68.6061284 | 61.9682631 | 76.8079507 | 67.1859046 | 67.0479295 | 69.0713843 |
| 66.6061284 | 61.9682631 | 70.8079507 | 67.1859046 | 67.0479295 | 71.0713843 |
| 64.6061284 | 61.9682631 | 65.8079507 | 67.1859046 | 67.0479295 | 71.0713843 |
| 63.6061284 | 61.9682631 | 63.8079507 | 67.1859046 | 67.0479295 | 69.0713843 |
| 63.6061284 | 61.9682631 | 63.8079507 | 67.1859046 | 67.0479295 | 69.0713843 |
| 63.6061284 | 60.9682631 | 63.8079507 | 67.1859046 | 68.0479295 | 69.0713843 |
| 64.6061284 | 59.9682631 | 63.8079507 | 67.1859046 | 68.0479295 | 72.0713843 |
| 66.6061284 | 59.9682631 | 65.8079507 | 68.1859046 | 68.0479295 | 73.0713843 |
| 68.6061284 | 59.9682631 | 65.8079507 | 68.1859046 | 69.0479295 | 73.0713843 |
| 68.6061284 | 58.9682631 | 65.8079507 | 68.1859046 | 70.0479295 | 72.0713843 |
| 68.6061284 | 58.9682631 | 65.8079507 | 68.1859046 | 70.0479295 | 72.0713843 |
| 68.6061284 | 58.9682631 | 65.8079507 | 68.1859046 | 69.0479295 | 72.0713843 |
| 68.6061284 | 60.9682631 | 65.8079507 | 68.1859046 | 69.0479295 | 71.0713843 |
| 68.6061284 | 63.9682631 | 65.8079507 | 68.1859046 | 69.0479295 | 71.0713843 |
| 67.6061284 | 57.9682631 | 65.8079507 | 68.1859046 | 69.0479295 | 68.0713843 |
| 65.6061284 | 57.9682631 | 65.8079507 | 68.1859046 | 69.0479295 | 67.0713843 |
| 64.6061284 | 57.9682631 | 65.8079507 | 67.1859046 | 69.0479295 | 67.0713843 |
| 63.6061284 | 57.9682631 | 64.8079507 | 67.1859046 | 69.0479295 | 66.0713843 |
| 63.6061284 | 57.9682631 | 64.8079507 | 67.1859046 | 70.0479295 | 65.0713843 |
| 65.6061284 | 57.9682631 | 64.8079507 | 73.1859046 | 70.0479295 | 65.0713843 |
| 66.6061284 | 56.9682631 | 63.8079507 | 74.1859046 | 70.0479295 | 66.0713843 |
| 67.6061284 | 56.9682631 | 63.8079507 | 75.1859046 | 70.0479295 | 66.0713843 |
| 69.6061284 | 56.9682631 | 64.8079507 | 76.1859046 | 71.0479295 | 66.0713843 |
| 69.6061284 | 56.9682631 | 74.8079507 | 76.1859046 | 71.0479295 | 67.0713843 |
| 69.6061284 | 56.9682631 | 74.8079507 | 76.1859046 | 71.0479295 | 68.0713843 |
| 69.6061284 | 63.9682631 | 77.8079507 | 76.1859046 | 71.0479295 | 68.0713843 |

|            |            |            |            |            |            |
|------------|------------|------------|------------|------------|------------|
| 69.6061284 | 64.9682631 | 77.8079507 | 76.1859046 | 70.0479295 | 68.0713843 |
| 68.6061284 | 60.9682631 | 77.8079507 | 76.1859046 | 70.0479295 | 67.0713843 |
| 67.6061284 | 58.9682631 | 78.8079507 | 76.1859046 | 70.0479295 | 67.0713843 |
| 67.6061284 | 57.9682631 | 78.8079507 | 76.1859046 | 70.0479295 | 67.0713843 |
| 66.6061284 | 57.9682631 | 77.8079507 | 76.1859046 | 70.0479295 | 66.0713843 |
| 65.6061284 | 58.9682631 | 77.8079507 | 76.1859046 | 71.0479295 | 66.0713843 |
| 65.6061284 | 58.9682631 | 77.8079507 | 76.1859046 | 71.0479295 | 66.0713843 |
| 66.6061284 | 59.9682631 | 75.8079507 | 75.1859046 | 72.0479295 | 67.0713843 |
| 65.6061284 | 59.9682631 | 73.8079507 | 75.1859046 | 73.0479295 | 68.0713843 |
| 66.6061284 | 59.9682631 | 73.8079507 | 75.1859046 | 73.0479295 | 70.0713843 |
| 66.6061284 | 59.9682631 | 72.8079507 | 74.1859046 | 73.0479295 | 72.0713843 |
| 65.6061284 | 60.9682631 | 72.8079507 | 74.1859046 | 73.0479295 | 74.0713843 |
| 64.6061284 | 59.9682631 | 72.8079507 | 75.1859046 | 73.0479295 | 75.0713843 |
| 65.6061284 | 59.9682631 | 69.8079507 | 76.1859046 | 73.0479295 | 74.0713843 |
| 64.6061284 | 58.9682631 | 67.8079507 | 77.1859046 | 72.0479295 | 74.0713843 |
| 64.6061284 | 63.9682631 | 65.8079507 | 77.1859046 | 71.0479295 | 73.0713843 |
| 64.6061284 | 67.9682631 | 65.8079507 | 76.1859046 | 71.0479295 | 73.0713843 |
| 63.6061284 | 71.9682631 | 65.8079507 | 76.1859046 | 70.0479295 | 73.0713843 |
| 63.6061284 | 75.9682631 | 65.8079507 | 76.1859046 | 70.0479295 | 73.0713843 |
| 63.6061284 | 75.9682631 | 65.8079507 | 76.1859046 | 70.0479295 | 73.0713843 |
| 62.6061284 | 70.9682631 | 64.8079507 | 73.1859046 | 70.0479295 | 74.0713843 |
| 62.6061284 | 72.9682631 | 63.8079507 | 73.1859046 | 70.0479295 | 74.0713843 |

| Activities | average of a behavior | moving average |
|------------|-----------------------|----------------|
|            | 73.6828782            | 63             |
|            | 74.1114496            | 63             |
|            | 74.2543067            | 63             |
|            | 73.9685925            | 63             |
|            | 74.1114496            | 63             |
|            | 74.2543067            | 63             |
|            | 74.3971639            | 63             |
|            | 73.6828782            | 63             |
|            | 73.6828782            | 63             |
|            | 74.6828782            | 63             |
|            | 74.540021             | 63 75.5598105  |
|            | 74.3971639            | 63 75.6057443  |
|            | 74.8257353            | 63 75.5757565  |
|            | 75.2543067            | 63 75.5570783  |
|            | 75.540021             | 63 75.5395905  |
|            | 76.1114496            | 63 75.5429361  |
|            | 76.2543067            | 63 75.5778293  |
|            | 75.8257353            | 63 75.6436748  |
|            | 76.1114496            | 63 75.701187   |
|            | 76.1114496            | 63 75.7789374  |
|            | 75.8257353            | 63 75.8578782  |
|            | 76.8257353            | 63 75.9543067  |
|            | 77.2543067            | 63 76.040021   |
|            | 76.9685925            | 63 76.1364496  |
|            | 76.8257353            | 63 76.2515726  |
|            | 76.8257353            | 63 76.3568742  |
|            | 76.3971639            | 63 76.4523543  |
|            | 76.540021             | 63 76.531763   |
|            | 76.3971639            | 63 76.6134039  |
|            | 76.8257353            | 63 76.6919197  |
|            | 77.3971639            | 63 76.7423106  |
|            | 76.9685925            | 63 76.7900228  |
|            | 77.2543067            | 63 76.8538066  |
|            | 76.9685925            | 63 76.903751   |
|            | 76.9685925            | 63 76.9492311  |
|            | 77.3971639            | 63 76.9906934  |
|            | 77.9685925            | 63 77.00537    |
|            | 76.9685925            | 63 76.9977251  |
|            | 77.1114496            | 63 77.0039195  |
|            | 76.8257353            | 63 77.0092211  |
|            | 77.540021             | 63 77.0238977  |
|            | 77.540021             | 63 77.0582171  |



|              |    |            |
|--------------|----|------------|
| 78.1114496   | 63 | 77.0737865 |
| 78.5735122   | 63 | 77.1005166 |
| 78.3235122   | 63 | 77.1343896 |
| 78.0735122   | 63 | 77.1812091 |
| 77.5735122   | 63 | 77.2186535 |
| 76.9485122   | 63 | 77.2026622 |
| 76.8235122   | 63 | 77.1795838 |
| 76.6985122   | 63 | 77.1600769 |
| 76.4485122   | 63 | 77.1693963 |
| 76.9485122   | 63 | 77.155055  |
| 76.8235122   | 63 | 77.151428  |
| 77.0735122   | 63 | 77.1437831 |
| 77.1985122   | 63 | 77.1439406 |
| 76.6985122   | 63 | 77.144098  |
| 75.9485122   | 63 | 77.1085411 |
| 76.0735122   | 63 | 77.0586985 |
| 76.3235122   | 63 | 77.0366337 |
| 76.6985122   | 63 | 77.0082197 |
| 77.1985122   | 63 | 76.9952819 |
| 77.4485122   | 63 | 76.9672647 |
| 78.3235122   | 63 | 76.9364697 |
| 78.3235122   | 63 | 76.8941668 |
| 78.6985122   | 63 | 76.8403124 |
| 78.3235122   | 63 | 76.7899301 |
| 75.7575116   | 63 | 76.7402423 |
| 75.6168866   | 63 | 76.7058323 |
| 75.6168866   | 63 | 76.7009362 |
| 77.1985122   | 63 | 76.699165  |
| 76.8235122   | 63 | 76.6810745 |
| 76.8235122   | 63 | 76.6914561 |
| 76.9485122   | 63 | 76.6893378 |
| 76.9748892   | 63 | 76.6792333 |
| 76.9748892   | 63 | 76.660101  |
| 75.9748892   | 63 | 76.6128438 |
| 75.9748892   | 63 | 76.5919754 |
| 76.0860003   | 63 | 76.5926349 |
| 75.9748892   | 63 | 76.581836  |
| 76.3082225   | 63 | 76.5620093 |
| 76.4193336   | 63 | 76.5300298 |
| 76.3082225   | 63 | 76.4744392 |
| 92314.16.9a. | 63 | 76.4102813 |
| BEFORE 1     | 63 | 76.3192483 |
| BEFORE 2     | 63 | 76.2332153 |
| BEFORE 3     | 63 | 76.1403073 |
| BEFORE 4     | 63 | 76.0642744 |

|           |            |    |            |
|-----------|------------|----|------------|
| BEFORE 5  | 76.7526669 | 63 | 76.0498914 |
| BEFORE 6  | 76.7526669 | 63 | 76.0440241 |
| BEFORE 7  | 75.9748892 | 63 | 76.0356567 |
| BEFORE 8  | 76.8637781 | 63 | 76.0052487 |
| BEFORE 9  | 76.8637781 | 63 | 75.9942158 |
| BEFORE 10 | 76.4193336 | 63 | 75.9981828 |
| BEFORE 11 | 76.3082225 | 63 | 76.0140248 |
| BEFORE 12 | 75.3082225 | 63 | 76.0442074 |
| BEFORE 13 | 75.8637781 | 63 | 76.08439   |
| BEFORE 14 | 75.9748892 | 63 | 76.1620726 |
| BEFORE 15 | 75.6415558 | 63 | 76.2472552 |
| BEFORE 16 | 75.5304447 | 63 | 76.32966   |
| BEFORE 17 | 75.4193336 | 63 | 76.4073426 |
| BEFORE 18 | 74.9748892 | 63 | 76.4691919 |
| BEFORE 19 | 74.8821932 | 63 | 76.5107634 |
| BEFORE 20 | 74.6821932 | 63 | 76.5201127 |
| BEFORE 21 | 74.8821932 | 63 | 76.5366842 |
| BEFORE 22 | 74.9821932 | 63 | 76.5482557 |
| BEFORE 23 | 75.2821932 | 63 | 76.5701049 |
| BEFORE 24 | 75.1821932 | 63 | 76.5800097 |
| BEFORE 25 | 75.3821932 | 63 | 76.5871368 |
| BEFORE 26 | 75.2821932 | 63 | 76.5828749 |
| BEFORE 27 | 75.9821932 | 63 | 76.5661131 |
| BEFORE 28 | 76.3821932 | 63 | 76.5537957 |
| BEFORE 29 | 76.9821932 | 63 | 76.5292561 |
| BEFORE 30 | 77.5821932 | 63 | 76.5047165 |
| BEFORE 31 | 78.1821932 | 63 | 76.5062879 |
| BEFORE 32 | 78.5821932 | 63 | 76.5181372 |
| BEFORE 33 | 79.0821932 | 63 | 76.5474865 |
| BEFORE 34 | 79.3821932 | 63 | 76.5604469 |
| BEFORE 35 | 79.3821932 | 63 | 76.5338312 |
| BEFORE 36 | 79.0821932 | 63 | 76.5127988 |
| BEFORE 37 | 78.7821932 | 63 | 76.4917942 |
| BEFORE 38 | 78.0821932 | 63 | 76.4680674 |
| BEFORE 39 | 76.6821932 | 63 | 76.4637016 |
| BEFORE 40 | 77.0821932 | 63 | 76.5112016 |
| BEFORE 41 | 76.8821932 | 63 | 76.5637016 |
| BEFORE 42 | 77.1821932 | 63 | 76.5912016 |
| BEFORE 43 | 76.4821932 | 63 | 76.6012016 |
| BEFORE 44 | 76.4821932 | 63 | 76.6012016 |
| BEFORE 45 | 76.5821932 | 63 | 76.5962016 |
| BEFORE 46 | 76.0821932 | 63 | 76.5912016 |
| BEFORE 47 | 75.4821932 | 63 | 76.5837016 |
| BEFORE 48 | 75.8821932 | 63 | 76.5587016 |
| BEFORE 49 | 75.8821932 | 63 | 76.5037016 |

|           |            |    |            |
|-----------|------------|----|------------|
| BEFORE 50 | 76.4821932 | 63 | 76.3987016 |
| BEFORE 51 | 76.7821932 | 63 | 76.2637016 |
| BEFORE 52 | 76.4821932 | 63 | 76.1012016 |
| BEFORE 53 | 76.3821932 | 63 | 75.9637016 |
| BEFORE 54 | 74.9102608 | 63 | 75.8537016 |
| BEFORE 55 | 74.8002608 | 63 | 75.7587016 |
| BEFORE 56 | 74.6902608 | 63 | 75.6787016 |
| BEFORE 57 | 74.4702608 | 63 | 75.5661533 |
| BEFORE 58 | 74.8002608 | 63 | 75.450355  |
| BEFORE 59 | 76.7821932 | 63 | 75.3548067 |
| BEFORE 60 | 76.7821932 | 63 | 75.2942584 |
| BEFORE 61 | 75.9821932 | 63 | 75.2457101 |
| BEFORE 62 | 75.3821932 | 63 | 75.2232101 |
| BEFORE 63 | 75.2821932 | 63 | 75.1932101 |
| BEFORE 64 | 74.9821932 | 63 | 75.1607101 |
| BEFORE 65 | 75.1821932 | 63 | 75.0932101 |
| BEFORE 66 | 74.9821932 | 63 | 75.0132101 |
| BEFORE 67 | 74.9821932 | 63 | 74.9732101 |
| BEFORE 68 | 74.1821932 | 63 | 74.9582101 |
| BEFORE 69 | 72.7821932 | 63 | 74.9432101 |
| BEFORE 70 | 72.1821932 | 63 | 74.9282101 |
| BEFORE 71 | 71.6821932 | 63 | 74.8932101 |
| BEFORE 72 | 73.0821932 | 63 | 74.8407101 |
| BEFORE 73 | 74.6821932 | 63 | 74.7932101 |
| BEFORE 74 | 75.5821932 | 63 | 74.7457101 |
| BEFORE 75 | 76.1821932 | 63 | 74.7300084 |
| BEFORE 76 | 74.5802608 | 63 | 74.7170567 |
| BEFORE 77 | 74.1502608 | 63 | 74.706855  |
| BEFORE 78 | 74.2602608 | 63 | 74.6971533 |
| BEFORE 79 | 74.2602608 | 63 | 74.6867016 |
| BEFORE 80 | 75.1402608 | 63 | 74.6392016 |
| BEFORE 81 | 75.9821932 | 63 | 74.5992016 |
| BEFORE 82 | 75.9821932 | 63 | 74.5717016 |
| BEFORE 83 | 75.1821932 | 63 | 74.5642016 |
| BEFORE 84 | 73.7821932 | 63 | 74.5467016 |
| BEFORE 85 | 73.3821932 | 63 | 74.5317016 |
| BEFORE 86 | 74.4821932 | 63 | 74.5167016 |
| BEFORE 87 | 74.8821932 | 63 | 74.5267016 |
| BEFORE 88 | 75.2821932 | 63 | 74.5517016 |
| BEFORE 89 | 75.2821932 | 63 | 74.6117016 |
| BEFORE 90 | 75.0821932 | 63 | 74.7067016 |
| BEFORE 91 | 74.6821932 | 63 | 74.8217016 |
| BEFORE 92 | 74.5821932 | 63 | 74.9467016 |
| BEFORE 93 | 74.4821932 | 63 | 75.0217016 |
| BEFORE 94 | 74.2821932 | 63 | 75.0567016 |

|            |            |    |            |
|------------|------------|----|------------|
| BEFORE 95  | 74.2821932 | 63 | 75.0692016 |
| BEFORE 96  | 74.2821932 | 63 | 75.0667016 |
| BEFORE 97  | 74.0821932 | 63 | 75.10175   |
| BEFORE 98  | 74.3821932 | 63 | 75.1600483 |
| BEFORE 99  | 74.8821932 | 63 | 75.2105966 |
| BEFORE 100 | 75.1821932 | 63 | 75.2611449 |
| BEFORE 101 | 74.8821932 | 63 | 75.2921932 |
| BEFORE 102 | 75.0821932 | 63 | 75.2996932 |
| BEFORE 103 | 74.5821932 | 63 | 75.3096932 |
| BEFORE 104 | 74.3821932 | 63 | 75.3596932 |
| BEFORE 105 | 74.5821932 | 63 | 75.4571932 |
| BEFORE 106 | 75.3821932 | 63 | 75.5646932 |
| BEFORE 107 | 75.9821932 | 63 | 75.6321932 |
| BEFORE 108 | 76.5821932 | 63 | 75.6846932 |
| BEFORE 109 | 76.5821932 | 63 | 75.7146932 |
| BEFORE 110 | 76.7821932 | 63 | 75.6979699 |
| BEFORE 111 | 76.6821932 | 63 | 75.6834965 |
| BEFORE 112 | 76.0821932 | 63 | 75.6872732 |
| BEFORE 113 | 76.0821932 | 63 | 75.7197732 |
| BEFORE 114 | 76.0821932 | 63 | 75.7497732 |
| BEFORE 115 | 76.0821932 | 63 | 75.7772732 |
| BEFORE 116 | 75.9821932 | 63 | 75.7947732 |
| BEFORE 117 | 76.4821932 | 63 | 75.8122732 |
| BEFORE 118 | 76.2821932 | 63 | 75.8247732 |
| BEFORE 119 | 76.2821932 | 63 | 75.8297732 |
| BEFORE 120 | 76.3821932 | 63 | 75.8222732 |
| BEFORE 121 | 76.2821932 | 63 | 75.8022732 |
| BEFORE 122 | 76.3821932 | 63 | 75.7847732 |
| BEFORE 123 | 77.1821932 | 63 | 75.7672732 |
| BEFORE 124 | 77.6821932 | 63 | 75.7647732 |
| BEFORE 125 | 77.6821932 | 63 | 75.7697732 |
| BEFORE 126 | 77.1821932 | 63 | 75.7672732 |
| BEFORE 127 | 76.9821932 | 63 | 75.7322732 |
| BEFORE 128 | 76.4821932 | 63 | 75.6897732 |
| BEFORE 129 | 74.6132597 | 63 | 75.6372732 |
| BEFORE 130 | 74.5032597 | 63 | 75.5847732 |
| BEFORE 131 | 74.8332597 | 63 | 75.5322732 |
| BEFORE 132 | 75.8821932 | 63 | 75.4947732 |
| BEFORE 133 | 75.6821932 | 63 | 75.4772732 |
| BEFORE 134 | 75.3821932 | 63 | 75.4622732 |
| BEFORE 135 | 74.9821932 | 63 | 75.4472732 |
| BEFORE 136 | 74.9821932 | 63 | 75.4397732 |
| BEFORE 137 | 74.5821932 | 63 | 75.4497732 |
| BEFORE 138 | 74.5821932 | 63 | 75.4822732 |
| BEFORE 139 | 74.5821932 | 63 | 75.5197732 |

|            |            |    |            |
|------------|------------|----|------------|
| BEFORE 140 | 74.3821932 | 63 | 75.5722732 |
| BEFORE 141 | 74.1821932 | 63 | 75.6222732 |
| BEFORE 142 | 74.3821932 | 63 | 75.6697732 |
| BEFORE 143 | 74.4821932 | 63 | 75.7047732 |
| BEFORE 144 | 74.5821932 | 63 | 75.7197732 |
| BEFORE 145 | 74.4821932 | 63 | 75.6997732 |
| BEFORE 146 | 73.9821932 | 63 | 75.6947732 |
| BEFORE 147 | 74.2821932 | 63 | 75.7072732 |
| BEFORE 148 | 74.4821932 | 63 | 75.7122732 |
| BEFORE 149 | 74.4821932 | 63 | 75.7297732 |
| BEFORE 150 | 74.6821932 | 63 | 75.7814965 |
| BEFORE 151 | 75.1821932 | 63 | 75.8609699 |
| BEFORE 152 | 75.3821932 | 63 | 75.9246932 |
| BEFORE 153 | 75.4821932 | 63 | 75.9721932 |
| BEFORE 154 | 75.4821932 | 63 | 76.0121932 |
| BEFORE 155 | 75.7821932 | 63 | 76.0571932 |
| BEFORE 156 | 76.3821932 | 63 | 76.1221932 |
| BEFORE 157 | 77.7821932 | 63 | 76.1971932 |
| BEFORE 158 | 77.7821932 | 63 | 76.2746932 |
| BEFORE 159 | 78.3821932 | 63 | 76.3396932 |
| BEFORE 160 | 78.3821932 | 63 | 76.3996932 |
| BEFORE 161 | 78.1821932 | 63 | 76.4521932 |
| BEFORE 162 | 77.7821932 | 63 | 76.4946932 |
| BEFORE 163 | 77.7821932 | 63 | 76.5271932 |
| BEFORE 164 | 76.8821932 | 63 | 76.5671932 |
| BEFORE 165 | 77.4821932 | 63 | 76.5996932 |
| BEFORE 166 | 77.6821932 | 63 | 76.6496932 |
| BEFORE 167 | 77.1821932 | 63 | 76.7196932 |
| BEFORE 168 | 77.1821932 | 63 | 76.7896932 |
| BEFORE 169 | 76.6821932 | 63 | 76.8521932 |
| BEFORE 170 | 77.6821932 | 63 | 76.9046932 |
| BEFORE 171 | 77.3821932 | 63 | 76.9646932 |
| BEFORE 172 | 77.7821932 | 63 | 77.0046932 |
| BEFORE 173 | 77.2821932 | 63 | 77.0396932 |
| BEFORE 174 | 77.1821932 | 63 | 77.0596932 |
| BEFORE 175 | 77.5821932 | 63 | 77.0646932 |
| BEFORE 176 | 77.9821932 | 63 | 77.0396932 |
| BEFORE 177 | 77.6821932 | 63 | 76.9696932 |
| BEFORE 178 | 77.1821932 | 63 | 76.8596932 |
| BEFORE 179 | 76.9821932 | 63 | 76.7446932 |
| BEFORE 180 | 76.4821932 | 63 | 76.6121932 |
| BEFORE 181 | 75.8821932 | 63 | 76.4946932 |
| BEFORE 182 | 75.6821932 | 63 | 76.3821932 |
| BEFORE 183 | 76.0821932 | 63 | 76.2771932 |
| BEFORE 184 | 75.8821932 | 63 | 76.1646932 |

|            |            |    |            |
|------------|------------|----|------------|
| BEFORE 185 | 76.4821932 | 63 | 76.0696932 |
| BEFORE 186 | 76.7821932 | 63 | 75.9621932 |
| BEFORE 187 | 77.0821932 | 63 | 75.8471932 |
| BEFORE 188 | 76.9821932 | 63 | 75.7396932 |
| BEFORE 189 | 76.5821932 | 63 | 75.6371932 |
| BEFORE 190 | 77.0821932 | 63 | 75.5571932 |
| BEFORE 191 | 76.7821932 | 63 | 75.4546932 |
| BEFORE 192 | 76.7821932 | 63 | 75.3596932 |
| BEFORE 193 | 76.2821932 | 63 | 75.2496932 |
| BEFORE 194 | 75.6821932 | 63 | 75.1446932 |
| BEFORE 195 | 74.7821932 | 63 | 75.0471932 |
| BEFORE 196 | 73.5821932 | 63 | 74.9321932 |
| BEFORE 197 | 73.3821932 | 63 | 74.8221932 |
| BEFORE 198 | 73.1821932 | 63 | 74.7196932 |
| BEFORE 199 | 73.0821932 | 63 | 74.6371932 |
| BEFORE 200 | 73.6821932 | 63 | 74.5496932 |
| BEFORE 201 | 73.6821932 | 63 | 74.4696932 |
| BEFORE 202 | 73.5821932 | 63 | 74.3871932 |
| BEFORE 203 | 73.2821932 | 63 | 74.3096932 |
| BEFORE 204 | 73.0821932 | 63 | 74.2096932 |
| BEFORE 205 | 73.1821932 | 63 | 74.1121932 |
| BEFORE 206 | 73.0821932 | 63 | 74.0046932 |
| BEFORE 207 | 72.8821932 | 63 | 73.8921932 |
| BEFORE 208 | 73.0821932 | 63 | 73.7796932 |
| BEFORE 209 | 73.4821932 | 63 | 73.6746932 |
| BEFORE 210 | 73.5821932 | 63 | 73.5846932 |
| BEFORE 211 | 73.5821932 | 63 | 73.4871932 |
| BEFORE 212 | 73.3821932 | 63 | 73.3921932 |
| BEFORE 213 | 73.0821932 | 63 | 73.2946932 |
| BEFORE 214 | 73.2821932 | 63 | 73.2021932 |
| BEFORE 215 | 72.9821932 | 63 | 73.1296932 |
| BEFORE 216 | 73.5821932 | 63 | 73.0746932 |
| BEFORE 217 | 73.5821932 | 63 | 73.0371932 |
| BEFORE 218 | 73.8821932 | 63 | 73.0096932 |
| BEFORE 219 | 73.4821932 | 63 | 72.9996932 |
| BEFORE 220 | 73.2821932 | 63 | 73.0071932 |
| BEFORE 221 | 72.5821932 | 63 | 73.0096932 |
| BEFORE 222 | 72.5821932 | 63 | 73.0271932 |
| BEFORE 223 | 72.0821932 | 63 | 73.0446932 |
| BEFORE 224 | 71.9821932 | 63 | 73.0696932 |
| BEFORE 225 | 72.1821932 | 63 | 73.0821932 |
| BEFORE 226 | 72.2821932 | 63 | 73.0871932 |
| BEFORE 227 | 72.5821932 | 63 | 73.0996932 |
| BEFORE 228 | 72.7821932 | 63 | 73.1021932 |
| BEFORE 229 | 72.9821932 | 63 | 73.0896932 |

|            |            |    |            |
|------------|------------|----|------------|
| BEFORE 230 | 73.1821932 | 63 | 73.0721932 |
| BEFORE 231 | 72.9821932 | 63 | 73.0546932 |
| BEFORE 232 | 72.8821932 | 63 | 73.0346932 |
| BEFORE 233 | 72.5821932 | 63 | 73.0446932 |
| BEFORE 234 | 72.7821932 | 63 | 73.0746932 |
| BEFORE 235 | 72.5821932 | 63 | 73.0996932 |
| BEFORE 236 | 72.0821932 | 63 | 73.1246932 |
| BEFORE 237 | 72.2821932 | 63 | 73.1371932 |
| BEFORE 238 | 72.7821932 | 63 | 73.1521932 |
| BEFORE 239 | 73.3821932 | 63 | 73.1496932 |
| BEFORE 240 | 73.7821932 | 63 | 73.1446932 |
| minute1    | 74.3821932 | 63 | 73.1346932 |
| minute2    | 74.2821932 | 63 | 73.1396932 |
| minute3    | 74.2821932 | 63 | 73.1421932 |
| minute4    | 73.5821932 | 63 | 73.1521932 |
| minute5    | 73.3821932 | 63 | 73.1521932 |
| minute6    | 73.5821932 | 63 | 73.1421932 |
| minute7    | 72.9821932 | 63 | 73.1296932 |
| minute8    | 72.5821932 | 63 | 73.1221932 |
| minute9    | 72.7821932 | 63 | 73.1146932 |
| minute10   | 72.8821932 | 63 | 73.1021932 |
| minute11   | 72.7821932 | 63 | 73.0946932 |
| minute12   | 73.7821932 | 63 | 73.0871932 |
| minute13   | 74.2821932 | 63 | 73.0746932 |
| minute14   | 74.2821932 | 63 | 73.0671932 |
| minute15   | 73.9821932 | 63 | 73.0521932 |
| minute16   | 74.0821932 | 63 | 73.0446932 |
| minute17   | 74.1821932 | 63 | 73.0496932 |
| minute18   | 73.7821932 | 63 | 73.0496932 |
| minute19   | 73.2821932 | 63 | 73.0546932 |
| minute20   | 72.8821932 | 63 | 73.0546932 |
| minute21   | 72.7821932 | 63 | 73.0621932 |
| minute22   | 72.6821932 | 63 | 73.0771932 |
| minute23   | 72.4821932 | 63 | 73.0971932 |
| minute24   | 71.9821932 | 63 | 73.1246932 |
| minute25   | 71.7821932 | 63 | 73.1596932 |
| minute26   | 71.7821932 | 63 | 73.1846932 |
| minute27   | 72.2821932 | 63 | 73.2046932 |
| minute28   | 72.4821932 | 63 | 73.2421932 |
| minute29   | 72.4821932 | 63 | 73.2996932 |
| minute30   | 72.8821932 | 63 | 73.3671932 |
| minute31   | 72.6821932 | 63 | 73.4346932 |
| minute32   | 72.3821932 | 63 | 73.5071932 |
| minute33   | 72.2821932 | 63 | 73.5596932 |
| minute34   | 72.1821932 | 63 | 73.5846932 |

|              |            |    |            |
|--------------|------------|----|------------|
| minute35     | 72.2821932 | 63 | 73.5819414 |
| minute36     | 72.2821932 | 63 | 73.5571441 |
| minute37     | 72.2821932 | 63 | 73.527574  |
| minute38     | 72.9821932 | 63 | 73.4932313 |
| minute39     | 73.3821932 | 63 | 73.473434  |
| minute40     | 74.0821932 | 63 | 73.4706822 |
| minute41     | 74.9821932 | 63 | 73.4711122 |
| minute42     | 75.0821932 | 63 | 73.4694967 |
| minute43     | 75.3821932 | 63 | 73.4521994 |
| minute44     | 74.9821932 | 63 | 73.4330839 |
| minute45     | 74.3821932 | 63 | 73.4082866 |
| minute46     | 74.3821932 | 63 | 73.374853  |
| minute47     | 74.4821932 | 63 | 73.3527829 |
| minute48     | 74.8821932 | 63 | 73.3159402 |
| minute49     | 75.4821932 | 63 | 73.2877338 |
| minute50     | 75.5821932 | 63 | 73.2686183 |
| minute51     | 75.6821932 | 63 | 73.2372301 |
| minute52     | 75.8821932 | 63 | 73.2426601 |
| minute53     | 75.2821932 | 63 | 73.2442265 |
| minute54     | 74.1721197 | 63 | 73.2460201 |
| minute55     | 72.9903015 | 63 | 73.2457682 |
| minute56     | 72.8993924 | 63 | 73.2430164 |
| minute57     | 72.8084833 | 63 | 73.2561736 |
| minute58     | 72.9903015 | 63 | 73.28524   |
| minute59     | 73.1721197 | 63 | 73.3036245 |
| minute60     | 72.8993924 | 63 | 73.3029181 |
| Activity6:27 | 72.7175742 | 73 | 73.2847117 |
| Activity6:28 | 71.9903015 | 73 | 73.2417326 |
| Activity6:29 | 71.7175742 | 73 | 73.1917081 |
| Activity6:30 | 70.9903015 | 73 | 73.1296381 |
| Activity6:31 | 70.4448469 | 73 | 73.0662044 |
| Activity6:32 | 70.8993924 | 73 | 73.0132253 |
| Activity6:33 | 70.8084833 | 73 | 72.9511553 |
| Activity6:34 | 71.3539378 | 73 | 72.8820398 |
| Activity6:35 | 71.7175742 | 73 | 72.8029243 |
| Activity6:36 | 71.6266651 | 73 | 72.715627  |
| Activity6:37 | 72.8993924 | 73 | 72.6258297 |
| Activity6:38 | 72.4448469 | 73 | 72.5676233 |
| Activity6:39 | 72.3539378 | 73 | 72.5089624 |
| Activity6:40 | 72.1721197 | 73 | 72.460756  |
| Activity6:41 | 72.1721197 | 73 | 72.4380288 |
| Activity6:42 | 72.8084833 | 73 | 72.4562106 |
| Activity6:43 | 73.4448469 | 73 | 72.4766651 |
| Activity6:44 | 73.7175742 | 73 | 72.4971197 |
| Activity6:45 | 73.3539378 | 73 | 72.5016651 |



|              |            |    |            |
|--------------|------------|----|------------|
| Activity6:46 | 73.3539378 | 73 | 72.5084833 |
| Activity6:47 | 73.2630288 | 73 | 72.5130288 |
| Activity6:48 | 73.0812106 | 73 | 72.5153015 |
| Activity6:49 | 72.8993924 | 73 | 72.5380288 |
| Activity6:50 | 72.4448469 | 73 | 72.5630288 |
| Activity6:51 | 72.2630288 | 73 | 72.6062106 |
| Activity6:52 | 71.8993924 | 73 | 72.660756  |
| Activity6:53 | 71.7175742 | 73 | 72.6971197 |
| Activity6:54 | 71.7175742 | 73 | 72.735756  |
| Activity6:55 | 71.9903015 | 73 | 72.7584833 |
| Activity6:56 | 71.9903015 | 73 | 72.7721197 |
| Activity6:57 | 73.3539378 | 73 | 72.7601374 |
| Activity6:58 | 73.535756  | 73 | 72.723775  |
| Activity6:59 | 73.3539378 | 73 | 72.7136522 |
| ACTivity7:00 | 73.2630288 | 73 | 72.7522886 |
| ACTivity7:01 | 73.7175742 | 73 | 72.7977431 |
| ACTivity7:02 | 73.7175742 | 73 | 72.8500159 |
| ACTivity7:03 | 73.6266651 | 73 | 72.8772886 |
| ACTivity7:04 | 73.1721197 | 73 | 72.8841068 |
| ACTivity7:05 | 73.4448469 | 73 | 72.8636522 |
| ACTivity7:06 | 73.0812106 | 73 | 72.8522886 |
| ACTivity7:07 | 72.8084833 | 73 | 72.8341068 |
| ACTivity7:08 | 72.8993924 | 73 | 72.8272886 |
| ACTivity7:09 | 72.7175742 | 73 | 72.8386522 |
| ACTivity7:10 | 72.7175742 | 73 | 72.8591068 |
| ACTivity7:11 | 72.6266651 | 73 | 72.9045613 |
| ACTivity7:12 | 72.3539378 | 73 | 72.9681977 |
| ACTivity7:13 | 72.3539378 | 73 | 73.0454704 |
| ACTivity7:14 | 72.2630288 | 73 | 73.1204704 |
| ACTivity7:15 | 72.2630288 | 73 | 73.1931977 |
| ACTivity7:16 | 71.1473747 | 73 | 73.2636522 |
| ACTivity7:17 | 71.4448954 | 73 | 73.340925  |
| ACTivity7:18 | 72.0399367 | 73 | 73.390925  |
| ACTivity7:19 | 73.8993924 | 73 | 73.4477431 |
| ACTivity7:20 | 73.9903015 | 73 | 73.5136522 |
| ACTivity7:21 | 74.2630288 | 73 | 73.5886522 |
| ACTivity7:22 | 73.8993924 | 73 | 73.640925  |
| ACTivity7:23 | 73.7175742 | 73 | 73.690925  |
| ACTivity7:24 | 72.8993924 | 73 | 73.7386522 |
| ACTivity7:25 | 72.8993924 | 73 | 73.8022886 |
| ACTivity7:26 | 72.6266651 | 73 | 73.890925  |
| ACTivity7:27 | 72.9903015 | 73 | 73.9954704 |
| ACTivity7:28 | 73.535756  | 73 | 74.07448   |
| ACTivity7:29 | 73.7175742 | 73 | 74.1443987 |
| ACTivity7:30 | 74.2630288 | 73 | 74.2068794 |

|              |            |    |            |
|--------------|------------|----|------------|
| ACtivity7:31 | 74.8084833 | 73 | 74.2693601 |
| ACtivity7:32 | 74.9903015 | 73 | 74.3192375 |
| ACtivity7:33 | 74.7175742 | 73 | 74.3709743 |
| ACtivity7:34 | 74.6266651 | 73 | 74.4326286 |
| ACtivity7:35 | 74.8084833 | 73 | 74.5013076 |
| ACtivity7:36 | 75.0812106 | 73 | 74.5699866 |
| ACtivity7:37 | 75.3539378 | 73 | 74.666557  |
| ACtivity7:38 | 75.8084833 | 73 | 74.7658134 |
| ACtivity7:39 | 75.9903015 | 73 | 74.8551523 |
| ACtivity7:40 | 76.2630288 | 73 | 74.910195  |
| ACtivity7:41 | 75.8084833 | 73 | 74.9557335 |
| ACtivity7:42 | 75.7175742 | 73 | 74.9969332 |
| ACtivity7:43 | 75.535756  | 73 | 75.0406123 |
| ACtivity7:44 | 75.7175742 | 73 | 75.0913161 |
| ACtivity7:45 | 76.9903015 | 73 | 75.1701191 |
| ACtivity7:46 | 77.2630288 | 73 | 75.2538808 |
| ACtivity7:47 | 75.9688677 | 73 | 75.354378  |
| ACtivity7:48 | 75.6961404 | 73 | 75.4313215 |
| ACtivity7:49 | 75.2168016 | 73 | 75.4772732 |
| ACtivity7:50 | 75.2168016 | 73 | 75.5062828 |
| ACtivity7:51 | 74.6217602 | 73 | 75.524342  |
| ACtivity7:52 | 74.4234131 | 73 | 75.5213268 |
| ACtivity7:53 | 74.8201074 | 73 | 75.5063282 |
| ACtivity7:54 | 75.01019   | 73 | 75.5055857 |
| ACtivity7:55 | 75.01019   | 73 | 75.4945127 |
| ACtivity7:56 | 75.01019   | 73 | 75.4638116 |
| ACtivity7:57 | 75.4151487 | 73 | 75.4486063 |
| ACtivity7:58 | 75.6134958 | 73 | 75.4414589 |
| ACtivity7:59 | 76.1010991 | 73 | 75.4177825 |
| activity8:00 | 75.8118429 | 73 | 75.3796434 |
| activity8:01 | 75.9110164 | 73 | 75.3247687 |
| activity8:02 | 75.6465536 | 73 | 75.258737  |
| activity8:03 | 75.7457272 | 73 | 75.1852673 |
| activity8:04 | 76.0515123 | 73 | 75.1066322 |
| activity8:05 | 76.2498594 | 73 | 75.0110551 |
| activity8:06 | 76.6465536 | 73 | 74.888825  |
| activity8:07 | 76.0680412 | 73 | 74.7773388 |
| activity8:08 | 75.3738264 | 73 | 74.7006859 |
| activity8:09 | 74.8779586 | 73 | 74.6308512 |
| activity8:10 | 74.9853966 | 73 | 74.5804379 |
| activity8:11 | 74.6878759 | 73 | 74.5298181 |
| activity8:12 | 74.3903553 | 73 | 74.4940743 |
| activity8:13 | 74.6878759 | 73 | 74.4583305 |
| activity8:14 | 74.1837437 | 73 | 74.407504  |
| activity8:15 | 73.5804379 | 73 | 74.3692809 |

|              |            |    |            |
|--------------|------------|----|------------|
| activity8:16 | 74.4729999 | 73 | 74.3508925 |
| activity8:17 | 75.0680412 | 73 | 74.3498594 |
| activity8:18 | 74.8614297 | 73 | 74.346347  |
| activity8:19 | 74.4647355 | 73 | 74.3353966 |
| activity8:20 | 74.0680412 | 73 | 74.3147355 |
| activity8:21 | 73.1672148 | 73 | 74.3010991 |
| activity8:22 | 72.778785  | 73 | 74.2996528 |
| activity8:23 | 72.3903553 | 73 | 74.3023388 |
| activity8:24 | 71.8944875 | 73 | 74.3122561 |
| activity8:25 | 72.1010991 | 73 | 74.3145288 |
| activity8:26 | 72.8035784 | 73 | 74.3238264 |
| activity8:27 | 72.902752  | 73 | 74.3356032 |
| activity8:28 | 72.902752  | 73 | 74.3696941 |
| activity8:29 | 73.2002726 | 73 | 74.4236198 |
| activity8:30 | 73.1920082 | 73 | 74.4552313 |
| activity8:31 | 73.1920082 | 73 | 74.491595  |
| activity8:32 | 72.9936611 | 73 | 74.5155619 |
| activity8:33 | 72.7870495 | 73 | 74.5469669 |
| activity8:34 | 73.4812644 | 73 | 74.5758925 |
| activity8:35 | 74.2746528 | 73 | 74.6199007 |
| activity8:36 | 74.9688677 | 73 | 74.6670082 |
| activity8:37 | 75.2746528 | 73 | 74.6940743 |
| activity8:38 | 75.1754793 | 73 | 74.7186611 |
| activity8:39 | 75.2746528 | 73 | 74.7755679 |
| activity8:40 | 75.2663883 | 73 | 74.8428053 |
| activity8:41 | 75.8531652 | 73 | 74.9207865 |
| activity8:42 | 75.7539917 | 73 | 75.0132305 |
| activity8:43 | 76.1424214 | 73 | 75.1180712 |
| activity8:44 | 76.1424214 | 73 | 75.224978  |
| activity8:45 | 76.6217602 | 73 | 75.3442815 |
| activity8:46 | 77.117628  | 73 | 75.4749486 |
| activity8:47 | 77.4316776 | 73 | 75.5799959 |
| activity8:48 | 77.5308512 | 73 | 75.6933077 |
| activity8:49 | 76.1424214 | 73 | 75.7878178 |
| activity8:50 | 76.4399421 | 73 | 75.8856337 |
| activity8:51 | 75.6465536 | 73 | 75.9962595 |
| activity8:52 | 75.6465536 | 73 | 76.1101911 |
| activity8:53 | 75.8449007 | 73 | 76.2411829 |
| activity8:54 | 75.9440743 | 73 | 76.3796126 |
| activity8:55 | 75.4647355 | 73 | 76.490563  |
| activity8:56 | 75.5556445 | 73 | 76.5835382 |
| activity8:57 | 76.0515123 | 73 | 76.6591581 |
| activity8:58 | 77.1377021 | 73 | 76.7312655 |
| activity8:59 | 77.154231  | 73 | 76.8103977 |
| Activity9:00 | 77.1872889 | 73 | 76.8668027 |

|              |            |    |            |
|--------------|------------|----|------------|
| Activity9:01 | 76.8649748 | 73 | 76.8918039 |
| Activity9:02 | 76.9724128 | 73 | 76.9093671 |
| Activity9:03 | 76.6666277 | 73 | 76.9655654 |
| Activity9:04 | 76.6666277 | 73 | 77.0093671 |
| Activity9:05 | 77.3277847 | 73 | 77.0529621 |
| Activity9:06 | 77.0054707 | 73 | 77.0845737 |
| Activity9:07 | 77.4352227 | 73 | 77.0864332 |
| Activity9:08 | 76.6831566 | 73 | 77.0581274 |
| Activity9:09 | 77.1129087 | 73 | 77.0267225 |
| Activity9:10 | 77.6170409 | 73 | 77.0145324 |
| Activity9:11 | 77.7492723 | 73 | 76.9996564 |
| Activity9:12 | 78.2333305 | 73 | 77.004615  |
| Activity9:13 | 78.3242396 | 73 | 77.0154815 |
| Activity9:14 | 77.9192809 | 73 | 77.0168438 |
| Activity9:15 | 77.9936611 | 73 | 77.0089085 |
| Activity9:16 | 77.9936611 | 73 | 76.9993204 |
| Activity9:17 | 78.1589503 | 73 | 76.9988232 |
| Activity9:18 | 78.3407685 | 73 | 76.9791111 |
| Activity9:19 | 77.5308512 | 73 | 76.9322443 |
| Activity9:20 | 76.2664368 | 73 | 76.8713278 |
| Activity9:21 | 76.555693  | 73 | 76.7936759 |
| Activity9:22 | 78.0019255 | 73 | 76.7218091 |
| Activity9:23 | 77.8944875 | 73 | 76.624529  |
| Activity9:24 | 77.8862231 | 73 | 76.5212572 |
| Activity9:25 | 77.8862231 | 73 | 76.4043491 |
| Activity9:26 | 77.1920082 | 73 | 76.2731847 |
| Activity9:27 | 76.2994462 | 73 | 76.1523509 |
| Activity9:28 | 76.2746528 | 73 | 76.0207733 |
| Activity9:29 | 75.6548181 | 73 | 75.9057247 |
| Activity9:30 | 75.8449007 | 73 | 75.7753868 |
| Activity9:31 | 75.8449007 | 73 | 75.6165365 |
| Activity9:32 | 76.0812106 | 73 | 75.4452895 |
| Activity9:33 | 75.8993924 | 73 | 75.2596683 |
| Activity9:34 | 75.6266651 | 73 | 75.0785926 |
| Activity9:35 | 75.0812106 | 73 | 74.9099135 |
| Activity9:36 | 75.535756  | 73 | 74.739375  |
| Activity9:37 | 75.2630288 | 73 | 74.5688365 |
| Activity9:38 | 75.2630288 | 73 | 74.3941657 |
| Activity9:39 | 74.7175742 | 73 | 74.2263131 |
| Activity9:40 | 74.0812106 | 73 | 74.0764357 |
| Activity9:41 | 73.9903015 | 73 | 73.9581687 |
| Activity9:42 | 73.0812106 | 73 | 73.8326703 |
| Activity9:43 | 72.535756  | 73 | 73.6619252 |
| Activity9:44 | 71.9903015 | 73 | 73.4870478 |
| Activity9:45 | 72.0812106 | 73 | 73.3101043 |

|               |            |    |            |
|---------------|------------|----|------------|
| Activity9:46  | 72.1721197 | 73 | 73.139979  |
| Activity9:47  | 72.1721197 | 73 | 72.9781181 |
| Activity9:48  | 72.0812106 | 73 | 72.8408441 |
| Activity9:49  | 71.8993924 | 73 | 72.7087353 |
| Activity9:50  | 71.2630288 | 73 | 72.5921224 |
| Activity9:51  | 70.8993924 | 73 | 72.4707574 |
| Activity9:52  | 70.8084833 | 73 | 72.3516651 |
| Activity9:53  | 71.0812106 | 73 | 72.2312106 |
| Activity9:54  | 71.1721197 | 73 | 72.1130288 |
| Activity9:55  | 71.1721197 | 73 | 72.0221197 |
| Activity9:56  | 71.1721197 | 73 | 71.9812106 |
| Activity9:57  | 71.1721197 | 73 | 71.9102527 |
| Activity9:58  | 71.6266651 | 73 | 71.8587164 |
| Activity9:59  | 71.535756  | 73 | 71.8096594 |
| Activity10:00 | 71.535756  | 73 | 71.74428   |
| Activity10:01 | 71.535756  | 73 | 71.6795205 |
| Activity10:02 | 71.1721197 | 73 | 71.6454296 |
| Activity10:03 | 70.8993924 | 73 | 71.6021298 |
| Activity10:04 | 70.8084833 | 73 | 71.5575904 |
| Activity10:05 | 71.0812106 | 73 | 71.5490013 |
| Activity10:06 | 70.7175742 | 73 | 71.5360734 |
| Activity10:07 | 70.8084833 | 73 | 71.5332695 |
| Activity10:08 | 70.9903015 | 73 | 71.5379036 |
| Activity10:09 | 70.9903015 | 73 | 71.549769  |
| Activity10:10 | 70.9903015 | 73 | 71.5787833 |
| Activity10:11 | 71.0812106 | 73 | 71.618748  |
| Activity10:12 | 71.2630288 | 73 | 71.6651176 |
| Activity10:13 | 71.1721197 | 73 | 71.7137599 |
| Activity10:14 | 71.9903015 | 73 | 71.7819417 |
| Activity10:15 | 73.4448469 | 73 | 71.8592145 |
| Activity10:16 | 72.6974424 | 73 | 71.9410327 |
| Activity10:17 | 73.2015747 | 73 | 72.029669  |
| Activity10:18 | 73.3007482 | 73 | 72.1160327 |
| Activity10:19 | 72.1024011 | 73 | 72.1933054 |
| Activity10:20 | 71.4908309 | 73 | 72.2751236 |
| Activity10:21 | 72.6266651 | 73 | 72.3660327 |
| Activity10:22 | 71.3492185 | 73 | 72.4501236 |
| Activity10:23 | 70.7541772 | 73 | 72.5433054 |
| Activity10:24 | 71.6467392 | 73 | 72.6410327 |
| Activity10:25 | 71.5640946 | 73 | 72.7455781 |
| Activity10:26 | 72.0599623 | 73 | 72.8387599 |
| Activity10:27 | 72.357483  | 73 | 72.9364872 |
| Activity10:28 | 72.5558301 | 73 | 72.989127  |
| Activity10:29 | 73.0599623 | 73 | 73.0322627 |
| Activity10:30 | 72.8616152 | 73 | 73.0832496 |

|               |            |    |            |
|---------------|------------|----|------------|
| Activity10:31 | 72.7541772 | 73 | 73.1464266 |
| Activity10:32 | 72.7541772 | 73 | 73.1872895 |
| Activity10:33 | 73.8084833 | 73 | 73.2691077 |
| Activity10:34 | 74.2630288 | 73 | 73.3554713 |
| Activity10:35 | 74.4448469 | 73 | 73.4281986 |
| Activity10:36 | 74.7175742 | 73 | 73.4554713 |
| Activity10:37 | 74.6266651 | 73 | 73.5059746 |
| Activity10:38 | 74.7175742 | 73 | 73.5438746 |
| Activity10:39 | 74.8084833 | 73 | 73.581568  |
| Activity10:40 | 75.1721197 | 73 | 73.6537655 |
| Activity10:41 | 74.8993924 | 73 | 73.7162523 |
| Activity10:42 | 74.8993924 | 73 | 73.7526159 |
| Activity10:43 | 74.8084833 | 73 | 73.8209157 |
| Activity10:44 | 74.9903015 | 73 | 73.9063642 |
| Activity10:45 | 74.8084833 | 73 | 73.9717715 |
| Activity10:46 | 74.6266651 | 73 | 74.0392448 |
| Activity10:47 | 72.9140752 | 73 | 74.0965942 |
| Activity10:48 | 72.7157281 | 73 | 74.1624147 |
| Activity10:49 | 73.0297777 | 73 | 74.2369128 |
| Activity10:50 | 73.517381  | 73 | 74.321535  |
| Activity10:51 | 72.7157281 | 73 | 74.3938444 |
| Activity10:52 | 74.535756  | 73 | 74.4647075 |
| Activity10:53 | 74.6266651 | 73 | 74.5285458 |
| Activity10:54 | 74.8993924 | 73 | 74.556729  |
| Activity10:55 | 74.535756  | 73 | 74.5663171 |
| Activity10:56 | 74.7175742 | 73 | 74.5589631 |
| Activity10:57 | 74.7175742 | 73 | 74.5402454 |
| Activity10:58 | 74.8084833 | 73 | 74.5231807 |
| Activity10:59 | 74.9903015 | 73 | 74.5083886 |
| Activity11:00 | 73.9903015 | 73 | 74.4884313 |
| Activity11:01 | 74.0812106 | 73 | 74.4494657 |
| minute1       | 74.0812106 | 63 | 74.4123596 |
| minute2       | 74.1721197 | 63 | 74.3725676 |
| minute3       | 74.2630288 | 63 | 74.3952948 |
| minute4       | 74.2630288 | 63 | 74.4157494 |
| minute5       | 74.3539378 | 63 | 74.4339312 |
| minute6       | 74.9903015 | 63 | 74.4566585 |
| minute7       | 75.535756  | 63 | 74.5222005 |
| minute8       | 76.4448469 | 63 | 74.5949739 |
| minute9       | 75.7539917 | 63 | 74.6644415 |
| minute10      | 75.5887024 | 63 | 74.7285373 |
| minute11      | 75.3077107 | 63 | 74.824038  |
| minute12      | 74.9358098 | 63 | 74.8899471 |
| minute13      | 74.6465536 | 63 | 74.9626743 |
| minute14      | 74.1506859 | 63 | 75.0285834 |

|          |            |    |            |
|----------|------------|----|------------|
| minute15 | 73.9688677 | 63 | 75.1058562 |
| minute16 | 73.9440743 | 63 | 75.1808562 |
| minute17 | 74.1258925 | 63 | 75.2376743 |
| minute18 | 74.01019   | 63 | 75.2944925 |
| minute19 | 73.6134958 | 63 | 75.3444925 |
| minute20 | 73.4151487 | 63 | 75.4081289 |
| minute21 | 73.3077107 | 63 | 75.4417752 |
| minute22 | 75.7175742 | 63 | 75.4686034 |
| minute23 | 75.8084833 | 63 | 75.4908861 |
| minute24 | 75.535756  | 63 | 75.5086234 |
| minute25 | 75.535756  | 63 | 75.5067326 |
| minute26 | 75.535756  | 63 | 75.4856269 |
| minute27 | 75.6266651 | 63 | 75.4308435 |
| minute28 | 75.8084833 | 63 | 75.3566386 |
| minute29 | 76.0812106 | 63 | 75.2547478 |
| minute30 | 76.535756  | 63 | 75.1620704 |
| minute31 | 77.1721197 | 63 | 75.0880195 |
| minute32 | 77.535756  | 63 | 75.0119025 |
| minute33 | 77.535756  | 63 | 74.9496284 |
| minute34 | 77.6266651 | 63 | 74.9014039 |
| minute35 | 77.7175742 | 63 | 74.8769398 |
| minute36 | 76.9903015 | 63 | 74.8592938 |
| minute37 | 77.0812106 | 63 | 74.8581767 |
| minute38 | 76.9903015 | 63 | 74.8525142 |
| minute39 | 76.535756  | 63 | 74.8588352 |
| minute40 | 75.4270648 | 63 | 74.879619  |
| minute41 | 75.1543376 | 63 | 74.8894523 |
| minute42 | 75.0634285 | 63 | 74.8837898 |
| minute43 | 74.9725194 | 63 | 74.8042444 |
| minute44 | 74.1873954 | 63 | 74.7110626 |
| minute45 | 73.5097095 | 63 | 74.6178808 |
| minute46 | 72.7989657 | 63 | 74.5315171 |
| minute47 | 72.5675607 | 63 | 74.4519717 |
| minute48 | 72.3692136 | 63 | 74.3746989 |
| minute49 | 72.0468996 | 63 | 74.2951535 |
| minute50 | 72.6266651 | 63 | 74.2065171 |
| minute51 | 72.2630288 | 63 | 74.1133353 |
| minute52 | 72.4448469 | 63 | 73.9951535 |
| minute53 | 72.7175742 | 63 | 73.8883353 |
| minute54 | 73.1721197 | 63 | 73.8133353 |
| minute55 | 73.2630288 | 63 | 73.7246989 |
| minute56 | 73.8993924 | 63 | 73.6315171 |
| minute57 | 73.8993924 | 63 | 73.5610626 |
| minute58 | 74.2630288 | 63 | 73.4815171 |
| minute59 | 74.4448469 | 63 | 73.3951535 |

|          |            |    |            |
|----------|------------|----|------------|
| minute60 | 73.8084833 | 63 | 73.3201535 |
| After1   | 73.0812106 | 63 | 73.2615071 |
| After2   | 72.535756  | 63 | 73.200588  |
| After3   | 72.0812106 | 63 | 73.1373962 |
| After4   | 71.8084833 | 63 | 73.0719317 |
| After5   | 72.0812106 | 63 | 73.0147316 |
| After6   | 72.3539378 | 63 | 72.9699282 |
| After7   | 72.535756  | 63 | 72.9292571 |
| After8   | 72.6266651 | 63 | 72.903462  |
| After9   | 72.535756  | 63 | 72.887171  |
| After10  | 72.8084833 | 63 | 72.8698469 |
| After11  | 72.4448469 | 63 | 72.8403015 |
| After12  | 73.2630288 | 63 | 72.7967288 |
| After13  | 74.535756  | 63 | 72.7436519 |
| After14  | 74.0812106 | 63 | 72.6961536 |
| After15  | 73.9903015 | 63 | 72.6779718 |
| After16  | 74.1721197 | 63 | 72.6529718 |
| After17  | 73.8993924 | 63 | 72.6143354 |
| After18  | 73.535756  | 63 | 72.5688809 |
| After19  | 73.535756  | 63 | 72.5166082 |
| After20  | 73.0812106 | 63 | 72.4461536 |
| After21  | 72.7175742 | 63 | 72.3916082 |
| After22  | 72.535756  | 63 | 72.3484263 |
| After23  | 72.3539378 | 63 | 72.3029718 |
| After24  | 71.8993924 | 63 | 72.2666082 |
| After25  | 71.7175742 | 63 | 72.2506991 |
| After26  | 71.1721197 | 63 | 72.2438809 |
| After27  | 71.535756  | 63 | 72.2438809 |
| After28  | 71.7175742 | 63 | 72.2461536 |
| After29  | 71.3539378 | 63 | 72.2484263 |
| After30  | 71.4448469 | 63 | 72.25979   |
| After31  | 70.5201204 | 63 | 72.2688809 |
| After32  | 70.3217733 | 63 | 72.2961536 |
| After33  | 70.8176411 | 63 | 72.3052445 |
| After34  | 72.4448469 | 63 | 72.28479   |
| After35  | 72.2630288 | 63 | 72.2802445 |
| After36  | 72.3539378 | 63 | 72.2756991 |
| After37  | 72.0812106 | 63 | 72.2552445 |
| After38  | 72.1721197 | 63 | 72.2484263 |
| After39  | 71.6266651 | 63 | 72.2393354 |
| After40  | 71.6266651 | 63 | 72.2302445 |
| After41  | 71.3539378 | 63 | 72.2393354 |
| After42  | 70.7175742 | 63 | 72.2484263 |
| After43  | 70.6266651 | 63 | 72.2575172 |
| After44  | 71.1721197 | 63 | 72.2688809 |



|         |            |    |            |
|---------|------------|----|------------|
| After45 | 71.8084833 | 63 | 72.2893354 |
| After46 | 72.3539378 | 63 | 72.3166082 |
| After47 | 72.6266651 | 63 | 72.3552445 |
| After48 | 72.7175742 | 63 | 72.4166082 |
| After49 | 72.9903015 | 63 | 72.4734263 |
| After50 | 73.1721197 | 63 | 72.5484263 |
| After51 | 73.535756  | 63 | 72.6234263 |
| After52 | 73.6266651 | 63 | 72.7147263 |
| After53 | 73.7175742 | 63 | 72.8178032 |
| After54 | 73.8993924 | 63 | 72.9084833 |
| After55 | 73.8084833 | 63 | 72.9630288 |
| After56 | 73.3539378 | 63 | 73.0130288 |
| After57 | 73.6266651 | 63 | 73.0266651 |
| After58 | 73.1721197 | 63 | 73.0380288 |
| After59 | 73.1721197 | 63 | 73.0425742 |
| After60 | 73.4448469 | 63 | 73.0584833 |
| After61 | 73.0812106 | 63 | 73.0743924 |
| After62 | 72.8993924 | 63 | 73.0971197 |
| After63 | 72.8084833 | 63 | 73.1334833 |
| After64 | 72.7175742 | 63 | 73.1653015 |
| After65 | 72.8084833 | 63 | 73.1743924 |
| After66 | 72.7175742 | 63 | 73.160756  |
| After67 | 73.9903015 | 63 | 73.1198469 |
| After68 | 73.9903015 | 63 | 73.0698469 |
| After69 | 74.3539378 | 63 | 73.0016651 |
| After70 | 74.4448469 | 63 | 72.9175742 |
| After71 | 74.1721197 | 63 | 72.8289378 |
| After72 | 74.4448469 | 63 | 72.7471197 |
| After73 | 74.4448469 | 63 | 72.6721197 |
| After74 | 74.6266651 | 63 | 72.6175742 |
| After75 | 74.2630288 | 63 | 72.5721197 |
| After76 | 72.8993924 | 63 | 72.535756  |
| After77 | 72.535756  | 63 | 72.5198469 |
| After78 | 72.3539378 | 63 | 72.4925742 |
| After79 | 72.2630288 | 63 | 72.4721197 |
| After80 | 72.2630288 | 63 | 72.4539378 |
| After81 | 72.2630288 | 63 | 72.4334833 |
| After82 | 72.1721197 | 63 | 72.4289378 |
| After83 | 71.8993924 | 63 | 72.435756  |
| After84 | 71.535756  | 63 | 72.4721197 |
| After85 | 71.2630288 | 63 | 72.5175742 |
| After86 | 70.7175742 | 63 | 72.5698469 |
| After87 | 70.6266651 | 63 | 72.6221197 |
| After88 | 69.9903015 | 63 | 72.635756  |
| After89 | 69.6266651 | 63 | 72.6584833 |

|          |            |    |            |
|----------|------------|----|------------|
| After90  | 69.6266651 | 63 | 72.6675742 |
| After91  | 70.2630288 | 63 | 72.6766651 |
| After92  | 70.6266651 | 63 | 72.6925742 |
| After93  | 71.535756  | 63 | 72.6948469 |
| After94  | 72.0812106 | 63 | 72.6903015 |
| After95  | 72.3539378 | 63 | 72.6812106 |
| After96  | 72.7175742 | 63 | 72.6880288 |
| After97  | 72.535756  | 63 | 72.7425742 |
| After98  | 72.3539378 | 63 | 72.8130288 |
| After99  | 72.4448469 | 63 | 72.8743924 |
| After100 | 72.6266651 | 63 | 72.935756  |
| After101 | 72.8993924 | 63 | 72.9903015 |
| After102 | 73.1721197 | 63 | 73.0403015 |
| After103 | 74.2630288 | 63 | 73.0993924 |
| After104 | 74.535756  | 63 | 73.1562106 |
| After105 | 74.8993924 | 63 | 73.2312106 |
| After106 | 74.8084833 | 63 | 73.3084833 |
| After107 | 74.535756  | 63 | 73.4062106 |
| After108 | 74.8993924 | 63 | 73.5062106 |
| After109 | 74.7175742 | 63 | 73.5925742 |
| After110 | 74.8084833 | 63 | 73.6789378 |
| After111 | 74.8084833 | 63 | 73.7630288 |
| After112 | 74.535756  | 63 | 73.8289378 |
| After113 | 74.2630288 | 63 | 73.8789378 |
| After114 | 74.2630288 | 63 | 73.8880288 |
| After115 | 74.535756  | 63 | 73.8789378 |
| After116 | 75.0812106 | 63 | 73.8653015 |
| After117 | 75.3539378 | 63 | 73.8380288 |
| After118 | 74.8084833 | 63 | 73.810756  |
| After119 | 74.7175742 | 63 | 73.7880288 |
| After120 | 74.4448469 | 63 | 73.7584833 |
| After121 | 74.2630288 | 63 | 73.7266651 |
| After122 | 74.535756  | 63 | 73.685756  |
| After123 | 74.1721197 | 63 | 73.6380288 |
| After124 | 74.535756  | 63 | 73.5584833 |
| After125 | 74.3539378 | 63 | 73.4721197 |
| After126 | 74.6266651 | 63 | 73.3698469 |
| After127 | 74.6266651 | 63 | 73.2584833 |
| After128 | 73.4448469 | 63 | 73.1516651 |
| After129 | 73.0812106 | 63 | 73.0380288 |
| After130 | 72.9903015 | 63 | 72.9266651 |
| After131 | 72.8993924 | 63 | 72.8175742 |
| After132 | 72.6266651 | 63 | 72.7084833 |
| After133 | 71.8993924 | 63 | 72.610756  |
| After134 | 71.7175742 | 63 | 72.5221197 |

|          |            |    |            |
|----------|------------|----|------------|
| After135 | 71.8084833 | 63 | 72.4312106 |
| After136 | 71.6266651 | 63 | 72.3380288 |
| After137 | 71.4448469 | 63 | 72.2380288 |
| After138 | 71.4448469 | 63 | 72.1312106 |
| After139 | 71.2630288 | 63 | 72.060756  |
| After140 | 71.3539378 | 63 | 71.9903015 |
| After141 | 71.2630288 | 63 | 71.9312106 |
| After142 | 71.2630288 | 63 | 71.8834833 |
| After143 | 71.0812106 | 63 | 71.8153015 |
| After144 | 71.0812106 | 63 | 71.7425742 |
| After145 | 70.8084833 | 63 | 71.6493924 |
| After146 | 70.3539378 | 63 | 71.5562106 |
| After147 | 70.2630288 | 63 | 71.4584833 |
| After148 | 70.3539378 | 63 | 71.3721197 |
| After149 | 70.2630288 | 63 | 71.3198469 |
| After150 | 70.4448469 | 63 | 71.285756  |
| After151 | 70.4448469 | 63 | 71.2630288 |
| After152 | 70.6266651 | 63 | 71.2562106 |
| After153 | 70.7175742 | 63 | 71.2630288 |
| After154 | 70.6266651 | 63 | 71.2880288 |
| After155 | 70.8084833 | 63 | 71.3130288 |
| After156 | 71.0812106 | 63 | 71.3562106 |
| After157 | 71.0812106 | 63 | 71.4312106 |
| After158 | 71.9903015 | 63 | 71.5516651 |
| After159 | 71.8993924 | 63 | 71.6903015 |
| After160 | 72.0812106 | 63 | 71.8425742 |
| After161 | 72.3539378 | 63 | 71.9834833 |
| After162 | 71.8084833 | 63 | 72.1266651 |
| After163 | 71.2630288 | 63 | 72.2675742 |
| After164 | 70.8084833 | 63 | 72.4243924 |
| After165 | 70.6266651 | 63 | 72.5743924 |
| After166 | 70.7175742 | 63 | 72.735756  |
| After167 | 71.1721197 | 63 | 72.9198469 |
| After168 | 71.3539378 | 63 | 73.1039378 |
| After169 | 71.7175742 | 63 | 73.2743924 |
| After170 | 72.0812106 | 63 | 73.4312106 |
| After171 | 72.6266651 | 63 | 73.560756  |
| After172 | 72.8993924 | 63 | 73.6880288 |
| After173 | 72.8993924 | 63 | 73.8130288 |
| After174 | 72.7175742 | 63 | 73.9403015 |
| After175 | 73.535756  | 63 | 74.060756  |
| After176 | 74.6266651 | 63 | 74.1789378 |
| After177 | 76.2630288 | 63 | 74.2698469 |
| After178 | 76.9903015 | 63 | 74.3584833 |
| After179 | 77.3539378 | 63 | 74.4221197 |

|          |            |    |            |
|----------|------------|----|------------|
| After180 | 76.9903015 | 63 | 74.4925742 |
| After181 | 76.9903015 | 63 | 74.5584833 |
| After182 | 76.8993924 | 63 | 74.6039378 |
| After183 | 77.3539378 | 63 | 74.6539378 |
| After184 | 77.0812106 | 63 | 74.710756  |
| After185 | 77.2630288 | 63 | 74.7743924 |
| After186 | 77.7175742 | 63 | 74.8312106 |
| After187 | 77.6266651 | 63 | 74.8834833 |
| After188 | 77.1721197 | 63 | 74.9312106 |
| After189 | 76.535756  | 63 | 74.9698469 |
| After190 | 75.6266651 | 63 | 74.9993924 |
| After191 | 75.535756  | 63 | 75.0198469 |
| After192 | 75.6266651 | 63 | 75.0289378 |
| After193 | 75.8084833 | 63 | 75.0403015 |
| After194 | 75.4448469 | 63 | 75.0584833 |
| After195 | 75.535756  | 63 | 75.0789378 |
| After196 | 74.7175742 | 63 | 75.0675742 |
| After197 | 74.6266651 | 63 | 75.035756  |
| After198 | 74.535756  | 63 | 74.960756  |
| After199 | 74.7175742 | 63 | 74.8789378 |
| After200 | 74.7175742 | 63 | 74.7925742 |
| After201 | 74.1721197 | 63 | 74.7130288 |
| After202 | 73.8084833 | 63 | 74.6198469 |
| After203 | 73.535756  | 63 | 74.5266651 |
| After204 | 73.3539378 | 63 | 74.4266651 |
| After205 | 72.8993924 | 63 | 74.3312106 |
| After206 | 72.8084833 | 63 | 74.2243924 |
| After207 | 73.0812106 | 63 | 74.0948469 |
| After208 | 72.8993924 | 63 | 73.9630288 |
| After209 | 72.8993924 | 63 | 73.8448469 |
| After210 | 72.8993924 | 63 | 73.7130754 |
| After211 | 72.9903015 | 63 | 73.6448936 |
| After212 | 73.3539378 | 63 | 73.5789845 |
| After213 | 73.6266651 | 63 | 73.5176209 |
| After214 | 73.535756  | 63 | 73.4517118 |
| After215 | 73.0812106 | 63 | 73.3948936 |
| After216 | 73.3539378 | 63 | 73.3358027 |
| After217 | 73.2630288 | 63 | 73.30853   |
| After218 | 73.7175742 | 63 | 73.2903482 |
| After219 | 73.8993924 | 63 | 73.3062573 |
| After220 | 73.8084833 | 63 | 73.3176209 |
| After221 | 73.2630288 | 63 | 73.3312573 |
| After222 | 73.1721197 | 63 | 73.3698936 |
| After223 | 73.3539378 | 63 | 73.4176209 |
| After224 | 73.2630288 | 63 | 73.4721663 |

|          |            |    |            |
|----------|------------|----|------------|
| After225 | 72.9903015 | 63 | 73.5267118 |
| After226 | 72.535756  | 63 | 73.5789845 |
| After227 | 72.3539378 | 63 | 73.5841037 |
| After228 | 72.4448469 | 63 | 73.5799253 |
| After229 | 71.2648957 | 63 | 73.577813  |
| After230 | 72.8993924 | 63 | 73.5806594 |
| After231 | 72.8993924 | 63 | 73.6147503 |
| After232 | 73.1721197 | 63 | 73.6420231 |
| After233 | 73.1721197 | 63 | 73.6624776 |
| After234 | 73.1721197 | 63 | 73.6533867 |
| After235 | 73.1721197 | 63 | 73.651114  |
| After236 | 73.6266651 | 63 | 73.6465685 |
| After237 | 73.8993924 | 63 | 73.6352049 |
| After238 | 75.1721197 | 63 | 73.6374776 |
| After239 | 75.1721197 | 63 | 73.6192958 |
| After240 | 75.2630288 | 63 | 73.6033867 |
|          | 75.7175742 | 63 | 73.6147503 |
|          | 75.7175742 | 63 | 73.6465685 |
|          | 75.7175742 | 63 | 73.701114  |
|          | 75.535756  | 63 | 73.7806594 |
|          | 74.9903015 | 63 | 73.8602049 |
|          | 73.0132488 | 63 | 73.9420231 |
|          | 72.9140752 | 63 | 74.0374776 |
|          | 72.8149017 | 63 | 74.1329321 |
|          | 73.0132488 | 63 | 74.2102049 |
|          | 74.2630288 | 63 | 74.2987946 |
|          | 74.0812106 | 63 | 74.3487946 |
|          | 74.1721197 | 63 | 74.3942491 |
|          | 73.2630288 | 63 | 74.4374309 |
|          | 73.4448469 | 63 | 74.4806127 |
|          | 72.8993924 | 63 | 74.5215218 |
|          | 72.8993924 | 63 | 74.5380194 |
|          | 73.3539378 | 63 | 74.5301381 |
|          | 72.9903015 | 63 | 74.530108  |
|          | 73.2630288 | 63 | 74.4982597 |
|          | 74.2630288 | 63 | 74.4748824 |
|          | 74.535756  | 63 | 74.4852142 |
|          | 75.3539378 | 63 | 74.4717857 |
|          | 76.535756  | 63 | 74.4511257 |
|          | 76.4448469 | 63 | 74.4074093 |
|          | 76.2630288 | 63 | 74.3659656 |
|          | 76.3539378 | 63 | 74.3408441 |
|          | 76.1721197 | 63 | 74.3758928 |
|          | 75.535756  | 63 | 74.4322225 |
|          | 74.8084833 | 63 | 74.5354519 |

|            |    |            |
|------------|----|------------|
| 74.8993924 | 63 | 74.6337225 |
| 74.7175742 | 63 | 74.6933106 |
| 74.8993924 | 63 | 74.781947  |
| 74.8993924 | 63 | 74.8212872 |
| 74.8084833 | 63 | 74.8734373 |
| 73.8320235 | 63 | 74.9036866 |
| 73.3114108 | 63 | 74.9376548 |
| 73.8981876 | 63 | 74.9590198 |
| 73.8981876 | 63 | 74.9789385 |
| 74.2370306 | 63 | 75.0380294 |
| 75.6763003 | 63 | 75.0993931 |
| 75.1804326 | 63 | 75.1403022 |
| 74.8911764 | 63 | 75.1812113 |
| 73.9689161 | 63 | 75.2039385 |
| 73.878007  | 63 | 75.1993931 |
| 73.985445  | 63 | 75.1903022 |
| 74.4151971 | 63 | 75.1789385 |
| 75.1672632 | 63 | 75.158484  |
| 76.9440743 | 63 | 75.1425749 |
| 76.9440743 | 63 | 75.1448476 |
| 76.6465536 | 63 | 75.1493931 |
| 77.6266651 | 69 | 75.1266658 |
| 75.7457272 | 69 | 75.083484  |
| 75.349033  | 69 | 75.0289385 |
| 74.6548181 | 69 | 74.9721203 |
| 74.2581239 | 69 | 74.9198476 |
| 73.7539917 | 69 | 74.9010773 |
| 74.1506859 | 69 | 74.9089587 |
| 75.3539378 | 69 | 74.9089888 |
| 75.7175742 | 69 | 74.9135643 |
| 75.8993924 | 69 | 74.8960325 |
| 76.1721197 | 69 | 74.8402461 |
| 76.2630288 | 69 | 74.7991292 |
| 76.3539378 | 69 | 74.7493346 |
| 76.0812106 | 69 | 74.7180511 |
| 75.8084833 | 69 | 74.691313  |
| 75.535756  | 69 | 74.627882  |
| 75.535756  | 69 | 74.5487486 |
| 75.6266651 | 69 | 74.4483342 |
| 74.9903015 | 69 | 74.3065986 |
| 73.9903015 | 69 | 74.1599044 |
| 72.9903015 | 69 | 74.0210614 |
| 72.7175742 | 69 | 73.8626743 |
| 72.6266651 | 69 | 73.7566826 |
| 72.7175742 | 69 | 73.6630876 |

|            |    |            |
|------------|----|------------|
| 73.0812106 | 69 | 73.5876743 |
| 73.6266651 | 69 | 73.5248644 |
| 73.8993924 | 69 | 73.4696991 |
| 74.0812106 | 69 | 73.3998644 |
| 73.535756  | 69 | 73.3098658 |
| 73.4448469 | 69 | 73.2182142 |
| 73.535756  | 63 | 73.131728  |
| 72.8993924 | 63 | 73.0359442 |
| 72.7175742 | 63 | 72.932929  |
| 72.8084833 | 63 | 72.8276411 |
| 71.4482065 | 63 | 72.7335102 |
| 71.2498594 | 63 | 72.6561149 |
| 71.1506859 | 63 | 72.5902898 |
| 71.2746528 | 63 | 72.5290101 |
| 71.0763057 | 63 | 72.4994647 |
| 71.0928346 | 63 | 72.4835556 |
| 71.2911817 | 63 | 72.4903737 |
| 71.5060578 | 63 | 72.5085556 |
| 71.6052313 | 63 | 72.5244647 |
| 71.6382892 | 63 | 72.5221919 |
| 71.7457272 | 63 | 72.5085556 |
| 71.5473801 | 63 | 72.4971919 |
| 71.3572974 | 63 | 72.4721919 |
| 71.7539917 | 63 | 72.4335556 |
| 72.0515123 | 63 | 72.3858283 |
| 72.4399421 | 63 | 72.3540101 |
| 72.3407685 | 63 | 72.3494647 |
| 72.1424214 | 63 | 72.3562828 |
| 72.1424214 | 63 | 72.388101  |
| 72.3159751 | 63 | 72.4312828 |
| 72.7126693 | 63 | 72.4767374 |
| 72.902752  | 63 | 72.5675625 |
| 73.0845702 | 63 | 72.6724372 |
| 74.4448469 | 63 | 72.772973  |
| 74.3539378 | 63 | 72.8704097 |
| 74.2630288 | 63 | 72.9682596 |
| 73.7175742 | 63 | 73.0497872 |
| 73.3539378 | 63 | 73.1172652 |
| 72.535756  | 63 | 73.1657349 |
| 72.1721197 | 63 | 73.213998  |
| 72.6266651 | 63 | 73.2796165 |
| 72.6266651 | 63 | 73.3607308 |
| 72.3539378 | 63 | 73.4536221 |
| 72.1721197 | 63 | 73.5535381 |
| 72.2630288 | 63 | 73.6389913 |

|            |    |            |
|------------|----|------------|
| 73.2630288 | 63 | 73.712461  |
| 73.8084833 | 63 | 73.7625836 |
| 74.1721197 | 63 | 73.8129129 |
| 74.4448469 | 63 | 73.8727462 |
| 74.6266651 | 63 | 73.9303069 |
| 75.0812106 | 63 | 73.9926196 |
| 75.4448469 | 63 | 74.0018331 |
| 75.1721197 | 63 | 74.0062946 |
| 75.1721197 | 63 | 74.0039378 |
| 74.9903015 | 63 | 73.9653015 |
| 74.3539378 | 63 | 73.9243924 |
| 73.9903015 | 63 | 73.8903015 |
| 73.4448469 | 63 | 73.8698469 |
| 73.535756  | 63 | 73.8698469 |
| 74.2630288 | 63 | 73.8971197 |
| 74.9903015 | 63 | 73.9380288 |
| 75.2630288 | 63 | 73.9766651 |
| 75.3539378 | 63 | 74.0198469 |
| 75.1721197 | 63 | 74.0698469 |
| 74.9903015 | 63 | 74.1008073 |
| 74.4448469 | 63 | 74.129495  |
| 74.3539378 | 63 | 74.1083893 |
| 74.535756  | 63 | 74.0970257 |
| 74.4448469 | 63 | 74.0561166 |
| 74.8084833 | 63 | 74.0083893 |
| 73.0812106 | 63 | 73.9470257 |
| 73.0812106 | 63 | 73.8788439 |
| 72.9903015 | 63 | 73.8083893 |
| 72.8993924 | 63 | 73.735662  |
| 72.7175742 | 63 | 73.669753  |
| 72.8993924 | 63 | 73.6061166 |
| 72.8993924 | 63 | 73.5561166 |
| 73.3539378 | 63 | 73.5174802 |
| 73.6266651 | 63 | 73.4970257 |
| 73.8084833 | 63 | 73.4811166 |
| 74.1721197 | 63 | 73.4583893 |
| 74.3539378 | 63 | 73.4311166 |
| 74.3539378 | 63 | 73.4152075 |
| 73.4105359 | 63 | 73.3902075 |
| 73.4105359 | 63 | 73.360662  |
| 72.4188004 | 63 | 73.3220257 |
| 73.3539378 | 63 | 73.2811166 |
| 72.535756  | 63 | 73.2288439 |
| 72.535756  | 63 | 73.1720257 |
| 72.1721197 | 63 | 73.1061166 |



|            |    |            |
|------------|----|------------|
| 72.3539378 | 63 | 73.0333893 |
| 72.6266651 | 63 | 73.0061166 |
| 72.2630288 | 63 | 72.985662  |
| 72.535756  | 63 | 72.9629348 |
| 72.4448469 | 63 | 72.9515711 |
| 72.3539378 | 63 | 72.9561166 |
| 72.4448469 | 63 | 72.9538439 |
| 72.6266651 | 63 | 72.9492984 |
| 72.8993924 | 63 | 72.919753  |
| 73.3539378 | 63 | 72.8765711 |
| 73.8993924 | 63 | 72.8242984 |
| 74.6266651 | 63 | 72.760662  |
| 74.3539378 | 63 | 72.6902075 |
| 73.9903015 | 63 | 72.619753  |
| 73.4448469 | 63 | 72.5819744 |
| 72.8084833 | 63 | 72.5441958 |
| 72.2630288 | 63 | 72.535756  |
| 72.2630288 | 63 | 72.5130288 |
| 71.8084833 | 63 | 72.5039378 |
| 71.8993924 | 63 | 72.4903015 |
| 71.9903015 | 63 | 72.485756  |
| 72.2630288 | 63 | 72.4812106 |
| 72.0812106 | 63 | 72.4743924 |
| 72.4448469 | 63 | 72.4698469 |
| 72.8993924 | 63 | 72.4584833 |
| 72.8084833 | 63 | 72.4425742 |
| 72.7175742 | 63 | 72.4289378 |
| 72.1721197 | 63 | 72.4130288 |
| 71.8993924 | 63 | 72.4016651 |
| 71.7175742 | 63 | 72.3993924 |
| 71.6266651 | 63 | 72.3903015 |
| 71.535756  | 63 | 72.360756  |
| 71.535756  | 63 | 72.2971197 |
| 71.8993924 | 63 | 72.2493924 |
| 71.8993924 | 63 | 72.2084833 |
| 72.0812106 | 63 | 72.1834833 |
| 72.4448469 | 63 | 72.1721197 |
| 72.1721197 | 63 | 72.1789378 |
| 71.9903015 | 63 | 72.2062106 |
| 71.9903015 | 63 | 72.2339722 |
| 72.1721197 | 63 | 72.2885176 |
| 72.3539378 | 63 | 72.3339722 |
| 72.0812106 | 63 | 72.3703358 |
| 72.0812106 | 63 | 72.402154  |
| 71.8084833 | 63 | 72.4248813 |

|            |    |            |
|------------|----|------------|
| 71.8084833 | 63 | 72.4203358 |
| 71.8084833 | 63 | 72.4066994 |
| 72.1721197 | 63 | 72.3816994 |
| 72.8084833 | 63 | 72.3612449 |
| 72.9903015 | 63 | 72.3476085 |
| 72.7175742 | 63 | 72.3316994 |
| 72.0812106 | 63 | 72.3135176 |
| 72.4448469 | 63 | 72.2816994 |
| 72.3539378 | 63 | 72.2453358 |
| 72.4448469 | 63 | 72.2089722 |
| 72.3539378 | 63 | 72.177154  |
| 72.535756  | 63 | 72.1453358 |
| 73.3539378 | 63 | 72.1180631 |
| 72.9189469 | 63 | 72.1203358 |
| 74.0812106 | 63 | 72.1407903 |
| 73.8084833 | 63 | 72.1703358 |
| 73.7175742 | 63 | 72.2089722 |
| 73.3539378 | 63 | 72.2476085 |
| 73.3539378 | 63 | 72.3044267 |
| 72.7175742 | 63 | 72.3498813 |
| 72.2630288 | 63 | 72.3816994 |
| 71.7175742 | 63 | 72.4135176 |
| 71.3539378 | 63 | 72.4294267 |
| 71.3539378 | 63 | 72.4362449 |
| 71.0812106 | 63 | 72.4248813 |
| 70.8993924 | 63 | 72.402154  |
| 70.2630288 | 63 | 72.3794267 |
| 70.0812106 | 63 | 72.3680631 |
| 70.4448469 | 63 | 72.3566994 |
| 70.6266651 | 63 | 72.3566994 |
| 70.8084833 | 63 | 72.3680631 |
| 71.3539378 | 63 | 72.3907903 |
| 72.2630288 | 63 | 72.3953358 |
| 72.8084833 | 63 | 72.3703358 |
| 73.1721197 | 63 | 72.3584833 |
| 73.7175742 | 63 | 72.3175742 |
| 73.8993924 | 63 | 72.2834833 |
| 74.3539378 | 63 | 72.2562106 |
| 73.8993924 | 63 | 72.2493924 |
| 73.0812106 | 63 | 72.2584833 |
| 73.0812106 | 63 | 72.2925742 |
| 72.4448469 | 63 | 72.2977862 |
| 72.4448469 | 63 | 72.3170477 |
| 72.3539378 | 63 | 72.3404415 |
| 72.0812106 | 63 | 72.3506121 |

|            |    |            |
|------------|----|------------|
| 71.8084833 | 63 | 72.3847031 |
| 71.6266651 | 63 | 72.3983394 |
| 71.9903015 | 63 | 72.4278849 |
| 72.3539378 | 63 | 72.4483394 |
| 72.8993924 | 63 | 72.4551576 |
| 73.2630288 | 63 | 72.4574303 |
| 72.7175742 | 63 | 72.4574303 |
| 72.3539378 | 63 | 72.4506121 |
| 72.4448469 | 63 | 72.4165212 |
| 72.4448469 | 63 | 72.3642485 |
| 72.4448469 | 63 | 72.3142485 |
| 72.6266651 | 63 | 72.2212789 |
| 73.0812106 | 63 | 72.1165324 |
| 73.7175742 | 63 | 71.9880257 |
| 74.0812106 | 63 | 71.8758412 |
| 72.4715073 | 63 | 71.8235684 |
| 72.4880362 | 63 | 71.7644775 |
| 72.2896891 | 63 | 71.7326594 |
| 71.7607635 | 63 | 71.6985684 |
| 72.4448469 | 63 | 71.6531139 |
| 71.4448469 | 63 | 71.6167503 |
| 71.4448469 | 63 | 71.594023  |
| 70.8993924 | 63 | 71.5849321 |
| 70.7175742 | 63 | 71.5917503 |
| 70.7175742 | 63 | 71.5849321 |
| 70.8084833 | 63 | 71.5712957 |
| 71.0812106 | 63 | 71.5394775 |
| 70.8993924 | 63 | 71.5099321 |
| 70.7175742 | 63 | 71.4917503 |
| 71.1721197 | 63 | 71.4758412 |
| 69.9987901 | 63 | 71.4599321 |
| 69.7095339 | 63 | 71.4462957 |
| 69.2136661 | 63 | 71.4235684 |
| 69.4120132 | 63 | 71.3849321 |
| 70.9903015 | 63 | 71.3462957 |
| 70.7175742 | 63 | 71.2985684 |
| 71.1721197 | 63 | 71.2979019 |
| 71.0812106 | 63 | 71.2968222 |
| 70.535756  | 63 | 71.3007012 |
| 70.6266651 | 63 | 71.3223487 |
| 70.8993924 | 63 | 71.3132578 |
| 71.2630288 | 63 | 71.3155305 |
| 72.2630288 | 63 | 71.3155305 |
| 72.0812106 | 63 | 71.3291669 |
| 72.3539378 | 63 | 71.345076  |

|            |    |            |
|------------|----|------------|
| 71.9903015 | 63 | 71.3609851 |
| 71.535756  | 63 | 71.3791669 |
| 71.6266651 | 63 | 71.3859851 |
| 71.8084833 | 63 | 71.395076  |
| 71.8084833 | 63 | 71.4064396 |
| 71.8993924 | 63 | 71.420076  |
| 71.7175742 | 63 | 71.4630456 |
| 71.535756  | 63 | 71.5109738 |
| 72.1721197 | 63 | 71.5758443 |
| 72.1721197 | 63 | 71.6130288 |
| 72.4448469 | 63 | 71.6153015 |
| 72.4448469 | 63 | 71.6221197 |
| 72.4448469 | 63 | 71.6153015 |
| 72.6266651 | 63 | 71.6198469 |
| 72.0812106 | 63 | 71.6471197 |
| 71.535756  | 63 | 71.6721197 |
| 71.4448469 | 63 | 71.7062106 |
| 71.4448469 | 63 | 71.7380288 |
| 71.3539378 | 63 | 71.7584833 |
| 71.3539378 | 63 | 71.785756  |
| 71.535756  | 63 | 71.7925742 |
| 71.3539378 | 63 | 71.8039378 |
| 71.2630288 | 63 | 71.8198469 |
| 71.1721197 | 63 | 71.8334833 |
| 71.7175742 | 63 | 71.8448469 |
| 71.7175742 | 63 | 71.8766651 |
| 71.6266651 | 63 | 71.9266651 |
| 71.8084833 | 63 | 72.0062106 |
| 70.8993924 | 63 | 72.0971197 |
| 71.0812106 | 63 | 72.1834833 |
| 70.9903015 | 63 | 72.2834833 |
| 70.8993924 | 63 | 72.3789378 |
| 71.2630288 | 63 | 72.4743924 |
| 71.6266651 | 63 | 72.5698469 |
| 71.6266651 | 63 | 72.6493924 |
| 72.2630288 | 63 | 72.7403015 |
| 72.535756  | 63 | 72.8471197 |
| 73.0812106 | 63 | 72.9653015 |
| 73.1721197 | 63 | 73.0903015 |
| 72.6266651 | 63 | 73.2221197 |
| 72.4448469 | 63 | 73.3584833 |
| 72.1721197 | 63 | 73.4903015 |
| 72.1721197 | 63 | 73.6198469 |
| 72.2630288 | 63 | 73.735756  |
| 73.0812106 | 63 | 73.8425742 |

|            |    |            |
|------------|----|------------|
| 73.8993924 | 63 | 73.9243924 |
| 74.8993924 | 63 | 73.9925742 |
| 75.1721197 | 63 | 74.0539378 |
| 75.6266651 | 63 | 74.1016651 |
| 76.1721197 | 63 | 74.1675742 |
| 76.2630288 | 63 | 74.2289378 |
| 76.2630288 | 63 | 74.2903015 |
| 76.2630288 | 63 | 74.3630288 |
| 75.8084833 | 63 | 74.4312106 |
| 75.7175742 | 63 | 74.4903015 |
| 75.8084833 | 63 | 74.5584833 |
| 76.1721197 | 63 | 74.6289378 |
| 76.4448469 | 63 | 74.7062106 |
| 76.6266651 | 63 | 74.7698469 |
| 76.8084833 | 63 | 74.8016651 |
| 76.8084833 | 63 | 74.8221197 |
| 76.535756  | 63 | 74.8403015 |
| 75.8993924 | 63 | 74.8562106 |
| 75.4448469 | 63 | 74.8721197 |
| 74.9903015 | 63 | 74.8880288 |
| 74.4448469 | 63 | 74.8903015 |
| 74.0812106 | 63 | 74.8698469 |
| 73.7175742 | 63 | 74.8198469 |
| 73.535756  | 63 | 74.7653015 |
| 73.535756  | 63 | 74.6948469 |
| 73.4448469 | 63 | 74.6198469 |
| 73.8084833 | 63 | 74.5425742 |
| 73.9903015 | 63 | 74.460756  |
| 73.9903015 | 63 | 74.3766651 |
| 74.3539378 | 63 | 74.2993924 |
| 75.0812106 | 63 | 74.2289378 |
| 75.6266651 | 63 | 74.160756  |
| 75.6266651 | 63 | 74.0880288 |
| 74.4448469 | 63 | 74.0130288 |
| 73.4448469 | 63 | 73.9312106 |
| 73.1721197 | 63 | 73.8312106 |
| 72.8084833 | 63 | 73.7334833 |
| 72.8084833 | 63 | 73.6312106 |
| 72.8993924 | 63 | 73.535756  |
| 73.1721197 | 63 | 73.4493924 |
| 73.0812106 | 63 | 73.385756  |
| 72.8993924 | 63 | 73.335756  |
| 72.9903015 | 63 | 73.3016651 |
| 72.8084833 | 63 | 73.285756  |
| 73.1721197 | 63 | 73.2834833 |

|              |            |    |            |
|--------------|------------|----|------------|
|              | 73.1721197 | 63 | 73.2903015 |
|              | 72.9903015 | 63 | 73.2903015 |
|              | 72.8993924 | 63 | 73.2834833 |
|              | 72.7175742 | 63 | 73.2698469 |
|              | 72.8993924 | 63 | 73.2584833 |
|              | 73.0812106 | 63 | 73.2471197 |
|              | 73.2630288 | 63 | 73.2198469 |
|              | 73.4448469 | 63 | 73.1698469 |
|              | 73.3539378 | 63 | 73.1198469 |
|              | 72.8084833 | 63 | 73.0903015 |
|              | 72.8993924 | 63 | 73.085756  |
|              | 72.4448469 | 63 | 73.0880288 |
|              | 72.0812106 | 63 | 73.1062106 |
|              | 71.9903015 | 63 | 73.1266651 |
|              | 72.4448469 | 63 | 73.135756  |
|              | 72.4448469 | 63 | 73.1312106 |
|              | 72.7175742 | 63 | 73.0971197 |
|              | 73.0812106 | 63 | 73.0698469 |
|              | 73.4448469 | 63 | 73.0403015 |
|              | 73.8084833 | 63 | 73.0153015 |
|              | 73.4448469 | 63 | 72.9721197 |
|              | 73.535756  | 63 | 72.9221197 |
|              | 73.4448469 | 63 | 72.8766651 |
|              | 73.535756  | 63 | 72.8266651 |
|              | 73.8993924 | 63 | 72.7834833 |
|              | 73.9903015 | 63 | 72.7266651 |
|              | 73.6266651 | 63 | 72.6653015 |
| 92314.16.9a. | 73.6266651 | 63 | 72.5971197 |
| Before1      | 73.2630288 | 63 | 72.535756  |
| Before2      | 73.2630288 | 63 | 72.4743924 |
| Before3      | 73.2630288 | 63 | 72.4334833 |
| Before4      | 73.535756  | 63 | 72.3971197 |
| Before5      | 73.6266651 | 63 | 72.385756  |
| Before6      | 73.2630288 | 63 | 72.385756  |
| Before7      | 72.9903015 | 63 | 72.3948469 |
| Before8      | 71.7175742 | 63 | 72.3834833 |
| Before9      | 71.8084833 | 63 | 72.3675742 |
| Before10     | 71.8084833 | 63 | 72.360756  |
| Before11     | 71.8084833 | 63 | 72.3630288 |
| Before12     | 71.4448469 | 63 | 72.3630288 |
| Before13     | 71.1721197 | 63 | 72.3584833 |
| Before14     | 71.1721197 | 63 | 72.360756  |
| Before15     | 70.8993924 | 63 | 72.3584833 |
| Before16     | 70.9903015 | 63 | 72.360756  |
| Before17     | 70.6266651 | 63 | 72.3448469 |

|          |            |    |            |
|----------|------------|----|------------|
| Before18 | 70.6266651 | 63 | 72.3130288 |
| Before19 | 70.535756  | 63 | 72.2925742 |
| Before20 | 70.9903015 | 63 | 72.285756  |
| Before21 | 70.8993924 | 63 | 72.2721197 |
| Before22 | 71.1721197 | 63 | 72.2834833 |
| Before23 | 71.4448469 | 63 | 72.2993924 |
| Before24 | 71.9903015 | 63 | 72.3153015 |
| Before25 | 72.0812106 | 63 | 72.3130288 |
| Before26 | 72.3539378 | 63 | 72.3130288 |
| Before27 | 71.9903015 | 63 | 72.3221197 |
| Before28 | 71.8084833 | 63 | 72.3448469 |
| Before29 | 72.4448469 | 63 | 72.3993924 |
| Before30 | 73.1721197 | 63 | 72.460756  |
| Before31 | 73.4448469 | 63 | 72.5493924 |
| Before32 | 73.6266651 | 63 | 72.6403015 |
| Before33 | 73.535756  | 63 | 72.7562106 |
| Before34 | 73.4448469 | 63 | 72.8812106 |
| Before35 | 73.535756  | 63 | 72.980021  |
| Before36 | 72.8993924 | 63 | 73.1232028 |
| Before37 | 72.6266651 | 63 | 73.2732028 |
| Before38 | 73.1721197 | 63 | 73.4322937 |
| Before39 | 73.3539378 | 63 | 73.5868392 |
| Before40 | 73.0812106 | 63 | 73.7015587 |
| Before41 | 73.7175742 | 63 | 73.8049146 |
| Before42 | 73.8993924 | 63 | 73.9435509 |
| Before43 | 73.8993924 | 63 | 74.0753691 |
| Before44 | 73.4448469 | 63 | 74.1980964 |
| Before45 | 73.6266651 | 63 | 74.3071873 |
| Before46 | 73.6266651 | 63 | 74.3890055 |
| Before47 | 73.8993924 | 63 | 74.4526418 |
| Before48 | 73.8993924 | 63 | 74.5230964 |
| Before49 | 74.2630288 | 63 | 74.5958236 |
| Before50 | 75.3539378 | 63 | 74.6640055 |
| Before51 | 75.4448469 | 63 | 74.7117327 |
| Before52 | 76.0812106 | 63 | 74.7503691 |
| Before53 | 76.1721197 | 63 | 74.7799146 |
| Before54 | 75.1245364 | 63 | 74.7958236 |
| Before55 | 76.6266651 | 63 | 74.8071873 |
| Before56 | 76.9903015 | 63 | 74.8321873 |
| Before57 | 76.9903015 | 63 | 74.8662782 |
| Before58 | 76.8084833 | 63 | 74.9117327 |
| Before59 | 75.1245364 | 63 | 74.9480964 |
| Before60 | 75.1245364 | 63 | 74.9799146 |
| Before61 | 76.4448469 | 63 | 75.0162782 |
| Before62 | 76.4448469 | 63 | 75.0230964 |

|           |            |    |            |
|-----------|------------|----|------------|
| Before63  | 76.3539378 | 63 | 75.0321873 |
| Before64  | 76.3539378 | 63 | 75.0435509 |
| Before65  | 75.3539378 | 63 | 75.0571873 |
| Before66  | 74.8993924 | 63 | 75.0730964 |
| Before67  | 74.8084833 | 63 | 75.0890055 |
| Before68  | 74.7175742 | 63 | 75.08446   |
| Before69  | 75.1721197 | 63 | 75.08446   |
| Before70  | 75.0812106 | 63 | 75.0730964 |
| Before71  | 74.9903015 | 63 | 75.0367327 |
| Before72  | 74.8084833 | 63 | 74.9980964 |
| Before73  | 74.1721197 | 63 | 74.9230964 |
| Before74  | 73.8993924 | 63 | 74.8412782 |
| Before75  | 74.535756  | 63 | 74.7697405 |
| Before76  | 74.2630288 | 63 | 74.649286  |
| Before77  | 74.4448469 | 63 | 74.5197405 |
| Before78  | 74.6266651 | 63 | 74.3833769 |
| Before79  | 74.6266651 | 63 | 74.2447405 |
| Before80  | 74.535756  | 63 | 74.1436574 |
| Before81  | 73.9903015 | 63 | 74.0289378 |
| Before82  | 74.2630288 | 63 | 73.8766651 |
| Before83  | 74.3539378 | 63 | 73.7153015 |
| Before84  | 73.9903015 | 69 | 73.5493924 |
| Before85  | 74.2630288 | 69 | 73.360756  |
| Before86  | 74.2630288 | 69 | 73.1903015 |
| Before87  | 73.7175742 | 69 | 73.035756  |
| Before88  | 73.8993924 | 69 | 72.8812106 |
| Before89  | 73.8084833 | 69 | 72.7312106 |
| Before90  | 73.8993924 | 69 | 72.5698469 |
| Before91  | 73.8993924 | 69 | 72.4198469 |
| Before92  | 73.0812106 | 69 | 72.2698469 |
| Before93  | 72.8993924 | 69 | 72.1334833 |
| Before94  | 72.2630288 | 69 | 72.010756  |
| Before95  | 71.8084833 | 69 | 71.9016651 |
| Before96  | 71.8084833 | 69 | 71.7675742 |
| Before97  | 71.535756  | 69 | 71.6448469 |
| Before98  | 71.2630288 | 69 | 71.5243924 |
| Before99  | 71.0812106 | 69 | 71.3993924 |
| Before100 | 70.535756  | 69 | 71.2834833 |
| Before101 | 70.3539378 | 69 | 71.1630288 |
| Before102 | 69.9903015 | 69 | 71.0584833 |
| Before103 | 69.7175742 | 69 | 70.9425742 |
| Before104 | 68.8084833 | 69 | 70.8403015 |
| Before105 | 68.535756  | 69 | 70.7584833 |
| Before106 | 68.7175742 | 69 | 70.6766651 |
| Before107 | 68.6266651 | 69 | 70.6016651 |



|           |            |    |            |
|-----------|------------|----|------------|
| Before108 | 68.7175742 | 69 | 70.5334833 |
| Before109 | 68.7175742 | 69 | 70.4721197 |
| Before110 | 69.0812106 | 69 | 70.4153015 |
| Before111 | 68.9903015 | 69 | 70.3471197 |
| Before112 | 69.3539378 | 69 | 70.2698469 |
| Before113 | 69.2630288 | 69 | 70.2153015 |
| Before114 | 69.535756  | 69 | 70.1698469 |
| Before115 | 69.1721197 | 69 | 70.1425742 |
| Before116 | 69.3539378 | 69 | 70.1243924 |
| Before117 | 69.6266651 | 69 | 70.1084833 |
| Before118 | 69.6266651 | 69 | 70.1016651 |
| Before119 | 69.9903015 | 69 | 70.1084833 |
| Before120 | 69.7175742 | 69 | 70.1153015 |
| Before121 | 69.8084833 | 69 | 70.1334833 |
| Before122 | 69.6266651 | 69 | 70.1584833 |
| Before123 | 70.2630288 | 69 | 70.1514272 |
| Before124 | 70.7175742 | 69 | 70.1513959 |
| Before125 | 70.9903015 | 69 | 70.1767777 |
| Before126 | 71.2630288 | 69 | 70.2166224 |
| Before127 | 70.9903015 | 69 | 70.2446903 |
| Before128 | 71.4448469 | 69 | 70.2626342 |
| Before129 | 71.535756  | 69 | 70.2785119 |
| Before130 | 71.1721197 | 69 | 70.3018277 |
| Before131 | 70.8084833 | 69 | 70.3160526 |
| Before132 | 70.8993924 | 69 | 70.3422609 |
| Before133 | 71.0812106 | 69 | 70.3742544 |
| Before134 | 71.1721197 | 69 | 70.4159586 |
| Before135 | 71.0812106 | 69 | 70.4531173 |
| Before136 | 71.1721197 | 69 | 70.4944083 |
| Before137 | 71.2630288 | 69 | 70.5336332 |
| Before138 | 71.535756  | 69 | 70.5311692 |
| Before139 | 71.3539378 | 69 | 70.5340771 |
| Before140 | 71.2630288 | 69 | 70.5167371 |
| Before141 | 71.3539378 | 69 | 70.521871  |
| Before142 | 69.7080566 | 69 | 70.5321703 |
| Before143 | 69.716321  | 69 | 70.532139  |
| Before144 | 69.8237591 | 69 | 70.5085539 |
| Before145 | 70.1295442 | 69 | 70.4783573 |
| Before146 | 69.840288  | 69 | 70.4510846 |
| Before147 | 69.3444202 | 69 | 70.4169937 |
| Before148 | 69.3526847 | 69 | 70.3919937 |
| Before149 | 69.6502053 | 69 | 70.35563   |
| Before150 | 69.6502053 | 69 | 70.3147209 |
| Before151 | 70.0386351 | 69 | 70.2919937 |
| Before152 | 70.6336764 | 69 | 70.2874482 |

|           |            |    |            |
|-----------|------------|----|------------|
| Before153 | 70.9311971 | 63 | 70.28063   |
| Before154 | 71.0221062 | 63 | 70.2579028 |
| Before155 | 70.8237591 | 63 | 70.23063   |
| Before156 | 70.9229326 | 63 | 70.2101755 |
| Before157 | 69.5281054 | 63 | 70.1919937 |
| Before158 | 69.7429814 | 63 | 70.1669937 |
| Before159 | 69.2967004 | 63 | 70.1419937 |
| Before160 | 69.9229326 | 63 | 70.13063   |
| Before161 | 70.2204533 | 63 | 70.1283573 |
| Before162 | 69.6254119 | 63 | 70.13063   |
| Before163 | 69.3196268 | 63 | 70.1740498 |
| Before164 | 69.5097095 | 63 | 70.2149902 |
| Before165 | 69.8993924 | 63 | 70.2486992 |
| Before166 | 69.8993924 | 63 | 70.2793091 |
| Before167 | 69.9903015 | 63 | 70.3216958 |
| Before168 | 69.9903015 | 63 | 70.3923882 |
| Before169 | 69.8993924 | 63 | 70.4696923 |
| Before170 | 70.2630288 | 63 | 70.5486493 |
| Before171 | 70.6266651 | 63 | 70.6366971 |
| Before172 | 70.6266651 | 63 | 70.7218524 |
| Before173 | 70.1721197 | 63 | 70.7875862 |
| Before174 | 70.0812106 | 63 | 70.8436093 |
| Before175 | 70.2630288 | 63 | 70.8905414 |
| Before176 | 70.4448469 | 63 | 70.9469777 |
| Before177 | 70.2630288 | 63 | 71.0054801 |
| Before178 | 70.535756  | 63 | 71.0965805 |
| Before179 | 70.8993924 | 63 | 71.1891271 |
| Before180 | 71.1721197 | 63 | 71.3041944 |
| Before181 | 71.4448469 | 63 | 71.4036059 |
| Before182 | 71.4448469 | 63 | 71.4887612 |
| Before183 | 71.3539378 | 63 | 71.5819744 |
| Before184 | 71.1721197 | 63 | 71.6646503 |
| Before185 | 71.3539378 | 63 | 71.7005094 |
| Before186 | 71.535756  | 63 | 71.7216678 |
| Before187 | 72.1721197 | 63 | 71.7807587 |
| Before188 | 72.4448469 | 63 | 71.8375769 |
| Before189 | 72.8084833 | 63 | 71.8898496 |
| Before190 | 73.1721197 | 63 | 71.9060493 |
| Before191 | 73.4448469 | 63 | 71.9057201 |
| Before192 | 73.2630288 | 63 | 71.911176  |
| Before193 | 73.1721197 | 63 | 71.9292352 |
| Before194 | 72.8993924 | 63 | 71.9710547 |
| Before195 | 73.0812106 | 63 | 72.043782  |
| Before196 | 73.2630288 | 63 | 72.1119638 |
| Before197 | 73.1721197 | 63 | 72.1778729 |

|           |            |    |            |
|-----------|------------|----|------------|
| Before198 | 73.4448469 | 63 | 72.2369638 |
| Before199 | 73.8993924 | 63 | 72.2846911 |
| Before200 | 73.8993924 | 63 | 72.3278729 |
| Before201 | 73.6266651 | 63 | 72.3502709 |
| Before202 | 73.3539378 | 63 | 72.3660574 |
| Before203 | 72.6266651 | 63 | 72.3936207 |
| Before204 | 70.9440743 | 63 | 72.4284155 |
| Before205 | 70.7457272 | 63 | 72.4578383 |
| Before206 | 72.2630288 | 63 | 72.4626743 |
| Before207 | 72.2630288 | 63 | 72.4629649 |
| Before208 | 72.0812106 | 63 | 72.4720559 |
| Before209 | 70.5473801 | 63 | 72.4743286 |
| Before210 | 70.2498594 | 63 | 72.4379649 |
| Before211 | 70.8449007 | 63 | 72.3720559 |
| Before212 | 71.349033  | 63 | 72.2993286 |
| Before213 | 71.8449007 | 63 | 72.2220559 |
| Before214 | 72.9903015 | 63 | 72.1447831 |
| Before215 | 72.9903015 | 63 | 72.0675104 |
| Before216 | 73.0812106 | 63 | 71.9902377 |
| Before217 | 72.6266651 | 63 | 71.9334195 |
| Before218 | 72.4448469 | 63 | 71.8743286 |
| Before219 | 72.6266651 | 63 | 71.8106922 |
| Before220 | 72.0680412 | 63 | 71.7402377 |
| Before221 | 72.0763057 | 63 | 71.6584195 |
| Before222 | 72.5473801 | 63 | 71.5834195 |
| Before223 | 72.7457272 | 63 | 71.5129649 |
| Before224 | 72.349033  | 63 | 71.4606922 |
| Before225 | 71.5473801 | 63 | 71.4573024 |
| Before226 | 71.5473801 | 63 | 71.4543259 |
| Before227 | 72.535756  | 63 | 71.4179623 |
| Before228 | 72.535756  | 63 | 71.3793259 |
| Before229 | 71.3539378 | 63 | 71.3565986 |
| Before230 | 70.535756  | 63 | 71.3926717 |
| Before231 | 70.535756  | 63 | 71.4316373 |
| Before232 | 70.1721197 | 63 | 71.4602723 |
| Before233 | 70.0812106 | 63 | 71.4785767 |
| Before234 | 69.8084833 | 63 | 71.4913026 |
| Before235 | 69.9903015 | 63 | 71.4731208 |
| Before236 | 70.9903015 | 63 | 71.4663026 |
| Before237 | 70.8084833 | 63 | 71.4617572 |
| Before238 | 70.8993924 | 63 | 71.4708481 |
| Before239 | 71.0812106 | 63 | 71.4913026 |
| Before240 | 70.6266651 | 63 | 71.504939  |
| minute1   | 70.6266651 | 63 | 71.532541  |
| minute2   | 70.535756  | 63 | 71.562209  |

|          |            |    |            |
|----------|------------|----|------------|
| minute3  | 70.535756  | 63 | 71.5664639 |
| minute4  | 70.8084833 | 63 | 71.5543964 |
| minute5  | 70.6266651 | 63 | 71.5363372 |
| minute6  | 70.8084833 | 63 | 71.5383194 |
| minute7  | 70.7175742 | 63 | 71.5380288 |
| minute8  | 71.1721197 | 63 | 71.4971197 |
| minute9  | 71.9903015 | 63 | 71.4584833 |
| minute10 | 71.8084833 | 63 | 71.435756  |
| minute11 | 71.9903015 | 63 | 71.4312106 |
| minute12 | 72.0812106 | 63 | 71.4266651 |
| minute13 | 72.3539378 | 63 | 71.4380288 |
| minute14 | 72.2630288 | 63 | 71.4471197 |
| minute15 | 72.7175742 | 63 | 71.4516651 |
| minute16 | 72.8993924 | 63 | 71.4516651 |
| minute17 | 72.9903015 | 63 | 71.4289378 |
| minute18 | 73.2630288 | 63 | 71.4039378 |
| minute19 | 73.1721197 | 63 | 71.3630288 |
| minute20 | 73.1721197 | 63 | 71.3153015 |
| minute21 | 73.2630288 | 63 | 71.2789378 |
| minute22 | 72.7175742 | 63 | 71.2425742 |
| minute23 | 72.2630288 | 63 | 71.2062106 |
| minute24 | 71.6266651 | 63 | 71.1721197 |
| minute25 | 71.6266651 | 63 | 71.1403015 |
| minute26 | 71.535756  | 63 | 71.1243924 |
| minute27 | 70.8993924 | 63 | 71.1198469 |
| minute28 | 70.9903015 | 63 | 71.1221197 |
| minute29 | 70.4448469 | 63 | 71.110756  |
| minute30 | 70.3539378 | 63 | 71.085756  |
| minute31 | 70.3539378 | 63 | 71.0766651 |
| minute32 | 70.6266651 | 63 | 71.0698469 |
| minute33 | 70.4448469 | 63 | 71.0675742 |
| minute34 | 69.9903015 | 63 | 71.0653015 |
| minute35 | 69.9903015 | 63 | 71.0834833 |
| minute36 | 70.0812106 | 63 | 71.1016651 |
| minute37 | 69.8084833 | 63 | 71.1130288 |
| minute38 | 69.2630288 | 63 | 71.1221197 |
| minute39 | 69.1721197 | 63 | 71.1175742 |
| minute40 | 69.1721197 | 63 | 71.1153015 |
| minute41 | 69.1721197 | 63 | 71.1448469 |
| minute42 | 69.0812106 | 63 | 71.1743924 |
| minute43 | 69.1721197 | 63 | 71.2289378 |
| minute44 | 69.535756  | 63 | 71.3062106 |
| minute45 | 69.9903015 | 63 | 71.4062106 |
| minute46 | 70.6266651 | 63 | 71.5266651 |
| minute47 | 70.8084833 | 63 | 71.6743924 |

|               |            |    |            |
|---------------|------------|----|------------|
| minute48      | 70.7175742 | 63 | 71.835756  |
| minute49      | 70.9903015 | 63 | 72.0016651 |
| minute50      | 71.4448469 | 63 | 72.1834833 |
| minute51      | 71.7175742 | 63 | 72.3630288 |
| minute52      | 71.9903015 | 63 | 72.5471197 |
| minute53      | 72.2630288 | 63 | 72.7403015 |
| minute54      | 72.9903015 | 63 | 72.9471197 |
| minute55      | 73.4448469 | 63 | 73.160756  |
| minute56      | 73.3539378 | 69 | 73.3562106 |
| minute57      | 73.3539378 | 69 | 73.5266651 |
| minute58      | 73.0812106 | 69 | 73.6693876 |
| minute59      | 73.0812106 | 69 | 73.8431017 |
| minute60      | 74.3539378 | 69 | 74.01413   |
| Activity27:59 | 74.4448469 | 73 | 74.2186754 |
| Activity28:00 | 74.8993924 | 73 | 74.4345845 |
| Activity28:01 | 75.3539378 | 73 | 74.6482209 |
| Activity28:02 | 75.6266651 | 73 | 74.8732209 |
| Activity28:03 | 76.4448469 | 73 | 75.0936754 |
| Activity28:04 | 77.4448469 | 73 | 75.2982209 |
| Activity28:05 | 77.3539378 | 73 | 75.4777663 |
| Activity28:06 | 77.6266651 | 73 | 75.6504936 |
| Activity28:07 | 77.7175742 | 73 | 75.8073118 |
| Activity28:08 | 77.535756  | 73 | 75.9368572 |
| Activity28:09 | 77.7175742 | 73 | 76.0482209 |
| Activity28:10 | 78.3539378 | 73 | 76.1504936 |
| Activity28:11 | 78.7175742 | 73 | 76.2504936 |
| Activity28:12 | 78.535756  | 73 | 76.3527663 |
| Activity28:13 | 77.8084833 | 73 | 76.4368572 |
| Activity28:14 | 76.8993924 | 73 | 76.5277663 |
| Activity28:15 | 75.517381  | 73 | 76.6209482 |
| Activity28:16 | 76.2115959 | 73 | 76.6982209 |
| Activity28:17 | 76.0132488 | 73 | 76.7686754 |
| Activity28:18 | 77.3539378 | 73 | 76.8277663 |
| Activity28:19 | 77.8084833 | 73 | 76.8436754 |
| Activity28:20 | 77.6266651 | 73 | 76.8482209 |
| Activity28:21 | 78.1721197 | 73 | 76.83913   |
| Activity28:22 | 78.3539378 | 73 | 76.8095845 |
| Activity28:23 | 78.1721197 | 73 | 76.7686754 |
| Activity28:24 | 77.8084833 | 73 | 76.7164027 |
| Activity28:25 | 77.7175742 | 73 | 76.6345845 |
| Activity28:26 | 76.9903015 | 73 | 76.56413   |
| Activity28:27 | 76.1721197 | 73 | 76.4982209 |
| Activity28:28 | 75.8993924 | 73 | 76.43913   |
| Activity28:29 | 75.8084833 | 73 | 76.3868572 |
| Activity28:30 | 75.9903015 | 73 | 76.3186754 |

|               |            |    |            |
|---------------|------------|----|------------|
| Activity28:31 | 76.3539378 | 73 | 76.23913   |
| Activity28:32 | 76.3539378 | 73 | 76.1527663 |
| Activity28:33 | 77.0812106 | 73 | 76.0777663 |
| Activity28:34 | 77.0812106 | 73 | 76.0232209 |
| Activity28:35 | 76.4448469 | 73 | 75.9959482 |
| Activity28:36 | 75.8993924 | 73 | 76.0168621 |
| Activity28:37 | 75.4448469 | 73 | 76.0226933 |
| Activity28:38 | 74.9903015 | 73 | 76.035756  |
| Activity28:39 | 74.6266651 | 73 | 76.0084833 |
| Activity28:40 | 74.535756  | 73 | 75.960756  |
| Activity28:41 | 74.1721197 | 73 | 75.9153015 |
| Activity28:42 | 73.9903015 | 73 | 75.8471197 |
| Activity28:43 | 74.3539378 | 73 | 75.7675742 |
| Activity28:44 | 74.1721197 | 73 | 75.6812106 |
| Activity28:45 | 74.535756  | 73 | 75.6175742 |
| Activity28:46 | 74.9903015 | 73 | 75.5584833 |
| Activity28:47 | 75.3539378 | 73 | 75.5153015 |
| Activity28:48 | 75.4448469 | 73 | 75.4948469 |
| Activity28:49 | 74.9903015 | 73 | 75.4698469 |
| Activity28:50 | 75.1721197 | 73 | 75.4243924 |
| Activity28:51 | 75.2630288 | 73 | 75.3766651 |
| Activity28:52 | 75.535756  | 73 | 75.310756  |
| Activity28:53 | 75.6266651 | 73 | 75.2653015 |
| Activity28:54 | 75.8084833 | 73 | 75.2130288 |
| Activity28:55 | 76.3539378 | 73 | 75.1562106 |
| Activity28:56 | 76.4448469 | 73 | 75.1084833 |
| Activity28:57 | 76.535756  | 73 | 75.0721197 |
| Activity28:58 | 76.2630288 | 73 | 75.0562106 |
| Activity28:59 | 75.8993924 | 73 | 75.0493924 |
| Activity29:00 | 75.8084833 | 73 | 75.0471197 |
| Activity29:01 | 75.4448469 | 73 | 75.0403015 |
| Activity29:02 | 75.1721197 | 73 | 75.0493924 |
| Activity29:03 | 74.7175742 | 73 | 75.0630288 |
| Activity29:04 | 75.2630288 | 73 | 75.0698469 |
| Activity29:05 | 75.3539378 | 73 | 75.0766651 |
| Activity29:06 | 75.2630288 | 73 | 75.0743924 |
| Activity29:07 | 75.3539378 | 73 | 75.060756  |
| Activity29:08 | 74.8993924 | 73 | 75.0562106 |
| Activity29:09 | 73.9903015 | 73 | 75.0493924 |
| Activity29:10 | 74.0812106 | 73 | 75.0516651 |
| Activity29:11 | 73.7175742 | 73 | 75.0516651 |
| Activity29:12 | 74.535756  | 73 | 75.0425742 |
| Activity29:13 | 74.9903015 | 73 | 75.0289378 |
| Activity29:14 | 74.8084833 | 73 | 75.0175742 |
| Activity29:15 | 74.535756  | 73 | 75.0153015 |

|               |            |    |            |
|---------------|------------|----|------------|
| Activity29:16 | 74.4448469 | 73 | 74.985756  |
| Activity29:17 | 74.8084833 | 73 | 74.9403015 |
| Activity29:18 | 74.7175742 | 73 | 74.8903015 |
| Activity29:19 | 74.535756  | 73 | 74.8403015 |
| Activity29:20 | 74.2630288 | 73 | 74.7789378 |
| Activity29:21 | 74.535756  | 73 | 74.6993924 |
| Activity29:22 | 74.535756  | 73 | 74.6289378 |
| Activity29:23 | 74.6266651 | 73 | 74.5630288 |
| Activity29:24 | 74.4448469 | 73 | 74.510756  |
| Activity29:25 | 74.4448469 | 73 | 74.4448469 |
| Activity29:26 | 74.4448469 | 73 | 74.3743924 |
| Activity29:27 | 75.1721197 | 73 | 74.3175742 |
| Activity29:28 | 75.1721197 | 73 | 74.2562106 |
| Activity29:29 | 75.0812106 | 73 | 74.1993924 |
| Activity29:30 | 75.1721197 | 73 | 74.1584833 |
| Activity29:31 | 74.8993924 | 73 | 74.0993924 |
| Activity29:32 | 74.9903015 | 73 | 74.0425742 |
| Activity29:33 | 75.1721197 | 73 | 73.9562106 |
| Activity29:34 | 75.7175742 | 73 | 73.860756  |
| Activity29:35 | 75.1721197 | 73 | 73.7675742 |
| Activity29:36 | 74.6266651 | 73 | 73.6925742 |
| Activity29:37 | 74.535756  | 73 | 73.6289378 |
| Activity29:38 | 74.2630288 | 73 | 73.5562106 |
| Activity29:39 | 73.4448469 | 73 | 73.485756  |
| Activity29:40 | 72.6266651 | 73 | 73.4016651 |
| Activity29:41 | 72.6266651 | 73 | 73.3221197 |
| Activity29:42 | 72.535756  | 73 | 73.2403015 |
| Activity29:43 | 72.6266651 | 73 | 73.1698469 |
| Activity29:44 | 72.6266651 | 73 | 73.110756  |
| Activity29:45 | 72.535756  | 73 | 73.0743924 |
| Activity29:46 | 72.9903015 | 73 | 73.0493924 |
| Activity29:47 | 72.8993924 | 73 | 73.0425742 |
| Activity29:48 | 72.6266651 | 73 | 73.0266651 |
| Activity29:49 | 72.3539378 | 73 | 73.010756  |
| Activity29:50 | 71.7175742 | 73 | 73.010756  |
| Activity29:51 | 71.4448469 | 73 | 72.9750962 |
| Activity29:52 | 71.0812106 | 73 | 72.9487339 |
| Activity29:53 | 71.1721197 | 73 | 72.9200989 |
| Activity29:54 | 71.0812106 | 73 | 72.8794804 |
| Activity29:55 | 71.535756  | 73 | 72.8153082 |
| Activity29:56 | 71.8993924 | 73 | 72.8289446 |
| Activity29:57 | 71.8993924 | 73 | 72.8493991 |
| Activity29:58 | 71.8993924 | 73 | 72.8743991 |
| Activity29:59 | 71.1721197 | 73 | 72.9153082 |
| Activity30:00 | 71.0812106 | 73 | 72.9766718 |

|               |            |    |            |
|---------------|------------|----|------------|
| Activity30:01 | 71.2630288 | 73 | 73.05849   |
| Activity30:02 | 71.7175742 | 73 | 73.0361983 |
| Activity30:03 | 72.2630288 | 73 | 73.0163859 |
| Activity30:04 | 72.9903015 | 73 | 73.0141355 |
| Activity30:05 | 73.4448469 | 73 | 72.9953562 |
| Activity30:06 | 74.1721197 | 73 | 72.9588083 |
| Activity30:07 | 74.535756  | 73 | 72.9131695 |
| Activity30:08 | 74.535756  | 73 | 72.8623654 |
| Activity30:09 | 75.0812106 | 73 | 72.8171398 |
| Activity30:10 | 73.7457272 | 73 | 72.8080489 |
| Activity30:11 | 73.8449007 | 73 | 72.8194125 |
| Activity30:12 | 73.8449007 | 73 | 72.8512307 |
| Activity30:13 | 73.5473801 | 73 | 72.8807761 |
| Activity30:14 | 73.1506859 | 73 | 72.9171398 |
| Activity30:15 | 75.7175742 | 73 | 72.9512307 |
| Activity30:16 | 75.4448469 | 73 | 72.9807761 |
| Activity30:17 | 75.535756  | 73 | 73.0080489 |
| Activity30:18 | 75.8993924 | 73 | 73.0535034 |
| Activity30:19 | 75.8993924 | 73 | 73.1012307 |
| Activity30:20 | 75.8993924 | 73 | 73.1625943 |
| Activity30:21 | 71.7349964 | 73 | 73.2421398 |
| Activity30:22 | 71.7432609 | 73 | 73.3307761 |
| Activity30:23 | 72.5366493 | 73 | 73.3989579 |
| Activity30:24 | 71.8754923 | 73 | 73.4535034 |
| Activity30:25 | 71.0738394 | 73 | 73.4875943 |
| Activity30:26 | 71.1647485 | 73 | 73.5125943 |
| Activity30:27 | 70.8672278 | 73 | 73.5171398 |
| Activity30:28 | 70.8176411 | 73 | 73.5307761 |
| Activity30:29 | 71.9903015 | 73 | 73.5535034 |
| Activity30:30 | 72.1721197 | 73 | 73.5535034 |
| Activity30:31 | 72.7175742 | 73 | 73.5891632 |
| Activity30:32 | 72.2630288 | 73 | 73.6132528 |
| Activity30:33 | 72.6266651 | 73 | 73.6396151 |
| Activity30:34 | 72.4448469 | 73 | 73.6825063 |
| Activity30:35 | 72.7175742 | 73 | 73.7489512 |
| Activity30:36 | 72.9903015 | 73 | 73.7648603 |
| Activity30:37 | 73.7175742 | 73 | 73.7944058 |
| Activity30:38 | 73.8084833 | 73 | 73.817133  |
| Activity30:39 | 73.6266651 | 73 | 73.842133  |
| Activity30:40 | 74.2630288 | 73 | 73.8648603 |
| Activity30:41 | 74.8084833 | 73 | 73.892133  |
| Activity30:42 | 74.4448469 | 73 | 74.0098793 |
| Activity30:43 | 74.4448469 | 73 | 74.1092371 |
| Activity30:44 | 74.3539378 | 73 | 74.1683057 |
| Activity30:45 | 74.4448469 | 73 | 74.2416305 |



|               |            |    |            |
|---------------|------------|----|------------|
| Activity30:46 | 74.3539378 | 73 | 74.3259057 |
| Activity30:47 | 75.0812106 | 73 | 74.391999  |
| Activity30:48 | 75.4448469 | 73 | 74.4632577 |
| Activity30:49 | 75.0812106 | 73 | 74.5221197 |
| Activity30:50 | 75.1721197 | 73 | 74.5471197 |
| Activity30:51 | 74.8084833 | 73 | 74.5426908 |
| Activity30:52 | 74.8993924 | 73 | 74.5271048 |
| Activity30:53 | 75.2630288 | 73 | 74.5725594 |
| Activity30:54 | 75.8084833 | 73 | 74.6111957 |
| Activity30:55 | 76.3539378 | 73 | 74.6543775 |
| Activity30:56 | 76.6266651 | 73 | 74.6439569 |
| Activity30:57 | 76.4448469 | 73 | 74.6316767 |
| Activity30:58 | 76.8993924 | 73 | 74.6036941 |
| Activity30:59 | 76.8084833 | 73 | 74.5734387 |
| Activity31:00 | 76.9903015 | 73 | 74.5477288 |
| Activity31:01 | 76.4448469 | 73 | 74.5085892 |
| Activity31:02 | 75.7175742 | 73 | 74.4632512 |
| Activity31:03 | 74.8993924 | 73 | 74.4609784 |
| Activity31:04 | 74.8084833 | 73 | 74.4541603 |
| Activity31:05 | 74.4448469 | 73 | 74.4496148 |
| Activity31:06 | 73.8084833 | 73 | 74.4450694 |
| Activity31:07 | 73.7175742 | 73 | 74.411095  |
| Activity31:08 | 73.1721197 | 73 | 74.3638975 |
| Activity31:09 | 72.9903015 | 73 | 74.3179396 |
| Activity31:10 | 71.9949631 | 73 | 74.2837587 |
| Activity31:11 | 72.0941366 | 73 | 74.2524702 |
| Activity31:12 | 74.0812106 | 73 | 74.2430826 |
| Activity31:13 | 74.1721197 | 73 | 74.2165463 |
| Activity31:14 | 74.1721197 | 73 | 74.173481  |
| Activity31:15 | 72.3007482 | 73 | 74.1240108 |
| Activity31:16 | 72.4990953 | 73 | 74.0609042 |
| Activity31:17 | 72.5982689 | 73 | 73.963729  |
| Activity31:18 | 72.5982689 | 73 | 73.8680001 |
| Activity31:19 | 72.5982689 | 73 | 73.7483043 |
| Activity31:20 | 72.6974424 | 73 | 73.6255092 |
| Activity31:21 | 72.9949631 | 73 | 73.5246151 |
| Activity31:22 | 74.3539378 | 73 | 73.43963   |
| Activity31:23 | 74.1721197 | 73 | 73.4215647 |
| Activity31:24 | 74.1721197 | 73 | 73.4647465 |
| Activity31:25 | 74.2630288 | 73 | 73.4965647 |
| Activity31:26 | 72.9949631 | 73 | 73.5306556 |
| Activity31:27 | 73.1933102 | 73 | 73.5829283 |
| Activity31:28 | 73.6065333 | 73 | 73.6079283 |
| Activity31:29 | 73.7139713 | 73 | 73.6374738 |
| Activity31:30 | 73.9205829 | 73 | 73.6806556 |

|               |            |    |            |
|---------------|------------|----|------------|
| Activity31:31 | 74.4329796 | 73 | 73.7419027 |
| Activity31:32 | 73.8379383 | 73 | 73.8029432 |
| Activity31:33 | 73.5404176 | 73 | 73.8233977 |
| Activity31:34 | 73.8296738 | 73 | 73.8574886 |
| Activity31:35 | 73.8296738 | 73 | 73.8824886 |
| Activity31:36 | 72.739658  | 73 | 73.9656366 |
| Activity31:37 | 72.6156911 | 73 | 74.0529167 |
| Activity31:38 | 72.1115589 | 73 | 74.1468084 |
| Activity31:39 | 71.8966828 | 73 | 74.2429729 |
| Activity31:40 | 72.9545341 | 73 | 74.3345919 |
| Activity31:41 | 73.0454432 | 73 | 74.4214588 |
| Activity31:42 | 74.9949631 | 73 | 74.5008877 |
| Activity31:43 | 76.6266651 | 73 | 74.548615  |
| Activity31:44 | 76.0812106 | 73 | 74.5827059 |
| Activity31:45 | 75.8084833 | 73 | 74.6122514 |
| Activity31:46 | 75.8993924 | 73 | 74.6349786 |
| Activity31:47 | 74.7175742 | 73 | 74.6894076 |
| Activity31:48 | 74.3539378 | 73 | 74.7366051 |
| Activity31:49 | 74.7175742 | 73 | 74.773472  |
| Activity31:50 | 74.4448469 | 73 | 74.8167439 |
| Activity31:51 | 74.535756  | 73 | 74.8548505 |
| Activity31:52 | 74.8993924 | 73 | 74.8915108 |
| Activity31:53 | 75.535756  | 73 | 74.9430472 |
| Activity31:54 | 75.1721197 | 73 | 74.9838397 |
| Activity31:55 | 75.6266651 | 73 | 75.0037645 |
| Activity31:56 | 75.9903015 | 73 | 75.0077802 |
| Activity31:57 | 76.3539378 | 73 | 75.041319  |
| Activity31:58 | 76.4448469 | 73 | 75.0802297 |
| Activity31:59 | 76.2630288 | 73 | 75.129471  |
| Activity32:00 | 76.1721197 | 73 | 75.1704478 |
| Activity32:01 | 76.1721197 | 73 | 75.1781602 |
| Activity32:02 | 76.2630288 | 73 | 75.1676908 |
| Activity32:03 | 75.535756  | 73 | 75.110756  |
| Activity32:04 | 75.3539378 | 73 | 75.0153015 |
| Activity32:05 | 75.1721197 | 73 | 74.9198469 |
| Activity32:06 | 75.1721197 | 73 | 74.8289378 |
| Activity32:07 | 75.0812106 | 73 | 74.7243924 |
| Activity32:08 | 75.0812106 | 73 | 74.6516651 |
| Activity32:09 | 75.4448469 | 73 | 74.5789378 |
| Activity32:10 | 75.4448469 | 73 | 74.4971197 |
| Activity32:11 | 75.8993924 | 73 | 74.4175742 |
| Activity32:12 | 75.8993924 | 73 | 74.3380288 |
| Activity32:13 | 75.1721197 | 73 | 74.2516651 |
| Activity32:14 | 74.6266651 | 73 | 74.1448469 |
| Activity32:15 | 73.9903015 | 73 | 74.0516651 |

|               |            |    |            |
|---------------|------------|----|------------|
| Activity32:16 | 74.0812106 | 73 | 73.9471197 |
| Activity32:17 | 74.1721197 | 73 | 73.8198469 |
| Activity32:18 | 74.0812106 | 73 | 73.6812106 |
| Activity32:19 | 73.535756  | 73 | 73.535756  |
| Activity32:20 | 73.2630288 | 73 | 73.3789378 |
| Activity32:21 | 72.6266651 | 73 | 73.2243924 |
| Activity32:22 | 72.7175742 | 73 | 73.085756  |
| Activity32:23 | 72.8084833 | 73 | 72.9539378 |
| Activity32:24 | 72.2630288 | 73 | 72.8448469 |
| Activity32:25 | 72.1721197 | 73 | 72.7448469 |
| Activity32:26 | 71.7175742 | 73 | 72.6516651 |
| Activity32:27 | 71.8084833 | 73 | 72.5425742 |
| Activity32:28 | 71.4448469 | 73 | 72.4380288 |
| Activity32:29 | 71.4448469 | 73 | 72.310756  |
| Activity32:30 | 71.2630288 | 73 | 72.1698469 |
| Activity32:31 | 71.3539378 | 73 | 72.0175742 |
| Activity32:32 | 71.4448469 | 73 | 71.8562106 |
| Activity32:33 | 71.2630288 | 73 | 71.6925742 |
| Activity32:34 | 71.4448469 | 73 | 71.5448469 |
| Activity32:35 | 71.4448469 | 73 | 71.4039378 |
| minute1       | 70.8993924 | 73 | 71.2812106 |
| minute2       | 70.8084833 | 69 | 71.1493924 |
| minute3       | 70.6266651 | 69 | 70.9948469 |
| minute4       | 69.9903015 | 69 | 70.8266651 |
| minute5       | 69.9903015 | 69 | 70.6675742 |
| minute6       | 70.6266651 | 69 | 70.4993924 |
| minute7       | 70.9903015 | 69 | 70.3425742 |
| minute8       | 71.1721197 | 69 | 70.1834833 |
| minute9       | 71.3539378 | 69 | 70.0289378 |
| minute10      | 71.4448469 | 69 | 69.8834833 |
| minute11      | 70.8084833 | 69 | 69.7380288 |
| minute12      | 70.8993924 | 69 | 69.6039378 |
| minute13      | 69.9903015 | 69 | 69.4743924 |
| minute14      | 69.8084833 | 69 | 69.360756  |
| minute15      | 69.3539378 | 69 | 69.2698469 |
| minute16      | 69.4448469 | 69 | 69.1903015 |
| minute17      | 69.3539378 | 69 | 69.1198469 |
| minute18      | 69.2630288 | 69 | 69.0562106 |
| minute19      | 68.9903015 | 69 | 69.0016651 |
| minute20      | 69.0812106 | 69 | 68.9471197 |
| minute21      | 68.8084833 | 69 | 68.8971197 |
| minute22      | 67.9903015 | 69 | 68.8539378 |
| minute23      | 67.3539378 | 69 | 68.8130288 |
| minute24      | 67.1721197 | 69 | 68.7675742 |
| minute25      | 66.535756  | 69 | 68.7380288 |

|          |            |    |            |
|----------|------------|----|------------|
| minute26 | 66.3539378 | 69 | 68.7130288 |
| minute27 | 66.3539378 | 69 | 68.6653015 |
| minute28 | 66.6266651 | 69 | 68.6084833 |
| minute29 | 66.4448469 | 69 | 68.5584833 |
| minute30 | 66.3539378 | 69 | 68.5039378 |
| minute31 | 66.3539378 | 69 | 68.4471197 |
| minute32 | 66.6266651 | 69 | 68.4175742 |
| minute33 | 66.8993924 | 69 | 68.3789378 |
| minute34 | 67.8084833 | 69 | 68.3630288 |
| minute35 | 68.0812106 | 69 | 68.3539378 |
| minute36 | 68.535756  | 69 | 68.3584833 |
| minute37 | 68.8993924 | 69 | 68.3675742 |
| minute38 | 69.0812106 | 69 | 68.3812106 |
| minute39 | 69.2630288 | 69 | 68.4016651 |
| minute40 | 69.4448469 | 69 | 68.4493924 |
| minute41 | 69.1721197 | 69 | 68.510756  |
| minute42 | 69.1721197 | 69 | 68.5812106 |
| minute43 | 68.8084833 | 69 | 68.6743924 |
| minute44 | 68.8084833 | 69 | 68.7721197 |
| minute45 | 68.9903015 | 69 | 68.8812106 |
| minute46 | 68.7175742 | 69 | 69.010756  |
| minute47 | 68.7175742 | 69 | 69.1539378 |
| minute48 | 69.1721197 | 69 | 69.3130288 |
| minute49 | 69.1721197 | 69 | 69.4766651 |
| minute50 | 69.1721197 | 69 | 69.660756  |
| minute51 | 69.6266651 | 69 | 69.8653015 |
| minute52 | 69.3539378 | 69 | 70.0789378 |
| minute53 | 69.3539378 | 69 | 70.285756  |
| minute54 | 69.4448469 | 69 | 70.4834833 |
| minute55 | 69.535756  | 69 | 70.6471197 |
| minute56 | 69.8084833 | 69 | 70.7971197 |
| minute57 | 69.8993924 | 69 | 70.9425742 |
| minute58 | 70.0812106 | 69 | 71.0721197 |
| minute59 | 70.8993924 | 69 | 71.1698469 |
| minute60 | 71.535756  | 69 | 71.2653015 |
| After1   | 71.6266651 | 69 | 71.360756  |
| After2   | 71.7175742 | 69 | 71.4630288 |
| After3   | 71.2630288 | 69 | 71.5334833 |
| After4   | 71.535756  | 69 | 71.610756  |
| After5   | 71.7175742 | 69 | 71.6789378 |
| After6   | 72.0812106 | 69 | 71.7221197 |
| After7   | 72.7175742 | 69 | 71.7584833 |
| After8   | 73.1721197 | 69 | 71.785756  |
| After9   | 73.8084833 | 69 | 71.785756  |
| After10  | 74.535756  | 69 | 71.7812106 |

|         |            |    |            |
|---------|------------|----|------------|
| After11 | 74.8993924 | 69 | 71.7721197 |
| After12 | 74.8993924 | 69 | 71.7471197 |
| After13 | 74.8084833 | 69 | 71.7198469 |
| After14 | 74.3539378 | 69 | 71.6903015 |
| After15 | 74.0812106 | 69 | 71.6630288 |
| After16 | 74.3539378 | 69 | 71.6289378 |
| After17 | 74.0812106 | 69 | 71.585756  |
| After18 | 72.9903015 | 69 | 71.5516651 |
| After19 | 73.0812106 | 69 | 71.5334833 |
| After20 | 73.2630288 | 69 | 71.5062106 |
| After21 | 73.2630288 | 69 | 71.4562106 |
| After22 | 71.9903015 | 69 | 71.4016651 |
| After23 | 71.8993924 | 69 | 71.3425742 |
| After24 | 71.535756  | 69 | 71.3198469 |
| After25 | 70.7175742 | 69 | 71.2675742 |
| After26 | 70.1721197 | 69 | 71.2084833 |
| After27 | 69.8084833 | 69 | 71.1425742 |
| After28 | 69.1721197 | 69 | 71.0653015 |
| After29 | 68.9903015 | 69 | 70.9789378 |
| After30 | 68.8084833 | 69 | 70.8812106 |
| After31 | 68.6266651 | 69 | 70.7721197 |
| After32 | 68.2630288 | 63 | 70.6743924 |
| After33 | 68.1721197 | 63 | 70.5880288 |
| After34 | 68.3539378 | 63 | 70.4993924 |
| After35 | 68.1721197 | 63 | 70.4198469 |
| After36 | 68.0812106 | 63 | 70.3266651 |
| After37 | 68.535756  | 63 | 70.2084833 |
| After38 | 69.3539378 | 63 | 70.0880288 |
| After39 | 69.8084833 | 63 | 69.985756  |
| After40 | 69.535756  | 63 | 69.8698469 |
| After41 | 69.4448469 | 63 | 69.735756  |
| After42 | 69.3539378 | 63 | 69.5993924 |
| After43 | 70.3539378 | 63 | 69.5016651 |
| After44 | 69.4448469 | 63 | 69.4175742 |
| After45 | 69.3539378 | 63 | 69.3630288 |
| After46 | 69.4448469 | 63 | 69.3380288 |
| After47 | 69.6266651 | 63 | 69.3289378 |
| After48 | 69.7175742 | 63 | 69.3334833 |
| After49 | 69.8993924 | 63 | 69.3584833 |
| After50 | 70.1721197 | 63 | 69.3880288 |
| After51 | 70.9903015 | 63 | 69.4175742 |
| After52 | 71.4448469 | 63 | 69.4539378 |
| After53 | 71.2630288 | 63 | 69.5153015 |
| After54 | 71.1721197 | 63 | 69.5812106 |
| After55 | 70.3539378 | 63 | 69.6539378 |

|          |            |    |            |
|----------|------------|----|------------|
| After56  | 69.6266651 | 63 | 69.7312106 |
| After57  | 69.2630288 | 63 | 69.8175742 |
| After58  | 68.8993924 | 63 | 69.9016651 |
| After59  | 68.4448469 | 63 | 69.9721197 |
| After60  | 67.8993924 | 63 | 70.0312106 |
| After61  | 67.8084833 | 63 | 70.1039378 |
| After62  | 68.0812106 | 63 | 70.1903015 |
| After63  | 68.535756  | 63 | 70.2812106 |
| After64  | 69.3539378 | 63 | 70.3471197 |
| After65  | 69.7175742 | 63 | 70.4471197 |
| After66  | 69.8084833 | 63 | 70.5471197 |
| After67  | 69.9903015 | 63 | 70.6425742 |
| After68  | 70.1721197 | 63 | 70.7074189 |
| After69  | 70.1721197 | 63 | 70.7627595 |
| After70  | 69.9903015 | 63 | 70.8263645 |
| After71  | 70.0812106 | 63 | 70.8856307 |
| After72  | 70.7175742 | 63 | 70.9318804 |
| After73  | 70.8084833 | 63 | 70.9593284 |
| After74  | 71.2630288 | 63 | 70.9830574 |
| After75  | 71.2630288 | 63 | 71.0041004 |
| After76  | 71.535756  | 63 | 71.049555  |
| After77  | 71.8993924 | 63 | 71.0950095 |
| After78  | 72.1721197 | 63 | 71.149555  |
| After79  | 72.1721197 | 63 | 71.2154641 |
| After80  | 72.4448469 | 63 | 71.2950095 |
| After81  | 72.8993924 | 63 | 71.3950095 |
| After82  | 72.9903015 | 63 | 71.4791004 |
| After83  | 72.9903015 | 63 | 71.5518277 |
| After84  | 73.4448469 | 63 | 71.6154641 |
| After85  | 73.3539378 | 63 | 71.6609186 |
| After86  | 73.2630288 | 63 | 71.6927368 |
| After87  | 72.2204533 | 63 | 71.6881913 |
| After88  | 71.9311971 | 63 | 71.6722823 |
| After89  | 72.4435938 | 63 | 71.6768277 |
| After90  | 72.5427673 | 63 | 71.6791004 |
| After91  | 72.840288  | 63 | 71.699555  |
| After92  | 72.5427673 | 63 | 71.7268277 |
| After93  | 72.2121888 | 63 | 71.7450095 |
| After94  | 72.0138417 | 63 | 71.7722823 |
| After95  | 72.1721197 | 63 | 71.7927368 |
| After96  | 71.4448469 | 63 | 71.8222823 |
| After97  | 71.4448469 | 63 | 71.849555  |
| After98  | 71.535756  | 63 | 71.8722823 |
| After99  | 71.6266651 | 63 | 71.8722823 |
| After100 | 71.8993924 | 63 | 71.8722823 |

|          |            |    |            |
|----------|------------|----|------------|
| After101 | 71.1721197 | 63 | 71.8609186 |
| After102 | 70.9903015 | 63 | 71.8427368 |
| After103 | 71.0812106 | 63 | 71.8200095 |
| After104 | 71.1721197 | 63 | 71.7881913 |
| After105 | 70.9903015 | 63 | 71.7609186 |
| After106 | 69.6266651 | 63 | 71.7404641 |
| After107 | 69.3539378 | 63 | 71.7359186 |
| After108 | 70.3539378 | 63 | 71.7688012 |
| After109 | 70.2630288 | 63 | 71.8293697 |
| After110 | 70.8084833 | 63 | 71.8771283 |
| After111 | 71.1721197 | 63 | 71.9474076 |
| After112 | 71.4448469 | 63 | 72.0147943 |
| After113 | 71.8993924 | 63 | 72.0828008 |
| After114 | 72.0812106 | 63 | 72.1590718 |
| After115 | 72.4448469 | 63 | 72.2266651 |
| After116 | 72.6266651 | 63 | 72.2721197 |
| After117 | 72.8084833 | 63 | 72.3221197 |
| After118 | 72.1721197 | 63 | 72.3630288 |
| After119 | 72.1721197 | 63 | 72.3993924 |
| After120 | 71.9903015 | 63 | 72.4312106 |
| After121 | 72.1721197 | 63 | 72.4630288 |
| After122 | 72.0812106 | 63 | 72.510756  |
| After123 | 71.7175742 | 63 | 72.5516651 |
| After124 | 72.3539378 | 63 | 72.5812106 |
| After125 | 72.535756  | 63 | 72.5971197 |
| After126 | 73.0812106 | 63 | 72.5971197 |
| After127 | 73.535756  | 63 | 72.6312106 |
| After128 | 74.3539378 | 63 | 72.6743924 |
| After129 | 74.3539378 | 63 | 72.6903015 |
| After130 | 75.3539378 | 63 | 72.710756  |
| After131 | 75.535756  | 63 | 72.7221197 |
| After132 | 75.2630288 | 63 | 72.7471197 |
| After133 | 75.2630288 | 63 | 72.7698469 |
| After134 | 74.7175742 | 63 | 72.7834833 |
| After135 | 73.9903015 | 63 | 72.7880288 |
| After136 | 73.4448469 | 63 | 72.7834833 |
| After137 | 73.0812106 | 63 | 72.7721197 |
| After138 | 72.9903015 | 63 | 72.7380288 |
| After139 | 72.8993924 | 63 | 72.7130288 |
| After140 | 73.1721197 | 63 | 72.6834833 |
| After141 | 73.0812106 | 63 | 72.6653015 |
| After142 | 72.6266651 | 63 | 72.635756  |
| After143 | 72.2630288 | 63 | 72.5971197 |
| After144 | 71.8084833 | 63 | 72.5539378 |
| After145 | 70.9903015 | 63 | 72.4812106 |

|          |            |    |            |
|----------|------------|----|------------|
| After146 | 70.9903015 | 63 | 72.4039378 |
| After147 | 71.0812106 | 63 | 72.2754267 |
| After148 | 70.9903015 | 63 | 72.1330725 |
| After149 | 71.0812106 | 63 | 71.9727431 |
| After150 | 71.2630288 | 63 | 71.8613795 |
| After151 | 72.1721197 | 63 | 71.6960915 |
| After152 | 72.3539378 | 63 | 71.5529096 |
| After153 | 72.4448469 | 63 | 71.4051824 |
| After154 | 72.2630288 | 63 | 71.241546  |
| After155 | 72.2630288 | 63 | 71.1029096 |
| After156 | 72.1721197 | 63 | 70.9892733 |
| After157 | 71.4448469 | 63 | 70.8960915 |
| After158 | 71.1721197 | 63 | 70.816546  |
| After159 | 70.9903015 | 63 | 70.741546  |
| After160 | 71.2630288 | 63 | 70.6756369 |
| After161 | 70.9903015 | 63 | 70.5960915 |
| After162 | 70.535756  | 63 | 70.5097278 |
| After163 | 69.9903015 | 63 | 70.4438187 |
| After164 | 69.4448469 | 63 | 70.3870005 |
| After165 | 69.4448469 | 63 | 70.3233642 |
| After166 | 67.9407631 | 63 | 70.2960915 |
| After167 | 67.8415896 | 63 | 70.2801824 |
| After168 | 67.9407631 | 63 | 70.2620005 |
| After169 | 69.8993924 | 63 | 70.2620005 |
| After170 | 68.742416  | 63 | 70.2642733 |
| After171 | 69.8084833 | 63 | 70.2892733 |
| After172 | 69.3539378 | 63 | 70.3097278 |
| After173 | 68.7175742 | 63 | 70.3370005 |
| After174 | 69.1721197 | 63 | 70.3642733 |
| After175 | 69.4448469 | 63 | 70.3892733 |
| After176 | 69.7175742 | 63 | 70.3983642 |
| After177 | 69.8993924 | 63 | 70.3983642 |
| After178 | 69.9903015 | 63 | 70.3938187 |
| After179 | 70.2630288 | 63 | 70.3870005 |
| After180 | 69.9903015 | 63 | 70.3938187 |
| After181 | 69.6266651 | 63 | 70.3983642 |
| After182 | 69.9903015 | 63 | 70.3960915 |
| After183 | 69.9903015 | 63 | 70.3983642 |
| After184 | 69.2630288 | 63 | 70.4097278 |
| After185 | 69.8993924 | 63 | 70.4370005 |
| After186 | 70.3539378 | 63 | 70.4620005 |
| After187 | 70.3539378 | 63 | 70.5359663 |
| After188 | 70.9903015 | 63 | 70.6124113 |
| After189 | 71.1721197 | 63 | 70.7022862 |
| After190 | 72.2630288 | 63 | 70.7568316 |



|          |            |    |            |
|----------|------------|----|------------|
| After191 | 72.9903015 | 63 | 70.8471197 |
| After192 | 73.4448469 | 63 | 70.9084833 |
| After193 | 73.535756  | 63 | 70.9766651 |
| After194 | 73.2630288 | 63 | 71.060756  |
| After195 | 72.6266651 | 63 | 71.1425742 |
| After196 | 72.1721197 | 63 | 71.2243924 |
| After197 | 71.2630288 | 63 | 71.3039378 |
| After198 | 70.8993924 | 63 | 71.3903015 |
| After199 | 71.2630288 | 63 | 71.4766651 |
| After200 | 71.4448469 | 63 | 71.5562106 |
| After201 | 70.8993924 | 63 | 71.6425742 |
| After202 | 70.6266651 | 63 | 71.7448469 |
| After203 | 70.4448469 | 63 | 71.8448469 |
| After204 | 70.535756  | 63 | 71.9105033 |
| After205 | 70.4448469 | 63 | 72.0067381 |
| After206 | 70.8993924 | 63 | 72.0622705 |
| After207 | 70.8993924 | 63 | 72.0841251 |
| After208 | 71.535756  | 63 | 72.106393  |
| After209 | 72.0812106 | 63 | 72.1226692 |
| After210 | 72.3539378 | 63 | 72.1321272 |
| After211 | 72.2630288 | 63 | 72.1192711 |
| After212 | 72.0812106 | 63 | 72.090506  |
| After213 | 72.0812106 | 63 | 72.0456251 |
| After214 | 72.4448469 | 63 | 72.0009508 |
| After215 | 72.7175742 | 63 | 71.9630948 |
| After216 | 72.8993924 | 63 | 71.960822  |
| After217 | 73.3539378 | 63 | 71.9630948 |
| After218 | 73.4448469 | 63 | 71.9880948 |
| After219 | 73.4448469 | 63 | 72.019913  |
| After220 | 73.4448469 | 63 | 72.0380948 |
| After221 | 73.7175742 | 63 | 72.0744584 |
| After222 | 73.9903015 | 63 | 72.1403675 |
| After223 | 72.6165546 | 63 | 72.210822  |
| After224 | 73.1124223 | 63 | 72.2721857 |
| After225 | 72.1206868 | 63 | 72.2764932 |
| After226 | 71.2281248 | 63 | 72.2855528 |
| After227 | 71.2446538 | 63 | 72.2658933 |
| After228 | 71.641348  | 63 | 72.2704388 |
| After229 | 71.5504389 | 63 | 72.252257  |
| After230 | 71.748786  | 63 | 72.2113479 |
| After231 | 71.8396951 | 63 | 72.1454388 |
| After232 | 71.6496124 | 63 | 72.0886206 |
| After233 | 71.748786  | 63 | 72.0431661 |
| After234 | 71.748786  | 63 | 72.0068024 |
| After235 | 72.535756  | 63 | 71.9613479 |

|          |            |    |            |
|----------|------------|----|------------|
| After236 | 72.2630288 | 63 | 71.9181661 |
| After237 | 72.2630288 | 63 | 71.8727115 |
| After238 | 72.1721197 | 63 | 71.8090752 |
| After239 | 71.9903015 | 63 | 71.7568024 |
| After240 | 72.8993924 | 63 | 71.702257  |
|          | 73.535756  | 63 | 71.6386206 |
|          | 73.4448469 | 63 | 71.5613479 |
|          | 72.8993924 | 63 | 71.4658933 |
|          | 70.7080566 | 63 | 71.4025097 |
|          | 70.8072301 | 63 | 71.297184  |
|          | 70.1130153 | 63 | 71.2007425 |
|          | 71.0812106 | 63 | 71.119797  |
|          | 70.8084833 | 63 | 71.0407109 |
|          | 70.4448469 | 63 | 70.9585256 |
|          | 69.7175742 | 63 | 70.8786131 |
|          | 69.9903015 | 63 | 70.8051055 |
|          | 70.2630288 | 63 | 70.7270525 |
|          | 70.6266651 | 63 | 70.658297  |
|          | 70.6266651 | 63 | 70.5870622 |
|          | 70.9903015 | 63 | 70.527191  |
|          | 71.0812106 | 63 | 70.4431001 |
|          | 70.8084833 | 63 | 70.3635546 |
|          | 71.3539378 | 63 | 70.2726455 |
|          | 71.2630288 | 63 | 70.1862819 |
|          | 70.8993924 | 63 | 70.0931001 |
|          | 70.6266651 | 63 | 69.9635546 |
|          | 70.1721197 | 63 | 69.8067364 |
|          | 70.0812106 | 63 | 69.6567364 |
|          | 68.8993924 | 63 | 69.5249182 |
|          | 68.2630288 | 63 | 69.4501562 |
|          | 67.9903015 | 63 | 69.379733  |
|          | 68.0812106 | 63 | 69.3448469 |
|          | 68.3539378 | 63 | 69.285756  |
|          | 68.3539378 | 63 | 69.2312106 |
|          | 68.8084833 | 63 | 69.185756  |
|          | 68.7175742 | 63 | 69.160756  |
|          | 68.8993924 | 63 | 69.1289378 |
|          | 68.8993924 | 63 | 69.0948469 |
|          | 69.3539378 | 63 | 69.0516651 |
|          | 69.1721197 | 63 | 69.0153015 |
|          | 69.0812106 | 63 | 68.9653015 |
|          | 68.6266651 | 63 | 68.910756  |
|          | 68.7175742 | 63 | 68.8789378 |
|          | 68.2630288 | 63 | 68.8539378 |
|          | 67.7175742 | 63 | 68.8403015 |

|            |    |            |
|------------|----|------------|
| 67.2630288 | 63 | 68.8448469 |
| 67.4448469 | 63 | 68.8721197 |
| 67.6266651 | 63 | 68.9266651 |
| 67.7175742 | 63 | 68.9948469 |
| 67.9903015 | 63 | 69.084807  |
| 68.7175742 | 63 | 69.1912959 |
| 68.7175742 | 63 | 69.2975782 |
| 68.6266651 | 63 | 69.3918771 |
| 68.6266651 | 63 | 69.4793578 |
| 68.7175742 | 63 | 69.5544418 |
| 68.7175742 | 63 | 69.6282861 |
| 68.8993924 | 63 | 69.7021304 |
| 68.8993924 | 63 | 69.783826  |
| 69.1721197 | 63 | 69.8747351 |
| 68.9903015 | 63 | 69.9315533 |
| 68.8993924 | 63 | 69.9747351 |
| 69.535756  | 63 | 69.9974624 |
| 70.3539378 | 63 | 70.0224624 |
| 70.7175742 | 63 | 70.0474624 |
| 71.0812106 | 63 | 70.0792805 |
| 71.7175742 | 63 | 70.1179169 |
| 72.3539378 | 63 | 70.1701896 |
| 72.8084833 | 63 | 70.2065533 |
| 72.4977933 | 63 | 70.2406442 |
| 72.5225867 | 63 | 70.2633714 |
| 72.241595  | 63 | 70.2747351 |
| 71.8531652 | 63 | 70.2656442 |
| 71.8531652 | 63 | 70.258826  |
| 71.3572974 | 63 | 70.2474624 |
| 71.7622561 | 63 | 70.2406442 |
| 71.671347  | 63 | 70.2383714 |
| 72.1672148 | 63 | 70.2451896 |
| 72.535756  | 63 | 70.2474624 |
| 71.6266651 | 63 | 70.2610987 |
| 70.8993924 | 63 | 70.2656442 |
| 69.9903015 | 63 | 70.2770078 |
| 69.6266651 | 63 | 70.2883714 |
| 69.7175742 | 63 | 70.2724624 |
| 69.535756  | 63 | 70.2247351 |
| 69.2630288 | 63 | 70.1610987 |
| 69.3539378 | 63 | 70.0929169 |
| 68.8993924 | 63 | 70.0179169 |
| 68.9903015 | 63 | 69.9315533 |
| 68.6266651 | 63 | 69.8565533 |
| 68.4448469 | 63 | 69.7984114 |

|            |    |            |
|------------|----|------------|
| 68.3539378 | 63 | 69.7396497 |
| 68.4448469 | 63 | 69.7106401 |
| 68.1721197 | 63 | 69.7049776 |
| 68.3539378 | 63 | 69.7015879 |
| 68.6266651 | 63 | 69.7287766 |
| 68.9903015 | 63 | 69.7344777 |
| 68.9903015 | 63 | 69.7538152 |
| 69.4448469 | 63 | 69.7630288 |
| 69.3539378 | 63 | 69.7562106 |
| 69.4448469 | 63 | 69.7766651 |
| 69.3539378 | 63 | 69.8198469 |
| 68.8993924 | 63 | 69.8812106 |
| 68.4448469 | 63 | 69.9403015 |
| 68.1721197 | 63 | 69.9948469 |
| 68.3539378 | 63 | 70.0448469 |
| 68.7175742 | 63 | 70.110756  |
| 68.8993924 | 63 | 70.1789378 |
| 69.8084833 | 63 | 70.2698469 |
| 70.1721197 | 63 | 70.3516651 |
| 70.1721197 | 63 | 70.4425742 |
| 71.0812106 | 63 | 70.5266651 |
| 71.6266651 | 63 | 70.6153015 |
| 71.7175742 | 63 | 70.6903015 |
| 72.4448469 | 63 | 70.7562106 |
| 71.9903015 | 63 | 70.8130288 |
| 72.4448469 | 63 | 70.8584833 |
| 72.535756  | 63 | 70.8789378 |
| 72.2630288 | 63 | 70.9016651 |
| 72.4448469 | 63 | 70.9062106 |
| 72.6266651 | 63 | 70.8925742 |
| 72.4448469 | 63 | 70.8834833 |
| 71.9903015 | 63 | 70.8721197 |
| 71.8993924 | 63 | 70.8766651 |
| 71.535756  | 63 | 70.9039378 |
| 71.8993924 | 63 | 70.9448469 |
| 72.0812106 | 63 | 70.9948469 |
| 72.535756  | 63 | 71.0448469 |
| 72.2630288 | 63 | 71.1039378 |
| 72.2630288 | 63 | 71.1425742 |
| 71.8084833 | 63 | 71.185756  |
| 71.8993924 | 63 | 71.2243924 |
| 71.4448469 | 63 | 71.235756  |
| 70.8084833 | 63 | 71.2198469 |
| 70.6266651 | 63 | 71.185756  |
| 70.4448469 | 63 | 71.1493924 |

|            |    |            |
|------------|----|------------|
| 69.8084833 | 63 | 71.1198469 |
| 69.8993924 | 63 | 71.0698469 |
| 69.6266651 | 63 | 71.0153015 |
| 68.8084833 | 63 | 70.9584833 |
| 69.0812106 | 63 | 70.8721197 |
| 68.8993924 | 63 | 70.7743924 |
| 69.0812106 | 63 | 70.685756  |
| 69.535756  | 63 | 70.610756  |
| 69.8084833 | 63 | 70.5448469 |
| 70.3539378 | 63 | 70.4880288 |
| 70.7175742 | 63 | 70.4448469 |
| 71.2630288 | 63 | 70.4062106 |
| 71.3539378 | 63 | 70.3675742 |
| 71.8993924 | 63 | 70.3516651 |
| 71.7175742 | 63 | 70.3448469 |
| 71.535756  | 63 | 70.3493924 |
| 70.9903015 | 63 | 70.3516651 |
| 70.3539378 | 63 | 70.3721197 |
| 70.9903015 | 63 | 70.4266651 |
| 70.8084833 | 63 | 70.4971197 |
| 70.4448469 | 63 | 70.5368647 |
| 70.3539378 | 63 | 70.634592  |
| 69.9903015 | 63 | 70.7186829 |
| 68.9903015 | 63 | 70.7914102 |
| 68.7175742 | 63 | 70.8709556 |
| 68.8993924 | 63 | 70.9414102 |
| 68.9903015 | 63 | 71.0027738 |
| 69.2630288 | 63 | 71.059592  |
| 69.2630288 | 63 | 71.0982284 |
| 70.1721197 | 63 | 71.1255011 |
| 70.535756  | 63 | 71.1414102 |
| 70.9903015 | 63 | 71.1391375 |
| 71.6266651 | 63 | 71.1141375 |
| 71.9903015 | 63 | 71.0914102 |
| 71.9903015 | 63 | 71.059592  |
| 71.9903015 | 63 | 71.0323193 |
| 72.2630288 | 63 | 71.0232284 |
| 72.9903015 | 63 | 71.0277738 |
| 73.4448469 | 63 | 71.010213  |
| 72.0346493 | 63 | 70.9647597 |
| 73.7175742 | 63 | 70.9118684 |
| 73.2630288 | 63 | 70.8457539 |
| 72.535756  | 63 | 70.7767468 |
| 71.9903015 | 63 | 70.7069133 |
| 71.8993924 | 63 | 70.6670385 |

|            |    |            |
|------------|----|------------|
| 71.3539378 | 63 | 70.6364612 |
| 71.3539378 | 63 | 70.6112558 |
| 71.0812106 | 63 | 70.5837777 |
| 70.8993924 | 63 | 70.55444   |
| 70.9903015 | 63 | 70.5393586 |
| 70.6266651 | 63 | 70.4965912 |
| 70.2630288 | 63 | 70.439361  |
| 70.4448469 | 63 | 70.3870883 |
| 70.6266651 | 63 | 70.3166337 |
| 70.6266651 | 63 | 70.2552701 |
| 71.1721197 | 63 | 70.2098156 |
| 71.1721197 | 63 | 70.1689065 |
| 69.6515069 | 63 | 70.1211792 |
| 69.1721681 | 63 | 70.0575428 |
| 68.6928292 | 63 | 69.9620883 |
| 67.8002673 | 63 | 69.8973432 |
| 67.5936557 | 63 | 69.7768887 |
| 67.1969615 | 63 | 69.649616  |
| 67.3953086 | 63 | 69.540525  |
| 67.4944821 | 63 | 69.4427978 |
| 67.8911764 | 63 | 69.3564341 |
| 67.8911764 | 63 | 69.290525  |
| 68.0895235 | 63 | 69.2473432 |
| 68.6597714 | 63 | 69.2177978 |
| 68.4614243 | 63 | 69.1973432 |
| 68.2465483 | 63 | 69.1677978 |
| 68.8993924 | 63 | 69.1359796 |
| 68.8084833 | 63 | 69.099616  |
| 69.535756  | 63 | 69.0382523 |
| 70.1721197 | 63 | 68.965525  |
| 70.3539378 | 63 | 68.8837069 |
| 70.3539378 | 63 | 68.7859796 |
| 70.4448469 | 63 | 68.6814341 |
| 69.6266651 | 63 | 68.6103585 |
| 69.4448469 | 63 | 68.5603573 |
| 68.8993924 | 63 | 68.5246123 |
| 68.1721197 | 63 | 68.5111814 |
| 68.1721197 | 63 | 68.4983702 |
| 68.0812106 | 63 | 68.5091128 |
| 68.4448469 | 63 | 68.5217149 |
| 68.7175742 | 63 | 68.5409286 |
| 69.6266651 | 63 | 68.5615885 |
| 69.8993924 | 63 | 68.6004303 |
| 70.0812106 | 63 | 68.6434043 |
| 69.8084833 | 63 | 68.6653039 |

|            |    |            |
|------------|----|------------|
| 69.3539378 | 63 | 68.6944349 |
| 68.8084833 | 69 | 68.710756  |
| 67.9903015 | 69 | 68.710756  |
| 67.7175742 | 69 | 68.7221197 |
| 67.3539378 | 69 | 68.7289378 |
| 67.2630288 | 69 | 68.7175742 |
| 66.9903015 | 69 | 68.7130288 |
| 66.8084833 | 69 | 68.7153015 |
| 67.1721197 | 69 | 68.7153015 |
| 67.2630288 | 69 | 68.7334833 |
| 67.2630288 | 69 | 68.7630288 |
| 67.0812106 | 69 | 68.810756  |
| 67.6266651 | 69 | 68.8812106 |
| 67.8993924 | 69 | 68.9539378 |
| 68.2630288 | 69 | 69.0039378 |
| 68.7175742 | 69 | 69.0028735 |
| 69.4448469 | 69 | 68.9927182 |
| 69.8084833 | 69 | 68.9722323 |
| 69.535756  | 69 | 68.9424489 |
| 69.6266651 | 69 | 68.9447216 |
| 68.8993924 | 69 | 68.9492671 |
| 68.8993924 | 69 | 68.9674489 |
| 69.2630288 | 69 | 69.0038125 |
| 69.8084833 | 69 | 69.0606307 |
| 69.7175742 | 69 | 69.0855994 |
| 70.1721197 | 69 | 69.1273036 |
| 70.4448469 | 69 | 69.1811979 |
| 70.4448469 | 69 | 69.2419104 |
| 70.3539378 | 69 | 69.319565  |
| 70.6266651 | 69 | 69.390608  |
| 70.8084833 | 69 | 69.4690891 |
| 70.9903015 | 69 | 69.5426115 |
| 71.0812106 | 69 | 69.6357933 |
| 70.0812106 | 69 | 69.7085206 |
| 68.4022715 | 69 | 69.7721569 |
| 68.3113624 | 69 | 69.8039751 |
| 68.8072301 | 69 | 69.813066  |
| 68.7080566 | 69 | 69.7903388 |
| 70.1721197 | 69 | 69.7676115 |
| 69.9903015 | 69 | 69.7607933 |
| 70.0812106 | 69 | 69.7517024 |
| 70.2630288 | 63 | 69.7744297 |
| 70.2630288 | 63 | 69.8062478 |
| 68.716321  | 63 | 69.8267024 |
| 69.0221062 | 63 | 69.8448842 |

|            |    |            |
|------------|----|------------|
| 69.4188004 | 63 | 69.863066  |
| 69.4188004 | 63 | 69.8585206 |
| 69.9146681 | 63 | 69.8335206 |
| 70.0138417 | 63 | 69.8062478 |
| 70.4022715 | 63 | 69.7812478 |
| 70.2039243 | 63 | 69.7517024 |
| 70.8084833 | 63 | 69.7153388 |
| 70.535756  | 63 | 69.6789751 |
| 70.4448469 | 63 | 69.6403388 |
| 69.535756  | 63 | 69.6198842 |
| 69.0812106 | 63 | 69.6391304 |
| 68.535756  | 63 | 69.6651948 |
| 68.8993924 | 63 | 69.6924989 |
| 69.2630288 | 63 | 69.7222823 |
| 69.2630288 | 63 | 69.7018277 |
| 69.8084833 | 63 | 69.6700095 |
| 70.1721197 | 63 | 69.6291004 |
| 70.0812106 | 63 | 69.5836459 |
| 70.535756  | 63 | 69.5381913 |
| 70.4448469 | 63 | 69.5359499 |
| 69.9903015 | 63 | 69.541973  |
| 69.4448469 | 63 | 69.5562605 |
| 69.3539378 | 63 | 69.5773663 |
| 69.3539378 | 63 | 69.5974389 |
| 69.4448469 | 63 | 69.6150322 |
| 69.3539378 | 63 | 69.6229148 |
| 69.535756  | 63 | 69.6380288 |
| 69.535756  | 63 | 69.6289378 |
| 69.2630288 | 63 | 69.6380288 |
| 69.1721197 | 63 | 69.6380288 |
| 69.3539378 | 63 | 69.6743924 |
| 69.8993924 | 63 | 69.7221197 |
| 69.8993924 | 63 | 69.7903015 |
| 69.3539378 | 63 | 69.8493924 |
| 68.7175742 | 63 | 69.8948469 |
| 68.4448469 | 63 | 69.935756  |
| 68.4448469 | 63 | 69.9630288 |
| 68.4448469 | 63 | 69.9812106 |
| 68.6266651 | 63 | 69.9971197 |
| 69.2630288 | 63 | 69.9948469 |
| 69.9903015 | 63 | 69.9971197 |
| 70.2630288 | 63 | 70.0062106 |
| 70.7175742 | 63 | 70.0175742 |
| 70.7175742 | 63 | 70.0289378 |
| 70.7175742 | 63 | 70.035756  |



|            |    |            |
|------------|----|------------|
| 70.8084833 | 63 | 70.0266651 |
| 70.4448469 | 63 | 70.0084833 |
| 70.8993924 | 63 | 69.9789378 |
| 70.4448469 | 63 | 69.9516651 |
| 70.9903015 | 63 | 69.9243924 |
| 70.9903015 | 63 | 69.9062106 |
| 71.2630288 | 63 | 69.8903015 |
| 71.2630288 | 63 | 69.8539378 |
| 71.0812106 | 63 | 69.8198469 |
| 70.8993924 | 63 | 69.8016651 |
| 70.8993924 | 63 | 69.7925742 |
| 70.8993924 | 63 | 69.7812106 |
| 70.7175742 | 63 | 69.7766651 |
| 70.4448469 | 63 | 69.7789378 |
| 70.535756  | 63 | 69.7812106 |
| 70.3539378 | 63 | 69.7562106 |
| 69.8993924 | 63 | 69.7084833 |
| 69.8084833 | 63 | 69.6653015 |
| 69.6266651 | 63 | 69.6039378 |
| 69.0812106 | 63 | 69.5403015 |
| 68.6266651 | 63 | 69.4789378 |
| 68.3539378 | 63 | 69.4084833 |
| 68.4448469 | 63 | 69.3562106 |
| 68.1721197 | 63 | 69.2903015 |
| 68.4448469 | 63 | 69.2448469 |
| 68.7175742 | 63 | 69.1971197 |
| 68.4448469 | 63 | 69.1516651 |
| 68.535756  | 63 | 69.110756  |
| 68.6266651 | 63 | 69.060756  |
| 68.3539378 | 63 | 69.0198469 |
| 67.9903015 | 63 | 68.985756  |
| 68.2630288 | 63 | 68.9516651 |
| 68.535756  | 63 | 68.9198469 |
| 68.7175742 | 63 | 68.8903015 |
| 68.2630288 | 63 | 68.8698469 |
| 68.0812106 | 63 | 68.8516651 |
| 68.535756  | 63 | 68.8425742 |
| 68.2630288 | 63 | 68.8448469 |
| 68.1721197 | 63 | 68.8471197 |
| 68.2630288 | 63 | 68.8266338 |
| 67.9903015 | 63 | 68.8179248 |
| 68.3539378 | 63 | 68.8236786 |
| 68.2630288 | 63 | 68.8362505 |
| 68.6266651 | 63 | 68.8521283 |
| 69.0812106 | 63 | 68.8849482 |

|            |    |            |
|------------|----|------------|
| 69.1721197 | 63 | 68.9109499 |
| 69.6266651 | 63 | 68.9350922 |
| 69.2630288 | 63 | 68.9829947 |
| 69.4448469 | 63 | 69.048046  |
| 69.535756  | 63 | 69.1203288 |
| 69.535756  | 63 | 69.2066611 |
| 69.6266651 | 63 | 69.3430247 |
| 69.535756  | 63 | 69.4462404 |
| 69.6266651 | 63 | 69.591695  |
| 69.8084833 | 63 | 69.7439677 |
| 69.9903015 | 63 | 69.9076041 |
| 69.9903015 | 63 | 70.0712404 |
| 69.8993924 | 63 | 70.1985131 |
| 68.8072301 | 63 | 70.3212404 |
| 68.73285   | 63 | 70.4235131 |
| 68.8568169 | 63 | 70.5053313 |
| 68.8568169 | 63 | 70.5962404 |
| 69.0799574 | 63 | 70.6894222 |
| 69.4849161 | 63 | 70.791695  |
| 69.4849161 | 63 | 70.869143  |
| 69.6832632 | 63 | 70.9472108 |
| 70.3609491 | 63 | 71.0403926 |
| 71.1378086 | 63 | 71.1108472 |
| 71.5179739 | 63 | 71.1903926 |
| 71.8072301 | 63 | 71.2426654 |
| 73.4448469 | 63 | 71.2722108 |
| 72.3916573 | 63 | 71.2699381 |
| 74.3539378 | 63 | 71.2472108 |
| 74.8084833 | 63 | 71.2267563 |
| 74.8084833 | 63 | 71.1903926 |
| 74.6266651 | 63 | 71.1403926 |
| 73.6266651 | 63 | 71.0881199 |
| 73.1721197 | 63 | 71.0335745 |
| 72.2630288 | 63 | 70.979029  |
| 71.535756  | 63 | 70.9495149 |
| 71.6266651 | 63 | 70.9173148 |
| 72.0812106 | 63 | 70.8797428 |
| 72.3539378 | 63 | 70.8353527 |
| 71.7245855 | 63 | 70.7808385 |
| 72.2039243 | 63 | 70.7184732 |
| 72.8993924 | 63 | 70.6583805 |
| 72.4448469 | 63 | 70.6001474 |
| 72.4448469 | 63 | 70.534063  |
| 71.535756  | 63 | 70.4576481 |
| 70.7175742 | 63 | 70.3899108 |

|            |    |            |
|------------|----|------------|
| 69.4448469 | 63 | 70.3172149 |
| 68.7175742 | 63 | 70.2240331 |
| 68.7175742 | 63 | 70.1503628 |
| 68.1721197 | 63 | 70.0253628 |
| 67.8084833 | 63 | 69.8958173 |
| 67.8993924 | 63 | 69.7549082 |
| 67.8084833 | 63 | 69.6094537 |
| 67.7175742 | 63 | 69.4867264 |
| 67.6266651 | 63 | 69.382181  |
| 67.4448469 | 63 | 69.3003628 |
| 67.3539378 | 63 | 69.2639992 |
| 67.0812106 | 63 | 69.2344537 |
| 66.8993924 | 63 | 69.2003628 |
| 66.9903015 | 63 | 69.1730901 |
| 67.0812106 | 63 | 69.1660966 |
| 67.3539378 | 63 | 69.1675742 |
| 67.7175742 | 63 | 69.1584833 |
| 68.0812106 | 63 | 69.1471197 |
| 68.8084833 | 63 | 69.1334833 |
| 68.8993924 | 63 | 69.1380288 |
| 69.7175742 | 63 | 69.1630288 |
| 69.4448469 | 63 | 69.2130288 |
| 69.3539378 | 63 | 69.2675742 |
| 69.6266651 | 63 | 69.310756  |
| 69.1721197 | 63 | 69.3675742 |
| 68.8084833 | 63 | 69.4334833 |
| 68.7175742 | 63 | 69.4948469 |
| 68.9903015 | 63 | 69.5562106 |
| 68.9903015 | 63 | 69.6153015 |
| 70.0812106 | 63 | 69.6925742 |
| 70.4448469 | 63 | 69.7789378 |
| 70.7175742 | 63 | 69.8539378 |
| 71.2630288 | 63 | 69.9471197 |
| 71.4448469 | 63 | 70.060756  |
| 72.2630288 | 63 | 70.1698469 |
| 72.535756  | 63 | 70.2721197 |
| 71.9903015 | 63 | 70.3584833 |
| 71.8993924 | 63 | 70.435756  |
| 71.7175742 | 63 | 70.4597242 |
| 71.7175742 | 63 | 70.4605518 |
| 71.4448469 | 63 | 70.5150973 |
| 70.8993924 | 63 | 70.5537337 |
| 70.4448469 | 63 | 70.6014609 |
| 70.4448469 | 63 | 70.6582791 |
| 70.4448469 | 63 | 70.6991882 |

|            |    |            |
|------------|----|------------|
| 70.3539378 | 63 | 70.7469155 |
| 70.2630288 | 63 | 70.8037337 |
| 70.0812106 | 63 | 70.8628246 |
| 70.7175742 | 63 | 70.9128246 |
| 70.8993924 | 63 | 70.9514609 |
| 70.3539378 | 63 | 70.9491882 |
| 70.8084833 | 63 | 70.9241882 |
| 71.4448469 | 63 | 70.8946427 |
| 71.3539378 | 63 | 70.8605518 |
| 71.1721197 | 63 | 70.8355518 |
| 70.8084833 | 63 | 70.7969155 |
| 70.8084833 | 63 | 70.7628246 |
| 69.0399367 | 63 | 70.7269628 |
| 68.8415896 | 63 | 70.6886217 |
| 71.0812106 | 63 | 70.6527599 |
| 71.2630288 | 63 | 70.6045014 |
| 71.3539378 | 63 | 70.543433  |
| 71.6266651 | 63 | 70.4712076 |
| 71.2630288 | 63 | 70.4103458 |
| 71.0812106 | 63 | 70.334608  |
| 71.0812106 | 63 | 70.2437875 |
| 71.0812106 | 63 | 70.1544133 |
| 70.9903015 | 63 | 70.0930497 |
| 70.535756  | 63 | 70.0362315 |
| 69.9903015 | 63 | 69.9703224 |
| 69.4448469 | 63 | 69.9089588 |
| 69.535756  | 63 | 69.8703224 |
| 69.8993924 | 63 | 69.8294133 |
| 70.4448469 | 63 | 69.7930497 |
| 70.7175742 | 63 | 69.7498679 |
| 71.1721197 | 63 | 69.7089588 |
| 70.5558301 | 63 | 69.6748679 |
| 70.3657475 | 63 | 69.6453224 |
| 70.2831028 | 63 | 69.6713543 |
| 69.7872351 | 63 | 69.7137084 |
| 69.0021111 | 63 | 69.6955266 |
| 68.0103755 | 63 | 69.6818902 |
| 68.0103755 | 63 | 69.6614357 |
| 67.4153342 | 63 | 69.634163  |
| 66.8120284 | 63 | 69.609163  |
| 66.7789706 | 63 | 69.6000721 |
| 67.8084833 | 63 | 69.5773448 |
| 67.8084833 | 63 | 69.5546175 |
| 68.0812106 | 63 | 69.5273448 |
| 68.4448469 | 63 | 69.4977993 |

|            |               |
|------------|---------------|
| 68.8084833 | 63 69.4727993 |
| 69.1721197 | 63 69.4523448 |
| 69.9903015 | 63 69.4227993 |
| 69.6266651 | 63 69.3796175 |
| 69.535756  | 63 69.3227993 |
| 69.4448469 | 63 69.2750721 |
| 69.6266651 | 63 69.2182539 |
| 70.0812106 | 63 69.1813884 |
| 70.535756  | 63 69.1401841 |
| 70.3539378 | 63 69.1033186 |
| 70.7175742 | 63 69.0765771 |
| 70.535756  | 63 69.0581    |
| 70.535756  | 63 69.0621436 |
| 70.2630288 | 63 69.0639145 |
| 70.7175742 | 63 69.0873796 |
| 70.1721197 | 63 69.1236546 |
| 70.1721197 | 63 69.1698469 |
| 69.8993924 | 63 69.1971197 |
| 69.3539378 | 63 69.2289378 |
| 68.9903015 | 63 69.2562106 |
| 68.6266651 | 63 69.2880288 |
| 68.3539378 | 63 69.3243924 |
| 68.1721197 | 63 69.3471197 |
| 68.1721197 | 63 69.3493924 |
| 68.8084833 | 63 69.3539378 |
| 68.8993924 | 63 69.3630288 |
| 69.0812106 | 63 69.3789378 |
| 68.7175742 | 63 69.3903015 |
| 68.8084833 | 63 69.3925742 |
| 68.7175742 | 63 69.3743924 |
| 68.2630288 | 63 69.3539378 |
| 68.1721197 | 63 69.3198469 |
| 68.0812106 | 63 69.2494147 |
| 68.3539378 | 63 69.1717511 |
| 68.2630288 | 63 69.1062776 |
| 68.6266651 | 63 69.0294404 |
| 68.8993924 | 63 68.9637603 |
| 69.0812106 | 63 68.9030388 |
| 69.1721197 | 63 68.8516148 |
| 69.7175742 | 63 68.8088686 |
| 70.2630288 | 63 68.807238  |
| 70.0812106 | 63 68.8171777 |
| 70.0812106 | 63 68.8289769 |
| 69.8084833 | 63 68.8767042 |
| 69.8993924 | 63 68.9244314 |

|            |    |            |
|------------|----|------------|
| 70.0812106 | 63 | 68.9562496 |
| 70.0812106 | 63 | 68.9789769 |
| 70.1721197 | 63 | 68.994886  |
| 69.8084833 | 63 | 69.0244314 |
| 69.535756  | 63 | 69.0607951 |
| 69.3539378 | 63 | 69.1153405 |
| 67.7184675 | 63 | 69.1653405 |
| 67.4292113 | 63 | 69.2107951 |
| 67.6440873 | 63 | 69.2517042 |
| 67.6440873 | 63 | 69.2835223 |
| 67.5449138 | 63 | 69.319886  |
| 67.7432609 | 63 | 69.3471587 |
| 67.8424345 | 63 | 69.3585223 |
| 67.6440873 | 63 | 69.3517042 |
| 68.9250791 | 63 | 69.3380678 |
| 69.0242526 | 63 | 69.3130678 |
| 68.8259055 | 63 | 69.2744314 |
| 70.0812106 | 63 | 69.2335223 |
| 70.0812106 | 63 | 69.1880678 |
| 70.0812106 | 63 | 69.1585223 |
| 69.8084833 | 63 | 69.1403405 |
| 69.7175742 | 63 | 69.1267042 |
| 69.8993924 | 63 | 69.1380678 |
| 70.2630288 | 63 | 69.1378835 |
| 70.8993924 | 63 | 69.1817075 |
| 70.2630288 | 63 | 69.2364819 |
| 69.9903015 | 63 | 69.2958018 |
| 69.7175742 | 63 | 69.3949753 |
| 69.6266651 | 63 | 69.5022067 |
| 69.7175742 | 63 | 69.6216282 |
| 69.7175742 | 63 | 69.736091  |
| 69.3539378 | 63 | 69.8681158 |
| 68.8084833 | 63 | 70.0026199 |
| 68.6266651 | 63 | 70.13981   |
| 68.7175742 | 63 | 70.2720414 |
| 68.7175742 | 63 | 70.3821654 |
| 68.4448469 | 63 | 70.48981   |
| 68.2630288 | 63 | 70.5848513 |
| 68.6266651 | 63 | 70.6255762 |
| 69.1721197 | 63 | 70.658863  |
| 69.535756  | 63 | 70.6921497 |
| 70.535756  | 63 | 70.719858  |
| 70.1647485 | 63 | 70.742401  |
| 71.5614427 | 63 | 70.7554399 |
| 71.726732  | 63 | 70.7542226 |

|            |    |            |
|------------|----|------------|
| 71.726732  | 63 | 70.7346168 |
| 71.6854097 | 63 | 70.7333994 |
| 71.7184675 | 63 | 70.7441656 |
| 72.4209468 | 63 | 70.7716673 |
| 72.2225997 | 63 | 70.8196235 |
| 72.8259055 | 63 | 70.8975384 |
| 73.1234262 | 63 | 70.9952656 |
| 73.3300378 | 63 | 71.0929929 |
| 72.9333435 | 63 | 71.1998111 |
| 73.3300378 | 63 | 71.2975384 |
| 73.3300378 | 63 | 71.3684901 |
| 72.6275584 | 63 | 71.4369625 |
| 71.710203  | 63 | 71.5151457 |
| 71.4126824 | 63 | 71.612957  |
| 71.4126824 | 63 | 71.7093219 |
| 70.9168146 | 63 | 71.7945299 |
| 70.619294  | 63 | 71.8859362 |
| 70.4209468 | 63 | 71.9573012 |
| 70.2143353 | 63 | 72.0431066 |
| 70.1151617 | 63 | 72.0989534 |
| 70.2143353 | 63 | 72.1382713 |
| 70.4209468 | 63 | 72.1386282 |
| 70.8176411 | 63 | 72.1239024 |
| 71.5449138 | 63 | 72.0949205 |
| 72.83417   | 63 | 72.0434179 |
| 73.6266651 | 63 | 71.9991467 |
| 73.2630288 | 63 | 71.9424788 |
| 73.0812106 | 63 | 71.8618439 |
| 72.535756  | 63 | 71.7702587 |
| 71.5556445 | 63 | 71.6885908 |
| 71.456471  | 63 | 71.6254293 |
| 71.5721735 | 63 | 71.5622678 |
| 72.1754793 | 63 | 71.4991063 |
| 72.4812644 | 63 | 71.4687961 |
| 72.5804379 | 63 | 71.4504693 |
| 73.1920082 | 63 | 71.4445393 |
| 73.3903553 | 63 | 71.4559645 |
| 73.5969669 | 63 | 71.4746212 |
| 73.795314  | 63 | 71.4858399 |
| 73.2994462 | 63 | 71.4925132 |
| 71.7410079 | 63 | 71.499393  |
| 71.0963798 | 63 | 71.4938761 |
| 70.5591897 | 63 | 71.4782353 |
| 70.3608426 | 63 | 71.4551565 |
| 70.4517517 | 63 | 71.4087305 |

|            |    |            |
|------------|----|------------|
| 70.5591897 | 63 | 71.3300732 |
| 69.8980327 | 63 | 71.2561902 |
| 69.6666277 | 63 | 71.1938775 |
| 69.6666277 | 63 | 71.1286723 |
| 70.8035784 | 63 | 71.0547893 |
| 70.8035784 | 63 | 70.985781  |
| 70.1010991 | 63 | 70.9145001 |
| 70.4977933 | 63 | 70.8254505 |
| 70.6796115 | 63 | 70.7049959 |
| 71.1754793 | 63 | 70.6109037 |
| 71.3738264 | 63 | 70.5188775 |
| 71.3655619 | 63 | 70.4001985 |
| 70.8696941 | 63 | 70.283379  |
| 70.4812644 | 63 | 70.1773032 |
| 70.3903553 | 63 | 70.048087  |
| 69.9936611 | 63 | 69.9289948 |
| 69.795314  | 63 | 69.8465907 |
| 69.8944875 | 63 | 69.7803024 |
| 69.6878759 | 63 | 69.734262  |
| 69.6878759 | 63 | 69.704544  |
| 70.671347  | 63 | 69.6748259 |
| 70.7705206 | 63 | 69.6446946 |
| 70.4729999 | 63 | 69.6356377 |
| 69.5804379 | 63 | 69.6300932 |
| 68.795314  | 63 | 69.6313668 |
| 68.6052313 | 63 | 69.5996713 |
| 68.01019   | 63 | 69.5634303 |
| 67.3572974 | 63 | 69.515703  |
| 68.7175742 | 63 | 69.455579  |
| 68.8993924 | 63 | 69.3886369 |
| 68.4448469 | 63 | 69.3117774 |
| 68.7175742 | 63 | 69.254462  |
| 69.3539378 | 63 | 69.2018986 |
| 68.6266651 | 63 | 69.1435502 |
| 68.535756  | 63 | 69.0926397 |
| 68.4448469 | 63 | 69.0462748 |
| 68.4448469 | 63 | 69.0234635 |
| 68.7175742 | 63 | 69.0078836 |
| 69.1721197 | 63 | 68.9966426 |
| 69.2630288 | 63 | 68.9860215 |
| 69.3539378 | 63 | 68.9685821 |
| 69.535756  | 63 | 68.917465  |
| 69.4448469 | 63 | 68.852505  |
| 69.7175742 | 63 | 68.8018012 |
| 69.535756  | 63 | 68.7802296 |



|            |    |            |
|------------|----|------------|
| 69.3539378 | 63 | 68.7714679 |
| 68.1920082 | 63 | 68.7543956 |
| 68.0928346 | 63 | 68.7501333 |
| 68.0019255 | 63 | 68.7621932 |
| 68.1010991 | 63 | 68.7251636 |
| 69.0812106 | 63 | 68.6682992 |
| 69.2630288 | 63 | 68.6079225 |
| 68.535756  | 63 | 68.5233722 |
| 68.4448469 | 63 | 68.4055575 |
| 68.535756  | 63 | 68.3059246 |
| 69.0812106 | 63 | 68.2013329 |
| 69.1721197 | 63 | 68.0921959 |
| 69.4448469 | 63 | 67.9929762 |
| 69.2630288 | 63 | 67.8867317 |
| 68.9903015 | 63 | 67.7765616 |
| 68.6266651 | 63 | 67.6734162 |
| 68.1721197 | 63 | 67.5704775 |
| 68.4448469 | 63 | 67.4479107 |
| 68.7175742 | 63 | 67.3547289 |
| 68.4448469 | 63 | 67.2615471 |
| 67.9223397 | 63 | 67.1592743 |
| 67.8396951 | 63 | 67.0638198 |
| 67.8396951 | 63 | 67.0065044 |
| 67.2363893 | 63 | 66.9516684 |
| 66.624819  | 63 | 66.9104687 |
| 66.0297777 | 63 | 66.8736078 |
| 65.3355628 | 63 | 66.8076987 |
| 64.641348  | 63 | 66.7349714 |
| 64.641348  | 63 | 66.6849714 |
| 64.3520918 | 63 | 66.6440624 |
| 64.0793645 | 63 | 66.6031533 |
| 64.4760587 | 63 | 66.5508805 |
| 64.4677942 | 63 | 66.4986078 |
| 64.7653149 | 63 | 66.4508805 |
| 65.1372157 | 63 | 66.4122442 |
| 65.2363893 | 63 | 66.3758805 |
| 64.6330835 | 63 | 66.3417896 |
| 65.7175742 | 63 | 66.3167896 |
| 65.9903015 | 63 | 66.2826987 |
| 65.4448469 | 63 | 66.2349714 |
| 65.535756  | 63 | 66.1849714 |
| 65.8993924 | 63 | 66.1480341 |
| 65.8993924 | 63 | 66.1313447 |
| 66.3539378 | 63 | 66.1192008 |
| 66.6266651 | 63 | 66.1198668 |

|            |    |            |
|------------|----|------------|
| 66.4448469 | 63 | 66.1267311 |
| 66.3539378 | 63 | 66.1416533 |
| 66.535756  | 63 | 66.1671127 |
| 66.8084833 | 63 | 66.205382  |
| 66.8993924 | 63 | 66.2413786 |
| 66.9903015 | 63 | 66.2823338 |
| 67.0812106 | 63 | 66.3369254 |
| 67.535756  | 63 | 66.3929633 |
| 67.7175742 | 63 | 66.4537532 |
| 67.535756  | 63 | 66.5321052 |
| 67.2630288 | 63 | 66.6079778 |
| 67.1721197 | 63 | 66.681371  |
| 67.0812106 | 63 | 66.7789378 |
| 66.8084833 | 63 | 66.8675742 |
| 66.4448469 | 63 | 66.9562106 |
| 66.4448469 | 63 | 67.060756  |
| 67.1721197 | 63 | 67.1721197 |
| 67.3539378 | 63 | 67.2834833 |
| 67.2630288 | 63 | 67.3948469 |
| 66.8993924 | 63 | 67.5084833 |
| 66.6266651 | 63 | 67.6198469 |
| 66.3539378 | 63 | 67.7084833 |
| 66.1721197 | 63 | 67.7812106 |
| 66.0812106 | 63 | 67.8471197 |
| 65.9903015 | 63 | 67.9016651 |
| 66.2630288 | 63 | 67.9539378 |
| 66.7175742 | 63 | 67.9948469 |
| 66.8993924 | 63 | 68.0243924 |
| 67.8993924 | 63 | 68.0448469 |
| 68.1721197 | 63 | 68.0516651 |
| 68.1721197 | 63 | 68.0721197 |
| 68.535756  | 63 | 68.0880288 |
| 69.2630288 | 63 | 68.1039378 |
| 69.535756  | 63 | 68.1130288 |
| 69.6266651 | 63 | 68.1289378 |
| 69.9903015 | 63 | 68.1562106 |
| 70.3539378 | 63 | 68.1834833 |
| 70.3539378 | 63 | 68.1971197 |
| 70.8993924 | 63 | 68.2084833 |
| 71.0812106 | 63 | 68.2221197 |
| 69.9903015 | 63 | 68.2493924 |
| 69.2630288 | 63 | 68.2834833 |
| 69.1721197 | 63 | 68.3198469 |
| 68.9903015 | 63 | 68.3721197 |
| 68.9903015 | 63 | 68.4289378 |

|            |    |            |
|------------|----|------------|
| 68.6266651 | 63 | 68.4789378 |
| 68.2630288 | 63 | 68.5175742 |
| 68.3539378 | 63 | 68.5243924 |
| 67.9903015 | 63 | 68.5243924 |
| 68.3539378 | 63 | 68.5016651 |
| 67.8993924 | 63 | 68.4743924 |
| 67.8084833 | 63 | 68.4380288 |
| 67.4448469 | 63 | 68.3971197 |
| 67.4448469 | 63 | 68.3334833 |
| 67.535756  | 63 | 68.2721197 |
| 67.535756  | 63 | 68.210756  |
| 67.7175742 | 63 | 68.1425742 |
| 67.8084833 | 63 | 68.0675742 |
| 67.8084833 | 63 | 67.9948469 |
| 67.9903015 | 63 | 67.9084833 |
| 67.9903015 | 63 | 67.8130288 |
| 67.8084833 | 63 | 67.7334833 |
| 68.2630288 | 63 | 67.6721197 |
| 68.3539378 | 63 | 67.6175742 |
| 67.9903015 | 63 | 67.5721197 |
| 67.8084833 | 63 | 67.5243924 |
| 66.9903015 | 63 | 67.4903015 |
| 66.8993924 | 63 | 67.4630288 |
| 66.9903015 | 63 | 67.4584833 |
| 67.0812106 | 63 | 67.4653015 |
| 66.7175742 | 63 | 67.4584833 |
| 66.8993924 | 63 | 67.4425742 |
| 66.7175742 | 63 | 67.4289378 |
| 67.0812106 | 63 | 67.4334833 |
| 67.1721197 | 63 | 67.4243924 |
| 67.2630288 | 63 | 67.435756  |
| 67.3539378 | 63 | 67.4202825 |
| 67.4448469 | 63 | 67.3963379 |
| 67.4448469 | 63 | 67.3713379 |
| 67.2630288 | 63 | 67.3349742 |
| 66.8084833 | 63 | 67.2713379 |
| 66.8084833 | 63 | 67.2054288 |
| 66.9903015 | 63 | 67.1531561 |
| 67.1721197 | 63 | 67.0917924 |
| 67.0812106 | 63 | 67.0167924 |
| 67.2630288 | 63 | 66.9645197 |
| 67.1721197 | 63 | 66.9236106 |
| 68.1721197 | 63 | 66.9099742 |
| 68.2630288 | 63 | 66.9008833 |
| 68.0812106 | 63 | 66.8940652 |

|            |    |            |
|------------|----|------------|
| 67.2630288 | 63 | 66.8963379 |
| 67.2630288 | 63 | 66.9077015 |
| 67.6266651 | 63 | 66.912247  |
| 67.0812106 | 63 | 66.9099742 |
| 67.9903015 | 63 | 66.8963379 |
| 66.9168146 | 63 | 66.8804288 |
| 66.7597898 | 63 | 66.862247  |
| 66.8084833 | 63 | 66.8395197 |
| 66.3539378 | 63 | 66.8077015 |
| 65.4448469 | 63 | 66.7849742 |
| 65.3539378 | 63 | 66.7713379 |
| 65.7175742 | 63 | 66.7758833 |
| 65.8084833 | 63 | 66.7895197 |
| 65.3539378 | 63 | 66.7963379 |
| 65.8993924 | 67 | 66.7804288 |
| 66.1721197 | 67 | 66.7599742 |
| 66.4448469 | 67 | 66.7213379 |
| 66.535756  | 67 | 66.6554288 |
| 66.7175742 | 67 | 66.5599742 |
| 67.1721197 | 67 | 66.4599742 |
| 67.1721197 | 67 | 66.362247  |
| 67.0812106 | 67 | 66.2986106 |
| 66.6266651 | 67 | 66.2463379 |
| 66.535756  | 67 | 66.1849742 |
| 66.535756  | 67 | 66.1531561 |
| 66.535756  | 67 | 66.1099742 |
| 66.4448469 | 67 | 66.107266  |
| 66.1721197 | 67 | 66.0993924 |
| 66.535756  | 67 | 66.1221197 |
| 66.7175742 | 67 | 66.1698469 |
| 66.9903015 | 67 | 66.2312106 |
| 67.3539378 | 67 | 66.2925742 |
| 67.2630288 | 67 | 66.3380288 |
| 66.535756  | 67 | 66.385756  |
| 66.2630288 | 67 | 66.4425742 |
| 65.7175742 | 67 | 66.5039378 |
| 64.535756  | 67 | 66.5584833 |
| 64.3539378 | 67 | 66.6175742 |
| 64.2630288 | 67 | 66.6698469 |
| 64.1721197 | 67 | 66.7198469 |
| 64.7175742 | 67 | 66.7743924 |
| 65.1721197 | 67 | 66.835756  |
| 65.1721197 | 67 | 66.9016651 |
| 65.8084833 | 67 | 66.9721197 |
| 66.2630288 | 67 | 67.0448469 |

|            |               |
|------------|---------------|
| 66.8084833 | 67 67.1062106 |
| 66.4448469 | 67 67.1562106 |
| 67.7175742 | 67 67.1880288 |
| 68.2630288 | 67 67.2153015 |
| 67.8993924 | 67 67.2289378 |
| 67.8084833 | 67 67.2334833 |
| 67.535756  | 67 67.235756  |
| 67.7175742 | 67 67.2563871 |
| 67.6266651 | 67 67.2917909 |
| 68.3539378 | 67 67.3503765 |
| 68.3539378 | 67 67.4257802 |
| 68.8084833 | 67 67.5073204 |
| 68.6266651 | 67 67.615906  |
| 68.7175742 | 67 67.736537  |
| 69.3539378 | 67 67.8319408 |
| 69.6266651 | 67 67.9246173 |
| 69.7175742 | 67 68.0036574 |
| 69.4448469 | 67 68.061334  |
| 69.4448469 | 67 68.1190105 |
| 68.9903015 | 67 68.1782779 |
| 68.535756  | 67 68.2311817 |
| 67.7175742 | 67 68.2704491 |
| 67.2630288 | 67 68.3238074 |
| 67.0812106 | 67 68.3753475 |
| 66.8993924 | 67 68.4232513 |
| 67.0812106 | 67 68.507746  |
| 68.1791799 | 67 68.5895134 |
| 68.6791799 | 67 68.668099  |
| 68.8791799 | 67 68.7471392 |
| 69.2791799 | 67 68.830952  |
| 68.9791799 | 67 68.8915831 |
| 68.8791799 | 67 68.9597141 |
| 69.1791799 | 67 69.0189815 |
| 68.0791799 | 67 69.0713403 |
| 67.8791799 | 67 69.1242041 |
| 67.8791799 | 67 69.1778255 |
| 67.4791799 | 67 69.2301842 |
| 67.4791799 | 67 69.2858258 |
| 68.1791799 | 67 69.3566189 |
| 68.3791799 | 67 69.427412  |
| 68.3791799 | 67 69.5012354 |
| 68.5791799 | 67 69.5753114 |
| 69.7791799 | 67 69.6781752 |
| 70.1791799 | 67 69.7951804 |
| 71.2791799 | 67 69.9250644 |

|            |    |            |
|------------|----|------------|
| 71.0791799 | 67 | 70.0594939 |
| 70.6791799 | 67 | 70.1560445 |
| 70.8791799 | 67 | 70.2279238 |
| 70.9791799 | 67 | 70.2756932 |
| 70.7791799 | 67 | 70.3215876 |
| 71.0791799 | 67 | 70.348107  |
| 71.1791799 | 67 | 70.3727514 |
| 70.7210154 | 67 | 70.4061458 |
| 70.8321265 | 67 | 70.4226652 |
| 71.4987932 | 67 | 70.4510597 |
| 71.7210154 | 67 | 70.4813291 |
| 71.9432376 | 67 | 70.5334735 |
| 72.276571  | 67 | 70.6299929 |
| 72.276571  | 67 | 70.7233873 |
| 71.9432376 | 67 | 70.8274067 |
| 71.4987932 | 67 | 70.9295512 |
| 71.8321265 | 67 | 71.0316956 |
| 71.9432376 | 67 | 71.131965  |
| 72.276571  | 67 | 71.2147344 |
| 72.276571  | 67 | 71.2906288 |
| 70.9432376 | 60 | 71.3546482 |
| 71.0543487 | 60 | 71.4330426 |

| Time     |         | Person 9   | Person 3   | Person 5   | Person13   | Person 2   |
|----------|---------|------------|------------|------------|------------|------------|
| 17:00:01 | 0:00:01 | 91.7694868 | 67.2605634 | 69.7715278 | 73.6061284 | 55.9682631 |
| 17:00:02 | 0:00:02 | 91.7694868 | 67.2605634 | 69.7715278 | 73.6061284 | 55.9682631 |
| 17:00:03 | 0:00:03 | 91.7694868 | 67.2605634 | 68.7715278 | 72.6061284 | 55.9682631 |
| 17:00:04 | 0:00:04 | 93.7694868 | 68.2605634 | 68.7715278 | 72.6061284 | 54.9682631 |
| 17:00:05 | 0:00:05 | 93.7694868 | 69.2605634 | 68.7715278 | 72.6061284 | 54.9682631 |
| 17:00:06 | 0:00:06 | 93.7694868 | 69.2605634 | 69.7715278 | 72.6061284 | 55.9682631 |
| 17:00:07 | 0:00:07 | 93.7694868 | 69.2605634 | 69.7715278 | 73.6061284 | 55.9682631 |
| 17:00:08 | 0:00:08 | 93.7694868 | 70.2605634 | 69.7715278 | 73.6061284 | 56.9682631 |
| 17:00:09 | 0:00:09 | 93.7694868 | 72.2605634 | 70.7715278 | 73.6061284 | 56.9682631 |
| 17:00:10 | 0:00:10 | 93.7694868 | 72.2605634 | 70.7715278 | 73.6061284 | 56.9682631 |
| 17:00:11 | 0:00:11 | 94.7694868 | 73.2605634 | 67.7715278 | 74.6061284 | 56.9682631 |
| 17:00:12 | 0:00:12 | 94.7694868 | 75.2605634 | 63.7715278 | 74.6061284 | 56.9682631 |
| 17:00:13 | 0:00:13 | 94.7694868 | 75.2605634 | 62.7715278 | 75.6061284 | 55.9682631 |
| 17:00:14 | 0:00:14 | 94.7694868 | 75.2605634 | 62.7715278 | 74.6061284 | 54.9682631 |
| 17:00:15 | 0:00:15 | 96.7694868 | 75.2605634 | 62.7715278 | 74.6061284 | 54.9682631 |
| 17:00:16 | 0:00:16 | 97.7694868 | 75.2605634 | 61.7715278 | 74.6061284 | 54.9682631 |
| 17:00:17 | 0:00:17 | 98.7694868 | 74.2605634 | 61.7715278 | 74.6061284 | 55.9682631 |
| 17:00:18 | 0:00:18 | 98.7694868 | 74.2605634 | 62.7715278 | 74.6061284 | 55.9682631 |
| 17:00:19 | 0:00:19 | 96.7694868 | 74.2605634 | 62.7715278 | 76.6061284 | 57.9682631 |
| 17:00:20 | 0:00:20 | 96.7694868 | 73.2605634 | 64.7715278 | 77.6061284 | 57.9682631 |
| 17:00:21 | 0:00:21 | 96.7694868 | 73.2605634 | 65.7715278 | 78.6061284 | 57.9682631 |
| 17:00:22 | 0:00:22 | 97.7694868 | 72.2605634 | 65.7715278 | 79.6061284 | 57.9682631 |
| 17:00:23 | 0:00:23 | 96.7694868 | 70.2605634 | 65.7715278 | 79.6061284 | 57.9682631 |
| 17:00:24 | 0:00:24 | 95.7694868 | 69.2605634 | 65.7715278 | 78.6061284 | 57.9682631 |
| 17:00:25 | 0:00:25 | 94.7694868 | 69.2605634 | 65.7715278 | 78.6061284 | 57.9682631 |
| 17:00:26 | 0:00:26 | 94.7694868 | 69.2605634 | 63.7715278 | 79.6061284 | 57.9682631 |
| 17:00:27 | 0:00:27 | 94.7694868 | 69.2605634 | 63.7715278 | 81.6061284 | 57.9682631 |
| 17:00:28 | 0:00:28 | 93.7694868 | 69.2605634 | 63.7715278 | 83.6061284 | 57.9682631 |
| 17:00:29 | 0:00:29 | 93.7694868 | 67.2605634 | 63.7715278 | 82.6061284 | 57.9682631 |
| 17:00:30 | 0:00:30 | 93.7694868 | 67.2605634 | 63.7715278 | 82.6061284 | 57.9682631 |
| 17:00:31 | 0:00:31 | 92.7694868 | 66.2605634 | 63.7715278 | 79.6061284 | 57.9682631 |
| 17:00:32 | 0:00:32 | 92.7694868 | 65.2605634 | 63.7715278 | 78.6061284 | 57.9682631 |
| 17:00:33 | 0:00:33 | 92.7694868 | 65.2605634 | 63.7715278 | 77.6061284 | 57.9682631 |
| 17:00:34 | 0:00:34 | 92.7694868 | 65.2605634 | 63.7715278 | 76.6061284 | 56.9682631 |
| 17:00:35 | 0:00:35 | 93.7694868 | 67.2605634 | 63.7715278 | 72.6061284 | 55.9682631 |
| 17:00:36 | 0:00:36 | 93.7694868 | 67.2605634 | 63.7715278 | 72.6061284 | 55.9682631 |
| 17:00:37 | 0:00:37 | 93.7694868 | 66.2605634 | 63.7715278 | 70.6061284 | 52.9682631 |
| 17:00:38 | 0:00:38 | 93.7694868 | 66.2605634 | 67.7715278 | 70.6061284 | 52.9682631 |
| 17:00:39 | 0:00:39 | 93.7694868 | 66.2605634 | 69.7715278 | 69.6061284 | 51.9682631 |
| 17:00:40 | 0:00:40 | 93.7694868 | 66.2605634 | 69.7715278 | 69.6061284 | 51.9682631 |
| 17:00:41 | 0:00:41 | 93.7694868 | 66.2605634 | 70.7715278 | 69.6061284 | 51.9682631 |
| 17:00:42 | 0:00:42 | 94.7694868 | 66.2605634 | 69.7715278 | 68.6061284 | 51.9682631 |
| 17:00:43 | 0:00:43 | 93.7694868 | 67.2605634 | 65.7715278 | 66.6061284 | 51.9682631 |

|          |         |            |            |            |            |            |
|----------|---------|------------|------------|------------|------------|------------|
| 17:00:44 | 0:00:44 | 93.7694868 | 68.2605634 | 65.7715278 | 66.6061284 | 52.9682631 |
| 17:00:45 | 0:00:45 | 93.7694868 | 69.2605634 | 65.7715278 | 65.6061284 | 52.9682631 |
| 17:00:46 | 0:00:46 | 93.7694868 | 71.2605634 | 66.7715278 | 65.6061284 | 53.9682631 |
| 17:00:47 | 0:00:47 | 93.7694868 | 72.2605634 | 68.7715278 | 66.6061284 | 53.9682631 |
| 17:00:48 | 0:00:48 | 92.7694868 | 72.2605634 | 68.7715278 | 68.6061284 | 53.9682631 |
| 17:00:49 | 0:00:49 | 92.7694868 | 73.2605634 | 70.7715278 | 68.6061284 | 53.9682631 |
| 17:00:50 | 0:00:50 | 92.7694868 | 73.2605634 | 70.7715278 | 68.6061284 | 53.9682631 |
| 17:00:51 | 0:00:51 | 92.7694868 | 73.2605634 | 70.7715278 | 68.6061284 | 54.9682631 |
| 17:00:52 | 0:00:52 | 92.7694868 | 72.2605634 | 70.7715278 | 68.6061284 | 54.9682631 |
| 17:00:53 | 0:00:53 | 92.7694868 | 72.2605634 | 70.7715278 | 69.6061284 | 54.9682631 |
| 17:00:54 | 0:00:54 | 92.7694868 | 71.2605634 | 70.7715278 | 70.6061284 | 53.9682631 |
| 17:00:55 | 0:00:55 | 92.7694868 | 71.2605634 | 70.7715278 | 70.6061284 | 53.9682631 |
| 17:00:56 | 0:00:56 | 91.7694868 | 71.2605634 | 71.7715278 | 69.6061284 | 53.9682631 |
| 17:00:57 | 0:00:57 | 83.7694868 | 70.2605634 | 71.7715278 | 69.6061284 | 54.9682631 |
| 17:00:58 | 0:00:58 | 76.7694868 | 71.2605634 | 71.7715278 | 71.6061284 | 54.9682631 |
| 17:00:59 | 0:00:59 | 73.7694868 | 73.2605634 | 69.7715278 | 72.6061284 | 54.9682631 |
| 17:01:00 | 0:01:00 | 72.7694868 | 76.2605634 | 69.7715278 | 73.6061284 | 53.9682631 |
| 17:01:01 | 0:01:01 | 71.7694868 | 77.2605634 | 66.7715278 | 73.6061284 | 53.9682631 |
| 17:01:02 | 0:01:02 | 71.7694868 | 77.2605634 | 65.7715278 | 73.6061284 | 53.9682631 |
| 17:01:03 | 0:01:03 | 70.7694868 | 76.2605634 | 65.7715278 | 73.6061284 | 53.9682631 |
| 17:01:04 | 0:01:04 | 70.7694868 | 68.2605634 | 66.7715278 | 73.6061284 | 53.9682631 |
| 17:01:05 | 0:01:05 | 69.7694868 | 64.2605634 | 66.7715278 | 67.6061284 | 53.9682631 |
| 17:01:06 | 0:01:06 | 68.7694868 | 62.2605634 | 65.7715278 | 66.6061284 | 53.9682631 |
| 17:01:07 | 0:01:07 | 66.7694868 | 62.2605634 | 64.7715278 | 66.6061284 | 53.9682631 |
| 17:01:08 | 0:01:08 | 66.7694868 | 61.2605634 | 65.7715278 | 66.6061284 | 54.9682631 |
| 17:01:09 | 0:01:09 | 65.7694868 | 61.2605634 | 65.7715278 | 68.6061284 | 54.9682631 |
| 17:01:10 | 0:01:10 | 65.7694868 | 62.2605634 | 66.7715278 | 71.6061284 | 54.9682631 |
| 17:01:11 | 0:01:11 | 65.7694868 | 63.2605634 | 66.7715278 | 73.6061284 | 54.9682631 |
| 17:01:12 | 0:01:12 | 66.7694868 | 64.2605634 | 66.7715278 | 73.6061284 | 55.9682631 |
| 17:01:13 | 0:01:13 | 67.7694868 | 65.2605634 | 65.7715278 | 73.6061284 | 55.9682631 |
| 17:01:14 | 0:01:14 | 67.7694868 | 65.2605634 | 65.7715278 | 73.6061284 | 55.9682631 |
| 17:01:15 | 0:01:15 | 66.7694868 | 66.2605634 | 64.7715278 | 73.6061284 | 55.9682631 |
| 17:01:16 | 0:01:16 | 66.7694868 | 65.2605634 | 64.7715278 | 72.6061284 | 56.9682631 |
| 17:01:17 | 0:01:17 | 66.7694868 | 65.2605634 | 64.7715278 | 72.6061284 | 59.9682631 |
| 17:01:18 | 0:01:18 | 66.7694868 | 65.2605634 | 64.7715278 | 70.6061284 | 59.9682631 |
| 17:01:19 | 0:01:19 | 66.7694868 | 66.2605634 | 64.7715278 | 68.6061284 | 60.9682631 |
| 17:01:20 | 0:01:20 | 66.7694868 | 67.2605634 | 64.7715278 | 67.6061284 | 60.9682631 |
| 17:01:21 | 0:01:21 | 65.7694868 | 67.2605634 | 65.7715278 | 67.6061284 | 61.9682631 |
| 17:01:22 | 0:01:22 | 65.7694868 | 67.2605634 | 65.7715278 | 67.6061284 | 61.9682631 |
| 17:01:23 | 0:01:23 | 63.7694868 | 68.2605634 | 65.7715278 | 67.6061284 | 65.9682631 |
| 17:01:24 | 0:01:24 | 63.7694868 | 68.2605634 | 65.7715278 | 67.6061284 | 63.9682631 |
| 17:01:25 | 0:01:25 | 63.7694868 | 68.2605634 | 65.7715278 | 67.6061284 | 61.9682631 |
| 17:01:26 | 0:01:26 | 62.7694868 | 67.2605634 | 64.7715278 | 65.6061284 | 59.9682631 |
| 17:01:27 | 0:01:27 | 62.7694868 | 67.2605634 | 64.7715278 | 64.6061284 | 57.9682631 |
| 17:01:28 | 0:01:28 | 63.7694868 | 67.2605634 | 64.7715278 | 64.6061284 | 56.9682631 |



|          |         |            |            |            |            |            |
|----------|---------|------------|------------|------------|------------|------------|
| 17:01:29 | 0:01:29 | 62.7694868 | 67.2605634 | 64.7715278 | 63.6061284 | 55.9682631 |
| 17:01:30 | 0:01:30 | 62.7694868 | 67.2605634 | 64.7715278 | 63.6061284 | 55.9682631 |
| 17:01:31 | 0:01:31 | 62.7694868 | 67.2605634 | 64.7715278 | 62.6061284 | 55.9682631 |
| 17:01:32 | 0:01:32 | 62.7694868 | 66.2605634 | 64.7715278 | 62.6061284 | 55.9682631 |
| 17:01:33 | 0:01:33 | 62.7694868 | 66.2605634 | 65.7715278 | 62.6061284 | 56.9682631 |
| 17:01:34 | 0:01:34 | 62.7694868 | 66.2605634 | 65.7715278 | 62.6061284 | 56.9682631 |
| 17:01:35 | 0:01:35 | 62.7694868 | 65.2605634 | 65.7715278 | 62.6061284 | 55.9682631 |
| 17:01:36 | 0:01:36 | 62.7694868 | 65.2605634 | 65.7715278 | 64.6061284 | 55.9682631 |
| 17:01:37 | 0:01:37 | 62.7694868 | 65.2605634 | 66.7715278 | 64.6061284 | 53.9682631 |
| 17:01:38 | 0:01:38 | 62.7694868 | 65.2605634 | 66.7715278 | 63.6061284 | 53.9682631 |
| 17:01:39 | 0:01:39 | 62.7694868 | 65.2605634 | 66.7715278 | 63.6061284 | 53.9682631 |
| 17:01:40 | 0:01:40 | 62.7694868 | 65.2605634 | 64.7715278 | 63.6061284 | 53.9682631 |
| 17:01:41 | 0:01:41 | 62.7694868 | 66.2605634 | 64.7715278 | 63.6061284 | 53.9682631 |
| 17:01:42 | 0:01:42 | 62.7694868 | 71.2605634 | 64.7715278 | 63.6061284 | 53.9682631 |
| 17:01:43 | 0:01:43 | 63.7694868 | 72.2605634 | 64.7715278 | 62.6061284 | 54.9682631 |
| 17:01:44 | 0:01:44 | 62.7694868 | 72.2605634 | 65.7715278 | 61.6061284 | 55.9682631 |
| 17:01:45 | 0:01:45 | 62.7694868 | 71.2605634 | 65.7715278 | 61.6061284 | 55.9682631 |
| 17:01:46 | 0:01:46 | 62.7694868 | 71.2605634 | 65.7715278 | 61.6061284 | 55.9682631 |
| 17:01:47 | 0:01:47 | 62.7694868 | 70.2605634 | 69.7715278 | 61.6061284 | 55.9682631 |
| 17:01:48 | 0:01:48 | 62.7694868 | 69.2605634 | 68.7715278 | 61.6061284 | 55.9682631 |
| 17:01:49 | 0:01:49 | 62.7694868 | 70.2605634 | 66.7715278 | 61.6061284 | 54.9682631 |
| 17:01:50 | 0:01:50 | 62.7694868 | 70.2605634 | 66.7715278 | 63.6061284 | 54.9682631 |
| 17:01:51 | 0:01:51 | 63.7694868 | 72.2605634 | 63.7715278 | 64.6061284 | 54.9682631 |
| 17:01:52 | 0:01:52 | 64.7694868 | 73.2605634 | 63.7715278 | 63.6061284 | 55.9682631 |
| 17:01:53 | 0:01:53 | 64.7694868 | 74.2605634 | 63.7715278 | 63.6061284 | 56.9682631 |
| 17:01:54 | 0:01:54 | 65.7694868 | 74.2605634 | 63.7715278 | 64.6061284 | 56.9682631 |
| 17:01:55 | 0:01:55 | 65.7694868 | 74.2605634 | 63.7715278 | 64.6061284 | 57.9682631 |
| 17:01:56 | 0:01:56 | 67.7694868 | 74.2605634 | 63.7715278 | 65.6061284 | 57.9682631 |
| 17:01:57 | 0:01:57 | 68.7694868 | 74.2605634 | 63.7715278 | 66.6061284 | 57.9682631 |
| 17:01:58 | 0:01:58 | 68.7694868 | 74.2605634 | 65.7715278 | 67.6061284 | 57.9682631 |
| 17:01:59 | 0:01:59 | 68.7694868 | 74.2605634 | 65.7715278 | 69.6061284 | 57.9682631 |
| 17:02:00 | 0:02:00 | 68.7694868 | 74.2605634 | 66.7715278 | 71.6061284 | 57.9682631 |
| 17:02:01 | 0:02:01 | 68.7694868 | 74.2605634 | 67.7715278 | 72.6061284 | 57.9682631 |
| 17:02:02 | 0:02:02 | 66.7694868 | 74.2605634 | 67.7715278 | 73.6061284 | 57.9682631 |
| 17:02:03 | 0:02:03 | 68.7694868 | 76.2605634 | 67.7715278 | 73.6061284 | 57.9682631 |
| 17:02:04 | 0:02:04 | 68.7694868 | 77.2605634 | 68.7715278 | 73.6061284 | 57.9682631 |
| 17:02:05 | 0:02:05 | 68.7694868 | 77.2605634 | 68.7715278 | 73.6061284 | 60.9682631 |
| 17:02:06 | 0:02:06 | 68.7694868 | 77.2605634 | 68.7715278 | 72.6061284 | 64.9682631 |
| 17:02:07 | 0:02:07 | 65.7694868 | 78.2605634 | 65.7715278 | 72.6061284 | 64.9682631 |
| 17:02:08 | 0:02:08 | 64.7694868 | 78.2605634 | 64.7715278 | 72.6061284 | 64.9682631 |
| 17:02:09 | 0:02:09 | 63.7694868 | 78.2605634 | 64.7715278 | 73.6061284 | 64.9682631 |
| 17:02:10 | 0:02:10 | 63.7694868 | 78.2605634 | 63.7715278 | 73.6061284 | 65.9682631 |
| 17:02:11 | 0:02:11 | 65.7694868 | 78.2605634 | 63.7715278 | 73.6061284 | 65.9682631 |
| 17:02:12 | 0:02:12 | 65.7694868 | 78.2605634 | 63.7715278 | 73.6061284 | 66.9682631 |
| 17:02:13 | 0:02:13 | 65.7694868 | 75.2605634 | 64.7715278 | 73.6061284 | 69.9682631 |

|          |         |            |            |            |            |            |
|----------|---------|------------|------------|------------|------------|------------|
| 17:02:14 | 0:02:14 | 65.7694868 | 71.2605634 | 64.7715278 | 72.6061284 | 71.9682631 |
| 17:02:15 | 0:02:15 | 65.7694868 | 68.2605634 | 66.7715278 | 72.6061284 | 69.9682631 |
| 17:02:16 | 0:02:16 | 65.7694868 | 66.2605634 | 67.7715278 | 68.6061284 | 68.9682631 |
| 17:02:17 | 0:02:17 | 65.7694868 | 64.2605634 | 67.7715278 | 67.6061284 | 68.9682631 |
| 17:02:18 | 0:02:18 | 65.7694868 | 64.2605634 | 67.7715278 | 66.6061284 | 67.9682631 |
| 17:02:19 | 0:02:19 | 65.7694868 | 64.2605634 | 66.7715278 | 65.6061284 | 61.9682631 |
| 17:02:20 | 0:02:20 | 65.7694868 | 64.2605634 | 64.7715278 | 66.6061284 | 57.9682631 |
| 17:02:21 | 0:02:21 | 63.7694868 | 64.2605634 | 63.7715278 | 67.6061284 | 56.9682631 |
| 17:02:22 | 0:02:22 | 62.7694868 | 64.2605634 | 63.7715278 | 67.6061284 | 55.9682631 |
| 17:02:23 | 0:02:23 | 62.7694868 | 64.2605634 | 63.7715278 | 67.6061284 | 52.9682631 |
| 17:02:24 | 0:02:24 | 62.7694868 | 64.2605634 | 63.7715278 | 67.6061284 | 52.9682631 |
| 17:02:25 | 0:02:25 | 61.7694868 | 63.2605634 | 63.7715278 | 67.6061284 | 47.9682631 |
| 17:02:26 | 0:02:26 | 61.7694868 | 63.2605634 | 62.7715278 | 67.6061284 | 46.9682631 |
| 17:02:27 | 0:02:27 | 62.7694868 | 62.2605634 | 61.7715278 | 63.6061284 | 49.9682631 |
| 17:02:28 | 0:02:28 | 62.7694868 | 60.2605634 | 60.7715278 | 63.6061284 | 51.9682631 |
| 17:02:29 | 0:02:29 | 62.7694868 | 60.2605634 | 60.7715278 | 63.6061284 | 51.9682631 |
| 17:02:30 | 0:02:30 | 62.7694868 | 59.2605634 | 60.7715278 | 64.6061284 | 51.9682631 |
| 17:02:31 | 0:02:31 | 61.7694868 | 59.2605634 | 60.7715278 | 64.6061284 | 51.9682631 |
| 17:02:32 | 0:02:32 | 60.7694868 | 58.2605634 | 59.7715278 | 65.6061284 | 51.9682631 |
| 17:02:33 | 0:02:33 | 60.7694868 | 59.2605634 | 59.7715278 | 65.6061284 | 52.9682631 |
| 17:02:34 | 0:02:34 | 61.7694868 | 60.2605634 | 59.7715278 | 66.6061284 | 52.9682631 |
| 17:02:35 | 0:02:35 | 61.7694868 | 62.2605634 | 59.7715278 | 66.6061284 | 52.9682631 |
| 17:02:36 | 0:02:36 | 62.7694868 | 63.2605634 | 60.7715278 | 67.6061284 | 52.9682631 |
| 17:02:37 | 0:02:37 | 62.7694868 | 63.2605634 | 59.7715278 | 66.6061284 | 53.9682631 |
| 17:02:38 | 0:02:38 | 63.7694868 | 64.2605634 | 59.7715278 | 66.6061284 | 54.9682631 |
| 17:02:39 | 0:02:39 | 63.7694868 | 64.2605634 | 60.7715278 | 66.6061284 | 55.9682631 |
| 17:02:40 | 0:02:40 | 63.7694868 | 64.2605634 | 60.7715278 | 65.6061284 | 55.9682631 |
| 17:02:41 | 0:02:41 | 63.7694868 | 64.2605634 | 60.7715278 | 65.6061284 | 55.9682631 |
| 17:02:42 | 0:02:42 | 63.7694868 | 64.2605634 | 60.7715278 | 66.6061284 | 55.9682631 |
| 17:02:43 | 0:02:43 | 63.7694868 | 65.2605634 | 61.7715278 | 67.6061284 | 55.9682631 |
| 17:02:44 | 0:02:44 | 63.7694868 | 65.2605634 | 60.7715278 | 67.6061284 | 55.9682631 |
| 17:02:45 | 0:02:45 | 63.7694868 | 65.2605634 | 60.7715278 | 67.6061284 | 54.9682631 |
| 17:02:46 | 0:02:46 | 67.7694868 | 66.2605634 | 60.7715278 | 68.6061284 | 55.9682631 |
| 17:02:47 | 0:02:47 | 68.7694868 | 66.2605634 | 61.7715278 | 68.6061284 | 55.9682631 |
| 17:02:48 | 0:02:48 | 69.7694868 | 65.2605634 | 61.7715278 | 68.6061284 | 60.9682631 |
| 17:02:49 | 0:02:49 | 69.7694868 | 65.2605634 | 61.7715278 | 68.6061284 | 61.9682631 |
| 17:02:50 | 0:02:50 | 69.7694868 | 65.2605634 | 62.7715278 | 69.6061284 | 62.9682631 |
| 17:02:51 | 0:02:51 | 68.7694868 | 66.2605634 | 62.7715278 | 70.6061284 | 62.9682631 |
| 17:02:52 | 0:02:52 | 66.7694868 | 66.2605634 | 61.7715278 | 72.6061284 | 63.9682631 |
| 17:02:53 | 0:02:53 | 65.7694868 | 66.2605634 | 61.7715278 | 73.6061284 | 66.9682631 |
| 17:02:54 | 0:02:54 | 65.7694868 | 64.2605634 | 61.7715278 | 75.6061284 | 66.9682631 |
| 17:02:55 | 0:02:55 | 65.7694868 | 63.2605634 | 62.7715278 | 76.6061284 | 66.9682631 |
| 17:02:56 | 0:02:56 | 65.7694868 | 63.2605634 | 62.7715278 | 76.6061284 | 66.9682631 |
| 17:02:57 | 0:02:57 | 66.7694868 | 63.2605634 | 62.7715278 | 76.6061284 | 66.9682631 |
| 17:02:58 | 0:02:58 | 67.7694868 | 62.2605634 | 62.7715278 | 76.6061284 | 67.9682631 |

|          |         |            |            |            |            |            |
|----------|---------|------------|------------|------------|------------|------------|
| 17:02:59 | 0:02:59 | 68.7694868 | 62.2605634 | 63.7715278 | 76.6061284 | 67.9682631 |
| 17:03:00 | 0:03:00 | 68.7694868 | 62.2605634 | 63.7715278 | 76.6061284 | 67.9682631 |
| 17:03:01 | 0:03:01 | 68.7694868 | 64.2605634 | 63.7715278 | 76.6061284 | 67.9682631 |
| 17:03:02 | 0:03:02 | 67.7694868 | 65.2605634 | 63.7715278 | 76.6061284 | 67.9682631 |
| 17:03:03 | 0:03:03 | 66.7694868 | 65.2605634 | 62.7715278 | 76.6061284 | 68.9682631 |
| 17:03:04 | 0:03:04 | 66.7694868 | 67.2605634 | 63.7715278 | 76.6061284 | 68.9682631 |
| 17:03:05 | 0:03:05 | 65.7694868 | 67.2605634 | 64.7715278 | 76.6061284 | 68.9682631 |
| 17:03:06 | 0:03:06 | 66.7694868 | 68.2605634 | 64.7715278 | 76.6061284 | 69.9682631 |
| 17:03:07 | 0:03:07 | 66.7694868 | 67.2605634 | 64.7715278 | 75.6061284 | 70.9682631 |
| 17:03:08 | 0:03:08 | 66.7694868 | 67.2605634 | 65.7715278 | 75.6061284 | 71.9682631 |
| 17:03:09 | 0:03:09 | 66.7694868 | 67.2605634 | 65.7715278 | 74.6061284 | 71.9682631 |
| 17:03:10 | 0:03:10 | 66.7694868 | 68.2605634 | 65.7715278 | 73.6061284 | 71.9682631 |
| 17:03:11 | 0:03:11 | 67.7694868 | 69.2605634 | 65.7715278 | 73.6061284 | 71.9682631 |
| 17:03:12 | 0:03:12 | 69.7694868 | 69.2605634 | 65.7715278 | 73.6061284 | 71.9682631 |
| 17:03:13 | 0:03:13 | 69.7694868 | 69.2605634 | 65.7715278 | 74.6061284 | 72.9682631 |
| 17:03:14 | 0:03:14 | 70.7694868 | 69.2605634 | 69.7715278 | 75.6061284 | 73.9682631 |
| 17:03:15 | 0:03:15 | 71.7694868 | 69.2605634 | 69.7715278 | 75.6061284 | 73.9682631 |
| 17:03:16 | 0:03:16 | 71.7694868 | 68.2605634 | 69.7715278 | 75.6061284 | 73.9682631 |
| 17:03:17 | 0:03:17 | 71.7694868 | 68.2605634 | 75.7715278 | 76.6061284 | 73.9682631 |
| 17:03:18 | 0:03:18 | 71.7694868 | 68.2605634 | 75.7715278 | 76.6061284 | 73.9682631 |
| 17:03:19 | 0:03:19 | 70.7694868 | 69.2605634 | 75.7715278 | 78.6061284 | 74.9682631 |
| 17:03:20 | 0:03:20 | 70.7694868 | 70.2605634 | 75.7715278 | 79.6061284 | 74.9682631 |
| 17:03:21 | 0:03:21 | 70.7694868 | 70.2605634 | 81.7715278 | 79.6061284 | 74.9682631 |
| 17:03:22 | 0:03:22 | 70.7694868 | 71.2605634 | 72.7715278 | 79.6061284 | 73.9682631 |
| 17:03:23 | 0:03:23 | 70.7694868 | 71.2605634 | 72.7715278 | 67.6061284 | 73.9682631 |
| 17:03:24 | 0:03:24 | 70.7694868 | 71.2605634 | 74.7715278 | 64.6061284 | 73.9682631 |
| 17:03:25 | 0:03:25 | 71.7694868 | 72.2605634 | 73.7715278 | 62.6061284 | 74.9682631 |
| 17:03:26 | 0:03:26 | 70.7694868 | 72.2605634 | 73.7715278 | 61.6061284 | 74.9682631 |
| 17:03:27 | 0:03:27 | 70.7694868 | 71.2605634 | 66.7715278 | 60.6061284 | 76.9682631 |
| 17:03:28 | 0:03:28 | 72.7694868 | 71.2605634 | 64.7715278 | 60.6061284 | 79.9682631 |
| 17:03:29 | 0:03:29 | 73.7694868 | 71.2605634 | 64.7715278 | 60.6061284 | 79.9682631 |
| 17:03:30 | 0:03:30 | 73.7694868 | 71.2605634 | 64.7715278 | 62.6061284 | 80.9682631 |
| 17:03:31 | 0:03:31 | 71.7694868 | 71.2605634 | 63.7715278 | 64.6061284 | 80.9682631 |
| 17:03:32 | 0:03:32 | 70.7694868 | 71.2605634 | 64.7715278 | 65.6061284 | 80.9682631 |
| 17:03:33 | 0:03:33 | 69.7694868 | 71.2605634 | 64.7715278 | 65.6061284 | 81.9682631 |
| 17:03:34 | 0:03:34 | 68.7694868 | 71.2605634 | 65.7715278 | 65.6061284 | 81.9682631 |
| 17:03:35 | 0:03:35 | 68.7694868 | 71.2605634 | 65.7715278 | 64.6061284 | 81.9682631 |
| 17:03:36 | 0:03:36 | 68.7694868 | 71.2605634 | 65.7715278 | 64.6061284 | 82.9682631 |
| 17:03:37 | 0:03:37 | 68.7694868 | 71.2605634 | 65.7715278 | 63.6061284 | 83.9682631 |
| 17:03:38 | 0:03:38 | 68.7694868 | 71.2605634 | 65.7715278 | 64.6061284 | 83.9682631 |
| 17:03:39 | 0:03:39 | 67.7694868 | 73.2605634 | 64.7715278 | 64.6061284 | 83.9682631 |
| 17:03:40 | 0:03:40 | 66.7694868 | 75.2605634 | 63.7715278 | 65.6061284 | 83.9682631 |
| 17:03:41 | 0:03:41 | 65.7694868 | 77.2605634 | 63.7715278 | 66.6061284 | 84.9682631 |
| 17:03:42 | 0:03:42 | 65.7694868 | 79.2605634 | 63.7715278 | 66.6061284 | 84.9682631 |
| 17:03:43 | 0:03:43 | 64.7694868 | 80.2605634 | 63.7715278 | 66.6061284 | 84.9682631 |

|          |         |            |            |            |            |            |
|----------|---------|------------|------------|------------|------------|------------|
| 17:03:44 | 0:03:44 | 64.7694868 | 79.2605634 | 64.7715278 | 66.6061284 | 86.9682631 |
| 17:03:45 | 0:03:45 | 65.7694868 | 77.2605634 | 64.7715278 | 66.6061284 | 86.9682631 |
| 17:03:46 | 0:03:46 | 65.7694868 | 77.2605634 | 64.7715278 | 66.6061284 | 87.9682631 |
| 17:03:47 | 0:03:47 | 65.7694868 | 73.2605634 | 65.7715278 | 67.6061284 | 87.9682631 |
| 17:03:48 | 0:03:48 | 65.7694868 | 72.2605634 | 66.7715278 | 68.6061284 | 87.9682631 |
| 17:03:49 | 0:03:49 | 65.7694868 | 72.2605634 | 66.7715278 | 66.6061284 | 87.9682631 |
| 17:03:50 | 0:03:50 | 66.7694868 | 71.2605634 | 67.7715278 | 65.6061284 | 87.9682631 |
| 17:03:51 | 0:03:51 | 66.7694868 | 70.2605634 | 67.7715278 | 65.6061284 | 87.9682631 |
| 17:03:52 | 0:03:52 | 64.7694868 | 69.2605634 | 67.7715278 | 69.6061284 | 87.9682631 |
| 17:03:53 | 0:03:53 | 64.7694868 | 68.2605634 | 67.7715278 | 74.6061284 | 85.9682631 |
| 17:03:54 | 0:03:54 | 64.7694868 | 68.2605634 | 68.7715278 | 76.6061284 | 83.9682631 |
| 17:03:55 | 0:03:55 | 64.7694868 | 68.2605634 | 68.7715278 | 76.6061284 | 83.9682631 |
| 17:03:56 | 0:03:56 | 64.7694868 | 68.2605634 | 70.7715278 | 75.6061284 | 81.9682631 |
| 17:03:57 | 0:03:57 | 63.7694868 | 68.2605634 | 70.7715278 | 73.6061284 | 81.9682631 |
| 17:03:58 | 0:03:58 | 64.7694868 | 68.2605634 | 73.7715278 | 69.6061284 | 80.9682631 |
| 17:03:59 | 0:03:59 | 64.7694868 | 69.2605634 | 74.7715278 | 68.6061284 | 79.9682631 |
| 17:04:00 | 0:04:00 | 64.7694868 | 69.2605634 | 75.7715278 | 67.6061284 | 79.9682631 |
| 17:04:01 | 0:04:01 | 64.7694868 | 69.2605634 | 75.7715278 | 67.6061284 | 78.9682631 |
| 17:04:02 | 0:04:02 | 65.7694868 | 68.2605634 | 77.7715278 | 65.6061284 | 77.9682631 |
| 17:04:03 | 0:04:03 | 65.7694868 | 68.2605634 | 77.7715278 | 65.6061284 | 77.9682631 |
| 17:04:04 | 0:04:04 | 65.7694868 | 69.2605634 | 77.7715278 | 66.6061284 | 71.9682631 |
| 17:04:05 | 0:04:05 | 65.7694868 | 69.2605634 | 77.7715278 | 64.6061284 | 64.9682631 |
| 17:04:06 | 0:04:06 | 65.7694868 | 69.2605634 | 66.7715278 | 64.6061284 | 62.9682631 |
| 17:04:07 | 0:04:07 | 65.7694868 | 68.2605634 | 65.7715278 | 63.6061284 | 60.9682631 |
| 17:04:08 | 0:04:08 | 66.7694868 | 69.2605634 | 64.7715278 | 64.6061284 | 59.9682631 |
| 17:04:09 | 0:04:09 | 66.7694868 | 69.2605634 | 64.7715278 | 64.6061284 | 60.9682631 |
| 17:04:10 | 0:04:10 | 66.7694868 | 72.2605634 | 64.7715278 | 65.6061284 | 60.9682631 |
| 17:04:11 | 0:04:11 | 66.7694868 | 72.2605634 | 64.7715278 | 65.6061284 | 62.9682631 |
| 17:04:12 | 0:04:12 | 66.7694868 | 72.2605634 | 64.7715278 | 65.6061284 | 62.9682631 |
| 17:04:13 | 0:04:13 | 66.7694868 | 72.2605634 | 64.7715278 | 67.6061284 | 64.9682631 |
| 17:04:14 | 0:04:14 | 67.7694868 | 71.2605634 | 63.7715278 | 69.6061284 | 64.9682631 |
| 17:04:15 | 0:04:15 | 67.7694868 | 71.2605634 | 64.7715278 | 70.6061284 | 64.9682631 |
| 17:04:16 | 0:04:16 | 67.7694868 | 71.2605634 | 64.7715278 | 70.6061284 | 62.9682631 |
| 17:04:17 | 0:04:17 | 68.7694868 | 70.2605634 | 63.7715278 | 70.6061284 | 61.9682631 |
| 17:04:18 | 0:04:18 | 68.7694868 | 70.2605634 | 62.7715278 | 70.6061284 | 61.9682631 |
| 17:04:19 | 0:04:19 | 68.7694868 | 69.2605634 | 62.7715278 | 70.6061284 | 59.9682631 |
| 17:04:20 | 0:04:20 | 69.7694868 | 69.2605634 | 61.7715278 | 71.6061284 | 59.9682631 |
| 17:04:21 | 0:04:21 | 69.7694868 | 69.2605634 | 62.7715278 | 71.6061284 | 59.9682631 |
| 17:04:22 | 0:04:22 | 69.7694868 | 69.2605634 | 62.7715278 | 71.6061284 | 59.9682631 |
| 17:04:23 | 0:04:23 | 69.7694868 | 68.2605634 | 62.7715278 | 69.6061284 | 59.9682631 |
| 17:04:24 | 0:04:24 | 68.7694868 | 68.2605634 | 63.7715278 | 66.6061284 | 59.9682631 |
| 17:04:25 | 0:04:25 | 68.7694868 | 68.2605634 | 63.7715278 | 66.6061284 | 59.9682631 |
| 17:04:26 | 0:04:26 | 68.7694868 | 68.2605634 | 65.7715278 | 65.6061284 | 59.9682631 |
| 17:04:27 | 0:04:27 | 68.7694868 | 68.2605634 | 65.7715278 | 65.6061284 | 59.9682631 |
| 17:04:28 | 0:04:28 | 68.7694868 | 68.2605634 | 66.7715278 | 65.6061284 | 60.9682631 |

|          |         |            |            |            |            |            |
|----------|---------|------------|------------|------------|------------|------------|
| 17:04:29 | 0:04:29 | 67.7694868 | 68.2605634 | 66.7715278 | 67.6061284 | 60.9682631 |
| 17:04:30 | 0:04:30 | 68.7694868 | 68.2605634 | 66.7715278 | 68.6061284 | 59.9682631 |
| 17:04:31 | 0:04:31 | 68.7694868 | 68.2605634 | 66.7715278 | 68.6061284 | 59.9682631 |
| 17:04:32 | 0:04:32 | 68.7694868 | 72.2605634 | 65.7715278 | 68.6061284 | 59.9682631 |
| 17:04:33 | 0:04:33 | 68.7694868 | 78.2605634 | 65.7715278 | 67.6061284 | 59.9682631 |
| 17:04:34 | 0:04:34 | 68.7694868 | 80.2605634 | 65.7715278 | 67.6061284 | 59.9682631 |
| 17:04:35 | 0:04:35 | 68.7694868 | 80.2605634 | 65.7715278 | 66.6061284 | 59.9682631 |
| 17:04:36 | 0:04:36 | 68.7694868 | 80.2605634 | 65.7715278 | 66.6061284 | 59.9682631 |
| 17:04:37 | 0:04:37 | 68.7694868 | 78.2605634 | 63.7715278 | 68.6061284 | 59.9682631 |
| 17:04:38 | 0:04:38 | 67.7694868 | 75.2605634 | 61.7715278 | 69.6061284 | 60.9682631 |
| 17:04:39 | 0:04:39 | 67.7694868 | 72.2605634 | 61.7715278 | 69.6061284 | 62.9682631 |
| 17:04:40 | 0:04:40 | 66.7694868 | 71.2605634 | 61.7715278 | 69.6061284 | 62.9682631 |
| 17:04:41 | 0:04:41 | 66.7694868 | 71.2605634 | 61.7715278 | 72.6061284 | 62.9682631 |
| 17:04:42 | 0:04:42 | 66.7694868 | 73.2605634 | 61.7715278 | 75.6061284 | 62.9682631 |
| 17:04:43 | 0:04:43 | 66.7694868 | 74.2605634 | 63.7715278 | 75.6061284 | 63.9682631 |
| 17:04:44 | 0:04:44 | 68.7694868 | 73.2605634 | 65.7715278 | 77.6061284 | 64.9682631 |
| 17:04:45 | 0:04:45 | 68.7694868 | 73.2605634 | 66.7715278 | 77.6061284 | 64.9682631 |
| 17:04:46 | 0:04:46 | 69.7694868 | 73.2605634 | 66.7715278 | 77.6061284 | 64.9682631 |
| 17:04:47 | 0:04:47 | 69.7694868 | 73.2605634 | 67.7715278 | 79.6061284 | 62.9682631 |
| 17:04:48 | 0:04:48 | 69.7694868 | 72.2605634 | 67.7715278 | 78.6061284 | 60.9682631 |
| 17:04:49 | 0:04:49 | 69.7694868 | 71.2605634 | 66.7715278 | 74.6061284 | 59.9682631 |
| 17:04:50 | 0:04:50 | 69.7694868 | 71.2605634 | 66.7715278 | 72.6061284 | 59.9682631 |
| 17:04:51 | 0:04:51 | 69.7694868 | 70.2605634 | 64.7715278 | 72.6061284 | 59.9682631 |
| 17:04:52 | 0:04:52 | 69.7694868 | 70.2605634 | 63.7715278 | 72.6061284 | 59.9682631 |
| 17:04:53 | 0:04:53 | 69.7694868 | 70.2605634 | 61.7715278 | 70.6061284 | 59.9682631 |
| 17:04:54 | 0:04:54 | 68.7694868 | 69.2605634 | 61.7715278 | 69.6061284 | 59.9682631 |
| 17:04:55 | 0:04:55 | 69.7694868 | 67.2605634 | 59.7715278 | 69.6061284 | 61.9682631 |
| 17:04:56 | 0:04:56 | 70.7694868 | 66.2605634 | 59.7715278 | 69.6061284 | 62.9682631 |
| 17:04:57 | 0:04:57 | 71.7694868 | 66.2605634 | 58.7715278 | 69.6061284 | 62.9682631 |
| 17:04:58 | 0:04:58 | 71.7694868 | 66.2605634 | 58.7715278 | 68.6061284 | 62.9682631 |
| 17:04:59 | 0:04:59 | 72.7694868 | 66.2605634 | 58.7715278 | 67.6061284 | 61.9682631 |
| 17:05:00 | 0:05:00 | 74.7694868 | 66.2605634 | 58.7715278 | 66.6061284 | 61.9682631 |
| 17:05:01 | 0:05:01 | 74.7694868 | 66.2605634 | 56.7715278 | 66.6061284 | 58.9682631 |
| 17:05:02 | 0:05:02 | 74.7694868 | 66.2605634 | 56.7715278 | 65.6061284 | 57.9682631 |
| 17:05:03 | 0:05:03 | 73.7694868 | 66.2605634 | 57.7715278 | 65.6061284 | 57.9682631 |
| 17:05:04 | 0:05:04 | 73.7694868 | 66.2605634 | 57.7715278 | 65.6061284 | 58.9682631 |
| 17:05:05 | 0:05:05 | 73.7694868 | 66.2605634 | 57.7715278 | 64.6061284 | 58.9682631 |
| 17:05:06 | 0:05:06 | 73.7694868 | 66.2605634 | 57.7715278 | 64.6061284 | 58.9682631 |
| 17:05:07 | 0:05:07 | 71.7694868 | 67.2605634 | 59.7715278 | 63.6061284 | 60.9682631 |
| 17:05:08 | 0:05:08 | 70.7694868 | 67.2605634 | 60.7715278 | 63.6061284 | 62.9682631 |
| 17:05:09 | 0:05:09 | 70.7694868 | 69.2605634 | 60.7715278 | 64.6061284 | 62.9682631 |
| 17:05:10 | 0:05:10 | 70.7694868 | 69.2605634 | 61.7715278 | 64.6061284 | 63.9682631 |
| 17:05:11 | 0:05:11 | 69.7694868 | 72.2605634 | 61.7715278 | 65.6061284 | 63.9682631 |
| 17:05:12 | 0:05:12 | 69.7694868 | 73.2605634 | 61.7715278 | 65.6061284 | 63.9682631 |
| 17:05:13 | 0:05:13 | 69.7694868 | 73.2605634 | 60.7715278 | 65.6061284 | 63.9682631 |

|          |         |            |            |            |            |            |
|----------|---------|------------|------------|------------|------------|------------|
| 17:05:14 | 0:05:14 | 68.7694868 | 73.2605634 | 60.7715278 | 65.6061284 | 61.9682631 |
| 17:05:15 | 0:05:15 | 68.7694868 | 73.2605634 | 60.7715278 | 63.6061284 | 61.9682631 |
| 17:05:16 | 0:05:16 | 68.7694868 | 73.2605634 | 61.7715278 | 63.6061284 | 58.9682631 |
| 17:05:17 | 0:05:17 | 68.7694868 | 72.2605634 | 62.7715278 | 65.6061284 | 58.9682631 |
| 17:05:18 | 0:05:18 | 68.7694868 | 71.2605634 | 63.7715278 | 65.6061284 | 58.9682631 |
| 17:05:19 | 0:05:19 | 68.7694868 | 71.2605634 | 63.7715278 | 66.6061284 | 58.9682631 |
| 17:05:20 | 0:05:20 | 67.7694868 | 71.2605634 | 63.7715278 | 66.6061284 | 58.9682631 |
| 17:05:21 | 0:05:21 | 66.7694868 | 69.2605634 | 63.7715278 | 66.6061284 | 58.9682631 |
| 17:05:22 | 0:05:22 | 65.7694868 | 69.2605634 | 63.7715278 | 65.6061284 | 58.9682631 |
| 17:05:23 | 0:05:23 | 64.7694868 | 69.2605634 | 63.7715278 | 65.6061284 | 58.9682631 |
| 17:05:24 | 0:05:24 | 63.7694868 | 69.2605634 | 62.7715278 | 65.6061284 | 58.9682631 |
| 17:05:25 | 0:05:25 | 62.7694868 | 69.2605634 | 62.7715278 | 65.6061284 | 58.9682631 |
| 17:05:26 | 0:05:26 | 62.7694868 | 69.2605634 | 62.7715278 | 65.6061284 | 58.9682631 |
| 17:05:27 | 0:05:27 | 63.7694868 | 70.2605634 | 61.7715278 | 66.6061284 | 58.9682631 |
| 17:05:28 | 0:05:28 | 64.7694868 | 70.2605634 | 61.7715278 | 67.6061284 | 58.9682631 |
| 17:05:29 | 0:05:29 | 65.7694868 | 70.2605634 | 61.7715278 | 67.6061284 | 58.9682631 |
| 17:05:30 | 0:05:30 | 64.7694868 | 70.2605634 | 60.7715278 | 67.6061284 | 58.9682631 |
| 17:05:31 | 0:05:31 | 64.7694868 | 71.2605634 | 60.7715278 | 70.6061284 | 58.9682631 |
| 17:05:32 | 0:05:32 | 64.7694868 | 71.2605634 | 61.7715278 | 69.6061284 | 57.9682631 |
| 17:05:33 | 0:05:33 | 64.7694868 | 71.2605634 | 61.7715278 | 68.6061284 | 58.9682631 |
| 17:05:34 | 0:05:34 | 64.7694868 | 71.2605634 | 61.7715278 | 68.6061284 | 60.9682631 |
| 17:05:35 | 0:05:35 | 63.7694868 | 69.2605634 | 61.7715278 | 69.6061284 | 60.9682631 |
| 17:05:36 | 0:05:36 | 63.7694868 | 67.2605634 | 61.7715278 | 69.6061284 | 62.9682631 |
| 17:05:37 | 0:05:37 | 63.7694868 | 65.2605634 | 61.7715278 | 69.6061284 | 62.9682631 |
| 17:05:38 | 0:05:38 | 63.7694868 | 64.2605634 | 61.7715278 | 70.6061284 | 63.9682631 |
| 17:05:39 | 0:05:39 | 63.7694868 | 64.2605634 | 61.7715278 | 71.6061284 | 63.9682631 |
| 17:05:40 | 0:05:40 | 62.7694868 | 65.2605634 | 63.7715278 | 74.6061284 | 63.9682631 |
| 17:05:41 | 0:05:41 | 63.7694868 | 66.2605634 | 63.7715278 | 74.6061284 | 65.9682631 |
| 17:05:42 | 0:05:42 | 63.7694868 | 66.2605634 | 64.7715278 | 75.6061284 | 65.9682631 |
| 17:05:43 | 0:05:43 | 64.7694868 | 67.2605634 | 64.7715278 | 75.6061284 | 65.9682631 |
| 17:05:44 | 0:05:44 | 64.7694868 | 67.2605634 | 64.7715278 | 70.6061284 | 64.9682631 |
| 17:05:45 | 0:05:45 | 65.7694868 | 66.2605634 | 66.7715278 | 67.6061284 | 64.9682631 |
| 17:05:46 | 0:05:46 | 65.7694868 | 65.2605634 | 67.7715278 | 65.6061284 | 63.9682631 |
| 17:05:47 | 0:05:47 | 64.7694868 | 65.2605634 | 67.7715278 | 65.6061284 | 62.9682631 |
| 17:05:48 | 0:05:48 | 64.7694868 | 64.2605634 | 65.7715278 | 64.6061284 | 62.9682631 |
| 17:05:49 | 0:05:49 | 64.7694868 | 64.2605634 | 65.7715278 | 64.6061284 | 62.9682631 |
| 17:05:50 | 0:05:50 | 64.7694868 | 64.2605634 | 64.7715278 | 63.6061284 | 62.9682631 |
| 17:05:51 | 0:05:51 | 62.7694868 | 65.2605634 | 64.7715278 | 63.6061284 | 62.9682631 |
| 17:05:52 | 0:05:52 | 62.7694868 | 66.2605634 | 64.7715278 | 64.6061284 | 63.9682631 |
| 17:05:53 | 0:05:53 | 62.7694868 | 65.2605634 | 64.7715278 | 65.6061284 | 64.9682631 |
| 17:05:54 | 0:05:54 | 62.7694868 | 65.2605634 | 65.7715278 | 67.6061284 | 67.9682631 |
| 17:05:55 | 0:05:55 | 62.7694868 | 65.2605634 | 65.7715278 | 67.6061284 | 68.9682631 |
| 17:05:56 | 0:05:56 | 61.7694868 | 65.2605634 | 65.7715278 | 68.6061284 | 68.9682631 |
| 17:05:57 | 0:05:57 | 61.7694868 | 67.2605634 | 63.7715278 | 69.6061284 | 68.9682631 |
| 17:05:58 | 0:05:58 | 60.7694868 | 67.2605634 | 62.7715278 | 69.6061284 | 68.9682631 |

|          |         |            |            |            |            |            |
|----------|---------|------------|------------|------------|------------|------------|
| 17:05:59 | 0:05:59 | 60.7694868 | 67.2605634 | 62.7715278 | 70.6061284 | 68.9682631 |
| 17:06:00 | 0:06:00 | 60.7694868 | 67.2605634 | 62.7715278 | 70.6061284 | 68.9682631 |
| 17:06:01 | 0:06:01 | 59.7694868 | 68.2605634 | 56.7715278 | 71.6061284 | 68.9682631 |
| 17:06:02 | 0:06:02 | 59.7694868 | 71.2605634 | 55.7715278 | 71.6061284 | 68.9682631 |
| 17:06:03 | 0:06:03 | 59.7694868 | 74.2605634 | 55.7715278 | 72.6061284 | 68.9682631 |
| 17:06:04 | 0:06:04 | 63.7694868 | 75.2605634 | 55.7715278 | 75.6061284 | 68.9682631 |
| 17:06:05 | 0:06:05 | 71.7694868 | 75.2605634 | 55.7715278 | 76.6061284 | 68.9682631 |
| 17:06:06 | 0:06:06 | 77.7694868 | 74.2605634 | 55.7715278 | 77.6061284 | 68.9682631 |
| 17:06:07 | 0:06:07 | 80.7694868 | 73.2605634 | 53.7715278 | 78.6061284 | 67.9682631 |
| 17:06:08 | 0:06:08 | 81.7694868 | 72.2605634 | 53.7715278 | 79.6061284 | 60.9682631 |
| 17:06:09 | 0:06:09 | 81.7694868 | 71.2605634 | 53.7715278 | 79.6061284 | 60.9682631 |
| 17:06:10 | 0:06:10 | 80.7694868 | 70.2605634 | 53.7715278 | 81.6061284 | 59.9682631 |
| 17:06:11 | 0:06:11 | 80.7694868 | 70.2605634 | 53.7715278 | 81.6061284 | 59.9682631 |
| 17:06:12 | 0:06:12 | 79.7694868 | 69.2605634 | 59.7715278 | 81.6061284 | 60.9682631 |
| 17:06:13 | 0:06:13 | 78.7694868 | 69.2605634 | 61.7715278 | 80.6061284 | 60.9682631 |
| 17:06:14 | 0:06:14 | 76.7694868 | 68.2605634 | 64.7715278 | 77.6061284 | 60.9682631 |
| 17:06:15 | 0:06:15 | 75.7694868 | 69.2605634 | 64.7715278 | 73.6061284 | 60.9682631 |
| 17:06:16 | 0:06:16 | 74.7694868 | 70.2605634 | 71.7715278 | 72.6061284 | 60.9682631 |
| 17:06:17 | 0:06:17 | 74.7694868 | 71.2605634 | 72.7715278 | 72.6061284 | 60.9682631 |
| 17:06:18 | 0:06:18 | 75.7694868 | 73.2605634 | 72.7715278 | 71.6061284 | 60.9682631 |
| 17:06:19 | 0:06:19 | 75.7694868 | 73.2605634 | 72.7715278 | 71.6061284 | 60.9682631 |
| 17:06:20 | 0:06:20 | 76.7694868 | 72.2605634 | 73.7715278 | 71.6061284 | 60.9682631 |
| 17:06:21 | 0:06:21 | 75.7694868 | 69.2605634 | 76.7715278 | 71.6061284 | 60.9682631 |
| 17:06:22 | 0:06:22 | 75.7694868 | 67.2605634 | 82.7715278 | 74.6061284 | 60.9682631 |
| 17:06:23 | 0:06:23 | 75.7694868 | 66.2605634 | 84.7715278 | 77.6061284 | 59.9682631 |
| 17:06:24 | 0:06:24 | 75.7694868 | 65.2605634 | 84.7715278 | 78.6061284 | 59.9682631 |
| 17:06:25 | 0:06:25 | 75.7694868 | 64.2605634 | 86.7715278 | 77.6061284 | 58.9682631 |
| 17:06:26 | 0:06:26 | 75.7694868 | 64.2605634 | 88.7715278 | 74.6061284 | 58.9682631 |
| 17:06:27 | 0:06:27 | 75.7694868 | 64.2605634 | 88.7715278 | 73.6061284 | 58.9682631 |
| 17:06:28 | 0:06:28 | 73.7694868 | 65.2605634 | 88.7715278 | 72.6061284 | 58.9682631 |
| 17:06:29 | 0:06:29 | 71.7694868 | 65.2605634 | 88.7715278 | 72.6061284 | 58.9682631 |
| 17:06:30 | 0:06:30 | 70.7694868 | 66.2605634 | 88.7715278 | 72.6061284 | 58.9682631 |
| 17:06:31 | 0:06:31 | 70.7694868 | 67.2605634 | 86.7715278 | 72.6061284 | 59.9682631 |
| 17:06:32 | 0:06:32 | 70.7694868 | 67.2605634 | 84.7715278 | 72.6061284 | 59.9682631 |
| 17:06:33 | 0:06:33 | 69.7694868 | 68.2605634 | 84.7715278 | 72.6061284 | 59.9682631 |
| 17:06:34 | 0:06:34 | 69.7694868 | 68.2605634 | 84.7715278 | 72.6061284 | 59.9682631 |
| 17:06:35 | 0:06:35 | 69.7694868 | 69.2605634 | 83.7715278 | 72.6061284 | 59.9682631 |
| 17:06:36 | 0:06:36 | 69.7694868 | 69.2605634 | 83.7715278 | 71.6061284 | 59.9682631 |
| 17:06:37 | 0:06:37 | 69.7694868 | 69.2605634 | 83.7715278 | 69.6061284 | 59.9682631 |
| 17:06:38 | 0:06:38 | 71.7694868 | 70.2605634 | 78.7715278 | 70.6061284 | 60.9682631 |
| 17:06:39 | 0:06:39 | 73.7694868 | 70.2605634 | 78.7715278 | 72.6061284 | 60.9682631 |
| 17:06:40 | 0:06:40 | 74.7694868 | 70.2605634 | 83.7715278 | 73.6061284 | 63.9682631 |
| 17:06:41 | 0:06:41 | 74.7694868 | 71.2605634 | 83.7715278 | 72.6061284 | 64.9682631 |
| 17:06:42 | 0:06:42 | 74.7694868 | 71.2605634 | 84.7715278 | 72.6061284 | 64.9682631 |
| 17:06:43 | 0:06:43 | 73.7694868 | 73.2605634 | 84.7715278 | 72.6061284 | 65.9682631 |

|          |         |            |            |            |            |            |
|----------|---------|------------|------------|------------|------------|------------|
| 17:06:44 | 0:06:44 | 72.7694868 | 73.2605634 | 92.7715278 | 73.6061284 | 65.9682631 |
| 17:06:45 | 0:06:45 | 73.7694868 | 73.2605634 | 92.7715278 | 73.6061284 | 65.9682631 |
| 17:06:46 | 0:06:46 | 73.7694868 | 73.2605634 | 93.7715278 | 74.6061284 | 65.9682631 |
| 17:06:47 | 0:06:47 | 72.7694868 | 74.2605634 | 95.7715278 | 74.6061284 | 66.9682631 |
| 17:06:48 | 0:06:48 | 72.7694868 | 74.2605634 | 95.7715278 | 72.6061284 | 67.9682631 |
| 17:06:49 | 0:06:49 | 71.7694868 | 75.2605634 | 95.7715278 | 70.6061284 | 67.9682631 |
| 17:06:50 | 0:06:50 | 71.7694868 | 75.2605634 | 95.7715278 | 66.6061284 | 67.9682631 |
| 17:06:51 | 0:06:51 | 71.7694868 | 78.2605634 | 95.7715278 | 65.6061284 | 68.9682631 |
| 17:06:52 | 0:06:52 | 71.7694868 | 81.2605634 | 95.7715278 | 65.6061284 | 69.9682631 |
| 17:06:53 | 0:06:53 | 72.7694868 | 83.2605634 | 96.7715278 | 65.6061284 | 70.9682631 |
| 17:06:54 | 0:06:54 | 72.7694868 | 83.2605634 | 96.7715278 | 65.6061284 | 70.9682631 |
| 17:06:55 | 0:06:55 | 73.7694868 | 83.2605634 | 95.7715278 | 68.6061284 | 71.9682631 |
| 17:06:56 | 0:06:56 | 73.7694868 | 84.2605634 | 95.7715278 | 69.6061284 | 71.9682631 |
| 17:06:57 | 0:06:57 | 73.7694868 | 84.2605634 | 95.7715278 | 71.6061284 | 71.9682631 |
| 17:06:58 | 0:06:58 | 72.7694868 | 83.2605634 | 95.7715278 | 71.6061284 | 71.9682631 |
| 17:06:59 | 0:06:59 | 72.7694868 | 83.2605634 | 95.7715278 | 69.6061284 | 71.9682631 |
| 17:07:00 | 0:07:00 | 72.7694868 | 83.2605634 | 93.7715278 | 69.6061284 | 71.9682631 |
| 17:07:01 | 0:07:01 | 72.7694868 | 82.2605634 | 93.7715278 | 70.6061284 | 71.9682631 |
| 17:07:02 | 0:07:02 | 71.7694868 | 82.2605634 | 72.0541657 | 73.6061284 | 69.9682631 |
| 17:07:03 | 0:07:03 | 71.7694868 | 83.2605634 | 89.7715278 | 75.6061284 | 65.9682631 |
| 17:07:04 | 0:07:04 | 69.7694868 | 83.2605634 | 83.7715278 | 75.6061284 | 63.9682631 |
| 17:07:05 | 0:07:05 | 67.7694868 | 82.2605634 | 83.7715278 | 76.6061284 | 62.9682631 |
| 17:07:06 | 0:07:06 | 67.7694868 | 80.2605634 | 75.7715278 | 73.6061284 | 61.9682631 |
| 17:07:07 | 0:07:07 | 71.7694868 | 80.2605634 | 73.7715278 | 71.6061284 | 61.9682631 |
| 17:07:08 | 0:07:08 | 74.7694868 | 76.2605634 | 73.7715278 | 69.6061284 | 62.9682631 |
| 17:07:09 | 0:07:09 | 77.7694868 | 76.2605634 | 68.7715278 | 66.6061284 | 62.9682631 |
| 17:07:10 | 0:07:10 | 77.7694868 | 75.2605634 | 67.7715278 | 63.6061284 | 62.9682631 |
| 17:07:11 | 0:07:11 | 77.7694868 | 74.2605634 | 65.7715278 | 61.6061284 | 62.9682631 |
| 17:07:12 | 0:07:12 | 77.7694868 | 74.2605634 | 65.7715278 | 60.6061284 | 62.9682631 |
| 17:07:13 | 0:07:13 | 77.7694868 | 74.2605634 | 66.7715278 | 61.6061284 | 62.9682631 |
| 17:07:14 | 0:07:14 | 77.7694868 | 73.2605634 | 70.7715278 | 62.6061284 | 62.9682631 |
| 17:07:15 | 0:07:15 | 72.7694868 | 73.2605634 | 73.7715278 | 62.6061284 | 62.9682631 |
| 17:07:16 | 0:07:16 | 72.7694868 | 73.2605634 | 74.7715278 | 66.6061284 | 62.9682631 |
| 17:07:17 | 0:07:17 | 72.7694868 | 70.2605634 | 74.7715278 | 68.6061284 | 61.9682631 |
| 17:07:18 | 0:07:18 | 71.7694868 | 70.2605634 | 74.7715278 | 69.6061284 | 61.9682631 |
| 17:07:19 | 0:07:19 | 70.7694868 | 70.2605634 | 72.7715278 | 69.6061284 | 61.9682631 |
| 17:07:20 | 0:07:20 | 70.7694868 | 70.2605634 | 70.7715278 | 74.6061284 | 61.9682631 |
| 17:07:21 | 0:07:21 | 71.7694868 | 70.2605634 | 70.7715278 | 72.6061284 | 61.9682631 |
| 17:07:22 | 0:07:22 | 73.7694868 | 71.2605634 | 68.7715278 | 72.6061284 | 61.9682631 |
| 17:07:23 | 0:07:23 | 77.7694868 | 74.2605634 | 67.7715278 | 71.6061284 | 61.9682631 |
| 17:07:24 | 0:07:24 | 80.7694868 | 74.2605634 | 66.7715278 | 69.6061284 | 61.9682631 |
| 17:07:25 | 0:07:25 | 88.7694868 | 74.2605634 | 66.7715278 | 65.6061284 | 61.9682631 |
| 17:07:26 | 0:07:26 | 71.6905293 | 74.2605634 | 66.7715278 | 64.6061284 | 65.9682631 |
| 17:07:27 | 0:07:27 | 71.7814384 | 74.2605634 | 65.7715278 | 64.6061284 | 65.9682631 |
| 17:07:28 | 0:07:28 | 71.8723475 | 73.2605634 | 66.7715278 | 64.6061284 | 66.9682631 |



|          |         |            |            |            |            |            |
|----------|---------|------------|------------|------------|------------|------------|
| 17:07:29 | 0:07:29 | 72.3268929 | 73.2605634 | 66.7715278 | 67.6061284 | 66.9682631 |
| 17:07:30 | 0:07:30 | 72.8723475 | 70.2605634 | 68.7715278 | 71.6061284 | 66.9682631 |
| 17:07:31 | 0:07:31 | 72.8723475 | 70.2605634 | 68.7715278 | 73.6061284 | 66.9682631 |
| 17:07:32 | 0:07:32 | 72.417802  | 70.2605634 | 68.7715278 | 70.6061284 | 64.9682631 |
| 17:07:33 | 0:07:33 | 72.7814384 | 71.2605634 | 68.7715278 | 69.6061284 | 65.9682631 |
| 17:07:34 | 0:07:34 | 72.7814384 | 71.2605634 | 68.7715278 | 69.6061284 | 68.9682631 |
| 17:07:35 | 0:07:35 | 92.7694868 | 71.2605634 | 68.7715278 | 70.6061284 | 69.9682631 |
| 17:07:36 | 0:07:36 | 83.7694868 | 73.2605634 | 68.7715278 | 71.6061284 | 67.9682631 |
| 17:07:37 | 0:07:37 | 76.7694868 | 74.2605634 | 69.7715278 | 71.6061284 | 67.9682631 |
| 17:07:38 | 0:07:38 | 67.7694868 | 74.2605634 | 71.7715278 | 72.6061284 | 67.9682631 |
| 17:07:39 | 0:07:39 | 67.7694868 | 74.2605634 | 71.7715278 | 72.6061284 | 68.9682631 |
| 17:07:40 | 0:07:40 | 66.7694868 | 74.2605634 | 72.7715278 | 72.6061284 | 68.9682631 |
| 17:07:41 | 0:07:41 | 65.7694868 | 74.2605634 | 70.7715278 | 71.6061284 | 68.9682631 |
| 17:07:42 | 0:07:42 | 65.7694868 | 76.2605634 | 66.7715278 | 69.6061284 | 68.9682631 |
| 17:07:43 | 0:07:43 | 64.7694868 | 76.2605634 | 66.7715278 | 66.6061284 | 68.9682631 |
| 17:07:44 | 0:07:44 | 63.7694868 | 76.2605634 | 66.7715278 | 65.6061284 | 68.9682631 |
| 17:07:45 | 0:07:45 | 63.7694868 | 75.2605634 | 66.7715278 | 65.6061284 | 69.9682631 |
| 17:07:46 | 0:07:46 | 62.7694868 | 75.2605634 | 66.7715278 | 66.6061284 | 71.9682631 |
| 17:07:47 | 0:07:47 | 60.7694868 | 75.2605634 | 66.7715278 | 66.6061284 | 71.9682631 |
| 17:07:48 | 0:07:48 | 60.7694868 | 75.2605634 | 66.7715278 | 66.6061284 | 71.9682631 |
| 17:07:49 | 0:07:49 | 59.7694868 | 75.2605634 | 65.7715278 | 70.6061284 | 70.9682631 |
| 17:07:50 | 0:07:50 | 58.7694868 | 76.2605634 | 65.7715278 | 71.6061284 | 69.9682631 |
| 17:07:51 | 0:07:51 | 58.7694868 | 76.2605634 | 64.7715278 | 72.6061284 | 65.9682631 |
| 17:07:52 | 0:07:52 | 59.7694868 | 76.2605634 | 63.7715278 | 72.6061284 | 64.9682631 |
| 17:07:53 | 0:07:53 | 59.7694868 | 74.2605634 | 63.7715278 | 70.6061284 | 64.9682631 |
| 17:07:54 | 0:07:54 | 60.7694868 | 74.2605634 | 63.7715278 | 67.6061284 | 63.9682631 |
| 17:07:55 | 0:07:55 | 60.7694868 | 68.2605634 | 63.7715278 | 65.6061284 | 62.9682631 |
| 17:07:56 | 0:07:56 | 61.7694868 | 66.2605634 | 63.7715278 | 64.6061284 | 61.9682631 |
| 17:07:57 | 0:07:57 | 61.7694868 | 65.2605634 | 64.7715278 | 63.6061284 | 60.9682631 |
| 17:07:58 | 0:07:58 | 61.7694868 | 65.2605634 | 64.7715278 | 62.6061284 | 60.9682631 |
| 17:07:59 | 0:07:59 | 61.7694868 | 66.2605634 | 67.7715278 | 62.6061284 | 59.9682631 |
| 17:08:00 | 0:08:00 | 61.7694868 | 66.2605634 | 67.7715278 | 64.6061284 | 58.9682631 |
| 17:08:01 | 0:08:01 | 62.7694868 | 66.2605634 | 68.7715278 | 65.6061284 | 58.9682631 |
| 17:08:02 | 0:08:02 | 65.7694868 | 66.2605634 | 68.7715278 | 66.6061284 | 58.9682631 |
| 17:08:03 | 0:08:03 | 67.7694868 | 65.2605634 | 68.7715278 | 66.6061284 | 58.9682631 |
| 17:08:04 | 0:08:04 | 67.7694868 | 64.2605634 | 67.7715278 | 67.6061284 | 58.9682631 |
| 17:08:05 | 0:08:05 | 69.7694868 | 64.2605634 | 66.7715278 | 68.6061284 | 58.9682631 |
| 17:08:06 | 0:08:06 | 68.7694868 | 64.2605634 | 65.7715278 | 69.6061284 | 58.9682631 |
| 17:08:07 | 0:08:07 | 68.7694868 | 64.2605634 | 65.7715278 | 72.6061284 | 59.9682631 |
| 17:08:08 | 0:08:08 | 68.7694868 | 65.2605634 | 65.7715278 | 72.6061284 | 59.9682631 |
| 17:08:09 | 0:08:09 | 68.7694868 | 66.2605634 | 64.7715278 | 70.6061284 | 59.9682631 |
| 17:08:10 | 0:08:10 | 68.7694868 | 67.2605634 | 68.7715278 | 69.6061284 | 59.9682631 |
| 17:08:11 | 0:08:11 | 68.7694868 | 67.2605634 | 71.7715278 | 67.6061284 | 61.9682631 |
| 17:08:12 | 0:08:12 | 68.7694868 | 66.2605634 | 71.7715278 | 65.6061284 | 58.9682631 |
| 17:08:13 | 0:08:13 | 69.7694868 | 67.2605634 | 71.7715278 | 65.6061284 | 57.9682631 |

|          |         |            |            |            |            |            |
|----------|---------|------------|------------|------------|------------|------------|
| 17:08:14 | 0:08:14 | 70.7694868 | 69.2605634 | 71.7715278 | 65.6061284 | 57.9682631 |
| 17:08:15 | 0:08:15 | 70.7694868 | 69.2605634 | 71.7715278 | 65.6061284 | 56.9682631 |
| 17:08:16 | 0:08:16 | 70.7694868 | 69.2605634 | 72.7715278 | 65.6061284 | 56.9682631 |
| 17:08:17 | 0:08:17 | 71.7694868 | 68.2605634 | 75.7715278 | 65.6061284 | 56.9682631 |
| 17:08:18 | 0:08:18 | 71.7694868 | 68.2605634 | 75.7715278 | 65.6061284 | 55.9682631 |
| 17:08:19 | 0:08:19 | 72.7694868 | 68.2605634 | 75.7715278 | 71.6061284 | 55.9682631 |
| 17:08:20 | 0:08:20 | 72.7694868 | 68.2605634 | 75.7715278 | 73.6061284 | 58.9682631 |
| 17:08:21 | 0:08:21 | 72.7694868 | 68.2605634 | 74.7715278 | 73.6061284 | 59.9682631 |
| 17:08:22 | 0:08:22 | 73.7694868 | 67.2605634 | 74.7715278 | 71.6061284 | 59.9682631 |
| 17:08:23 | 0:08:23 | 73.7694868 | 67.2605634 | 71.7715278 | 69.6061284 | 59.9682631 |
| 17:08:24 | 0:08:24 | 73.7694868 | 67.2605634 | 69.7715278 | 66.6061284 | 59.9682631 |
| 17:08:25 | 0:08:25 | 73.7694868 | 66.2605634 | 69.7715278 | 64.6061284 | 59.9682631 |
| 17:08:26 | 0:08:26 | 72.7694868 | 66.2605634 | 67.7715278 | 65.6061284 | 59.9682631 |
| 17:08:27 | 0:08:27 | 72.7694868 | 66.2605634 | 70.7715278 | 65.6061284 | 59.9682631 |
| 17:08:28 | 0:08:28 | 70.7694868 | 69.2605634 | 70.7715278 | 66.6061284 | 60.9682631 |
| 17:08:29 | 0:08:29 | 69.7694868 | 72.2605634 | 70.7715278 | 66.6061284 | 60.9682631 |
| 17:08:30 | 0:08:30 | 69.7694868 | 75.2605634 | 69.7715278 | 67.6061284 | 60.9682631 |
| 17:08:31 | 0:08:31 | 68.7694868 | 76.2605634 | 69.7715278 | 67.6061284 | 58.9682631 |
| 17:08:32 | 0:08:32 | 66.7694868 | 79.2605634 | 68.7715278 | 67.6061284 | 57.9682631 |
| 17:08:33 | 0:08:33 | 64.7694868 | 80.2605634 | 68.7715278 | 67.6061284 | 57.9682631 |
| 17:08:34 | 0:08:34 | 64.7694868 | 80.2605634 | 65.7715278 | 67.6061284 | 57.9682631 |
| 17:08:35 | 0:08:35 | 63.7694868 | 81.2605634 | 65.7715278 | 63.6061284 | 57.9682631 |
| 17:08:36 | 0:08:36 | 63.7694868 | 81.2605634 | 65.7715278 | 64.6061284 | 57.9682631 |
| 17:08:37 | 0:08:37 | 63.7694868 | 81.2605634 | 65.7715278 | 65.6061284 | 57.9682631 |
| 17:08:38 | 0:08:38 | 63.7694868 | 81.2605634 | 65.7715278 | 63.6061284 | 57.9682631 |
| 17:08:39 | 0:08:39 | 63.7694868 | 80.2605634 | 67.7715278 | 62.6061284 | 57.9682631 |
| 17:08:40 | 0:08:40 | 64.7694868 | 80.2605634 | 68.7715278 | 62.6061284 | 57.9682631 |
| 17:08:41 | 0:08:41 | 66.7694868 | 79.2605634 | 67.7715278 | 61.6061284 | 56.9682631 |
| 17:08:42 | 0:08:42 | 66.7694868 | 79.2605634 | 67.7715278 | 61.6061284 | 56.9682631 |
| 17:08:43 | 0:08:43 | 68.7694868 | 76.2605634 | 66.7715278 | 59.6061284 | 56.9682631 |
| 17:08:44 | 0:08:44 | 68.7694868 | 74.2605634 | 66.7715278 | 60.6061284 | 57.9682631 |
| 17:08:45 | 0:08:45 | 69.7694868 | 74.2605634 | 66.7715278 | 62.6061284 | 58.9682631 |
| 17:08:46 | 0:08:46 | 71.7694868 | 74.2605634 | 62.7715278 | 64.6061284 | 58.9682631 |
| 17:08:47 | 0:08:47 | 73.7694868 | 73.2605634 | 61.7715278 | 65.6061284 | 59.9682631 |
| 17:08:48 | 0:08:48 | 74.7694868 | 72.2605634 | 62.7715278 | 69.6061284 | 59.9682631 |
| 17:08:49 | 0:08:49 | 74.7694868 | 72.2605634 | 62.7715278 | 70.6061284 | 59.9682631 |
| 17:08:50 | 0:08:50 | 77.7694868 | 72.2605634 | 62.7715278 | 70.6061284 | 59.9682631 |
| 17:08:51 | 0:08:51 | 77.7694868 | 73.2605634 | 62.7715278 | 69.6061284 | 59.9682631 |
| 17:08:52 | 0:08:52 | 77.7694868 | 74.2605634 | 62.7715278 | 67.6061284 | 57.9682631 |
| 17:08:53 | 0:08:53 | 77.7694868 | 75.2605634 | 62.7715278 | 65.6061284 | 56.9682631 |
| 17:08:54 | 0:08:54 | 77.7694868 | 76.2605634 | 62.7715278 | 64.6061284 | 56.9682631 |
| 17:08:55 | 0:08:55 | 81.7694868 | 72.2605634 | 63.7715278 | 64.6061284 | 56.9682631 |
| 17:08:56 | 0:08:56 | 81.7694868 | 71.2605634 | 63.7715278 | 66.6061284 | 57.9682631 |
| 17:08:57 | 0:08:57 | 81.7694868 | 70.2605634 | 63.7715278 | 69.6061284 | 57.9682631 |
| 17:08:58 | 0:08:58 | 82.7694868 | 70.2605634 | 63.7715278 | 71.6061284 | 57.9682631 |

|          |         |            |            |            |            |            |
|----------|---------|------------|------------|------------|------------|------------|
| 17:08:59 | 0:08:59 | 82.7694868 | 70.2605634 | 63.7715278 | 73.6061284 | 58.9682631 |
| 17:09:00 | 0:09:00 | 81.7694868 | 70.2605634 | 63.7715278 | 73.6061284 | 59.9682631 |
| 17:09:01 | 0:09:01 | 81.7694868 | 68.2605634 | 63.7715278 | 73.6061284 | 59.9682631 |
| 17:09:02 | 0:09:02 | 81.7694868 | 67.2605634 | 61.7715278 | 71.6061284 | 59.9682631 |
| 17:09:03 | 0:09:03 | 81.7694868 | 66.2605634 | 60.7715278 | 70.6061284 | 59.9682631 |
| 17:09:04 | 0:09:04 | 81.7694868 | 65.2605634 | 60.7715278 | 69.6061284 | 59.9682631 |
| 17:09:05 | 0:09:05 | 81.7694868 | 63.2605634 | 60.7715278 | 67.6061284 | 59.9682631 |
| 17:09:06 | 0:09:06 | 81.7694868 | 63.2605634 | 60.7715278 | 66.6061284 | 59.9682631 |
| 17:09:07 | 0:09:07 | 80.7694868 | 63.2605634 | 59.7715278 | 67.6061284 | 59.9682631 |
| 17:09:08 | 0:09:08 | 80.7694868 | 63.2605634 | 58.7715278 | 68.6061284 | 59.9682631 |
| 17:09:09 | 0:09:09 | 79.7694868 | 64.2605634 | 58.7715278 | 70.6061284 | 61.9682631 |
| 17:09:10 | 0:09:10 | 77.7694868 | 66.2605634 | 58.7715278 | 71.6061284 | 61.9682631 |
| 17:09:11 | 0:09:11 | 76.7694868 | 68.2605634 | 57.7715278 | 71.6061284 | 61.9682631 |
| 17:09:12 | 0:09:12 | 76.7694868 | 70.2605634 | 58.7715278 | 71.6061284 | 61.9682631 |
| 17:09:13 | 0:09:13 | 75.7694868 | 70.2605634 | 58.7715278 | 70.6061284 | 61.9682631 |
| 17:09:14 | 0:09:14 | 74.7694868 | 71.2605634 | 66.7715278 | 70.6061284 | 62.9682631 |
| 17:09:15 | 0:09:15 | 72.7694868 | 70.2605634 | 66.7715278 | 70.6061284 | 62.9682631 |
| 17:09:16 | 0:09:16 | 69.7694868 | 68.2605634 | 66.7715278 | 71.6061284 | 61.9682631 |
| 17:09:17 | 0:09:17 | 68.7694868 | 67.2605634 | 66.7715278 | 71.6061284 | 61.9682631 |
| 17:09:18 | 0:09:18 | 67.7694868 | 66.2605634 | 66.7715278 | 72.6061284 | 61.9682631 |
| 17:09:19 | 0:09:19 | 66.7694868 | 65.2605634 | 66.7715278 | 72.6061284 | 59.9682631 |
| 17:09:20 | 0:09:20 | 66.7694868 | 65.2605634 | 66.7715278 | 72.6061284 | 58.9682631 |
| 17:09:21 | 0:09:21 | 66.7694868 | 64.2605634 | 66.7715278 | 68.6061284 | 57.9682631 |
| 17:09:22 | 0:09:22 | 66.7694868 | 64.2605634 | 65.7715278 | 68.6061284 | 56.9682631 |
| 17:09:23 | 0:09:23 | 66.7694868 | 64.2605634 | 63.7715278 | 68.6061284 | 56.9682631 |
| 17:09:24 | 0:09:24 | 65.7694868 | 64.2605634 | 62.7715278 | 68.6061284 | 56.9682631 |
| 17:09:25 | 0:09:25 | 65.7694868 | 63.2605634 | 62.7715278 | 68.6061284 | 57.9682631 |
| 17:09:26 | 0:09:26 | 64.7694868 | 62.2605634 | 62.7715278 | 69.6061284 | 58.9682631 |
| 17:09:27 | 0:09:27 | 62.7694868 | 62.2605634 | 62.7715278 | 69.6061284 | 58.9682631 |
| 17:09:28 | 0:09:28 | 62.7694868 | 61.2605634 | 62.7715278 | 70.6061284 | 58.9682631 |
| 17:09:29 | 0:09:29 | 61.7694868 | 61.2605634 | 62.7715278 | 70.6061284 | 59.9682631 |
| 17:09:30 | 0:09:30 | 61.7694868 | 61.2605634 | 63.7715278 | 70.6061284 | 59.9682631 |
| 17:09:31 | 0:09:31 | 61.7694868 | 61.2605634 | 63.7715278 | 70.6061284 | 59.9682631 |
| 17:09:32 | 0:09:32 | 61.7694868 | 61.2605634 | 63.7715278 | 70.6061284 | 57.9682631 |
| 17:09:33 | 0:09:33 | 61.7694868 | 61.2605634 | 63.7715278 | 71.6061284 | 57.9682631 |
| 17:09:34 | 0:09:34 | 61.7694868 | 63.2605634 | 63.7715278 | 71.6061284 | 54.9682631 |
| 17:09:35 | 0:09:35 | 61.7694868 | 64.2605634 | 63.7715278 | 72.6061284 | 52.9682631 |
| 17:09:36 | 0:09:36 | 61.7694868 | 64.2605634 | 63.7715278 | 72.6061284 | 52.9682631 |
| 17:09:37 | 0:09:37 | 60.7694868 | 64.2605634 | 63.7715278 | 72.6061284 | 52.9682631 |
| 17:09:38 | 0:09:38 | 60.7694868 | 64.2605634 | 63.7715278 | 72.6061284 | 52.9682631 |
| 17:09:39 | 0:09:39 | 60.7694868 | 66.2605634 | 61.7715278 | 72.6061284 | 53.9682631 |
| 17:09:40 | 0:09:40 | 63.7694868 | 68.2605634 | 61.7715278 | 74.6061284 | 55.9682631 |
| 17:09:41 | 0:09:41 | 63.7694868 | 68.2605634 | 60.7715278 | 75.6061284 | 56.9682631 |
| 17:09:42 | 0:09:42 | 64.7694868 | 69.2605634 | 59.7715278 | 75.6061284 | 56.9682631 |
| 17:09:43 | 0:09:43 | 64.7694868 | 70.2605634 | 59.7715278 | 75.6061284 | 55.9682631 |

|          |         |            |            |            |            |            |
|----------|---------|------------|------------|------------|------------|------------|
| 17:09:44 | 0:09:44 | 65.7694868 | 70.2605634 | 59.7715278 | 75.6061284 | 55.9682631 |
| 17:09:45 | 0:09:45 | 66.7694868 | 70.2605634 | 59.7715278 | 76.6061284 | 54.9682631 |
| 17:09:46 | 0:09:46 | 67.7694868 | 72.2605634 | 61.7715278 | 76.6061284 | 52.9682631 |
| 17:09:47 | 0:09:47 | 67.7694868 | 71.2605634 | 61.7715278 | 74.6061284 | 52.9682631 |
| 17:09:48 | 0:09:48 | 68.7694868 | 71.2605634 | 61.7715278 | 74.6061284 | 52.9682631 |
| 17:09:49 | 0:09:49 | 68.7694868 | 69.2605634 | 61.7715278 | 72.6061284 | 52.9682631 |
| 17:09:50 | 0:09:50 | 69.7694868 | 66.2605634 | 61.7715278 | 71.6061284 | 53.9682631 |
| 17:09:51 | 0:09:51 | 69.7694868 | 65.2605634 | 62.7715278 | 69.6061284 | 56.9682631 |
| 17:09:52 | 0:09:52 | 69.7694868 | 65.2605634 | 62.7715278 | 68.6061284 | 56.9682631 |
| 17:09:53 | 0:09:53 | 69.7694868 | 65.2605634 | 62.7715278 | 68.6061284 | 56.9682631 |
| 17:09:54 | 0:09:54 | 70.7694868 | 64.2605634 | 63.7715278 | 67.6061284 | 56.9682631 |
| 17:09:55 | 0:09:55 | 70.7694868 | 64.2605634 | 63.7715278 | 65.6061284 | 55.9682631 |
| 17:09:56 | 0:09:56 | 71.7694868 | 63.2605634 | 64.7715278 | 65.6061284 | 55.9682631 |
| 17:09:57 | 0:09:57 | 70.7694868 | 63.2605634 | 63.7715278 | 64.6061284 | 54.9682631 |
| 17:09:58 | 0:09:58 | 70.7694868 | 63.2605634 | 63.7715278 | 62.6061284 | 55.9682631 |
| 17:09:59 | 0:09:59 | 70.7694868 | 63.2605634 | 63.7715278 | 62.6061284 | 55.9682631 |
| 17:10:00 | 0:10:00 | 70.7694868 | 63.2605634 | 65.7715278 | 62.6061284 | 55.9682631 |
| 17:10:01 | 0:10:01 | 70.7694868 | 63.2605634 | 65.7715278 | 62.6061284 | 56.9682631 |
| 17:10:02 | 0:10:02 | 69.7694868 | 63.2605634 | 65.7715278 | 62.6061284 | 57.9682631 |
| 17:10:03 | 0:10:03 | 67.7694868 | 63.2605634 | 66.7715278 | 63.6061284 | 58.9682631 |
| 17:10:04 | 0:10:04 | 66.7694868 | 63.2605634 | 66.7715278 | 66.6061284 | 58.9682631 |
| 17:10:05 | 0:10:05 | 67.7694868 | 63.2605634 | 67.7715278 | 67.6061284 | 58.9682631 |
| 17:10:06 | 0:10:06 | 67.7694868 | 63.2605634 | 67.7715278 | 68.6061284 | 58.9682631 |
| 17:10:07 | 0:10:07 | 67.7694868 | 64.2605634 | 68.7715278 | 68.6061284 | 58.9682631 |
| 17:10:08 | 0:10:08 | 67.7694868 | 64.2605634 | 68.7715278 | 68.6061284 | 59.9682631 |
| 17:10:09 | 0:10:09 | 68.7694868 | 64.2605634 | 69.7715278 | 68.6061284 | 59.9682631 |
| 17:10:10 | 0:10:10 | 68.7694868 | 66.2605634 | 69.7715278 | 68.6061284 | 59.9682631 |
| 17:10:11 | 0:10:11 | 68.7694868 | 67.2605634 | 67.7715278 | 69.6061284 | 59.9682631 |
| 17:10:12 | 0:10:12 | 69.7694868 | 67.2605634 | 67.7715278 | 71.6061284 | 60.9682631 |
| 17:10:13 | 0:10:13 | 69.7694868 | 68.2605634 | 63.7715278 | 70.6061284 | 62.9682631 |
| 17:10:14 | 0:10:14 | 70.7694868 | 68.2605634 | 63.7715278 | 69.6061284 | 63.9682631 |
| 17:10:15 | 0:10:15 | 71.7694868 | 67.2605634 | 63.7715278 | 69.6061284 | 62.9682631 |
| 17:10:16 | 0:10:16 | 71.7694868 | 66.2605634 | 62.7715278 | 69.6061284 | 61.9682631 |
| 17:10:17 | 0:10:17 | 71.7694868 | 66.2605634 | 62.7715278 | 69.6061284 | 60.9682631 |
| 17:10:18 | 0:10:18 | 71.7694868 | 65.2605634 | 62.7715278 | 68.6061284 | 60.9682631 |
| 17:10:19 | 0:10:19 | 73.7694868 | 65.2605634 | 62.7715278 | 68.6061284 | 60.9682631 |
| 17:10:20 | 0:10:20 | 73.7694868 | 66.2605634 | 63.7715278 | 67.6061284 | 60.9682631 |
| 17:10:21 | 0:10:21 | 73.7694868 | 68.2605634 | 63.7715278 | 65.6061284 | 59.9682631 |
| 17:10:22 | 0:10:22 | 73.7694868 | 68.2605634 | 63.7715278 | 65.6061284 | 59.9682631 |
| 17:10:23 | 0:10:23 | 73.7694868 | 68.2605634 | 64.7715278 | 64.6061284 | 59.9682631 |
| 17:10:24 | 0:10:24 | 70.7694868 | 68.2605634 | 64.7715278 | 64.6061284 | 59.9682631 |
| 17:10:25 | 0:10:25 | 70.7694868 | 68.2605634 | 64.7715278 | 64.6061284 | 58.9682631 |
| 17:10:26 | 0:10:26 | 69.7694868 | 68.2605634 | 64.7715278 | 64.6061284 | 58.9682631 |
| 17:10:27 | 0:10:27 | 68.7694868 | 68.2605634 | 64.7715278 | 64.6061284 | 58.9682631 |
| 17:10:28 | 0:10:28 | 68.7694868 | 68.2605634 | 65.7715278 | 65.6061284 | 58.9682631 |

|          |         |            |            |            |            |            |
|----------|---------|------------|------------|------------|------------|------------|
| 17:10:29 | 0:10:29 | 68.7694868 | 68.2605634 | 65.7715278 | 64.6061284 | 58.9682631 |
| 17:10:30 | 0:10:30 | 68.7694868 | 68.2605634 | 65.7715278 | 64.6061284 | 58.9682631 |
| 17:10:31 | 0:10:31 | 69.7694868 | 70.2605634 | 66.7715278 | 62.6061284 | 58.9682631 |
| 17:10:32 | 0:10:32 | 69.7694868 | 68.2605634 | 69.7715278 | 62.6061284 | 58.9682631 |
| 17:10:33 | 0:10:33 | 69.7694868 | 68.2605634 | 70.7715278 | 62.6061284 | 58.9682631 |
| 17:10:34 | 0:10:34 | 69.7694868 | 70.2605634 | 71.7715278 | 63.6061284 | 57.9682631 |
| 17:10:35 | 0:10:35 | 69.7694868 | 70.2605634 | 71.7715278 | 64.6061284 | 57.9682631 |
| 17:10:36 | 0:10:36 | 68.7694868 | 71.2605634 | 71.7715278 | 64.6061284 | 57.9682631 |
| 17:10:37 | 0:10:37 | 68.7694868 | 71.2605634 | 71.7715278 | 65.6061284 | 56.9682631 |
| 17:10:38 | 0:10:38 | 68.7694868 | 71.2605634 | 71.7715278 | 65.6061284 | 54.9682631 |
| 17:10:39 | 0:10:39 | 68.7694868 | 71.2605634 | 72.7715278 | 65.6061284 | 54.9682631 |
| 17:10:40 | 0:10:40 | 68.7694868 | 70.2605634 | 72.7715278 | 65.6061284 | 54.9682631 |
| 17:10:41 | 0:10:41 | 68.7694868 | 69.2605634 | 72.7715278 | 65.6061284 | 54.9682631 |
| 17:10:42 | 0:10:42 | 69.7694868 | 69.2605634 | 72.7715278 | 65.6061284 | 54.9682631 |
| 17:10:43 | 0:10:43 | 69.7694868 | 69.2605634 | 72.7715278 | 67.6061284 | 54.9682631 |
| 17:10:44 | 0:10:44 | 69.7694868 | 69.2605634 | 72.7715278 | 67.6061284 | 54.9682631 |
| 17:10:45 | 0:10:45 | 69.7694868 | 69.2605634 | 72.7715278 | 66.6061284 | 54.9682631 |
| 17:10:46 | 0:10:46 | 69.7694868 | 69.2605634 | 72.7715278 | 66.6061284 | 55.9682631 |
| 17:10:47 | 0:10:47 | 71.7694868 | 70.2605634 | 72.7715278 | 66.6061284 | 56.9682631 |
| 17:10:48 | 0:10:48 | 73.7694868 | 70.2605634 | 72.7715278 | 67.6061284 | 57.9682631 |
| 17:10:49 | 0:10:49 | 74.7694868 | 70.2605634 | 72.7715278 | 67.6061284 | 60.9682631 |
| 17:10:50 | 0:10:50 | 74.7694868 | 70.2605634 | 73.7715278 | 67.6061284 | 64.9682631 |
| 17:10:51 | 0:10:51 | 75.7694868 | 70.2605634 | 74.7715278 | 67.6061284 | 64.9682631 |
| 17:10:52 | 0:10:52 | 75.7694868 | 70.2605634 | 67.7715278 | 71.6061284 | 66.9682631 |
| 17:10:53 | 0:10:53 | 75.7694868 | 70.2605634 | 64.7715278 | 72.6061284 | 65.9682631 |
| 17:10:54 | 0:10:54 | 75.7694868 | 70.2605634 | 64.7715278 | 71.6061284 | 65.9682631 |
| 17:10:55 | 0:10:55 | 73.7694868 | 70.2605634 | 64.7715278 | 70.6061284 | 64.9682631 |
| 17:10:56 | 0:10:56 | 71.7694868 | 69.2605634 | 63.7715278 | 69.6061284 | 63.9682631 |
| 17:10:57 | 0:10:57 | 69.7694868 | 69.2605634 | 63.7715278 | 67.6061284 | 63.9682631 |
| 17:10:58 | 0:10:58 | 67.7694868 | 69.2605634 | 63.7715278 | 67.6061284 | 63.9682631 |
| 17:10:59 | 0:10:59 | 66.7694868 | 69.2605634 | 63.7715278 | 68.6061284 | 63.9682631 |
| 17:11:00 | 0:11:00 | 65.7694868 | 69.2605634 | 63.7715278 | 69.6061284 | 64.9682631 |
| 17:11:01 | 0:11:01 | 64.7694868 | 69.2605634 | 63.7715278 | 69.6061284 | 68.9682631 |
| 17:11:02 | 0:11:02 | 63.7694868 | 69.2605634 | 63.7715278 | 70.6061284 | 71.9682631 |
| 17:11:03 | 0:11:03 | 62.7694868 | 69.2605634 | 63.7715278 | 72.6061284 | 74.9682631 |
| 17:11:04 | 0:11:04 | 62.7694868 | 70.2605634 | 63.7715278 | 72.6061284 | 79.9682631 |
| 17:11:05 | 0:11:05 | 62.7694868 | 70.2605634 | 64.7715278 | 74.6061284 | 81.9682631 |
| 17:11:06 | 0:11:06 | 62.7694868 | 72.2605634 | 64.7715278 | 75.6061284 | 88.9682631 |
| 17:11:07 | 0:11:07 | 62.7694868 | 75.2605634 | 64.7715278 | 75.6061284 | 91.9682631 |
| 17:11:08 | 0:11:08 | 62.7694868 | 75.2605634 | 65.7715278 | 74.6061284 | 91.9682631 |
| 17:11:09 | 0:11:09 | 62.7694868 | 75.2605634 | 65.7715278 | 72.6061284 | 73.1450748 |
| 17:11:10 | 0:11:10 | 62.7694868 | 75.2605634 | 64.7715278 | 72.6061284 | 73.1450748 |
| 17:11:11 | 0:11:11 | 61.7694868 | 74.2605634 | 64.7715278 | 70.6061284 | 73.3268929 |
| 17:11:12 | 0:11:12 | 62.7694868 | 74.2605634 | 65.7715278 | 69.6061284 | 74.2359838 |
| 17:11:13 | 0:11:13 | 63.7694868 | 74.2605634 | 65.7715278 | 69.6061284 | 74.5996202 |

|          |         |            |            |            |            |            |
|----------|---------|------------|------------|------------|------------|------------|
| 17:11:14 | 0:11:14 | 64.7694868 | 74.2605634 | 66.7715278 | 69.6061284 | 74.8723475 |
| 17:11:15 | 0:11:15 | 64.7694868 | 74.2605634 | 66.7715278 | 70.6061284 | 74.7814384 |
| 17:11:16 | 0:11:16 | 64.7694868 | 74.2605634 | 67.7715278 | 70.6061284 | 75.0541657 |
| 17:11:17 | 0:11:17 | 65.7694868 | 73.2605634 | 67.7715278 | 71.6061284 | 75.0541657 |
| 17:11:18 | 0:11:18 | 67.7694868 | 73.2605634 | 68.7715278 | 71.6061284 | 75.3268929 |
| 17:11:19 | 0:11:19 | 66.7694868 | 73.2605634 | 67.7715278 | 71.6061284 | 75.3268929 |
| 17:11:20 | 0:11:20 | 65.7694868 | 70.2605634 | 67.7715278 | 74.6061284 | 75.5087111 |
| 17:11:21 | 0:11:21 | 64.7694868 | 69.2605634 | 67.7715278 | 74.6061284 | 75.0541657 |
| 17:11:22 | 0:11:22 | 63.7694868 | 69.2605634 | 67.7715278 | 72.6061284 | 74.7814384 |
| 17:11:23 | 0:11:23 | 63.7694868 | 68.2605634 | 67.7715278 | 71.6061284 | 74.5087111 |
| 17:11:24 | 0:11:24 | 63.7694868 | 68.2605634 | 67.7715278 | 71.6061284 | 74.5087111 |
| 17:11:25 | 0:11:25 | 63.7694868 | 68.2605634 | 66.7715278 | 69.6061284 | 73.5087111 |
| 17:11:26 | 0:11:26 | 63.7694868 | 68.2605634 | 66.7715278 | 69.6061284 | 73.2359838 |
| 17:11:27 | 0:11:27 | 63.7694868 | 68.2605634 | 68.7715278 | 69.6061284 | 73.5087111 |
| 17:11:28 | 0:11:28 | 63.7694868 | 68.2605634 | 68.7715278 | 69.6061284 | 73.5996202 |
| 17:11:29 | 0:11:29 | 63.7694868 | 68.2605634 | 68.7715278 | 70.6061284 | 73.417802  |
| 17:11:30 | 0:11:30 | 63.7694868 | 71.2605634 | 67.7715278 | 70.6061284 | 72.6905293 |
| 17:11:31 | 0:11:31 | 63.7694868 | 74.2605634 | 67.7715278 | 70.6061284 | 72.6905293 |
| 17:11:32 | 0:11:32 | 63.7694868 | 74.2605634 | 67.7715278 | 70.6061284 | 72.7814384 |
| 17:11:33 | 0:11:33 | 62.7694868 | 72.2605634 | 66.7715278 | 70.6061284 | 72.5087111 |
| 17:11:34 | 0:11:34 | 62.7694868 | 70.2605634 | 65.7715278 | 70.6061284 | 72.1450748 |
| 17:11:35 | 0:11:35 | 62.7694868 | 68.2605634 | 65.7715278 | 71.6061284 | 72.1450748 |
| 17:11:36 | 0:11:36 | 64.7694868 | 68.2605634 | 66.7715278 | 69.6061284 | 72.0541657 |
| 17:11:37 | 0:11:37 | 65.7694868 | 68.2605634 | 65.7715278 | 64.6061284 | 71.7814384 |
| 17:11:38 | 0:11:38 | 66.7694868 | 68.2605634 | 65.7715278 | 60.6061284 | 71.2359838 |
| 17:11:39 | 0:11:39 | 66.7694868 | 68.2605634 | 66.7715278 | 58.6061284 | 70.6905293 |
| 17:11:40 | 0:11:40 | 67.7694868 | 67.2605634 | 67.7715278 | 58.6061284 | 70.417802  |
| 17:11:41 | 0:11:41 | 67.7694868 | 67.2605634 | 66.7715278 | 58.6061284 | 70.3268929 |
| 17:11:42 | 0:11:42 | 67.7694868 | 68.2605634 | 66.7715278 | 59.6061284 | 70.7814384 |
| 17:11:43 | 0:11:43 | 66.7694868 | 68.2605634 | 65.7715278 | 59.6061284 | 70.5087111 |
| 17:11:44 | 0:11:44 | 65.7694868 | 68.2605634 | 63.7715278 | 60.6061284 | 70.417802  |
| 17:11:45 | 0:11:45 | 64.7694868 | 68.2605634 | 63.7715278 | 61.6061284 | 69.7814384 |
| 17:11:46 | 0:11:46 | 64.7694868 | 69.2605634 | 62.7715278 | 61.6061284 | 69.3268929 |
| 17:11:47 | 0:11:47 | 63.7694868 | 70.2605634 | 62.7715278 | 61.6061284 | 69.2359838 |
| 17:11:48 | 0:11:48 | 63.7694868 | 70.2605634 | 63.7715278 | 66.6061284 | 69.5087111 |
| 17:11:49 | 0:11:49 | 64.7694868 | 69.2605634 | 63.7715278 | 67.6061284 | 69.5996202 |
| 17:11:50 | 0:11:50 | 64.7694868 | 69.2605634 | 62.7715278 | 68.6061284 | 91.9682631 |
| 17:11:51 | 0:11:51 | 64.7694868 | 69.2605634 | 62.7715278 | 68.6061284 | 90.9682631 |
| 17:11:52 | 0:11:52 | 64.7694868 | 70.2605634 | 61.7715278 | 67.6061284 | 89.9682631 |
| 17:11:53 | 0:11:53 | 64.7694868 | 71.2605634 | 60.7715278 | 68.6061284 | 89.9682631 |
| 17:11:54 | 0:11:54 | 64.7694868 | 70.2605634 | 60.7715278 | 68.6061284 | 87.9682631 |
| 17:11:55 | 0:11:55 | 63.7694868 | 70.2605634 | 60.7715278 | 68.6061284 | 86.9682631 |
| 17:11:56 | 0:11:56 | 64.7694868 | 69.2605634 | 62.7715278 | 69.6061284 | 86.9682631 |
| 17:11:57 | 0:11:57 | 64.7694868 | 68.2605634 | 63.7715278 | 68.6061284 | 60.9682631 |
| 17:11:58 | 0:11:58 | 64.7694868 | 67.2605634 | 64.7715278 | 67.6061284 | 57.9682631 |

|          |         |            |            |            |            |            |
|----------|---------|------------|------------|------------|------------|------------|
| 17:11:59 | 0:11:59 | 65.7694868 | 67.2605634 | 64.7715278 | 67.6061284 | 57.9682631 |
| 17:12:00 | 0:12:00 | 66.7694868 | 66.2605634 | 65.7715278 | 67.6061284 | 55.9682631 |
| 17:12:01 | 0:12:01 | 67.7694868 | 65.2605634 | 65.7715278 | 67.6061284 | 54.9682631 |
| 17:12:02 | 0:12:02 | 68.7694868 | 64.2605634 | 65.7715278 | 67.6061284 | 54.9682631 |
| 17:12:03 | 0:12:03 | 68.7694868 | 63.2605634 | 65.7715278 | 67.6061284 | 54.9682631 |
| 17:12:04 | 0:12:04 | 69.7694868 | 63.2605634 | 65.7715278 | 68.6061284 | 53.9682631 |
| 17:12:05 | 0:12:05 | 69.7694868 | 63.2605634 | 66.7715278 | 68.6061284 | 53.9682631 |
| 17:12:06 | 0:12:06 | 69.7694868 | 62.2605634 | 66.7715278 | 68.6061284 | 52.9682631 |
| 17:12:07 | 0:12:07 | 68.7694868 | 62.2605634 | 66.7715278 | 67.6061284 | 52.9682631 |
| 17:12:08 | 0:12:08 | 65.7694868 | 62.2605634 | 66.7715278 | 68.6061284 | 52.9682631 |
| 17:12:09 | 0:12:09 | 65.7694868 | 63.2605634 | 65.7715278 | 69.6061284 | 52.9682631 |
| 17:12:10 | 0:12:10 | 64.7694868 | 63.2605634 | 64.7715278 | 69.6061284 | 53.9682631 |
| 17:12:11 | 0:12:11 | 64.7694868 | 62.2605634 | 63.7715278 | 69.6061284 | 53.9682631 |
| 17:12:12 | 0:12:12 | 64.7694868 | 62.2605634 | 63.7715278 | 69.6061284 | 55.9682631 |
| 17:12:13 | 0:12:13 | 65.7694868 | 62.2605634 | 63.7715278 | 69.6061284 | 57.9682631 |
| 17:12:14 | 0:12:14 | 65.7694868 | 63.2605634 | 63.7715278 | 69.6061284 | 57.9682631 |
| 17:12:15 | 0:12:15 | 65.7694868 | 64.2605634 | 63.7715278 | 70.6061284 | 57.9682631 |
| 17:12:16 | 0:12:16 | 65.7694868 | 64.2605634 | 63.7715278 | 71.6061284 | 57.9682631 |
| 17:12:17 | 0:12:17 | 65.7694868 | 64.2605634 | 60.7715278 | 71.6061284 | 57.9682631 |
| 17:12:18 | 0:12:18 | 65.7694868 | 64.2605634 | 60.7715278 | 71.6061284 | 57.9682631 |
| 17:12:19 | 0:12:19 | 65.7694868 | 64.2605634 | 60.7715278 | 71.6061284 | 57.9682631 |
| 17:12:20 | 0:12:20 | 65.7694868 | 63.2605634 | 61.7715278 | 70.6061284 | 57.9682631 |
| 17:12:21 | 0:12:21 | 65.7694868 | 63.2605634 | 61.7715278 | 69.6061284 | 58.9682631 |
| 17:12:22 | 0:12:22 | 65.7694868 | 63.2605634 | 63.7715278 | 69.6061284 | 58.9682631 |
| 17:12:23 | 0:12:23 | 64.7694868 | 63.2605634 | 64.7715278 | 69.6061284 | 59.9682631 |
| 17:12:24 | 0:12:24 | 64.7694868 | 64.2605634 | 64.7715278 | 68.6061284 | 59.9682631 |
| 17:12:25 | 0:12:25 | 64.7694868 | 65.2605634 | 64.7715278 | 67.6061284 | 58.9682631 |
| 17:12:26 | 0:12:26 | 64.7694868 | 66.2605634 | 65.7715278 | 67.6061284 | 57.9682631 |
| 17:12:27 | 0:12:27 | 64.7694868 | 66.2605634 | 65.7715278 | 68.6061284 | 57.9682631 |
| 17:12:28 | 0:12:28 | 64.7694868 | 67.2605634 | 64.7715278 | 70.6061284 | 57.9682631 |
| 17:12:29 | 0:12:29 | 64.7694868 | 67.2605634 | 63.7715278 | 71.6061284 | 57.9682631 |
| 17:12:30 | 0:12:30 | 66.7694868 | 67.2605634 | 63.7715278 | 71.6061284 | 57.9682631 |
| 17:12:31 | 0:12:31 | 68.7694868 | 68.2605634 | 63.7715278 | 71.6061284 | 56.9682631 |
| 17:12:32 | 0:12:32 | 68.7694868 | 72.2605634 | 62.7715278 | 70.6061284 | 56.9682631 |
| 17:12:33 | 0:12:33 | 68.7694868 | 75.2605634 | 62.7715278 | 70.6061284 | 56.9682631 |
| 17:12:34 | 0:12:34 | 65.7694868 | 75.2605634 | 63.7715278 | 70.6061284 | 56.9682631 |
| 17:12:35 | 0:12:35 | 65.7694868 | 78.2605634 | 64.7715278 | 70.6061284 | 56.9682631 |
| 17:12:36 | 0:12:36 | 64.7694868 | 78.2605634 | 64.7715278 | 70.6061284 | 54.9682631 |
| 17:12:37 | 0:12:37 | 63.7694868 | 79.2605634 | 65.7715278 | 70.6061284 | 54.9682631 |
| 17:12:38 | 0:12:38 | 63.7694868 | 79.2605634 | 66.7715278 | 70.6061284 | 54.9682631 |
| 17:12:39 | 0:12:39 | 64.7694868 | 79.2605634 | 67.7715278 | 70.6061284 | 54.9682631 |
| 17:12:40 | 0:12:40 | 65.7694868 | 80.2605634 | 67.7715278 | 69.6061284 | 53.9682631 |
| 17:12:41 | 0:12:41 | 65.7694868 | 80.2605634 | 70.7715278 | 69.6061284 | 53.9682631 |
| 17:12:42 | 0:12:42 | 65.7694868 | 74.2605634 | 71.7715278 | 69.6061284 | 54.9682631 |
| 17:12:43 | 0:12:43 | 65.7694868 | 70.2605634 | 71.7715278 | 69.6061284 | 54.9682631 |

|          |         |            |            |            |            |            |
|----------|---------|------------|------------|------------|------------|------------|
| 17:12:44 | 0:12:44 | 65.7694868 | 67.2605634 | 71.7715278 | 69.6061284 | 54.9682631 |
| 17:12:45 | 0:12:45 | 65.7694868 | 66.2605634 | 76.7715278 | 70.6061284 | 54.9682631 |
| 17:12:46 | 0:12:46 | 65.7694868 | 65.2605634 | 77.7715278 | 69.6061284 | 56.9682631 |
| 17:12:47 | 0:12:47 | 66.7694868 | 65.2605634 | 77.7715278 | 69.6061284 | 58.9682631 |
| 17:12:48 | 0:12:48 | 66.7694868 | 65.2605634 | 78.7715278 | 69.6061284 | 58.9682631 |
| 17:12:49 | 0:12:49 | 66.7694868 | 65.2605634 | 78.7715278 | 68.6061284 | 60.9682631 |
| 17:12:50 | 0:12:50 | 66.7694868 | 64.2605634 | 79.7715278 | 68.6061284 | 60.9682631 |
| 17:12:51 | 0:12:51 | 64.7694868 | 61.2605634 | 79.7715278 | 67.6061284 | 68.9682631 |
| 17:12:52 | 0:12:52 | 63.7694868 | 60.2605634 | 80.7715278 | 68.6061284 | 69.9682631 |
| 17:12:53 | 0:12:53 | 63.7694868 | 59.2605634 | 80.7715278 | 68.6061284 | 70.9682631 |
| 17:12:54 | 0:12:54 | 63.7694868 | 59.2605634 | 81.7715278 | 70.6061284 | 71.9682631 |
| 17:12:55 | 0:12:55 | 62.7694868 | 59.2605634 | 78.7715278 | 72.6061284 | 72.9682631 |
| 17:12:56 | 0:12:56 | 62.7694868 | 60.2605634 | 77.7715278 | 72.6061284 | 72.9682631 |
| 17:12:57 | 0:12:57 | 62.7694868 | 61.2605634 | 75.7715278 | 73.6061284 | 72.9682631 |
| 17:12:58 | 0:12:58 | 63.7694868 | 61.2605634 | 73.7715278 | 74.6061284 | 71.9682631 |
| 17:12:59 | 0:12:59 | 63.7694868 | 61.2605634 | 73.7715278 | 74.6061284 | 71.9682631 |
| 17:13:00 | 0:13:00 | 63.7694868 | 62.2605634 | 73.7715278 | 74.6061284 | 71.9682631 |
| 17:13:01 | 0:13:01 | 63.7694868 | 62.2605634 | 67.7715278 | 75.6061284 | 71.9682631 |
| 17:13:02 | 0:13:02 | 63.7694868 | 62.2605634 | 67.7715278 | 75.6061284 | 71.9682631 |
| 17:13:03 | 0:13:03 | 63.7694868 | 62.2605634 | 67.7715278 | 76.6061284 | 71.9682631 |
| 17:13:04 | 0:13:04 | 63.7694868 | 63.2605634 | 64.7715278 | 76.6061284 | 71.9682631 |
| 17:13:05 | 0:13:05 | 63.7694868 | 63.2605634 | 61.7715278 | 77.6061284 | 71.9682631 |
| 17:13:06 | 0:13:06 | 62.7694868 | 64.2605634 | 61.7715278 | 77.6061284 | 71.9682631 |
| 17:13:07 | 0:13:07 | 62.7694868 | 64.2605634 | 59.7715278 | 76.6061284 | 71.9682631 |
| 17:13:08 | 0:13:08 | 62.7694868 | 65.2605634 | 59.7715278 | 76.6061284 | 69.9682631 |
| 17:13:09 | 0:13:09 | 61.7694868 | 67.2605634 | 58.7715278 | 75.6061284 | 67.9682631 |
| 17:13:10 | 0:13:10 | 64.7694868 | 68.2605634 | 58.7715278 | 70.6061284 | 67.9682631 |
| 17:13:11 | 0:13:11 | 64.7694868 | 69.2605634 | 58.7715278 | 65.6061284 | 67.9682631 |
| 17:13:12 | 0:13:12 | 64.7694868 | 69.2605634 | 58.7715278 | 65.6061284 | 67.9682631 |
| 17:13:13 | 0:13:13 | 63.7694868 | 68.2605634 | 57.7715278 | 64.6061284 | 66.9682631 |
| 17:13:14 | 0:13:14 | 64.7694868 | 67.2605634 | 57.7715278 | 64.6061284 | 66.9682631 |
| 17:13:15 | 0:13:15 | 63.7694868 | 67.2605634 | 57.7715278 | 63.6061284 | 65.9682631 |
| 17:13:16 | 0:13:16 | 63.7694868 | 67.2605634 | 56.7715278 | 64.6061284 | 65.9682631 |
| 17:13:17 | 0:13:17 | 63.7694868 | 67.2605634 | 56.7715278 | 64.6061284 | 65.9682631 |
| 17:13:18 | 0:13:18 | 62.7694868 | 68.2605634 | 56.7715278 | 64.6061284 | 64.9682631 |
| 17:13:19 | 0:13:19 | 61.7694868 | 68.2605634 | 56.7715278 | 64.6061284 | 63.9682631 |
| 17:13:20 | 0:13:20 | 62.7694868 | 68.2605634 | 56.7715278 | 66.6061284 | 64.9682631 |
| 17:13:21 | 0:13:21 | 63.7694868 | 68.2605634 | 57.7715278 | 66.6061284 | 67.9682631 |
| 17:13:22 | 0:13:22 | 63.7694868 | 69.2605634 | 58.7715278 | 65.6061284 | 69.9682631 |
| 17:13:23 | 0:13:23 | 63.7694868 | 69.2605634 | 58.7715278 | 65.6061284 | 71.9682631 |
| 17:13:24 | 0:13:24 | 64.7694868 | 69.2605634 | 58.7715278 | 65.6061284 | 74.9682631 |
| 17:13:25 | 0:13:25 | 64.7694868 | 69.2605634 | 58.7715278 | 65.6061284 | 74.9682631 |
| 17:13:26 | 0:13:26 | 64.7694868 | 69.2605634 | 59.7715278 | 66.6061284 | 75.9682631 |
| 17:13:27 | 0:13:27 | 65.7694868 | 69.2605634 | 66.7715278 | 66.6061284 | 75.9682631 |
| 17:13:28 | 0:13:28 | 65.7694868 | 69.2605634 | 66.7715278 | 65.6061284 | 76.9682631 |



|          |         |            |            |            |            |            |
|----------|---------|------------|------------|------------|------------|------------|
| 17:13:29 | 0:13:29 | 65.7694868 | 70.2605634 | 67.7715278 | 66.6061284 | 77.9682631 |
| 17:13:30 | 0:13:30 | 64.7694868 | 74.2605634 | 68.7715278 | 66.6061284 | 77.9682631 |
| 17:13:31 | 0:13:31 | 63.7694868 | 75.2605634 | 68.7715278 | 66.6061284 | 78.9682631 |
| 17:13:32 | 0:13:32 | 63.7694868 | 77.2605634 | 67.7715278 | 67.6061284 | 78.9682631 |
| 17:13:33 | 0:13:33 | 62.7694868 | 78.2605634 | 63.7715278 | 67.6061284 | 79.9682631 |
| 17:13:34 | 0:13:34 | 63.7694868 | 79.2605634 | 63.7715278 | 67.6061284 | 79.9682631 |
| 17:13:35 | 0:13:35 | 63.7694868 | 81.2605634 | 63.7715278 | 66.6061284 | 81.9682631 |
| 17:13:36 | 0:13:36 | 65.7694868 | 83.2605634 | 63.7715278 | 65.6061284 | 81.9682631 |
| 17:13:37 | 0:13:37 | 66.7694868 | 83.2605634 | 63.7715278 | 65.6061284 | 81.9682631 |
| 17:13:38 | 0:13:38 | 67.7694868 | 83.2605634 | 63.7715278 | 65.6061284 | 83.9682631 |
| 17:13:39 | 0:13:39 | 69.7694868 | 83.2605634 | 63.7715278 | 65.6061284 | 83.9682631 |
| 17:13:40 | 0:13:40 | 69.7694868 | 84.2605634 | 63.7715278 | 67.6061284 | 81.9682631 |
| 17:13:41 | 0:13:41 | 68.7694868 | 84.2605634 | 63.7715278 | 68.6061284 | 81.9682631 |
| 17:13:42 | 0:13:42 | 64.7694868 | 84.2605634 | 64.7715278 | 71.6061284 | 80.9682631 |
| 17:13:43 | 0:13:43 | 61.7694868 | 84.2605634 | 64.7715278 | 71.6061284 | 80.9682631 |
| 17:13:44 | 0:13:44 | 60.7694868 | 85.2605634 | 64.7715278 | 71.6061284 | 80.9682631 |
| 17:13:45 | 0:13:45 | 60.7694868 | 85.2605634 | 65.7715278 | 68.6061284 | 80.9682631 |
| 17:13:46 | 0:13:46 | 60.7694868 | 86.2605634 | 65.7715278 | 67.6061284 | 80.9682631 |
| 17:13:47 | 0:13:47 | 60.7694868 | 86.2605634 | 65.7715278 | 67.6061284 | 80.9682631 |
| 17:13:48 | 0:13:48 | 60.7694868 | 81.2605634 | 64.7715278 | 67.6061284 | 80.9682631 |
| 17:13:49 | 0:13:49 | 60.7694868 | 74.2605634 | 64.7715278 | 68.6061284 | 80.9682631 |
| 17:13:50 | 0:13:50 | 60.7694868 | 74.2605634 | 64.7715278 | 68.6061284 | 80.9682631 |
| 17:13:51 | 0:13:51 | 60.7694868 | 70.2605634 | 65.7715278 | 66.6061284 | 77.9682631 |
| 17:13:52 | 0:13:52 | 62.7694868 | 68.2605634 | 66.7715278 | 65.6061284 | 77.9682631 |
| 17:13:53 | 0:13:53 | 62.7694868 | 67.2605634 | 67.7715278 | 65.6061284 | 77.9682631 |
| 17:13:54 | 0:13:54 | 62.7694868 | 67.2605634 | 67.7715278 | 65.6061284 | 77.9682631 |
| 17:13:55 | 0:13:55 | 63.7694868 | 66.2605634 | 67.7715278 | 65.6061284 | 76.9682631 |
| 17:13:56 | 0:13:56 | 63.7694868 | 66.2605634 | 67.7715278 | 65.6061284 | 75.9682631 |
| 17:13:57 | 0:13:57 | 63.7694868 | 68.2605634 | 65.7715278 | 66.6061284 | 75.9682631 |
| 17:13:58 | 0:13:58 | 64.7694868 | 67.2605634 | 65.7715278 | 66.6061284 | 75.9682631 |
| 17:13:59 | 0:13:59 | 64.7694868 | 66.2605634 | 65.7715278 | 65.6061284 | 74.9682631 |
| 17:14:00 | 0:14:00 | 64.7694868 | 65.2605634 | 65.7715278 | 65.6061284 | 74.9682631 |
| 17:14:01 | 0:14:01 | 63.7694868 | 64.2605634 | 65.7715278 | 65.6061284 | 74.9682631 |
| 17:14:02 | 0:14:02 | 62.7694868 | 63.2605634 | 64.7715278 | 65.6061284 | 74.9682631 |
| 17:14:03 | 0:14:03 | 62.7694868 | 63.2605634 | 62.7715278 | 67.6061284 | 74.9682631 |
| 17:14:04 | 0:14:04 | 62.7694868 | 63.2605634 | 61.7715278 | 70.6061284 | 74.9682631 |
| 17:14:05 | 0:14:05 | 62.7694868 | 63.2605634 | 61.7715278 | 71.6061284 | 72.9682631 |
| 17:14:06 | 0:14:06 | 62.7694868 | 63.2605634 | 61.7715278 | 71.6061284 | 72.9682631 |
| 17:14:07 | 0:14:07 | 62.7694868 | 64.2605634 | 63.7715278 | 74.6061284 | 72.9682631 |
| 17:14:08 | 0:14:08 | 62.7694868 | 64.2605634 | 63.7715278 | 75.6061284 | 71.9682631 |
| 17:14:09 | 0:14:09 | 62.7694868 | 65.2605634 | 63.7715278 | 75.6061284 | 70.9682631 |
| 17:14:10 | 0:14:10 | 62.7694868 | 65.2605634 | 62.7715278 | 75.6061284 | 68.9682631 |
| 17:14:11 | 0:14:11 | 62.7694868 | 65.2605634 | 62.7715278 | 75.6061284 | 68.9682631 |
| 17:14:12 | 0:14:12 | 62.7694868 | 65.2605634 | 61.7715278 | 75.6061284 | 68.9682631 |
| 17:14:13 | 0:14:13 | 65.7694868 | 66.2605634 | 60.7715278 | 76.6061284 | 68.9682631 |

|          |         |            |            |            |            |            |
|----------|---------|------------|------------|------------|------------|------------|
| 17:14:14 | 0:14:14 | 67.7694868 | 68.2605634 | 59.7715278 | 76.6061284 | 68.9682631 |
| 17:14:15 | 0:14:15 | 66.7694868 | 68.2605634 | 59.7715278 | 75.6061284 | 68.9682631 |
| 17:14:16 | 0:14:16 | 64.7694868 | 68.2605634 | 59.7715278 | 75.6061284 | 68.9682631 |
| 17:14:17 | 0:14:17 | 61.7694868 | 69.2605634 | 59.7715278 | 74.6061284 | 63.9682631 |
| 17:14:18 | 0:14:18 | 61.7694868 | 69.2605634 | 59.7715278 | 74.6061284 | 61.9682631 |
| 17:14:19 | 0:14:19 | 61.7694868 | 69.2605634 | 59.7715278 | 74.6061284 | 59.9682631 |
| 17:14:20 | 0:14:20 | 61.7694868 | 70.2605634 | 58.7715278 | 74.6061284 | 58.9682631 |
| 17:14:21 | 0:14:21 | 61.7694868 | 70.2605634 | 58.7715278 | 74.6061284 | 58.9682631 |
| 17:14:22 | 0:14:22 | 61.7694868 | 71.2605634 | 58.7715278 | 74.6061284 | 59.9682631 |
| 17:14:23 | 0:14:23 | 60.7694868 | 71.2605634 | 57.7715278 | 74.6061284 | 60.9682631 |
| 17:14:24 | 0:14:24 | 59.7694868 | 71.2605634 | 57.7715278 | 73.6061284 | 60.9682631 |
| 17:14:25 | 0:14:25 | 59.7694868 | 71.2605634 | 57.7715278 | 70.6061284 | 59.9682631 |
| 17:14:26 | 0:14:26 | 59.7694868 | 72.2605634 | 56.7715278 | 67.6061284 | 59.9682631 |
| 17:14:27 | 0:14:27 | 58.7694868 | 72.2605634 | 55.7715278 | 66.6061284 | 59.9682631 |
| 17:14:28 | 0:14:28 | 58.7694868 | 72.2605634 | 55.7715278 | 65.6061284 | 59.9682631 |
| 17:14:29 | 0:14:29 | 58.7694868 | 72.2605634 | 54.7715278 | 64.6061284 | 59.9682631 |
| 17:14:30 | 0:14:30 | 58.7694868 | 75.2605634 | 54.7715278 | 68.6061284 | 59.9682631 |
| 17:14:31 | 0:14:31 | 57.7694868 | 75.2605634 | 54.7715278 | 74.6061284 | 59.9682631 |
| 17:14:32 | 0:14:32 | 57.7694868 | 75.2605634 | 55.7715278 | 77.6061284 | 60.9682631 |
| 17:14:33 | 0:14:33 | 57.7694868 | 75.2605634 | 58.7715278 | 78.6061284 | 59.9682631 |
| 17:14:34 | 0:14:34 | 55.7694868 | 75.2605634 | 58.7715278 | 78.6061284 | 60.9682631 |
| 17:14:35 | 0:14:35 | 55.7694868 | 72.2605634 | 58.7715278 | 78.6061284 | 60.9682631 |
| 17:14:36 | 0:14:36 | 55.7694868 | 71.2605634 | 58.7715278 | 77.6061284 | 60.9682631 |
| 17:14:37 | 0:14:37 | 55.7694868 | 71.2605634 | 60.7715278 | 75.6061284 | 62.9682631 |
| 17:14:38 | 0:14:38 | 55.7694868 | 71.2605634 | 60.7715278 | 75.6061284 | 62.9682631 |
| 17:14:39 | 0:14:39 | 55.7694868 | 71.2605634 | 60.7715278 | 73.6061284 | 62.9682631 |
| 17:14:40 | 0:14:40 | 55.7694868 | 71.2605634 | 58.7715278 | 72.6061284 | 62.9682631 |
| 17:14:41 | 0:14:41 | 56.7694868 | 71.2605634 | 58.7715278 | 72.6061284 | 63.9682631 |
| 17:14:42 | 0:14:42 | 56.7694868 | 72.2605634 | 58.7715278 | 72.6061284 | 63.9682631 |
| 17:14:43 | 0:14:43 | 57.7694868 | 72.2605634 | 60.7715278 | 73.6061284 | 63.9682631 |
| 17:14:44 | 0:14:44 | 57.7694868 | 73.2605634 | 61.7715278 | 73.6061284 | 62.9682631 |
| 17:14:45 | 0:14:45 | 59.7694868 | 73.2605634 | 61.7715278 | 73.6061284 | 60.9682631 |
| 17:14:46 | 0:14:46 | 67.7694868 | 72.2605634 | 61.7715278 | 72.6061284 | 59.9682631 |
| 17:14:47 | 0:14:47 | 67.7694868 | 71.2605634 | 61.7715278 | 72.6061284 | 59.9682631 |
| 17:14:48 | 0:14:48 | 67.7694868 | 71.2605634 | 61.7715278 | 72.6061284 | 58.9682631 |
| 17:14:49 | 0:14:49 | 67.7694868 | 71.2605634 | 61.7715278 | 72.6061284 | 58.9682631 |
| 17:14:50 | 0:14:50 | 67.7694868 | 71.2605634 | 60.7715278 | 72.6061284 | 58.9682631 |
| 17:14:51 | 0:14:51 | 67.7694868 | 71.2605634 | 60.7715278 | 72.6061284 | 58.9682631 |
| 17:14:52 | 0:14:52 | 67.7694868 | 71.2605634 | 60.7715278 | 72.6061284 | 57.9682631 |
| 17:14:53 | 0:14:53 | 67.7694868 | 71.2605634 | 60.7715278 | 73.6061284 | 57.9682631 |
| 17:14:54 | 0:14:54 | 66.7694868 | 71.2605634 | 60.7715278 | 73.6061284 | 55.9682631 |
| 17:14:55 | 0:14:55 | 68.7694868 | 71.2605634 | 60.7715278 | 73.6061284 | 54.9682631 |
| 17:14:56 | 0:14:56 | 68.7694868 | 71.2605634 | 60.7715278 | 74.6061284 | 54.9682631 |
| 17:14:57 | 0:14:57 | 68.7694868 | 70.2605634 | 60.7715278 | 75.6061284 | 54.9682631 |
| 17:14:58 | 0:14:58 | 68.7694868 | 72.2605634 | 62.7715278 | 75.6061284 | 54.9682631 |

|          |         |            |            |            |            |            |
|----------|---------|------------|------------|------------|------------|------------|
| 17:14:59 | 0:14:59 | 69.7694868 | 72.2605634 | 64.7715278 | 75.6061284 | 54.9682631 |
| 17:15:00 | 0:15:00 | 69.7694868 | 72.2605634 | 64.7715278 | 75.6061284 | 54.9682631 |
| 17:15:01 | 0:15:01 | 69.7694868 | 71.2605634 | 63.7715278 | 80.6061284 | 56.9682631 |
| 17:15:02 | 0:15:02 | 69.7694868 | 71.2605634 | 63.7715278 | 81.6061284 | 56.9682631 |
| 17:15:03 | 0:15:03 | 70.7694868 | 70.2605634 | 63.7715278 | 81.6061284 | 56.9682631 |
| 17:15:04 | 0:15:04 | 70.7694868 | 70.2605634 | 66.7715278 | 82.6061284 | 56.9682631 |
| 17:15:05 | 0:15:05 | 70.7694868 | 73.2605634 | 66.7715278 | 83.6061284 | 56.9682631 |
| 17:15:06 | 0:15:06 | 70.7694868 | 75.2605634 | 67.7715278 | 83.6061284 | 56.9682631 |
| 17:15:07 | 0:15:07 | 70.7694868 | 76.2605634 | 67.7715278 | 83.6061284 | 56.9682631 |
| 17:15:08 | 0:15:08 | 72.7694868 | 74.2605634 | 67.7715278 | 80.6061284 | 56.9682631 |
| 17:15:09 | 0:15:09 | 73.7694868 | 72.2605634 | 67.7715278 | 77.6061284 | 57.9682631 |
| 17:15:10 | 0:15:10 | 73.7694868 | 71.2605634 | 65.7715278 | 75.6061284 | 57.9682631 |
| 17:15:11 | 0:15:11 | 73.7694868 | 71.2605634 | 65.7715278 | 74.6061284 | 58.9682631 |
| 17:15:12 | 0:15:12 | 74.7694868 | 71.2605634 | 63.7715278 | 72.6061284 | 59.9682631 |
| 17:15:13 | 0:15:13 | 73.7694868 | 72.2605634 | 61.7715278 | 72.6061284 | 58.9682631 |
| 17:15:14 | 0:15:14 | 65.7694868 | 72.2605634 | 60.7715278 | 71.6061284 | 57.9682631 |
| 17:15:15 | 0:15:15 | 63.7694868 | 72.2605634 | 60.7715278 | 71.6061284 | 57.9682631 |
| 17:15:16 | 0:15:16 | 63.7694868 | 72.2605634 | 59.7715278 | 71.6061284 | 56.9682631 |
| 17:15:17 | 0:15:17 | 62.7694868 | 72.2605634 | 60.7715278 | 71.6061284 | 56.9682631 |
| 17:15:18 | 0:15:18 | 62.7694868 | 72.2605634 | 60.7715278 | 72.6061284 | 57.9682631 |
| 17:15:19 | 0:15:19 | 62.7694868 | 72.2605634 | 60.7715278 | 72.6061284 | 57.9682631 |
| 17:15:20 | 0:15:20 | 62.7694868 | 72.2605634 | 59.7715278 | 72.6061284 | 58.9682631 |
| 17:15:21 | 0:15:21 | 62.7694868 | 71.2605634 | 59.7715278 | 71.6061284 | 58.9682631 |
| 17:15:22 | 0:15:22 | 62.7694868 | 71.2605634 | 59.7715278 | 70.6061284 | 58.9682631 |
| 17:15:23 | 0:15:23 | 62.7694868 | 72.2605634 | 59.7715278 | 67.6061284 | 58.9682631 |
| 17:15:24 | 0:15:24 | 62.7694868 | 72.2605634 | 58.7715278 | 64.6061284 | 58.9682631 |
| 17:15:25 | 0:15:25 | 61.7694868 | 75.2605634 | 57.7715278 | 63.6061284 | 57.9682631 |
| 17:15:26 | 0:15:26 | 61.7694868 | 75.2605634 | 58.7715278 | 62.6061284 | 56.9682631 |
| 17:15:27 | 0:15:27 | 61.7694868 | 75.2605634 | 58.7715278 | 62.6061284 | 56.9682631 |
| 17:15:28 | 0:15:28 | 63.7694868 | 73.2605634 | 58.7715278 | 62.6061284 | 56.9682631 |
| 17:15:29 | 0:15:29 | 65.7694868 | 73.2605634 | 59.7715278 | 61.6061284 | 56.9682631 |
| 17:15:30 | 0:15:30 | 65.7694868 | 72.2605634 | 60.7715278 | 61.6061284 | 56.9682631 |
| 17:15:31 | 0:15:31 | 66.7694868 | 71.2605634 | 61.7715278 | 61.6061284 | 56.9682631 |
| 17:15:32 | 0:15:32 | 66.7694868 | 71.2605634 | 61.7715278 | 61.6061284 | 58.9682631 |
| 17:15:33 | 0:15:33 | 66.7694868 | 71.2605634 | 62.7715278 | 61.6061284 | 60.9682631 |
| 17:15:34 | 0:15:34 | 66.7694868 | 71.2605634 | 62.7715278 | 61.6061284 | 60.9682631 |
| 17:15:35 | 0:15:35 | 66.7694868 | 72.2605634 | 63.7715278 | 61.6061284 | 61.9682631 |
| 17:15:36 | 0:15:36 | 66.7694868 | 73.2605634 | 65.7715278 | 64.6061284 | 61.9682631 |
| 17:15:37 | 0:15:37 | 66.7694868 | 73.2605634 | 66.7715278 | 65.6061284 | 61.9682631 |
| 17:15:38 | 0:15:38 | 66.7694868 | 73.2605634 | 66.7715278 | 66.6061284 | 61.9682631 |
| 17:15:39 | 0:15:39 | 66.7694868 | 73.2605634 | 66.7715278 | 66.6061284 | 61.9682631 |
| 17:15:40 | 0:15:40 | 67.7694868 | 73.2605634 | 66.7715278 | 66.6061284 | 59.9682631 |
| 17:15:41 | 0:15:41 | 67.7694868 | 73.2605634 | 66.7715278 | 65.6061284 | 57.9682631 |
| 17:15:42 | 0:15:42 | 67.7694868 | 73.2605634 | 66.7715278 | 64.6061284 | 56.9682631 |
| 17:15:43 | 0:15:43 | 67.7694868 | 74.2605634 | 66.7715278 | 63.6061284 | 55.9682631 |

|          |         |            |            |            |            |            |
|----------|---------|------------|------------|------------|------------|------------|
| 17:15:44 | 0:15:44 | 67.7694868 | 75.2605634 | 69.7715278 | 62.6061284 | 54.9682631 |
| 17:15:45 | 0:15:45 | 67.7694868 | 75.2605634 | 70.7715278 | 62.6061284 | 53.9682631 |
| 17:15:46 | 0:15:46 | 68.7694868 | 75.2605634 | 70.7715278 | 63.6061284 | 53.9682631 |
| 17:15:47 | 0:15:47 | 68.7694868 | 73.2605634 | 70.7715278 | 64.6061284 | 53.9682631 |
| 17:15:48 | 0:15:48 | 68.7694868 | 72.2605634 | 70.7715278 | 65.6061284 | 53.9682631 |
| 17:15:49 | 0:15:49 | 68.7694868 | 71.2605634 | 70.7715278 | 66.6061284 | 53.9682631 |
| 17:15:50 | 0:15:50 | 68.7694868 | 71.2605634 | 68.7715278 | 66.6061284 | 55.9682631 |
| 17:15:51 | 0:15:51 | 68.7694868 | 70.2605634 | 64.7715278 | 66.6061284 | 55.9682631 |
| 17:15:52 | 0:15:52 | 68.7694868 | 70.2605634 | 64.7715278 | 66.6061284 | 55.9682631 |
| 17:15:53 | 0:15:53 | 67.7694868 | 70.2605634 | 62.7715278 | 66.6061284 | 55.9682631 |
| 17:15:54 | 0:15:54 | 67.7694868 | 70.2605634 | 62.7715278 | 66.6061284 | 55.9682631 |
| 17:15:55 | 0:15:55 | 66.7694868 | 71.2605634 | 62.7715278 | 67.6061284 | 56.9682631 |
| 17:15:56 | 0:15:56 | 65.7694868 | 72.2605634 | 62.7715278 | 67.6061284 | 56.9682631 |
| 17:15:57 | 0:15:57 | 65.7694868 | 73.2605634 | 62.7715278 | 67.6061284 | 57.9682631 |
| 17:15:58 | 0:15:58 | 65.7694868 | 74.2605634 | 62.7715278 | 68.6061284 | 57.9682631 |
| 17:15:59 | 0:15:59 | 65.7694868 | 74.2605634 | 64.7715278 | 69.6061284 | 57.9682631 |
| 17:16:00 | 0:16:00 | 65.7694868 | 74.2605634 | 65.7715278 | 72.6061284 | 57.9682631 |
| 17:16:01 | 0:16:01 | 65.7694868 | 73.2605634 | 67.7715278 | 72.6061284 | 58.9682631 |
| 17:16:02 | 0:16:02 | 67.7694868 | 74.2605634 | 69.7715278 | 73.6061284 | 58.9682631 |
| 17:16:03 | 0:16:03 | 68.7694868 | 74.2605634 | 70.7715278 | 74.6061284 | 59.9682631 |
| 17:16:04 | 0:16:04 | 68.7694868 | 74.2605634 | 72.7715278 | 74.6061284 | 59.9682631 |
| 17:16:05 | 0:16:05 | 68.7694868 | 76.2605634 | 73.7715278 | 74.6061284 | 60.9682631 |
| 17:16:06 | 0:16:06 | 69.7694868 | 77.2605634 | 73.7715278 | 75.6061284 | 60.9682631 |
| 17:16:07 | 0:16:07 | 69.7694868 | 78.2605634 | 74.7715278 | 75.6061284 | 60.9682631 |
| 17:16:08 | 0:16:08 | 69.7694868 | 78.2605634 | 74.7715278 | 74.6061284 | 60.9682631 |
| 17:16:09 | 0:16:09 | 69.7694868 | 78.2605634 | 74.7715278 | 73.6061284 | 60.9682631 |
| 17:16:10 | 0:16:10 | 69.7694868 | 78.2605634 | 77.7715278 | 73.6061284 | 60.9682631 |
| 17:16:11 | 0:16:11 | 68.7694868 | 79.2605634 | 74.7715278 | 70.6061284 | 60.9682631 |
| 17:16:12 | 0:16:12 | 69.7694868 | 79.2605634 | 74.7715278 | 68.6061284 | 60.9682631 |
| 17:16:13 | 0:16:13 | 69.7694868 | 80.2605634 | 74.7715278 | 68.6061284 | 60.9682631 |
| 17:16:14 | 0:16:14 | 68.7694868 | 80.2605634 | 73.7715278 | 68.6061284 | 60.9682631 |
| 17:16:15 | 0:16:15 | 71.7694868 | 80.2605634 | 73.7715278 | 68.6061284 | 60.9682631 |
| 17:16:16 | 0:16:16 | 72.7694868 | 81.2605634 | 73.7715278 | 68.6061284 | 61.9682631 |
| 17:16:17 | 0:16:17 | 73.7694868 | 81.2605634 | 69.7715278 | 67.6061284 | 61.9682631 |
| 17:16:18 | 0:16:18 | 74.7694868 | 81.2605634 | 69.7715278 | 67.6061284 | 61.9682631 |
| 17:16:19 | 0:16:19 | 74.7694868 | 82.2605634 | 61.7715278 | 69.6061284 | 62.9682631 |
| 17:16:20 | 0:16:20 | 74.7694868 | 82.2605634 | 59.7715278 | 71.6061284 | 63.9682631 |
| 17:16:21 | 0:16:21 | 74.7694868 | 82.2605634 | 59.7715278 | 71.6061284 | 62.9682631 |
| 17:16:22 | 0:16:22 | 74.7694868 | 76.2605634 | 57.7715278 | 70.6061284 | 63.9682631 |
| 17:16:23 | 0:16:23 | 73.7694868 | 74.2605634 | 55.7715278 | 70.6061284 | 63.9682631 |
| 17:16:24 | 0:16:24 | 73.7694868 | 74.2605634 | 54.7715278 | 70.6061284 | 63.9682631 |
| 17:16:25 | 0:16:25 | 72.7694868 | 74.2605634 | 54.7715278 | 70.6061284 | 63.9682631 |
| 17:16:26 | 0:16:26 | 72.7694868 | 72.2605634 | 55.7715278 | 70.6061284 | 63.9682631 |
| 17:16:27 | 0:16:27 | 72.7694868 | 71.2605634 | 56.7715278 | 70.6061284 | 63.9682631 |
| 17:16:28 | 0:16:28 | 72.7694868 | 71.2605634 | 56.7715278 | 70.6061284 | 63.9682631 |

|          |         |            |            |            |            |            |
|----------|---------|------------|------------|------------|------------|------------|
| 17:16:29 | 0:16:29 | 72.7694868 | 63.2605634 | 58.7715278 | 72.6061284 | 63.9682631 |
| 17:16:30 | 0:16:30 | 72.7694868 | 63.2605634 | 58.7715278 | 73.6061284 | 65.9682631 |
| 17:16:31 | 0:16:31 | 72.7694868 | 62.2605634 | 58.7715278 | 74.6061284 | 65.9682631 |
| 17:16:32 | 0:16:32 | 72.7694868 | 62.2605634 | 57.7715278 | 74.6061284 | 65.9682631 |
| 17:16:33 | 0:16:33 | 72.7694868 | 62.2605634 | 57.7715278 | 73.6061284 | 65.9682631 |
| 17:16:34 | 0:16:34 | 73.7694868 | 64.2605634 | 57.7715278 | 71.6061284 | 65.9682631 |
| 17:16:35 | 0:16:35 | 73.7694868 | 65.2605634 | 58.7715278 | 70.6061284 | 65.9682631 |
| 17:16:36 | 0:16:36 | 73.7694868 | 65.2605634 | 58.7715278 | 69.6061284 | 65.9682631 |
| 17:16:37 | 0:16:37 | 73.7694868 | 69.2605634 | 58.7715278 | 69.6061284 | 65.9682631 |
| 17:16:38 | 0:16:38 | 74.7694868 | 69.2605634 | 58.7715278 | 70.6061284 | 65.9682631 |
| 17:16:39 | 0:16:39 | 76.7694868 | 69.2605634 | 58.7715278 | 71.6061284 | 65.9682631 |
| 17:16:40 | 0:16:40 | 77.7694868 | 69.2605634 | 58.7715278 | 71.6061284 | 65.9682631 |
| 17:16:41 | 0:16:41 | 78.7694868 | 69.2605634 | 58.7715278 | 72.6061284 | 65.9682631 |
| 17:16:42 | 0:16:42 | 78.7694868 | 69.2605634 | 58.7715278 | 70.6061284 | 66.9682631 |
| 17:16:43 | 0:16:43 | 74.7694868 | 73.2605634 | 56.7715278 | 68.6061284 | 65.9682631 |
| 17:16:44 | 0:16:44 | 71.7694868 | 74.2605634 | 56.7715278 | 64.6061284 | 65.9682631 |
| 17:16:45 | 0:16:45 | 70.7694868 | 74.2605634 | 56.7715278 | 62.6061284 | 64.9682631 |
| 17:16:46 | 0:16:46 | 70.7694868 | 71.2605634 | 56.7715278 | 62.6061284 | 64.9682631 |
| 17:16:47 | 0:16:47 | 70.7694868 | 66.2605634 | 56.7715278 | 61.6061284 | 64.9682631 |
| 17:16:48 | 0:16:48 | 70.7694868 | 66.2605634 | 56.7715278 | 61.6061284 | 64.9682631 |
| 17:16:49 | 0:16:49 | 71.7694868 | 61.2605634 | 57.7715278 | 61.6061284 | 64.9682631 |
| 17:16:50 | 0:16:50 | 71.7694868 | 60.2605634 | 59.7715278 | 64.6061284 | 64.9682631 |
| 17:16:51 | 0:16:51 | 71.7694868 | 60.2605634 | 59.7715278 | 63.6061284 | 64.9682631 |
| 17:16:52 | 0:16:52 | 69.7694868 | 60.2605634 | 61.7715278 | 63.6061284 | 62.9682631 |
| 17:16:53 | 0:16:53 | 68.7694868 | 60.2605634 | 62.7715278 | 63.6061284 | 62.9682631 |
| 17:16:54 | 0:16:54 | 68.7694868 | 60.2605634 | 62.7715278 | 62.6061284 | 62.9682631 |
| 17:16:55 | 0:16:55 | 60.7694868 | 60.2605634 | 62.7715278 | 62.6061284 | 61.9682631 |
| 17:16:56 | 0:16:56 | 59.7694868 | 59.2605634 | 61.7715278 | 62.6061284 | 61.9682631 |
| 17:16:57 | 0:16:57 | 58.7694868 | 59.2605634 | 60.7715278 | 62.6061284 | 61.9682631 |
| 17:16:58 | 0:16:58 | 57.7694868 | 59.2605634 | 60.7715278 | 63.6061284 | 61.9682631 |
| 17:16:59 | 0:16:59 | 64.7694868 | 59.2605634 | 60.7715278 | 64.6061284 | 60.9682631 |
| 17:17:00 | 0:17:00 | 67.7694868 | 59.2605634 | 60.7715278 | 65.6061284 | 60.9682631 |
| 17:17:01 | 0:17:01 | 67.7694868 | 60.2605634 | 60.7715278 | 65.6061284 | 60.9682631 |
| 17:17:02 | 0:17:02 | 71.7694868 | 60.2605634 | 60.7715278 | 65.6061284 | 59.9682631 |
| 17:17:03 | 0:17:03 | 71.7694868 | 61.2605634 | 60.7715278 | 64.6061284 | 59.9682631 |
| 17:17:04 | 0:17:04 | 71.7694868 | 64.2605634 | 61.7715278 | 63.6061284 | 59.9682631 |
| 17:17:05 | 0:17:05 | 71.7694868 | 67.2605634 | 62.7715278 | 62.6061284 | 59.9682631 |
| 17:17:06 | 0:17:06 | 71.7694868 | 67.2605634 | 64.7715278 | 63.6061284 | 59.9682631 |
| 17:17:07 | 0:17:07 | 72.7694868 | 69.2605634 | 66.7715278 | 63.6061284 | 59.9682631 |
| 17:17:08 | 0:17:08 | 72.7694868 | 70.2605634 | 66.7715278 | 63.6061284 | 59.9682631 |
| 17:17:09 | 0:17:09 | 72.7694868 | 71.2605634 | 66.7715278 | 63.6061284 | 59.9682631 |
| 17:17:10 | 0:17:10 | 73.7694868 | 71.2605634 | 66.7715278 | 63.6061284 | 60.9682631 |
| 17:17:11 | 0:17:11 | 73.7694868 | 71.2605634 | 66.7715278 | 65.6061284 | 60.9682631 |
| 17:17:12 | 0:17:12 | 73.7694868 | 71.2605634 | 66.7715278 | 67.6061284 | 60.9682631 |
| 17:17:13 | 0:17:13 | 72.7694868 | 72.2605634 | 67.7715278 | 69.6061284 | 59.9682631 |

|          |         |            |            |            |            |            |
|----------|---------|------------|------------|------------|------------|------------|
| 17:17:14 | 0:17:14 | 73.7694868 | 72.2605634 | 67.7715278 | 71.6061284 | 59.9682631 |
| 17:17:15 | 0:17:15 | 74.7694868 | 74.2605634 | 68.7715278 | 71.6061284 | 59.9682631 |
| 17:17:16 | 0:17:16 | 74.7694868 | 72.2605634 | 68.7715278 | 71.6061284 | 59.9682631 |
| 17:17:17 | 0:17:17 | 74.7694868 | 73.2605634 | 69.7715278 | 71.6061284 | 59.9682631 |
| 17:17:18 | 0:17:18 | 74.7694868 | 74.2605634 | 69.7715278 | 74.6061284 | 59.9682631 |
| 17:17:19 | 0:17:19 | 73.7694868 | 75.2605634 | 69.7715278 | 75.6061284 | 58.9682631 |
| 17:17:20 | 0:17:20 | 72.7694868 | 75.2605634 | 70.7715278 | 77.6061284 | 58.9682631 |
| 17:17:21 | 0:17:21 | 71.7694868 | 74.2605634 | 71.7715278 | 78.6061284 | 57.9682631 |
| 17:17:22 | 0:17:22 | 71.7694868 | 73.2605634 | 71.7715278 | 79.6061284 | 59.9682631 |
| 17:17:23 | 0:17:23 | 70.7694868 | 73.2605634 | 72.7715278 | 79.6061284 | 59.9682631 |
| 17:17:24 | 0:17:24 | 70.7694868 | 72.2605634 | 72.7715278 | 80.6061284 | 59.9682631 |
| 17:17:25 | 0:17:25 | 69.7694868 | 70.2605634 | 72.7715278 | 79.6061284 | 59.9682631 |
| 17:17:26 | 0:17:26 | 69.7694868 | 67.2605634 | 73.7715278 | 76.6061284 | 59.9682631 |
| 17:17:27 | 0:17:27 | 69.7694868 | 66.2605634 | 72.7715278 | 74.6061284 | 60.9682631 |
| 17:17:28 | 0:17:28 | 69.7694868 | 66.2605634 | 72.7715278 | 73.6061284 | 60.9682631 |
| 17:17:29 | 0:17:29 | 69.7694868 | 66.2605634 | 71.7715278 | 73.6061284 | 60.9682631 |
| 17:17:30 | 0:17:30 | 69.7694868 | 66.2605634 | 71.7715278 | 75.6061284 | 61.9682631 |
| 17:17:31 | 0:17:31 | 69.7694868 | 66.2605634 | 68.7715278 | 75.6061284 | 61.9682631 |
| 17:17:32 | 0:17:32 | 68.7694868 | 66.2605634 | 68.7715278 | 77.6061284 | 61.9682631 |
| 17:17:33 | 0:17:33 | 68.7694868 | 66.2605634 | 68.7715278 | 76.6061284 | 61.9682631 |
| 17:17:34 | 0:17:34 | 68.7694868 | 66.2605634 | 68.7715278 | 76.6061284 | 61.9682631 |
| 17:17:35 | 0:17:35 | 68.7694868 | 67.2605634 | 68.7715278 | 76.6061284 | 61.9682631 |
| 17:17:36 | 0:17:36 | 67.7694868 | 67.2605634 | 68.7715278 | 76.6061284 | 62.9682631 |
| 17:17:37 | 0:17:37 | 67.7694868 | 67.2605634 | 68.7715278 | 74.6061284 | 62.9682631 |
| 17:17:38 | 0:17:38 | 67.7694868 | 67.2605634 | 68.7715278 | 70.6061284 | 62.9682631 |
| 17:17:39 | 0:17:39 | 67.7694868 | 67.2605634 | 68.7715278 | 68.6061284 | 64.9682631 |
| 17:17:40 | 0:17:40 | 67.7694868 | 68.2605634 | 68.7715278 | 66.6061284 | 66.9682631 |
| 17:17:41 | 0:17:41 | 66.7694868 | 68.2605634 | 68.7715278 | 66.6061284 | 67.9682631 |
| 17:17:42 | 0:17:42 | 66.7694868 | 68.2605634 | 68.7715278 | 66.6061284 | 67.9682631 |
| 17:17:43 | 0:17:43 | 66.7694868 | 70.2605634 | 67.7715278 | 66.6061284 | 66.9682631 |
| 17:17:44 | 0:17:44 | 66.7694868 | 74.2605634 | 67.7715278 | 66.6061284 | 65.9682631 |
| 17:17:45 | 0:17:45 | 66.7694868 | 75.2605634 | 67.7715278 | 66.6061284 | 64.9682631 |
| 17:17:46 | 0:17:46 | 65.7694868 | 74.2605634 | 68.7715278 | 66.6061284 | 62.9682631 |
| 17:17:47 | 0:17:47 | 64.7694868 | 72.2605634 | 68.7715278 | 66.6061284 | 57.9682631 |
| 17:17:48 | 0:17:48 | 64.7694868 | 72.2605634 | 68.7715278 | 70.6061284 | 56.9682631 |
| 17:17:49 | 0:17:49 | 64.7694868 | 70.2605634 | 68.7715278 | 70.6061284 | 56.9682631 |
| 17:17:50 | 0:17:50 | 65.7694868 | 69.2605634 | 69.7715278 | 76.6061284 | 56.9682631 |
| 17:17:51 | 0:17:51 | 65.7694868 | 67.2605634 | 71.7715278 | 76.6061284 | 56.9682631 |
| 17:17:52 | 0:17:52 | 66.7694868 | 67.2605634 | 71.7715278 | 75.6061284 | 55.9682631 |
| 17:17:53 | 0:17:53 | 66.7694868 | 66.2605634 | 71.7715278 | 73.6061284 | 55.9682631 |
| 17:17:54 | 0:17:54 | 66.7694868 | 66.2605634 | 71.7715278 | 73.6061284 | 55.9682631 |
| 17:17:55 | 0:17:55 | 66.7694868 | 66.2605634 | 73.7715278 | 73.6061284 | 56.9682631 |
| 17:17:56 | 0:17:56 | 67.7694868 | 65.2605634 | 73.7715278 | 71.6061284 | 57.9682631 |
| 17:17:57 | 0:17:57 | 67.7694868 | 65.2605634 | 73.7715278 | 71.6061284 | 57.9682631 |
| 17:17:58 | 0:17:58 | 67.7694868 | 64.2605634 | 74.7715278 | 71.6061284 | 57.9682631 |

|          |         |            |            |            |            |            |
|----------|---------|------------|------------|------------|------------|------------|
| 17:17:59 | 0:17:59 | 67.7694868 | 64.2605634 | 74.7715278 | 66.6061284 | 57.9682631 |
| 17:18:00 | 0:18:00 | 68.7694868 | 66.2605634 | 74.7715278 | 66.6061284 | 57.9682631 |
| 17:18:01 | 0:18:01 | 69.7694868 | 66.2605634 | 73.7715278 | 66.6061284 | 56.9682631 |
| 17:18:02 | 0:18:02 | 70.7694868 | 67.2605634 | 73.7715278 | 66.6061284 | 56.9682631 |
| 17:18:03 | 0:18:03 | 70.7694868 | 67.2605634 | 70.7715278 | 66.6061284 | 56.9682631 |
| 17:18:04 | 0:18:04 | 70.7694868 | 67.2605634 | 70.7715278 | 67.6061284 | 56.9682631 |
| 17:18:05 | 0:18:05 | 71.7694868 | 67.2605634 | 70.7715278 | 67.6061284 | 57.9682631 |
| 17:18:06 | 0:18:06 | 71.7694868 | 67.2605634 | 71.7715278 | 67.6061284 | 57.9682631 |
| 17:18:07 | 0:18:07 | 72.7694868 | 67.2605634 | 71.7715278 | 70.6061284 | 57.9682631 |
| 17:18:08 | 0:18:08 | 72.7694868 | 68.2605634 | 71.7715278 | 70.6061284 | 57.9682631 |
| 17:18:09 | 0:18:09 | 72.7694868 | 70.2605634 | 71.7715278 | 70.6061284 | 58.9682631 |
| 17:18:10 | 0:18:10 | 73.7694868 | 70.2605634 | 71.7715278 | 70.6061284 | 58.9682631 |
| 17:18:11 | 0:18:11 | 72.7694868 | 69.2605634 | 70.7715278 | 68.6061284 | 57.9682631 |
| 17:18:12 | 0:18:12 | 72.7694868 | 68.2605634 | 69.7715278 | 68.6061284 | 57.9682631 |
| 17:18:13 | 0:18:13 | 72.7694868 | 67.2605634 | 69.7715278 | 68.6061284 | 56.9682631 |
| 17:18:14 | 0:18:14 | 71.7694868 | 67.2605634 | 69.7715278 | 68.6061284 | 55.9682631 |
| 17:18:15 | 0:18:15 | 71.7694868 | 67.2605634 | 69.7715278 | 68.6061284 | 55.9682631 |
| 17:18:16 | 0:18:16 | 72.7694868 | 66.2605634 | 69.7715278 | 70.6061284 | 54.9682631 |
| 17:18:17 | 0:18:17 | 74.7694868 | 66.2605634 | 69.7715278 | 71.6061284 | 54.9682631 |
| 17:18:18 | 0:18:18 | 75.7694868 | 66.2605634 | 70.7715278 | 72.6061284 | 54.9682631 |
| 17:18:19 | 0:18:19 | 76.7694868 | 67.2605634 | 70.7715278 | 75.6061284 | 54.9682631 |
| 17:18:20 | 0:18:20 | 77.7694868 | 67.2605634 | 73.7715278 | 78.6061284 | 53.9682631 |
| 17:18:21 | 0:18:21 | 78.7694868 | 66.2605634 | 74.7715278 | 78.6061284 | 53.9682631 |
| 17:18:22 | 0:18:22 | 80.7694868 | 65.2605634 | 71.7715278 | 77.6061284 | 53.9682631 |
| 17:18:23 | 0:18:23 | 81.7694868 | 65.2605634 | 66.7715278 | 77.6061284 | 52.9682631 |
| 17:18:24 | 0:18:24 | 80.7694868 | 64.2605634 | 66.7715278 | 77.6061284 | 52.9682631 |
| 17:18:25 | 0:18:25 | 80.7694868 | 64.2605634 | 67.7715278 | 77.6061284 | 52.9682631 |
| 17:18:26 | 0:18:26 | 80.7694868 | 64.2605634 | 67.7715278 | 78.6061284 | 52.9682631 |
| 17:18:27 | 0:18:27 | 78.7694868 | 64.2605634 | 66.7715278 | 79.6061284 | 52.9682631 |
| 17:18:28 | 0:18:28 | 77.7694868 | 64.2605634 | 66.7715278 | 77.6061284 | 52.9682631 |
| 17:18:29 | 0:18:29 | 74.7694868 | 64.2605634 | 64.7715278 | 77.6061284 | 52.9682631 |
| 17:18:30 | 0:18:30 | 72.7694868 | 64.2605634 | 64.7715278 | 76.6061284 | 52.9682631 |
| 17:18:31 | 0:18:31 | 71.7694868 | 64.2605634 | 64.7715278 | 76.6061284 | 52.9682631 |
| 17:18:32 | 0:18:32 | 69.7694868 | 64.2605634 | 64.7715278 | 76.6061284 | 52.9682631 |
| 17:18:33 | 0:18:33 | 68.7694868 | 64.2605634 | 64.7715278 | 76.6061284 | 52.9682631 |
| 17:18:34 | 0:18:34 | 67.7694868 | 65.2605634 | 64.7715278 | 72.6061284 | 52.9682631 |
| 17:18:35 | 0:18:35 | 66.7694868 | 65.2605634 | 64.7715278 | 69.6061284 | 52.9682631 |
| 17:18:36 | 0:18:36 | 66.7694868 | 65.2605634 | 64.7715278 | 69.6061284 | 52.9682631 |
| 17:18:37 | 0:18:37 | 65.7694868 | 65.2605634 | 61.7715278 | 71.6061284 | 56.9682631 |
| 17:18:38 | 0:18:38 | 65.7694868 | 65.2605634 | 60.7715278 | 72.6061284 | 56.9682631 |
| 17:18:39 | 0:18:39 | 65.7694868 | 66.2605634 | 59.7715278 | 73.6061284 | 55.9682631 |
| 17:18:40 | 0:18:40 | 65.7694868 | 66.2605634 | 59.7715278 | 73.6061284 | 55.9682631 |
| 17:18:41 | 0:18:41 | 64.7694868 | 69.2605634 | 59.7715278 | 71.6061284 | 55.9682631 |
| 17:18:42 | 0:18:42 | 63.7694868 | 69.2605634 | 59.7715278 | 70.6061284 | 55.9682631 |
| 17:18:43 | 0:18:43 | 63.7694868 | 70.2605634 | 59.7715278 | 70.6061284 | 55.9682631 |

|          |         |            |            |            |            |            |
|----------|---------|------------|------------|------------|------------|------------|
| 17:18:44 | 0:18:44 | 62.7694868 | 71.2605634 | 59.7715278 | 71.6061284 | 55.9682631 |
| 17:18:45 | 0:18:45 | 62.7694868 | 72.2605634 | 59.7715278 | 71.6061284 | 59.9682631 |
| 17:18:46 | 0:18:46 | 62.7694868 | 72.2605634 | 59.7715278 | 71.6061284 | 60.9682631 |
| 17:18:47 | 0:18:47 | 63.7694868 | 73.2605634 | 59.7715278 | 70.6061284 | 60.9682631 |
| 17:18:48 | 0:18:48 | 63.7694868 | 73.2605634 | 59.7715278 | 69.6061284 | 59.9682631 |
| 17:18:49 | 0:18:49 | 63.7694868 | 75.2605634 | 60.7715278 | 69.6061284 | 58.9682631 |
| 17:18:50 | 0:18:50 | 63.7694868 | 75.2605634 | 63.7715278 | 71.6061284 | 58.9682631 |
| 17:18:51 | 0:18:51 | 63.7694868 | 76.2605634 | 63.7715278 | 75.6061284 | 57.9682631 |
| 17:18:52 | 0:18:52 | 64.7694868 | 76.2605634 | 65.7715278 | 75.6061284 | 57.9682631 |
| 17:18:53 | 0:18:53 | 65.7694868 | 76.2605634 | 66.7715278 | 74.6061284 | 57.9682631 |
| 17:18:54 | 0:18:54 | 64.7694868 | 76.2605634 | 67.7715278 | 72.6061284 | 56.9682631 |
| 17:18:55 | 0:18:55 | 64.7694868 | 76.2605634 | 67.7715278 | 71.6061284 | 56.9682631 |
| 17:18:56 | 0:18:56 | 64.7694868 | 78.2605634 | 68.7715278 | 69.6061284 | 56.9682631 |
| 17:18:57 | 0:18:57 | 63.7694868 | 78.2605634 | 68.7715278 | 67.6061284 | 56.9682631 |
| 17:18:58 | 0:18:58 | 63.7694868 | 79.2605634 | 69.7715278 | 67.6061284 | 56.9682631 |
| 17:18:59 | 0:18:59 | 62.7694868 | 79.2605634 | 65.7715278 | 67.6061284 | 55.9682631 |
| 17:19:00 | 0:19:00 | 61.7694868 | 81.2605634 | 63.7715278 | 68.6061284 | 55.9682631 |
| 17:19:01 | 0:19:01 | 61.7694868 | 81.2605634 | 63.7715278 | 68.6061284 | 54.9682631 |
| 17:19:02 | 0:19:02 | 61.7694868 | 81.2605634 | 63.7715278 | 69.6061284 | 55.9682631 |
| 17:19:03 | 0:19:03 | 61.7694868 | 82.2605634 | 57.7715278 | 69.6061284 | 58.9682631 |
| 17:19:04 | 0:19:04 | 62.7694868 | 82.2605634 | 55.7715278 | 69.6061284 | 60.9682631 |
| 17:19:05 | 0:19:05 | 61.7694868 | 82.2605634 | 55.7715278 | 70.6061284 | 63.9682631 |
| 17:19:06 | 0:19:06 | 61.7694868 | 82.2605634 | 56.7715278 | 70.6061284 | 63.9682631 |
| 17:19:07 | 0:19:07 | 61.7694868 | 81.2605634 | 56.7715278 | 71.6061284 | 64.9682631 |
| 17:19:08 | 0:19:08 | 61.7694868 | 79.2605634 | 58.7715278 | 71.6061284 | 65.9682631 |
| 17:19:09 | 0:19:09 | 61.7694868 | 78.2605634 | 58.7715278 | 73.6061284 | 65.9682631 |
| 17:19:10 | 0:19:10 | 61.7694868 | 74.2605634 | 59.7715278 | 74.6061284 | 66.9682631 |
| 17:19:11 | 0:19:11 | 61.7694868 | 74.2605634 | 61.7715278 | 74.6061284 | 63.9682631 |
| 17:19:12 | 0:19:12 | 61.7694868 | 72.2605634 | 62.7715278 | 74.6061284 | 63.9682631 |
| 17:19:13 | 0:19:13 | 60.7694868 | 66.2605634 | 62.7715278 | 74.6061284 | 61.9682631 |
| 17:19:14 | 0:19:14 | 60.7694868 | 64.2605634 | 62.7715278 | 74.6061284 | 59.9682631 |
| 17:19:15 | 0:19:15 | 60.7694868 | 63.2605634 | 62.7715278 | 74.6061284 | 58.9682631 |
| 17:19:16 | 0:19:16 | 60.7694868 | 62.2605634 | 62.7715278 | 74.6061284 | 58.9682631 |
| 17:19:17 | 0:19:17 | 60.7694868 | 62.2605634 | 62.7715278 | 75.6061284 | 58.9682631 |
| 17:19:18 | 0:19:18 | 60.7694868 | 62.2605634 | 62.7715278 | 75.6061284 | 58.9682631 |
| 17:19:19 | 0:19:19 | 60.7694868 | 62.2605634 | 62.7715278 | 75.6061284 | 57.9682631 |
| 17:19:20 | 0:19:20 | 60.7694868 | 62.2605634 | 62.7715278 | 75.6061284 | 57.9682631 |
| 17:19:21 | 0:19:21 | 61.7694868 | 62.2605634 | 61.7715278 | 75.6061284 | 56.9682631 |
| 17:19:22 | 0:19:22 | 62.7694868 | 64.2605634 | 61.7715278 | 74.6061284 | 56.9682631 |
| 17:19:23 | 0:19:23 | 62.7694868 | 67.2605634 | 62.7715278 | 74.6061284 | 55.9682631 |
| 17:19:24 | 0:19:24 | 63.7694868 | 67.2605634 | 62.7715278 | 74.6061284 | 55.9682631 |
| 17:19:25 | 0:19:25 | 63.7694868 | 67.2605634 | 62.7715278 | 74.6061284 | 59.9682631 |
| 17:19:26 | 0:19:26 | 63.7694868 | 67.2605634 | 62.7715278 | 74.6061284 | 60.9682631 |
| 17:19:27 | 0:19:27 | 63.7694868 | 69.2605634 | 64.7715278 | 74.6061284 | 60.9682631 |
| 17:19:28 | 0:19:28 | 63.7694868 | 69.2605634 | 66.7715278 | 74.6061284 | 61.9682631 |



|          |         |            |            |            |            |            |
|----------|---------|------------|------------|------------|------------|------------|
| 17:19:29 | 0:19:29 | 64.7694868 | 70.2605634 | 70.7715278 | 73.6061284 | 61.9682631 |
| 17:19:30 | 0:19:30 | 64.7694868 | 70.2605634 | 70.7715278 | 73.6061284 | 61.9682631 |
| 17:19:31 | 0:19:31 | 64.7694868 | 70.2605634 | 74.7715278 | 72.6061284 | 61.9682631 |
| 17:19:32 | 0:19:32 | 64.7694868 | 70.2605634 | 75.7715278 | 70.6061284 | 61.9682631 |
| 17:19:33 | 0:19:33 | 65.7694868 | 70.2605634 | 76.7715278 | 68.6061284 | 61.9682631 |
| 17:19:34 | 0:19:34 | 65.7694868 | 71.2605634 | 76.7715278 | 68.6061284 | 61.9682631 |
| 17:19:35 | 0:19:35 | 65.7694868 | 72.2605634 | 79.7715278 | 69.6061284 | 61.9682631 |
| 17:19:36 | 0:19:36 | 65.7694868 | 72.2605634 | 79.7715278 | 72.6061284 | 61.9682631 |
| 17:19:37 | 0:19:37 | 65.7694868 | 72.2605634 | 79.7715278 | 76.6061284 | 62.9682631 |
| 17:19:38 | 0:19:38 | 66.7694868 | 72.2605634 | 79.7715278 | 78.6061284 | 61.9682631 |
| 17:19:39 | 0:19:39 | 66.7694868 | 71.2605634 | 79.7715278 | 79.6061284 | 60.9682631 |
| 17:19:40 | 0:19:40 | 66.7694868 | 71.2605634 | 74.7715278 | 79.6061284 | 59.9682631 |
| 17:19:41 | 0:19:41 | 66.7694868 | 69.2605634 | 74.7715278 | 78.6061284 | 59.9682631 |
| 17:19:42 | 0:19:42 | 66.7694868 | 69.2605634 | 74.7715278 | 77.6061284 | 59.9682631 |
| 17:19:43 | 0:19:43 | 66.7694868 | 67.2605634 | 72.7715278 | 75.6061284 | 60.9682631 |
| 17:19:44 | 0:19:44 | 66.7694868 | 67.2605634 | 72.7715278 | 73.6061284 | 60.9682631 |
| 17:19:45 | 0:19:45 | 66.7694868 | 65.2605634 | 72.7715278 | 70.6061284 | 61.9682631 |
| 17:19:46 | 0:19:46 | 66.7694868 | 65.2605634 | 73.7715278 | 69.6061284 | 60.9682631 |
| 17:19:47 | 0:19:47 | 66.7694868 | 64.2605634 | 73.7715278 | 71.6061284 | 59.9682631 |
| 17:19:48 | 0:19:48 | 66.7694868 | 64.2605634 | 75.7715278 | 71.6061284 | 58.9682631 |
| 17:19:49 | 0:19:49 | 66.7694868 | 64.2605634 | 75.7715278 | 70.6061284 | 58.9682631 |
| 17:19:50 | 0:19:50 | 66.7694868 | 63.2605634 | 75.7715278 | 69.6061284 | 55.9682631 |
| 17:19:51 | 0:19:51 | 66.7694868 | 65.2605634 | 75.7715278 | 68.6061284 | 53.9682631 |
| 17:19:52 | 0:19:52 | 70.7694868 | 65.2605634 | 76.7715278 | 64.6061284 | 53.9682631 |
| 17:19:53 | 0:19:53 | 71.7694868 | 67.2605634 | 76.7715278 | 62.6061284 | 53.9682631 |
| 17:19:54 | 0:19:54 | 71.7694868 | 66.2605634 | 76.7715278 | 61.6061284 | 52.9682631 |
| 17:19:55 | 0:19:55 | 72.7694868 | 66.2605634 | 76.7715278 | 60.6061284 | 52.9682631 |
| 17:19:56 | 0:19:56 | 72.7694868 | 66.2605634 | 72.7715278 | 60.6061284 | 52.9682631 |
| 17:19:57 | 0:19:57 | 72.7694868 | 66.2605634 | 72.7715278 | 61.6061284 | 52.9682631 |
| 17:19:58 | 0:19:58 | 73.7694868 | 66.2605634 | 72.7715278 | 62.6061284 | 52.9682631 |
| 17:19:59 | 0:19:59 | 73.7694868 | 66.2605634 | 71.7715278 | 63.6061284 | 52.9682631 |
| 17:20:00 | 0:20:00 | 69.7694868 | 67.2605634 | 71.7715278 | 65.6061284 | 52.9682631 |
| 17:20:01 | 0:20:01 | 68.7694868 | 67.2605634 | 71.7715278 | 66.6061284 | 52.9682631 |
| 17:20:02 | 0:20:02 | 68.7694868 | 67.2605634 | 71.7715278 | 67.6061284 | 53.9682631 |
| 17:20:03 | 0:20:03 | 68.7694868 | 67.2605634 | 71.7715278 | 67.6061284 | 52.9682631 |
| 17:20:04 | 0:20:04 | 68.7694868 | 68.2605634 | 71.7715278 | 67.6061284 | 52.9682631 |
| 17:20:05 | 0:20:05 | 69.7694868 | 68.2605634 | 71.7715278 | 67.6061284 | 52.9682631 |
| 17:20:06 | 0:20:06 | 68.7694868 | 71.2605634 | 71.7715278 | 65.6061284 | 53.9682631 |
| 17:20:07 | 0:20:07 | 68.7694868 | 71.2605634 | 71.7715278 | 63.6061284 | 53.9682631 |
| 17:20:08 | 0:20:08 | 69.7694868 | 71.2605634 | 71.7715278 | 63.6061284 | 53.9682631 |
| 17:20:09 | 0:20:09 | 69.7694868 | 71.2605634 | 71.7715278 | 63.6061284 | 53.9682631 |
| 17:20:10 | 0:20:10 | 69.7694868 | 71.2605634 | 71.7715278 | 69.6061284 | 53.9682631 |
| 17:20:11 | 0:20:11 | 70.7694868 | 67.2605634 | 71.7715278 | 73.6061284 | 54.9682631 |
| 17:20:12 | 0:20:12 | 70.7694868 | 66.2605634 | 71.7715278 | 73.6061284 | 54.9682631 |
| 17:20:13 | 0:20:13 | 70.7694868 | 66.2605634 | 71.7715278 | 71.6061284 | 54.9682631 |

|          |         |            |            |            |            |            |
|----------|---------|------------|------------|------------|------------|------------|
| 17:20:14 | 0:20:14 | 70.7694868 | 66.2605634 | 71.7715278 | 69.6061284 | 54.9682631 |
| 17:20:15 | 0:20:15 | 70.7694868 | 66.2605634 | 71.7715278 | 68.6061284 | 53.9682631 |
| 17:20:16 | 0:20:16 | 71.7694868 | 66.2605634 | 72.7715278 | 71.6061284 | 53.9682631 |
| 17:20:17 | 0:20:17 | 71.7694868 | 66.2605634 | 72.7715278 | 72.6061284 | 53.9682631 |
| 17:20:18 | 0:20:18 | 70.7694868 | 66.2605634 | 72.7715278 | 73.6061284 | 53.9682631 |
| 17:20:19 | 0:20:19 | 68.7694868 | 67.2605634 | 71.7715278 | 69.6061284 | 54.9682631 |
| 17:20:20 | 0:20:20 | 67.7694868 | 69.2605634 | 71.7715278 | 67.6061284 | 55.9682631 |
| 17:20:21 | 0:20:21 | 67.7694868 | 70.2605634 | 72.7715278 | 64.6061284 | 55.9682631 |
| 17:20:22 | 0:20:22 | 67.7694868 | 70.2605634 | 72.7715278 | 63.6061284 | 55.9682631 |
| 17:20:23 | 0:20:23 | 67.7694868 | 71.2605634 | 70.7715278 | 63.6061284 | 54.9682631 |
| 17:20:24 | 0:20:24 | 67.7694868 | 71.2605634 | 70.7715278 | 63.6061284 | 54.9682631 |
| 17:20:25 | 0:20:25 | 67.7694868 | 71.2605634 | 70.7715278 | 66.6061284 | 52.9682631 |
| 17:20:26 | 0:20:26 | 67.7694868 | 71.2605634 | 70.7715278 | 66.6061284 | 52.9682631 |
| 17:20:27 | 0:20:27 | 69.7694868 | 78.2605634 | 70.7715278 | 66.6061284 | 52.9682631 |
| 17:20:28 | 0:20:28 | 69.7694868 | 80.2605634 | 70.7715278 | 66.6061284 | 51.9682631 |
| 17:20:29 | 0:20:29 | 69.7694868 | 82.2605634 | 69.7715278 | 67.6061284 | 51.9682631 |
| 17:20:30 | 0:20:30 | 68.7694868 | 82.2605634 | 68.7715278 | 67.6061284 | 51.9682631 |
| 17:20:31 | 0:20:31 | 67.7694868 | 82.2605634 | 67.7715278 | 67.6061284 | 51.9682631 |
| 17:20:32 | 0:20:32 | 67.7694868 | 80.2605634 | 64.7715278 | 67.6061284 | 52.9682631 |
| 17:20:33 | 0:20:33 | 67.7694868 | 80.2605634 | 62.7715278 | 67.6061284 | 53.9682631 |
| 17:20:34 | 0:20:34 | 67.7694868 | 80.2605634 | 62.7715278 | 68.6061284 | 54.9682631 |
| 17:20:35 | 0:20:35 | 67.7694868 | 79.2605634 | 62.7715278 | 68.6061284 | 55.9682631 |
| 17:20:36 | 0:20:36 | 67.7694868 | 79.2605634 | 62.7715278 | 64.6061284 | 56.9682631 |
| 17:20:37 | 0:20:37 | 67.7694868 | 79.2605634 | 60.7715278 | 64.6061284 | 57.9682631 |
| 17:20:38 | 0:20:38 | 67.7694868 | 79.2605634 | 64.7715278 | 66.6061284 | 57.9682631 |
| 17:20:39 | 0:20:39 | 67.7694868 | 79.2605634 | 65.7715278 | 68.6061284 | 58.9682631 |
| 17:20:40 | 0:20:40 | 68.7694868 | 79.2605634 | 65.7715278 | 72.6061284 | 57.9682631 |
| 17:20:41 | 0:20:41 | 68.7694868 | 79.2605634 | 66.7715278 | 74.6061284 | 58.9682631 |
| 17:20:42 | 0:20:42 | 68.7694868 | 79.2605634 | 66.7715278 | 74.6061284 | 58.9682631 |
| 17:20:43 | 0:20:43 | 68.7694868 | 79.2605634 | 64.7715278 | 73.6061284 | 58.9682631 |
| 17:20:44 | 0:20:44 | 67.7694868 | 79.2605634 | 64.7715278 | 73.6061284 | 58.9682631 |
| 17:20:45 | 0:20:45 | 67.7694868 | 79.2605634 | 63.7715278 | 72.6061284 | 58.9682631 |
| 17:20:46 | 0:20:46 | 65.7694868 | 72.2605634 | 63.7715278 | 72.6061284 | 58.9682631 |
| 17:20:47 | 0:20:47 | 65.7694868 | 70.2605634 | 62.7715278 | 72.6061284 | 57.9682631 |
| 17:20:48 | 0:20:48 | 66.7694868 | 70.2605634 | 59.7715278 | 75.6061284 | 58.9682631 |
| 17:20:49 | 0:20:49 | 66.7694868 | 67.2605634 | 59.7715278 | 76.6061284 | 56.9682631 |
| 17:20:50 | 0:20:50 | 65.7694868 | 65.2605634 | 59.7715278 | 76.6061284 | 56.9682631 |
| 17:20:51 | 0:20:51 | 65.7694868 | 64.2605634 | 59.7715278 | 76.6061284 | 56.9682631 |
| 17:20:52 | 0:20:52 | 66.7694868 | 64.2605634 | 59.7715278 | 76.6061284 | 57.9682631 |
| 17:20:53 | 0:20:53 | 66.7694868 | 64.2605634 | 59.7715278 | 76.6061284 | 57.9682631 |
| 17:20:54 | 0:20:54 | 68.7694868 | 64.2605634 | 59.7715278 | 77.6061284 | 59.9682631 |
| 17:20:55 | 0:20:55 | 70.7694868 | 64.2605634 | 58.7715278 | 77.6061284 | 59.9682631 |
| 17:20:56 | 0:20:56 | 72.7694868 | 64.2605634 | 58.7715278 | 77.6061284 | 58.9682631 |
| 17:20:57 | 0:20:57 | 75.7694868 | 66.2605634 | 58.7715278 | 70.6061284 | 57.9682631 |
| 17:20:58 | 0:20:58 | 76.7694868 | 66.2605634 | 57.7715278 | 66.6061284 | 54.9682631 |

|          |         |            |            |            |            |            |
|----------|---------|------------|------------|------------|------------|------------|
| 17:20:59 | 0:20:59 | 77.7694868 | 66.2605634 | 57.7715278 | 64.6061284 | 53.9682631 |
| 17:21:00 | 0:21:00 | 77.7694868 | 66.2605634 | 57.7715278 | 64.6061284 | 52.9682631 |
| 17:21:01 | 0:21:01 | 77.7694868 | 66.2605634 | 57.7715278 | 64.6061284 | 52.9682631 |
| 17:21:02 | 0:21:02 | 77.7694868 | 66.2605634 | 57.7715278 | 64.6061284 | 52.9682631 |
| 17:21:03 | 0:21:03 | 77.7694868 | 66.2605634 | 58.7715278 | 63.6061284 | 52.9682631 |
| 17:21:04 | 0:21:04 | 77.7694868 | 67.2605634 | 58.7715278 | 64.6061284 | 53.9682631 |
| 17:21:05 | 0:21:05 | 77.7694868 | 67.2605634 | 58.7715278 | 64.6061284 | 53.9682631 |
| 17:21:06 | 0:21:06 | 78.7694868 | 68.2605634 | 58.7715278 | 67.6061284 | 53.9682631 |
| 17:21:07 | 0:21:07 | 78.7694868 | 68.2605634 | 57.7715278 | 72.6061284 | 53.9682631 |
| 17:21:08 | 0:21:08 | 78.7694868 | 68.2605634 | 57.7715278 | 74.6061284 | 54.9682631 |
| 17:21:09 | 0:21:09 | 78.7694868 | 68.2605634 | 53.7715278 | 74.6061284 | 57.9682631 |
| 17:21:10 | 0:21:10 | 78.7694868 | 68.2605634 | 53.7715278 | 74.6061284 | 57.9682631 |
| 17:21:11 | 0:21:11 | 78.7694868 | 68.2605634 | 53.7715278 | 75.6061284 | 58.9682631 |
| 17:21:12 | 0:21:12 | 78.7694868 | 68.2605634 | 52.7715278 | 75.6061284 | 59.9682631 |
| 17:21:13 | 0:21:13 | 78.7694868 | 69.2605634 | 52.7715278 | 76.6061284 | 60.9682631 |
| 17:21:14 | 0:21:14 | 78.7694868 | 69.2605634 | 52.7715278 | 76.6061284 | 60.9682631 |
| 17:21:15 | 0:21:15 | 78.7694868 | 70.2605634 | 52.7715278 | 75.6061284 | 60.9682631 |
| 17:21:16 | 0:21:16 | 78.7694868 | 70.2605634 | 52.7715278 | 72.6061284 | 60.9682631 |
| 17:21:17 | 0:21:17 | 78.7694868 | 70.2605634 | 52.7715278 | 70.6061284 | 58.9682631 |
| 17:21:18 | 0:21:18 | 78.7694868 | 70.2605634 | 52.7715278 | 70.6061284 | 58.9682631 |
| 17:21:19 | 0:21:19 | 80.7694868 | 70.2605634 | 53.7715278 | 64.6061284 | 56.9682631 |
| 17:21:20 | 0:21:20 | 80.7694868 | 69.2605634 | 54.7715278 | 64.6061284 | 54.9682631 |
| 17:21:21 | 0:21:21 | 81.7694868 | 69.2605634 | 54.7715278 | 66.6061284 | 54.9682631 |
| 17:21:22 | 0:21:22 | 83.7694868 | 69.2605634 | 54.7715278 | 66.6061284 | 54.9682631 |
| 17:21:23 | 0:21:23 | 85.7694868 | 65.2605634 | 54.7715278 | 68.6061284 | 54.9682631 |
| 17:21:24 | 0:21:24 | 86.7694868 | 65.2605634 | 55.7715278 | 68.6061284 | 54.9682631 |
| 17:21:25 | 0:21:25 | 86.7694868 | 64.2605634 | 55.7715278 | 68.6061284 | 55.9682631 |
| 17:21:26 | 0:21:26 | 86.7694868 | 66.2605634 | 55.7715278 | 67.6061284 | 56.9682631 |
| 17:21:27 | 0:21:27 | 86.7694868 | 66.2605634 | 52.7715278 | 64.6061284 | 57.9682631 |
| 17:21:28 | 0:21:28 | 85.7694868 | 66.2605634 | 52.7715278 | 64.6061284 | 59.9682631 |
| 17:21:29 | 0:21:29 | 86.7694868 | 70.2605634 | 52.7715278 | 62.6061284 | 60.9682631 |
| 17:21:30 | 0:21:30 | 86.7694868 | 73.2605634 | 52.7715278 | 63.6061284 | 60.9682631 |
| 17:21:31 | 0:21:31 | 87.7694868 | 76.2605634 | 52.7715278 | 64.6061284 | 60.9682631 |
| 17:21:32 | 0:21:32 | 87.7694868 | 77.2605634 | 52.7715278 | 64.6061284 | 60.9682631 |
| 17:21:33 | 0:21:33 | 87.7694868 | 78.2605634 | 52.7715278 | 66.6061284 | 60.9682631 |
| 17:21:34 | 0:21:34 | 89.7694868 | 79.2605634 | 52.7715278 | 68.6061284 | 58.9682631 |
| 17:21:35 | 0:21:35 | 89.7694868 | 79.2605634 | 51.7715278 | 70.6061284 | 58.9682631 |
| 17:21:36 | 0:21:36 | 91.7694868 | 79.2605634 | 50.7715278 | 71.6061284 | 56.9682631 |
| 17:21:37 | 0:21:37 | 91.7694868 | 80.2605634 | 50.7715278 | 72.6061284 | 55.9682631 |
| 17:21:38 | 0:21:38 | 91.7694868 | 80.2605634 | 50.7715278 | 70.6061284 | 54.9682631 |
| 17:21:39 | 0:21:39 | 90.7694868 | 80.2605634 | 50.7715278 | 67.6061284 | 54.9682631 |
| 17:21:40 | 0:21:40 | 90.7694868 | 80.2605634 | 47.7715278 | 66.6061284 | 54.9682631 |
| 17:21:41 | 0:21:41 | 90.7694868 | 80.2605634 | 46.7715278 | 66.6061284 | 55.9682631 |
| 17:21:42 | 0:21:42 | 90.7694868 | 79.2605634 | 46.7715278 | 66.6061284 | 55.9682631 |
| 17:21:43 | 0:21:43 | 91.7694868 | 78.2605634 | 45.7715278 | 71.6061284 | 55.9682631 |

|          |         |            |            |            |            |            |
|----------|---------|------------|------------|------------|------------|------------|
| 17:21:44 | 0:21:44 | 91.7694868 | 74.2605634 | 45.7715278 | 71.6061284 | 54.9682631 |
| 17:21:45 | 0:21:45 | 91.7694868 | 73.2605634 | 46.7715278 | 70.6061284 | 54.9682631 |
| 17:21:46 | 0:21:46 | 91.7694868 | 73.2605634 | 46.7715278 | 69.6061284 | 54.9682631 |
| 17:21:47 | 0:21:47 | 91.7694868 | 74.2605634 | 46.7715278 | 70.6061284 | 53.9682631 |
| 17:21:48 | 0:21:48 | 70.3268929 | 73.2605634 | 46.7715278 | 70.6061284 | 53.9682631 |
| 17:21:49 | 0:21:49 | 91.7694868 | 72.2605634 | 46.7715278 | 69.6061284 | 53.9682631 |
| 17:21:50 | 0:21:50 | 90.7694868 | 72.2605634 | 46.7715278 | 69.6061284 | 53.9682631 |
| 17:21:51 | 0:21:51 | 90.7694868 | 72.2605634 | 46.7715278 | 69.6061284 | 53.9682631 |
| 17:21:52 | 0:21:52 | 90.7694868 | 71.2605634 | 46.7715278 | 69.6061284 | 53.9682631 |
| 17:21:53 | 0:21:53 | 90.7694868 | 71.2605634 | 46.7715278 | 69.6061284 | 53.9682631 |
| 17:21:54 | 0:21:54 | 87.7694868 | 71.2605634 | 46.7715278 | 68.6061284 | 54.9682631 |
| 17:21:55 | 0:21:55 | 87.7694868 | 71.2605634 | 46.7715278 | 68.6061284 | 54.9682631 |
| 17:21:56 | 0:21:56 | 85.7694868 | 71.2605634 | 58.7715278 | 66.6061284 | 54.9682631 |
| 17:21:57 | 0:21:57 | 85.7694868 | 71.2605634 | 60.7715278 | 66.6061284 | 53.9682631 |
| 17:21:58 | 0:21:58 | 86.7694868 | 71.2605634 | 61.7715278 | 69.6061284 | 53.9682631 |
| 17:21:59 | 0:21:59 | 87.7694868 | 71.2605634 | 62.7715278 | 72.6061284 | 53.9682631 |
| 17:22:00 | 0:22:00 | 87.7694868 | 71.2605634 | 62.7715278 | 73.6061284 | 53.9682631 |
| 17:22:01 | 0:22:01 | 87.7694868 | 71.2605634 | 62.7715278 | 74.6061284 | 53.9682631 |
| 17:22:02 | 0:22:02 | 87.7694868 | 71.2605634 | 62.7715278 | 73.6061284 | 53.9682631 |
| 17:22:03 | 0:22:03 | 87.7694868 | 72.2605634 | 62.7715278 | 67.6061284 | 54.9682631 |
| 17:22:04 | 0:22:04 | 76.7694868 | 73.2605634 | 62.7715278 | 62.6061284 | 56.9682631 |
| 17:22:05 | 0:22:05 | 75.7694868 | 73.2605634 | 62.7715278 | 61.6061284 | 56.9682631 |
| 17:22:06 | 0:22:06 | 73.7694868 | 73.2605634 | 63.7715278 | 60.6061284 | 56.9682631 |
| 17:22:07 | 0:22:07 | 72.7694868 | 74.2605634 | 63.7715278 | 59.6061284 | 56.9682631 |
| 17:22:08 | 0:22:08 | 72.7694868 | 75.2605634 | 64.7715278 | 60.6061284 | 55.9682631 |
| 17:22:09 | 0:22:09 | 70.7694868 | 76.2605634 | 64.7715278 | 60.6061284 | 54.9682631 |
| 17:22:10 | 0:22:10 | 69.7694868 | 78.2605634 | 75.7715278 | 60.6061284 | 54.9682631 |
| 17:22:11 | 0:22:11 | 68.7694868 | 77.2605634 | 78.7715278 | 60.6061284 | 54.9682631 |
| 17:22:12 | 0:22:12 | 68.7694868 | 77.2605634 | 78.7715278 | 60.6061284 | 54.9682631 |
| 17:22:13 | 0:22:13 | 67.7694868 | 75.2605634 | 71.1450748 | 60.6061284 | 54.9682631 |
| 17:22:14 | 0:22:14 | 67.7694868 | 75.2605634 | 72.3268929 | 61.6061284 | 55.9682631 |
| 17:22:15 | 0:22:15 | 67.7694868 | 75.2605634 | 72.8723475 | 62.6061284 | 56.9682631 |
| 17:22:16 | 0:22:16 | 67.7694868 | 75.2605634 | 73.3268929 | 62.6061284 | 58.9682631 |
| 17:22:17 | 0:22:17 | 67.7694868 | 75.2605634 | 73.6905293 | 61.6061284 | 59.9682631 |
| 17:22:18 | 0:22:18 | 67.7694868 | 71.2605634 | 73.5087111 | 60.6061284 | 59.9682631 |
| 17:22:19 | 0:22:19 | 67.7694868 | 69.2605634 | 73.9632566 | 60.6061284 | 59.9682631 |
| 17:22:20 | 0:22:20 | 67.7694868 | 69.2605634 | 74.5087111 | 60.6061284 | 59.9682631 |
| 17:22:21 | 0:22:21 | 67.7694868 | 69.2605634 | 74.5996202 | 60.6061284 | 59.9682631 |
| 17:22:22 | 0:22:22 | 67.7694868 | 69.2605634 | 74.7814384 | 60.6061284 | 58.9682631 |
| 17:22:23 | 0:22:23 | 67.7694868 | 69.2605634 | 75.0541657 | 60.6061284 | 58.9682631 |
| 17:22:24 | 0:22:24 | 66.7694868 | 69.2605634 | 75.2359838 | 60.6061284 | 58.9682631 |
| 17:22:25 | 0:22:25 | 65.7694868 | 69.2605634 | 74.5996202 | 60.6061284 | 57.9682631 |
| 17:22:26 | 0:22:26 | 61.7694868 | 68.2605634 | 74.3268929 | 60.6061284 | 57.9682631 |
| 17:22:27 | 0:22:27 | 61.7694868 | 68.2605634 | 74.2359838 | 63.6061284 | 57.9682631 |
| 17:22:28 | 0:22:28 | 61.7694868 | 68.2605634 | 74.1450748 | 66.6061284 | 57.9682631 |

|          |         |            |            |            |            |            |
|----------|---------|------------|------------|------------|------------|------------|
| 17:22:29 | 0:22:29 | 61.7694868 | 69.2605634 | 74.1450748 | 67.6061284 | 56.9682631 |
| 17:22:30 | 0:22:30 | 61.7694868 | 69.2605634 | 74.1450748 | 69.6061284 | 55.9682631 |
| 17:22:31 | 0:22:31 | 62.7694868 | 70.2605634 | 74.5996202 | 70.6061284 | 55.9682631 |
| 17:22:32 | 0:22:32 | 62.7694868 | 70.2605634 | 74.6905293 | 70.6061284 | 54.9682631 |
| 17:22:33 | 0:22:33 | 62.7694868 | 69.2605634 | 74.7814384 | 70.6061284 | 54.9682631 |
| 17:22:34 | 0:22:34 | 62.7694868 | 69.2605634 | 75.3268929 | 70.6061284 | 54.9682631 |
| 17:22:35 | 0:22:35 | 62.7694868 | 70.2605634 | 75.6905293 | 70.6061284 | 54.9682631 |
| 17:22:36 | 0:22:36 | 62.7694868 | 70.2605634 | 75.3268929 | 70.6061284 | 53.9682631 |
| 17:22:37 | 0:22:37 | 60.7694868 | 70.2605634 | 74.9632566 | 70.6061284 | 53.9682631 |
| 17:22:38 | 0:22:38 | 60.7694868 | 70.2605634 | 74.5087111 | 70.6061284 | 53.9682631 |
| 17:22:39 | 0:22:39 | 59.7694868 | 71.2605634 | 73.0541657 | 69.6061284 | 54.9682631 |
| 17:22:40 | 0:22:40 | 57.7694868 | 72.2605634 | 72.1450748 | 69.6061284 | 55.9682631 |
| 17:22:41 | 0:22:41 | 58.7694868 | 72.2605634 | 72.2359838 | 69.6061284 | 56.9682631 |
| 17:22:42 | 0:22:42 | 58.7694868 | 72.2605634 | 71.8723475 | 69.6061284 | 56.9682631 |
| 17:22:43 | 0:22:43 | 58.7694868 | 73.2605634 | 72.3268929 | 69.6061284 | 56.9682631 |
| 17:22:44 | 0:22:44 | 59.7694868 | 73.2605634 | 73.2359838 | 69.6061284 | 56.9682631 |
| 17:22:45 | 0:22:45 | 59.7694868 | 74.2605634 | 74.5087111 | 74.6061284 | 56.9682631 |
| 17:22:46 | 0:22:46 | 59.7694868 | 73.2605634 | 74.0541657 | 74.6061284 | 56.9682631 |
| 17:22:47 | 0:22:47 | 61.7694868 | 72.2605634 | 74.2359838 | 75.6061284 | 56.9682631 |
| 17:22:48 | 0:22:48 | 62.7694868 | 71.2605634 | 73.9632566 | 74.6061284 | 56.9682631 |
| 17:22:49 | 0:22:49 | 62.7694868 | 71.2605634 | 74.2359838 | 74.6061284 | 57.9682631 |
| 17:22:50 | 0:22:50 | 63.7694868 | 70.2605634 | 73.7814384 | 73.6061284 | 57.9682631 |
| 17:22:51 | 0:22:51 | 63.7694868 | 70.2605634 | 73.417802  | 73.6061284 | 57.9682631 |
| 17:22:52 | 0:22:52 | 68.7694868 | 70.2605634 | 74.2359838 | 72.6061284 | 58.9682631 |
| 17:22:53 | 0:22:53 | 67.7694868 | 70.2605634 | 74.3268929 | 72.6061284 | 59.9682631 |
| 17:22:54 | 0:22:54 | 65.7694868 | 70.2605634 | 73.8723475 | 72.6061284 | 59.9682631 |
| 17:22:55 | 0:22:55 | 64.7694868 | 69.2605634 | 73.6905293 | 72.6061284 | 60.9682631 |
| 17:22:56 | 0:22:56 | 62.7694868 | 68.2605634 | 73.8723475 | 73.6061284 | 65.9682631 |
| 17:22:57 | 0:22:57 | 62.7694868 | 68.2605634 | 73.5087111 | 74.6061284 | 69.9682631 |
| 17:22:58 | 0:22:58 | 62.7694868 | 67.2605634 | 73.5087111 | 74.6061284 | 69.9682631 |
| 17:22:59 | 0:22:59 | 62.7694868 | 67.2605634 | 73.5087111 | 74.6061284 | 69.9682631 |
| 17:23:00 | 0:23:00 | 62.7694868 | 67.2605634 | 72.7814384 | 67.6061284 | 68.9682631 |
| 17:23:01 | 0:23:01 | 62.7694868 | 64.2605634 | 71.9632566 | 65.6061284 | 67.9682631 |
| 17:23:02 | 0:23:02 | 62.7694868 | 64.2605634 | 71.5996202 | 65.6061284 | 65.9682631 |
| 17:23:03 | 0:23:03 | 61.7694868 | 64.2605634 | 71.5087111 | 65.6061284 | 63.9682631 |
| 17:23:04 | 0:23:04 | 61.7694868 | 63.2605634 | 70.8723475 | 65.6061284 | 58.9682631 |
| 17:23:05 | 0:23:05 | 62.7694868 | 64.2605634 | 70.1450748 | 64.6061284 | 53.9682631 |
| 17:23:06 | 0:23:06 | 62.7694868 | 64.2605634 | 70.1450748 | 64.6061284 | 53.9682631 |
| 17:23:07 | 0:23:07 | 69.7694868 | 66.2605634 | 70.7814384 | 65.6061284 | 50.9682631 |
| 17:23:08 | 0:23:08 | 68.7694868 | 66.2605634 | 71.417802  | 66.6061284 | 49.9682631 |
| 17:23:09 | 0:23:09 | 65.7694868 | 66.2605634 | 72.5087111 | 72.6061284 | 49.9682631 |
| 17:23:10 | 0:23:10 | 64.7694868 | 68.2605634 | 72.6905293 | 73.6061284 | 48.9682631 |
| 17:23:11 | 0:23:11 | 63.7694868 | 68.2605634 | 72.3268929 | 70.6061284 | 48.9682631 |
| 17:23:12 | 0:23:12 | 62.7694868 | 68.2605634 | 72.1450748 | 69.6061284 | 48.9682631 |
| 17:23:13 | 0:23:13 | 62.7694868 | 67.2605634 | 71.9632566 | 68.6061284 | 50.9682631 |

|          |         |            |            |            |            |            |
|----------|---------|------------|------------|------------|------------|------------|
| 17:23:14 | 0:23:14 | 62.7694868 | 67.2605634 | 71.2359838 | 67.6061284 | 51.9682631 |
| 17:23:15 | 0:23:15 | 62.7694868 | 67.2605634 | 71.3268929 | 67.6061284 | 52.9682631 |
| 17:23:16 | 0:23:16 | 62.7694868 | 69.2605634 | 70.7814384 | 67.6061284 | 52.9682631 |
| 17:23:17 | 0:23:17 | 62.7694868 | 70.2605634 | 70.8723475 | 67.6061284 | 52.9682631 |
| 17:23:18 | 0:23:18 | 61.7694868 | 70.2605634 | 70.9632566 | 67.6061284 | 53.9682631 |
| 17:23:19 | 0:23:19 | 61.7694868 | 71.2605634 | 71.2359838 | 67.6061284 | 53.9682631 |
| 17:23:20 | 0:23:20 | 59.7694868 | 71.2605634 | 71.2359838 | 67.6061284 | 54.9682631 |
| 17:23:21 | 0:23:21 | 58.7694868 | 71.2605634 | 70.7814384 | 66.6061284 | 54.9682631 |
| 17:23:22 | 0:23:22 | 55.7694868 | 71.2605634 | 70.417802  | 66.6061284 | 54.9682631 |
| 17:23:23 | 0:23:23 | 54.7694868 | 71.2605634 | 69.9632566 | 66.6061284 | 53.9682631 |
| 17:23:24 | 0:23:24 | 54.7694868 | 71.2605634 | 69.6905293 | 65.6061284 | 53.9682631 |
| 17:23:25 | 0:23:25 | 53.7694868 | 71.2605634 | 70.2359838 | 65.6061284 | 53.9682631 |
| 17:23:26 | 0:23:26 | 53.7694868 | 71.2605634 | 70.7814384 | 66.6061284 | 53.9682631 |
| 17:23:27 | 0:23:27 | 52.7694868 | 71.2605634 | 70.5996202 | 66.6061284 | 53.9682631 |
| 17:23:28 | 0:23:28 | 51.7694868 | 71.2605634 | 70.417802  | 67.6061284 | 53.9682631 |
| 17:23:29 | 0:23:29 | 51.7694868 | 71.2605634 | 70.2359838 | 68.6061284 | 54.9682631 |
| 17:23:30 | 0:23:30 | 51.7694868 | 71.2605634 | 70.5087111 | 69.6061284 | 54.9682631 |
| 17:23:31 | 0:23:31 | 52.7694868 | 71.2605634 | 70.6905293 | 69.6061284 | 54.9682631 |
| 17:23:32 | 0:23:32 | 52.7694868 | 71.2605634 | 70.8723475 | 69.6061284 | 56.9682631 |
| 17:23:33 | 0:23:33 | 53.7694868 | 71.2605634 | 71.1450748 | 68.6061284 | 57.9682631 |
| 17:23:34 | 0:23:34 | 53.7694868 | 70.2605634 | 70.7814384 | 67.6061284 | 57.9682631 |
| 17:23:35 | 0:23:35 | 54.7694868 | 70.2605634 | 70.9632566 | 67.6061284 | 58.9682631 |
| 17:23:36 | 0:23:36 | 54.7694868 | 67.2605634 | 70.5087111 | 67.6061284 | 58.9682631 |
| 17:23:37 | 0:23:37 | 54.7694868 | 66.2605634 | 70.5996202 | 68.6061284 | 58.9682631 |
| 17:23:38 | 0:23:38 | 54.7694868 | 66.2605634 | 70.5087111 | 68.6061284 | 59.9682631 |
| 17:23:39 | 0:23:39 | 54.7694868 | 66.2605634 | 70.417802  | 68.6061284 | 59.9682631 |
| 17:23:40 | 0:23:40 | 54.7694868 | 65.2605634 | 70.3268929 | 68.6061284 | 59.9682631 |
| 17:23:41 | 0:23:41 | 56.7694868 | 65.2605634 | 70.417802  | 68.6061284 | 59.9682631 |
| 17:23:42 | 0:23:42 | 56.7694868 | 66.2605634 | 69.6905293 | 68.6061284 | 59.9682631 |
| 17:23:43 | 0:23:43 | 61.7694868 | 66.2605634 | 69.9632566 | 67.6061284 | 59.9682631 |
| 17:23:44 | 0:23:44 | 60.7694868 | 66.2605634 | 69.8723475 | 67.6061284 | 59.9682631 |
| 17:23:45 | 0:23:45 | 60.7694868 | 66.2605634 | 69.7814384 | 66.6061284 | 58.9682631 |
| 17:23:46 | 0:23:46 | 59.7694868 | 70.2605634 | 87.7715278 | 65.6061284 | 57.9682631 |
| 17:23:47 | 0:23:47 | 59.7694868 | 70.2605634 | 87.7715278 | 66.6061284 | 56.9682631 |
| 17:23:48 | 0:23:48 | 59.7694868 | 70.2605634 | 87.7715278 | 66.6061284 | 55.9682631 |
| 17:23:49 | 0:23:49 | 58.7694868 | 70.2605634 | 86.7715278 | 67.6061284 | 55.9682631 |
| 17:23:50 | 0:23:50 | 57.7694868 | 70.2605634 | 86.7715278 | 67.6061284 | 55.9682631 |
| 17:23:51 | 0:23:51 | 55.7694868 | 70.2605634 | 86.7715278 | 68.6061284 | 55.9682631 |
| 17:23:52 | 0:23:52 | 55.7694868 | 70.2605634 | 86.7715278 | 67.6061284 | 55.9682631 |
| 17:23:53 | 0:23:53 | 55.7694868 | 70.2605634 | 84.7715278 | 67.6061284 | 56.9682631 |
| 17:23:54 | 0:23:54 | 55.7694868 | 70.2605634 | 84.7715278 | 66.6061284 | 58.9682631 |
| 17:23:55 | 0:23:55 | 55.7694868 | 72.2605634 | 84.7715278 | 66.6061284 | 60.9682631 |
| 17:23:56 | 0:23:56 | 55.7694868 | 72.2605634 | 84.7715278 | 66.6061284 | 61.9682631 |
| 17:23:57 | 0:23:57 | 55.7694868 | 72.2605634 | 70.3268929 | 67.6061284 | 62.9682631 |
| 17:23:58 | 0:23:58 | 55.7694868 | 71.2605634 | 70.5996202 | 67.6061284 | 62.9682631 |

|          |         |            |            |            |            |            |
|----------|---------|------------|------------|------------|------------|------------|
| 17:23:59 | 0:23:59 | 56.7694868 | 71.2605634 | 71.417802  | 71.6061284 | 63.9682631 |
| 17:24:00 | 0:24:00 | 56.7694868 | 71.2605634 | 71.417802  | 71.6061284 | 63.9682631 |
| 17:24:01 | 0:24:01 | 57.7694868 | 71.2605634 | 87.7715278 | 72.6061284 | 63.9682631 |
| 17:24:02 | 0:24:02 | 57.7694868 | 71.2605634 | 83.7715278 | 72.6061284 | 63.9682631 |
| 17:24:03 | 0:24:03 | 59.7694868 | 71.2605634 | 83.7715278 | 72.6061284 | 63.9682631 |
| 17:24:04 | 0:24:04 | 60.7694868 | 71.2605634 | 74.7715278 | 72.6061284 | 63.9682631 |
| 17:24:05 | 0:24:05 | 60.7694868 | 74.2605634 | 70.7715278 | 73.6061284 | 63.9682631 |
| 17:24:06 | 0:24:06 | 60.7694868 | 74.2605634 | 69.7715278 | 73.6061284 | 63.9682631 |
| 17:24:07 | 0:24:07 | 57.7694868 | 74.2605634 | 67.7715278 | 74.6061284 | 63.9682631 |
| 17:24:08 | 0:24:08 | 56.7694868 | 74.2605634 | 67.7715278 | 74.6061284 | 63.9682631 |
| 17:24:09 | 0:24:09 | 56.7694868 | 74.2605634 | 65.7715278 | 73.6061284 | 63.9682631 |
| 17:24:10 | 0:24:10 | 56.7694868 | 75.2605634 | 65.7715278 | 69.6061284 | 64.9682631 |
| 17:24:11 | 0:24:11 | 56.7694868 | 75.2605634 | 64.7715278 | 67.6061284 | 65.9682631 |
| 17:24:12 | 0:24:12 | 61.7694868 | 75.2605634 | 63.7715278 | 66.6061284 | 65.9682631 |
| 17:24:13 | 0:24:13 | 62.7694868 | 76.2605634 | 63.7715278 | 66.6061284 | 66.9682631 |
| 17:24:14 | 0:24:14 | 63.7694868 | 76.2605634 | 63.7715278 | 72.6061284 | 67.9682631 |
| 17:24:15 | 0:24:15 | 64.7694868 | 76.2605634 | 63.7715278 | 73.6061284 | 68.9682631 |
| 17:24:16 | 0:24:16 | 64.7694868 | 76.2605634 | 62.7715278 | 74.6061284 | 67.9682631 |
| 17:24:17 | 0:24:17 | 65.7694868 | 77.2605634 | 62.7715278 | 74.6061284 | 67.9682631 |
| 17:24:18 | 0:24:18 | 66.7694868 | 75.2605634 | 60.7715278 | 73.6061284 | 67.9682631 |
| 17:24:19 | 0:24:19 | 66.7694868 | 69.2605634 | 58.7715278 | 73.6061284 | 67.9682631 |
| 17:24:20 | 0:24:20 | 66.7694868 | 67.2605634 | 59.7715278 | 72.6061284 | 67.9682631 |
| 17:24:21 | 0:24:21 | 66.7694868 | 65.2605634 | 59.7715278 | 72.6061284 | 67.9682631 |
| 17:24:22 | 0:24:22 | 65.7694868 | 64.2605634 | 60.7715278 | 70.6061284 | 67.9682631 |
| 17:24:23 | 0:24:23 | 64.7694868 | 64.2605634 | 63.7715278 | 70.6061284 | 67.9682631 |
| 17:24:24 | 0:24:24 | 65.7694868 | 62.2605634 | 70.7715278 | 68.6061284 | 67.9682631 |
| 17:24:25 | 0:24:25 | 64.7694868 | 62.2605634 | 72.7715278 | 66.6061284 | 67.9682631 |
| 17:24:26 | 0:24:26 | 63.7694868 | 62.2605634 | 72.7715278 | 66.6061284 | 66.9682631 |
| 17:24:27 | 0:24:27 | 63.7694868 | 61.2605634 | 71.7715278 | 63.6061284 | 66.9682631 |
| 17:24:28 | 0:24:28 | 62.7694868 | 61.2605634 | 71.7715278 | 64.6061284 | 66.9682631 |
| 17:24:29 | 0:24:29 | 62.7694868 | 61.2605634 | 71.7715278 | 64.6061284 | 68.9682631 |
| 17:24:30 | 0:24:30 | 62.7694868 | 61.2605634 | 71.7715278 | 65.6061284 | 68.9682631 |
| 17:24:31 | 0:24:31 | 63.7694868 | 70.2605634 | 71.7715278 | 65.6061284 | 67.9682631 |
| 17:24:32 | 0:24:32 | 63.7694868 | 73.2605634 | 71.7715278 | 65.6061284 | 67.9682631 |
| 17:24:33 | 0:24:33 | 63.7694868 | 72.2605634 | 71.7715278 | 63.6061284 | 67.9682631 |
| 17:24:34 | 0:24:34 | 63.7694868 | 71.2605634 | 71.7715278 | 62.6061284 | 67.9682631 |
| 17:24:35 | 0:24:35 | 64.7694868 | 71.2605634 | 70.7715278 | 62.6061284 | 67.9682631 |
| 17:24:36 | 0:24:36 | 65.7694868 | 71.2605634 | 71.7715278 | 61.6061284 | 68.9682631 |
| 17:24:37 | 0:24:37 | 64.7694868 | 72.2605634 | 71.7715278 | 61.6061284 | 69.9682631 |
| 17:24:38 | 0:24:38 | 64.7694868 | 72.2605634 | 74.7715278 | 61.6061284 | 71.9682631 |
| 17:24:39 | 0:24:39 | 64.7694868 | 71.2605634 | 74.7715278 | 65.6061284 | 71.9682631 |
| 17:24:40 | 0:24:40 | 64.7694868 | 72.2605634 | 86.7715278 | 67.6061284 | 72.9682631 |
| 17:24:41 | 0:24:41 | 63.7694868 | 72.2605634 | 86.7715278 | 67.6061284 | 64.9682631 |
| 17:24:42 | 0:24:42 | 64.7694868 | 72.2605634 | 89.7715278 | 64.6061284 | 58.9682631 |
| 17:24:43 | 0:24:43 | 64.7694868 | 72.2605634 | 71.0541657 | 63.6061284 | 56.9682631 |

|          |         |            |            |            |            |            |
|----------|---------|------------|------------|------------|------------|------------|
| 17:24:44 | 0:24:44 | 64.7694868 | 73.2605634 | 70.6905293 | 63.6061284 | 56.9682631 |
| 17:24:45 | 0:24:45 | 64.7694868 | 73.2605634 | 70.7715278 | 62.6061284 | 56.9682631 |
| 17:24:46 | 0:24:46 | 65.7694868 | 73.2605634 | 70.7715278 | 63.6061284 | 56.9682631 |
| 17:24:47 | 0:24:47 | 65.7694868 | 73.2605634 | 67.7715278 | 63.6061284 | 57.9682631 |
| 17:24:48 | 0:24:48 | 65.7694868 | 73.2605634 | 67.7715278 | 67.6061284 | 57.9682631 |
| 17:24:49 | 0:24:49 | 65.7694868 | 72.2605634 | 67.7715278 | 67.6061284 | 57.9682631 |
| 17:24:50 | 0:24:50 | 65.7694868 | 72.2605634 | 70.7715278 | 67.6061284 | 57.9682631 |
| 17:24:51 | 0:24:51 | 67.7694868 | 72.2605634 | 75.7715278 | 67.6061284 | 59.9682631 |
| 17:24:52 | 0:24:52 | 67.7694868 | 72.2605634 | 75.7715278 | 67.6061284 | 61.9682631 |
| 17:24:53 | 0:24:53 | 67.7694868 | 73.2605634 | 76.7715278 | 67.6061284 | 61.9682631 |
| 17:24:54 | 0:24:54 | 67.7694868 | 73.2605634 | 76.7715278 | 67.6061284 | 61.9682631 |
| 17:24:55 | 0:24:55 | 67.7694868 | 73.2605634 | 85.7715278 | 68.6061284 | 62.9682631 |
| 17:24:56 | 0:24:56 | 67.7694868 | 72.2605634 | 88.7715278 | 68.6061284 | 62.9682631 |
| 17:24:57 | 0:24:57 | 69.7694868 | 71.2605634 | 88.7715278 | 67.6061284 | 60.9682631 |
| 17:24:58 | 0:24:58 | 70.7694868 | 71.2605634 | 89.7715278 | 67.6061284 | 58.9682631 |
| 17:24:59 | 0:24:59 | 70.7694868 | 70.2605634 | 90.7715278 | 67.6061284 | 58.9682631 |
| 17:25:00 | 0:25:00 | 70.7694868 | 69.2605634 | 90.7715278 | 68.6061284 | 58.9682631 |
| 17:25:01 | 0:25:01 | 70.7694868 | 69.2605634 | 91.7715278 | 70.6061284 | 58.9682631 |
| 17:25:02 | 0:25:02 | 70.7694868 | 68.2605634 | 86.7715278 | 70.6061284 | 58.9682631 |
| 17:25:03 | 0:25:03 | 70.7694868 | 68.2605634 | 86.7715278 | 70.6061284 | 59.9682631 |
| 17:25:04 | 0:25:04 | 70.7694868 | 68.2605634 | 71.2359838 | 71.6061284 | 59.9682631 |
| 17:25:05 | 0:25:05 | 70.7694868 | 67.2605634 | 70.5087111 | 71.6061284 | 59.9682631 |
| 17:25:06 | 0:25:06 | 70.7694868 | 67.2605634 | 70.2359838 | 70.6061284 | 57.9682631 |
| 17:25:07 | 0:25:07 | 70.7694868 | 67.2605634 | 69.8723475 | 69.6061284 | 56.9682631 |
| 17:25:08 | 0:25:08 | 69.7694868 | 67.2605634 | 69.5996202 | 68.6061284 | 56.9682631 |
| 17:25:09 | 0:25:09 | 69.7694868 | 67.2605634 | 69.3268929 | 68.6061284 | 55.9682631 |
| 17:25:10 | 0:25:10 | 70.7694868 | 67.2605634 | 68.9632566 | 67.6061284 | 54.9682631 |
| 17:25:11 | 0:25:11 | 71.7694868 | 67.2605634 | 70.1450748 | 67.6061284 | 54.9682631 |
| 17:25:12 | 0:25:12 | 72.7694868 | 66.2605634 | 70.5087111 | 67.6061284 | 54.9682631 |
| 17:25:13 | 0:25:13 | 72.7694868 | 66.2605634 | 70.6905293 | 67.6061284 | 53.9682631 |
| 17:25:14 | 0:25:14 | 72.7694868 | 69.2605634 | 70.9632566 | 65.6061284 | 53.9682631 |
| 17:25:15 | 0:25:15 | 72.7694868 | 71.2605634 | 71.2359838 | 64.6061284 | 53.9682631 |
| 17:25:16 | 0:25:16 | 72.7694868 | 71.2605634 | 70.5996202 | 62.6061284 | 52.9682631 |
| 17:25:17 | 0:25:17 | 72.7694868 | 71.2605634 | 69.6905293 | 61.6061284 | 52.9682631 |
| 17:25:18 | 0:25:18 | 71.7694868 | 71.2605634 | 69.2359838 | 62.6061284 | 52.9682631 |
| 17:25:19 | 0:25:19 | 71.7694868 | 71.2605634 | 69.0541657 | 62.6061284 | 51.9682631 |
| 17:25:20 | 0:25:20 | 71.7694868 | 71.2605634 | 68.9632566 | 61.6061284 | 51.9682631 |
| 17:25:21 | 0:25:21 | 71.7694868 | 71.2605634 | 69.0541657 | 61.6061284 | 50.9682631 |
| 17:25:22 | 0:25:22 | 70.7694868 | 71.2605634 | 69.3268929 | 62.6061284 | 49.9682631 |
| 17:25:23 | 0:25:23 | 70.7694868 | 71.2605634 | 69.2359838 | 61.6061284 | 49.9682631 |
| 17:25:24 | 0:25:24 | 70.7694868 | 71.2605634 | 69.1450748 | 61.6061284 | 47.9682631 |
| 17:25:25 | 0:25:25 | 69.7694868 | 72.2605634 | 69.1450748 | 61.6061284 | 48.9682631 |
| 17:25:26 | 0:25:26 | 68.7694868 | 72.2605634 | 69.2359838 | 62.6061284 | 48.9682631 |
| 17:25:27 | 0:25:27 | 68.7694868 | 72.2605634 | 69.8723475 | 62.6061284 | 52.9682631 |
| 17:25:28 | 0:25:28 | 68.7694868 | 69.2605634 | 70.1450748 | 63.6061284 | 59.9682631 |



|          |         |            |            |            |            |            |
|----------|---------|------------|------------|------------|------------|------------|
| 17:25:29 | 0:25:29 | 68.7694868 | 69.2605634 | 70.417802  | 65.6061284 | 59.9682631 |
| 17:25:30 | 0:25:30 | 68.7694868 | 69.2605634 | 71.2359838 | 68.6061284 | 63.9682631 |
| 17:25:31 | 0:25:31 | 68.7694868 | 69.2605634 | 71.0541657 | 69.6061284 | 63.9682631 |
| 17:25:32 | 0:25:32 | 68.7694868 | 69.2605634 | 71.3268929 | 70.6061284 | 63.9682631 |
| 17:25:33 | 0:25:33 | 67.7694868 | 69.2605634 | 71.3268929 | 70.6061284 | 64.9682631 |
| 17:25:34 | 0:25:34 | 67.7694868 | 69.2605634 | 71.0541657 | 70.6061284 | 62.9682631 |
| 17:25:35 | 0:25:35 | 67.7694868 | 69.2605634 | 70.5996202 | 70.6061284 | 59.9682631 |
| 17:25:36 | 0:25:36 | 67.7694868 | 70.2605634 | 70.1450748 | 70.6061284 | 55.9682631 |
| 17:25:37 | 0:25:37 | 68.7694868 | 70.2605634 | 69.7814384 | 69.6061284 | 53.9682631 |
| 17:25:38 | 0:25:38 | 69.7694868 | 70.2605634 | 69.6905293 | 69.6061284 | 52.9682631 |
| 17:25:39 | 0:25:39 | 70.7694868 | 72.2605634 | 69.6905293 | 68.6061284 | 52.9682631 |
| 17:25:40 | 0:25:40 | 73.7694868 | 71.2605634 | 69.8723475 | 69.6061284 | 52.9682631 |
| 17:25:41 | 0:25:41 | 74.7694868 | 70.2605634 | 70.2359838 | 70.6061284 | 52.9682631 |
| 17:25:42 | 0:25:42 | 74.7694868 | 68.2605634 | 70.0541657 | 70.6061284 | 52.9682631 |
| 17:25:43 | 0:25:43 | 75.7694868 | 66.2605634 | 70.2359838 | 70.6061284 | 53.9682631 |
| 17:25:44 | 0:25:44 | 75.7694868 | 66.2605634 | 70.2359838 | 70.6061284 | 53.9682631 |
| 17:25:45 | 0:25:45 | 69.7694868 | 67.2605634 | 69.6905293 | 70.6061284 | 52.9682631 |
| 17:25:46 | 0:25:46 | 66.7694868 | 69.2605634 | 69.8723475 | 70.6061284 | 52.9682631 |
| 17:25:47 | 0:25:47 | 64.7694868 | 71.2605634 | 69.417802  | 69.6061284 | 51.9682631 |
| 17:25:48 | 0:25:48 | 64.7694868 | 71.2605634 | 69.417802  | 69.6061284 | 51.9682631 |
| 17:25:49 | 0:25:49 | 61.7694868 | 74.2605634 | 68.417802  | 69.6061284 | 50.9682631 |
| 17:25:50 | 0:25:50 | 61.7694868 | 73.2605634 | 68.0541657 | 69.6061284 | 50.9682631 |
| 17:25:51 | 0:25:51 | 60.7694868 | 72.2605634 | 67.0541657 | 69.6061284 | 51.9682631 |
| 17:25:52 | 0:25:52 | 60.7694868 | 70.2605634 | 66.7814384 | 69.6061284 | 52.9682631 |
| 17:25:53 | 0:25:53 | 58.7694868 | 68.2605634 | 66.417802  | 69.6061284 | 52.9682631 |
| 17:25:54 | 0:25:54 | 58.7694868 | 67.2605634 | 66.3268929 | 69.6061284 | 52.9682631 |
| 17:25:55 | 0:25:55 | 58.7694868 | 67.2605634 | 66.417802  | 69.6061284 | 52.9682631 |
| 17:25:56 | 0:25:56 | 57.7694868 | 67.2605634 | 66.417802  | 70.6061284 | 52.9682631 |
| 17:25:57 | 0:25:57 | 55.7694868 | 67.2605634 | 66.5996202 | 71.6061284 | 52.9682631 |
| 17:25:58 | 0:25:58 | 55.7694868 | 67.2605634 | 66.7814384 | 71.6061284 | 52.9682631 |
| 17:25:59 | 0:25:59 | 54.7694868 | 67.2605634 | 66.5087111 | 72.6061284 | 52.9682631 |
| 17:26:00 | 0:26:00 | 54.7694868 | 67.2605634 | 66.0541657 | 72.6061284 | 52.9682631 |
| 17:26:01 | 0:26:01 | 54.7694868 | 67.2605634 | 65.5996202 | 73.6061284 | 52.9682631 |
| 17:26:02 | 0:26:02 | 54.7694868 | 67.2605634 | 69.7715278 | 74.6061284 | 52.9682631 |
| 17:26:03 | 0:26:03 | 53.7694868 | 67.2605634 | 69.7715278 | 75.6061284 | 52.9682631 |
| 17:26:04 | 0:26:04 | 52.7694868 | 67.2605634 | 64.7715278 | 77.6061284 | 52.9682631 |
| 17:26:05 | 0:26:05 | 52.7694868 | 67.2605634 | 63.7715278 | 78.6061284 | 52.9682631 |
| 17:26:06 | 0:26:06 | 52.7694868 | 67.2605634 | 62.7715278 | 77.6061284 | 52.9682631 |
| 17:26:07 | 0:26:07 | 53.7694868 | 70.2605634 | 62.7715278 | 76.6061284 | 53.9682631 |
| 17:26:08 | 0:26:08 | 53.7694868 | 71.2605634 | 62.7715278 | 75.6061284 | 54.9682631 |
| 17:26:09 | 0:26:09 | 53.7694868 | 71.2605634 | 62.7715278 | 75.6061284 | 55.9682631 |
| 17:26:10 | 0:26:10 | 53.7694868 | 72.2605634 | 62.7715278 | 74.6061284 | 57.9682631 |
| 17:26:11 | 0:26:11 | 53.7694868 | 71.2605634 | 62.7715278 | 74.6061284 | 59.9682631 |
| 17:26:12 | 0:26:12 | 53.7694868 | 71.2605634 | 62.7715278 | 74.6061284 | 59.9682631 |
| 17:26:13 | 0:26:13 | 55.7694868 | 70.2605634 | 63.7715278 | 73.6061284 | 58.9682631 |

|          |         |            |            |            |            |            |
|----------|---------|------------|------------|------------|------------|------------|
| 17:26:14 | 0:26:14 | 54.7694868 | 70.2605634 | 63.7715278 | 74.6061284 | 58.9682631 |
| 17:26:15 | 0:26:15 | 53.7694868 | 71.2605634 | 65.7715278 | 75.6061284 | 57.9682631 |
| 17:26:16 | 0:26:16 | 53.7694868 | 72.2605634 | 66.7715278 | 75.6061284 | 56.9682631 |
| 17:26:17 | 0:26:17 | 53.7694868 | 73.2605634 | 66.7715278 | 74.6061284 | 55.9682631 |
| 17:26:18 | 0:26:18 | 53.7694868 | 73.2605634 | 66.7715278 | 74.6061284 | 55.9682631 |
| 17:26:19 | 0:26:19 | 53.7694868 | 74.2605634 | 66.7715278 | 75.6061284 | 55.9682631 |
| 17:26:20 | 0:26:20 | 53.7694868 | 74.2605634 | 65.7715278 | 74.6061284 | 55.9682631 |
| 17:26:21 | 0:26:21 | 58.7694868 | 74.2605634 | 65.7715278 | 74.6061284 | 56.9682631 |
| 17:26:22 | 0:26:22 | 60.7694868 | 74.2605634 | 64.7715278 | 74.6061284 | 57.9682631 |
| 17:26:23 | 0:26:23 | 60.7694868 | 74.2605634 | 63.7715278 | 74.6061284 | 57.9682631 |
| 17:26:24 | 0:26:24 | 60.7694868 | 74.2605634 | 63.7715278 | 74.6061284 | 57.9682631 |
| 17:26:25 | 0:26:25 | 60.7694868 | 76.2605634 | 63.7715278 | 73.6061284 | 56.9682631 |
| 17:26:26 | 0:26:26 | 60.7694868 | 77.2605634 | 63.7715278 | 70.6061284 | 56.9682631 |
| 17:26:27 | 0:26:27 | 60.7694868 | 77.2605634 | 64.7715278 | 67.6061284 | 56.9682631 |
| 17:26:28 | 0:26:28 | 64.7694868 | 76.2605634 | 64.7715278 | 68.6061284 | 56.9682631 |
| 17:26:29 | 0:26:29 | 65.7694868 | 75.2605634 | 64.7715278 | 68.6061284 | 57.9682631 |
| 17:26:30 | 0:26:30 | 65.7694868 | 75.2605634 | 64.7715278 | 68.6061284 | 58.9682631 |
| 17:26:31 | 0:26:31 | 66.7694868 | 76.2605634 | 64.7715278 | 68.6061284 | 59.9682631 |
| 17:26:32 | 0:26:32 | 66.7694868 | 76.2605634 | 64.7715278 | 67.6061284 | 59.9682631 |
| 17:26:33 | 0:26:33 | 66.7694868 | 75.2605634 | 64.7715278 | 69.6061284 | 60.9682631 |
| 17:26:34 | 0:26:34 | 66.7694868 | 74.2605634 | 64.7715278 | 70.6061284 | 60.9682631 |
| 17:26:35 | 0:26:35 | 66.7694868 | 72.2605634 | 64.7715278 | 70.6061284 | 60.9682631 |
| 17:26:36 | 0:26:36 | 66.7694868 | 70.2605634 | 64.7715278 | 70.6061284 | 60.9682631 |
| 17:26:37 | 0:26:37 | 66.7694868 | 68.2605634 | 65.7715278 | 70.6061284 | 60.9682631 |
| 17:26:38 | 0:26:38 | 66.7694868 | 66.2605634 | 65.7715278 | 70.6061284 | 60.9682631 |
| 17:26:39 | 0:26:39 | 66.7694868 | 64.2605634 | 65.7715278 | 70.6061284 | 60.9682631 |
| 17:26:40 | 0:26:40 | 66.7694868 | 64.2605634 | 65.7715278 | 70.6061284 | 60.9682631 |
| 17:26:41 | 0:26:41 | 66.7694868 | 63.2605634 | 65.7715278 | 70.6061284 | 60.9682631 |
| 17:26:42 | 0:26:42 | 66.7694868 | 63.2605634 | 65.7715278 | 70.6061284 | 60.9682631 |
| 17:26:43 | 0:26:43 | 63.7694868 | 66.2605634 | 70.7715278 | 69.6061284 | 60.9682631 |
| 17:26:44 | 0:26:44 | 62.7694868 | 67.2605634 | 70.7715278 | 70.6061284 | 60.9682631 |
| 17:26:45 | 0:26:45 | 61.7694868 | 67.2605634 | 75.7715278 | 70.6061284 | 60.9682631 |
| 17:26:46 | 0:26:46 | 61.7694868 | 67.2605634 | 75.7715278 | 70.6061284 | 61.9682631 |
| 17:26:47 | 0:26:47 | 61.7694868 | 67.2605634 | 76.7715278 | 70.6061284 | 61.9682631 |
| 17:26:48 | 0:26:48 | 62.7694868 | 66.2605634 | 76.7715278 | 69.6061284 | 61.9682631 |
| 17:26:49 | 0:26:49 | 62.7694868 | 65.2605634 | 76.7715278 | 69.6061284 | 61.9682631 |
| 17:26:50 | 0:26:50 | 61.7694868 | 64.2605634 | 75.7715278 | 69.6061284 | 64.9682631 |
| 17:26:51 | 0:26:51 | 61.7694868 | 64.2605634 | 74.7715278 | 69.6061284 | 65.9682631 |
| 17:26:52 | 0:26:52 | 61.7694868 | 65.2605634 | 72.7715278 | 68.6061284 | 65.9682631 |
| 17:26:53 | 0:26:53 | 61.7694868 | 65.2605634 | 72.7715278 | 66.6061284 | 65.9682631 |
| 17:26:54 | 0:26:54 | 61.7694868 | 65.2605634 | 70.7715278 | 65.6061284 | 65.9682631 |
| 17:26:55 | 0:26:55 | 61.7694868 | 65.2605634 | 71.7715278 | 65.6061284 | 66.9682631 |
| 17:26:56 | 0:26:56 | 61.7694868 | 65.2605634 | 70.7715278 | 65.6061284 | 65.9682631 |
| 17:26:57 | 0:26:57 | 61.7694868 | 65.2605634 | 70.7715278 | 66.6061284 | 65.9682631 |
| 17:26:58 | 0:26:58 | 61.7694868 | 65.2605634 | 70.7715278 | 69.6061284 | 65.9682631 |

|          |         |            |            |            |            |            |
|----------|---------|------------|------------|------------|------------|------------|
| 17:26:59 | 0:26:59 | 61.7694868 | 65.2605634 | 69.7715278 | 71.6061284 | 65.9682631 |
| 17:27:00 | 0:27:00 | 61.7694868 | 65.2605634 | 68.7715278 | 72.6061284 | 65.9682631 |
| 17:27:01 | 0:27:01 | 61.7694868 | 66.2605634 | 67.7715278 | 73.6061284 | 65.9682631 |
| 17:27:02 | 0:27:02 | 61.7694868 | 67.2605634 | 67.7715278 | 73.6061284 | 64.9682631 |
| 17:27:03 | 0:27:03 | 61.7694868 | 67.2605634 | 63.7715278 | 73.6061284 | 62.9682631 |
| 17:27:04 | 0:27:04 | 61.7694868 | 67.2605634 | 62.7715278 | 75.6061284 | 60.9682631 |
| 17:27:05 | 0:27:05 | 61.7694868 | 67.2605634 | 62.7715278 | 75.6061284 | 60.9682631 |
| 17:27:06 | 0:27:06 | 62.7694868 | 67.2605634 | 62.7715278 | 76.6061284 | 59.9682631 |
| 17:27:07 | 0:27:07 | 63.7694868 | 67.2605634 | 62.7715278 | 77.6061284 | 59.9682631 |
| 17:27:08 | 0:27:08 | 63.7694868 | 67.2605634 | 61.7715278 | 77.6061284 | 58.9682631 |
| 17:27:09 | 0:27:09 | 63.7694868 | 67.2605634 | 61.7715278 | 78.6061284 | 58.9682631 |
| 17:27:10 | 0:27:10 | 63.7694868 | 66.2605634 | 61.7715278 | 78.6061284 | 57.9682631 |
| 17:27:11 | 0:27:11 | 62.7694868 | 66.2605634 | 61.7715278 | 78.6061284 | 57.9682631 |
| 17:27:12 | 0:27:12 | 62.7694868 | 66.2605634 | 63.7715278 | 78.6061284 | 56.9682631 |
| 17:27:13 | 0:27:13 | 62.7694868 | 66.2605634 | 63.7715278 | 77.6061284 | 55.9682631 |
| 17:27:14 | 0:27:14 | 60.7694868 | 67.2605634 | 62.7715278 | 78.6061284 | 54.9682631 |
| 17:27:15 | 0:27:15 | 60.7694868 | 67.2605634 | 62.7715278 | 77.6061284 | 52.9682631 |
| 17:27:16 | 0:27:16 | 60.7694868 | 67.2605634 | 61.7715278 | 76.6061284 | 52.9682631 |
| 17:27:17 | 0:27:17 | 66.7694868 | 70.2605634 | 61.7715278 | 76.6061284 | 53.9682631 |
| 17:27:18 | 0:27:18 | 67.7694868 | 70.2605634 | 61.7715278 | 76.6061284 | 53.9682631 |
| 17:27:19 | 0:27:19 | 67.7694868 | 70.2605634 | 60.7715278 | 75.6061284 | 53.9682631 |
| 17:27:20 | 0:27:20 | 65.7694868 | 70.2605634 | 59.7715278 | 75.6061284 | 53.9682631 |
| 17:27:21 | 0:27:21 | 64.7694868 | 71.2605634 | 59.7715278 | 74.6061284 | 53.9682631 |
| 17:27:22 | 0:27:22 | 64.7694868 | 70.2605634 | 59.7715278 | 76.6061284 | 53.9682631 |
| 17:27:23 | 0:27:23 | 64.7694868 | 70.2605634 | 60.7715278 | 77.6061284 | 53.9682631 |
| 17:27:24 | 0:27:24 | 64.7694868 | 72.2605634 | 60.7715278 | 77.6061284 | 53.9682631 |
| 17:27:25 | 0:27:25 | 64.7694868 | 71.2605634 | 61.7715278 | 77.6061284 | 53.9682631 |
| 17:27:26 | 0:27:26 | 64.7694868 | 71.2605634 | 61.7715278 | 78.6061284 | 53.9682631 |
| 17:27:27 | 0:27:27 | 64.7694868 | 70.2605634 | 61.7715278 | 77.6061284 | 54.9682631 |
| 17:27:28 | 0:27:28 | 65.7694868 | 70.2605634 | 61.7715278 | 75.6061284 | 54.9682631 |
| 17:27:29 | 0:27:29 | 66.7694868 | 71.2605634 | 62.7715278 | 74.6061284 | 53.9682631 |
| 17:27:30 | 0:27:30 | 66.7694868 | 71.2605634 | 62.7715278 | 73.6061284 | 53.9682631 |
| 17:27:31 | 0:27:31 | 65.7694868 | 71.2605634 | 64.7715278 | 73.6061284 | 53.9682631 |
| 17:27:32 | 0:27:32 | 65.7694868 | 70.2605634 | 65.7715278 | 73.6061284 | 53.9682631 |
| 17:27:33 | 0:27:33 | 65.7694868 | 70.2605634 | 67.7715278 | 70.6061284 | 53.9682631 |
| 17:27:34 | 0:27:34 | 64.7694868 | 70.2605634 | 68.7715278 | 71.6061284 | 53.9682631 |
| 17:27:35 | 0:27:35 | 63.7694868 | 69.2605634 | 68.7715278 | 72.6061284 | 54.9682631 |
| 17:27:36 | 0:27:36 | 63.7694868 | 69.2605634 | 68.7715278 | 72.6061284 | 54.9682631 |
| 17:27:37 | 0:27:37 | 58.7694868 | 67.2605634 | 68.7715278 | 72.6061284 | 58.9682631 |
| 17:27:38 | 0:27:38 | 58.7694868 | 64.2605634 | 71.7715278 | 77.6061284 | 58.9682631 |
| 17:27:39 | 0:27:39 | 58.7694868 | 64.2605634 | 73.7715278 | 77.6061284 | 58.9682631 |
| 17:27:40 | 0:27:40 | 58.7694868 | 64.2605634 | 73.7715278 | 77.6061284 | 58.9682631 |
| 17:27:41 | 0:27:41 | 59.7694868 | 64.2605634 | 73.7715278 | 76.6061284 | 57.9682631 |
| 17:27:42 | 0:27:42 | 61.7694868 | 64.2605634 | 73.7715278 | 74.6061284 | 57.9682631 |
| 17:27:43 | 0:27:43 | 61.7694868 | 66.2605634 | 73.7715278 | 74.6061284 | 56.9682631 |

|          |         |            |            |            |            |            |
|----------|---------|------------|------------|------------|------------|------------|
| 17:27:44 | 0:27:44 | 61.7694868 | 71.2605634 | 73.7715278 | 72.6061284 | 55.9682631 |
| 17:27:45 | 0:27:45 | 61.7694868 | 72.2605634 | 72.7715278 | 70.6061284 | 55.9682631 |
| 17:27:46 | 0:27:46 | 61.7694868 | 71.2605634 | 72.7715278 | 70.6061284 | 55.9682631 |
| 17:27:47 | 0:27:47 | 62.7694868 | 66.2605634 | 71.7715278 | 70.6061284 | 55.9682631 |
| 17:27:48 | 0:27:48 | 62.7694868 | 66.2605634 | 71.7715278 | 68.6061284 | 55.9682631 |
| 17:27:49 | 0:27:49 | 62.7694868 | 63.2605634 | 71.7715278 | 66.6061284 | 55.9682631 |
| 17:27:50 | 0:27:50 | 63.7694868 | 63.2605634 | 72.7715278 | 67.6061284 | 55.9682631 |
| 17:27:51 | 0:27:51 | 63.7694868 | 63.2605634 | 72.7715278 | 67.6061284 | 54.9682631 |
| 17:27:52 | 0:27:52 | 62.7694868 | 62.2605634 | 71.7715278 | 68.6061284 | 53.9682631 |
| 17:27:53 | 0:27:53 | 62.7694868 | 62.2605634 | 71.7715278 | 68.6061284 | 53.9682631 |
| 17:27:54 | 0:27:54 | 62.7694868 | 62.2605634 | 70.7715278 | 67.6061284 | 53.9682631 |
| 17:27:55 | 0:27:55 | 62.7694868 | 62.2605634 | 70.7715278 | 67.6061284 | 53.9682631 |
| 17:27:56 | 0:27:56 | 62.7694868 | 61.2605634 | 71.7715278 | 67.6061284 | 53.9682631 |
| 17:27:57 | 0:27:57 | 62.7694868 | 61.2605634 | 71.7715278 | 67.6061284 | 53.9682631 |
| 17:27:58 | 0:27:58 | 62.7694868 | 60.2605634 | 74.7715278 | 67.6061284 | 53.9682631 |
| 17:27:59 | 0:27:59 | 62.7694868 | 60.2605634 | 74.7715278 | 66.6061284 | 53.9682631 |
| 17:28:00 | 0:28:00 | 63.7694868 | 60.2605634 | 74.7715278 | 64.6061284 | 53.9682631 |
| 17:28:01 | 0:28:01 | 63.7694868 | 60.2605634 | 74.7715278 | 63.6061284 | 53.9682631 |
| 17:28:02 | 0:28:02 | 63.7694868 | 60.2605634 | 74.7715278 | 63.6061284 | 53.9682631 |
| 17:28:03 | 0:28:03 | 63.7694868 | 60.2605634 | 73.7715278 | 62.6061284 | 53.9682631 |
| 17:28:04 | 0:28:04 | 63.7694868 | 60.2605634 | 72.7715278 | 62.6061284 | 53.9682631 |
| 17:28:05 | 0:28:05 | 63.7694868 | 60.2605634 | 71.7715278 | 66.6061284 | 53.9682631 |
| 17:28:06 | 0:28:06 | 63.7694868 | 60.2605634 | 71.7715278 | 68.6061284 | 54.9682631 |
| 17:28:07 | 0:28:07 | 63.7694868 | 60.2605634 | 71.7715278 | 68.6061284 | 54.9682631 |
| 17:28:08 | 0:28:08 | 63.7694868 | 61.2605634 | 71.7715278 | 68.6061284 | 54.9682631 |
| 17:28:09 | 0:28:09 | 63.7694868 | 62.2605634 | 70.7715278 | 67.6061284 | 54.9682631 |
| 17:28:10 | 0:28:10 | 63.7694868 | 62.2605634 | 70.7715278 | 66.6061284 | 54.9682631 |
| 17:28:11 | 0:28:11 | 63.7694868 | 63.2605634 | 69.7715278 | 64.6061284 | 55.9682631 |
| 17:28:12 | 0:28:12 | 63.7694868 | 64.2605634 | 69.7715278 | 63.6061284 | 56.9682631 |
| 17:28:13 | 0:28:13 | 64.7694868 | 65.2605634 | 69.7715278 | 62.6061284 | 55.9682631 |
| 17:28:14 | 0:28:14 | 64.7694868 | 66.2605634 | 68.7715278 | 61.6061284 | 56.9682631 |
| 17:28:15 | 0:28:15 | 63.7694868 | 66.2605634 | 68.7715278 | 61.6061284 | 55.9682631 |
| 17:28:16 | 0:28:16 | 63.7694868 | 66.2605634 | 68.7715278 | 62.6061284 | 55.9682631 |
| 17:28:17 | 0:28:17 | 63.7694868 | 65.2605634 | 68.7715278 | 65.6061284 | 55.9682631 |
| 17:28:18 | 0:28:18 | 63.7694868 | 65.2605634 | 68.7715278 | 67.6061284 | 54.9682631 |
| 17:28:19 | 0:28:19 | 64.7694868 | 64.2605634 | 70.7715278 | 70.6061284 | 54.9682631 |
| 17:28:20 | 0:28:20 | 64.7694868 | 64.2605634 | 70.7715278 | 70.6061284 | 54.9682631 |
| 17:28:21 | 0:28:21 | 64.7694868 | 63.2605634 | 70.7715278 | 70.6061284 | 54.9682631 |
| 17:28:22 | 0:28:22 | 64.7694868 | 63.2605634 | 71.7715278 | 68.6061284 | 55.9682631 |
| 17:28:23 | 0:28:23 | 68.7694868 | 62.2605634 | 73.7715278 | 64.6061284 | 55.9682631 |
| 17:28:24 | 0:28:24 | 67.7694868 | 61.2605634 | 74.7715278 | 62.6061284 | 56.9682631 |
| 17:28:25 | 0:28:25 | 67.7694868 | 60.2605634 | 75.7715278 | 60.6061284 | 56.9682631 |
| 17:28:26 | 0:28:26 | 66.7694868 | 60.2605634 | 75.7715278 | 60.6061284 | 56.9682631 |
| 17:28:27 | 0:28:27 | 65.7694868 | 60.2605634 | 75.7715278 | 61.6061284 | 56.9682631 |
| 17:28:28 | 0:28:28 | 65.7694868 | 60.2605634 | 75.7715278 | 62.6061284 | 56.9682631 |

|          |         |            |            |            |            |            |
|----------|---------|------------|------------|------------|------------|------------|
| 17:28:29 | 0:28:29 | 64.7694868 | 59.2605634 | 75.7715278 | 62.6061284 | 56.9682631 |
| 17:28:30 | 0:28:30 | 64.7694868 | 59.2605634 | 75.7715278 | 62.6061284 | 56.9682631 |
| 17:28:31 | 0:28:31 | 62.7694868 | 58.2605634 | 72.7715278 | 63.6061284 | 56.9682631 |
| 17:28:32 | 0:28:32 | 63.7694868 | 58.2605634 | 71.7715278 | 64.6061284 | 57.9682631 |
| 17:28:33 | 0:28:33 | 63.7694868 | 58.2605634 | 68.7715278 | 63.6061284 | 58.9682631 |
| 17:28:34 | 0:28:34 | 63.7694868 | 58.2605634 | 64.7715278 | 63.6061284 | 59.9682631 |
| 17:28:35 | 0:28:35 | 64.7694868 | 58.2605634 | 64.7715278 | 64.6061284 | 60.9682631 |
| 17:28:36 | 0:28:36 | 64.7694868 | 58.2605634 | 63.7715278 | 64.6061284 | 60.9682631 |
| 17:28:37 | 0:28:37 | 64.7694868 | 59.2605634 | 62.7715278 | 64.6061284 | 61.9682631 |
| 17:28:38 | 0:28:38 | 64.7694868 | 60.2605634 | 62.7715278 | 64.6061284 | 62.9682631 |
| 17:28:39 | 0:28:39 | 67.7694868 | 67.2605634 | 62.7715278 | 65.6061284 | 62.9682631 |
| 17:28:40 | 0:28:40 | 68.7694868 | 70.2605634 | 62.7715278 | 65.6061284 | 61.9682631 |
| 17:28:41 | 0:28:41 | 68.7694868 | 71.2605634 | 63.7715278 | 66.6061284 | 60.9682631 |
| 17:28:42 | 0:28:42 | 69.7694868 | 71.2605634 | 63.7715278 | 66.6061284 | 61.9682631 |
| 17:28:43 | 0:28:43 | 69.7694868 | 71.2605634 | 63.7715278 | 66.6061284 | 61.9682631 |
| 17:28:44 | 0:28:44 | 69.7694868 | 71.2605634 | 63.7715278 | 67.6061284 | 62.9682631 |
| 17:28:45 | 0:28:45 | 69.7694868 | 70.2605634 | 63.7715278 | 67.6061284 | 62.9682631 |
| 17:28:46 | 0:28:46 | 68.7694868 | 70.2605634 | 65.7715278 | 66.6061284 | 61.9682631 |
| 17:28:47 | 0:28:47 | 67.7694868 | 70.2605634 | 65.7715278 | 65.6061284 | 59.9682631 |
| 17:28:48 | 0:28:48 | 67.7694868 | 70.2605634 | 65.7715278 | 65.6061284 | 58.9682631 |
| 17:28:49 | 0:28:49 | 67.7694868 | 70.2605634 | 65.7715278 | 65.6061284 | 57.9682631 |
| 17:28:50 | 0:28:50 | 67.7694868 | 69.2605634 | 66.7715278 | 64.6061284 | 57.9682631 |
| 17:28:51 | 0:28:51 | 67.7694868 | 69.2605634 | 66.7715278 | 64.6061284 | 55.9682631 |
| 17:28:52 | 0:28:52 | 67.7694868 | 69.2605634 | 66.7715278 | 65.6061284 | 55.9682631 |
| 17:28:53 | 0:28:53 | 67.7694868 | 69.2605634 | 66.7715278 | 64.6061284 | 55.9682631 |
| 17:28:54 | 0:28:54 | 66.7694868 | 69.2605634 | 68.7715278 | 63.6061284 | 57.9682631 |
| 17:28:55 | 0:28:55 | 65.7694868 | 69.2605634 | 68.7715278 | 63.6061284 | 57.9682631 |
| 17:28:56 | 0:28:56 | 65.7694868 | 69.2605634 | 68.7715278 | 64.6061284 | 57.9682631 |
| 17:28:57 | 0:28:57 | 65.7694868 | 69.2605634 | 68.7715278 | 64.6061284 | 57.9682631 |
| 17:28:58 | 0:28:58 | 65.7694868 | 69.2605634 | 66.7715278 | 65.6061284 | 56.9682631 |
| 17:28:59 | 0:28:59 | 65.7694868 | 69.2605634 | 62.7715278 | 65.6061284 | 55.9682631 |
| 17:29:00 | 0:29:00 | 65.7694868 | 69.2605634 | 62.7715278 | 65.6061284 | 55.9682631 |
| 17:29:01 | 0:29:01 | 65.7694868 | 69.2605634 | 57.7715278 | 65.6061284 | 55.9682631 |
| 17:29:02 | 0:29:02 | 65.7694868 | 69.2605634 | 57.7715278 | 65.6061284 | 55.9682631 |
| 17:29:03 | 0:29:03 | 65.7694868 | 69.2605634 | 57.7715278 | 64.6061284 | 55.9682631 |
| 17:29:04 | 0:29:04 | 65.7694868 | 69.2605634 | 57.7715278 | 62.6061284 | 55.9682631 |
| 17:29:05 | 0:29:05 | 65.7694868 | 69.2605634 | 51.7715278 | 62.6061284 | 55.9682631 |
| 17:29:06 | 0:29:06 | 65.7694868 | 69.2605634 | 50.7715278 | 63.6061284 | 55.9682631 |
| 17:29:07 | 0:29:07 | 64.7694868 | 69.2605634 | 49.7715278 | 63.6061284 | 54.9682631 |
| 17:29:08 | 0:29:08 | 64.7694868 | 69.2605634 | 49.7715278 | 64.6061284 | 54.9682631 |
| 17:29:09 | 0:29:09 | 66.7694868 | 71.2605634 | 47.7715278 | 64.6061284 | 55.9682631 |
| 17:29:10 | 0:29:10 | 66.7694868 | 75.2605634 | 47.7715278 | 67.6061284 | 55.9682631 |
| 17:29:11 | 0:29:11 | 66.7694868 | 75.2605634 | 47.7715278 | 67.6061284 | 55.9682631 |
| 17:29:12 | 0:29:12 | 65.7694868 | 76.2605634 | 48.7715278 | 67.6061284 | 56.9682631 |
| 17:29:13 | 0:29:13 | 65.7694868 | 79.2605634 | 49.7715278 | 65.6061284 | 56.9682631 |

|          |         |            |            |            |            |            |
|----------|---------|------------|------------|------------|------------|------------|
| 17:29:14 | 0:29:14 | 65.7694868 | 79.2605634 | 49.7715278 | 64.6061284 | 56.9682631 |
| 17:29:15 | 0:29:15 | 65.7694868 | 75.2605634 | 49.7715278 | 64.6061284 | 56.9682631 |
| 17:29:16 | 0:29:16 | 64.7694868 | 73.2605634 | 49.7715278 | 64.6061284 | 57.9682631 |
| 17:29:17 | 0:29:17 | 63.7694868 | 72.2605634 | 51.7715278 | 67.6061284 | 57.9682631 |
| 17:29:18 | 0:29:18 | 63.7694868 | 72.2605634 | 52.7715278 | 67.6061284 | 56.9682631 |
| 17:29:19 | 0:29:19 | 63.7694868 | 72.2605634 | 52.7715278 | 67.6061284 | 56.9682631 |
| 17:29:20 | 0:29:20 | 62.7694868 | 67.2605634 | 52.7715278 | 64.6061284 | 56.9682631 |
| 17:29:21 | 0:29:21 | 62.7694868 | 65.2605634 | 55.7715278 | 63.6061284 | 56.9682631 |
| 17:29:22 | 0:29:22 | 62.7694868 | 65.2605634 | 56.7715278 | 61.6061284 | 56.9682631 |
| 17:29:23 | 0:29:23 | 62.7694868 | 64.2605634 | 56.7715278 | 60.6061284 | 58.9682631 |
| 17:29:24 | 0:29:24 | 62.7694868 | 64.2605634 | 56.7715278 | 60.6061284 | 58.9682631 |
| 17:29:25 | 0:29:25 | 62.7694868 | 65.2605634 | 56.7715278 | 61.6061284 | 63.9682631 |
| 17:29:26 | 0:29:26 | 62.7694868 | 66.2605634 | 57.7715278 | 61.6061284 | 63.9682631 |
| 17:29:27 | 0:29:27 | 62.7694868 | 66.2605634 | 57.7715278 | 63.6061284 | 63.9682631 |
| 17:29:28 | 0:29:28 | 62.7694868 | 66.2605634 | 57.7715278 | 63.6061284 | 64.9682631 |
| 17:29:29 | 0:29:29 | 60.7694868 | 66.2605634 | 58.7715278 | 63.6061284 | 64.9682631 |
| 17:29:30 | 0:29:30 | 59.7694868 | 66.2605634 | 59.7715278 | 64.6061284 | 64.9682631 |
| 17:29:31 | 0:29:31 | 59.7694868 | 66.2605634 | 66.7715278 | 64.6061284 | 64.9682631 |
| 17:29:32 | 0:29:32 | 59.7694868 | 66.2605634 | 66.7715278 | 63.6061284 | 65.9682631 |
| 17:29:33 | 0:29:33 | 58.7694868 | 66.2605634 | 67.7715278 | 61.6061284 | 64.9682631 |
| 17:29:34 | 0:29:34 | 57.7694868 | 66.2605634 | 67.7715278 | 61.6061284 | 63.9682631 |
| 17:29:35 | 0:29:35 | 57.7694868 | 66.2605634 | 67.7715278 | 61.6061284 | 63.9682631 |
| 17:29:36 | 0:29:36 | 58.7694868 | 65.2605634 | 67.7715278 | 61.6061284 | 62.9682631 |
| 17:29:37 | 0:29:37 | 58.7694868 | 65.2605634 | 67.7715278 | 61.6061284 | 62.9682631 |
| 17:29:38 | 0:29:38 | 59.7694868 | 65.2605634 | 68.7715278 | 61.6061284 | 62.9682631 |
| 17:29:39 | 0:29:39 | 60.7694868 | 64.2605634 | 69.7715278 | 62.6061284 | 62.9682631 |
| 17:29:40 | 0:29:40 | 60.7694868 | 64.2605634 | 72.7715278 | 62.6061284 | 62.9682631 |
| 17:29:41 | 0:29:41 | 61.7694868 | 64.2605634 | 76.7715278 | 62.6061284 | 62.9682631 |
| 17:29:42 | 0:29:42 | 62.7694868 | 65.2605634 | 78.7715278 | 61.6061284 | 60.9682631 |
| 17:29:43 | 0:29:43 | 63.7694868 | 67.2605634 | 80.7715278 | 61.6061284 | 59.9682631 |
| 17:29:44 | 0:29:44 | 63.7694868 | 67.2605634 | 80.7715278 | 60.6061284 | 59.9682631 |
| 17:29:45 | 0:29:45 | 63.7694868 | 66.2605634 | 80.7715278 | 60.6061284 | 59.9682631 |
| 17:29:46 | 0:29:46 | 63.7694868 | 66.2605634 | 80.7715278 | 61.6061284 | 59.9682631 |
| 17:29:47 | 0:29:47 | 65.7694868 | 66.2605634 | 81.7715278 | 61.6061284 | 59.9682631 |
| 17:29:48 | 0:29:48 | 67.7694868 | 66.2605634 | 81.7715278 | 61.6061284 | 59.9682631 |
| 17:29:49 | 0:29:49 | 68.7694868 | 66.2605634 | 82.7715278 | 61.6061284 | 56.9682631 |
| 17:29:50 | 0:29:50 | 68.7694868 | 66.2605634 | 84.7715278 | 61.6061284 | 55.9682631 |
| 17:29:51 | 0:29:51 | 68.7694868 | 65.2605634 | 84.7715278 | 64.6061284 | 54.9682631 |
| 17:29:52 | 0:29:52 | 67.7694868 | 65.2605634 | 84.7715278 | 65.6061284 | 54.9682631 |
| 17:29:53 | 0:29:53 | 67.7694868 | 65.2605634 | 84.7715278 | 65.6061284 | 54.9682631 |
| 17:29:54 | 0:29:54 | 67.7694868 | 65.2605634 | 84.7715278 | 65.6061284 | 54.9682631 |
| 17:29:55 | 0:29:55 | 67.7694868 | 65.2605634 | 83.7715278 | 65.6061284 | 54.9682631 |
| 17:29:56 | 0:29:56 | 67.7694868 | 65.2605634 | 83.7715278 | 65.6061284 | 54.9682631 |
| 17:29:57 | 0:29:57 | 66.7694868 | 68.2605634 | 83.7715278 | 65.6061284 | 54.9682631 |
| 17:29:58 | 0:29:58 | 66.7694868 | 71.2605634 | 81.7715278 | 66.6061284 | 53.9682631 |

|          |         |            |            |            |            |            |
|----------|---------|------------|------------|------------|------------|------------|
| 17:29:59 | 0:29:59 | 66.7694868 | 71.2605634 | 82.7715278 | 67.6061284 | 53.9682631 |
| 17:30:00 | 0:30:00 | 66.7694868 | 74.2605634 | 82.7715278 | 67.6061284 | 52.9682631 |
| 17:30:01 | 0:30:01 | 66.7694868 | 73.2605634 | 82.7715278 | 67.6061284 | 52.9682631 |
| 17:30:02 | 0:30:02 | 66.7694868 | 73.2605634 | 81.7715278 | 67.6061284 | 52.9682631 |
| 17:30:03 | 0:30:03 | 66.7694868 | 67.2605634 | 81.7715278 | 66.6061284 | 52.9682631 |
| 17:30:04 | 0:30:04 | 65.7694868 | 66.2605634 | 81.7715278 | 66.6061284 | 52.9682631 |
| 17:30:05 | 0:30:05 | 64.7694868 | 66.2605634 | 83.7715278 | 66.6061284 | 52.9682631 |
| 17:30:06 | 0:30:06 | 64.7694868 | 64.2605634 | 84.7715278 | 67.6061284 | 52.9682631 |
| 17:30:07 | 0:30:07 | 64.7694868 | 63.2605634 | 85.7715278 | 67.6061284 | 53.9682631 |
| 17:30:08 | 0:30:08 | 64.7694868 | 63.2605634 | 85.7715278 | 67.6061284 | 53.9682631 |
| 17:30:09 | 0:30:09 | 65.7694868 | 63.2605634 | 85.7715278 | 66.6061284 | 53.9682631 |
| 17:30:10 | 0:30:10 | 64.7694868 | 63.2605634 | 83.7715278 | 65.6061284 | 53.9682631 |
| 17:30:11 | 0:30:11 | 65.7694868 | 63.2605634 | 81.7715278 | 64.6061284 | 53.9682631 |
| 17:30:12 | 0:30:12 | 66.7694868 | 63.2605634 | 77.7715278 | 63.6061284 | 52.9682631 |
| 17:30:13 | 0:30:13 | 66.7694868 | 62.2605634 | 71.7715278 | 64.6061284 | 52.9682631 |
| 17:30:14 | 0:30:14 | 66.7694868 | 62.2605634 | 70.7715278 | 64.6061284 | 52.9682631 |
| 17:30:15 | 0:30:15 | 66.7694868 | 62.2605634 | 67.7715278 | 65.6061284 | 52.9682631 |
| 17:30:16 | 0:30:16 | 66.7694868 | 62.2605634 | 65.7715278 | 65.6061284 | 52.9682631 |
| 17:30:17 | 0:30:17 | 67.7694868 | 62.2605634 | 64.7715278 | 66.6061284 | 52.9682631 |
| 17:30:18 | 0:30:18 | 67.7694868 | 62.2605634 | 64.7715278 | 66.6061284 | 52.9682631 |
| 17:30:19 | 0:30:19 | 67.7694868 | 64.2605634 | 62.7715278 | 67.6061284 | 52.9682631 |
| 17:30:20 | 0:30:20 | 68.7694868 | 64.2605634 | 62.7715278 | 66.6061284 | 52.9682631 |
| 17:30:21 | 0:30:21 | 68.7694868 | 64.2605634 | 61.7715278 | 64.6061284 | 52.9682631 |
| 17:30:22 | 0:30:22 | 65.7694868 | 64.2605634 | 61.7715278 | 62.6061284 | 52.9682631 |
| 17:30:23 | 0:30:23 | 63.7694868 | 63.2605634 | 62.7715278 | 61.6061284 | 52.9682631 |
| 17:30:24 | 0:30:24 | 63.7694868 | 63.2605634 | 62.7715278 | 62.6061284 | 52.9682631 |
| 17:30:25 | 0:30:25 | 62.7694868 | 63.2605634 | 64.7715278 | 62.6061284 | 52.9682631 |
| 17:30:26 | 0:30:26 | 61.7694868 | 63.2605634 | 64.7715278 | 62.6061284 | 51.9682631 |
| 17:30:27 | 0:30:27 | 61.7694868 | 63.2605634 | 63.7715278 | 61.6061284 | 52.9682631 |
| 17:30:28 | 0:30:28 | 61.7694868 | 67.2605634 | 62.7715278 | 59.6061284 | 52.9682631 |
| 17:30:29 | 0:30:29 | 61.7694868 | 68.2605634 | 61.7715278 | 58.6061284 | 52.9682631 |
| 17:30:30 | 0:30:30 | 62.7694868 | 67.2605634 | 61.7715278 | 60.6061284 | 52.9682631 |
| 17:30:31 | 0:30:31 | 61.7694868 | 66.2605634 | 61.7715278 | 62.6061284 | 52.9682631 |
| 17:30:32 | 0:30:32 | 61.7694868 | 65.2605634 | 61.7715278 | 64.6061284 | 53.9682631 |
| 17:30:33 | 0:30:33 | 61.7694868 | 65.2605634 | 61.7715278 | 66.6061284 | 52.9682631 |
| 17:30:34 | 0:30:34 | 61.7694868 | 65.2605634 | 57.7715278 | 71.6061284 | 52.9682631 |
| 17:30:35 | 0:30:35 | 61.7694868 | 65.2605634 | 52.7715278 | 73.6061284 | 52.9682631 |
| 17:30:36 | 0:30:36 | 61.7694868 | 67.2605634 | 51.7715278 | 74.6061284 | 52.9682631 |
| 17:30:37 | 0:30:37 | 61.7694868 | 68.2605634 | 51.7715278 | 74.6061284 | 51.9682631 |
| 17:30:38 | 0:30:38 | 62.7694868 | 68.2605634 | 50.7715278 | 74.6061284 | 51.9682631 |
| 17:30:39 | 0:30:39 | 62.7694868 | 68.2605634 | 50.7715278 | 74.6061284 | 52.9682631 |
| 17:30:40 | 0:30:40 | 62.7694868 | 68.2605634 | 51.7715278 | 73.6061284 | 51.9682631 |
| 17:30:41 | 0:30:41 | 62.7694868 | 68.2605634 | 54.7715278 | 66.6061284 | 52.9682631 |
| 17:30:42 | 0:30:42 | 62.7694868 | 68.2605634 | 58.7715278 | 64.6061284 | 53.9682631 |
| 17:30:43 | 0:30:43 | 62.7694868 | 68.2605634 | 60.7715278 | 63.6061284 | 53.9682631 |

|          |         |            |            |            |            |            |
|----------|---------|------------|------------|------------|------------|------------|
| 17:30:44 | 0:30:44 | 63.7694868 | 69.2605634 | 61.7715278 | 63.6061284 | 61.9682631 |
| 17:30:45 | 0:30:45 | 63.7694868 | 70.2605634 | 61.7715278 | 63.6061284 | 65.9682631 |
| 17:30:46 | 0:30:46 | 63.7694868 | 70.2605634 | 61.7715278 | 63.6061284 | 66.9682631 |
| 17:30:47 | 0:30:47 | 63.7694868 | 70.2605634 | 62.7715278 | 63.6061284 | 69.9682631 |
| 17:30:48 | 0:30:48 | 63.7694868 | 70.2605634 | 62.7715278 | 64.6061284 | 68.9682631 |
| 17:30:49 | 0:30:49 | 63.7694868 | 70.2605634 | 63.7715278 | 65.6061284 | 63.9682631 |
| 17:30:50 | 0:30:50 | 63.7694868 | 71.2605634 | 63.7715278 | 65.6061284 | 59.9682631 |
| 17:30:51 | 0:30:51 | 64.7694868 | 71.2605634 | 63.7715278 | 65.6061284 | 57.9682631 |
| 17:30:52 | 0:30:52 | 65.7694868 | 72.2605634 | 63.7715278 | 64.6061284 | 56.9682631 |
| 17:30:53 | 0:30:53 | 66.7694868 | 72.2605634 | 65.7715278 | 63.6061284 | 55.9682631 |
| 17:30:54 | 0:30:54 | 64.7694868 | 72.2605634 | 67.7715278 | 62.6061284 | 54.9682631 |
| 17:30:55 | 0:30:55 | 61.7694868 | 72.2605634 | 67.7715278 | 61.6061284 | 53.9682631 |
| 17:30:56 | 0:30:56 | 60.7694868 | 74.2605634 | 67.7715278 | 61.6061284 | 53.9682631 |
| 17:30:57 | 0:30:57 | 60.7694868 | 74.2605634 | 68.7715278 | 61.6061284 | 53.9682631 |
| 17:30:58 | 0:30:58 | 59.7694868 | 80.2605634 | 68.7715278 | 63.6061284 | 53.9682631 |
| 17:30:59 | 0:30:59 | 60.7694868 | 84.2605634 | 68.7715278 | 65.6061284 | 53.9682631 |
| 17:31:00 | 0:31:00 | 60.7694868 | 84.2605634 | 68.7715278 | 65.6061284 | 53.9682631 |
| 17:31:01 | 0:31:01 | 60.7694868 | 84.2605634 | 68.7715278 | 64.6061284 | 53.9682631 |
| 17:31:02 | 0:31:02 | 60.7694868 | 84.2605634 | 68.7715278 | 63.6061284 | 53.9682631 |
| 17:31:03 | 0:31:03 | 60.7694868 | 84.2605634 | 68.7715278 | 61.6061284 | 54.9682631 |
| 17:31:04 | 0:31:04 | 60.7694868 | 84.2605634 | 68.7715278 | 61.6061284 | 54.9682631 |
| 17:31:05 | 0:31:05 | 60.7694868 | 84.2605634 | 68.7715278 | 60.6061284 | 54.9682631 |
| 17:31:06 | 0:31:06 | 60.7694868 | 84.2605634 | 68.7715278 | 60.6061284 | 54.9682631 |
| 17:31:07 | 0:31:07 | 59.7694868 | 70.2605634 | 68.7715278 | 60.6061284 | 54.9682631 |
| 17:31:08 | 0:31:08 | 59.7694868 | 68.2605634 | 68.7715278 | 61.6061284 | 54.9682631 |
| 17:31:09 | 0:31:09 | 59.7694868 | 68.2605634 | 68.7715278 | 61.6061284 | 54.9682631 |
| 17:31:10 | 0:31:10 | 58.7694868 | 67.2605634 | 68.7715278 | 61.6061284 | 54.9682631 |
| 17:31:11 | 0:31:11 | 58.7694868 | 68.2605634 | 68.7715278 | 62.6061284 | 54.9682631 |
| 17:31:12 | 0:31:12 | 58.7694868 | 68.2605634 | 68.7715278 | 62.6061284 | 54.9682631 |
| 17:31:13 | 0:31:13 | 57.7694868 | 68.2605634 | 68.7715278 | 63.6061284 | 59.9682631 |
| 17:31:14 | 0:31:14 | 59.7694868 | 68.2605634 | 69.7715278 | 67.6061284 | 60.9682631 |
| 17:31:15 | 0:31:15 | 60.7694868 | 68.2605634 | 68.7715278 | 66.6061284 | 60.9682631 |
| 17:31:16 | 0:31:16 | 60.7694868 | 68.2605634 | 68.7715278 | 66.6061284 | 59.9682631 |
| 17:31:17 | 0:31:17 | 60.7694868 | 68.2605634 | 67.7715278 | 65.6061284 | 58.9682631 |
| 17:31:18 | 0:31:18 | 60.7694868 | 69.2605634 | 67.7715278 | 66.6061284 | 57.9682631 |
| 17:31:19 | 0:31:19 | 60.7694868 | 72.2605634 | 68.7715278 | 66.6061284 | 56.9682631 |
| 17:31:20 | 0:31:20 | 60.7694868 | 71.2605634 | 68.7715278 | 67.6061284 | 55.9682631 |
| 17:31:21 | 0:31:21 | 60.7694868 | 70.2605634 | 70.7715278 | 68.6061284 | 55.9682631 |
| 17:31:22 | 0:31:22 | 60.7694868 | 70.2605634 | 70.7715278 | 68.6061284 | 55.9682631 |
| 17:31:23 | 0:31:23 | 60.7694868 | 70.2605634 | 71.7715278 | 68.6061284 | 55.9682631 |
| 17:31:24 | 0:31:24 | 60.7694868 | 70.2605634 | 71.7715278 | 68.6061284 | 54.9682631 |
| 17:31:25 | 0:31:25 | 61.7694868 | 70.2605634 | 72.7715278 | 68.6061284 | 54.9682631 |
| 17:31:26 | 0:31:26 | 61.7694868 | 69.2605634 | 72.7715278 | 67.6061284 | 54.9682631 |
| 17:31:27 | 0:31:27 | 61.7694868 | 69.2605634 | 74.7715278 | 67.6061284 | 54.9682631 |
| 17:31:28 | 0:31:28 | 60.7694868 | 69.2605634 | 74.7715278 | 67.6061284 | 54.9682631 |



|          |         |            |            |            |            |            |
|----------|---------|------------|------------|------------|------------|------------|
| 17:31:29 | 0:31:29 | 60.7694868 | 68.2605634 | 74.7715278 | 67.6061284 | 54.9682631 |
| 17:31:30 | 0:31:30 | 60.7694868 | 68.2605634 | 74.7715278 | 67.6061284 | 54.9682631 |
| 17:31:31 | 0:31:31 | 60.7694868 | 68.2605634 | 77.7715278 | 67.6061284 | 54.9682631 |
| 17:31:32 | 0:31:32 | 60.7694868 | 68.2605634 | 78.7715278 | 67.6061284 | 56.9682631 |
| 17:31:33 | 0:31:33 | 61.7694868 | 67.2605634 | 82.7715278 | 67.6061284 | 56.9682631 |
| 17:31:34 | 0:31:34 | 61.7694868 | 67.2605634 | 83.7715278 | 66.6061284 | 59.9682631 |
| 17:31:35 | 0:31:35 | 61.7694868 | 73.2605634 | 83.7715278 | 65.6061284 | 59.9682631 |
| 17:31:36 | 0:31:36 | 61.7694868 | 73.2605634 | 82.7715278 | 65.6061284 | 59.9682631 |
| 17:31:37 | 0:31:37 | 61.7694868 | 72.2605634 | 82.7715278 | 63.6061284 | 58.9682631 |
| 17:31:38 | 0:31:38 | 60.7694868 | 71.2605634 | 82.7715278 | 64.6061284 | 56.9682631 |
| 17:31:39 | 0:31:39 | 59.7694868 | 69.2605634 | 79.7715278 | 64.6061284 | 56.9682631 |
| 17:31:40 | 0:31:40 | 58.7694868 | 68.2605634 | 79.7715278 | 68.6061284 | 55.9682631 |
| 17:31:41 | 0:31:41 | 58.7694868 | 68.2605634 | 71.7715278 | 71.6061284 | 55.9682631 |
| 17:31:42 | 0:31:42 | 57.7694868 | 69.2605634 | 65.7715278 | 72.6061284 | 55.9682631 |
| 17:31:43 | 0:31:43 | 57.7694868 | 68.2605634 | 61.7715278 | 73.6061284 | 55.9682631 |
| 17:31:44 | 0:31:44 | 57.7694868 | 68.2605634 | 60.7715278 | 73.6061284 | 56.9682631 |
| 17:31:45 | 0:31:45 | 58.7694868 | 68.2605634 | 60.7715278 | 73.6061284 | 56.9682631 |
| 17:31:46 | 0:31:46 | 58.7694868 | 68.2605634 | 58.7715278 | 69.6061284 | 56.9682631 |
| 17:31:47 | 0:31:47 | 58.7694868 | 68.2605634 | 58.7715278 | 68.6061284 | 56.9682631 |
| 17:31:48 | 0:31:48 | 59.7694868 | 68.2605634 | 58.7715278 | 68.6061284 | 56.9682631 |
| 17:31:49 | 0:31:49 | 59.7694868 | 68.2605634 | 58.7715278 | 68.6061284 | 56.9682631 |
| 17:31:50 | 0:31:50 | 59.7694868 | 68.2605634 | 58.7715278 | 68.6061284 | 56.9682631 |
| 17:31:51 | 0:31:51 | 59.7694868 | 68.2605634 | 59.7715278 | 70.6061284 | 56.9682631 |
| 17:31:52 | 0:31:52 | 60.7694868 | 69.2605634 | 59.7715278 | 71.6061284 | 59.9682631 |
| 17:31:53 | 0:31:53 | 60.7694868 | 71.2605634 | 61.7715278 | 71.6061284 | 60.9682631 |
| 17:31:54 | 0:31:54 | 60.7694868 | 71.2605634 | 61.7715278 | 71.6061284 | 60.9682631 |
| 17:31:55 | 0:31:55 | 60.7694868 | 71.2605634 | 61.7715278 | 70.6061284 | 62.9682631 |
| 17:31:56 | 0:31:56 | 60.7694868 | 69.2605634 | 61.7715278 | 68.6061284 | 62.9682631 |
| 17:31:57 | 0:31:57 | 60.7694868 | 68.2605634 | 61.7715278 | 66.6061284 | 62.9682631 |
| 17:31:58 | 0:31:58 | 60.7694868 | 68.2605634 | 62.7715278 | 66.6061284 | 63.9682631 |
| 17:31:59 | 0:31:59 | 60.7694868 | 68.2605634 | 63.7715278 | 66.6061284 | 63.9682631 |
| 17:32:00 | 0:32:00 | 60.7694868 | 68.2605634 | 63.7715278 | 67.6061284 | 63.9682631 |
| 17:32:01 | 0:32:01 | 60.7694868 | 68.2605634 | 63.7715278 | 68.6061284 | 64.9682631 |
| 17:32:02 | 0:32:02 | 61.7694868 | 68.2605634 | 64.7715278 | 68.6061284 | 64.9682631 |
| 17:32:03 | 0:32:03 | 61.7694868 | 67.2605634 | 60.7715278 | 68.6061284 | 64.9682631 |
| 17:32:04 | 0:32:04 | 61.7694868 | 67.2605634 | 60.7715278 | 69.6061284 | 64.9682631 |
| 17:32:05 | 0:32:05 | 61.7694868 | 67.2605634 | 60.7715278 | 70.6061284 | 64.9682631 |
| 17:32:06 | 0:32:06 | 61.7694868 | 67.2605634 | 60.7715278 | 70.6061284 | 64.9682631 |
| 17:32:07 | 0:32:07 | 61.7694868 | 66.2605634 | 63.7715278 | 70.6061284 | 64.9682631 |
| 17:32:08 | 0:32:08 | 61.7694868 | 65.2605634 | 63.7715278 | 70.6061284 | 64.9682631 |
| 17:32:09 | 0:32:09 | 62.7694868 | 65.2605634 | 63.7715278 | 69.6061284 | 64.9682631 |
| 17:32:10 | 0:32:10 | 64.7694868 | 65.2605634 | 65.7715278 | 67.6061284 | 62.9682631 |
| 17:32:11 | 0:32:11 | 64.7694868 | 66.2605634 | 66.7715278 | 67.6061284 | 62.9682631 |
| 17:32:12 | 0:32:12 | 65.7694868 | 66.2605634 | 67.7715278 | 67.6061284 | 62.9682631 |
| 17:32:13 | 0:32:13 | 65.7694868 | 66.2605634 | 68.7715278 | 68.6061284 | 57.9682631 |

|          |         |            |            |            |            |            |
|----------|---------|------------|------------|------------|------------|------------|
| 17:32:14 | 0:32:14 | 65.7694868 | 66.2605634 | 67.7715278 | 68.6061284 | 57.9682631 |
| 17:32:15 | 0:32:15 | 63.7694868 | 67.2605634 | 67.7715278 | 68.6061284 | 56.9682631 |
| 17:32:16 | 0:32:16 | 64.7694868 | 68.2605634 | 68.7715278 | 67.6061284 | 56.9682631 |
| 17:32:17 | 0:32:17 | 64.7694868 | 69.2605634 | 68.7715278 | 67.6061284 | 56.9682631 |
| 17:32:18 | 0:32:18 | 63.7694868 | 69.2605634 | 68.7715278 | 67.6061284 | 57.9682631 |
| 17:32:19 | 0:32:19 | 63.7694868 | 70.2605634 | 68.7715278 | 67.6061284 | 57.9682631 |
| 17:32:20 | 0:32:20 | 63.7694868 | 70.2605634 | 71.7715278 | 68.6061284 | 57.9682631 |
| 17:32:21 | 0:32:21 | 63.7694868 | 70.2605634 | 72.7715278 | 68.6061284 | 57.9682631 |
| 17:32:22 | 0:32:22 | 63.7694868 | 70.2605634 | 73.7715278 | 69.6061284 | 57.9682631 |
| 17:32:23 | 0:32:23 | 63.7694868 | 70.2605634 | 73.7715278 | 70.6061284 | 57.9682631 |
| 17:32:24 | 0:32:24 | 62.7694868 | 70.2605634 | 76.7715278 | 70.6061284 | 57.9682631 |
| 17:32:25 | 0:32:25 | 59.7694868 | 71.2605634 | 80.7715278 | 70.6061284 | 57.9682631 |
| 17:32:26 | 0:32:26 | 58.7694868 | 71.2605634 | 86.7715278 | 69.6061284 | 57.9682631 |
| 17:32:27 | 0:32:27 | 57.7694868 | 71.2605634 | 89.7715278 | 70.6061284 | 57.9682631 |
| 17:32:28 | 0:32:28 | 57.7694868 | 72.2605634 | 89.7715278 | 70.6061284 | 56.9682631 |
| 17:32:29 | 0:32:29 | 57.7694868 | 71.2605634 | 87.7715278 | 71.6061284 | 54.9682631 |
| 17:32:30 | 0:32:30 | 58.7694868 | 71.2605634 | 89.7715278 | 72.6061284 | 54.9682631 |
| 17:32:31 | 0:32:31 | 58.7694868 | 71.2605634 | 81.7715278 | 74.6061284 | 53.9682631 |
| 17:32:32 | 0:32:32 | 59.7694868 | 71.2605634 | 69.7715278 | 75.6061284 | 53.9682631 |
| 17:32:33 | 0:32:33 | 59.7694868 | 72.2605634 | 70.7715278 | 75.6061284 | 54.9682631 |
| 17:32:34 | 0:32:34 | 59.7694868 | 72.2605634 | 70.7715278 | 74.6061284 | 54.9682631 |
| 17:32:35 | 0:32:35 | 59.7694868 | 72.2605634 | 70.7715278 | 73.6061284 | 54.9682631 |
| 17:32:36 | 0:32:36 | 58.7694868 | 75.2605634 | 87.7715278 | 73.6061284 | 54.9682631 |
| 17:32:37 | 0:32:37 | 58.7694868 | 75.2605634 | 70.5087111 | 73.6061284 | 55.9682631 |
| 17:32:38 | 0:32:38 | 58.7694868 | 74.2605634 | 71.7814384 | 74.6061284 | 56.9682631 |
| 17:32:39 | 0:32:39 | 58.7694868 | 73.2605634 | 72.6905293 | 73.6061284 | 56.9682631 |
| 17:32:40 | 0:32:40 | 58.7694868 | 74.2605634 | 73.8723475 | 74.6061284 | 56.9682631 |
| 17:32:41 | 0:32:41 | 58.7694868 | 77.2605634 | 74.6905293 | 74.6061284 | 56.9682631 |
| 17:32:42 | 0:32:42 | 57.7694868 | 79.2605634 | 74.7814384 | 75.6061284 | 56.9682631 |
| 17:32:43 | 0:32:43 | 59.7694868 | 81.2605634 | 75.5087111 | 74.6061284 | 57.9682631 |
| 17:32:44 | 0:32:44 | 59.7694868 | 82.2605634 | 75.6905293 | 73.6061284 | 57.9682631 |
| 17:32:45 | 0:32:45 | 58.7694868 | 82.2605634 | 75.5087111 | 72.6061284 | 59.9682631 |
| 17:32:46 | 0:32:46 | 58.7694868 | 82.2605634 | 74.417802  | 70.6061284 | 59.9682631 |
| 17:32:47 | 0:32:47 | 59.7694868 | 82.2605634 | 73.9632566 | 68.6061284 | 60.9682631 |
| 17:32:48 | 0:32:48 | 59.7694868 | 82.2605634 | 73.0541657 | 66.6061284 | 60.9682631 |
| 17:32:49 | 0:32:49 | 59.7694868 | 82.2605634 | 90.7715278 | 65.6061284 | 58.9682631 |
| 17:32:50 | 0:32:50 | 59.7694868 | 83.2605634 | 90.7715278 | 65.6061284 | 57.9682631 |
| 17:32:51 | 0:32:51 | 58.7694868 | 83.2605634 | 90.7715278 | 67.6061284 | 56.9682631 |
| 17:32:52 | 0:32:52 | 58.7694868 | 82.2605634 | 85.7715278 | 67.6061284 | 55.9682631 |
| 17:32:53 | 0:32:53 | 58.7694868 | 82.2605634 | 82.7715278 | 68.6061284 | 55.9682631 |
| 17:32:54 | 0:32:54 | 59.7694868 | 81.2605634 | 81.7715278 | 70.6061284 | 54.9682631 |
| 17:32:55 | 0:32:55 | 59.7694868 | 75.2605634 | 81.7715278 | 71.6061284 | 55.9682631 |
| 17:32:56 | 0:32:56 | 59.7694868 | 73.2605634 | 82.7715278 | 72.6061284 | 55.9682631 |
| 17:32:57 | 0:32:57 | 59.7694868 | 71.2605634 | 86.7715278 | 73.6061284 | 55.9682631 |
| 17:32:58 | 0:32:58 | 58.7694868 | 71.2605634 | 70.0541657 | 75.6061284 | 56.9682631 |

|          |         |            |            |            |            |            |
|----------|---------|------------|------------|------------|------------|------------|
| 17:32:59 | 0:32:59 | 58.7694868 | 71.2605634 | 71.2359838 | 76.6061284 | 56.9682631 |
| 17:33:00 | 0:33:00 | 58.7694868 | 71.2605634 | 71.2359838 | 76.6061284 | 56.9682631 |
| 17:33:01 | 0:33:01 | 59.7694868 | 70.2605634 | 70.8723475 | 76.6061284 | 56.9682631 |
| 17:33:02 | 0:33:02 | 59.7694868 | 70.2605634 | 71.5087111 | 76.6061284 | 56.9682631 |
| 17:33:03 | 0:33:03 | 59.7694868 | 70.2605634 | 71.6905293 | 75.6061284 | 56.9682631 |
| 17:33:04 | 0:33:04 | 59.7694868 | 70.2605634 | 69.5996202 | 75.6061284 | 56.9682631 |
| 17:33:05 | 0:33:05 | 59.7694868 | 70.2605634 | 87.7715278 | 74.6061284 | 56.9682631 |
| 17:33:06 | 0:33:06 | 59.7694868 | 70.2605634 | 78.7715278 | 72.6061284 | 56.9682631 |
| 17:33:07 | 0:33:07 | 60.7694868 | 71.2605634 | 78.7715278 | 71.6061284 | 56.9682631 |
| 17:33:08 | 0:33:08 | 60.7694868 | 74.2605634 | 76.7715278 | 71.6061284 | 56.9682631 |
| 17:33:09 | 0:33:09 | 60.7694868 | 75.2605634 | 75.7715278 | 71.6061284 | 56.9682631 |
| 17:33:10 | 0:33:10 | 60.7694868 | 75.2605634 | 75.7715278 | 72.6061284 | 57.9682631 |
| 17:33:11 | 0:33:11 | 61.7694868 | 73.2605634 | 75.7715278 | 73.6061284 | 57.9682631 |
| 17:33:12 | 0:33:12 | 61.7694868 | 73.2605634 | 69.7715278 | 73.6061284 | 57.9682631 |
| 17:33:13 | 0:33:13 | 62.7694868 | 73.2605634 | 68.7715278 | 73.6061284 | 57.9682631 |
| 17:33:14 | 0:33:14 | 62.7694868 | 73.2605634 | 67.7715278 | 73.6061284 | 57.9682631 |
| 17:33:15 | 0:33:15 | 62.7694868 | 73.2605634 | 67.7715278 | 73.6061284 | 59.9682631 |
| 17:33:16 | 0:33:16 | 62.7694868 | 73.2605634 | 67.7715278 | 73.6061284 | 60.9682631 |
| 17:33:17 | 0:33:17 | 62.7694868 | 73.2605634 | 67.7715278 | 74.6061284 | 63.9682631 |
| 17:33:18 | 0:33:18 | 62.7694868 | 73.2605634 | 67.7715278 | 74.6061284 | 63.9682631 |
| 17:33:19 | 0:33:19 | 62.7694868 | 73.2605634 | 67.7715278 | 74.6061284 | 63.9682631 |
| 17:33:20 | 0:33:20 | 63.7694868 | 73.2605634 | 68.7715278 | 75.6061284 | 63.9682631 |
| 17:33:21 | 0:33:21 | 63.7694868 | 73.2605634 | 68.7715278 | 77.6061284 | 64.9682631 |
| 17:33:22 | 0:33:22 | 63.7694868 | 73.2605634 | 68.7715278 | 77.6061284 | 65.9682631 |
| 17:33:23 | 0:33:23 | 64.7694868 | 79.2605634 | 68.7715278 | 78.6061284 | 65.9682631 |
| 17:33:24 | 0:33:24 | 64.7694868 | 83.2605634 | 68.7715278 | 78.6061284 | 65.9682631 |
| 17:33:25 | 0:33:25 | 64.7694868 | 83.2605634 | 68.7715278 | 79.6061284 | 63.9682631 |
| 17:33:26 | 0:33:26 | 65.7694868 | 83.2605634 | 68.7715278 | 79.6061284 | 61.9682631 |
| 17:33:27 | 0:33:27 | 65.7694868 | 81.2605634 | 67.7715278 | 79.6061284 | 61.9682631 |
| 17:33:28 | 0:33:28 | 65.7694868 | 80.2605634 | 67.7715278 | 79.6061284 | 61.9682631 |
| 17:33:29 | 0:33:29 | 65.7694868 | 78.2605634 | 67.7715278 | 80.6061284 | 61.9682631 |
| 17:33:30 | 0:33:30 | 65.7694868 | 78.2605634 | 67.7715278 | 80.6061284 | 59.9682631 |
| 17:33:31 | 0:33:31 | 65.7694868 | 77.2605634 | 67.7715278 | 82.6061284 | 59.9682631 |
| 17:33:32 | 0:33:32 | 66.7694868 | 77.2605634 | 68.7715278 | 83.6061284 | 59.9682631 |
| 17:33:33 | 0:33:33 | 67.7694868 | 77.2605634 | 68.7715278 | 84.6061284 | 59.9682631 |
| 17:33:34 | 0:33:34 | 67.7694868 | 79.2605634 | 69.7715278 | 85.6061284 | 60.9682631 |
| 17:33:35 | 0:33:35 | 67.7694868 | 78.2605634 | 69.7715278 | 85.6061284 | 59.9682631 |
| 17:33:36 | 0:33:36 | 66.7694868 | 78.2605634 | 69.7715278 | 85.6061284 | 59.9682631 |
| 17:33:37 | 0:33:37 | 65.7694868 | 78.2605634 | 69.7715278 | 76.6061284 | 59.9682631 |
| 17:33:38 | 0:33:38 | 62.7694868 | 78.2605634 | 67.7715278 | 70.6061284 | 59.9682631 |
| 17:33:39 | 0:33:39 | 62.7694868 | 79.2605634 | 67.7715278 | 67.6061284 | 61.9682631 |
| 17:33:40 | 0:33:40 | 62.7694868 | 79.2605634 | 67.7715278 | 66.6061284 | 62.9682631 |
| 17:33:41 | 0:33:41 | 62.7694868 | 78.2605634 | 67.7715278 | 67.6061284 | 61.9682631 |
| 17:33:42 | 0:33:42 | 62.7694868 | 77.2605634 | 66.7715278 | 68.6061284 | 61.9682631 |
| 17:33:43 | 0:33:43 | 62.7694868 | 79.2605634 | 66.7715278 | 68.6061284 | 61.9682631 |

|          |         |            |            |            |            |            |
|----------|---------|------------|------------|------------|------------|------------|
| 17:33:44 | 0:33:44 | 62.7694868 | 80.2605634 | 66.7715278 | 68.6061284 | 60.9682631 |
| 17:33:45 | 0:33:45 | 63.7694868 | 80.2605634 | 63.7715278 | 66.6061284 | 60.9682631 |
| 17:33:46 | 0:33:46 | 63.7694868 | 80.2605634 | 63.7715278 | 65.6061284 | 60.9682631 |
| 17:33:47 | 0:33:47 | 62.7694868 | 79.2605634 | 63.7715278 | 63.6061284 | 57.9682631 |
| 17:33:48 | 0:33:48 | 62.7694868 | 79.2605634 | 61.7715278 | 62.6061284 | 56.9682631 |
| 17:33:49 | 0:33:49 | 62.7694868 | 78.2605634 | 60.7715278 | 62.6061284 | 56.9682631 |
| 17:33:50 | 0:33:50 | 62.7694868 | 76.2605634 | 60.7715278 | 61.6061284 | 57.9682631 |
| 17:33:51 | 0:33:51 | 62.7694868 | 75.2605634 | 61.7715278 | 61.6061284 | 57.9682631 |
| 17:33:52 | 0:33:52 | 64.7694868 | 74.2605634 | 61.7715278 | 60.6061284 | 57.9682631 |
| 17:33:53 | 0:33:53 | 65.7694868 | 74.2605634 | 61.7715278 | 59.6061284 | 57.9682631 |
| 17:33:54 | 0:33:54 | 65.7694868 | 74.2605634 | 61.7715278 | 59.6061284 | 57.9682631 |
| 17:33:55 | 0:33:55 | 67.7694868 | 68.2605634 | 63.7715278 | 63.6061284 | 58.9682631 |
| 17:33:56 | 0:33:56 | 67.7694868 | 66.2605634 | 64.7715278 | 64.6061284 | 58.9682631 |
| 17:33:57 | 0:33:57 | 67.7694868 | 64.2605634 | 66.7715278 | 64.6061284 | 59.9682631 |
| 17:33:58 | 0:33:58 | 68.7694868 | 63.2605634 | 66.7715278 | 65.6061284 | 60.9682631 |
| 17:33:59 | 0:33:59 | 70.7694868 | 62.2605634 | 67.7715278 | 65.6061284 | 59.9682631 |
| 17:34:00 | 0:34:00 | 70.7694868 | 61.2605634 | 67.7715278 | 65.6061284 | 58.9682631 |
| 17:34:01 | 0:34:01 | 71.7694868 | 60.2605634 | 69.7715278 | 65.6061284 | 57.9682631 |
| 17:34:02 | 0:34:02 | 70.7694868 | 60.2605634 | 72.7715278 | 65.6061284 | 56.9682631 |
| 17:34:03 | 0:34:03 | 70.7694868 | 60.2605634 | 74.7715278 | 66.6061284 | 55.9682631 |
| 17:34:04 | 0:34:04 | 69.7694868 | 60.2605634 | 74.7715278 | 67.6061284 | 54.9682631 |
| 17:34:05 | 0:34:05 | 69.7694868 | 60.2605634 | 75.7715278 | 67.6061284 | 53.9682631 |
| 17:34:06 | 0:34:06 | 69.7694868 | 60.2605634 | 79.7715278 | 67.6061284 | 52.9682631 |
| 17:34:07 | 0:34:07 | 68.7694868 | 60.2605634 | 79.7715278 | 67.6061284 | 52.9682631 |
| 17:34:08 | 0:34:08 | 67.7694868 | 61.2605634 | 79.7715278 | 67.6061284 | 52.9682631 |
| 17:34:09 | 0:34:09 | 66.7694868 | 61.2605634 | 79.7715278 | 68.6061284 | 53.9682631 |
| 17:34:10 | 0:34:10 | 65.7694868 | 61.2605634 | 82.7715278 | 69.6061284 | 53.9682631 |
| 17:34:11 | 0:34:11 | 65.7694868 | 62.2605634 | 82.7715278 | 69.6061284 | 53.9682631 |
| 17:34:12 | 0:34:12 | 65.7694868 | 66.2605634 | 86.7715278 | 69.6061284 | 53.9682631 |
| 17:34:13 | 0:34:13 | 65.7694868 | 67.2605634 | 86.7715278 | 68.6061284 | 54.9682631 |
| 17:34:14 | 0:34:14 | 66.7694868 | 68.2605634 | 86.7715278 | 69.6061284 | 54.9682631 |
| 17:34:15 | 0:34:15 | 66.7694868 | 68.2605634 | 87.7715278 | 70.6061284 | 54.9682631 |
| 17:34:16 | 0:34:16 | 66.7694868 | 68.2605634 | 88.7715278 | 71.6061284 | 57.9682631 |
| 17:34:17 | 0:34:17 | 65.7694868 | 67.2605634 | 88.7715278 | 72.6061284 | 58.9682631 |
| 17:34:18 | 0:34:18 | 64.7694868 | 67.2605634 | 89.7715278 | 72.6061284 | 58.9682631 |
| 17:34:19 | 0:34:19 | 64.7694868 | 66.2605634 | 90.7715278 | 72.6061284 | 55.9682631 |
| 17:34:20 | 0:34:20 | 63.7694868 | 66.2605634 | 90.7715278 | 72.6061284 | 55.9682631 |
| 17:34:21 | 0:34:21 | 63.7694868 | 66.2605634 | 90.7715278 | 72.6061284 | 55.9682631 |
| 17:34:22 | 0:34:22 | 63.7694868 | 66.2605634 | 87.7715278 | 72.6061284 | 54.9682631 |
| 17:34:23 | 0:34:23 | 63.7694868 | 66.2605634 | 85.7715278 | 72.6061284 | 54.9682631 |
| 17:34:24 | 0:34:24 | 63.7694868 | 66.2605634 | 83.7715278 | 73.6061284 | 54.9682631 |
| 17:34:25 | 0:34:25 | 63.7694868 | 65.2605634 | 82.7715278 | 75.6061284 | 54.9682631 |
| 17:34:26 | 0:34:26 | 63.7694868 | 68.2605634 | 81.7715278 | 78.6061284 | 55.9682631 |
| 17:34:27 | 0:34:27 | 64.7694868 | 69.2605634 | 81.7715278 | 79.6061284 | 57.9682631 |
| 17:34:28 | 0:34:28 | 65.7694868 | 70.2605634 | 81.7715278 | 79.6061284 | 59.9682631 |

|          |         |            |            |            |            |            |
|----------|---------|------------|------------|------------|------------|------------|
| 17:34:29 | 0:34:29 | 65.7694868 | 71.2605634 | 79.7715278 | 79.6061284 | 58.9682631 |
| 17:34:30 | 0:34:30 | 65.7694868 | 71.2605634 | 79.7715278 | 79.6061284 | 56.9682631 |
| 17:34:31 | 0:34:31 | 64.7694868 | 71.2605634 | 79.7715278 | 80.6061284 | 55.9682631 |
| 17:34:32 | 0:34:32 | 64.7694868 | 72.2605634 | 75.7715278 | 81.6061284 | 55.9682631 |
| 17:34:33 | 0:34:33 | 64.7694868 | 72.2605634 | 75.7715278 | 82.6061284 | 54.9682631 |
| 17:34:34 | 0:34:34 | 64.7694868 | 73.2605634 | 75.7715278 | 82.6061284 | 53.9682631 |
| 17:34:35 | 0:34:35 | 64.7694868 | 74.2605634 | 67.7715278 | 82.6061284 | 53.9682631 |
| 17:34:36 | 0:34:36 | 65.7694868 | 75.2605634 | 63.7715278 | 84.6061284 | 53.9682631 |
| 17:34:37 | 0:34:37 | 65.7694868 | 74.2605634 | 62.7715278 | 84.6061284 | 53.9682631 |
| 17:34:38 | 0:34:38 | 66.7694868 | 74.2605634 | 61.7715278 | 84.6061284 | 55.9682631 |
| 17:34:39 | 0:34:39 | 66.7694868 | 74.2605634 | 61.7715278 | 84.6061284 | 57.9682631 |
| 17:34:40 | 0:34:40 | 66.7694868 | 72.2605634 | 60.7715278 | 83.6061284 | 57.9682631 |
| 17:34:41 | 0:34:41 | 66.7694868 | 72.2605634 | 60.7715278 | 84.6061284 | 58.9682631 |
| 17:34:42 | 0:34:42 | 66.7694868 | 72.2605634 | 60.7715278 | 75.6061284 | 59.9682631 |
| 17:34:43 | 0:34:43 | 66.7694868 | 72.2605634 | 60.7715278 | 67.6061284 | 59.9682631 |
| 17:34:44 | 0:34:44 | 66.7694868 | 73.2605634 | 60.7715278 | 66.6061284 | 59.9682631 |
| 17:34:45 | 0:34:45 | 65.7694868 | 75.2605634 | 60.7715278 | 66.6061284 | 58.9682631 |
| 17:34:46 | 0:34:46 | 65.7694868 | 77.2605634 | 59.7715278 | 66.6061284 | 58.9682631 |
| 17:34:47 | 0:34:47 | 64.7694868 | 78.2605634 | 59.7715278 | 66.6061284 | 57.9682631 |
| 17:34:48 | 0:34:48 | 64.7694868 | 78.2605634 | 59.7715278 | 66.6061284 | 57.9682631 |
| 17:34:49 | 0:34:49 | 64.7694868 | 74.2605634 | 59.7715278 | 66.6061284 | 57.9682631 |
| 17:34:50 | 0:34:50 | 64.7694868 | 72.2605634 | 58.7715278 | 66.6061284 | 57.9682631 |
| 17:34:51 | 0:34:51 | 64.7694868 | 70.2605634 | 58.7715278 | 67.6061284 | 55.9682631 |
| 17:34:52 | 0:34:52 | 64.7694868 | 68.2605634 | 58.7715278 | 67.6061284 | 55.9682631 |
| 17:34:53 | 0:34:53 | 64.7694868 | 67.2605634 | 59.7715278 | 68.6061284 | 54.9682631 |
| 17:34:54 | 0:34:54 | 63.7694868 | 67.2605634 | 59.7715278 | 69.6061284 | 54.9682631 |
| 17:34:55 | 0:34:55 | 63.7694868 | 68.2605634 | 59.7715278 | 69.6061284 | 55.9682631 |
| 17:34:56 | 0:34:56 | 63.7694868 | 68.2605634 | 59.7715278 | 69.6061284 | 55.9682631 |
| 17:34:57 | 0:34:57 | 63.7694868 | 69.2605634 | 61.7715278 | 70.6061284 | 55.9682631 |
| 17:34:58 | 0:34:58 | 63.7694868 | 71.2605634 | 63.7715278 | 70.6061284 | 55.9682631 |
| 17:34:59 | 0:34:59 | 63.7694868 | 72.2605634 | 65.7715278 | 71.6061284 | 55.9682631 |
| 17:35:00 | 0:35:00 | 62.7694868 | 72.2605634 | 65.7715278 | 71.6061284 | 55.9682631 |
| 17:35:01 | 0:35:01 | 62.7694868 | 72.2605634 | 65.7715278 | 72.6061284 | 55.9682631 |
| 17:35:02 | 0:35:02 | 62.7694868 | 72.2605634 | 67.7715278 | 74.6061284 | 55.9682631 |
| 17:35:03 | 0:35:03 | 62.7694868 | 72.2605634 | 67.7715278 | 74.6061284 | 58.9682631 |
| 17:35:04 | 0:35:04 | 61.7694868 | 74.2605634 | 67.7715278 | 76.6061284 | 59.9682631 |
| 17:35:05 | 0:35:05 | 60.7694868 | 75.2605634 | 69.7715278 | 76.6061284 | 59.9682631 |
| 17:35:06 | 0:35:06 | 60.7694868 | 74.2605634 | 67.7715278 | 80.6061284 | 59.9682631 |
| 17:35:07 | 0:35:07 | 60.7694868 | 73.2605634 | 65.7715278 | 81.6061284 | 61.9682631 |
| 17:35:08 | 0:35:08 | 60.7694868 | 73.2605634 | 64.7715278 | 83.6061284 | 61.9682631 |
| 17:35:09 | 0:35:09 | 60.7694868 | 72.2605634 | 64.7715278 | 84.6061284 | 62.9682631 |
| 17:35:10 | 0:35:10 | 59.7694868 | 71.2605634 | 65.7715278 | 83.6061284 | 61.9682631 |
| 17:35:11 | 0:35:11 | 60.7694868 | 71.2605634 | 66.7715278 | 80.6061284 | 59.9682631 |
| 17:35:12 | 0:35:12 | 60.7694868 | 71.2605634 | 66.7715278 | 77.6061284 | 59.9682631 |
| 17:35:13 | 0:35:13 | 60.7694868 | 71.2605634 | 67.7715278 | 75.6061284 | 59.9682631 |

|          |         |            |            |            |            |            |
|----------|---------|------------|------------|------------|------------|------------|
| 17:35:14 | 0:35:14 | 60.7694868 | 71.2605634 | 68.7715278 | 73.6061284 | 59.9682631 |
| 17:35:15 | 0:35:15 | 60.7694868 | 70.2605634 | 68.7715278 | 70.6061284 | 59.9682631 |
| 17:35:16 | 0:35:16 | 61.7694868 | 69.2605634 | 68.7715278 | 66.6061284 | 59.9682631 |
| 17:35:17 | 0:35:17 | 62.7694868 | 69.2605634 | 68.7715278 | 64.6061284 | 59.9682631 |
| 17:35:18 | 0:35:18 | 62.7694868 | 68.2605634 | 68.7715278 | 63.6061284 | 60.9682631 |
| 17:35:19 | 0:35:19 | 64.7694868 | 68.2605634 | 69.7715278 | 63.6061284 | 62.9682631 |
| 17:35:20 | 0:35:20 | 64.7694868 | 67.2605634 | 70.7715278 | 65.6061284 | 62.9682631 |
| 17:35:21 | 0:35:21 | 64.7694868 | 69.2605634 | 70.7715278 | 66.6061284 | 62.9682631 |
| 17:35:22 | 0:35:22 | 65.7694868 | 70.2605634 | 73.7715278 | 67.6061284 | 63.9682631 |
| 17:35:23 | 0:35:23 | 65.7694868 | 70.2605634 | 73.7715278 | 67.6061284 | 66.9682631 |
| 17:35:24 | 0:35:24 | 64.7694868 | 70.2605634 | 74.7715278 | 67.6061284 | 66.9682631 |
| 17:35:25 | 0:35:25 | 64.7694868 | 70.2605634 | 74.7715278 | 67.6061284 | 66.9682631 |
| 17:35:26 | 0:35:26 | 64.7694868 | 70.2605634 | 74.7715278 | 67.6061284 | 66.9682631 |
| 17:35:27 | 0:35:27 | 64.7694868 | 70.2605634 | 75.7715278 | 68.6061284 | 68.9682631 |
| 17:35:28 | 0:35:28 | 63.7694868 | 70.2605634 | 76.7715278 | 68.6061284 | 70.9682631 |
| 17:35:29 | 0:35:29 | 63.7694868 | 70.2605634 | 76.7715278 | 68.6061284 | 73.9682631 |
| 17:35:30 | 0:35:30 | 63.7694868 | 72.2605634 | 81.7715278 | 68.6061284 | 75.9682631 |
| 17:35:31 | 0:35:31 | 63.7694868 | 73.2605634 | 81.7715278 | 68.6061284 | 75.9682631 |
| 17:35:32 | 0:35:32 | 64.7694868 | 78.2605634 | 81.7715278 | 69.6061284 | 75.9682631 |
| 17:35:33 | 0:35:33 | 63.7694868 | 79.2605634 | 83.7715278 | 68.6061284 | 76.9682631 |
| 17:35:34 | 0:35:34 | 63.7694868 | 80.2605634 | 83.7715278 | 67.6061284 | 78.9682631 |
| 17:35:35 | 0:35:35 | 62.7694868 | 81.2605634 | 83.7715278 | 67.6061284 | 80.9682631 |
| 17:35:36 | 0:35:36 | 62.7694868 | 82.2605634 | 83.7715278 | 67.6061284 | 81.9682631 |
| 17:35:37 | 0:35:37 | 61.7694868 | 82.2605634 | 83.7715278 | 68.6061284 | 80.9682631 |
| 17:35:38 | 0:35:38 | 61.7694868 | 82.2605634 | 81.7715278 | 69.6061284 | 80.9682631 |
| 17:35:39 | 0:35:39 | 61.7694868 | 82.2605634 | 81.7715278 | 69.6061284 | 82.9682631 |
| 17:35:40 | 0:35:40 | 61.7694868 | 82.2605634 | 84.7715278 | 69.6061284 | 83.9682631 |
| 17:35:41 | 0:35:41 | 61.7694868 | 79.2605634 | 84.7715278 | 68.6061284 | 86.9682631 |
| 17:35:42 | 0:35:42 | 61.7694868 | 79.2605634 | 84.7715278 | 68.6061284 | 86.9682631 |
| 17:35:43 | 0:35:43 | 62.7694868 | 78.2605634 | 84.7715278 | 69.6061284 | 94.9682631 |
| 17:35:44 | 0:35:44 | 62.7694868 | 77.2605634 | 84.7715278 | 70.6061284 | 94.9682631 |
| 17:35:45 | 0:35:45 | 62.7694868 | 76.2605634 | 83.7715278 | 70.6061284 | 95.9682631 |
| 17:35:46 | 0:35:46 | 63.7694868 | 75.2605634 | 83.7715278 | 70.6061284 | 95.9682631 |
| 17:35:47 | 0:35:47 | 64.7694868 | 74.2605634 | 83.7715278 | 70.6061284 | 98.9682631 |
| 17:35:48 | 0:35:48 | 65.7694868 | 72.2605634 | 83.7715278 | 70.6061284 | 99.9682631 |
| 17:35:49 | 0:35:49 | 65.7694868 | 71.2605634 | 77.7715278 | 74.6061284 | 99.9682631 |
| 17:35:50 | 0:35:50 | 64.7694868 | 71.2605634 | 74.7715278 | 74.6061284 | 77.8723475 |
| 17:35:51 | 0:35:51 | 63.7694868 | 71.2605634 | 74.7715278 | 73.6061284 | 78.9632566 |
| 17:35:52 | 0:35:52 | 63.7694868 | 70.2605634 | 72.7715278 | 73.6061284 | 78.7814384 |
| 17:35:53 | 0:35:53 | 63.7694868 | 70.2605634 | 71.7715278 | 73.6061284 | 78.6905293 |
| 17:35:54 | 0:35:54 | 62.7694868 | 71.2605634 | 69.7715278 | 73.6061284 | 77.7814384 |
| 17:35:55 | 0:35:55 | 62.7694868 | 71.2605634 | 70.7715278 | 72.6061284 | 76.5087111 |
| 17:35:56 | 0:35:56 | 62.7694868 | 72.2605634 | 70.7715278 | 71.6061284 | 76.2359838 |
| 17:35:57 | 0:35:57 | 62.7694868 | 73.2605634 | 73.7715278 | 68.6061284 | 76.1450748 |
| 17:35:58 | 0:35:58 | 62.7694868 | 74.2605634 | 74.7715278 | 66.6061284 | 76.1450748 |

|          |         |            |            |            |            |            |
|----------|---------|------------|------------|------------|------------|------------|
| 17:35:59 | 0:35:59 | 62.7694868 | 74.2605634 | 74.7715278 | 66.6061284 | 75.9632566 |
| 17:36:00 | 0:36:00 | 63.7694868 | 73.2605634 | 76.7715278 | 67.6061284 | 76.2359838 |
| 17:36:01 | 0:36:01 | 63.7694868 | 73.2605634 | 76.7715278 | 67.6061284 | 76.1450748 |
| 17:36:02 | 0:36:02 | 64.7694868 | 73.2605634 | 77.7715278 | 66.6061284 | 75.8723475 |
| 17:36:03 | 0:36:03 | 64.7694868 | 72.2605634 | 77.7715278 | 66.6061284 | 75.3268929 |
| 17:36:04 | 0:36:04 | 64.7694868 | 73.2605634 | 77.7715278 | 66.6061284 | 75.2359838 |
| 17:36:05 | 0:36:05 | 64.7694868 | 73.2605634 | 78.7715278 | 66.6061284 | 75.1450748 |
| 17:36:06 | 0:36:06 | 64.7694868 | 73.2605634 | 79.7715278 | 66.6061284 | 74.9632566 |
| 17:36:07 | 0:36:07 | 63.7694868 | 74.2605634 | 79.7715278 | 66.6061284 | 74.9632566 |
| 17:36:08 | 0:36:08 | 63.7694868 | 75.2605634 | 79.7715278 | 66.6061284 | 75.1450748 |
| 17:36:09 | 0:36:09 | 63.7694868 | 75.2605634 | 79.7715278 | 66.6061284 | 75.3268929 |
| 17:36:10 | 0:36:10 | 63.7694868 | 75.2605634 | 79.7715278 | 66.6061284 | 75.3268929 |
| 17:36:11 | 0:36:11 | 63.7694868 | 76.2605634 | 76.7715278 | 66.6061284 | 75.2359838 |
| 17:36:12 | 0:36:12 | 63.7694868 | 76.2605634 | 73.7715278 | 67.6061284 | 75.0541657 |
| 17:36:13 | 0:36:13 | 63.7694868 | 76.2605634 | 73.7715278 | 68.6061284 | 75.2359838 |
| 17:36:14 | 0:36:14 | 63.7694868 | 78.2605634 | 65.7715278 | 69.6061284 | 74.8723475 |
| 17:36:15 | 0:36:15 | 63.7694868 | 78.2605634 | 64.7715278 | 70.6061284 | 74.9632566 |
| 17:36:16 | 0:36:16 | 64.7694868 | 78.2605634 | 64.7715278 | 70.6061284 | 75.0541657 |
| 17:36:17 | 0:36:17 | 65.7694868 | 80.2605634 | 64.7715278 | 70.6061284 | 75.5996202 |
| 17:36:18 | 0:36:18 | 65.7694868 | 80.2605634 | 64.7715278 | 69.6061284 | 76.3268929 |
| 17:36:19 | 0:36:19 | 65.7694868 | 83.2605634 | 64.7715278 | 69.6061284 | 76.3268929 |
| 17:36:20 | 0:36:20 | 66.7694868 | 81.2605634 | 64.7715278 | 69.6061284 | 76.3268929 |
| 17:36:21 | 0:36:21 | 66.7694868 | 81.2605634 | 65.7715278 | 68.6061284 | 76.1450748 |
| 17:36:22 | 0:36:22 | 66.7694868 | 77.2605634 | 65.7715278 | 68.6061284 | 75.2359838 |
| 17:36:23 | 0:36:23 | 66.7694868 | 75.2605634 | 65.7715278 | 68.6061284 | 74.8723475 |
| 17:36:24 | 0:36:24 | 66.7694868 | 75.2605634 | 65.7715278 | 69.6061284 | 74.9632566 |
| 17:36:25 | 0:36:25 | 66.7694868 | 70.2605634 | 66.7715278 | 68.6061284 | 74.6905293 |
| 17:36:26 | 0:36:26 | 66.7694868 | 68.2605634 | 63.7715278 | 68.6061284 | 73.8723475 |
| 17:36:27 | 0:36:27 | 65.7694868 | 68.2605634 | 63.7715278 | 66.6061284 | 73.6905293 |
| 17:36:28 | 0:36:28 | 65.7694868 | 67.2605634 | 63.7715278 | 65.6061284 | 73.5087111 |
| 17:36:29 | 0:36:29 | 63.7694868 | 67.2605634 | 63.7715278 | 65.6061284 | 73.1450748 |
| 17:36:30 | 0:36:30 | 63.7694868 | 67.2605634 | 63.7715278 | 65.6061284 | 73.3268929 |
| 17:36:31 | 0:36:31 | 63.7694868 | 67.2605634 | 63.7715278 | 65.6061284 | 73.5996202 |
| 17:36:32 | 0:36:32 | 62.7694868 | 67.2605634 | 62.7715278 | 66.6061284 | 73.8723475 |
| 17:36:33 | 0:36:33 | 61.7694868 | 67.2605634 | 62.7715278 | 67.6061284 | 73.6905293 |
| 17:36:34 | 0:36:34 | 60.7694868 | 69.2605634 | 62.7715278 | 67.6061284 | 73.8723475 |
| 17:36:35 | 0:36:35 | 60.7694868 | 66.2605634 | 62.7715278 | 67.6061284 | 73.7814384 |
| 17:36:36 | 0:36:36 | 60.7694868 | 66.2605634 | 62.7715278 | 67.6061284 | 73.7814384 |
| 17:36:37 | 0:36:37 | 60.7694868 | 65.2605634 | 62.7715278 | 67.6061284 | 73.5087111 |
| 17:36:38 | 0:36:38 | 60.7694868 | 65.2605634 | 61.7715278 | 67.6061284 | 73.3268929 |
| 17:36:39 | 0:36:39 | 61.7694868 | 65.2605634 | 61.7715278 | 68.6061284 | 73.9632566 |
| 17:36:40 | 0:36:40 | 61.7694868 | 67.2605634 | 62.7715278 | 70.6061284 | 77.1450748 |
| 17:36:41 | 0:36:41 | 61.7694868 | 68.2605634 | 61.7715278 | 70.6061284 | 78.417802  |
| 17:36:42 | 0:36:42 | 61.7694868 | 68.2605634 | 61.7715278 | 69.6061284 | 78.6905293 |
| 17:36:43 | 0:36:43 | 61.7694868 | 69.2605634 | 61.7715278 | 69.6061284 | 78.0541657 |

|          |         |            |            |            |            |            |
|----------|---------|------------|------------|------------|------------|------------|
| 17:36:44 | 0:36:44 | 61.7694868 | 68.2605634 | 60.7715278 | 69.6061284 | 77.7814384 |
| 17:36:45 | 0:36:45 | 61.7694868 | 68.2605634 | 60.7715278 | 69.6061284 | 78.2359838 |
| 17:36:46 | 0:36:46 | 61.7694868 | 67.2605634 | 67.7715278 | 69.6061284 | 78.6905293 |
| 17:36:47 | 0:36:47 | 61.7694868 | 67.2605634 | 71.7715278 | 70.6061284 | 79.2359838 |
| 17:36:48 | 0:36:48 | 61.7694868 | 67.2605634 | 71.7715278 | 70.6061284 | 79.2359838 |
| 17:36:49 | 0:36:49 | 61.7694868 | 68.2605634 | 74.7715278 | 71.6061284 | 79.7814384 |
| 17:36:50 | 0:36:50 | 66.7694868 | 67.2605634 | 73.7715278 | 72.6061284 | 80.417802  |
| 17:36:51 | 0:36:51 | 66.7694868 | 67.2605634 | 72.7715278 | 72.6061284 | 79.9632566 |
| 17:36:52 | 0:36:52 | 67.7694868 | 67.2605634 | 72.7715278 | 73.6061284 | 80.1450748 |
| 17:36:53 | 0:36:53 | 67.7694868 | 68.2605634 | 72.7715278 | 74.6061284 | 80.5996202 |
| 17:36:54 | 0:36:54 | 67.7694868 | 68.2605634 | 71.7715278 | 74.6061284 | 80.5087111 |
| 17:36:55 | 0:36:55 | 67.7694868 | 68.2605634 | 69.7715278 | 74.6061284 | 80.9632566 |
| 17:36:56 | 0:36:56 | 67.7694868 | 68.2605634 | 69.7715278 | 74.6061284 | 81.5087111 |
| 17:36:57 | 0:36:57 | 66.7694868 | 68.2605634 | 67.7715278 | 74.6061284 | 81.1450748 |
| 17:36:58 | 0:36:58 | 66.7694868 | 68.2605634 | 67.7715278 | 74.6061284 | 81.5996202 |
| 17:36:59 | 0:36:59 | 66.7694868 | 68.2605634 | 66.7715278 | 74.6061284 | 81.8723475 |
| 17:37:00 | 0:37:00 | 66.7694868 | 68.2605634 | 65.7715278 | 74.6061284 | 81.5087111 |
| 17:37:01 | 0:37:01 | 66.7694868 | 68.2605634 | 65.7715278 | 74.6061284 | 81.9632566 |
| 17:37:02 | 0:37:02 | 66.7694868 | 71.2605634 | 64.7715278 | 74.6061284 | 82.5996202 |
| 17:37:03 | 0:37:03 | 66.7694868 | 71.2605634 | 65.7715278 | 74.6061284 | 83.5996202 |
| 17:37:04 | 0:37:04 | 65.7694868 | 72.2605634 | 65.7715278 | 73.6061284 | 83.3268929 |
| 17:37:05 | 0:37:05 | 64.7694868 | 72.2605634 | 65.7715278 | 72.6061284 | 83.0541657 |
| 17:37:06 | 0:37:06 | 63.7694868 | 72.2605634 | 65.7715278 | 72.6061284 | 83.417802  |
| 17:37:07 | 0:37:07 | 62.7694868 | 72.2605634 | 67.7715278 | 73.6061284 | 82.417802  |
| 17:37:08 | 0:37:08 | 62.7694868 | 72.2605634 | 67.7715278 | 73.6061284 | 81.8723475 |
| 17:37:09 | 0:37:09 | 62.7694868 | 71.2605634 | 66.7715278 | 73.6061284 | 81.417802  |
| 17:37:10 | 0:37:10 | 62.7694868 | 67.2605634 | 66.7715278 | 73.6061284 | 79.1450748 |
| 17:37:11 | 0:37:11 | 61.7694868 | 67.2605634 | 66.7715278 | 75.6061284 | 78.5996202 |
| 17:37:12 | 0:37:12 | 61.7694868 | 67.2605634 | 66.7715278 | 77.6061284 | 78.417802  |
| 17:37:13 | 0:37:13 | 61.7694868 | 66.2605634 | 66.7715278 | 79.6061284 | 78.2359838 |
| 17:37:14 | 0:37:14 | 61.7694868 | 66.2605634 | 66.7715278 | 78.6061284 | 77.6905293 |
| 17:37:15 | 0:37:15 | 61.7694868 | 65.2605634 | 66.7715278 | 76.6061284 | 77.7814384 |
| 17:37:16 | 0:37:16 | 61.7694868 | 64.2605634 | 66.7715278 | 74.6061284 | 77.5996202 |
| 17:37:17 | 0:37:17 | 59.7694868 | 63.2605634 | 66.7715278 | 72.6061284 | 77.2359838 |
| 17:37:18 | 0:37:18 | 59.7694868 | 63.2605634 | 63.7715278 | 71.6061284 | 76.8723475 |
| 17:37:19 | 0:37:19 | 61.7694868 | 63.2605634 | 63.7715278 | 71.6061284 | 76.7814384 |
| 17:37:20 | 0:37:20 | 61.7694868 | 63.2605634 | 65.7715278 | 71.6061284 | 77.7814384 |
| 17:37:21 | 0:37:21 | 62.7694868 | 63.2605634 | 65.7715278 | 71.6061284 | 77.6905293 |
| 17:37:22 | 0:37:22 | 62.7694868 | 65.2605634 | 65.7715278 | 71.6061284 | 77.6905293 |
| 17:37:23 | 0:37:23 | 62.7694868 | 66.2605634 | 64.7715278 | 71.6061284 | 77.2359838 |
| 17:37:24 | 0:37:24 | 62.7694868 | 66.2605634 | 64.7715278 | 73.6061284 | 77.2359838 |
| 17:37:25 | 0:37:25 | 63.7694868 | 66.2605634 | 62.7715278 | 73.6061284 | 77.0541657 |
| 17:37:26 | 0:37:26 | 63.7694868 | 65.2605634 | 61.7715278 | 74.6061284 | 76.5996202 |
| 17:37:27 | 0:37:27 | 64.7694868 | 65.2605634 | 61.7715278 | 74.6061284 | 76.6905293 |
| 17:37:28 | 0:37:28 | 64.7694868 | 65.2605634 | 61.7715278 | 74.6061284 | 76.7814384 |



|          |         |            |            |            |            |            |
|----------|---------|------------|------------|------------|------------|------------|
| 17:37:29 | 0:37:29 | 64.7694868 | 66.2605634 | 61.7715278 | 75.6061284 | 77.2359838 |
| 17:37:30 | 0:37:30 | 64.7694868 | 66.2605634 | 61.7715278 | 75.6061284 | 77.2359838 |
| 17:37:31 | 0:37:31 | 64.7694868 | 67.2605634 | 61.7715278 | 77.6061284 | 77.0541657 |
| 17:37:32 | 0:37:32 | 64.7694868 | 68.2605634 | 64.7715278 | 74.6061284 | 77.0541657 |
| 17:37:33 | 0:37:33 | 63.7694868 | 68.2605634 | 66.7715278 | 73.6061284 | 76.8723475 |
| 17:37:34 | 0:37:34 | 63.7694868 | 69.2605634 | 65.7715278 | 73.6061284 | 76.6905293 |
| 17:37:35 | 0:37:35 | 63.7694868 | 69.2605634 | 66.7715278 | 73.6061284 | 76.5996202 |
| 17:37:36 | 0:37:36 | 65.7694868 | 69.2605634 | 66.7715278 | 73.6061284 | 76.8723475 |
| 17:37:37 | 0:37:37 | 67.7694868 | 69.2605634 | 66.7715278 | 72.6061284 | 76.9632566 |
| 17:37:38 | 0:37:38 | 67.7694868 | 69.2605634 | 67.7715278 | 72.6061284 | 76.6905293 |
| 17:37:39 | 0:37:39 | 67.7694868 | 70.2605634 | 70.7715278 | 72.6061284 | 76.5996202 |
| 17:37:40 | 0:37:40 | 67.7694868 | 71.2605634 | 70.7715278 | 72.6061284 | 76.9632566 |
| 17:37:41 | 0:37:41 | 65.7694868 | 73.2605634 | 72.7715278 | 72.6061284 | 76.9632566 |
| 17:37:42 | 0:37:42 | 65.7694868 | 76.2605634 | 73.7715278 | 73.6061284 | 77.5996202 |
| 17:37:43 | 0:37:43 | 65.7694868 | 77.2605634 | 73.7715278 | 72.6061284 | 77.5087111 |
| 17:37:44 | 0:37:44 | 65.7694868 | 77.2605634 | 73.7715278 | 71.6061284 | 77.0541657 |
| 17:37:45 | 0:37:45 | 65.7694868 | 77.2605634 | 73.7715278 | 71.6061284 | 77.3268929 |
| 17:37:46 | 0:37:46 | 64.7694868 | 78.2605634 | 73.7715278 | 70.6061284 | 77.5087111 |
| 17:37:47 | 0:37:47 | 64.7694868 | 79.2605634 | 73.7715278 | 70.6061284 | 77.6905293 |
| 17:37:48 | 0:37:48 | 64.7694868 | 79.2605634 | 73.7715278 | 70.6061284 | 77.6905293 |
| 17:37:49 | 0:37:49 | 64.7694868 | 79.2605634 | 73.7715278 | 71.6061284 | 77.5996202 |
| 17:37:50 | 0:37:50 | 63.7694868 | 78.2605634 | 72.7715278 | 70.6061284 | 76.417802  |
| 17:37:51 | 0:37:51 | 63.7694868 | 78.2605634 | 67.7715278 | 70.6061284 | 75.417802  |
| 17:37:52 | 0:37:52 | 63.7694868 | 77.2605634 | 67.7715278 | 68.6061284 | 75.1450748 |
| 17:37:53 | 0:37:53 | 63.7694868 | 75.2605634 | 64.7715278 | 68.6061284 | 74.5996202 |
| 17:37:54 | 0:37:54 | 63.7694868 | 71.2605634 | 60.7715278 | 68.6061284 | 74.5087111 |
| 17:37:55 | 0:37:55 | 63.7694868 | 69.2605634 | 58.7715278 | 70.6061284 | 74.2359838 |
| 17:37:56 | 0:37:56 | 63.7694868 | 68.2605634 | 58.7715278 | 70.6061284 | 74.1450748 |
| 17:37:57 | 0:37:57 | 63.7694868 | 70.2605634 | 58.7715278 | 70.6061284 | 74.2359838 |
| 17:37:58 | 0:37:58 | 70.7694868 | 72.2605634 | 58.7715278 | 70.6061284 | 74.9632566 |
| 17:37:59 | 0:37:59 | 71.7694868 | 72.2605634 | 59.7715278 | 69.6061284 | 74.9632566 |
| 17:38:00 | 0:38:00 | 71.7694868 | 72.2605634 | 59.7715278 | 69.6061284 | 74.5996202 |
| 17:38:01 | 0:38:01 | 70.7694868 | 72.2605634 | 59.7715278 | 67.6061284 | 74.5087111 |
| 17:38:02 | 0:38:02 | 70.7694868 | 72.2605634 | 60.7715278 | 67.6061284 | 74.9632566 |
| 17:38:03 | 0:38:03 | 68.7694868 | 72.2605634 | 61.7715278 | 68.6061284 | 74.8723475 |
| 17:38:04 | 0:38:04 | 66.7694868 | 72.2605634 | 61.7715278 | 67.6061284 | 74.5087111 |
| 17:38:05 | 0:38:05 | 65.7694868 | 71.2605634 | 61.7715278 | 67.6061284 | 73.5087111 |
| 17:38:06 | 0:38:06 | 64.7694868 | 69.2605634 | 61.7715278 | 67.6061284 | 72.9632566 |
| 17:38:07 | 0:38:07 | 63.7694868 | 68.2605634 | 62.7715278 | 67.6061284 | 72.7814384 |
| 17:38:08 | 0:38:08 | 63.7694868 | 68.2605634 | 63.7715278 | 67.6061284 | 72.1450748 |
| 17:38:09 | 0:38:09 | 63.7694868 | 67.2605634 | 65.7715278 | 67.6061284 | 72.0541657 |
| 17:38:10 | 0:38:10 | 62.7694868 | 68.2605634 | 65.7715278 | 67.6061284 | 72.2359838 |
| 17:38:11 | 0:38:11 | 62.7694868 | 68.2605634 | 64.7715278 | 67.6061284 | 72.1450748 |
| 17:38:12 | 0:38:12 | 63.7694868 | 69.2605634 | 63.7715278 | 67.6061284 | 72.6905293 |
| 17:38:13 | 0:38:13 | 63.7694868 | 69.2605634 | 62.7715278 | 68.6061284 | 72.8723475 |

|          |         |            |            |            |            |            |
|----------|---------|------------|------------|------------|------------|------------|
| 17:38:14 | 0:38:14 | 63.7694868 | 71.2605634 | 61.7715278 | 68.6061284 | 73.3268929 |
| 17:38:15 | 0:38:15 | 62.7694868 | 73.2605634 | 61.7715278 | 68.6061284 | 73.417802  |
| 17:38:16 | 0:38:16 | 61.7694868 | 74.2605634 | 62.7715278 | 68.6061284 | 73.5087111 |
| 17:38:17 | 0:38:17 | 61.7694868 | 75.2605634 | 62.7715278 | 68.6061284 | 73.0541657 |
| 17:38:18 | 0:38:18 | 60.7694868 | 74.2605634 | 62.7715278 | 68.6061284 | 71.6905293 |
| 17:38:19 | 0:38:19 | 60.7694868 | 74.2605634 | 62.7715278 | 70.6061284 | 71.417802  |
| 17:38:20 | 0:38:20 | 60.7694868 | 73.2605634 | 62.7715278 | 70.6061284 | 70.0541657 |
| 17:38:21 | 0:38:21 | 60.7694868 | 72.2605634 | 62.7715278 | 72.6061284 | 69.2359838 |
| 17:38:22 | 0:38:22 | 60.7694868 | 71.2605634 | 62.7715278 | 72.6061284 | 68.8723475 |
| 17:38:23 | 0:38:23 | 60.7694868 | 71.2605634 | 62.7715278 | 72.6061284 | 68.5087111 |
| 17:38:24 | 0:38:24 | 60.7694868 | 71.2605634 | 62.7715278 | 72.6061284 | 68.5087111 |
| 17:38:25 | 0:38:25 | 60.7694868 | 70.2605634 | 61.7715278 | 72.6061284 | 68.6905293 |
| 17:38:26 | 0:38:26 | 58.7694868 | 70.2605634 | 61.7715278 | 73.6061284 | 86.9682631 |
| 17:38:27 | 0:38:27 | 58.7694868 | 70.2605634 | 61.7715278 | 73.6061284 | 85.9682631 |
| 17:38:28 | 0:38:28 | 58.7694868 | 69.2605634 | 61.7715278 | 73.6061284 | 85.9682631 |
| 17:38:29 | 0:38:29 | 58.7694868 | 68.2605634 | 61.7715278 | 73.6061284 | 86.9682631 |
| 17:38:30 | 0:38:30 | 58.7694868 | 67.2605634 | 61.7715278 | 74.6061284 | 86.9682631 |
| 17:38:31 | 0:38:31 | 58.7694868 | 67.2605634 | 61.7715278 | 75.6061284 | 86.9682631 |
| 17:38:32 | 0:38:32 | 58.7694868 | 67.2605634 | 61.7715278 | 74.6061284 | 87.9682631 |
| 17:38:33 | 0:38:33 | 58.7694868 | 67.2605634 | 61.7715278 | 74.6061284 | 88.9682631 |
| 17:38:34 | 0:38:34 | 57.7694868 | 67.2605634 | 61.7715278 | 76.6061284 | 88.9682631 |
| 17:38:35 | 0:38:35 | 57.7694868 | 68.2605634 | 62.7715278 | 77.6061284 | 89.9682631 |
| 17:38:36 | 0:38:36 | 57.7694868 | 69.2605634 | 62.7715278 | 78.6061284 | 67.8723475 |
| 17:38:37 | 0:38:37 | 57.7694868 | 69.2605634 | 61.7715278 | 78.6061284 | 67.5996202 |
| 17:38:38 | 0:38:38 | 57.7694868 | 69.2605634 | 60.7715278 | 77.6061284 | 67.2359838 |
| 17:38:39 | 0:38:39 | 57.7694868 | 69.2605634 | 60.7715278 | 73.6061284 | 66.5996202 |
| 17:38:40 | 0:38:40 | 57.7694868 | 69.2605634 | 60.7715278 | 69.6061284 | 66.417802  |
| 17:38:41 | 0:38:41 | 62.7694868 | 69.2605634 | 61.7715278 | 66.6061284 | 66.6905293 |
| 17:38:42 | 0:38:42 | 63.7694868 | 70.2605634 | 61.7715278 | 64.6061284 | 87.9682631 |
| 17:38:43 | 0:38:43 | 63.7694868 | 71.2605634 | 62.7715278 | 63.6061284 | 87.9682631 |
| 17:38:44 | 0:38:44 | 63.7694868 | 71.2605634 | 62.7715278 | 63.6061284 | 86.9682631 |
| 17:38:45 | 0:38:45 | 63.7694868 | 71.2605634 | 61.7715278 | 64.6061284 | 86.9682631 |
| 17:38:46 | 0:38:46 | 64.7694868 | 74.2605634 | 62.7715278 | 64.6061284 | 86.9682631 |
| 17:38:47 | 0:38:47 | 64.7694868 | 75.2605634 | 63.7715278 | 64.6061284 | 86.9682631 |
| 17:38:48 | 0:38:48 | 65.7694868 | 74.2605634 | 63.7715278 | 63.6061284 | 85.9682631 |
| 17:38:49 | 0:38:49 | 65.7694868 | 73.2605634 | 63.7715278 | 63.6061284 | 85.9682631 |
| 17:38:50 | 0:38:50 | 66.7694868 | 72.2605634 | 63.7715278 | 63.6061284 | 85.9682631 |
| 17:38:51 | 0:38:51 | 66.7694868 | 70.2605634 | 63.7715278 | 63.6061284 | 86.9682631 |
| 17:38:52 | 0:38:52 | 66.7694868 | 69.2605634 | 63.7715278 | 63.6061284 | 86.9682631 |
| 17:38:53 | 0:38:53 | 66.7694868 | 66.2605634 | 63.7715278 | 64.6061284 | 88.9682631 |
| 17:38:54 | 0:38:54 | 65.7694868 | 65.2605634 | 63.7715278 | 65.6061284 | 85.9682631 |
| 17:38:55 | 0:38:55 | 66.7694868 | 65.2605634 | 62.7715278 | 65.6061284 | 84.9682631 |
| 17:38:56 | 0:38:56 | 67.7694868 | 65.2605634 | 61.7715278 | 65.6061284 | 84.9682631 |
| 17:38:57 | 0:38:57 | 68.7694868 | 66.2605634 | 61.7715278 | 64.6061284 | 84.9682631 |
| 17:38:58 | 0:38:58 | 69.7694868 | 67.2605634 | 61.7715278 | 65.6061284 | 85.9682631 |

|          |         |            |            |            |            |            |
|----------|---------|------------|------------|------------|------------|------------|
| 17:38:59 | 0:38:59 | 70.7694868 | 68.2605634 | 61.7715278 | 66.6061284 | 85.9682631 |
| 17:39:00 | 0:39:00 | 70.7694868 | 68.2605634 | 61.7715278 | 67.6061284 | 85.9682631 |
| 17:39:01 | 0:39:01 | 70.7694868 | 68.2605634 | 61.7715278 | 67.6061284 | 86.9682631 |
| 17:39:02 | 0:39:02 | 70.7694868 | 68.2605634 | 62.7715278 | 67.6061284 | 88.9682631 |
| 17:39:03 | 0:39:03 | 70.7694868 | 68.2605634 | 62.7715278 | 67.6061284 | 89.9682631 |
| 17:39:04 | 0:39:04 | 69.7694868 | 68.2605634 | 62.7715278 | 67.6061284 | 89.9682631 |
| 17:39:05 | 0:39:05 | 67.7694868 | 68.2605634 | 62.7715278 | 67.6061284 | 91.9682631 |
| 17:39:06 | 0:39:06 | 61.7694868 | 67.2605634 | 62.7715278 | 67.6061284 | 69.8723475 |
| 17:39:07 | 0:39:07 | 59.7694868 | 74.2605634 | 62.7715278 | 67.6061284 | 70.1450748 |
| 17:39:08 | 0:39:08 | 59.7694868 | 78.2605634 | 65.7715278 | 68.6061284 | 71.2359838 |
| 17:39:09 | 0:39:09 | 58.7694868 | 80.2605634 | 65.7715278 | 69.6061284 | 71.5087111 |
| 17:39:10 | 0:39:10 | 58.7694868 | 80.2605634 | 65.7715278 | 70.6061284 | 71.5996202 |
| 17:39:11 | 0:39:11 | 58.7694868 | 80.2605634 | 65.7715278 | 66.6061284 | 71.5087111 |
| 17:39:12 | 0:39:12 | 58.7694868 | 80.2605634 | 65.7715278 | 66.6061284 | 92.9682631 |
| 17:39:13 | 0:39:13 | 58.7694868 | 80.2605634 | 61.7715278 | 66.6061284 | 70.417802  |
| 17:39:14 | 0:39:14 | 58.7694868 | 80.2605634 | 60.7715278 | 66.6061284 | 92.9682631 |
| 17:39:15 | 0:39:15 | 58.7694868 | 79.2605634 | 60.7715278 | 66.6061284 | 70.7814384 |
| 17:39:16 | 0:39:16 | 58.7694868 | 79.2605634 | 59.7715278 | 66.6061284 | 70.5996202 |
| 17:39:17 | 0:39:17 | 57.7694868 | 79.2605634 | 58.7715278 | 66.6061284 | 70.6905293 |
| 17:39:18 | 0:39:18 | 57.7694868 | 79.2605634 | 58.7715278 | 66.6061284 | 70.6905293 |
| 17:39:19 | 0:39:19 | 57.7694868 | 78.2605634 | 54.7715278 | 67.6061284 | 69.417802  |
| 17:39:20 | 0:39:20 | 57.7694868 | 78.2605634 | 54.7715278 | 67.6061284 | 69.5087111 |
| 17:39:21 | 0:39:21 | 57.7694868 | 77.2605634 | 55.7715278 | 69.6061284 | 69.7814384 |
| 17:39:22 | 0:39:22 | 57.7694868 | 72.2605634 | 55.7715278 | 69.6061284 | 68.8723475 |
| 17:39:23 | 0:39:23 | 58.7694868 | 69.2605634 | 55.7715278 | 69.6061284 | 68.5996202 |
| 17:39:24 | 0:39:24 | 59.7694868 | 67.2605634 | 55.7715278 | 69.6061284 | 88.9682631 |
| 17:39:25 | 0:39:25 | 59.7694868 | 64.2605634 | 63.7715278 | 73.6061284 | 72.9682631 |
| 17:39:26 | 0:39:26 | 60.7694868 | 64.2605634 | 63.7715278 | 75.6061284 | 66.9682631 |
| 17:39:27 | 0:39:27 | 62.7694868 | 64.2605634 | 64.7715278 | 76.6061284 | 62.9682631 |
| 17:39:28 | 0:39:28 | 66.7694868 | 62.2605634 | 66.7715278 | 78.6061284 | 59.9682631 |
| 17:39:29 | 0:39:29 | 66.7694868 | 62.2605634 | 65.7715278 | 79.6061284 | 54.9682631 |
| 17:39:30 | 0:39:30 | 66.7694868 | 61.2605634 | 65.7715278 | 79.6061284 | 54.9682631 |
| 17:39:31 | 0:39:31 | 65.7694868 | 61.2605634 | 65.7715278 | 79.6061284 | 53.9682631 |
| 17:39:32 | 0:39:32 | 65.7694868 | 61.2605634 | 64.7715278 | 79.6061284 | 52.9682631 |
| 17:39:33 | 0:39:33 | 65.7694868 | 60.2605634 | 64.7715278 | 79.6061284 | 52.9682631 |
| 17:39:34 | 0:39:34 | 65.7694868 | 65.2605634 | 64.7715278 | 79.6061284 | 52.9682631 |
| 17:39:35 | 0:39:35 | 64.7694868 | 70.2605634 | 64.7715278 | 79.6061284 | 52.9682631 |
| 17:39:36 | 0:39:36 | 67.7694868 | 72.2605634 | 64.7715278 | 80.6061284 | 52.9682631 |
| 17:39:37 | 0:39:37 | 68.7694868 | 72.2605634 | 64.7715278 | 81.6061284 | 52.9682631 |
| 17:39:38 | 0:39:38 | 67.7694868 | 71.2605634 | 66.7715278 | 84.6061284 | 51.9682631 |
| 17:39:39 | 0:39:39 | 67.7694868 | 71.2605634 | 66.7715278 | 80.6061284 | 51.9682631 |
| 17:39:40 | 0:39:40 | 66.7694868 | 71.2605634 | 66.7715278 | 76.6061284 | 52.9682631 |
| 17:39:41 | 0:39:41 | 66.7694868 | 71.2605634 | 64.7715278 | 73.6061284 | 52.9682631 |
| 17:39:42 | 0:39:42 | 66.7694868 | 72.2605634 | 62.7715278 | 71.6061284 | 52.9682631 |
| 17:39:43 | 0:39:43 | 66.7694868 | 72.2605634 | 62.7715278 | 70.6061284 | 52.9682631 |

|          |         |            |            |            |            |            |
|----------|---------|------------|------------|------------|------------|------------|
| 17:39:44 | 0:39:44 | 66.7694868 | 70.2605634 | 62.7715278 | 69.6061284 | 51.9682631 |
| 17:39:45 | 0:39:45 | 66.7694868 | 69.2605634 | 62.7715278 | 67.6061284 | 51.9682631 |
| 17:39:46 | 0:39:46 | 67.7694868 | 68.2605634 | 62.7715278 | 67.6061284 | 51.9682631 |
| 17:39:47 | 0:39:47 | 66.7694868 | 68.2605634 | 61.7715278 | 67.6061284 | 51.9682631 |
| 17:39:48 | 0:39:48 | 66.7694868 | 68.2605634 | 61.7715278 | 67.6061284 | 51.9682631 |
| 17:39:49 | 0:39:49 | 65.7694868 | 69.2605634 | 62.7715278 | 66.6061284 | 52.9682631 |
| 17:39:50 | 0:39:50 | 64.7694868 | 69.2605634 | 62.7715278 | 66.6061284 | 52.9682631 |
| 17:39:51 | 0:39:51 | 63.7694868 | 69.2605634 | 63.7715278 | 67.6061284 | 54.9682631 |
| 17:39:52 | 0:39:52 | 63.7694868 | 70.2605634 | 64.7715278 | 68.6061284 | 55.9682631 |
| 17:39:53 | 0:39:53 | 62.7694868 | 70.2605634 | 64.7715278 | 68.6061284 | 55.9682631 |
| 17:39:54 | 0:39:54 | 62.7694868 | 70.2605634 | 64.7715278 | 68.6061284 | 55.9682631 |
| 17:39:55 | 0:39:55 | 61.7694868 | 70.2605634 | 64.7715278 | 68.6061284 | 55.9682631 |
| 17:39:56 | 0:39:56 | 62.7694868 | 69.2605634 | 63.7715278 | 69.6061284 | 55.9682631 |
| 17:39:57 | 0:39:57 | 61.7694868 | 68.2605634 | 63.7715278 | 70.6061284 | 54.9682631 |
| 17:39:58 | 0:39:58 | 61.7694868 | 67.2605634 | 62.7715278 | 70.6061284 | 54.9682631 |
| 17:39:59 | 0:39:59 | 61.7694868 | 67.2605634 | 63.7715278 | 70.6061284 | 54.9682631 |
| 17:40:00 | 0:40:00 | 61.7694868 | 67.2605634 | 63.7715278 | 70.6061284 | 53.9682631 |
| 17:40:01 | 0:40:01 | 60.7694868 | 66.2605634 | 63.7715278 | 70.6061284 | 53.9682631 |
| 17:40:02 | 0:40:02 | 60.7694868 | 66.2605634 | 64.7715278 | 70.6061284 | 54.9682631 |
| 17:40:03 | 0:40:03 | 60.7694868 | 66.2605634 | 66.7715278 | 70.6061284 | 54.9682631 |
| 17:40:04 | 0:40:04 | 61.7694868 | 67.2605634 | 66.7715278 | 70.6061284 | 54.9682631 |
| 17:40:05 | 0:40:05 | 61.7694868 | 66.2605634 | 66.7715278 | 71.6061284 | 54.9682631 |
| 17:40:06 | 0:40:06 | 61.7694868 | 66.2605634 | 67.7715278 | 71.6061284 | 54.9682631 |
| 17:40:07 | 0:40:07 | 62.7694868 | 66.2605634 | 67.7715278 | 71.6061284 | 55.9682631 |
| 17:40:08 | 0:40:08 | 61.7694868 | 66.2605634 | 67.7715278 | 71.6061284 | 57.9682631 |
| 17:40:09 | 0:40:09 | 60.7694868 | 67.2605634 | 68.7715278 | 71.6061284 | 57.9682631 |
| 17:40:10 | 0:40:10 | 60.7694868 | 68.2605634 | 68.7715278 | 71.6061284 | 57.9682631 |
| 17:40:11 | 0:40:11 | 60.7694868 | 68.2605634 | 68.7715278 | 71.6061284 | 57.9682631 |
| 17:40:12 | 0:40:12 | 60.7694868 | 68.2605634 | 68.7715278 | 71.6061284 | 57.9682631 |
| 17:40:13 | 0:40:13 | 60.7694868 | 69.2605634 | 68.7715278 | 77.6061284 | 59.9682631 |
| 17:40:14 | 0:40:14 | 60.7694868 | 69.2605634 | 68.7715278 | 77.6061284 | 61.9682631 |
| 17:40:15 | 0:40:15 | 60.7694868 | 69.2605634 | 67.7715278 | 77.6061284 | 66.9682631 |
| 17:40:16 | 0:40:16 | 60.7694868 | 69.2605634 | 66.7715278 | 77.6061284 | 66.9682631 |
| 17:40:17 | 0:40:17 | 61.7694868 | 69.2605634 | 65.7715278 | 78.6061284 | 70.9682631 |
| 17:40:18 | 0:40:18 | 61.7694868 | 69.2605634 | 65.7715278 | 78.6061284 | 72.9682631 |
| 17:40:19 | 0:40:19 | 61.7694868 | 69.2605634 | 59.7715278 | 77.6061284 | 72.9682631 |
| 17:40:20 | 0:40:20 | 61.7694868 | 68.2605634 | 58.7715278 | 77.6061284 | 72.9682631 |
| 17:40:21 | 0:40:21 | 61.7694868 | 67.2605634 | 59.7715278 | 77.6061284 | 72.9682631 |
| 17:40:22 | 0:40:22 | 61.7694868 | 70.2605634 | 59.7715278 | 77.6061284 | 72.9682631 |
| 17:40:23 | 0:40:23 | 61.7694868 | 72.2605634 | 60.7715278 | 77.6061284 | 72.9682631 |
| 17:40:24 | 0:40:24 | 61.7694868 | 71.2605634 | 60.7715278 | 76.6061284 | 72.9682631 |
| 17:40:25 | 0:40:25 | 60.7694868 | 71.2605634 | 60.7715278 | 74.6061284 | 72.9682631 |
| 17:40:26 | 0:40:26 | 60.7694868 | 70.2605634 | 62.7715278 | 72.6061284 | 72.9682631 |
| 17:40:27 | 0:40:27 | 60.7694868 | 69.2605634 | 62.7715278 | 69.6061284 | 68.9682631 |
| 17:40:28 | 0:40:28 | 60.7694868 | 69.2605634 | 62.7715278 | 68.6061284 | 68.9682631 |

|          |         |            |            |            |            |            |
|----------|---------|------------|------------|------------|------------|------------|
| 17:40:29 | 0:40:29 | 60.7694868 | 69.2605634 | 61.7715278 | 67.6061284 | 68.9682631 |
| 17:40:30 | 0:40:30 | 60.7694868 | 68.2605634 | 61.7715278 | 67.6061284 | 68.9682631 |
| 17:40:31 | 0:40:31 | 60.7694868 | 68.2605634 | 60.7715278 | 67.6061284 | 68.9682631 |
| 17:40:32 | 0:40:32 | 59.7694868 | 68.2605634 | 60.7715278 | 68.6061284 | 74.9682631 |
| 17:40:33 | 0:40:33 | 60.7694868 | 68.2605634 | 61.7715278 | 67.6061284 | 74.9682631 |
| 17:40:34 | 0:40:34 | 60.7694868 | 67.2605634 | 61.7715278 | 67.6061284 | 74.9682631 |
| 17:40:35 | 0:40:35 | 60.7694868 | 67.2605634 | 61.7715278 | 66.6061284 | 87.9682631 |
| 17:40:36 | 0:40:36 | 60.7694868 | 67.2605634 | 61.7715278 | 66.6061284 | 87.9682631 |
| 17:40:37 | 0:40:37 | 60.7694868 | 67.2605634 | 60.7715278 | 65.6061284 | 87.9682631 |
| 17:40:38 | 0:40:38 | 60.7694868 | 68.2605634 | 60.7715278 | 65.6061284 | 66.417802  |
| 17:40:39 | 0:40:39 | 61.7694868 | 68.2605634 | 59.7715278 | 65.6061284 | 66.5996202 |
| 17:40:40 | 0:40:40 | 62.7694868 | 69.2605634 | 59.7715278 | 65.6061284 | 84.9682631 |
| 17:40:41 | 0:40:41 | 62.7694868 | 70.2605634 | 60.7715278 | 65.6061284 | 84.9682631 |
| 17:40:42 | 0:40:42 | 61.7694868 | 71.2605634 | 60.7715278 | 66.6061284 | 84.9682631 |
| 17:40:43 | 0:40:43 | 61.7694868 | 71.2605634 | 60.7715278 | 66.6061284 | 87.9682631 |
| 17:40:44 | 0:40:44 | 60.7694868 | 70.2605634 | 60.7715278 | 66.6061284 | 87.9682631 |
| 17:40:45 | 0:40:45 | 60.7694868 | 70.2605634 | 61.7715278 | 66.6061284 | 88.9682631 |
| 17:40:46 | 0:40:46 | 60.7694868 | 70.2605634 | 61.7715278 | 66.6061284 | 67.5996202 |
| 17:40:47 | 0:40:47 | 60.7694868 | 70.2605634 | 61.7715278 | 66.6061284 | 68.0541657 |
| 17:40:48 | 0:40:48 | 60.7694868 | 70.2605634 | 61.7715278 | 66.6061284 | 68.5996202 |
| 17:40:49 | 0:40:49 | 60.7694868 | 68.2605634 | 62.7715278 | 66.6061284 | 68.5087111 |
| 17:40:50 | 0:40:50 | 60.7694868 | 66.2605634 | 62.7715278 | 66.6061284 | 68.5087111 |
| 17:40:51 | 0:40:51 | 60.7694868 | 66.2605634 | 62.7715278 | 66.6061284 | 68.5087111 |
| 17:40:52 | 0:40:52 | 59.7694868 | 64.2605634 | 63.7715278 | 65.6061284 | 68.0541657 |
| 17:40:53 | 0:40:53 | 59.7694868 | 64.2605634 | 64.7715278 | 65.6061284 | 67.9632566 |
| 17:40:54 | 0:40:54 | 59.7694868 | 64.2605634 | 65.7715278 | 65.6061284 | 68.1450748 |
| 17:40:55 | 0:40:55 | 59.7694868 | 65.2605634 | 65.7715278 | 65.6061284 | 69.0541657 |
| 17:40:56 | 0:40:56 | 59.7694868 | 65.2605634 | 63.7715278 | 65.6061284 | 68.9632566 |
| 17:40:57 | 0:40:57 | 59.7694868 | 66.2605634 | 63.7715278 | 65.6061284 | 69.0541657 |
| 17:40:58 | 0:40:58 | 58.7694868 | 69.2605634 | 62.7715278 | 65.6061284 | 69.7814384 |
| 17:40:59 | 0:40:59 | 58.7694868 | 70.2605634 | 61.7715278 | 66.6061284 | 70.3268929 |
| 17:41:00 | 0:41:00 | 56.7694868 | 70.2605634 | 61.7715278 | 66.6061284 | 70.0541657 |
| 17:41:01 | 0:41:01 | 56.7694868 | 72.2605634 | 61.7715278 | 66.6061284 | 70.2359838 |
| 17:41:02 | 0:41:02 | 56.7694868 | 73.2605634 | 60.7715278 | 68.6061284 | 69.9632566 |
| 17:41:03 | 0:41:03 | 56.7694868 | 74.2605634 | 60.7715278 | 72.6061284 | 70.1450748 |
| 17:41:04 | 0:41:04 | 57.7694868 | 74.2605634 | 60.7715278 | 71.6061284 | 69.9632566 |
| 17:41:05 | 0:41:05 | 57.7694868 | 74.2605634 | 60.7715278 | 71.6061284 | 70.1450748 |
| 17:41:06 | 0:41:06 | 57.7694868 | 74.2605634 | 60.7715278 | 71.6061284 | 70.1450748 |
| 17:41:07 | 0:41:07 | 59.7694868 | 73.2605634 | 61.7715278 | 71.6061284 | 70.1450748 |
| 17:41:08 | 0:41:08 | 59.7694868 | 73.2605634 | 61.7715278 | 71.6061284 | 69.417802  |
| 17:41:09 | 0:41:09 | 59.7694868 | 73.2605634 | 61.7715278 | 71.6061284 | 68.3268929 |
| 17:41:10 | 0:41:10 | 61.7694868 | 72.2605634 | 61.7715278 | 74.6061284 | 68.6905293 |
| 17:41:11 | 0:41:11 | 62.7694868 | 71.2605634 | 60.7715278 | 79.6061284 | 69.0541657 |
| 17:41:12 | 0:41:12 | 64.7694868 | 71.2605634 | 60.7715278 | 82.6061284 | 71.0541657 |
| 17:41:13 | 0:41:13 | 64.7694868 | 71.2605634 | 60.7715278 | 84.6061284 | 71.5087111 |

|          |         |            |            |            |            |            |
|----------|---------|------------|------------|------------|------------|------------|
| 17:41:14 | 0:41:14 | 64.7694868 | 71.2605634 | 61.7715278 | 87.6061284 | 71.9632566 |
| 17:41:15 | 0:41:15 | 64.7694868 | 71.2605634 | 62.7715278 | 93.6061284 | 72.8723475 |
| 17:41:16 | 0:41:16 | 65.7694868 | 71.2605634 | 62.7715278 | 73.1450748 | 73.1450748 |
| 17:41:17 | 0:41:17 | 65.7694868 | 71.2605634 | 62.7715278 | 73.0541657 | 73.0541657 |
| 17:41:18 | 0:41:18 | 67.7694868 | 71.2605634 | 62.7715278 | 73.5087111 | 73.5087111 |
| 17:41:19 | 0:41:19 | 67.7694868 | 69.2605634 | 61.7715278 | 73.3268929 | 73.3268929 |
| 17:41:20 | 0:41:20 | 67.7694868 | 68.2605634 | 61.7715278 | 73.2359838 | 73.2359838 |
| 17:41:21 | 0:41:21 | 68.7694868 | 67.2605634 | 61.7715278 | 94.6061284 | 73.8723475 |
| 17:41:22 | 0:41:22 | 67.7694868 | 67.2605634 | 61.7715278 | 91.6061284 | 73.8723475 |
| 17:41:23 | 0:41:23 | 66.7694868 | 66.2605634 | 61.7715278 | 87.6061284 | 73.417802  |
| 17:41:24 | 0:41:24 | 66.7694868 | 66.2605634 | 61.7715278 | 85.6061284 | 73.1450748 |
| 17:41:25 | 0:41:25 | 66.7694868 | 66.2605634 | 61.7715278 | 85.6061284 | 73.2359838 |
| 17:41:26 | 0:41:26 | 65.7694868 | 66.2605634 | 61.7715278 | 86.6061284 | 72.8723475 |
| 17:41:27 | 0:41:27 | 64.7694868 | 66.2605634 | 60.7715278 | 86.6061284 | 72.8723475 |
| 17:41:28 | 0:41:28 | 63.7694868 | 66.2605634 | 60.7715278 | 86.6061284 | 73.2359838 |
| 17:41:29 | 0:41:29 | 64.7694868 | 66.2605634 | 60.7715278 | 84.6061284 | 73.0541657 |
| 17:41:30 | 0:41:30 | 64.7694868 | 66.2605634 | 60.7715278 | 83.6061284 | 72.9632566 |
| 17:41:31 | 0:41:31 | 64.7694868 | 67.2605634 | 60.7715278 | 82.6061284 | 71.8723475 |
| 17:41:32 | 0:41:32 | 64.7694868 | 69.2605634 | 58.7715278 | 81.6061284 | 71.7814384 |
| 17:41:33 | 0:41:33 | 63.7694868 | 68.2605634 | 58.7715278 | 81.6061284 | 71.5996202 |
| 17:41:34 | 0:41:34 | 63.7694868 | 68.2605634 | 59.7715278 | 81.6061284 | 72.5087111 |
| 17:41:35 | 0:41:35 | 63.7694868 | 64.2605634 | 59.7715278 | 80.6061284 | 73.2359838 |
| 17:41:36 | 0:41:36 | 62.7694868 | 63.2605634 | 59.7715278 | 80.6061284 | 73.417802  |
| 17:41:37 | 0:41:37 | 62.7694868 | 63.2605634 | 59.7715278 | 80.6061284 | 73.417802  |
| 17:41:38 | 0:41:38 | 61.7694868 | 63.2605634 | 60.7715278 | 80.6061284 | 73.5996202 |
| 17:41:39 | 0:41:39 | 61.7694868 | 64.2605634 | 60.7715278 | 79.6061284 | 73.5996202 |
| 17:41:40 | 0:41:40 | 61.7694868 | 64.2605634 | 60.7715278 | 77.6061284 | 71.5996202 |
| 17:41:41 | 0:41:41 | 61.7694868 | 65.2605634 | 61.7715278 | 77.6061284 | 71.1450748 |
| 17:41:42 | 0:41:42 | 62.7694868 | 64.2605634 | 62.7715278 | 76.6061284 | 71.0541657 |
| 17:41:43 | 0:41:43 | 64.7694868 | 64.2605634 | 62.7715278 | 73.6061284 | 71.417802  |
| 17:41:44 | 0:41:44 | 65.7694868 | 64.2605634 | 68.7715278 | 72.6061284 | 72.0541657 |
| 17:41:45 | 0:41:45 | 67.7694868 | 64.2605634 | 68.7715278 | 70.6061284 | 71.9632566 |
| 17:41:46 | 0:41:46 | 68.7694868 | 64.2605634 | 69.7715278 | 67.6061284 | 72.3268929 |
| 17:41:47 | 0:41:47 | 65.7694868 | 65.2605634 | 68.7715278 | 66.6061284 | 72.5996202 |
| 17:41:48 | 0:41:48 | 63.7694868 | 66.2605634 | 66.7715278 | 65.6061284 | 72.1450748 |
| 17:41:49 | 0:41:49 | 63.7694868 | 69.2605634 | 65.7715278 | 65.6061284 | 72.5087111 |
| 17:41:50 | 0:41:50 | 62.7694868 | 68.2605634 | 65.7715278 | 65.6061284 | 72.1450748 |
| 17:41:51 | 0:41:51 | 61.7694868 | 67.2605634 | 65.7715278 | 65.6061284 | 71.8723475 |
| 17:41:52 | 0:41:52 | 61.7694868 | 65.2605634 | 64.7715278 | 64.6061284 | 71.2359838 |
| 17:41:53 | 0:41:53 | 60.7694868 | 65.2605634 | 65.7715278 | 63.6061284 | 71.417802  |
| 17:41:54 | 0:41:54 | 59.7694868 | 65.2605634 | 66.7715278 | 63.6061284 | 72.1450748 |
| 17:41:55 | 0:41:55 | 59.7694868 | 65.2605634 | 66.7715278 | 63.6061284 | 71.9632566 |
| 17:41:56 | 0:41:56 | 59.7694868 | 65.2605634 | 67.7715278 | 64.6061284 | 72.2359838 |
| 17:41:57 | 0:41:57 | 59.7694868 | 64.2605634 | 67.7715278 | 64.6061284 | 72.2359838 |
| 17:41:58 | 0:41:58 | 59.7694868 | 64.2605634 | 66.7715278 | 64.6061284 | 71.9632566 |

|          |         |            |            |            |            |            |
|----------|---------|------------|------------|------------|------------|------------|
| 17:41:59 | 0:41:59 | 58.7694868 | 65.2605634 | 65.7715278 | 66.6061284 | 72.1450748 |
| 17:42:00 | 0:42:00 | 58.7694868 | 65.2605634 | 65.7715278 | 66.6061284 | 72.1450748 |
| 17:42:01 | 0:42:01 | 59.7694868 | 69.2605634 | 64.7715278 | 69.6061284 | 72.6905293 |
| 17:42:02 | 0:42:02 | 60.7694868 | 69.2605634 | 65.7715278 | 69.6061284 | 70.1450748 |
| 17:42:03 | 0:42:03 | 60.7694868 | 69.2605634 | 65.7715278 | 69.6061284 | 69.8723475 |
| 17:42:04 | 0:42:04 | 60.7694868 | 69.2605634 | 67.7715278 | 68.6061284 | 69.3268929 |
| 17:42:05 | 0:42:05 | 60.7694868 | 72.2605634 | 67.7715278 | 68.6061284 | 69.9632566 |
| 17:42:06 | 0:42:06 | 61.7694868 | 73.2605634 | 66.7715278 | 67.6061284 | 70.0541657 |
| 17:42:07 | 0:42:07 | 61.7694868 | 72.2605634 | 64.7715278 | 66.6061284 | 69.8723475 |
| 17:42:08 | 0:42:08 | 62.7694868 | 71.2605634 | 64.7715278 | 66.6061284 | 70.1450748 |
| 17:42:09 | 0:42:09 | 62.7694868 | 71.2605634 | 61.7715278 | 66.6061284 | 69.6905293 |
| 17:42:10 | 0:42:10 | 63.7694868 | 71.2605634 | 61.7715278 | 65.6061284 | 69.417802  |
| 17:42:11 | 0:42:11 | 63.7694868 | 71.2605634 | 60.7715278 | 64.6061284 | 89.9682631 |
| 17:42:12 | 0:42:12 | 62.7694868 | 72.2605634 | 59.7715278 | 65.6061284 | 89.9682631 |
| 17:42:13 | 0:42:13 | 62.7694868 | 72.2605634 | 59.7715278 | 65.6061284 | 87.9682631 |
| 17:42:14 | 0:42:14 | 62.7694868 | 71.2605634 | 60.7715278 | 65.6061284 | 76.9682631 |
| 17:42:15 | 0:42:15 | 62.7694868 | 69.2605634 | 59.7715278 | 65.6061284 | 75.9682631 |
| 17:42:16 | 0:42:16 | 62.7694868 | 68.2605634 | 59.7715278 | 64.6061284 | 75.9682631 |
| 17:42:17 | 0:42:17 | 62.7694868 | 67.2605634 | 58.7715278 | 64.6061284 | 75.9682631 |
| 17:42:18 | 0:42:18 | 62.7694868 | 68.2605634 | 58.7715278 | 64.6061284 | 69.9682631 |
| 17:42:19 | 0:42:19 | 63.7694868 | 70.2605634 | 56.7715278 | 63.6061284 | 69.9682631 |
| 17:42:20 | 0:42:20 | 63.7694868 | 72.2605634 | 55.7715278 | 62.6061284 | 65.9682631 |
| 17:42:21 | 0:42:21 | 63.7694868 | 73.2605634 | 55.7715278 | 62.6061284 | 65.9682631 |
| 17:42:22 | 0:42:22 | 64.7694868 | 73.2605634 | 56.7715278 | 62.6061284 | 65.9682631 |
| 17:42:23 | 0:42:23 | 65.7694868 | 71.2605634 | 56.7715278 | 64.6061284 | 62.9682631 |
| 17:42:24 | 0:42:24 | 65.7694868 | 70.2605634 | 58.7715278 | 66.6061284 | 62.9682631 |
| 17:42:25 | 0:42:25 | 65.7694868 | 69.2605634 | 58.7715278 | 66.6061284 | 62.9682631 |
| 17:42:26 | 0:42:26 | 66.7694868 | 68.2605634 | 59.7715278 | 67.6061284 | 62.9682631 |
| 17:42:27 | 0:42:27 | 66.7694868 | 69.2605634 | 59.7715278 | 67.6061284 | 62.9682631 |
| 17:42:28 | 0:42:28 | 66.7694868 | 71.2605634 | 59.7715278 | 68.6061284 | 62.9682631 |
| 17:42:29 | 0:42:29 | 67.7694868 | 71.2605634 | 59.7715278 | 68.6061284 | 62.9682631 |
| 17:42:30 | 0:42:30 | 67.7694868 | 71.2605634 | 59.7715278 | 69.6061284 | 73.9682631 |
| 17:42:31 | 0:42:31 | 67.7694868 | 71.2605634 | 60.7715278 | 68.6061284 | 73.9682631 |
| 17:42:32 | 0:42:32 | 67.7694868 | 73.2605634 | 60.7715278 | 68.6061284 | 73.9682631 |
| 17:42:33 | 0:42:33 | 65.7694868 | 74.2605634 | 60.7715278 | 68.6061284 | 73.9682631 |
| 17:42:34 | 0:42:34 | 64.7694868 | 76.2605634 | 61.7715278 | 68.6061284 | 70.9682631 |
| 17:42:35 | 0:42:35 | 64.7694868 | 76.2605634 | 63.7715278 | 67.6061284 | 71.9682631 |
| 17:42:36 | 0:42:36 | 64.7694868 | 76.2605634 | 63.7715278 | 68.6061284 | 74.9682631 |
| 17:42:37 | 0:42:37 | 64.7694868 | 77.2605634 | 62.7715278 | 67.6061284 | 76.9682631 |
| 17:42:38 | 0:42:38 | 65.7694868 | 77.2605634 | 62.7715278 | 66.6061284 | 78.9682631 |
| 17:42:39 | 0:42:39 | 65.7694868 | 77.2605634 | 62.7715278 | 66.6061284 | 79.9682631 |
| 17:42:40 | 0:42:40 | 63.7694868 | 77.2605634 | 62.7715278 | 66.6061284 | 82.9682631 |
| 17:42:41 | 0:42:41 | 63.7694868 | 77.2605634 | 62.7715278 | 66.6061284 | 82.9682631 |
| 17:42:42 | 0:42:42 | 63.7694868 | 77.2605634 | 63.7715278 | 66.6061284 | 83.9682631 |
| 17:42:43 | 0:42:43 | 64.7694868 | 77.2605634 | 63.7715278 | 66.6061284 | 83.9682631 |

|          |         |            |            |            |            |            |
|----------|---------|------------|------------|------------|------------|------------|
| 17:42:44 | 0:42:44 | 64.7694868 | 77.2605634 | 62.7715278 | 69.6061284 | 88.9682631 |
| 17:42:45 | 0:42:45 | 65.7694868 | 73.2605634 | 63.7715278 | 71.6061284 | 88.9682631 |
| 17:42:46 | 0:42:46 | 66.7694868 | 72.2605634 | 62.7715278 | 73.6061284 | 69.5996202 |
| 17:42:47 | 0:42:47 | 67.7694868 | 71.2605634 | 62.7715278 | 74.6061284 | 69.6905293 |
| 17:42:48 | 0:42:48 | 66.7694868 | 70.2605634 | 62.7715278 | 74.6061284 | 69.6905293 |
| 17:42:49 | 0:42:49 | 66.7694868 | 70.2605634 | 62.7715278 | 73.6061284 | 69.5996202 |
| 17:42:50 | 0:42:50 | 66.7694868 | 71.2605634 | 63.7715278 | 74.6061284 | 69.8723475 |
| 17:42:51 | 0:42:51 | 66.7694868 | 73.2605634 | 64.7715278 | 74.6061284 | 70.1450748 |
| 17:42:52 | 0:42:52 | 66.7694868 | 73.2605634 | 64.7715278 | 74.6061284 | 70.5996202 |
| 17:42:53 | 0:42:53 | 66.7694868 | 73.2605634 | 65.7715278 | 74.6061284 | 71.2359838 |
| 17:42:54 | 0:42:54 | 66.7694868 | 73.2605634 | 65.7715278 | 74.6061284 | 71.2359838 |
| 17:42:55 | 0:42:55 | 68.7694868 | 73.2605634 | 66.7715278 | 70.6061284 | 72.0541657 |
| 17:42:56 | 0:42:56 | 68.7694868 | 74.2605634 | 66.7715278 | 69.6061284 | 72.2359838 |
| 17:42:57 | 0:42:57 | 68.7694868 | 74.2605634 | 66.7715278 | 67.6061284 | 72.5996202 |
| 17:42:58 | 0:42:58 | 68.7694868 | 79.2605634 | 66.7715278 | 66.6061284 | 73.2359838 |
| 17:42:59 | 0:42:59 | 68.7694868 | 79.2605634 | 66.7715278 | 66.6061284 | 73.417802  |
| 17:43:00 | 0:43:00 | 69.7694868 | 79.2605634 | 66.7715278 | 66.6061284 | 73.5996202 |
| 17:43:01 | 0:43:01 | 69.7694868 | 75.2605634 | 66.7715278 | 65.6061284 | 73.417802  |
| 17:43:02 | 0:43:02 | 70.7694868 | 74.2605634 | 66.7715278 | 66.6061284 | 73.6905293 |
| 17:43:03 | 0:43:03 | 71.7694868 | 73.2605634 | 66.7715278 | 67.6061284 | 73.8723475 |
| 17:43:04 | 0:43:04 | 71.7694868 | 73.2605634 | 66.7715278 | 67.6061284 | 74.2359838 |
| 17:43:05 | 0:43:05 | 71.7694868 | 73.2605634 | 66.7715278 | 68.6061284 | 95.9682631 |
| 17:43:06 | 0:43:06 | 70.7694868 | 71.2605634 | 74.7715278 | 68.6061284 | 95.9682631 |
| 17:43:07 | 0:43:07 | 70.7694868 | 71.2605634 | 75.7715278 | 68.6061284 | 95.9682631 |
| 17:43:08 | 0:43:08 | 71.7694868 | 71.2605634 | 73.7715278 | 68.6061284 | 95.9682631 |
| 17:43:09 | 0:43:09 | 71.7694868 | 71.2605634 | 69.7715278 | 70.6061284 | 93.9682631 |
| 17:43:10 | 0:43:10 | 71.7694868 | 70.2605634 | 69.7715278 | 72.6061284 | 93.9682631 |
| 17:43:11 | 0:43:11 | 71.7694868 | 68.2605634 | 64.7715278 | 72.6061284 | 93.9682631 |
| 17:43:12 | 0:43:12 | 70.7694868 | 65.2605634 | 61.7715278 | 73.6061284 | 94.9682631 |
| 17:43:13 | 0:43:13 | 63.7694868 | 64.2605634 | 62.7715278 | 68.6061284 | 71.9632566 |
| 17:43:14 | 0:43:14 | 63.7694868 | 64.2605634 | 62.7715278 | 66.6061284 | 71.9632566 |
| 17:43:15 | 0:43:15 | 64.7694868 | 64.2605634 | 62.7715278 | 65.6061284 | 72.3268929 |
| 17:43:16 | 0:43:16 | 65.7694868 | 64.2605634 | 64.7715278 | 65.6061284 | 71.7814384 |
| 17:43:17 | 0:43:17 | 65.7694868 | 63.2605634 | 64.7715278 | 65.6061284 | 59.9682631 |
| 17:43:18 | 0:43:18 | 65.7694868 | 64.2605634 | 64.7715278 | 65.6061284 | 59.9682631 |
| 17:43:19 | 0:43:19 | 64.7694868 | 64.2605634 | 63.7715278 | 65.6061284 | 55.9682631 |
| 17:43:20 | 0:43:20 | 64.7694868 | 64.2605634 | 63.7715278 | 65.6061284 | 52.9682631 |
| 17:43:21 | 0:43:21 | 64.7694868 | 64.2605634 | 64.7715278 | 66.6061284 | 52.9682631 |
| 17:43:22 | 0:43:22 | 64.7694868 | 65.2605634 | 64.7715278 | 66.6061284 | 51.9682631 |
| 17:43:23 | 0:43:23 | 64.7694868 | 66.2605634 | 65.7715278 | 65.6061284 | 49.9682631 |
| 17:43:24 | 0:43:24 | 63.7694868 | 66.2605634 | 65.7715278 | 65.6061284 | 49.9682631 |
| 17:43:25 | 0:43:25 | 63.7694868 | 65.2605634 | 66.7715278 | 67.6061284 | 49.9682631 |
| 17:43:26 | 0:43:26 | 63.7694868 | 65.2605634 | 67.7715278 | 70.6061284 | 49.9682631 |
| 17:43:27 | 0:43:27 | 61.7694868 | 65.2605634 | 70.7715278 | 70.6061284 | 49.9682631 |
| 17:43:28 | 0:43:28 | 61.7694868 | 71.2605634 | 71.7715278 | 70.6061284 | 49.9682631 |



|          |         |            |            |            |            |            |
|----------|---------|------------|------------|------------|------------|------------|
| 17:43:29 | 0:43:29 | 61.7694868 | 71.2605634 | 71.7715278 | 70.6061284 | 49.9682631 |
| 17:43:30 | 0:43:30 | 61.7694868 | 73.2605634 | 71.7715278 | 70.6061284 | 49.9682631 |
| 17:43:31 | 0:43:31 | 61.7694868 | 73.2605634 | 72.7715278 | 70.6061284 | 49.9682631 |
| 17:43:32 | 0:43:32 | 61.7694868 | 73.2605634 | 73.7715278 | 70.6061284 | 49.9682631 |
| 17:43:33 | 0:43:33 | 62.7694868 | 73.2605634 | 73.7715278 | 70.6061284 | 50.9682631 |
| 17:43:34 | 0:43:34 | 62.7694868 | 73.2605634 | 73.7715278 | 70.6061284 | 50.9682631 |
| 17:43:35 | 0:43:35 | 62.7694868 | 73.2605634 | 73.7715278 | 70.6061284 | 53.9682631 |
| 17:43:36 | 0:43:36 | 62.7694868 | 73.2605634 | 73.7715278 | 69.6061284 | 53.9682631 |
| 17:43:37 | 0:43:37 | 61.7694868 | 76.2605634 | 74.7715278 | 70.6061284 | 53.9682631 |
| 17:43:38 | 0:43:38 | 61.7694868 | 76.2605634 | 74.7715278 | 71.6061284 | 53.9682631 |
| 17:43:39 | 0:43:39 | 62.7694868 | 76.2605634 | 69.7715278 | 72.6061284 | 53.9682631 |
| 17:43:40 | 0:43:40 | 64.7694868 | 76.2605634 | 69.7715278 | 77.6061284 | 53.9682631 |
| 17:43:41 | 0:43:41 | 67.7694868 | 75.2605634 | 69.7715278 | 80.6061284 | 55.9682631 |
| 17:43:42 | 0:43:42 | 67.7694868 | 74.2605634 | 68.7715278 | 80.6061284 | 57.9682631 |
| 17:43:43 | 0:43:43 | 69.7694868 | 73.2605634 | 68.7715278 | 79.6061284 | 57.9682631 |
| 17:43:44 | 0:43:44 | 69.7694868 | 72.2605634 | 68.7715278 | 79.6061284 | 57.9682631 |
| 17:43:45 | 0:43:45 | 70.7694868 | 71.2605634 | 68.7715278 | 78.6061284 | 57.9682631 |
| 17:43:46 | 0:43:46 | 69.7694868 | 71.2605634 | 67.7715278 | 78.6061284 | 57.9682631 |
| 17:43:47 | 0:43:47 | 69.7694868 | 68.2605634 | 64.7715278 | 78.6061284 | 57.9682631 |
| 17:43:48 | 0:43:48 | 69.7694868 | 68.2605634 | 64.7715278 | 78.6061284 | 57.9682631 |
| 17:43:49 | 0:43:49 | 67.7694868 | 65.2605634 | 63.7715278 | 80.6061284 | 57.9682631 |
| 17:43:50 | 0:43:50 | 67.7694868 | 65.2605634 | 62.7715278 | 82.6061284 | 57.9682631 |
| 17:43:51 | 0:43:51 | 68.7694868 | 65.2605634 | 62.7715278 | 82.6061284 | 57.9682631 |
| 17:43:52 | 0:43:52 | 68.7694868 | 65.2605634 | 61.7715278 | 82.6061284 | 57.9682631 |
| 17:43:53 | 0:43:53 | 66.7694868 | 65.2605634 | 61.7715278 | 81.6061284 | 57.9682631 |
| 17:43:54 | 0:43:54 | 66.7694868 | 65.2605634 | 61.7715278 | 80.6061284 | 58.9682631 |
| 17:43:55 | 0:43:55 | 64.7694868 | 65.2605634 | 58.7715278 | 78.6061284 | 59.9682631 |
| 17:43:56 | 0:43:56 | 63.7694868 | 65.2605634 | 57.7715278 | 70.6061284 | 59.9682631 |
| 17:43:57 | 0:43:57 | 63.7694868 | 65.2605634 | 56.7715278 | 66.6061284 | 59.9682631 |
| 17:43:58 | 0:43:58 | 63.7694868 | 64.2605634 | 56.7715278 | 66.6061284 | 59.9682631 |
| 17:43:59 | 0:43:59 | 63.7694868 | 64.2605634 | 56.7715278 | 62.6061284 | 59.9682631 |
| 17:44:00 | 0:44:00 | 62.7694868 | 64.2605634 | 55.7715278 | 62.6061284 | 63.9682631 |
| 17:44:01 | 0:44:01 | 61.7694868 | 64.2605634 | 54.7715278 | 61.6061284 | 64.9682631 |
| 17:44:02 | 0:44:02 | 61.7694868 | 64.2605634 | 54.7715278 | 61.6061284 | 65.9682631 |
| 17:44:03 | 0:44:03 | 62.7694868 | 64.2605634 | 54.7715278 | 61.6061284 | 65.9682631 |
| 17:44:04 | 0:44:04 | 62.7694868 | 64.2605634 | 56.7715278 | 61.6061284 | 65.9682631 |
| 17:44:05 | 0:44:05 | 63.7694868 | 63.2605634 | 56.7715278 | 61.6061284 | 69.3268929 |
| 17:44:06 | 0:44:06 | 61.7694868 | 63.2605634 | 56.7715278 | 60.6061284 | 70.1450748 |
| 17:44:07 | 0:44:07 | 61.7694868 | 63.2605634 | 56.7715278 | 58.6061284 | 70.5996202 |
| 17:44:08 | 0:44:08 | 61.7694868 | 63.2605634 | 56.7715278 | 57.6061284 | 70.5996202 |
| 17:44:09 | 0:44:09 | 61.7694868 | 64.2605634 | 57.7715278 | 57.6061284 | 70.2359838 |
| 17:44:10 | 0:44:10 | 60.7694868 | 67.2605634 | 57.7715278 | 57.6061284 | 71.417802  |
| 17:44:11 | 0:44:11 | 60.7694868 | 67.2605634 | 59.7715278 | 55.6061284 | 71.9632566 |
| 17:44:12 | 0:44:12 | 59.7694868 | 67.2605634 | 58.7715278 | 56.6061284 | 72.0541657 |
| 17:44:13 | 0:44:13 | 59.7694868 | 68.2605634 | 58.7715278 | 56.6061284 | 72.0541657 |

|          |         |            |            |            |            |            |
|----------|---------|------------|------------|------------|------------|------------|
| 17:44:14 | 0:44:14 | 59.7694868 | 69.2605634 | 58.7715278 | 57.6061284 | 72.0541657 |
| 17:44:15 | 0:44:15 | 59.7694868 | 69.2605634 | 58.7715278 | 57.6061284 | 71.5087111 |
| 17:44:16 | 0:44:16 | 59.7694868 | 69.2605634 | 57.7715278 | 57.6061284 | 71.417802  |
| 17:44:17 | 0:44:17 | 58.7694868 | 68.2605634 | 56.7715278 | 59.6061284 | 71.3268929 |
| 17:44:18 | 0:44:18 | 59.7694868 | 66.2605634 | 56.7715278 | 59.6061284 | 71.5996202 |
| 17:44:19 | 0:44:19 | 59.7694868 | 64.2605634 | 56.7715278 | 59.6061284 | 71.5087111 |
| 17:44:20 | 0:44:20 | 59.7694868 | 63.2605634 | 55.7715278 | 58.6061284 | 71.3268929 |
| 17:44:21 | 0:44:21 | 60.7694868 | 61.2605634 | 55.7715278 | 58.6061284 | 70.9632566 |
| 17:44:22 | 0:44:22 | 60.7694868 | 61.2605634 | 55.7715278 | 58.6061284 | 70.5087111 |
| 17:44:23 | 0:44:23 | 59.7694868 | 62.2605634 | 57.7715278 | 57.6061284 | 69.417802  |
| 17:44:24 | 0:44:24 | 59.7694868 | 62.2605634 | 57.7715278 | 57.6061284 | 69.0541657 |
| 17:44:25 | 0:44:25 | 59.7694868 | 62.2605634 | 57.7715278 | 58.6061284 | 69.0541657 |
| 17:44:26 | 0:44:26 | 59.7694868 | 63.2605634 | 56.7715278 | 59.6061284 | 68.9632566 |
| 17:44:27 | 0:44:27 | 59.7694868 | 63.2605634 | 56.7715278 | 59.6061284 | 68.6905293 |
| 17:44:28 | 0:44:28 | 59.7694868 | 63.2605634 | 55.7715278 | 59.6061284 | 68.9632566 |
| 17:44:29 | 0:44:29 | 59.7694868 | 64.2605634 | 55.7715278 | 59.6061284 | 68.6905293 |
| 17:44:30 | 0:44:30 | 60.7694868 | 64.2605634 | 55.7715278 | 59.6061284 | 68.2359838 |
| 17:44:31 | 0:44:31 | 60.7694868 | 65.2605634 | 54.7715278 | 61.6061284 | 65.8723475 |
| 17:44:32 | 0:44:32 | 60.7694868 | 68.2605634 | 54.7715278 | 64.6061284 | 65.6905293 |
| 17:44:33 | 0:44:33 | 59.7694868 | 68.2605634 | 54.7715278 | 64.6061284 | 65.417802  |
| 17:44:34 | 0:44:34 | 59.7694868 | 69.2605634 | 54.7715278 | 63.6061284 | 65.0541657 |
| 17:44:35 | 0:44:35 | 59.7694868 | 70.2605634 | 54.7715278 | 62.6061284 | 64.9632566 |
| 17:44:36 | 0:44:36 | 59.7694868 | 71.2605634 | 55.7715278 | 62.6061284 | 65.2359838 |
| 17:44:37 | 0:44:37 | 59.7694868 | 72.2605634 | 55.7715278 | 61.6061284 | 65.5087111 |
| 17:44:38 | 0:44:38 | 59.7694868 | 74.2605634 | 56.7715278 | 60.6061284 | 65.9632566 |
| 17:44:39 | 0:44:39 | 60.7694868 | 75.2605634 | 56.7715278 | 60.6061284 | 66.1450748 |
| 17:44:40 | 0:44:40 | 61.7694868 | 75.2605634 | 56.7715278 | 60.6061284 | 66.9632566 |
| 17:44:41 | 0:44:41 | 62.7694868 | 74.2605634 | 57.7715278 | 62.6061284 | 67.5087111 |
| 17:44:42 | 0:44:42 | 62.7694868 | 74.2605634 | 57.7715278 | 62.6061284 | 67.5087111 |
| 17:44:43 | 0:44:43 | 64.7694868 | 68.2605634 | 57.7715278 | 61.6061284 | 67.417802  |
| 17:44:44 | 0:44:44 | 64.7694868 | 67.2605634 | 61.7715278 | 61.6061284 | 67.7814384 |
| 17:44:45 | 0:44:45 | 64.7694868 | 67.2605634 | 64.7715278 | 61.6061284 | 67.9632566 |
| 17:44:46 | 0:44:46 | 66.7694868 | 68.2605634 | 65.7715278 | 60.6061284 | 68.1450748 |
| 17:44:47 | 0:44:47 | 68.7694868 | 68.2605634 | 65.7715278 | 60.6061284 | 68.417802  |
| 17:44:48 | 0:44:48 | 68.7694868 | 69.2605634 | 67.7715278 | 59.6061284 | 68.7814384 |
| 17:44:49 | 0:44:49 | 68.7694868 | 70.2605634 | 67.7715278 | 59.6061284 | 69.5996202 |
| 17:44:50 | 0:44:50 | 68.7694868 | 69.2605634 | 67.7715278 | 59.6061284 | 69.5087111 |
| 17:44:51 | 0:44:51 | 67.7694868 | 68.2605634 | 67.7715278 | 60.6061284 | 69.6905293 |
| 17:44:52 | 0:44:52 | 66.7694868 | 66.2605634 | 67.7715278 | 60.6061284 | 69.417802  |
| 17:44:53 | 0:44:53 | 65.7694868 | 64.2605634 | 68.7715278 | 60.6061284 | 68.6905293 |
| 17:44:54 | 0:44:54 | 63.7694868 | 63.2605634 | 69.7715278 | 60.6061284 | 68.6905293 |
| 17:44:55 | 0:44:55 | 62.7694868 | 63.2605634 | 69.7715278 | 61.6061284 | 69.0541657 |
| 17:44:56 | 0:44:56 | 62.7694868 | 62.2605634 | 70.7715278 | 61.6061284 | 69.417802  |
| 17:44:57 | 0:44:57 | 62.7694868 | 61.2605634 | 71.7715278 | 61.6061284 | 69.7814384 |
| 17:44:58 | 0:44:58 | 63.7694868 | 61.2605634 | 71.7715278 | 61.6061284 | 69.7814384 |

|          |         |            |            |            |            |            |
|----------|---------|------------|------------|------------|------------|------------|
| 17:44:59 | 0:44:59 | 63.7694868 | 62.2605634 | 73.7715278 | 61.6061284 | 70.5996202 |
| 17:45:00 | 0:45:00 | 63.7694868 | 62.2605634 | 74.7715278 | 60.6061284 | 70.5996202 |
| 17:45:01 | 0:45:01 | 62.7694868 | 64.2605634 | 74.7715278 | 60.6061284 | 70.9632566 |
| 17:45:02 | 0:45:02 | 61.7694868 | 64.2605634 | 74.7715278 | 60.6061284 | 70.7814384 |
| 17:45:03 | 0:45:03 | 60.7694868 | 64.2605634 | 74.7715278 | 61.6061284 | 71.0541657 |
| 17:45:04 | 0:45:04 | 60.7694868 | 63.2605634 | 74.7715278 | 62.6061284 | 70.9632566 |
| 17:45:05 | 0:45:05 | 60.7694868 | 62.2605634 | 74.7715278 | 64.6061284 | 70.8723475 |
| 17:45:06 | 0:45:06 | 60.7694868 | 61.2605634 | 74.7715278 | 65.6061284 | 70.9632566 |
| 17:45:07 | 0:45:07 | 60.7694868 | 60.2605634 | 74.7715278 | 66.6061284 | 70.417802  |
| 17:45:08 | 0:45:08 | 60.7694868 | 60.2605634 | 74.7715278 | 66.6061284 | 70.5087111 |
| 17:45:09 | 0:45:09 | 60.7694868 | 60.2605634 | 74.7715278 | 67.6061284 | 70.5087111 |
| 17:45:10 | 0:45:10 | 60.7694868 | 63.2605634 | 73.7715278 | 67.6061284 | 70.6905293 |
| 17:45:11 | 0:45:11 | 60.7694868 | 64.2605634 | 73.7715278 | 65.6061284 | 70.7814384 |
| 17:45:12 | 0:45:12 | 60.7694868 | 64.2605634 | 74.7715278 | 63.6061284 | 70.7814384 |
| 17:45:13 | 0:45:13 | 60.7694868 | 64.2605634 | 74.7715278 | 63.6061284 | 71.2359838 |
| 17:45:14 | 0:45:14 | 60.7694868 | 64.2605634 | 74.7715278 | 63.6061284 | 72.0541657 |
| 17:45:15 | 0:45:15 | 60.7694868 | 64.2605634 | 74.7715278 | 63.6061284 | 72.5087111 |
| 17:45:16 | 0:45:16 | 60.7694868 | 64.2605634 | 73.7715278 | 63.6061284 | 72.417802  |
| 17:45:17 | 0:45:17 | 62.7694868 | 65.2605634 | 73.7715278 | 63.6061284 | 72.5996202 |
| 17:45:18 | 0:45:18 | 64.7694868 | 66.2605634 | 63.7715278 | 61.6061284 | 71.8723475 |
| 17:45:19 | 0:45:19 | 65.7694868 | 68.2605634 | 62.7715278 | 60.6061284 | 71.6905293 |
| 17:45:20 | 0:45:20 | 66.7694868 | 72.2605634 | 62.7715278 | 60.6061284 | 72.2359838 |
| 17:45:21 | 0:45:21 | 67.7694868 | 72.2605634 | 62.7715278 | 60.6061284 | 72.2359838 |
| 17:45:22 | 0:45:22 | 67.7694868 | 74.2605634 | 62.7715278 | 61.6061284 | 72.6905293 |
| 17:45:23 | 0:45:23 | 68.7694868 | 75.2605634 | 60.7715278 | 63.6061284 | 72.9632566 |
| 17:45:24 | 0:45:24 | 68.7694868 | 75.2605634 | 59.7715278 | 67.6061284 | 73.2359838 |
| 17:45:25 | 0:45:25 | 68.7694868 | 77.2605634 | 58.7715278 | 68.6061284 | 73.2359838 |
| 17:45:26 | 0:45:26 | 68.7694868 | 78.2605634 | 58.7715278 | 69.6061284 | 73.417802  |
| 17:45:27 | 0:45:27 | 68.7694868 | 78.2605634 | 58.7715278 | 68.6061284 | 73.0541657 |
| 17:45:28 | 0:45:28 | 67.7694868 | 78.2605634 | 58.7715278 | 66.6061284 | 72.9632566 |
| 17:45:29 | 0:45:29 | 66.7694868 | 77.2605634 | 58.7715278 | 64.6061284 | 72.6905293 |
| 17:45:30 | 0:45:30 | 66.7694868 | 77.2605634 | 58.7715278 | 63.6061284 | 72.7814384 |
| 17:45:31 | 0:45:31 | 66.7694868 | 77.2605634 | 58.7715278 | 61.6061284 | 72.9632566 |
| 17:45:32 | 0:45:32 | 67.7694868 | 77.2605634 | 58.7715278 | 60.6061284 | 72.9632566 |
| 17:45:33 | 0:45:33 | 67.7694868 | 77.2605634 | 58.7715278 | 60.6061284 | 72.5087111 |
| 17:45:34 | 0:45:34 | 67.7694868 | 78.2605634 | 58.7715278 | 59.6061284 | 72.3268929 |
| 17:45:35 | 0:45:35 | 68.7694868 | 78.2605634 | 57.7715278 | 59.6061284 | 72.1450748 |
| 17:45:36 | 0:45:36 | 68.7694868 | 78.2605634 | 57.7715278 | 59.6061284 | 72.1450748 |
| 17:45:37 | 0:45:37 | 68.7694868 | 79.2605634 | 57.7715278 | 58.6061284 | 71.8723475 |
| 17:45:38 | 0:45:38 | 67.7694868 | 80.2605634 | 58.7715278 | 58.6061284 | 72.1450748 |
| 17:45:39 | 0:45:39 | 67.7694868 | 80.2605634 | 58.7715278 | 58.6061284 | 71.8723475 |
| 17:45:40 | 0:45:40 | 67.7694868 | 80.2605634 | 59.7715278 | 58.6061284 | 71.7814384 |
| 17:45:41 | 0:45:41 | 68.7694868 | 77.2605634 | 60.7715278 | 58.6061284 | 71.9632566 |
| 17:45:42 | 0:45:42 | 68.7694868 | 75.2605634 | 60.7715278 | 60.6061284 | 74.1450748 |
| 17:45:43 | 0:45:43 | 68.7694868 | 67.2605634 | 60.7715278 | 62.6061284 | 73.5996202 |

|          |         |            |            |            |            |            |
|----------|---------|------------|------------|------------|------------|------------|
| 17:45:44 | 0:45:44 | 68.7694868 | 64.2605634 | 60.7715278 | 62.6061284 | 73.3268929 |
| 17:45:45 | 0:45:45 | 67.7694868 | 62.2605634 | 57.7715278 | 61.6061284 | 72.6905293 |
| 17:45:46 | 0:45:46 | 65.7694868 | 61.2605634 | 56.7715278 | 61.6061284 | 72.2359838 |
| 17:45:47 | 0:45:47 | 64.7694868 | 61.2605634 | 57.7715278 | 62.6061284 | 72.1450748 |
| 17:45:48 | 0:45:48 | 63.7694868 | 61.2605634 | 57.7715278 | 64.6061284 | 72.3268929 |
| 17:45:49 | 0:45:49 | 63.7694868 | 61.2605634 | 57.7715278 | 62.6061284 | 71.8723475 |
| 17:45:50 | 0:45:50 | 63.7694868 | 61.2605634 | 59.7715278 | 62.6061284 | 71.6905293 |
| 17:45:51 | 0:45:51 | 62.7694868 | 60.2605634 | 56.7715278 | 61.6061284 | 70.8723475 |
| 17:45:52 | 0:45:52 | 61.7694868 | 59.2605634 | 56.7715278 | 60.6061284 | 70.0541657 |
| 17:45:53 | 0:45:53 | 61.7694868 | 58.2605634 | 57.7715278 | 60.6061284 | 69.7814384 |
| 17:45:54 | 0:45:54 | 61.7694868 | 58.2605634 | 57.7715278 | 60.6061284 | 69.3268929 |
| 17:45:55 | 0:45:55 | 61.7694868 | 59.2605634 | 57.7715278 | 61.6061284 | 69.5996202 |
| 17:45:56 | 0:45:56 | 61.7694868 | 59.2605634 | 59.7715278 | 62.6061284 | 70.0541657 |
| 17:45:57 | 0:45:57 | 61.7694868 | 60.2605634 | 59.7715278 | 65.6061284 | 70.5087111 |
| 17:45:58 | 0:45:58 | 61.7694868 | 60.2605634 | 59.7715278 | 70.6061284 | 70.9632566 |
| 17:45:59 | 0:45:59 | 61.7694868 | 60.2605634 | 59.7715278 | 76.6061284 | 70.3268929 |
| 17:46:00 | 0:46:00 | 61.7694868 | 61.2605634 | 59.7715278 | 78.6061284 | 70.417802  |
| 17:46:01 | 0:46:01 | 61.7694868 | 61.2605634 | 60.7715278 | 79.6061284 | 69.2359838 |
| 17:46:02 | 0:46:02 | 61.7694868 | 61.2605634 | 60.7715278 | 78.6061284 | 69.0541657 |
| 17:46:03 | 0:46:03 | 61.7694868 | 62.2605634 | 61.7715278 | 77.6061284 | 69.3268929 |
| 17:46:04 | 0:46:04 | 61.7694868 | 62.2605634 | 61.7715278 | 77.6061284 | 69.417802  |
| 17:46:05 | 0:46:05 | 61.7694868 | 63.2605634 | 61.7715278 | 77.6061284 | 69.7814384 |
| 17:46:06 | 0:46:06 | 61.7694868 | 63.2605634 | 61.7715278 | 77.6061284 | 70.1450748 |
| 17:46:07 | 0:46:07 | 62.7694868 | 62.2605634 | 61.7715278 | 77.6061284 | 70.417802  |
| 17:46:08 | 0:46:08 | 62.7694868 | 63.2605634 | 61.7715278 | 76.6061284 | 70.3268929 |
| 17:46:09 | 0:46:09 | 62.7694868 | 63.2605634 | 61.7715278 | 75.6061284 | 70.3268929 |
| 17:46:10 | 0:46:10 | 62.7694868 | 63.2605634 | 61.7715278 | 74.6061284 | 70.417802  |
| 17:46:11 | 0:46:11 | 66.7694868 | 63.2605634 | 63.7715278 | 74.6061284 | 70.7814384 |
| 17:46:12 | 0:46:12 | 67.7694868 | 63.2605634 | 64.7715278 | 72.6061284 | 70.1450748 |
| 17:46:13 | 0:46:13 | 67.7694868 | 62.2605634 | 67.7715278 | 71.6061284 | 84.9682631 |
| 17:46:14 | 0:46:14 | 63.7694868 | 61.2605634 | 67.7715278 | 71.6061284 | 80.9682631 |
| 17:46:15 | 0:46:15 | 62.7694868 | 60.2605634 | 67.7715278 | 70.6061284 | 80.9682631 |
| 17:46:16 | 0:46:16 | 62.7694868 | 59.2605634 | 65.7715278 | 69.6061284 | 79.9682631 |
| 17:46:17 | 0:46:17 | 62.7694868 | 59.2605634 | 64.7715278 | 68.6061284 | 77.9682631 |
| 17:46:18 | 0:46:18 | 62.7694868 | 58.2605634 | 61.7715278 | 67.6061284 | 74.9682631 |
| 17:46:19 | 0:46:19 | 61.7694868 | 58.2605634 | 60.7715278 | 66.6061284 | 71.9682631 |
| 17:46:20 | 0:46:20 | 61.7694868 | 60.2605634 | 60.7715278 | 65.6061284 | 71.9682631 |
| 17:46:21 | 0:46:21 | 60.7694868 | 61.2605634 | 60.7715278 | 64.6061284 | 71.9682631 |
| 17:46:22 | 0:46:22 | 60.7694868 | 61.2605634 | 61.7715278 | 65.6061284 | 70.9682631 |
| 17:46:23 | 0:46:23 | 59.7694868 | 61.2605634 | 65.7715278 | 65.6061284 | 67.9682631 |
| 17:46:24 | 0:46:24 | 59.7694868 | 61.2605634 | 65.7715278 | 67.6061284 | 64.9682631 |
| 17:46:25 | 0:46:25 | 59.7694868 | 62.2605634 | 65.7715278 | 67.6061284 | 63.9682631 |
| 17:46:26 | 0:46:26 | 59.7694868 | 62.2605634 | 65.7715278 | 68.6061284 | 61.9682631 |
| 17:46:27 | 0:46:27 | 59.7694868 | 61.2605634 | 64.7715278 | 69.6061284 | 61.9682631 |
| 17:46:28 | 0:46:28 | 59.7694868 | 61.2605634 | 63.7715278 | 69.6061284 | 61.9682631 |

|          |         |            |            |            |            |            |
|----------|---------|------------|------------|------------|------------|------------|
| 17:46:29 | 0:46:29 | 56.7694868 | 61.2605634 | 63.7715278 | 70.6061284 | 65.9682631 |
| 17:46:30 | 0:46:30 | 56.7694868 | 61.2605634 | 63.7715278 | 70.6061284 | 65.9682631 |
| 17:46:31 | 0:46:31 | 55.7694868 | 61.2605634 | 62.7715278 | 71.6061284 | 75.9682631 |
| 17:46:32 | 0:46:32 | 55.7694868 | 61.2605634 | 62.7715278 | 71.6061284 | 84.9682631 |
| 17:46:33 | 0:46:33 | 55.7694868 | 61.2605634 | 57.7715278 | 72.6061284 | 88.9682631 |
| 17:46:34 | 0:46:34 | 56.7694868 | 60.2605634 | 56.7715278 | 72.6061284 | 90.9682631 |
| 17:46:35 | 0:46:35 | 56.7694868 | 60.2605634 | 55.7715278 | 73.6061284 | 68.1450748 |
| 17:46:36 | 0:46:36 | 55.7694868 | 60.2605634 | 54.7715278 | 74.6061284 | 68.5087111 |
| 17:46:37 | 0:46:37 | 56.7694868 | 60.2605634 | 53.7715278 | 70.6061284 | 68.7814384 |
| 17:46:38 | 0:46:38 | 58.7694868 | 60.2605634 | 53.7715278 | 70.6061284 | 69.3268929 |
| 17:46:39 | 0:46:39 | 59.7694868 | 61.2605634 | 52.7715278 | 68.6061284 | 69.417802  |
| 17:46:40 | 0:46:40 | 60.7694868 | 61.2605634 | 50.7715278 | 66.6061284 | 68.5087111 |
| 17:46:41 | 0:46:41 | 60.7694868 | 61.2605634 | 50.7715278 | 65.6061284 | 68.3268929 |
| 17:46:42 | 0:46:42 | 60.7694868 | 61.2605634 | 50.7715278 | 65.6061284 | 68.1450748 |
| 17:46:43 | 0:46:43 | 60.7694868 | 61.2605634 | 51.7715278 | 64.6061284 | 88.9682631 |
| 17:46:44 | 0:46:44 | 61.7694868 | 62.2605634 | 50.7715278 | 65.6061284 | 86.9682631 |
| 17:46:45 | 0:46:45 | 61.7694868 | 67.2605634 | 50.7715278 | 66.6061284 | 85.9682631 |
| 17:46:46 | 0:46:46 | 61.7694868 | 67.2605634 | 51.7715278 | 67.6061284 | 81.9682631 |
| 17:46:47 | 0:46:47 | 61.7694868 | 68.2605634 | 52.7715278 | 67.6061284 | 81.9682631 |
| 17:46:48 | 0:46:48 | 61.7694868 | 68.2605634 | 52.7715278 | 66.6061284 | 79.9682631 |
| 17:46:49 | 0:46:49 | 60.7694868 | 68.2605634 | 51.7715278 | 65.6061284 | 74.9682631 |
| 17:46:50 | 0:46:50 | 60.7694868 | 67.2605634 | 52.7715278 | 65.6061284 | 72.9682631 |
| 17:46:51 | 0:46:51 | 60.7694868 | 67.2605634 | 51.7715278 | 62.6061284 | 71.9682631 |
| 17:46:52 | 0:46:52 | 59.7694868 | 65.2605634 | 51.7715278 | 61.6061284 | 71.9682631 |
| 17:46:53 | 0:46:53 | 58.7694868 | 64.2605634 | 51.7715278 | 61.6061284 | 64.9682631 |
| 17:46:54 | 0:46:54 | 58.7694868 | 64.2605634 | 51.7715278 | 63.6061284 | 62.9682631 |
| 17:46:55 | 0:46:55 | 58.7694868 | 70.2605634 | 52.7715278 | 64.6061284 | 62.9682631 |
| 17:46:56 | 0:46:56 | 58.7694868 | 73.2605634 | 52.7715278 | 64.6061284 | 58.9682631 |
| 17:46:57 | 0:46:57 | 58.7694868 | 72.2605634 | 56.7715278 | 65.6061284 | 54.9682631 |
| 17:46:58 | 0:46:58 | 59.7694868 | 72.2605634 | 56.7715278 | 66.6061284 | 54.9682631 |
| 17:46:59 | 0:46:59 | 59.7694868 | 70.2605634 | 56.7715278 | 65.6061284 | 53.9682631 |
| 17:47:00 | 0:47:00 | 59.7694868 | 70.2605634 | 57.7715278 | 64.6061284 | 52.9682631 |
| 17:47:01 | 0:47:01 | 59.7694868 | 67.2605634 | 57.7715278 | 63.6061284 | 52.9682631 |
| 17:47:02 | 0:47:02 | 58.7694868 | 66.2605634 | 57.7715278 | 63.6061284 | 52.9682631 |
| 17:47:03 | 0:47:03 | 58.7694868 | 66.2605634 | 56.7715278 | 63.6061284 | 55.9682631 |
| 17:47:04 | 0:47:04 | 58.7694868 | 65.2605634 | 57.7715278 | 62.6061284 | 55.9682631 |
| 17:47:05 | 0:47:05 | 58.7694868 | 65.2605634 | 57.7715278 | 62.6061284 | 57.9682631 |
| 17:47:06 | 0:47:06 | 58.7694868 | 65.2605634 | 57.7715278 | 63.6061284 | 58.9682631 |
| 17:47:07 | 0:47:07 | 58.7694868 | 65.2605634 | 58.7715278 | 65.6061284 | 58.9682631 |
| 17:47:08 | 0:47:08 | 59.7694868 | 65.2605634 | 58.7715278 | 66.6061284 | 58.9682631 |
| 17:47:09 | 0:47:09 | 59.7694868 | 65.2605634 | 59.7715278 | 66.6061284 | 62.9682631 |
| 17:47:10 | 0:47:10 | 61.7694868 | 67.2605634 | 59.7715278 | 66.6061284 | 62.9682631 |
| 17:47:11 | 0:47:11 | 61.7694868 | 67.2605634 | 59.7715278 | 64.6061284 | 62.9682631 |
| 17:47:12 | 0:47:12 | 62.7694868 | 67.2605634 | 59.7715278 | 63.6061284 | 62.9682631 |
| 17:47:13 | 0:47:13 | 62.7694868 | 66.2605634 | 59.7715278 | 63.6061284 | 62.9682631 |

|          |         |            |            |            |            |            |
|----------|---------|------------|------------|------------|------------|------------|
| 17:47:14 | 0:47:14 | 62.7694868 | 64.2605634 | 59.7715278 | 63.6061284 | 65.9682631 |
| 17:47:15 | 0:47:15 | 61.7694868 | 63.2605634 | 61.7715278 | 69.6061284 | 63.9682631 |
| 17:47:16 | 0:47:16 | 59.7694868 | 63.2605634 | 61.7715278 | 71.6061284 | 63.9682631 |
| 17:47:17 | 0:47:17 | 58.7694868 | 62.2605634 | 64.7715278 | 73.6061284 | 59.9682631 |
| 17:47:18 | 0:47:18 | 57.7694868 | 62.2605634 | 63.7715278 | 74.6061284 | 58.9682631 |
| 17:47:19 | 0:47:19 | 56.7694868 | 62.2605634 | 63.7715278 | 74.6061284 | 58.9682631 |
| 17:47:20 | 0:47:20 | 55.7694868 | 64.2605634 | 63.7715278 | 74.6061284 | 58.9682631 |
| 17:47:21 | 0:47:21 | 55.7694868 | 66.2605634 | 63.7715278 | 78.6061284 | 58.9682631 |
| 17:47:22 | 0:47:22 | 54.7694868 | 64.2605634 | 63.7715278 | 80.6061284 | 58.9682631 |
| 17:47:23 | 0:47:23 | 54.7694868 | 64.2605634 | 62.7715278 | 81.6061284 | 58.9682631 |
| 17:47:24 | 0:47:24 | 54.7694868 | 64.2605634 | 62.7715278 | 81.6061284 | 58.9682631 |
| 17:47:25 | 0:47:25 | 55.7694868 | 64.2605634 | 61.7715278 | 80.6061284 | 58.9682631 |
| 17:47:26 | 0:47:26 | 55.7694868 | 64.2605634 | 61.7715278 | 79.6061284 | 58.9682631 |
| 17:47:27 | 0:47:27 | 55.7694868 | 65.2605634 | 61.7715278 | 77.6061284 | 57.9682631 |
| 17:47:28 | 0:47:28 | 55.7694868 | 67.2605634 | 62.7715278 | 77.6061284 | 54.9682631 |
| 17:47:29 | 0:47:29 | 57.7694868 | 67.2605634 | 64.7715278 | 77.6061284 | 54.9682631 |
| 17:47:30 | 0:47:30 | 58.7694868 | 67.2605634 | 64.7715278 | 79.6061284 | 54.9682631 |
| 17:47:31 | 0:47:31 | 58.7694868 | 66.2605634 | 64.7715278 | 81.6061284 | 54.9682631 |
| 17:47:32 | 0:47:32 | 59.7694868 | 66.2605634 | 67.7715278 | 80.6061284 | 54.9682631 |
| 17:47:33 | 0:47:33 | 59.7694868 | 66.2605634 | 66.7715278 | 76.6061284 | 54.9682631 |
| 17:47:34 | 0:47:34 | 59.7694868 | 66.2605634 | 63.7715278 | 74.6061284 | 54.9682631 |
| 17:47:35 | 0:47:35 | 58.7694868 | 66.2605634 | 62.7715278 | 71.6061284 | 53.9682631 |
| 17:47:36 | 0:47:36 | 59.7694868 | 66.2605634 | 62.7715278 | 71.6061284 | 52.9682631 |
| 17:47:37 | 0:47:37 | 59.7694868 | 66.2605634 | 62.7715278 | 71.6061284 | 52.9682631 |
| 17:47:38 | 0:47:38 | 60.7694868 | 66.2605634 | 62.7715278 | 73.6061284 | 52.9682631 |
| 17:47:39 | 0:47:39 | 60.7694868 | 69.2605634 | 62.7715278 | 74.6061284 | 52.9682631 |
| 17:47:40 | 0:47:40 | 60.7694868 | 68.2605634 | 62.7715278 | 74.6061284 | 51.9682631 |
| 17:47:41 | 0:47:41 | 60.7694868 | 68.2605634 | 62.7715278 | 74.6061284 | 51.9682631 |
| 17:47:42 | 0:47:42 | 61.7694868 | 68.2605634 | 62.7715278 | 74.6061284 | 51.9682631 |
| 17:47:43 | 0:47:43 | 61.7694868 | 69.2605634 | 62.7715278 | 75.6061284 | 51.9682631 |
| 17:47:44 | 0:47:44 | 61.7694868 | 69.2605634 | 62.7715278 | 76.6061284 | 51.9682631 |
| 17:47:45 | 0:47:45 | 61.7694868 | 70.2605634 | 60.7715278 | 76.6061284 | 51.9682631 |
| 17:47:46 | 0:47:46 | 61.7694868 | 70.2605634 | 59.7715278 | 76.6061284 | 51.9682631 |
| 17:47:47 | 0:47:47 | 61.7694868 | 70.2605634 | 59.7715278 | 77.6061284 | 51.9682631 |
| 17:47:48 | 0:47:48 | 60.7694868 | 70.2605634 | 59.7715278 | 78.6061284 | 51.9682631 |

| Person 6   | Person 11  | Person 1   | Person 7   | Person 12  | Person 4 | Activity |
|------------|------------|------------|------------|------------|----------|----------|
| 70.8079507 | 67.1859046 | 71.0479295 | 80.0713843 | 78.6316603 |          |          |
| 70.8079507 | 67.1859046 | 71.0479295 | 83.0713843 | 78.6316603 |          |          |
| 70.8079507 | 69.1859046 | 71.0479295 | 84.0713843 | 81.6316603 |          |          |
| 70.8079507 | 69.1859046 | 70.0479295 | 84.0713843 | 82.6316603 |          |          |
| 70.8079507 | 70.1859046 | 70.0479295 | 86.0713843 | 84.6316603 |          |          |
| 70.8079507 | 69.1859046 | 70.0479295 | 85.0713843 | 86.6316603 |          |          |
| 70.8079507 | 67.1859046 | 70.0479295 | 85.0713843 | 86.6316603 |          |          |
| 70.8079507 | 67.1859046 | 69.0479295 | 85.0713843 | 86.6316603 |          |          |
| 70.8079507 | 67.1859046 | 69.0479295 | 84.0713843 | 87.6316603 |          |          |
| 70.8079507 | 66.1859046 | 69.0479295 | 82.0713843 | 87.6316603 |          |          |
| 92.8079507 | 66.1859046 | 69.0479295 | 80.0713843 | 87.6316603 |          |          |
| 92.8079507 | 66.1859046 | 68.0479295 | 78.0713843 | 86.6316603 |          |          |
| 90.8079507 | 66.1859046 | 68.0479295 | 76.0713843 | 88.6316603 |          |          |
| 76.3120799 | 65.1859046 | 69.0479295 | 74.0713843 | 90.6316603 |          |          |
| 76.9120799 | 65.1859046 | 69.0479295 | 73.0713843 | 91.6316603 |          |          |
| 76.7120799 | 65.1859046 | 69.0479295 | 72.0713843 | 90.6316603 |          |          |
| 76.6120799 | 64.1859046 | 69.0479295 | 71.0713843 | 90.6316603 |          |          |
| 76.6120799 | 64.1859046 | 69.0479295 | 70.0713843 | 90.6316603 |          |          |
| 76.6120799 | 64.1859046 | 69.0479295 | 70.0713843 | 88.6316603 |          |          |
| 76.6120799 | 64.1859046 | 70.0479295 | 70.0713843 | 85.6316603 |          |          |
| 77.1120799 | 65.1859046 | 71.0479295 | 71.0713843 | 85.6316603 |          |          |
| 77.2120799 | 65.1859046 | 71.0479295 | 71.0713843 | 85.6316603 |          |          |
| 76.5120799 | 67.1859046 | 71.0479295 | 72.0713843 | 78.6316603 |          |          |
| 76.0120799 | 67.1859046 | 70.0479295 | 72.0713843 | 77.6316603 |          |          |
| 76.3120799 | 69.1859046 | 69.0479295 | 75.0713843 | 77.6316603 |          |          |
| 76.2120799 | 70.1859046 | 69.0479295 | 74.0713843 | 77.6316603 |          |          |
| 76.4120799 | 71.1859046 | 69.0479295 | 74.0713843 | 76.6316603 |          |          |
| 76.9120799 | 74.1859046 | 69.0479295 | 74.0713843 | 75.6316603 |          |          |
| 76.3120799 | 74.1859046 | 70.0479295 | 70.0713843 | 75.6316603 |          |          |
| 76.1120799 | 74.1859046 | 70.0479295 | 68.0713843 | 75.6316603 |          |          |
| 75.3120799 | 73.1859046 | 70.0479295 | 68.0713843 | 74.6316603 |          |          |
| 74.9120799 | 73.1859046 | 70.0479295 | 67.0713843 | 73.6316603 |          |          |
| 74.8120799 | 72.1859046 | 70.0479295 | 67.0713843 | 74.6316603 |          |          |
| 75.0120799 | 71.1859046 | 70.0479295 | 68.0713843 | 78.6316603 |          |          |
| 74.6120799 | 68.1859046 | 71.0479295 | 68.0713843 | 78.6316603 |          |          |
| 74.6120799 | 68.1859046 | 71.0479295 | 68.0713843 | 78.6316603 |          |          |
| 73.6120799 | 66.1859046 | 71.0479295 | 67.0713843 | 80.6316603 |          |          |
| 73.7120799 | 64.1859046 | 73.0479295 | 66.0713843 | 78.6316603 |          |          |
| 73.5120799 | 63.1859046 | 73.0479295 | 66.0713843 | 77.6316603 |          |          |
| 73.3120799 | 62.1859046 | 73.0479295 | 65.0713843 | 77.6316603 |          |          |
| 73.2120799 | 62.1859046 | 74.0479295 | 65.0713843 | 76.6316603 |          |          |
| 73.0120799 | 62.1859046 | 74.0479295 | 65.0713843 | 75.6316603 |          |          |
| 72.0120799 | 60.1859046 | 74.0479295 | 65.0713843 | 73.6316603 |          |          |

72.0120799 59.1859046 74.0479295 64.0713843 73.6316603  
71.8120799 59.1859046 74.0479295 64.0713843 73.6316603  
72.1120799 58.1859046 74.0479295 65.0713843 73.6316603  
72.5120799 58.1859046 74.0479295 65.0713843 73.6316603  
72.6120799 58.1859046 74.0479295 65.0713843 73.6316603  
73.0120799 58.1859046 75.0479295 65.0713843 74.6316603  
73.0120799 57.1859046 76.0479295 65.0713843 74.6316603  
73.1120799 57.1859046 76.0479295 65.0713843 74.6316603  
73.1120799 57.1859046 77.0479295 65.0713843 74.6316603  
73.2120799 57.1859046 77.0479295 65.0713843 74.6316603  
73.2120799 57.1859046 77.0479295 67.0713843 74.6316603  
73.0120799 55.1859046 76.0479295 68.0713843 74.6316603  
72.8120799 54.1859046 76.0479295 69.0713843 74.6316603  
72.3120799 53.1859046 76.0479295 71.0713843 76.6316603  
71.9120799 53.1859046 76.0479295 71.0713843 76.6316603  
72.1120799 54.1859046 76.0479295 72.0713843 79.6316603  
93.8079507 54.1859046 76.0479295 76.0713843 80.6316603  
92.8079507 56.1859046 76.0479295 76.0713843 80.6316603  
92.8079507 59.1859046 76.0479295 77.0713843 80.6316603  
92.8079507 60.1859046 76.0479295 77.0713843 79.6316603  
90.8079507 60.1859046 76.0479295 77.0713843 77.6316603  
88.8079507 60.1859046 75.0479295 77.0713843 76.6316603  
86.8079507 59.1859046 75.0479295 77.0713843 76.6316603  
86.8079507 59.1859046 74.0479295 82.0713843 75.6316603  
85.8079507 59.1859046 74.0479295 82.0713843 75.6316603  
84.8079507 58.1859046 74.0479295 84.0713843 75.6316603  
84.8079507 58.1859046 73.0479295 84.0713843 79.6316603  
84.8079507 58.1859046 72.0479295 83.0713843 79.6316603  
85.8079507 59.1859046 72.0479295 81.0713843 80.6316603  
89.8079507 58.1859046 72.0479295 77.0713843 79.6316603  
91.8079507 58.1859046 71.0479295 77.0713843 77.6316603  
91.8079507 58.1859046 71.0479295 74.0713843 77.6316603  
90.8079507 57.1859046 71.0479295 74.0713843 76.6316603  
90.8079507 57.1859046 71.0479295 73.0713843 70.6316603  
90.8079507 57.1859046 71.0479295 72.0713843 70.6316603  
89.8079507 57.1859046 71.0479295 71.0713843 66.6316603  
89.8079507 58.1859046 71.0479295 71.0713843 66.6316603  
88.8079507 58.1859046 71.0479295 71.0713843 65.6316603  
88.8079507 60.1859046 71.0479295 71.0713843 66.6316603  
88.8079507 60.1859046 70.0479295 70.0713843 67.6316603  
84.8079507 60.1859046 70.0479295 70.0713843 66.6316603  
84.8079507 60.1859046 70.0479295 70.0713843 64.6316603  
84.8079507 62.1859046 71.0479295 70.0713843 63.6316603  
84.8079507 62.1859046 71.0479295 70.0713843 63.6316603  
83.8079507 61.1859046 71.0479295 69.0713843 63.6316603

92314.17.10a  
Before1  
Before2  
Before3



|            |            |            |            |            |          |
|------------|------------|------------|------------|------------|----------|
| 76.8079507 | 61.1859046 | 71.0479295 | 68.0713843 | 64.6316603 | Before4  |
| 76.8079507 | 61.1859046 | 71.0479295 | 68.0713843 | 64.6316603 | Before5  |
| 74.8079507 | 60.1859046 | 70.0479295 | 68.0713843 | 68.6316603 | Before6  |
| 75.8079507 | 60.1859046 | 70.0479295 | 67.0713843 | 69.6316603 | Before7  |
| 74.8079507 | 60.1859046 | 69.0479295 | 67.0713843 | 67.6316603 | Before8  |
| 74.8079507 | 59.1859046 | 69.0479295 | 67.0713843 | 65.6316603 | Before9  |
| 74.8079507 | 59.1859046 | 70.0479295 | 68.0713843 | 65.6316603 | Before10 |
| 74.8079507 | 59.1859046 | 71.0479295 | 68.0713843 | 65.6316603 | Before11 |
| 73.8079507 | 59.1859046 | 71.0479295 | 67.0713843 | 66.6316603 | Before12 |
| 73.8079507 | 60.1859046 | 70.0479295 | 67.0713843 | 66.6316603 | Before13 |
| 71.8079507 | 60.1859046 | 69.0479295 | 67.0713843 | 67.6316603 | Before14 |
| 71.8079507 | 61.1859046 | 68.0479295 | 67.0713843 | 69.6316603 | Before15 |
| 71.8079507 | 61.1859046 | 68.0479295 | 67.0713843 | 71.6316603 | Before16 |
| 71.8079507 | 61.1859046 | 67.0479295 | 67.0713843 | 71.6316603 | Before17 |
| 70.8079507 | 62.1859046 | 66.0479295 | 67.0713843 | 71.6316603 | Before18 |
| 70.8079507 | 62.1859046 | 66.0479295 | 67.0713843 | 72.6316603 | Before19 |
| 70.8079507 | 62.1859046 | 66.0479295 | 68.0713843 | 72.6316603 | Before20 |
| 69.8079507 | 63.1859046 | 66.0479295 | 68.0713843 | 72.6316603 | Before21 |
| 69.8079507 | 66.1859046 | 67.0479295 | 70.0713843 | 72.6316603 | Before22 |
| 69.8079507 | 68.1859046 | 67.0479295 | 70.0713843 | 72.6316603 | Before23 |
| 69.8079507 | 68.1859046 | 67.0479295 | 70.0713843 | 72.6316603 | Before24 |
| 70.8079507 | 68.1859046 | 67.0479295 | 70.0713843 | 72.6316603 | Before25 |
| 71.8079507 | 68.1859046 | 67.0479295 | 71.0713843 | 72.6316603 | Before26 |
| 71.8079507 | 68.1859046 | 67.0479295 | 72.0713843 | 72.6316603 | Before27 |
| 70.8079507 | 70.1859046 | 67.0479295 | 72.0713843 | 72.6316603 | Before28 |
| 70.8079507 | 70.1859046 | 67.0479295 | 73.0713843 | 72.6316603 | Before29 |
| 70.8079507 | 70.1859046 | 68.0479295 | 74.0713843 | 73.6316603 | Before30 |
| 70.8079507 | 70.1859046 | 69.0479295 | 75.0713843 | 73.6316603 | Before31 |
| 70.8079507 | 71.1859046 | 70.0479295 | 74.0713843 | 72.6316603 | Before32 |
| 69.8079507 | 72.1859046 | 70.0479295 | 72.0713843 | 70.6316603 | Before33 |
| 69.8079507 | 75.1859046 | 71.0479295 | 72.0713843 | 70.6316603 | Before34 |
| 69.8079507 | 75.1859046 | 73.0479295 | 70.0713843 | 70.6316603 | Before35 |
| 69.8079507 | 75.1859046 | 73.0479295 | 69.0713843 | 70.6316603 | Before36 |
| 69.8079507 | 74.1859046 | 71.0479295 | 68.0713843 | 70.6316603 | Before37 |
| 71.8079507 | 75.1859046 | 71.0479295 | 68.0713843 | 70.6316603 | Before38 |
| 72.8079507 | 75.1859046 | 71.0479295 | 68.0713843 | 70.6316603 | Before39 |
| 72.8079507 | 77.1859046 | 71.0479295 | 67.0713843 | 70.6316603 | Before40 |
| 72.8079507 | 77.1859046 | 71.0479295 | 68.0713843 | 70.6316603 | Before41 |
| 72.8079507 | 77.1859046 | 69.0479295 | 68.0713843 | 70.6316603 | Before42 |
| 72.8079507 | 77.1859046 | 68.0479295 | 70.0713843 | 71.6316603 | Before43 |
| 72.8079507 | 77.1859046 | 68.0479295 | 70.0713843 | 72.6316603 | Before44 |
| 71.8079507 | 76.1859046 | 68.0479295 | 72.0713843 | 72.6316603 | Before45 |
| 71.8079507 | 76.1859046 | 67.0479295 | 73.0713843 | 73.6316603 | Before46 |
| 70.8079507 | 77.1859046 | 66.0479295 | 73.0713843 | 75.6316603 | Before47 |
| 68.8079507 | 77.1859046 | 65.0479295 | 73.0713843 | 72.6316603 | Before48 |

|            |            |            |            |            |            |          |
|------------|------------|------------|------------|------------|------------|----------|
| 68.8079507 | 78.1859046 | 65.0479295 | 73.0713843 | 67.6316603 | 70.4750234 | Before49 |
| 71.8079507 | 78.1859046 | 65.0479295 | 70.0713843 | 65.6316603 | 71.4750234 | Before50 |
| 72.8079507 | 78.1859046 | 66.0479295 | 69.0713843 | 65.6316603 | 71.4750234 | Before51 |
| 72.8079507 | 78.1859046 | 65.0479295 | 69.0713843 | 65.6316603 | 69.4750234 | Before52 |
| 72.8079507 | 79.1859046 | 65.0479295 | 68.0713843 | 65.6316603 | 69.4750234 | Before53 |
| 69.8079507 | 81.1859046 | 65.0479295 | 68.0713843 | 65.6316603 | 68.4750234 | Before54 |
| 68.8079507 | 81.1859046 | 66.0479295 | 69.0713843 | 65.6316603 | 68.4750234 | Before55 |
| 68.8079507 | 81.1859046 | 66.0479295 | 70.0713843 | 65.6316603 | 68.4750234 | Before56 |
| 70.8079507 | 80.1859046 | 66.0479295 | 70.0713843 | 65.6316603 | 68.4750234 | Before57 |
| 71.8079507 | 79.1859046 | 67.0479295 | 70.0713843 | 65.6316603 | 69.4750234 | Before58 |
| 71.8079507 | 79.1859046 | 67.0479295 | 70.0713843 | 65.6316603 | 69.4750234 | Before59 |
| 71.8079507 | 75.1859046 | 67.0479295 | 70.0713843 | 65.6316603 | 69.4750234 | Before60 |
| 72.8079507 | 73.1859046 | 67.0479295 | 69.0713843 | 65.6316603 | 70.4750234 | Before61 |
| 72.8079507 | 72.1859046 | 66.0479295 | 67.0713843 | 65.6316603 | 70.4750234 | Before62 |
| 72.8079507 | 71.1859046 | 66.0479295 | 67.0713843 | 65.6316603 | 69.4750234 | Before63 |
| 72.8079507 | 71.1859046 | 65.0479295 | 66.0713843 | 65.6316603 | 69.4750234 | Before64 |
| 72.8079507 | 71.1859046 | 65.0479295 | 66.0713843 | 73.6316603 | 69.4750234 | Before65 |
| 71.8079507 | 72.1859046 | 65.0479295 | 66.0713843 | 73.6316603 | 69.4750234 | Before66 |
| 71.8079507 | 74.1859046 | 65.0479295 | 66.0713843 | 73.6316603 | 69.4750234 | Before67 |
| 71.8079507 | 75.1859046 | 65.0479295 | 66.0713843 | 73.6316603 | 69.4750234 | Before68 |
| 65.8079507 | 74.1859046 | 65.0479295 | 67.0713843 | 73.6316603 | 69.4750234 | Before69 |
| 65.8079507 | 72.1859046 | 65.0479295 | 69.0713843 | 77.6316603 | 69.4750234 | Before70 |
| 65.8079507 | 71.1859046 | 65.0479295 | 76.0713843 | 78.6316603 | 69.4750234 | Before71 |
| 64.8079507 | 70.1859046 | 65.0479295 | 76.0713843 | 77.6316603 | 69.4750234 | Before72 |
| 64.8079507 | 69.1859046 | 65.0479295 | 79.0713843 | 77.6316603 | 69.4750234 | Before73 |
| 64.8079507 | 69.1859046 | 64.0479295 | 82.0713843 | 77.6316603 | 69.4750234 | Before74 |
| 63.8079507 | 68.1859046 | 64.0479295 | 82.0713843 | 77.6316603 | 68.4750234 | Before75 |
| 63.8079507 | 63.1859046 | 64.0479295 | 83.0713843 | 77.6316603 | 68.4750234 | Before76 |
| 63.8079507 | 60.1859046 | 64.0479295 | 81.0713843 | 77.6316603 | 68.4750234 | Before77 |
| 63.8079507 | 60.1859046 | 64.0479295 | 82.0713843 | 77.6316603 | 71.4750234 | Before78 |
| 63.8079507 | 60.1859046 | 64.0479295 | 82.0713843 | 76.6316603 | 73.4750234 | Before79 |
| 63.8079507 | 60.1859046 | 64.0479295 | 83.0713843 | 74.6316603 | 74.4750234 | Before80 |
| 63.8079507 | 60.1859046 | 64.0479295 | 83.0713843 | 73.6316603 | 74.4750234 | Before81 |
| 64.8079507 | 60.1859046 | 64.0479295 | 83.0713843 | 73.6316603 | 73.4750234 | Before82 |
| 64.8079507 | 61.1859046 | 64.0479295 | 83.0713843 | 73.6316603 | 73.4750234 | Before83 |
| 66.8079507 | 65.1859046 | 65.0479295 | 77.0713843 | 74.6316603 | 73.4750234 | Before84 |
| 66.8079507 | 67.1859046 | 67.0479295 | 76.0713843 | 74.6316603 | 72.4750234 | Before85 |
| 66.8079507 | 69.1859046 | 68.0479295 | 75.0713843 | 74.6316603 | 71.4750234 | Before86 |
| 68.8079507 | 70.1859046 | 69.0479295 | 75.0713843 | 71.6316603 | 71.4750234 | Before87 |
| 68.8079507 | 71.1859046 | 68.0479295 | 72.0713843 | 71.6316603 | 71.4750234 | Before88 |
| 68.8079507 | 72.1859046 | 68.0479295 | 71.0713843 | 71.6316603 | 71.4750234 | Before89 |
| 68.8079507 | 72.1859046 | 68.0479295 | 71.0713843 | 71.6316603 | 71.4750234 | Before90 |
| 71.8079507 | 71.1859046 | 68.0479295 | 71.0713843 | 70.6316603 | 71.4750234 | Before91 |
| 72.8079507 | 70.1859046 | 68.0479295 | 70.0713843 | 70.6316603 | 71.4750234 | Before92 |
| 72.8079507 | 70.1859046 | 67.0479295 | 69.0713843 | 70.6316603 | 71.4750234 | Before93 |

|            |            |            |            |            |            |           |
|------------|------------|------------|------------|------------|------------|-----------|
| 72.8079507 | 70.1859046 | 67.0479295 | 69.0713843 | 71.6316603 | 70.4750234 | Before94  |
| 72.8079507 | 71.1859046 | 66.0479295 | 69.0713843 | 72.6316603 | 70.4750234 | Before95  |
| 66.8079507 | 71.1859046 | 66.0479295 | 69.0713843 | 74.6316603 | 70.4750234 | Before96  |
| 66.8079507 | 71.1859046 | 66.0479295 | 69.0713843 | 74.6316603 | 70.4750234 | Before97  |
| 64.8079507 | 71.1859046 | 66.0479295 | 69.0713843 | 74.6316603 | 70.4750234 | Before98  |
| 61.8079507 | 70.1859046 | 65.0479295 | 69.0713843 | 74.6316603 | 70.4750234 | Before99  |
| 60.8079507 | 70.1859046 | 65.0479295 | 69.0713843 | 74.6316603 | 70.4750234 | Before100 |
| 60.8079507 | 72.1859046 | 66.0479295 | 69.0713843 | 74.6316603 | 70.4750234 | Before101 |
| 59.8079507 | 72.1859046 | 66.0479295 | 68.0713843 | 74.6316603 | 70.4750234 | Before102 |
| 59.8079507 | 72.1859046 | 66.0479295 | 68.0713843 | 74.6316603 | 70.4750234 | Before103 |
| 59.8079507 | 69.1859046 | 66.0479295 | 68.0713843 | 74.6316603 | 70.4750234 | Before104 |
| 60.8079507 | 67.1859046 | 66.0479295 | 68.0713843 | 74.6316603 | 71.4750234 | Before105 |
| 62.8079507 | 65.1859046 | 66.0479295 | 68.0713843 | 74.6316603 | 71.4750234 | Before106 |
| 62.8079507 | 64.1859046 | 67.0479295 | 68.0713843 | 74.6316603 | 71.4750234 | Before107 |
| 62.8079507 | 64.1859046 | 69.0479295 | 68.0713843 | 77.6316603 | 71.4750234 | Before108 |
| 61.8079507 | 65.1859046 | 68.0479295 | 68.0713843 | 77.6316603 | 71.4750234 | Before109 |
| 61.8079507 | 66.1859046 | 68.0479295 | 68.0713843 | 77.6316603 | 71.4750234 | Before110 |
| 61.8079507 | 68.1859046 | 68.0479295 | 69.0713843 | 77.6316603 | 71.4750234 | Before111 |
| 61.8079507 | 69.1859046 | 68.0479295 | 70.0713843 | 78.6316603 | 71.4750234 | Before112 |
| 61.8079507 | 69.1859046 | 68.0479295 | 70.0713843 | 78.6316603 | 71.4750234 | Before113 |
| 63.8079507 | 69.1859046 | 69.0479295 | 71.0713843 | 79.6316603 | 73.4750234 | Before114 |
| 63.8079507 | 68.1859046 | 69.0479295 | 72.0713843 | 80.6316603 | 73.4750234 | Before115 |
| 63.8079507 | 67.1859046 | 69.0479295 | 72.0713843 | 81.6316603 | 78.4750234 | Before116 |
| 64.8079507 | 66.1859046 | 69.0479295 | 72.0713843 | 81.6316603 | 81.4750234 | Before117 |
| 64.8079507 | 66.1859046 | 69.0479295 | 71.0713843 | 81.6316603 | 83.4750234 | Before118 |
| 64.8079507 | 66.1859046 | 67.0479295 | 70.0713843 | 74.6316603 | 85.4750234 | Before119 |
| 64.8079507 | 67.1859046 | 67.0479295 | 70.0713843 | 69.6316603 | 85.4750234 | Before120 |
| 63.8079507 | 67.1859046 | 67.0479295 | 70.0713843 | 66.6316603 | 89.4750234 | Before121 |
| 66.8079507 | 67.1859046 | 66.0479295 | 70.0713843 | 65.6316603 | 90.4750234 | Before122 |
| 66.8079507 | 68.1859046 | 65.0479295 | 70.0713843 | 65.6316603 | 90.4750234 | Before123 |
| 66.8079507 | 69.1859046 | 65.0479295 | 70.0713843 | 65.6316603 | 87.4750234 | Before124 |
| 64.8079507 | 69.1859046 | 65.0479295 | 70.0713843 | 65.6316603 | 86.4750234 | Before125 |
| 65.8079507 | 70.1859046 | 66.0479295 | 70.0713843 | 65.6316603 | 83.4750234 | Before126 |
| 65.8079507 | 71.1859046 | 66.0479295 | 70.0713843 | 65.6316603 | 83.4750234 | Before127 |
| 65.8079507 | 71.1859046 | 66.0479295 | 70.0713843 | 66.6316603 | 82.4750234 | Before128 |
| 65.8079507 | 66.1859046 | 66.0479295 | 70.0713843 | 66.6316603 | 82.4750234 | Before129 |
| 65.8079507 | 62.1859046 | 66.0479295 | 69.0713843 | 66.6316603 | 82.4750234 | Before130 |
| 65.8079507 | 61.1859046 | 66.0479295 | 69.0713843 | 66.6316603 | 82.4750234 | Before131 |
| 65.8079507 | 60.1859046 | 66.0479295 | 69.0713843 | 66.6316603 | 81.4750234 | Before132 |
| 65.8079507 | 60.1859046 | 68.0479295 | 69.0713843 | 67.6316603 | 81.4750234 | Before133 |
| 65.8079507 | 60.1859046 | 69.0479295 | 69.0713843 | 68.6316603 | 81.4750234 | Before134 |
| 65.8079507 | 61.1859046 | 69.0479295 | 69.0713843 | 68.6316603 | 70.4750234 | Before135 |
| 63.8079507 | 63.1859046 | 70.0479295 | 69.0713843 | 68.6316603 | 68.4750234 | Before136 |
| 63.8079507 | 64.1859046 | 70.0479295 | 69.0713843 | 69.6316603 | 68.4750234 | Before137 |
| 61.8079507 | 64.1859046 | 71.0479295 | 69.0713843 | 69.6316603 | 69.4750234 | Before138 |

|            |            |            |            |            |            |           |
|------------|------------|------------|------------|------------|------------|-----------|
| 61.8079507 | 63.1859046 | 71.0479295 | 69.0713843 | 70.6316603 | 69.4750234 | Before139 |
| 61.8079507 | 63.1859046 | 71.0479295 | 72.0713843 | 70.6316603 | 71.4750234 | minute1   |
| 59.8079507 | 63.1859046 | 71.0479295 | 72.0713843 | 70.6316603 | 72.4750234 | minute2   |
| 59.8079507 | 62.1859046 | 70.0479295 | 72.0713843 | 75.6316603 | 73.4750234 | minute3   |
| 59.8079507 | 62.1859046 | 70.0479295 | 73.0713843 | 75.6316603 | 73.4750234 | minute4   |
| 59.8079507 | 62.1859046 | 70.0479295 | 74.0713843 | 75.6316603 | 73.4750234 | minute5   |
| 63.8079507 | 63.1859046 | 69.0479295 | 74.0713843 | 75.6316603 | 73.4750234 | minute6   |
| 64.8079507 | 63.1859046 | 69.0479295 | 74.0713843 | 75.6316603 | 73.4750234 | minute7   |
| 64.8079507 | 62.1859046 | 69.0479295 | 74.0713843 | 75.6316603 | 73.4750234 | minute8   |
| 64.8079507 | 62.1859046 | 69.0479295 | 74.0713843 | 75.6316603 | 72.4750234 | minute9   |
| 64.8079507 | 64.1859046 | 69.0479295 | 75.0713843 | 74.6316603 | 72.4750234 | minute10  |
| 64.8079507 | 64.1859046 | 69.0479295 | 75.0713843 | 75.6316603 | 72.4750234 | minute11  |
| 64.8079507 | 64.1859046 | 68.0479295 | 75.0713843 | 77.6316603 | 72.4750234 | minute12  |
| 64.8079507 | 64.1859046 | 69.0479295 | 74.0713843 | 77.6316603 | 72.4750234 | minute13  |
| 64.8079507 | 64.1859046 | 69.0479295 | 68.0713843 | 76.6316603 | 72.4750234 | minute14  |
| 64.8079507 | 64.1859046 | 69.0479295 | 67.0713843 | 76.6316603 | 71.4750234 | minute15  |
| 64.8079507 | 64.1859046 | 69.0479295 | 67.0713843 | 75.6316603 | 69.4750234 | minute16  |
| 64.8079507 | 64.1859046 | 68.0479295 | 67.0713843 | 75.6316603 | 69.4750234 | minute17  |
| 64.8079507 | 65.1859046 | 68.0479295 | 67.0713843 | 71.6316603 | 69.4750234 | minute18  |
| 64.8079507 | 65.1859046 | 68.0479295 | 67.0713843 | 69.6316603 | 70.4750234 | minute19  |
| 64.8079507 | 65.1859046 | 68.0479295 | 67.0713843 | 69.6316603 | 70.4750234 | minute20  |
| 63.8079507 | 63.1859046 | 71.0479295 | 67.0713843 | 69.6316603 | 70.4750234 | minute21  |
| 61.8079507 | 63.1859046 | 71.0479295 | 67.0713843 | 69.6316603 | 70.4750234 | minute22  |
| 61.8079507 | 62.1859046 | 71.0479295 | 68.0713843 | 70.6316603 | 66.4750234 | minute23  |
| 60.8079507 | 62.1859046 | 71.0479295 | 69.0713843 | 71.6316603 | 66.4750234 | minute24  |
| 59.8079507 | 62.1859046 | 71.0479295 | 69.0713843 | 71.6316603 | 65.4750234 | minute25  |
| 60.8079507 | 63.1859046 | 71.0479295 | 69.0713843 | 69.6316603 | 65.4750234 | minute26  |
| 62.8079507 | 64.1859046 | 71.0479295 | 70.0713843 | 68.6316603 | 64.4750234 | minute27  |
| 62.8079507 | 64.1859046 | 71.0479295 | 70.0713843 | 68.6316603 | 64.4750234 | minute28  |
| 65.8079507 | 66.1859046 | 73.0479295 | 70.0713843 | 67.6316603 | 65.4750234 | minute29  |
| 66.8079507 | 67.1859046 | 75.0479295 | 70.0713843 | 67.6316603 | 65.4750234 | minute30  |
| 64.8079507 | 68.1859046 | 75.0479295 | 70.0713843 | 67.6316603 | 68.4750234 | minute31  |
| 64.8079507 | 67.1859046 | 76.0479295 | 71.0713843 | 66.6316603 | 68.4750234 | minute32  |
| 60.8079507 | 66.1859046 | 76.0479295 | 71.0713843 | 66.6316603 | 68.4750234 | minute33  |
| 60.8079507 | 67.1859046 | 77.0479295 | 70.0713843 | 66.6316603 | 68.4750234 | minute34  |
| 60.8079507 | 68.1859046 | 78.0479295 | 71.0713843 | 69.6316603 | 69.4750234 | minute35  |
| 60.8079507 | 68.1859046 | 79.0479295 | 70.0713843 | 76.6316603 | 69.4750234 | minute36  |
| 59.8079507 | 69.1859046 | 79.0479295 | 70.0713843 | 76.6316603 | 69.4750234 | minute37  |
| 59.8079507 | 73.1859046 | 79.0479295 | 70.0713843 | 79.6316603 | 69.4750234 | minute38  |
| 58.8079507 | 75.1859046 | 79.0479295 | 70.0713843 | 79.6316603 | 69.4750234 | minute39  |
| 58.8079507 | 77.1859046 | 79.0479295 | 70.0713843 | 79.6316603 | 68.4750234 | minute40  |
| 59.8079507 | 78.1859046 | 79.0479295 | 70.0713843 | 79.6316603 | 68.4750234 | minute41  |
| 59.8079507 | 78.1859046 | 79.0479295 | 69.0713843 | 78.6316603 | 68.4750234 | minute42  |
| 59.8079507 | 78.1859046 | 79.0479295 | 68.0713843 | 78.6316603 | 68.4750234 | minute43  |
| 59.8079507 | 74.1859046 | 79.0479295 | 68.0713843 | 74.6316603 | 68.4750234 | minute44  |

|            |            |            |            |            |            |              |
|------------|------------|------------|------------|------------|------------|--------------|
| 60.8079507 | 71.1859046 | 79.0479295 | 67.0713843 | 72.6316603 | 68.4750234 | minute45     |
| 59.8079507 | 69.1859046 | 79.0479295 | 66.0713843 | 72.6316603 | 68.4750234 | minute46     |
| 59.8079507 | 69.1859046 | 79.0479295 | 66.0713843 | 67.6316603 | 68.4750234 | minute47     |
| 60.8079507 | 69.1859046 | 78.0479295 | 66.0713843 | 67.6316603 | 67.4750234 | minute48     |
| 60.8079507 | 69.1859046 | 78.0479295 | 66.0713843 | 67.6316603 | 67.4750234 | minute49     |
| 61.8079507 | 69.1859046 | 78.0479295 | 66.0713843 | 70.6316603 | 67.4750234 | minute50     |
| 61.8079507 | 69.1859046 | 76.0479295 | 66.0713843 | 70.6316603 | 68.4750234 | minute51     |
| 60.8079507 | 68.1859046 | 75.0479295 | 66.0713843 | 69.6316603 | 68.4750234 | minute52     |
| 60.8079507 | 68.1859046 | 75.0479295 | 66.0713843 | 68.6316603 | 68.4750234 | minute53     |
| 60.8079507 | 68.1859046 | 75.0479295 | 66.0713843 | 69.6316603 | 68.4750234 | minute54     |
| 62.8079507 | 69.1859046 | 75.0479295 | 66.0713843 | 69.6316603 | 69.4750234 | minute55     |
| 62.8079507 | 68.1859046 | 76.0479295 | 66.0713843 | 69.6316603 | 69.4750234 | minute56     |
| 62.8079507 | 67.1859046 | 76.0479295 | 66.0713843 | 69.6316603 | 69.4750234 | minute57     |
| 63.8079507 | 66.1859046 | 75.0479295 | 66.0713843 | 69.6316603 | 69.4750234 | minute58     |
| 63.8079507 | 65.1859046 | 75.0479295 | 66.0713843 | 69.6316603 | 70.4750234 | minute59     |
| 64.8079507 | 65.1859046 | 74.0479295 | 67.0713843 | 67.6316603 | 70.4750234 | minute60     |
| 64.8079507 | 64.1859046 | 73.0479295 | 67.0713843 | 65.6316603 | 69.4750234 | Activity3:19 |
| 63.8079507 | 64.1859046 | 72.0479295 | 67.0713843 | 65.6316603 | 69.4750234 | Activity3:20 |
| 63.8079507 | 65.1859046 | 72.0479295 | 66.0713843 | 64.6316603 | 69.4750234 | Activity3:21 |
| 63.8079507 | 65.1859046 | 72.0479295 | 66.0713843 | 61.6316603 | 70.4750234 | Activity3:22 |
| 63.8079507 | 66.1859046 | 72.0479295 | 66.0713843 | 59.6316603 | 70.4750234 | Activity3:23 |
| 63.8079507 | 69.1859046 | 71.0479295 | 66.0713843 | 58.6316603 | 71.4750234 | Activity3:24 |
| 66.8079507 | 71.1859046 | 70.0479295 | 65.0713843 | 58.6316603 | 73.4750234 | Activity3:25 |
| 66.8079507 | 71.1859046 | 70.0479295 | 65.0713843 | 58.6316603 | 73.4750234 | Activity3:26 |
| 66.8079507 | 71.1859046 | 70.0479295 | 65.0713843 | 58.6316603 | 73.4750234 | Activity3:27 |
| 66.8079507 | 71.1859046 | 70.0479295 | 65.0713843 | 58.6316603 | 72.4750234 | Activity3:28 |
| 66.8079507 | 71.1859046 | 70.0479295 | 65.0713843 | 58.6316603 | 71.4750234 | Activity3:29 |
| 66.8079507 | 72.1859046 | 70.0479295 | 65.0713843 | 59.6316603 | 70.4750234 | Activity3:30 |
| 65.8079507 | 72.1859046 | 69.0479295 | 65.0713843 | 59.6316603 | 70.4750234 | Activity3:31 |
| 65.8079507 | 73.1859046 | 69.0479295 | 66.0713843 | 61.6316603 | 71.4750234 | Activity3:32 |
| 64.8079507 | 73.1859046 | 69.0479295 | 66.0713843 | 62.6316603 | 74.4750234 | Activity3:33 |
| 62.8079507 | 73.1859046 | 69.0479295 | 67.0713843 | 63.6316603 | 74.4750234 | Activity3:34 |
| 65.8079507 | 73.1859046 | 70.0479295 | 66.0713843 | 64.6316603 | 74.4750234 | Activity3:35 |
| 68.8079507 | 73.1859046 | 70.0479295 | 66.0713843 | 66.6316603 | 74.4750234 | Activity3:36 |
| 69.8079507 | 74.1859046 | 70.0479295 | 66.0713843 | 68.6316603 | 74.4750234 | Activity3:37 |
| 69.8079507 | 74.1859046 | 70.0479295 | 66.0713843 | 70.6316603 | 73.4750234 | Activity3:38 |
| 70.8079507 | 74.1859046 | 70.0479295 | 66.0713843 | 70.6316603 | 72.4750234 | Activity3:39 |
| 70.8079507 | 74.1859046 | 70.0479295 | 66.0713843 | 70.6316603 | 72.4750234 | Activity3:40 |
| 71.8079507 | 74.1859046 | 70.0479295 | 65.0713843 | 74.6316603 | 72.4750234 | Activity3:41 |
| 70.8079507 | 74.1859046 | 70.0479295 | 66.0713843 | 74.6316603 | 72.4750234 | Activity3:42 |
| 70.8079507 | 74.1859046 | 70.0479295 | 67.0713843 | 74.6316603 | 72.4750234 | Activity3:43 |
| 70.8079507 | 75.1859046 | 70.0479295 | 67.0713843 | 74.6316603 | 71.4750234 | Activity3:44 |
| 70.8079507 | 76.1859046 | 69.0479295 | 68.0713843 | 75.6316603 | 71.4750234 | Activity3:45 |
| 70.8079507 | 77.1859046 | 69.0479295 | 68.0713843 | 78.6316603 | 73.4750234 | Activity3:46 |
| 67.8079507 | 77.1859046 | 69.0479295 | 69.0713843 | 78.6316603 | 74.4750234 | Activity3:47 |

|            |            |            |            |            |            |              |
|------------|------------|------------|------------|------------|------------|--------------|
| 66.8079507 | 78.1859046 | 69.0479295 | 70.0713843 | 78.6316603 | 72.4750234 | Activity3:48 |
| 65.8079507 | 86.1859046 | 69.0479295 | 70.0713843 | 77.6316603 | 72.4750234 | Activity3:49 |
| 65.8079507 | 86.1859046 | 69.0479295 | 70.0713843 | 77.6316603 | 72.4750234 | Activity3:50 |
| 65.8079507 | 86.1859046 | 69.0479295 | 70.0713843 | 76.6316603 | 72.4750234 | Activity3:51 |
| 62.8079507 | 86.1859046 | 70.0479295 | 70.0713843 | 76.6316603 | 72.4750234 | Activity3:52 |
| 62.8079507 | 75.1859046 | 69.0479295 | 70.0713843 | 76.6316603 | 71.4750234 | Activity3:53 |
| 62.8079507 | 72.1859046 | 69.0479295 | 70.0713843 | 77.6316603 | 71.4750234 | Activity3:54 |
| 61.8079507 | 71.1859046 | 69.0479295 | 70.0713843 | 77.6316603 | 71.4750234 | Activity3:55 |
| 61.8079507 | 73.1859046 | 69.0479295 | 69.0713843 | 76.6316603 | 71.4750234 | Activity3:56 |
| 62.8079507 | 73.1859046 | 69.0479295 | 69.0713843 | 76.6316603 | 71.4750234 | Activity3:57 |
| 63.8079507 | 71.1859046 | 69.0479295 | 69.0713843 | 76.6316603 | 71.4750234 | Activity3:58 |
| 63.8079507 | 70.1859046 | 69.0479295 | 69.0713843 | 76.6316603 | 71.4750234 | Activity3:59 |
| 63.8079507 | 68.1859046 | 69.0479295 | 68.0713843 | 75.6316603 | 71.4750234 | Activity4:00 |
| 63.8079507 | 68.1859046 | 69.0479295 | 67.0713843 | 74.6316603 | 71.4750234 | Activity4:01 |
| 63.8079507 | 66.1859046 | 70.0479295 | 67.0713843 | 74.6316603 | 71.4750234 | Activity4:02 |
| 64.8079507 | 65.1859046 | 70.0479295 | 66.0713843 | 75.6316603 | 70.4750234 | Activity4:03 |
| 64.8079507 | 65.1859046 | 70.0479295 | 65.0713843 | 77.6316603 | 70.4750234 | Activity4:04 |
| 64.8079507 | 65.1859046 | 70.0479295 | 65.0713843 | 76.6316603 | 70.4750234 | Activity4:05 |
| 64.8079507 | 65.1859046 | 70.0479295 | 66.0713843 | 76.6316603 | 70.4750234 | Activity4:06 |
| 64.8079507 | 65.1859046 | 71.0479295 | 66.0713843 | 74.6316603 | 70.4750234 | Activity4:07 |
| 64.8079507 | 65.1859046 | 71.0479295 | 66.0713843 | 74.6316603 | 71.4750234 | Activity4:08 |
| 65.8079507 | 66.1859046 | 70.0479295 | 67.0713843 | 72.6316603 | 72.4750234 | Activity4:09 |
| 65.8079507 | 66.1859046 | 70.0479295 | 71.0713843 | 69.6316603 | 72.4750234 | Activity4:10 |
| 65.8079507 | 67.1859046 | 69.0479295 | 71.0713843 | 69.6316603 | 72.4750234 | Activity4:11 |
| 66.8079507 | 67.1859046 | 69.0479295 | 71.0713843 | 72.6316603 | 74.4750234 | Activity4:12 |
| 67.8079507 | 68.1859046 | 69.0479295 | 71.0713843 | 76.6316603 | 74.4750234 | Activity4:13 |
| 67.8079507 | 68.1859046 | 69.0479295 | 69.0713843 | 76.6316603 | 73.4750234 | Activity4:14 |
| 67.8079507 | 68.1859046 | 69.0479295 | 67.0713843 | 75.6316603 | 74.4750234 | Activity4:15 |
| 67.8079507 | 69.1859046 | 68.0479295 | 67.0713843 | 74.6316603 | 74.4750234 | Activity4:16 |
| 67.8079507 | 70.1859046 | 68.0479295 | 67.0713843 | 71.6316603 | 75.4750234 | Activity4:17 |
| 66.8079507 | 70.1859046 | 68.0479295 | 67.0713843 | 71.6316603 | 75.4750234 | Activity4:18 |
| 66.8079507 | 70.1859046 | 68.0479295 | 70.0713843 | 70.6316603 | 74.4750234 | Activity4:19 |
| 66.8079507 | 70.1859046 | 68.0479295 | 72.0713843 | 69.6316603 | 74.4750234 | Activity4:20 |
| 66.8079507 | 70.1859046 | 69.0479295 | 72.0713843 | 68.6316603 | 74.4750234 | Activity4:21 |
| 66.8079507 | 72.1859046 | 69.0479295 | 73.0713843 | 68.6316603 | 74.4750234 | Activity4:22 |
| 66.8079507 | 74.1859046 | 68.0479295 | 73.0713843 | 68.6316603 | 74.4750234 | Activity4:23 |
| 66.8079507 | 74.1859046 | 67.0479295 | 72.0713843 | 72.6316603 | 74.4750234 | Activity4:24 |
| 66.8079507 | 73.1859046 | 67.0479295 | 70.0713843 | 72.6316603 | 74.4750234 | Activity4:25 |
| 67.8079507 | 67.1859046 | 67.0479295 | 68.0713843 | 73.6316603 | 74.4750234 | Activity4:26 |
| 68.8079507 | 65.1859046 | 67.0479295 | 68.0713843 | 74.6316603 | 76.4750234 | Activity4:27 |
| 68.8079507 | 65.1859046 | 67.0479295 | 69.0713843 | 74.6316603 | 77.4750234 | Activity4:28 |
| 68.8079507 | 65.1859046 | 67.0479295 | 70.0713843 | 74.6316603 | 77.4750234 | Activity4:29 |
| 68.8079507 | 65.1859046 | 67.0479295 | 70.0713843 | 75.6316603 | 79.4750234 | Activity4:30 |
| 68.8079507 | 65.1859046 | 67.0479295 | 70.0713843 | 75.6316603 | 79.4750234 | Activity4:31 |
| 69.8079507 | 65.1859046 | 67.0479295 | 70.0713843 | 75.6316603 | 79.4750234 | Activity4:32 |

|            |            |            |            |            |            |              |
|------------|------------|------------|------------|------------|------------|--------------|
| 69.8079507 | 66.1859046 | 68.0479295 | 70.0713843 | 74.6316603 | 78.4750234 | Activity4:33 |
| 69.8079507 | 66.1859046 | 68.0479295 | 70.0713843 | 74.6316603 | 78.4750234 | Activity4:34 |
| 70.8079507 | 74.1859046 | 69.0479295 | 71.0713843 | 74.6316603 | 75.4750234 | Activity4:35 |
| 70.8079507 | 76.1859046 | 70.0479295 | 73.0713843 | 75.6316603 | 75.4750234 | Activity4:36 |
| 70.8079507 | 73.1859046 | 75.0479295 | 74.0713843 | 74.6316603 | 73.4750234 | Activity4:37 |
| 67.8079507 | 67.1859046 | 78.0479295 | 74.0713843 | 76.6316603 | 73.4750234 | Activity4:38 |
| 69.8079507 | 65.1859046 | 79.0479295 | 74.0713843 | 76.6316603 | 73.4750234 | Activity4:39 |
| 69.8079507 | 65.1859046 | 81.0479295 | 74.0713843 | 76.6316603 | 72.4750234 | Activity4:40 |
| 69.8079507 | 64.1859046 | 81.0479295 | 74.0713843 | 76.6316603 | 72.4750234 | Activity4:41 |
| 69.8079507 | 64.1859046 | 82.0479295 | 74.0713843 | 77.6316603 | 72.4750234 | Activity4:42 |
| 69.8079507 | 64.1859046 | 82.0479295 | 74.0713843 | 77.6316603 | 71.4750234 | Activity4:43 |
| 71.8079507 | 64.1859046 | 81.0479295 | 75.0713843 | 77.6316603 | 71.4750234 | Activity4:44 |
| 72.8079507 | 64.1859046 | 79.0479295 | 75.0713843 | 77.6316603 | 71.4750234 | Activity4:45 |
| 72.8079507 | 64.1859046 | 77.0479295 | 75.0713843 | 76.6316603 | 71.4750234 | Activity4:46 |
| 73.8079507 | 68.1859046 | 75.0479295 | 75.0713843 | 76.6316603 | 72.4750234 | Activity4:47 |
| 63.8079507 | 72.1859046 | 72.0479295 | 76.0713843 | 75.6316603 | 74.4750234 | Activity4:48 |
| 59.8079507 | 73.1859046 | 69.0479295 | 76.0713843 | 75.6316603 | 74.4750234 | Activity4:49 |
| 58.8079507 | 70.1859046 | 67.0479295 | 76.0713843 | 74.6316603 | 76.4750234 | Activity4:50 |
| 58.8079507 | 67.1859046 | 67.0479295 | 77.0713843 | 70.6316603 | 77.4750234 | Activity4:51 |
| 59.8079507 | 65.1859046 | 67.0479295 | 79.0713843 | 69.6316603 | 77.4750234 | Activity4:52 |
| 60.8079507 | 64.1859046 | 67.0479295 | 80.0713843 | 68.6316603 | 77.4750234 | Activity4:53 |
| 60.8079507 | 63.1859046 | 67.0479295 | 81.0713843 | 70.6316603 | 77.4750234 | Activity4:54 |
| 61.8079507 | 63.1859046 | 67.0479295 | 81.0713843 | 70.6316603 | 77.4750234 | Activity4:55 |
| 62.8079507 | 63.1859046 | 67.0479295 | 81.0713843 | 73.6316603 | 77.4750234 | Activity4:56 |
| 64.8079507 | 62.1859046 | 67.0479295 | 81.0713843 | 75.6316603 | 77.4750234 | Activity4:57 |
| 64.8079507 | 62.1859046 | 69.0479295 | 80.0713843 | 74.6316603 | 77.4750234 | Activity4:58 |
| 64.8079507 | 62.1859046 | 70.0479295 | 78.0713843 | 73.6316603 | 77.4750234 | Activity4:59 |
| 64.8079507 | 62.1859046 | 72.0479295 | 77.0713843 | 71.6316603 | 77.4750234 | Activity5:00 |
| 64.8079507 | 62.1859046 | 72.0479295 | 77.0713843 | 71.6316603 | 78.4750234 | Activity5:01 |
| 64.8079507 | 62.1859046 | 72.0479295 | 76.0713843 | 71.6316603 | 76.4750234 | Activity5:02 |
| 64.8079507 | 61.1859046 | 72.0479295 | 77.0713843 | 71.6316603 | 74.4750234 | Activity5:03 |
| 63.8079507 | 61.1859046 | 73.0479295 | 77.0713843 | 71.6316603 | 74.4750234 | Activity5:04 |
| 63.8079507 | 60.1859046 | 73.0479295 | 75.0713843 | 71.6316603 | 73.4750234 | Activity5:05 |
| 63.8079507 | 60.1859046 | 73.0479295 | 73.0713843 | 71.6316603 | 73.4750234 | Activity5:06 |
| 66.8079507 | 60.1859046 | 73.0479295 | 73.0713843 | 74.6316603 | 73.4750234 | Activity5:07 |
| 64.8079507 | 60.1859046 | 75.0479295 | 73.0713843 | 75.6316603 | 77.4750234 | Activity5:08 |
| 64.8079507 | 60.1859046 | 79.0479295 | 73.0713843 | 78.6316603 | 77.4750234 | Activity5:09 |
| 63.8079507 | 60.1859046 | 79.0479295 | 72.0713843 | 79.6316603 | 77.4750234 | Activity5:10 |
| 63.8079507 | 61.1859046 | 78.0479295 | 70.0713843 | 79.6316603 | 77.4750234 | Activity5:11 |
| 63.8079507 | 61.1859046 | 78.0479295 | 70.0713843 | 79.6316603 | 77.4750234 | Activity5:12 |
| 62.8079507 | 63.1859046 | 77.0479295 | 70.0713843 | 79.6316603 | 77.4750234 | Activity5:13 |
| 61.8079507 | 63.1859046 | 76.0479295 | 70.0713843 | 78.6316603 | 77.4750234 | Activity5:14 |
| 63.8079507 | 64.1859046 | 77.0479295 | 70.0713843 | 78.6316603 | 78.4750234 | Activity5:15 |
| 63.8079507 | 64.1859046 | 77.0479295 | 70.0713843 | 78.6316603 | 79.4750234 | Activity5:16 |
| 67.8079507 | 66.1859046 | 77.0479295 | 70.0713843 | 79.6316603 | 79.4750234 | Activity5:17 |

|            |            |            |            |            |            |              |
|------------|------------|------------|------------|------------|------------|--------------|
| 70.8079507 | 68.1859046 | 77.0479295 | 70.0713843 | 81.6316603 | 79.4750234 | Activity5:18 |
| 70.8079507 | 70.1859046 | 78.0479295 | 70.0713843 | 79.6316603 | 81.4750234 | Activity5:19 |
| 70.8079507 | 72.1859046 | 78.0479295 | 70.0713843 | 77.6316603 | 83.4750234 | Activity5:20 |
| 70.8079507 | 73.1859046 | 78.0479295 | 69.0713843 | 75.6316603 | 85.4750234 | Activity5:21 |
| 68.8079507 | 73.1859046 | 78.0479295 | 69.0713843 | 75.6316603 | 85.4750234 | Activity5:22 |
| 68.8079507 | 74.1859046 | 78.0479295 | 69.0713843 | 73.6316603 | 85.4750234 | Activity5:23 |
| 66.8079507 | 75.1859046 | 77.0479295 | 67.0713843 | 72.6316603 | 82.4750234 | Activity5:24 |
| 64.8079507 | 75.1859046 | 77.0479295 | 67.0713843 | 72.6316603 | 80.4750234 | Activity5:25 |
| 64.8079507 | 73.1859046 | 77.0479295 | 66.0713843 | 72.6316603 | 80.4750234 | Activity5:26 |
| 64.8079507 | 71.1859046 | 77.0479295 | 67.0713843 | 71.6316603 | 78.4750234 | Activity5:27 |
| 64.8079507 | 71.1859046 | 77.0479295 | 67.0713843 | 71.6316603 | 78.4750234 | Activity5:28 |
| 62.8079507 | 71.1859046 | 77.0479295 | 67.0713843 | 68.6316603 | 75.4750234 | Activity5:29 |
| 62.8079507 | 71.1859046 | 78.0479295 | 69.0713843 | 64.6316603 | 75.4750234 | Activity5:30 |
| 62.8079507 | 71.1859046 | 79.0479295 | 68.0713843 | 64.6316603 | 75.4750234 | Activity5:31 |
| 61.8079507 | 72.1859046 | 80.0479295 | 66.0713843 | 64.6316603 | 74.4750234 | Activity5:32 |
| 61.8079507 | 73.1859046 | 80.0479295 | 65.0713843 | 61.6316603 | 74.4750234 | Activity5:33 |
| 60.8079507 | 73.1859046 | 78.0479295 | 64.0713843 | 60.6316603 | 73.4750234 | Activity5:34 |
| 60.8079507 | 71.1859046 | 78.0479295 | 64.0713843 | 60.6316603 | 73.4750234 | Activity5:35 |
| 58.8079507 | 64.1859046 | 77.0479295 | 65.0713843 | 61.6316603 | 73.4750234 | Activity5:36 |
| 58.8079507 | 60.1859046 | 76.0479295 | 64.0713843 | 61.6316603 | 72.4750234 | Activity5:37 |
| 57.8079507 | 60.1859046 | 76.0479295 | 64.0713843 | 68.6316603 | 72.4750234 | Activity5:38 |
| 57.8079507 | 60.1859046 | 75.0479295 | 64.0713843 | 68.6316603 | 72.4750234 | Activity5:39 |
| 58.8079507 | 64.1859046 | 75.0479295 | 64.0713843 | 78.6316603 | 72.4750234 | Activity5:40 |
| 58.8079507 | 68.1859046 | 75.0479295 | 69.0713843 | 76.6316603 | 71.4750234 | Activity5:41 |
| 58.8079507 | 69.1859046 | 75.0479295 | 69.0713843 | 76.6316603 | 71.4750234 | Activity5:42 |
| 58.8079507 | 69.1859046 | 75.0479295 | 70.0713843 | 76.6316603 | 72.4750234 | Activity5:43 |
| 57.8079507 | 69.1859046 | 75.0479295 | 68.0713843 | 69.6316603 | 71.4750234 | Activity5:44 |
| 57.8079507 | 69.1859046 | 76.0479295 | 67.0713843 | 66.6316603 | 71.4750234 | Activity5:45 |
| 57.8079507 | 69.1859046 | 76.0479295 | 65.0713843 | 66.6316603 | 71.4750234 | Activity5:46 |
| 67.8079507 | 69.1859046 | 75.0479295 | 65.0713843 | 66.6316603 | 71.4750234 | Activity5:47 |
| 67.8079507 | 70.1859046 | 72.0479295 | 65.0713843 | 71.6316603 | 71.4750234 | Activity5:48 |
| 67.8079507 | 70.1859046 | 72.0479295 | 66.0713843 | 73.6316603 | 72.4750234 | Activity5:49 |
| 63.8079507 | 70.1859046 | 71.0479295 | 67.0713843 | 73.6316603 | 73.4750234 | Activity5:50 |
| 61.8079507 | 71.1859046 | 70.0479295 | 67.0713843 | 73.6316603 | 72.4750234 | Activity5:51 |
| 60.8079507 | 72.1859046 | 70.0479295 | 67.0713843 | 72.6316603 | 72.4750234 | Activity5:52 |
| 60.8079507 | 73.1859046 | 70.0479295 | 67.0713843 | 70.6316603 | 72.4750234 | Activity5:53 |
| 60.8079507 | 74.1859046 | 70.0479295 | 67.0713843 | 70.6316603 | 72.4750234 | Activity5:54 |
| 60.8079507 | 74.1859046 | 70.0479295 | 67.0713843 | 70.6316603 | 72.4750234 | Activity5:55 |
| 59.8079507 | 74.1859046 | 73.0479295 | 67.0713843 | 70.6316603 | 72.4750234 | Activity5:56 |
| 59.8079507 | 74.1859046 | 74.0479295 | 67.0713843 | 70.6316603 | 72.4750234 | Activity5:57 |
| 59.8079507 | 72.1859046 | 74.0479295 | 68.0713843 | 70.6316603 | 73.4750234 | Activity5:58 |
| 59.8079507 | 72.1859046 | 77.0479295 | 68.0713843 | 71.6316603 | 74.4750234 | Activity5:59 |
| 59.8079507 | 71.1859046 | 77.0479295 | 68.0713843 | 72.6316603 | 73.4750234 | Activity6:00 |
| 59.8079507 | 71.1859046 | 77.0479295 | 67.0713843 | 72.6316603 | 73.4750234 | Activity6:01 |
| 59.8079507 | 71.1859046 | 76.0479295 | 66.0713843 | 72.6316603 | 74.4750234 | Activity6:02 |



|            |            |            |            |            |            |              |
|------------|------------|------------|------------|------------|------------|--------------|
| 59.8079507 | 71.1859046 | 74.0479295 | 66.0713843 | 75.6316603 | 73.4750234 | Activity6:03 |
| 59.8079507 | 71.1859046 | 74.0479295 | 65.0713843 | 78.6316603 | 72.4750234 | Activity6:04 |
| 59.8079507 | 70.1859046 | 73.0479295 | 65.0713843 | 78.6316603 | 72.4750234 | Activity6:05 |
| 59.8079507 | 70.1859046 | 73.0479295 | 65.0713843 | 79.6316603 | 72.4750234 | Activity6:06 |
| 59.8079507 | 72.1859046 | 73.0479295 | 66.0713843 | 80.6316603 | 72.4750234 | Activity6:07 |
| 61.8079507 | 72.1859046 | 73.0479295 | 66.0713843 | 80.6316603 | 69.4750234 | Activity6:08 |
| 64.8079507 | 72.1859046 | 73.0479295 | 66.0713843 | 80.6316603 | 69.4750234 | Activity6:09 |
| 65.8079507 | 72.1859046 | 73.0479295 | 65.0713843 | 80.6316603 | 69.4750234 | Activity6:10 |
| 66.8079507 | 72.1859046 | 73.0479295 | 65.0713843 | 81.6316603 | 68.4750234 | Activity6:11 |
| 66.8079507 | 72.1859046 | 73.0479295 | 65.0713843 | 81.6316603 | 67.4750234 | Activity6:12 |
| 66.8079507 | 73.1859046 | 73.0479295 | 66.0713843 | 82.6316603 | 66.4750234 | Activity6:13 |
| 66.8079507 | 73.1859046 | 73.0479295 | 65.0713843 | 81.6316603 | 66.4750234 | Activity6:14 |
| 66.8079507 | 73.1859046 | 74.0479295 | 65.0713843 | 80.6316603 | 66.4750234 | minute1      |
| 66.8079507 | 73.1859046 | 74.0479295 | 65.0713843 | 80.6316603 | 72.4750234 | minute2      |
| 68.8079507 | 73.1859046 | 76.0479295 | 64.0713843 | 80.6316603 | 72.4750234 | minute3      |
| 69.8079507 | 73.1859046 | 76.0479295 | 65.0713843 | 80.6316603 | 77.4750234 | minute4      |
| 69.8079507 | 74.1859046 | 76.0479295 | 65.0713843 | 80.6316603 | 79.4750234 | minute5      |
| 69.8079507 | 75.1859046 | 76.0479295 | 66.0713843 | 82.6316603 | 79.4750234 | minute6      |
| 72.8079507 | 77.1859046 | 78.0479295 | 66.0713843 | 80.6316603 | 80.4750234 | minute7      |
| 72.8079507 | 77.1859046 | 78.0479295 | 66.0713843 | 80.6316603 | 80.4750234 | minute8      |
| 72.8079507 | 77.1859046 | 77.0479295 | 67.0713843 | 80.6316603 | 78.4750234 | minute9      |
| 73.8079507 | 78.1859046 | 73.0479295 | 68.0713843 | 74.6316603 | 77.4750234 | minute10     |
| 76.8079507 | 78.1859046 | 73.0479295 | 68.0713843 | 64.6316603 | 77.4750234 | minute11     |
| 76.8079507 | 79.1859046 | 72.0479295 | 67.0713843 | 64.6316603 | 77.4750234 | minute12     |
| 77.8079507 | 79.1859046 | 71.0479295 | 67.0713843 | 63.6316603 | 76.4750234 | minute13     |
| 77.8079507 | 81.1859046 | 71.0479295 | 68.0713843 | 63.6316603 | 75.4750234 | minute14     |
| 76.8079507 | 83.1859046 | 70.0479295 | 68.0713843 | 64.6316603 | 73.4750234 | minute15     |
| 76.8079507 | 81.1859046 | 70.0479295 | 68.0713843 | 66.6316603 | 72.4750234 | minute16     |
| 70.8079507 | 79.1859046 | 70.0479295 | 69.0713843 | 68.6316603 | 72.4750234 | minute17     |
| 70.8079507 | 78.1859046 | 70.0479295 | 69.0713843 | 70.6316603 | 72.4750234 | minute18     |
| 68.8079507 | 78.1859046 | 70.0479295 | 70.0713843 | 71.6316603 | 72.4750234 | minute19     |
| 66.8079507 | 78.1859046 | 70.0479295 | 70.0713843 | 71.6316603 | 72.4750234 | minute20     |
| 66.8079507 | 77.1859046 | 69.0479295 | 70.0713843 | 71.6316603 | 72.4750234 | minute21     |
| 66.8079507 | 77.1859046 | 69.0479295 | 70.0713843 | 70.6316603 | 71.4750234 | minute22     |
| 66.8079507 | 78.1859046 | 68.0479295 | 68.0713843 | 69.6316603 | 69.4750234 | minute23     |
| 66.8079507 | 74.1859046 | 68.0479295 | 68.0713843 | 69.6316603 | 68.4750234 | minute24     |
| 66.8079507 | 74.1859046 | 68.0479295 | 68.0713843 | 69.6316603 | 67.4750234 | minute25     |
| 68.8079507 | 74.1859046 | 68.0479295 | 67.0713843 | 70.6316603 | 68.4750234 | minute26     |
| 68.8079507 | 73.1859046 | 68.0479295 | 67.0713843 | 70.6316603 | 68.4750234 | minute27     |
| 70.8079507 | 73.1859046 | 68.0479295 | 67.0713843 | 70.6316603 | 68.4750234 | minute28     |
| 70.8079507 | 72.1859046 | 67.0479295 | 67.0713843 | 71.6316603 | 68.4750234 | minute29     |
| 70.8079507 | 70.1859046 | 67.0479295 | 66.0713843 | 72.6316603 | 68.4750234 | minute30     |
| 70.8079507 | 70.1859046 | 67.0479295 | 63.0713843 | 72.6316603 | 68.4750234 | minute31     |
| 70.8079507 | 68.1859046 | 67.0479295 | 63.0713843 | 71.6316603 | 73.4750234 | minute32     |
| 70.8079507 | 67.1859046 | 67.0479295 | 63.0713843 | 70.6316603 | 73.4750234 | minute33     |

|            |            |            |            |            |            |          |
|------------|------------|------------|------------|------------|------------|----------|
| 69.8079507 | 67.1859046 | 66.0479295 | 63.0713843 | 69.6316603 | 73.4750234 | minute34 |
| 69.8079507 | 67.1859046 | 66.0479295 | 63.0713843 | 69.6316603 | 73.4750234 | minute35 |
| 69.8079507 | 67.1859046 | 66.0479295 | 64.0713843 | 69.6316603 | 73.4750234 | minute36 |
| 69.8079507 | 67.1859046 | 66.0479295 | 64.0713843 | 70.6316603 | 73.4750234 | minute37 |
| 71.8079507 | 68.1859046 | 66.0479295 | 65.0713843 | 70.6316603 | 73.4750234 | minute38 |
| 71.8079507 | 68.1859046 | 67.0479295 | 64.0713843 | 73.6316603 | 73.4750234 | minute39 |
| 71.8079507 | 68.1859046 | 67.0479295 | 64.0713843 | 74.6316603 | 73.4750234 | minute40 |
| 67.8079507 | 70.1859046 | 67.0479295 | 64.0713843 | 74.6316603 | 73.4750234 | minute41 |
| 66.8079507 | 71.1859046 | 68.0479295 | 65.0713843 | 74.6316603 | 73.4750234 | minute42 |
| 66.8079507 | 71.1859046 | 73.0479295 | 65.0713843 | 75.6316603 | 74.4750234 | minute43 |
| 66.8079507 | 72.1859046 | 73.0479295 | 65.0713843 | 76.6316603 | 74.4750234 | minute44 |
| 66.8079507 | 73.1859046 | 73.0479295 | 64.0713843 | 76.6316603 | 74.4750234 | minute45 |
| 68.8079507 | 73.1859046 | 73.0479295 | 64.0713843 | 76.6316603 | 74.4750234 | minute46 |
| 72.8079507 | 75.1859046 | 73.0479295 | 63.0713843 | 77.6316603 | 73.4750234 | minute47 |
| 72.8079507 | 76.1859046 | 73.0479295 | 63.0713843 | 76.6316603 | 73.4750234 | minute48 |
| 73.8079507 | 76.1859046 | 73.0479295 | 63.0713843 | 76.6316603 | 70.4750234 | minute49 |
| 73.8079507 | 80.1859046 | 73.0479295 | 63.0713843 | 75.6316603 | 69.4750234 | minute50 |
| 74.8079507 | 80.1859046 | 73.0479295 | 62.0713843 | 75.6316603 | 69.4750234 | minute51 |
| 72.8079507 | 80.1859046 | 73.0479295 | 62.0713843 | 75.6316603 | 67.4750234 | minute52 |
| 72.8079507 | 80.1859046 | 72.0479295 | 62.0713843 | 78.6316603 | 67.4750234 | minute53 |
| 72.8079507 | 80.1859046 | 72.0479295 | 63.0713843 | 79.6316603 | 67.4750234 | minute54 |
| 72.8079507 | 80.1859046 | 72.0479295 | 63.0713843 | 79.6316603 | 67.4750234 | minute55 |
| 72.8079507 | 80.1859046 | 72.0479295 | 65.0713843 | 79.6316603 | 67.4750234 | minute56 |
| 73.8079507 | 80.1859046 | 72.0479295 | 66.0713843 | 79.6316603 | 67.4750234 | minute57 |
| 74.8079507 | 80.1859046 | 72.0479295 | 66.0713843 | 79.6316603 | 67.4750234 | minute58 |
| 74.8079507 | 81.1859046 | 71.0479295 | 66.0713843 | 80.6316603 | 68.4750234 | minute59 |
| 74.8079507 | 81.1859046 | 70.0479295 | 65.0713843 | 80.6316603 | 68.4750234 | minute60 |
| 74.8079507 | 81.1859046 | 70.0479295 | 65.0713843 | 80.6316603 | 68.4750234 | AFTER1   |
| 74.8079507 | 81.1859046 | 70.0479295 | 65.0713843 | 80.6316603 | 68.4750234 | AFTER2   |
| 74.8079507 | 81.1859046 | 70.0479295 | 64.0713843 | 80.6316603 | 70.4750234 | AFTER3   |
| 75.8079507 | 81.1859046 | 70.0479295 | 64.0713843 | 82.6316603 | 70.4750234 | AFTER4   |
| 75.8079507 | 81.1859046 | 71.0479295 | 64.0713843 | 85.6316603 | 69.4750234 | AFTER5   |
| 74.8079507 | 81.1859046 | 71.0479295 | 64.0713843 | 85.6316603 | 69.4750234 | AFTER6   |
| 74.8079507 | 81.1859046 | 71.0479295 | 65.0713843 | 85.6316603 | 69.4750234 | AFTER7   |
| 74.8079507 | 80.1859046 | 71.0479295 | 65.0713843 | 88.6316603 | 69.4750234 | AFTER8   |
| 75.8079507 | 80.1859046 | 70.0479295 | 65.0713843 | 89.6316603 | 69.4750234 | AFTER9   |
| 75.8079507 | 80.1859046 | 70.0479295 | 65.0713843 | 89.6316603 | 69.4750234 | AFTER10  |
| 74.8079507 | 80.1859046 | 70.0479295 | 66.0713843 | 89.6316603 | 69.4750234 | AFTER11  |
| 72.8079507 | 80.1859046 | 69.0479295 | 66.0713843 | 86.6316603 | 68.4750234 | AFTER12  |
| 71.8079507 | 80.1859046 | 69.0479295 | 66.0713843 | 86.6316603 | 68.4750234 | AFTER13  |
| 71.8079507 | 80.1859046 | 69.0479295 | 66.0713843 | 86.6316603 | 68.4750234 | AFTER14  |
| 69.8079507 | 80.1859046 | 69.0479295 | 66.0713843 | 84.6316603 | 68.4750234 | AFTER15  |
| 67.8079507 | 80.1859046 | 69.0479295 | 66.0713843 | 69.6316603 | 68.4750234 | AFTER16  |
| 67.8079507 | 82.1859046 | 70.0479295 | 66.0713843 | 67.6316603 | 68.4750234 | AFTER17  |
| 65.8079507 | 82.1859046 | 70.0479295 | 66.0713843 | 67.6316603 | 69.4750234 | AFTER18  |

|            |            |            |            |            |            |         |
|------------|------------|------------|------------|------------|------------|---------|
| 64.8079507 | 81.1859046 | 71.0479295 | 67.0713843 | 68.6316603 | 69.4750234 | AFTER19 |
| 64.8079507 | 81.1859046 | 71.0479295 | 68.0713843 | 71.6316603 | 69.4750234 | AFTER20 |
| 65.8079507 | 80.1859046 | 72.0479295 | 68.0713843 | 73.6316603 | 67.4750234 | AFTER21 |
| 65.8079507 | 80.1859046 | 72.0479295 | 68.0713843 | 73.6316603 | 67.4750234 | AFTER22 |
| 65.8079507 | 79.1859046 | 72.0479295 | 68.0713843 | 75.6316603 | 71.4750234 | AFTER23 |
| 65.8079507 | 78.1859046 | 71.0479295 | 69.0713843 | 75.6316603 | 71.4750234 | AFTER24 |
| 65.8079507 | 80.1859046 | 71.0479295 | 69.0713843 | 75.6316603 | 71.4750234 | AFTER25 |
| 69.8079507 | 83.1859046 | 71.0479295 | 67.0713843 | 75.6316603 | 71.4750234 | AFTER26 |
| 70.8079507 | 83.1859046 | 71.0479295 | 67.0713843 | 75.6316603 | 71.4750234 | AFTER27 |
| 70.8079507 | 81.1859046 | 71.0479295 | 67.0713843 | 75.6316603 | 70.4750234 | AFTER28 |
| 70.8079507 | 78.1859046 | 69.0479295 | 67.0713843 | 75.6316603 | 70.4750234 | AFTER29 |
| 70.8079507 | 76.1859046 | 69.0479295 | 67.0713843 | 72.6316603 | 70.4750234 | AFTER30 |
| 70.8079507 | 75.1859046 | 68.0479295 | 68.0713843 | 71.6316603 | 70.4750234 | AFTER31 |
| 70.8079507 | 75.1859046 | 67.0479295 | 68.0713843 | 71.6316603 | 69.4750234 | AFTER32 |
| 71.8079507 | 75.1859046 | 67.0479295 | 68.0713843 | 71.6316603 | 69.4750234 | AFTER33 |
| 71.8079507 | 74.1859046 | 67.0479295 | 68.0713843 | 69.6316603 | 69.4750234 | AFTER34 |
| 68.8079507 | 74.1859046 | 67.0479295 | 67.0713843 | 67.6316603 | 68.4750234 | AFTER35 |
| 68.8079507 | 75.1859046 | 67.0479295 | 67.0713843 | 67.6316603 | 68.4750234 | AFTER36 |
| 66.8079507 | 74.1859046 | 68.0479295 | 67.0713843 | 67.6316603 | 68.4750234 | AFTER37 |
| 65.8079507 | 73.1859046 | 69.0479295 | 67.0713843 | 68.6316603 | 68.4750234 | AFTER38 |
| 65.8079507 | 67.1859046 | 68.0479295 | 67.0713843 | 70.6316603 | 68.4750234 | AFTER39 |
| 64.8079507 | 63.1859046 | 68.0479295 | 69.0713843 | 70.6316603 | 68.4750234 | AFTER40 |
| 64.8079507 | 60.1859046 | 68.0479295 | 69.0713843 | 71.6316603 | 67.4750234 | AFTER41 |
| 64.8079507 | 59.1859046 | 68.0479295 | 69.0713843 | 70.6316603 | 67.4750234 | AFTER42 |
| 64.8079507 | 58.1859046 | 68.0479295 | 69.0713843 | 70.6316603 | 66.4750234 | AFTER43 |
| 66.8079507 | 58.1859046 | 68.0479295 | 68.0713843 | 70.6316603 | 66.4750234 | AFTER44 |
| 66.8079507 | 58.1859046 | 68.0479295 | 68.0713843 | 70.6316603 | 67.4750234 | AFTER45 |
| 67.8079507 | 58.1859046 | 68.0479295 | 68.0713843 | 70.6316603 | 67.4750234 | AFTER46 |
| 68.8079507 | 61.1859046 | 68.0479295 | 68.0713843 | 70.6316603 | 67.4750234 | AFTER47 |
| 68.8079507 | 63.1859046 | 68.0479295 | 67.0713843 | 71.6316603 | 67.4750234 | AFTER48 |
| 68.8079507 | 63.1859046 | 69.0479295 | 67.0713843 | 73.6316603 | 67.4750234 | AFTER49 |
| 68.8079507 | 63.1859046 | 71.0479295 | 67.0713843 | 73.6316603 | 67.4750234 | AFTER50 |
| 68.8079507 | 63.1859046 | 71.0479295 | 68.0713843 | 74.6316603 | 66.4750234 | AFTER51 |
| 68.8079507 | 66.1859046 | 71.0479295 | 68.0713843 | 76.6316603 | 68.4750234 | AFTER52 |
| 68.8079507 | 68.1859046 | 71.0479295 | 68.0713843 | 76.6316603 | 68.4750234 | AFTER53 |
| 68.8079507 | 69.1859046 | 71.0479295 | 67.0713843 | 73.6316603 | 69.4750234 | AFTER54 |
| 69.8079507 | 69.1859046 | 71.0479295 | 67.0713843 | 73.6316603 | 69.4750234 | AFTER55 |
| 69.8079507 | 69.1859046 | 71.0479295 | 67.0713843 | 73.6316603 | 69.4750234 | AFTER56 |
| 69.8079507 | 69.1859046 | 71.0479295 | 66.0713843 | 69.6316603 | 69.4750234 | AFTER57 |
| 68.8079507 | 69.1859046 | 71.0479295 | 66.0713843 | 69.6316603 | 70.4750234 | AFTER58 |
| 68.8079507 | 69.1859046 | 71.0479295 | 66.0713843 | 69.6316603 | 70.4750234 | AFTER59 |
| 67.8079507 | 69.1859046 | 70.0479295 | 66.0713843 | 70.6316603 | 70.4750234 | AFTER60 |
| 67.8079507 | 70.1859046 | 70.0479295 | 67.0713843 | 71.6316603 | 70.4750234 | AFTER61 |
| 67.8079507 | 70.1859046 | 70.0479295 | 67.0713843 | 72.6316603 | 70.4750234 | AFTER62 |
| 67.8079507 | 71.1859046 | 70.0479295 | 67.0713843 | 72.6316603 | 72.4750234 | AFTER63 |

|            |            |            |            |            |            |          |
|------------|------------|------------|------------|------------|------------|----------|
| 70.8079507 | 71.1859046 | 70.0479295 | 69.0713843 | 71.6316603 | 73.4750234 | AFTER64  |
| 70.8079507 | 71.1859046 | 71.0479295 | 69.0713843 | 71.6316603 | 73.4750234 | AFTER65  |
| 71.8079507 | 72.1859046 | 71.0479295 | 69.0713843 | 71.6316603 | 73.4750234 | AFTER66  |
| 71.8079507 | 72.1859046 | 72.0479295 | 68.0713843 | 71.6316603 | 72.4750234 | AFTER67  |
| 70.8079507 | 72.1859046 | 73.0479295 | 68.0713843 | 72.6316603 | 71.4750234 | AFTER68  |
| 70.8079507 | 72.1859046 | 73.0479295 | 68.0713843 | 74.6316603 | 70.4750234 | AFTER69  |
| 70.8079507 | 72.1859046 | 73.0479295 | 68.0713843 | 77.6316603 | 70.4750234 | AFTER70  |
| 70.8079507 | 71.1859046 | 73.0479295 | 68.0713843 | 77.6316603 | 69.4750234 | AFTER71  |
| 70.8079507 | 70.1859046 | 73.0479295 | 67.0713843 | 78.6316603 | 69.4750234 | AFTER72  |
| 70.8079507 | 66.1859046 | 73.0479295 | 67.0713843 | 79.6316603 | 69.4750234 | AFTER73  |
| 70.8079507 | 64.1859046 | 72.0479295 | 67.0713843 | 79.6316603 | 69.4750234 | AFTER74  |
| 70.8079507 | 64.1859046 | 72.0479295 | 66.0713843 | 79.6316603 | 71.4750234 | AFTER75  |
| 70.8079507 | 64.1859046 | 72.0479295 | 66.0713843 | 77.6316603 | 71.4750234 | AFTER76  |
| 70.8079507 | 64.1859046 | 72.0479295 | 66.0713843 | 77.6316603 | 70.4750234 | AFTER77  |
| 70.8079507 | 65.1859046 | 72.0479295 | 66.0713843 | 76.6316603 | 69.4750234 | AFTER78  |
| 70.8079507 | 66.1859046 | 72.0479295 | 67.0713843 | 74.6316603 | 69.4750234 | AFTER79  |
| 69.8079507 | 72.1859046 | 72.0479295 | 67.0713843 | 72.6316603 | 70.4750234 | AFTER80  |
| 68.8079507 | 75.1859046 | 73.0479295 | 67.0713843 | 72.6316603 | 70.4750234 | AFTER81  |
| 68.8079507 | 76.1859046 | 72.0479295 | 67.0713843 | 71.6316603 | 71.4750234 | AFTER82  |
| 67.8079507 | 76.1859046 | 70.0479295 | 66.0713843 | 71.6316603 | 71.4750234 | AFTER83  |
| 67.8079507 | 77.1859046 | 70.0479295 | 66.0713843 | 72.6316603 | 71.4750234 | AFTER84  |
| 69.8079507 | 77.1859046 | 70.0479295 | 65.0713843 | 78.6316603 | 71.4750234 | AFTER85  |
| 69.8079507 | 77.1859046 | 70.0479295 | 65.0713843 | 81.6316603 | 71.4750234 | AFTER86  |
| 69.8079507 | 74.1859046 | 70.0479295 | 65.0713843 | 83.6316603 | 71.4750234 | AFTER87  |
| 69.8079507 | 71.1859046 | 70.0479295 | 65.0713843 | 83.6316603 | 71.4750234 | AFTER88  |
| 68.8079507 | 67.1859046 | 71.0479295 | 65.0713843 | 83.6316603 | 71.4750234 | AFTER89  |
| 68.8079507 | 64.1859046 | 71.0479295 | 65.0713843 | 83.6316603 | 71.4750234 | AFTER90  |
| 68.8079507 | 62.1859046 | 71.0479295 | 65.0713843 | 83.6316603 | 72.4750234 | AFTER91  |
| 67.8079507 | 61.1859046 | 71.0479295 | 65.0713843 | 82.6316603 | 73.4750234 | AFTER92  |
| 68.8079507 | 61.1859046 | 71.0479295 | 65.0713843 | 82.6316603 | 73.4750234 | AFTER93  |
| 69.8079507 | 61.1859046 | 72.0479295 | 65.0713843 | 82.6316603 | 73.4750234 | AFTER94  |
| 69.8079507 | 62.1859046 | 71.0479295 | 65.0713843 | 82.6316603 | 74.4750234 | AFTER95  |
| 69.8079507 | 63.1859046 | 71.0479295 | 65.0713843 | 81.6316603 | 76.4750234 | AFTER96  |
| 70.8079507 | 63.1859046 | 71.0479295 | 65.0713843 | 80.6316603 | 76.4750234 | AFTER97  |
| 69.8079507 | 63.1859046 | 71.0479295 | 65.0713843 | 79.6316603 | 77.4750234 | AFTER98  |
| 70.8079507 | 63.1859046 | 71.0479295 | 65.0713843 | 79.6316603 | 79.4750234 | AFTER99  |
| 70.8079507 | 63.1859046 | 72.0479295 | 65.0713843 | 75.6316603 | 77.4750234 | AFTER100 |
| 68.8079507 | 64.1859046 | 72.0479295 | 65.0713843 | 69.6316603 | 75.4750234 | AFTER101 |
| 68.8079507 | 62.1859046 | 71.0479295 | 65.0713843 | 66.6316603 | 73.4750234 | AFTER102 |
| 68.8079507 | 62.1859046 | 70.0479295 | 65.0713843 | 66.6316603 | 73.4750234 | AFTER103 |
| 67.8079507 | 62.1859046 | 70.0479295 | 65.0713843 | 68.6316603 | 73.4750234 | AFTER104 |
| 66.8079507 | 62.1859046 | 70.0479295 | 65.0713843 | 71.6316603 | 75.4750234 | AFTER105 |
| 68.8079507 | 62.1859046 | 70.0479295 | 65.0713843 | 73.6316603 | 75.4750234 | AFTER106 |
| 70.8079507 | 62.1859046 | 70.0479295 | 65.0713843 | 74.6316603 | 73.4750234 | AFTER107 |
| 72.8079507 | 62.1859046 | 70.0479295 | 65.0713843 | 75.6316603 | 72.4750234 | AFTER108 |

|            |            |            |            |            |            |          |
|------------|------------|------------|------------|------------|------------|----------|
| 72.8079507 | 63.1859046 | 70.0479295 | 66.0713843 | 75.6316603 | 72.4750234 | AFTER109 |
| 72.8079507 | 63.1859046 | 70.0479295 | 66.0713843 | 75.6316603 | 72.4750234 | AFTER110 |
| 72.8079507 | 73.1859046 | 70.0479295 | 66.0713843 | 75.6316603 | 71.4750234 | AFTER111 |
| 73.8079507 | 73.1859046 | 72.0479295 | 67.0713843 | 75.6316603 | 70.4750234 | AFTER112 |
| 73.8079507 | 73.1859046 | 72.0479295 | 67.0713843 | 75.6316603 | 70.4750234 | AFTER113 |
| 73.8079507 | 72.1859046 | 73.0479295 | 68.0713843 | 73.6316603 | 69.4750234 | AFTER114 |
| 73.8079507 | 71.1859046 | 72.0479295 | 68.0713843 | 74.6316603 | 69.4750234 | AFTER115 |
| 73.8079507 | 70.1859046 | 72.0479295 | 69.0713843 | 73.6316603 | 69.4750234 | AFTER116 |
| 73.8079507 | 66.1859046 | 72.0479295 | 69.0713843 | 73.6316603 | 70.4750234 | AFTER117 |
| 73.8079507 | 65.1859046 | 71.0479295 | 69.0713843 | 73.6316603 | 70.4750234 | AFTER118 |
| 73.8079507 | 64.1859046 | 71.0479295 | 69.0713843 | 73.6316603 | 70.4750234 | AFTER119 |
| 73.8079507 | 63.1859046 | 71.0479295 | 70.0713843 | 74.6316603 | 70.4750234 | AFTER120 |
| 72.8079507 | 63.1859046 | 70.0479295 | 70.0713843 | 74.6316603 | 70.4750234 | AFTER121 |
| 71.8079507 | 63.1859046 | 70.0479295 | 70.0713843 | 73.6316603 | 69.4750234 | AFTER122 |
| 71.8079507 | 64.1859046 | 70.0479295 | 70.0713843 | 72.6316603 | 69.4750234 | AFTER123 |
| 71.8079507 | 64.1859046 | 70.0479295 | 70.0713843 | 72.6316603 | 70.4750234 | AFTER124 |
| 71.8079507 | 64.1859046 | 70.0479295 | 70.0713843 | 72.6316603 | 70.4750234 | AFTER125 |
| 71.8079507 | 66.1859046 | 70.0479295 | 70.0713843 | 72.6316603 | 71.4750234 | AFTER126 |
| 71.8079507 | 67.1859046 | 70.0479295 | 69.0713843 | 71.6316603 | 71.4750234 | AFTER127 |
| 71.8079507 | 68.1859046 | 71.0479295 | 69.0713843 | 71.6316603 | 71.4750234 | AFTER128 |
| 71.8079507 | 68.1859046 | 71.0479295 | 68.0713843 | 71.6316603 | 70.4750234 | AFTER129 |
| 70.8079507 | 68.1859046 | 70.0479295 | 69.0713843 | 71.6316603 | 70.4750234 | AFTER130 |
| 70.8079507 | 68.1859046 | 70.0479295 | 69.0713843 | 71.6316603 | 70.4750234 | AFTER131 |
| 70.8079507 | 68.1859046 | 70.0479295 | 69.0713843 | 71.6316603 | 71.4750234 | AFTER132 |
| 70.8079507 | 67.1859046 | 70.0479295 | 69.0713843 | 71.6316603 | 71.4750234 | AFTER133 |
| 69.8079507 | 67.1859046 | 70.0479295 | 69.0713843 | 71.6316603 | 71.4750234 | AFTER134 |
| 69.8079507 | 67.1859046 | 71.0479295 | 71.0713843 | 71.6316603 | 71.4750234 | AFTER135 |
| 68.8079507 | 67.1859046 | 71.0479295 | 71.0713843 | 71.6316603 | 74.4750234 | AFTER136 |
| 68.8079507 | 67.1859046 | 71.0479295 | 71.0713843 | 71.6316603 | 74.4750234 | AFTER137 |
| 67.8079507 | 67.1859046 | 71.0479295 | 71.0713843 | 79.6316603 | 75.4750234 | AFTER138 |
| 67.8079507 | 70.1859046 | 71.0479295 | 71.0713843 | 79.6316603 | 75.4750234 | AFTER139 |
| 67.8079507 | 73.1859046 | 70.0479295 | 71.0713843 | 79.6316603 | 74.4750234 | AFTER140 |
| 67.8079507 | 74.1859046 | 70.0479295 | 71.0713843 | 67.6316603 | 74.4750234 | AFTER141 |
| 67.8079507 | 75.1859046 | 70.0479295 | 80.0713843 | 67.6316603 | 73.4750234 | AFTER142 |
| 67.8079507 | 74.1859046 | 70.0479295 | 80.0713843 | 67.6316603 | 73.4750234 | AFTER143 |
| 67.8079507 | 73.1859046 | 70.0479295 | 81.0713843 | 64.6316603 | 73.4750234 | AFTER144 |
| 67.8079507 | 71.1859046 | 70.0479295 | 80.0713843 | 66.6316603 | 74.4750234 | AFTER145 |
| 67.8079507 | 71.1859046 | 70.0479295 | 80.0713843 | 70.6316603 | 74.4750234 | AFTER146 |
| 65.8079507 | 70.1859046 | 69.0479295 | 81.0713843 | 70.6316603 | 74.4750234 | AFTER147 |
| 65.8079507 | 70.1859046 | 69.0479295 | 81.0713843 | 72.6316603 | 73.4750234 | AFTER148 |
| 65.8079507 | 70.1859046 | 69.0479295 | 81.0713843 | 72.6316603 | 72.4750234 | AFTER149 |
| 65.8079507 | 69.1859046 | 69.0479295 | 82.0713843 | 72.6316603 | 72.4750234 | AFTER150 |
| 66.8079507 | 69.1859046 | 69.0479295 | 82.0713843 | 74.6316603 | 72.4750234 | AFTER151 |
| 66.8079507 | 69.1859046 | 69.0479295 | 82.0713843 | 78.6316603 | 72.4750234 | AFTER152 |
| 66.8079507 | 69.1859046 | 70.0479295 | 82.0713843 | 78.6316603 | 71.4750234 | AFTER153 |

|            |            |            |            |            |            |          |
|------------|------------|------------|------------|------------|------------|----------|
| 66.8079507 | 70.1859046 | 70.0479295 | 82.0713843 | 78.6316603 | 70.4750234 | AFTER154 |
| 65.8079507 | 70.1859046 | 71.0479295 | 82.0713843 | 75.6316603 | 70.4750234 | AFTER155 |
| 65.8079507 | 72.1859046 | 72.0479295 | 82.0713843 | 75.6316603 | 69.4750234 | AFTER156 |
| 65.8079507 | 73.1859046 | 71.0479295 | 81.0713843 | 75.6316603 | 69.4750234 | AFTER157 |
| 68.8079507 | 73.1859046 | 71.0479295 | 81.0713843 | 71.6316603 | 70.4750234 | AFTER158 |
| 71.8079507 | 74.1859046 | 71.0479295 | 79.0713843 | 70.6316603 | 70.4750234 | AFTER159 |
| 72.8079507 | 74.1859046 | 71.0479295 | 79.0713843 | 70.6316603 | 72.4750234 | AFTER160 |
| 70.8079507 | 74.1859046 | 70.0479295 | 79.0713843 | 70.6316603 | 72.4750234 | AFTER161 |
| 69.8079507 | 75.1859046 | 70.0479295 | 79.0713843 | 70.6316603 | 71.4750234 | AFTER162 |
| 69.8079507 | 76.1859046 | 70.0479295 | 79.0713843 | 70.6316603 | 69.4750234 | AFTER163 |
| 69.8079507 | 76.1859046 | 70.0479295 | 79.0713843 | 70.6316603 | 69.4750234 | AFTER164 |
| 69.8079507 | 66.1859046 | 70.0479295 | 78.0713843 | 70.6316603 | 69.4750234 | AFTER165 |
| 69.8079507 | 64.1859046 | 70.0479295 | 78.0713843 | 69.6316603 | 68.4750234 | AFTER166 |
| 70.8079507 | 63.1859046 | 72.0479295 | 78.0713843 | 67.6316603 | 69.4750234 | AFTER167 |
| 71.8079507 | 61.1859046 | 74.0479295 | 79.0713843 | 66.6316603 | 69.4750234 | AFTER168 |
| 71.8079507 | 61.1859046 | 75.0479295 | 78.0713843 | 63.6316603 | 69.4750234 | AFTER169 |
| 71.8079507 | 61.1859046 | 75.0479295 | 69.0713843 | 62.6316603 | 69.4750234 | AFTER170 |
| 70.8079507 | 61.1859046 | 76.0479295 | 67.0713843 | 61.6316603 | 69.4750234 | AFTER171 |
| 70.8079507 | 61.1859046 | 76.0479295 | 67.0713843 | 62.6316603 | 69.4750234 | AFTER172 |
| 69.8079507 | 62.1859046 | 76.0479295 | 67.0713843 | 62.6316603 | 69.4750234 | AFTER173 |
| 69.8079507 | 63.1859046 | 77.0479295 | 66.0713843 | 61.6316603 | 69.4750234 | AFTER174 |
| 68.8079507 | 65.1859046 | 77.0479295 | 66.0713843 | 61.6316603 | 69.4750234 | AFTER175 |
| 68.8079507 | 66.1859046 | 76.0479295 | 66.0713843 | 61.6316603 | 69.4750234 | AFTER176 |
| 68.8079507 | 67.1859046 | 76.0479295 | 68.0713843 | 60.6316603 | 69.4750234 | AFTER177 |
| 65.8079507 | 68.1859046 | 75.0479295 | 69.0713843 | 59.6316603 | 69.4750234 | AFTER178 |
| 64.8079507 | 68.1859046 | 75.0479295 | 69.0713843 | 59.6316603 | 69.4750234 | AFTER179 |
| 62.8079507 | 68.1859046 | 75.0479295 | 67.0713843 | 60.6316603 | 70.4750234 | AFTER180 |
| 61.8079507 | 67.1859046 | 75.0479295 | 67.0713843 | 62.6316603 | 70.4750234 | AFTER181 |
| 61.8079507 | 67.1859046 | 76.0479295 | 65.0713843 | 66.6316603 | 70.4750234 | AFTER182 |
| 61.8079507 | 66.1859046 | 77.0479295 | 64.0713843 | 69.6316603 | 70.4750234 | AFTER183 |
| 60.8079507 | 66.1859046 | 78.0479295 | 64.0713843 | 69.6316603 | 71.4750234 | AFTER184 |
| 61.8079507 | 66.1859046 | 78.0479295 | 64.0713843 | 69.6316603 | 73.4750234 | AFTER185 |
| 62.8079507 | 65.1859046 | 75.0479295 | 64.0713843 | 69.6316603 | 73.4750234 | AFTER186 |
| 62.8079507 | 66.1859046 | 74.0479295 | 63.0713843 | 69.6316603 | 73.4750234 | AFTER187 |
| 63.8079507 | 66.1859046 | 73.0479295 | 63.0713843 | 67.6316603 | 73.4750234 | AFTER188 |
| 63.8079507 | 66.1859046 | 73.0479295 | 63.0713843 | 68.6316603 | 73.4750234 | AFTER189 |
| 63.8079507 | 69.1859046 | 74.0479295 | 62.0713843 | 67.6316603 | 74.4750234 | AFTER190 |
| 63.8079507 | 70.1859046 | 73.0479295 | 62.0713843 | 67.6316603 | 74.4750234 | AFTER191 |
| 63.8079507 | 70.1859046 | 73.0479295 | 62.0713843 | 68.6316603 | 72.4750234 | AFTER192 |
| 64.8079507 | 70.1859046 | 72.0479295 | 63.0713843 | 67.6316603 | 71.4750234 | AFTER193 |
| 64.8079507 | 69.1859046 | 72.0479295 | 64.0713843 | 66.6316603 | 71.4750234 | AFTER194 |
| 64.8079507 | 68.1859046 | 70.0479295 | 64.0713843 | 65.6316603 | 71.4750234 | AFTER195 |
| 64.8079507 | 65.1859046 | 70.0479295 | 65.0713843 | 65.6316603 | 71.4750234 | AFTER196 |
| 64.8079507 | 64.1859046 | 70.0479295 | 65.0713843 | 66.6316603 | 70.4750234 | AFTER197 |
| 64.8079507 | 64.1859046 | 70.0479295 | 65.0713843 | 66.6316603 | 70.4750234 | AFTER198 |

|            |            |            |            |            |            |          |
|------------|------------|------------|------------|------------|------------|----------|
| 63.8079507 | 64.1859046 | 70.0479295 | 65.0713843 | 66.6316603 | 70.4750234 | AFTER199 |
| 63.8079507 | 64.1859046 | 69.0479295 | 66.0713843 | 67.6316603 | 70.4750234 | AFTER200 |
| 62.8079507 | 64.1859046 | 69.0479295 | 66.0713843 | 68.6316603 | 71.4750234 | AFTER201 |
| 62.8079507 | 65.1859046 | 68.0479295 | 66.0713843 | 68.6316603 | 72.4750234 | AFTER202 |
| 62.8079507 | 65.1859046 | 68.0479295 | 66.0713843 | 69.6316603 | 73.4750234 | AFTER203 |
| 62.8079507 | 67.1859046 | 68.0479295 | 67.0713843 | 68.6316603 | 73.4750234 | AFTER204 |
| 63.8079507 | 68.1859046 | 68.0479295 | 68.0713843 | 65.6316603 | 73.4750234 | AFTER205 |
| 64.8079507 | 68.1859046 | 69.0479295 | 68.0713843 | 65.6316603 | 72.4750234 | AFTER206 |
| 67.8079507 | 68.1859046 | 69.0479295 | 69.0713843 | 65.6316603 | 72.4750234 | AFTER207 |
| 66.8079507 | 67.1859046 | 69.0479295 | 72.0713843 | 65.6316603 | 73.4750234 | AFTER208 |
| 67.8079507 | 65.1859046 | 68.0479295 | 72.0713843 | 65.6316603 | 73.4750234 | AFTER209 |
| 67.8079507 | 64.1859046 | 69.0479295 | 79.0713843 | 65.6316603 | 73.4750234 | AFTER210 |
| 67.8079507 | 63.1859046 | 69.0479295 | 80.0713843 | 64.6316603 | 77.4750234 | AFTER211 |
| 67.8079507 | 62.1859046 | 69.0479295 | 82.0713843 | 64.6316603 | 78.4750234 | AFTER212 |
| 67.8079507 | 62.1859046 | 69.0479295 | 84.0713843 | 69.6316603 | 79.4750234 | AFTER213 |
| 64.8079507 | 62.1859046 | 69.0479295 | 84.0713843 | 71.6316603 | 79.4750234 | AFTER214 |
| 62.8079507 | 62.1859046 | 69.0479295 | 86.0713843 | 71.6316603 | 78.4750234 | AFTER215 |
| 60.8079507 | 61.1859046 | 69.0479295 | 89.0713843 | 69.6316603 | 76.4750234 | AFTER216 |
| 60.8079507 | 62.1859046 | 70.0479295 | 90.0713843 | 68.6316603 | 76.4750234 | AFTER217 |
| 60.8079507 | 62.1859046 | 70.0479295 | 90.0713843 | 68.6316603 | 76.4750234 | AFTER218 |
| 60.8079507 | 62.1859046 | 69.0479295 | 68.1450748 | 68.6316603 | 76.4750234 | AFTER219 |
| 60.8079507 | 62.1859046 | 69.0479295 | 67.9632566 | 68.6316603 | 75.4750234 | AFTER220 |
| 63.8079507 | 62.1859046 | 67.0479295 | 68.0541657 | 68.6316603 | 74.4750234 | AFTER221 |
| 63.8079507 | 62.1859046 | 67.0479295 | 68.2359838 | 68.6316603 | 74.4750234 | AFTER222 |
| 63.8079507 | 63.1859046 | 67.0479295 | 68.5996202 | 70.6316603 | 74.4750234 | AFTER223 |
| 63.8079507 | 63.1859046 | 67.0479295 | 68.6905293 | 72.6316603 | 74.4750234 | AFTER224 |
| 63.8079507 | 63.1859046 | 67.0479295 | 68.7814384 | 73.6316603 | 73.4750234 | AFTER225 |
| 64.8079507 | 63.1859046 | 64.0479295 | 68.5087111 | 70.6316603 | 73.4750234 | AFTER226 |
| 64.8079507 | 63.1859046 | 63.0479295 | 68.5996202 | 70.6316603 | 73.4750234 | AFTER227 |
| 64.8079507 | 63.1859046 | 63.0479295 | 68.7814384 | 70.6316603 | 73.4750234 | AFTER228 |
| 63.8079507 | 63.1859046 | 64.0479295 | 68.7814384 | 70.6316603 | 73.4750234 | AFTER229 |
| 63.8079507 | 64.1859046 | 65.0479295 | 69.2359838 | 70.6316603 | 73.4750234 | AFTER230 |
| 63.8079507 | 65.1859046 | 65.0479295 | 87.0713843 | 69.6316603 | 73.4750234 | AFTER231 |
| 59.8079507 | 65.1859046 | 68.0479295 | 87.0713843 | 68.6316603 | 72.4750234 | AFTER232 |
| 58.8079507 | 65.1859046 | 68.0479295 | 85.0713843 | 68.6316603 | 72.4750234 | AFTER233 |
| 58.8079507 | 65.1859046 | 68.0479295 | 85.0713843 | 68.6316603 | 72.4750234 | AFTER234 |
| 57.8079507 | 65.1859046 | 68.0479295 | 83.0713843 | 68.6316603 | 72.4750234 | AFTER235 |
| 57.8079507 | 66.1859046 | 68.0479295 | 82.0713843 | 68.6316603 | 72.4750234 | AFTER236 |
| 57.8079507 | 67.1859046 | 66.0479295 | 82.0713843 | 72.6316603 | 71.4750234 | AFTER237 |
| 62.8079507 | 67.1859046 | 67.0479295 | 82.0713843 | 75.6316603 | 71.4750234 | AFTER238 |
| 64.8079507 | 67.1859046 | 67.0479295 | 82.0713843 | 75.6316603 | 71.4750234 | AFTER239 |
| 64.8079507 | 67.1859046 | 67.0479295 | 83.0713843 | 75.6316603 | 71.4750234 | AFTER240 |
| 65.8079507 | 67.1859046 | 67.0479295 | 83.0713843 | 74.6316603 | 68.4750234 |          |
| 65.8079507 | 69.1859046 | 67.0479295 | 85.0713843 | 74.6316603 | 68.4750234 |          |
| 65.8079507 | 70.1859046 | 68.0479295 | 85.0713843 | 68.6316603 | 68.4750234 |          |

|            |            |            |            |            |            |
|------------|------------|------------|------------|------------|------------|
| 67.8079507 | 70.1859046 | 68.0479295 | 86.0713843 | 63.6316603 | 67.4750234 |
| 68.8079507 | 70.1859046 | 69.0479295 | 90.0713843 | 63.6316603 | 67.4750234 |
| 67.8079507 | 70.1859046 | 68.0479295 | 75.0713843 | 64.6316603 | 68.4750234 |
| 67.8079507 | 69.1859046 | 69.0479295 | 75.0713843 | 67.6316603 | 68.4750234 |
| 67.8079507 | 69.1859046 | 69.0479295 | 75.0713843 | 66.6316603 | 68.4750234 |
| 66.8079507 | 69.1859046 | 69.0479295 | 75.0713843 | 66.6316603 | 67.4750234 |
| 66.8079507 | 69.1859046 | 69.0479295 | 75.0713843 | 65.6316603 | 67.4750234 |
| 64.8079507 | 69.1859046 | 68.0479295 | 75.0713843 | 65.6316603 | 67.4750234 |
| 65.8079507 | 69.1859046 | 69.0479295 | 75.0713843 | 65.6316603 | 67.4750234 |
| 66.8079507 | 69.1859046 | 69.0479295 | 75.0713843 | 64.6316603 | 67.4750234 |
| 67.8079507 | 70.1859046 | 69.0479295 | 74.0713843 | 63.6316603 | 67.4750234 |
| 67.8079507 | 74.1859046 | 69.0479295 | 72.0713843 | 62.6316603 | 68.4750234 |
| 66.8079507 | 80.1859046 | 69.0479295 | 72.0713843 | 61.6316603 | 72.4750234 |
| 66.8079507 | 85.1859046 | 69.0479295 | 72.0713843 | 61.6316603 | 71.4750234 |
| 62.8079507 | 85.1859046 | 69.0479295 | 72.0713843 | 63.6316603 | 70.4750234 |
| 62.8079507 | 85.1859046 | 68.0479295 | 72.0713843 | 65.6316603 | 70.4750234 |
| 62.8079507 | 86.1859046 | 68.0479295 | 72.0713843 | 65.6316603 | 70.4750234 |
| 62.8079507 | 84.1859046 | 68.0479295 | 75.0713843 | 63.6316603 | 70.4750234 |
| 61.8079507 | 77.1859046 | 68.0479295 | 75.0713843 | 62.6316603 | 69.4750234 |
| 60.8079507 | 71.1859046 | 68.0479295 | 74.0713843 | 62.6316603 | 70.4750234 |
| 60.8079507 | 69.1859046 | 69.0479295 | 74.0713843 | 62.6316603 | 70.4750234 |
| 60.8079507 | 68.1859046 | 69.0479295 | 74.0713843 | 61.6316603 | 70.4750234 |
| 57.8079507 | 68.1859046 | 69.0479295 | 74.0713843 | 62.6316603 | 70.4750234 |
| 56.8079507 | 68.1859046 | 68.0479295 | 74.0713843 | 63.6316603 | 70.4750234 |
| 56.8079507 | 68.1859046 | 68.0479295 | 74.0713843 | 65.6316603 | 70.4750234 |
| 55.8079507 | 68.1859046 | 68.0479295 | 75.0713843 | 68.6316603 | 70.4750234 |
| 57.8079507 | 69.1859046 | 68.0479295 | 76.0713843 | 68.6316603 | 71.4750234 |
| 57.8079507 | 68.1859046 | 68.0479295 | 76.0713843 | 66.6316603 | 70.4750234 |
| 57.8079507 | 68.1859046 | 68.0479295 | 76.0713843 | 66.6316603 | 70.4750234 |
| 65.8079507 | 65.1859046 | 69.0479295 | 77.0713843 | 63.6316603 | 70.4750234 |
| 66.8079507 | 66.1859046 | 69.0479295 | 76.0713843 | 63.6316603 | 69.4750234 |
| 66.8079507 | 66.1859046 | 69.0479295 | 77.0713843 | 63.6316603 | 69.4750234 |
| 67.8079507 | 68.1859046 | 69.0479295 | 78.0713843 | 64.6316603 | 73.4750234 |
| 67.8079507 | 68.1859046 | 70.0479295 | 78.0713843 | 65.6316603 | 78.4750234 |
| 68.8079507 | 67.1859046 | 72.0479295 | 79.0713843 | 64.6316603 | 81.4750234 |
| 69.8079507 | 66.1859046 | 73.0479295 | 83.0713843 | 63.6316603 | 81.4750234 |
| 70.8079507 | 65.1859046 | 72.0479295 | 88.0713843 | 63.6316603 | 81.4750234 |
| 70.8079507 | 63.1859046 | 71.0479295 | 91.0713843 | 63.6316603 | 80.4750234 |
| 70.8079507 | 63.1859046 | 71.0479295 | 69.6905293 | 63.6316603 | 78.4750234 |
| 70.8079507 | 62.1859046 | 70.0479295 | 69.5087111 | 62.6316603 | 77.4750234 |
| 71.8079507 | 62.1859046 | 70.0479295 | 92.0713843 | 62.6316603 | 76.4750234 |
| 71.8079507 | 62.1859046 | 70.0479295 | 92.0713843 | 64.6316603 | 75.4750234 |
| 71.8079507 | 61.1859046 | 70.0479295 | 70.2359838 | 64.6316603 | 75.4750234 |
| 71.8079507 | 61.1859046 | 70.0479295 | 70.7814384 | 64.6316603 | 73.4750234 |
| 71.8079507 | 61.1859046 | 70.0479295 | 70.6905293 | 65.6316603 | 71.4750234 |



|            |            |            |            |            |            |
|------------|------------|------------|------------|------------|------------|
| 70.8079507 | 61.1859046 | 68.0479295 | 92.0713843 | 65.6316603 | 71.4750234 |
| 68.8079507 | 61.1859046 | 67.0479295 | 92.0713843 | 64.6316603 | 71.4750234 |
| 68.8079507 | 61.1859046 | 67.0479295 | 92.0713843 | 63.6316603 | 70.4750234 |
| 67.8079507 | 61.1859046 | 67.0479295 | 92.0713843 | 63.6316603 | 70.4750234 |
| 67.8079507 | 61.1859046 | 68.0479295 | 92.0713843 | 63.6316603 | 70.4750234 |
| 65.8079507 | 64.1859046 | 68.0479295 | 92.0713843 | 63.6316603 | 70.4750234 |
| 65.8079507 | 67.1859046 | 72.0479295 | 91.0713843 | 68.6316603 | 71.4750234 |
| 65.8079507 | 69.1859046 | 73.0479295 | 90.0713843 | 70.6316603 | 71.4750234 |
| 63.8079507 | 70.1859046 | 73.0479295 | 90.0713843 | 70.6316603 | 72.4750234 |
| 64.8079507 | 70.1859046 | 74.0479295 | 89.0713843 | 73.6316603 | 72.4750234 |
| 64.8079507 | 70.1859046 | 75.0479295 | 89.0713843 | 75.6316603 | 72.4750234 |
| 64.8079507 | 70.1859046 | 76.0479295 | 85.0713843 | 76.6316603 | 72.4750234 |
| 64.8079507 | 70.1859046 | 77.0479295 | 86.0713843 | 77.6316603 | 72.4750234 |
| 64.8079507 | 70.1859046 | 78.0479295 | 86.0713843 | 77.6316603 | 72.4750234 |
| 64.8079507 | 69.1859046 | 77.0479295 | 87.0713843 | 70.6316603 | 71.4750234 |
| 64.8079507 | 69.1859046 | 78.0479295 | 87.0713843 | 69.6316603 | 71.4750234 |
| 64.8079507 | 62.1859046 | 78.0479295 | 87.0713843 | 70.6316603 | 69.4750234 |
| 64.8079507 | 59.1859046 | 78.0479295 | 87.0713843 | 70.6316603 | 66.4750234 |
| 64.8079507 | 57.1859046 | 78.0479295 | 88.0713843 | 72.6316603 | 66.4750234 |
| 64.8079507 | 57.1859046 | 78.0479295 | 88.0713843 | 74.6316603 | 66.4750234 |
| 64.8079507 | 56.1859046 | 77.0479295 | 89.0713843 | 74.6316603 | 66.4750234 |
| 64.8079507 | 56.1859046 | 75.0479295 | 93.0713843 | 74.6316603 | 67.4750234 |
| 65.8079507 | 56.1859046 | 74.0479295 | 70.1450748 | 73.6316603 | 67.4750234 |
| 65.8079507 | 56.1859046 | 74.0479295 | 88.0713843 | 72.6316603 | 68.4750234 |
| 62.8079507 | 56.1859046 | 74.0479295 | 88.0713843 | 72.6316603 | 69.4750234 |
| 62.8079507 | 58.1859046 | 73.0479295 | 90.0713843 | 69.6316603 | 69.4750234 |
| 64.8079507 | 59.1859046 | 73.0479295 | 89.0713843 | 68.6316603 | 69.4750234 |
| 64.8079507 | 60.1859046 | 73.0479295 | 80.0713843 | 66.6316603 | 69.4750234 |
| 67.8079507 | 58.1859046 | 72.0479295 | 72.0713843 | 64.6316603 | 71.4750234 |
| 67.8079507 | 57.1859046 | 72.0479295 | 72.0713843 | 62.6316603 | 72.4750234 |
| 67.8079507 | 57.1859046 | 72.0479295 | 69.0713843 | 62.6316603 | 72.4750234 |
| 68.8079507 | 57.1859046 | 72.0479295 | 69.0713843 | 60.6316603 | 73.4750234 |
| 68.8079507 | 57.1859046 | 72.0479295 | 68.0713843 | 59.6316603 | 74.4750234 |
| 68.8079507 | 56.1859046 | 72.0479295 | 68.0713843 | 59.6316603 | 74.4750234 |
| 71.8079507 | 56.1859046 | 72.0479295 | 68.0713843 | 59.6316603 | 75.4750234 |
| 73.8079507 | 58.1859046 | 71.0479295 | 68.0713843 | 59.6316603 | 75.4750234 |
| 73.8079507 | 60.1859046 | 71.0479295 | 68.0713843 | 63.6316603 | 80.4750234 |
| 73.8079507 | 60.1859046 | 71.0479295 | 68.0713843 | 63.6316603 | 80.4750234 |
| 73.8079507 | 71.1859046 | 71.0479295 | 72.0713843 | 65.6316603 | 82.4750234 |
| 75.8079507 | 72.1859046 | 70.0479295 | 75.0713843 | 65.6316603 | 82.4750234 |
| 75.8079507 | 73.1859046 | 70.0479295 | 75.0713843 | 63.6316603 | 81.4750234 |
| 75.8079507 | 72.1859046 | 70.0479295 | 76.0713843 | 63.6316603 | 79.4750234 |
| 75.8079507 | 68.1859046 | 70.0479295 | 82.0713843 | 63.6316603 | 79.4750234 |
| 75.8079507 | 66.1859046 | 70.0479295 | 86.0713843 | 62.6316603 | 77.4750234 |
| 74.8079507 | 64.1859046 | 69.0479295 | 86.0713843 | 62.6316603 | 72.4750234 |

|            |            |            |            |            |            |
|------------|------------|------------|------------|------------|------------|
| 74.8079507 | 62.1859046 | 69.0479295 | 88.0713843 | 63.6316603 | 72.4750234 |
| 73.8079507 | 61.1859046 | 69.0479295 | 88.0713843 | 63.6316603 | 71.4750234 |
| 72.8079507 | 60.1859046 | 69.0479295 | 89.0713843 | 62.6316603 | 70.4750234 |
| 71.8079507 | 60.1859046 | 69.0479295 | 89.0713843 | 62.6316603 | 68.4750234 |
| 70.8079507 | 59.1859046 | 69.0479295 | 89.0713843 | 62.6316603 | 68.4750234 |
| 69.8079507 | 58.1859046 | 69.0479295 | 89.0713843 | 65.6316603 | 68.4750234 |
| 69.8079507 | 57.1859046 | 69.0479295 | 85.0713843 | 65.6316603 | 68.4750234 |
| 69.8079507 | 57.1859046 | 69.0479295 | 83.0713843 | 65.6316603 | 67.4750234 |
| 66.8079507 | 58.1859046 | 70.0479295 | 81.0713843 | 64.6316603 | 66.4750234 |
| 65.8079507 | 58.1859046 | 70.0479295 | 81.0713843 | 63.6316603 | 66.4750234 |
| 63.8079507 | 59.1859046 | 70.0479295 | 80.0713843 | 63.6316603 | 66.4750234 |
| 63.8079507 | 59.1859046 | 70.0479295 | 80.0713843 | 64.6316603 | 66.4750234 |
| 63.8079507 | 59.1859046 | 69.0479295 | 80.0713843 | 65.6316603 | 67.4750234 |
| 65.8079507 | 60.1859046 | 69.0479295 | 80.0713843 | 68.6316603 | 67.4750234 |
| 66.8079507 | 60.1859046 | 69.0479295 | 79.0713843 | 68.6316603 | 67.4750234 |
| 66.8079507 | 60.1859046 | 70.0479295 | 79.0713843 | 68.6316603 | 68.4750234 |
| 67.8079507 | 60.1859046 | 70.0479295 | 78.0713843 | 70.6316603 | 68.4750234 |
| 68.8079507 | 60.1859046 | 70.0479295 | 76.0713843 | 70.6316603 | 68.4750234 |
| 68.8079507 | 61.1859046 | 70.0479295 | 75.0713843 | 70.6316603 | 68.4750234 |
| 66.8079507 | 61.1859046 | 70.0479295 | 73.0713843 | 72.6316603 | 69.4750234 |
| 63.8079507 | 61.1859046 | 70.0479295 | 72.0713843 | 72.6316603 | 69.4750234 |
| 63.8079507 | 61.1859046 | 69.0479295 | 70.0713843 | 73.6316603 | 70.4750234 |
| 63.8079507 | 61.1859046 | 70.0479295 | 70.0713843 | 76.6316603 | 71.4750234 |
| 64.8079507 | 62.1859046 | 69.0479295 | 69.0713843 | 78.6316603 | 73.4750234 |
| 65.8079507 | 63.1859046 | 69.0479295 | 69.0713843 | 79.6316603 | 77.4750234 |
| 65.8079507 | 63.1859046 | 69.0479295 | 69.0713843 | 80.6316603 | 77.4750234 |
| 66.8079507 | 65.1859046 | 69.0479295 | 69.0713843 | 80.6316603 | 81.4750234 |
| 66.8079507 | 65.1859046 | 69.0479295 | 71.0713843 | 80.6316603 | 84.4750234 |
| 66.8079507 | 66.1859046 | 69.0479295 | 71.0713843 | 79.6316603 | 89.4750234 |
| 66.8079507 | 69.1859046 | 69.0479295 | 72.0713843 | 79.6316603 | 90.4750234 |
| 66.8079507 | 69.1859046 | 68.0479295 | 72.0713843 | 79.6316603 | 90.4750234 |
| 67.8079507 | 69.1859046 | 68.0479295 | 72.0713843 | 79.6316603 | 90.4750234 |
| 67.8079507 | 69.1859046 | 68.0479295 | 72.0713843 | 80.6316603 | 90.4750234 |
| 67.8079507 | 69.1859046 | 69.0479295 | 71.0713843 | 81.6316603 | 90.4750234 |
| 67.8079507 | 70.1859046 | 69.0479295 | 71.0713843 | 81.6316603 | 90.4750234 |
| 67.8079507 | 70.1859046 | 68.0479295 | 73.0713843 | 82.6316603 | 89.4750234 |
| 67.8079507 | 70.1859046 | 68.0479295 | 75.0713843 | 81.6316603 | 86.4750234 |
| 68.8079507 | 68.1859046 | 68.0479295 | 75.0713843 | 79.6316603 | 83.4750234 |
| 67.8079507 | 65.1859046 | 68.0479295 | 75.0713843 | 78.6316603 | 83.4750234 |
| 66.8079507 | 65.1859046 | 68.0479295 | 76.0713843 | 79.6316603 | 83.4750234 |
| 66.8079507 | 64.1859046 | 68.0479295 | 77.0713843 | 79.6316603 | 81.4750234 |
| 65.8079507 | 64.1859046 | 68.0479295 | 77.0713843 | 78.6316603 | 81.4750234 |
| 65.8079507 | 64.1859046 | 69.0479295 | 79.0713843 | 77.6316603 | 80.4750234 |
| 65.8079507 | 64.1859046 | 69.0479295 | 81.0713843 | 74.6316603 | 80.4750234 |
| 65.8079507 | 65.1859046 | 68.0479295 | 82.0713843 | 70.6316603 | 79.4750234 |

|            |            |            |            |            |            |
|------------|------------|------------|------------|------------|------------|
| 65.8079507 | 65.1859046 | 68.0479295 | 82.0713843 | 68.6316603 | 79.4750234 |
| 65.8079507 | 65.1859046 | 68.0479295 | 82.0713843 | 68.6316603 | 79.4750234 |
| 65.8079507 | 63.1859046 | 69.0479295 | 79.0713843 | 64.6316603 | 73.4750234 |
| 66.8079507 | 63.1859046 | 69.0479295 | 79.0713843 | 64.6316603 | 73.4750234 |
| 67.8079507 | 63.1859046 | 70.0479295 | 79.0713843 | 64.6316603 | 73.4750234 |
| 67.8079507 | 63.1859046 | 70.0479295 | 79.0713843 | 66.6316603 | 72.4750234 |
| 69.8079507 | 63.1859046 | 70.0479295 | 77.0713843 | 66.6316603 | 72.4750234 |
| 71.8079507 | 62.1859046 | 70.0479295 | 76.0713843 | 66.6316603 | 72.4750234 |
| 72.8079507 | 62.1859046 | 71.0479295 | 75.0713843 | 65.6316603 | 72.4750234 |
| 72.8079507 | 62.1859046 | 71.0479295 | 75.0713843 | 65.6316603 | 72.4750234 |
| 74.8079507 | 62.1859046 | 72.0479295 | 75.0713843 | 64.6316603 | 70.4750234 |
| 74.8079507 | 64.1859046 | 72.0479295 | 75.0713843 | 64.6316603 | 70.4750234 |
| 74.8079507 | 64.1859046 | 72.0479295 | 75.0713843 | 64.6316603 | 70.4750234 |
| 74.8079507 | 69.1859046 | 74.0479295 | 74.0713843 | 63.6316603 | 70.4750234 |
| 74.8079507 | 72.1859046 | 74.0479295 | 73.0713843 | 63.6316603 | 70.4750234 |
| 73.8079507 | 73.1859046 | 74.0479295 | 73.0713843 | 62.6316603 | 70.4750234 |
| 70.8079507 | 74.1859046 | 75.0479295 | 73.0713843 | 61.6316603 | 70.4750234 |
| 69.8079507 | 74.1859046 | 75.0479295 | 72.0713843 | 61.6316603 | 70.4750234 |
| 69.8079507 | 75.1859046 | 75.0479295 | 71.0713843 | 61.6316603 | 70.4750234 |
| 67.8079507 | 75.1859046 | 74.0479295 | 69.0713843 | 61.6316603 | 70.4750234 |
| 67.8079507 | 75.1859046 | 74.0479295 | 69.0713843 | 62.6316603 | 70.4750234 |
| 66.8079507 | 75.1859046 | 73.0479295 | 70.0713843 | 62.6316603 | 70.4750234 |
| 65.8079507 | 75.1859046 | 71.0479295 | 70.0713843 | 62.6316603 | 70.4750234 |
| 65.8079507 | 75.1859046 | 71.0479295 | 70.0713843 | 62.6316603 | 70.4750234 |
| 65.8079507 | 76.1859046 | 70.0479295 | 74.0713843 | 62.6316603 | 70.4750234 |
| 65.8079507 | 76.1859046 | 69.0479295 | 75.0713843 | 62.6316603 | 70.4750234 |
| 65.8079507 | 75.1859046 | 69.0479295 | 75.0713843 | 61.6316603 | 69.4750234 |
| 64.8079507 | 75.1859046 | 69.0479295 | 75.0713843 | 64.6316603 | 69.4750234 |
| 64.8079507 | 75.1859046 | 70.0479295 | 75.0713843 | 64.6316603 | 70.4750234 |
| 64.8079507 | 74.1859046 | 70.0479295 | 75.0713843 | 69.6316603 | 71.4750234 |
| 66.8079507 | 73.1859046 | 70.0479295 | 76.0713843 | 68.6316603 | 71.4750234 |
| 66.8079507 | 73.1859046 | 69.0479295 | 76.0713843 | 67.6316603 | 71.4750234 |
| 66.8079507 | 74.1859046 | 70.0479295 | 81.0713843 | 63.6316603 | 71.4750234 |
| 66.8079507 | 74.1859046 | 70.0479295 | 81.0713843 | 61.6316603 | 71.4750234 |
| 67.8079507 | 74.1859046 | 70.0479295 | 81.0713843 | 59.6316603 | 71.4750234 |
| 66.8079507 | 68.1859046 | 70.0479295 | 82.0713843 | 59.6316603 | 70.4750234 |
| 66.8079507 | 66.1859046 | 69.0479295 | 81.0713843 | 61.6316603 | 70.4750234 |
| 71.8079507 | 66.1859046 | 69.0479295 | 79.0713843 | 63.6316603 | 70.4750234 |
| 72.8079507 | 66.1859046 | 69.0479295 | 77.0713843 | 63.6316603 | 70.4750234 |
| 73.8079507 | 66.1859046 | 69.0479295 | 77.0713843 | 63.6316603 | 71.4750234 |
| 71.8079507 | 66.1859046 | 68.0479295 | 75.0713843 | 63.6316603 | 71.4750234 |
| 70.8079507 | 66.1859046 | 68.0479295 | 75.0713843 | 63.6316603 | 71.4750234 |
| 68.8079507 | 65.1859046 | 68.0479295 | 70.0713843 | 63.6316603 | 71.4750234 |
| 68.8079507 | 65.1859046 | 68.0479295 | 70.0713843 | 62.6316603 | 71.4750234 |
| 69.8079507 | 68.1859046 | 68.0479295 | 70.0713843 | 62.6316603 | 71.4750234 |

|            |            |            |            |            |            |
|------------|------------|------------|------------|------------|------------|
| 70.8079507 | 68.1859046 | 68.0479295 | 70.0713843 | 62.6316603 | 71.4750234 |
| 70.8079507 | 68.1859046 | 68.0479295 | 70.0713843 | 62.6316603 | 71.4750234 |
| 70.8079507 | 68.1859046 | 68.0479295 | 70.0713843 | 72.6316603 | 72.4750234 |
| 71.8079507 | 68.1859046 | 69.0479295 | 70.0713843 | 72.6316603 | 74.4750234 |
| 71.8079507 | 59.1859046 | 68.0479295 | 69.0713843 | 74.6316603 | 74.4750234 |
| 71.8079507 | 58.1859046 | 68.0479295 | 68.0713843 | 73.6316603 | 79.4750234 |
| 71.8079507 | 58.1859046 | 69.0479295 | 68.0713843 | 69.6316603 | 79.4750234 |
| 71.8079507 | 58.1859046 | 68.0479295 | 67.0713843 | 66.6316603 | 79.4750234 |
| 71.8079507 | 60.1859046 | 68.0479295 | 67.0713843 | 65.6316603 | 79.4750234 |
| 71.8079507 | 64.1859046 | 68.0479295 | 67.0713843 | 65.6316603 | 77.4750234 |
| 71.8079507 | 64.1859046 | 68.0479295 | 67.0713843 | 65.6316603 | 77.4750234 |
| 71.8079507 | 64.1859046 | 68.0479295 | 67.0713843 | 66.6316603 | 77.4750234 |
| 71.8079507 | 65.1859046 | 68.0479295 | 67.0713843 | 67.6316603 | 73.4750234 |
| 71.8079507 | 65.1859046 | 68.0479295 | 69.0713843 | 67.6316603 | 72.4750234 |
| 71.8079507 | 65.1859046 | 68.0479295 | 69.0713843 | 66.6316603 | 72.4750234 |
| 72.8079507 | 65.1859046 | 67.0479295 | 68.0713843 | 65.6316603 | 72.4750234 |
| 72.8079507 | 66.1859046 | 67.0479295 | 67.0713843 | 65.6316603 | 72.4750234 |
| 72.8079507 | 67.1859046 | 68.0479295 | 67.0713843 | 65.6316603 | 71.4750234 |
| 74.8079507 | 69.1859046 | 68.0479295 | 67.0713843 | 65.6316603 | 71.4750234 |
| 74.8079507 | 69.1859046 | 67.0479295 | 67.0713843 | 65.6316603 | 71.4750234 |
| 74.8079507 | 71.1859046 | 67.0479295 | 68.0713843 | 65.6316603 | 70.4750234 |
| 76.8079507 | 71.1859046 | 67.0479295 | 67.0713843 | 65.6316603 | 71.4750234 |
| 77.8079507 | 71.1859046 | 67.0479295 | 67.0713843 | 66.6316603 | 71.4750234 |
| 78.8079507 | 71.1859046 | 68.0479295 | 67.0713843 | 66.6316603 | 71.4750234 |
| 78.8079507 | 72.1859046 | 69.0479295 | 67.0713843 | 66.6316603 | 73.4750234 |
| 79.8079507 | 73.1859046 | 69.0479295 | 67.0713843 | 65.6316603 | 74.4750234 |
| 79.8079507 | 72.1859046 | 69.0479295 | 67.0713843 | 64.6316603 | 74.4750234 |
| 79.8079507 | 72.1859046 | 69.0479295 | 68.0713843 | 64.6316603 | 74.4750234 |
| 76.8079507 | 71.1859046 | 69.0479295 | 69.0713843 | 64.6316603 | 73.4750234 |
| 73.8079507 | 71.1859046 | 69.0479295 | 70.0713843 | 64.6316603 | 74.4750234 |
| 73.8079507 | 71.1859046 | 69.0479295 | 72.0713843 | 64.6316603 | 74.4750234 |
| 73.8079507 | 71.1859046 | 69.0479295 | 72.0713843 | 66.6316603 | 75.4750234 |
| 71.8079507 | 71.1859046 | 69.0479295 | 74.0713843 | 75.6316603 | 75.4750234 |
| 70.8079507 | 68.1859046 | 69.0479295 | 73.0713843 | 82.6316603 | 75.4750234 |
| 69.8079507 | 67.1859046 | 68.0479295 | 73.0713843 | 83.6316603 | 74.4750234 |
| 67.8079507 | 67.1859046 | 68.0479295 | 73.0713843 | 83.6316603 | 74.4750234 |
| 67.8079507 | 69.1859046 | 68.0479295 | 68.0713843 | 77.6316603 | 75.4750234 |
| 66.8079507 | 69.1859046 | 68.0479295 | 68.0713843 | 70.6316603 | 75.4750234 |
| 66.8079507 | 68.1859046 | 69.0479295 | 67.0713843 | 70.6316603 | 74.4750234 |
| 66.8079507 | 68.1859046 | 69.0479295 | 67.0713843 | 64.6316603 | 74.4750234 |
| 66.8079507 | 68.1859046 | 69.0479295 | 67.0713843 | 62.6316603 | 75.4750234 |
| 64.8079507 | 68.1859046 | 69.0479295 | 68.0713843 | 61.6316603 | 75.4750234 |
| 64.8079507 | 68.1859046 | 69.0479295 | 68.0713843 | 61.6316603 | 76.4750234 |
| 62.8079507 | 68.1859046 | 70.0479295 | 69.0713843 | 62.6316603 | 75.4750234 |
| 61.8079507 | 68.1859046 | 70.0479295 | 69.0713843 | 62.6316603 | 75.4750234 |

|            |            |            |            |            |            |
|------------|------------|------------|------------|------------|------------|
| 61.8079507 | 68.1859046 | 70.0479295 | 71.0713843 | 62.6316603 | 75.4750234 |
| 61.8079507 | 68.1859046 | 71.0479295 | 71.0713843 | 62.6316603 | 75.4750234 |
| 62.8079507 | 75.1859046 | 71.0479295 | 72.0713843 | 62.6316603 | 75.4750234 |
| 62.8079507 | 76.1859046 | 71.0479295 | 72.0713843 | 62.6316603 | 75.4750234 |
| 64.8079507 | 76.1859046 | 71.0479295 | 74.0713843 | 62.6316603 | 75.4750234 |
| 64.8079507 | 75.1859046 | 71.0479295 | 74.0713843 | 67.6316603 | 75.4750234 |
| 69.8079507 | 75.1859046 | 71.0479295 | 74.0713843 | 69.6316603 | 75.4750234 |
| 72.8079507 | 75.1859046 | 71.0479295 | 74.0713843 | 71.6316603 | 70.4750234 |
| 73.8079507 | 75.1859046 | 71.0479295 | 74.0713843 | 73.6316603 | 70.4750234 |
| 69.8079507 | 75.1859046 | 72.0479295 | 77.0713843 | 75.6316603 | 70.4750234 |
| 63.8079507 | 74.1859046 | 71.0479295 | 79.0713843 | 77.6316603 | 71.4750234 |
| 61.8079507 | 74.1859046 | 70.0479295 | 79.0713843 | 77.6316603 | 71.4750234 |
| 60.8079507 | 75.1859046 | 71.0479295 | 78.0713843 | 77.6316603 | 71.4750234 |
| 60.8079507 | 77.1859046 | 71.0479295 | 76.0713843 | 75.6316603 | 70.4750234 |
| 60.8079507 | 79.1859046 | 72.0479295 | 75.0713843 | 74.6316603 | 70.4750234 |
| 60.8079507 | 80.1859046 | 71.0479295 | 75.0713843 | 74.6316603 | 70.4750234 |
| 60.8079507 | 80.1859046 | 71.0479295 | 75.0713843 | 73.6316603 | 70.4750234 |
| 60.8079507 | 79.1859046 | 71.0479295 | 75.0713843 | 73.6316603 | 70.4750234 |
| 60.8079507 | 79.1859046 | 70.0479295 | 75.0713843 | 72.6316603 | 70.4750234 |
| 60.8079507 | 79.1859046 | 70.0479295 | 75.0713843 | 72.6316603 | 70.4750234 |
| 60.8079507 | 78.1859046 | 70.0479295 | 75.0713843 | 71.6316603 | 70.4750234 |
| 58.8079507 | 78.1859046 | 70.0479295 | 75.0713843 | 72.6316603 | 70.4750234 |
| 55.8079507 | 78.1859046 | 70.0479295 | 75.0713843 | 71.6316603 | 70.4750234 |
| 56.8079507 | 78.1859046 | 70.0479295 | 76.0713843 | 70.6316603 | 71.4750234 |
| 56.8079507 | 78.1859046 | 70.0479295 | 76.0713843 | 70.6316603 | 71.4750234 |
| 58.8079507 | 78.1859046 | 70.0479295 | 78.0713843 | 70.6316603 | 70.4750234 |
| 58.8079507 | 78.1859046 | 70.0479295 | 79.0713843 | 70.6316603 | 70.4750234 |
| 59.8079507 | 78.1859046 | 70.0479295 | 79.0713843 | 70.6316603 | 70.4750234 |
| 61.8079507 | 77.1859046 | 70.0479295 | 79.0713843 | 70.6316603 | 70.4750234 |
| 63.8079507 | 77.1859046 | 71.0479295 | 79.0713843 | 70.6316603 | 70.4750234 |
| 64.8079507 | 77.1859046 | 71.0479295 | 79.0713843 | 71.6316603 | 68.4750234 |
| 65.8079507 | 76.1859046 | 73.0479295 | 79.0713843 | 72.6316603 | 69.4750234 |
| 65.8079507 | 76.1859046 | 75.0479295 | 79.0713843 | 72.6316603 | 69.4750234 |
| 65.8079507 | 76.1859046 | 78.0479295 | 79.0713843 | 73.6316603 | 69.4750234 |
| 68.8079507 | 76.1859046 | 78.0479295 | 83.0713843 | 73.6316603 | 70.4750234 |
| 68.8079507 | 77.1859046 | 76.0479295 | 84.0713843 | 74.6316603 | 71.4750234 |
| 68.8079507 | 78.1859046 | 76.0479295 | 84.0713843 | 74.6316603 | 71.4750234 |
| 67.8079507 | 78.1859046 | 74.0479295 | 85.0713843 | 74.6316603 | 72.4750234 |
| 66.8079507 | 77.1859046 | 73.0479295 | 85.0713843 | 73.6316603 | 74.4750234 |
| 67.8079507 | 78.1859046 | 73.0479295 | 86.0713843 | 74.6316603 | 75.4750234 |
| 66.8079507 | 79.1859046 | 73.0479295 | 86.0713843 | 74.6316603 | 75.4750234 |
| 66.8079507 | 79.1859046 | 73.0479295 | 86.0713843 | 75.6316603 | 78.4750234 |
| 66.8079507 | 79.1859046 | 73.0479295 | 87.0713843 | 75.6316603 | 78.4750234 |
| 65.8079507 | 77.1859046 | 73.0479295 | 87.0713843 | 76.6316603 | 79.4750234 |
| 66.8079507 | 77.1859046 | 73.0479295 | 86.0713843 | 77.6316603 | 79.4750234 |

|            |            |            |            |            |            |
|------------|------------|------------|------------|------------|------------|
| 67.8079507 | 74.1859046 | 73.0479295 | 82.0713843 | 77.6316603 | 80.4750234 |
| 67.8079507 | 74.1859046 | 73.0479295 | 79.0713843 | 80.6316603 | 80.4750234 |
| 67.8079507 | 73.1859046 | 74.0479295 | 77.0713843 | 80.6316603 | 80.4750234 |
| 69.8079507 | 72.1859046 | 73.0479295 | 77.0713843 | 80.6316603 | 80.4750234 |
| 70.8079507 | 70.1859046 | 71.0479295 | 76.0713843 | 81.6316603 | 78.4750234 |
| 70.8079507 | 68.1859046 | 71.0479295 | 76.0713843 | 81.6316603 | 78.4750234 |
| 71.8079507 | 67.1859046 | 71.0479295 | 71.0713843 | 81.6316603 | 76.4750234 |
| 72.8079507 | 67.1859046 | 71.0479295 | 71.0713843 | 82.6316603 | 75.4750234 |
| 71.8079507 | 67.1859046 | 71.0479295 | 67.0713843 | 84.6316603 | 75.4750234 |
| 71.8079507 | 67.1859046 | 71.0479295 | 66.0713843 | 84.6316603 | 75.4750234 |
| 69.8079507 | 67.1859046 | 71.0479295 | 65.0713843 | 85.6316603 | 74.4750234 |
| 68.8079507 | 67.1859046 | 71.0479295 | 64.0713843 | 86.6316603 | 74.4750234 |
| 67.8079507 | 68.1859046 | 71.0479295 | 65.0713843 | 86.6316603 | 74.4750234 |
| 67.8079507 | 68.1859046 | 71.0479295 | 65.0713843 | 86.6316603 | 74.4750234 |
| 68.8079507 | 70.1859046 | 71.0479295 | 65.0713843 | 86.6316603 | 74.4750234 |
| 69.8079507 | 70.1859046 | 70.0479295 | 68.0713843 | 86.6316603 | 73.4750234 |
| 69.8079507 | 71.1859046 | 70.0479295 | 68.0713843 | 86.6316603 | 73.4750234 |
| 70.8079507 | 73.1859046 | 70.0479295 | 68.0713843 | 87.6316603 | 73.4750234 |
| 70.8079507 | 73.1859046 | 70.0479295 | 68.0713843 | 87.6316603 | 73.4750234 |
| 70.8079507 | 73.1859046 | 70.0479295 | 69.0713843 | 88.6316603 | 73.4750234 |
| 70.8079507 | 73.1859046 | 70.0479295 | 68.0713843 | 86.6316603 | 70.4750234 |
| 71.8079507 | 73.1859046 | 71.0479295 | 68.0713843 | 86.6316603 | 68.4750234 |
| 72.8079507 | 73.1859046 | 72.0479295 | 68.0713843 | 82.6316603 | 68.4750234 |
| 73.8079507 | 74.1859046 | 73.0479295 | 69.0713843 | 79.6316603 | 69.4750234 |
| 73.8079507 | 82.1859046 | 73.0479295 | 70.0713843 | 79.6316603 | 69.4750234 |
| 73.8079507 | 87.1859046 | 73.0479295 | 70.0713843 | 79.6316603 | 68.4750234 |
| 77.8079507 | 87.1859046 | 73.0479295 | 70.0713843 | 74.6316603 | 67.4750234 |
| 78.8079507 | 90.1859046 | 73.0479295 | 70.0713843 | 74.6316603 | 67.4750234 |
| 78.8079507 | 90.1859046 | 73.0479295 | 70.0713843 | 74.6316603 | 67.4750234 |
| 78.8079507 | 90.1859046 | 72.0479295 | 70.0713843 | 75.6316603 | 67.4750234 |
| 81.8079507 | 90.1859046 | 71.0479295 | 69.0713843 | 75.6316603 | 67.4750234 |
| 82.8079507 | 90.1859046 | 71.0479295 | 68.0713843 | 75.6316603 | 67.4750234 |
| 84.8079507 | 90.1859046 | 71.0479295 | 68.0713843 | 75.6316603 | 67.4750234 |
| 84.8079507 | 90.1859046 | 71.0479295 | 68.0713843 | 75.6316603 | 67.4750234 |
| 86.8079507 | 90.1859046 | 70.0479295 | 69.0713843 | 75.6316603 | 67.4750234 |
| 89.8079507 | 89.1859046 | 70.0479295 | 71.0713843 | 74.6316603 | 67.4750234 |
| 90.8079507 | 89.1859046 | 70.0479295 | 71.0713843 | 74.6316603 | 67.4750234 |
| 90.8079507 | 88.1859046 | 70.0479295 | 72.0713843 | 73.6316603 | 68.4750234 |
| 88.8079507 | 88.1859046 | 69.0479295 | 72.0713843 | 75.6316603 | 68.4750234 |
| 87.8079507 | 88.1859046 | 69.0479295 | 72.0713843 | 75.6316603 | 70.4750234 |
| 77.8079507 | 87.1859046 | 69.0479295 | 69.0713843 | 75.6316603 | 71.4750234 |
| 77.8079507 | 84.1859046 | 70.0479295 | 68.0713843 | 78.6316603 | 71.4750234 |
| 71.8079507 | 83.1859046 | 70.0479295 | 68.0713843 | 78.6316603 | 70.4750234 |
| 70.8079507 | 83.1859046 | 70.0479295 | 68.0713843 | 84.6316603 | 70.4750234 |
| 72.8079507 | 83.1859046 | 71.0479295 | 68.0713843 | 78.6316603 | 70.4750234 |

|            |            |            |            |            |            |
|------------|------------|------------|------------|------------|------------|
| 72.8079507 | 83.1859046 | 70.0479295 | 68.0713843 | 78.6316603 | 70.4750234 |
| 72.8079507 | 82.1859046 | 70.0479295 | 68.0713843 | 76.6316603 | 70.4750234 |
| 72.8079507 | 82.1859046 | 70.0479295 | 67.0713843 | 75.6316603 | 70.4750234 |
| 64.8079507 | 82.1859046 | 70.0479295 | 67.0713843 | 73.6316603 | 70.4750234 |
| 62.8079507 | 80.1859046 | 70.0479295 | 64.0713843 | 71.6316603 | 71.4750234 |
| 62.8079507 | 80.1859046 | 71.0479295 | 64.0713843 | 69.6316603 | 71.4750234 |
| 62.8079507 | 80.1859046 | 71.0479295 | 64.0713843 | 69.6316603 | 71.4750234 |
| 62.8079507 | 80.1859046 | 71.0479295 | 64.0713843 | 67.6316603 | 71.4750234 |
| 62.8079507 | 79.1859046 | 69.0479295 | 64.0713843 | 68.6316603 | 70.4750234 |
| 62.8079507 | 78.1859046 | 68.0479295 | 64.0713843 | 67.6316603 | 70.4750234 |
| 72.8079507 | 77.1859046 | 68.0479295 | 64.0713843 | 67.6316603 | 70.4750234 |
| 76.8079507 | 76.1859046 | 68.0479295 | 64.0713843 | 67.6316603 | 70.4750234 |
| 76.8079507 | 74.1859046 | 68.0479295 | 64.0713843 | 67.6316603 | 70.4750234 |
| 79.8079507 | 74.1859046 | 68.0479295 | 64.0713843 | 67.6316603 | 70.4750234 |
| 79.8079507 | 70.1859046 | 69.0479295 | 64.0713843 | 65.6316603 | 69.4750234 |
| 78.8079507 | 69.1859046 | 69.0479295 | 64.0713843 | 59.6316603 | 69.4750234 |
| 76.8079507 | 69.1859046 | 70.0479295 | 64.0713843 | 59.6316603 | 70.4750234 |
| 76.8079507 | 70.1859046 | 70.0479295 | 64.0713843 | 59.6316603 | 70.4750234 |
| 70.8079507 | 70.1859046 | 70.0479295 | 64.0713843 | 59.6316603 | 70.4750234 |
| 70.8079507 | 70.1859046 | 70.0479295 | 65.0713843 | 59.6316603 | 70.4750234 |
| 71.8079507 | 71.1859046 | 70.0479295 | 65.0713843 | 58.6316603 | 70.4750234 |
| 71.8079507 | 70.1859046 | 70.0479295 | 65.0713843 | 59.6316603 | 70.4750234 |
| 71.8079507 | 70.1859046 | 70.0479295 | 65.0713843 | 59.6316603 | 70.4750234 |
| 71.8079507 | 71.1859046 | 70.0479295 | 65.0713843 | 60.6316603 | 70.4750234 |
| 72.8079507 | 72.1859046 | 70.0479295 | 65.0713843 | 60.6316603 | 70.4750234 |
| 73.8079507 | 72.1859046 | 70.0479295 | 66.0713843 | 60.6316603 | 70.4750234 |
| 73.8079507 | 72.1859046 | 71.0479295 | 66.0713843 | 60.6316603 | 73.4750234 |
| 73.8079507 | 72.1859046 | 71.0479295 | 66.0713843 | 60.6316603 | 75.4750234 |
| 69.8079507 | 72.1859046 | 71.0479295 | 66.0713843 | 61.6316603 | 75.4750234 |
| 69.8079507 | 72.1859046 | 71.0479295 | 65.0713843 | 62.6316603 | 75.4750234 |
| 65.8079507 | 72.1859046 | 71.0479295 | 65.0713843 | 71.6316603 | 74.4750234 |
| 66.8079507 | 71.1859046 | 70.0479295 | 65.0713843 | 71.6316603 | 74.4750234 |
| 66.8079507 | 70.1859046 | 69.0479295 | 65.0713843 | 77.6316603 | 74.4750234 |
| 70.8079507 | 70.1859046 | 69.0479295 | 65.0713843 | 78.6316603 | 74.4750234 |
| 73.8079507 | 71.1859046 | 69.0479295 | 64.0713843 | 77.6316603 | 74.4750234 |
| 73.8079507 | 71.1859046 | 69.0479295 | 64.0713843 | 77.6316603 | 74.4750234 |
| 73.8079507 | 71.1859046 | 69.0479295 | 64.0713843 | 76.6316603 | 73.4750234 |
| 73.8079507 | 71.1859046 | 69.0479295 | 64.0713843 | 76.6316603 | 73.4750234 |
| 70.8079507 | 70.1859046 | 69.0479295 | 64.0713843 | 73.6316603 | 73.4750234 |
| 68.8079507 | 70.1859046 | 69.0479295 | 67.0713843 | 73.6316603 | 74.4750234 |
| 68.8079507 | 70.1859046 | 69.0479295 | 68.0713843 | 73.6316603 | 76.4750234 |
| 68.8079507 | 70.1859046 | 69.0479295 | 68.0713843 | 74.6316603 | 76.4750234 |
| 68.8079507 | 70.1859046 | 70.0479295 | 68.0713843 | 74.6316603 | 79.4750234 |
| 69.8079507 | 70.1859046 | 70.0479295 | 68.0713843 | 77.6316603 | 79.4750234 |
| 68.8079507 | 69.1859046 | 70.0479295 | 74.0713843 | 77.6316603 | 77.4750234 |

|            |            |            |            |            |            |
|------------|------------|------------|------------|------------|------------|
| 68.8079507 | 70.1859046 | 70.0479295 | 74.0713843 | 78.6316603 | 75.4750234 |
| 62.8079507 | 71.1859046 | 71.0479295 | 72.0713843 | 77.6316603 | 75.4750234 |
| 61.8079507 | 74.1859046 | 72.0479295 | 70.0713843 | 75.6316603 | 73.4750234 |
| 61.8079507 | 74.1859046 | 75.0479295 | 70.0713843 | 73.6316603 | 72.4750234 |
| 60.8079507 | 73.1859046 | 79.0479295 | 70.0713843 | 72.6316603 | 71.4750234 |
| 61.8079507 | 73.1859046 | 81.0479295 | 70.0713843 | 72.6316603 | 70.4750234 |
| 63.8079507 | 72.1859046 | 81.0479295 | 70.0713843 | 73.6316603 | 69.4750234 |
| 63.8079507 | 72.1859046 | 80.0479295 | 70.0713843 | 74.6316603 | 69.4750234 |
| 64.8079507 | 73.1859046 | 80.0479295 | 70.0713843 | 74.6316603 | 69.4750234 |
| 64.8079507 | 75.1859046 | 79.0479295 | 74.0713843 | 74.6316603 | 69.4750234 |
| 64.8079507 | 76.1859046 | 78.0479295 | 74.0713843 | 73.6316603 | 69.4750234 |
| 66.8079507 | 76.1859046 | 74.0479295 | 74.0713843 | 72.6316603 | 69.4750234 |
| 66.8079507 | 76.1859046 | 73.0479295 | 73.0713843 | 72.6316603 | 69.4750234 |
| 66.8079507 | 76.1859046 | 72.0479295 | 70.0713843 | 73.6316603 | 69.4750234 |
| 67.8079507 | 76.1859046 | 72.0479295 | 70.0713843 | 74.6316603 | 70.4750234 |
| 67.8079507 | 76.1859046 | 72.0479295 | 69.0713843 | 75.6316603 | 70.4750234 |
| 67.8079507 | 76.1859046 | 72.0479295 | 67.0713843 | 75.6316603 | 70.4750234 |
| 67.8079507 | 76.1859046 | 72.0479295 | 67.0713843 | 74.6316603 | 70.4750234 |
| 68.8079507 | 77.1859046 | 72.0479295 | 68.0713843 | 72.6316603 | 70.4750234 |
| 68.8079507 | 77.1859046 | 73.0479295 | 68.0713843 | 73.6316603 | 70.4750234 |
| 68.8079507 | 78.1859046 | 73.0479295 | 68.0713843 | 73.6316603 | 70.4750234 |
| 61.8079507 | 78.1859046 | 73.0479295 | 68.0713843 | 74.6316603 | 71.4750234 |
| 60.8079507 | 78.1859046 | 74.0479295 | 68.0713843 | 75.6316603 | 71.4750234 |
| 60.8079507 | 79.1859046 | 74.0479295 | 68.0713843 | 75.6316603 | 71.4750234 |
| 61.8079507 | 79.1859046 | 74.0479295 | 69.0713843 | 76.6316603 | 71.4750234 |
| 65.8079507 | 79.1859046 | 73.0479295 | 70.0713843 | 76.6316603 | 71.4750234 |
| 65.8079507 | 78.1859046 | 72.0479295 | 70.0713843 | 76.6316603 | 70.4750234 |
| 66.8079507 | 78.1859046 | 71.0479295 | 71.0713843 | 76.6316603 | 68.4750234 |
| 66.8079507 | 78.1859046 | 71.0479295 | 71.0713843 | 76.6316603 | 67.4750234 |
| 67.8079507 | 79.1859046 | 71.0479295 | 71.0713843 | 76.6316603 | 67.4750234 |
| 67.8079507 | 79.1859046 | 71.0479295 | 71.0713843 | 77.6316603 | 67.4750234 |
| 68.8079507 | 78.1859046 | 71.0479295 | 71.0713843 | 76.6316603 | 67.4750234 |
| 68.8079507 | 78.1859046 | 71.0479295 | 71.0713843 | 72.6316603 | 67.4750234 |
| 68.8079507 | 78.1859046 | 71.0479295 | 72.0713843 | 68.6316603 | 67.4750234 |
| 69.8079507 | 77.1859046 | 72.0479295 | 72.0713843 | 68.6316603 | 67.4750234 |
| 69.8079507 | 78.1859046 | 72.0479295 | 73.0713843 | 68.6316603 | 66.4750234 |
| 71.8079507 | 79.1859046 | 71.0479295 | 72.0713843 | 68.6316603 | 66.4750234 |
| 71.8079507 | 79.1859046 | 71.0479295 | 72.0713843 | 68.6316603 | 69.4750234 |
| 72.8079507 | 79.1859046 | 71.0479295 | 73.0713843 | 68.6316603 | 69.4750234 |
| 72.8079507 | 79.1859046 | 72.0479295 | 75.0713843 | 68.6316603 | 69.4750234 |
| 72.8079507 | 78.1859046 | 72.0479295 | 75.0713843 | 68.6316603 | 70.4750234 |
| 73.8079507 | 76.1859046 | 75.0479295 | 75.0713843 | 69.6316603 | 70.4750234 |
| 73.8079507 | 76.1859046 | 75.0479295 | 72.0713843 | 70.6316603 | 70.4750234 |
| 76.8079507 | 74.1859046 | 74.0479295 | 72.0713843 | 70.6316603 | 70.4750234 |
| 78.8079507 | 74.1859046 | 74.0479295 | 75.0713843 | 70.6316603 | 69.4750234 |



|            |            |            |            |            |            |
|------------|------------|------------|------------|------------|------------|
| 78.8079507 | 73.1859046 | 72.0479295 | 75.0713843 | 70.6316603 | 69.4750234 |
| 78.8079507 | 73.1859046 | 72.0479295 | 75.0713843 | 70.6316603 | 69.4750234 |
| 80.8079507 | 71.1859046 | 71.0479295 | 76.0713843 | 70.6316603 | 69.4750234 |
| 81.8079507 | 71.1859046 | 71.0479295 | 75.0713843 | 70.6316603 | 69.4750234 |
| 81.8079507 | 69.1859046 | 71.0479295 | 75.0713843 | 70.6316603 | 69.4750234 |
| 81.8079507 | 69.1859046 | 72.0479295 | 75.0713843 | 78.6316603 | 69.4750234 |
| 82.8079507 | 69.1859046 | 72.0479295 | 70.0713843 | 81.6316603 | 69.4750234 |
| 83.8079507 | 69.1859046 | 72.0479295 | 70.0713843 | 80.6316603 | 69.4750234 |
| 83.8079507 | 69.1859046 | 72.0479295 | 70.0713843 | 77.6316603 | 69.4750234 |
| 83.8079507 | 70.1859046 | 72.0479295 | 71.0713843 | 75.6316603 | 69.4750234 |
| 82.8079507 | 71.1859046 | 71.0479295 | 71.0713843 | 75.6316603 | 69.4750234 |
| 82.8079507 | 71.1859046 | 71.0479295 | 73.0713843 | 73.6316603 | 69.4750234 |
| 81.8079507 | 70.1859046 | 71.0479295 | 73.0713843 | 71.6316603 | 69.4750234 |
| 82.8079507 | 70.1859046 | 71.0479295 | 73.0713843 | 71.6316603 | 68.4750234 |
| 82.8079507 | 67.1859046 | 71.0479295 | 74.0713843 | 70.6316603 | 69.4750234 |
| 82.8079507 | 67.1859046 | 71.0479295 | 74.0713843 | 70.6316603 | 69.4750234 |
| 82.8079507 | 67.1859046 | 71.0479295 | 74.0713843 | 69.6316603 | 69.4750234 |
| 82.8079507 | 67.1859046 | 71.0479295 | 74.0713843 | 70.6316603 | 70.4750234 |
| 78.8079507 | 67.1859046 | 71.0479295 | 74.0713843 | 70.6316603 | 70.4750234 |
| 77.8079507 | 67.1859046 | 70.0479295 | 74.0713843 | 71.6316603 | 71.4750234 |
| 76.8079507 | 67.1859046 | 70.0479295 | 73.0713843 | 72.6316603 | 71.4750234 |
| 73.8079507 | 67.1859046 | 70.0479295 | 73.0713843 | 73.6316603 | 73.4750234 |
| 70.8079507 | 67.1859046 | 69.0479295 | 73.0713843 | 73.6316603 | 73.4750234 |
| 69.8079507 | 67.1859046 | 69.0479295 | 72.0713843 | 72.6316603 | 73.4750234 |
| 68.8079507 | 67.1859046 | 69.0479295 | 72.0713843 | 71.6316603 | 73.4750234 |
| 67.8079507 | 67.1859046 | 70.0479295 | 72.0713843 | 71.6316603 | 73.4750234 |
| 66.8079507 | 67.1859046 | 70.0479295 | 71.0713843 | 71.6316603 | 73.4750234 |
| 65.8079507 | 68.1859046 | 70.0479295 | 71.0713843 | 71.6316603 | 73.4750234 |
| 65.8079507 | 69.1859046 | 70.0479295 | 70.0713843 | 71.6316603 | 74.4750234 |
| 64.8079507 | 70.1859046 | 70.0479295 | 70.0713843 | 71.6316603 | 74.4750234 |
| 64.8079507 | 70.1859046 | 70.0479295 | 70.0713843 | 73.6316603 | 72.4750234 |
| 63.8079507 | 70.1859046 | 70.0479295 | 71.0713843 | 74.6316603 | 71.4750234 |
| 63.8079507 | 71.1859046 | 71.0479295 | 71.0713843 | 73.6316603 | 70.4750234 |
| 65.8079507 | 73.1859046 | 70.0479295 | 71.0713843 | 73.6316603 | 70.4750234 |
| 71.8079507 | 73.1859046 | 70.0479295 | 71.0713843 | 70.6316603 | 68.4750234 |
| 74.8079507 | 73.1859046 | 69.0479295 | 71.0713843 | 68.6316603 | 67.4750234 |
| 73.8079507 | 73.1859046 | 69.0479295 | 72.0713843 | 69.6316603 | 68.4750234 |
| 73.8079507 | 73.1859046 | 68.0479295 | 73.0713843 | 69.6316603 | 68.4750234 |
| 73.8079507 | 73.1859046 | 68.0479295 | 73.0713843 | 71.6316603 | 69.4750234 |
| 72.8079507 | 72.1859046 | 68.0479295 | 74.0713843 | 73.6316603 | 69.4750234 |
| 71.8079507 | 72.1859046 | 69.0479295 | 74.0713843 | 73.6316603 | 69.4750234 |
| 71.8079507 | 73.1859046 | 69.0479295 | 74.0713843 | 73.6316603 | 69.4750234 |
| 70.8079507 | 73.1859046 | 69.0479295 | 70.0713843 | 71.6316603 | 69.4750234 |
| 69.8079507 | 73.1859046 | 69.0479295 | 68.0713843 | 71.6316603 | 69.4750234 |
| 69.8079507 | 73.1859046 | 69.0479295 | 68.0713843 | 70.6316603 | 69.4750234 |

|            |            |            |            |            |            |
|------------|------------|------------|------------|------------|------------|
| 69.8079507 | 72.1859046 | 69.0479295 | 68.0713843 | 70.6316603 | 69.4750234 |
| 69.8079507 | 66.1859046 | 70.0479295 | 68.0713843 | 68.6316603 | 69.4750234 |
| 69.8079507 | 65.1859046 | 70.0479295 | 69.0713843 | 64.6316603 | 69.4750234 |
| 69.8079507 | 64.1859046 | 70.0479295 | 70.0713843 | 62.6316603 | 69.4750234 |
| 69.8079507 | 63.1859046 | 71.0479295 | 70.0713843 | 62.6316603 | 69.4750234 |
| 73.8079507 | 62.1859046 | 70.0479295 | 73.0713843 | 62.6316603 | 69.4750234 |
| 76.8079507 | 63.1859046 | 70.0479295 | 74.0713843 | 61.6316603 | 73.4750234 |
| 76.8079507 | 63.1859046 | 70.0479295 | 75.0713843 | 60.6316603 | 73.4750234 |
| 76.8079507 | 63.1859046 | 70.0479295 | 75.0713843 | 61.6316603 | 71.4750234 |
| 77.8079507 | 63.1859046 | 69.0479295 | 74.0713843 | 61.6316603 | 70.4750234 |
| 77.8079507 | 63.1859046 | 69.0479295 | 74.0713843 | 61.6316603 | 70.4750234 |
| 74.8079507 | 64.1859046 | 69.0479295 | 72.0713843 | 65.6316603 | 71.4750234 |
| 73.8079507 | 64.1859046 | 70.0479295 | 72.0713843 | 69.6316603 | 71.4750234 |
| 71.8079507 | 67.1859046 | 70.0479295 | 72.0713843 | 70.6316603 | 74.4750234 |
| 67.8079507 | 69.1859046 | 70.0479295 | 71.0713843 | 70.6316603 | 77.4750234 |
| 67.8079507 | 69.1859046 | 70.0479295 | 71.0713843 | 66.6316603 | 77.4750234 |
| 62.8079507 | 70.1859046 | 70.0479295 | 71.0713843 | 62.6316603 | 77.4750234 |
| 62.8079507 | 70.1859046 | 70.0479295 | 71.0713843 | 60.6316603 | 78.4750234 |
| 61.8079507 | 70.1859046 | 70.0479295 | 72.0713843 | 58.6316603 | 75.4750234 |
| 61.8079507 | 70.1859046 | 71.0479295 | 72.0713843 | 58.6316603 | 74.4750234 |
| 60.8079507 | 70.1859046 | 71.0479295 | 71.0713843 | 58.6316603 | 75.4750234 |
| 60.8079507 | 70.1859046 | 73.0479295 | 71.0713843 | 58.6316603 | 75.4750234 |
| 60.8079507 | 70.1859046 | 74.0479295 | 71.0713843 | 64.6316603 | 75.4750234 |
| 60.8079507 | 70.1859046 | 73.0479295 | 71.0713843 | 67.6316603 | 75.4750234 |
| 60.8079507 | 70.1859046 | 73.0479295 | 72.0713843 | 67.6316603 | 75.4750234 |
| 60.8079507 | 69.1859046 | 73.0479295 | 72.0713843 | 65.6316603 | 75.4750234 |
| 60.8079507 | 70.1859046 | 73.0479295 | 72.0713843 | 65.6316603 | 76.4750234 |
| 58.8079507 | 71.1859046 | 74.0479295 | 71.0713843 | 65.6316603 | 76.4750234 |
| 58.8079507 | 73.1859046 | 73.0479295 | 72.0713843 | 65.6316603 | 76.4750234 |
| 56.8079507 | 72.1859046 | 73.0479295 | 72.0713843 | 64.6316603 | 75.4750234 |
| 57.8079507 | 72.1859046 | 73.0479295 | 72.0713843 | 64.6316603 | 73.4750234 |
| 58.8079507 | 71.1859046 | 73.0479295 | 72.0713843 | 64.6316603 | 72.4750234 |
| 57.8079507 | 70.1859046 | 73.0479295 | 73.0713843 | 71.6316603 | 71.4750234 |
| 56.8079507 | 71.1859046 | 74.0479295 | 73.0713843 | 73.6316603 | 71.4750234 |
| 55.8079507 | 71.1859046 | 74.0479295 | 73.0713843 | 73.6316603 | 71.4750234 |
| 56.8079507 | 71.1859046 | 74.0479295 | 73.0713843 | 72.6316603 | 70.4750234 |
| 56.8079507 | 72.1859046 | 75.0479295 | 73.0713843 | 71.6316603 | 70.4750234 |
| 57.8079507 | 72.1859046 | 75.0479295 | 73.0713843 | 71.6316603 | 70.4750234 |
| 57.8079507 | 72.1859046 | 75.0479295 | 71.0713843 | 73.6316603 | 70.4750234 |
| 57.8079507 | 72.1859046 | 78.0479295 | 71.0713843 | 73.6316603 | 70.4750234 |
| 57.8079507 | 69.1859046 | 78.0479295 | 71.0713843 | 74.6316603 | 70.4750234 |
| 57.8079507 | 65.1859046 | 78.0479295 | 71.0713843 | 75.6316603 | 70.4750234 |
| 56.8079507 | 63.1859046 | 78.0479295 | 71.0713843 | 75.6316603 | 70.4750234 |
| 56.8079507 | 62.1859046 | 78.0479295 | 71.0713843 | 76.6316603 | 70.4750234 |
| 56.8079507 | 61.1859046 | 78.0479295 | 72.0713843 | 75.6316603 | 70.4750234 |

|            |            |            |            |            |            |
|------------|------------|------------|------------|------------|------------|
| 56.8079507 | 61.1859046 | 77.0479295 | 72.0713843 | 73.6316603 | 70.4750234 |
| 56.8079507 | 61.1859046 | 76.0479295 | 73.0713843 | 72.6316603 | 70.4750234 |
| 56.8079507 | 61.1859046 | 76.0479295 | 72.0713843 | 73.6316603 | 69.4750234 |
| 56.8079507 | 61.1859046 | 76.0479295 | 73.0713843 | 73.6316603 | 69.4750234 |
| 58.8079507 | 62.1859046 | 77.0479295 | 73.0713843 | 73.6316603 | 69.4750234 |
| 58.8079507 | 62.1859046 | 77.0479295 | 74.0713843 | 70.6316603 | 66.4750234 |
| 56.8079507 | 63.1859046 | 77.0479295 | 76.0713843 | 70.6316603 | 66.4750234 |
| 56.8079507 | 65.1859046 | 77.0479295 | 76.0713843 | 68.6316603 | 66.4750234 |
| 56.8079507 | 67.1859046 | 77.0479295 | 75.0713843 | 66.6316603 | 66.4750234 |
| 56.8079507 | 68.1859046 | 78.0479295 | 73.0713843 | 65.6316603 | 65.4750234 |
| 57.8079507 | 68.1859046 | 78.0479295 | 73.0713843 | 64.6316603 | 68.4750234 |
| 61.8079507 | 69.1859046 | 78.0479295 | 73.0713843 | 64.6316603 | 68.4750234 |
| 63.8079507 | 69.1859046 | 78.0479295 | 75.0713843 | 65.6316603 | 70.4750234 |
| 63.8079507 | 69.1859046 | 80.0479295 | 75.0713843 | 66.6316603 | 70.4750234 |
| 63.8079507 | 70.1859046 | 80.0479295 | 76.0713843 | 68.6316603 | 71.4750234 |
| 61.8079507 | 70.1859046 | 80.0479295 | 76.0713843 | 69.6316603 | 72.4750234 |
| 60.8079507 | 70.1859046 | 80.0479295 | 76.0713843 | 71.6316603 | 72.4750234 |
| 60.8079507 | 70.1859046 | 79.0479295 | 74.0713843 | 70.6316603 | 72.4750234 |
| 62.8079507 | 70.1859046 | 79.0479295 | 74.0713843 | 69.6316603 | 72.4750234 |
| 62.8079507 | 70.1859046 | 79.0479295 | 74.0713843 | 69.6316603 | 72.4750234 |
| 62.8079507 | 70.1859046 | 79.0479295 | 74.0713843 | 69.6316603 | 72.4750234 |
| 63.8079507 | 70.1859046 | 79.0479295 | 75.0713843 | 65.6316603 | 73.4750234 |
| 64.8079507 | 70.1859046 | 79.0479295 | 75.0713843 | 64.6316603 | 73.4750234 |
| 65.8079507 | 70.1859046 | 79.0479295 | 76.0713843 | 64.6316603 | 73.4750234 |
| 65.8079507 | 70.1859046 | 79.0479295 | 75.0713843 | 65.6316603 | 72.4750234 |
| 66.8079507 | 71.1859046 | 79.0479295 | 75.0713843 | 66.6316603 | 72.4750234 |
| 69.8079507 | 70.1859046 | 80.0479295 | 74.0713843 | 67.6316603 | 72.4750234 |
| 69.8079507 | 69.1859046 | 80.0479295 | 75.0713843 | 67.6316603 | 71.4750234 |
| 71.8079507 | 69.1859046 | 81.0479295 | 75.0713843 | 68.6316603 | 71.4750234 |
| 71.8079507 | 69.1859046 | 83.0479295 | 75.0713843 | 69.6316603 | 71.4750234 |
| 69.8079507 | 67.1859046 | 83.0479295 | 75.0713843 | 69.6316603 | 71.4750234 |
| 68.8079507 | 67.1859046 | 83.0479295 | 75.0713843 | 69.6316603 | 71.4750234 |
| 67.8079507 | 66.1859046 | 83.0479295 | 75.0713843 | 69.6316603 | 71.4750234 |
| 66.8079507 | 66.1859046 | 83.0479295 | 75.0713843 | 67.6316603 | 71.4750234 |
| 66.8079507 | 66.1859046 | 83.0479295 | 75.0713843 | 67.6316603 | 71.4750234 |
| 65.8079507 | 65.1859046 | 83.0479295 | 76.0713843 | 68.6316603 | 71.4750234 |
| 65.8079507 | 65.1859046 | 84.0479295 | 76.0713843 | 70.6316603 | 71.4750234 |
| 65.8079507 | 65.1859046 | 84.0479295 | 83.0713843 | 70.6316603 | 71.4750234 |
| 65.8079507 | 65.1859046 | 84.0479295 | 83.0713843 | 70.6316603 | 73.4750234 |
| 65.8079507 | 65.1859046 | 84.0479295 | 83.0713843 | 70.6316603 | 72.4750234 |
| 65.8079507 | 63.1859046 | 86.0479295 | 78.0713843 | 69.6316603 | 72.4750234 |
| 66.8079507 | 63.1859046 | 84.0479295 | 75.0713843 | 69.6316603 | 72.4750234 |
| 66.8079507 | 63.1859046 | 84.0479295 | 72.0713843 | 68.6316603 | 72.4750234 |
| 66.8079507 | 62.1859046 | 85.0479295 | 71.0713843 | 68.6316603 | 72.4750234 |
| 66.8079507 | 62.1859046 | 86.0479295 | 71.0713843 | 68.6316603 | 72.4750234 |

|            |            |            |            |            |            |
|------------|------------|------------|------------|------------|------------|
| 66.8079507 | 62.1859046 | 85.0479295 | 72.0713843 | 68.6316603 | 71.4750234 |
| 66.8079507 | 66.1859046 | 82.0479295 | 73.0713843 | 68.6316603 | 71.4750234 |
| 66.8079507 | 70.1859046 | 82.0479295 | 74.0713843 | 68.6316603 | 71.4750234 |
| 66.8079507 | 70.1859046 | 77.0479295 | 75.0713843 | 69.6316603 | 71.4750234 |
| 69.8079507 | 71.1859046 | 73.0479295 | 75.0713843 | 69.6316603 | 73.4750234 |
| 70.8079507 | 71.1859046 | 71.0479295 | 75.0713843 | 68.6316603 | 73.4750234 |
| 70.8079507 | 71.1859046 | 70.0479295 | 75.0713843 | 69.6316603 | 71.4750234 |
| 70.8079507 | 75.1859046 | 70.0479295 | 75.0713843 | 69.6316603 | 71.4750234 |
| 72.8079507 | 76.1859046 | 70.0479295 | 75.0713843 | 70.6316603 | 71.4750234 |
| 73.8079507 | 76.1859046 | 69.0479295 | 75.0713843 | 70.6316603 | 71.4750234 |
| 73.8079507 | 78.1859046 | 69.0479295 | 75.0713843 | 70.6316603 | 71.4750234 |
| 72.8079507 | 78.1859046 | 69.0479295 | 75.0713843 | 71.6316603 | 71.4750234 |
| 72.8079507 | 78.1859046 | 69.0479295 | 75.0713843 | 72.6316603 | 71.4750234 |
| 70.8079507 | 78.1859046 | 69.0479295 | 75.0713843 | 72.6316603 | 71.4750234 |
| 69.8079507 | 78.1859046 | 69.0479295 | 75.0713843 | 73.6316603 | 71.4750234 |
| 67.8079507 | 79.1859046 | 69.0479295 | 75.0713843 | 74.6316603 | 72.4750234 |
| 67.8079507 | 79.1859046 | 69.0479295 | 75.0713843 | 75.6316603 | 74.4750234 |
| 67.8079507 | 79.1859046 | 69.0479295 | 76.0713843 | 75.6316603 | 74.4750234 |
| 67.8079507 | 79.1859046 | 69.0479295 | 76.0713843 | 75.6316603 | 74.4750234 |
| 66.8079507 | 80.1859046 | 69.0479295 | 76.0713843 | 75.6316603 | 70.4750234 |
| 65.8079507 | 81.1859046 | 69.0479295 | 77.0713843 | 77.6316603 | 70.4750234 |
| 57.8079507 | 81.1859046 | 68.0479295 | 67.0713843 | 77.6316603 | 70.4750234 |
| 57.8079507 | 80.1859046 | 67.0479295 | 65.0713843 | 78.6316603 | 69.4750234 |
| 56.8079507 | 81.1859046 | 66.0479295 | 65.0713843 | 79.6316603 | 69.4750234 |
| 56.8079507 | 81.1859046 | 66.0479295 | 65.0713843 | 79.6316603 | 69.4750234 |
| 57.8079507 | 81.1859046 | 66.0479295 | 65.0713843 | 80.6316603 | 67.4750234 |
| 57.8079507 | 81.1859046 | 66.0479295 | 65.0713843 | 81.6316603 | 67.4750234 |
| 57.8079507 | 82.1859046 | 65.0479295 | 65.0713843 | 81.6316603 | 68.4750234 |
| 57.8079507 | 82.1859046 | 65.0479295 | 65.0713843 | 81.6316603 | 68.4750234 |
| 57.8079507 | 83.1859046 | 66.0479295 | 70.0713843 | 79.6316603 | 69.4750234 |
| 58.8079507 | 83.1859046 | 66.0479295 | 70.0713843 | 79.6316603 | 69.4750234 |
| 58.8079507 | 83.1859046 | 66.0479295 | 70.0713843 | 78.6316603 | 69.4750234 |
| 60.8079507 | 84.1859046 | 66.0479295 | 70.0713843 | 78.6316603 | 69.4750234 |
| 60.8079507 | 83.1859046 | 66.0479295 | 72.0713843 | 76.6316603 | 69.4750234 |
| 60.8079507 | 83.1859046 | 65.0479295 | 73.0713843 | 73.6316603 | 69.4750234 |
| 63.8079507 | 83.1859046 | 65.0479295 | 75.0713843 | 73.6316603 | 69.4750234 |
| 64.8079507 | 84.1859046 | 65.0479295 | 76.0713843 | 73.6316603 | 70.4750234 |
| 64.8079507 | 85.1859046 | 65.0479295 | 76.0713843 | 73.6316603 | 70.4750234 |
| 67.8079507 | 85.1859046 | 65.0479295 | 76.0713843 | 73.6316603 | 70.4750234 |
| 68.8079507 | 86.1859046 | 65.0479295 | 76.0713843 | 73.6316603 | 70.4750234 |
| 69.8079507 | 85.1859046 | 65.0479295 | 76.0713843 | 73.6316603 | 72.4750234 |
| 69.8079507 | 83.1859046 | 65.0479295 | 71.0713843 | 73.6316603 | 72.4750234 |
| 72.8079507 | 81.1859046 | 65.0479295 | 71.0713843 | 73.6316603 | 72.4750234 |
| 73.8079507 | 79.1859046 | 65.0479295 | 68.0713843 | 73.6316603 | 72.4750234 |
| 73.8079507 | 78.1859046 | 64.0479295 | 66.0713843 | 73.6316603 | 72.4750234 |

|            |            |            |            |            |            |
|------------|------------|------------|------------|------------|------------|
| 73.8079507 | 77.1859046 | 64.0479295 | 66.0713843 | 74.6316603 | 72.4750234 |
| 75.8079507 | 77.1859046 | 65.0479295 | 66.0713843 | 70.6316603 | 71.4750234 |
| 76.8079507 | 76.1859046 | 66.0479295 | 67.0713843 | 69.6316603 | 72.4750234 |
| 76.8079507 | 76.1859046 | 67.0479295 | 67.0713843 | 69.6316603 | 72.4750234 |
| 76.8079507 | 76.1859046 | 67.0479295 | 68.0713843 | 68.6316603 | 75.4750234 |
| 77.8079507 | 75.1859046 | 67.0479295 | 72.0713843 | 71.6316603 | 74.4750234 |
| 77.8079507 | 74.1859046 | 67.0479295 | 73.0713843 | 73.6316603 | 74.4750234 |
| 78.8079507 | 71.1859046 | 67.0479295 | 73.0713843 | 72.6316603 | 74.4750234 |
| 78.8079507 | 69.1859046 | 67.0479295 | 73.0713843 | 72.6316603 | 74.4750234 |
| 77.8079507 | 67.1859046 | 67.0479295 | 73.0713843 | 72.6316603 | 72.4750234 |
| 64.8079507 | 65.1859046 | 66.0479295 | 72.0713843 | 72.6316603 | 73.4750234 |
| 59.8079507 | 65.1859046 | 66.0479295 | 68.0713843 | 72.6316603 | 73.4750234 |
| 59.8079507 | 65.1859046 | 66.0479295 | 66.0713843 | 73.6316603 | 73.4750234 |
| 58.8079507 | 65.1859046 | 67.0479295 | 65.0713843 | 73.6316603 | 72.4750234 |
| 59.8079507 | 66.1859046 | 67.0479295 | 67.0713843 | 74.6316603 | 72.4750234 |
| 59.8079507 | 68.1859046 | 67.0479295 | 74.0713843 | 75.6316603 | 71.4750234 |
| 59.8079507 | 71.1859046 | 67.0479295 | 79.0713843 | 75.6316603 | 71.4750234 |
| 58.8079507 | 72.1859046 | 67.0479295 | 80.0713843 | 71.6316603 | 71.4750234 |
| 59.8079507 | 72.1859046 | 67.0479295 | 80.0713843 | 69.6316603 | 72.4750234 |
| 59.8079507 | 71.1859046 | 67.0479295 | 80.0713843 | 68.6316603 | 72.4750234 |
| 59.8079507 | 70.1859046 | 68.0479295 | 81.0713843 | 68.6316603 | 72.4750234 |
| 59.8079507 | 66.1859046 | 69.0479295 | 81.0713843 | 68.6316603 | 71.4750234 |
| 59.8079507 | 63.1859046 | 69.0479295 | 80.0713843 | 68.6316603 | 71.4750234 |
| 59.8079507 | 62.1859046 | 69.0479295 | 80.0713843 | 73.6316603 | 71.4750234 |
| 59.8079507 | 62.1859046 | 69.0479295 | 80.0713843 | 74.6316603 | 71.4750234 |
| 57.8079507 | 63.1859046 | 69.0479295 | 78.0713843 | 73.6316603 | 72.4750234 |
| 56.8079507 | 64.1859046 | 69.0479295 | 78.0713843 | 73.6316603 | 72.4750234 |
| 55.8079507 | 68.1859046 | 69.0479295 | 75.0713843 | 71.6316603 | 73.4750234 |
| 54.8079507 | 69.1859046 | 69.0479295 | 74.0713843 | 64.6316603 | 73.4750234 |
| 54.8079507 | 70.1859046 | 69.0479295 | 74.0713843 | 64.6316603 | 73.4750234 |
| 54.8079507 | 70.1859046 | 69.0479295 | 73.0713843 | 66.6316603 | 72.4750234 |
| 54.8079507 | 66.1859046 | 70.0479295 | 74.0713843 | 68.6316603 | 72.4750234 |
| 54.8079507 | 62.1859046 | 70.0479295 | 74.0713843 | 69.6316603 | 72.4750234 |
| 53.8079507 | 60.1859046 | 70.0479295 | 74.0713843 | 70.6316603 | 72.4750234 |
| 53.8079507 | 60.1859046 | 69.0479295 | 78.0713843 | 69.6316603 | 72.4750234 |
| 53.8079507 | 60.1859046 | 67.0479295 | 79.0713843 | 68.6316603 | 72.4750234 |
| 53.8079507 | 59.1859046 | 67.0479295 | 78.0713843 | 66.6316603 | 72.4750234 |
| 53.8079507 | 59.1859046 | 67.0479295 | 78.0713843 | 66.6316603 | 72.4750234 |
| 53.8079507 | 59.1859046 | 66.0479295 | 77.0713843 | 68.6316603 | 72.4750234 |
| 54.8079507 | 60.1859046 | 67.0479295 | 77.0713843 | 71.6316603 | 74.4750234 |
| 55.8079507 | 61.1859046 | 67.0479295 | 82.0713843 | 74.6316603 | 74.4750234 |
| 55.8079507 | 61.1859046 | 67.0479295 | 82.0713843 | 75.6316603 | 73.4750234 |
| 55.8079507 | 60.1859046 | 68.0479295 | 82.0713843 | 75.6316603 | 72.4750234 |
| 56.8079507 | 60.1859046 | 68.0479295 | 82.0713843 | 74.6316603 | 72.4750234 |
| 59.8079507 | 60.1859046 | 68.0479295 | 81.0713843 | 70.6316603 | 72.4750234 |

|            |            |            |            |            |            |
|------------|------------|------------|------------|------------|------------|
| 59.8079507 | 60.1859046 | 68.0479295 | 78.0713843 | 65.6316603 | 73.4750234 |
| 60.8079507 | 61.1859046 | 68.0479295 | 78.0713843 | 63.6316603 | 74.4750234 |
| 60.8079507 | 63.1859046 | 68.0479295 | 68.0713843 | 61.6316603 | 76.4750234 |
| 62.8079507 | 64.1859046 | 68.0479295 | 66.0713843 | 61.6316603 | 77.4750234 |
| 62.8079507 | 65.1859046 | 68.0479295 | 66.0713843 | 61.6316603 | 77.4750234 |
| 63.8079507 | 66.1859046 | 68.0479295 | 66.0713843 | 63.6316603 | 77.4750234 |
| 64.8079507 | 67.1859046 | 68.0479295 | 66.0713843 | 63.6316603 | 76.4750234 |
| 64.8079507 | 66.1859046 | 68.0479295 | 66.0713843 | 64.6316603 | 75.4750234 |
| 64.8079507 | 65.1859046 | 68.0479295 | 66.0713843 | 65.6316603 | 74.4750234 |
| 64.8079507 | 64.1859046 | 68.0479295 | 66.0713843 | 65.6316603 | 74.4750234 |
| 64.8079507 | 64.1859046 | 68.0479295 | 66.0713843 | 65.6316603 | 74.4750234 |
| 64.8079507 | 64.1859046 | 69.0479295 | 67.0713843 | 66.6316603 | 78.4750234 |
| 65.8079507 | 63.1859046 | 69.0479295 | 67.0713843 | 73.6316603 | 79.4750234 |
| 65.8079507 | 63.1859046 | 68.0479295 | 67.0713843 | 75.6316603 | 79.4750234 |
| 66.8079507 | 63.1859046 | 67.0479295 | 68.0713843 | 75.6316603 | 78.4750234 |
| 65.8079507 | 63.1859046 | 66.0479295 | 68.0713843 | 75.6316603 | 78.4750234 |
| 64.8079507 | 65.1859046 | 66.0479295 | 68.0713843 | 76.6316603 | 78.4750234 |
| 65.8079507 | 67.1859046 | 65.0479295 | 71.0713843 | 76.6316603 | 75.4750234 |
| 65.8079507 | 69.1859046 | 65.0479295 | 71.0713843 | 76.6316603 | 75.4750234 |
| 65.8079507 | 70.1859046 | 65.0479295 | 73.0713843 | 75.6316603 | 75.4750234 |
| 65.8079507 | 70.1859046 | 65.0479295 | 75.0713843 | 73.6316603 | 75.4750234 |
| 65.8079507 | 69.1859046 | 65.0479295 | 76.0713843 | 72.6316603 | 76.4750234 |
| 65.8079507 | 66.1859046 | 65.0479295 | 77.0713843 | 72.6316603 | 76.4750234 |
| 65.8079507 | 64.1859046 | 66.0479295 | 79.0713843 | 73.6316603 | 76.4750234 |
| 63.8079507 | 63.1859046 | 66.0479295 | 79.0713843 | 74.6316603 | 76.4750234 |
| 63.8079507 | 62.1859046 | 66.0479295 | 81.0713843 | 76.6316603 | 72.4750234 |
| 62.8079507 | 63.1859046 | 67.0479295 | 81.0713843 | 76.6316603 | 71.4750234 |
| 61.8079507 | 63.1859046 | 68.0479295 | 81.0713843 | 76.6316603 | 71.4750234 |
| 62.8079507 | 64.1859046 | 68.0479295 | 81.0713843 | 73.6316603 | 70.4750234 |
| 62.8079507 | 66.1859046 | 68.0479295 | 82.0713843 | 70.6316603 | 70.4750234 |
| 64.8079507 | 66.1859046 | 68.0479295 | 83.0713843 | 68.6316603 | 70.4750234 |
| 63.8079507 | 67.1859046 | 68.0479295 | 83.0713843 | 68.6316603 | 71.4750234 |
| 62.8079507 | 66.1859046 | 69.0479295 | 85.0713843 | 68.6316603 | 71.4750234 |
| 62.8079507 | 60.1859046 | 69.0479295 | 85.0713843 | 67.6316603 | 72.4750234 |
| 62.8079507 | 57.1859046 | 69.0479295 | 85.0713843 | 67.6316603 | 70.4750234 |
| 63.8079507 | 55.1859046 | 70.0479295 | 85.0713843 | 67.6316603 | 70.4750234 |
| 67.8079507 | 55.1859046 | 71.0479295 | 85.0713843 | 67.6316603 | 70.4750234 |
| 67.8079507 | 55.1859046 | 71.0479295 | 85.0713843 | 72.6316603 | 70.4750234 |
| 69.8079507 | 56.1859046 | 71.0479295 | 86.0713843 | 74.6316603 | 70.4750234 |
| 69.8079507 | 57.1859046 | 73.0479295 | 83.0713843 | 74.6316603 | 70.4750234 |
| 70.8079507 | 58.1859046 | 73.0479295 | 82.0713843 | 73.6316603 | 70.4750234 |
| 70.8079507 | 59.1859046 | 71.0479295 | 82.0713843 | 74.6316603 | 69.4750234 |
| 70.8079507 | 60.1859046 | 70.0479295 | 83.0713843 | 74.6316603 | 68.4750234 |
| 70.8079507 | 61.1859046 | 71.0479295 | 75.0713843 | 74.6316603 | 68.4750234 |
| 71.8079507 | 64.1859046 | 70.0479295 | 75.0713843 | 75.6316603 | 68.4750234 |

|            |            |            |            |            |            |
|------------|------------|------------|------------|------------|------------|
| 71.8079507 | 67.1859046 | 70.0479295 | 74.0713843 | 75.6316603 | 67.4750234 |
| 71.8079507 | 67.1859046 | 70.0479295 | 74.0713843 | 75.6316603 | 67.4750234 |
| 72.8079507 | 71.1859046 | 70.0479295 | 74.0713843 | 75.6316603 | 68.4750234 |
| 70.8079507 | 73.1859046 | 70.0479295 | 72.0713843 | 75.6316603 | 68.4750234 |
| 69.8079507 | 73.1859046 | 70.0479295 | 72.0713843 | 75.6316603 | 68.4750234 |
| 69.8079507 | 74.1859046 | 69.0479295 | 72.0713843 | 75.6316603 | 69.4750234 |
| 69.8079507 | 75.1859046 | 69.0479295 | 72.0713843 | 75.6316603 | 69.4750234 |
| 67.8079507 | 75.1859046 | 69.0479295 | 72.0713843 | 74.6316603 | 70.4750234 |
| 68.8079507 | 72.1859046 | 68.0479295 | 72.0713843 | 74.6316603 | 70.4750234 |
| 68.8079507 | 72.1859046 | 68.0479295 | 70.0713843 | 70.6316603 | 70.4750234 |
| 68.8079507 | 73.1859046 | 68.0479295 | 69.0713843 | 67.6316603 | 72.4750234 |
| 68.8079507 | 75.1859046 | 68.0479295 | 69.0713843 | 64.6316603 | 73.4750234 |
| 68.8079507 | 76.1859046 | 67.0479295 | 69.0713843 | 64.6316603 | 73.4750234 |
| 68.8079507 | 77.1859046 | 68.0479295 | 68.0713843 | 63.6316603 | 74.4750234 |
| 69.8079507 | 76.1859046 | 68.0479295 | 68.0713843 | 63.6316603 | 75.4750234 |
| 68.8079507 | 74.1859046 | 67.0479295 | 68.0713843 | 63.6316603 | 76.4750234 |
| 67.8079507 | 72.1859046 | 67.0479295 | 68.0713843 | 61.6316603 | 76.4750234 |
| 67.8079507 | 72.1859046 | 67.0479295 | 68.0713843 | 61.6316603 | 77.4750234 |
| 67.8079507 | 72.1859046 | 67.0479295 | 65.0713843 | 61.6316603 | 77.4750234 |
| 67.8079507 | 73.1859046 | 67.0479295 | 63.0713843 | 59.6316603 | 79.4750234 |
| 66.8079507 | 74.1859046 | 66.0479295 | 63.0713843 | 59.6316603 | 84.4750234 |
| 66.8079507 | 75.1859046 | 66.0479295 | 62.0713843 | 59.6316603 | 84.4750234 |
| 66.8079507 | 75.1859046 | 65.0479295 | 62.0713843 | 54.6316603 | 67.8723475 |
| 66.8079507 | 74.1859046 | 65.0479295 | 62.0713843 | 53.6316603 | 67.5996202 |
| 66.8079507 | 73.1859046 | 65.0479295 | 61.0713843 | 53.6316603 | 67.5996202 |
| 66.8079507 | 73.1859046 | 65.0479295 | 60.0713843 | 50.6316603 | 67.5996202 |
| 66.8079507 | 73.1859046 | 66.0479295 | 59.0713843 | 48.6316603 | 67.3268929 |
| 67.8079507 | 72.1859046 | 66.0479295 | 59.0713843 | 48.6316603 | 67.1450748 |
| 66.8079507 | 71.1859046 | 66.0479295 | 59.0713843 | 48.6316603 | 66.417802  |
| 66.8079507 | 71.1859046 | 66.0479295 | 59.0713843 | 48.6316603 | 66.3268929 |
| 66.8079507 | 72.1859046 | 66.0479295 | 59.0713843 | 48.6316603 | 66.5087111 |
| 66.8079507 | 72.1859046 | 67.0479295 | 59.0713843 | 66.6316603 | 89.4750234 |
| 66.8079507 | 72.1859046 | 67.0479295 | 59.0713843 | 76.6316603 | 87.4750234 |
| 66.8079507 | 71.1859046 | 68.0479295 | 59.0713843 | 76.6316603 | 88.4750234 |
| 66.8079507 | 71.1859046 | 68.0479295 | 59.0713843 | 82.6316603 | 89.4750234 |
| 67.8079507 | 72.1859046 | 69.0479295 | 61.0713843 | 83.6316603 | 89.4750234 |
| 68.8079507 | 74.1859046 | 69.0479295 | 61.0713843 | 83.6316603 | 89.4750234 |
| 70.8079507 | 75.1859046 | 69.0479295 | 62.0713843 | 82.6316603 | 88.4750234 |
| 72.8079507 | 75.1859046 | 69.0479295 | 62.0713843 | 75.6316603 | 88.4750234 |
| 72.8079507 | 74.1859046 | 70.0479295 | 64.0713843 | 75.6316603 | 86.4750234 |
| 72.8079507 | 73.1859046 | 69.0479295 | 65.0713843 | 66.6316603 | 84.4750234 |
| 73.8079507 | 73.1859046 | 69.0479295 | 67.0713843 | 65.6316603 | 84.4750234 |
| 73.8079507 | 73.1859046 | 69.0479295 | 67.0713843 | 64.6316603 | 84.4750234 |
| 73.8079507 | 74.1859046 | 69.0479295 | 70.0713843 | 64.6316603 | 79.4750234 |
| 73.8079507 | 74.1859046 | 69.0479295 | 70.0713843 | 63.6316603 | 78.4750234 |

|            |            |            |            |            |            |
|------------|------------|------------|------------|------------|------------|
| 74.8079507 | 74.1859046 | 69.0479295 | 69.0713843 | 63.6316603 | 74.4750234 |
| 74.8079507 | 74.1859046 | 69.0479295 | 69.0713843 | 65.6316603 | 73.4750234 |
| 75.8079507 | 73.1859046 | 69.0479295 | 69.0713843 | 71.6316603 | 73.4750234 |
| 75.8079507 | 73.1859046 | 68.0479295 | 69.0713843 | 72.6316603 | 71.4750234 |
| 75.8079507 | 73.1859046 | 69.0479295 | 69.0713843 | 71.6316603 | 70.4750234 |
| 74.8079507 | 72.1859046 | 69.0479295 | 69.0713843 | 71.6316603 | 70.4750234 |
| 72.8079507 | 71.1859046 | 69.0479295 | 69.0713843 | 69.6316603 | 70.4750234 |
| 72.8079507 | 69.1859046 | 69.0479295 | 70.0713843 | 68.6316603 | 71.4750234 |
| 71.8079507 | 68.1859046 | 69.0479295 | 70.0713843 | 68.6316603 | 71.4750234 |
| 69.8079507 | 69.1859046 | 69.0479295 | 70.0713843 | 68.6316603 | 71.4750234 |
| 69.8079507 | 69.1859046 | 69.0479295 | 70.0713843 | 68.6316603 | 71.4750234 |
| 69.8079507 | 71.1859046 | 69.0479295 | 72.0713843 | 69.6316603 | 71.4750234 |
| 68.8079507 | 71.1859046 | 68.0479295 | 73.0713843 | 69.6316603 | 70.4750234 |
| 68.8079507 | 71.1859046 | 67.0479295 | 73.0713843 | 70.6316603 | 70.4750234 |
| 69.8079507 | 72.1859046 | 66.0479295 | 73.0713843 | 71.6316603 | 70.4750234 |
| 69.8079507 | 73.1859046 | 66.0479295 | 73.0713843 | 70.6316603 | 70.4750234 |
| 68.8079507 | 73.1859046 | 66.0479295 | 72.0713843 | 70.6316603 | 70.4750234 |
| 71.8079507 | 72.1859046 | 67.0479295 | 72.0713843 | 70.6316603 | 70.4750234 |
| 72.8079507 | 71.1859046 | 68.0479295 | 71.0713843 | 70.6316603 | 69.4750234 |
| 72.8079507 | 71.1859046 | 68.0479295 | 71.0713843 | 70.6316603 | 69.4750234 |
| 70.8079507 | 71.1859046 | 68.0479295 | 68.0713843 | 69.6316603 | 69.4750234 |
| 66.8079507 | 70.1859046 | 69.0479295 | 65.0713843 | 69.6316603 | 67.4750234 |
| 64.8079507 | 70.1859046 | 70.0479295 | 65.0713843 | 69.6316603 | 67.4750234 |
| 64.8079507 | 69.1859046 | 71.0479295 | 63.0713843 | 69.6316603 | 67.4750234 |
| 63.8079507 | 68.1859046 | 71.0479295 | 63.0713843 | 71.6316603 | 64.4750234 |
| 63.8079507 | 67.1859046 | 71.0479295 | 62.0713843 | 70.6316603 | 64.4750234 |
| 63.8079507 | 67.1859046 | 72.0479295 | 61.0713843 | 70.6316603 | 61.4750234 |
| 66.8079507 | 67.1859046 | 72.0479295 | 61.0713843 | 72.6316603 | 63.4750234 |
| 66.8079507 | 67.1859046 | 73.0479295 | 62.0713843 | 73.6316603 | 64.4750234 |
| 67.8079507 | 68.1859046 | 74.0479295 | 62.0713843 | 73.6316603 | 64.4750234 |
| 68.8079507 | 69.1859046 | 75.0479295 | 61.0713843 | 73.6316603 | 64.4750234 |
| 69.8079507 | 69.1859046 | 75.0479295 | 61.0713843 | 73.6316603 | 65.4750234 |
| 69.8079507 | 68.1859046 | 73.0479295 | 61.0713843 | 72.6316603 | 65.4750234 |
| 72.8079507 | 66.1859046 | 72.0479295 | 61.0713843 | 63.6316603 | 65.4750234 |
| 74.8079507 | 64.1859046 | 70.0479295 | 61.0713843 | 61.6316603 | 65.4750234 |
| 75.8079507 | 62.1859046 | 70.0479295 | 61.0713843 | 60.6316603 | 66.4750234 |
| 75.8079507 | 62.1859046 | 69.0479295 | 61.0713843 | 61.6316603 | 66.4750234 |
| 75.8079507 | 62.1859046 | 68.0479295 | 62.0713843 | 63.6316603 | 66.4750234 |
| 77.8079507 | 62.1859046 | 68.0479295 | 62.0713843 | 65.6316603 | 66.4750234 |
| 77.8079507 | 62.1859046 | 68.0479295 | 62.0713843 | 65.6316603 | 66.4750234 |
| 78.8079507 | 62.1859046 | 68.0479295 | 61.0713843 | 65.6316603 | 66.4750234 |
| 77.8079507 | 62.1859046 | 69.0479295 | 62.0713843 | 63.6316603 | 66.4750234 |
| 76.8079507 | 63.1859046 | 69.0479295 | 62.0713843 | 62.6316603 | 68.4750234 |
| 76.8079507 | 64.1859046 | 69.0479295 | 62.0713843 | 63.6316603 | 68.4750234 |
| 73.8079507 | 65.1859046 | 69.0479295 | 62.0713843 | 63.6316603 | 68.4750234 |



|            |            |            |            |            |            |
|------------|------------|------------|------------|------------|------------|
| 73.8079507 | 65.1859046 | 69.0479295 | 62.0713843 | 63.6316603 | 69.4750234 |
| 72.8079507 | 66.1859046 | 69.0479295 | 62.0713843 | 65.6316603 | 69.4750234 |
| 67.8079507 | 67.1859046 | 69.0479295 | 62.0713843 | 66.6316603 | 69.4750234 |
| 67.8079507 | 67.1859046 | 69.0479295 | 63.0713843 | 66.6316603 | 70.4750234 |
| 67.8079507 | 66.1859046 | 69.0479295 | 63.0713843 | 67.6316603 | 70.4750234 |
| 67.8079507 | 65.1859046 | 69.0479295 | 63.0713843 | 68.6316603 | 69.4750234 |
| 67.8079507 | 65.1859046 | 69.0479295 | 63.0713843 | 67.6316603 | 68.4750234 |
| 67.8079507 | 65.1859046 | 68.0479295 | 63.0713843 | 66.6316603 | 68.4750234 |
| 66.8079507 | 65.1859046 | 68.0479295 | 63.0713843 | 65.6316603 | 68.4750234 |
| 66.8079507 | 64.1859046 | 68.0479295 | 63.0713843 | 65.6316603 | 68.4750234 |
| 64.8079507 | 64.1859046 | 68.0479295 | 63.0713843 | 65.6316603 | 68.4750234 |
| 64.8079507 | 63.1859046 | 68.0479295 | 63.0713843 | 66.6316603 | 67.4750234 |
| 64.8079507 | 64.1859046 | 68.0479295 | 63.0713843 | 68.6316603 | 67.4750234 |
| 65.8079507 | 64.1859046 | 68.0479295 | 64.0713843 | 69.6316603 | 67.4750234 |
| 68.8079507 | 63.1859046 | 68.0479295 | 64.0713843 | 69.6316603 | 67.4750234 |
| 68.8079507 | 62.1859046 | 68.0479295 | 64.0713843 | 69.6316603 | 68.4750234 |
| 68.8079507 | 61.1859046 | 68.0479295 | 65.0713843 | 68.6316603 | 69.4750234 |
| 68.8079507 | 60.1859046 | 69.0479295 | 65.0713843 | 67.6316603 | 72.4750234 |
| 66.8079507 | 59.1859046 | 67.0479295 | 67.0713843 | 66.6316603 | 72.4750234 |
| 66.8079507 | 59.1859046 | 67.0479295 | 67.0713843 | 66.6316603 | 72.4750234 |
| 58.8079507 | 59.1859046 | 65.0479295 | 67.0713843 | 64.6316603 | 74.4750234 |
| 56.8079507 | 59.1859046 | 65.0479295 | 66.0713843 | 63.6316603 | 73.4750234 |
| 48.8079507 | 59.1859046 | 65.0479295 | 65.0713843 | 63.6316603 | 72.4750234 |
| 47.8079507 | 59.1859046 | 65.0479295 | 65.0713843 | 63.6316603 | 71.4750234 |
| 46.8079507 | 61.1859046 | 66.0479295 | 64.0713843 | 63.6316603 | 71.4750234 |
| 45.8079507 | 65.1859046 | 66.0479295 | 64.0713843 | 60.6316603 | 71.4750234 |
| 45.8079507 | 66.1859046 | 66.0479295 | 64.0713843 | 60.6316603 | 71.4750234 |
| 43.8079507 | 67.1859046 | 67.0479295 | 64.0713843 | 60.6316603 | 71.4750234 |
| 47.8079507 | 67.1859046 | 67.0479295 | 64.0713843 | 60.6316603 | 71.4750234 |
| 47.8079507 | 68.1859046 | 66.0479295 | 64.0713843 | 62.6316603 | 71.4750234 |
| 48.8079507 | 69.1859046 | 67.0479295 | 64.0713843 | 62.6316603 | 71.4750234 |
| 48.8079507 | 69.1859046 | 67.0479295 | 64.0713843 | 62.6316603 | 71.4750234 |
| 48.8079507 | 69.1859046 | 67.0479295 | 64.0713843 | 62.6316603 | 71.4750234 |
| 49.8079507 | 69.1859046 | 67.0479295 | 64.0713843 | 62.6316603 | 71.4750234 |
| 49.8079507 | 69.1859046 | 67.0479295 | 65.0713843 | 62.6316603 | 71.4750234 |
| 49.8079507 | 69.1859046 | 67.0479295 | 66.0713843 | 63.6316603 | 74.4750234 |
| 55.8079507 | 70.1859046 | 67.0479295 | 66.0713843 | 72.6316603 | 75.4750234 |
| 58.8079507 | 75.1859046 | 67.0479295 | 68.0713843 | 77.6316603 | 75.4750234 |
| 61.8079507 | 76.1859046 | 67.0479295 | 69.0713843 | 77.6316603 | 76.4750234 |
| 61.8079507 | 74.1859046 | 68.0479295 | 69.0713843 | 76.6316603 | 77.4750234 |
| 63.8079507 | 72.1859046 | 68.0479295 | 65.0713843 | 73.6316603 | 77.4750234 |
| 63.8079507 | 70.1859046 | 68.0479295 | 65.0713843 | 71.6316603 | 77.4750234 |
| 66.8079507 | 69.1859046 | 67.0479295 | 64.0713843 | 70.6316603 | 77.4750234 |
| 68.8079507 | 68.1859046 | 67.0479295 | 64.0713843 | 69.6316603 | 77.4750234 |
| 69.8079507 | 67.1859046 | 66.0479295 | 64.0713843 | 68.6316603 | 77.4750234 |

|            |            |            |            |            |            |
|------------|------------|------------|------------|------------|------------|
| 70.8079507 | 66.1859046 | 66.0479295 | 64.0713843 | 71.6316603 | 78.4750234 |
| 70.8079507 | 66.1859046 | 66.0479295 | 64.0713843 | 72.6316603 | 78.4750234 |
| 71.8079507 | 65.1859046 | 66.0479295 | 64.0713843 | 73.6316603 | 78.4750234 |
| 70.8079507 | 65.1859046 | 66.0479295 | 64.0713843 | 74.6316603 | 78.4750234 |
| 68.8079507 | 65.1859046 | 66.0479295 | 67.0713843 | 74.6316603 | 78.4750234 |
| 66.8079507 | 65.1859046 | 66.0479295 | 69.0713843 | 74.6316603 | 77.4750234 |
| 66.8079507 | 65.1859046 | 66.0479295 | 69.0713843 | 75.6316603 | 71.4750234 |
| 66.8079507 | 66.1859046 | 66.0479295 | 71.0713843 | 76.6316603 | 71.4750234 |
| 66.8079507 | 66.1859046 | 68.0479295 | 74.0713843 | 76.6316603 | 70.4750234 |
| 66.8079507 | 63.1859046 | 71.0479295 | 74.0713843 | 76.6316603 | 70.4750234 |
| 66.8079507 | 62.1859046 | 73.0479295 | 75.0713843 | 76.6316603 | 70.4750234 |
| 67.8079507 | 62.1859046 | 74.0479295 | 75.0713843 | 77.6316603 | 69.4750234 |
| 69.8079507 | 62.1859046 | 76.0479295 | 78.0713843 | 78.6316603 | 68.4750234 |
| 71.8079507 | 62.1859046 | 77.0479295 | 79.0713843 | 80.6316603 | 67.4750234 |
| 72.8079507 | 62.1859046 | 77.0479295 | 81.0713843 | 81.6316603 | 67.4750234 |
| 73.8079507 | 62.1859046 | 76.0479295 | 83.0713843 | 81.6316603 | 67.4750234 |
| 73.8079507 | 62.1859046 | 75.0479295 | 84.0713843 | 82.6316603 | 66.4750234 |
| 74.8079507 | 66.1859046 | 74.0479295 | 83.0713843 | 82.6316603 | 66.4750234 |
| 74.8079507 | 68.1859046 | 73.0479295 | 83.0713843 | 82.6316603 | 67.4750234 |
| 74.8079507 | 68.1859046 | 72.0479295 | 83.0713843 | 82.6316603 | 66.4750234 |
| 74.8079507 | 68.1859046 | 72.0479295 | 78.0713843 | 75.6316603 | 66.4750234 |
| 74.8079507 | 67.1859046 | 72.0479295 | 74.0713843 | 72.6316603 | 65.4750234 |
| 74.8079507 | 66.1859046 | 72.0479295 | 74.0713843 | 69.6316603 | 65.4750234 |
| 74.8079507 | 65.1859046 | 71.0479295 | 74.0713843 | 67.6316603 | 64.4750234 |
| 75.8079507 | 65.1859046 | 72.0479295 | 76.0713843 | 66.6316603 | 64.4750234 |
| 75.8079507 | 65.1859046 | 72.0479295 | 77.0713843 | 67.6316603 | 65.4750234 |
| 76.8079507 | 65.1859046 | 73.0479295 | 77.0713843 | 68.6316603 | 65.4750234 |
| 76.8079507 | 66.1859046 | 73.0479295 | 77.0713843 | 69.6316603 | 65.4750234 |
| 76.8079507 | 66.1859046 | 73.0479295 | 77.0713843 | 69.6316603 | 65.4750234 |
| 77.8079507 | 67.1859046 | 81.0479295 | 75.0713843 | 70.6316603 | 65.4750234 |
| 77.8079507 | 66.1859046 | 83.0479295 | 76.0713843 | 71.6316603 | 65.4750234 |
| 77.8079507 | 67.1859046 | 83.0479295 | 69.0713843 | 72.6316603 | 66.4750234 |
| 77.8079507 | 67.1859046 | 83.0479295 | 69.0713843 | 72.6316603 | 66.4750234 |
| 82.8079507 | 66.1859046 | 84.0479295 | 66.0713843 | 72.6316603 | 67.4750234 |
| 82.8079507 | 64.1859046 | 85.0479295 | 65.0713843 | 71.6316603 | 67.4750234 |
| 84.8079507 | 63.1859046 | 85.0479295 | 65.0713843 | 71.6316603 | 68.4750234 |
| 85.8079507 | 62.1859046 | 84.0479295 | 65.0713843 | 71.6316603 | 68.4750234 |
| 85.8079507 | 63.1859046 | 84.0479295 | 65.0713843 | 71.6316603 | 68.4750234 |
| 85.8079507 | 63.1859046 | 80.0479295 | 64.0713843 | 71.6316603 | 68.4750234 |
| 82.8079507 | 63.1859046 | 75.0479295 | 64.0713843 | 71.6316603 | 69.4750234 |
| 81.8079507 | 63.1859046 | 76.0479295 | 65.0713843 | 72.6316603 | 69.4750234 |
| 80.8079507 | 63.1859046 | 77.0479295 | 65.0713843 | 72.6316603 | 70.4750234 |
| 80.8079507 | 63.1859046 | 76.0479295 | 65.0713843 | 73.6316603 | 70.4750234 |
| 79.8079507 | 63.1859046 | 76.0479295 | 66.0713843 | 73.6316603 | 70.4750234 |
| 75.8079507 | 64.1859046 | 74.0479295 | 66.0713843 | 73.6316603 | 73.4750234 |

|            |            |            |            |            |            |
|------------|------------|------------|------------|------------|------------|
| 74.8079507 | 64.1859046 | 72.0479295 | 66.0713843 | 73.6316603 | 73.4750234 |
| 74.8079507 | 65.1859046 | 72.0479295 | 66.0713843 | 73.6316603 | 73.4750234 |
| 75.8079507 | 65.1859046 | 71.0479295 | 66.0713843 | 74.6316603 | 71.4750234 |
| 75.8079507 | 66.1859046 | 71.0479295 | 66.0713843 | 75.6316603 | 70.4750234 |
| 75.8079507 | 67.1859046 | 70.0479295 | 66.0713843 | 84.6316603 | 70.4750234 |
| 73.8079507 | 64.1859046 | 70.0479295 | 66.0713843 | 89.6316603 | 70.4750234 |
| 73.8079507 | 63.1859046 | 70.0479295 | 67.0713843 | 91.6316603 | 70.4750234 |
| 73.8079507 | 63.1859046 | 70.0479295 | 67.0713843 | 91.6316603 | 70.4750234 |
| 73.8079507 | 64.1859046 | 70.0479295 | 67.0713843 | 90.6316603 | 71.4750234 |
| 73.8079507 | 64.1859046 | 70.0479295 | 67.0713843 | 89.6316603 | 72.4750234 |
| 73.8079507 | 66.1859046 | 71.0479295 | 67.0713843 | 89.6316603 | 72.4750234 |
| 73.8079507 | 68.1859046 | 72.0479295 | 67.0713843 | 87.6316603 | 72.4750234 |
| 73.8079507 | 69.1859046 | 74.0479295 | 67.0713843 | 86.6316603 | 72.4750234 |
| 74.8079507 | 70.1859046 | 74.0479295 | 68.0713843 | 84.6316603 | 72.4750234 |
| 75.8079507 | 70.1859046 | 74.0479295 | 68.0713843 | 84.6316603 | 72.4750234 |
| 76.8079507 | 72.1859046 | 74.0479295 | 69.0713843 | 83.6316603 | 72.4750234 |
| 76.8079507 | 73.1859046 | 74.0479295 | 69.0713843 | 83.6316603 | 72.4750234 |
| 78.8079507 | 73.1859046 | 73.0479295 | 69.0713843 | 83.6316603 | 72.4750234 |
| 78.8079507 | 72.1859046 | 72.0479295 | 72.0713843 | 82.6316603 | 73.4750234 |
| 77.8079507 | 72.1859046 | 71.0479295 | 72.0713843 | 80.6316603 | 73.4750234 |
| 77.8079507 | 69.1859046 | 70.0479295 | 74.0713843 | 73.6316603 | 78.4750234 |
| 77.8079507 | 66.1859046 | 70.0479295 | 74.0713843 | 73.6316603 | 77.4750234 |
| 76.8079507 | 65.1859046 | 69.0479295 | 75.0713843 | 70.6316603 | 77.4750234 |
| 76.8079507 | 64.1859046 | 69.0479295 | 75.0713843 | 69.6316603 | 78.4750234 |
| 76.8079507 | 62.1859046 | 69.0479295 | 73.0713843 | 70.6316603 | 78.4750234 |
| 76.8079507 | 60.1859046 | 69.0479295 | 73.0713843 | 72.6316603 | 78.4750234 |
| 76.8079507 | 59.1859046 | 70.0479295 | 72.0713843 | 72.6316603 | 77.4750234 |
| 76.8079507 | 58.1859046 | 70.0479295 | 72.0713843 | 67.6316603 | 77.4750234 |
| 75.8079507 | 58.1859046 | 69.0479295 | 71.0713843 | 61.6316603 | 75.4750234 |
| 75.8079507 | 57.1859046 | 69.0479295 | 71.0713843 | 58.6316603 | 74.4750234 |
| 76.8079507 | 56.1859046 | 68.0479295 | 71.0713843 | 56.6316603 | 74.4750234 |
| 74.8079507 | 56.1859046 | 68.0479295 | 71.0713843 | 55.6316603 | 72.4750234 |
| 72.8079507 | 56.1859046 | 68.0479295 | 72.0713843 | 56.6316603 | 70.4750234 |
| 71.8079507 | 56.1859046 | 67.0479295 | 72.0713843 | 56.6316603 | 70.4750234 |
| 71.8079507 | 56.1859046 | 67.0479295 | 71.0713843 | 56.6316603 | 70.4750234 |
| 71.8079507 | 56.1859046 | 67.0479295 | 71.0713843 | 62.6316603 | 69.4750234 |
| 71.8079507 | 56.1859046 | 64.0479295 | 69.0713843 | 62.6316603 | 69.4750234 |
| 71.8079507 | 56.1859046 | 64.0479295 | 69.0713843 | 62.6316603 | 69.4750234 |
| 70.8079507 | 58.1859046 | 64.0479295 | 64.0713843 | 64.6316603 | 69.4750234 |
| 70.8079507 | 59.1859046 | 64.0479295 | 64.0713843 | 63.6316603 | 69.4750234 |
| 69.8079507 | 59.1859046 | 65.0479295 | 64.0713843 | 63.6316603 | 69.4750234 |
| 67.8079507 | 60.1859046 | 65.0479295 | 64.0713843 | 62.6316603 | 69.4750234 |
| 66.8079507 | 60.1859046 | 65.0479295 | 64.0713843 | 64.6316603 | 69.4750234 |
| 66.8079507 | 61.1859046 | 65.0479295 | 64.0713843 | 67.6316603 | 69.4750234 |
| 63.8079507 | 61.1859046 | 65.0479295 | 64.0713843 | 69.6316603 | 69.4750234 |

|            |            |            |            |            |            |
|------------|------------|------------|------------|------------|------------|
| 62.8079507 | 62.1859046 | 64.0479295 | 64.0713843 | 70.6316603 | 69.4750234 |
| 62.8079507 | 66.1859046 | 64.0479295 | 64.0713843 | 70.6316603 | 69.4750234 |
| 62.8079507 | 70.1859046 | 64.0479295 | 63.0713843 | 71.6316603 | 71.4750234 |
| 62.8079507 | 72.1859046 | 64.0479295 | 63.0713843 | 71.6316603 | 73.4750234 |
| 60.8079507 | 73.1859046 | 63.0479295 | 63.0713843 | 71.6316603 | 74.4750234 |
| 58.8079507 | 74.1859046 | 63.0479295 | 63.0713843 | 71.6316603 | 74.4750234 |
| 58.8079507 | 74.1859046 | 64.0479295 | 63.0713843 | 70.6316603 | 74.4750234 |
| 57.8079507 | 74.1859046 | 64.0479295 | 62.0713843 | 69.6316603 | 74.4750234 |
| 56.8079507 | 73.1859046 | 64.0479295 | 62.0713843 | 66.6316603 | 72.4750234 |
| 54.8079507 | 71.1859046 | 64.0479295 | 62.0713843 | 66.6316603 | 71.4750234 |
| 53.8079507 | 68.1859046 | 65.0479295 | 62.0713843 | 67.6316603 | 71.4750234 |
| 53.8079507 | 67.1859046 | 65.0479295 | 60.0713843 | 68.6316603 | 71.4750234 |
| 54.8079507 | 66.1859046 | 65.0479295 | 58.0713843 | 68.6316603 | 71.4750234 |
| 55.8079507 | 66.1859046 | 64.0479295 | 58.0713843 | 69.6316603 | 71.4750234 |
| 55.8079507 | 65.1859046 | 64.0479295 | 63.0713843 | 69.6316603 | 73.4750234 |
| 56.8079507 | 62.1859046 | 64.0479295 | 64.0713843 | 70.6316603 | 73.4750234 |
| 56.8079507 | 61.1859046 | 64.0479295 | 64.0713843 | 70.6316603 | 74.4750234 |
| 56.8079507 | 61.1859046 | 65.0479295 | 64.0713843 | 70.6316603 | 76.4750234 |
| 56.8079507 | 60.1859046 | 65.0479295 | 64.0713843 | 72.6316603 | 77.4750234 |
| 56.8079507 | 60.1859046 | 65.0479295 | 64.0713843 | 73.6316603 | 78.4750234 |
| 56.8079507 | 59.1859046 | 65.0479295 | 64.0713843 | 73.6316603 | 78.4750234 |
| 56.8079507 | 59.1859046 | 65.0479295 | 65.0713843 | 73.6316603 | 78.4750234 |
| 56.8079507 | 59.1859046 | 66.0479295 | 66.0713843 | 74.6316603 | 78.4750234 |
| 56.8079507 | 61.1859046 | 66.0479295 | 66.0713843 | 74.6316603 | 78.4750234 |
| 56.8079507 | 61.1859046 | 66.0479295 | 66.0713843 | 74.6316603 | 78.4750234 |
| 55.8079507 | 68.1859046 | 66.0479295 | 66.0713843 | 74.6316603 | 78.4750234 |
| 54.8079507 | 70.1859046 | 66.0479295 | 66.0713843 | 73.6316603 | 78.4750234 |
| 53.8079507 | 70.1859046 | 65.0479295 | 66.0713843 | 72.6316603 | 78.4750234 |
| 54.8079507 | 69.1859046 | 66.0479295 | 66.0713843 | 72.6316603 | 76.4750234 |
| 54.8079507 | 69.1859046 | 66.0479295 | 66.0713843 | 69.6316603 | 76.4750234 |
| 54.8079507 | 69.1859046 | 66.0479295 | 66.0713843 | 69.6316603 | 76.4750234 |
| 54.8079507 | 66.1859046 | 65.0479295 | 66.0713843 | 69.6316603 | 76.4750234 |
| 55.8079507 | 65.1859046 | 65.0479295 | 66.0713843 | 72.6316603 | 77.4750234 |
| 55.8079507 | 65.1859046 | 65.0479295 | 66.0713843 | 73.6316603 | 77.4750234 |
| 57.8079507 | 62.1859046 | 65.0479295 | 65.0713843 | 73.6316603 | 77.4750234 |
| 57.8079507 | 62.1859046 | 65.0479295 | 65.0713843 | 72.6316603 | 73.4750234 |
| 58.8079507 | 62.1859046 | 65.0479295 | 65.0713843 | 69.6316603 | 72.4750234 |
| 58.8079507 | 61.1859046 | 65.0479295 | 65.0713843 | 69.6316603 | 70.4750234 |
| 58.8079507 | 61.1859046 | 65.0479295 | 65.0713843 | 69.6316603 | 70.4750234 |
| 58.8079507 | 61.1859046 | 65.0479295 | 65.0713843 | 69.6316603 | 70.4750234 |
| 58.8079507 | 61.1859046 | 65.0479295 | 65.0713843 | 68.6316603 | 70.4750234 |
| 61.8079507 | 61.1859046 | 65.0479295 | 65.0713843 | 67.6316603 | 68.4750234 |
| 61.8079507 | 61.1859046 | 65.0479295 | 65.0713843 | 65.6316603 | 68.4750234 |
| 63.8079507 | 63.1859046 | 65.0479295 | 65.0713843 | 65.6316603 | 68.4750234 |

|            |            |            |            |            |            |
|------------|------------|------------|------------|------------|------------|
| 64.8079507 | 65.1859046 | 65.0479295 | 65.0713843 | 66.6316603 | 67.4750234 |
| 64.8079507 | 65.1859046 | 65.0479295 | 65.0713843 | 66.6316603 | 67.4750234 |
| 63.8079507 | 67.1859046 | 64.0479295 | 65.0713843 | 67.6316603 | 68.4750234 |
| 64.8079507 | 68.1859046 | 64.0479295 | 65.0713843 | 64.6316603 | 69.4750234 |
| 63.8079507 | 68.1859046 | 64.0479295 | 65.0713843 | 64.6316603 | 69.4750234 |
| 63.8079507 | 65.1859046 | 65.0479295 | 65.0713843 | 62.6316603 | 69.4750234 |
| 62.8079507 | 63.1859046 | 65.0479295 | 64.0713843 | 65.6316603 | 70.4750234 |
| 62.8079507 | 63.1859046 | 64.0479295 | 64.0713843 | 67.6316603 | 70.4750234 |
| 62.8079507 | 65.1859046 | 65.0479295 | 64.0713843 | 69.6316603 | 70.4750234 |
| 62.8079507 | 66.1859046 | 65.0479295 | 64.0713843 | 71.6316603 | 70.4750234 |
| 62.8079507 | 66.1859046 | 65.0479295 | 65.0713843 | 71.6316603 | 70.4750234 |
| 61.8079507 | 66.1859046 | 65.0479295 | 66.0713843 | 69.6316603 | 70.4750234 |
| 61.8079507 | 66.1859046 | 65.0479295 | 66.0713843 | 68.6316603 | 70.4750234 |
| 54.8079507 | 66.1859046 | 68.0479295 | 66.0713843 | 67.6316603 | 72.4750234 |
| 54.8079507 | 66.1859046 | 68.0479295 | 63.0713843 | 68.6316603 | 71.4750234 |
| 54.8079507 | 66.1859046 | 68.0479295 | 63.0713843 | 69.6316603 | 71.4750234 |
| 55.8079507 | 66.1859046 | 68.0479295 | 62.0713843 | 71.6316603 | 71.4750234 |
| 55.8079507 | 66.1859046 | 68.0479295 | 62.0713843 | 73.6316603 | 71.4750234 |
| 55.8079507 | 67.1859046 | 68.0479295 | 63.0713843 | 73.6316603 | 71.4750234 |
| 55.8079507 | 67.1859046 | 68.0479295 | 64.0713843 | 73.6316603 | 71.4750234 |
| 55.8079507 | 68.1859046 | 68.0479295 | 64.0713843 | 72.6316603 | 71.4750234 |
| 55.8079507 | 69.1859046 | 67.0479295 | 64.0713843 | 67.6316603 | 71.4750234 |
| 55.8079507 | 70.1859046 | 67.0479295 | 64.0713843 | 63.6316603 | 71.4750234 |
| 53.8079507 | 70.1859046 | 66.0479295 | 64.0713843 | 60.6316603 | 71.4750234 |
| 55.8079507 | 68.1859046 | 66.0479295 | 64.0713843 | 59.6316603 | 71.4750234 |
| 58.8079507 | 66.1859046 | 66.0479295 | 64.0713843 | 59.6316603 | 72.4750234 |
| 61.8079507 | 65.1859046 | 66.0479295 | 65.0713843 | 61.6316603 | 72.4750234 |
| 62.8079507 | 65.1859046 | 66.0479295 | 65.0713843 | 64.6316603 | 72.4750234 |
| 62.8079507 | 65.1859046 | 66.0479295 | 65.0713843 | 67.6316603 | 73.4750234 |
| 62.8079507 | 64.1859046 | 66.0479295 | 65.0713843 | 69.6316603 | 73.4750234 |
| 62.8079507 | 63.1859046 | 66.0479295 | 65.0713843 | 70.6316603 | 73.4750234 |
| 62.8079507 | 61.1859046 | 65.0479295 | 66.0713843 | 70.6316603 | 73.4750234 |
| 62.8079507 | 60.1859046 | 65.0479295 | 68.0713843 | 69.6316603 | 73.4750234 |
| 62.8079507 | 59.1859046 | 65.0479295 | 68.0713843 | 65.6316603 | 74.4750234 |
| 62.8079507 | 58.1859046 | 65.0479295 | 70.0713843 | 62.6316603 | 73.4750234 |
| 62.8079507 | 58.1859046 | 65.0479295 | 69.0713843 | 60.6316603 | 73.4750234 |
| 62.8079507 | 58.1859046 | 65.0479295 | 67.0713843 | 59.6316603 | 72.4750234 |
| 62.8079507 | 58.1859046 | 65.0479295 | 66.0713843 | 59.6316603 | 72.4750234 |
| 62.8079507 | 59.1859046 | 65.0479295 | 68.0713843 | 60.6316603 | 70.4750234 |
| 62.8079507 | 59.1859046 | 65.0479295 | 72.0713843 | 62.6316603 | 70.4750234 |
| 62.8079507 | 59.1859046 | 65.0479295 | 72.0713843 | 63.6316603 | 69.4750234 |
| 63.8079507 | 58.1859046 | 67.0479295 | 72.0713843 | 64.6316603 | 67.4750234 |
| 64.8079507 | 58.1859046 | 67.0479295 | 72.0713843 | 63.6316603 | 67.4750234 |
| 64.8079507 | 59.1859046 | 66.0479295 | 72.0713843 | 63.6316603 | 67.4750234 |

|            |            |            |            |            |            |
|------------|------------|------------|------------|------------|------------|
| 64.8079507 | 59.1859046 | 66.0479295 | 72.0713843 | 63.6316603 | 66.4750234 |
| 64.8079507 | 60.1859046 | 66.0479295 | 72.0713843 | 64.6316603 | 67.4750234 |
| 64.8079507 | 63.1859046 | 66.0479295 | 72.0713843 | 64.6316603 | 68.4750234 |
| 64.8079507 | 63.1859046 | 66.0479295 | 72.0713843 | 64.6316603 | 68.4750234 |
| 64.8079507 | 63.1859046 | 66.0479295 | 74.0713843 | 63.6316603 | 68.4750234 |
| 65.8079507 | 61.1859046 | 65.0479295 | 75.0713843 | 63.6316603 | 68.4750234 |
| 65.8079507 | 59.1859046 | 65.0479295 | 76.0713843 | 62.6316603 | 69.4750234 |
| 65.8079507 | 57.1859046 | 65.0479295 | 76.0713843 | 60.6316603 | 69.4750234 |
| 65.8079507 | 56.1859046 | 65.0479295 | 77.0713843 | 59.6316603 | 69.4750234 |
| 66.8079507 | 55.1859046 | 65.0479295 | 78.0713843 | 59.6316603 | 69.4750234 |
| 66.8079507 | 55.1859046 | 65.0479295 | 78.0713843 | 59.6316603 | 69.4750234 |
| 66.8079507 | 55.1859046 | 65.0479295 | 78.0713843 | 63.6316603 | 74.4750234 |
| 66.8079507 | 56.1859046 | 65.0479295 | 76.0713843 | 64.6316603 | 74.4750234 |
| 66.8079507 | 57.1859046 | 66.0479295 | 75.0713843 | 64.6316603 | 74.4750234 |
| 66.8079507 | 58.1859046 | 66.0479295 | 75.0713843 | 65.6316603 | 70.4750234 |
| 66.8079507 | 59.1859046 | 66.0479295 | 75.0713843 | 65.6316603 | 70.4750234 |
| 66.8079507 | 59.1859046 | 65.0479295 | 75.0713843 | 65.6316603 | 68.4750234 |
| 66.8079507 | 59.1859046 | 65.0479295 | 73.0713843 | 67.6316603 | 67.4750234 |
| 66.8079507 | 59.1859046 | 65.0479295 | 68.0713843 | 66.6316603 | 67.4750234 |
| 69.8079507 | 60.1859046 | 65.0479295 | 68.0713843 | 65.6316603 | 66.4750234 |
| 69.8079507 | 61.1859046 | 65.0479295 | 68.0713843 | 65.6316603 | 66.4750234 |
| 70.8079507 | 61.1859046 | 65.0479295 | 68.0713843 | 64.6316603 | 66.4750234 |
| 71.8079507 | 61.1859046 | 65.0479295 | 69.0713843 | 64.6316603 | 67.4750234 |
| 71.8079507 | 61.1859046 | 65.0479295 | 69.0713843 | 63.6316603 | 67.4750234 |
| 71.8079507 | 72.1859046 | 65.0479295 | 76.0713843 | 64.6316603 | 67.4750234 |
| 71.8079507 | 78.1859046 | 65.0479295 | 80.0713843 | 65.6316603 | 66.4750234 |
| 69.8079507 | 79.1859046 | 65.0479295 | 82.0713843 | 66.6316603 | 66.4750234 |
| 69.8079507 | 78.1859046 | 65.0479295 | 82.0713843 | 69.6316603 | 66.4750234 |
| 69.8079507 | 75.1859046 | 65.0479295 | 82.0713843 | 69.6316603 | 67.4750234 |
| 69.8079507 | 72.1859046 | 65.0479295 | 78.0713843 | 71.6316603 | 67.4750234 |
| 69.8079507 | 72.1859046 | 65.0479295 | 78.0713843 | 71.6316603 | 67.4750234 |
| 70.8079507 | 72.1859046 | 73.0479295 | 76.0713843 | 69.6316603 | 66.4750234 |
| 70.8079507 | 72.1859046 | 79.0479295 | 76.0713843 | 66.6316603 | 67.4750234 |
| 71.8079507 | 71.1859046 | 87.0479295 | 76.0713843 | 64.6316603 | 68.4750234 |
| 72.8079507 | 70.1859046 | 91.0479295 | 76.0713843 | 63.6316603 | 70.4750234 |
| 73.8079507 | 69.1859046 | 92.0479295 | 73.0713843 | 61.6316603 | 71.4750234 |
| 73.8079507 | 65.1859046 | 70.5087111 | 67.0713843 | 61.6316603 | 71.4750234 |
| 73.8079507 | 62.1859046 | 70.8723475 | 67.0713843 | 61.6316603 | 71.4750234 |
| 74.8079507 | 62.1859046 | 71.0541657 | 65.0713843 | 61.6316603 | 70.4750234 |
| 71.8079507 | 62.1859046 | 70.9632566 | 65.0713843 | 61.6316603 | 70.4750234 |
| 71.8079507 | 63.1859046 | 71.1450748 | 64.0713843 | 61.6316603 | 70.4750234 |
| 69.8079507 | 63.1859046 | 70.8723475 | 64.0713843 | 61.6316603 | 70.4750234 |
| 70.8079507 | 61.1859046 | 70.9632566 | 64.0713843 | 61.6316603 | 70.4750234 |
| 72.8079507 | 60.1859046 | 71.5087111 | 64.0713843 | 61.6316603 | 71.4750234 |
| 72.8079507 | 61.1859046 | 71.8723475 | 64.0713843 | 61.6316603 | 71.4750234 |

|            |            |            |            |            |            |
|------------|------------|------------|------------|------------|------------|
| 73.8079507 | 61.1859046 | 72.3268929 | 64.0713843 | 61.6316603 | 72.4750234 |
| 75.8079507 | 61.1859046 | 73.0541657 | 66.0713843 | 61.6316603 | 72.4750234 |
| 75.8079507 | 62.1859046 | 72.9632566 | 66.0713843 | 61.6316603 | 72.4750234 |
| 75.8079507 | 62.1859046 | 72.9632566 | 66.0713843 | 61.6316603 | 73.4750234 |
| 75.8079507 | 62.1859046 | 71.5996202 | 66.0713843 | 61.6316603 | 74.4750234 |
| 74.8079507 | 67.1859046 | 71.1450748 | 67.0713843 | 62.6316603 | 74.4750234 |
| 74.8079507 | 67.1859046 | 71.0541657 | 67.0713843 | 63.6316603 | 74.4750234 |
| 72.8079507 | 67.1859046 | 70.8723475 | 67.0713843 | 63.6316603 | 74.4750234 |
| 71.8079507 | 67.1859046 | 71.1450748 | 68.0713843 | 64.6316603 | 75.4750234 |
| 69.8079507 | 71.1859046 | 71.6905293 | 68.0713843 | 69.6316603 | 75.4750234 |
| 69.8079507 | 75.1859046 | 72.3268929 | 68.0713843 | 71.6316603 | 76.4750234 |
| 69.8079507 | 76.1859046 | 72.1450748 | 68.0713843 | 70.6316603 | 78.4750234 |
| 68.8079507 | 76.1859046 | 71.5996202 | 68.0713843 | 68.6316603 | 78.4750234 |
| 68.8079507 | 77.1859046 | 71.6905293 | 69.0713843 | 67.6316603 | 84.4750234 |
| 68.8079507 | 77.1859046 | 71.417802  | 71.0713843 | 67.6316603 | 86.4750234 |
| 68.8079507 | 77.1859046 | 71.5996202 | 71.0713843 | 68.6316603 | 89.4750234 |
| 67.8079507 | 77.1859046 | 93.0479295 | 76.0713843 | 68.6316603 | 89.4750234 |
| 67.8079507 | 78.1859046 | 79.0479295 | 77.0713843 | 71.6316603 | 89.4750234 |
| 67.8079507 | 78.1859046 | 77.0479295 | 77.0713843 | 70.6316603 | 89.4750234 |
| 67.8079507 | 78.1859046 | 77.0479295 | 77.0713843 | 70.6316603 | 89.4750234 |
| 67.8079507 | 78.1859046 | 71.0479295 | 69.0713843 | 67.6316603 | 90.4750234 |
| 65.8079507 | 78.1859046 | 69.0479295 | 69.0713843 | 65.6316603 | 68.5996202 |
| 66.8079507 | 78.1859046 | 69.0479295 | 68.0713843 | 63.6316603 | 68.1450748 |
| 66.8079507 | 78.1859046 | 70.0479295 | 67.0713843 | 62.6316603 | 67.5087111 |
| 67.8079507 | 78.1859046 | 69.0479295 | 67.0713843 | 62.6316603 | 87.4750234 |
| 68.8079507 | 75.1859046 | 69.0479295 | 67.0713843 | 61.6316603 | 87.4750234 |
| 67.8079507 | 73.1859046 | 68.0479295 | 67.0713843 | 61.6316603 | 85.4750234 |
| 66.8079507 | 69.1859046 | 68.0479295 | 67.0713843 | 61.6316603 | 85.4750234 |
| 66.8079507 | 67.1859046 | 68.0479295 | 67.0713843 | 61.6316603 | 85.4750234 |
| 66.8079507 | 66.1859046 | 68.0479295 | 66.0713843 | 63.6316603 | 84.4750234 |
| 67.8079507 | 65.1859046 | 68.0479295 | 68.0713843 | 63.6316603 | 84.4750234 |
| 71.8079507 | 64.1859046 | 68.0479295 | 69.0713843 | 63.6316603 | 82.4750234 |
| 71.8079507 | 63.1859046 | 68.0479295 | 69.0713843 | 64.6316603 | 80.4750234 |
| 72.8079507 | 62.1859046 | 67.0479295 | 69.0713843 | 65.6316603 | 80.4750234 |
| 72.8079507 | 61.1859046 | 67.0479295 | 69.0713843 | 70.6316603 | 78.4750234 |
| 72.8079507 | 60.1859046 | 67.0479295 | 69.0713843 | 71.6316603 | 77.4750234 |
| 71.8079507 | 60.1859046 | 70.0479295 | 69.0713843 | 72.6316603 | 77.4750234 |
| 67.8079507 | 60.1859046 | 73.0479295 | 68.0713843 | 73.6316603 | 75.4750234 |
| 67.8079507 | 62.1859046 | 74.0479295 | 68.0713843 | 75.6316603 | 71.4750234 |
| 67.8079507 | 66.1859046 | 74.0479295 | 68.0713843 | 77.6316603 | 69.4750234 |
| 62.8079507 | 69.1859046 | 73.0479295 | 68.0713843 | 77.6316603 | 69.4750234 |
| 62.8079507 | 70.1859046 | 71.0479295 | 68.0713843 | 79.6316603 | 70.4750234 |
| 62.8079507 | 70.1859046 | 69.0479295 | 68.0713843 | 80.6316603 | 70.4750234 |
| 60.8079507 | 70.1859046 | 70.0479295 | 69.0713843 | 80.6316603 | 70.4750234 |
| 60.8079507 | 67.1859046 | 70.0479295 | 69.0713843 | 80.6316603 | 70.4750234 |

|            |            |            |            |            |            |
|------------|------------|------------|------------|------------|------------|
| 59.8079507 | 63.1859046 | 69.0479295 | 69.0713843 | 78.6316603 | 68.4750234 |
| 59.8079507 | 61.1859046 | 68.0479295 | 71.0713843 | 75.6316603 | 67.4750234 |
| 57.8079507 | 60.1859046 | 69.0479295 | 72.0713843 | 75.6316603 | 67.4750234 |
| 55.8079507 | 59.1859046 | 68.0479295 | 73.0713843 | 75.6316603 | 66.4750234 |
| 54.8079507 | 59.1859046 | 68.0479295 | 75.0713843 | 75.6316603 | 66.4750234 |
| 54.8079507 | 59.1859046 | 68.0479295 | 77.0713843 | 75.6316603 | 66.4750234 |
| 54.8079507 | 60.1859046 | 68.0479295 | 79.0713843 | 75.6316603 | 66.4750234 |
| 54.8079507 | 60.1859046 | 68.0479295 | 77.0713843 | 75.6316603 | 66.4750234 |
| 54.8079507 | 60.1859046 | 68.0479295 | 77.0713843 | 75.6316603 | 68.4750234 |
| 55.8079507 | 60.1859046 | 67.0479295 | 76.0713843 | 74.6316603 | 68.4750234 |
| 58.8079507 | 61.1859046 | 67.0479295 | 75.0713843 | 74.6316603 | 68.4750234 |
| 59.8079507 | 61.1859046 | 67.0479295 | 74.0713843 | 74.6316603 | 69.4750234 |
| 59.8079507 | 60.1859046 | 67.0479295 | 73.0713843 | 75.6316603 | 68.4750234 |
| 60.8079507 | 60.1859046 | 67.0479295 | 73.0713843 | 75.6316603 | 68.4750234 |
| 62.8079507 | 60.1859046 | 67.0479295 | 73.0713843 | 82.6316603 | 67.4750234 |
| 62.8079507 | 60.1859046 | 67.0479295 | 73.0713843 | 83.6316603 | 67.4750234 |
| 62.8079507 | 61.1859046 | 67.0479295 | 73.0713843 | 83.6316603 | 67.4750234 |
| 62.8079507 | 64.1859046 | 66.0479295 | 73.0713843 | 83.6316603 | 67.4750234 |
| 62.8079507 | 65.1859046 | 67.0479295 | 73.0713843 | 85.6316603 | 67.4750234 |
| 63.8079507 | 66.1859046 | 67.0479295 | 73.0713843 | 86.6316603 | 67.4750234 |
| 63.8079507 | 67.1859046 | 67.0479295 | 73.0713843 | 86.6316603 | 68.4750234 |
| 63.8079507 | 67.1859046 | 67.0479295 | 74.0713843 | 76.6316603 | 67.4750234 |
| 64.8079507 | 70.1859046 | 67.0479295 | 74.0713843 | 69.6316603 | 68.4750234 |
| 64.8079507 | 74.1859046 | 67.0479295 | 75.0713843 | 69.6316603 | 68.4750234 |
| 64.8079507 | 76.1859046 | 68.0479295 | 75.0713843 | 62.6316603 | 70.4750234 |
| 64.8079507 | 76.1859046 | 68.0479295 | 75.0713843 | 62.6316603 | 71.4750234 |
| 64.8079507 | 76.1859046 | 68.0479295 | 76.0713843 | 60.6316603 | 74.4750234 |
| 64.8079507 | 77.1859046 | 68.0479295 | 76.0713843 | 60.6316603 | 75.4750234 |
| 64.8079507 | 77.1859046 | 68.0479295 | 76.0713843 | 60.6316603 | 75.4750234 |
| 59.8079507 | 77.1859046 | 68.0479295 | 67.0713843 | 61.6316603 | 75.4750234 |
| 58.8079507 | 73.1859046 | 68.0479295 | 65.0713843 | 60.6316603 | 73.4750234 |
| 58.8079507 | 72.1859046 | 69.0479295 | 65.0713843 | 60.6316603 | 73.4750234 |
| 58.8079507 | 71.1859046 | 68.0479295 | 65.0713843 | 60.6316603 | 72.4750234 |
| 57.8079507 | 68.1859046 | 68.0479295 | 64.0713843 | 59.6316603 | 72.4750234 |
| 58.8079507 | 66.1859046 | 69.0479295 | 64.0713843 | 59.6316603 | 72.4750234 |
| 58.8079507 | 64.1859046 | 69.0479295 | 64.0713843 | 59.6316603 | 72.4750234 |
| 59.8079507 | 63.1859046 | 69.0479295 | 64.0713843 | 59.6316603 | 72.4750234 |
| 61.8079507 | 63.1859046 | 69.0479295 | 64.0713843 | 59.6316603 | 71.4750234 |
| 62.8079507 | 63.1859046 | 69.0479295 | 65.0713843 | 57.6316603 | 71.4750234 |
| 62.8079507 | 63.1859046 | 69.0479295 | 65.0713843 | 56.6316603 | 70.4750234 |
| 62.8079507 | 63.1859046 | 69.0479295 | 65.0713843 | 56.6316603 | 70.4750234 |
| 62.8079507 | 62.1859046 | 69.0479295 | 65.0713843 | 55.6316603 | 69.4750234 |
| 63.8079507 | 61.1859046 | 69.0479295 | 67.0713843 | 55.6316603 | 69.4750234 |
| 63.8079507 | 60.1859046 | 70.0479295 | 68.0713843 | 55.6316603 | 69.4750234 |
| 65.8079507 | 59.1859046 | 70.0479295 | 68.0713843 | 54.6316603 | 69.4750234 |



|            |            |            |            |            |            |
|------------|------------|------------|------------|------------|------------|
| 66.8079507 | 59.1859046 | 70.0479295 | 71.0713843 | 54.6316603 | 67.4750234 |
| 66.8079507 | 61.1859046 | 69.0479295 | 71.0713843 | 54.6316603 | 66.4750234 |
| 66.8079507 | 62.1859046 | 69.0479295 | 71.0713843 | 54.6316603 | 66.4750234 |
| 66.8079507 | 62.1859046 | 70.0479295 | 71.0713843 | 61.6316603 | 66.4750234 |
| 66.8079507 | 60.1859046 | 70.0479295 | 72.0713843 | 63.6316603 | 66.4750234 |
| 66.8079507 | 59.1859046 | 69.0479295 | 72.0713843 | 63.6316603 | 66.4750234 |
| 66.8079507 | 58.1859046 | 70.0479295 | 73.0713843 | 63.6316603 | 67.4750234 |
| 66.8079507 | 58.1859046 | 70.0479295 | 65.0713843 | 63.6316603 | 67.4750234 |
| 65.8079507 | 57.1859046 | 71.0479295 | 65.0713843 | 64.6316603 | 68.4750234 |
| 65.8079507 | 56.1859046 | 70.0479295 | 65.0713843 | 64.6316603 | 68.4750234 |
| 66.8079507 | 56.1859046 | 70.0479295 | 65.0713843 | 64.6316603 | 68.4750234 |
| 66.8079507 | 56.1859046 | 70.0479295 | 66.0713843 | 64.6316603 | 68.4750234 |
| 66.8079507 | 57.1859046 | 70.0479295 | 66.0713843 | 64.6316603 | 67.4750234 |
| 66.8079507 | 59.1859046 | 70.0479295 | 68.0713843 | 64.6316603 | 67.4750234 |
| 66.8079507 | 61.1859046 | 70.0479295 | 69.0713843 | 64.6316603 | 67.4750234 |
| 65.8079507 | 63.1859046 | 69.0479295 | 69.0713843 | 74.6316603 | 68.4750234 |
| 64.8079507 | 64.1859046 | 69.0479295 | 70.0713843 | 74.6316603 | 68.4750234 |
| 64.8079507 | 65.1859046 | 70.0479295 | 71.0713843 | 74.6316603 | 68.4750234 |
| 63.8079507 | 67.1859046 | 70.0479295 | 71.0713843 | 75.6316603 | 69.4750234 |
| 62.8079507 | 68.1859046 | 71.0479295 | 71.0713843 | 74.6316603 | 70.4750234 |
| 62.8079507 | 68.1859046 | 71.0479295 | 70.0713843 | 72.6316603 | 70.4750234 |
| 62.8079507 | 68.1859046 | 68.0479295 | 70.0713843 | 70.6316603 | 69.4750234 |
| 62.8079507 | 65.1859046 | 67.0479295 | 70.0713843 | 67.6316603 | 68.4750234 |
| 62.8079507 | 61.1859046 | 67.0479295 | 68.0713843 | 65.6316603 | 68.4750234 |
| 63.8079507 | 60.1859046 | 67.0479295 | 67.0713843 | 67.6316603 | 68.4750234 |
| 63.8079507 | 60.1859046 | 67.0479295 | 66.0713843 | 67.6316603 | 68.4750234 |
| 63.8079507 | 60.1859046 | 67.0479295 | 65.0713843 | 67.6316603 | 69.4750234 |
| 63.8079507 | 62.1859046 | 67.0479295 | 63.0713843 | 67.6316603 | 69.4750234 |
| 64.8079507 | 64.1859046 | 66.0479295 | 63.0713843 | 67.6316603 | 69.4750234 |
| 64.8079507 | 66.1859046 | 66.0479295 | 63.0713843 | 64.6316603 | 72.4750234 |
| 64.8079507 | 67.1859046 | 68.0479295 | 63.0713843 | 63.6316603 | 73.4750234 |
| 63.8079507 | 70.1859046 | 69.0479295 | 63.0713843 | 61.6316603 | 73.4750234 |
| 63.8079507 | 71.1859046 | 69.0479295 | 63.0713843 | 60.6316603 | 72.4750234 |
| 64.8079507 | 72.1859046 | 69.0479295 | 64.0713843 | 59.6316603 | 72.4750234 |
| 65.8079507 | 73.1859046 | 70.0479295 | 65.0713843 | 59.6316603 | 72.4750234 |
| 65.8079507 | 73.1859046 | 72.0479295 | 65.0713843 | 60.6316603 | 72.4750234 |
| 65.8079507 | 72.1859046 | 75.0479295 | 65.0713843 | 62.6316603 | 72.4750234 |
| 65.8079507 | 72.1859046 | 75.0479295 | 65.0713843 | 62.6316603 | 72.4750234 |
| 65.8079507 | 68.1859046 | 79.0479295 | 70.0713843 | 65.6316603 | 71.4750234 |
| 65.8079507 | 68.1859046 | 79.0479295 | 71.0713843 | 65.6316603 | 71.4750234 |
| 65.8079507 | 67.1859046 | 88.0479295 | 71.0713843 | 63.6316603 | 71.4750234 |
| 64.8079507 | 66.1859046 | 86.0479295 | 73.0713843 | 61.6316603 | 71.4750234 |
| 65.8079507 | 66.1859046 | 82.0479295 | 73.0713843 | 60.6316603 | 71.4750234 |
| 65.8079507 | 66.1859046 | 80.0479295 | 76.0713843 | 60.6316603 | 71.4750234 |
| 66.8079507 | 66.1859046 | 78.0479295 | 76.0713843 | 61.6316603 | 71.4750234 |

|            |            |            |            |            |            |
|------------|------------|------------|------------|------------|------------|
| 66.8079507 | 67.1859046 | 77.0479295 | 76.0713843 | 63.6316603 | 71.4750234 |
| 67.8079507 | 67.1859046 | 75.0479295 | 77.0713843 | 64.6316603 | 71.4750234 |
| 64.8079507 | 70.1859046 | 74.0479295 | 77.0713843 | 64.6316603 | 71.4750234 |
| 63.8079507 | 71.1859046 | 74.0479295 | 77.0713843 | 64.6316603 | 70.4750234 |
| 63.8079507 | 72.1859046 | 74.0479295 | 78.0713843 | 64.6316603 | 71.4750234 |
| 63.8079507 | 72.1859046 | 74.0479295 | 80.0713843 | 64.6316603 | 72.4750234 |
| 63.8079507 | 67.1859046 | 73.0479295 | 79.0713843 | 63.6316603 | 72.4750234 |
| 62.8079507 | 64.1859046 | 72.0479295 | 79.0713843 | 63.6316603 | 72.4750234 |
| 62.8079507 | 63.1859046 | 71.0479295 | 77.0713843 | 63.6316603 | 72.4750234 |
| 61.8079507 | 61.1859046 | 71.0479295 | 77.0713843 | 63.6316603 | 72.4750234 |
| 61.8079507 | 60.1859046 | 70.0479295 | 77.0713843 | 63.6316603 | 71.4750234 |
| 61.8079507 | 60.1859046 | 70.0479295 | 77.0713843 | 64.6316603 | 69.4750234 |
| 60.8079507 | 60.1859046 | 70.0479295 | 77.0713843 | 64.6316603 | 69.4750234 |
| 60.8079507 | 60.1859046 | 70.0479295 | 76.0713843 | 64.6316603 | 69.4750234 |
| 60.8079507 | 60.1859046 | 70.0479295 | 76.0713843 | 65.6316603 | 68.4750234 |
| 59.8079507 | 60.1859046 | 70.0479295 | 76.0713843 | 66.6316603 | 69.4750234 |
| 59.8079507 | 60.1859046 | 70.0479295 | 76.0713843 | 67.6316603 | 69.4750234 |
| 59.8079507 | 60.1859046 | 70.0479295 | 76.0713843 | 67.6316603 | 69.4750234 |
| 60.8079507 | 60.1859046 | 69.0479295 | 78.0713843 | 67.6316603 | 69.4750234 |
| 61.8079507 | 61.1859046 | 69.0479295 | 78.0713843 | 67.6316603 | 70.4750234 |
| 61.8079507 | 61.1859046 | 70.0479295 | 79.0713843 | 68.6316603 | 70.4750234 |
| 61.8079507 | 61.1859046 | 70.0479295 | 79.0713843 | 69.6316603 | 71.4750234 |
| 61.8079507 | 61.1859046 | 69.0479295 | 78.0713843 | 69.6316603 | 71.4750234 |
| 63.8079507 | 61.1859046 | 69.0479295 | 78.0713843 | 69.6316603 | 71.4750234 |
| 65.8079507 | 60.1859046 | 68.0479295 | 79.0713843 | 69.6316603 | 71.4750234 |
| 66.8079507 | 60.1859046 | 68.0479295 | 81.0713843 | 69.6316603 | 70.4750234 |
| 66.8079507 | 59.1859046 | 67.0479295 | 81.0713843 | 73.6316603 | 70.4750234 |
| 66.8079507 | 59.1859046 | 67.0479295 | 82.0713843 | 77.6316603 | 70.4750234 |
| 66.8079507 | 59.1859046 | 67.0479295 | 82.0713843 | 76.6316603 | 70.4750234 |
| 66.8079507 | 59.1859046 | 67.0479295 | 82.0713843 | 77.6316603 | 71.4750234 |
| 67.8079507 | 59.1859046 | 68.0479295 | 82.0713843 | 77.6316603 | 71.4750234 |
| 67.8079507 | 60.1859046 | 67.0479295 | 80.0713843 | 77.6316603 | 71.4750234 |
| 70.8079507 | 65.1859046 | 66.0479295 | 80.0713843 | 78.6316603 | 71.4750234 |
| 70.8079507 | 69.1859046 | 66.0479295 | 80.0713843 | 79.6316603 | 70.4750234 |
| 70.8079507 | 72.1859046 | 66.0479295 | 80.0713843 | 78.6316603 | 70.4750234 |
| 73.8079507 | 73.1859046 | 65.0479295 | 80.0713843 | 78.6316603 | 70.4750234 |
| 75.8079507 | 74.1859046 | 65.0479295 | 75.0713843 | 77.6316603 | 70.4750234 |
| 75.8079507 | 74.1859046 | 65.0479295 | 75.0713843 | 77.6316603 | 69.4750234 |
| 76.8079507 | 69.1859046 | 65.0479295 | 70.0713843 | 73.6316603 | 70.4750234 |
| 76.8079507 | 67.1859046 | 64.0479295 | 68.0713843 | 73.6316603 | 70.4750234 |
| 77.8079507 | 66.1859046 | 64.0479295 | 67.0713843 | 74.6316603 | 70.4750234 |
| 77.8079507 | 65.1859046 | 64.0479295 | 67.0713843 | 75.6316603 | 70.4750234 |
| 77.8079507 | 63.1859046 | 64.0479295 | 66.0713843 | 76.6316603 | 69.4750234 |
| 77.8079507 | 61.1859046 | 64.0479295 | 66.0713843 | 76.6316603 | 68.4750234 |
| 77.8079507 | 60.1859046 | 65.0479295 | 66.0713843 | 76.6316603 | 68.4750234 |

|            |            |            |            |            |            |
|------------|------------|------------|------------|------------|------------|
| 76.8079507 | 60.1859046 | 65.0479295 | 66.0713843 | 75.6316603 | 68.4750234 |
| 76.8079507 | 60.1859046 | 65.0479295 | 66.0713843 | 75.6316603 | 68.4750234 |
| 74.8079507 | 58.1859046 | 67.0479295 | 66.0713843 | 69.6316603 | 68.4750234 |
| 73.8079507 | 59.1859046 | 67.0479295 | 66.0713843 | 69.6316603 | 69.4750234 |
| 73.8079507 | 59.1859046 | 67.0479295 | 65.0713843 | 68.6316603 | 69.4750234 |
| 70.8079507 | 59.1859046 | 67.0479295 | 65.0713843 | 68.6316603 | 70.4750234 |
| 68.8079507 | 58.1859046 | 69.0479295 | 65.0713843 | 67.6316603 | 70.4750234 |
| 67.8079507 | 58.1859046 | 68.0479295 | 65.0713843 | 67.6316603 | 70.4750234 |
| 67.8079507 | 58.1859046 | 69.0479295 | 64.0713843 | 67.6316603 | 70.4750234 |
| 67.8079507 | 58.1859046 | 69.0479295 | 64.0713843 | 68.6316603 | 70.4750234 |
| 66.8079507 | 58.1859046 | 69.0479295 | 64.0713843 | 68.6316603 | 69.4750234 |
| 66.8079507 | 58.1859046 | 69.0479295 | 64.0713843 | 69.6316603 | 69.4750234 |
| 66.8079507 | 61.1859046 | 69.0479295 | 65.0713843 | 69.6316603 | 69.4750234 |
| 66.8079507 | 63.1859046 | 69.0479295 | 66.0713843 | 69.6316603 | 69.4750234 |
| 64.8079507 | 66.1859046 | 70.0479295 | 69.0713843 | 68.6316603 | 69.4750234 |
| 64.8079507 | 69.1859046 | 70.0479295 | 69.0713843 | 68.6316603 | 69.4750234 |
| 64.8079507 | 71.1859046 | 71.0479295 | 74.0713843 | 68.6316603 | 69.4750234 |
| 63.8079507 | 71.1859046 | 70.0479295 | 75.0713843 | 68.6316603 | 69.4750234 |
| 63.8079507 | 71.1859046 | 70.0479295 | 77.0713843 | 65.6316603 | 69.4750234 |
| 62.8079507 | 70.1859046 | 70.0479295 | 78.0713843 | 61.6316603 | 70.4750234 |
| 62.8079507 | 67.1859046 | 71.0479295 | 78.0713843 | 58.6316603 | 70.4750234 |
| 62.8079507 | 65.1859046 | 71.0479295 | 78.0713843 | 56.6316603 | 70.4750234 |
| 62.8079507 | 65.1859046 | 71.0479295 | 75.0713843 | 55.6316603 | 72.4750234 |
| 63.8079507 | 65.1859046 | 71.0479295 | 72.0713843 | 55.6316603 | 74.4750234 |
| 66.8079507 | 65.1859046 | 71.0479295 | 72.0713843 | 54.6316603 | 75.4750234 |
| 67.8079507 | 65.1859046 | 70.0479295 | 73.0713843 | 54.6316603 | 74.4750234 |
| 68.8079507 | 65.1859046 | 70.0479295 | 73.0713843 | 55.6316603 | 74.4750234 |
| 68.8079507 | 65.1859046 | 70.0479295 | 74.0713843 | 56.6316603 | 75.4750234 |
| 68.8079507 | 71.1859046 | 69.0479295 | 74.0713843 | 59.6316603 | 76.4750234 |
| 68.8079507 | 74.1859046 | 69.0479295 | 74.0713843 | 59.6316603 | 77.4750234 |
| 68.8079507 | 74.1859046 | 69.0479295 | 74.0713843 | 60.6316603 | 83.4750234 |
| 68.8079507 | 75.1859046 | 69.0479295 | 76.0713843 | 60.6316603 | 83.4750234 |
| 68.8079507 | 74.1859046 | 68.0479295 | 78.0713843 | 61.6316603 | 89.4750234 |
| 68.8079507 | 73.1859046 | 68.0479295 | 78.0713843 | 62.6316603 | 93.4750234 |
| 67.8079507 | 72.1859046 | 67.0479295 | 87.0713843 | 64.6316603 | 93.4750234 |
| 65.8079507 | 71.1859046 | 67.0479295 | 87.0713843 | 65.6316603 | 93.4750234 |
| 64.8079507 | 71.1859046 | 67.0479295 | 87.0713843 | 65.6316603 | 92.4750234 |
| 64.8079507 | 72.1859046 | 67.0479295 | 87.0713843 | 66.6316603 | 91.4750234 |
| 65.8079507 | 73.1859046 | 66.0479295 | 87.0713843 | 66.6316603 | 87.4750234 |
| 65.8079507 | 73.1859046 | 66.0479295 | 86.0713843 | 66.6316603 | 87.4750234 |
| 70.8079507 | 73.1859046 | 66.0479295 | 83.0713843 | 64.6316603 | 87.4750234 |
| 72.8079507 | 72.1859046 | 65.0479295 | 83.0713843 | 63.6316603 | 86.4750234 |
| 74.8079507 | 71.1859046 | 66.0479295 | 82.0713843 | 63.6316603 | 85.4750234 |
| 75.8079507 | 71.1859046 | 66.0479295 | 80.0713843 | 64.6316603 | 85.4750234 |
| 74.8079507 | 71.1859046 | 66.0479295 | 78.0713843 | 65.6316603 | 85.4750234 |

|            |            |            |            |            |            |
|------------|------------|------------|------------|------------|------------|
| 74.8079507 | 71.1859046 | 66.0479295 | 78.0713843 | 64.6316603 | 83.4750234 |
| 74.8079507 | 71.1859046 | 66.0479295 | 77.0713843 | 65.6316603 | 73.4750234 |
| 74.8079507 | 70.1859046 | 66.0479295 | 77.0713843 | 65.6316603 | 70.4750234 |
| 73.8079507 | 69.1859046 | 67.0479295 | 78.0713843 | 65.6316603 | 70.4750234 |
| 72.8079507 | 68.1859046 | 67.0479295 | 78.0713843 | 65.6316603 | 68.4750234 |
| 72.8079507 | 65.1859046 | 68.0479295 | 78.0713843 | 65.6316603 | 68.4750234 |
| 72.8079507 | 63.1859046 | 69.0479295 | 78.0713843 | 67.6316603 | 66.4750234 |
| 72.8079507 | 63.1859046 | 69.0479295 | 78.0713843 | 71.6316603 | 65.4750234 |
| 71.8079507 | 63.1859046 | 69.0479295 | 77.0713843 | 72.6316603 | 65.4750234 |
| 71.8079507 | 64.1859046 | 70.0479295 | 76.0713843 | 74.6316603 | 65.4750234 |
| 71.8079507 | 64.1859046 | 70.0479295 | 76.0713843 | 74.6316603 | 65.4750234 |
| 71.8079507 | 65.1859046 | 68.0479295 | 72.0713843 | 79.6316603 | 65.4750234 |
| 70.8079507 | 65.1859046 | 68.0479295 | 71.0713843 | 80.6316603 | 65.4750234 |
| 70.8079507 | 65.1859046 | 66.0479295 | 71.0713843 | 81.6316603 | 64.4750234 |
| 70.8079507 | 64.1859046 | 66.0479295 | 71.0713843 | 81.6316603 | 64.4750234 |
| 70.8079507 | 65.1859046 | 66.0479295 | 71.0713843 | 81.6316603 | 64.4750234 |
| 70.8079507 | 66.1859046 | 66.0479295 | 72.0713843 | 82.6316603 | 65.4750234 |
| 69.8079507 | 67.1859046 | 67.0479295 | 73.0713843 | 83.6316603 | 65.4750234 |
| 70.8079507 | 68.1859046 | 67.0479295 | 73.0713843 | 83.6316603 | 64.4750234 |
| 70.8079507 | 68.1859046 | 67.0479295 | 74.0713843 | 84.6316603 | 64.4750234 |
| 70.8079507 | 68.1859046 | 68.0479295 | 77.0713843 | 84.6316603 | 64.4750234 |
| 71.8079507 | 68.1859046 | 68.0479295 | 79.0713843 | 84.6316603 | 64.4750234 |
| 71.8079507 | 67.1859046 | 68.0479295 | 82.0713843 | 84.6316603 | 64.4750234 |
| 71.8079507 | 67.1859046 | 68.0479295 | 82.0713843 | 84.6316603 | 64.4750234 |
| 71.8079507 | 67.1859046 | 68.0479295 | 85.0713843 | 85.6316603 | 65.4750234 |
| 75.8079507 | 66.1859046 | 69.0479295 | 88.0713843 | 85.6316603 | 65.4750234 |
| 75.8079507 | 67.1859046 | 69.0479295 | 88.0713843 | 85.6316603 | 66.4750234 |
| 75.8079507 | 67.1859046 | 69.0479295 | 69.0713843 | 85.6316603 | 67.4750234 |
| 75.8079507 | 68.1859046 | 69.0479295 | 65.0713843 | 85.6316603 | 67.4750234 |
| 75.8079507 | 67.1859046 | 69.0479295 | 65.0713843 | 85.6316603 | 67.4750234 |
| 75.8079507 | 67.1859046 | 70.0479295 | 64.0713843 | 85.6316603 | 66.4750234 |
| 76.8079507 | 67.1859046 | 70.0479295 | 64.0713843 | 85.6316603 | 65.4750234 |
| 76.8079507 | 67.1859046 | 70.0479295 | 64.0713843 | 84.6316603 | 65.4750234 |
| 76.8079507 | 66.1859046 | 69.0479295 | 64.0713843 | 80.6316603 | 65.4750234 |
| 77.8079507 | 64.1859046 | 69.0479295 | 64.0713843 | 78.6316603 | 66.4750234 |
| 76.8079507 | 63.1859046 | 69.0479295 | 64.0713843 | 77.6316603 | 66.4750234 |
| 76.8079507 | 63.1859046 | 68.0479295 | 65.0713843 | 76.6316603 | 67.4750234 |
| 74.8079507 | 63.1859046 | 68.0479295 | 65.0713843 | 76.6316603 | 68.4750234 |
| 74.8079507 | 63.1859046 | 68.0479295 | 66.0713843 | 76.6316603 | 68.4750234 |
| 74.8079507 | 63.1859046 | 68.0479295 | 66.0713843 | 76.6316603 | 68.4750234 |
| 74.8079507 | 63.1859046 | 68.0479295 | 67.0713843 | 76.6316603 | 68.4750234 |
| 74.8079507 | 63.1859046 | 68.0479295 | 67.0713843 | 76.6316603 | 68.4750234 |
| 74.8079507 | 63.1859046 | 68.0479295 | 68.0713843 | 73.6316603 | 68.4750234 |
| 66.8079507 | 63.1859046 | 68.0479295 | 68.0713843 | 71.6316603 | 68.4750234 |
| 66.8079507 | 63.1859046 | 68.0479295 | 69.0713843 | 69.6316603 | 66.4750234 |

|            |            |            |            |            |            |
|------------|------------|------------|------------|------------|------------|
| 62.8079507 | 62.1859046 | 68.0479295 | 69.0713843 | 65.6316603 | 66.4750234 |
| 62.8079507 | 63.1859046 | 67.0479295 | 69.0713843 | 62.6316603 | 66.4750234 |
| 62.8079507 | 65.1859046 | 66.0479295 | 68.0713843 | 61.6316603 | 66.4750234 |
| 60.8079507 | 66.1859046 | 66.0479295 | 68.0713843 | 61.6316603 | 68.4750234 |
| 59.8079507 | 66.1859046 | 67.0479295 | 68.0713843 | 61.6316603 | 68.4750234 |
| 59.8079507 | 65.1859046 | 69.0479295 | 68.0713843 | 61.6316603 | 68.4750234 |
| 60.8079507 | 65.1859046 | 69.0479295 | 68.0713843 | 61.6316603 | 68.4750234 |
| 60.8079507 | 64.1859046 | 67.0479295 | 68.0713843 | 63.6316603 | 68.4750234 |
| 60.8079507 | 64.1859046 | 66.0479295 | 68.0713843 | 63.6316603 | 68.4750234 |
| 60.8079507 | 63.1859046 | 66.0479295 | 65.0713843 | 64.6316603 | 67.4750234 |
| 59.8079507 | 63.1859046 | 66.0479295 | 65.0713843 | 63.6316603 | 67.4750234 |
| 59.8079507 | 64.1859046 | 66.0479295 | 65.0713843 | 63.6316603 | 67.4750234 |
| 59.8079507 | 65.1859046 | 66.0479295 | 65.0713843 | 63.6316603 | 67.4750234 |
| 59.8079507 | 65.1859046 | 65.0479295 | 65.0713843 | 63.6316603 | 67.4750234 |
| 58.8079507 | 66.1859046 | 65.0479295 | 65.0713843 | 63.6316603 | 67.4750234 |
| 55.8079507 | 66.1859046 | 65.0479295 | 65.0713843 | 64.6316603 | 67.4750234 |
| 55.8079507 | 66.1859046 | 65.0479295 | 65.0713843 | 64.6316603 | 67.4750234 |
| 54.8079507 | 70.1859046 | 65.0479295 | 66.0713843 | 64.6316603 | 67.4750234 |
| 53.8079507 | 70.1859046 | 65.0479295 | 66.0713843 | 63.6316603 | 67.4750234 |
| 53.8079507 | 70.1859046 | 65.0479295 | 66.0713843 | 63.6316603 | 67.4750234 |
| 53.8079507 | 71.1859046 | 66.0479295 | 66.0713843 | 61.6316603 | 66.4750234 |
| 52.8079507 | 71.1859046 | 66.0479295 | 65.0713843 | 61.6316603 | 67.4750234 |
| 57.8079507 | 70.1859046 | 69.0479295 | 65.0713843 | 60.6316603 | 67.4750234 |
| 59.8079507 | 70.1859046 | 70.0479295 | 66.0713843 | 60.6316603 | 68.4750234 |
| 59.8079507 | 70.1859046 | 69.0479295 | 66.0713843 | 62.6316603 | 69.4750234 |
| 59.8079507 | 69.1859046 | 68.0479295 | 66.0713843 | 63.6316603 | 69.4750234 |
| 62.8079507 | 69.1859046 | 67.0479295 | 67.0713843 | 64.6316603 | 70.4750234 |
| 62.8079507 | 69.1859046 | 67.0479295 | 67.0713843 | 63.6316603 | 70.4750234 |
| 64.8079507 | 68.1859046 | 67.0479295 | 67.0713843 | 63.6316603 | 70.4750234 |
| 65.8079507 | 65.1859046 | 67.0479295 | 68.0713843 | 63.6316603 | 71.4750234 |
| 65.8079507 | 65.1859046 | 67.0479295 | 68.0713843 | 63.6316603 | 70.4750234 |
| 65.8079507 | 64.1859046 | 67.0479295 | 68.0713843 | 62.6316603 | 70.4750234 |
| 68.8079507 | 63.1859046 | 67.0479295 | 69.0713843 | 62.6316603 | 70.4750234 |
| 68.8079507 | 63.1859046 | 66.0479295 | 69.0713843 | 61.6316603 | 70.4750234 |
| 68.8079507 | 62.1859046 | 66.0479295 | 69.0713843 | 61.6316603 | 69.4750234 |
| 69.8079507 | 62.1859046 | 68.0479295 | 69.0713843 | 62.6316603 | 70.4750234 |
| 70.8079507 | 62.1859046 | 68.0479295 | 68.0713843 | 64.6316603 | 71.4750234 |
| 70.8079507 | 61.1859046 | 68.0479295 | 68.0713843 | 65.6316603 | 71.4750234 |
| 70.8079507 | 61.1859046 | 69.0479295 | 68.0713843 | 65.6316603 | 70.4750234 |
| 69.8079507 | 61.1859046 | 69.0479295 | 68.0713843 | 66.6316603 | 70.4750234 |
| 69.8079507 | 61.1859046 | 73.0479295 | 68.0713843 | 67.6316603 | 70.4750234 |
| 69.8079507 | 61.1859046 | 74.0479295 | 67.0713843 | 67.6316603 | 68.4750234 |
| 69.8079507 | 61.1859046 | 75.0479295 | 67.0713843 | 67.6316603 | 68.4750234 |
| 69.8079507 | 60.1859046 | 75.0479295 | 66.0713843 | 67.6316603 | 68.4750234 |
| 69.8079507 | 60.1859046 | 73.0479295 | 66.0713843 | 67.6316603 | 68.4750234 |

|            |            |            |            |            |            |
|------------|------------|------------|------------|------------|------------|
| 62.8079507 | 60.1859046 | 71.0479295 | 66.0713843 | 67.6316603 | 68.4750234 |
| 62.8079507 | 58.1859046 | 70.0479295 | 66.0713843 | 67.6316603 | 68.4750234 |
| 62.8079507 | 59.1859046 | 70.0479295 | 66.0713843 | 67.6316603 | 68.4750234 |
| 62.8079507 | 59.1859046 | 69.0479295 | 66.0713843 | 66.6316603 | 69.4750234 |
| 62.8079507 | 58.1859046 | 69.0479295 | 66.0713843 | 67.6316603 | 69.4750234 |
| 61.8079507 | 58.1859046 | 69.0479295 | 66.0713843 | 67.6316603 | 69.4750234 |
| 62.8079507 | 58.1859046 | 69.0479295 | 66.0713843 | 68.6316603 | 69.4750234 |
| 62.8079507 | 58.1859046 | 70.0479295 | 66.0713843 | 69.6316603 | 69.4750234 |
| 62.8079507 | 59.1859046 | 70.0479295 | 66.0713843 | 69.6316603 | 69.4750234 |
| 62.8079507 | 59.1859046 | 71.0479295 | 66.0713843 | 72.6316603 | 69.4750234 |
| 68.8079507 | 62.1859046 | 71.0479295 | 66.0713843 | 73.6316603 | 69.4750234 |
| 69.8079507 | 62.1859046 | 71.0479295 | 66.0713843 | 73.6316603 | 69.4750234 |
| 69.8079507 | 61.1859046 | 71.0479295 | 67.0713843 | 73.6316603 | 69.4750234 |
| 69.8079507 | 60.1859046 | 71.0479295 | 67.0713843 | 73.6316603 | 69.4750234 |
| 69.8079507 | 60.1859046 | 71.0479295 | 69.0713843 | 73.6316603 | 69.4750234 |
| 69.8079507 | 59.1859046 | 71.0479295 | 69.0713843 | 73.6316603 | 69.4750234 |
| 69.8079507 | 59.1859046 | 71.0479295 | 70.0713843 | 73.6316603 | 69.4750234 |
| 70.8079507 | 58.1859046 | 71.0479295 | 73.0713843 | 71.6316603 | 70.4750234 |
| 69.8079507 | 59.1859046 | 71.0479295 | 73.0713843 | 72.6316603 | 70.4750234 |
| 68.8079507 | 60.1859046 | 70.0479295 | 76.0713843 | 73.6316603 | 70.4750234 |
| 69.8079507 | 60.1859046 | 70.0479295 | 77.0713843 | 73.6316603 | 71.4750234 |
| 69.8079507 | 64.1859046 | 70.0479295 | 83.0713843 | 73.6316603 | 73.4750234 |
| 69.8079507 | 65.1859046 | 70.0479295 | 85.0713843 | 73.6316603 | 75.4750234 |
| 71.8079507 | 65.1859046 | 72.0479295 | 85.0713843 | 67.6316603 | 75.4750234 |
| 71.8079507 | 66.1859046 | 73.0479295 | 88.0713843 | 65.6316603 | 75.4750234 |
| 70.8079507 | 66.1859046 | 73.0479295 | 90.0713843 | 64.6316603 | 75.4750234 |
| 70.8079507 | 66.1859046 | 73.0479295 | 90.0713843 | 64.6316603 | 75.4750234 |
| 70.8079507 | 68.1859046 | 73.0479295 | 90.0713843 | 65.6316603 | 75.4750234 |
| 70.8079507 | 68.1859046 | 73.0479295 | 90.0713843 | 65.6316603 | 75.4750234 |
| 70.8079507 | 69.1859046 | 73.0479295 | 94.0713843 | 64.6316603 | 74.4750234 |
| 68.8079507 | 69.1859046 | 72.0479295 | 95.0713843 | 64.6316603 | 74.4750234 |
| 69.8079507 | 70.1859046 | 72.0479295 | 76.417802  | 64.6316603 | 74.4750234 |
| 69.8079507 | 71.1859046 | 71.0479295 | 76.2359838 | 63.6316603 | 73.4750234 |
| 70.8079507 | 71.1859046 | 70.0479295 | 76.8723475 | 63.6316603 | 72.4750234 |
| 71.8079507 | 73.1859046 | 70.0479295 | 77.8723475 | 68.6316603 | 72.4750234 |
| 73.8079507 | 75.1859046 | 70.0479295 | 78.2359838 | 71.6316603 | 71.4750234 |
| 72.8079507 | 76.1859046 | 70.0479295 | 77.8723475 | 71.6316603 | 70.4750234 |
| 72.8079507 | 79.1859046 | 69.0479295 | 78.9632566 | 70.6316603 | 70.4750234 |
| 72.8079507 | 80.1859046 | 69.0479295 | 78.7814384 | 67.6316603 | 69.4750234 |
| 72.8079507 | 80.1859046 | 69.0479295 | 78.6905293 | 64.6316603 | 69.4750234 |
| 72.8079507 | 80.1859046 | 68.0479295 | 77.7814384 | 64.6316603 | 69.4750234 |
| 63.8079507 | 81.1859046 | 67.0479295 | 76.5087111 | 63.6316603 | 69.4750234 |
| 61.8079507 | 82.1859046 | 67.0479295 | 76.2359838 | 64.6316603 | 69.4750234 |
| 59.8079507 | 82.1859046 | 67.0479295 | 76.1450748 | 66.6316603 | 67.4750234 |
| 59.8079507 | 82.1859046 | 67.0479295 | 76.1450748 | 68.6316603 | 67.4750234 |

|            |            |            |            |            |            |
|------------|------------|------------|------------|------------|------------|
| 58.8079507 | 81.1859046 | 67.0479295 | 75.9632566 | 68.6316603 | 67.4750234 |
| 58.8079507 | 79.1859046 | 67.0479295 | 76.2359838 | 69.6316603 | 66.4750234 |
| 57.8079507 | 79.1859046 | 66.0479295 | 76.1450748 | 69.6316603 | 66.4750234 |
| 57.8079507 | 75.1859046 | 66.0479295 | 75.8723475 | 68.6316603 | 67.4750234 |
| 57.8079507 | 73.1859046 | 67.0479295 | 75.3268929 | 64.6316603 | 67.4750234 |
| 57.8079507 | 72.1859046 | 68.0479295 | 75.2359838 | 62.6316603 | 67.4750234 |
| 57.8079507 | 71.1859046 | 69.0479295 | 75.1450748 | 60.6316603 | 67.4750234 |
| 57.8079507 | 68.1859046 | 68.0479295 | 74.9632566 | 60.6316603 | 67.4750234 |
| 58.8079507 | 68.1859046 | 67.0479295 | 74.9632566 | 60.6316603 | 67.4750234 |
| 58.8079507 | 69.1859046 | 66.0479295 | 75.1450748 | 60.6316603 | 67.4750234 |
| 58.8079507 | 69.1859046 | 66.0479295 | 75.3268929 | 61.6316603 | 67.4750234 |
| 60.8079507 | 69.1859046 | 65.0479295 | 75.3268929 | 60.6316603 | 67.4750234 |
| 60.8079507 | 69.1859046 | 65.0479295 | 75.2359838 | 59.6316603 | 67.4750234 |
| 60.8079507 | 69.1859046 | 65.0479295 | 75.0541657 | 59.6316603 | 67.4750234 |
| 61.8079507 | 69.1859046 | 64.0479295 | 75.2359838 | 58.6316603 | 68.4750234 |
| 63.8079507 | 68.1859046 | 64.0479295 | 74.8723475 | 58.6316603 | 68.4750234 |
| 63.8079507 | 68.1859046 | 64.0479295 | 74.9632566 | 60.6316603 | 68.4750234 |
| 63.8079507 | 66.1859046 | 65.0479295 | 75.0541657 | 61.6316603 | 68.4750234 |
| 66.8079507 | 66.1859046 | 65.0479295 | 75.5996202 | 62.6316603 | 68.4750234 |
| 67.8079507 | 66.1859046 | 66.0479295 | 76.3268929 | 62.6316603 | 68.4750234 |
| 67.8079507 | 65.1859046 | 66.0479295 | 76.3268929 | 62.6316603 | 69.4750234 |
| 68.8079507 | 65.1859046 | 66.0479295 | 76.3268929 | 63.6316603 | 70.4750234 |
| 70.8079507 | 65.1859046 | 66.0479295 | 76.1450748 | 63.6316603 | 70.4750234 |
| 71.8079507 | 63.1859046 | 65.0479295 | 75.2359838 | 62.6316603 | 70.4750234 |
| 70.8079507 | 62.1859046 | 65.0479295 | 74.8723475 | 62.6316603 | 70.4750234 |
| 70.8079507 | 62.1859046 | 65.0479295 | 74.9632566 | 62.6316603 | 70.4750234 |
| 70.8079507 | 62.1859046 | 66.0479295 | 74.6905293 | 62.6316603 | 70.4750234 |
| 69.8079507 | 59.1859046 | 66.0479295 | 73.8723475 | 63.6316603 | 70.4750234 |
| 67.8079507 | 59.1859046 | 67.0479295 | 73.6905293 | 65.6316603 | 70.4750234 |
| 67.8079507 | 59.1859046 | 68.0479295 | 73.5087111 | 66.6316603 | 70.4750234 |
| 66.8079507 | 59.1859046 | 68.0479295 | 73.1450748 | 66.6316603 | 70.4750234 |
| 66.8079507 | 59.1859046 | 68.0479295 | 73.3268929 | 67.6316603 | 71.4750234 |
| 65.8079507 | 59.1859046 | 67.0479295 | 73.5996202 | 67.6316603 | 72.4750234 |
| 65.8079507 | 61.1859046 | 67.0479295 | 73.8723475 | 67.6316603 | 72.4750234 |
| 65.8079507 | 60.1859046 | 66.0479295 | 73.6905293 | 67.6316603 | 72.4750234 |
| 65.8079507 | 60.1859046 | 66.0479295 | 73.8723475 | 67.6316603 | 72.4750234 |
| 65.8079507 | 60.1859046 | 66.0479295 | 73.7814384 | 67.6316603 | 73.4750234 |
| 65.8079507 | 60.1859046 | 66.0479295 | 73.7814384 | 67.6316603 | 73.4750234 |
| 65.8079507 | 60.1859046 | 66.0479295 | 73.5087111 | 69.6316603 | 73.4750234 |
| 64.8079507 | 61.1859046 | 66.0479295 | 73.3268929 | 70.6316603 | 74.4750234 |
| 61.8079507 | 61.1859046 | 66.0479295 | 73.9632566 | 70.6316603 | 75.4750234 |
| 61.8079507 | 63.1859046 | 66.0479295 | 77.1450748 | 72.6316603 | 76.4750234 |
| 61.8079507 | 64.1859046 | 67.0479295 | 78.417802  | 74.6316603 | 75.4750234 |
| 60.8079507 | 64.1859046 | 68.0479295 | 78.6905293 | 77.6316603 | 75.4750234 |
| 59.8079507 | 64.1859046 | 69.0479295 | 97.0713843 | 78.6316603 | 70.4750234 |

|            |            |            |            |            |            |
|------------|------------|------------|------------|------------|------------|
| 59.8079507 | 64.1859046 | 70.0479295 | 95.0713843 | 78.6316603 | 70.4750234 |
| 58.8079507 | 65.1859046 | 70.0479295 | 94.0713843 | 83.6316603 | 69.4750234 |
| 58.8079507 | 65.1859046 | 70.0479295 | 92.0713843 | 83.6316603 | 69.4750234 |
| 58.8079507 | 65.1859046 | 70.0479295 | 92.0713843 | 83.6316603 | 70.4750234 |
| 57.8079507 | 65.1859046 | 70.0479295 | 92.0713843 | 83.6316603 | 70.4750234 |
| 56.8079507 | 65.1859046 | 70.0479295 | 92.0713843 | 83.6316603 | 70.4750234 |
| 56.8079507 | 64.1859046 | 70.0479295 | 92.0713843 | 83.6316603 | 70.4750234 |
| 56.8079507 | 63.1859046 | 70.0479295 | 90.0713843 | 84.6316603 | 68.4750234 |
| 55.8079507 | 63.1859046 | 70.0479295 | 89.0713843 | 86.6316603 | 68.4750234 |
| 55.8079507 | 63.1859046 | 72.0479295 | 89.0713843 | 86.6316603 | 68.4750234 |
| 53.8079507 | 64.1859046 | 73.0479295 | 89.0713843 | 86.6316603 | 68.4750234 |
| 49.8079507 | 64.1859046 | 73.0479295 | 89.0713843 | 92.6316603 | 67.4750234 |
| 49.8079507 | 64.1859046 | 75.0479295 | 88.0713843 | 92.6316603 | 68.4750234 |
| 49.8079507 | 64.1859046 | 75.0479295 | 88.0713843 | 92.6316603 | 68.4750234 |
| 53.8079507 | 64.1859046 | 78.0479295 | 87.0713843 | 91.6316603 | 68.4750234 |
| 61.8079507 | 64.1859046 | 82.0479295 | 86.0713843 | 84.6316603 | 68.4750234 |
| 61.8079507 | 64.1859046 | 82.0479295 | 89.0713843 | 77.6316603 | 69.4750234 |
| 63.8079507 | 65.1859046 | 87.0479295 | 89.0713843 | 74.6316603 | 69.4750234 |
| 64.8079507 | 67.1859046 | 89.0479295 | 89.0713843 | 73.6316603 | 70.4750234 |
| 65.8079507 | 74.1859046 | 91.0479295 | 89.0713843 | 74.6316603 | 69.4750234 |
| 66.8079507 | 76.1859046 | 94.0479295 | 88.0713843 | 74.6316603 | 69.4750234 |
| 66.8079507 | 76.1859046 | 97.0479295 | 87.0713843 | 76.6316603 | 69.4750234 |
| 68.8079507 | 76.1859046 | 98.0479295 | 87.0713843 | 79.6316603 | 69.4750234 |
| 69.8079507 | 68.1859046 | 99.0479295 | 80.0713843 | 79.6316603 | 69.4750234 |
| 69.8079507 | 63.1859046 | 100.04793  | 78.0713843 | 79.6316603 | 69.4750234 |
| 70.8079507 | 61.1859046 | 98.0479295 | 78.0713843 | 79.6316603 | 69.4750234 |
| 70.8079507 | 59.1859046 | 95.0479295 | 78.0713843 | 63.6316603 | 69.4750234 |
| 70.8079507 | 58.1859046 | 93.0479295 | 77.0713843 | 60.6316603 | 69.4750234 |
| 70.8079507 | 58.1859046 | 91.0479295 | 77.0713843 | 58.6316603 | 69.4750234 |
| 71.8079507 | 58.1859046 | 90.0479295 | 77.0713843 | 57.6316603 | 67.4750234 |
| 71.8079507 | 59.1859046 | 89.0479295 | 75.0713843 | 57.6316603 | 67.4750234 |
| 71.8079507 | 61.1859046 | 89.0479295 | 75.0713843 | 57.6316603 | 67.4750234 |
| 71.8079507 | 61.1859046 | 89.0479295 | 75.0713843 | 57.6316603 | 67.4750234 |
| 71.8079507 | 62.1859046 | 89.0479295 | 75.0713843 | 57.6316603 | 67.4750234 |
| 71.8079507 | 62.1859046 | 91.0479295 | 72.0713843 | 58.6316603 | 67.4750234 |
| 71.8079507 | 62.1859046 | 92.0479295 | 68.0713843 | 58.6316603 | 67.4750234 |
| 71.8079507 | 59.1859046 | 96.0479295 | 66.0713843 | 68.6316603 | 67.4750234 |
| 68.8079507 | 58.1859046 | 97.0479295 | 66.0713843 | 69.6316603 | 66.4750234 |
| 67.8079507 | 57.1859046 | 98.0479295 | 66.0713843 | 69.6316603 | 66.4750234 |
| 67.8079507 | 56.1859046 | 98.0479295 | 66.0713843 | 66.6316603 | 66.4750234 |
| 67.8079507 | 55.1859046 | 77.2359838 | 66.0713843 | 64.6316603 | 66.4750234 |
| 67.8079507 | 54.1859046 | 77.0541657 | 66.0713843 | 63.6316603 | 66.4750234 |
| 64.8079507 | 54.1859046 | 76.5996202 | 66.0713843 | 63.6316603 | 65.4750234 |
| 64.8079507 | 55.1859046 | 76.6905293 | 66.0713843 | 63.6316603 | 65.4750234 |
| 64.8079507 | 57.1859046 | 76.7814384 | 66.0713843 | 61.6316603 | 65.4750234 |



|            |            |            |            |            |            |
|------------|------------|------------|------------|------------|------------|
| 64.8079507 | 58.1859046 | 77.2359838 | 69.0713843 | 61.6316603 | 65.4750234 |
| 64.8079507 | 58.1859046 | 77.2359838 | 69.0713843 | 61.6316603 | 65.4750234 |
| 64.8079507 | 61.1859046 | 90.0479295 | 69.0713843 | 63.6316603 | 65.4750234 |
| 65.8079507 | 61.1859046 | 85.0479295 | 73.0713843 | 62.6316603 | 65.4750234 |
| 66.8079507 | 61.1859046 | 82.0479295 | 73.0713843 | 62.6316603 | 65.4750234 |
| 66.8079507 | 60.1859046 | 81.0479295 | 73.0713843 | 62.6316603 | 65.4750234 |
| 65.8079507 | 61.1859046 | 79.0479295 | 73.0713843 | 62.6316603 | 65.4750234 |
| 65.8079507 | 60.1859046 | 78.0479295 | 74.0713843 | 62.6316603 | 65.4750234 |
| 65.8079507 | 59.1859046 | 78.0479295 | 74.0713843 | 62.6316603 | 66.4750234 |
| 64.8079507 | 58.1859046 | 75.0479295 | 74.0713843 | 63.6316603 | 67.4750234 |
| 64.8079507 | 58.1859046 | 75.0479295 | 74.0713843 | 63.6316603 | 67.4750234 |
| 64.8079507 | 58.1859046 | 74.0479295 | 76.0713843 | 67.6316603 | 68.4750234 |
| 63.8079507 | 57.1859046 | 74.0479295 | 78.0713843 | 68.6316603 | 68.4750234 |
| 63.8079507 | 57.1859046 | 74.0479295 | 78.0713843 | 68.6316603 | 71.4750234 |
| 61.8079507 | 58.1859046 | 73.0479295 | 78.0713843 | 68.6316603 | 72.4750234 |
| 60.8079507 | 58.1859046 | 72.0479295 | 78.0713843 | 68.6316603 | 75.4750234 |
| 62.8079507 | 58.1859046 | 72.0479295 | 78.0713843 | 69.6316603 | 76.4750234 |
| 62.8079507 | 59.1859046 | 72.0479295 | 78.0713843 | 69.6316603 | 78.4750234 |
| 65.8079507 | 59.1859046 | 72.0479295 | 78.0713843 | 69.6316603 | 78.4750234 |
| 65.8079507 | 59.1859046 | 72.0479295 | 78.0713843 | 69.6316603 | 78.4750234 |
| 65.8079507 | 59.1859046 | 72.0479295 | 78.0713843 | 69.6316603 | 78.4750234 |
| 57.8079507 | 59.1859046 | 72.0479295 | 78.0713843 | 69.6316603 | 77.4750234 |
| 54.8079507 | 59.1859046 | 72.0479295 | 78.0713843 | 69.6316603 | 74.4750234 |
| 54.8079507 | 58.1859046 | 72.0479295 | 78.0713843 | 72.6316603 | 73.4750234 |
| 54.8079507 | 58.1859046 | 73.0479295 | 77.0713843 | 72.6316603 | 72.4750234 |
| 57.8079507 | 58.1859046 | 73.0479295 | 77.0713843 | 76.6316603 | 72.4750234 |
| 58.8079507 | 58.1859046 | 73.0479295 | 77.0713843 | 76.6316603 | 70.4750234 |
| 58.8079507 | 58.1859046 | 73.0479295 | 77.0713843 | 76.6316603 | 70.4750234 |
| 58.8079507 | 58.1859046 | 72.0479295 | 77.0713843 | 76.6316603 | 70.4750234 |
| 58.8079507 | 58.1859046 | 71.0479295 | 77.0713843 | 76.6316603 | 70.4750234 |
| 59.8079507 | 59.1859046 | 71.0479295 | 77.0713843 | 73.6316603 | 70.4750234 |
| 59.8079507 | 60.1859046 | 73.0479295 | 77.0713843 | 65.6316603 | 71.4750234 |
| 59.8079507 | 61.1859046 | 74.0479295 | 77.0713843 | 64.6316603 | 72.4750234 |
| 59.8079507 | 62.1859046 | 74.0479295 | 78.0713843 | 64.6316603 | 73.4750234 |
| 59.8079507 | 62.1859046 | 74.0479295 | 78.0713843 | 63.6316603 | 73.4750234 |
| 59.8079507 | 61.1859046 | 74.0479295 | 78.0713843 | 63.6316603 | 73.4750234 |
| 60.8079507 | 58.1859046 | 74.0479295 | 71.0713843 | 63.6316603 | 73.4750234 |
| 63.8079507 | 57.1859046 | 74.0479295 | 67.0713843 | 62.6316603 | 72.4750234 |
| 63.8079507 | 57.1859046 | 74.0479295 | 67.0713843 | 61.6316603 | 72.4750234 |
| 63.8079507 | 56.1859046 | 74.0479295 | 67.0713843 | 60.6316603 | 72.4750234 |
| 62.8079507 | 55.1859046 | 74.0479295 | 68.0713843 | 60.6316603 | 72.4750234 |
| 62.8079507 | 55.1859046 | 75.0479295 | 70.0713843 | 60.6316603 | 71.4750234 |
| 62.8079507 | 55.1859046 | 75.0479295 | 70.0713843 | 60.6316603 | 71.4750234 |
| 62.8079507 | 56.1859046 | 72.0479295 | 72.0713843 | 64.6316603 | 72.4750234 |
| 62.8079507 | 57.1859046 | 71.0479295 | 72.0713843 | 66.6316603 | 72.4750234 |

|            |            |            |            |            |            |
|------------|------------|------------|------------|------------|------------|
| 63.8079507 | 58.1859046 | 71.0479295 | 72.0713843 | 67.6316603 | 73.4750234 |
| 64.8079507 | 58.1859046 | 71.0479295 | 72.0713843 | 67.6316603 | 73.4750234 |
| 64.8079507 | 58.1859046 | 70.0479295 | 74.0713843 | 67.6316603 | 72.4750234 |
| 64.8079507 | 59.1859046 | 70.0479295 | 74.0713843 | 66.6316603 | 72.4750234 |
| 64.8079507 | 59.1859046 | 69.0479295 | 74.0713843 | 65.6316603 | 72.4750234 |
| 64.8079507 | 58.1859046 | 69.0479295 | 74.0713843 | 63.6316603 | 70.4750234 |
| 63.8079507 | 57.1859046 | 70.0479295 | 74.0713843 | 63.6316603 | 70.4750234 |
| 61.8079507 | 56.1859046 | 70.0479295 | 75.0713843 | 62.6316603 | 70.4750234 |
| 61.8079507 | 55.1859046 | 70.0479295 | 75.0713843 | 62.6316603 | 68.4750234 |
| 61.8079507 | 55.1859046 | 70.0479295 | 74.0713843 | 62.6316603 | 68.4750234 |
| 61.8079507 | 55.1859046 | 70.0479295 | 74.0713843 | 62.6316603 | 68.4750234 |
| 61.8079507 | 54.1859046 | 70.0479295 | 74.0713843 | 69.6316603 | 68.4750234 |
| 61.8079507 | 55.1859046 | 69.0479295 | 74.0713843 | 70.6316603 | 67.4750234 |
| 60.8079507 | 55.1859046 | 69.0479295 | 74.0713843 | 70.6316603 | 67.4750234 |
| 60.8079507 | 55.1859046 | 69.0479295 | 74.0713843 | 70.6316603 | 67.4750234 |
| 60.8079507 | 55.1859046 | 69.0479295 | 74.0713843 | 70.6316603 | 67.4750234 |
| 60.8079507 | 56.1859046 | 70.0479295 | 74.0713843 | 70.6316603 | 67.4750234 |
| 63.8079507 | 58.1859046 | 71.0479295 | 75.0713843 | 70.6316603 | 67.4750234 |
| 63.8079507 | 60.1859046 | 72.0479295 | 75.0713843 | 69.6316603 | 66.4750234 |
| 63.8079507 | 60.1859046 | 71.0479295 | 75.0713843 | 67.6316603 | 66.4750234 |
| 63.8079507 | 60.1859046 | 71.0479295 | 72.0713843 | 66.6316603 | 65.4750234 |
| 63.8079507 | 60.1859046 | 70.0479295 | 72.0713843 | 63.6316603 | 65.4750234 |
| 64.8079507 | 61.1859046 | 69.0479295 | 68.0713843 | 59.6316603 | 64.4750234 |
| 64.8079507 | 62.1859046 | 69.0479295 | 68.0713843 | 58.6316603 | 62.4750234 |
| 66.8079507 | 62.1859046 | 69.0479295 | 64.0713843 | 58.6316603 | 62.4750234 |
| 66.8079507 | 62.1859046 | 70.0479295 | 62.0713843 | 57.6316603 | 62.4750234 |
| 68.8079507 | 62.1859046 | 71.0479295 | 61.0713843 | 57.6316603 | 62.4750234 |
| 68.8079507 | 62.1859046 | 70.0479295 | 61.0713843 | 57.6316603 | 63.4750234 |
| 71.8079507 | 62.1859046 | 70.0479295 | 61.0713843 | 57.6316603 | 63.4750234 |
| 71.8079507 | 63.1859046 | 70.0479295 | 56.0713843 | 57.6316603 | 64.4750234 |
| 73.8079507 | 65.1859046 | 69.0479295 | 56.0713843 | 54.6316603 | 64.4750234 |
| 73.8079507 | 67.1859046 | 69.0479295 | 56.0713843 | 53.6316603 | 64.4750234 |
| 73.8079507 | 68.1859046 | 69.0479295 | 56.0713843 | 66.6316603 | 63.4750234 |
| 74.8079507 | 68.1859046 | 68.0479295 | 56.0713843 | 69.6316603 | 63.4750234 |
| 74.8079507 | 68.1859046 | 67.0479295 | 57.0713843 | 69.6316603 | 64.4750234 |
| 75.8079507 | 68.1859046 | 68.0479295 | 59.0713843 | 69.6316603 | 65.4750234 |
| 75.8079507 | 66.1859046 | 68.0479295 | 67.0713843 | 65.6316603 | 65.4750234 |
| 76.8079507 | 63.1859046 | 69.0479295 | 67.0713843 | 63.6316603 | 65.4750234 |
| 77.8079507 | 61.1859046 | 69.0479295 | 70.0713843 | 61.6316603 | 65.4750234 |
| 77.8079507 | 60.1859046 | 69.0479295 | 71.0713843 | 61.6316603 | 65.4750234 |
| 79.8079507 | 58.1859046 | 69.0479295 | 74.0713843 | 61.6316603 | 65.4750234 |
| 81.8079507 | 57.1859046 | 69.0479295 | 75.0713843 | 61.6316603 | 64.4750234 |
| 81.8079507 | 56.1859046 | 69.0479295 | 78.0713843 | 62.6316603 | 64.4750234 |
| 82.8079507 | 55.1859046 | 69.0479295 | 78.0713843 | 63.6316603 | 64.4750234 |
| 83.8079507 | 56.1859046 | 69.0479295 | 78.0713843 | 63.6316603 | 64.4750234 |

|            |            |            |            |            |            |
|------------|------------|------------|------------|------------|------------|
| 84.8079507 | 56.1859046 | 68.0479295 | 71.0713843 | 63.6316603 | 63.4750234 |
| 85.8079507 | 59.1859046 | 68.0479295 | 65.0713843 | 64.6316603 | 64.4750234 |
| 85.8079507 | 61.1859046 | 68.0479295 | 64.0713843 | 65.6316603 | 64.4750234 |
| 85.8079507 | 62.1859046 | 68.0479295 | 64.0713843 | 66.6316603 | 64.4750234 |
| 84.8079507 | 63.1859046 | 68.0479295 | 63.0713843 | 68.6316603 | 64.4750234 |
| 84.8079507 | 62.1859046 | 68.0479295 | 63.0713843 | 69.6316603 | 65.4750234 |
| 84.8079507 | 62.1859046 | 68.0479295 | 63.0713843 | 69.6316603 | 65.4750234 |
| 84.8079507 | 63.1859046 | 68.0479295 | 63.0713843 | 69.6316603 | 65.4750234 |
| 83.8079507 | 64.1859046 | 68.0479295 | 63.0713843 | 67.6316603 | 65.4750234 |
| 82.8079507 | 67.1859046 | 71.0479295 | 63.0713843 | 66.6316603 | 65.4750234 |
| 81.8079507 | 70.1859046 | 71.0479295 | 63.0713843 | 66.6316603 | 65.4750234 |
| 80.8079507 | 71.1859046 | 72.0479295 | 63.0713843 | 65.6316603 | 65.4750234 |
| 80.8079507 | 71.1859046 | 72.0479295 | 66.0713843 | 65.6316603 | 65.4750234 |
| 78.8079507 | 71.1859046 | 73.0479295 | 66.0713843 | 65.6316603 | 65.4750234 |
| 75.8079507 | 67.1859046 | 74.0479295 | 66.0713843 | 65.6316603 | 65.4750234 |
| 74.8079507 | 63.1859046 | 76.0479295 | 70.0713843 | 66.6316603 | 67.4750234 |
| 73.8079507 | 62.1859046 | 77.0479295 | 70.0713843 | 66.6316603 | 68.4750234 |
| 72.8079507 | 60.1859046 | 79.0479295 | 69.0713843 | 67.6316603 | 68.4750234 |
| 72.8079507 | 60.1859046 | 80.0479295 | 66.0713843 | 72.6316603 | 68.4750234 |
| 72.8079507 | 60.1859046 | 80.0479295 | 66.0713843 | 72.6316603 | 68.4750234 |
| 63.8079507 | 61.1859046 | 78.0479295 | 66.0713843 | 72.6316603 | 68.4750234 |
| 63.8079507 | 63.1859046 | 78.0479295 | 65.0713843 | 72.6316603 | 68.4750234 |
| 63.8079507 | 64.1859046 | 78.0479295 | 65.0713843 | 72.6316603 | 68.4750234 |
| 60.8079507 | 63.1859046 | 78.0479295 | 65.0713843 | 72.6316603 | 67.4750234 |
| 58.8079507 | 63.1859046 | 80.0479295 | 65.0713843 | 72.6316603 | 67.4750234 |
| 57.8079507 | 63.1859046 | 81.0479295 | 65.0713843 | 69.6316603 | 67.4750234 |
| 57.8079507 | 63.1859046 | 84.0479295 | 66.0713843 | 69.6316603 | 67.4750234 |
| 56.8079507 | 64.1859046 | 87.0479295 | 67.0713843 | 69.6316603 | 67.4750234 |
| 56.8079507 | 65.1859046 | 89.0479295 | 67.0713843 | 77.6316603 | 67.4750234 |
| 56.8079507 | 66.1859046 | 89.0479295 | 67.0713843 | 77.6316603 | 67.4750234 |
| 56.8079507 | 66.1859046 | 89.0479295 | 67.0713843 | 76.6316603 | 67.4750234 |
| 56.8079507 | 66.1859046 | 84.0479295 | 66.0713843 | 76.6316603 | 67.4750234 |
| 57.8079507 | 66.1859046 | 81.0479295 | 66.0713843 | 75.6316603 | 67.4750234 |
| 60.8079507 | 66.1859046 | 76.0479295 | 65.0713843 | 75.6316603 | 68.4750234 |
| 66.8079507 | 65.1859046 | 76.0479295 | 65.0713843 | 75.6316603 | 68.4750234 |
| 66.8079507 | 64.1859046 | 75.0479295 | 66.0713843 | 75.6316603 | 68.4750234 |
| 69.8079507 | 64.1859046 | 73.0479295 | 67.0713843 | 74.6316603 | 68.4750234 |
| 68.8079507 | 65.1859046 | 72.0479295 | 67.0713843 | 73.6316603 | 68.4750234 |
| 68.8079507 | 66.1859046 | 72.0479295 | 67.0713843 | 72.6316603 | 68.4750234 |
| 67.8079507 | 66.1859046 | 72.0479295 | 67.0713843 | 71.6316603 | 67.4750234 |
| 67.8079507 | 66.1859046 | 71.0479295 | 67.0713843 | 70.6316603 | 67.4750234 |
| 67.8079507 | 67.1859046 | 71.0479295 | 67.0713843 | 70.6316603 | 67.4750234 |
| 67.8079507 | 69.1859046 | 70.0479295 | 67.0713843 | 70.6316603 | 66.4750234 |
| 66.8079507 | 71.1859046 | 70.0479295 | 67.0713843 | 69.6316603 | 66.4750234 |
| 66.8079507 | 71.1859046 | 71.0479295 | 68.0713843 | 69.6316603 | 67.4750234 |

|            |            |            |            |            |            |
|------------|------------|------------|------------|------------|------------|
| 65.8079507 | 71.1859046 | 71.0479295 | 70.0713843 | 69.6316603 | 69.4750234 |
| 65.8079507 | 71.1859046 | 72.0479295 | 70.0713843 | 67.6316603 | 70.4750234 |
| 65.8079507 | 72.1859046 | 73.0479295 | 73.0713843 | 67.6316603 | 70.4750234 |
| 65.8079507 | 71.1859046 | 73.0479295 | 71.0713843 | 71.6316603 | 70.4750234 |
| 64.8079507 | 71.1859046 | 74.0479295 | 71.0713843 | 78.6316603 | 71.4750234 |
| 64.8079507 | 73.1859046 | 74.0479295 | 70.0713843 | 78.6316603 | 72.4750234 |
| 66.8079507 | 74.1859046 | 74.0479295 | 69.0713843 | 78.6316603 | 73.4750234 |
| 69.8079507 | 75.1859046 | 76.0479295 | 68.0713843 | 74.6316603 | 74.4750234 |
| 69.8079507 | 76.1859046 | 76.0479295 | 68.0713843 | 71.6316603 | 74.4750234 |
| 67.8079507 | 77.1859046 | 76.0479295 | 66.0713843 | 68.6316603 | 73.4750234 |
| 67.8079507 | 78.1859046 | 75.0479295 | 66.0713843 | 69.6316603 | 72.4750234 |
| 64.8079507 | 77.1859046 | 74.0479295 | 66.0713843 | 69.6316603 | 71.4750234 |
| 62.8079507 | 77.1859046 | 74.0479295 | 66.0713843 | 70.6316603 | 71.4750234 |
| 62.8079507 | 77.1859046 | 73.0479295 | 65.0713843 | 71.6316603 | 71.4750234 |
| 59.8079507 | 77.1859046 | 72.0479295 | 65.0713843 | 71.6316603 | 71.4750234 |
| 57.8079507 | 77.1859046 | 72.0479295 | 64.0713843 | 72.6316603 | 70.4750234 |
| 56.8079507 | 77.1859046 | 72.0479295 | 64.0713843 | 73.6316603 | 70.4750234 |
| 56.8079507 | 76.1859046 | 74.0479295 | 71.0713843 | 74.6316603 | 70.4750234 |
| 56.8079507 | 76.1859046 | 73.0479295 | 76.0713843 | 76.6316603 | 70.4750234 |
| 56.8079507 | 76.1859046 | 72.0479295 | 77.0713843 | 78.6316603 | 70.4750234 |
| 56.8079507 | 76.1859046 | 71.0479295 | 77.0713843 | 80.6316603 | 70.4750234 |
| 53.8079507 | 76.1859046 | 70.0479295 | 83.0713843 | 80.6316603 | 69.4750234 |
| 53.8079507 | 76.1859046 | 70.0479295 | 84.0713843 | 80.6316603 | 69.4750234 |
| 53.8079507 | 73.1859046 | 69.0479295 | 84.0713843 | 70.6316603 | 69.4750234 |
| 52.8079507 | 71.1859046 | 69.0479295 | 88.0713843 | 70.6316603 | 68.4750234 |
| 52.8079507 | 70.1859046 | 69.0479295 | 88.0713843 | 66.6316603 | 68.4750234 |
| 53.8079507 | 66.1859046 | 69.0479295 | 67.2359838 | 63.6316603 | 68.4750234 |
| 53.8079507 | 65.1859046 | 69.0479295 | 66.8723475 | 61.6316603 | 67.4750234 |
| 53.8079507 | 65.1859046 | 69.0479295 | 66.8723475 | 61.6316603 | 67.4750234 |
| 55.8079507 | 64.1859046 | 69.0479295 | 68.0541657 | 61.6316603 | 67.4750234 |
| 55.8079507 | 63.1859046 | 69.0479295 | 68.0541657 | 60.6316603 | 67.4750234 |
| 55.8079507 | 63.1859046 | 69.0479295 | 68.417802  | 60.6316603 | 67.4750234 |
| 55.8079507 | 63.1859046 | 70.0479295 | 68.2359838 | 60.6316603 | 67.4750234 |
| 56.8079507 | 65.1859046 | 70.0479295 | 90.0713843 | 60.6316603 | 67.4750234 |
| 58.8079507 | 66.1859046 | 70.0479295 | 84.0713843 | 60.6316603 | 67.4750234 |
| 60.8079507 | 66.1859046 | 71.0479295 | 83.0713843 | 60.6316603 | 67.4750234 |
| 60.8079507 | 62.1859046 | 71.0479295 | 83.0713843 | 60.6316603 | 67.4750234 |
| 60.8079507 | 61.1859046 | 71.0479295 | 83.0713843 | 61.6316603 | 67.4750234 |
| 60.8079507 | 61.1859046 | 71.0479295 | 83.0713843 | 63.6316603 | 67.4750234 |
| 58.8079507 | 60.1859046 | 71.0479295 | 77.0713843 | 62.6316603 | 67.4750234 |
| 58.8079507 | 59.1859046 | 71.0479295 | 79.0713843 | 62.6316603 | 67.4750234 |
| 58.8079507 | 60.1859046 | 70.0479295 | 79.0713843 | 63.6316603 | 67.4750234 |
| 59.8079507 | 60.1859046 | 69.0479295 | 80.0713843 | 63.6316603 | 67.4750234 |
| 59.8079507 | 61.1859046 | 69.0479295 | 81.0713843 | 63.6316603 | 67.4750234 |
| 59.8079507 | 62.1859046 | 67.0479295 | 81.0713843 | 63.6316603 | 67.4750234 |

|            |            |            |            |            |            |
|------------|------------|------------|------------|------------|------------|
| 59.8079507 | 64.1859046 | 66.0479295 | 82.0713843 | 62.6316603 | 67.4750234 |
| 59.8079507 | 64.1859046 | 66.0479295 | 82.0713843 | 62.6316603 | 66.4750234 |
| 58.8079507 | 64.1859046 | 66.0479295 | 83.0713843 | 62.6316603 | 66.4750234 |
| 59.8079507 | 62.1859046 | 67.0479295 | 83.0713843 | 61.6316603 | 66.4750234 |
| 59.8079507 | 62.1859046 | 67.0479295 | 83.0713843 | 58.6316603 | 67.4750234 |
| 59.8079507 | 61.1859046 | 67.0479295 | 79.0713843 | 56.6316603 | 67.4750234 |
| 59.8079507 | 60.1859046 | 67.0479295 | 77.0713843 | 56.6316603 | 67.4750234 |
| 59.8079507 | 60.1859046 | 68.0479295 | 76.0713843 | 58.6316603 | 68.4750234 |
| 59.8079507 | 59.1859046 | 67.0479295 | 65.0713843 | 61.6316603 | 68.4750234 |
| 59.8079507 | 59.1859046 | 67.0479295 | 63.0713843 | 63.6316603 | 68.4750234 |
| 59.8079507 | 59.1859046 | 67.0479295 | 63.0713843 | 65.6316603 | 68.4750234 |
| 59.8079507 | 60.1859046 | 67.0479295 | 63.0713843 | 64.6316603 | 68.4750234 |
| 56.8079507 | 62.1859046 | 67.0479295 | 63.0713843 | 63.6316603 | 68.4750234 |
| 55.8079507 | 64.1859046 | 66.0479295 | 66.0713843 | 62.6316603 | 67.4750234 |
| 55.8079507 | 66.1859046 | 66.0479295 | 69.0713843 | 62.6316603 | 67.4750234 |
| 55.8079507 | 67.1859046 | 66.0479295 | 69.0713843 | 62.6316603 | 67.4750234 |
| 55.8079507 | 67.1859046 | 67.0479295 | 70.0713843 | 62.6316603 | 67.4750234 |
| 55.8079507 | 67.1859046 | 68.0479295 | 69.0713843 | 64.6316603 | 67.4750234 |
| 54.8079507 | 69.1859046 | 68.0479295 | 69.0713843 | 68.6316603 | 67.4750234 |
| 53.8079507 | 69.1859046 | 71.0479295 | 70.0713843 | 68.6316603 | 67.4750234 |
| 53.8079507 | 68.1859046 | 74.0479295 | 70.0713843 | 68.6316603 | 65.4750234 |
| 53.8079507 | 67.1859046 | 75.0479295 | 71.0713843 | 68.6316603 | 64.4750234 |
| 53.8079507 | 67.1859046 | 75.0479295 | 72.0713843 | 66.6316603 | 64.4750234 |
| 52.8079507 | 66.1859046 | 75.0479295 | 72.0713843 | 64.6316603 | 64.4750234 |
| 52.8079507 | 66.1859046 | 73.0479295 | 73.0713843 | 62.6316603 | 64.4750234 |
| 52.8079507 | 67.1859046 | 72.0479295 | 73.0713843 | 61.6316603 | 65.4750234 |
| 52.8079507 | 69.1859046 | 72.0479295 | 78.0713843 | 61.6316603 | 65.4750234 |
| 52.8079507 | 70.1859046 | 70.0479295 | 78.0713843 | 63.6316603 | 65.4750234 |
| 51.8079507 | 70.1859046 | 70.0479295 | 78.0713843 | 64.6316603 | 65.4750234 |
| 51.8079507 | 68.1859046 | 70.0479295 | 78.0713843 | 64.6316603 | 64.4750234 |
| 51.8079507 | 66.1859046 | 70.0479295 | 75.0713843 | 64.6316603 | 65.4750234 |
| 51.8079507 | 64.1859046 | 70.0479295 | 69.0713843 | 64.6316603 | 66.4750234 |
| 50.8079507 | 62.1859046 | 70.0479295 | 69.0713843 | 64.6316603 | 66.4750234 |
| 50.8079507 | 61.1859046 | 68.0479295 | 67.0713843 | 64.6316603 | 66.4750234 |
| 50.8079507 | 61.1859046 | 67.0479295 | 66.0713843 | 64.6316603 | 65.4750234 |
| 50.8079507 | 59.1859046 | 67.0479295 | 66.0713843 | 65.6316603 | 65.4750234 |
| 50.8079507 | 58.1859046 | 67.0479295 | 66.0713843 | 69.6316603 | 65.4750234 |
| 50.8079507 | 58.1859046 | 67.0479295 | 66.0713843 | 69.6316603 | 65.4750234 |
| 49.8079507 | 58.1859046 | 67.0479295 | 66.0713843 | 68.6316603 | 65.4750234 |
| 48.8079507 | 58.1859046 | 67.0479295 | 66.0713843 | 64.6316603 | 65.4750234 |
| 48.8079507 | 58.1859046 | 67.0479295 | 65.0713843 | 62.6316603 | 64.4750234 |
| 48.8079507 | 58.1859046 | 67.0479295 | 65.0713843 | 62.6316603 | 64.4750234 |
| 48.8079507 | 59.1859046 | 67.0479295 | 64.0713843 | 62.6316603 | 64.4750234 |
| 56.8079507 | 59.1859046 | 67.0479295 | 63.0713843 | 69.6316603 | 67.4750234 |
| 57.8079507 | 60.1859046 | 67.0479295 | 62.0713843 | 72.6316603 | 66.4750234 |

|            |            |            |            |            |            |
|------------|------------|------------|------------|------------|------------|
| 57.8079507 | 61.1859046 | 67.0479295 | 61.0713843 | 73.6316603 | 66.4750234 |
| 58.8079507 | 62.1859046 | 68.0479295 | 62.0713843 | 72.6316603 | 66.4750234 |
| 58.8079507 | 62.1859046 | 68.0479295 | 62.0713843 | 70.6316603 | 66.4750234 |
| 58.8079507 | 62.1859046 | 68.0479295 | 62.0713843 | 68.6316603 | 65.4750234 |
| 58.8079507 | 63.1859046 | 68.0479295 | 61.0713843 | 68.6316603 | 66.4750234 |
| 59.8079507 | 64.1859046 | 68.0479295 | 62.0713843 | 67.6316603 | 66.4750234 |
| 59.8079507 | 64.1859046 | 68.0479295 | 64.0713843 | 67.6316603 | 66.4750234 |
| 64.8079507 | 69.1859046 | 68.0479295 | 64.0713843 | 67.6316603 | 66.4750234 |
| 65.8079507 | 72.1859046 | 68.0479295 | 64.0713843 | 67.6316603 | 66.4750234 |
| 65.8079507 | 73.1859046 | 68.0479295 | 65.0713843 | 67.6316603 | 66.4750234 |
| 65.8079507 | 73.1859046 | 69.0479295 | 65.0713843 | 66.6316603 | 66.4750234 |
| 65.8079507 | 74.1859046 | 68.0479295 | 65.0713843 | 67.6316603 | 66.4750234 |
| 61.8079507 | 75.1859046 | 68.0479295 | 65.0713843 | 67.6316603 | 66.4750234 |
| 61.8079507 | 75.1859046 | 69.0479295 | 65.0713843 | 68.6316603 | 66.4750234 |
| 61.8079507 | 76.1859046 | 69.0479295 | 68.0713843 | 68.6316603 | 68.4750234 |
| 61.8079507 | 76.1859046 | 69.0479295 | 68.0713843 | 67.6316603 | 68.4750234 |
| 60.8079507 | 75.1859046 | 69.0479295 | 69.0713843 | 67.6316603 | 69.4750234 |
| 61.8079507 | 74.1859046 | 69.0479295 | 70.0713843 | 67.6316603 | 69.4750234 |
| 62.8079507 | 73.1859046 | 69.0479295 | 71.0713843 | 67.6316603 | 69.4750234 |
| 63.8079507 | 73.1859046 | 69.0479295 | 72.0713843 | 67.6316603 | 69.4750234 |
| 63.8079507 | 73.1859046 | 70.0479295 | 72.0713843 | 74.6316603 | 70.4750234 |
| 63.8079507 | 71.1859046 | 70.0479295 | 76.0713843 | 85.6316603 | 70.4750234 |
| 62.8079507 | 71.1859046 | 69.0479295 | 76.0713843 | 91.6316603 | 70.4750234 |
| 62.8079507 | 70.1859046 | 69.0479295 | 76.0713843 | 92.6316603 | 70.4750234 |
| 62.8079507 | 70.1859046 | 70.0479295 | 77.0713843 | 92.6316603 | 70.4750234 |
| 63.8079507 | 70.1859046 | 70.0479295 | 79.0713843 | 89.6316603 | 70.4750234 |
| 63.8079507 | 61.1859046 | 69.0479295 | 81.0713843 | 77.6316603 | 70.4750234 |
| 64.8079507 | 59.1859046 | 69.0479295 | 81.0713843 | 71.6316603 | 70.4750234 |
| 64.8079507 | 59.1859046 | 69.0479295 | 83.0713843 | 66.6316603 | 72.4750234 |
| 64.8079507 | 61.1859046 | 71.0479295 | 83.0713843 | 66.6316603 | 72.4750234 |
| 64.8079507 | 62.1859046 | 71.0479295 | 86.0713843 | 62.6316603 | 73.4750234 |
| 65.8079507 | 62.1859046 | 72.0479295 | 86.0713843 | 59.6316603 | 73.4750234 |
| 65.8079507 | 64.1859046 | 74.0479295 | 90.0713843 | 56.6316603 | 73.4750234 |
| 64.8079507 | 66.1859046 | 78.0479295 | 92.0713843 | 56.6316603 | 75.4750234 |
| 64.8079507 | 66.1859046 | 79.0479295 | 92.0713843 | 56.6316603 | 74.4750234 |
| 64.8079507 | 67.1859046 | 75.0479295 | 72.5087111 | 56.6316603 | 73.4750234 |
| 64.8079507 | 66.1859046 | 73.0479295 | 72.1450748 | 56.6316603 | 73.4750234 |
| 64.8079507 | 66.1859046 | 72.0479295 | 71.8723475 | 57.6316603 | 73.4750234 |
| 65.8079507 | 63.1859046 | 70.0479295 | 71.2359838 | 57.6316603 | 72.4750234 |
| 65.8079507 | 63.1859046 | 70.0479295 | 71.417802  | 60.6316603 | 72.4750234 |
| 65.8079507 | 66.1859046 | 70.0479295 | 72.1450748 | 63.6316603 | 71.4750234 |
| 65.8079507 | 67.1859046 | 70.0479295 | 71.9632566 | 61.6316603 | 70.4750234 |
| 66.8079507 | 67.1859046 | 70.0479295 | 72.2359838 | 60.6316603 | 70.4750234 |
| 66.8079507 | 68.1859046 | 70.0479295 | 72.2359838 | 60.6316603 | 70.4750234 |
| 66.8079507 | 67.1859046 | 70.0479295 | 71.9632566 | 59.6316603 | 70.4750234 |

|            |            |            |            |            |            |
|------------|------------|------------|------------|------------|------------|
| 66.8079507 | 67.1859046 | 70.0479295 | 72.1450748 | 60.6316603 | 71.4750234 |
| 66.8079507 | 67.1859046 | 70.0479295 | 72.1450748 | 60.6316603 | 71.4750234 |
| 66.8079507 | 66.1859046 | 71.0479295 | 72.6905293 | 60.6316603 | 70.4750234 |
| 66.8079507 | 66.1859046 | 71.0479295 | 74.0713843 | 60.6316603 | 70.4750234 |
| 66.8079507 | 66.1859046 | 71.0479295 | 70.0713843 | 60.6316603 | 70.4750234 |
| 64.8079507 | 64.1859046 | 71.0479295 | 68.0713843 | 60.6316603 | 69.4750234 |
| 65.8079507 | 64.1859046 | 71.0479295 | 67.0713843 | 60.6316603 | 69.4750234 |
| 66.8079507 | 65.1859046 | 71.0479295 | 66.0713843 | 60.6316603 | 69.4750234 |
| 66.8079507 | 66.1859046 | 72.0479295 | 66.0713843 | 60.6316603 | 69.4750234 |
| 67.8079507 | 67.1859046 | 72.0479295 | 67.0713843 | 60.6316603 | 69.4750234 |
| 67.8079507 | 67.1859046 | 71.0479295 | 67.0713843 | 60.6316603 | 69.4750234 |
| 67.8079507 | 67.1859046 | 71.0479295 | 67.0713843 | 60.6316603 | 69.4750234 |
| 67.8079507 | 67.1859046 | 70.0479295 | 67.0713843 | 60.6316603 | 69.4750234 |
| 65.8079507 | 66.1859046 | 70.0479295 | 68.0713843 | 60.6316603 | 69.4750234 |
| 64.8079507 | 67.1859046 | 70.0479295 | 69.0713843 | 59.6316603 | 69.4750234 |
| 63.8079507 | 68.1859046 | 71.0479295 | 69.0713843 | 59.6316603 | 70.4750234 |
| 63.8079507 | 69.1859046 | 71.0479295 | 69.0713843 | 57.6316603 | 70.4750234 |
| 63.8079507 | 71.1859046 | 71.0479295 | 70.0713843 | 57.6316603 | 69.4750234 |
| 63.8079507 | 71.1859046 | 70.0479295 | 71.0713843 | 59.6316603 | 69.4750234 |
| 63.8079507 | 71.1859046 | 70.0479295 | 73.0713843 | 61.6316603 | 69.4750234 |
| 63.8079507 | 69.1859046 | 69.0479295 | 73.0713843 | 63.6316603 | 69.4750234 |
| 63.8079507 | 69.1859046 | 69.0479295 | 75.0713843 | 65.6316603 | 69.4750234 |
| 61.8079507 | 67.1859046 | 69.0479295 | 77.0713843 | 65.6316603 | 69.4750234 |
| 60.8079507 | 68.1859046 | 70.0479295 | 77.0713843 | 66.6316603 | 70.4750234 |
| 59.8079507 | 68.1859046 | 72.0479295 | 78.0713843 | 66.6316603 | 70.4750234 |
| 58.8079507 | 67.1859046 | 73.0479295 | 78.0713843 | 61.6316603 | 70.4750234 |
| 58.8079507 | 66.1859046 | 74.0479295 | 79.0713843 | 59.6316603 | 70.4750234 |
| 58.8079507 | 66.1859046 | 74.0479295 | 80.0713843 | 59.6316603 | 70.4750234 |
| 60.8079507 | 66.1859046 | 74.0479295 | 80.0713843 | 59.6316603 | 71.4750234 |
| 60.8079507 | 65.1859046 | 74.0479295 | 80.0713843 | 61.6316603 | 71.4750234 |
| 57.8079507 | 64.1859046 | 74.0479295 | 80.0713843 | 61.6316603 | 71.4750234 |
| 57.8079507 | 64.1859046 | 75.0479295 | 80.0713843 | 61.6316603 | 71.4750234 |
| 56.8079507 | 63.1859046 | 76.0479295 | 84.0713843 | 61.6316603 | 71.4750234 |
| 56.8079507 | 63.1859046 | 78.0479295 | 84.0713843 | 61.6316603 | 72.4750234 |
| 57.8079507 | 63.1859046 | 79.0479295 | 86.0713843 | 61.6316603 | 73.4750234 |
| 58.8079507 | 63.1859046 | 79.0479295 | 86.0713843 | 65.6316603 | 74.4750234 |
| 58.8079507 | 63.1859046 | 79.0479295 | 71.3268929 | 67.6316603 | 76.4750234 |
| 59.8079507 | 62.1859046 | 78.0479295 | 71.5996202 | 67.6316603 | 76.4750234 |
| 59.8079507 | 62.1859046 | 78.0479295 | 76.0713843 | 66.6316603 | 74.4750234 |
| 59.8079507 | 62.1859046 | 77.0479295 | 70.0713843 | 66.6316603 | 74.4750234 |
| 59.8079507 | 62.1859046 | 76.0479295 | 67.0713843 | 62.6316603 | 73.4750234 |
| 58.8079507 | 62.1859046 | 75.0479295 | 67.0713843 | 60.6316603 | 72.4750234 |
| 56.8079507 | 63.1859046 | 73.0479295 | 65.0713843 | 59.6316603 | 72.4750234 |
| 56.8079507 | 64.1859046 | 72.0479295 | 64.0713843 | 59.6316603 | 72.4750234 |
| 57.8079507 | 65.1859046 | 72.0479295 | 64.0713843 | 60.6316603 | 72.4750234 |

|            |            |            |            |            |            |
|------------|------------|------------|------------|------------|------------|
| 57.8079507 | 65.1859046 | 72.0479295 | 64.0713843 | 62.6316603 | 71.4750234 |
| 58.8079507 | 65.1859046 | 71.0479295 | 64.0713843 | 64.6316603 | 71.4750234 |
| 58.8079507 | 65.1859046 | 70.0479295 | 64.0713843 | 65.6316603 | 71.4750234 |
| 58.8079507 | 65.1859046 | 70.0479295 | 64.0713843 | 66.6316603 | 70.4750234 |
| 58.8079507 | 65.1859046 | 70.0479295 | 64.0713843 | 67.6316603 | 70.4750234 |
| 58.8079507 | 64.1859046 | 70.0479295 | 65.0713843 | 67.6316603 | 70.4750234 |
| 58.8079507 | 64.1859046 | 70.0479295 | 67.0713843 | 67.6316603 | 69.4750234 |
| 58.8079507 | 64.1859046 | 70.0479295 | 67.0713843 | 67.6316603 | 69.4750234 |
| 58.8079507 | 63.1859046 | 70.0479295 | 71.0713843 | 68.6316603 | 70.4750234 |
| 59.8079507 | 63.1859046 | 74.0479295 | 72.0713843 | 68.6316603 | 70.4750234 |
| 59.8079507 | 63.1859046 | 74.0479295 | 72.0713843 | 68.6316603 | 70.4750234 |
| 59.8079507 | 63.1859046 | 78.0479295 | 73.0713843 | 70.6316603 | 70.4750234 |
| 59.8079507 | 63.1859046 | 78.0479295 | 73.0713843 | 71.6316603 | 70.4750234 |
| 58.8079507 | 63.1859046 | 82.0479295 | 74.0713843 | 71.6316603 | 71.4750234 |
| 59.8079507 | 64.1859046 | 83.0479295 | 71.0713843 | 75.6316603 | 71.4750234 |
| 60.8079507 | 66.1859046 | 82.0479295 | 71.0713843 | 75.6316603 | 71.4750234 |
| 60.8079507 | 66.1859046 | 84.0479295 | 70.0713843 | 75.6316603 | 71.4750234 |
| 60.8079507 | 67.1859046 | 86.0479295 | 71.0713843 | 75.6316603 | 70.4750234 |
| 60.8079507 | 68.1859046 | 86.0479295 | 72.0713843 | 76.6316603 | 70.4750234 |
| 60.8079507 | 68.1859046 | 88.0479295 | 72.0713843 | 76.6316603 | 70.4750234 |
| 60.8079507 | 67.1859046 | 91.0479295 | 73.0713843 | 76.6316603 | 71.4750234 |
| 61.8079507 | 66.1859046 | 97.0479295 | 73.0713843 | 76.6316603 | 71.4750234 |
| 62.8079507 | 65.1859046 | 97.0479295 | 75.0713843 | 76.6316603 | 71.4750234 |
| 64.8079507 | 64.1859046 | 98.0479295 | 77.0713843 | 76.6316603 | 71.4750234 |
| 65.8079507 | 62.1859046 | 75.9632566 | 77.0713843 | 76.6316603 | 71.4750234 |
| 65.8079507 | 62.1859046 | 76.1450748 | 78.0713843 | 76.6316603 | 71.4750234 |
| 66.8079507 | 62.1859046 | 75.8723475 | 78.0713843 | 70.6316603 | 71.4750234 |
| 66.8079507 | 62.1859046 | 74.2359838 | 77.0713843 | 66.6316603 | 71.4750234 |
| 66.8079507 | 62.1859046 | 73.7814384 | 76.0713843 | 67.6316603 | 71.4750234 |
| 66.8079507 | 63.1859046 | 93.0479295 | 75.0713843 | 67.6316603 | 71.4750234 |
| 65.8079507 | 68.1859046 | 92.0479295 | 75.0713843 | 68.6316603 | 69.4750234 |
| 65.8079507 | 70.1859046 | 92.0479295 | 74.0713843 | 71.6316603 | 69.4750234 |
| 65.8079507 | 70.1859046 | 82.0479295 | 74.0713843 | 72.6316603 | 69.4750234 |
| 65.8079507 | 70.1859046 | 81.0479295 | 74.0713843 | 72.6316603 | 69.4750234 |
| 64.8079507 | 72.1859046 | 79.0479295 | 73.0713843 | 72.6316603 | 69.4750234 |
| 70.8079507 | 74.1859046 | 78.0479295 | 73.0713843 | 72.6316603 | 68.4750234 |
| 70.8079507 | 76.1859046 | 75.0479295 | 69.0713843 | 72.6316603 | 68.4750234 |
| 70.8079507 | 77.1859046 | 72.0479295 | 68.0713843 | 74.6316603 | 67.4750234 |
| 69.8079507 | 77.1859046 | 71.0479295 | 68.0713843 | 74.6316603 | 67.4750234 |
| 66.8079507 | 77.1859046 | 71.0479295 | 66.0713843 | 73.6316603 | 67.4750234 |
| 66.8079507 | 77.1859046 | 71.0479295 | 65.0713843 | 73.6316603 | 66.4750234 |
| 65.8079507 | 75.1859046 | 71.0479295 | 65.0713843 | 72.6316603 | 65.4750234 |
| 63.8079507 | 74.1859046 | 72.0479295 | 65.0713843 | 71.6316603 | 64.4750234 |
| 63.8079507 | 74.1859046 | 74.0479295 | 65.0713843 | 70.6316603 | 64.4750234 |
| 62.8079507 | 74.1859046 | 75.0479295 | 65.0713843 | 69.6316603 | 64.4750234 |



|            |            |            |            |            |            |
|------------|------------|------------|------------|------------|------------|
| 62.8079507 | 74.1859046 | 77.0479295 | 65.0713843 | 68.6316603 | 66.4750234 |
| 61.8079507 | 73.1859046 | 79.0479295 | 65.0713843 | 67.6316603 | 66.4750234 |
| 60.8079507 | 73.1859046 | 85.0479295 | 65.0713843 | 67.6316603 | 66.4750234 |
| 60.8079507 | 72.1859046 | 86.0479295 | 65.0713843 | 64.6316603 | 66.4750234 |
| 60.8079507 | 69.1859046 | 86.0479295 | 66.0713843 | 64.6316603 | 65.4750234 |
| 59.8079507 | 65.1859046 | 88.0479295 | 66.0713843 | 65.6316603 | 65.4750234 |
| 64.8079507 | 63.1859046 | 68.2359838 | 66.0713843 | 65.6316603 | 65.4750234 |
| 64.8079507 | 62.1859046 | 68.1450748 | 66.0713843 | 65.6316603 | 65.4750234 |
| 65.8079507 | 62.1859046 | 68.7814384 | 67.0713843 | 65.6316603 | 64.4750234 |
| 65.8079507 | 62.1859046 | 68.9632566 | 68.0713843 | 65.6316603 | 64.4750234 |
| 64.8079507 | 62.1859046 | 68.5996202 | 69.0713843 | 65.6316603 | 64.4750234 |
| 64.8079507 | 61.1859046 | 69.0541657 | 69.0713843 | 65.6316603 | 64.4750234 |
| 64.8079507 | 62.1859046 | 69.6905293 | 67.0713843 | 67.6316603 | 63.4750234 |
| 64.8079507 | 61.1859046 | 92.0479295 | 65.0713843 | 72.6316603 | 63.4750234 |
| 63.8079507 | 61.1859046 | 70.1450748 | 65.0713843 | 74.6316603 | 63.4750234 |
| 63.8079507 | 61.1859046 | 70.2359838 | 65.0713843 | 74.6316603 | 64.4750234 |
| 62.8079507 | 61.1859046 | 69.8723475 | 64.0713843 | 73.6316603 | 64.4750234 |
| 59.8079507 | 60.1859046 | 69.3268929 | 64.0713843 | 73.6316603 | 63.4750234 |
| 58.8079507 | 60.1859046 | 68.7814384 | 64.0713843 | 73.6316603 | 64.4750234 |
| 58.8079507 | 60.1859046 | 68.7814384 | 64.0713843 | 73.6316603 | 64.4750234 |
| 58.8079507 | 60.1859046 | 68.2359838 | 65.0713843 | 70.6316603 | 64.4750234 |
| 58.8079507 | 59.1859046 | 68.1450748 | 66.0713843 | 70.6316603 | 64.4750234 |
| 55.8079507 | 59.1859046 | 67.5996202 | 66.0713843 | 68.6316603 | 64.4750234 |
| 56.8079507 | 60.1859046 | 89.0479295 | 66.0713843 | 68.6316603 | 64.4750234 |
| 57.8079507 | 61.1859046 | 88.0479295 | 66.0713843 | 67.6316603 | 65.4750234 |
| 57.8079507 | 61.1859046 | 88.0479295 | 67.0713843 | 67.6316603 | 65.4750234 |
| 57.8079507 | 61.1859046 | 84.0479295 | 70.0713843 | 67.6316603 | 66.4750234 |
| 57.8079507 | 60.1859046 | 83.0479295 | 69.0713843 | 68.6316603 | 65.4750234 |
| 57.8079507 | 60.1859046 | 82.0479295 | 68.0713843 | 68.6316603 | 65.4750234 |
| 56.8079507 | 60.1859046 | 81.0479295 | 67.0713843 | 70.6316603 | 65.4750234 |
| 56.8079507 | 60.1859046 | 81.0479295 | 66.0713843 | 69.6316603 | 65.4750234 |
| 56.8079507 | 60.1859046 | 81.0479295 | 66.0713843 | 69.6316603 | 65.4750234 |
| 58.8079507 | 61.1859046 | 81.0479295 | 66.0713843 | 69.6316603 | 65.4750234 |
| 58.8079507 | 63.1859046 | 80.0479295 | 66.0713843 | 69.6316603 | 65.4750234 |
| 58.8079507 | 64.1859046 | 80.0479295 | 65.0713843 | 69.6316603 | 65.4750234 |
| 58.8079507 | 65.1859046 | 79.0479295 | 65.0713843 | 70.6316603 | 65.4750234 |
| 58.8079507 | 67.1859046 | 77.0479295 | 65.0713843 | 75.6316603 | 65.4750234 |
| 57.8079507 | 68.1859046 | 77.0479295 | 65.0713843 | 75.6316603 | 65.4750234 |
| 57.8079507 | 70.1859046 | 78.0479295 | 66.0713843 | 75.6316603 | 65.4750234 |
| 57.8079507 | 71.1859046 | 78.0479295 | 66.0713843 | 69.6316603 | 65.4750234 |
| 51.8079507 | 72.1859046 | 78.0479295 | 66.0713843 | 67.6316603 | 66.4750234 |
| 51.8079507 | 72.1859046 | 78.0479295 | 66.0713843 | 66.6316603 | 66.4750234 |
| 50.8079507 | 72.1859046 | 81.0479295 | 67.0713843 | 66.6316603 | 66.4750234 |
| 50.8079507 | 71.1859046 | 80.0479295 | 67.0713843 | 67.6316603 | 67.4750234 |
| 51.8079507 | 70.1859046 | 78.0479295 | 67.0713843 | 68.6316603 | 67.4750234 |

|            |            |            |            |            |            |
|------------|------------|------------|------------|------------|------------|
| 51.8079507 | 69.1859046 | 76.0479295 | 69.0713843 | 68.6316603 | 67.4750234 |
| 51.8079507 | 67.1859046 | 72.0479295 | 69.0713843 | 68.6316603 | 67.4750234 |
| 51.8079507 | 66.1859046 | 71.0479295 | 72.0713843 | 68.6316603 | 68.4750234 |
| 51.8079507 | 66.1859046 | 71.0479295 | 73.0713843 | 68.6316603 | 68.4750234 |
| 51.8079507 | 64.1859046 | 71.0479295 | 78.0713843 | 68.6316603 | 68.4750234 |
| 52.8079507 | 63.1859046 | 71.0479295 | 80.0713843 | 66.6316603 | 69.4750234 |
| 52.8079507 | 62.1859046 | 72.0479295 | 81.0713843 | 66.6316603 | 69.4750234 |
| 52.8079507 | 61.1859046 | 72.0479295 | 81.0713843 | 65.6316603 | 69.4750234 |
| 53.8079507 | 60.1859046 | 72.0479295 | 78.0713843 | 65.6316603 | 69.4750234 |
| 52.8079507 | 59.1859046 | 72.0479295 | 74.0713843 | 64.6316603 | 69.4750234 |
| 53.8079507 | 59.1859046 | 73.0479295 | 72.0713843 | 64.6316603 | 68.4750234 |
| 53.8079507 | 59.1859046 | 73.0479295 | 72.0713843 | 65.6316603 | 68.4750234 |
| 53.8079507 | 59.1859046 | 73.0479295 | 69.0713843 | 66.6316603 | 68.4750234 |
| 53.8079507 | 59.1859046 | 73.0479295 | 67.0713843 | 66.6316603 | 68.4750234 |
| 53.8079507 | 60.1859046 | 74.0479295 | 67.0713843 | 69.6316603 | 68.4750234 |
| 53.8079507 | 60.1859046 | 73.0479295 | 66.0713843 | 69.6316603 | 68.4750234 |
| 52.8079507 | 60.1859046 | 70.0479295 | 66.0713843 | 69.6316603 | 68.4750234 |
| 52.8079507 | 60.1859046 | 68.0479295 | 66.0713843 | 63.6316603 | 68.4750234 |
| 52.8079507 | 59.1859046 | 67.0479295 | 65.0713843 | 61.6316603 | 68.4750234 |
| 52.8079507 | 59.1859046 | 67.0479295 | 66.0713843 | 61.6316603 | 68.4750234 |
| 52.8079507 | 59.1859046 | 66.0479295 | 65.0713843 | 61.6316603 | 68.4750234 |
| 52.8079507 | 60.1859046 | 66.0479295 | 65.0713843 | 58.6316603 | 69.4750234 |
| 54.8079507 | 60.1859046 | 66.0479295 | 65.0713843 | 58.6316603 | 68.4750234 |
| 54.8079507 | 61.1859046 | 67.0479295 | 65.0713843 | 58.6316603 | 68.4750234 |
| 54.8079507 | 61.1859046 | 68.0479295 | 65.0713843 | 59.6316603 | 68.4750234 |
| 55.8079507 | 61.1859046 | 68.0479295 | 64.0713843 | 59.6316603 | 68.4750234 |
| 55.8079507 | 60.1859046 | 67.0479295 | 63.0713843 | 66.6316603 | 69.4750234 |
| 57.8079507 | 60.1859046 | 67.0479295 | 63.0713843 | 67.6316603 | 69.4750234 |
| 57.8079507 | 60.1859046 | 67.0479295 | 63.0713843 | 67.6316603 | 69.4750234 |
| 56.8079507 | 62.1859046 | 67.0479295 | 64.0713843 | 64.6316603 | 69.4750234 |
| 56.8079507 | 62.1859046 | 67.0479295 | 64.0713843 | 63.6316603 | 69.4750234 |
| 55.8079507 | 61.1859046 | 67.0479295 | 64.0713843 | 63.6316603 | 69.4750234 |
| 56.8079507 | 62.1859046 | 67.0479295 | 64.0713843 | 61.6316603 | 68.4750234 |
| 58.8079507 | 63.1859046 | 66.0479295 | 64.0713843 | 61.6316603 | 67.4750234 |
| 59.8079507 | 63.1859046 | 67.0479295 | 64.0713843 | 61.6316603 | 67.4750234 |
| 60.8079507 | 65.1859046 | 67.0479295 | 64.0713843 | 64.6316603 | 67.4750234 |
| 60.8079507 | 65.1859046 | 67.0479295 | 64.0713843 | 64.6316603 | 67.4750234 |
| 60.8079507 | 65.1859046 | 67.0479295 | 63.0713843 | 67.6316603 | 68.4750234 |
| 61.8079507 | 64.1859046 | 68.0479295 | 62.0713843 | 67.6316603 | 68.4750234 |
| 61.8079507 | 63.1859046 | 68.0479295 | 63.0713843 | 65.6316603 | 69.4750234 |
| 62.8079507 | 63.1859046 | 68.0479295 | 63.0713843 | 64.6316603 | 70.4750234 |
| 63.8079507 | 63.1859046 | 68.0479295 | 63.0713843 | 63.6316603 | 70.4750234 |
| 63.8079507 | 61.1859046 | 68.0479295 | 63.0713843 | 63.6316603 | 70.4750234 |
| 63.8079507 | 60.1859046 | 67.0479295 | 63.0713843 | 63.6316603 | 70.4750234 |
| 62.8079507 | 60.1859046 | 66.0479295 | 63.0713843 | 63.6316603 | 69.4750234 |

|            |            |            |            |            |            |
|------------|------------|------------|------------|------------|------------|
| 62.8079507 | 61.1859046 | 66.0479295 | 66.0713843 | 65.6316603 | 69.4750234 |
| 62.8079507 | 61.1859046 | 66.0479295 | 66.0713843 | 66.6316603 | 68.4750234 |
| 62.8079507 | 61.1859046 | 67.0479295 | 67.0713843 | 67.6316603 | 68.4750234 |
| 61.8079507 | 60.1859046 | 67.0479295 | 67.0713843 | 67.6316603 | 68.4750234 |
| 60.8079507 | 58.1859046 | 67.0479295 | 67.0713843 | 69.6316603 | 69.4750234 |
| 60.8079507 | 55.1859046 | 68.0479295 | 67.0713843 | 69.6316603 | 70.4750234 |
| 59.8079507 | 54.1859046 | 68.0479295 | 65.0713843 | 69.6316603 | 72.4750234 |
| 59.8079507 | 54.1859046 | 68.0479295 | 65.0713843 | 70.6316603 | 73.4750234 |
| 59.8079507 | 54.1859046 | 68.0479295 | 65.0713843 | 70.6316603 | 73.4750234 |
| 59.8079507 | 54.1859046 | 68.0479295 | 65.0713843 | 71.6316603 | 72.4750234 |
| 59.8079507 | 53.1859046 | 69.0479295 | 64.0713843 | 71.6316603 | 72.4750234 |
| 59.8079507 | 53.1859046 | 69.0479295 | 63.0713843 | 72.6316603 | 72.4750234 |
| 59.8079507 | 54.1859046 | 69.0479295 | 63.0713843 | 72.6316603 | 72.4750234 |
| 59.8079507 | 54.1859046 | 69.0479295 | 63.0713843 | 73.6316603 | 72.4750234 |
| 61.8079507 | 55.1859046 | 68.0479295 | 65.0713843 | 74.6316603 | 72.4750234 |
| 61.8079507 | 56.1859046 | 68.0479295 | 65.0713843 | 84.6316603 | 72.4750234 |
| 63.8079507 | 58.1859046 | 67.0479295 | 65.0713843 | 85.6316603 | 72.4750234 |
| 63.8079507 | 59.1859046 | 67.0479295 | 65.0713843 | 85.6316603 | 72.4750234 |
| 63.8079507 | 59.1859046 | 67.0479295 | 65.0713843 | 84.6316603 | 72.4750234 |
| 63.8079507 | 60.1859046 | 67.0479295 | 64.0713843 | 83.6316603 | 74.4750234 |
| 62.8079507 | 61.1859046 | 66.0479295 | 64.0713843 | 81.6316603 | 74.4750234 |
| 61.8079507 | 62.1859046 | 66.0479295 | 65.0713843 | 81.6316603 | 74.4750234 |
| 61.8079507 | 64.1859046 | 66.0479295 | 65.0713843 | 78.6316603 | 75.4750234 |
| 61.8079507 | 66.1859046 | 66.0479295 | 65.0713843 | 77.6316603 | 76.4750234 |
| 61.8079507 | 67.1859046 | 66.0479295 | 65.0713843 | 77.6316603 | 76.4750234 |
| 62.8079507 | 67.1859046 | 66.0479295 | 65.0713843 | 77.6316603 | 76.4750234 |
| 61.8079507 | 67.1859046 | 67.0479295 | 64.0713843 | 77.6316603 | 74.4750234 |
| 61.8079507 | 65.1859046 | 68.0479295 | 63.0713843 | 76.6316603 | 74.4750234 |
| 61.8079507 | 62.1859046 | 68.0479295 | 63.0713843 | 76.6316603 | 74.4750234 |
| 61.8079507 | 60.1859046 | 68.0479295 | 63.0713843 | 76.6316603 | 74.4750234 |
| 61.8079507 | 60.1859046 | 68.0479295 | 63.0713843 | 75.6316603 | 74.4750234 |
| 62.8079507 | 59.1859046 | 68.0479295 | 63.0713843 | 77.6316603 | 74.4750234 |
| 62.8079507 | 59.1859046 | 69.0479295 | 63.0713843 | 78.6316603 | 74.4750234 |
| 62.8079507 | 59.1859046 | 69.0479295 | 63.0713843 | 78.6316603 | 74.4750234 |
| 61.8079507 | 58.1859046 | 68.0479295 | 62.0713843 | 77.6316603 | 74.4750234 |
| 61.8079507 | 56.1859046 | 68.0479295 | 62.0713843 | 77.6316603 | 75.4750234 |
| 61.8079507 | 55.1859046 | 68.0479295 | 62.0713843 | 77.6316603 | 74.4750234 |
| 61.8079507 | 55.1859046 | 68.0479295 | 62.0713843 | 77.6316603 | 74.4750234 |
| 61.8079507 | 55.1859046 | 68.0479295 | 66.0713843 | 73.6316603 | 74.4750234 |
| 62.8079507 | 55.1859046 | 68.0479295 | 69.0713843 | 72.6316603 | 74.4750234 |
| 62.8079507 | 55.1859046 | 67.0479295 | 69.0713843 | 71.6316603 | 73.4750234 |
| 62.8079507 | 57.1859046 | 67.0479295 | 69.0713843 | 71.6316603 | 69.4750234 |
| 62.8079507 | 60.1859046 | 67.0479295 | 69.0713843 | 71.6316603 | 69.4750234 |
| 62.8079507 | 64.1859046 | 68.0479295 | 69.0713843 | 71.6316603 | 68.4750234 |
| 62.8079507 | 65.1859046 | 68.0479295 | 69.0713843 | 70.6316603 | 68.4750234 |

|            |            |            |            |            |            |
|------------|------------|------------|------------|------------|------------|
| 62.8079507 | 66.1859046 | 68.0479295 | 71.0713843 | 69.6316603 | 68.4750234 |
| 62.8079507 | 66.1859046 | 68.0479295 | 71.0713843 | 69.6316603 | 68.4750234 |
| 61.8079507 | 66.1859046 | 68.0479295 | 71.0713843 | 69.6316603 | 68.4750234 |
| 61.8079507 | 65.1859046 | 68.0479295 | 71.0713843 | 69.6316603 | 67.4750234 |
| 61.8079507 | 64.1859046 | 68.0479295 | 73.0713843 | 69.6316603 | 67.4750234 |
| 58.8079507 | 63.1859046 | 69.0479295 | 74.0713843 | 69.6316603 | 67.4750234 |
| 56.8079507 | 61.1859046 | 69.0479295 | 74.0713843 | 69.6316603 | 67.4750234 |
| 56.8079507 | 60.1859046 | 69.0479295 | 74.0713843 | 69.6316603 | 66.4750234 |
| 55.8079507 | 60.1859046 | 69.0479295 | 74.0713843 | 69.6316603 | 66.4750234 |
| 55.8079507 | 60.1859046 | 68.0479295 | 73.0713843 | 70.6316603 | 66.4750234 |
| 54.8079507 | 62.1859046 | 68.0479295 | 73.0713843 | 69.6316603 | 65.4750234 |
| 54.8079507 | 63.1859046 | 68.0479295 | 73.0713843 | 68.6316603 | 67.4750234 |
| 54.8079507 | 63.1859046 | 69.0479295 | 73.0713843 | 68.6316603 | 68.4750234 |
| 54.8079507 | 64.1859046 | 69.0479295 | 73.0713843 | 68.6316603 | 68.4750234 |
| 54.8079507 | 64.1859046 | 69.0479295 | 73.0713843 | 68.6316603 | 68.4750234 |
| 54.8079507 | 64.1859046 | 69.0479295 | 74.0713843 | 68.6316603 | 68.4750234 |
| 55.8079507 | 62.1859046 | 69.0479295 | 74.0713843 | 67.6316603 | 68.4750234 |
| 52.8079507 | 62.1859046 | 69.0479295 | 74.0713843 | 67.6316603 | 68.4750234 |
| 52.8079507 | 61.1859046 | 69.0479295 | 74.0713843 | 67.6316603 | 68.4750234 |
| 52.8079507 | 61.1859046 | 68.0479295 | 74.0713843 | 67.6316603 | 69.4750234 |
| 51.8079507 | 61.1859046 | 68.0479295 | 77.0713843 | 65.6316603 | 69.4750234 |
| 50.8079507 | 63.1859046 | 68.0479295 | 79.0713843 | 65.6316603 | 69.4750234 |
| 51.8079507 | 64.1859046 | 67.0479295 | 82.0713843 | 65.6316603 | 69.4750234 |
| 51.8079507 | 64.1859046 | 68.0479295 | 84.0713843 | 64.6316603 | 72.4750234 |
| 53.8079507 | 64.1859046 | 68.0479295 | 84.0713843 | 64.6316603 | 70.4750234 |
| 53.8079507 | 64.1859046 | 68.0479295 | 88.0713843 | 64.6316603 | 68.4750234 |
| 55.8079507 | 64.1859046 | 68.0479295 | 89.0713843 | 64.6316603 | 68.4750234 |
| 55.8079507 | 64.1859046 | 68.0479295 | 89.0713843 | 64.6316603 | 68.4750234 |
| 55.8079507 | 64.1859046 | 69.0479295 | 88.0713843 | 64.6316603 | 67.4750234 |
| 56.8079507 | 64.1859046 | 70.0479295 | 87.0713843 | 67.6316603 | 66.4750234 |
| 55.8079507 | 67.1859046 | 70.0479295 | 86.0713843 | 67.6316603 | 66.4750234 |
| 56.8079507 | 68.1859046 | 71.0479295 | 85.0713843 | 69.6316603 | 66.4750234 |
| 57.8079507 | 68.1859046 | 71.0479295 | 85.0713843 | 69.6316603 | 66.4750234 |
| 56.8079507 | 68.1859046 | 72.0479295 | 85.0713843 | 67.6316603 | 66.4750234 |
| 56.8079507 | 68.1859046 | 72.0479295 | 84.0713843 | 65.6316603 | 66.4750234 |
| 53.8079507 | 66.1859046 | 71.0479295 | 84.0713843 | 65.6316603 | 66.4750234 |
| 52.8079507 | 66.1859046 | 71.0479295 | 84.0713843 | 65.6316603 | 66.4750234 |
| 52.8079507 | 66.1859046 | 71.0479295 | 85.0713843 | 68.6316603 | 66.4750234 |
| 52.8079507 | 66.1859046 | 71.0479295 | 86.0713843 | 69.6316603 | 68.4750234 |
| 53.8079507 | 66.1859046 | 72.0479295 | 85.0713843 | 69.6316603 | 69.4750234 |
| 53.8079507 | 67.1859046 | 73.0479295 | 85.0713843 | 69.6316603 | 70.4750234 |
| 53.8079507 | 68.1859046 | 74.0479295 | 80.0713843 | 69.6316603 | 70.4750234 |
| 55.8079507 | 68.1859046 | 77.0479295 | 78.0713843 | 69.6316603 | 70.4750234 |
| 55.8079507 | 68.1859046 | 78.0479295 | 77.0713843 | 71.6316603 | 70.4750234 |
| 57.8079507 | 68.1859046 | 79.0479295 | 76.0713843 | 72.6316603 | 70.4750234 |

|            |            |            |            |            |            |
|------------|------------|------------|------------|------------|------------|
| 56.8079507 | 68.1859046 | 79.0479295 | 76.0713843 | 73.6316603 | 70.4750234 |
| 56.8079507 | 68.1859046 | 79.0479295 | 76.0713843 | 73.6316603 | 70.4750234 |
| 58.8079507 | 66.1859046 | 72.0479295 | 75.0713843 | 74.6316603 | 69.4750234 |
| 58.8079507 | 65.1859046 | 72.0479295 | 75.0713843 | 74.6316603 | 69.4750234 |
| 58.8079507 | 64.1859046 | 71.0479295 | 74.0713843 | 74.6316603 | 69.4750234 |
| 60.8079507 | 63.1859046 | 71.0479295 | 74.0713843 | 78.6316603 | 71.4750234 |
| 61.8079507 | 62.1859046 | 71.0479295 | 66.0713843 | 78.6316603 | 71.4750234 |
| 62.8079507 | 63.1859046 | 70.0479295 | 65.0713843 | 79.6316603 | 71.4750234 |
| 63.8079507 | 65.1859046 | 68.0479295 | 64.0713843 | 81.6316603 | 73.4750234 |
| 64.8079507 | 66.1859046 | 67.0479295 | 64.0713843 | 82.6316603 | 73.4750234 |
| 64.8079507 | 67.1859046 | 67.0479295 | 63.0713843 | 83.6316603 | 74.4750234 |
| 65.8079507 | 68.1859046 | 67.0479295 | 62.0713843 | 75.6316603 | 75.4750234 |
| 66.8079507 | 69.1859046 | 68.0479295 | 62.0713843 | 75.6316603 | 75.4750234 |
| 66.8079507 | 69.1859046 | 68.0479295 | 62.0713843 | 77.6316603 | 75.4750234 |
| 68.8079507 | 68.1859046 | 71.0479295 | 62.0713843 | 77.6316603 | 75.4750234 |
| 68.8079507 | 68.1859046 | 73.0479295 | 64.0713843 | 77.6316603 | 75.4750234 |
| 68.8079507 | 68.1859046 | 73.0479295 | 65.0713843 | 76.6316603 | 72.4750234 |
| 68.8079507 | 68.1859046 | 72.0479295 | 64.0713843 | 76.6316603 | 72.4750234 |
| 68.8079507 | 68.1859046 | 71.0479295 | 64.0713843 | 75.6316603 | 72.4750234 |
| 70.8079507 | 68.1859046 | 71.0479295 | 64.0713843 | 73.6316603 | 72.4750234 |
| 70.8079507 | 67.1859046 | 71.0479295 | 66.0713843 | 69.6316603 | 72.4750234 |
| 71.8079507 | 67.1859046 | 71.0479295 | 66.0713843 | 69.6316603 | 70.4750234 |
| 71.8079507 | 67.1859046 | 70.0479295 | 66.0713843 | 69.6316603 | 70.4750234 |
| 71.8079507 | 67.1859046 | 70.0479295 | 66.0713843 | 71.6316603 | 69.4750234 |
| 71.8079507 | 67.1859046 | 70.0479295 | 66.0713843 | 72.6316603 | 69.4750234 |
| 72.8079507 | 67.1859046 | 69.0479295 | 65.0713843 | 72.6316603 | 69.4750234 |
| 74.8079507 | 67.1859046 | 69.0479295 | 64.0713843 | 72.6316603 | 68.4750234 |
| 72.8079507 | 68.1859046 | 70.0479295 | 64.0713843 | 72.6316603 | 68.4750234 |
| 72.8079507 | 68.1859046 | 68.0479295 | 64.0713843 | 72.6316603 | 66.4750234 |
| 71.8079507 | 69.1859046 | 67.0479295 | 65.0713843 | 72.6316603 | 65.4750234 |
| 70.8079507 | 69.1859046 | 67.0479295 | 65.0713843 | 70.6316603 | 65.4750234 |
| 69.8079507 | 70.1859046 | 67.0479295 | 65.0713843 | 70.6316603 | 65.4750234 |
| 69.8079507 | 71.1859046 | 67.0479295 | 66.0713843 | 72.6316603 | 65.4750234 |
| 69.8079507 | 71.1859046 | 67.0479295 | 67.0713843 | 72.6316603 | 65.4750234 |
| 68.8079507 | 73.1859046 | 67.0479295 | 67.0713843 | 73.6316603 | 65.4750234 |
| 66.8079507 | 74.1859046 | 67.0479295 | 67.0713843 | 74.6316603 | 65.4750234 |
| 65.8079507 | 76.1859046 | 67.0479295 | 67.0713843 | 74.6316603 | 65.4750234 |
| 63.8079507 | 79.1859046 | 67.0479295 | 67.0713843 | 72.6316603 | 65.4750234 |
| 62.8079507 | 79.1859046 | 67.0479295 | 67.0713843 | 69.6316603 | 66.4750234 |
| 63.8079507 | 79.1859046 | 66.0479295 | 67.0713843 | 66.6316603 | 67.4750234 |
| 63.8079507 | 80.1859046 | 66.0479295 | 66.0713843 | 66.6316603 | 68.4750234 |
| 63.8079507 | 80.1859046 | 65.0479295 | 66.0713843 | 64.6316603 | 68.4750234 |
| 63.8079507 | 80.1859046 | 65.0479295 | 66.0713843 | 61.6316603 | 69.4750234 |
| 63.8079507 | 80.1859046 | 64.0479295 | 66.0713843 | 61.6316603 | 70.4750234 |
| 63.8079507 | 80.1859046 | 64.0479295 | 66.0713843 | 62.6316603 | 71.4750234 |

|            |            |            |            |            |            |
|------------|------------|------------|------------|------------|------------|
| 61.8079507 | 80.1859046 | 65.0479295 | 67.0713843 | 62.6316603 | 71.4750234 |
| 60.8079507 | 80.1859046 | 66.0479295 | 67.0713843 | 64.6316603 | 71.4750234 |
| 60.8079507 | 77.1859046 | 66.0479295 | 67.0713843 | 66.6316603 | 71.4750234 |
| 60.8079507 | 75.1859046 | 66.0479295 | 67.0713843 | 66.6316603 | 70.4750234 |
| 56.8079507 | 74.1859046 | 66.0479295 | 67.0713843 | 65.6316603 | 69.4750234 |
| 56.8079507 | 71.1859046 | 66.0479295 | 68.0713843 | 65.6316603 | 69.4750234 |
| 56.8079507 | 71.1859046 | 66.0479295 | 68.0713843 | 65.6316603 | 70.4750234 |
| 56.8079507 | 70.1859046 | 66.0479295 | 68.0713843 | 64.6316603 | 70.4750234 |
| 56.8079507 | 67.1859046 | 68.0479295 | 67.0713843 | 65.6316603 | 71.4750234 |
| 56.8079507 | 65.1859046 | 69.0479295 | 67.0713843 | 65.6316603 | 70.4750234 |
| 56.8079507 | 65.1859046 | 69.0479295 | 67.0713843 | 65.6316603 | 70.4750234 |
| 62.8079507 | 64.1859046 | 66.0479295 | 67.0713843 | 65.6316603 | 69.4750234 |
| 62.8079507 | 64.1859046 | 66.0479295 | 67.0713843 | 66.6316603 | 69.4750234 |
| 57.8079507 | 64.1859046 | 66.0479295 | 68.0713843 | 65.6316603 | 70.4750234 |
| 54.8079507 | 63.1859046 | 66.0479295 | 68.0713843 | 65.6316603 | 69.4750234 |
| 54.8079507 | 62.1859046 | 66.0479295 | 68.0713843 | 64.6316603 | 69.4750234 |
| 53.8079507 | 62.1859046 | 66.0479295 | 68.0713843 | 65.6316603 | 69.4750234 |
| 53.8079507 | 62.1859046 | 66.0479295 | 69.0713843 | 66.6316603 | 68.4750234 |
| 53.8079507 | 62.1859046 | 67.0479295 | 68.0713843 | 67.6316603 | 69.4750234 |
| 53.8079507 | 62.1859046 | 67.0479295 | 69.0713843 | 67.6316603 | 69.4750234 |
| 53.8079507 | 62.1859046 | 68.0479295 | 69.0713843 | 68.6316603 | 70.4750234 |
| 53.8079507 | 62.1859046 | 69.0479295 | 69.0713843 | 68.6316603 | 71.4750234 |
| 53.8079507 | 62.1859046 | 69.0479295 | 68.0713843 | 68.6316603 | 71.4750234 |
| 54.8079507 | 63.1859046 | 71.0479295 | 68.0713843 | 68.6316603 |            |
| 56.8079507 | 65.1859046 | 72.0479295 | 68.0713843 | 69.6316603 |            |
| 56.8079507 | 67.1859046 | 71.0479295 | 68.0713843 | 71.6316603 |            |
| 57.8079507 | 67.1859046 | 71.0479295 | 68.0713843 | 71.6316603 |            |
| 58.8079507 | 67.1859046 | 71.0479295 | 69.0713843 | 73.6316603 |            |
| 58.8079507 | 67.1859046 | 70.0479295 | 69.0713843 | 74.6316603 |            |
| 58.8079507 | 67.1859046 | 70.0479295 | 69.0713843 | 74.6316603 |            |
| 58.8079507 | 66.1859046 | 70.0479295 | 69.0713843 | 74.6316603 |            |
| 60.8079507 | 64.1859046 | 70.0479295 | 75.0713843 | 74.6316603 |            |
| 60.8079507 | 63.1859046 | 69.0479295 | 77.0713843 | 74.6316603 |            |
| 60.8079507 | 63.1859046 | 69.0479295 | 77.0713843 | 76.6316603 |            |
| 60.8079507 | 63.1859046 | 69.0479295 | 65.6721572 | 76.6316603 |            |

| Activity | behavior       |                |
|----------|----------------|----------------|
|          | average of all | moving average |
|          | 72.6120799     | 75.1249306     |
|          | 72.9120799     | 74.8965781     |
|          | 73.3120799     | 63 74.7272547  |
|          | 73.5120799     | 63 74.5714881  |
|          | 74.1120799     | 63 74.419542   |
|          | 74.3120799     | 63 74.2958676  |
|          | 74.2120799     | 63 74.1692201  |
|          | 74.3120799     | 63 74.0778813  |
|          | 74.6120799     | 63 74.019025   |
|          | 74.3120799     | 63 73.9556775  |
|          | 76.3120799     | 63 73.8863841  |
|          | 75.7120799     | 63 73.8100236  |
|          | 75.4120799     | 63 73.7291118  |
|          | 73.7624928     | 63 73.6495648  |
|          | 74.0224928     | 63 73.6026571  |
|          | 73.8024928     | 63 73.5622092  |
|          | 73.6924928     | 63 73.5157553  |
|          | 73.6924928     | 63 73.4580234  |
|          | 73.6924928     | 63 73.3855094  |
|          | 73.6924928     | 63 73.3110731  |
|          | 74.2424928     | 63 73.2348586  |
|          | 74.3524928     | 63 73.1783689  |
|          | 73.5824928     | 63 73.1088793  |
|          | 73.0324928     | 63 73.0018896  |
|          | 73.3624928     | 63 72.8898999  |
|          | 73.2524928     | 63 72.7624102  |
|          | 73.4724928     | 63 72.6406706  |
|          | 73.8224928     | 63 72.5324309  |
|          | 73.1624928     | 63 72.4244412  |
|          | 72.9424928     | 63 72.3224515  |
|          | 72.1624928     | 63 72.2279618  |
|          | 71.7224928     | 63 72.0862222  |
|          | 71.6124928     | 63 71.9594825  |
|          | 71.8324928     | 63 71.8429928  |
|          | 71.3924928     | 63 71.7702428  |
|          | 71.3924928     | 63 71.6854928  |
|          | 70.5924928     | 63 71.6032428  |
|          | 70.7024928     | 63 71.5099928  |
|          | 70.4824928     | 63 71.4057428  |
|          | 70.2624928     | 63 71.3094928  |
|          | 70.3524928     | 63 71.2849825  |
|          | 70.1324928     | 63 71.2417222  |
|          | 69.0324928     | 63 71.2032118  |

|            |    |            |
|------------|----|------------|
| 69.0324928 | 63 | 71.1789515 |
| 69.0124928 | 63 | 71.1409412 |
| 69.4424928 | 63 | 71.0571809 |
| 69.8824928 | 63 | 70.9561706 |
| 69.9924928 | 63 | 70.8496602 |
| 70.5324928 | 63 | 70.7343999 |
| 70.5324928 | 63 | 70.6381396 |
| 70.6424928 | 63 | 70.5673793 |
| 70.6424928 | 63 | 70.5186189 |
| 70.7524928 | 63 | 70.4908586 |
| 70.8524928 | 63 | 70.4633483 |
| 70.6324928 | 63 | 70.427838  |
| 70.5124928 | 63 | 70.3933276 |
| 69.9624928 | 63 | 70.3488173 |
| 69.5224928 | 63 | 70.314307  |
| 69.8424928 | 63 | 70.2695467 |
| 72.7120799 | 63 | 70.2152864 |
| 72.5120799 | 63 | 70.169026  |
| 72.8120799 | 63 | 70.1180157 |
| 72.6120799 | 63 | 70.0800054 |
| 71.5120799 | 63 | 70.0744951 |
| 70.0120799 | 63 | 70.0514847 |
| 69.2120799 | 63 | 70.0189744 |
| 69.2120799 | 63 | 69.9632141 |
| 69.2120799 | 63 | 69.8889538 |
| 69.3120799 | 63 | 69.8044434 |
| 70.1120799 | 63 | 69.6814331 |
| 70.2120799 | 63 | 69.5584228 |
| 70.6120799 | 63 | 69.4301625 |
| 70.5120799 | 63 | 69.3019022 |
| 70.4120799 | 63 | 69.1658918 |
| 70.0120799 | 63 | 69.0198815 |
| 69.6120799 | 63 | 68.8793712 |
| 69.2120799 | 63 | 68.7493609 |
| 68.9120799 | 63 | 68.6281005 |
| 68.3120799 | 63 | 68.5153402 |
| 68.4120799 | 63 | 68.3895799 |
| 68.3120799 | 63 | 68.1920799 |
| 68.6120799 | 63 | 68.0070799 |
| 68.8120799 | 63 | 67.8245799 |
| 68.1120799 | 63 | 67.6495799 |
| 67.7120799 | 63 | 67.5045799 |
| 67.2120799 | 63 | 67.3970799 |
| 66.9120799 | 63 | 67.3095799 |
| 66.6120799 | 63 | 67.2445799 |



|            |    |            |
|------------|----|------------|
| 65.6120799 | 63 | 67.1795799 |
| 65.6120799 | 63 | 67.1070799 |
| 65.5120799 | 63 | 67.0220799 |
| 65.5120799 | 63 | 66.9420799 |
| 65.3120799 | 63 | 66.8595799 |
| 65.0120799 | 63 | 66.7870799 |
| 65.0120799 | 63 | 66.7245799 |
| 65.3120799 | 63 | 66.6820799 |
| 65.1120799 | 63 | 66.6620799 |
| 65.0120799 | 63 | 66.6570799 |
| 64.8120799 | 63 | 66.6570799 |
| 64.8120799 | 63 | 66.6870799 |
| 65.1120799 | 63 | 66.7220799 |
| 65.5120799 | 63 | 66.7620799 |
| 65.6120799 | 63 | 66.7820799 |
| 65.7120799 | 63 | 66.8145799 |
| 65.7120799 | 63 | 66.8720799 |
| 65.7120799 | 63 | 66.9495799 |
| 66.6120799 | 63 | 67.0495799 |
| 66.6120799 | 63 | 67.1395799 |
| 66.4120799 | 63 | 67.2370799 |
| 66.7120799 | 63 | 67.3620799 |
| 67.0120799 | 63 | 67.4870799 |
| 67.3120799 | 63 | 67.6220799 |
| 67.6120799 | 63 | 67.7620799 |
| 67.9120799 | 63 | 67.8945799 |
| 68.3120799 | 63 | 68.0183593 |
| 68.8120799 | 63 | 68.1330478 |
| 69.0120799 | 63 | 68.2288727 |
| 68.9120799 | 63 | 68.3160612 |
| 69.5120799 | 63 | 68.4012042 |
| 69.8120799 | 63 | 68.46862   |
| 69.9120799 | 63 | 68.5269449 |
| 69.4120799 | 63 | 68.5732243 |
| 70.1120799 | 63 | 68.607231  |
| 70.4120799 | 63 | 68.636465  |
| 70.8120799 | 63 | 68.6631989 |
| 71.2120799 | 63 | 68.6649329 |
| 70.5120799 | 63 | 68.6598487 |
| 70.5120799 | 63 | 68.6186281 |
| 70.6120799 | 63 | 68.5705893 |
| 70.6120799 | 63 | 68.5230051 |
| 70.9120799 | 63 | 68.4861027 |
| 71.1120799 | 63 | 68.4394276 |
| 70.6120799 | 63 | 68.3852524 |

|            |    |            |
|------------|----|------------|
| 69.9632566 | 63 | 68.3303955 |
| 69.5996202 | 63 | 68.2612204 |
| 69.1450748 | 63 | 68.1956816 |
| 68.5996202 | 63 | 68.1426428 |
| 68.417802  | 63 | 68.0755132 |
| 67.5087111 | 63 | 68.0222471 |
| 67.1450748 | 63 | 67.963072  |
| 66.9632566 | 63 | 67.887306  |
| 66.8723475 | 63 | 67.799949  |
| 66.7814384 | 63 | 67.7160012 |
| 66.7814384 | 63 | 67.6304624 |
| 65.7814384 | 63 | 67.5374236 |
| 65.5087111 | 63 | 67.4321121 |
| 64.9632566 | 63 | 67.330437  |
| 64.6905293 | 63 | 67.2508073 |
| 64.5087111 | 63 | 67.184814  |
| 65.2359838 | 63 | 67.1231389 |
| 65.1450748 | 63 | 67.0728274 |
| 65.1450748 | 63 | 67.0195614 |
| 65.417802  | 63 | 66.9635681 |
| 65.1450748 | 63 | 66.9200748 |
| 65.6905293 | 63 | 66.892802  |
| 66.6905293 | 63 | 66.8768929 |
| 66.3268929 | 63 | 66.8746202 |
| 66.7814384 | 63 | 66.8859838 |
| 67.1450748 | 63 | 66.8996202 |
| 66.7814384 | 63 | 66.9405293 |
| 66.417802  | 63 | 66.992802  |
| 66.0541657 | 63 | 67.0450748 |
| 66.6905293 | 63 | 67.0996202 |
| 66.6905293 | 63 | 67.1496202 |
| 66.5996202 | 63 | 67.1950748 |
| 67.1450748 | 63 | 67.2632566 |
| 67.3268929 | 63 | 67.3518929 |
| 67.8723475 | 63 | 67.4473475 |
| 68.1450748 | 63 | 67.5541657 |
| 68.5996202 | 63 | 67.6564384 |
| 68.7814384 | 63 | 67.7405293 |
| 68.8723475 | 63 | 67.8314384 |
| 68.8723475 | 63 | 67.9268929 |
| 68.8723475 | 63 | 68.0314384 |
| 68.9632566 | 63 | 68.1564384 |
| 69.0541657 | 63 | 68.2723475 |
| 69.0541657 | 63 | 68.367802  |
| 68.9632566 | 63 | 68.4950748 |

|            |    |            |
|------------|----|------------|
| 69.1450748 | 63 | 68.6109838 |
| 69.2359838 | 63 | 68.7405293 |
| 69.0541657 | 63 | 68.8859838 |
| 69.0541657 | 63 | 69.0655293 |
| 68.7814384 | 63 | 69.2405293 |
| 68.5996202 | 63 | 69.3746202 |
| 68.5087111 | 63 | 69.4882566 |
| 69.0541657 | 63 | 69.5950748 |
| 68.7814384 | 63 | 69.6837111 |
| 68.9632566 | 63 | 69.7564384 |
| 68.5996202 | 63 | 69.8223475 |
| 68.5996202 | 63 | 69.8791657 |
| 68.7814384 | 63 | 69.9246202 |
| 68.9632566 | 63 | 69.9632566 |
| 69.5996202 | 63 | 70.0041657 |
| 70.1450748 | 63 | 70.0450748 |
| 70.3268929 | 63 | 70.0746202 |
| 70.5087111 | 63 | 70.0882566 |
| 71.417802  | 63 | 70.0996202 |
| 71.417802  | 63 | 70.1064384 |
| 72.3268929 | 63 | 70.1246202 |
| 72.5996202 | 63 | 70.142802  |
| 73.5996202 | 63 | 70.1382566 |
| 73.0541657 | 63 | 70.142802  |
| 72.0541657 | 63 | 70.1564384 |
| 71.2359838 | 63 | 70.1768929 |
| 70.8723475 | 63 | 70.2064384 |
| 70.6905293 | 63 | 70.2473475 |
| 70.2359838 | 63 | 70.2746202 |
| 70.5087111 | 63 | 70.3132566 |
| 70.417802  | 63 | 70.3518929 |
| 70.417802  | 63 | 70.3973475 |
| 70.3268929 | 63 | 70.4518929 |
| 70.5087111 | 63 | 70.5018929 |
| 70.5087111 | 63 | 70.5473475 |
| 70.0541657 | 63 | 70.5791657 |
| 69.5087111 | 63 | 70.6041657 |
| 69.5087111 | 63 | 70.6268929 |
| 69.3268929 | 63 | 70.6450748 |
| 69.6905293 | 63 | 70.6337111 |
| 69.8723475 | 63 | 70.6041657 |
| 69.0541657 | 63 | 70.5473475 |
| 69.2359838 | 63 | 70.4768929 |
| 69.5996202 | 63 | 70.3768929 |
| 69.5996202 | 63 | 70.2814384 |

|            |    |            |
|------------|----|------------|
| 69.7814384 | 63 | 70.2087111 |
| 70.1450748 | 63 | 70.1473475 |
| 70.1450748 | 63 | 70.0746202 |
| 70.3268929 | 63 | 69.9723475 |
| 70.5087111 | 63 | 69.8632566 |
| 70.417802  | 63 | 69.7518929 |
| 70.7814384 | 63 | 69.6405293 |
| 70.7814384 | 63 | 69.5382566 |
| 70.7814384 | 63 | 69.4473475 |
| 70.8723475 | 63 | 69.3518929 |
| 71.1450748 | 63 | 69.2814384 |
| 71.2359838 | 63 | 69.2337111 |
| 71.2359838 | 63 | 69.2087111 |
| 70.9632566 | 63 | 69.1791657 |
| 70.2359838 | 63 | 69.1382566 |
| 70.0541657 | 63 | 69.0882566 |
| 69.7814384 | 63 | 69.042802  |
| 69.5996202 | 63 | 69.0359838 |
| 69.2359838 | 63 | 69.0268929 |
| 69.1450748 | 63 | 69.0246202 |
| 68.7814384 | 63 | 69.017802  |
| 67.9632566 | 63 | 69.0018929 |
| 66.5996202 | 63 | 68.9814384 |
| 65.8723475 | 63 | 68.9587111 |
| 66.0541657 | 63 | 68.9291657 |
| 65.9632566 | 63 | 68.8814384 |
| 66.3268929 | 63 | 68.8268929 |
| 66.6905293 | 63 | 68.7564384 |
| 66.6905293 | 63 | 68.6746202 |
| 67.6905293 | 63 | 68.5973475 |
| 68.1450748 | 63 | 68.5291657 |
| 68.5087111 | 63 | 68.467802  |
| 68.3268929 | 63 | 68.3996202 |
| 67.6905293 | 63 | 68.3223475 |
| 67.6905293 | 63 | 68.2450748 |
| 68.0541657 | 63 | 68.1791657 |
| 68.7814384 | 63 | 68.1246202 |
| 68.8723475 | 63 | 68.0723475 |
| 69.5087111 | 63 | 68.0291657 |
| 69.3268929 | 63 | 68.0041657 |
| 69.1450748 | 63 | 67.9905293 |
| 69.3268929 | 63 | 67.9973475 |
| 69.2359838 | 63 | 68.0155293 |
| 69.1450748 | 63 | 68.0655293 |
| 68.5996202 | 63 | 68.1337111 |

|            |    |            |
|------------|----|------------|
| 68.2359838 | 63 | 68.1837111 |
| 67.9632566 | 63 | 68.217802  |
| 67.5087111 | 63 | 68.242802  |
| 67.6905293 | 63 | 68.2632566 |
| 68.1450748 | 63 | 68.2814384 |
| 68.6905293 | 63 | 68.2655293 |
| 68.5087111 | 63 | 68.2291657 |
| 68.1450748 | 63 | 68.1791657 |
| 67.8723475 | 63 | 68.1382566 |
| 67.5996202 | 63 | 68.1087111 |
| 67.8723475 | 63 | 68.0882566 |
| 67.6905293 | 63 | 68.0632566 |
| 67.8723475 | 63 | 68.0223475 |
| 68.2359838 | 63 | 67.9768929 |
| 68.5996202 | 63 | 67.9223475 |
| 69.0541657 | 63 | 67.8814384 |
| 68.6905293 | 73 | 67.8496202 |
| 68.5996202 | 73 | 67.8109838 |
| 68.5996202 | 73 | 67.7746202 |
| 68.0541657 | 73 | 67.7541657 |
| 67.3268929 | 73 | 67.7518929 |
| 67.3268929 | 73 | 67.767802  |
| 67.5087111 | 73 | 67.7950748 |
| 67.417802  | 73 | 67.8450748 |
| 67.0541657 | 73 | 67.9064384 |
| 66.6905293 | 73 | 67.9518929 |
| 66.5087111 | 73 | 67.9746202 |
| 66.6905293 | 73 | 68.0109838 |
| 66.5087111 | 73 | 68.0518929 |
| 66.8723475 | 73 | 68.1018929 |
| 67.0541657 | 73 | 68.1541657 |
| 67.1450748 | 73 | 68.1723475 |
| 67.0541657 | 73 | 68.1882566 |
| 67.3268929 | 73 | 68.1882566 |
| 67.6905293 | 73 | 68.1746202 |
| 67.8723475 | 73 | 68.1518929 |
| 67.7814384 | 73 | 68.1109838 |
| 67.7814384 | 73 | 68.0746202 |
| 68.3268929 | 73 | 68.0314384 |
| 68.5087111 | 73 | 67.9882566 |
| 68.8723475 | 73 | 67.9609838 |
| 69.0541657 | 73 | 67.9518929 |
| 69.5087111 | 73 | 67.9405293 |
| 70.1450748 | 73 | 67.9314384 |
| 69.9632566 | 73 | 67.9246202 |

|            |    |            |
|------------|----|------------|
| 69.5996202 | 73 | 67.9246202 |
| 69.9632566 | 73 | 67.9405293 |
| 69.7814384 | 73 | 67.9587111 |
| 69.8723475 | 73 | 67.9746202 |
| 69.6905293 | 73 | 67.9905293 |
| 68.5996202 | 73 | 68.0132566 |
| 68.3268929 | 73 | 68.0473475 |
| 67.8723475 | 73 | 68.0837111 |
| 67.6905293 | 73 | 68.1268929 |
| 67.6905293 | 73 | 68.1655293 |
| 67.417802  | 73 | 68.1973475 |
| 67.2359838 | 73 | 68.2087111 |
| 66.8723475 | 73 | 68.2223475 |
| 66.8723475 | 73 | 68.2314384 |
| 66.9632566 | 73 | 68.2223475 |
| 66.9632566 | 73 | 68.2064384 |
| 66.8723475 | 73 | 68.1837111 |
| 67.1450748 | 73 | 68.1564384 |
| 67.1450748 | 73 | 68.1087111 |
| 67.0541657 | 73 | 68.0382566 |
| 67.3268929 | 73 | 67.9791657 |
| 67.2359838 | 73 | 67.9473475 |
| 67.3268929 | 73 | 67.9109838 |
| 67.1450748 | 73 | 67.8859838 |
| 67.7814384 | 73 | 67.8609838 |
| 68.417802  | 73 | 67.8382566 |
| 68.5996202 | 73 | 67.8450748 |
| 68.7814384 | 73 | 67.8587111 |
| 68.8723475 | 73 | 67.8905293 |
| 68.9632566 | 73 | 67.9450748 |
| 68.3268929 | 73 | 68.0087111 |
| 68.3268929 | 73 | 68.0882566 |
| 68.1450748 | 73 | 68.1950748 |
| 67.9632566 | 73 | 68.3268929 |
| 67.8723475 | 73 | 68.4564384 |
| 67.9632566 | 73 | 68.5746202 |
| 67.9632566 | 73 | 68.6882566 |
| 67.5996202 | 73 | 68.8064384 |
| 67.3268929 | 73 | 68.9155293 |
| 67.5996202 | 73 | 69.0291657 |
| 68.3268929 | 73 | 69.1541657 |
| 68.5087111 | 73 | 69.2496202 |
| 68.7814384 | 73 | 69.3246202 |
| 68.8723475 | 73 | 69.3996202 |
| 68.7814384 | 73 | 69.4723475 |

|            |    |            |
|------------|----|------------|
| 68.8723475 | 73 | 69.5337111 |
| 68.8723475 | 73 | 69.5791657 |
| 69.1450748 | 73 | 69.6268929 |
| 69.8723475 | 73 | 69.6700748 |
| 70.2359838 | 73 | 69.7359838 |
| 70.5996202 | 73 | 69.8132566 |
| 71.5087111 | 73 | 69.9064384 |
| 72.1450748 | 73 | 69.992802  |
| 72.0541657 | 73 | 70.0791657 |
| 71.6905293 | 73 | 70.1700748 |
| 71.5087111 | 73 | 70.2518929 |
| 71.5996202 | 73 | 70.3223475 |
| 71.5087111 | 73 | 70.392802  |
| 71.6905293 | 73 | 70.4632566 |
| 72.0541657 | 73 | 70.5314384 |
| 71.1450748 | 73 | 70.6064384 |
| 70.2359838 | 73 | 70.6746202 |
| 70.3268929 | 73 | 70.7541657 |
| 70.0541657 | 73 | 70.8223475 |
| 70.2359838 | 73 | 70.8791657 |
| 70.2359838 | 73 | 70.9382566 |
| 70.5087111 | 73 | 71.0041657 |
| 70.5087111 | 73 | 71.0859838 |
| 71.5087111 | 73 | 71.1746202 |
| 72.0541657 | 73 | 71.2496202 |
| 72.0541657 | 73 | 71.3359838 |
| 71.7814384 | 73 | 71.4473475 |
| 71.5996202 | 73 | 71.5450748 |
| 71.5996202 | 73 | 71.6359838 |
| 71.1450748 | 73 | 71.7359838 |
| 70.7814384 | 73 | 71.8382566 |
| 70.7814384 | 73 | 71.9382566 |
| 70.417802  | 73 | 72.0087111 |
| 70.0541657 | 73 | 72.0791657 |
| 70.5996202 | 73 | 72.1473475 |
| 71.0541657 | 73 | 72.2087111 |
| 71.6905293 | 73 | 72.292802  |
| 71.5087111 | 73 | 72.3905293 |
| 71.1450748 | 73 | 72.4882566 |
| 71.1450748 | 73 | 72.5973475 |
| 71.5087111 | 73 | 72.692802  |
| 72.1450748 | 73 | 72.7768929 |
| 72.6905293 | 73 | 72.8359838 |
| 72.8723475 | 73 | 72.8905293 |
| 73.6905293 | 73 | 72.8525353 |

|            |    |            |
|------------|----|------------|
| 75.0541657 | 73 | 72.8229898 |
| 75.417802  | 73 | 72.7843535 |
| 75.7814384 | 73 | 72.7434444 |
| 76.0541657 | 73 | 72.7093535 |
| 75.7814384 | 73 | 72.6888989 |
| 75.5087111 | 73 | 72.6775353 |
| 74.417802  | 73 | 72.6684444 |
| 74.3268929 | 73 | 72.6229898 |
| 74.417802  | 73 | 72.5684444 |
| 74.5087111 | 73 | 72.5161717 |
| 74.5087111 | 73 | 72.4752626 |
| 74.1450748 | 73 | 72.4388989 |
| 74.2359838 | 73 | 72.3911717 |
| 74.417802  | 73 | 72.3525353 |
| 74.0541657 | 73 | 72.3116262 |
| 73.5996202 | 73 | 72.2684444 |
| 72.8723475 | 73 | 72.2070807 |
| 72.6905293 | 73 | 72.1388989 |
| 69.9889509 | 73 | 72.054808  |
| 70.8723475 | 73 | 71.9729898 |
| 70.5087111 | 73 | 71.8843535 |
| 70.1450748 | 73 | 71.7616262 |
| 70.2359838 | 73 | 71.6502626 |
| 70.7814384 | 73 | 71.4955377 |
| 70.6905293 | 73 | 71.3296557 |
| 70.417802  | 73 | 71.1707986 |
| 68.9632566 | 73 | 71.0266109 |
| 68.2359838 | 73 | 70.9200265 |
| 67.9632566 | 73 | 70.8157148 |
| 68.9632566 | 73 | 70.6990064 |
| 69.5996202 | 73 | 70.5922154 |
| 69.7814384 | 73 | 70.4899698 |
| 69.9632566 | 73 | 70.4536062 |
| 69.5087111 | 73 | 70.396788  |
| 69.417802  | 73 | 70.3263335 |
| 69.0541657 | 73 | 70.2490607 |
| 69.417802  | 73 | 70.1899698 |
| 69.3268929 | 73 | 70.1445153 |
| 69.5996202 | 73 | 70.0945153 |
| 70.1450748 | 73 | 70.1166002 |
| 70.1450748 | 73 | 70.1143275 |
| 70.9632566 | 73 | 70.1325093 |
| 69.5924423 | 73 | 70.1666002 |
| 69.4188885 | 73 | 70.2120548 |
| 69.427153  | 73 | 70.2529638 |



|            |    |            |
|------------|----|------------|
| 69.7412026 | 73 | 70.2961457 |
| 70.1544257 | 73 | 70.3438729 |
| 70.1544257 | 73 | 70.409782  |
| 69.749467  | 73 | 70.4688729 |
| 70.2370704 | 73 | 70.5302366 |
| 70.4188885 | 73 | 70.5529638 |
| 72.6905293 | 73 | 70.5575093 |
| 71.9632566 | 73 | 70.534782  |
| 71.5996202 | 73 | 70.4984184 |
| 70.9632566 | 73 | 70.4575093 |
| 71.2359838 | 73 | 70.4188729 |
| 71.0541657 | 73 | 70.3961457 |
| 70.6905293 | 75 | 70.3620548 |
| 70.8723475 | 75 | 70.3325093 |
| 70.7814384 | 75 | 70.3006911 |
| 71.2359838 | 75 | 70.2461457 |
| 71.5087111 | 75 | 70.1779638 |
| 72.0541657 | 75 | 70.0916002 |
| 72.417802  | 75 | 70.0440524 |
| 72.417802  | 75 | 70.0076616 |
| 72.3268929 | 75 | 69.9778824 |
| 71.5996202 | 75 | 69.9334337 |
| 70.5996202 | 75 | 69.8831999 |
| 70.417802  | 75 | 69.8329662 |
| 69.8723475 | 75 | 69.7837654 |
| 69.7814384 | 75 | 69.7201019 |
| 68.8723475 | 75 | 69.6518929 |
| 68.5087111 | 75 | 69.5246202 |
| 67.8723475 | 75 | 69.4200748 |
| 67.8723475 | 75 | 69.3337111 |
| 68.1450748 | 75 | 69.2700748 |
| 68.0541657 | 75 | 69.2223475 |
| 68.1450748 | 75 | 69.192802  |
| 68.3268929 | 75 | 69.167802  |
| 67.9632566 | 75 | 69.1382566 |
| 67.417802  | 75 | 69.1155293 |
| 67.5087111 | 75 | 69.0746202 |
| 67.6905293 | 75 | 69.0200748 |
| 67.9632566 | 75 | 68.9518929 |
| 68.2359838 | 75 | 68.892802  |
| 67.9632566 | 75 | 68.8405293 |
| 68.1450748 | 75 | 68.7905293 |
| 68.1450748 | 75 | 68.7700748 |
| 67.7814384 | 75 | 68.7700748 |
| 67.6905293 | 75 | 68.7632566 |

|            |    |            |
|------------|----|------------|
| 67.6905293 | 75 | 68.7723475 |
| 67.5996202 | 75 | 68.7814384 |
| 67.7814384 | 75 | 68.8041657 |
| 68.1450748 | 75 | 68.842802  |
| 68.417802  | 63 | 68.9041657 |
| 69.3268929 | 63 | 68.9632566 |
| 69.8723475 | 63 | 69.0200748 |
| 69.6905293 | 63 | 69.0791657 |
| 69.6905293 | 63 | 69.1314384 |
| 69.8723475 | 63 | 69.1791657 |
| 69.5996202 | 63 | 69.2291657 |
| 69.3268929 | 63 | 69.2996202 |
| 69.3268929 | 63 | 69.3837111 |
| 70.0541657 | 63 | 69.4609838 |
| 70.3268929 | 63 | 69.5382566 |
| 70.3268929 | 63 | 69.6246202 |
| 70.7814384 | 63 | 69.7223475 |
| 70.5996202 | 63 | 69.8223475 |
| 70.1450748 | 63 | 69.9223475 |
| 70.2359838 | 63 | 70.0087111 |
| 70.1450748 | 63 | 70.0905293 |
| 69.7814384 | 63 | 70.1723475 |
| 70.0541657 | 63 | 70.2496202 |
| 70.3268929 | 63 | 70.2882566 |
| 70.2359838 | 63 | 70.3246202 |
| 70.417802  | 63 | 70.3587111 |
| 70.417802  | 63 | 70.3791657 |
| 70.2359838 | 63 | 70.3950748 |
| 70.2359838 | 63 | 70.4132566 |
| 69.9632566 | 63 | 70.4200748 |
| 70.2359838 | 63 | 70.4268929 |
| 70.8723475 | 63 | 70.4337111 |
| 70.7814384 | 63 | 70.442802  |
| 71.0541657 | 63 | 70.4609838 |
| 71.6905293 | 63 | 70.4609838 |
| 71.8723475 | 63 | 70.4473475 |
| 72.1450748 | 63 | 70.4314384 |
| 72.1450748 | 63 | 70.3950748 |
| 71.2359838 | 63 | 70.3587111 |
| 70.9632566 | 63 | 70.3359838 |
| 70.9632566 | 63 | 70.3087111 |
| 70.6905293 | 63 | 70.2973475 |
| 69.3268929 | 63 | 70.2723475 |
| 69.5996202 | 63 | 70.2314384 |
| 69.7814384 | 63 | 70.1746202 |

|            |    |            |
|------------|----|------------|
| 70.1450748 | 63 | 70.117802  |
| 70.5087111 | 63 | 70.0359838 |
| 70.417802  | 63 | 69.9450748 |
| 69.9632566 | 63 | 69.8382566 |
| 70.1450748 | 63 | 69.7223475 |
| 69.8723475 | 63 | 69.6041657 |
| 69.6905293 | 63 | 69.4768929 |
| 70.0541657 | 63 | 69.3359838 |
| 70.0541657 | 63 | 69.1996202 |
| 69.7814384 | 63 | 69.0609838 |
| 69.6905293 | 63 | 68.9109838 |
| 69.3268929 | 63 | 68.7632566 |
| 69.1450748 | 63 | 68.6155293 |
| 69.2359838 | 63 | 68.4700748 |
| 69.1450748 | 63 | 68.3587111 |
| 69.6905293 | 63 | 68.2609838 |
| 68.7814384 | 63 | 68.1564384 |
| 68.417802  | 63 | 68.0609838 |
| 68.0541657 | 63 | 67.9996202 |
| 67.9632566 | 63 | 67.917802  |
| 67.1450748 | 63 | 67.8314384 |
| 66.7814384 | 63 | 67.7382566 |
| 65.9632566 | 63 | 67.6541657 |
| 65.5996202 | 63 | 67.5814384 |
| 65.2359838 | 63 | 67.5246202 |
| 65.1450748 | 63 | 67.4700748 |
| 65.2359838 | 63 | 67.4359838 |
| 65.3268929 | 63 | 67.4109838 |
| 65.5087111 | 63 | 67.3882566 |
| 65.6905293 | 63 | 67.3564384 |
| 65.9632566 | 63 | 67.3337111 |
| 66.2359838 | 63 | 67.3064384 |
| 66.3268929 | 63 | 67.2905293 |
| 66.7814384 | 63 | 67.2768929 |
| 67.0541657 | 63 | 67.2564384 |
| 66.7814384 | 63 | 67.2314384 |
| 66.8723475 | 63 | 67.1859838 |
| 66.8723475 | 63 | 67.1587111 |
| 66.3268929 | 63 | 67.1382566 |
| 66.3268929 | 63 | 67.1155293 |
| 66.417802  | 63 | 67.0905293 |
| 67.1450748 | 63 | 67.0859838 |
| 67.5087111 | 63 | 67.1041657 |
| 67.6905293 | 63 | 67.1518929 |
| 67.9632566 | 63 | 67.2087111 |

|            |    |            |
|------------|----|------------|
| 68.5087111 | 63 | 67.267802  |
| 68.6905293 | 63 | 67.3382566 |
| 69.1450748 | 63 | 67.4291657 |
| 68.7814384 | 63 | 67.5268929 |
| 68.8723475 | 63 | 67.6223475 |
| 68.5996202 | 63 | 67.7087111 |
| 68.6905293 | 63 | 67.7837111 |
| 68.5996202 | 63 | 67.8496202 |
| 68.417802  | 63 | 67.9109838 |
| 68.1450748 | 63 | 67.9655293 |
| 67.8723475 | 63 | 68.0109838 |
| 67.6905293 | 63 | 68.0700748 |
| 67.5996202 | 63 | 68.1268929 |
| 67.1450748 | 63 | 68.1814384 |
| 66.9632566 | 63 | 68.2473475 |
| 66.9632566 | 63 | 68.3064384 |
| 67.5087111 | 63 | 68.3746202 |
| 67.8723475 | 63 | 68.4155293 |
| 67.8723475 | 63 | 68.4246202 |
| 67.5996202 | 63 | 68.4109838 |
| 67.9632566 | 63 | 68.3882566 |
| 68.8723475 | 63 | 68.3473475 |
| 69.2359838 | 63 | 68.3087111 |
| 69.3268929 | 63 | 68.2655293 |
| 69.1450748 | 63 | 68.2314384 |
| 68.9632566 | 63 | 68.2041657 |
| 68.8723475 | 63 | 68.1859838 |
| 68.7814384 | 63 | 68.1655293 |
| 68.9632566 | 63 | 68.1723475 |
| 68.8723475 | 63 | 68.192802  |
| 69.1450748 | 63 | 68.2223475 |
| 69.1450748 | 63 | 68.2609838 |
| 69.0541657 | 63 | 68.3041657 |
| 68.9632566 | 63 | 68.3473475 |
| 68.6905293 | 63 | 68.3950748 |
| 69.1450748 | 63 | 68.4382566 |
| 68.7814384 | 63 | 68.4814384 |
| 67.8723475 | 63 | 68.5109838 |
| 67.1450748 | 63 | 68.5246202 |
| 67.0541657 | 63 | 68.5337111 |
| 66.8723475 | 63 | 68.5541657 |
| 67.1450748 | 63 | 68.567802  |
| 67.417802  | 63 | 68.5564384 |
| 67.417802  | 63 | 68.5450748 |
| 67.7814384 | 63 | 68.5382566 |

|            |    |            |
|------------|----|------------|
| 67.8723475 | 63 | 68.5496202 |
| 67.8723475 | 63 | 68.5700748 |
| 68.8723475 | 63 | 68.6018929 |
| 69.2359838 | 63 | 68.6405293 |
| 69.3268929 | 63 | 68.6746202 |
| 69.417802  | 63 | 68.7018929 |
| 69.417802  | 63 | 68.717802  |
| 69.3268929 | 63 | 68.7314384 |
| 69.0541657 | 63 | 68.7382566 |
| 68.6905293 | 63 | 68.7382566 |
| 68.6905293 | 63 | 68.7587111 |
| 68.6905293 | 63 | 68.7746202 |
| 68.417802  | 63 | 68.8041657 |
| 68.2359838 | 63 | 68.8382566 |
| 68.417802  | 63 | 68.917802  |
| 68.5087111 | 63 | 69.0064384 |
| 68.417802  | 63 | 69.1064384 |
| 68.7814384 | 63 | 69.2109838 |
| 69.0541657 | 63 | 69.3405293 |
| 69.5996202 | 63 | 69.4768929 |
| 69.7814384 | 63 | 69.6064384 |
| 70.1450748 | 63 | 69.684113  |
| 70.3268929 | 63 | 69.7595148 |
| 70.3268929 | 63 | 69.8080571 |
| 69.9632566 | 63 | 69.8609383 |
| 69.7814384 | 63 | 69.914646  |
| 69.6905293 | 63 | 69.9712462 |
| 69.3268929 | 63 | 70.0230943 |
| 68.9632566 | 63 | 70.0846531 |
| 69.5087111 | 63 | 70.1530302 |
| 69.7814384 | 63 | 70.2379362 |
| 69.9632566 | 63 | 70.3205694 |
| 69.2359838 | 63 | 70.4081614 |
| 70.3268929 | 63 | 70.4901748 |
| 70.5996202 | 63 | 70.5670229 |
| 70.8723475 | 63 | 70.6318875 |
| 71.3268929 | 63 | 70.6944795 |
| 72.5996202 | 63 | 70.7252532 |
| 72.8723475 | 63 | 70.7372253 |
| 72.9632566 | 63 | 70.7498172 |
| 70.9793304 | 63 | 70.7512521 |
| 70.8884213 | 63 | 70.7431829 |
| 70.8140411 | 63 | 70.7061881 |
| 71.3512312 | 63 | 70.6646478 |
| 71.4751981 | 63 | 70.6255868 |

|                         |    |            |
|-------------------------|----|------------|
| 71.6818097              | 63 | 70.585906  |
| 71.4917271              | 63 | 70.543126  |
| 71.7892477              | 63 | 70.5026188 |
| 71.7892477              | 63 | 70.4732686 |
| 72.0867684              | 63 | 70.4455712 |
| 71.9958593              | 63 | 70.3893615 |
| 72.1942064              | 63 | 70.3205485 |
| 71.6983386              | 63 | 70.2442974 |
| 71.3099089              | 63 | 70.1837489 |
| 71.0123882              | 63 | 70.1083242 |
| 71.0123882              | 63 | 70.0254616 |
| 69.6487518              | 63 | 69.9333015 |
| 69.2603221              | 63 | 69.8351496 |
| 69.5578428              | 63 | 69.6973283 |
| 69.6570163              | 63 | 69.5502095 |
| 69.4586692              | 63 | 69.4105287 |
| 68.6652808              | 63 | 69.3251981 |
| 68.6652808              | 63 | 69.2997963 |
| 68.7644543              | 63 | 69.2739812 |
| 68.3760246              | 63 | 69.2279182 |
| 68.0702394              | 63 | 69.178756  |
| 68.0702394              | 63 | 69.1153377 |
| 68.1528841              | 63 | 69.043035  |
| 67.8553634              | 63 | 68.965567  |
| 67.2603221              | 63 | 68.8244627 |
| 67.0289171              | 63 | 68.6668295 |
| 66.9132147              | 63 | 68.5114689 |
| 66.8140411              | 63 | 68.3511497 |
| 67.3099089              | 63 | 68.2032272 |
| 67.2851155              | 63 | 68.0672882 |
| 67.1859419              | 63 | 67.9410599 |
| 67.400818               | 63 | 67.8216498 |
| 67.0867684              | 63 | 67.7386033 |
| 66.9875948              | 63 | 67.6629949 |
| 67.3760246              | 63 | 67.5844938 |
| 67.5661072              | 63 | 67.5035135 |
| 69.8723475              | 63 | 67.4252191 |
| 69.7814384              | 63 | 67.3803958 |
| 69.5087111              | 63 | 67.3378451 |
| 69.5087111              | 63 | 67.3019061 |
| 69.1450748              | 63 | 67.3006778 |
| 68.5996202              | 63 | 67.3070942 |
| 92314.17.10: 68.6905293 | 63 | 67.3157832 |
| Before1 66.1450748      | 63 | 67.315588  |
| Before2 65.7814384      | 69 | 67.320558  |

|          |            |    |            |
|----------|------------|----|------------|
| Before3  | 65.7814384 | 69 | 67.3404041 |
| Before4  | 65.7814384 | 69 | 67.3139301 |
| Before5  | 65.7814384 | 69 | 67.2853899 |
| Before6  | 65.8723475 | 69 | 67.2595357 |
| Before7  | 65.9632566 | 69 | 67.2262435 |
| Before8  | 66.2359838 | 69 | 67.2034885 |
| Before9  | 66.3268929 | 69 | 67.1879649 |
| Before10 | 66.2359838 | 69 | 67.1650032 |
| Before11 | 66.417802  | 69 | 67.1401821 |
| Before12 | 66.417802  | 69 | 67.1180469 |
| Before13 | 66.3268929 | 69 | 67.0911596 |
| Before14 | 66.8723475 | 69 | 67.0595203 |
| Before15 | 66.9632566 | 69 | 66.980349  |
| Before16 | 67.3268929 | 69 | 66.9485308 |
| Before17 | 68.3268929 | 69 | 66.921258  |
| Before18 | 68.3268929 | 69 | 66.8939853 |
| Before19 | 68.417802  | 69 | 66.871258  |
| Before20 | 68.1450748 | 63 | 66.8644399 |
| Before21 | 68.0541657 | 63 | 66.8485308 |
| Before22 | 68.0541657 | 63 | 66.9030762 |
| Before23 | 65.9699557 | 63 | 66.9894399 |
| Before24 | 65.7716086 | 63 | 67.0848944 |
| Before25 | 65.7798731 | 63 | 67.1826217 |
| Before26 | 65.9782202 | 63 | 67.280349  |
| Before27 | 66.3749144 | 63 | 67.3758035 |
| Before28 | 66.564997  | 63 | 67.4508035 |
| Before29 | 66.4823524 | 63 | 67.505349  |
| Before30 | 66.0939226 | 63 | 67.5826217 |
| Before31 | 66.1021871 | 63 | 67.630349  |
| Before32 | 66.3005342 | 63 | 67.6871671 |
| Before33 | 66.3005342 | 63 | 67.7439853 |
| Before34 | 66.7054929 | 63 | 67.8008035 |
| Before35 | 68.5087111 | 63 | 67.8417126 |
| Before36 | 68.417802  | 63 | 67.8780762 |
| Before37 | 68.417802  | 63 | 67.9121671 |
| Before38 | 68.2359838 | 63 | 67.921258  |
| Before39 | 68.3268929 | 63 | 67.9394399 |
| Before40 | 68.0541657 | 63 | 67.9576217 |
| Before41 | 68.3268929 | 63 | 68.0008035 |
| Before42 | 69.2359838 | 63 | 68.055349  |
| Before43 | 69.5996202 | 63 | 68.1008035 |
| Before44 | 69.6905293 | 63 | 68.200636  |
| Before45 | 69.6905293 | 63 | 68.3099727 |
| Before46 | 69.6905293 | 63 | 68.4054664 |
| Before47 | 68.9632566 | 63 | 68.4732741 |

|          |            |    |            |
|----------|------------|----|------------|
| Before48 | 68.417802  | 63 | 68.5175281 |
| Before49 | 69.417802  | 63 | 68.5502119 |
| Before50 | 68.1450748 | 63 | 68.5758708 |
| Before51 | 68.6905293 | 63 | 68.6066951 |
| Before52 | 68.6905293 | 63 | 68.6282218 |
| Before53 | 68.5996202 | 63 | 68.6470626 |
| Before54 | 68.5087111 | 63 | 68.6659034 |
| Before55 | 68.417802  | 63 | 68.6837111 |
| Before56 | 68.6905293 | 63 | 68.6382566 |
| Before57 | 68.6905293 | 63 | 68.5950748 |
| Before58 | 69.0541657 | 63 | 68.5496202 |
| Before59 | 69.1450748 | 63 | 68.5087111 |
| Before60 | 69.8723475 | 63 | 68.4609838 |
| Before61 | 70.2359838 | 63 | 68.4405293 |
| Before62 | 69.8723475 | 63 | 68.4291657 |
| Before63 | 69.9632566 | 63 | 68.4041657 |
| Before64 | 70.1450748 | 63 | 68.3746202 |
| Before65 | 69.5996202 | 63 | 68.3609838 |
| Before66 | 68.6905293 | 63 | 68.3564384 |
| Before67 | 68.1450748 | 63 | 68.3055728 |
| Before68 | 67.8723475 | 63 | 68.2679304 |
| Before69 | 67.5087111 | 63 | 68.304294  |
| Before70 | 67.3268929 | 63 | 68.3179304 |
| Before71 | 66.9632566 | 63 | 68.3183045 |
| Before72 | 67.0541657 | 63 | 68.3199182 |
| Before73 | 67.0541657 | 63 | 68.3190526 |
| Before74 | 67.417802  | 63 | 68.3713254 |
| Before75 | 66.6905293 | 63 | 68.4258708 |
| Before76 | 66.6905293 | 63 | 68.4804163 |
| Before77 | 66.5996202 | 63 | 68.5304163 |
| Before78 | 66.5996202 | 63 | 68.5758708 |
| Before79 | 66.417802  | 63 | 68.6190526 |
| Before80 | 67.2359838 | 63 | 68.6940526 |
| Before81 | 67.8723475 | 63 | 68.7667799 |
| Before82 | 68.2359838 | 63 | 68.832689  |
| Before83 | 68.417802  | 63 | 68.9235981 |
| Before84 | 69.1450748 | 63 | 69.0235981 |
| Before85 | 69.5087111 | 63 | 69.1167799 |
| Before86 | 67.6559061 | 63 | 69.2304163 |
| Before87 | 67.457559  | 63 | 69.3667799 |
| Before88 | 69.8723475 | 63 | 69.4895072 |
| Before89 | 69.9632566 | 63 | 69.6190526 |
| Before90 | 68.1600383 | 63 | 69.7349617 |
| Before91 | 68.7550797 | 63 | 69.8417799 |
| Before92 | 68.6559061 | 63 | 69.9599617 |



|           |            |    |            |
|-----------|------------|----|------------|
| Before93  | 70.6905293 | 63 | 70.0667799 |
| Before94  | 70.6905293 | 63 | 70.157689  |
| Before95  | 70.5996202 | 63 | 70.2463254 |
| Before96  | 70.6905293 | 63 | 70.2805838 |
| Before97  | 70.5087111 | 63 | 70.3555838 |
| Before98  | 70.7814384 | 63 | 70.428311  |
| Before99  | 72.1450748 | 63 | 70.5010383 |
| Before100 | 72.7814384 | 63 | 70.578311  |
| Before101 | 72.8723475 | 63 | 70.6101292 |
| Before102 | 73.5087111 | 63 | 70.6101292 |
| Before103 | 73.9632566 | 63 | 70.5964928 |
| Before104 | 73.8723475 | 63 | 70.5646747 |
| Before105 | 74.1450748 | 63 | 70.5124019 |
| Before106 | 74.1450748 | 63 | 70.4442201 |
| Before107 | 73.0541657 | 63 | 70.4132675 |
| Before108 | 73.0541657 | 63 | 70.3963645 |
| Before109 | 72.1450748 | 63 | 70.3304554 |
| Before110 | 71.5996202 | 63 | 70.2850009 |
| Before111 | 71.6905293 | 63 | 70.2846268 |
| Before112 | 71.3268929 | 63 | 70.3261948 |
| Before113 | 70.6905293 | 63 | 70.3816059 |
| Before114 | 70.9632566 | 63 | 70.3816059 |
| Before115 | 68.0608648 | 63 | 70.3702422 |
| Before116 | 69.6905293 | 63 | 70.3656968 |
| Before117 | 69.5087111 | 63 | 70.3543331 |
| Before118 | 69.5087111 | 63 | 70.3361513 |
| Before119 | 69.5087111 | 63 | 70.3202422 |
| Before120 | 68.5087111 | 63 | 70.2588786 |
| Before121 | 67.8723475 | 63 | 70.1702422 |
| Before122 | 67.6905293 | 63 | 70.0543331 |
| Before123 | 67.1450748 | 63 | 69.913424  |
| Before124 | 67.0541657 | 63 | 69.7588786 |
| Before125 | 66.7814384 | 63 | 69.5929695 |
| Before126 | 66.417802  | 63 | 69.413424  |
| Before127 | 66.7814384 | 63 | 69.2270604 |
| Before128 | 67.2359838 | 63 | 69.0611513 |
| Before129 | 68.1450748 | 63 | 68.8861513 |
| Before130 | 68.1450748 | 63 | 68.7270604 |
| Before131 | 70.417802  | 63 | 68.5770604 |
| Before132 | 70.8723475 | 63 | 68.4316059 |
| Before133 | 70.6905293 | 63 | 68.2929695 |
| Before134 | 70.2359838 | 63 | 68.1702422 |
| Before135 | 70.417802  | 63 | 68.0611513 |
| Before136 | 70.2359838 | 63 | 68.0337111 |
| Before137 | 69.7814384 | 63 | 67.9768929 |

|           |            |    |            |
|-----------|------------|----|------------|
| Before138 | 70.1450748 | 63 | 67.9291657 |
| Before139 | 69.6905293 | 63 | 67.8700748 |
| Before140 | 69.2359838 | 63 | 67.8018929 |
| Before141 | 68.2359838 | 63 | 67.7655293 |
| Before142 | 67.8723475 | 63 | 67.7587111 |
| Before143 | 67.7814384 | 63 | 67.7723475 |
| Before144 | 67.2359838 | 63 | 67.7973475 |
| Before145 | 66.9632566 | 63 | 67.8337111 |
| Before146 | 66.6905293 | 63 | 67.892802  |
| Before147 | 66.417802  | 63 | 67.9746202 |
| Before148 | 66.0541657 | 63 | 68.067802  |
| Before149 | 65.7814384 | 63 | 68.1496202 |
| Before150 | 65.5996202 | 63 | 68.2109838 |
| Before151 | 65.8723475 | 63 | 68.2859838 |
| Before152 | 65.7814384 | 63 | 68.3041657 |
| Before153 | 65.7814384 | 63 | 68.3109838 |
| Before154 | 66.5996202 | 63 | 68.3246202 |
| Before155 | 66.9632566 | 63 | 68.342802  |
| Before156 | 67.417802  | 63 | 68.342802  |
| Before157 | 67.5996202 | 63 | 68.3337111 |
| Before158 | 67.1450748 | 63 | 68.3405293 |
| Before159 | 66.7814384 | 63 | 68.3268929 |
| Before160 | 67.0541657 | 63 | 68.3223475 |
| Before161 | 67.5996202 | 63 | 68.3337111 |
| Before162 | 68.2359838 | 63 | 68.367802  |
| Before163 | 68.1450748 | 63 | 68.4109838 |
| Before164 | 68.5087111 | 63 | 68.4587111 |
| Before165 | 69.1450748 | 63 | 68.5200748 |
| Before166 | 69.6905293 | 63 | 68.567802  |
| Before167 | 70.5087111 | 63 | 68.6268929 |
| Before168 | 70.5087111 | 63 | 68.6973475 |
| Before169 | 70.5996202 | 63 | 68.7882566 |
| Before170 | 71.1450748 | 63 | 68.8950748 |
| Before171 | 71.1450748 | 63 | 69.0132566 |
| Before172 | 71.1450748 | 63 | 69.1268929 |
| Before173 | 71.2359838 | 63 | 69.2359838 |
| Before174 | 70.9632566 | 63 | 69.3382566 |
| Before175 | 70.417802  | 63 | 69.4132566 |
| Before176 | 69.8723475 | 63 | 69.4791657 |
| Before177 | 70.0541657 | 63 | 69.5405293 |
| Before178 | 69.5996202 | 63 | 69.5950748 |
| Before179 | 69.5087111 | 63 | 69.6337111 |
| Before180 | 69.6905293 | 63 | 69.6723475 |
| Before181 | 69.5996202 | 63 | 69.6950748 |
| Before182 | 69.5996202 | 63 | 69.7041657 |

|           |            |    |            |
|-----------|------------|----|------------|
| Before183 | 69.6905293 | 63 | 69.6905293 |
| Before184 | 69.6905293 | 63 | 69.6814384 |
| Before185 | 68.8723475 | 63 | 69.6609838 |
| Before186 | 69.0541657 | 63 | 69.6132566 |
| Before187 | 69.2359838 | 63 | 69.5496202 |
| Before188 | 69.6905293 | 63 | 69.4700748 |
| Before189 | 70.0541657 | 63 | 69.3814384 |
| Before190 | 70.3268929 | 63 | 69.2814384 |
| Before191 | 70.417802  | 63 | 69.1700748 |
| Before192 | 70.1450748 | 63 | 69.0632566 |
| Before193 | 69.8723475 | 63 | 68.967802  |
| Before194 | 69.5996202 | 63 | 68.8768929 |
| Before195 | 69.5996202 | 63 | 68.7882566 |
| Before196 | 69.8723475 | 63 | 68.7223475 |
| Before197 | 69.7814384 | 63 | 68.6700748 |
| Before198 | 68.6905293 | 63 | 68.617802  |
| Before199 | 68.3268929 | 63 | 68.5609838 |
| Before200 | 67.9632566 | 63 | 68.5087111 |
| Before201 | 67.9632566 | 63 | 68.4768929 |
| Before202 | 67.6905293 | 63 | 68.4496202 |
| Before203 | 67.7814384 | 63 | 68.4291657 |
| Before204 | 67.6905293 | 63 | 68.3950748 |
| Before205 | 67.2359838 | 63 | 68.3564384 |
| Before206 | 67.1450748 | 63 | 68.3132566 |
| Before207 | 67.3268929 | 63 | 68.2587111 |
| Before208 | 66.9632566 | 63 | 68.2064384 |
| Before209 | 66.5996202 | 63 | 68.1496202 |
| Before210 | 66.6905293 | 63 | 68.0837111 |
| Before211 | 66.8723475 | 63 | 68.0405293 |
| Before212 | 67.3268929 | 63 | 68.0018929 |
| Before213 | 67.5996202 | 63 | 67.9496202 |
| Before214 | 67.417802  | 63 | 67.9087111 |
| Before215 | 67.7814384 | 63 | 67.867802  |
| Before216 | 67.7814384 | 63 | 67.8041657 |
| Before217 | 67.9632566 | 63 | 67.7359838 |
| Before218 | 67.3268929 | 63 | 67.667802  |
| Before219 | 67.417802  | 63 | 67.6268929 |
| Before220 | 68.417802  | 63 | 67.6018929 |
| Before221 | 68.5087111 | 63 | 67.5814384 |
| Before222 | 68.7814384 | 63 | 67.567802  |
| Before223 | 68.3268929 | 63 | 67.5632566 |
| Before224 | 68.1450748 | 63 | 67.5587111 |
| Before225 | 67.1450748 | 63 | 67.5655293 |
| Before226 | 66.8723475 | 63 | 67.5905293 |
| Before227 | 67.1450748 | 63 | 67.6405293 |

|           |            |    |            |
|-----------|------------|----|------------|
| Before228 | 67.417802  | 63 | 67.692802  |
| Before229 | 67.417802  | 63 | 67.7632566 |
| Before230 | 68.5996202 | 63 | 67.8564384 |
| Before231 | 68.8723475 | 63 | 67.9587111 |
| Before232 | 68.0541657 | 63 | 68.0655293 |
| Before233 | 68.2359838 | 63 | 68.167802  |
| Before234 | 67.9632566 | 63 | 68.2655293 |
| Before235 | 67.0541657 | 63 | 68.3700748 |
| Before236 | 67.1450748 | 63 | 68.4541657 |
| Before237 | 67.0541657 | 63 | 68.5268929 |
| Before238 | 67.0541657 | 63 | 68.5950748 |
| Before239 | 67.3268929 | 63 | 68.6791657 |
| Before240 | 67.1450748 | 63 | 68.7746202 |
| minute1   | 67.417802  | 63 | 68.8723475 |
| minute2   | 67.5087111 | 63 | 68.9632566 |
| minute3   | 67.5996202 | 63 | 69.042802  |
| minute4   | 67.9632566 | 63 | 69.1200748 |
| minute5   | 68.2359838 | 63 | 69.1859838 |
| minute6   | 69.1450748 | 63 | 69.2564384 |
| minute7   | 69.417802  | 63 | 69.3109838 |
| minute8   | 69.7814384 | 63 | 69.3337111 |
| minute9   | 70.3268929 | 63 | 69.3450748 |
| minute10  | 70.7814384 | 63 | 69.3496202 |
| minute11  | 71.1450748 | 63 | 69.3246202 |
| minute12  | 71.417802  | 63 | 69.292802  |
| minute13  | 71.5087111 | 63 | 69.2791657 |
| minute14  | 71.5996202 | 63 | 69.2564384 |
| minute15  | 71.1450748 | 63 | 69.2496202 |
| minute16  | 70.6905293 | 63 | 69.2859838 |
| minute17  | 70.6905293 | 63 | 69.3200748 |
| minute18  | 70.6905293 | 63 | 69.3632566 |
| minute19  | 71.2359838 | 63 | 69.417802  |
| minute20  | 72.3268929 | 63 | 69.4837111 |
| minute21  | 72.1450748 | 63 | 69.5518929 |
| minute22  | 71.9632566 | 63 | 69.6291657 |
| minute23  | 71.417802  | 63 | 69.7132566 |
| minute24  | 70.7814384 | 63 | 69.7950748 |
| minute25  | 69.9632566 | 63 | 69.8632566 |
| minute26  | 69.0541657 | 63 | 69.9291657 |
| minute27  | 68.0541657 | 63 | 69.9632566 |
| minute28  | 67.8723475 | 63 | 69.9814384 |
| minute29  | 67.5996202 | 63 | 69.9768929 |
| minute30  | 67.5996202 | 63 | 69.9473475 |
| minute31  | 67.5996202 | 63 | 69.8973475 |
| minute32  | 67.5087111 | 63 | 69.8200748 |

|               |            |    |            |
|---------------|------------|----|------------|
| minute33      | 67.3268929 | 63 | 69.7359838 |
| minute34      | 67.6905293 | 63 | 69.6382566 |
| minute35      | 68.5087111 | 63 | 69.5450748 |
| minute36      | 68.5087111 | 63 | 69.4518929 |
| minute37      | 68.7814384 | 63 | 69.3700748 |
| minute38      | 69.2359838 | 63 | 69.2882566 |
| minute39      | 69.9632566 | 63 | 69.2109838 |
| minute40      | 69.8723475 | 63 | 69.1018929 |
| minute41      | 70.5087111 | 63 | 68.9609838 |
| minute42      | 70.8723475 | 63 | 68.8223475 |
| minute43      | 70.8723475 | 63 | 68.6950748 |
| minute44      | 70.6905293 | 63 | 68.5973475 |
| minute45      | 70.8723475 | 63 | 68.5337111 |
| minute46      | 70.5087111 | 63 | 68.4973475 |
| minute47      | 70.1450748 | 63 | 68.4996202 |
| minute48      | 69.5996202 | 63 | 68.5450748 |
| minute49      | 69.1450748 | 63 | 68.6064384 |
| minute50      | 68.7814384 | 63 | 68.6837111 |
| minute51      | 68.0541657 | 63 | 68.7655293 |
| minute52      | 68.0541657 | 63 | 68.8541657 |
| minute53      | 67.5996202 | 63 | 68.9587111 |
| minute54      | 67.8723475 | 63 | 69.0700748 |
| minute55      | 67.417802  | 63 | 69.1859838 |
| minute56      | 67.417802  | 63 | 69.2882566 |
| minute57      | 67.417802  | 63 | 69.392802  |
| minute58      | 67.5996202 | 63 | 69.4973475 |
| minute59      | 66.8723475 | 63 | 69.5859838 |
| minute60      | 66.6905293 | 63 | 69.6655293 |
| Activity15:32 | 66.5996202 | 63 | 69.7382566 |
| Activity15:33 | 66.8723475 | 73 | 69.7996202 |
| Activity15:34 | 67.5087111 | 73 | 69.8496202 |
| Activity15:35 | 68.2359838 | 73 | 69.8950748 |
| Activity15:36 | 68.5087111 | 73 | 69.9337111 |
| Activity15:37 | 69.1450748 | 73 | 69.967802  |
| Activity15:38 | 69.8723475 | 73 | 70.0087111 |
| Activity15:39 | 70.3268929 | 73 | 70.0564384 |
| Activity15:40 | 70.6905293 | 73 | 70.1109838 |
| Activity15:41 | 70.8723475 | 73 | 70.1655293 |
| Activity15:42 | 71.1450748 | 73 | 70.2200748 |
| Activity15:43 | 71.6905293 | 73 | 70.2859838 |
| Activity15:44 | 71.7814384 | 73 | 70.3564384 |
| Activity15:45 | 72.3268929 | 73 | 70.4405293 |
| Activity15:46 | 72.5996202 | 73 | 70.5268929 |
| Activity15:47 | 72.6905293 | 73 | 70.6268929 |
| Activity15:48 | 72.9632566 | 73 | 70.7291657 |

|               |            |    |            |
|---------------|------------|----|------------|
| Activity15:49 | 72.7814384 | 73 | 70.8337111 |
| Activity15:50 | 73.1450748 | 73 | 70.9200748 |
| Activity15:51 | 72.7814384 | 73 | 71.0268929 |
| Activity15:52 | 72.9632566 | 73 | 71.1337111 |
| Activity15:53 | 72.8723475 | 73 | 71.242802  |
| Activity15:54 | 72.6905293 | 73 | 71.3564384 |
| Activity15:55 | 72.2359838 | 73 | 71.4632566 |
| Activity15:56 | 72.2359838 | 73 | 71.5496202 |
| Activity15:57 | 72.1450748 | 73 | 71.6382566 |
| Activity15:58 | 72.0541657 | 73 | 71.7109838 |
| Activity15:59 | 71.7814384 | 73 | 71.7655293 |
| Activity16:00 | 71.3268929 | 73 | 71.817802  |
| Activity16:01 | 70.9632566 | 73 | 71.8609838 |
| Activity16:02 | 70.6905293 | 73 | 71.8973475 |
| Activity16:03 | 70.8723475 | 73 | 71.9087111 |
| Activity16:04 | 70.9632566 | 73 | 71.917802  |
| Activity16:05 | 71.3268929 | 73 | 71.9268929 |
| Activity16:06 | 71.417802  | 73 | 71.9405293 |
| Activity16:07 | 71.5087111 | 73 | 71.9473475 |
| Activity16:08 | 71.5996202 | 73 | 71.9473475 |
| Activity16:09 | 71.0541657 | 73 | 71.9359838 |
| Activity16:10 | 71.1450748 | 73 | 71.8996202 |
| Activity16:11 | 70.9632566 | 73 | 71.8609838 |
| Activity16:12 | 70.9632566 | 73 | 71.8109838 |
| Activity16:13 | 71.417802  | 73 | 71.767802  |
| Activity16:14 | 71.7814384 | 73 | 71.7200748 |
| Activity16:15 | 71.6905293 | 73 | 71.6632566 |
| Activity16:16 | 72.0541657 | 73 | 71.617802  |
| Activity16:17 | 72.0541657 | 73 | 71.5655293 |
| Activity16:18 | 72.0541657 | 73 | 71.4973475 |
| Activity16:19 | 72.417802  | 73 | 71.4064384 |
| Activity16:20 | 72.417802  | 73 | 71.3223475 |
| Activity16:21 | 72.3268929 | 73 | 71.2541657 |
| Activity16:22 | 71.5996202 | 73 | 71.192802  |
| Activity16:23 | 72.0541657 | 73 | 71.1405293 |
| Activity16:24 | 72.1450748 | 73 | 71.0791657 |
| Activity16:25 | 72.8723475 | 73 | 71.042802  |
| Activity16:26 | 72.8723475 | 73 | 71.0064384 |
| Activity16:27 | 72.6905293 | 73 | 70.9496202 |
| Activity16:28 | 72.5087111 | 73 | 70.892802  |
| Activity16:29 | 71.3268929 | 73 | 70.8155293 |
| Activity16:30 | 71.5996202 | 73 | 70.7291657 |
| Activity16:31 | 70.7814384 | 73 | 70.6405293 |
| Activity16:32 | 71.2359838 | 73 | 70.5609838 |
| Activity16:33 | 70.9632566 | 73 | 70.4746202 |

|               |            |    |            |
|---------------|------------|----|------------|
| Activity16:34 | 70.417802  | 73 | 70.3859838 |
| Activity16:35 | 70.417802  | 73 | 70.3018929 |
| Activity16:36 | 70.1450748 | 73 | 70.2337111 |
| Activity16:37 | 69.417802  | 73 | 70.1587111 |
| Activity16:38 | 68.417802  | 73 | 70.0814384 |
| Activity16:39 | 68.417802  | 73 | 69.9973475 |
| Activity16:40 | 68.5996202 | 73 | 69.9041657 |
| Activity16:41 | 68.5087111 | 73 | 69.8223475 |
| Activity16:42 | 68.5996202 | 73 | 69.7496202 |
| Activity16:43 | 68.417802  | 73 | 69.6837111 |
| Activity16:44 | 69.5087111 | 73 | 69.5996202 |
| Activity16:45 | 69.8723475 | 73 | 69.5109838 |
| Activity16:46 | 69.1450748 | 73 | 69.3950748 |
| Activity16:47 | 69.2359838 | 73 | 69.2859838 |
| Activity16:48 | 68.5087111 | 73 | 69.1882566 |
| Activity16:49 | 67.5996202 | 73 | 69.0973475 |
| Activity16:50 | 67.5996202 | 73 | 69.0268929 |
| Activity16:51 | 67.7814384 | 73 | 68.9359838 |
| Activity16:52 | 67.5087111 | 73 | 68.8655293 |
| Activity16:53 | 67.8723475 | 73 | 68.7723475 |
| Activity16:54 | 68.417802  | 73 | 68.6905293 |
| Activity16:55 | 68.9632566 | 73 | 68.6291657 |
| Activity16:56 | 69.0541657 | 73 | 68.5700748 |
| Activity16:57 | 68.9632566 | 73 | 68.5268929 |
| Activity16:58 | 68.6905293 | 73 | 68.5064384 |
| Activity16:59 | 68.6905293 | 73 | 68.517802  |
| Activity17:00 | 69.1450748 | 73 | 68.5314384 |
| Activity17:01 | 69.417802  | 73 | 68.5359838 |
| Activity17:02 | 68.9632566 | 73 | 68.5382566 |
| Activity17:03 | 68.6905293 | 73 | 68.5405293 |
| Activity17:04 | 68.5996202 | 73 | 68.542802  |
| Activity17:05 | 68.2359838 | 73 | 68.5268929 |
| Activity17:06 | 68.5087111 | 73 | 68.5155293 |
| Activity17:07 | 68.7814384 | 73 | 68.5314384 |
| Activity17:08 | 68.8723475 | 73 | 68.5564384 |
| Activity17:09 | 68.5087111 | 73 | 68.6132566 |
| Activity17:10 | 67.9632566 | 73 | 68.6837111 |
| Activity17:11 | 67.9632566 | 73 | 68.7450748 |
| Activity17:12 | 67.5087111 | 73 | 68.7996202 |
| Activity17:13 | 67.6905293 | 73 | 68.8473475 |
| Activity17:14 | 67.9632566 | 73 | 68.8973475 |
| Activity17:15 | 68.0541657 | 73 | 68.9200748 |
| Activity17:16 | 68.417802  | 73 | 68.9246202 |
| Activity17:17 | 68.5996202 | 73 | 68.9223475 |
| Activity17:18 | 68.8723475 | 73 | 68.9291657 |

|               |            |    |            |
|---------------|------------|----|------------|
| Activity17:19 | 68.9632566 | 73 | 68.942802  |
| Activity17:20 | 68.7814384 | 73 | 68.9609838 |
| Activity17:21 | 68.5996202 | 73 | 68.9632566 |
| Activity17:22 | 68.6905293 | 73 | 68.9632566 |
| Activity17:23 | 68.5087111 | 73 | 68.9791657 |
| Activity17:24 | 68.8723475 | 73 | 69.0109838 |
| Activity17:25 | 69.417802  | 73 | 69.0564384 |
| Activity17:26 | 69.7814384 | 73 | 69.1018929 |
| Activity17:27 | 70.2359838 | 73 | 69.1359838 |
| Activity17:28 | 70.7814384 | 73 | 69.1587111 |
| Activity17:29 | 70.417802  | 73 | 69.1632566 |
| Activity17:30 | 70.0541657 | 73 | 69.1700748 |
| Activity17:31 | 69.9632566 | 73 | 69.1837111 |
| Activity17:32 | 69.417802  | 73 | 69.1859838 |
| Activity17:33 | 69.8723475 | 73 | 69.1950748 |
| Activity17:34 | 69.3268929 | 73 | 69.2018929 |
| Activity17:35 | 69.1450748 | 73 | 69.2018929 |
| Activity17:36 | 68.9632566 | 73 | 69.2018929 |
| Activity17:37 | 69.2359838 | 73 | 69.1973475 |
| Activity17:38 | 69.2359838 | 73 | 69.1973475 |
| Activity17:39 | 69.417802  | 73 | 69.2041657 |
| Activity17:40 | 69.2359838 | 73 | 69.2109838 |
| Activity17:41 | 69.417802  | 73 | 69.2382566 |
| Activity17:42 | 69.5996202 | 73 | 69.267802  |
| Activity17:43 | 69.9632566 | 73 | 69.3041657 |
| Activity17:44 | 70.417802  | 73 | 69.3609838 |
| Activity17:45 | 70.0541657 | 73 | 69.4132566 |
| Activity17:46 | 69.8723475 | 73 | 69.4518929 |
| Activity17:47 | 69.6905293 | 73 | 69.4882566 |
| Activity17:48 | 69.0541657 | 73 | 69.5109838 |
| Activity17:49 | 68.7814384 | 73 | 69.5155293 |
| Activity17:50 | 68.5087111 | 73 | 69.5518929 |
| Activity17:51 | 68.0541657 | 73 | 69.6064384 |
| Activity17:52 | 67.8723475 | 73 | 69.6700748 |
| Activity17:53 | 67.9632566 | 73 | 69.7518929 |
| Activity17:54 | 67.9632566 | 73 | 69.8268929 |
| Activity17:55 | 68.0541657 | 73 | 69.9109838 |
| Activity17:56 | 68.2359838 | 73 | 69.9859838 |
| Activity17:57 | 68.5996202 | 73 | 70.0496202 |
| Activity17:58 | 69.1450748 | 73 | 70.1041657 |
| Activity17:59 | 69.2359838 | 73 | 70.142802  |
| Activity18:00 | 69.8723475 | 73 | 70.1723475 |
| Activity18:01 | 69.7814384 | 73 | 70.1950748 |
| Activity18:02 | 70.1450748 | 73 | 70.2155293 |
| Activity18:03 | 70.7814384 | 73 | 70.2223475 |



|               |            |    |            |
|---------------|------------|----|------------|
| Activity18:04 | 70.9632566 | 73 | 70.2223475 |
| Activity18:05 | 70.9632566 | 73 | 70.2064384 |
| Activity18:06 | 71.2359838 | 73 | 70.1882566 |
| Activity18:07 | 71.1450748 | 73 | 70.1632566 |
| Activity18:08 | 70.9632566 | 73 | 70.1382566 |
| Activity18:09 | 71.8723475 | 73 | 70.1268929 |
| Activity18:10 | 72.2359838 | 73 | 70.1155293 |
| Activity18:11 | 72.5087111 | 73 | 70.1064384 |
| Activity18:12 | 72.6905293 | 73 | 70.0996202 |
| Activity18:13 | 72.8723475 | 73 | 70.1018929 |
| Activity18:14 | 72.6905293 | 73 | 70.1064384 |
| Activity18:15 | 72.1450748 | 73 | 70.1109838 |
| Activity18:16 | 71.5087111 | 73 | 70.1109838 |
| Activity18:17 | 71.417802  | 73 | 70.1064384 |
| Activity18:18 | 70.7814384 | 73 | 70.1041657 |
| Activity18:19 | 70.5996202 | 73 | 70.0882566 |
| Activity18:20 | 70.1450748 | 73 | 70.0700748 |
| Activity18:21 | 70.2359838 | 73 | 70.042802  |
| Activity18:22 | 69.8723475 | 73 | 70.0200748 |
| Activity18:23 | 69.9632566 | 73 | 69.9905293 |
| Activity18:24 | 69.7814384 | 73 | 69.9496202 |
| Activity18:25 | 69.3268929 | 73 | 69.9041657 |
| Activity18:26 | 68.8723475 | 73 | 69.8746202 |
| Activity18:27 | 68.6905293 | 73 | 69.8268929 |
| Activity18:28 | 68.5996202 | 73 | 69.7723475 |
| Activity18:29 | 68.3268929 | 73 | 69.7155293 |
| Activity18:30 | 68.1450748 | 73 | 69.6291657 |
| Activity18:31 | 67.7814384 | 73 | 69.5132566 |
| Activity18:32 | 67.9632566 | 73 | 69.392802  |
| Activity18:33 | 68.1450748 | 73 | 69.2655293 |
| Activity18:34 | 68.1450748 | 73 | 69.1337111 |
| Activity18:35 | 68.0541657 | 73 | 69.0064384 |
| Activity18:36 | 68.0541657 | 73 | 68.9109838 |
| Activity18:37 | 68.5087111 | 73 | 68.8291657 |
| Activity18:38 | 68.5087111 | 73 | 68.7450748 |
| Activity18:39 | 68.5087111 | 73 | 68.667802  |
| Activity18:40 | 68.7814384 | 73 | 68.5950748 |
| Activity18:41 | 68.8723475 | 73 | 68.5382566 |
| Activity18:42 | 68.9632566 | 73 | 68.4882566 |
| Activity18:43 | 69.1450748 | 73 | 68.4791657 |
| Activity18:44 | 69.1450748 | 73 | 68.4700748 |
| Activity18:45 | 69.7814384 | 73 | 68.4609838 |
| Activity18:46 | 69.3268929 | 73 | 68.4405293 |
| Activity18:47 | 68.9632566 | 73 | 68.4246202 |
| Activity18:48 | 68.6905293 | 73 | 68.392802  |

|               |            |    |            |
|---------------|------------|----|------------|
| Activity18:49 | 68.417802  | 73 | 68.3609838 |
| Activity18:50 | 67.5996202 | 73 | 68.3382566 |
| Activity18:51 | 67.6905293 | 73 | 68.3246202 |
| Activity18:52 | 67.5996202 | 73 | 68.3291657 |
| Activity18:53 | 67.5996202 | 73 | 68.3314384 |
| Activity18:54 | 67.5996202 | 73 | 68.3450748 |
| Activity18:55 | 68.3268929 | 73 | 68.3609838 |
| Activity18:56 | 68.2359838 | 73 | 68.392802  |
| Activity18:57 | 68.0541657 | 73 | 68.4314384 |
| Activity18:58 | 67.6905293 | 73 | 68.4632566 |
| Activity18:59 | 67.6905293 | 73 | 68.4768929 |
| Activity19:00 | 67.8723475 | 73 | 68.4859838 |
| Activity19:01 | 68.2359838 | 73 | 68.4814384 |
| Activity19:02 | 69.5087111 | 73 | 68.4655293 |
| Activity19:03 | 69.5996202 | 73 | 68.4450748 |
| Activity19:04 | 69.417802  | 73 | 68.4223475 |
| Activity19:05 | 68.5087111 | 73 | 68.3882566 |
| Activity19:06 | 68.2359838 | 73 | 68.3337111 |
| Activity19:07 | 67.417802  | 73 | 68.2905293 |
| Activity19:08 | 67.3268929 | 73 | 68.2609838 |
| Activity19:09 | 67.417802  | 73 | 68.2450748 |
| Activity19:10 | 67.5996202 | 73 | 68.242802  |
| Activity19:11 | 67.9632566 | 73 | 68.2564384 |
| Activity19:12 | 68.0541657 | 73 | 68.2632566 |
| Activity19:13 | 68.6905293 | 73 | 68.2655293 |
| Activity19:14 | 68.7814384 | 73 | 68.2496202 |
| Activity19:15 | 69.3268929 | 73 | 68.2223475 |
| Activity19:16 | 69.5996202 | 73 | 68.1723475 |
| Activity19:17 | 69.7814384 | 73 | 68.1223475 |
| Activity19:18 | 69.0541657 | 73 | 68.0791657 |
| Activity19:19 | 68.8723475 | 73 | 68.0541657 |
| Activity19:20 | 68.5996202 | 73 | 68.0246202 |
| Activity19:21 | 68.2359838 | 73 | 67.992802  |
| Activity19:22 | 68.1450748 | 73 | 67.9632566 |
| Activity19:23 | 68.2359838 | 73 | 67.9087111 |
| Activity19:24 | 67.7814384 | 73 | 67.8541657 |
| Activity19:25 | 67.5996202 | 73 | 67.8087111 |
| Activity19:26 | 67.5996202 | 73 | 67.7973475 |
| Activity19:27 | 67.7814384 | 73 | 67.8132566 |
| Activity19:28 | 68.0541657 | 73 | 67.8564384 |
| Activity19:29 | 68.3268929 | 73 | 67.9200748 |
| Activity19:30 | 68.1450748 | 73 | 67.9814384 |
| Activity19:31 | 67.9632566 | 73 | 68.0405293 |
| Activity19:32 | 67.6905293 | 73 | 68.0746202 |
| Activity19:33 | 66.9632566 | 73 | 68.0996202 |

|               |            |    |            |
|---------------|------------|----|------------|
| Activity19:34 | 66.5087111 | 73 | 68.1087111 |
| Activity19:35 | 66.3268929 | 73 | 68.1041657 |
| Activity19:36 | 66.2359838 | 73 | 68.0791657 |
| Activity19:37 | 66.3268929 | 73 | 68.0541657 |
| Activity19:38 | 66.6905293 | 73 | 68.0337111 |
| Activity19:39 | 66.5087111 | 73 | 68.0291657 |
| Activity19:40 | 66.5996202 | 73 | 68.0405293 |
| Activity19:41 | 67.0541657 | 73 | 68.0655293 |
| Activity19:42 | 67.3268929 | 73 | 68.1018929 |
| Activity19:43 | 67.417802  | 73 | 68.1382566 |
| Activity19:44 | 67.5996202 | 73 | 68.1814384 |
| Activity19:45 | 68.0541657 | 73 | 68.2359838 |
| Activity19:46 | 68.8723475 | 73 | 68.3018929 |
| Activity19:47 | 69.1450748 | 73 | 68.3746202 |
| Activity19:48 | 69.8723475 | 73 | 68.4382566 |
| Activity19:49 | 69.8723475 | 73 | 68.5018929 |
| Activity19:50 | 69.9632566 | 73 | 68.5655293 |
| Activity19:51 | 69.3268929 | 73 | 68.642802  |
| Activity19:52 | 69.0541657 | 73 | 68.7405293 |
| Activity19:53 | 69.0541657 | 73 | 68.8518929 |
| Activity19:54 | 68.5996202 | 73 | 68.9723475 |
| Activity19:55 | 68.3268929 | 73 | 69.0814384 |
| Activity19:56 | 68.5996202 | 73 | 69.1768929 |
| Activity19:57 | 68.9632566 | 73 | 69.2655293 |
| Activity19:58 | 68.8723475 | 73 | 69.3473475 |
| Activity19:59 | 69.3268929 | 73 | 69.4314384 |
| Activity20:00 | 69.5996202 | 73 | 69.5064384 |
| Activity20:01 | 69.6905293 | 73 | 69.5814384 |
| Activity20:02 | 69.5996202 | 73 | 69.6541657 |
| Activity20:03 | 69.9632566 | 73 | 69.7155293 |
| Activity20:04 | 69.9632566 | 73 | 69.7281598 |
| Activity20:05 | 70.2359838 | 73 | 69.775887  |
| Activity20:06 | 70.5087111 | 73 | 69.8054325 |
| Activity20:07 | 70.3268929 | 73 | 69.8236143 |
| Activity20:08 | 70.5996202 | 73 | 69.8417961 |
| Activity20:09 | 70.8723475 | 73 | 69.8417961 |
| Activity20:10 | 71.2359838 | 73 | 69.8395234 |
| Activity20:11 | 71.8723475 | 73 | 69.8349779 |
| Activity20:12 | 72.1450748 | 73 | 69.8667961 |
| Activity20:13 | 71.7814384 | 73 | 69.9031598 |
| Activity20:14 | 70.8723475 | 73 | 69.950887  |
| Activity20:15 | 70.1450748 | 73 | 70.0236143 |
| Activity20:16 | 69.7814384 | 73 | 70.1122507 |
| Activity20:17 | 69.5996202 | 73 | 70.1986143 |
| Activity20:18 | 70.0541657 | 73 | 70.2736143 |

|               |            |    |            |
|---------------|------------|----|------------|
| Activity20:19 | 69.5087111 | 73 | 70.3327052 |
| Activity20:20 | 69.5996202 | 73 | 70.3577052 |
| Activity20:21 | 69.9632566 | 73 | 70.3281598 |
| Activity20:22 | 69.7814384 | 73 | 70.2827052 |
| Activity20:23 | 67.9230208 | 73 | 70.2372507 |
| Activity20:24 | 69.5087111 | 73 | 70.1872507 |
| Activity20:25 | 69.2359838 | 73 | 70.1327052 |
| Activity20:26 | 69.5996202 | 73 | 70.100887  |
| Activity20:27 | 69.8723475 | 73 | 70.0667961 |
| minute1       | 69.8723475 | 73 | 70.0372507 |
| minute2       | 69.7814384 | 63 | 69.9903724 |
| minute3       | 69.7814384 | 63 | 69.94618   |
| minute4       | 70.5996202 | 63 | 69.8964092 |
| minute5       | 70.5087111 | 63 | 69.8431259 |
| minute6       | 70.9632566 | 63 | 69.7815782 |
| minute7       | 71.5087111 | 63 | 69.7105263 |
| minute8       | 71.8723475 | 63 | 69.670053  |
| minute9       | 72.0541657 | 63 | 69.658092  |
| minute10      | 71.9632566 | 63 | 69.6577013 |
| minute11      | 71.2359838 | 63 | 69.6668148 |
| minute12      | 70.3268929 | 63 | 69.6697298 |
| minute13      | 68.417802  | 63 | 69.6889672 |
| minute14      | 67.8723475 | 63 | 69.6840311 |
| minute15      | 67.7814384 | 63 | 69.6602933 |
| minute16      | 67.9632566 | 63 | 69.6386216 |
| minute17      | 67.7814384 | 63 | 69.660931  |
| minute18      | 68.9632566 | 63 | 69.6458709 |
| minute19      | 69.1450748 | 63 | 69.6353562 |
| minute20      | 69.1450748 | 63 | 69.6281473 |
| minute21      | 68.7244881 | 63 | 69.6143269 |
| minute22      | 69.1046534 | 63 | 69.6052585 |
| minute23      | 69.2451493 | 63 | 69.6133389 |
| minute24      | 69.741017  | 63 | 69.6290639 |
| minute25      | 69.6831658 | 63 | 69.614417  |
| minute26      | 68.9393641 | 63 | 69.5921255 |
| minute27      | 69.2534137 | 63 | 69.5460736 |
| minute28      | 69.6666369 | 63 | 69.446716  |
| minute29      | 69.7658104 | 63 | 69.3157467 |
| minute30      | 69.9641575 | 63 | 69.1827114 |
| minute31      | 70.1707691 | 63 | 69.0465769 |
| minute32      | 70.2782071 | 63 | 68.9432937 |
| minute33      | 69.4021741 | 63 | 68.8875311 |
| minute34      | 69.0137443 | 63 | 68.9142065 |
| minute35      | 68.9145708 | 63 | 68.9443943 |
| minute36      | 68.8153972 | 63 | 68.9818135 |

|          |            |    |            |
|----------|------------|----|------------|
| minute37 | 68.9063063 | 63 | 69.0072493 |
| minute38 | 68.8153972 | 63 | 69.0423957 |
| minute39 | 69.311265  | 63 | 69.0356001 |
| minute40 | 69.3195294 | 63 | 69.0143416 |
| minute41 | 69.5096121 | 63 | 69.0153972 |
| minute42 | 70.1046534 | 63 | 69.0294468 |
| minute43 | 70.4104385 | 63 | 69.0215955 |
| minute44 | 70.0137443 | 63 | 69.007546  |
| minute45 | 69.6170501 | 63 | 68.9860584 |
| minute46 | 69.1211823 | 63 | 68.9583724 |
| minute47 | 67.5344055 | 63 | 68.9492815 |
| minute48 | 66.633579  | 63 | 68.9323393 |
| minute49 | 66.7327526 | 63 | 68.8852319 |
| minute50 | 66.5178765 | 63 | 68.8133311 |
| minute51 | 67.1046534 | 63 | 68.7265542 |
| minute52 | 68.0963889 | 63 | 68.6321327 |
| minute53 | 69.4848187 | 63 | 68.5153972 |
| minute54 | 69.07986   | 63 | 68.4007278 |
| minute55 | 69.2782071 | 63 | 68.2957691 |
| minute56 | 68.9806865 | 63 | 68.2106451 |
| minute57 | 69.187298  | 63 | 68.1453559 |
| minute58 | 68.6914303 | 63 | 68.1098187 |
| minute59 | 68.294736  | 63 | 68.0792402 |
| minute60 | 69.187298  | 63 | 68.0240749 |
| AFTER1   | 69.2864716 | 63 | 67.9637443 |
| AFTER2   | 68.7906038 | 63 | 67.893703  |
| AFTER3   | 68.6831658 | 63 | 67.7912236 |
| AFTER4   | 68.8815129 | 63 | 67.6858517 |
| AFTER5   | 68.5757278 | 63 | 67.5755212 |
| AFTER6   | 68.5757278 | 63 | 67.4821327 |
| AFTER7   | 68.5757278 | 63 | 67.4036203 |
| AFTER8   | 67.7823393 | 63 | 67.3767608 |
| AFTER9   | 66.8897774 | 63 | 67.372422  |
| AFTER10  | 66.4930831 | 63 | 67.3577526 |
| AFTER11  | 66.3939096 | 63 | 67.3385377 |
| AFTER12  | 65.6087856 | 63 | 67.2968022 |
| AFTER13  | 64.8153972 | 63 | 67.2273807 |
| AFTER14  | 64.8153972 | 63 | 67.1381245 |
| AFTER15  | 65.5096121 | 63 | 67.0806865 |
| AFTER16  | 66.203827  | 63 | 67.0178765 |
| AFTER17  | 67.4848187 | 63 | 66.9620914 |
| AFTER18  | 67.5922567 | 63 | 66.9007278 |
| AFTER19  | 67.1046534 | 63 | 66.8591989 |
| AFTER20  | 66.9063063 | 63 | 66.8348187 |
| AFTER21  | 66.7079592 | 63 | 66.7976286 |

|         |            |    |            |
|---------|------------|----|------------|
| AFTER22 | 66.0054798 | 63 | 66.7653972 |
| AFTER23 | 66.1955625 | 63 | 66.7401906 |
| AFTER24 | 65.6005212 | 63 | 66.7226286 |
| AFTER25 | 65.8815129 | 63 | 66.6877112 |
| AFTER26 | 65.9806865 | 63 | 66.6651906 |
| AFTER27 | 66.4600253 | 63 | 66.6401906 |
| AFTER28 | 66.4600253 | 63 | 66.6127112 |
| AFTER29 | 66.1459757 | 63 | 66.6025873 |
| AFTER30 | 65.7492815 | 63 | 66.6195294 |
| AFTER31 | 65.4352319 | 63 | 66.6424633 |
| AFTER32 | 65.3195294 | 63 | 66.6775873 |
| AFTER33 | 65.9145708 | 63 | 66.7321327 |
| AFTER34 | 66.7823393 | 63 | 66.8040336 |
| AFTER35 | 66.7658104 | 63 | 66.9213664 |
| AFTER36 | 66.7492815 | 63 | 67.0077075 |
| AFTER37 | 66.7327526 | 63 | 67.0630569 |
| AFTER38 | 67.0302732 | 63 | 67.0841088 |
| AFTER39 | 67.3195294 | 63 | 67.1115656 |
| AFTER40 | 67.6996947 | 63 | 67.1603034 |
| AFTER41 | 67.9972154 | 63 | 67.2253635 |
| AFTER42 | 67.7823393 | 63 | 67.2931096 |
| AFTER43 | 67.9806865 | 63 | 67.3806903 |
| AFTER44 | 67.4848187 | 63 | 67.4703372 |
| AFTER45 | 67.6749013 | 63 | 67.5771329 |
| AFTER46 | 67.5757278 | 63 | 67.6349841 |
| AFTER47 | 67.4765542 | 63 | 67.6977941 |
| AFTER48 | 67.3773807 | 63 | 67.7663891 |
| AFTER49 | 67.5674633 | 63 | 67.8349841 |
| AFTER50 | 67.4104385 | 63 | 67.9667798 |
| AFTER51 | 67.7988683 | 63 | 68.0948565 |
| AFTER52 | 67.7906038 | 63 | 68.2330571 |
| AFTER53 | 67.6914303 | 63 | 68.3582412 |
| AFTER54 | 69.5087111 | 63 | 68.4708219 |
| AFTER55 | 68.9632566 | 63 | 68.5548903 |
| AFTER56 | 68.417802  | 63 | 68.6234628 |
| AFTER57 | 68.3268929 | 63 | 68.6765395 |
| AFTER58 | 68.6905293 | 63 | 68.7209385 |
| AFTER59 | 69.0541657 | 63 | 68.7533539 |
| AFTER60 | 69.5087111 | 63 | 68.7739926 |
| AFTER61 | 69.417802  | 63 | 68.794218  |
| AFTER62 | 69.5087111 | 63 | 68.8160963 |
| AFTER63 | 69.7814384 | 63 | 68.8547101 |
| AFTER64 | 69.8723475 | 63 | 68.8838198 |
| AFTER65 | 68.1955625 | 63 | 68.9253262 |
| AFTER66 | 68.4930831 | 63 | 68.9598078 |

|          |            |    |            |
|----------|------------|----|------------|
| AFTER67  | 69.203827  | 63 | 68.9854052 |
| AFTER68  | 69.203827  | 63 | 69.0043909 |
| AFTER69  | 71.417802  | 63 | 69.0213105 |
| AFTER70  | 70.8723475 | 63 | 68.9775629 |
| AFTER71  | 70.9632566 | 63 | 68.9257574 |
| AFTER72  | 70.3268929 | 63 | 68.8642412 |
| AFTER73  | 70.417802  | 63 | 68.8029316 |
| AFTER74  | 70.1450748 | 63 | 68.7366634 |
| AFTER75  | 69.5087111 | 63 | 68.6200044 |
| AFTER76  | 68.8723475 | 63 | 68.4994198 |
| AFTER77  | 68.5087111 | 63 | 68.392265  |
| AFTER78  | 68.3268929 | 63 | 68.2946142 |
| AFTER79  | 68.1450748 | 63 | 68.2855233 |
| AFTER80  | 68.5087111 | 63 | 68.3059779 |
| AFTER81  | 68.8723475 | 63 | 68.3241597 |
| AFTER82  | 69.3268929 | 63 | 68.3537052 |
| AFTER83  | 69.1450748 | 63 | 68.3900688 |
| AFTER84  | 69.1450748 | 63 | 68.4264324 |
| AFTER85  | 69.0541657 | 63 | 68.4696142 |
| AFTER86  | 68.5996202 | 63 | 68.5456248 |
| AFTER87  | 68.2359838 | 63 | 68.6255609 |
| AFTER88  | 68.0541657 | 63 | 68.6672739 |
| AFTER89  | 65.8175588 | 63 | 68.7498961 |
| AFTER90  | 65.3382199 | 63 | 68.7544415 |
| AFTER91  | 65.3382199 | 63 | 68.758987  |
| AFTER92  | 65.3382199 | 63 | 68.7073566 |
| AFTER93  | 65.0406993 | 63 | 68.6639907 |
| AFTER94  | 64.8423522 | 63 | 68.6185361 |
| AFTER95  | 64.1398728 | 63 | 68.5980816 |
| AFTER96  | 64.1316083 | 63 | 68.5844452 |
| AFTER97  | 64.4208645 | 63 | 68.5935361 |
| AFTER98  | 68.3268929 | 63 | 68.6048998 |
| AFTER99  | 69.8723475 | 63 | 68.6162634 |
| AFTER100 | 70.2359838 | 63 | 68.6503543 |
| AFTER101 | 70.5996202 | 63 | 68.6753543 |
| AFTER102 | 70.9632566 | 63 | 68.6935361 |
| AFTER103 | 71.2359838 | 63 | 68.7003543 |
| AFTER104 | 71.5996202 | 63 | 68.7480816 |
| AFTER105 | 71.2359838 | 63 | 68.7958089 |
| AFTER106 | 71.6905293 | 63 | 68.8412634 |
| AFTER107 | 70.8723475 | 63 | 68.902627  |
| AFTER108 | 72.5087111 | 63 | 68.9730816 |
| AFTER109 | 71.5996202 | 63 | 69.0435361 |
| AFTER110 | 71.0541657 | 63 | 69.1835422 |
| AFTER111 | 68.8980418 | 63 | 69.3196227 |

|          |            |    |            |
|----------|------------|----|------------|
| AFTER112 | 68.5922567 | 63 | 69.4579759 |
| AFTER113 | 68.5996202 | 63 | 69.5496574 |
| AFTER114 | 69.3268929 | 63 | 69.6243967 |
| AFTER115 | 68.9632566 | 63 | 69.694384  |
| AFTER116 | 69.2359838 | 63 | 69.7720159 |
| AFTER117 | 68.9632566 | 63 | 69.837871  |
| AFTER118 | 68.7814384 | 63 | 69.8867839 |
| AFTER119 | 69.5087111 | 63 | 69.8281287 |
| AFTER120 | 69.5087111 | 63 | 69.7517049 |
| AFTER121 | 69.5996202 | 63 | 69.6761076 |
| AFTER122 | 69.5996202 | 63 | 69.5963781 |
| AFTER123 | 71.0541657 | 63 | 69.5149957 |
| AFTER124 | 71.0541657 | 63 | 69.4342331 |
| AFTER125 | 70.8723475 | 63 | 69.3270242 |
| AFTER126 | 71.0541657 | 63 | 69.2041128 |
| AFTER127 | 71.0541657 | 63 | 69.0597139 |
| AFTER128 | 70.8723475 | 63 | 68.9308108 |
| AFTER129 | 71.417802  | 63 | 68.7585192 |
| AFTER130 | 70.7814384 | 63 | 68.6114343 |
| AFTER131 | 70.8723475 | 63 | 68.4854238 |
| AFTER132 | 69.0054798 | 63 | 68.410837  |
| AFTER133 | 68.0302732 | 63 | 68.3391428 |
| AFTER134 | 67.6418435 | 63 | 68.2672645 |
| AFTER135 | 67.2451493 | 63 | 68.1796837 |
| AFTER136 | 66.7658104 | 63 | 68.1162765 |
| AFTER137 | 66.3773807 | 63 | 68.0534891 |
| AFTER138 | 65.9806865 | 63 | 68.0049579 |
| AFTER139 | 66.8153972 | 63 | 67.9832862 |
| AFTER140 | 67.2120914 | 63 | 67.938474  |
| AFTER141 | 67.4104385 | 63 | 67.9010998 |
| AFTER142 | 67.7079592 | 63 | 67.8614529 |
| AFTER143 | 68.0054798 | 63 | 67.814368  |
| AFTER144 | 67.311265  | 63 | 67.7185228 |
| AFTER145 | 66.3195294 | 63 | 67.6102809 |
| AFTER146 | 65.9145708 | 63 | 67.496667  |
| AFTER147 | 65.7162236 | 63 | 67.3760284 |
| AFTER148 | 65.6170501 | 63 | 67.2553897 |
| AFTER149 | 65.7162236 | 63 | 67.1442552 |
| AFTER150 | 66.0137443 | 63 | 67.0294017 |
| AFTER151 | 65.9145708 | 63 | 66.9323168 |
| AFTER152 | 65.7244881 | 63 | 66.8379179 |
| AFTER153 | 65.7244881 | 63 | 66.7901906 |
| AFTER154 | 65.8236617 | 63 | 66.7519674 |
| AFTER155 | 66.4269674 | 63 | 66.726141  |
| AFTER156 | 66.7244881 | 63 | 66.6955625 |



|          |            |    |            |
|----------|------------|----|------------|
| AFTER157 | 67.0220088 | 63 | 66.6769674 |
| AFTER158 | 67.9145708 | 63 | 66.6408104 |
| AFTER159 | 67.7162236 | 63 | 66.6001079 |
| AFTER160 | 68.0137443 | 63 | 66.511265  |
| AFTER161 | 68.0137443 | 63 | 66.4050666 |
| AFTER162 | 67.7162236 | 63 | 66.286265  |
| AFTER163 | 67.2203559 | 63 | 66.157546  |
| AFTER164 | 66.7244881 | 63 | 66.0238683 |
| AFTER165 | 66.3277939 | 63 | 65.907546  |
| AFTER166 | 66.2286203 | 63 | 65.8232484 |
| AFTER167 | 66.2286203 | 63 | 65.7540336 |
| AFTER168 | 66.4269674 | 63 | 65.6959757 |
| AFTER169 | 66.8236617 | 63 | 65.6393641 |
| AFTER170 | 66.8980418 | 63 | 65.5815129 |
| AFTER171 | 67.0963889 | 63 | 65.5302507 |
| AFTER172 | 67.0963889 | 63 | 65.4837406 |
| AFTER173 | 66.5013476 | 63 | 65.4442552 |
| AFTER174 | 66.6087856 | 63 | 65.4434063 |
| AFTER175 | 66.0220088 | 63 | 65.4696234 |
| AFTER176 | 66.0220088 | 63 | 65.5034852 |
| AFTER177 | 64.9310997 | 63 | 65.529909  |
| AFTER178 | 64.3525873 | 63 | 65.5352583 |
| AFTER179 | 63.2616782 | 63 | 65.5137482 |
| AFTER180 | 62.9641575 | 63 | 65.4971968 |
| AFTER181 | 62.6583724 | 63 | 65.4732073 |
| AFTER182 | 62.5591989 | 63 | 65.4446724 |
| AFTER183 | 62.6583724 | 63 | 65.4326664 |
| AFTER184 | 62.6583724 | 63 | 65.4398753 |
| AFTER185 | 62.9476286 | 63 | 65.4640263 |
| AFTER186 | 63.1459757 | 63 | 65.4958219 |
| AFTER187 | 63.3939096 | 63 | 65.5323697 |
| AFTER188 | 63.3525873 | 63 | 65.5711901 |
| AFTER189 | 63.4021741 | 63 | 65.5891428 |
| AFTER190 | 63.9632566 | 63 | 65.6199054 |
| AFTER191 | 64.0541657 | 63 | 65.6624449 |
| AFTER192 | 64.1450748 | 63 | 65.6977529 |
| AFTER193 | 65.6905293 | 63 | 65.7376064 |
| AFTER194 | 66.8723475 | 63 | 65.7968814 |
| AFTER195 | 67.7814384 | 63 | 65.8648341 |
| AFTER196 | 67.7814384 | 63 | 65.9542744 |
| AFTER197 | 67.2359838 | 63 | 66.0618965 |
| AFTER198 | 67.0541657 | 63 | 66.2036095 |
| AFTER199 | 67.0541657 | 63 | 66.3620581 |
| AFTER200 | 67.0541657 | 63 | 66.5614157 |
| AFTER201 | 66.8723475 | 63 | 66.7704841 |

|          |            |    |            |
|----------|------------|----|------------|
| AFTER202 | 67.2359838 | 63 | 66.9871971 |
| AFTER203 | 67.5087111 | 63 | 67.1791167 |
| AFTER204 | 67.6905293 | 63 | 67.343557  |
| AFTER205 | 67.5996202 | 63 | 67.4943609 |
| AFTER206 | 67.6905293 | 63 | 67.6242971 |
| AFTER207 | 67.7814384 | 63 | 67.7515473 |
| AFTER208 | 67.1450748 | 63 | 67.8748719 |
| AFTER209 | 68.0541657 | 63 | 68.0060477 |
| AFTER210 | 68.5996202 | 63 | 68.1382566 |
| AFTER211 | 68.5087111 | 63 | 68.2564384 |
| AFTER212 | 68.6905293 | 63 | 68.4018929 |
| AFTER213 | 68.8723475 | 63 | 68.5541657 |
| AFTER214 | 69.3268929 | 63 | 68.667802  |
| AFTER215 | 69.5996202 | 63 | 68.7541657 |
| AFTER216 | 70.3268929 | 63 | 68.8268929 |
| AFTER217 | 70.5996202 | 63 | 68.8905293 |
| AFTER218 | 70.6905293 | 63 | 68.9700748 |
| AFTER219 | 71.2359838 | 63 | 69.0518929 |
| AFTER220 | 71.3268929 | 63 | 69.1359838 |
| AFTER221 | 71.3268929 | 63 | 69.2041657 |
| AFTER222 | 70.2359838 | 63 | 69.2564384 |
| AFTER223 | 69.2359838 | 63 | 69.2973475 |
| AFTER224 | 68.6905293 | 63 | 69.3382566 |
| AFTER225 | 68.1450748 | 63 | 69.3700748 |
| AFTER226 | 68.2359838 | 63 | 69.4064384 |
| AFTER227 | 68.3268929 | 63 | 69.442802  |
| AFTER228 | 68.5996202 | 63 | 69.4723475 |
| AFTER229 | 68.6905293 | 63 | 69.5200748 |
| AFTER230 | 68.6905293 | 63 | 69.5450748 |
| AFTER231 | 69.8723475 | 63 | 69.5587111 |
| AFTER232 | 70.2359838 | 63 | 69.5814384 |
| AFTER233 | 70.2359838 | 63 | 69.5973475 |
| AFTER234 | 70.3268929 | 63 | 69.6132566 |
| AFTER235 | 70.6905293 | 63 | 69.6200748 |
| AFTER236 | 70.3268929 | 63 | 69.6268929 |
| AFTER237 | 70.417802  | 63 | 69.6109838 |
| AFTER238 | 70.3268929 | 63 | 69.5973475 |
| AFTER239 | 70.417802  | 63 | 69.5791657 |
| AFTER240 | 69.7814384 | 63 | 69.5496202 |
|          | 68.9632566 | 63 | 69.5223475 |
|          | 68.8723475 | 63 | 69.492802  |
|          | 69.1450748 | 63 | 69.492802  |
|          | 68.9632566 | 63 | 69.5132566 |
|          | 69.0541657 | 63 | 69.5450748 |
|          | 69.1450748 | 63 | 69.6155293 |

|            |    |            |
|------------|----|------------|
| 68.9632566 | 63 | 69.6768929 |
| 69.0541657 | 63 | 69.7223475 |
| 69.0541657 | 63 | 69.7450748 |
| 69.1450748 | 63 | 69.7518929 |
| 69.417802  | 63 | 69.7587111 |
| 69.3268929 | 63 | 69.7337111 |
| 69.5087111 | 63 | 69.7041657 |
| 69.5996202 | 63 | 69.6700748 |
| 69.8723475 | 63 | 69.6223475 |
| 69.6905293 | 63 | 69.5382566 |
| 70.0541657 | 63 | 69.4496202 |
| 69.9632566 | 63 | 69.3541657 |
| 70.0541657 | 63 | 69.2473475 |
| 70.2359838 | 63 | 69.1359838 |
| 70.1450748 | 63 | 69.0359838 |
| 70.2359838 | 63 | 68.9518929 |
| 70.0541657 | 63 | 68.8837111 |
| 69.9632566 | 63 | 68.7973475 |
| 70.9632566 | 63 | 68.7155293 |
| 70.6905293 | 63 | 68.6200748 |
| 70.1450748 | 63 | 68.5337111 |
| 69.5087111 | 63 | 68.4564384 |
| 68.9632566 | 63 | 68.3723475 |
| 68.9632566 | 63 | 68.2882566 |
| 68.8723475 | 63 | 68.2109838 |
| 69.0541657 | 63 | 68.1268929 |
| 68.8723475 | 63 | 68.0496202 |
| 68.417802  | 63 | 67.9723475 |
| 67.3268929 | 63 | 67.9041657 |
| 66.7814384 | 63 | 67.8268929 |
| 66.5996202 | 63 | 67.7473475 |
| 66.0541657 | 63 | 67.6450748 |
| 65.9632566 | 63 | 67.5518929 |
| 65.7814384 | 63 | 67.4473475 |
| 65.5996202 | 63 | 67.3155293 |
| 66.1450748 | 63 | 67.1746202 |
| 65.6905293 | 63 | 67.0223475 |
| 65.6905293 | 63 | 66.8700748 |
| 65.2359838 | 63 | 66.7155293 |
| 65.6905293 | 63 | 66.5382566 |
| 65.8723475 | 63 | 66.3859838 |
| 65.6905293 | 63 | 66.2450748 |
| 65.6905293 | 63 | 66.117802  |
| 66.0541657 | 63 | 66.0087111 |
| 66.0541657 | 63 | 65.9041657 |

|            |    |            |
|------------|----|------------|
| 66.2359838 | 63 | 65.8018929 |
| 66.417802  | 63 | 65.6905293 |
| 66.8723475 | 63 | 65.5905293 |
| 66.7814384 | 63 | 65.5109838 |
| 66.5087111 | 63 | 65.4655293 |
| 65.9632566 | 63 | 65.4405293 |
| 66.2359838 | 63 | 65.417802  |
| 65.8723475 | 63 | 65.4200748 |
| 64.9632566 | 63 | 65.4223475 |
| 64.5087111 | 63 | 65.4246202 |
| 64.1450748 | 63 | 65.4291657 |
| 63.9632566 | 63 | 65.4132566 |
| 63.7814384 | 63 | 65.4041657 |
| 63.8723475 | 63 | 65.3882566 |
| 64.5996202 | 63 | 65.3973475 |
| 64.5087111 | 63 | 65.3996202 |
| 64.417802  | 63 | 65.4041657 |
| 64.5996202 | 63 | 65.4018929 |
| 64.7814384 | 63 | 65.3905293 |
| 64.7814384 | 63 | 65.3632566 |
| 64.5996202 | 63 | 65.3382566 |
| 64.8723475 | 63 | 65.3041657 |
| 65.2359838 | 63 | 65.2587111 |
| 65.5087111 | 63 | 65.1996202 |
| 65.7814384 | 63 | 65.1382566 |
| 65.6905293 | 63 | 65.0950748 |
| 66.1450748 | 63 | 65.067802  |
| 66.0541657 | 63 | 65.0337111 |
| 65.8723475 | 63 | 65.0018929 |
| 65.7814384 | 63 | 64.9973475 |
| 65.5087111 | 63 | 64.9950748 |
| 65.3268929 | 63 | 64.9859838 |
| 65.0541657 | 63 | 64.9882566 |
| 65.5996202 | 63 | 64.9950748 |
| 65.7814384 | 63 | 65.0132566 |
| 66.0541657 | 63 | 65.0246202 |
| 65.5996202 | 63 | 65.0655293 |
| 65.2359838 | 63 | 65.1155293 |
| 64.9632566 | 63 | 65.1609838 |
| 65.0541657 | 63 | 65.2041657 |
| 64.8723475 | 63 | 65.2405293 |
| 64.5996202 | 63 | 65.2791657 |
| 64.5087111 | 63 | 65.3109838 |
| 64.3268929 | 63 | 65.3359838 |
| 64.7814384 | 63 | 65.3496202 |

|            |    |            |
|------------|----|------------|
| 64.8723475 | 63 | 65.3587111 |
| 64.8723475 | 63 | 65.3700748 |
| 64.5996202 | 63 | 65.367802  |
| 64.7814384 | 63 | 65.3518929 |
| 64.417802  | 63 | 65.3359838 |
| 63.7814384 | 63 | 65.3064384 |
| 64.0541657 | 63 | 65.2859838 |
| 64.0541657 | 63 | 65.2723475 |
| 64.5996202 | 63 | 65.2791657 |
| 65.0541657 | 63 | 65.2814384 |
| 66.1450748 | 63 | 65.2837111 |
| 66.417802  | 63 | 65.2700748 |
| 66.417802  | 63 | 65.267802  |
| 66.5087111 | 63 | 65.2587111 |
| 66.2359838 | 63 | 65.2564384 |
| 66.1450748 | 63 | 65.2405293 |
| 66.1450748 | 63 | 65.217802  |
| 66.2359838 | 63 | 65.1814384 |
| 66.0541657 | 63 | 65.1382566 |
| 66.1450748 | 63 | 65.0905293 |
| 66.1450748 | 63 | 65.0382566 |
| 66.0541657 | 63 | 65.0041657 |
| 65.417802  | 63 | 64.9859838 |
| 65.2359838 | 63 | 64.9768929 |
| 64.5996202 | 63 | 64.967802  |
| 64.6905293 | 63 | 64.9723475 |
| 64.7814384 | 63 | 64.9882566 |
| 65.3268929 | 63 | 64.9950748 |
| 65.6905293 | 63 | 65.0064384 |
| 65.8723475 | 63 | 65.0109838 |
| 65.5087111 | 63 | 65.0064384 |
| 65.5087111 | 63 | 64.9723475 |
| 64.8723475 | 63 | 64.9087111 |
| 64.8723475 | 63 | 64.8359838 |
| 64.417802  | 63 | 64.7564384 |
| 63.9632566 | 63 | 64.6859838 |
| 63.1450748 | 63 | 64.617802  |
| 62.7814384 | 63 | 64.5859838 |
| 62.417802  | 63 | 64.5564384 |
| 62.6905293 | 63 | 64.5382566 |
| 63.5087111 | 63 | 64.5155293 |
| 64.1450748 | 63 | 64.492802  |
| 64.2359838 | 63 | 64.467802  |
| 64.417802  | 63 | 64.4723475 |
| 64.5996202 | 63 | 64.467802  |

|            |               |
|------------|---------------|
| 64.417802  | 63 64.4768929 |
| 64.3268929 | 63 64.4814384 |
| 64.5087111 | 63 64.4837111 |
| 64.7814384 | 63 64.4768929 |
| 64.8723475 | 63 64.4587111 |
| 64.7814384 | 63 64.4837111 |
| 63.8723475 | 63 64.5450748 |
| 63.5087111 | 63 64.617802  |
| 63.3268929 | 63 64.7223475 |
| 63.417802  | 63 64.8246202 |
| 63.417802  | 63 64.9359838 |
| 64.8723475 | 63 65.0564384 |
| 65.0541657 | 63 65.2041657 |
| 65.3268929 | 63 65.3723475 |
| 65.2359838 | 63 65.5723475 |
| 65.2359838 | 63 65.7814384 |
| 65.0541657 | 63 65.9609838 |
| 65.5996202 | 63 66.0552129 |
| 65.0541657 | 63 66.1434502 |
| 64.9632566 | 63 66.2230098 |
| 64.8723475 | 63 66.2909992 |
| 64.8723475 | 63 66.3639473 |
| 65.0541657 | 63 66.43173   |
| 64.9632566 | 63 66.4929012 |
| 66.8723475 | 63 66.5575848 |
| 67.9632566 | 63 66.6253676 |
| 68.417802  | 63 66.7055471 |
| 69.0541657 | 63 66.8237431 |
| 68.9632566 | 63 66.9508233 |
| 68.8723475 | 63 67.0824491 |
| 68.7814384 | 63 67.1950666 |
| 69.0541657 | 63 67.3157419 |
| 69.5087111 | 63 67.4043924 |
| 70.417802  | 63 67.4835388 |
| 71.0541657 | 63 67.5633051 |
| 70.6905293 | 63 67.6624928 |
| 67.9142367 | 63 67.7790359 |
| 67.7654764 | 63 67.8951658 |
| 67.6001871 | 63 67.985056  |
| 67.3191954 | 63 68.0933346 |
| 67.3357243 | 63 68.1987207 |
| 67.0382037 | 63 68.3136109 |
| 66.955559  | 63 68.4817927 |
| 67.3687822 | 63 68.6204291 |
| 67.5836582 | 63 68.7567927 |

|            |    |            |
|------------|----|------------|
| 67.9886169 | 63 | 68.8454291 |
| 68.6001871 | 63 | 68.8727018 |
| 68.5919227 | 63 | 68.8252577 |
| 68.5919227 | 63 | 68.7495078 |
| 67.9225012 | 63 | 68.660948  |
| 68.2448152 | 63 | 68.6132207 |
| 68.4183689 | 63 | 68.5632207 |
| 68.2200218 | 63 | 68.4950389 |
| 68.5175425 | 63 | 68.3995844 |
| 69.2034929 | 63 | 68.2745844 |
| 69.8977078 | 63 | 68.1336753 |
| 69.6993607 | 63 | 68.0041298 |
| 69.1952284 | 63 | 67.9530826 |
| 69.3853111 | 63 | 67.9012089 |
| 69.1786995 | 63 | 67.8580129 |
| 69.4679557 | 63 | 67.8286599 |
| 71.5996202 | 63 | 67.7988937 |
| 70.5996202 | 63 | 67.7765655 |
| 70.417802  | 63 | 67.7540306 |
| 70.417802  | 63 | 67.7234379 |
| 69.0541657 | 63 | 67.6965643 |
| 66.5200381 | 63 | 67.6550212 |
| 66.0241703 | 63 | 67.6004615 |
| 65.4208645 | 63 | 67.5370176 |
| 66.9632566 | 63 | 67.4803919 |
| 66.7814384 | 63 | 67.4359562 |
| 66.3268929 | 63 | 67.3857354 |
| 65.6905293 | 63 | 67.3311758 |
| 65.417802  | 63 | 67.2815748 |
| 65.417802  | 63 | 67.2245359 |
| 65.5087111 | 63 | 67.1526209 |
| 65.8723475 | 63 | 67.0610778 |
| 65.6905293 | 63 | 66.9744934 |
| 65.8723475 | 63 | 66.8936941 |
| 66.1450748 | 63 | 66.8126882 |
| 66.1450748 | 63 | 66.7345748 |
| 66.1450748 | 63 | 66.6515028 |
| 66.0541657 | 63 | 66.5060482 |
| 66.1450748 | 63 | 66.383321  |
| 66.5087111 | 63 | 66.2696846 |
| 66.3268929 | 63 | 66.1901392 |
| 66.417802  | 63 | 66.1628664 |
| 66.0541657 | 63 | 66.2012196 |
| 66.3268929 | 63 | 66.2542422 |
| 66.1450748 | 63 | 66.3291657 |

|            |    |            |
|------------|----|------------|
| 66.2359838 | 63 | 66.3700748 |
| 66.2359838 | 63 | 66.4200748 |
| 66.2359838 | 63 | 66.4564384 |
| 66.2359838 | 63 | 66.5041657 |
| 66.3268929 | 63 | 66.5359838 |
| 66.2359838 | 63 | 66.5609838 |
| 66.2359838 | 63 | 66.5859838 |
| 65.9632566 | 63 | 66.6018929 |
| 66.1450748 | 63 | 66.6314384 |
| 66.0541657 | 63 | 66.6564384 |
| 66.1450748 | 63 | 66.6564384 |
| 65.7814384 | 63 | 66.6518929 |
| 65.6905293 | 63 | 66.6450748 |
| 65.8723475 | 63 | 66.6314384 |
| 67.2359838 | 63 | 66.5950748 |
| 67.9632566 | 63 | 66.5518929 |
| 68.0541657 | 63 | 66.5155293 |
| 68.1450748 | 63 | 66.4746202 |
| 68.417802  | 63 | 66.4496202 |
| 68.5996202 | 63 | 66.417802  |
| 68.7814384 | 63 | 66.3882566 |
| 67.7814384 | 63 | 66.3541657 |
| 67.5996202 | 63 | 66.317802  |
| 66.6905293 | 63 | 66.2814384 |
| 66.417802  | 63 | 66.2518929 |
| 66.5087111 | 63 | 66.217802  |
| 66.5087111 | 63 | 66.1882566 |
| 66.8723475 | 63 | 66.1587111 |
| 66.8723475 | 63 | 66.1450748 |
| 66.1450748 | 63 | 66.1518929 |
| 65.9632566 | 63 | 66.1723475 |
| 65.8723475 | 63 | 66.192802  |
| 65.5087111 | 63 | 66.2382566 |
| 64.6905293 | 63 | 66.2655293 |
| 64.7814384 | 63 | 66.2814384 |
| 64.8723475 | 63 | 66.2518929 |
| 64.7814384 | 63 | 66.192802  |
| 65.0541657 | 63 | 66.1359838 |
| 65.0541657 | 63 | 66.0655293 |
| 64.9632566 | 63 | 65.9859838 |
| 64.8723475 | 63 | 65.8996202 |
| 64.7814384 | 63 | 65.8337111 |
| 64.7814384 | 63 | 65.7973475 |
| 65.0541657 | 63 | 65.7587111 |
| 64.9632566 | 63 | 65.7473475 |



|            |    |            |
|------------|----|------------|
| 65.0541657 | 63 | 65.7473475 |
| 65.0541657 | 63 | 65.7382566 |
| 65.417802  | 63 | 65.7155293 |
| 66.417802  | 63 | 65.6723475 |
| 66.8723475 | 63 | 65.6246202 |
| 66.9632566 | 63 | 65.6087111 |
| 67.5996202 | 63 | 65.5950748 |
| 66.7814384 | 63 | 65.5859838 |
| 66.5087111 | 63 | 65.5768929 |
| 66.0541657 | 63 | 65.5859838 |
| 65.5996202 | 63 | 65.6018929 |
| 65.7814384 | 63 | 65.6246202 |
| 65.3268929 | 63 | 65.6541657 |
| 65.2359838 | 63 | 65.6791657 |
| 65.1450748 | 63 | 65.7132566 |
| 66.1450748 | 63 | 65.7473475 |
| 66.3268929 | 63 | 65.792802  |
| 66.0541657 | 63 | 65.8518929 |
| 66.2359838 | 63 | 65.9109838 |
| 66.417802  | 63 | 65.9837111 |
| 66.1450748 | 63 | 66.0587111 |
| 65.5996202 | 63 | 66.1450748 |
| 65.1450748 | 63 | 66.2223475 |
| 64.9632566 | 63 | 66.2859838 |
| 65.5087111 | 63 | 66.3314384 |
| 65.417802  | 63 | 66.3587111 |
| 65.5087111 | 63 | 66.3859838 |
| 65.1450748 | 63 | 66.3950748 |
| 65.0541657 | 63 | 66.4268929 |
| 65.417802  | 63 | 66.4655293 |
| 65.7814384 | 63 | 66.5223475 |
| 65.9632566 | 63 | 66.5996202 |
| 66.0541657 | 63 | 66.6632566 |
| 66.417802  | 63 | 66.7291657 |
| 66.3268929 | 63 | 66.792802  |
| 66.6905293 | 63 | 66.8541657 |
| 67.1450748 | 63 | 66.8882566 |
| 67.1450748 | 63 | 66.9200748 |
| 67.9632566 | 63 | 66.9655293 |
| 67.9632566 | 63 | 67.0109838 |
| 68.5087111 | 63 | 67.0518929 |
| 68.1450748 | 63 | 67.092802  |
| 67.9632566 | 63 | 67.1587111 |
| 68.2359838 | 63 | 67.2200748 |
| 67.9632566 | 63 | 67.267802  |

|            |    |            |
|------------|----|------------|
| 68.0541657 | 63 | 67.3155293 |
| 67.9632566 | 63 | 67.3700748 |
| 68.0541657 | 63 | 67.4246202 |
| 68.0541657 | 63 | 67.5268929 |
| 68.3268929 | 63 | 67.5990229 |
| 68.6905293 | 63 | 67.6695    |
| 68.3268929 | 63 | 67.7329522 |
| 67.9632566 | 63 | 67.8036359 |
| 67.7814384 | 63 | 67.8920882 |
| 67.5996202 | 63 | 67.9739289 |
| 67.5087111 | 63 | 68.0733316 |
| 67.5996202 | 63 | 68.1686021 |
| 67.8723475 | 63 | 68.2475502 |
| 68.0541657 | 63 | 68.3376554 |
| 68.0541657 | 63 | 68.4153638 |
| 67.7814384 | 63 | 68.4910062 |
| 68.2359838 | 63 | 68.5932789 |
| 67.5996202 | 63 | 68.6978244 |
| 66.8723475 | 63 | 68.8046426 |
| 67.417802  | 63 | 68.8614607 |
| 67.5996202 | 63 | 68.909188  |
| 67.6905293 | 63 | 68.9546426 |
| 69.2359838 | 63 | 68.9932789 |
| 67.9393641 | 63 | 69.0228244 |
| 68.2368848 | 63 | 69.0523698 |
| 68.3195294 | 63 | 69.0416486 |
| 68.7906038 | 63 | 69.0222496 |
| 69.5922567 | 63 | 69.0119415 |
| 69.6914303 | 63 | 68.9917161 |
| 70.3030005 | 63 | 68.9797552 |
| 70.5013476 | 63 | 68.9659347 |
| 70.3030005 | 63 | 68.9450895 |
| 70.7492815 | 63 | 68.9564531 |
| 71.0715955 | 63 | 68.9314531 |
| 70.9889509 | 63 | 68.9041804 |
| 72.5996202 | 63 | 68.8814531 |
| 72.3268929 | 63 | 68.8609986 |
| 72.2359838 | 63 | 68.8359986 |
| 70.5087111 | 63 | 68.8359986 |
| 69.8723475 | 63 | 68.8473622 |
| 69.8723475 | 63 | 68.8541804 |
| 69.5087111 | 63 | 68.8609986 |
| 69.2359838 | 63 | 68.8882713 |
| 69.2359838 | 63 | 68.8769077 |
| 67.8980418 | 63 | 68.9047777 |

|            |    |            |
|------------|----|------------|
| 67.9145708 | 63 | 68.9161188 |
| 67.9145708 | 63 | 68.9140302 |
| 67.1542402 | 63 | 68.8978919 |
| 67.3030005 | 63 | 68.8639851 |
| 67.0468022 | 63 | 68.8298717 |
| 66.6749013 | 63 | 68.805469  |
| 68.0541657 | 63 | 68.7851985 |
| 66.8723475 | 63 | 68.7721595 |
| 66.9632566 | 63 | 68.7525089 |
| 67.1450748 | 63 | 68.7384368 |
| 66.9632566 | 63 | 68.7332489 |
| 67.2359838 | 63 | 68.7014308 |
| 67.5996202 | 63 | 68.6787035 |
| 67.3268929 | 63 | 68.6764308 |
| 67.6905293 | 63 | 68.7332489 |
| 67.8723475 | 63 | 68.8287035 |
| 68.7814384 | 63 | 68.9309762 |
| 68.7814384 | 63 | 69.0332489 |
| 69.0541657 | 63 | 69.1423399 |
| 68.6905293 | 63 | 69.2218853 |
| 68.2359838 | 63 | 69.3076066 |
| 68.1450748 | 63 | 69.3929146 |
| 68.2359838 | 63 | 69.4736772 |
| 68.3268929 | 63 | 69.5711754 |
| 69.3268929 | 63 | 69.6626818 |
| 69.6905293 | 63 | 69.7605931 |
| 69.7814384 | 63 | 69.8609838 |
| 69.9632566 | 63 | 69.8950748 |
| 70.5087111 | 63 | 69.9473475 |
| 70.7814384 | 63 | 69.9814384 |
| 71.3268929 | 63 | 69.992802  |
| 71.417802  | 63 | 69.9996202 |
| 72.1450748 | 63 | 69.992802  |
| 72.7814384 | 63 | 69.9837111 |
| 73.6905293 | 63 | 69.9791657 |
| 73.9632566 | 63 | 69.9723475 |
| 73.5996202 | 63 | 69.9609838 |
| 73.5996202 | 63 | 69.9337111 |
| 72.417802  | 63 | 69.9041657 |
| 71.3268929 | 63 | 69.8655293 |
| 71.3268929 | 63 | 69.8382566 |
| 71.1450748 | 63 | 69.8268929 |
| 71.0541657 | 63 | 69.8223475 |
| 70.9632566 | 63 | 69.8246202 |
| 70.9632566 | 63 | 69.8291657 |

|            |    |            |
|------------|----|------------|
| 70.6905293 | 63 | 69.817802  |
| 69.417802  | 63 | 69.8041657 |
| 68.9632566 | 63 | 69.7950748 |
| 68.3268929 | 63 | 69.792802  |
| 67.5996202 | 63 | 69.7746202 |
| 67.2359838 | 63 | 69.7609838 |
| 66.9632566 | 63 | 69.7518929 |
| 67.2359838 | 63 | 69.7518929 |
| 67.1450748 | 63 | 69.6950748 |
| 67.417802  | 63 | 69.6337111 |
| 67.417802  | 63 | 69.5496202 |
| 67.6905293 | 63 | 69.4632566 |
| 67.5996202 | 63 | 69.3905293 |
| 67.5087111 | 63 | 69.3268929 |
| 67.5996202 | 63 | 69.2791657 |
| 67.7814384 | 63 | 69.2541657 |
| 67.9632566 | 63 | 69.2155293 |
| 68.3268929 | 63 | 69.1791657 |
| 68.5087111 | 63 | 69.142802  |
| 68.8723475 | 63 | 69.1018929 |
| 69.1450748 | 63 | 69.0564384 |
| 69.417802  | 63 | 69.017802  |
| 69.8723475 | 63 | 69.0109838 |
| 69.7814384 | 63 | 69.0246202 |
| 70.2359838 | 63 | 69.042802  |
| 70.9632566 | 63 | 69.0814384 |
| 71.417802  | 63 | 69.1041657 |
| 69.8723475 | 63 | 69.1223475 |
| 70.3268929 | 63 | 69.1291657 |
| 70.3268929 | 63 | 69.1359838 |
| 70.5087111 | 63 | 69.1359838 |
| 70.6905293 | 63 | 69.1382566 |
| 71.0541657 | 63 | 69.1200748 |
| 70.5087111 | 63 | 69.1018929 |
| 70.3268929 | 63 | 69.0791657 |
| 69.7814384 | 63 | 69.0496202 |
| 69.6905293 | 63 | 69.0155293 |
| 69.5996202 | 63 | 68.9700748 |
| 69.3268929 | 63 | 68.9223475 |
| 69.1450748 | 63 | 68.8496202 |
| 69.1450748 | 63 | 68.7496202 |
| 69.1450748 | 63 | 68.6382566 |
| 69.5087111 | 63 | 68.5200748 |
| 69.0541657 | 63 | 68.4018929 |
| 69.1450748 | 63 | 68.2791657 |

|            |    |            |
|------------|----|------------|
| 68.1450748 | 63 | 68.1450748 |
| 67.6905293 | 63 | 67.9814384 |
| 67.5087111 | 63 | 67.7973475 |
| 67.417802  | 63 | 67.6587111 |
| 67.417802  | 63 | 67.5155293 |
| 67.5087111 | 63 | 67.3768929 |
| 66.9632566 | 63 | 67.2314384 |
| 66.8723475 | 63 | 67.0973475 |
| 66.5996202 | 63 | 66.9518929 |
| 66.417802  | 63 | 66.8314384 |
| 66.417802  | 63 | 66.7246202 |
| 66.1450748 | 63 | 66.6382566 |
| 66.417802  | 63 | 66.5473475 |
| 65.5996202 | 63 | 66.467802  |
| 64.8723475 | 63 | 66.3996202 |
| 64.6905293 | 63 | 66.3382566 |
| 64.6905293 | 63 | 66.2973475 |
| 65.1450748 | 63 | 66.267802  |
| 64.8723475 | 63 | 66.2314384 |
| 64.8723475 | 63 | 66.2064384 |
| 64.417802  | 63 | 66.1814384 |
| 64.0541657 | 63 | 66.1950748 |
| 64.3268929 | 63 | 66.2087111 |
| 64.5996202 | 63 | 66.2223475 |
| 64.7814384 | 63 | 66.2268929 |
| 64.6905293 | 63 | 66.2246202 |
| 65.3268929 | 63 | 66.1973475 |
| 65.2359838 | 63 | 66.167802  |
| 65.6905293 | 63 | 66.1337111 |
| 66.0541657 | 63 | 66.1018929 |
| 66.3268929 | 63 | 66.0723475 |
| 66.0541657 | 63 | 66.0518929 |
| 66.417802  | 63 | 66.0473475 |
| 66.5996202 | 63 | 66.0473475 |
| 66.6905293 | 63 | 66.0859838 |
| 67.5087111 | 63 | 66.1587111 |
| 67.9632566 | 63 | 66.2587111 |
| 68.0541657 | 63 | 66.3609838 |
| 68.0541657 | 63 | 66.4518929 |
| 68.1450748 | 63 | 66.5564384 |
| 68.6905293 | 63 | 66.6700748 |
| 68.2359838 | 63 | 66.7996202 |
| 68.0541657 | 63 | 66.9609838 |
| 67.5996202 | 63 | 67.1223475 |
| 67.3268929 | 63 | 67.2950748 |

|            |    |            |
|------------|----|------------|
| 66.417802  | 63 | 67.4746202 |
| 65.7814384 | 63 | 67.667802  |
| 65.5087111 | 63 | 67.8768929 |
| 65.3268929 | 63 | 68.1041657 |
| 65.2359838 | 63 | 68.3132566 |
| 65.5996202 | 63 | 68.517802  |
| 65.9632566 | 63 | 68.7200748 |
| 66.417802  | 63 | 68.9382566 |
| 67.1450748 | 63 | 69.1518929 |
| 67.7814384 | 63 | 69.3609838 |
| 68.6905293 | 63 | 69.5950748 |
| 68.7814384 | 63 | 69.8041657 |
| 68.7814384 | 63 | 69.9617712 |
| 69.0541657 | 63 | 70.1121452 |
| 69.417802  | 63 | 70.2685111 |
| 69.5996202 | 63 | 70.4430587 |
| 70.5087111 | 63 | 70.6116146 |
| 70.7814384 | 63 | 70.7291261 |
| 71.5087111 | 63 | 70.853869  |
| 71.9632566 | 63 | 70.9755127 |
| 72.417802  | 63 | 71.0944704 |
| 73.6905293 | 63 | 71.225205  |
| 74.3268929 | 63 | 71.3433363 |
| 74.0541657 | 63 | 71.4670462 |
| 74.2359838 | 63 | 71.5926155 |
| 74.417802  | 63 | 71.725003  |
| 74.7814384 | 63 | 71.8429277 |
| 74.9632566 | 63 | 71.9552739 |
| 74.9632566 | 63 | 72.0512977 |
| 76.0541657 | 63 | 72.1210819 |
| 75.8723475 | 63 | 72.1588413 |
| 74.2674764 | 63 | 72.1711875 |
| 74.0691293 | 63 | 72.178575  |
| 74.3087987 | 63 | 72.1783179 |
| 75.1269805 | 63 | 72.1712426 |
| 75.4327656 | 63 | 72.1581756 |
| 72.9364427 | 63 | 72.1436622 |
| 73.0438807 | 63 | 72.1064216 |
| 72.4653683 | 63 | 72.0551315 |
| 72.085203  | 63 | 71.9802876 |
| 71.6471865 | 63 | 71.8971792 |
| 70.5066906 | 63 | 71.7919634 |
| 70.4571039 | 63 | 71.6598881 |
| 70.3496659 | 63 | 71.5145896 |
| 70.531484  | 63 | 71.3944978 |

|            |    |            |
|------------|----|------------|
| 70.316608  | 63 | 71.275439  |
| 70.4571039 | 63 | 71.158653  |
| 70.2587568 | 63 | 71.0373215 |
| 69.9364427 | 63 | 70.9151635 |
| 69.2918146 | 63 | 70.7729643 |
| 69.1843766 | 63 | 70.5927485 |
| 69.0769386 | 63 | 70.4197641 |
| 68.7711535 | 63 | 70.2765709 |
| 68.7711535 | 63 | 70.1164355 |
| 68.8951204 | 63 | 69.9449365 |
| 69.0190873 | 63 | 69.7521566 |
| 69.0190873 | 63 | 69.5432609 |
| 68.7298311 | 63 | 69.4021452 |
| 68.5149551 | 63 | 69.2573105 |
| 68.6389221 | 63 | 69.130451  |
| 68.20917   | 63 | 69.0077237 |
| 68.4075171 | 63 | 68.899046  |
| 68.5149551 | 63 | 68.8139221 |
| 69.2504923 | 63 | 68.7300378 |
| 69.4736328 | 63 | 68.6498725 |
| 69.7463601 | 63 | 68.566608  |
| 69.9281782 | 63 | 68.491608  |
| 70.0769386 | 63 | 68.4502857 |
| 69.2752857 | 63 | 68.4265254 |
| 68.8455336 | 63 | 68.416608  |
| 68.9529716 | 63 | 68.4563166 |
| 68.5397485 | 63 | 68.491273  |
| 67.6637154 | 63 | 68.5367667 |
| 67.4488394 | 63 | 68.600029  |
| 67.4157816 | 63 | 68.6781673 |
| 67.0769386 | 63 | 68.7509337 |
| 67.2918146 | 63 | 68.8309315 |
| 67.2504923 | 63 | 68.9191938 |
| 67.3909882 | 63 | 69.0022908 |
| 67.1761121 | 63 | 69.0957183 |
| 67.3000791 | 63 | 69.1961707 |
| 67.101732  | 63 | 69.3048875 |
| 67.101732  | 63 | 69.407406  |
| 67.1430543 | 63 | 69.5130236 |
| 67.2009055 | 63 | 69.5926082 |
| 67.316608  | 63 | 69.679011  |
| 68.8042113 | 63 | 69.7660336 |
| 69.3083435 | 63 | 69.8385934 |
| 69.5397485 | 63 | 69.9198309 |
| 70.8801568 | 63 | 70.038465  |

|            |    |            |
|------------|----|------------|
| 70.5826361 | 63 | 70.1951158 |
| 70.8966857 | 63 | 70.3575516 |
| 71.3016444 | 63 | 70.5342436 |
| 71.8966857 | 63 | 70.7450265 |
| 71.8057766 | 63 | 70.9339086 |
| 72.2189998 | 63 | 71.1087412 |
| 72.5495783 | 63 | 71.2796481 |
| 72.0537105 | 63 | 71.3831996 |
| 72.2520576 | 63 | 71.4729082 |
| 72.6570163 | 63 | 71.5541456 |
| 72.5578428 | 63 | 71.6357963 |
| 72.508256  | 63 | 71.70629   |
| 72.7396609 | 63 | 71.7796763 |
| 72.4338758 | 63 | 71.8458311 |
| 72.9297436 | 63 | 71.9010355 |
| 73.2272642 | 63 | 71.9448763 |
| 72.83057   | 63 | 71.9833452 |
| 73.3264378 | 63 | 72.0118967 |
| 74.0206527 | 63 | 72.0230929 |
| 75.1115618 | 63 | 72.0307766 |
| 75.4504047 | 63 | 71.9948262 |
| 75.6074295 | 63 | 71.9167412 |
| 76.0950328 | 63 | 71.8231604 |
| 75.0041237 | 63 | 71.7060258 |
| 74.4090824 | 63 | 71.5789738 |
| 73.9132147 | 63 | 71.4546078 |
| 71.4338758 | 63 | 71.3356137 |
| 70.8388345 | 63 | 71.2083552 |
| 70.6404874 | 63 | 71.14038   |
| 70.4421403 | 63 | 71.0674461 |
| 70.1198262 | 63 | 70.9794296 |
| 70.0371816 | 63 | 70.8889337 |
| 69.7479254 | 63 | 70.7971982 |
| 69.3512312 | 63 | 70.7025701 |
| 68.954537  | 63 | 70.6180659 |
| 68.8553634 | 63 | 70.5159998 |
| 69.9462725 | 63 | 70.41538   |
| 69.7561899 | 63 | 70.341413  |
| 69.847099  | 63 | 70.2618676 |
| 69.4421403 | 63 | 70.1845949 |
| 67.4592361 | 63 | 70.0775701 |
| 67.153451  | 63 | 69.9610411 |
| 66.6162609 | 63 | 69.8502973 |
| 66.814608  | 63 | 69.7323221 |
| 66.8311369 | 63 | 69.6511238 |



|            |    |            |
|------------|----|------------|
| 67.4592361 | 63 | 69.5848015 |
| 67.4592361 | 63 | 69.532942  |
| 69.3347023 | 63 | 69.5108345 |
| 69.3347023 | 63 | 69.4763304 |
| 69.1363552 | 63 | 69.4416197 |
| 68.938008  | 63 | 69.3969916 |
| 68.8388345 | 63 | 69.357942  |
| 68.954537  | 63 | 69.3135205 |
| 69.0537105 | 63 | 69.2738511 |
| 68.847099  | 63 | 69.2465783 |
| 69.2024709 | 63 | 69.2490577 |
| 69.8718923 | 63 | 69.2540163 |
| 70.1446196 | 63 | 69.2217849 |
| 70.9297436 | 63 | 69.1918263 |
| 70.83057   | 63 | 69.1697188 |
| 70.7892477 | 63 | 69.155256  |
| 71.1776775 | 63 | 69.1804485 |
| 71.3760246 | 63 | 69.1860128 |
| 71.7561899 | 63 | 69.1878581 |
| 71.7561899 | 63 | 69.1797861 |
| 71.8388345 | 63 | 69.1675818 |
| 70.5495783 | 63 | 69.1394685 |
| 69.4586692 | 63 | 69.1163138 |
| 69.2520576 | 63 | 69.0437932 |
| 68.6570163 | 63 | 68.9861485 |
| 68.5578428 | 63 | 68.9384213 |
| 68.2603221 | 63 | 68.9080494 |
| 68.1611485 | 63 | 68.8849089 |
| 68.2603221 | 63 | 68.8613552 |
| 69.0537105 | 63 | 68.8365618 |
| 69.0537105 | 63 | 68.8047436 |
| 68.6570163 | 63 | 68.7566031 |
| 68.5578428 | 63 | 68.6840824 |
| 68.9628014 | 63 | 68.5983386 |
| 68.8636279 | 63 | 68.4830494 |
| 68.4669337 | 63 | 68.3671403 |
| 67.3760246 | 63 | 68.2522642 |
| 66.6900742 | 63 | 68.1371816 |
| 66.4917271 | 63 | 68.0564079 |
| 66.3429667 | 63 | 67.9615845 |
| 66.3347023 | 63 | 67.8644885 |
| 66.5330494 | 63 | 67.7653263 |
| 66.4338758 | 63 | 67.702941  |
| 67.0289171 | 63 | 67.6860102 |
| 67.2272642 | 63 | 67.6765174 |

|            |    |            |
|------------|----|------------|
| 67.723132  | 63 | 67.6773553 |
| 67.9132147 | 63 | 67.6715815 |
| 68.0123882 | 63 | 67.6732458 |
| 68.061975  | 63 | 67.6135351 |
| 67.5743717 | 63 | 67.543907  |
| 67.276851  | 63 | 67.4445268 |
| 66.9710659 | 63 | 67.330064  |
| 66.7148675 | 63 | 67.2205598 |
| 66.3181733 | 63 | 67.1209731 |
| 66.1942064 | 63 | 67.066439  |
| 66.1942064 | 63 | 67.0098388 |
| 66.5743717 | 63 | 66.9608832 |
| 68.1450748 | 63 | 66.9414731 |
| 67.9632566 | 63 | 66.9801209 |
| 67.8723475 | 63 | 67.0350909 |
| 67.8723475 | 63 | 67.0915073 |
| 68.0541657 | 63 | 67.1572211 |
| 68.7814384 | 63 | 67.2225218 |
| 68.8723475 | 63 | 67.2812108 |
| 68.6905293 | 63 | 67.3227511 |
| 68.3268929 | 63 | 67.3593327 |
| 68.3268929 | 63 | 67.381245  |
| 65.7727188 | 63 | 67.3984051 |
| 65.4751981 | 63 | 67.4199041 |
| 65.0785039 | 63 | 67.4447088 |
| 64.4751981 | 63 | 67.4953401 |
| 64.276851  | 63 | 67.5420456 |
| 64.5743717 | 63 | 67.5986686 |
| 66.7814384 | 63 | 67.6685147 |
| 66.5996202 | 63 | 67.7596418 |
| 66.5087111 | 63 | 67.8584135 |
| 66.5996202 | 63 | 67.9571852 |
| 68.2359838 | 63 | 68.0464528 |
| 68.6905293 | 63 | 68.0325984 |
| 68.5996202 | 63 | 68.0307275 |
| 68.9632566 | 63 | 68.0608814 |
| 69.1450748 | 63 | 68.1007461 |
| 68.7814384 | 63 | 68.1385446 |
| 68.6905293 | 63 | 68.155682  |
| 68.6905293 | 63 | 68.2170456 |
| 68.5996202 | 63 | 68.2089764 |
| 68.5996202 | 63 | 68.2680673 |
| 68.8723475 | 63 | 68.2744609 |
| 69.0541657 | 63 | 68.3397502 |
| 69.5996202 | 63 | 68.4149568 |

|            |    |            |
|------------|----|------------|
| 69.1450748 | 63 | 68.5000807 |
| 69.2359838 | 63 | 68.5655766 |
| 69.5087111 | 63 | 68.6385105 |
| 69.9632566 | 63 | 68.7114444 |
| 70.1450748 | 63 | 68.7044082 |
| 70.1450748 | 63 | 68.6967522 |
| 70.1450748 | 63 | 68.7285704 |
| 67.5909006 | 63 | 68.7512977 |
| 67.8884213 | 63 | 68.7353886 |
| 69.0785039 | 63 | 68.7331158 |
| 69.4669337 | 63 | 68.7422067 |
| 69.5661072 | 63 | 68.7285704 |
| 69.4669337 | 63 | 68.6944795 |
| 71.3268929 | 63 | 68.6581158 |
| 68.3677601 | 63 | 68.614934  |
| 70.6905293 | 63 | 68.5808431 |
| 68.5826361 | 63 | 68.5581158 |
| 68.384289  | 63 | 68.5467522 |
| 68.4834626 | 63 | 68.5376613 |
| 68.4834626 | 63 | 68.5285704 |
| 67.0950328 | 63 | 68.5035704 |
| 67.1942064 | 63 | 68.4762977 |
| 67.4917271 | 63 | 68.439934  |
| 66.4999915 | 63 | 68.3853886 |
| 66.2933799 | 63 | 68.3126613 |
| 67.7814384 | 63 | 68.239934  |
| 67.5087111 | 63 | 68.164934  |
| 67.5996202 | 63 | 68.0831158 |
| 68.5996202 | 63 | 68.0765156 |
| 68.9632566 | 63 | 68.0602047 |
| 68.417802  | 63 | 68.0323235 |
| 67.7814384 | 63 | 68.0015498 |
| 67.3268929 | 63 | 67.9728422 |
| 66.9632566 | 63 | 67.9579775 |
| 67.3268929 | 63 | 67.9011593 |
| 67.6905293 | 63 | 67.9001376 |
| 68.1450748 | 63 | 67.8410467 |
| 68.5087111 | 63 | 67.8187441 |
| 68.6905293 | 63 | 67.7991273 |
| 68.5996202 | 63 | 67.7702131 |
| 68.0541657 | 63 | 67.7276625 |
| 67.7814384 | 63 | 67.7152772 |
| 67.3268929 | 63 | 67.6981398 |
| 67.0541657 | 63 | 67.6894735 |
| 67.2359838 | 63 | 67.7237824 |

|            |               |
|------------|---------------|
| 67.1450748 | 63 67.7723475 |
| 66.8723475 | 63 67.7905293 |
| 67.3268929 | 63 67.817802  |
| 67.2359838 | 63 67.8473475 |
| 67.9632566 | 63 67.8246202 |
| 68.2359838 | 63 67.7950748 |
| 68.417802  | 63 67.7700748 |
| 68.8723475 | 63 67.702267  |
| 69.0541657 | 63 67.6359056 |
| 68.3268929 | 63 67.578635  |
| 68.3268929 | 63 67.5376868 |
| 67.6905293 | 63 67.4876477 |
| 67.5996202 | 63 67.4361623 |
| 67.3268929 | 63 67.3751727 |
| 66.7814384 | 63 67.3774454 |
| 66.5996202 | 63 67.3797182 |
| 66.5087111 | 63 67.3842636 |
| 67.1450748 | 63 67.3819909 |
| 67.8723475 | 63 67.3910818 |
| 68.2359838 | 63 67.4183545 |
| 68.5087111 | 63 67.4251727 |
| 68.5996202 | 63 67.4319909 |
| 68.7814384 | 63 67.4410818 |
| 67.6905293 | 63 67.4388091 |
| 67.7814384 | 63 67.4251727 |
| 67.417802  | 63 67.3888091 |
| 65.0691293 | 63 67.3433545 |
| 64.672435  | 63 67.2888091 |
| 64.672435  | 63 67.2206273 |
| 65.688964  | 63 67.1592636 |
| 65.688964  | 63 67.1138091 |
| 66.0856582 | 63 67.0501727 |
| 66.0691293 | 63 67.0229    |
| 68.7814384 | 63 67.0047182 |
| 68.6905293 | 63 66.9660818 |
| 68.2359838 | 63 66.8943762 |
| 67.6905293 | 63 66.8321748 |
| 67.6905293 | 63 66.8185384 |
| 68.1450748 | 63 66.7889929 |
| 67.5087111 | 63 66.7458111 |
| 67.417802  | 63 66.7117202 |
| 67.2359838 | 63 66.6685384 |
| 67.2359838 | 63 66.6321748 |
| 66.6905293 | 63 66.547246  |
| 66.5087111 | 63 66.5019867 |

|            |    |            |
|------------|----|------------|
| 66.417802  | 63 | 66.4625125 |
| 66.2359838 | 63 | 66.4296499 |
| 66.1450748 | 63 | 66.4509586 |
| 66.5996202 | 63 | 66.479912  |
| 66.5087111 | 63 | 66.4919233 |
| 65.7814384 | 63 | 66.4737692 |
| 66.5996202 | 63 | 66.4583011 |
| 66.8723475 | 63 | 66.4531635 |
| 65.7814384 | 63 | 66.4459599 |
| 63.9132147 | 63 | 66.3734279 |
| 64.1115618 | 63 | 66.300276  |
| 65.9632566 | 63 | 66.2329092 |
| 65.9632566 | 63 | 66.1581045 |
| 66.1450748 | 63 | 66.0814402 |
| 66.8723475 | 63 | 65.9859743 |
| 66.7814384 | 63 | 65.9113761 |
| 67.1450748 | 63 | 65.8363647 |
| 65.384289  | 63 | 65.7731302 |
| 65.8801568 | 63 | 65.7098957 |
| 66.2024709 | 63 | 65.6602975 |
| 66.1032973 | 63 | 65.6022283 |
| 65.9214791 | 63 | 65.5348616 |
| 65.83057   | 63 | 65.4819576 |
| 65.1528841 | 63 | 65.4412438 |
| 64.9628014 | 63 | 65.4437117 |
| 65.0702394 | 63 | 65.4608491 |
| 65.8801568 | 63 | 65.508565  |
| 65.7809833 | 63 | 65.5606197 |
| 65.8801568 | 63 | 65.557701  |
| 65.7644543 | 63 | 65.5748236 |
| 65.5413138 | 63 | 65.6475361 |
| 64.6983386 | 63 | 65.7121907 |
| 64.6239585 | 63 | 65.7324125 |
| 64.3264378 | 63 | 65.8253763 |
| 64.5247849 | 63 | 65.9137947 |
| 64.4173469 | 63 | 65.9739073 |
| 64.7066031 | 63 | 66.0311273 |
| 64.7066031 | 63 | 66.0817357 |
| 64.7066031 | 63 | 66.1687192 |
| 64.1859419 | 63 | 66.243306  |
| 63.723132  | 63 | 66.322025  |
| 64.1198262 | 63 | 66.3982647 |
| 64.5165204 | 63 | 66.4765705 |
| 66.6983386 | 63 | 66.5569424 |
| 67.1942064 | 63 | 66.6540498 |

|            |    |            |
|------------|----|------------|
| 67.6900742 | 63 | 66.7554961 |
| 68.6818097 | 63 | 66.8790498 |
| 66.7555982 | 63 | 67.0021903 |
| 66.466342  | 63 | 67.1327688 |
| 66.8217139 | 63 | 67.260868  |
| 66.697747  | 63 | 67.3968184 |
| 66.7721271 | 63 | 67.5383473 |
| 69.6818097 | 63 | 67.6464052 |
| 69.6818097 | 63 | 67.7439258 |
| 69.276851  | 63 | 67.8464052 |
| 69.0702394 | 63 | 67.9515705 |
| 69.169413  | 63 | 68.0767771 |
| 68.8636279 | 63 | 68.1922729 |
| 68.8636279 | 63 | 68.3176862 |
| 69.3512312 | 63 | 68.4550828 |
| 69.1528841 | 63 | 68.5953721 |
| 69.0537105 | 63 | 68.699052  |
| 69.0454461 | 63 | 68.779798  |
| 69.0371816 | 63 | 68.8448415 |
| 69.0206527 | 63 | 68.8319924 |
| 70.0123882 | 63 | 68.8121186 |
| 70.8057766 | 63 | 68.7945175 |
| 71.0041237 | 63 | 68.7467511 |
| 71.0041237 | 63 | 68.7529251 |
| 71.2024709 | 63 | 68.7663305 |
| 71.2024709 | 63 | 68.7627937 |
| 69.0206527 | 63 | 68.7700008 |
| 68.5247849 | 63 | 68.7753484 |
| 68.4256114 | 63 | 68.7240696 |
| 68.7313965 | 63 | 68.6746894 |
| 69.4256114 | 63 | 68.6257225 |
| 69.3264378 | 63 | 68.5670448 |
| 69.723132  | 63 | 68.5141522 |
| 70.2024709 | 63 | 68.4713836 |
| 69.7975122 | 63 | 68.4236563 |
| 67.870327  | 63 | 68.371177  |
| 67.3496659 | 63 | 68.3135324 |
| 67.1182609 | 63 | 68.2577472 |
| 66.1843766 | 63 | 68.2420561 |
| 66.3992526 | 63 | 68.2220262 |
| 66.9860295 | 63 | 68.197864  |
| 66.7711535 | 63 | 68.1284539 |
| 67.0025584 | 63 | 68.0278455 |
| 67.0025584 | 63 | 67.9222783 |
| 66.6802444 | 63 | 67.8167112 |

|            |    |            |
|------------|----|------------|
| 66.9860295 | 63 | 67.7039127 |
| 66.9860295 | 63 | 67.5888414 |
| 67.6306576 | 63 | 67.5283156 |
| 67.7066031 | 63 | 67.4779137 |
| 67.3181733 | 63 | 67.4413549 |
| 66.723132  | 63 | 67.3971514 |
| 67.0537105 | 63 | 67.3287743 |
| 67.1528841 | 63 | 67.2583311 |
| 66.954537  | 63 | 67.1847888 |
| 67.2520576 | 63 | 67.1083539 |
| 66.847099  | 63 | 67.0511339 |
| 66.8223056 | 63 | 67.0352753 |
| 68.417802  | 63 | 67.0619787 |
| 68.2359838 | 63 | 67.1012854 |
| 68.0541657 | 63 | 67.1753029 |
| 67.2359838 | 63 | 67.2530393 |
| 66.7814384 | 63 | 67.32747   |
| 66.7814384 | 63 | 67.3873987 |
| 66.7814384 | 63 | 67.4489804 |
| 66.6905293 | 63 | 67.5161796 |
| 66.5996202 | 63 | 67.5800731 |
| 66.5996202 | 63 | 67.6181402 |
| 66.5087111 | 63 | 67.6471163 |
| 66.9632566 | 63 | 67.6463404 |
| 66.9632566 | 63 | 67.6459385 |
| 66.6905293 | 63 | 67.6643383 |
| 66.5087111 | 63 | 67.715796  |
| 66.7814384 | 63 | 67.7635346 |
| 67.1450748 | 63 | 67.767047  |
| 67.5087111 | 63 | 67.7779974 |
| 67.2359838 | 63 | 67.7792371 |
| 68.417802  | 63 | 67.7881214 |
| 68.6905293 | 63 | 67.8073363 |
| 69.1450748 | 63 | 67.7941018 |
| 69.5087111 | 63 | 67.7978094 |
| 69.9632566 | 63 | 67.8234179 |
| 69.1683028 | 63 | 67.8694809 |
| 69.4658235 | 63 | 67.9424034 |
| 69.6905293 | 63 | 68.0180118 |
| 69.2359838 | 63 | 68.1012649 |
| 68.5087111 | 63 | 68.2064188 |
| 68.1450748 | 63 | 68.3188041 |
| 67.5996202 | 63 | 68.4361481 |
| 67.6905293 | 63 | 68.5508062 |
| 68.0541657 | 63 | 68.6638113 |

|            |    |            |
|------------|----|------------|
| 68.7814384 | 63 | 68.7840479 |
| 68.9632566 | 63 | 68.92102   |
| 67.2933799 | 63 | 69.1278381 |
| 67.3925535 | 63 | 69.3437472 |
| 67.3016444 | 63 | 69.5619291 |
| 67.2024709 | 63 | 69.7162821 |
| 67.5909006 | 63 | 69.8710483 |
| 67.8884213 | 63 | 69.9865584 |
| 68.384289  | 63 | 70.0642585 |
| 69.0785039 | 63 | 70.1181983 |
| 69.0785039 | 63 | 70.1272778 |
| 69.6983386 | 63 | 70.1249937 |
| 69.8057766 | 63 | 70.1525008 |
| 70.1115618 | 63 | 70.1576938 |
| 70.8966857 | 63 | 70.1258756 |
| 71.0950328 | 63 | 70.1031484 |
| 71.2933799 | 63 | 70.0986029 |
| 71.0950328 | 63 | 70.0849666 |
| 71.4834626 | 63 | 70.0849666 |
| 71.7727188 | 63 | 70.0781484 |
| 72.169413  | 63 | 70.0463302 |
| 74.7814384 | 63 | 69.989512  |
| 75.417802  | 63 | 69.9213302 |
| 75.8723475 | 63 | 69.8948953 |
| 73.6828318 | 63 | 69.8705265 |
| 73.4266334 | 63 | 69.8620668 |
| 73.0382037 | 63 | 69.8629046 |
| 71.7985342 | 63 | 69.8563044 |
| 71.3026665 | 63 | 69.8559026 |
| 69.8718923 | 63 | 69.8385586 |
| 69.8718923 | 63 | 69.8015865 |
| 70.2685866 | 63 | 69.760069  |
| 69.6735452 | 63 | 69.6716648 |
| 68.417802  | 63 | 69.5758225 |
| 68.3268929 | 63 | 69.4851456 |
| 68.3268929 | 63 | 69.3797993 |
| 67.5996202 | 63 | 69.2618496 |
| 67.5996202 | 63 | 69.1536107 |
| 67.417802  | 63 | 69.0676858 |
| 66.7814384 | 63 | 69.027408  |
| 66.5087111 | 63 | 68.9323922 |
| 66.2359838 | 63 | 68.8276657 |
| 66.2359838 | 63 | 68.6477212 |
| 66.417802  | 63 | 68.4347188 |
| 66.9632566 | 63 | 68.1954768 |



|            |               |
|------------|---------------|
| 67.2359838 | 63 68.0109727 |
| 67.3268929 | 63 67.8179975 |
| 67.8723475 | 63 67.6367991 |
| 67.6905293 | 63 67.4762619 |
| 67.5996202 | 63 67.3791403 |
| 67.417802  | 63 67.3132426 |
| 66.1621706 | 63 67.2496176 |
| 65.972088  | 63 67.1624389 |
| 66.4844846 | 63 67.0605908 |
| 66.6828318 | 63 66.9742271 |
| 66.3770466 | 63 66.8855908 |
| 66.9638235 | 63 66.783318  |
| 67.6580384 | 63 66.7037726 |
| 69.8723475 | 63 66.6264999 |
| 67.972088  | 63 66.558318  |
| 67.9803524 | 63 66.508318  |
| 67.5836582 | 63 66.4719544 |
| 66.8977078 | 63 66.4614058 |
| 66.3026665 | 63 66.4458986 |
| 66.3026665 | 63 66.4314244 |
| 65.7076251 | 63 66.3896775 |
| 65.7902698 | 63 66.331195  |
| 65.3770466 | 63 66.2753985 |
| 67.417802  | 63 66.2140235 |
| 67.2359838 | 63 66.1551278 |
| 67.3268929 | 63 66.0985049 |
| 66.7814384 | 63 66.0487001 |
| 65.5996202 | 63 66.0154101 |
| 64.9632566 | 63 65.9889383 |
| 64.7814384 | 63 65.9494499 |
| 64.2359838 | 63 65.9101682 |
| 64.417802  | 63 65.8760517 |
| 64.5087111 | 63 65.8223072 |
| 64.6905293 | 63 65.7435626 |
| 64.7814384 | 63 65.6016091 |
| 65.0541657 | 63 65.4910463 |
| 65.8140411 | 63 65.3771778 |
| 65.615694  | 63 65.2777721 |
| 65.8388345 | 63 65.1930358 |
| 65.2933799 | 63 65.1180102 |
| 64.8966857 | 63 65.0526954 |
| 65.0950328 | 63 64.9993641 |
| 65.4173469 | 63 64.9361154 |
| 65.3347023 | 63 64.864189  |
| 65.3347023 | 63 64.7431033 |

|            |               |
|------------|---------------|
| 65.4256114 | 63 64.6259431 |
| 64.83057   | 63 64.5011384 |
| 64.9132147 | 63 64.3874906 |
| 64.9049502 | 63 64.3108263 |
| 65.1115618 | 63 64.2552365 |
| 65.0123882 | 63 64.214316  |
| 64.8140411 | 63 64.1919906 |
| 64.508256  | 63 64.1806155 |
| 64.1942064 | 63 64.1818438 |
| 63.5495783 | 63 64.1785267 |
| 63.4256114 | 63 64.1590938 |
| 63.6074295 | 63 64.1382147 |
| 63.508256  | 63 64.1010246 |
| 63.3016444 | 63 64.0737518 |
| 63.6900742 | 63 64.0483386 |
| 63.5743717 | 63 64.0464791 |
| 63.2603221 | 63 64.0723056 |
| 62.4999915 | 63 64.090694  |
| 62.5743717 | 63 64.1059833 |
| 62.5495783 | 63 64.1159006 |
| 62.3347023 | 63 64.1173469 |
| 62.2355287 | 63 64.1142477 |
| 62.5330494 | 63 64.126851  |
| 62.7396609 | 63 64.1336692 |
| 63.1446196 | 63 64.136975  |
| 63.3429667 | 63 64.13057   |
| 63.9628014 | 63 64.1489585 |
| 64.5578428 | 63 64.1723056 |
| 64.5578428 | 63 64.2132147 |
| 64.0041237 | 63 64.2547436 |
| 64.2189998 | 63 64.313008  |
| 64.3264378 | 63 64.3718923 |
| 64.5247849 | 63 64.4237518 |
| 64.8223056 | 63 64.4828428 |
| 65.2189998 | 63 64.5458593 |
| 65.9297436 | 63 64.5993717 |
| 65.83057   | 63 64.6557766 |
| 66.0289171 | 63 64.7249915 |
| 65.7313965 | 63 64.8134213 |
| 65.3925535 | 63 64.8999915 |
| 65.3016444 | 63 64.9995783 |
| 65.3347023 | 63 65.1313965 |
| 65.1859419 | 63 65.275818  |
| 65.0371816 | 63 65.4125948 |
| 64.8553634 | 63 65.5491651 |

|            |    |            |
|------------|----|------------|
| 65.7479254 | 63 | 65.6557766 |
| 65.7479254 | 63 | 65.7524709 |
| 66.1446196 | 63 | 65.8485452 |
| 65.8553634 | 63 | 65.9320163 |
| 65.8801568 | 63 | 66.0278841 |
| 65.7809833 | 63 | 66.1450328 |
| 65.6818097 | 63 | 66.2665204 |
| 65.8718923 | 63 | 66.3830494 |
| 65.8223056 | 63 | 66.4927601 |
| 65.83057   | 63 | 66.5851155 |
| 65.83057   | 63 | 66.6559833 |
| 66.0289171 | 63 | 66.697099  |
| 66.0371816 | 63 | 66.7431733 |
| 66.0371816 | 63 | 66.7847023 |
| 66.5330494 | 63 | 66.8336692 |
| 67.6074295 | 63 | 66.8787105 |
| 68.0123882 | 63 | 66.9233386 |
| 68.0041237 | 63 | 66.9621816 |
| 68.2024709 | 63 | 67.0047436 |
| 67.4090824 | 63 | 67.0504047 |
| 67.2107353 | 63 | 67.1103221 |
| 67.8057766 | 63 | 67.1404874 |
| 67.8966857 | 63 | 67.1681733 |
| 68.3925535 | 63 | 67.1909006 |
| 68.6900742 | 63 | 67.2349089 |
| 69.0785039 | 63 | 67.2634213 |
| 68.9875948 | 63 | 67.2915204 |
| 68.9132147 | 63 | 67.3047436 |
| 68.5165204 | 63 | 67.300818  |
| 68.0537105 | 63 | 67.2956527 |
| 67.5743717 | 63 | 67.2952394 |
| 67.6735452 | 63 | 67.2847023 |
| 67.6900742 | 63 | 67.2642477 |
| 67.6900742 | 63 | 67.2235452 |
| 67.1942064 | 63 | 67.1718923 |
| 67.0867684 | 63 | 67.1049502 |
| 66.8884213 | 63 | 67.0078428 |
| 66.8884213 | 63 | 66.9103221 |
| 66.8636279 | 63 | 66.8254047 |
| 67.2520576 | 63 | 66.7479254 |
| 66.954537  | 63 | 66.7026775 |
| 66.8553634 | 63 | 66.676851  |
| 67.0537105 | 63 | 66.6386279 |
| 67.615694  | 63 | 66.5931733 |
| 67.0206527 | 63 | 66.5303634 |

|            |    |            |
|------------|----|------------|
| 66.9049502 | 63 | 66.463008  |
| 66.2107353 | 63 | 66.3861485 |
| 65.7148675 | 63 | 66.3214791 |
| 65.615694  | 63 | 66.2685866 |
| 65.8140411 | 63 | 66.2375948 |
| 65.4090824 | 63 | 66.2179667 |
| 65.2107353 | 63 | 66.2125948 |
| 64.4090824 | 63 | 66.2094956 |
| 63.9710659 | 63 | 66.2204461 |
| 63.8553634 | 63 | 66.2276775 |
| 63.723132  | 63 | 66.2900855 |
| 64.1115618 | 63 | 66.3369977 |
| 64.6074295 | 63 | 66.3911414 |
| 65.1032973 | 63 | 66.4361941 |
| 65.5991651 | 63 | 66.4682302 |
| 66.1776775 | 63 | 66.4655557 |
| 66.276851  | 63 | 66.4430464 |
| 66.0785039 | 63 | 66.4230164 |
| 65.8801568 | 63 | 66.404846  |
| 65.9958593 | 63 | 66.3839896 |
| 66.0041237 | 63 | 66.3825547 |
| 66.400818  | 63 | 66.3885578 |
| 66.7975122 | 63 | 66.4050981 |
| 67.276851  | 63 | 66.4385806 |
| 67.2685866 | 63 | 66.4768151 |
| 67.3594956 | 63 | 66.5146364 |
| 67.5495783 | 63 | 66.5671271 |
| 68.1280907 | 63 | 66.6245765 |
| 67.9793304 | 63 | 66.7043399 |
| 69.6905293 | 63 | 66.8132356 |
| 68.9632566 | 63 | 66.9182057 |
| 69.0541657 | 63 | 67.0446633 |
| 68.6905293 | 63 | 67.0913575 |
| 68.1450748 | 63 | 67.1264815 |
| 67.1450748 | 63 | 67.1498286 |
| 66.0541657 | 63 | 67.1711096 |
| 66.0541657 | 63 | 67.1804071 |
| 66.3268929 | 63 | 67.1647047 |
| 66.7814384 | 63 | 67.1580931 |
| 66.9632566 | 63 | 67.1605724 |
| 67.1450748 | 63 | 67.2165755 |
| 66.8723475 | 63 | 67.2814629 |
| 67.0541657 | 63 | 67.3409785 |
| 67.1450748 | 63 | 67.3814857 |
| 67.3268929 | 63 | 67.4100095 |

|            |    |            |
|------------|----|------------|
| 67.5087111 | 63 | 67.4319217 |
| 67.5087111 | 63 | 67.4265612 |
| 67.5996202 | 63 | 67.4096304 |
| 68.3268929 | 63 | 67.3646004 |
| 68.0541657 | 63 | 67.3164713 |
| 68.7814384 | 63 | 67.2073804 |
| 65.9793304 | 63 | 67.1141986 |
| 66.0123882 | 63 | 67.0369259 |
| 66.0371816 | 63 | 66.9664713 |
| 66.4504047 | 63 | 66.9005622 |
| 66.5495783 | 63 | 66.8619259 |
| 65.6487518 | 63 | 66.8346531 |
| 65.8140411 | 63 | 66.8051077 |
| 65.9793304 | 63 | 66.7687441 |
| 68.2359838 | 63 | 66.7187441 |
| 68.5996202 | 63 | 66.6732895 |
| 68.7814384 | 63 | 66.6210168 |
| 68.417802  | 63 | 66.5823804 |
| 68.417802  | 63 | 66.5414713 |
| 68.1450748 | 63 | 66.4982895 |
| 67.1450748 | 63 | 66.4505622 |
| 66.8723475 | 63 | 66.4119259 |
| 66.3268929 | 63 | 66.3755622 |
| 66.0541657 | 63 | 66.327835  |
| 65.3268929 | 63 | 66.2619259 |
| 65.2359838 | 63 | 66.2051077 |
| 65.9632566 | 63 | 66.1323804 |
| 65.8723475 | 63 | 66.1433422 |
| 65.5087111 | 63 | 66.1512048 |
| 65.5996202 | 63 | 66.1493567 |
| 64.9632566 | 63 | 66.1167235 |
| 64.8723475 | 63 | 66.0747927 |
| 64.8723475 | 63 | 66.059928  |
| 64.7814384 | 63 | 66.0500221 |
| 65.1450748 | 63 | 66.0337111 |
| 65.0541657 | 63 | 65.9564384 |
| 65.3268929 | 63 | 65.8700748 |
| 65.417802  | 63 | 65.7791657 |
| 65.417802  | 63 | 65.6973475 |
| 65.417802  | 63 | 65.6018929 |
| 65.9632566 | 63 | 65.5018929 |
| 66.0541657 | 63 | 65.4314384 |
| 65.6905293 | 63 | 65.3746202 |
| 65.6905293 | 63 | 65.3359838 |
| 65.7814384 | 63 | 65.3155293 |

|            |    |            |
|------------|----|------------|
| 65.8723475 | 63 | 65.3041657 |
| 66.417802  | 63 | 65.2905293 |
| 66.3268929 | 63 | 65.2496202 |
| 65.9632566 | 63 | 65.2087111 |
| 65.1450748 | 63 | 65.1687953 |
| 64.8723475 | 63 | 65.1491068 |
| 65.0541657 | 63 | 65.1628274 |
| 65.417802  | 63 | 65.1763207 |
| 65.3268929 | 63 | 65.199814  |
| 65.1450748 | 63 | 65.2280801 |
| 65.1450748 | 63 | 65.2522552 |
| 65.1450748 | 63 | 65.2787031 |
| 65.1450748 | 63 | 65.3108327 |
| 64.5996202 | 63 | 65.3381897 |
| 64.1450748 | 63 | 65.3730466 |
| 64.3268929 | 63 | 65.3794055 |
| 64.5996202 | 63 | 65.364435  |
| 64.7814384 | 63 | 65.3462841 |
| 65.2359838 | 63 | 65.3369802 |
| 64.8723475 | 63 | 65.3271594 |
| 64.6905293 | 63 | 65.31418   |
| 64.3268929 | 63 | 65.2977633 |
| 64.2359838 | 63 | 65.2638228 |
| 63.9120799 | 63 | 65.2306018 |
| 64.8120799 |    | 65.2069678 |
| 65.5120799 |    | 65.2090309 |
| 65.4120799 |    | 65.2206407 |
| 65.8120799 |    | 65.2265862 |
| 65.9120799 |    | 65.2195041 |
| 66.1120799 |    | 65.2153738 |
| 66.1120799 |    | 65.2181858 |
| 66.6120799 |    | 65.2212321 |
| 66.5120799 |    | 65.2245432 |
| 66.8120799 |    | 65.2281554 |
| 65.6721572 |    | 65.2580857 |

| Time     |         | Person 4   | Person 3   | Person 8  | Person 5   | Person 1   |
|----------|---------|------------|------------|-----------|------------|------------|
| 17:00:23 | 0:00:01 | 85.1268003 | 75.4754328 | 80.318326 | 83.2427597 | 66.8868972 |
| 17:00:24 | 0:00:02 | 86.1268003 | 75.4754328 | 81.318326 | 84.2427597 | 65.8868972 |
| 17:00:25 | 0:00:03 | 86.1268003 | 76.4754328 | 81.318326 | 84.2427597 | 65.8868972 |
| 17:00:26 | 0:00:04 | 85.1268003 | 76.4754328 | 81.318326 | 85.2427597 | 65.8868972 |
| 17:00:27 | 0:00:05 | 85.1268003 | 76.4754328 | 81.318326 | 85.2427597 | 65.8868972 |
| 17:00:28 | 0:00:06 | 85.1268003 | 76.4754328 | 82.318326 | 85.2427597 | 65.8868972 |
| 17:00:29 | 0:00:07 | 85.1268003 | 76.4754328 | 82.318326 | 85.2427597 | 65.8868972 |
| 17:00:30 | 0:00:08 | 87.1268003 | 76.4754328 | 82.318326 | 85.2427597 | 65.8868972 |
| 17:00:31 | 0:00:09 | 87.1268003 | 76.4754328 | 82.318326 | 84.2427597 | 65.8868972 |
| 17:00:32 | 0:00:10 | 88.1268003 | 76.4754328 | 82.318326 | 84.2427597 | 65.8868972 |
| 17:00:33 | 0:00:11 | 86.1268003 | 75.4754328 | 82.318326 | 84.2427597 | 64.8868972 |
| 17:00:34 | 0:00:12 | 85.1268003 | 75.4754328 | 82.318326 | 83.2427597 | 63.8868972 |
| 17:00:35 | 0:00:13 | 85.1268003 | 75.4754328 | 82.318326 | 83.2427597 | 63.8868972 |
| 17:00:36 | 0:00:14 | 85.1268003 | 75.4754328 | 82.318326 | 83.2427597 | 63.8868972 |
| 17:00:37 | 0:00:15 | 85.1268003 | 75.4754328 | 82.318326 | 90.2427597 | 64.8868972 |
| 17:00:38 | 0:00:16 | 84.1268003 | 75.4754328 | 82.318326 | 80.3805438 | 64.8868972 |
| 17:00:39 | 0:00:17 | 84.1268003 | 75.4754328 | 82.318326 | 80.3805438 | 64.8868972 |
| 17:00:40 | 0:00:18 | 84.1268003 | 75.4754328 | 83.318326 | 80.7138771 | 65.8868972 |
| 17:00:41 | 0:00:19 | 83.1268003 | 76.4754328 | 85.318326 | 81.0472104 | 65.8868972 |
| 17:00:42 | 0:00:20 | 83.1268003 | 76.4754328 | 86.318326 | 90.2427597 | 65.8868972 |
| 17:00:43 | 0:00:21 | 83.1268003 | 76.4754328 | 86.318326 | 90.2427597 | 66.8868972 |
| 17:00:44 | 0:00:22 | 82.1268003 | 76.4754328 | 86.318326 | 89.2427597 | 66.8868972 |
| 17:00:45 | 0:00:23 | 81.1268003 | 76.4754328 | 86.318326 | 88.2427597 | 68.8868972 |
| 17:00:46 | 0:00:24 | 81.1268003 | 78.4754328 | 85.318326 | 89.2427597 | 69.8868972 |
| 17:00:47 | 0:00:25 | 80.1268003 | 78.4754328 | 85.318326 | 89.2427597 | 69.8868972 |
| 17:00:48 | 0:00:26 | 80.1268003 | 78.4754328 | 85.318326 | 90.2427597 | 68.8868972 |
| 17:00:49 | 0:00:27 | 78.1268003 | 78.4754328 | 85.318326 | 90.2427597 | 67.8868972 |
| 17:00:50 | 0:00:28 | 78.1268003 | 78.4754328 | 84.318326 | 90.2427597 | 67.8868972 |
| 17:00:51 | 0:00:29 | 79.1268003 | 79.4754328 | 83.318326 | 92.2427597 | 67.8868972 |
| 17:00:52 | 0:00:30 | 79.1268003 | 79.4754328 | 82.318326 | 92.2427597 | 67.8868972 |
| 17:00:53 | 0:00:31 | 80.1268003 | 79.4754328 | 82.318326 | 92.2427597 | 67.8868972 |
| 17:00:54 | 0:00:32 | 81.1268003 | 79.4754328 | 82.318326 | 92.2427597 | 67.8868972 |
| 17:00:55 | 0:00:33 | 81.1268003 | 79.4754328 | 82.318326 | 80.2138771 | 67.8868972 |
| 17:00:56 | 0:00:34 | 82.1268003 | 78.4754328 | 84.318326 | 80.0472104 | 66.8868972 |
| 17:00:57 | 0:00:35 | 83.1268003 | 78.4754328 | 84.318326 | 92.2427597 | 66.8868972 |
| 17:00:58 | 0:00:36 | 84.1268003 | 78.4754328 | 85.318326 | 92.2427597 | 66.8868972 |
| 17:00:59 | 0:00:37 | 84.1268003 | 78.4754328 | 85.318326 | 92.2427597 | 67.8868972 |
| 17:01:00 | 0:00:38 | 84.1268003 | 78.4754328 | 86.318326 | 92.2427597 | 67.8868972 |
| 17:01:01 | 0:00:39 | 84.1268003 | 78.4754328 | 86.318326 | 92.2427597 | 68.8868972 |
| 17:01:02 | 0:00:40 | 85.1268003 | 77.4754328 | 86.318326 | 91.2427597 | 68.8868972 |
| 17:01:03 | 0:00:41 | 85.1268003 | 77.4754328 | 86.318326 | 91.2427597 | 69.8868972 |
| 17:01:04 | 0:00:42 | 81.1268003 | 76.4754328 | 86.318326 | 91.2427597 | 70.8868972 |
| 17:01:05 | 0:00:43 | 78.1268003 | 76.4754328 | 87.318326 | 91.2427597 | 71.8868972 |

|          |         |            |            |           |            |            |
|----------|---------|------------|------------|-----------|------------|------------|
| 17:01:06 | 0:00:44 | 77.1268003 | 75.4754328 | 87.318326 | 91.2427597 | 71.8868972 |
| 17:01:07 | 0:00:45 | 76.1268003 | 75.4754328 | 88.318326 | 89.2427597 | 72.8868972 |
| 17:01:08 | 0:00:46 | 76.1268003 | 75.4754328 | 88.318326 | 89.2427597 | 73.8868972 |
| 17:01:09 | 0:00:47 | 76.1268003 | 75.4754328 | 86.318326 | 89.2427597 | 73.8868972 |
| 17:01:10 | 0:00:48 | 76.1268003 | 75.4754328 | 85.318326 | 88.2427597 | 74.8868972 |
| 17:01:11 | 0:00:49 | 76.1268003 | 75.4754328 | 84.318326 | 87.2427597 | 74.8868972 |
| 17:01:12 | 0:00:50 | 76.1268003 | 75.4754328 | 84.318326 | 87.2427597 | 74.8868972 |
| 17:01:13 | 0:00:51 | 76.1268003 | 75.4754328 | 84.318326 | 86.2427597 | 74.8868972 |
| 17:01:14 | 0:00:52 | 83.1268003 | 75.4754328 | 84.318326 | 85.2427597 | 74.8868972 |
| 17:01:15 | 0:00:53 | 85.1268003 | 75.4754328 | 84.318326 | 85.2427597 | 77.8868972 |
| 17:01:16 | 0:00:54 | 85.1268003 | 75.4754328 | 85.318326 | 84.2427597 | 82.8868972 |
| 17:01:17 | 0:00:55 | 82.1268003 | 75.4754328 | 85.318326 | 84.2427597 | 82.8868972 |
| 17:01:18 | 0:00:56 | 79.1268003 | 75.4754328 | 87.318326 | 85.2427597 | 83.8868972 |
| 17:01:19 | 0:00:57 | 78.1268003 | 77.4754328 | 88.318326 | 86.2427597 | 85.8868972 |
| 17:01:20 | 0:00:58 | 79.1268003 | 77.4754328 | 88.318326 | 86.2427597 | 89.8868972 |
| 17:01:21 | 0:00:59 | 79.1268003 | 77.4754328 | 88.318326 | 87.2427597 | 92.8868972 |
| 17:01:22 | 0:01:00 | 80.1268003 | 78.4754328 | 91.318326 | 89.2427597 | 92.8868972 |
| 17:01:23 | 0:01:01 | 80.1268003 | 78.4754328 | 92.318326 | 89.2427597 | 96.8868972 |
| 17:01:24 | 0:01:02 | 81.1268003 | 79.4754328 | 94.318326 | 91.2427597 | 97.8868972 |
| 17:01:25 | 0:01:03 | 81.1268003 | 79.4754328 | 94.318326 | 91.2427597 | 97.8868972 |
| 17:01:26 | 0:01:04 | 81.1268003 | 79.4754328 | 96.318326 | 91.2427597 | 95.8868972 |
| 17:01:27 | 0:01:05 | 81.1268003 | 86.4754328 | 96.318326 | 90.2427597 | 95.8868972 |
| 17:01:28 | 0:01:06 | 81.1268003 | 87.4754328 | 97.318326 | 90.2427597 | 95.8868972 |
| 17:01:29 | 0:01:07 | 81.1268003 | 87.4754328 | 97.318326 | 90.2427597 | 97.8868972 |
| 17:01:30 | 0:01:08 | 81.1268003 | 87.4754328 | 97.318326 | 90.2427597 | 97.8868972 |
| 17:01:31 | 0:01:09 | 81.1268003 | 87.4754328 | 95.318326 | 90.2427597 | 98.8868972 |
| 17:01:32 | 0:01:10 | 79.1268003 | 86.4754328 | 88.318326 | 90.2427597 | 85.5472104 |
| 17:01:33 | 0:01:11 | 78.1268003 | 86.4754328 | 86.318326 | 90.2427597 | 94.8868972 |
| 17:01:34 | 0:01:12 | 77.1268003 | 89.4754328 | 86.318326 | 91.2427597 | 91.8868972 |
| 17:01:35 | 0:01:13 | 77.1268003 | 89.4754328 | 84.318326 | 91.2427597 | 91.8868972 |
| 17:01:36 | 0:01:14 | 75.1268003 | 82.5472104 | 84.318326 | 91.2427597 | 73.8868972 |
| 17:01:37 | 0:01:15 | 75.1268003 | 82.5472104 | 84.318326 | 91.2427597 | 71.8868972 |
| 17:01:38 | 0:01:16 | 75.1268003 | 82.5472104 | 83.318326 | 91.2427597 | 68.8868972 |
| 17:01:39 | 0:01:17 | 75.1268003 | 83.5472104 | 83.318326 | 91.2427597 | 68.8868972 |
| 17:01:40 | 0:01:18 | 75.1268003 | 83.7138771 | 83.318326 | 91.2427597 | 66.8868972 |
| 17:01:41 | 0:01:19 | 74.1268003 | 83.7138771 | 83.318326 | 91.2427597 | 66.8868972 |
| 17:01:42 | 0:01:20 | 72.1268003 | 83.2138771 | 83.318326 | 90.2427597 | 66.8868972 |
| 17:01:43 | 0:01:21 | 71.1268003 | 82.3805438 | 83.318326 | 89.2427597 | 64.8868972 |
| 17:01:44 | 0:01:22 | 71.1268003 | 80.5472104 | 80.318326 | 88.2427597 | 64.8868972 |
| 17:01:45 | 0:01:23 | 69.1268003 | 78.8805438 | 80.318326 | 88.2427597 | 65.8868972 |
| 17:01:46 | 0:01:24 | 79.1268003 | 89.4754328 | 80.318326 | 88.2427597 | 65.8868972 |
| 17:01:47 | 0:01:25 | 79.1268003 | 89.4754328 | 80.318326 | 88.2427597 | 66.8868972 |
| 17:01:48 | 0:01:26 | 79.1268003 | 86.4754328 | 80.318326 | 88.2427597 | 66.8868972 |
| 17:01:49 | 0:01:27 | 80.1268003 | 86.4754328 | 80.318326 | 89.2427597 | 66.8868972 |
| 17:01:50 | 0:01:28 | 80.1268003 | 86.4754328 | 80.318326 | 89.2427597 | 65.8868972 |



|          |         |            |            |           |            |            |
|----------|---------|------------|------------|-----------|------------|------------|
| 17:01:51 | 0:01:29 | 80.1268003 | 83.4754328 | 80.318326 | 89.2427597 | 65.8868972 |
| 17:01:52 | 0:01:30 | 81.1268003 | 82.4754328 | 80.318326 | 89.2427597 | 64.8868972 |
| 17:01:53 | 0:01:31 | 81.1268003 | 81.4754328 | 80.318326 | 89.2427597 | 64.8868972 |
| 17:01:54 | 0:01:32 | 81.1268003 | 81.4754328 | 80.318326 | 89.2427597 | 64.8868972 |
| 17:01:55 | 0:01:33 | 81.1268003 | 81.4754328 | 80.318326 | 89.2427597 | 64.8868972 |
| 17:01:56 | 0:01:34 | 83.1268003 | 80.4754328 | 80.318326 | 89.2427597 | 64.8868972 |
| 17:01:57 | 0:01:35 | 84.1268003 | 80.4754328 | 80.318326 | 89.2427597 | 64.8868972 |
| 17:01:58 | 0:01:36 | 85.1268003 | 80.4754328 | 80.318326 | 89.2427597 | 64.8868972 |
| 17:01:59 | 0:01:37 | 85.1268003 | 81.4754328 | 80.318326 | 90.2427597 | 64.8868972 |
| 17:02:00 | 0:01:38 | 85.1268003 | 82.4754328 | 87.318326 | 90.2427597 | 64.8868972 |
| 17:02:01 | 0:01:39 | 85.1268003 | 83.4754328 | 86.318326 | 91.2427597 | 63.8868972 |
| 17:02:02 | 0:01:40 | 85.1268003 | 84.4754328 | 86.318326 | 93.2427597 | 62.8868972 |
| 17:02:03 | 0:01:41 | 86.1268003 | 84.4754328 | 86.318326 | 93.2427597 | 62.8868972 |
| 17:02:04 | 0:01:42 | 86.1268003 | 83.4754328 | 84.318326 | 93.2427597 | 63.8868972 |
| 17:02:05 | 0:01:43 | 86.1268003 | 82.4754328 | 83.318326 | 93.2427597 | 63.8868972 |
| 17:02:06 | 0:01:44 | 87.1268003 | 80.4754328 | 83.318326 | 93.2427597 | 63.8868972 |
| 17:02:07 | 0:01:45 | 87.1268003 | 78.4754328 | 83.318326 | 80.3805438 | 64.8868972 |
| 17:02:08 | 0:01:46 | 87.1268003 | 78.4754328 | 82.318326 | 80.2138771 | 64.8868972 |
| 17:02:09 | 0:01:47 | 88.1268003 | 78.4754328 | 81.318326 | 92.2427597 | 64.8868972 |
| 17:02:10 | 0:01:48 | 88.1268003 | 73.4754328 | 81.318326 | 92.2427597 | 64.8868972 |
| 17:02:11 | 0:01:49 | 88.1268003 | 73.4754328 | 79.318326 | 89.2427597 | 64.8868972 |
| 17:02:12 | 0:01:50 | 88.1268003 | 73.4754328 | 78.318326 | 88.2427597 | 65.8868972 |
| 17:02:13 | 0:01:51 | 88.1268003 | 72.4754328 | 76.318326 | 86.2427597 | 64.8868972 |
| 17:02:14 | 0:01:52 | 88.1268003 | 72.4754328 | 74.318326 | 86.2427597 | 65.8868972 |
| 17:02:15 | 0:01:53 | 88.1268003 | 72.4754328 | 74.318326 | 85.2427597 | 65.8868972 |
| 17:02:16 | 0:01:54 | 90.1268003 | 73.4754328 | 74.318326 | 85.2427597 | 65.8868972 |
| 17:02:17 | 0:01:55 | 77.0472104 | 72.4754328 | 72.318326 | 85.2427597 | 65.8868972 |
| 17:02:18 | 0:01:56 | 89.1268003 | 72.4754328 | 72.318326 | 81.2427597 | 65.8868972 |
| 17:02:19 | 0:01:57 | 89.1268003 | 72.4754328 | 72.318326 | 81.2427597 | 66.8868972 |
| 17:02:20 | 0:01:58 | 89.1268003 | 72.4754328 | 75.318326 | 82.2427597 | 66.8868972 |
| 17:02:21 | 0:01:59 | 78.3805438 | 72.4754328 | 76.318326 | 85.2427597 | 67.8868972 |
| 17:02:22 | 0:02:00 | 91.1268003 | 72.4754328 | 76.318326 | 86.2427597 | 68.8868972 |
| 17:02:23 | 0:02:01 | 78.2138771 | 72.4754328 | 76.318326 | 86.2427597 | 68.8868972 |
| 17:02:24 | 0:02:02 | 78.2138771 | 72.4754328 | 76.318326 | 86.2427597 | 68.8868972 |
| 17:02:25 | 0:02:03 | 80.1268003 | 72.4754328 | 81.318326 | 86.2427597 | 68.8868972 |
| 17:02:26 | 0:02:04 | 74.1268003 | 75.4754328 | 80.318326 | 89.2427597 | 67.8868972 |
| 17:02:27 | 0:02:05 | 74.1268003 | 76.4754328 | 80.318326 | 89.2427597 | 67.8868972 |
| 17:02:28 | 0:02:06 | 74.1268003 | 76.4754328 | 80.318326 | 89.2427597 | 67.8868972 |
| 17:02:29 | 0:02:07 | 75.1268003 | 75.4754328 | 80.318326 | 87.2427597 | 67.8868972 |
| 17:02:30 | 0:02:08 | 75.1268003 | 75.4754328 | 80.318326 | 85.2427597 | 67.8868972 |
| 17:02:31 | 0:02:09 | 75.1268003 | 75.4754328 | 80.318326 | 84.2427597 | 67.8868972 |
| 17:02:32 | 0:02:10 | 75.1268003 | 76.4754328 | 80.318326 | 84.2427597 | 67.8868972 |
| 17:02:33 | 0:02:11 | 75.1268003 | 77.4754328 | 78.318326 | 84.2427597 | 66.8868972 |
| 17:02:34 | 0:02:12 | 75.1268003 | 77.4754328 | 78.318326 | 84.2427597 | 66.8868972 |
| 17:02:35 | 0:02:13 | 75.1268003 | 76.4754328 | 77.318326 | 84.2427597 | 67.8868972 |

|          |         |            |            |           |            |            |
|----------|---------|------------|------------|-----------|------------|------------|
| 17:02:36 | 0:02:14 | 75.1268003 | 75.4754328 | 77.318326 | 84.2427597 | 69.8868972 |
| 17:02:37 | 0:02:15 | 75.1268003 | 75.4754328 | 77.318326 | 84.2427597 | 69.8868972 |
| 17:02:38 | 0:02:16 | 75.1268003 | 75.4754328 | 79.318326 | 84.2427597 | 69.8868972 |
| 17:02:39 | 0:02:17 | 75.1268003 | 76.4754328 | 79.318326 | 85.2427597 | 68.8868972 |
| 17:02:40 | 0:02:18 | 76.1268003 | 75.4754328 | 79.318326 | 85.2427597 | 68.8868972 |
| 17:02:41 | 0:02:19 | 78.1268003 | 75.4754328 | 74.318326 | 85.2427597 | 67.8868972 |
| 17:02:42 | 0:02:20 | 79.1268003 | 75.4754328 | 72.318326 | 85.2427597 | 67.8868972 |
| 17:02:43 | 0:02:21 | 79.1268003 | 75.4754328 | 72.318326 | 85.2427597 | 67.8868972 |
| 17:02:44 | 0:02:22 | 79.1268003 | 75.4754328 | 71.318326 | 84.2427597 | 68.8868972 |
| 17:02:45 | 0:02:23 | 79.1268003 | 74.4754328 | 72.318326 | 83.2427597 | 68.8868972 |
| 17:02:46 | 0:02:24 | 79.1268003 | 74.4754328 | 73.318326 | 82.2427597 | 68.8868972 |
| 17:02:47 | 0:02:25 | 79.1268003 | 74.4754328 | 73.318326 | 82.2427597 | 69.8868972 |
| 17:02:48 | 0:02:26 | 79.1268003 | 74.4754328 | 74.318326 | 81.2427597 | 71.8868972 |
| 17:02:49 | 0:02:27 | 79.1268003 | 74.4754328 | 75.318326 | 81.2427597 | 72.8868972 |
| 17:02:50 | 0:02:28 | 79.1268003 | 74.4754328 | 74.318326 | 83.2427597 | 72.8868972 |
| 17:02:51 | 0:02:29 | 82.1268003 | 74.4754328 | 74.318326 | 83.2427597 | 67.8868972 |
| 17:02:52 | 0:02:30 | 83.1268003 | 76.4754328 | 73.318326 | 83.2427597 | 65.8868972 |
| 17:02:53 | 0:02:31 | 80.1268003 | 77.4754328 | 74.318326 | 83.2427597 | 65.8868972 |
| 17:02:54 | 0:02:32 | 80.1268003 | 77.4754328 | 74.318326 | 82.2427597 | 65.8868972 |
| 17:02:55 | 0:02:33 | 78.1268003 | 76.4754328 | 75.318326 | 80.2427597 | 64.8868972 |
| 17:02:56 | 0:02:34 | 77.1268003 | 76.4754328 | 76.318326 | 79.2427597 | 63.8868972 |
| 17:02:57 | 0:02:35 | 68.1268003 | 76.4754328 | 75.318326 | 79.2427597 | 63.8868972 |
| 17:02:58 | 0:02:36 | 67.1268003 | 76.4754328 | 75.318326 | 79.2427597 | 63.8868972 |
| 17:02:59 | 0:02:37 | 67.1268003 | 75.4754328 | 75.318326 | 79.2427597 | 63.8868972 |
| 17:03:00 | 0:02:38 | 67.1268003 | 75.4754328 | 75.318326 | 79.2427597 | 63.8868972 |
| 17:03:01 | 0:02:39 | 71.1268003 | 76.4754328 | 77.318326 | 79.2427597 | 62.8868972 |
| 17:03:02 | 0:02:40 | 71.1268003 | 76.4754328 | 77.318326 | 79.2427597 | 63.8868972 |
| 17:03:03 | 0:02:41 | 72.1268003 | 75.4754328 | 81.318326 | 79.2427597 | 64.8868972 |
| 17:03:04 | 0:02:42 | 72.1268003 | 75.4754328 | 82.318326 | 79.2427597 | 64.8868972 |
| 17:03:05 | 0:02:43 | 76.1268003 | 75.4754328 | 82.318326 | 79.2427597 | 64.8868972 |
| 17:03:06 | 0:02:44 | 77.1268003 | 74.4754328 | 82.318326 | 80.2427597 | 63.8868972 |
| 17:03:07 | 0:02:45 | 77.1268003 | 75.4754328 | 83.318326 | 81.2427597 | 62.8868972 |
| 17:03:08 | 0:02:46 | 77.1268003 | 75.4754328 | 83.318326 | 81.2427597 | 62.8868972 |
| 17:03:09 | 0:02:47 | 76.1268003 | 76.4754328 | 83.318326 | 81.2427597 | 62.8868972 |
| 17:03:10 | 0:02:48 | 76.1268003 | 76.4754328 | 83.318326 | 82.2427597 | 64.8868972 |
| 17:03:11 | 0:02:49 | 78.1268003 | 75.4754328 | 84.318326 | 83.2427597 | 65.8868972 |
| 17:03:12 | 0:02:50 | 81.1268003 | 75.4754328 | 84.318326 | 83.2427597 | 67.8868972 |
| 17:03:13 | 0:02:51 | 81.1268003 | 75.4754328 | 84.318326 | 83.2427597 | 67.8868972 |
| 17:03:14 | 0:02:52 | 84.1268003 | 76.4754328 | 84.318326 | 83.2427597 | 68.8868972 |
| 17:03:15 | 0:02:53 | 85.1268003 | 76.4754328 | 84.318326 | 83.2427597 | 71.8868972 |
| 17:03:16 | 0:02:54 | 82.1268003 | 75.4754328 | 84.318326 | 82.2427597 | 71.8868972 |
| 17:03:17 | 0:02:55 | 81.1268003 | 74.4754328 | 85.318326 | 82.2427597 | 71.8868972 |
| 17:03:18 | 0:02:56 | 81.1268003 | 74.4754328 | 85.318326 | 82.2427597 | 71.8868972 |
| 17:03:19 | 0:02:57 | 81.1268003 | 74.4754328 | 88.318326 | 82.2427597 | 72.8868972 |
| 17:03:20 | 0:02:58 | 79.1268003 | 74.4754328 | 88.318326 | 80.2427597 | 72.8868972 |

|          |         |            |            |           |            |            |
|----------|---------|------------|------------|-----------|------------|------------|
| 17:03:21 | 0:02:59 | 79.1268003 | 74.4754328 | 87.318326 | 80.2427597 | 73.8868972 |
| 17:03:22 | 0:03:00 | 78.1268003 | 74.4754328 | 82.318326 | 80.2427597 | 77.8868972 |
| 17:03:23 | 0:03:01 | 74.1268003 | 74.4754328 | 77.318326 | 81.2427597 | 78.8868972 |
| 17:03:24 | 0:03:02 | 73.1268003 | 74.4754328 | 77.318326 | 81.2427597 | 78.8868972 |
| 17:03:25 | 0:03:03 | 73.1268003 | 73.4754328 | 74.318326 | 82.2427597 | 78.8868972 |
| 17:03:26 | 0:03:04 | 71.1268003 | 72.4754328 | 71.318326 | 82.2427597 | 78.8868972 |
| 17:03:27 | 0:03:05 | 69.1268003 | 72.4754328 | 70.318326 | 82.2427597 | 75.8868972 |
| 17:03:28 | 0:03:06 | 69.1268003 | 72.4754328 | 70.318326 | 82.2427597 | 73.8868972 |
| 17:03:29 | 0:03:07 | 69.1268003 | 72.4754328 | 70.318326 | 82.2427597 | 72.8868972 |
| 17:03:30 | 0:03:08 | 69.1268003 | 73.4754328 | 71.318326 | 82.2427597 | 71.8868972 |
| 17:03:31 | 0:03:09 | 68.1268003 | 73.4754328 | 73.318326 | 82.2427597 | 71.8868972 |
| 17:03:32 | 0:03:10 | 68.1268003 | 73.4754328 | 73.318326 | 82.2427597 | 71.8868972 |
| 17:03:33 | 0:03:11 | 68.1268003 | 74.4754328 | 73.318326 | 82.2427597 | 71.8868972 |
| 17:03:34 | 0:03:12 | 68.1268003 | 74.4754328 | 74.318326 | 82.2427597 | 71.8868972 |
| 17:03:35 | 0:03:13 | 68.1268003 | 74.4754328 | 74.318326 | 82.2427597 | 70.8868972 |
| 17:03:36 | 0:03:14 | 67.1268003 | 78.4754328 | 75.318326 | 82.2427597 | 68.8868972 |
| 17:03:37 | 0:03:15 | 67.1268003 | 80.4754328 | 75.318326 | 82.2427597 | 68.8868972 |
| 17:03:38 | 0:03:16 | 68.1268003 | 80.4754328 | 75.318326 | 81.2427597 | 68.8868972 |
| 17:03:39 | 0:03:17 | 68.1268003 | 79.4754328 | 76.318326 | 82.2427597 | 67.8868972 |
| 17:03:40 | 0:03:18 | 70.1268003 | 79.4754328 | 76.318326 | 82.2427597 | 66.8868972 |
| 17:03:41 | 0:03:19 | 70.1268003 | 78.4754328 | 76.318326 | 82.2427597 | 65.8868972 |
| 17:03:42 | 0:03:20 | 70.1268003 | 79.4754328 | 76.318326 | 82.2427597 | 64.8868972 |
| 17:03:43 | 0:03:21 | 71.1268003 | 79.4754328 | 76.318326 | 82.2427597 | 64.8868972 |
| 17:03:44 | 0:03:22 | 71.1268003 | 79.4754328 | 76.318326 | 83.2427597 | 64.8868972 |
| 17:03:45 | 0:03:23 | 72.1268003 | 78.4754328 | 76.318326 | 83.2427597 | 64.8868972 |
| 17:03:46 | 0:03:24 | 68.1268003 | 77.4754328 | 76.318326 | 86.2427597 | 64.8868972 |
| 17:03:47 | 0:03:25 | 68.1268003 | 76.4754328 | 78.318326 | 87.2427597 | 64.8868972 |
| 17:03:48 | 0:03:26 | 68.1268003 | 76.4754328 | 78.318326 | 87.2427597 | 64.8868972 |
| 17:03:49 | 0:03:27 | 71.1268003 | 76.4754328 | 80.318326 | 87.2427597 | 65.8868972 |
| 17:03:50 | 0:03:28 | 71.1268003 | 76.4754328 | 80.318326 | 87.2427597 | 65.8868972 |
| 17:03:51 | 0:03:29 | 72.1268003 | 76.4754328 | 81.318326 | 87.2427597 | 65.8868972 |
| 17:03:52 | 0:03:30 | 73.1268003 | 76.4754328 | 81.318326 | 87.2427597 | 64.8868972 |
| 17:03:53 | 0:03:31 | 74.1268003 | 80.4754328 | 81.318326 | 83.2427597 | 64.8868972 |
| 17:03:54 | 0:03:32 | 74.1268003 | 80.4754328 | 81.318326 | 83.2427597 | 65.8868972 |
| 17:03:55 | 0:03:33 | 74.1268003 | 81.4754328 | 82.318326 | 83.2427597 | 65.8868972 |
| 17:03:56 | 0:03:34 | 74.1268003 | 81.4754328 | 82.318326 | 83.2427597 | 65.8868972 |
| 17:03:57 | 0:03:35 | 75.1268003 | 79.4754328 | 82.318326 | 84.2427597 | 65.8868972 |
| 17:03:58 | 0:03:36 | 77.1268003 | 78.4754328 | 81.318326 | 84.2427597 | 65.8868972 |
| 17:03:59 | 0:03:37 | 77.1268003 | 78.4754328 | 80.318326 | 84.2427597 | 64.8868972 |
| 17:04:00 | 0:03:38 | 77.1268003 | 77.4754328 | 80.318326 | 84.2427597 | 64.8868972 |
| 17:04:01 | 0:03:39 | 78.1268003 | 78.4754328 | 78.318326 | 84.2427597 | 64.8868972 |
| 17:04:02 | 0:03:40 | 78.1268003 | 78.4754328 | 78.318326 | 84.2427597 | 64.8868972 |
| 17:04:03 | 0:03:41 | 78.1268003 | 78.4754328 | 82.318326 | 84.2427597 | 63.8868972 |
| 17:04:04 | 0:03:42 | 78.1268003 | 78.4754328 | 82.318326 | 85.2427597 | 63.8868972 |
| 17:04:05 | 0:03:43 | 76.1268003 | 77.4754328 | 83.318326 | 85.2427597 | 63.8868972 |

|          |         |            |            |           |            |            |
|----------|---------|------------|------------|-----------|------------|------------|
| 17:04:06 | 0:03:44 | 76.1268003 | 77.4754328 | 82.318326 | 85.2427597 | 62.8868972 |
| 17:04:07 | 0:03:45 | 72.1268003 | 76.4754328 | 80.318326 | 85.2427597 | 64.8868972 |
| 17:04:08 | 0:03:46 | 68.1268003 | 75.4754328 | 79.318326 | 86.2427597 | 64.8868972 |
| 17:04:09 | 0:03:47 | 69.1268003 | 75.4754328 | 78.318326 | 86.2427597 | 64.8868972 |
| 17:04:10 | 0:03:48 | 69.1268003 | 75.4754328 | 77.318326 | 86.2427597 | 64.8868972 |
| 17:04:11 | 0:03:49 | 70.1268003 | 76.4754328 | 77.318326 | 86.2427597 | 64.8868972 |
| 17:04:12 | 0:03:50 | 70.1268003 | 76.4754328 | 77.318326 | 86.2427597 | 64.8868972 |
| 17:04:13 | 0:03:51 | 74.1268003 | 77.4754328 | 76.318326 | 86.2427597 | 64.8868972 |
| 17:04:14 | 0:03:52 | 72.1268003 | 77.4754328 | 76.318326 | 86.2427597 | 63.8868972 |
| 17:04:15 | 0:03:53 | 72.1268003 | 77.4754328 | 76.318326 | 86.2427597 | 65.8868972 |
| 17:04:16 | 0:03:54 | 71.1268003 | 78.4754328 | 76.318326 | 86.2427597 | 65.8868972 |
| 17:04:17 | 0:03:55 | 71.1268003 | 79.4754328 | 74.318326 | 87.2427597 | 66.8868972 |
| 17:04:18 | 0:03:56 | 73.1268003 | 83.4754328 | 73.318326 | 87.2427597 | 66.8868972 |
| 17:04:19 | 0:03:57 | 73.1268003 | 84.4754328 | 72.318326 | 87.2427597 | 67.8868972 |
| 17:04:20 | 0:03:58 | 73.1268003 | 84.4754328 | 72.318326 | 89.2427597 | 67.8868972 |
| 17:04:21 | 0:03:59 | 75.1268003 | 84.4754328 | 70.318326 | 91.2427597 | 65.8868972 |
| 17:04:22 | 0:04:00 | 75.1268003 | 83.4754328 | 70.318326 | 78.6649667 | 64.8868972 |
| 17:04:23 | 0:04:01 | 75.1268003 | 82.4754328 | 69.318326 | 78.6649667 | 64.8868972 |
| 17:04:24 | 0:04:02 | 75.1268003 | 82.4754328 | 68.318326 | 78.2363953 | 64.8868972 |
| 17:04:25 | 0:04:03 | 74.1268003 | 81.4754328 | 68.318326 | 78.0935381 | 64.8868972 |
| 17:04:26 | 0:04:04 | 71.1268003 | 81.4754328 | 68.318326 | 78.3346531 | 64.8868972 |
| 17:04:27 | 0:04:05 | 71.1268003 | 81.4754328 | 68.318326 | 91.2427597 | 65.8868972 |
| 17:04:28 | 0:04:06 | 71.1268003 | 81.4754328 | 66.318326 | 88.2427597 | 65.8868972 |
| 17:04:29 | 0:04:07 | 71.1268003 | 81.4754328 | 66.318326 | 86.2427597 | 65.8868972 |
| 17:04:30 | 0:04:08 | 71.1268003 | 80.4754328 | 67.318326 | 87.2427597 | 65.8868972 |
| 17:04:31 | 0:04:09 | 72.1268003 | 80.4754328 | 67.318326 | 87.2427597 | 65.8868972 |
| 17:04:32 | 0:04:10 | 73.1268003 | 80.4754328 | 68.318326 | 89.2427597 | 65.8868972 |
| 17:04:33 | 0:04:11 | 73.1268003 | 80.4754328 | 69.318326 | 89.2427597 | 65.8868972 |
| 17:04:34 | 0:04:12 | 73.1268003 | 80.4754328 | 69.318326 | 76.3346531 | 65.8868972 |
| 17:04:35 | 0:04:13 | 73.1268003 | 80.4754328 | 72.318326 | 87.2427597 | 65.8868972 |
| 17:04:36 | 0:04:14 | 74.1268003 | 80.4754328 | 74.318326 | 87.2427597 | 65.8868972 |
| 17:04:37 | 0:04:15 | 75.1268003 | 80.4754328 | 75.318326 | 87.2427597 | 66.8868972 |
| 17:04:38 | 0:04:16 | 75.1268003 | 80.4754328 | 76.318326 | 87.2427597 | 66.8868972 |
| 17:04:39 | 0:04:17 | 76.1268003 | 80.4754328 | 76.318326 | 85.2427597 | 66.8868972 |
| 17:04:40 | 0:04:18 | 76.1268003 | 80.4754328 | 78.318326 | 84.2427597 | 66.8868972 |
| 17:04:41 | 0:04:19 | 76.1268003 | 80.4754328 | 78.318326 | 84.2427597 | 65.8868972 |
| 17:04:42 | 0:04:20 | 76.1268003 | 80.4754328 | 79.318326 | 84.2427597 | 65.8868972 |
| 17:04:43 | 0:04:21 | 76.1268003 | 78.4754328 | 79.318326 | 84.2427597 | 65.8868972 |
| 17:04:44 | 0:04:22 | 78.1268003 | 76.4754328 | 79.318326 | 84.2427597 | 66.8868972 |
| 17:04:45 | 0:04:23 | 77.1268003 | 76.4754328 | 80.318326 | 84.2427597 | 72.8868972 |
| 17:04:46 | 0:04:24 | 73.1268003 | 74.4754328 | 80.318326 | 81.2427597 | 72.8868972 |
| 17:04:47 | 0:04:25 | 73.1268003 | 71.4754328 | 84.318326 | 81.2427597 | 73.8868972 |
| 17:04:48 | 0:04:26 | 72.1268003 | 71.4754328 | 85.318326 | 79.2427597 | 74.8868972 |
| 17:04:49 | 0:04:27 | 70.1268003 | 71.4754328 | 87.318326 | 79.2427597 | 78.8868972 |
| 17:04:50 | 0:04:28 | 70.1268003 | 71.4754328 | 88.318326 | 79.2427597 | 80.8868972 |

|          |         |            |            |            |            |            |
|----------|---------|------------|------------|------------|------------|------------|
| 17:04:51 | 0:04:29 | 70.1268003 | 71.4754328 | 88.318326  | 79.2427597 | 80.8868972 |
| 17:04:52 | 0:04:30 | 70.1268003 | 71.4754328 | 77.5846531 | 79.2427597 | 81.8868972 |
| 17:04:53 | 0:04:31 | 71.1268003 | 71.4754328 | 77.9596531 | 79.2427597 | 82.8868972 |
| 17:04:54 | 0:04:32 | 74.1268003 | 71.4754328 | 78.7096531 | 79.2427597 | 82.8868972 |
| 17:04:55 | 0:04:33 | 74.1268003 | 71.4754328 | 78.8346531 | 79.2427597 | 83.8868972 |
| 17:04:56 | 0:04:34 | 74.1268003 | 71.4754328 | 79.2096531 | 79.2427597 | 84.8868972 |
| 17:04:57 | 0:04:35 | 73.1268003 | 71.4754328 | 78.7096531 | 79.2427597 | 79.8868972 |
| 17:04:58 | 0:04:36 | 73.1268003 | 71.4754328 | 78.5846531 | 79.2427597 | 75.8868972 |
| 17:04:59 | 0:04:37 | 73.1268003 | 71.4754328 | 78.3346531 | 80.2427597 | 72.8868972 |
| 17:05:00 | 0:04:38 | 73.1268003 | 72.4754328 | 78.4596531 | 80.2427597 | 71.8868972 |
| 17:05:01 | 0:04:39 | 73.1268003 | 73.4754328 | 78.5846531 | 80.2427597 | 70.8868972 |
| 17:05:02 | 0:04:40 | 73.1268003 | 76.4754328 | 78.5846531 | 77.2427597 | 70.8868972 |
| 17:05:03 | 0:04:41 | 77.1268003 | 76.4754328 | 79.5846531 | 77.2427597 | 69.8868972 |
| 17:05:04 | 0:04:42 | 77.1268003 | 76.4754328 | 79.8346531 | 77.2427597 | 69.8868972 |
| 17:05:05 | 0:04:43 | 78.1268003 | 75.4754328 | 85.318326  | 79.2427597 | 68.8868972 |
| 17:05:06 | 0:04:44 | 78.1268003 | 75.4754328 | 85.318326  | 79.2427597 | 68.8868972 |
| 17:05:07 | 0:04:45 | 78.1268003 | 74.4754328 | 79.318326  | 81.2427597 | 68.8868972 |
| 17:05:08 | 0:04:46 | 79.1268003 | 73.4754328 | 79.318326  | 81.2427597 | 67.8868972 |
| 17:05:09 | 0:04:47 | 79.1268003 | 73.4754328 | 79.318326  | 81.2427597 | 67.8868972 |
| 17:05:10 | 0:04:48 | 80.1268003 | 74.4754328 | 79.318326  | 81.2427597 | 67.8868972 |
| 17:05:11 | 0:04:49 | 80.1268003 | 74.4754328 | 79.318326  | 81.2427597 | 66.8868972 |
| 17:05:12 | 0:04:50 | 82.1268003 | 74.4754328 | 79.318326  | 80.2427597 | 66.8868972 |
| 17:05:13 | 0:04:51 | 79.1268003 | 74.4754328 | 79.318326  | 80.2427597 | 67.8868972 |
| 17:05:14 | 0:04:52 | 79.1268003 | 74.4754328 | 79.318326  | 81.2427597 | 67.8868972 |
| 17:05:15 | 0:04:53 | 79.1268003 | 73.4754328 | 79.318326  | 81.2427597 | 67.8868972 |
| 17:05:16 | 0:04:54 | 79.1268003 | 72.4754328 | 79.318326  | 81.2427597 | 67.8868972 |
| 17:05:17 | 0:04:55 | 78.1268003 | 72.4754328 | 80.318326  | 81.2427597 | 67.8868972 |
| 17:05:18 | 0:04:56 | 77.1268003 | 71.4754328 | 81.318326  | 81.2427597 | 68.8868972 |
| 17:05:19 | 0:04:57 | 76.1268003 | 71.4754328 | 81.318326  | 81.2427597 | 68.8868972 |
| 17:05:20 | 0:04:58 | 76.1268003 | 71.4754328 | 80.318326  | 81.2427597 | 68.8868972 |
| 17:05:21 | 0:04:59 | 75.1268003 | 72.4754328 | 80.318326  | 82.2427597 | 67.8868972 |
| 17:05:22 | 0:05:00 | 75.1268003 | 74.4754328 | 80.318326  | 83.2427597 | 68.8868972 |
| 17:05:23 | 0:05:01 | 75.1268003 | 76.4754328 | 80.318326  | 83.2427597 | 68.8868972 |
| 17:05:24 | 0:05:02 | 78.1268003 | 74.4754328 | 80.318326  | 83.2427597 | 67.8868972 |
| 17:05:25 | 0:05:03 | 79.1268003 | 73.4754328 | 78.318326  | 83.2427597 | 67.8868972 |
| 17:05:26 | 0:05:04 | 79.1268003 | 73.4754328 | 77.318326  | 83.2427597 | 67.8868972 |
| 17:05:27 | 0:05:05 | 79.1268003 | 72.4754328 | 77.318326  | 83.2427597 | 67.8868972 |
| 17:05:28 | 0:05:06 | 80.1268003 | 72.4754328 | 77.318326  | 83.2427597 | 67.8868972 |
| 17:05:29 | 0:05:07 | 80.1268003 | 72.4754328 | 75.318326  | 84.2427597 | 67.8868972 |
| 17:05:30 | 0:05:08 | 75.1268003 | 74.4754328 | 75.318326  | 85.2427597 | 67.8868972 |
| 17:05:31 | 0:05:09 | 73.1268003 | 75.4754328 | 75.318326  | 85.2427597 | 67.8868972 |
| 17:05:32 | 0:05:10 | 73.1268003 | 76.4754328 | 75.318326  | 85.2427597 | 67.8868972 |
| 17:05:33 | 0:05:11 | 73.1268003 | 76.4754328 | 75.318326  | 85.2427597 | 67.8868972 |
| 17:05:34 | 0:05:12 | 73.1268003 | 76.4754328 | 75.318326  | 85.2427597 | 67.8868972 |
| 17:05:35 | 0:05:13 | 73.1268003 | 76.4754328 | 75.318326  | 84.2427597 | 66.8868972 |

|          |         |            |            |           |            |            |
|----------|---------|------------|------------|-----------|------------|------------|
| 17:05:36 | 0:05:14 | 73.1268003 | 76.4754328 | 75.318326 | 84.2427597 | 66.8868972 |
| 17:05:37 | 0:05:15 | 73.1268003 | 77.4754328 | 75.318326 | 84.2427597 | 65.8868972 |
| 17:05:38 | 0:05:16 | 73.1268003 | 77.4754328 | 74.318326 | 82.2427597 | 67.8868972 |
| 17:05:39 | 0:05:17 | 73.1268003 | 77.4754328 | 74.318326 | 80.2427597 | 69.8868972 |
| 17:05:40 | 0:05:18 | 73.1268003 | 76.4754328 | 74.318326 | 79.2427597 | 69.8868972 |
| 17:05:41 | 0:05:19 | 73.1268003 | 74.4754328 | 75.318326 | 79.2427597 | 70.8868972 |
| 17:05:42 | 0:05:20 | 73.1268003 | 74.4754328 | 75.318326 | 79.2427597 | 70.8868972 |
| 17:05:43 | 0:05:21 | 74.1268003 | 74.4754328 | 76.318326 | 79.2427597 | 70.8868972 |
| 17:05:44 | 0:05:22 | 75.1268003 | 73.4754328 | 77.318326 | 79.2427597 | 70.8868972 |
| 17:05:45 | 0:05:23 | 75.1268003 | 73.4754328 | 77.318326 | 79.2427597 | 69.8868972 |
| 17:05:46 | 0:05:24 | 75.1268003 | 73.4754328 | 76.318326 | 79.2427597 | 68.8868972 |
| 17:05:47 | 0:05:25 | 75.1268003 | 71.4754328 | 75.318326 | 80.2427597 | 68.8868972 |
| 17:05:48 | 0:05:26 | 75.1268003 | 71.4754328 | 75.318326 | 80.2427597 | 68.8868972 |
| 17:05:49 | 0:05:27 | 75.1268003 | 70.4754328 | 74.318326 | 80.2427597 | 68.8868972 |
| 17:05:50 | 0:05:28 | 75.1268003 | 69.4754328 | 74.318326 | 80.2427597 | 68.8868972 |
| 17:05:51 | 0:05:29 | 76.1268003 | 68.4754328 | 74.318326 | 80.2427597 | 68.8868972 |
| 17:05:52 | 0:05:30 | 80.1268003 | 68.4754328 | 74.318326 | 81.2427597 | 68.8868972 |
| 17:05:53 | 0:05:31 | 80.1268003 | 68.4754328 | 74.318326 | 81.2427597 | 68.8868972 |
| 17:05:54 | 0:05:32 | 82.1268003 | 69.4754328 | 75.318326 | 81.2427597 | 68.8868972 |
| 17:05:55 | 0:05:33 | 84.1268003 | 69.4754328 | 76.318326 | 81.2427597 | 68.8868972 |
| 17:05:56 | 0:05:34 | 76.1268003 | 69.4754328 | 82.318326 | 82.2427597 | 69.8868972 |
| 17:05:57 | 0:05:35 | 71.1268003 | 69.4754328 | 82.318326 | 83.2427597 | 70.8868972 |
| 17:05:58 | 0:05:36 | 71.1268003 | 69.4754328 | 84.318326 | 84.2427597 | 70.8868972 |
| 17:05:59 | 0:05:37 | 70.1268003 | 69.4754328 | 84.318326 | 84.2427597 | 69.8868972 |
| 17:06:00 | 0:05:38 | 70.1268003 | 69.4754328 | 84.318326 | 84.2427597 | 69.8868972 |
| 17:06:01 | 0:05:39 | 69.1268003 | 69.4754328 | 85.318326 | 84.2427597 | 67.8868972 |
| 17:06:02 | 0:05:40 | 69.1268003 | 69.4754328 | 85.318326 | 83.2427597 | 67.8868972 |
| 17:06:03 | 0:05:41 | 69.1268003 | 71.4754328 | 85.318326 | 83.2427597 | 69.8868972 |
| 17:06:04 | 0:05:42 | 66.1268003 | 72.4754328 | 85.318326 | 83.2427597 | 70.8868972 |
| 17:06:05 | 0:05:43 | 64.1268003 | 72.4754328 | 83.318326 | 84.2427597 | 68.8868972 |
| 17:06:06 | 0:05:44 | 64.1268003 | 72.4754328 | 80.318326 | 85.2427597 | 68.8868972 |
| 17:06:07 | 0:05:45 | 64.1268003 | 69.4754328 | 78.318326 | 85.2427597 | 68.8868972 |
| 17:06:08 | 0:05:46 | 65.1268003 | 69.4754328 | 78.318326 | 84.2427597 | 68.8868972 |
| 17:06:09 | 0:05:47 | 65.1268003 | 69.4754328 | 78.318326 | 84.2427597 | 67.8868972 |
| 17:06:10 | 0:05:48 | 65.1268003 | 69.4754328 | 78.318326 | 84.2427597 | 67.8868972 |
| 17:06:11 | 0:05:49 | 70.1268003 | 69.4754328 | 78.318326 | 84.2427597 | 67.8868972 |
| 17:06:12 | 0:05:50 | 72.1268003 | 69.4754328 | 78.318326 | 84.2427597 | 67.8868972 |
| 17:06:13 | 0:05:51 | 72.1268003 | 70.4754328 | 78.318326 | 85.2427597 | 68.8868972 |
| 17:06:14 | 0:05:52 | 72.1268003 | 70.4754328 | 78.318326 | 85.2427597 | 68.8868972 |
| 17:06:15 | 0:05:53 | 71.1268003 | 75.4754328 | 76.318326 | 85.2427597 | 68.8868972 |
| 17:06:16 | 0:05:54 | 72.1268003 | 75.4754328 | 76.318326 | 84.2427597 | 68.8868972 |
| 17:06:17 | 0:05:55 | 73.1268003 | 75.4754328 | 77.318326 | 84.2427597 | 69.8868972 |
| 17:06:18 | 0:05:56 | 73.1268003 | 74.4754328 | 77.318326 | 83.2427597 | 69.8868972 |
| 17:06:19 | 0:05:57 | 74.1268003 | 73.4754328 | 77.318326 | 81.2427597 | 68.8868972 |
| 17:06:20 | 0:05:58 | 74.1268003 | 73.4754328 | 78.318326 | 81.2427597 | 68.8868972 |

|          |         |            |            |           |            |            |
|----------|---------|------------|------------|-----------|------------|------------|
| 17:06:21 | 0:05:59 | 74.1268003 | 73.4754328 | 78.318326 | 81.2427597 | 68.8868972 |
| 17:06:22 | 0:06:00 | 71.1268003 | 73.4754328 | 78.318326 | 81.2427597 | 69.8868972 |
| 17:06:23 | 0:06:01 | 70.1268003 | 73.4754328 | 80.318326 | 82.2427597 | 68.8868972 |
| 17:06:24 | 0:06:02 | 70.1268003 | 73.4754328 | 81.318326 | 83.2427597 | 68.8868972 |
| 17:06:25 | 0:06:03 | 70.1268003 | 73.4754328 | 82.318326 | 83.2427597 | 67.8868972 |
| 17:06:26 | 0:06:04 | 69.1268003 | 74.4754328 | 82.318326 | 83.2427597 | 67.8868972 |
| 17:06:27 | 0:06:05 | 68.1268003 | 77.4754328 | 82.318326 | 83.2427597 | 66.8868972 |
| 17:06:28 | 0:06:06 | 68.1268003 | 77.4754328 | 82.318326 | 83.2427597 | 66.8868972 |
| 17:06:29 | 0:06:07 | 68.1268003 | 79.4754328 | 82.318326 | 83.2427597 | 66.8868972 |
| 17:06:30 | 0:06:08 | 68.1268003 | 82.4754328 | 84.318326 | 83.2427597 | 66.8868972 |
| 17:06:31 | 0:06:09 | 66.1268003 | 84.4754328 | 84.318326 | 81.2427597 | 66.8868972 |
| 17:06:32 | 0:06:10 | 65.1268003 | 85.4754328 | 84.318326 | 81.2427597 | 66.8868972 |
| 17:06:33 | 0:06:11 | 64.1268003 | 85.4754328 | 85.318326 | 80.2427597 | 66.8868972 |
| 17:06:34 | 0:06:12 | 65.1268003 | 86.4754328 | 86.318326 | 79.2427597 | 66.8868972 |
| 17:06:35 | 0:06:13 | 66.1268003 | 86.4754328 | 87.318326 | 79.2427597 | 66.8868972 |
| 17:06:36 | 0:06:14 | 69.1268003 | 87.4754328 | 87.318326 | 79.2427597 | 66.8868972 |
| 17:06:37 | 0:06:15 | 71.1268003 | 86.4754328 | 88.318326 | 79.2427597 | 66.8868972 |
| 17:06:38 | 0:06:16 | 71.1268003 | 84.4754328 | 86.318326 | 80.2427597 | 66.8868972 |
| 17:06:39 | 0:06:17 | 71.1268003 | 84.4754328 | 86.318326 | 80.2427597 | 68.8868972 |
| 17:06:40 | 0:06:18 | 69.1268003 | 81.4754328 | 86.318326 | 79.2427597 | 70.8868972 |
| 17:06:41 | 0:06:19 | 68.1268003 | 76.4754328 | 85.318326 | 80.2427597 | 70.8868972 |
| 17:06:42 | 0:06:20 | 68.1268003 | 76.4754328 | 84.318326 | 80.2427597 | 71.8868972 |
| 17:06:43 | 0:06:21 | 68.1268003 | 76.4754328 | 84.318326 | 80.2427597 | 71.8868972 |
| 17:06:44 | 0:06:22 | 76.1268003 | 76.4754328 | 84.318326 | 80.2427597 | 71.8868972 |
| 17:06:45 | 0:06:23 | 79.1268003 | 76.4754328 | 85.318326 | 80.2427597 | 71.8868972 |
| 17:06:46 | 0:06:24 | 80.1268003 | 76.4754328 | 85.318326 | 80.2427597 | 71.8868972 |
| 17:06:47 | 0:06:25 | 80.1268003 | 77.4754328 | 84.318326 | 80.2427597 | 70.8868972 |
| 17:06:48 | 0:06:26 | 81.1268003 | 77.4754328 | 82.318326 | 80.2427597 | 69.8868972 |
| 17:06:49 | 0:06:27 | 76.1268003 | 77.4754328 | 82.318326 | 81.2427597 | 69.8868972 |
| 17:06:50 | 0:06:28 | 74.1268003 | 77.4754328 | 82.318326 | 81.2427597 | 69.8868972 |
| 17:06:51 | 0:06:29 | 74.1268003 | 77.4754328 | 82.318326 | 82.2427597 | 69.8868972 |
| 17:06:52 | 0:06:30 | 76.1268003 | 77.4754328 | 82.318326 | 83.2427597 | 70.8868972 |
| 17:06:53 | 0:06:31 | 78.1268003 | 77.4754328 | 83.318326 | 83.2427597 | 71.8868972 |
| 17:06:54 | 0:06:32 | 78.1268003 | 77.4754328 | 83.318326 | 83.2427597 | 71.8868972 |
| 17:06:55 | 0:06:33 | 78.1268003 | 77.4754328 | 83.318326 | 83.2427597 | 77.8868972 |
| 17:06:56 | 0:06:34 | 82.1268003 | 77.4754328 | 83.318326 | 83.2427597 | 77.8868972 |
| 17:06:57 | 0:06:35 | 82.1268003 | 78.4754328 | 83.318326 | 82.2427597 | 77.8868972 |
| 17:06:58 | 0:06:36 | 82.1268003 | 78.4754328 | 83.318326 | 81.2427597 | 77.8868972 |
| 17:06:59 | 0:06:37 | 82.1268003 | 77.4754328 | 83.318326 | 80.2427597 | 78.8868972 |
| 17:07:00 | 0:06:38 | 78.1268003 | 77.4754328 | 82.318326 | 79.2427597 | 78.8868972 |
| 17:07:01 | 0:06:39 | 75.1268003 | 76.4754328 | 80.318326 | 79.2427597 | 78.8868972 |
| 17:07:02 | 0:06:40 | 73.1268003 | 76.4754328 | 80.318326 | 78.2427597 | 77.8868972 |
| 17:07:03 | 0:06:41 | 73.1268003 | 76.4754328 | 80.318326 | 77.2427597 | 75.8868972 |
| 17:07:04 | 0:06:42 | 73.1268003 | 76.4754328 | 82.318326 | 77.2427597 | 73.8868972 |
| 17:07:05 | 0:06:43 | 73.1268003 | 76.4754328 | 82.318326 | 76.2427597 | 73.8868972 |

|          |         |            |            |           |            |            |
|----------|---------|------------|------------|-----------|------------|------------|
| 17:07:06 | 0:06:44 | 73.1268003 | 75.4754328 | 82.318326 | 76.2427597 | 73.8868972 |
| 17:07:07 | 0:06:45 | 73.1268003 | 75.4754328 | 83.318326 | 76.2427597 | 73.8868972 |
| 17:07:08 | 0:06:46 | 73.1268003 | 74.4754328 | 83.318326 | 75.2427597 | 74.8868972 |
| 17:07:09 | 0:06:47 | 73.1268003 | 73.4754328 | 83.318326 | 76.2427597 | 74.8868972 |
| 17:07:10 | 0:06:48 | 74.1268003 | 73.4754328 | 84.318326 | 76.2427597 | 73.8868972 |
| 17:07:11 | 0:06:49 | 74.1268003 | 73.4754328 | 84.318326 | 76.2427597 | 72.8868972 |
| 17:07:12 | 0:06:50 | 75.1268003 | 73.4754328 | 84.318326 | 76.2427597 | 71.8868972 |
| 17:07:13 | 0:06:51 | 75.1268003 | 73.4754328 | 82.318326 | 76.2427597 | 71.8868972 |
| 17:07:14 | 0:06:52 | 81.1268003 | 73.4754328 | 82.318326 | 76.2427597 | 71.8868972 |
| 17:07:15 | 0:06:53 | 81.1268003 | 73.4754328 | 82.318326 | 77.2427597 | 71.8868972 |
| 17:07:16 | 0:06:54 | 90.1268003 | 73.4754328 | 82.318326 | 77.2427597 | 71.8868972 |
| 17:07:17 | 0:06:55 | 77.8888889 | 73.4754328 | 82.318326 | 78.2427597 | 71.8868972 |
| 17:07:18 | 0:06:56 | 78         | 73.4754328 | 83.318326 | 79.2427597 | 71.8868972 |
| 17:07:19 | 0:06:57 | 78.1111111 | 74.4754328 | 83.318326 | 79.2427597 | 71.8868972 |
| 17:07:20 | 0:06:58 | 77.7777778 | 74.4754328 | 80.318326 | 79.2427597 | 71.8868972 |
| 17:07:21 | 0:06:59 | 77.7777778 | 74.4754328 | 79.318326 | 80.2427597 | 71.8868972 |
| 17:07:22 | 0:07:00 | 77.3333333 | 74.4754328 | 69.318326 | 80.2427597 | 70.8868972 |
| 17:07:23 | 0:07:01 | 78         | 77.4754328 | 68.318326 | 80.2427597 | 71.8868972 |
| 17:07:24 | 0:07:02 | 90.1268003 | 77.4754328 | 68.318326 | 80.2427597 | 72.8868972 |
| 17:07:25 | 0:07:03 | 88.1268003 | 77.4754328 | 69.318326 | 80.2427597 | 73.8868972 |
| 17:07:26 | 0:07:04 | 86.1268003 | 76.4754328 | 71.318326 | 80.2427597 | 73.8868972 |
| 17:07:27 | 0:07:05 | 86.1268003 | 76.4754328 | 71.318326 | 80.2427597 | 76.8868972 |
| 17:07:28 | 0:07:06 | 86.1268003 | 75.4754328 | 71.318326 | 80.2427597 | 76.8868972 |
| 17:07:29 | 0:07:07 | 85.1268003 | 75.4754328 | 71.318326 | 80.2427597 | 76.8868972 |
| 17:07:30 | 0:07:08 | 81.1268003 | 74.4754328 | 71.318326 | 86.2427597 | 75.8868972 |
| 17:07:31 | 0:07:09 | 79.1268003 | 74.4754328 | 72.318326 | 86.2427597 | 75.8868972 |
| 17:07:32 | 0:07:10 | 79.1268003 | 73.4754328 | 72.318326 | 86.2427597 | 74.8868972 |
| 17:07:33 | 0:07:11 | 79.1268003 | 73.4754328 | 73.318326 | 86.2427597 | 73.8868972 |
| 17:07:34 | 0:07:12 | 79.1268003 | 74.4754328 | 74.318326 | 85.2427597 | 73.8868972 |
| 17:07:35 | 0:07:13 | 79.1268003 | 74.4754328 | 75.318326 | 84.2427597 | 72.8868972 |
| 17:07:36 | 0:07:14 | 78.1268003 | 74.4754328 | 76.318326 | 83.2427597 | 72.8868972 |
| 17:07:37 | 0:07:15 | 78.1268003 | 74.4754328 | 76.318326 | 79.2427597 | 73.8868972 |
| 17:07:38 | 0:07:16 | 73.1268003 | 74.4754328 | 76.318326 | 79.2427597 | 73.8868972 |
| 17:07:39 | 0:07:17 | 73.1268003 | 74.4754328 | 77.318326 | 78.2427597 | 73.8868972 |
| 17:07:40 | 0:07:18 | 73.1268003 | 73.4754328 | 80.318326 | 75.2427597 | 74.8868972 |
| 17:07:41 | 0:07:19 | 73.1268003 | 72.4754328 | 80.318326 | 75.2427597 | 74.8868972 |
| 17:07:42 | 0:07:20 | 71.1268003 | 72.4754328 | 80.318326 | 75.2427597 | 75.8868972 |
| 17:07:43 | 0:07:21 | 71.1268003 | 72.4754328 | 80.318326 | 75.2427597 | 76.8868972 |
| 17:07:44 | 0:07:22 | 71.1268003 | 72.4754328 | 79.318326 | 77.2427597 | 77.8868972 |
| 17:07:45 | 0:07:23 | 71.1268003 | 72.4754328 | 79.318326 | 77.2427597 | 78.8868972 |
| 17:07:46 | 0:07:24 | 72.1268003 | 73.4754328 | 79.318326 | 77.2427597 | 78.8868972 |
| 17:07:47 | 0:07:25 | 72.1268003 | 73.4754328 | 79.318326 | 77.2427597 | 79.8868972 |
| 17:07:48 | 0:07:26 | 72.1268003 | 73.4754328 | 79.318326 | 77.2427597 | 79.8868972 |
| 17:07:49 | 0:07:27 | 81.1268003 | 74.4754328 | 79.318326 | 77.2427597 | 79.8868972 |
| 17:07:50 | 0:07:28 | 83.1268003 | 74.4754328 | 78.318326 | 75.2427597 | 79.8868972 |



|          |         |            |            |           |            |            |
|----------|---------|------------|------------|-----------|------------|------------|
| 17:07:51 | 0:07:29 | 83.1268003 | 76.4754328 | 79.318326 | 75.2427597 | 77.8868972 |
| 17:07:52 | 0:07:30 | 87.1268003 | 76.4754328 | 79.318326 | 75.2427597 | 76.8868972 |
| 17:07:53 | 0:07:31 | 89.1268003 | 76.4754328 | 80.318326 | 76.2427597 | 75.8868972 |
| 17:07:54 | 0:07:32 | 89.1268003 | 76.4754328 | 80.318326 | 76.2427597 | 74.8868972 |
| 17:07:55 | 0:07:33 | 90.1268003 | 76.4754328 | 81.318326 | 77.2427597 | 74.8868972 |
| 17:07:56 | 0:07:34 | 93.1268003 | 76.4754328 | 81.318326 | 77.2427597 | 74.8868972 |
| 17:07:57 | 0:07:35 | 80.3333333 | 76.4754328 | 81.318326 | 77.2427597 | 73.8868972 |
| 17:07:58 | 0:07:36 | 78.8888889 | 73.4754328 | 81.318326 | 77.2427597 | 72.8868972 |
| 17:07:59 | 0:07:37 | 78.6666667 | 73.4754328 | 81.318326 | 77.2427597 | 71.8868972 |
| 17:08:00 | 0:07:38 | 78.8888889 | 75.4754328 | 81.318326 | 77.2427597 | 71.8868972 |
| 17:08:01 | 0:07:39 | 79         | 75.4754328 | 81.318326 | 78.2427597 | 71.8868972 |
| 17:08:02 | 0:07:40 | 79.1111111 | 75.4754328 | 80.318326 | 78.2427597 | 71.8868972 |
| 17:08:03 | 0:07:41 | 79.4444444 | 75.4754328 | 80.318326 | 79.2427597 | 71.8868972 |
| 17:08:04 | 0:07:42 | 80.3333333 | 75.4754328 | 80.318326 | 81.2427597 | 71.8868972 |
| 17:08:05 | 0:07:43 | 80.4444444 | 75.4754328 | 79.318326 | 82.2427597 | 70.8868972 |
| 17:08:06 | 0:07:44 | 80.4444444 | 75.4754328 | 79.318326 | 83.2427597 | 70.8868972 |
| 17:08:07 | 0:07:45 | 80.2222222 | 74.4754328 | 79.318326 | 83.2427597 | 70.8868972 |
| 17:08:08 | 0:07:46 | 79.8888889 | 74.4754328 | 79.318326 | 83.2427597 | 70.8868972 |
| 17:08:09 | 0:07:47 | 80.1111111 | 73.4754328 | 80.318326 | 85.2427597 | 71.8868972 |
| 17:08:10 | 0:07:48 | 79.8888889 | 73.4754328 | 80.318326 | 84.2427597 | 71.8868972 |
| 17:08:11 | 0:07:49 | 80.2222222 | 74.4754328 | 81.318326 | 84.2427597 | 71.8868972 |
| 17:08:12 | 0:07:50 | 84.1268003 | 74.4754328 | 81.318326 | 83.2427597 | 71.8868972 |
| 17:08:13 | 0:07:51 | 79.1268003 | 75.4754328 | 83.318326 | 82.2427597 | 72.8868972 |
| 17:08:14 | 0:07:52 | 78.1268003 | 75.4754328 | 83.318326 | 82.2427597 | 71.8868972 |
| 17:08:15 | 0:07:53 | 77.1268003 | 76.4754328 | 83.318326 | 79.2427597 | 70.8868972 |
| 17:08:16 | 0:07:54 | 77.1268003 | 75.4754328 | 83.318326 | 76.2427597 | 70.8868972 |
| 17:08:17 | 0:07:55 | 71.1268003 | 74.4754328 | 88.318326 | 76.2427597 | 69.8868972 |
| 17:08:18 | 0:07:56 | 69.1268003 | 73.4754328 | 88.318326 | 73.2427597 | 68.8868972 |
| 17:08:19 | 0:07:57 | 67.1268003 | 72.4754328 | 87.318326 | 73.2427597 | 70.8868972 |
| 17:08:20 | 0:07:58 | 67.1268003 | 72.4754328 | 87.318326 | 72.2427597 | 70.8868972 |
| 17:08:21 | 0:07:59 | 66.1268003 | 72.4754328 | 86.318326 | 72.2427597 | 70.8868972 |
| 17:08:22 | 0:08:00 | 66.1268003 | 73.4754328 | 86.318326 | 72.2427597 | 72.8868972 |
| 17:08:23 | 0:08:01 | 66.1268003 | 73.4754328 | 83.318326 | 72.2427597 | 74.8868972 |
| 17:08:24 | 0:08:02 | 66.1268003 | 74.4754328 | 83.318326 | 72.2427597 | 76.8868972 |
| 17:08:25 | 0:08:03 | 66.1268003 | 74.4754328 | 83.318326 | 72.2427597 | 76.8868972 |
| 17:08:26 | 0:08:04 | 67.1268003 | 74.4754328 | 83.318326 | 72.2427597 | 76.8868972 |
| 17:08:27 | 0:08:05 | 68.1268003 | 74.4754328 | 83.318326 | 72.2427597 | 76.8868972 |
| 17:08:28 | 0:08:06 | 69.1268003 | 74.4754328 | 82.318326 | 72.2427597 | 77.8868972 |
| 17:08:29 | 0:08:07 | 70.1268003 | 74.4754328 | 80.318326 | 73.2427597 | 80.8868972 |
| 17:08:30 | 0:08:08 | 70.1268003 | 74.4754328 | 79.318326 | 73.2427597 | 80.8868972 |
| 17:08:31 | 0:08:09 | 72.1268003 | 74.4754328 | 79.318326 | 75.2427597 | 80.8868972 |
| 17:08:32 | 0:08:10 | 72.1268003 | 75.4754328 | 79.318326 | 77.2427597 | 81.8868972 |
| 17:08:33 | 0:08:11 | 73.1268003 | 75.4754328 | 80.318326 | 79.2427597 | 81.8868972 |
| 17:08:34 | 0:08:12 | 74.1268003 | 75.4754328 | 81.318326 | 79.2427597 | 82.8868972 |
| 17:08:35 | 0:08:13 | 72.1268003 | 76.4754328 | 81.318326 | 77.2427597 | 84.8868972 |

|          |         |            |            |           |            |             |
|----------|---------|------------|------------|-----------|------------|-------------|
| 17:08:36 | 0:08:14 | 72.1268003 | 76.4754328 | 82.318326 | 77.2427597 | 84.8868972  |
| 17:08:37 | 0:08:15 | 71.1268003 | 76.4754328 | 82.318326 | 74.2427597 | 78.7777778  |
| 17:08:38 | 0:08:16 | 69.1268003 | 76.4754328 | 82.318326 | 73.2427597 | 79.11111111 |
| 17:08:39 | 0:08:17 | 69.1268003 | 76.4754328 | 81.318326 | 73.2427597 | 78.44444444 |
| 17:08:40 | 0:08:18 | 69.1268003 | 76.4754328 | 81.318326 | 73.2427597 | 78.22222222 |
| 17:08:41 | 0:08:19 | 67.1268003 | 76.4754328 | 81.318326 | 73.2427597 | 78          |
| 17:08:42 | 0:08:20 | 67.1268003 | 76.4754328 | 81.318326 | 73.2427597 | 78          |
| 17:08:43 | 0:08:21 | 65.1268003 | 77.4754328 | 81.318326 | 72.2427597 | 80.8868972  |
| 17:08:44 | 0:08:22 | 64.1268003 | 76.4754328 | 81.318326 | 72.2427597 | 79.8868972  |
| 17:08:45 | 0:08:23 | 64.1268003 | 75.4754328 | 81.318326 | 73.2427597 | 77.8868972  |
| 17:08:46 | 0:08:24 | 63.1268003 | 74.4754328 | 80.318326 | 72.2427597 | 77.8868972  |
| 17:08:47 | 0:08:25 | 60.1268003 | 74.4754328 | 80.318326 | 72.2427597 | 74.8868972  |
| 17:08:48 | 0:08:26 | 58.1268003 | 74.4754328 | 80.318326 | 72.2427597 | 74.8868972  |
| 17:08:49 | 0:08:27 | 58.1268003 | 75.4754328 | 80.318326 | 72.2427597 | 74.8868972  |
| 17:08:50 | 0:08:28 | 57.1268003 | 75.4754328 | 80.318326 | 75.2427597 | 74.8868972  |
| 17:08:51 | 0:08:29 | 57.1268003 | 75.4754328 | 80.318326 | 76.2427597 | 75.8868972  |
| 17:08:52 | 0:08:30 | 58.1268003 | 75.4754328 | 80.318326 | 77.2427597 | 76.8868972  |
| 17:08:53 | 0:08:31 | 58.1268003 | 75.4754328 | 80.318326 | 78.2427597 | 77.8868972  |
| 17:08:54 | 0:08:32 | 58.1268003 | 74.4754328 | 80.318326 | 78.2427597 | 77.8868972  |
| 17:08:55 | 0:08:33 | 58.1268003 | 73.4754328 | 80.318326 | 79.2427597 | 78.8868972  |
| 17:08:56 | 0:08:34 | 60.1268003 | 73.4754328 | 79.318326 | 79.2427597 | 79.8868972  |
| 17:08:57 | 0:08:35 | 60.1268003 | 73.4754328 | 79.318326 | 79.2427597 | 79.8868972  |
| 17:08:58 | 0:08:36 | 63.1268003 | 73.4754328 | 80.318326 | 79.2427597 | 80.8868972  |
| 17:08:59 | 0:08:37 | 63.1268003 | 73.4754328 | 81.318326 | 79.2427597 | 81.8868972  |
| 17:09:00 | 0:08:38 | 63.1268003 | 73.4754328 | 81.318326 | 79.2427597 | 78.8868972  |
| 17:09:01 | 0:08:39 | 63.1268003 | 73.4754328 | 80.318326 | 79.2427597 | 78.8868972  |
| 17:09:02 | 0:08:40 | 63.1268003 | 73.4754328 | 80.318326 | 79.2427597 | 78.8868972  |
| 17:09:03 | 0:08:41 | 63.1268003 | 73.4754328 | 80.318326 | 79.2427597 | 78.8868972  |
| 17:09:04 | 0:08:42 | 63.1268003 | 72.4754328 | 80.318326 | 79.2427597 | 78.8868972  |
| 17:09:05 | 0:08:43 | 63.1268003 | 72.4754328 | 80.318326 | 79.2427597 | 79.8868972  |
| 17:09:06 | 0:08:44 | 63.1268003 | 72.4754328 | 80.318326 | 81.2427597 | 79.8868972  |
| 17:09:07 | 0:08:45 | 73.1268003 | 72.4754328 | 80.318326 | 82.2427597 | 79.8868972  |
| 17:09:08 | 0:08:46 | 73.1268003 | 73.4754328 | 80.318326 | 82.2427597 | 79.8868972  |
| 17:09:09 | 0:08:47 | 75.1268003 | 73.4754328 | 79.318326 | 82.2427597 | 77.8868972  |
| 17:09:10 | 0:08:48 | 75.1268003 | 73.4754328 | 79.318326 | 81.2427597 | 77.8868972  |
| 17:09:11 | 0:08:49 | 78.1268003 | 73.4754328 | 79.318326 | 80.2427597 | 77.8868972  |
| 17:09:12 | 0:08:50 | 79.1268003 | 73.4754328 | 78.318326 | 79.2427597 | 76.8868972  |
| 17:09:13 | 0:08:51 | 78.1268003 | 73.4754328 | 77.318326 | 79.2427597 | 76.8868972  |
| 17:09:14 | 0:08:52 | 78.1268003 | 72.4754328 | 77.318326 | 79.2427597 | 77.8868972  |
| 17:09:15 | 0:08:53 | 78.1268003 | 72.4754328 | 76.318326 | 79.2427597 | 77.8868972  |
| 17:09:16 | 0:08:54 | 77.1268003 | 72.4754328 | 76.318326 | 80.2427597 | 77.8868972  |
| 17:09:17 | 0:08:55 | 77.1268003 | 72.4754328 | 76.318326 | 80.2427597 | 77.8868972  |
| 17:09:18 | 0:08:56 | 76.1268003 | 72.4754328 | 76.318326 | 80.2427597 | 78.8868972  |
| 17:09:19 | 0:08:57 | 73.1268003 | 76.4754328 | 77.318326 | 81.2427597 | 78.8868972  |
| 17:09:20 | 0:08:58 | 73.1268003 | 77.4754328 | 77.318326 | 81.2427597 | 79.8868972  |

|          |         |            |            |           |            |            |
|----------|---------|------------|------------|-----------|------------|------------|
| 17:09:21 | 0:08:59 | 73.1268003 | 77.4754328 | 77.318326 | 81.2427597 | 84.8868972 |
| 17:09:22 | 0:09:00 | 73.1268003 | 76.4754328 | 78.318326 | 80.2427597 | 87.8868972 |
| 17:09:23 | 0:09:01 | 73.1268003 | 75.4754328 | 77.318326 | 80.2427597 | 87.8868972 |
| 17:09:24 | 0:09:02 | 72.1268003 | 74.4754328 | 79.318326 | 80.2427597 | 78.5555556 |
| 17:09:25 | 0:09:03 | 72.1268003 | 72.4754328 | 79.318326 | 79.2427597 | 78.3333333 |
| 17:09:26 | 0:09:04 | 71.1268003 | 72.4754328 | 79.318326 | 77.2427597 | 77.7777778 |
| 17:09:27 | 0:09:05 | 71.1268003 | 71.4754328 | 79.318326 | 76.2427597 | 77.6666667 |
| 17:09:28 | 0:09:06 | 70.1268003 | 71.4754328 | 79.318326 | 76.2427597 | 77.7777778 |
| 17:09:29 | 0:09:07 | 70.1268003 | 72.4754328 | 79.318326 | 76.2427597 | 78.4444444 |
| 17:09:30 | 0:09:08 | 70.1268003 | 72.4754328 | 79.318326 | 76.2427597 | 78.6666667 |
| 17:09:31 | 0:09:09 | 72.1268003 | 73.4754328 | 79.318326 | 77.2427597 | 79.7777778 |
| 17:09:32 | 0:09:10 | 72.1268003 | 72.4754328 | 79.318326 | 77.2427597 | 79.8888889 |
| 17:09:33 | 0:09:11 | 73.1268003 | 72.4754328 | 79.318326 | 77.2427597 | 84.8868972 |
| 17:09:34 | 0:09:12 | 73.1268003 | 73.4754328 | 79.318326 | 77.2427597 | 82.8868972 |
| 17:09:35 | 0:09:13 | 72.1268003 | 73.4754328 | 79.318326 | 77.2427597 | 82.8868972 |
| 17:09:36 | 0:09:14 | 72.1268003 | 73.4754328 | 79.318326 | 77.2427597 | 82.8868972 |
| 17:09:37 | 0:09:15 | 72.1268003 | 74.4754328 | 77.318326 | 76.2427597 | 81.8868972 |
| 17:09:38 | 0:09:16 | 70.1268003 | 74.4754328 | 72.318326 | 76.2427597 | 81.8868972 |
| 17:09:39 | 0:09:17 | 70.1268003 | 75.4754328 | 72.318326 | 74.2427597 | 81.8868972 |
| 17:09:40 | 0:09:18 | 70.1268003 | 76.4754328 | 70.318326 | 76.2427597 | 84.8868972 |
| 17:09:41 | 0:09:19 | 70.1268003 | 79.4754328 | 71.318326 | 77.2427597 | 87.8868972 |
| 17:09:42 | 0:09:20 | 70.1268003 | 80.4754328 | 73.318326 | 77.2427597 | 88.8868972 |
| 17:09:43 | 0:09:21 | 71.1268003 | 80.4754328 | 74.318326 | 78.2427597 | 89.8868972 |
| 17:09:44 | 0:09:22 | 71.1268003 | 78.4754328 | 76.318326 | 79.2427597 | 89.8868972 |
| 17:09:45 | 0:09:23 | 72.1268003 | 75.4754328 | 77.318326 | 79.2427597 | 90.8868972 |
| 17:09:46 | 0:09:24 | 74.1268003 | 73.4754328 | 78.318326 | 79.2427597 | 90.8868972 |
| 17:09:47 | 0:09:25 | 75.1268003 | 72.4754328 | 78.318326 | 79.2427597 | 90.8868972 |
| 17:09:48 | 0:09:26 | 75.1268003 | 71.4754328 | 79.318326 | 79.2427597 | 79.1111111 |
| 17:09:49 | 0:09:27 | 76.1268003 | 71.4754328 | 78.318326 | 78.2427597 | 79.5555556 |
| 17:09:50 | 0:09:28 | 76.1268003 | 71.4754328 | 78.318326 | 78.2427597 | 80.4444444 |
| 17:09:51 | 0:09:29 | 77.1268003 | 71.4754328 | 78.318326 | 78.2427597 | 80.8888889 |
| 17:09:52 | 0:09:30 | 77.1268003 | 71.4754328 | 78.318326 | 78.2427597 | 80.2222222 |
| 17:09:53 | 0:09:31 | 77.1268003 | 71.4754328 | 78.318326 | 79.2427597 | 85.8868972 |
| 17:09:54 | 0:09:32 | 76.1268003 | 71.4754328 | 77.318326 | 79.2427597 | 85.8868972 |
| 17:09:55 | 0:09:33 | 76.1268003 | 72.4754328 | 77.318326 | 79.2427597 | 80.8868972 |
| 17:09:56 | 0:09:34 | 74.1268003 | 74.4754328 | 77.318326 | 80.2427597 | 77.8868972 |
| 17:09:57 | 0:09:35 | 73.1268003 | 76.4754328 | 77.318326 | 80.2427597 | 77.8868972 |
| 17:09:58 | 0:09:36 | 73.1268003 | 91.4754328 | 77.318326 | 80.2427597 | 77.8868972 |
| 17:09:59 | 0:09:37 | 72.1268003 | 82.4444444 | 77.318326 | 80.2427597 | 77.8868972 |
| 17:10:00 | 0:09:38 | 71.1268003 | 83.5555556 | 77.318326 | 80.2427597 | 76.8868972 |
| 17:10:01 | 0:09:39 | 71.1268003 | 83.8888889 | 77.318326 | 79.2427597 | 75.8868972 |
| 17:10:02 | 0:09:40 | 71.1268003 | 83.1111111 | 78.318326 | 79.2427597 | 74.8868972 |
| 17:10:03 | 0:09:41 | 71.1268003 | 82.6666667 | 78.318326 | 79.2427597 | 74.8868972 |
| 17:10:04 | 0:09:42 | 71.1268003 | 82.3333333 | 78.318326 | 79.2427597 | 73.8868972 |
| 17:10:05 | 0:09:43 | 71.1268003 | 80.8888889 | 78.318326 | 80.2427597 | 72.8868972 |

|          |         |            |            |           |            |            |
|----------|---------|------------|------------|-----------|------------|------------|
| 17:10:06 | 0:09:44 | 71.1268003 | 79.7777778 | 78.318326 | 80.2427597 | 72.8868972 |
| 17:10:07 | 0:09:45 | 71.1268003 | 80         | 79.318326 | 79.2427597 | 72.8868972 |
| 17:10:08 | 0:09:46 | 73.1268003 | 79.8888889 | 78.318326 | 79.2427597 | 72.8868972 |
| 17:10:09 | 0:09:47 | 73.1268003 | 80.1111111 | 78.318326 | 80.2427597 | 71.8868972 |
| 17:10:10 | 0:09:48 | 73.1268003 | 80         | 78.318326 | 81.2427597 | 71.8868972 |
| 17:10:11 | 0:09:49 | 75.1268003 | 80.2222222 | 78.318326 | 81.2427597 | 72.8868972 |
| 17:10:12 | 0:09:50 | 75.1268003 | 80.3333333 | 78.318326 | 81.2427597 | 72.8868972 |
| 17:10:13 | 0:09:51 | 75.1268003 | 80.3333333 | 78.318326 | 82.2427597 | 70.8868972 |
| 17:10:14 | 0:09:52 | 75.1268003 | 79.8888889 | 78.318326 | 82.2427597 | 69.8868972 |
| 17:10:15 | 0:09:53 | 75.1268003 | 80.1111111 | 79.318326 | 82.2427597 | 70.8868972 |
| 17:10:16 | 0:09:54 | 75.1268003 | 79.8888889 | 79.318326 | 86.2427597 | 70.8868972 |
| 17:10:17 | 0:09:55 | 75.1268003 | 80.5555556 | 79.318326 | 88.2427597 | 71.8868972 |
| 17:10:18 | 0:09:56 | 76.1268003 | 92.4754328 | 79.318326 | 89.2427597 | 72.8868972 |
| 17:10:19 | 0:09:57 | 77.1268003 | 83.4754328 | 79.318326 | 89.2427597 | 72.8868972 |
| 17:10:20 | 0:09:58 | 79.1268003 | 78.4754328 | 79.318326 | 89.2427597 | 72.8868972 |
| 17:10:21 | 0:09:59 | 80.1268003 | 78.4754328 | 79.318326 | 88.2427597 | 72.8868972 |
| 17:10:22 | 0:10:00 | 80.1268003 | 78.4754328 | 79.318326 | 88.2427597 | 72.8868972 |
| 17:10:23 | 0:10:01 | 81.1268003 | 78.4754328 | 79.318326 | 85.2427597 | 72.8868972 |
| 17:10:24 | 0:10:02 | 80.1268003 | 77.4754328 | 79.318326 | 82.2427597 | 72.8868972 |
| 17:10:25 | 0:10:03 | 79.1268003 | 76.4754328 | 78.318326 | 79.2427597 | 72.8868972 |
| 17:10:26 | 0:10:04 | 78.1268003 | 74.4754328 | 78.318326 | 77.2427597 | 72.8868972 |
| 17:10:27 | 0:10:05 | 78.1268003 | 71.4754328 | 79.318326 | 77.2427597 | 73.8868972 |
| 17:10:28 | 0:10:06 | 76.1268003 | 71.4754328 | 80.318326 | 75.2427597 | 73.8868972 |
| 17:10:29 | 0:10:07 | 72.1268003 | 70.4754328 | 80.318326 | 74.2427597 | 73.8868972 |
| 17:10:30 | 0:10:08 | 72.1268003 | 70.4754328 | 80.318326 | 74.2427597 | 73.8868972 |
| 17:10:31 | 0:10:09 | 72.1268003 | 69.4754328 | 81.318326 | 76.2427597 | 75.8868972 |
| 17:10:32 | 0:10:10 | 70.1268003 | 67.4754328 | 82.318326 | 76.2427597 | 76.8868972 |
| 17:10:33 | 0:10:11 | 70.1268003 | 66.4754328 | 82.318326 | 79.2427597 | 77.8868972 |
| 17:10:34 | 0:10:12 | 70.1268003 | 65.4754328 | 80.318326 | 79.2427597 | 80.8868972 |
| 17:10:35 | 0:10:13 | 70.1268003 | 68.4754328 | 79.318326 | 79.2427597 | 83.8868972 |
| 17:10:36 | 0:10:14 | 70.1268003 | 69.4754328 | 79.318326 | 79.2427597 | 85.8868972 |
| 17:10:37 | 0:10:15 | 70.1268003 | 69.4754328 | 79.318326 | 80.2427597 | 85.8868972 |
| 17:10:38 | 0:10:16 | 70.1268003 | 69.4754328 | 79.318326 | 81.2427597 | 83.8868972 |
| 17:10:39 | 0:10:17 | 70.1268003 | 68.4754328 | 79.318326 | 81.2427597 | 83.8868972 |
| 17:10:40 | 0:10:18 | 70.1268003 | 68.4754328 | 79.318326 | 81.2427597 | 80.8868972 |
| 17:10:41 | 0:10:19 | 70.1268003 | 68.4754328 | 79.318326 | 81.2427597 | 80.8868972 |
| 17:10:42 | 0:10:20 | 71.1268003 | 68.4754328 | 79.318326 | 82.2427597 | 79.8868972 |
| 17:10:43 | 0:10:21 | 71.1268003 | 68.4754328 | 78.318326 | 81.2427597 | 78.8868972 |
| 17:10:44 | 0:10:22 | 73.1268003 | 68.4754328 | 78.318326 | 80.2427597 | 78.8868972 |
| 17:10:45 | 0:10:23 | 72.1268003 | 67.4754328 | 78.318326 | 79.2427597 | 75.8868972 |
| 17:10:46 | 0:10:24 | 72.1268003 | 65.4754328 | 78.318326 | 80.2427597 | 75.8868972 |
| 17:10:47 | 0:10:25 | 72.1268003 | 64.4754328 | 77.318326 | 80.2427597 | 74.8868972 |
| 17:10:48 | 0:10:26 | 72.1268003 | 64.4754328 | 77.318326 | 80.2427597 | 74.8868972 |
| 17:10:49 | 0:10:27 | 73.1268003 | 63.4754328 | 77.318326 | 81.2427597 | 73.8868972 |
| 17:10:50 | 0:10:28 | 73.1268003 | 61.4754328 | 77.318326 | 80.2427597 | 72.8868972 |

|          |         |            |            |           |            |            |
|----------|---------|------------|------------|-----------|------------|------------|
| 17:10:51 | 0:10:29 | 73.1268003 | 61.4754328 | 76.318326 | 80.2427597 | 72.8868972 |
| 17:10:52 | 0:10:30 | 72.1268003 | 57.4754328 | 76.318326 | 80.2427597 | 68.8868972 |
| 17:10:53 | 0:10:31 | 73.1268003 | 57.4754328 | 72.318326 | 80.2427597 | 68.8868972 |
| 17:10:54 | 0:10:32 | 74.1268003 | 56.4754328 | 71.318326 | 80.2427597 | 69.8868972 |
| 17:10:55 | 0:10:33 | 75.1268003 | 56.4754328 | 70.318326 | 78.2427597 | 71.8868972 |
| 17:10:56 | 0:10:34 | 75.1268003 | 55.4754328 | 70.318326 | 76.2427597 | 71.8868972 |
| 17:10:57 | 0:10:35 | 76.1268003 | 53.4754328 | 69.318326 | 76.2427597 | 71.8868972 |
| 17:10:58 | 0:10:36 | 76.1268003 | 52.4754328 | 69.318326 | 75.2427597 | 75.8868972 |
| 17:10:59 | 0:10:37 | 76.1268003 | 53.4754328 | 69.318326 | 74.2427597 | 77.8868972 |
| 17:11:00 | 0:10:38 | 77.1268003 | 55.4754328 | 70.318326 | 74.2427597 | 77.8868972 |
| 17:11:01 | 0:10:39 | 77.1268003 | 64.4754328 | 70.318326 | 74.2427597 | 80.8868972 |
| 17:11:02 | 0:10:40 | 77.1268003 | 68.4754328 | 70.318326 | 74.2427597 | 79.8868972 |
| 17:11:03 | 0:10:41 | 77.1268003 | 71.4754328 | 71.318326 | 74.2427597 | 79.8868972 |
| 17:11:04 | 0:10:42 | 75.1268003 | 71.4754328 | 71.318326 | 74.2427597 | 79.8868972 |
| 17:11:05 | 0:10:43 | 70.1268003 | 75.4754328 | 72.318326 | 73.2427597 | 79.8868972 |
| 17:11:06 | 0:10:44 | 68.1268003 | 77.4754328 | 73.318326 | 71.2427597 | 79.8868972 |
| 17:11:07 | 0:10:45 | 68.1268003 | 77.4754328 | 73.318326 | 69.2427597 | 84.8868972 |
| 17:11:08 | 0:10:46 | 68.1268003 | 78.4754328 | 75.318326 | 69.2427597 | 85.8868972 |
| 17:11:09 | 0:10:47 | 70.1268003 | 78.4754328 | 73.318326 | 68.2427597 | 85.8868972 |
| 17:11:10 | 0:10:48 | 73.1268003 | 78.4754328 | 72.318326 | 68.2427597 | 85.8868972 |
| 17:11:11 | 0:10:49 | 73.1268003 | 78.4754328 | 72.318326 | 68.2427597 | 85.8868972 |
| 17:11:12 | 0:10:50 | 73.1268003 | 77.4754328 | 72.318326 | 68.2427597 | 85.8868972 |
| 17:11:13 | 0:10:51 | 73.1268003 | 75.4754328 | 72.318326 | 68.2427597 | 85.8868972 |
| 17:11:14 | 0:10:52 | 74.1268003 | 75.4754328 | 72.318326 | 81.2427597 | 84.8868972 |
| 17:11:15 | 0:10:53 | 74.1268003 | 74.4754328 | 72.318326 | 81.2427597 | 83.8868972 |
| 17:11:16 | 0:10:54 | 75.1268003 | 74.4754328 | 72.318326 | 85.2427597 | 83.8868972 |
| 17:11:17 | 0:10:55 | 76.1268003 | 74.4754328 | 72.318326 | 82.2427597 | 84.8868972 |
| 17:11:18 | 0:10:56 | 77.1268003 | 74.4754328 | 72.318326 | 82.2427597 | 85.8868972 |
| 17:11:19 | 0:10:57 | 77.1268003 | 74.4754328 | 74.318326 | 79.2427597 | 85.8868972 |
| 17:11:20 | 0:10:58 | 78.1268003 | 75.4754328 | 74.318326 | 78.2427597 | 85.8868972 |
| 17:11:21 | 0:10:59 | 78.1268003 | 74.4754328 | 73.318326 | 78.2427597 | 88.8868972 |
| 17:11:22 | 0:11:00 | 78.1268003 | 73.4754328 | 73.318326 | 78.2427597 | 89.8868972 |
| 17:11:23 | 0:11:01 | 79.1268003 | 73.4754328 | 73.318326 | 79.2427597 | 90.8868972 |
| 17:11:24 | 0:11:02 | 79.1268003 | 73.4754328 | 73.318326 | 79.2427597 | 90.8868972 |
| 17:11:25 | 0:11:03 | 79.1268003 | 71.4754328 | 73.318326 | 80.2427597 | 78.3333333 |
| 17:11:26 | 0:11:04 | 79.1268003 | 71.4754328 | 73.318326 | 80.2427597 | 78.1111111 |
| 17:11:27 | 0:11:05 | 79.1268003 | 71.4754328 | 74.318326 | 81.2427597 | 89.8868972 |
| 17:11:28 | 0:11:06 | 79.1268003 | 71.4754328 | 74.318326 | 81.2427597 | 85.8868972 |
| 17:11:29 | 0:11:07 | 79.1268003 | 70.4754328 | 77.318326 | 81.2427597 | 79.8868972 |
| 17:11:30 | 0:11:08 | 79.1268003 | 71.4754328 | 77.318326 | 81.2427597 | 76.8868972 |
| 17:11:31 | 0:11:09 | 79.1268003 | 71.4754328 | 77.318326 | 81.2427597 | 75.8868972 |
| 17:11:32 | 0:11:10 | 80.1268003 | 72.4754328 | 77.318326 | 81.2427597 | 75.8868972 |
| 17:11:33 | 0:11:11 | 79.1268003 | 72.4754328 | 77.318326 | 81.2427597 | 75.8868972 |
| 17:11:34 | 0:11:12 | 79.1268003 | 72.4754328 | 77.318326 | 81.2427597 | 75.8868972 |
| 17:11:35 | 0:11:13 | 78.1268003 | 72.4754328 | 77.318326 | 81.2427597 | 75.8868972 |

|          |         |            |            |           |            |            |
|----------|---------|------------|------------|-----------|------------|------------|
| 17:11:36 | 0:11:14 | 78.1268003 | 72.4754328 | 77.318326 | 81.2427597 | 75.8868972 |
| 17:11:37 | 0:11:15 | 78.1268003 | 72.4754328 | 79.318326 | 77.2427597 | 75.8868972 |
| 17:11:38 | 0:11:16 | 75.1268003 | 72.4754328 | 79.318326 | 74.2427597 | 74.8868972 |
| 17:11:39 | 0:11:17 | 75.1268003 | 73.4754328 | 80.318326 | 73.2427597 | 73.8868972 |
| 17:11:40 | 0:11:18 | 70.1268003 | 73.4754328 | 79.318326 | 73.2427597 | 73.8868972 |
| 17:11:41 | 0:11:19 | 70.1268003 | 74.4754328 | 79.318326 | 74.2427597 | 73.8868972 |
| 17:11:42 | 0:11:20 | 69.1268003 | 74.4754328 | 76.318326 | 73.2427597 | 73.8868972 |
| 17:11:43 | 0:11:21 | 68.1268003 | 74.4754328 | 76.318326 | 73.2427597 | 73.8868972 |
| 17:11:44 | 0:11:22 | 68.1268003 | 74.4754328 | 76.318326 | 73.2427597 | 73.8868972 |
| 17:11:45 | 0:11:23 | 69.1268003 | 72.4754328 | 76.318326 | 73.2427597 | 73.8868972 |
| 17:11:46 | 0:11:24 | 68.1268003 | 72.4754328 | 76.318326 | 73.2427597 | 73.8868972 |
| 17:11:47 | 0:11:25 | 68.1268003 | 73.4754328 | 76.318326 | 74.2427597 | 74.8868972 |
| 17:11:48 | 0:11:26 | 68.1268003 | 73.4754328 | 78.318326 | 74.2427597 | 74.8868972 |
| 17:11:49 | 0:11:27 | 68.1268003 | 73.4754328 | 78.318326 | 74.2427597 | 74.8868972 |
| 17:11:50 | 0:11:28 | 69.1268003 | 73.4754328 | 76.318326 | 75.2427597 | 75.8868972 |
| 17:11:51 | 0:11:29 | 69.1268003 | 74.4754328 | 76.318326 | 75.2427597 | 75.8868972 |
| 17:11:52 | 0:11:30 | 69.1268003 | 73.4754328 | 76.318326 | 75.2427597 | 74.8868972 |
| 17:11:53 | 0:11:31 | 69.1268003 | 73.4754328 | 75.318326 | 76.2427597 | 75.8868972 |
| 17:11:54 | 0:11:32 | 69.1268003 | 73.4754328 | 75.318326 | 76.2427597 | 75.8868972 |
| 17:11:55 | 0:11:33 | 69.1268003 | 72.4754328 | 78.318326 | 76.2427597 | 74.8868972 |
| 17:11:56 | 0:11:34 | 68.1268003 | 72.4754328 | 78.318326 | 75.2427597 | 74.8868972 |
| 17:11:57 | 0:11:35 | 68.1268003 | 72.4754328 | 77.318326 | 75.2427597 | 74.8868972 |
| 17:11:58 | 0:11:36 | 69.1268003 | 71.4754328 | 77.318326 | 75.2427597 | 74.8868972 |
| 17:11:59 | 0:11:37 | 69.1268003 | 71.4754328 | 76.318326 | 76.2427597 | 73.8868972 |
| 17:12:00 | 0:11:38 | 69.1268003 | 71.4754328 | 76.318326 | 76.2427597 | 73.8868972 |
| 17:12:01 | 0:11:39 | 69.1268003 | 71.4754328 | 75.318326 | 79.2427597 | 75.8868972 |
| 17:12:02 | 0:11:40 | 69.1268003 | 71.4754328 | 75.318326 | 79.2427597 | 75.8868972 |
| 17:12:03 | 0:11:41 | 70.1268003 | 71.4754328 | 75.318326 | 80.2427597 | 74.8868972 |
| 17:12:04 | 0:11:42 | 70.1268003 | 71.4754328 | 74.318326 | 80.2427597 | 74.8868972 |
| 17:12:05 | 0:11:43 | 72.1268003 | 72.4754328 | 74.318326 | 80.2427597 | 74.8868972 |
| 17:12:06 | 0:11:44 | 71.1268003 | 71.4754328 | 76.318326 | 80.2427597 | 74.8868972 |
| 17:12:07 | 0:11:45 | 71.1268003 | 71.4754328 | 77.318326 | 79.2427597 | 74.8868972 |
| 17:12:08 | 0:11:46 | 71.1268003 | 71.4754328 | 77.318326 | 78.2427597 | 74.8868972 |
| 17:12:09 | 0:11:47 | 71.1268003 | 71.4754328 | 77.318326 | 78.2427597 | 76.8868972 |
| 17:12:10 | 0:11:48 | 72.1268003 | 73.4754328 | 77.318326 | 78.2427597 | 75.8868972 |
| 17:12:11 | 0:11:49 | 72.1268003 | 73.4754328 | 77.318326 | 78.2427597 | 75.8868972 |
| 17:12:12 | 0:11:50 | 72.1268003 | 73.4754328 | 77.318326 | 78.2427597 | 74.8868972 |
| 17:12:13 | 0:11:51 | 72.1268003 | 73.4754328 | 76.318326 | 77.2427597 | 74.8868972 |
| 17:12:14 | 0:11:52 | 72.1268003 | 73.4754328 | 76.318326 | 75.2427597 | 74.8868972 |
| 17:12:15 | 0:11:53 | 72.1268003 | 73.4754328 | 76.318326 | 75.2427597 | 74.8868972 |
| 17:12:16 | 0:11:54 | 72.1268003 | 73.4754328 | 76.318326 | 74.2427597 | 76.8868972 |
| 17:12:17 | 0:11:55 | 72.1268003 | 73.4754328 | 77.318326 | 74.2427597 | 77.8868972 |
| 17:12:18 | 0:11:56 | 72.1268003 | 73.4754328 | 77.318326 | 74.2427597 | 77.8868972 |
| 17:12:19 | 0:11:57 | 79.1268003 | 76.4754328 | 78.318326 | 75.2427597 | 78.8868972 |
| 17:12:20 | 0:11:58 | 81.1268003 | 76.4754328 | 78.318326 | 75.2427597 | 78.8868972 |

|          |         |            |            |           |            |            |
|----------|---------|------------|------------|-----------|------------|------------|
| 17:12:21 | 0:11:59 | 81.1268003 | 76.4754328 | 78.318326 | 75.2427597 | 78.8868972 |
| 17:12:22 | 0:12:00 | 81.1268003 | 74.4754328 | 79.318326 | 76.2427597 | 77.8868972 |
| 17:12:23 | 0:12:01 | 81.1268003 | 74.4754328 | 79.318326 | 76.2427597 | 77.8868972 |
| 17:12:24 | 0:12:02 | 87.1268003 | 72.4754328 | 79.318326 | 76.2427597 | 77.8868972 |
| 17:12:25 | 0:12:03 | 87.1268003 | 71.4754328 | 79.318326 | 76.2427597 | 77.8868972 |
| 17:12:26 | 0:12:04 | 89.1268003 | 70.4754328 | 80.318326 | 73.2427597 | 77.8868972 |
| 17:12:27 | 0:12:05 | 88.1268003 | 70.4754328 | 81.318326 | 73.2427597 | 77.8868972 |
| 17:12:28 | 0:12:06 | 88.1268003 | 70.4754328 | 81.318326 | 74.2427597 | 77.8868972 |
| 17:12:29 | 0:12:07 | 85.1268003 | 70.4754328 | 81.318326 | 74.2427597 | 77.8868972 |
| 17:12:30 | 0:12:08 | 83.1268003 | 70.4754328 | 81.318326 | 73.2427597 | 77.8868972 |
| 17:12:31 | 0:12:09 | 84.1268003 | 68.4754328 | 81.318326 | 73.2427597 | 80.8868972 |
| 17:12:32 | 0:12:10 | 84.1268003 | 68.4754328 | 83.318326 | 74.2427597 | 81.8868972 |
| 17:12:33 | 0:12:11 | 84.1268003 | 68.4754328 | 85.318326 | 75.2427597 | 81.8868972 |
| 17:12:34 | 0:12:12 | 80.1268003 | 67.4754328 | 85.318326 | 76.2427597 | 81.8868972 |
| 17:12:35 | 0:12:13 | 79.1268003 | 67.4754328 | 84.318326 | 76.2427597 | 81.8868972 |
| 17:12:36 | 0:12:14 | 77.1268003 | 66.4754328 | 84.318326 | 76.2427597 | 80.8868972 |
| 17:12:37 | 0:12:15 | 77.1268003 | 66.4754328 | 84.318326 | 76.2427597 | 76.8868972 |
| 17:12:38 | 0:12:16 | 76.1268003 | 67.4754328 | 84.318326 | 76.2427597 | 76.8868972 |
| 17:12:39 | 0:12:17 | 72.1268003 | 67.4754328 | 85.318326 | 74.2427597 | 76.8868972 |
| 17:12:40 | 0:12:18 | 72.1268003 | 67.4754328 | 86.318326 | 74.2427597 | 74.8868972 |
| 17:12:41 | 0:12:19 | 72.1268003 | 67.4754328 | 86.318326 | 74.2427597 | 74.8868972 |
| 17:12:42 | 0:12:20 | 72.1268003 | 67.4754328 | 86.318326 | 74.2427597 | 73.8868972 |
| 17:12:43 | 0:12:21 | 70.1268003 | 67.4754328 | 86.318326 | 77.2427597 | 73.8868972 |
| 17:12:44 | 0:12:22 | 70.1268003 | 67.4754328 | 86.318326 | 77.2427597 | 73.8868972 |
| 17:12:45 | 0:12:23 | 69.1268003 | 69.4754328 | 86.318326 | 77.2427597 | 73.8868972 |
| 17:12:46 | 0:12:24 | 67.1268003 | 71.4754328 | 84.318326 | 77.2427597 | 72.8868972 |
| 17:12:47 | 0:12:25 | 67.1268003 | 71.4754328 | 83.318326 | 77.2427597 | 72.8868972 |
| 17:12:48 | 0:12:26 | 67.1268003 | 72.4754328 | 83.318326 | 76.2427597 | 73.8868972 |
| 17:12:49 | 0:12:27 | 67.1268003 | 74.4754328 | 83.318326 | 76.2427597 | 73.8868972 |
| 17:12:50 | 0:12:28 | 67.1268003 | 75.4754328 | 83.318326 | 75.2427597 | 73.8868972 |
| 17:12:51 | 0:12:29 | 67.1268003 | 74.4754328 | 75.318326 | 75.2427597 | 72.8868972 |
| 17:12:52 | 0:12:30 | 67.1268003 | 73.4754328 | 71.318326 | 75.2427597 | 72.8868972 |
| 17:12:53 | 0:12:31 | 67.1268003 | 72.4754328 | 69.318326 | 75.2427597 | 72.8868972 |
| 17:12:54 | 0:12:32 | 67.1268003 | 72.4754328 | 67.318326 | 74.2427597 | 72.8868972 |
| 17:12:55 | 0:12:33 | 67.1268003 | 73.4754328 | 67.318326 | 74.2427597 | 72.8868972 |
| 17:12:56 | 0:12:34 | 68.1268003 | 73.4754328 | 66.318326 | 74.2427597 | 72.8868972 |
| 17:12:57 | 0:12:35 | 69.1268003 | 74.4754328 | 67.318326 | 74.2427597 | 72.8868972 |
| 17:12:58 | 0:12:36 | 69.1268003 | 73.4754328 | 69.318326 | 76.2427597 | 72.8868972 |
| 17:12:59 | 0:12:37 | 69.1268003 | 73.4754328 | 70.318326 | 76.2427597 | 72.8868972 |
| 17:13:00 | 0:12:38 | 68.1268003 | 73.4754328 | 71.318326 | 76.2427597 | 72.8868972 |
| 17:13:01 | 0:12:39 | 65.1268003 | 73.4754328 | 71.318326 | 78.2427597 | 72.8868972 |
| 17:13:02 | 0:12:40 | 65.1268003 | 73.4754328 | 71.318326 | 78.2427597 | 73.8868972 |
| 17:13:03 | 0:12:41 | 65.1268003 | 73.4754328 | 71.318326 | 77.2427597 | 72.8868972 |
| 17:13:04 | 0:12:42 | 64.1268003 | 74.4754328 | 71.318326 | 77.2427597 | 72.8868972 |
| 17:13:05 | 0:12:43 | 64.1268003 | 75.4754328 | 71.318326 | 77.2427597 | 73.8868972 |

|          |         |            |            |           |            |            |
|----------|---------|------------|------------|-----------|------------|------------|
| 17:13:06 | 0:12:44 | 65.1268003 | 75.4754328 | 70.318326 | 77.2427597 | 73.8868972 |
| 17:13:07 | 0:12:45 | 65.1268003 | 75.4754328 | 70.318326 | 77.2427597 | 73.8868972 |
| 17:13:08 | 0:12:46 | 67.1268003 | 75.4754328 | 70.318326 | 78.2427597 | 73.8868972 |
| 17:13:09 | 0:12:47 | 67.1268003 | 76.4754328 | 71.318326 | 78.2427597 | 73.8868972 |
| 17:13:10 | 0:12:48 | 67.1268003 | 76.4754328 | 71.318326 | 78.2427597 | 73.8868972 |
| 17:13:11 | 0:12:49 | 68.1268003 | 75.4754328 | 71.318326 | 79.2427597 | 73.8868972 |
| 17:13:12 | 0:12:50 | 68.1268003 | 75.4754328 | 71.318326 | 79.2427597 | 73.8868972 |
| 17:13:13 | 0:12:51 | 68.1268003 | 72.4754328 | 71.318326 | 79.2427597 | 73.8868972 |
| 17:13:14 | 0:12:52 | 68.1268003 | 72.4754328 | 71.318326 | 79.2427597 | 73.8868972 |
| 17:13:15 | 0:12:53 | 68.1268003 | 74.4754328 | 71.318326 | 79.2427597 | 74.8868972 |
| 17:13:16 | 0:12:54 | 70.1268003 | 75.4754328 | 71.318326 | 79.2427597 | 75.8868972 |
| 17:13:17 | 0:12:55 | 72.1268003 | 74.4754328 | 71.318326 | 79.2427597 | 75.8868972 |
| 17:13:18 | 0:12:56 | 72.1268003 | 74.4754328 | 72.318326 | 79.2427597 | 75.8868972 |
| 17:13:19 | 0:12:57 | 72.1268003 | 74.4754328 | 72.318326 | 79.2427597 | 75.8868972 |
| 17:13:20 | 0:12:58 | 73.1268003 | 73.4754328 | 78.318326 | 81.2427597 | 76.8868972 |
| 17:13:21 | 0:12:59 | 73.1268003 | 72.4754328 | 78.318326 | 81.2427597 | 76.8868972 |
| 17:13:22 | 0:13:00 | 73.1268003 | 72.4754328 | 78.318326 | 82.2427597 | 76.8868972 |
| 17:13:23 | 0:13:01 | 72.1268003 | 72.4754328 | 75.318326 | 82.2427597 | 76.8868972 |
| 17:13:24 | 0:13:02 | 73.1268003 | 73.4754328 | 75.318326 | 82.2427597 | 76.8868972 |
| 17:13:25 | 0:13:03 | 73.1268003 | 73.4754328 | 75.318326 | 82.2427597 | 77.8868972 |
| 17:13:26 | 0:13:04 | 74.1268003 | 74.4754328 | 75.318326 | 82.2427597 | 77.8868972 |
| 17:13:27 | 0:13:05 | 74.1268003 | 74.4754328 | 75.318326 | 82.2427597 | 77.8868972 |
| 17:13:28 | 0:13:06 | 74.1268003 | 74.4754328 | 75.318326 | 82.2427597 | 78.8868972 |
| 17:13:29 | 0:13:07 | 74.1268003 | 75.4754328 | 75.318326 | 82.2427597 | 79.8868972 |
| 17:13:30 | 0:13:08 | 74.1268003 | 75.4754328 | 75.318326 | 82.2427597 | 79.8868972 |
| 17:13:31 | 0:13:09 | 73.1268003 | 77.4754328 | 75.318326 | 82.2427597 | 79.8868972 |
| 17:13:32 | 0:13:10 | 72.1268003 | 78.4754328 | 75.318326 | 82.2427597 | 79.8868972 |
| 17:13:33 | 0:13:11 | 71.1268003 | 78.4754328 | 75.318326 | 84.2427597 | 80.8868972 |
| 17:13:34 | 0:13:12 | 71.1268003 | 77.4754328 | 75.318326 | 85.2427597 | 79.8868972 |
| 17:13:35 | 0:13:13 | 70.1268003 | 74.4754328 | 74.318326 | 85.2427597 | 78.8868972 |
| 17:13:36 | 0:13:14 | 69.1268003 | 74.4754328 | 74.318326 | 85.2427597 | 77.8868972 |
| 17:13:37 | 0:13:15 | 69.1268003 | 74.4754328 | 74.318326 | 85.2427597 | 76.8868972 |
| 17:13:38 | 0:13:16 | 68.1268003 | 76.4754328 | 73.318326 | 83.2427597 | 76.8868972 |
| 17:13:39 | 0:13:17 | 68.1268003 | 78.4754328 | 73.318326 | 82.2427597 | 76.8868972 |
| 17:13:40 | 0:13:18 | 68.1268003 | 79.4754328 | 73.318326 | 81.2427597 | 75.8868972 |
| 17:13:41 | 0:13:19 | 69.1268003 | 79.4754328 | 73.318326 | 81.2427597 | 74.8868972 |
| 17:13:42 | 0:13:20 | 69.1268003 | 79.4754328 | 73.318326 | 81.2427597 | 74.8868972 |
| 17:13:43 | 0:13:21 | 69.1268003 | 78.4754328 | 73.318326 | 81.2427597 | 74.8868972 |
| 17:13:44 | 0:13:22 | 67.1268003 | 76.4754328 | 74.318326 | 81.2427597 | 73.8868972 |
| 17:13:45 | 0:13:23 | 67.1268003 | 75.4754328 | 75.318326 | 80.2427597 | 73.8868972 |
| 17:13:46 | 0:13:24 | 66.1268003 | 75.4754328 | 75.318326 | 80.2427597 | 74.8868972 |
| 17:13:47 | 0:13:25 | 66.1268003 | 75.4754328 | 75.318326 | 80.2427597 | 74.8868972 |
| 17:13:48 | 0:13:26 | 66.1268003 | 76.4754328 | 75.318326 | 79.2427597 | 75.8868972 |
| 17:13:49 | 0:13:27 | 66.1268003 | 76.4754328 | 76.318326 | 76.2427597 | 75.8868972 |
| 17:13:50 | 0:13:28 | 66.1268003 | 76.4754328 | 76.318326 | 74.2427597 | 75.8868972 |



|          |         |            |            |            |            |            |
|----------|---------|------------|------------|------------|------------|------------|
| 17:13:51 | 0:13:29 | 66.1268003 | 76.4754328 | 77.318326  | 72.2427597 | 75.8868972 |
| 17:13:52 | 0:13:30 | 66.1268003 | 76.4754328 | 79.318326  | 72.2427597 | 74.8868972 |
| 17:13:53 | 0:13:31 | 66.1268003 | 76.4754328 | 80.318326  | 72.2427597 | 75.8868972 |
| 17:13:54 | 0:13:32 | 67.1268003 | 75.4754328 | 81.318326  | 72.2427597 | 77.8868972 |
| 17:13:55 | 0:13:33 | 68.1268003 | 74.4754328 | 82.318326  | 73.2427597 | 77.8868972 |
| 17:13:56 | 0:13:34 | 68.1268003 | 74.4754328 | 85.318326  | 74.2427597 | 79.8868972 |
| 17:13:57 | 0:13:35 | 68.1268003 | 74.4754328 | 87.318326  | 74.2427597 | 79.8868972 |
| 17:13:58 | 0:13:36 | 69.1268003 | 75.4754328 | 87.318326  | 75.2427597 | 78.8868972 |
| 17:13:59 | 0:13:37 | 69.1268003 | 76.4754328 | 88.318326  | 74.2427597 | 78.8868972 |
| 17:14:00 | 0:13:38 | 69.1268003 | 74.4754328 | 88.318326  | 74.2427597 | 78.8868972 |
| 17:14:01 | 0:13:39 | 73.1268003 | 73.4754328 | 87.318326  | 73.2427597 | 78.8868972 |
| 17:14:02 | 0:13:40 | 73.1268003 | 73.4754328 | 86.318326  | 72.2427597 | 78.8868972 |
| 17:14:03 | 0:13:41 | 74.1268003 | 73.4754328 | 85.318326  | 72.2427597 | 78.8868972 |
| 17:14:04 | 0:13:42 | 73.1268003 | 73.4754328 | 85.318326  | 72.2427597 | 80.8868972 |
| 17:14:05 | 0:13:43 | 73.1268003 | 73.4754328 | 84.318326  | 71.2427597 | 80.8868972 |
| 17:14:06 | 0:13:44 | 73.1268003 | 73.4754328 | 84.318326  | 71.2427597 | 80.8868972 |
| 17:14:07 | 0:13:45 | 73.1268003 | 73.4754328 | 83.318326  | 73.2427597 | 81.8868972 |
| 17:14:08 | 0:13:46 | 73.1268003 | 74.4754328 | 83.318326  | 74.2427597 | 81.8868972 |
| 17:14:09 | 0:13:47 | 71.1268003 | 74.4754328 | 85.318326  | 75.2427597 | 75.8868972 |
| 17:14:10 | 0:13:48 | 70.1268003 | 74.4754328 | 86.318326  | 76.2427597 | 75.8868972 |
| 17:14:11 | 0:13:49 | 70.1268003 | 74.4754328 | 87.318326  | 77.2427597 | 72.8868972 |
| 17:14:12 | 0:13:50 | 70.1268003 | 74.4754328 | 88.318326  | 76.2427597 | 72.8868972 |
| 17:14:13 | 0:13:51 | 69.1268003 | 74.4754328 | 75.7777778 | 75.2427597 | 72.8868972 |
| 17:14:14 | 0:13:52 | 69.1268003 | 75.4754328 | 76.2222222 | 75.2427597 | 72.8868972 |
| 17:14:15 | 0:13:53 | 69.1268003 | 75.4754328 | 88.318326  | 74.2427597 | 73.8868972 |
| 17:14:16 | 0:13:54 | 69.1268003 | 75.4754328 | 86.318326  | 74.2427597 | 73.8868972 |
| 17:14:17 | 0:13:55 | 70.1268003 | 75.4754328 | 85.318326  | 75.2427597 | 73.8868972 |
| 17:14:18 | 0:13:56 | 70.1268003 | 76.4754328 | 85.318326  | 76.2427597 | 73.8868972 |
| 17:14:19 | 0:13:57 | 70.1268003 | 76.4754328 | 85.318326  | 77.2427597 | 72.8868972 |
| 17:14:20 | 0:13:58 | 69.1268003 | 76.4754328 | 85.318326  | 78.2427597 | 72.8868972 |
| 17:14:21 | 0:13:59 | 69.1268003 | 78.4754328 | 85.318326  | 78.2427597 | 72.8868972 |
| 17:14:22 | 0:14:00 | 69.1268003 | 78.4754328 | 84.318326  | 78.2427597 | 73.8868972 |
| 17:14:23 | 0:14:01 | 69.1268003 | 78.4754328 | 83.318326  | 78.2427597 | 73.8868972 |
| 17:14:24 | 0:14:02 | 69.1268003 | 76.4754328 | 83.318326  | 78.2427597 | 73.8868972 |
| 17:14:25 | 0:14:03 | 69.1268003 | 76.4754328 | 83.318326  | 78.2427597 | 73.8868972 |
| 17:14:26 | 0:14:04 | 69.1268003 | 76.4754328 | 83.318326  | 78.2427597 | 73.8868972 |
| 17:14:27 | 0:14:05 | 69.1268003 | 77.4754328 | 82.318326  | 78.2427597 | 72.8868972 |
| 17:14:28 | 0:14:06 | 69.1268003 | 77.4754328 | 80.318326  | 79.2427597 | 71.8868972 |
| 17:14:29 | 0:14:07 | 70.1268003 | 77.4754328 | 80.318326  | 79.2427597 | 69.8868972 |
| 17:14:30 | 0:14:08 | 70.1268003 | 79.4754328 | 79.318326  | 79.2427597 | 69.8868972 |
| 17:14:31 | 0:14:09 | 72.1268003 | 80.4754328 | 79.318326  | 78.2427597 | 68.8868972 |
| 17:14:32 | 0:14:10 | 74.1268003 | 81.4754328 | 79.318326  | 78.2427597 | 68.8868972 |
| 17:14:33 | 0:14:11 | 74.1268003 | 81.4754328 | 79.318326  | 77.2427597 | 69.8868972 |
| 17:14:34 | 0:14:12 | 75.1268003 | 81.4754328 | 79.318326  | 77.2427597 | 69.8868972 |
| 17:14:35 | 0:14:13 | 75.1268003 | 81.4754328 | 79.318326  | 77.2427597 | 69.8868972 |

|          |         |            |            |           |            |            |
|----------|---------|------------|------------|-----------|------------|------------|
| 17:14:36 | 0:14:14 | 74.1268003 | 81.4754328 | 79.318326 | 77.2427597 | 69.8868972 |
| 17:14:37 | 0:14:15 | 74.1268003 | 81.4754328 | 83.318326 | 78.2427597 | 69.8868972 |
| 17:14:38 | 0:14:16 | 72.1268003 | 81.4754328 | 83.318326 | 81.2427597 | 69.8868972 |
| 17:14:39 | 0:14:17 | 71.1268003 | 81.4754328 | 83.318326 | 82.2427597 | 69.8868972 |
| 17:14:40 | 0:14:18 | 71.1268003 | 81.4754328 | 81.318326 | 83.2427597 | 69.8868972 |
| 17:14:41 | 0:14:19 | 71.1268003 | 80.4754328 | 78.318326 | 83.2427597 | 69.8868972 |
| 17:14:42 | 0:14:20 | 71.1268003 | 79.4754328 | 76.318326 | 83.2427597 | 69.8868972 |
| 17:14:43 | 0:14:21 | 72.1268003 | 79.4754328 | 76.318326 | 83.2427597 | 69.8868972 |
| 17:14:44 | 0:14:22 | 71.1268003 | 78.4754328 | 75.318326 | 79.2427597 | 69.8868972 |
| 17:14:45 | 0:14:23 | 69.1268003 | 78.4754328 | 74.318326 | 79.2427597 | 68.8868972 |
| 17:14:46 | 0:14:24 | 67.1268003 | 78.4754328 | 74.318326 | 75.2427597 | 67.8868972 |
| 17:14:47 | 0:14:25 | 67.1268003 | 78.4754328 | 75.318326 | 75.2427597 | 67.8868972 |
| 17:14:48 | 0:14:26 | 66.1268003 | 78.4754328 | 74.318326 | 75.2427597 | 67.8868972 |
| 17:14:49 | 0:14:27 | 66.1268003 | 78.4754328 | 74.318326 | 74.2427597 | 67.8868972 |
| 17:14:50 | 0:14:28 | 66.1268003 | 69.4754328 | 71.318326 | 74.2427597 | 67.8868972 |
| 17:14:51 | 0:14:29 | 66.1268003 | 69.4754328 | 70.318326 | 74.2427597 | 68.8868972 |
| 17:14:52 | 0:14:30 | 66.1268003 | 66.4754328 | 70.318326 | 72.2427597 | 68.8868972 |
| 17:14:53 | 0:14:31 | 70.1268003 | 65.4754328 | 69.318326 | 73.2427597 | 68.8868972 |
| 17:14:54 | 0:14:32 | 70.1268003 | 65.4754328 | 69.318326 | 73.2427597 | 69.8868972 |
| 17:14:55 | 0:14:33 | 70.1268003 | 66.4754328 | 69.318326 | 73.2427597 | 69.8868972 |
| 17:14:56 | 0:14:34 | 68.1268003 | 66.4754328 | 71.318326 | 73.2427597 | 68.8868972 |
| 17:14:57 | 0:14:35 | 66.1268003 | 67.4754328 | 72.318326 | 74.2427597 | 68.8868972 |
| 17:14:58 | 0:14:36 | 65.1268003 | 68.4754328 | 70.318326 | 75.2427597 | 68.8868972 |
| 17:14:59 | 0:14:37 | 65.1268003 | 71.4754328 | 70.318326 | 75.2427597 | 68.8868972 |
| 17:15:00 | 0:14:38 | 65.1268003 | 71.4754328 | 70.318326 | 75.2427597 | 68.8868972 |
| 17:15:01 | 0:14:39 | 68.1268003 | 72.4754328 | 70.318326 | 75.2427597 | 67.8868972 |
| 17:15:02 | 0:14:40 | 68.1268003 | 72.4754328 | 70.318326 | 75.2427597 | 67.8868972 |
| 17:15:03 | 0:14:41 | 69.1268003 | 71.4754328 | 71.318326 | 77.2427597 | 67.8868972 |
| 17:15:04 | 0:14:42 | 70.1268003 | 71.4754328 | 72.318326 | 78.2427597 | 69.8868972 |
| 17:15:05 | 0:14:43 | 70.1268003 | 71.4754328 | 71.318326 | 78.2427597 | 69.8868972 |
| 17:15:06 | 0:14:44 | 70.1268003 | 71.4754328 | 71.318326 | 79.2427597 | 70.8868972 |
| 17:15:07 | 0:14:45 | 69.1268003 | 71.4754328 | 72.318326 | 79.2427597 | 71.8868972 |
| 17:15:08 | 0:14:46 | 69.1268003 | 71.4754328 | 72.318326 | 79.2427597 | 71.8868972 |
| 17:15:09 | 0:14:47 | 68.1268003 | 72.4754328 | 74.318326 | 80.2427597 | 71.8868972 |
| 17:15:10 | 0:14:48 | 68.1268003 | 73.4754328 | 75.318326 | 81.2427597 | 74.8868972 |
| 17:15:11 | 0:14:49 | 67.1268003 | 74.4754328 | 77.318326 | 82.2427597 | 75.8868972 |
| 17:15:12 | 0:14:50 | 67.1268003 | 74.4754328 | 77.318326 | 82.2427597 | 75.8868972 |
| 17:15:13 | 0:14:51 | 67.1268003 | 74.4754328 | 77.318326 | 82.2427597 | 76.8868972 |
| 17:15:14 | 0:14:52 | 67.1268003 | 76.4754328 | 75.318326 | 82.2427597 | 76.8868972 |
| 17:15:15 | 0:14:53 | 67.1268003 | 78.4754328 | 75.318326 | 82.2427597 | 76.8868972 |
| 17:15:16 | 0:14:54 | 67.1268003 | 78.4754328 | 75.318326 | 83.2427597 | 75.8868972 |
| 17:15:17 | 0:14:55 | 68.1268003 | 78.4754328 | 77.318326 | 84.2427597 | 74.8868972 |
| 17:15:18 | 0:14:56 | 68.1268003 | 78.4754328 | 77.318326 | 84.2427597 | 74.8868972 |
| 17:15:19 | 0:14:57 | 68.1268003 | 81.4754328 | 77.318326 | 88.2427597 | 73.8868972 |
| 17:15:20 | 0:14:58 | 68.1268003 | 80.4754328 | 78.318326 | 88.2427597 | 72.8868972 |

|          |         |            |            |            |            |            |
|----------|---------|------------|------------|------------|------------|------------|
| 17:15:21 | 0:14:59 | 68.1268003 | 79.4754328 | 78.318326  | 89.2427597 | 71.8868972 |
| 17:15:22 | 0:15:00 | 68.1268003 | 79.4754328 | 79.318326  | 89.2427597 | 71.8868972 |
| 17:15:23 | 0:15:01 | 68.1268003 | 78.4754328 | 79.318326  | 87.2427597 | 72.8868972 |
| 17:15:24 | 0:15:02 | 68.1268003 | 77.4754328 | 80.318326  | 85.2427597 | 73.8868972 |
| 17:15:25 | 0:15:03 | 68.1268003 | 77.4754328 | 80.318326  | 83.2427597 | 73.8868972 |
| 17:15:26 | 0:15:04 | 68.1268003 | 77.4754328 | 81.318326  | 83.2427597 | 73.8868972 |
| 17:15:27 | 0:15:05 | 68.1268003 | 77.4754328 | 81.318326  | 79.2427597 | 72.8868972 |
| 17:15:28 | 0:15:06 | 68.1268003 | 77.4754328 | 81.318326  | 76.2427597 | 72.8868972 |
| 17:15:29 | 0:15:07 | 68.1268003 | 78.4754328 | 81.318326  | 76.2427597 | 72.8868972 |
| 17:15:30 | 0:15:08 | 68.1268003 | 79.4754328 | 81.318326  | 75.2427597 | 72.8868972 |
| 17:15:31 | 0:15:09 | 69.1268003 | 78.4754328 | 82.318326  | 75.2427597 | 73.8868972 |
| 17:15:32 | 0:15:10 | 69.1268003 | 78.4754328 | 82.318326  | 75.2427597 | 72.8868972 |
| 17:15:33 | 0:15:11 | 69.1268003 | 78.4754328 | 84.318326  | 75.2427597 | 72.8868972 |
| 17:15:34 | 0:15:12 | 69.1268003 | 78.4754328 | 87.318326  | 75.2427597 | 72.8868972 |
| 17:15:35 | 0:15:13 | 69.1268003 | 78.4754328 | 89.318326  | 75.2427597 | 72.8868972 |
| 17:15:36 | 0:15:14 | 68.1268003 | 77.4754328 | 76.2222222 | 74.2427597 | 71.8868972 |
| 17:15:37 | 0:15:15 | 67.1268003 | 77.4754328 | 76.4444444 | 74.2427597 | 71.8868972 |
| 17:15:38 | 0:15:16 | 66.1268003 | 77.4754328 | 77.4444444 | 74.2427597 | 71.8868972 |
| 17:15:39 | 0:15:17 | 66.1268003 | 77.4754328 | 85.318326  | 74.2427597 | 72.8868972 |
| 17:15:40 | 0:15:18 | 66.1268003 | 77.4754328 | 82.318326  | 75.2427597 | 72.8868972 |
| 17:15:41 | 0:15:19 | 66.1268003 | 75.4754328 | 79.318326  | 75.2427597 | 72.8868972 |
| 17:15:42 | 0:15:20 | 66.1268003 | 74.4754328 | 77.318326  | 75.2427597 | 72.8868972 |
| 17:15:43 | 0:15:21 | 65.1268003 | 74.4754328 | 77.318326  | 76.2427597 | 73.8868972 |
| 17:15:44 | 0:15:22 | 64.1268003 | 74.4754328 | 74.318326  | 77.2427597 | 74.8868972 |
| 17:15:45 | 0:15:23 | 64.1268003 | 74.4754328 | 73.318326  | 77.2427597 | 76.8868972 |
| 17:15:46 | 0:15:24 | 64.1268003 | 75.4754328 | 73.318326  | 77.2427597 | 77.8868972 |
| 17:15:47 | 0:15:25 | 65.1268003 | 75.4754328 | 73.318326  | 77.2427597 | 77.8868972 |
| 17:15:48 | 0:15:26 | 65.1268003 | 75.4754328 | 73.318326  | 77.2427597 | 76.8868972 |
| 17:15:49 | 0:15:27 | 68.1268003 | 75.4754328 | 73.318326  | 77.2427597 | 75.8868972 |
| 17:15:50 | 0:15:28 | 68.1268003 | 75.4754328 | 73.318326  | 77.2427597 | 75.8868972 |
| 17:15:51 | 0:15:29 | 68.1268003 | 75.4754328 | 74.318326  | 77.2427597 | 75.8868972 |
| 17:15:52 | 0:15:30 | 68.1268003 | 75.4754328 | 74.318326  | 77.2427597 | 75.8868972 |
| 17:15:53 | 0:15:31 | 69.1268003 | 76.4754328 | 74.318326  | 76.2427597 | 75.8868972 |
| 17:15:54 | 0:15:32 | 69.1268003 | 76.4754328 | 74.318326  | 76.2427597 | 75.8868972 |
| 17:15:55 | 0:15:33 | 71.1268003 | 76.4754328 | 75.318326  | 75.2427597 | 76.8868972 |
| 17:15:56 | 0:15:34 | 69.1268003 | 76.4754328 | 73.318326  | 76.2427597 | 75.8868972 |
| 17:15:57 | 0:15:35 | 66.1268003 | 76.4754328 | 73.318326  | 76.2427597 | 74.8868972 |
| 17:15:58 | 0:15:36 | 66.1268003 | 77.4754328 | 73.318326  | 75.2427597 | 74.8868972 |
| 17:15:59 | 0:15:37 | 64.1268003 | 77.4754328 | 74.318326  | 75.2427597 | 74.8868972 |
| 17:16:00 | 0:15:38 | 64.1268003 | 77.4754328 | 74.318326  | 75.2427597 | 74.8868972 |
| 17:16:01 | 0:15:39 | 64.1268003 | 76.4754328 | 74.318326  | 74.2427597 | 74.8868972 |
| 17:16:02 | 0:15:40 | 64.1268003 | 76.4754328 | 73.318326  | 74.2427597 | 74.8868972 |
| 17:16:03 | 0:15:41 | 64.1268003 | 76.4754328 | 73.318326  | 77.2427597 | 74.8868972 |
| 17:16:04 | 0:15:42 | 64.1268003 | 76.4754328 | 73.318326  | 78.2427597 | 74.8868972 |
| 17:16:05 | 0:15:43 | 64.1268003 | 76.4754328 | 73.318326  | 78.2427597 | 74.8868972 |

|          |         |            |            |           |            |            |
|----------|---------|------------|------------|-----------|------------|------------|
| 17:16:06 | 0:15:44 | 64.1268003 | 76.4754328 | 73.318326 | 78.2427597 | 75.8868972 |
| 17:16:07 | 0:15:45 | 64.1268003 | 76.4754328 | 73.318326 | 78.2427597 | 75.8868972 |
| 17:16:08 | 0:15:46 | 64.1268003 | 78.4754328 | 73.318326 | 79.2427597 | 75.8868972 |
| 17:16:09 | 0:15:47 | 64.1268003 | 78.4754328 | 72.318326 | 80.2427597 | 77.8868972 |
| 17:16:10 | 0:15:48 | 64.1268003 | 81.4754328 | 71.318326 | 80.2427597 | 78.8868972 |
| 17:16:11 | 0:15:49 | 64.1268003 | 80.4754328 | 71.318326 | 80.2427597 | 79.8868972 |
| 17:16:12 | 0:15:50 | 64.1268003 | 79.4754328 | 71.318326 | 80.2427597 | 79.8868972 |
| 17:16:13 | 0:15:51 | 64.1268003 | 79.4754328 | 70.318326 | 79.2427597 | 79.8868972 |
| 17:16:14 | 0:15:52 | 64.1268003 | 79.4754328 | 71.318326 | 80.2427597 | 79.8868972 |
| 17:16:15 | 0:15:53 | 63.1268003 | 79.4754328 | 71.318326 | 78.2427597 | 79.8868972 |
| 17:16:16 | 0:15:54 | 63.1268003 | 79.4754328 | 71.318326 | 78.2427597 | 79.8868972 |
| 17:16:17 | 0:15:55 | 63.1268003 | 79.4754328 | 71.318326 | 74.2427597 | 77.8868972 |
| 17:16:18 | 0:15:56 | 63.1268003 | 80.4754328 | 70.318326 | 74.2427597 | 74.8868972 |
| 17:16:19 | 0:15:57 | 64.1268003 | 83.4754328 | 69.318326 | 75.2427597 | 73.8868972 |
| 17:16:20 | 0:15:58 | 64.1268003 | 84.4754328 | 69.318326 | 76.2427597 | 73.8868972 |
| 17:16:21 | 0:15:59 | 65.1268003 | 84.4754328 | 69.318326 | 77.2427597 | 73.8868972 |
| 17:16:22 | 0:16:00 | 65.1268003 | 82.4754328 | 68.318326 | 76.2427597 | 73.8868972 |
| 17:16:23 | 0:16:01 | 64.1268003 | 81.4754328 | 68.318326 | 75.2427597 | 72.8868972 |
| 17:16:24 | 0:16:02 | 64.1268003 | 81.4754328 | 68.318326 | 74.2427597 | 72.8868972 |
| 17:16:25 | 0:16:03 | 64.1268003 | 81.4754328 | 68.318326 | 74.2427597 | 72.8868972 |
| 17:16:26 | 0:16:04 | 64.1268003 | 81.4754328 | 69.318326 | 71.2427597 | 72.8868972 |
| 17:16:27 | 0:16:05 | 64.1268003 | 81.4754328 | 70.318326 | 71.2427597 | 72.8868972 |
| 17:16:28 | 0:16:06 | 63.1268003 | 81.4754328 | 71.318326 | 71.2427597 | 72.8868972 |
| 17:16:29 | 0:16:07 | 63.1268003 | 81.4754328 | 70.318326 | 71.2427597 | 72.8868972 |
| 17:16:30 | 0:16:08 | 68.1268003 | 81.4754328 | 70.318326 | 71.2427597 | 72.8868972 |
| 17:16:31 | 0:16:09 | 70.1268003 | 80.4754328 | 69.318326 | 71.2427597 | 72.8868972 |
| 17:16:32 | 0:16:10 | 70.1268003 | 79.4754328 | 69.318326 | 73.2427597 | 73.8868972 |
| 17:16:33 | 0:16:11 | 70.1268003 | 79.4754328 | 68.318326 | 73.2427597 | 73.8868972 |
| 17:16:34 | 0:16:12 | 72.1268003 | 78.4754328 | 68.318326 | 73.2427597 | 73.8868972 |
| 17:16:35 | 0:16:13 | 72.1268003 | 77.4754328 | 69.318326 | 75.2427597 | 73.8868972 |
| 17:16:36 | 0:16:14 | 73.1268003 | 75.4754328 | 70.318326 | 75.2427597 | 73.8868972 |
| 17:16:37 | 0:16:15 | 75.1268003 | 74.4754328 | 73.318326 | 74.2427597 | 73.8868972 |
| 17:16:38 | 0:16:16 | 75.1268003 | 74.4754328 | 72.318326 | 74.2427597 | 73.8868972 |
| 17:16:39 | 0:16:17 | 75.1268003 | 71.4754328 | 72.318326 | 74.2427597 | 73.8868972 |
| 17:16:40 | 0:16:18 | 75.1268003 | 71.4754328 | 69.318326 | 74.2427597 | 72.8868972 |
| 17:16:41 | 0:16:19 | 73.1268003 | 70.4754328 | 68.318326 | 74.2427597 | 71.8868972 |
| 17:16:42 | 0:16:20 | 71.1268003 | 70.4754328 | 67.318326 | 75.2427597 | 69.8868972 |
| 17:16:43 | 0:16:21 | 71.1268003 | 70.4754328 | 68.318326 | 76.2427597 | 69.8868972 |
| 17:16:44 | 0:16:22 | 70.1268003 | 70.4754328 | 68.318326 | 76.2427597 | 69.8868972 |
| 17:16:45 | 0:16:23 | 69.1268003 | 70.4754328 | 69.318326 | 76.2427597 | 69.8868972 |
| 17:16:46 | 0:16:24 | 69.1268003 | 70.4754328 | 70.318326 | 77.2427597 | 70.8868972 |
| 17:16:47 | 0:16:25 | 70.1268003 | 69.4754328 | 71.318326 | 77.2427597 | 71.8868972 |
| 17:16:48 | 0:16:26 | 70.1268003 | 69.4754328 | 71.318326 | 77.2427597 | 71.8868972 |
| 17:16:49 | 0:16:27 | 70.1268003 | 68.4754328 | 69.318326 | 77.2427597 | 75.8868972 |
| 17:16:50 | 0:16:28 | 70.1268003 | 68.4754328 | 68.318326 | 77.2427597 | 75.8868972 |

|          |         |            |            |           |            |             |
|----------|---------|------------|------------|-----------|------------|-------------|
| 17:16:51 | 0:16:29 | 69.1268003 | 68.4754328 | 68.318326 | 77.2427597 | 75.8868972  |
| 17:16:52 | 0:16:30 | 69.1268003 | 68.4754328 | 68.318326 | 77.2427597 | 74.8868972  |
| 17:16:53 | 0:16:31 | 69.1268003 | 75.4754328 | 68.318326 | 79.2427597 | 74.8868972  |
| 17:16:54 | 0:16:32 | 68.1268003 | 74.4754328 | 70.318326 | 79.2427597 | 74.8868972  |
| 17:16:55 | 0:16:33 | 68.1268003 | 73.4754328 | 70.318326 | 78.2427597 | 74.8868972  |
| 17:16:56 | 0:16:34 | 68.1268003 | 72.4754328 | 70.318326 | 78.2427597 | 74.8868972  |
| 17:16:57 | 0:16:35 | 68.1268003 | 73.4754328 | 71.318326 | 78.2427597 | 78.8868972  |
| 17:16:58 | 0:16:36 | 66.1268003 | 73.4754328 | 72.318326 | 78.2427597 | 79.8868972  |
| 17:16:59 | 0:16:37 | 65.1268003 | 74.4754328 | 72.318326 | 78.2427597 | 79.8868972  |
| 17:17:00 | 0:16:38 | 66.1268003 | 73.4754328 | 73.318326 | 78.2427597 | 79.8868972  |
| 17:17:01 | 0:16:39 | 66.1268003 | 72.4754328 | 78.318326 | 77.2427597 | 78.8868972  |
| 17:17:02 | 0:16:40 | 66.1268003 | 71.4754328 | 80.318326 | 77.2427597 | 78.8868972  |
| 17:17:03 | 0:16:41 | 66.1268003 | 69.4754328 | 80.318326 | 77.2427597 | 78.8868972  |
| 17:17:04 | 0:16:42 | 66.1268003 | 68.4754328 | 80.318326 | 77.2427597 | 77.8868972  |
| 17:17:05 | 0:16:43 | 65.1268003 | 68.4754328 | 80.318326 | 77.2427597 | 77.8868972  |
| 17:17:06 | 0:16:44 | 65.1268003 | 69.4754328 | 73.318326 | 77.2427597 | 77.8868972  |
| 17:17:07 | 0:16:45 | 65.1268003 | 70.4754328 | 70.318326 | 77.2427597 | 77.8868972  |
| 17:17:08 | 0:16:46 | 65.1268003 | 72.4754328 | 68.318326 | 77.2427597 | 77.8868972  |
| 17:17:09 | 0:16:47 | 65.1268003 | 73.4754328 | 68.318326 | 78.2427597 | 78.8868972  |
| 17:17:10 | 0:16:48 | 67.1268003 | 74.4754328 | 69.318326 | 79.2427597 | 79.8868972  |
| 17:17:11 | 0:16:49 | 67.1268003 | 74.4754328 | 70.318326 | 79.2427597 | 80.8868972  |
| 17:17:12 | 0:16:50 | 67.1268003 | 74.4754328 | 70.318326 | 79.2427597 | 81.8868972  |
| 17:17:13 | 0:16:51 | 67.1268003 | 73.4754328 | 69.318326 | 80.2427597 | 82.8868972  |
| 17:17:14 | 0:16:52 | 67.1268003 | 73.4754328 | 69.318326 | 78.2427597 | 82.8868972  |
| 17:17:15 | 0:16:53 | 66.1268003 | 73.4754328 | 69.318326 | 78.2427597 | 83.8868972  |
| 17:17:16 | 0:16:54 | 64.1268003 | 73.4754328 | 69.318326 | 78.2427597 | 84.8868972  |
| 17:17:17 | 0:16:55 | 64.1268003 | 73.4754328 | 69.318326 | 78.2427597 | 85.8868972  |
| 17:17:18 | 0:16:56 | 63.1268003 | 72.4754328 | 69.318326 | 78.2427597 | 85.8868972  |
| 17:17:19 | 0:16:57 | 64.1268003 | 71.4754328 | 68.318326 | 78.2427597 | 86.8868972  |
| 17:17:20 | 0:16:58 | 64.1268003 | 71.4754328 | 68.318326 | 78.2427597 | 88.8868972  |
| 17:17:21 | 0:16:59 | 65.1268003 | 70.4754328 | 68.318326 | 80.2427597 | 77.11111111 |
| 17:17:22 | 0:17:00 | 65.1268003 | 70.4754328 | 68.318326 | 80.2427597 | 76.33333333 |
| 17:17:23 | 0:17:01 | 65.1268003 | 72.4754328 | 69.318326 | 80.2427597 | 88.8868972  |
| 17:17:24 | 0:17:02 | 65.1268003 | 72.4754328 | 75.318326 | 81.2427597 | 76          |
| 17:17:25 | 0:17:03 | 65.1268003 | 73.4754328 | 79.318326 | 81.2427597 | 88.8868972  |
| 17:17:26 | 0:17:04 | 64.1268003 | 74.4754328 | 79.318326 | 81.2427597 | 85.8868972  |
| 17:17:27 | 0:17:05 | 64.1268003 | 74.4754328 | 81.318326 | 82.2427597 | 85.8868972  |
| 17:17:28 | 0:17:06 | 64.1268003 | 74.4754328 | 81.318326 | 83.2427597 | 85.8868972  |
| 17:17:29 | 0:17:07 | 64.1268003 | 74.4754328 | 82.318326 | 83.2427597 | 79.8868972  |
| 17:17:30 | 0:17:08 | 63.1268003 | 74.4754328 | 83.318326 | 83.2427597 | 79.8868972  |
| 17:17:31 | 0:17:09 | 62.1268003 | 74.4754328 | 83.318326 | 83.2427597 | 79.8868972  |
| 17:17:32 | 0:17:10 | 63.1268003 | 74.4754328 | 84.318326 | 84.2427597 | 78.8868972  |
| 17:17:33 | 0:17:11 | 63.1268003 | 75.4754328 | 84.318326 | 84.2427597 | 78.8868972  |
| 17:17:34 | 0:17:12 | 63.1268003 | 74.4754328 | 84.318326 | 84.2427597 | 78.8868972  |
| 17:17:35 | 0:17:13 | 63.1268003 | 73.4754328 | 82.318326 | 84.2427597 | 78.8868972  |

|          |         |            |            |           |            |            |
|----------|---------|------------|------------|-----------|------------|------------|
| 17:17:36 | 0:17:14 | 62.1268003 | 73.4754328 | 78.318326 | 84.2427597 | 78.8868972 |
| 17:17:37 | 0:17:15 | 62.1268003 | 72.4754328 | 76.318326 | 84.2427597 | 78.8868972 |
| 17:17:38 | 0:17:16 | 67.1268003 | 72.4754328 | 74.318326 | 84.2427597 | 78.8868972 |
| 17:17:39 | 0:17:17 | 67.1268003 | 72.4754328 | 74.318326 | 84.2427597 | 79.8868972 |
| 17:17:40 | 0:17:18 | 69.1268003 | 72.4754328 | 73.318326 | 84.2427597 | 79.8868972 |
| 17:17:41 | 0:17:19 | 70.1268003 | 74.4754328 | 73.318326 | 82.2427597 | 79.8868972 |
| 17:17:42 | 0:17:20 | 70.1268003 | 74.4754328 | 73.318326 | 82.2427597 | 79.8868972 |
| 17:17:43 | 0:17:21 | 70.1268003 | 74.4754328 | 76.318326 | 79.2427597 | 77.8868972 |
| 17:17:44 | 0:17:22 | 81.1268003 | 74.4754328 | 77.318326 | 77.2427597 | 75.8868972 |
| 17:17:45 | 0:17:23 | 84.1268003 | 73.4754328 | 77.318326 | 74.2427597 | 75.8868972 |
| 17:17:46 | 0:17:24 | 88.1268003 | 73.4754328 | 78.318326 | 74.2427597 | 75.8868972 |
| 17:17:47 | 0:17:25 | 75.8888889 | 73.4754328 | 79.318326 | 74.2427597 | 74.8868972 |
| 17:17:48 | 0:17:26 | 75.7777778 | 74.4754328 | 79.318326 | 74.2427597 | 74.8868972 |
| 17:17:49 | 0:17:27 | 75.5555556 | 74.4754328 | 80.318326 | 74.2427597 | 74.8868972 |
| 17:17:50 | 0:17:28 | 87.1268003 | 73.4754328 | 80.318326 | 74.2427597 | 74.8868972 |
| 17:17:51 | 0:17:29 | 87.1268003 | 73.4754328 | 80.318326 | 74.2427597 | 75.8868972 |
| 17:17:52 | 0:17:30 | 85.1268003 | 73.4754328 | 80.318326 | 77.2427597 | 75.8868972 |
| 17:17:53 | 0:17:31 | 84.1268003 | 73.4754328 | 80.318326 | 77.2427597 | 77.8868972 |
| 17:17:54 | 0:17:32 | 84.1268003 | 74.4754328 | 80.318326 | 80.2427597 | 79.8868972 |
| 17:17:55 | 0:17:33 | 84.1268003 | 74.4754328 | 80.318326 | 81.2427597 | 79.8868972 |
| 17:17:56 | 0:17:34 | 84.1268003 | 74.4754328 | 80.318326 | 80.2427597 | 78.8868972 |
| 17:17:57 | 0:17:35 | 84.1268003 | 75.4754328 | 81.318326 | 80.2427597 | 78.8868972 |
| 17:17:58 | 0:17:36 | 84.1268003 | 75.4754328 | 82.318326 | 79.2427597 | 79.8868972 |
| 17:17:59 | 0:17:37 | 84.1268003 | 76.4754328 | 82.318326 | 79.2427597 | 79.8868972 |
| 17:18:00 | 0:17:38 | 84.1268003 | 77.4754328 | 83.318326 | 79.2427597 | 79.8868972 |
| 17:18:01 | 0:17:39 | 84.1268003 | 77.4754328 | 82.318326 | 78.2427597 | 79.8868972 |
| 17:18:02 | 0:17:40 | 84.1268003 | 76.4754328 | 82.318326 | 78.2427597 | 79.8868972 |
| 17:18:03 | 0:17:41 | 84.1268003 | 75.4754328 | 84.318326 | 77.2427597 | 77.8868972 |
| 17:18:04 | 0:17:42 | 84.1268003 | 73.4754328 | 85.318326 | 77.2427597 | 77.8868972 |
| 17:18:05 | 0:17:43 | 84.1268003 | 73.4754328 | 85.318326 | 77.2427597 | 77.8868972 |
| 17:18:06 | 0:17:44 | 84.1268003 | 73.4754328 | 83.318326 | 76.2427597 | 77.8868972 |
| 17:18:07 | 0:17:45 | 83.1268003 | 73.4754328 | 81.318326 | 74.2427597 | 77.8868972 |
| 17:18:08 | 0:17:46 | 83.1268003 | 73.4754328 | 81.318326 | 73.2427597 | 74.8868972 |
| 17:18:09 | 0:17:47 | 83.1268003 | 73.4754328 | 81.318326 | 73.2427597 | 71.8868972 |
| 17:18:10 | 0:17:48 | 82.1268003 | 73.4754328 | 80.318326 | 73.2427597 | 71.8868972 |
| 17:18:11 | 0:17:49 | 82.1268003 | 73.4754328 | 80.318326 | 73.2427597 | 71.8868972 |
| 17:18:12 | 0:17:50 | 82.1268003 | 73.4754328 | 80.318326 | 72.2427597 | 71.8868972 |
| 17:18:13 | 0:17:51 | 80.1268003 | 72.4754328 | 78.318326 | 72.2427597 | 72.8868972 |
| 17:18:14 | 0:17:52 | 80.1268003 | 72.4754328 | 78.318326 | 72.2427597 | 72.8868972 |
| 17:18:15 | 0:17:53 | 79.1268003 | 72.4754328 | 78.318326 | 72.2427597 | 72.8868972 |
| 17:18:16 | 0:17:54 | 79.1268003 | 72.4754328 | 75.318326 | 70.2427597 | 73.8868972 |
| 17:18:17 | 0:17:55 | 78.1268003 | 72.4754328 | 75.318326 | 70.2427597 | 73.8868972 |
| 17:18:18 | 0:17:56 | 78.1268003 | 72.4754328 | 77.318326 | 69.2427597 | 74.8868972 |
| 17:18:19 | 0:17:57 | 79.1268003 | 73.4754328 | 77.318326 | 69.2427597 | 74.8868972 |
| 17:18:20 | 0:17:58 | 79.1268003 | 79.4754328 | 77.318326 | 71.2427597 | 74.8868972 |

|          |         |            |            |           |            |            |
|----------|---------|------------|------------|-----------|------------|------------|
| 17:18:21 | 0:17:59 | 79.1268003 | 82.4754328 | 79.318326 | 71.2427597 | 74.8868972 |
| 17:18:22 | 0:18:00 | 75.1268003 | 83.4754328 | 79.318326 | 75.2427597 | 74.8868972 |
| 17:18:23 | 0:18:01 | 73.1268003 | 83.4754328 | 80.318326 | 76.2427597 | 75.8868972 |
| 17:18:24 | 0:18:02 | 73.1268003 | 82.4754328 | 80.318326 | 76.2427597 | 74.8868972 |
| 17:18:25 | 0:18:03 | 66.1268003 | 82.4754328 | 81.318326 | 75.2427597 | 74.8868972 |
| 17:18:26 | 0:18:04 | 64.1268003 | 81.4754328 | 81.318326 | 75.2427597 | 73.8868972 |
| 17:18:27 | 0:18:05 | 64.1268003 | 79.4754328 | 81.318326 | 74.2427597 | 72.8868972 |
| 17:18:28 | 0:18:06 | 65.1268003 | 79.4754328 | 81.318326 | 74.2427597 | 74.8868972 |
| 17:18:29 | 0:18:07 | 66.1268003 | 78.4754328 | 81.318326 | 74.2427597 | 75.8868972 |
| 17:18:30 | 0:18:08 | 66.1268003 | 78.4754328 | 81.318326 | 76.2427597 | 75.8868972 |
| 17:18:31 | 0:18:09 | 65.1268003 | 77.4754328 | 81.318326 | 77.2427597 | 76.8868972 |
| 17:18:32 | 0:18:10 | 64.1268003 | 77.4754328 | 80.318326 | 77.2427597 | 76.8868972 |
| 17:18:33 | 0:18:11 | 64.1268003 | 77.4754328 | 80.318326 | 78.2427597 | 77.8868972 |
| 17:18:34 | 0:18:12 | 64.1268003 | 77.4754328 | 80.318326 | 77.2427597 | 76.8868972 |
| 17:18:35 | 0:18:13 | 64.1268003 | 77.4754328 | 80.318326 | 77.2427597 | 76.8868972 |
| 17:18:36 | 0:18:14 | 64.1268003 | 77.4754328 | 80.318326 | 77.2427597 | 76.8868972 |
| 17:18:37 | 0:18:15 | 68.1268003 | 76.4754328 | 82.318326 | 75.2427597 | 76.8868972 |
| 17:18:38 | 0:18:16 | 68.1268003 | 72.4754328 | 82.318326 | 75.2427597 | 77.8868972 |
| 17:18:39 | 0:18:17 | 69.1268003 | 72.4754328 | 82.318326 | 75.2427597 | 78.8868972 |
| 17:18:40 | 0:18:18 | 69.1268003 | 72.4754328 | 82.318326 | 77.2427597 | 78.8868972 |
| 17:18:41 | 0:18:19 | 69.1268003 | 72.4754328 | 82.318326 | 78.2427597 | 78.8868972 |
| 17:18:42 | 0:18:20 | 69.1268003 | 72.4754328 | 83.318326 | 78.2427597 | 76.8868972 |
| 17:18:43 | 0:18:21 | 69.1268003 | 71.4754328 | 83.318326 | 79.2427597 | 76.8868972 |
| 17:18:44 | 0:18:22 | 69.1268003 | 70.4754328 | 83.318326 | 79.2427597 | 76.8868972 |
| 17:18:45 | 0:18:23 | 69.1268003 | 70.4754328 | 83.318326 | 79.2427597 | 75.8868972 |
| 17:18:46 | 0:18:24 | 69.1268003 | 70.4754328 | 87.318326 | 78.2427597 | 75.8868972 |
| 17:18:47 | 0:18:25 | 69.1268003 | 71.4754328 | 87.318326 | 78.2427597 | 75.8868972 |
| 17:18:48 | 0:18:26 | 69.1268003 | 71.4754328 | 87.318326 | 79.2427597 | 75.8868972 |
| 17:18:49 | 0:18:27 | 69.1268003 | 71.4754328 | 87.318326 | 80.2427597 | 76.8868972 |
| 17:18:50 | 0:18:28 | 69.1268003 | 71.4754328 | 87.318326 | 80.2427597 | 77.8868972 |
| 17:18:51 | 0:18:29 | 69.1268003 | 71.4754328 | 87.318326 | 81.2427597 | 79.8868972 |
| 17:18:52 | 0:18:30 | 69.1268003 | 70.4754328 | 87.318326 | 83.2427597 | 79.8868972 |
| 17:18:53 | 0:18:31 | 68.1268003 | 71.4754328 | 87.318326 | 82.2427597 | 79.8868972 |
| 17:18:54 | 0:18:32 | 67.1268003 | 72.4754328 | 86.318326 | 82.2427597 | 78.8868972 |
| 17:18:55 | 0:18:33 | 66.1268003 | 72.4754328 | 86.318326 | 81.2427597 | 78.8868972 |
| 17:18:56 | 0:18:34 | 65.1268003 | 71.4754328 | 86.318326 | 79.2427597 | 78.8868972 |
| 17:18:57 | 0:18:35 | 65.1268003 | 71.4754328 | 86.318326 | 77.2427597 | 77.8868972 |
| 17:18:58 | 0:18:36 | 65.1268003 | 71.4754328 | 86.318326 | 75.2427597 | 76.8868972 |
| 17:18:59 | 0:18:37 | 66.1268003 | 71.4754328 | 86.318326 | 74.2427597 | 76.8868972 |
| 17:19:00 | 0:18:38 | 66.1268003 | 71.4754328 | 86.318326 | 74.2427597 | 75.8868972 |
| 17:19:01 | 0:18:39 | 66.1268003 | 71.4754328 | 85.318326 | 75.2427597 | 76.8868972 |
| 17:19:02 | 0:18:40 | 66.1268003 | 73.4754328 | 85.318326 | 76.2427597 | 77.8868972 |
| 17:19:03 | 0:18:41 | 66.1268003 | 73.4754328 | 85.318326 | 78.2427597 | 76.8868972 |
| 17:19:04 | 0:18:42 | 66.1268003 | 73.4754328 | 86.318326 | 80.2427597 | 76.8868972 |
| 17:19:05 | 0:18:43 | 65.1268003 | 73.4754328 | 85.318326 | 80.2427597 | 75.8868972 |

|          |         |            |            |           |            |            |
|----------|---------|------------|------------|-----------|------------|------------|
| 17:19:06 | 0:18:44 | 65.1268003 | 73.4754328 | 85.318326 | 81.2427597 | 75.8868972 |
| 17:19:07 | 0:18:45 | 65.1268003 | 73.4754328 | 85.318326 | 80.2427597 | 75.8868972 |
| 17:19:08 | 0:18:46 | 65.1268003 | 73.4754328 | 85.318326 | 78.2427597 | 75.8868972 |
| 17:19:09 | 0:18:47 | 66.1268003 | 73.4754328 | 85.318326 | 78.2427597 | 75.8868972 |
| 17:19:10 | 0:18:48 | 66.1268003 | 74.4754328 | 85.318326 | 77.2427597 | 75.8868972 |
| 17:19:11 | 0:18:49 | 66.1268003 | 74.4754328 | 84.318326 | 75.2427597 | 75.8868972 |
| 17:19:12 | 0:18:50 | 66.1268003 | 74.4754328 | 84.318326 | 75.2427597 | 75.8868972 |
| 17:19:13 | 0:18:51 | 67.1268003 | 75.4754328 | 83.318326 | 74.2427597 | 74.8868972 |
| 17:19:14 | 0:18:52 | 67.1268003 | 78.4754328 | 82.318326 | 74.2427597 | 73.8868972 |
| 17:19:15 | 0:18:53 | 69.1268003 | 81.4754328 | 87.318326 | 75.2427597 | 74.8868972 |
| 17:19:16 | 0:18:54 | 69.1268003 | 82.4754328 | 87.318326 | 75.2427597 | 74.8868972 |
| 17:19:17 | 0:18:55 | 70.1268003 | 82.4754328 | 87.318326 | 76.2427597 | 75.8868972 |
| 17:19:18 | 0:18:56 | 69.1268003 | 83.4754328 | 86.318326 | 77.2427597 | 75.8868972 |
| 17:19:19 | 0:18:57 | 68.1268003 | 85.4754328 | 85.318326 | 78.2427597 | 79.8868972 |
| 17:19:20 | 0:18:58 | 68.1268003 | 85.4754328 | 85.318326 | 78.2427597 | 81.8868972 |
| 17:19:21 | 0:18:59 | 69.1268003 | 84.4754328 | 84.318326 | 78.2427597 | 83.8868972 |
| 17:19:22 | 0:19:00 | 68.1268003 | 82.4754328 | 83.318326 | 78.2427597 | 76.7777778 |
| 17:19:23 | 0:19:01 | 69.1268003 | 79.4754328 | 83.318326 | 78.2427597 | 76.4444444 |
| 17:19:24 | 0:19:02 | 70.1268003 | 76.4754328 | 83.318326 | 77.2427597 | 76.7777778 |
| 17:19:25 | 0:19:03 | 70.1268003 | 74.4754328 | 83.318326 | 77.2427597 | 76.8888889 |
| 17:19:26 | 0:19:04 | 70.1268003 | 73.4754328 | 77.318326 | 77.2427597 | 76.4444444 |
| 17:19:27 | 0:19:05 | 70.1268003 | 72.4754328 | 73.318326 | 79.2427597 | 76.5555556 |
| 17:19:28 | 0:19:06 | 70.1268003 | 72.4754328 | 72.318326 | 78.2427597 | 77         |
| 17:19:29 | 0:19:07 | 70.1268003 | 74.4754328 | 71.318326 | 77.2427597 | 77.4444444 |
| 17:19:30 | 0:19:08 | 70.1268003 | 74.4754328 | 71.318326 | 77.2427597 | 77.4444444 |
| 17:19:31 | 0:19:09 | 70.1268003 | 76.4754328 | 70.318326 | 77.2427597 | 77.7777778 |
| 17:19:32 | 0:19:10 | 69.1268003 | 76.4754328 | 70.318326 | 76.2427597 | 77.5555556 |
| 17:19:33 | 0:19:11 | 69.1268003 | 75.4754328 | 70.318326 | 77.2427597 | 78.3333333 |
| 17:19:34 | 0:19:12 | 69.1268003 | 75.4754328 | 69.318326 | 77.2427597 | 78.7777778 |
| 17:19:35 | 0:19:13 | 70.1268003 | 75.4754328 | 68.318326 | 78.2427597 | 79.2222222 |
| 17:19:36 | 0:19:14 | 71.1268003 | 74.4754328 | 67.318326 | 78.2427597 | 79         |
| 17:19:37 | 0:19:15 | 72.1268003 | 74.4754328 | 68.318326 | 79.2427597 | 79.3333333 |
| 17:19:38 | 0:19:16 | 72.1268003 | 74.4754328 | 68.318326 | 80.2427597 | 79.8888889 |
| 17:19:39 | 0:19:17 | 72.1268003 | 74.4754328 | 69.318326 | 80.2427597 | 81.2222222 |
| 17:19:40 | 0:19:18 | 73.1268003 | 74.4754328 | 70.318326 | 80.2427597 | 81.6666667 |
| 17:19:41 | 0:19:19 | 73.1268003 | 74.4754328 | 71.318326 | 80.2427597 | 82.8888889 |
| 17:19:42 | 0:19:20 | 73.1268003 | 74.4754328 | 73.318326 | 80.2427597 | 82.4444444 |
| 17:19:43 | 0:19:21 | 73.1268003 | 74.4754328 | 74.318326 | 80.2427597 | 80.2222222 |
| 17:19:44 | 0:19:22 | 73.1268003 | 74.4754328 | 74.318326 | 80.2427597 | 78         |
| 17:19:45 | 0:19:23 | 73.1268003 | 74.4754328 | 77.318326 | 80.2427597 | 77.6666667 |
| 17:19:46 | 0:19:24 | 73.1268003 | 75.4754328 | 77.318326 | 79.2427597 | 84.8868972 |
| 17:19:47 | 0:19:25 | 73.1268003 | 75.4754328 | 78.318326 | 79.2427597 | 81.8868972 |
| 17:19:48 | 0:19:26 | 73.1268003 | 75.4754328 | 78.318326 | 78.2427597 | 79.8868972 |
| 17:19:49 | 0:19:27 | 72.1268003 | 75.4754328 | 79.318326 | 78.2427597 | 77.8868972 |
| 17:19:50 | 0:19:28 | 71.1268003 | 76.4754328 | 80.318326 | 78.2427597 | 75.8868972 |



|          |         |            |            |           |            |            |
|----------|---------|------------|------------|-----------|------------|------------|
| 17:19:51 | 0:19:29 | 71.1268003 | 76.4754328 | 80.318326 | 78.2427597 | 75.8868972 |
| 17:19:52 | 0:19:30 | 70.1268003 | 77.4754328 | 83.318326 | 77.2427597 | 74.8868972 |
| 17:19:53 | 0:19:31 | 70.1268003 | 78.4754328 | 83.318326 | 77.2427597 | 74.8868972 |
| 17:19:54 | 0:19:32 | 71.1268003 | 79.4754328 | 83.318326 | 77.2427597 | 74.8868972 |
| 17:19:55 | 0:19:33 | 71.1268003 | 80.4754328 | 83.318326 | 77.2427597 | 73.8868972 |
| 17:19:56 | 0:19:34 | 71.1268003 | 80.4754328 | 83.318326 | 78.2427597 | 73.8868972 |
| 17:19:57 | 0:19:35 | 72.1268003 | 80.4754328 | 83.318326 | 78.2427597 | 73.8868972 |
| 17:19:58 | 0:19:36 | 72.1268003 | 80.4754328 | 82.318326 | 78.2427597 | 73.8868972 |
| 17:19:59 | 0:19:37 | 72.1268003 | 80.4754328 | 82.318326 | 79.2427597 | 73.8868972 |
| 17:20:00 | 0:19:38 | 72.1268003 | 80.4754328 | 82.318326 | 78.2427597 | 73.8868972 |
| 17:20:01 | 0:19:39 | 73.1268003 | 80.4754328 | 82.318326 | 78.2427597 | 74.8868972 |
| 17:20:02 | 0:19:40 | 73.1268003 | 80.4754328 | 83.318326 | 76.2427597 | 74.8868972 |
| 17:20:03 | 0:19:41 | 74.1268003 | 80.4754328 | 83.318326 | 76.2427597 | 76.8868972 |
| 17:20:04 | 0:19:42 | 74.1268003 | 80.4754328 | 84.318326 | 75.2427597 | 76.8868972 |
| 17:20:05 | 0:19:43 | 74.1268003 | 76.4754328 | 84.318326 | 76.2427597 | 75.8868972 |
| 17:20:06 | 0:19:44 | 75.1268003 | 75.4754328 | 84.318326 | 76.2427597 | 75.8868972 |
| 17:20:07 | 0:19:45 | 76.1268003 | 74.4754328 | 84.318326 | 77.2427597 | 75.8868972 |
| 17:20:08 | 0:19:46 | 76.1268003 | 74.4754328 | 84.318326 | 77.2427597 | 77.8868972 |
| 17:20:09 | 0:19:47 | 76.1268003 | 74.4754328 | 83.318326 | 76.2427597 | 80.8868972 |
| 17:20:10 | 0:19:48 | 76.1268003 | 73.4754328 | 80.318326 | 76.2427597 | 84.8868972 |
| 17:20:11 | 0:19:49 | 75.1268003 | 74.4754328 | 70.318326 | 75.2427597 | 87.8868972 |
| 17:20:12 | 0:19:50 | 74.1268003 | 75.4754328 | 67.318326 | 74.2427597 | 75.8888889 |
| 17:20:13 | 0:19:51 | 74.1268003 | 75.4754328 | 66.318326 | 74.2427597 | 75.7777778 |
| 17:20:14 | 0:19:52 | 72.1268003 | 74.4754328 | 66.318326 | 74.2427597 | 75.6666667 |
| 17:20:15 | 0:19:53 | 72.1268003 | 73.4754328 | 65.318326 | 74.2427597 | 75.5555556 |
| 17:20:16 | 0:19:54 | 72.1268003 | 71.4754328 | 65.318326 | 74.2427597 | 75.4444444 |
| 17:20:17 | 0:19:55 | 66.1268003 | 71.4754328 | 65.318326 | 74.2427597 | 74.7777778 |
| 17:20:18 | 0:19:56 | 66.1268003 | 71.4754328 | 65.318326 | 74.2427597 | 74.4444444 |
| 17:20:19 | 0:19:57 | 65.1268003 | 71.4754328 | 67.318326 | 74.2427597 | 74.4444444 |
| 17:20:20 | 0:19:58 | 65.1268003 | 72.4754328 | 69.318326 | 74.2427597 | 74.8888889 |
| 17:20:21 | 0:19:59 | 64.1268003 | 72.4754328 | 73.318326 | 75.2427597 | 75.6666667 |
| 17:20:22 | 0:20:00 | 64.1268003 | 73.4754328 | 74.318326 | 76.2427597 | 76.1111111 |
| 17:20:23 | 0:20:01 | 64.1268003 | 73.4754328 | 74.318326 | 76.2427597 | 76.3333333 |
| 17:20:24 | 0:20:02 | 64.1268003 | 73.4754328 | 74.318326 | 76.2427597 | 76.3333333 |
| 17:20:25 | 0:20:03 | 67.1268003 | 73.4754328 | 73.318326 | 76.2427597 | 76.4444444 |
| 17:20:26 | 0:20:04 | 67.1268003 | 73.4754328 | 74.318326 | 76.2427597 | 76.8888889 |
| 17:20:27 | 0:20:05 | 69.1268003 | 73.4754328 | 74.318326 | 76.2427597 | 77.2222222 |
| 17:20:28 | 0:20:06 | 69.1268003 | 73.4754328 | 75.318326 | 77.2427597 | 77.4444444 |
| 17:20:29 | 0:20:07 | 69.1268003 | 73.4754328 | 76.318326 | 77.2427597 | 77.2222222 |
| 17:20:30 | 0:20:08 | 69.1268003 | 73.4754328 | 76.318326 | 77.2427597 | 77.6666667 |
| 17:20:31 | 0:20:09 | 69.1268003 | 74.4754328 | 77.318326 | 78.2427597 | 79         |
| 17:20:32 | 0:20:10 | 69.1268003 | 74.4754328 | 77.318326 | 78.2427597 | 79         |
| 17:20:33 | 0:20:11 | 69.1268003 | 73.4754328 | 77.318326 | 78.2427597 | 78.5555556 |
| 17:20:34 | 0:20:12 | 68.1268003 | 73.4754328 | 77.318326 | 79.2427597 | 78.5555556 |
| 17:20:35 | 0:20:13 | 67.1268003 | 73.4754328 | 79.318326 | 79.2427597 | 78.6666667 |

|          |         |            |            |           |            |            |
|----------|---------|------------|------------|-----------|------------|------------|
| 17:20:36 | 0:20:14 | 67.1268003 | 72.4754328 | 79.318326 | 79.2427597 | 79.1111111 |
| 17:20:37 | 0:20:15 | 67.1268003 | 72.4754328 | 78.318326 | 79.2427597 | 79.2222222 |
| 17:20:38 | 0:20:16 | 67.1268003 | 73.4754328 | 76.318326 | 79.2427597 | 79.3333333 |
| 17:20:39 | 0:20:17 | 68.1268003 | 73.4754328 | 75.318326 | 79.2427597 | 78.8888889 |
| 17:20:40 | 0:20:18 | 68.1268003 | 73.4754328 | 75.318326 | 78.2427597 | 78.3333333 |
| 17:20:41 | 0:20:19 | 68.1268003 | 73.4754328 | 74.318326 | 75.2427597 | 77.5555556 |
| 17:20:42 | 0:20:20 | 69.1268003 | 74.4754328 | 74.318326 | 74.2427597 | 77.4444444 |
| 17:20:43 | 0:20:21 | 70.1268003 | 74.4754328 | 74.318326 | 74.2427597 | 77.6666667 |
| 17:20:44 | 0:20:22 | 71.1268003 | 75.4754328 | 75.318326 | 74.2427597 | 78.2222222 |
| 17:20:45 | 0:20:23 | 71.1268003 | 75.4754328 | 75.318326 | 75.2427597 | 78.4444444 |
| 17:20:46 | 0:20:24 | 70.1268003 | 74.4754328 | 75.318326 | 75.2427597 | 77.8888889 |
| 17:20:47 | 0:20:25 | 70.1268003 | 74.4754328 | 78.318326 | 76.2427597 | 79.8888889 |
| 17:20:48 | 0:20:26 | 70.1268003 | 74.4754328 | 79.318326 | 77.2427597 | 80.1111111 |
| 17:20:49 | 0:20:27 | 70.1268003 | 74.4754328 | 79.318326 | 77.2427597 | 78.4444444 |
| 17:20:50 | 0:20:28 | 71.1268003 | 74.4754328 | 79.318326 | 77.2427597 | 78.4444444 |
| 17:20:51 | 0:20:29 | 72.1268003 | 74.4754328 | 80.318326 | 77.2427597 | 78.4444444 |
| 17:20:52 | 0:20:30 | 72.1268003 | 75.4754328 | 80.318326 | 77.2427597 | 78.7777778 |
| 17:20:53 | 0:20:31 | 74.1268003 | 75.4754328 | 80.318326 | 77.2427597 | 79         |
| 17:20:54 | 0:20:32 | 74.1268003 | 76.4754328 | 80.318326 | 77.2427597 | 78.7777778 |
| 17:20:55 | 0:20:33 | 74.1268003 | 76.4754328 | 81.318326 | 77.2427597 | 85.8868972 |
| 17:20:56 | 0:20:34 | 74.1268003 | 76.4754328 | 81.318326 | 78.2427597 | 85.8868972 |
| 17:20:57 | 0:20:35 | 74.1268003 | 77.4754328 | 82.318326 | 77.2427597 | 85.8868972 |
| 17:20:58 | 0:20:36 | 74.1268003 | 79.4754328 | 82.318326 | 74.2427597 | 87.8868972 |
| 17:20:59 | 0:20:37 | 79.1268003 | 79.4754328 | 82.318326 | 74.2427597 | 87.8868972 |
| 17:21:00 | 0:20:38 | 82.1268003 | 79.4754328 | 82.318326 | 74.2427597 | 85.8868972 |
| 17:21:01 | 0:20:39 | 83.1268003 | 78.4754328 | 81.318326 | 74.2427597 | 85.8868972 |
| 17:21:02 | 0:20:40 | 81.1268003 | 78.4754328 | 81.318326 | 74.2427597 | 85.8868972 |
| 17:21:03 | 0:20:41 | 80.1268003 | 80.4754328 | 80.318326 | 76.2427597 | 85.8868972 |
| 17:21:04 | 0:20:42 | 80.1268003 | 84.4754328 | 78.318326 | 78.2427597 | 85.8868972 |
| 17:21:05 | 0:20:43 | 80.1268003 | 84.4754328 | 78.318326 | 78.2427597 | 84.8868972 |
| 17:21:06 | 0:20:44 | 80.1268003 | 84.4754328 | 77.318326 | 78.2427597 | 83.8868972 |
| 17:21:07 | 0:20:45 | 79.1268003 | 84.4754328 | 77.318326 | 79.2427597 | 82.8868972 |
| 17:21:08 | 0:20:46 | 79.1268003 | 84.4754328 | 77.318326 | 79.2427597 | 82.8868972 |
| 17:21:09 | 0:20:47 | 79.1268003 | 84.4754328 | 77.318326 | 79.2427597 | 77.8868972 |
| 17:21:10 | 0:20:48 | 81.1268003 | 84.4754328 | 77.318326 | 79.2427597 | 77.8868972 |
| 17:21:11 | 0:20:49 | 84.1268003 | 84.4754328 | 77.318326 | 79.2427597 | 76.8868972 |
| 17:21:12 | 0:20:50 | 85.1268003 | 85.4754328 | 77.318326 | 79.2427597 | 76.8868972 |
| 17:21:13 | 0:20:51 | 85.1268003 | 83.4754328 | 77.318326 | 79.2427597 | 75.8868972 |
| 17:21:14 | 0:20:52 | 86.1268003 | 83.4754328 | 77.318326 | 79.2427597 | 75.8868972 |
| 17:21:15 | 0:20:53 | 86.1268003 | 81.4754328 | 79.318326 | 80.2427597 | 75.8868972 |
| 17:21:16 | 0:20:54 | 86.1268003 | 80.4754328 | 79.318326 | 81.2427597 | 75.8868972 |
| 17:21:17 | 0:20:55 | 86.1268003 | 80.4754328 | 80.318326 | 81.2427597 | 75.8868972 |
| 17:21:18 | 0:20:56 | 86.1268003 | 80.4754328 | 80.318326 | 81.2427597 | 75.8868972 |
| 17:21:19 | 0:20:57 | 84.1268003 | 79.4754328 | 78.318326 | 81.2427597 | 75.8868972 |
| 17:21:20 | 0:20:58 | 80.1268003 | 79.4754328 | 79.318326 | 78.2427597 | 74.8868972 |

|          |         |            |            |           |            |             |
|----------|---------|------------|------------|-----------|------------|-------------|
| 17:21:21 | 0:20:59 | 77.1268003 | 79.4754328 | 80.318326 | 74.2427597 | 74.8868972  |
| 17:21:22 | 0:21:00 | 77.1268003 | 79.4754328 | 80.318326 | 74.2427597 | 74.8868972  |
| 17:21:23 | 0:21:01 | 76.1268003 | 79.4754328 | 80.318326 | 74.2427597 | 74.8868972  |
| 17:21:24 | 0:21:02 | 75.1268003 | 78.4754328 | 80.318326 | 74.2427597 | 74.8868972  |
| 17:21:25 | 0:21:03 | 74.1268003 | 78.4754328 | 80.318326 | 75.2427597 | 74.8868972  |
| 17:21:26 | 0:21:04 | 74.1268003 | 77.4754328 | 78.318326 | 75.2427597 | 74.8868972  |
| 17:21:27 | 0:21:05 | 72.1268003 | 77.4754328 | 76.318326 | 76.2427597 | 74.8868972  |
| 17:21:28 | 0:21:06 | 72.1268003 | 78.4754328 | 75.318326 | 77.2427597 | 74.8868972  |
| 17:21:29 | 0:21:07 | 71.1268003 | 78.4754328 | 74.318326 | 77.2427597 | 73.8868972  |
| 17:21:30 | 0:21:08 | 70.1268003 | 78.4754328 | 75.318326 | 77.2427597 | 73.8868972  |
| 17:21:31 | 0:21:09 | 70.1268003 | 78.4754328 | 76.318326 | 75.2427597 | 73.8868972  |
| 17:21:32 | 0:21:10 | 70.1268003 | 78.4754328 | 77.318326 | 74.2427597 | 73.8868972  |
| 17:21:33 | 0:21:11 | 68.1268003 | 78.4754328 | 78.318326 | 73.2427597 | 73.8868972  |
| 17:21:34 | 0:21:12 | 68.1268003 | 78.4754328 | 80.318326 | 73.2427597 | 75.8868972  |
| 17:21:35 | 0:21:13 | 68.1268003 | 79.4754328 | 80.318326 | 72.2427597 | 76.8868972  |
| 17:21:36 | 0:21:14 | 68.1268003 | 81.4754328 | 81.318326 | 73.2427597 | 77.8868972  |
| 17:21:37 | 0:21:15 | 72.1268003 | 80.4754328 | 81.318326 | 74.2427597 | 77.8868972  |
| 17:21:38 | 0:21:16 | 73.1268003 | 80.4754328 | 81.318326 | 74.2427597 | 80.8868972  |
| 17:21:39 | 0:21:17 | 74.1268003 | 80.4754328 | 81.318326 | 75.2427597 | 81.8868972  |
| 17:21:40 | 0:21:18 | 75.1268003 | 80.4754328 | 81.318326 | 75.2427597 | 82.8868972  |
| 17:21:41 | 0:21:19 | 75.1268003 | 80.4754328 | 81.318326 | 75.2427597 | 83.8868972  |
| 17:21:42 | 0:21:20 | 75.1268003 | 80.4754328 | 82.318326 | 75.2427597 | 84.8868972  |
| 17:21:43 | 0:21:21 | 75.1268003 | 80.4754328 | 82.318326 | 75.2427597 | 86.8868972  |
| 17:21:44 | 0:21:22 | 73.1268003 | 83.4754328 | 82.318326 | 75.2427597 | 88.8868972  |
| 17:21:45 | 0:21:23 | 73.1268003 | 82.4754328 | 81.318326 | 75.2427597 | 88.8868972  |
| 17:21:46 | 0:21:24 | 70.1268003 | 80.4754328 | 81.318326 | 76.2427597 | 76          |
| 17:21:47 | 0:21:25 | 71.1268003 | 79.4754328 | 81.318326 | 76.2427597 | 76.11111111 |
| 17:21:48 | 0:21:26 | 71.1268003 | 78.4754328 | 81.318326 | 77.2427597 | 76          |
| 17:21:49 | 0:21:27 | 72.1268003 | 78.4754328 | 81.318326 | 78.2427597 | 76.44444444 |
| 17:21:50 | 0:21:28 | 73.1268003 | 78.4754328 | 81.318326 | 78.2427597 | 77          |
| 17:21:51 | 0:21:29 | 73.1268003 | 79.4754328 | 82.318326 | 77.2427597 | 77.11111111 |
| 17:21:52 | 0:21:30 | 72.1268003 | 79.4754328 | 82.318326 | 77.2427597 | 77.8888889  |
| 17:21:53 | 0:21:31 | 71.1268003 | 79.4754328 | 81.318326 | 76.2427597 | 77.5555556  |
| 17:21:54 | 0:21:32 | 71.1268003 | 79.4754328 | 80.318326 | 76.2427597 | 77.33333333 |
| 17:21:55 | 0:21:33 | 70.1268003 | 79.4754328 | 80.318326 | 75.2427597 | 76.22222222 |
| 17:21:56 | 0:21:34 | 71.1268003 | 79.4754328 | 80.318326 | 74.2427597 | 75.6666667  |
| 17:21:57 | 0:21:35 | 71.1268003 | 79.4754328 | 80.318326 | 74.2427597 | 87.8868972  |
| 17:21:58 | 0:21:36 | 71.1268003 | 79.4754328 | 80.318326 | 74.2427597 | 87.8868972  |
| 17:21:59 | 0:21:37 | 71.1268003 | 81.4754328 | 80.318326 | 73.2427597 | 81.8868972  |
| 17:22:00 | 0:21:38 | 71.1268003 | 85.4754328 | 80.318326 | 73.2427597 | 81.8868972  |
| 17:22:01 | 0:21:39 | 71.1268003 | 86.4754328 | 78.318326 | 72.2427597 | 79.8868972  |
| 17:22:02 | 0:21:40 | 71.1268003 | 87.4754328 | 78.318326 | 72.2427597 | 79.8868972  |
| 17:22:03 | 0:21:41 | 70.1268003 | 87.4754328 | 77.318326 | 73.2427597 | 79.8868972  |
| 17:22:04 | 0:21:42 | 70.1268003 | 86.4754328 | 76.318326 | 73.2427597 | 79.8868972  |
| 17:22:05 | 0:21:43 | 70.1268003 | 85.4754328 | 78.318326 | 73.2427597 | 78.8868972  |

|          |         |            |            |           |            |            |
|----------|---------|------------|------------|-----------|------------|------------|
| 17:22:06 | 0:21:44 | 70.1268003 | 85.4754328 | 87.318326 | 73.2427597 | 77.8868972 |
| 17:22:07 | 0:21:45 | 69.1268003 | 85.4754328 | 87.318326 | 73.2427597 | 77.8868972 |
| 17:22:08 | 0:21:46 | 69.1268003 | 85.4754328 | 81.318326 | 73.2427597 | 78.8868972 |
| 17:22:09 | 0:21:47 | 69.1268003 | 85.4754328 | 78.318326 | 72.2427597 | 78.8868972 |
| 17:22:10 | 0:21:48 | 67.1268003 | 85.4754328 | 78.318326 | 72.2427597 | 78.8868972 |
| 17:22:11 | 0:21:49 | 67.1268003 | 85.4754328 | 74.318326 | 72.2427597 | 78.8868972 |
| 17:22:12 | 0:21:50 | 67.1268003 | 85.4754328 | 74.318326 | 72.2427597 | 78.8868972 |
| 17:22:13 | 0:21:51 | 67.1268003 | 85.4754328 | 71.318326 | 72.2427597 | 78.8868972 |
| 17:22:14 | 0:21:52 | 70.1268003 | 85.4754328 | 71.318326 | 72.2427597 | 78.8868972 |
| 17:22:15 | 0:21:53 | 70.1268003 | 86.4754328 | 71.318326 | 73.2427597 | 78.8868972 |
| 17:22:16 | 0:21:54 | 72.1268003 | 87.4754328 | 69.318326 | 73.2427597 | 79.8868972 |
| 17:22:17 | 0:21:55 | 72.1268003 | 87.4754328 | 69.318326 | 73.2427597 | 79.8868972 |
| 17:22:18 | 0:21:56 | 73.1268003 | 85.4754328 | 69.318326 | 74.2427597 | 79.8868972 |
| 17:22:19 | 0:21:57 | 72.1268003 | 83.4754328 | 69.318326 | 78.2427597 | 75.8868972 |
| 17:22:20 | 0:21:58 | 72.1268003 | 82.4754328 | 71.318326 | 78.2427597 | 74.8868972 |
| 17:22:21 | 0:21:59 | 70.1268003 | 81.4754328 | 72.318326 | 78.2427597 | 73.8868972 |
| 17:22:22 | 0:22:00 | 68.1268003 | 80.4754328 | 71.318326 | 78.2427597 | 73.8868972 |
| 17:22:23 | 0:22:01 | 67.1268003 | 79.4754328 | 70.318326 | 81.2427597 | 73.8868972 |
| 17:22:24 | 0:22:02 | 67.1268003 | 78.4754328 | 69.318326 | 83.2427597 | 73.8868972 |
| 17:22:25 | 0:22:03 | 66.1268003 | 76.4754328 | 69.318326 | 83.2427597 | 73.8868972 |
| 17:22:26 | 0:22:04 | 66.1268003 | 76.4754328 | 66.318326 | 84.2427597 | 73.8868972 |
| 17:22:27 | 0:22:05 | 65.1268003 | 74.4754328 | 66.318326 | 82.2427597 | 74.8868972 |
| 17:22:28 | 0:22:06 | 65.1268003 | 73.4754328 | 67.318326 | 82.2427597 | 73.8868972 |
| 17:22:29 | 0:22:07 | 65.1268003 | 73.4754328 | 66.318326 | 82.2427597 | 73.8868972 |
| 17:22:30 | 0:22:08 | 66.1268003 | 74.4754328 | 65.318326 | 82.2427597 | 71.8868972 |
| 17:22:31 | 0:22:09 | 70.1268003 | 74.4754328 | 64.318326 | 82.2427597 | 71.8868972 |
| 17:22:32 | 0:22:10 | 71.1268003 | 74.4754328 | 64.318326 | 83.2427597 | 72.8868972 |
| 17:22:33 | 0:22:11 | 71.1268003 | 73.4754328 | 66.318326 | 82.2427597 | 72.8868972 |
| 17:22:34 | 0:22:12 | 72.1268003 | 73.4754328 | 67.318326 | 82.2427597 | 72.8868972 |
| 17:22:35 | 0:22:13 | 72.1268003 | 73.4754328 | 67.318326 | 82.2427597 | 72.8868972 |
| 17:22:36 | 0:22:14 | 72.1268003 | 72.4754328 | 65.318326 | 82.2427597 | 72.8868972 |
| 17:22:37 | 0:22:15 | 71.1268003 | 72.4754328 | 64.318326 | 82.2427597 | 72.8868972 |
| 17:22:38 | 0:22:16 | 71.1268003 | 72.4754328 | 64.318326 | 82.2427597 | 73.8868972 |
| 17:22:39 | 0:22:17 | 71.1268003 | 73.4754328 | 65.318326 | 82.2427597 | 72.8868972 |
| 17:22:40 | 0:22:18 | 72.1268003 | 73.4754328 | 65.318326 | 81.2427597 | 73.8868972 |
| 17:22:41 | 0:22:19 | 73.1268003 | 74.4754328 | 66.318326 | 80.2427597 | 73.8868972 |
| 17:22:42 | 0:22:20 | 73.1268003 | 73.4754328 | 65.318326 | 80.2427597 | 74.8868972 |
| 17:22:43 | 0:22:21 | 73.1268003 | 73.4754328 | 66.318326 | 79.2427597 | 75.8868972 |
| 17:22:44 | 0:22:22 | 72.1268003 | 73.4754328 | 66.318326 | 79.2427597 | 76.8868972 |
| 17:22:45 | 0:22:23 | 72.1268003 | 73.4754328 | 66.318326 | 79.2427597 | 76.8868972 |
| 17:22:46 | 0:22:24 | 69.1268003 | 74.4754328 | 66.318326 | 78.2427597 | 75.8868972 |
| 17:22:47 | 0:22:25 | 69.1268003 | 75.4754328 | 66.318326 | 78.2427597 | 75.8868972 |
| 17:22:48 | 0:22:26 | 69.1268003 | 76.4754328 | 67.318326 | 77.2427597 | 75.8868972 |
| 17:22:49 | 0:22:27 | 69.1268003 | 75.4754328 | 67.318326 | 73.2427597 | 76.8868972 |
| 17:22:50 | 0:22:28 | 69.1268003 | 74.4754328 | 67.318326 | 71.2427597 | 75.8868972 |

|          |         |            |            |           |            |            |
|----------|---------|------------|------------|-----------|------------|------------|
| 17:22:51 | 0:22:29 | 68.1268003 | 74.4754328 | 67.318326 | 71.2427597 | 75.8868972 |
| 17:22:52 | 0:22:30 | 68.1268003 | 73.4754328 | 67.318326 | 71.2427597 | 75.8868972 |
| 17:22:53 | 0:22:31 | 69.1268003 | 73.4754328 | 68.318326 | 73.2427597 | 76.8868972 |
| 17:22:54 | 0:22:32 | 69.1268003 | 74.4754328 | 68.318326 | 73.2427597 | 76.8868972 |
| 17:22:55 | 0:22:33 | 70.1268003 | 74.4754328 | 71.318326 | 74.2427597 | 79.8868972 |
| 17:22:56 | 0:22:34 | 71.1268003 | 74.4754328 | 71.318326 | 74.2427597 | 80.8868972 |
| 17:22:57 | 0:22:35 | 71.1268003 | 74.4754328 | 71.318326 | 74.2427597 | 81.8868972 |
| 17:22:58 | 0:22:36 | 71.1268003 | 74.4754328 | 71.318326 | 74.2427597 | 81.8868972 |
| 17:22:59 | 0:22:37 | 69.1268003 | 74.4754328 | 73.318326 | 73.2427597 | 81.8868972 |
| 17:23:00 | 0:22:38 | 69.1268003 | 74.4754328 | 74.318326 | 73.2427597 | 80.8868972 |
| 17:23:01 | 0:22:39 | 70.1268003 | 74.4754328 | 74.318326 | 71.2427597 | 77.8868972 |
| 17:23:02 | 0:22:40 | 72.1268003 | 74.4754328 | 74.318326 | 70.2427597 | 76.8868972 |
| 17:23:03 | 0:22:41 | 73.1268003 | 73.4754328 | 73.318326 | 70.2427597 | 76.8868972 |
| 17:23:04 | 0:22:42 | 74.1268003 | 70.4754328 | 71.318326 | 70.2427597 | 76.8868972 |
| 17:23:05 | 0:22:43 | 74.1268003 | 69.4754328 | 69.318326 | 70.2427597 | 76.8868972 |
| 17:23:06 | 0:22:44 | 74.1268003 | 69.4754328 | 69.318326 | 70.2427597 | 76.8868972 |
| 17:23:07 | 0:22:45 | 74.1268003 | 69.4754328 | 67.318326 | 71.2427597 | 75.8868972 |
| 17:23:08 | 0:22:46 | 74.1268003 | 69.4754328 | 67.318326 | 71.2427597 | 76.8868972 |
| 17:23:09 | 0:22:47 | 71.1268003 | 70.4754328 | 67.318326 | 71.2427597 | 76.8868972 |
| 17:23:10 | 0:22:48 | 68.1268003 | 70.4754328 | 67.318326 | 71.2427597 | 76.8868972 |
| 17:23:11 | 0:22:49 | 66.1268003 | 70.4754328 | 70.318326 | 71.2427597 | 76.8868972 |
| 17:23:12 | 0:22:50 | 66.1268003 | 71.4754328 | 72.318326 | 71.2427597 | 76.8868972 |
| 17:23:13 | 0:22:51 | 66.1268003 | 71.4754328 | 72.318326 | 72.2427597 | 73.8868972 |
| 17:23:14 | 0:22:52 | 68.1268003 | 71.4754328 | 73.318326 | 72.2427597 | 72.8868972 |
| 17:23:15 | 0:22:53 | 69.1268003 | 71.4754328 | 72.318326 | 72.2427597 | 72.8868972 |
| 17:23:16 | 0:22:54 | 69.1268003 | 70.4754328 | 71.318326 | 75.2427597 | 71.8868972 |
| 17:23:17 | 0:22:55 | 70.1268003 | 70.4754328 | 70.318326 | 77.2427597 | 71.8868972 |
| 17:23:18 | 0:22:56 | 69.1268003 | 70.4754328 | 70.318326 | 77.2427597 | 71.8868972 |
| 17:23:19 | 0:22:57 | 69.1268003 | 70.4754328 | 70.318326 | 76.2427597 | 71.8868972 |
| 17:23:20 | 0:22:58 | 69.1268003 | 70.4754328 | 71.318326 | 75.2427597 | 72.8868972 |
| 17:23:21 | 0:22:59 | 69.1268003 | 70.4754328 | 71.318326 | 74.2427597 | 72.8868972 |
| 17:23:22 | 0:23:00 | 68.1268003 | 70.4754328 | 72.318326 | 74.2427597 | 72.8868972 |
| 17:23:23 | 0:23:01 | 68.1268003 | 70.4754328 | 72.318326 | 73.2427597 | 72.8868972 |
| 17:23:24 | 0:23:02 | 68.1268003 | 70.4754328 | 71.318326 | 73.2427597 | 73.8868972 |
| 17:23:25 | 0:23:03 | 69.1268003 | 70.4754328 | 70.318326 | 74.2427597 | 73.8868972 |
| 17:23:26 | 0:23:04 | 69.1268003 | 70.4754328 | 68.318326 | 75.2427597 | 74.8868972 |
| 17:23:27 | 0:23:05 | 69.1268003 | 71.4754328 | 67.318326 | 75.2427597 | 74.8868972 |
| 17:23:28 | 0:23:06 | 69.1268003 | 71.4754328 | 66.318326 | 77.2427597 | 74.8868972 |
| 17:23:29 | 0:23:07 | 69.1268003 | 73.4754328 | 65.318326 | 77.2427597 | 74.8868972 |
| 17:23:30 | 0:23:08 | 68.1268003 | 73.4754328 | 65.318326 | 77.2427597 | 74.8868972 |
| 17:23:31 | 0:23:09 | 68.1268003 | 73.4754328 | 65.318326 | 77.2427597 | 75.8868972 |
| 17:23:32 | 0:23:10 | 67.1268003 | 75.4754328 | 67.318326 | 77.2427597 | 75.8868972 |
| 17:23:33 | 0:23:11 | 67.1268003 | 75.4754328 | 67.318326 | 76.2427597 | 75.8868972 |
| 17:23:34 | 0:23:12 | 67.1268003 | 77.4754328 | 69.318326 | 76.2427597 | 75.8868972 |
| 17:23:35 | 0:23:13 | 67.1268003 | 77.4754328 | 69.318326 | 76.2427597 | 75.8868972 |

|          |         |            |            |           |            |            |
|----------|---------|------------|------------|-----------|------------|------------|
| 17:23:36 | 0:23:14 | 67.1268003 | 77.4754328 | 70.318326 | 78.2427597 | 75.8868972 |
| 17:23:37 | 0:23:15 | 68.1268003 | 76.4754328 | 70.318326 | 78.2427597 | 75.8868972 |
| 17:23:38 | 0:23:16 | 68.1268003 | 77.4754328 | 70.318326 | 78.2427597 | 75.8868972 |
| 17:23:39 | 0:23:17 | 68.1268003 | 77.4754328 | 70.318326 | 79.2427597 | 75.8868972 |
| 17:23:40 | 0:23:18 | 68.1268003 | 79.4754328 | 70.318326 | 80.2427597 | 75.8868972 |
| 17:23:41 | 0:23:19 | 68.1268003 | 80.4754328 | 70.318326 | 80.2427597 | 75.8868972 |
| 17:23:42 | 0:23:20 | 68.1268003 | 81.4754328 | 72.318326 | 80.2427597 | 75.8868972 |
| 17:23:43 | 0:23:21 | 69.1268003 | 81.4754328 | 72.318326 | 78.2427597 | 75.8868972 |
| 17:23:44 | 0:23:22 | 70.1268003 | 81.4754328 | 73.318326 | 77.2427597 | 74.8868972 |
| 17:23:45 | 0:23:23 | 70.1268003 | 81.4754328 | 73.318326 | 76.2427597 | 74.8868972 |
| 17:23:46 | 0:23:24 | 70.1268003 | 81.4754328 | 73.318326 | 76.2427597 | 74.8868972 |
| 17:23:47 | 0:23:25 | 70.1268003 | 81.4754328 | 73.318326 | 75.2427597 | 72.8868972 |
| 17:23:48 | 0:23:26 | 70.1268003 | 82.4754328 | 73.318326 | 75.2427597 | 73.8868972 |
| 17:23:49 | 0:23:27 | 70.1268003 | 82.4754328 | 73.318326 | 75.2427597 | 74.8868972 |
| 17:23:50 | 0:23:28 | 70.1268003 | 81.4754328 | 73.318326 | 76.2427597 | 74.8868972 |
| 17:23:51 | 0:23:29 | 70.1268003 | 80.4754328 | 74.318326 | 76.2427597 | 74.8868972 |
| 17:23:52 | 0:23:30 | 70.1268003 | 79.4754328 | 75.318326 | 77.2427597 | 74.8868972 |
| 17:23:53 | 0:23:31 | 72.1268003 | 79.4754328 | 76.318326 | 77.2427597 | 74.8868972 |
| 17:23:54 | 0:23:32 | 78.1268003 | 79.4754328 | 76.318326 | 77.2427597 | 74.8868972 |
| 17:23:55 | 0:23:33 | 78.1268003 | 79.4754328 | 75.318326 | 76.2427597 | 73.8868972 |
| 17:23:56 | 0:23:34 | 77.1268003 | 78.4754328 | 75.318326 | 75.2427597 | 73.8868972 |
| 17:23:57 | 0:23:35 | 76.1268003 | 77.4754328 | 74.318326 | 75.2427597 | 73.8868972 |
| 17:23:58 | 0:23:36 | 76.1268003 | 76.4754328 | 75.318326 | 75.2427597 | 73.8868972 |
| 17:23:59 | 0:23:37 | 76.1268003 | 75.4754328 | 75.318326 | 75.2427597 | 73.8868972 |
| 17:24:00 | 0:23:38 | 76.1268003 | 75.4754328 | 75.318326 | 75.2427597 | 73.8868972 |
| 17:24:01 | 0:23:39 | 72.1268003 | 75.4754328 | 76.318326 | 74.2427597 | 78.8868972 |
| 17:24:02 | 0:23:40 | 72.1268003 | 75.4754328 | 76.318326 | 76.2427597 | 78.8868972 |
| 17:24:03 | 0:23:41 | 71.1268003 | 76.4754328 | 76.318326 | 76.2427597 | 81.8868972 |
| 17:24:04 | 0:23:42 | 70.1268003 | 76.4754328 | 74.318326 | 76.2427597 | 83.8868972 |
| 17:24:05 | 0:23:43 | 71.1268003 | 76.4754328 | 73.318326 | 76.2427597 | 83.8868972 |
| 17:24:06 | 0:23:44 | 71.1268003 | 75.4754328 | 73.318326 | 76.2427597 | 83.8868972 |
| 17:24:07 | 0:23:45 | 71.1268003 | 75.4754328 | 73.318326 | 76.2427597 | 83.8868972 |
| 17:24:08 | 0:23:46 | 71.1268003 | 74.4754328 | 74.318326 | 76.2427597 | 83.8868972 |
| 17:24:09 | 0:23:47 | 71.1268003 | 73.4754328 | 76.318326 | 76.2427597 | 83.8868972 |
| 17:24:10 | 0:23:48 | 70.1268003 | 73.4754328 | 76.318326 | 76.2427597 | 83.8868972 |
| 17:24:11 | 0:23:49 | 70.1268003 | 73.4754328 | 77.318326 | 77.2427597 | 83.8868972 |
| 17:24:12 | 0:23:50 | 70.1268003 | 73.4754328 | 76.318326 | 77.2427597 | 83.8868972 |
| 17:24:13 | 0:23:51 | 71.1268003 | 74.4754328 | 74.318326 | 77.2427597 | 83.8868972 |
| 17:24:14 | 0:23:52 | 71.1268003 | 75.4754328 | 72.318326 | 77.2427597 | 83.8868972 |
| 17:24:15 | 0:23:53 | 71.1268003 | 74.4754328 | 71.318326 | 77.2427597 | 79.8868972 |
| 17:24:16 | 0:23:54 | 71.1268003 | 73.4754328 | 70.318326 | 76.2427597 | 78.8868972 |
| 17:24:17 | 0:23:55 | 71.1268003 | 73.4754328 | 70.318326 | 75.2427597 | 78.8868972 |
| 17:24:18 | 0:23:56 | 71.1268003 | 73.4754328 | 72.318326 | 74.2427597 | 76.8868972 |
| 17:24:19 | 0:23:57 | 71.1268003 | 73.4754328 | 73.318326 | 74.2427597 | 75.8868972 |
| 17:24:20 | 0:23:58 | 71.1268003 | 73.4754328 | 73.318326 | 74.2427597 | 75.8868972 |

|          |         |            |            |           |            |            |
|----------|---------|------------|------------|-----------|------------|------------|
| 17:24:21 | 0:23:59 | 72.1268003 | 73.4754328 | 74.318326 | 74.2427597 | 76.8868972 |
| 17:24:22 | 0:24:00 | 72.1268003 | 75.4754328 | 75.318326 | 72.2427597 | 76.8868972 |
| 17:24:23 | 0:24:01 | 74.1268003 | 76.4754328 | 75.318326 | 70.2427597 | 76.8868972 |
| 17:24:24 | 0:24:02 | 75.1268003 | 77.4754328 | 75.318326 | 69.2427597 | 77.8868972 |
| 17:24:25 | 0:24:03 | 74.1268003 | 78.4754328 | 75.318326 | 68.2427597 | 78.8868972 |
| 17:24:26 | 0:24:04 | 73.1268003 | 78.4754328 | 76.318326 | 70.2427597 | 78.8868972 |
| 17:24:27 | 0:24:05 | 73.1268003 | 78.4754328 | 76.318326 | 70.2427597 | 78.8868972 |
| 17:24:28 | 0:24:06 | 72.1268003 | 78.4754328 | 77.318326 | 71.2427597 | 78.8868972 |
| 17:24:29 | 0:24:07 | 72.1268003 | 78.4754328 | 77.318326 | 72.2427597 | 78.8868972 |
| 17:24:30 | 0:24:08 | 72.1268003 | 79.4754328 | 77.318326 | 72.2427597 | 80.8868972 |
| 17:24:31 | 0:24:09 | 72.1268003 | 79.4754328 | 76.318326 | 72.2427597 | 78.8868972 |
| 17:24:32 | 0:24:10 | 72.1268003 | 80.4754328 | 76.318326 | 71.2427597 | 78.8868972 |
| 17:24:33 | 0:24:11 | 72.1268003 | 83.4754328 | 75.318326 | 71.2427597 | 77.8868972 |
| 17:24:34 | 0:24:12 | 72.1268003 | 86.4754328 | 75.318326 | 71.2427597 | 76.8868972 |
| 17:24:35 | 0:24:13 | 74.1268003 | 85.4754328 | 75.318326 | 72.2427597 | 76.8868972 |
| 17:24:36 | 0:24:14 | 74.1268003 | 81.4754328 | 75.318326 | 73.2427597 | 79.8868972 |
| 17:24:37 | 0:24:15 | 74.1268003 | 76.4754328 | 75.318326 | 74.2427597 | 79.8868972 |
| 17:24:38 | 0:24:16 | 74.1268003 | 74.4754328 | 76.318326 | 74.2427597 | 80.8868972 |
| 17:24:39 | 0:24:17 | 74.1268003 | 72.4754328 | 76.318326 | 74.2427597 | 80.8868972 |
| 17:24:40 | 0:24:18 | 74.1268003 | 72.4754328 | 76.318326 | 74.2427597 | 80.8868972 |
| 17:24:41 | 0:24:19 | 74.1268003 | 71.4754328 | 76.318326 | 73.2427597 | 80.8868972 |
| 17:24:42 | 0:24:20 | 75.1268003 | 71.4754328 | 75.318326 | 73.2427597 | 80.8868972 |
| 17:24:43 | 0:24:21 | 75.1268003 | 71.4754328 | 76.318326 | 74.2427597 | 80.8868972 |
| 17:24:44 | 0:24:22 | 76.1268003 | 71.4754328 | 75.318326 | 75.2427597 | 80.8868972 |
| 17:24:45 | 0:24:23 | 76.1268003 | 73.4754328 | 75.318326 | 75.2427597 | 81.8868972 |
| 17:24:46 | 0:24:24 | 78.1268003 | 74.4754328 | 75.318326 | 77.2427597 | 81.8868972 |
| 17:24:47 | 0:24:25 | 76.1268003 | 74.4754328 | 76.318326 | 77.2427597 | 82.8868972 |
| 17:24:48 | 0:24:26 | 76.1268003 | 77.4754328 | 76.318326 | 77.2427597 | 82.8868972 |
| 17:24:49 | 0:24:27 | 74.1268003 | 80.4754328 | 77.318326 | 77.2427597 | 81.8868972 |
| 17:24:50 | 0:24:28 | 75.1268003 | 80.4754328 | 77.318326 | 76.2427597 | 81.8868972 |
| 17:24:51 | 0:24:29 | 75.1268003 | 80.4754328 | 78.318326 | 76.2427597 | 81.8868972 |
| 17:24:52 | 0:24:30 | 75.1268003 | 78.4754328 | 77.318326 | 76.2427597 | 81.8868972 |
| 17:24:53 | 0:24:31 | 75.1268003 | 76.4754328 | 77.318326 | 77.2427597 | 82.8868972 |
| 17:24:54 | 0:24:32 | 75.1268003 | 76.4754328 | 77.318326 | 77.2427597 | 82.8868972 |
| 17:24:55 | 0:24:33 | 74.1268003 | 76.4754328 | 78.318326 | 79.2427597 | 78.8868972 |
| 17:24:56 | 0:24:34 | 71.1268003 | 80.4754328 | 78.318326 | 80.2427597 | 77.8868972 |
| 17:24:57 | 0:24:35 | 69.1268003 | 82.4754328 | 78.318326 | 80.2427597 | 76.8868972 |
| 17:24:58 | 0:24:36 | 69.1268003 | 82.4754328 | 78.318326 | 80.2427597 | 75.8868972 |
| 17:24:59 | 0:24:37 | 69.1268003 | 82.4754328 | 78.318326 | 80.2427597 | 74.8868972 |
| 17:25:00 | 0:24:38 | 66.1268003 | 82.4754328 | 78.318326 | 80.2427597 | 74.8868972 |
| 17:25:01 | 0:24:39 | 66.1268003 | 83.4754328 | 82.318326 | 80.2427597 | 74.8868972 |
| 17:25:02 | 0:24:40 | 69.1268003 | 84.4754328 | 81.318326 | 80.2427597 | 75.8868972 |
| 17:25:03 | 0:24:41 | 69.1268003 | 86.4754328 | 80.318326 | 79.2427597 | 75.8868972 |
| 17:25:04 | 0:24:42 | 69.1268003 | 88.4754328 | 79.318326 | 79.2427597 | 75.8868972 |
| 17:25:05 | 0:24:43 | 70.1268003 | 88.4754328 | 79.318326 | 79.2427597 | 75.8868972 |

|          |         |            |            |           |            |            |
|----------|---------|------------|------------|-----------|------------|------------|
| 17:25:06 | 0:24:44 | 70.1268003 | 89.4754328 | 80.318326 | 79.2427597 | 75.8868972 |
| 17:25:07 | 0:24:45 | 70.1268003 | 76.6666667 | 81.318326 | 78.2427597 | 76.8868972 |
| 17:25:08 | 0:24:46 | 70.1268003 | 89.4754328 | 82.318326 | 78.2427597 | 76.8868972 |
| 17:25:09 | 0:24:47 | 70.1268003 | 76.6666667 | 82.318326 | 78.2427597 | 75.8868972 |
| 17:25:10 | 0:24:48 | 70.1268003 | 77.2222222 | 82.318326 | 78.2427597 | 76.8868972 |
| 17:25:11 | 0:24:49 | 70.1268003 | 77.4444444 | 82.318326 | 78.2427597 | 76.8868972 |
| 17:25:12 | 0:24:50 | 70.1268003 | 77.5555556 | 81.318326 | 78.2427597 | 77.8868972 |
| 17:25:13 | 0:24:51 | 70.1268003 | 77.7777778 | 81.318326 | 80.2427597 | 77.8868972 |
| 17:25:14 | 0:24:52 | 71.1268003 | 78.2222222 | 81.318326 | 80.2427597 | 77.8868972 |
| 17:25:15 | 0:24:53 | 71.1268003 | 78.6666667 | 81.318326 | 80.2427597 | 78.8868972 |
| 17:25:16 | 0:24:54 | 71.1268003 | 78.5555556 | 81.318326 | 80.2427597 | 78.8868972 |
| 17:25:17 | 0:24:55 | 71.1268003 | 78.2222222 | 81.318326 | 79.2427597 | 78.8868972 |
| 17:25:18 | 0:24:56 | 71.1268003 | 78.1111111 | 81.318326 | 78.2427597 | 78.8868972 |
| 17:25:19 | 0:24:57 | 69.1268003 | 77.1111111 | 81.318326 | 77.2427597 | 77.8868972 |
| 17:25:20 | 0:24:58 | 69.1268003 | 77         | 81.318326 | 77.2427597 | 77.8868972 |
| 17:25:21 | 0:24:59 | 69.1268003 | 77.5555556 | 81.318326 | 78.2427597 | 77.8868972 |
| 17:25:22 | 0:25:00 | 69.1268003 | 77.8888889 | 81.318326 | 79.2427597 | 77.8868972 |
| 17:25:23 | 0:25:01 | 69.1268003 | 77.7777778 | 78.318326 | 79.2427597 | 77.8868972 |
| 17:25:24 | 0:25:02 | 69.1268003 | 78.5555556 | 77.318326 | 81.2427597 | 78.8868972 |
| 17:25:25 | 0:25:03 | 72.1268003 | 82.4754328 | 75.318326 | 82.2427597 | 78.8868972 |
| 17:25:26 | 0:25:04 | 73.1268003 | 82.4754328 | 73.318326 | 81.2427597 | 78.8868972 |
| 17:25:27 | 0:25:05 | 73.1268003 | 76.4754328 | 71.318326 | 80.2427597 | 78.8868972 |
| 17:25:28 | 0:25:06 | 74.1268003 | 75.4754328 | 69.318326 | 78.2427597 | 82.8868972 |
| 17:25:29 | 0:25:07 | 73.1268003 | 75.4754328 | 69.318326 | 78.2427597 | 82.8868972 |
| 17:25:30 | 0:25:08 | 73.1268003 | 75.4754328 | 69.318326 | 78.2427597 | 83.8868972 |
| 17:25:31 | 0:25:09 | 72.1268003 | 75.4754328 | 69.318326 | 78.2427597 | 83.8868972 |
| 17:25:32 | 0:25:10 | 72.1268003 | 74.4754328 | 69.318326 | 77.2427597 | 83.8868972 |
| 17:25:33 | 0:25:11 | 72.1268003 | 73.4754328 | 69.318326 | 77.2427597 | 82.8868972 |
| 17:25:34 | 0:25:12 | 72.1268003 | 70.4754328 | 69.318326 | 77.2427597 | 82.8868972 |
| 17:25:35 | 0:25:13 | 72.1268003 | 71.4754328 | 70.318326 | 77.2427597 | 81.8868972 |
| 17:25:36 | 0:25:14 | 72.1268003 | 71.4754328 | 70.318326 | 76.2427597 | 81.8868972 |
| 17:25:37 | 0:25:15 | 72.1268003 | 71.4754328 | 71.318326 | 76.2427597 | 81.8868972 |
| 17:25:38 | 0:25:16 | 71.1268003 | 71.4754328 | 74.318326 | 76.2427597 | 81.8868972 |
| 17:25:39 | 0:25:17 | 72.1268003 | 71.4754328 | 75.318326 | 76.2427597 | 80.8868972 |
| 17:25:40 | 0:25:18 | 82.1268003 | 73.4754328 | 75.318326 | 78.2427597 | 81.8868972 |
| 17:25:41 | 0:25:19 | 82.1268003 | 73.4754328 | 75.318326 | 78.2427597 | 80.8868972 |
| 17:25:42 | 0:25:20 | 82.1268003 | 70.4754328 | 75.318326 | 79.2427597 | 80.8868972 |
| 17:25:43 | 0:25:21 | 83.1268003 | 68.4754328 | 75.318326 | 79.2427597 | 80.8868972 |
| 17:25:44 | 0:25:22 | 83.1268003 | 68.4754328 | 76.318326 | 78.2427597 | 80.8868972 |
| 17:25:45 | 0:25:23 | 83.1268003 | 68.4754328 | 77.318326 | 78.2427597 | 80.8868972 |
| 17:25:46 | 0:25:24 | 83.1268003 | 69.4754328 | 77.318326 | 78.2427597 | 80.8868972 |
| 17:25:47 | 0:25:25 | 80.1268003 | 69.4754328 | 78.318326 | 78.2427597 | 80.8868972 |
| 17:25:48 | 0:25:26 | 80.1268003 | 69.4754328 | 78.318326 | 78.2427597 | 80.8868972 |
| 17:25:49 | 0:25:27 | 78.1268003 | 70.4754328 | 78.318326 | 72.2427597 | 79.8868972 |
| 17:25:50 | 0:25:28 | 78.1268003 | 70.4754328 | 78.318326 | 70.2427597 | 79.8868972 |



|          |         |            |            |           |            |            |
|----------|---------|------------|------------|-----------|------------|------------|
| 17:25:51 | 0:25:29 | 75.1268003 | 70.4754328 | 78.318326 | 69.2427597 | 79.8868972 |
| 17:25:52 | 0:25:30 | 75.1268003 | 69.4754328 | 78.318326 | 69.2427597 | 79.8868972 |
| 17:25:53 | 0:25:31 | 74.1268003 | 69.4754328 | 78.318326 | 69.2427597 | 79.8868972 |
| 17:25:54 | 0:25:32 | 72.1268003 | 69.4754328 | 80.318326 | 69.2427597 | 79.8868972 |
| 17:25:55 | 0:25:33 | 71.1268003 | 69.4754328 | 80.318326 | 69.2427597 | 79.8868972 |
| 17:25:56 | 0:25:34 | 71.1268003 | 69.4754328 | 77.318326 | 69.2427597 | 80.8868972 |
| 17:25:57 | 0:25:35 | 71.1268003 | 69.4754328 | 76.318326 | 70.2427597 | 81.8868972 |
| 17:25:58 | 0:25:36 | 71.1268003 | 69.4754328 | 68.318326 | 70.2427597 | 81.8868972 |
| 17:25:59 | 0:25:37 | 71.1268003 | 69.4754328 | 66.318326 | 73.2427597 | 82.8868972 |
| 17:26:00 | 0:25:38 | 72.1268003 | 69.4754328 | 64.318326 | 73.2427597 | 82.8868972 |
| 17:26:01 | 0:25:39 | 72.1268003 | 68.4754328 | 64.318326 | 73.2427597 | 84.8868972 |
| 17:26:02 | 0:25:40 | 73.1268003 | 68.4754328 | 64.318326 | 72.2427597 | 85.8868972 |
| 17:26:03 | 0:25:41 | 73.1268003 | 68.4754328 | 65.318326 | 72.2427597 | 85.8868972 |
| 17:26:04 | 0:25:42 | 73.1268003 | 69.4754328 | 66.318326 | 73.2427597 | 85.8868972 |
| 17:26:05 | 0:25:43 | 73.1268003 | 69.4754328 | 67.318326 | 73.2427597 | 78.8868972 |
| 17:26:06 | 0:25:44 | 73.1268003 | 69.4754328 | 66.318326 | 75.2427597 | 78.8868972 |
| 17:26:07 | 0:25:45 | 73.1268003 | 69.4754328 | 65.318326 | 76.2427597 | 78.8868972 |
| 17:26:08 | 0:25:46 | 72.1268003 | 70.4754328 | 61.318326 | 76.2427597 | 78.8868972 |
| 17:26:09 | 0:25:47 | 72.1268003 | 70.4754328 | 59.318326 | 76.2427597 | 77.8868972 |
| 17:26:10 | 0:25:48 | 72.1268003 | 71.4754328 | 59.318326 | 76.2427597 | 77.8868972 |
| 17:26:11 | 0:25:49 | 71.1268003 | 71.4754328 | 59.318326 | 76.2427597 | 76.8868972 |
| 17:26:12 | 0:25:50 | 70.1268003 | 71.4754328 | 59.318326 | 75.2427597 | 75.8868972 |
| 17:26:13 | 0:25:51 | 69.1268003 | 71.4754328 | 59.318326 | 74.2427597 | 76.8868972 |
| 17:26:14 | 0:25:52 | 69.1268003 | 71.4754328 | 60.318326 | 74.2427597 | 77.8868972 |
| 17:26:15 | 0:25:53 | 70.1268003 | 71.4754328 | 60.318326 | 74.2427597 | 76.8868972 |
| 17:26:16 | 0:25:54 | 73.1268003 | 71.4754328 | 60.318326 | 74.2427597 | 75.8868972 |
| 17:26:17 | 0:25:55 | 72.1268003 | 71.4754328 | 61.318326 | 75.2427597 | 75.8868972 |
| 17:26:18 | 0:25:56 | 71.1268003 | 71.4754328 | 63.318326 | 76.2427597 | 74.8868972 |
| 17:26:19 | 0:25:57 | 71.1268003 | 71.4754328 | 63.318326 | 77.2427597 | 74.8868972 |
| 17:26:20 | 0:25:58 | 71.1268003 | 71.4754328 | 67.318326 | 78.2427597 | 73.8868972 |
| 17:26:21 | 0:25:59 | 71.1268003 | 71.4754328 | 67.318326 | 78.2427597 | 72.8868972 |
| 17:26:22 | 0:26:00 | 73.1268003 | 71.4754328 | 65.318326 | 78.2427597 | 72.8868972 |
| 17:26:23 | 0:26:01 | 73.1268003 | 71.4754328 | 64.318326 | 79.2427597 | 72.8868972 |
| 17:26:24 | 0:26:02 | 74.1268003 | 71.4754328 | 64.318326 | 79.2427597 | 72.8868972 |
| 17:26:25 | 0:26:03 | 74.1268003 | 70.4754328 | 66.318326 | 72.2427597 | 72.8868972 |
| 17:26:26 | 0:26:04 | 75.1268003 | 70.4754328 | 68.318326 | 71.2427597 | 72.8868972 |
| 17:26:27 | 0:26:05 | 75.1268003 | 72.4754328 | 69.318326 | 71.2427597 | 73.8868972 |
| 17:26:28 | 0:26:06 | 75.1268003 | 72.4754328 | 70.318326 | 76.2427597 | 75.8868972 |
| 17:26:29 | 0:26:07 | 75.1268003 | 75.4754328 | 71.318326 | 78.2427597 | 77.8868972 |
| 17:26:30 | 0:26:08 | 75.1268003 | 78.4754328 | 70.318326 | 77.2427597 | 77.8868972 |
| 17:26:31 | 0:26:09 | 75.1268003 | 79.4754328 | 69.318326 | 77.2427597 | 76.8868972 |
| 17:26:32 | 0:26:10 | 77.1268003 | 79.4754328 | 69.318326 | 75.2427597 | 76.8868972 |
| 17:26:33 | 0:26:11 | 78.1268003 | 81.4754328 | 69.318326 | 73.2427597 | 75.8868972 |
| 17:26:34 | 0:26:12 | 78.1268003 | 81.4754328 | 70.318326 | 73.2427597 | 74.8868972 |
| 17:26:35 | 0:26:13 | 78.1268003 | 81.4754328 | 69.318326 | 68.2427597 | 74.8868972 |

|          |         |            |            |           |            |            |
|----------|---------|------------|------------|-----------|------------|------------|
| 17:26:36 | 0:26:14 | 78.1268003 | 81.4754328 | 69.318326 | 68.2427597 | 73.8868972 |
| 17:26:37 | 0:26:15 | 78.1268003 | 81.4754328 | 70.318326 | 68.2427597 | 74.8868972 |
| 17:26:38 | 0:26:16 | 78.1268003 | 80.4754328 | 71.318326 | 68.2427597 | 74.8868972 |
| 17:26:39 | 0:26:17 | 78.1268003 | 80.4754328 | 71.318326 | 69.2427597 | 74.8868972 |
| 17:26:40 | 0:26:18 | 76.1268003 | 80.4754328 | 70.318326 | 70.2427597 | 74.8868972 |
| 17:26:41 | 0:26:19 | 76.1268003 | 79.4754328 | 70.318326 | 70.2427597 | 74.8868972 |
| 17:26:42 | 0:26:20 | 76.1268003 | 79.4754328 | 70.318326 | 70.2427597 | 74.8868972 |
| 17:26:43 | 0:26:21 | 72.1268003 | 80.4754328 | 69.318326 | 69.2427597 | 74.8868972 |
| 17:26:44 | 0:26:22 | 72.1268003 | 80.4754328 | 69.318326 | 68.2427597 | 76.8868972 |
| 17:26:45 | 0:26:23 | 71.1268003 | 81.4754328 | 70.318326 | 67.2427597 | 75.8868972 |
| 17:26:46 | 0:26:24 | 71.1268003 | 81.4754328 | 70.318326 | 67.2427597 | 75.8868972 |
| 17:26:47 | 0:26:25 | 73.1268003 | 81.4754328 | 70.318326 | 66.2427597 | 75.8868972 |
| 17:26:48 | 0:26:26 | 73.1268003 | 82.4754328 | 70.318326 | 66.2427597 | 76.8868972 |
| 17:26:49 | 0:26:27 | 73.1268003 | 82.4754328 | 70.318326 | 67.2427597 | 77.8868972 |
| 17:26:50 | 0:26:28 | 72.1268003 | 82.4754328 | 71.318326 | 67.2427597 | 79.8868972 |
| 17:26:51 | 0:26:29 | 72.1268003 | 82.4754328 | 75.318326 | 67.2427597 | 80.8868972 |
| 17:26:52 | 0:26:30 | 72.1268003 | 80.4754328 | 78.318326 | 71.2427597 | 82.8868972 |
| 17:26:53 | 0:26:31 | 73.1268003 | 78.4754328 | 78.318326 | 71.2427597 | 83.8868972 |
| 17:26:54 | 0:26:32 | 74.1268003 | 75.4754328 | 80.318326 | 73.2427597 | 83.8868972 |
| 17:26:55 | 0:26:33 | 74.1268003 | 75.4754328 | 79.318326 | 73.2427597 | 83.8868972 |
| 17:26:56 | 0:26:34 | 75.1268003 | 75.4754328 | 79.318326 | 73.2427597 | 83.8868972 |
| 17:26:57 | 0:26:35 | 75.1268003 | 74.4754328 | 79.318326 | 75.2427597 | 83.8868972 |
| 17:26:58 | 0:26:36 | 75.1268003 | 74.4754328 | 79.318326 | 76.2427597 | 83.8868972 |
| 17:26:59 | 0:26:37 | 75.1268003 | 74.4754328 | 79.318326 | 76.2427597 | 83.8868972 |
| 17:27:00 | 0:26:38 | 76.1268003 | 74.4754328 | 79.318326 | 76.2427597 | 83.8868972 |
| 17:27:01 | 0:26:39 | 76.1268003 | 74.4754328 | 80.318326 | 75.2427597 | 83.8868972 |
| 17:27:02 | 0:26:40 | 77.1268003 | 74.4754328 | 82.318326 | 74.2427597 | 84.8868972 |
| 17:27:03 | 0:26:41 | 77.1268003 | 74.4754328 | 79.318326 | 74.2427597 | 83.8868972 |
| 17:27:04 | 0:26:42 | 77.1268003 | 74.4754328 | 77.318326 | 74.2427597 | 82.8868972 |
| 17:27:05 | 0:26:43 | 75.1268003 | 73.4754328 | 75.318326 | 75.2427597 | 82.8868972 |
| 17:27:06 | 0:26:44 | 74.1268003 | 72.4754328 | 72.318326 | 75.2427597 | 81.8868972 |
| 17:27:07 | 0:26:45 | 73.1268003 | 72.4754328 | 70.318326 | 75.2427597 | 80.8868972 |
| 17:27:08 | 0:26:46 | 71.1268003 | 72.4754328 | 70.318326 | 75.2427597 | 80.8868972 |
| 17:27:09 | 0:26:47 | 71.1268003 | 74.4754328 | 69.318326 | 75.2427597 | 79.8868972 |
| 17:27:10 | 0:26:48 | 72.1268003 | 75.4754328 | 68.318326 | 75.2427597 | 80.8868972 |
| 17:27:11 | 0:26:49 | 72.1268003 | 75.4754328 | 68.318326 | 76.2427597 | 81.8868972 |
| 17:27:12 | 0:26:50 | 73.1268003 | 76.4754328 | 68.318326 | 80.2427597 | 81.8868972 |
| 17:27:13 | 0:26:51 | 74.1268003 | 77.4754328 | 67.318326 | 80.2427597 | 79.8868972 |
| 17:27:14 | 0:26:52 | 75.1268003 | 77.4754328 | 67.318326 | 81.2427597 | 80.8868972 |
| 17:27:15 | 0:26:53 | 75.1268003 | 81.4754328 | 67.318326 | 81.2427597 | 81.8868972 |
| 17:27:16 | 0:26:54 | 75.1268003 | 81.4754328 | 67.318326 | 80.2427597 | 81.8868972 |
| 17:27:17 | 0:26:55 | 75.1268003 | 80.4754328 | 67.318326 | 77.2427597 | 83.8868972 |
| 17:27:18 | 0:26:56 | 75.1268003 | 80.4754328 | 68.318326 | 76.2427597 | 84.8868972 |
| 17:27:19 | 0:26:57 | 75.1268003 | 79.4754328 | 69.318326 | 76.2427597 | 84.8868972 |
| 17:27:20 | 0:26:58 | 76.1268003 | 79.4754328 | 69.318326 | 77.2427597 | 84.8868972 |

|          |         |            |            |           |            |            |
|----------|---------|------------|------------|-----------|------------|------------|
| 17:27:21 | 0:26:59 | 79.1268003 | 79.4754328 | 70.318326 | 77.2427597 | 85.8868972 |
| 17:27:22 | 0:27:00 | 79.1268003 | 80.4754328 | 70.318326 | 73.2427597 | 85.8868972 |
| 17:27:23 | 0:27:01 | 82.1268003 | 81.4754328 | 70.318326 | 72.2427597 | 86.8868972 |
| 17:27:24 | 0:27:02 | 82.1268003 | 81.4754328 | 70.318326 | 72.2427597 | 86.8868972 |
| 17:27:25 | 0:27:03 | 83.1268003 | 83.4754328 | 70.318326 | 72.2427597 | 86.8868972 |
| 17:27:26 | 0:27:04 | 83.1268003 | 83.4754328 | 74.318326 | 72.2427597 | 86.8868972 |
| 17:27:27 | 0:27:05 | 82.1268003 | 81.4754328 | 75.318326 | 72.2427597 | 86.8868972 |
| 17:27:28 | 0:27:06 | 82.1268003 | 78.4754328 | 75.318326 | 73.2427597 | 86.8868972 |
| 17:27:29 | 0:27:07 | 82.1268003 | 75.4754328 | 74.318326 | 75.2427597 | 85.8868972 |
| 17:27:30 | 0:27:08 | 82.1268003 | 74.4754328 | 72.318326 | 76.2427597 | 85.8868972 |
| 17:27:31 | 0:27:09 | 81.1268003 | 73.4754328 | 71.318326 | 76.2427597 | 85.8868972 |
| 17:27:32 | 0:27:10 | 81.1268003 | 74.4754328 | 71.318326 | 76.2427597 | 85.8868972 |
| 17:27:33 | 0:27:11 | 81.1268003 | 75.4754328 | 71.318326 | 77.2427597 | 86.8868972 |
| 17:27:34 | 0:27:12 | 81.1268003 | 77.4754328 | 70.318326 | 77.2427597 | 86.8868972 |
| 17:27:35 | 0:27:13 | 78.1268003 | 78.4754328 | 70.318326 | 77.2427597 | 86.8868972 |
| 17:27:36 | 0:27:14 | 78.1268003 | 78.4754328 | 70.318326 | 77.2427597 | 86.8868972 |
| 17:27:37 | 0:27:15 | 79.1268003 | 75.4754328 | 68.318326 | 77.2427597 | 79.8868972 |
| 17:27:38 | 0:27:16 | 79.1268003 | 72.4754328 | 68.318326 | 77.2427597 | 78.8868972 |
| 17:27:39 | 0:27:17 | 77.1268003 | 72.4754328 | 69.318326 | 77.2427597 | 76.8868972 |
| 17:27:40 | 0:27:18 | 71.1268003 | 71.4754328 | 70.318326 | 77.2427597 | 76.8868972 |
| 17:27:41 | 0:27:19 | 71.1268003 | 71.4754328 | 71.318326 | 78.2427597 | 75.8868972 |
| 17:27:42 | 0:27:20 | 69.1268003 | 71.4754328 | 72.318326 | 78.2427597 | 74.8868972 |
| 17:27:43 | 0:27:21 | 69.1268003 | 71.4754328 | 73.318326 | 78.2427597 | 73.8868972 |
| 17:27:44 | 0:27:22 | 69.1268003 | 71.4754328 | 73.318326 | 79.2427597 | 73.8868972 |
| 17:27:45 | 0:27:23 | 68.1268003 | 73.4754328 | 72.318326 | 79.2427597 | 73.8868972 |
| 17:27:46 | 0:27:24 | 68.1268003 | 73.4754328 | 72.318326 | 79.2427597 | 73.8868972 |
| 17:27:47 | 0:27:25 | 68.1268003 | 73.4754328 | 72.318326 | 79.2427597 | 72.8868972 |
| 17:27:48 | 0:27:26 | 68.1268003 | 75.4754328 | 73.318326 | 79.2427597 | 71.8868972 |
| 17:27:49 | 0:27:27 | 68.1268003 | 76.4754328 | 74.318326 | 80.2427597 | 71.8868972 |
| 17:27:50 | 0:27:28 | 69.1268003 | 76.4754328 | 75.318326 | 80.2427597 | 72.8868972 |
| 17:27:51 | 0:27:29 | 69.1268003 | 77.4754328 | 75.318326 | 80.2427597 | 72.8868972 |
| 17:27:52 | 0:27:30 | 69.1268003 | 79.4754328 | 75.318326 | 82.2427597 | 71.8868972 |
| 17:27:53 | 0:27:31 | 68.1268003 | 79.4754328 | 75.318326 | 82.2427597 | 70.8868972 |
| 17:27:54 | 0:27:32 | 68.1268003 | 79.4754328 | 75.318326 | 82.2427597 | 69.8868972 |
| 17:27:55 | 0:27:33 | 68.1268003 | 80.4754328 | 75.318326 | 82.2427597 | 68.8868972 |
| 17:27:56 | 0:27:34 | 68.1268003 | 80.4754328 | 75.318326 | 81.2427597 | 68.8868972 |
| 17:27:57 | 0:27:35 | 68.1268003 | 78.4754328 | 76.318326 | 80.2427597 | 69.8868972 |
| 17:27:58 | 0:27:36 | 68.1268003 | 77.4754328 | 76.318326 | 79.2427597 | 68.8868972 |
| 17:27:59 | 0:27:37 | 67.1268003 | 77.4754328 | 76.318326 | 79.2427597 | 68.8868972 |
| 17:28:00 | 0:27:38 | 70.1268003 | 78.4754328 | 76.318326 | 79.2427597 | 68.8868972 |
| 17:28:01 | 0:27:39 | 74.1268003 | 78.4754328 | 76.318326 | 80.2427597 | 68.8868972 |
| 17:28:02 | 0:27:40 | 74.1268003 | 78.4754328 | 76.318326 | 80.2427597 | 68.8868972 |
| 17:28:03 | 0:27:41 | 76.1268003 | 78.4754328 | 76.318326 | 80.2427597 | 68.8868972 |
| 17:28:04 | 0:27:42 | 75.1268003 | 78.4754328 | 77.318326 | 80.2427597 | 68.8868972 |
| 17:28:05 | 0:27:43 | 75.1268003 | 78.4754328 | 77.318326 | 81.2427597 | 67.8868972 |

|          |         |            |            |           |            |            |
|----------|---------|------------|------------|-----------|------------|------------|
| 17:28:06 | 0:27:44 | 76.1268003 | 78.4754328 | 77.318326 | 81.2427597 | 67.8868972 |
| 17:28:07 | 0:27:45 | 76.1268003 | 78.4754328 | 77.318326 | 81.2427597 | 68.8868972 |
| 17:28:08 | 0:27:46 | 79.1268003 | 78.4754328 | 77.318326 | 80.2427597 | 69.8868972 |
| 17:28:09 | 0:27:47 | 80.1268003 | 79.4754328 | 80.318326 | 80.2427597 | 68.8868972 |
| 17:28:10 | 0:27:48 | 80.1268003 | 81.4754328 | 80.318326 | 80.2427597 | 68.8868972 |
| 17:28:11 | 0:27:49 | 80.1268003 | 81.4754328 | 80.318326 | 80.2427597 | 68.8868972 |
| 17:28:12 | 0:27:50 | 80.1268003 | 81.4754328 | 80.318326 | 80.2427597 | 69.8868972 |
| 17:28:13 | 0:27:51 | 80.1268003 | 81.4754328 | 80.318326 | 79.2427597 | 69.8868972 |
| 17:28:14 | 0:27:52 | 80.1268003 | 80.4754328 | 82.318326 | 79.2427597 | 69.8868972 |
| 17:28:15 | 0:27:53 | 80.1268003 | 81.4754328 | 83.318326 | 79.2427597 | 69.8868972 |
| 17:28:16 | 0:27:54 | 80.1268003 | 82.4754328 | 83.318326 | 80.2427597 | 69.8868972 |
| 17:28:17 | 0:27:55 | 84.1268003 | 84.4754328 | 79.318326 | 81.2427597 | 70.8868972 |
| 17:28:18 | 0:27:56 | 87.1268003 | 84.4754328 | 75.318326 | 82.2427597 | 70.8868972 |
| 17:28:19 | 0:27:57 | 87.1268003 | 84.4754328 | 75.318326 | 81.2427597 | 70.8868972 |
| 17:28:20 | 0:27:58 | 89.1268003 | 84.4754328 | 75.318326 | 81.2427597 | 69.8868972 |
| 17:28:21 | 0:27:59 | 88.1268003 | 84.4754328 | 73.318326 | 74.2427597 | 69.8868972 |
| 17:28:22 | 0:28:00 | 86.1268003 | 84.4754328 | 72.318326 | 73.2427597 | 69.8868972 |
| 17:28:23 | 0:28:01 | 84.1268003 | 84.4754328 | 72.318326 | 72.2427597 | 70.8868972 |
| 17:28:24 | 0:28:02 | 82.1268003 | 83.4754328 | 72.318326 | 72.2427597 | 71.8868972 |
| 17:28:25 | 0:28:03 | 82.1268003 | 83.4754328 | 72.318326 | 72.2427597 | 71.8868972 |
| 17:28:26 | 0:28:04 | 81.1268003 | 82.4754328 | 73.318326 | 72.2427597 | 70.8868972 |
| 17:28:27 | 0:28:05 | 81.1268003 | 82.4754328 | 73.318326 | 75.2427597 | 70.8868972 |
| 17:28:28 | 0:28:06 | 81.1268003 | 81.4754328 | 73.318326 | 76.2427597 | 70.8868972 |
| 17:28:29 | 0:28:07 | 79.1268003 | 81.4754328 | 73.318326 | 76.2427597 | 69.8868972 |
| 17:28:30 | 0:28:08 | 79.1268003 | 81.4754328 | 73.318326 | 76.2427597 | 69.8868972 |
| 17:28:31 | 0:28:09 | 76.1268003 | 81.4754328 | 71.318326 | 77.2427597 | 68.8868972 |
| 17:28:32 | 0:28:10 | 76.1268003 | 82.4754328 | 71.318326 | 78.2427597 | 68.8868972 |
| 17:28:33 | 0:28:11 | 76.1268003 | 82.4754328 | 71.318326 | 77.2427597 | 68.8868972 |
| 17:28:34 | 0:28:12 | 74.1268003 | 82.4754328 | 72.318326 | 76.2427597 | 68.8868972 |
| 17:28:35 | 0:28:13 | 74.1268003 | 83.4754328 | 73.318326 | 76.2427597 | 69.8868972 |
| 17:28:36 | 0:28:14 | 74.1268003 | 83.4754328 | 74.318326 | 76.2427597 | 69.8868972 |
| 17:28:37 | 0:28:15 | 74.1268003 | 83.4754328 | 74.318326 | 76.2427597 | 69.8868972 |
| 17:28:38 | 0:28:16 | 68.1268003 | 83.4754328 | 75.318326 | 79.2427597 | 69.8868972 |
| 17:28:39 | 0:28:17 | 68.1268003 | 83.4754328 | 75.318326 | 81.2427597 | 70.8868972 |
| 17:28:40 | 0:28:18 | 68.1268003 | 83.4754328 | 75.318326 | 83.2427597 | 71.8868972 |
| 17:28:41 | 0:28:19 | 68.1268003 | 83.4754328 | 75.318326 | 83.2427597 | 71.8868972 |
| 17:28:42 | 0:28:20 | 68.1268003 | 83.4754328 | 74.318326 | 83.2427597 | 71.8868972 |
| 17:28:43 | 0:28:21 | 68.1268003 | 83.4754328 | 74.318326 | 82.2427597 | 71.8868972 |
| 17:28:44 | 0:28:22 | 68.1268003 | 83.4754328 | 75.318326 | 81.2427597 | 72.8868972 |
| 17:28:45 | 0:28:23 | 67.1268003 | 83.4754328 | 75.318326 | 82.2427597 | 72.8868972 |
| 17:28:46 | 0:28:24 | 66.1268003 | 81.4754328 | 75.318326 | 82.2427597 | 72.8868972 |
| 17:28:47 | 0:28:25 | 66.1268003 | 82.4754328 | 75.318326 | 83.2427597 | 72.8868972 |
| 17:28:48 | 0:28:26 | 66.1268003 | 84.4754328 | 75.318326 | 83.2427597 | 72.8868972 |
| 17:28:49 | 0:28:27 | 89.1268003 | 85.4754328 | 75.318326 | 83.2427597 | 72.8868972 |
| 17:28:50 | 0:28:28 | 93.1268003 | 86.4754328 | 76.318326 | 83.2427597 | 72.8868972 |

|          |         |            |            |           |            |            |
|----------|---------|------------|------------|-----------|------------|------------|
| 17:28:51 | 0:28:29 | 80.8888889 | 86.4754328 | 76.318326 | 83.2427597 | 73.8868972 |
| 17:28:52 | 0:28:30 | 93.1268003 | 86.4754328 | 75.318326 | 83.2427597 | 73.8868972 |
| 17:28:53 | 0:28:31 | 91.1268003 | 86.4754328 | 75.318326 | 83.2427597 | 74.8868972 |
| 17:28:54 | 0:28:32 | 91.1268003 | 84.4754328 | 76.318326 | 83.2427597 | 75.8868972 |
| 17:28:55 | 0:28:33 | 88.1268003 | 83.4754328 | 76.318326 | 83.2427597 | 75.8868972 |
| 17:28:56 | 0:28:34 | 88.1268003 | 80.4754328 | 76.318326 | 83.2427597 | 74.8868972 |
| 17:28:57 | 0:28:35 | 88.1268003 | 77.4754328 | 76.318326 | 83.2427597 | 74.8868972 |
| 17:28:58 | 0:28:36 | 89.1268003 | 75.4754328 | 76.318326 | 83.2427597 | 74.8868972 |
| 17:28:59 | 0:28:37 | 90.1268003 | 75.4754328 | 76.318326 | 83.2427597 | 74.8868972 |
| 17:29:00 | 0:28:38 | 92.1268003 | 74.4754328 | 76.318326 | 83.2427597 | 74.8868972 |
| 17:29:01 | 0:28:39 | 92.1268003 | 74.4754328 | 75.318326 | 83.2427597 | 74.8868972 |
| 17:29:02 | 0:28:40 | 90.1268003 | 74.4754328 | 75.318326 | 83.2427597 | 73.8868972 |
| 17:29:03 | 0:28:41 | 88.1268003 | 72.4754328 | 75.318326 | 83.2427597 | 73.8868972 |
| 17:29:04 | 0:28:42 | 86.1268003 | 71.4754328 | 75.318326 | 83.2427597 | 73.8868972 |
| 17:29:05 | 0:28:43 | 86.1268003 | 71.4754328 | 74.318326 | 84.2427597 | 73.8868972 |
| 17:29:06 | 0:28:44 | 80.1268003 | 71.4754328 | 74.318326 | 78.2427597 | 74.8868972 |
| 17:29:07 | 0:28:45 | 78.1268003 | 71.4754328 | 74.318326 | 76.2427597 | 74.8868972 |
| 17:29:08 | 0:28:46 | 76.1268003 | 71.4754328 | 75.318326 | 76.2427597 | 74.8868972 |
| 17:29:09 | 0:28:47 | 74.1268003 | 71.4754328 | 76.318326 | 75.2427597 | 71.8868972 |
| 17:29:10 | 0:28:48 | 73.1268003 | 73.4754328 | 76.318326 | 74.2427597 | 69.8868972 |
| 17:29:11 | 0:28:49 | 74.1268003 | 74.4754328 | 78.318326 | 74.2427597 | 69.8868972 |
| 17:29:12 | 0:28:50 | 75.1268003 | 75.4754328 | 78.318326 | 73.2427597 | 69.8868972 |
| 17:29:13 | 0:28:51 | 75.1268003 | 74.4754328 | 80.318326 | 73.2427597 | 68.8868972 |
| 17:29:14 | 0:28:52 | 75.1268003 | 72.4754328 | 80.318326 | 73.2427597 | 68.8868972 |
| 17:29:15 | 0:28:53 | 72.1268003 | 71.4754328 | 81.318326 | 72.2427597 | 68.8868972 |
| 17:29:16 | 0:28:54 | 71.1268003 | 71.4754328 | 81.318326 | 72.2427597 | 68.8868972 |
| 17:29:17 | 0:28:55 | 70.1268003 | 70.4754328 | 82.318326 | 70.2427597 | 68.8868972 |
| 17:29:18 | 0:28:56 | 70.1268003 | 70.4754328 | 83.318326 | 70.2427597 | 68.8868972 |
| 17:29:19 | 0:28:57 | 70.1268003 | 71.4754328 | 83.318326 | 70.2427597 | 69.8868972 |
| 17:29:20 | 0:28:58 | 70.1268003 | 71.4754328 | 83.318326 | 70.2427597 | 70.8868972 |
| 17:29:21 | 0:28:59 | 70.1268003 | 72.4754328 | 83.318326 | 70.2427597 | 71.8868972 |
| 17:29:22 | 0:29:00 | 69.1268003 | 72.4754328 | 82.318326 | 71.2427597 | 72.8868972 |
| 17:29:23 | 0:29:01 | 70.1268003 | 72.4754328 | 82.318326 | 70.2427597 | 73.8868972 |
| 17:29:24 | 0:29:02 | 70.1268003 | 72.4754328 | 82.318326 | 70.2427597 | 73.8868972 |
| 17:29:25 | 0:29:03 | 70.1268003 | 71.4754328 | 82.318326 | 70.2427597 | 72.8868972 |
| 17:29:26 | 0:29:04 | 70.1268003 | 72.4754328 | 83.318326 | 71.2427597 | 71.8868972 |
| 17:29:27 | 0:29:05 | 70.1268003 | 73.4754328 | 83.318326 | 72.2427597 | 71.8868972 |
| 17:29:28 | 0:29:06 | 71.1268003 | 73.4754328 | 83.318326 | 72.2427597 | 71.8868972 |
| 17:29:29 | 0:29:07 | 71.1268003 | 73.4754328 | 83.318326 | 71.2427597 | 69.8868972 |
| 17:29:30 | 0:29:08 | 71.1268003 | 73.4754328 | 82.318326 | 71.2427597 | 69.8868972 |
| 17:29:31 | 0:29:09 | 71.1268003 | 73.4754328 | 82.318326 | 71.2427597 | 68.8868972 |
| 17:29:32 | 0:29:10 | 71.1268003 | 73.4754328 | 82.318326 | 71.2427597 | 68.8868972 |
| 17:29:33 | 0:29:11 | 72.1268003 | 74.4754328 | 78.318326 | 71.2427597 | 68.8868972 |
| 17:29:34 | 0:29:12 | 74.1268003 | 75.4754328 | 78.318326 | 72.2427597 | 68.8868972 |
| 17:29:35 | 0:29:13 | 74.1268003 | 74.4754328 | 77.318326 | 72.2427597 | 69.8868972 |

|          |         |            |            |           |            |            |
|----------|---------|------------|------------|-----------|------------|------------|
| 17:29:36 | 0:29:14 | 75.1268003 | 74.4754328 | 77.318326 | 72.2427597 | 75.8868972 |
| 17:29:37 | 0:29:15 | 75.1268003 | 74.4754328 | 77.318326 | 73.2427597 | 78.8868972 |
| 17:29:38 | 0:29:16 | 76.1268003 | 74.4754328 | 77.318326 | 72.2427597 | 82.8868972 |
| 17:29:39 | 0:29:17 | 76.1268003 | 74.4754328 | 76.318326 | 72.2427597 | 82.8868972 |
| 17:29:40 | 0:29:18 | 76.1268003 | 75.4754328 | 76.318326 | 72.2427597 | 76         |
| 17:29:41 | 0:29:19 | 77.1268003 | 74.4754328 | 76.318326 | 71.2427597 | 75.7777778 |
| 17:29:42 | 0:29:20 | 77.1268003 | 74.4754328 | 76.318326 | 71.2427597 | 75.8888889 |
| 17:29:43 | 0:29:21 | 79.1268003 | 74.4754328 | 76.318326 | 71.2427597 | 87.8868972 |
| 17:29:44 | 0:29:22 | 78.1268003 | 76.4754328 | 76.318326 | 71.2427597 | 86.8868972 |
| 17:29:45 | 0:29:23 | 77.1268003 | 76.4754328 | 76.318326 | 71.2427597 | 86.8868972 |
| 17:29:46 | 0:29:24 | 76.1268003 | 76.4754328 | 76.318326 | 71.2427597 | 86.8868972 |
| 17:29:47 | 0:29:25 | 75.1268003 | 75.4754328 | 76.318326 | 71.2427597 | 86.8868972 |
| 17:29:48 | 0:29:26 | 75.1268003 | 74.4754328 | 77.318326 | 73.2427597 | 86.8868972 |
| 17:29:49 | 0:29:27 | 75.1268003 | 73.4754328 | 77.318326 | 72.2427597 | 86.8868972 |
| 17:29:50 | 0:29:28 | 75.1268003 | 72.4754328 | 77.318326 | 71.2427597 | 86.8868972 |
| 17:29:51 | 0:29:29 | 75.1268003 | 72.4754328 | 77.318326 | 71.2427597 | 86.8868972 |
| 17:29:52 | 0:29:30 | 75.1268003 | 73.4754328 | 77.318326 | 71.2427597 | 86.8868972 |
| 17:29:53 | 0:29:31 | 75.1268003 | 73.4754328 | 77.318326 | 71.2427597 | 80.8868972 |
| 17:29:54 | 0:29:32 | 75.1268003 | 74.4754328 | 78.318326 | 71.2427597 | 78.8868972 |
| 17:29:55 | 0:29:33 | 76.1268003 | 75.4754328 | 79.318326 | 71.2427597 | 78.8868972 |
| 17:29:56 | 0:29:34 | 77.1268003 | 75.4754328 | 80.318326 | 70.2427597 | 77.8868972 |
| 17:29:57 | 0:29:35 | 77.1268003 | 76.4754328 | 80.318326 | 70.2427597 | 78.8868972 |
| 17:29:58 | 0:29:36 | 77.1268003 | 77.4754328 | 78.318326 | 70.2427597 | 80.8868972 |
| 17:29:59 | 0:29:37 | 78.1268003 | 76.4754328 | 73.318326 | 72.2427597 | 80.8868972 |
| 17:30:00 | 0:29:38 | 78.1268003 | 75.4754328 | 72.318326 | 72.2427597 | 81.8868972 |
| 17:30:01 | 0:29:39 | 78.1268003 | 75.4754328 | 71.318326 | 72.2427597 | 81.8868972 |
| 17:30:02 | 0:29:40 | 78.1268003 | 76.4754328 | 72.318326 | 72.2427597 | 79.8868972 |
| 17:30:03 | 0:29:41 | 78.1268003 | 76.4754328 | 73.318326 | 71.2427597 | 78.8868972 |
| 17:30:04 | 0:29:42 | 78.1268003 | 76.4754328 | 73.318326 | 69.2427597 | 75.8868972 |
| 17:30:05 | 0:29:43 | 78.1268003 | 76.4754328 | 73.318326 | 70.2427597 | 75.8868972 |
| 17:30:06 | 0:29:44 | 78.1268003 | 76.4754328 | 73.318326 | 70.2427597 | 76.8868972 |
| 17:30:07 | 0:29:45 | 79.1268003 | 76.4754328 | 74.318326 | 70.2427597 | 76.8868972 |
| 17:30:08 | 0:29:46 | 79.1268003 | 78.4754328 | 74.318326 | 70.2427597 | 75.8868972 |
| 17:30:09 | 0:29:47 | 80.1268003 | 80.4754328 | 74.318326 | 70.2427597 | 73.8868972 |
| 17:30:10 | 0:29:48 | 80.1268003 | 83.4754328 | 74.318326 | 72.2427597 | 72.8868972 |
| 17:30:11 | 0:29:49 | 80.1268003 | 84.4754328 | 75.318326 | 72.2427597 | 71.8868972 |
| 17:30:12 | 0:29:50 | 80.1268003 | 84.4754328 | 75.318326 | 72.2427597 | 71.8868972 |
| 17:30:13 | 0:29:51 | 80.1268003 | 84.4754328 | 75.318326 | 74.2427597 | 70.8868972 |
| 17:30:14 | 0:29:52 | 80.1268003 | 74.4444444 | 75.318326 | 75.2427597 | 70.8868972 |
| 17:30:15 | 0:29:53 | 80.1268003 | 74.3333333 | 75.318326 | 75.2427597 | 70.8868972 |
| 17:30:16 | 0:29:54 | 78.1268003 | 74.3333333 | 75.318326 | 76.2427597 | 71.8868972 |
| 17:30:17 | 0:29:55 | 77.1268003 | 83.4754328 | 75.318326 | 76.2427597 | 71.8868972 |
| 17:30:18 | 0:29:56 | 77.1268003 | 83.4754328 | 75.318326 | 76.2427597 | 71.8868972 |
| 17:30:19 | 0:29:57 | 77.1268003 | 74.4754328 | 76.318326 | 76.2427597 | 71.8868972 |
| 17:30:20 | 0:29:58 | 79.1268003 | 74.4754328 | 73.318326 | 75.2427597 | 71.8868972 |

|          |         |            |            |           |            |            |
|----------|---------|------------|------------|-----------|------------|------------|
| 17:30:21 | 0:29:59 | 80.1268003 | 72.4754328 | 71.318326 | 75.2427597 | 71.8868972 |
| 17:30:22 | 0:30:00 | 80.1268003 | 71.4754328 | 71.318326 | 74.2427597 | 72.8868972 |
| 17:30:23 | 0:30:01 | 80.1268003 | 71.4754328 | 71.318326 | 74.2427597 | 72.8868972 |
| 17:30:24 | 0:30:02 | 81.1268003 | 71.4754328 | 72.318326 | 74.2427597 | 72.8868972 |
| 17:30:25 | 0:30:03 | 80.1268003 | 71.4754328 | 72.318326 | 74.2427597 | 72.8868972 |
| 17:30:26 | 0:30:04 | 78.1268003 | 71.4754328 | 72.318326 | 73.2427597 | 72.8868972 |
| 17:30:27 | 0:30:05 | 78.1268003 | 71.4754328 | 72.318326 | 72.2427597 | 72.8868972 |
| 17:30:28 | 0:30:06 | 78.1268003 | 70.4754328 | 72.318326 | 74.2427597 | 72.8868972 |
| 17:30:29 | 0:30:07 | 78.1268003 | 69.4754328 | 75.318326 | 74.2427597 | 71.8868972 |
| 17:30:30 | 0:30:08 | 78.1268003 | 68.4754328 | 75.318326 | 75.2427597 | 71.8868972 |
| 17:30:31 | 0:30:09 | 78.1268003 | 68.4754328 | 75.318326 | 75.2427597 | 71.8868972 |
| 17:30:32 | 0:30:10 | 78.1268003 | 68.4754328 | 75.318326 | 76.2427597 | 72.8868972 |
| 17:30:33 | 0:30:11 | 78.1268003 | 68.4754328 | 75.318326 | 76.2427597 | 72.8868972 |
| 17:30:34 | 0:30:12 | 80.1268003 | 70.4754328 | 75.318326 | 75.2427597 | 72.8868972 |
| 17:30:35 | 0:30:13 | 81.1268003 | 71.4754328 | 75.318326 | 74.2427597 | 72.8868972 |
| 17:30:36 | 0:30:14 | 82.1268003 | 71.4754328 | 78.318326 | 74.2427597 | 72.8868972 |
| 17:30:37 | 0:30:15 | 83.1268003 | 72.4754328 | 80.318326 | 74.2427597 | 72.8868972 |
| 17:30:38 | 0:30:16 | 83.1268003 | 72.4754328 | 81.318326 | 75.2427597 | 73.8868972 |
| 17:30:39 | 0:30:17 | 85.1268003 | 72.4754328 | 81.318326 | 77.2427597 | 73.8868972 |
| 17:30:40 | 0:30:18 | 74.8888889 | 72.4754328 | 82.318326 | 77.2427597 | 72.8868972 |
| 17:30:41 | 0:30:19 | 75.4444444 | 71.4754328 | 81.318326 | 77.2427597 | 72.8868972 |
| 17:30:42 | 0:30:20 | 76.2222222 | 72.4754328 | 82.318326 | 76.2427597 | 72.8868972 |
| 17:30:43 | 0:30:21 | 76.2222222 | 72.4754328 | 82.318326 | 75.2427597 | 71.8868972 |
| 17:30:44 | 0:30:22 | 76.4444444 | 72.4754328 | 82.318326 | 74.2427597 | 71.8868972 |
| 17:30:45 | 0:30:23 | 76.4444444 | 73.4754328 | 83.318326 | 73.2427597 | 71.8868972 |
| 17:30:46 | 0:30:24 | 84.1268003 | 74.4754328 | 83.318326 | 72.2427597 | 72.8868972 |
| 17:30:47 | 0:30:25 | 81.1268003 | 74.4754328 | 83.318326 | 74.2427597 | 72.8868972 |
| 17:30:48 | 0:30:26 | 81.1268003 | 75.4754328 | 84.318326 | 74.2427597 | 72.8868972 |
| 17:30:49 | 0:30:27 | 79.1268003 | 75.4754328 | 84.318326 | 75.2427597 | 74.8868972 |
| 17:30:50 | 0:30:28 | 76.1268003 | 75.4754328 | 84.318326 | 76.2427597 | 74.8868972 |
| 17:30:51 | 0:30:29 | 71.1268003 | 82.4754328 | 84.318326 | 77.2427597 | 77.8868972 |
| 17:30:52 | 0:30:30 | 70.1268003 | 82.4754328 | 74.318326 | 77.2427597 | 77.8868972 |
| 17:30:53 | 0:30:31 | 71.1268003 | 86.4754328 | 74.318326 | 77.2427597 | 81.8868972 |
| 17:30:54 | 0:30:32 | 71.1268003 | 86.4754328 | 75.318326 | 78.2427597 | 81.8868972 |
| 17:30:55 | 0:30:33 | 71.1268003 | 86.4754328 | 76.318326 | 78.2427597 | 82.8868972 |
| 17:30:56 | 0:30:34 | 71.1268003 | 88.4754328 | 76.318326 | 78.2427597 | 82.8868972 |
| 17:30:57 | 0:30:35 | 72.1268003 | 76.6666667 | 76.318326 | 80.2427597 | 82.8868972 |
| 17:30:58 | 0:30:36 | 72.1268003 | 76.8888889 | 76.318326 | 80.2427597 | 81.8868972 |
| 17:30:59 | 0:30:37 | 74.1268003 | 76.6666667 | 76.318326 | 80.2427597 | 78.8868972 |
| 17:31:00 | 0:30:38 | 75.1268003 | 77         | 76.318326 | 80.2427597 | 78.8868972 |
| 17:31:01 | 0:30:39 | 73.1268003 | 85.4754328 | 77.318326 | 79.2427597 | 77.8868972 |
| 17:31:02 | 0:30:40 | 73.1268003 | 80.4754328 | 77.318326 | 79.2427597 | 75.8868972 |
| 17:31:03 | 0:30:41 | 74.1268003 | 75.4754328 | 77.318326 | 78.2427597 | 75.8868972 |
| 17:31:04 | 0:30:42 | 74.1268003 | 73.4754328 | 76.318326 | 78.2427597 | 75.8868972 |
| 17:31:05 | 0:30:43 | 76.1268003 | 72.4754328 | 76.318326 | 78.2427597 | 75.8868972 |

|          |         |            |            |           |            |            |
|----------|---------|------------|------------|-----------|------------|------------|
| 17:31:06 | 0:30:44 | 76.1268003 | 73.4754328 | 76.318326 | 77.2427597 | 75.8868972 |
| 17:31:07 | 0:30:45 | 75.1268003 | 74.4754328 | 76.318326 | 77.2427597 | 75.8868972 |
| 17:31:08 | 0:30:46 | 75.1268003 | 75.4754328 | 75.318326 | 77.2427597 | 75.8868972 |
| 17:31:09 | 0:30:47 | 74.1268003 | 75.4754328 | 74.318326 | 77.2427597 | 75.8868972 |
| 17:31:10 | 0:30:48 | 73.1268003 | 75.4754328 | 74.318326 | 78.2427597 | 75.8868972 |
| 17:31:11 | 0:30:49 | 72.1268003 | 75.4754328 | 73.318326 | 78.2427597 | 76.8868972 |
| 17:31:12 | 0:30:50 | 72.1268003 | 75.4754328 | 73.318326 | 78.2427597 | 76.8868972 |
| 17:31:13 | 0:30:51 | 72.1268003 | 73.4754328 | 73.318326 | 78.2427597 | 73.8868972 |
| 17:31:14 | 0:30:52 | 74.1268003 | 73.4754328 | 73.318326 | 78.2427597 | 72.8868972 |
| 17:31:15 | 0:30:53 | 75.1268003 | 73.4754328 | 76.318326 | 78.2427597 | 72.8868972 |
| 17:31:16 | 0:30:54 | 75.1268003 | 73.4754328 | 76.318326 | 78.2427597 | 72.8868972 |
| 17:31:17 | 0:30:55 | 74.1268003 | 73.4754328 | 78.318326 | 78.2427597 | 72.8868972 |
| 17:31:18 | 0:30:56 | 74.1268003 | 73.4754328 | 78.318326 | 78.2427597 | 72.8868972 |
| 17:31:19 | 0:30:57 | 74.1268003 | 73.4754328 | 78.318326 | 79.2427597 | 73.8868972 |
| 17:31:20 | 0:30:58 | 74.1268003 | 74.4754328 | 76.318326 | 80.2427597 | 73.8868972 |
| 17:31:21 | 0:30:59 | 73.1268003 | 73.4754328 | 75.318326 | 81.2427597 | 73.8868972 |
| 17:31:22 | 0:31:00 | 73.1268003 | 73.4754328 | 76.318326 | 81.2427597 | 73.8868972 |
| 17:31:23 | 0:31:01 | 73.1268003 | 72.4754328 | 76.318326 | 82.2427597 | 73.8868972 |
| 17:31:24 | 0:31:02 | 73.1268003 | 70.4754328 | 77.318326 | 83.2427597 | 73.8868972 |
| 17:31:25 | 0:31:03 | 73.1268003 | 68.4754328 | 77.318326 | 83.2427597 | 73.8868972 |
| 17:31:26 | 0:31:04 | 75.1268003 | 69.4754328 | 77.318326 | 83.2427597 | 73.8868972 |
| 17:31:27 | 0:31:05 | 75.1268003 | 71.4754328 | 77.318326 | 83.2427597 | 73.8868972 |
| 17:31:28 | 0:31:06 | 75.1268003 | 72.4754328 | 79.318326 | 83.2427597 | 73.8868972 |
| 17:31:29 | 0:31:07 | 75.1268003 | 72.4754328 | 79.318326 | 82.2427597 | 73.8868972 |
| 17:31:30 | 0:31:08 | 75.1268003 | 74.4754328 | 79.318326 | 82.2427597 | 73.8868972 |
| 17:31:31 | 0:31:09 | 75.1268003 | 74.4754328 | 78.318326 | 83.2427597 | 74.8868972 |
| 17:31:32 | 0:31:10 | 74.1268003 | 73.4754328 | 78.318326 | 83.2427597 | 74.8868972 |
| 17:31:33 | 0:31:11 | 74.1268003 | 73.4754328 | 78.318326 | 83.2427597 | 74.8868972 |
| 17:31:34 | 0:31:12 | 71.1268003 | 72.4754328 | 78.318326 | 83.2427597 | 73.8868972 |
| 17:31:35 | 0:31:13 | 70.1268003 | 72.4754328 | 79.318326 | 83.2427597 | 72.8868972 |
| 17:31:36 | 0:31:14 | 70.1268003 | 72.4754328 | 79.318326 | 81.2427597 | 72.8868972 |
| 17:31:37 | 0:31:15 | 70.1268003 | 72.4754328 | 78.318326 | 81.2427597 | 73.8868972 |
| 17:31:38 | 0:31:16 | 69.1268003 | 74.4754328 | 78.318326 | 81.2427597 | 74.8868972 |
| 17:31:39 | 0:31:17 | 69.1268003 | 74.4754328 | 80.318326 | 80.2427597 | 74.8868972 |
| 17:31:40 | 0:31:18 | 69.1268003 | 74.4754328 | 81.318326 | 80.2427597 | 74.8868972 |
| 17:31:41 | 0:31:19 | 69.1268003 | 74.4754328 | 80.318326 | 81.2427597 | 74.8868972 |
| 17:31:42 | 0:31:20 | 69.1268003 | 74.4754328 | 80.318326 | 83.2427597 | 76.8868972 |
| 17:31:43 | 0:31:21 | 73.1268003 | 74.4754328 | 80.318326 | 83.2427597 | 78.8868972 |
| 17:31:44 | 0:31:22 | 80.1268003 | 74.4754328 | 80.318326 | 82.2427597 | 78.8868972 |
| 17:31:45 | 0:31:23 | 80.1268003 | 75.4754328 | 80.318326 | 82.2427597 | 78.8868972 |
| 17:31:46 | 0:31:24 | 82.1268003 | 75.4754328 | 79.318326 | 81.2427597 | 78.8868972 |
| 17:31:47 | 0:31:25 | 82.1268003 | 75.4754328 | 78.318326 | 80.2427597 | 78.8868972 |
| 17:31:48 | 0:31:26 | 82.1268003 | 75.4754328 | 78.318326 | 80.2427597 | 79.8868972 |
| 17:31:49 | 0:31:27 | 82.1268003 | 75.4754328 | 79.318326 | 79.2427597 | 79.8868972 |
| 17:31:50 | 0:31:28 | 82.1268003 | 74.4754328 | 79.318326 | 78.2427597 | 80.8868972 |



|          |         |            |            |           |            |            |
|----------|---------|------------|------------|-----------|------------|------------|
| 17:31:51 | 0:31:29 | 82.1268003 | 74.4754328 | 81.318326 | 76.2427597 | 79.8868972 |
| 17:31:52 | 0:31:30 | 82.1268003 | 74.4754328 | 82.318326 | 75.2427597 | 77.8868972 |
| 17:31:53 | 0:31:31 | 81.1268003 | 74.4754328 | 82.318326 | 74.2427597 | 76.8868972 |
| 17:31:54 | 0:31:32 | 81.1268003 | 75.4754328 | 82.318326 | 74.2427597 | 75.8868972 |
| 17:31:55 | 0:31:33 | 81.1268003 | 76.4754328 | 82.318326 | 74.2427597 | 76.8868972 |
| 17:31:56 | 0:31:34 | 81.1268003 | 77.4754328 | 82.318326 | 73.2427597 | 77.8868972 |
| 17:31:57 | 0:31:35 | 82.1268003 | 77.4754328 | 82.318326 | 73.2427597 | 78.8868972 |
| 17:31:58 | 0:31:36 | 82.1268003 | 77.4754328 | 82.318326 | 73.2427597 | 78.8868972 |
| 17:31:59 | 0:31:37 | 81.1268003 | 76.4754328 | 82.318326 | 73.2427597 | 79.8868972 |
| 17:32:00 | 0:31:38 | 81.1268003 | 75.4754328 | 82.318326 | 72.2427597 | 79.8868972 |
| 17:32:01 | 0:31:39 | 81.1268003 | 75.4754328 | 82.318326 | 71.2427597 | 79.8868972 |
| 17:32:02 | 0:31:40 | 83.1268003 | 75.4754328 | 82.318326 | 71.2427597 | 79.8868972 |
| 17:32:03 | 0:31:41 | 85.1268003 | 75.4754328 | 82.318326 | 71.2427597 | 79.8868972 |
| 17:32:04 | 0:31:42 | 76.5555556 | 75.4754328 | 81.318326 | 70.2427597 | 78.8868972 |
| 17:32:05 | 0:31:43 | 76.6666667 | 76.4754328 | 81.318326 | 70.2427597 | 75.8868972 |
| 17:32:06 | 0:31:44 | 76.6666667 | 76.4754328 | 81.318326 | 70.2427597 | 75.8868972 |
| 17:32:07 | 0:31:45 | 77.2222222 | 75.4754328 | 79.318326 | 70.2427597 | 74.8868972 |
| 17:32:08 | 0:31:46 | 88.1268003 | 74.4754328 | 79.318326 | 70.2427597 | 74.8868972 |
| 17:32:09 | 0:31:47 | 88.1268003 | 73.4754328 | 80.318326 | 70.2427597 | 74.8868972 |
| 17:32:10 | 0:31:48 | 84.1268003 | 72.4754328 | 80.318326 | 70.2427597 | 74.8868972 |
| 17:32:11 | 0:31:49 | 84.1268003 | 72.4754328 | 80.318326 | 70.2427597 | 74.8868972 |
| 17:32:12 | 0:31:50 | 84.1268003 | 72.4754328 | 80.318326 | 70.2427597 | 77.8868972 |
| 17:32:13 | 0:31:51 | 84.1268003 | 73.4754328 | 80.318326 | 71.2427597 | 80.8868972 |
| 17:32:14 | 0:31:52 | 84.1268003 | 75.4754328 | 80.318326 | 71.2427597 | 80.8868972 |
| 17:32:15 | 0:31:53 | 83.1268003 | 76.4754328 | 80.318326 | 71.2427597 | 80.8868972 |
| 17:32:16 | 0:31:54 | 83.1268003 | 77.4754328 | 81.318326 | 71.2427597 | 80.8868972 |
| 17:32:17 | 0:31:55 | 83.1268003 | 77.4754328 | 82.318326 | 71.2427597 | 80.8868972 |
| 17:32:18 | 0:31:56 | 83.1268003 | 77.4754328 | 83.318326 | 70.2427597 | 79.8868972 |
| 17:32:19 | 0:31:57 | 83.1268003 | 77.4754328 | 83.318326 | 70.2427597 | 75.8868972 |
| 17:32:20 | 0:31:58 | 83.1268003 | 77.4754328 | 83.318326 | 70.2427597 | 73.8868972 |
| 17:32:21 | 0:31:59 | 83.1268003 | 77.4754328 | 82.318326 | 70.2427597 | 72.8868972 |
| 17:32:22 | 0:32:00 | 83.1268003 | 78.4754328 | 82.318326 | 69.2427597 | 72.8868972 |
| 17:32:23 | 0:32:01 | 84.1268003 | 81.4754328 | 81.318326 | 69.2427597 | 73.8868972 |
| 17:32:24 | 0:32:02 | 89.1268003 | 83.4754328 | 81.318326 | 69.2427597 | 73.8868972 |
| 17:32:25 | 0:32:03 | 89.1268003 | 84.4754328 | 80.318326 | 69.2427597 | 73.8868972 |
| 17:32:26 | 0:32:04 | 89.1268003 | 83.4754328 | 80.318326 | 69.2427597 | 73.8868972 |
| 17:32:27 | 0:32:05 | 89.1268003 | 82.4754328 | 80.318326 | 68.2427597 | 73.8868972 |
| 17:32:28 | 0:32:06 | 89.1268003 | 81.4754328 | 79.318326 | 67.2427597 | 73.8868972 |
| 17:32:29 | 0:32:07 | 89.1268003 | 80.4754328 | 78.318326 | 67.2427597 | 74.8868972 |
| 17:32:30 | 0:32:08 | 89.1268003 | 80.4754328 | 78.318326 | 67.2427597 | 75.8868972 |
| 17:32:31 | 0:32:09 | 89.1268003 | 80.4754328 | 78.318326 | 67.2427597 | 75.8868972 |
| 17:32:32 | 0:32:10 | 75.6666667 | 79.4754328 | 78.318326 | 67.2427597 | 75.8868972 |
| 17:32:33 | 0:32:11 | 75.8888889 | 78.4754328 | 78.318326 | 67.2427597 | 75.8868972 |
| 17:32:34 | 0:32:12 | 86.1268003 | 77.4754328 | 77.318326 | 68.2427597 | 76.8868972 |
| 17:32:35 | 0:32:13 | 75.5555556 | 76.4754328 | 75.318326 | 68.2427597 | 76.8868972 |

|          |         |            |            |           |            |            |
|----------|---------|------------|------------|-----------|------------|------------|
| 17:32:36 | 0:32:14 | 75.1111111 | 76.4754328 | 74.318326 | 68.2427597 | 77.8868972 |
| 17:32:37 | 0:32:15 | 75.5555556 | 77.4754328 | 74.318326 | 68.2427597 | 77.8868972 |
| 17:32:38 | 0:32:16 | 90.1268003 | 78.4754328 | 74.318326 | 82.2427597 | 77.8868972 |
| 17:32:39 | 0:32:17 | 78         | 78.4754328 | 74.318326 | 82.2427597 | 77.8868972 |
| 17:32:40 | 0:32:18 | 78         | 78.4754328 | 73.318326 | 82.2427597 | 77.8868972 |
| 17:32:41 | 0:32:19 | 77.8888889 | 78.4754328 | 73.318326 | 82.2427597 | 77.8868972 |
| 17:32:42 | 0:32:20 | 77.8888889 | 78.4754328 | 74.318326 | 82.2427597 | 77.8868972 |
| 17:32:43 | 0:32:21 | 78.3333333 | 76.4754328 | 75.318326 | 82.2427597 | 77.8868972 |
| 17:32:44 | 0:32:22 | 92.1268003 | 78.4754328 | 75.318326 | 81.2427597 | 78.8868972 |
| 17:32:45 | 0:32:23 | 92.1268003 | 78.4754328 | 77.318326 | 81.2427597 | 77.8868972 |
| 17:32:46 | 0:32:24 | 92.1268003 | 78.4754328 | 77.318326 | 81.2427597 | 77.8868972 |
| 17:32:47 | 0:32:25 | 79         | 79.4754328 | 77.318326 | 77.2427597 | 77.8868972 |
| 17:32:48 | 0:32:26 | 78.6666667 | 80.4754328 | 77.318326 | 75.2427597 | 76.8868972 |
| 17:32:49 | 0:32:27 | 79         | 80.4754328 | 76.318326 | 76.2427597 | 77.8868972 |
| 17:32:50 | 0:32:28 | 92.1268003 | 80.4754328 | 76.318326 | 76.2427597 | 78.8868972 |
| 17:32:51 | 0:32:29 | 78.1268003 | 80.4754328 | 75.318326 | 75.2427597 | 78.8868972 |
| 17:32:52 | 0:32:30 | 77.1268003 | 80.4754328 | 74.318326 | 75.2427597 | 81.8868972 |
| 17:32:53 | 0:32:31 | 77.1268003 | 80.4754328 | 74.318326 | 75.2427597 | 84.8868972 |
| 17:32:54 | 0:32:32 | 75.1268003 | 80.4754328 | 74.318326 | 75.2427597 | 82.8868972 |
| 17:32:55 | 0:32:33 | 74.1268003 | 78.4754328 | 74.318326 | 74.2427597 | 81.8868972 |
| 17:32:56 | 0:32:34 | 71.1268003 | 79.4754328 | 73.318326 | 74.2427597 | 81.8868972 |
| 17:32:57 | 0:32:35 | 68.1268003 | 80.4754328 | 73.318326 | 74.2427597 | 81.8868972 |
| 17:32:58 | 0:32:36 | 68.1268003 | 80.4754328 | 70.318326 | 74.2427597 | 81.8868972 |
| 17:32:59 | 0:32:37 | 68.1268003 | 80.4754328 | 67.318326 | 74.2427597 | 81.8868972 |
| 17:33:00 | 0:32:38 | 68.1268003 | 80.4754328 | 67.318326 | 74.2427597 | 81.8868972 |
| 17:33:01 | 0:32:39 | 68.1268003 | 80.4754328 | 65.318326 | 74.2427597 | 81.8868972 |
| 17:33:02 | 0:32:40 | 70.1268003 | 81.4754328 | 64.318326 | 74.2427597 | 81.8868972 |
| 17:33:03 | 0:32:41 | 76.1268003 | 82.4754328 | 63.318326 | 75.2427597 | 82.8868972 |
| 17:33:04 | 0:32:42 | 79.1268003 | 82.4754328 | 62.318326 | 75.2427597 | 82.8868972 |
| 17:33:05 | 0:32:43 | 81.1268003 | 82.4754328 | 62.318326 | 77.2427597 | 81.8868972 |
| 17:33:06 | 0:32:44 | 81.1268003 | 82.4754328 | 62.318326 | 77.2427597 | 79.8868972 |
| 17:33:07 | 0:32:45 | 81.1268003 | 82.4754328 | 64.318326 | 77.2427597 | 78.8868972 |
| 17:33:08 | 0:32:46 | 81.1268003 | 82.4754328 | 67.318326 | 77.2427597 | 78.8868972 |
| 17:33:09 | 0:32:47 | 80.1268003 | 82.4754328 | 68.318326 | 77.2427597 | 76.8868972 |
| 17:33:10 | 0:32:48 | 80.1268003 | 81.4754328 | 69.318326 | 77.2427597 | 75.8868972 |
| 17:33:11 | 0:32:49 | 80.1268003 | 81.4754328 | 70.318326 | 77.2427597 | 76.8868972 |
| 17:33:12 | 0:32:50 | 80.1268003 | 81.4754328 | 72.318326 | 77.2427597 | 76.8868972 |
| 17:33:13 | 0:32:51 | 80.1268003 | 80.4754328 | 73.318326 | 76.2427597 | 76.8868972 |
| 17:33:14 | 0:32:52 | 78.1268003 | 79.4754328 | 74.318326 | 76.2427597 | 77.8868972 |
| 17:33:15 | 0:32:53 | 78.1268003 | 79.4754328 | 76.318326 | 81.2427597 | 77.8868972 |
| 17:33:16 | 0:32:54 | 78.1268003 | 79.4754328 | 77.318326 | 83.2427597 | 77.8868972 |
| 17:33:17 | 0:32:55 | 78.1268003 | 79.4754328 | 77.318326 | 83.2427597 | 76.8868972 |
| 17:33:18 | 0:32:56 | 76.1268003 | 79.4754328 | 77.318326 | 84.2427597 | 75.8868972 |
| 17:33:19 | 0:32:57 | 76.1268003 | 79.4754328 | 78.318326 | 85.2427597 | 75.8868972 |
| 17:33:20 | 0:32:58 | 75.1268003 | 78.4754328 | 77.318326 | 85.2427597 | 75.8868972 |

|          |         |            |            |           |            |            |
|----------|---------|------------|------------|-----------|------------|------------|
| 17:33:21 | 0:32:59 | 75.1268003 | 79.4754328 | 77.318326 | 85.2427597 | 75.8868972 |
| 17:33:22 | 0:33:00 | 75.1268003 | 80.4754328 | 76.318326 | 85.2427597 | 75.8868972 |
| 17:33:23 | 0:33:01 | 74.1268003 | 81.4754328 | 76.318326 | 88.2427597 | 75.8868972 |
| 17:33:24 | 0:33:02 | 73.1268003 | 81.4754328 | 75.318326 | 88.2427597 | 75.8868972 |
| 17:33:25 | 0:33:03 | 73.1268003 | 81.4754328 | 74.318326 | 88.2427597 | 75.8868972 |
| 17:33:26 | 0:33:04 | 73.1268003 | 81.4754328 | 72.318326 | 88.2427597 | 76.8868972 |
| 17:33:27 | 0:33:05 | 73.1268003 | 82.4754328 | 71.318326 | 88.2427597 | 76.8868972 |
| 17:33:28 | 0:33:06 | 73.1268003 | 83.4754328 | 71.318326 | 88.2427597 | 76.8868972 |
| 17:33:29 | 0:33:07 | 73.1268003 | 85.4754328 | 73.318326 | 88.2427597 | 76.8868972 |
| 17:33:30 | 0:33:08 | 73.1268003 | 76.5555556 | 74.318326 | 88.2427597 | 76.8868972 |
| 17:33:31 | 0:33:09 | 72.1268003 | 76.6666667 | 75.318326 | 88.2427597 | 78.8868972 |
| 17:33:32 | 0:33:10 | 73.1268003 | 77.5555556 | 75.318326 | 88.2427597 | 79.8868972 |
| 17:33:33 | 0:33:11 | 73.1268003 | 89.4754328 | 76.318326 | 78.1111111 | 80.8868972 |
| 17:33:34 | 0:33:12 | 73.1268003 | 88.4754328 | 76.318326 | 78.1111111 | 80.8868972 |
| 17:33:35 | 0:33:13 | 79.1268003 | 88.4754328 | 76.318326 | 78.8888889 | 79.8868972 |
| 17:33:36 | 0:33:14 | 79.1268003 | 88.4754328 | 76.318326 | 92.2427597 | 79.8868972 |
| 17:33:37 | 0:33:15 | 79.1268003 | 88.4754328 | 76.318326 | 80.5555556 | 79.8868972 |
| 17:33:38 | 0:33:16 | 78.1268003 | 88.4754328 | 76.318326 | 80.7777778 | 79.8868972 |
| 17:33:39 | 0:33:17 | 77.1268003 | 88.4754328 | 76.318326 | 80.6666667 | 79.8868972 |
| 17:33:40 | 0:33:18 | 77.1268003 | 88.4754328 | 76.318326 | 80.2222222 | 79.8868972 |
| 17:33:41 | 0:33:19 | 78.1268003 | 87.4754328 | 76.318326 | 79.8888889 | 79.8868972 |
| 17:33:42 | 0:33:20 | 78.1268003 | 87.4754328 | 76.318326 | 79.4444444 | 80.8868972 |
| 17:33:43 | 0:33:21 | 79.1268003 | 88.4754328 | 76.318326 | 79.1111111 | 81.8868972 |
| 17:33:44 | 0:33:22 | 79.1268003 | 88.4754328 | 76.318326 | 78.8888889 | 81.8868972 |
| 17:33:45 | 0:33:23 | 79.1268003 | 85.4754328 | 83.318326 | 79.1111111 | 82.8868972 |
| 17:33:46 | 0:33:24 | 79.1268003 | 80.4754328 | 82.318326 | 78.1111111 | 81.8868972 |
| 17:33:47 | 0:33:25 | 79.1268003 | 79.4754328 | 80.318326 | 78.1111111 | 81.8868972 |
| 17:33:48 | 0:33:26 | 79.1268003 | 79.4754328 | 76.318326 | 77.8888889 | 81.8868972 |
| 17:33:49 | 0:33:27 | 77.1268003 | 79.4754328 | 68.318326 | 77.2222222 | 82.8868972 |
| 17:33:50 | 0:33:28 | 77.1268003 | 78.4754328 | 68.318326 | 90.2427597 | 82.8868972 |
| 17:33:51 | 0:33:29 | 76.1268003 | 81.4754328 | 61.318326 | 89.2427597 | 82.8868972 |
| 17:33:52 | 0:33:30 | 76.1268003 | 83.4754328 | 60.318326 | 89.2427597 | 82.8868972 |
| 17:33:53 | 0:33:31 | 74.1268003 | 84.4754328 | 60.318326 | 90.2427597 | 82.8868972 |
| 17:33:54 | 0:33:32 | 74.1268003 | 84.4754328 | 60.318326 | 90.2427597 | 82.8868972 |
| 17:33:55 | 0:33:33 | 74.1268003 | 75.4754328 | 64.318326 | 91.2427597 | 79.3333333 |
| 17:33:56 | 0:33:34 | 72.1268003 | 75.4754328 | 67.318326 | 91.2427597 | 79.6666667 |
| 17:33:57 | 0:33:35 | 72.1268003 | 72.4754328 | 68.318326 | 91.2427597 | 79.3333333 |
| 17:33:58 | 0:33:36 | 72.1268003 | 69.4754328 | 69.318326 | 91.2427597 | 79.5555556 |
| 17:33:59 | 0:33:37 | 72.1268003 | 69.4754328 | 69.318326 | 92.2427597 | 80.3333333 |
| 17:34:00 | 0:33:38 | 72.1268003 | 69.4754328 | 70.318326 | 89.2427597 | 80         |
| 17:34:01 | 0:33:39 | 72.1268003 | 70.4754328 | 70.318326 | 89.2427597 | 81.5555556 |
| 17:34:02 | 0:33:40 | 71.1268003 | 70.4754328 | 72.318326 | 89.2427597 | 82.5555556 |
| 17:34:03 | 0:33:41 | 70.1268003 | 70.4754328 | 73.318326 | 89.2427597 | 83.2222222 |
| 17:34:04 | 0:33:42 | 70.1268003 | 69.4754328 | 73.318326 | 89.2427597 | 81.7777778 |
| 17:34:05 | 0:33:43 | 69.1268003 | 69.4754328 | 74.318326 | 89.2427597 | 81.2222222 |

|          |         |            |            |           |            |            |
|----------|---------|------------|------------|-----------|------------|------------|
| 17:34:06 | 0:33:44 | 69.1268003 | 69.4754328 | 74.318326 | 89.2427597 | 81.4444444 |
| 17:34:07 | 0:33:45 | 70.1268003 | 68.4754328 | 75.318326 | 89.2427597 | 81.3333333 |
| 17:34:08 | 0:33:46 | 70.1268003 | 69.4754328 | 75.318326 | 88.2427597 | 80.7777778 |
| 17:34:09 | 0:33:47 | 72.1268003 | 70.4754328 | 75.318326 | 88.2427597 | 79.8888889 |
| 17:34:10 | 0:33:48 | 72.1268003 | 72.4754328 | 74.318326 | 87.2427597 | 88.8868972 |
| 17:34:11 | 0:33:49 | 72.1268003 | 72.4754328 | 74.318326 | 87.2427597 | 86.8868972 |
| 17:34:12 | 0:33:50 | 72.1268003 | 74.4754328 | 74.318326 | 87.2427597 | 85.8868972 |
| 17:34:13 | 0:33:51 | 72.1268003 | 76.4754328 | 73.318326 | 86.2427597 | 84.8868972 |
| 17:34:14 | 0:33:52 | 72.1268003 | 77.4754328 | 75.318326 | 86.2427597 | 84.8868972 |
| 17:34:15 | 0:33:53 | 72.1268003 | 77.4754328 | 78.318326 | 84.2427597 | 83.8868972 |
| 17:34:16 | 0:33:54 | 72.1268003 | 80.4754328 | 78.318326 | 82.2427597 | 84.8868972 |
| 17:34:17 | 0:33:55 | 72.1268003 | 81.4754328 | 77.318326 | 81.2427597 | 84.8868972 |
| 17:34:18 | 0:33:56 | 72.1268003 | 83.4754328 | 67.318326 | 79.2427597 | 85.8868972 |
| 17:34:19 | 0:33:57 | 72.1268003 | 84.4754328 | 61.318326 | 77.2427597 | 84.8868972 |
| 17:34:20 | 0:33:58 | 74.1268003 | 85.4754328 | 58.318326 | 75.2427597 | 83.8868972 |
| 17:34:21 | 0:33:59 | 74.1268003 | 84.4754328 | 58.318326 | 75.2427597 | 82.8868972 |
| 17:34:22 | 0:34:00 | 77.1268003 | 84.4754328 | 58.318326 | 75.2427597 | 82.8868972 |
| 17:34:23 | 0:34:01 | 78.1268003 | 81.4754328 | 60.318326 | 75.2427597 | 82.8868972 |
| 17:34:24 | 0:34:02 | 78.1268003 | 79.4754328 | 64.318326 | 79.2427597 | 81.8868972 |
| 17:34:25 | 0:34:03 | 82.1268003 | 79.4754328 | 67.318326 | 79.2427597 | 81.8868972 |
| 17:34:26 | 0:34:04 | 81.1268003 | 76.4754328 | 70.318326 | 80.2427597 | 78.8868972 |
| 17:34:27 | 0:34:05 | 80.1268003 | 75.4754328 | 73.318326 | 80.2427597 | 78.8868972 |
| 17:34:28 | 0:34:06 | 79.1268003 | 75.4754328 | 73.318326 | 79.2427597 | 77.8868972 |
| 17:34:29 | 0:34:07 | 79.1268003 | 72.4754328 | 74.318326 | 78.2427597 | 77.8868972 |
| 17:34:30 | 0:34:08 | 78.1268003 | 71.4754328 | 74.318326 | 79.2427597 | 77.8868972 |
| 17:34:31 | 0:34:09 | 78.1268003 | 71.4754328 | 74.318326 | 79.2427597 | 77.8868972 |
| 17:34:32 | 0:34:10 | 78.1268003 | 70.4754328 | 71.318326 | 79.2427597 | 78.8868972 |
| 17:34:33 | 0:34:11 | 78.1268003 | 69.4754328 | 68.318326 | 79.2427597 | 77.8868972 |
| 17:34:34 | 0:34:12 | 78.1268003 | 69.4754328 | 68.318326 | 79.2427597 | 76.8868972 |
| 17:34:35 | 0:34:13 | 78.1268003 | 69.4754328 | 67.318326 | 79.2427597 | 75.8868972 |
| 17:34:36 | 0:34:14 | 77.1268003 | 69.4754328 | 68.318326 | 79.2427597 | 75.8868972 |
| 17:34:37 | 0:34:15 | 77.1268003 | 69.4754328 | 68.318326 | 79.2427597 | 74.8868972 |
| 17:34:38 | 0:34:16 | 77.1268003 | 69.4754328 | 68.318326 | 79.2427597 | 74.8868972 |
| 17:34:39 | 0:34:17 | 78.1268003 | 70.4754328 | 68.318326 | 78.2427597 | 73.8868972 |
| 17:34:40 | 0:34:18 | 79.1268003 | 70.4754328 | 65.318326 | 78.2427597 | 73.8868972 |
| 17:34:41 | 0:34:19 | 79.1268003 | 70.4754328 | 64.318326 | 78.2427597 | 73.8868972 |
| 17:34:42 | 0:34:20 | 79.1268003 | 70.4754328 | 64.318326 | 78.2427597 | 73.8868972 |
| 17:34:43 | 0:34:21 | 80.1268003 | 70.4754328 | 64.318326 | 78.2427597 | 74.8868972 |
| 17:34:44 | 0:34:22 | 80.1268003 | 72.4754328 | 64.318326 | 78.2427597 | 74.8868972 |
| 17:34:45 | 0:34:23 | 80.1268003 | 71.4754328 | 64.318326 | 78.2427597 | 74.8868972 |
| 17:34:46 | 0:34:24 | 79.1268003 | 71.4754328 | 65.318326 | 77.2427597 | 74.8868972 |
| 17:34:47 | 0:34:25 | 79.1268003 | 70.4754328 | 66.318326 | 77.2427597 | 74.8868972 |
| 17:34:48 | 0:34:26 | 79.1268003 | 70.4754328 | 66.318326 | 77.2427597 | 74.8868972 |
| 17:34:49 | 0:34:27 | 79.1268003 | 70.4754328 | 67.318326 | 75.2427597 | 75.8868972 |
| 17:34:50 | 0:34:28 | 81.1268003 | 71.4754328 | 68.318326 | 75.2427597 | 75.8868972 |

|          |         |            |            |           |            |            |
|----------|---------|------------|------------|-----------|------------|------------|
| 17:34:51 | 0:34:29 | 80.1268003 | 72.4754328 | 69.318326 | 75.2427597 | 76.8868972 |
| 17:34:52 | 0:34:30 | 81.1268003 | 72.4754328 | 69.318326 | 75.2427597 | 77.8868972 |
| 17:34:53 | 0:34:31 | 82.1268003 | 72.4754328 | 70.318326 | 75.2427597 | 78.8868972 |
| 17:34:54 | 0:34:32 | 82.1268003 | 72.4754328 | 70.318326 | 75.2427597 | 78.8868972 |
| 17:34:55 | 0:34:33 | 83.1268003 | 72.4754328 | 71.318326 | 74.2427597 | 78.8868972 |
| 17:34:56 | 0:34:34 | 83.1268003 | 73.4754328 | 71.318326 | 74.2427597 | 80.8868972 |
| 17:34:57 | 0:34:35 | 83.1268003 | 73.4754328 | 71.318326 | 73.2427597 | 81.8868972 |
| 17:34:58 | 0:34:36 | 81.1268003 | 73.4754328 | 72.318326 | 73.2427597 | 81.8868972 |
| 17:34:59 | 0:34:37 | 81.1268003 | 73.4754328 | 72.318326 | 73.2427597 | 81.8868972 |
| 17:35:00 | 0:34:38 | 80.1268003 | 73.4754328 | 72.318326 | 73.2427597 | 82.8868972 |
| 17:35:01 | 0:34:39 | 80.1268003 | 73.4754328 | 72.318326 | 73.2427597 | 83.8868972 |
| 17:35:02 | 0:34:40 | 78.1268003 | 74.4754328 | 72.318326 | 73.2427597 | 81.8868972 |
| 17:35:03 | 0:34:41 | 78.1268003 | 74.4754328 | 72.318326 | 72.2427597 | 79.8868972 |
| 17:35:04 | 0:34:42 | 77.1268003 | 73.4754328 | 72.318326 | 72.2427597 | 77.8868972 |
| 17:35:05 | 0:34:43 | 77.1268003 | 75.4754328 | 74.318326 | 72.2427597 | 76.8868972 |
| 17:35:06 | 0:34:44 | 77.1268003 | 75.4754328 | 75.318326 | 72.2427597 | 75.8868972 |
| 17:35:07 | 0:34:45 | 77.1268003 | 75.4754328 | 75.318326 | 72.2427597 | 76.8868972 |
| 17:35:08 | 0:34:46 | 77.1268003 | 75.4754328 | 76.318326 | 72.2427597 | 76.8868972 |
| 17:35:09 | 0:34:47 | 77.1268003 | 75.4754328 | 77.318326 | 72.2427597 | 76.8868972 |
| 17:35:10 | 0:34:48 | 77.1268003 | 79.4754328 | 77.318326 | 72.2427597 | 76.8868972 |
| 17:35:11 | 0:34:49 | 75.1268003 | 83.4754328 | 77.318326 | 72.2427597 | 76.8868972 |
| 17:35:12 | 0:34:50 | 75.1268003 | 81.4754328 | 78.318326 | 72.2427597 | 76.8868972 |
| 17:35:13 | 0:34:51 | 75.1268003 | 80.4754328 | 79.318326 | 72.2427597 | 78.8868972 |
| 17:35:14 | 0:34:52 | 75.1268003 | 79.4754328 | 79.318326 | 72.2427597 | 79.8868972 |
| 17:35:15 | 0:34:53 | 77.1268003 | 79.4754328 | 79.318326 | 72.2427597 | 79.8868972 |
| 17:35:16 | 0:34:54 | 78.1268003 | 79.4754328 | 72.318326 | 72.2427597 | 77.8868972 |
| 17:35:17 | 0:34:55 | 81.1268003 | 78.4754328 | 68.318326 | 72.2427597 | 77.8868972 |
| 17:35:18 | 0:34:56 | 82.1268003 | 78.4754328 | 67.318326 | 72.2427597 | 77.8868972 |
| 17:35:19 | 0:34:57 | 82.1268003 | 78.4754328 | 66.318326 | 72.2427597 | 77.8868972 |
| 17:35:20 | 0:34:58 | 80.1268003 | 77.4754328 | 66.318326 | 74.2427597 | 77.8868972 |
| 17:35:21 | 0:34:59 | 79.1268003 | 77.4754328 | 67.318326 | 74.2427597 | 76.8868972 |
| 17:35:22 | 0:35:00 | 79.1268003 | 77.4754328 | 67.318326 | 75.2427597 | 78.8868972 |
| 17:35:23 | 0:35:01 | 80.1268003 | 76.4754328 | 66.318326 | 75.2427597 | 77.8868972 |
| 17:35:24 | 0:35:02 | 80.1268003 | 75.4754328 | 65.318326 | 75.2427597 | 78.8868972 |
| 17:35:25 | 0:35:03 | 80.1268003 | 75.4754328 | 65.318326 | 75.2427597 | 78.8868972 |
| 17:35:26 | 0:35:04 | 80.1268003 | 74.4754328 | 65.318326 | 75.2427597 | 78.8868972 |
| 17:35:27 | 0:35:05 | 77.1268003 | 74.4754328 | 65.318326 | 75.2427597 | 78.8868972 |
| 17:35:28 | 0:35:06 | 76.1268003 | 74.4754328 | 65.318326 | 74.2427597 | 78.8868972 |
| 17:35:29 | 0:35:07 | 76.1268003 | 73.4754328 | 65.318326 | 74.2427597 | 78.8868972 |
| 17:35:30 | 0:35:08 | 75.1268003 | 73.4754328 | 66.318326 | 74.2427597 | 78.8868972 |
| 17:35:31 | 0:35:09 | 74.1268003 | 72.4754328 | 66.318326 | 73.2427597 | 78.8868972 |
| 17:35:32 | 0:35:10 | 74.1268003 | 72.4754328 | 69.318326 | 73.2427597 | 81.8868972 |
| 17:35:33 | 0:35:11 | 73.1268003 | 72.4754328 | 69.318326 | 72.2427597 | 81.8868972 |
| 17:35:34 | 0:35:12 | 73.1268003 | 71.4754328 | 71.318326 | 71.2427597 | 83.8868972 |
| 17:35:35 | 0:35:13 | 73.1268003 | 71.4754328 | 71.318326 | 70.2427597 | 84.8868972 |

|          |         |            |            |           |            |            |
|----------|---------|------------|------------|-----------|------------|------------|
| 17:35:36 | 0:35:14 | 75.1268003 | 71.4754328 | 71.318326 | 69.2427597 | 82.8868972 |
| 17:35:37 | 0:35:15 | 76.1268003 | 73.4754328 | 72.318326 | 69.2427597 | 81.8868972 |
| 17:35:38 | 0:35:16 | 76.1268003 | 74.4754328 | 72.318326 | 64.2427597 | 80.8868972 |
| 17:35:39 | 0:35:17 | 76.1268003 | 74.4754328 | 75.318326 | 64.2427597 | 79.8868972 |
| 17:35:40 | 0:35:18 | 76.1268003 | 74.4754328 | 75.318326 | 63.2427597 | 74.8868972 |
| 17:35:41 | 0:35:19 | 76.1268003 | 74.4754328 | 76.318326 | 62.2427597 | 73.8868972 |
| 17:35:42 | 0:35:20 | 76.1268003 | 74.4754328 | 76.318326 | 62.2427597 | 73.8868972 |
| 17:35:43 | 0:35:21 | 76.1268003 | 79.4754328 | 79.318326 | 63.2427597 | 74.8868972 |
| 17:35:44 | 0:35:22 | 76.1268003 | 80.4754328 | 80.318326 | 63.2427597 | 74.8868972 |
| 17:35:45 | 0:35:23 | 76.1268003 | 82.4754328 | 80.318326 | 63.2427597 | 74.8868972 |
| 17:35:46 | 0:35:24 | 76.1268003 | 83.4754328 | 80.318326 | 66.2427597 | 74.8868972 |
| 17:35:47 | 0:35:25 | 76.1268003 | 83.4754328 | 79.318326 | 66.2427597 | 75.8868972 |
| 17:35:48 | 0:35:26 | 76.1268003 | 83.4754328 | 79.318326 | 68.2427597 | 76.8868972 |
| 17:35:49 | 0:35:27 | 77.1268003 | 85.4754328 | 77.318326 | 69.2427597 | 77.8868972 |
| 17:35:50 | 0:35:28 | 78.1268003 | 85.4754328 | 77.318326 | 73.2427597 | 77.8868972 |
| 17:35:51 | 0:35:29 | 78.1268003 | 86.4754328 | 76.318326 | 75.2427597 | 77.8868972 |
| 17:35:52 | 0:35:30 | 79.1268003 | 86.4754328 | 74.318326 | 75.2427597 | 77.8868972 |
| 17:35:53 | 0:35:31 | 80.1268003 | 86.4754328 | 73.318326 | 75.2427597 | 75.8868972 |
| 17:35:54 | 0:35:32 | 82.1268003 | 86.4754328 | 73.318326 | 75.2427597 | 74.8868972 |
| 17:35:55 | 0:35:33 | 82.1268003 | 86.4754328 | 71.318326 | 75.2427597 | 74.8868972 |
| 17:35:56 | 0:35:34 | 82.1268003 | 86.4754328 | 71.318326 | 75.2427597 | 73.8868972 |
| 17:35:57 | 0:35:35 | 83.1268003 | 83.4754328 | 70.318326 | 75.2427597 | 72.8868972 |
| 17:35:58 | 0:35:36 | 83.1268003 | 81.4754328 | 70.318326 | 75.2427597 | 71.8868972 |
| 17:35:59 | 0:35:37 | 83.1268003 | 80.4754328 | 70.318326 | 75.2427597 | 71.8868972 |
| 17:36:00 | 0:35:38 | 83.1268003 | 80.4754328 | 70.318326 | 74.2427597 | 71.8868972 |
| 17:36:01 | 0:35:39 | 81.1268003 | 79.4754328 | 72.318326 | 72.2427597 | 71.8868972 |
| 17:36:02 | 0:35:40 | 81.1268003 | 79.4754328 | 72.318326 | 72.2427597 | 71.8868972 |
| 17:36:03 | 0:35:41 | 81.1268003 | 79.4754328 | 72.318326 | 72.2427597 | 71.8868972 |
| 17:36:04 | 0:35:42 | 81.1268003 | 79.4754328 | 72.318326 | 72.2427597 | 71.8868972 |
| 17:36:05 | 0:35:43 | 81.1268003 | 79.4754328 | 72.318326 | 72.2427597 | 71.8868972 |
| 17:36:06 | 0:35:44 | 77.1268003 | 79.4754328 | 72.318326 | 73.2427597 | 71.8868972 |
| 17:36:07 | 0:35:45 | 75.1268003 | 79.4754328 | 73.318326 | 73.2427597 | 71.8868972 |
| 17:36:08 | 0:35:46 | 73.1268003 | 76.4754328 | 73.318326 | 73.2427597 | 71.8868972 |
| 17:36:09 | 0:35:47 | 71.1268003 | 75.4754328 | 73.318326 | 73.2427597 | 71.8868972 |
| 17:36:10 | 0:35:48 | 70.1268003 | 75.4754328 | 82.318326 | 72.2427597 | 70.8868972 |
| 17:36:11 | 0:35:49 | 70.1268003 | 75.4754328 | 83.318326 | 72.2427597 | 71.8868972 |
| 17:36:12 | 0:35:50 | 70.1268003 | 75.4754328 | 83.318326 | 72.2427597 | 71.8868972 |
| 17:36:13 | 0:35:51 | 70.1268003 | 75.4754328 | 83.318326 | 72.2427597 | 72.8868972 |
| 17:36:14 | 0:35:52 | 70.1268003 | 75.4754328 | 86.318326 | 72.2427597 | 73.8868972 |
| 17:36:15 | 0:35:53 | 74.1268003 | 74.4754328 | 86.318326 | 72.2427597 | 73.8868972 |
| 17:36:16 | 0:35:54 | 76.1268003 | 74.4754328 | 84.318326 | 72.2427597 | 73.8868972 |
| 17:36:17 | 0:35:55 | 77.1268003 | 74.4754328 | 83.318326 | 72.2427597 | 73.8868972 |
| 17:36:18 | 0:35:56 | 77.1268003 | 72.4754328 | 82.318326 | 72.2427597 | 73.8868972 |
| 17:36:19 | 0:35:57 | 77.1268003 | 71.4754328 | 81.318326 | 72.2427597 | 73.8868972 |
| 17:36:20 | 0:35:58 | 78.1268003 | 71.4754328 | 81.318326 | 71.2427597 | 73.8868972 |

|          |         |            |            |           |            |            |
|----------|---------|------------|------------|-----------|------------|------------|
| 17:36:21 | 0:35:59 | 79.1268003 | 71.4754328 | 81.318326 | 71.2427597 | 73.8868972 |
| 17:36:22 | 0:36:00 | 79.1268003 | 71.4754328 | 75.318326 | 70.2427597 | 74.8868972 |
| 17:36:23 | 0:36:01 | 80.1268003 | 71.4754328 | 72.318326 | 70.2427597 | 74.8868972 |
| 17:36:24 | 0:36:02 | 80.1268003 | 71.4754328 | 69.318326 | 71.2427597 | 75.8868972 |
| 17:36:25 | 0:36:03 | 80.1268003 | 79.4754328 | 65.318326 | 71.2427597 | 75.8868972 |
| 17:36:26 | 0:36:04 | 80.1268003 | 79.4754328 | 65.318326 | 76.2427597 | 75.8868972 |
| 17:36:27 | 0:36:05 | 79.1268003 | 77.4754328 | 65.318326 | 76.2427597 | 75.8868972 |
| 17:36:28 | 0:36:06 | 78.1268003 | 74.4754328 | 64.318326 | 77.2427597 | 75.8868972 |
| 17:36:29 | 0:36:07 | 77.1268003 | 72.4754328 | 64.318326 | 76.2427597 | 75.8868972 |
| 17:36:30 | 0:36:08 | 77.1268003 | 72.4754328 | 64.318326 | 76.2427597 | 75.8868972 |
| 17:36:31 | 0:36:09 | 76.1268003 | 72.4754328 | 63.318326 | 75.2427597 | 75.8868972 |
| 17:36:32 | 0:36:10 | 75.1268003 | 70.4754328 | 63.318326 | 74.2427597 | 75.8868972 |
| 17:36:33 | 0:36:11 | 75.1268003 | 69.4754328 | 64.318326 | 74.2427597 | 75.8868972 |
| 17:36:34 | 0:36:12 | 76.1268003 | 68.4754328 | 64.318326 | 72.2427597 | 74.8868972 |
| 17:36:35 | 0:36:13 | 77.1268003 | 68.4754328 | 64.318326 | 72.2427597 | 75.8868972 |
| 17:36:36 | 0:36:14 | 77.1268003 | 68.4754328 | 64.318326 | 72.2427597 | 75.8868972 |
| 17:36:37 | 0:36:15 | 77.1268003 | 70.4754328 | 66.318326 | 72.2427597 | 75.8868972 |
| 17:36:38 | 0:36:16 | 77.1268003 | 70.4754328 | 66.318326 | 70.2427597 | 75.8868972 |
| 17:36:39 | 0:36:17 | 77.1268003 | 71.4754328 | 66.318326 | 70.2427597 | 75.8868972 |
| 17:36:40 | 0:36:18 | 78.1268003 | 71.4754328 | 66.318326 | 70.2427597 | 75.8868972 |
| 17:36:41 | 0:36:19 | 78.1268003 | 73.4754328 | 66.318326 | 70.2427597 | 75.8868972 |
| 17:36:42 | 0:36:20 | 78.1268003 | 75.4754328 | 66.318326 | 70.2427597 | 76.8868972 |
| 17:36:43 | 0:36:21 | 79.1268003 | 77.4754328 | 68.318326 | 70.2427597 | 84.8868972 |
| 17:36:44 | 0:36:22 | 77.1268003 | 79.4754328 | 69.318326 | 69.2427597 | 85.8868972 |
| 17:36:45 | 0:36:23 | 77.1268003 | 80.4754328 | 69.318326 | 69.2427597 | 86.8868972 |
| 17:36:46 | 0:36:24 | 77.1268003 | 80.4754328 | 69.318326 | 70.2427597 | 87.8868972 |
| 17:36:47 | 0:36:25 | 77.1268003 | 80.4754328 | 69.318326 | 70.2427597 | 87.8868972 |
| 17:36:48 | 0:36:26 | 77.1268003 | 80.4754328 | 71.318326 | 73.2427597 | 87.8868972 |
| 17:36:49 | 0:36:27 | 77.1268003 | 81.4754328 | 75.318326 | 73.2427597 | 88.8868972 |
| 17:36:50 | 0:36:28 | 77.1268003 | 81.4754328 | 75.318326 | 75.2427597 | 88.8868972 |
| 17:36:51 | 0:36:29 | 76.1268003 | 81.4754328 | 75.318326 | 77.2427597 | 87.8868972 |
| 17:36:52 | 0:36:30 | 76.1268003 | 77.4754328 | 75.318326 | 77.2427597 | 87.8868972 |
| 17:36:53 | 0:36:31 | 76.1268003 | 75.4754328 | 75.318326 | 77.2427597 | 87.8868972 |
| 17:36:54 | 0:36:32 | 76.1268003 | 75.4754328 | 74.318326 | 77.2427597 | 87.8868972 |
| 17:36:55 | 0:36:33 | 76.1268003 | 74.4754328 | 73.318326 | 77.2427597 | 87.8868972 |
| 17:36:56 | 0:36:34 | 75.1268003 | 74.4754328 | 73.318326 | 77.2427597 | 87.8868972 |
| 17:36:57 | 0:36:35 | 74.1268003 | 75.4754328 | 73.318326 | 77.2427597 | 87.8868972 |
| 17:36:58 | 0:36:36 | 73.1268003 | 74.4754328 | 72.318326 | 75.2427597 | 87.8868972 |
| 17:36:59 | 0:36:37 | 73.1268003 | 74.4754328 | 72.318326 | 74.2427597 | 86.8868972 |
| 17:37:00 | 0:36:38 | 73.1268003 | 74.4754328 | 72.318326 | 73.2427597 | 85.8868972 |
| 17:37:01 | 0:36:39 | 74.1268003 | 74.4754328 | 72.318326 | 73.2427597 | 81.8868972 |
| 17:37:02 | 0:36:40 | 74.1268003 | 74.4754328 | 72.318326 | 72.2427597 | 76.8868972 |
| 17:37:03 | 0:36:41 | 74.1268003 | 74.4754328 | 73.318326 | 71.2427597 | 75.8868972 |
| 17:37:04 | 0:36:42 | 74.1268003 | 73.4754328 | 73.318326 | 71.2427597 | 74.8868972 |
| 17:37:05 | 0:36:43 | 76.1268003 | 72.4754328 | 73.318326 | 70.2427597 | 74.8868972 |

|          |         |            |            |           |            |            |
|----------|---------|------------|------------|-----------|------------|------------|
| 17:37:06 | 0:36:44 | 77.1268003 | 72.4754328 | 73.318326 | 68.2427597 | 74.8868972 |
| 17:37:07 | 0:36:45 | 77.1268003 | 72.4754328 | 73.318326 | 67.2427597 | 73.8868972 |
| 17:37:08 | 0:36:46 | 77.1268003 | 71.4754328 | 74.318326 | 67.2427597 | 73.8868972 |
| 17:37:09 | 0:36:47 | 77.1268003 | 70.4754328 | 74.318326 | 67.2427597 | 73.8868972 |
| 17:37:10 | 0:36:48 | 77.1268003 | 69.4754328 | 74.318326 | 67.2427597 | 73.8868972 |
| 17:37:11 | 0:36:49 | 78.1268003 | 71.4754328 | 75.318326 | 67.2427597 | 74.8868972 |
| 17:37:12 | 0:36:50 | 78.1268003 | 71.4754328 | 75.318326 | 67.2427597 | 77.8868972 |
| 17:37:13 | 0:36:51 | 78.1268003 | 71.4754328 | 75.318326 | 69.2427597 | 77.8868972 |
| 17:37:14 | 0:36:52 | 78.1268003 | 71.4754328 | 75.318326 | 69.2427597 | 77.8868972 |
| 17:37:15 | 0:36:53 | 78.1268003 | 72.4754328 | 75.318326 | 69.2427597 | 78.8868972 |
| 17:37:16 | 0:36:54 | 75.1268003 | 72.4754328 | 75.318326 | 69.2427597 | 79.8868972 |
| 17:37:17 | 0:36:55 | 75.1268003 | 73.4754328 | 76.318326 | 70.2427597 | 79.8868972 |
| 17:37:18 | 0:36:56 | 75.1268003 | 74.4754328 | 78.318326 | 70.2427597 | 79.8868972 |
| 17:37:19 | 0:36:57 | 75.1268003 | 74.4754328 | 78.318326 | 70.2427597 | 79.8868972 |
| 17:37:20 | 0:36:58 | 75.1268003 | 74.4754328 | 79.318326 | 70.2427597 | 78.8868972 |
| 17:37:21 | 0:36:59 | 75.1268003 | 74.4754328 | 79.318326 | 71.2427597 | 78.8868972 |
| 17:37:22 | 0:37:00 | 74.1268003 | 75.4754328 | 79.318326 | 71.2427597 | 78.8868972 |
| 17:37:23 | 0:37:01 | 76.1268003 | 77.4754328 | 78.318326 | 72.2427597 | 78.8868972 |
| 17:37:24 | 0:37:02 | 76.1268003 | 78.4754328 | 78.318326 | 72.2427597 | 77.8868972 |
| 17:37:25 | 0:37:03 | 76.1268003 | 79.4754328 | 78.318326 | 72.2427597 | 76.8868972 |
| 17:37:26 | 0:37:04 | 76.1268003 | 79.4754328 | 78.318326 | 71.2427597 | 75.8868972 |
| 17:37:27 | 0:37:05 | 75.1268003 | 78.4754328 | 78.318326 | 71.2427597 | 76.8868972 |
| 17:37:28 | 0:37:06 | 74.1268003 | 77.4754328 | 78.318326 | 71.2427597 | 76.8868972 |
| 17:37:29 | 0:37:07 | 75.1268003 | 77.4754328 | 79.318326 | 71.2427597 | 76.8868972 |
| 17:37:30 | 0:37:08 | 75.1268003 | 77.4754328 | 79.318326 | 71.2427597 | 76.8868972 |
| 17:37:31 | 0:37:09 | 76.1268003 | 77.4754328 | 80.318326 | 71.2427597 | 75.8868972 |
| 17:37:32 | 0:37:10 | 76.1268003 | 77.4754328 | 82.318326 | 71.2427597 | 75.8868972 |
| 17:37:33 | 0:37:11 | 78.1268003 | 78.4754328 | 82.318326 | 71.2427597 | 75.8868972 |
| 17:37:34 | 0:37:12 | 80.1268003 | 78.4754328 | 86.318326 | 71.2427597 | 75.8868972 |
| 17:37:35 | 0:37:13 | 79.1268003 | 78.4754328 | 86.318326 | 71.2427597 | 74.8868972 |
| 17:37:36 | 0:37:14 | 79.1268003 | 78.4754328 | 86.318326 | 71.2427597 | 74.8868972 |
| 17:37:37 | 0:37:15 | 79.1268003 | 78.4754328 | 86.318326 | 72.2427597 | 74.8868972 |
| 17:37:38 | 0:37:16 | 78.1268003 | 79.4754328 | 86.318326 | 72.2427597 | 74.8868972 |
| 17:37:39 | 0:37:17 | 77.1268003 | 79.4754328 | 86.318326 | 72.2427597 | 74.8868972 |
| 17:37:40 | 0:37:18 | 77.1268003 | 79.4754328 | 88.318326 | 72.2427597 | 74.8868972 |
| 17:37:41 | 0:37:19 | 77.1268003 | 80.4754328 | 90.318326 | 72.2427597 | 74.8868972 |
| 17:37:42 | 0:37:20 | 77.1268003 | 80.4754328 | 91.318326 | 71.2427597 | 74.8868972 |
| 17:37:43 | 0:37:21 | 77.1268003 | 79.4754328 | 91.318326 | 70.2427597 | 74.8868972 |
| 17:37:44 | 0:37:22 | 77.1268003 | 79.4754328 | 89.318326 | 70.2427597 | 73.8868972 |
| 17:37:45 | 0:37:23 | 77.1268003 | 79.4754328 | 89.318326 | 73.2427597 | 73.8868972 |
| 17:37:46 | 0:37:24 | 77.1268003 | 80.4754328 | 89.318326 | 77.2427597 | 72.8868972 |
| 17:37:47 | 0:37:25 | 77.1268003 | 80.4754328 | 89.318326 | 78.2427597 | 71.8868972 |
| 17:37:48 | 0:37:26 | 76.1268003 | 80.4754328 | 89.318326 | 78.2427597 | 71.8868972 |
| 17:37:49 | 0:37:27 | 74.1268003 | 80.4754328 | 87.318326 | 78.2427597 | 71.8868972 |
| 17:37:50 | 0:37:28 | 73.1268003 | 78.4754328 | 87.318326 | 75.2427597 | 70.8868972 |



|          |         |            |            |           |            |            |
|----------|---------|------------|------------|-----------|------------|------------|
| 17:37:51 | 0:37:29 | 73.1268003 | 77.4754328 | 87.318326 | 74.2427597 | 70.8868972 |
| 17:37:52 | 0:37:30 | 72.1268003 | 76.4754328 | 86.318326 | 74.2427597 | 73.8868972 |
| 17:37:53 | 0:37:31 | 72.1268003 | 76.4754328 | 86.318326 | 74.2427597 | 75.8868972 |
| 17:37:54 | 0:37:32 | 72.1268003 | 76.4754328 | 87.318326 | 74.2427597 | 75.8868972 |
| 17:37:55 | 0:37:33 | 72.1268003 | 76.4754328 | 88.318326 | 74.2427597 | 75.8868972 |
| 17:37:56 | 0:37:34 | 71.1268003 | 76.4754328 | 88.318326 | 73.2427597 | 76.8868972 |
| 17:37:57 | 0:37:35 | 71.1268003 | 77.4754328 | 86.318326 | 73.2427597 | 76.8868972 |
| 17:37:58 | 0:37:36 | 71.1268003 | 77.4754328 | 85.318326 | 73.2427597 | 76.8868972 |
| 17:37:59 | 0:37:37 | 72.1268003 | 76.4754328 | 85.318326 | 70.2427597 | 76.8868972 |
| 17:38:00 | 0:37:38 | 72.1268003 | 76.4754328 | 85.318326 | 69.2427597 | 78.8868972 |
| 17:38:01 | 0:37:39 | 73.1268003 | 76.4754328 | 86.318326 | 69.2427597 | 78.8868972 |
| 17:38:02 | 0:37:40 | 74.1268003 | 77.4754328 | 86.318326 | 72.2427597 | 78.8868972 |
| 17:38:03 | 0:37:41 | 75.1268003 | 82.4754328 | 85.318326 | 73.2427597 | 78.8868972 |
| 17:38:04 | 0:37:42 | 75.1268003 | 86.4754328 | 85.318326 | 73.2427597 | 79.8868972 |
| 17:38:05 | 0:37:43 | 75.1268003 | 86.4754328 | 85.318326 | 73.2427597 | 79.8868972 |
| 17:38:06 | 0:37:44 | 77.1268003 | 86.4754328 | 85.318326 | 72.2427597 | 75.8868972 |
| 17:38:07 | 0:37:45 | 77.1268003 | 83.4754328 | 85.318326 | 72.2427597 | 74.8868972 |
| 17:38:08 | 0:37:46 | 77.1268003 | 78.4754328 | 84.318326 | 72.2427597 | 74.8868972 |
| 17:38:09 | 0:37:47 | 76.1268003 | 77.4754328 | 83.318326 | 72.2427597 | 73.8868972 |
| 17:38:10 | 0:37:48 | 75.1268003 | 77.4754328 | 81.318326 | 74.2427597 | 72.8868972 |
| 17:38:11 | 0:37:49 | 75.1268003 | 77.4754328 | 81.318326 | 75.2427597 | 71.8868972 |
| 17:38:12 | 0:37:50 | 75.1268003 | 75.4754328 | 81.318326 | 75.2427597 | 71.8868972 |
| 17:38:13 | 0:37:51 | 75.1268003 | 75.4754328 | 79.318326 | 76.2427597 | 71.8868972 |
| 17:38:14 | 0:37:52 | 75.1268003 | 76.4754328 | 79.318326 | 77.2427597 | 72.8868972 |
| 17:38:15 | 0:37:53 | 75.1268003 | 75.4754328 | 79.318326 | 77.2427597 | 72.8868972 |
| 17:38:16 | 0:37:54 | 75.1268003 | 74.4754328 | 79.318326 | 78.2427597 | 73.8868972 |
| 17:38:17 | 0:37:55 | 75.1268003 | 74.4754328 | 77.318326 | 78.2427597 | 73.8868972 |
| 17:38:18 | 0:37:56 | 75.1268003 | 74.4754328 | 77.318326 | 79.2427597 | 73.8868972 |
| 17:38:19 | 0:37:57 | 76.1268003 | 75.4754328 | 76.318326 | 79.2427597 | 73.8868972 |
| 17:38:20 | 0:37:58 | 76.1268003 | 75.4754328 | 76.318326 | 79.2427597 | 73.8868972 |
| 17:38:21 | 0:37:59 | 76.1268003 | 75.4754328 | 75.318326 | 79.2427597 | 74.8868972 |
| 17:38:22 | 0:38:00 | 76.1268003 | 75.4754328 | 76.318326 | 79.2427597 | 74.8868972 |
| 17:38:23 | 0:38:01 | 76.1268003 | 75.4754328 | 76.318326 | 81.2427597 | 74.8868972 |
| 17:38:24 | 0:38:02 | 76.1268003 | 75.4754328 | 76.318326 | 81.2427597 | 74.8868972 |
| 17:38:25 | 0:38:03 | 76.1268003 | 75.4754328 | 77.318326 | 81.2427597 | 74.8868972 |
| 17:38:26 | 0:38:04 | 77.1268003 | 75.4754328 | 78.318326 | 83.2427597 | 75.8868972 |
| 17:38:27 | 0:38:05 | 77.1268003 | 75.4754328 | 79.318326 | 83.2427597 | 75.8868972 |
| 17:38:28 | 0:38:06 | 77.1268003 | 75.4754328 | 79.318326 | 83.2427597 | 75.8868972 |
| 17:38:29 | 0:38:07 | 76.1268003 | 75.4754328 | 79.318326 | 83.2427597 | 75.8868972 |
| 17:38:30 | 0:38:08 | 75.1268003 | 74.4754328 | 80.318326 | 84.2427597 | 75.8868972 |
| 17:38:31 | 0:38:09 | 73.1268003 | 72.4754328 | 80.318326 | 83.2427597 | 75.8868972 |
| 17:38:32 | 0:38:10 | 72.1268003 | 72.4754328 | 77.318326 | 83.2427597 | 76.8868972 |
| 17:38:33 | 0:38:11 | 72.1268003 | 71.4754328 | 75.318326 | 81.2427597 | 76.8868972 |
| 17:38:34 | 0:38:12 | 71.1268003 | 71.4754328 | 69.318326 | 80.2427597 | 76.8868972 |
| 17:38:35 | 0:38:13 | 71.1268003 | 71.4754328 | 68.318326 | 80.2427597 | 76.8868972 |

|          |         |            |            |           |            |            |
|----------|---------|------------|------------|-----------|------------|------------|
| 17:38:36 | 0:38:14 | 71.1268003 | 69.4754328 | 67.318326 | 78.2427597 | 77.8868972 |
| 17:38:37 | 0:38:15 | 71.1268003 | 69.4754328 | 68.318326 | 78.2427597 | 77.8868972 |
| 17:38:38 | 0:38:16 | 71.1268003 | 69.4754328 | 69.318326 | 78.2427597 | 77.8868972 |
| 17:38:39 | 0:38:17 | 72.1268003 | 69.4754328 | 69.318326 | 78.2427597 | 78.8868972 |
| 17:38:40 | 0:38:18 | 72.1268003 | 68.4754328 | 69.318326 | 79.2427597 | 80.8868972 |
| 17:38:41 | 0:38:19 | 72.1268003 | 65.4754328 | 69.318326 | 79.2427597 | 82.8868972 |
| 17:38:42 | 0:38:20 | 72.1268003 | 65.4754328 | 70.318326 | 79.2427597 | 80.8868972 |
| 17:38:43 | 0:38:21 | 72.1268003 | 65.4754328 | 70.318326 | 75.2427597 | 79.8868972 |
| 17:38:44 | 0:38:22 | 73.1268003 | 66.4754328 | 70.318326 | 71.2427597 | 77.8868972 |
| 17:38:45 | 0:38:23 | 74.1268003 | 67.4754328 | 69.318326 | 71.2427597 | 76.8868972 |
| 17:38:46 | 0:38:24 | 74.1268003 | 67.4754328 | 70.318326 | 70.2427597 | 76.8868972 |
| 17:38:47 | 0:38:25 | 74.1268003 | 67.4754328 | 70.318326 | 70.2427597 | 76.8868972 |
| 17:38:48 | 0:38:26 | 75.1268003 | 66.4754328 | 71.318326 | 71.2427597 | 76.8868972 |
| 17:38:49 | 0:38:27 | 75.1268003 | 67.4754328 | 71.318326 | 71.2427597 | 76.8868972 |
| 17:38:50 | 0:38:28 | 74.1268003 | 74.4754328 | 71.318326 | 72.2427597 | 76.8868972 |
| 17:38:51 | 0:38:29 | 74.1268003 | 74.4754328 | 70.318326 | 73.2427597 | 76.8868972 |
| 17:38:52 | 0:38:30 | 73.1268003 | 74.4754328 | 70.318326 | 73.2427597 | 76.8868972 |
| 17:38:53 | 0:38:31 | 73.1268003 | 73.4754328 | 70.318326 | 73.2427597 | 77.8868972 |
| 17:38:54 | 0:38:32 | 72.1268003 | 74.4754328 | 70.318326 | 73.2427597 | 77.8868972 |
| 17:38:55 | 0:38:33 | 72.1268003 | 74.4754328 | 69.318326 | 73.2427597 | 77.8868972 |
| 17:38:56 | 0:38:34 | 72.1268003 | 74.4754328 | 69.318326 | 73.2427597 | 77.8868972 |
| 17:38:57 | 0:38:35 | 72.1268003 | 74.4754328 | 69.318326 | 71.2427597 | 77.8868972 |
| 17:38:58 | 0:38:36 | 72.1268003 | 74.4754328 | 69.318326 | 72.2427597 | 77.8868972 |
| 17:38:59 | 0:38:37 | 72.1268003 | 74.4754328 | 73.318326 | 72.2427597 | 77.8868972 |
| 17:39:00 | 0:38:38 | 73.1268003 | 74.4754328 | 74.318326 | 72.2427597 | 77.8868972 |
| 17:39:01 | 0:38:39 | 77.1268003 | 75.4754328 | 74.318326 | 72.2427597 | 79.8868972 |
| 17:39:02 | 0:38:40 | 79.1268003 | 75.4754328 | 76.318326 | 72.2427597 | 79.8868972 |
| 17:39:03 | 0:38:41 | 79.1268003 | 74.4754328 | 79.318326 | 71.2427597 | 79.8868972 |
| 17:39:04 | 0:38:42 | 80.1268003 | 73.4754328 | 79.318326 | 71.2427597 | 79.8868972 |
| 17:39:05 | 0:38:43 | 80.1268003 | 73.4754328 | 79.318326 | 71.2427597 | 79.8868972 |
| 17:39:06 | 0:38:44 | 77.1268003 | 73.4754328 | 79.318326 | 70.2427597 | 79.8868972 |
| 17:39:07 | 0:38:45 | 75.1268003 | 75.4754328 | 80.318326 | 70.2427597 | 79.8868972 |
| 17:39:08 | 0:38:46 | 73.1268003 | 77.4754328 | 80.318326 | 70.2427597 | 79.8868972 |
| 17:39:09 | 0:38:47 | 73.1268003 | 78.4754328 | 80.318326 | 70.2427597 | 78.8868972 |
| 17:39:10 | 0:38:48 | 72.1268003 | 78.4754328 | 79.318326 | 70.2427597 | 78.8868972 |
| 17:39:11 | 0:38:49 | 73.1268003 | 78.4754328 | 76.318326 | 70.2427597 | 78.8868972 |
| 17:39:12 | 0:38:50 | 73.1268003 | 78.4754328 | 77.318326 | 71.2427597 | 77.8868972 |
| 17:39:13 | 0:38:51 | 74.1268003 | 80.4754328 | 77.318326 | 71.2427597 | 77.8868972 |
| 17:39:14 | 0:38:52 | 76.1268003 | 80.4754328 | 77.318326 | 71.2427597 | 77.8868972 |
| 17:39:15 | 0:38:53 | 76.1268003 | 81.4754328 | 77.318326 | 71.2427597 | 78.8868972 |
| 17:39:16 | 0:38:54 | 76.1268003 | 81.4754328 | 78.318326 | 71.2427597 | 78.8868972 |
| 17:39:17 | 0:38:55 | 76.1268003 | 81.4754328 | 79.318326 | 72.2427597 | 77.8868972 |
| 17:39:18 | 0:38:56 | 76.1268003 | 81.4754328 | 79.318326 | 72.2427597 | 77.8868972 |
| 17:39:19 | 0:38:57 | 76.1268003 | 82.4754328 | 79.318326 | 73.2427597 | 77.8868972 |
| 17:39:20 | 0:38:58 | 71.1268003 | 82.4754328 | 79.318326 | 74.2427597 | 76.8868972 |

|          |         |            |            |           |            |            |
|----------|---------|------------|------------|-----------|------------|------------|
| 17:39:21 | 0:38:59 | 72.1268003 | 86.4754328 | 79.318326 | 74.2427597 | 77.8868972 |
| 17:39:22 | 0:39:00 | 72.1268003 | 89.4754328 | 80.318326 | 72.2427597 | 77.8868972 |
| 17:39:23 | 0:39:01 | 72.1268003 | 89.4754328 | 80.318326 | 72.2427597 | 76.8868972 |
| 17:39:24 | 0:39:02 | 72.1268003 | 76.5555556 | 80.318326 | 73.2427597 | 76.8868972 |
| 17:39:25 | 0:39:03 | 73.1268003 | 89.4754328 | 80.318326 | 73.2427597 | 76.8868972 |
| 17:39:26 | 0:39:04 | 73.1268003 | 89.4754328 | 79.318326 | 73.2427597 | 76.8868972 |
| 17:39:27 | 0:39:05 | 74.1268003 | 87.4754328 | 79.318326 | 73.2427597 | 77.8868972 |
| 17:39:28 | 0:39:06 | 73.1268003 | 82.4754328 | 80.318326 | 73.2427597 | 84.8868972 |
| 17:39:29 | 0:39:07 | 73.1268003 | 78.4754328 | 80.318326 | 73.2427597 | 87.8868972 |
| 17:39:30 | 0:39:08 | 71.1268003 | 78.4754328 | 80.318326 | 72.2427597 | 88.8868972 |
| 17:39:31 | 0:39:09 | 70.1268003 | 77.4754328 | 81.318326 | 72.2427597 | 88.8868972 |
| 17:39:32 | 0:39:10 | 70.1268003 | 77.4754328 | 81.318326 | 70.2427597 | 77.3333333 |
| 17:39:33 | 0:39:11 | 70.1268003 | 77.4754328 | 82.318326 | 71.2427597 | 77.5555556 |
| 17:39:34 | 0:39:12 | 69.1268003 | 76.4754328 | 81.318326 | 73.2427597 | 77.8888889 |
| 17:39:35 | 0:39:13 | 69.1268003 | 75.4754328 | 81.318326 | 73.2427597 | 78         |
| 17:39:36 | 0:39:14 | 69.1268003 | 74.4754328 | 80.318326 | 73.2427597 | 78         |
| 17:39:37 | 0:39:15 | 69.1268003 | 74.4754328 | 80.318326 | 73.2427597 | 78         |
| 17:39:38 | 0:39:16 | 69.1268003 | 75.4754328 | 80.318326 | 73.2427597 | 78.3333333 |
| 17:39:39 | 0:39:17 | 69.1268003 | 75.4754328 | 80.318326 | 73.2427597 | 78.4444444 |
| 17:39:40 | 0:39:18 | 69.1268003 | 75.4754328 | 81.318326 | 74.2427597 | 79         |
| 17:39:41 | 0:39:19 | 69.1268003 | 75.4754328 | 81.318326 | 74.2427597 | 79         |
| 17:39:42 | 0:39:20 | 69.1268003 | 75.4754328 | 82.318326 | 74.2427597 | 78.6666667 |
| 17:39:43 | 0:39:21 | 69.1268003 | 75.4754328 | 82.318326 | 77.2427597 | 78.4444444 |
| 17:39:44 | 0:39:22 | 69.1268003 | 74.4754328 | 81.318326 | 77.2427597 | 77.8888889 |
| 17:39:45 | 0:39:23 | 69.1268003 | 74.4754328 | 81.318326 | 77.2427597 | 77.1111111 |
| 17:39:46 | 0:39:24 | 68.1268003 | 72.4754328 | 81.318326 | 78.2427597 | 85.8868972 |
| 17:39:47 | 0:39:25 | 67.1268003 | 79.4754328 | 81.318326 | 78.2427597 | 85.8868972 |
| 17:39:48 | 0:39:26 | 66.1268003 | 81.4754328 | 81.318326 | 78.2427597 | 85.8868972 |
| 17:39:49 | 0:39:27 | 66.1268003 | 82.4754328 | 81.318326 | 78.2427597 | 84.8868972 |
| 17:39:50 | 0:39:28 | 66.1268003 | 82.4754328 | 78.318326 | 78.2427597 | 81.8868972 |
| 17:39:51 | 0:39:29 | 66.1268003 | 81.4754328 | 76.318326 | 78.2427597 | 80.8868972 |
| 17:39:52 | 0:39:30 | 66.1268003 | 80.4754328 | 75.318326 | 78.2427597 | 80.8868972 |
| 17:39:53 | 0:39:31 | 66.1268003 | 80.4754328 | 74.318326 | 80.2427597 | 80.8868972 |
| 17:39:54 | 0:39:32 | 65.1268003 | 79.4754328 | 75.318326 | 80.2427597 | 80.8868972 |
| 17:39:55 | 0:39:33 | 65.1268003 | 79.4754328 | 75.318326 | 80.2427597 | 80.8868972 |
| 17:39:56 | 0:39:34 | 65.1268003 | 79.4754328 | 75.318326 | 80.2427597 | 82.8868972 |
| 17:39:57 | 0:39:35 | 65.1268003 | 78.4754328 | 77.318326 | 75.2427597 | 82.8868972 |
| 17:39:58 | 0:39:36 | 69.1268003 | 78.4754328 | 78.318326 | 74.2427597 | 81.8868972 |
| 17:39:59 | 0:39:37 | 69.1268003 | 78.4754328 | 76.318326 | 74.2427597 | 81.8868972 |
| 17:40:00 | 0:39:38 | 68.1268003 | 77.4754328 | 76.318326 | 73.2427597 | 80.8868972 |
| 17:40:01 | 0:39:39 | 70.1268003 | 77.4754328 | 77.318326 | 73.2427597 | 80.8868972 |
| 17:40:02 | 0:39:40 | 72.1268003 | 77.4754328 | 78.318326 | 73.2427597 | 81.8868972 |
| 17:40:03 | 0:39:41 | 72.1268003 | 75.4754328 | 78.318326 | 71.2427597 | 81.8868972 |
| 17:40:04 | 0:39:42 | 71.1268003 | 75.4754328 | 79.318326 | 71.2427597 | 81.8868972 |
| 17:40:05 | 0:39:43 | 71.1268003 | 75.4754328 | 79.318326 | 70.2427597 | 81.8868972 |

|          |         |            |            |            |            |            |
|----------|---------|------------|------------|------------|------------|------------|
| 17:40:06 | 0:39:44 | 71.1268003 | 75.4754328 | 79.318326  | 69.2427597 | 81.8868972 |
| 17:40:07 | 0:39:45 | 71.1268003 | 75.4754328 | 80.318326  | 69.2427597 | 80.8868972 |
| 17:40:08 | 0:39:46 | 71.1268003 | 79.4754328 | 81.318326  | 67.2427597 | 79.8868972 |
| 17:40:09 | 0:39:47 | 71.1268003 | 78.4754328 | 83.318326  | 66.2427597 | 78.8868972 |
| 17:40:10 | 0:39:48 | 71.1268003 | 77.4754328 | 83.318326  | 66.2427597 | 77.8868972 |
| 17:40:11 | 0:39:49 | 72.1268003 | 76.4754328 | 84.318326  | 65.2427597 | 77.8868972 |
| 17:40:12 | 0:39:50 | 72.1268003 | 76.4754328 | 84.318326  | 65.2427597 | 77.8868972 |
| 17:40:13 | 0:39:51 | 72.1268003 | 74.4754328 | 83.318326  | 64.2427597 | 77.8868972 |
| 17:40:14 | 0:39:52 | 71.1268003 | 74.4754328 | 82.318326  | 64.2427597 | 77.8868972 |
| 17:40:15 | 0:39:53 | 71.1268003 | 74.4754328 | 82.318326  | 63.2427597 | 76.8868972 |
| 17:40:16 | 0:39:54 | 71.1268003 | 74.4754328 | 81.318326  | 63.2427597 | 76.8868972 |
| 17:40:17 | 0:39:55 | 70.1268003 | 75.4754328 | 81.318326  | 64.2427597 | 76.8868972 |
| 17:40:18 | 0:39:56 | 70.1268003 | 75.4754328 | 82.318326  | 66.2427597 | 76.8868972 |
| 17:40:19 | 0:39:57 | 70.1268003 | 75.4754328 | 83.318326  | 70.2427597 | 76.8868972 |
| 17:40:20 | 0:39:58 | 70.1268003 | 75.4754328 | 85.318326  | 73.2427597 | 76.8868972 |
| 17:40:21 | 0:39:59 | 68.1268003 | 75.4754328 | 85.318326  | 77.2427597 | 78.8868972 |
| 17:40:22 | 0:40:00 | 69.1268003 | 73.4754328 | 87.318326  | 77.2427597 | 79.8868972 |
| 17:40:23 | 0:40:01 | 71.1268003 | 72.4754328 | 75.1111111 | 77.2427597 | 78.8868972 |
| 17:40:24 | 0:40:02 | 73.1268003 | 72.4754328 | 74.4444444 | 73.2427597 | 76.8868972 |
| 17:40:25 | 0:40:03 | 74.1268003 | 72.4754328 | 74.3333333 | 71.2427597 | 75.8868972 |
| 17:40:26 | 0:40:04 | 74.1268003 | 72.4754328 | 74.3333333 | 70.2427597 | 75.8868972 |
| 17:40:27 | 0:40:05 | 73.1268003 | 71.4754328 | 74.3333333 | 70.2427597 | 75.8868972 |
| 17:40:28 | 0:40:06 | 73.1268003 | 71.4754328 | 74.4444444 | 70.2427597 | 75.8868972 |
| 17:40:29 | 0:40:07 | 65.1268003 | 71.4754328 | 73.3333333 | 71.2427597 | 75.8868972 |
| 17:40:30 | 0:40:08 | 64.1268003 | 70.4754328 | 72.5555556 | 69.2427597 | 75.8868972 |
| 17:40:31 | 0:40:09 | 64.1268003 | 69.4754328 | 72.2222222 | 68.2427597 | 77.8868972 |
| 17:40:32 | 0:40:10 | 64.1268003 | 69.4754328 | 72.1111111 | 68.2427597 | 77.8868972 |
| 17:40:33 | 0:40:11 | 68.1268003 | 70.4754328 | 72.6666667 | 67.2427597 | 77.8868972 |
| 17:40:34 | 0:40:12 | 70.1268003 | 70.4754328 | 73.1111111 | 67.2427597 | 77.8868972 |
| 17:40:35 | 0:40:13 | 70.1268003 | 70.4754328 | 73.4444444 | 67.2427597 | 78.8868972 |
| 17:40:36 | 0:40:14 | 72.1268003 | 70.4754328 | 85.318326  | 67.2427597 | 78.8868972 |
| 17:40:37 | 0:40:15 | 74.1268003 | 71.4754328 | 85.318326  | 67.2427597 | 78.8868972 |
| 17:40:38 | 0:40:16 | 74.1268003 | 71.4754328 | 85.318326  | 66.2427597 | 78.8868972 |
| 17:40:39 | 0:40:17 | 75.1268003 | 71.4754328 | 85.318326  | 66.2427597 | 78.8868972 |
| 17:40:40 | 0:40:18 | 75.1268003 | 71.4754328 | 85.318326  | 66.2427597 | 79.8868972 |
| 17:40:41 | 0:40:19 | 77.1268003 | 72.4754328 | 85.318326  | 66.2427597 | 79.8868972 |
| 17:40:42 | 0:40:20 | 77.1268003 | 71.4754328 | 85.318326  | 66.2427597 | 79.8868972 |
| 17:40:43 | 0:40:21 | 78.1268003 | 71.4754328 | 85.318326  | 66.2427597 | 79.8868972 |
| 17:40:44 | 0:40:22 | 78.1268003 | 70.4754328 | 85.318326  | 66.2427597 | 79.8868972 |
| 17:40:45 | 0:40:23 | 81.1268003 | 70.4754328 | 85.318326  | 66.2427597 | 79.8868972 |
| 17:40:46 | 0:40:24 | 81.1268003 | 70.4754328 | 85.318326  | 66.2427597 | 79.8868972 |
| 17:40:47 | 0:40:25 | 81.1268003 | 70.4754328 | 84.318326  | 65.2427597 | 79.8868972 |
| 17:40:48 | 0:40:26 | 83.1268003 | 70.4754328 | 85.318326  | 64.2427597 | 79.8868972 |
| 17:40:49 | 0:40:27 | 88.1268003 | 69.4754328 | 86.318326  | 64.2427597 | 79.8868972 |
| 17:40:50 | 0:40:28 | 89.1268003 | 69.4754328 | 86.318326  | 64.2427597 | 79.8868972 |

|          |         |            |            |           |            |            |
|----------|---------|------------|------------|-----------|------------|------------|
| 17:40:51 | 0:40:29 | 89.1268003 | 69.4754328 | 86.318326 | 64.2427597 | 79.8868972 |
| 17:40:52 | 0:40:30 | 89.1268003 | 70.4754328 | 86.318326 | 64.2427597 | 79.8868972 |
| 17:40:53 | 0:40:31 | 90.1268003 | 71.4754328 | 85.318326 | 64.2427597 | 79.8868972 |
| 17:40:54 | 0:40:32 | 91.1268003 | 72.4754328 | 84.318326 | 64.2427597 | 78.8868972 |
| 17:40:55 | 0:40:33 | 91.1268003 | 72.4754328 | 83.318326 | 64.2427597 | 77.8868972 |
| 17:40:56 | 0:40:34 | 78.3333333 | 72.4754328 | 81.318326 | 64.2427597 | 76.8868972 |
| 17:40:57 | 0:40:35 | 78.1111111 | 72.4754328 | 81.318326 | 64.2427597 | 76.8868972 |
| 17:40:58 | 0:40:36 | 78.1111111 | 73.4754328 | 81.318326 | 66.2427597 | 74.8868972 |
| 17:40:59 | 0:40:37 | 89.1268003 | 73.4754328 | 80.318326 | 70.2427597 | 73.8868972 |
| 17:41:00 | 0:40:38 | 86.1268003 | 74.4754328 | 83.318326 | 78.2427597 | 73.8868972 |
| 17:41:01 | 0:40:39 | 83.1268003 | 77.4754328 | 83.318326 | 78.2427597 | 73.8868972 |
| 17:41:02 | 0:40:40 | 82.1268003 | 77.4754328 | 84.318326 | 78.2427597 | 73.8868972 |
| 17:41:03 | 0:40:41 | 82.1268003 | 77.4754328 | 84.318326 | 78.2427597 | 73.8868972 |
| 17:41:04 | 0:40:42 | 84.1268003 | 77.4754328 | 84.318326 | 79.2427597 | 73.8868972 |
| 17:41:05 | 0:40:43 | 85.1268003 | 78.4754328 | 84.318326 | 81.2427597 | 74.8868972 |
| 17:41:06 | 0:40:44 | 85.1268003 | 78.4754328 | 84.318326 | 81.2427597 | 74.8868972 |
| 17:41:07 | 0:40:45 | 87.1268003 | 78.4754328 | 75.318326 | 81.2427597 | 77.8868972 |
| 17:41:08 | 0:40:46 | 87.1268003 | 78.4754328 | 73.318326 | 83.2427597 | 78.8868972 |
| 17:41:09 | 0:40:47 | 86.1268003 | 78.4754328 | 73.318326 | 83.2427597 | 79.8868972 |
| 17:41:10 | 0:40:48 | 85.1268003 | 79.4754328 | 73.318326 | 82.2427597 | 79.8868972 |
| 17:41:11 | 0:40:49 | 82.1268003 | 79.4754328 | 73.318326 | 82.2427597 | 79.8868972 |
| 17:41:12 | 0:40:50 | 78.1268003 | 80.4754328 | 74.318326 | 81.2427597 | 79.8868972 |
| 17:41:13 | 0:40:51 | 78.1268003 | 80.4754328 | 75.318326 | 81.2427597 | 80.8868972 |
| 17:41:14 | 0:40:52 | 78.1268003 | 81.4754328 | 76.318326 | 81.2427597 | 80.8868972 |
| 17:41:15 | 0:40:53 | 80.1268003 | 81.4754328 | 76.318326 | 81.2427597 | 82.8868972 |

| Person 13  | Person 2 | Person 11 | Person 12 |  | Activity | average of a |
|------------|----------|-----------|-----------|--|----------|--------------|
| 79.2330467 |          |           |           |  |          | 78.3805438   |
| 81.2330467 |          |           |           |  |          | 79.0472104   |
| 83.2330467 |          |           |           |  |          | 79.5472104   |
| 83.2330467 |          |           |           |  |          | 79.5472104   |
| 84.2330467 |          |           |           |  |          | 79.7138771   |
| 82.2330467 |          |           |           |  |          | 79.5472104   |
| 82.2330467 |          |           |           |  |          | 79.5472104   |
| 82.2330467 |          |           |           |  |          | 79.8805438   |
| 82.2330467 |          |           |           |  |          | 79.7138771   |
| 83.2330467 |          |           |           |  |          | 80.0472104   |
| 83.2330467 |          |           |           |  |          | 79.3805438   |
| 83.2330467 |          |           |           |  |          | 78.8805438   |
| 82.2330467 |          |           |           |  |          | 78.7138771   |
| 82.2330467 |          |           |           |  |          | 78.7138771   |
| 82.2330467 |          |           |           |  |          | 80.0472104   |
| 80.2330467 |          |           |           |  |          | 77.9035078   |
| 80.2330467 |          |           |           |  |          | 77.9035078   |
| 80.2330467 |          |           |           |  |          | 78.2923967   |
| 81.2330467 |          |           |           |  |          | 78.8479522   |
| 81.2330467 |          |           |           |  |          | 80.5472104   |
| 81.2330467 |          |           |           |  |          | 80.7138771   |
| 82.2330467 |          |           |           |  |          | 80.5472104   |
| 83.2330467 |          |           |           |  |          | 80.7138771   |
| 83.2330467 |          |           |           |  |          | 81.2138771   |
| 83.2330467 |          |           |           |  |          | 81.0472104   |
| 82.2330467 |          |           |           |  |          | 80.8805438   |
| 81.2330467 |          |           |           |  |          | 80.2138771   |
| 81.2330467 |          |           |           |  |          | 80.0472104   |
| 80.2330467 |          |           |           |  |          | 80.3805438   |
| 81.2330467 |          |           |           |  |          | 80.3805438   |
| 81.2330467 |          |           |           |  |          | 80.5472104   |
| 80.2330467 |          |           |           |  |          | 80.5472104   |
| 77.2330467 |          |           |           |  |          | 78.0423967   |
| 75.2330467 |          |           |           |  |          | 77.8479522   |
| 75.2330467 |          |           |           |  |          | 80.0472104   |
| 73.2330467 |          |           |           |  |          | 80.0472104   |
| 74.2330467 |          |           |           |  |          | 80.3805438   |
| 74.2330467 |          |           |           |  |          | 80.5472104   |
| 74.2330467 |          |           |           |  |          | 80.7138771   |
| 71.2330467 |          |           |           |  |          | 80.0472104   |
| 69.2330467 |          |           |           |  |          | 79.8805438   |
| 69.2330467 |          |           |           |  |          | 79.2138771   |
| 69.2330467 |          |           |           |  |          | 79.0472104   |

|            |  |  |  |  |            |
|------------|--|--|--|--|------------|
| 69.2330467 |  |  |  |  | 78.7138771 |
| 71.2330467 |  |  |  |  | 78.8805438 |
| 71.2330467 |  |  |  |  | 79.0472104 |
| 71.2330467 |  |  |  |  | 78.7138771 |
| 71.2330467 |  |  |  |  | 78.5472104 |
| 70.2330467 |  |  |  |  | 78.0472104 |
| 70.2330467 |  |  |  |  | 78.0472104 |
| 69.2330467 |  |  |  |  | 77.7138771 |
| 69.2330467 |  |  |  |  | 78.7138771 |
| 69.2330467 |  |  |  |  | 79.5472104 |
| 69.2330467 |  |  |  |  | 80.3805438 |
| 69.2330467 |  |  |  |  | 79.8805438 |
| 72.2330467 |  |  |  |  | 80.5472104 |
| 73.2330467 |  |  |  |  | 81.5472104 |
| 73.2330467 |  |  |  |  | 82.3805438 |
| 74.2330467 |  |  |  |  | 83.2138771 |
| 73.2330467 |  |  |  |  | 84.2138771 |
| 72.2330467 |  |  |  |  | 84.8805438 |
| 71.2330467 |  |  |  |  | 85.8805438 |
| 70.2330467 |  |  |  |  | 85.7138771 |
| 70.2330467 |  |  |  |  | 85.7138771 |
| 71.2330467 |  |  |  |  | 86.8805438 |
| 71.2330467 |  |  |  |  | 87.2138771 |
| 71.2330467 |  |  |  |  | 87.5472104 |
| 71.2330467 |  |  |  |  | 87.5472104 |
| 71.2330467 |  |  |  |  | 87.3805438 |
| 70.2330467 |  |  |  |  | 83.3239293 |
| 70.2330467 |  |  |  |  | 84.3805438 |
| 70.2330467 |  |  |  |  | 84.3805438 |
| 74.2330467 |  |  |  |  | 84.7138771 |
| 74.2330467 |  |  |  |  | 80.22584   |
| 76.2330467 |  |  |  |  | 80.22584   |
| 77.2330467 |  |  |  |  | 79.72584   |
| 79.2330467 |  |  |  |  | 80.22584   |
| 79.2330467 |  |  |  |  | 79.9202845 |
| 79.2330467 |  |  |  |  | 79.7536178 |
| 79.2330467 |  |  |  |  | 79.1702845 |
| 78.2330467 |  |  |  |  | 78.1980623 |
| 77.2330467 |  |  |  |  | 77.0591734 |
| 77.2330467 |  |  |  |  | 76.6147289 |
| 77.2330467 |  |  |  |  | 80.0472104 |
| 77.2330467 |  |  |  |  | 80.2138771 |
| 77.2330467 |  |  |  |  | 79.7138771 |
| 77.2330467 |  |  |  |  | 80.0472104 |
| 78.2330467 |  |  |  |  | 80.0472104 |

|            |  |  |  |  |            |
|------------|--|--|--|--|------------|
| 78.2330467 |  |  |  |  | 79.5472104 |
| 78.2330467 |  |  |  |  | 79.3805438 |
| 77.2330467 |  |  |  |  | 79.0472104 |
| 77.2330467 |  |  |  |  | 79.0472104 |
| 74.2330467 |  |  |  |  | 78.5472104 |
| 74.2330467 |  |  |  |  | 78.7138771 |
| 74.2330467 |  |  |  |  | 78.8805438 |
| 74.2330467 |  |  |  |  | 79.0472104 |
| 74.2330467 |  |  |  |  | 79.3805438 |
| 74.2330467 |  |  |  |  | 80.7138771 |
| 73.2330467 |  |  |  |  | 80.5472104 |
| 73.2330467 |  |  |  |  | 80.8805438 |
| 73.2330467 |  |  |  |  | 81.0472104 |
| 72.2330467 |  |  |  |  | 80.5472104 |
| 74.2330467 |  |  |  |  | 80.5472104 |
| 75.2330467 |  |  |  |  | 80.5472104 |
| 75.2330467 |  |  |  |  | 78.2368411 |
| 75.2330467 |  |  |  |  | 78.0423967 |
| 77.2330467 |  |  |  |  | 80.3805438 |
| 78.2330467 |  |  |  |  | 79.7138771 |
| 78.2330467 |  |  |  |  | 78.8805438 |
| 78.2330467 |  |  |  |  | 78.7138771 |
| 78.2330467 |  |  |  |  | 77.7138771 |
| 78.2330467 |  |  |  |  | 77.5472104 |
| 78.2330467 |  |  |  |  | 77.3805438 |
| 76.2330467 |  |  |  |  | 77.5472104 |
| 76.2330467 |  |  |  |  | 74.8672788 |
| 78.2330467 |  |  |  |  | 76.5472104 |
| 78.2330467 |  |  |  |  | 76.7138771 |
| 78.2330467 |  |  |  |  | 77.3805438 |
| 77.2330467 |  |  |  |  | 76.2561677 |
| 77.2330467 |  |  |  |  | 78.7138771 |
| 74.2330467 |  |  |  |  | 76.0617232 |
| 74.2330467 |  |  |  |  | 76.0617232 |
| 73.2330467 |  |  |  |  | 77.0472104 |
| 73.2330467 |  |  |  |  | 76.7138771 |
| 76.2330467 |  |  |  |  | 77.3805438 |
| 76.2330467 |  |  |  |  | 77.3805438 |
| 76.2330467 |  |  |  |  | 77.0472104 |
| 76.2330467 |  |  |  |  | 76.7138771 |
| 76.2330467 |  |  |  |  | 76.5472104 |
| 76.2330467 |  |  |  |  | 76.7138771 |
| 76.2330467 |  |  |  |  | 76.3805438 |
| 74.2330467 |  |  |  |  | 76.0472104 |
| 74.2330467 |  |  |  |  | 75.8805438 |



|            |            |  |  |  |            |
|------------|------------|--|--|--|------------|
| 71.2330467 |            |  |  |  | 75.5472104 |
| 71.2330467 |            |  |  |  | 75.5472104 |
| 73.2330467 |            |  |  |  | 76.2138771 |
| 74.2330467 |            |  |  |  | 76.5472104 |
| 74.2330467 |            |  |  |  | 76.5472104 |
| 74.2330467 |            |  |  |  | 75.8805438 |
| 74.2330467 |            |  |  |  | 75.7138771 |
| 74.2330467 |            |  |  |  | 75.7138771 |
| 74.2330467 |            |  |  |  | 75.5472104 |
| 74.2330467 |            |  |  |  | 75.3805438 |
| 74.2330467 |            |  |  |  | 75.3805438 |
| 74.2330467 |            |  |  |  | 75.5472104 |
| 75.2330467 |            |  |  |  | 76.0472104 |
| 75.2330467 |            |  |  |  | 76.3805438 |
| 79.2330467 |            |  |  |  | 77.2138771 |
| 79.2330467 |            |  |  |  | 76.8805438 |
| 85.2330467 |            |  |  |  | 77.8805438 |
| 89.2330467 |            |  |  |  | 78.3805438 |
| 89.2330467 | 85.3715043 |  |  |  | 79.2363953 |
| 90.2330467 | 83.3715043 |  |  |  | 78.3792524 |
| 90.2330467 | 83.3715043 |  |  |  | 78.0935381 |
| 87.2330467 | 83.3715043 |  |  |  | 76.2363953 |
| 85.2330467 | 85.3715043 |  |  |  | 76.0935381 |
| 85.2330467 | 86.3715043 |  |  |  | 76.0935381 |
| 83.2330467 | 87.3715043 |  |  |  | 75.950681  |
| 83.2330467 | 87.3715043 |  |  |  | 76.8078238 |
| 82.2330467 | 88.3715043 |  |  |  | 76.950681  |
| 81.2330467 | 88.3715043 |  |  |  | 77.5221096 |
| 81.2330467 | 86.3715043 |  |  |  | 77.3792524 |
| 78.2330467 | 86.3715043 |  |  |  | 77.5221096 |
| 78.2330467 | 86.3715043 |  |  |  | 77.5221096 |
| 78.2330467 | 86.3715043 |  |  |  | 77.8078238 |
| 77.2330467 | 86.3715043 |  |  |  | 77.6649667 |
| 77.2330467 | 86.3715043 |  |  |  | 77.6649667 |
| 77.2330467 | 86.3715043 |  |  |  | 78.0935381 |
| 77.2330467 | 84.3715043 |  |  |  | 78.3792524 |
| 77.2330467 | 84.3715043 |  |  |  | 79.0935381 |
| 76.2330467 | 84.3715043 |  |  |  | 78.950681  |
| 76.2330467 | 84.3715043 |  |  |  | 79.6649667 |
| 77.2330467 | 84.3715043 |  |  |  | 80.3792524 |
| 77.2330467 | 82.3715043 |  |  |  | 79.3792524 |
| 77.2330467 | 81.3715043 |  |  |  | 79.0935381 |
| 77.2330467 | 81.3715043 |  |  |  | 79.0935381 |
| 77.2330467 | 81.3715043 |  |  |  | 79.6649667 |
| 77.2330467 | 81.3715043 |  |  |  | 79.0935381 |

|            |            |  |  |  |  |            |
|------------|------------|--|--|--|--|------------|
| 77.2330467 | 81.3715043 |  |  |  |  | 79.0935381 |
| 77.2330467 | 91.3715043 |  |  |  |  | 80.2363953 |
| 77.2330467 | 91.3715043 |  |  |  |  | 79.2363953 |
| 76.2330467 | 90.3715043 |  |  |  |  | 78.8078238 |
| 77.2330467 | 90.3715043 |  |  |  |  | 78.5221096 |
| 77.2330467 | 88.3715043 |  |  |  |  | 77.3792524 |
| 78.2330467 | 88.3715043 |  |  |  |  | 76.6649667 |
| 78.2330467 | 88.3715043 |  |  |  |  | 76.3792524 |
| 78.2330467 | 88.3715043 |  |  |  |  | 76.2363953 |
| 78.2330467 | 88.3715043 |  |  |  |  | 76.3792524 |
| 78.2330467 | 88.3715043 |  |  |  |  | 76.5221096 |
| 78.2330467 | 88.3715043 |  |  |  |  | 76.5221096 |
| 78.2330467 | 85.3715043 |  |  |  |  | 76.2363953 |
| 80.2330467 | 84.3715043 |  |  |  |  | 76.5221096 |
| 81.2330467 | 84.3715043 |  |  |  |  | 76.5221096 |
| 81.2330467 | 85.3715043 |  |  |  |  | 76.950681  |
| 81.2330467 | 85.3715043 |  |  |  |  | 77.2363953 |
| 79.2330467 | 85.3715043 |  |  |  |  | 76.950681  |
| 78.2330467 | 84.3715043 |  |  |  |  | 76.6649667 |
| 78.2330467 | 84.3715043 |  |  |  |  | 76.8078238 |
| 76.2330467 | 82.3715043 |  |  |  |  | 75.950681  |
| 77.2330467 | 82.3715043 |  |  |  |  | 76.0935381 |
| 77.2330467 | 81.3715043 |  |  |  |  | 76.0935381 |
| 76.2330467 | 83.3715043 |  |  |  |  | 76.3792524 |
| 76.2330467 | 83.3715043 |  |  |  |  | 76.3792524 |
| 77.2330467 | 83.3715043 |  |  |  |  | 76.2363953 |
| 77.2330467 | 83.3715043 |  |  |  |  | 76.5221096 |
| 76.2330467 | 83.3715043 |  |  |  |  | 76.3792524 |
| 76.2330467 | 83.3715043 |  |  |  |  | 77.2363953 |
| 75.2330467 | 83.3715043 |  |  |  |  | 77.0935381 |
| 73.2330467 | 83.3715043 |  |  |  |  | 77.0935381 |
| 73.2330467 | 83.3715043 |  |  |  |  | 77.0935381 |
| 73.2330467 | 84.3715043 |  |  |  |  | 77.3792524 |
| 72.2330467 | 86.3715043 |  |  |  |  | 77.6649667 |
| 72.2330467 | 86.3715043 |  |  |  |  | 77.950681  |
| 73.2330467 | 86.3715043 |  |  |  |  | 78.0935381 |
| 73.2330467 | 85.3715043 |  |  |  |  | 77.950681  |
| 76.2330467 | 84.3715043 |  |  |  |  | 78.2363953 |
| 78.2330467 | 84.3715043 |  |  |  |  | 78.2363953 |
| 78.2330467 | 84.3715043 |  |  |  |  | 78.0935381 |
| 79.2330467 | 84.3715043 |  |  |  |  | 78.2363953 |
| 78.2330467 | 84.3715043 |  |  |  |  | 78.0935381 |
| 78.2330467 | 84.3715043 |  |  |  |  | 78.5221096 |
| 78.2330467 | 84.3715043 |  |  |  |  | 78.6649667 |
| 78.2330467 | 84.3715043 |  |  |  |  | 78.3792524 |

|            |            |            |  |  |            |
|------------|------------|------------|--|--|------------|
| 78.2330467 | 80.3715043 |            |  |  | 77.5221096 |
| 78.2330467 | 79.3715043 |            |  |  | 76.6649667 |
| 77.2330467 | 79.3715043 |            |  |  | 75.8078238 |
| 77.2330467 | 79.3715043 |            |  |  | 75.8078238 |
| 77.2330467 | 82.3715043 |            |  |  | 76.0935381 |
| 77.2330467 | 82.3715043 |            |  |  | 76.3792524 |
| 77.2330467 | 82.3715043 |            |  |  | 76.3792524 |
| 76.2330467 | 82.3715043 |            |  |  | 76.8078238 |
| 76.2330467 | 83.3715043 |            |  |  | 76.5221096 |
| 76.2330467 | 81.3715043 |            |  |  | 76.5221096 |
| 76.2330467 | 81.3715043 |            |  |  | 76.5221096 |
| 76.2330467 | 81.3715043 |            |  |  | 76.6649667 |
| 75.2330467 | 81.3715043 |            |  |  | 77.2363953 |
| 75.2330467 | 85.3715043 |            |  |  | 77.950681  |
| 76.2330467 | 85.3715043 |            |  |  | 78.3792524 |
| 78.2330467 | 86.3715043 |            |  |  | 78.8078238 |
| 78.2330467 | 86.3715043 |            |  |  | 76.725282  |
| 80.2330467 | 86.3715043 |            |  |  | 76.725282  |
| 79.2330467 | 85.3715043 |            |  |  | 76.2354861 |
| 79.2330467 | 86.3715043 |            |  |  | 76.0722208 |
| 79.2330467 | 87.3715043 | 83.0224581 |  |  | 76.7211398 |
| 80.2330467 | 87.3715043 | 83.0224581 |  |  | 78.5846531 |
| 79.2330467 | 88.3715043 | 77.0224581 |  |  | 77.2096531 |
| 79.2330467 | 88.3715043 | 75.0224581 |  |  | 76.7096531 |
| 76.2330467 | 87.3715043 | 74.0224581 |  |  | 76.2096531 |
| 76.2330467 | 87.3715043 | 74.0224581 |  |  | 76.3346531 |
| 75.2330467 | 87.3715043 | 75.0224581 |  |  | 76.8346531 |
| 75.2330467 | 84.3715043 | 75.0224581 |  |  | 76.5846531 |
| 74.2330467 | 84.3715043 | 74.0224581 |  |  | 74.7211398 |
| 74.2330467 | 84.3715043 | 71.0224581 |  |  | 76.0846531 |
| 74.2330467 | 84.3715043 | 71.0224581 |  |  | 76.4596531 |
| 72.2330467 | 84.3715043 | 71.0224581 |  |  | 76.5846531 |
| 73.2330467 | 87.3715043 | 71.0224581 |  |  | 77.2096531 |
| 73.2330467 | 87.3715043 | 72.0224581 |  |  | 77.2096531 |
| 73.2330467 | 87.3715043 | 72.0224581 |  |  | 77.3346531 |
| 73.2330467 | 85.3715043 | 74.0224581 |  |  | 77.2096531 |
| 74.2330467 | 79.3715043 | 77.0224581 |  |  | 77.0846531 |
| 74.2330467 | 79.3715043 | 78.0224581 |  |  | 76.9596531 |
| 73.2330467 | 78.3715043 | 78.0224581 |  |  | 76.8346531 |
| 74.2330467 | 78.3715043 | 76.0224581 |  |  | 77.4596531 |
| 74.2330467 | 78.3715043 | 75.0224581 |  |  | 76.2096531 |
| 75.2330467 | 79.3715043 | 75.0224581 |  |  | 76.7096531 |
| 75.2330467 | 79.3715043 | 75.0224581 |  |  | 76.5846531 |
| 75.2330467 | 81.3715043 | 73.0224581 |  |  | 77.0846531 |
| 76.2330467 | 81.3715043 | 72.0224581 |  |  | 77.4596531 |

|            |            |            |  |  |  |            |
|------------|------------|------------|--|--|--|------------|
| 76.2330467 | 79.3715043 | 72.0224581 |  |  |  | 77.2096531 |
| 76.2330467 | 78.3715043 | 72.0224581 |  |  |  | 75.867944  |
| 75.2330467 | 78.3715043 | 73.0224581 |  |  |  | 76.164819  |
| 75.2330467 | 78.3715043 | 74.0224581 |  |  |  | 76.758569  |
| 75.2330467 | 78.3715043 | 74.0224581 |  |  |  | 76.899194  |
| 75.2330467 | 78.3715043 | 74.0224581 |  |  |  | 77.071069  |
| 75.2330467 | 78.3715043 | 75.0224581 |  |  |  | 76.383569  |
| 75.2330467 | 79.3715043 | 76.0224581 |  |  |  | 76.117944  |
| 75.2330467 | 79.3715043 | 76.0224581 |  |  |  | 75.836694  |
| 76.2330467 | 79.3715043 | 76.0224581 |  |  |  | 75.977319  |
| 77.2330467 | 79.3715043 | 76.0224581 |  |  |  | 76.117944  |
| 77.2330467 | 79.3715043 | 76.0224581 |  |  |  | 76.117944  |
| 82.2330467 | 79.3715043 | 76.0224581 |  |  |  | 77.242944  |
| 84.2330467 | 79.3715043 | 76.0224581 |  |  |  | 77.524194  |
| 84.2330467 | 79.3715043 | 76.0224581 |  |  |  | 78.3346531 |
| 84.2330467 | 79.3715043 | 76.0224581 |  |  |  | 78.3346531 |
| 87.2330467 | 79.3715043 | 78.0224581 |  |  |  | 78.3346531 |
| 87.2330467 | 79.3715043 | 78.0224581 |  |  |  | 78.2096531 |
| 85.2330467 | 78.3715043 | 79.0224581 |  |  |  | 77.9596531 |
| 84.2330467 | 79.3715043 | 80.0224581 |  |  |  | 78.3346531 |
| 84.2330467 | 79.3715043 | 80.0224581 |  |  |  | 78.2096531 |
| 84.2330467 | 80.3715043 | 80.0224581 |  |  |  | 78.4596531 |
| 81.2330467 | 80.3715043 | 81.0224581 |  |  |  | 77.9596531 |
| 79.2330467 | 80.3715043 | 81.0224581 |  |  |  | 77.8346531 |
| 79.2330467 | 84.3715043 | 81.0224581 |  |  |  | 78.2096531 |
| 78.2330467 | 83.3715043 | 81.0224581 |  |  |  | 77.8346531 |
| 76.2330467 | 82.3715043 | 81.0224581 |  |  |  | 77.4596531 |
| 76.2330467 | 82.3715043 | 81.0224581 |  |  |  | 77.4596531 |
| 76.2330467 | 82.3715043 | 81.0224581 |  |  |  | 77.3346531 |
| 76.2330467 | 82.3715043 | 81.0224581 |  |  |  | 77.2096531 |
| 77.2330467 | 82.3715043 | 80.0224581 |  |  |  | 77.2096531 |
| 77.2330467 | 82.3715043 | 80.0224581 |  |  |  | 77.7096531 |
| 77.2330467 | 82.3715043 | 80.0224581 |  |  |  | 77.9596531 |
| 75.2330467 | 80.3715043 | 77.0224581 |  |  |  | 77.0846531 |
| 74.2330467 | 80.3715043 | 77.0224581 |  |  |  | 76.7096531 |
| 74.2330467 | 80.3715043 | 75.0224581 |  |  |  | 76.3346531 |
| 73.2330467 | 80.3715043 | 75.0224581 |  |  |  | 76.0846531 |
| 73.2330467 | 80.3715043 | 75.0224581 |  |  |  | 76.2096531 |
| 73.2330467 | 80.3715043 | 74.0224581 |  |  |  | 75.9596531 |
| 73.2330467 | 84.3715043 | 74.0224581 |  |  |  | 76.2096531 |
| 73.2330467 | 85.3715043 | 73.0224581 |  |  |  | 76.0846531 |
| 73.2330467 | 85.3715043 | 74.0224581 |  |  |  | 76.3346531 |
| 73.2330467 | 85.3715043 | 74.0224581 |  |  |  | 76.3346531 |
| 73.2330467 | 85.3715043 | 75.0224581 |  |  |  | 76.4596531 |
| 73.2330467 | 86.3715043 | 75.0224581 |  |  |  | 76.3346531 |

|            |            |            |           |  |  |            |
|------------|------------|------------|-----------|--|--|------------|
| 72.2330467 | 85.3715043 | 75.0224581 |           |  |  | 76.0846531 |
| 72.2330467 | 85.3715043 | 75.0224581 |           |  |  | 76.0846531 |
| 73.2330467 | 85.3715043 | 72.0224581 |           |  |  | 75.7096531 |
| 73.2330467 | 86.3715043 | 72.0224581 |           |  |  | 75.8346531 |
| 73.2330467 | 88.3715043 | 72.0224581 |           |  |  | 75.8346531 |
| 74.2330467 | 88.3715043 | 72.0224581 |           |  |  | 75.9596531 |
| 75.2330467 | 88.3715043 | 74.0224581 |           |  |  | 76.3346531 |
| 76.2330467 | 88.3715043 | 74.0224581 |           |  |  | 76.7096531 |
| 76.2330467 | 87.3715043 | 70.0224581 |           |  |  | 76.2096531 |
| 76.2330467 | 87.3715043 | 70.0224581 |           |  |  | 76.0846531 |
| 74.2330467 | 87.3715043 | 70.0224581 |           |  |  | 75.5846531 |
| 73.2330467 | 87.3715043 | 69.0224581 |           |  |  | 75.0846531 |
| 73.2330467 | 87.3715043 | 69.0224581 |           |  |  | 75.0846531 |
| 72.2330467 | 86.3715043 | 69.0224581 |           |  |  | 74.5846531 |
| 72.2330467 | 86.3715043 | 69.0224581 |           |  |  | 74.4596531 |
| 73.2330467 | 86.3715043 | 72.0224581 |           |  |  | 74.9596531 |
| 75.2330467 | 86.3715043 | 72.0224581 |           |  |  | 75.8346531 |
| 77.2330467 | 88.3715043 | 73.0224581 |           |  |  | 76.4596531 |
| 76.2330467 | 88.3715043 | 74.0224581 |           |  |  | 76.9596531 |
| 76.2330467 | 88.3715043 | 74.0224581 |           |  |  | 77.3346531 |
| 76.2330467 | 88.3715043 | 75.0224581 |           |  |  | 77.4596531 |
| 75.2330467 | 88.3715043 | 75.0224581 |           |  |  | 76.9596531 |
| 71.2330467 | 88.3715043 | 75.0224581 |           |  |  | 76.8346531 |
| 71.2330467 | 88.3715043 | 75.0224581 |           |  |  | 76.5846531 |
| 71.2330467 | 88.3715043 | 75.0224581 |           |  |  | 76.5846531 |
| 69.2330467 | 76.3346531 | 75.0224581 |           |  |  | 74.5800467 |
| 69.2330467 | 76.3346531 | 76.0224581 |           |  |  | 74.5800467 |
| 69.2330467 | 76.9596531 | 76.0224581 |           |  |  | 75.1581717 |
| 70.2330467 | 76.9596531 | 76.0224581 |           |  |  | 75.1581717 |
| 70.2330467 | 76.4596531 | 76.0224581 |           |  |  | 74.4706717 |
| 72.2330467 | 83.3715043 | 80.0224581 |           |  |  | 75.8346531 |
| 73.2330467 | 83.3715043 | 82.0224581 |           |  |  | 75.5846531 |
| 71.2330467 | 83.3715043 | 82.0224581 |           |  |  | 75.3346531 |
| 71.2330467 | 83.3715043 | 82.0224581 |           |  |  | 75.2096531 |
| 72.2330467 | 83.3715043 | 80.0224581 |           |  |  | 75.0846531 |
| 72.2330467 | 83.3715043 | 80.0224581 |           |  |  | 75.7096531 |
| 71.2330467 | 83.3715043 | 80.0224581 |           |  |  | 75.8346531 |
| 72.2330467 | 83.3715043 | 82.0224581 |           |  |  | 76.5846531 |
| 72.2330467 | 83.3715043 | 83.0224581 |           |  |  | 76.7096531 |
| 74.2330467 | 83.3715043 | 83.0224581 |           |  |  | 77.2096531 |
| 75.2330467 | 83.3715043 | 84.0224581 |           |  |  | 77.4596531 |
| 75.2330467 | 85.3715043 | 84.0224581 |           |  |  | 78.0846531 |
| 73.2330467 | 85.3715043 | 83.0224581 |           |  |  | 77.4596531 |
| 73.2330467 | 86.3715043 | 83.0224581 |           |  |  | 77.2096531 |
| 72.2330467 | 85.3715043 | 83.0224581 | 84.322775 |  |  | 77.8888889 |

|            |            |            |           |  |  |            |
|------------|------------|------------|-----------|--|--|------------|
| 72.2330467 | 84.3715043 | 83.0224581 | 84.322775 |  |  | 77.7777778 |
| 72.2330467 | 84.3715043 | 83.0224581 | 83.322775 |  |  | 77.4444444 |
| 72.2330467 | 84.3715043 | 83.0224581 | 83.322775 |  |  | 77.5555556 |
| 73.2330467 | 81.3715043 | 83.0224581 | 81.322775 |  |  | 77.3333333 |
| 73.2330467 | 79.3715043 | 83.0224581 | 78.322775 |  |  | 76.7777778 |
| 73.2330467 | 77.3715043 | 83.0224581 | 77.322775 |  |  | 76.4444444 |
| 73.2330467 | 77.3715043 | 83.0224581 | 77.322775 |  |  | 76.5555556 |
| 72.2330467 | 76.3715043 | 82.0224581 | 75.322775 |  |  | 76         |
| 71.2330467 | 76.3715043 | 81.0224581 | 75.322775 |  |  | 76         |
| 71.2330467 | 76.3715043 | 79.0224581 | 75.322775 |  |  | 76.3333333 |
| 71.2330467 | 77.3715043 | 77.0224581 | 75.322775 |  |  | 76         |
| 70.2330467 | 77.3715043 | 73.0224581 | 74.322775 |  |  | 75.3333333 |
| 70.2330467 | 77.3715043 | 73.0224581 | 74.322775 |  |  | 75.2222222 |
| 70.2330467 | 77.3715043 | 73.0224581 | 73.322775 |  |  | 75.3333333 |
| 70.2330467 | 77.3715043 | 73.0224581 | 73.322775 |  |  | 75.5555556 |
| 73.2330467 | 77.3715043 | 73.0224581 | 73.322775 |  |  | 76.3333333 |
| 73.2330467 | 77.3715043 | 73.0224581 | 73.322775 |  |  | 76.5555556 |
| 73.2330467 | 78.3715043 | 72.0224581 | 74.322775 |  |  | 76.3333333 |
| 72.2330467 | 79.3715043 | 72.0224581 | 74.322775 |  |  | 76.5555556 |
| 72.2330467 | 79.3715043 | 72.0224581 | 74.322775 |  |  | 76.1111111 |
| 72.2330467 | 81.3715043 | 72.0224581 | 85.322775 |  |  | 76.8888889 |
| 73.2330467 | 81.3715043 | 72.0224581 | 87.322775 |  |  | 77.2222222 |
| 73.2330467 | 82.3715043 | 72.0224581 | 88.322775 |  |  | 77.4444444 |
| 74.2330467 | 82.3715043 | 72.0224581 | 88.322775 |  |  | 78.4444444 |
| 75.2330467 | 82.3715043 | 72.0224581 | 90.322775 |  |  | 79.2222222 |
| 75.2330467 | 83.3715043 | 72.0224581 | 91.322775 |  |  | 79.5555556 |
| 74.2330467 | 83.3715043 | 74.0224581 | 91.322775 |  |  | 79.5555556 |
| 74.2330467 | 84.3715043 | 74.0224581 | 91.322775 |  |  | 79.4444444 |
| 74.2330467 | 84.3715043 | 79.0224581 | 88.322775 |  |  | 79.2222222 |
| 74.2330467 | 84.3715043 | 79.0224581 | 84.322775 |  |  | 78.5555556 |
| 74.2330467 | 83.3715043 | 79.0224581 | 82.322775 |  |  | 78.3333333 |
| 74.2330467 | 83.3715043 | 79.0224581 | 82.322775 |  |  | 78.7777778 |
| 74.2330467 | 81.3715043 | 72.0224581 | 79.322775 |  |  | 77.8888889 |
| 74.2330467 | 81.3715043 | 72.0224581 | 79.322775 |  |  | 77.8888889 |
| 74.2330467 | 83.3715043 | 71.0224581 | 79.322775 |  |  | 78.6666667 |
| 73.2330467 | 84.3715043 | 71.0224581 | 74.322775 |  |  | 78.5555556 |
| 73.2330467 | 84.3715043 | 71.0224581 | 76.322775 |  |  | 78.7777778 |
| 75.2330467 | 84.3715043 | 71.0224581 | 78.322775 |  |  | 79.1111111 |
| 75.2330467 | 85.3715043 | 71.0224581 | 80.322775 |  |  | 79.3333333 |
| 76.2330467 | 85.3715043 | 71.0224581 | 82.322775 |  |  | 79         |
| 76.2330467 | 85.3715043 | 73.0224581 | 82.322775 |  |  | 78.5555556 |
| 75.2330467 | 85.3715043 | 73.0224581 | 82.322775 |  |  | 78         |
| 75.2330467 | 85.3715043 | 74.0224581 | 80.322775 |  |  | 77.5555556 |
| 74.2330467 | 85.3715043 | 74.0224581 | 75.322775 |  |  | 76.8888889 |
| 74.2330467 | 85.3715043 | 75.0224581 | 75.322775 |  |  | 76.8888889 |

|            |             |            |           |  |  |             |
|------------|-------------|------------|-----------|--|--|-------------|
| 74.2330467 | 85.3715043  | 74.0224581 | 70.322775 |  |  | 76.11111111 |
| 75.2330467 | 85.3715043  | 74.0224581 | 71.322775 |  |  | 76.44444444 |
| 75.2330467 | 86.3715043  | 72.0224581 | 72.322775 |  |  | 76.33333333 |
| 75.2330467 | 88.3715043  | 71.0224581 | 72.322775 |  |  | 76.44444444 |
| 75.2330467 | 88.3715043  | 71.0224581 | 72.322775 |  |  | 76.55555556 |
| 75.2330467 | 88.3715043  | 71.0224581 | 71.322775 |  |  | 76.33333333 |
| 75.2330467 | 76.44444444 | 71.0224581 | 71.322775 |  |  | 75.0081045  |
| 75.2330467 | 75.7777778  | 66.0224581 | 72.322775 |  |  | 74.2673637  |
| 76.2330467 | 76.6666667  | 65.0224581 | 73.322775 |  |  | 75.1439069  |
| 79.2330467 | 77.1111111  | 65.0224581 | 73.322775 |  |  | 75.6377341  |
| 79.2330467 | 90.3715043  | 65.0224581 | 73.322775 |  |  | 78.11111111 |
| 79.2330467 | 87.3715043  | 65.0224581 | 72.322775 |  |  | 76.4180098  |
| 78.2330467 | 87.3715043  | 65.0224581 | 72.322775 |  |  | 76.5414666  |
| 77.2330467 | 87.3715043  | 67.0224581 | 71.322775 |  |  | 76.6649234  |
| 77.2330467 | 85.3715043  | 68.0224581 | 71.322775 |  |  | 76.1834419  |
| 76.2330467 | 84.3715043  | 68.0224581 | 73.322775 |  |  | 76.1834419  |
| 76.2330467 | 84.3715043  | 68.0224581 | 80.322775 |  |  | 75.6896148  |
| 75.2330467 | 84.3715043  | 69.0224581 | 83.322775 |  |  | 76.4303555  |
| 75.2330467 | 83.3715043  | 71.0224581 | 83.322775 |  |  | 78          |
| 75.2330467 | 82.3715043  | 71.0224581 | 83.322775 |  |  | 77.8888889  |
| 75.2330467 | 81.3715043  | 73.0224581 | 82.322775 |  |  | 77.7777778  |
| 75.2330467 | 81.3715043  | 74.0224581 | 82.322775 |  |  | 78.2222222  |
| 76.2330467 | 81.3715043  | 73.0224581 | 82.322775 |  |  | 78.11111111 |
| 76.2330467 | 82.3715043  | 73.0224581 | 82.322775 |  |  | 78.11111111 |
| 76.2330467 | 82.3715043  | 72.0224581 | 82.322775 |  |  | 78          |
| 75.2330467 | 82.3715043  | 71.0224581 | 81.322775 |  |  | 77.55555556 |
| 75.2330467 | 82.3715043  | 71.0224581 | 81.322775 |  |  | 77.33333333 |
| 75.2330467 | 82.3715043  | 71.0224581 | 83.322775 |  |  | 77.55555556 |
| 76.2330467 | 83.3715043  | 71.0224581 | 82.322775 |  |  | 77.7777778  |
| 76.2330467 | 83.3715043  | 70.0224581 | 80.322775 |  |  | 77.33333333 |
| 79.2330467 | 83.3715043  | 70.0224581 | 79.322775 |  |  | 77.44444444 |
| 79.2330467 | 83.3715043  | 70.0224581 | 77.322775 |  |  | 76.8888889  |
| 79.2330467 | 84.3715043  | 70.0224581 | 77.322775 |  |  | 76.44444444 |
| 80.2330467 | 84.3715043  | 70.0224581 | 77.322775 |  |  | 76.55555556 |
| 81.2330467 | 84.3715043  | 71.0224581 | 77.322775 |  |  | 76.7777778  |
| 83.2330467 | 84.3715043  | 71.0224581 | 79.322775 |  |  | 77.11111111 |
| 83.2330467 | 84.3715043  | 72.0224581 | 82.322775 |  |  | 77.44444444 |
| 83.2330467 | 84.3715043  | 73.0224581 | 84.322775 |  |  | 77.8888889  |
| 84.2330467 | 84.3715043  | 75.0224581 | 84.322775 |  |  | 78.44444444 |
| 83.2330467 | 84.3715043  | 75.0224581 | 85.322775 |  |  | 78.55555556 |
| 82.2330467 | 84.3715043  | 75.0224581 | 85.322775 |  |  | 78.6666667  |
| 77.2330467 | 85.3715043  | 74.0224581 | 86.322775 |  |  | 78.33333333 |
| 77.2330467 | 85.3715043  | 74.0224581 | 86.322775 |  |  | 78.33333333 |
| 76.2330467 | 85.3715043  | 74.0224581 | 85.322775 |  |  | 79.2222222  |
| 75.2330467 | 85.3715043  | 75.0224581 | 85.322775 |  |  | 79.11111111 |

|            |            |            |           |  |  |            |
|------------|------------|------------|-----------|--|--|------------|
| 75.2330467 | 84.3715043 | 78.0224581 | 83.322775 |  |  | 79.2222222 |
| 75.2330467 | 84.3715043 | 81.0224581 | 84.322775 |  |  | 80         |
| 75.2330467 | 85.3715043 | 81.0224581 | 85.322775 |  |  | 80.5555556 |
| 75.2330467 | 85.3715043 | 81.0224581 | 86.322775 |  |  | 80.5555556 |
| 75.2330467 | 84.3715043 | 79.0224581 | 85.322775 |  |  | 80.4444444 |
| 75.2330467 | 84.3715043 | 78.0224581 | 84.322775 |  |  | 80.5555556 |
| 75.2330467 | 84.3715043 | 77.0224581 | 84.322775 |  |  | 78.911837  |
| 75.2330467 | 84.3715043 | 75.0224581 | 76.322775 |  |  | 77.1957876 |
| 75.2330467 | 84.3715043 | 75.0224581 | 75.322775 |  |  | 76.948874  |
| 75.2330467 | 84.3715043 | 75.0224581 | 74.322775 |  |  | 77.0846765 |
| 75.2330467 | 85.3715043 | 75.0224581 | 73.322775 |  |  | 77.2081333 |
| 76.2330467 | 85.3715043 | 76.0224581 | 73.322775 |  |  | 77.3315901 |
| 79.2330467 | 85.3715043 | 76.0224581 | 72.322775 |  |  | 77.7019605 |
| 81.2330467 | 86.3715043 | 77.0224581 | 75.322775 |  |  | 78.8007259 |
| 82.2330467 | 87.3715043 | 77.0224581 | 75.322775 |  |  | 78.9241827 |
| 82.2330467 | 87.3715043 | 73.0224581 | 78.322775 |  |  | 78.9241827 |
| 82.2330467 | 87.3715043 | 73.0224581 | 77.322775 |  |  | 78.6772691 |
| 82.2330467 | 85.3715043 | 72.0224581 | 77.322775 |  |  | 78.3068987 |
| 82.2330467 | 84.3715043 | 72.0224581 | 77.322775 |  |  | 78.5538123 |
| 81.2330467 | 84.3715043 | 71.0224581 | 78.322775 |  |  | 78.3068987 |
| 81.2330467 | 85.3715043 | 70.0224581 | 79.322775 |  |  | 78.6772691 |
| 79.2330467 | 84.3715043 | 70.0224581 | 80.322775 |  |  | 78.7777778 |
| 79.2330467 | 83.3715043 | 69.0224581 | 80.322775 |  |  | 78.3333333 |
| 80.2330467 | 80.3715043 | 69.0224581 | 79.322775 |  |  | 77.7777778 |
| 80.2330467 | 78.3715043 | 70.0224581 | 79.322775 |  |  | 77.2222222 |
| 79.2330467 | 78.3715043 | 71.0224581 | 78.322775 |  |  | 76.6666667 |
| 79.2330467 | 78.3715043 | 71.0224581 | 78.322775 |  |  | 76.3333333 |
| 80.2330467 | 78.3715043 | 75.0224581 | 78.322775 |  |  | 76.1111111 |
| 80.2330467 | 80.3715043 | 75.0224581 | 78.322775 |  |  | 76.1111111 |
| 80.2330467 | 80.3715043 | 75.0224581 | 78.322775 |  |  | 76         |
| 79.2330467 | 79.3715043 | 75.0224581 | 78.322775 |  |  | 75.5555556 |
| 75.2330467 | 76.3715043 | 75.0224581 | 78.322775 |  |  | 75.1111111 |
| 73.2330467 | 76.3715043 | 75.0224581 | 79.322775 |  |  | 74.8888889 |
| 73.2330467 | 74.3715043 | 75.0224581 | 79.322775 |  |  | 75         |
| 72.2330467 | 75.3715043 | 75.0224581 | 79.322775 |  |  | 75         |
| 73.2330467 | 76.3715043 | 75.0224581 | 80.322775 |  |  | 75.4444444 |
| 75.2330467 | 76.3715043 | 75.0224581 | 80.322775 |  |  | 75.7777778 |
| 75.2330467 | 78.3715043 | 76.0224581 | 81.322775 |  |  | 76.3333333 |
| 75.2330467 | 79.3715043 | 76.0224581 | 82.322775 |  |  | 76.8888889 |
| 75.2330467 | 79.3715043 | 77.0224581 | 82.322775 |  |  | 76.8888889 |
| 76.2330467 | 79.3715043 | 77.0224581 | 82.322775 |  |  | 77.4444444 |
| 75.2330467 | 79.3715043 | 78.0224581 | 82.322775 |  |  | 77.8888889 |
| 75.2330467 | 78.3715043 | 78.0224581 | 81.322775 |  |  | 78.1111111 |
| 75.2330467 | 78.3715043 | 78.0224581 | 81.322775 |  |  | 78.4444444 |
| 75.2330467 | 78.3715043 | 76.0224581 | 81.322775 |  |  | 78.1111111 |



|            |            |            |            |  |  |            |
|------------|------------|------------|------------|--|--|------------|
| 76.2330467 | 80.3715043 | 76.0224581 | 80.322775  |  |  | 78.4444444 |
| 75.2330467 | 81.3715043 | 73.0224581 | 80.322775  |  |  | 76.9878756 |
| 74.2330467 | 82.3715043 | 72.0224581 | 83.322775  |  |  | 76.9138016 |
| 73.2330467 | 82.3715043 | 72.0224581 | 85.322775  |  |  | 76.8397275 |
| 72.2330467 | 82.3715043 | 72.0224581 | 85.322775  |  |  | 76.703925  |
| 73.2330467 | 81.3715043 | 71.0224581 | 86.322775  |  |  | 76.4570114 |
| 73.2330467 | 81.3715043 | 71.0224581 | 86.322775  |  |  | 76.4570114 |
| 74.2330467 | 81.3715043 | 71.0224581 | 87.322775  |  |  | 76.7777778 |
| 74.2330467 | 81.3715043 | 75.0224581 | 87.322775  |  |  | 76.8888889 |
| 73.2330467 | 81.3715043 | 74.0224581 | 87.322775  |  |  | 76.4444444 |
| 72.2330467 | 82.3715043 | 68.0224581 | 87.322775  |  |  | 75.3333333 |
| 68.2330467 | 82.3715043 | 66.0224581 | 74         |  |  | 72.5196917 |
| 68.2330467 | 82.3715043 | 66.0224581 | 73.8888889 |  |  | 72.2851238 |
| 67.2330467 | 80.3715043 | 67.0224581 | 73.7777778 |  |  | 72.161667  |
| 67.2330467 | 78.3715043 | 67.0224581 | 73.7777778 |  |  | 72.161667  |
| 67.2330467 | 76.3715043 | 68.0224581 | 73.8888889 |  |  | 72.2851238 |
| 72.2330467 | 76.3715043 | 68.0224581 | 74.7777778 |  |  | 73.2727781 |
| 72.2330467 | 76.3715043 | 68.0224581 | 75         |  |  | 73.5196917 |
| 73.2330467 | 76.3715043 | 68.0224581 | 75         |  |  | 73.5196917 |
| 74.2330467 | 76.3715043 | 68.0224581 | 75.3333333 |  |  | 73.7789509 |
| 74.2330467 | 78.3715043 | 71.0224581 | 76.1111111 |  |  | 74.6431485 |
| 72.2330467 | 78.3715043 | 71.0224581 | 88.322775  |  |  | 75.7777778 |
| 71.2330467 | 80.3715043 | 75.0224581 | 88.322775  |  |  | 76.8888889 |
| 71.2330467 | 80.3715043 | 75.0224581 | 89.322775  |  |  | 77.2222222 |
| 70.2330467 | 78.3715043 | 75.0224581 | 76.6666667 |  |  | 75.1493213 |
| 71.2330467 | 77.3715043 | 72.0224581 | 76.2222222 |  |  | 74.6554941 |
| 71.2330467 | 77.3715043 | 72.0224581 | 76.1111111 |  |  | 74.6431485 |
| 71.2330467 | 77.3715043 | 72.0224581 | 76.1111111 |  |  | 74.6431485 |
| 73.2330467 | 77.3715043 | 65.0224581 | 75.4444444 |  |  | 73.9024077 |
| 73.2330467 | 79.3715043 | 65.0224581 | 82.322775  |  |  | 75         |
| 73.2330467 | 80.3715043 | 65.0224581 | 79.322775  |  |  | 75         |
| 73.2330467 | 81.3715043 | 65.0224581 | 78.322775  |  |  | 76.2222222 |
| 73.2330467 | 82.3715043 | 70.0224581 | 77.322775  |  |  | 76.8888889 |
| 74.2330467 | 82.3715043 | 71.0224581 | 77.322775  |  |  | 77         |
| 74.2330467 | 82.3715043 | 71.0224581 | 77.322775  |  |  | 76.8888889 |
| 74.2330467 | 82.3715043 | 72.0224581 | 78.322775  |  |  | 77.3333333 |
| 74.2330467 | 81.3715043 | 74.0224581 | 80.322775  |  |  | 77.4444444 |
| 74.2330467 | 81.3715043 | 75.0224581 | 80.322775  |  |  | 77.3333333 |
| 74.2330467 | 81.3715043 | 75.0224581 | 81.322775  |  |  | 77.4444444 |
| 73.2330467 | 81.3715043 | 77.0224581 | 83.322775  |  |  | 77.6666667 |
| 73.2330467 | 81.3715043 | 78.0224581 | 84.322775  |  |  | 77.8888889 |
| 73.2330467 | 80.3715043 | 78.0224581 | 84.322775  |  |  | 77.7777778 |
| 73.2330467 | 79.3715043 | 78.0224581 | 84.322775  |  |  | 77.6666667 |
| 75.2330467 | 79.3715043 | 78.0224581 | 83.322775  |  |  | 78.1111111 |
| 75.2330467 | 78.3715043 | 79.0224581 | 83.322775  |  |  | 78.3333333 |

|            |            |            |           |           |  |            |
|------------|------------|------------|-----------|-----------|--|------------|
| 75.2330467 | 78.3715043 | 79.0224581 | 82.322775 |           |  | 78.7777778 |
| 72.2330467 | 78.3715043 | 80.0224581 | 82.322775 |           |  | 78.7777778 |
| 71.2330467 | 78.3715043 | 81.0224581 | 81.322775 |           |  | 78.4444444 |
| 70.2330467 | 77.3715043 | 80.0224581 | 81.322775 |           |  | 77.0742954 |
| 70.2330467 | 77.3715043 | 80.0224581 | 82.322775 |           |  | 76.8273818 |
| 69.2330467 | 76.3715043 | 80.0224581 | 82.322775 |           |  | 76.2100978 |
| 69.2330467 | 76.3715043 | 80.0224581 | 82.322775 |           |  | 75.9755299 |
| 70.2330467 | 79.3715043 | 78.0224581 | 82.322775 |           |  | 76.0989867 |
| 71.2330467 | 81.3715043 | 78.0224581 | 82.322775 |           |  | 76.6175053 |
| 71.2330467 | 82.3715043 | 78.0224581 | 82.322775 |           |  | 76.7533077 |
| 76.2330467 | 82.3715043 | 76.0224581 | 85.322775 |           |  | 77.9878756 |
| 78.2330467 | 82.3715043 | 76.0224581 | 85.322775 |           |  | 78.1113324 |
| 79.2330467 | 83.3715043 | 76.0224581 | 85.322775 |           |  | 79         |
| 79.2330467 | 83.3715043 | 77.0224581 | 85.322775 |           |  | 79         |
| 79.2330467 | 83.3715043 | 76.0224581 | 85.322775 |           |  | 78.7777778 |
| 79.2330467 | 83.3715043 | 76.0224581 | 85.322775 |           |  | 78.7777778 |
| 78.2330467 | 83.3715043 | 75.0224581 | 85.322775 |           |  | 78.2222222 |
| 78.2330467 | 83.3715043 | 76.0224581 | 85.322775 |           |  | 77.5555556 |
| 78.2330467 | 83.3715043 | 78.0224581 | 85.322775 |           |  | 77.6666667 |
| 78.2330467 | 84.3715043 | 78.0224581 | 85.322775 |           |  | 78.2222222 |
| 78.2330467 | 86.3715043 | 78.0224581 | 85.322775 |           |  | 79.3333333 |
| 78.2330467 | 87.3715043 | 78.0224581 | 84.322775 |           |  | 79.7777778 |
| 77.2330467 | 87.3715043 | 79.0224581 | 80.322775 |           |  | 79.7777778 |
| 77.2330467 | 87.3715043 | 79.0224581 | 78.322775 |           |  | 79.6666667 |
| 77.2330467 | 86.3715043 | 79.0224581 | 76.322775 |           |  | 79.3333333 |
| 76.2330467 | 86.3715043 | 78.0224581 | 76.322775 |           |  | 79.2222222 |
| 76.2330467 | 86.3715043 | 77.0224581 | 74.322775 |           |  | 78.8888889 |
| 76.2330467 | 85.3715043 | 77.0224581 | 76.322775 | Before 1  |  | 77.6915793 |
| 76.2330467 | 86.3715043 | 76.0224581 | 76.322775 | Before 2  |  | 77.6298509 |
| 76.2330467 | 86.3715043 | 76.0224581 | 79.322775 | Before 3  |  | 78.0619497 |
| 78.2330467 | 86.3715043 | 76.0224581 | 79.322775 | Before 4  |  | 78.4446657 |
| 78.2330467 | 84.3715043 | 76.0224581 | 80.322775 | Before 5  |  | 78.2594806 |
| 78.2330467 | 83.3715043 | 76.0224581 | 80.322775 | Before 6  |  | 78.8888889 |
| 79.2330467 | 83.3715043 | 77.0224581 | 80.322775 | Before 7  |  | 78.8888889 |
| 79.2330467 | 83.3715043 | 77.0224581 | 81.322775 | Before 8  |  | 78.5555556 |
| 80.2330467 | 83.3715043 | 77.0224581 | 82.322775 | Before 9  |  | 78.5555556 |
| 80.2330467 | 82.3715043 | 77.0224581 | 81.322775 | Before 10 |  | 78.4444444 |
| 81.2330467 | 83.3715043 | 77.0224581 | 82.322775 | Before 11 |  | 80.4444444 |
| 84.2330467 | 83.3715043 | 77.0224581 | 82.322775 | Before 12 |  | 79.6632235 |
| 84.2330467 | 83.3715043 | 77.0224581 | 79.322775 | Before 13 |  | 79.2311248 |
| 84.2330467 | 84.3715043 | 78.0224581 | 79.322775 | Before 14 |  | 79.2681618 |
| 79.2330467 | 82.3715043 | 78.0224581 | 76.322775 | Before 15 |  | 78.0706309 |
| 78.2330467 | 80.3715043 | 78.0224581 | 74.322775 | Before 16 |  | 77.4656927 |
| 78.2330467 | 79.3715043 | 78.0224581 | 72.322775 | Before 17 |  | 76.9842112 |
| 78.2330467 | 79.3715043 | 79.0224581 | 71.322775 | Before 18 |  | 76.8237173 |

|            |            |            |           |  |           |            |
|------------|------------|------------|-----------|--|-----------|------------|
| 79.2330467 | 78.3715043 | 80.0224581 | 71.322775 |  | Before 19 | 76.8113717 |
| 80.2330467 | 78.3715043 | 80.0224581 | 72.322775 |  | Before 20 | 77.0582852 |
| 79.2330467 | 79.3715043 | 80.0224581 | 72.322775 |  | Before 21 | 77.1570507 |
| 79.2330467 | 81.3715043 | 79.0224581 | 72.322775 |  | Before 22 | 77.2928531 |
| 77.2330467 | 81.3715043 | 79.0224581 | 73.322775 |  | Before 23 | 77.2805075 |
| 76.2330467 | 82.3715043 | 79.0224581 | 73.322775 |  | Before 24 | 77.6385322 |
| 75.2330467 | 82.3715043 | 79.0224581 | 75.322775 |  | Before 25 | 77.7619889 |
| 75.2330467 | 82.3715043 | 79.0224581 | 76.322775 |  | Before 26 | 77.7619889 |
| 75.2330467 | 82.3715043 | 79.0224581 | 77.322775 |  | Before 27 | 77.7126062 |
| 75.2330467 | 83.3715043 | 78.0224581 | 77.322775 |  | Before 28 | 77.9595198 |
| 76.2330467 | 83.3715043 | 76.0224581 | 77.322775 |  | Before 29 | 78.2681618 |
| 76.2330467 | 83.3715043 | 76.0224581 | 77.322775 |  | Before 30 | 78.6755692 |
| 77.2330467 | 83.3715043 | 78.0224581 | 76.322775 |  | Before 31 | 80.5555556 |
| 77.2330467 | 83.3715043 | 77.0224581 | 76.322775 |  | Before 32 | 79.5555556 |
| 78.2330467 | 82.3715043 | 77.0224581 | 76.322775 |  | Before 33 | 79.2222222 |
| 79.2330467 | 82.3715043 | 77.0224581 | 76.322775 |  | Before 34 | 79.3333333 |
| 80.2330467 | 82.3715043 | 76.0224581 | 76.322775 |  | Before 35 | 79.3333333 |
| 80.2330467 | 82.3715043 | 76.0224581 | 78.322775 |  | Before 36 | 79.3333333 |
| 84.2330467 | 83.3715043 | 76.0224581 | 79.322775 |  | Before 37 | 79.4444444 |
| 84.2330467 | 83.3715043 | 77.0224581 | 82.322775 |  | Before 38 | 79.2222222 |
| 85.2330467 | 84.3715043 | 77.0224581 | 84.322775 |  | Before 39 | 79.1111111 |
| 85.2330467 | 85.3715043 | 79.0224581 | 84.322775 |  | Before 40 | 79.3333333 |
| 82.2330467 | 85.3715043 | 80.0224581 | 84.322775 |  | Before 41 | 78.7777778 |
| 79.2330467 | 85.3715043 | 80.0224581 | 83.322775 |  | Before 42 | 77.6666667 |
| 79.2330467 | 85.3715043 | 80.0224581 | 83.322775 |  | Before 43 | 77.6666667 |
| 77.2330467 | 77.3715043 | 85.0224581 | 79.322775 |  | Before 44 | 77.1111111 |
| 77.2330467 | 76.3715043 | 86.0224581 | 73.322775 |  | Before 45 | 76.2222222 |
| 77.2330467 | 77.3715043 | 86.0224581 | 70.322775 |  | Before 46 | 76.3333333 |
| 77.2330467 | 77.3715043 | 87.0224581 | 70.322775 |  | Before 47 | 76.4444444 |
| 76.2330467 | 77.3715043 | 87.0224581 | 70.322775 |  | Before 48 | 76.8888889 |
| 78.2330467 | 77.3715043 | 86.0224581 | 70.322775 |  | Before 49 | 77.3333333 |
| 78.2330467 | 77.3715043 | 86.0224581 | 71.322775 |  | Before 50 | 77.5555556 |
| 77.2330467 | 77.3715043 | 84.0224581 | 72.322775 |  | Before 51 | 77.2222222 |
| 77.2330467 | 77.3715043 | 84.0224581 | 72.322775 |  | Before 52 | 77.1111111 |
| 77.2330467 | 77.3715043 | 84.0224581 | 72.322775 |  | Before 53 | 76.7777778 |
| 77.2330467 | 77.3715043 | 84.0224581 | 72.322775 |  | Before 54 | 76.7777778 |
| 77.2330467 | 78.3715043 | 84.0224581 | 72.322775 |  | Before 55 | 77         |
| 77.2330467 | 78.3715043 | 84.0224581 | 72.322775 |  | Before 56 | 76.6666667 |
| 77.2330467 | 78.3715043 | 84.0224581 | 72.322775 |  | Before 57 | 76.7777778 |
| 77.2330467 | 79.3715043 | 84.0224581 | 73.322775 |  | Before 58 | 76.3333333 |
| 78.2330467 | 79.3715043 | 84.0224581 | 74.322775 |  | Before 59 | 76.4444444 |
| 78.2330467 | 79.3715043 | 83.0224581 | 75.322775 |  | Before 60 | 76.1111111 |
| 80.2330467 | 79.3715043 | 83.0224581 | 75.322775 |  | Before 61 | 76.3333333 |
| 81.2330467 | 79.3715043 | 83.0224581 | 75.322775 |  | Before 62 | 76.4444444 |
| 81.2330467 | 79.3715043 | 84.0224581 | 75.322775 |  | Before 63 | 76.1111111 |

|            |            |            |           |  |            |            |
|------------|------------|------------|-----------|--|------------|------------|
| 80.2330467 | 79.3715043 | 85.0224581 | 74.322775 |  | Before 64  | 75.8888889 |
| 79.2330467 | 79.3715043 | 85.0224581 | 73.322775 |  | Before 65  | 74.6666667 |
| 79.2330467 | 79.3715043 | 85.0224581 | 72.322775 |  | Before 66  | 74.2222222 |
| 77.2330467 | 79.3715043 | 85.0224581 | 69.322775 |  | Before 67  | 73.6666667 |
| 77.2330467 | 78.3715043 | 85.0224581 | 69.322775 |  | Before 68  | 73.5555556 |
| 77.2330467 | 78.3715043 | 73.2222222 | 68.322775 |  | Before 69  | 71.7999738 |
| 77.2330467 | 80.3715043 | 73.2222222 | 68.322775 |  | Before 70  | 71.7999738 |
| 79.2330467 | 81.3715043 | 73.8888889 | 68.322775 |  | Before 71  | 72.4296034 |
| 79.2330467 | 82.3715043 | 74.2222222 | 67.322775 |  | Before 72  | 72.6888627 |
| 78.2330467 | 82.3715043 | 74.6666667 | 67.322775 |  | Before 73  | 73.0715787 |
| 77.2330467 | 83.3715043 | 84.0224581 | 67.322775 |  | Before 74  | 75.4444444 |
| 76.2330467 | 83.3715043 | 84.0224581 | 67.322775 |  | Before 75  | 75.6666667 |
| 76.2330467 | 83.3715043 | 82.0224581 | 67.322775 |  | Before 76  | 75.8888889 |
| 76.2330467 | 83.3715043 | 81.0224581 | 67.322775 |  | Before 77  | 75.5555556 |
| 75.2330467 | 83.3715043 | 81.0224581 | 67.322775 |  | Before 78  | 75.3333333 |
| 76.2330467 | 83.3715043 | 82.0224581 | 67.322775 |  | Before 79  | 75.4444444 |
| 76.2330467 | 83.3715043 | 83.0224581 | 67.322775 |  | Before 80  | 75.8888889 |
| 76.2330467 | 83.3715043 | 83.0224581 | 67.322775 |  | Before 81  | 76.3333333 |
| 77.2330467 | 84.3715043 | 83.0224581 | 67.322775 |  | Before 82  | 76.4444444 |
| 79.2330467 | 84.3715043 | 83.0224581 | 67.322775 |  | Before 83  | 76.8888889 |
| 80.2330467 | 84.3715043 | 83.0224581 | 67.322775 |  | Before 84  | 77         |
| 80.2330467 | 82.3715043 | 83.0224581 | 68.322775 |  | Before 85  | 76.7777778 |
| 79.2330467 | 80.3715043 | 83.0224581 | 68.322775 |  | Before 86  | 76.2222222 |
| 79.2330467 | 80.3715043 | 83.0224581 | 70.322775 |  | Before 87  | 77.8888889 |
| 78.2330467 | 80.3715043 | 83.0224581 | 74.322775 |  | Before 88  | 78         |
| 78.2330467 | 80.3715043 | 83.0224581 | 77.322775 |  | Before 89  | 78.8888889 |
| 77.2330467 | 80.3715043 | 82.0224581 | 77.322775 |  | Before 90  | 78.5555556 |
| 77.2330467 | 82.3715043 | 77.0224581 | 81.322775 |  | Before 91  | 78.8888889 |
| 75.2330467 | 82.3715043 | 73.0224581 | 82.322775 |  | Before 92  | 78.2222222 |
| 75.2330467 | 82.3715043 | 72.0224581 | 84.322775 |  | Before 93  | 78.4444444 |
| 75.2330467 | 83.3715043 | 72.0224581 | 82.322775 |  | Before 94  | 78.4444444 |
| 75.2330467 | 83.3715043 | 72.0224581 | 82.322775 |  | Before 95  | 78.4444444 |
| 74.2330467 | 83.3715043 | 72.0224581 | 82.322775 |  | Before 96  | 78.6666667 |
| 74.2330467 | 83.3715043 | 72.0224581 | 82.322775 |  | Before 97  | 78.6666667 |
| 74.2330467 | 86.3715043 | 66.0224581 | 82.322775 |  | Before 98  | 76.8273818 |
| 73.2330467 | 88.3715043 | 64.0224581 | 81.322775 |  | Before 99  | 76.5804682 |
| 74.2330467 | 88.3715043 | 62.0224581 | 81.322775 |  | Before 100 | 78         |
| 75.2330467 | 89.3715043 | 62.0224581 | 82.322775 |  | Before 101 | 77.8888889 |
| 75.2330467 | 77.4444444 | 61.0224581 | 82.322775 |  | Before 102 | 76.0081045 |
| 75.2330467 | 77.1111111 | 60.0224581 | 82.322775 |  | Before 103 | 75.6377341 |
| 75.2330467 | 89.3715043 | 60.0224581 | 82.322775 |  | Before 104 | 76.8888889 |
| 74.2330467 | 89.3715043 | 60.0224581 | 82.322775 |  | Before 105 | 77         |
| 74.2330467 | 80.3715043 | 60.0224581 | 84.322775 |  | Before 106 | 76.1111111 |
| 74.2330467 | 80.3715043 | 60.0224581 | 84.322775 |  | Before 107 | 76.1111111 |
| 74.2330467 | 81.3715043 | 68.0224581 | 84.322775 |  | Before 108 | 77         |

|            |            |            |           |  |            |            |
|------------|------------|------------|-----------|--|------------|------------|
| 75.2330467 | 82.3715043 | 69.0224581 | 84.322775 |  | Before 109 | 77.3333333 |
| 75.2330467 | 82.3715043 | 69.0224581 | 85.322775 |  | Before 110 | 77.2222222 |
| 75.2330467 | 82.3715043 | 68.0224581 | 85.322775 |  | Before 111 | 76.3333333 |
| 75.2330467 | 82.3715043 | 67.0224581 | 86.322775 |  | Before 112 | 76.3333333 |
| 77.2330467 | 80.3715043 | 67.0224581 | 86.322775 |  | Before 113 | 75.6666667 |
| 76.2330467 | 80.3715043 | 67.0224581 | 86.322775 |  | Before 114 | 75.7777778 |
| 76.2330467 | 78.3715043 | 67.0224581 | 85.322775 |  | Before 115 | 74.8888889 |
| 76.2330467 | 79.3715043 | 69.0224581 | 85.322775 |  | Before 116 | 75.1111111 |
| 75.2330467 | 80.3715043 | 70.0224581 | 85.322775 |  | Before 117 | 75.2222222 |
| 75.2330467 | 81.3715043 | 72.0224581 | 86.322775 |  | Before 118 | 75.5555556 |
| 76.2330467 | 82.3715043 | 72.0224581 | 83.322775 |  | Before 119 | 75.3333333 |
| 75.2330467 | 83.3715043 | 72.0224581 | 83.322775 |  | Before 120 | 75.6666667 |
| 75.2330467 | 82.3715043 | 76.0224581 | 81.322775 |  | minute1    | 76         |
| 75.2330467 | 81.3715043 | 76.0224581 | 81.322775 |  | minute2    | 75.8888889 |
| 75.2330467 | 80.3715043 | 76.0224581 | 82.322775 |  | minute3    | 76         |
| 75.2330467 | 80.3715043 | 76.0224581 | 82.322775 |  | minute4    | 76.1111111 |
| 75.2330467 | 80.3715043 | 76.0224581 | 84.322775 |  | minute5    | 76.1111111 |
| 76.2330467 | 80.3715043 | 76.0224581 | 84.322775 |  | minute6    | 76.3333333 |
| 77.2330467 | 80.3715043 | 76.0224581 | 83.322775 |  | minute7    | 76.3333333 |
| 77.2330467 | 80.3715043 | 76.0224581 | 80.322775 |  | minute8    | 76.1111111 |
| 77.2330467 | 80.3715043 | 76.0224581 | 75.322775 |  | minute9    | 75.3333333 |
| 76.2330467 | 80.3715043 | 78.0224581 | 75.322775 |  | minute10   | 75.3333333 |
| 76.2330467 | 80.3715043 | 78.0224581 | 74.322775 |  | minute11   | 75.2222222 |
| 75.2330467 | 80.3715043 | 78.0224581 | 74.322775 |  | minute12   | 75         |
| 74.2330467 | 80.3715043 | 77.0224581 | 73.322775 |  | minute13   | 74.6666667 |
| 74.2330467 | 80.3715043 | 76.0224581 | 73.322775 |  | minute14   | 75         |
| 75.2330467 | 80.3715043 | 76.0224581 | 73.322775 |  | minute15   | 75.1111111 |
| 75.2330467 | 79.3715043 | 76.0224581 | 74.322775 |  | minute16   | 75.2222222 |
| 75.2330467 | 79.3715043 | 76.0224581 | 74.322775 |  | minute17   | 75.1111111 |
| 76.2330467 | 79.3715043 | 77.0224581 | 74.322775 |  | minute18   | 75.6666667 |
| 76.2330467 | 80.3715043 | 78.0224581 | 74.322775 |  | minute19   | 75.8888889 |
| 76.2330467 | 80.3715043 | 79.0224581 | 74.322775 |  | minute20   | 76         |
| 76.2330467 | 81.3715043 | 79.0224581 | 74.322775 |  | minute21   | 76         |
| 76.2330467 | 81.3715043 | 79.0224581 | 72.322775 |  | minute22   | 76         |
| 76.2330467 | 81.3715043 | 81.0224581 | 72.322775 |  | minute23   | 76.4444444 |
| 78.2330467 | 81.3715043 | 81.0224581 | 73.322775 |  | minute24   | 76.7777778 |
| 78.2330467 | 82.3715043 | 82.0224581 | 73.322775 |  | minute25   | 76.8888889 |
| 79.2330467 | 82.3715043 | 82.0224581 | 73.322775 |  | minute26   | 76.7777778 |
| 79.2330467 | 81.3715043 | 82.0224581 | 73.322775 |  | minute27   | 76.4444444 |
| 80.2330467 | 80.3715043 | 82.0224581 | 73.322775 |  | minute28   | 76.4444444 |
| 80.2330467 | 80.3715043 | 82.0224581 | 74.322775 |  | minute29   | 76.6666667 |
| 80.2330467 | 77.3715043 | 82.0224581 | 74.322775 |  | minute30   | 76.5555556 |
| 80.2330467 | 77.3715043 | 82.0224581 | 74.322775 |  | minute31   | 76.5555556 |
| 78.2330467 | 77.3715043 | 82.0224581 | 76.322775 |  | minute32   | 78         |
| 78.2330467 | 77.3715043 | 82.0224581 | 78.322775 |  | minute33   | 78.4444444 |

|            |            |            |           |  |          |            |
|------------|------------|------------|-----------|--|----------|------------|
| 78.2330467 | 77.3715043 | 82.0224581 | 79.322775 |  | minute34 | 78.5555556 |
| 78.2330467 | 78.3715043 | 82.0224581 | 79.322775 |  | minute35 | 78.5555556 |
| 78.2330467 | 80.3715043 | 82.0224581 | 79.322775 |  | minute36 | 78.7777778 |
| 77.2330467 | 80.3715043 | 81.0224581 | 79.322775 |  | minute37 | 79         |
| 77.2330467 | 81.3715043 | 81.0224581 | 79.322775 |  | minute38 | 79         |
| 77.2330467 | 81.3715043 | 81.0224581 | 79.322775 |  | minute39 | 78.8888889 |
| 77.2330467 | 81.3715043 | 76.0224581 | 77.322775 |  | minute40 | 78.1111111 |
| 77.2330467 | 81.3715043 | 76.0224581 | 77.322775 |  | minute41 | 78.2222222 |
| 77.2330467 | 81.3715043 | 77.0224581 | 77.322775 |  | minute42 | 78         |
| 78.2330467 | 81.3715043 | 78.0224581 | 76.322775 |  | minute43 | 77.7777778 |
| 78.2330467 | 81.3715043 | 79.0224581 | 76.322775 |  | minute44 | 78.1111111 |
| 80.2330467 | 81.3715043 | 79.0224581 | 76.322775 |  | minute45 | 78.7777778 |
| 82.2330467 | 81.3715043 | 78.0224581 | 76.322775 |  | minute46 | 79.2222222 |
| 82.2330467 | 81.3715043 | 76.0224581 | 77.322775 |  | minute47 | 78.6666667 |
| 82.2330467 | 80.3715043 | 76.0224581 | 76.322775 |  | minute48 | 78.2222222 |
| 80.2330467 | 79.3715043 | 76.0224581 | 74.322775 |  | minute49 | 77.2222222 |
| 79.2330467 | 79.3715043 | 76.0224581 | 71.322775 |  | minute50 | 76.3333333 |
| 78.2330467 | 78.3715043 | 76.0224581 | 72.322775 |  | minute51 | 76.2222222 |
| 78.2330467 | 82.3715043 | 76.0224581 | 72.322775 |  | minute52 | 76.1111111 |
| 77.2330467 | 84.3715043 | 76.0224581 | 72.322775 |  | minute53 | 76.1111111 |
| 78.2330467 | 84.3715043 | 75.0224581 | 72.322775 |  | minute54 | 76.1111111 |
| 78.2330467 | 85.3715043 | 75.0224581 | 73.322775 |  | minute55 | 76.2222222 |
| 80.2330467 | 85.3715043 | 75.0224581 | 74.322775 |  | minute56 | 76.6666667 |
| 81.2330467 | 85.3715043 | 75.0224581 | 76.322775 |  | minute57 | 77         |
| 84.2330467 | 84.3715043 | 75.0224581 | 76.322775 |  | minute58 | 77.3333333 |
| 84.2330467 | 83.3715043 | 75.0224581 | 77.322775 |  | minute59 | 77         |
| 85.2330467 | 83.3715043 | 75.0224581 | 78.322775 |  | minute60 | 77.1111111 |
| 85.2330467 | 82.3715043 | 75.0224581 | 77.322775 |  | Movie1   | 77         |
| 84.2330467 | 81.3715043 | 75.0224581 | 76.322775 |  | Movie2   | 76.8888889 |
| 84.2330467 | 80.3715043 | 76.0224581 | 76.322775 |  | Movie3   | 76.8888889 |
| 84.2330467 | 80.3715043 | 75.0224581 | 73.322775 |  | Movie4   | 75.3333333 |
| 83.2330467 | 79.3715043 | 75.0224581 | 73.322775 |  | Movie5   | 74.5555556 |
| 84.2330467 | 78.3715043 | 75.0224581 | 73.322775 |  | Movie6   | 74.2222222 |
| 85.2330467 | 78.3715043 | 74.0224581 | 73.322775 |  | Movie7   | 73.8888889 |
| 85.2330467 | 77.3715043 | 74.0224581 | 73.322775 |  | Movie8   | 73.8888889 |
| 85.2330467 | 75.3715043 | 73.0224581 | 73.322775 |  | Movie9   | 73.5555556 |
| 85.2330467 | 75.3715043 | 72.0224581 | 78.322775 |  | Movie10  | 74.3333333 |
| 85.2330467 | 74.3715043 | 72.0224581 | 78.322775 |  | Movie11  | 74.5555556 |
| 84.2330467 | 73.3715043 | 72.0224581 | 77.322775 |  | Movie12  | 74.3333333 |
| 81.2330467 | 73.3715043 | 72.0224581 | 77.322775 |  | Movie13  | 74         |
| 81.2330467 | 73.3715043 | 72.0224581 | 77.322775 |  | Movie14  | 73.8888889 |
| 79.2330467 | 75.3715043 | 71.0224581 | 77.322775 |  | Movie15  | 73.8888889 |
| 78.2330467 | 75.3715043 | 71.0224581 | 77.322775 |  | Movie16  | 73.5555556 |
| 77.2330467 | 75.3715043 | 71.0224581 | 78.322775 |  | Movie17  | 73.5555556 |
| 77.2330467 | 76.3715043 | 72.0224581 | 78.322775 |  | Movie18  | 74         |

|            |            |            |           |  |         |            |
|------------|------------|------------|-----------|--|---------|------------|
| 77.2330467 | 76.3715043 | 72.0224581 | 80.322775 |  | Movie19 | 74.2222222 |
| 76.2330467 | 76.3715043 | 72.0224581 | 81.322775 |  | Movie20 | 74.2222222 |
| 76.2330467 | 76.3715043 | 73.0224581 | 76.322775 |  | Movie21 | 74.1111111 |
| 76.2330467 | 76.3715043 | 73.0224581 | 74.322775 |  | Movie22 | 74.1111111 |
| 76.2330467 | 77.3715043 | 73.0224581 | 74.322775 |  | Movie23 | 74.2222222 |
| 75.2330467 | 77.3715043 | 73.0224581 | 73.322775 |  | Movie24 | 74.1111111 |
| 75.2330467 | 77.3715043 | 73.0224581 | 73.322775 |  | Movie25 | 74.1111111 |
| 73.2330467 | 77.3715043 | 73.0224581 | 73.322775 |  | Movie26 | 73.5555556 |
| 73.2330467 | 77.3715043 | 75.0224581 | 72.322775 |  | Movie27 | 73.6666667 |
| 73.2330467 | 77.3715043 | 75.0224581 | 71.322775 |  | Movie28 | 73.8888889 |
| 74.2330467 | 77.3715043 | 75.0224581 | 70.322775 |  | Movie29 | 74.3333333 |
| 74.2330467 | 77.3715043 | 75.0224581 | 70.322775 |  | Movie30 | 74.4444444 |
| 75.2330467 | 77.3715043 | 75.0224581 | 71.322775 |  | Movie31 | 74.7777778 |
| 77.2330467 | 78.3715043 | 77.0224581 | 74.322775 |  |         | 75.6666667 |
| 78.2330467 | 78.3715043 | 76.0224581 | 75.322775 |  |         | 76.7777778 |
| 77.2330467 | 78.3715043 | 71.0224581 | 74.322775 |  |         | 75.8888889 |
| 77.2330467 | 79.3715043 | 70.0224581 | 73.322775 |  |         | 75.8888889 |
| 78.2330467 | 81.3715043 | 70.0224581 | 73.322775 |  |         | 75.7777778 |
| 79.2330467 | 81.3715043 | 72.0224581 | 73.322775 |  |         | 76.3333333 |
| 79.2330467 | 81.3715043 | 73.0224581 | 73.322775 |  |         | 76.5555556 |
| 80.2330467 | 81.3715043 | 73.0224581 | 74.322775 |  |         | 77         |
| 81.2330467 | 81.3715043 | 73.0224581 | 77.322775 |  |         | 77.4444444 |
| 81.2330467 | 82.3715043 | 73.0224581 | 79.322775 |  |         | 77.8888889 |
| 80.2330467 | 83.3715043 | 75.0224581 | 81.322775 |  |         | 78.5555556 |
| 80.2330467 | 83.3715043 | 77.0224581 | 81.322775 |  |         | 78.7777778 |
| 80.2330467 | 84.3715043 | 78.0224581 | 81.322775 |  |         | 79.1111111 |
| 81.2330467 | 84.3715043 | 78.0224581 | 81.322775 |  |         | 79.2222222 |
| 82.2330467 | 84.3715043 | 77.0224581 | 80.322775 |  |         | 79.3333333 |
| 82.2330467 | 84.3715043 | 77.0224581 | 79.322775 |  |         | 79.1111111 |
| 82.2330467 | 83.3715043 | 77.0224581 | 77.322775 |  |         | 78.1111111 |
| 82.2330467 | 82.3715043 | 76.0224581 | 77.322775 |  |         | 77.6666667 |
| 81.2330467 | 80.3715043 | 76.0224581 | 77.322775 |  |         | 77.2222222 |
| 77.2330467 | 80.3715043 | 72.0224581 | 76.322775 |  |         | 76         |
| 77.2330467 | 80.3715043 | 70.0224581 | 76.322775 |  |         | 75.8888889 |
| 76.2330467 | 81.3715043 | 70.0224581 | 76.322775 |  |         | 75.7777778 |
| 75.2330467 | 83.3715043 | 70.0224581 | 80.322775 |  |         | 76.3333333 |
| 75.2330467 | 83.3715043 | 69.0224581 | 83.322775 |  |         | 76.5555556 |
| 75.2330467 | 83.3715043 | 69.0224581 | 86.322775 |  |         | 76.7777778 |
| 76.2330467 | 82.3715043 | 68.0224581 | 86.322775 |  |         | 76.2222222 |
| 77.2330467 | 82.3715043 | 68.0224581 | 86.322775 |  |         | 76.2222222 |
| 78.2330467 | 82.3715043 | 68.0224581 | 86.322775 |  |         | 76.3333333 |
| 78.2330467 | 82.3715043 | 68.0224581 | 79.322775 |  |         | 75.5555556 |
| 78.2330467 | 82.3715043 | 67.0224581 | 77.322775 |  |         | 75.3333333 |
| 77.2330467 | 82.3715043 | 67.0224581 | 74.322775 |  |         | 74.6666667 |
| 79.2330467 | 82.3715043 | 68.0224581 | 72.322775 |  |         | 74.5555556 |

|            |            |            |           |  |  |            |
|------------|------------|------------|-----------|--|--|------------|
| 80.2330467 | 83.3715043 | 68.0224581 | 72.322775 |  |  | 74.6666667 |
| 80.2330467 | 83.3715043 | 68.0224581 | 71.322775 |  |  | 74.6666667 |
| 81.2330467 | 83.3715043 | 69.0224581 | 72.322775 |  |  | 75.2222222 |
| 80.2330467 | 83.3715043 | 69.0224581 | 74.322775 |  |  | 75.6666667 |
| 75.2330467 | 81.3715043 | 69.0224581 | 74.322775 |  |  | 75.1111111 |
| 73.2330467 | 81.3715043 | 68.0224581 | 76.322775 |  |  | 75.6666667 |
| 73.2330467 | 81.3715043 | 68.0224581 | 78.322775 |  |  | 76.1111111 |
| 70.2330467 | 80.3715043 | 68.0224581 | 78.322775 |  |  | 75.8888889 |
| 68.2330467 | 79.3715043 | 71.0224581 | 78.322775 |  |  | 76         |
| 69.2330467 | 78.3715043 | 73.0224581 | 76.322775 |  |  | 75.7777778 |
| 69.2330467 | 78.3715043 | 73.0224581 | 73.322775 |  |  | 75.5555556 |
| 71.2330467 | 78.3715043 | 74.0224581 | 73.322775 |  |  | 75.6666667 |
| 74.2330467 | 78.3715043 | 78.0224581 | 70.322775 |  |  | 76.1111111 |
| 76.2330467 | 78.3715043 | 79.0224581 | 71.322775 |  |  | 76.6666667 |
| 78.2330467 | 78.3715043 | 79.0224581 | 73.322775 |  |  | 76.8888889 |
| 78.2330467 | 78.3715043 | 79.0224581 | 73.322775 |  |  | 76.8888889 |
| 78.2330467 | 78.3715043 | 77.0224581 | 74.322775 |  |  | 77         |
| 77.2330467 | 78.3715043 | 77.0224581 | 73.322775 |  |  | 77         |
| 77.2330467 | 78.3715043 | 77.0224581 | 72.322775 |  |  | 76.3333333 |
| 75.2330467 | 78.3715043 | 75.0224581 | 72.322775 |  |  | 76         |
| 75.2330467 | 82.3715043 | 73.0224581 | 71.322775 |  |  | 76         |
| 74.2330467 | 82.3715043 | 73.0224581 | 71.322775 |  |  | 75.8888889 |
| 74.2330467 | 82.3715043 | 72.0224581 | 72.322775 |  |  | 74.2732724 |
| 75.2330467 | 82.3715043 | 73.0224581 | 73.322775 |  |  | 74.7670996 |
| 77.2330467 | 82.3715043 | 73.0224581 | 74.322775 |  |  | 76.4444444 |
| 79.2330467 | 82.3715043 | 72.0224581 | 75.322775 |  |  | 76.4444444 |
| 81.2330467 | 82.3715043 | 73.0224581 | 75.322775 |  |  | 76.8888889 |
| 81.2330467 | 81.3715043 | 75.0224581 | 77.322775 |  |  | 77.4444444 |
| 83.2330467 | 79.3715043 | 75.0224581 | 77.322775 |  |  | 77.4444444 |
| 84.2330467 | 80.3715043 | 76.0224581 | 77.322775 |  |  | 77.7777778 |
| 82.2330467 | 80.3715043 | 79.0224581 | 77.322775 |  |  | 78.1111111 |
| 82.2330467 | 79.3715043 | 79.0224581 | 77.322775 |  |  | 78         |
| 80.2330467 | 78.3715043 | 80.0224581 | 78.322775 |  |  | 77.7777778 |
| 78.2330467 | 78.3715043 | 80.0224581 | 78.322775 |  |  | 77.3333333 |
| 75.2330467 | 78.3715043 | 80.0224581 | 78.322775 |  |  | 77         |
| 76.2330467 | 79.3715043 | 79.0224581 | 77.322775 |  |  | 77         |
| 75.2330467 | 79.3715043 | 79.0224581 | 76.322775 |  |  | 76.6666667 |
| 75.2330467 | 79.3715043 | 79.0224581 | 75.322775 |  |  | 76.3333333 |
| 75.2330467 | 79.3715043 | 79.0224581 | 76.322775 |  |  | 76.3333333 |
| 75.2330467 | 79.3715043 | 77.0224581 | 77.322775 |  |  | 76.3333333 |
| 73.2330467 | 79.3715043 | 75.0224581 | 79.322775 |  |  | 76.2222222 |
| 72.2330467 | 80.3715043 | 75.0224581 | 79.322775 |  |  | 76.5555556 |
| 72.2330467 | 81.3715043 | 75.0224581 | 80.322775 |  |  | 76.7777778 |
| 72.2330467 | 81.3715043 | 76.0224581 | 83.322775 |  |  | 77.3333333 |
| 72.2330467 | 81.3715043 | 77.0224581 | 85.322775 |  |  | 77.6666667 |



|            |            |            |           |  |          |            |
|------------|------------|------------|-----------|--|----------|------------|
| 72.2330467 | 81.3715043 | 77.0224581 | 86.322775 |  |          | 77.6666667 |
| 73.2330467 | 81.3715043 | 77.0224581 | 87.322775 |  |          | 78.4444444 |
| 73.2330467 | 80.3715043 | 77.0224581 | 87.322775 |  |          | 78.4444444 |
| 74.2330467 | 79.3715043 | 77.0224581 | 86.322775 |  |          | 78.3333333 |
| 74.2330467 | 79.3715043 | 78.0224581 | 85.322775 |  |          | 78.2222222 |
| 74.2330467 | 79.3715043 | 79.0224581 | 83.322775 |  |          | 77.6666667 |
| 74.2330467 | 79.3715043 | 79.0224581 | 82.322775 |  |          | 77.2222222 |
| 74.2330467 | 85.3715043 | 79.0224581 | 82.322775 |  | Movie 1  | 78         |
| 73.2330467 | 87.3715043 | 80.0224581 | 80.322775 |  | Movie 2  | 77.2222222 |
| 72.2330467 | 87.3715043 | 80.0224581 | 76.322775 |  | Movie 3  | 76.2222222 |
| 71.2330467 | 85.3715043 | 80.0224581 | 73.322775 |  | Movie 4  | 74.7777778 |
| 72.2330467 | 84.3715043 | 80.0224581 | 73.322775 |  | Movie 5  | 74.8888889 |
| 73.2330467 | 84.3715043 | 80.0224581 | 73.322775 |  | Movie 6  | 74.7777778 |
| 73.2330467 | 83.3715043 | 78.0224581 | 72.322775 |  | Movie 7  | 74.2222222 |
| 73.2330467 | 83.3715043 | 78.0224581 | 72.322775 |  | Movie 8  | 72.8888889 |
| 72.2330467 | 83.3715043 | 78.0224581 | 69.322775 |  | Movie 9  | 72.4444444 |
| 72.2330467 | 83.3715043 | 80.0224581 | 68.322775 |  | Movie 10 | 72         |
| 72.2330467 | 82.3715043 | 80.0224581 | 68.322775 |  | Movie 11 | 72.2222222 |
| 72.2330467 | 82.3715043 | 80.0224581 | 68.322775 |  | Movie 12 | 72.3333333 |
| 72.2330467 | 81.3715043 | 82.0224581 | 69.322775 |  | Movie 13 | 72.6666667 |
| 71.2330467 | 81.3715043 | 82.0224581 | 70.322775 |  | Movie 14 | 72.5555556 |
| 71.2330467 | 82.3715043 | 82.0224581 | 71.322775 |  | Movie 15 | 72.8888889 |
| 70.2330467 | 82.3715043 | 81.0224581 | 72.322775 |  | Movie 16 | 72.6666667 |
| 70.2330467 | 83.3715043 | 73.0224581 | 72.322775 |  | Movie 17 | 72.2222222 |
| 70.2330467 | 83.3715043 | 73.0224581 | 72.322775 |  | Movie 18 | 72.2222222 |
| 71.2330467 | 72.8888889 | 73.0224581 | 71.322775 |  | Movie 19 | 71.3908205 |
| 71.2330467 | 72.3333333 | 68.0224581 | 71.322775 |  | Movie 20 | 70.7735366 |
| 71.2330467 | 72.5555556 | 67.0224581 | 71.322775 |  | Movie 21 | 71.0204501 |
| 72.2330467 | 73         | 65.0224581 | 71.322775 |  | Movie 22 | 71.5142773 |
| 73.2330467 | 84.3715043 | 65.0224581 | 71.322775 |  | Movie 23 | 72.7777778 |
| 74.2330467 | 84.3715043 | 63.0224581 | 72.322775 |  | Movie 24 | 73         |
| 74.2330467 | 73.3333333 | 62.0224581 | 72.322775 |  | Movie 25 | 71.7735366 |
| 75.2330467 | 87.3715043 | 62.0224581 | 83.322775 |  | Movie 26 | 74.6666667 |
| 75.2330467 | 87.3715043 | 62.0224581 | 84.322775 |  | Movie 27 | 75.1111111 |
| 78.2330467 | 88.3715043 | 62.0224581 | 84.322775 |  | Movie 28 | 76.2222222 |
| 78.2330467 | 88.3715043 | 61.0224581 | 83.322775 |  | Movie 29 | 76.4444444 |
| 80.2330467 | 88.3715043 | 60.0224581 | 83.322775 |  | Movie 30 | 76.5555556 |
| 80.2330467 | 88.3715043 | 60.0224581 | 82.322775 |  | Movie 31 | 76.5555556 |
| 80.2330467 | 88.3715043 | 60.0224581 | 81.322775 |  | Movie 32 | 76.4444444 |
| 80.2330467 | 88.3715043 | 60.0224581 | 82.322775 |  | Movie 33 | 76.7777778 |
| 80.2330467 | 88.3715043 | 59.0224581 | 85.322775 |  | Movie 34 | 77         |
| 76.2330467 | 89.3715043 | 59.0224581 | 86.322775 |  | Movie 35 | 77.1111111 |
| 76.2330467 | 89.3715043 | 59.0224581 | 86.322775 |  | Movie 36 | 77.1111111 |
| 76.2330467 | 88.3715043 | 60.0224581 | 87.322775 |  | Movie 37 | 77.8888889 |
| 77.2330467 | 87.3715043 | 60.0224581 | 87.322775 |  | Movie 38 | 77.7777778 |

|            |            |            |           |  |          |            |
|------------|------------|------------|-----------|--|----------|------------|
| 79.2330467 | 87.3715043 | 60.0224581 | 87.322775 |  | Movie 39 | 77.8888889 |
| 79.2330467 | 86.3715043 | 60.0224581 | 87.322775 |  | Movie 40 | 77.8888889 |
| 78.2330467 | 86.3715043 | 60.0224581 | 87.322775 |  | Movie 41 | 77.5555556 |
| 76.2330467 | 85.3715043 | 61.0224581 | 87.322775 |  | Movie 42 | 77.2222222 |
| 74.2330467 | 80.3715043 | 62.0224581 | 87.322775 |  | Movie 43 | 76.3333333 |
| 74.2330467 | 79.3715043 | 61.0224581 | 87.322775 |  | Movie 44 | 76.2222222 |
| 73.2330467 | 79.3715043 | 61.0224581 | 87.322775 |  | Movie 45 | 75.5555556 |
| 72.2330467 | 79.3715043 | 61.0224581 | 87.322775 |  | Movie 46 | 75.1111111 |
| 72.2330467 | 79.3715043 | 61.0224581 | 87.322775 |  | Movie 47 | 75.2222222 |
| 72.2330467 | 79.3715043 | 63.0224581 | 87.322775 |  | Movie 48 | 75.4444444 |
| 73.2330467 | 79.3715043 | 63.0224581 | 87.322775 |  | Movie 49 | 75.7777778 |
| 73.2330467 | 79.3715043 | 64.0224581 | 87.322775 |  |          | 75.7777778 |
| 73.2330467 | 79.3715043 | 65.0224581 | 86.322775 |  |          | 76         |
| 74.2330467 | 79.3715043 | 65.0224581 | 86.322775 |  |          | 76.4444444 |
| 74.2330467 | 80.3715043 | 65.0224581 | 86.322775 |  |          | 76.7777778 |
| 73.2330467 | 80.3715043 | 65.0224581 | 86.322775 |  |          | 74.7670996 |
| 73.2330467 | 80.3715043 | 65.0224581 | 86.322775 |  |          | 74.6806798 |
| 73.2330467 | 80.3715043 | 75.0224581 | 86.322775 |  |          | 75.7917909 |
| 73.2330467 | 79.3715043 | 76.0224581 | 86.322775 |  |          | 76.7777778 |
| 73.2330467 | 79.3715043 | 76.0224581 | 83.322775 |  |          | 76.2222222 |
| 76.2330467 | 78.3715043 | 75.0224581 | 83.322775 |  |          | 75.7777778 |
| 76.2330467 | 78.3715043 | 75.0224581 | 83.322775 |  |          | 75.4444444 |
| 76.2330467 | 78.3715043 | 78.0224581 | 76.322775 |  |          | 75.1111111 |
| 77.2330467 | 78.3715043 | 78.0224581 | 77.322775 |  |          | 75.1111111 |
| 77.2330467 | 78.3715043 | 78.0224581 | 77.322775 |  |          | 75.2222222 |
| 78.2330467 | 78.3715043 | 82.0224581 | 77.322775 |  |          | 76         |
| 78.2330467 | 80.3715043 | 82.0224581 | 78.322775 |  |          | 76.4444444 |
| 78.2330467 | 82.3715043 | 82.0224581 | 79.322775 |  |          | 76.6666667 |
| 78.2330467 | 82.3715043 | 81.0224581 | 81.322775 |  |          | 77         |
| 78.2330467 | 83.3715043 | 81.0224581 | 82.322775 |  |          | 77.2222222 |
| 78.2330467 | 83.3715043 | 79.0224581 | 82.322775 |  |          | 77.1111111 |
| 79.2330467 | 83.3715043 | 76.0224581 | 82.322775 |  |          | 76.8888889 |
| 79.2330467 | 79.3715043 | 73.0224581 | 82.322775 |  |          | 76.2222222 |
| 79.2330467 | 79.3715043 | 73.0224581 | 82.322775 |  |          | 76.2222222 |
| 79.2330467 | 67.3715043 | 70.0224581 | 80.322775 |  |          | 74.6666667 |
| 79.2330467 | 65.3715043 | 71.0224581 | 80.322775 |  |          | 74.1111111 |
| 78.2330467 | 65.3715043 | 71.0224581 | 81.322775 |  |          | 73.6666667 |
| 79.2330467 | 65.3715043 | 73.0224581 | 82.322775 |  |          | 74.1111111 |
| 79.2330467 | 65.3715043 | 75.0224581 | 82.322775 |  |          | 74.2222222 |
| 80.2330467 | 67.3715043 | 75.0224581 | 82.322775 |  |          | 74.5555556 |
| 79.2330467 | 73.3715043 | 75.0224581 | 82.322775 |  |          | 74.8888889 |
| 79.2330467 | 73.3715043 | 75.0224581 | 82.322775 |  |          | 74.7777778 |
| 78.2330467 | 73.3715043 | 75.0224581 | 78.322775 |  |          | 74.5555556 |
| 77.2330467 | 70.3715043 | 75.0224581 | 77.322775 |  |          | 74.1111111 |
| 77.2330467 | 70.3715043 | 75.0224581 | 77.322775 |  |          | 74.1111111 |

|            |            |            |           |  |          |            |
|------------|------------|------------|-----------|--|----------|------------|
| 76.2330467 | 68.3715043 | 75.0224581 | 78.322775 |  |          | 74         |
| 76.2330467 | 68.3715043 | 77.0224581 | 78.322775 |  |          | 74.2222222 |
| 75.2330467 | 68.3715043 | 77.0224581 | 78.322775 |  |          | 74.4444444 |
| 75.2330467 | 68.3715043 | 77.0224581 | 79.322775 |  |          | 74.7777778 |
| 75.2330467 | 69.3715043 | 77.0224581 | 80.322775 |  |          | 75.3333333 |
| 75.2330467 | 73.3715043 | 77.0224581 | 80.322775 |  |          | 75.7777778 |
| 75.2330467 | 76.3715043 | 77.0224581 | 80.322775 |  |          | 76         |
| 76.2330467 | 78.3715043 | 76.0224581 | 79.322775 |  |          | 75.8888889 |
| 80.2330467 | 78.3715043 | 74.0224581 | 78.322775 |  |          | 76.2222222 |
| 80.2330467 | 78.3715043 | 74.0224581 | 77.322775 |  |          | 75.7777778 |
| 80.2330467 | 80.3715043 | 74.0224581 | 78.322775 |  | Movie 1  | 76.1111111 |
| 77.2330467 | 80.3715043 | 70.0224581 | 78.322775 |  | Movie 2  | 74.6666667 |
| 75.2330467 | 81.3715043 | 69.0224581 | 77.322775 |  | Movie 3  | 74         |
| 74.2330467 | 82.3715043 | 69.0224581 | 76.322775 |  | Movie 4  | 74.2222222 |
| 74.2330467 | 82.3715043 | 69.0224581 | 75.322775 |  | Movie 5  | 74.3333333 |
| 75.2330467 | 82.3715043 | 68.0224581 | 74.322775 |  | Movie 6  | 74.4444444 |
| 75.2330467 | 82.3715043 | 68.0224581 | 74.322775 |  | Movie 7  | 74         |
| 76.2330467 | 82.3715043 | 67.0224581 | 72.322775 |  | Movie 8  | 73.3333333 |
| 76.2330467 | 82.3715043 | 67.0224581 | 72.322775 |  | Movie 9  | 73.2222222 |
| 76.2330467 | 82.3715043 | 67.0224581 | 73.322775 |  | Movie 10 | 73.3333333 |
| 76.2330467 | 82.3715043 | 66.0224581 | 73.322775 |  | Movie 11 | 73         |
| 76.2330467 | 81.3715043 | 65.0224581 | 73.322775 |  | Movie 12 | 72.8888889 |
| 76.2330467 | 80.3715043 | 65.0224581 | 72.322775 |  | Movie 13 | 72.6666667 |
| 75.2330467 | 80.3715043 | 65.0224581 | 72.322775 |  | Movie 14 | 72.4444444 |
| 75.2330467 | 79.3715043 | 65.0224581 | 73.322775 |  | Movie 15 | 73         |
| 74.2330467 | 79.3715043 | 66.0224581 | 73.322775 |  | Movie 16 | 73         |
| 73.2330467 | 78.3715043 | 66.0224581 | 73.322775 |  | Movie 17 | 73         |
| 74.2330467 | 77.3715043 | 66.0224581 | 73.322775 |  | Movie 18 | 72.8888889 |
| 74.2330467 | 77.3715043 | 66.0224581 | 73.322775 |  | Movie 19 | 73         |
| 74.2330467 | 77.3715043 | 66.0224581 | 73.322775 |  | Movie 20 | 73.2222222 |
| 76.2330467 | 76.3715043 | 66.0224581 | 75.322775 |  | Movie 21 | 73.5555556 |
| 77.2330467 | 76.3715043 | 67.0224581 | 79.322775 |  | Movie 22 | 74.5555556 |
| 76.2330467 | 78.3715043 | 68.0224581 | 80.322775 |  | Movie 23 | 74.7777778 |
| 76.2330467 | 80.3715043 | 69.0224581 | 80.322775 |  | Movie 24 | 74.7777778 |
| 75.2330467 | 80.3715043 | 69.0224581 | 79.322775 |  | Movie 25 | 74.1111111 |
| 75.2330467 | 80.3715043 | 69.0224581 | 79.322775 |  | Movie 26 | 73.5555556 |
| 73.2330467 | 80.3715043 | 70.0224581 | 79.322775 |  | Movie 27 | 73         |
| 74.2330467 | 80.3715043 | 70.0224581 | 78.322775 |  | Movie 28 | 73.2222222 |
| 74.2330467 | 80.3715043 | 70.0224581 | 78.322775 |  | Movie 29 | 73.1111111 |
| 76.2330467 | 80.3715043 | 69.0224581 | 78.322775 |  | Movie 30 | 73.2222222 |
| 75.2330467 | 80.3715043 | 69.0224581 | 78.322775 |  | Movie 31 | 73.4444444 |
| 75.2330467 | 80.3715043 | 69.0224581 | 78.322775 |  | Movie 32 | 73.6666667 |
| 75.2330467 | 80.3715043 | 69.0224581 | 78.322775 |  | Movie 33 | 73.6666667 |
| 73.2330467 | 80.3715043 | 64.0224581 | 78.322775 |  | Movie 34 | 73         |
| 72.2330467 | 80.3715043 | 63.0224581 | 78.322775 |  | Movie 35 | 72.6666667 |

|            |            |            |            |  |           |            |
|------------|------------|------------|------------|--|-----------|------------|
| 71.2330467 | 81.3715043 | 63.0224581 | 79.322775  |  | Movie 36  | 72.6666667 |
| 71.2330467 | 81.3715043 | 62.0224581 | 79.322775  |  | Movie 37  | 72.4444444 |
| 71.2330467 | 82.3715043 | 61.0224581 | 79.322775  |  | Movie 38  | 73.4444444 |
| 71.2330467 | 82.3715043 | 61.0224581 | 80.322775  |  | Movie 39  | 73.5555556 |
| 71.2330467 | 83.3715043 | 62.0224581 | 81.322775  |  | Movie 40  | 73.6666667 |
| 71.2330467 | 83.3715043 | 62.0224581 | 82.322775  |  | Movie 41  | 73.6666667 |
| 73.2330467 | 83.3715043 | 63.0224581 | 84.322775  |  | Movie 42  | 74.8888889 |
| 74.2330467 | 85.3715043 | 63.0224581 | 85.322775  |  | Movie 43  | 75.3333333 |
| 75.2330467 | 85.3715043 | 64.0224581 | 85.322775  |  | Movie 44  | 75.5555556 |
| 75.2330467 | 87.3715043 | 64.0224581 | 86.322775  |  | Movie 45  | 76         |
| 75.2330467 | 88.3715043 | 65.0224581 | 88.322775  |  | Movie 46  | 76.6666667 |
| 75.2330467 | 88.3715043 | 65.0224581 | 88.322775  |  | Movie 47  | 76.7777778 |
| 75.2330467 | 88.3715043 | 66.0224581 | 89.322775  |  | Movie 48  | 76.7777778 |
| 74.2330467 | 88.3715043 | 67.0224581 | 76.5555556 |  | minute 1  | 75.1369756 |
| 75.2330467 | 77.1111111 | 67.0224581 | 77.1111111 |  | minute 2  | 73.9475492 |
| 76.2330467 | 77         | 71.0224581 | 77         |  | minute 3  | 73.8117467 |
| 77.2330467 | 77.1111111 | 73.0224581 | 77.1111111 |  | minute 4  | 73.9475492 |
| 77.2330467 | 77.1111111 | 73.0224581 | 77.1111111 |  | minute 5  | 73.9475492 |
| 77.2330467 | 77.4444444 | 73.0224581 | 77.4444444 |  | minute 6  | 74.3549566 |
| 77.2330467 | 78.1111111 | 73.0224581 | 89.322775  |  | minute 7  | 76.4155119 |
| 77.2330467 | 78.3333333 | 73.0224581 | 89.322775  |  | minute 8  | 76.6624254 |
| 77.2330467 | 78.5555556 | 73.0224581 | 89.322775  |  | minute 9  | 76.7982279 |
| 79.2330467 | 78.8888889 | 74.0224581 | 88.322775  |  | minute 10 | 77.0574872 |
| 79.2330467 | 79.4444444 | 81.0224581 | 88.322775  |  | minute 11 | 77.6747711 |
| 79.2330467 | 79.2222222 | 81.0224581 | 85.322775  |  | minute 12 | 77.3167464 |
| 79.2330467 | 79.1111111 | 81.0224581 | 85.322775  |  | minute 13 | 77.1932896 |
| 80.2330467 | 79.3333333 | 81.0224581 | 85.322775  |  | minute 14 | 77.4402032 |
| 80.2330467 | 76.8888889 | 67.0224581 | 79.322775  |  | minute 15 | 74.7241538 |
| 81.2330467 | 77         | 67.0224581 | 79.322775  |  | minute 16 | 74.8476106 |
| 81.2330467 | 76.8888889 | 65.0224581 | 78.322775  |  | minute 17 | 74.7241538 |
| 82.2330467 | 77.1111111 | 64.0224581 | 78.322775  |  | minute 18 | 73.6626467 |
| 82.2330467 | 76.3333333 | 61.0224581 | 77.322775  |  | minute 19 | 73.0453628 |
| 82.2330467 | 76.5555556 | 61.0224581 | 77.322775  |  | minute 20 | 74.7982279 |
| 80.2330467 | 86.3715043 | 58.0224581 | 76.322775  |  | minute 21 | 74.5681225 |
| 80.2330467 | 85.3715043 | 58.0224581 | 76.322775  |  | minute 22 | 76.4444444 |
| 79.2330467 | 85.3715043 | 58.0224581 | 75.322775  |  | minute 23 | 75.8888889 |
| 77.2330467 | 81.3715043 | 58.0224581 | 74.322775  |  | minute 24 | 75.4444444 |
| 77.2330467 | 76.3715043 | 60.0224581 | 74.322775  |  | minute 25 | 75.2222222 |
| 77.2330467 | 76.3715043 | 62.0224581 | 74.322775  |  | minute 26 | 74.8888889 |
| 76.2330467 | 73.3715043 | 62.0224581 | 73.322775  |  | minute 27 | 74.3333333 |
| 75.2330467 | 73.3715043 | 62.0224581 | 77.322775  |  | minute 28 | 74.5555556 |
| 75.2330467 | 75.3715043 | 62.0224581 | 79.322775  |  | minute 29 | 75.2222222 |
| 74.2330467 | 78.3715043 | 61.0224581 | 79.322775  |  | minute 30 | 75.4444444 |
| 73.2330467 | 78.3715043 | 61.0224581 | 79.322775  |  | minute 31 | 75.2222222 |
| 72.2330467 | 77.3715043 | 59.0224581 | 79.322775  |  | minute 32 | 74.4444444 |

|            |            |            |           |  |            |            |
|------------|------------|------------|-----------|--|------------|------------|
| 72.2330467 | 77.3715043 | 59.0224581 | 80.322775 |  | minute 33  | 74         |
| 74.2330467 | 77.3715043 | 59.0224581 | 80.322775 |  | minute 34  | 73.8888889 |
| 75.2330467 | 77.3715043 | 59.0224581 | 80.322775 |  | minute 35  | 74.3333333 |
| 74.2330467 | 77.3715043 | 60.0224581 | 80.322775 |  | minute 36  | 74.4444444 |
| 72.2330467 | 77.3715043 | 60.0224581 | 80.322775 |  | minute 37  | 74.3333333 |
| 72.2330467 | 77.3715043 | 61.0224581 | 79.322775 |  | minute 38  | 74.4444444 |
| 72.2330467 | 77.3715043 | 61.0224581 | 79.322775 |  | minute 39  | 74.4444444 |
| 70.2330467 | 77.3715043 | 61.0224581 | 78.322775 |  | minute 40  | 73.8888889 |
| 71.2330467 | 77.3715043 | 61.0224581 | 78.322775 |  | minute 41  | 74.8888889 |
| 73.2330467 | 77.3715043 | 62.0224581 | 77.322775 |  | minute 42  | 75         |
| 75.2330467 | 77.3715043 | 61.0224581 | 77.322775 |  | minute 43  | 75.6666667 |
| 75.2330467 | 78.3715043 | 61.0224581 | 77.322775 |  | minute 44  | 74.4180098 |
| 73.2330467 | 78.3715043 | 61.0224581 | 77.322775 |  | minute 45  | 74.2945531 |
| 72.2330467 | 78.3715043 | 60.0224581 | 76.322775 |  | minute 46  | 74.0476395 |
| 72.2330467 | 78.3715043 | 60.0224581 | 76.322775 |  | minute 47  | 75.2222222 |
| 72.2330467 | 78.3715043 | 59.0224581 | 75.322775 |  | minute 48  | 75.1111111 |
| 73.2330467 | 78.3715043 | 60.0224581 | 75.322775 |  | minute 49  | 75.4444444 |
| 73.2330467 | 78.3715043 | 60.0224581 | 75.322775 |  | minute 50  | 75.5555556 |
| 74.2330467 | 78.3715043 | 61.0224581 | 76.322775 |  | minute 51  | 76.5555556 |
| 74.2330467 | 77.3715043 | 60.0224581 | 77.322775 |  | minute 52  | 76.5555556 |
| 74.2330467 | 77.3715043 | 60.0224581 | 78.322775 |  | minute 53  | 76.4444444 |
| 75.2330467 | 76.3715043 | 60.0224581 | 78.322775 |  | minute 54  | 76.6666667 |
| 75.2330467 | 76.3715043 | 59.0224581 | 78.322775 |  | minute 55  | 76.6666667 |
| 75.2330467 | 76.3715043 | 59.0224581 | 79.322775 |  | minute 56  | 76.8888889 |
| 75.2330467 | 76.3715043 | 59.0224581 | 81.322775 |  | minute 57  | 77.3333333 |
| 75.2330467 | 76.3715043 | 59.0224581 | 79.322775 |  | minute 58  | 76.8888889 |
| 75.2330467 | 76.3715043 | 62.0224581 | 79.322775 |  | minute 59  | 77.1111111 |
| 75.2330467 | 75.3715043 | 62.0224581 | 78.322775 |  | minute 60  | 76.6666667 |
| 75.2330467 | 76.3715043 | 63.0224581 | 78.322775 |  | Between 1  | 76.7777778 |
| 74.2330467 | 76.3715043 | 66.0224581 | 78.322775 |  | Between 2  | 77         |
| 73.2330467 | 76.3715043 | 68.0224581 | 78.322775 |  | Between 3  | 76.7777778 |
| 73.2330467 | 75.3715043 | 69.0224581 | 78.322775 |  | Between 4  | 76.2222222 |
| 74.2330467 | 73.3715043 | 69.0224581 | 78.322775 |  | Between 5  | 75.6666667 |
| 73.2330467 | 73.3715043 | 70.0224581 | 78.322775 |  | Between 6  | 75.3333333 |
| 73.2330467 | 73.3715043 | 71.0224581 | 76.322775 |  | Between 7  | 75         |
| 72.2330467 | 73.3715043 | 71.0224581 | 76.322775 |  | Between 8  | 74.8888889 |
| 72.2330467 | 74.3715043 | 71.0224581 | 73.322775 |  | Between 9  | 74.5555556 |
| 72.2330467 | 79.3715043 | 70.0224581 | 73.322775 |  | Between 10 | 74.5555556 |
| 72.2330467 | 77.3715043 | 69.0224581 | 74.322775 |  | Between 11 | 74.3333333 |
| 72.2330467 | 77.3715043 | 69.0224581 | 75.322775 |  | Between 12 | 74.3333333 |
| 73.2330467 | 72.3715043 | 72.0224581 | 75.322775 |  | Between 13 | 73.7777778 |
| 74.2330467 | 71.3715043 | 72.0224581 | 75.322775 |  | Between 14 | 73.6666667 |
| 76.2330467 | 71.3715043 | 78.0224581 | 75.322775 |  | Between 15 | 74.7777778 |
| 77.2330467 | 72.3715043 | 80.0224581 | 75.322775 |  | Between 16 | 75.4444444 |
| 77.2330467 | 72.3715043 | 80.0224581 | 75.322775 |  | Between 17 | 76.3333333 |

|            |            |            |           |  |            |            |
|------------|------------|------------|-----------|--|------------|------------|
| 77.2330467 | 76.3715043 | 80.0224581 | 74.322775 |  | Between 18 | 77.2222222 |
| 77.2330467 | 76.3715043 | 78.0224581 | 73.322775 |  | Between 19 | 77         |
| 77.2330467 | 78.3715043 | 78.0224581 | 73.322775 |  | Between 20 | 77.3333333 |
| 77.2330467 | 78.3715043 | 78.0224581 | 75.322775 |  | Between 21 | 77.3333333 |
| 77.2330467 | 79.3715043 | 71.0224581 | 76.322775 |  | Between 22 | 76         |
| 77.2330467 | 79.3715043 | 69.0224581 | 78.322775 |  | Between 23 | 75.5555556 |
| 77.2330467 | 81.3715043 | 70.0224581 | 79.322775 |  | Between 24 | 75.5555556 |
| 76.2330467 | 81.3715043 | 70.0224581 | 79.322775 |  | Between 25 | 75.7777778 |
| 76.2330467 | 82.3715043 | 71.0224581 | 79.322775 |  | Between 26 | 76.1111111 |
| 76.2330467 | 82.3715043 | 73.0224581 | 79.322775 |  | Between 27 | 76.5555556 |
| 76.2330467 | 81.3715043 | 73.0224581 | 79.322775 |  | Between 28 | 76.4444444 |
| 76.2330467 | 81.3715043 | 77.0224581 | 79.322775 |  | Between 29 | 76.6666667 |
| 76.2330467 | 80.3715043 | 77.0224581 | 79.322775 |  | Between 30 | 76.7777778 |
| 76.2330467 | 80.3715043 | 77.0224581 | 80.322775 |  | Between 31 | 76.6666667 |
| 76.2330467 | 80.3715043 | 74.0224581 | 80.322775 |  | Between 32 | 76.3333333 |
| 76.2330467 | 80.3715043 | 74.0224581 | 80.322775 |  | Between 33 | 76.3333333 |
| 76.2330467 | 80.3715043 | 69.0224581 | 79.322775 |  | Between 34 | 76         |
| 77.2330467 | 80.3715043 | 69.0224581 | 79.322775 |  | Between 35 | 75.7777778 |
| 77.2330467 | 80.3715043 | 65.0224581 | 79.322775 |  | Between 36 | 75.5555556 |
| 77.2330467 | 80.3715043 | 65.0224581 | 78.322775 |  | Between 37 | 75.6666667 |
| 76.2330467 | 80.3715043 | 65.0224581 | 78.322775 |  | Between 38 | 75.6666667 |
| 76.2330467 | 76.3715043 | 65.0224581 | 77.322775 |  | Between 39 | 75         |
| 75.2330467 | 75.3715043 | 65.0224581 | 77.322775 |  | Between 40 | 74.7777778 |
| 75.2330467 | 75.3715043 | 65.0224581 | 77.322775 |  | Between 41 | 74.6666667 |
| 75.2330467 | 75.3715043 | 65.0224581 | 78.322775 |  | Between 42 | 74.6666667 |
| 75.2330467 | 75.3715043 | 65.0224581 | 80.322775 |  | Between 43 | 75.2222222 |
| 75.2330467 | 74.3715043 | 65.0224581 | 80.322775 |  | Between 44 | 75.2222222 |
| 76.2330467 | 74.3715043 | 66.0224581 | 80.322775 |  | Between 45 | 75.5555556 |
| 77.2330467 | 74.3715043 | 66.0224581 | 80.322775 |  | Between 46 | 75.8888889 |
| 78.2330467 | 74.3715043 | 67.0224581 | 80.322775 |  | Between 47 | 76.2222222 |
| 76.2330467 | 75.3715043 | 67.0224581 | 79.322775 |  | Between 48 | 76.3333333 |
| 75.2330467 | 75.3715043 | 69.0224581 | 78.322775 |  | Between 49 | 76.4444444 |
| 74.2330467 | 75.3715043 | 71.0224581 | 78.322775 |  | Between 50 | 76.4444444 |
| 74.2330467 | 77.3715043 | 72.0224581 | 78.322775 |  | Between 51 | 76.5555556 |
| 74.2330467 | 77.3715043 | 72.0224581 | 78.322775 |  | Between 52 | 76.3333333 |
| 74.2330467 | 77.3715043 | 75.0224581 | 78.322775 |  | Between 53 | 76.2222222 |
| 74.2330467 | 77.3715043 | 78.0224581 | 78.322775 |  | Between 54 | 76.2222222 |
| 75.2330467 | 77.3715043 | 78.0224581 | 77.322775 |  | Between 55 | 75.8888889 |
| 75.2330467 | 77.3715043 | 79.0224581 | 78.322775 |  | Between 56 | 76.1111111 |
| 76.2330467 | 76.3715043 | 79.0224581 | 79.322775 |  | Between 57 | 76.1111111 |
| 76.2330467 | 75.3715043 | 79.0224581 | 80.322775 |  | Between 58 | 76.2222222 |
| 76.2330467 | 73.3715043 | 79.0224581 | 81.322775 |  | Between 59 | 76.5555556 |
| 76.2330467 | 73.3715043 | 79.0224581 | 82.322775 |  | Between 60 | 76.7777778 |
| 77.2330467 | 73.3715043 | 79.0224581 | 82.322775 |  | Between 61 | 77.2222222 |
| 77.2330467 | 73.3715043 | 79.0224581 | 84.322775 |  | Between 62 | 77.1111111 |

|            |            |            |            |  |             |            |
|------------|------------|------------|------------|--|-------------|------------|
| 77.2330467 | 73.3715043 | 79.0224581 | 84.322775  |  | Between 63  | 77.2222222 |
| 77.2330467 | 73.3715043 | 78.0224581 | 84.322775  |  | Between 64  | 77         |
| 79.2330467 | 75.3715043 | 71.0224581 | 77.2222222 |  | Between 65  | 75.6554941 |
| 79.2330467 | 75.3715043 | 71.0224581 | 77.3333333 |  | Between 66  | 75.7789509 |
| 78.2330467 | 75.3715043 | 71.0224581 | 85.322775  |  | Between 67  | 76.5555556 |
| 77.2330467 | 75.3715043 | 71.0224581 | 80.322775  |  | Between 68  | 75.5555556 |
| 75.2330467 | 77.3715043 | 75.0224581 | 77.322775  |  | Between 69  | 75.6666667 |
| 74.2330467 | 77.3715043 | 74.0224581 | 78.322775  |  | Between 70  | 75.4444444 |
| 74.2330467 | 77.3715043 | 70.0224581 | 78.322775  |  | Between 71  | 75.1111111 |
| 74.2330467 | 77.3715043 | 70.0224581 | 79.322775  |  | Between 72  | 76.5555556 |
| 74.2330467 | 78.3715043 | 67.0224581 | 79.322775  |  | Between 73  | 76.4444444 |
| 73.2330467 | 79.3715043 | 68.0224581 | 79.322775  |  | Between 74  | 76.8888889 |
| 73.2330467 | 80.3715043 | 68.0224581 | 79.322775  |  | Between 75  | 77         |
| 73.2330467 | 80.3715043 | 68.0224581 | 79.322775  |  | Between 76  | 77.5555556 |
| 72.2330467 | 75.3715043 | 68.0224581 | 81.322775  |  | Between 77  | 77.3333333 |
| 73.2330467 | 75.3715043 | 66.0224581 | 83.322775  |  | Between 78  | 77.5555556 |
| 73.2330467 | 66.3715043 | 64.0224581 | 83.322775  |  | Between 79  | 75.0989867 |
| 73.2330467 | 61.3715043 | 65.0224581 | 83.322775  |  | Between 80  | 74.395283  |
| 74.2330467 | 61.3715043 | 65.0224581 | 84.322775  |  | Between 81  | 74.321209  |
| 74.2330467 | 61.3715043 | 65.0224581 | 85.322775  |  | Between 82  | 74.2224435 |
| 74.2330467 | 65.3715043 | 65.0224581 | 85.322775  |  | Between 83  | 73.8397275 |
| 75.2330467 | 69.3715043 | 65.0224581 | 85.322775  |  | Between 84  | 74.0742954 |
| 82.2330467 | 69.3715043 | 65.0224581 | 86.322775  |  | Between 85  | 74.7903448 |
| 82.2330467 | 72.3715043 | 66.0224581 | 86.322775  |  | Between 86  | 75.2841719 |
| 82.2330467 | 72.3715043 | 66.0224581 | 86.322775  |  | Between 87  | 75.2841719 |
| 80.2330467 | 75.3715043 | 64.0224581 | 88.322775  |  | Between 88  | 75.5434312 |
| 77.2330467 | 76.3715043 | 63.0224581 | 89.322775  |  | Between 89  | 75.0742954 |
| 77.2330467 | 77.3715043 | 65.0224581 | 90.322775  |  | Between 90  | 75.6051596 |
| 77.2330467 | 79.3715043 | 65.0224581 | 90.322775  |  | Between 91  | 75.7656534 |
| 77.2330467 | 80.3715043 | 66.0224581 | 84.322775  |  | Between 92  | 75.4817028 |
| 77.2330467 | 81.3715043 | 65.0224581 | 82.322775  |  | Between 93  | 75.1236781 |
| 77.2330467 | 81.3715043 | 66.0224581 | 81.322775  |  | Between 94  | 75.4940485 |
| 77.2330467 | 82.3715043 | 66.0224581 | 80.322775  |  | Between 95  | 75.666888  |
| 77.2330467 | 82.3715043 | 66.0224581 | 81.322775  |  | Between 96  | 76.0372583 |
| 78.2330467 | 82.3715043 | 67.0224581 | 81.322775  |  | Between 97  | 76.5310855 |
| 78.2330467 | 83.3715043 | 67.0224581 | 81.322775  |  | Between 98  | 76.8891102 |
| 77.2330467 | 83.3715043 | 67.0224581 | 82.322775  |  | Between 99  | 77.0619497 |
| 74.2330467 | 83.3715043 | 67.0224581 | 80.322775  |  | Between 100 | 76.3705917 |
| 74.2330467 | 84.3715043 | 67.0224581 | 77.322775  |  | Between 101 | 75.9014559 |
| 73.2330467 | 84.3715043 | 67.0224581 | 76.322775  |  | Between 102 | 75.9755299 |
| 72.2330467 | 84.3715043 | 67.0224581 | 76.322775  |  | Between 103 | 76.6666667 |
| 72.2330467 | 85.3715043 | 67.0224581 | 76.322775  |  | Between 104 | 76.5555556 |
| 72.2330467 | 86.3715043 | 68.0224581 | 75.322775  |  | Between 105 | 76.3333333 |
| 72.2330467 | 87.3715043 | 68.0224581 | 72.322775  |  | Between 106 | 75.8888889 |
| 73.2330467 | 87.3715043 | 68.0224581 | 73.322775  |  | Between 107 | 76         |

|            |            |            |           |  |             |            |
|------------|------------|------------|-----------|--|-------------|------------|
| 73.2330467 | 86.3715043 | 68.0224581 | 73.322775 |  | Between 108 | 75.8888889 |
| 73.2330467 | 83.3715043 | 68.0224581 | 73.322775 |  | Between 109 | 75.6666667 |
| 73.2330467 | 83.3715043 | 68.0224581 | 74.322775 |  | Between 110 | 75.8888889 |
| 73.2330467 | 81.3715043 | 68.0224581 | 76.322775 |  | Between 111 | 76.1111111 |
| 73.2330467 | 80.3715043 | 70.0224581 | 76.322775 |  | Between 112 | 76.2222222 |
| 73.2330467 | 79.3715043 | 72.0224581 | 77.322775 |  | Between 113 | 76.5555556 |
| 73.2330467 | 78.3715043 | 74.0224581 | 77.322775 |  | Between 114 | 76.7777778 |
| 72.2330467 | 79.3715043 | 72.0224581 | 75.322775 |  | Between 115 | 76.2222222 |
| 72.2330467 | 81.3715043 | 72.0224581 | 75.322775 |  | Between 116 | 76.5555556 |
| 72.2330467 | 81.3715043 | 72.0224581 | 74.322775 |  | Between 117 | 76.3333333 |
| 72.2330467 | 81.3715043 | 71.0224581 | 70.322775 |  | Between 118 | 76         |
| 73.2330467 | 81.3715043 | 71.0224581 | 70.322775 |  | Between 119 | 76         |
| 74.2330467 | 81.3715043 | 71.0224581 | 70.322775 |  | Between 120 | 76.4444444 |
| 76.2330467 | 78.3715043 | 71.0224581 | 71.322775 |  |             | 76.4444444 |
| 72.2330467 | 78.3715043 | 71.0224581 | 72.322775 |  |             | 75.6666667 |
| 72.2330467 | 79.3715043 | 71.0224581 | 73.322775 |  |             | 75.8888889 |
| 72.2330467 | 79.3715043 | 71.0224581 | 73.322775 |  |             | 76         |
| 73.2330467 | 81.3715043 | 69.0224581 | 76.322775 |  |             | 76.6666667 |
| 73.2330467 | 82.3715043 | 69.0224581 | 76.322775 |  |             | 76.8888889 |
| 75.2330467 | 81.3715043 | 69.0224581 | 75.322775 |  |             | 76.8888889 |
| 77.2330467 | 80.3715043 | 69.0224581 | 75.322775 |  |             | 76.1111111 |
| 77.2330467 | 79.3715043 | 69.0224581 | 75.322775 |  |             | 74.2224435 |
| 77.2330467 | 79.3715043 | 69.0224581 | 75.322775 |  |             | 74.0989867 |
| 77.2330467 | 79.3715043 | 69.0224581 | 75.322775 |  |             | 73.7533077 |
| 75.2330467 | 80.3715043 | 69.0224581 | 75.322775 |  |             | 73.4076287 |
| 75.2330467 | 80.3715043 | 69.0224581 | 76.322775 |  |             | 73.2841719 |
| 74.2330467 | 80.3715043 | 70.0224581 | 76.322775 |  |             | 72.5434312 |
| 73.2330467 | 81.3715043 | 70.0224581 | 76.322775 |  |             | 72.5063941 |
| 73.2330467 | 81.3715043 | 71.0224581 | 75.322775 |  |             | 72.6175053 |
| 72.2330467 | 82.3715043 | 72.0224581 | 74.322775 |  |             | 73.0002213 |
| 71.2330467 | 82.3715043 | 72.0224581 | 75.322775 |  |             | 73.5310855 |
| 71.2330467 | 82.3715043 | 70.0224581 | 75.322775 |  |             | 73.6915793 |
| 71.2330467 | 81.3715043 | 69.0224581 | 77.322775 |  |             | 73.7162707 |
| 71.2330467 | 81.3715043 | 69.0224581 | 77.322775 |  |             | 73.7162707 |
| 71.2330467 | 78.3715043 | 69.0224581 | 76.322775 |  |             | 73.5063941 |
| 72.2330467 | 77.3715043 | 69.0224581 | 76.322775 |  |             | 73.666888  |
| 72.2330467 | 77.3715043 | 67.0224581 | 76.322775 |  |             | 73.703925  |
| 72.2330467 | 78.3715043 | 67.0224581 | 74.322775 |  |             | 73.8397275 |
| 74.2330467 | 78.3715043 | 68.0224581 | 74.322775 |  |             | 74.2594806 |
| 76.2330467 | 78.3715043 | 68.0224581 | 74.322775 |  |             | 74.5310855 |
| 75.2330467 | 78.3715043 | 78.0224581 | 73.322775 |  |             | 75.9014559 |
| 75.2330467 | 78.3715043 | 78.0224581 | 73.322775 |  |             | 75.9014559 |
| 74.2330467 | 78.3715043 | 78.0224581 | 71.322775 |  |             | 75.4076287 |
| 74.2330467 | 79.3715043 | 76.0224581 | 71.322775 |  |             | 75.2965176 |
| 74.2330467 | 79.3715043 | 75.0224581 | 72.322775 |  |             | 75.4199744 |



|            |            |            |           |  |  |            |
|------------|------------|------------|-----------|--|--|------------|
| 74.2330467 | 80.3715043 | 75.0224581 | 74.322775 |  |  | 75.6915793 |
| 75.2330467 | 80.3715043 | 75.0224581 | 76.322775 |  |  | 75.9261472 |
| 75.2330467 | 82.3715043 | 74.0224581 | 76.322775 |  |  | 75.9384929 |
| 74.2330467 | 83.3715043 | 71.0224581 | 76.322775 |  |  | 75.5557769 |
| 74.2330467 | 83.3715043 | 69.0224581 | 76.322775 |  |  | 75.1607151 |
| 73.2330467 | 83.3715043 | 69.0224581 | 76.322775 |  |  | 74.5187398 |
| 72.2330467 | 83.3715043 | 69.0224581 | 76.322775 |  |  | 74.5063941 |
| 72.2330467 | 83.3715043 | 69.0224581 | 76.322775 |  |  | 74.6421966 |
| 71.2330467 | 82.3715043 | 69.0224581 | 76.322775 |  |  | 74.8150361 |
| 72.2330467 | 80.3715043 | 69.0224581 | 76.322775 |  |  | 74.8397275 |
| 72.2330467 | 80.3715043 | 66.0224581 | 76.322775 |  |  | 74.2224435 |
| 73.2330467 | 79.3715043 | 66.0224581 | 84.322775 |  |  | 75.7779991 |
| 73.2330467 | 77.3715043 | 66.0224581 | 86.322775 |  |  | 76.0249127 |
| 73.2330467 | 77.3715043 | 66.0224581 | 87.322775 |  |  | 75.9508386 |
| 74.2330467 | 77.3715043 | 66.0224581 | 87.322775 |  |  | 76.1730608 |
| 74.2330467 | 77.3715043 | 65.0224581 | 87.322775 |  |  | 76.2841719 |
| 74.2330467 | 80.3715043 | 65.0224581 | 87.322775 |  |  | 76.7656534 |
| 74.2330467 | 80.3715043 | 65.0224581 | 87.322775 |  |  | 77.012567  |
| 75.2330467 | 80.3715043 | 65.0224581 | 85.322775 |  |  | 76.9878756 |
| 75.2330467 | 80.3715043 | 65.0224581 | 84.322775 |  |  | 77.7777778 |
| 76.2330467 | 79.3715043 | 65.0224581 | 83.322775 |  |  | 77.7777778 |
| 76.2330467 | 79.3715043 | 65.0224581 | 81.322775 |  |  | 77.6666667 |
| 76.2330467 | 78.3715043 | 65.0224581 | 80.322775 |  |  | 77.5555556 |
| 77.2330467 | 77.3715043 | 71.0224581 | 79.322775 |  |  | 78.6666667 |
| 77.2330467 | 77.3715043 | 71.0224581 | 79.322775 |  |  | 78.7777778 |
| 77.2330467 | 77.3715043 | 72.0224581 | 79.322775 |  |  | 78.7777778 |
| 77.2330467 | 77.3715043 | 72.0224581 | 79.322775 |  |  | 78.5555556 |
| 77.2330467 | 76.3715043 | 73.0224581 | 81.322775 |  |  | 79         |
| 77.2330467 | 76.3715043 | 73.0224581 | 81.322775 |  |  | 79.4444444 |
| 76.2330467 | 77.3715043 | 73.0224581 | 82.322775 |  |  | 79.4444444 |
| 74.2330467 | 78.3715043 | 73.0224581 | 84.322775 |  |  | 79.3333333 |
| 74.2330467 | 77.3715043 | 73.0224581 | 86.322775 |  |  | 79.3333333 |
| 74.2330467 | 76.3715043 | 76.0224581 | 86.322775 |  |  | 79.5555556 |
| 73.2330467 | 76.3715043 | 76.0224581 | 88.322775 |  |  | 79.1111111 |
| 73.2330467 | 76.3715043 | 71.0224581 | 88.322775 |  |  | 78.7777778 |
| 73.2330467 | 77.3715043 | 71.0224581 | 87.322775 |  |  | 79         |
| 73.2330467 | 78.3715043 | 67.0224581 | 84.322775 |  |  | 78.5555556 |
| 72.2330467 | 78.3715043 | 64.0224581 | 83.322775 |  |  | 77.6666667 |
| 71.2330467 | 78.3715043 | 63.0224581 | 81.322775 |  |  | 77.3333333 |
| 72.2330467 | 78.3715043 | 63.0224581 | 79.322775 |  |  | 77.3333333 |
| 72.2330467 | 78.3715043 | 64.0224581 | 77.322775 |  |  | 77.2222222 |
| 73.2330467 | 78.3715043 | 66.0224581 | 77.322775 |  |  | 77.6666667 |
| 73.2330467 | 78.3715043 | 66.0224581 | 77.322775 |  |  | 77.6666667 |
| 74.2330467 | 78.3715043 | 68.0224581 | 79.322775 |  |  | 77.6666667 |
| 73.2330467 | 78.3715043 | 70.0224581 | 79.322775 |  |  | 77         |

|            |            |            |           |  |  |            |
|------------|------------|------------|-----------|--|--|------------|
| 74.2330467 | 82.3715043 | 71.0224581 | 78.322775 |  |  | 76.8888889 |
| 74.2330467 | 82.3715043 | 71.0224581 | 78.322775 |  |  | 76.8888889 |
| 74.2330467 | 82.3715043 | 70.0224581 | 77.322775 |  |  | 76.5555556 |
| 74.2330467 | 82.3715043 | 69.0224581 | 74.322775 |  |  | 75.8888889 |
| 76.2330467 | 81.3715043 | 68.0224581 | 73.322775 |  |  | 75.7777778 |
| 76.2330467 | 80.3715043 | 68.0224581 | 72.322775 |  |  | 75.2222222 |
| 77.2330467 | 78.3715043 | 68.0224581 | 72.322775 |  |  | 74.7777778 |
| 77.2330467 | 76.3715043 | 68.0224581 | 71.322775 |  |  | 74.5555556 |
| 77.2330467 | 74.3715043 | 67.0224581 | 70.322775 |  |  | 73.7777778 |
| 77.2330467 | 74.3715043 | 67.0224581 | 69.322775 |  |  | 73.6666667 |
| 77.2330467 | 74.3715043 | 67.0224581 | 68.322775 |  |  | 73.4444444 |
| 73.2330467 | 75.3715043 | 67.0224581 | 69.322775 |  |  | 73.2222222 |
| 72.2330467 | 76.3715043 | 67.0224581 | 71.322775 |  |  | 73.2222222 |
| 73.2330467 | 78.3715043 | 67.0224581 | 73.322775 |  |  | 74.2222222 |
| 73.2330467 | 78.3715043 | 67.0224581 | 74.322775 |  |  | 74.4444444 |
| 74.2330467 | 77.3715043 | 67.0224581 | 73.322775 |  |  | 74.8888889 |
| 75.2330467 | 76.3715043 | 64.0224581 | 73.322775 |  |  | 75         |
| 76.2330467 | 75.3715043 | 63.0224581 | 73.322775 |  |  | 75.3333333 |
| 76.2330467 | 75.3715043 | 65.0224581 | 74.322775 |  |  | 76         |
| 75.2330467 | 75.3715043 | 67.0224581 | 73.322775 |  |  | 76.2222222 |
| 75.2330467 | 75.3715043 | 67.0224581 | 73.322775 |  |  | 76.3333333 |
| 75.2330467 | 76.3715043 | 66.0224581 | 73.322775 |  |  | 76.5555556 |
| 74.2330467 | 77.3715043 | 65.0224581 | 74.322775 |  |  | 76.7777778 |
| 73.2330467 | 77.3715043 | 65.0224581 | 74.322775 |  |  | 77         |
| 72.2330467 | 77.3715043 | 64.0224581 | 74.322775 |  |  | 76.5555556 |
| 72.2330467 | 77.3715043 | 63.0224581 | 74.322775 |  |  | 74.5681225 |
| 73.2330467 | 77.3715043 | 63.0224581 | 74.322775 |  |  | 74.6915793 |
| 73.2330467 | 77.3715043 | 62.0224581 | 74.322775 |  |  | 74.5681225 |
| 73.2330467 | 77.3715043 | 62.0224581 | 75.322775 |  |  | 74.9508386 |
| 73.2330467 | 80.3715043 | 62.0224581 | 75.322775 |  |  | 75.4570114 |
| 72.2330467 | 81.3715043 | 62.0224581 | 75.322775 |  |  | 75.5804682 |
| 72.2330467 | 81.3715043 | 62.0224581 | 75.322775 |  |  | 75.5557769 |
| 71.2330467 | 80.3715043 | 63.0224581 | 75.322775 |  |  | 75.0742954 |
| 71.2330467 | 80.3715043 | 63.0224581 | 74.322775 |  |  | 74.8273818 |
| 71.2330467 | 76.3715043 | 63.0224581 | 74.322775 |  |  | 74.0372583 |
| 71.2330467 | 74.3715043 | 63.0224581 | 74.322775 |  |  | 73.7533077 |
| 72.2330467 | 74.3715043 | 63.0224581 | 74.322775 |  |  | 75.2222222 |
| 73.2330467 | 74.3715043 | 67.0224581 | 74.322775 |  |  | 75.7777778 |
| 73.2330467 | 75.3715043 | 80.0224581 | 74.322775 |  |  | 76.7777778 |
| 73.2330467 | 75.3715043 | 80.0224581 | 75.322775 |  |  | 77.3333333 |
| 73.2330467 | 76.3715043 | 80.0224581 | 75.322775 |  |  | 77         |
| 73.2330467 | 76.3715043 | 81.0224581 | 75.322775 |  |  | 77.2222222 |
| 73.2330467 | 76.3715043 | 81.0224581 | 75.322775 |  |  | 77.1111111 |
| 72.2330467 | 76.3715043 | 76.0224581 | 74.322775 |  |  | 76.1111111 |
| 72.2330467 | 76.3715043 | 74.0224581 | 74.322775 |  |  | 75.8888889 |

|            |            |            |           |  |          |            |
|------------|------------|------------|-----------|--|----------|------------|
| 72.2330467 | 76.3715043 | 74.0224581 | 75.322775 |  |          | 76.8888889 |
| 72.2330467 | 76.3715043 | 71.0224581 | 75.322775 |  |          | 76.4444444 |
| 71.2330467 | 76.3715043 | 70.0224581 | 76.322775 |  |          | 75.7777778 |
| 71.2330467 | 77.3715043 | 70.0224581 | 76.322775 |  |          | 75.4444444 |
| 71.2330467 | 78.3715043 | 70.0224581 | 76.322775 |  |          | 75.3333333 |
| 74.2330467 | 78.3715043 | 68.0224581 | 75.322775 |  |          | 74.8888889 |
| 74.2330467 | 78.3715043 | 68.0224581 | 75.322775 |  |          | 74.8888889 |
| 74.2330467 | 77.3715043 | 68.0224581 | 74.322775 |  |          | 74.3333333 |
| 74.2330467 | 77.3715043 | 66.0224581 | 74.322775 |  |          | 74.4444444 |
| 74.2330467 | 77.3715043 | 65.0224581 | 74.322775 |  |          | 74.5555556 |
| 75.2330467 | 77.3715043 | 64.0224581 | 74.322775 |  |          | 74.7777778 |
| 76.2330467 | 77.3715043 | 64.0224581 | 74.322775 |  |          | 74.8888889 |
| 76.2330467 | 77.3715043 | 64.0224581 | 74.322775 |  |          | 74.8888889 |
| 79.2330467 | 79.3715043 | 64.0224581 | 73.322775 |  |          | 75         |
| 78.2330467 | 80.3715043 | 63.0224581 | 73.322775 |  |          | 74.8888889 |
| 78.2330467 | 79.3715043 | 63.0224581 | 73.322775 |  |          | 74.4444444 |
| 78.2330467 | 78.3715043 | 63.0224581 | 73.322775 |  | Movie 1  | 73.8888889 |
| 78.2330467 | 78.3715043 | 64.0224581 | 72.322775 |  | Movie 2  | 73.8888889 |
| 77.2330467 | 77.3715043 | 63.0224581 | 71.322775 |  | Movie 3  | 73.4444444 |
| 76.2330467 | 77.3715043 | 61.0224581 | 71.322775 |  | Movie 4  | 72.7777778 |
| 76.2330467 | 77.3715043 | 61.0224581 | 71.322775 |  | Movie 5  | 72.5555556 |
| 76.2330467 | 77.3715043 | 60.0224581 | 72.322775 |  | Movie 6  | 72.1111111 |
| 73.2330467 | 78.3715043 | 60.0224581 | 73.322775 |  | Movie 7  | 71.8888889 |
| 72.2330467 | 78.3715043 | 61.0224581 | 74.322775 |  | Movie 8  | 71.8888889 |
| 72.2330467 | 78.3715043 | 65.0224581 | 74.322775 |  | Movie 9  | 72.2222222 |
| 72.2330467 | 78.3715043 | 65.0224581 | 74.322775 |  | Movie 10 | 72.5555556 |
| 70.2330467 | 77.3715043 | 65.0224581 | 74.322775 |  | Movie 11 | 72.5555556 |
| 70.2330467 | 76.3715043 | 65.0224581 | 73.322775 |  | Movie 12 | 72.3333333 |
| 70.2330467 | 75.3715043 | 64.0224581 | 73.322775 |  | Movie 13 | 72.3333333 |
| 70.2330467 | 75.3715043 | 63.0224581 | 73.322775 |  | Movie 14 | 72.2222222 |
| 70.2330467 | 75.3715043 | 63.0224581 | 74.322775 |  | Movie 15 | 72         |
| 70.2330467 | 75.3715043 | 63.0224581 | 73.322775 |  | Movie 16 | 71.6666667 |
| 73.2330467 | 75.3715043 | 70.0224581 | 72.322775 |  | Movie 17 | 72.7777778 |
| 73.2330467 | 75.3715043 | 70.0224581 | 72.322775 |  | Movie 18 | 72.8888889 |
| 74.2330467 | 75.3715043 | 70.0224581 | 72.322775 |  | Movie 19 | 73.1111111 |
| 75.2330467 | 80.3715043 | 70.0224581 | 73.322775 |  | Movie 20 | 74.1111111 |
| 75.2330467 | 80.3715043 | 73.0224581 | 74.322775 |  | Movie 21 | 74.4444444 |
| 72.2330467 | 80.3715043 | 73.0224581 | 75.322775 |  | Movie 22 | 74.3333333 |
| 72.2330467 | 74.3715043 | 71.0224581 | 75.322775 |  | Movie 23 | 73.4444444 |
| 72.2330467 | 71.3715043 | 65.0224581 | 74.322775 |  | Movie 24 | 72.3333333 |
| 72.2330467 | 71.3715043 | 65.0224581 | 74.322775 |  | Movie 25 | 71.8888889 |
| 73.2330467 | 73.3715043 | 64.0224581 | 74.322775 |  | Movie 26 | 72.2222222 |
| 77.2330467 | 74.3715043 | 64.0224581 | 74.322775 |  | Movie 27 | 72.8888889 |
| 77.2330467 | 76.3715043 | 65.0224581 | 73.322775 |  | Movie 28 | 72.6666667 |
| 78.2330467 | 78.3715043 | 69.0224581 | 73.322775 |  | Movie 29 | 73         |

|            |            |            |            |  |          |             |
|------------|------------|------------|------------|--|----------|-------------|
| 78.2330467 | 79.3715043 | 71.0224581 | 72.322775  |  | Movie 30 | 73.11111111 |
| 78.2330467 | 78.3715043 | 71.0224581 | 71.322775  |  | Movie 31 | 72.7777778  |
| 78.2330467 | 77.3715043 | 71.0224581 | 71.322775  |  | Movie 32 | 73.2222222  |
| 77.2330467 | 76.3715043 | 74.0224581 | 72.322775  |  | Movie 33 | 73.5555556  |
| 77.2330467 | 74.3715043 | 74.0224581 | 72.322775  |  | Movie 34 | 74.2222222  |
| 77.2330467 | 74.3715043 | 69.0224581 | 77.322775  |  | Movie 35 | 74.4444444  |
| 78.2330467 | 74.3715043 | 65.0224581 | 77.322775  |  | Movie 36 | 74.2222222  |
| 77.2330467 | 75.3715043 | 63.0224581 | 76.322775  |  | Movie 37 | 73.8888889  |
| 77.2330467 | 76.3715043 | 61.0224581 | 75.322775  |  | Movie 38 | 73.5555556  |
| 77.2330467 | 77.3715043 | 61.0224581 | 75.322775  |  | Movie 39 | 73.6666667  |
| 76.2330467 | 77.3715043 | 61.0224581 | 74.322775  |  | Movie 40 | 73          |
| 76.2330467 | 77.3715043 | 61.0224581 | 74.322775  |  | Movie 41 | 73          |
| 76.2330467 | 76.3715043 | 62.0224581 | 73.322775  |  | Movie 42 | 72.7777778  |
| 76.2330467 | 76.3715043 | 62.0224581 | 73.322775  |  | Movie 43 | 72.3333333  |
| 75.2330467 | 76.3715043 | 62.0224581 | 73.322775  |  | Movie 44 | 71.8888889  |
| 75.2330467 | 76.3715043 | 62.0224581 | 73.322775  |  | Movie 45 | 71.8888889  |
| 75.2330467 | 75.3715043 | 62.0224581 | 73.322775  |  | Movie 46 | 71.5555556  |
| 75.2330467 | 75.3715043 | 62.0224581 | 82.322775  |  | Movie 47 | 72.6666667  |
| 75.2330467 | 76.3715043 | 62.0224581 | 73.2222222 |  | Movie 48 | 71.544383   |
| 80.2330467 | 76.3715043 | 62.0224581 | 73.5555556 |  | Movie 49 | 71.8036423  |
| 81.2330467 | 75.3715043 | 62.0224581 | 73.7777778 |  | Movie 50 | 71.9394448  |
| 81.2330467 | 75.3715043 | 62.0224581 | 74.1111111 |  | Movie 51 | 72.3098151  |
| 81.2330467 | 70.3715043 | 60.0224581 | 73         |  | Movie 52 | 71.1863583  |
| 81.2330467 | 70.3715043 | 60.0224581 | 73.1111111 |  | Movie 53 | 71.4209262  |
| 81.2330467 | 71.3715043 | 60.0224581 | 82.322775  |  | Movie 54 | 72.5555556  |
| 80.2330467 | 72.3715043 | 60.0224581 | 79.322775  |  | Movie 55 | 72.2222222  |
| 80.2330467 | 73.3715043 | 60.0224581 | 79.322775  |  | Movie 56 | 72.5555556  |
| 78.2330467 | 75.3715043 | 61.0224581 | 76.322775  |  | Movie 57 | 72.2222222  |
| 78.2330467 | 75.3715043 | 62.0224581 | 75.322775  |  | Movie 58 | 72.1111111  |
| 75.2330467 | 76.3715043 | 61.0224581 | 74.322775  |  | Movie 59 | 71.7777778  |
| 74.2330467 | 76.3715043 | 61.0224581 | 72.322775  |  |          | 71.3333333  |
| 73.2330467 | 76.3715043 | 63.0224581 | 72.322775  |  |          | 71.4444444  |
| 73.2330467 | 78.3715043 | 64.0224581 | 70.322775  |  |          | 71.4444444  |
| 73.2330467 | 78.3715043 | 65.0224581 | 70.322775  |  |          | 71.5555556  |
| 73.2330467 | 78.3715043 | 65.0224581 | 70.322775  |  |          | 71.6666667  |
| 73.2330467 | 77.3715043 | 63.0224581 | 70.322775  |  |          | 71.3333333  |
| 74.2330467 | 77.3715043 | 62.0224581 | 70.322775  |  |          | 71.3333333  |
| 74.2330467 | 77.3715043 | 61.0224581 | 71.322775  |  |          | 71.4444444  |
| 74.2330467 | 77.3715043 | 61.0224581 | 70.322775  |  |          | 71.4444444  |
| 74.2330467 | 77.3715043 | 61.0224581 | 71.322775  |  |          | 71.4444444  |
| 73.2330467 | 77.3715043 | 61.0224581 | 70.322775  |  |          | 71.3333333  |
| 73.2330467 | 77.3715043 | 61.0224581 | 69.322775  |  |          | 71.5555556  |
| 72.2330467 | 78.3715043 | 61.0224581 | 68.322775  |  |          | 71.3333333  |
| 72.2330467 | 78.3715043 | 61.0224581 | 68.322775  |  |          | 71.7777778  |
| 72.2330467 | 78.3715043 | 61.0224581 | 68.322775  |  |          | 71.7777778  |

|            |            |            |           |  |  |            |
|------------|------------|------------|-----------|--|--|------------|
| 73.2330467 | 78.3715043 | 61.0224581 | 69.322775 |  |  | 72.3333333 |
| 73.2330467 | 78.3715043 | 64.0224581 | 71.322775 |  |  | 72.8888889 |
| 73.2330467 | 76.3715043 | 67.0224581 | 72.322775 |  |  | 73.2222222 |
| 75.2330467 | 76.3715043 | 67.0224581 | 74.322775 |  |  | 73.7777778 |
| 76.2330467 | 76.3715043 | 67.0224581 | 76.322775 |  |  | 74.4444444 |
| 77.2330467 | 78.3715043 | 69.0224581 | 78.322775 |  |  | 75.3333333 |
| 80.2330467 | 79.3715043 | 69.0224581 | 78.322775 |  |  | 76.1111111 |
| 80.2330467 | 79.3715043 | 69.0224581 | 78.322775 |  |  | 76         |
| 82.2330467 | 79.3715043 | 71.0224581 | 76.322775 |  |  | 76.2222222 |
| 82.2330467 | 78.3715043 | 71.0224581 | 75.322775 |  |  | 75.8888889 |
| 81.2330467 | 78.3715043 | 77.0224581 | 74.322775 |  |  | 76.3333333 |
| 81.2330467 | 78.3715043 | 77.0224581 | 73.322775 |  |  | 75.8888889 |
| 78.2330467 | 78.3715043 | 79.0224581 | 73.322775 |  |  | 76         |
| 78.2330467 | 78.3715043 | 80.0224581 | 73.322775 |  |  | 76.2222222 |
| 78.2330467 | 79.3715043 | 80.0224581 | 73.322775 |  |  | 76.3333333 |
| 77.2330467 | 80.3715043 | 80.0224581 | 73.322775 |  |  | 76.3333333 |
| 76.2330467 | 80.3715043 | 79.0224581 | 72.322775 |  |  | 76.1111111 |
| 74.2330467 | 80.3715043 | 78.0224581 | 71.322775 |  |  | 76         |
| 74.2330467 | 80.3715043 | 78.0224581 | 70.322775 |  |  | 76.5555556 |
| 72.2330467 | 80.3715043 | 79.0224581 | 68.322775 |  |  | 75.8888889 |
| 71.2330467 | 80.3715043 | 79.0224581 | 67.322775 |  |  | 75.3333333 |
| 71.2330467 | 80.3715043 | 79.0224581 | 67.322775 |  |  | 75         |
| 69.2330467 | 80.3715043 | 79.0224581 | 66.322775 |  |  | 74.6666667 |
| 69.2330467 | 82.3715043 | 79.0224581 | 67.322775 |  |  | 74.8888889 |
| 69.2330467 | 82.3715043 | 79.0224581 | 67.322775 |  |  | 74.8888889 |
| 68.2330467 | 83.3715043 | 77.0224581 | 71.322775 |  |  | 75.2222222 |
| 68.2330467 | 83.3715043 | 77.0224581 | 71.322775 |  |  | 75.4444444 |
| 69.2330467 | 84.3715043 | 77.0224581 | 72.322775 |  |  | 76.1111111 |
| 70.2330467 | 84.3715043 | 76.0224581 | 72.322775 |  |  | 76         |
| 70.2330467 | 84.3715043 | 76.0224581 | 73.322775 |  |  | 76.1111111 |
| 70.2330467 | 84.3715043 | 79.0224581 | 73.322775 |  |  | 76.3333333 |
| 70.2330467 | 84.3715043 | 81.0224581 | 73.322775 |  |  | 76.5555556 |
| 69.2330467 | 85.3715043 | 81.0224581 | 73.322775 |  |  | 76.5555556 |
| 69.2330467 | 85.3715043 | 83.0224581 | 73.322775 |  |  | 76.8888889 |
| 69.2330467 | 85.3715043 | 83.0224581 | 73.322775 |  |  | 76.7777778 |
| 69.2330467 | 85.3715043 | 83.0224581 | 74.322775 |  |  | 77.1111111 |
| 70.2330467 | 85.3715043 | 87.0224581 | 75.322775 |  |  | 77.6666667 |
| 70.2330467 | 85.3715043 | 87.0224581 | 75.322775 |  |  | 77.6666667 |
| 72.2330467 | 87.3715043 | 81.0224581 | 75.322775 |  |  | 77.3333333 |
| 73.2330467 | 87.3715043 | 80.0224581 | 75.322775 |  |  | 76.6666667 |
| 74.2330467 | 85.3715043 | 80.0224581 | 74.322775 |  |  | 76         |
| 74.2330467 | 84.3715043 | 78.0224581 | 73.322775 |  |  | 75.4444444 |
| 73.2330467 | 83.3715043 | 77.0224581 | 72.322775 |  |  | 74.8888889 |
| 72.2330467 | 82.3715043 | 77.0224581 | 72.322775 |  |  | 74.6666667 |
| 72.2330467 | 82.3715043 | 77.0224581 | 72.322775 |  |  | 74.6666667 |

|            |            |            |           |  |  |            |
|------------|------------|------------|-----------|--|--|------------|
| 71.2330467 | 78.3715043 | 77.0224581 | 74.322775 |  |  | 74.6666667 |
| 72.2330467 | 75.3715043 | 77.0224581 | 76.322775 |  |  | 74.7777778 |
| 72.2330467 | 78.3715043 | 76.0224581 | 77.322775 |  |  | 75.2222222 |
| 72.2330467 | 82.3715043 | 76.0224581 | 77.322775 |  |  | 75.8888889 |
| 74.2330467 | 83.3715043 | 76.0224581 | 76.322775 |  |  | 76.1111111 |
| 74.2330467 | 83.3715043 | 76.0224581 | 75.322775 |  |  | 76.2222222 |
| 74.2330467 | 83.3715043 | 76.0224581 | 75.322775 |  |  | 76.2222222 |
| 73.2330467 | 82.3715043 | 75.0224581 | 73.322775 |  |  | 75.7777778 |
| 73.2330467 | 81.3715043 | 75.0224581 | 71.322775 |  |  | 75.5555556 |
| 73.2330467 | 81.3715043 | 74.0224581 | 70.322775 |  |  | 75.6666667 |
| 73.2330467 | 81.3715043 | 72.0224581 | 70.322775 |  |  | 75.1111111 |
| 73.2330467 | 80.3715043 | 75.0224581 | 70.322775 |  |  | 75.3333333 |
| 74.2330467 | 79.3715043 | 76.0224581 | 70.322775 |  |  | 75.5555556 |
| 74.2330467 | 79.3715043 | 76.0224581 | 71.322775 |  |  | 75.8888889 |
| 74.2330467 | 79.3715043 | 75.0224581 | 72.322775 |  |  | 76.1111111 |
| 75.2330467 | 78.3715043 | 75.0224581 | 71.322775 |  |  | 76         |
| 75.2330467 | 78.3715043 | 73.0224581 | 71.322775 |  |  | 75.3333333 |
| 75.2330467 | 79.3715043 | 74.0224581 | 69.322775 |  |  | 75.3333333 |
| 79.2330467 | 79.3715043 | 74.0224581 | 67.322775 |  |  | 75.3333333 |
| 78.2330467 | 80.3715043 | 74.0224581 | 67.322775 |  |  | 75.3333333 |
| 76.2330467 | 79.3715043 | 74.0224581 | 67.322775 |  |  | 74.7777778 |
| 75.2330467 | 79.3715043 | 70.0224581 | 68.322775 |  |  | 74.3333333 |
| 75.2330467 | 79.3715043 | 68.0224581 | 68.322775 |  |  | 74.3333333 |
| 75.2330467 | 77.3715043 | 68.0224581 | 67.322775 |  |  | 74.1111111 |
| 76.2330467 | 78.3715043 | 68.0224581 | 65.322775 |  |  | 74.4444444 |
| 79.2330467 | 78.3715043 | 68.0224581 | 64.322775 |  |  | 75.2222222 |
| 80.2330467 | 78.3715043 | 68.0224581 | 65.322775 |  |  | 75.4444444 |
| 80.2330467 | 78.3715043 | 68.0224581 | 65.322775 |  |  | 75.7777778 |
| 80.2330467 | 78.3715043 | 68.0224581 | 65.322775 |  |  | 75.8888889 |
| 77.2330467 | 78.3715043 | 68.0224581 | 66.322775 |  |  | 75.6666667 |
| 75.2330467 | 81.3715043 | 68.0224581 | 66.322775 |  |  | 75.8888889 |
| 72.2330467 | 80.3715043 | 68.0224581 | 66.322775 |  |  | 75.1111111 |
| 72.2330467 | 76.3715043 | 68.0224581 | 68.322775 |  |  | 74.8888889 |
| 72.2330467 | 76.3715043 | 68.0224581 | 68.322775 |  |  | 74.8888889 |
| 69.2330467 | 73.3715043 | 68.0224581 | 67.322775 |  |  | 73.8888889 |
| 69.2330467 | 73.3715043 | 67.0224581 | 68.322775 |  |  | 74         |
| 69.2330467 | 72.3715043 | 67.0224581 | 68.322775 |  |  | 73.7777778 |
| 71.2330467 | 72.3715043 | 67.0224581 | 68.322775 |  |  | 73.8888889 |
| 71.2330467 | 72.3715043 | 67.0224581 | 69.322775 |  |  | 73.8888889 |
| 72.2330467 | 72.3715043 | 69.0224581 | 71.322775 |  |  | 74.1111111 |
| 72.2330467 | 78.3715043 | 71.0224581 | 71.322775 |  |  | 75.5555556 |
| 75.2330467 | 78.3715043 | 72.0224581 | 72.322775 |  |  | 76.5555556 |
| 77.2330467 | 78.3715043 | 72.0224581 | 73.322775 |  |  | 76.8888889 |
| 77.2330467 | 78.3715043 | 72.0224581 | 74.322775 |  |  | 77.1111111 |
| 77.2330467 | 74.3715043 | 72.0224581 | 73.322775 |  |  | 76.6666667 |

|            |            |            |           |  |         |            |
|------------|------------|------------|-----------|--|---------|------------|
| 77.2330467 | 74.3715043 | 72.0224581 | 73.322775 |  |         | 76.8888889 |
| 77.2330467 | 74.3715043 | 72.0224581 | 70.322775 |  |         | 75.2434704 |
| 77.2330467 | 74.3715043 | 72.0224581 | 70.322775 |  |         | 76.7777778 |
| 76.2330467 | 74.3715043 | 73.0224581 | 70.322775 |  |         | 75.2434704 |
| 76.2330467 | 76.3715043 | 73.0224581 | 71.322775 |  |         | 75.7496433 |
| 75.2330467 | 80.3715043 | 73.0224581 | 70.322775 |  |         | 75.9965568 |
| 75.2330467 | 81.3715043 | 73.0224581 | 70.322775 |  |         | 76.1200136 |
| 74.2330467 | 81.3715043 | 73.0224581 | 70.322775 |  |         | 76.2558161 |
| 74.2330467 | 81.3715043 | 74.0224581 | 71.322775 |  |         | 76.6385322 |
| 74.2330467 | 82.3715043 | 74.0224581 | 72.322775 |  |         | 77.0212482 |
| 73.2330467 | 82.3715043 | 74.0224581 | 72.322775 |  |         | 76.8977914 |
| 73.2330467 | 82.3715043 | 74.0224581 | 70.322775 |  |         | 76.527421  |
| 73.2330467 | 81.3715043 | 75.0224581 | 70.322775 |  |         | 76.4039643 |
| 72.2330467 | 81.3715043 | 75.0224581 | 67.322775 |  |         | 75.4039643 |
| 73.2330467 | 80.3715043 | 76.0224581 | 65.322775 |  |         | 75.2805075 |
| 73.2330467 | 80.3715043 | 77.0224581 | 67.322775 |  |         | 75.7866803 |
| 74.2330467 | 80.3715043 | 77.0224581 | 68.322775 |  |         | 76.1570507 |
| 74.2330467 | 79.3715043 | 78.0224581 | 70.322775 |  |         | 76.0335939 |
| 74.2330467 | 79.3715043 | 80.0224581 | 73.322775 |  |         | 76.8977914 |
| 74.2330467 | 80.3715043 | 80.0224581 | 76.322775 |  |         | 78         |
| 73.2330467 | 80.3715043 | 81.0224581 | 78.322775 |  |         | 78         |
| 73.2330467 | 80.3715043 | 80.0224581 | 78.322775 |  |         | 76.8888889 |
| 72.2330467 | 80.3715043 | 80.0224581 | 77.322775 |  |         | 76.6666667 |
| 71.2330467 | 80.3715043 | 75.0224581 | 74.322775 |  |         | 75.5555556 |
| 70.2330467 | 81.3715043 | 74.0224581 | 71.322775 |  |         | 75.2222222 |
| 70.2330467 | 81.3715043 | 73.0224581 | 70.322775 |  |         | 74.8888889 |
| 70.2330467 | 81.3715043 | 73.0224581 | 69.322775 |  |         | 74.5555556 |
| 70.2330467 | 81.3715043 | 73.0224581 | 70.322775 |  |         | 74.4444444 |
| 71.2330467 | 81.3715043 | 72.0224581 | 71.322775 |  |         | 74.2222222 |
| 71.2330467 | 82.3715043 | 71.0224581 | 70.322775 |  |         | 74.2222222 |
| 71.2330467 | 82.3715043 | 71.0224581 | 69.322775 |  |         | 74         |
| 75.2330467 | 82.3715043 | 74.0224581 | 69.322775 |  |         | 74.8888889 |
| 74.2330467 | 81.3715043 | 75.0224581 | 69.322775 |  |         | 75         |
| 73.2330467 | 80.3715043 | 73.0224581 | 71.322775 |  |         | 74.8888889 |
| 72.2330467 | 80.3715043 | 73.0224581 | 73.322775 |  |         | 76.6666667 |
| 72.2330467 | 80.3715043 | 72.0224581 | 73.322775 |  |         | 76.4444444 |
| 72.2330467 | 80.3715043 | 71.0224581 | 73.322775 |  |         | 76.1111111 |
| 71.2330467 | 80.3715043 | 69.0224581 | 72.322775 |  | Movie 1 | 75.5555556 |
| 70.2330467 | 80.3715043 | 68.0224581 | 72.322775 |  | Movie 2 | 75.3333333 |
| 70.2330467 | 80.3715043 | 68.0224581 | 72.322775 |  | Movie 3 | 75.4444444 |
| 71.2330467 | 81.3715043 | 68.0224581 | 72.322775 |  | Movie 4 | 75.7777778 |
| 71.2330467 | 81.3715043 | 68.0224581 | 72.322775 |  | Movie 5 | 75.5555556 |
| 71.2330467 | 81.3715043 | 68.0224581 | 72.322775 |  | Movie 6 | 75.5555556 |
| 71.2330467 | 81.3715043 | 66.0224581 | 70.322775 |  | Movie 7 | 74.2222222 |
| 69.2330467 | 84.3715043 | 65.0224581 | 69.322775 |  | Movie 8 | 73.8888889 |

|            |            |            |           |  |          |            |
|------------|------------|------------|-----------|--|----------|------------|
| 71.2330467 | 73.5555556 | 63.0224581 | 68.322775 |  | Movie 9  | 72.1315612 |
| 71.2330467 | 73.4444444 | 63.0224581 | 68.322775 |  | Movie 10 | 72.0081045 |
| 73.2330467 | 73.6666667 | 63.0224581 | 68.322775 |  | Movie 11 | 72.1439069 |
| 74.2330467 | 86.3715043 | 65.0224581 | 67.322775 |  | Movie 12 | 73.7777778 |
| 74.2330467 | 85.3715043 | 65.0224581 | 67.322775 |  | Movie 13 | 73.5555556 |
| 74.2330467 | 85.3715043 | 65.0224581 | 67.322775 |  | Movie 14 | 73.3333333 |
| 74.2330467 | 85.3715043 | 65.0224581 | 67.322775 |  | Movie 15 | 73.4444444 |
| 74.2330467 | 84.3715043 | 65.0224581 | 67.322775 |  | Movie 16 | 72.4444444 |
| 75.2330467 | 84.3715043 | 67.0224581 | 68.322775 |  | Movie 17 | 73.1111111 |
| 78.2330467 | 84.3715043 | 67.0224581 | 68.322775 |  | Movie 18 | 73.3333333 |
| 79.2330467 | 83.3715043 | 67.0224581 | 68.322775 |  | Movie 19 | 73.4444444 |
| 79.2330467 | 82.3715043 | 67.0224581 | 68.322775 |  | Movie 20 | 73.4444444 |
| 78.2330467 | 81.3715043 | 68.0224581 | 67.322775 |  | Movie 21 | 73.3333333 |
| 78.2330467 | 81.3715043 | 68.0224581 | 67.322775 |  | Movie 22 | 73.6666667 |
| 78.2330467 | 81.3715043 | 67.0224581 | 67.322775 |  | Movie 23 | 72.8888889 |
| 78.2330467 | 81.3715043 | 67.0224581 | 69.322775 |  | Movie 24 | 73.2222222 |
| 79.2330467 | 81.3715043 | 68.0224581 | 73.322775 |  | Movie 25 | 73.8888889 |
| 78.2330467 | 82.3715043 | 68.0224581 | 80.322775 |  | Movie 26 | 74.2222222 |
| 78.2330467 | 82.3715043 | 68.0224581 | 80.322775 |  | Movie 27 | 73.8888889 |
| 78.2330467 | 83.3715043 | 68.0224581 | 80.322775 |  | Movie 28 | 74.1111111 |
| 78.2330467 | 80.3715043 | 68.0224581 | 77.322775 |  | Movie 29 | 73.2222222 |
| 77.2330467 | 79.3715043 | 68.0224581 | 77.322775 |  | Movie 30 | 72.6666667 |
| 77.2330467 | 79.3715043 | 66.0224581 | 73.322775 |  | Movie 31 | 71.8888889 |
| 76.2330467 | 79.3715043 | 66.0224581 | 71.322775 |  | Movie 32 | 71.7777778 |
| 76.2330467 | 78.3715043 | 66.0224581 | 70.322775 |  | Movie 33 | 71.5555556 |
| 76.2330467 | 78.3715043 | 66.0224581 | 71.322775 |  | Movie 34 | 71.8888889 |
| 75.2330467 | 77.3715043 | 66.0224581 | 73.322775 |  | Movie 35 | 72         |
| 77.2330467 | 76.3715043 | 66.0224581 | 74.322775 |  | Movie 36 | 72.3333333 |
| 77.2330467 | 75.3715043 | 65.0224581 | 73.322775 |  | Movie 37 | 72.1111111 |
| 80.2330467 | 74.3715043 | 64.0224581 | 73.322775 |  | Movie 38 | 72.6666667 |
| 82.2330467 | 74.3715043 | 64.0224581 | 72.322775 |  | Movie 39 | 72.6666667 |
| 83.2330467 | 75.3715043 | 65.0224581 | 72.322775 |  | Movie 40 | 73         |
| 80.2330467 | 75.3715043 | 68.0224581 | 71.322775 |  | Movie 41 | 72.8888889 |
| 76.2330467 | 76.3715043 | 69.0224581 | 70.322775 |  | Movie 42 | 72.6666667 |
| 76.2330467 | 76.3715043 | 69.0224581 | 69.322775 |  | Movie 43 | 71.8888889 |
| 73.2330467 | 76.3715043 | 66.0224581 | 69.322775 |  | Movie 44 | 71.4444444 |
| 72.2330467 | 76.3715043 | 64.0224581 | 68.322775 |  | Movie 45 | 71.4444444 |
| 73.2330467 | 76.3715043 | 62.0224581 | 68.322775 |  | Minute 1 | 72.2222222 |
| 72.2330467 | 76.3715043 | 61.0224581 | 68.322775 |  | Minute 2 | 72.8888889 |
| 72.2330467 | 77.3715043 | 61.0224581 | 69.322775 |  | Minute 3 | 73.2222222 |
| 71.2330467 | 77.3715043 | 61.0224581 | 69.322775 |  | Minute 4 | 73         |
| 70.2330467 | 77.3715043 | 62.0224581 | 69.322775 |  | Minute 5 | 73         |
| 68.2330467 | 77.3715043 | 64.0224581 | 69.322775 |  | Minute 6 | 73         |
| 66.2330467 | 77.3715043 | 64.0224581 | 68.322775 |  | Minute 7 | 72.6666667 |
| 66.2330467 | 82.3715043 | 64.0224581 | 67.322775 |  | Minute 8 | 72.4444444 |



|            |            |            |           |  |           |            |
|------------|------------|------------|-----------|--|-----------|------------|
| 66.2330467 | 82.3715043 | 64.0224581 | 67.322775 |  | Minute 9  | 72.3333333 |
| 66.2330467 | 82.3715043 | 60.0224581 | 68.322775 |  | Minute 10 | 72.2222222 |
| 68.2330467 | 82.3715043 | 59.0224581 | 69.322775 |  | Minute 11 | 72.4444444 |
| 68.2330467 | 82.3715043 | 59.0224581 | 73.322775 |  | Minute 12 | 73         |
| 68.2330467 | 82.3715043 | 58.0224581 | 77.322775 |  | Minute 13 | 73.1111111 |
| 66.2330467 | 82.3715043 | 58.0224581 | 78.322775 |  | Minute 14 | 72.8888889 |
| 66.2330467 | 82.3715043 | 58.0224581 | 78.322775 |  | Minute 15 | 72.8888889 |
| 66.2330467 | 83.3715043 | 58.0224581 | 78.322775 |  | Minute 16 | 72.4444444 |
| 70.2330467 | 85.3715043 | 60.0224581 | 78.322775 |  | Minute 17 | 73.4444444 |
| 72.2330467 | 84.3715043 | 60.0224581 | 78.322775 |  | Minute 18 | 73.4444444 |
| 73.2330467 | 82.3715043 | 60.0224581 | 78.322775 |  | Minute 19 | 73.3333333 |
| 74.2330467 | 80.3715043 | 60.0224581 | 78.322775 |  | Minute 20 | 73.3333333 |
| 74.2330467 | 79.3715043 | 63.0224581 | 78.322775 |  | Minute 21 | 73.7777778 |
| 74.2330467 | 79.3715043 | 65.0224581 | 77.322775 |  | Minute 22 | 74.1111111 |
| 74.2330467 | 79.3715043 | 65.0224581 | 76.322775 |  | Minute 23 | 74.2222222 |
| 74.2330467 | 79.3715043 | 66.0224581 | 76.322775 |  | Minute 24 | 74.8888889 |
| 74.2330467 | 80.3715043 | 66.0224581 | 76.322775 |  | Minute 25 | 75.7777778 |
| 75.2330467 | 80.3715043 | 66.0224581 | 76.322775 |  | Minute 26 | 75.8888889 |
| 75.2330467 | 80.3715043 | 67.0224581 | 77.322775 |  | Minute 27 | 76.3333333 |
| 75.2330467 | 81.3715043 | 67.0224581 | 77.322775 |  | Minute 28 | 76.3333333 |
| 77.2330467 | 81.3715043 | 67.0224581 | 77.322775 |  | Minute 29 | 76.6666667 |
| 79.2330467 | 80.3715043 | 77.0224581 | 78.322775 |  | Minute 30 | 78.1111111 |
| 79.2330467 | 74.3715043 | 77.0224581 | 78.322775 |  | Minute 31 | 77.5555556 |
| 79.2330467 | 69.3715043 | 80.0224581 | 78.322775 |  | Minute 32 | 77.3333333 |
| 76.2330467 | 69.3715043 | 79.0224581 | 79.322775 |  | Minute 33 | 77.1111111 |
| 76.2330467 | 69.3715043 | 76.0224581 | 80.322775 |  | Minute 34 | 76.8888889 |
| 74.2330467 | 71.3715043 | 74.0224581 | 80.322775 |  | Minute 35 | 77         |
| 73.2330467 | 72.3715043 | 73.0224581 | 81.322775 |  | Minute 36 | 76.5555556 |
| 71.2330467 | 75.3715043 | 73.0224581 | 81.322775 |  | Minute 37 | 76.3333333 |
| 66.2330467 | 77.3715043 | 73.0224581 | 81.322775 |  | Minute 38 | 75.5555556 |
| 66.2330467 | 77.3715043 | 74.0224581 | 82.322775 |  | Minute 39 | 75.1111111 |
| 67.2330467 | 77.3715043 | 74.0224581 | 84.322775 |  | Minute 40 | 75         |
| 67.2330467 | 76.3715043 | 74.0224581 | 84.322775 |  | Minute 41 | 74.6666667 |
| 66.2330467 | 76.3715043 | 75.0224581 | 84.322775 |  | Minute 42 | 74.6666667 |
| 66.2330467 | 77.3715043 | 75.0224581 | 84.322775 |  | Minute 43 | 75         |
| 67.2330467 | 77.3715043 | 75.0224581 | 84.322775 |  | Minute 44 | 75.3333333 |
| 68.2330467 | 77.3715043 | 75.0224581 | 84.322775 |  | Minute 45 | 76.1111111 |
| 66.2330467 | 77.3715043 | 77.0224581 | 85.322775 |  | Minute 46 | 76.1111111 |
| 67.2330467 | 79.3715043 | 78.0224581 | 87.322775 |  | Minute 47 | 77.1111111 |
| 67.2330467 | 81.3715043 | 78.0224581 | 87.322775 |  | Minute 48 | 77.8888889 |
| 67.2330467 | 81.3715043 | 86.0224581 | 87.322775 |  | Minute 49 | 78.6666667 |
| 69.2330467 | 81.3715043 | 86.0224581 | 86.322775 |  | Minute 50 | 78.5555556 |
| 69.2330467 | 80.3715043 | 86.0224581 | 86.322775 |  | Minute 51 | 78.5555556 |
| 70.2330467 | 80.3715043 | 88.0224581 | 86.322775 |  | Minute 52 | 78.8888889 |
| 69.2330467 | 79.3715043 | 88.0224581 | 90.322775 |  | Minute 53 | 79.3333333 |

|            |            |            |           |  |           |            |
|------------|------------|------------|-----------|--|-----------|------------|
| 69.2330467 | 79.3715043 | 88.0224581 | 90.322775 |  | Minute 54 | 79.8888889 |
| 70.2330467 | 79.3715043 | 88.0224581 | 89.322775 |  | Minute 55 | 79.5555556 |
| 71.2330467 | 79.3715043 | 88.0224581 | 89.322775 |  | Minute 56 | 80.1111111 |
| 70.2330467 | 80.3715043 | 87.0224581 | 88.322775 |  | Minute 57 | 79.8888889 |
| 70.2330467 | 81.3715043 | 87.0224581 | 88.322775 |  | Minute 58 | 80.3333333 |
| 71.2330467 | 81.3715043 | 87.0224581 | 86.322775 |  | Minute 59 | 80.6666667 |
| 71.2330467 | 80.3715043 | 86.0224581 | 86.322775 |  | Minute 60 | 80.2222222 |
| 71.2330467 | 80.3715043 | 86.0224581 | 81.322775 |  | After 1   | 79.4444444 |
| 71.2330467 | 80.3715043 | 86.0224581 | 81.322775 |  | After 2   | 79.1111111 |
| 72.2330467 | 80.3715043 | 86.0224581 | 81.322775 |  | After 3   | 79         |
| 73.2330467 | 81.3715043 | 85.0224581 | 81.322775 |  | After 4   | 78.7777778 |
| 74.2330467 | 81.3715043 | 85.0224581 | 81.322775 |  | After 5   | 79         |
| 74.2330467 | 81.3715043 | 85.0224581 | 81.322775 |  | After 6   | 79.3333333 |
| 74.2330467 | 80.3715043 | 87.0224581 | 82.322775 |  | After 7   | 79.6666667 |
| 74.2330467 | 79.3715043 | 87.0224581 | 83.322775 |  | After 8   | 79.4444444 |
| 74.2330467 | 79.3715043 | 87.0224581 | 83.322775 |  | After 9   | 79.4444444 |
| 75.2330467 | 77.3715043 | 87.0224581 | 85.322775 |  | After 10  | 78.3333333 |
| 75.2330467 | 77.3715043 | 87.0224581 | 85.322775 |  | After 11  | 77.8888889 |
| 76.2330467 | 79.3715043 | 88.0224581 | 86.322775 |  | After 12  | 78.1111111 |
| 76.2330467 | 79.3715043 | 88.0224581 | 85.322775 |  | After 13  | 77.3333333 |
| 76.2330467 | 80.3715043 | 86.0224581 | 85.322775 |  | After 14  | 77.3333333 |
| 76.2330467 | 80.3715043 | 84.0224581 | 85.322775 |  | After 15  | 76.8888889 |
| 76.2330467 | 80.3715043 | 84.0224581 | 86.322775 |  | After 16  | 77         |
| 82.2330467 | 78.3715043 | 83.0224581 | 88.322775 |  | After 17  | 77.6666667 |
| 85.2330467 | 75.3715043 | 82.0224581 | 88.322775 |  | After 18  | 77.5555556 |
| 85.2330467 | 74.3715043 | 81.0224581 | 88.322775 |  | After 19  | 77.3333333 |
| 85.2330467 | 73.3715043 | 81.0224581 | 87.322775 |  | After 20  | 77         |
| 86.2330467 | 74.3715043 | 81.0224581 | 87.322775 |  | After 21  | 77.4444444 |
| 86.2330467 | 74.3715043 | 81.0224581 | 86.322775 |  | After 22  | 77.6666667 |
| 84.2330467 | 76.3715043 | 79.0224581 | 86.322775 |  | After 23  | 77.7777778 |
| 84.2330467 | 77.3715043 | 79.0224581 | 82.322775 |  | After 24  | 77.5555556 |
| 82.2330467 | 79.3715043 | 79.0224581 | 82.322775 |  | After 25  | 77.8888889 |
| 80.2330467 | 80.3715043 | 79.0224581 | 82.322775 |  | After 26  | 77.5555556 |
| 77.2330467 | 80.3715043 | 78.0224581 | 81.322775 |  | After 27  | 76.8888889 |
| 76.2330467 | 80.3715043 | 78.0224581 | 81.322775 |  | After 28  | 76.7777778 |
| 76.2330467 | 78.3715043 | 78.0224581 | 81.322775 |  | After 29  | 76.4444444 |
| 76.2330467 | 77.3715043 | 77.0224581 | 81.322775 |  | After 30  | 76.1111111 |
| 76.2330467 | 77.3715043 | 76.0224581 | 80.322775 |  | After 31  | 75.5555556 |
| 76.2330467 | 77.3715043 | 74.0224581 | 78.322775 |  | After 32  | 75         |
| 77.2330467 | 79.3715043 | 72.0224581 | 78.322775 |  | After 33  | 75.5555556 |
| 76.2330467 | 80.3715043 | 70.0224581 | 81.322775 |  | After 34  | 76.2222222 |
| 76.2330467 | 81.3715043 | 70.0224581 | 82.322775 |  | After 35  | 76.4444444 |
| 76.2330467 | 81.3715043 | 70.0224581 | 79.322775 |  | After 36  | 76.3333333 |
| 76.2330467 | 80.3715043 | 74.0224581 | 77.322775 |  | After 37  | 76.4444444 |
| 77.2330467 | 79.3715043 | 77.0224581 | 77.322775 |  | After 38  | 76.7777778 |

|            |            |            |           |  |          |            |
|------------|------------|------------|-----------|--|----------|------------|
| 77.2330467 | 79.3715043 | 78.0224581 | 76.322775 |  | After 39 | 76.8888889 |
| 77.2330467 | 78.3715043 | 79.0224581 | 78.322775 |  | After 40 | 77.2222222 |
| 77.2330467 | 78.3715043 | 79.0224581 | 80.322775 |  | After 41 | 77.7777778 |
| 84.2330467 | 78.3715043 | 81.0224581 | 82.322775 |  | After 42 | 79.4444444 |
| 85.2330467 | 78.3715043 | 81.0224581 | 82.322775 |  | After 43 | 79.7777778 |
| 86.2330467 | 78.3715043 | 81.0224581 | 85.322775 |  | After 44 | 80.2222222 |
| 86.2330467 | 79.3715043 | 81.0224581 | 85.322775 |  | After 45 | 80.4444444 |
| 86.2330467 | 80.3715043 | 77.0224581 | 85.322775 |  | After 46 | 80         |
| 85.2330467 | 80.3715043 | 76.0224581 | 83.322775 |  | After 47 | 79.6666667 |
| 80.2330467 | 81.3715043 | 75.0224581 | 81.322775 |  | After 48 | 79.1111111 |
| 76.2330467 | 81.3715043 | 75.0224581 | 78.322775 |  | After 49 | 78.5555556 |
| 73.2330467 | 80.3715043 | 73.0224581 | 77.322775 |  | After 50 | 78.2222222 |
| 71.2330467 | 79.3715043 | 71.0224581 | 77.322775 |  | After 51 | 77.6666667 |
| 70.2330467 | 79.3715043 | 70.0224581 | 78.322775 |  | After 52 | 77.4444444 |
| 69.2330467 | 80.3715043 | 70.0224581 | 79.322775 |  | After 53 | 77.6666667 |
| 69.2330467 | 80.3715043 | 70.0224581 | 79.322775 |  | After 54 | 76.5555556 |
| 71.2330467 | 81.3715043 | 70.0224581 | 77.322775 |  | After 55 | 76.2222222 |
| 72.2330467 | 81.3715043 | 72.0224581 | 77.322775 |  | After 56 | 76.3333333 |
| 72.2330467 | 81.3715043 | 72.0224581 | 77.322775 |  | After 57 | 76.1111111 |
| 74.2330467 | 81.3715043 | 69.0224581 | 77.322775 |  | After 58 | 76         |
| 75.2330467 | 80.3715043 | 69.0224581 | 80.322775 |  | After 59 | 76.1111111 |
| 75.2330467 | 80.3715043 | 69.0224581 | 79.322775 |  | After 60 | 76.3333333 |
| 75.2330467 | 80.3715043 | 69.0224581 | 79.322775 |  | After 61 | 76.3333333 |
| 75.2330467 | 81.3715043 | 68.0224581 | 77.322775 |  | After 62 | 75.7777778 |
| 75.2330467 | 81.3715043 | 68.0224581 | 77.322775 |  | After 63 | 75.7777778 |
| 75.2330467 | 81.3715043 | 68.0224581 | 77.322775 |  | After 64 | 75.2222222 |
| 75.2330467 | 81.3715043 | 68.0224581 | 78.322775 |  | After 65 | 75.5555556 |
| 75.2330467 | 82.3715043 | 68.0224581 | 79.322775 |  | After 66 | 75.6666667 |
| 76.2330467 | 83.3715043 | 69.0224581 | 80.322775 |  | After 67 | 75.8888889 |
| 79.2330467 | 84.3715043 | 72.0224581 | 82.322775 |  | After 68 | 77.2222222 |
| 80.2330467 | 82.3715043 | 72.0224581 | 83.322775 |  | After 69 | 77.3333333 |
| 82.2330467 | 82.3715043 | 74.0224581 | 83.322775 |  | After 70 | 77.7777778 |
| 82.2330467 | 81.3715043 | 74.0224581 | 83.322775 |  | After 71 | 77.4444444 |
| 82.2330467 | 81.3715043 | 74.0224581 | 83.322775 |  | After 72 | 77.7777778 |
| 81.2330467 | 80.3715043 | 74.0224581 | 80.322775 |  | After 73 | 77.5555556 |
| 80.2330467 | 85.3715043 | 72.0224581 | 77.322775 |  | After 74 | 77.4444444 |
| 79.2330467 | 85.3715043 | 72.0224581 | 76.322775 |  | After 75 | 77.1111111 |
| 78.2330467 | 85.3715043 | 72.0224581 | 76.322775 |  | After 76 | 76.8888889 |
| 80.2330467 | 85.3715043 | 73.0224581 | 76.322775 |  | After 77 | 77.3333333 |
| 81.2330467 | 85.3715043 | 74.0224581 | 76.322775 |  | After 78 | 77.5555556 |
| 81.2330467 | 84.3715043 | 74.0224581 | 76.322775 |  | After 79 | 77.1111111 |
| 82.2330467 | 83.3715043 | 74.0224581 | 77.322775 |  | After 80 | 77.4444444 |
| 82.2330467 | 83.3715043 | 76.0224581 | 77.322775 |  | After 81 | 77.8888889 |
| 82.2330467 | 83.3715043 | 77.0224581 | 77.322775 |  | After 82 | 80.6666667 |
| 82.2330467 | 77.3715043 | 77.0224581 | 77.322775 |  | After 83 | 80.6666667 |

|            |            |            |           |  |           |            |
|------------|------------|------------|-----------|--|-----------|------------|
| 81.2330467 | 76.3715043 | 78.0224581 | 78.322775 |  | After 84  | 79.4180098 |
| 80.2330467 | 77.3715043 | 78.0224581 | 78.322775 |  | After 85  | 80.6666667 |
| 81.2330467 | 77.3715043 | 79.0224581 | 77.322775 |  | After 86  | 80.6666667 |
| 82.2330467 | 78.3715043 | 79.0224581 | 77.322775 |  | After 87  | 80.8888889 |
| 82.2330467 | 78.3715043 | 79.0224581 | 77.322775 |  | After 88  | 80.4444444 |
| 82.2330467 | 78.3715043 | 79.0224581 | 77.322775 |  | After 89  | 80         |
| 83.2330467 | 78.3715043 | 79.0224581 | 78.322775 |  | After 90  | 79.8888889 |
| 83.2330467 | 78.3715043 | 79.0224581 | 77.322775 |  | After 91  | 79.6666667 |
| 84.2330467 | 78.3715043 | 79.0224581 | 78.322775 |  | After 92  | 80         |
| 84.2330467 | 78.3715043 | 78.0224581 | 78.322775 |  | After 93  | 80         |
| 84.2330467 | 78.3715043 | 78.0224581 | 79.322775 |  | After 94  | 80         |
| 84.2330467 | 78.3715043 | 78.0224581 | 79.322775 |  | After 95  | 79.6666667 |
| 84.2330467 | 79.3715043 | 77.0224581 | 80.322775 |  | After 96  | 79.3333333 |
| 84.2330467 | 79.3715043 | 75.0224581 | 81.322775 |  | After 97  | 78.8888889 |
| 84.2330467 | 78.3715043 | 72.0224581 | 81.322775 |  | After 98  | 78.4444444 |
| 81.2330467 | 78.3715043 | 70.0224581 | 81.322775 |  | After 99  | 76.6666667 |
| 79.2330467 | 78.3715043 | 70.0224581 | 80.322775 |  | After 100 | 75.8888889 |
| 76.2330467 | 78.3715043 | 70.0224581 | 80.322775 |  | After 101 | 75.4444444 |
| 76.2330467 | 78.3715043 | 70.0224581 | 81.322775 |  | After 102 | 75         |
| 76.2330467 | 78.3715043 | 72.0224581 | 83.322775 |  | After 103 | 75.2222222 |
| 77.2330467 | 78.3715043 | 78.0224581 | 84.322775 |  | After 104 | 76.5555556 |
| 80.2330467 | 78.3715043 | 78.0224581 | 84.322775 |  | After 105 | 77         |
| 80.2330467 | 78.3715043 | 79.0224581 | 85.322775 |  | After 106 | 77.2222222 |
| 78.2330467 | 78.3715043 | 79.0224581 | 84.322775 |  | After 107 | 76.6666667 |
| 78.2330467 | 78.3715043 | 71.0224581 | 82.322775 |  | After 108 | 75.1111111 |
| 78.2330467 | 78.3715043 | 71.0224581 | 81.322775 |  | After 109 | 74.8888889 |
| 73.2330467 | 79.3715043 | 71.0224581 | 79.322775 |  | After 110 | 73.8888889 |
| 73.2330467 | 81.3715043 | 70.0224581 | 78.322775 |  | After 111 | 74         |
| 73.2330467 | 81.3715043 | 68.0224581 | 75.322775 |  | After 112 | 73.6666667 |
| 75.2330467 | 81.3715043 | 68.0224581 | 73.322775 |  | After 113 | 73.7777778 |
| 75.2330467 | 80.3715043 | 68.0224581 | 72.322775 |  | After 114 | 73.7777778 |
| 75.2330467 | 79.3715043 | 66.0224581 | 72.322775 |  | After 115 | 73.4444444 |
| 77.2330467 | 79.3715043 | 66.0224581 | 73.322775 |  | After 116 | 73.8888889 |
| 77.2330467 | 79.3715043 | 66.0224581 | 73.322775 |  | After 117 | 73.8888889 |
| 77.2330467 | 80.3715043 | 66.0224581 | 72.322775 |  | After 118 | 73.6666667 |
| 77.2330467 | 80.3715043 | 66.0224581 | 70.322775 |  | After 119 | 73.6666667 |
| 76.2330467 | 80.3715043 | 66.0224581 | 70.322775 |  | After 120 | 73.7777778 |
| 75.2330467 | 80.3715043 | 67.0224581 | 70.322775 |  |           | 73.8888889 |
| 73.2330467 | 80.3715043 | 67.0224581 | 70.322775 |  |           | 73.3333333 |
| 73.2330467 | 77.3715043 | 66.0224581 | 71.322775 |  |           | 72.8888889 |
| 68.2330467 | 77.3715043 | 66.0224581 | 70.322775 |  |           | 72.1111111 |
| 68.2330467 | 74.3715043 | 65.0224581 | 70.322775 |  |           | 71.6666667 |
| 66.2330467 | 74.3715043 | 65.0224581 | 69.322775 |  |           | 71.1111111 |
| 67.2330467 | 74.3715043 | 71.0224581 | 70.322775 |  |           | 72.4444444 |
| 68.2330467 | 74.3715043 | 71.0224581 | 70.322775 |  |           | 72.4444444 |

|            |            |            |           |  |  |            |
|------------|------------|------------|-----------|--|--|------------|
| 69.2330467 | 74.3715043 | 74.0224581 | 70.322775 |  |  | 73.6666667 |
| 69.2330467 | 79.3715043 | 73.0224581 | 69.322775 |  |  | 74.4444444 |
| 70.2330467 | 79.3715043 | 70.0224581 | 69.322775 |  |  | 74.6666667 |
| 70.2330467 | 79.3715043 | 71.0224581 | 70.322775 |  |  | 74.7777778 |
| 70.2330467 | 79.3715043 | 72.0224581 | 70.322775 |  |  | 74.2347892 |
| 69.2330467 | 79.3715043 | 72.0224581 | 71.322775 |  |  | 74.0989867 |
| 69.2330467 | 79.3715043 | 75.0224581 | 71.322775 |  |  | 74.4446657 |
| 69.2330467 | 79.3715043 | 77.0224581 | 71.322775 |  |  | 76.2222222 |
| 69.2330467 | 80.3715043 | 78.0224581 | 70.322775 |  |  | 76.3333333 |
| 69.2330467 | 80.3715043 | 79.0224581 | 69.322775 |  |  | 76.2222222 |
| 71.2330467 | 81.3715043 | 79.0224581 | 68.322775 |  |  | 76.3333333 |
| 72.2330467 | 82.3715043 | 79.0224581 | 69.322775 |  |  | 76.4444444 |
| 72.2330467 | 82.3715043 | 79.0224581 | 70.322775 |  |  | 76.7777778 |
| 73.2330467 | 82.3715043 | 80.0224581 | 72.322775 |  |  | 77         |
| 73.2330467 | 81.3715043 | 79.0224581 | 75.322775 |  |  | 76.8888889 |
| 72.2330467 | 80.3715043 | 78.0224581 | 78.322775 |  |  | 76.8888889 |
| 69.2330467 | 80.3715043 | 78.0224581 | 80.322775 |  |  | 76.8888889 |
| 69.2330467 | 80.3715043 | 78.0224581 | 82.322775 |  |  | 76.4444444 |
| 68.2330467 | 79.3715043 | 78.0224581 | 82.322775 |  |  | 76.2222222 |
| 68.2330467 | 79.3715043 | 77.0224581 | 81.322775 |  |  | 76.3333333 |
| 68.2330467 | 79.3715043 | 76.0224581 | 81.322775 |  |  | 76.2222222 |
| 69.2330467 | 79.3715043 | 76.0224581 | 78.322775 |  |  | 76.2222222 |
| 68.2330467 | 79.3715043 | 76.0224581 | 78.322775 |  |  | 76.2222222 |
| 68.2330467 | 80.3715043 | 76.0224581 | 78.322775 |  |  | 76         |
| 68.2330467 | 80.3715043 | 76.0224581 | 77.322775 |  |  | 75.7777778 |
| 66.2330467 | 76.3715043 | 76.0224581 | 77.322775 |  |  | 75         |
| 66.2330467 | 76.3715043 | 76.0224581 | 72.322775 |  |  | 74.4444444 |
| 65.2330467 | 76.3715043 | 78.0224581 | 70.322775 |  |  | 74.2222222 |
| 65.2330467 | 75.3715043 | 78.0224581 | 70.322775 |  |  | 73.5555556 |
| 65.2330467 | 75.3715043 | 78.0224581 | 70.322775 |  |  | 73.6666667 |
| 65.2330467 | 75.3715043 | 82.0224581 | 70.322775 |  |  | 74.2222222 |
| 65.2330467 | 75.3715043 | 81.0224581 | 70.322775 |  |  | 74.3333333 |
| 65.2330467 | 75.3715043 | 81.0224581 | 69.322775 |  |  | 74.3333333 |
| 66.2330467 | 73.3715043 | 77.0224581 | 69.322775 |  |  | 73.8888889 |
| 66.2330467 | 72.3715043 | 77.0224581 | 69.322775 |  |  | 74.2222222 |
| 64.2330467 | 72.3715043 | 75.0224581 | 69.322775 |  |  | 73.8888889 |
| 64.2330467 | 72.3715043 | 75.0224581 | 69.322775 |  |  | 73.8888889 |
| 64.2330467 | 71.3715043 | 75.0224581 | 69.322775 |  |  | 73.8888889 |
| 64.2330467 | 71.3715043 | 74.0224581 | 70.322775 |  |  | 72.8854457 |
| 65.2330467 | 70.3715043 | 73.0224581 | 70.322775 |  |  | 72.7619889 |
| 65.2330467 | 70.3715043 | 73.0224581 | 70.322775 |  |  | 72.7619889 |
| 67.2330467 | 77.3715043 | 72.0224581 | 69.322775 |  |  | 74.4444444 |
| 67.2330467 | 77.3715043 | 72.0224581 | 69.322775 |  |  | 74.4444444 |
| 67.2330467 | 78.3715043 | 72.0224581 | 68.322775 |  |  | 73.5555556 |
| 74.2330467 | 73.3715043 | 70.0224581 | 68.322775 |  |  | 73.3333333 |

|            |            |            |           |  |  |            |
|------------|------------|------------|-----------|--|--|------------|
| 77.2330467 | 72.3715043 | 70.0224581 | 69.322775 |  |  | 73.3333333 |
| 79.2330467 | 71.3715043 | 70.0224581 | 69.322775 |  |  | 73.3333333 |
| 81.2330467 | 71.3715043 | 70.0224581 | 69.322775 |  |  | 73.5555556 |
| 81.2330467 | 70.3715043 | 70.0224581 | 69.322775 |  |  | 73.6666667 |
| 80.2330467 | 73.3715043 | 73.0224581 | 70.322775 |  |  | 74.2222222 |
| 80.2330467 | 74.3715043 | 74.0224581 | 71.322775 |  |  | 74.2222222 |
| 79.2330467 | 74.3715043 | 74.0224581 | 71.322775 |  |  | 74         |
| 77.2330467 | 74.3715043 | 73.0224581 | 70.322775 |  |  | 73.6666667 |
| 76.2330467 | 74.3715043 | 69.0224581 | 68.322775 |  |  | 73         |
| 75.2330467 | 76.3715043 | 69.0224581 | 67.322775 |  |  | 73         |
| 75.2330467 | 77.3715043 | 65.0224581 | 67.322775 |  |  | 72.6666667 |
| 75.2330467 | 77.3715043 | 64.0224581 | 66.322775 |  |  | 72.6666667 |
| 75.2330467 | 78.3715043 | 63.0224581 | 66.322775 |  |  | 72.6666667 |
| 76.2330467 | 77.3715043 | 63.0224581 | 66.322775 |  |  | 73         |
| 76.2330467 | 77.3715043 | 64.0224581 | 66.322775 |  |  | 73.2222222 |
| 75.2330467 | 77.3715043 | 64.0224581 | 66.322775 |  |  | 73.5555556 |
| 73.2330467 | 75.3715043 | 66.0224581 | 66.322775 |  |  | 73.7777778 |
| 73.2330467 | 73.3715043 | 68.0224581 | 65.322775 |  |  | 74         |
| 70.2330467 | 74.3715043 | 73.0224581 | 63.322775 |  |  | 74.5555556 |
| 70.2330467 | 74.3715043 | 73.0224581 | 63.322775 |  |  | 73.4180098 |
| 70.2330467 | 78.3715043 | 73.0224581 | 64.322775 |  |  | 73.8130716 |
| 70.2330467 | 79.3715043 | 74.0224581 | 68.322775 |  |  | 74.6772691 |
| 70.2330467 | 80.3715043 | 71.0224581 | 70.322775 |  |  | 74.4550469 |
| 70.2330467 | 81.3715043 | 71.0224581 | 71.322775 |  |  | 74.5908494 |
| 70.2330467 | 81.3715043 | 70.0224581 | 71.322775 |  |  | 74.5908494 |
| 69.2330467 | 81.3715043 | 70.0224581 | 69.322775 |  |  | 75.2222222 |
| 69.2330467 | 81.3715043 | 69.0224581 | 69.322775 |  |  | 75         |
| 69.2330467 | 81.3715043 | 69.0224581 | 68.322775 |  |  | 75.1111111 |
| 67.2330467 | 81.3715043 | 70.0224581 | 64.322775 |  |  | 74.6666667 |
| 66.2330467 | 81.3715043 | 72.0224581 | 64.322775 |  |  | 74.5555556 |
| 68.2330467 | 82.3715043 | 72.0224581 | 64.322775 |  |  | 75.5555556 |
| 69.2330467 | 82.3715043 | 72.0224581 | 64.322775 |  |  | 74.4444444 |
| 69.2330467 | 82.3715043 | 72.0224581 | 64.322775 |  |  | 75.4444444 |
| 70.2330467 | 88.3715043 | 72.0224581 | 63.322775 |  |  | 76.3333333 |
| 70.2330467 | 88.3715043 | 72.0224581 | 63.322775 |  |  | 76.5555556 |
| 70.2330467 | 87.3715043 | 71.0224581 | 62.322775 |  |  | 76.4444444 |
| 69.2330467 | 86.3715043 | 71.0224581 | 62.322775 |  |  | 75.2434704 |
| 69.2330467 | 86.3715043 | 71.0224581 | 64.322775 |  |  | 75.3792729 |
| 68.2330467 | 83.3715043 | 71.0224581 | 67.322775 |  |  | 75.1323593 |
| 68.2330467 | 81.3715043 | 74.0224581 | 68.322775 |  |  | 75.5027297 |
| 70.2330467 | 81.3715043 | 74.0224581 | 69.322775 |  |  | 76.4444444 |
| 70.2330467 | 81.3715043 | 78.0224581 | 69.322775 |  |  | 76.1111111 |
| 71.2330467 | 75.3715043 | 79.0224581 | 69.322775 |  |  | 75.1111111 |
| 71.2330467 | 76.3715043 | 79.0224581 | 68.322775 |  |  | 74.7777778 |
| 77.2330467 | 76.3715043 | 79.0224581 | 67.322775 |  |  | 75.4444444 |

|            |            |            |           |  |  |            |
|------------|------------|------------|-----------|--|--|------------|
| 78.2330467 | 76.3715043 | 79.0224581 | 68.322775 |  |  | 75.6666667 |
| 77.2330467 | 76.3715043 | 78.0224581 | 68.322775 |  |  | 75.4444444 |
| 76.2330467 | 76.3715043 | 78.0224581 | 68.322775 |  |  | 75.3333333 |
| 76.2330467 | 74.3715043 | 77.0224581 | 67.322775 |  |  | 74.6666667 |
| 77.2330467 | 75.3715043 | 77.0224581 | 65.322775 |  |  | 74.6666667 |
| 78.2330467 | 75.3715043 | 77.0224581 | 64.322775 |  |  | 74.5555556 |
| 78.2330467 | 75.3715043 | 77.0224581 | 64.322775 |  |  | 74.5555556 |
| 80.2330467 | 75.3715043 | 79.0224581 | 64.322775 |  |  | 74.4444444 |
| 80.2330467 | 76.3715043 | 78.0224581 | 65.322775 |  |  | 74.6666667 |
| 79.2330467 | 76.3715043 | 78.0224581 | 64.322775 |  |  | 74.8888889 |
| 78.2330467 | 76.3715043 | 78.0224581 | 63.322775 |  |  | 74.6666667 |
| 78.2330467 | 76.3715043 | 74.0224581 | 62.322775 |  |  | 74.2222222 |
| 75.2330467 | 76.3715043 | 68.0224581 | 62.322775 |  |  | 73.2222222 |
| 74.2330467 | 76.3715043 | 68.0224581 | 65.322775 |  |  | 73.6666667 |
| 73.2330467 | 75.3715043 | 69.0224581 | 65.322775 |  |  | 73.5555556 |
| 72.2330467 | 75.3715043 | 70.0224581 | 64.322775 |  |  | 73.2222222 |
| 72.2330467 | 75.3715043 | 70.0224581 | 64.322775 |  |  | 73.3333333 |
| 71.2330467 | 78.3715043 | 70.0224581 | 64.322775 |  |  | 73.5555556 |
| 71.2330467 | 80.3715043 | 73.0224581 | 65.322775 |  |  | 74.2222222 |
| 71.2330467 | 80.3715043 | 75.0224581 | 65.322775 |  |  | 74.2222222 |
| 71.2330467 | 79.3715043 | 77.0224581 | 65.322775 |  |  | 74.6666667 |
| 71.2330467 | 79.3715043 | 79.0224581 | 67.322775 |  |  | 75.3333333 |
| 71.2330467 | 79.3715043 | 79.0224581 | 68.322775 |  |  | 75.7777778 |
| 71.2330467 | 79.3715043 | 79.0224581 | 70.322775 |  |  | 75.8888889 |
| 71.2330467 | 79.3715043 | 78.0224581 | 71.322775 |  |  | 76.1111111 |
| 72.2330467 | 79.3715043 | 77.0224581 | 71.322775 |  |  | 76.2222222 |
| 72.2330467 | 79.3715043 | 76.0224581 | 71.322775 |  |  | 75.8888889 |
| 72.2330467 | 79.3715043 | 76.0224581 | 71.322775 |  |  | 75.8888889 |
| 73.2330467 | 80.3715043 | 76.0224581 | 71.322775 |  |  | 75.5555556 |
| 73.2330467 | 80.3715043 | 76.0224581 | 73.322775 |  |  | 75.6666667 |
| 74.2330467 | 81.3715043 | 79.0224581 | 73.322775 |  |  | 76         |
| 74.2330467 | 81.3715043 | 80.0224581 | 73.322775 |  |  | 76.1111111 |
| 74.2330467 | 81.3715043 | 80.0224581 | 73.322775 |  |  | 76.3333333 |
| 75.2330467 | 77.3715043 | 76.0224581 | 72.322775 |  |  | 75.5555556 |
| 75.2330467 | 78.3715043 | 74.0224581 | 72.322775 |  |  | 75.5555556 |
| 75.2330467 | 78.3715043 | 74.0224581 | 72.322775 |  |  | 75.5555556 |
| 74.2330467 | 79.3715043 | 71.0224581 | 72.322775 |  |  | 75.6666667 |
| 74.2330467 | 80.3715043 | 71.0224581 | 72.322775 |  |  | 76.4444444 |
| 74.2330467 | 80.3715043 | 71.0224581 | 70.322775 |  |  | 76.8888889 |
| 72.2330467 | 80.3715043 | 71.0224581 | 70.322775 |  |  | 76.7777778 |
| 71.2330467 | 79.3715043 | 71.0224581 | 70.322775 |  |  | 76.5555556 |
| 71.2330467 | 79.3715043 | 70.0224581 | 70.322775 |  |  | 76.2222222 |
| 72.2330467 | 78.3715043 | 70.0224581 | 70.322775 |  |  | 76.3333333 |
| 73.2330467 | 78.3715043 | 68.0224581 | 70.322775 |  |  | 76.2222222 |
| 74.2330467 | 78.3715043 | 68.0224581 | 75.322775 |  |  | 76.7777778 |

|            |            |            |           |  |  |            |
|------------|------------|------------|-----------|--|--|------------|
| 74.2330467 | 79.3715043 | 68.0224581 | 75.322775 |  |  | 76.7777778 |
| 75.2330467 | 79.3715043 | 68.0224581 | 72.322775 |  |  | 76.3333333 |
| 75.2330467 | 79.3715043 | 68.0224581 | 70.322775 |  |  | 75.7777778 |
| 75.2330467 | 80.3715043 | 68.0224581 | 70.322775 |  |  | 75.8888889 |
| 73.2330467 | 80.3715043 | 68.0224581 | 67.322775 |  |  | 75.5555556 |
| 73.2330467 | 80.3715043 | 68.0224581 | 67.322775 |  |  | 75.6666667 |
| 73.2330467 | 80.3715043 | 68.0224581 | 67.322775 |  |  | 75.8888889 |
| 74.2330467 | 83.3715043 | 68.0224581 | 67.322775 |  |  | 76.3333333 |
| 75.2330467 | 83.3715043 | 68.0224581 | 69.322775 |  |  | 76.5555556 |
| 76.2330467 | 83.3715043 | 68.0224581 | 69.322775 |  |  | 76.4444444 |
| 76.2330467 | 83.3715043 | 68.0224581 | 68.322775 |  |  | 76.2222222 |
| 76.2330467 | 81.3715043 | 68.0224581 | 69.322775 |  |  | 76.3333333 |
| 74.2330467 | 80.3715043 | 68.0224581 | 70.322775 |  |  | 76.3333333 |
| 74.2330467 | 80.3715043 | 68.0224581 | 70.322775 |  |  | 75.0476395 |
| 74.2330467 | 81.3715043 | 71.0224581 | 69.322775 |  |  | 75.1710963 |
| 74.2330467 | 81.3715043 | 71.0224581 | 69.322775 |  |  | 75.1710963 |
| 75.2330467 | 81.3715043 | 75.0224581 | 72.322775 |  |  | 75.6772691 |
| 75.2330467 | 80.3715043 | 75.0224581 | 72.322775 |  |  | 76.6666667 |
| 76.2330467 | 79.3715043 | 75.0224581 | 73.322775 |  |  | 76.7777778 |
| 76.2330467 | 79.3715043 | 75.0224581 | 73.322775 |  |  | 76.2222222 |
| 76.2330467 | 79.3715043 | 74.0224581 | 72.322775 |  |  | 76         |
| 76.2330467 | 79.3715043 | 74.0224581 | 71.322775 |  |  | 76.2222222 |
| 76.2330467 | 78.3715043 | 74.0224581 | 71.322775 |  |  | 76.6666667 |
| 76.2330467 | 78.3715043 | 73.0224581 | 72.322775 |  |  | 76.8888889 |
| 76.2330467 | 82.3715043 | 74.0224581 | 74.322775 |  |  | 77.6666667 |
| 76.2330467 | 82.3715043 | 74.0224581 | 76.322775 |  |  | 78.1111111 |
| 77.2330467 | 82.3715043 | 74.0224581 | 76.322775 |  |  | 78.3333333 |
| 77.2330467 | 85.3715043 | 75.0224581 | 75.322775 |  |  | 78.5555556 |
| 77.2330467 | 85.3715043 | 75.0224581 | 75.322775 |  |  | 78.1111111 |
| 77.2330467 | 86.3715043 | 75.0224581 | 74.322775 |  |  | 77.8888889 |
| 77.2330467 | 83.3715043 | 72.0224581 | 74.322775 |  |  | 77         |
| 76.2330467 | 82.3715043 | 72.0224581 | 74.322775 |  |  | 76.7777778 |
| 76.2330467 | 82.3715043 | 68.0224581 | 74.322775 |  |  | 76.7777778 |
| 76.2330467 | 81.3715043 | 66.0224581 | 74.322775 |  |  | 77.2222222 |
| 76.2330467 | 80.3715043 | 65.0224581 | 76.322775 |  |  | 77.2222222 |
| 77.2330467 | 80.3715043 | 66.0224581 | 75.322775 |  |  | 77.2222222 |
| 80.2330467 | 79.3715043 | 69.0224581 | 75.322775 |  |  | 77.5555556 |
| 81.2330467 | 79.3715043 | 69.0224581 | 74.322775 |  |  | 77.2222222 |
| 81.2330467 | 78.3715043 | 69.0224581 | 74.322775 |  |  | 77         |
| 81.2330467 | 78.3715043 | 70.0224581 | 74.322775 |  |  | 77.2222222 |
| 80.2330467 | 72.3715043 | 70.0224581 | 74.322775 |  |  | 76.4444444 |
| 79.2330467 | 67.3715043 | 71.0224581 | 73.322775 |  |  | 74.1710963 |
| 79.2330467 | 67.3715043 | 72.0224581 | 75.322775 |  |  | 74.4180098 |
| 79.2330467 | 66.3715043 | 72.0224581 | 76.322775 |  |  | 75.5555556 |
| 79.2330467 | 66.3715043 | 72.0224581 | 76.322775 |  |  | 74.0476395 |



|            |            |            |           |  |       |            |
|------------|------------|------------|-----------|--|-------|------------|
| 79.2330467 | 66.3715043 | 73.0224581 | 71.322775 |  |       | 73.5538123 |
| 80.2330467 | 66.3715043 | 73.0224581 | 72.322775 |  |       | 73.9365284 |
| 83.2330467 | 66.3715043 | 75.0224581 | 73.322775 |  |       | 77.8888889 |
| 83.2330467 | 66.3715043 | 74.0224581 | 74.322775 |  |       | 76.5414666 |
| 83.2330467 | 67.3715043 | 74.0224581 | 74.322775 |  |       | 76.5414666 |
| 82.2330467 | 67.3715043 | 74.0224581 | 74.322775 |  |       | 76.4180098 |
| 79.2330467 | 67.3715043 | 74.0224581 | 76.322775 |  |       | 76.4180098 |
| 77.2330467 | 69.3715043 | 77.0224581 | 77.322775 |  |       | 76.8007259 |
| 77.2330467 | 82.3715043 | 77.0224581 | 77.322775 |  |       | 80         |
| 77.2330467 | 85.3715043 | 78.0224581 | 77.322775 |  |       | 80.5555556 |
| 77.2330467 | 85.3715043 | 78.0224581 | 75.322775 |  |       | 80.3333333 |
| 77.2330467 | 85.3715043 | 79.0224581 | 65.322775 |  |       | 77.5414666 |
| 77.2330467 | 85.3715043 | 79.0224581 | 64.322775 |  |       | 77.1710963 |
| 77.2330467 | 85.3715043 | 80.0224581 | 65.322775 |  |       | 77.5414666 |
| 79.2330467 | 85.3715043 | 83.0224581 | 65.322775 |  |       | 79.6666667 |
| 79.2330467 | 85.3715043 | 83.0224581 | 65.322775 |  |       | 77.8888889 |
| 77.2330467 | 86.3715043 | 83.0224581 | 65.322775 |  |       | 77.8888889 |
| 77.2330467 | 86.3715043 | 83.0224581 | 63.322775 |  |       | 78         |
| 75.2330467 | 86.3715043 | 69.0224581 | 62.322775 |  |       | 75.6666667 |
| 70.2330467 | 86.3715043 | 64.0224581 | 61.322775 |  |       | 73.8888889 |
| 69.2330467 | 73.5555556 | 64.0224581 | 62.322775 |  |       | 72.1315612 |
| 68.2330467 | 72.8888889 | 61.0224581 | 62.322775 |  |       | 71.3908205 |
| 69.2330467 | 72.4444444 | 60.0224581 | 61.322775 |  |       | 70.8969933 |
| 69.2330467 | 72.1111111 | 59.0224581 | 62.322775 |  |       | 70.526623  |
| 69.2330467 | 72.1111111 | 59.0224581 | 62.322775 |  |       | 70.526623  |
| 72.2330467 | 72.4444444 | 59.0224581 | 65.322775 |  |       | 71.0081045 |
| 73.2330467 | 79.3715043 | 60.0224581 | 66.322775 |  |       | 72.3333333 |
| 73.2330467 | 79.3715043 | 63.0224581 | 66.322775 |  | Movie | 73.5555556 |
| 73.2330467 | 75.3715043 | 63.0224581 | 65.322775 |  | Movie | 73.2222222 |
| 72.2330467 | 76.3715043 | 65.0224581 | 66.322775 |  | Movie | 73.8888889 |
| 73.2330467 | 77.3715043 | 63.0224581 | 67.322775 |  | Movie | 73.7777778 |
| 74.2330467 | 78.3715043 | 62.0224581 | 69.322775 |  | Movie | 74.2222222 |
| 74.2330467 | 78.3715043 | 62.0224581 | 69.322775 |  | Movie | 74.5555556 |
| 74.2330467 | 78.3715043 | 61.0224581 | 68.322775 |  | Movie | 74.1111111 |
| 75.2330467 | 78.3715043 | 61.0224581 | 69.322775 |  | Movie | 74.2222222 |
| 76.2330467 | 78.3715043 | 66.0224581 | 70.322775 |  | Movie | 75.2222222 |
| 76.2330467 | 78.3715043 | 68.0224581 | 70.322775 |  | Movie | 75.6666667 |
| 76.2330467 | 78.3715043 | 68.0224581 | 71.322775 |  | Movie | 75.6666667 |
| 76.2330467 | 78.3715043 | 69.0224581 | 71.322775 |  | Movie | 75.6666667 |
| 76.2330467 | 78.3715043 | 69.0224581 | 71.322775 |  | Movie | 76.4444444 |
| 75.2330467 | 80.3715043 | 69.0224581 | 73.322775 |  | Movie | 77.1111111 |
| 75.2330467 | 80.3715043 | 71.0224581 | 73.322775 |  | Movie | 77.2222222 |
| 72.2330467 | 79.3715043 | 74.0224581 | 73.322775 |  | Movie | 76.8888889 |
| 72.2330467 | 79.3715043 | 74.0224581 | 72.322775 |  | Movie | 77         |
| 72.2330467 | 77.3715043 | 77.0224581 | 68.322775 |  | Movie | 76.3333333 |

|            |            |            |           |  |          |            |
|------------|------------|------------|-----------|--|----------|------------|
| 73.2330467 | 75.3715043 | 78.0224581 | 67.322775 |  | Movie    | 76.3333333 |
| 71.2330467 | 74.3715043 | 80.0224581 | 67.322775 |  | Movie    | 76.2222222 |
| 72.2330467 | 74.3715043 | 80.0224581 | 67.322775 |  | Movie    | 76.6666667 |
| 73.2330467 | 75.3715043 | 80.0224581 | 69.322775 |  | Movie    | 76.8888889 |
| 74.2330467 | 77.3715043 | 79.0224581 | 70.322775 |  | Movie    | 77.1111111 |
| 74.2330467 | 77.3715043 | 74.0224581 | 70.322775 |  | Movie    | 76.4444444 |
| 75.2330467 | 78.3715043 | 69.0224581 | 69.322775 |  | Movie    | 76         |
| 75.2330467 | 78.3715043 | 68.0224581 | 68.322775 |  | Movie    | 75.8888889 |
| 74.2330467 | 78.3715043 | 68.0224581 | 69.322775 |  | Movie    | 76.3333333 |
| 72.2330467 | 78.3715043 | 68.0224581 | 68.322775 |  | Movie    | 75.1200136 |
| 72.2330467 | 79.3715043 | 68.0224581 | 66.322775 |  | Movie    | 75.2434704 |
| 72.2330467 | 79.3715043 | 73.0224581 | 66.322775 |  | Movie    | 76.1200136 |
| 72.2330467 | 79.3715043 | 73.0224581 | 66.322775 |  | Movie    | 76.5409279 |
| 72.2330467 | 79.3715043 | 73.0224581 | 67.322775 |  | Movie    | 76.5409279 |
| 74.2330467 | 78.3715043 | 73.0224581 | 68.322775 |  | Movie    | 77.4051255 |
| 78.2330467 | 77.3715043 | 81.0224581 | 69.322775 |  | Movie    | 80.2222222 |
| 78.2330467 | 77.3715043 | 80.0224581 | 71.322775 |  | Movie    | 79.0347551 |
| 81.2330467 | 77.3715043 | 80.0224581 | 71.322775 |  | Movie    | 79.2816687 |
| 81.2330467 | 77.3715043 | 79.0224581 | 72.322775 |  | Movie    | 79.1582119 |
| 81.2330467 | 76.3715043 | 73.0224581 | 75.322775 |  | Movie    | 78.6643847 |
| 83.2330467 | 75.3715043 | 67.0224581 | 76.322775 |  | Movie    | 78.1829032 |
| 83.2330467 | 74.3715043 | 64.0224581 | 76.322775 |  | Movie    | 77.8001872 |
| 83.2330467 | 74.3715043 | 62.0224581 | 74.322775 |  | Movie    | 77.652039  |
| 83.2330467 | 73.3715043 | 62.0224581 | 73.322775 |  | Movie    | 77.4051255 |
| 81.2330467 | 73.3715043 | 61.0224581 | 73.322775 |  | Movie    | 77.652039  |
| 78.2330467 | 73.3715043 | 62.0224581 | 74.322775 |  | Movie    | 76.652039  |
| 79.2330467 | 73.3715043 | 64.0224581 | 74.322775 |  | Movie    | 76.652039  |
| 80.2330467 | 73.3715043 | 65.0224581 | 74.322775 |  | Movie    | 76.4051255 |
| 80.2330467 | 77.3715043 | 65.0224581 | 73.322775 |  | Movie    | 75.6643847 |
| 80.2330467 | 82.3715043 | 74.0224581 | 73.322775 |  | Movie    | 78.5555556 |
| 81.2330467 | 83.3715043 | 74.0224581 | 74.322775 |  | Movie    | 78.2222222 |
| 81.2330467 | 83.3715043 | 74.0224581 | 73.322775 |  | Movie    | 78.2222222 |
| 81.2330467 | 83.3715043 | 74.0224581 | 73.322775 |  | Movie    | 78.2222222 |
| 81.2330467 | 83.3715043 | 74.0224581 | 73.322775 |  | Movie    | 78.2222222 |
| 76.2330467 | 83.3715043 | 77.0224581 | 72.322775 |  | Movie    | 77.049604  |
| 74.2330467 | 83.3715043 | 77.0224581 | 72.322775 |  | Movie    | 76.9755299 |
| 74.2330467 | 83.3715043 | 76.0224581 | 71.322775 |  | Movie    | 76.4940485 |
| 74.2330467 | 82.3715043 | 76.0224581 | 71.322775 |  | Movie    | 76.1854065 |
| 75.2330467 | 80.3715043 | 76.0224581 | 71.322775 |  | Movie    | 76.2718262 |
| 77.2330467 | 75.3715043 | 76.0224581 | 73.322775 |  | Movie    | 75.9014559 |
| 77.2330467 | 74.3715043 | 78.0224581 | 76.322775 |  | Movie    | 76.6298509 |
| 79.2330467 | 73.3715043 | 78.0224581 | 79.322775 |  | Movie    | 77.2965176 |
| 81.2330467 | 73.3715043 | 78.0224581 | 81.322775 |  | Movie    | 77.8150361 |
| 81.2330467 | 73.3715043 | 78.0224581 | 83.322775 |  | Movie    | 77.7656534 |
| 81.2330467 | 74.3715043 | 78.0224581 | 83.322775 |  | minute 1 | 77.8150361 |

|            |            |            |           |  |           |            |
|------------|------------|------------|-----------|--|-----------|------------|
| 82.2330467 | 74.3715043 | 77.0224581 | 86.322775 |  | minute 2  | 78.1730608 |
| 80.2330467 | 75.3715043 | 78.0224581 | 87.322775 |  | minute 3  | 78.3829374 |
| 81.2330467 | 75.3715043 | 77.0224581 | 87.322775 |  | minute 4  | 78.321209  |
| 81.2330467 | 76.3715043 | 72.0224581 | 89.322775 |  | minute 5  | 78.3335546 |
| 81.2330467 | 78.3715043 | 72.0224581 | 89.322775 |  | minute 6  | 79.5555556 |
| 81.2330467 | 79.3715043 | 72.0224581 | 90.322775 |  | minute 7  | 79.5555556 |
| 81.2330467 | 78.3715043 | 72.0224581 | 90.322775 |  | minute 8  | 79.5555556 |
| 81.2330467 | 77.3715043 | 68.0224581 | 89.322775 |  | minute 9  | 78.7777778 |
| 80.2330467 | 77.3715043 | 67.0224581 | 86.322775 |  | minute 10 | 78.5555556 |
| 80.2330467 | 77.3715043 | 67.0224581 | 86.322775 |  | minute 11 | 78.5555556 |
| 80.2330467 | 77.3715043 | 67.0224581 | 83.322775 |  | minute 12 | 78.4444444 |
| 81.2330467 | 77.3715043 | 67.0224581 | 80.322775 |  | minute 13 | 78.1111111 |
| 81.2330467 | 78.3715043 | 66.0224581 | 71.322775 |  | minute 14 | 76.1111111 |
| 86.2330467 | 80.3715043 | 69.0224581 | 71.322775 |  | minute 15 | 76.3333333 |
| 87.2330467 | 79.3715043 | 69.0224581 | 69.322775 |  | minute 16 | 75.7777778 |
| 87.2330467 | 78.3715043 | 70.0224581 | 67.322775 |  | minute 17 | 75.3333333 |
| 87.2330467 | 77.3715043 | 71.0224581 | 69.322775 |  | minute 18 | 75.8888889 |
| 87.2330467 | 77.3715043 | 74.0224581 | 71.322775 |  | minute 19 | 76.4444444 |
| 87.2330467 | 75.3715043 | 75.0224581 | 72.322775 |  | minute 20 | 77         |
| 87.2330467 | 74.3715043 | 75.0224581 | 74.322775 |  | minute 21 | 77.8888889 |
| 88.2330467 | 73.3715043 | 75.0224581 | 77.322775 |  | minute 22 | 77.8888889 |
| 86.2330467 | 74.3715043 | 75.0224581 | 78.322775 |  | minute 23 | 78         |
| 84.2330467 | 75.3715043 | 76.0224581 | 81.322775 |  | minute 24 | 78         |
| 84.2330467 | 76.3715043 | 75.0224581 | 82.322775 |  | minute 25 | 77.7777778 |
| 84.2330467 | 76.3715043 | 75.0224581 | 83.322775 |  | minute 26 | 77.7777778 |
| 84.2330467 | 76.3715043 | 76.0224581 | 82.322775 |  | minute 27 | 77.7777778 |
| 84.2330467 | 76.3715043 | 76.0224581 | 82.322775 |  | minute 28 | 77.4444444 |
| 84.2330467 | 75.3715043 | 76.0224581 | 80.322775 |  | minute 29 | 76.5555556 |
| 84.2330467 | 76.3715043 | 75.0224581 | 75.322775 |  | minute 30 | 75.8888889 |
| 84.2330467 | 76.3715043 | 75.0224581 | 72.322775 |  | minute 31 | 75.3333333 |
| 80.2330467 | 76.3715043 | 76.0224581 | 70.322775 |  | minute 32 | 74.7777778 |
| 80.2330467 | 77.3715043 | 76.0224581 | 70.322775 |  | minute 33 | 74.7777778 |
| 78.2330467 | 77.3715043 | 77.0224581 | 67.322775 |  | minute 34 | 74.3333333 |
| 77.2330467 | 77.3715043 | 78.0224581 | 67.322775 |  | minute 35 | 74.3333333 |
| 76.2330467 | 78.3715043 | 78.0224581 | 67.322775 |  | minute 36 | 74.1111111 |
| 77.2330467 | 80.3715043 | 82.0224581 | 67.322775 |  | minute 37 | 74.7777778 |
| 77.2330467 | 80.3715043 | 82.0224581 | 67.322775 |  | minute 38 | 74.7777778 |
| 77.2330467 | 79.3715043 | 82.0224581 | 63.322775 |  | minute 39 | 74.4444444 |
| 77.2330467 | 79.3715043 | 82.0224581 | 63.322775 |  | minute 40 | 74.6666667 |
| 77.2330467 | 79.3715043 | 80.0224581 | 64.322775 |  | minute 41 | 74.4444444 |
| 77.2330467 | 79.3715043 | 76.0224581 | 65.322775 |  | minute 42 | 74         |
| 77.2330467 | 79.3715043 | 76.0224581 | 68.322775 |  | minute 43 | 74.3333333 |
| 77.2330467 | 79.3715043 | 76.0224581 | 68.322775 |  | minute 44 | 74.3333333 |
| 77.2330467 | 78.3715043 | 72.0224581 | 72.322775 |  | minute 45 | 74.2222222 |
| 77.2330467 | 78.3715043 | 73.0224581 | 75.322775 |  | minute 46 | 75.1111111 |

|            |            |            |           |  |           |            |
|------------|------------|------------|-----------|--|-----------|------------|
| 77.2330467 | 77.3715043 | 72.0224581 | 77.322775 |  | minute 47 | 75.3333333 |
| 78.2330467 | 77.3715043 | 72.0224581 | 78.322775 |  | minute 48 | 75.7777778 |
| 80.2330467 | 76.3715043 | 70.0224581 | 80.322775 |  | minute 49 | 76.2222222 |
| 80.2330467 | 76.3715043 | 71.0224581 | 81.322775 |  | minute 50 | 76.4444444 |
| 82.2330467 | 77.3715043 | 72.0224581 | 82.322775 |  | minute 51 | 77.1111111 |
| 83.2330467 | 77.3715043 | 72.0224581 | 82.322775 |  | minute 52 | 77.5555556 |
| 84.2330467 | 77.3715043 | 72.0224581 | 82.322775 |  | minute 53 | 77.6666667 |
| 84.2330467 | 78.3715043 | 72.0224581 | 84.322775 |  | minute 54 | 77.8888889 |
| 84.2330467 | 78.3715043 | 71.0224581 | 83.322775 |  | minute 55 | 77.6666667 |
| 84.2330467 | 78.3715043 | 71.0224581 | 81.322775 |  | minute 56 | 77.4444444 |
| 85.2330467 | 77.3715043 | 69.0224581 | 80.322775 |  | minute 57 | 77.2222222 |
| 83.2330467 | 77.3715043 | 68.0224581 | 80.322775 |  | minute 58 | 76.5555556 |
| 81.2330467 | 77.3715043 | 67.0224581 | 78.322775 |  | minute 59 | 75.6666667 |
| 81.2330467 | 77.3715043 | 67.0224581 | 78.322775 |  | minute 60 | 75.2222222 |
| 79.2330467 | 77.3715043 | 65.0224581 | 77.322775 |  | After 1   | 75         |
| 77.2330467 | 77.3715043 | 65.0224581 | 77.322775 |  | After 2   | 74.7777778 |
| 77.2330467 | 78.3715043 | 65.0224581 | 77.322775 |  | After 3   | 75         |
| 77.2330467 | 79.3715043 | 65.0224581 | 77.322775 |  | After 4   | 75.2222222 |
| 76.2330467 | 80.3715043 | 65.0224581 | 80.322775 |  | After 5   | 75.6666667 |
| 76.2330467 | 80.3715043 | 65.0224581 | 80.322775 |  | After 6   | 76.1111111 |
| 76.2330467 | 77.3715043 | 65.0224581 | 88.322775 |  | After 7   | 76.8888889 |
| 76.2330467 | 75.3715043 | 65.0224581 | 89.322775 |  | After 8   | 76.6666667 |
| 76.2330467 | 74.3715043 | 65.0224581 | 89.322775 |  | After 9   | 76.7777778 |
| 76.2330467 | 74.3715043 | 65.0224581 | 89.322775 |  | After 10  | 76.7777778 |
| 76.2330467 | 76.3715043 | 65.0224581 | 80.322775 |  | After 11  | 76.2222222 |
| 76.2330467 | 76.3715043 | 67.0224581 | 74.322775 |  | After 12  | 74.8888889 |
| 76.2330467 | 77.3715043 | 67.0224581 | 72.322775 |  | After 13  | 74.5555556 |
| 79.2330467 | 77.3715043 | 67.0224581 | 72.322775 |  | After 14  | 74.8888889 |
| 78.2330467 | 77.3715043 | 66.0224581 | 73.322775 |  | After 15  | 74.6666667 |
| 78.2330467 | 77.3715043 | 63.0224581 | 73.322775 |  | After 16  | 74.2222222 |
| 80.2330467 | 77.3715043 | 62.0224581 | 72.322775 |  | After 17  | 74.1111111 |
| 83.2330467 | 78.3715043 | 63.0224581 | 69.322775 |  | After 18  | 74.6666667 |
| 83.2330467 | 78.3715043 | 63.0224581 | 68.322775 |  | After 19  | 74.3333333 |
| 81.2330467 | 77.3715043 | 63.0224581 | 70.322775 |  | After 20  | 74.1111111 |
| 81.2330467 | 77.3715043 | 62.0224581 | 71.322775 |  | After 21  | 74.1111111 |
| 81.2330467 | 81.3715043 | 63.0224581 | 72.322775 |  | After 22  | 74.6666667 |
| 80.2330467 | 81.3715043 | 63.0224581 | 72.322775 |  | After 23  | 74.2222222 |
| 78.2330467 | 81.3715043 | 65.0224581 | 72.322775 |  | After 24  | 74         |
| 78.2330467 | 81.3715043 | 65.0224581 | 73.322775 |  | After 25  | 74         |
| 77.2330467 | 81.3715043 | 64.0224581 | 74.322775 |  | After 26  | 73.8888889 |
| 78.2330467 | 81.3715043 | 64.0224581 | 75.322775 |  | After 27  | 73.7777778 |
| 78.2330467 | 81.3715043 | 62.0224581 | 75.322775 |  | After 28  | 74.2222222 |
| 78.2330467 | 81.3715043 | 61.0224581 | 77.322775 |  | After 29  | 74.1111111 |
| 78.2330467 | 82.3715043 | 60.0224581 | 77.322775 |  | After 30  | 74.3333333 |
| 78.2330467 | 85.3715043 | 60.0224581 | 78.322775 |  | After 31  | 74.7777778 |

|            |            |            |           |  |          |            |
|------------|------------|------------|-----------|--|----------|------------|
| 78.2330467 | 86.3715043 | 59.0224581 | 80.322775 |  | After 32 | 74.8888889 |
| 77.2330467 | 86.3715043 | 59.0224581 | 81.322775 |  | After 33 | 75.2222222 |
| 76.2330467 | 86.3715043 | 59.0224581 | 81.322775 |  | After 34 | 74.5555556 |
| 76.2330467 | 86.3715043 | 59.0224581 | 80.322775 |  | After 35 | 74.6666667 |
| 76.2330467 | 86.3715043 | 60.0224581 | 79.322775 |  | After 36 | 74         |
| 76.2330467 | 86.3715043 | 62.0224581 | 78.322775 |  | After 37 | 74         |
| 76.2330467 | 86.3715043 | 62.0224581 | 78.322775 |  | After 38 | 74         |
| 76.2330467 | 84.3715043 | 62.0224581 | 77.322775 |  | After 39 | 74.7777778 |
| 76.2330467 | 83.3715043 | 63.0224581 | 75.322775 |  | After 40 | 74.7777778 |
| 76.2330467 | 81.3715043 | 64.0224581 | 72.322775 |  | After 41 | 74.5555556 |
| 76.2330467 | 80.3715043 | 64.0224581 | 70.322775 |  | After 42 | 74.6666667 |
| 78.2330467 | 78.3715043 | 66.0224581 | 68.322775 |  | After 43 | 74.6666667 |
| 78.2330467 | 78.3715043 | 66.0224581 | 68.322775 |  | After 44 | 75         |
| 78.2330467 | 78.3715043 | 68.0224581 | 68.322775 |  | After 45 | 75.5555556 |
| 78.2330467 | 78.3715043 | 68.0224581 | 68.322775 |  | After 46 | 76.1111111 |
| 78.2330467 | 76.3715043 | 69.0224581 | 67.322775 |  | After 47 | 76.1111111 |
| 75.2330467 | 75.3715043 | 71.0224581 | 67.322775 |  | After 48 | 75.7777778 |
| 75.2330467 | 74.3715043 | 73.0224581 | 67.322775 |  | After 49 | 75.6666667 |
| 75.2330467 | 74.3715043 | 73.0224581 | 66.322775 |  | After 50 | 75.6666667 |
| 75.2330467 | 74.3715043 | 73.0224581 | 65.322775 |  | After 51 | 75.3333333 |
| 76.2330467 | 74.3715043 | 73.0224581 | 66.322775 |  | After 52 | 75.4444444 |
| 76.2330467 | 74.3715043 | 73.0224581 | 66.322775 |  | After 53 | 75         |
| 76.2330467 | 74.3715043 | 73.0224581 | 66.322775 |  | After 54 | 74.6666667 |
| 80.2330467 | 74.3715043 | 73.0224581 | 66.322775 |  | After 55 | 75         |
| 80.2330467 | 71.3715043 | 73.0224581 | 66.322775 |  | After 56 | 74.5555556 |
| 80.2330467 | 70.3715043 | 73.0224581 | 66.322775 |  | After 57 | 74.1111111 |
| 79.2330467 | 71.3715043 | 73.0224581 | 66.322775 |  | After 58 | 74.1111111 |
| 79.2330467 | 73.3715043 | 73.0224581 | 66.322775 |  | After 59 | 74.3333333 |
| 78.2330467 | 73.3715043 | 73.0224581 | 66.322775 |  | After 60 | 74.2222222 |
| 77.2330467 | 73.3715043 | 73.0224581 | 66.322775 |  | After 61 | 74.1111111 |
| 77.2330467 | 73.3715043 | 74.0224581 | 67.322775 |  | After 62 | 74         |
| 77.2330467 | 73.3715043 | 74.0224581 | 67.322775 |  | After 63 | 73.8888889 |
| 77.2330467 | 73.3715043 | 74.0224581 | 67.322775 |  | After 64 | 73.3333333 |
| 76.2330467 | 74.3715043 | 74.0224581 | 67.322775 |  | After 65 | 73         |
| 76.2330467 | 74.3715043 | 75.0224581 | 67.322775 |  | After 66 | 73.7777778 |
| 73.2330467 | 75.3715043 | 75.0224581 | 69.322775 |  | After 67 | 74         |
| 73.2330467 | 75.3715043 | 76.0224581 | 70.322775 |  | After 68 | 74.2222222 |
| 74.2330467 | 75.3715043 | 77.0224581 | 70.322775 |  | After 69 | 74.5555556 |
| 74.2330467 | 76.3715043 | 77.0224581 | 67.322775 |  | After 70 | 74.7777778 |
| 75.2330467 | 76.3715043 | 77.0224581 | 66.322775 |  | After 71 | 75.1111111 |
| 75.2330467 | 76.3715043 | 77.0224581 | 66.322775 |  | After 72 | 75.1111111 |
| 75.2330467 | 76.3715043 | 78.0224581 | 68.322775 |  | After 73 | 75.4444444 |
| 75.2330467 | 76.3715043 | 78.0224581 | 69.322775 |  | After 74 | 75.2222222 |
| 75.2330467 | 77.3715043 | 78.0224581 | 70.322775 |  | After 75 | 75.2222222 |
| 75.2330467 | 77.3715043 | 78.0224581 | 71.322775 |  | After 76 | 75.3333333 |

|            |            |            |           |  |           |            |
|------------|------------|------------|-----------|--|-----------|------------|
| 76.2330467 | 77.3715043 | 79.0224581 | 73.322775 |  | After 77  | 75.8888889 |
| 77.2330467 | 81.3715043 | 79.0224581 | 73.322775 |  | After 78  | 75.7777778 |
| 79.2330467 | 80.3715043 | 84.0224581 | 73.322775 |  | After 79  | 76.2222222 |
| 80.2330467 | 80.3715043 | 86.0224581 | 72.322775 |  | After 80  | 76.3333333 |
| 83.2330467 | 79.3715043 | 86.0224581 | 71.322775 |  | After 81  | 76.8888889 |
| 83.2330467 | 78.3715043 | 80.0224581 | 70.322775 |  | After 82  | 76.5555556 |
| 86.2330467 | 78.3715043 | 79.0224581 | 69.322775 |  | After 83  | 76.3333333 |
| 86.2330467 | 80.3715043 | 78.0224581 | 68.322775 |  | After 84  | 75.8888889 |
| 86.2330467 | 81.3715043 | 78.0224581 | 68.322775 |  | After 85  | 75.5555556 |
| 85.2330467 | 81.3715043 | 78.0224581 | 70.322775 |  | After 86  | 75.6666667 |
| 85.2330467 | 82.3715043 | 79.0224581 | 71.322775 |  | After 87  | 75.6666667 |
| 81.2330467 | 82.3715043 | 79.0224581 | 71.322775 |  | After 88  | 74.7777778 |
| 80.2330467 | 82.3715043 | 79.0224581 | 72.322775 |  | After 89  | 74.7777778 |
| 78.2330467 | 82.3715043 | 80.0224581 | 70.322775 |  | After 90  | 74.1111111 |
| 76.2330467 | 82.3715043 | 80.0224581 | 69.322775 |  | After 91  | 74         |
| 76.2330467 | 82.3715043 | 80.0224581 | 69.322775 |  | After 92  | 74         |
| 75.2330467 | 80.3715043 | 81.0224581 | 68.322775 |  | After 93  | 74.1111111 |
| 74.2330467 | 80.3715043 | 81.0224581 | 67.322775 |  | After 94  | 73.6666667 |
| 74.2330467 | 80.3715043 | 81.0224581 | 65.322775 |  | After 95  | 73.5555556 |
| 74.2330467 | 81.3715043 | 80.0224581 | 65.322775 |  | After 96  | 73.6666667 |
| 74.2330467 | 83.3715043 | 80.0224581 | 65.322775 |  | After 97  | 74.1111111 |
| 75.2330467 | 83.3715043 | 80.0224581 | 67.322775 |  | After 98  | 74.7777778 |
| 76.2330467 | 82.3715043 | 80.0224581 | 68.322775 |  | After 99  | 76.3333333 |
| 77.2330467 | 80.3715043 | 80.0224581 | 68.322775 |  | After 100 | 76.3333333 |
| 78.2330467 | 80.3715043 | 80.0224581 | 68.322775 |  | After 101 | 76.6666667 |
| 78.2330467 | 78.3715043 | 81.0224581 | 69.322775 |  | After 102 | 76.8888889 |
| 79.2330467 | 78.3715043 | 81.0224581 | 70.322775 |  | After 103 | 77.1111111 |
| 78.2330467 | 78.3715043 | 81.0224581 | 70.322775 |  | After 104 | 77.5555556 |
| 75.2330467 | 74.3715043 | 81.0224581 | 69.322775 |  | After 105 | 77.3333333 |
| 74.2330467 | 74.3715043 | 81.0224581 | 67.322775 |  | After 106 | 77.2222222 |
| 74.2330467 | 72.3715043 | 81.0224581 | 66.322775 |  | After 107 | 76.8888889 |
| 74.2330467 | 72.3715043 | 81.0224581 | 66.322775 |  | After 108 | 76.4444444 |
| 74.2330467 | 72.3715043 | 81.0224581 | 67.322775 |  | After 109 | 76.3333333 |
| 74.2330467 | 73.3715043 | 81.0224581 | 68.322775 |  | After 110 | 76.4444444 |
| 74.2330467 | 73.3715043 | 78.0224581 | 69.322775 |  | After 111 | 76         |
| 74.2330467 | 73.3715043 | 79.0224581 | 71.322775 |  | After 112 | 76.2222222 |
| 75.2330467 | 73.3715043 | 79.0224581 | 71.322775 |  | After 113 | 76.3333333 |
| 75.2330467 | 73.3715043 | 79.0224581 | 73.322775 |  | After 114 | 76         |
| 75.2330467 | 72.3715043 | 79.0224581 | 77.322775 |  | After 115 | 76.1111111 |
| 76.2330467 | 72.3715043 | 79.0224581 | 79.322775 |  | After 116 | 76.2222222 |
| 76.2330467 | 74.3715043 | 79.0224581 | 80.322775 |  | After 117 | 76.2222222 |
| 76.2330467 | 76.3715043 | 79.0224581 | 80.322775 |  | After 118 | 75.7777778 |
| 76.2330467 | 76.3715043 | 80.0224581 | 80.322775 |  | After 119 | 75.7777778 |
| 76.2330467 | 78.3715043 | 81.0224581 | 80.322775 |  | After 120 | 75.8888889 |
| 78.2330467 | 78.3715043 | 81.0224581 | 81.322775 |  |           | 76.2222222 |

|            |            |            |           |  |  |            |
|------------|------------|------------|-----------|--|--|------------|
| 78.2330467 | 80.3715043 | 81.0224581 | 81.322775 |  |  | 76.3333333 |
| 78.2330467 | 81.3715043 | 81.0224581 | 81.322775 |  |  | 76.2222222 |
| 80.2330467 | 81.3715043 | 80.0224581 | 79.322775 |  |  | 76.1111111 |
| 81.2330467 | 81.3715043 | 80.0224581 | 76.322775 |  |  | 75.7777778 |
| 79.2330467 | 80.3715043 | 79.0224581 | 74.322775 |  |  | 75         |
| 78.2330467 | 77.3715043 | 79.0224581 | 72.322775 |  |  | 74.8888889 |
| 78.2330467 | 74.3715043 | 79.0224581 | 72.322775 |  |  | 74.8888889 |
| 78.2330467 | 72.3715043 | 80.0224581 | 70.322775 |  |  | 74.7777778 |
| 79.2330467 | 72.3715043 | 81.0224581 | 69.322775 |  |  | 74.8888889 |
| 79.2330467 | 72.3715043 | 80.0224581 | 66.322775 |  |  | 74.6666667 |
| 80.2330467 | 72.3715043 | 80.0224581 | 65.322775 |  |  | 74.4444444 |
| 79.2330467 | 72.3715043 | 78.0224581 | 65.322775 |  |  | 74.4444444 |
| 78.2330467 | 71.3715043 | 75.0224581 | 65.322775 |  |  | 74.2222222 |
| 77.2330467 | 70.3715043 | 75.0224581 | 66.322775 |  |  | 74.1111111 |
| 74.2330467 | 70.3715043 | 74.0224581 | 68.322775 |  |  | 73.8888889 |
| 72.2330467 | 71.3715043 | 74.0224581 | 70.322775 |  |  | 74.1111111 |
| 72.2330467 | 71.3715043 | 76.0224581 | 70.322775 |  |  | 74.3333333 |
| 69.2330467 | 71.3715043 | 78.0224581 | 70.322775 |  |  | 74.6666667 |
| 69.2330467 | 71.3715043 | 78.0224581 | 70.322775 |  |  | 74.6666667 |
| 69.2330467 | 71.3715043 | 79.0224581 | 70.322775 |  |  | 74.7777778 |
| 69.2330467 | 73.3715043 | 80.0224581 | 73.322775 |  |  | 75.2222222 |
| 69.2330467 | 74.3715043 | 80.0224581 | 78.322775 |  |  | 75.7777778 |
| 69.2330467 | 75.3715043 | 80.0224581 | 78.322775 |  |  | 75.6666667 |
| 69.2330467 | 75.3715043 | 80.0224581 | 78.322775 |  |  | 75.8888889 |
| 69.2330467 | 75.3715043 | 80.0224581 | 78.322775 |  |  | 75.8888889 |
| 68.2330467 | 77.3715043 | 80.0224581 | 81.322775 |  |  | 76.4444444 |
| 68.2330467 | 78.3715043 | 81.0224581 | 81.322775 |  |  | 76.8888889 |
| 68.2330467 | 79.3715043 | 81.0224581 | 82.322775 |  |  | 77.4444444 |
| 69.2330467 | 79.3715043 | 81.0224581 | 82.322775 |  |  | 78.2222222 |
| 69.2330467 | 80.3715043 | 81.0224581 | 81.322775 |  |  | 78         |
| 70.2330467 | 80.3715043 | 81.0224581 | 79.322775 |  |  | 77.8888889 |
| 71.2330467 | 80.3715043 | 81.0224581 | 79.322775 |  |  | 78.1111111 |
| 71.2330467 | 80.3715043 | 81.0224581 | 78.322775 |  |  | 78         |
| 73.2330467 | 81.3715043 | 81.0224581 | 77.322775 |  |  | 78.1111111 |
| 73.2330467 | 83.3715043 | 80.0224581 | 77.322775 |  |  | 78.4444444 |
| 73.2330467 | 85.3715043 | 80.0224581 | 77.322775 |  |  | 79         |
| 74.2330467 | 86.3715043 | 79.0224581 | 77.322775 |  |  | 79.1111111 |
| 73.2330467 | 86.3715043 | 79.0224581 | 78.322775 |  |  | 78.8888889 |
| 72.2330467 | 86.3715043 | 79.0224581 | 78.322775 |  |  | 78.4444444 |
| 72.2330467 | 86.3715043 | 75.0224581 | 79.322775 |  |  | 78.4444444 |
| 72.2330467 | 87.3715043 | 75.0224581 | 80.322775 |  |  | 79.1111111 |
| 72.2330467 | 87.3715043 | 75.0224581 | 80.322775 |  |  | 79.1111111 |
| 76.2330467 | 88.3715043 | 75.0224581 | 80.322775 |  |  | 79.5555556 |
| 77.2330467 | 88.3715043 | 80.0224581 | 81.322775 |  |  | 79.8888889 |
| 78.2330467 | 87.3715043 | 80.0224581 | 81.322775 |  |  | 79.1111111 |

|            |            |            |           |  |  |            |
|------------|------------|------------|-----------|--|--|------------|
| 77.2330467 | 84.3715043 | 81.0224581 | 81.322775 |  |  | 78.5555556 |
| 75.2330467 | 82.3715043 | 84.0224581 | 81.322775 |  |  | 78.4444444 |
| 74.2330467 | 81.3715043 | 84.0224581 | 81.322775 |  |  | 78.4444444 |
| 71.2330467 | 80.3715043 | 83.0224581 | 82.322775 |  |  | 78.1111111 |
| 70.2330467 | 79.3715043 | 80.0224581 | 84.322775 |  |  | 77.8888889 |
| 70.2330467 | 76.3715043 | 79.0224581 | 85.322775 |  |  | 77.4444444 |
| 69.2330467 | 76.3715043 | 79.0224581 | 86.322775 |  |  | 77.3333333 |
| 70.2330467 | 76.3715043 | 78.0224581 | 86.322775 |  |  | 77.2222222 |
| 71.2330467 | 76.3715043 | 77.0224581 | 87.322775 |  |  | 77         |
| 71.2330467 | 76.3715043 | 77.0224581 | 87.322775 |  |  | 77.1111111 |
| 70.2330467 | 76.3715043 | 77.0224581 | 87.322775 |  |  | 77.2222222 |
| 70.2330467 | 76.3715043 | 76.0224581 | 87.322775 |  |  | 77.6666667 |
| 70.2330467 | 76.3715043 | 76.0224581 | 86.322775 |  |  | 78.2222222 |
| 69.2330467 | 76.3715043 | 76.0224581 | 85.322775 |  |  | 78.5555556 |
| 68.2330467 | 76.3715043 | 76.0224581 | 84.322775 |  |  | 78.3333333 |
| 68.2330467 | 76.3715043 | 76.0224581 | 83.322775 |  |  | 77.8888889 |
| 69.2330467 | 77.3715043 | 76.0224581 | 83.322775 |  |  | 77.6666667 |
| 69.2330467 | 78.3715043 | 75.0224581 | 83.322775 |  |  | 77         |
| 72.2330467 | 80.3715043 | 75.0224581 | 83.322775 |  |  | 77.1111111 |
| 72.2330467 | 81.3715043 | 73.0224581 | 83.322775 |  |  | 76.7777778 |
| 72.2330467 | 80.3715043 | 72.0224581 | 83.322775 |  |  | 76.5555556 |
| 72.2330467 | 78.3715043 | 71.0224581 | 83.322775 |  |  | 76         |
| 71.2330467 | 77.3715043 | 72.0224581 | 83.322775 |  |  | 75.7777778 |
| 71.2330467 | 76.3715043 | 72.0224581 | 83.322775 |  |  | 76         |
| 71.2330467 | 76.3715043 | 73.0224581 | 81.322775 |  |  | 75.7777778 |
| 72.2330467 | 76.3715043 | 73.0224581 | 81.322775 |  |  | 76         |
| 71.2330467 | 74.3715043 | 73.0224581 | 81.322775 |  |  | 75.4444444 |
| 71.2330467 | 74.3715043 | 73.0224581 | 81.322775 |  |  | 75.5555556 |
| 72.2330467 | 74.3715043 | 73.0224581 | 81.322775 |  |  | 75.7777778 |
| 72.2330467 | 74.3715043 | 74.0224581 | 79.322775 |  |  | 75.6666667 |
| 73.2330467 | 73.3715043 | 74.0224581 | 79.322775 |  |  | 75.6666667 |
| 73.2330467 | 73.3715043 | 75.0224581 | 79.322775 |  |  | 75.8888889 |
| 73.2330467 | 73.3715043 | 75.0224581 | 79.322775 |  |  | 76.1111111 |
| 73.2330467 | 73.3715043 | 75.0224581 | 79.322775 |  |  | 76.1111111 |
| 75.2330467 | 73.3715043 | 77.0224581 | 79.322775 |  |  | 76.6666667 |
| 75.2330467 | 73.3715043 | 77.0224581 | 77.322775 |  |  | 77         |
| 75.2330467 | 73.3715043 | 78.0224581 | 77.322775 |  |  | 77.2222222 |
| 75.2330467 | 73.3715043 | 79.0224581 | 77.322775 |  |  | 77.3333333 |
| 77.2330467 | 73.3715043 | 80.0224581 | 78.322775 |  |  | 77.6666667 |
| 77.2330467 | 73.3715043 | 81.0224581 | 79.322775 |  |  | 77.8888889 |
| 79.2330467 | 82.3715043 | 81.0224581 | 79.322775 |  |  | 78.5555556 |
| 78.2330467 | 86.3715043 | 81.0224581 | 79.322775 |  |  | 78.5555556 |
| 79.2330467 | 87.3715043 | 82.0224581 | 78.322775 |  |  | 78.2222222 |
| 79.2330467 | 87.3715043 | 82.0224581 | 78.322775 |  |  | 77.3333333 |
| 80.2330467 | 87.3715043 | 83.0224581 | 78.322775 |  |  | 77.4444444 |



|            |            |            |            |  |  |            |
|------------|------------|------------|------------|--|--|------------|
| 80.2330467 | 87.3715043 | 83.0224581 | 77.322775  |  |  | 76.8888889 |
| 82.2330467 | 87.3715043 | 84.0224581 | 77.322775  |  |  | 77.3333333 |
| 81.2330467 | 86.3715043 | 84.0224581 | 77.322775  |  |  | 77.2222222 |
| 80.2330467 | 85.3715043 | 85.0224581 | 77.322775  |  |  | 77.3333333 |
| 80.2330467 | 85.3715043 | 84.0224581 | 77.322775  |  |  | 77.4444444 |
| 81.2330467 | 83.3715043 | 84.0224581 | 78.322775  |  |  | 77.3333333 |
| 80.2330467 | 81.3715043 | 80.0224581 | 79.322775  |  |  | 76.5555556 |
| 80.2330467 | 80.3715043 | 80.0224581 | 79.322775  |  |  | 75.8888889 |
| 78.2330467 | 80.3715043 | 80.0224581 | 79.322775  |  |  | 75.2222222 |
| 78.2330467 | 79.3715043 | 80.0224581 | 76.3333333 |  |  | 74.7789509 |
| 77.2330467 | 79.3715043 | 79.0224581 | 76.4444444 |  |  | 74.5690744 |
| 78.2330467 | 77.3715043 | 78.0224581 | 76.3333333 |  |  | 74.3345065 |
| 78.2330467 | 75.3715043 | 78.0224581 | 76.3333333 |  |  | 74.3345065 |
| 78.2330467 | 75.3715043 | 78.0224581 | 76.2222222 |  |  | 74.4332719 |
| 78.2330467 | 75.3715043 | 78.0224581 | 76.8888889 |  |  | 75.2851238 |
| 77.2330467 | 75.3715043 | 78.0224581 | 88.322775  |  |  | 76.4444444 |
| 76.2330467 | 75.3715043 | 78.0224581 | 88.322775  |  |  | 76.2222222 |
| 76.2330467 | 75.3715043 | 78.0224581 | 88.322775  |  |  | 76.2222222 |
| 75.2330467 | 75.3715043 | 78.0224581 | 86.322775  |  |  | 75.8888889 |
| 75.2330467 | 76.3715043 | 78.0224581 | 83.322775  |  |  | 75.5555556 |
| 75.2330467 | 77.3715043 | 76.0224581 | 80.322775  |  |  | 75.1111111 |
| 75.2330467 | 78.3715043 | 76.0224581 | 78.322775  |  |  | 74.7777778 |
| 76.2330467 | 78.3715043 | 76.0224581 | 77.322775  |  |  | 74.8888889 |
| 77.2330467 | 78.3715043 | 75.0224581 | 76.322775  |  |  | 75.2222222 |
| 77.2330467 | 78.3715043 | 75.0224581 | 77.322775  |  |  | 75.5555556 |
| 77.2330467 | 78.3715043 | 76.0224581 | 78.322775  |  |  | 76.5555556 |
| 78.2330467 | 79.3715043 | 77.0224581 | 77.322775  |  |  | 77.2222222 |
| 78.2330467 | 79.3715043 | 77.0224581 | 76.322775  |  |  | 77.2222222 |
| 78.2330467 | 81.3715043 | 78.0224581 | 75.322775  |  |  | 77.4444444 |
| 77.2330467 | 82.3715043 | 78.0224581 | 74.322775  |  |  | 77.3333333 |
| 77.2330467 | 82.3715043 | 79.0224581 | 73.322775  |  |  | 76.8888889 |
| 77.2330467 | 82.3715043 | 79.0224581 | 73.322775  |  |  | 77         |
| 77.2330467 | 82.3715043 | 79.0224581 | 72.322775  |  |  | 76.8888889 |
| 76.2330467 | 82.3715043 | 82.0224581 | 68.322775  |  |  | 76.6666667 |
| 76.2330467 | 82.3715043 | 82.0224581 | 68.322775  |  |  | 76.4444444 |
| 75.2330467 | 82.3715043 | 82.0224581 | 70.322775  |  |  | 76.3333333 |
| 73.2330467 | 83.3715043 | 83.0224581 | 70.322775  |  |  | 76.4444444 |
| 73.2330467 | 85.3715043 | 83.0224581 | 72.322775  |  |  | 77.2222222 |
| 72.2330467 | 86.3715043 | 83.0224581 | 71.322775  |  |  | 77.3333333 |
| 72.2330467 | 86.3715043 | 83.0224581 | 70.322775  |  |  | 77.4444444 |
| 74.2330467 | 86.3715043 | 83.0224581 | 70.322775  |  |  | 77.7777778 |
| 74.2330467 | 86.3715043 | 83.0224581 | 71.322775  |  |  | 78         |
| 74.2330467 | 86.3715043 | 83.0224581 | 71.322775  |  |  | 78         |
| 71.2330467 | 87.3715043 | 81.0224581 | 70.322775  |  |  | 77.6666667 |
| 70.2330467 | 86.3715043 | 80.0224581 | 69.322775  |  |  | 76.6666667 |

|            |            |            |           |  |  |            |
|------------|------------|------------|-----------|--|--|------------|
| 70.2330467 | 85.3715043 | 80.0224581 | 69.322775 |  |  | 77.2222222 |
| 69.2330467 | 83.3715043 | 80.0224581 | 69.322775 |  |  | 77.1111111 |
| 69.2330467 | 80.3715043 | 80.0224581 | 71.322775 |  |  | 76.8888889 |
| 68.2330467 | 77.3715043 | 79.0224581 | 72.322775 |  |  | 75.1200136 |
| 68.2330467 | 75.3715043 | 82.0224581 | 73.322775 |  |  | 76.8888889 |
| 70.2330467 | 74.3715043 | 83.0224581 | 72.322775 |  |  | 76.8888889 |
| 72.2330467 | 73.3715043 | 83.0224581 | 72.322775 |  |  | 77         |
| 76.2330467 | 73.3715043 | 83.0224581 | 72.322775 |  |  | 77.6666667 |
| 76.2330467 | 73.3715043 | 82.0224581 | 72.322775 |  |  | 77.4444444 |
| 76.2330467 | 74.3715043 | 82.0224581 | 72.322775 |  |  | 77.3333333 |
| 78.2330467 | 76.3715043 | 82.0224581 | 71.322775 |  |  | 77.5555556 |
| 78.2330467 | 76.3715043 | 81.0224581 | 70.322775 |  |  | 75.8273818 |
| 80.2330467 | 74.3715043 | 81.0224581 | 70.322775 |  |  | 76.0742954 |
| 80.2330467 | 74.3715043 | 80.0224581 | 71.322775 |  |  | 76.0002213 |
| 80.2330467 | 74.3715043 | 80.0224581 | 72.322775 |  |  | 76.012567  |
| 80.2330467 | 75.3715043 | 80.0224581 | 73.322775 |  |  | 76.012567  |
| 80.2330467 | 76.3715043 | 80.0224581 | 72.322775 |  |  | 76.012567  |
| 80.2330467 | 76.3715043 | 80.0224581 | 71.322775 |  |  | 76.049604  |
| 80.2330467 | 77.3715043 | 80.0224581 | 70.322775 |  |  | 76.0619497 |
| 79.2330467 | 77.3715043 | 81.0224581 | 71.322775 |  |  | 76.4570114 |
| 79.2330467 | 77.3715043 | 81.0224581 | 70.322775 |  |  | 76.3459003 |
| 76.2330467 | 77.3715043 | 81.0224581 | 70.322775 |  |  | 76.0866411 |
| 75.2330467 | 75.3715043 | 81.0224581 | 70.322775 |  |  | 76.0619497 |
| 75.2330467 | 74.3715043 | 81.0224581 | 70.322775 |  |  | 75.666888  |
| 74.2330467 | 73.3715043 | 81.0224581 | 70.322775 |  |  | 75.358246  |
| 73.2330467 | 73.3715043 | 81.0224581 | 73.322775 |  |  | 76.3333333 |
| 73.2330467 | 72.3715043 | 80.0224581 | 77.322775 |  |  | 77.2222222 |
| 74.2330467 | 72.3715043 | 81.0224581 | 77.322775 |  |  | 77.5555556 |
| 74.2330467 | 72.3715043 | 82.0224581 | 73.322775 |  |  | 77.2222222 |
| 74.2330467 | 73.3715043 | 82.0224581 | 70.322775 |  |  | 76.3333333 |
| 74.2330467 | 73.3715043 | 85.0224581 | 68.322775 |  |  | 76         |
| 74.2330467 | 73.3715043 | 84.0224581 | 68.322775 |  |  | 75.6666667 |
| 74.2330467 | 73.3715043 | 84.0224581 | 67.322775 |  |  | 75.6666667 |
| 74.2330467 | 73.3715043 | 84.0224581 | 67.322775 |  |  | 75.5555556 |
| 75.2330467 | 76.3715043 | 84.0224581 | 68.322775 |  |  | 76.1111111 |
| 75.2330467 | 76.3715043 | 84.0224581 | 68.322775 |  |  | 76.3333333 |
| 75.2330467 | 80.3715043 | 83.0224581 | 68.322775 |  |  | 76.2222222 |
| 75.2330467 | 82.3715043 | 82.0224581 | 67.322775 |  |  | 76.5555556 |
| 75.2330467 | 81.3715043 | 82.0224581 | 65.322775 |  |  | 76         |
| 75.2330467 | 79.3715043 | 81.0224581 | 64.322775 |  |  | 75.1111111 |
| 75.2330467 | 77.3715043 | 81.0224581 | 64.322775 |  |  | 75.2222222 |
| 75.2330467 | 75.3715043 | 81.0224581 | 64.322775 |  |  | 75.4444444 |
| 75.2330467 | 74.3715043 | 80.0224581 | 66.322775 |  |  | 75         |
| 75.2330467 | 74.3715043 | 81.0224581 | 67.322775 |  |  | 75.2222222 |
| 73.2330467 | 74.3715043 | 81.0224581 | 66.322775 |  |  | 74.7777778 |

|            |            |            |           |  |  |            |
|------------|------------|------------|-----------|--|--|------------|
| 73.2330467 | 74.3715043 | 81.0224581 | 66.322775 |  |  | 74.6666667 |
| 73.2330467 | 74.3715043 | 79.0224581 | 64.322775 |  |  | 74.2222222 |
| 74.2330467 | 74.3715043 | 79.0224581 | 64.322775 |  |  | 74.5555556 |
| 74.2330467 | 74.3715043 | 79.0224581 | 63.322775 |  |  | 74.3333333 |
| 74.2330467 | 74.3715043 | 78.0224581 | 63.322775 |  |  | 74         |
| 73.2330467 | 74.3715043 | 78.0224581 | 63.322775 |  |  | 73.8888889 |
| 73.2330467 | 74.3715043 | 78.0224581 | 63.322775 |  |  | 73.8888889 |
| 72.2330467 | 74.3715043 | 79.0224581 | 65.322775 |  |  | 73.6666667 |
| 71.2330467 | 74.3715043 | 79.0224581 | 65.322775 |  |  | 73.3333333 |
| 71.2330467 | 71.3715043 | 78.0224581 | 66.322775 |  |  | 72.7777778 |
| 70.2330467 | 72.3715043 | 77.0224581 | 67.322775 |  |  | 72.6666667 |
| 70.2330467 | 72.3715043 | 77.0224581 | 66.322775 |  |  | 72.6666667 |
| 69.2330467 | 72.3715043 | 77.0224581 | 66.322775 |  |  | 72.8888889 |
| 70.2330467 | 74.3715043 | 76.0224581 | 65.322775 |  |  | 73.5555556 |
| 70.2330467 | 75.3715043 | 76.0224581 | 66.322775 |  |  | 74.3333333 |
| 70.2330467 | 75.3715043 | 76.0224581 | 66.322775 |  |  | 74.7777778 |
| 73.2330467 | 73.3715043 | 76.0224581 | 67.322775 |  |  | 75.2222222 |
| 74.2330467 | 69.3715043 | 76.0224581 | 67.322775 |  |  | 73.5325317 |
| 74.2330467 | 69.3715043 | 75.0224581 | 66.322775 |  |  | 72.7917909 |
| 76.2330467 | 69.3715043 | 75.0224581 | 65.322775 |  |  | 72.6683341 |
| 77.2330467 | 69.3715043 | 75.0224581 | 65.322775 |  |  | 72.6683341 |
| 77.2330467 | 71.3715043 | 75.0224581 | 65.322775 |  |  | 72.6683341 |
| 77.2330467 | 72.3715043 | 73.0224581 | 67.322775 |  |  | 72.7917909 |
| 77.2330467 | 71.3715043 | 69.0224581 | 68.322775 |  |  | 71.4461119 |
| 77.2330467 | 69.3715043 | 66.0224581 | 70.322775 |  |  | 70.5819144 |
| 77.2330467 | 67.3715043 | 65.0224581 | 71.322775 |  |  | 70.3226551 |
| 77.2330467 | 67.3715043 | 63.0224581 | 72.322775 |  |  | 70.1991983 |
| 77.2330467 | 68.3715043 | 63.0224581 | 73.322775 |  |  | 70.9275934 |
| 78.2330467 | 68.3715043 | 63.0224581 | 74.322775 |  |  | 71.4214206 |
| 78.2330467 | 69.3715043 | 63.0224581 | 76.322775 |  |  | 71.902902  |
| 81.2330467 | 72.3715043 | 63.0224581 | 76.322775 |  |  | 74.1111111 |
| 84.2330467 | 75.3715043 | 63.0224581 | 76.322775 |  |  | 75.1111111 |
| 84.2330467 | 76.3715043 | 63.0224581 | 76.322775 |  |  | 75.1111111 |
| 84.2330467 | 76.3715043 | 64.0224581 | 77.322775 |  |  | 75.4444444 |
| 85.2330467 | 76.3715043 | 64.0224581 | 84.322775 |  |  | 76.4444444 |
| 86.2330467 | 76.3715043 | 64.0224581 | 84.322775 |  |  | 76.8888889 |
| 87.2330467 | 76.3715043 | 64.0224581 | 84.322775 |  |  | 76.8888889 |
| 87.2330467 | 76.3715043 | 64.0224581 | 85.322775 |  |  | 77.1111111 |
| 88.2330467 | 76.3715043 | 64.0224581 | 85.322775 |  |  | 77.1111111 |
| 88.2330467 | 71.3715043 | 64.0224581 | 84.322775 |  |  | 76.7777778 |
| 88.2330467 | 71.3715043 | 65.0224581 | 82.322775 |  |  | 76.6666667 |
| 89.2330467 | 72.3715043 | 66.0224581 | 82.322775 |  |  | 76.7777778 |
| 76.4444444 | 73.3715043 | 66.0224581 | 75.322775 |  |  | 74.9123775 |
| 76.7777778 | 74.3715043 | 67.0224581 | 71.322775 |  |  | 75.2827479 |
| 77.7777778 | 78.3715043 | 67.0224581 | 69.322775 |  |  | 75.7271923 |

|             |            |            |           |  |  |            |
|-------------|------------|------------|-----------|--|--|------------|
| 78.11111111 | 80.3715043 | 67.0224581 | 69.322775 |  |  | 75.9864516 |
| 78.11111111 | 79.3715043 | 67.0224581 | 69.322775 |  |  | 75.9864516 |
| 78.22222222 | 79.3715043 | 67.0224581 | 69.322775 |  |  | 76.1099084 |
| 78.77777778 | 79.3715043 | 72.0224581 | 69.322775 |  |  | 76.7271923 |
| 78.44444444 | 79.3715043 | 73.0224581 | 69.322775 |  |  | 76.5790442 |
| 78.33333333 | 80.3715043 | 74.0224581 | 70.322775 |  |  | 75.1452022 |
| 78.11111111 | 81.3715043 | 74.0224581 | 70.322775 |  |  | 75.2069306 |
| 87.2330467  | 81.3715043 | 74.0224581 | 73.322775 |  |  | 76.6649234 |
| 87.2330467  | 80.3715043 | 74.0224581 | 75.322775 |  |  | 78.2222222 |
| 84.2330467  | 77.3715043 | 74.0224581 | 76.322775 |  |  | 78.6666667 |
| 83.2330467  | 74.3715043 | 75.0224581 | 76.322775 |  |  | 78.3333333 |
| 83.2330467  | 73.3715043 | 77.0224581 | 76.322775 |  |  | 78.4444444 |
| 82.2330467  | 72.3715043 | 80.0224581 | 79.322775 |  |  | 78.8888889 |
| 82.2330467  | 73.3715043 | 82.0224581 | 81.322775 |  |  | 79.7777778 |
| 85.2330467  | 76.3715043 | 82.0224581 | 82.322775 |  |  | 81.1111111 |
| 85.2330467  | 76.3715043 | 82.0224581 | 82.322775 |  |  | 81.1111111 |
| 85.2330467  | 77.3715043 | 82.0224581 | 84.322775 |  |  | 81         |
| 85.2330467  | 78.3715043 | 82.0224581 | 86.322775 |  |  | 81.4444444 |
| 85.2330467  | 78.3715043 | 82.0224581 | 88.322775 |  |  | 81.6666667 |
| 85.2330467  | 78.3715043 | 82.0224581 | 88.322775 |  |  | 81.5555556 |
| 86.2330467  | 77.3715043 | 82.0224581 | 86.322775 |  |  | 81         |
| 86.2330467  | 77.3715043 | 82.0224581 | 86.322775 |  |  | 80.6666667 |
| 85.2330467  | 77.3715043 | 82.0224581 | 83.322775 |  |  | 80.4444444 |
| 85.2330467  | 78.3715043 | 82.0224581 | 83.322775 |  |  | 80.7777778 |
| 86.2330467  | 78.3715043 | 82.0224581 | 83.322775 |  |  | 81.3333333 |

| Behavior | moving average |  |
|----------|----------------|--|
| 63       | 78.3805438     |  |
| 63       | 79.0472104     |  |
| 63       | 79.5472104     |  |
| 63       | 79.5472104     |  |
| 63       | 79.7138771     |  |
| 63       | 79.5472104     |  |
| 63       | 79.5472104     |  |
| 63       | 79.8805438     |  |
| 63       | 79.7138771     |  |
| 63       | 80.0472104     |  |
| 63       | 79.3805438     |  |
| 63       | 78.8805438     |  |
| 63       | 78.7138771     |  |
| 63       | 78.7138771     |  |
| 63       | 80.0472104     |  |
| 63       | 77.9035078     |  |
| 63       | 77.9035078     |  |
| 63       | 79.6703037     |  |
| 63       | 79.6933802     |  |
| 63       | 79.7195468     |  |
| 63       | 79.7277384     |  |
| 63       | 79.7652384     |  |
| 63       | 79.769405      |  |
| 63       | 79.756905      |  |
| 63       | 79.7360717     |  |
| 63       | 79.7152384     |  |
| 63       | 79.7027384     |  |
| 63       | 79.681905      |  |
| 63       | 79.6485717     |  |
| 63       | 79.606905      |  |
| 63       | 79.556905      |  |
| 63       | 79.5152384     |  |
| 63       | 79.5110717     |  |
| 63       | 79.531905      |  |
| 63       | 79.5735717     |  |
| 63       | 79.569405      |  |
| 63       | 79.6354976     |  |
| 63       | 79.7265902     |  |
| 63       | 79.8287938     |  |
| 63       | 79.937942      |  |
| 63       | 80.0296086     |  |
| 63       | 80.1337753     |  |
| 63       | 80.2671086     |  |

|    |            |  |
|----|------------|--|
| 63 | 80.3921086 |  |
| 63 | 80.5046086 |  |
| 63 | 80.650442  |  |
| 63 | 80.8087753 |  |
| 63 | 80.9921086 |  |
| 63 | 81.1796086 |  |
| 63 | 81.3546086 |  |
| 63 | 81.4281933 |  |
| 63 | 81.5240266 |  |
| 63 | 81.6198599 |  |
| 63 | 81.7866469 |  |
| 63 | 81.8460941 |  |
| 63 | 81.8505599 |  |
| 63 | 81.8425256 |  |
| 63 | 81.838658  |  |
| 63 | 81.8229849 |  |
| 63 | 81.7989784 |  |
| 63 | 81.7770552 |  |
| 63 | 81.7349932 |  |
| 63 | 81.6811256 |  |
| 63 | 81.6203136 |  |
| 63 | 81.6536469 |  |
| 63 | 81.6869802 |  |
| 63 | 81.7036469 |  |
| 63 | 81.7369802 |  |
| 63 | 81.7744802 |  |
| 63 | 81.8119802 |  |
| 63 | 81.8453136 |  |
| 63 | 81.8786469 |  |
| 63 | 81.8869802 |  |
| 63 | 81.8619802 |  |
| 63 | 81.8203136 |  |
| 63 | 81.7953136 |  |
| 63 | 81.7578136 |  |
| 63 | 81.7036469 |  |
| 63 | 81.6619802 |  |
| 63 | 81.5953136 |  |
| 63 | 81.5119802 |  |
| 63 | 81.4161469 |  |
| 63 | 81.2828136 |  |
| 63 | 81.1536469 |  |
| 63 | 81.0244802 |  |
| 63 | 80.8083877 |  |
| 63 | 80.5791007 |  |
| 63 | 80.399934  |  |

|    |            |  |
|----|------------|--|
| 63 | 80.2041007 |  |
| 63 | 79.9916007 |  |
| 63 | 79.8763494 |  |
| 63 | 79.7096827 |  |
| 63 | 79.5388494 |  |
| 63 | 79.355516  |  |
| 63 | 79.2885503 |  |
| 63 | 79.1545863 |  |
| 63 | 79.0751205 |  |
| 63 | 78.9873214 |  |
| 63 | 78.9238279 |  |
| 63 | 78.8363917 |  |
| 63 | 78.8249815 |  |
| 63 | 78.771573  |  |
| 63 | 78.7466368 |  |
| 63 | 78.7574488 |  |
| 63 | 78.6741155 |  |
| 63 | 78.6032821 |  |
| 63 | 78.5449488 |  |
| 63 | 78.4699488 |  |
| 63 | 78.3866155 |  |
| 63 | 78.3116155 |  |
| 63 | 78.2449488 |  |
| 63 | 78.1782821 |  |
| 63 | 78.1032821 |  |
| 63 | 78.0366155 |  |
| 63 | 77.9574488 |  |
| 63 | 77.8741155 |  |
| 63 | 77.8032821 |  |
| 63 | 77.7324488 |  |
| 63 | 77.6282821 |  |
| 63 | 77.5116155 |  |
| 63 | 77.3824488 |  |
| 63 | 77.2491155 |  |
| 63 | 77.1241155 |  |
| 63 | 76.9949488 |  |
| 63 | 76.8657821 |  |
| 63 | 76.7985414 |  |
| 63 | 76.7486617 |  |
| 63 | 76.6486617 |  |
| 63 | 76.5861617 |  |
| 63 | 76.5361617 |  |
| 63 | 76.5153284 |  |
| 63 | 76.531995  |  |
| 63 | 76.5742247 |  |

|    |            |  |
|----|------------|--|
| 63 | 76.5991924 |  |
| 63 | 76.6128506 |  |
| 63 | 76.6470785 |  |
| 63 | 76.6357367 |  |
| 63 | 76.6202282 |  |
| 63 | 76.5844816 |  |
| 63 | 76.598273  |  |
| 63 | 76.5541931 |  |
| 63 | 76.5907028 |  |
| 63 | 76.623641  |  |
| 63 | 76.6355135 |  |
| 63 | 76.6557193 |  |
| 63 | 76.6664013 |  |
| 63 | 76.6735119 |  |
| 63 | 76.6889558 |  |
| 63 | 76.7234473 |  |
| 63 | 76.7692484 |  |
| 63 | 76.8287399 |  |
| 63 | 76.8929933 |  |
| 63 | 76.9834372 |  |
| 63 | 77.095905  |  |
| 63 | 77.191706  |  |
| 63 | 77.2803642 |  |
| 63 | 77.3523557 |  |
| 63 | 77.4302996 |  |
| 63 | 77.4939578 |  |
| 63 | 77.5742827 |  |
| 63 | 77.6873456 |  |
| 63 | 77.7754086 |  |
| 63 | 77.8569239 |  |
| 63 | 77.9354631 |  |
| 63 | 77.9854308 |  |
| 63 | 78.0133747 |  |
| 63 | 78.0216757 |  |
| 63 | 78.018072  |  |
| 63 | 77.9972064 |  |
| 63 | 77.9882456 |  |
| 63 | 77.9542847 |  |
| 63 | 77.900681  |  |
| 63 | 77.8328238 |  |
| 63 | 77.7863953 |  |
| 63 | 77.7578238 |  |
| 63 | 77.7828238 |  |
| 63 | 77.8042524 |  |
| 63 | 77.8185381 |  |



|    |            |  |
|----|------------|--|
| 63 | 77.8399667 |  |
| 63 | 77.8185381 |  |
| 63 | 77.7971096 |  |
| 63 | 77.7613953 |  |
| 63 | 77.7363953 |  |
| 63 | 77.7078238 |  |
| 63 | 77.675681  |  |
| 63 | 77.6435381 |  |
| 63 | 77.6113953 |  |
| 63 | 77.600681  |  |
| 63 | 77.575681  |  |
| 63 | 77.5435381 |  |
| 63 | 77.4935381 |  |
| 63 | 77.4542524 |  |
| 63 | 77.4042524 |  |
| 63 | 77.3435381 |  |
| 63 | 77.3113953 |  |
| 63 | 77.2828238 |  |
| 63 | 77.2613953 |  |
| 63 | 77.225681  |  |
| 63 | 77.200681  |  |
| 63 | 77.1792524 |  |
| 63 | 77.125681  |  |
| 63 | 77.1078238 |  |
| 63 | 77.1042524 |  |
| 63 | 77.100681  |  |
| 63 | 77.1042524 |  |
| 63 | 77.1042524 |  |
| 63 | 77.0899667 |  |
| 63 | 77.0792524 |  |
| 63 | 77.0721096 |  |
| 63 | 77.0685381 |  |
| 63 | 77.0649667 |  |
| 63 | 77.0792524 |  |
| 63 | 77.0792524 |  |
| 63 | 77.0792524 |  |
| 63 | 77.0685381 |  |
| 63 | 77.0542524 |  |
| 63 | 77.0613953 |  |
| 63 | 77.0935381 |  |
| 63 | 77.1328238 |  |
| 63 | 77.2042524 |  |
| 63 | 77.220046  |  |
| 63 | 77.2358396 |  |
| 63 | 77.2322455 |  |

|    |            |  |
|----|------------|--|
| 63 | 77.2245697 |  |
| 63 | 77.2366883 |  |
| 63 | 77.2882519 |  |
| 63 | 77.3090119 |  |
| 63 | 77.2958433 |  |
| 63 | 77.2737462 |  |
| 63 | 77.2547741 |  |
| 63 | 77.248302  |  |
| 63 | 77.228437  |  |
| 63 | 77.1548413 |  |
| 63 | 77.1081906 |  |
| 63 | 77.0673435 |  |
| 63 | 77.0331928 |  |
| 63 | 77.0075242 |  |
| 63 | 76.9818557 |  |
| 63 | 76.9628835 |  |
| 63 | 76.937215  |  |
| 63 | 76.9119929 |  |
| 63 | 76.8729315 |  |
| 63 | 76.8271736 |  |
| 63 | 76.8041836 |  |
| 63 | 76.7713722 |  |
| 63 | 76.7724894 |  |
| 63 | 76.7919101 |  |
| 63 | 76.8238309 |  |
| 63 | 76.8579837 |  |
| 63 | 76.8787437 |  |
| 63 | 76.865961  |  |
| 63 | 76.8498859 |  |
| 63 | 76.8557974 |  |
| 63 | 76.8652245 |  |
| 63 | 76.8789485 |  |
| 63 | 76.8719136 |  |
| 63 | 76.8439523 |  |
| 63 | 76.7911026 |  |
| 63 | 76.7310543 |  |
| 63 | 76.6638073 |  |
| 63 | 76.6486238 |  |
| 63 | 76.6615654 |  |
| 63 | 76.6937831 |  |
| 63 | 76.7503439 |  |
| 63 | 76.7906817 |  |
| 63 | 76.7844317 |  |
| 63 | 76.8094317 |  |
| 63 | 76.8406817 |  |

|    |            |  |
|----|------------|--|
| 63 | 76.8938067 |  |
| 63 | 76.9406817 |  |
| 63 | 76.9813067 |  |
| 63 | 77.0156817 |  |
| 63 | 77.0935195 |  |
| 63 | 77.1466445 |  |
| 63 | 77.1810195 |  |
| 63 | 77.2028945 |  |
| 63 | 77.2091445 |  |
| 63 | 77.2122695 |  |
| 63 | 77.2091445 |  |
| 63 | 77.2091445 |  |
| 63 | 77.2247695 |  |
| 63 | 77.2497695 |  |
| 63 | 77.2560195 |  |
| 63 | 77.2372695 |  |
| 63 | 77.2403945 |  |
| 63 | 77.2247695 |  |
| 63 | 77.2153945 |  |
| 63 | 77.1872695 |  |
| 63 | 77.1560195 |  |
| 63 | 77.1278945 |  |
| 63 | 77.1395623 |  |
| 63 | 77.1438081 |  |
| 63 | 77.1363352 |  |
| 63 | 77.1222217 |  |
| 63 | 77.0975613 |  |
| 63 | 77.0900884 |  |
| 63 | 77.0798811 |  |
| 63 | 77.0798301 |  |
| 63 | 77.0762635 |  |
| 63 | 77.0723062 |  |
| 63 | 77.0777239 |  |
| 63 | 77.0643917 |  |
| 63 | 77.0315281 |  |
| 63 | 76.9752781 |  |
| 63 | 76.9065281 |  |
| 63 | 76.8252781 |  |
| 63 | 76.7471531 |  |
| 63 | 76.6627781 |  |
| 63 | 76.5659031 |  |
| 63 | 76.4846531 |  |
| 63 | 76.4190281 |  |
| 63 | 76.3815281 |  |
| 63 | 76.3596531 |  |

|    |            |  |
|----|------------|--|
| 63 | 76.3377781 |  |
| 63 | 76.3284031 |  |
| 63 | 76.3159031 |  |
| 63 | 76.3002781 |  |
| 63 | 76.2815281 |  |
| 63 | 76.2659031 |  |
| 63 | 76.200163  |  |
| 63 | 76.1219228 |  |
| 63 | 76.0518858 |  |
| 63 | 76.0037237 |  |
| 63 | 75.9477492 |  |
| 63 | 75.9352492 |  |
| 63 | 75.9227492 |  |
| 63 | 75.9008742 |  |
| 63 | 75.8821242 |  |
| 63 | 75.8539992 |  |
| 63 | 75.8446242 |  |
| 63 | 75.8321242 |  |
| 63 | 75.8383742 |  |
| 63 | 75.8446242 |  |
| 63 | 75.8664992 |  |
| 63 | 75.9008742 |  |
| 63 | 75.9508742 |  |
| 63 | 75.9946242 |  |
| 63 | 76.0289992 |  |
| 63 | 76.0803551 |  |
| 63 | 76.1258082 |  |
| 63 | 76.153553  |  |
| 63 | 76.1747006 |  |
| 63 | 76.2027926 |  |
| 63 | 76.2201207 |  |
| 63 | 76.2416155 |  |
| 63 | 76.278388  |  |
| 63 | 76.3012717 |  |
| 63 | 76.3366554 |  |
| 63 | 76.3834974 |  |
| 63 | 76.409506  |  |
| 63 | 76.396973  |  |
| 63 | 76.3660373 |  |
| 63 | 76.3253793 |  |
| 63 | 76.2809018 |  |
| 63 | 76.2527438 |  |
| 63 | 76.2426414 |  |
| 63 | 76.2301084 |  |
| 63 | 76.229381  |  |

|    |            |  |
|----|------------|--|
| 63 | 76.2175424 |  |
| 63 | 76.2752635 |  |
| 63 | 76.3413179 |  |
| 63 | 76.3984747 |  |
| 63 | 76.4806315 |  |
| 63 | 76.5994203 |  |
| 63 | 76.6924428 |  |
| 63 | 76.7917154 |  |
| 63 | 76.8944602 |  |
| 63 | 76.9947744 |  |
| 63 | 77.081547  |  |
| 63 | 77.147139  |  |
| 63 | 77.2207171 |  |
| 63 | 77.253323  |  |
| 63 | 77.2828039 |  |
| 63 | 77.3192292 |  |
| 63 | 77.3466268 |  |
| 63 | 77.3639549 |  |
| 63 | 77.4052413 |  |
| 63 | 77.4583333 |  |
| 63 | 77.4861111 |  |
| 63 | 77.5055556 |  |
| 63 | 77.5194444 |  |
| 63 | 77.5194444 |  |
| 63 | 77.5083333 |  |
| 63 | 77.5111111 |  |
| 63 | 77.5027778 |  |
| 63 | 77.5       |  |
| 63 | 77.5083333 |  |
| 63 | 77.5194444 |  |
| 63 | 77.525     |  |
| 63 | 77.5333333 |  |
| 63 | 77.5252026 |  |
| 63 | 77.5013311 |  |
| 63 | 77.4965955 |  |
| 63 | 77.49865   |  |
| 63 | 77.5430944 |  |
| 63 | 77.5396558 |  |
| 63 | 77.5448591 |  |
| 63 | 77.5475933 |  |
| 63 | 77.5494016 |  |
| 63 | 77.5317654 |  |
| 63 | 77.4934502 |  |
| 63 | 77.468098  |  |
| 63 | 77.4569869 |  |

|    |            |  |
|----|------------|--|
| 63 | 77.4236535 |  |
| 63 | 77.3792091 |  |
| 63 | 77.3458757 |  |
| 63 | 77.3125424 |  |
| 63 | 77.2847646 |  |
| 63 | 77.2708757 |  |
| 63 | 77.2514313 |  |
| 63 | 77.2153202 |  |
| 63 | 77.2069869 |  |
| 63 | 77.2042091 |  |
| 63 | 77.1708757 |  |
| 63 | 77.143098  |  |
| 63 | 77.0958757 |  |
| 63 | 77.0292091 |  |
| 63 | 76.9597646 |  |
| 63 | 76.9042091 |  |
| 63 | 76.868098  |  |
| 63 | 76.8542091 |  |
| 63 | 76.8625424 |  |
| 63 | 76.9014313 |  |
| 63 | 76.943098  |  |
| 63 | 77.0069869 |  |
| 63 | 77.0542091 |  |
| 63 | 77.1042091 |  |
| 63 | 77.1736535 |  |
| 63 | 77.2375424 |  |
| 63 | 77.3097646 |  |
| 63 | 77.434562  |  |
| 63 | 77.5917668 |  |
| 63 | 77.727058  |  |
| 63 | 77.8472258 |  |
| 63 | 77.9083369 |  |
| 63 | 77.9706826 |  |
| 63 | 77.9870406 |  |
| 63 | 77.9941394 |  |
| 63 | 78.0166702 |  |
| 63 | 78.0422875 |  |
| 63 | 78.0833369 |  |
| 63 | 78.115127  |  |
| 63 | 78.1351452 |  |
| 63 | 78.1610275 |  |
| 63 | 78.1896876 |  |
| 63 | 78.2010638 |  |
| 63 | 78.2059585 |  |
| 63 | 78.217026  |  |

|    |            |  |
|----|------------|--|
| 63 | 78.2246985 |  |
| 63 | 78.2527413 |  |
| 63 | 78.2888525 |  |
| 63 | 78.3082969 |  |
| 63 | 78.3082969 |  |
| 63 | 78.3055191 |  |
| 63 | 78.2860747 |  |
| 63 | 78.2721858 |  |
| 63 | 78.2638525 |  |
| 63 | 78.2527413 |  |
| 63 | 78.2332969 |  |
| 63 | 78.194408  |  |
| 63 | 78.1360747 |  |
| 63 | 78.0610747 |  |
| 63 | 77.9749636 |  |
| 63 | 77.8860747 |  |
| 63 | 77.8055191 |  |
| 63 | 77.7416302 |  |
| 63 | 77.6916302 |  |
| 63 | 77.6332969 |  |
| 63 | 77.5777413 |  |
| 63 | 77.5332969 |  |
| 63 | 77.4805191 |  |
| 63 | 77.419408  |  |
| 63 | 77.3666302 |  |
| 63 | 77.3082969 |  |
| 63 | 77.2555191 |  |
| 63 | 77.2074201 |  |
| 63 | 77.2003704 |  |
| 63 | 77.1976418 |  |
| 63 | 77.188123  |  |
| 63 | 77.1693449 |  |
| 63 | 77.1474805 |  |
| 63 | 77.1243759 |  |
| 63 | 77.07658   |  |
| 63 | 77.0145865 |  |
| 63 | 76.9248153 |  |
| 63 | 76.7708759 |  |
| 63 | 76.6203315 |  |
| 63 | 76.4605278 |  |
| 63 | 76.3068971 |  |
| 63 | 76.1470934 |  |
| 63 | 76.0094684 |  |
| 63 | 75.8891274 |  |
| 63 | 75.7826752 |  |

|    |            |  |
|----|------------|--|
| 63 | 75.6965935 |  |
| 63 | 75.6460055 |  |
| 63 | 75.6321166 |  |
| 63 | 75.6515611 |  |
| 63 | 75.6793388 |  |
| 63 | 75.6580719 |  |
| 63 | 75.6355703 |  |
| 63 | 75.6238713 |  |
| 63 | 75.6177277 |  |
| 63 | 75.5902879 |  |
| 63 | 75.5902879 |  |
| 63 | 75.5791768 |  |
| 63 | 75.5902879 |  |
| 63 | 75.6041768 |  |
| 63 | 75.6069546 |  |
| 63 | 75.6069546 |  |
| 63 | 75.6041768 |  |
| 63 | 75.5930657 |  |
| 63 | 75.5736213 |  |
| 63 | 75.5486213 |  |
| 63 | 75.5375102 |  |
| 63 | 75.5236213 |  |
| 63 | 75.5433688 |  |
| 63 | 75.5621905 |  |
| 63 | 75.593975  |  |
| 63 | 75.6347103 |  |
| 63 | 75.6927294 |  |
| 63 | 75.7507486 |  |
| 63 | 75.7924152 |  |
| 63 | 75.7970504 |  |
| 63 | 75.8066238 |  |
| 63 | 75.8285429 |  |
| 63 | 75.9149389 |  |
| 63 | 76.0102855 |  |
| 63 | 76.1216814 |  |
| 63 | 76.2364725 |  |
| 63 | 76.3790413 |  |
| 63 | 76.5000051 |  |
| 63 | 76.6370128 |  |
| 63 | 76.7740205 |  |
| 63 | 76.8989912 |  |
| 63 | 77.0023569 |  |
| 63 | 77.063468  |  |
| 63 | 77.0801347 |  |
| 63 | 77.0912458 |  |



|    |            |  |
|----|------------|--|
| 63 | 77.1680683 |  |
| 63 | 77.2850143 |  |
| 63 | 77.4133801 |  |
| 63 | 77.5417458 |  |
| 63 | 77.6858523 |  |
| 63 | 77.7941856 |  |
| 63 | 77.8997412 |  |
| 63 | 77.9664078 |  |
| 63 | 77.9864751 |  |
| 63 | 78.0022214 |  |
| 63 | 78.0315479 |  |
| 63 | 78.0593312 |  |
| 63 | 78.0797071 |  |
| 63 | 78.118596  |  |
| 63 | 78.1547071 |  |
| 63 | 78.1769293 |  |
| 63 | 78.193596  |  |
| 63 | 78.2102626 |  |
| 63 | 78.2797071 |  |
| 63 | 78.3185099 |  |
| 63 | 78.3409547 |  |
| 63 | 78.3532143 |  |
| 63 | 78.3355356 |  |
| 63 | 78.3110668 |  |
| 63 | 78.3088147 |  |
| 63 | 78.3087231 |  |
| 63 | 78.3237549 |  |
| 63 | 78.3508238 |  |
| 63 | 78.3772754 |  |
| 63 | 78.3941591 |  |
| 63 | 78.4073391 |  |
| 63 | 78.3986055 |  |
| 63 | 78.3898719 |  |
| 63 | 78.3589217 |  |
| 63 | 78.3267368 |  |
| 63 | 78.3062804 |  |
| 63 | 78.29354   |  |
| 63 | 78.3048736 |  |
| 63 | 78.3798736 |  |
| 63 | 78.4270959 |  |
| 63 | 78.4520959 |  |
| 63 | 78.4520959 |  |
| 63 | 78.4409848 |  |
| 63 | 78.4298736 |  |
| 63 | 78.4243181 |  |

|    |            |  |
|----|------------|--|
| 63 | 78.4215403 |  |
| 63 | 78.4187625 |  |
| 63 | 78.4298736 |  |
| 63 | 78.4570286 |  |
| 63 | 78.457949  |  |
| 63 | 78.4480669 |  |
| 63 | 78.4147281 |  |
| 63 | 78.3637966 |  |
| 63 | 78.2999077 |  |
| 63 | 78.2387966 |  |
| 63 | 78.1971299 |  |
| 63 | 78.1665744 |  |
| 63 | 78.1443522 |  |
| 63 | 78.0637966 |  |
| 63 | 77.9999938 |  |
| 63 | 77.9386601 |  |
| 63 | 77.8764005 |  |
| 63 | 77.8496347 |  |
| 63 | 77.8296591 |  |
| 63 | 77.8244983 |  |
| 63 | 77.8122387 |  |
| 63 | 77.8030655 |  |
| 63 | 77.7793861 |  |
| 63 | 77.7587932 |  |
| 63 | 77.737583  |  |
| 63 | 77.7083481 |  |
| 63 | 77.664607  |  |
| 63 | 77.5872239 |  |
| 63 | 77.4987298 |  |
| 63 | 77.3975813 |  |
| 63 | 77.2874822 |  |
| 63 | 77.1257775 |  |
| 63 | 76.9538876 |  |
| 63 | 76.7507388 |  |
| 63 | 76.5790715 |  |
| 63 | 76.4253054 |  |
| 63 | 76.3280831 |  |
| 63 | 76.2364165 |  |
| 63 | 76.1503054 |  |
| 63 | 76.0530831 |  |
| 63 | 75.9558609 |  |
| 63 | 75.8641943 |  |
| 63 | 75.7780831 |  |
| 63 | 75.716972  |  |
| 63 | 75.6864165 |  |

|    |            |  |
|----|------------|--|
| 63 | 75.666972  |  |
| 63 | 75.6641943 |  |
| 63 | 75.6780831 |  |
| 63 | 75.6753054 |  |
| 63 | 75.7114165 |  |
| 63 | 75.7391943 |  |
| 63 | 75.7780831 |  |
| 63 | 75.8030831 |  |
| 63 | 75.8447498 |  |
| 63 | 75.8725276 |  |
| 63 | 75.9141943 |  |
| 63 | 75.9558609 |  |
| 63 | 75.991972  |  |
| 63 | 76.041972  |  |
| 63 | 76.0891943 |  |
| 63 | 76.1015455 |  |
| 63 | 76.1049461 |  |
| 63 | 76.1521683 |  |
| 63 | 76.1910572 |  |
| 63 | 76.1801487 |  |
| 63 | 76.1683142 |  |
| 63 | 76.1933142 |  |
| 63 | 76.2516476 |  |
| 63 | 76.2988698 |  |
| 63 | 76.3599809 |  |
| 63 | 76.446092  |  |
| 63 | 76.584426  |  |
| 63 | 76.7199822 |  |
| 63 | 76.8175755 |  |
| 63 | 76.9086872 |  |
| 63 | 76.9735644 |  |
| 63 | 76.9818978 |  |
| 63 | 76.9624533 |  |
| 63 | 76.9430089 |  |
| 63 | 76.9346755 |  |
| 63 | 76.9402311 |  |
| 63 | 76.9374533 |  |
| 63 | 76.9318978 |  |
| 63 | 76.9235644 |  |
| 63 | 76.9096755 |  |
| 63 | 76.8874533 |  |
| 63 | 76.8652311 |  |
| 63 | 76.8485644 |  |
| 63 | 76.8513422 |  |
| 63 | 76.8124533 |  |

|    |            |  |
|----|------------|--|
| 63 | 76.7652311 |  |
| 63 | 76.6763422 |  |
| 63 | 76.5957867 |  |
| 63 | 76.50412   |  |
| 63 | 76.4235644 |  |
| 63 | 76.32912   |  |
| 63 | 76.2430089 |  |
| 63 | 76.1596755 |  |
| 63 | 76.0735644 |  |
| 63 | 75.9846755 |  |
| 63 | 75.9556577 |  |
| 63 | 75.9383682 |  |
| 63 | 75.8883682 |  |
| 63 | 75.841146  |  |
| 63 | 75.8409434 |  |
| 63 | 75.8611111 |  |
| 63 | 75.8583333 |  |
| 63 | 75.8555556 |  |
| 63 | 75.8722222 |  |
| 63 | 75.8805556 |  |
| 63 | 75.8666667 |  |
| 63 | 75.85      |  |
| 63 | 75.8333333 |  |
| 63 | 75.8388889 |  |
| 63 | 75.8805556 |  |
| 63 | 75.95      |  |
| 63 | 76.0194444 |  |
| 63 | 76.1111111 |  |
| 63 | 76.2027778 |  |
| 63 | 76.2972222 |  |
| 63 | 76.3833333 |  |
| 63 | 76.4722222 |  |
| 63 | 76.5333333 |  |
| 63 | 76.5888889 |  |
| 63 | 76.6416667 |  |
| 63 | 76.6861111 |  |
| 63 | 76.7361111 |  |
| 63 | 76.8027778 |  |
| 63 | 76.875     |  |
| 63 | 76.9333333 |  |
| 63 | 76.9861111 |  |
| 63 | 77.0333333 |  |
| 63 | 77.0583333 |  |
| 63 | 77.0833333 |  |
| 63 | 77.1111111 |  |

|    |            |  |
|----|------------|--|
| 63 | 77.1472222 |  |
| 63 | 77.175     |  |
| 63 | 77.2027778 |  |
| 63 | 77.2388889 |  |
| 63 | 77.2861111 |  |
| 63 | 77.3277778 |  |
| 63 | 77.3555556 |  |
| 63 | 77.3833333 |  |
| 63 | 77.4083333 |  |
| 63 | 77.4305556 |  |
| 63 | 77.4416667 |  |
| 63 | 77.4055556 |  |
| 63 | 77.3472222 |  |
| 63 | 77.2833333 |  |
| 63 | 77.2194444 |  |
| 63 | 77.1555556 |  |
| 63 | 77.0777778 |  |
| 63 | 77.0222222 |  |
| 63 | 76.9722222 |  |
| 63 | 76.8805556 |  |
| 63 | 76.7694444 |  |
| 63 | 76.6527778 |  |
| 63 | 76.5361111 |  |
| 63 | 76.4055556 |  |
| 63 | 76.2694444 |  |
| 63 | 76.1444444 |  |
| 63 | 76.0277778 |  |
| 65 | 75.9305556 |  |
| 65 | 75.8277778 |  |
| 65 | 75.7305556 |  |
| 65 | 75.6416667 |  |
| 65 | 75.5416667 |  |
| 65 | 75.425     |  |
| 65 | 75.2833333 |  |
| 65 | 75.1583333 |  |
| 65 | 75.05      |  |
| 65 | 74.9777778 |  |
| 65 | 74.9305556 |  |
| 65 | 74.8944444 |  |
| 65 | 74.8833333 |  |
| 65 | 74.9       |  |
| 65 | 74.8944444 |  |
| 65 | 74.8861111 |  |
| 65 | 74.8638889 |  |
| 65 | 74.8472222 |  |

|    |            |  |
|----|------------|--|
| 65 | 74.8277778 |  |
| 65 | 74.8277778 |  |
| 65 | 74.8361111 |  |
| 65 | 74.8583333 |  |
| 65 | 74.9       |  |
| 65 | 74.9472222 |  |
| 65 | 75.0416667 |  |
| 65 | 75.1583333 |  |
| 65 | 75.2861111 |  |
| 65 | 75.4166667 |  |
| 65 | 75.5222222 |  |
| 65 | 75.625     |  |
| 65 | 75.6972222 |  |
| 63 | 75.7333333 |  |
| 63 | 75.7722222 |  |
| 63 | 75.8166667 |  |
| 63 | 75.8777778 |  |
| 63 | 75.9444444 |  |
| 63 | 76.025     |  |
| 63 | 76.0916667 |  |
| 63 | 76.1472222 |  |
| 63 | 76.2       |  |
| 63 | 76.2333333 |  |
| 63 | 76.2638889 |  |
| 63 | 76.2777778 |  |
| 63 | 76.2861111 |  |
| 63 | 76.3       |  |
| 63 | 76.3138889 |  |
| 63 | 76.3555556 |  |
| 63 | 76.4055556 |  |
| 63 | 76.4361111 |  |
| 63 | 76.4694444 |  |
| 63 | 76.5111111 |  |
| 63 | 76.5388889 |  |
| 63 | 76.5472222 |  |
| 63 | 76.5222222 |  |
| 63 | 76.5138889 |  |
| 63 | 76.5083333 |  |
| 63 | 76.5166667 |  |
| 63 | 76.525     |  |
| 63 | 76.5333333 |  |
| 63 | 76.5305556 |  |
| 63 | 76.5194444 |  |
| 63 | 76.4972222 |  |
| 63 | 76.4416667 |  |

|    |            |  |
|----|------------|--|
| 63 | 76.3722222 |  |
| 63 | 76.2944444 |  |
| 63 | 76.2111111 |  |
| 63 | 76.0846096 |  |
| 63 | 75.9760093 |  |
| 63 | 75.9343426 |  |
| 63 | 75.9037871 |  |
| 63 | 75.8954537 |  |
| 63 | 75.9315649 |  |
| 63 | 75.9704537 |  |
| 63 | 76.0204537 |  |
| 63 | 76.0648982 |  |
| 63 | 76.1010093 |  |
| 63 | 76.1260093 |  |
| 63 | 76.1537871 |  |
| 63 | 76.1732315 |  |
| 63 | 76.1898982 |  |
| 63 | 76.217676  |  |
| 63 | 76.242676  |  |
| 63 | 76.2843426 |  |
| 63 | 76.3287871 |  |
| 63 | 76.367676  |  |
| 63 | 76.4148982 |  |
| 63 | 76.4537871 |  |
| 63 | 76.4954537 |  |
| 63 | 76.5593426 |  |
| 63 | 76.6093426 |  |
| 63 | 76.667676  |  |
| 63 | 76.7315649 |  |
| 63 | 76.7898982 |  |
| 63 | 76.8510093 |  |
| 63 | 76.9037871 |  |
| 63 | 76.942676  |  |
| 63 | 76.9898982 |  |
| 63 | 77.0037871 |  |
| 63 | 76.9871204 |  |
| 63 | 76.9343426 |  |
| 63 | 76.8815649 |  |
| 63 | 76.8260093 |  |
| 63 | 76.7732315 |  |
| 63 | 76.6954537 |  |
| 63 | 76.6065649 |  |
| 63 | 76.5093426 |  |
| 63 | 76.4580664 |  |
| 63 | 76.3972222 |  |

|    |            |  |
|----|------------|--|
| 63 | 76.3027778 |  |
| 63 | 76.2055556 |  |
| 63 | 76.1055556 |  |
| 63 | 75.9861111 |  |
| 63 | 75.8555556 |  |
| 63 | 75.7166667 |  |
| 63 | 75.5486594 |  |
| 65 | 75.3679978 |  |
| 65 | 75.1990646 |  |
| 65 | 75.0535882 |  |
| 65 | 74.9480327 |  |
| 65 | 74.8480327 |  |
| 65 | 74.7257044 |  |
| 65 | 74.6840377 |  |
| 65 | 74.6534822 |  |
| 65 | 74.6507044 |  |
| 65 | 74.65626   |  |
| 65 | 74.65626   |  |
| 65 | 74.6507044 |  |
| 65 | 74.6284822 |  |
| 65 | 74.60626   |  |
| 65 | 74.5895933 |  |
| 65 | 74.55626   |  |
| 65 | 74.5229266 |  |
| 65 | 74.5118155 |  |
| 65 | 74.5007044 |  |
| 65 | 74.50626   |  |
| 65 | 74.5229266 |  |
| 65 | 74.5118155 |  |
| 65 | 74.5118155 |  |
| 65 | 74.5145933 |  |
| 65 | 74.5507044 |  |
| 65 | 74.5673711 |  |
| 65 | 74.5757044 |  |
| 65 | 74.6007044 |  |
| 65 | 74.6645933 |  |
| 65 | 74.7479266 |  |
| 65 | 74.8423711 |  |
| 65 | 74.9368155 |  |
| 65 | 75.0395933 |  |
| 65 | 75.1423711 |  |
| 65 | 75.1976597 |  |
| 65 | 75.2424545 |  |
| 65 | 75.3205826 |  |
| 65 | 75.4344715 |  |



|    |            |  |
|----|------------|--|
| 65 | 75.5344715 |  |
| 65 | 75.6441454 |  |
| 65 | 75.7609181 |  |
| 65 | 75.8631846 |  |
| 65 | 75.9531055 |  |
| 65 | 76.0142166 |  |
| 65 | 76.0892166 |  |
| 65 | 76.2059893 |  |
| 65 | 76.2559893 |  |
| 65 | 76.3032115 |  |
| 65 | 76.3282115 |  |
| 63 | 76.3448781 |  |
| 63 | 76.3532115 |  |
| 63 | 76.3448781 |  |
| 63 | 76.3393226 |  |
| 63 | 76.2865448 |  |
| 63 | 76.2143226 |  |
| 63 | 76.1282115 |  |
| 63 | 76.0532115 |  |
| 63 | 75.9615448 |  |
| 63 | 75.8809893 |  |
| 63 | 75.8059893 |  |
| 63 | 75.7282115 |  |
| 63 | 75.6532115 |  |
| 63 | 75.5754337 |  |
| 63 | 75.5198781 |  |
| 63 | 75.4643226 |  |
| 63 | 75.4309893 |  |
| 63 | 75.4143226 |  |
| 63 | 75.4032115 |  |
| 63 | 75.4004337 |  |
| 63 | 75.4004337 |  |
| 63 | 75.4059893 |  |
| 63 | 75.4032115 |  |
| 63 | 75.3976559 |  |
| 63 | 75.3726559 |  |
| 63 | 75.4062562 |  |
| 63 | 75.4059059 |  |
| 63 | 75.3611111 |  |
| 63 | 75.2972222 |  |
| 63 | 75.25      |  |
| 63 | 75.2166667 |  |
| 63 | 75.1805556 |  |
| 63 | 75.1361111 |  |
| 63 | 75.0888889 |  |

|    |            |  |
|----|------------|--|
| 63 | 75.0416667 |  |
| 63 | 74.9666667 |  |
| 63 | 74.8777778 |  |
| 63 | 74.7777778 |  |
| 63 | 74.6638889 |  |
| 63 | 74.5583333 |  |
| 63 | 74.4555556 |  |
| 63 | 74.3583333 |  |
| 63 | 74.275     |  |
| 65 | 74.1944444 |  |
| 65 | 74.1583333 |  |
| 65 | 74.1444444 |  |
| 65 | 74.1666667 |  |
| 65 | 74.1833333 |  |
| 65 | 74.1972222 |  |
| 65 | 74.1861111 |  |
| 65 | 74.1527778 |  |
| 65 | 74.1083333 |  |
| 65 | 74.075     |  |
| 65 | 74.05      |  |
| 65 | 74.0277778 |  |
| 65 | 74.0138889 |  |
| 65 | 74         |  |
| 65 | 73.9805556 |  |
| 65 | 73.9361111 |  |
| 65 | 73.8694444 |  |
| 65 | 73.7916667 |  |
| 65 | 73.7027778 |  |
| 65 | 73.6416667 |  |
| 65 | 73.575     |  |
| 65 | 73.5222222 |  |
| 65 | 73.4611111 |  |
| 65 | 73.4666667 |  |
| 65 | 73.5       |  |
| 65 | 73.5333333 |  |
| 65 | 73.575     |  |
| 65 | 73.6305556 |  |
| 65 | 73.7       |  |
| 65 | 73.7861111 |  |
| 65 | 73.8339799 |  |
| 65 | 73.8493353 |  |
| 65 | 73.869629  |  |
| 65 | 73.8960955 |  |
| 65 | 73.9281176 |  |
| 65 | 73.9758804 |  |

|    |            |  |
|----|------------|--|
| 65 | 74.0612682 |  |
| 65 | 74.1528288 |  |
| 65 | 74.2477845 |  |
| 65 | 74.3519995 |  |
| 65 | 74.4688688 |  |
| 65 | 74.5712319 |  |
| 65 | 74.6621752 |  |
| 65 | 74.7342914 |  |
| 65 | 74.7329508 |  |
| 65 | 74.7346966 |  |
| 65 | 74.7500227 |  |
| 65 | 74.7527    |  |
| 65 | 74.753834  |  |
| 65 | 74.7932342 |  |
| 63 | 74.8296595 |  |
| 63 | 74.910215  |  |
| 63 | 74.9713261 |  |
| 63 | 75.0157706 |  |
| 63 | 75.0546595 |  |
| 63 | 75.1018817 |  |
| 63 | 75.1435484 |  |
| 63 | 75.1907706 |  |
| 63 | 75.260215  |  |
| 63 | 75.310215  |  |
| 63 | 75.3518817 |  |
| 63 | 75.3713261 |  |
| 63 | 75.3796595 |  |
| 63 | 75.3546595 |  |
| 63 | 75.3296595 |  |
| 63 | 75.3018817 |  |
| 63 | 75.260215  |  |
| 63 | 75.2046595 |  |
| 63 | 75.1463261 |  |
| 63 | 75.0741039 |  |
| 63 | 75.0679017 |  |
| 63 | 75.094213  |  |
| 63 | 75.140586  |  |
| 63 | 75.1523475 |  |
| 63 | 75.1610226 |  |
| 63 | 75.1533397 |  |
| 63 | 75.1235075 |  |
| 63 | 75.0847246 |  |
| 63 | 75.05088   |  |
| 63 | 75.0133317 |  |
| 63 | 74.9853513 |  |

|    |            |  |
|----|------------|--|
| 63 | 74.9663216 |  |
| 63 | 74.9476004 |  |
| 63 | 74.928262  |  |
| 63 | 74.9768248 |  |
| 63 | 75.0278568 |  |
| 63 | 75.0930863 |  |
| 63 | 75.1737423 |  |
| 63 | 75.275386  |  |
| 63 | 75.322097  |  |
| 63 | 75.3773384 |  |
| 63 | 75.3912273 |  |
| 63 | 75.4134495 |  |
| 63 | 75.4328939 |  |
| 63 | 75.4440051 |  |
| 63 | 75.4551162 |  |
| 63 | 75.4717828 |  |
| 63 | 75.4801162 |  |
| 63 | 75.4634495 |  |
| 63 | 75.4412273 |  |
| 63 | 75.4190051 |  |
| 63 | 75.4162273 |  |
| 63 | 75.4106717 |  |
| 63 | 75.4051162 |  |
| 63 | 75.4162273 |  |
| 63 | 75.4412273 |  |
| 63 | 75.4912273 |  |
| 63 | 75.5606717 |  |
| 63 | 75.6245606 |  |
| 63 | 75.7106717 |  |
| 63 | 75.7717828 |  |
| 63 | 75.7967828 |  |
| 63 | 75.7940051 |  |
| 63 | 75.8224437 |  |
| 63 | 75.8595243 |  |
| 63 | 75.9111111 |  |
| 63 | 75.9444444 |  |
| 63 | 75.9777778 |  |
| 63 | 76.0083333 |  |
| 63 | 76.0388889 |  |
| 63 | 76.0416667 |  |
| 63 | 76.0361111 |  |
| 63 | 76.0333333 |  |
| 63 | 76.0166667 |  |
| 63 | 75.9944444 |  |
| 63 | 75.9611111 |  |

|    |            |  |
|----|------------|--|
| 63 | 75.9194444 |  |
| 63 | 75.8888889 |  |
| 63 | 75.8361111 |  |
| 63 | 75.7888889 |  |
| 63 | 75.7361111 |  |
| 63 | 75.6777778 |  |
| 63 | 75.6388889 |  |
| 63 | 75.6138889 |  |
| 63 | 75.6111111 |  |
| 63 | 75.625     |  |
| 63 | 75.6555556 |  |
| 63 | 75.6916667 |  |
| 63 | 75.7388889 |  |
| 63 | 75.7861111 |  |
| 63 | 75.8416667 |  |
| 63 | 75.8916667 |  |
| 63 | 75.9527778 |  |
| 63 | 76.0166667 |  |
| 63 | 76.0444444 |  |
| 63 | 76.0611111 |  |
| 63 | 76.0555556 |  |
| 63 | 76.0305556 |  |
| 63 | 76.0194444 |  |
| 63 | 76.0055556 |  |
| 63 | 76.0027778 |  |
| 63 | 76.0305556 |  |
| 63 | 76.0722222 |  |
| 63 | 76.1083333 |  |
| 63 | 76.1052762 |  |
| 63 | 76.0969722 |  |
| 63 | 76.0969722 |  |
| 63 | 76.07475   |  |
| 63 | 76.04975   |  |
| 63 | 76.0164167 |  |
| 63 | 75.9775278 |  |
| 63 | 75.9830833 |  |
| 63 | 75.9858611 |  |
| 63 | 76.0080833 |  |
| 63 | 76.0386389 |  |
| 63 | 76.0886389 |  |
| 63 | 76.1303056 |  |
| 63 | 76.1775278 |  |
| 63 | 76.1800025 |  |
| 63 | 76.1704401 |  |
| 63 | 76.1618037 |  |

|    |            |  |
|----|------------|--|
| 63 | 76.1506981 |  |
| 63 | 76.1161357 |  |
| 63 | 76.0874375 |  |
| 63 | 76.0683073 |  |
| 63 | 76.0531893 |  |
| 63 | 76.0297381 |  |
| 63 | 76.0099905 |  |
| 63 | 75.9757368 |  |
| 63 | 75.9547547 |  |
| 63 | 75.9350071 |  |
| 63 | 75.9137164 |  |
| 63 | 75.8862528 |  |
| 63 | 75.8680484 |  |
| 63 | 75.8624984 |  |
| 63 | 75.8606521 |  |
| 63 | 75.8711514 |  |
| 63 | 75.8878236 |  |
| 63 | 75.9004835 |  |
| 63 | 75.8903038 |  |
| 63 | 75.8572847 |  |
| 63 | 75.8288951 |  |
| 63 | 75.8150063 |  |
| 63 | 75.8038951 |  |
| 63 | 75.8208411 |  |
| 63 | 75.8235896 |  |
| 63 | 75.8097007 |  |
| 63 | 75.818034  |  |
| 63 | 75.818034  |  |
| 63 | 75.8291451 |  |
| 63 | 75.8541451 |  |
| 63 | 75.8458118 |  |
| 63 | 75.8485896 |  |
| 63 | 75.8458118 |  |
| 63 | 75.8263673 |  |
| 63 | 75.8013673 |  |
| 63 | 75.7763673 |  |
| 63 | 75.7374785 |  |
| 63 | 75.7600038 |  |
| 63 | 75.8112328 |  |
| 63 | 75.8643137 |  |
| 63 | 75.9004193 |  |
| 63 | 75.9516483 |  |
| 63 | 75.9997909 |  |
| 63 | 76.046699  |  |
| 63 | 76.0868169 |  |

|    |            |  |
|----|------------|--|
| 63 | 76.1269348 |  |
| 63 | 76.1411268 |  |
| 63 | 76.1198305 |  |
| 63 | 76.0821762 |  |
| 63 | 76.0318676 |  |
| 63 | 75.9800157 |  |
| 63 | 75.9340281 |  |
| 63 | 75.8602626 |  |
| 63 | 75.7812503 |  |
| 63 | 75.6957565 |  |
| 63 | 75.6074849 |  |
| 63 | 75.5235342 |  |
| 63 | 75.439275  |  |
| 63 | 75.372917  |  |
| 63 | 75.3182873 |  |
| 63 | 75.2565589 |  |
| 63 | 75.1815645 |  |
| 63 | 75.1102737 |  |
| 63 | 75.0479336 |  |
| 63 | 75.0071984 |  |
| 63 | 74.9704755 |  |
| 63 | 74.9707897 |  |
| 63 | 74.9766594 |  |
| 63 | 74.9646279 |  |
| 63 | 74.9442631 |  |
| 63 | 74.9242069 |  |
| 63 | 74.9026075 |  |
| 63 | 74.8813167 |  |
| 63 | 74.8742235 |  |
| 63 | 74.849229  |  |
| 63 | 74.8199135 |  |
| 63 | 74.782882  |  |
| 63 | 74.7455419 |  |
| 63 | 74.7004857 |  |
| 63 | 74.6597505 |  |
| 63 | 74.639077  |  |
| 63 | 74.5974159 |  |
| 63 | 74.5918658 |  |
| 63 | 74.575822  |  |
| 63 | 74.5523707 |  |
| 63 | 74.534475  |  |
| 63 | 74.5388016 |  |
| 63 | 74.6023818 |  |
| 63 | 74.6752213 |  |
| 63 | 74.7560855 |  |

|    |            |  |
|----|------------|--|
| 63 | 74.8653392 |  |
| 63 | 74.9776794 |  |
| 63 | 75.1057603 |  |
| 63 | 75.2319893 |  |
| 63 | 75.3832183 |  |
| 63 | 75.5276572 |  |
| 63 | 75.6588246 |  |
| 63 | 75.780424  |  |
| 63 | 75.9125172 |  |
| 63 | 76.0557215 |  |
| 63 | 76.2041728 |  |
| 63 | 76.3458339 |  |
| 63 | 76.4865691 |  |
| 63 | 76.6294648 |  |
| 63 | 76.7507556 |  |
| 63 | 76.8569229 |  |
| 63 | 76.9343865 |  |
| 63 | 77.000739  |  |
| 63 | 77.0572149 |  |
| 63 | 77.1081353 |  |
| 63 | 77.1559693 |  |
| 63 | 77.1942354 |  |
| 63 | 77.2377484 |  |
| 63 | 77.2809527 |  |
| 63 | 77.333725  |  |
| 63 | 77.3797071 |  |
| 63 | 77.4389608 |  |
| 63 | 77.4985232 |  |
| 63 | 77.5463572 |  |
| 63 | 77.5732035 |  |
| 63 | 77.5966547 |  |
| 63 | 77.6216492 |  |
| 63 | 77.5966437 |  |
| 63 | 77.5599097 |  |
| 63 | 77.5055832 |  |
| 63 | 77.4429234 |  |
| 63 | 77.3719302 |  |
| 63 | 77.2833444 |  |
| 63 | 77.1885858 |  |
| 63 | 77.1194444 |  |
| 63 | 77.0361111 |  |
| 63 | 76.9638889 |  |
| 63 | 76.8972222 |  |
| 63 | 76.8416667 |  |
| 63 | 76.775     |  |



|    |            |  |
|----|------------|--|
| 63 | 76.7111111 |  |
| 63 | 76.65      |  |
| 63 | 76.6       |  |
| 63 | 76.5444444 |  |
| 63 | 76.4833333 |  |
| 63 | 76.4111111 |  |
| 63 | 76.2919808 |  |
| 63 | 76.175937  |  |
| 63 | 76.0512512 |  |
| 63 | 75.9472444 |  |
| 63 | 75.8642252 |  |
| 63 | 75.7787369 |  |
| 63 | 75.7037424 |  |
| 63 | 75.6389331 |  |
| 63 | 75.5762844 |  |
| 63 | 75.4938825 |  |
| 63 | 75.4071596 |  |
| 63 | 75.3460485 |  |
| 63 | 75.2988263 |  |
| 63 | 75.2766041 |  |
| 63 | 75.2849374 |  |
| 63 | 75.2877152 |  |
| 63 | 75.2960485 |  |
| 63 | 75.3099374 |  |
| 63 | 75.315493  |  |
| 63 | 75.3182707 |  |
| 63 | 75.3599374 |  |
| 63 | 75.4016041 |  |
| 63 | 75.4321596 |  |
| 63 | 75.4738263 |  |
| 63 | 75.515493  |  |
| 63 | 75.5516041 |  |
| 63 | 75.5932707 |  |
| 63 | 75.6210485 |  |
| 63 | 75.6266041 |  |
| 63 | 75.6293818 |  |
| 63 | 75.6266041 |  |
| 63 | 75.6238263 |  |
| 63 | 75.6127152 |  |
| 63 | 75.5877152 |  |
| 63 | 75.5543818 |  |
| 63 | 75.5071596 |  |
| 63 | 75.440493  |  |
| 63 | 75.3682707 |  |
| 63 | 75.2793818 |  |

|    |            |  |
|----|------------|--|
| 63 | 75.1849374 |  |
| 63 | 75.1346232 |  |
| 63 | 75.0701115 |  |
| 63 | 75.0031307 |  |
| 63 | 74.9265819 |  |
| 63 | 74.8457122 |  |
| 63 | 74.7700894 |  |
| 63 | 74.6950839 |  |
| 63 | 74.6265598 |  |
| 63 | 74.5642086 |  |
| 63 | 74.5188327 |  |
| 63 | 74.475     |  |
| 63 | 74.3861111 |  |
| 63 | 74.3111111 |  |
| 63 | 74.2138889 |  |
| 63 | 74.1083333 |  |
| 65 | 74.0361111 |  |
| 65 | 73.9666667 |  |
| 65 | 73.8972222 |  |
| 65 | 73.8305556 |  |
| 65 | 73.7416667 |  |
| 65 | 73.6166667 |  |
| 65 | 73.5111111 |  |
| 65 | 73.4388889 |  |
| 65 | 73.3694444 |  |
| 65 | 73.3111111 |  |
| 65 | 73.2666667 |  |
| 65 | 73.2138889 |  |
| 65 | 73.1861111 |  |
| 65 | 73.1638889 |  |
| 65 | 73.1555556 |  |
| 65 | 73.1472222 |  |
| 65 | 73.1305556 |  |
| 65 | 73.1055556 |  |
| 65 | 73.0694444 |  |
| 65 | 73.0388889 |  |
| 65 | 73.0027778 |  |
| 65 | 72.9805556 |  |
| 65 | 72.9527778 |  |
| 65 | 72.925     |  |
| 65 | 72.9027778 |  |
| 65 | 72.8861111 |  |
| 65 | 72.8722222 |  |
| 65 | 72.8916667 |  |
| 65 | 72.883054  |  |

|    |            |  |
|----|------------|--|
| 65 | 72.8725895 |  |
| 65 | 72.8571868 |  |
| 65 | 72.8510432 |  |
| 65 | 72.8223689 |  |
| 65 | 72.7995587 |  |
| 65 | 72.807892  |  |
| 65 | 72.8134476 |  |
| 65 | 72.8356698 |  |
| 65 | 72.8217809 |  |
| 65 | 72.8023365 |  |
| 65 | 72.7690031 |  |
| 65 | 72.6995587 |  |
| 65 | 72.6245587 |  |
| 65 | 72.5523365 |  |
| 65 | 72.5051142 |  |
| 65 | 72.4884476 |  |
| 65 | 72.4745587 |  |
| 65 | 72.4523365 |  |
| 65 | 72.4162254 |  |
| 65 | 72.3856698 |  |
| 65 | 72.3467809 |  |
| 65 | 72.3023365 |  |
| 65 | 72.2717809 |  |
| 65 | 72.2245587 |  |
| 65 | 72.1801142 |  |
| 65 | 72.1190031 |  |
| 65 | 72.0662254 |  |
| 65 | 72.032892  |  |
| 65 | 72.0162254 |  |
| 65 | 72.0217809 |  |
| 63 | 72.0412254 |  |
| 63 | 72.0995587 |  |
| 63 | 72.1773365 |  |
| 63 | 72.257892  |  |
| 63 | 72.3551142 |  |
| 63 | 72.4551142 |  |
| 63 | 72.5662254 |  |
| 63 | 72.6745587 |  |
| 63 | 72.757892  |  |
| 63 | 72.874838  |  |
| 63 | 72.9880803 |  |
| 63 | 73.0979275 |  |
| 63 | 73.1929599 |  |
| 63 | 73.3133009 |  |
| 63 | 73.4416667 |  |

|    |            |  |
|----|------------|--|
| 63 | 73.525     |  |
| 63 | 73.6027778 |  |
| 63 | 73.6638889 |  |
| 63 | 73.725     |  |
| 63 | 73.7944444 |  |
| 63 | 73.8722222 |  |
| 63 | 73.9694444 |  |
| 63 | 74.0694444 |  |
| 63 | 74.1861111 |  |
| 63 | 74.2972222 |  |
| 63 | 74.4083333 |  |
| 63 | 74.5333333 |  |
| 63 | 74.6638889 |  |
| 63 | 74.7916667 |  |
| 63 | 74.9277778 |  |
| 63 | 75.0611111 |  |
| 63 | 75.2055556 |  |
| 63 | 75.3583333 |  |
| 63 | 75.5166667 |  |
| 63 | 75.6555556 |  |
| 63 | 75.7777778 |  |
| 63 | 75.8694444 |  |
| 63 | 75.9333333 |  |
| 63 | 75.975     |  |
| 63 | 75.9972222 |  |
| 63 | 76.0027778 |  |
| 63 | 75.9861111 |  |
| 63 | 75.9527778 |  |
| 63 | 75.9333333 |  |
| 63 | 75.925     |  |
| 63 | 75.9305556 |  |
| 63 | 75.9277778 |  |
| 63 | 75.9361111 |  |
| 63 | 75.9305556 |  |
| 63 | 75.9138889 |  |
| 63 | 75.8972222 |  |
| 63 | 75.8666667 |  |
| 63 | 75.8472222 |  |
| 63 | 75.8361111 |  |
| 63 | 75.8194444 |  |
| 63 | 75.825     |  |
| 63 | 75.8416667 |  |
| 63 | 75.85      |  |
| 63 | 75.8666667 |  |
| 63 | 75.8777778 |  |

|    |            |  |
|----|------------|--|
| 63 | 75.8888889 |  |
| 63 | 75.8777778 |  |
| 63 | 75.85      |  |
| 63 | 75.8055556 |  |
| 63 | 75.7583333 |  |
| 63 | 75.7166667 |  |
| 63 | 75.6888889 |  |
| 63 | 75.6611111 |  |
| 63 | 75.6416667 |  |
| 63 | 75.6166667 |  |
| 63 | 75.5888889 |  |
| 63 | 75.5583333 |  |
| 63 | 75.4944444 |  |
| 63 | 75.425     |  |
| 63 | 75.3638889 |  |
| 63 | 75.2944444 |  |
| 63 | 75.2444444 |  |
| 63 | 75.2027778 |  |
| 63 | 75.1777778 |  |
| 63 | 75.1583333 |  |
| 63 | 75.1444444 |  |
| 63 | 75.1666667 |  |
| 63 | 75.2111111 |  |
| 63 | 75.2527778 |  |
| 63 | 75.2833333 |  |
| 63 | 75.2972222 |  |
| 63 | 75.3138889 |  |
| 63 | 75.2894201 |  |
| 63 | 75.3144201 |  |
| 63 | 75.306618  |  |
| 63 | 75.3086924 |  |
| 63 | 75.3308285 |  |
| 63 | 75.3504955 |  |
| 63 | 75.368002  |  |
| 63 | 75.3867431 |  |
| 63 | 75.4094966 |  |
| 63 | 75.4319413 |  |
| 63 | 75.4617935 |  |
| 63 | 75.4885593 |  |
| 63 | 75.4903251 |  |
| 63 | 75.4890044 |  |
| 63 | 75.514227  |  |
| 63 | 75.5598199 |  |
| 63 | 75.6023264 |  |
| 63 | 75.6719935 |  |

|    |            |  |
|----|------------|--|
| 63 | 75.7608823 |  |
| 63 | 75.8303268 |  |
| 63 | 75.8664379 |  |
| 63 | 75.8886601 |  |
| 63 | 75.8803268 |  |
| 63 | 75.8692157 |  |
| 63 | 75.8442157 |  |
| 63 | 75.8303268 |  |
| 63 | 75.8192157 |  |
| 63 | 75.802549  |  |
| 63 | 75.8108823 |  |
| 63 | 75.8108823 |  |
| 63 | 75.8386601 |  |
| 63 | 75.8664379 |  |
| 63 | 75.8914379 |  |
| 63 | 75.9553268 |  |
| 63 | 75.977549  |  |
| 63 | 75.9664379 |  |
| 63 | 75.9331046 |  |
| 63 | 75.8886601 |  |
| 63 | 75.8581046 |  |
| 63 | 75.8303268 |  |
| 63 | 75.8381289 |  |
| 63 | 75.8075734 |  |
| 63 | 75.7820422 |  |
| 63 | 75.7355233 |  |
| 63 | 75.6388984 |  |
| 63 | 75.5361007 |  |
| 63 | 75.4333029 |  |
| 63 | 75.3617841 |  |
| 63 | 75.2751418 |  |
| 63 | 75.1860303 |  |
| 63 | 75.1089559 |  |
| 63 | 75.0099679 |  |
| 63 | 74.9526466 |  |
| 63 | 74.9039672 |  |
| 63 | 74.8454113 |  |
| 65 | 74.7775962 |  |
| 65 | 74.7100897 |  |
| 65 | 74.6293115 |  |
| 65 | 74.5015338 |  |
| 65 | 74.3820893 |  |
| 65 | 74.3070893 |  |
| 65 | 74.2459782 |  |
| 65 | 74.2043115 |  |

|    |            |  |
|----|------------|--|
| 65 | 74.1765338 |  |
| 65 | 74.1348671 |  |
| 65 | 74.0876449 |  |
| 65 | 74.023756  |  |
| 65 | 73.9626449 |  |
| 65 | 73.8959782 |  |
| 65 | 73.8432004 |  |
| 65 | 73.7709782 |  |
| 65 | 73.7043115 |  |
| 65 | 73.6348671 |  |
| 65 | 73.5348671 |  |
| 65 | 73.4404226 |  |
| 65 | 73.3626449 |  |
| 65 | 73.2959782 |  |
| 65 | 73.2293115 |  |
| 65 | 73.1404226 |  |
| 65 | 73.0320893 |  |
| 65 | 72.9293115 |  |
| 65 | 72.8459782 |  |
| 65 | 72.8126449 |  |
| 65 | 72.7959782 |  |
| 65 | 72.8176892 |  |
| 65 | 72.8424866 |  |
| 65 | 72.8638889 |  |
| 65 | 72.8361111 |  |
| 65 | 72.8083333 |  |
| 65 | 72.7833333 |  |
| 65 | 72.7527778 |  |
| 65 | 72.7527778 |  |
| 65 | 72.75      |  |
| 65 | 72.7444444 |  |
| 65 | 72.7305556 |  |
| 65 | 72.7166667 |  |
| 65 | 72.6944444 |  |
| 65 | 72.6888889 |  |
| 65 | 72.7027778 |  |
| 65 | 72.7055556 |  |
| 63 | 72.6916667 |  |
| 63 | 72.6805556 |  |
| 63 | 72.6861111 |  |
| 63 | 72.6888889 |  |
| 63 | 72.7305556 |  |
| 63 | 72.8083333 |  |
| 63 | 72.9083333 |  |
| 63 | 73.0222222 |  |

|    |            |  |
|----|------------|--|
| 63 | 73.1416667 |  |
| 63 | 73.2611111 |  |
| 63 | 73.4138889 |  |
| 63 | 73.5444444 |  |
| 63 | 73.675     |  |
| 63 | 73.7861111 |  |
| 63 | 73.8916667 |  |
| 63 | 73.9916667 |  |
| 63 | 74.0833333 |  |
| 63 | 74.175     |  |
| 63 | 74.2666667 |  |
| 63 | 74.3583333 |  |
| 63 | 74.4472222 |  |
| 63 | 74.5083333 |  |
| 63 | 74.5527778 |  |
| 63 | 74.5972222 |  |
| 63 | 74.6555556 |  |
| 63 | 74.7333333 |  |
| 63 | 74.8111111 |  |
| 63 | 74.9222222 |  |
| 63 | 75.0583333 |  |
| 63 | 75.2166667 |  |
| 63 | 75.375     |  |
| 63 | 75.5277778 |  |
| 63 | 75.675     |  |
| 63 | 75.8305556 |  |
| 63 | 76.0055556 |  |
| 63 | 76.1722222 |  |
| 63 | 76.3638889 |  |
| 63 | 76.525     |  |
| 63 | 76.6972222 |  |
| 63 | 76.8805556 |  |
| 63 | 77.0527778 |  |
| 63 | 77.1944444 |  |
| 63 | 77.3194444 |  |
| 63 | 77.4388889 |  |
| 63 | 77.5361111 |  |
| 63 | 77.6166667 |  |
| 63 | 77.7027778 |  |
| 63 | 77.7861111 |  |
| 63 | 77.8638889 |  |
| 63 | 77.9333333 |  |
| 63 | 77.9388889 |  |
| 63 | 77.9472222 |  |
| 63 | 77.9666667 |  |



|    |            |  |
|----|------------|--|
| 63 | 77.9722222 |  |
| 63 | 77.9833333 |  |
| 63 | 77.9805556 |  |
| 63 | 77.9916667 |  |
| 63 | 78.025     |  |
| 63 | 78.075     |  |
| 63 | 78.1305556 |  |
| 63 | 78.1805556 |  |
| 63 | 78.25      |  |
| 63 | 78.325     |  |
| 63 | 78.3944444 |  |
| 63 | 78.45      |  |
| 63 | 78.4944444 |  |
| 63 | 78.5305556 |  |
| 63 | 78.525     |  |
| 63 | 78.4972222 |  |
| 63 | 78.4416667 |  |
| 63 | 78.3805556 |  |
| 63 | 78.3055556 |  |
| 63 | 78.2083333 |  |
| 63 | 78.1138889 |  |
| 63 | 78.0222222 |  |
| 63 | 77.9444444 |  |
| 63 | 77.85      |  |
| 63 | 77.7638889 |  |
| 63 | 77.675     |  |
| 63 | 77.5805556 |  |
| 63 | 77.5055556 |  |
| 63 | 77.4638889 |  |
| 63 | 77.4722222 |  |
| 63 | 77.4916667 |  |
| 63 | 77.5277778 |  |
| 63 | 77.5638889 |  |
| 63 | 77.5805556 |  |
| 63 | 77.5805556 |  |
| 63 | 77.5722222 |  |
| 63 | 77.55      |  |
| 63 | 77.5472222 |  |
| 63 | 77.5416667 |  |
| 63 | 77.525     |  |
| 63 | 77.5333333 |  |
| 63 | 77.5138889 |  |
| 63 | 77.4972222 |  |
| 63 | 77.4805556 |  |
| 63 | 77.4416667 |  |

|    |            |  |
|----|------------|--|
| 63 | 77.4027778 |  |
| 63 | 77.3722222 |  |
| 63 | 77.3555556 |  |
| 63 | 77.3277778 |  |
| 63 | 77.2805556 |  |
| 63 | 77.2305556 |  |
| 63 | 77.1722222 |  |
| 63 | 77.1138889 |  |
| 63 | 77.0666667 |  |
| 63 | 77.0416667 |  |
| 63 | 77.0527778 |  |
| 63 | 77.075     |  |
| 63 | 77.1166667 |  |
| 63 | 77.1638889 |  |
| 63 | 77.2333333 |  |
| 63 | 77.2833333 |  |
| 63 | 77.3138889 |  |
| 63 | 77.3305556 |  |
| 63 | 77.3444444 |  |
| 63 | 77.3666667 |  |
| 63 | 77.3861111 |  |
| 63 | 77.3916667 |  |
| 63 | 77.3972222 |  |
| 63 | 77.4       |  |
| 63 | 77.4305556 |  |
| 63 | 77.4527778 |  |
| 63 | 77.4326725 |  |
| 63 | 77.438228  |  |
| 63 | 77.4548947 |  |
| 63 | 77.4854502 |  |
| 63 | 77.5187836 |  |
| 63 | 77.5548947 |  |
| 63 | 77.5965614 |  |
| 63 | 77.6465614 |  |
| 63 | 77.7104502 |  |
| 63 | 77.7687836 |  |
| 63 | 77.8548947 |  |
| 63 | 77.9410058 |  |
| 63 | 78.0160058 |  |
| 63 | 78.0854502 |  |
| 63 | 78.1465614 |  |
| 63 | 78.1604502 |  |
| 63 | 78.1493391 |  |
| 63 | 78.1271169 |  |
| 63 | 78.1076725 |  |

|    |            |  |
|----|------------|--|
| 63 | 78.0937836 |  |
| 63 | 78.1271169 |  |
| 63 | 78.163228  |  |
| 63 | 78.2021169 |  |
| 63 | 78.2215614 |  |
| 63 | 78.1687836 |  |
| 63 | 78.1076725 |  |
| 63 | 78.0104502 |  |
| 63 | 77.9243391 |  |
| 63 | 77.8215614 |  |
| 63 | 77.7271169 |  |
| 63 | 77.6354502 |  |
| 63 | 77.5437836 |  |
| 63 | 77.4687836 |  |
| 63 | 77.3826725 |  |
| 63 | 77.2854502 |  |
| 63 | 77.1993391 |  |
| 63 | 77.1076725 |  |
| 63 | 77.0076725 |  |
| 63 | 76.8243391 |  |
| 63 | 76.6298947 |  |
| 63 | 76.4472222 |  |
| 63 | 76.2222222 |  |
| 63 | 75.9833333 |  |
| 63 | 75.7722222 |  |
| 63 | 75.5722222 |  |
| 63 | 75.4138889 |  |
| 63 | 75.2777778 |  |
| 63 | 75.1527778 |  |
| 63 | 75.0222222 |  |
| 63 | 74.878092  |  |
| 63 | 74.7305666 |  |
| 63 | 74.6000166 |  |
| 63 | 74.5222388 |  |
| 63 | 74.4583499 |  |
| 63 | 74.4027944 |  |
| 63 | 74.394461  |  |
| 63 | 74.4083499 |  |
| 63 | 74.4416833 |  |
| 63 | 74.4916833 |  |
| 63 | 74.5333499 |  |
| 63 | 74.5416833 |  |
| 63 | 74.5389055 |  |
| 63 | 74.519461  |  |
| 63 | 74.5083499 |  |

|    |            |  |
|----|------------|--|
| 63 | 74.5389055 |  |
| 63 | 74.5722388 |  |
| 63 | 74.6305722 |  |
| 63 | 74.6861277 |  |
| 63 | 74.744461  |  |
| 63 | 74.794461  |  |
| 63 | 74.8250166 |  |
| 63 | 74.8500166 |  |
| 63 | 74.8583499 |  |
| 63 | 74.8500166 |  |
| 63 | 74.8500166 |  |
| 63 | 74.8639055 |  |
| 63 | 74.8777944 |  |
| 63 | 74.8889055 |  |
| 63 | 74.9027944 |  |
| 63 | 74.9361277 |  |
| 63 | 74.9805722 |  |
| 63 | 75.0361277 |  |
| 63 | 75.1055722 |  |
| 63 | 75.1165972 |  |
| 63 | 75.1245358 |  |
| 63 | 75.1019189 |  |
| 63 | 75.1019189 |  |
| 63 | 75.0963633 |  |
| 63 | 75.0658077 |  |
| 63 | 75.0432713 |  |
| 63 | 75.02413   |  |
| 63 | 74.9963467 |  |
| 63 | 74.92968   |  |
| 63 | 74.8630134 |  |
| 63 | 74.8130134 |  |
| 63 | 74.7602356 |  |
| 63 | 74.6991245 |  |
| 63 | 74.6213467 |  |
| 63 | 74.5213467 |  |
| 63 | 74.4241245 |  |
| 63 | 74.3185689 |  |
| 63 | 74.2130134 |  |
| 63 | 74.1185689 |  |
| 63 | 74.0380134 |  |
| 63 | 73.9602356 |  |
| 63 | 73.8935689 |  |
| 63 | 73.8324578 |  |
| 63 | 73.7769023 |  |
| 63 | 73.7407911 |  |

|    |            |  |
|----|------------|--|
| 63 | 73.6817969 |  |
| 63 | 73.6521237 |  |
| 63 | 73.6579444 |  |
| 63 | 73.663765  |  |
| 63 | 73.6896473 |  |
| 63 | 73.7127519 |  |
| 63 | 73.7377519 |  |
| 63 | 73.7544185 |  |
| 63 | 73.773863  |  |
| 63 | 73.7933074 |  |
| 63 | 73.8016408 |  |
| 63 | 73.8433074 |  |
| 63 | 73.8571963 |  |
| 63 | 73.8960852 |  |
| 63 | 73.9822824 |  |
| 63 | 74.0771216 |  |
| 63 | 74.169183  |  |
| 63 | 74.1891586 |  |
| 63 | 74.2125293 |  |
| 63 | 74.2519494 |  |
| 63 | 74.3061843 |  |
| 63 | 74.3839621 |  |
| 63 | 74.4534065 |  |
| 63 | 74.4922954 |  |
| 63 | 74.5200732 |  |
| 63 | 74.5506288 |  |
| 63 | 74.5867399 |  |
| 63 | 74.622851  |  |
| 63 | 74.6645177 |  |
| 63 | 74.7061843 |  |
| 63 | 74.747851  |  |
| 63 | 74.7950732 |  |
| 63 | 74.8422954 |  |
| 63 | 74.8867399 |  |
| 63 | 74.9284065 |  |
| 63 | 74.9700732 |  |
| 63 | 74.997851  |  |
| 63 | 75.0089621 |  |
| 63 | 74.9895177 |  |
| 63 | 74.9672954 |  |
| 63 | 74.9707341 |  |
| 63 | 74.9559628 |  |
| 63 | 74.9223644 |  |
| 63 | 74.8998772 |  |
| 63 | 74.8906615 |  |

|    |            |  |
|----|------------|--|
| 63 | 74.8814458 |  |
| 63 | 74.8675569 |  |
| 63 | 74.8758903 |  |
| 63 | 74.8925569 |  |
| 63 | 74.9231125 |  |
| 63 | 74.9620014 |  |
| 63 | 74.978668  |  |
| 63 | 75.0147791 |  |
| 63 | 75.0258903 |  |
| 63 | 75.0064458 |  |
| 63 | 74.9842236 |  |
| 63 | 74.9731125 |  |
| 63 | 74.9948035 |  |
| 63 | 75.018655  |  |
| 63 | 75.0292349 |  |
| 63 | 75.0305556 |  |
| 63 | 75.0083333 |  |
| 63 | 74.9972222 |  |
| 63 | 75.0305556 |  |
| 63 | 75.0833333 |  |
| 63 | 75.1166667 |  |
| 63 | 75.1388889 |  |
| 63 | 75.1583333 |  |
| 63 | 75.1833333 |  |
| 63 | 75.2222222 |  |
| 63 | 75.275     |  |
| 63 | 75.3305556 |  |
| 63 | 75.375     |  |
| 63 | 75.4083333 |  |
| 63 | 75.4388889 |  |
| 63 | 75.4555556 |  |
| 63 | 75.4805556 |  |
| 63 | 75.5222222 |  |
| 63 | 75.6       |  |
| 63 | 75.6722222 |  |
| 63 | 75.7444444 |  |
| 63 | 75.8194444 |  |
| 63 | 75.8944444 |  |
| 63 | 75.9638889 |  |
| 63 | 75.9845243 |  |
| 63 | 76.0082462 |  |
| 63 | 76.0208569 |  |
| 63 | 76.0294553 |  |
| 63 | 76.0516775 |  |
| 63 | 76.0738998 |  |

|    |            |  |
|----|------------|--|
| 63 | 76.0766775 |  |
| 63 | 76.071122  |  |
| 63 | 76.0794553 |  |
| 63 | 76.0988998 |  |
| 63 | 76.1322331 |  |
| 63 | 76.1822331 |  |
| 63 | 76.2350109 |  |
| 63 | 76.2905664 |  |
| 63 | 76.346122  |  |
| 63 | 76.4100109 |  |
| 63 | 76.4683442 |  |
| 63 | 76.5044553 |  |
| 63 | 76.5322331 |  |
| 63 | 76.5405664 |  |
| 63 | 76.5488998 |  |
| 63 | 76.5600109 |  |
| 63 | 76.5766775 |  |
| 63 | 76.6100109 |  |
| 63 | 76.6322331 |  |
| 63 | 76.6516775 |  |
| 63 | 76.6627886 |  |
| 63 | 76.6544553 |  |
| 63 | 76.6003994 |  |
| 63 | 76.5664052 |  |
| 63 | 76.5580718 |  |
| 63 | 76.5203739 |  |
| 63 | 76.4675526 |  |
| 63 | 76.4187436 |  |
| 63 | 76.4576325 |  |
| 63 | 76.4572802 |  |
| 63 | 76.4597058 |  |
| 63 | 76.4646005 |  |
| 63 | 76.4667174 |  |
| 63 | 76.4784022 |  |
| 63 | 76.6022112 |  |
| 63 | 76.7368227 |  |
| 63 | 76.8658786 |  |
| 63 | 76.9124836 |  |
| 63 | 76.9250943 |  |
| 63 | 76.9441865 |  |
| 63 | 77.0302976 |  |
| 63 | 77.0775199 |  |
| 63 | 77.1191865 |  |
| 63 | 77.1525199 |  |
| 63 | 77.1219643 |  |

|    |            |  |
|----|------------|--|
| 63 | 77.0275199 |  |
| 63 | 76.8780311 |  |
| 63 | 76.7044683 |  |
| 63 | 76.5130042 |  |
| 63 | 76.323392  |  |
| 63 | 76.1393354 |  |
| 63 | 75.989538  |  |
| 63 | 75.8784269 |  |
| 63 | 75.7978713 |  |
| 63 | 75.6978713 |  |
| 63 | 75.614538  |  |
| 63 | 75.5284269 |  |
| 63 | 75.4450936 |  |
| 63 | 75.3784269 |  |
| 63 | 75.3062047 |  |
| 63 | 75.2312047 |  |
| 63 | 75.2006491 |  |
| 63 | 75.2380384 |  |
| 63 | 75.2692548 |  |
| 63 | 75.2720326 |  |
| 63 | 75.3319527 |  |
| 63 | 75.4208852 |  |
| 63 | 75.5030275 |  |
| 63 | 75.4780275 |  |
| 63 | 75.4894908 |  |
| 63 | 75.4842875 |  |
| 63 | 75.4821706 |  |
| 65 | 75.4772759 |  |
| 65 | 75.4739244 |  |
| 65 | 75.3961467 |  |
| 65 | 75.3100355 |  |
| 65 | 75.2128133 |  |
| 65 | 75.1742767 |  |
| 65 | 75.1422215 |  |
| 65 | 75.1120181 |  |
| 65 | 74.9983518 |  |
| 65 | 74.9322164 |  |
| 65 | 74.8879945 |  |
| 65 | 74.8515177 |  |
| 65 | 74.8733742 |  |
| 65 | 74.9612801 |  |
| 65 | 75.1635466 |  |
| 65 | 75.354645  |  |
| 65 | 75.5642619 |  |
| 65 | 75.7800516 |  |



|    |            |  |
|----|------------|--|
| 65 | 75.9834957 |  |
| 65 | 76.1628656 |  |
| 65 | 76.299537  |  |
| 65 | 76.4019491 |  |
| 65 | 76.5065216 |  |
| 65 | 76.6006004 |  |
| 65 | 76.6724569 |  |
| 65 | 76.7332023 |  |
| 65 | 76.7794416 |  |
| 65 | 76.8182734 |  |
| 65 | 76.9266068 |  |
| 65 | 77.0016068 |  |
| 65 | 77.0654957 |  |
| 65 | 77.1293845 |  |
| 65 | 77.1932734 |  |
| 65 | 77.2084024 |  |
| 65 | 77.2050129 |  |
| 65 | 77.1868085 |  |
| 65 | 77.1692215 |  |
| 65 | 77.1510171 |  |
| 65 | 77.1402202 |  |
| 65 | 77.1476331 |  |
| 65 | 77.1744905 |  |
| 65 | 77.2031998 |  |
| 65 | 77.2251189 |  |
| 65 | 77.242717  |  |
| 65 | 77.2859324 |  |
| 65 | 77.3455058 |  |
| 65 | 77.4063139 |  |
| 65 | 77.4563194 |  |
| 65 | 77.5672079 |  |
| 65 | 77.6750101 |  |
| 65 | 77.7608986 |  |
| 65 | 77.8168199 |  |
| 65 | 77.8671855 |  |
| 65 | 77.8959463 |  |
| 65 | 77.8515019 |  |
| 65 | 77.8284108 |  |
| 65 | 77.7491468 |  |
| 65 | 77.6785248 |  |
| 65 | 77.6063597 |  |
| 65 | 77.5351204 |  |
| 65 | 77.487338  |  |
| 65 | 77.4571481 |  |
| 69 | 77.44702   |  |

|    |            |  |
|----|------------|--|
| 69 | 77.4529412 |  |
| 69 | 77.4838625 |  |
| 69 | 77.5175615 |  |
| 69 | 77.5574333 |  |
| 69 | 77.6102682 |  |
| 69 | 77.5908237 |  |
| 69 | 77.5797126 |  |
| 69 | 77.5602682 |  |
| 69 | 77.5186015 |  |
| 69 | 77.4602682 |  |
| 69 | 77.4173614 |  |
| 69 | 77.3624176 |  |
| 69 | 77.3195108 |  |
| 69 | 77.273209  |  |
| 69 | 77.2247467 |  |
| 69 | 77.1799881 |  |
| 69 | 77.1336862 |  |
| 69 | 77.0707177 |  |
| 69 | 76.9864529 |  |
| 69 | 76.9089783 |  |
| 69 | 76.8247135 |  |
| 69 | 76.720387  |  |
| 69 | 76.6191469 |  |
| 69 | 76.51945   |  |
| 69 | 76.4166667 |  |
| 69 | 76.3055556 |  |
| 69 | 76.2       |  |
| 69 | 76.1055556 |  |
| 69 | 76.0416667 |  |
| 69 | 75.9888889 |  |
| 69 | 75.9527778 |  |
| 69 | 75.9305556 |  |
| 69 | 75.9194444 |  |
| 69 | 75.9638889 |  |
| 69 | 75.9972222 |  |
| 69 | 76.0388889 |  |
| 69 | 76.0861111 |  |
| 69 | 76.1027778 |  |
| 69 | 76.0833333 |  |
| 69 | 76.0388889 |  |
| 69 | 75.9666667 |  |
| 63 | 75.8888889 |  |
| 63 | 75.8138889 |  |
| 63 | 75.7444444 |  |
| 63 | 75.6916667 |  |

|    |            |  |
|----|------------|--|
| 63 | 75.65      |  |
| 63 | 75.6277778 |  |
| 69 | 75.6083333 |  |
| 69 | 75.6138889 |  |
| 69 | 75.6361111 |  |
| 69 | 75.6583333 |  |
| 69 | 75.6611111 |  |
| 69 | 75.6555556 |  |
| 69 | 75.6694444 |  |
| 69 | 75.6777778 |  |
| 69 | 75.6805556 |  |
| 69 | 75.6638889 |  |
| 69 | 75.6611111 |  |
| 69 | 75.6583333 |  |
| 69 | 75.6444444 |  |
| 69 | 75.6361111 |  |
| 69 | 75.6527778 |  |
| 69 | 75.65      |  |
| 69 | 75.6416667 |  |
| 69 | 75.6361111 |  |
| 69 | 75.6055556 |  |
| 69 | 75.5666667 |  |
| 69 | 75.5277778 |  |
| 69 | 75.475     |  |
| 69 | 75.4222222 |  |
| 69 | 75.3638889 |  |
| 69 | 75.2972222 |  |
| 69 | 75.2361111 |  |
| 69 | 75.1527778 |  |
| 69 | 75.0777778 |  |
| 69 | 74.9916667 |  |
| 69 | 74.9111111 |  |
| 69 | 74.8472222 |  |
| 69 | 74.825     |  |
| 69 | 74.8138889 |  |
| 69 | 74.8027778 |  |
| 63 | 74.8       |  |
| 63 | 74.7916667 |  |
| 63 | 74.7861111 |  |
| 63 | 74.7833333 |  |
| 63 | 74.7833333 |  |
| 63 | 74.7638889 |  |
| 63 | 74.7416667 |  |
| 63 | 74.7138889 |  |
| 63 | 74.6861111 |  |

|    |            |  |
|----|------------|--|
| 63 | 74.6638889 |  |
| 63 | 74.6777778 |  |
| 63 | 74.6888889 |  |
| 63 | 74.6833333 |  |
| 63 | 74.6916667 |  |
| 63 | 74.7       |  |
| 63 | 74.7       |  |
| 63 | 74.6861111 |  |
| 63 | 74.6861111 |  |
| 63 | 74.6888889 |  |
| 63 | 74.6888889 |  |
| 63 | 74.6722222 |  |
| 63 | 74.6638889 |  |
| 63 | 74.6472222 |  |
| 63 | 74.6222222 |  |
| 63 | 74.6194444 |  |
| 63 | 74.625     |  |
| 63 | 74.625     |  |
| 63 | 74.6361111 |  |
| 63 | 74.6472222 |  |
| 63 | 74.6555556 |  |
| 63 | 74.6611111 |  |
| 63 | 74.6666667 |  |
| 63 | 74.6833333 |  |
| 63 | 74.6972222 |  |
| 63 | 74.7305556 |  |
| 63 | 74.7777778 |  |
| 63 | 74.8222222 |  |
| 63 | 74.8583333 |  |
| 63 | 74.8972222 |  |
| 63 | 74.9555556 |  |
| 63 | 75.0027778 |  |
| 63 | 75.0444444 |  |
| 63 | 75.0666667 |  |
| 63 | 75.0666667 |  |
| 63 | 75.0555556 |  |
| 63 | 75.0444444 |  |
| 63 | 75.0194444 |  |
| 63 | 74.9972222 |  |
| 63 | 74.9583333 |  |
| 63 | 74.925     |  |
| 63 | 74.8888889 |  |
| 63 | 74.8666667 |  |
| 63 | 74.8416667 |  |
| 63 | 74.8055556 |  |

|    |            |  |
|----|------------|--|
| 63 | 74.7833333 |  |
| 63 | 74.7833333 |  |
| 63 | 74.8       |  |
| 63 | 74.85      |  |
| 63 | 74.9027778 |  |
| 63 | 74.9666667 |  |
| 63 | 75.0388889 |  |
| 63 | 75.1194444 |  |
| 63 | 75.225     |  |
| 63 | 75.3333333 |  |
| 63 | 75.4194444 |  |
| 63 | 75.4916667 |  |
| 63 | 75.5472222 |  |
| 63 | 75.5916667 |  |
| 63 | 75.6333333 |  |
| 63 | 75.6555556 |  |
| 63 | 75.6833333 |  |
| 63 | 75.7055556 |  |
| 63 | 75.725     |  |
| 63 | 75.7472222 |  |
| 63 | 75.7694444 |  |
| 63 | 75.7777778 |  |
| 63 | 75.7777778 |  |
| 63 | 75.7666667 |  |
| 63 | 75.7555556 |  |
| 63 | 75.7388889 |  |
| 63 | 75.7333333 |  |
| 63 | 75.7305556 |  |
| 63 | 75.7361111 |  |
| 63 | 75.7416667 |  |
| 63 | 75.725     |  |
| 63 | 75.7055556 |  |
| 63 | 75.7083333 |  |
| 63 | 75.7083333 |  |
| 63 | 75.7277778 |  |
| 63 | 75.7444444 |  |
| 63 | 75.7555556 |  |
| 63 | 75.7638889 |  |
| 63 | 75.7777778 |  |
| 63 | 75.7916667 |  |
| 63 | 75.7972222 |  |
| 63 | 75.7972222 |  |
| 63 | 75.7861111 |  |
| 63 | 75.7444444 |  |
| 63 | 75.7027778 |  |

|    |            |  |
|----|------------|--|
| 63 | 75.6555556 |  |
| 63 | 75.6138889 |  |
| 63 | 75.5805556 |  |
| 63 | 75.5333333 |  |
| 63 | 75.4972222 |  |
| 63 | 75.4638889 |  |
| 63 | 75.4527778 |  |
| 63 | 75.4638889 |  |
| 63 | 75.4916667 |  |
| 63 | 75.5361111 |  |
| 63 | 75.5861111 |  |
| 63 | 75.6277778 |  |
| 63 | 75.6722222 |  |
| 63 | 75.7222222 |  |
| 63 | 75.7722222 |  |
| 63 | 75.8277778 |  |
| 63 | 75.8972222 |  |
| 63 | 75.9805556 |  |
| 63 | 76.0583333 |  |
| 63 | 76.1222222 |  |
| 63 | 76.1777778 |  |
| 63 | 76.2472222 |  |
| 63 | 76.3194444 |  |
| 63 | 76.4055556 |  |
| 63 | 76.5083333 |  |
| 63 | 76.6111111 |  |
| 63 | 76.7027778 |  |
| 63 | 76.7916667 |  |
|    | 76.8833333 |  |
|    | 76.9638889 |  |
|    | 77.0444444 |  |
|    | 77.1194444 |  |
|    | 77.1916667 |  |
|    | 77.2666667 |  |
|    | 77.3388889 |  |
|    | 77.4194444 |  |
|    | 77.4972222 |  |
|    | 77.5805556 |  |
|    | 77.6694444 |  |
|    | 77.7666667 |  |
|    | 77.8555556 |  |
|    | 77.9222222 |  |
|    | 77.9694444 |  |
|    | 78.0027778 |  |
|    | 78.0333333 |  |

|  |            |  |
|--|------------|--|
|  | 78.0555556 |  |
|  | 78.0583333 |  |
|  | 78.0361111 |  |
|  | 77.9944444 |  |
|  | 77.9388889 |  |
|  | 77.8833333 |  |
|  | 77.8361111 |  |
|  | 77.7694444 |  |
|  | 77.7083333 |  |
|  | 77.65      |  |
|  | 77.5805556 |  |
|  | 77.4972222 |  |
|  | 77.4166667 |  |
|  | 77.3472222 |  |
|  | 77.2888889 |  |
|  | 77.2444444 |  |
|  | 77.1916667 |  |
|  | 77.1444444 |  |
|  | 77.0888889 |  |
|  | 77.0333333 |  |
|  | 77.0027778 |  |
|  | 77.0027778 |  |
|  | 77.0055556 |  |
|  | 77         |  |
|  | 76.9805556 |  |
|  | 76.9694444 |  |
|  | 76.9555556 |  |
|  | 76.9555556 |  |
|  | 76.9555556 |  |
|  | 76.9638889 |  |
|  | 76.9722222 |  |
|  | 76.975     |  |
|  | 76.9472222 |  |
|  | 76.8888889 |  |
|  | 76.8055556 |  |
|  | 76.716696  |  |
|  | 76.6337006 |  |
|  | 76.5503966 |  |
|  | 76.4837593 |  |
|  | 76.4168133 |  |
|  | 76.379497  |  |
|  | 76.3767192 |  |
|  | 76.3822747 |  |
|  | 76.3933858 |  |
|  | 76.3906081 |  |

|  |            |  |
|--|------------|--|
|  | 76.3850525 |  |
|  | 76.3628303 |  |
|  | 76.3461636 |  |
|  | 76.329497  |  |
|  | 76.3156081 |  |
|  | 76.3128303 |  |
|  | 76.3350525 |  |
|  | 76.3683858 |  |
|  | 76.3961636 |  |
|  | 76.429497  |  |
|  | 76.4461636 |  |
|  | 76.4433858 |  |
|  | 76.4378303 |  |
|  | 76.4267192 |  |
|  | 76.4017192 |  |
|  | 76.3656081 |  |
|  | 76.3100525 |  |
|  | 76.2572747 |  |
|  | 76.2322747 |  |
|  | 76.2322747 |  |
|  | 76.2322747 |  |
|  | 76.254497  |  |
|  | 76.2711636 |  |
|  | 76.2906081 |  |
|  | 76.2989414 |  |
|  | 76.279497  |  |
|  | 76.2767192 |  |
|  | 76.2906081 |  |
|  | 76.3156081 |  |
|  | 76.3130529 |  |
|  | 76.3658013 |  |
|  | 76.4237967 |  |
|  | 76.490434  |  |
|  | 76.573738  |  |
|  | 76.6490173 |  |
|  | 76.7002226 |  |
|  | 76.7280003 |  |
|  | 76.7181293 |  |
|  | 76.7144312 |  |
|  | 76.7172145 |  |
|  | 76.7286398 |  |
|  | 76.7511762 |  |
|  | 76.7820459 |  |
|  | 76.8110638 |  |
|  | 76.8320569 |  |



|  |            |  |
|--|------------|--|
|  | 76.8545933 |  |
|  | 76.849352  |  |
|  | 76.8209624 |  |
|  | 76.7919556 |  |
|  | 76.7475167 |  |
|  | 76.6981395 |  |
|  | 76.6842506 |  |
|  | 76.6898062 |  |
|  | 76.7064729 |  |
|  | 76.7203617 |  |
|  | 76.717584  |  |
|  | 76.7092506 |  |
|  | 76.6898062 |  |
|  | 76.6509173 |  |
|  | 76.6064729 |  |
|  | 76.5731395 |  |
|  | 76.5370284 |  |
|  | 76.492584  |  |
|  | 76.4564729 |  |
|  | 76.4148062 |  |
|  | 76.3759173 |  |
|  | 76.3259173 |  |
|  | 76.2842506 |  |
|  | 76.2370284 |  |
|  | 76.2395836 |  |
|  | 76.1868059 |  |
|  | 76.1312503 |  |
|  | 76.0618059 |  |
|  | 75.9840281 |  |
|  | 75.9062503 |  |
|  | 75.822917  |  |
|  | 75.7312503 |  |
|  | 75.682788  |  |
|  | 75.6225973 |  |
|  | 75.5559251 |  |
|  | 75.4750553 |  |
|  | 75.3914078 |  |
|  | 75.3077603 |  |
|  | 75.2287424 |  |
|  | 75.1660826 |  |
|  | 75.1129906 |  |
|  | 75.0737876 |  |
|  | 75.0521771 |  |
|  | 74.9889416 |  |
|  | 74.9170642 |  |

|  |            |  |
|--|------------|--|
|  | 74.8498164 |  |
|  | 74.7581914 |  |
|  | 74.6443442 |  |
|  | 74.5252501 |  |
|  | 74.3808474 |  |
|  | 74.2370619 |  |
|  | 74.0951283 |  |
|  | 73.9584416 |  |
|  | 73.8399647 |  |
|  | 73.7366114 |  |
|  | 73.6314061 |  |
|  | 73.5758506 |  |
|  | 73.5480728 |  |
|  | 73.5119617 |  |
|  | 73.4980728 |  |
|  | 73.5314061 |  |
|  | 73.5730728 |  |
|  | 73.6091839 |  |
|  | 73.6619617 |  |
|  | 73.7091839 |  |
|  | 73.7591839 |  |
|  | 73.8091839 |  |
|  | 73.8730728 |  |
|  | 73.8819933 |  |
|  | 73.9057287 |  |
|  | 73.9489085 |  |
|  | 74.0013476 |  |
|  | 74.0537867 |  |
|  | 74.1148677 |  |
|  | 74.1997142 |  |
|  | 74.2947458 |  |
|  | 74.3567092 |  |
|  | 74.4202158 |  |
|  | 74.5146167 |  |
|  | 74.6312833 |  |
|  | 74.7396167 |  |
|  | 74.8285056 |  |
|  | 74.9090611 |  |
|  | 75.0429701 |  |
|  | 75.2176197 |  |
|  | 75.4286892 |  |
|  | 75.6397586 |  |
|  | 75.8480502 |  |
|  | 76.0643666 |  |
|  | 76.3198804 |  |

|  |            |  |
|--|------------|--|
|  | 76.5942215 |  |
|  | 76.8611551 |  |
|  | 77.1228418 |  |
|  | 77.3607631 |  |
|  | 77.594672  |  |
|  | 77.8304328 |  |
|  | 78.027655  |  |
|  | 78.1024382 |  |
|  | 78.1811573 |  |
|  | 78.2551225 |  |
|  | 78.3054191 |  |
|  | 78.3458914 |  |
|  | 78.3887444 |  |
|  | 78.4274606 |  |
|  | 78.4685965 |  |
|  | 78.5231391 |  |
|  | 78.5850215 |  |
|  | 78.6473402 |  |
|  | 78.7807318 |  |
|  | 78.8301574 |  |
|  | 78.8637101 |  |
|  | 78.8919717 |  |
|  | 78.9281699 |  |
|  | 78.9758319 |  |
|  | 79.0252576 |  |

| Time     | Person 1   | Person 11  | Person 8   | Person 6   | Person 7   |
|----------|------------|------------|------------|------------|------------|
| 17:03:50 | 64.8197433 | 53.8243232 | 70.8106527 | 70.5666434 | 69.6321585 |
| 17:03:51 | 64.8197433 | 54.8243232 | 70.8106527 | 64.5666434 | 69.6321585 |
| 17:03:52 | 64.8197433 | 54.8243232 | 70.9106527 | 64.5666434 | 70.6321585 |
| 17:03:53 | 62.8197433 | 54.8243232 | 70.6106527 | 64.5666434 | 69.6321585 |
| 17:03:54 | 62.8197433 | 55.8243232 | 70.0106527 | 60.5666434 | 69.6321585 |
| 17:03:55 | 61.8197433 | 55.8243232 | 69.5106527 | 60.5666434 | 68.6321585 |
| 17:03:56 | 62.8197433 | 55.8243232 | 84.1349434 | 60.5666434 | 68.6321585 |
| 17:03:57 | 62.8197433 | 55.8243232 | 83.1349434 | 61.5666434 | 67.6321585 |
| 17:03:58 | 62.8197433 | 54.8243232 | 82.1349434 | 61.5666434 | 67.6321585 |
| 17:03:59 | 62.8197433 | 54.8243232 | 83.1349434 | 61.5666434 | 67.6321585 |
| 17:04:00 | 62.8197433 | 54.8243232 | 83.1349434 | 61.5666434 | 66.6321585 |
| 17:04:01 | 62.8197433 | 51.8243232 | 83.1349434 | 61.5666434 | 66.6321585 |
| 17:04:02 | 62.8197433 | 51.8243232 | 82.1349434 | 62.5666434 | 66.6321585 |
| 17:04:03 | 63.8197433 | 51.8243232 | 81.1349434 | 62.5666434 | 66.6321585 |
| 17:04:04 | 63.8197433 | 51.8243232 | 81.1349434 | 62.5666434 | 66.6321585 |
| 17:04:05 | 63.8197433 | 51.8243232 | 81.1349434 | 62.5666434 | 64.6321585 |
| 17:04:06 | 63.8197433 | 59.8243232 | 81.1349434 | 62.5666434 | 63.6321585 |
| 17:04:07 | 63.8197433 | 63.8243232 | 81.1349434 | 62.5666434 | 63.6321585 |
| 17:04:08 | 64.8197433 | 64.8243232 | 81.1349434 | 63.5666434 | 63.6321585 |
| 17:04:09 | 64.8197433 | 64.8243232 | 81.1349434 | 63.5666434 | 63.6321585 |
| 17:04:10 | 64.8197433 | 64.8243232 | 81.1349434 | 63.5666434 | 63.6321585 |
| 17:04:11 | 64.8197433 | 66.8243232 | 82.1349434 | 65.5666434 | 64.6321585 |
| 17:04:12 | 64.8197433 | 66.8243232 | 82.1349434 | 65.5666434 | 64.6321585 |
| 17:04:13 | 64.8197433 | 71.8243232 | 82.1349434 | 65.5666434 | 64.6321585 |
| 17:04:14 | 65.8197433 | 72.8243232 | 71.1106527 | 68.5666434 | 65.6321585 |
| 17:04:15 | 66.8197433 | 72.8243232 | 71.4106527 | 67.5666434 | 65.6321585 |
| 17:04:16 | 67.8197433 | 68.8243232 | 71.3106527 | 66.5666434 | 64.6321585 |
| 17:04:17 | 68.8197433 | 65.8243232 | 71.2106527 | 66.5666434 | 64.6321585 |
| 17:04:18 | 67.8197433 | 65.8243232 | 71.8106527 | 67.5666434 | 63.6321585 |
| 17:04:19 | 66.8197433 | 64.8243232 | 71.9106527 | 67.5666434 | 63.6321585 |
| 17:04:20 | 66.8197433 | 64.8243232 | 72.0106527 | 67.5666434 | 63.6321585 |
| 17:04:21 | 65.8197433 | 64.8243232 | 72.0106527 | 67.5666434 | 64.6321585 |
| 17:04:22 | 65.8197433 | 65.8243232 | 72.3106527 | 68.5666434 | 65.6321585 |
| 17:04:23 | 65.8197433 | 64.8243232 | 74.1349434 | 68.5666434 | 65.6321585 |
| 17:04:24 | 64.8197433 | 64.8243232 | 73.1349434 | 68.5666434 | 65.6321585 |
| 17:04:25 | 64.8197433 | 64.8243232 | 74.1349434 | 68.5666434 | 65.6321585 |
| 17:04:26 | 65.8197433 | 65.8243232 | 74.1349434 | 68.5666434 | 65.6321585 |
| 17:04:27 | 64.8197433 | 64.8243232 | 74.1349434 | 68.5666434 | 65.6321585 |
| 17:04:28 | 65.8197433 | 64.8243232 | 75.1349434 | 68.5666434 | 66.6321585 |
| 17:04:29 | 65.8197433 | 64.8243232 | 75.1349434 | 69.5666434 | 66.6321585 |
| 17:04:30 | 64.8197433 | 64.8243232 | 75.1349434 | 70.5666434 | 68.6321585 |
| 17:04:31 | 63.8197433 | 64.8243232 | 75.1349434 | 71.5666434 | 68.6321585 |
| 17:04:32 | 63.8197433 | 62.8243232 | 75.1349434 | 71.5666434 | 68.6321585 |

|          |            |            |            |            |            |
|----------|------------|------------|------------|------------|------------|
| 17:04:33 | 62.8197433 | 62.8243232 | 75.1349434 | 68.5666434 | 67.6321585 |
| 17:04:34 | 62.8197433 | 63.8243232 | 76.1349434 | 66.5666434 | 67.6321585 |
| 17:04:35 | 61.8197433 | 63.8243232 | 76.1349434 | 66.5666434 | 66.6321585 |
| 17:04:36 | 61.8197433 | 63.8243232 | 75.1349434 | 66.5666434 | 66.6321585 |
| 17:04:37 | 61.8197433 | 64.8243232 | 75.1349434 | 65.5666434 | 65.6321585 |
| 17:04:38 | 61.8197433 | 64.8243232 | 73.1349434 | 65.5666434 | 64.6321585 |
| 17:04:39 | 61.8197433 | 63.8243232 | 72.1349434 | 65.5666434 | 64.6321585 |
| 17:04:40 | 61.8197433 | 63.8243232 | 72.1349434 | 65.5666434 | 64.6321585 |
| 17:04:41 | 61.8197433 | 63.8243232 | 71.1349434 | 65.5666434 | 64.6321585 |
| 17:04:42 | 61.8197433 | 63.8243232 | 71.1349434 | 64.5666434 | 64.6321585 |
| 17:04:43 | 61.8197433 | 63.8243232 | 71.1349434 | 65.5666434 | 64.6321585 |
| 17:04:44 | 61.8197433 | 62.8243232 | 70.1349434 | 65.5666434 | 64.6321585 |
| 17:04:45 | 61.8197433 | 62.8243232 | 70.1349434 | 65.5666434 | 65.6321585 |
| 17:04:46 | 62.8197433 | 62.8243232 | 70.1349434 | 64.5666434 | 65.6321585 |
| 17:04:47 | 62.8197433 | 62.8243232 | 73.1349434 | 64.5666434 | 66.6321585 |
| 17:04:48 | 62.8197433 | 62.8243232 | 74.1349434 | 64.5666434 | 68.6321585 |
| 17:04:49 | 62.8197433 | 63.8243232 | 75.1349434 | 64.5666434 | 68.6321585 |
| 17:04:50 | 62.8197433 | 63.8243232 | 75.1349434 | 64.5666434 | 67.6321585 |
| 17:04:51 | 62.8197433 | 63.8243232 | 74.1349434 | 64.5666434 | 67.6321585 |
| 17:04:52 | 62.8197433 | 63.8243232 | 72.1349434 | 64.5666434 | 66.6321585 |
| 17:04:53 | 62.8197433 | 63.8243232 | 72.1349434 | 64.5666434 | 67.6321585 |
| 17:04:54 | 62.8197433 | 63.8243232 | 71.1349434 | 63.5666434 | 68.6321585 |
| 17:04:55 | 62.8197433 | 63.8243232 | 71.1349434 | 66.5666434 | 68.6321585 |
| 17:04:56 | 62.8197433 | 63.8243232 | 71.1349434 | 72.5666434 | 68.6321585 |
| 17:04:57 | 62.8197433 | 63.8243232 | 70.1349434 | 72.5666434 | 68.6321585 |
| 17:04:58 | 64.8197433 | 64.8243232 | 69.1349434 | 77.5666434 | 69.6321585 |
| 17:04:59 | 65.8197433 | 64.8243232 | 65.1349434 | 79.5666434 | 69.6321585 |
| 17:05:00 | 65.8197433 | 68.8243232 | 65.1349434 | 80.5666434 | 70.6321585 |
| 17:05:01 | 67.8197433 | 72.8243232 | 63.1349434 | 80.5666434 | 70.6321585 |
| 17:05:02 | 68.8197433 | 74.8243232 | 61.1349434 | 80.5666434 | 70.6321585 |
| 17:05:03 | 69.8197433 | 74.8243232 | 57.1349434 | 81.5666434 | 70.6321585 |
| 17:05:04 | 71.8197433 | 74.8243232 | 57.1349434 | 81.5666434 | 70.6321585 |
| 17:05:05 | 71.8197433 | 73.8243232 | 57.1349434 | 77.5666434 | 70.6321585 |
| 17:05:06 | 71.8197433 | 73.8243232 | 57.1349434 | 77.5666434 | 70.6321585 |
| 17:05:07 | 71.8197433 | 66.8243232 | 56.1349434 | 66.5666434 | 74.6321585 |
| 17:05:08 | 68.8197433 | 65.8243232 | 55.1349434 | 66.5666434 | 72.6321585 |
| 17:05:09 | 67.8197433 | 65.8243232 | 55.1349434 | 66.5666434 | 70.6321585 |
| 17:05:10 | 66.8197433 | 65.8243232 | 56.1349434 | 65.5666434 | 70.6321585 |
| 17:05:11 | 65.8197433 | 61.8243232 | 58.1349434 | 64.5666434 | 69.6321585 |
| 17:05:12 | 64.8197433 | 60.8243232 | 58.1349434 | 64.5666434 | 69.6321585 |
| 17:05:13 | 63.8197433 | 60.8243232 | 58.1349434 | 63.5666434 | 68.6321585 |
| 17:05:14 | 63.8197433 | 59.8243232 | 58.1349434 | 63.5666434 | 69.6321585 |
| 17:05:15 | 63.8197433 | 58.8243232 | 58.1349434 | 63.5666434 | 69.6321585 |
| 17:05:16 | 63.8197433 | 58.8243232 | 58.1349434 | 64.5666434 | 69.6321585 |
| 17:05:17 | 63.8197433 | 58.8243232 | 59.1349434 | 64.5666434 | 69.6321585 |

|          |            |            |            |            |            |
|----------|------------|------------|------------|------------|------------|
| 17:05:18 | 63.8197433 | 59.8243232 | 59.1349434 | 65.5666434 | 69.6321585 |
| 17:05:19 | 63.8197433 | 59.8243232 | 59.1349434 | 66.5666434 | 69.6321585 |
| 17:05:20 | 63.8197433 | 59.8243232 | 59.1349434 | 66.5666434 | 69.6321585 |
| 17:05:21 | 63.8197433 | 59.8243232 | 59.1349434 | 66.5666434 | 69.6321585 |
| 17:05:22 | 64.8197433 | 58.8243232 | 61.1349434 | 67.5666434 | 69.6321585 |
| 17:05:23 | 66.8197433 | 59.8243232 | 61.1349434 | 68.5666434 | 69.6321585 |
| 17:05:24 | 65.8197433 | 60.8243232 | 61.1349434 | 68.5666434 | 69.6321585 |
| 17:05:25 | 65.8197433 | 61.8243232 | 60.1349434 | 71.5666434 | 69.6321585 |
| 17:05:26 | 65.8197433 | 61.8243232 | 61.1349434 | 71.5666434 | 69.6321585 |
| 17:05:27 | 65.8197433 | 61.8243232 | 63.1349434 | 71.5666434 | 69.6321585 |
| 17:05:28 | 67.8197433 | 62.8243232 | 63.1349434 | 73.5666434 | 69.6321585 |
| 17:05:29 | 67.8197433 | 61.8243232 | 63.1349434 | 74.5666434 | 69.6321585 |
| 17:05:30 | 67.8197433 | 61.8243232 | 65.1349434 | 74.5666434 | 69.6321585 |
| 17:05:31 | 66.8197433 | 61.8243232 | 66.1349434 | 74.5666434 | 69.6321585 |
| 17:05:32 | 66.8197433 | 61.8243232 | 66.1349434 | 73.5666434 | 67.6321585 |
| 17:05:33 | 66.8197433 | 61.8243232 | 66.1349434 | 68.5666434 | 67.6321585 |
| 17:05:34 | 66.8197433 | 61.8243232 | 67.1349434 | 67.5666434 | 66.6321585 |
| 17:05:35 | 66.8197433 | 61.8243232 | 67.1349434 | 66.5666434 | 66.6321585 |
| 17:05:36 | 66.8197433 | 61.8243232 | 67.1349434 | 66.5666434 | 65.6321585 |
| 17:05:37 | 68.8197433 | 59.8243232 | 67.1349434 | 65.5666434 | 65.6321585 |
| 17:05:38 | 73.8197433 | 58.8243232 | 67.1349434 | 65.5666434 | 65.6321585 |
| 17:05:39 | 76.8197433 | 58.8243232 | 67.1349434 | 66.5666434 | 66.6321585 |
| 17:05:40 | 77.8197433 | 58.8243232 | 67.1349434 | 66.5666434 | 67.6321585 |
| 17:05:41 | 78.8197433 | 58.8243232 | 67.1349434 | 66.5666434 | 67.6321585 |
| 17:05:42 | 79.8197433 | 58.8243232 | 67.1349434 | 66.5666434 | 67.6321585 |
| 17:05:43 | 71.1106527 | 59.8243232 | 67.1349434 | 69.5666434 | 68.6321585 |
| 17:05:44 | 71.1106527 | 59.8243232 | 67.1349434 | 69.5666434 | 68.6321585 |
| 17:05:45 | 71.4106527 | 59.8243232 | 68.1349434 | 72.5666434 | 66.6321585 |
| 17:05:46 | 84.8197433 | 62.8243232 | 68.1349434 | 72.5666434 | 66.6321585 |
| 17:05:47 | 81.8197433 | 62.8243232 | 72.1349434 | 72.5666434 | 66.6321585 |
| 17:05:48 | 78.8197433 | 61.8243232 | 68.1349434 | 74.5666434 | 66.6321585 |
| 17:05:49 | 72.8197433 | 60.8243232 | 68.1349434 | 74.5666434 | 68.6321585 |
| 17:05:50 | 68.8197433 | 60.8243232 | 58.1349434 | 76.5666434 | 69.6321585 |
| 17:05:51 | 66.8197433 | 59.8243232 | 58.1349434 | 78.5666434 | 69.6321585 |
| 17:05:52 | 65.8197433 | 59.8243232 | 58.1349434 | 78.5666434 | 69.6321585 |
| 17:05:53 | 64.8197433 | 59.8243232 | 58.1349434 | 78.5666434 | 69.6321585 |
| 17:05:54 | 64.8197433 | 59.8243232 | 58.1349434 | 78.5666434 | 69.6321585 |
| 17:05:55 | 65.8197433 | 59.8243232 | 58.1349434 | 78.5666434 | 68.6321585 |
| 17:05:56 | 64.8197433 | 59.8243232 | 58.1349434 | 77.5666434 | 68.6321585 |
| 17:05:57 | 63.8197433 | 59.8243232 | 58.1349434 | 77.5666434 | 67.6321585 |
| 17:05:58 | 63.8197433 | 60.8243232 | 58.1349434 | 77.5666434 | 67.6321585 |
| 17:05:59 | 63.8197433 | 60.8243232 | 54.1349434 | 74.5666434 | 67.6321585 |
| 17:06:00 | 63.8197433 | 60.8243232 | 54.1349434 | 74.5666434 | 67.6321585 |
| 17:06:01 | 62.8197433 | 60.8243232 | 53.1349434 | 74.5666434 | 65.6321585 |
| 17:06:02 | 62.8197433 | 61.8243232 | 53.1349434 | 74.5666434 | 65.6321585 |

|          |            |            |            |            |            |
|----------|------------|------------|------------|------------|------------|
| 17:06:03 | 62.8197433 | 62.8243232 | 53.1349434 | 74.5666434 | 65.6321585 |
| 17:06:04 | 62.8197433 | 62.8243232 | 54.1349434 | 75.5666434 | 64.6321585 |
| 17:06:05 | 62.8197433 | 62.8243232 | 55.1349434 | 75.5666434 | 64.6321585 |
| 17:06:06 | 63.8197433 | 63.8243232 | 56.1349434 | 75.5666434 | 64.6321585 |
| 17:06:07 | 64.8197433 | 63.8243232 | 56.1349434 | 75.5666434 | 64.6321585 |
| 17:06:08 | 64.8197433 | 63.8243232 | 57.1349434 | 77.5666434 | 65.6321585 |
| 17:06:09 | 63.8197433 | 63.8243232 | 64.1349434 | 81.5666434 | 64.6321585 |
| 17:06:10 | 63.8197433 | 65.8243232 | 64.1349434 | 80.5666434 | 64.6321585 |
| 17:06:11 | 63.8197433 | 65.8243232 | 64.1349434 | 73.5666434 | 63.6321585 |
| 17:06:12 | 63.8197433 | 65.8243232 | 64.1349434 | 73.5666434 | 63.6321585 |
| 17:06:13 | 63.8197433 | 69.8243232 | 65.1349434 | 73.5666434 | 63.6321585 |
| 17:06:14 | 63.8197433 | 71.8243232 | 65.1349434 | 73.5666434 | 63.6321585 |
| 17:06:15 | 63.8197433 | 71.8243232 | 65.1349434 | 72.5666434 | 63.6321585 |
| 17:06:16 | 64.8197433 | 71.8243232 | 64.1349434 | 72.5666434 | 63.6321585 |
| 17:06:17 | 65.8197433 | 70.8243232 | 63.1349434 | 72.5666434 | 63.6321585 |
| 17:06:18 | 66.8197433 | 66.8243232 | 62.1349434 | 70.5666434 | 68.6321585 |
| 17:06:19 | 66.8197433 | 63.8243232 | 62.1349434 | 70.5666434 | 70.6321585 |
| 17:06:20 | 66.8197433 | 63.8243232 | 63.1349434 | 68.5666434 | 70.6321585 |
| 17:06:21 | 65.8197433 | 63.8243232 | 63.1349434 | 68.5666434 | 70.6321585 |
| 17:06:22 | 64.8197433 | 62.8243232 | 63.1349434 | 66.5666434 | 70.6321585 |
| 17:06:23 | 63.8197433 | 60.8243232 | 64.1349434 | 65.5666434 | 69.6321585 |
| 17:06:24 | 62.8197433 | 60.8243232 | 64.1349434 | 65.5666434 | 69.6321585 |
| 17:06:25 | 62.8197433 | 60.8243232 | 64.1349434 | 65.5666434 | 69.6321585 |
| 17:06:26 | 62.8197433 | 60.8243232 | 64.1349434 | 65.5666434 | 68.6321585 |
| 17:06:27 | 62.8197433 | 59.8243232 | 64.1349434 | 66.5666434 | 67.6321585 |
| 17:06:28 | 62.8197433 | 59.8243232 | 65.1349434 | 66.5666434 | 67.6321585 |
| 17:06:29 | 62.8197433 | 59.8243232 | 65.1349434 | 66.5666434 | 66.6321585 |
| 17:06:30 | 62.8197433 | 60.8243232 | 66.1349434 | 67.5666434 | 66.6321585 |
| 17:06:31 | 62.8197433 | 61.8243232 | 67.1349434 | 72.5666434 | 66.6321585 |
| 17:06:32 | 62.8197433 | 61.8243232 | 68.1349434 | 72.5666434 | 67.6321585 |
| 17:06:33 | 62.8197433 | 61.8243232 | 68.1349434 | 74.5666434 | 67.6321585 |
| 17:06:34 | 63.8197433 | 61.8243232 | 68.1349434 | 72.5666434 | 69.6321585 |
| 17:06:35 | 63.8197433 | 61.8243232 | 69.1349434 | 72.5666434 | 69.6321585 |
| 17:06:36 | 62.8197433 | 61.8243232 | 71.1349434 | 70.5666434 | 69.6321585 |
| 17:06:37 | 62.8197433 | 60.8243232 | 72.1349434 | 67.5666434 | 69.6321585 |
| 17:06:38 | 62.8197433 | 60.8243232 | 72.1349434 | 66.5666434 | 69.6321585 |
| 17:06:39 | 62.8197433 | 60.8243232 | 72.1349434 | 65.5666434 | 70.6321585 |
| 17:06:40 | 62.8197433 | 60.8243232 | 73.1349434 | 65.5666434 | 71.6321585 |
| 17:06:41 | 62.8197433 | 60.8243232 | 73.1349434 | 65.5666434 | 71.6321585 |
| 17:06:42 | 63.8197433 | 60.8243232 | 73.1349434 | 65.5666434 | 71.6321585 |
| 17:06:43 | 62.8197433 | 60.8243232 | 74.1349434 | 65.5666434 | 71.6321585 |
| 17:06:44 | 62.8197433 | 60.8243232 | 75.1349434 | 65.5666434 | 71.6321585 |
| 17:06:45 | 63.8197433 | 60.8243232 | 77.1349434 | 66.5666434 | 71.6321585 |
| 17:06:46 | 63.8197433 | 60.8243232 | 77.1349434 | 66.5666434 | 71.6321585 |
| 17:06:47 | 63.8197433 | 62.8243232 | 78.1349434 | 66.5666434 | 71.6321585 |

|          |            |            |            |            |            |
|----------|------------|------------|------------|------------|------------|
| 17:06:48 | 63.8197433 | 63.8243232 | 79.1349434 | 66.5666434 | 72.6321585 |
| 17:06:49 | 64.8197433 | 63.8243232 | 80.1349434 | 68.5666434 | 72.6321585 |
| 17:06:50 | 64.8197433 | 63.8243232 | 80.1349434 | 70.5666434 | 72.6321585 |
| 17:06:51 | 64.8197433 | 63.8243232 | 80.1349434 | 70.5666434 | 72.6321585 |
| 17:06:52 | 64.8197433 | 63.8243232 | 79.1349434 | 74.5666434 | 72.6321585 |
| 17:06:53 | 63.8197433 | 62.8243232 | 78.1349434 | 78.5666434 | 72.6321585 |
| 17:06:54 | 63.8197433 | 62.8243232 | 78.1349434 | 78.5666434 | 72.6321585 |
| 17:06:55 | 63.8197433 | 61.8243232 | 77.1349434 | 78.5666434 | 71.6321585 |
| 17:06:56 | 62.8197433 | 61.8243232 | 77.1349434 | 76.5666434 | 70.6321585 |
| 17:06:57 | 63.8197433 | 61.8243232 | 77.1349434 | 71.5666434 | 70.6321585 |
| 17:06:58 | 63.8197433 | 60.8243232 | 75.1349434 | 71.5666434 | 69.6321585 |
| 17:06:59 | 64.8197433 | 60.8243232 | 73.1349434 | 73.5666434 | 71.6321585 |
| 17:07:00 | 64.8197433 | 61.8243232 | 72.1349434 | 72.5666434 | 71.6321585 |
| 17:07:01 | 64.8197433 | 61.8243232 | 72.1349434 | 72.5666434 | 71.6321585 |
| 17:07:02 | 63.8197433 | 62.8243232 | 71.1349434 | 71.5666434 | 71.6321585 |
| 17:07:03 | 63.8197433 | 61.8243232 | 71.1349434 | 71.5666434 | 71.6321585 |
| 17:07:04 | 63.8197433 | 61.8243232 | 71.1349434 | 70.5666434 | 71.6321585 |
| 17:07:05 | 63.8197433 | 60.8243232 | 71.1349434 | 70.5666434 | 71.6321585 |
| 17:07:06 | 63.8197433 | 60.8243232 | 70.1349434 | 70.5666434 | 71.6321585 |
| 17:07:07 | 63.8197433 | 60.8243232 | 70.1349434 | 70.5666434 | 71.6321585 |
| 17:07:08 | 63.8197433 | 60.8243232 | 71.1349434 | 70.5666434 | 73.6321585 |
| 17:07:09 | 63.8197433 | 60.8243232 | 73.1349434 | 70.5666434 | 73.6321585 |
| 17:07:10 | 63.8197433 | 60.8243232 | 75.1349434 | 71.5666434 | 73.6321585 |
| 17:07:11 | 63.8197433 | 60.8243232 | 77.1349434 | 71.5666434 | 73.6321585 |
| 17:07:12 | 63.8197433 | 60.8243232 | 77.1349434 | 71.5666434 | 73.6321585 |
| 17:07:13 | 63.8197433 | 60.8243232 | 79.1349434 | 69.5666434 | 73.6321585 |
| 17:07:14 | 63.8197433 | 60.8243232 | 81.1349434 | 68.5666434 | 73.6321585 |
| 17:07:15 | 62.8197433 | 60.8243232 | 81.1349434 | 66.5666434 | 74.6321585 |
| 17:07:16 | 62.8197433 | 59.8243232 | 80.1349434 | 66.5666434 | 74.6321585 |
| 17:07:17 | 62.8197433 | 59.8243232 | 80.1349434 | 66.5666434 | 75.6321585 |
| 17:07:18 | 62.8197433 | 59.8243232 | 80.1349434 | 64.5666434 | 74.6321585 |
| 17:07:19 | 62.8197433 | 59.8243232 | 82.1349434 | 64.5666434 | 72.6321585 |
| 17:07:20 | 62.8197433 | 60.8243232 | 84.1349434 | 64.5666434 | 72.6321585 |
| 17:07:21 | 62.8197433 | 71.8243232 | 84.1349434 | 64.5666434 | 71.6321585 |
| 17:07:22 | 62.8197433 | 71.8243232 | 84.1349434 | 63.5666434 | 71.6321585 |
| 17:07:23 | 62.8197433 | 71.8243232 | 84.1349434 | 63.5666434 | 70.6321585 |
| 17:07:24 | 62.8197433 | 73.8243232 | 84.1349434 | 64.5666434 | 70.6321585 |
| 17:07:25 | 62.8197433 | 75.8243232 | 79.1349434 | 66.5666434 | 70.6321585 |
| 17:07:26 | 62.8197433 | 75.8243232 | 79.1349434 | 66.5666434 | 70.6321585 |
| 17:07:27 | 62.8197433 | 75.8243232 | 72.1349434 | 66.5666434 | 67.6321585 |
| 17:07:28 | 62.8197433 | 75.8243232 | 70.1349434 | 66.5666434 | 67.6321585 |
| 17:07:29 | 62.8197433 | 75.8243232 | 70.1349434 | 66.5666434 | 68.6321585 |
| 17:07:30 | 62.8197433 | 73.8243232 | 70.1349434 | 66.5666434 | 69.6321585 |
| 17:07:31 | 62.8197433 | 71.8243232 | 70.1349434 | 66.5666434 | 69.6321585 |
| 17:07:32 | 62.8197433 | 68.8243232 | 70.1349434 | 67.5666434 | 68.6321585 |



|          |            |            |            |            |            |
|----------|------------|------------|------------|------------|------------|
| 17:07:33 | 62.8197433 | 67.8243232 | 70.1349434 | 68.5666434 | 68.6321585 |
| 17:07:34 | 62.8197433 | 68.8243232 | 70.1349434 | 68.5666434 | 69.6321585 |
| 17:07:35 | 62.8197433 | 69.8243232 | 70.1349434 | 68.5666434 | 69.6321585 |
| 17:07:36 | 62.8197433 | 69.8243232 | 69.1349434 | 70.5666434 | 68.6321585 |
| 17:07:37 | 62.8197433 | 70.8243232 | 69.1349434 | 70.5666434 | 68.6321585 |
| 17:07:38 | 63.8197433 | 70.8243232 | 73.1349434 | 71.5666434 | 68.6321585 |
| 17:07:39 | 63.8197433 | 70.8243232 | 73.1349434 | 71.5666434 | 68.6321585 |
| 17:07:40 | 64.8197433 | 69.8243232 | 74.1349434 | 71.5666434 | 68.6321585 |
| 17:07:41 | 64.8197433 | 67.8243232 | 72.1349434 | 71.5666434 | 68.6321585 |
| 17:07:42 | 63.8197433 | 66.8243232 | 70.1349434 | 71.5666434 | 68.6321585 |
| 17:07:43 | 62.8197433 | 65.8243232 | 69.1349434 | 72.5666434 | 68.6321585 |
| 17:07:44 | 62.8197433 | 65.8243232 | 67.1349434 | 72.5666434 | 68.6321585 |
| 17:07:45 | 62.8197433 | 65.8243232 | 66.1349434 | 72.5666434 | 68.6321585 |
| 17:07:46 | 61.8197433 | 65.8243232 | 64.1349434 | 72.5666434 | 68.6321585 |
| 17:07:47 | 61.8197433 | 64.8243232 | 64.1349434 | 72.5666434 | 68.6321585 |
| 17:07:48 | 61.8197433 | 64.8243232 | 64.1349434 | 72.5666434 | 68.6321585 |
| 17:07:49 | 61.8197433 | 64.8243232 | 66.1349434 | 80.5666434 | 69.6321585 |
| 17:07:50 | 61.8197433 | 64.8243232 | 68.1349434 | 80.5666434 | 69.6321585 |
| 17:07:51 | 61.8197433 | 64.8243232 | 69.1349434 | 80.5666434 | 69.6321585 |
| 17:07:52 | 62.8197433 | 64.8243232 | 69.1349434 | 82.5666434 | 69.6321585 |
| 17:07:53 | 62.8197433 | 64.8243232 | 69.1349434 | 68.574478  | 69.6321585 |
| 17:07:54 | 62.8197433 | 64.8243232 | 69.1349434 | 68.2108417 | 69.6321585 |
| 17:07:55 | 62.8197433 | 65.8243232 | 69.1349434 | 78.5666434 | 71.6321585 |
| 17:07:56 | 62.8197433 | 65.8243232 | 68.1349434 | 75.5666434 | 71.6321585 |
| 17:07:57 | 62.8197433 | 65.8243232 | 68.1349434 | 75.5666434 | 71.6321585 |
| 17:07:58 | 62.8197433 | 65.8243232 | 68.1349434 | 73.5666434 | 71.6321585 |
| 17:07:59 | 61.8197433 | 65.8243232 | 69.1349434 | 73.5666434 | 71.6321585 |
| 17:08:00 | 61.8197433 | 65.8243232 | 69.1349434 | 73.5666434 | 71.6321585 |
| 17:08:01 | 62.8197433 | 67.8243232 | 69.1349434 | 73.5666434 | 70.6321585 |
| 17:08:02 | 61.8197433 | 67.8243232 | 69.1349434 | 73.5666434 | 70.6321585 |
| 17:08:03 | 62.8197433 | 66.8243232 | 69.1349434 | 73.5666434 | 70.6321585 |
| 17:08:04 | 62.8197433 | 66.8243232 | 69.1349434 | 73.5666434 | 69.6321585 |
| 17:08:05 | 62.8197433 | 66.8243232 | 68.1349434 | 73.5666434 | 69.6321585 |
| 17:08:06 | 61.8197433 | 66.8243232 | 69.1349434 | 73.5666434 | 69.6321585 |
| 17:08:07 | 61.8197433 | 67.8243232 | 68.1349434 | 73.5666434 | 69.6321585 |
| 17:08:08 | 61.8197433 | 68.8243232 | 68.1349434 | 73.5666434 | 69.6321585 |
| 17:08:09 | 61.8197433 | 68.8243232 | 67.1349434 | 73.5666434 | 69.6321585 |
| 17:08:10 | 62.8197433 | 68.8243232 | 66.1349434 | 75.5666434 | 69.6321585 |
| 17:08:11 | 62.8197433 | 68.8243232 | 65.1349434 | 75.5666434 | 71.6321585 |
| 17:08:12 | 62.8197433 | 68.8243232 | 65.1349434 | 76.5666434 | 71.6321585 |
| 17:08:13 | 62.8197433 | 67.8243232 | 65.1349434 | 76.5666434 | 71.6321585 |
| 17:08:14 | 62.8197433 | 67.8243232 | 62.1349434 | 77.5666434 | 70.6321585 |
| 17:08:15 | 62.8197433 | 67.8243232 | 62.1349434 | 77.5666434 | 69.6321585 |
| 17:08:16 | 62.8197433 | 68.8243232 | 62.1349434 | 77.5666434 | 69.6321585 |
| 17:08:17 | 62.8197433 | 68.8243232 | 63.1349434 | 74.5666434 | 69.6321585 |

|          |            |            |            |            |            |
|----------|------------|------------|------------|------------|------------|
| 17:08:18 | 63.8197433 | 67.8243232 | 63.1349434 | 73.5666434 | 69.6321585 |
| 17:08:19 | 63.8197433 | 65.8243232 | 63.1349434 | 73.5666434 | 69.6321585 |
| 17:08:20 | 64.8197433 | 64.8243232 | 63.1349434 | 73.5666434 | 69.6321585 |
| 17:08:21 | 63.8197433 | 63.8243232 | 63.1349434 | 74.5666434 | 68.6321585 |
| 17:08:22 | 63.8197433 | 63.8243232 | 64.1349434 | 74.5666434 | 68.6321585 |
| 17:08:23 | 63.8197433 | 63.8243232 | 64.1349434 | 75.5666434 | 68.6321585 |
| 17:08:24 | 63.8197433 | 63.8243232 | 73.1349434 | 76.5666434 | 67.6321585 |
| 17:08:25 | 63.8197433 | 63.8243232 | 75.1349434 | 76.5666434 | 67.6321585 |
| 17:08:26 | 64.8197433 | 64.8243232 | 74.1349434 | 76.5666434 | 67.6321585 |
| 17:08:27 | 64.8197433 | 65.8243232 | 71.1349434 | 77.5666434 | 67.6321585 |
| 17:08:28 | 64.8197433 | 64.8243232 | 71.1349434 | 78.5666434 | 68.6321585 |
| 17:08:29 | 64.8197433 | 65.8243232 | 71.1349434 | 78.5666434 | 68.6321585 |
| 17:08:30 | 63.8197433 | 65.8243232 | 70.1349434 | 78.5666434 | 68.6321585 |
| 17:08:31 | 63.8197433 | 65.8243232 | 71.1349434 | 78.5666434 | 68.6321585 |
| 17:08:32 | 64.8197433 | 65.8243232 | 75.1349434 | 78.5666434 | 68.6321585 |
| 17:08:33 | 64.8197433 | 65.8243232 | 76.1349434 | 78.5666434 | 68.6321585 |
| 17:08:34 | 64.8197433 | 65.8243232 | 77.1349434 | 78.5666434 | 68.6321585 |
| 17:08:35 | 64.8197433 | 65.8243232 | 76.1349434 | 78.5666434 | 74.6321585 |
| 17:08:36 | 65.8197433 | 65.8243232 | 71.1349434 | 77.5666434 | 74.6321585 |
| 17:08:37 | 66.8197433 | 65.8243232 | 67.1349434 | 75.5666434 | 76.6321585 |
| 17:08:38 | 65.8197433 | 65.8243232 | 65.1349434 | 75.5666434 | 78.6321585 |
| 17:08:39 | 64.8197433 | 65.8243232 | 65.1349434 | 76.5666434 | 78.6321585 |
| 17:08:40 | 63.8197433 | 65.8243232 | 66.1349434 | 76.5666434 | 78.6321585 |
| 17:08:41 | 63.8197433 | 65.8243232 | 66.1349434 | 76.5666434 | 79.6321585 |
| 17:08:42 | 63.8197433 | 65.8243232 | 66.1349434 | 76.5666434 | 79.6321585 |
| 17:08:43 | 63.8197433 | 65.8243232 | 65.1349434 | 76.5666434 | 81.6321585 |
| 17:08:44 | 62.8197433 | 64.8243232 | 64.1349434 | 76.5666434 | 81.6321585 |
| 17:08:45 | 62.8197433 | 64.8243232 | 64.1349434 | 75.5666434 | 82.6321585 |
| 17:08:46 | 62.8197433 | 64.8243232 | 63.1349434 | 73.5666434 | 83.6321585 |
| 17:08:47 | 63.8197433 | 64.8243232 | 62.1349434 | 72.5666434 | 84.6321585 |
| 17:08:48 | 63.8197433 | 64.8243232 | 61.1349434 | 71.5666434 | 84.6321585 |
| 17:08:49 | 62.8197433 | 64.8243232 | 61.1349434 | 71.5666434 | 82.6321585 |
| 17:08:50 | 62.8197433 | 64.8243232 | 61.1349434 | 66.5666434 | 82.6321585 |
| 17:08:51 | 62.8197433 | 63.8243232 | 61.1349434 | 65.5666434 | 76.6321585 |
| 17:08:52 | 62.8197433 | 63.8243232 | 61.1349434 | 65.5666434 | 74.6321585 |
| 17:08:53 | 62.8197433 | 63.8243232 | 61.1349434 | 65.5666434 | 74.6321585 |
| 17:08:54 | 62.8197433 | 64.8243232 | 68.1349434 | 65.5666434 | 69.6321585 |
| 17:08:55 | 62.8197433 | 64.8243232 | 72.1349434 | 65.5666434 | 66.6321585 |
| 17:08:56 | 62.8197433 | 67.8243232 | 72.1349434 | 65.5666434 | 65.6321585 |
| 17:08:57 | 62.8197433 | 67.8243232 | 71.1349434 | 66.5666434 | 65.6321585 |
| 17:08:58 | 62.8197433 | 68.8243232 | 69.1349434 | 66.5666434 | 65.6321585 |
| 17:08:59 | 63.8197433 | 73.8243232 | 68.1349434 | 67.5666434 | 65.6321585 |
| 17:09:00 | 63.8197433 | 74.8243232 | 67.1349434 | 68.5666434 | 65.6321585 |
| 17:09:01 | 63.8197433 | 74.8243232 | 67.1349434 | 73.5666434 | 64.6321585 |
| 17:09:02 | 64.8197433 | 73.8243232 | 66.1349434 | 74.5666434 | 64.6321585 |

|          |            |            |            |            |            |
|----------|------------|------------|------------|------------|------------|
| 17:09:03 | 66.8197433 | 71.8243232 | 66.1349434 | 74.5666434 | 64.6321585 |
| 17:09:04 | 66.8197433 | 71.8243232 | 66.1349434 | 73.5666434 | 63.6321585 |
| 17:09:05 | 66.8197433 | 72.8243232 | 68.1349434 | 73.5666434 | 63.6321585 |
| 17:09:06 | 64.8197433 | 71.8243232 | 68.1349434 | 73.5666434 | 65.6321585 |
| 17:09:07 | 63.8197433 | 71.8243232 | 68.1349434 | 74.5666434 | 66.6321585 |
| 17:09:08 | 62.8197433 | 71.8243232 | 63.1349434 | 74.5666434 | 65.6321585 |
| 17:09:09 | 62.8197433 | 71.8243232 | 59.1349434 | 73.5666434 | 65.6321585 |
| 17:09:10 | 62.8197433 | 70.8243232 | 59.1349434 | 73.5666434 | 66.6321585 |
| 17:09:11 | 63.8197433 | 69.8243232 | 57.1349434 | 72.5666434 | 66.6321585 |
| 17:09:12 | 63.8197433 | 68.8243232 | 59.1349434 | 72.5666434 | 66.6321585 |
| 17:09:13 | 63.8197433 | 67.8243232 | 62.1349434 | 72.5666434 | 66.6321585 |
| 17:09:14 | 63.8197433 | 67.8243232 | 63.1349434 | 72.5666434 | 66.6321585 |
| 17:09:15 | 63.8197433 | 67.8243232 | 64.1349434 | 75.5666434 | 69.6321585 |
| 17:09:16 | 64.8197433 | 67.8243232 | 64.1349434 | 75.5666434 | 69.6321585 |
| 17:09:17 | 64.8197433 | 65.8243232 | 64.1349434 | 75.5666434 | 69.6321585 |
| 17:09:18 | 64.8197433 | 64.8243232 | 62.1349434 | 76.5666434 | 70.6321585 |
| 17:09:19 | 64.8197433 | 64.8243232 | 60.1349434 | 76.5666434 | 69.6321585 |
| 17:09:20 | 64.8197433 | 63.8243232 | 60.1349434 | 75.5666434 | 69.6321585 |
| 17:09:21 | 64.8197433 | 63.8243232 | 61.1349434 | 74.5666434 | 69.6321585 |
| 17:09:22 | 64.8197433 | 63.8243232 | 61.1349434 | 74.5666434 | 69.6321585 |
| 17:09:23 | 64.8197433 | 64.8243232 | 66.1349434 | 74.5666434 | 70.6321585 |
| 17:09:24 | 64.8197433 | 64.8243232 | 67.1349434 | 74.5666434 | 70.6321585 |
| 17:09:25 | 65.8197433 | 63.8243232 | 67.1349434 | 74.5666434 | 72.6321585 |
| 17:09:26 | 67.8197433 | 64.8243232 | 65.1349434 | 74.5666434 | 72.6321585 |
| 17:09:27 | 68.8197433 | 64.8243232 | 63.1349434 | 74.5666434 | 73.6321585 |
| 17:09:28 | 68.8197433 | 64.8243232 | 62.1349434 | 74.5666434 | 75.6321585 |
| 17:09:29 | 69.8197433 | 64.8243232 | 62.1349434 | 74.5666434 | 76.6321585 |
| 17:09:30 | 69.8197433 | 65.8243232 | 62.1349434 | 74.5666434 | 76.6321585 |
| 17:09:31 | 69.8197433 | 65.8243232 | 62.1349434 | 74.5666434 | 76.6321585 |
| 17:09:32 | 70.8197433 | 65.8243232 | 62.1349434 | 74.5666434 | 77.6321585 |
| 17:09:33 | 71.8197433 | 65.8243232 | 60.1349434 | 76.5666434 | 77.6321585 |
| 17:09:34 | 71.8197433 | 66.8243232 | 60.1349434 | 76.5666434 | 75.6321585 |
| 17:09:35 | 71.8197433 | 69.8243232 | 60.1349434 | 73.5666434 | 74.6321585 |
| 17:09:36 | 71.8197433 | 69.8243232 | 60.1349434 | 73.5666434 | 74.6321585 |
| 17:09:37 | 73.8197433 | 70.8243232 | 60.1349434 | 73.5666434 | 74.6321585 |
| 17:09:38 | 74.8197433 | 70.8243232 | 60.1349434 | 73.5666434 | 74.6321585 |
| 17:09:39 | 75.8197433 | 70.8243232 | 59.1349434 | 73.5666434 | 76.6321585 |
| 17:09:40 | 74.8197433 | 70.8243232 | 58.1349434 | 73.5666434 | 81.6321585 |
| 17:09:41 | 73.8197433 | 70.8243232 | 58.1349434 | 72.5666434 | 82.6321585 |
| 17:09:42 | 72.8197433 | 71.8243232 | 57.1349434 | 72.5666434 | 81.6321585 |
| 17:09:43 | 70.8197433 | 71.8243232 | 57.1349434 | 72.5666434 | 73.6321585 |
| 17:09:44 | 66.8197433 | 71.8243232 | 57.1349434 | 72.5666434 | 73.6321585 |
| 17:09:45 | 66.8197433 | 71.8243232 | 56.1349434 | 72.5666434 | 68.6321585 |
| 17:09:46 | 64.8197433 | 71.8243232 | 56.1349434 | 72.5666434 | 67.6321585 |
| 17:09:47 | 64.8197433 | 71.8243232 | 56.1349434 | 72.5666434 | 67.6321585 |

|          |            |            |            |            |            |
|----------|------------|------------|------------|------------|------------|
| 17:09:48 | 64.8197433 | 71.8243232 | 55.1349434 | 72.5666434 | 67.6321585 |
| 17:09:49 | 63.8197433 | 72.8243232 | 54.1349434 | 72.5666434 | 67.6321585 |
| 17:09:50 | 63.8197433 | 73.8243232 | 54.1349434 | 72.5666434 | 67.6321585 |
| 17:09:51 | 63.8197433 | 73.8243232 | 53.1349434 | 73.5666434 | 67.6321585 |
| 17:09:52 | 63.8197433 | 74.8243232 | 51.1349434 | 73.5666434 | 67.6321585 |
| 17:09:53 | 63.8197433 | 74.8243232 | 51.1349434 | 73.5666434 | 69.6321585 |
| 17:09:54 | 63.8197433 | 74.8243232 | 51.1349434 | 73.5666434 | 69.6321585 |
| 17:09:55 | 63.8197433 | 76.8243232 | 51.1349434 | 73.5666434 | 69.6321585 |
| 17:09:56 | 63.8197433 | 77.8243232 | 50.1349434 | 73.5666434 | 69.6321585 |
| 17:09:57 | 63.8197433 | 77.8243232 | 50.1349434 | 73.5666434 | 69.6321585 |
| 17:09:58 | 62.8197433 | 77.8243232 | 49.1349434 | 73.5666434 | 69.6321585 |
| 17:09:59 | 65.8197433 | 77.8243232 | 49.1349434 | 73.5666434 | 69.6321585 |
| 17:10:00 | 65.8197433 | 76.8243232 | 50.1349434 | 73.5666434 | 69.6321585 |
| 17:10:01 | 67.8197433 | 76.8243232 | 50.1349434 | 71.5666434 | 71.6321585 |
| 17:10:02 | 69.8197433 | 75.8243232 | 50.1349434 | 71.5666434 | 72.6321585 |
| 17:10:03 | 69.8197433 | 74.8243232 | 50.1349434 | 71.5666434 | 73.6321585 |
| 17:10:04 | 69.8197433 | 73.8243232 | 51.1349434 | 71.5666434 | 74.6321585 |
| 17:10:05 | 68.8197433 | 73.8243232 | 52.1349434 | 71.5666434 | 74.6321585 |
| 17:10:06 | 68.8197433 | 70.8243232 | 55.1349434 | 71.5666434 | 74.6321585 |
| 17:10:07 | 67.8197433 | 68.8243232 | 55.1349434 | 70.5666434 | 79.6321585 |
| 17:10:08 | 67.8197433 | 68.8243232 | 56.1349434 | 67.5666434 | 79.6321585 |
| 17:10:09 | 67.8197433 | 68.8243232 | 57.1349434 | 67.5666434 | 82.6321585 |
| 17:10:10 | 67.8197433 | 68.8243232 | 57.1349434 | 67.5666434 | 83.6321585 |
| 17:10:11 | 67.8197433 | 68.8243232 | 57.1349434 | 68.5666434 | 83.6321585 |
| 17:10:12 | 67.8197433 | 68.8243232 | 55.1349434 | 68.5666434 | 83.6321585 |
| 17:10:13 | 67.8197433 | 67.8243232 | 54.1349434 | 68.5666434 | 69.3017507 |
| 17:10:14 | 67.8197433 | 64.8243232 | 53.1349434 | 68.5666434 | 68.574478  |
| 17:10:15 | 67.8197433 | 64.8243232 | 52.1349434 | 68.5666434 | 81.6321585 |
| 17:10:16 | 67.8197433 | 64.8243232 | 51.1349434 | 68.5666434 | 81.6321585 |
| 17:10:17 | 67.8197433 | 64.8243232 | 50.1349434 | 68.5666434 | 79.6321585 |
| 17:10:18 | 66.8197433 | 64.8243232 | 49.1349434 | 68.5666434 | 77.6321585 |
| 17:10:19 | 66.8197433 | 64.8243232 | 49.1349434 | 68.5666434 | 74.6321585 |
| 17:10:20 | 65.8197433 | 65.8243232 | 49.1349434 | 68.5666434 | 73.6321585 |
| 17:10:21 | 65.8197433 | 68.8243232 | 49.1349434 | 68.5666434 | 73.6321585 |
| 17:10:22 | 65.8197433 | 77.8243232 | 49.1349434 | 68.5666434 | 73.6321585 |
| 17:10:23 | 64.8197433 | 79.8243232 | 49.1349434 | 68.5666434 | 73.6321585 |
| 17:10:24 | 63.8197433 | 79.8243232 | 51.1349434 | 68.5666434 | 73.6321585 |
| 17:10:25 | 63.8197433 | 79.8243232 | 53.1349434 | 71.5666434 | 73.6321585 |
| 17:10:26 | 63.8197433 | 79.8243232 | 54.1349434 | 71.5666434 | 72.6321585 |
| 17:10:27 | 63.8197433 | 77.8243232 | 54.1349434 | 71.5666434 | 71.6321585 |
| 17:10:28 | 63.8197433 | 74.8243232 | 56.1349434 | 76.5666434 | 71.6321585 |
| 17:10:29 | 63.8197433 | 73.8243232 | 56.1349434 | 76.5666434 | 70.6321585 |
| 17:10:30 | 63.8197433 | 73.8243232 | 56.1349434 | 76.5666434 | 70.6321585 |
| 17:10:31 | 63.8197433 | 72.8243232 | 58.1349434 | 76.5666434 | 70.6321585 |
| 17:10:32 | 63.8197433 | 76.8243232 | 61.1349434 | 77.5666434 | 68.6321585 |

|          |            |            |            |            |            |
|----------|------------|------------|------------|------------|------------|
| 17:10:33 | 64.8197433 | 76.8243232 | 63.1349434 | 77.5666434 | 69.6321585 |
| 17:10:34 | 64.8197433 | 84.8243232 | 64.1349434 | 77.5666434 | 69.6321585 |
| 17:10:35 | 64.8197433 | 84.8243232 | 66.1349434 | 75.5666434 | 70.6321585 |
| 17:10:36 | 63.8197433 | 84.8243232 | 68.1349434 | 74.5666434 | 70.6321585 |
| 17:10:37 | 63.8197433 | 84.8243232 | 70.1349434 | 74.5666434 | 70.6321585 |
| 17:10:38 | 63.8197433 | 84.8243232 | 70.1349434 | 74.5666434 | 70.6321585 |
| 17:10:39 | 62.8197433 | 83.8243232 | 73.1349434 | 73.5666434 | 69.6321585 |
| 17:10:40 | 62.8197433 | 83.8243232 | 74.1349434 | 73.5666434 | 70.6321585 |
| 17:10:41 | 62.8197433 | 83.8243232 | 74.1349434 | 73.5666434 | 70.6321585 |
| 17:10:42 | 63.8197433 | 83.8243232 | 74.1349434 | 74.5666434 | 70.6321585 |
| 17:10:43 | 63.8197433 | 82.8243232 | 75.1349434 | 76.5666434 | 68.6321585 |
| 17:10:44 | 63.8197433 | 82.8243232 | 75.1349434 | 77.5666434 | 68.6321585 |
| 17:10:45 | 63.8197433 | 80.8243232 | 69.1349434 | 77.5666434 | 67.6321585 |
| 17:10:46 | 63.8197433 | 79.8243232 | 67.1349434 | 78.5666434 | 67.6321585 |
| 17:10:47 | 63.8197433 | 78.8243232 | 67.1349434 | 79.5666434 | 67.6321585 |
| 17:10:48 | 63.8197433 | 76.8243232 | 67.1349434 | 80.5666434 | 67.6321585 |
| 17:10:49 | 62.8197433 | 69.8243232 | 65.1349434 | 80.5666434 | 67.6321585 |
| 17:10:50 | 62.8197433 | 67.8243232 | 64.1349434 | 80.5666434 | 70.6321585 |
| 17:10:51 | 62.8197433 | 65.8243232 | 64.1349434 | 82.5666434 | 70.6321585 |
| 17:10:52 | 62.8197433 | 63.8243232 | 64.1349434 | 81.5666434 | 70.6321585 |
| 17:10:53 | 61.8197433 | 62.8243232 | 65.1349434 | 80.5666434 | 71.6321585 |
| 17:10:54 | 61.8197433 | 61.8243232 | 70.1349434 | 79.5666434 | 72.6321585 |
| 17:10:55 | 63.8197433 | 60.8243232 | 72.1349434 | 79.5666434 | 72.6321585 |
| 17:10:56 | 64.8197433 | 60.8243232 | 75.1349434 | 78.5666434 | 72.6321585 |
| 17:10:57 | 63.8197433 | 59.8243232 | 77.1349434 | 76.5666434 | 72.6321585 |
| 17:10:58 | 63.8197433 | 59.8243232 | 77.1349434 | 76.5666434 | 72.6321585 |
| 17:10:59 | 63.8197433 | 59.8243232 | 77.1349434 | 76.5666434 | 72.6321585 |
| 17:11:00 | 63.8197433 | 61.8243232 | 77.1349434 | 77.5666434 | 72.6321585 |
| 17:11:01 | 63.8197433 | 63.8243232 | 77.1349434 | 77.5666434 | 72.6321585 |
| 17:11:02 | 62.8197433 | 64.8243232 | 78.1349434 | 79.5666434 | 72.6321585 |
| 17:11:03 | 62.8197433 | 64.8243232 | 78.1349434 | 79.5666434 | 72.6321585 |
| 17:11:04 | 63.8197433 | 67.8243232 | 79.1349434 | 79.5666434 | 71.6321585 |
| 17:11:05 | 63.8197433 | 67.8243232 | 79.1349434 | 76.5666434 | 71.6321585 |
| 17:11:06 | 63.8197433 | 67.8243232 | 79.1349434 | 76.5666434 | 72.6321585 |
| 17:11:07 | 63.8197433 | 67.8243232 | 76.1349434 | 77.5666434 | 71.6321585 |
| 17:11:08 | 63.8197433 | 67.8243232 | 73.1349434 | 77.5666434 | 71.6321585 |
| 17:11:09 | 63.8197433 | 67.8243232 | 69.1349434 | 75.5666434 | 73.6321585 |
| 17:11:10 | 64.8197433 | 67.8243232 | 62.1349434 | 74.5666434 | 71.6321585 |
| 17:11:11 | 64.8197433 | 67.8243232 | 58.1349434 | 75.5666434 | 70.6321585 |
| 17:11:12 | 64.8197433 | 67.8243232 | 55.1349434 | 75.5666434 | 71.6321585 |
| 17:11:13 | 64.8197433 | 66.8243232 | 55.1349434 | 76.5666434 | 71.6321585 |
| 17:11:14 | 63.8197433 | 66.8243232 | 55.1349434 | 77.5666434 | 72.6321585 |
| 17:11:15 | 63.8197433 | 66.8243232 | 60.1349434 | 77.5666434 | 73.6321585 |
| 17:11:16 | 63.8197433 | 66.8243232 | 62.1349434 | 77.5666434 | 74.6321585 |
| 17:11:17 | 63.8197433 | 65.8243232 | 62.1349434 | 77.5666434 | 73.6321585 |

|          |            |            |            |            |            |
|----------|------------|------------|------------|------------|------------|
| 17:11:18 | 62.8197433 | 64.8243232 | 62.1349434 | 80.5666434 | 73.6321585 |
| 17:11:19 | 62.8197433 | 63.8243232 | 62.1349434 | 81.5666434 | 73.6321585 |
| 17:11:20 | 62.8197433 | 62.8243232 | 62.1349434 | 81.5666434 | 71.6321585 |
| 17:11:21 | 62.8197433 | 62.8243232 | 61.1349434 | 81.5666434 | 71.6321585 |
| 17:11:22 | 62.8197433 | 62.8243232 | 60.1349434 | 82.5666434 | 71.6321585 |
| 17:11:23 | 62.8197433 | 60.8243232 | 60.1349434 | 83.5666434 | 71.6321585 |
| 17:11:24 | 62.8197433 | 60.8243232 | 60.1349434 | 68.2740208 | 71.6321585 |
| 17:11:25 | 62.8197433 | 58.8243232 | 51.1349434 | 68.5779255 | 72.6321585 |
| 17:11:26 | 62.8197433 | 58.8243232 | 50.1349434 | 69.1199326 | 72.6321585 |
| 17:11:27 | 62.8197433 | 58.8243232 | 49.1349434 | 69.4835689 | 71.6321585 |
| 17:11:28 | 61.8197433 | 60.8243232 | 49.1349434 | 69.4835689 | 71.6321585 |
| 17:11:29 | 62.8197433 | 61.8243232 | 53.1349434 | 69.574478  | 71.6321585 |
| 17:11:30 | 62.8197433 | 62.8243232 | 53.1349434 | 69.8472053 | 71.6321585 |
| 17:11:31 | 63.8197433 | 64.8243232 | 61.1349434 | 71.3017507 | 74.6321585 |
| 17:11:32 | 63.8197433 | 64.8243232 | 61.1349434 | 71.574478  | 74.6321585 |
| 17:11:33 | 63.8197433 | 68.8243232 | 63.1349434 | 71.6653871 | 71.6321585 |
| 17:11:34 | 63.8197433 | 69.8243232 | 65.1349434 | 72.0290235 | 71.6321585 |
| 17:11:35 | 63.8197433 | 69.8243232 | 65.1349434 | 85.5666434 | 71.6321585 |
| 17:11:36 | 64.8197433 | 68.8243232 | 65.1349434 | 85.5666434 | 71.6321585 |
| 17:11:37 | 64.8197433 | 67.8243232 | 67.1349434 | 84.5666434 | 70.6321585 |
| 17:11:38 | 64.8197433 | 67.8243232 | 67.1349434 | 84.5666434 | 69.6321585 |
| 17:11:39 | 64.8197433 | 67.8243232 | 68.1349434 | 84.5666434 | 70.6321585 |
| 17:11:40 | 64.8197433 | 67.8243232 | 68.1349434 | 84.5666434 | 70.6321585 |
| 17:11:41 | 64.8197433 | 67.8243232 | 68.1349434 | 84.5666434 | 69.6321585 |
| 17:11:42 | 64.8197433 | 68.8243232 | 69.1349434 | 84.5666434 | 69.6321585 |
| 17:11:43 | 64.8197433 | 68.8243232 | 69.1349434 | 84.5666434 | 70.6321585 |
| 17:11:44 | 64.8197433 | 68.8243232 | 69.1349434 | 76.5666434 | 70.6321585 |
| 17:11:45 | 64.8197433 | 68.8243232 | 69.1349434 | 71.5666434 | 70.6321585 |
| 17:11:46 | 65.8197433 | 68.8243232 | 69.1349434 | 71.5666434 | 71.6321585 |
| 17:11:47 | 65.8197433 | 68.8243232 | 69.1349434 | 64.5666434 | 71.6321585 |
| 17:11:48 | 64.8197433 | 70.8243232 | 69.1349434 | 62.5666434 | 72.6321585 |
| 17:11:49 | 64.8197433 | 70.8243232 | 69.1349434 | 62.5666434 | 72.6321585 |
| 17:11:50 | 64.8197433 | 70.8243232 | 69.1349434 | 62.5666434 | 72.6321585 |
| 17:11:51 | 64.8197433 | 69.8243232 | 69.1349434 | 62.5666434 | 72.6321585 |
| 17:11:52 | 63.8197433 | 70.8243232 | 67.1349434 | 65.5666434 | 72.6321585 |
| 17:11:53 | 63.8197433 | 70.8243232 | 66.1349434 | 67.5666434 | 71.6321585 |
| 17:11:54 | 63.8197433 | 71.8243232 | 64.1349434 | 67.5666434 | 71.6321585 |
| 17:11:55 | 63.8197433 | 71.8243232 | 64.1349434 | 67.5666434 | 70.6321585 |
| 17:11:56 | 63.8197433 | 71.8243232 | 65.1349434 | 67.5666434 | 70.6321585 |
| 17:11:57 | 63.8197433 | 71.8243232 | 66.1349434 | 67.5666434 | 70.6321585 |
| 17:11:58 | 63.8197433 | 72.8243232 | 67.1349434 | 68.5666434 | 68.6321585 |
| 17:11:59 | 63.8197433 | 72.8243232 | 67.1349434 | 68.5666434 | 68.6321585 |
| 17:12:00 | 63.8197433 | 72.8243232 | 67.1349434 | 68.5666434 | 68.6321585 |
| 17:12:01 | 63.8197433 | 72.8243232 | 66.1349434 | 68.5666434 | 68.6321585 |
| 17:12:02 | 63.8197433 | 73.8243232 | 66.1349434 | 68.5666434 | 68.6321585 |

|          |            |            |            |            |            |
|----------|------------|------------|------------|------------|------------|
| 17:12:03 | 63.8197433 | 73.8243232 | 66.1349434 | 68.5666434 | 68.6321585 |
| 17:12:04 | 64.8197433 | 73.8243232 | 67.1349434 | 68.5666434 | 68.6321585 |
| 17:12:05 | 65.8197433 | 74.8243232 | 67.1349434 | 68.5666434 | 67.6321585 |
| 17:12:06 | 65.8197433 | 74.8243232 | 69.1349434 | 67.5666434 | 67.6321585 |
| 17:12:07 | 65.8197433 | 74.8243232 | 70.1349434 | 67.5666434 | 67.6321585 |
| 17:12:08 | 65.8197433 | 76.8243232 | 68.1349434 | 67.5666434 | 67.6321585 |
| 17:12:09 | 65.8197433 | 76.8243232 | 65.1349434 | 67.5666434 | 67.6321585 |
| 17:12:10 | 64.8197433 | 76.8243232 | 61.1349434 | 68.5666434 | 67.6321585 |
| 17:12:11 | 64.8197433 | 77.8243232 | 59.1349434 | 69.5666434 | 66.6321585 |
| 17:12:12 | 65.8197433 | 77.8243232 | 59.1349434 | 69.5666434 | 66.6321585 |
| 17:12:13 | 65.8197433 | 77.8243232 | 58.1349434 | 69.5666434 | 67.6321585 |
| 17:12:14 | 65.8197433 | 79.8243232 | 58.1349434 | 69.5666434 | 68.6321585 |
| 17:12:15 | 65.8197433 | 78.8243232 | 59.1349434 | 69.5666434 | 68.6321585 |
| 17:12:16 | 65.8197433 | 78.8243232 | 59.1349434 | 69.5666434 | 69.6321585 |
| 17:12:17 | 65.8197433 | 78.8243232 | 63.1349434 | 71.5666434 | 70.6321585 |
| 17:12:18 | 65.8197433 | 78.8243232 | 63.1349434 | 71.5666434 | 70.6321585 |
| 17:12:19 | 64.8197433 | 79.8243232 | 67.1349434 | 71.5666434 | 71.6321585 |
| 17:12:20 | 64.8197433 | 79.8243232 | 69.1349434 | 71.5666434 | 71.6321585 |
| 17:12:21 | 64.8197433 | 80.8243232 | 69.1349434 | 71.5666434 | 70.6321585 |
| 17:12:22 | 64.8197433 | 80.8243232 | 69.1349434 | 73.5666434 | 69.6321585 |
| 17:12:23 | 64.8197433 | 80.8243232 | 66.1349434 | 77.5666434 | 69.6321585 |
| 17:12:24 | 63.8197433 | 82.8243232 | 66.1349434 | 75.5666434 | 70.6321585 |
| 17:12:25 | 63.8197433 | 82.8243232 | 65.1349434 | 75.5666434 | 70.6321585 |
| 17:12:26 | 63.8197433 | 83.8243232 | 67.1349434 | 74.5666434 | 70.6321585 |
| 17:12:27 | 63.8197433 | 83.8243232 | 67.1349434 | 74.5666434 | 69.6321585 |
| 17:12:28 | 63.8197433 | 83.8243232 | 72.1349434 | 72.5666434 | 68.6321585 |
| 17:12:29 | 64.8197433 | 83.8243232 | 72.1349434 | 72.5666434 | 68.6321585 |
| 17:12:30 | 64.8197433 | 76.8243232 | 71.1349434 | 72.5666434 | 67.6321585 |
| 17:12:31 | 64.8197433 | 76.8243232 | 69.1349434 | 71.5666434 | 67.6321585 |
| 17:12:32 | 64.8197433 | 76.8243232 | 68.1349434 | 71.5666434 | 67.6321585 |
| 17:12:33 | 64.8197433 | 76.8243232 | 67.1349434 | 71.5666434 | 68.6321585 |
| 17:12:34 | 64.8197433 | 76.8243232 | 65.1349434 | 71.5666434 | 68.6321585 |
| 17:12:35 | 64.8197433 | 76.8243232 | 63.1349434 | 71.5666434 | 68.6321585 |
| 17:12:36 | 64.8197433 | 73.8243232 | 63.1349434 | 71.5666434 | 69.6321585 |
| 17:12:37 | 65.8197433 | 70.8243232 | 63.1349434 | 72.5666434 | 69.6321585 |
| 17:12:38 | 65.8197433 | 70.8243232 | 63.1349434 | 72.5666434 | 70.6321585 |
| 17:12:39 | 65.8197433 | 67.8243232 | 63.1349434 | 73.5666434 | 70.6321585 |
| 17:12:40 | 65.8197433 | 67.8243232 | 63.1349434 | 74.5666434 | 70.6321585 |
| 17:12:41 | 65.8197433 | 67.8243232 | 63.1349434 | 74.5666434 | 70.6321585 |
| 17:12:42 | 65.8197433 | 66.8243232 | 63.1349434 | 74.5666434 | 69.6321585 |
| 17:12:43 | 66.8197433 | 66.8243232 | 63.1349434 | 74.5666434 | 69.6321585 |
| 17:12:44 | 66.8197433 | 66.8243232 | 63.1349434 | 74.5666434 | 69.6321585 |
| 17:12:45 | 66.8197433 | 66.8243232 | 63.1349434 | 74.5666434 | 69.6321585 |
| 17:12:46 | 66.8197433 | 66.8243232 | 63.1349434 | 74.5666434 | 69.6321585 |
| 17:12:47 | 66.8197433 | 66.8243232 | 62.1349434 | 74.5666434 | 70.6321585 |

|          |            |            |            |            |            |
|----------|------------|------------|------------|------------|------------|
| 17:12:48 | 67.8197433 | 66.8243232 | 62.1349434 | 74.5666434 | 70.6321585 |
| 17:12:49 | 68.8197433 | 66.8243232 | 63.1349434 | 75.5666434 | 71.6321585 |
| 17:12:50 | 68.8197433 | 66.8243232 | 60.1349434 | 75.5666434 | 71.6321585 |
| 17:12:51 | 68.8197433 | 66.8243232 | 60.1349434 | 74.5666434 | 71.6321585 |
| 17:12:52 | 72.8197433 | 66.8243232 | 60.1349434 | 74.5666434 | 72.6321585 |
| 17:12:53 | 75.8197433 | 67.8243232 | 61.1349434 | 74.5666434 | 72.6321585 |
| 17:12:54 | 73.8197433 | 71.8243232 | 61.1349434 | 73.5666434 | 73.6321585 |
| 17:12:55 | 74.8197433 | 74.8243232 | 62.1349434 | 73.5666434 | 73.6321585 |
| 17:12:56 | 75.8197433 | 74.8243232 | 67.1349434 | 73.5666434 | 72.6321585 |
| 17:12:57 | 73.8197433 | 78.8243232 | 69.1349434 | 73.5666434 | 72.6321585 |
| 17:12:58 | 72.8197433 | 79.8243232 | 69.1349434 | 73.5666434 | 72.6321585 |
| 17:12:59 | 69.8197433 | 81.8243232 | 70.1349434 | 74.5666434 | 72.6321585 |
| 17:13:00 | 66.8197433 | 81.8243232 | 70.1349434 | 73.5666434 | 72.6321585 |
| 17:13:01 | 65.8197433 | 81.8243232 | 69.1349434 | 72.5666434 | 73.6321585 |
| 17:13:02 | 64.8197433 | 81.8243232 | 68.1349434 | 72.5666434 | 72.6321585 |
| 17:13:03 | 64.8197433 | 83.8243232 | 66.1349434 | 73.5666434 | 72.6321585 |
| 17:13:04 | 63.8197433 | 83.8243232 | 66.1349434 | 73.5666434 | 72.6321585 |
| 17:13:05 | 63.8197433 | 83.8243232 | 66.1349434 | 73.5666434 | 72.6321585 |
| 17:13:06 | 63.8197433 | 83.8243232 | 65.1349434 | 73.5666434 | 72.6321585 |
| 17:13:07 | 63.8197433 | 70.7562962 | 65.1349434 | 73.5666434 | 72.6321585 |
| 17:13:08 | 63.8197433 | 70.9381144 | 65.1349434 | 73.5666434 | 71.6321585 |
| 17:13:09 | 63.8197433 | 70.7562962 | 65.1349434 | 74.5666434 | 70.6321585 |
| 17:13:10 | 63.8197433 | 70.8472053 | 65.1349434 | 74.5666434 | 70.6321585 |
| 17:13:11 | 62.8197433 | 70.8472053 | 65.1349434 | 72.5666434 | 70.6321585 |
| 17:13:12 | 62.8197433 | 68.5725717 | 65.1349434 | 72.5666434 | 70.6321585 |
| 17:13:13 | 62.8197433 | 70.2859684 | 63.1349434 | 69.5666434 | 70.6321585 |
| 17:13:14 | 62.8197433 | 70.6653871 | 62.1349434 | 67.5666434 | 70.6321585 |
| 17:13:15 | 62.8197433 | 85.8243232 | 62.1349434 | 67.5666434 | 70.6321585 |
| 17:13:16 | 62.8197433 | 85.8243232 | 64.1349434 | 67.5666434 | 71.6321585 |
| 17:13:17 | 63.8197433 | 85.8243232 | 65.1349434 | 67.5666434 | 71.6321585 |
| 17:13:18 | 63.8197433 | 69.8243232 | 66.1349434 | 66.5666434 | 70.6321585 |
| 17:13:19 | 63.8197433 | 63.8243232 | 66.1349434 | 66.5666434 | 70.6321585 |
| 17:13:20 | 63.8197433 | 63.8243232 | 68.1349434 | 66.5666434 | 70.6321585 |
| 17:13:21 | 63.8197433 | 63.8243232 | 69.1349434 | 66.5666434 | 70.6321585 |
| 17:13:22 | 63.8197433 | 63.8243232 | 70.1349434 | 66.5666434 | 71.6321585 |
| 17:13:23 | 63.8197433 | 64.8243232 | 71.1349434 | 66.5666434 | 71.6321585 |
| 17:13:24 | 63.8197433 | 64.8243232 | 71.1349434 | 66.5666434 | 71.6321585 |
| 17:13:25 | 63.8197433 | 64.8243232 | 74.1349434 | 68.5666434 | 70.6321585 |
| 17:13:26 | 63.8197433 | 63.8243232 | 78.1349434 | 68.5666434 | 70.6321585 |
| 17:13:27 | 63.8197433 | 62.8243232 | 81.1349434 | 67.5666434 | 70.6321585 |
| 17:13:28 | 63.8197433 | 60.8243232 | 81.1349434 | 67.5666434 | 70.6321585 |
| 17:13:29 | 63.8197433 | 60.8243232 | 81.1349434 | 67.5666434 | 70.6321585 |
| 17:13:30 | 63.8197433 | 59.8243232 | 81.1349434 | 68.5666434 | 70.6321585 |
| 17:13:31 | 63.8197433 | 59.8243232 | 81.1349434 | 68.5666434 | 70.6321585 |
| 17:13:32 | 62.8197433 | 59.8243232 | 81.1349434 | 69.5666434 | 71.6321585 |



|          |            |            |            |            |            |
|----------|------------|------------|------------|------------|------------|
| 17:13:33 | 62.8197433 | 59.8243232 | 81.1349434 | 69.5666434 | 70.6321585 |
| 17:13:34 | 63.8197433 | 59.8243232 | 83.1349434 | 69.5666434 | 70.6321585 |
| 17:13:35 | 63.8197433 | 59.8243232 | 83.1349434 | 69.5666434 | 70.6321585 |
| 17:13:36 | 62.8197433 | 59.8243232 | 83.1349434 | 69.5666434 | 70.6321585 |
| 17:13:37 | 63.8197433 | 59.8243232 | 82.1349434 | 69.5666434 | 70.6321585 |
| 17:13:38 | 63.8197433 | 59.8243232 | 82.1349434 | 69.5666434 | 70.6321585 |
| 17:13:39 | 63.8197433 | 59.8243232 | 81.1349434 | 69.5666434 | 70.6321585 |
| 17:13:40 | 63.8197433 | 59.8243232 | 81.1349434 | 69.5666434 | 69.6321585 |
| 17:13:41 | 63.8197433 | 82.8243232 | 80.1349434 | 73.5666434 | 69.6321585 |
| 17:13:42 | 63.8197433 | 82.8243232 | 79.1349434 | 73.5666434 | 69.6321585 |
| 17:13:43 | 63.8197433 | 80.8243232 | 74.1349434 | 73.5666434 | 69.6321585 |
| 17:13:44 | 63.8197433 | 74.8243232 | 73.1349434 | 73.5666434 | 69.6321585 |
| 17:13:45 | 62.8197433 | 73.8243232 | 73.1349434 | 73.5666434 | 69.6321585 |
| 17:13:46 | 62.8197433 | 73.8243232 | 72.1349434 | 73.5666434 | 68.6321585 |
| 17:13:47 | 62.8197433 | 72.8243232 | 73.1349434 | 73.5666434 | 67.6321585 |
| 17:13:48 | 62.8197433 | 71.8243232 | 73.1349434 | 73.5666434 | 68.6321585 |
| 17:13:49 | 64.8197433 | 70.8243232 | 73.1349434 | 73.5666434 | 68.6321585 |
| 17:13:50 | 65.8197433 | 69.8243232 | 74.1349434 | 73.5666434 | 68.6321585 |
| 17:13:51 | 66.8197433 | 68.8243232 | 74.1349434 | 73.5666434 | 68.6321585 |
| 17:13:52 | 68.8197433 | 68.8243232 | 75.1349434 | 72.5666434 | 68.6321585 |
| 17:13:53 | 70.8197433 | 67.8243232 | 75.1349434 | 72.5666434 | 68.6321585 |
| 17:13:54 | 71.8197433 | 67.8243232 | 76.1349434 | 72.5666434 | 69.6321585 |
| 17:13:55 | 72.8197433 | 67.8243232 | 77.1349434 | 72.5666434 | 69.6321585 |
| 17:13:56 | 72.8197433 | 67.8243232 | 77.1349434 | 72.5666434 | 70.6321585 |
| 17:13:57 | 72.8197433 | 67.8243232 | 78.1349434 | 71.5666434 | 70.6321585 |
| 17:13:58 | 72.8197433 | 67.8243232 | 78.1349434 | 71.5666434 | 70.6321585 |
| 17:13:59 | 72.8197433 | 67.8243232 | 78.1349434 | 71.5666434 | 70.6321585 |
| 17:14:00 | 72.8197433 | 67.8243232 | 78.1349434 | 72.5666434 | 70.6321585 |
| 17:14:01 | 74.8197433 | 67.8243232 | 78.1349434 | 74.5666434 | 70.6321585 |
| 17:14:02 | 75.8197433 | 68.8243232 | 78.1349434 | 74.5666434 | 70.6321585 |
| 17:14:03 | 75.8197433 | 68.8243232 | 77.1349434 | 74.5666434 | 71.6321585 |
| 17:14:04 | 75.8197433 | 68.8243232 | 77.1349434 | 75.5666434 | 71.6321585 |
| 17:14:05 | 72.8197433 | 76.8243232 | 72.1349434 | 75.5666434 | 71.6321585 |
| 17:14:06 | 72.8197433 | 76.8243232 | 72.1349434 | 75.5666434 | 71.6321585 |
| 17:14:07 | 68.8197433 | 77.8243232 | 71.1349434 | 75.5666434 | 72.6321585 |
| 17:14:08 | 67.8197433 | 77.8243232 | 70.1349434 | 74.5666434 | 73.6321585 |
| 17:14:09 | 66.8197433 | 77.8243232 | 69.1349434 | 74.5666434 | 74.6321585 |
| 17:14:10 | 64.8197433 | 77.8243232 | 69.1349434 | 74.5666434 | 74.6321585 |
| 17:14:11 | 64.8197433 | 78.8243232 | 69.1349434 | 73.5666434 | 73.6321585 |
| 17:14:12 | 64.8197433 | 78.8243232 | 69.1349434 | 73.5666434 | 72.6321585 |
| 17:14:13 | 64.8197433 | 78.8243232 | 69.1349434 | 73.5666434 | 71.6321585 |
| 17:14:14 | 63.8197433 | 78.8243232 | 69.1349434 | 74.5666434 | 70.6321585 |
| 17:14:15 | 63.8197433 | 78.8243232 | 70.1349434 | 75.5666434 | 70.6321585 |
| 17:14:16 | 63.8197433 | 77.8243232 | 70.1349434 | 75.5666434 | 70.6321585 |
| 17:14:17 | 63.8197433 | 77.8243232 | 71.1349434 | 75.5666434 | 71.6321585 |

|          |            |            |            |            |            |
|----------|------------|------------|------------|------------|------------|
| 17:14:18 | 63.8197433 | 77.8243232 | 71.1349434 | 75.5666434 | 71.6321585 |
| 17:14:19 | 63.8197433 | 77.8243232 | 71.1349434 | 75.5666434 | 71.6321585 |
| 17:14:20 | 62.8197433 | 76.8243232 | 71.1349434 | 74.5666434 | 71.6321585 |
| 17:14:21 | 62.8197433 | 74.8243232 | 70.1349434 | 74.5666434 | 71.6321585 |
| 17:14:22 | 62.8197433 | 74.8243232 | 70.1349434 | 74.5666434 | 70.6321585 |
| 17:14:23 | 62.8197433 | 72.8243232 | 70.1349434 | 74.5666434 | 70.6321585 |
| 17:14:24 | 62.8197433 | 71.8243232 | 69.1349434 | 72.5666434 | 70.6321585 |
| 17:14:25 | 62.8197433 | 69.8243232 | 69.1349434 | 72.5666434 | 70.6321585 |
| 17:14:26 | 62.8197433 | 68.8243232 | 70.1349434 | 72.5666434 | 70.6321585 |
| 17:14:27 | 62.8197433 | 68.8243232 | 71.1349434 | 72.5666434 | 70.6321585 |
| 17:14:28 | 61.8197433 | 67.8243232 | 71.1349434 | 72.5666434 | 70.6321585 |
| 17:14:29 | 60.8197433 | 66.8243232 | 72.1349434 | 72.5666434 | 70.6321585 |
| 17:14:30 | 60.8197433 | 66.8243232 | 73.1349434 | 72.5666434 | 70.6321585 |
| 17:14:31 | 60.8197433 | 66.8243232 | 78.1349434 | 73.5666434 | 70.6321585 |
| 17:14:32 | 60.8197433 | 65.8243232 | 78.1349434 | 73.5666434 | 70.6321585 |
| 17:14:33 | 60.8197433 | 65.8243232 | 80.1349434 | 73.5666434 | 70.6321585 |
| 17:14:34 | 59.8197433 | 65.8243232 | 80.1349434 | 75.5666434 | 70.6321585 |
| 17:14:35 | 60.8197433 | 65.8243232 | 80.1349434 | 76.5666434 | 69.6321585 |
| 17:14:36 | 61.8197433 | 64.8243232 | 80.1349434 | 77.5666434 | 69.6321585 |
| 17:14:37 | 63.8197433 | 64.8243232 | 80.1349434 | 77.5666434 | 68.6321585 |
| 17:14:38 | 64.8197433 | 64.8243232 | 81.1349434 | 79.5666434 | 68.6321585 |
| 17:14:39 | 65.8197433 | 64.8243232 | 81.1349434 | 79.5666434 | 68.6321585 |
| 17:14:40 | 65.8197433 | 65.8243232 | 81.1349434 | 79.5666434 | 68.6321585 |
| 17:14:41 | 64.8197433 | 65.8243232 | 80.1349434 | 79.5666434 | 68.6321585 |
| 17:14:42 | 63.8197433 | 79.8243232 | 76.1349434 | 79.5666434 | 69.6321585 |
| 17:14:43 | 62.8197433 | 80.8243232 | 75.1349434 | 79.5666434 | 69.6321585 |
| 17:14:44 | 62.8197433 | 76.8243232 | 74.1349434 | 79.5666434 | 69.6321585 |
| 17:14:45 | 61.8197433 | 75.8243232 | 74.1349434 | 79.5666434 | 69.6321585 |
| 17:14:46 | 61.8197433 | 75.8243232 | 74.1349434 | 78.5666434 | 72.6321585 |
| 17:14:47 | 61.8197433 | 73.8243232 | 72.1349434 | 78.5666434 | 72.6321585 |
| 17:14:48 | 61.8197433 | 72.8243232 | 70.1349434 | 78.5666434 | 73.6321585 |
| 17:14:49 | 61.8197433 | 70.8243232 | 68.1349434 | 77.5666434 | 74.6321585 |
| 17:14:50 | 61.8197433 | 70.8243232 | 67.1349434 | 76.5666434 | 71.6321585 |
| 17:14:51 | 61.8197433 | 69.8243232 | 67.1349434 | 75.5666434 | 68.6321585 |
| 17:14:52 | 60.8197433 | 69.8243232 | 66.1349434 | 75.5666434 | 68.6321585 |
| 17:14:53 | 60.8197433 | 71.8243232 | 66.1349434 | 74.5666434 | 68.6321585 |
| 17:14:54 | 60.8197433 | 73.8243232 | 66.1349434 | 70.5666434 | 68.6321585 |
| 17:14:55 | 60.8197433 | 73.8243232 | 66.1349434 | 69.5666434 | 72.6321585 |
| 17:14:56 | 60.8197433 | 72.8243232 | 66.1349434 | 68.5666434 | 72.6321585 |
| 17:14:57 | 60.8197433 | 72.8243232 | 66.1349434 | 68.5666434 | 72.6321585 |
| 17:14:58 | 60.8197433 | 72.8243232 | 66.1349434 | 68.5666434 | 71.6321585 |
| 17:14:59 | 60.8197433 | 69.8243232 | 67.1349434 | 67.5666434 | 71.6321585 |
| 17:15:00 | 60.8197433 | 69.8243232 | 67.1349434 | 67.5666434 | 71.6321585 |
| 17:15:01 | 60.8197433 | 69.8243232 | 64.1349434 | 64.5666434 | 65.6321585 |
| 17:15:02 | 60.8197433 | 68.8243232 | 65.1349434 | 62.5666434 | 65.6321585 |

|          |            |            |            |            |            |
|----------|------------|------------|------------|------------|------------|
| 17:15:03 | 60.8197433 | 68.8243232 | 65.1349434 | 62.5666434 | 63.6321585 |
| 17:15:04 | 60.8197433 | 68.8243232 | 65.1349434 | 62.5666434 | 63.6321585 |
| 17:15:05 | 61.8197433 | 67.8243232 | 65.1349434 | 62.5666434 | 63.6321585 |
| 17:15:06 | 61.8197433 | 67.8243232 | 66.1349434 | 61.5666434 | 64.6321585 |
| 17:15:07 | 61.8197433 | 67.8243232 | 66.1349434 | 61.5666434 | 65.6321585 |
| 17:15:08 | 61.8197433 | 67.8243232 | 66.1349434 | 60.5666434 | 65.6321585 |
| 17:15:09 | 61.8197433 | 67.8243232 | 66.1349434 | 60.5666434 | 66.6321585 |
| 17:15:10 | 61.8197433 | 67.8243232 | 67.1349434 | 62.5666434 | 66.6321585 |
| 17:15:11 | 61.8197433 | 68.8243232 | 67.1349434 | 65.5666434 | 66.6321585 |
| 17:15:12 | 62.8197433 | 68.8243232 | 66.1349434 | 64.5666434 | 68.6321585 |
| 17:15:13 | 62.8197433 | 69.8243232 | 65.1349434 | 64.5666434 | 70.6321585 |
| 17:15:14 | 62.8197433 | 70.8243232 | 65.1349434 | 64.5666434 | 71.6321585 |
| 17:15:15 | 62.8197433 | 71.8243232 | 64.1349434 | 65.5666434 | 71.6321585 |
| 17:15:16 | 61.8197433 | 71.8243232 | 64.1349434 | 65.5666434 | 70.6321585 |
| 17:15:17 | 61.8197433 | 70.8243232 | 64.1349434 | 66.5666434 | 69.6321585 |
| 17:15:18 | 61.8197433 | 70.8243232 | 64.1349434 | 66.5666434 | 69.6321585 |
| 17:15:19 | 61.8197433 | 70.8243232 | 72.1349434 | 66.5666434 | 69.6321585 |
| 17:15:20 | 61.8197433 | 70.8243232 | 72.1349434 | 66.5666434 | 69.6321585 |
| 17:15:21 | 61.8197433 | 68.8243232 | 73.1349434 | 66.5666434 | 69.6321585 |
| 17:15:22 | 61.8197433 | 68.8243232 | 72.1349434 | 66.5666434 | 68.6321585 |
| 17:15:23 | 61.8197433 | 67.8243232 | 72.1349434 | 63.5666434 | 68.6321585 |
| 17:15:24 | 61.8197433 | 76.8243232 | 72.1349434 | 63.5666434 | 68.6321585 |
| 17:15:25 | 61.8197433 | 76.8243232 | 72.1349434 | 62.5666434 | 68.6321585 |
| 17:15:26 | 61.8197433 | 76.8243232 | 71.1349434 | 61.5666434 | 67.6321585 |
| 17:15:27 | 61.8197433 | 76.8243232 | 67.1349434 | 61.5666434 | 66.6321585 |
| 17:15:28 | 61.8197433 | 76.8243232 | 67.1349434 | 60.5666434 | 66.6321585 |
| 17:15:29 | 61.8197433 | 76.8243232 | 67.1349434 | 60.5666434 | 65.6321585 |
| 17:15:30 | 61.8197433 | 75.8243232 | 67.1349434 | 60.5666434 | 65.6321585 |
| 17:15:31 | 61.8197433 | 75.8243232 | 67.1349434 | 59.5666434 | 64.6321585 |
| 17:15:32 | 61.8197433 | 75.8243232 | 65.1349434 | 60.5666434 | 64.6321585 |
| 17:15:33 | 61.8197433 | 76.8243232 | 65.1349434 | 61.5666434 | 64.6321585 |
| 17:15:34 | 61.8197433 | 76.8243232 | 65.1349434 | 68.5666434 | 64.6321585 |
| 17:15:35 | 61.8197433 | 77.8243232 | 65.1349434 | 68.5666434 | 63.6321585 |
| 17:15:36 | 61.8197433 | 79.8243232 | 65.1349434 | 69.5666434 | 64.6321585 |
| 17:15:37 | 61.8197433 | 80.8243232 | 65.1349434 | 69.5666434 | 63.6321585 |
| 17:15:38 | 61.8197433 | 78.8243232 | 64.1349434 | 69.5666434 | 63.6321585 |
| 17:15:39 | 61.8197433 | 71.8243232 | 64.1349434 | 69.5666434 | 63.6321585 |
| 17:15:40 | 61.8197433 | 71.8243232 | 63.1349434 | 71.5666434 | 63.6321585 |
| 17:15:41 | 61.8197433 | 66.8243232 | 64.1349434 | 71.5666434 | 63.6321585 |
| 17:15:42 | 61.8197433 | 63.8243232 | 64.1349434 | 71.5666434 | 63.6321585 |
| 17:15:43 | 62.8197433 | 60.8243232 | 65.1349434 | 71.5666434 | 63.6321585 |
| 17:15:44 | 62.8197433 | 57.8243232 | 65.1349434 | 71.5666434 | 63.6321585 |
| 17:15:45 | 62.8197433 | 57.8243232 | 65.1349434 | 71.5666434 | 63.6321585 |
| 17:15:46 | 62.8197433 | 57.8243232 | 65.1349434 | 71.5666434 | 62.6321585 |
| 17:15:47 | 62.8197433 | 57.8243232 | 71.1349434 | 71.5666434 | 62.6321585 |

|          |            |            |            |            |            |
|----------|------------|------------|------------|------------|------------|
| 17:15:48 | 63.8197433 | 56.8243232 | 78.1349434 | 71.5666434 | 61.6321585 |
| 17:15:49 | 63.8197433 | 56.8243232 | 79.1349434 | 71.5666434 | 61.6321585 |
| 17:15:50 | 63.8197433 | 55.8243232 | 79.1349434 | 70.5666434 | 61.6321585 |
| 17:15:51 | 64.8197433 | 55.8243232 | 79.1349434 | 69.5666434 | 60.6321585 |
| 17:15:52 | 64.8197433 | 55.8243232 | 79.1349434 | 75.5666434 | 60.6321585 |
| 17:15:53 | 63.8197433 | 55.8243232 | 79.1349434 | 77.5666434 | 60.6321585 |
| 17:15:54 | 63.8197433 | 55.8243232 | 79.1349434 | 77.5666434 | 60.6321585 |
| 17:15:55 | 63.8197433 | 57.8243232 | 79.1349434 | 74.5666434 | 63.6321585 |
| 17:15:56 | 63.8197433 | 57.8243232 | 79.1349434 | 73.5666434 | 64.6321585 |
| 17:15:57 | 63.8197433 | 57.8243232 | 79.1349434 | 72.5666434 | 64.6321585 |
| 17:15:58 | 62.8197433 | 58.8243232 | 79.1349434 | 72.5666434 | 66.6321585 |
| 17:15:59 | 62.8197433 | 59.8243232 | 81.1349434 | 72.5666434 | 67.6321585 |
| 17:16:00 | 61.8197433 | 59.8243232 | 80.1349434 | 72.5666434 | 67.6321585 |
| 17:16:01 | 61.8197433 | 59.8243232 | 80.1349434 | 72.5666434 | 67.6321585 |
| 17:16:02 | 61.8197433 | 59.8243232 | 79.1349434 | 70.5666434 | 69.6321585 |
| 17:16:03 | 61.8197433 | 59.8243232 | 78.1349434 | 70.5666434 | 69.6321585 |
| 17:16:04 | 61.8197433 | 58.8243232 | 76.1349434 | 70.5666434 | 70.6321585 |
| 17:16:05 | 61.8197433 | 58.8243232 | 76.1349434 | 70.5666434 | 70.6321585 |
| 17:16:06 | 61.8197433 | 58.8243232 | 75.1349434 | 67.5666434 | 70.6321585 |
| 17:16:07 | 61.8197433 | 58.8243232 | 74.1349434 | 66.5666434 | 70.6321585 |
| 17:16:08 | 61.8197433 | 62.8243232 | 72.1349434 | 66.5666434 | 69.6321585 |
| 17:16:09 | 61.8197433 | 62.8243232 | 72.1349434 | 66.5666434 | 69.6321585 |
| 17:16:10 | 61.8197433 | 67.8243232 | 72.1349434 | 65.5666434 | 64.6321585 |
| 17:16:11 | 61.8197433 | 67.8243232 | 72.1349434 | 64.5666434 | 61.6321585 |
| 17:16:12 | 61.8197433 | 66.8243232 | 71.1349434 | 64.5666434 | 61.6321585 |
| 17:16:13 | 61.8197433 | 65.8243232 | 70.1349434 | 64.5666434 | 61.6321585 |
| 17:16:14 | 61.8197433 | 65.8243232 | 69.1349434 | 64.5666434 | 61.6321585 |
| 17:16:15 | 61.8197433 | 61.8243232 | 67.1349434 | 64.5666434 | 61.6321585 |
| 17:16:16 | 61.8197433 | 60.8243232 | 67.1349434 | 63.5666434 | 60.6321585 |
| 17:16:17 | 61.8197433 | 59.8243232 | 67.1349434 | 62.5666434 | 60.6321585 |
| 17:16:18 | 61.8197433 | 59.8243232 | 68.1349434 | 59.5666434 | 59.6321585 |
| 17:16:19 | 61.8197433 | 59.8243232 | 67.1349434 | 59.5666434 | 59.6321585 |
| 17:16:20 | 61.8197433 | 60.8243232 | 67.1349434 | 58.5666434 | 59.6321585 |
| 17:16:21 | 61.8197433 | 61.8243232 | 66.1349434 | 58.5666434 | 58.6321585 |
| 17:16:22 | 61.8197433 | 61.8243232 | 66.1349434 | 58.5666434 | 58.6321585 |
| 17:16:23 | 61.8197433 | 60.8243232 | 67.1349434 | 58.5666434 | 58.6321585 |
| 17:16:24 | 61.8197433 | 60.8243232 | 73.1349434 | 58.5666434 | 68.6321585 |
| 17:16:25 | 61.8197433 | 59.8243232 | 78.1349434 | 60.5666434 | 68.6321585 |
| 17:16:26 | 61.8197433 | 59.8243232 | 78.1349434 | 61.5666434 | 71.6321585 |
| 17:16:27 | 61.8197433 | 59.8243232 | 80.1349434 | 64.5666434 | 67.6321585 |
| 17:16:28 | 61.8197433 | 58.8243232 | 80.1349434 | 65.5666434 | 67.6321585 |
| 17:16:29 | 61.8197433 | 58.8243232 | 78.1349434 | 65.5666434 | 67.6321585 |
| 17:16:30 | 61.8197433 | 58.8243232 | 76.1349434 | 65.5666434 | 67.6321585 |
| 17:16:31 | 61.8197433 | 57.8243232 | 75.1349434 | 65.5666434 | 66.6321585 |
| 17:16:32 | 61.8197433 | 57.8243232 | 75.1349434 | 66.5666434 | 67.6321585 |

|          |            |            |            |            |            |
|----------|------------|------------|------------|------------|------------|
| 17:16:33 | 62.8197433 | 57.8243232 | 75.1349434 | 66.5666434 | 67.6321585 |
| 17:16:34 | 62.8197433 | 64.8243232 | 75.1349434 | 65.5666434 | 68.6321585 |
| 17:16:35 | 62.8197433 | 64.8243232 | 75.1349434 | 65.5666434 | 71.6321585 |
| 17:16:36 | 62.8197433 | 65.8243232 | 75.1349434 | 65.5666434 | 72.6321585 |
| 17:16:37 | 62.8197433 | 65.8243232 | 75.1349434 | 65.5666434 | 72.6321585 |
| 17:16:38 | 62.8197433 | 65.8243232 | 76.1349434 | 66.5666434 | 73.6321585 |
| 17:16:39 | 62.8197433 | 65.8243232 | 76.1349434 | 66.5666434 | 73.6321585 |
| 17:16:40 | 62.8197433 | 65.8243232 | 74.1349434 | 69.5666434 | 73.6321585 |
| 17:16:41 | 62.8197433 | 65.8243232 | 73.1349434 | 71.5666434 | 73.6321585 |
| 17:16:42 | 62.8197433 | 64.8243232 | 72.1349434 | 71.5666434 | 73.6321585 |
| 17:16:43 | 62.8197433 | 64.8243232 | 72.1349434 | 73.5666434 | 80.6321585 |
| 17:16:44 | 62.8197433 | 64.8243232 | 72.1349434 | 73.5666434 | 80.6321585 |
| 17:16:45 | 61.8197433 | 63.8243232 | 71.1349434 | 73.5666434 | 81.6321585 |
| 17:16:46 | 61.8197433 | 65.8243232 | 71.1349434 | 73.5666434 | 83.6321585 |
| 17:16:47 | 61.8197433 | 65.8243232 | 70.1349434 | 74.5666434 | 70.6653871 |
| 17:16:48 | 61.8197433 | 65.8243232 | 70.1349434 | 74.5666434 | 70.5925569 |
| 17:16:49 | 61.8197433 | 65.8243232 | 70.1349434 | 73.5666434 | 68.4958799 |
| 17:16:50 | 61.8197433 | 65.8243232 | 65.1349434 | 72.5666434 | 69.7562962 |
| 17:16:51 | 61.8197433 | 65.8243232 | 65.1349434 | 72.5666434 | 69.8472053 |
| 17:16:52 | 61.8197433 | 65.8243232 | 65.1349434 | 72.5666434 | 69.9381144 |
| 17:16:53 | 62.8197433 | 65.8243232 | 65.1349434 | 70.5666434 | 69.9381144 |
| 17:16:54 | 62.8197433 | 66.8243232 | 65.1349434 | 69.5666434 | 83.6321585 |
| 17:16:55 | 62.8197433 | 66.8243232 | 66.1349434 | 69.5666434 | 82.6321585 |
| 17:16:56 | 62.8197433 | 62.8243232 | 66.1349434 | 69.5666434 | 82.6321585 |
| 17:16:57 | 62.8197433 | 62.8243232 | 66.1349434 | 69.5666434 | 82.6321585 |
| 17:16:58 | 62.8197433 | 62.8243232 | 66.1349434 | 69.5666434 | 81.6321585 |
| 17:16:59 | 62.8197433 | 60.8243232 | 66.1349434 | 70.5666434 | 83.6321585 |
| 17:17:00 | 62.8197433 | 59.8243232 | 66.1349434 | 71.5666434 | 83.6321585 |
| 17:17:01 | 62.8197433 | 59.8243232 | 66.1349434 | 71.5666434 | 83.6321585 |
| 17:17:02 | 61.8197433 | 61.8243232 | 66.1349434 | 71.5666434 | 83.6321585 |
| 17:17:03 | 61.8197433 | 62.8243232 | 66.1349434 | 72.5666434 | 84.6321585 |
| 17:17:04 | 61.8197433 | 63.8243232 | 65.1349434 | 72.5666434 | 84.6321585 |
| 17:17:05 | 61.8197433 | 68.8243232 | 64.1349434 | 74.5666434 | 83.6321585 |
| 17:17:06 | 62.8197433 | 71.8243232 | 66.1349434 | 76.5666434 | 83.6321585 |
| 17:17:07 | 62.8197433 | 72.8243232 | 67.1349434 | 76.5666434 | 82.6321585 |
| 17:17:08 | 62.8197433 | 72.8243232 | 69.1349434 | 76.5666434 | 81.6321585 |
| 17:17:09 | 62.8197433 | 71.8243232 | 69.1349434 | 76.5666434 | 80.6321585 |
| 17:17:10 | 62.8197433 | 68.8243232 | 68.1349434 | 76.5666434 | 80.6321585 |
| 17:17:11 | 61.8197433 | 64.8243232 | 68.1349434 | 77.5666434 | 78.6321585 |
| 17:17:12 | 61.8197433 | 64.8243232 | 68.1349434 | 77.5666434 | 77.6321585 |
| 17:17:13 | 61.8197433 | 62.8243232 | 68.1349434 | 77.5666434 | 77.6321585 |
| 17:17:14 | 61.8197433 | 62.8243232 | 68.1349434 | 75.5666434 | 75.6321585 |
| 17:17:15 | 61.8197433 | 61.8243232 | 68.1349434 | 75.5666434 | 74.6321585 |
| 17:17:16 | 61.8197433 | 61.8243232 | 67.1349434 | 69.5666434 | 74.6321585 |
| 17:17:17 | 62.8197433 | 59.8243232 | 66.1349434 | 69.5666434 | 74.6321585 |

|          |            |            |            |            |            |
|----------|------------|------------|------------|------------|------------|
| 17:17:18 | 62.8197433 | 60.8243232 | 66.1349434 | 69.5666434 | 71.6321585 |
| 17:17:19 | 61.8197433 | 60.8243232 | 63.1349434 | 67.5666434 | 69.6321585 |
| 17:17:20 | 61.8197433 | 60.8243232 | 66.1349434 | 66.5666434 | 69.6321585 |
| 17:17:21 | 61.8197433 | 60.8243232 | 66.1349434 | 65.5666434 | 69.6321585 |
| 17:17:22 | 61.8197433 | 61.8243232 | 67.1349434 | 65.5666434 | 68.6321585 |
| 17:17:23 | 61.8197433 | 62.8243232 | 67.1349434 | 65.5666434 | 68.6321585 |
| 17:17:24 | 61.8197433 | 65.8243232 | 67.1349434 | 65.5666434 | 68.6321585 |
| 17:17:25 | 61.8197433 | 65.8243232 | 62.1349434 | 65.5666434 | 68.6321585 |
| 17:17:26 | 61.8197433 | 66.8243232 | 60.1349434 | 64.5666434 | 68.6321585 |
| 17:17:27 | 61.8197433 | 68.8243232 | 60.1349434 | 65.5666434 | 68.6321585 |
| 17:17:28 | 61.8197433 | 68.8243232 | 60.1349434 | 65.5666434 | 68.6321585 |
| 17:17:29 | 61.8197433 | 68.8243232 | 59.1349434 | 65.5666434 | 69.6321585 |
| 17:17:30 | 61.8197433 | 68.8243232 | 57.1349434 | 65.5666434 | 69.6321585 |
| 17:17:31 | 62.8197433 | 68.8243232 | 54.1349434 | 65.5666434 | 69.6321585 |
| 17:17:32 | 62.8197433 | 68.8243232 | 53.1349434 | 65.5666434 | 70.6321585 |
| 17:17:33 | 62.8197433 | 72.8243232 | 53.1349434 | 65.5666434 | 69.6321585 |
| 17:17:34 | 62.8197433 | 75.8243232 | 53.1349434 | 65.5666434 | 69.6321585 |
| 17:17:35 | 62.8197433 | 77.8243232 | 52.1349434 | 65.5666434 | 68.6321585 |
| 17:17:36 | 62.8197433 | 78.8243232 | 52.1349434 | 65.5666434 | 68.6321585 |
| 17:17:37 | 62.8197433 | 78.8243232 | 52.1349434 | 66.5666434 | 68.6321585 |
| 17:17:38 | 62.8197433 | 78.8243232 | 51.1349434 | 68.5666434 | 69.6321585 |
| 17:17:39 | 62.8197433 | 78.8243232 | 49.1349434 | 68.5666434 | 69.6321585 |
| 17:17:40 | 63.8197433 | 78.8243232 | 49.1349434 | 69.5666434 | 69.6321585 |
| 17:17:41 | 62.8197433 | 79.8243232 | 51.1349434 | 69.5666434 | 67.6321585 |
| 17:17:42 | 62.8197433 | 79.8243232 | 51.1349434 | 69.5666434 | 67.6321585 |
| 17:17:43 | 62.8197433 | 80.8243232 | 51.1349434 | 71.5666434 | 64.6321585 |
| 17:17:44 | 62.8197433 | 77.8243232 | 51.1349434 | 71.5666434 | 64.6321585 |
| 17:17:45 | 62.8197433 | 77.8243232 | 52.1349434 | 71.5666434 | 62.6321585 |
| 17:17:46 | 62.8197433 | 71.8243232 | 52.1349434 | 71.5666434 | 62.6321585 |
| 17:17:47 | 62.8197433 | 67.8243232 | 52.1349434 | 73.5666434 | 62.6321585 |
| 17:17:48 | 62.8197433 | 66.8243232 | 53.1349434 | 75.5666434 | 62.6321585 |
| 17:17:49 | 62.8197433 | 66.8243232 | 53.1349434 | 75.5666434 | 63.6321585 |
| 17:17:50 | 63.8197433 | 66.8243232 | 53.1349434 | 76.5666434 | 63.6321585 |
| 17:17:51 | 63.8197433 | 64.8243232 | 54.1349434 | 74.5666434 | 63.6321585 |
| 17:17:52 | 64.8197433 | 64.8243232 | 54.1349434 | 73.5666434 | 63.6321585 |
| 17:17:53 | 64.8197433 | 64.8243232 | 55.1349434 | 73.5666434 | 64.6321585 |
| 17:17:54 | 63.8197433 | 63.8243232 | 57.1349434 | 73.5666434 | 66.6321585 |
| 17:17:55 | 63.8197433 | 63.8243232 | 58.1349434 | 73.5666434 | 65.6321585 |
| 17:17:56 | 63.8197433 | 63.8243232 | 58.1349434 | 71.5666434 | 65.6321585 |
| 17:17:57 | 63.8197433 | 63.8243232 | 58.1349434 | 70.5666434 | 65.6321585 |
| 17:17:58 | 63.8197433 | 63.8243232 | 58.1349434 | 69.5666434 | 66.6321585 |
| 17:17:59 | 62.8197433 | 63.8243232 | 57.1349434 | 69.5666434 | 65.6321585 |
| 17:18:00 | 62.8197433 | 67.8243232 | 56.1349434 | 70.5666434 | 65.6321585 |
| 17:18:01 | 62.8197433 | 67.8243232 | 55.1349434 | 72.5666434 | 65.6321585 |
| 17:18:02 | 61.8197433 | 68.8243232 | 56.1349434 | 72.5666434 | 66.6321585 |

|          |            |            |            |            |            |
|----------|------------|------------|------------|------------|------------|
| 17:18:03 | 61.8197433 | 68.8243232 | 56.1349434 | 73.5666434 | 67.6321585 |
| 17:18:04 | 61.8197433 | 67.8243232 | 52.1349434 | 73.5666434 | 67.6321585 |
| 17:18:05 | 61.8197433 | 67.8243232 | 48.1349434 | 73.5666434 | 67.6321585 |
| 17:18:06 | 61.8197433 | 67.8243232 | 48.1349434 | 73.5666434 | 67.6321585 |
| 17:18:07 | 62.8197433 | 64.8243232 | 50.1349434 | 74.5666434 | 67.6321585 |
| 17:18:08 | 62.8197433 | 63.8243232 | 51.1349434 | 75.5666434 | 68.6321585 |
| 17:18:09 | 62.8197433 | 64.8243232 | 53.1349434 | 76.5666434 | 68.6321585 |
| 17:18:10 | 62.8197433 | 64.8243232 | 55.1349434 | 76.5666434 | 68.6321585 |
| 17:18:11 | 62.8197433 | 65.8243232 | 57.1349434 | 76.5666434 | 71.6321585 |
| 17:18:12 | 62.8197433 | 65.8243232 | 59.1349434 | 76.5666434 | 71.6321585 |
| 17:18:13 | 62.8197433 | 65.8243232 | 59.1349434 | 76.5666434 | 70.6321585 |
| 17:18:14 | 62.8197433 | 65.8243232 | 59.1349434 | 75.5666434 | 70.6321585 |
| 17:18:15 | 62.8197433 | 65.8243232 | 59.1349434 | 75.5666434 | 69.6321585 |
| 17:18:16 | 62.8197433 | 65.8243232 | 59.1349434 | 74.5666434 | 69.6321585 |
| 17:18:17 | 62.8197433 | 65.8243232 | 60.1349434 | 73.5666434 | 69.6321585 |
| 17:18:18 | 62.8197433 | 66.8243232 | 60.1349434 | 73.5666434 | 68.6321585 |
| 17:18:19 | 62.8197433 | 66.8243232 | 61.1349434 | 73.5666434 | 67.6321585 |
| 17:18:20 | 62.8197433 | 67.8243232 | 62.1349434 | 73.5666434 | 67.6321585 |
| 17:18:21 | 62.8197433 | 69.8243232 | 63.1349434 | 72.5666434 | 67.6321585 |
| 17:18:22 | 62.8197433 | 69.8243232 | 65.1349434 | 71.5666434 | 67.6321585 |
| 17:18:23 | 62.8197433 | 69.8243232 | 65.1349434 | 72.5666434 | 67.6321585 |
| 17:18:24 | 62.8197433 | 67.8243232 | 65.1349434 | 72.5666434 | 68.6321585 |
| 17:18:25 | 62.8197433 | 67.8243232 | 66.1349434 | 72.5666434 | 68.6321585 |
| 17:18:26 | 62.8197433 | 67.8243232 | 66.1349434 | 72.5666434 | 71.6321585 |
| 17:18:27 | 62.8197433 | 67.8243232 | 66.1349434 | 70.5666434 | 71.6321585 |
| 17:18:28 | 62.8197433 | 67.8243232 | 67.1349434 | 68.5666434 | 71.6321585 |
| 17:18:29 | 63.8197433 | 67.8243232 | 67.1349434 | 67.5666434 | 73.6321585 |
| 17:18:30 | 63.8197433 | 68.8243232 | 67.1349434 | 67.5666434 | 74.6321585 |
| 17:18:31 | 63.8197433 | 68.8243232 | 68.1349434 | 65.5666434 | 74.6321585 |
| 17:18:32 | 64.8197433 | 69.8243232 | 69.1349434 | 65.5666434 | 74.6321585 |
| 17:18:33 | 64.8197433 | 71.8243232 | 69.1349434 | 65.5666434 | 71.6321585 |
| 17:18:34 | 65.8197433 | 71.8243232 | 69.1349434 | 66.5666434 | 70.6321585 |
| 17:18:35 | 65.8197433 | 71.8243232 | 71.1349434 | 66.5666434 | 70.6321585 |
| 17:18:36 | 65.8197433 | 71.8243232 | 71.1349434 | 66.5666434 | 70.6321585 |
| 17:18:37 | 63.8197433 | 71.8243232 | 75.1349434 | 66.5666434 | 70.6321585 |
| 17:18:38 | 63.8197433 | 71.8243232 | 76.1349434 | 66.5666434 | 70.6321585 |
| 17:18:39 | 62.8197433 | 71.8243232 | 77.1349434 | 66.5666434 | 70.6321585 |
| 17:18:40 | 62.8197433 | 71.8243232 | 77.1349434 | 66.5666434 | 70.6321585 |
| 17:18:41 | 62.8197433 | 71.8243232 | 79.1349434 | 66.5666434 | 71.6321585 |
| 17:18:42 | 62.8197433 | 71.8243232 | 79.1349434 | 66.5666434 | 70.6321585 |
| 17:18:43 | 62.8197433 | 72.8243232 | 79.1349434 | 66.5666434 | 69.6321585 |
| 17:18:44 | 62.8197433 | 72.8243232 | 79.1349434 | 66.5666434 | 69.6321585 |
| 17:18:45 | 62.8197433 | 74.8243232 | 79.1349434 | 66.5666434 | 68.6321585 |
| 17:18:46 | 62.8197433 | 74.8243232 | 80.1349434 | 70.5666434 | 65.6321585 |
| 17:18:47 | 62.8197433 | 74.8243232 | 80.1349434 | 72.5666434 | 65.6321585 |

|          |            |            |            |            |            |
|----------|------------|------------|------------|------------|------------|
| 17:18:48 | 62.8197433 | 75.8243232 | 85.1349434 | 72.5666434 | 64.6321585 |
| 17:18:49 | 62.8197433 | 75.8243232 | 86.1349434 | 72.5666434 | 64.6321585 |
| 17:18:50 | 62.8197433 | 81.8243232 | 86.1349434 | 73.5666434 | 63.6321585 |
| 17:18:51 | 62.8197433 | 81.8243232 | 85.1349434 | 73.5666434 | 63.6321585 |
| 17:18:52 | 62.8197433 | 84.8243232 | 85.1349434 | 73.5666434 | 63.6321585 |
| 17:18:53 | 62.8197433 | 84.8243232 | 85.1349434 | 73.5666434 | 65.6321585 |
| 17:18:54 | 62.8197433 | 87.8243232 | 84.1349434 | 73.5666434 | 67.6321585 |
| 17:18:55 | 62.8197433 | 87.8243232 | 84.1349434 | 73.5666434 | 67.6321585 |
| 17:18:56 | 62.8197433 | 73.8472053 | 85.1349434 | 73.5666434 | 66.6321585 |
| 17:18:57 | 62.8197433 | 73.2108417 | 84.1349434 | 73.5666434 | 66.6321585 |
| 17:18:58 | 62.8197433 | 72.8472053 | 84.1349434 | 71.5666434 | 65.6321585 |
| 17:18:59 | 62.8197433 | 73.2108417 | 83.1349434 | 71.5666434 | 64.6321585 |
| 17:19:00 | 62.8197433 | 72.9381144 | 83.1349434 | 69.5666434 | 64.6321585 |
| 17:19:01 | 62.8197433 | 73.1199326 | 83.1349434 | 69.5666434 | 65.6321585 |
| 17:19:02 | 62.8197433 | 73.0290235 | 82.1349434 | 69.5666434 | 65.6321585 |
| 17:19:03 | 62.8197433 | 72.8472053 | 82.1349434 | 69.5666434 | 65.6321585 |
| 17:19:04 | 62.8197433 | 72.6653871 | 82.1349434 | 70.5666434 | 65.6321585 |
| 17:19:05 | 62.8197433 | 73.1199326 | 82.1349434 | 71.5666434 | 65.6321585 |
| 17:19:06 | 62.8197433 | 82.8243232 | 82.1349434 | 71.5666434 | 66.6321585 |
| 17:19:07 | 62.8197433 | 80.8243232 | 81.1349434 | 70.5666434 | 66.6321585 |
| 17:19:08 | 62.8197433 | 80.8243232 | 80.1349434 | 70.5666434 | 66.6321585 |
| 17:19:09 | 62.8197433 | 80.8243232 | 80.1349434 | 70.5666434 | 67.6321585 |
| 17:19:10 | 62.8197433 | 78.8243232 | 71.1349434 | 68.5666434 | 67.6321585 |
| 17:19:11 | 62.8197433 | 78.8243232 | 68.1349434 | 67.5666434 | 68.6321585 |
| 17:19:12 | 62.8197433 | 76.8243232 | 68.1349434 | 67.5666434 | 69.6321585 |
| 17:19:13 | 62.8197433 | 76.8243232 | 68.1349434 | 67.5666434 | 69.6321585 |
| 17:19:14 | 62.8197433 | 76.8243232 | 68.1349434 | 67.5666434 | 69.6321585 |
| 17:19:15 | 62.8197433 | 76.8243232 | 68.1349434 | 67.5666434 | 67.6321585 |
| 17:19:16 | 62.8197433 | 76.8243232 | 67.1349434 | 67.5666434 | 65.6321585 |
| 17:19:17 | 62.8197433 | 76.8243232 | 67.1349434 | 67.5666434 | 65.6321585 |
| 17:19:18 | 62.8197433 | 76.8243232 | 67.1349434 | 66.5666434 | 65.6321585 |
| 17:19:19 | 62.8197433 | 76.8243232 | 67.1349434 | 67.5666434 | 66.6321585 |
| 17:19:20 | 62.8197433 | 76.8243232 | 67.1349434 | 67.5666434 | 66.6321585 |
| 17:19:21 | 62.8197433 | 76.8243232 | 67.1349434 | 67.5666434 | 67.6321585 |
| 17:19:22 | 62.8197433 | 77.8243232 | 69.1349434 | 67.5666434 | 67.6321585 |
| 17:19:23 | 62.8197433 | 77.8243232 | 69.1349434 | 67.5666434 | 67.6321585 |
| 17:19:24 | 62.8197433 | 77.8243232 | 69.1349434 | 67.5666434 | 67.6321585 |
| 17:19:25 | 62.8197433 | 78.8243232 | 69.1349434 | 71.5666434 | 67.6321585 |
| 17:19:26 | 62.8197433 | 79.8243232 | 69.1349434 | 71.5666434 | 66.6321585 |
| 17:19:27 | 62.8197433 | 79.8243232 | 69.1349434 | 71.5666434 | 65.6321585 |
| 17:19:28 | 62.8197433 | 78.8243232 | 69.1349434 | 71.5666434 | 65.6321585 |
| 17:19:29 | 62.8197433 | 77.8243232 | 68.1349434 | 71.5666434 | 65.6321585 |
| 17:19:30 | 62.8197433 | 77.8243232 | 68.1349434 | 71.5666434 | 65.6321585 |
| 17:19:31 | 62.8197433 | 76.8243232 | 69.1349434 | 73.5666434 | 65.6321585 |
| 17:19:32 | 62.8197433 | 77.8243232 | 71.1349434 | 74.5666434 | 65.6321585 |



|          |            |            |            |            |            |
|----------|------------|------------|------------|------------|------------|
| 17:19:33 | 62.8197433 | 76.8243232 | 72.1349434 | 74.5666434 | 65.6321585 |
| 17:19:34 | 62.8197433 | 76.8243232 | 72.1349434 | 74.5666434 | 64.6321585 |
| 17:19:35 | 62.8197433 | 76.8243232 | 72.1349434 | 75.5666434 | 64.6321585 |
| 17:19:36 | 62.8197433 | 76.8243232 | 72.1349434 | 75.5666434 | 64.6321585 |
| 17:19:37 | 62.8197433 | 75.8243232 | 72.1349434 | 75.5666434 | 64.6321585 |
| 17:19:38 | 62.8197433 | 75.8243232 | 72.1349434 | 75.5666434 | 64.6321585 |
| 17:19:39 | 63.8197433 | 75.8243232 | 72.1349434 | 75.5666434 | 64.6321585 |
| 17:19:40 | 63.8197433 | 74.8243232 | 72.1349434 | 75.5666434 | 64.6321585 |
| 17:19:41 | 62.8197433 | 74.8243232 | 73.1349434 | 75.5666434 | 65.6321585 |
| 17:19:42 | 62.8197433 | 74.8243232 | 73.1349434 | 75.5666434 | 66.6321585 |
| 17:19:43 | 62.8197433 | 75.8243232 | 73.1349434 | 75.5666434 | 67.6321585 |
| 17:19:44 | 62.8197433 | 75.8243232 | 73.1349434 | 75.5666434 | 67.6321585 |
| 17:19:45 | 62.8197433 | 76.8243232 | 73.1349434 | 74.5666434 | 66.6321585 |
| 17:19:46 | 62.8197433 | 77.8243232 | 74.1349434 | 74.5666434 | 66.6321585 |
| 17:19:47 | 62.8197433 | 78.8243232 | 74.1349434 | 74.5666434 | 66.6321585 |
| 17:19:48 | 62.8197433 | 78.8243232 | 74.1349434 | 74.5666434 | 66.6321585 |
| 17:19:49 | 62.8197433 | 78.8243232 | 73.1349434 | 74.5666434 | 66.6321585 |
| 17:19:50 | 62.8197433 | 78.8243232 | 73.1349434 | 73.5666434 | 68.6321585 |
| 17:19:51 | 62.8197433 | 79.8243232 | 72.1349434 | 73.5666434 | 68.6321585 |
| 17:19:52 | 62.8197433 | 79.8243232 | 72.1349434 | 72.5666434 | 68.6321585 |
| 17:19:53 | 62.8197433 | 79.8243232 | 71.1349434 | 72.5666434 | 68.6321585 |
| 17:19:54 | 62.8197433 | 80.8243232 | 71.1349434 | 72.5666434 | 68.6321585 |
| 17:19:55 | 62.8197433 | 80.8243232 | 70.1349434 | 72.5666434 | 68.6321585 |
| 17:19:56 | 62.8197433 | 80.8243232 | 70.1349434 | 70.5666434 | 68.6321585 |
| 17:19:57 | 62.8197433 | 77.8243232 | 70.1349434 | 62.5666434 | 68.6321585 |
| 17:19:58 | 62.8197433 | 70.8243232 | 70.1349434 | 61.5666434 | 71.6321585 |
| 17:19:59 | 62.8197433 | 61.8243232 | 70.1349434 | 61.5666434 | 72.6321585 |
| 17:20:00 | 62.8197433 | 61.8243232 | 71.1349434 | 61.5666434 | 73.6321585 |
| 17:20:01 | 62.8197433 | 61.8243232 | 70.1349434 | 61.5666434 | 73.6321585 |
| 17:20:02 | 62.8197433 | 61.8243232 | 54.1349434 | 60.5666434 | 73.6321585 |
| 17:20:03 | 62.8197433 | 60.8243232 | 50.1349434 | 59.5666434 | 73.6321585 |
| 17:20:04 | 62.8197433 | 59.8243232 | 50.1349434 | 59.5666434 | 73.6321585 |
| 17:20:05 | 62.8197433 | 59.8243232 | 52.1349434 | 61.5666434 | 73.6321585 |
| 17:20:06 | 62.8197433 | 60.8243232 | 55.1349434 | 62.5666434 | 73.6321585 |
| 17:20:07 | 62.8197433 | 60.8243232 | 56.1349434 | 65.5666434 | 75.6321585 |
| 17:20:08 | 62.8197433 | 60.8243232 | 57.1349434 | 66.5666434 | 75.6321585 |
| 17:20:09 | 62.8197433 | 62.8243232 | 57.1349434 | 66.5666434 | 74.6321585 |
| 17:20:10 | 62.8197433 | 62.8243232 | 57.1349434 | 66.5666434 | 73.6321585 |
| 17:20:11 | 62.8197433 | 62.8243232 | 58.1349434 | 66.5666434 | 73.6321585 |
| 17:20:12 | 62.8197433 | 62.8243232 | 59.1349434 | 66.5666434 | 73.6321585 |
| 17:20:13 | 62.8197433 | 62.8243232 | 61.1349434 | 66.5666434 | 73.6321585 |
| 17:20:14 | 62.8197433 | 62.8243232 | 64.1349434 | 66.5666434 | 72.6321585 |
| 17:20:15 | 62.8197433 | 62.8243232 | 66.1349434 | 66.5666434 | 71.6321585 |
| 17:20:16 | 62.8197433 | 62.8243232 | 68.1349434 | 65.5666434 | 66.6321585 |
| 17:20:17 | 62.8197433 | 62.8243232 | 69.1349434 | 63.5666434 | 65.6321585 |

|          |            |            |            |            |            |
|----------|------------|------------|------------|------------|------------|
| 17:20:18 | 62.8197433 | 62.8243232 | 70.1349434 | 63.5666434 | 65.6321585 |
| 17:20:19 | 63.8197433 | 63.8243232 | 71.1349434 | 63.5666434 | 65.6321585 |
| 17:20:20 | 63.8197433 | 63.8243232 | 71.1349434 | 64.5666434 | 66.6321585 |
| 17:20:21 | 63.8197433 | 63.8243232 | 70.1349434 | 65.5666434 | 66.6321585 |
| 17:20:22 | 63.8197433 | 63.8243232 | 67.1349434 | 65.5666434 | 66.6321585 |
| 17:20:23 | 63.8197433 | 63.8243232 | 64.1349434 | 65.5666434 | 67.6321585 |
| 17:20:24 | 63.8197433 | 63.8243232 | 64.1349434 | 65.5666434 | 67.6321585 |
| 17:20:25 | 63.8197433 | 63.8243232 | 62.1349434 | 58.5666434 | 67.6321585 |
| 17:20:26 | 63.8197433 | 63.8243232 | 62.1349434 | 56.5666434 | 65.6321585 |
| 17:20:27 | 63.8197433 | 63.8243232 | 63.1349434 | 56.5666434 | 65.6321585 |
| 17:20:28 | 62.8197433 | 63.8243232 | 63.1349434 | 56.5666434 | 66.6321585 |
| 17:20:29 | 62.8197433 | 64.8243232 | 62.1349434 | 57.5666434 | 66.6321585 |
| 17:20:30 | 62.8197433 | 64.8243232 | 62.1349434 | 60.5666434 | 67.6321585 |
| 17:20:31 | 62.8197433 | 64.8243232 | 62.1349434 | 63.5666434 | 67.6321585 |
| 17:20:32 | 62.8197433 | 64.8243232 | 62.1349434 | 62.5666434 | 67.6321585 |
| 17:20:33 | 62.8197433 | 63.8243232 | 62.1349434 | 61.5666434 | 68.6321585 |
| 17:20:34 | 62.8197433 | 63.8243232 | 62.1349434 | 62.5666434 | 68.6321585 |
| 17:20:35 | 62.8197433 | 64.8243232 | 62.1349434 | 63.5666434 | 67.6321585 |
| 17:20:36 | 63.8197433 | 64.8243232 | 62.1349434 | 63.5666434 | 66.6321585 |
| 17:20:37 | 63.8197433 | 64.8243232 | 62.1349434 | 63.5666434 | 66.6321585 |
| 17:20:38 | 62.8197433 | 63.8243232 | 62.1349434 | 62.5666434 | 66.6321585 |
| 17:20:39 | 62.8197433 | 64.8243232 | 63.1349434 | 62.5666434 | 66.6321585 |
| 17:20:40 | 61.8197433 | 64.8243232 | 62.1349434 | 63.5666434 | 65.6321585 |
| 17:20:41 | 61.8197433 | 64.8243232 | 62.1349434 | 63.5666434 | 65.6321585 |
| 17:20:42 | 61.8197433 | 65.8243232 | 60.1349434 | 63.5666434 | 65.6321585 |
| 17:20:43 | 61.8197433 | 65.8243232 | 59.1349434 | 63.5666434 | 65.6321585 |
| 17:20:44 | 61.8197433 | 65.8243232 | 59.1349434 | 64.5666434 | 66.6321585 |
| 17:20:45 | 61.8197433 | 65.8243232 | 58.1349434 | 64.5666434 | 66.6321585 |
| 17:20:46 | 61.8197433 | 65.8243232 | 57.1349434 | 64.5666434 | 66.6321585 |
| 17:20:47 | 62.8197433 | 65.8243232 | 57.1349434 | 64.5666434 | 66.6321585 |
| 17:20:48 | 62.8197433 | 65.8243232 | 61.1349434 | 64.5666434 | 66.6321585 |
| 17:20:49 | 62.8197433 | 64.8243232 | 64.1349434 | 64.5666434 | 66.6321585 |
| 17:20:50 | 62.8197433 | 63.8243232 | 65.1349434 | 65.5666434 | 66.6321585 |
| 17:20:51 | 62.8197433 | 63.8243232 | 66.1349434 | 66.5666434 | 66.6321585 |
| 17:20:52 | 62.8197433 | 63.8243232 | 66.1349434 | 67.5666434 | 67.6321585 |
| 17:20:53 | 62.8197433 | 63.8243232 | 66.1349434 | 67.5666434 | 68.6321585 |
| 17:20:54 | 62.8197433 | 63.8243232 | 67.1349434 | 67.5666434 | 70.6321585 |
| 17:20:55 | 62.8197433 | 63.8243232 | 67.1349434 | 67.5666434 | 70.6321585 |
| 17:20:56 | 62.8197433 | 63.8243232 | 67.1349434 | 68.5666434 | 70.6321585 |
| 17:20:57 | 62.8197433 | 63.8243232 | 68.1349434 | 67.5666434 | 70.6321585 |
| 17:20:58 | 62.8197433 | 63.8243232 | 68.1349434 | 67.5666434 | 70.6321585 |
| 17:20:59 | 62.8197433 | 64.8243232 | 68.1349434 | 66.5666434 | 70.6321585 |
| 17:21:00 | 62.8197433 | 64.8243232 | 68.1349434 | 66.5666434 | 71.6321585 |
| 17:21:01 | 62.8197433 | 64.8243232 | 68.1349434 | 66.5666434 | 71.6321585 |
| 17:21:02 | 62.8197433 | 64.8243232 | 68.1349434 | 66.5666434 | 71.6321585 |

|          |            |            |            |            |            |
|----------|------------|------------|------------|------------|------------|
| 17:21:03 | 62.8197433 | 64.8243232 | 68.1349434 | 65.5666434 | 69.6321585 |
| 17:21:04 | 62.8197433 | 65.8243232 | 67.1349434 | 63.5666434 | 69.6321585 |
| 17:21:05 | 62.8197433 | 65.8243232 | 66.1349434 | 63.5666434 | 64.6321585 |
| 17:21:06 | 62.8197433 | 65.8243232 | 66.1349434 | 63.5666434 | 63.6321585 |
| 17:21:07 | 62.8197433 | 66.8243232 | 66.1349434 | 60.5666434 | 62.6321585 |
| 17:21:08 | 62.8197433 | 66.8243232 | 66.1349434 | 60.5666434 | 62.6321585 |
| 17:21:09 | 62.8197433 | 66.8243232 | 66.1349434 | 60.5666434 | 62.6321585 |
| 17:21:10 | 62.8197433 | 66.8243232 | 65.1349434 | 58.5666434 | 62.6321585 |
| 17:21:11 | 62.8197433 | 66.8243232 | 65.1349434 | 58.5666434 | 61.6321585 |
| 17:21:12 | 62.8197433 | 64.8243232 | 65.1349434 | 57.5666434 | 61.6321585 |
| 17:21:13 | 62.8197433 | 61.8243232 | 65.1349434 | 57.5666434 | 62.6321585 |
| 17:21:14 | 62.8197433 | 61.8243232 | 66.1349434 | 57.5666434 | 62.6321585 |
| 17:21:15 | 62.8197433 | 61.8243232 | 67.1349434 | 56.5666434 | 63.6321585 |
| 17:21:16 | 62.8197433 | 60.8243232 | 67.1349434 | 56.5666434 | 64.6321585 |
| 17:21:17 | 62.8197433 | 60.8243232 | 67.1349434 | 57.5666434 | 66.6321585 |
| 17:21:18 | 62.8197433 | 60.8243232 | 67.1349434 | 57.5666434 | 66.6321585 |
| 17:21:19 | 62.8197433 | 63.8243232 | 67.1349434 | 57.5666434 | 66.6321585 |
| 17:21:20 | 62.8197433 | 63.8243232 | 67.1349434 | 58.5666434 | 66.6321585 |
| 17:21:21 | 62.8197433 | 63.8243232 | 68.1349434 | 57.5666434 | 67.6321585 |
| 17:21:22 | 62.8197433 | 63.8243232 | 66.1349434 | 57.5666434 | 66.6321585 |
| 17:21:23 | 62.8197433 | 63.8243232 | 61.1349434 | 57.5666434 | 66.6321585 |
| 17:21:24 | 62.8197433 | 63.8243232 | 60.1349434 | 58.5666434 | 66.6321585 |
| 17:21:25 | 62.8197433 | 64.8243232 | 60.1349434 | 60.5666434 | 67.6321585 |
| 17:21:26 | 62.8197433 | 64.8243232 | 61.1349434 | 60.5666434 | 67.6321585 |
| 17:21:27 | 62.8197433 | 64.8243232 | 61.1349434 | 60.5666434 | 67.6321585 |
| 17:21:28 | 62.8197433 | 64.8243232 | 61.1349434 | 61.5666434 | 67.6321585 |
| 17:21:29 | 62.8197433 | 64.8243232 | 61.1349434 | 61.5666434 | 68.6321585 |
| 17:21:30 | 62.8197433 | 64.8243232 | 63.1349434 | 61.5666434 | 70.6321585 |
| 17:21:31 | 62.8197433 | 62.8243232 | 63.1349434 | 62.5666434 | 72.6321585 |
| 17:21:32 | 62.8197433 | 62.8243232 | 64.1349434 | 62.5666434 | 72.6321585 |
| 17:21:33 | 62.8197433 | 62.8243232 | 64.1349434 | 62.5666434 | 72.6321585 |
| 17:21:34 | 62.8197433 | 60.8243232 | 64.1349434 | 62.5666434 | 72.6321585 |
| 17:21:35 | 62.8197433 | 61.8243232 | 64.1349434 | 62.5666434 | 72.6321585 |
| 17:21:36 | 62.8197433 | 62.8243232 | 64.1349434 | 62.5666434 | 72.6321585 |
| 17:21:37 | 62.8197433 | 62.8243232 | 64.1349434 | 61.5666434 | 70.6321585 |
| 17:21:38 | 62.8197433 | 62.8243232 | 64.1349434 | 62.5666434 | 70.6321585 |
| 17:21:39 | 62.8197433 | 63.8243232 | 62.1349434 | 62.5666434 | 70.6321585 |
| 17:21:40 | 62.8197433 | 64.8243232 | 61.1349434 | 63.5666434 | 69.6321585 |
| 17:21:41 | 62.8197433 | 71.8243232 | 59.1349434 | 60.5666434 | 70.6321585 |
| 17:21:42 | 62.8197433 | 74.8243232 | 57.1349434 | 61.5666434 | 70.6321585 |
| 17:21:43 | 62.8197433 | 75.8243232 | 56.1349434 | 61.5666434 | 71.6321585 |
| 17:21:44 | 62.8197433 | 69.8243232 | 57.1349434 | 62.5666434 | 74.6321585 |
| 17:21:45 | 62.8197433 | 67.8243232 | 59.1349434 | 63.5666434 | 74.6321585 |
| 17:21:46 | 62.8197433 | 67.8243232 | 59.1349434 | 63.5666434 | 74.6321585 |
| 17:21:47 | 62.8197433 | 66.8243232 | 61.1349434 | 62.5666434 | 75.6321585 |

|          |            |            |            |            |            |
|----------|------------|------------|------------|------------|------------|
| 17:21:48 | 62.8197433 | 70.8243232 | 61.1349434 | 62.5666434 | 78.6321585 |
| 17:21:49 | 62.8197433 | 70.8243232 | 61.1349434 | 61.5666434 | 78.6321585 |
| 17:21:50 | 62.8197433 | 72.8243232 | 61.1349434 | 62.5666434 | 76.6321585 |
| 17:21:51 | 62.8197433 | 75.8243232 | 62.1349434 | 62.5666434 | 72.6321585 |
| 17:21:52 | 62.8197433 | 76.8243232 | 62.1349434 | 63.5666434 | 71.6321585 |
| 17:21:53 | 62.8197433 | 76.8243232 | 62.1349434 | 63.5666434 | 71.6321585 |
| 17:21:54 | 62.8197433 | 76.8243232 | 62.1349434 | 63.5666434 | 71.6321585 |
| 17:21:55 | 62.8197433 | 75.8243232 | 63.1349434 | 64.5666434 | 71.6321585 |
| 17:21:56 | 62.8197433 | 68.8243232 | 64.1349434 | 65.5666434 | 71.6321585 |
| 17:21:57 | 62.8197433 | 65.8243232 | 64.1349434 | 65.5666434 | 70.6321585 |
| 17:21:58 | 62.8197433 | 62.8243232 | 64.1349434 | 65.5666434 | 69.6321585 |
| 17:21:59 | 62.8197433 | 62.8243232 | 64.1349434 | 65.5666434 | 68.6321585 |
| 17:22:00 | 62.8197433 | 60.8243232 | 64.1349434 | 66.5666434 | 68.6321585 |
| 17:22:01 | 62.8197433 | 60.8243232 | 64.1349434 | 65.5666434 | 68.6321585 |
| 17:22:02 | 62.8197433 | 60.8243232 | 64.1349434 | 63.5666434 | 68.6321585 |
| 17:22:03 | 62.8197433 | 59.8243232 | 64.1349434 | 62.5666434 | 69.6321585 |
| 17:22:04 | 62.8197433 | 59.8243232 | 66.1349434 | 62.5666434 | 68.6321585 |
| 17:22:05 | 62.8197433 | 59.8243232 | 66.1349434 | 62.5666434 | 65.6321585 |
| 17:22:06 | 62.8197433 | 59.8243232 | 66.1349434 | 62.5666434 | 60.6321585 |
| 17:22:07 | 62.8197433 | 59.8243232 | 67.1349434 | 62.5666434 | 60.6321585 |
| 17:22:08 | 62.8197433 | 60.8243232 | 66.1349434 | 62.5666434 | 57.6321585 |
| 17:22:09 | 62.8197433 | 61.8243232 | 66.1349434 | 63.5666434 | 53.6321585 |
| 17:22:10 | 62.8197433 | 62.8243232 | 66.1349434 | 64.5666434 | 52.6321585 |
| 17:22:11 | 62.8197433 | 62.8243232 | 66.1349434 | 64.5666434 | 52.6321585 |
| 17:22:12 | 62.8197433 | 62.8243232 | 66.1349434 | 64.5666434 | 52.6321585 |
| 17:22:13 | 63.8197433 | 63.8243232 | 62.1349434 | 64.5666434 | 49.6321585 |
| 17:22:14 | 63.8197433 | 63.8243232 | 62.1349434 | 64.5666434 | 49.6321585 |
| 17:22:15 | 63.8197433 | 63.8243232 | 59.1349434 | 64.5666434 | 50.6321585 |
| 17:22:16 | 64.8197433 | 63.8243232 | 59.1349434 | 64.5666434 | 51.6321585 |
| 17:22:17 | 64.8197433 | 63.8243232 | 59.1349434 | 64.5666434 | 53.6321585 |
| 17:22:18 | 64.8197433 | 64.8243232 | 59.1349434 | 64.5666434 | 56.6321585 |
| 17:22:19 | 65.8197433 | 64.8243232 | 59.1349434 | 65.5666434 | 58.6321585 |
| 17:22:20 | 64.8197433 | 65.8243232 | 59.1349434 | 65.5666434 | 58.6321585 |
| 17:22:21 | 64.8197433 | 65.8243232 | 60.1349434 | 67.5666434 | 59.6321585 |
| 17:22:22 | 64.8197433 | 65.8243232 | 63.1349434 | 67.5666434 | 59.6321585 |
| 17:22:23 | 64.8197433 | 65.8243232 | 66.1349434 | 67.5666434 | 59.6321585 |
| 17:22:24 | 64.8197433 | 65.8243232 | 68.1349434 | 67.5666434 | 60.6321585 |
| 17:22:25 | 66.8197433 | 65.8243232 | 69.1349434 | 67.5666434 | 62.6321585 |
| 17:22:26 | 69.8197433 | 68.8243232 | 69.1349434 | 67.5666434 | 63.6321585 |
| 17:22:27 | 70.8197433 | 68.8243232 | 70.1349434 | 67.5666434 | 63.6321585 |
| 17:22:28 | 71.8197433 | 68.8243232 | 71.1349434 | 66.5666434 | 64.6321585 |
| 17:22:29 | 71.8197433 | 68.8243232 | 71.1349434 | 66.5666434 | 64.6321585 |
| 17:22:30 | 69.8197433 | 68.8243232 | 71.1349434 | 66.5666434 | 64.6321585 |
| 17:22:31 | 66.8197433 | 68.8243232 | 71.1349434 | 69.5666434 | 64.6321585 |
| 17:22:32 | 65.8197433 | 69.8243232 | 72.1349434 | 70.5666434 | 64.6321585 |

|          |            |            |            |            |            |
|----------|------------|------------|------------|------------|------------|
| 17:22:33 | 64.8197433 | 69.8243232 | 73.1349434 | 70.5666434 | 64.6321585 |
| 17:22:34 | 64.8197433 | 74.8243232 | 73.1349434 | 70.5666434 | 65.6321585 |
| 17:22:35 | 64.8197433 | 77.8243232 | 74.1349434 | 72.5666434 | 65.6321585 |
| 17:22:36 | 64.8197433 | 77.8243232 | 75.1349434 | 72.5666434 | 65.6321585 |
| 17:22:37 | 64.8197433 | 77.8243232 | 75.1349434 | 72.5666434 | 66.6321585 |
| 17:22:38 | 63.8197433 | 78.8243232 | 75.1349434 | 73.5666434 | 67.6321585 |
| 17:22:39 | 63.8197433 | 79.8243232 | 75.1349434 | 73.5666434 | 68.6321585 |
| 17:22:40 | 63.8197433 | 79.8243232 | 75.1349434 | 73.5666434 | 68.6321585 |
| 17:22:41 | 63.8197433 | 79.8243232 | 76.1349434 | 73.5666434 | 69.6321585 |
| 17:22:42 | 63.8197433 | 79.8243232 | 75.1349434 | 74.5666434 | 69.6321585 |
| 17:22:43 | 64.8197433 | 78.8243232 | 75.1349434 | 74.5666434 | 68.6321585 |
| 17:22:44 | 65.8197433 | 77.8243232 | 75.1349434 | 74.5666434 | 68.6321585 |
| 17:22:45 | 65.8197433 | 76.8243232 | 75.1349434 | 74.5666434 | 68.6321585 |
| 17:22:46 | 66.8197433 | 70.8243232 | 75.1349434 | 74.5666434 | 70.6321585 |
| 17:22:47 | 66.8197433 | 70.8243232 | 76.1349434 | 70.5666434 | 70.6321585 |
| 17:22:48 | 67.8197433 | 67.8243232 | 76.1349434 | 69.5666434 | 70.6321585 |
| 17:22:49 | 66.8197433 | 67.8243232 | 76.1349434 | 68.5666434 | 71.6321585 |
| 17:22:50 | 64.8197433 | 67.8243232 | 76.1349434 | 66.5666434 | 71.6321585 |
| 17:22:51 | 63.8197433 | 67.8243232 | 76.1349434 | 66.5666434 | 71.6321585 |
| 17:22:52 | 63.8197433 | 67.8243232 | 76.1349434 | 64.5666434 | 71.6321585 |
| 17:22:53 | 63.8197433 | 67.8243232 | 77.1349434 | 64.5666434 | 71.6321585 |
| 17:22:54 | 63.8197433 | 67.8243232 | 77.1349434 | 63.5666434 | 71.6321585 |
| 17:22:55 | 62.8197433 | 67.8243232 | 77.1349434 | 64.5666434 | 71.6321585 |
| 17:22:56 | 62.8197433 | 67.8243232 | 77.1349434 | 64.5666434 | 71.6321585 |
| 17:22:57 | 62.8197433 | 67.8243232 | 77.1349434 | 65.5666434 | 68.6321585 |
| 17:22:58 | 62.8197433 | 67.8243232 | 77.1349434 | 65.5666434 | 67.6321585 |
| 17:22:59 | 62.8197433 | 67.8243232 | 77.1349434 | 66.5666434 | 64.6321585 |
| 17:23:00 | 62.8197433 | 67.8243232 | 77.1349434 | 66.5666434 | 64.6321585 |
| 17:23:01 | 62.8197433 | 67.8243232 | 77.1349434 | 66.5666434 | 64.6321585 |
| 17:23:02 | 62.8197433 | 67.8243232 | 78.1349434 | 66.5666434 | 62.6321585 |
| 17:23:03 | 62.8197433 | 71.8243232 | 78.1349434 | 66.5666434 | 62.6321585 |
| 17:23:04 | 62.8197433 | 72.8243232 | 78.1349434 | 66.5666434 | 62.6321585 |
| 17:23:05 | 62.8197433 | 73.8243232 | 78.1349434 | 67.5666434 | 60.6321585 |
| 17:23:06 | 62.8197433 | 73.8243232 | 78.1349434 | 67.5666434 | 60.6321585 |
| 17:23:07 | 62.8197433 | 74.8243232 | 79.1349434 | 68.5666434 | 61.6321585 |
| 17:23:08 | 62.8197433 | 74.8243232 | 79.1349434 | 68.5666434 | 61.6321585 |
| 17:23:09 | 62.8197433 | 74.8243232 | 78.1349434 | 68.5666434 | 61.6321585 |
| 17:23:10 | 62.8197433 | 72.8243232 | 74.1349434 | 68.5666434 | 62.6321585 |
| 17:23:11 | 62.8197433 | 72.8243232 | 68.1349434 | 69.5666434 | 62.6321585 |
| 17:23:12 | 62.8197433 | 72.8243232 | 64.1349434 | 68.5666434 | 62.6321585 |
| 17:23:13 | 62.8197433 | 72.8243232 | 62.1349434 | 68.5666434 | 63.6321585 |
| 17:23:14 | 63.8197433 | 72.8243232 | 61.1349434 | 67.5666434 | 63.6321585 |
| 17:23:15 | 63.8197433 | 72.8243232 | 61.1349434 | 66.5666434 | 63.6321585 |
| 17:23:16 | 63.8197433 | 71.8243232 | 61.1349434 | 66.5666434 | 63.6321585 |
| 17:23:17 | 63.8197433 | 70.8243232 | 60.1349434 | 66.5666434 | 63.6321585 |

|          |            |            |            |            |            |
|----------|------------|------------|------------|------------|------------|
| 17:23:18 | 63.8197433 | 69.8243232 | 59.1349434 | 66.5666434 | 64.6321585 |
| 17:23:19 | 63.8197433 | 69.8243232 | 57.1349434 | 64.5666434 | 64.6321585 |
| 17:23:20 | 62.8197433 | 65.8243232 | 57.1349434 | 64.5666434 | 63.6321585 |
| 17:23:21 | 62.8197433 | 65.8243232 | 56.1349434 | 64.5666434 | 63.6321585 |
| 17:23:22 | 62.8197433 | 65.8243232 | 56.1349434 | 64.5666434 | 62.6321585 |
| 17:23:23 | 63.8197433 | 65.8243232 | 55.1349434 | 64.5666434 | 62.6321585 |
| 17:23:24 | 63.8197433 | 65.8243232 | 55.1349434 | 66.5666434 | 62.6321585 |
| 17:23:25 | 63.8197433 | 65.8243232 | 55.1349434 | 66.5666434 | 62.6321585 |
| 17:23:26 | 62.8197433 | 65.8243232 | 53.1349434 | 66.5666434 | 62.6321585 |
| 17:23:27 | 62.8197433 | 65.8243232 | 52.1349434 | 66.5666434 | 62.6321585 |
| 17:23:28 | 62.8197433 | 65.8243232 | 51.1349434 | 68.5666434 | 64.6321585 |
| 17:23:29 | 61.8197433 | 65.8243232 | 51.1349434 | 68.5666434 | 63.6321585 |
| 17:23:30 | 61.8197433 | 65.8243232 | 51.1349434 | 68.5666434 | 63.6321585 |
| 17:23:31 | 61.8197433 | 66.8243232 | 51.1349434 | 68.5666434 | 63.6321585 |
| 17:23:32 | 61.8197433 | 66.8243232 | 52.1349434 | 68.5666434 | 63.6321585 |
| 17:23:33 | 61.8197433 | 67.8243232 | 55.1349434 | 68.5666434 | 61.6321585 |
| 17:23:34 | 61.8197433 | 67.8243232 | 58.1349434 | 69.5666434 | 61.6321585 |
| 17:23:35 | 61.8197433 | 68.8243232 | 58.1349434 | 69.5666434 | 63.6321585 |
| 17:23:36 | 61.8197433 | 68.8243232 | 58.1349434 | 69.5666434 | 63.6321585 |
| 17:23:37 | 61.8197433 | 69.8243232 | 57.1349434 | 69.5666434 | 65.6321585 |
| 17:23:38 | 61.8197433 | 69.8243232 | 56.1349434 | 69.5666434 | 65.6321585 |
| 17:23:39 | 62.8197433 | 69.8243232 | 56.1349434 | 69.5666434 | 66.6321585 |
| 17:23:40 | 62.8197433 | 71.8243232 | 56.1349434 | 69.5666434 | 66.6321585 |
| 17:23:41 | 62.8197433 | 71.8243232 | 55.1349434 | 69.5666434 | 67.6321585 |
| 17:23:42 | 62.8197433 | 71.8243232 | 56.1349434 | 70.5666434 | 67.6321585 |
| 17:23:43 | 62.8197433 | 71.8243232 | 56.1349434 | 69.5666434 | 67.6321585 |
| 17:23:44 | 62.8197433 | 72.8243232 | 56.1349434 | 67.5666434 | 67.6321585 |
| 17:23:45 | 62.8197433 | 72.8243232 | 58.1349434 | 67.5666434 | 67.6321585 |
| 17:23:46 | 62.8197433 | 72.8243232 | 59.1349434 | 70.5666434 | 67.6321585 |
| 17:23:47 | 62.8197433 | 73.8243232 | 60.1349434 | 70.5666434 | 68.6321585 |
| 17:23:48 | 62.8197433 | 68.8243232 | 56.1349434 | 71.5666434 | 68.6321585 |
| 17:23:49 | 62.8197433 | 67.8243232 | 54.1349434 | 71.5666434 | 69.6321585 |
| 17:23:50 | 62.8197433 | 67.8243232 | 54.1349434 | 71.5666434 | 69.6321585 |
| 17:23:51 | 62.8197433 | 67.8243232 | 54.1349434 | 71.5666434 | 70.6321585 |
| 17:23:52 | 62.8197433 | 67.8243232 | 54.1349434 | 69.5666434 | 71.6321585 |
| 17:23:53 | 62.8197433 | 67.8243232 | 54.1349434 | 69.5666434 | 71.6321585 |
| 17:23:54 | 62.8197433 | 67.8243232 | 54.1349434 | 69.5666434 | 69.6321585 |
| 17:23:55 | 62.8197433 | 69.8243232 | 54.1349434 | 69.5666434 | 67.6321585 |
| 17:23:56 | 62.8197433 | 69.8243232 | 54.1349434 | 69.5666434 | 65.6321585 |
| 17:23:57 | 62.8197433 | 69.8243232 | 54.1349434 | 67.5666434 | 65.6321585 |
| 17:23:58 | 62.8197433 | 69.8243232 | 54.1349434 | 67.5666434 | 64.6321585 |
| 17:23:59 | 62.8197433 | 69.8243232 | 54.1349434 | 67.5666434 | 64.6321585 |
| 17:24:00 | 62.8197433 | 69.8243232 | 54.1349434 | 67.5666434 | 64.6321585 |
| 17:24:01 | 62.8197433 | 67.8243232 | 54.1349434 | 67.5666434 | 63.6321585 |
| 17:24:02 | 63.8197433 | 67.8243232 | 58.1349434 | 68.5666434 | 63.6321585 |

|          |            |            |            |            |            |
|----------|------------|------------|------------|------------|------------|
| 17:24:03 | 63.8197433 | 66.8243232 | 58.1349434 | 68.5666434 | 66.6321585 |
| 17:24:04 | 63.8197433 | 65.8243232 | 59.1349434 | 68.5666434 | 68.6321585 |
| 17:24:05 | 63.8197433 | 65.8243232 | 60.1349434 | 69.5666434 | 68.6321585 |
| 17:24:06 | 63.8197433 | 62.8243232 | 61.1349434 | 68.5666434 | 68.6321585 |
| 17:24:07 | 62.8197433 | 62.8243232 | 61.1349434 | 68.5666434 | 68.6321585 |
| 17:24:08 | 62.8197433 | 61.8243232 | 62.1349434 | 68.5666434 | 68.6321585 |
| 17:24:09 | 62.8197433 | 61.8243232 | 64.1349434 | 68.5666434 | 68.6321585 |
| 17:24:10 | 62.8197433 | 61.8243232 | 66.1349434 | 69.5666434 | 68.6321585 |
| 17:24:11 | 62.8197433 | 62.8243232 | 66.1349434 | 69.5666434 | 68.6321585 |
| 17:24:12 | 62.8197433 | 62.8243232 | 67.1349434 | 69.5666434 | 69.6321585 |
| 17:24:13 | 62.8197433 | 63.8243232 | 67.1349434 | 69.5666434 | 71.6321585 |
| 17:24:14 | 63.8197433 | 63.8243232 | 66.1349434 | 69.5666434 | 73.6321585 |
| 17:24:15 | 63.8197433 | 63.8243232 | 67.1349434 | 71.5666434 | 75.6321585 |
| 17:24:16 | 62.8197433 | 63.8243232 | 67.1349434 | 72.5666434 | 75.6321585 |
| 17:24:17 | 62.8197433 | 64.8243232 | 67.1349434 | 73.5666434 | 76.6321585 |
| 17:24:18 | 62.8197433 | 65.8243232 | 67.1349434 | 73.5666434 | 76.6321585 |
| 17:24:19 | 62.8197433 | 64.8243232 | 68.1349434 | 73.5666434 | 79.6321585 |
| 17:24:20 | 62.8197433 | 64.8243232 | 67.1349434 | 73.5666434 | 79.6321585 |
| 17:24:21 | 62.8197433 | 64.8243232 | 68.1349434 | 72.5666434 | 79.6321585 |
| 17:24:22 | 62.8197433 | 64.8243232 | 68.1349434 | 71.5666434 | 79.6321585 |
| 17:24:23 | 62.8197433 | 65.8243232 | 67.1349434 | 71.5666434 | 71.6321585 |
| 17:24:24 | 62.8197433 | 67.8243232 | 67.1349434 | 71.5666434 | 71.6321585 |
| 17:24:25 | 62.8197433 | 68.8243232 | 67.1349434 | 72.5666434 | 69.6321585 |
| 17:24:26 | 62.8197433 | 68.8243232 | 65.1349434 | 72.5666434 | 70.6321585 |
| 17:24:27 | 62.8197433 | 72.8243232 | 65.1349434 | 73.5666434 | 72.6321585 |
| 17:24:28 | 62.8197433 | 73.8243232 | 65.1349434 | 73.5666434 | 72.6321585 |
| 17:24:29 | 63.8197433 | 75.8243232 | 63.1349434 | 73.5666434 | 72.6321585 |
| 17:24:30 | 63.8197433 | 75.8243232 | 58.1349434 | 73.5666434 | 72.6321585 |
| 17:24:31 | 63.8197433 | 75.8243232 | 58.1349434 | 73.5666434 | 72.6321585 |
| 17:24:32 | 63.8197433 | 75.8243232 | 58.1349434 | 73.5666434 | 74.6321585 |
| 17:24:33 | 63.8197433 | 74.8243232 | 57.1349434 | 74.5666434 | 75.6321585 |
| 17:24:34 | 63.8197433 | 72.8243232 | 57.1349434 | 74.5666434 | 75.6321585 |
| 17:24:35 | 63.8197433 | 72.8243232 | 57.1349434 | 74.5666434 | 75.6321585 |
| 17:24:36 | 63.8197433 | 72.8243232 | 57.1349434 | 74.5666434 | 75.6321585 |
| 17:24:37 | 63.8197433 | 72.8243232 | 57.1349434 | 74.5666434 | 76.6321585 |
| 17:24:38 | 63.8197433 | 72.8243232 | 57.1349434 | 74.5666434 | 75.6321585 |
| 17:24:39 | 62.8197433 | 72.8243232 | 57.1349434 | 74.5666434 | 74.6321585 |
| 17:24:40 | 62.8197433 | 72.8243232 | 62.1349434 | 74.5666434 | 74.6321585 |
| 17:24:41 | 62.8197433 | 72.8243232 | 61.1349434 | 74.5666434 | 74.6321585 |
| 17:24:42 | 62.8197433 | 71.8243232 | 58.1349434 | 74.5666434 | 75.6321585 |
| 17:24:43 | 62.8197433 | 71.8243232 | 57.1349434 | 75.5666434 | 75.6321585 |
| 17:24:44 | 62.8197433 | 71.8243232 | 57.1349434 | 75.5666434 | 75.6321585 |
| 17:24:45 | 62.8197433 | 71.8243232 | 57.1349434 | 75.5666434 | 77.6321585 |
| 17:24:46 | 62.8197433 | 71.8243232 | 58.1349434 | 75.5666434 | 77.6321585 |
| 17:24:47 | 62.8197433 | 71.8243232 | 60.1349434 | 75.5666434 | 77.6321585 |

|          |            |            |            |            |            |
|----------|------------|------------|------------|------------|------------|
| 17:24:48 | 62.8197433 | 71.8243232 | 64.1349434 | 76.5666434 | 78.6321585 |
| 17:24:49 | 62.8197433 | 71.8243232 | 70.1349434 | 76.5666434 | 81.6321585 |
| 17:24:50 | 61.8197433 | 70.8243232 | 73.1349434 | 76.5666434 | 81.6321585 |
| 17:24:51 | 61.8197433 | 70.8243232 | 73.1349434 | 75.5666434 | 81.6321585 |
| 17:24:52 | 61.8197433 | 70.8243232 | 69.1349434 | 75.5666434 | 82.6321585 |
| 17:24:53 | 61.8197433 | 70.8243232 | 61.1349434 | 75.5666434 | 81.6321585 |
| 17:24:54 | 61.8197433 | 70.8243232 | 61.1349434 | 75.5666434 | 81.6321585 |
| 17:24:55 | 62.8197433 | 67.8243232 | 56.1349434 | 72.5666434 | 77.6321585 |
| 17:24:56 | 62.8197433 | 66.8243232 | 55.1349434 | 72.5666434 | 77.6321585 |
| 17:24:57 | 62.8197433 | 65.8243232 | 55.1349434 | 69.5666434 | 77.6321585 |
| 17:24:58 | 62.8197433 | 65.8243232 | 56.1349434 | 69.5666434 | 75.6321585 |
| 17:24:59 | 62.8197433 | 65.8243232 | 56.1349434 | 69.5666434 | 74.6321585 |
| 17:25:00 | 62.8197433 | 64.8243232 | 57.1349434 | 69.5666434 | 74.6321585 |
| 17:25:01 | 62.8197433 | 64.8243232 | 61.1349434 | 69.5666434 | 74.6321585 |
| 17:25:02 | 62.8197433 | 64.8243232 | 61.1349434 | 69.5666434 | 71.6321585 |
| 17:25:03 | 62.8197433 | 64.8243232 | 52.1349434 | 70.5666434 | 70.6321585 |
| 17:25:04 | 62.8197433 | 60.8243232 | 51.1349434 | 70.5666434 | 70.6321585 |
| 17:25:05 | 62.8197433 | 59.8243232 | 51.1349434 | 70.5666434 | 70.6321585 |
| 17:25:06 | 62.8197433 | 59.8243232 | 52.1349434 | 70.5666434 | 70.6321585 |
| 17:25:07 | 62.8197433 | 59.8243232 | 53.1349434 | 70.5666434 | 70.6321585 |
| 17:25:08 | 62.8197433 | 61.8243232 | 53.1349434 | 70.5666434 | 71.6321585 |
| 17:25:09 | 62.8197433 | 62.8243232 | 54.1349434 | 72.5666434 | 71.6321585 |
| 17:25:10 | 62.8197433 | 63.8243232 | 54.1349434 | 73.5666434 | 71.6321585 |
| 17:25:11 | 62.8197433 | 63.8243232 | 55.1349434 | 73.5666434 | 67.6321585 |
| 17:25:12 | 63.8197433 | 63.8243232 | 55.1349434 | 74.5666434 | 64.6321585 |
| 17:25:13 | 63.8197433 | 63.8243232 | 55.1349434 | 77.5666434 | 64.6321585 |
| 17:25:14 | 63.8197433 | 64.8243232 | 59.1349434 | 77.5666434 | 64.6321585 |
| 17:25:15 | 63.8197433 | 64.8243232 | 61.1349434 | 78.5666434 | 63.6321585 |
| 17:25:16 | 63.8197433 | 66.8243232 | 62.1349434 | 78.5666434 | 62.6321585 |
| 17:25:17 | 63.8197433 | 64.8243232 | 62.1349434 | 78.5666434 | 62.6321585 |
| 17:25:18 | 64.8197433 | 62.8243232 | 63.1349434 | 77.5666434 | 61.6321585 |
| 17:25:19 | 64.8197433 | 62.8243232 | 64.1349434 | 77.5666434 | 61.6321585 |
| 17:25:20 | 64.8197433 | 60.8243232 | 64.1349434 | 77.5666434 | 61.6321585 |
| 17:25:21 | 64.8197433 | 59.8243232 | 65.1349434 | 77.5666434 | 61.6321585 |
| 17:25:22 | 64.8197433 | 58.8243232 | 65.1349434 | 77.5666434 | 61.6321585 |
| 17:25:23 | 64.8197433 | 58.8243232 | 65.1349434 | 76.5666434 | 62.6321585 |
| 17:25:24 | 64.8197433 | 58.8243232 | 65.1349434 | 76.5666434 | 63.6321585 |
| 17:25:25 | 66.8197433 | 58.8243232 | 64.1349434 | 76.5666434 | 64.6321585 |
| 17:25:26 | 66.8197433 | 58.8243232 | 65.1349434 | 77.5666434 | 64.6321585 |
| 17:25:27 | 66.8197433 | 58.8243232 | 65.1349434 | 77.5666434 | 64.6321585 |
| 17:25:28 | 66.8197433 | 58.8243232 | 70.1349434 | 77.5666434 | 64.6321585 |
| 17:25:29 | 67.8197433 | 58.8243232 | 70.1349434 | 77.5666434 | 64.6321585 |
| 17:25:30 | 68.8197433 | 59.8243232 | 74.1349434 | 76.5666434 | 63.6321585 |
| 17:25:31 | 68.8197433 | 59.8243232 | 75.1349434 | 76.5666434 | 64.6321585 |
| 17:25:32 | 66.8197433 | 59.8243232 | 75.1349434 | 76.5666434 | 64.6321585 |



|          |            |            |            |            |            |
|----------|------------|------------|------------|------------|------------|
| 17:25:33 | 64.8197433 | 59.8243232 | 75.1349434 | 76.5666434 | 64.6321585 |
| 17:25:34 | 63.8197433 | 59.8243232 | 75.1349434 | 76.5666434 | 64.6321585 |
| 17:25:35 | 63.8197433 | 59.8243232 | 75.1349434 | 76.5666434 | 63.6321585 |
| 17:25:36 | 62.8197433 | 59.8243232 | 75.1349434 | 78.5666434 | 62.6321585 |
| 17:25:37 | 62.8197433 | 60.8243232 | 74.1349434 | 79.5666434 | 62.6321585 |
| 17:25:38 | 62.8197433 | 62.8243232 | 74.1349434 | 79.5666434 | 62.6321585 |
| 17:25:39 | 62.8197433 | 64.8243232 | 71.1349434 | 80.5666434 | 62.6321585 |
| 17:25:40 | 62.8197433 | 65.8243232 | 71.1349434 | 80.5666434 | 62.6321585 |
| 17:25:41 | 62.8197433 | 65.8243232 | 71.1349434 | 70.4835689 | 64.6321585 |
| 17:25:42 | 62.8197433 | 65.8243232 | 71.1349434 | 70.4835689 | 64.6321585 |
| 17:25:43 | 62.8197433 | 65.8243232 | 72.1349434 | 70.4835689 | 65.6321585 |
| 17:25:44 | 62.8197433 | 65.8243232 | 73.1349434 | 71.0290235 | 65.6321585 |
| 17:25:45 | 62.8197433 | 65.8243232 | 73.1349434 | 71.6653871 | 65.6321585 |
| 17:25:46 | 62.8197433 | 65.8243232 | 74.1349434 | 71.7562962 | 65.6321585 |
| 17:25:47 | 62.8197433 | 64.8243232 | 73.1349434 | 72.0290235 | 65.6321585 |
| 17:25:48 | 62.8197433 | 64.8243232 | 73.1349434 | 72.0290235 | 65.6321585 |
| 17:25:49 | 62.8197433 | 64.8243232 | 72.1349434 | 73.5494935 | 65.6321585 |
| 17:25:50 | 61.8197433 | 64.8243232 | 71.1349434 | 83.5666434 | 65.6321585 |
| 17:25:51 | 61.8197433 | 64.8243232 | 71.1349434 | 75.5666434 | 66.6321585 |
| 17:25:52 | 61.8197433 | 64.8243232 | 71.1349434 | 75.5666434 | 67.6321585 |
| 17:25:53 | 61.8197433 | 64.8243232 | 69.1349434 | 70.5666434 | 66.6321585 |
| 17:25:54 | 61.8197433 | 64.8243232 | 67.1349434 | 68.5666434 | 66.6321585 |
| 17:25:55 | 62.8197433 | 66.8243232 | 67.1349434 | 68.5666434 | 64.6321585 |
| 17:25:56 | 63.8197433 | 66.8243232 | 65.1349434 | 67.5666434 | 64.6321585 |
| 17:25:57 | 62.8197433 | 66.8243232 | 63.1349434 | 68.5666434 | 64.6321585 |
| 17:25:58 | 62.8197433 | 62.8243232 | 59.1349434 | 68.5666434 | 64.6321585 |
| 17:25:59 | 62.8197433 | 61.8243232 | 59.1349434 | 69.5666434 | 65.6321585 |
| 17:26:00 | 62.8197433 | 61.8243232 | 58.1349434 | 69.5666434 | 67.6321585 |
| 17:26:01 | 62.8197433 | 60.8243232 | 58.1349434 | 69.5666434 | 67.6321585 |
| 17:26:02 | 62.8197433 | 60.8243232 | 57.1349434 | 69.5666434 | 67.6321585 |
| 17:26:03 | 62.8197433 | 60.8243232 | 57.1349434 | 69.5666434 | 68.6321585 |
| 17:26:04 | 62.8197433 | 61.8243232 | 59.1349434 | 69.5666434 | 69.6321585 |
| 17:26:05 | 62.8197433 | 60.8243232 | 58.1349434 | 68.5666434 | 69.6321585 |
| 17:26:06 | 62.8197433 | 60.8243232 | 58.1349434 | 68.5666434 | 71.6321585 |
| 17:26:07 | 62.8197433 | 61.8243232 | 55.1349434 | 68.5666434 | 72.6321585 |
| 17:26:08 | 62.8197433 | 62.8243232 | 53.1349434 | 68.5666434 | 72.6321585 |
| 17:26:09 | 62.8197433 | 62.8243232 | 53.1349434 | 68.5666434 | 72.6321585 |
| 17:26:10 | 62.8197433 | 63.8243232 | 53.1349434 | 68.5666434 | 72.6321585 |
| 17:26:11 | 62.8197433 | 63.8243232 | 54.1349434 | 68.5666434 | 74.6321585 |
| 17:26:12 | 62.8197433 | 63.8243232 | 54.1349434 | 68.5666434 | 75.6321585 |
| 17:26:13 | 62.8197433 | 63.8243232 | 54.1349434 | 69.5666434 | 74.6321585 |
| 17:26:14 | 62.8197433 | 64.8243232 | 54.1349434 | 69.5666434 | 70.6321585 |
| 17:26:15 | 62.8197433 | 64.8243232 | 55.1349434 | 69.5666434 | 70.6321585 |
| 17:26:16 | 62.8197433 | 64.8243232 | 55.1349434 | 70.5666434 | 70.6321585 |
| 17:26:17 | 62.8197433 | 64.8243232 | 55.1349434 | 70.5666434 | 68.6321585 |

|          |            |            |            |            |            |
|----------|------------|------------|------------|------------|------------|
| 17:26:18 | 62.8197433 | 64.8243232 | 54.1349434 | 70.5666434 | 66.6321585 |
| 17:26:19 | 62.8197433 | 64.8243232 | 54.1349434 | 70.5666434 | 66.6321585 |
| 17:26:20 | 62.8197433 | 65.8243232 | 54.1349434 | 69.5666434 | 64.6321585 |
| 17:26:21 | 62.8197433 | 65.8243232 | 55.1349434 | 69.5666434 | 60.6321585 |
| 17:26:22 | 62.8197433 | 65.8243232 | 55.1349434 | 70.5666434 | 60.6321585 |
| 17:26:23 | 62.8197433 | 67.8243232 | 54.1349434 | 70.5666434 | 56.6321585 |
| 17:26:24 | 62.8197433 | 69.8243232 | 54.1349434 | 71.5666434 | 56.6321585 |
| 17:26:25 | 62.8197433 | 69.8243232 | 57.1349434 | 71.5666434 | 56.6321585 |
| 17:26:26 | 62.8197433 | 69.8243232 | 64.1349434 | 71.5666434 | 56.6321585 |
| 17:26:27 | 62.8197433 | 69.8243232 | 66.1349434 | 71.5666434 | 56.6321585 |
| 17:26:28 | 62.8197433 | 69.8243232 | 66.1349434 | 71.5666434 | 56.6321585 |
| 17:26:29 | 62.8197433 | 69.8243232 | 66.1349434 | 71.5666434 | 56.6321585 |
| 17:26:30 | 62.8197433 | 67.8243232 | 67.1349434 | 72.5666434 | 56.6321585 |
| 17:26:31 | 63.8197433 | 67.8243232 | 67.1349434 | 71.5666434 | 56.6321585 |
| 17:26:32 | 65.8197433 | 61.8243232 | 68.1349434 | 70.5666434 | 56.6321585 |
| 17:26:33 | 67.8197433 | 60.8243232 | 67.1349434 | 70.5666434 | 58.6321585 |
| 17:26:34 | 68.8197433 | 60.8243232 | 65.1349434 | 70.5666434 | 59.6321585 |
| 17:26:35 | 68.8197433 | 60.8243232 | 64.1349434 | 70.5666434 | 61.6321585 |
| 17:26:36 | 68.8197433 | 60.8243232 | 64.1349434 | 70.5666434 | 61.6321585 |
| 17:26:37 | 68.8197433 | 60.8243232 | 64.1349434 | 69.5666434 | 62.6321585 |
| 17:26:38 | 67.8197433 | 60.8243232 | 64.1349434 | 69.5666434 | 68.6321585 |
| 17:26:39 | 66.8197433 | 59.8243232 | 64.1349434 | 71.5666434 | 68.6321585 |
| 17:26:40 | 64.8197433 | 60.8243232 | 63.1349434 | 71.5666434 | 69.6321585 |
| 17:26:41 | 64.8197433 | 61.8243232 | 63.1349434 | 71.5666434 | 68.6321585 |
| 17:26:42 | 64.8197433 | 61.8243232 | 63.1349434 | 71.5666434 | 68.6321585 |
| 17:26:43 | 63.8197433 | 65.8243232 | 61.1349434 | 71.5666434 | 68.6321585 |
| 17:26:44 | 63.8197433 | 67.8243232 | 62.1349434 | 70.5666434 | 68.6321585 |
| 17:26:45 | 63.8197433 | 67.8243232 | 62.1349434 | 70.5666434 | 68.6321585 |
| 17:26:46 | 63.8197433 | 67.8243232 | 64.1349434 | 70.5666434 | 68.6321585 |
| 17:26:47 | 63.8197433 | 72.8243232 | 64.1349434 | 69.5666434 | 68.6321585 |
| 17:26:48 | 63.8197433 | 72.8243232 | 65.1349434 | 69.5666434 | 69.6321585 |
| 17:26:49 | 63.8197433 | 72.8243232 | 65.1349434 | 69.5666434 | 69.6321585 |
| 17:26:50 | 62.8197433 | 72.8243232 | 64.1349434 | 69.5666434 | 69.6321585 |
| 17:26:51 | 62.8197433 | 72.8243232 | 63.1349434 | 69.5666434 | 68.6321585 |
| 17:26:52 | 62.8197433 | 72.8243232 | 60.1349434 | 69.5666434 | 68.6321585 |
| 17:26:53 | 62.8197433 | 74.8243232 | 57.1349434 | 69.5666434 | 69.6321585 |
| 17:26:54 | 62.8197433 | 74.8243232 | 57.1349434 | 68.5666434 | 69.6321585 |
| 17:26:55 | 62.8197433 | 74.8243232 | 57.1349434 | 67.5666434 | 69.6321585 |
| 17:26:56 | 62.8197433 | 74.8243232 | 57.1349434 | 67.5666434 | 70.6321585 |
| 17:26:57 | 62.8197433 | 73.8243232 | 57.1349434 | 67.5666434 | 70.6321585 |
| 17:26:58 | 62.8197433 | 72.8243232 | 61.1349434 | 68.5666434 | 71.6321585 |
| 17:26:59 | 62.8197433 | 67.8243232 | 72.1349434 | 69.5666434 | 71.6321585 |
| 17:27:00 | 62.8197433 | 65.8243232 | 77.1349434 | 69.5666434 | 72.6321585 |
| 17:27:01 | 62.8197433 | 65.8243232 | 78.1349434 | 69.5666434 | 72.6321585 |
| 17:27:02 | 62.8197433 | 65.8243232 | 78.1349434 | 69.5666434 | 72.6321585 |

|          |            |            |            |            |            |
|----------|------------|------------|------------|------------|------------|
| 17:27:03 | 62.8197433 | 65.8243232 | 73.1349434 | 69.5666434 | 73.6321585 |
| 17:27:04 | 62.8197433 | 65.8243232 | 70.1349434 | 71.5666434 | 73.6321585 |
| 17:27:05 | 62.8197433 | 65.8243232 | 68.1349434 | 71.5666434 | 70.6321585 |
| 17:27:06 | 61.8197433 | 64.8243232 | 67.1349434 | 73.5666434 | 69.6321585 |
| 17:27:07 | 61.8197433 | 61.8243232 | 67.1349434 | 74.5666434 | 69.6321585 |
| 17:27:08 | 61.8197433 | 58.8243232 | 67.1349434 | 74.5666434 | 69.6321585 |
| 17:27:09 | 61.8197433 | 58.8243232 | 67.1349434 | 74.5666434 | 68.6321585 |
| 17:27:10 | 61.8197433 | 58.8243232 | 67.1349434 | 73.5666434 | 68.6321585 |
| 17:27:11 | 61.8197433 | 58.8243232 | 67.1349434 | 72.5666434 | 68.6321585 |
| 17:27:12 | 62.8197433 | 57.8243232 | 67.1349434 | 73.5666434 | 68.6321585 |
| 17:27:13 | 63.8197433 | 57.8243232 | 67.1349434 | 73.5666434 | 68.6321585 |
| 17:27:14 | 63.8197433 | 58.8243232 | 66.1349434 | 73.5666434 | 69.6321585 |
| 17:27:15 | 64.8197433 | 58.8243232 | 66.1349434 | 73.5666434 | 66.6321585 |
| 17:27:16 | 65.8197433 | 58.8243232 | 66.1349434 | 73.5666434 | 65.6321585 |
| 17:27:17 | 67.8197433 | 59.8243232 | 66.1349434 | 73.5666434 | 64.6321585 |
| 17:27:18 | 68.8197433 | 60.8243232 | 67.1349434 | 73.5666434 | 64.6321585 |
| 17:27:19 | 68.8197433 | 60.8243232 | 67.1349434 | 72.5666434 | 64.6321585 |
| 17:27:20 | 69.8197433 | 59.8243232 | 67.1349434 | 72.5666434 | 65.6321585 |
| 17:27:21 | 69.8197433 | 59.8243232 | 67.1349434 | 73.5666434 | 66.6321585 |
| 17:27:22 | 70.8197433 | 59.8243232 | 65.1349434 | 73.5666434 | 67.6321585 |
| 17:27:23 | 70.8197433 | 58.8243232 | 63.1349434 | 73.5666434 | 68.6321585 |
| 17:27:24 | 70.8197433 | 58.8243232 | 63.1349434 | 72.5666434 | 68.6321585 |
| 17:27:25 | 75.8197433 | 58.8243232 | 62.1349434 | 71.5666434 | 70.6321585 |
| 17:27:26 | 76.8197433 | 58.8243232 | 62.1349434 | 71.5666434 | 72.6321585 |
| 17:27:27 | 77.8197433 | 59.8243232 | 62.1349434 | 71.5666434 | 72.6321585 |
| 17:27:28 | 77.8197433 | 62.8243232 | 61.1349434 | 70.5666434 | 72.6321585 |
| 17:27:29 | 79.8197433 | 62.8243232 | 60.1349434 | 70.5666434 | 72.6321585 |
| 17:27:30 | 83.8197433 | 62.8243232 | 62.1349434 | 69.5666434 | 71.6321585 |
| 17:27:31 | 69.4835689 | 62.8243232 | 62.1349434 | 69.5666434 | 71.6321585 |
| 17:27:32 | 82.8197433 | 62.8243232 | 62.1349434 | 69.5666434 | 71.6321585 |
| 17:27:33 | 79.8197433 | 62.8243232 | 63.1349434 | 70.5666434 | 71.6321585 |
| 17:27:34 | 78.8197433 | 64.8243232 | 63.1349434 | 69.5666434 | 70.6321585 |
| 17:27:35 | 77.8197433 | 64.8243232 | 65.1349434 | 68.5666434 | 70.6321585 |
| 17:27:36 | 77.8197433 | 64.8243232 | 65.1349434 | 68.5666434 | 70.6321585 |
| 17:27:37 | 76.8197433 | 64.8243232 | 66.1349434 | 68.5666434 | 71.6321585 |
| 17:27:38 | 76.8197433 | 65.8243232 | 69.1349434 | 68.5666434 | 71.6321585 |
| 17:27:39 | 76.8197433 | 64.8243232 | 70.1349434 | 68.5666434 | 71.6321585 |
| 17:27:40 | 76.8197433 | 65.8243232 | 71.1349434 | 68.5666434 | 71.6321585 |
| 17:27:41 | 76.8197433 | 65.8243232 | 73.1349434 | 68.5666434 | 74.6321585 |
| 17:27:42 | 74.8197433 | 65.8243232 | 73.1349434 | 69.5666434 | 74.6321585 |
| 17:27:43 | 75.8197433 | 65.8243232 | 75.1349434 | 69.5666434 | 73.6321585 |
| 17:27:44 | 72.8197433 | 65.8243232 | 75.1349434 | 69.5666434 | 73.6321585 |
| 17:27:45 | 71.8197433 | 60.8243232 | 75.1349434 | 69.5666434 | 70.6321585 |
| 17:27:46 | 70.8197433 | 59.8243232 | 74.1349434 | 71.5666434 | 69.6321585 |
| 17:27:47 | 69.8197433 | 58.8243232 | 71.1349434 | 71.5666434 | 69.6321585 |

|          |            |            |            |            |            |
|----------|------------|------------|------------|------------|------------|
| 17:27:48 | 68.8197433 | 57.8243232 | 69.1349434 | 73.5666434 | 69.6321585 |
| 17:27:49 | 65.8197433 | 57.8243232 | 68.1349434 | 75.5666434 | 70.6321585 |
| 17:27:50 | 64.8197433 | 57.8243232 | 65.1349434 | 75.5666434 | 70.6321585 |
| 17:27:51 | 64.8197433 | 58.8243232 | 63.1349434 | 75.5666434 | 70.6321585 |
| 17:27:52 | 64.8197433 | 59.8243232 | 59.1349434 | 75.5666434 | 70.6321585 |
| 17:27:53 | 64.8197433 | 59.8243232 | 58.1349434 | 71.5666434 | 70.6321585 |
| 17:27:54 | 64.8197433 | 59.8243232 | 58.1349434 | 71.5666434 | 69.6321585 |
| 17:27:55 | 64.8197433 | 60.8243232 | 57.1349434 | 70.5666434 | 67.6321585 |
| 17:27:56 | 65.8197433 | 60.8243232 | 57.1349434 | 70.5666434 | 65.6321585 |
| 17:27:57 | 65.8197433 | 61.8243232 | 57.1349434 | 70.5666434 | 65.6321585 |
| 17:27:58 | 65.8197433 | 60.8243232 | 57.1349434 | 70.5666434 | 65.6321585 |
| 17:27:59 | 65.8197433 | 61.8243232 | 59.1349434 | 70.5666434 | 64.6321585 |
| 17:28:00 | 66.8197433 | 61.8243232 | 60.1349434 | 66.5666434 | 64.6321585 |
| 17:28:01 | 64.8197433 | 62.8243232 | 60.1349434 | 66.5666434 | 64.6321585 |
| 17:28:02 | 65.8197433 | 61.8243232 | 61.1349434 | 66.5666434 | 64.6321585 |
| 17:28:03 | 65.8197433 | 61.8243232 | 66.1349434 | 66.5666434 | 64.6321585 |
| 17:28:04 | 65.8197433 | 62.8243232 | 69.1349434 | 65.5666434 | 64.6321585 |
| 17:28:05 | 65.8197433 | 62.8243232 | 70.1349434 | 65.5666434 | 64.6321585 |
| 17:28:06 | 66.8197433 | 63.8243232 | 70.1349434 | 65.5666434 | 64.6321585 |
| 17:28:07 | 67.8197433 | 64.8243232 | 70.1349434 | 64.5666434 | 64.6321585 |
| 17:28:08 | 69.8197433 | 65.8243232 | 69.1349434 | 64.5666434 | 64.6321585 |
| 17:28:09 | 70.8197433 | 64.8243232 | 67.1349434 | 63.5666434 | 64.6321585 |
| 17:28:10 | 70.8197433 | 62.8243232 | 64.1349434 | 64.5666434 | 64.6321585 |
| 17:28:11 | 70.8197433 | 62.8243232 | 63.1349434 | 64.5666434 | 64.6321585 |
| 17:28:12 | 71.8197433 | 60.8243232 | 62.1349434 | 65.5666434 | 64.6321585 |
| 17:28:13 | 71.8197433 | 59.8243232 | 61.1349434 | 65.5666434 | 64.6321585 |
| 17:28:14 | 71.8197433 | 58.8243232 | 61.1349434 | 65.5666434 | 65.6321585 |
| 17:28:15 | 70.8197433 | 58.8243232 | 61.1349434 | 65.5666434 | 65.6321585 |
| 17:28:16 | 70.8197433 | 62.8243232 | 61.1349434 | 65.5666434 | 65.6321585 |
| 17:28:17 | 70.8197433 | 62.8243232 | 61.1349434 | 65.5666434 | 65.6321585 |
| 17:28:18 | 70.8197433 | 62.8243232 | 60.1349434 | 65.5666434 | 65.6321585 |
| 17:28:19 | 68.8197433 | 62.8243232 | 58.1349434 | 68.5666434 | 67.6321585 |
| 17:28:20 | 66.8197433 | 62.8243232 | 57.1349434 | 70.5666434 | 68.6321585 |
| 17:28:21 | 65.8197433 | 62.8243232 | 57.1349434 | 74.5666434 | 68.6321585 |
| 17:28:22 | 65.8197433 | 62.8243232 | 57.1349434 | 74.5666434 | 68.6321585 |
| 17:28:23 | 65.8197433 | 62.8243232 | 57.1349434 | 74.5666434 | 68.6321585 |
| 17:28:24 | 65.8197433 | 62.8243232 | 57.1349434 | 73.5666434 | 68.6321585 |
| 17:28:25 | 65.8197433 | 62.8243232 | 57.1349434 | 73.5666434 | 67.6321585 |
| 17:28:26 | 64.8197433 | 61.8243232 | 58.1349434 | 72.5666434 | 67.6321585 |
| 17:28:27 | 63.8197433 | 61.8243232 | 59.1349434 | 71.5666434 | 63.6321585 |
| 17:28:28 | 61.8197433 | 60.8243232 | 62.1349434 | 71.5666434 | 62.6321585 |
| 17:28:29 | 61.8197433 | 59.8243232 | 64.1349434 | 70.5666434 | 61.6321585 |
| 17:28:30 | 61.8197433 | 59.8243232 | 64.1349434 | 70.5666434 | 61.6321585 |
| 17:28:31 | 61.8197433 | 59.8243232 | 68.1349434 | 64.5666434 | 61.6321585 |
| 17:28:32 | 61.8197433 | 59.8243232 | 70.1349434 | 63.5666434 | 61.6321585 |

|          |            |            |            |            |            |
|----------|------------|------------|------------|------------|------------|
| 17:28:33 | 61.8197433 | 58.8243232 | 70.1349434 | 63.5666434 | 61.6321585 |
| 17:28:34 | 61.8197433 | 58.8243232 | 70.1349434 | 63.5666434 | 61.6321585 |
| 17:28:35 | 61.8197433 | 58.8243232 | 67.1349434 | 63.5666434 | 61.6321585 |
| 17:28:36 | 61.8197433 | 59.8243232 | 66.1349434 | 62.5666434 | 62.6321585 |
| 17:28:37 | 61.8197433 | 59.8243232 | 66.1349434 | 62.5666434 | 62.6321585 |
| 17:28:38 | 61.8197433 | 59.8243232 | 66.1349434 | 62.5666434 | 62.6321585 |
| 17:28:39 | 62.8197433 | 60.8243232 | 66.1349434 | 62.5666434 | 62.6321585 |
| 17:28:40 | 62.8197433 | 61.8243232 | 65.1349434 | 63.5666434 | 62.6321585 |
| 17:28:41 | 61.8197433 | 61.8243232 | 64.1349434 | 63.5666434 | 63.6321585 |
| 17:28:42 | 61.8197433 | 61.8243232 | 64.1349434 | 63.5666434 | 63.6321585 |
| 17:28:43 | 61.8197433 | 59.8243232 | 63.1349434 | 64.5666434 | 64.6321585 |
| 17:28:44 | 61.8197433 | 58.8243232 | 63.1349434 | 64.5666434 | 64.6321585 |
| 17:28:45 | 61.8197433 | 58.8243232 | 64.1349434 | 65.5666434 | 63.6321585 |
| 17:28:46 | 60.8197433 | 61.8243232 | 64.1349434 | 65.5666434 | 62.6321585 |
| 17:28:47 | 60.8197433 | 61.8243232 | 65.1349434 | 64.5666434 | 62.6321585 |
| 17:28:48 | 60.8197433 | 61.8243232 | 65.1349434 | 64.5666434 | 61.6321585 |
| 17:28:49 | 60.8197433 | 62.8243232 | 65.1349434 | 63.5666434 | 61.6321585 |
| 17:28:50 | 60.8197433 | 62.8243232 | 64.1349434 | 63.5666434 | 61.6321585 |
| 17:28:51 | 60.8197433 | 62.8243232 | 63.1349434 | 63.5666434 | 62.6321585 |
| 17:28:52 | 60.8197433 | 62.8243232 | 63.1349434 | 63.5666434 | 63.6321585 |
| 17:28:53 | 61.8197433 | 62.8243232 | 63.1349434 | 63.5666434 | 63.6321585 |
| 17:28:54 | 61.8197433 | 62.8243232 | 63.1349434 | 63.5666434 | 64.6321585 |
| 17:28:55 | 61.8197433 | 63.8243232 | 63.1349434 | 63.5666434 | 64.6321585 |
| 17:28:56 | 61.8197433 | 63.8243232 | 60.1349434 | 63.5666434 | 66.6321585 |
| 17:28:57 | 61.8197433 | 64.8243232 | 59.1349434 | 70.5666434 | 67.6321585 |
| 17:28:58 | 62.8197433 | 65.8243232 | 59.1349434 | 71.5666434 | 68.6321585 |
| 17:28:59 | 63.8197433 | 66.8243232 | 58.1349434 | 71.5666434 | 68.6321585 |
| 17:29:00 | 64.8197433 | 64.8243232 | 61.1349434 | 71.5666434 | 68.6321585 |
| 17:29:01 | 62.8197433 | 64.8243232 | 65.1349434 | 71.5666434 | 68.6321585 |
| 17:29:02 | 62.8197433 | 62.8243232 | 73.0290235 | 70.5666434 | 68.6321585 |
| 17:29:03 | 61.8197433 | 61.8243232 | 74.7562962 | 66.5666434 | 69.6321585 |
| 17:29:04 | 61.8197433 | 60.8243232 | 74.9381144 | 65.5666434 | 70.6321585 |
| 17:29:05 | 61.8197433 | 60.8243232 | 74.574478  | 65.5666434 | 70.6321585 |
| 17:29:06 | 61.8197433 | 60.8243232 | 74.4835689 | 65.5666434 | 70.6321585 |
| 17:29:07 | 61.8197433 | 62.8243232 | 74.574478  | 64.5666434 | 70.6321585 |
| 17:29:08 | 61.8197433 | 63.8243232 | 74.6653871 | 64.5666434 | 70.6321585 |
| 17:29:09 | 61.8197433 | 63.8243232 | 74.3926598 | 64.5666434 | 70.6321585 |
| 17:29:10 | 61.8197433 | 64.8243232 | 74.1199326 | 64.5666434 | 69.6321585 |
| 17:29:11 | 61.8197433 | 65.8243232 | 74.8472053 | 63.5666434 | 69.6321585 |
| 17:29:12 | 61.8197433 | 63.8243232 | 74.3926598 | 63.5666434 | 69.6321585 |
| 17:29:13 | 60.8197433 | 61.8243232 | 74.7562962 | 63.5666434 | 73.6321585 |
| 17:29:14 | 60.8197433 | 61.8243232 | 74.3017507 | 63.5666434 | 72.6321585 |
| 17:29:15 | 60.8197433 | 61.8243232 | 74.574478  | 65.5666434 | 72.6321585 |
| 17:29:16 | 60.8197433 | 63.8243232 | 75.0290235 | 65.5666434 | 73.6321585 |
| 17:29:17 | 60.8197433 | 63.8243232 | 75.0290235 | 66.5666434 | 72.6321585 |

|          |            |            |            |            |            |
|----------|------------|------------|------------|------------|------------|
| 17:29:18 | 60.8197433 | 63.8243232 | 75.2108417 | 68.5666434 | 72.6321585 |
| 17:29:19 | 61.8197433 | 63.8243232 | 75.6653871 | 68.5666434 | 72.6321585 |
| 17:29:20 | 61.8197433 | 63.8243232 | 75.7562962 | 67.5666434 | 70.6321585 |
| 17:29:21 | 61.8197433 | 64.8243232 | 75.8472053 | 67.5666434 | 70.6321585 |
| 17:29:22 | 61.8197433 | 65.8243232 | 76.3017507 | 68.5666434 | 70.6321585 |
| 17:29:23 | 61.8197433 | 65.8243232 | 76.2108417 | 68.5666434 | 70.6321585 |
| 17:29:24 | 61.8197433 | 65.8243232 | 76.2108417 | 68.5666434 | 70.6321585 |
| 17:29:25 | 61.8197433 | 67.8243232 | 72.7398909 | 67.5666434 | 70.6321585 |
| 17:29:26 | 61.8197433 | 67.8243232 | 74.3926598 | 67.5666434 | 70.6321585 |
| 17:29:27 | 61.8197433 | 67.8243232 | 73.6653871 | 67.5666434 | 72.6321585 |
| 17:29:28 | 61.8197433 | 68.8243232 | 73.7562962 | 67.5666434 | 73.6321585 |
| 17:29:29 | 61.8197433 | 70.8243232 | 73.6653871 | 67.5666434 | 73.6321585 |
| 17:29:30 | 61.8197433 | 70.8243232 | 73.574478  | 66.5666434 | 75.6321585 |
| 17:29:31 | 61.8197433 | 71.8243232 | 73.3926598 | 67.5666434 | 76.6321585 |
| 17:29:32 | 61.8197433 | 72.8243232 | 81.1349434 | 67.5666434 | 76.6321585 |
| 17:29:33 | 61.8197433 | 72.8243232 | 72.1349434 | 67.5666434 | 74.6321585 |
| 17:29:34 | 61.8197433 | 73.8243232 | 71.1349434 | 67.5666434 | 73.6321585 |
| 17:29:35 | 61.8197433 | 71.8243232 | 74.1349434 | 68.5666434 | 73.6321585 |
| 17:29:36 | 61.8197433 | 71.8243232 | 76.1349434 | 68.5666434 | 72.6321585 |
| 17:29:37 | 61.8197433 | 69.8243232 | 77.1349434 | 68.5666434 | 71.6321585 |
| 17:29:38 | 61.8197433 | 66.8243232 | 77.1349434 | 68.5666434 | 71.6321585 |
| 17:29:39 | 61.8197433 | 63.8243232 | 77.1349434 | 68.5666434 | 68.6321585 |
| 17:29:40 | 62.8197433 | 61.8243232 | 78.1349434 | 69.5666434 | 68.6321585 |
| 17:29:41 | 62.8197433 | 60.8243232 | 79.1349434 | 69.5666434 | 67.6321585 |
| 17:29:42 | 62.8197433 | 60.8243232 | 78.1349434 | 70.5666434 | 67.6321585 |
| 17:29:43 | 62.8197433 | 60.8243232 | 78.1349434 | 71.5666434 | 64.6321585 |
| 17:29:44 | 61.8197433 | 60.8243232 | 78.1349434 | 72.5666434 | 61.6321585 |
| 17:29:45 | 61.8197433 | 59.8243232 | 78.1349434 | 72.5666434 | 59.6321585 |
| 17:29:46 | 61.8197433 | 59.8243232 | 79.1349434 | 72.5666434 | 58.6321585 |
| 17:29:47 | 61.8197433 | 59.8243232 | 79.1349434 | 72.5666434 | 58.6321585 |
| 17:29:48 | 61.8197433 | 59.8243232 | 79.1349434 | 71.5666434 | 58.6321585 |
| 17:29:49 | 61.8197433 | 59.8243232 | 79.1349434 | 71.5666434 | 57.6321585 |
| 17:29:50 | 61.8197433 | 59.8243232 | 78.1349434 | 67.5666434 | 57.6321585 |
| 17:29:51 | 60.8197433 | 60.8243232 | 77.1349434 | 66.5666434 | 57.6321585 |
| 17:29:52 | 60.8197433 | 62.8243232 | 77.1349434 | 66.5666434 | 57.6321585 |
| 17:29:53 | 60.8197433 | 64.8243232 | 77.1349434 | 66.5666434 | 55.6321585 |
| 17:29:54 | 60.8197433 | 64.8243232 | 77.1349434 | 65.5666434 | 55.6321585 |
| 17:29:55 | 60.8197433 | 65.8243232 | 81.1349434 | 65.5666434 | 55.6321585 |
| 17:29:56 | 60.8197433 | 65.8243232 | 82.1349434 | 65.5666434 | 55.6321585 |
| 17:29:57 | 60.8197433 | 66.8243232 | 82.1349434 | 65.5666434 | 54.6321585 |
| 17:29:58 | 60.8197433 | 68.8243232 | 82.1349434 | 65.5666434 | 54.6321585 |
| 17:29:59 | 61.8197433 | 68.8243232 | 82.1349434 | 65.5666434 | 54.6321585 |
| 17:30:00 | 61.8197433 | 68.8243232 | 82.1349434 | 65.5666434 | 54.6321585 |
| 17:30:01 | 61.8197433 | 69.8243232 | 82.1349434 | 65.5666434 | 54.6321585 |
| 17:30:02 | 61.8197433 | 69.8243232 | 82.1349434 | 65.5666434 | 54.6321585 |

|          |            |            |            |            |            |
|----------|------------|------------|------------|------------|------------|
| 17:30:03 | 61.8197433 | 70.8243232 | 82.1349434 | 64.5666434 | 61.6321585 |
| 17:30:04 | 61.8197433 | 70.8243232 | 83.1349434 | 64.5666434 | 65.6321585 |
| 17:30:05 | 61.8197433 | 72.8243232 | 82.1349434 | 65.5666434 | 64.6321585 |
| 17:30:06 | 61.8197433 | 72.8243232 | 81.1349434 | 65.5666434 | 64.6321585 |
| 17:30:07 | 62.8197433 | 72.8243232 | 81.1349434 | 65.5666434 | 64.6321585 |
| 17:30:08 | 62.8197433 | 72.8243232 | 81.1349434 | 65.5666434 | 64.6321585 |
| 17:30:09 | 62.8197433 | 72.8243232 | 81.1349434 | 63.5666434 | 65.6321585 |
| 17:30:10 | 61.8197433 | 72.8243232 | 81.1349434 | 62.5666434 | 65.6321585 |
| 17:30:11 | 61.8197433 | 73.8243232 | 81.1349434 | 62.5666434 | 66.6321585 |
| 17:30:12 | 61.8197433 | 71.8243232 | 81.1349434 | 61.5666434 | 66.6321585 |
| 17:30:13 | 61.8197433 | 71.8243232 | 81.1349434 | 61.5666434 | 66.6321585 |
| 17:30:14 | 61.8197433 | 70.8243232 | 81.1349434 | 61.5666434 | 67.6321585 |
| 17:30:15 | 61.8197433 | 70.8243232 | 81.1349434 | 59.5666434 | 66.6321585 |
| 17:30:16 | 61.8197433 | 66.8243232 | 81.1349434 | 57.5666434 | 66.6321585 |
| 17:30:17 | 61.8197433 | 62.8243232 | 81.1349434 | 57.5666434 | 66.6321585 |
| 17:30:18 | 61.8197433 | 62.8243232 | 81.1349434 | 57.5666434 | 66.6321585 |
| 17:30:19 | 62.8197433 | 60.8243232 | 80.1349434 | 58.5666434 | 66.6321585 |
| 17:30:20 | 62.8197433 | 59.8243232 | 80.1349434 | 58.5666434 | 66.6321585 |
| 17:30:21 | 62.8197433 | 58.8243232 | 80.1349434 | 58.5666434 | 64.6321585 |
| 17:30:22 | 62.8197433 | 58.8243232 | 80.1349434 | 58.5666434 | 63.6321585 |
| 17:30:23 | 62.8197433 | 58.8243232 | 81.1349434 | 58.5666434 | 63.6321585 |
| 17:30:24 | 62.8197433 | 58.8243232 | 81.1349434 | 58.5666434 | 63.6321585 |
| 17:30:25 | 62.8197433 | 58.8243232 | 81.1349434 | 58.5666434 | 63.6321585 |
| 17:30:26 | 62.8197433 | 58.8243232 | 77.1349434 | 57.5666434 | 63.6321585 |
| 17:30:27 | 62.8197433 | 58.8243232 | 77.1349434 | 57.5666434 | 62.6321585 |
| 17:30:28 | 62.8197433 | 58.8243232 | 70.1349434 | 57.5666434 | 63.6321585 |
| 17:30:29 | 61.8197433 | 58.8243232 | 70.1349434 | 58.5666434 | 63.6321585 |
| 17:30:30 | 61.8197433 | 57.8243232 | 68.1349434 | 57.5666434 | 63.6321585 |
| 17:30:31 | 60.8197433 | 57.8243232 | 68.1349434 | 57.5666434 | 64.6321585 |
| 17:30:32 | 60.8197433 | 57.8243232 | 68.1349434 | 58.5666434 | 64.6321585 |
| 17:30:33 | 60.8197433 | 58.8243232 | 67.1349434 | 58.5666434 | 64.6321585 |
| 17:30:34 | 60.8197433 | 58.8243232 | 67.1349434 | 57.5666434 | 64.6321585 |
| 17:30:35 | 60.8197433 | 59.8243232 | 68.1349434 | 57.5666434 | 64.6321585 |
| 17:30:36 | 61.8197433 | 60.8243232 | 68.1349434 | 57.5666434 | 65.6321585 |
| 17:30:37 | 61.8197433 | 60.8243232 | 68.1349434 | 57.5666434 | 65.6321585 |
| 17:30:38 | 61.8197433 | 63.8243232 | 68.1349434 | 58.5666434 | 65.6321585 |
| 17:30:39 | 61.8197433 | 63.8243232 | 68.1349434 | 59.5666434 | 65.6321585 |
| 17:30:40 | 61.8197433 | 64.8243232 | 66.1349434 | 60.5666434 | 66.6321585 |
| 17:30:41 | 61.8197433 | 64.8243232 | 65.1349434 | 63.5666434 | 67.6321585 |
| 17:30:42 | 61.8197433 | 62.8243232 | 64.1349434 | 66.5666434 | 67.6321585 |
| 17:30:43 | 61.8197433 | 61.8243232 | 64.1349434 | 67.5666434 | 69.6321585 |
| 17:30:44 | 61.8197433 | 61.8243232 | 66.1349434 | 67.5666434 | 69.6321585 |
| 17:30:45 | 61.8197433 | 61.8243232 | 69.1349434 | 73.5666434 | 69.6321585 |
| 17:30:46 | 61.8197433 | 60.8243232 | 69.1349434 | 73.5666434 | 68.6321585 |
| 17:30:47 | 61.8197433 | 60.8243232 | 70.1349434 | 73.5666434 | 68.6321585 |

|          |            |            |            |            |            |
|----------|------------|------------|------------|------------|------------|
| 17:30:48 | 61.8197433 | 60.8243232 | 70.1349434 | 72.5666434 | 69.6321585 |
| 17:30:49 | 61.8197433 | 62.8243232 | 70.1349434 | 71.5666434 | 69.6321585 |
| 17:30:50 | 61.8197433 | 63.8243232 | 71.1349434 | 70.5666434 | 69.6321585 |
| 17:30:51 | 61.8197433 | 63.8243232 | 75.1349434 | 67.5666434 | 69.6321585 |
| 17:30:52 | 61.8197433 | 63.8243232 | 77.1349434 | 66.5666434 | 72.6321585 |
| 17:30:53 | 61.8197433 | 62.8243232 | 78.1349434 | 66.5666434 | 71.6321585 |
| 17:30:54 | 61.8197433 | 60.8243232 | 78.1349434 | 67.5666434 | 70.6321585 |
| 17:30:55 | 61.8197433 | 60.8243232 | 78.1349434 | 67.5666434 | 68.6321585 |
| 17:30:56 | 61.8197433 | 58.8243232 | 78.1349434 | 67.5666434 | 68.6321585 |
| 17:30:57 | 62.8197433 | 57.8243232 | 79.1349434 | 66.5666434 | 68.6321585 |
| 17:30:58 | 62.8197433 | 57.8243232 | 79.1349434 | 66.5666434 | 68.6321585 |
| 17:30:59 | 62.8197433 | 57.8243232 | 80.1349434 | 66.5666434 | 67.6321585 |
| 17:31:00 | 61.8197433 | 58.8243232 | 80.1349434 | 65.5666434 | 67.6321585 |
| 17:31:01 | 61.8197433 | 59.8243232 | 82.1349434 | 65.5666434 | 67.6321585 |
| 17:31:02 | 62.8197433 | 60.8243232 | 83.1349434 | 65.5666434 | 67.6321585 |
| 17:31:03 | 62.8197433 | 61.8243232 | 83.1349434 | 65.5666434 | 66.6321585 |
| 17:31:04 | 62.8197433 | 62.8243232 | 84.1349434 | 64.5666434 | 66.6321585 |
| 17:31:05 | 62.8197433 | 62.8243232 | 84.1349434 | 64.5666434 | 65.6321585 |
| 17:31:06 | 62.8197433 | 62.8243232 | 69.8472053 | 64.5666434 | 64.6321585 |
| 17:31:07 | 62.8197433 | 61.8243232 | 69.7562962 | 64.5666434 | 63.6321585 |
| 17:31:08 | 62.8197433 | 60.8243232 | 69.9381144 | 64.5666434 | 63.6321585 |
| 17:31:09 | 62.8197433 | 60.8243232 | 70.1199326 | 64.5666434 | 63.6321585 |
| 17:31:10 | 62.8197433 | 60.8243232 | 69.8472053 | 64.5666434 | 63.6321585 |
| 17:31:11 | 62.8197433 | 60.8243232 | 69.6653871 | 64.5666434 | 63.6321585 |
| 17:31:12 | 62.8197433 | 60.8243232 | 69.6653871 | 64.5666434 | 63.6321585 |
| 17:31:13 | 63.8197433 | 60.8243232 | 67.7352968 | 64.5666434 | 65.6321585 |
| 17:31:14 | 62.8197433 | 60.8243232 | 81.1349434 | 65.5666434 | 65.6321585 |
| 17:31:15 | 62.8197433 | 60.8243232 | 80.1349434 | 65.5666434 | 66.6321585 |
| 17:31:16 | 62.8197433 | 60.8243232 | 80.1349434 | 65.5666434 | 66.6321585 |
| 17:31:17 | 62.8197433 | 60.8243232 | 80.1349434 | 65.5666434 | 66.6321585 |
| 17:31:18 | 62.8197433 | 60.8243232 | 78.1349434 | 65.5666434 | 67.6321585 |
| 17:31:19 | 62.8197433 | 61.8243232 | 76.1349434 | 65.5666434 | 67.6321585 |
| 17:31:20 | 62.8197433 | 61.8243232 | 76.1349434 | 65.5666434 | 67.6321585 |
| 17:31:21 | 62.8197433 | 62.8243232 | 75.1349434 | 66.5666434 | 68.6321585 |
| 17:31:22 | 62.8197433 | 63.8243232 | 73.1349434 | 66.5666434 | 69.6321585 |
| 17:31:23 | 62.8197433 | 63.8243232 | 71.1349434 | 68.5666434 | 69.6321585 |
| 17:31:24 | 62.8197433 | 61.8243232 | 70.1349434 | 71.5666434 | 70.6321585 |
| 17:31:25 | 62.8197433 | 61.8243232 | 69.1349434 | 71.5666434 | 70.6321585 |
| 17:31:26 | 62.8197433 | 61.8243232 | 68.1349434 | 72.5666434 | 71.6321585 |
| 17:31:27 | 62.8197433 | 60.8243232 | 70.1349434 | 72.5666434 | 71.6321585 |
| 17:31:28 | 62.8197433 | 60.8243232 | 73.1349434 | 71.5666434 | 71.6321585 |
| 17:31:29 | 62.8197433 | 59.8243232 | 73.1349434 | 71.5666434 | 72.6321585 |
| 17:31:30 | 62.8197433 | 59.8243232 | 73.1349434 | 71.5666434 | 74.6321585 |
| 17:31:31 | 62.8197433 | 59.8243232 | 73.1349434 | 71.5666434 | 76.6321585 |
| 17:31:32 | 63.8197433 | 59.8243232 | 73.1349434 | 71.5666434 | 76.6321585 |



|          |            |            |            |            |            |
|----------|------------|------------|------------|------------|------------|
| 17:31:33 | 63.8197433 | 59.8243232 | 73.1349434 | 71.5666434 | 76.6321585 |
| 17:31:34 | 63.8197433 | 59.8243232 | 74.1349434 | 71.5666434 | 76.6321585 |
| 17:31:35 | 63.8197433 | 59.8243232 | 74.1349434 | 70.5666434 | 74.6321585 |
| 17:31:36 | 62.8197433 | 60.8243232 | 74.1349434 | 68.5666434 | 74.6321585 |
| 17:31:37 | 62.8197433 | 61.8243232 | 74.1349434 | 68.5666434 | 72.6321585 |
| 17:31:38 | 62.8197433 | 61.8243232 | 74.1349434 | 67.5666434 | 70.6321585 |
| 17:31:39 | 62.8197433 | 62.8243232 | 74.1349434 | 67.5666434 | 70.6321585 |
| 17:31:40 | 62.8197433 | 62.8243232 | 74.1349434 | 61.5666434 | 70.6321585 |
| 17:31:41 | 62.8197433 | 62.8243232 | 74.1349434 | 59.5666434 | 70.6321585 |
| 17:31:42 | 62.8197433 | 58.8243232 | 74.1349434 | 58.5666434 | 70.6321585 |
| 17:31:43 | 62.8197433 | 57.8243232 | 75.1349434 | 58.5666434 | 70.6321585 |
| 17:31:44 | 62.8197433 | 57.8243232 | 76.1349434 | 58.5666434 | 70.6321585 |
| 17:31:45 | 62.8197433 | 57.8243232 | 77.1349434 | 58.5666434 | 70.6321585 |
| 17:31:46 | 61.8197433 | 57.8243232 | 77.1349434 | 58.5666434 | 71.6321585 |
| 17:31:47 | 61.8197433 | 57.8243232 | 78.1349434 | 58.5666434 | 71.6321585 |
| 17:31:48 | 61.8197433 | 58.8243232 | 78.1349434 | 57.5666434 | 71.6321585 |
| 17:31:49 | 61.8197433 | 58.8243232 | 79.1349434 | 57.5666434 | 72.6321585 |
| 17:31:50 | 61.8197433 | 60.8243232 | 80.1349434 | 57.5666434 | 72.6321585 |
| 17:31:51 | 61.8197433 | 61.8243232 | 79.1349434 | 54.5666434 | 72.6321585 |
| 17:31:52 | 61.8197433 | 61.8243232 | 78.1349434 | 54.5666434 | 72.6321585 |
| 17:31:53 | 61.8197433 | 61.8243232 | 75.1349434 | 54.5666434 | 72.6321585 |
| 17:31:54 | 61.8197433 | 61.8243232 | 74.1349434 | 54.5666434 | 72.6321585 |
| 17:31:55 | 61.8197433 | 60.8243232 | 74.1349434 | 54.5666434 | 72.6321585 |
| 17:31:56 | 61.8197433 | 60.8243232 | 73.1349434 | 54.5666434 | 72.6321585 |
| 17:31:57 | 61.8197433 | 61.8243232 | 73.1349434 | 54.5666434 | 72.6321585 |
| 17:31:58 | 61.8197433 | 61.8243232 | 74.1349434 | 54.5666434 | 72.6321585 |
| 17:31:59 | 61.8197433 | 61.8243232 | 75.1349434 | 54.5666434 | 74.6321585 |
| 17:32:00 | 61.8197433 | 63.8243232 | 74.1349434 | 55.5666434 | 73.6321585 |
| 17:32:01 | 61.8197433 | 64.8243232 | 74.1349434 | 55.5666434 | 72.6321585 |
| 17:32:02 | 61.8197433 | 64.8243232 | 74.1349434 | 55.5666434 | 71.6321585 |
| 17:32:03 | 62.8197433 | 64.8243232 | 74.1349434 | 55.5666434 | 70.6321585 |
| 17:32:04 | 62.8197433 | 65.8243232 | 74.1349434 | 55.5666434 | 70.6321585 |
| 17:32:05 | 62.8197433 | 65.8243232 | 74.1349434 | 56.5666434 | 69.6321585 |
| 17:32:06 | 62.8197433 | 65.8243232 | 74.1349434 | 56.5666434 | 69.6321585 |
| 17:32:07 | 62.8197433 | 66.8243232 | 75.1349434 | 56.5666434 | 70.6321585 |
| 17:32:08 | 62.8197433 | 67.8243232 | 75.1349434 | 57.5666434 | 70.6321585 |
| 17:32:09 | 62.8197433 | 67.8243232 | 76.1349434 | 57.5666434 | 70.6321585 |
| 17:32:10 | 62.8197433 | 67.8243232 | 79.1349434 | 58.5666434 | 70.6321585 |
| 17:32:11 | 62.8197433 | 67.8243232 | 79.1349434 | 59.5666434 | 69.6321585 |
| 17:32:12 | 62.8197433 | 68.8243232 | 83.1349434 | 59.5666434 | 69.6321585 |
| 17:32:13 | 62.8197433 | 68.8243232 | 82.1349434 | 59.5666434 | 68.6321585 |
| 17:32:14 | 62.8197433 | 68.8243232 | 82.1349434 | 62.5666434 | 68.6321585 |
| 17:32:15 | 62.8197433 | 68.8243232 | 81.1349434 | 62.5666434 | 68.6321585 |
| 17:32:16 | 62.8197433 | 72.8243232 | 82.1349434 | 62.5666434 | 68.6321585 |
| 17:32:17 | 62.8197433 | 72.8243232 | 84.1349434 | 63.5666434 | 68.6321585 |

|          |            |            |            |            |            |
|----------|------------|------------|------------|------------|------------|
| 17:32:18 | 62.8197433 | 72.8243232 | 85.1349434 | 63.5666434 | 68.6321585 |
| 17:32:19 | 62.8197433 | 72.8243232 | 86.1349434 | 65.5666434 | 68.6321585 |
| 17:32:20 | 62.8197433 | 71.8243232 | 87.1349434 | 65.5666434 | 67.6321585 |
| 17:32:21 | 63.8197433 | 71.8243232 | 72.9381144 | 65.5666434 | 67.6321585 |
| 17:32:22 | 63.8197433 | 74.8243232 | 87.1349434 | 66.5666434 | 67.6321585 |
| 17:32:23 | 62.8197433 | 74.8243232 | 86.1349434 | 67.5666434 | 67.6321585 |
| 17:32:24 | 61.8197433 | 76.8243232 | 85.1349434 | 67.5666434 | 67.6321585 |
| 17:32:25 | 61.8197433 | 76.8243232 | 84.1349434 | 70.5666434 | 67.6321585 |
| 17:32:26 | 61.8197433 | 76.8243232 | 83.1349434 | 71.5666434 | 67.6321585 |
| 17:32:27 | 61.8197433 | 77.8243232 | 83.1349434 | 71.5666434 | 67.6321585 |
| 17:32:28 | 61.8197433 | 77.8243232 | 84.1349434 | 74.5666434 | 66.6321585 |
| 17:32:29 | 61.8197433 | 77.8243232 | 85.1349434 | 74.5666434 | 66.6321585 |
| 17:32:30 | 61.8197433 | 77.8243232 | 85.1349434 | 76.5666434 | 67.6321585 |
| 17:32:31 | 61.8197433 | 77.8243232 | 86.1349434 | 77.5666434 | 68.6321585 |
| 17:32:32 | 61.8197433 | 79.8243232 | 86.1349434 | 77.5666434 | 68.6321585 |
| 17:32:33 | 61.8197433 | 79.8243232 | 87.1349434 | 79.5666434 | 70.6321585 |
| 17:32:34 | 61.8197433 | 80.8243232 | 87.1349434 | 79.5666434 | 72.6321585 |
| 17:32:35 | 61.8197433 | 81.8243232 | 87.1349434 | 78.5666434 | 72.6321585 |
| 17:32:36 | 61.8197433 | 82.8243232 | 87.1349434 | 78.5666434 | 75.6321585 |
| 17:32:37 | 61.8197433 | 82.8243232 | 87.1349434 | 74.5666434 | 75.6321585 |
| 17:32:38 | 61.8197433 | 82.8243232 | 87.1349434 | 73.5666434 | 75.6321585 |
| 17:32:39 | 61.8197433 | 82.8243232 | 86.1349434 | 71.5666434 | 75.6321585 |
| 17:32:40 | 61.8197433 | 81.8243232 | 84.1349434 | 69.5666434 | 75.6321585 |
| 17:32:41 | 61.8197433 | 81.8243232 | 82.1349434 | 69.5666434 | 68.6321585 |
| 17:32:42 | 61.8197433 | 81.8243232 | 81.1349434 | 69.5666434 | 66.6321585 |
| 17:32:43 | 61.8197433 | 81.8243232 | 81.1349434 | 68.5666434 | 66.6321585 |
| 17:32:44 | 61.8197433 | 81.8243232 | 81.1349434 | 69.5666434 | 66.6321585 |
| 17:32:45 | 61.8197433 | 81.8243232 | 80.1349434 | 69.5666434 | 66.6321585 |
| 17:32:46 | 61.8197433 | 80.8243232 | 80.1349434 | 69.5666434 | 65.6321585 |
| 17:32:47 | 61.8197433 | 80.8243232 | 80.1349434 | 70.5666434 | 65.6321585 |
| 17:32:48 | 62.8197433 | 79.8243232 | 81.1349434 | 70.5666434 | 65.6321585 |
| 17:32:49 | 62.8197433 | 80.8243232 | 82.1349434 | 70.5666434 | 65.6321585 |
| 17:32:50 | 62.8197433 | 80.8243232 | 82.1349434 | 70.5666434 | 65.6321585 |
| 17:32:51 | 62.8197433 | 79.8243232 | 81.1349434 | 71.5666434 | 65.6321585 |
| 17:32:52 | 62.8197433 | 79.8243232 | 78.1349434 | 71.5666434 | 65.6321585 |
| 17:32:53 | 62.8197433 | 79.8243232 | 75.1349434 | 71.5666434 | 65.6321585 |
| 17:32:54 | 62.8197433 | 80.8243232 | 72.1349434 | 71.5666434 | 65.6321585 |
| 17:32:55 | 62.8197433 | 81.8243232 | 71.1349434 | 70.5666434 | 65.6321585 |
| 17:32:56 | 62.8197433 | 82.8243232 | 71.1349434 | 70.5666434 | 65.6321585 |
| 17:32:57 | 63.8197433 | 83.8243232 | 71.1349434 | 71.5666434 | 65.6321585 |
| 17:32:58 | 63.8197433 | 83.8243232 | 71.1349434 | 71.5666434 | 65.6321585 |
| 17:32:59 | 64.8197433 | 84.8243232 | 71.1349434 | 71.5666434 | 65.6321585 |
| 17:33:00 | 64.8197433 | 84.8243232 | 71.1349434 | 71.5666434 | 65.6321585 |
| 17:33:01 | 68.8197433 | 72.8227663 | 73.1349434 | 71.5666434 | 65.6321585 |
| 17:33:02 | 71.8197433 | 71.7562962 | 72.1349434 | 71.5666434 | 65.6321585 |

|          |            |            |            |            |            |
|----------|------------|------------|------------|------------|------------|
| 17:33:03 | 73.8197433 | 72.1199326 | 72.1349434 | 71.5666434 | 65.6321585 |
| 17:33:04 | 74.8197433 | 72.2108417 | 72.1349434 | 69.5666434 | 65.6321585 |
| 17:33:05 | 77.8197433 | 72.2108417 | 72.1349434 | 67.5666434 | 65.6321585 |
| 17:33:06 | 79.8197433 | 72.3017507 | 71.1349434 | 67.5666434 | 66.6321585 |
| 17:33:07 | 80.8197433 | 71.574478  | 71.1349434 | 66.5666434 | 67.6321585 |
| 17:33:08 | 81.8197433 | 71.574478  | 70.1349434 | 66.5666434 | 67.6321585 |
| 17:33:09 | 81.8197433 | 71.4835689 | 70.1349434 | 65.5666434 | 67.6321585 |
| 17:33:10 | 81.8197433 | 71.3926598 | 70.1349434 | 65.5666434 | 66.6321585 |
| 17:33:11 | 84.8197433 | 71.2108417 | 70.1349434 | 65.5666434 | 65.6321585 |
| 17:33:12 | 80.8197433 | 71.3017507 | 69.1349434 | 66.5666434 | 64.6321585 |
| 17:33:13 | 78.8197433 | 70.8472053 | 68.1349434 | 66.5666434 | 64.6321585 |
| 17:33:14 | 77.8197433 | 79.8243232 | 68.1349434 | 67.5666434 | 64.6321585 |
| 17:33:15 | 76.8197433 | 79.8243232 | 68.1349434 | 68.5666434 | 64.6321585 |
| 17:33:16 | 76.8197433 | 79.8243232 | 69.1349434 | 68.5666434 | 64.6321585 |
| 17:33:17 | 75.8197433 | 79.8243232 | 69.1349434 | 68.5666434 | 64.6321585 |
| 17:33:18 | 74.8197433 | 73.8243232 | 69.1349434 | 69.5666434 | 64.6321585 |
| 17:33:19 | 73.8197433 | 70.8243232 | 69.1349434 | 69.5666434 | 64.6321585 |
| 17:33:20 | 73.8197433 | 69.8243232 | 70.1349434 | 69.5666434 | 64.6321585 |
| 17:33:21 | 72.8197433 | 69.8243232 | 70.1349434 | 68.5666434 | 65.6321585 |
| 17:33:22 | 73.8197433 | 69.8243232 | 71.1349434 | 68.5666434 | 66.6321585 |
| 17:33:23 | 74.8197433 | 68.8243232 | 71.1349434 | 68.5666434 | 66.6321585 |
| 17:33:24 | 76.8197433 | 66.8243232 | 71.1349434 | 67.5666434 | 66.6321585 |
| 17:33:25 | 76.8197433 | 66.8243232 | 72.1349434 | 67.5666434 | 66.6321585 |
| 17:33:26 | 77.8197433 | 66.8243232 | 72.1349434 | 67.5666434 | 66.6321585 |
| 17:33:27 | 78.8197433 | 67.8243232 | 71.1349434 | 66.5666434 | 66.6321585 |
| 17:33:28 | 79.8197433 | 68.8243232 | 70.1349434 | 66.5666434 | 66.6321585 |
| 17:33:29 | 79.8197433 | 68.8243232 | 71.1349434 | 66.5666434 | 67.6321585 |
| 17:33:30 | 79.8197433 | 72.8243232 | 71.1349434 | 64.5666434 | 68.6321585 |
| 17:33:31 | 79.8197433 | 73.8243232 | 72.1349434 | 64.5666434 | 69.6321585 |
| 17:33:32 | 80.8197433 | 72.8243232 | 73.1349434 | 64.5666434 | 68.6321585 |
| 17:33:33 | 80.8197433 | 69.8243232 | 73.1349434 | 63.5666434 | 68.6321585 |
| 17:33:34 | 78.8197433 | 67.8243232 | 73.1349434 | 64.5666434 | 68.6321585 |
| 17:33:35 | 72.8197433 | 65.8243232 | 73.1349434 | 64.5666434 | 69.6321585 |
| 17:33:36 | 68.8197433 | 60.8243232 | 74.1349434 | 64.5666434 | 70.6321585 |
| 17:33:37 | 67.8197433 | 58.8243232 | 75.1349434 | 64.5666434 | 72.6321585 |
| 17:33:38 | 66.8197433 | 58.8243232 | 76.1349434 | 61.5666434 | 72.6321585 |
| 17:33:39 | 65.8197433 | 58.8243232 | 76.1349434 | 61.5666434 | 72.6321585 |
| 17:33:40 | 65.8197433 | 58.8243232 | 78.1349434 | 61.5666434 | 72.6321585 |
| 17:33:41 | 65.8197433 | 58.8243232 | 78.1349434 | 62.5666434 | 72.6321585 |
| 17:33:42 | 65.8197433 | 58.8243232 | 78.1349434 | 62.5666434 | 73.6321585 |
| 17:33:43 | 64.8197433 | 58.8243232 | 78.1349434 | 62.5666434 | 74.6321585 |
| 17:33:44 | 63.8197433 | 58.8243232 | 80.1349434 | 62.5666434 | 75.6321585 |
| 17:33:45 | 63.8197433 | 58.8243232 | 67.3926598 | 62.5666434 | 76.6321585 |
| 17:33:46 | 63.8197433 | 58.8243232 | 82.1349434 | 62.5666434 | 77.6321585 |
| 17:33:47 | 64.8197433 | 58.8243232 | 82.1349434 | 62.5666434 | 78.6321585 |

|          |            |            |            |            |            |
|----------|------------|------------|------------|------------|------------|
| 17:33:48 | 65.8197433 | 60.8243232 | 82.1349434 | 62.5666434 | 78.6321585 |
| 17:33:49 | 66.8197433 | 63.8243232 | 82.1349434 | 59.5666434 | 82.6321585 |
| 17:33:50 | 64.8197433 | 64.8243232 | 82.1349434 | 59.5666434 | 82.6321585 |
| 17:33:51 | 64.8197433 | 64.8243232 | 82.1349434 | 59.5666434 | 69.9381144 |
| 17:33:52 | 64.8197433 | 62.8243232 | 82.1349434 | 59.5666434 | 70.0290235 |
| 17:33:53 | 65.8197433 | 62.8243232 | 82.1349434 | 59.5666434 | 70.3017507 |
| 17:33:54 | 65.8197433 | 62.8243232 | 82.1349434 | 59.5666434 | 68.9847529 |
| 17:33:55 | 67.8197433 | 59.8243232 | 81.1349434 | 59.5666434 | 72.0290235 |
| 17:33:56 | 68.8197433 | 59.8243232 | 81.1349434 | 60.5666434 | 72.2108417 |
| 17:33:57 | 68.8197433 | 59.8243232 | 82.1349434 | 60.5666434 | 71.8472053 |
| 17:33:58 | 69.8197433 | 58.8243232 | 82.1349434 | 60.5666434 | 71.6653871 |
| 17:33:59 | 70.8197433 | 57.8243232 | 82.1349434 | 60.5666434 | 71.6653871 |
| 17:34:00 | 71.8197433 | 57.8243232 | 82.1349434 | 60.5666434 | 84.6321585 |
| 17:34:01 | 73.8197433 | 57.8243232 | 82.1349434 | 61.5666434 | 84.6321585 |
| 17:34:02 | 74.8197433 | 57.8243232 | 82.1349434 | 61.5666434 | 84.6321585 |
| 17:34:03 | 73.8197433 | 57.8243232 | 82.1349434 | 61.5666434 | 84.6321585 |
| 17:34:04 | 73.8197433 | 56.8243232 | 82.1349434 | 62.5666434 | 83.6321585 |
| 17:34:05 | 70.8197433 | 56.8243232 | 83.1349434 | 65.5666434 | 83.6321585 |
| 17:34:06 | 69.8197433 | 56.8243232 | 82.1349434 | 67.5666434 | 76.6321585 |
| 17:34:07 | 69.8197433 | 56.8243232 | 81.1349434 | 68.5666434 | 72.6321585 |
| 17:34:08 | 68.8197433 | 55.8243232 | 80.1349434 | 67.5666434 | 69.6321585 |
| 17:34:09 | 68.8197433 | 54.8243232 | 80.1349434 | 68.5666434 | 66.6321585 |
| 17:34:10 | 69.8197433 | 54.8243232 | 80.1349434 | 68.5666434 | 66.6321585 |
| 17:34:11 | 69.8197433 | 54.8243232 | 78.1349434 | 69.5666434 | 64.6321585 |
| 17:34:12 | 70.8197433 | 53.8243232 | 77.1349434 | 68.5666434 | 63.6321585 |
| 17:34:13 | 71.8197433 | 52.8243232 | 80.1349434 | 66.5666434 | 62.6321585 |
| 17:34:14 | 71.8197433 | 52.8243232 | 80.1349434 | 65.5666434 | 62.6321585 |
| 17:34:15 | 71.8197433 | 52.8243232 | 79.1349434 | 63.5666434 | 62.6321585 |
| 17:34:16 | 72.8197433 | 52.8243232 | 79.1349434 | 63.5666434 | 62.6321585 |
| 17:34:17 | 73.8197433 | 52.8243232 | 78.1349434 | 64.5666434 | 62.6321585 |
| 17:34:18 | 72.8197433 | 55.8243232 | 78.1349434 | 64.5666434 | 62.6321585 |
| 17:34:19 | 73.8197433 | 56.8243232 | 77.1349434 | 64.5666434 | 62.6321585 |
| 17:34:20 | 75.8197433 | 57.8243232 | 77.1349434 | 64.5666434 | 62.6321585 |
| 17:34:21 | 77.8197433 | 57.8243232 | 76.1349434 | 64.5666434 | 65.6321585 |
| 17:34:22 | 80.8197433 | 57.8243232 | 76.1349434 | 65.5666434 | 65.6321585 |
| 17:34:23 | 80.8197433 | 57.8243232 | 76.1349434 | 65.5666434 | 65.6321585 |
| 17:34:24 | 81.8197433 | 56.8243232 | 75.1349434 | 65.5666434 | 65.6321585 |
| 17:34:25 | 81.8197433 | 57.8243232 | 75.1349434 | 65.5666434 | 65.6321585 |
| 17:34:26 | 81.8197433 | 57.8243232 | 72.1349434 | 65.5666434 | 66.6321585 |
| 17:34:27 | 80.8197433 | 56.8243232 | 71.1349434 | 65.5666434 | 66.6321585 |
| 17:34:28 | 77.8197433 | 56.8243232 | 69.1349434 | 65.5666434 | 66.6321585 |
| 17:34:29 | 74.8197433 | 55.8243232 | 69.1349434 | 65.5666434 | 67.6321585 |
| 17:34:30 | 72.8197433 | 55.8243232 | 69.1349434 | 65.5666434 | 68.6321585 |
| 17:34:31 | 69.8197433 | 54.8243232 | 69.1349434 | 63.5666434 | 68.6321585 |
| 17:34:32 | 68.8197433 | 54.8243232 | 69.1349434 | 63.5666434 | 68.6321585 |

|          |            |            |            |            |            |
|----------|------------|------------|------------|------------|------------|
| 17:34:33 | 68.8197433 | 54.8243232 | 69.1349434 | 63.5666434 | 70.6321585 |
| 17:34:34 | 67.8197433 | 56.8243232 | 69.1349434 | 63.5666434 | 72.6321585 |
| 17:34:35 | 66.8197433 | 58.8243232 | 69.1349434 | 63.5666434 | 72.6321585 |
| 17:34:36 | 66.8197433 | 59.8243232 | 69.1349434 | 64.5666434 | 74.6321585 |
| 17:34:37 | 66.8197433 | 60.8243232 | 69.1349434 | 64.5666434 | 76.6321585 |
| 17:34:38 | 66.8197433 | 60.8243232 | 68.1349434 | 65.5666434 | 78.6321585 |
| 17:34:39 | 67.8197433 | 60.8243232 | 68.1349434 | 65.5666434 | 78.6321585 |
| 17:34:40 | 65.8197433 | 60.8243232 | 67.1349434 | 65.5666434 | 78.6321585 |
| 17:34:41 | 65.8197433 | 60.8243232 | 67.1349434 | 65.5666434 | 73.6321585 |
| 17:34:42 | 65.8197433 | 60.8243232 | 67.1349434 | 66.5666434 | 72.6321585 |
| 17:34:43 | 64.8197433 | 59.8243232 | 66.1349434 | 69.5666434 | 72.6321585 |
| 17:34:44 | 63.8197433 | 57.8243232 | 65.1349434 | 74.5666434 | 72.6321585 |
| 17:34:45 | 63.8197433 | 52.8243232 | 64.1349434 | 74.5666434 | 70.6321585 |
| 17:34:46 | 64.8197433 | 50.8243232 | 63.1349434 | 67.5666434 | 70.6321585 |
| 17:34:47 | 63.8197433 | 47.8243232 | 62.1349434 | 67.5666434 | 70.6321585 |
| 17:34:48 | 63.8197433 | 47.8243232 | 62.1349434 | 67.5666434 | 70.6321585 |
| 17:34:49 | 63.8197433 | 47.8243232 | 62.1349434 | 66.5666434 | 70.6321585 |
| 17:34:50 | 63.8197433 | 48.8243232 | 61.1349434 | 66.5666434 | 65.6321585 |
| 17:34:51 | 63.8197433 | 48.8243232 | 61.1349434 | 66.5666434 | 64.6321585 |
| 17:34:52 | 63.8197433 | 52.8243232 | 60.1349434 | 66.5666434 | 64.6321585 |
| 17:34:53 | 63.8197433 | 55.8243232 | 60.1349434 | 66.5666434 | 64.6321585 |
| 17:34:54 | 63.8197433 | 55.8243232 | 65.1349434 | 65.5666434 | 64.6321585 |
| 17:34:55 | 62.8197433 | 55.8243232 | 75.1349434 | 65.5666434 | 64.6321585 |
| 17:34:56 | 62.8197433 | 55.8243232 | 75.1349434 | 65.5666434 | 64.6321585 |
| 17:34:57 | 62.8197433 | 55.8243232 | 74.1349434 | 66.5666434 | 63.6321585 |
| 17:34:58 | 62.8197433 | 70.8243232 | 66.1349434 | 66.5666434 | 63.6321585 |
| 17:34:59 | 62.8197433 | 76.8243232 | 65.1349434 | 65.5666434 | 63.6321585 |
| 17:35:00 | 62.8197433 | 76.8243232 | 65.1349434 | 65.5666434 | 63.6321585 |
| 17:35:01 | 62.8197433 | 76.8243232 | 64.1349434 | 65.5666434 | 62.6321585 |
| 17:35:02 | 62.8197433 | 77.8243232 | 64.1349434 | 67.5666434 | 61.6321585 |
| 17:35:03 | 62.8197433 | 78.8243232 | 63.1349434 | 68.5666434 | 64.6321585 |
| 17:35:04 | 62.8197433 | 80.8243232 | 63.1349434 | 68.5666434 | 64.6321585 |
| 17:35:05 | 62.8197433 | 80.8243232 | 63.1349434 | 69.5666434 | 65.6321585 |
| 17:35:06 | 62.8197433 | 81.8243232 | 63.1349434 | 67.5666434 | 66.6321585 |
| 17:35:07 | 62.8197433 | 81.8243232 | 63.1349434 | 66.5666434 | 66.6321585 |
| 17:35:08 | 61.8197433 | 82.8243232 | 63.1349434 | 67.5666434 | 68.6321585 |
| 17:35:09 | 61.8197433 | 82.8243232 | 63.1349434 | 67.5666434 | 68.6321585 |
| 17:35:10 | 61.8197433 | 84.8243232 | 63.1349434 | 68.5666434 | 71.6321585 |
| 17:35:11 | 61.8197433 | 84.8243232 | 62.1349434 | 70.5666434 | 74.6321585 |
| 17:35:12 | 61.8197433 | 85.8243232 | 62.1349434 | 70.5666434 | 75.6321585 |
| 17:35:13 | 62.8197433 | 86.8243232 | 62.1349434 | 70.5666434 | 76.6321585 |
| 17:35:14 | 62.8197433 | 72.3017507 | 62.1349434 | 70.5666434 | 76.6321585 |
| 17:35:15 | 62.8197433 | 72.574478  | 63.1349434 | 70.5666434 | 77.6321585 |
| 17:35:16 | 62.8197433 | 72.8472053 | 63.1349434 | 70.5666434 | 77.6321585 |
| 17:35:17 | 62.8197433 | 73.3017507 | 63.1349434 | 71.5666434 | 79.6321585 |

|          |            |            |            |            |            |
|----------|------------|------------|------------|------------|------------|
| 17:35:18 | 62.8197433 | 72.8472053 | 63.1349434 | 71.5666434 | 81.6321585 |
| 17:35:19 | 62.8197433 | 72.7562962 | 63.1349434 | 71.5666434 | 81.6321585 |
| 17:35:20 | 62.8197433 | 71.9381144 | 63.1349434 | 71.5666434 | 81.6321585 |
| 17:35:21 | 62.8197433 | 71.3926598 | 63.1349434 | 71.5666434 | 82.6321585 |
| 17:35:22 | 62.8197433 | 70.9381144 | 63.1349434 | 71.5666434 | 83.6321585 |
| 17:35:23 | 62.8197433 | 70.9381144 | 63.1349434 | 70.5666434 | 82.6321585 |
| 17:35:24 | 62.8197433 | 70.1199326 | 64.1349434 | 70.5666434 | 71.6321585 |
| 17:35:25 | 62.8197433 | 69.9381144 | 64.1349434 | 69.5666434 | 67.6321585 |
| 17:35:26 | 62.8197433 | 70.1199326 | 64.1349434 | 69.5666434 | 66.6321585 |
| 17:35:27 | 61.8197433 | 70.574478  | 65.1349434 | 69.5666434 | 66.6321585 |
| 17:35:28 | 61.8197433 | 70.4835689 | 65.1349434 | 69.5666434 | 66.6321585 |
| 17:35:29 | 62.8197433 | 70.1199326 | 65.1349434 | 68.5666434 | 65.6321585 |
| 17:35:30 | 62.8197433 | 78.8243232 | 65.1349434 | 69.5666434 | 65.6321585 |
| 17:35:31 | 62.8197433 | 74.8243232 | 65.1349434 | 69.5666434 | 65.6321585 |
| 17:35:32 | 62.8197433 | 73.8243232 | 65.1349434 | 69.5666434 | 65.6321585 |
| 17:35:33 | 62.8197433 | 73.8243232 | 65.1349434 | 70.5666434 | 66.6321585 |
| 17:35:34 | 62.8197433 | 72.8243232 | 63.1349434 | 70.5666434 | 66.6321585 |
| 17:35:35 | 62.8197433 | 71.8243232 | 63.1349434 | 73.5666434 | 65.6321585 |
| 17:35:36 | 62.8197433 | 71.8243232 | 62.1349434 | 74.5666434 | 65.6321585 |
| 17:35:37 | 62.8197433 | 71.8243232 | 62.1349434 | 72.5666434 | 65.6321585 |
| 17:35:38 | 62.8197433 | 71.8243232 | 62.1349434 | 71.5666434 | 65.6321585 |
| 17:35:39 | 62.8197433 | 71.8243232 | 62.1349434 | 69.5666434 | 66.6321585 |
| 17:35:40 | 62.8197433 | 67.8243232 | 60.1349434 | 66.5666434 | 66.6321585 |
| 17:35:41 | 62.8197433 | 66.8243232 | 60.1349434 | 66.5666434 | 66.6321585 |
| 17:35:42 | 62.8197433 | 66.8243232 | 60.1349434 | 66.5666434 | 66.6321585 |
| 17:35:43 | 62.8197433 | 66.8243232 | 59.1349434 | 66.5666434 | 67.6321585 |
| 17:35:44 | 62.8197433 | 66.8243232 | 57.1349434 | 65.5666434 | 67.6321585 |
| 17:35:45 | 62.8197433 | 66.8243232 | 55.1349434 | 65.5666434 | 67.6321585 |
| 17:35:46 | 62.8197433 | 66.8243232 | 53.1349434 | 64.5666434 | 68.6321585 |
| 17:35:47 | 62.8197433 | 66.8243232 | 53.1349434 | 64.5666434 | 68.6321585 |
| 17:35:48 | 62.8197433 | 66.8243232 | 53.1349434 | 64.5666434 | 68.6321585 |
| 17:35:49 | 62.8197433 | 66.8243232 | 52.1349434 | 64.5666434 | 68.6321585 |
| 17:35:50 | 62.8197433 | 66.8243232 | 52.1349434 | 64.5666434 | 66.6321585 |
| 17:35:51 | 62.8197433 | 66.8243232 | 51.1349434 | 63.5666434 | 67.6321585 |
| 17:35:52 | 62.8197433 | 67.8243232 | 51.1349434 | 64.5666434 | 67.6321585 |
| 17:35:53 | 62.8197433 | 68.8243232 | 51.1349434 | 64.5666434 | 67.6321585 |
| 17:35:54 | 62.8197433 | 69.8243232 | 51.1349434 | 63.5666434 | 67.6321585 |
| 17:35:55 | 62.8197433 | 69.8243232 | 50.1349434 | 63.5666434 | 67.6321585 |
| 17:35:56 | 62.8197433 | 69.8243232 | 50.1349434 | 63.5666434 | 66.6321585 |
| 17:35:57 | 62.8197433 | 69.8243232 | 50.1349434 | 63.5666434 | 65.6321585 |
| 17:35:58 | 62.8197433 | 70.8243232 | 50.1349434 | 61.5666434 | 65.6321585 |
| 17:35:59 | 62.8197433 | 70.8243232 | 49.1349434 | 61.5666434 | 65.6321585 |
| 17:36:00 | 62.8197433 | 70.8243232 | 49.1349434 | 61.5666434 | 65.6321585 |
| 17:36:01 | 62.8197433 | 67.8243232 | 49.1349434 | 61.5666434 | 65.6321585 |
| 17:36:02 | 62.8197433 | 65.8243232 | 45.1349434 | 61.5666434 | 67.6321585 |

|          |            |            |            |            |            |
|----------|------------|------------|------------|------------|------------|
| 17:36:03 | 62.8197433 | 65.8243232 | 44.1349434 | 59.5666434 | 67.6321585 |
| 17:36:04 | 62.8197433 | 64.8243232 | 43.1349434 | 59.5666434 | 68.6321585 |
| 17:36:05 | 62.8197433 | 64.8243232 | 42.1349434 | 60.5666434 | 67.6321585 |
| 17:36:06 | 61.8197433 | 65.8243232 | 42.1349434 | 60.5666434 | 67.6321585 |
| 17:36:07 | 61.8197433 | 65.8243232 | 42.1349434 | 60.5666434 | 67.6321585 |
| 17:36:08 | 61.8197433 | 65.8243232 | 42.1349434 | 60.5666434 | 66.6321585 |
| 17:36:09 | 61.8197433 | 66.8243232 | 42.1349434 | 60.5666434 | 65.6321585 |
| 17:36:10 | 61.8197433 | 66.8243232 | 42.1349434 | 61.5666434 | 65.6321585 |
| 17:36:11 | 61.8197433 | 66.8243232 | 43.1349434 | 61.5666434 | 65.6321585 |
| 17:36:12 | 61.8197433 | 68.8243232 | 43.1349434 | 62.5666434 | 65.6321585 |
| 17:36:13 | 61.8197433 | 70.8243232 | 44.1349434 | 61.5666434 | 64.6321585 |
| 17:36:14 | 61.8197433 | 70.8243232 | 44.1349434 | 61.5666434 | 63.6321585 |
| 17:36:15 | 61.8197433 | 71.8243232 | 44.1349434 | 61.5666434 | 63.6321585 |
| 17:36:16 | 61.8197433 | 73.8243232 | 45.1349434 | 61.5666434 | 63.6321585 |
| 17:36:17 | 61.8197433 | 66.8243232 | 45.1349434 | 62.5666434 | 63.6321585 |
| 17:36:18 | 61.8197433 | 66.8243232 | 45.1349434 | 63.5666434 | 63.6321585 |
| 17:36:19 | 62.8197433 | 65.8243232 | 46.1349434 | 65.5666434 | 63.6321585 |
| 17:36:20 | 62.8197433 | 64.8243232 | 46.1349434 | 65.5666434 | 65.6321585 |
| 17:36:21 | 62.8197433 | 64.8243232 | 46.1349434 | 65.5666434 | 65.6321585 |
| 17:36:22 | 62.8197433 | 63.8243232 | 47.1349434 | 64.5666434 | 65.6321585 |
| 17:36:23 | 62.8197433 | 63.8243232 | 60.1349434 | 64.5666434 | 65.6321585 |
| 17:36:24 | 62.8197433 | 62.8243232 | 67.1349434 | 60.5666434 | 66.6321585 |
| 17:36:25 | 62.8197433 | 62.8243232 | 66.1349434 | 60.5666434 | 66.6321585 |
| 17:36:26 | 62.8197433 | 61.8243232 | 64.1349434 | 58.5666434 | 66.6321585 |
| 17:36:27 | 62.8197433 | 61.8243232 | 62.1349434 | 58.5666434 | 66.6321585 |
| 17:36:28 | 62.8197433 | 62.8243232 | 63.1349434 | 58.5666434 | 65.6321585 |
| 17:36:29 | 62.8197433 | 62.8243232 | 63.1349434 | 59.5666434 | 65.6321585 |
| 17:36:30 | 62.8197433 | 62.8243232 | 66.1349434 | 59.5666434 | 65.6321585 |
| 17:36:31 | 62.8197433 | 62.8243232 | 68.1349434 | 59.5666434 | 65.6321585 |
| 17:36:32 | 62.8197433 | 63.8243232 | 71.1349434 | 59.5666434 | 64.6321585 |
| 17:36:33 | 62.8197433 | 63.8243232 | 72.1349434 | 59.5666434 | 65.6321585 |
| 17:36:34 | 62.8197433 | 64.8243232 | 72.1349434 | 59.5666434 | 65.6321585 |
| 17:36:35 | 62.8197433 | 63.8243232 | 67.1349434 | 59.5666434 | 65.6321585 |
| 17:36:36 | 62.8197433 | 63.8243232 | 67.1349434 | 59.5666434 | 65.6321585 |
| 17:36:37 | 62.8197433 | 63.8243232 | 62.1349434 | 59.5666434 | 65.6321585 |
| 17:36:38 | 62.8197433 | 63.8243232 | 63.1349434 | 59.5666434 | 65.6321585 |
| 17:36:39 | 62.8197433 | 63.8243232 | 66.1349434 | 59.5666434 | 65.6321585 |
| 17:36:40 | 62.8197433 | 63.8243232 | 68.1349434 | 59.5666434 | 64.6321585 |
| 17:36:41 | 62.8197433 | 63.8243232 | 70.1349434 | 59.5666434 | 64.6321585 |
| 17:36:42 | 62.8197433 | 63.8243232 | 72.1349434 | 59.5666434 | 63.6321585 |
| 17:36:43 | 63.8197433 | 62.8243232 | 73.1349434 | 59.5666434 | 62.6321585 |
| 17:36:44 | 63.8197433 | 62.8243232 | 73.1349434 | 61.5666434 | 63.6321585 |
| 17:36:45 | 63.8197433 | 62.8243232 | 71.1349434 | 64.5666434 | 63.6321585 |
| 17:36:46 | 62.8197433 | 64.8243232 | 64.1349434 | 64.5666434 | 62.6321585 |
| 17:36:47 | 62.8197433 | 64.8243232 | 58.1349434 | 64.5666434 | 62.6321585 |

|          |            |            |            |            |            |
|----------|------------|------------|------------|------------|------------|
| 17:36:48 | 62.8197433 | 64.8243232 | 56.1349434 | 64.5666434 | 62.6321585 |
| 17:36:49 | 62.8197433 | 65.8243232 | 56.1349434 | 65.5666434 | 62.6321585 |
| 17:36:50 | 62.8197433 | 65.8243232 | 58.1349434 | 65.5666434 | 62.6321585 |
| 17:36:51 | 62.8197433 | 67.8243232 | 59.1349434 | 65.5666434 | 63.6321585 |
| 17:36:52 | 62.8197433 | 66.8243232 | 59.1349434 | 65.5666434 | 64.6321585 |
| 17:36:53 | 62.8197433 | 64.8243232 | 59.1349434 | 66.5666434 | 64.6321585 |
| 17:36:54 | 62.8197433 | 61.8243232 | 59.1349434 | 66.5666434 | 66.6321585 |
| 17:36:55 | 62.8197433 | 60.8243232 | 59.1349434 | 66.5666434 | 67.6321585 |
| 17:36:56 | 62.8197433 | 60.8243232 | 59.1349434 | 66.5666434 | 67.6321585 |
| 17:36:57 | 62.8197433 | 60.8243232 | 59.1349434 | 66.5666434 | 67.6321585 |
| 17:36:58 | 62.8197433 | 60.8243232 | 60.1349434 | 66.5666434 | 67.6321585 |
| 17:36:59 | 62.8197433 | 60.8243232 | 63.1349434 | 65.5666434 | 68.6321585 |
| 17:37:00 | 62.8197433 | 60.8243232 | 64.1349434 | 65.5666434 | 69.6321585 |
| 17:37:01 | 62.8197433 | 60.8243232 | 64.1349434 | 65.5666434 | 70.6321585 |
| 17:37:02 | 62.8197433 | 60.8243232 | 64.1349434 | 65.5666434 | 71.6321585 |
| 17:37:03 | 62.8197433 | 62.8243232 | 61.1349434 | 66.5666434 | 73.6321585 |
| 17:37:04 | 62.8197433 | 62.8243232 | 60.1349434 | 67.5666434 | 73.6321585 |
| 17:37:05 | 62.8197433 | 62.8243232 | 59.1349434 | 68.5666434 | 78.6321585 |
| 17:37:06 | 62.8197433 | 67.8243232 | 59.1349434 | 68.5666434 | 78.6321585 |
| 17:37:07 | 62.8197433 | 67.8243232 | 59.1349434 | 70.5666434 | 79.6321585 |
| 17:37:08 | 62.8197433 | 68.8243232 | 58.1349434 | 71.5666434 | 79.6321585 |
| 17:37:09 | 62.8197433 | 69.8243232 | 58.1349434 | 72.5666434 | 79.6321585 |
| 17:37:10 | 62.8197433 | 72.8243232 | 58.1349434 | 72.5666434 | 78.6321585 |
| 17:37:11 | 62.8197433 | 72.8243232 | 70.1349434 | 66.5666434 | 78.6321585 |
| 17:37:12 | 62.8197433 | 74.8243232 | 72.1349434 | 65.5666434 | 77.6321585 |
| 17:37:13 | 62.8197433 | 75.8243232 | 69.1349434 | 65.5666434 | 76.6321585 |
| 17:37:14 | 62.8197433 | 75.8243232 | 68.1349434 | 65.5666434 | 76.6321585 |
| 17:37:15 | 62.8197433 | 76.8243232 | 66.1349434 | 65.5666434 | 76.6321585 |
| 17:37:16 | 62.8197433 | 76.8243232 | 64.1349434 | 65.5666434 | 76.6321585 |
| 17:37:17 | 62.8197433 | 76.8243232 | 61.1349434 | 64.5666434 | 76.6321585 |
| 17:37:18 | 62.8197433 | 77.8243232 | 61.1349434 | 64.5666434 | 75.6321585 |
| 17:37:19 | 62.8197433 | 76.8243232 | 54.1349434 | 64.5666434 | 75.6321585 |
| 17:37:20 | 62.8197433 | 73.8243232 | 52.1349434 | 64.5666434 | 75.6321585 |
| 17:37:21 | 62.8197433 | 66.8243232 | 52.1349434 | 63.5666434 | 75.6321585 |
| 17:37:22 | 62.8197433 | 66.8243232 | 51.1349434 | 63.5666434 | 74.6321585 |
| 17:37:23 | 62.8197433 | 61.8243232 | 52.1349434 | 64.5666434 | 72.6321585 |
| 17:37:24 | 62.8197433 | 60.8243232 | 54.1349434 | 64.5666434 | 69.6321585 |
| 17:37:25 | 62.8197433 | 60.8243232 | 55.1349434 | 64.5666434 | 66.6321585 |
| 17:37:26 | 62.8197433 | 61.8243232 | 55.1349434 | 65.5666434 | 65.6321585 |
| 17:37:27 | 62.8197433 | 61.8243232 | 52.1349434 | 65.5666434 | 66.6321585 |
| 17:37:28 | 62.8197433 | 61.8243232 | 51.1349434 | 63.5666434 | 66.6321585 |
| 17:37:29 | 62.8197433 | 66.8243232 | 50.1349434 | 63.5666434 | 69.6321585 |
| 17:37:30 | 62.8197433 | 66.8243232 | 50.1349434 | 63.5666434 | 69.6321585 |
| 17:37:31 | 62.8197433 | 69.8243232 | 50.1349434 | 63.5666434 | 69.6321585 |
| 17:37:32 | 62.8197433 | 70.8243232 | 51.1349434 | 64.5666434 | 77.6321585 |



|          |            |            |            |            |            |
|----------|------------|------------|------------|------------|------------|
| 17:37:33 | 62.8197433 | 70.8243232 | 55.1349434 | 64.5666434 | 79.6321585 |
| 17:37:34 | 62.8197433 | 70.8243232 | 57.1349434 | 64.5666434 | 80.6321585 |
| 17:37:35 | 62.8197433 | 70.8243232 | 57.1349434 | 64.5666434 | 67.7562962 |
| 17:37:36 | 62.8197433 | 72.8243232 | 58.1349434 | 64.5666434 | 82.6321585 |
| 17:37:37 | 62.8197433 | 74.8243232 | 59.1349434 | 64.5666434 | 67.4835689 |
| 17:37:38 | 62.8197433 | 76.8243232 | 59.1349434 | 64.5666434 | 67.3017507 |
| 17:37:39 | 62.8197433 | 78.8243232 | 63.1349434 | 63.5666434 | 67.7562962 |
| 17:37:40 | 62.8197433 | 78.8243232 | 65.1349434 | 63.5666434 | 67.9381144 |
| 17:37:41 | 62.8197433 | 79.8243232 | 64.1349434 | 63.5666434 | 67.8472053 |
| 17:37:42 | 62.8197433 | 76.8243232 | 64.1349434 | 62.5666434 | 67.6653871 |
| 17:37:43 | 62.8197433 | 74.8243232 | 64.1349434 | 62.5666434 | 67.3017507 |
| 17:37:44 | 62.8197433 | 74.8243232 | 64.1349434 | 62.5666434 | 67.6653871 |
| 17:37:45 | 62.8197433 | 70.8243232 | 64.1349434 | 63.5666434 | 67.8472053 |
| 17:37:46 | 62.8197433 | 69.8243232 | 64.1349434 | 68.5666434 | 68.3017507 |
| 17:37:47 | 62.8197433 | 69.8243232 | 67.1349434 | 69.5666434 | 68.7562962 |
| 17:37:48 | 62.8197433 | 68.8243232 | 68.1349434 | 69.5666434 | 68.8472053 |
| 17:37:49 | 63.8197433 | 68.8243232 | 68.1349434 | 68.5666434 | 69.2108417 |
| 17:37:50 | 63.8197433 | 66.8243232 | 68.1349434 | 68.5666434 | 69.0290235 |
| 17:37:51 | 63.8197433 | 66.8243232 | 68.1349434 | 68.5666434 | 69.1199326 |
| 17:37:52 | 63.8197433 | 66.8243232 | 69.1349434 | 68.5666434 | 69.3017507 |
| 17:37:53 | 64.8197433 | 66.8243232 | 69.1349434 | 68.5666434 | 69.4835689 |
| 17:37:54 | 66.8197433 | 65.8243232 | 70.1349434 | 68.5666434 | 82.6321585 |
| 17:37:55 | 66.8197433 | 65.8243232 | 70.1349434 | 68.5666434 | 80.6321585 |
| 17:37:56 | 67.8197433 | 61.8243232 | 70.1349434 | 68.5666434 | 80.6321585 |
| 17:37:57 | 68.8197433 | 60.8243232 | 70.1349434 | 68.5666434 | 79.6321585 |
| 17:37:58 | 68.8197433 | 60.8243232 | 70.1349434 | 68.5666434 | 78.6321585 |
| 17:37:59 | 68.8197433 | 60.8243232 | 69.1349434 | 66.5666434 | 73.6321585 |
| 17:38:00 | 67.8197433 | 61.8243232 | 56.1349434 | 66.5666434 | 72.6321585 |
| 17:38:01 | 67.8197433 | 61.8243232 | 53.1349434 | 66.5666434 | 72.6321585 |
| 17:38:02 | 67.8197433 | 61.8243232 | 52.1349434 | 65.5666434 | 72.6321585 |
| 17:38:03 | 67.8197433 | 61.8243232 | 52.1349434 | 65.5666434 | 72.6321585 |
| 17:38:04 | 67.8197433 | 59.8243232 | 52.1349434 | 65.5666434 | 72.6321585 |
| 17:38:05 | 66.8197433 | 59.8243232 | 52.1349434 | 64.5666434 | 73.6321585 |
| 17:38:06 | 65.8197433 | 59.8243232 | 52.1349434 | 64.5666434 | 73.6321585 |
| 17:38:07 | 64.8197433 | 59.8243232 | 52.1349434 | 64.5666434 | 73.6321585 |
| 17:38:08 | 64.8197433 | 58.8243232 | 52.1349434 | 64.5666434 | 74.6321585 |
| 17:38:09 | 63.8197433 | 58.8243232 | 59.1349434 | 64.5666434 | 77.6321585 |
| 17:38:10 | 63.8197433 | 59.8243232 | 60.1349434 | 64.5666434 | 77.6321585 |
| 17:38:11 | 62.8197433 | 59.8243232 | 61.1349434 | 64.5666434 | 77.6321585 |
| 17:38:12 | 62.8197433 | 59.8243232 | 56.1349434 | 67.5666434 | 79.6321585 |
| 17:38:13 | 62.8197433 | 59.8243232 | 53.1349434 | 68.5666434 | 79.6321585 |
| 17:38:14 | 62.8197433 | 58.8243232 | 52.1349434 | 68.5666434 | 79.6321585 |
| 17:38:15 | 62.8197433 | 58.8243232 | 51.1349434 | 62.5666434 | 79.6321585 |
| 17:38:16 | 62.8197433 | 57.8243232 | 51.1349434 | 62.5666434 | 79.6321585 |
| 17:38:17 | 62.8197433 | 57.8243232 | 52.1349434 | 57.5666434 | 79.6321585 |

|          |            |            |            |            |            |
|----------|------------|------------|------------|------------|------------|
| 17:38:18 | 62.8197433 | 57.8243232 | 51.1349434 | 57.5666434 | 75.6321585 |
| 17:38:19 | 62.8197433 | 57.8243232 | 51.1349434 | 56.5666434 | 71.6321585 |
| 17:38:20 | 62.8197433 | 57.8243232 | 52.1349434 | 57.5666434 | 71.6321585 |
| 17:38:21 | 62.8197433 | 57.8243232 | 52.1349434 | 57.5666434 | 71.6321585 |
| 17:38:22 | 62.8197433 | 57.8243232 | 53.1349434 | 57.5666434 | 71.6321585 |
| 17:38:23 | 62.8197433 | 57.8243232 | 54.1349434 | 58.5666434 | 70.6321585 |
| 17:38:24 | 62.8197433 | 57.8243232 | 54.1349434 | 58.5666434 | 70.6321585 |
| 17:38:25 | 61.8197433 | 57.8243232 | 55.1349434 | 58.5666434 | 69.6321585 |
| 17:38:26 | 61.8197433 | 54.8243232 | 57.1349434 | 58.5666434 | 67.6321585 |
| 17:38:27 | 61.8197433 | 54.8243232 | 57.1349434 | 58.5666434 | 67.6321585 |
| 17:38:28 | 61.8197433 | 53.8243232 | 57.1349434 | 59.5666434 | 66.6321585 |
| 17:38:29 | 61.8197433 | 54.8243232 | 57.1349434 | 61.5666434 | 65.6321585 |
| 17:38:30 | 61.8197433 | 54.8243232 | 57.1349434 | 61.5666434 | 65.6321585 |
| 17:38:31 | 61.8197433 | 56.8243232 | 57.1349434 | 60.5666434 | 65.6321585 |
| 17:38:32 | 61.8197433 | 56.8243232 | 62.1349434 | 60.5666434 | 65.6321585 |
| 17:38:33 | 61.8197433 | 56.8243232 | 64.1349434 | 60.5666434 | 65.6321585 |
| 17:38:34 | 61.8197433 | 58.8243232 | 63.1349434 | 61.5666434 | 65.6321585 |
| 17:38:35 | 61.8197433 | 59.8243232 | 61.1349434 | 61.5666434 | 66.6321585 |
| 17:38:36 | 61.8197433 | 59.8243232 | 61.1349434 | 61.5666434 | 66.6321585 |
| 17:38:37 | 61.8197433 | 59.8243232 | 61.1349434 | 61.5666434 | 65.6321585 |
| 17:38:38 | 61.8197433 | 57.8243232 | 61.1349434 | 62.5666434 | 65.6321585 |
| 17:38:39 | 61.8197433 | 57.8243232 | 62.1349434 | 62.5666434 | 65.6321585 |
| 17:38:40 | 61.8197433 | 57.8243232 | 63.1349434 | 63.5666434 | 65.6321585 |
| 17:38:41 | 62.8197433 | 55.8243232 | 63.1349434 | 63.5666434 | 64.6321585 |
| 17:38:42 | 61.8197433 | 54.8243232 | 64.1349434 | 63.5666434 | 63.6321585 |
| 17:38:43 | 62.8197433 | 54.8243232 | 65.1349434 | 67.5666434 | 63.6321585 |
| 17:38:44 | 62.8197433 | 53.8243232 | 65.1349434 | 67.5666434 | 64.6321585 |
| 17:38:45 | 62.8197433 | 54.8243232 | 65.1349434 | 67.5666434 | 65.6321585 |
| 17:38:46 | 62.8197433 | 56.8243232 | 63.1349434 | 68.5666434 | 65.6321585 |
| 17:38:47 | 62.8197433 | 56.8243232 | 63.1349434 | 67.5666434 | 65.6321585 |
| 17:38:48 | 62.8197433 | 56.8243232 | 61.1349434 | 65.5666434 | 66.6321585 |
| 17:38:49 | 62.8197433 | 56.8243232 | 61.1349434 | 65.5666434 | 66.6321585 |
| 17:38:50 | 62.8197433 | 56.8243232 | 61.1349434 | 63.5666434 | 69.6321585 |
| 17:38:51 | 61.8197433 | 57.8243232 | 60.1349434 | 63.5666434 | 66.6321585 |
| 17:38:52 | 61.8197433 | 57.8243232 | 60.1349434 | 57.5666434 | 65.6321585 |
| 17:38:53 | 61.8197433 | 57.8243232 | 60.1349434 | 57.5666434 | 65.6321585 |
| 17:38:54 | 61.8197433 | 58.8243232 | 60.1349434 | 57.5666434 | 65.6321585 |
| 17:38:55 | 61.8197433 | 60.8243232 | 60.1349434 | 57.5666434 | 63.6321585 |
| 17:38:56 | 61.8197433 | 61.8243232 | 60.1349434 | 57.5666434 | 63.6321585 |
| 17:38:57 | 61.8197433 | 61.8243232 | 60.1349434 | 57.5666434 | 63.6321585 |
| 17:38:58 | 61.8197433 | 62.8243232 | 59.1349434 | 60.5666434 | 63.6321585 |
| 17:38:59 | 61.8197433 | 62.8243232 | 50.1349434 | 62.5666434 | 63.6321585 |
| 17:39:00 | 61.8197433 | 62.8243232 | 50.1349434 | 62.5666434 | 63.6321585 |
| 17:39:01 | 61.8197433 | 62.8243232 | 52.1349434 | 59.5666434 | 63.6321585 |
| 17:39:02 | 61.8197433 | 65.8243232 | 53.1349434 | 59.5666434 | 63.6321585 |

|          |            |            |            |            |            |
|----------|------------|------------|------------|------------|------------|
| 17:39:03 | 61.8197433 | 67.8243232 | 54.1349434 | 59.5666434 | 63.6321585 |
| 17:39:04 | 61.8197433 | 68.8243232 | 51.1349434 | 60.5666434 | 63.6321585 |
| 17:39:05 | 61.8197433 | 68.8243232 | 49.1349434 | 61.5666434 | 63.6321585 |
| 17:39:06 | 61.8197433 | 64.8243232 | 48.1349434 | 61.5666434 | 63.6321585 |
| 17:39:07 | 61.8197433 | 60.8243232 | 48.1349434 | 59.5666434 | 63.6321585 |
| 17:39:08 | 61.8197433 | 57.8243232 | 49.1349434 | 57.5666434 | 63.6321585 |
| 17:39:09 | 62.8197433 | 57.8243232 | 49.1349434 | 57.5666434 | 63.6321585 |
| 17:39:10 | 62.8197433 | 55.8243232 | 49.1349434 | 54.5666434 | 69.6321585 |
| 17:39:11 | 62.8197433 | 55.8243232 | 49.1349434 | 55.5666434 | 77.6321585 |
| 17:39:12 | 62.8197433 | 55.8243232 | 49.1349434 | 55.5666434 | 77.6321585 |
| 17:39:13 | 62.8197433 | 55.8243232 | 49.1349434 | 55.5666434 | 64.1199326 |
| 17:39:14 | 62.8197433 | 55.8243232 | 50.1349434 | 55.5666434 | 63.9381144 |
| 17:39:15 | 62.8197433 | 55.8243232 | 52.1349434 | 55.5666434 | 63.8472053 |
| 17:39:16 | 62.8197433 | 55.8243232 | 55.1349434 | 56.5666434 | 64.2108417 |
| 17:39:17 | 62.8197433 | 56.8243232 | 55.1349434 | 56.5666434 | 64.3017507 |
| 17:39:18 | 62.8197433 | 56.8243232 | 55.1349434 | 56.5666434 | 62.46871   |
| 17:39:19 | 62.8197433 | 56.8243232 | 54.1349434 | 58.5666434 | 65.343674  |
| 17:39:20 | 62.8197433 | 55.8243232 | 53.1349434 | 59.5666434 | 64.7562962 |
| 17:39:21 | 62.8197433 | 55.8243232 | 53.1349434 | 59.5666434 | 64.6653871 |
| 17:39:22 | 62.8197433 | 55.8243232 | 52.1349434 | 62.5666434 | 78.6321585 |
| 17:39:23 | 62.8197433 | 55.8243232 | 53.1349434 | 62.5666434 | 77.6321585 |
| 17:39:24 | 62.8197433 | 56.8243232 | 54.1349434 | 63.5666434 | 77.6321585 |
| 17:39:25 | 62.8197433 | 56.8243232 | 54.1349434 | 63.5666434 | 77.6321585 |
| 17:39:26 | 62.8197433 | 56.8243232 | 53.1349434 | 63.5666434 | 77.6321585 |
| 17:39:27 | 62.8197433 | 57.8243232 | 53.1349434 | 63.5666434 | 77.6321585 |
| 17:39:28 | 61.8197433 | 57.8243232 | 53.1349434 | 63.5666434 | 77.6321585 |
| 17:39:29 | 62.8197433 | 57.8243232 | 53.1349434 | 64.5666434 | 77.6321585 |
| 17:39:30 | 62.8197433 | 59.8243232 | 52.1349434 | 66.5666434 | 76.6321585 |
| 17:39:31 | 62.8197433 | 59.8243232 | 52.1349434 | 66.5666434 | 74.6321585 |
| 17:39:32 | 62.8197433 | 59.8243232 | 52.1349434 | 67.5666434 | 74.6321585 |
| 17:39:33 | 62.8197433 | 62.8243232 | 53.1349434 | 67.5666434 | 73.6321585 |
| 17:39:34 | 62.8197433 | 62.8243232 | 56.1349434 | 69.5666434 | 73.6321585 |
| 17:39:35 | 62.8197433 | 58.8243232 | 58.1349434 | 73.5666434 | 73.6321585 |
| 17:39:36 | 62.8197433 | 58.8243232 | 58.1349434 | 72.5666434 | 72.6321585 |
| 17:39:37 | 62.8197433 | 58.8243232 | 57.1349434 | 72.5666434 | 72.6321585 |
| 17:39:38 | 62.8197433 | 58.8243232 | 57.1349434 | 73.5666434 | 72.6321585 |
| 17:39:39 | 62.8197433 | 57.8243232 | 58.1349434 | 74.5666434 | 71.6321585 |
| 17:39:40 | 62.8197433 | 57.8243232 | 60.1349434 | 75.5666434 | 71.6321585 |
| 17:39:41 | 62.8197433 | 58.8243232 | 62.1349434 | 77.5666434 | 69.6321585 |
| 17:39:42 | 62.8197433 | 58.8243232 | 65.1349434 | 77.5666434 | 66.6321585 |
| 17:39:43 | 62.8197433 | 61.8243232 | 67.1349434 | 78.5666434 | 66.6321585 |
| 17:39:44 | 62.8197433 | 62.8243232 | 68.1349434 | 79.5666434 | 66.6321585 |
| 17:39:45 | 62.8197433 | 61.8243232 | 68.1349434 | 81.5666434 | 66.6321585 |
| 17:39:46 | 62.8197433 | 61.8243232 | 63.1349434 | 83.5666434 | 65.6321585 |
| 17:39:47 | 62.8197433 | 61.8243232 | 59.1349434 | 83.5666434 | 65.6321585 |

|          |            |            |            |            |            |
|----------|------------|------------|------------|------------|------------|
| 17:39:48 | 62.8197433 | 57.8243232 | 57.1349434 | 68.8472053 | 65.6321585 |
| 17:39:49 | 62.8197433 | 54.8243232 | 57.1349434 | 68.6653871 | 65.6321585 |
| 17:39:50 | 62.8197433 | 54.8243232 | 56.1349434 | 68.574478  | 64.6321585 |
| 17:39:51 | 62.8197433 | 54.8243232 | 56.1349434 | 78.5666434 | 63.6321585 |
| 17:39:52 | 62.8197433 | 54.8243232 | 56.1349434 | 77.5666434 | 63.6321585 |
| 17:39:53 | 62.8197433 | 55.8243232 | 56.1349434 | 77.5666434 | 63.6321585 |
| 17:39:54 | 62.8197433 | 55.8243232 | 56.1349434 | 76.5666434 | 63.6321585 |
| 17:39:55 | 62.8197433 | 56.8243232 | 56.1349434 | 76.5666434 | 63.6321585 |
| 17:39:56 | 62.8197433 | 57.8243232 | 57.1349434 | 76.5666434 | 63.6321585 |
| 17:39:57 | 62.8197433 | 61.8243232 | 58.1349434 | 75.5666434 | 63.6321585 |
| 17:39:58 | 62.8197433 | 62.8243232 | 60.1349434 | 76.5666434 | 64.6321585 |
| 17:39:59 | 62.8197433 | 61.8243232 | 63.1349434 | 77.5666434 | 65.6321585 |
| 17:40:00 | 62.8197433 | 59.8243232 | 63.1349434 | 77.5666434 | 65.6321585 |
| 17:40:01 | 63.8197433 | 59.8243232 | 63.1349434 | 78.5666434 | 67.6321585 |
| 17:40:02 | 63.8197433 | 58.8243232 | 63.1349434 | 78.5666434 | 67.6321585 |
| 17:40:03 | 65.8197433 | 57.8243232 | 63.1349434 | 78.5666434 | 69.6321585 |
| 17:40:04 | 66.8197433 | 57.8243232 | 63.1349434 | 78.5666434 | 69.6321585 |
| 17:40:05 | 66.8197433 | 57.8243232 | 64.1349434 | 78.5666434 | 69.6321585 |
| 17:40:06 | 66.8197433 | 57.8243232 | 64.1349434 | 78.5666434 | 68.6321585 |
| 17:40:07 | 65.8197433 | 57.8243232 | 64.1349434 | 79.5666434 | 68.6321585 |
| 17:40:08 | 65.8197433 | 56.8243232 | 63.1349434 | 77.5666434 | 67.6321585 |
| 17:40:09 | 64.8197433 | 55.8243232 | 62.1349434 | 77.5666434 | 67.6321585 |
| 17:40:10 | 64.8197433 | 55.8243232 | 61.1349434 | 77.5666434 | 67.6321585 |
| 17:40:11 | 64.8197433 | 55.8243232 | 61.1349434 | 77.5666434 | 67.6321585 |
| 17:40:12 | 64.8197433 | 55.8243232 | 61.1349434 | 77.5666434 | 67.6321585 |
| 17:40:13 | 63.8197433 | 56.8243232 | 60.1349434 | 76.5666434 | 67.6321585 |
| 17:40:14 | 63.8197433 | 57.8243232 | 60.1349434 | 76.5666434 | 67.6321585 |
| 17:40:15 | 63.8197433 | 59.8243232 | 60.1349434 | 75.5666434 | 67.6321585 |
| 17:40:16 | 63.8197433 | 60.8243232 | 60.1349434 | 74.5666434 | 67.6321585 |
| 17:40:17 | 63.8197433 | 64.8243232 | 60.1349434 | 75.5666434 | 67.6321585 |
| 17:40:18 | 63.8197433 | 64.8243232 | 60.1349434 | 75.5666434 | 67.6321585 |
| 17:40:19 | 63.8197433 | 64.8243232 | 60.1349434 | 75.5666434 | 67.6321585 |
| 17:40:20 | 63.8197433 | 65.8243232 | 59.1349434 | 76.5666434 | 67.6321585 |
| 17:40:21 | 63.8197433 | 65.8243232 | 57.1349434 | 76.5666434 | 67.6321585 |
| 17:40:22 | 62.8197433 | 65.8243232 | 57.1349434 | 76.5666434 | 67.6321585 |
| 17:40:23 | 62.8197433 | 66.8243232 | 72.1349434 | 77.5666434 | 67.6321585 |
| 17:40:24 | 62.8197433 | 71.8243232 | 71.1349434 | 78.5666434 | 68.6321585 |
| 17:40:25 | 62.8197433 | 71.8243232 | 71.1349434 | 80.5666434 | 67.6321585 |
| 17:40:26 | 62.8197433 | 71.8243232 | 71.1349434 | 80.5666434 | 67.6321585 |
| 17:40:27 | 62.8197433 | 70.8243232 | 68.1349434 | 80.5666434 | 68.6321585 |
| 17:40:28 | 62.8197433 | 68.8243232 | 68.1349434 | 81.5666434 | 68.6321585 |
| 17:40:29 | 62.8197433 | 65.8243232 | 68.1349434 | 82.5666434 | 68.6321585 |
| 17:40:30 | 62.8197433 | 64.8243232 | 68.1349434 | 82.5666434 | 69.6321585 |
| 17:40:31 | 62.8197433 | 63.8243232 | 67.1349434 | 81.5666434 | 71.6321585 |
| 17:40:32 | 62.8197433 | 63.8243232 | 64.1349434 | 81.5666434 | 71.6321585 |

|          |            |            |            |            |            |
|----------|------------|------------|------------|------------|------------|
| 17:40:33 | 62.8197433 | 63.8243232 | 63.1349434 | 81.5666434 | 73.6321585 |
| 17:40:34 | 62.8197433 | 63.8243232 | 64.1349434 | 81.5666434 | 76.6321585 |
| 17:40:35 | 62.8197433 | 63.8243232 | 64.1349434 | 81.5666434 | 76.6321585 |
| 17:40:36 | 62.8197433 | 63.8243232 | 69.1349434 | 81.5666434 | 83.6321585 |
| 17:40:37 | 62.8197433 | 63.8243232 | 69.1349434 | 81.5666434 | 83.6321585 |
| 17:40:38 | 62.8197433 | 63.8243232 | 71.1349434 | 81.5666434 | 83.6321585 |
| 17:40:39 | 62.8197433 | 63.8243232 | 68.1349434 | 81.5666434 | 83.6321585 |
| 17:40:40 | 62.8197433 | 63.8243232 | 68.1349434 | 80.5666434 | 83.6321585 |
| 17:40:41 | 62.8197433 | 63.8243232 | 59.1349434 | 71.5666434 | 83.6321585 |
| 17:40:42 | 62.8197433 | 64.8243232 | 60.1349434 | 70.5666434 | 82.6321585 |
| 17:40:43 | 62.8197433 | 64.8243232 | 62.1349434 | 71.5666434 | 82.6321585 |
| 17:40:44 | 62.8197433 | 65.8243232 | 64.1349434 | 71.5666434 | 82.6321585 |
| 17:40:45 | 62.8197433 | 81.8243232 | 66.1349434 | 70.5666434 | 83.6321585 |
| 17:40:46 | 62.8197433 | 81.8243232 | 67.1349434 | 70.5666434 | 84.6321585 |
| 17:40:47 | 62.8197433 | 80.8243232 | 67.1349434 | 70.5666434 | 84.6321585 |
| 17:40:48 | 62.8197433 | 75.8243232 | 67.1349434 | 70.5666434 | 85.6321585 |
| 17:40:49 | 62.8197433 | 75.8243232 | 67.1349434 | 71.5666434 | 83.6321585 |
| 17:40:50 | 63.8197433 | 73.8243232 | 67.1349434 | 70.5666434 | 83.6321585 |
| 17:40:51 | 63.8197433 | 72.8243232 | 67.1349434 | 70.5666434 | 81.6321585 |
| 17:40:52 | 63.8197433 | 72.8243232 | 67.1349434 | 70.5666434 | 77.6321585 |
| 17:40:53 | 63.8197433 | 71.8243232 | 66.1349434 | 70.5666434 | 77.6321585 |
| 17:40:54 | 63.8197433 | 71.8243232 | 66.1349434 | 70.5666434 | 77.6321585 |
| 17:40:55 | 63.8197433 | 71.8243232 | 66.1349434 | 70.5666434 | 77.6321585 |
| 17:40:56 | 63.8197433 | 71.8243232 | 64.1349434 | 70.5666434 | 77.6321585 |
| 17:40:57 | 64.8197433 | 72.8243232 | 62.1349434 | 69.5666434 | 76.6321585 |
| 17:40:58 | 69.8197433 | 72.8243232 | 61.1349434 | 68.5666434 | 73.6321585 |
| 17:40:59 | 70.8197433 | 72.8243232 | 62.1349434 | 68.5666434 | 69.6321585 |
| 17:41:00 | 71.8197433 | 72.8243232 | 63.1349434 | 68.5666434 | 68.6321585 |
| 17:41:01 | 72.8197433 | 72.8243232 | 64.1349434 | 69.5666434 | 68.6321585 |
| 17:41:02 | 74.8197433 | 72.8243232 | 64.1349434 | 70.5666434 | 68.6321585 |
| 17:41:03 | 75.8197433 | 72.8243232 | 64.1349434 | 74.5666434 | 67.6321585 |
| 17:41:04 | 75.8197433 | 72.8243232 | 64.1349434 | 74.5666434 | 67.6321585 |
| 17:41:05 | 75.8197433 | 71.8243232 | 64.1349434 | 74.5666434 | 67.6321585 |
| 17:41:06 | 75.8197433 | 71.8243232 | 64.1349434 | 74.5666434 | 67.6321585 |
| 17:41:07 | 79.8197433 | 67.8243232 | 64.1349434 | 74.5666434 | 67.6321585 |
| 17:41:08 | 80.8197433 | 67.8243232 | 68.1349434 | 75.5666434 | 67.6321585 |
| 17:41:09 | 79.8197433 | 67.8243232 | 70.1349434 | 75.5666434 | 67.6321585 |
| 17:41:10 | 73.8197433 | 67.8243232 | 71.1349434 | 78.5666434 | 68.6321585 |
| 17:41:11 | 69.8197433 | 72.8243232 | 72.1349434 | 78.5666434 | 69.6321585 |
| 17:41:12 | 67.8197433 | 72.8243232 | 73.1349434 | 78.5666434 | 69.6321585 |
| 17:41:13 | 67.8197433 | 73.8243232 | 73.1349434 | 78.5666434 | 69.6321585 |
| 17:41:14 | 66.8197433 | 75.8243232 | 71.1349434 | 79.5666434 | 69.6321585 |
| 17:41:15 | 66.8197433 | 74.8243232 | 71.1349434 | 79.5666434 | 68.6321585 |
| 17:41:16 | 66.8197433 | 74.8243232 | 71.1349434 | 81.5666434 | 68.6321585 |
| 17:41:17 | 66.8197433 | 73.8243232 | 70.1349434 | 81.5666434 | 68.6321585 |

|          |            |            |            |            |            |
|----------|------------|------------|------------|------------|------------|
| 17:41:18 | 66.8197433 | 73.8243232 | 69.1349434 | 81.5666434 | 68.6321585 |
| 17:41:19 | 66.8197433 | 70.8243232 | 68.1349434 | 83.5666434 | 69.6321585 |
| 17:41:20 | 66.8197433 | 67.8243232 | 66.1349434 | 69.7562962 | 70.6321585 |
| 17:41:21 | 66.8197433 | 65.8243232 | 65.1349434 | 69.9381144 | 70.6321585 |
| 17:41:22 | 66.8197433 | 65.8243232 | 63.1349434 | 70.2108417 | 75.6321585 |
| 17:41:23 | 66.8197433 | 67.8243232 | 62.1349434 | 70.3017507 | 75.6321585 |
| 17:41:24 | 64.8197433 | 67.8243232 | 62.1349434 | 69.9381144 | 75.6321585 |
| 17:41:25 | 63.8197433 | 67.8243232 | 61.1349434 | 69.574478  | 76.6321585 |
| 17:41:26 | 62.8197433 | 68.8243232 | 61.1349434 | 69.9381144 | 77.6321585 |
| 17:41:27 | 62.8197433 | 68.8243232 | 61.1349434 | 69.8472053 | 77.6321585 |
| 17:41:28 | 62.8197433 | 67.8243232 | 62.1349434 | 69.6653871 | 77.6321585 |
| 17:41:29 | 62.8197433 | 67.8243232 | 60.1349434 | 69.3017507 | 76.6321585 |
| 17:41:30 | 62.8197433 | 66.8243232 | 54.1349434 | 68.574478  | 74.6321585 |
| 17:41:31 | 62.8197433 | 66.8243232 | 52.1349434 | 68.0290235 | 73.6321585 |
| 17:41:32 | 63.8197433 | 66.8243232 | 52.1349434 | 67.7562962 | 73.6321585 |
| 17:41:33 | 64.8197433 | 67.8243232 | 51.1349434 | 66.7562962 | 71.6321585 |
| 17:41:34 | 63.8197433 | 67.8243232 | 51.1349434 | 66.0290235 | 69.6321585 |
| 17:41:35 | 63.8197433 | 67.8243232 | 51.1349434 | 80.5666434 | 69.6321585 |
| 17:41:36 | 62.8197433 | 67.8243232 | 51.1349434 | 79.5666434 | 68.6321585 |
| 17:41:37 | 62.8197433 | 68.8243232 | 51.1349434 | 79.5666434 | 68.6321585 |
| 17:41:38 | 62.8197433 | 67.8243232 | 51.1349434 | 79.5666434 | 68.6321585 |
| 17:41:39 | 62.8197433 | 67.8243232 | 51.1349434 | 79.5666434 | 68.6321585 |
| 17:41:40 | 61.8197433 | 66.8243232 | 50.1349434 | 65.8472053 | 70.6321585 |
| 17:41:41 | 61.8197433 | 65.8243232 | 50.1349434 | 65.8472053 | 68.6321585 |
| 17:41:42 | 61.8197433 | 61.8243232 | 51.1349434 | 65.6653871 | 68.6321585 |
| 17:41:43 | 61.8197433 | 59.8243232 | 56.1349434 | 80.5666434 | 68.6321585 |
| 17:41:44 | 61.8197433 | 57.8243232 | 56.1349434 | 80.5666434 | 68.6321585 |
| 17:41:45 | 61.8197433 | 56.8243232 | 56.1349434 | 80.5666434 | 67.6321585 |
| 17:41:46 | 61.8197433 | 56.8243232 | 59.1349434 | 80.5666434 | 67.6321585 |
| 17:41:47 | 61.8197433 | 55.8243232 | 60.1349434 | 80.5666434 | 68.6321585 |
| 17:41:48 | 61.8197433 | 56.8243232 | 61.1349434 | 78.5666434 | 68.6321585 |
| 17:41:49 | 61.8197433 | 61.8243232 | 64.1349434 | 78.5666434 | 68.6321585 |
| 17:41:50 | 61.8197433 | 69.8243232 | 64.1349434 | 78.5666434 | 68.6321585 |
| 17:41:51 | 61.8197433 | 73.8243232 | 71.1349434 | 78.5666434 | 68.6321585 |
| 17:41:52 | 61.8197433 | 73.8243232 | 72.1349434 | 76.5666434 | 68.6321585 |
| 17:41:53 | 61.8197433 | 73.8243232 | 72.1349434 | 76.5666434 | 68.6321585 |
| 17:41:54 | 62.8197433 | 73.8243232 | 72.1349434 | 74.5666434 | 68.6321585 |
| 17:41:55 | 62.8197433 | 73.8243232 | 72.1349434 | 65.5666434 | 68.6321585 |
| 17:41:56 | 62.8197433 | 73.8243232 | 71.1349434 | 60.5666434 | 69.6321585 |
| 17:41:57 | 62.8197433 | 73.8243232 | 71.1349434 | 58.5666434 | 69.6321585 |
| 17:41:58 | 62.8197433 | 73.8243232 | 74.1349434 | 57.5666434 | 69.6321585 |
| 17:41:59 | 63.8197433 | 73.8243232 | 74.1349434 | 56.5666434 | 69.6321585 |
| 17:42:00 | 63.8197433 | 73.8243232 | 74.1349434 | 56.5666434 | 69.6321585 |
| 17:42:01 | 63.8197433 | 74.8243232 | 76.1349434 | 59.5666434 | 67.6321585 |
| 17:42:02 | 63.8197433 | 74.8243232 | 76.1349434 | 59.5666434 | 66.6321585 |

|          |            |            |            |            |            |
|----------|------------|------------|------------|------------|------------|
| 17:42:03 | 63.8197433 | 74.8243232 | 75.1349434 | 59.5666434 | 66.6321585 |
| 17:42:04 | 64.8197433 | 74.8243232 | 67.1349434 | 59.5666434 | 66.6321585 |
| 17:42:05 | 65.8197433 | 73.8243232 | 67.1349434 | 58.5666434 | 66.6321585 |
| 17:42:06 | 65.8197433 | 73.8243232 | 63.1349434 | 58.5666434 | 66.6321585 |
| 17:42:07 | 65.8197433 | 73.8243232 | 64.1349434 | 58.5666434 | 66.6321585 |
| 17:42:08 | 64.8197433 | 73.8243232 | 64.1349434 | 58.5666434 | 67.6321585 |
| 17:42:09 | 64.8197433 | 73.8243232 | 65.1349434 | 58.5666434 | 68.6321585 |
| 17:42:10 | 64.8197433 | 73.8243232 | 66.1349434 | 59.5666434 | 69.6321585 |
| 17:42:11 | 63.8197433 | 74.8243232 | 66.1349434 | 59.5666434 | 69.6321585 |
| 17:42:12 | 63.8197433 | 74.8243232 | 66.1349434 | 59.5666434 | 68.6321585 |
| 17:42:13 | 63.8197433 | 73.8243232 | 65.1349434 | 59.5666434 | 68.6321585 |
| 17:42:14 | 62.8197433 | 71.8243232 | 65.1349434 | 59.5666434 | 68.6321585 |
| 17:42:15 | 62.8197433 | 70.8243232 | 63.1349434 | 59.5666434 | 68.6321585 |
| 17:42:16 | 62.8197433 | 70.8243232 | 63.1349434 | 60.5666434 | 68.6321585 |
| 17:42:17 | 62.8197433 | 68.8243232 | 57.1349434 | 61.5666434 | 68.6321585 |
| 17:42:18 | 62.8197433 | 67.8243232 | 56.1349434 | 62.5666434 | 68.6321585 |
| 17:42:19 | 62.8197433 | 67.8243232 | 55.1349434 | 62.5666434 | 69.6321585 |
| 17:42:20 | 62.8197433 | 66.8243232 | 56.1349434 | 62.5666434 | 71.6321585 |
| 17:42:21 | 62.8197433 | 66.8243232 | 62.1349434 | 62.5666434 | 72.6321585 |
| 17:42:22 | 61.8197433 | 66.8243232 | 63.1349434 | 63.5666434 | 72.6321585 |
| 17:42:23 | 61.8197433 | 71.8243232 | 63.1349434 | 63.5666434 | 73.6321585 |
| 17:42:24 | 62.8197433 | 69.8243232 | 63.1349434 | 61.5666434 | 73.6321585 |
| 17:42:25 | 62.8197433 | 69.8243232 | 63.1349434 | 60.5666434 | 74.6321585 |
| 17:42:26 | 62.8197433 | 63.8243232 | 64.1349434 | 60.5666434 | 74.6321585 |
| 17:42:27 | 62.8197433 | 61.8243232 | 64.1349434 | 60.5666434 | 69.6321585 |
| 17:42:28 | 62.8197433 | 60.8243232 | 64.1349434 | 60.5666434 | 67.6321585 |
| 17:42:29 | 61.8197433 | 59.8243232 | 65.1349434 | 61.5666434 | 67.6321585 |
| 17:42:30 | 61.8197433 | 59.8243232 | 65.1349434 | 62.5666434 | 65.6321585 |
| 17:42:31 | 62.8197433 | 59.8243232 | 65.1349434 | 62.5666434 | 65.6321585 |
| 17:42:32 | 62.8197433 | 60.8243232 | 62.1349434 | 65.5666434 | 64.6321585 |
| 17:42:33 | 62.8197433 | 60.8243232 | 62.1349434 | 66.5666434 | 64.6321585 |
| 17:42:34 | 62.8197433 | 60.8243232 | 62.1349434 | 66.5666434 | 64.6321585 |
| 17:42:35 | 62.8197433 | 60.8243232 | 62.1349434 | 66.5666434 | 65.6321585 |
| 17:42:36 | 62.8197433 | 61.8243232 | 62.1349434 | 66.5666434 | 65.6321585 |
| 17:42:37 | 63.8197433 | 62.8243232 | 61.1349434 | 66.5666434 | 65.6321585 |
| 17:42:38 | 63.8197433 | 62.8243232 | 60.1349434 | 64.5666434 | 65.6321585 |
| 17:42:39 | 63.8197433 | 62.8243232 | 63.1349434 | 64.5666434 | 65.6321585 |
| 17:42:40 | 63.8197433 | 63.8243232 | 64.1349434 | 62.5666434 | 65.6321585 |
| 17:42:41 | 63.8197433 | 62.8243232 | 64.1349434 | 61.5666434 | 66.6321585 |
| 17:42:42 | 63.8197433 | 62.8243232 | 66.1349434 | 61.5666434 | 66.6321585 |
| 17:42:43 | 64.8197433 | 62.8243232 | 65.1349434 | 61.5666434 | 66.6321585 |
| 17:42:44 | 64.8197433 | 62.8243232 | 68.1349434 | 61.5666434 | 66.6321585 |
| 17:42:45 | 64.8197433 | 62.8243232 | 69.1349434 | 62.5666434 | 66.6321585 |
| 17:42:46 | 64.8197433 | 62.8243232 | 69.1349434 | 62.5666434 | 66.6321585 |
| 17:42:47 | 64.8197433 | 61.8243232 | 69.1349434 | 63.5666434 | 66.6321585 |

|          |            |            |            |            |            |
|----------|------------|------------|------------|------------|------------|
| 17:42:48 | 64.8197433 | 61.8243232 | 69.1349434 | 63.5666434 | 66.6321585 |
| 17:42:49 | 64.8197433 | 61.8243232 | 69.1349434 | 63.5666434 | 68.6321585 |
| 17:42:50 | 64.8197433 | 60.8243232 | 68.1349434 | 59.5666434 | 68.6321585 |
| 17:42:51 | 64.8197433 | 60.8243232 | 68.1349434 | 59.5666434 | 69.6321585 |
| 17:42:52 | 64.8197433 | 59.8243232 | 68.1349434 | 59.5666434 | 70.6321585 |
| 17:42:53 | 64.8197433 | 59.8243232 | 67.1349434 | 59.5666434 | 70.6321585 |
| 17:42:54 | 64.8197433 | 59.8243232 | 67.1349434 | 59.5666434 | 70.6321585 |
| 17:42:55 | 63.8197433 | 68.8243232 | 64.1349434 | 58.5666434 | 70.6321585 |
| 17:42:56 | 62.8197433 | 68.8243232 | 62.1349434 | 58.5666434 | 70.6321585 |
| 17:42:57 | 62.8197433 | 69.8243232 | 62.1349434 | 57.5666434 | 70.6321585 |
| 17:42:58 | 62.8197433 | 69.8243232 | 62.1349434 | 57.5666434 | 66.6321585 |
| 17:42:59 | 63.8197433 | 71.8243232 | 62.1349434 | 57.5666434 | 63.6321585 |
| 17:43:00 | 63.8197433 | 71.8243232 | 60.1349434 | 57.5666434 | 62.6321585 |
| 17:43:01 | 63.8197433 | 71.8243232 | 61.1349434 | 57.5666434 | 62.6321585 |
| 17:43:02 | 62.8197433 | 71.8243232 | 63.1349434 | 57.5666434 | 62.6321585 |
| 17:43:03 | 61.8197433 | 71.8243232 | 64.1349434 | 57.5666434 | 62.6321585 |
| 17:43:04 | 61.8197433 | 69.8243232 | 64.1349434 | 56.5666434 | 63.6321585 |
| 17:43:05 | 62.8197433 | 67.8243232 | 65.1349434 | 56.5666434 | 64.6321585 |
| 17:43:06 | 62.8197433 | 67.8243232 | 66.1349434 | 56.5666434 | 64.6321585 |
| 17:43:07 | 62.8197433 | 64.8243232 | 67.1349434 | 57.5666434 | 64.6321585 |
| 17:43:08 | 62.8197433 | 64.8243232 | 66.1349434 | 57.5666434 | 64.6321585 |
| 17:43:09 | 62.8197433 | 64.8243232 | 63.1349434 | 57.5666434 | 65.6321585 |
| 17:43:10 | 62.8197433 | 63.8243232 | 63.1349434 | 57.5666434 | 65.6321585 |
| 17:43:11 | 61.8197433 | 62.8243232 | 65.1349434 | 60.5666434 | 65.6321585 |
| 17:43:12 | 61.8197433 | 61.8243232 | 66.1349434 | 63.5666434 | 65.6321585 |
| 17:43:13 | 62.8197433 | 61.8243232 | 66.1349434 | 68.5666434 | 65.6321585 |
| 17:43:14 | 62.8197433 | 61.8243232 | 68.1349434 | 68.5666434 | 66.6321585 |
| 17:43:15 | 62.8197433 | 61.8243232 | 69.1349434 | 67.5666434 | 67.6321585 |
| 17:43:16 | 62.8197433 | 60.8243232 | 69.1349434 | 64.5666434 | 68.6321585 |
| 17:43:17 | 62.8197433 | 60.8243232 | 70.1349434 | 63.5666434 | 68.6321585 |
| 17:43:18 | 62.8197433 | 60.8243232 | 71.1349434 | 63.5666434 | 69.6321585 |
| 17:43:19 | 62.8197433 | 60.8243232 | 74.1349434 | 63.5666434 | 70.6321585 |
| 17:43:20 | 62.8197433 | 60.8243232 | 74.1349434 | 63.5666434 | 71.6321585 |
| 17:43:21 | 61.8197433 | 61.8243232 | 72.1349434 | 63.5666434 | 72.6321585 |
| 17:43:22 | 62.8197433 | 61.8243232 | 72.1349434 | 64.5666434 | 72.6321585 |
| 17:43:23 | 62.8197433 | 61.8243232 | 70.1349434 | 64.5666434 | 73.6321585 |
| 17:43:24 | 62.8197433 | 63.8243232 | 62.1349434 | 64.5666434 | 74.6321585 |
| 17:43:25 | 62.8197433 | 63.8243232 | 58.1349434 | 64.5666434 | 75.6321585 |
| 17:43:26 | 62.8197433 | 64.8243232 | 58.1349434 | 64.5666434 | 77.6321585 |
| 17:43:27 | 62.8197433 | 64.8243232 | 58.1349434 | 64.5666434 | 78.6321585 |
| 17:43:28 | 62.8197433 | 64.8243232 | 57.1349434 | 64.5666434 | 79.6321585 |
| 17:43:29 | 62.8197433 | 64.8243232 | 57.1349434 | 64.5666434 | 80.6321585 |
| 17:43:30 | 62.8197433 | 64.8243232 | 57.1349434 | 64.5666434 | 80.6321585 |
| 17:43:31 | 63.8197433 | 64.8243232 | 57.1349434 | 64.5666434 | 80.6321585 |
| 17:43:32 | 63.8197433 | 64.8243232 | 51.1349434 | 65.5666434 | 70.6321585 |



|          |            |            |            |            |            |
|----------|------------|------------|------------|------------|------------|
| 17:43:33 | 66.8197433 | 64.8243232 | 51.1349434 | 65.5666434 | 68.6321585 |
| 17:43:34 | 67.8197433 | 65.8243232 | 51.1349434 | 65.5666434 | 66.6321585 |
| 17:43:35 | 67.8197433 | 66.8243232 | 52.1349434 | 65.5666434 | 66.6321585 |
| 17:43:36 | 65.8197433 | 66.8243232 | 54.1349434 | 65.5666434 | 66.6321585 |
| 17:43:37 | 65.8197433 | 66.8243232 | 54.1349434 | 65.5666434 | 65.6321585 |
| 17:43:38 | 65.8197433 | 66.8243232 | 55.1349434 | 65.5666434 | 65.6321585 |
| 17:43:39 | 65.8197433 | 67.8243232 | 56.1349434 | 64.5666434 | 65.6321585 |
| 17:43:40 | 65.8197433 | 67.8243232 | 56.1349434 | 64.5666434 | 64.6321585 |
| 17:43:41 | 64.8197433 | 66.8243232 | 57.1349434 | 65.5666434 | 64.6321585 |
| 17:43:42 | 64.8197433 | 66.8243232 | 57.1349434 | 64.5666434 | 64.6321585 |
| 17:43:43 | 64.8197433 | 61.8243232 | 62.1349434 | 63.5666434 | 64.6321585 |
| 17:43:44 | 63.8197433 | 60.8243232 | 63.1349434 | 62.5666434 | 65.6321585 |
| 17:43:45 | 63.8197433 | 60.8243232 | 63.1349434 | 61.5666434 | 66.6321585 |
| 17:43:46 | 63.8197433 | 60.8243232 | 61.1349434 | 61.5666434 | 66.6321585 |
| 17:43:47 | 63.8197433 | 59.8243232 | 61.1349434 | 58.5666434 | 66.6321585 |
| 17:43:48 | 63.8197433 | 59.8243232 | 61.1349434 | 58.5666434 | 66.6321585 |
| 17:43:49 | 63.8197433 | 59.8243232 | 61.1349434 | 57.5666434 | 65.6321585 |
| 17:43:50 | 63.8197433 | 59.8243232 | 62.1349434 | 57.5666434 | 66.6321585 |
| 17:43:51 | 63.8197433 | 63.8243232 | 64.1349434 | 57.5666434 | 66.6321585 |
| 17:43:52 | 63.8197433 | 63.8243232 | 67.1349434 | 57.5666434 | 66.6321585 |
| 17:43:53 | 63.8197433 | 66.8243232 | 69.1349434 | 57.5666434 | 66.6321585 |
| 17:43:54 | 63.8197433 | 64.8243232 | 69.1349434 | 58.5666434 | 65.6321585 |
| 17:43:55 | 63.8197433 | 64.8243232 | 69.1349434 | 58.5666434 | 65.6321585 |
| 17:43:56 | 64.8197433 | 64.8243232 | 69.1349434 | 58.5666434 | 65.6321585 |
| 17:43:57 | 65.8197433 | 64.8243232 | 69.1349434 | 58.5666434 | 65.6321585 |
| 17:43:58 | 64.8197433 | 64.8243232 | 69.1349434 | 58.5666434 | 64.6321585 |
| 17:43:59 | 64.8197433 | 63.8243232 | 68.1349434 | 58.5666434 | 64.6321585 |
| 17:44:00 | 64.8197433 | 63.8243232 | 67.1349434 | 60.5666434 | 64.6321585 |
| 17:44:01 | 64.8197433 | 63.8243232 | 66.1349434 | 60.5666434 | 64.6321585 |
| 17:44:02 | 65.8197433 | 63.8243232 | 67.1349434 | 61.5666434 | 64.6321585 |
| 17:44:03 | 64.8197433 | 63.8243232 | 67.1349434 | 62.5666434 | 65.6321585 |
| 17:44:04 | 64.8197433 | 67.8243232 | 67.1349434 | 61.5666434 | 65.6321585 |
| 17:44:05 | 65.8197433 | 70.8243232 | 66.1349434 | 61.5666434 | 65.6321585 |
| 17:44:06 | 66.8197433 | 70.8243232 | 63.1349434 | 60.5666434 | 66.6321585 |
| 17:44:07 | 66.8197433 | 71.8243232 | 61.1349434 | 60.5666434 | 66.6321585 |
| 17:44:08 | 66.8197433 | 71.8243232 | 60.1349434 | 60.5666434 | 66.6321585 |
| 17:44:09 | 66.8197433 | 71.8243232 | 60.1349434 | 60.5666434 | 66.6321585 |
| 17:44:10 | 66.8197433 | 69.8243232 | 62.1349434 | 59.5666434 | 67.6321585 |
| 17:44:11 | 68.8197433 | 68.8243232 | 62.1349434 | 58.5666434 | 68.6321585 |
| 17:44:12 | 69.8197433 | 68.8243232 | 61.1349434 | 57.5666434 | 69.6321585 |
| 17:44:13 | 71.8197433 | 68.8243232 | 62.1349434 | 57.5666434 | 69.6321585 |
| 17:44:14 | 73.8197433 | 68.8243232 | 62.1349434 | 57.5666434 | 75.6321585 |
| 17:44:15 | 74.8197433 | 68.8243232 | 63.1349434 | 57.5666434 | 77.6321585 |
| 17:44:16 | 74.8197433 | 68.8243232 | 65.1349434 | 58.5666434 | 77.6321585 |
| 17:44:17 | 75.8197433 | 68.8243232 | 68.1349434 | 61.5666434 | 74.6321585 |

|          |            |            |            |            |            |
|----------|------------|------------|------------|------------|------------|
| 17:44:18 | 75.8197433 | 69.8243232 | 70.1349434 | 61.5666434 | 70.6321585 |
| 17:44:19 | 76.8197433 | 67.8243232 | 70.1349434 | 64.5666434 | 68.6321585 |
| 17:44:20 | 78.8197433 | 63.8243232 | 68.1349434 | 64.5666434 | 68.6321585 |
| 17:44:21 | 79.8197433 | 62.8243232 | 65.1349434 | 64.5666434 | 67.6321585 |
| 17:44:22 | 79.8197433 | 62.8243232 | 62.1349434 | 64.5666434 | 67.6321585 |
| 17:44:23 | 79.8197433 | 60.8243232 | 61.1349434 | 66.5666434 | 67.6321585 |
| 17:44:24 | 79.8197433 | 58.8243232 | 61.1349434 | 69.5666434 | 70.6321585 |
| 17:44:25 | 77.8197433 | 57.8243232 | 62.1349434 | 69.5666434 | 72.6321585 |
| 17:44:26 | 76.8197433 | 57.8243232 | 62.1349434 | 72.5666434 | 71.6321585 |
| 17:44:27 | 75.8197433 | 56.8243232 | 62.1349434 | 73.5666434 | 71.6321585 |
| 17:44:28 | 73.8197433 | 55.8243232 | 62.1349434 | 75.5666434 | 70.6321585 |
| 17:44:29 | 73.8197433 | 55.8243232 | 62.1349434 | 75.5666434 | 70.6321585 |
| 17:44:30 | 73.8197433 | 55.8243232 | 62.1349434 | 78.5666434 | 66.6321585 |
| 17:44:31 | 75.8197433 | 55.8243232 | 62.1349434 | 69.3017507 | 66.6321585 |
| 17:44:32 | 76.8197433 | 59.8243232 | 62.1349434 | 70.1199326 | 66.6321585 |
| 17:44:33 | 78.8197433 | 62.8243232 | 61.1349434 | 70.4835689 | 65.6321585 |
| 17:44:34 | 79.8197433 | 63.8243232 | 61.1349434 | 70.7562962 | 65.6321585 |
| 17:44:35 | 79.8197433 | 65.8243232 | 64.1349434 | 71.6653871 | 65.6321585 |
| 17:44:36 | 82.8197433 | 67.8243232 | 66.1349434 | 72.574478  | 64.6321585 |
| 17:44:37 | 82.8197433 | 67.8243232 | 65.1349434 | 72.6653871 | 64.6321585 |
| 17:44:38 | 79.8197433 | 67.8243232 | 62.1349434 | 72.2108417 | 63.6321585 |
| 17:44:39 | 78.8197433 | 68.8243232 | 57.1349434 | 72.0290235 | 63.6321585 |
| 17:44:40 | 76.8197433 | 69.8243232 | 53.1349434 | 71.574478  | 63.6321585 |
| 17:44:41 | 77.8197433 | 68.8243232 | 53.1349434 | 71.8472053 | 63.6321585 |
| 17:44:42 | 77.8197433 | 68.8243232 | 53.1349434 | 71.8472053 | 63.6321585 |
| 17:44:43 | 77.8197433 | 64.8243232 | 54.1349434 | 72.2613561 | 63.6321585 |
| 17:44:44 | 78.8197433 | 63.8243232 | 54.1349434 | 71.574478  | 65.6321585 |
| 17:44:45 | 78.8197433 | 63.8243232 | 56.1349434 | 72.1199326 | 66.6321585 |
| 17:44:46 | 78.8197433 | 63.8243232 | 56.1349434 | 72.1199326 | 67.6321585 |
| 17:44:47 | 78.8197433 | 62.8243232 | 56.1349434 | 71.8472053 | 69.6321585 |
| 17:44:48 | 79.8197433 | 61.8243232 | 56.1349434 | 71.574478  | 69.6321585 |
| 17:44:49 | 80.8197433 | 61.8243232 | 57.1349434 | 71.1199326 | 70.6321585 |
| 17:44:50 | 80.8197433 | 60.8243232 | 57.1349434 | 70.9381144 | 70.6321585 |
| 17:44:51 | 82.8197433 | 60.8243232 | 57.1349434 | 70.6653871 | 70.6321585 |
| 17:44:52 | 82.8197433 | 60.8243232 | 58.1349434 | 70.9381144 | 69.6321585 |
| 17:44:53 | 82.8197433 | 60.8243232 | 58.1349434 | 70.8472053 | 69.6321585 |
| 17:44:54 | 83.8197433 | 59.8243232 | 59.1349434 | 71.574478  | 69.6321585 |
| 17:44:55 | 83.8197433 | 59.8243232 | 58.1349434 | 71.3017507 | 69.6321585 |
| 17:44:56 | 83.8197433 | 59.8243232 | 57.1349434 | 71.2108417 | 70.6321585 |
| 17:44:57 | 84.8197433 | 59.8243232 | 71.1349434 | 72.3926598 | 70.6321585 |
| 17:44:58 | 77.8197433 | 59.8243232 | 71.1349434 | 71.6653871 | 70.6321585 |
| 17:44:59 | 76.8197433 | 59.8243232 | 75.1349434 | 72.2108417 | 70.6321585 |
| 17:45:00 | 71.8197433 | 59.8243232 | 75.1349434 | 71.6653871 | 70.6321585 |
| 17:45:01 | 70.8197433 | 59.8243232 | 76.1349434 | 71.2108417 | 66.6321585 |
| 17:45:02 | 69.8197433 | 59.8243232 | 59.1349434 | 69.4835689 | 65.6321585 |

|          |            |            |            |            |            |
|----------|------------|------------|------------|------------|------------|
| 17:45:03 | 66.8197433 | 59.8243232 | 53.1349434 | 68.6653871 | 64.6321585 |
| 17:45:04 | 65.8197433 | 60.8243232 | 50.1349434 | 68.2108417 | 63.6321585 |
| 17:45:05 | 64.8197433 | 61.8243232 | 48.1349434 | 67.574478  | 63.6321585 |
| 17:45:06 | 64.8197433 | 61.8243232 | 48.1349434 | 67.3017507 | 62.6321585 |
| 17:45:07 | 63.8197433 | 61.8243232 | 49.1349434 | 66.9381144 | 61.6321585 |
| 17:45:08 | 63.8197433 | 61.8243232 | 51.1349434 | 67.0290235 | 61.6321585 |
| 17:45:09 | 63.8197433 | 61.8243232 | 55.1349434 | 66.9381144 | 60.6321585 |
| 17:45:10 | 63.8197433 | 61.8243232 | 57.1349434 | 66.9381144 | 58.6321585 |
| 17:45:11 | 63.8197433 | 62.8243232 | 58.1349434 | 67.2108417 | 60.6321585 |
| 17:45:12 | 63.8197433 | 75.8243232 | 57.1349434 | 68.3926598 | 60.6321585 |
| 17:45:13 | 62.8197433 | 75.8243232 | 53.1349434 | 68.0290235 | 60.6321585 |
| 17:45:14 | 62.8197433 | 73.8243232 | 50.1349434 | 67.8472053 | 62.6321585 |
| 17:45:15 | 62.8197433 | 67.8243232 | 50.1349434 | 67.2108417 | 63.6321585 |
| 17:45:16 | 62.8197433 | 67.8243232 | 50.1349434 | 67.2108417 | 63.6321585 |
| 17:45:17 | 62.8197433 | 65.8243232 | 49.1349434 | 67.0290235 | 63.6321585 |
| 17:45:18 | 62.8197433 | 64.8243232 | 49.1349434 | 67.2108417 | 63.6321585 |
| 17:45:19 | 62.8197433 | 64.8243232 | 51.1349434 | 67.574478  | 63.6321585 |
| 17:45:20 | 62.8197433 | 62.8243232 | 52.1349434 | 67.9381144 | 63.6321585 |
| 17:45:21 | 61.8197433 | 61.8243232 | 52.1349434 | 68.3926598 | 64.6321585 |
| 17:45:22 | 61.8197433 | 60.8243232 | 52.1349434 | 68.8472053 | 64.6321585 |
| 17:45:23 | 62.8197433 | 60.8243232 | 51.1349434 | 69.2108417 | 64.6321585 |
| 17:45:24 | 62.8197433 | 60.8243232 | 51.1349434 | 69.3926598 | 64.6321585 |
| 17:45:25 | 62.8197433 | 60.8243232 | 51.1349434 | 69.574478  | 65.6321585 |
| 17:45:26 | 62.8197433 | 60.8243232 | 51.1349434 | 69.574478  | 65.6321585 |
| 17:45:27 | 62.8197433 | 60.8243232 | 52.1349434 | 69.7562962 | 65.6321585 |
| 17:45:28 | 62.8197433 | 60.8243232 | 53.1349434 | 70.1199326 | 66.6321585 |
| 17:45:29 | 62.8197433 | 60.8243232 | 53.1349434 | 70.2108417 | 66.6321585 |
| 17:45:30 | 62.8197433 | 59.8243232 | 54.1349434 | 70.3926598 | 68.6321585 |
| 17:45:31 | 62.8197433 | 59.8243232 | 54.1349434 | 84.5666434 | 70.6321585 |
| 17:45:32 | 62.8197433 | 58.8243232 | 55.1349434 | 84.5666434 | 71.6321585 |
| 17:45:33 | 62.8197433 | 58.8243232 | 55.1349434 | 84.5666434 | 71.6321585 |
| 17:45:34 | 62.8197433 | 58.8243232 | 55.1349434 | 80.5666434 | 67.6321585 |
| 17:45:35 | 62.8197433 | 58.8243232 | 56.1349434 | 79.5666434 | 67.6321585 |
| 17:45:36 | 62.8197433 | 58.8243232 | 56.1349434 | 79.5666434 | 67.6321585 |
| 17:45:37 | 62.8197433 | 58.8243232 | 58.1349434 | 77.5666434 | 67.6321585 |
| 17:45:38 | 62.8197433 | 57.8243232 | 59.1349434 | 77.5666434 | 65.6321585 |
| 17:45:39 | 62.8197433 | 57.8243232 | 59.1349434 | 72.5666434 | 65.6321585 |
| 17:45:40 | 62.8197433 | 57.8243232 | 59.1349434 | 72.5666434 | 65.6321585 |
| 17:45:41 | 62.8197433 | 57.8243232 | 57.1349434 | 66.5666434 | 64.6321585 |
| 17:45:42 | 62.8197433 | 58.8243232 | 57.1349434 | 66.5666434 | 64.6321585 |
| 17:45:43 | 62.8197433 | 58.8243232 | 56.1349434 | 57.5666434 | 64.6321585 |
| 17:45:44 | 62.8197433 | 59.8243232 | 55.1349434 | 57.5666434 | 64.6321585 |
| 17:45:45 | 62.8197433 | 59.8243232 | 55.1349434 | 56.5666434 | 64.6321585 |
| 17:45:46 | 62.8197433 | 59.8243232 | 54.1349434 | 56.5666434 | 64.6321585 |
| 17:45:47 | 63.8197433 | 59.8243232 | 54.1349434 | 56.5666434 | 64.6321585 |

|          |            |            |            |            |            |
|----------|------------|------------|------------|------------|------------|
| 17:45:48 | 63.8197433 | 60.8243232 | 53.1349434 | 56.5666434 | 64.6321585 |
| 17:45:49 | 62.8197433 | 60.8243232 | 53.1349434 | 57.5666434 | 65.6321585 |
| 17:45:50 | 62.8197433 | 64.8243232 | 53.1349434 | 57.5666434 | 65.6321585 |
| 17:45:51 | 62.8197433 | 65.8243232 | 53.1349434 | 58.5666434 | 65.6321585 |
| 17:45:52 | 62.8197433 | 65.8243232 | 53.1349434 | 58.5666434 | 64.6321585 |
| 17:45:53 | 62.8197433 | 65.8243232 | 55.1349434 | 58.5666434 | 64.6321585 |
| 17:45:54 | 62.8197433 | 65.8243232 | 61.1349434 | 58.5666434 | 64.6321585 |
| 17:45:55 | 62.8197433 | 60.8243232 | 62.1349434 | 57.5666434 | 63.6321585 |
| 17:45:56 | 62.8197433 | 59.8243232 | 62.1349434 | 58.5666434 | 63.6321585 |
| 17:45:57 | 62.8197433 | 59.8243232 | 64.1349434 | 58.5666434 | 62.6321585 |
| 17:45:58 | 62.8197433 | 57.8243232 | 65.1349434 | 59.5666434 | 62.6321585 |
| 17:45:59 | 62.8197433 | 57.8243232 | 66.1349434 | 59.5666434 | 62.6321585 |
| 17:46:00 | 62.8197433 | 57.8243232 | 69.1349434 | 58.5666434 | 62.6321585 |
| 17:46:01 | 62.8197433 | 57.8243232 | 72.1349434 | 58.5666434 | 62.6321585 |
| 17:46:02 | 62.8197433 | 57.8243232 | 77.1349434 | 57.5666434 | 62.6321585 |
| 17:46:03 | 62.8197433 | 57.8243232 | 78.1349434 | 57.5666434 | 63.6321585 |
| 17:46:04 | 62.8197433 | 57.8243232 | 78.1349434 | 57.5666434 | 64.6321585 |
| 17:46:05 | 62.8197433 | 56.8243232 | 78.1349434 | 57.5666434 | 65.6321585 |
| 17:46:06 | 62.8197433 | 58.8243232 | 78.1349434 | 57.5666434 | 65.6321585 |
| 17:46:07 | 62.8197433 | 58.8243232 | 78.1349434 | 58.5666434 | 65.6321585 |
| 17:46:08 | 62.8197433 | 58.8243232 | 78.1349434 | 58.5666434 | 65.6321585 |
| 17:46:09 | 62.8197433 | 58.8243232 | 78.1349434 | 58.5666434 | 65.6321585 |
| 17:46:10 | 62.8197433 | 58.8243232 | 78.1349434 | 58.5666434 | 68.6321585 |
| 17:46:11 | 62.8197433 | 58.8243232 | 75.1349434 | 57.5666434 | 68.6321585 |
| 17:46:12 | 62.8197433 | 58.8243232 | 75.1349434 | 57.5666434 | 71.6321585 |
| 17:46:13 | 62.8197433 | 59.8243232 | 75.1349434 | 57.5666434 | 73.6321585 |
| 17:46:14 | 62.8197433 | 59.8243232 | 74.1349434 | 58.5666434 | 76.6321585 |
| 17:46:15 | 62.8197433 | 61.8243232 | 74.1349434 | 58.5666434 | 76.6321585 |
| 17:46:16 | 62.8197433 | 60.8243232 | 72.1349434 | 58.5666434 | 73.6321585 |
| 17:46:17 | 62.8197433 | 59.8243232 | 71.1349434 | 58.5666434 | 73.6321585 |
| 17:46:18 | 62.8197433 | 59.8243232 | 71.1349434 | 58.5666434 | 72.6321585 |
| 17:46:19 | 62.8197433 | 59.8243232 | 70.1349434 | 58.5666434 | 71.6321585 |
| 17:46:20 | 62.8197433 | 59.8243232 | 70.1349434 | 58.5666434 | 71.6321585 |
| 17:46:21 | 62.8197433 | 58.8243232 | 70.1349434 | 58.5666434 | 71.6321585 |
| 17:46:22 | 62.8197433 | 57.8243232 | 70.1349434 | 58.5666434 | 71.6321585 |
| 17:46:23 | 62.8197433 | 57.8243232 | 55.1349434 | 59.5666434 | 69.6321585 |
| 17:46:24 | 62.8197433 | 57.8243232 | 53.1349434 | 61.5666434 | 66.6321585 |
| 17:46:25 | 62.8197433 | 57.8243232 | 53.1349434 | 59.5666434 | 66.6321585 |
| 17:46:26 | 62.8197433 | 57.8243232 | 54.1349434 | 59.5666434 | 66.6321585 |
| 17:46:27 | 62.8197433 | 56.8243232 | 55.1349434 | 60.5666434 | 68.6321585 |
| 17:46:28 | 62.8197433 | 54.8243232 | 56.1349434 | 59.5666434 | 68.6321585 |
| 17:46:29 | 62.8197433 | 54.8243232 | 57.1349434 | 60.5666434 | 68.6321585 |
| 17:46:30 | 62.8197433 | 54.8243232 | 57.1349434 | 60.5666434 | 68.6321585 |
| 17:46:31 | 62.8197433 | 54.8243232 | 57.1349434 | 61.5666434 | 68.6321585 |
| 17:46:32 | 62.8197433 | 54.8243232 | 57.1349434 | 61.5666434 | 71.6321585 |

|          |            |            |            |            |            |
|----------|------------|------------|------------|------------|------------|
| 17:46:33 | 62.8197433 | 55.8243232 | 57.1349434 | 62.5666434 | 75.6321585 |
| 17:46:34 | 62.8197433 | 55.8243232 | 57.1349434 | 60.5666434 | 80.6321585 |
| 17:46:35 | 62.8197433 | 55.8243232 | 57.1349434 | 60.5666434 | 81.6321585 |
| 17:46:36 | 61.8197433 | 55.8243232 | 57.1349434 | 59.5666434 | 81.6321585 |
| 17:46:37 | 61.8197433 | 55.8243232 | 58.1349434 | 59.5666434 | 70.6653871 |
| 17:46:38 | 61.8197433 | 57.8243232 | 61.1349434 | 59.5666434 | 71.2108417 |
| 17:46:39 | 61.8197433 | 57.8243232 | 65.1349434 | 60.5666434 | 71.3017507 |
| 17:46:40 | 61.8197433 | 57.8243232 | 67.1349434 | 62.5666434 | 82.6321585 |
| 17:46:41 | 61.8197433 | 56.8243232 | 67.1349434 | 63.5666434 | 81.6321585 |
| 17:46:42 | 62.8197433 | 56.8243232 | 67.1349434 | 63.5666434 | 81.6321585 |
| 17:46:43 | 62.8197433 | 57.8243232 | 58.1349434 | 63.5666434 | 81.6321585 |
| 17:46:44 | 62.8197433 | 56.8243232 | 55.1349434 | 59.5666434 | 81.6321585 |
| 17:46:45 | 62.8197433 | 56.8243232 | 55.1349434 | 59.5666434 | 82.6321585 |
| 17:46:46 | 62.8197433 | 56.8243232 | 57.1349434 | 59.5666434 | 70.8472053 |
| 17:46:47 | 62.8197433 | 56.8243232 | 57.1349434 | 59.5666434 | 70.3926598 |
| 17:46:48 | 62.8197433 | 56.8243232 | 56.1349434 | 60.5666434 | 68.4835689 |
| 17:46:49 | 62.8197433 | 56.8243232 | 56.1349434 | 62.5666434 | 68.7562962 |
| 17:46:50 | 63.8197433 | 58.8243232 | 54.1349434 | 62.5666434 | 68.7562962 |
| 17:46:51 | 62.8197433 | 62.8243232 | 54.1349434 | 63.5666434 | 68.9381144 |
| 17:46:52 | 62.8197433 | 61.8243232 | 54.1349434 | 63.5666434 | 67.4835689 |
| 17:46:53 | 63.8197433 | 61.8243232 | 54.1349434 | 63.5666434 | 78.6321585 |
| 17:46:54 | 63.8197433 | 61.8243232 | 54.1349434 | 63.5666434 | 78.6321585 |
| 17:46:55 | 63.8197433 | 60.8243232 | 54.1349434 | 63.5666434 | 68.6321585 |
| 17:46:56 | 62.8197433 | 58.8243232 | 54.1349434 | 63.5666434 | 68.6321585 |
| 17:46:57 | 62.8197433 | 57.8243232 | 54.1349434 | 63.5666434 | 68.6321585 |
| 17:46:58 | 62.8197433 | 57.8243232 | 54.1349434 | 62.5666434 | 68.6321585 |
| 17:46:59 | 62.8197433 | 57.8243232 | 57.1349434 | 62.5666434 | 68.6321585 |
| 17:47:00 | 62.8197433 | 58.8243232 | 55.1349434 | 62.5666434 | 69.6321585 |
| 17:47:01 | 62.8197433 | 58.8243232 | 55.1349434 | 62.5666434 | 69.6321585 |
| 17:47:02 | 62.8197433 | 59.8243232 | 54.1349434 | 62.5666434 | 70.6321585 |
| 17:47:03 | 62.8197433 | 59.8243232 | 54.1349434 | 61.5666434 | 70.6321585 |
| 17:47:04 | 62.8197433 | 59.8243232 | 54.1349434 | 61.5666434 | 71.6321585 |
| 17:47:05 | 62.8197433 | 59.8243232 | 57.1349434 | 61.5666434 | 71.6321585 |
| 17:47:06 | 62.8197433 | 59.8243232 | 60.1349434 | 61.5666434 | 71.6321585 |
| 17:47:07 | 62.8197433 | 59.8243232 | 61.1349434 | 62.5666434 | 70.6321585 |
| 17:47:08 | 62.8197433 | 59.8243232 | 62.1349434 | 62.5666434 | 69.6321585 |
| 17:47:09 | 62.8197433 | 59.8243232 | 62.1349434 | 61.5666434 | 69.6321585 |
| 17:47:10 | 62.8197433 | 61.8243232 | 63.1349434 | 61.5666434 | 69.6321585 |
| 17:47:11 | 62.8197433 | 61.8243232 | 62.1349434 | 61.5666434 | 68.6321585 |
| 17:47:12 | 62.8197433 | 62.8243232 | 61.1349434 | 60.5666434 | 68.6321585 |
| 17:47:13 | 62.8197433 | 62.8243232 | 60.1349434 | 60.5666434 | 68.6321585 |
| 17:47:14 | 62.8197433 | 62.8243232 | 61.1349434 | 60.5666434 | 69.6321585 |
| 17:47:15 | 62.8197433 | 62.8243232 | 62.1349434 | 60.5666434 | 68.6321585 |
| 17:47:16 | 62.8197433 | 62.8243232 | 63.1349434 | 60.5666434 | 68.6321585 |
| 17:47:17 | 62.8197433 | 62.8243232 | 63.1349434 | 58.5666434 | 68.6321585 |

|          |            |            |            |            |            |
|----------|------------|------------|------------|------------|------------|
| 17:47:18 | 63.8197433 | 62.8243232 | 63.1349434 | 56.5666434 | 68.6321585 |
| 17:47:19 | 63.8197433 | 62.8243232 | 63.1349434 | 56.5666434 | 68.6321585 |
| 17:47:20 | 64.8197433 | 62.8243232 | 62.1349434 | 53.5666434 | 70.6321585 |
| 17:47:21 | 65.8197433 | 62.8243232 | 61.1349434 | 53.5666434 | 70.6321585 |
| 17:47:22 | 64.8197433 | 69.8243232 | 61.1349434 | 51.5666434 | 70.6321585 |
| 17:47:23 | 64.8197433 | 69.8243232 | 61.1349434 | 51.5666434 | 74.6321585 |
| 17:47:24 | 64.8197433 | 69.8243232 | 61.1349434 | 51.5666434 | 74.6321585 |
| 17:47:25 | 63.8197433 | 64.8243232 | 60.1349434 | 51.5666434 | 74.6321585 |
| 17:47:26 | 63.8197433 | 62.8243232 | 61.1349434 | 51.5666434 | 73.6321585 |
| 17:47:27 | 62.8197433 | 61.8243232 | 64.1349434 | 51.5666434 | 74.6321585 |
| 17:47:28 | 62.8197433 | 61.8243232 | 67.1349434 | 51.5666434 | 72.6321585 |
| 17:47:29 | 62.8197433 | 60.8243232 | 68.1349434 | 68.5666434 | 72.6321585 |
| 17:47:30 | 62.8197433 | 59.8243232 | 68.1349434 | 70.5666434 | 70.6321585 |
| 17:47:31 | 62.8197433 | 59.8243232 | 68.1349434 | 72.5666434 | 69.6321585 |
| 17:47:32 | 62.8197433 | 58.8243232 | 69.1349434 | 72.5666434 | 68.6321585 |
| 17:47:33 | 62.8197433 | 58.8243232 | 69.1349434 | 73.5666434 | 68.6321585 |
| 17:47:34 | 62.8197433 | 58.8243232 | 70.1349434 | 74.5666434 | 68.6321585 |
| 17:47:35 | 62.8197433 | 59.8243232 | 70.1349434 | 74.5666434 | 68.6321585 |
| 17:47:36 | 62.8197433 | 60.8243232 | 71.1349434 | 74.5666434 | 68.6321585 |
| 17:47:37 | 62.8197433 | 60.8243232 | 72.1349434 | 74.5666434 | 67.6321585 |
| 17:47:38 | 62.8197433 | 60.8243232 | 73.1349434 | 75.5666434 | 66.6321585 |
| 17:47:39 | 62.8197433 | 60.8243232 | 73.1349434 | 75.5666434 | 66.6321585 |
| 17:47:40 | 62.8197433 | 60.8243232 | 74.1349434 | 75.5666434 | 66.6321585 |
| 17:47:41 | 63.8197433 | 61.8243232 | 72.1349434 | 75.5666434 | 66.6321585 |
| 17:47:42 | 63.8197433 | 64.8243232 | 72.1349434 | 76.5666434 | 65.6321585 |
| 17:47:43 | 63.8197433 | 66.8243232 | 71.1349434 | 76.5666434 | 65.6321585 |
| 17:47:44 | 63.8197433 | 65.8243232 | 70.1349434 | 77.5666434 | 65.6321585 |
| 17:47:45 | 63.8197433 | 64.8243232 | 70.1349434 | 77.5666434 | 65.6321585 |
| 17:47:46 | 63.8197433 | 64.8243232 | 70.1349434 | 77.5666434 | 65.6321585 |
| 17:47:47 | 63.8197433 | 63.8243232 | 69.1349434 | 77.5666434 | 65.6321585 |
| 17:47:48 | 63.8197433 | 61.8243232 | 69.1349434 | 78.5666434 | 65.6321585 |
| 17:47:49 | 63.8197433 | 61.8243232 | 69.1349434 | 78.5666434 | 65.6321585 |
| 17:47:50 | 63.8197433 | 61.8243232 | 70.1349434 | 78.5666434 | 65.6321585 |
| 17:47:51 | 63.8197433 | 61.8243232 | 73.1349434 | 79.5666434 | 65.6321585 |
| 17:47:52 | 64.8197433 | 60.8243232 | 74.1349434 | 79.5666434 | 65.6321585 |
| 17:47:53 | 65.8197433 | 61.8243232 | 73.1349434 | 81.5666434 | 65.6321585 |
| 17:47:54 | 65.8197433 | 61.8243232 | 71.1349434 | 81.5666434 | 62.6321585 |
| 17:47:55 | 65.8197433 | 60.8243232 | 70.1349434 | 81.5666434 | 62.6321585 |
| 17:47:56 | 65.8197433 | 60.8243232 | 69.1349434 | 80.5666434 | 62.6321585 |
| 17:47:57 | 65.8197433 | 60.8243232 | 68.1349434 | 80.5666434 | 62.6321585 |
| 17:47:58 | 65.8197433 | 59.8243232 | 67.1349434 | 79.5666434 | 62.6321585 |
| 17:47:59 | 64.8197433 | 59.8243232 | 65.1349434 | 79.5666434 | 62.6321585 |
| 17:48:00 | 65.8197433 | 60.8243232 | 62.1349434 | 79.5666434 | 62.6321585 |
| 17:48:01 | 65.8197433 | 60.8243232 | 61.1349434 | 79.5666434 | 62.6321585 |
| 17:48:02 | 65.8197433 | 61.8243232 | 61.1349434 | 79.5666434 | 62.6321585 |

|          |            |            |            |            |            |
|----------|------------|------------|------------|------------|------------|
| 17:48:03 | 65.8197433 | 61.8243232 | 61.1349434 | 81.5666434 | 62.6321585 |
| 17:48:04 | 65.8197433 | 61.8243232 | 61.1349434 | 67.4835689 | 59.6321585 |
| 17:48:05 | 65.8197433 | 61.8243232 | 61.1349434 | 67.3926598 | 59.6321585 |
| 17:48:06 | 65.8197433 | 62.8243232 | 61.1349434 | 67.0290235 | 56.6321585 |
| 17:48:07 | 65.8197433 | 58.8243232 | 62.1349434 | 66.3926598 | 52.6321585 |
| 17:48:08 | 64.8197433 | 58.8243232 | 62.1349434 | 66.3017507 | 50.6321585 |
| 17:48:09 | 64.8197433 | 58.8243232 | 63.1349434 | 69.5666434 | 50.6321585 |
| 17:48:10 | 63.8197433 | 58.8243232 | 64.1349434 | 64.5666434 | 51.6321585 |
| 17:48:11 | 63.8197433 | 58.8243232 | 64.1349434 | 64.5666434 | 51.6321585 |
| 17:48:12 | 63.8197433 | 58.8243232 | 64.1349434 | 62.5666434 | 53.6321585 |
| 17:48:13 | 63.8197433 | 58.8243232 | 64.1349434 | 61.5666434 | 56.6321585 |
| 17:48:14 | 62.8197433 | 58.8243232 | 64.1349434 | 61.5666434 | 57.6321585 |
| 17:48:15 | 62.8197433 | 58.8243232 | 63.1349434 | 61.5666434 | 57.6321585 |
| 17:48:16 | 62.8197433 | 58.8243232 | 63.1349434 | 60.5666434 | 59.6321585 |
| 17:48:17 | 62.8197433 | 59.8243232 | 63.1349434 | 60.5666434 | 60.6321585 |
| 17:48:18 | 62.8197433 | 59.8243232 | 63.1349434 | 60.5666434 | 60.6321585 |
| 17:48:19 | 62.8197433 | 59.8243232 | 63.1349434 | 60.5666434 | 61.6321585 |
| 17:48:20 | 63.8197433 | 63.8243232 | 61.1349434 | 60.5666434 | 60.6321585 |
| 17:48:21 | 64.8197433 | 65.8243232 | 58.1349434 | 60.5666434 | 60.6321585 |
| 17:48:22 | 65.8197433 | 66.8243232 | 58.1349434 | 59.5666434 | 60.6321585 |
| 17:48:23 | 66.8197433 | 67.8243232 | 58.1349434 | 59.5666434 | 60.6321585 |
| 17:48:24 | 66.8197433 | 69.8243232 | 58.1349434 | 63.5666434 | 62.6321585 |
| 17:48:25 | 65.8197433 | 69.8243232 | 58.1349434 | 63.5666434 | 63.6321585 |
| 17:48:26 | 64.8197433 | 69.8243232 | 59.1349434 | 64.5666434 | 63.6321585 |
| 17:48:27 | 64.8197433 | 68.8243232 | 59.1349434 | 63.5666434 | 74.6321585 |
| 17:48:28 | 65.8197433 | 69.8243232 | 59.1349434 | 63.5666434 | 76.6321585 |
| 17:48:29 | 65.8197433 | 70.8243232 | 59.1349434 | 63.5666434 | 77.6321585 |
| 17:48:30 | 65.8197433 | 75.8243232 | 59.1349434 | 63.5666434 | 81.6321585 |
| 17:48:31 | 65.8197433 | 75.8243232 | 59.1349434 | 63.5666434 | 82.6321585 |
| 17:48:32 | 65.8197433 | 75.8243232 | 59.1349434 | 63.5666434 | 68.574478  |
| 17:48:33 | 65.8197433 | 74.8243232 | 63.1349434 | 64.5666434 | 69.0290235 |
| 17:48:34 | 66.8197433 | 73.8243232 | 63.1349434 | 64.5666434 | 68.9381144 |
| 17:48:35 | 65.8197433 | 69.8243232 | 65.1349434 | 64.5666434 | 68.3926598 |
| 17:48:36 | 66.8197433 | 65.8243232 | 70.1349434 | 67.5666434 | 68.7562962 |
| 17:48:37 | 66.8197433 | 63.8243232 | 70.1349434 | 67.5666434 | 68.2108417 |
| 17:48:38 | 66.8197433 | 61.8243232 | 76.1349434 | 67.5666434 | 82.6321585 |
| 17:48:39 | 66.8197433 | 60.8243232 | 76.1349434 | 68.5666434 | 81.6321585 |
| 17:48:40 | 66.8197433 | 61.8243232 | 76.1349434 | 67.5666434 | 80.6321585 |
| 17:48:41 | 71.8197433 | 61.8243232 | 72.1349434 | 66.5666434 | 80.6321585 |
| 17:48:42 | 78.8197433 | 61.8243232 | 67.1349434 | 66.5666434 | 80.6321585 |
| 17:48:43 | 81.8197433 | 61.8243232 | 67.1349434 | 66.5666434 | 80.6321585 |
| 17:48:44 | 81.8197433 | 61.8243232 | 67.1349434 | 66.5666434 | 81.6321585 |
| 17:48:45 | 80.8197433 | 63.8243232 | 61.1349434 | 66.5666434 | 81.6321585 |
| 17:48:46 | 80.8197433 | 63.8243232 | 61.1349434 | 66.5666434 | 80.6321585 |
| 17:48:47 | 79.8197433 | 63.8243232 | 60.1349434 | 66.5666434 | 79.6321585 |

|          |            |            |            |            |            |
|----------|------------|------------|------------|------------|------------|
| 17:48:48 | 79.8197433 | 63.8243232 | 58.1349434 | 66.5666434 | 77.6321585 |
| 17:48:49 | 77.8197433 | 63.8243232 | 56.1349434 | 65.5666434 | 76.6321585 |
| 17:48:50 | 72.8197433 | 63.8243232 | 55.1349434 | 65.5666434 | 76.6321585 |
| 17:48:51 | 70.8197433 | 64.8243232 | 53.1349434 | 65.5666434 | 70.6321585 |
| 17:48:52 | 69.8197433 | 59.8243232 | 53.1349434 | 65.5666434 | 65.6321585 |
| 17:48:53 | 68.8197433 | 58.8243232 | 53.1349434 | 65.5666434 | 63.6321585 |
| 17:48:54 | 67.8197433 | 58.8243232 | 54.1349434 | 65.5666434 | 62.6321585 |
| 17:48:55 | 67.8197433 | 58.8243232 | 60.1349434 | 65.5666434 | 62.6321585 |
| 17:48:56 | 67.8197433 | 58.8243232 | 63.1349434 | 64.5666434 | 65.6321585 |
| 17:48:57 | 67.8197433 | 59.8243232 | 64.1349434 | 65.5666434 | 65.6321585 |
| 17:48:58 | 67.8197433 | 59.8243232 | 64.1349434 | 66.5666434 | 65.6321585 |
| 17:48:59 | 67.8197433 | 59.8243232 | 64.1349434 | 67.5666434 | 66.6321585 |
| 17:49:00 | 67.8197433 | 59.8243232 | 64.1349434 | 67.5666434 | 66.6321585 |
| 17:49:01 | 67.8197433 | 58.8243232 | 63.1349434 | 67.5666434 | 66.6321585 |
| 17:49:02 | 69.8197433 | 58.8243232 | 62.1349434 | 67.5666434 | 66.6321585 |
| 17:49:03 | 69.8197433 | 58.8243232 | 61.1349434 | 67.5666434 | 66.6321585 |
| 17:49:04 | 72.8197433 | 59.8243232 | 61.1349434 | 67.5666434 | 68.6321585 |
| 17:49:05 | 74.8197433 | 60.8243232 | 60.1349434 | 67.5666434 | 69.6321585 |
| 17:49:06 | 74.8197433 | 60.8243232 | 72.1349434 | 67.5666434 | 70.6321585 |
| 17:49:07 | 74.8197433 | 61.8243232 | 72.1349434 | 67.5666434 | 71.6321585 |
| 17:49:08 | 74.8197433 | 62.8243232 | 73.1349434 | 67.5666434 | 71.6321585 |
| 17:49:09 | 74.8197433 | 65.8243232 | 72.1349434 | 67.5666434 | 71.6321585 |
| 17:49:10 | 74.8197433 | 65.8243232 | 67.1349434 | 67.5666434 | 70.6321585 |
| 17:49:11 | 73.8197433 | 65.8243232 | 62.1349434 | 71.5666434 | 70.6321585 |
| 17:49:12 | 73.8197433 | 65.8243232 | 62.1349434 | 71.5666434 | 70.6321585 |
| 17:49:13 | 70.8197433 | 66.8243232 | 58.1349434 | 72.5666434 | 70.6321585 |
| 17:49:14 | 70.8197433 | 66.8243232 | 58.1349434 | 72.5666434 | 67.6321585 |
| 17:49:15 | 67.8197433 | 66.8243232 | 58.1349434 | 74.5666434 | 66.6321585 |
| 17:49:16 | 64.8197433 | 67.8243232 | 60.1349434 | 74.5666434 | 66.6321585 |
| 17:49:17 | 64.8197433 | 67.8243232 | 63.1349434 | 74.5666434 | 66.6321585 |
| 17:49:18 | 63.8197433 | 69.8243232 | 63.1349434 | 75.5666434 | 65.6321585 |
| 17:49:19 | 63.8197433 | 65.8243232 | 62.1349434 | 75.5666434 | 65.6321585 |
| 17:49:20 | 63.8197433 | 64.8243232 | 59.1349434 | 75.5666434 | 65.6321585 |
| 17:49:21 | 63.8197433 | 64.8243232 | 59.1349434 | 79.5666434 | 65.6321585 |
| 17:49:22 | 64.8197433 | 64.8243232 | 55.1349434 | 79.5666434 | 65.6321585 |
| 17:49:23 | 64.8197433 | 64.8243232 | 56.1349434 | 79.5666434 | 65.6321585 |
| 17:49:24 | 65.8197433 | 63.8243232 | 56.1349434 | 80.5666434 | 65.6321585 |
| 17:49:25 | 66.8197433 | 63.8243232 | 56.1349434 | 80.5666434 | 65.6321585 |
| 17:49:26 | 68.8197433 | 64.8243232 | 55.1349434 | 80.5666434 | 65.6321585 |
| 17:49:27 | 68.8197433 | 64.8243232 | 54.1349434 | 80.5666434 | 65.6321585 |
| 17:49:28 | 68.8197433 | 64.8243232 | 54.1349434 | 80.5666434 | 67.6321585 |
| 17:49:29 | 70.8197433 | 64.8243232 | 56.1349434 | 80.5666434 | 67.6321585 |
| 17:49:30 | 70.8197433 | 63.8243232 | 58.1349434 | 80.5666434 | 68.6321585 |
| 17:49:31 | 67.8197433 | 60.8243232 | 58.1349434 | 80.5666434 | 68.6321585 |
| 17:49:32 | 67.8197433 | 59.8243232 | 58.1349434 | 70.5666434 | 68.6321585 |



|          |            |            |            |            |            |
|----------|------------|------------|------------|------------|------------|
| 17:49:33 | 64.8197433 | 59.8243232 | 59.1349434 | 70.5666434 | 68.6321585 |
| 17:49:34 | 63.8197433 | 61.8243232 | 59.1349434 | 70.5666434 | 68.6321585 |
| 17:49:35 | 63.8197433 | 61.8243232 | 62.1349434 | 69.5666434 | 68.6321585 |
| 17:49:36 | 62.8197433 | 62.8243232 | 64.1349434 | 67.5666434 | 67.6321585 |
| 17:49:37 | 62.8197433 | 63.8243232 | 65.1349434 | 67.5666434 | 67.6321585 |
| 17:49:38 | 63.8197433 | 63.8243232 | 65.1349434 | 67.5666434 | 68.6321585 |
| 17:49:39 | 63.8197433 | 62.8243232 | 65.1349434 | 67.5666434 | 71.6321585 |
| 17:49:40 | 63.8197433 | 62.8243232 | 65.1349434 | 69.5666434 | 73.6321585 |
| 17:49:41 | 63.8197433 | 62.8243232 | 64.1349434 | 70.5666434 | 73.6321585 |
| 17:49:42 | 63.8197433 | 62.8243232 | 63.1349434 | 71.5666434 | 73.6321585 |
| 17:49:43 | 63.8197433 | 62.8243232 | 62.1349434 | 71.5666434 | 74.6321585 |
| 17:49:44 | 63.8197433 | 62.8243232 | 62.1349434 | 72.5666434 | 74.6321585 |
| 17:49:45 | 63.8197433 | 63.8243232 | 73.1349434 | 75.5666434 | 75.6321585 |
| 17:49:46 | 63.8197433 | 63.8243232 | 76.1349434 | 76.5666434 | 77.6321585 |
| 17:49:47 | 63.8197433 | 63.8243232 | 76.1349434 | 76.5666434 | 81.6321585 |
| 17:49:48 | 63.8197433 | 61.8243232 | 76.1349434 | 77.5666434 | 81.6321585 |
| 17:49:49 | 63.8197433 | 61.8243232 | 76.1349434 | 77.5666434 | 81.6321585 |
| 17:49:50 | 63.8197433 | 61.8243232 | 76.1349434 | 77.5666434 | 81.6321585 |
| 17:49:51 | 63.8197433 | 62.8243232 | 76.1349434 | 77.5666434 | 80.6321585 |
| 17:49:52 | 63.8197433 | 62.8243232 | 75.1349434 | 77.5666434 | 79.6321585 |
| 17:49:53 | 63.8197433 | 66.8243232 | 73.1349434 | 77.5666434 | 79.6321585 |
| 17:49:54 | 63.8197433 | 67.8243232 | 73.1349434 | 77.5666434 | 79.6321585 |
| 17:49:55 | 63.8197433 | 69.8243232 | 71.1349434 | 76.5666434 | 78.6321585 |
| 17:49:56 | 63.8197433 | 70.8243232 | 70.1349434 | 76.5666434 | 79.6321585 |
| 17:49:57 | 63.8197433 | 70.8243232 | 69.1349434 | 74.5666434 | 79.6321585 |
| 17:49:58 | 63.8197433 | 70.8243232 | 65.1349434 | 74.5666434 | 80.6321585 |
| 17:49:59 | 63.8197433 | 71.8243232 | 65.1349434 | 74.5666434 | 80.6321585 |
| 17:50:00 | 63.8197433 | 71.8243232 | 65.1349434 | 72.5666434 | 81.6321585 |
| 17:50:01 | 63.8197433 | 73.8243232 | 65.1349434 | 71.5666434 | 81.6321585 |
| 17:50:02 | 63.8197433 | 73.8243232 | 65.1349434 | 71.5666434 | 81.6321585 |
| 17:50:03 | 63.8197433 | 73.8243232 | 65.1349434 | 64.5666434 | 81.6321585 |
| 17:50:04 | 63.8197433 | 73.8243232 | 65.1349434 | 64.5666434 | 81.6321585 |
| 17:50:05 | 63.8197433 | 73.8243232 | 64.1349434 | 62.5666434 | 81.6321585 |
| 17:50:06 | 63.8197433 | 73.8243232 | 64.1349434 | 62.5666434 | 66.2434137 |
| 17:50:07 | 63.8197433 | 74.8243232 | 64.1349434 | 60.5666434 | 66.574478  |
| 17:50:08 | 63.8197433 | 66.8472053 | 63.1349434 | 59.5666434 | 80.6321585 |
| 17:50:09 | 64.8197433 | 66.7562962 | 63.1349434 | 58.5666434 | 80.6321585 |
| 17:50:10 | 64.8197433 | 67.0290235 | 64.1349434 | 58.5666434 | 80.6321585 |
| 17:50:11 | 64.8197433 | 67.1199326 | 63.1349434 | 58.5666434 | 81.6321585 |
| 17:50:12 | 64.8197433 | 65.7562962 | 52.1349434 | 58.5666434 | 65.7562962 |
| 17:50:13 | 64.8197433 | 65.0290235 | 46.1349434 | 58.5666434 | 79.6321585 |
| 17:50:14 | 63.8197433 | 63.7562962 | 46.1349434 | 55.5666434 | 69.6321585 |
| 17:50:15 | 63.8197433 | 63.3017507 | 45.1349434 | 54.5666434 | 68.6321585 |
| 17:50:16 | 63.8197433 | 63.0290235 | 46.1349434 | 54.5666434 | 67.6321585 |
| 17:50:17 | 64.8197433 | 63.2108417 | 46.1349434 | 54.5666434 | 67.6321585 |

|          |            |            |            |            |            |
|----------|------------|------------|------------|------------|------------|
| 17:50:18 | 64.8197433 | 63.3926598 | 49.1349434 | 55.5666434 | 67.6321585 |
| 17:50:19 | 64.8197433 | 64.1199326 | 53.1349434 | 55.5666434 | 66.6321585 |
| 17:50:20 | 64.8197433 | 64.4835689 | 53.1349434 | 55.5666434 | 66.6321585 |
| 17:50:21 | 64.8197433 | 65.3017507 | 58.1349434 | 55.5666434 | 67.6321585 |
| 17:50:22 | 64.8197433 | 65.6653871 | 58.1349434 | 55.5666434 | 67.6321585 |
| 17:50:23 | 64.8197433 | 66.6653871 | 58.1349434 | 57.5666434 | 73.6321585 |
| 17:50:24 | 64.8197433 | 66.9381144 | 62.1349434 | 57.5666434 | 74.6321585 |
| 17:50:25 | 64.8197433 | 67.1199326 | 62.1349434 | 57.5666434 | 77.6321585 |
| 17:50:26 | 64.8197433 | 67.3926598 | 62.1349434 | 58.5666434 | 78.6321585 |
| 17:50:27 | 64.8197433 | 66.9381144 | 62.1349434 | 58.5666434 | 79.6321585 |
| 17:50:28 | 64.8197433 | 67.1199326 | 62.1349434 | 58.5666434 | 79.6321585 |
| 17:50:29 | 64.8197433 | 67.6653871 | 61.1349434 | 58.5666434 | 67.6653871 |
| 17:50:30 | 63.8197433 | 68.0290235 | 62.1349434 | 58.5666434 | 68.0290235 |
| 17:50:31 | 63.8197433 | 68.8472053 | 63.1349434 | 61.5666434 | 68.8472053 |
| 17:50:32 | 63.8197433 | 68.574478  | 64.1349434 | 61.5666434 | 68.574478  |
| 17:50:33 | 63.8197433 | 82.8243232 | 63.1349434 | 61.5666434 | 68.7562962 |
| 17:50:34 | 63.8197433 | 81.8243232 | 63.1349434 | 63.5666434 | 69.2108417 |
| 17:50:35 | 63.8197433 | 81.8243232 | 63.1349434 | 61.5666434 | 68.9381144 |
| 17:50:36 | 63.8197433 | 80.8243232 | 64.1349434 | 61.5666434 | 68.4835689 |
| 17:50:37 | 63.8197433 | 80.8243232 | 64.1349434 | 62.5666434 | 69.0290235 |
| 17:50:38 | 64.8197433 | 81.8243232 | 64.1349434 | 63.5666434 | 69.4835689 |
| 17:50:39 | 64.8197433 | 81.8243232 | 64.1349434 | 63.5666434 | 81.6321585 |
| 17:50:40 | 64.8197433 | 81.8243232 | 62.1349434 | 63.5666434 | 73.6321585 |
| 17:50:41 | 64.8197433 | 77.8243232 | 61.1349434 | 62.5666434 | 73.6321585 |
| 17:50:42 | 64.8197433 | 77.8243232 | 61.1349434 | 61.5666434 | 73.6321585 |
| 17:50:43 | 64.8197433 | 77.8243232 | 61.1349434 | 61.5666434 | 73.6321585 |
| 17:50:44 | 64.8197433 | 75.8243232 | 60.1349434 | 61.5666434 | 73.6321585 |
| 17:50:45 | 65.8197433 | 75.8243232 | 60.1349434 | 61.5666434 | 71.6321585 |
| 17:50:46 | 65.8197433 | 75.8243232 | 58.1349434 | 61.5666434 | 68.6321585 |
| 17:50:47 | 66.8197433 | 75.8243232 | 58.1349434 | 60.5666434 | 64.6321585 |
| 17:50:48 | 67.8197433 | 75.8243232 | 58.1349434 | 60.5666434 | 64.6321585 |
| 17:50:49 | 66.8197433 | 73.8243232 | 58.1349434 | 60.5666434 | 64.6321585 |
| 17:50:50 | 66.8197433 | 72.8243232 | 61.1349434 | 60.5666434 | 64.6321585 |
| 17:50:51 | 65.8197433 | 72.8243232 | 61.1349434 | 60.5666434 | 59.6321585 |
| 17:50:52 | 64.8197433 | 68.8243232 | 61.1349434 | 60.5666434 | 59.6321585 |
| 17:50:53 | 64.8197433 | 66.8243232 | 61.1349434 | 61.5666434 | 60.6321585 |
| 17:50:54 | 65.8197433 | 65.8243232 | 61.1349434 | 63.5666434 | 61.6321585 |
| 17:50:55 | 65.8197433 | 65.8243232 | 60.1349434 | 64.5666434 | 61.6321585 |
| 17:50:56 | 66.8197433 | 64.8243232 | 60.1349434 | 64.5666434 | 61.6321585 |
| 17:50:57 | 66.8197433 | 63.8243232 | 60.1349434 | 64.5666434 | 61.6321585 |
| 17:50:58 | 66.8197433 | 62.8243232 | 60.1349434 | 68.5666434 | 63.6321585 |
| 17:50:59 | 65.8197433 | 61.8243232 | 60.1349434 | 68.5666434 | 64.6321585 |
| 17:51:00 | 65.8197433 | 61.8243232 | 60.1349434 | 68.5666434 | 64.6321585 |
| 17:51:01 | 64.8197433 | 60.8243232 | 61.1349434 | 68.5666434 | 65.6321585 |
| 17:51:02 | 64.8197433 | 59.8243232 | 61.1349434 | 68.5666434 | 65.6321585 |

|          |            |            |            |            |            |
|----------|------------|------------|------------|------------|------------|
| 17:51:03 | 64.8197433 | 58.8243232 | 62.1349434 | 68.5666434 | 65.6321585 |
| 17:51:04 | 64.8197433 | 58.8243232 | 62.1349434 | 68.5666434 | 66.6321585 |
| 17:51:05 | 64.8197433 | 58.8243232 | 62.1349434 | 68.5666434 | 65.6321585 |
| 17:51:06 | 63.8197433 | 59.8243232 | 62.1349434 | 64.5666434 | 65.6321585 |
| 17:51:07 | 63.8197433 | 60.8243232 | 62.1349434 | 64.5666434 | 65.6321585 |
| 17:51:08 | 62.8197433 | 60.8243232 | 62.1349434 | 63.5666434 | 65.6321585 |
| 17:51:09 | 62.8197433 | 60.8243232 | 61.1349434 | 63.5666434 | 66.6321585 |
| 17:51:10 | 62.8197433 | 60.8243232 | 60.1349434 | 61.5666434 | 66.6321585 |
| 17:51:11 | 61.8197433 | 60.8243232 | 60.1349434 | 64.5666434 | 66.6321585 |
| 17:51:12 | 61.8197433 | 60.8243232 | 60.1349434 | 65.5666434 | 66.6321585 |
| 17:51:13 | 61.8197433 | 60.8243232 | 63.1349434 | 65.5666434 | 66.6321585 |
| 17:51:14 | 62.8197433 | 60.8243232 | 63.1349434 | 64.5666434 | 65.6321585 |
| 17:51:15 | 62.8197433 | 60.8243232 | 62.1349434 | 64.5666434 | 65.6321585 |
| 17:51:16 | 62.8197433 | 61.8243232 | 61.1349434 | 64.5666434 | 64.6321585 |
| 17:51:17 | 65.8197433 | 62.8243232 | 61.1349434 | 64.5666434 | 63.6321585 |
| 17:51:18 | 66.8197433 | 62.8243232 | 60.1349434 | 64.5666434 | 63.6321585 |
| 17:51:19 | 67.8197433 | 61.8243232 | 61.1349434 | 64.5666434 | 63.6321585 |
| 17:51:20 | 66.8197433 | 61.8243232 | 70.1349434 | 64.5666434 | 64.6321585 |
| 17:51:21 | 65.8197433 | 61.8243232 | 73.1349434 | 64.5666434 | 63.6321585 |
| 17:51:22 | 65.8197433 | 61.8243232 | 73.1349434 | 64.5666434 | 63.6321585 |
| 17:51:23 | 64.8197433 | 61.8243232 | 73.1349434 | 64.5666434 | 63.6321585 |
| 17:51:24 | 63.8197433 | 61.8243232 | 73.1349434 | 72.5666434 | 65.6321585 |
| 17:51:25 | 63.8197433 | 61.8243232 | 72.1349434 | 74.5666434 | 66.6321585 |
| 17:51:26 | 63.8197433 | 61.8243232 | 70.1349434 | 74.5666434 | 66.6321585 |
| 17:51:27 | 63.8197433 | 61.8243232 | 66.1349434 | 74.5666434 | 67.6321585 |
| 17:51:28 | 63.8197433 | 62.8243232 | 63.1349434 | 75.5666434 | 67.6321585 |
| 17:51:29 | 64.8197433 | 62.8243232 | 61.1349434 | 75.5666434 | 67.6321585 |
| 17:51:30 | 64.8197433 | 67.8243232 | 60.1349434 | 75.5666434 | 67.6321585 |
| 17:51:31 | 64.8197433 | 69.8243232 | 61.1349434 | 75.5666434 | 67.6321585 |
| 17:51:32 | 64.8197433 | 69.8243232 | 64.1349434 | 76.5666434 | 67.6321585 |
| 17:51:33 | 64.8197433 | 70.8243232 | 64.1349434 | 76.5666434 | 67.6321585 |
| 17:51:34 | 64.8197433 | 70.8243232 | 64.1349434 | 76.5666434 | 68.6321585 |
| 17:51:35 | 63.8197433 | 70.8243232 | 61.1349434 | 76.5666434 | 68.6321585 |
| 17:51:36 | 63.8197433 | 72.8243232 | 59.1349434 | 72.5666434 | 68.6321585 |
| 17:51:37 | 63.8197433 | 72.8243232 | 59.1349434 | 72.5666434 | 68.6321585 |
| 17:51:38 | 62.8197433 | 72.8243232 | 58.1349434 | 71.5666434 | 69.6321585 |
| 17:51:39 | 62.8197433 | 72.8243232 | 59.1349434 | 71.5666434 | 69.6321585 |
| 17:51:40 | 62.8197433 | 72.8243232 | 59.1349434 | 71.5666434 | 68.6321585 |
| 17:51:41 | 62.8197433 | 72.8243232 | 59.1349434 | 69.5666434 | 68.6321585 |
| 17:51:42 | 62.8197433 | 67.8243232 | 59.1349434 | 68.5666434 | 68.6321585 |
| 17:51:43 | 63.8197433 | 67.8243232 | 59.1349434 | 68.5666434 | 68.6321585 |
| 17:51:44 | 63.8197433 | 60.8243232 | 59.1349434 | 68.5666434 | 68.6321585 |
| 17:51:45 | 62.8197433 | 58.8243232 | 59.1349434 | 67.5666434 | 68.6321585 |
| 17:51:46 | 62.8197433 | 58.8243232 | 59.1349434 | 67.5666434 | 68.6321585 |
| 17:51:47 | 63.8197433 | 58.8243232 | 59.1349434 | 68.5666434 | 68.6321585 |

|          |            |            |            |            |            |
|----------|------------|------------|------------|------------|------------|
| 17:51:48 | 62.8197433 | 56.8243232 | 59.1349434 | 68.5666434 | 68.6321585 |
| 17:51:49 | 62.8197433 | 56.8243232 | 59.1349434 | 68.5666434 | 68.6321585 |
| 17:51:50 | 62.8197433 | 56.8243232 | 59.1349434 | 68.5666434 | 69.6321585 |
| 17:51:51 | 62.8197433 | 60.8243232 | 65.1349434 | 68.5666434 | 72.6321585 |
| 17:51:52 | 62.8197433 | 60.8243232 | 65.1349434 | 70.5666434 | 73.6321585 |
| 17:51:53 | 62.8197433 | 60.8243232 | 66.1349434 | 72.5666434 | 73.6321585 |
| 17:51:54 | 62.8197433 | 60.8243232 | 66.1349434 | 72.5666434 | 73.6321585 |
| 17:51:55 | 62.8197433 | 64.8243232 | 63.1349434 | 72.5666434 | 75.6321585 |
| 17:51:56 | 62.8197433 | 64.8243232 | 57.1349434 | 73.5666434 | 74.6321585 |
| 17:51:57 | 62.8197433 | 61.8243232 | 56.1349434 | 73.5666434 | 74.6321585 |
| 17:51:58 | 62.8197433 | 61.8243232 | 56.1349434 | 73.5666434 | 70.6321585 |
| 17:51:59 | 62.8197433 | 61.8243232 | 57.1349434 | 73.5666434 | 70.6321585 |
| 17:52:00 | 61.8197433 | 58.8243232 | 56.1349434 | 73.5666434 | 70.6321585 |
| 17:52:01 | 59.8197433 | 58.8243232 | 56.1349434 | 73.5666434 | 69.6321585 |
| 17:52:02 | 59.8197433 | 57.8243232 | 56.1349434 | 76.5666434 | 69.6321585 |
| 17:52:03 | 59.8197433 | 57.8243232 | 56.1349434 | 76.5666434 | 68.6321585 |
| 17:52:04 | 59.8197433 | 59.8243232 | 57.1349434 | 76.5666434 | 67.6321585 |
| 17:52:05 | 59.8197433 | 61.8243232 | 59.1349434 | 66.3926598 | 67.6321585 |
| 17:52:06 | 60.8197433 | 61.8243232 | 61.1349434 | 66.6653871 | 68.6321585 |
| 17:52:07 | 60.8197433 | 61.8243232 | 60.1349434 | 67.0290235 | 68.6321585 |
| 17:52:08 | 61.8197433 | 64.8243232 | 60.1349434 | 67.574478  | 68.6321585 |
| 17:52:09 | 62.8197433 | 65.8243232 | 61.1349434 | 68.1199326 | 68.6321585 |
| 17:52:10 | 63.8197433 | 65.8243232 | 63.1349434 | 68.3017507 | 68.6321585 |
| 17:52:11 | 64.8197433 | 65.8243232 | 63.1349434 | 68.3017507 | 68.6321585 |
| 17:52:12 | 65.8197433 | 65.8243232 | 61.1349434 | 68.3017507 | 68.6321585 |
| 17:52:13 | 65.8197433 | 64.8243232 | 61.1349434 | 68.0290235 | 68.6321585 |
| 17:52:14 | 65.8197433 | 62.8243232 | 60.1349434 | 67.6653871 | 68.6321585 |
| 17:52:15 | 64.8197433 | 62.8243232 | 58.1349434 | 67.4835689 | 68.6321585 |
| 17:52:16 | 64.8197433 | 61.8243232 | 58.1349434 | 67.574478  | 68.6321585 |
| 17:52:17 | 64.8197433 | 61.8243232 | 58.1349434 | 67.2108417 | 67.6321585 |
| 17:52:18 | 63.8197433 | 61.8243232 | 60.1349434 | 67.3926598 | 67.6321585 |
| 17:52:19 | 63.8197433 | 62.8243232 | 62.1349434 | 68.0290235 | 67.6321585 |
| 17:52:20 | 63.8197433 | 62.8243232 | 63.1349434 | 72.5666434 | 69.6321585 |
| 17:52:21 | 64.8197433 | 62.8243232 | 63.1349434 | 72.5666434 | 70.6321585 |
| 17:52:22 | 66.8197433 | 62.8243232 | 63.1349434 | 72.5666434 | 70.6321585 |
| 17:52:23 | 66.8197433 | 62.8243232 | 63.1349434 | 65.5666434 | 70.6321585 |
| 17:52:24 | 66.8197433 | 69.8243232 | 63.1349434 | 65.5666434 | 70.6321585 |
| 17:52:25 | 66.8197433 | 76.8243232 | 63.1349434 | 65.5666434 | 70.6321585 |
| 17:52:26 | 66.8197433 | 76.8243232 | 63.1349434 | 65.5666434 | 71.6321585 |
| 17:52:27 | 67.8197433 | 77.8243232 | 63.1349434 | 65.5666434 | 71.6321585 |
| 17:52:28 | 67.8197433 | 77.8243232 | 63.1349434 | 65.5666434 | 72.6321585 |
| 17:52:29 | 67.8197433 | 77.8243232 | 64.1349434 | 65.5666434 | 72.6321585 |
| 17:52:30 | 67.8197433 | 76.8243232 | 69.1349434 | 66.5666434 | 73.6321585 |
| 17:52:31 | 67.8197433 | 75.8243232 | 71.1349434 | 67.5666434 | 71.6321585 |
| 17:52:32 | 67.8197433 | 75.8243232 | 70.1349434 | 68.5666434 | 70.6321585 |

|          |            |            |            |            |            |
|----------|------------|------------|------------|------------|------------|
| 17:52:33 | 68.8197433 | 73.8243232 | 67.1349434 | 68.5666434 | 70.6321585 |
| 17:52:34 | 68.8197433 | 71.8243232 | 60.1349434 | 69.5666434 | 69.6321585 |
| 17:52:35 | 68.8197433 | 67.8243232 | 55.1349434 | 70.5666434 | 70.6321585 |
| 17:52:36 | 69.8197433 | 67.8243232 | 52.1349434 | 70.5666434 | 71.6321585 |
| 17:52:37 | 69.8197433 | 65.8243232 | 52.1349434 | 71.5666434 | 71.6321585 |
| 17:52:38 | 71.8197433 | 63.8243232 | 52.1349434 | 71.5666434 | 71.6321585 |
| 17:52:39 | 71.8197433 | 63.8243232 | 53.1349434 | 72.5666434 | 71.6321585 |
| 17:52:40 | 71.8197433 | 63.8243232 | 54.1349434 | 71.5666434 | 71.6321585 |
| 17:52:41 | 70.8197433 | 61.8243232 | 55.1349434 | 71.5666434 | 71.6321585 |
| 17:52:42 | 69.8197433 | 61.8243232 | 57.1349434 | 71.5666434 | 72.6321585 |
| 17:52:43 | 69.8197433 | 61.8243232 | 59.1349434 | 71.5666434 | 72.6321585 |
| 17:52:44 | 68.8197433 | 60.8243232 | 59.1349434 | 72.5666434 | 72.6321585 |
| 17:52:45 | 67.8197433 | 60.8243232 | 59.1349434 | 72.5666434 | 72.6321585 |
| 17:52:46 | 66.8197433 | 60.8243232 | 59.1349434 | 72.5666434 | 72.6321585 |
| 17:52:47 | 65.8197433 | 60.8243232 | 59.1349434 | 72.5666434 | 72.6321585 |
| 17:52:48 | 65.8197433 | 60.8243232 | 59.1349434 | 72.5666434 | 72.6321585 |
| 17:52:49 | 64.8197433 | 60.8243232 | 59.1349434 | 69.5666434 | 72.6321585 |
| 17:52:50 | 63.8197433 | 62.8243232 | 62.1349434 | 69.5666434 | 70.6321585 |
| 17:52:51 | 63.8197433 | 64.8243232 | 67.1349434 | 69.5666434 | 69.6321585 |
| 17:52:52 | 63.8197433 | 64.8243232 | 68.1349434 | 69.5666434 | 70.6321585 |
| 17:52:53 | 64.8197433 | 63.8243232 | 68.1349434 | 68.5666434 | 70.6321585 |
| 17:52:54 | 65.8197433 | 63.8243232 | 64.1349434 | 66.5666434 | 70.6321585 |
| 17:52:55 | 66.8197433 | 63.8243232 | 63.1349434 | 66.5666434 | 70.6321585 |
| 17:52:56 | 68.8197433 | 62.8243232 | 63.1349434 | 66.5666434 | 70.6321585 |
| 17:52:57 | 72.8197433 | 59.8243232 | 63.1349434 | 58.5666434 | 70.6321585 |
| 17:52:58 | 72.8197433 | 59.8243232 | 62.1349434 | 57.5666434 | 70.6321585 |
| 17:52:59 | 72.8197433 | 60.8243232 | 62.1349434 | 57.5666434 | 69.6321585 |
| 17:53:00 | 72.8197433 | 60.8243232 | 62.1349434 | 57.5666434 | 69.6321585 |
| 17:53:01 | 73.8197433 | 60.8243232 | 61.1349434 | 57.5666434 | 69.6321585 |
| 17:53:02 | 74.8197433 | 62.8243232 | 69.1349434 | 57.5666434 | 69.6321585 |
| 17:53:03 | 74.8197433 | 62.8243232 | 69.1349434 | 62.5666434 | 69.6321585 |
| 17:53:04 | 73.8197433 | 62.8243232 | 74.1349434 | 62.5666434 | 69.6321585 |
| 17:53:05 | 71.8197433 | 63.8243232 | 78.1349434 | 63.5666434 | 69.6321585 |
| 17:53:06 | 69.8197433 | 63.8243232 | 78.1349434 | 63.5666434 | 69.6321585 |
| 17:53:07 | 66.8197433 | 64.8243232 | 81.1349434 | 63.5666434 | 69.6321585 |
| 17:53:08 | 65.8197433 | 63.8243232 | 81.1349434 | 63.5666434 | 70.6321585 |
| 17:53:09 | 64.8197433 | 63.8243232 | 68.3017507 | 66.5666434 | 70.6321585 |
| 17:53:10 | 63.8197433 | 63.8243232 | 68.9381144 | 68.5666434 | 70.6321585 |
| 17:53:11 | 62.8197433 | 64.8243232 | 68.6653871 | 68.5666434 | 68.6321585 |
| 17:53:12 | 62.8197433 | 66.8243232 | 68.6653871 | 68.5666434 | 67.6321585 |
| 17:53:13 | 62.8197433 | 66.8243232 | 68.2108417 | 68.5666434 | 67.6321585 |
| 17:53:14 | 62.8197433 | 65.8243232 | 68.1199326 | 69.5666434 | 67.6321585 |
| 17:53:15 | 62.8197433 | 65.8243232 | 68.1199326 | 69.5666434 | 67.6321585 |
| 17:53:16 | 62.8197433 | 65.8243232 | 67.8472053 | 69.5666434 | 67.6321585 |
| 17:53:17 | 62.8197433 | 65.8243232 | 68.1199326 | 70.5666434 | 68.6321585 |

|          |            |            |            |            |            |
|----------|------------|------------|------------|------------|------------|
| 17:53:18 | 62.8197433 | 65.8243232 | 68.574478  | 73.5666434 | 69.6321585 |
| 17:53:19 | 62.8197433 | 67.8243232 | 68.7562962 | 74.5666434 | 69.6321585 |
| 17:53:20 | 62.8197433 | 69.8243232 | 83.1349434 | 75.5666434 | 69.6321585 |
| 17:53:21 | 62.8197433 | 71.8243232 | 83.1349434 | 75.5666434 | 69.6321585 |
| 17:53:22 | 62.8197433 | 72.8243232 | 83.1349434 | 75.5666434 | 69.6321585 |
| 17:53:23 | 63.8197433 | 72.8243232 | 83.1349434 | 76.5666434 | 69.6321585 |
| 17:53:24 | 63.8197433 | 73.8243232 | 81.1349434 | 81.5666434 | 70.6321585 |
| 17:53:25 | 63.8197433 | 71.8243232 | 78.1349434 | 84.5666434 | 70.6321585 |
| 17:53:26 | 63.8197433 | 66.8243232 | 57.1349434 | 67.6653871 | 71.6321585 |
| 17:53:27 | 63.8197433 | 66.8243232 | 52.1349434 | 67.4835689 | 70.6321585 |
| 17:53:28 | 62.8197433 | 66.8243232 | 52.1349434 | 67.4835689 | 69.6321585 |
| 17:53:29 | 62.8197433 | 66.8243232 | 53.1349434 | 67.3926598 | 67.6321585 |
| 17:53:30 | 62.8197433 | 66.8243232 | 53.1349434 | 67.4835689 | 67.6321585 |
| 17:53:31 | 62.8197433 | 66.8243232 | 53.1349434 | 67.4835689 | 67.6321585 |
| 17:53:32 | 63.8197433 | 66.8243232 | 53.1349434 | 81.5666434 | 68.6321585 |
| 17:53:33 | 62.8197433 | 66.8243232 | 53.1349434 | 80.5666434 | 68.6321585 |
| 17:53:34 | 62.8197433 | 66.8243232 | 54.1349434 | 79.5666434 | 68.6321585 |
| 17:53:35 | 62.8197433 | 66.8243232 | 54.1349434 | 79.5666434 | 68.6321585 |
| 17:53:36 | 62.8197433 | 66.8243232 | 54.1349434 | 76.5666434 | 68.6321585 |
| 17:53:37 | 62.8197433 | 66.8243232 | 54.1349434 | 74.5666434 | 68.6321585 |
| 17:53:38 | 62.8197433 | 67.8243232 | 54.1349434 | 75.5666434 | 68.6321585 |
| 17:53:39 | 62.8197433 | 67.8243232 | 55.1349434 | 75.5666434 | 68.6321585 |
| 17:53:40 | 62.8197433 | 68.8243232 | 56.1349434 | 75.5666434 | 69.6321585 |
| 17:53:41 | 62.8197433 | 68.8243232 | 56.1349434 | 77.5666434 | 70.6321585 |
| 17:53:42 | 62.8197433 | 68.8243232 | 56.1349434 | 77.5666434 | 70.6321585 |
| 17:53:43 | 62.8197433 | 68.8243232 | 56.1349434 | 79.5666434 | 70.6321585 |
| 17:53:44 | 62.8197433 | 68.8243232 | 56.1349434 | 80.5666434 | 72.6321585 |
| 17:53:45 | 62.8197433 | 68.8243232 | 59.1349434 | 80.5666434 | 73.6321585 |
| 17:53:46 | 62.8197433 | 67.8243232 | 59.1349434 | 80.5666434 | 74.6321585 |
| 17:53:47 | 62.8197433 | 66.8243232 | 59.1349434 | 80.5666434 | 74.6321585 |
| 17:53:48 | 62.8197433 | 65.8243232 | 60.1349434 | 80.5666434 | 75.6321585 |
| 17:53:49 | 62.8197433 | 65.8243232 | 61.1349434 | 80.5666434 | 75.6321585 |
| 17:53:50 | 62.8197433 | 64.8243232 | 61.1349434 | 81.5666434 | 75.6321585 |
| 17:53:51 | 62.8197433 | 64.8243232 | 62.1349434 | 81.5666434 | 75.6321585 |
| 17:53:52 | 62.8197433 | 63.8243232 | 62.1349434 | 81.5666434 | 76.6321585 |
| 17:53:53 | 62.8197433 | 58.8243232 | 62.1349434 | 82.5666434 | 73.6321585 |
| 17:53:54 | 62.8197433 | 58.8243232 | 62.1349434 | 82.5666434 | 71.6321585 |
| 17:53:55 | 62.8197433 | 57.8243232 | 62.1349434 | 82.5666434 | 70.6321585 |
| 17:53:56 | 62.8197433 | 57.8243232 | 60.1349434 | 82.5666434 | 70.6321585 |
| 17:53:57 | 62.8197433 | 56.8243232 | 56.1349434 | 80.5666434 | 69.6321585 |
| 17:53:58 | 61.8197433 | 54.8243232 | 53.1349434 | 81.5666434 | 69.6321585 |
| 17:53:59 | 61.8197433 | 53.8243232 | 54.1349434 | 81.5666434 | 69.6321585 |
| 17:54:00 | 62.8197433 | 53.8243232 | 54.1349434 | 81.5666434 | 69.6321585 |
| 17:54:01 | 62.8197433 | 52.8243232 | 54.1349434 | 81.5666434 | 68.6321585 |
| 17:54:02 | 62.8197433 | 52.8243232 | 54.1349434 | 79.5666434 | 67.6321585 |

|          |            |            |            |            |            |
|----------|------------|------------|------------|------------|------------|
| 17:54:03 | 62.8197433 | 52.8243232 | 54.1349434 | 79.5666434 | 67.6321585 |
| 17:54:04 | 65.8197433 | 52.8243232 | 54.1349434 | 79.5666434 | 67.6321585 |
| 17:54:05 | 65.8197433 | 52.8243232 | 51.1349434 | 79.5666434 | 67.6321585 |
| 17:54:06 | 65.8197433 | 52.8243232 | 50.1349434 | 79.5666434 | 67.6321585 |
| 17:54:07 | 65.8197433 | 52.8243232 | 49.1349434 | 79.5666434 | 67.6321585 |
| 17:54:08 | 66.8197433 | 50.8243232 | 49.1349434 | 79.5666434 | 67.6321585 |
| 17:54:09 | 66.8197433 | 50.8243232 | 49.1349434 | 79.5666434 | 67.6321585 |
| 17:54:10 | 66.8197433 | 49.8243232 | 49.1349434 | 79.5666434 | 67.6321585 |
| 17:54:11 | 66.8197433 | 49.8243232 | 49.1349434 | 76.5666434 | 67.6321585 |
| 17:54:12 | 66.8197433 | 49.8243232 | 49.1349434 | 76.5666434 | 68.6321585 |
| 17:54:13 | 66.8197433 | 49.8243232 | 49.1349434 | 75.5666434 | 69.6321585 |
| 17:54:14 | 66.8197433 | 49.8243232 | 48.1349434 | 74.5666434 | 68.6321585 |
| 17:54:15 | 66.8197433 | 49.8243232 | 47.1349434 | 74.5666434 | 68.6321585 |
| 17:54:16 | 67.8197433 | 48.8243232 | 47.1349434 | 74.5666434 | 68.6321585 |
| 17:54:17 | 67.8197433 | 48.8243232 | 46.1349434 | 74.5666434 | 68.6321585 |
| 17:54:18 | 67.8197433 | 48.8243232 | 46.1349434 | 73.5666434 | 68.6321585 |
| 17:54:19 | 67.8197433 | 48.8243232 | 45.1349434 | 73.5666434 | 68.6321585 |
| 17:54:20 | 67.8197433 | 50.8243232 | 45.1349434 | 72.5666434 | 68.6321585 |
| 17:54:21 | 67.8197433 | 50.8243232 | 44.1349434 | 72.5666434 | 70.6321585 |
| 17:54:22 | 76.8197433 | 50.8243232 | 44.1349434 | 72.5666434 | 73.6321585 |
| 17:54:23 | 76.8197433 | 50.8243232 | 44.1349434 | 72.5666434 | 73.6321585 |
| 17:54:24 | 76.8197433 | 50.8243232 | 45.1349434 | 72.5666434 | 73.6321585 |
| 17:54:25 | 76.8197433 | 50.8243232 | 46.1349434 | 72.5666434 | 73.6321585 |
| 17:54:26 | 76.8197433 | 55.8243232 | 47.1349434 | 72.5666434 | 73.6321585 |
| 17:54:27 | 76.8197433 | 55.8243232 | 47.1349434 | 72.5666434 | 74.6321585 |
| 17:54:28 | 76.8197433 | 56.8243232 | 46.1349434 | 73.5666434 | 74.6321585 |
| 17:54:29 | 76.8197433 | 56.8243232 | 46.1349434 | 73.5666434 | 74.6321585 |
| 17:54:30 | 76.8197433 | 56.8243232 | 46.1349434 | 73.5666434 | 75.6321585 |
| 17:54:31 | 76.8197433 | 56.8243232 | 46.1349434 | 73.5666434 | 74.6321585 |
| 17:54:32 | 76.8197433 | 55.8243232 | 46.1349434 | 73.5666434 | 75.6321585 |
| 17:54:33 | 76.8197433 | 56.8243232 | 46.1349434 | 73.5666434 | 75.6321585 |
| 17:54:34 | 76.8197433 | 56.8243232 | 46.1349434 | 73.5666434 | 75.6321585 |
| 17:54:35 | 76.8197433 | 57.8243232 | 46.1349434 | 75.5666434 | 74.6321585 |
| 17:54:36 | 76.8197433 | 57.8243232 | 46.1349434 | 75.5666434 | 74.6321585 |
| 17:54:37 | 76.8197433 | 58.8243232 | 44.1349434 | 75.5666434 | 74.6321585 |
| 17:54:38 | 76.8197433 | 59.8243232 | 43.1349434 | 74.5666434 | 74.6321585 |
| 17:54:39 | 76.8197433 | 60.8243232 | 42.1349434 | 74.5666434 | 74.6321585 |
| 17:54:40 | 76.8197433 | 61.8243232 | 41.1349434 | 74.5666434 | 75.6321585 |
| 17:54:41 | 76.8197433 | 61.8243232 | 41.1349434 | 74.5666434 | 75.6321585 |
| 17:54:42 | 76.8197433 | 61.8243232 | 41.1349434 | 79.5666434 | 75.6321585 |
| 17:54:43 |            | 62.8243232 | 41.1349434 | 79.5666434 | 76.6321585 |
| 17:54:44 |            | 62.8243232 | 41.1349434 | 79.5666434 | 76.6321585 |
| 17:54:45 |            | 63.8243232 | 41.1349434 | 79.5666434 | 76.6321585 |
| 17:54:46 |            | 63.8243232 | 43.1349434 | 79.5666434 | 76.6321585 |
| 17:54:47 |            | 63.8243232 | 44.1349434 | 79.5666434 | 77.6321585 |

|          |            |            |            |            |
|----------|------------|------------|------------|------------|
| 17:54:48 | 64.8243232 | 46.1349434 | 79.5666434 | 77.6321585 |
| 17:54:49 | 64.8243232 | 47.1349434 | 79.5666434 | 76.6321585 |
| 17:54:50 | 69.8243232 | 47.1349434 | 79.5666434 | 76.6321585 |
| 17:54:51 | 69.8243232 | 48.1349434 | 79.5666434 | 74.6321585 |
| 17:54:52 | 69.8243232 | 49.1349434 | 79.5666434 | 74.6321585 |
| 17:54:53 | 69.8243232 | 51.1349434 | 79.5666434 | 74.6321585 |
| 17:54:54 | 69.8243232 | 52.1349434 | 79.5666434 | 74.6321585 |
| 17:54:55 | 71.8243232 | 52.1349434 | 79.5666434 | 74.6321585 |
| 17:54:56 | 71.8243232 | 52.1349434 | 79.5666434 | 73.6321585 |



| Person 3   | Person 9   | Person 2   | Person 12  | Person 4   | Person 13 |
|------------|------------|------------|------------|------------|-----------|
| 70.3348948 | 59.2822025 | 69.5851169 | 81.3936894 | 81.5328118 |           |
| 72.3348948 | 58.2822025 | 72.5851169 | 81.3936894 | 82.5328118 |           |
| 72.3348948 | 58.2822025 | 72.5851169 | 81.3936894 | 83.5328118 |           |
| 74.3348948 | 58.2822025 | 72.5851169 | 81.3936894 | 81.5328118 |           |
| 73.3348948 | 58.2822025 | 72.5851169 | 80.3936894 | 80.5328118 |           |
| 72.3348948 | 57.2822025 | 72.5851169 | 80.3936894 | 80.5328118 |           |
| 73.3348948 | 57.2822025 | 73.5851169 | 79.3936894 | 81.5328118 |           |
| 74.3348948 | 57.2822025 | 73.5851169 | 78.3936894 | 82.5328118 |           |
| 76.3348948 | 58.2822025 | 73.5851169 | 77.3936894 | 82.5328118 |           |
| 76.3348948 | 58.2822025 | 73.5851169 | 75.3936894 | 82.5328118 |           |
| 78.3348948 | 58.2822025 | 73.5851169 | 72.3936894 | 82.5328118 |           |
| 79.3348948 | 59.2822025 | 73.5851169 | 71.3936894 | 82.5328118 |           |
| 78.3348948 | 59.2822025 | 72.5851169 | 71.3936894 | 80.5328118 |           |
| 78.3348948 | 59.2822025 | 72.5851169 | 72.3936894 | 79.5328118 |           |
| 78.3348948 | 58.2822025 | 72.5851169 | 73.3936894 | 78.5328118 |           |
| 77.3348948 | 58.2822025 | 72.5851169 | 73.3936894 | 76.5328118 |           |
| 77.3348948 | 58.2822025 | 72.5851169 | 73.3936894 | 72.5328118 |           |
| 74.3348948 | 58.2822025 | 72.5851169 | 74.3936894 | 71.5328118 |           |
| 73.3348948 | 58.2822025 | 72.5851169 | 77.3936894 | 71.5328118 |           |
| 74.3348948 | 59.2822025 | 72.5851169 | 78.3936894 | 71.5328118 |           |
| 74.3348948 | 59.2822025 | 70.5851169 | 78.3936894 | 73.5328118 |           |
| 74.3348948 | 59.2822025 | 69.5851169 | 78.3936894 | 75.5328118 |           |
| 74.3348948 | 59.2822025 | 69.5851169 | 78.3936894 | 75.5328118 |           |
| 72.3348948 | 59.2822025 | 69.5851169 | 76.3936894 | 75.5328118 |           |
| 71.3348948 | 59.2822025 | 69.5851169 | 76.3936894 | 75.5328118 |           |
| 71.3348948 | 59.2822025 | 70.5851169 | 76.3936894 | 75.5328118 |           |
| 71.3348948 | 59.2822025 | 70.5851169 | 77.3936894 | 75.5328118 |           |
| 70.3348948 | 60.2822025 | 70.5851169 | 78.3936894 | 75.5328118 |           |
| 70.3348948 | 64.2822025 | 70.5851169 | 81.3936894 | 75.5328118 |           |
| 70.3348948 | 66.2822025 | 70.5851169 | 81.3936894 | 74.5328118 |           |
| 70.3348948 | 66.2822025 | 70.5851169 | 82.3936894 | 72.5328118 |           |
| 70.3348948 | 66.2822025 | 70.5851169 | 82.3936894 | 72.5328118 |           |
| 70.3348948 | 66.2822025 | 71.5851169 | 82.3936894 | 71.5328118 |           |
| 70.3348948 | 68.2822025 | 71.5851169 | 81.3936894 | 71.5328118 |           |
| 70.3348948 | 68.2822025 | 71.5851169 | 82.3936894 | 70.5328118 |           |
| 70.3348948 | 68.2822025 | 71.5851169 | 82.3936894 | 69.5328118 |           |
| 70.3348948 | 70.2822025 | 70.5851169 | 81.3936894 | 69.5328118 |           |
| 70.3348948 | 70.2822025 | 70.5851169 | 77.3936894 | 68.5328118 |           |
| 71.3348948 | 70.2822025 | 73.5851169 | 76.3936894 | 66.5328118 |           |
| 71.3348948 | 70.2822025 | 75.5851169 | 75.3936894 | 66.5328118 |           |
| 71.3348948 | 70.2822025 | 75.5851169 | 75.3936894 | 66.5328118 |           |
| 71.3348948 | 70.2822025 | 76.5851169 | 74.3936894 | 66.5328118 |           |
| 70.3348948 | 70.2822025 | 76.5851169 | 73.3936894 | 65.5328118 |           |

|            |            |            |            |            |
|------------|------------|------------|------------|------------|
| 68.3348948 | 71.2822025 | 80.5851169 | 73.3936894 | 65.5328118 |
| 67.3348948 | 71.2822025 | 80.5851169 | 73.3936894 | 65.5328118 |
| 68.3348948 | 71.2822025 | 80.5851169 | 70.3936894 | 65.5328118 |
| 68.3348948 | 71.2822025 | 79.5851169 | 68.3936894 | 65.5328118 |
| 68.3348948 | 70.2822025 | 76.5851169 | 67.3936894 | 65.5328118 |
| 69.3348948 | 70.2822025 | 76.5851169 | 67.3936894 | 65.5328118 |
| 69.3348948 | 70.2822025 | 75.5851169 | 68.3936894 | 67.5328118 |
| 69.3348948 | 69.2822025 | 75.5851169 | 68.3936894 | 67.5328118 |
| 68.3348948 | 69.2822025 | 73.5851169 | 68.3936894 | 67.5328118 |
| 68.3348948 | 68.2822025 | 73.5851169 | 66.3936894 | 69.5328118 |
| 67.3348948 | 67.2822025 | 71.5851169 | 65.3936894 | 70.5328118 |
| 67.3348948 | 66.2822025 | 71.5851169 | 64.3936894 | 71.5328118 |
| 67.3348948 | 66.2822025 | 71.5851169 | 64.3936894 | 71.5328118 |
| 67.3348948 | 64.2822025 | 71.5851169 | 64.3936894 | 71.5328118 |
| 67.3348948 | 64.2822025 | 70.5851169 | 64.3936894 | 71.5328118 |
| 67.3348948 | 64.2822025 | 70.5851169 | 66.3936894 | 71.5328118 |
| 66.3348948 | 64.2822025 | 71.5851169 | 70.3936894 | 70.5328118 |
| 66.3348948 | 64.2822025 | 71.5851169 | 73.3936894 | 70.5328118 |
| 66.3348948 | 64.2822025 | 71.5851169 | 75.3936894 | 70.5328118 |
| 66.3348948 | 64.2822025 | 71.5851169 | 75.3936894 | 69.5328118 |
| 66.3348948 | 64.2822025 | 71.5851169 | 75.3936894 | 69.5328118 |
| 69.3348948 | 64.2822025 | 71.5851169 | 76.3936894 | 70.5328118 |
| 69.3348948 | 64.2822025 | 71.5851169 | 77.3936894 | 70.5328118 |
| 69.3348948 | 64.2822025 | 73.5851169 | 78.3936894 | 70.5328118 |
| 68.3348948 | 64.2822025 | 73.5851169 | 79.3936894 | 71.5328118 |
| 69.3348948 | 64.2822025 | 73.5851169 | 79.3936894 | 71.5328118 |
| 70.3348948 | 65.2822025 | 72.5851169 | 79.3936894 | 71.5328118 |
| 71.3348948 | 65.2822025 | 72.5851169 | 81.3936894 | 71.5328118 |
| 71.3348948 | 65.2822025 | 72.5851169 | 80.3936894 | 71.5328118 |
| 71.3348948 | 66.2822025 | 72.5851169 | 80.3936894 | 71.5328118 |
| 71.3348948 | 66.2822025 | 72.5851169 | 80.3936894 | 70.5328118 |
| 70.3348948 | 66.2822025 | 71.5851169 | 80.3936894 | 69.5328118 |
| 70.3348948 | 66.2822025 | 70.5851169 | 79.3936894 | 69.5328118 |
| 70.3348948 | 66.2822025 | 70.5851169 | 79.3936894 | 69.5328118 |
| 70.3348948 | 66.2822025 | 69.5851169 | 79.3936894 | 68.5328118 |
| 70.3348948 | 66.2822025 | 70.5851169 | 79.3936894 | 68.5328118 |
| 70.3348948 | 66.2822025 | 70.5851169 | 75.3936894 | 69.5328118 |
| 70.3348948 | 66.2822025 | 70.5851169 | 75.3936894 | 69.5328118 |
| 70.3348948 | 66.2822025 | 70.5851169 | 74.3936894 | 69.5328118 |
| 70.3348948 | 67.2822025 | 70.5851169 | 73.3936894 | 70.5328118 |
| 71.3348948 | 67.2822025 | 70.5851169 | 73.3936894 | 78.5328118 |
| 70.3348948 | 68.2822025 | 70.5851169 | 73.3936894 | 78.5328118 |
| 71.3348948 | 68.2822025 | 70.5851169 | 72.3936894 | 81.5328118 |
| 71.3348948 | 68.2822025 | 70.5851169 | 72.3936894 | 82.5328118 |
| 72.3348948 | 69.2822025 | 71.5851169 | 71.3936894 | 82.5328118 |

|            |            |            |            |            |
|------------|------------|------------|------------|------------|
| 72.3348948 | 69.2822025 | 71.5851169 | 72.3936894 | 68.7106527 |
| 73.3348948 | 69.2822025 | 71.5851169 | 72.3936894 | 69.1106527 |
| 73.3348948 | 69.2822025 | 70.5851169 | 73.3936894 | 69.1106527 |
| 73.3348948 | 75.2822025 | 69.5851169 | 73.3936894 | 69.6106527 |
| 73.3348948 | 75.2822025 | 68.5851169 | 73.3936894 | 70.1106527 |
| 73.3348948 | 75.2822025 | 67.5851169 | 73.3936894 | 70.6106527 |
| 74.3348948 | 75.2822025 | 67.5851169 | 74.3936894 | 70.8106527 |
| 74.3348948 | 76.2822025 | 67.5851169 | 74.3936894 | 71.2106527 |
| 74.3348948 | 76.2822025 | 67.5851169 | 75.3936894 | 71.4106527 |
| 75.3348948 | 77.2822025 | 68.5851169 | 79.3936894 | 72.3106527 |
| 75.3348948 | 77.2822025 | 68.5851169 | 80.3936894 | 72.9106527 |
| 75.3348948 | 80.2822025 | 68.5851169 | 80.3936894 | 87.5328118 |
| 77.3348948 | 81.2822025 | 67.5851169 | 81.3936894 | 87.5328118 |
| 79.3348948 | 81.2822025 | 67.5851169 | 82.3936894 | 85.5328118 |
| 79.3348948 | 81.2822025 | 67.5851169 | 82.3936894 | 81.5328118 |
| 78.3348948 | 81.2822025 | 67.5851169 | 82.3936894 | 81.5328118 |
| 78.3348948 | 81.2822025 | 67.5851169 | 81.3936894 | 79.5328118 |
| 78.3348948 | 82.2822025 | 67.5851169 | 81.3936894 | 75.5328118 |
| 78.3348948 | 82.2822025 | 67.5851169 | 81.3936894 | 72.5328118 |
| 78.3348948 | 82.2822025 | 67.5851169 | 81.3936894 | 70.5328118 |
| 78.3348948 | 82.2822025 | 67.5851169 | 81.3936894 | 70.5328118 |
| 76.3348948 | 82.2822025 | 68.5851169 | 80.3936894 | 69.5328118 |
| 76.3348948 | 80.2822025 | 68.5851169 | 79.3936894 | 69.5328118 |
| 75.3348948 | 79.2822025 | 68.5851169 | 79.3936894 | 70.5328118 |
| 73.3348948 | 78.2822025 | 68.5851169 | 76.3936894 | 70.5328118 |
| 72.3348948 | 74.2822025 | 67.5851169 | 75.3936894 | 70.5328118 |
| 71.3348948 | 72.2822025 | 67.5851169 | 75.3936894 | 72.5328118 |
| 71.3348948 | 72.2822025 | 69.5851169 | 74.3936894 | 72.5328118 |
| 69.3348948 | 71.2822025 | 69.5851169 | 74.3936894 | 70.5328118 |
| 69.3348948 | 72.2822025 | 69.5851169 | 74.3936894 | 70.5328118 |
| 69.3348948 | 73.2822025 | 69.5851169 | 73.3936894 | 70.5328118 |
| 69.3348948 | 73.2822025 | 69.5851169 | 73.3936894 | 70.5328118 |
| 69.3348948 | 72.2822025 | 69.5851169 | 73.3936894 | 74.5328118 |
| 69.3348948 | 72.2822025 | 69.5851169 | 73.3936894 | 75.5328118 |
| 69.3348948 | 71.2822025 | 70.5851169 | 73.3936894 | 72.5328118 |
| 70.3348948 | 71.2822025 | 69.5851169 | 73.3936894 | 72.5328118 |
| 70.3348948 | 71.2822025 | 69.5851169 | 72.3936894 | 72.5328118 |
| 70.3348948 | 71.2822025 | 69.5851169 | 72.3936894 | 70.5328118 |
| 70.3348948 | 71.2822025 | 69.5851169 | 70.3936894 | 70.5328118 |
| 69.3348948 | 71.2822025 | 69.5851169 | 69.3936894 | 70.5328118 |
| 69.3348948 | 71.2822025 | 69.5851169 | 69.3936894 | 68.5328118 |
| 68.3348948 | 71.2822025 | 70.5851169 | 69.3936894 | 67.5328118 |
| 68.3348948 | 71.2822025 | 70.5851169 | 69.3936894 | 67.5328118 |
| 69.3348948 | 63.2822025 | 72.5851169 | 69.3936894 | 66.5328118 |
| 69.3348948 | 62.2822025 | 73.5851169 | 69.3936894 | 66.5328118 |

|            |            |            |            |            |
|------------|------------|------------|------------|------------|
| 69.3348948 | 62.2822025 | 73.5851169 | 69.3936894 | 65.5328118 |
| 69.3348948 | 62.2822025 | 75.5851169 | 73.3936894 | 65.5328118 |
| 69.3348948 | 62.2822025 | 75.5851169 | 76.3936894 | 65.5328118 |
| 68.3348948 | 62.2822025 | 75.5851169 | 76.3936894 | 65.5328118 |
| 68.3348948 | 62.2822025 | 75.5851169 | 76.3936894 | 65.5328118 |
| 68.3348948 | 62.2822025 | 74.5851169 | 76.3936894 | 65.5328118 |
| 68.3348948 | 62.2822025 | 74.5851169 | 76.3936894 | 65.5328118 |
| 68.3348948 | 61.2822025 | 73.5851169 | 76.3936894 | 65.5328118 |
| 68.3348948 | 61.2822025 | 74.5851169 | 76.3936894 | 65.5328118 |
| 68.3348948 | 61.2822025 | 74.5851169 | 76.3936894 | 65.5328118 |
| 70.3348948 | 61.2822025 | 74.5851169 | 76.3936894 | 69.5328118 |
| 70.3348948 | 61.2822025 | 74.5851169 | 76.3936894 | 69.5328118 |
| 72.3348948 | 61.2822025 | 74.5851169 | 76.3936894 | 70.5328118 |
| 72.3348948 | 62.2822025 | 74.5851169 | 76.3936894 | 71.5328118 |
| 72.3348948 | 62.2822025 | 75.5851169 | 74.3936894 | 71.5328118 |
| 72.3348948 | 63.2822025 | 75.5851169 | 74.3936894 | 70.5328118 |
| 72.3348948 | 64.2822025 | 75.5851169 | 74.3936894 | 70.5328118 |
| 71.3348948 | 65.2822025 | 75.5851169 | 75.3936894 | 69.5328118 |
| 70.3348948 | 67.2822025 | 75.5851169 | 75.3936894 | 69.5328118 |
| 70.3348948 | 67.2822025 | 75.5851169 | 76.3936894 | 69.5328118 |
| 70.3348948 | 68.2822025 | 71.5851169 | 76.3936894 | 69.5328118 |
| 70.3348948 | 69.2822025 | 71.5851169 | 76.3936894 | 71.5328118 |
| 74.3348948 | 69.2822025 | 71.5851169 | 76.3936894 | 70.5328118 |
| 74.3348948 | 69.2822025 | 71.5851169 | 76.3936894 | 70.5328118 |
| 73.3348948 | 69.2822025 | 71.5851169 | 76.3936894 | 70.5328118 |
| 73.3348948 | 69.2822025 | 71.5851169 | 76.3936894 | 71.5328118 |
| 73.3348948 | 70.2822025 | 71.5851169 | 76.3936894 | 71.5328118 |
| 73.3348948 | 72.2822025 | 71.5851169 | 76.3936894 | 71.5328118 |
| 71.3348948 | 72.2822025 | 70.5851169 | 76.3936894 | 71.5328118 |
| 71.3348948 | 72.2822025 | 70.5851169 | 76.3936894 | 71.5328118 |
| 71.3348948 | 71.2822025 | 70.5851169 | 75.3936894 | 71.5328118 |
| 70.3348948 | 70.2822025 | 70.5851169 | 74.3936894 | 71.5328118 |
| 70.3348948 | 70.2822025 | 70.5851169 | 74.3936894 | 71.5328118 |
| 70.3348948 | 70.2822025 | 70.5851169 | 72.3936894 | 75.5328118 |
| 70.3348948 | 70.2822025 | 70.5851169 | 72.3936894 | 75.5328118 |
| 70.3348948 | 70.2822025 | 69.5851169 | 71.3936894 | 78.5328118 |
| 70.3348948 | 71.2822025 | 65.5851169 | 71.3936894 | 78.5328118 |
| 69.3348948 | 69.2822025 | 65.5851169 | 71.3936894 | 79.5328118 |
| 69.3348948 | 68.2822025 | 64.5851169 | 71.3936894 | 75.5328118 |
| 69.3348948 | 67.2822025 | 64.5851169 | 71.3936894 | 75.5328118 |
| 69.3348948 | 67.2822025 | 65.5851169 | 72.3936894 | 75.5328118 |
| 69.3348948 | 66.2822025 | 65.5851169 | 75.3936894 | 76.5328118 |
| 69.3348948 | 66.2822025 | 66.5851169 | 75.3936894 | 78.5328118 |

|            |            |            |            |            |            |
|------------|------------|------------|------------|------------|------------|
| 69.3348948 | 64.2822025 | 66.5851169 | 74.3936894 | 79.5328118 |            |
| 69.3348948 | 63.2822025 | 66.5851169 | 73.3936894 | 79.5328118 |            |
| 69.3348948 | 63.2822025 | 66.5851169 | 73.3936894 | 81.5328118 |            |
| 69.3348948 | 63.2822025 | 67.5851169 | 73.3936894 | 82.5328118 |            |
| 70.3348948 | 63.2822025 | 70.5851169 | 71.3936894 | 82.5328118 |            |
| 71.3348948 | 63.2822025 | 71.5851169 | 67.3936894 | 81.5328118 |            |
| 71.3348948 | 63.2822025 | 71.5851169 | 67.3936894 | 81.5328118 |            |
| 71.3348948 | 63.2822025 | 73.5851169 | 65.3936894 | 78.5328118 |            |
| 71.3348948 | 63.2822025 | 75.5851169 | 65.3936894 | 78.5328118 |            |
| 71.3348948 | 64.2822025 | 75.5851169 | 67.3936894 | 78.5328118 |            |
| 71.3348948 | 64.2822025 | 75.5851169 | 68.3936894 | 78.5328118 |            |
| 71.3348948 | 66.2822025 | 75.5851169 | 69.3936894 | 77.5328118 |            |
| 70.3348948 | 66.2822025 | 75.5851169 | 70.3936894 | 76.5328118 |            |
| 69.3348948 | 65.2822025 | 75.5851169 | 71.3936894 | 72.5328118 |            |
| 68.3348948 | 65.2822025 | 75.5851169 | 71.3936894 | 72.5328118 |            |
| 67.3348948 | 65.2822025 | 75.5851169 | 71.3936894 | 72.5328118 |            |
| 66.3348948 | 66.2822025 | 76.5851169 | 71.3936894 | 73.5328118 |            |
| 66.3348948 | 66.2822025 | 75.5851169 | 71.3936894 | 73.5328118 |            |
| 66.3348948 | 66.2822025 | 75.5851169 | 73.3936894 | 70.5328118 |            |
| 66.3348948 | 66.2822025 | 74.5851169 | 73.3936894 | 69.5328118 |            |
| 68.3348948 | 66.2822025 | 72.5851169 | 73.3936894 | 69.5328118 |            |
| 69.3348948 | 66.2822025 | 71.5851169 | 73.3936894 | 69.5328118 |            |
| 69.3348948 | 68.2822025 | 71.5851169 | 73.3936894 | 69.5328118 |            |
| 69.3348948 | 68.2822025 | 71.5851169 | 73.3936894 | 69.5328118 |            |
| 69.3348948 | 68.2822025 | 73.5851169 | 73.3936894 | 70.5328118 |            |
| 69.3348948 | 73.2822025 | 73.5851169 | 73.3936894 | 71.5328118 |            |
| 71.3348948 | 73.2822025 | 73.5851169 | 73.3936894 | 71.5328118 |            |
| 73.3348948 | 76.2822025 | 71.5851169 | 72.3936894 | 71.5328118 | 75.2127309 |
| 75.3348948 | 76.2822025 | 70.5851169 | 74.3936894 | 70.5328118 | 75.2127309 |
| 75.3348948 | 77.2822025 | 69.5851169 | 74.3936894 | 69.5328118 | 74.2127309 |
| 75.3348948 | 77.2822025 | 69.5851169 | 75.3936894 | 69.5328118 | 70.2127309 |
| 76.3348948 | 76.2822025 | 68.5851169 | 75.3936894 | 69.5328118 | 70.2127309 |
| 77.3348948 | 76.2822025 | 68.5851169 | 75.3936894 | 70.5328118 | 66.2127309 |
| 77.3348948 | 73.2822025 | 68.5851169 | 75.3936894 | 72.5328118 | 64.2127309 |
| 77.3348948 | 70.2822025 | 68.5851169 | 75.3936894 | 72.5328118 | 64.2127309 |
| 78.3348948 | 69.2822025 | 68.5851169 | 75.3936894 | 72.5328118 | 64.2127309 |
| 78.3348948 | 69.2822025 | 68.5851169 | 75.3936894 | 72.5328118 | 65.2127309 |
| 78.3348948 | 69.2822025 | 68.5851169 | 75.3936894 | 72.5328118 | 64.2127309 |
| 74.3348948 | 69.2822025 | 68.5851169 | 75.3936894 | 71.5328118 | 64.2127309 |
| 73.3348948 | 69.2822025 | 68.5851169 | 75.3936894 | 71.5328118 | 64.2127309 |
| 73.3348948 | 69.2822025 | 68.5851169 | 76.3936894 | 70.5328118 | 64.2127309 |
| 72.3348948 | 69.2822025 | 68.5851169 | 78.3936894 | 70.5328118 | 63.2127309 |
| 72.3348948 | 69.2822025 | 68.5851169 | 79.3936894 | 70.5328118 | 63.2127309 |
| 72.3348948 | 71.2822025 | 68.5851169 | 79.3936894 | 69.5328118 | 63.2127309 |
| 72.3348948 | 72.2822025 | 68.5851169 | 77.3936894 | 69.5328118 | 63.2127309 |

|            |            |            |            |            |            |
|------------|------------|------------|------------|------------|------------|
| 72.3348948 | 72.2822025 | 67.5851169 | 76.3936894 | 69.5328118 | 65.2127309 |
| 72.3348948 | 73.2822025 | 68.5851169 | 76.3936894 | 68.5328118 | 65.2127309 |
| 72.3348948 | 74.2822025 | 68.5851169 | 77.3936894 | 68.5328118 | 65.2127309 |
| 72.3348948 | 74.2822025 | 69.5851169 | 77.3936894 | 68.5328118 | 64.2127309 |
| 72.3348948 | 74.2822025 | 69.5851169 | 77.3936894 | 69.5328118 | 64.2127309 |
| 70.3348948 | 74.2822025 | 69.5851169 | 77.3936894 | 69.5328118 | 64.2127309 |
| 70.3348948 | 73.2822025 | 69.5851169 | 75.3936894 | 69.5328118 | 64.2127309 |
| 70.3348948 | 73.2822025 | 71.5851169 | 75.3936894 | 69.5328118 | 64.2127309 |
| 70.3348948 | 73.2822025 | 71.5851169 | 75.3936894 | 69.5328118 | 64.2127309 |
| 70.3348948 | 71.2822025 | 69.5851169 | 75.3936894 | 69.5328118 | 64.2127309 |
| 70.3348948 | 71.2822025 | 69.5851169 | 75.3936894 | 69.5328118 | 65.2127309 |
| 70.3348948 | 71.2822025 | 68.5851169 | 76.3936894 | 70.5328118 | 62.2127309 |
| 70.3348948 | 70.2822025 | 68.5851169 | 77.3936894 | 70.5328118 | 62.2127309 |
| 70.3348948 | 69.2822025 | 68.5851169 | 77.3936894 | 70.5328118 | 61.2127309 |
| 70.3348948 | 69.2822025 | 68.5851169 | 77.3936894 | 70.5328118 | 61.2127309 |
| 70.3348948 | 69.2822025 | 68.5851169 | 77.3936894 | 70.5328118 | 61.2127309 |
| 69.3348948 | 65.2822025 | 69.5851169 | 76.3936894 | 68.5328118 | 64.2127309 |
| 69.3348948 | 65.2822025 | 69.5851169 | 77.3936894 | 67.5328118 | 65.2127309 |
| 69.3348948 | 60.2822025 | 70.5851169 | 77.3936894 | 67.5328118 | 66.2127309 |
| 66.3348948 | 57.2822025 | 70.5851169 | 77.3936894 | 66.5328118 | 66.2127309 |
| 66.3348948 | 57.2822025 | 70.5851169 | 77.3936894 | 65.5328118 | 66.2127309 |
| 65.3348948 | 57.2822025 | 70.5851169 | 77.3936894 | 65.5328118 | 63.2127309 |
| 65.3348948 | 57.2822025 | 70.5851169 | 77.3936894 | 65.5328118 | 63.2127309 |
| 67.3348948 | 55.2822025 | 71.5851169 | 77.3936894 | 66.5328118 | 63.2127309 |
| 67.3348948 | 55.2822025 | 71.5851169 | 78.3936894 | 66.5328118 | 62.2127309 |
| 68.3348948 | 55.2822025 | 71.5851169 | 78.3936894 | 67.5328118 | 63.2127309 |
| 69.3348948 | 56.2822025 | 71.5851169 | 78.3936894 | 68.5328118 | 63.2127309 |
| 69.3348948 | 56.2822025 | 73.5851169 | 78.3936894 | 68.5328118 | 63.2127309 |
| 69.3348948 | 56.2822025 | 73.5851169 | 77.3936894 | 68.5328118 | 64.2127309 |
| 69.3348948 | 56.2822025 | 73.5851169 | 77.3936894 | 68.5328118 | 63.2127309 |
| 69.3348948 | 56.2822025 | 73.5851169 | 76.3936894 | 68.5328118 | 63.2127309 |
| 70.3348948 | 58.2822025 | 68.5851169 | 75.3936894 | 67.5328118 | 63.2127309 |
| 71.3348948 | 58.2822025 | 66.5851169 | 74.3936894 | 67.5328118 | 63.2127309 |
| 71.3348948 | 61.2822025 | 66.5851169 | 74.3936894 | 68.5328118 | 64.2127309 |
| 71.3348948 | 62.2822025 | 66.5851169 | 73.3936894 | 68.5328118 | 64.2127309 |
| 71.3348948 | 62.2822025 | 66.5851169 | 71.3936894 | 68.5328118 | 70.2127309 |
| 70.3348948 | 63.2822025 | 65.5851169 | 73.3936894 | 69.5328118 | 71.2127309 |
| 70.3348948 | 63.2822025 | 64.5851169 | 73.3936894 | 69.5328118 | 71.2127309 |
| 70.3348948 | 62.2822025 | 64.5851169 | 74.3936894 | 69.5328118 | 71.2127309 |
| 75.3348948 | 62.2822025 | 62.5851169 | 73.3936894 | 69.5328118 | 72.2127309 |
| 77.3348948 | 62.2822025 | 62.5851169 | 70.3936894 | 69.5328118 | 72.2127309 |
| 77.3348948 | 62.2822025 | 68.5851169 | 66.3936894 | 69.5328118 | 73.2127309 |
| 77.3348948 | 62.2822025 | 68.5851169 | 66.3936894 | 69.5328118 | 73.2127309 |
| 77.3348948 | 63.2822025 | 77.5851169 | 66.3936894 | 69.5328118 | 73.2127309 |
| 77.3348948 | 64.2822025 | 78.5851169 | 66.3936894 | 69.5328118 | 73.2127309 |

|            |            |            |            |            |            |
|------------|------------|------------|------------|------------|------------|
| 75.3348948 | 65.2822025 | 77.5851169 | 66.3936894 | 69.5328118 | 73.2127309 |
| 75.3348948 | 64.2822025 | 77.5851169 | 66.3936894 | 69.5328118 | 73.2127309 |
| 72.3348948 | 64.2822025 | 77.5851169 | 66.3936894 | 68.5328118 | 73.2127309 |
| 72.3348948 | 64.2822025 | 77.5851169 | 66.3936894 | 68.5328118 | 73.2127309 |
| 71.3348948 | 64.2822025 | 77.5851169 | 65.3936894 | 68.5328118 | 73.2127309 |
| 71.3348948 | 64.2822025 | 75.5851169 | 66.3936894 | 69.5328118 | 72.2127309 |
| 68.3348948 | 63.2822025 | 74.5851169 | 73.3936894 | 70.5328118 | 72.2127309 |
| 68.3348948 | 63.2822025 | 73.5851169 | 73.3936894 | 70.5328118 | 72.2127309 |
| 69.3348948 | 63.2822025 | 72.5851169 | 76.3936894 | 72.5328118 | 71.2127309 |
| 69.3348948 | 62.2822025 | 72.5851169 | 76.3936894 | 70.5328118 | 71.2127309 |
| 69.3348948 | 62.2822025 | 72.5851169 | 79.3936894 | 70.5328118 | 72.2127309 |
| 69.3348948 | 62.2822025 | 68.5851169 | 79.3936894 | 70.5328118 | 72.2127309 |
| 68.3348948 | 62.2822025 | 68.5851169 | 79.3936894 | 70.5328118 | 73.2127309 |
| 66.3348948 | 65.2822025 | 68.5851169 | 78.3936894 | 69.5328118 | 73.2127309 |
| 65.3348948 | 65.2822025 | 66.5851169 | 76.3936894 | 69.5328118 | 73.2127309 |
| 64.3348948 | 64.2822025 | 66.5851169 | 76.3936894 | 69.5328118 | 73.2127309 |
| 65.3348948 | 64.2822025 | 65.5851169 | 71.3936894 | 69.5328118 | 72.2127309 |
| 65.3348948 | 65.2822025 | 65.5851169 | 70.3936894 | 69.5328118 | 70.2127309 |
| 65.3348948 | 65.2822025 | 69.5851169 | 71.3936894 | 70.5328118 | 70.2127309 |
| 66.3348948 | 65.2822025 | 70.5851169 | 72.3936894 | 70.5328118 | 70.2127309 |
| 66.3348948 | 65.2822025 | 70.5851169 | 75.3936894 | 70.5328118 | 71.2127309 |
| 66.3348948 | 63.2822025 | 70.5851169 | 75.3936894 | 71.5328118 | 72.2127309 |
| 66.3348948 | 63.2822025 | 70.5851169 | 77.3936894 | 73.5328118 | 72.2127309 |
| 65.3348948 | 61.2822025 | 70.5851169 | 80.3936894 | 74.5328118 | 73.2127309 |
| 65.3348948 | 61.2822025 | 70.5851169 | 80.3936894 | 74.5328118 | 73.2127309 |
| 66.3348948 | 60.2822025 | 70.5851169 | 81.3936894 | 74.5328118 | 74.2127309 |
| 66.3348948 | 59.2822025 | 70.5851169 | 81.3936894 | 76.5328118 | 75.2127309 |
| 68.3348948 | 58.2822025 | 70.5851169 | 81.3936894 | 77.5328118 | 75.2127309 |
| 68.3348948 | 58.2822025 | 71.5851169 | 81.3936894 | 77.5328118 | 75.2127309 |
| 68.3348948 | 58.2822025 | 71.5851169 | 82.3936894 | 77.5328118 | 71.2127309 |
| 71.3348948 | 58.2822025 | 71.5851169 | 82.3936894 | 77.5328118 | 70.2127309 |
| 72.3348948 | 59.2822025 | 70.5851169 | 83.3936894 | 77.5328118 | 70.2127309 |
| 73.3348948 | 59.2822025 | 68.5851169 | 83.3936894 | 77.5328118 | 69.2127309 |
| 73.3348948 | 57.2822025 | 67.5851169 | 81.3936894 | 77.5328118 | 69.2127309 |
| 73.3348948 | 57.2822025 | 66.5851169 | 79.3936894 | 77.5328118 | 68.2127309 |
| 73.3348948 | 57.2822025 | 65.5851169 | 79.3936894 | 77.5328118 | 67.2127309 |
| 74.3348948 | 56.2822025 | 65.5851169 | 79.3936894 | 77.5328118 | 62.2127309 |
| 74.3348948 | 55.2822025 | 65.5851169 | 80.3936894 | 76.5328118 | 62.2127309 |
| 74.3348948 | 55.2822025 | 67.5851169 | 79.3936894 | 76.5328118 | 62.2127309 |
| 74.3348948 | 55.2822025 | 67.5851169 | 77.3936894 | 75.5328118 | 63.2127309 |
| 74.3348948 | 55.2822025 | 66.5851169 | 77.3936894 | 75.5328118 | 63.2127309 |
| 74.3348948 | 55.2822025 | 66.5851169 | 77.3936894 | 75.5328118 | 61.2127309 |
| 74.3348948 | 57.2822025 | 67.5851169 | 77.3936894 | 74.5328118 | 61.2127309 |
| 74.3348948 | 58.2822025 | 67.5851169 | 77.3936894 | 72.5328118 | 60.2127309 |
| 77.3348948 | 58.2822025 | 68.5851169 | 77.3936894 | 72.5328118 | 59.2127309 |

|            |            |            |            |            |            |
|------------|------------|------------|------------|------------|------------|
| 78.3348948 | 57.2822025 | 68.5851169 | 77.3936894 | 72.5328118 | 59.2127309 |
| 79.3348948 | 53.2822025 | 68.5851169 | 77.3936894 | 72.5328118 | 60.2127309 |
| 80.3348948 | 52.2822025 | 68.5851169 | 77.3936894 | 72.5328118 | 63.2127309 |
| 81.3348948 | 52.2822025 | 69.5851169 | 76.3936894 | 71.5328118 | 65.2127309 |
| 82.3348948 | 52.2822025 | 70.5851169 | 77.3936894 | 71.5328118 | 65.2127309 |
| 81.3348948 | 51.2822025 | 71.5851169 | 78.3936894 | 71.5328118 | 65.2127309 |
| 77.3348948 | 54.2822025 | 71.5851169 | 78.3936894 | 71.5328118 | 62.2127309 |
| 76.3348948 | 56.2822025 | 71.5851169 | 76.3936894 | 70.5328118 | 61.2127309 |
| 74.3348948 | 56.2822025 | 69.5851169 | 75.3936894 | 70.5328118 | 61.2127309 |
| 72.3348948 | 56.2822025 | 69.5851169 | 75.3936894 | 70.5328118 | 62.2127309 |
| 72.3348948 | 56.2822025 | 68.5851169 | 74.3936894 | 69.5328118 | 62.2127309 |
| 72.3348948 | 56.2822025 | 67.5851169 | 74.3936894 | 70.5328118 | 62.2127309 |
| 72.3348948 | 56.2822025 | 67.5851169 | 70.3936894 | 70.5328118 | 67.2127309 |
| 74.3348948 | 55.2822025 | 67.5851169 | 70.3936894 | 70.5328118 | 68.2127309 |
| 76.3348948 | 55.2822025 | 67.5851169 | 70.3936894 | 69.5328118 | 75.2127309 |
| 77.3348948 | 55.2822025 | 67.5851169 | 70.3936894 | 69.5328118 | 75.2127309 |
| 77.3348948 | 54.2822025 | 68.5851169 | 70.3936894 | 69.5328118 | 76.2127309 |
| 76.3348948 | 54.2822025 | 68.5851169 | 69.3936894 | 69.5328118 | 77.2127309 |
| 75.3348948 | 54.2822025 | 68.5851169 | 69.3936894 | 69.5328118 | 77.2127309 |
| 75.3348948 | 54.2822025 | 68.5851169 | 68.3936894 | 68.5328118 | 76.2127309 |
| 75.3348948 | 56.2822025 | 69.5851169 | 70.3936894 | 68.5328118 | 76.2127309 |
| 75.3348948 | 56.2822025 | 69.5851169 | 73.3936894 | 68.5328118 | 76.2127309 |
| 75.3348948 | 58.2822025 | 69.5851169 | 74.3936894 | 69.5328118 | 70.2127309 |
| 75.3348948 | 58.2822025 | 70.5851169 | 75.3936894 | 69.5328118 | 67.2127309 |
| 75.3348948 | 58.2822025 | 70.5851169 | 75.3936894 | 69.5328118 | 66.2127309 |
| 74.3348948 | 58.2822025 | 71.5851169 | 76.3936894 | 70.5328118 | 64.2127309 |
| 74.3348948 | 59.2822025 | 71.5851169 | 77.3936894 | 70.5328118 | 63.2127309 |
| 72.3348948 | 59.2822025 | 71.5851169 | 77.3936894 | 70.5328118 | 63.2127309 |
| 71.3348948 | 60.2822025 | 71.5851169 | 78.3936894 | 70.5328118 | 63.2127309 |
| 71.3348948 | 63.2822025 | 71.5851169 | 80.3936894 | 70.5328118 | 62.2127309 |
| 72.3348948 | 64.2822025 | 71.5851169 | 83.3936894 | 69.5328118 | 62.2127309 |
| 73.3348948 | 65.2822025 | 72.5851169 | 83.3936894 | 69.5328118 | 62.2127309 |
| 73.3348948 | 65.2822025 | 72.5851169 | 83.3936894 | 69.5328118 | 62.2127309 |
| 75.3348948 | 66.2822025 | 73.5851169 | 83.3936894 | 69.5328118 | 66.2127309 |
| 74.3348948 | 66.2822025 | 74.5851169 | 82.3936894 | 69.5328118 | 66.2127309 |
| 74.3348948 | 67.2822025 | 74.5851169 | 81.3936894 | 69.5328118 | 66.2127309 |
| 73.3348948 | 67.2822025 | 74.5851169 | 81.3936894 | 69.5328118 | 62.2127309 |
| 72.3348948 | 68.2822025 | 76.5851169 | 80.3936894 | 70.5328118 | 60.2127309 |
| 72.3348948 | 68.2822025 | 76.5851169 | 77.3936894 | 69.5328118 | 59.2127309 |
| 72.3348948 | 68.2822025 | 76.5851169 | 75.3936894 | 69.5328118 | 59.2127309 |
| 71.3348948 | 66.2822025 | 77.5851169 | 74.3936894 | 69.5328118 | 59.2127309 |
| 71.3348948 | 66.2822025 | 78.5851169 | 74.3936894 | 69.5328118 | 59.2127309 |
| 73.3348948 | 66.2822025 | 76.5851169 | 73.3936894 | 69.5328118 | 66.2127309 |
| 74.3348948 | 67.2822025 | 76.5851169 | 72.3936894 | 67.5328118 | 67.2127309 |



|            |            |            |            |            |            |
|------------|------------|------------|------------|------------|------------|
| 75.3348948 | 67.2822025 | 76.5851169 | 72.3936894 | 67.5328118 | 67.2127309 |
| 76.3348948 | 67.2822025 | 74.5851169 | 71.3936894 | 67.5328118 | 67.2127309 |
| 77.3348948 | 68.2822025 | 73.5851169 | 71.3936894 | 66.5328118 | 65.2127309 |
| 77.3348948 | 68.2822025 | 73.5851169 | 72.3936894 | 66.5328118 | 65.2127309 |
| 77.3348948 | 68.2822025 | 73.5851169 | 75.3936894 | 66.5328118 | 66.2127309 |
| 76.3348948 | 68.2822025 | 72.5851169 | 76.3936894 | 66.5328118 | 68.2127309 |
| 74.3348948 | 68.2822025 | 72.5851169 | 76.3936894 | 65.5328118 | 69.2127309 |
| 73.3348948 | 68.2822025 | 71.5851169 | 74.3936894 | 65.5328118 | 69.2127309 |
| 73.3348948 | 69.2822025 | 71.5851169 | 74.3936894 | 67.5328118 | 70.2127309 |
| 72.3348948 | 70.2822025 | 71.5851169 | 74.3936894 | 69.5328118 | 70.2127309 |
| 73.3348948 | 70.2822025 | 71.5851169 | 75.3936894 | 70.5328118 | 69.2127309 |
| 73.3348948 | 70.2822025 | 71.5851169 | 75.3936894 | 70.5328118 | 68.2127309 |
| 72.3348948 | 71.2822025 | 72.5851169 | 75.3936894 | 70.5328118 | 68.2127309 |
| 72.3348948 | 71.2822025 | 72.5851169 | 75.3936894 | 71.5328118 | 67.2127309 |
| 72.3348948 | 72.2822025 | 72.5851169 | 75.3936894 | 71.5328118 | 68.2127309 |
| 73.3348948 | 73.2822025 | 72.5851169 | 74.3936894 | 71.5328118 | 68.2127309 |
| 74.3348948 | 73.2822025 | 73.5851169 | 74.3936894 | 71.5328118 | 69.2127309 |
| 74.3348948 | 74.2822025 | 73.5851169 | 74.3936894 | 71.5328118 | 69.2127309 |
| 74.3348948 | 78.2822025 | 73.5851169 | 71.3936894 | 70.5328118 | 69.2127309 |
| 73.3348948 | 78.2822025 | 73.5851169 | 69.3936894 | 70.5328118 | 70.2127309 |
| 73.3348948 | 78.2822025 | 74.5851169 | 67.3936894 | 70.5328118 | 69.2127309 |
| 73.3348948 | 79.2822025 | 73.5851169 | 63.3936894 | 70.5328118 | 69.2127309 |
| 73.3348948 | 79.2822025 | 72.5851169 | 62.3936894 | 70.5328118 | 69.2127309 |
| 72.3348948 | 79.2822025 | 72.5851169 | 61.3936894 | 71.5328118 | 69.2127309 |
| 72.3348948 | 79.2822025 | 71.5851169 | 59.3936894 | 71.5328118 | 69.2127309 |
| 72.3348948 | 79.2822025 | 71.5851169 | 55.3936894 | 71.5328118 | 69.2127309 |
| 71.3348948 | 80.2822025 | 70.5851169 | 54.3936894 | 71.5328118 | 68.2127309 |
| 71.3348948 | 79.2822025 | 69.5851169 | 54.3936894 | 71.5328118 | 68.2127309 |
| 71.3348948 | 79.2822025 | 69.5851169 | 54.3936894 | 71.5328118 | 66.2127309 |
| 71.3348948 | 77.2822025 | 70.5851169 | 53.3936894 | 72.5328118 | 65.2127309 |
| 71.3348948 | 77.2822025 | 70.5851169 | 53.3936894 | 72.5328118 | 65.2127309 |
| 71.3348948 | 77.2822025 | 70.5851169 | 53.3936894 | 72.5328118 | 65.2127309 |
| 71.3348948 | 77.2822025 | 70.5851169 | 53.3936894 | 74.5328118 | 64.2127309 |
| 71.3348948 | 77.2822025 | 71.5851169 | 53.3936894 | 75.5328118 | 64.2127309 |
| 71.3348948 | 77.2822025 | 71.5851169 | 53.3936894 | 76.5328118 | 64.2127309 |
| 71.3348948 | 77.2822025 | 69.5851169 | 53.3936894 | 76.5328118 | 64.2127309 |
| 71.3348948 | 77.2822025 | 67.5851169 | 52.3936894 | 76.5328118 | 64.2127309 |
| 71.3348948 | 77.2822025 | 66.5851169 | 59.3936894 | 77.5328118 | 75.2127309 |
| 71.3348948 | 77.2822025 | 66.5851169 | 71.3936894 | 79.5328118 | 76.2127309 |
| 71.3348948 | 77.2822025 | 66.5851169 | 74.3936894 | 81.5328118 | 77.2127309 |
| 72.3348948 | 77.2822025 | 66.5851169 | 75.3936894 | 81.5328118 | 77.2127309 |
| 73.3348948 | 77.2822025 | 66.5851169 | 71.3936894 | 80.5328118 | 76.2127309 |
| 73.3348948 | 77.2822025 | 66.5851169 | 71.3936894 | 80.5328118 | 76.2127309 |
| 73.3348948 | 77.2822025 | 67.5851169 | 69.3936894 | 80.5328118 | 76.2127309 |
| 73.3348948 | 78.2822025 | 68.5851169 | 70.3936894 | 81.5328118 | 76.2127309 |

|            |            |            |            |            |            |
|------------|------------|------------|------------|------------|------------|
| 73.3348948 | 78.2822025 | 68.5851169 | 71.3936894 | 81.5328118 | 76.2127309 |
| 73.3348948 | 80.2822025 | 72.5851169 | 71.3936894 | 81.5328118 | 76.2127309 |
| 76.3348948 | 80.2822025 | 72.5851169 | 71.3936894 | 81.5328118 | 76.2127309 |
| 79.3348948 | 80.2822025 | 72.5851169 | 73.3936894 | 76.5328118 | 75.2127309 |
| 79.3348948 | 80.2822025 | 75.5851169 | 73.3936894 | 75.5328118 | 75.2127309 |
| 79.3348948 | 79.2822025 | 75.5851169 | 74.3936894 | 74.5328118 | 74.2127309 |
| 79.3348948 | 74.2822025 | 76.5851169 | 74.3936894 | 74.5328118 | 73.2127309 |
| 78.3348948 | 74.2822025 | 77.5851169 | 74.3936894 | 75.5328118 | 72.2127309 |
| 78.3348948 | 71.2822025 | 77.5851169 | 75.3936894 | 76.5328118 | 72.2127309 |
| 78.3348948 | 70.2822025 | 77.5851169 | 77.3936894 | 76.5328118 | 72.2127309 |
| 77.3348948 | 69.2822025 | 78.5851169 | 78.3936894 | 76.5328118 | 72.2127309 |
| 77.3348948 | 69.2822025 | 78.5851169 | 78.3936894 | 77.5328118 | 72.2127309 |
| 74.3348948 | 69.2822025 | 78.5851169 | 77.3936894 | 77.5328118 | 71.2127309 |
| 73.3348948 | 69.2822025 | 79.5851169 | 77.3936894 | 79.5328118 | 70.2127309 |
| 72.3348948 | 68.2822025 | 80.5851169 | 78.3936894 | 79.5328118 | 70.2127309 |
| 71.3348948 | 68.2822025 | 77.5851169 | 78.3936894 | 80.5328118 | 72.2127309 |
| 74.3348948 | 69.2822025 | 76.5851169 | 78.3936894 | 80.5328118 | 73.2127309 |
| 74.3348948 | 69.2822025 | 76.5851169 | 78.3936894 | 80.5328118 | 72.2127309 |
| 73.3348948 | 69.2822025 | 75.5851169 | 77.3936894 | 81.5328118 | 70.2127309 |
| 69.3348948 | 69.2822025 | 75.5851169 | 78.3936894 | 81.5328118 | 70.2127309 |
| 67.3348948 | 70.2822025 | 75.5851169 | 78.3936894 | 79.5328118 | 69.2127309 |
| 67.3348948 | 71.2822025 | 77.5851169 | 77.3936894 | 79.5328118 | 70.2127309 |
| 65.3348948 | 71.2822025 | 79.5851169 | 76.3936894 | 77.5328118 | 70.2127309 |
| 65.3348948 | 71.2822025 | 80.5851169 | 76.3936894 | 77.5328118 | 69.2127309 |
| 65.3348948 | 71.2822025 | 80.5851169 | 76.3936894 | 77.5328118 | 69.2127309 |
| 68.3348948 | 71.2822025 | 82.5851169 | 76.3936894 | 77.5328118 | 69.2127309 |
| 69.3348948 | 71.2822025 | 85.5851169 | 76.3936894 | 77.5328118 | 69.2127309 |
| 69.3348948 | 72.2822025 | 85.5851169 | 76.3936894 | 78.5328118 | 69.2127309 |
| 70.3348948 | 72.2822025 | 85.5851169 | 78.3936894 | 79.5328118 | 70.2127309 |
| 70.3348948 | 72.2822025 | 85.5851169 | 78.3936894 | 78.5328118 | 70.2127309 |
| 70.3348948 | 75.2822025 | 83.5851169 | 79.3936894 | 75.5328118 | 70.2127309 |
| 70.3348948 | 76.2822025 | 81.5851169 | 79.3936894 | 75.5328118 | 69.2127309 |
| 70.3348948 | 76.2822025 | 76.5851169 | 79.3936894 | 72.5328118 | 69.2127309 |
| 71.3348948 | 76.2822025 | 76.5851169 | 79.3936894 | 71.5328118 | 69.2127309 |
| 71.3348948 | 76.2822025 | 76.5851169 | 79.3936894 | 70.5328118 | 69.2127309 |
| 71.3348948 | 76.2822025 | 76.5851169 | 79.3936894 | 68.5328118 | 69.2127309 |
| 71.3348948 | 76.2822025 | 75.5851169 | 78.3936894 | 67.5328118 | 69.2127309 |
| 71.3348948 | 75.2822025 | 75.5851169 | 78.3936894 | 67.5328118 | 69.2127309 |
| 71.3348948 | 75.2822025 | 77.5851169 | 78.3936894 | 67.5328118 | 69.2127309 |
| 71.3348948 | 75.2822025 | 77.5851169 | 77.3936894 | 67.5328118 | 69.2127309 |
| 69.3348948 | 74.2822025 | 77.5851169 | 77.3936894 | 67.5328118 | 69.2127309 |
| 68.3348948 | 74.2822025 | 77.5851169 | 79.3936894 | 66.5328118 | 69.2127309 |
| 65.3348948 | 75.2822025 | 77.5851169 | 80.3936894 | 66.5328118 | 73.2127309 |
| 64.3348948 | 75.2822025 | 75.5851169 | 81.3936894 | 66.5328118 | 73.2127309 |
| 64.3348948 | 75.2822025 | 74.5851169 | 82.3936894 | 65.5328118 | 76.2127309 |

|            |            |            |            |            |            |
|------------|------------|------------|------------|------------|------------|
| 64.3348948 | 74.2822025 | 73.5851169 | 79.3936894 | 64.5328118 | 76.2127309 |
| 64.3348948 | 74.2822025 | 72.5851169 | 78.3936894 | 64.5328118 | 77.2127309 |
| 64.3348948 | 73.2822025 | 73.5851169 | 76.3936894 | 64.5328118 | 78.2127309 |
| 64.3348948 | 71.2822025 | 75.5851169 | 74.3936894 | 64.5328118 | 78.2127309 |
| 63.3348948 | 70.2822025 | 77.5851169 | 74.3936894 | 64.5328118 | 78.2127309 |
| 63.3348948 | 70.2822025 | 77.5851169 | 73.3936894 | 64.5328118 | 78.2127309 |
| 63.3348948 | 70.2822025 | 77.5851169 | 73.3936894 | 64.5328118 | 78.2127309 |
| 63.3348948 | 70.2822025 | 77.5851169 | 74.3936894 | 64.5328118 | 77.2127309 |
| 64.3348948 | 70.2822025 | 80.5851169 | 75.3936894 | 63.5328118 | 75.2127309 |
| 64.3348948 | 70.2822025 | 83.5851169 | 76.3936894 | 64.5328118 | 75.2127309 |
| 64.3348948 | 70.2822025 | 69.4835689 | 76.3936894 | 64.5328118 | 73.2127309 |
| 64.3348948 | 70.2822025 | 69.574478  | 76.3936894 | 64.5328118 | 68.2127309 |
| 64.3348948 | 70.2822025 | 69.8472053 | 76.3936894 | 65.5328118 | 67.2127309 |
| 65.3348948 | 70.2822025 | 71.3017507 | 76.3936894 | 65.5328118 | 67.2127309 |
| 65.3348948 | 70.2822025 | 71.574478  | 75.3936894 | 66.5328118 | 69.2127309 |
| 65.3348948 | 69.2822025 | 71.6653871 | 73.3936894 | 66.5328118 | 69.2127309 |
| 65.3348948 | 69.2822025 | 72.0290235 | 72.3936894 | 68.5328118 | 69.2127309 |
| 65.3348948 | 67.2822025 | 71.4835689 | 71.3936894 | 68.5328118 | 68.2127309 |
| 66.3348948 | 64.2822025 | 71.3017507 | 71.3936894 | 68.5328118 | 68.2127309 |
| 66.3348948 | 64.2822025 | 71.0290235 | 71.3936894 | 68.5328118 | 66.2127309 |
| 67.3348948 | 64.2822025 | 71.0290235 | 71.3936894 | 68.5328118 | 66.2127309 |
| 68.3348948 | 64.2822025 | 71.1199326 | 71.3936894 | 66.5328118 | 66.2127309 |
| 68.3348948 | 63.2822025 | 71.0290235 | 71.3936894 | 66.5328118 | 66.2127309 |
| 68.3348948 | 63.2822025 | 70.9381144 | 71.3936894 | 65.5328118 | 67.2127309 |
| 68.3348948 | 63.2822025 | 70.7562962 | 71.3936894 | 65.5328118 | 67.2127309 |
| 68.3348948 | 63.2822025 | 83.5851169 | 71.3936894 | 65.5328118 | 67.2127309 |
| 69.3348948 | 63.2822025 | 83.5851169 | 72.3936894 | 65.5328118 | 65.2127309 |
| 69.3348948 | 63.2822025 | 83.5851169 | 72.3936894 | 66.5328118 | 65.2127309 |
| 69.3348948 | 63.2822025 | 83.5851169 | 73.3936894 | 66.5328118 | 65.2127309 |
| 69.3348948 | 63.2822025 | 83.5851169 | 73.3936894 | 66.5328118 | 65.2127309 |
| 70.3348948 | 63.2822025 | 82.5851169 | 74.3936894 | 67.5328118 | 65.2127309 |
| 70.3348948 | 63.2822025 | 82.5851169 | 75.3936894 | 68.5328118 | 70.2127309 |
| 70.3348948 | 62.2822025 | 82.5851169 | 75.3936894 | 68.5328118 | 72.2127309 |
| 70.3348948 | 62.2822025 | 82.5851169 | 79.3936894 | 68.5328118 | 72.2127309 |
| 70.3348948 | 64.2822025 | 82.5851169 | 82.3936894 | 69.5328118 | 71.2127309 |
| 70.3348948 | 64.2822025 | 82.5851169 | 82.3936894 | 70.5328118 | 71.2127309 |
| 71.3348948 | 64.2822025 | 81.5851169 | 83.3936894 | 70.5328118 | 71.2127309 |
| 74.3348948 | 64.2822025 | 80.5851169 | 83.3936894 | 70.5328118 | 71.2127309 |
| 74.3348948 | 64.2822025 | 78.5851169 | 83.3936894 | 69.5328118 | 70.2127309 |
| 75.3348948 | 64.2822025 | 78.5851169 | 83.3936894 | 69.5328118 | 66.2127309 |
| 75.3348948 | 64.2822025 | 77.5851169 | 83.3936894 | 69.5328118 | 65.2127309 |
| 75.3348948 | 60.2822025 | 77.5851169 | 83.3936894 | 69.5328118 | 64.2127309 |
| 75.3348948 | 60.2822025 | 73.5851169 | 80.3936894 | 69.5328118 | 65.2127309 |
| 75.3348948 | 57.2822025 | 72.5851169 | 80.3936894 | 70.5328118 | 65.2127309 |
| 74.3348948 | 54.2822025 | 72.5851169 | 80.3936894 | 71.5328118 | 64.2127309 |

|            |            |            |            |            |            |
|------------|------------|------------|------------|------------|------------|
| 74.3348948 | 49.2822025 | 72.5851169 | 78.3936894 | 72.5328118 | 64.2127309 |
| 74.3348948 | 49.2822025 | 71.5851169 | 76.3936894 | 72.5328118 | 63.2127309 |
| 74.3348948 | 49.2822025 | 72.5851169 | 74.3936894 | 72.5328118 | 63.2127309 |
| 74.3348948 | 49.2822025 | 72.5851169 | 73.3936894 | 72.5328118 | 63.2127309 |
| 73.3348948 | 48.2822025 | 72.5851169 | 73.3936894 | 72.5328118 | 63.2127309 |
| 73.3348948 | 48.2822025 | 73.5851169 | 72.3936894 | 71.5328118 | 63.2127309 |
| 73.3348948 | 48.2822025 | 73.5851169 | 72.3936894 | 68.5328118 | 63.2127309 |
| 73.3348948 | 47.2822025 | 73.5851169 | 74.3936894 | 67.5328118 | 63.2127309 |
| 73.3348948 | 47.2822025 | 73.5851169 | 75.3936894 | 67.5328118 | 63.2127309 |
| 75.3348948 | 47.2822025 | 70.5851169 | 76.3936894 | 68.5328118 | 63.2127309 |
| 76.3348948 | 47.2822025 | 69.5851169 | 76.3936894 | 68.5328118 | 63.2127309 |
| 77.3348948 | 47.2822025 | 69.5851169 | 77.3936894 | 68.5328118 | 63.2127309 |
| 77.3348948 | 48.2822025 | 68.5851169 | 77.3936894 | 69.5328118 | 63.2127309 |
| 77.3348948 | 48.2822025 | 67.5851169 | 78.3936894 | 70.5328118 | 63.2127309 |
| 77.3348948 | 49.2822025 | 67.5851169 | 78.3936894 | 70.5328118 | 63.2127309 |
| 77.3348948 | 49.2822025 | 67.5851169 | 78.3936894 | 70.5328118 | 63.2127309 |
| 71.3348948 | 49.2822025 | 68.5851169 | 77.3936894 | 70.5328118 | 70.8786446 |
| 71.3348948 | 49.2822025 | 68.5851169 | 77.3936894 | 71.5328118 | 71.1199326 |
| 71.3348948 | 50.2822025 | 70.5851169 | 77.3936894 | 70.5328118 | 85.2127309 |
| 71.3348948 | 51.2822025 | 70.5851169 | 74.3936894 | 69.5328118 | 80.2127309 |
| 70.3348948 | 51.2822025 | 70.5851169 | 74.3936894 | 69.5328118 | 80.2127309 |
| 70.3348948 | 51.2822025 | 70.5851169 | 74.3936894 | 69.5328118 | 77.2127309 |
| 69.3348948 | 51.2822025 | 70.5851169 | 74.3936894 | 69.5328118 | 73.2127309 |
| 69.3348948 | 51.2822025 | 71.5851169 | 74.3936894 | 70.5328118 | 69.2127309 |
| 69.3348948 | 53.2822025 | 72.5851169 | 74.3936894 | 70.5328118 | 67.2127309 |
| 69.3348948 | 53.2822025 | 72.5851169 | 75.3936894 | 73.5328118 | 67.2127309 |
| 69.3348948 | 63.2822025 | 72.5851169 | 75.3936894 | 73.5328118 | 68.2127309 |
| 69.3348948 | 63.2822025 | 73.5851169 | 76.3936894 | 74.5328118 | 68.2127309 |
| 69.3348948 | 65.2822025 | 73.5851169 | 76.3936894 | 74.5328118 | 68.2127309 |
| 69.3348948 | 65.2822025 | 73.5851169 | 77.3936894 | 74.5328118 | 68.2127309 |
| 69.3348948 | 66.2822025 | 72.5851169 | 78.3936894 | 74.5328118 | 69.2127309 |
| 70.3348948 | 64.2822025 | 72.5851169 | 78.3936894 | 73.5328118 | 69.2127309 |
| 71.3348948 | 63.2822025 | 72.5851169 | 76.3936894 | 71.5328118 | 70.2127309 |
| 72.3348948 | 63.2822025 | 72.5851169 | 73.3936894 | 71.5328118 | 70.2127309 |
| 72.3348948 | 63.2822025 | 72.5851169 | 73.3936894 | 71.5328118 | 69.2127309 |
| 72.3348948 | 63.2822025 | 70.5851169 | 71.3936894 | 70.5328118 | 69.2127309 |
| 72.3348948 | 63.2822025 | 70.5851169 | 71.3936894 | 69.5328118 | 70.2127309 |
| 71.3348948 | 63.2822025 | 70.5851169 | 72.3936894 | 69.5328118 | 71.2127309 |
| 70.3348948 | 63.2822025 | 70.5851169 | 72.3936894 | 69.5328118 | 72.2127309 |
| 69.3348948 | 63.2822025 | 71.5851169 | 72.3936894 | 69.5328118 | 72.2127309 |
| 69.3348948 | 63.2822025 | 73.5851169 | 72.3936894 | 69.5328118 | 72.2127309 |
| 68.3348948 | 63.2822025 | 73.5851169 | 72.3936894 | 69.5328118 | 71.2127309 |
| 68.3348948 | 63.2822025 | 73.5851169 | 74.3936894 | 69.5328118 | 70.2127309 |
| 68.3348948 | 63.2822025 | 74.5851169 | 77.3936894 | 69.5328118 | 69.2127309 |

|            |            |            |            |            |            |
|------------|------------|------------|------------|------------|------------|
| 68.3348948 | 63.2822025 | 74.5851169 | 81.3936894 | 69.5328118 | 69.2127309 |
| 68.3348948 | 63.2822025 | 75.5851169 | 81.3936894 | 68.5328118 | 69.2127309 |
| 68.3348948 | 63.2822025 | 75.5851169 | 80.3936894 | 66.5328118 | 69.2127309 |
| 68.3348948 | 64.2822025 | 75.5851169 | 76.3936894 | 66.5328118 | 70.2127309 |
| 74.3348948 | 65.2822025 | 73.5851169 | 72.3936894 | 66.5328118 | 71.2127309 |
| 71.6653871 | 65.2822025 | 72.5851169 | 72.3936894 | 66.5328118 | 72.2127309 |
| 72.0290235 | 66.2822025 | 72.5851169 | 72.3936894 | 66.5328118 | 72.2127309 |
| 72.4835689 | 66.2822025 | 71.5851169 | 71.3936894 | 69.5328118 | 72.2127309 |
| 87.3348948 | 65.2822025 | 71.5851169 | 71.3936894 | 69.5328118 | 71.2127309 |
| 86.3348948 | 65.2822025 | 70.5851169 | 73.3936894 | 69.5328118 | 71.2127309 |
| 85.3348948 | 64.2822025 | 70.5851169 | 76.3936894 | 69.5328118 | 70.2127309 |
| 85.3348948 | 64.2822025 | 70.5851169 | 77.3936894 | 69.5328118 | 70.2127309 |
| 77.3348948 | 64.2822025 | 70.5851169 | 77.3936894 | 69.5328118 | 70.2127309 |
| 74.3348948 | 64.2822025 | 70.5851169 | 78.3936894 | 69.5328118 | 70.2127309 |
| 74.3348948 | 64.2822025 | 70.5851169 | 78.3936894 | 69.5328118 | 70.2127309 |
| 70.3348948 | 65.2822025 | 69.5851169 | 78.3936894 | 69.5328118 | 71.2127309 |
| 69.3348948 | 65.2822025 | 69.5851169 | 75.3936894 | 68.5328118 | 72.2127309 |
| 69.3348948 | 66.2822025 | 69.5851169 | 73.3936894 | 67.5328118 | 72.2127309 |
| 68.3348948 | 66.2822025 | 69.5851169 | 72.3936894 | 67.5328118 | 72.2127309 |
| 68.3348948 | 67.2822025 | 69.5851169 | 72.3936894 | 67.5328118 | 72.2127309 |
| 68.3348948 | 71.2822025 | 69.5851169 | 72.3936894 | 67.5328118 | 71.2127309 |
| 67.3348948 | 72.2822025 | 67.5851169 | 70.3936894 | 67.5328118 | 72.2127309 |
| 67.3348948 | 73.2822025 | 67.5851169 | 69.3936894 | 67.5328118 | 73.2127309 |
| 65.3348948 | 73.2822025 | 67.5851169 | 70.3936894 | 68.5328118 | 76.2127309 |
| 65.3348948 | 73.2822025 | 67.5851169 | 70.3936894 | 68.5328118 | 76.2127309 |
| 63.3348948 | 75.2822025 | 68.5851169 | 73.3936894 | 68.5328118 | 76.2127309 |
| 63.3348948 | 76.2822025 | 68.5851169 | 73.3936894 | 68.5328118 | 78.2127309 |
| 64.3348948 | 83.2822025 | 68.5851169 | 73.3936894 | 69.5328118 | 79.2127309 |
| 64.3348948 | 84.2822025 | 68.5851169 | 73.3936894 | 68.5328118 | 79.2127309 |
| 64.3348948 | 84.2822025 | 68.5851169 | 73.3936894 | 68.5328118 | 79.2127309 |
| 65.3348948 | 85.2822025 | 68.5851169 | 73.3936894 | 68.5328118 | 79.2127309 |
| 65.3348948 | 70.2108417 | 69.5851169 | 73.3936894 | 68.5328118 | 79.2127309 |
| 65.3348948 | 70.3926598 | 69.5851169 | 73.3936894 | 67.5328118 | 78.2127309 |
| 64.3348948 | 70.4835689 | 69.5851169 | 73.3936894 | 67.5328118 | 78.2127309 |
| 64.3348948 | 84.2822025 | 69.5851169 | 73.3936894 | 67.5328118 | 78.2127309 |
| 64.3348948 | 84.2822025 | 69.5851169 | 76.3936894 | 66.5328118 | 78.2127309 |
| 64.3348948 | 81.2822025 | 69.5851169 | 77.3936894 | 66.5328118 | 75.2127309 |
| 65.3348948 | 81.2822025 | 69.5851169 | 77.3936894 | 67.5328118 | 73.2127309 |
| 65.3348948 | 78.2822025 | 69.5851169 | 79.3936894 | 68.5328118 | 70.2127309 |
| 67.3348948 | 76.2822025 | 69.5851169 | 79.3936894 | 69.5328118 | 69.2127309 |
| 66.3348948 | 76.2822025 | 69.5851169 | 79.3936894 | 69.5328118 | 68.2127309 |
| 66.3348948 | 76.2822025 | 69.5851169 | 79.3936894 | 69.5328118 | 68.2127309 |
| 66.3348948 | 73.2822025 | 68.5851169 | 80.3936894 | 68.5328118 | 66.2127309 |
| 67.3348948 | 73.2822025 | 68.5851169 | 79.3936894 | 68.5328118 | 67.2127309 |
| 67.3348948 | 66.2822025 | 68.5851169 | 79.3936894 | 68.5328118 | 67.2127309 |



|            |            |            |            |            |            |
|------------|------------|------------|------------|------------|------------|
| 72.3348948 | 64.2822025 | 70.5851169 | 82.3936894 | 67.5328118 | 68.2127309 |
| 72.3348948 | 65.2822025 | 70.5851169 | 82.3936894 | 67.5328118 | 66.2127309 |
| 71.3348948 | 64.2822025 | 69.5851169 | 84.3936894 | 67.5328118 | 65.2127309 |
| 70.3348948 | 63.2822025 | 69.5851169 | 70.574478  | 68.5328118 | 65.2127309 |
| 69.3348948 | 63.2822025 | 69.5851169 | 70.3926598 | 68.5328118 | 65.2127309 |
| 69.3348948 | 63.2822025 | 69.5851169 | 81.3936894 | 68.5328118 | 65.2127309 |
| 69.3348948 | 63.2822025 | 68.5851169 | 80.3936894 | 68.5328118 | 64.2127309 |
| 70.3348948 | 63.2822025 | 67.5851169 | 80.3936894 | 69.5328118 | 64.2127309 |
| 72.3348948 | 63.2822025 | 67.5851169 | 83.3936894 | 69.5328118 | 64.2127309 |
| 72.3348948 | 63.2822025 | 67.5851169 | 84.3936894 | 70.5328118 | 70.2127309 |
| 72.3348948 | 63.2822025 | 67.5851169 | 84.3936894 | 70.5328118 | 75.2127309 |
| 72.3348948 | 64.2822025 | 67.5851169 | 84.3936894 | 70.5328118 | 75.2127309 |
| 71.3348948 | 65.2822025 | 67.5851169 | 84.3936894 | 69.5328118 | 76.2127309 |
| 71.3348948 | 67.2822025 | 67.5851169 | 84.3936894 | 69.5328118 | 76.2127309 |
| 71.3348948 | 67.2822025 | 67.5851169 | 82.3936894 | 68.5328118 | 76.2127309 |
| 71.3348948 | 68.2822025 | 66.5851169 | 82.3936894 | 68.5328118 | 76.2127309 |
| 71.3348948 | 66.2822025 | 66.5851169 | 82.3936894 | 68.5328118 | 76.2127309 |
| 71.3348948 | 66.2822025 | 66.5851169 | 82.3936894 | 68.5328118 | 75.2127309 |
| 71.3348948 | 65.2822025 | 66.5851169 | 81.3936894 | 68.5328118 | 76.2127309 |
| 71.3348948 | 64.2822025 | 65.5851169 | 81.3936894 | 68.5328118 | 77.2127309 |
| 70.3348948 | 63.2822025 | 65.5851169 | 79.3936894 | 68.5328118 | 78.2127309 |
| 70.3348948 | 64.2822025 | 66.5851169 | 77.3936894 | 68.5328118 | 78.2127309 |
| 70.3348948 | 64.2822025 | 66.5851169 | 77.3936894 | 68.5328118 | 77.2127309 |
| 69.3348948 | 64.2822025 | 66.5851169 | 75.3936894 | 69.5328118 | 77.2127309 |
| 70.3348948 | 64.2822025 | 66.5851169 | 73.3936894 | 69.5328118 | 74.2127309 |
| 70.3348948 | 64.2822025 | 65.5851169 | 72.3936894 | 69.5328118 | 71.2127309 |
| 70.3348948 | 62.2822025 | 64.5851169 | 72.3936894 | 69.5328118 | 71.2127309 |
| 70.3348948 | 61.2822025 | 63.5851169 | 72.3936894 | 70.5328118 | 70.2127309 |
| 70.3348948 | 60.2822025 | 63.5851169 | 73.3936894 | 70.5328118 | 70.2127309 |
| 71.3348948 | 60.2822025 | 63.5851169 | 72.3936894 | 69.5328118 | 70.2127309 |
| 71.3348948 | 60.2822025 | 63.5851169 | 71.3936894 | 68.5328118 | 69.2127309 |
| 78.3348948 | 60.2822025 | 63.5851169 | 71.3936894 | 68.5328118 | 69.2127309 |
| 78.3348948 | 59.2822025 | 61.5851169 | 71.3936894 | 68.5328118 | 69.2127309 |
| 75.3348948 | 59.2822025 | 61.5851169 | 71.3936894 | 68.5328118 | 69.2127309 |
| 75.3348948 | 57.2822025 | 61.5851169 | 71.3936894 | 68.5328118 | 69.2127309 |
| 74.3348948 | 57.2822025 | 61.5851169 | 71.3936894 | 68.5328118 | 69.2127309 |
| 74.3348948 | 57.2822025 | 61.5851169 | 72.3936894 | 67.5328118 | 71.2127309 |
| 74.3348948 | 57.2822025 | 61.5851169 | 72.3936894 | 67.5328118 | 71.2127309 |
| 74.3348948 | 56.2822025 | 66.5851169 | 73.3936894 | 67.5328118 | 71.2127309 |
| 72.3348948 | 56.2822025 | 66.5851169 | 73.3936894 | 68.5328118 | 71.2127309 |
| 71.3348948 | 56.2822025 | 66.5851169 | 73.3936894 | 68.5328118 | 71.2127309 |
| 68.3348948 | 56.2822025 | 67.5851169 | 74.3936894 | 68.5328118 | 71.2127309 |
| 68.3348948 | 56.2822025 | 67.5851169 | 74.3936894 | 68.5328118 | 71.2127309 |
| 64.3348948 | 56.2822025 | 67.5851169 | 76.3936894 | 68.5328118 | 71.2127309 |
| 64.3348948 | 59.2822025 | 70.5851169 | 77.3936894 | 68.5328118 | 71.2127309 |

|            |            |            |            |            |            |
|------------|------------|------------|------------|------------|------------|
| 64.3348948 | 59.2822025 | 70.5851169 | 77.3936894 | 67.5328118 | 71.2127309 |
| 64.3348948 | 62.2822025 | 72.5851169 | 77.3936894 | 67.5328118 | 71.2127309 |
| 65.3348948 | 62.2822025 | 72.5851169 | 78.3936894 | 67.5328118 | 74.2127309 |
| 66.3348948 | 62.2822025 | 72.5851169 | 77.3936894 | 68.5328118 | 76.2127309 |
| 66.3348948 | 62.2822025 | 68.5851169 | 77.3936894 | 68.5328118 | 76.2127309 |
| 66.3348948 | 62.2822025 | 66.5851169 | 77.3936894 | 69.5328118 | 76.2127309 |
| 66.3348948 | 62.2822025 | 65.5851169 | 77.3936894 | 70.5328118 | 74.2127309 |
| 66.3348948 | 63.2822025 | 65.5851169 | 77.3936894 | 70.5328118 | 73.2127309 |
| 65.3348948 | 63.2822025 | 65.5851169 | 76.3936894 | 70.5328118 | 73.2127309 |
| 65.3348948 | 64.2822025 | 65.5851169 | 70.3936894 | 72.5328118 | 73.2127309 |
| 65.3348948 | 65.2822025 | 65.5851169 | 70.3936894 | 73.5328118 | 72.2127309 |
| 65.3348948 | 65.2822025 | 65.5851169 | 66.3936894 | 74.5328118 | 69.2127309 |
| 65.3348948 | 66.2822025 | 63.5851169 | 66.3936894 | 74.5328118 | 69.2127309 |
| 65.3348948 | 66.2822025 | 64.5851169 | 66.3936894 | 75.5328118 | 68.2127309 |
| 65.3348948 | 67.2822025 | 65.5851169 | 66.3936894 | 74.5328118 | 65.2127309 |
| 68.3348948 | 67.2822025 | 66.5851169 | 66.3936894 | 73.5328118 | 64.2127309 |
| 68.3348948 | 67.2822025 | 66.5851169 | 67.3936894 | 73.5328118 | 65.2127309 |
| 67.3348948 | 67.2822025 | 66.5851169 | 68.3936894 | 72.5328118 | 65.2127309 |
| 66.3348948 | 67.2822025 | 66.5851169 | 70.3936894 | 72.5328118 | 66.2127309 |
| 66.3348948 | 68.2822025 | 67.5851169 | 71.3936894 | 72.5328118 | 67.2127309 |
| 65.3348948 | 68.2822025 | 67.5851169 | 70.3936894 | 72.5328118 | 68.2127309 |
| 65.3348948 | 67.2822025 | 68.5851169 | 69.3936894 | 72.5328118 | 67.2127309 |
| 69.3348948 | 66.2822025 | 68.5851169 | 68.3936894 | 72.5328118 | 67.2127309 |
| 70.3348948 | 66.2822025 | 68.5851169 | 69.3936894 | 72.5328118 | 63.2127309 |
| 70.3348948 | 66.2822025 | 70.5851169 | 70.3936894 | 71.5328118 | 63.2127309 |
| 70.3348948 | 65.2822025 | 70.5851169 | 71.3936894 | 71.5328118 | 65.2127309 |
| 70.3348948 | 65.2822025 | 70.5851169 | 72.3936894 | 71.5328118 | 66.2127309 |
| 70.3348948 | 65.2822025 | 71.5851169 | 72.3936894 | 71.5328118 | 66.2127309 |
| 70.3348948 | 65.2822025 | 73.5851169 | 72.3936894 | 71.5328118 | 67.2127309 |
| 70.3348948 | 65.2822025 | 73.5851169 | 72.3936894 | 71.5328118 | 69.2127309 |
| 70.3348948 | 65.2822025 | 73.5851169 | 72.3936894 | 73.5328118 | 69.2127309 |
| 71.3348948 | 64.2822025 | 73.5851169 | 72.3936894 | 74.5328118 | 70.2127309 |
| 71.3348948 | 64.2822025 | 72.5851169 | 72.3936894 | 74.5328118 | 70.2127309 |
| 71.3348948 | 64.2822025 | 70.5851169 | 73.3936894 | 74.5328118 | 71.2127309 |
| 71.3348948 | 64.2822025 | 68.5851169 | 73.3936894 | 74.5328118 | 71.2127309 |
| 71.3348948 | 64.2822025 | 68.5851169 | 73.3936894 | 75.5328118 | 71.2127309 |
| 73.3348948 | 64.2822025 | 68.5851169 | 74.3936894 | 75.5328118 | 72.2127309 |
| 73.3348948 | 65.2822025 | 67.5851169 | 75.3936894 | 78.5328118 | 72.2127309 |
| 72.3348948 | 68.2822025 | 67.5851169 | 76.3936894 | 80.5328118 | 70.2127309 |
| 73.3348948 | 68.2822025 | 67.5851169 | 80.3936894 | 81.5328118 | 69.2127309 |
| 73.3348948 | 69.2822025 | 67.5851169 | 82.3936894 | 83.5328118 | 69.2127309 |
| 73.3348948 | 67.2822025 | 67.5851169 | 83.3936894 | 83.5328118 | 71.2127309 |
| 73.3348948 | 67.2822025 | 67.5851169 | 83.3936894 | 80.5328118 | 73.2127309 |
| 73.3348948 | 67.2822025 | 67.5851169 | 83.3936894 | 79.5328118 | 74.2127309 |
| 72.3348948 | 67.2822025 | 67.5851169 | 83.3936894 | 79.5328118 | 74.2127309 |



|            |            |            |            |            |            |
|------------|------------|------------|------------|------------|------------|
| 72.3348948 | 67.2822025 | 67.5851169 | 84.3936894 | 78.5328118 | 74.2127309 |
| 71.3348948 | 67.2822025 | 67.5851169 | 84.3936894 | 78.5328118 | 74.2127309 |
| 70.3348948 | 67.2822025 | 66.5851169 | 69.6653871 | 78.5328118 | 68.2127309 |
| 71.3348948 | 67.2822025 | 67.5851169 | 77.3936894 | 81.5328118 | 67.2127309 |
| 71.3348948 | 67.2822025 | 67.5851169 | 77.3936894 | 83.5328118 | 65.2127309 |
| 72.3348948 | 66.2822025 | 67.5851169 | 68.3936894 | 82.5328118 | 65.2127309 |
| 72.3348948 | 66.2822025 | 67.5851169 | 68.3936894 | 82.5328118 | 65.2127309 |
| 71.3348948 | 67.2822025 | 66.5851169 | 67.3936894 | 67.6786446 | 65.2127309 |
| 72.3348948 | 66.2822025 | 66.5851169 | 67.3936894 | 73.5328118 | 65.2127309 |
| 71.3348948 | 66.2822025 | 66.5851169 | 66.3936894 | 72.5328118 | 65.2127309 |
| 71.3348948 | 66.2822025 | 67.5851169 | 64.3936894 | 72.5328118 | 64.2127309 |
| 71.3348948 | 66.2822025 | 66.5851169 | 64.3936894 | 71.5328118 | 64.2127309 |
| 71.3348948 | 66.2822025 | 67.5851169 | 64.3936894 | 70.5328118 | 70.2127309 |
| 70.3348948 | 67.2822025 | 67.5851169 | 67.3936894 | 70.5328118 | 72.2127309 |
| 70.3348948 | 67.2822025 | 69.5851169 | 67.3936894 | 69.5328118 | 75.2127309 |
| 70.3348948 | 69.2822025 | 70.5851169 | 69.3936894 | 70.5328118 | 76.2127309 |
| 71.3348948 | 69.2822025 | 70.5851169 | 69.3936894 | 69.5328118 | 76.2127309 |
| 71.3348948 | 68.2822025 | 70.5851169 | 70.3936894 | 69.5328118 | 77.2127309 |
| 71.3348948 | 68.2822025 | 69.5851169 | 70.3936894 | 69.5328118 | 77.2127309 |
| 71.3348948 | 68.2822025 | 68.5851169 | 70.3936894 | 69.5328118 | 79.2127309 |
| 71.3348948 | 65.2822025 | 68.5851169 | 70.3936894 | 68.5328118 | 78.2127309 |
| 71.3348948 | 65.2822025 | 68.5851169 | 71.3936894 | 66.5328118 | 77.2127309 |
| 73.3348948 | 64.2822025 | 68.5851169 | 72.3936894 | 65.5328118 | 73.2127309 |
| 73.3348948 | 64.2822025 | 68.5851169 | 73.3936894 | 65.5328118 | 71.2127309 |
| 73.3348948 | 65.2822025 | 69.5851169 | 73.3936894 | 65.5328118 | 71.2127309 |
| 73.3348948 | 65.2822025 | 69.5851169 | 75.3936894 | 64.5328118 | 71.2127309 |
| 72.3348948 | 66.2822025 | 69.5851169 | 76.3936894 | 64.5328118 | 72.2127309 |
| 72.3348948 | 66.2822025 | 69.5851169 | 76.3936894 | 63.5328118 | 72.2127309 |
| 72.3348948 | 66.2822025 | 69.5851169 | 76.3936894 | 63.5328118 | 73.2127309 |
| 72.3348948 | 64.2822025 | 69.5851169 | 76.3936894 | 63.5328118 | 73.2127309 |
| 72.3348948 | 63.2822025 | 68.5851169 | 76.3936894 | 63.5328118 | 73.2127309 |
| 72.3348948 | 63.2822025 | 68.5851169 | 76.3936894 | 64.5328118 | 71.2127309 |
| 74.3348948 | 63.2822025 | 68.5851169 | 74.3936894 | 65.5328118 | 71.2127309 |
| 74.3348948 | 61.2822025 | 68.5851169 | 73.3936894 | 66.5328118 | 66.2127309 |
| 75.3348948 | 60.2822025 | 68.5851169 | 72.3936894 | 68.5328118 | 65.2127309 |
| 75.3348948 | 60.2822025 | 68.5851169 | 72.3936894 | 68.5328118 | 65.2127309 |
| 76.3348948 | 60.2822025 | 69.5851169 | 72.3936894 | 68.5328118 | 67.2127309 |
| 77.3348948 | 59.2822025 | 69.5851169 | 72.3936894 | 66.5328118 | 68.2127309 |
| 77.3348948 | 59.2822025 | 69.5851169 | 72.3936894 | 66.5328118 | 68.2127309 |
| 77.3348948 | 59.2822025 | 69.5851169 | 72.3936894 | 66.5328118 | 69.2127309 |
| 77.3348948 | 59.2822025 | 69.5851169 | 72.3936894 | 66.5328118 | 69.2127309 |
| 79.3348948 | 59.2822025 | 70.5851169 | 74.3936894 | 66.5328118 | 68.2127309 |
| 79.3348948 | 59.2822025 | 70.5851169 | 75.3936894 | 66.5328118 | 68.2127309 |
| 81.3348948 | 60.2822025 | 70.5851169 | 75.3936894 | 66.5328118 | 68.2127309 |
| 68.4835689 | 61.2822025 | 69.5851169 | 74.3936894 | 65.5328118 | 69.2127309 |

|            |            |            |            |            |            |
|------------|------------|------------|------------|------------|------------|
| 82.3348948 | 62.2822025 | 69.5851169 | 72.3936894 | 65.5328118 | 69.2127309 |
| 75.3348948 | 63.2822025 | 68.5851169 | 72.3936894 | 65.5328118 | 69.2127309 |
| 75.3348948 | 63.2822025 | 68.5851169 | 71.3936894 | 65.5328118 | 71.2127309 |
| 74.3348948 | 63.2822025 | 68.5851169 | 71.3936894 | 65.5328118 | 69.2127309 |
| 74.3348948 | 63.2822025 | 68.5851169 | 68.3936894 | 65.5328118 | 69.2127309 |
| 74.3348948 | 63.2822025 | 68.5851169 | 67.3936894 | 65.5328118 | 69.2127309 |
| 74.3348948 | 64.2822025 | 67.5851169 | 66.3936894 | 67.5328118 | 66.2127309 |
| 74.3348948 | 65.2822025 | 68.5851169 | 66.3936894 | 67.5328118 | 66.2127309 |
| 72.3348948 | 65.2822025 | 68.5851169 | 68.3936894 | 67.5328118 | 67.2127309 |
| 72.3348948 | 65.2822025 | 68.5851169 | 70.3936894 | 67.5328118 | 70.2127309 |
| 71.3348948 | 65.2822025 | 68.5851169 | 70.3936894 | 67.5328118 | 70.2127309 |
| 70.3348948 | 65.2822025 | 68.5851169 | 71.3936894 | 67.5328118 | 72.2127309 |
| 70.3348948 | 65.2822025 | 69.5851169 | 71.3936894 | 67.5328118 | 72.2127309 |
| 70.3348948 | 66.2822025 | 69.5851169 | 71.3936894 | 67.5328118 | 71.2127309 |
| 69.3348948 | 68.2822025 | 70.5851169 | 71.3936894 | 67.5328118 | 71.2127309 |
| 69.3348948 | 68.2822025 | 70.5851169 | 71.3936894 | 67.5328118 | 71.2127309 |
| 68.3348948 | 68.2822025 | 70.5851169 | 71.3936894 | 67.5328118 | 71.2127309 |
| 68.3348948 | 66.2822025 | 70.5851169 | 71.3936894 | 68.5328118 | 71.2127309 |
| 69.3348948 | 65.2822025 | 70.5851169 | 71.3936894 | 69.5328118 | 71.2127309 |
| 70.3348948 | 65.2822025 | 70.5851169 | 71.3936894 | 69.5328118 | 71.2127309 |
| 70.3348948 | 65.2822025 | 70.5851169 | 72.3936894 | 69.5328118 | 71.2127309 |
| 70.3348948 | 65.2822025 | 70.5851169 | 76.3936894 | 70.5328118 | 71.2127309 |
| 70.3348948 | 65.2822025 | 71.5851169 | 78.3936894 | 70.5328118 | 72.2127309 |
| 70.3348948 | 66.2822025 | 71.5851169 | 78.3936894 | 69.5328118 | 70.2127309 |
| 70.3348948 | 66.2822025 | 71.5851169 | 78.3936894 | 69.5328118 | 69.2127309 |
| 71.3348948 | 69.2822025 | 71.5851169 | 78.3936894 | 69.5328118 | 69.2127309 |
| 72.3348948 | 70.2822025 | 71.5851169 | 76.3936894 | 69.5328118 | 69.2127309 |
| 73.3348948 | 70.2822025 | 71.5851169 | 76.3936894 | 69.5328118 | 69.2127309 |
| 75.3348948 | 69.2822025 | 71.5851169 | 72.3936894 | 69.5328118 | 70.2127309 |
| 75.3348948 | 66.2822025 | 71.5851169 | 70.3936894 | 69.5328118 | 70.2127309 |
| 75.3348948 | 65.2822025 | 71.5851169 | 70.3936894 | 69.5328118 | 70.2127309 |
| 75.3348948 | 65.2822025 | 72.5851169 | 71.3936894 | 69.5328118 | 69.2127309 |
| 75.3348948 | 65.2822025 | 72.5851169 | 71.3936894 | 69.5328118 | 69.2127309 |
| 75.3348948 | 65.2822025 | 71.5851169 | 71.3936894 | 69.5328118 | 68.2127309 |
| 75.3348948 | 65.2822025 | 71.5851169 | 71.3936894 | 68.5328118 | 68.2127309 |
| 75.3348948 | 65.2822025 | 71.5851169 | 72.3936894 | 68.5328118 | 67.2127309 |
| 74.3348948 | 65.2822025 | 71.5851169 | 72.3936894 | 68.5328118 | 67.2127309 |
| 72.3348948 | 65.2822025 | 72.5851169 | 72.3936894 | 69.5328118 | 68.2127309 |
| 71.3348948 | 65.2822025 | 73.5851169 | 72.3936894 | 69.5328118 | 68.2127309 |
| 71.3348948 | 65.2822025 | 73.5851169 | 72.3936894 | 70.5328118 | 68.2127309 |
| 70.3348948 | 64.2822025 | 73.5851169 | 74.3936894 | 70.5328118 | 69.2127309 |
| 69.3348948 | 64.2822025 | 73.5851169 | 76.3936894 | 70.5328118 | 69.2127309 |
| 68.3348948 | 65.2822025 | 73.5851169 | 77.3936894 | 70.5328118 | 73.2127309 |
| 68.3348948 | 65.2822025 | 72.5851169 | 78.3936894 | 71.5328118 | 74.2127309 |
| 65.3348948 | 64.2822025 | 71.5851169 | 77.3936894 | 71.5328118 | 74.2127309 |

|            |            |            |            |            |            |
|------------|------------|------------|------------|------------|------------|
| 65.3348948 | 65.2822025 | 71.5851169 | 75.3936894 | 70.5328118 | 74.2127309 |
| 65.3348948 | 65.2822025 | 70.5851169 | 75.3936894 | 70.5328118 | 74.2127309 |
| 65.3348948 | 65.2822025 | 69.5851169 | 74.3936894 | 70.5328118 | 77.2127309 |
| 65.3348948 | 64.2822025 | 69.5851169 | 74.3936894 | 70.5328118 | 79.2127309 |
| 64.3348948 | 66.2822025 | 69.5851169 | 75.3936894 | 70.5328118 | 78.2127309 |
| 64.3348948 | 67.2822025 | 69.5851169 | 75.3936894 | 70.5328118 | 78.2127309 |
| 67.3348948 | 67.2822025 | 68.5851169 | 75.3936894 | 71.5328118 | 76.2127309 |
| 68.3348948 | 67.2822025 | 68.5851169 | 75.3936894 | 72.5328118 | 76.2127309 |
| 68.3348948 | 67.2822025 | 68.5851169 | 74.3936894 | 73.5328118 | 75.2127309 |
| 68.3348948 | 67.2822025 | 70.5851169 | 74.3936894 | 73.5328118 | 74.2127309 |
| 67.3348948 | 66.2822025 | 70.5851169 | 74.3936894 | 73.5328118 | 74.2127309 |
| 66.3348948 | 66.2822025 | 71.5851169 | 73.3936894 | 75.5328118 | 71.2127309 |
| 66.3348948 | 66.2822025 | 70.5851169 | 71.3936894 | 75.5328118 | 69.2127309 |
| 67.3348948 | 66.2822025 | 69.5851169 | 69.3936894 | 76.5328118 | 67.2127309 |
| 67.3348948 | 66.2822025 | 69.5851169 | 69.3936894 | 75.5328118 | 67.2127309 |
| 68.3348948 | 66.2822025 | 69.5851169 | 70.3936894 | 75.5328118 | 66.2127309 |
| 68.3348948 | 66.2822025 | 69.5851169 | 70.3936894 | 75.5328118 | 66.2127309 |
| 70.3348948 | 71.2822025 | 69.5851169 | 70.3936894 | 74.5328118 | 66.2127309 |
| 71.3348948 | 70.2822025 | 69.5851169 | 70.3936894 | 73.5328118 | 66.2127309 |
| 71.3348948 | 70.2822025 | 69.5851169 | 69.3936894 | 72.5328118 | 71.2127309 |
| 71.3348948 | 69.2822025 | 71.5851169 | 69.3936894 | 72.5328118 | 74.2127309 |
| 70.3348948 | 67.2822025 | 72.5851169 | 69.3936894 | 72.5328118 | 74.2127309 |
| 69.3348948 | 68.2822025 | 73.5851169 | 69.3936894 | 72.5328118 | 74.2127309 |
| 69.3348948 | 68.2822025 | 73.5851169 | 68.3936894 | 72.5328118 | 74.2127309 |
| 69.3348948 | 68.2822025 | 73.5851169 | 68.3936894 | 72.5328118 | 74.2127309 |
| 68.3348948 | 69.2822025 | 74.5851169 | 68.3936894 | 72.5328118 | 71.2127309 |
| 68.3348948 | 69.2822025 | 74.5851169 | 67.3936894 | 72.5328118 | 71.2127309 |
| 67.3348948 | 69.2822025 | 74.5851169 | 67.3936894 | 72.5328118 | 71.2127309 |
| 67.3348948 | 70.2822025 | 75.5851169 | 67.3936894 | 73.5328118 | 71.2127309 |
| 66.3348948 | 70.2822025 | 75.5851169 | 68.3936894 | 73.5328118 | 71.2127309 |
| 65.3348948 | 70.2822025 | 75.5851169 | 69.3936894 | 73.5328118 | 71.2127309 |
| 65.3348948 | 70.2822025 | 76.5851169 | 70.3936894 | 72.5328118 | 73.2127309 |
| 64.3348948 | 70.2822025 | 76.5851169 | 74.3936894 | 71.5328118 | 73.2127309 |
| 64.3348948 | 70.2822025 | 76.5851169 | 76.3936894 | 70.5328118 | 73.2127309 |
| 64.3348948 | 70.2822025 | 76.5851169 | 77.3936894 | 69.5328118 | 72.2127309 |
| 64.3348948 | 74.2822025 | 76.5851169 | 77.3936894 | 69.5328118 | 72.2127309 |
| 65.3348948 | 74.2822025 | 77.5851169 | 77.3936894 | 70.5328118 | 72.2127309 |
| 65.3348948 | 74.2822025 | 77.5851169 | 77.3936894 | 69.5328118 | 71.2127309 |
| 65.3348948 | 74.2822025 | 68.5851169 | 77.3936894 | 69.5328118 | 71.2127309 |
| 65.3348948 | 74.2822025 | 67.5851169 | 77.3936894 | 69.5328118 | 71.2127309 |
| 65.3348948 | 73.2822025 | 66.5851169 | 77.3936894 | 69.5328118 | 71.2127309 |
| 65.3348948 | 72.2822025 | 66.5851169 | 77.3936894 | 69.5328118 | 71.2127309 |
| 66.3348948 | 71.2822025 | 66.5851169 | 77.3936894 | 69.5328118 | 71.2127309 |
| 68.3348948 | 70.2822025 | 67.5851169 | 77.3936894 | 69.5328118 | 70.2127309 |
| 68.3348948 | 69.2822025 | 67.5851169 | 77.3936894 | 68.5328118 | 70.2127309 |

|            |            |            |            |            |            |
|------------|------------|------------|------------|------------|------------|
| 68.3348948 | 69.2822025 | 66.5851169 | 77.3936894 | 67.5328118 | 70.2127309 |
| 68.3348948 | 65.2822025 | 66.5851169 | 77.3936894 | 67.5328118 | 70.2127309 |
| 70.3348948 | 64.2822025 | 66.5851169 | 77.3936894 | 65.5328118 | 71.2127309 |
| 72.3348948 | 64.2822025 | 67.5851169 | 76.3936894 | 65.5328118 | 71.2127309 |
| 72.3348948 | 65.2822025 | 67.5851169 | 76.3936894 | 65.5328118 | 71.2127309 |
| 73.3348948 | 66.2822025 | 69.5851169 | 77.3936894 | 65.5328118 | 72.2127309 |
| 73.3348948 | 66.2822025 | 70.5851169 | 77.3936894 | 65.5328118 | 72.2127309 |
| 73.3348948 | 66.2822025 | 70.5851169 | 77.3936894 | 66.5328118 | 72.2127309 |
| 73.3348948 | 66.2822025 | 69.5851169 | 77.3936894 | 66.5328118 | 73.2127309 |
| 73.3348948 | 66.2822025 | 69.5851169 | 75.3936894 | 65.5328118 | 73.2127309 |
| 70.3348948 | 66.2822025 | 69.5851169 | 75.3936894 | 63.5328118 | 74.2127309 |
| 68.3348948 | 66.2822025 | 69.5851169 | 75.3936894 | 63.5328118 | 74.2127309 |
| 68.3348948 | 67.2822025 | 69.5851169 | 74.3936894 | 63.5328118 | 75.2127309 |
| 68.3348948 | 67.2822025 | 69.5851169 | 72.3936894 | 63.5328118 | 76.2127309 |
| 67.3348948 | 66.2822025 | 69.5851169 | 72.3936894 | 63.5328118 | 76.2127309 |
| 67.3348948 | 66.2822025 | 69.5851169 | 72.3936894 | 65.5328118 | 74.2127309 |
| 67.3348948 | 66.2822025 | 69.5851169 | 71.3936894 | 66.5328118 | 73.2127309 |
| 67.3348948 | 66.2822025 | 69.5851169 | 71.3936894 | 66.5328118 | 73.2127309 |
| 67.3348948 | 66.2822025 | 70.5851169 | 71.3936894 | 66.5328118 | 74.2127309 |
| 67.3348948 | 66.2822025 | 70.5851169 | 71.3936894 | 66.5328118 | 73.2127309 |
| 67.3348948 | 66.2822025 | 71.5851169 | 71.3936894 | 66.5328118 | 74.2127309 |
| 68.3348948 | 66.2822025 | 72.5851169 | 73.3936894 | 66.5328118 | 74.2127309 |
| 68.3348948 | 66.2822025 | 73.5851169 | 76.3936894 | 67.5328118 | 73.2127309 |
| 68.3348948 | 66.2822025 | 73.5851169 | 76.3936894 | 67.5328118 | 73.2127309 |
| 68.3348948 | 66.2822025 | 74.5851169 | 78.3936894 | 67.5328118 | 73.2127309 |
| 68.3348948 | 66.2822025 | 75.5851169 | 78.3936894 | 67.5328118 | 72.2127309 |
| 68.3348948 | 66.2822025 | 75.5851169 | 79.3936894 | 67.5328118 | 71.2127309 |
| 68.3348948 | 66.2822025 | 75.5851169 | 79.3936894 | 67.5328118 | 72.2127309 |
| 68.3348948 | 66.2822025 | 75.5851169 | 79.3936894 | 68.5328118 | 72.2127309 |
| 68.3348948 | 67.2822025 | 75.5851169 | 77.3936894 | 68.5328118 | 73.2127309 |
| 68.3348948 | 67.2822025 | 75.5851169 | 78.3936894 | 68.5328118 | 73.2127309 |
| 68.3348948 | 71.2822025 | 75.5851169 | 78.3936894 | 68.5328118 | 72.2127309 |
| 68.3348948 | 71.2822025 | 75.5851169 | 78.3936894 | 68.5328118 | 72.2127309 |
| 68.3348948 | 78.2822025 | 74.5851169 | 77.3936894 | 68.5328118 | 74.2127309 |
| 68.3348948 | 79.2822025 | 74.5851169 | 77.3936894 | 68.5328118 | 75.2127309 |
| 68.3348948 | 79.2822025 | 73.5851169 | 77.3936894 | 68.5328118 | 75.2127309 |
| 70.3348948 | 79.2822025 | 72.5851169 | 76.3936894 | 68.5328118 | 75.2127309 |
| 69.3348948 | 79.2822025 | 72.5851169 | 76.3936894 | 68.5328118 | 76.2127309 |
| 69.3348948 | 78.2822025 | 69.5851169 | 76.3936894 | 70.5328118 | 76.2127309 |
| 67.3348948 | 76.2822025 | 68.5851169 | 76.3936894 | 72.5328118 | 73.2127309 |
| 67.3348948 | 76.2822025 | 69.5851169 | 76.3936894 | 72.5328118 | 72.2127309 |
| 70.3348948 | 75.2822025 | 69.5851169 | 76.3936894 | 72.5328118 | 73.2127309 |
| 72.3348948 | 74.2822025 | 69.5851169 | 76.3936894 | 72.5328118 | 73.2127309 |
| 73.3348948 | 74.2822025 | 67.5851169 | 76.3936894 | 73.5328118 | 78.2127309 |

|            |            |            |            |            |            |
|------------|------------|------------|------------|------------|------------|
| 72.3348948 | 74.2822025 | 66.5851169 | 76.3936894 | 74.5328118 | 81.2127309 |
| 72.3348948 | 72.2822025 | 64.5851169 | 77.3936894 | 74.5328118 | 80.2127309 |
| 73.3348948 | 72.2822025 | 64.5851169 | 77.3936894 | 74.5328118 | 81.2127309 |
| 74.3348948 | 71.2822025 | 64.5851169 | 77.3936894 | 75.5328118 | 81.2127309 |
| 75.3348948 | 71.2822025 | 64.5851169 | 76.3936894 | 75.5328118 | 82.2127309 |
| 75.3348948 | 71.2822025 | 64.5851169 | 73.3936894 | 76.5328118 | 82.2127309 |
| 74.3348948 | 70.2822025 | 64.5851169 | 73.3936894 | 76.5328118 | 78.2127309 |
| 73.3348948 | 70.2822025 | 64.5851169 | 73.3936894 | 76.5328118 | 78.2127309 |
| 72.3348948 | 69.2822025 | 64.5851169 | 73.3936894 | 77.5328118 | 77.2127309 |
| 67.3348948 | 67.2822025 | 64.5851169 | 73.3936894 | 77.5328118 | 77.2127309 |
| 65.3348948 | 67.2822025 | 64.5851169 | 73.3936894 | 77.5328118 | 78.2127309 |
| 65.3348948 | 67.2822025 | 65.5851169 | 74.3936894 | 77.5328118 | 78.2127309 |
| 65.3348948 | 67.2822025 | 65.5851169 | 74.3936894 | 77.5328118 | 77.2127309 |
| 66.3348948 | 65.2822025 | 65.5851169 | 74.3936894 | 77.5328118 | 76.2127309 |
| 67.3348948 | 64.2822025 | 65.5851169 | 75.3936894 | 77.5328118 | 75.2127309 |
| 67.3348948 | 62.2822025 | 65.5851169 | 75.3936894 | 77.5328118 | 75.2127309 |
| 68.3348948 | 63.2822025 | 65.5851169 | 75.3936894 | 77.5328118 | 78.2127309 |
| 68.3348948 | 64.2822025 | 65.5851169 | 75.3936894 | 79.5328118 | 79.2127309 |
| 68.3348948 | 66.2822025 | 65.5851169 | 75.3936894 | 79.5328118 | 79.2127309 |
| 74.3348948 | 69.2822025 | 66.5851169 | 75.3936894 | 79.5328118 | 80.2127309 |
| 75.3348948 | 70.2822025 | 66.5851169 | 75.3936894 | 79.5328118 | 81.2127309 |
| 74.3348948 | 70.2822025 | 66.5851169 | 75.3936894 | 79.5328118 | 82.2127309 |
| 74.3348948 | 70.2822025 | 67.5851169 | 75.3936894 | 79.5328118 | 82.2127309 |
| 71.3348948 | 69.2822025 | 67.5851169 | 74.3936894 | 79.5328118 | 82.2127309 |
| 70.3348948 | 69.2822025 | 68.5851169 | 73.3936894 | 79.5328118 | 82.2127309 |
| 69.3348948 | 69.2822025 | 68.5851169 | 72.3936894 | 79.5328118 | 82.2127309 |
| 69.3348948 | 68.2822025 | 71.5851169 | 71.3936894 | 78.5328118 | 81.2127309 |
| 69.3348948 | 67.2822025 | 72.5851169 | 71.3936894 | 77.5328118 | 79.2127309 |
| 69.3348948 | 66.2822025 | 72.5851169 | 71.3936894 | 76.5328118 | 79.2127309 |
| 68.3348948 | 66.2822025 | 72.5851169 | 71.3936894 | 75.5328118 | 79.2127309 |
| 68.3348948 | 66.2822025 | 73.5851169 | 73.3936894 | 75.5328118 | 80.2127309 |
| 68.3348948 | 66.2822025 | 73.5851169 | 76.3936894 | 75.5328118 | 79.2127309 |
| 67.3348948 | 66.2822025 | 73.5851169 | 78.3936894 | 74.5328118 | 79.2127309 |
| 67.3348948 | 66.2822025 | 72.5851169 | 79.3936894 | 73.5328118 | 79.2127309 |
| 67.3348948 | 69.2822025 | 71.5851169 | 79.3936894 | 73.5328118 | 81.2127309 |
| 67.3348948 | 71.2822025 | 71.5851169 | 79.3936894 | 71.5328118 | 81.2127309 |
| 67.3348948 | 72.2822025 | 72.5851169 | 79.3936894 | 71.5328118 | 82.2127309 |
| 67.3348948 | 75.2822025 | 72.5851169 | 79.3936894 | 71.5328118 | 82.2127309 |
| 66.3348948 | 75.2822025 | 71.5851169 | 80.3936894 | 70.5328118 | 78.2127309 |
| 66.3348948 | 74.2822025 | 70.5851169 | 80.3936894 | 70.5328118 | 74.2127309 |
| 66.3348948 | 74.2822025 | 70.5851169 | 79.3936894 | 70.5328118 | 72.2127309 |
| 66.3348948 | 73.2822025 | 67.5851169 | 78.3936894 | 72.5328118 | 72.2127309 |
| 66.3348948 | 73.2822025 | 67.5851169 | 78.3936894 | 72.5328118 | 72.2127309 |
| 68.3348948 | 73.2822025 | 66.5851169 | 76.3936894 | 72.5328118 | 65.2127309 |
| 68.3348948 | 73.2822025 | 66.5851169 | 76.3936894 | 73.5328118 | 65.2127309 |

|            |            |            |            |            |            |
|------------|------------|------------|------------|------------|------------|
| 68.3348948 | 73.2822025 | 66.5851169 | 75.3936894 | 76.5328118 | 64.2127309 |
| 67.3348948 | 73.2822025 | 66.5851169 | 77.3936894 | 76.5328118 | 64.2127309 |
| 66.3348948 | 73.2822025 | 66.5851169 | 77.3936894 | 78.5328118 | 70.2127309 |
| 66.3348948 | 73.2822025 | 67.5851169 | 77.3936894 | 78.5328118 | 71.2127309 |
| 65.3348948 | 72.2822025 | 67.5851169 | 76.3936894 | 78.5328118 | 71.2127309 |
| 65.3348948 | 71.2822025 | 68.5851169 | 76.3936894 | 78.5328118 | 72.2127309 |
| 66.3348948 | 68.2822025 | 68.5851169 | 76.3936894 | 78.5328118 | 72.2127309 |
| 66.3348948 | 66.2822025 | 69.5851169 | 76.3936894 | 78.5328118 | 76.2127309 |
| 66.3348948 | 65.2822025 | 69.5851169 | 77.3936894 | 79.5328118 | 77.2127309 |
| 66.3348948 | 64.2822025 | 70.5851169 | 78.3936894 | 80.5328118 | 76.2127309 |
| 66.3348948 | 64.2822025 | 72.5851169 | 78.3936894 | 80.5328118 | 76.2127309 |
| 65.3348948 | 64.2822025 | 72.5851169 | 78.3936894 | 81.5328118 | 75.2127309 |
| 66.3348948 | 63.2822025 | 74.5851169 | 78.3936894 | 82.5328118 | 75.2127309 |
| 66.3348948 | 64.2822025 | 74.5851169 | 78.3936894 | 83.5328118 | 73.2127309 |
| 69.3348948 | 65.2822025 | 74.5851169 | 77.3936894 | 83.5328118 | 72.2127309 |
| 69.3348948 | 65.2822025 | 73.5851169 | 75.3936894 | 83.5328118 | 76.2127309 |
| 69.3348948 | 65.2822025 | 72.5851169 | 75.3936894 | 83.5328118 | 76.2127309 |
| 70.3348948 | 65.2822025 | 72.5851169 | 73.3936894 | 84.5328118 | 77.2127309 |
| 70.3348948 | 64.2822025 | 71.5851169 | 73.3936894 | 83.5328118 | 75.2127309 |
| 70.3348948 | 63.2822025 | 71.5851169 | 72.3936894 | 83.5328118 | 74.2127309 |
| 69.3348948 | 63.2822025 | 73.5851169 | 71.3936894 | 81.5328118 | 74.2127309 |
| 70.3348948 | 64.2822025 | 73.5851169 | 71.3936894 | 78.5328118 | 73.2127309 |
| 70.3348948 | 64.2822025 | 73.5851169 | 71.3936894 | 78.5328118 | 73.2127309 |
| 71.3348948 | 64.2822025 | 73.5851169 | 70.3936894 | 73.5328118 | 74.2127309 |
| 71.3348948 | 63.2822025 | 73.5851169 | 70.3936894 | 73.5328118 | 76.2127309 |
| 71.3348948 | 63.2822025 | 73.5851169 | 71.3936894 | 72.5328118 | 79.2127309 |
| 71.3348948 | 64.2822025 | 70.5851169 | 71.3936894 | 71.5328118 | 79.2127309 |
| 74.3348948 | 68.2822025 | 70.5851169 | 71.3936894 | 71.5328118 | 80.2127309 |
| 74.3348948 | 69.2822025 | 70.5851169 | 71.3936894 | 71.5328118 | 80.2127309 |
| 71.3348948 | 71.2822025 | 67.5851169 | 71.3936894 | 71.5328118 | 68.1199326 |
| 71.3348948 | 71.2822025 | 67.5851169 | 69.3936894 | 71.5328118 | 67.574478  |
| 69.3348948 | 71.2822025 | 67.5851169 | 69.3936894 | 71.5328118 | 67.4835689 |
| 66.3348948 | 73.2822025 | 66.5851169 | 69.3936894 | 69.5328118 | 67.4835689 |
| 64.3348948 | 74.2822025 | 66.5851169 | 76.3936894 | 68.5328118 | 68.3926598 |
| 64.3348948 | 68.2822025 | 66.5851169 | 76.3936894 | 68.5328118 | 68.3926598 |
| 62.3348948 | 67.2822025 | 66.5851169 | 79.3936894 | 68.5328118 | 68.8472053 |
| 62.3348948 | 67.2822025 | 66.5851169 | 79.3936894 | 68.5328118 | 68.9381144 |
| 62.3348948 | 64.2822025 | 66.5851169 | 80.3936894 | 68.5328118 | 68.7562962 |
| 62.3348948 | 63.2822025 | 66.5851169 | 80.3936894 | 69.5328118 | 68.8472053 |
| 62.3348948 | 62.2822025 | 67.5851169 | 69.0290235 | 69.5328118 | 69.0290235 |
| 62.3348948 | 59.2822025 | 67.5851169 | 69.1199326 | 68.5328118 | 69.1199326 |
| 62.3348948 | 59.2822025 | 66.5851169 | 69.1199326 | 67.5328118 | 69.1199326 |
| 62.3348948 | 59.2822025 | 67.5851169 | 69.2108417 | 67.5328118 | 69.2108417 |
| 62.3348948 | 56.2822025 | 67.5851169 | 68.574478  | 67.5328118 | 68.574478  |
| 63.3348948 | 58.2822025 | 67.5851169 | 68.6653871 | 67.5328118 | 68.6653871 |

|            |            |            |            |            |            |
|------------|------------|------------|------------|------------|------------|
| 63.3348948 | 62.2822025 | 67.5851169 | 69.1199326 | 67.5328118 | 69.1199326 |
| 63.3348948 | 63.2822025 | 66.5851169 | 69.1199326 | 66.5328118 | 69.1199326 |
| 66.3348948 | 64.2822025 | 66.5851169 | 69.3926598 | 63.5328118 | 69.3926598 |
| 65.3348948 | 65.2822025 | 66.5851169 | 69.3926598 | 63.5328118 | 69.3926598 |
| 62.3348948 | 65.2822025 | 66.5851169 | 68.8472053 | 63.5328118 | 68.8472053 |
| 60.3348948 | 65.2822025 | 66.5851169 | 68.4835689 | 63.5328118 | 68.4835689 |
| 60.3348948 | 65.2822025 | 66.5851169 | 68.4835689 | 63.5328118 | 68.4835689 |
| 59.3348948 | 66.2822025 | 66.5851169 | 67.16871   | 63.5328118 | 78.2127309 |
| 59.3348948 | 66.2822025 | 66.5851169 | 67.0290235 | 65.5328118 | 78.2127309 |
| 59.3348948 | 66.2822025 | 67.5851169 | 66.8472053 | 65.5328118 | 74.2127309 |
| 59.3348948 | 64.2822025 | 67.5851169 | 66.6653871 | 65.5328118 | 74.2127309 |
| 59.3348948 | 64.2822025 | 68.5851169 | 66.574478  | 66.5328118 | 70.2127309 |
| 60.3348948 | 64.2822025 | 68.5851169 | 67.1199326 | 66.5328118 | 70.2127309 |
| 60.3348948 | 63.2822025 | 68.5851169 | 67.6653871 | 68.5328118 | 72.2127309 |
| 60.3348948 | 64.2822025 | 69.5851169 | 68.1199326 | 69.5328118 | 75.2127309 |
| 61.3348948 | 64.2822025 | 69.5851169 | 68.0290235 | 69.5328118 | 73.2127309 |
| 61.3348948 | 64.2822025 | 69.5851169 | 67.9381144 | 68.5328118 | 72.2127309 |
| 62.3348948 | 64.2822025 | 69.5851169 | 68.0290235 | 67.5328118 | 72.2127309 |
| 62.3348948 | 64.2822025 | 68.5851169 | 67.7562962 | 66.5328118 | 71.2127309 |
| 62.3348948 | 64.2822025 | 67.5851169 | 67.3926598 | 65.5328118 | 69.2127309 |
| 62.3348948 | 64.2822025 | 66.5851169 | 66.9381144 | 65.5328118 | 68.2127309 |
| 62.3348948 | 64.2822025 | 65.5851169 | 66.8472053 | 65.5328118 | 68.2127309 |
| 62.3348948 | 65.2822025 | 65.5851169 | 66.574478  | 65.5328118 | 67.2127309 |
| 62.3348948 | 65.2822025 | 65.5851169 | 66.6653871 | 65.5328118 | 70.2127309 |
| 63.3348948 | 66.2822025 | 65.5851169 | 66.6653871 | 65.5328118 | 70.2127309 |
| 62.3348948 | 68.2822025 | 66.5851169 | 66.7562962 | 65.5328118 | 72.2127309 |
| 62.3348948 | 68.2822025 | 66.5851169 | 81.3936894 | 65.5328118 | 72.2127309 |
| 60.3348948 | 68.2822025 | 66.5851169 | 81.3936894 | 64.5328118 | 76.2127309 |
| 60.3348948 | 68.2822025 | 66.5851169 | 80.3936894 | 64.5328118 | 80.2127309 |
| 59.3348948 | 68.2822025 | 67.5851169 | 80.3936894 | 64.5328118 | 80.2127309 |
| 58.3348948 | 68.2822025 | 67.5851169 | 78.3936894 | 65.5328118 | 80.2127309 |
| 58.3348948 | 67.2822025 | 67.5851169 | 74.3936894 | 66.5328118 | 81.2127309 |
| 58.3348948 | 67.2822025 | 67.5851169 | 73.3936894 | 66.5328118 | 81.2127309 |
| 63.3348948 | 67.2822025 | 67.5851169 | 72.3936894 | 68.5328118 | 81.2127309 |
| 63.3348948 | 67.2822025 | 68.5851169 | 73.3936894 | 68.5328118 | 81.2127309 |
| 64.3348948 | 66.2822025 | 72.5851169 | 74.3936894 | 69.5328118 | 82.2127309 |
| 64.3348948 | 66.2822025 | 73.5851169 | 74.3936894 | 74.5328118 | 82.2127309 |
| 66.3348948 | 66.2822025 | 73.5851169 | 74.3936894 | 75.5328118 | 82.2127309 |
| 66.3348948 | 66.2822025 | 72.5851169 | 74.3936894 | 75.5328118 | 79.2127309 |
| 67.3348948 | 66.2822025 | 69.5851169 | 74.3936894 | 73.5328118 | 79.2127309 |
| 68.3348948 | 66.2822025 | 68.5851169 | 74.3936894 | 72.5328118 | 77.2127309 |
| 68.3348948 | 66.2822025 | 67.5851169 | 73.3936894 | 70.5328118 | 73.2127309 |
| 68.3348948 | 66.2822025 | 66.5851169 | 72.3936894 | 68.5328118 | 73.2127309 |
| 68.3348948 | 66.2822025 | 66.5851169 | 71.3936894 | 67.5328118 | 69.2127309 |
| 68.3348948 | 67.2822025 | 65.5851169 | 70.3936894 | 67.5328118 | 68.2127309 |

|            |            |            |            |            |            |
|------------|------------|------------|------------|------------|------------|
| 68.3348948 | 68.2822025 | 65.5851169 | 70.3936894 | 67.5328118 | 67.2127309 |
| 68.3348948 | 68.2822025 | 65.5851169 | 70.3936894 | 67.5328118 | 65.2127309 |
| 69.3348948 | 69.2822025 | 65.5851169 | 70.3936894 | 67.5328118 | 65.2127309 |
| 70.3348948 | 69.2822025 | 64.5851169 | 72.3936894 | 67.5328118 | 64.2127309 |
| 70.3348948 | 69.2822025 | 64.5851169 | 72.3936894 | 67.5328118 | 64.2127309 |
| 70.3348948 | 69.2822025 | 63.5851169 | 72.3936894 | 67.5328118 | 64.2127309 |
| 70.3348948 | 71.2822025 | 63.5851169 | 72.3936894 | 68.5328118 | 64.2127309 |
| 70.3348948 | 70.2822025 | 63.5851169 | 73.3936894 | 68.5328118 | 64.2127309 |
| 67.3348948 | 69.2822025 | 63.5851169 | 74.3936894 | 65.5328118 | 61.2127309 |
| 67.3348948 | 67.2822025 | 63.5851169 | 73.3936894 | 65.5328118 | 60.2127309 |
| 67.3348948 | 66.2822025 | 63.5851169 | 72.3936894 | 65.5328118 | 60.2127309 |
| 66.3348948 | 64.2822025 | 63.5851169 | 72.3936894 | 66.5328118 | 61.2127309 |
| 66.3348948 | 64.2822025 | 63.5851169 | 72.3936894 | 67.5328118 | 65.2127309 |
| 65.3348948 | 64.2822025 | 64.5851169 | 71.3936894 | 67.5328118 | 66.2127309 |
| 64.3348948 | 64.2822025 | 65.5851169 | 68.3936894 | 70.5328118 | 66.2127309 |
| 64.3348948 | 64.2822025 | 65.5851169 | 68.3936894 | 70.5328118 | 66.2127309 |
| 60.3348948 | 61.2822025 | 65.5851169 | 66.3936894 | 71.5328118 | 67.2127309 |
| 60.3348948 | 58.2822025 | 66.5851169 | 67.3936894 | 71.5328118 | 67.2127309 |
| 66.3348948 | 58.2822025 | 66.5851169 | 67.3936894 | 70.5328118 | 68.2127309 |
| 67.3348948 | 54.2822025 | 67.5851169 | 67.3936894 | 70.5328118 | 68.2127309 |
| 70.3348948 | 54.2822025 | 68.5851169 | 65.3936894 | 70.5328118 | 66.2127309 |
| 71.3348948 | 55.2822025 | 68.5851169 | 65.3936894 | 70.5328118 | 66.2127309 |
| 72.3348948 | 56.2822025 | 68.5851169 | 64.3936894 | 70.5328118 | 66.2127309 |
| 73.3348948 | 59.2822025 | 69.5851169 | 65.3936894 | 70.5328118 | 68.2127309 |
| 73.3348948 | 62.2822025 | 69.5851169 | 66.3936894 | 71.5328118 | 68.2127309 |
| 73.3348948 | 63.2822025 | 69.5851169 | 66.3936894 | 71.5328118 | 66.2127309 |
| 73.3348948 | 64.2822025 | 69.5851169 | 68.3936894 | 71.5328118 | 66.2127309 |
| 73.3348948 | 65.2822025 | 69.5851169 | 71.3936894 | 71.5328118 | 64.2127309 |
| 73.3348948 | 67.2822025 | 68.5851169 | 73.3936894 | 72.5328118 | 63.2127309 |
| 73.3348948 | 67.2822025 | 67.5851169 | 73.3936894 | 72.5328118 | 63.2127309 |
| 72.3348948 | 68.2822025 | 66.5851169 | 72.3936894 | 72.5328118 | 63.2127309 |
| 71.3348948 | 68.2822025 | 65.5851169 | 70.3936894 | 72.5328118 | 66.2127309 |
| 71.3348948 | 70.2822025 | 65.5851169 | 70.3936894 | 72.5328118 | 66.2127309 |
| 71.3348948 | 72.2822025 | 64.5851169 | 65.3936894 | 72.5328118 | 66.2127309 |
| 71.3348948 | 72.2822025 | 64.5851169 | 66.3936894 | 72.5328118 | 66.2127309 |
| 71.3348948 | 73.2822025 | 64.5851169 | 68.3936894 | 72.5328118 | 61.2127309 |
| 71.3348948 | 73.2822025 | 64.5851169 | 70.3936894 | 72.5328118 | 60.2127309 |
| 72.3348948 | 73.2822025 | 64.5851169 | 71.3936894 | 72.5328118 | 59.2127309 |
| 72.3348948 | 73.2822025 | 63.5851169 | 71.3936894 | 72.5328118 | 58.2127309 |
| 73.3348948 | 73.2822025 | 63.5851169 | 72.3936894 | 70.5328118 | 58.2127309 |
| 73.3348948 | 73.2822025 | 63.5851169 | 73.3936894 | 68.5328118 | 63.2127309 |
| 73.3348948 | 73.2822025 | 63.5851169 | 75.3936894 | 64.5328118 | 64.2127309 |
| 72.3348948 | 73.2822025 | 67.5851169 | 77.3936894 | 64.5328118 | 64.2127309 |
| 70.3348948 | 74.2822025 | 68.5851169 | 77.3936894 | 64.5328118 | 64.2127309 |
| 70.3348948 | 74.2822025 | 70.5851169 | 78.3936894 | 63.5328118 | 63.2127309 |



|            |            |            |            |            |            |
|------------|------------|------------|------------|------------|------------|
| 70.3348948 | 73.2822025 | 70.5851169 | 80.3936894 | 63.5328118 | 62.2127309 |
| 70.3348948 | 69.2822025 | 70.5851169 | 81.3936894 | 64.5328118 | 61.2127309 |
| 71.3348948 | 68.2822025 | 71.5851169 | 82.3936894 | 64.5328118 | 61.2127309 |
| 72.3348948 | 68.2822025 | 71.5851169 | 83.3936894 | 64.5328118 | 60.2127309 |
| 73.3348948 | 68.2822025 | 72.5851169 | 83.3936894 | 65.5328118 | 61.2127309 |
| 74.3348948 | 68.2822025 | 71.5851169 | 69.3926598 | 65.5328118 | 62.2127309 |
| 74.3348948 | 68.2822025 | 71.5851169 | 69.4835689 | 65.5328118 | 62.2127309 |
| 74.3348948 | 68.2822025 | 71.5851169 | 70.0290235 | 65.5328118 | 67.2127309 |
| 74.3348948 | 68.2822025 | 71.5851169 | 70.2108417 | 67.5328118 | 70.2127309 |
| 74.3348948 | 67.2822025 | 71.5851169 | 69.9381144 | 68.5328118 | 71.2127309 |
| 74.3348948 | 66.2822025 | 71.5851169 | 69.4835689 | 68.5328118 | 72.2127309 |
| 75.3348948 | 66.2822025 | 71.5851169 | 69.3926598 | 68.5328118 | 72.2127309 |
| 80.3348948 | 66.2822025 | 70.5851169 | 82.3936894 | 68.5328118 | 72.2127309 |
| 82.3348948 | 65.2822025 | 70.5851169 | 82.3936894 | 68.5328118 | 74.2127309 |
| 81.3348948 | 65.2822025 | 71.5851169 | 82.3936894 | 67.5328118 | 75.2127309 |
| 79.3348948 | 65.2822025 | 71.5851169 | 81.3936894 | 67.5328118 | 75.2127309 |
| 78.3348948 | 65.2822025 | 71.5851169 | 81.3936894 | 66.5328118 | 80.2127309 |
| 78.3348948 | 66.2822025 | 67.5851169 | 82.3936894 | 66.5328118 | 82.2127309 |
| 78.3348948 | 67.2822025 | 67.5851169 | 83.3936894 | 65.5328118 | 83.2127309 |
| 78.3348948 | 67.2822025 | 66.5851169 | 83.3936894 | 65.5328118 | 83.2127309 |
| 78.3348948 | 67.2822025 | 65.5851169 | 68.574478  | 65.5328118 | 68.574478  |
| 76.3348948 | 68.2822025 | 65.5851169 | 81.3936894 | 65.5328118 | 68.1199326 |
| 75.3348948 | 68.2822025 | 65.5851169 | 81.3936894 | 65.5328118 | 68.1199326 |
| 73.3348948 | 68.2822025 | 64.5851169 | 81.3936894 | 65.5328118 | 67.8472053 |
| 73.3348948 | 68.2822025 | 64.5851169 | 81.3936894 | 65.5328118 | 84.2127309 |
| 72.3348948 | 66.2822025 | 65.5851169 | 81.3936894 | 65.5328118 | 67.2108417 |
| 71.3348948 | 66.2822025 | 64.5851169 | 81.3936894 | 64.5328118 | 66.8472053 |
| 71.3348948 | 66.2822025 | 64.5851169 | 66.574478  | 64.5328118 | 66.574478  |
| 71.3348948 | 66.2822025 | 64.5851169 | 81.3936894 | 64.5328118 | 66.7562962 |
| 71.3348948 | 66.2822025 | 64.5851169 | 66.6653871 | 64.5328118 | 79.2127309 |
| 71.3348948 | 66.2822025 | 64.5851169 | 81.3936894 | 67.5328118 | 77.2127309 |
| 68.3348948 | 66.2822025 | 64.5851169 | 81.3936894 | 68.5328118 | 77.2127309 |
| 67.3348948 | 66.2822025 | 64.5851169 | 79.3936894 | 68.5328118 | 75.2127309 |
| 67.3348948 | 66.2822025 | 64.5851169 | 79.3936894 | 72.5328118 | 75.2127309 |
| 68.3348948 | 66.2822025 | 64.5851169 | 75.3936894 | 74.5328118 | 75.2127309 |
| 69.3348948 | 65.2822025 | 64.5851169 | 73.3936894 | 79.5328118 | 75.2127309 |
| 69.3348948 | 65.2822025 | 65.5851169 | 73.3936894 | 79.5328118 | 74.2127309 |
| 68.3348948 | 65.2822025 | 65.5851169 | 73.3936894 | 79.5328118 | 76.2127309 |
| 69.3348948 | 64.2822025 | 65.5851169 | 73.3936894 | 79.5328118 | 76.2127309 |
| 69.3348948 | 63.2822025 | 65.5851169 | 73.3936894 | 79.5328118 | 76.2127309 |
| 69.3348948 | 61.2822025 | 67.5851169 | 73.3936894 | 76.5328118 | 75.2127309 |
| 70.3348948 | 61.2822025 | 67.5851169 | 72.3936894 | 74.5328118 | 75.2127309 |
| 70.3348948 | 59.2822025 | 66.5851169 | 72.3936894 | 74.5328118 | 75.2127309 |
| 70.3348948 | 59.2822025 | 66.5851169 | 72.3936894 | 74.5328118 | 75.2127309 |
| 71.3348948 | 59.2822025 | 66.5851169 | 72.3936894 | 73.5328118 | 75.2127309 |

|            |            |            |            |            |            |
|------------|------------|------------|------------|------------|------------|
| 71.3348948 | 59.2822025 | 66.5851169 | 71.3936894 | 71.5328118 | 74.2127309 |
| 71.3348948 | 60.2822025 | 66.5851169 | 69.3936894 | 69.5328118 | 74.2127309 |
| 71.3348948 | 61.2822025 | 66.5851169 | 67.3936894 | 69.5328118 | 74.2127309 |
| 71.3348948 | 62.2822025 | 66.5851169 | 66.3936894 | 69.5328118 | 76.2127309 |
| 71.3348948 | 63.2822025 | 66.5851169 | 66.3936894 | 68.5328118 | 77.2127309 |
| 72.3348948 | 63.2822025 | 67.5851169 | 65.3936894 | 68.5328118 | 77.2127309 |
| 72.3348948 | 63.2822025 | 67.5851169 | 65.3936894 | 68.5328118 | 77.2127309 |
| 72.3348948 | 62.2822025 | 71.5851169 | 64.3936894 | 68.5328118 | 72.2127309 |
| 72.3348948 | 62.2822025 | 72.5851169 | 63.3936894 | 68.5328118 | 71.2127309 |
| 75.3348948 | 62.2822025 | 73.5851169 | 64.3936894 | 68.5328118 | 71.2127309 |
| 76.3348948 | 62.2822025 | 81.5851169 | 65.3936894 | 68.5328118 | 70.2127309 |
| 77.3348948 | 60.2822025 | 83.5851169 | 67.3936894 | 68.5328118 | 70.2127309 |
| 72.3348948 | 60.2822025 | 71.7562962 | 68.3936894 | 68.5328118 | 71.2127309 |
| 70.3348948 | 56.2822025 | 71.3017507 | 69.3936894 | 68.5328118 | 71.2127309 |
| 68.3348948 | 55.2822025 | 71.0290235 | 69.3936894 | 71.5328118 | 71.2127309 |
| 67.3348948 | 55.2822025 | 71.1199326 | 69.3936894 | 73.5328118 | 74.2127309 |
| 67.3348948 | 56.2822025 | 71.2108417 | 69.3936894 | 74.5328118 | 74.2127309 |
| 66.3348948 | 56.2822025 | 70.6653871 | 69.3936894 | 74.5328118 | 73.2127309 |
| 66.3348948 | 61.2822025 | 70.7562962 | 70.3936894 | 74.5328118 | 69.2127309 |
| 66.3348948 | 65.2822025 | 70.8472053 | 70.3936894 | 74.5328118 | 68.2127309 |
| 66.3348948 | 68.2822025 | 71.2108417 | 70.3936894 | 74.5328118 | 67.2127309 |
| 66.3348948 | 69.2822025 | 71.1199326 | 71.3936894 | 74.5328118 | 65.2127309 |
| 66.3348948 | 69.2822025 | 70.9381144 | 71.3936894 | 74.5328118 | 64.2127309 |
| 66.3348948 | 70.2822025 | 70.6653871 | 71.3936894 | 74.5328118 | 64.2127309 |
| 66.3348948 | 73.2822025 | 74.5851169 | 72.3936894 | 74.5328118 | 67.2127309 |
| 66.3348948 | 76.2822025 | 70.5851169 | 72.3936894 | 75.5328118 | 68.2127309 |
| 67.3348948 | 76.2822025 | 67.5851169 | 73.3936894 | 75.5328118 | 68.2127309 |
| 66.3348948 | 76.2822025 | 67.5851169 | 73.3936894 | 75.5328118 | 69.2127309 |
| 66.3348948 | 76.2822025 | 66.5851169 | 73.3936894 | 75.5328118 | 68.2127309 |
| 67.3348948 | 75.2822025 | 66.5851169 | 73.3936894 | 82.5328118 | 66.2127309 |
| 67.3348948 | 75.2822025 | 66.5851169 | 73.3936894 | 81.5328118 | 66.2127309 |
| 67.3348948 | 75.2822025 | 67.5851169 | 73.3936894 | 81.5328118 | 64.2127309 |
| 66.3348948 | 75.2822025 | 67.5851169 | 73.3936894 | 79.5328118 | 63.2127309 |
| 66.3348948 | 75.2822025 | 67.5851169 | 73.3936894 | 79.5328118 | 63.2127309 |
| 64.3348948 | 76.2822025 | 67.5851169 | 71.3936894 | 75.5328118 | 63.2127309 |
| 64.3348948 | 76.2822025 | 67.5851169 | 71.3936894 | 74.5328118 | 63.2127309 |
| 64.3348948 | 76.2822025 | 67.5851169 | 71.3936894 | 74.5328118 | 60.2127309 |
| 64.3348948 | 75.2822025 | 67.5851169 | 71.3936894 | 74.5328118 | 58.2127309 |
| 64.3348948 | 74.2822025 | 68.5851169 | 70.3936894 | 74.5328118 | 58.2127309 |
| 64.3348948 | 74.2822025 | 69.5851169 | 71.3936894 | 74.5328118 | 64.2127309 |
| 64.3348948 | 74.2822025 | 70.5851169 | 71.3936894 | 75.5328118 | 68.2127309 |
| 73.3348948 | 74.2822025 | 70.5851169 | 70.3936894 | 76.5328118 | 71.2127309 |
| 75.3348948 | 74.2822025 | 72.5851169 | 68.3936894 | 77.5328118 | 71.2127309 |
| 75.3348948 | 74.2822025 | 72.5851169 | 67.3936894 | 77.5328118 | 75.2127309 |
| 75.3348948 | 76.2822025 | 74.5851169 | 67.3936894 | 77.5328118 | 77.2127309 |

|            |            |            |            |            |            |
|------------|------------|------------|------------|------------|------------|
| 75.3348948 | 76.2822025 | 74.5851169 | 66.3936894 | 78.5328118 | 77.2127309 |
| 75.3348948 | 76.2822025 | 74.5851169 | 65.3936894 | 79.5328118 | 77.2127309 |
| 75.3348948 | 76.2822025 | 72.5851169 | 65.3936894 | 79.5328118 | 77.2127309 |
| 75.3348948 | 76.2822025 | 70.5851169 | 65.3936894 | 79.5328118 | 74.2127309 |
| 76.3348948 | 76.2822025 | 70.5851169 | 66.3936894 | 79.5328118 | 73.2127309 |
| 76.3348948 | 76.2822025 | 70.5851169 | 66.3936894 | 79.5328118 | 72.2127309 |
| 76.3348948 | 78.2822025 | 70.5851169 | 67.3936894 | 79.5328118 | 72.2127309 |
| 77.3348948 | 78.2822025 | 70.5851169 | 67.3936894 | 71.5328118 | 71.2127309 |
| 77.3348948 | 78.2822025 | 70.5851169 | 67.3936894 | 71.5328118 | 70.2127309 |
| 77.3348948 | 79.2822025 | 68.5851169 | 67.3936894 | 71.5328118 | 70.2127309 |
| 77.3348948 | 80.2822025 | 68.5851169 | 67.3936894 | 70.5328118 | 70.2127309 |
| 77.3348948 | 80.2822025 | 69.5851169 | 66.3936894 | 70.5328118 | 71.2127309 |
| 77.3348948 | 81.2822025 | 71.5851169 | 66.3936894 | 70.5328118 | 71.2127309 |
| 78.3348948 | 81.2822025 | 71.5851169 | 67.3936894 | 69.5328118 | 71.2127309 |
| 80.3348948 | 81.2822025 | 71.5851169 | 71.3936894 | 69.5328118 | 64.2127309 |
| 80.3348948 | 81.2822025 | 71.5851169 | 70.3936894 | 68.5328118 | 61.2127309 |
| 80.3348948 | 82.2822025 | 71.5851169 | 68.3936894 | 69.5328118 | 60.2127309 |
| 80.3348948 | 82.2822025 | 70.5851169 | 68.3936894 | 69.5328118 | 61.2127309 |
| 79.3348948 | 82.2822025 | 70.5851169 | 67.3936894 | 69.5328118 | 62.2127309 |
| 79.3348948 | 81.2822025 | 70.5851169 | 67.3936894 | 68.5328118 | 62.2127309 |
| 78.3348948 | 79.2822025 | 71.5851169 | 68.3936894 | 68.5328118 | 63.2127309 |
| 74.3348948 | 79.2822025 | 71.5851169 | 68.3936894 | 67.5328118 | 66.2127309 |
| 73.3348948 | 78.2822025 | 71.5851169 | 69.3936894 | 67.5328118 | 67.2127309 |
| 72.3348948 | 78.2822025 | 71.5851169 | 69.3936894 | 66.5328118 | 70.2127309 |
| 71.3348948 | 78.2822025 | 71.5851169 | 69.3936894 | 66.5328118 | 70.2127309 |
| 69.3348948 | 78.2822025 | 71.5851169 | 68.3936894 | 65.5328118 | 70.2127309 |
| 67.3348948 | 78.2822025 | 71.5851169 | 68.3936894 | 65.5328118 | 65.2127309 |
| 66.3348948 | 78.2822025 | 72.5851169 | 67.3936894 | 66.5328118 | 61.2127309 |
| 65.3348948 | 77.2822025 | 72.5851169 | 68.3936894 | 66.5328118 | 60.2127309 |
| 65.3348948 | 75.2822025 | 72.5851169 | 68.3936894 | 66.5328118 | 59.2127309 |
| 65.3348948 | 75.2822025 | 72.5851169 | 68.3936894 | 66.5328118 | 61.2127309 |
| 65.3348948 | 74.2822025 | 70.5851169 | 68.3936894 | 67.5328118 | 63.2127309 |
| 67.3348948 | 69.2822025 | 70.5851169 | 67.3936894 | 67.5328118 | 65.2127309 |
| 67.3348948 | 68.2822025 | 70.5851169 | 68.3936894 | 67.5328118 | 66.2127309 |
| 68.3348948 | 66.2822025 | 70.5851169 | 68.3936894 | 67.5328118 | 67.2127309 |
| 68.3348948 | 64.2822025 | 70.5851169 | 68.3936894 | 67.5328118 | 67.2127309 |
| 67.3348948 | 63.2822025 | 70.5851169 | 68.3936894 | 67.5328118 | 66.2127309 |
| 66.3348948 | 63.2822025 | 70.5851169 | 68.3936894 | 67.5328118 | 66.2127309 |
| 67.3348948 | 62.2822025 | 69.5851169 | 68.3936894 | 67.5328118 | 66.2127309 |
| 67.3348948 | 58.2822025 | 68.5851169 | 68.3936894 | 66.5328118 | 67.2127309 |
| 67.3348948 | 54.2822025 | 68.5851169 | 68.3936894 | 66.5328118 | 68.2127309 |
| 68.3348948 | 54.2822025 | 68.5851169 | 68.3936894 | 66.5328118 | 69.2127309 |
| 68.3348948 | 54.2822025 | 68.5851169 | 68.3936894 | 66.5328118 | 69.2127309 |
| 68.3348948 | 53.2822025 | 68.5851169 | 70.3936894 | 65.5328118 | 69.2127309 |
| 68.3348948 | 53.2822025 | 68.5851169 | 71.3936894 | 62.5328118 | 69.2127309 |

|            |            |            |            |            |            |
|------------|------------|------------|------------|------------|------------|
| 66.3348948 | 53.2822025 | 68.5851169 | 69.3936894 | 60.5328118 | 68.2127309 |
| 65.3348948 | 53.2822025 | 68.5851169 | 67.3936894 | 59.5328118 | 68.2127309 |
| 65.3348948 | 53.2822025 | 68.5851169 | 66.3936894 | 59.5328118 | 68.2127309 |
| 66.3348948 | 53.2822025 | 68.5851169 | 66.3936894 | 58.5328118 | 68.2127309 |
| 71.3348948 | 54.2822025 | 68.5851169 | 68.3936894 | 58.5328118 | 69.2127309 |
| 72.3348948 | 54.2822025 | 68.5851169 | 70.3936894 | 58.5328118 | 70.2127309 |
| 72.3348948 | 54.2822025 | 69.5851169 | 70.3936894 | 59.5328118 | 70.2127309 |
| 72.3348948 | 54.2822025 | 70.5851169 | 75.3936894 | 60.5328118 | 70.2127309 |
| 70.3348948 | 54.2822025 | 70.5851169 | 75.3936894 | 60.5328118 | 70.2127309 |
| 69.3348948 | 55.2822025 | 71.5851169 | 75.3936894 | 61.5328118 | 70.2127309 |
| 68.3348948 | 55.2822025 | 71.5851169 | 75.3936894 | 61.5328118 | 70.2127309 |
| 67.3348948 | 55.2822025 | 71.5851169 | 75.3936894 | 64.5328118 | 74.2127309 |
| 67.3348948 | 54.2822025 | 71.5851169 | 76.3936894 | 64.5328118 | 74.2127309 |
| 67.3348948 | 54.2822025 | 70.5851169 | 76.3936894 | 65.5328118 | 77.2127309 |
| 68.3348948 | 54.2822025 | 70.5851169 | 76.3936894 | 66.5328118 | 79.2127309 |
| 68.3348948 | 54.2822025 | 69.5851169 | 77.3936894 | 68.5328118 | 79.2127309 |
| 69.3348948 | 54.2822025 | 69.5851169 | 77.3936894 | 68.5328118 | 81.2127309 |
| 69.3348948 | 54.2822025 | 69.5851169 | 74.3936894 | 70.5328118 | 81.2127309 |
| 69.3348948 | 55.2822025 | 68.5851169 | 72.3936894 | 70.5328118 | 80.2127309 |
| 66.3348948 | 57.2822025 | 68.5851169 | 72.3936894 | 71.5328118 | 73.2127309 |
| 65.3348948 | 59.2822025 | 68.5851169 | 72.3936894 | 71.5328118 | 68.2127309 |
| 64.3348948 | 63.2822025 | 68.5851169 | 72.3936894 | 71.5328118 | 68.2127309 |
| 65.3348948 | 65.2822025 | 67.5851169 | 72.3936894 | 71.5328118 | 66.2127309 |
| 65.3348948 | 65.2822025 | 67.5851169 | 69.3936894 | 71.5328118 | 66.2127309 |
| 65.3348948 | 66.2822025 | 67.5851169 | 68.3936894 | 71.5328118 | 66.2127309 |
| 65.3348948 | 66.2822025 | 67.5851169 | 69.3936894 | 71.5328118 | 67.2127309 |
| 65.3348948 | 67.2822025 | 67.5851169 | 70.3936894 | 71.5328118 | 67.2127309 |
| 65.3348948 | 68.2822025 | 66.5851169 | 69.3936894 | 72.5328118 | 67.2127309 |
| 65.3348948 | 68.2822025 | 66.5851169 | 68.3936894 | 72.5328118 | 67.2127309 |
| 65.3348948 | 68.2822025 | 66.5851169 | 64.3936894 | 72.5328118 | 67.2127309 |
| 66.3348948 | 69.2822025 | 66.5851169 | 60.3936894 | 72.5328118 | 67.2127309 |
| 67.3348948 | 69.2822025 | 66.5851169 | 57.3936894 | 73.5328118 | 67.2127309 |
| 67.3348948 | 69.2822025 | 68.5851169 | 56.3936894 | 73.5328118 | 64.2127309 |
| 68.3348948 | 69.2822025 | 68.5851169 | 56.3936894 | 73.5328118 | 64.2127309 |
| 68.3348948 | 69.2822025 | 68.5851169 | 57.3936894 | 68.5328118 | 62.2127309 |
| 68.3348948 | 70.2822025 | 68.5851169 | 59.3936894 | 67.5328118 | 62.2127309 |
| 68.3348948 | 70.2822025 | 69.5851169 | 60.3936894 | 65.5328118 | 62.2127309 |
| 68.3348948 | 70.2822025 | 69.5851169 | 62.3936894 | 65.5328118 | 64.2127309 |
| 69.3348948 | 70.2822025 | 69.5851169 | 64.3936894 | 65.5328118 | 64.2127309 |
| 69.3348948 | 74.2822025 | 69.5851169 | 65.3936894 | 66.5328118 | 65.2127309 |
| 69.3348948 | 75.2822025 | 69.5851169 | 65.3936894 | 65.5328118 | 67.2127309 |
| 69.3348948 | 76.2822025 | 69.5851169 | 65.3936894 | 65.5328118 | 66.2127309 |
| 69.3348948 | 76.2822025 | 69.5851169 | 64.3936894 | 65.5328118 | 66.2127309 |
| 70.3348948 | 76.2822025 | 71.5851169 | 64.3936894 | 65.5328118 | 66.2127309 |
| 70.3348948 | 76.2822025 | 71.5851169 | 65.3936894 | 64.5328118 | 66.2127309 |

|            |            |            |            |            |            |
|------------|------------|------------|------------|------------|------------|
| 70.3348948 | 76.2822025 | 73.5851169 | 66.3936894 | 64.5328118 | 66.2127309 |
| 70.3348948 | 76.2822025 | 72.5851169 | 67.3936894 | 63.5328118 | 67.2127309 |
| 70.3348948 | 76.2822025 | 70.5851169 | 67.3936894 | 63.5328118 | 68.2127309 |
| 70.3348948 | 76.2822025 | 70.5851169 | 67.3936894 | 64.5328118 | 68.2127309 |
| 70.3348948 | 78.2822025 | 69.5851169 | 67.3936894 | 64.5328118 | 69.2127309 |
| 70.3348948 | 79.2822025 | 69.5851169 | 68.3936894 | 64.5328118 | 70.2127309 |
| 70.3348948 | 79.2822025 | 69.5851169 | 68.3936894 | 64.5328118 | 70.2127309 |
| 70.3348948 | 80.2822025 | 68.5851169 | 66.3936894 | 64.5328118 | 70.2127309 |
| 71.3348948 | 80.2822025 | 68.5851169 | 65.3936894 | 63.5328118 | 70.2127309 |
| 71.3348948 | 81.2822025 | 69.5851169 | 64.3936894 | 62.5328118 | 69.2127309 |
| 72.3348948 | 81.2822025 | 69.5851169 | 64.3936894 | 62.5328118 | 70.2127309 |
| 72.3348948 | 81.2822025 | 69.5851169 | 64.3936894 | 62.5328118 | 70.2127309 |
| 72.3348948 | 81.2822025 | 69.5851169 | 63.3936894 | 64.5328118 | 71.2127309 |
| 72.3348948 | 81.2822025 | 69.5851169 | 63.3936894 | 67.5328118 | 72.2127309 |
| 72.3348948 | 81.2822025 | 69.5851169 | 64.3936894 | 67.5328118 | 72.2127309 |
| 72.3348948 | 80.2822025 | 69.5851169 | 65.3936894 | 69.5328118 | 72.2127309 |
| 72.3348948 | 79.2822025 | 69.5851169 | 66.3936894 | 69.5328118 | 70.2127309 |
| 72.3348948 | 79.2822025 | 69.5851169 | 65.3936894 | 69.5328118 | 70.2127309 |
| 72.3348948 | 79.2822025 | 68.5851169 | 64.3936894 | 69.5328118 | 70.2127309 |
| 71.3348948 | 78.2822025 | 68.5851169 | 62.3936894 | 69.5328118 | 71.2127309 |
| 71.3348948 | 78.2822025 | 67.5851169 | 62.3936894 | 70.5328118 | 71.2127309 |
| 68.3348948 | 78.2822025 | 67.5851169 | 63.3936894 | 70.5328118 | 71.2127309 |
| 68.3348948 | 77.2822025 | 68.5851169 | 64.3936894 | 72.5328118 | 71.2127309 |
| 67.3348948 | 74.2822025 | 68.5851169 | 65.3936894 | 72.5328118 | 71.2127309 |
| 66.3348948 | 73.2822025 | 69.5851169 | 65.3936894 | 72.5328118 | 71.2127309 |
| 66.3348948 | 73.2822025 | 69.5851169 | 66.3936894 | 73.5328118 | 70.2127309 |
| 74.3348948 | 73.2822025 | 69.5851169 | 68.3936894 | 74.5328118 | 70.2127309 |
| 75.3348948 | 72.2822025 | 69.5851169 | 68.3936894 | 75.5328118 | 70.2127309 |
| 74.3348948 | 72.2822025 | 69.5851169 | 68.3936894 | 77.5328118 | 70.2127309 |
| 73.3348948 | 72.2822025 | 69.5851169 | 68.3936894 | 78.5328118 | 71.2127309 |
| 72.3348948 | 72.2822025 | 69.5851169 | 67.3936894 | 78.5328118 | 71.2127309 |
| 71.3348948 | 72.2822025 | 69.5851169 | 67.3936894 | 78.5328118 | 71.2127309 |
| 70.3348948 | 72.2822025 | 69.5851169 | 67.3936894 | 77.5328118 | 72.2127309 |
| 69.3348948 | 72.2822025 | 68.5851169 | 68.3936894 | 75.5328118 | 71.2127309 |
| 69.3348948 | 72.2822025 | 69.5851169 | 69.3936894 | 75.5328118 | 71.2127309 |
| 68.3348948 | 73.2822025 | 69.5851169 | 70.3936894 | 74.5328118 | 71.2127309 |
| 68.3348948 | 73.2822025 | 69.5851169 | 69.3936894 | 73.5328118 | 71.2127309 |
| 69.3348948 | 71.2822025 | 69.5851169 | 68.3936894 | 73.5328118 | 71.2127309 |
| 72.3348948 | 70.2822025 | 69.5851169 | 67.3936894 | 73.5328118 | 74.2127309 |
| 74.3348948 | 67.2822025 | 69.5851169 | 66.3936894 | 72.5328118 | 74.2127309 |
| 75.3348948 | 67.2822025 | 69.5851169 | 66.3936894 | 71.5328118 | 74.2127309 |
| 75.3348948 | 67.2822025 | 69.5851169 | 66.3936894 | 71.5328118 | 73.2127309 |
| 74.3348948 | 67.2822025 | 70.5851169 | 66.3936894 | 71.5328118 | 72.2127309 |
| 71.3348948 | 68.2822025 | 69.5851169 | 66.3936894 | 71.5328118 | 72.2127309 |
| 69.3348948 | 68.2822025 | 69.5851169 | 66.3936894 | 71.5328118 | 72.2127309 |

|            |            |            |            |            |            |
|------------|------------|------------|------------|------------|------------|
| 68.3348948 | 68.2822025 | 68.5851169 | 66.3936894 | 70.5328118 | 70.2127309 |
| 67.3348948 | 69.2822025 | 68.5851169 | 66.3936894 | 70.5328118 | 70.2127309 |
| 67.3348948 | 69.2822025 | 68.5851169 | 66.3936894 | 70.5328118 | 70.2127309 |
| 67.3348948 | 69.2822025 | 68.5851169 | 68.3936894 | 70.5328118 | 69.2127309 |
| 71.3348948 | 69.2822025 | 67.5851169 | 70.3936894 | 70.5328118 | 69.2127309 |
| 71.3348948 | 69.2822025 | 67.5851169 | 71.3936894 | 70.5328118 | 71.2127309 |
| 71.3348948 | 70.2822025 | 67.5851169 | 70.3936894 | 71.5328118 | 72.2127309 |
| 71.3348948 | 70.2822025 | 67.5851169 | 70.3936894 | 72.5328118 | 74.2127309 |
| 69.3348948 | 69.2822025 | 67.5851169 | 70.3936894 | 72.5328118 | 73.2127309 |
| 68.3348948 | 68.2822025 | 68.5851169 | 71.3936894 | 72.5328118 | 73.2127309 |
| 67.3348948 | 67.2822025 | 69.5851169 | 70.3936894 | 72.5328118 | 73.2127309 |
| 67.3348948 | 67.2822025 | 72.5851169 | 70.3936894 | 72.5328118 | 73.2127309 |
| 67.3348948 | 67.2822025 | 77.5851169 | 70.3936894 | 74.5328118 | 72.2127309 |
| 68.3348948 | 66.2822025 | 77.5851169 | 69.3936894 | 74.5328118 | 71.2127309 |
| 68.3348948 | 67.2822025 | 81.5851169 | 70.3936894 | 74.5328118 | 71.2127309 |
| 68.3348948 | 67.2822025 | 81.5851169 | 70.3936894 | 74.5328118 | 71.2127309 |
| 68.3348948 | 68.2822025 | 85.5851169 | 71.3936894 | 75.5328118 | 73.2127309 |
| 68.3348948 | 69.2822025 | 71.8472053 | 71.3936894 | 74.5328118 | 73.2127309 |
| 68.3348948 | 70.2822025 | 71.2108417 | 71.3936894 | 72.5328118 | 74.2127309 |
| 68.3348948 | 71.2822025 | 71.4835689 | 71.3936894 | 72.5328118 | 75.2127309 |
| 68.3348948 | 71.2822025 | 79.5851169 | 71.3936894 | 72.5328118 | 75.2127309 |
| 68.3348948 | 71.2822025 | 79.5851169 | 71.3936894 | 72.5328118 | 74.2127309 |
| 68.3348948 | 71.2822025 | 79.5851169 | 71.3936894 | 72.5328118 | 73.2127309 |
| 67.3348948 | 71.2822025 | 79.5851169 | 72.3936894 | 73.5328118 | 73.2127309 |
| 67.3348948 | 70.2822025 | 79.5851169 | 72.3936894 | 73.5328118 | 73.2127309 |
| 67.3348948 | 69.2822025 | 79.5851169 | 70.3936894 | 71.5328118 | 73.2127309 |
| 67.3348948 | 69.2822025 | 79.5851169 | 68.3936894 | 71.5328118 | 73.2127309 |
| 66.3348948 | 69.2822025 | 78.5851169 | 66.3936894 | 70.5328118 | 74.2127309 |
| 65.3348948 | 69.2822025 | 73.5851169 | 65.3936894 | 70.5328118 | 75.2127309 |
| 63.3348948 | 70.2822025 | 73.5851169 | 65.3936894 | 70.5328118 | 76.2127309 |
| 63.3348948 | 69.2822025 | 73.5851169 | 65.3936894 | 69.5328118 | 76.2127309 |
| 62.3348948 | 68.2822025 | 73.5851169 | 65.3936894 | 68.5328118 | 76.2127309 |
| 62.3348948 | 67.2822025 | 73.5851169 | 65.3936894 | 68.5328118 | 75.2127309 |
| 62.3348948 | 67.2822025 | 77.5851169 | 65.3936894 | 68.5328118 | 74.2127309 |
| 62.3348948 | 67.2822025 | 76.5851169 | 65.3936894 | 66.5328118 | 75.2127309 |
| 62.3348948 | 67.2822025 | 73.5851169 | 65.3936894 | 66.5328118 | 75.2127309 |
| 63.3348948 | 68.2822025 | 72.5851169 | 68.3936894 | 69.5328118 | 75.2127309 |
| 63.3348948 | 69.2822025 | 71.5851169 | 68.3936894 | 69.5328118 | 75.2127309 |
| 63.3348948 | 69.2822025 | 71.5851169 | 70.3936894 | 69.5328118 | 75.2127309 |
| 62.3348948 | 70.2822025 | 71.5851169 | 70.3936894 | 69.5328118 | 75.2127309 |
| 62.3348948 | 70.2822025 | 71.5851169 | 70.3936894 | 69.5328118 | 75.2127309 |
| 63.3348948 | 71.2822025 | 71.5851169 | 66.3936894 | 69.5328118 | 78.2127309 |
| 65.3348948 | 71.2822025 | 70.5851169 | 65.3936894 | 70.5328118 | 78.2127309 |
| 67.3348948 | 71.2822025 | 70.5851169 | 64.3936894 | 70.5328118 | 80.2127309 |
| 68.3348948 | 69.2822025 | 70.5851169 | 64.3936894 | 70.5328118 | 68.0290235 |

|            |            |            |            |            |            |
|------------|------------|------------|------------|------------|------------|
| 68.3348948 | 67.2822025 | 70.5851169 | 64.3936894 | 70.5328118 | 67.6653871 |
| 68.3348948 | 67.2822025 | 71.5851169 | 64.3936894 | 70.5328118 | 67.7562962 |
| 68.3348948 | 66.2822025 | 71.5851169 | 64.3936894 | 71.5328118 | 67.574478  |
| 68.3348948 | 66.2822025 | 72.5851169 | 65.3936894 | 74.5328118 | 67.7562962 |
| 68.3348948 | 66.2822025 | 72.5851169 | 65.3936894 | 74.5328118 | 67.8472053 |
| 68.3348948 | 66.2822025 | 72.5851169 | 67.3936894 | 77.5328118 | 68.0290235 |
| 68.3348948 | 66.2822025 | 72.5851169 | 67.3936894 | 78.5328118 | 81.2127309 |
| 67.3348948 | 66.2822025 | 72.5851169 | 66.3936894 | 79.5328118 | 81.2127309 |
| 67.3348948 | 67.2822025 | 72.5851169 | 62.3936894 | 78.5328118 | 79.2127309 |
| 67.3348948 | 66.2822025 | 72.5851169 | 60.3936894 | 79.5328118 | 79.2127309 |
| 66.3348948 | 66.2822025 | 72.5851169 | 58.3936894 | 79.5328118 | 79.2127309 |
| 66.3348948 | 66.2822025 | 72.5851169 | 58.3936894 | 81.5328118 | 79.2127309 |
| 66.3348948 | 66.2822025 | 72.5851169 | 58.3936894 | 68.3926598 | 78.2127309 |
| 67.3348948 | 66.2822025 | 72.5851169 | 58.3936894 | 68.4835689 | 78.2127309 |
| 68.3348948 | 66.2822025 | 73.5851169 | 58.3936894 | 68.3017507 | 78.2127309 |
| 68.3348948 | 68.2822025 | 74.5851169 | 60.3936894 | 69.0290235 | 78.2127309 |
| 69.3348948 | 68.2822025 | 74.5851169 | 61.3936894 | 69.1199326 | 77.2127309 |
| 69.3348948 | 68.2822025 | 74.5851169 | 62.3936894 | 74.5328118 | 76.2127309 |
| 69.3348948 | 68.2822025 | 74.5851169 | 62.3936894 | 74.5328118 | 74.2127309 |
| 69.3348948 | 69.2822025 | 74.5851169 | 63.3936894 | 72.5328118 | 74.2127309 |
| 69.3348948 | 69.2822025 | 74.5851169 | 64.3936894 | 72.5328118 | 74.2127309 |
| 69.3348948 | 69.2822025 | 73.5851169 | 64.3936894 | 72.5328118 | 74.2127309 |
| 69.3348948 | 69.2822025 | 73.5851169 | 64.3936894 | 73.5328118 | 74.2127309 |
| 70.3348948 | 70.2822025 | 71.5851169 | 63.3936894 | 73.5328118 | 74.2127309 |
| 70.3348948 | 70.2822025 | 71.5851169 | 63.3936894 | 73.5328118 | 74.2127309 |
| 72.3348948 | 69.2822025 | 70.5851169 | 62.3936894 | 73.5328118 | 72.2127309 |
| 76.3348948 | 69.2822025 | 70.5851169 | 61.3936894 | 73.5328118 | 71.2127309 |
| 76.3348948 | 69.2822025 | 70.5851169 | 61.3936894 | 73.5328118 | 71.2127309 |
| 76.3348948 | 69.2822025 | 70.5851169 | 61.3936894 | 68.5328118 | 68.2127309 |
| 75.3348948 | 69.2822025 | 70.5851169 | 61.3936894 | 68.5328118 | 68.2127309 |
| 75.3348948 | 69.2822025 | 69.5851169 | 61.3936894 | 66.5328118 | 67.2127309 |
| 75.3348948 | 68.2822025 | 69.5851169 | 60.3936894 | 64.5328118 | 66.2127309 |
| 75.3348948 | 68.2822025 | 68.5851169 | 60.3936894 | 64.5328118 | 66.2127309 |
| 75.3348948 | 68.2822025 | 68.5851169 | 60.3936894 | 65.5328118 | 67.2127309 |
| 76.3348948 | 67.2822025 | 67.5851169 | 60.3936894 | 65.5328118 | 71.2127309 |
| 76.3348948 | 65.2822025 | 68.5851169 | 60.3936894 | 67.5328118 | 71.2127309 |
| 76.3348948 | 64.2822025 | 68.5851169 | 67.3936894 | 67.5328118 | 71.2127309 |
| 76.3348948 | 64.2822025 | 68.5851169 | 73.3936894 | 67.5328118 | 68.2127309 |
| 76.3348948 | 64.2822025 | 68.5851169 | 73.3936894 | 67.5328118 | 65.2127309 |
| 72.3348948 | 64.2822025 | 68.5851169 | 79.3936894 | 67.5328118 | 64.2127309 |
| 71.3348948 | 65.2822025 | 68.5851169 | 79.3936894 | 66.5328118 | 64.2127309 |
| 70.3348948 | 65.2822025 | 68.5851169 | 79.3936894 | 66.5328118 | 64.2127309 |
| 70.3348948 | 68.2822025 | 68.5851169 | 82.3936894 | 66.5328118 | 65.2127309 |
| 69.3348948 | 69.2822025 | 68.5851169 | 83.3936894 | 66.5328118 | 65.2127309 |
| 70.3348948 | 69.2822025 | 68.5851169 | 83.3936894 | 66.5328118 | 67.2127309 |

|            |            |            |            |            |            |
|------------|------------|------------|------------|------------|------------|
| 70.3348948 | 69.2822025 | 68.5851169 | 82.3936894 | 67.5328118 | 67.2127309 |
| 70.3348948 | 71.2822025 | 67.5851169 | 82.3936894 | 65.5328118 | 67.2127309 |
| 70.3348948 | 71.2822025 | 67.5851169 | 75.3936894 | 65.5328118 | 72.2127309 |
| 68.3348948 | 71.2822025 | 67.5851169 | 74.3936894 | 65.5328118 | 72.2127309 |
| 67.3348948 | 73.2822025 | 66.5851169 | 74.3936894 | 64.5328118 | 73.2127309 |
| 67.3348948 | 73.2822025 | 67.5851169 | 70.3936894 | 65.5328118 | 75.2127309 |
| 67.3348948 | 74.2822025 | 67.5851169 | 69.3936894 | 65.5328118 | 74.2127309 |
| 67.3348948 | 74.2822025 | 68.5851169 | 69.3936894 | 65.5328118 | 72.2127309 |
| 65.3348948 | 75.2822025 | 68.5851169 | 68.3936894 | 67.5328118 | 71.2127309 |
| 62.3348948 | 76.2822025 | 68.5851169 | 67.3936894 | 67.5328118 | 71.2127309 |
| 61.3348948 | 76.2822025 | 68.5851169 | 67.3936894 | 67.5328118 | 71.2127309 |
| 60.3348948 | 77.2822025 | 68.5851169 | 66.3936894 | 67.5328118 | 71.2127309 |
| 60.3348948 | 77.2822025 | 68.5851169 | 66.3936894 | 67.5328118 | 70.2127309 |
| 60.3348948 | 77.2822025 | 68.5851169 | 66.3936894 | 67.5328118 | 71.2127309 |
| 60.3348948 | 78.2822025 | 69.5851169 | 66.3936894 | 67.5328118 | 71.2127309 |
| 68.3348948 | 79.2822025 | 68.5851169 | 69.3936894 | 67.5328118 | 71.2127309 |
| 70.3348948 | 79.2822025 | 67.5851169 | 72.3936894 | 67.5328118 | 71.2127309 |
| 70.3348948 | 79.2822025 | 67.5851169 | 73.3936894 | 67.5328118 | 71.2127309 |
| 69.3348948 | 79.2822025 | 67.5851169 | 73.3936894 | 66.5328118 | 71.2127309 |
| 69.3348948 | 79.2822025 | 68.5851169 | 73.3936894 | 64.5328118 | 70.2127309 |
| 69.3348948 | 78.2822025 | 68.5851169 | 73.3936894 | 64.5328118 | 70.2127309 |
| 69.3348948 | 76.2822025 | 68.5851169 | 71.3936894 | 64.5328118 | 67.2127309 |
| 69.3348948 | 76.2822025 | 69.5851169 | 70.3936894 | 64.5328118 | 65.2127309 |
| 70.3348948 | 75.2822025 | 69.5851169 | 69.3936894 | 63.5328118 | 64.2127309 |
| 70.3348948 | 75.2822025 | 70.5851169 | 69.3936894 | 60.5328118 | 65.2127309 |
| 71.3348948 | 75.2822025 | 70.5851169 | 69.3936894 | 60.5328118 | 65.2127309 |
| 71.3348948 | 75.2822025 | 70.5851169 | 69.3936894 | 59.5328118 | 65.2127309 |
| 71.3348948 | 75.2822025 | 70.5851169 | 70.3936894 | 59.5328118 | 65.2127309 |
| 73.3348948 | 74.2822025 | 69.5851169 | 70.3936894 | 59.5328118 | 66.2127309 |
| 74.3348948 | 74.2822025 | 69.5851169 | 71.3936894 | 58.5328118 | 66.2127309 |
| 74.3348948 | 74.2822025 | 69.5851169 | 71.3936894 | 55.5328118 | 67.2127309 |
| 74.3348948 | 75.2822025 | 70.5851169 | 71.3936894 | 53.5328118 | 67.2127309 |
| 74.3348948 | 75.2822025 | 70.5851169 | 70.3936894 | 53.5328118 | 66.2127309 |
| 74.3348948 | 75.2822025 | 70.5851169 | 70.3936894 | 53.5328118 | 66.2127309 |
| 74.3348948 | 75.2822025 | 71.5851169 | 69.3936894 | 49.5328118 | 63.2127309 |
| 74.3348948 | 73.2822025 | 70.5851169 | 69.3936894 | 49.5328118 | 63.2127309 |
| 74.3348948 | 72.2822025 | 70.5851169 | 69.3936894 | 49.5328118 | 63.2127309 |
| 74.3348948 | 72.2822025 | 70.5851169 | 70.3936894 | 49.5328118 | 64.2127309 |
| 74.3348948 | 71.2822025 | 70.5851169 | 70.3936894 | 52.5328118 | 63.2127309 |
| 74.3348948 | 71.2822025 | 70.5851169 | 69.3936894 | 52.5328118 | 63.2127309 |
| 74.3348948 | 67.2822025 | 70.5851169 | 68.3936894 | 54.5328118 | 63.2127309 |
| 75.3348948 | 66.2822025 | 70.5851169 | 67.3936894 | 54.5328118 | 63.2127309 |
| 72.3348948 | 66.2822025 | 70.5851169 | 66.3936894 | 61.5328118 | 63.2127309 |
| 71.3348948 | 65.2822025 | 70.5851169 | 67.3936894 | 64.5328118 | 64.2127309 |
| 67.3348948 | 65.2822025 | 70.5851169 | 67.3936894 | 66.5328118 | 65.2127309 |



|            |            |            |            |            |            |
|------------|------------|------------|------------|------------|------------|
| 65.3348948 | 65.2822025 | 70.5851169 | 67.3936894 | 66.5328118 | 65.2127309 |
| 65.3348948 | 65.2822025 | 70.5851169 | 66.3936894 | 67.5328118 | 66.2127309 |
| 64.3348948 | 65.2822025 | 70.5851169 | 65.3936894 | 68.5328118 | 65.2127309 |
| 65.3348948 | 65.2822025 | 71.5851169 | 64.3936894 | 69.5328118 | 65.2127309 |
| 65.3348948 | 65.2822025 | 72.5851169 | 63.3936894 | 69.5328118 | 65.2127309 |
| 65.3348948 | 66.2822025 | 72.5851169 | 62.3936894 | 69.5328118 | 64.2127309 |
| 66.3348948 | 66.2822025 | 73.5851169 | 62.3936894 | 69.5328118 | 64.2127309 |
| 67.3348948 | 66.2822025 | 74.5851169 | 63.3936894 | 69.5328118 | 65.2127309 |
| 67.3348948 | 74.2822025 | 74.5851169 | 64.3936894 | 69.5328118 | 65.2127309 |
| 67.3348948 | 74.2822025 | 75.5851169 | 64.3936894 | 69.5328118 | 68.2127309 |
| 66.3348948 | 77.2822025 | 75.5851169 | 64.3936894 | 69.5328118 | 71.2127309 |
| 66.3348948 | 77.2822025 | 75.5851169 | 64.3936894 | 70.5328118 | 72.2127309 |
| 66.3348948 | 77.2822025 | 75.5851169 | 65.3936894 | 70.5328118 | 72.2127309 |
| 66.3348948 | 77.2822025 | 75.5851169 | 65.3936894 | 70.5328118 | 76.2127309 |
| 66.3348948 | 77.2822025 | 76.5851169 | 64.3936894 | 70.5328118 | 80.2127309 |
| 65.3348948 | 78.2822025 | 76.5851169 | 63.3936894 | 70.5328118 | 80.2127309 |
| 65.3348948 | 78.2822025 | 77.5851169 | 62.3936894 | 71.5328118 | 80.2127309 |
| 65.3348948 | 77.2822025 | 77.5851169 | 62.3936894 | 71.5328118 | 81.2127309 |
| 65.3348948 | 76.2822025 | 77.5851169 | 62.3936894 | 72.5328118 | 82.2127309 |
| 65.3348948 | 75.2822025 | 78.5851169 | 62.3936894 | 72.5328118 | 83.2127309 |
| 65.3348948 | 75.2822025 | 76.5851169 | 63.3936894 | 72.5328118 | 83.2127309 |
| 65.3348948 | 75.2822025 | 76.5851169 | 63.3936894 | 72.5328118 | 83.2127309 |
| 62.3348948 | 75.2822025 | 72.5851169 | 64.3936894 | 68.5328118 | 68.4835689 |
| 61.3348948 | 75.2822025 | 71.5851169 | 65.3936894 | 68.5328118 | 79.2127309 |
| 67.3348948 | 73.2822025 | 71.5851169 | 65.3936894 | 68.5328118 | 79.2127309 |
| 70.3348948 | 72.2822025 | 70.5851169 | 65.3936894 | 69.5328118 | 71.2127309 |
| 70.3348948 | 71.2822025 | 70.5851169 | 66.3936894 | 69.5328118 | 69.2127309 |
| 70.3348948 | 71.2822025 | 70.5851169 | 67.3936894 | 69.5328118 | 69.2127309 |
| 70.3348948 | 71.2822025 | 73.5851169 | 68.3936894 | 69.5328118 | 69.2127309 |
| 70.3348948 | 71.2822025 | 75.5851169 | 68.3936894 | 69.5328118 | 73.2127309 |
| 70.3348948 | 71.2822025 | 76.5851169 | 67.3936894 | 71.5328118 | 73.2127309 |
| 70.3348948 | 70.2822025 | 77.5851169 | 65.3936894 | 73.5328118 | 73.2127309 |
| 70.3348948 | 70.2822025 | 77.5851169 | 64.3936894 | 74.5328118 | 73.2127309 |
| 69.3348948 | 70.2822025 | 69.5851169 | 63.3936894 | 74.5328118 | 73.2127309 |
| 68.3348948 | 70.2822025 | 67.5851169 | 63.3936894 | 74.5328118 | 73.2127309 |
| 68.3348948 | 71.2822025 | 67.5851169 | 63.3936894 | 74.5328118 | 67.2127309 |
| 67.3348948 | 72.2822025 | 66.5851169 | 63.3936894 | 75.5328118 | 65.2127309 |
| 67.3348948 | 73.2822025 | 66.5851169 | 63.3936894 | 76.5328118 | 65.2127309 |
| 68.3348948 | 73.2822025 | 67.5851169 | 62.3936894 | 76.5328118 | 64.2127309 |
| 68.3348948 | 74.2822025 | 67.5851169 | 62.3936894 | 77.5328118 | 67.2127309 |
| 68.3348948 | 74.2822025 | 67.5851169 | 63.3936894 | 77.5328118 | 68.2127309 |
| 68.3348948 | 74.2822025 | 67.5851169 | 63.3936894 | 77.5328118 | 68.2127309 |
| 68.3348948 | 74.2822025 | 67.5851169 | 63.3936894 | 77.5328118 | 68.2127309 |
| 68.3348948 | 73.2822025 | 67.5851169 | 65.3936894 | 76.5328118 | 69.2127309 |
| 70.3348948 | 72.2822025 | 67.5851169 | 66.3936894 | 75.5328118 | 70.2127309 |

|            |            |            |            |            |            |
|------------|------------|------------|------------|------------|------------|
| 71.3348948 | 73.2822025 | 67.5851169 | 67.3936894 | 75.5328118 | 71.2127309 |
| 71.3348948 | 73.2822025 | 67.5851169 | 67.3936894 | 73.5328118 | 71.2127309 |
| 71.3348948 | 73.2822025 | 68.5851169 | 67.3936894 | 72.5328118 | 69.2127309 |
| 71.3348948 | 73.2822025 | 69.5851169 | 67.3936894 | 72.5328118 | 68.2127309 |
| 71.3348948 | 74.2822025 | 71.5851169 | 67.3936894 | 72.5328118 | 68.2127309 |
| 71.3348948 | 74.2822025 | 71.5851169 | 67.3936894 | 72.5328118 | 67.2127309 |
| 70.3348948 | 74.2822025 | 71.5851169 | 67.3936894 | 72.5328118 | 67.2127309 |
| 70.3348948 | 75.2822025 | 72.5851169 | 67.3936894 | 72.5328118 | 67.2127309 |
| 69.3348948 | 75.2822025 | 73.5851169 | 67.3936894 | 72.5328118 | 69.2127309 |
| 69.3348948 | 75.2822025 | 73.5851169 | 67.3936894 | 72.5328118 | 71.2127309 |
| 69.3348948 | 75.2822025 | 73.5851169 | 72.3936894 | 72.5328118 | 73.2127309 |
| 69.3348948 | 76.2822025 | 73.5851169 | 74.3936894 | 73.5328118 | 74.2127309 |
| 69.3348948 | 76.2822025 | 74.5851169 | 75.3936894 | 75.5328118 | 75.2127309 |
| 68.3348948 | 76.2822025 | 75.5851169 | 76.3936894 | 75.5328118 | 75.2127309 |
| 68.3348948 | 76.2822025 | 76.5851169 | 76.3936894 | 76.5328118 | 75.2127309 |
| 72.3348948 | 74.2822025 | 76.5851169 | 76.3936894 | 76.5328118 | 75.2127309 |
| 73.3348948 | 74.2822025 | 76.5851169 | 71.3936894 | 79.5328118 | 75.2127309 |
| 72.3348948 | 74.2822025 | 76.5851169 | 66.3936894 | 81.5328118 | 75.2127309 |
| 72.3348948 | 73.2822025 | 76.5851169 | 63.3936894 | 79.5328118 | 77.2127309 |
| 72.3348948 | 73.2822025 | 75.5851169 | 61.3936894 | 78.5328118 | 77.2127309 |
| 72.3348948 | 72.2822025 | 74.5851169 | 59.3936894 | 78.5328118 | 77.2127309 |
| 72.3348948 | 72.2822025 | 74.5851169 | 59.3936894 | 77.5328118 | 78.2127309 |
| 72.3348948 | 72.2822025 | 74.5851169 | 59.3936894 | 77.5328118 | 78.2127309 |
| 72.3348948 | 71.2822025 | 73.5851169 | 61.3936894 | 77.5328118 | 78.2127309 |
| 72.3348948 | 71.2822025 | 74.5851169 | 61.3936894 | 76.5328118 | 78.2127309 |
| 72.3348948 | 71.2822025 | 74.5851169 | 65.3936894 | 76.5328118 | 78.2127309 |
| 72.3348948 | 70.2822025 | 74.5851169 | 66.3936894 | 76.5328118 | 78.2127309 |
| 72.3348948 | 71.2822025 | 75.5851169 | 66.3936894 | 76.5328118 | 78.2127309 |
| 72.3348948 | 74.2822025 | 77.5851169 | 66.3936894 | 76.5328118 | 78.2127309 |
| 72.3348948 | 74.2822025 | 78.5851169 | 66.3936894 | 77.5328118 | 78.2127309 |
| 71.3348948 | 74.2822025 | 82.5851169 | 65.3936894 | 77.5328118 | 79.2127309 |
| 69.3348948 | 73.2822025 | 83.5851169 | 65.3936894 | 77.5328118 | 79.2127309 |
| 69.3348948 | 73.2822025 | 83.5851169 | 65.3936894 | 77.5328118 | 79.2127309 |
| 69.3348948 | 73.2822025 | 84.5851169 | 65.3936894 | 77.5328118 | 79.2127309 |
| 71.3348948 | 72.2822025 | 84.5851169 | 65.3936894 | 75.5328118 | 80.2127309 |
| 71.3348948 | 72.2822025 | 85.5851169 | 65.3936894 | 74.5328118 | 80.2127309 |
| 72.3348948 | 71.2822025 | 85.5851169 | 65.3936894 | 74.5328118 | 80.2127309 |
| 73.3348948 | 72.2822025 | 85.5851169 | 66.3936894 | 73.5328118 | 77.2127309 |
| 81.3348948 | 73.2822025 | 87.5851169 | 66.3936894 | 73.5328118 | 75.2127309 |
| 81.3348948 | 73.2822025 | 74.3926598 | 66.3936894 | 72.5328118 | 72.2127309 |
| 82.3348948 | 74.2822025 | 74.7562962 | 66.3936894 | 72.5328118 | 72.2127309 |
| 82.3348948 | 74.2822025 | 74.3017507 | 64.3936894 | 70.5328118 | 67.2127309 |
| 82.3348948 | 75.2822025 | 74.574478  | 63.3936894 | 70.5328118 | 67.2127309 |
| 81.3348948 | 75.2822025 | 75.0290235 | 62.3936894 | 70.5328118 | 67.2127309 |
| 81.3348948 | 74.2822025 | 75.0290235 | 62.3936894 | 70.5328118 | 67.2127309 |

|            |            |            |            |            |            |
|------------|------------|------------|------------|------------|------------|
| 82.3348948 | 73.2822025 | 75.2108417 | 62.3936894 | 70.5328118 | 66.2127309 |
| 82.3348948 | 72.2822025 | 75.6653871 | 65.3936894 | 70.5328118 | 67.2127309 |
| 82.3348948 | 72.2822025 | 75.7562962 | 68.3936894 | 70.5328118 | 67.2127309 |
| 82.3348948 | 72.2822025 | 75.8472053 | 69.3936894 | 70.5328118 | 65.2127309 |
| 82.3348948 | 72.2822025 | 76.3017507 | 69.3936894 | 70.5328118 | 65.2127309 |
| 82.3348948 | 71.2822025 | 76.2108417 | 69.3936894 | 71.5328118 | 65.2127309 |
| 82.3348948 | 71.2822025 | 76.2108417 | 69.3936894 | 71.5328118 | 65.2127309 |
| 79.3348948 | 71.2822025 | 72.7398909 | 63.3936894 | 71.5328118 | 64.2127309 |
| 78.3348948 | 69.2822025 | 74.3926598 | 61.3936894 | 69.5328118 | 65.2127309 |
| 78.3348948 | 69.2822025 | 73.6653871 | 60.3936894 | 69.5328118 | 65.2127309 |
| 76.3348948 | 70.2822025 | 73.7562962 | 60.3936894 | 69.5328118 | 68.2127309 |
| 73.3348948 | 70.2822025 | 73.6653871 | 61.3936894 | 69.5328118 | 69.2127309 |
| 72.3348948 | 70.2822025 | 86.5851169 | 63.3936894 | 69.5328118 | 69.2127309 |
| 72.3348948 | 71.2822025 | 86.5851169 | 65.3936894 | 68.5328118 | 68.2127309 |
| 72.3348948 | 71.2822025 | 86.5851169 | 67.3936894 | 68.5328118 | 67.2127309 |
| 73.3348948 | 71.2822025 | 71.2108417 | 67.3936894 | 68.5328118 | 67.2127309 |
| 73.3348948 | 71.2822025 | 71.1199326 | 68.3936894 | 68.5328118 | 66.2127309 |
| 73.3348948 | 70.2822025 | 71.0290235 | 66.3936894 | 68.5328118 | 66.2127309 |
| 73.3348948 | 70.2822025 | 71.574478  | 65.3936894 | 69.5328118 | 71.2127309 |
| 73.3348948 | 71.2822025 | 71.4835689 | 65.3936894 | 69.5328118 | 71.2127309 |
| 73.3348948 | 71.2822025 | 71.1199326 | 65.3936894 | 68.5328118 | 71.2127309 |
| 74.3348948 | 71.2822025 | 70.7562962 | 64.3936894 | 68.5328118 | 70.2127309 |
| 74.3348948 | 71.2822025 | 70.6653871 | 65.3936894 | 68.5328118 | 69.2127309 |
| 73.3348948 | 71.2822025 | 70.4835689 | 65.3936894 | 68.5328118 | 69.2127309 |
| 71.3348948 | 71.2822025 | 76.5851169 | 67.3936894 | 66.5328118 | 70.2127309 |
| 70.3348948 | 71.2822025 | 70.5851169 | 68.3936894 | 66.5328118 | 71.2127309 |
| 70.3348948 | 71.2822025 | 68.5851169 | 68.3936894 | 68.5328118 | 73.2127309 |
| 70.3348948 | 71.2822025 | 67.5851169 | 68.3936894 | 68.5328118 | 74.2127309 |
| 73.3348948 | 71.2822025 | 65.5851169 | 69.3936894 | 67.5328118 | 74.2127309 |
| 75.3348948 | 71.2822025 | 64.5851169 | 70.3936894 | 67.5328118 | 74.2127309 |
| 76.3348948 | 71.2822025 | 64.5851169 | 70.3936894 | 67.5328118 | 74.2127309 |
| 76.3348948 | 71.2822025 | 64.5851169 | 71.3936894 | 67.5328118 | 74.2127309 |
| 76.3348948 | 72.2822025 | 64.5851169 | 71.3936894 | 68.5328118 | 75.2127309 |
| 76.3348948 | 72.2822025 | 64.5851169 | 71.3936894 | 67.5328118 | 75.2127309 |
| 76.3348948 | 72.2822025 | 64.5851169 | 71.3936894 | 66.5328118 | 75.2127309 |
| 76.3348948 | 73.2822025 | 65.5851169 | 74.3936894 | 65.5328118 | 74.2127309 |
| 77.3348948 | 73.2822025 | 65.5851169 | 75.3936894 | 64.5328118 | 74.2127309 |
| 78.3348948 | 73.2822025 | 65.5851169 | 74.3936894 | 64.5328118 | 74.2127309 |
| 79.3348948 | 73.2822025 | 65.5851169 | 71.3936894 | 64.5328118 | 75.2127309 |
| 79.3348948 | 73.2822025 | 65.5851169 | 67.3936894 | 64.5328118 | 75.2127309 |
| 79.3348948 | 73.2822025 | 66.5851169 | 64.3936894 | 64.5328118 | 74.2127309 |
| 80.3348948 | 73.2822025 | 66.5851169 | 61.3936894 | 65.5328118 | 73.2127309 |
| 80.3348948 | 73.2822025 | 67.5851169 | 59.3936894 | 65.5328118 | 73.2127309 |
| 80.3348948 | 73.2822025 | 67.5851169 | 58.3936894 | 65.5328118 | 73.2127309 |
| 80.3348948 | 73.2822025 | 67.5851169 | 57.3936894 | 65.5328118 | 73.2127309 |

|            |            |            |            |            |            |
|------------|------------|------------|------------|------------|------------|
| 80.3348948 | 73.2822025 | 68.5851169 | 57.3936894 | 65.5328118 | 72.2127309 |
| 79.3348948 | 75.2822025 | 68.5851169 | 57.3936894 | 65.5328118 | 72.2127309 |
| 79.3348948 | 76.2822025 | 68.5851169 | 57.3936894 | 64.5328118 | 70.2127309 |
| 79.3348948 | 76.2822025 | 68.5851169 | 57.3936894 | 63.5328118 | 70.2127309 |
| 78.3348948 | 77.2822025 | 69.5851169 | 58.3936894 | 63.5328118 | 69.2127309 |
| 76.3348948 | 77.2822025 | 69.5851169 | 58.3936894 | 63.5328118 | 68.2127309 |
| 75.3348948 | 77.2822025 | 69.5851169 | 59.3936894 | 63.5328118 | 68.2127309 |
| 73.3348948 | 77.2822025 | 69.5851169 | 60.3936894 | 63.5328118 | 68.2127309 |
| 72.3348948 | 77.2822025 | 72.5851169 | 60.3936894 | 62.5328118 | 72.2127309 |
| 71.3348948 | 80.2822025 | 72.5851169 | 60.3936894 | 62.5328118 | 74.2127309 |
| 71.3348948 | 81.2822025 | 70.5851169 | 60.3936894 | 62.5328118 | 74.2127309 |
| 70.3348948 | 81.2822025 | 70.5851169 | 63.3936894 | 63.5328118 | 75.2127309 |
| 70.3348948 | 81.2822025 | 69.5851169 | 63.3936894 | 63.5328118 | 75.2127309 |
| 77.3348948 | 80.2822025 | 68.5851169 | 62.3936894 | 69.5328118 | 75.2127309 |
| 79.3348948 | 80.2822025 | 68.5851169 | 63.3936894 | 70.5328118 | 75.2127309 |
| 79.3348948 | 80.2822025 | 68.5851169 | 63.3936894 | 70.5328118 | 75.2127309 |
| 79.3348948 | 80.2822025 | 68.5851169 | 63.3936894 | 72.5328118 | 76.2127309 |
| 80.3348948 | 80.2822025 | 68.5851169 | 62.3936894 | 72.5328118 | 77.2127309 |
| 81.3348948 | 80.2822025 | 67.5851169 | 60.3936894 | 70.5328118 | 78.2127309 |
| 81.3348948 | 80.2822025 | 67.5851169 | 59.3936894 | 69.5328118 | 78.2127309 |
| 81.3348948 | 80.2822025 | 67.5851169 | 58.3936894 | 69.5328118 | 78.2127309 |
| 81.3348948 | 80.2822025 | 67.5851169 | 57.3936894 | 69.5328118 | 78.2127309 |
| 81.3348948 | 80.2822025 | 68.5851169 | 58.3936894 | 69.5328118 | 78.2127309 |
| 82.3348948 | 80.2822025 | 68.5851169 | 59.3936894 | 69.5328118 | 78.2127309 |
| 82.3348948 | 80.2822025 | 68.5851169 | 59.3936894 | 69.5328118 | 78.2127309 |
| 82.3348948 | 80.2822025 | 69.5851169 | 60.3936894 | 69.5328118 | 78.2127309 |
| 81.3348948 | 80.2822025 | 69.5851169 | 61.3936894 | 67.5328118 | 78.2127309 |
| 80.3348948 | 80.2822025 | 68.5851169 | 62.3936894 | 67.5328118 | 78.2127309 |
| 79.3348948 | 80.2822025 | 68.5851169 | 61.3936894 | 65.5328118 | 77.2127309 |
| 76.3348948 | 80.2822025 | 67.5851169 | 60.3936894 | 65.5328118 | 77.2127309 |
| 72.3348948 | 80.2822025 | 67.5851169 | 60.3936894 | 65.5328118 | 76.2127309 |
| 70.3348948 | 80.2822025 | 67.5851169 | 60.3936894 | 65.5328118 | 75.2127309 |
| 68.3348948 | 79.2822025 | 68.5851169 | 60.3936894 | 65.5328118 | 75.2127309 |
| 68.3348948 | 77.2822025 | 68.5851169 | 60.3936894 | 62.5328118 | 76.2127309 |
| 69.3348948 | 73.2822025 | 68.5851169 | 60.3936894 | 62.5328118 | 76.2127309 |
| 73.3348948 | 73.2822025 | 68.5851169 | 63.3936894 | 63.5328118 | 76.2127309 |
| 76.3348948 | 72.2822025 | 67.5851169 | 65.3936894 | 63.5328118 | 76.2127309 |
| 76.3348948 | 71.2822025 | 67.5851169 | 67.3936894 | 63.5328118 | 75.2127309 |
| 76.3348948 | 71.2822025 | 67.5851169 | 67.3936894 | 64.5328118 | 73.2127309 |
| 76.3348948 | 71.2822025 | 67.5851169 | 67.3936894 | 64.5328118 | 71.2127309 |
| 76.3348948 | 73.2822025 | 67.5851169 | 67.3936894 | 64.5328118 | 70.2127309 |
| 76.3348948 | 72.2822025 | 67.5851169 | 67.3936894 | 64.5328118 | 70.2127309 |
| 77.3348948 | 72.2822025 | 67.5851169 | 67.3936894 | 64.5328118 | 70.2127309 |
| 75.3348948 | 72.2822025 | 67.5851169 | 64.3936894 | 64.5328118 | 69.2127309 |
| 73.3348948 | 71.2822025 | 68.5851169 | 63.3936894 | 64.5328118 | 69.2127309 |



|            |            |            |            |            |            |
|------------|------------|------------|------------|------------|------------|
| 69.3348948 | 73.2822025 | 69.5851169 | 61.3936894 | 75.5328118 | 78.2127309 |
| 69.3348948 | 74.2822025 | 69.5851169 | 61.3936894 | 73.5328118 | 76.2127309 |
| 69.3348948 | 74.2822025 | 69.5851169 | 63.3936894 | 73.5328118 | 76.2127309 |
| 70.3348948 | 74.2822025 | 71.5851169 | 67.3936894 | 72.5328118 | 72.2127309 |
| 77.3348948 | 74.2822025 | 71.5851169 | 68.3936894 | 71.5328118 | 71.2127309 |
| 79.3348948 | 74.2822025 | 71.5851169 | 69.3936894 | 71.5328118 | 71.2127309 |
| 79.3348948 | 74.2822025 | 70.5851169 | 68.3936894 | 71.5328118 | 71.2127309 |
| 80.3348948 | 74.2822025 | 71.5851169 | 68.3936894 | 71.5328118 | 70.2127309 |
| 80.3348948 | 74.2822025 | 71.5851169 | 68.3936894 | 71.5328118 | 70.2127309 |
| 78.3348948 | 74.2822025 | 71.5851169 | 67.3936894 | 71.5328118 | 71.2127309 |
| 73.3348948 | 72.2822025 | 70.5851169 | 66.3936894 | 71.5328118 | 71.2127309 |
| 71.3348948 | 72.2822025 | 69.5851169 | 65.3936894 | 71.5328118 | 71.2127309 |
| 69.3348948 | 72.2822025 | 69.5851169 | 65.3936894 | 71.5328118 | 72.2127309 |
| 68.3348948 | 71.2822025 | 68.5851169 | 65.3936894 | 71.5328118 | 72.2127309 |
| 68.3348948 | 71.2822025 | 67.5851169 | 65.3936894 | 71.5328118 | 71.2127309 |
| 68.3348948 | 71.2822025 | 67.5851169 | 65.3936894 | 71.5328118 | 71.2127309 |
| 67.3348948 | 72.2822025 | 67.5851169 | 66.3936894 | 71.5328118 | 71.2127309 |
| 67.3348948 | 73.2822025 | 69.5851169 | 66.3936894 | 71.5328118 | 70.2127309 |
| 67.3348948 | 75.2822025 | 69.5851169 | 66.3936894 | 71.5328118 | 69.2127309 |
| 67.3348948 | 76.2822025 | 70.5851169 | 65.3936894 | 69.5328118 | 68.2127309 |
| 67.3348948 | 75.2822025 | 71.5851169 | 65.3936894 | 69.5328118 | 68.2127309 |
| 67.3348948 | 75.2822025 | 72.5851169 | 65.3936894 | 69.5328118 | 67.2127309 |
| 66.3348948 | 74.2822025 | 71.5851169 | 65.3936894 | 69.5328118 | 67.2127309 |
| 66.3348948 | 74.2822025 | 71.5851169 | 65.3936894 | 69.5328118 | 68.2127309 |
| 66.3348948 | 74.2822025 | 71.5851169 | 65.3936894 | 69.5328118 | 69.2127309 |
| 66.3348948 | 74.2822025 | 71.5851169 | 66.3936894 | 69.5328118 | 71.2127309 |
| 66.3348948 | 74.2822025 | 71.5851169 | 68.3936894 | 69.5328118 | 73.2127309 |
| 66.3348948 | 74.2822025 | 71.5851169 | 68.3936894 | 69.5328118 | 72.2127309 |
| 79.3348948 | 74.2822025 | 71.5851169 | 71.3936894 | 69.5328118 | 72.2127309 |
| 79.3348948 | 74.2822025 | 72.5851169 | 71.3936894 | 69.5328118 | 72.2127309 |
| 82.3348948 | 74.2822025 | 73.5851169 | 77.3936894 | 68.5328118 | 71.2127309 |
| 83.3348948 | 74.2822025 | 73.5851169 | 76.3936894 | 68.5328118 | 70.2127309 |
| 83.3348948 | 74.2822025 | 74.5851169 | 74.3936894 | 68.5328118 | 70.2127309 |
| 83.3348948 | 74.2822025 | 74.5851169 | 74.3936894 | 68.5328118 | 70.2127309 |
| 84.3348948 | 71.2822025 | 75.5851169 | 73.3936894 | 66.5328118 | 71.2127309 |
| 82.3348948 | 70.2822025 | 75.5851169 | 73.3936894 | 66.5328118 | 70.2127309 |
| 81.3348948 | 70.2822025 | 75.5851169 | 73.3936894 | 67.5328118 | 70.2127309 |
| 81.3348948 | 70.2822025 | 75.5851169 | 73.3936894 | 67.5328118 | 70.2127309 |
| 81.3348948 | 70.2822025 | 75.5851169 | 74.3936894 | 68.5328118 | 70.2127309 |
| 80.3348948 | 70.2822025 | 75.5851169 | 74.3936894 | 69.5328118 | 71.2127309 |
| 79.3348948 | 71.2822025 | 75.5851169 | 74.3936894 | 69.5328118 | 72.2127309 |
| 78.3348948 | 70.2822025 | 75.5851169 | 74.3936894 | 70.5328118 | 72.2127309 |
| 78.3348948 | 70.2822025 | 74.5851169 | 74.3936894 | 70.5328118 | 70.2127309 |
| 80.3348948 | 71.2822025 | 74.5851169 | 74.3936894 | 70.5328118 | 70.2127309 |
| 82.3348948 | 71.2822025 | 74.5851169 | 73.3936894 | 70.5328118 | 69.2127309 |

|            |            |            |            |            |            |
|------------|------------|------------|------------|------------|------------|
| 82.3348948 | 71.2822025 | 74.5851169 | 72.3936894 | 70.5328118 | 69.2127309 |
| 83.3348948 | 71.2822025 | 74.5851169 | 72.3936894 | 71.5328118 | 70.2127309 |
| 83.3348948 | 71.2822025 | 74.5851169 | 72.3936894 | 71.5328118 | 70.2127309 |
| 83.3348948 | 71.2822025 | 74.5851169 | 72.3936894 | 72.5328118 | 71.2127309 |
| 83.3348948 | 72.2822025 | 74.5851169 | 71.3936894 | 72.5328118 | 73.2127309 |
| 83.3348948 | 72.2822025 | 74.5851169 | 71.3936894 | 71.5328118 | 74.2127309 |
| 82.3348948 | 72.2822025 | 74.5851169 | 71.3936894 | 68.5328118 | 75.2127309 |
| 82.3348948 | 72.2822025 | 74.5851169 | 71.3936894 | 67.5328118 | 75.2127309 |
| 83.3348948 | 72.2822025 | 73.5851169 | 71.3936894 | 67.5328118 | 75.2127309 |
| 83.3348948 | 72.2822025 | 72.5851169 | 70.3936894 | 66.5328118 | 75.2127309 |
| 83.3348948 | 72.2822025 | 73.5851169 | 70.3936894 | 66.5328118 | 72.2127309 |
| 84.3348948 | 73.2822025 | 73.5851169 | 70.3936894 | 65.5328118 | 72.2127309 |
| 84.3348948 | 73.2822025 | 73.5851169 | 69.3936894 | 65.5328118 | 72.2127309 |
| 85.3348948 | 73.2822025 | 71.5851169 | 68.3936894 | 65.5328118 | 72.2127309 |
| 86.3348948 | 73.2822025 | 71.5851169 | 68.3936894 | 66.5328118 | 72.2127309 |
| 86.3348948 | 74.2822025 | 71.5851169 | 68.3936894 | 66.5328118 | 73.2127309 |
| 86.3348948 | 75.2822025 | 71.5851169 | 67.3936894 | 67.5328118 | 74.2127309 |
| 86.3348948 | 76.2822025 | 71.5851169 | 64.3936894 | 67.5328118 | 75.2127309 |
| 74.3348948 | 77.2822025 | 69.5851169 | 64.3936894 | 68.5328118 | 76.2127309 |
| 69.3348948 | 77.2822025 | 68.5851169 | 65.3936894 | 68.5328118 | 76.2127309 |
| 68.3348948 | 78.2822025 | 68.5851169 | 64.3936894 | 68.5328118 | 77.2127309 |
| 68.3348948 | 79.2822025 | 68.5851169 | 63.3936894 | 68.5328118 | 77.2127309 |
| 68.3348948 | 79.2822025 | 67.5851169 | 63.3936894 | 70.5328118 | 78.2127309 |
| 68.3348948 | 76.2822025 | 67.5851169 | 62.3936894 | 70.5328118 | 78.2127309 |
| 69.3348948 | 74.2822025 | 67.5851169 | 63.3936894 | 76.5328118 | 77.2127309 |
| 69.3348948 | 74.2822025 | 67.5851169 | 63.3936894 | 76.5328118 | 77.2127309 |
| 69.3348948 | 72.2822025 | 67.5851169 | 64.3936894 | 79.5328118 | 77.2127309 |
| 68.3348948 | 71.2822025 | 67.5851169 | 64.3936894 | 83.5328118 | 77.2127309 |
| 65.3348948 | 70.2822025 | 67.5851169 | 65.3936894 | 83.5328118 | 76.2127309 |
| 65.3348948 | 69.2822025 | 67.5851169 | 68.3936894 | 85.5328118 | 75.2127309 |
| 65.3348948 | 67.2822025 | 67.5851169 | 69.3936894 | 72.2108417 | 76.2127309 |
| 65.3348948 | 67.2822025 | 67.5851169 | 70.3936894 | 72.574478  | 76.2127309 |
| 65.3348948 | 68.2822025 | 67.5851169 | 69.3936894 | 72.574478  | 76.2127309 |
| 67.3348948 | 69.2822025 | 67.5851169 | 68.3936894 | 72.8472053 | 78.2127309 |
| 67.3348948 | 70.2822025 | 67.5851169 | 68.3936894 | 70.5328118 | 78.2127309 |
| 67.3348948 | 70.2822025 | 64.5851169 | 68.3936894 | 68.5328118 | 78.2127309 |
| 67.3348948 | 70.2822025 | 64.5851169 | 68.3936894 | 68.5328118 | 78.2127309 |
| 67.3348948 | 70.2822025 | 64.5851169 | 68.3936894 | 68.5328118 | 78.2127309 |
| 68.3348948 | 69.2822025 | 64.5851169 | 68.3936894 | 67.5328118 | 78.2127309 |
| 69.3348948 | 67.2822025 | 64.5851169 | 68.3936894 | 67.5328118 | 78.2127309 |
| 69.3348948 | 66.2822025 | 71.5851169 | 68.3936894 | 67.5328118 | 77.2127309 |
| 69.3348948 | 65.2822025 | 73.5851169 | 67.3936894 | 66.5328118 | 73.2127309 |
| 69.3348948 | 65.2822025 | 73.5851169 | 67.3936894 | 66.5328118 | 73.2127309 |
| 71.3348948 | 65.2822025 | 74.5851169 | 68.3936894 | 65.5328118 | 72.2127309 |
| 71.3348948 | 65.2822025 | 75.5851169 | 68.3936894 | 65.5328118 | 72.2127309 |

|            |            |            |            |            |            |
|------------|------------|------------|------------|------------|------------|
| 73.3348948 | 65.2822025 | 75.5851169 | 68.3936894 | 65.5328118 | 71.2127309 |
| 74.3348948 | 66.2822025 | 75.5851169 | 68.3936894 | 65.5328118 | 72.2127309 |
| 74.3348948 | 66.2822025 | 75.5851169 | 67.3936894 | 65.5328118 | 72.2127309 |
| 71.3348948 | 68.2822025 | 75.5851169 | 67.3936894 | 65.5328118 | 72.2127309 |
| 66.3348948 | 68.2822025 | 76.5851169 | 66.3936894 | 65.5328118 | 69.2127309 |
| 66.3348948 | 68.2822025 | 76.5851169 | 65.3936894 | 66.5328118 | 69.2127309 |
| 63.3348948 | 69.2822025 | 76.5851169 | 65.3936894 | 66.5328118 | 70.2127309 |
| 63.3348948 | 69.2822025 | 76.5851169 | 65.3936894 | 66.5328118 | 70.2127309 |
| 63.3348948 | 66.2822025 | 71.5851169 | 65.3936894 | 66.5328118 | 74.2127309 |
| 64.3348948 | 66.2822025 | 71.5851169 | 65.3936894 | 68.5328118 | 77.2127309 |
| 64.3348948 | 64.2822025 | 66.5851169 | 65.3936894 | 72.5328118 | 78.2127309 |
| 66.3348948 | 59.2822025 | 65.5851169 | 63.3936894 | 74.5328118 | 72.2127309 |
| 66.3348948 | 59.2822025 | 65.5851169 | 62.3936894 | 75.5328118 | 72.2127309 |
| 66.3348948 | 59.2822025 | 65.5851169 | 61.3936894 | 75.5328118 | 69.2127309 |
| 66.3348948 | 59.2822025 | 65.5851169 | 60.3936894 | 75.5328118 | 67.2127309 |
| 66.3348948 | 59.2822025 | 65.5851169 | 60.3936894 | 76.5328118 | 67.2127309 |
| 67.3348948 | 58.2822025 | 65.5851169 | 60.3936894 | 77.5328118 | 67.2127309 |
| 67.3348948 | 60.2822025 | 65.5851169 | 61.3936894 | 76.5328118 | 74.2127309 |
| 66.3348948 | 62.2822025 | 65.5851169 | 61.3936894 | 76.5328118 | 74.2127309 |
| 66.3348948 | 62.2822025 | 65.5851169 | 62.3936894 | 71.5328118 | 74.2127309 |
| 66.3348948 | 63.2822025 | 65.5851169 | 62.3936894 | 71.5328118 | 74.2127309 |
| 67.3348948 | 65.2822025 | 65.5851169 | 62.3936894 | 69.5328118 | 73.2127309 |
| 70.3348948 | 66.2822025 | 65.5851169 | 63.3936894 | 68.5328118 | 73.2127309 |
| 70.3348948 | 66.2822025 | 65.5851169 | 63.3936894 | 68.5328118 | 73.2127309 |
| 74.3348948 | 67.2822025 | 65.5851169 | 64.3936894 | 68.5328118 | 74.2127309 |
| 73.3348948 | 66.2822025 | 65.5851169 | 65.3936894 | 68.5328118 | 76.2127309 |
| 73.3348948 | 66.2822025 | 65.5851169 | 65.3936894 | 68.5328118 | 76.2127309 |
| 68.3348948 | 66.2822025 | 65.5851169 | 66.3936894 | 67.5328118 | 76.2127309 |
| 67.3348948 | 66.2822025 | 65.5851169 | 68.3936894 | 68.5328118 | 76.2127309 |
| 67.3348948 | 68.2822025 | 65.5851169 | 68.3936894 | 68.5328118 | 76.2127309 |
| 65.3348948 | 68.2822025 | 65.5851169 | 73.3936894 | 67.5328118 | 76.2127309 |
| 65.3348948 | 67.2822025 | 65.5851169 | 74.3936894 | 66.5328118 | 77.2127309 |
| 65.3348948 | 66.2822025 | 65.5851169 | 74.3936894 | 66.5328118 | 63.2127309 |
| 65.3348948 | 66.2822025 | 65.5851169 | 70.3936894 | 66.5328118 | 62.2127309 |
| 65.3348948 | 66.2822025 | 66.5851169 | 68.3936894 | 65.5328118 | 62.2127309 |
| 65.3348948 | 66.2822025 | 70.5851169 | 68.3936894 | 65.5328118 | 63.2127309 |
| 67.3348948 | 66.2822025 | 70.5851169 | 62.3936894 | 65.5328118 | 65.2127309 |
| 67.3348948 | 65.2822025 | 71.5851169 | 60.3936894 | 65.5328118 | 64.2127309 |
| 67.3348948 | 65.2822025 | 71.5851169 | 60.3936894 | 65.5328118 | 64.2127309 |
| 67.3348948 | 65.2822025 | 71.5851169 | 59.3936894 | 65.5328118 | 64.2127309 |
| 68.3348948 | 66.2822025 | 71.5851169 | 58.3936894 | 65.5328118 | 64.2127309 |
| 68.3348948 | 66.2822025 | 72.5851169 | 58.3936894 | 65.5328118 | 64.2127309 |
| 68.3348948 | 66.2822025 | 72.5851169 | 59.3936894 | 66.5328118 | 64.2127309 |
| 68.3348948 | 67.2822025 | 72.5851169 | 61.3936894 | 66.5328118 | 64.2127309 |
| 67.3348948 | 68.2822025 | 72.5851169 | 61.3936894 | 66.5328118 | 64.2127309 |



|            |            |            |            |            |            |
|------------|------------|------------|------------|------------|------------|
| 65.3348948 | 68.2822025 | 72.5851169 | 61.3936894 | 66.5328118 | 64.2127309 |
| 62.3348948 | 73.2822025 | 72.5851169 | 64.3936894 | 66.5328118 | 66.2127309 |
| 62.3348948 | 75.2822025 | 72.5851169 | 64.3936894 | 65.5328118 | 67.2127309 |
| 62.3348948 | 76.2822025 | 74.5851169 | 64.3936894 | 65.5328118 | 68.2127309 |
| 62.3348948 | 76.2822025 | 73.5851169 | 65.3936894 | 65.5328118 | 68.2127309 |
| 63.3348948 | 76.2822025 | 73.5851169 | 66.3936894 | 65.5328118 | 68.2127309 |
| 63.3348948 | 76.2822025 | 73.5851169 | 66.3936894 | 65.5328118 | 68.2127309 |
| 77.3348948 | 76.2822025 | 70.5851169 | 67.3936894 | 66.5328118 | 75.2127309 |
| 78.3348948 | 76.2822025 | 69.5851169 | 67.3936894 | 66.5328118 | 75.2127309 |
| 76.3348948 | 76.2822025 | 69.5851169 | 67.3936894 | 65.5328118 | 75.2127309 |
| 73.3348948 | 76.2822025 | 69.5851169 | 69.3936894 | 65.5328118 | 76.2127309 |
| 70.3348948 | 77.2822025 | 69.5851169 | 72.3936894 | 64.5328118 | 76.2127309 |
| 67.3348948 | 77.2822025 | 69.5851169 | 73.3936894 | 64.5328118 | 76.2127309 |
| 66.3348948 | 77.2822025 | 69.5851169 | 73.3936894 | 64.5328118 | 76.2127309 |
| 66.3348948 | 78.2822025 | 68.5851169 | 73.3936894 | 64.5328118 | 77.2127309 |
| 66.3348948 | 79.2822025 | 67.5851169 | 72.3936894 | 65.5328118 | 83.2127309 |
| 66.3348948 | 79.2822025 | 67.5851169 | 71.3936894 | 65.5328118 | 82.2127309 |
| 65.3348948 | 79.2822025 | 67.5851169 | 70.3936894 | 66.5328118 | 81.2127309 |
| 66.3348948 | 79.2822025 | 67.5851169 | 69.3936894 | 67.5328118 | 81.2127309 |
| 66.3348948 | 79.2822025 | 67.5851169 | 69.3936894 | 67.5328118 | 78.2127309 |
| 66.3348948 | 79.2822025 | 67.5851169 | 68.3936894 | 67.5328118 | 77.2127309 |
| 66.3348948 | 79.2822025 | 67.5851169 | 68.3936894 | 69.5328118 | 76.2127309 |
| 66.3348948 | 79.2822025 | 66.5851169 | 69.3936894 | 71.5328118 | 73.2127309 |
| 66.3348948 | 79.2822025 | 66.5851169 | 69.3936894 | 71.5328118 | 74.2127309 |
| 67.3348948 | 79.2822025 | 66.5851169 | 69.3936894 | 73.5328118 | 73.2127309 |
| 67.3348948 | 78.2822025 | 65.5851169 | 68.3936894 | 72.5328118 | 72.2127309 |
| 67.3348948 | 78.2822025 | 65.5851169 | 67.3936894 | 72.5328118 | 72.2127309 |
| 67.3348948 | 80.2822025 | 65.5851169 | 71.3936894 | 72.5328118 | 73.2127309 |
| 69.3348948 | 81.2822025 | 65.5851169 | 71.3936894 | 72.5328118 | 74.2127309 |
| 70.3348948 | 80.2822025 | 66.5851169 | 70.3936894 | 71.5328118 | 74.2127309 |
| 71.3348948 | 80.2822025 | 66.5851169 | 68.3936894 | 71.5328118 | 75.2127309 |
| 71.3348948 | 71.2822025 | 67.5851169 | 68.3936894 | 71.5328118 | 75.2127309 |
| 69.3348948 | 70.2822025 | 67.5851169 | 68.3936894 | 71.5328118 | 73.2127309 |
| 67.3348948 | 70.2822025 | 67.5851169 | 66.3936894 | 71.5328118 | 73.2127309 |
| 66.3348948 | 71.2822025 | 67.5851169 | 66.3936894 | 70.5328118 | 72.2127309 |
| 65.3348948 | 71.2822025 | 66.5851169 | 66.3936894 | 71.5328118 | 70.2127309 |
| 64.3348948 | 69.2822025 | 66.5851169 | 64.3936894 | 71.5328118 | 70.2127309 |
| 65.3348948 | 68.2822025 | 66.5851169 | 61.3936894 | 72.5328118 | 70.2127309 |
| 66.3348948 | 68.2822025 | 66.5851169 | 60.3936894 | 72.5328118 | 71.2127309 |
| 66.3348948 | 68.2822025 | 66.5851169 | 59.3936894 | 72.5328118 | 73.2127309 |
| 67.3348948 | 68.2822025 | 66.5851169 | 59.3936894 | 72.5328118 | 73.2127309 |
| 67.3348948 | 69.2822025 | 66.5851169 | 58.3936894 | 72.5328118 | 73.2127309 |
| 67.3348948 | 69.2822025 | 66.5851169 | 58.3936894 | 71.5328118 | 73.2127309 |
| 67.3348948 | 71.2822025 | 66.5851169 | 57.3936894 | 70.5328118 | 73.2127309 |
| 67.3348948 | 71.2822025 | 65.5851169 | 57.3936894 | 70.5328118 | 73.2127309 |

|            |            |            |            |            |            |
|------------|------------|------------|------------|------------|------------|
| 67.3348948 | 73.2822025 | 65.5851169 | 58.3936894 | 70.5328118 | 73.2127309 |
| 67.3348948 | 73.2822025 | 65.5851169 | 65.3936894 | 68.5328118 | 72.2127309 |
| 68.3348948 | 73.2822025 | 65.5851169 | 66.3936894 | 67.5328118 | 71.2127309 |
| 69.3348948 | 73.2822025 | 65.5851169 | 68.3936894 | 67.5328118 | 71.2127309 |
| 70.3348948 | 73.2822025 | 65.5851169 | 66.3936894 | 66.5328118 | 73.2127309 |
| 70.3348948 | 73.2822025 | 65.5851169 | 64.3936894 | 68.5328118 | 74.2127309 |
| 70.3348948 | 73.2822025 | 65.5851169 | 64.3936894 | 66.5328118 | 74.2127309 |
| 70.3348948 | 73.2822025 | 66.5851169 | 64.3936894 | 66.5328118 | 73.2127309 |
| 70.3348948 | 68.2822025 | 66.5851169 | 63.3936894 | 66.5328118 | 69.2127309 |
| 70.3348948 | 68.2822025 | 66.5851169 | 62.3936894 | 66.5328118 | 66.2127309 |
| 69.3348948 | 66.2822025 | 67.5851169 | 61.3936894 | 66.5328118 | 66.2127309 |
| 69.3348948 | 65.2822025 | 67.5851169 | 61.3936894 | 66.5328118 | 67.2127309 |
| 69.3348948 | 66.2822025 | 67.5851169 | 60.3936894 | 66.5328118 | 68.2127309 |
| 76.3348948 | 66.2822025 | 68.5851169 | 60.3936894 | 66.5328118 | 68.2127309 |
| 76.3348948 | 66.2822025 | 68.5851169 | 59.3936894 | 66.5328118 | 68.2127309 |
| 76.3348948 | 66.2822025 | 68.5851169 | 59.3936894 | 66.5328118 | 68.2127309 |
| 72.3348948 | 66.2822025 | 69.5851169 | 61.3936894 | 68.5328118 | 68.2127309 |
| 70.3348948 | 66.2822025 | 69.5851169 | 62.3936894 | 70.5328118 | 67.2127309 |
| 69.3348948 | 67.2822025 | 70.5851169 | 60.3936894 | 70.5328118 | 67.2127309 |
| 69.3348948 | 68.2822025 | 69.5851169 | 60.3936894 | 70.5328118 | 68.2127309 |
| 69.3348948 | 68.2822025 | 69.5851169 | 59.3936894 | 71.5328118 | 68.2127309 |
| 70.3348948 | 67.2822025 | 69.5851169 | 59.3936894 | 68.5328118 | 68.2127309 |
| 72.3348948 | 67.2822025 | 69.5851169 | 59.3936894 | 68.5328118 | 68.2127309 |
| 72.3348948 | 68.2822025 | 68.5851169 | 62.3936894 | 67.5328118 | 68.2127309 |
| 72.3348948 | 69.2822025 | 66.5851169 | 65.3936894 | 66.5328118 | 68.2127309 |
| 73.3348948 | 69.2822025 | 66.5851169 | 67.3936894 | 66.5328118 | 68.2127309 |
| 73.3348948 | 69.2822025 | 66.5851169 | 69.3936894 | 66.5328118 | 69.2127309 |
| 74.3348948 | 69.2822025 | 66.5851169 | 71.3936894 | 66.5328118 | 69.2127309 |
| 74.3348948 | 69.2822025 | 66.5851169 | 71.3936894 | 66.5328118 | 72.2127309 |
| 74.3348948 | 69.2822025 | 66.5851169 | 69.3936894 | 66.5328118 | 72.2127309 |
| 74.3348948 | 69.2822025 | 66.5851169 | 67.3936894 | 66.5328118 | 72.2127309 |
| 80.3348948 | 69.2822025 | 67.5851169 | 66.3936894 | 68.5328118 | 75.2127309 |
| 81.3348948 | 70.2822025 | 67.5851169 | 66.3936894 | 69.5328118 | 78.2127309 |
| 80.3348948 | 70.2822025 | 68.5851169 | 65.3936894 | 69.5328118 | 79.2127309 |
| 80.3348948 | 70.2822025 | 68.5851169 | 64.3936894 | 70.5328118 | 79.2127309 |
| 80.3348948 | 70.2822025 | 69.5851169 | 65.3936894 | 70.5328118 | 79.2127309 |
| 80.3348948 | 70.2822025 | 66.5851169 | 67.3936894 | 70.5328118 | 80.2127309 |
| 79.3348948 | 70.2822025 | 66.5851169 | 68.3936894 | 70.5328118 | 79.2127309 |
| 79.3348948 | 70.2822025 | 66.5851169 | 68.3936894 | 70.5328118 | 79.2127309 |
| 79.3348948 | 70.2822025 | 66.5851169 | 69.3936894 | 73.5328118 | 79.2127309 |
| 80.3348948 | 70.2822025 | 66.5851169 | 67.3936894 | 74.5328118 | 76.2127309 |
| 80.3348948 | 70.2822025 | 66.5851169 | 66.3936894 | 75.5328118 | 76.2127309 |
| 80.3348948 | 68.2822025 | 67.5851169 | 67.3936894 | 75.5328118 | 76.2127309 |
| 80.3348948 | 68.2822025 | 67.5851169 | 68.3936894 | 74.5328118 | 76.2127309 |
| 80.3348948 | 68.2822025 | 68.5851169 | 67.3936894 | 76.5328118 | 76.2127309 |

|            |            |            |            |            |            |
|------------|------------|------------|------------|------------|------------|
| 80.3348948 | 60.2822025 | 69.5851169 | 67.3936894 | 76.5328118 | 76.2127309 |
| 77.3348948 | 60.2822025 | 71.5851169 | 67.3936894 | 76.5328118 | 76.2127309 |
| 70.3348948 | 60.2822025 | 71.5851169 | 66.3936894 | 76.5328118 | 76.2127309 |
| 67.3348948 | 59.2822025 | 70.5851169 | 65.3936894 | 77.5328118 | 75.2127309 |
| 66.3348948 | 59.2822025 | 69.5851169 | 63.3936894 | 77.5328118 | 74.2127309 |
| 66.3348948 | 59.2822025 | 69.5851169 | 63.3936894 | 79.5328118 | 74.2127309 |
| 66.3348948 | 59.2822025 | 69.5851169 | 62.3936894 | 80.5328118 | 74.2127309 |
| 66.3348948 | 59.2822025 | 68.5851169 | 62.3936894 | 82.5328118 | 76.2127309 |
| 67.3348948 | 59.2822025 | 68.5851169 | 64.3936894 | 82.5328118 | 76.2127309 |
| 69.3348948 | 60.2822025 | 67.5851169 | 65.3936894 | 83.5328118 | 77.2127309 |
| 69.3348948 | 61.2822025 | 67.5851169 | 65.3936894 | 83.5328118 | 77.2127309 |
| 70.3348948 | 61.2822025 | 67.5851169 | 64.3936894 | 83.5328118 | 77.2127309 |
| 70.3348948 | 61.2822025 | 67.5851169 | 62.3936894 | 82.5328118 | 77.2127309 |
| 70.3348948 | 61.2822025 | 68.5851169 | 61.3936894 | 83.5328118 | 76.2127309 |
| 68.3348948 | 62.2822025 | 68.5851169 | 60.3936894 | 82.5328118 | 75.2127309 |
| 67.3348948 | 62.2822025 | 69.5851169 | 61.3936894 | 68.8472053 | 74.2127309 |
| 65.3348948 | 62.2822025 | 70.5851169 | 62.3936894 | 82.5328118 | 74.2127309 |
| 65.3348948 | 62.2822025 | 70.5851169 | 64.3936894 | 82.5328118 | 74.2127309 |
| 65.3348948 | 62.2822025 | 70.5851169 | 66.3936894 | 82.5328118 | 73.2127309 |
| 65.3348948 | 62.2822025 | 70.5851169 | 67.3936894 | 82.5328118 | 73.2127309 |
| 65.3348948 | 62.2822025 | 70.5851169 | 66.3936894 | 80.5328118 | 71.2127309 |
| 65.3348948 | 62.2822025 | 69.5851169 | 65.3936894 | 75.5328118 | 69.2127309 |
| 65.3348948 | 62.2822025 | 69.5851169 | 65.3936894 | 75.5328118 | 69.2127309 |
| 65.3348948 | 62.2822025 | 68.5851169 | 65.3936894 | 74.5328118 | 69.2127309 |
| 65.3348948 | 62.2822025 | 68.5851169 | 65.3936894 | 74.5328118 | 69.2127309 |
| 64.3348948 | 64.2822025 | 67.5851169 | 63.3936894 | 75.5328118 | 68.2127309 |
| 64.3348948 | 64.2822025 | 66.5851169 | 62.3936894 | 73.5328118 | 68.2127309 |
| 66.3348948 | 64.2822025 | 66.5851169 | 63.3936894 | 72.5328118 | 68.2127309 |
| 68.3348948 | 65.2822025 | 67.5851169 | 64.3936894 | 71.5328118 | 69.2127309 |
| 68.3348948 | 65.2822025 | 67.5851169 | 65.3936894 | 71.5328118 | 69.2127309 |
| 69.3348948 | 65.2822025 | 68.5851169 | 66.3936894 | 71.5328118 | 69.2127309 |
| 71.3348948 | 64.2822025 | 68.5851169 | 66.3936894 | 71.5328118 | 70.2127309 |
| 72.3348948 | 64.2822025 | 68.5851169 | 66.3936894 | 71.5328118 | 70.2127309 |
| 73.3348948 | 65.2822025 | 68.5851169 | 65.3936894 | 71.5328118 | 70.2127309 |
| 73.3348948 | 66.2822025 | 68.5851169 | 65.3936894 | 70.5328118 | 69.2127309 |
| 71.3348948 | 66.2822025 | 68.5851169 | 63.3936894 | 70.5328118 | 69.2127309 |
| 69.3348948 | 71.2822025 | 68.5851169 | 61.3936894 | 70.5328118 | 68.2127309 |
| 67.3348948 | 71.2822025 | 69.5851169 | 60.3936894 | 68.5328118 | 68.2127309 |
| 67.3348948 | 71.2822025 | 72.5851169 | 61.3936894 | 68.5328118 | 67.2127309 |
| 67.3348948 | 71.2822025 | 74.5851169 | 63.3936894 | 66.5328118 | 67.2127309 |
| 67.3348948 | 72.2822025 | 75.5851169 | 65.3936894 | 66.5328118 | 67.2127309 |
| 67.3348948 | 72.2822025 | 76.5851169 | 65.3936894 | 66.5328118 | 69.2127309 |
| 67.3348948 | 72.2822025 | 75.5851169 | 66.3936894 | 67.5328118 | 69.2127309 |
| 68.3348948 | 74.2822025 | 74.5851169 | 66.3936894 | 68.5328118 | 70.2127309 |
| 69.3348948 | 76.2822025 | 74.5851169 | 66.3936894 | 68.5328118 | 70.2127309 |

|            |            |            |            |            |            |
|------------|------------|------------|------------|------------|------------|
| 69.3348948 | 76.2822025 | 74.5851169 | 66.3936894 | 68.5328118 | 70.2127309 |
| 69.3348948 | 72.2822025 | 74.5851169 | 67.3936894 | 69.5328118 | 70.2127309 |
| 69.3348948 | 72.2822025 | 74.5851169 | 68.3936894 | 69.5328118 | 69.2127309 |
| 69.3348948 | 69.2822025 | 74.5851169 | 68.3936894 | 68.5328118 | 69.2127309 |
| 69.3348948 | 69.2822025 | 74.5851169 | 67.3936894 | 68.5328118 | 71.2127309 |
| 70.3348948 | 69.2822025 | 74.5851169 | 66.3936894 | 68.5328118 | 71.2127309 |
| 70.3348948 | 69.2822025 | 74.5851169 | 66.3936894 | 68.5328118 | 75.2127309 |
| 70.3348948 | 69.2822025 | 74.5851169 | 65.3936894 | 68.5328118 | 77.2127309 |
| 70.3348948 | 69.2822025 | 73.5851169 | 65.3936894 | 68.5328118 | 77.2127309 |
| 70.3348948 | 69.2822025 | 73.5851169 | 64.3936894 | 66.5328118 | 77.2127309 |
| 71.3348948 | 69.2822025 | 70.5851169 | 64.3936894 | 66.5328118 | 77.2127309 |
| 71.3348948 | 70.2822025 | 69.5851169 | 64.3936894 | 67.5328118 | 76.2127309 |
| 71.3348948 | 70.2822025 | 69.5851169 | 66.3936894 | 70.5328118 | 75.2127309 |
| 68.3348948 | 70.2822025 | 68.5851169 | 67.3936894 | 70.5328118 | 75.2127309 |
| 66.3348948 | 71.2822025 | 69.5851169 | 76.3936894 | 70.5328118 | 76.2127309 |
| 66.3348948 | 71.2822025 | 69.5851169 | 79.3936894 | 70.5328118 | 76.2127309 |
| 66.3348948 | 78.2822025 | 69.5851169 | 79.3936894 | 74.5328118 | 76.2127309 |
| 66.3348948 | 78.2822025 | 70.5851169 | 79.3936894 | 74.5328118 | 76.2127309 |
| 66.3348948 | 67.2822025 | 70.5851169 | 78.3936894 | 74.5328118 | 75.2127309 |
| 66.3348948 | 66.2822025 | 72.5851169 | 70.3936894 | 74.5328118 | 73.2127309 |
| 66.3348948 | 66.2822025 | 73.5851169 | 66.3936894 | 74.5328118 | 72.2127309 |
| 66.3348948 | 66.2822025 | 73.5851169 | 64.3936894 | 75.5328118 | 72.2127309 |
| 65.3348948 | 65.2822025 | 73.5851169 | 63.3936894 | 77.5328118 | 72.2127309 |
| 64.3348948 | 65.2822025 | 73.5851169 | 63.3936894 | 77.5328118 | 69.2127309 |
| 63.3348948 | 65.2822025 | 73.5851169 | 62.3936894 | 66.1199326 | 69.2127309 |
| 63.3348948 | 66.2822025 | 73.5851169 | 62.3936894 | 66.574478  | 72.2127309 |
| 64.3348948 | 66.2822025 | 73.5851169 | 61.3936894 | 66.8472053 | 73.2127309 |
| 75.3348948 | 66.2822025 | 72.5851169 | 61.3936894 | 82.5328118 | 73.2127309 |
| 78.3348948 | 69.2822025 | 72.5851169 | 61.3936894 | 81.5328118 | 75.2127309 |
| 78.3348948 | 69.2822025 | 72.5851169 | 61.3936894 | 81.5328118 | 76.2127309 |
| 78.3348948 | 68.2822025 | 71.5851169 | 61.3936894 | 81.5328118 | 76.2127309 |
| 80.3348948 | 68.2822025 | 71.5851169 | 61.3936894 | 81.5328118 | 76.2127309 |
| 81.3348948 | 68.2822025 | 71.5851169 | 60.3936894 | 81.5328118 | 76.2127309 |
| 81.3348948 | 68.2822025 | 71.5851169 | 60.3936894 | 81.5328118 | 76.2127309 |
| 79.3348948 | 69.2822025 | 70.5851169 | 61.3936894 | 81.5328118 | 83.2127309 |
| 74.3348948 | 69.2822025 | 69.5851169 | 61.3936894 | 80.5328118 | 68.574478  |
| 74.3348948 | 69.2822025 | 69.5851169 | 61.3936894 | 80.5328118 | 68.8472053 |
| 70.3348948 | 69.2822025 | 69.5851169 | 74.3936894 | 80.5328118 | 69.9381144 |
| 68.3348948 | 69.2822025 | 68.5851169 | 76.3936894 | 79.5328118 | 69.9381144 |
| 67.3348948 | 70.2822025 | 67.5851169 | 76.3936894 | 79.5328118 | 69.9381144 |
| 67.3348948 | 71.2822025 | 67.5851169 | 75.3936894 | 79.5328118 | 69.9381144 |
| 67.3348948 | 71.2822025 | 67.5851169 | 74.3936894 | 79.5328118 | 70.1199326 |
| 67.3348948 | 71.2822025 | 66.5851169 | 73.3936894 | 79.5328118 | 70.0290235 |
| 64.3348948 | 71.2822025 | 66.5851169 | 72.3936894 | 77.5328118 | 68.9381144 |
| 63.3348948 | 70.2822025 | 67.5851169 | 71.3936894 | 77.5328118 | 68.2108417 |

|            |            |            |            |            |            |
|------------|------------|------------|------------|------------|------------|
| 62.3348948 | 70.2822025 | 67.5851169 | 69.3936894 | 76.5328118 | 67.4835689 |
| 62.3348948 | 68.2822025 | 66.5851169 | 69.3936894 | 76.5328118 | 67.3926598 |
| 62.3348948 | 68.2822025 | 66.5851169 | 69.3936894 | 70.5328118 | 78.2127309 |
| 62.3348948 | 68.2822025 | 67.5851169 | 70.3936894 | 69.5328118 | 78.2127309 |
| 63.3348948 | 66.2822025 | 67.5851169 | 72.3936894 | 68.5328118 | 78.2127309 |
| 63.3348948 | 65.2822025 | 68.5851169 | 74.3936894 | 68.5328118 | 78.2127309 |
| 64.3348948 | 65.2822025 | 68.5851169 | 75.3936894 | 67.5328118 | 78.2127309 |
| 64.3348948 | 66.2822025 | 67.5851169 | 76.3936894 | 67.5328118 | 78.2127309 |
| 64.3348948 | 66.2822025 | 66.5851169 | 76.3936894 | 67.5328118 | 78.2127309 |
| 63.3348948 | 66.2822025 | 67.5851169 | 75.3936894 | 66.5328118 | 80.2127309 |
| 63.3348948 | 66.2822025 | 67.5851169 | 71.3936894 | 66.5328118 | 79.2127309 |
| 63.3348948 | 66.2822025 | 67.5851169 | 67.3936894 | 66.5328118 | 76.2127309 |
| 63.3348948 | 66.2822025 | 67.5851169 | 65.3936894 | 66.5328118 | 76.2127309 |
| 63.3348948 | 64.2822025 | 67.5851169 | 65.3936894 | 65.5328118 | 74.2127309 |
| 63.3348948 | 62.2822025 | 67.5851169 | 64.3936894 | 64.5328118 | 73.2127309 |
| 64.3348948 | 61.2822025 | 67.5851169 | 65.3936894 | 62.5328118 | 73.2127309 |
| 64.3348948 | 60.2822025 | 67.5851169 | 65.3936894 | 62.5328118 | 73.2127309 |
| 65.3348948 | 61.2822025 | 66.5851169 | 65.3936894 | 62.5328118 | 70.2127309 |
| 66.3348948 | 61.2822025 | 66.5851169 | 64.3936894 | 61.5328118 | 70.2127309 |
| 66.3348948 | 60.2822025 | 66.5851169 | 63.3936894 | 61.5328118 | 69.2127309 |
| 66.3348948 | 60.2822025 | 66.5851169 | 61.3936894 | 61.5328118 | 69.2127309 |
| 66.3348948 | 62.2822025 | 66.5851169 | 60.3936894 | 61.5328118 | 69.2127309 |
| 67.3348948 | 62.2822025 | 66.5851169 | 60.3936894 | 61.5328118 | 68.2127309 |
| 68.3348948 | 62.2822025 | 66.5851169 | 60.3936894 | 61.5328118 | 70.2127309 |
| 69.3348948 | 62.2822025 | 66.5851169 | 62.3936894 | 60.5328118 | 74.2127309 |
| 69.3348948 | 62.2822025 | 66.5851169 | 64.3936894 | 60.5328118 | 76.2127309 |
| 69.3348948 | 63.2822025 | 66.5851169 | 65.3936894 | 60.5328118 | 76.2127309 |
| 69.3348948 | 66.2822025 | 67.5851169 | 66.3936894 | 60.5328118 | 78.2127309 |
| 69.3348948 | 66.2822025 | 68.5851169 | 66.3936894 | 61.5328118 | 78.2127309 |
| 69.3348948 | 66.2822025 | 68.5851169 | 65.3936894 | 61.5328118 | 78.2127309 |
| 69.3348948 | 66.2822025 | 68.5851169 | 65.3936894 | 61.5328118 | 78.2127309 |
| 69.3348948 | 66.2822025 | 68.5851169 | 65.3936894 | 63.5328118 | 78.2127309 |
| 69.3348948 | 67.2822025 | 68.5851169 | 65.3936894 | 63.5328118 | 78.2127309 |
| 69.3348948 | 67.2822025 | 69.5851169 | 65.3936894 | 65.5328118 | 78.2127309 |
| 69.3348948 | 67.2822025 | 70.5851169 | 67.3936894 | 65.5328118 | 78.2127309 |
| 69.3348948 | 67.2822025 | 72.5851169 | 68.3936894 | 65.5328118 | 77.2127309 |
| 69.3348948 | 68.2822025 | 73.5851169 | 69.3936894 | 67.5328118 | 77.2127309 |
| 70.3348948 | 67.2822025 | 74.5851169 | 70.3936894 | 68.5328118 | 78.2127309 |
| 75.3348948 | 67.2822025 | 74.5851169 | 70.3936894 | 68.5328118 | 78.2127309 |
| 78.3348948 | 66.2822025 | 74.5851169 | 70.3936894 | 68.5328118 | 78.2127309 |
| 80.3348948 | 64.2822025 | 73.5851169 | 69.3936894 | 68.5328118 | 78.2127309 |
| 80.3348948 | 64.2822025 | 73.5851169 | 65.3936894 | 69.5328118 | 78.2127309 |
| 80.3348948 | 64.2822025 | 73.5851169 | 65.3936894 | 69.5328118 | 78.2127309 |
| 75.3348948 | 62.2822025 | 73.5851169 | 57.3936894 | 71.5328118 | 78.2127309 |
| 71.3348948 | 62.2822025 | 74.5851169 | 56.3936894 | 70.5328118 | 78.2127309 |

|            |            |            |            |            |            |
|------------|------------|------------|------------|------------|------------|
| 69.3348948 | 62.2822025 | 76.5851169 | 55.3936894 | 70.5328118 | 78.2127309 |
| 68.3348948 | 63.2822025 | 80.5851169 | 55.3936894 | 69.5328118 | 76.2127309 |
| 67.3348948 | 57.2822025 | 79.5851169 | 56.3936894 | 69.5328118 | 77.2127309 |
| 67.3348948 | 57.2822025 | 77.5851169 | 56.3936894 | 69.5328118 | 79.2127309 |
| 67.3348948 | 54.2822025 | 73.5851169 | 55.3936894 | 68.5328118 | 78.2127309 |
| 66.3348948 | 54.2822025 | 71.5851169 | 55.3936894 | 68.5328118 | 76.2127309 |
| 65.3348948 | 56.2822025 | 70.5851169 | 55.3936894 | 68.5328118 | 76.2127309 |
| 64.3348948 | 58.2822025 | 69.5851169 | 55.3936894 | 68.5328118 | 76.2127309 |
| 64.3348948 | 58.2822025 | 68.5851169 | 55.3936894 | 68.5328118 | 76.2127309 |
| 64.3348948 | 59.2822025 | 68.5851169 | 55.3936894 | 68.5328118 | 76.2127309 |
| 63.3348948 | 59.2822025 | 67.5851169 | 55.3936894 | 69.5328118 | 75.2127309 |
| 64.3348948 | 59.2822025 | 67.5851169 | 58.3936894 | 70.5328118 | 74.2127309 |
| 64.3348948 | 59.2822025 | 66.5851169 | 61.3936894 | 70.5328118 | 74.2127309 |
| 64.3348948 | 60.2822025 | 66.5851169 | 63.3936894 | 70.5328118 | 72.2127309 |
| 64.3348948 | 60.2822025 | 66.5851169 | 63.3936894 | 70.5328118 | 73.2127309 |
| 64.3348948 | 60.2822025 | 65.5851169 | 63.3936894 | 70.5328118 | 75.2127309 |
| 64.3348948 | 62.2822025 | 65.5851169 | 64.3936894 | 71.5328118 | 75.2127309 |
| 63.3348948 | 62.2822025 | 65.5851169 | 65.3936894 | 71.5328118 | 75.2127309 |
| 63.3348948 | 62.2822025 | 65.5851169 | 66.3936894 | 71.5328118 | 74.2127309 |
| 63.3348948 | 63.2822025 | 65.5851169 | 67.3936894 | 71.5328118 | 74.2127309 |
| 64.3348948 | 63.2822025 | 65.5851169 | 70.3936894 | 69.5328118 | 73.2127309 |
| 65.3348948 | 64.2822025 | 66.5851169 | 70.3936894 | 68.5328118 | 72.2127309 |
| 65.3348948 | 66.2822025 | 66.5851169 | 69.3936894 | 68.5328118 | 72.2127309 |
| 65.3348948 | 69.2822025 | 66.5851169 | 68.3936894 | 68.5328118 | 72.2127309 |
| 65.3348948 | 70.2822025 | 66.5851169 | 64.3936894 | 65.5328118 | 71.2127309 |
| 65.3348948 | 70.2822025 | 66.5851169 | 60.3936894 | 64.5328118 | 71.2127309 |
| 65.3348948 | 70.2822025 | 66.5851169 | 58.3936894 | 63.5328118 | 71.2127309 |
| 65.3348948 | 69.2822025 | 67.5851169 | 58.3936894 | 63.5328118 | 71.2127309 |
| 65.3348948 | 69.2822025 | 67.5851169 | 58.3936894 | 64.5328118 | 71.2127309 |
| 65.3348948 | 69.2822025 | 67.5851169 | 61.3936894 | 64.5328118 | 72.2127309 |
| 67.3348948 | 69.2822025 | 66.5851169 | 65.3936894 | 64.5328118 | 73.2127309 |
| 68.3348948 | 69.2822025 | 66.5851169 | 65.3936894 | 64.5328118 | 73.2127309 |
| 70.3348948 | 68.2822025 | 66.5851169 | 68.3936894 | 64.5328118 | 79.2127309 |
| 69.3348948 | 72.2822025 | 66.5851169 | 67.3936894 | 64.5328118 | 81.2127309 |
| 68.3348948 | 74.2822025 | 66.5851169 | 67.3936894 | 64.5328118 | 81.2127309 |
| 67.3348948 | 75.2822025 | 66.5851169 | 66.3936894 | 64.5328118 | 80.2127309 |
| 67.3348948 | 74.2822025 | 66.5851169 | 65.3936894 | 64.5328118 | 79.2127309 |
| 67.3348948 | 74.2822025 | 67.5851169 | 64.3936894 | 63.5328118 | 79.2127309 |
| 66.3348948 | 72.2822025 | 69.5851169 | 64.3936894 | 63.5328118 | 79.2127309 |
| 66.3348948 | 70.2822025 | 68.5851169 | 64.3936894 | 64.5328118 | 77.2127309 |
| 66.3348948 | 69.2822025 | 68.5851169 | 64.3936894 | 64.5328118 | 77.2127309 |
| 65.3348948 | 68.2822025 | 68.5851169 | 64.3936894 | 64.5328118 | 77.2127309 |
| 65.3348948 | 68.2822025 | 67.5851169 | 64.3936894 | 63.5328118 | 76.2127309 |
| 65.3348948 | 68.2822025 | 67.5851169 | 64.3936894 | 63.5328118 | 76.2127309 |
| 65.3348948 | 68.2822025 | 67.5851169 | 65.3936894 | 63.5328118 | 76.2127309 |

|            |            |            |            |            |            |
|------------|------------|------------|------------|------------|------------|
| 65.3348948 | 69.2822025 | 67.5851169 | 66.3936894 | 63.5328118 | 69.2127309 |
| 75.3348948 | 69.2822025 | 67.5851169 | 66.3936894 | 64.5328118 | 69.2127309 |
| 65.2108417 | 70.2822025 | 68.5851169 | 65.3936894 | 64.5328118 | 66.2127309 |
| 65.1199326 | 70.2822025 | 68.5851169 | 63.3936894 | 64.5328118 | 67.2127309 |
| 65.3017507 | 70.2822025 | 69.5851169 | 61.3936894 | 64.5328118 | 69.2127309 |
| 65.2108417 | 68.2822025 | 70.5851169 | 60.3936894 | 64.5328118 | 68.2127309 |
| 65.9494935 | 68.2822025 | 70.5851169 | 60.3936894 | 64.5328118 | 68.2127309 |
| 65.0599871 | 64.2822025 | 70.5851169 | 60.3936894 | 64.5328118 | 68.2127309 |
| 64.4835689 | 64.2822025 | 70.5851169 | 61.3936894 | 63.5328118 | 67.2127309 |
| 64.9381144 | 66.2822025 | 70.5851169 | 63.3936894 | 63.5328118 | 67.2127309 |
| 64.8472053 | 67.2822025 | 70.5851169 | 64.3936894 | 63.5328118 | 67.2127309 |
| 64.9381144 | 67.2822025 | 70.5851169 | 64.3936894 | 63.5328118 | 67.2127309 |
| 79.3348948 | 68.2822025 | 72.5851169 | 64.3936894 | 64.5328118 | 67.2127309 |
| 79.3348948 | 68.2822025 | 72.5851169 | 63.3936894 | 69.5328118 | 67.2127309 |
| 79.3348948 | 68.2822025 | 72.5851169 | 62.3936894 | 69.5328118 | 67.2127309 |
| 79.3348948 | 69.2822025 | 72.5851169 | 62.3936894 | 70.5328118 | 66.2127309 |
| 80.3348948 | 68.2822025 | 71.5851169 | 62.3936894 | 70.5328118 | 66.2127309 |
| 79.3348948 | 68.2822025 | 70.5851169 | 61.3936894 | 70.5328118 | 67.2127309 |
| 78.3348948 | 68.2822025 | 70.5851169 | 61.3936894 | 70.5328118 | 69.2127309 |
| 75.3348948 | 68.2822025 | 70.5851169 | 61.3936894 | 70.5328118 | 70.2127309 |
| 64.3348948 | 67.2822025 | 69.5851169 | 61.3936894 | 70.5328118 | 70.2127309 |
| 64.3348948 | 67.2822025 | 69.5851169 | 61.3936894 | 70.5328118 | 70.2127309 |
| 60.3348948 | 68.2822025 | 68.5851169 | 60.3936894 | 70.5328118 | 72.2127309 |
| 59.3348948 | 68.2822025 | 68.5851169 | 58.3936894 | 69.5328118 | 74.2127309 |
| 60.3348948 | 68.2822025 | 67.5851169 | 58.3936894 | 69.5328118 | 74.2127309 |
| 60.3348948 | 68.2822025 | 67.5851169 | 58.3936894 | 66.5328118 | 75.2127309 |
| 60.3348948 | 68.2822025 | 66.5851169 | 57.3936894 | 64.5328118 | 76.2127309 |
| 61.3348948 | 68.2822025 | 66.5851169 | 73.3936894 | 64.5328118 | 76.2127309 |
| 60.3348948 | 68.2822025 | 66.5851169 | 74.3936894 | 64.5328118 | 76.2127309 |
| 60.3348948 | 68.2822025 | 66.5851169 | 74.3936894 | 63.5328118 | 75.2127309 |
| 59.3348948 | 67.2822025 | 66.5851169 | 74.3936894 | 63.5328118 | 74.2127309 |
| 58.3348948 | 67.2822025 | 66.5851169 | 60.3936894 | 62.5328118 | 73.2127309 |
| 58.3348948 | 65.2822025 | 66.5851169 | 55.3936894 | 62.5328118 | 73.2127309 |
| 58.3348948 | 64.2822025 | 66.5851169 | 52.3936894 | 62.5328118 | 73.2127309 |
| 58.3348948 | 64.2822025 | 65.5851169 | 50.3936894 | 62.5328118 | 73.2127309 |
| 59.3348948 | 64.2822025 | 65.5851169 | 49.3936894 | 63.5328118 | 72.2127309 |
| 60.3348948 | 65.2822025 | 65.5851169 | 49.3936894 | 63.5328118 | 72.2127309 |
| 60.3348948 | 65.2822025 | 65.5851169 | 51.3936894 | 63.5328118 | 72.2127309 |
| 61.3348948 | 65.2822025 | 66.5851169 | 54.3936894 | 63.5328118 | 72.2127309 |
| 61.3348948 | 64.2822025 | 66.5851169 | 56.3936894 | 62.5328118 | 69.2127309 |
| 62.3348948 | 64.2822025 | 66.5851169 | 58.3936894 | 62.5328118 | 69.2127309 |
| 64.3348948 | 64.2822025 | 66.5851169 | 59.3936894 | 60.5328118 | 68.2127309 |
| 66.3348948 | 64.2822025 | 66.5851169 | 59.3936894 | 60.5328118 | 67.2127309 |
| 67.3348948 | 64.2822025 | 66.5851169 | 58.3936894 | 60.5328118 | 68.2127309 |
| 67.3348948 | 64.2822025 | 68.5851169 | 57.3936894 | 62.5328118 | 68.2127309 |

|            |            |            |            |            |            |
|------------|------------|------------|------------|------------|------------|
| 67.3348948 | 64.2822025 | 68.5851169 | 58.3936894 | 64.5328118 | 70.2127309 |
| 66.3348948 | 65.2822025 | 67.5851169 | 58.3936894 | 64.5328118 | 74.2127309 |
| 66.3348948 | 65.2822025 | 68.5851169 | 58.3936894 | 65.5328118 | 74.2127309 |
| 64.3348948 | 65.2822025 | 68.5851169 | 59.3936894 | 66.5328118 | 75.2127309 |
| 63.3348948 | 65.2822025 | 68.5851169 | 60.3936894 | 66.5328118 | 74.2127309 |
| 63.3348948 | 65.2822025 | 69.5851169 | 60.3936894 | 66.5328118 | 72.2127309 |
| 62.3348948 | 65.2822025 | 69.5851169 | 59.3936894 | 66.5328118 | 72.2127309 |
| 62.3348948 | 65.2822025 | 69.5851169 | 59.3936894 | 66.5328118 | 72.2127309 |
| 61.3348948 | 65.2822025 | 69.5851169 | 59.3936894 | 67.5328118 | 72.2127309 |
| 62.3348948 | 65.2822025 | 70.5851169 | 59.3936894 | 67.5328118 | 73.2127309 |
| 63.3348948 | 65.2822025 | 71.5851169 | 60.3936894 | 67.5328118 | 73.2127309 |
| 62.3348948 | 65.2822025 | 69.5851169 | 60.3936894 | 67.5328118 | 72.2127309 |
| 61.3348948 | 66.2822025 | 69.5851169 | 60.3936894 | 67.5328118 | 68.2127309 |
| 61.3348948 | 66.2822025 | 69.5851169 | 60.3936894 | 67.5328118 | 68.2127309 |
| 61.3348948 | 67.2822025 | 69.5851169 | 61.3936894 | 67.5328118 | 66.2127309 |
| 61.3348948 | 67.2822025 | 69.5851169 | 61.3936894 | 67.5328118 | 66.2127309 |
| 60.3348948 | 68.2822025 | 69.5851169 | 68.3936894 | 67.5328118 | 66.2127309 |
| 59.3348948 | 69.2822025 | 68.5851169 | 69.3936894 | 68.5328118 | 65.2127309 |
| 58.3348948 | 68.2822025 | 68.5851169 | 69.3936894 | 68.5328118 | 67.2127309 |
| 58.3348948 | 69.2822025 | 68.5851169 | 68.3936894 | 68.5328118 | 67.2127309 |
| 58.3348948 | 69.2822025 | 68.5851169 | 68.3936894 | 69.5328118 | 68.2127309 |
| 58.3348948 | 69.2822025 | 67.5851169 | 68.3936894 | 69.5328118 | 69.2127309 |
| 58.3348948 | 69.2822025 | 67.5851169 | 69.3936894 | 70.5328118 | 69.2127309 |
| 58.3348948 | 69.2822025 | 67.5851169 | 70.3936894 | 69.5328118 | 70.2127309 |
| 57.3348948 | 69.2822025 | 66.5851169 | 71.3936894 | 69.5328118 | 70.2127309 |
| 57.3348948 | 67.2822025 | 66.5851169 | 73.3936894 | 69.5328118 | 69.2127309 |
| 57.3348948 | 65.2822025 | 66.5851169 | 73.3936894 | 69.5328118 | 70.2127309 |
| 57.3348948 | 65.2822025 | 66.5851169 | 74.3936894 | 69.5328118 | 70.2127309 |
| 56.3348948 | 65.2822025 | 66.5851169 | 74.3936894 | 68.5328118 | 69.2127309 |
| 56.3348948 | 65.2822025 | 66.5851169 | 74.3936894 | 68.5328118 | 67.2127309 |
| 56.3348948 | 65.2822025 | 66.5851169 | 74.3936894 | 68.5328118 | 67.2127309 |
| 56.3348948 | 65.2822025 | 66.5851169 | 75.3936894 | 68.5328118 | 66.2127309 |
| 56.3348948 | 66.2822025 | 66.5851169 | 75.3936894 | 68.5328118 | 68.2127309 |
| 56.3348948 | 69.2822025 | 66.5851169 | 75.3936894 | 68.5328118 | 68.2127309 |
| 56.3348948 | 73.2822025 | 67.5851169 | 75.3936894 | 68.5328118 | 68.2127309 |
| 57.3348948 | 78.2822025 | 67.5851169 | 72.3936894 | 68.5328118 | 68.2127309 |
| 58.3348948 | 67.574478  | 67.5851169 | 72.3936894 | 68.5328118 | 68.2127309 |
| 58.3348948 | 68.1199326 | 67.5851169 | 72.3936894 | 67.5328118 | 68.2127309 |
| 59.3348948 | 68.574478  | 67.5851169 | 71.3936894 | 68.5328118 | 69.2127309 |
| 60.3348948 | 69.0290235 | 67.5851169 | 71.3936894 | 68.5328118 | 69.2127309 |
| 60.3348948 | 70.0290235 | 67.5851169 | 71.3936894 | 68.5328118 | 70.2127309 |
| 62.3348948 | 70.1199326 | 67.5851169 | 68.3936894 | 67.5328118 | 69.2127309 |
| 63.3348948 | 70.2108417 | 67.5851169 | 67.3936894 | 67.5328118 | 69.2127309 |
| 63.3348948 | 69.8472053 | 67.5851169 | 66.3936894 | 68.5328118 | 69.2127309 |
| 64.3348948 | 69.574478  | 67.5851169 | 66.3936894 | 68.5328118 | 69.2127309 |



|            |            |            |            |            |            |
|------------|------------|------------|------------|------------|------------|
| 64.3348948 | 68.8472053 | 67.5851169 | 66.3936894 | 68.5328118 | 67.2127309 |
| 64.3348948 | 68.6653871 | 68.5851169 | 66.3936894 | 68.5328118 | 67.2127309 |
| 64.3348948 | 68.574478  | 68.5851169 | 66.3936894 | 68.5328118 | 68.2127309 |
| 64.3348948 | 67.9381144 | 68.5851169 | 66.3936894 | 68.5328118 | 69.2127309 |
| 64.3348948 | 67.6653871 | 69.5851169 | 66.3936894 | 67.5328118 | 69.2127309 |
| 66.3348948 | 67.8472053 | 69.5851169 | 69.3936894 | 67.5328118 | 67.2127309 |
| 67.3348948 | 67.8472053 | 70.5851169 | 69.3936894 | 66.5328118 | 68.2127309 |
| 67.3348948 | 67.8472053 | 70.5851169 | 68.3936894 | 66.5328118 | 68.2127309 |
| 67.3348948 | 67.9381144 | 70.5851169 | 68.3936894 | 65.5328118 | 68.2127309 |
| 68.3348948 | 68.3017507 | 70.5851169 | 68.3936894 | 64.5328118 | 68.2127309 |
| 68.3348948 | 68.7562962 | 70.5851169 | 68.3936894 | 64.5328118 | 68.2127309 |
| 69.3348948 | 68.8472053 | 70.5851169 | 68.3936894 | 63.5328118 | 66.2127309 |
| 71.3348948 | 68.7562962 | 70.5851169 | 68.3936894 | 63.5328118 | 65.2127309 |
| 71.3348948 | 69.1199326 | 71.5851169 | 69.3936894 | 63.5328118 | 65.2127309 |
| 74.3348948 | 69.2108417 | 71.5851169 | 69.3936894 | 63.5328118 | 66.2127309 |
| 74.3348948 | 80.2822025 | 72.5851169 | 70.3936894 | 64.5328118 | 67.2127309 |
| 74.3348948 | 80.2822025 | 73.5851169 | 70.3936894 | 64.5328118 | 67.2127309 |
| 75.3348948 | 80.2822025 | 73.5851169 | 70.3936894 | 63.5328118 | 71.2127309 |
| 76.3348948 | 80.2822025 | 73.5851169 | 70.3936894 | 62.5328118 | 71.2127309 |
| 76.3348948 | 80.2822025 | 73.5851169 | 70.3936894 | 62.5328118 | 71.2127309 |
| 80.3348948 | 80.2822025 | 73.5851169 | 69.3936894 | 62.5328118 | 71.2127309 |
| 81.3348948 | 79.2822025 | 74.5851169 | 60.3936894 | 62.5328118 | 71.2127309 |
| 81.3348948 | 79.2822025 | 74.5851169 | 60.3936894 | 62.5328118 | 71.2127309 |
| 82.3348948 | 79.2822025 | 74.5851169 | 58.3936894 | 63.5328118 | 72.2127309 |
| 82.3348948 | 79.2822025 | 74.5851169 | 58.3936894 | 63.5328118 | 72.2127309 |
| 80.3348948 | 73.2822025 | 73.5851169 | 56.3936894 | 63.5328118 | 71.2127309 |
| 79.3348948 | 73.2822025 | 73.5851169 | 54.3936894 | 63.5328118 | 71.2127309 |
| 79.3348948 | 71.2822025 | 74.5851169 | 54.3936894 | 63.5328118 | 70.2127309 |
| 79.3348948 | 70.2822025 | 71.5851169 | 54.3936894 | 63.5328118 | 71.2127309 |
| 79.3348948 | 71.2822025 | 70.5851169 | 52.3936894 | 63.5328118 | 71.2127309 |
| 79.3348948 | 71.2822025 | 70.5851169 | 48.3936894 | 62.5328118 | 70.2127309 |
| 79.3348948 | 72.2822025 | 69.5851169 | 48.3936894 | 62.5328118 | 69.2127309 |
| 79.3348948 | 73.2822025 | 68.5851169 | 48.3936894 | 62.5328118 | 71.2127309 |
| 78.3348948 | 76.2822025 | 67.5851169 | 49.3936894 | 62.5328118 | 70.2127309 |
| 78.3348948 | 77.2822025 | 65.5851169 | 49.3936894 | 62.5328118 | 70.2127309 |
| 78.3348948 | 77.2822025 | 65.5851169 | 53.3936894 | 63.5328118 | 71.2127309 |
| 79.3348948 | 74.2822025 | 64.5851169 | 54.3936894 | 63.5328118 | 72.2127309 |
| 79.3348948 | 72.2822025 | 64.5851169 | 54.3936894 | 63.5328118 | 74.2127309 |
| 80.3348948 | 69.2822025 | 64.5851169 | 56.3936894 | 62.5328118 | 74.2127309 |
| 82.3348948 | 67.2822025 | 64.5851169 | 58.3936894 | 62.5328118 | 76.2127309 |
| 82.3348948 | 65.2822025 | 64.5851169 | 60.3936894 | 63.5328118 | 76.2127309 |
| 83.3348948 | 63.2822025 | 64.5851169 | 60.3936894 | 63.5328118 | 76.2127309 |
| 83.3348948 | 63.2822025 | 64.5851169 | 60.3936894 | 63.5328118 | 76.2127309 |
| 83.3348948 | 63.2822025 | 64.5851169 | 61.3936894 | 63.5328118 | 76.2127309 |
| 69.1199326 | 63.2822025 | 65.5851169 | 62.3936894 | 63.5328118 | 76.2127309 |

|            |            |            |            |            |            |
|------------|------------|------------|------------|------------|------------|
| 69.9381144 | 63.2822025 | 65.5851169 | 62.3936894 | 71.5328118 | 76.2127309 |
| 84.3348948 | 63.2822025 | 66.5851169 | 65.3936894 | 72.5328118 | 76.2127309 |
| 84.3348948 | 67.2822025 | 66.5851169 | 65.3936894 | 73.5328118 | 77.2127309 |
| 84.3348948 | 78.2822025 | 66.5851169 | 65.3936894 | 73.5328118 | 77.2127309 |
| 84.3348948 | 78.2822025 | 66.5851169 | 66.3936894 | 73.5328118 | 77.2127309 |
| 84.3348948 | 75.7562962 | 66.5851169 | 65.3936894 | 73.5328118 | 76.2127309 |
| 83.3348948 | 75.6653871 | 66.5851169 | 65.3936894 | 73.5328118 | 75.2127309 |
| 83.3348948 | 76.0290235 | 67.5851169 | 65.3936894 | 73.5328118 | 75.2127309 |
| 82.3348948 | 74.7562962 | 67.5851169 | 65.3936894 | 73.5328118 | 75.2127309 |
| 81.3348948 | 75.1199326 | 68.5851169 | 65.3936894 | 73.5328118 | 75.2127309 |
| 80.3348948 | 75.574478  | 70.5851169 | 65.3936894 | 73.5328118 | 74.2127309 |
| 79.3348948 | 75.8472053 | 71.5851169 | 65.3936894 | 72.5328118 | 74.2127309 |
| 78.3348948 | 77.3926598 | 71.5851169 | 65.3936894 | 70.5328118 | 75.2127309 |
| 77.3348948 | 77.6653871 | 71.5851169 | 66.3936894 | 70.5328118 | 75.2127309 |
| 77.3348948 | 78.3017507 | 71.5851169 | 74.3936894 | 70.5328118 | 75.2127309 |
| 76.3348948 | 77.6653871 | 71.5851169 | 76.3936894 | 68.5328118 | 74.2127309 |
| 76.3348948 | 77.0290235 | 72.5851169 | 75.3936894 | 68.5328118 | 68.2127309 |
| 76.3348948 | 76.574478  | 72.5851169 | 72.3936894 | 68.5328118 | 68.2127309 |
| 76.3348948 | 75.9381144 | 72.5851169 | 69.3936894 | 67.5328118 | 68.2127309 |
| 76.3348948 | 75.3017507 | 72.5851169 | 67.3936894 | 66.5328118 | 68.2127309 |
| 76.3348948 | 74.9381144 | 73.5851169 | 68.3936894 | 66.5328118 | 66.2127309 |
| 76.3348948 | 73.9381144 | 73.5851169 | 70.3936894 | 66.5328118 | 65.2127309 |
| 76.3348948 | 73.1199326 | 73.5851169 | 72.3936894 | 66.5328118 | 64.2127309 |
| 76.3348948 | 72.1199326 | 73.5851169 | 73.3936894 | 65.5328118 | 64.2127309 |
| 77.3348948 | 84.2822025 | 73.5851169 | 73.3936894 | 65.5328118 | 63.2127309 |
| 83.3348948 | 79.2822025 | 72.5851169 | 72.3936894 | 66.5328118 | 63.2127309 |
| 83.3348948 | 73.2822025 | 71.5851169 | 67.3936894 | 66.5328118 | 63.2127309 |
| 81.3348948 | 70.2822025 | 71.5851169 | 64.3936894 | 68.5328118 | 63.2127309 |
| 78.3348948 | 70.2822025 | 71.5851169 | 62.3936894 | 68.5328118 | 63.2127309 |
| 75.3348948 | 67.2822025 | 72.5851169 | 61.3936894 | 67.5328118 | 65.2127309 |
| 72.3348948 | 66.2822025 | 73.5851169 | 61.3936894 | 66.5328118 | 66.2127309 |
| 71.3348948 | 66.2822025 | 73.5851169 | 62.3936894 | 66.5328118 | 67.2127309 |
| 69.3348948 | 65.2822025 | 73.5851169 | 64.3936894 | 66.5328118 | 67.2127309 |
| 69.3348948 | 65.2822025 | 73.5851169 | 64.3936894 | 66.5328118 | 67.2127309 |
| 69.3348948 | 63.2822025 | 74.5851169 | 64.3936894 | 66.5328118 | 68.2127309 |
| 69.3348948 | 63.2822025 | 74.5851169 | 64.3936894 | 66.5328118 | 69.2127309 |
| 70.3348948 | 63.2822025 | 74.5851169 | 63.3936894 | 66.5328118 | 71.2127309 |
| 70.3348948 | 63.2822025 | 74.5851169 | 61.3936894 | 67.5328118 | 71.2127309 |
| 70.3348948 | 63.2822025 | 74.5851169 | 60.3936894 | 67.5328118 | 71.2127309 |
| 70.3348948 | 63.2822025 | 73.5851169 | 59.3936894 | 67.5328118 | 72.2127309 |
| 70.3348948 | 63.2822025 | 73.5851169 | 59.3936894 | 68.5328118 | 73.2127309 |
| 70.3348948 | 63.2822025 | 71.5851169 | 62.3936894 | 68.5328118 | 73.2127309 |
| 69.3348948 | 64.2822025 | 70.5851169 | 64.3936894 | 68.5328118 | 74.2127309 |
| 69.3348948 | 64.2822025 | 69.5851169 | 65.3936894 | 68.5328118 | 74.2127309 |
| 69.3348948 | 64.2822025 | 69.5851169 | 65.3936894 | 68.5328118 | 74.2127309 |

|            |            |            |            |            |            |
|------------|------------|------------|------------|------------|------------|
| 70.3348948 | 63.2822025 | 69.5851169 | 63.3936894 | 68.5328118 | 74.2127309 |
| 69.3348948 | 62.2822025 | 68.5851169 | 61.3936894 | 68.5328118 | 76.2127309 |
| 68.3348948 | 62.2822025 | 68.5851169 | 61.3936894 | 68.5328118 | 77.2127309 |
| 67.3348948 | 62.2822025 | 69.5851169 | 61.3936894 | 68.5328118 | 81.2127309 |
| 66.3348948 | 63.2822025 | 69.5851169 | 61.3936894 | 68.5328118 | 81.2127309 |
| 66.3348948 | 63.2822025 | 69.5851169 | 61.3936894 | 67.5328118 | 82.2127309 |
| 66.3348948 | 63.2822025 | 68.5851169 | 61.3936894 | 66.5328118 | 81.2127309 |
| 66.3348948 | 63.2822025 | 69.5851169 | 62.3936894 | 65.5328118 | 77.2127309 |
| 67.3348948 | 63.2822025 | 70.5851169 | 63.3936894 | 65.5328118 | 77.2127309 |
| 67.3348948 | 63.2822025 | 70.5851169 | 62.3936894 | 65.5328118 | 77.2127309 |
| 67.3348948 | 63.2822025 | 70.5851169 | 62.3936894 | 64.5328118 | 76.2127309 |
| 67.3348948 | 63.2822025 | 70.5851169 | 62.3936894 | 64.5328118 | 74.2127309 |
| 68.3348948 | 63.2822025 | 70.5851169 | 62.3936894 | 64.5328118 | 74.2127309 |
| 68.3348948 | 62.2822025 | 70.5851169 | 63.3936894 | 64.5328118 | 73.2127309 |
| 69.3348948 | 62.2822025 | 70.5851169 | 61.3936894 | 63.5328118 | 71.2127309 |
| 69.3348948 | 62.2822025 | 70.5851169 | 59.3936894 | 63.5328118 | 69.2127309 |
| 70.3348948 | 62.2822025 | 70.5851169 | 58.3936894 | 62.5328118 | 68.2127309 |
| 72.3348948 | 61.2822025 | 70.5851169 | 58.3936894 | 62.5328118 | 68.2127309 |
| 72.3348948 | 59.2822025 | 70.5851169 | 58.3936894 | 62.5328118 | 68.2127309 |
| 72.3348948 | 59.2822025 | 70.5851169 | 57.3936894 | 64.5328118 | 69.2127309 |
| 72.3348948 | 59.2822025 | 70.5851169 | 57.3936894 | 64.5328118 | 69.2127309 |
| 72.3348948 | 58.2822025 | 70.5851169 | 59.3936894 | 64.5328118 | 69.2127309 |
| 71.3348948 | 58.2822025 | 70.5851169 | 60.3936894 | 64.5328118 | 69.2127309 |
| 71.3348948 | 60.2822025 | 70.5851169 | 62.3936894 | 64.5328118 | 68.2127309 |
| 71.3348948 | 60.2822025 | 71.5851169 | 63.3936894 | 64.5328118 | 67.2127309 |
| 71.3348948 | 60.2822025 | 72.5851169 | 65.3936894 | 65.5328118 | 67.2127309 |
| 71.3348948 | 61.2822025 | 72.5851169 | 66.3936894 | 65.5328118 | 67.2127309 |
| 70.3348948 | 61.2822025 | 72.5851169 | 66.3936894 | 66.5328118 | 66.2127309 |
| 70.3348948 | 62.2822025 | 71.5851169 | 65.3936894 | 66.5328118 | 67.2127309 |
| 70.3348948 | 62.2822025 | 71.5851169 | 63.3936894 | 67.5328118 | 67.2127309 |
| 71.3348948 | 63.2822025 | 70.5851169 | 62.3936894 | 67.5328118 | 68.2127309 |
| 70.3348948 | 65.2822025 | 69.5851169 | 61.3936894 | 67.5328118 | 68.2127309 |
| 70.3348948 | 65.2822025 | 69.5851169 | 60.3936894 | 68.5328118 | 68.2127309 |
| 70.3348948 | 66.2822025 | 68.5851169 | 60.3936894 | 68.5328118 | 70.2127309 |
| 70.3348948 | 67.2822025 | 68.5851169 | 61.3936894 | 69.5328118 | 73.2127309 |
| 70.3348948 | 65.2822025 | 68.5851169 | 62.3936894 | 69.5328118 | 75.2127309 |
| 70.3348948 | 65.2822025 | 68.5851169 | 62.3936894 | 70.5328118 | 77.2127309 |
| 72.3348948 | 65.2822025 | 69.5851169 | 62.3936894 | 70.5328118 | 77.2127309 |
| 73.3348948 | 65.2822025 | 69.5851169 | 62.3936894 | 71.5328118 | 77.2127309 |
| 72.3348948 | 65.2822025 | 69.5851169 | 62.3936894 | 72.5328118 | 74.2127309 |
| 71.3348948 | 65.2822025 | 69.5851169 | 62.3936894 | 71.5328118 | 75.2127309 |
| 69.3348948 | 65.2822025 | 69.5851169 | 62.3936894 | 71.5328118 | 76.2127309 |
| 69.3348948 | 65.2822025 | 69.5851169 | 62.3936894 | 71.5328118 | 76.2127309 |
| 68.3348948 | 65.2822025 | 73.5851169 | 64.3936894 | 72.5328118 | 77.2127309 |
| 67.3348948 | 66.2822025 | 74.5851169 | 64.3936894 | 73.5328118 | 77.2127309 |

|            |            |            |            |            |            |
|------------|------------|------------|------------|------------|------------|
| 67.3348948 | 66.2822025 | 78.5851169 | 65.3936894 | 72.5328118 | 76.2127309 |
| 67.3348948 | 66.2822025 | 80.5851169 | 65.3936894 | 71.5328118 | 76.2127309 |
| 67.3348948 | 66.2822025 | 79.5851169 | 65.3936894 | 71.5328118 | 75.2127309 |
| 66.3348948 | 66.2822025 | 76.5851169 | 65.3936894 | 71.5328118 | 74.2127309 |
| 65.3348948 | 66.2822025 | 74.5851169 | 65.3936894 | 71.5328118 | 74.2127309 |
| 65.3348948 | 66.2822025 | 72.5851169 | 65.3936894 | 71.5328118 | 74.2127309 |
| 65.3348948 | 66.2822025 | 70.5851169 | 66.3936894 | 72.5328118 | 74.2127309 |
| 65.3348948 | 65.2822025 | 69.5851169 | 66.3936894 | 71.5328118 | 74.2127309 |
| 65.3348948 | 65.2822025 | 69.5851169 | 66.3936894 | 71.5328118 | 74.2127309 |
| 65.3348948 | 65.2822025 | 69.5851169 | 64.3936894 | 68.5328118 | 74.2127309 |
| 64.3348948 | 65.2822025 | 69.5851169 | 64.3936894 | 67.5328118 | 74.2127309 |
| 64.3348948 | 65.2822025 | 69.5851169 | 66.3936894 | 67.5328118 | 75.2127309 |
| 64.3348948 | 65.2822025 | 70.5851169 | 66.3936894 | 65.5328118 | 75.2127309 |
| 64.3348948 | 66.2822025 | 70.5851169 | 65.3936894 | 65.5328118 | 76.2127309 |
| 63.3348948 | 69.2822025 | 71.5851169 | 65.3936894 | 64.5328118 | 76.2127309 |
| 63.3348948 | 69.2822025 | 73.5851169 | 64.3936894 | 64.5328118 | 76.2127309 |
| 64.3348948 | 70.2822025 | 74.5851169 | 64.3936894 | 63.5328118 | 75.2127309 |
| 64.3348948 | 71.2822025 | 75.5851169 | 64.3936894 | 63.5328118 | 75.2127309 |
| 65.3348948 | 72.2822025 | 75.5851169 | 65.3936894 | 63.5328118 | 75.2127309 |
| 65.3348948 | 76.2822025 | 76.5851169 | 66.3936894 | 63.5328118 | 75.2127309 |
| 65.3348948 | 76.2822025 | 76.5851169 | 66.3936894 | 63.5328118 | 75.2127309 |
| 67.3348948 | 76.2822025 | 70.5851169 | 67.3936894 | 64.5328118 | 75.2127309 |
| 69.3348948 | 76.2822025 | 69.5851169 | 66.3936894 | 64.5328118 | 75.2127309 |
| 69.3348948 | 76.2822025 | 69.5851169 | 67.3936894 | 64.5328118 | 75.2127309 |
| 69.3348948 | 76.2822025 | 70.5851169 | 68.3936894 | 64.5328118 | 75.2127309 |
| 70.3348948 | 76.2822025 | 70.5851169 | 68.3936894 | 65.5328118 | 76.2127309 |
| 70.3348948 | 76.2822025 | 68.5851169 | 68.3936894 | 66.5328118 | 76.2127309 |
| 70.3348948 | 76.2822025 | 67.5851169 | 67.3936894 | 66.5328118 | 75.2127309 |
| 71.3348948 | 74.2822025 | 67.5851169 | 67.3936894 | 65.5328118 | 75.2127309 |
| 73.3348948 | 73.2822025 | 67.5851169 | 66.3936894 | 65.5328118 | 74.2127309 |
| 73.3348948 | 75.2822025 | 68.5851169 | 65.3936894 | 66.5328118 | 74.2127309 |
| 71.3348948 | 75.2822025 | 68.5851169 | 64.3936894 | 67.5328118 | 73.2127309 |
| 69.3348948 | 74.2822025 | 69.5851169 | 64.3936894 | 68.5328118 | 72.2127309 |
| 67.3348948 | 74.2822025 | 69.5851169 | 64.3936894 | 68.5328118 | 72.2127309 |
| 66.3348948 | 74.2822025 | 69.5851169 | 64.3936894 | 68.5328118 | 72.2127309 |
| 66.3348948 | 74.2822025 | 69.5851169 | 65.3936894 | 69.5328118 | 72.2127309 |
| 67.3348948 | 74.2822025 | 69.5851169 | 65.3936894 | 70.5328118 | 72.2127309 |
| 69.3348948 | 74.2822025 | 69.5851169 | 65.3936894 | 70.5328118 | 72.2127309 |
| 68.3348948 | 74.2822025 | 69.5851169 | 66.3936894 | 71.5328118 | 73.2127309 |
| 67.3348948 | 74.2822025 | 69.5851169 | 79.3936894 | 71.5328118 | 72.2127309 |
| 65.3348948 | 74.2822025 | 71.5851169 | 83.3936894 | 71.5328118 | 72.2127309 |
| 65.3348948 | 74.2822025 | 71.5851169 | 69.574478  | 71.5328118 | 72.2127309 |
| 64.3348948 | 75.2822025 | 74.5851169 | 69.9381144 | 71.5328118 | 71.2127309 |
| 64.3348948 | 75.2822025 | 78.5851169 | 70.3017507 | 71.5328118 | 70.2127309 |
| 64.3348948 | 85.2822025 | 78.5851169 | 85.3936894 | 70.5328118 | 69.2127309 |

|            |            |            |            |            |            |
|------------|------------|------------|------------|------------|------------|
| 64.3348948 | 70.7562962 | 78.5851169 | 82.3936894 | 70.5328118 | 69.2127309 |
| 64.3348948 | 70.3926598 | 78.5851169 | 77.3936894 | 69.5328118 | 69.2127309 |
| 64.3348948 | 69.3926598 | 78.5851169 | 73.3936894 | 68.5328118 | 69.2127309 |
| 66.3348948 | 69.3926598 | 78.5851169 | 71.3936894 | 67.5328118 | 69.2127309 |
| 67.3348948 | 69.3926598 | 77.5851169 | 70.3936894 | 67.5328118 | 70.2127309 |
| 68.3348948 | 69.1199326 | 74.5851169 | 69.3936894 | 67.5328118 | 71.2127309 |
| 68.3348948 | 71.674435  | 74.5851169 | 69.3936894 | 67.5328118 | 71.2127309 |
| 69.3348948 | 69.0290235 | 71.5851169 | 67.3936894 | 64.5328118 | 73.2127309 |
| 69.3348948 | 68.2108417 | 67.5851169 | 66.3936894 | 64.5328118 | 73.2127309 |
| 70.3348948 | 68.0290235 | 65.5851169 | 65.3936894 | 64.5328118 | 73.2127309 |
| 70.3348948 | 67.574478  | 64.5851169 | 63.3936894 | 64.5328118 | 74.2127309 |
| 70.3348948 | 67.574478  | 64.5851169 | 63.3936894 | 63.5328118 | 75.2127309 |
| 70.3348948 | 67.3926598 | 64.5851169 | 60.3936894 | 63.5328118 | 78.2127309 |
| 70.3348948 | 67.4835689 | 65.5851169 | 60.3936894 | 62.5328118 | 78.2127309 |
| 69.3348948 | 67.574478  | 65.5851169 | 60.3936894 | 62.5328118 | 80.2127309 |
| 69.3348948 | 67.3926598 | 65.5851169 | 60.3936894 | 62.5328118 | 79.2127309 |
| 70.3348948 | 67.1199326 | 65.5851169 | 59.3936894 | 62.5328118 | 78.2127309 |
| 71.3348948 | 81.2822025 | 65.5851169 | 59.3936894 | 62.5328118 | 78.2127309 |
| 71.3348948 | 78.2822025 | 65.5851169 | 60.3936894 | 63.5328118 | 75.2127309 |
| 71.3348948 | 75.2822025 | 65.5851169 | 60.3936894 | 63.5328118 | 75.2127309 |
| 71.3348948 | 75.2822025 | 65.5851169 | 60.3936894 | 63.5328118 | 75.2127309 |
| 71.3348948 | 74.2822025 | 65.5851169 | 58.3936894 | 63.5328118 | 75.2127309 |
| 71.3348948 | 74.2822025 | 65.5851169 | 57.3936894 | 63.5328118 | 75.2127309 |
| 69.3348948 | 73.2822025 | 65.5851169 | 56.3936894 | 63.5328118 | 75.2127309 |
| 69.3348948 | 71.2822025 | 65.5851169 | 56.3936894 | 62.5328118 | 74.2127309 |
| 69.3348948 | 71.2822025 | 65.5851169 | 56.3936894 | 63.5328118 | 74.2127309 |
| 69.3348948 | 71.2822025 | 65.5851169 | 56.3936894 | 63.5328118 | 72.2127309 |
| 69.3348948 | 71.2822025 | 65.5851169 | 57.3936894 | 63.5328118 | 72.2127309 |
| 69.3348948 | 71.2822025 | 65.5851169 | 57.3936894 | 64.5328118 | 72.2127309 |
| 68.3348948 | 70.2822025 | 66.5851169 | 57.3936894 | 64.5328118 | 72.2127309 |
| 68.3348948 | 70.2822025 | 66.5851169 | 57.3936894 | 65.5328118 | 72.2127309 |
| 68.3348948 | 69.2822025 | 67.5851169 | 60.3936894 | 65.5328118 | 72.2127309 |
| 68.3348948 | 69.2822025 | 69.5851169 | 61.3936894 | 65.5328118 | 71.2127309 |
| 69.3348948 | 69.2822025 | 67.5851169 | 62.3936894 | 66.5328118 | 71.2127309 |
| 71.3348948 | 68.2822025 | 66.5851169 | 62.3936894 | 66.5328118 | 69.2127309 |
| 71.3348948 | 68.2822025 | 66.5851169 | 65.3936894 | 66.5328118 | 69.2127309 |
| 71.3348948 | 67.2822025 | 66.5851169 | 66.3936894 | 66.5328118 | 68.2127309 |
| 65.3348948 | 68.2822025 | 66.5851169 | 66.3936894 | 67.5328118 | 67.2127309 |
| 63.3348948 | 68.2822025 | 67.5851169 | 65.3936894 | 67.5328118 | 67.2127309 |
| 63.3348948 | 67.2822025 | 69.5851169 | 65.3936894 | 67.5328118 | 68.2127309 |
| 62.3348948 | 67.2822025 | 72.5851169 | 65.3936894 | 66.5328118 | 69.2127309 |
| 62.3348948 | 67.2822025 | 76.5851169 | 66.3936894 | 65.5328118 | 69.2127309 |
| 62.3348948 | 66.2822025 | 79.5851169 | 67.3936894 | 65.5328118 | 70.2127309 |
| 62.3348948 | 66.2822025 | 80.5851169 | 68.3936894 | 65.5328118 | 70.2127309 |
| 62.3348948 | 66.2822025 | 66.574478  | 68.3936894 | 65.5328118 | 69.2127309 |

|            |            |            |            |            |            |
|------------|------------|------------|------------|------------|------------|
| 62.3348948 | 67.2822025 | 66.574478  | 67.3936894 | 64.5328118 | 68.2127309 |
| 62.3348948 | 67.2822025 | 66.6653871 | 66.3936894 | 65.5328118 | 68.2127309 |
| 61.3348948 | 67.2822025 | 66.2108417 | 66.3936894 | 65.5328118 | 67.2127309 |
| 61.3348948 | 67.2822025 | 73.5851169 | 66.3936894 | 65.5328118 | 66.2127309 |
| 60.3348948 | 67.2822025 | 70.5851169 | 65.3936894 | 65.5328118 | 66.2127309 |
| 60.3348948 | 67.2822025 | 68.5851169 | 65.3936894 | 64.5328118 | 66.2127309 |
| 60.3348948 | 67.2822025 | 68.5851169 | 68.3936894 | 64.5328118 | 67.2127309 |
| 60.3348948 | 67.2822025 | 68.5851169 | 69.3936894 | 63.5328118 | 68.2127309 |
| 60.3348948 | 67.2822025 | 69.5851169 | 69.3936894 | 63.5328118 | 69.2127309 |
| 60.3348948 | 67.2822025 | 70.5851169 | 68.3936894 | 62.5328118 | 69.2127309 |
| 60.3348948 | 67.2822025 | 71.5851169 | 67.3936894 | 62.5328118 | 73.2127309 |
| 60.3348948 | 67.2822025 | 71.5851169 | 67.3936894 | 62.5328118 | 73.2127309 |
| 60.3348948 | 67.2822025 | 71.5851169 | 67.3936894 | 62.5328118 | 73.2127309 |
| 61.3348948 | 67.2822025 | 72.5851169 | 67.3936894 | 64.5328118 | 72.2127309 |
| 61.3348948 | 69.2822025 | 71.5851169 | 68.3936894 | 65.5328118 | 71.2127309 |
| 61.3348948 | 69.2822025 | 71.5851169 | 68.3936894 | 65.5328118 | 71.2127309 |
| 62.3348948 | 71.2822025 | 70.5851169 | 70.3936894 | 65.5328118 | 70.2127309 |
| 64.3348948 | 72.2822025 | 70.5851169 | 72.3936894 | 65.5328118 | 70.2127309 |
| 64.3348948 | 73.2822025 | 70.5851169 | 73.3936894 | 67.5328118 | 71.2127309 |
| 65.3348948 | 73.2822025 | 70.5851169 | 74.3936894 | 67.5328118 | 71.2127309 |
| 66.3348948 | 73.2822025 | 71.5851169 | 74.3936894 | 67.5328118 | 72.2127309 |
| 66.3348948 | 72.2822025 | 72.5851169 | 73.3936894 | 68.5328118 | 72.2127309 |
| 68.3348948 | 71.2822025 | 72.5851169 | 73.3936894 | 68.5328118 | 71.2127309 |
| 69.3348948 | 68.2822025 | 71.5851169 | 72.3936894 | 67.5328118 | 71.2127309 |
| 70.3348948 | 66.2822025 | 70.5851169 | 71.3936894 | 68.5328118 | 72.2127309 |
| 70.3348948 | 66.2822025 | 70.5851169 | 70.3936894 | 69.5328118 | 74.2127309 |
| 71.3348948 | 66.2822025 | 70.5851169 | 70.3936894 | 69.5328118 | 74.2127309 |
| 71.3348948 | 66.2822025 | 70.5851169 | 75.3936894 | 69.5328118 | 76.2127309 |
| 72.3348948 | 66.2822025 | 70.5851169 | 76.3936894 | 69.5328118 | 76.2127309 |
| 72.3348948 | 66.2822025 | 70.5851169 | 76.3936894 | 69.5328118 | 77.2127309 |
| 72.3348948 | 66.2822025 | 70.5851169 | 75.3936894 | 69.5328118 | 78.2127309 |
| 71.3348948 | 66.2822025 | 70.5851169 | 75.3936894 | 69.5328118 | 78.2127309 |
| 70.3348948 | 66.2822025 | 70.5851169 | 75.3936894 | 69.5328118 | 78.2127309 |
| 70.3348948 | 65.2822025 | 69.5851169 | 73.3936894 | 69.5328118 | 78.2127309 |
| 71.3348948 | 63.2822025 | 69.5851169 | 73.3936894 | 69.5328118 | 78.2127309 |
| 70.3348948 | 63.2822025 | 68.5851169 | 72.3936894 | 68.5328118 | 78.2127309 |
| 69.3348948 | 63.2822025 | 68.5851169 | 72.3936894 | 68.5328118 | 78.2127309 |
| 69.3348948 | 63.2822025 | 68.5851169 | 71.3936894 | 68.5328118 | 78.2127309 |
| 69.3348948 | 64.2822025 | 68.5851169 | 71.3936894 | 67.5328118 | 78.2127309 |
| 68.3348948 | 65.2822025 | 67.5851169 | 70.3936894 | 66.5328118 | 79.2127309 |
| 68.3348948 | 67.2822025 | 67.5851169 | 70.3936894 | 66.5328118 | 79.2127309 |
| 67.3348948 | 67.2822025 | 67.5851169 | 69.3936894 | 67.5328118 | 79.2127309 |
| 67.3348948 | 67.2822025 | 67.5851169 | 68.3936894 | 67.5328118 | 79.2127309 |
| 69.3348948 | 68.2822025 | 67.5851169 | 65.3936894 | 68.5328118 | 76.2127309 |
| 69.3348948 | 68.2822025 | 67.5851169 | 65.3936894 | 69.5328118 | 77.2127309 |

|            |            |            |            |            |            |
|------------|------------|------------|------------|------------|------------|
| 69.3348948 | 68.2822025 | 67.5851169 | 64.3936894 | 69.5328118 | 77.2127309 |
| 69.3348948 | 68.2822025 | 67.5851169 | 62.3936894 | 69.5328118 | 77.2127309 |
| 69.3348948 | 68.2822025 | 67.5851169 | 60.3936894 | 71.5328118 | 73.2127309 |
| 68.3348948 | 66.2822025 | 67.5851169 | 60.3936894 | 71.5328118 | 70.2127309 |
| 69.3348948 | 66.2822025 | 67.5851169 | 61.3936894 | 71.5328118 | 69.2127309 |
| 69.3348948 | 68.2822025 | 67.5851169 | 61.3936894 | 71.5328118 | 69.2127309 |
| 69.3348948 | 74.2822025 | 67.5851169 | 61.3936894 | 70.5328118 | 68.2127309 |
| 69.3348948 | 75.2822025 | 67.5851169 | 62.3936894 | 72.5328118 | 69.2127309 |
| 69.3348948 | 75.2822025 | 67.5851169 | 62.3936894 | 74.5328118 | 70.2127309 |
| 69.3348948 | 73.2822025 | 67.5851169 | 62.3936894 | 74.5328118 | 70.2127309 |
| 69.3348948 | 72.2822025 | 68.5851169 | 62.3936894 | 76.5328118 | 70.2127309 |
| 68.3348948 | 72.2822025 | 69.5851169 | 59.3936894 | 79.5328118 | 69.2127309 |
| 66.3348948 | 72.2822025 | 69.5851169 | 59.3936894 | 79.5328118 | 69.2127309 |
| 65.3348948 | 72.2822025 | 67.5851169 | 60.3936894 | 81.5328118 | 69.2127309 |
| 65.3348948 | 71.2822025 | 66.5851169 | 61.3936894 | 83.5328118 | 69.2127309 |
| 65.3348948 | 70.2822025 | 66.5851169 | 61.3936894 | 70.4835689 | 67.2127309 |
| 66.3348948 | 68.2822025 | 67.5851169 | 61.3936894 | 70.7562962 | 67.2127309 |
| 66.3348948 | 67.2822025 | 70.5851169 | 62.3936894 | 71.6653871 | 66.2127309 |
| 69.3348948 | 66.2822025 | 70.5851169 | 62.3936894 | 72.574478  | 66.2127309 |
| 72.3348948 | 65.2822025 | 69.5851169 | 63.3936894 | 72.6653871 | 66.2127309 |
| 72.3348948 | 65.2822025 | 68.5851169 | 65.3936894 | 72.2108417 | 66.2127309 |
| 72.3348948 | 65.2822025 | 68.5851169 | 66.3936894 | 72.0290235 | 68.2127309 |
| 72.3348948 | 65.2822025 | 68.5851169 | 66.3936894 | 71.574478  | 68.2127309 |
| 73.3348948 | 65.2822025 | 67.5851169 | 65.3936894 | 71.8472053 | 70.2127309 |
| 73.3348948 | 65.2822025 | 67.5851169 | 65.3936894 | 71.8472053 | 70.2127309 |
| 73.3348948 | 65.2822025 | 68.5851169 | 64.3936894 | 72.2613561 | 71.2127309 |
| 71.3348948 | 65.2822025 | 68.5851169 | 64.3936894 | 71.574478  | 71.2127309 |
| 70.3348948 | 65.2822025 | 72.5851169 | 64.3936894 | 72.1199326 | 71.2127309 |
| 69.3348948 | 65.2822025 | 76.5851169 | 63.3936894 | 72.1199326 | 70.2127309 |
| 68.3348948 | 65.2822025 | 76.5851169 | 63.3936894 | 85.5328118 | 70.2127309 |
| 67.3348948 | 65.2822025 | 76.5851169 | 63.3936894 | 83.5328118 | 70.2127309 |
| 66.3348948 | 65.2822025 | 70.5851169 | 65.3936894 | 80.5328118 | 70.2127309 |
| 64.3348948 | 65.2822025 | 68.5851169 | 66.3936894 | 80.5328118 | 70.2127309 |
| 64.3348948 | 66.2822025 | 66.5851169 | 66.3936894 | 76.5328118 | 70.2127309 |
| 66.3348948 | 68.2822025 | 65.5851169 | 65.3936894 | 75.5328118 | 70.2127309 |
| 66.3348948 | 68.2822025 | 65.5851169 | 64.3936894 | 75.5328118 | 70.2127309 |
| 68.3348948 | 69.2822025 | 65.5851169 | 63.3936894 | 75.5328118 | 73.2127309 |
| 69.3348948 | 69.2822025 | 65.5851169 | 61.3936894 | 74.5328118 | 73.2127309 |
| 69.3348948 | 69.2822025 | 65.5851169 | 59.3936894 | 74.5328118 | 75.2127309 |
| 69.3348948 | 69.2822025 | 65.5851169 | 58.3936894 | 72.5328118 | 76.2127309 |
| 69.3348948 | 70.2822025 | 65.5851169 | 58.3936894 | 69.5328118 | 76.2127309 |
| 69.3348948 | 71.2822025 | 66.5851169 | 59.3936894 | 69.5328118 | 76.2127309 |
| 69.3348948 | 70.2822025 | 68.5851169 | 60.3936894 | 66.5328118 | 76.2127309 |
| 68.3348948 | 70.2822025 | 69.5851169 | 61.3936894 | 64.5328118 | 76.2127309 |
| 69.3348948 | 70.2822025 | 69.5851169 | 62.3936894 | 64.5328118 | 76.2127309 |

|            |            |            |            |            |            |
|------------|------------|------------|------------|------------|------------|
| 70.3348948 | 70.2822025 | 68.5851169 | 63.3936894 | 64.5328118 | 76.2127309 |
| 70.3348948 | 69.2822025 | 68.5851169 | 63.3936894 | 64.5328118 | 76.2127309 |
| 69.3348948 | 69.2822025 | 68.5851169 | 62.3936894 | 64.5328118 | 75.2127309 |
| 69.3348948 | 69.2822025 | 67.5851169 | 61.3936894 | 65.5328118 | 74.2127309 |
| 69.3348948 | 68.2822025 | 66.5851169 | 61.3936894 | 66.5328118 | 73.2127309 |
| 68.3348948 | 68.2822025 | 66.5851169 | 62.3936894 | 66.5328118 | 72.2127309 |
| 68.3348948 | 66.2822025 | 66.5851169 | 62.3936894 | 66.5328118 | 72.2127309 |
| 68.3348948 | 66.2822025 | 66.5851169 | 62.3936894 | 66.5328118 | 72.2127309 |
| 68.3348948 | 65.2822025 | 66.5851169 | 62.3936894 | 67.5328118 | 72.2127309 |
| 68.3348948 | 65.2822025 | 66.5851169 | 62.3936894 | 70.5328118 | 70.2127309 |
| 69.3348948 | 65.2822025 | 66.5851169 | 62.3936894 | 70.5328118 | 70.2127309 |
| 69.3348948 | 65.2822025 | 67.5851169 | 62.3936894 | 70.5328118 | 70.2127309 |
| 68.3348948 | 63.2822025 | 67.5851169 | 63.3936894 | 70.5328118 | 70.2127309 |
| 67.3348948 | 63.2822025 | 67.5851169 | 63.3936894 | 71.5328118 | 70.2127309 |
| 67.3348948 | 63.2822025 | 66.5851169 | 63.3936894 | 72.5328118 | 71.2127309 |
| 67.3348948 | 63.2822025 | 66.5851169 | 62.3936894 | 76.5328118 | 71.2127309 |
| 68.3348948 | 63.2822025 | 66.5851169 | 63.3936894 | 76.5328118 | 71.2127309 |
| 68.3348948 | 64.2822025 | 66.5851169 | 66.3936894 | 77.5328118 | 71.2127309 |
| 69.3348948 | 65.2822025 | 68.5851169 | 67.3936894 | 77.5328118 | 71.2127309 |
| 69.3348948 | 65.2822025 | 72.5851169 | 68.3936894 | 77.5328118 | 72.2127309 |
| 69.3348948 | 64.2822025 | 72.5851169 | 71.3936894 | 78.5328118 | 72.2127309 |
| 69.3348948 | 64.2822025 | 71.5851169 | 72.3936894 | 78.5328118 | 74.2127309 |
| 69.3348948 | 64.2822025 | 71.5851169 | 73.3936894 | 79.5328118 | 75.2127309 |
| 69.3348948 | 64.2822025 | 70.5851169 | 75.3936894 | 80.5328118 | 75.2127309 |
| 69.3348948 | 65.2822025 | 69.5851169 | 76.3936894 | 80.5328118 | 75.2127309 |
| 69.3348948 | 66.2822025 | 69.5851169 | 77.3936894 | 83.5328118 | 75.2127309 |
| 69.3348948 | 66.2822025 | 69.5851169 | 77.3936894 | 84.5328118 | 75.2127309 |
| 69.3348948 | 66.2822025 | 68.5851169 | 77.3936894 | 84.5328118 | 76.2127309 |
| 69.3348948 | 66.2822025 | 67.5851169 | 78.3936894 | 84.5328118 | 76.2127309 |
| 70.3348948 | 65.2822025 | 67.5851169 | 78.3936894 | 83.5328118 | 76.2127309 |
| 71.3348948 | 65.2822025 | 67.5851169 | 79.3936894 | 82.5328118 | 77.2127309 |
| 72.3348948 | 82.2822025 | 67.5851169 | 78.3936894 | 83.5328118 | 78.2127309 |
| 71.3348948 | 83.2822025 | 67.5851169 | 78.3936894 | 83.5328118 | 78.2127309 |
| 71.3348948 | 83.2822025 | 67.5851169 | 78.3936894 | 83.5328118 | 78.2127309 |
| 70.3348948 | 72.06871   | 67.5851169 | 71.3936894 | 84.5328118 | 80.2127309 |
| 70.3348948 | 71.4835689 | 66.5851169 | 71.3936894 | 85.5328118 | 79.2127309 |
| 69.3348948 | 70.7562962 | 66.5851169 | 69.3936894 | 70.7562962 | 78.2127309 |
| 68.3348948 | 70.7562962 | 66.5851169 | 67.3936894 | 70.7562962 | 77.2127309 |
| 68.3348948 | 70.0290235 | 66.5851169 | 67.3936894 | 70.0290235 | 77.2127309 |
| 68.3348948 | 69.8472053 | 65.5851169 | 67.3936894 | 69.8472053 | 77.2127309 |
| 69.3348948 | 68.9381144 | 66.5851169 | 67.3936894 | 68.9381144 | 75.2127309 |
| 70.3348948 | 68.9381144 | 66.5851169 | 67.3936894 | 68.9381144 | 75.2127309 |
| 70.3348948 | 68.7562962 | 66.5851169 | 67.3936894 | 68.7562962 | 75.2127309 |
| 70.3348948 | 67.4835689 | 66.5851169 | 68.3936894 | 75.5328118 | 75.2127309 |
| 70.3348948 | 69.3926598 | 66.5851169 | 76.3936894 | 70.5328118 | 75.2127309 |



|            |            |            |            |            |            |
|------------|------------|------------|------------|------------|------------|
| 70.3348948 | 70.7562962 | 71.5851169 | 76.3936894 | 70.5328118 | 75.2127309 |
| 70.3348948 | 70.9381144 | 72.5851169 | 76.3936894 | 70.5328118 | 75.2127309 |
| 70.3348948 | 71.3017507 | 72.5851169 | 74.3936894 | 69.5328118 | 75.2127309 |
| 70.3348948 | 70.2108417 | 72.5851169 | 64.3936894 | 68.5328118 | 76.2127309 |
| 70.3348948 | 69.7562962 | 72.5851169 | 61.3936894 | 68.5328118 | 76.2127309 |
| 70.3348948 | 69.7562962 | 71.5851169 | 59.3936894 | 68.5328118 | 77.2127309 |
| 71.3348948 | 70.2108417 | 71.5851169 | 60.3936894 | 67.5328118 | 79.2127309 |
| 71.3348948 | 69.6653871 | 71.5851169 | 62.3936894 | 67.5328118 | 79.2127309 |
| 71.3348948 | 69.2108417 | 71.5851169 | 62.3936894 | 67.5328118 | 74.2127309 |
| 71.3348948 | 68.9381144 | 72.5851169 | 62.3936894 | 67.5328118 | 70.2127309 |
| 71.3348948 | 68.1199326 | 69.5851169 | 60.3936894 | 66.5328118 | 68.2127309 |
| 71.3348948 | 68.1199326 | 68.5851169 | 57.3936894 | 66.5328118 | 68.2127309 |
| 70.3348948 | 68.3017507 | 67.5851169 | 56.3936894 | 66.5328118 | 68.2127309 |
| 70.3348948 | 68.574478  | 66.5851169 | 56.3936894 | 66.5328118 | 68.2127309 |
| 69.3348948 | 69.2108417 | 66.5851169 | 58.3936894 | 66.5328118 | 69.2127309 |
| 69.3348948 | 69.9381144 | 65.5851169 | 61.3936894 | 66.5328118 | 73.2127309 |
| 69.3348948 | 70.0290235 | 65.5851169 | 61.3936894 | 65.5328118 | 74.2127309 |
| 69.3348948 | 70.2108417 | 65.5851169 | 63.3936894 | 65.5328118 | 75.2127309 |
| 69.3348948 | 70.4835689 | 65.5851169 | 66.3936894 | 66.5328118 | 73.2127309 |
| 69.3348948 | 70.3926598 | 65.5851169 | 67.3936894 | 66.5328118 | 71.2127309 |
| 72.3348948 | 70.9381144 | 65.5851169 | 69.3936894 | 68.5328118 | 71.2127309 |
| 77.3348948 | 70.9381144 | 65.5851169 | 69.3936894 | 68.5328118 | 69.2127309 |
| 77.3348948 | 71.2108417 | 66.5851169 | 69.3936894 | 68.5328118 | 69.2127309 |
| 76.3348948 | 70.8472053 | 66.5851169 | 69.3936894 | 69.5328118 | 69.2127309 |
| 76.3348948 | 71.2108417 | 66.5851169 | 70.3936894 | 71.5328118 | 69.2127309 |
| 76.3348948 | 71.3017507 | 66.5851169 | 70.3936894 | 71.5328118 | 70.2127309 |
| 76.3348948 | 72.574478  | 66.5851169 | 71.3936894 | 82.5328118 | 70.2127309 |
| 76.3348948 | 72.3926598 | 66.5851169 | 68.3936894 | 82.5328118 | 71.2127309 |
| 76.3348948 | 71.3926598 | 65.5851169 | 65.3936894 | 82.5328118 | 72.2127309 |
| 76.3348948 | 71.0290235 | 65.5851169 | 65.3936894 | 84.5328118 | 71.2127309 |
| 74.3348948 | 70.574478  | 65.5851169 | 65.3936894 | 70.574478  | 71.2127309 |
| 73.3348948 | 70.3926598 | 65.5851169 | 64.3936894 | 70.3926598 | 71.2127309 |
| 73.3348948 | 70.4835689 | 65.5851169 | 64.3936894 | 70.4835689 | 71.2127309 |
| 73.3348948 | 70.7562962 | 65.5851169 | 66.3936894 | 70.7562962 | 70.2127309 |
| 72.3348948 | 70.574478  | 65.5851169 | 66.3936894 | 80.5328118 | 73.2127309 |
| 72.3348948 | 69.2108417 | 65.5851169 | 67.3936894 | 80.5328118 | 73.2127309 |
| 72.3348948 | 68.9381144 | 65.5851169 | 68.3936894 | 76.5328118 | 76.2127309 |
| 71.3348948 | 68.2108417 | 65.5851169 | 68.3936894 | 70.5328118 | 76.2127309 |
| 70.3348948 | 68.2108417 | 65.5851169 | 68.3936894 | 70.5328118 | 76.2127309 |
| 70.3348948 | 68.3017507 | 65.5851169 | 68.3936894 | 69.5328118 | 76.2127309 |
| 69.3348948 | 67.7562962 | 64.5851169 | 68.3936894 | 68.5328118 | 76.2127309 |
| 69.3348948 | 67.4835689 | 64.5851169 | 63.3936894 | 68.5328118 | 76.2127309 |
| 69.3348948 | 67.9202449 | 64.5851169 | 63.3936894 | 68.5328118 | 76.2127309 |
| 68.3348948 | 67.8786446 | 64.5851169 | 59.3936894 | 68.5328118 | 80.2127309 |
| 67.3348948 | 68.3017507 | 64.5851169 | 59.3936894 | 69.5328118 | 80.2127309 |

|            |            |            |            |            |            |
|------------|------------|------------|------------|------------|------------|
| 67.3348948 | 69.0290235 | 64.5851169 | 59.3936894 | 68.5328118 | 81.2127309 |
| 67.3348948 | 69.8472053 | 64.5851169 | 60.3936894 | 67.5328118 | 84.2127309 |
| 66.3348948 | 69.8472053 | 64.5851169 | 60.3936894 | 67.5328118 | 84.2127309 |
| 66.3348948 | 69.9381144 | 64.5851169 | 61.3936894 | 67.5328118 | 69.9381144 |
| 63.3348948 | 70.6653871 | 64.5851169 | 61.3936894 | 66.5328118 | 70.6653871 |
| 63.3348948 | 71.2108417 | 64.5851169 | 60.3936894 | 66.5328118 | 71.2108417 |
| 63.3348948 | 71.3017507 | 64.5851169 | 58.3936894 | 66.5328118 | 84.2127309 |
| 64.3348948 | 71.1199326 | 64.5851169 | 56.3936894 | 66.5328118 | 84.2127309 |
| 64.3348948 | 70.6653871 | 64.5851169 | 56.3936894 | 65.5328118 | 81.2127309 |
| 64.3348948 | 70.3017507 | 64.5851169 | 56.3936894 | 65.5328118 | 75.2127309 |
| 64.3348948 | 69.6653871 | 64.5851169 | 57.3936894 | 65.5328118 | 75.2127309 |
| 67.3348948 | 69.2108417 | 64.5851169 | 61.3936894 | 65.5328118 | 71.2127309 |
| 67.3348948 | 69.2108417 | 64.5851169 | 61.3936894 | 65.5328118 | 69.2127309 |
| 70.3348948 | 70.8472053 | 64.5851169 | 66.3936894 | 65.5328118 | 66.2127309 |
| 70.3348948 | 70.3926598 | 64.5851169 | 70.3936894 | 65.5328118 | 66.2127309 |
| 70.3348948 | 68.4835689 | 64.5851169 | 70.3936894 | 65.5328118 | 66.2127309 |
| 69.3348948 | 68.7562962 | 64.5851169 | 71.3936894 | 65.5328118 | 66.2127309 |
| 69.3348948 | 68.7562962 | 64.5851169 | 69.3936894 | 65.5328118 | 66.2127309 |
| 69.3348948 | 68.9381144 | 64.5851169 | 66.3936894 | 66.5328118 | 66.2127309 |
| 69.3348948 | 67.4835689 | 64.5851169 | 66.3936894 | 66.5328118 | 65.2127309 |
| 69.3348948 | 67.2108417 | 64.5851169 | 66.3936894 | 67.5328118 | 65.2127309 |
| 69.3348948 | 81.2822025 | 64.5851169 | 66.3936894 | 68.5328118 | 65.2127309 |
| 70.3348948 | 66.2108417 | 67.5851169 | 66.3936894 | 67.5328118 | 64.2127309 |
| 70.3348948 | 80.2822025 | 67.5851169 | 66.3936894 | 67.5328118 | 63.2127309 |
| 69.3348948 | 65.9381144 | 69.5851169 | 68.3936894 | 66.5328118 | 63.2127309 |
| 68.3348948 | 65.9381144 | 70.5851169 | 69.3936894 | 66.5328118 | 63.2127309 |
| 68.3348948 | 66.1199326 | 72.5851169 | 69.3936894 | 64.5328118 | 62.2127309 |
| 68.3348948 | 66.0290235 | 73.5851169 | 67.3936894 | 64.5328118 | 62.2127309 |
| 67.3348948 | 65.7562962 | 73.5851169 | 64.3936894 | 64.5328118 | 63.2127309 |
| 67.3348948 | 65.9381144 | 73.5851169 | 64.3936894 | 65.5328118 | 63.2127309 |
| 67.3348948 | 65.6653871 | 73.5851169 | 62.3936894 | 65.5328118 | 63.2127309 |
| 67.3348948 | 65.7562962 | 74.5851169 | 61.3936894 | 65.5328118 | 63.2127309 |
| 67.3348948 | 66.3017507 | 75.5851169 | 61.3936894 | 66.5328118 | 64.2127309 |
| 68.3348948 | 67.7562962 | 76.5851169 | 63.3936894 | 66.5328118 | 69.2127309 |
| 68.3348948 | 68.574478  | 77.5851169 | 63.3936894 | 67.5328118 | 75.2127309 |
| 68.3348948 | 68.3926598 | 76.5851169 | 63.3936894 | 67.5328118 | 74.2127309 |
| 68.3348948 | 68.1199326 | 74.5851169 | 63.3936894 | 67.5328118 | 74.2127309 |
| 68.3348948 | 68.0290235 | 70.5851169 | 63.3936894 | 67.5328118 | 74.2127309 |
| 71.3348948 | 67.6653871 | 70.5851169 | 60.3936894 | 67.5328118 | 74.2127309 |
| 72.3348948 | 67.2108417 | 69.5851169 | 59.3936894 | 66.5328118 | 73.2127309 |
| 72.3348948 | 67.2108417 | 69.5851169 | 59.3936894 | 67.5328118 | 72.2127309 |
| 73.3348948 | 67.6653871 | 69.5851169 | 60.3936894 | 67.5328118 | 73.2127309 |
| 74.3348948 | 81.2822025 | 69.5851169 | 60.3936894 | 67.5328118 | 73.2127309 |
| 74.3348948 | 81.2822025 | 69.5851169 | 60.3936894 | 68.5328118 | 74.2127309 |
| 72.3348948 | 78.2822025 | 69.5851169 | 60.3936894 | 68.5328118 | 75.2127309 |

|            |            |            |            |            |            |
|------------|------------|------------|------------|------------|------------|
| 69.3348948 | 78.2822025 | 69.5851169 | 63.3936894 | 68.5328118 | 75.2127309 |
| 68.3348948 | 78.2822025 | 67.5851169 | 63.3936894 | 68.5328118 | 74.2127309 |
| 68.3348948 | 77.2822025 | 66.5851169 | 63.3936894 | 68.5328118 | 73.2127309 |
| 68.3348948 | 77.2822025 | 66.5851169 | 64.3936894 | 68.5328118 | 74.2127309 |
| 68.3348948 | 71.2822025 | 65.5851169 | 66.3936894 | 68.5328118 | 74.2127309 |
| 69.3348948 | 68.2822025 | 65.5851169 | 66.3936894 | 67.5328118 | 75.2127309 |
| 69.3348948 | 68.2822025 | 65.5851169 | 66.3936894 | 67.5328118 | 75.2127309 |
| 69.3348948 | 63.2822025 | 65.5851169 | 63.3936894 | 68.5328118 | 77.2127309 |
| 69.3348948 | 61.2822025 | 65.5851169 | 62.3936894 | 68.5328118 | 77.2127309 |
| 70.3348948 | 61.2822025 | 65.5851169 | 63.3936894 | 68.5328118 | 77.2127309 |
| 70.3348948 | 61.2822025 | 65.5851169 | 63.3936894 | 68.5328118 | 77.2127309 |
| 71.3348948 | 62.2822025 | 65.5851169 | 64.3936894 | 68.5328118 | 79.2127309 |
| 72.3348948 | 62.2822025 | 65.5851169 | 65.3936894 | 68.5328118 | 79.2127309 |
| 74.3348948 | 61.2822025 | 65.5851169 | 66.3936894 | 69.5328118 | 79.2127309 |
| 74.3348948 | 61.2822025 | 65.5851169 | 65.3936894 | 69.5328118 | 80.2127309 |
| 74.3348948 | 61.2822025 | 66.5851169 | 64.3936894 | 69.5328118 | 79.2127309 |
| 73.3348948 | 61.2822025 | 67.5851169 | 63.3936894 | 69.5328118 | 79.2127309 |
| 73.3348948 | 61.2822025 | 67.5851169 | 62.3936894 | 70.5328118 | 78.2127309 |
| 71.3348948 | 62.2822025 | 67.5851169 | 61.3936894 | 70.5328118 | 78.2127309 |
| 70.3348948 | 62.2822025 | 67.5851169 | 60.3936894 | 70.5328118 | 75.2127309 |
| 69.3348948 | 62.2822025 | 67.5851169 | 60.3936894 | 73.5328118 | 73.2127309 |
| 70.3348948 | 62.2822025 | 67.5851169 | 60.3936894 | 75.5328118 | 72.2127309 |
| 70.3348948 | 62.2822025 | 67.5851169 | 59.3936894 | 75.5328118 | 72.2127309 |
| 69.3348948 | 60.2822025 | 67.5851169 | 59.3936894 | 75.5328118 | 72.2127309 |
| 70.3348948 | 60.2822025 | 67.5851169 | 59.3936894 | 76.5328118 | 72.2127309 |
| 70.3348948 | 59.2822025 | 67.5851169 | 59.3936894 | 75.5328118 | 73.2127309 |
| 69.3348948 | 59.2822025 | 67.5851169 | 59.3936894 | 75.5328118 | 73.2127309 |
| 68.3348948 | 59.2822025 | 66.5851169 | 58.3936894 | 76.5328118 | 72.2127309 |
| 67.3348948 | 59.2822025 | 67.5851169 | 58.3936894 | 76.5328118 | 72.2127309 |
| 67.3348948 | 59.2822025 | 67.5851169 | 58.3936894 | 76.5328118 | 70.2127309 |
| 66.3348948 | 59.2822025 | 68.5851169 | 57.3936894 | 76.5328118 | 68.2127309 |
| 66.3348948 | 59.2822025 | 68.5851169 | 56.3936894 | 76.5328118 | 68.2127309 |
| 66.3348948 | 59.2822025 | 67.5851169 | 59.3936894 | 75.5328118 | 68.2127309 |
| 66.3348948 | 59.2822025 | 67.5851169 | 60.3936894 | 76.5328118 | 72.2127309 |
| 66.3348948 | 58.2822025 | 67.5851169 | 60.3936894 | 76.5328118 | 72.2127309 |
| 66.3348948 | 58.2822025 | 67.5851169 | 63.3936894 | 76.5328118 | 74.2127309 |
| 66.3348948 | 58.2822025 | 66.5851169 | 63.3936894 | 74.5328118 | 75.2127309 |
| 66.3348948 | 58.2822025 | 66.5851169 | 67.3936894 | 74.5328118 | 75.2127309 |
| 66.3348948 | 58.2822025 | 65.5851169 | 67.3936894 | 72.5328118 | 75.2127309 |
| 65.3348948 | 58.2822025 | 65.5851169 | 65.3936894 | 71.5328118 | 75.2127309 |
| 64.3348948 | 57.2822025 | 65.5851169 | 65.3936894 | 71.5328118 | 75.2127309 |
| 64.3348948 | 56.2822025 | 65.5851169 | 65.3936894 | 71.5328118 | 75.2127309 |
| 64.3348948 | 56.2822025 | 65.5851169 | 67.3936894 | 70.5328118 | 75.2127309 |
| 68.3348948 | 56.2822025 | 65.5851169 | 68.3936894 | 70.5328118 | 75.2127309 |
| 69.3348948 | 57.2822025 | 66.5851169 | 68.3936894 | 70.5328118 | 76.2127309 |

|            |            |            |            |            |            |
|------------|------------|------------|------------|------------|------------|
| 70.3348948 | 57.2822025 | 66.5851169 | 68.3936894 | 70.5328118 | 77.2127309 |
| 70.3348948 | 58.2822025 | 66.5851169 | 68.3936894 | 69.5328118 | 77.2127309 |
| 70.3348948 | 58.2822025 | 66.5851169 | 67.3936894 | 68.5328118 | 77.2127309 |
| 70.3348948 | 60.2822025 | 69.5851169 | 65.3936894 | 67.5328118 | 73.2127309 |
| 70.3348948 | 60.2822025 | 69.5851169 | 65.3936894 | 67.5328118 | 72.2127309 |
| 72.3348948 | 60.2822025 | 69.5851169 | 65.3936894 | 67.5328118 | 72.2127309 |
| 73.3348948 | 60.2822025 | 69.5851169 | 66.3936894 | 67.5328118 | 71.2127309 |
| 73.3348948 | 62.2822025 | 69.5851169 | 66.3936894 | 66.5328118 | 68.2127309 |
| 73.3348948 | 62.2822025 | 67.5851169 | 66.3936894 | 66.5328118 | 67.2127309 |
| 74.3348948 | 63.2822025 | 67.5851169 | 66.3936894 | 65.5328118 | 66.2127309 |
| 74.3348948 | 63.2822025 | 66.5851169 | 68.3936894 | 65.5328118 | 66.2127309 |
| 76.3348948 | 63.2822025 | 66.5851169 | 69.3936894 | 65.5328118 | 65.2127309 |
| 64.8472053 | 63.2822025 | 66.5851169 | 69.3936894 | 65.5328118 | 64.2127309 |
| 65.0290235 | 63.2822025 | 66.5851169 | 70.3936894 | 65.5328118 | 62.2127309 |
| 65.574478  | 63.2822025 | 66.5851169 | 72.3936894 | 65.5328118 | 62.2127309 |
| 66.5044315 | 63.2822025 | 66.5851169 | 72.3936894 | 65.5328118 | 62.2127309 |
| 66.928888  | 65.2822025 | 67.5851169 | 70.3936894 | 65.5328118 | 62.2127309 |
| 66.0290235 | 66.2822025 | 69.5851169 | 65.3936894 | 65.5328118 | 62.2127309 |
| 66.0290235 | 66.2822025 | 69.5851169 | 64.3936894 | 65.5328118 | 63.2127309 |
| 66.2108417 | 66.2822025 | 70.5851169 | 64.3936894 | 65.5328118 | 63.2127309 |
| 66.3926598 | 66.2822025 | 70.5851169 | 63.3936894 | 65.5328118 | 64.2127309 |
| 67.3926598 | 66.2822025 | 71.5851169 | 63.3936894 | 65.5328118 | 66.2127309 |
| 66.9381144 | 66.2822025 | 71.5851169 | 62.3936894 | 64.5328118 | 66.2127309 |
| 81.3348948 | 66.2822025 | 71.5851169 | 64.3936894 | 63.5328118 | 67.2127309 |
| 77.3348948 | 68.2822025 | 71.5851169 | 66.3936894 | 63.5328118 | 67.2127309 |
| 75.3348948 | 68.2822025 | 71.5851169 | 67.3936894 | 64.5328118 | 67.2127309 |
| 74.3348948 | 68.2822025 | 70.5851169 | 67.3936894 | 64.5328118 | 68.2127309 |
| 72.3348948 | 68.2822025 | 70.5851169 | 66.3936894 | 64.5328118 | 68.2127309 |
| 71.3348948 | 68.2822025 | 69.5851169 | 65.3936894 | 64.5328118 | 69.2127309 |
| 69.3348948 | 68.2822025 | 68.5851169 | 64.3936894 | 63.5328118 | 72.2127309 |
| 68.3348948 | 69.2822025 | 68.5851169 | 64.3936894 | 63.5328118 | 72.2127309 |
| 67.3348948 | 69.2822025 | 68.5851169 | 64.3936894 | 62.5328118 | 73.2127309 |
| 66.3348948 | 69.2822025 | 67.5851169 | 64.3936894 | 62.5328118 | 72.2127309 |
| 66.3348948 | 67.2822025 | 67.5851169 | 64.3936894 | 63.5328118 | 72.2127309 |
| 66.3348948 | 64.2822025 | 67.5851169 | 64.3936894 | 63.5328118 | 72.2127309 |
| 66.3348948 | 60.2822025 | 67.5851169 | 63.3936894 | 63.5328118 | 72.2127309 |
| 67.3348948 | 60.2822025 | 67.5851169 | 64.3936894 | 63.5328118 | 72.2127309 |
| 67.3348948 | 59.2822025 | 67.5851169 | 64.3936894 | 62.5328118 | 72.2127309 |
| 67.3348948 | 59.2822025 | 67.5851169 | 64.3936894 | 64.5328118 | 72.2127309 |
| 67.3348948 | 58.2822025 | 67.5851169 | 64.3936894 | 64.5328118 | 72.2127309 |
| 67.3348948 | 57.2822025 | 67.5851169 | 64.3936894 | 65.5328118 | 83.2127309 |
| 68.3348948 | 57.2822025 | 67.5851169 | 65.3936894 | 64.5328118 | 70.0290235 |
| 68.3348948 | 57.2822025 | 67.5851169 | 65.3936894 | 64.5328118 | 69.7562962 |
| 69.3348948 | 56.2822025 | 66.5851169 | 65.3936894 | 64.5328118 | 69.4835689 |
| 69.3348948 | 55.2822025 | 66.5851169 | 67.3936894 | 64.5328118 | 69.3017507 |

|            |            |            |            |            |            |
|------------|------------|------------|------------|------------|------------|
| 70.3348948 | 55.2822025 | 66.5851169 | 72.3936894 | 64.5328118 | 72.2127309 |
| 71.3348948 | 55.2822025 | 66.5851169 | 74.3936894 | 65.5328118 | 69.2127309 |
| 71.3348948 | 54.2822025 | 66.5851169 | 67.8472053 | 65.5328118 | 69.2127309 |
| 72.3348948 | 54.2822025 | 66.5851169 | 67.3017507 | 64.5328118 | 69.2127309 |
| 72.3348948 | 54.2822025 | 66.5851169 | 66.574478  | 64.5328118 | 70.2127309 |
| 72.3348948 | 54.2822025 | 66.5851169 | 66.1199326 | 63.5328118 | 70.2127309 |
| 71.3348948 | 53.2822025 | 66.5851169 | 65.7562962 | 63.5328118 | 70.2127309 |
| 71.3348948 | 53.2822025 | 66.5851169 | 66.0290235 | 63.5328118 | 70.2127309 |
| 70.3348948 | 53.2822025 | 66.5851169 | 66.1199326 | 63.5328118 | 71.2127309 |
| 70.3348948 | 53.2822025 | 67.5851169 | 66.3926598 | 63.5328118 | 71.2127309 |
| 70.3348948 | 54.2822025 | 67.5851169 | 66.574478  | 63.5328118 | 71.2127309 |
| 70.3348948 | 56.2822025 | 67.5851169 | 79.3936894 | 63.5328118 | 71.2127309 |
| 70.3348948 | 57.2822025 | 67.5851169 | 79.3936894 | 63.5328118 | 69.2127309 |
| 71.3348948 | 58.2822025 | 67.5851169 | 71.3936894 | 63.5328118 | 69.2127309 |
| 72.3348948 | 58.2822025 | 67.5851169 | 68.3936894 | 63.5328118 | 70.2127309 |
| 72.3348948 | 62.2822025 | 67.5851169 | 65.3936894 | 63.5328118 | 71.2127309 |
| 72.3348948 | 62.2822025 | 67.5851169 | 61.3936894 | 64.5328118 | 71.2127309 |
| 73.3348948 | 63.2822025 | 68.5851169 | 61.3936894 | 64.5328118 | 71.2127309 |
| 73.3348948 | 63.2822025 | 68.5851169 | 60.3936894 | 64.5328118 | 71.2127309 |
| 73.3348948 | 64.2822025 | 68.5851169 | 59.3936894 | 64.5328118 | 71.2127309 |
| 74.3348948 | 61.2822025 | 67.5851169 | 59.3936894 | 64.5328118 | 71.2127309 |
| 74.3348948 | 60.2822025 | 67.5851169 | 59.3936894 | 65.5328118 | 71.2127309 |
| 75.3348948 | 60.2822025 | 67.5851169 | 59.3936894 | 65.5328118 | 74.2127309 |
| 76.3348948 | 60.2822025 | 66.5851169 | 58.3936894 | 65.5328118 | 75.2127309 |
| 76.3348948 | 60.2822025 | 66.5851169 | 58.3936894 | 65.5328118 | 75.2127309 |
| 76.3348948 | 60.2822025 | 66.5851169 | 56.3936894 | 66.5328118 | 77.2127309 |
| 76.3348948 | 60.2822025 | 65.5851169 | 55.3936894 | 66.5328118 | 77.2127309 |
| 75.3348948 | 60.2822025 | 65.5851169 | 55.3936894 | 67.5328118 | 75.2127309 |
| 75.3348948 | 60.2822025 | 65.5851169 | 54.3936894 | 67.5328118 | 73.2127309 |
| 72.3348948 | 61.2822025 | 65.5851169 | 54.3936894 | 68.5328118 | 72.2127309 |
| 71.3348948 | 61.2822025 | 65.5851169 | 53.3936894 | 68.5328118 | 71.2127309 |
| 69.3348948 | 61.2822025 | 65.5851169 | 53.3936894 | 68.5328118 | 71.2127309 |
| 69.3348948 | 60.2822025 | 65.5851169 | 54.3936894 | 68.5328118 | 71.2127309 |
| 68.3348948 | 59.2822025 | 65.5851169 | 54.3936894 | 69.5328118 | 75.2127309 |
| 68.3348948 | 59.2822025 | 65.5851169 | 58.3936894 | 69.5328118 | 76.2127309 |
| 68.3348948 | 60.2822025 | 65.5851169 | 60.3936894 | 68.5328118 | 76.2127309 |
| 68.3348948 | 60.2822025 | 65.5851169 | 64.3936894 | 66.5328118 | 78.2127309 |
| 67.3348948 | 60.2822025 | 66.5851169 | 64.3936894 | 66.5328118 | 78.2127309 |
| 66.3348948 | 59.2822025 | 66.5851169 | 66.3936894 | 66.5328118 | 76.2127309 |
| 66.3348948 | 59.2822025 | 66.5851169 | 67.3936894 | 66.5328118 | 76.2127309 |
| 66.3348948 | 58.2822025 | 66.5851169 | 67.3936894 | 66.5328118 | 70.2127309 |
| 65.3348948 | 58.2822025 | 66.5851169 | 68.3936894 | 66.5328118 | 68.2127309 |
| 65.3348948 | 58.2822025 | 66.5851169 | 68.3936894 | 66.5328118 | 66.2127309 |
| 65.3348948 | 58.2822025 | 66.5851169 | 72.3936894 | 67.5328118 | 66.2127309 |
| 66.3348948 | 57.2822025 | 66.5851169 | 73.3936894 | 67.5328118 | 66.2127309 |

|            |            |            |            |            |            |
|------------|------------|------------|------------|------------|------------|
| 66.3348948 | 57.2822025 | 66.5851169 | 73.3936894 | 67.5328118 | 64.2127309 |
| 66.3348948 | 58.2822025 | 67.5851169 | 74.3936894 | 68.5328118 | 63.2127309 |
| 66.3348948 | 58.2822025 | 69.5851169 | 74.3936894 | 68.5328118 | 63.2127309 |
| 67.3348948 | 59.2822025 | 69.5851169 | 73.3936894 | 68.5328118 | 63.2127309 |
| 69.3348948 | 59.2822025 | 69.5851169 | 73.3936894 | 68.5328118 | 63.2127309 |
| 69.3348948 | 59.2822025 | 73.5851169 | 73.3936894 | 68.5328118 | 63.2127309 |
| 70.3348948 | 59.2822025 | 73.5851169 | 73.3936894 | 72.5328118 | 63.2127309 |
| 70.3348948 | 59.2822025 | 73.5851169 | 74.3936894 | 74.5328118 | 63.2127309 |
| 69.3348948 | 59.2822025 | 73.5851169 | 74.3936894 | 76.5328118 | 63.2127309 |
| 69.3348948 | 60.2822025 | 73.5851169 | 74.3936894 | 76.5328118 | 64.2127309 |
| 69.3348948 | 64.2822025 | 73.5851169 | 80.3936894 | 76.5328118 | 67.2127309 |
| 69.3348948 | 63.2822025 | 74.5851169 | 82.3936894 | 77.5328118 | 68.2127309 |
| 69.3348948 | 63.2822025 | 74.5851169 | 81.3936894 | 77.5328118 | 68.2127309 |
| 69.3348948 | 63.2822025 | 77.5851169 | 79.3936894 | 77.5328118 | 68.2127309 |
| 69.3348948 | 63.2822025 | 76.5851169 | 79.3936894 | 77.5328118 | 67.2127309 |
| 69.3348948 | 63.2822025 | 76.5851169 | 76.3936894 | 77.5328118 | 66.2127309 |
| 67.3348948 | 63.2822025 | 74.5851169 | 68.3936894 | 77.5328118 | 65.2127309 |
| 67.3348948 | 64.2822025 | 73.5851169 | 67.3936894 | 76.5328118 | 65.2127309 |
| 67.3348948 | 64.2822025 | 73.5851169 | 67.3936894 | 73.5328118 | 65.2127309 |
| 67.3348948 | 65.2822025 | 73.5851169 | 66.3936894 | 73.5328118 | 65.2127309 |
| 68.3348948 | 66.2822025 | 73.5851169 | 66.3936894 | 72.5328118 | 67.2127309 |
| 68.3348948 | 66.2822025 | 73.5851169 | 66.3936894 | 71.5328118 | 68.2127309 |
| 68.3348948 | 66.2822025 | 72.5851169 | 66.3936894 | 71.5328118 | 68.2127309 |
| 69.3348948 | 67.2822025 | 70.5851169 | 66.3936894 | 71.5328118 | 67.2127309 |
| 70.3348948 | 67.2822025 | 69.5851169 | 65.3936894 | 71.5328118 | 67.2127309 |
| 71.3348948 | 68.2822025 | 70.5851169 | 67.3936894 | 71.5328118 | 67.2127309 |
| 73.3348948 | 68.2822025 | 67.5851169 | 67.3936894 | 71.5328118 | 66.2127309 |
| 75.3348948 | 69.2822025 | 67.5851169 | 68.3936894 | 71.5328118 | 66.2127309 |
| 74.3348948 | 68.2822025 | 66.5851169 | 68.3936894 | 71.5328118 | 66.2127309 |
| 74.3348948 | 66.2822025 | 66.5851169 | 64.3936894 | 71.5328118 | 66.2127309 |
| 73.3348948 | 66.2822025 | 65.5851169 | 63.3936894 | 71.5328118 | 67.2127309 |
| 72.3348948 | 63.2822025 | 65.5851169 | 61.3936894 | 70.5328118 | 69.2127309 |
| 72.3348948 | 63.2822025 | 65.5851169 | 59.3936894 | 69.5328118 | 69.2127309 |
| 72.3348948 | 63.2822025 | 65.5851169 | 59.3936894 | 69.5328118 | 69.2127309 |
| 72.3348948 | 57.2822025 | 64.5851169 | 57.3936894 | 65.5328118 | 70.2127309 |
| 71.3348948 | 57.2822025 | 64.5851169 | 57.3936894 | 64.5328118 | 70.2127309 |
| 70.3348948 | 57.2822025 | 64.5851169 | 57.3936894 | 62.5328118 | 70.2127309 |
| 69.3348948 | 57.2822025 | 64.5851169 | 61.3936894 | 63.5328118 | 68.2127309 |
| 68.3348948 | 57.2822025 | 64.5851169 | 63.3936894 | 63.5328118 | 68.2127309 |
| 65.3348948 | 57.2822025 | 64.5851169 | 64.3936894 | 63.5328118 | 68.2127309 |
| 64.3348948 | 57.2822025 | 64.5851169 | 64.3936894 | 63.5328118 | 69.2127309 |
| 63.3348948 | 57.2822025 | 65.5851169 | 62.3936894 | 64.5328118 | 70.2127309 |
| 62.3348948 | 57.2822025 | 65.5851169 | 60.3936894 | 65.5328118 | 70.2127309 |
| 61.3348948 | 57.2822025 | 65.5851169 | 58.3936894 | 65.5328118 | 71.2127309 |
| 61.3348948 | 57.2822025 | 65.5851169 | 58.3936894 | 65.5328118 | 72.2127309 |

|            |            |            |            |            |            |
|------------|------------|------------|------------|------------|------------|
| 60.3348948 | 59.2822025 | 64.5851169 | 58.3936894 | 63.5328118 | 72.2127309 |
| 60.3348948 | 59.2822025 | 64.5851169 | 61.3936894 | 62.5328118 | 74.2127309 |
| 61.3348948 | 58.2822025 | 64.5851169 | 64.3936894 | 62.5328118 | 75.2127309 |
| 60.3348948 | 58.2822025 | 65.5851169 | 67.3936894 | 61.5328118 | 76.2127309 |
| 61.3348948 | 58.2822025 | 65.5851169 | 68.3936894 | 63.5328118 | 75.2127309 |
| 64.3348948 | 57.2822025 | 65.5851169 | 68.3936894 | 63.5328118 | 74.2127309 |
| 64.3348948 | 56.2822025 | 66.5851169 | 65.3936894 | 62.5328118 | 74.2127309 |
| 66.3348948 | 56.2822025 | 66.5851169 | 63.3936894 | 62.5328118 | 73.2127309 |
| 66.3348948 | 56.2822025 | 67.5851169 | 61.3936894 | 62.5328118 | 73.2127309 |
| 66.3348948 | 56.2822025 | 66.5851169 | 59.3936894 | 60.5328118 | 72.2127309 |
| 67.3348948 | 56.2822025 | 66.5851169 | 59.3936894 | 60.5328118 | 73.2127309 |
| 68.3348948 | 57.2822025 | 66.5851169 | 62.3936894 | 55.5328118 | 73.2127309 |
| 69.3348948 | 57.2822025 | 66.5851169 | 63.3936894 | 55.5328118 | 74.2127309 |
| 69.3348948 | 59.2822025 | 67.5851169 | 64.3936894 | 55.5328118 | 74.2127309 |
| 69.3348948 | 61.2822025 | 68.5851169 | 64.3936894 | 55.5328118 | 74.2127309 |
| 72.3348948 | 61.2822025 | 68.5851169 | 65.3936894 | 55.5328118 | 75.2127309 |
| 74.3348948 | 61.2822025 | 67.5851169 | 64.3936894 | 55.5328118 | 76.2127309 |
| 73.3348948 | 61.2822025 | 67.5851169 | 64.3936894 | 55.5328118 | 76.2127309 |
| 68.3348948 | 61.2822025 | 68.5851169 | 63.3936894 | 55.5328118 | 76.2127309 |
| 66.3348948 | 63.2822025 | 69.5851169 | 63.3936894 | 58.5328118 | 76.2127309 |
| 65.3348948 | 63.2822025 | 69.5851169 | 64.3936894 | 58.5328118 | 76.2127309 |
| 64.3348948 | 63.2822025 | 67.5851169 | 65.3936894 | 63.5328118 | 76.2127309 |
| 64.3348948 | 63.2822025 | 67.5851169 | 65.3936894 | 65.5328118 | 76.2127309 |
| 65.3348948 | 63.2822025 | 67.5851169 | 64.3936894 | 67.5328118 | 77.2127309 |
| 67.3348948 | 63.2822025 | 67.5851169 | 63.3936894 | 67.5328118 | 77.2127309 |
| 68.3348948 | 66.2822025 | 67.5851169 | 61.3936894 | 67.5328118 | 76.2127309 |
| 72.3348948 | 67.2822025 | 67.5851169 | 61.3936894 | 67.5328118 | 76.2127309 |
| 77.3348948 | 68.2822025 | 66.5851169 | 62.3936894 | 67.5328118 | 74.2127309 |
| 80.3348948 | 69.2822025 | 65.5851169 | 63.3936894 | 66.5328118 | 74.2127309 |
| 81.3348948 | 70.2822025 | 65.5851169 | 63.3936894 | 66.5328118 | 73.2127309 |
| 81.3348948 | 70.2822025 | 65.5851169 | 62.3936894 | 66.5328118 | 72.2127309 |
| 80.3348948 | 72.2822025 | 66.5851169 | 61.3936894 | 66.5328118 | 71.2127309 |
| 75.3348948 | 73.2822025 | 66.5851169 | 61.3936894 | 66.5328118 | 71.2127309 |
| 73.3348948 | 74.2822025 | 66.5851169 | 60.3936894 | 66.5328118 | 69.2127309 |
| 72.3348948 | 74.2822025 | 66.5851169 | 61.3936894 | 65.5328118 | 68.2127309 |
| 73.3348948 | 75.2822025 | 66.5851169 | 61.3936894 | 63.5328118 | 68.2127309 |
| 74.3348948 | 73.2822025 | 67.5851169 | 62.3936894 | 62.5328118 | 69.2127309 |
| 75.3348948 | 73.2822025 | 66.5851169 | 63.3936894 | 63.5328118 | 69.2127309 |
| 74.3348948 | 73.2822025 | 66.5851169 | 63.3936894 | 64.5328118 | 67.2127309 |
| 74.3348948 | 73.2822025 | 66.5851169 | 61.3936894 | 63.5328118 | 66.2127309 |
| 75.3348948 | 72.2822025 | 66.5851169 | 60.3936894 | 63.5328118 | 66.2127309 |
| 75.3348948 | 72.2822025 | 66.5851169 | 59.3936894 | 63.5328118 | 64.2127309 |
| 75.3348948 | 72.2822025 | 66.5851169 | 59.3936894 | 63.5328118 | 64.2127309 |
| 79.3348948 | 71.2822025 | 65.5851169 | 59.3936894 | 63.5328118 | 64.2127309 |
| 80.3348948 | 70.2822025 | 65.5851169 | 59.3936894 | 63.5328118 | 64.2127309 |

|            |            |            |            |            |            |
|------------|------------|------------|------------|------------|------------|
| 66.0290235 | 70.2822025 | 65.5851169 | 60.3936894 | 63.5328118 | 65.2127309 |
| 80.3348948 | 70.2822025 | 65.5851169 | 61.3936894 | 64.5328118 | 65.2127309 |
| 76.3348948 | 70.2822025 | 65.5851169 | 62.3936894 | 65.5328118 | 65.2127309 |
| 69.3348948 | 70.2822025 | 65.5851169 | 61.3936894 | 65.5328118 | 67.2127309 |
| 68.3348948 | 71.2822025 | 65.5851169 | 60.3936894 | 65.5328118 | 67.2127309 |
| 68.3348948 | 71.2822025 | 65.5851169 | 59.3936894 | 64.5328118 | 68.2127309 |
| 68.3348948 | 71.2822025 | 65.5851169 | 59.3936894 | 64.5328118 | 68.2127309 |
| 69.3348948 | 71.2822025 | 65.5851169 | 58.3936894 | 64.5328118 | 71.2127309 |
| 69.3348948 | 72.2822025 | 65.5851169 | 58.3936894 | 64.5328118 | 71.2127309 |
| 69.3348948 | 64.2822025 | 65.5851169 | 58.3936894 | 64.5328118 | 71.2127309 |
| 68.3348948 | 64.2822025 | 65.5851169 | 58.3936894 | 66.5328118 | 71.2127309 |
| 67.3348948 | 64.2822025 | 66.5851169 | 59.3936894 | 71.5328118 | 71.2127309 |
| 66.3348948 | 64.2822025 | 65.5851169 | 60.3936894 | 71.5328118 | 72.2127309 |
| 66.3348948 | 64.2822025 | 65.5851169 | 61.3936894 | 72.5328118 | 72.2127309 |
| 66.3348948 | 62.2822025 | 65.5851169 | 61.3936894 | 73.5328118 | 72.2127309 |
| 66.3348948 | 62.2822025 | 66.5851169 | 63.3936894 | 73.5328118 | 72.2127309 |
| 66.3348948 | 62.2822025 | 67.5851169 | 66.3936894 | 74.5328118 | 76.2127309 |
| 66.3348948 | 62.2822025 | 67.5851169 | 68.3936894 | 74.5328118 | 76.2127309 |
| 66.3348948 | 62.2822025 | 67.5851169 | 68.3936894 | 74.5328118 | 76.2127309 |
| 66.3348948 | 62.2822025 | 67.5851169 | 68.3936894 | 74.5328118 | 79.2127309 |
| 67.3348948 | 62.2822025 | 67.5851169 | 68.3936894 | 74.5328118 | 79.2127309 |
| 68.3348948 | 62.2822025 | 69.5851169 | 67.3936894 | 74.5328118 | 69.8472053 |
| 69.3348948 | 65.2822025 | 70.5851169 | 69.3936894 | 74.5328118 | 70.7562962 |
| 71.3348948 | 66.2822025 | 70.5851169 | 69.3936894 | 72.5328118 | 70.6653871 |
| 72.3348948 | 66.2822025 | 70.5851169 | 68.3936894 | 71.5328118 | 70.2108417 |
| 76.3348948 | 67.2822025 | 70.5851169 | 68.3936894 | 70.5328118 | 70.3926598 |
| 76.3348948 | 73.2822025 | 69.5851169 | 66.3936894 | 70.5328118 | 70.574478  |
| 73.3348948 | 75.2822025 | 69.5851169 | 64.3936894 | 70.5328118 | 84.2127309 |
| 72.3348948 | 76.2822025 | 69.5851169 | 63.3936894 | 68.5328118 | 83.2127309 |
| 72.3348948 | 77.2822025 | 70.5851169 | 63.3936894 | 68.5328118 | 83.2127309 |
| 72.3348948 | 79.2822025 | 70.5851169 | 65.3936894 | 64.5328118 | 80.2127309 |
| 72.3348948 | 79.2822025 | 70.5851169 | 66.3936894 | 64.5328118 | 80.2127309 |
| 72.3348948 | 82.2822025 | 70.5851169 | 66.3936894 | 64.5328118 | 78.2127309 |
| 73.3348948 | 69.9381144 | 70.5851169 | 66.3936894 | 65.5328118 | 70.2127309 |
| 73.3348948 | 69.7562962 | 70.5851169 | 66.3936894 | 66.5328118 | 66.2127309 |
| 73.3348948 | 69.6653871 | 70.5851169 | 66.3936894 | 66.5328118 | 66.2127309 |
| 73.3348948 | 69.6653871 | 69.5851169 | 66.3936894 | 66.5328118 | 66.2127309 |
| 73.3348948 | 69.574478  | 69.5851169 | 68.3936894 | 66.5328118 | 63.2127309 |
| 73.3348948 | 69.7562962 | 69.5851169 | 70.3936894 | 68.5328118 | 63.2127309 |
| 73.3348948 | 69.3017507 | 68.5851169 | 72.3936894 | 68.5328118 | 63.2127309 |
| 72.3348948 | 69.1199326 | 67.5851169 | 71.3936894 | 68.5328118 | 63.2127309 |
| 71.3348948 | 68.3926598 | 66.5851169 | 70.3936894 | 69.5328118 | 64.2127309 |
| 70.3348948 | 67.9381144 | 66.5851169 | 69.3936894 | 69.5328118 | 64.2127309 |
| 70.3348948 | 69.0290235 | 66.5851169 | 69.3936894 | 69.5328118 | 73.2127309 |
| 69.3348948 | 69.3017507 | 67.5851169 | 69.3936894 | 69.5328118 | 73.2127309 |



|            |            |            |            |            |            |
|------------|------------|------------|------------|------------|------------|
| 69.3348948 | 68.8472053 | 67.5851169 | 68.3936894 | 70.5328118 | 71.2127309 |
| 70.3348948 | 68.9381144 | 67.5851169 | 68.3936894 | 70.5328118 | 71.2127309 |
| 71.3348948 | 68.6653871 | 66.5851169 | 67.3936894 | 70.5328118 | 68.2127309 |
| 71.3348948 | 69.8472053 | 66.5851169 | 68.3936894 | 70.5328118 | 66.2127309 |
| 71.3348948 | 69.7562962 | 66.5851169 | 67.3936894 | 68.5328118 | 65.2127309 |
| 71.3348948 | 70.0290235 | 66.5851169 | 68.3936894 | 68.5328118 | 65.2127309 |
| 71.3348948 | 71.2180137 | 66.5851169 | 68.3936894 | 68.5328118 | 65.2127309 |
| 71.3348948 | 70.4190703 | 66.5851169 | 67.3936894 | 67.5328118 | 65.2127309 |
| 71.3348948 | 69.1199326 | 67.5851169 | 65.3936894 | 67.5328118 | 69.2127309 |
| 71.3348948 | 78.2822025 | 67.5851169 | 63.3936894 | 67.5328118 | 70.2127309 |
| 70.3348948 | 72.2822025 | 67.5851169 | 63.3936894 | 67.5328118 | 73.2127309 |
| 69.3348948 | 69.2822025 | 67.5851169 | 63.3936894 | 66.5328118 | 73.2127309 |
| 69.3348948 | 67.2822025 | 68.5851169 | 64.3936894 | 66.5328118 | 73.2127309 |
| 67.3348948 | 67.2822025 | 68.5851169 | 67.3936894 | 66.5328118 | 72.2127309 |
| 67.3348948 | 64.2822025 | 68.5851169 | 68.3936894 | 65.5328118 | 67.2127309 |
| 67.3348948 | 63.2822025 | 68.5851169 | 68.3936894 | 65.5328118 | 62.2127309 |
| 68.3348948 | 62.2822025 | 68.5851169 | 67.3936894 | 65.5328118 | 62.2127309 |
| 68.3348948 | 60.2822025 | 68.5851169 | 65.3936894 | 65.5328118 | 61.2127309 |
| 69.3348948 | 59.2822025 | 67.5851169 | 64.3936894 | 65.5328118 | 62.2127309 |
| 70.3348948 | 59.2822025 | 67.5851169 | 65.3936894 | 64.5328118 | 66.2127309 |
| 70.3348948 | 59.2822025 | 67.5851169 | 66.3936894 | 64.5328118 | 66.2127309 |
| 71.3348948 | 59.2822025 | 67.5851169 | 67.3936894 | 65.5328118 | 66.2127309 |
| 71.3348948 | 59.2822025 | 66.5851169 | 67.3936894 | 65.5328118 | 66.2127309 |
| 71.3348948 | 56.2822025 | 68.5851169 | 67.3936894 | 65.5328118 | 66.2127309 |
| 70.3348948 | 55.2822025 | 68.5851169 | 67.3936894 | 65.5328118 | 66.2127309 |
| 69.3348948 | 55.2822025 | 69.5851169 | 67.3936894 | 65.5328118 | 64.2127309 |
| 68.3348948 | 55.2822025 | 70.5851169 | 67.3936894 | 65.5328118 | 64.2127309 |
| 69.3348948 | 55.2822025 | 70.5851169 | 67.3936894 | 65.5328118 | 64.2127309 |
| 69.3348948 | 55.2822025 | 70.5851169 | 68.3936894 | 66.5328118 | 64.2127309 |
| 69.3348948 | 55.2822025 | 70.5851169 | 68.3936894 | 66.5328118 | 64.2127309 |
| 70.3348948 | 55.2822025 | 70.5851169 | 68.3936894 | 66.5328118 | 64.2127309 |
| 70.3348948 | 55.2822025 | 74.5851169 | 68.3936894 | 66.5328118 | 64.2127309 |
| 70.3348948 | 55.2822025 | 77.5851169 | 69.3936894 | 65.5328118 | 64.2127309 |
| 69.3348948 | 56.2822025 | 74.5851169 | 69.3936894 | 65.5328118 | 64.2127309 |
| 68.3348948 | 56.2822025 | 69.5851169 | 69.3936894 | 65.5328118 | 67.2127309 |
| 68.3348948 | 56.2822025 | 67.5851169 | 69.3936894 | 65.5328118 | 68.2127309 |
| 68.3348948 | 56.2822025 | 66.5851169 | 69.3936894 | 65.5328118 | 74.2127309 |
| 69.3348948 | 56.2822025 | 65.5851169 | 68.3936894 | 65.5328118 | 74.2127309 |
| 70.3348948 | 56.2822025 | 65.5851169 | 68.3936894 | 65.5328118 | 76.2127309 |
| 70.3348948 | 56.2822025 | 65.5851169 | 68.3936894 | 65.5328118 | 73.2127309 |
| 70.3348948 | 56.2822025 | 65.5851169 | 68.3936894 | 64.5328118 | 73.2127309 |
| 70.3348948 | 56.2822025 | 65.5851169 | 68.3936894 | 64.5328118 | 74.2127309 |
| 70.3348948 | 56.2822025 | 65.5851169 | 68.3936894 | 63.5328118 | 74.2127309 |
| 69.3348948 | 56.2822025 | 65.5851169 | 68.3936894 | 63.5328118 | 76.2127309 |
| 69.3348948 | 57.2822025 | 65.5851169 | 68.3936894 | 64.5328118 | 78.2127309 |

|            |            |            |            |            |            |
|------------|------------|------------|------------|------------|------------|
| 69.3348948 | 57.2822025 | 65.5851169 | 69.3936894 | 62.5328118 | 78.2127309 |
| 69.3348948 | 57.2822025 | 65.5851169 | 69.3936894 | 60.5328118 | 81.2127309 |
| 70.3348948 | 64.2822025 | 69.5851169 | 69.3936894 | 60.5328118 | 68.3017507 |
| 70.3348948 | 64.2822025 | 71.5851169 | 71.3936894 | 60.5328118 | 68.6653871 |
| 70.3348948 | 61.2822025 | 71.5851169 | 75.3936894 | 61.5328118 | 78.2127309 |
| 70.3348948 | 59.2822025 | 71.5851169 | 75.3936894 | 60.5328118 | 78.2127309 |
| 69.3348948 | 58.2822025 | 73.5851169 | 76.3936894 | 60.5328118 | 72.2127309 |
| 69.3348948 | 58.2822025 | 75.5851169 | 76.3936894 | 60.5328118 | 65.2127309 |
| 69.3348948 | 58.2822025 | 75.5851169 | 76.3936894 | 60.5328118 | 64.2127309 |
| 69.3348948 | 58.2822025 | 78.5851169 | 76.3936894 | 61.5328118 | 64.2127309 |
| 69.3348948 | 58.2822025 | 78.5851169 | 76.3936894 | 61.5328118 | 64.2127309 |
| 69.3348948 | 58.2822025 | 78.5851169 | 69.3936894 | 61.5328118 | 63.2127309 |
| 69.3348948 | 58.2822025 | 78.5851169 | 69.3936894 | 62.5328118 | 63.2127309 |
| 70.3348948 | 58.2822025 | 78.5851169 | 69.3936894 | 62.5328118 | 65.2127309 |
| 70.3348948 | 57.2822025 | 78.5851169 | 68.3936894 | 62.5328118 | 65.2127309 |
| 70.3348948 | 57.2822025 | 78.5851169 | 68.3936894 | 62.5328118 | 65.2127309 |
| 69.3348948 | 55.2822025 | 77.5851169 | 68.3936894 | 65.5328118 | 65.2127309 |
| 69.3348948 | 55.2822025 | 76.5851169 | 66.3936894 | 65.5328118 | 65.2127309 |
| 68.3348948 | 55.2822025 | 76.5851169 | 63.3936894 | 71.5328118 | 65.2127309 |
| 69.3348948 | 55.2822025 | 76.5851169 | 62.3936894 | 72.5328118 | 65.2127309 |
| 69.3348948 | 55.2822025 | 75.5851169 | 62.3936894 | 71.5328118 | 62.2127309 |
| 69.3348948 | 55.2822025 | 75.5851169 | 62.3936894 | 71.5328118 | 62.2127309 |
| 69.3348948 | 60.2822025 | 72.5851169 | 62.3936894 | 70.5328118 | 62.2127309 |
| 70.3348948 | 60.2822025 | 70.5851169 | 62.3936894 | 70.5328118 | 63.2127309 |
| 71.3348948 | 60.2822025 | 69.5851169 | 59.3936894 | 70.5328118 | 63.2127309 |
| 72.3348948 | 59.2822025 | 67.5851169 | 59.3936894 | 70.5328118 | 63.2127309 |
| 71.3348948 | 58.2822025 | 66.5851169 | 59.3936894 | 70.5328118 | 63.2127309 |
| 71.3348948 | 56.2822025 | 65.5851169 | 59.3936894 | 69.5328118 | 66.2127309 |
| 71.3348948 | 56.2822025 | 64.5851169 | 59.3936894 | 68.5328118 | 68.2127309 |
| 71.3348948 | 56.2822025 | 64.5851169 | 59.3936894 | 67.5328118 | 68.2127309 |
| 69.3348948 | 56.2822025 | 64.5851169 | 60.3936894 | 66.5328118 | 69.2127309 |
| 69.3348948 | 56.2822025 | 65.5851169 | 60.3936894 | 66.5328118 | 69.2127309 |
| 69.3348948 | 56.2822025 | 68.5851169 | 60.3936894 | 66.5328118 | 69.2127309 |
| 69.3348948 | 56.2822025 | 68.5851169 | 61.3936894 | 64.5328118 | 68.2127309 |
| 74.3348948 | 56.2822025 | 69.5851169 | 63.3936894 | 64.5328118 | 67.2127309 |
| 74.3348948 | 56.2822025 | 69.5851169 | 67.3936894 | 64.5328118 | 67.2127309 |
| 74.3348948 | 56.2822025 | 69.5851169 | 72.3936894 | 63.5328118 | 66.2127309 |
| 74.3348948 | 58.2822025 | 69.5851169 | 73.3936894 | 63.5328118 | 66.2127309 |
| 74.3348948 | 58.2822025 | 69.5851169 | 72.3936894 | 63.5328118 | 66.2127309 |
| 73.3348948 | 58.2822025 | 69.5851169 | 70.3936894 | 63.5328118 | 66.2127309 |
| 73.3348948 | 59.2822025 | 68.5851169 | 65.3936894 | 62.5328118 | 66.2127309 |
| 73.3348948 | 61.2822025 | 68.5851169 | 62.3936894 | 62.5328118 | 65.2127309 |
| 74.3348948 | 61.2822025 | 67.5851169 | 61.3936894 | 62.5328118 | 66.2127309 |
| 74.3348948 | 61.2822025 | 67.5851169 | 61.3936894 | 62.5328118 | 66.2127309 |
| 74.3348948 | 61.2822025 | 67.5851169 | 61.3936894 | 63.5328118 | 66.2127309 |

|            |            |            |            |            |            |
|------------|------------|------------|------------|------------|------------|
| 72.3348948 | 61.2822025 | 67.5851169 | 65.3936894 | 63.5328118 | 66.2127309 |
| 71.3348948 | 61.2822025 | 68.5851169 | 65.3936894 | 63.5328118 | 67.2127309 |
| 71.3348948 | 61.2822025 | 68.5851169 | 65.3936894 | 62.5328118 | 67.2127309 |
| 70.3348948 | 64.2822025 | 68.5851169 | 65.3936894 | 62.5328118 | 66.2127309 |
| 70.3348948 | 64.2822025 | 68.5851169 | 65.3936894 | 62.5328118 | 67.2127309 |
| 70.3348948 | 64.2822025 | 68.5851169 | 65.3936894 | 61.5328118 | 67.2127309 |
| 71.3348948 | 65.2822025 | 68.5851169 | 65.3936894 | 62.5328118 | 67.2127309 |
| 71.3348948 | 66.2822025 | 68.5851169 | 65.3936894 | 62.5328118 | 67.2127309 |
| 71.3348948 | 66.2822025 | 69.5851169 | 63.3936894 | 61.5328118 | 68.2127309 |
| 71.3348948 | 70.2822025 | 69.5851169 | 63.3936894 | 61.5328118 | 68.2127309 |
| 72.3348948 | 71.2822025 | 69.5851169 | 63.3936894 | 61.5328118 | 67.2127309 |
| 72.3348948 | 71.2822025 | 70.5851169 | 63.3936894 | 61.5328118 | 67.2127309 |
| 71.3348948 | 72.2822025 | 67.5851169 | 62.3936894 | 62.5328118 | 71.2127309 |
| 71.3348948 | 74.2822025 | 66.5851169 | 62.3936894 | 62.5328118 | 72.2127309 |
| 71.3348948 | 75.2822025 | 66.5851169 | 64.3936894 | 62.5328118 | 73.2127309 |
| 71.3348948 | 76.2822025 | 66.5851169 | 64.3936894 | 62.5328118 | 73.2127309 |
| 72.3348948 | 76.2822025 | 66.5851169 | 64.3936894 | 62.5328118 | 72.2127309 |
| 72.3348948 | 77.2822025 | 66.5851169 | 65.3936894 | 63.5328118 | 70.2127309 |
| 75.3348948 | 77.2822025 | 66.5851169 | 65.3936894 | 62.5328118 | 69.2127309 |
| 74.3348948 | 78.2822025 | 66.5851169 | 65.3936894 | 62.5328118 | 69.2127309 |
| 73.3348948 | 78.2822025 | 66.5851169 | 68.3936894 | 62.5328118 | 68.2127309 |
| 73.3348948 | 78.2822025 | 66.5851169 | 68.3936894 | 63.5328118 | 68.2127309 |
| 73.3348948 | 79.2822025 | 66.5851169 | 68.3936894 | 63.5328118 | 68.2127309 |
| 73.3348948 | 79.2822025 | 65.5851169 | 68.3936894 | 63.5328118 | 68.2127309 |
| 73.3348948 | 79.2822025 | 65.5851169 | 68.3936894 | 63.5328118 | 68.2127309 |
| 72.3348948 | 78.2822025 | 65.5851169 | 69.3936894 | 65.5328118 | 59.2127309 |
| 72.3348948 | 78.2822025 | 65.5851169 | 73.3936894 | 65.5328118 | 58.2127309 |
| 70.3348948 | 80.2822025 | 65.5851169 | 81.3936894 | 65.5328118 | 58.2127309 |
| 69.3348948 | 81.2822025 | 65.5851169 | 81.3936894 | 65.5328118 | 58.2127309 |
| 69.3348948 | 81.2822025 | 66.5851169 | 70.8472053 | 65.5328118 | 66.2127309 |
| 69.3348948 | 81.2822025 | 66.5851169 | 86.3936894 | 65.5328118 | 78.2127309 |
| 69.3348948 | 81.2822025 | 66.5851169 | 86.3936894 | 65.5328118 | 83.2127309 |
| 69.3348948 | 81.2822025 | 66.5851169 | 86.3936894 | 65.5328118 | 84.2127309 |
| 70.3348948 | 81.2822025 | 66.5851169 | 86.3936894 | 65.5328118 | 83.2127309 |
| 70.3348948 | 84.2822025 | 66.5851169 | 86.3936894 | 65.5328118 | 83.2127309 |
| 70.3348948 | 84.2822025 | 66.5851169 | 72.574478  | 64.5328118 | 83.2127309 |
| 70.3348948 | 84.2822025 | 67.5851169 | 72.3926598 | 64.5328118 | 82.2127309 |
| 70.3348948 | 85.2822025 | 67.5851169 | 71.574478  | 64.5328118 | 74.2127309 |
| 71.3348948 | 85.2822025 | 67.5851169 | 70.7562962 | 64.5328118 | 69.2127309 |
| 71.3348948 | 69.6653871 | 66.5851169 | 69.6653871 | 64.5328118 | 66.2127309 |
| 71.3348948 | 69.1199326 | 66.5851169 | 69.1199326 | 64.5328118 | 65.2127309 |
| 72.3348948 | 69.0290235 | 66.5851169 | 69.0290235 | 64.5328118 | 65.2127309 |
| 73.3348948 | 69.9381144 | 66.5851169 | 84.3936894 | 65.5328118 | 71.2127309 |
| 75.3348948 | 70.0290235 | 67.5851169 | 82.3936894 | 66.5328118 | 71.2127309 |
| 75.3348948 | 69.9381144 | 69.5851169 | 80.3936894 | 66.5328118 | 72.2127309 |

|            |            |            |            |            |            |
|------------|------------|------------|------------|------------|------------|
| 75.3348948 | 69.8472053 | 70.5851169 | 78.3936894 | 66.5328118 | 71.2127309 |
| 75.3348948 | 69.7562962 | 71.5851169 | 76.3936894 | 66.5328118 | 69.2127309 |
| 76.3348948 | 69.3926598 | 70.5851169 | 76.3936894 | 65.5328118 | 69.2127309 |
| 76.3348948 | 68.9381144 | 69.5851169 | 76.3936894 | 65.5328118 | 67.2127309 |
| 77.3348948 | 68.7562962 | 69.5851169 | 76.3936894 | 64.5328118 | 66.2127309 |
| 76.3348948 | 81.2822025 | 69.5851169 | 77.3936894 | 64.5328118 | 69.2127309 |
| 75.3348948 | 81.2822025 | 68.5851169 | 71.3936894 | 63.5328118 | 69.2127309 |
| 74.3348948 | 80.2822025 | 68.5851169 | 70.3936894 | 63.5328118 | 70.2127309 |
| 74.3348948 | 80.2822025 | 68.5851169 | 69.3936894 | 64.5328118 | 71.2127309 |
| 74.3348948 | 80.2822025 | 69.5851169 | 69.3936894 | 64.5328118 | 67.2127309 |
| 74.3348948 | 79.2822025 | 69.5851169 | 69.3936894 | 65.5328118 | 67.2127309 |
| 75.3348948 | 77.2822025 | 67.5851169 | 70.3936894 | 65.5328118 | 66.2127309 |
| 75.3348948 | 75.2822025 | 66.5851169 | 70.3936894 | 65.5328118 | 68.2127309 |
| 76.3348948 | 74.2822025 | 65.5851169 | 72.3936894 | 65.5328118 | 70.2127309 |
| 76.3348948 | 74.2822025 | 65.5851169 | 74.3936894 | 65.5328118 | 70.2127309 |
| 76.3348948 | 71.2822025 | 64.5851169 | 75.3936894 | 65.5328118 | 70.2127309 |
| 76.3348948 | 71.2822025 | 64.5851169 | 74.3936894 | 64.5328118 | 70.2127309 |
| 75.3348948 | 72.2822025 | 64.5851169 | 73.3936894 | 64.5328118 | 70.2127309 |
| 75.3348948 | 76.2822025 | 64.5851169 | 74.3936894 | 64.5328118 | 70.2127309 |
| 73.3348948 | 82.2822025 | 64.5851169 | 77.3936894 | 63.5328118 | 69.2127309 |
| 72.3348948 | 68.2108417 | 64.5851169 | 79.3936894 | 63.5328118 | 69.2127309 |
| 72.3348948 | 68.4835689 | 65.5851169 | 80.3936894 | 63.5328118 | 69.2127309 |
| 71.3348948 | 82.2822025 | 65.5851169 | 80.3936894 | 63.5328118 | 69.2127309 |
| 71.3348948 | 80.2822025 | 65.5851169 | 80.3936894 | 63.5328118 | 69.2127309 |
| 69.3348948 | 78.2822025 | 67.5851169 | 80.3936894 | 64.5328118 | 69.2127309 |
| 69.3348948 | 78.2822025 | 67.5851169 | 80.3936894 | 64.5328118 | 69.2127309 |
| 69.3348948 | 78.2822025 | 66.5851169 | 81.3936894 | 64.5328118 | 69.2127309 |
| 69.3348948 | 78.2822025 | 66.5851169 | 81.3936894 | 65.5328118 | 71.2127309 |
| 70.3348948 | 78.2822025 | 65.5851169 | 82.3936894 | 65.5328118 | 71.2127309 |
| 70.3348948 | 78.2822025 | 65.5851169 | 82.3936894 | 66.5328118 | 73.2127309 |
| 70.3348948 | 78.2822025 | 65.5851169 | 82.3936894 | 66.5328118 | 73.2127309 |
| 69.3348948 | 70.2822025 | 65.5851169 | 79.3936894 | 66.5328118 | 73.2127309 |
| 69.3348948 | 69.2822025 | 65.5851169 | 77.3936894 | 66.5328118 | 73.2127309 |
| 69.3348948 | 69.2822025 | 65.5851169 | 77.3936894 | 66.5328118 | 73.2127309 |
| 68.3348948 | 68.2822025 | 65.5851169 | 75.3936894 | 67.5328118 | 74.2127309 |
| 67.3348948 | 68.2822025 | 65.5851169 | 73.3936894 | 67.5328118 | 77.2127309 |
| 68.3348948 | 67.2822025 | 65.5851169 | 73.3936894 | 67.5328118 | 78.2127309 |
| 69.3348948 | 66.2822025 | 65.5851169 | 73.3936894 | 67.5328118 | 79.2127309 |
| 69.3348948 | 66.2822025 | 65.5851169 | 73.3936894 | 71.5328118 | 80.2127309 |
| 69.3348948 | 66.2822025 | 65.5851169 | 73.3936894 | 75.5328118 | 80.2127309 |
| 70.3348948 | 67.2822025 | 65.5851169 | 73.3936894 | 77.5328118 | 80.2127309 |
| 70.3348948 | 67.2822025 | 65.5851169 | 71.3936894 | 77.5328118 | 80.2127309 |
| 70.3348948 | 67.2822025 | 66.5851169 | 70.3936894 | 80.5328118 | 81.2127309 |
| 70.3348948 | 67.2822025 | 66.5851169 | 68.3936894 | 80.5328118 | 81.2127309 |
| 70.3348948 | 67.2822025 | 65.5851169 | 68.3936894 | 80.5328118 | 81.2127309 |

|            |            |            |            |            |            |
|------------|------------|------------|------------|------------|------------|
| 70.3348948 | 67.2822025 | 65.5851169 | 67.3936894 | 81.5328118 | 81.2127309 |
| 70.3348948 | 67.2822025 | 65.5851169 | 66.3936894 | 83.5328118 | 81.2127309 |
| 70.3348948 | 67.2822025 | 65.5851169 | 65.3936894 | 83.5328118 | 81.2127309 |
| 70.3348948 | 67.2822025 | 65.5851169 | 65.3936894 | 70.6499515 | 80.2127309 |
| 69.3348948 | 67.2822025 | 65.5851169 | 60.3936894 | 70.0499515 | 79.2127309 |
| 69.3348948 | 68.2822025 | 66.5851169 | 56.3936894 | 70.0499515 | 79.2127309 |
| 69.3348948 | 68.2822025 | 68.5851169 | 56.3936894 | 70.4499515 | 80.2127309 |
| 69.3348948 | 69.2822025 | 68.5851169 | 56.3936894 | 70.8499515 | 80.2127309 |
| 68.3348948 | 69.2822025 | 68.5851169 | 56.3936894 | 69.770319  | 81.2127309 |

| Activity   | behavior | average of all | moving average |
|------------|----------|----------------|----------------|
| 69.4502952 | 61       | 68.6330857     |                |
| 69.4502952 | 61       | 68.6586458     |                |
| 69.6419618 | 61       | 68.694035      |                |
| 69.3169618 | 63       | 68.7297448     |                |
| 68.6669618 | 63       | 68.7569075     |                |
| 68.2086285 | 63       | 68.782895      |                |
| 69.7106527 | 63       | 68.8048226     |                |
| 69.7106527 | 63       | 68.8191648     |                |
| 69.7106527 | 63       | 68.8082706     |                |
| 69.6106527 | 63       | 68.8028478     |                |
| 69.4106527 | 63       | 68.7889849     |                |
| 69.2106527 | 63       | 68.7709553     |                |
| 68.8106527 | 63       | 68.7363399     |                |
| 68.8106527 | 63       | 68.7055707     |                |
| 68.7106527 | 63       | 68.6786476     |                |
| 68.2106527 | 63       | 68.6619809     |                |
| 68.5106527 | 63       | 68.6568527     |                |
| 68.6106527 | 63       | 68.6754662     |                |
| 69.1106527 | 63       | 68.6626456     |                |
| 69.4106527 | 63       | 68.6575174     |                |
| 69.4106527 | 63       | 68.6690559     |                |
| 70.1106527 | 63       | 68.6895687     |                |
| 70.1636822 | 63       | 68.7190559     |                |
| 70.3641494 | 63       | 68.7575174     |                |
| 69.8586285 | 63       | 68.7921328     |                |
| 70.0169618 | 63       | 68.8267482     |                |
| 69.6586285 | 63       | 68.8600815     |                |
| 69.5502952 | 63       | 68.8908508     |                |
| 70.2002952 | 63       | 68.9280303     |                |
| 70.1419618 | 63       | 68.9652097     |                |
| 70.0836285 | 63       | 69.0049533     |                |
| 70.0836285 | 63       | 69.0331585     |                |
| 70.4086285 | 63       | 69.0780303     |                |
| 70.2106527 | 63       | 69.1190559     |                |
| 70.0106527 | 63       | 69.1600815     |                |
| 70.0106527 | 63       | 69.1908508     |                |
| 70.2106527 | 63       | 69.2100815     |                |
| 69.5106527 | 63       | 69.220338      |                |
| 69.9106527 | 63       | 69.2468188     |                |
| 70.1106527 | 63       | 69.244245      |                |
| 70.3106527 | 63       | 69.2309162     |                |
| 70.3106527 | 63       | 69.2098952     |                |
| 69.8106527 | 63       | 69.1851348     |                |

|            |    |            |
|------------|----|------------|
| 69.6106527 | 63 | 69.1568488 |
| 69.5106527 | 63 | 69.1356141 |
| 69.1106527 | 63 | 69.1279477 |
| 68.7106527 | 63 | 69.1010246 |
| 68.1106527 | 63 | 69.0766657 |
| 67.9106527 | 63 | 69.0548708 |
| 67.9106527 | 63 | 69.0382041 |
| 67.8106527 | 63 | 69.0133941 |
| 67.4106527 | 63 | 68.994567  |
| 67.2106527 | 63 | 68.9808681 |
| 66.9106527 | 63 | 68.9741137 |
| 66.6106527 | 63 | 68.9723806 |
| 66.7106527 | 63 | 68.9818655 |
| 66.5106527 | 63 | 68.990282  |
| 66.8106527 | 63 | 69.002972  |
| 67.3106527 | 63 | 69.0120295 |
| 67.8106527 | 63 | 69.0297409 |
| 68.0106527 | 63 | 69.0557856 |
| 68.1106527 | 63 | 69.091683  |
| 67.7106527 | 63 | 69.1333109 |
| 67.8106527 | 63 | 69.1736506 |
| 68.2106527 | 63 | 69.2114971 |
| 68.6106527 | 63 | 69.2396213 |
| 69.5106527 | 63 | 69.2672114 |
| 69.5106527 | 63 | 69.2910621 |
| 70.4106527 | 63 | 69.3014513 |
| 70.4106527 | 63 | 69.3087422 |
| 71.3106527 | 63 | 69.3219092 |
| 71.6106527 | 63 | 69.3376403 |
| 71.8106527 | 63 | 69.3479227 |
| 71.5106527 | 63 | 69.3607432 |
| 71.4106527 | 63 | 69.3697175 |
| 70.7106527 | 63 | 69.3681053 |
| 70.7324646 | 63 | 69.3628605 |
| 68.9245416 | 63 | 69.3707568 |
| 68.4106527 | 63 | 69.3848593 |
| 67.8106527 | 63 | 69.3989619 |
| 67.7106527 | 63 | 69.4028081 |
| 67.1106527 | 63 | 69.400244  |
| 67.0106527 | 63 | 69.3938337 |
| 67.6106527 | 63 | 69.3899875 |
| 67.6106527 | 63 | 69.3822952 |
| 67.8106527 | 63 | 69.3784491 |
| 68.0106527 | 63 | 69.3784491 |
| 68.3106527 | 63 | 69.3835773 |

|            |    |            |
|------------|----|------------|
| 67.4754728 | 63 | 69.3861414 |
| 67.7421395 | 63 | 69.3835773 |
| 67.7421395 | 63 | 69.3810132 |
| 68.2838061 | 63 | 69.3733209 |
| 68.5754728 | 63 | 69.3684043 |
| 68.9504728 | 63 | 69.3543017 |
| 69.1671395 | 63 | 69.3453274 |
| 69.6004728 | 63 | 69.335071  |
| 69.8171395 | 63 | 69.336353  |
| 70.7921395 | 63 | 69.3389171 |
| 71.4421395 | 63 | 69.3376351 |
| 72.9106527 | 63 | 69.3312248 |
| 73.4106527 | 63 | 69.3260966 |
| 73.5106527 | 63 | 69.3312248 |
| 72.8106527 | 63 | 69.3401992 |
| 72.2106527 | 63 | 69.3389171 |
| 71.8106527 | 63 | 69.3325069 |
| 71.4106527 | 63 | 69.335071  |
| 71.0106527 | 63 | 69.3286607 |
| 70.7106527 | 63 | 69.3248146 |
| 71.1106527 | 63 | 69.311994  |
| 71.3106527 | 63 | 69.2966094 |
| 71.2106527 | 63 | 69.2684043 |
| 71.2106527 | 63 | 69.236353  |
| 70.7106527 | 63 | 69.2004556 |
| 69.8848952 | 63 | 69.1684043 |
| 69.8015618 | 63 | 69.1337889 |
| 70.1265618 | 63 | 69.0991735 |
| 71.0106527 | 63 | 69.0668426 |
| 71.2106527 | 63 | 69.0615363 |
| 70.6106527 | 63 | 69.0615363 |
| 70.1106527 | 63 | 69.0679466 |
| 69.3106527 | 63 | 69.0756389 |
| 69.3106527 | 63 | 69.0910235 |
| 68.9106527 | 63 | 69.1115363 |
| 68.8106527 | 63 | 69.1346133 |
| 68.7106527 | 63 | 69.1628184 |
| 68.5106527 | 63 | 69.1871774 |
| 68.1106527 | 63 | 69.2102543 |
| 67.7106527 | 63 | 69.228203  |
| 67.6106527 | 63 | 69.251731  |
| 66.8106527 | 63 | 69.2679939 |
| 66.8271593 | 63 | 69.285539  |
| 65.8106527 | 63 | 69.2961396 |
| 65.9106527 | 63 | 69.306847  |



|            |    |            |
|------------|----|------------|
| 65.9106527 | 63 | 69.3089006 |
| 66.6106527 | 63 | 69.3068944 |
| 67.0106527 | 63 | 69.2916403 |
| 67.2106527 | 63 | 69.2736084 |
| 67.3106527 | 63 | 69.2507688 |
| 67.6106527 | 63 | 69.2234421 |
| 68.5106527 | 63 | 69.1849805 |
| 68.4106527 | 63 | 69.1413908 |
| 67.7106527 | 63 | 69.0990831 |
| 67.7106527 | 63 | 69.0708779 |
| 68.8106527 | 63 | 69.0529292 |
| 69.0106527 | 63 | 69.046519  |
| 69.2106527 | 63 | 69.0426728 |
| 69.4106527 | 63 | 69.0439549 |
| 69.2106527 | 63 | 69.0394781 |
| 69.1106527 | 63 | 69.0292217 |
| 69.1106527 | 63 | 69.0151192 |
| 69.0106527 | 63 | 68.9984525 |
| 69.0106527 | 63 | 68.9881961 |
| 68.7106527 | 63 | 68.9817858 |
| 68.0106527 | 63 | 68.979552  |
| 68.2106527 | 63 | 68.9745403 |
| 68.5106527 | 63 | 68.9627979 |
| 68.4106527 | 63 | 68.941003  |
| 68.3106527 | 63 | 68.9140799 |
| 68.3106527 | 63 | 68.8922851 |
| 68.3106527 | 63 | 68.8743363 |
| 68.6106527 | 63 | 68.8704902 |
| 69.4106527 | 63 | 68.8692081 |
| 69.8106527 | 63 | 68.8794645 |
| 69.7106527 | 63 | 68.8935671 |
| 69.8106527 | 63 | 68.9127979 |
| 69.7106527 | 63 | 68.9422851 |
| 69.3106527 | 63 | 68.9807466 |
| 69.0106527 | 63 | 69.0291173 |
| 69.1106527 | 63 | 69.0787701 |
| 69.1106527 | 63 | 69.1375138 |
| 69.4106527 | 63 | 69.1890528 |
| 69.1106527 | 63 | 69.2524585 |
| 69.0106527 | 63 | 69.3157476 |
| 68.4106527 | 63 | 69.3871953 |
| 68.4106527 | 63 | 69.4450066 |
| 69.0106527 | 63 | 69.4965241 |
| 69.3106527 | 63 | 69.5501396 |
| 69.9106527 | 63 | 69.600142  |

|            |    |            |
|------------|----|------------|
| 70.0106527 | 63 | 69.6404708 |
| 70.2106527 | 63 | 69.6564406 |
| 70.6106527 | 63 | 69.6713614 |
| 70.8106527 | 63 | 69.6964221 |
| 71.3106527 | 63 | 69.7214828 |
| 71.1106527 | 63 | 69.7312754 |
| 71.1106527 | 63 | 69.733842  |
| 70.3614677 | 63 | 69.7338444 |
| 70.3106527 | 63 | 69.7347792 |
| 70.2106527 | 63 | 69.7417746 |
| 69.9106527 | 63 | 69.7500521 |
| 70.4106527 | 63 | 69.7606606 |
| 70.2106527 | 63 | 69.7772131 |
| 69.7106527 | 63 | 69.7902692 |
| 69.4106527 | 63 | 69.8106679 |
| 69.2106527 | 63 | 69.8353789 |
| 69.3106527 | 63 | 69.8482019 |
| 69.1106527 | 63 | 69.8560131 |
| 68.9106527 | 63 | 69.8604445 |
| 68.7106527 | 63 | 69.8649923 |
| 69.0106527 | 63 | 69.8637127 |
| 69.2106527 | 63 | 69.8612676 |
| 69.7106527 | 63 | 69.8501029 |
| 69.9106527 | 63 | 69.8417137 |
| 70.2106527 | 63 | 69.8316928 |
| 70.8106527 | 63 | 69.820623  |
| 71.1106527 | 63 | 69.8036091 |
| 71.4835689 | 63 | 69.7732714 |
| 71.4835689 | 63 | 69.7430413 |
| 71.3926598 | 63 | 69.7292908 |
| 70.8472053 | 63 | 69.7119272 |
| 70.7562962 | 63 | 69.6945637 |
| 70.8472053 | 63 | 69.6745195 |
| 71.4835689 | 63 | 69.661818  |
| 71.1199326 | 63 | 69.6527295 |
| 71.0290235 | 63 | 69.6536643 |
| 71.3926598 | 63 | 69.6522681 |
| 71.2108417 | 63 | 69.6420141 |
| 70.7562962 | 63 | 69.6220865 |
| 69.7562962 | 63 | 69.59097   |
| 69.574478  | 63 | 69.564399  |
| 69.6653871 | 63 | 69.5352639 |
| 69.6653871 | 63 | 69.5068281 |
| 69.574478  | 63 | 69.4781592 |
| 69.2108417 | 63 | 69.4442455 |

|            |    |            |
|------------|----|------------|
| 69.2108417 | 63 | 69.4140615 |
| 69.4835689 | 63 | 69.3885394 |
| 69.7562962 | 63 | 69.3702913 |
| 69.7562962 | 63 | 69.3526947 |
| 69.9381144 | 63 | 69.3352146 |
| 70.3017507 | 63 | 69.3344011 |
| 70.0290235 | 63 | 69.3271774 |
| 70.3017507 | 63 | 69.3190214 |
| 69.9381144 | 63 | 69.313779  |
| 69.2108417 | 63 | 69.3077208 |
| 69.1199326 | 63 | 69.3018958 |
| 68.7562962 | 63 | 69.2936231 |
| 68.6653871 | 63 | 69.2879146 |
| 68.2108417 | 63 | 69.2987562 |
| 68.1199326 | 63 | 69.3133274 |
| 67.7398091 | 63 | 69.3298799 |
| 68.7562962 | 63 | 69.3392063 |
| 69.0290235 | 63 | 69.34795   |
| 68.8472053 | 63 | 69.3506331 |
| 68.4835689 | 63 | 69.347139  |
| 67.3443114 | 63 | 69.3359526 |
| 66.9527031 | 63 | 69.3209201 |
| 67.9381144 | 63 | 69.2999411 |
| 67.7562962 | 63 | 69.2731345 |
| 67.7562962 | 63 | 69.25099   |
| 67.8472053 | 63 | 69.237004  |
| 68.1199326 | 63 | 69.2241835 |
| 68.3017507 | 63 | 69.213694  |
| 68.4835689 | 63 | 69.1950459 |
| 68.3017507 | 63 | 69.1857219 |
| 68.2108417 | 63 | 69.1810599 |
| 67.7562962 | 63 | 69.1714355 |
| 67.4835689 | 63 | 69.1684006 |
| 67.9381144 | 63 | 69.1695661 |
| 67.9381144 | 63 | 69.1858831 |
| 68.3926598 | 63 | 69.2033656 |
| 68.574478  | 63 | 69.2161861 |
| 68.6653871 | 63 | 69.2290066 |
| 68.7562962 | 63 | 69.2418271 |
| 69.1199326 | 63 | 69.2511511 |
| 68.9381144 | 63 | 69.2453236 |
| 68.9381144 | 63 | 69.2290066 |
| 68.8472053 | 63 | 69.2068621 |
| 69.8472053 | 63 | 69.1823866 |
| 69.8472053 | 63 | 69.1555801 |

|            |    |            |
|------------|----|------------|
| 69.574478  | 63 | 69.127608  |
| 69.3017507 | 63 | 69.1008015 |
| 68.9381144 | 63 | 69.0681675 |
| 68.7562962 | 63 | 69.0448574 |
| 68.6653871 | 63 | 69.0343679 |
| 68.6653871 | 63 | 69.0273749 |
| 69.7562962 | 63 | 69.0285404 |
| 69.8472053 | 63 | 69.0308714 |
| 70.3017507 | 63 | 69.0343679 |
| 69.9381144 | 63 | 69.0460229 |
| 70.3926598 | 63 | 69.0637168 |
| 70.1199326 | 63 | 69.0730408 |
| 69.9381144 | 63 | 69.0707098 |
| 69.9381144 | 63 | 69.0602203 |
| 69.9381144 | 63 | 69.0508963 |
| 69.8472053 | 63 | 69.0468542 |
| 69.3926598 | 63 | 69.0478326 |
| 69.6653871 | 63 | 69.0350121 |
| 69.7562962 | 63 | 69.0256881 |
| 69.7562962 | 63 | 69.0256881 |
| 70.0290235 | 63 | 69.0280191 |
| 70.0290235 | 63 | 69.0338466 |
| 70.3926598 | 63 | 69.0373431 |
| 70.6653871 | 63 | 69.0361776 |
| 70.6419544 | 63 | 69.0338466 |
| 70.9741161 | 63 | 69.0315156 |
| 70.8472053 | 63 | 69.0350121 |
| 71.0290235 | 63 | 69.0466671 |
| 70.9381144 | 63 | 69.0594876 |
| 70.6653871 | 63 | 69.0781357 |
| 70.6653871 | 63 | 69.0897907 |
| 70.574478  | 63 | 69.0979492 |
| 69.9381144 | 63 | 69.1049422 |
| 68.7562962 | 63 | 69.1131007 |
| 68.2108417 | 63 | 69.1189282 |
| 68.0290235 | 63 | 69.1247557 |
| 67.8472053 | 63 | 69.1340797 |
| 67.8472053 | 63 | 69.1503967 |
| 68.1199326 | 63 | 69.1573897 |
| 67.9381144 | 63 | 69.1667138 |
| 67.7562962 | 63 | 69.1811835 |
| 68.1199326 | 63 | 69.2092144 |
| 68.3926598 | 63 | 69.2430139 |
| 68.574478  | 63 | 69.2814754 |
| 68.8472053 | 63 | 69.3187715 |

|            |    |            |
|------------|----|------------|
| 68.8472053 | 63 | 69.354902  |
| 68.4835689 | 63 | 69.368888  |
| 69.0290235 | 63 | 69.3677225 |
| 69.1199326 | 63 | 69.352571  |
| 69.4835689 | 63 | 69.336254  |
| 68.8472053 | 63 | 69.317606  |
| 68.0290235 | 63 | 69.3024545 |
| 67.7562962 | 63 | 69.2896339 |
| 67.0290235 | 63 | 69.2733169 |
| 67.0290235 | 63 | 69.2558344 |
| 66.9381144 | 63 | 69.2406829 |
| 67.0290235 | 63 | 69.2348554 |
| 67.7562962 | 63 | 69.2290279 |
| 68.0290235 | 63 | 69.2197039 |
| 68.574478  | 63 | 69.2080489 |
| 68.574478  | 63 | 69.1975593 |
| 68.3926598 | 63 | 69.1894008 |
| 68.1199326 | 63 | 69.1765803 |
| 68.0290235 | 63 | 69.1625943 |
| 68.0290235 | 63 | 69.1500742 |
| 68.3926598 | 63 | 69.1356266 |
| 68.9381144 | 63 | 69.1274681 |
| 69.3926598 | 63 | 69.1181441 |
| 69.3017507 | 63 | 69.1146476 |
| 69.2108417 | 63 | 69.1158131 |
| 69.2108417 | 63 | 69.1169786 |
| 69.3926598 | 63 | 69.1181441 |
| 69.574478  | 63 | 69.1228061 |
| 69.3926598 | 63 | 69.1426197 |
| 69.6653871 | 63 | 69.1682607 |
| 70.1199326 | 63 | 69.1962327 |
| 70.3926598 | 63 | 69.2207082 |
| 70.574478  | 63 | 69.2242375 |
| 70.7031203 | 63 | 69.2152152 |
| 71.4881559 | 63 | 69.2175462 |
| 71.574478  | 63 | 69.2187117 |
| 71.7562962 | 63 | 69.2093877 |
| 71.574478  | 63 | 69.1919052 |
| 71.4835689 | 63 | 69.1685952 |
| 70.8472053 | 63 | 69.1417887 |
| 69.7562962 | 63 | 69.1208096 |
| 69.1199326 | 63 | 69.1161476 |
| 68.6653871 | 63 | 69.1033271 |
| 68.9381144 | 63 | 69.0870101 |
| 68.9381144 | 63 | 69.0928376 |

|            |    |            |
|------------|----|------------|
| 68.9381144 | 63 | 69.1243061 |
| 68.6653871 | 63 | 69.1697607 |
| 68.574478  | 63 | 69.2257047 |
| 68.6653871 | 63 | 69.2828143 |
| 68.9381144 | 63 | 69.34089   |
| 69.2108417 | 63 | 69.3924008 |
| 69.0290235 | 63 | 69.4611654 |
| 68.8472053 | 63 | 69.5264334 |
| 69.2108417 | 63 | 69.6056875 |
| 69.3926598 | 63 | 69.6826106 |
| 69.3926598 | 63 | 69.7583682 |
| 69.574478  | 63 | 69.8411187 |
| 69.6653871 | 63 | 69.9250348 |
| 69.8472053 | 63 | 70.0031234 |
| 70.2108417 | 63 | 70.083543  |
| 70.3017507 | 63 | 70.1581351 |
| 70.6653871 | 63 | 70.2292306 |
| 70.7562962 | 63 | 70.2944987 |
| 70.7562962 | 63 | 70.3632633 |
| 70.6653871 | 63 | 70.4168763 |
| 70.3017507 | 63 | 70.4693239 |
| 70.3017507 | 63 | 70.5194404 |
| 70.2108417 | 63 | 70.564895  |
| 70.2108417 | 63 | 70.6056875 |
| 69.7562962 | 63 | 70.641818  |
| 68.1224886 | 63 | 70.6674591 |
| 67.4161949 | 63 | 70.6826106 |
| 68.1199326 | 63 | 70.6896036 |
| 67.8472053 | 63 | 70.7031058 |
| 67.3926598 | 63 | 70.7065435 |
| 67.0290235 | 63 | 70.712371  |
| 66.7562962 | 63 | 70.7135365 |
| 66.7562962 | 63 | 70.7228606 |
| 67.2108417 | 63 | 70.7380121 |
| 68.1199326 | 63 | 70.7671496 |
| 68.0290235 | 63 | 70.8184316 |
| 67.8472053 | 63 | 70.8802032 |
| 69.9381144 | 63 | 70.9466368 |
| 71.3017507 | 63 | 71.0119048 |
| 71.574478  | 63 | 71.0643524 |
| 72.1199326 | 63 | 71.1179654 |
| 71.4835689 | 63 | 71.170413  |
| 71.5589297 | 63 | 71.2181985 |
| 70.9559547 | 63 | 71.2566601 |
| 72.3926598 | 63 | 71.2799701 |

|            |    |            |
|------------|----|------------|
| 72.8472053 | 63 | 71.2974526 |
| 74.2108417 | 63 | 71.3137696 |
| 74.574478  | 63 | 71.3289212 |
| 74.4835689 | 63 | 71.3405762 |
| 74.8472053 | 63 | 71.3603897 |
| 74.6653871 | 63 | 71.3813687 |
| 74.1199326 | 63 | 71.4000167 |
| 74.3017507 | 63 | 71.4116717 |
| 74.2108417 | 63 | 71.4198302 |
| 74.4835689 | 63 | 71.4186647 |
| 74.4835689 | 63 | 71.4128372 |
| 74.6653871 | 63 | 71.4023477 |
| 73.3926598 | 63 | 71.3883617 |
| 73.3017507 | 63 | 71.3565499 |
| 73.3017507 | 63 | 71.3169408 |
| 73.1199326 | 63 | 71.2845835 |
| 72.574478  | 63 | 71.2562605 |
| 72.4835689 | 63 | 71.2142101 |
| 72.1199326 | 63 | 71.1735044 |
| 71.574478  | 63 | 71.1406883 |
| 71.1199326 | 63 | 71.1493492 |
| 71.7562962 | 63 | 71.1701134 |
| 71.7562962 | 63 | 71.1822139 |
| 72.0290235 | 63 | 71.2031902 |
| 71.8472053 | 63 | 71.2377861 |
| 72.3017507 | 63 | 71.2745337 |
| 72.6653871 | 63 | 71.3110124 |
| 73.1199326 | 63 | 71.347491  |
| 73.7562962 | 63 | 71.3793973 |
| 73.9381144 | 63 | 71.3983935 |
| 73.8472053 | 63 | 71.4173    |
| 74.0290235 | 63 | 71.4399719 |
| 73.0290235 | 63 | 71.4492959 |
| 73.1199326 | 63 | 71.4318134 |
| 72.7562962 | 63 | 71.4061724 |
| 72.3017507 | 63 | 71.3770349 |
| 71.6653871 | 63 | 71.3478973 |
| 70.7562962 | 63 | 71.3201246 |
| 70.574478  | 63 | 71.3082409 |
| 70.3017507 | 63 | 71.2791034 |
| 70.0290235 | 63 | 71.2476348 |
| 70.1199326 | 63 | 71.2056768 |
| 70.9381144 | 63 | 71.1602223 |
| 71.0290235 | 63 | 71.1159332 |
| 71.0290235 | 63 | 71.0681477 |

|            |    |            |
|------------|----|------------|
| 70.574478  | 63 | 71.0191966 |
| 70.4835689 | 63 | 70.9749076 |
| 70.1199326 | 63 | 70.927122  |
| 69.8472053 | 63 | 70.8746745 |
| 69.8472053 | 63 | 70.8117374 |
| 69.6653871 | 63 | 70.7441383 |
| 68.2749752 | 63 | 70.6707118 |
| 67.5758763 | 63 | 70.6066092 |
| 67.7778779 | 63 | 70.5413411 |
| 68.0925632 | 63 | 70.4760731 |
| 66.9309057 | 63 | 70.413136  |
| 67.0358008 | 63 | 70.3560265 |
| 67.1966399 | 63 | 70.2989169 |
| 68.7980385 | 63 | 70.2394763 |
| 69.0358008 | 63 | 70.1823668 |
| 69.0637728 | 63 | 70.1310847 |
| 69.4833532 | 63 | 70.0739752 |
| 70.0911422 | 63 | 70.0168656 |
| 69.895338  | 63 | 69.9620871 |
| 69.6016317 | 63 | 69.910805  |
| 69.6016317 | 63 | 69.8560265 |
| 69.6995338 | 63 | 69.8059099 |
| 69.6016317 | 63 | 69.7510593 |
| 69.5037296 | 63 | 69.6977167 |
| 69.6156177 | 63 | 69.6457155 |
| 70.6653871 | 63 | 69.6107505 |
| 69.9381144 | 63 | 69.5652959 |
| 69.574478  | 63 | 69.5326619 |
| 69.8472053 | 63 | 69.4953659 |
| 69.2108417 | 63 | 69.4557388 |
| 69.3926598 | 63 | 69.4219393 |
| 70.0290235 | 63 | 69.3962983 |
| 70.1199326 | 63 | 69.3893053 |
| 70.3926598 | 63 | 69.3986293 |
| 70.9381144 | 63 | 69.4044568 |
| 71.0290235 | 63 | 69.4126153 |
| 71.0290235 | 63 | 69.4196083 |
| 71.1199326 | 63 | 69.4184428 |
| 70.8472053 | 63 | 69.4114498 |
| 70.6653871 | 63 | 69.3986293 |
| 70.574478  | 63 | 69.3869743 |
| 70.1199326 | 63 | 69.3741537 |
| 69.574478  | 63 | 69.3624987 |
| 69.2108417 | 63 | 69.3508437 |
| 68.9381144 | 63 | 69.3403542 |



|            |    |            |
|------------|----|------------|
| 68.3926598 | 63 | 69.3333612 |
| 68.2108417 | 63 | 69.341863  |
| 68.2108417 | 63 | 69.3604931 |
| 68.2108417 | 63 | 69.3788644 |
| 68.1199326 | 63 | 69.3908703 |
| 68.0290235 | 63 | 69.4189348 |
| 67.4835689 | 63 | 69.4491509 |
| 67.1199326 | 63 | 69.4831325 |
| 67.1199326 | 63 | 69.5012454 |
| 67.3017507 | 63 | 69.509317  |
| 67.3017507 | 63 | 69.5135335 |
| 67.7562962 | 63 | 69.5205293 |
| 67.8472053 | 63 | 69.5252587 |
| 68.0290235 | 63 | 69.5365329 |
| 68.7562962 | 63 | 69.5588346 |
| 68.8415818 | 63 | 69.599279  |
| 69.5955739 | 63 | 69.6431302 |
| 69.882025  | 63 | 69.6882367 |
| 71.1199326 | 63 | 69.7369292 |
| 70.4835689 | 63 | 69.7702013 |
| 70.4835689 | 63 | 69.7853529 |
| 70.2108417 | 63 | 69.8063319 |
| 69.6653871 | 63 | 69.8296419 |
| 69.6653871 | 63 | 69.8436279 |
| 69.6653871 | 63 | 69.8634414 |
| 70.2108417 | 63 | 69.8774275 |
| 71.3017507 | 63 | 69.8718915 |
| 70.7562962 | 63 | 69.8677003 |
| 70.6653871 | 63 | 69.8565161 |
| 70.6653871 | 63 | 69.8395941 |
| 70.8472053 | 63 | 69.8215066 |
| 70.4835689 | 63 | 69.7966894 |
| 70.0290235 | 63 | 69.7747897 |
| 69.6653871 | 63 | 69.757509  |
| 69.4835689 | 63 | 69.769164  |
| 69.2108417 | 63 | 69.7854811 |
| 68.9381144 | 63 | 69.8099566 |
| 69.0290235 | 63 | 69.8239426 |
| 69.1199326 | 63 | 69.8218998 |
| 68.9381144 | 63 | 69.8238915 |
| 69.0290235 | 63 | 69.8331451 |
| 69.2108417 | 63 | 69.8599517 |
| 69.0290235 | 63 | 69.8914202 |
| 69.1199326 | 63 | 69.9170612 |
| 69.3926598 | 63 | 69.9485297 |

|            |    |            |
|------------|----|------------|
| 69.8472053 | 63 | 69.9811638 |
| 70.2108417 | 63 | 70.0219563 |
| 69.6653871 | 63 | 70.0627489 |
| 69.3926598 | 63 | 70.1035414 |
| 70.0290235 | 63 | 70.1350099 |
| 70.4600404 | 63 | 70.167644  |
| 70.7747257 | 63 | 70.1874575 |
| 71.3411592 | 63 | 70.200278  |
| 72.7562962 | 63 | 70.214264  |
| 73.1199326 | 63 | 70.2200915 |
| 73.1199326 | 63 | 70.2224946 |
| 73.3017507 | 63 | 70.2163967 |
| 72.2108417 | 63 | 70.2077917 |
| 71.8472053 | 63 | 70.1821507 |
| 71.574478  | 63 | 70.1716612 |
| 71.3926598 | 63 | 70.1984677 |
| 70.9381144 | 63 | 70.2334328 |
| 70.7562962 | 63 | 70.2718943 |
| 70.4835689 | 63 | 70.3045283 |
| 69.5972172 | 63 | 70.3359969 |
| 69.7930214 | 63 | 70.3569759 |
| 69.5202941 | 63 | 70.3639689 |
| 69.6181962 | 63 | 70.3779549 |
| 69.6181962 | 63 | 70.3931064 |
| 69.0932808 | 63 | 70.4129199 |
| 69.4117569 | 63 | 70.429237  |
| 69.4993151 | 63 | 70.452547  |
| 71.574478  | 63 | 70.4793535 |
| 71.8472053 | 63 | 70.5096565 |
| 72.0290235 | 63 | 70.5399596 |
| 70.6653871 | 63 | 70.5725936 |
| 69.0515062 | 63 | 70.6052276 |
| 69.0934642 | 63 | 70.6355307 |
| 69.1144433 | 63 | 70.6611717 |
| 70.3017507 | 63 | 70.6856472 |
| 70.6653871 | 63 | 70.7124537 |
| 70.2108417 | 63 | 70.7369293 |
| 70.574478  | 63 | 70.7625703 |
| 70.574478  | 63 | 70.7952043 |
| 70.6653871 | 63 | 70.8290039 |
| 70.3017507 | 63 | 70.8580482 |
| 70.3017507 | 63 | 70.8801927 |
| 69.7562962 | 63 | 70.9081648 |
| 69.8472053 | 63 | 70.9384678 |
| 69.3017507 | 63 | 70.9582813 |

|          |            |    |            |
|----------|------------|----|------------|
|          | 68.8472053 | 63 | 70.970238  |
|          | 69.1199326 | 63 | 70.9746637 |
|          | 69.2108417 | 63 | 70.970662  |
|          | 69.0290235 | 63 | 70.9485175 |
|          | 69.1199326 | 63 | 70.9252074 |
|          | 69.2108417 | 63 | 70.9018974 |
|          | 69.1199326 | 63 | 70.8797529 |
|          | 69.6653871 | 63 | 70.8692634 |
|          | 72.574478  | 63 | 70.8622704 |
|          | 72.9381144 | 63 | 70.8529464 |
|          | 72.6653871 | 63 | 70.8278422 |
|          | 72.2108417 | 63 | 70.8060553 |
|          | 72.1199326 | 63 | 70.7944003 |
|          | 71.8472053 | 63 | 70.7780833 |
|          | 71.8472053 | 63 | 70.7719643 |
|          | 71.8472053 | 63 | 70.7691624 |
|          | 71.8472053 | 63 | 70.7803466 |
|          | 72.2108417 | 63 | 70.7937721 |
|          | 72.1199326 | 63 | 70.8071976 |
|          | 72.3017507 | 63 | 70.8285184 |
|          | 72.1199326 | 63 | 70.85508   |
|          | 72.0290235 | 63 | 70.8758572 |
|          | 71.8472053 | 63 | 70.8723607 |
|          | 71.7562962 | 63 | 70.8642022 |
|          | 71.4835689 | 63 | 70.8537127 |
|          | 71.3926598 | 63 | 70.8607057 |
|          | 71.1199326 | 63 | 70.8883895 |
|          | 70.8472053 | 63 | 70.9167008 |
|          | 71.1199326 | 63 | 70.9459087 |
|          | 71.1199326 | 63 | 70.9598947 |
|          | 71.0290235 | 63 | 70.9645568 |
|          | 71.6653871 | 63 | 70.9820393 |
|          | 72.0290235 | 63 | 70.9878668 |
|          | 72.1126658 | 63 | 70.9843703 |
|          | 71.9381144 | 63 | 70.9750463 |
| Before1  | 71.8472053 | 63 | 70.9727153 |
| Before2  | 71.7562962 | 63 | 70.9645568 |
| Before3  | 71.574478  | 63 | 70.9575637 |
| Before4  | 71.3926598 | 63 | 70.9529017 |
| Before5  | 71.1199326 | 63 | 70.9459087 |
| Before6  | 71.0290235 | 63 | 70.9354192 |
| Before7  | 71.0290235 | 63 | 70.9167712 |
| Before8  | 71.3017507 | 63 | 70.8969577 |
| Before9  | 71.3017507 | 63 | 70.8794752 |
| Before10 | 71.574478  | 63 | 70.8643237 |

|          |            |    |            |
|----------|------------|----|------------|
| Before11 | 71.3926598 | 63 | 70.8515031 |
| Before12 | 71.3017507 | 63 | 70.8386826 |
| Before13 | 70.8472053 | 63 | 70.8165381 |
| Before14 | 69.4345387 | 63 | 70.7524355 |
| Before15 | 69.2387345 | 63 | 70.6819844 |
| Before16 | 69.8472053 | 63 | 70.5993461 |
| Before17 | 69.2108417 | 63 | 70.529416  |
| Before18 | 69.1199326 | 63 | 70.4571549 |
| Before19 | 69.574478  | 63 | 70.3942178 |
| Before20 | 70.3926598 | 63 | 70.3371083 |
| Before21 | 70.6653871 | 63 | 70.2846607 |
| Before22 | 70.6653871 | 63 | 70.2287167 |
| Before23 | 70.7562962 | 63 | 70.1657796 |
| Before24 | 71.4835689 | 63 | 70.1028426 |
| Before25 | 71.1199326 | 63 | 70.041071  |
| Before26 | 71.3017507 | 63 | 69.9839614 |
| Before27 | 71.2108417 | 63 | 69.9256864 |
| Before28 | 71.2108417 | 63 | 69.8732388 |
| Before29 | 71.2108417 | 63 | 69.8172948 |
| Before30 | 71.2108417 | 63 | 69.7648472 |
| Before31 | 71.3017507 | 63 | 69.7123997 |
| Before32 | 71.3926598 | 63 | 69.6599521 |
| Before33 | 71.3926598 | 63 | 69.6133321 |
| Before34 | 71.0290235 | 63 | 69.5748705 |
| Before35 | 71.574478  | 63 | 69.5352435 |
| Before36 | 71.0290235 | 63 | 69.4979475 |
| Before37 | 70.3017507 | 63 | 69.4548239 |
| Before38 | 69.9381144 | 63 | 69.4012109 |
| Before39 | 70.1199326 | 63 | 69.354684  |
| Before40 | 69.6653871 | 63 | 69.3115604 |
| Before41 | 69.2108417 | 63 | 69.2637749 |
| Before42 | 69.4835689 | 63 | 69.2136583 |
| Before43 | 68.7562962 | 63 | 69.1670383 |
| Before44 | 68.0290235 | 63 | 69.1239147 |
| Before45 | 67.6653871 | 63 | 69.0842877 |
| Before46 | 67.6653871 | 63 | 69.0469917 |
| Before47 | 67.6653871 | 63 | 69.0108611 |
| Before48 | 67.9381144 | 63 | 68.9758961 |
| Before49 | 68.2108417 | 63 | 68.9514206 |
| Before50 | 68.1199326 | 63 | 68.922283  |
| Before51 | 67.9381144 | 63 | 68.9001385 |
| Before52 | 67.574478  | 63 | 68.8768285 |
| Before53 | 67.4429236 | 63 | 68.857015  |
| Before54 | 66.2195979 | 63 | 68.8518161 |
| Before55 | 66.7562962 | 63 | 68.854955  |

|           |            |    |            |
|-----------|------------|----|------------|
| Before56  | 66.4835689 | 63 | 68.8491275 |
| Before57  | 66.9381144 | 63 | 68.8537895 |
| Before58  | 67.3926598 | 63 | 68.864279  |
| Before59  | 67.7562962 | 63 | 68.86661   |
| Before60  | 67.4835689 | 63 | 68.857286  |
| Before61  | 67.3017507 | 63 | 68.8433    |
| Before62  | 67.2108417 | 63 | 68.8351414 |
| Before63  | 67.4835689 | 63 | 68.8328104 |
| Before64  | 67.6653871 | 63 | 68.8211554 |
| Before65  | 67.4835689 | 63 | 68.7879825 |
| Before66  | 67.7562962 | 63 | 68.7623414 |
| Before67  | 67.3926598 | 63 | 68.7448589 |
| Before68  | 67.3926598 | 63 | 68.7168869 |
| Before69  | 67.3017507 | 63 | 68.6915193 |
| Before70  | 67.0290235 | 63 | 68.6462348 |
| Before71  | 67.2108417 | 63 | 68.6066077 |
| Before72  | 68.1199326 | 63 | 68.5611532 |
| Before73  | 68.0290235 | 63 | 68.5156986 |
| Before74  | 68.1199326 | 63 | 68.4772371 |
| Before75  | 68.3017507 | 63 | 68.4364446 |
| Before76  | 67.8472053 | 63 | 68.4084725 |
| Before77  | 68.4835689 | 63 | 68.393321  |
| Before78  | 68.574478  | 63 | 68.3898245 |
| Before79  | 68.1199326 | 63 | 68.381666  |
| Before80  | 67.8472053 | 63 | 68.3805005 |
| Before81  | 67.9381144 | 69 | 68.379335  |
| Before82  | 68.0290235 | 69 | 68.3735075 |
| Before83  | 68.0290235 | 69 | 68.372342  |
| Before84  | 68.1199326 | 69 | 68.3781695 |
| Before85  | 68.2108417 | 69 | 68.383997  |
| Before86  | 68.574478  | 69 | 68.383997  |
| Before87  | 69.3926598 | 69 | 68.383997  |
| Before88  | 69.3017507 | 69 | 68.379335  |
| Before89  | 69.6653871 | 69 | 68.372342  |
| Before90  | 69.4835689 | 69 | 68.358356  |
| Before91  | 69.3017507 | 69 | 68.34437   |
| Before92  | 69.0290235 | 69 | 68.3303839 |
| Before93  | 69.4835689 | 69 | 68.312257  |
| Before94  | 69.3926598 | 69 | 68.3074828 |
| Before95  | 69.574478  | 69 | 68.2969932 |
| Before96  | 69.9381144 | 69 | 68.2806762 |
| Before97  | 69.7562962 | 69 | 68.2585317 |
| Before98  | 69.6653871 | 69 | 68.2305597 |
| Before99  | 69.574478  | 69 | 68.2212357 |
| Before100 | 70.0290235 | 69 | 68.2212357 |

|           |            |    |            |
|-----------|------------|----|------------|
| Before101 | 70.574478  | 69 | 68.2282287 |
| Before102 | 70.574478  | 69 | 68.2387182 |
| Before103 | 68.5324408 | 69 | 68.2457112 |
| Before104 | 69.3017507 | 69 | 68.2527042 |
| Before105 | 69.8472053 | 69 | 68.2608627 |
| Before106 | 69.0290235 | 69 | 68.2655247 |
| Before107 | 69.2321727 | 69 | 68.2638783 |
| Before108 | 67.6786446 | 69 | 68.2755333 |
| Before109 | 68.2108417 | 69 | 68.2883538 |
| Before110 | 67.8472053 | 69 | 68.3093328 |
| Before111 | 67.8472053 | 69 | 68.3268153 |
| Before112 | 68.0290235 | 69 | 68.3291463 |
| Before113 | 68.3926598 | 69 | 68.3349738 |
| Before114 | 68.8472053 | 69 | 68.3373048 |
| Before115 | 69.1199326 | 69 | 68.3408013 |
| Before116 | 69.6653871 | 69 | 68.3524563 |
| Before117 | 69.4835689 | 69 | 68.3594494 |
| Before118 | 69.574478  | 69 | 68.3746009 |
| Before119 | 69.1199326 | 69 | 68.3979109 |
| Before120 | 69.0290235 | 69 | 68.4235519 |
| Before121 | 68.6653871 | 69 | 68.4526894 |
| Before122 | 68.4835689 | 69 | 68.4707427 |
| Before123 | 68.1199326 | 69 | 68.4885804 |
| Before124 | 67.6653871 | 69 | 68.4970771 |
| Before125 | 67.6653871 | 69 | 68.5012339 |
| Before126 | 67.574478  | 69 | 68.5019839 |
| Before127 | 67.6653871 | 69 | 68.4934996 |
| Before128 | 67.0290235 | 69 | 68.4861807 |
| Before129 | 66.8472053 | 69 | 68.4931737 |
| Before130 | 66.4835689 | 69 | 68.5071597 |
| Before131 | 66.0290235 | 63 | 68.5164837 |
| Before132 | 65.8472053 | 63 | 68.5281387 |
| Before133 | 65.9381144 | 63 | 68.5374628 |
| Before134 | 65.2108417 | 63 | 68.5491178 |
| Before135 | 65.2108417 | 63 | 68.5596073 |
| Before136 | 65.2108417 | 63 | 68.5631038 |
| Before137 | 67.0290235 | 63 | 68.5642693 |
| Before138 | 67.4835689 | 63 | 68.5689313 |
| Before139 | 67.8472053 | 63 | 68.5759243 |
| Before140 | 68.0290235 | 63 | 68.5829173 |
| Before141 | 68.0290235 | 63 | 68.5899103 |
| Before142 | 68.2108417 | 63 | 68.5969033 |
| Before143 | 68.1199326 | 63 | 68.6312418 |
| Before144 | 68.1199326 | 63 | 68.6522208 |
| Before145 | 67.2642362 | 63 | 68.6627103 |

|           |            |    |            |
|-----------|------------|----|------------|
| Before146 | 68.3017507 | 63 | 68.6766963 |
| Before147 | 68.3017507 | 63 | 68.6880779 |
| Before148 | 68.6653871 | 63 | 68.7182109 |
| Before149 | 68.574478  | 63 | 68.7380244 |
| Before150 | 68.3017507 | 63 | 68.7659965 |
| Before151 | 68.4835689 | 63 | 68.788141  |
| Before152 | 68.3017507 | 63 | 68.7986305 |
| Before153 | 68.574478  | 63 | 68.799796  |
| Before154 | 68.7562962 | 63 | 68.7846445 |
| Before155 | 69.0290235 | 63 | 68.769493  |
| Before156 | 69.7562962 | 63 | 68.7473485 |
| Before157 | 69.9381144 | 63 | 68.7298659 |
| Before158 | 69.8472053 | 63 | 68.7135489 |
| Before159 | 70.2108417 | 63 | 68.7077214 |
| Before160 | 69.4371739 | 63 | 68.6995629 |
| Before161 | 69.4203669 | 63 | 68.6925699 |
| Before162 | 68.7826723 | 63 | 68.6925699 |
| Before163 | 68.535076  | 63 | 68.6949009 |
| Before164 | 68.6329781 | 63 | 68.7007284 |
| Before165 | 68.7308802 | 63 | 68.6983974 |
| Before166 | 68.7308802 | 63 | 68.6914044 |
| Before167 | 70.2108417 | 63 | 68.6820804 |
| Before168 | 70.574478  | 63 | 68.6855769 |
| Before169 | 70.0290235 | 63 | 68.6949009 |
| Before170 | 69.9381144 | 63 | 68.7158799 |
| Before171 | 70.2108417 | 63 | 68.7426865 |
| Before172 | 70.3017507 | 63 | 68.776486  |
| Before173 | 70.3926598 | 63 | 68.816113  |
| Before174 | 70.2108417 | 63 | 68.8604021 |
| Before175 | 69.8472053 | 63 | 68.9081876 |
| Before176 | 70.0290235 | 63 | 68.9548077 |
| Before177 | 70.1199326 | 63 | 68.9769217 |
| Before178 | 70.574478  | 63 | 68.9921268 |
| Before179 | 71.1199326 | 63 | 68.9979543 |
| Before180 | 71.1199326 | 63 | 68.9991198 |
| Before181 | 71.2108417 | 63 | 68.9967888 |
| Before182 | 70.9381144 | 63 | 68.9897958 |
| Before183 | 70.6653871 | 63 | 68.9862993 |
| Before184 | 70.1199326 | 63 | 68.9874648 |
| Before185 | 70.1199326 | 63 | 69.0042628 |
| Before186 | 70.0290235 | 63 | 69.0054283 |
| Before187 | 69.7562962 | 63 | 69.0054283 |
| Before188 | 70.0290235 | 63 | 69.0077593 |
| Before189 | 69.574478  | 63 | 69.0170833 |
| Before190 | 68.8472053 | 63 | 69.0275728 |

|           |            |    |            |
|-----------|------------|----|------------|
| Before191 | 68.4835689 | 63 | 69.0229108 |
| Before192 | 67.6653871 | 63 | 69.0182488 |
| Before193 | 67.9381144 | 63 | 69.0077593 |
| Before194 | 67.9381144 | 63 | 68.9902767 |
| Before195 | 68.1199326 | 63 | 68.9739597 |
| Before196 | 68.3017507 | 63 | 68.9506497 |
| Before197 | 68.6653871 | 63 | 68.9250087 |
| Before198 | 68.3926598 | 63 | 68.9005332 |
| Before199 | 68.1199326 | 63 | 68.8609061 |
| Before200 | 68.4835689 | 63 | 68.8265359 |
| Before201 | 68.3017507 | 63 | 68.7947121 |
| Before202 | 68.1199326 | 63 | 68.773395  |
| Before203 | 67.4835689 | 63 | 68.7645761 |
| Before204 | 67.0290235 | 63 | 68.7603296 |
| Before205 | 66.9381144 | 63 | 68.7583244 |
| Before206 | 67.3017507 | 63 | 68.7633123 |
| Before207 | 67.574478  | 63 | 68.7481608 |
| Before208 | 68.1199326 | 63 | 68.7225198 |
| Before209 | 68.1199326 | 63 | 68.7003752 |
| Before210 | 68.4835689 | 63 | 68.6793962 |
| Before211 | 69.0290235 | 63 | 68.6525897 |
| Before212 | 68.6653871 | 63 | 68.6222867 |
| Before213 | 68.9381144 | 63 | 68.5908181 |
| Before214 | 68.8472053 | 63 | 68.5605151 |
| Before215 | 68.7539173 | 63 | 68.5372051 |
| Before216 | 68.6695671 | 63 | 68.516226  |
| Before217 | 68.3017507 | 63 | 68.4940815 |
| Before218 | 68.1199326 | 63 | 68.469606  |
| Before219 | 67.8472053 | 63 | 68.441634  |
| Before220 | 67.6653871 | 63 | 68.4194895 |
| Before221 | 67.8472053 | 63 | 68.3996759 |
| Before222 | 68.2108417 | 63 | 68.3845244 |
| Before223 | 68.574478  | 63 | 68.3717039 |
| Before224 | 68.3926598 | 63 | 68.3682074 |
| Before225 | 68.3017507 | 63 | 68.3682074 |
| Before226 | 68.8472053 | 63 | 68.3682074 |
| Before227 | 69.3017507 | 63 | 68.3763659 |
| Before228 | 69.1199326 | 63 | 68.3798624 |
| Before229 | 68.1199326 | 63 | 68.3915174 |
| Before230 | 67.9381144 | 63 | 68.418324  |
| Before231 | 67.7562962 | 63 | 68.4503867 |
| Before232 | 67.3926598 | 63 | 68.5042905 |
| Before233 | 67.7562962 | 63 | 68.556738  |
| Before234 | 67.9381144 | 63 | 68.6080201 |
| Before235 | 67.9381144 | 63 | 68.6569711 |



|           |            |    |            |
|-----------|------------|----|------------|
| Before236 | 67.9381144 | 63 | 68.7070877 |
| Before237 | 67.1199326 | 63 | 68.7490457 |
| Before238 | 66.7562962 | 63 | 68.7875073 |
| Before239 | 66.9381144 | 63 | 68.8294653 |
| Before240 | 67.1199326 | 63 | 68.8714233 |
| minute1   | 67.8472053 | 63 | 68.9192089 |
| minute2   | 68.3017507 | 63 | 68.9774839 |
| minute3   | 68.574478  | 63 | 69.052076  |
| minute4   | 69.1199326 | 63 | 69.1289991 |
| minute5   | 69.0290235 | 63 | 69.2164117 |
| minute6   | 68.574478  | 63 | 69.2991623 |
| minute7   | 68.3017507 | 63 | 69.3830784 |
| minute8   | 68.3017507 | 63 | 69.4600014 |
| minute9   | 68.1199326 | 63 | 69.5345935 |
| minute10  | 67.9381144 | 63 | 69.6033581 |
| minute11  | 67.9381144 | 63 | 69.6493731 |
| minute12  | 67.8472053 | 63 | 69.6902779 |
| minute13  | 68.0290235 | 63 | 69.7226655 |
| minute14  | 68.3926598 | 63 | 69.7572945 |
| minute15  | 68.3926598 | 63 | 69.789354  |
| minute16  | 68.6653871 | 63 | 69.8220467 |
| minute17  | 68.9381144 | 63 | 69.8581998 |
| minute18  | 69.3926598 | 63 | 69.8941736 |
| minute19  | 69.6653871 | 63 | 69.9390231 |
| minute20  | 69.7562962 | 63 | 69.9924794 |
| minute21  | 69.6653871 | 63 | 70.0554165 |
| minute22  | 69.8472053 | 63 | 70.12185   |
| minute23  | 70.1199326 | 63 | 70.1859526 |
| minute24  | 70.0290235 | 63 | 70.2535517 |
| minute25  | 70.3926598 | 63 | 70.3083302 |
| minute26  | 70.3017507 | 63 | 70.3467918 |
| minute27  | 70.4835689 | 63 | 70.3770948 |
| minute28  | 70.9381144 | 63 | 70.4073978 |
| minute29  | 70.9844607 | 63 | 70.4493559 |
| minute30  | 71.869884  | 63 | 70.4878174 |
| minute31  | 72.0290235 | 63 | 70.5227824 |
| minute32  | 71.9381144 | 63 | 70.5600785 |
| minute33  | 71.9381144 | 63 | 70.596209  |
| minute34  | 72.2108417 | 63 | 70.6346706 |
| minute35  | 71.9381144 | 63 | 70.6731321 |
| minute36  | 71.3926598 | 63 | 70.7115936 |
| minute37  | 71.3926598 | 63 | 70.7687032 |
| minute38  | 71.7562962 | 63 | 70.8304748 |
| minute39  | 72.0290235 | 63 | 70.8934118 |
| minute40  | 72.6653871 | 63 | 70.9633419 |

|          |            |    |            |
|----------|------------|----|------------|
| minute41 | 73.3017507 | 63 | 71.0169549 |
| minute42 | 73.0290235 | 63 | 71.056582  |
| minute43 | 73.7562962 | 63 | 71.0880505 |
| minute44 | 73.7562962 | 63 | 71.1066985 |
| minute45 | 74.1199326 | 63 | 71.1270821 |
| minute46 | 74.1199326 | 63 | 71.1444685 |
| minute47 | 73.9381144 | 63 | 71.1724405 |
| minute48 | 73.8472053 | 63 | 71.2015781 |
| minute49 | 72.6181962 | 63 | 71.2330466 |
| minute50 | 71.8559585 | 63 | 71.2761701 |
| minute51 | 71.4643501 | 63 | 71.3216247 |
| minute52 | 71.5482662 | 63 | 71.3635827 |
| minute53 | 71.2545599 | 63 | 71.4043753 |
| minute54 | 71.2195948 | 63 | 71.4393403 |
| minute55 | 71.1216927 | 63 | 71.4766363 |
| minute56 | 70.9258885 | 63 | 71.5139324 |
| minute57 | 71.3454689 | 63 | 71.5500629 |
| minute58 | 71.8349794 | 63 | 71.5850279 |
| minute59 | 72.7562962 | 63 | 71.615331  |
| minute60 | 73.3926598 | 63 | 71.6467995 |
| Activity | 73.574478  | 73 | 71.6817645 |
| Activity | 73.6653871 | 73 | 71.7178951 |
| Activity | 72.574478  | 73 | 71.7516946 |
| Activity | 71.8472053 | 73 | 71.7843286 |
| Activity | 71.6653871 | 73 | 71.8146317 |
| Activity | 71.4835689 | 73 | 71.8402727 |
| Activity | 71.3926598 | 73 | 71.8589207 |
| Activity | 70.9381144 | 73 | 71.8682447 |
| Activity | 70.4835689 | 73 | 71.875809  |
| Activity | 70.3017507 | 73 | 71.8708563 |
| Activity | 70.574478  | 73 | 71.8568703 |
| Activity | 70.9381144 | 73 | 71.8323948 |
| Activity | 70.9381144 | 73 | 71.8055882 |
| Activity | 70.9381144 | 73 | 71.7624647 |
| Activity | 71.574478  | 73 | 71.7344927 |
| Activity | 71.574478  | 73 | 71.7135136 |
| Activity | 71.8472053 | 73 | 71.6566712 |
| Activity | 72.574478  | 73 | 71.5856634 |
| Activity | 72.0290235 | 73 | 71.5079316 |
| Activity | 71.3926598 | 73 | 71.4220412 |
| Activity | 71.0290235 | 73 | 71.3405439 |
| Activity | 70.574478  | 73 | 71.2625432 |
| Activity | 70.6189452 | 73 | 71.1785356 |
| Activity | 69.9306138 | 73 | 71.0957831 |
| Activity | 70.4835689 | 73 | 71.0048722 |

|          |            |    |            |
|----------|------------|----|------------|
| Activity | 70.574478  | 73 | 70.9152164 |
| Activity | 70.574478  | 73 | 70.8182079 |
| Activity | 71.3017507 | 73 | 70.7207512 |
| Activity | 71.4835689 | 73 | 70.639051  |
| Activity | 71.1199326 | 73 | 70.5694541 |
| Activity | 71.2108417 | 73 | 70.4954642 |
| Activity | 71.1199326 | 73 | 70.4217432 |
| Activity | 71.3017507 | 73 | 70.3585117 |
| Activity | 71.574478  | 73 | 70.2977009 |
| Activity | 71.7562962 | 73 | 70.2421797 |
| Activity | 72.1199326 | 73 | 70.1891688 |
| Activity | 72.0290235 | 73 | 70.1227098 |
| Activity | 72.2108417 | 73 | 70.0445957 |
| Activity | 72.3926598 | 73 | 69.95467   |
| Activity | 72.6653871 | 73 | 69.8534147 |
| Activity | 72.7562962 | 73 | 69.7474427 |
| Activity | 72.574478  | 73 | 69.6377949 |
| Activity | 72.7562962 | 73 | 69.5396228 |
| Activity | 72.3017507 | 73 | 69.4495196 |
| Activity | 71.9381144 | 73 | 69.3682921 |
| Activity | 71.6653871 | 73 | 69.2969266 |
| Activity | 71.574478  | 73 | 69.2330023 |
| Activity | 71.4835689 | 73 | 69.1726642 |
| Activity | 70.9381144 | 73 | 69.1168984 |
| Activity | 70.0290235 | 73 | 69.0647188 |
| Activity | 69.8472053 | 73 | 69.0052773 |
| Activity | 68.8472053 | 73 | 68.9361531 |
| Activity | 69.7562962 | 73 | 68.8607531 |
| Activity | 69.7562962 | 73 | 68.7860703 |
| Activity | 66.9589481 | 73 | 68.7004498 |
| Activity | 66.2176893 | 73 | 68.6180568 |
| Activity | 65.9659411 | 73 | 68.5331535 |
| Activity | 65.9659411 | 73 | 68.4421538 |
| Activity | 66.9449621 | 73 | 68.3745547 |
| Activity | 66.9449621 | 73 | 68.3151142 |
| Activity | 67.2037033 | 73 | 68.2626666 |
| Activity | 67.3016054 | 73 | 68.2172121 |
| Activity | 67.0288781 | 73 | 68.1735184 |
| Activity | 67.1267802 | 73 | 68.137484  |
| Activity | 66.3714563 | 73 | 68.0943605 |
| Activity | 66.2455822 | 73 | 68.0593955 |
| Activity | 66.2455822 | 73 | 68.0290924 |
| Activity | 66.4274003 | 73 | 67.9987894 |
| Activity | 65.6931346 | 73 | 67.9766449 |
| Activity | 65.7980297 | 73 | 67.9626589 |

|          |            |    |            |
|----------|------------|----|------------|
| Activity | 66.3225052 | 73 | 67.9440109 |
| Activity | 66.4763514 | 73 | 67.9218663 |
| Activity | 66.7910367 | 73 | 67.8938943 |
| Activity | 66.7910367 | 73 | 67.8531018 |
| Activity | 66.1616661 | 73 | 67.8064817 |
| Activity | 65.7420857 | 73 | 67.7482067 |
| Activity | 65.7420857 | 73 | 67.6887661 |
| Activity | 65.4947461 | 73 | 67.623498  |
| Activity | 65.3086646 | 73 | 67.551237  |
| Activity | 65.1128604 | 73 | 67.4708174 |
| Activity | 64.9170562 | 73 | 67.3892323 |
| Activity | 64.8191541 | 73 | 67.3064817 |
| Activity | 65.3296436 | 73 | 67.2202346 |
| Activity | 65.9170562 | 73 | 67.1433116 |
| Activity | 66.4065667 | 73 | 67.067554  |
| Activity | 66.2317415 | 73 | 66.9836379 |
| Activity | 66.1338394 | 73 | 66.8927288 |
| Activity | 66.2317415 | 73 | 66.7983232 |
| Activity | 65.9380352 | 73 | 66.7109106 |
| Activity | 65.5464268 | 73 | 66.6421461 |
| minute1  | 65.0569163 | 71 | 66.5757125 |
| minute2  | 65.1128604 | 71 | 66.5255959 |
| minute3  | 64.8960771 | 71 | 66.4644466 |
| minute4  | 65.1478254 | 71 | 66.3989843 |
| minute5  | 65.2247485 | 71 | 66.3684142 |
| minute6  | 65.4764967 | 71 | 66.3555059 |
| minute7  | 66.7562962 | 71 | 66.3399976 |
| minute8  | 66.7562962 | 71 | 66.3186618 |
| minute9  | 66.9381144 | 71 | 66.2871055 |
| minute10 | 67.0290235 | 71 | 66.2613767 |
| minute11 | 67.2108417 | 71 | 66.2428202 |
| minute12 | 67.1199326 | 71 | 66.228836  |
| minute13 | 67.1199326 | 71 | 66.2183484 |
| minute14 | 67.8472053 | 71 | 66.2112676 |
| minute15 | 68.2108417 | 71 | 66.2208634 |
| minute16 | 68.9381144 | 71 | 66.2367351 |
| minute17 | 69.7562962 | 71 | 66.2526067 |
| minute18 | 70.0290235 | 71 | 66.2638163 |
| minute19 | 69.7562962 | 71 | 66.2809431 |
| minute20 | 69.3926598 | 71 | 66.3002216 |
| minute21 | 69.1199326 | 71 | 66.3092795 |
| minute22 | 68.3926598 | 71 | 66.314034  |
| minute23 | 68.1199326 | 71 | 66.3135886 |
| minute24 | 67.574478  | 71 | 66.3131433 |
| minute25 | 67.3926598 | 71 | 66.3219322 |

|          |            |    |            |
|----------|------------|----|------------|
| minute26 | 67.1199326 | 71 | 66.3372659 |
| minute27 | 66.7562962 | 71 | 66.3549306 |
| minute28 | 66.3926598 | 71 | 66.3815939 |
| minute29 | 66.3926598 | 71 | 66.4083117 |
| minute30 | 66.1199326 | 71 | 66.4445329 |
| minute31 | 66.0290235 | 71 | 66.4832645 |
| minute32 | 66.3017507 | 71 | 66.5255821 |
| minute33 | 66.0290235 | 71 | 66.5695136 |
| minute34 | 65.1199326 | 71 | 66.6012521 |
| minute35 | 64.4835689 | 71 | 66.6302113 |
| minute36 | 64.1199326 | 71 | 66.6625774 |
| minute37 | 64.1199326 | 71 | 66.7020262 |
| minute38 | 64.6653871 | 71 | 66.7277568 |
| minute39 | 64.6653871 | 71 | 66.7575219 |
| minute40 | 64.9381144 | 71 | 66.7998386 |
| minute41 | 64.9866473 | 71 | 66.848969  |
| minute42 | 64.6502379 | 71 | 66.8936166 |
| minute43 | 64.574478  | 71 | 66.935754  |
| minute44 | 65.2108417 | 71 | 66.9743948 |
| minute45 | 64.7562962 | 71 | 67.0278296 |
| minute46 | 64.3017507 | 71 | 67.0803678 |
| minute47 | 64.4835689 | 71 | 67.1141673 |
| minute48 | 64.9381144 | 71 | 67.1433049 |
| minute49 | 65.7562962 | 71 | 67.1747734 |
| minute50 | 66.2108417 | 71 | 67.2015799 |
| minute51 | 66.2108417 | 71 | 67.2225589 |
| minute52 | 66.574478  | 71 | 67.2447035 |
| minute53 | 67.1199326 | 71 | 67.2333145 |
| minute54 | 67.4835689 | 71 | 67.2209404 |
| minute55 | 67.4835689 | 71 | 67.2039043 |
| minute56 | 67.3017507 | 71 | 67.1737787 |
| minute57 | 67.0290235 | 71 | 67.1565821 |
| minute58 | 67.3017507 | 71 | 67.1036844 |
| minute59 | 67.0290235 | 71 | 67.0502488 |
| minute60 | 66.8472053 | 71 | 66.9840813 |
| AFTER1   | 66.7562962 | 71 | 66.9385353 |
| AFTER2   | 66.7562962 | 71 | 66.9018658 |
| AFTER3   | 66.8472053 | 71 | 66.8890453 |
| AFTER4   | 66.9381144 | 71 | 66.8855488 |
| AFTER5   | 67.1199326 | 71 | 66.8785558 |
| AFTER6   | 67.574478  | 71 | 66.8843833 |
| AFTER7   | 67.3926598 | 71 | 66.8972038 |
| AFTER8   | 67.9381144 | 71 | 66.9216793 |
| AFTER9   | 67.9381144 | 71 | 66.9496514 |
| AFTER10  | 68.1199326 | 71 | 66.9881129 |

|         |            |    |            |
|---------|------------|----|------------|
| AFTER11 | 68.7562962 | 71 | 67.0358984 |
| AFTER12 | 68.3926598 | 71 | 67.081353  |
| AFTER13 | 68.6653871 | 71 | 67.127973  |
| AFTER14 | 68.7562962 | 71 | 67.1839171 |
| AFTER15 | 69.2108417 | 71 | 67.2421921 |
| AFTER16 | 68.2387345 | 71 | 67.3051292 |
| AFTER17 | 68.2597135 | 71 | 67.3703973 |
| AFTER18 | 68.8471261 | 71 | 67.4240103 |
| AFTER19 | 68.8890841 | 71 | 67.4811199 |
| AFTER20 | 68.5953778 | 71 | 67.5405604 |
| AFTER21 | 68.1827904 | 71 | 67.6028753 |
| AFTER22 | 68.1618114 | 71 | 67.6718341 |
| AFTER23 | 69.3926598 | 71 | 67.7452607 |
| AFTER24 | 69.574478  | 71 | 67.8128597 |
| AFTER25 | 69.3926598 | 71 | 67.8827898 |
| AFTER26 | 69.0290235 | 71 | 67.9597129 |
| AFTER27 | 69.3926598 | 71 | 68.0401325 |
| AFTER28 | 69.1199326 | 71 | 68.1240485 |
| AFTER29 | 68.8472053 | 71 | 68.2009716 |
| AFTER30 | 68.8472053 | 71 | 68.2564569 |
| AFTER31 | 66.2315961 | 71 | 68.3027078 |
| AFTER32 | 66.882025  | 71 | 68.3405313 |
| AFTER33 | 66.882025  | 71 | 68.3726169 |
| AFTER34 | 66.5883187 | 71 | 68.4012957 |
| AFTER35 | 68.414961  | 71 | 68.4224435 |
| AFTER36 | 65.903004  | 71 | 68.4471775 |
| AFTER37 | 65.5883187 | 71 | 68.4766632 |
| AFTER38 | 64.2315961 | 71 | 68.5066868 |
| AFTER39 | 65.5673397 | 71 | 68.5389517 |
| AFTER40 | 65.5324408 | 71 | 68.5720235 |
| AFTER41 | 67.1199326 | 71 | 68.6064401 |
| AFTER42 | 67.3017507 | 71 | 68.6483982 |
| AFTER43 | 66.8472053 | 71 | 68.6891907 |
| AFTER44 | 67.574478  | 71 | 68.7253212 |
| AFTER45 | 67.7562962 | 71 | 68.7591208 |
| AFTER46 | 68.3017507 | 71 | 68.7847618 |
| AFTER47 | 68.574478  | 71 | 68.8173958 |
| AFTER48 | 69.1199326 | 71 | 68.8465334 |
| AFTER49 | 69.7562962 | 71 | 68.8756709 |
| AFTER50 | 69.8472053 | 71 | 68.8978154 |
| AFTER51 | 69.6653871 | 71 | 68.9118014 |
| AFTER52 | 69.4835689 | 71 | 68.9269529 |
| AFTER53 | 69.0290235 | 71 | 68.9374424 |
| AFTER54 | 69.0290235 | 71 | 68.9421045 |
| AFTER55 | 69.2108417 | 71 | 68.9316149 |

|          |            |    |            |
|----------|------------|----|------------|
| AFTER56  | 68.8472053 | 71 | 68.9265953 |
| AFTER57  | 69.1199326 | 71 | 68.9248033 |
| AFTER58  | 69.574478  | 71 | 68.9213078 |
| AFTER59  | 69.8472053 | 71 | 68.9300949 |
| AFTER60  | 70.0290235 | 71 | 68.9449785 |
| AFTER61  | 70.3017507 | 71 | 68.9674826 |
| AFTER62  | 70.4835689 | 71 | 68.9949177 |
| AFTER63  | 70.2108417 | 71 | 69.0054072 |
| AFTER64  | 70.3017507 | 71 | 69.0089037 |
| AFTER65  | 70.7562962 | 71 | 69.0054072 |
| AFTER66  | 71.4835689 | 71 | 68.9995797 |
| AFTER67  | 71.7562962 | 71 | 68.9890902 |
| AFTER68  | 70.5386946 | 71 | 68.9809317 |
| AFTER69  | 69.8184149 | 71 | 68.9820972 |
| AFTER70  | 69.5247086 | 71 | 68.9739387 |
| AFTER71  | 69.6226107 | 63 | 68.9946516 |
| AFTER72  | 69.7205128 | 63 | 69.0046947 |
| AFTER73  | 69.1331002 | 63 | 69.0182344 |
| AFTER74  | 69.2310023 | 63 | 69.0343739 |
| AFTER75  | 69.3289044 | 63 | 69.0305915 |
| AFTER76  | 69.6435897 | 63 | 69.0613447 |
| AFTER77  | 69.5456876 | 63 | 69.0961323 |
| AFTER78  | 69.4268065 | 63 | 69.1448172 |
| AFTER79  | 69.4407925 | 63 | 69.1798738 |
| AFTER80  | 70.0290235 | 63 | 69.2188743 |
| AFTER81  | 70.0290235 | 63 | 69.2363568 |
| AFTER82  | 69.7562962 | 63 | 69.2515083 |
| AFTER83  | 69.7562962 | 63 | 69.2713218 |
| AFTER84  | 69.574478  | 63 | 69.2818113 |
| AFTER85  | 69.9381144 | 63 | 69.2923008 |
| AFTER86  | 70.2108417 | 63 | 69.2969628 |
| AFTER87  | 70.2108417 | 63 | 69.2992938 |
| AFTER88  | 69.8472053 | 63 | 69.2888043 |
| AFTER89  | 69.8472053 | 63 | 69.2608323 |
| AFTER90  | 69.574478  | 63 | 69.2293638 |
| AFTER91  | 69.4835689 | 63 | 69.2025572 |
| AFTER92  | 69.1199326 | 63 | 69.1780817 |
| AFTER93  | 68.3926598 | 63 | 69.1524407 |
| AFTER94  | 67.8472053 | 63 | 69.1244687 |
| AFTER95  | 68.1199326 | 63 | 69.0918346 |
| AFTER96  | 68.574478  | 63 | 69.0661936 |
| AFTER97  | 69.574478  | 63 | 69.0358906 |
| AFTER98  | 69.7562962 | 63 | 68.997429  |
| AFTER99  | 69.9381144 | 63 | 68.9496435 |
| AFTER100 | 70.3017507 | 63 | 68.8983614 |

|          |            |    |            |
|----------|------------|----|------------|
| AFTER101 | 70.2108417 | 63 | 68.8400864 |
| AFTER102 | 69.8472053 | 63 | 68.7713218 |
| AFTER103 | 69.1199326 | 63 | 68.7013917 |
| AFTER104 | 68.574478  | 63 | 68.6326272 |
| AFTER105 | 68.574478  | 63 | 68.5566148 |
| AFTER106 | 68.4835689 | 63 | 68.4708742 |
| AFTER107 | 68.9381144 | 63 | 68.3846271 |
| AFTER108 | 68.2108417 | 63 | 68.3081628 |
| AFTER109 | 67.8472053 | 63 | 68.2386018 |
| AFTER110 | 67.6653871 | 63 | 68.1739718 |
| AFTER111 | 67.9381144 | 63 | 68.1045901 |
| AFTER112 | 67.8472053 | 63 | 68.0432773 |
| AFTER113 | 68.1199326 | 63 | 67.9941575 |
| AFTER114 | 68.3017507 | 63 | 67.9484445 |
| AFTER115 | 68.3017507 | 63 | 67.9131313 |
| AFTER116 | 68.0290235 | 63 | 67.8726182 |
| AFTER117 | 68.3017507 | 63 | 67.8380223 |
| AFTER118 | 68.574478  | 63 | 67.8072815 |
| AFTER119 | 68.4835689 | 63 | 67.7856854 |
| AFTER120 | 68.4835689 | 63 | 67.7623754 |
| AFTER121 | 68.3926598 | 63 | 67.7425618 |
| AFTER122 | 68.3926598 | 63 | 67.7344033 |
| AFTER123 | 68.574478  | 63 | 67.7297413 |
| AFTER124 | 68.6653871 | 63 | 67.7344033 |
| AFTER125 | 68.7562962 | 63 | 67.7320723 |
| AFTER126 | 68.3017507 | 63 | 67.7227483 |
| AFTER127 | 67.574478  | 63 | 67.7041003 |
| AFTER128 | 67.3926598 | 63 | 67.6761283 |
| AFTER129 | 67.574478  | 63 | 67.6539837 |
| AFTER130 | 67.574478  | 63 | 67.6353357 |
| AFTER131 | 67.0290235 | 63 | 67.6131912 |
| AFTER132 | 66.8472053 | 63 | 67.6038672 |
| AFTER133 | 66.6653871 | 63 | 67.6073637 |
| AFTER134 | 66.8472053 | 63 | 67.6213497 |
| AFTER135 | 66.7562962 | 63 | 67.6260117 |
| AFTER136 | 66.574478  | 63 | 67.6236807 |
| AFTER137 | 66.1199326 | 63 | 67.6061982 |
| AFTER138 | 66.0290235 | 63 | 67.5840537 |
| AFTER139 | 65.7562962 | 63 | 67.5560816 |
| AFTER140 | 65.1199326 | 63 | 67.5211166 |
| AFTER141 | 64.7562962 | 63 | 67.4884826 |
| AFTER142 | 64.9381144 | 63 | 67.454683  |
| AFTER143 | 64.8273297 | 63 | 67.431373  |
| AFTER144 | 64.7958006 | 63 | 67.412725  |
| AFTER145 | 65.0290235 | 63 | 67.4045665 |



|          |            |    |            |
|----------|------------|----|------------|
| AFTER146 | 64.574478  | 63 | 67.3999045 |
| AFTER147 | 64.3926598 | 63 | 67.394077  |
| AFTER148 | 64.4835689 | 63 | 67.3999045 |
| AFTER149 | 64.2108417 | 63 | 67.410394  |
| AFTER150 | 64.9381144 | 63 | 67.42438   |
| AFTER151 | 65.3017507 | 63 | 67.4395315 |
| AFTER152 | 65.6653871 | 63 | 67.4581796 |
| AFTER153 | 66.574478  | 63 | 67.4838206 |
| AFTER154 | 66.4835689 | 63 | 67.5176201 |
| AFTER155 | 66.8472053 | 63 | 67.5514196 |
| AFTER156 | 67.0290235 | 63 | 67.5887157 |
| AFTER157 | 67.7562962 | 63 | 67.6213497 |
| AFTER158 | 68.2108417 | 63 | 67.6434942 |
| AFTER159 | 68.4835689 | 63 | 67.6667012 |
| AFTER160 | 69.1199326 | 63 | 67.6713632 |
| AFTER161 | 69.3926598 | 63 | 67.6736942 |
| AFTER162 | 69.9381144 | 63 | 67.6701977 |
| AFTER163 | 69.7562962 | 63 | 67.6655357 |
| AFTER164 | 69.4835689 | 63 | 67.6585427 |
| AFTER165 | 68.7562962 | 63 | 67.6527152 |
| AFTER166 | 67.6653871 | 63 | 67.6620392 |
| AFTER167 | 68.1199326 | 63 | 67.6783562 |
| AFTER168 | 68.1199326 | 63 | 67.6888457 |
| AFTER169 | 67.7562962 | 63 | 67.6888457 |
| AFTER170 | 68.3926598 | 63 | 67.6865147 |
| AFTER171 | 68.6653871 | 63 | 67.6900112 |
| AFTER172 | 68.9381144 | 63 | 67.6935077 |
| AFTER173 | 68.4835689 | 63 | 67.7028317 |
| AFTER174 | 68.3926598 | 63 | 67.7121557 |
| AFTER175 | 68.2108417 | 63 | 67.7284728 |
| AFTER176 | 68.0290235 | 63 | 67.7401278 |
| AFTER177 | 67.7562962 | 63 | 67.7552793 |
| AFTER178 | 67.574478  | 63 | 67.7762583 |
| AFTER179 | 67.6653871 | 63 | 67.8193818 |
| AFTER180 | 67.2108417 | 63 | 67.8741604 |
| AFTER181 | 67.3017507 | 63 | 67.9370975 |
| AFTER182 | 67.1199326 | 63 | 67.996538  |
| AFTER183 | 67.9381144 | 63 | 68.0527369 |
| AFTER184 | 68.1199326 | 63 | 68.10934   |
| AFTER185 | 68.4835689 | 63 | 68.1594565 |
| AFTER186 | 68.6653871 | 63 | 68.2107386 |
| AFTER187 | 68.6653871 | 63 | 68.2655171 |
| AFTER188 | 68.7562962 | 63 | 68.3191302 |
| AFTER189 | 69.1199326 | 63 | 68.3750742 |
| AFTER190 | 69.3017507 | 63 | 68.4216943 |

|          |            |    |            |
|----------|------------|----|------------|
| AFTER191 | 70.1199326 | 63 | 68.4706453 |
| AFTER192 | 70.9381144 | 63 | 68.5114379 |
| AFTER193 | 70.9381144 | 63 | 68.5464029 |
| AFTER194 | 70.9381144 | 63 | 68.5825335 |
| AFTER195 | 70.8472053 | 63 | 68.6174985 |
| AFTER196 | 70.3017507 | 63 | 68.648967  |
| AFTER197 | 70.2937112 | 63 | 68.6664495 |
| AFTER198 | 68.8472053 | 63 | 68.669946  |
| AFTER199 | 68.574478  | 63 | 68.6687805 |
| AFTER200 | 68.1199326 | 63 | 68.658291  |
| AFTER201 | 68.2108417 | 63 | 68.6454705 |
| AFTER202 | 68.1199326 | 63 | 68.63265   |
| AFTER203 | 68.3017507 | 63 | 68.627988  |
| AFTER204 | 69.0290235 | 63 | 68.6291535 |
| AFTER205 | 68.8472053 | 63 | 68.644305  |
| AFTER206 | 68.2108417 | 63 | 68.6626021 |
| AFTER207 | 67.574478  | 63 | 68.6750718 |
| AFTER208 | 67.3926598 | 63 | 68.6875414 |
| AFTER209 | 67.3017507 | 63 | 68.7102316 |
| AFTER210 | 67.1199326 | 63 | 68.7325631 |
| AFTER211 | 67.3926598 | 63 | 68.7506809 |
| AFTER212 | 67.574478  | 63 | 68.7700539 |
| AFTER213 | 68.0290235 | 63 | 68.7952544 |
| AFTER214 | 67.4835689 | 63 | 68.8340084 |
| AFTER215 | 67.3017507 | 63 | 68.866094  |
| AFTER216 | 67.6653871 | 63 | 68.8917245 |
| AFTER217 | 69.1199326 | 63 | 68.924617  |
| AFTER218 | 69.3926598 | 63 | 68.957251  |
| AFTER219 | 69.6653871 | 63 | 68.9828921 |
| AFTER220 | 69.574478  | 63 | 69.0143606 |
| AFTER221 | 69.2108417 | 63 | 69.0434981 |
| AFTER222 | 69.2108417 | 63 | 69.0714702 |
| AFTER223 | 68.9381144 | 63 | 69.0738012 |
| AFTER224 | 68.574478  | 63 | 69.0726357 |
| AFTER225 | 68.6653871 | 63 | 69.0633117 |
| AFTER226 | 68.6653871 | 63 | 69.0434981 |
| AFTER227 | 68.574478  | 63 | 69.0225191 |
| AFTER228 | 68.574478  | 63 | 68.9992091 |
| AFTER229 | 69.1199326 | 63 | 68.9724026 |
| AFTER230 | 68.8472053 | 63 | 68.9374375 |
| AFTER231 | 69.3017507 | 63 | 68.8978105 |
| AFTER232 | 69.3017507 | 63 | 68.8441974 |
| AFTER233 | 69.574478  | 63 | 68.7859224 |
| AFTER234 | 69.4835689 | 63 | 68.7358058 |
| AFTER235 | 69.1199326 | 63 | 68.6880203 |

|          |            |    |            |
|----------|------------|----|------------|
| AFTER236 | 68.4835689 | 63 | 68.6530552 |
| AFTER237 | 68.3926598 | 63 | 68.6193588 |
| AFTER238 | 68.3017507 | 63 | 68.6042073 |
| AFTER239 | 68.3926598 | 63 | 68.5902213 |
| AFTER240 | 68.9381144 | 63 | 68.5843937 |
|          | 69.3926598 | 63 | 68.5820627 |
|          | 69.574478  | 63 | 68.5659232 |
|          | 69.9381144 | 63 | 68.5414458 |
|          | 69.0925632 | 63 | 68.5088995 |
|          | 69.0925632 | 63 | 68.476174  |
|          | 69.0925632 | 63 | 68.4541173 |
|          | 69.5261296 | 63 | 68.4414742 |
|          | 70.1345212 | 63 | 68.4336724 |
|          | 70.0785772 | 63 | 68.444162  |
|          | 70.4492066 | 63 | 68.4593135 |
|          | 70.4492066 | 63 | 68.472134  |
|          | 71.4154689 | 63 | 68.4826235 |
|          | 70.7135198 | 63 | 68.483789  |
|          | 70.0282051 | 63 | 68.4942785 |
|          | 70.3219114 | 63 | 68.4933334 |
|          | 70.1199326 | 63 | 68.4889814 |
|          | 69.6653871 | 63 | 68.4634712 |
|          | 69.6653871 | 63 | 68.4435194 |
|          | 69.574478  | 63 | 68.4213263 |
|          | 69.3017507 | 63 | 68.4050093 |
|          | 68.1199326 | 63 | 68.3910233 |
|          | 68.0290235 | 63 | 68.3770373 |
|          | 67.7562962 | 63 | 68.3735408 |
|          | 67.1199326 | 63 | 68.3735408 |
|          | 67.0290235 | 63 | 68.3723753 |
|          | 66.9381144 | 63 | 68.3700443 |
|          | 67.0290235 | 63 | 68.3688788 |
|          | 66.574478  | 63 | 68.3635204 |
|          | 67.0290235 | 63 | 68.3576929 |
|          | 66.7562962 | 63 | 68.3553619 |
|          | 66.3926598 | 63 | 68.3402103 |
|          | 67.0290235 | 63 | 68.3285553 |
|          | 67.1199326 | 63 | 68.3110728 |
|          | 67.574478  | 63 | 68.2889283 |
|          | 67.6653871 | 63 | 68.2679493 |
|          | 67.6653871 | 63 | 68.2551288 |
|          | 67.4835689 | 63 | 68.2434737 |
|          | 67.6653871 | 63 | 68.2341497 |
|          | 68.0290235 | 63 | 68.2294877 |
|          | 66.861046  | 63 | 68.2201637 |

|            |    |            |
|------------|----|------------|
| 66.3925145 | 63 | 68.2026812 |
| 66.4904166 | 63 | 68.1828677 |
| 66.2946124 | 63 | 68.1630542 |
| 66.4904166 | 63 | 68.1610741 |
| 66.5883187 | 63 | 68.1719145 |
| 66.7841229 | 63 | 68.1850859 |
| 68.1199326 | 63 | 68.1961952 |
| 68.3017507 | 63 | 68.1948427 |
| 68.3926598 | 63 | 68.1918764 |
| 68.3926598 | 63 | 68.1759999 |
| 68.1199326 | 63 | 68.1542959 |
| 68.3017507 | 63 | 68.117873  |
| 67.2280328 | 63 | 68.0869528 |
| 67.3259349 | 63 | 68.0624878 |
| 67.1301307 | 63 | 68.0319263 |
| 67.8364244 | 63 | 68.0016233 |
| 67.9343265 | 63 | 67.9748168 |
| 68.3017507 | 63 | 67.9480102 |
| 68.1199326 | 63 | 67.9223692 |
| 68.1199326 | 63 | 67.8967282 |
| 68.6653871 | 63 | 67.8874042 |
| 68.574478  | 63 | 67.8839077 |
| 68.574478  | 63 | 67.9002247 |
| 68.4835689 | 63 | 67.9281967 |
| 68.4835689 | 63 | 67.9596652 |
| 68.1565208 | 63 | 67.9922993 |
| 68.6653871 | 63 | 68.0214368 |
| 68.6653871 | 63 | 68.0529053 |
| 68.1199326 | 63 | 68.0692224 |
| 68.3926598 | 63 | 68.0925324 |
| 68.2108417 | 63 | 68.1205044 |
| 67.7562962 | 63 | 68.1414834 |
| 67.4835689 | 63 | 68.1636279 |
| 67.4835689 | 63 | 68.179945  |
| 67.4835689 | 63 | 68.200924  |
| 67.574478  | 63 | 68.2091096 |
| 68.0290235 | 63 | 68.2335851 |
| 68.2108417 | 63 | 68.2522331 |
| 68.0290235 | 63 | 68.2650536 |
| 68.0290235 | 63 | 68.2905172 |
| 68.3926598 | 69 | 68.3250082 |
| 68.9381144 | 69 | 68.3482304 |
| 69.9381144 | 69 | 68.3751285 |
| 70.1199326 | 69 | 68.3983507 |
| 70.3926598 | 69 | 68.4249798 |

|            |               |
|------------|---------------|
| 70.0290235 | 69 68.4560916 |
| 69.8472053 | 69 68.4677466 |
| 69.2108417 | 69 68.4759051 |
| 68.7562962 | 69 68.4782361 |
| 68.574478  | 69 68.4735741 |
| 68.3017507 | 69 68.4735741 |
| 68.1199326 | 69 68.4642501 |
| 67.9381144 | 69 68.4640297 |
| 67.7562962 | 69 68.4625541 |
| 67.574478  | 69 68.4565959 |
| 67.574478  | 69 68.4427481 |
| 67.574478  | 69 68.4241486 |
| 67.3017507 | 69 68.3938456 |
| 67.3926598 | 69 68.3670391 |
| 67.7562962 | 69 68.341398  |
| 69.0290235 | 69 68.318088  |
| 69.3017507 | 69 68.301771  |
| 69.4835689 | 69 68.290116  |
| 69.4835689 | 69 68.2842885 |
| 69.3017507 | 69 68.2772955 |
| 69.0290235 | 69 68.2779919 |
| 68.3017507 | 69 68.2779919 |
| 68.574478  | 69 68.2826539 |
| 68.574478  | 69 68.2989709 |
| 68.6653871 | 69 68.3129569 |
| 68.8472053 | 69 68.3327704 |
| 68.8472053 | 69 68.3607425 |
| 69.3017507 | 69 68.3933765 |
| 68.3038632 | 69 68.422514  |
| 69.3926598 | 69 68.4208087 |
| 69.1199326 | 69 68.4254708 |
| 69.0290235 | 69 68.4278018 |
| 68.8472053 | 69 68.4184777 |
| 69.0828113 | 69 68.4091537 |
| 68.3017507 | 69 68.3998297 |
| 68.3926598 | 69 68.3951677 |
| 68.3017507 | 69 68.3905057 |
| 68.6653871 | 69 68.3741887 |
| 69.2108417 | 69 68.3567062 |
| 69.0290235 | 69 68.3357272 |
| 68.9381144 | 69 68.3112516 |
| 68.574478  | 69 68.2856106 |
| 68.0290235 | 69 68.2623006 |
| 68.1199326 | 69 68.2413216 |
| 67.574478  | 69 68.2238391 |

|            |    |            |
|------------|----|------------|
| 67.2108417 | 69 | 68.207522  |
| 67.2108417 | 69 | 68.193536  |
| 66.6653871 | 69 | 68.1830465 |
| 66.7562962 | 69 | 68.1737225 |
| 66.4835689 | 69 | 68.1666198 |
| 65.9381144 | 69 | 68.1598644 |
| 66.0290235 | 69 | 68.1552024 |
| 66.1199326 | 69 | 68.1575334 |
| 66.8472053 | 69 | 68.1563679 |
| 67.3017507 | 69 | 68.1447129 |
| 67.6653871 | 69 | 68.1167409 |
| 68.0290235 | 69 | 68.0887688 |
| 67.9381144 | 69 | 68.0573003 |
| 68.2108417 | 69 | 68.0269973 |
| 68.6653871 | 69 | 68.0025218 |
| 69.0290235 | 69 | 67.9827082 |
| 69.3926598 | 69 | 67.9745497 |
| 69.4835689 | 69 | 67.9698877 |
| 69.7562962 | 69 | 67.9698877 |
| 69.9381144 | 69 | 67.9757152 |
| 70.0290235 | 69 | 67.9815427 |
| 69.7562962 | 69 | 67.9897012 |
| 67.3505565 | 69 | 67.9931978 |
| 67.9381144 | 69 | 68.0083222 |
| 68.2108417 | 69 | 68.0036602 |
| 67.4835689 | 69 | 67.9978327 |
| 67.3017507 | 69 | 67.9896742 |
| 67.3017507 | 69 | 67.9803502 |
| 68.0290235 | 69 | 67.9691711 |
| 68.574478  | 69 | 67.9691711 |
| 68.6653871 | 69 | 67.9668401 |
| 68.7562962 | 69 | 67.9749986 |
| 68.7562962 | 69 | 67.9878191 |
| 68.1199326 | 69 | 67.9948121 |
| 67.8472053 | 69 | 68.0087981 |
| 67.3926598 | 69 | 68.0321081 |
| 67.1199326 | 69 | 68.0713617 |
| 67.2108417 | 69 | 68.1207463 |
| 67.0290235 | 69 | 68.1665446 |
| 67.0290235 | 69 | 68.2182601 |
| 67.1199326 | 69 | 68.2753549 |
| 67.0290235 | 69 | 68.3337048 |
| 67.0204682 | 69 | 68.4003029 |
| 67.0475573 | 69 | 68.4649285 |
| 67.2108417 | 69 | 68.5312577 |

|            |               |
|------------|---------------|
| 67.4835689 | 69 68.6156072 |
| 67.3017507 | 69 68.678519  |
| 66.8472053 | 69 68.7446583 |
| 66.8472053 | 69 68.7898186 |
| 67.1199326 | 69 68.8321996 |
| 67.0290235 | 69 68.8726979 |
| 67.1199326 | 69 68.907548  |
| 67.3926598 | 69 68.945267  |
| 67.4835689 | 69 68.9852273 |
| 67.6653871 | 69 69.0197188 |
| 68.2108417 | 69 69.0499069 |
| 68.574478  | 69 69.0791984 |
| 69.1199326 | 69 69.1069658 |
| 69.3017507 | 69 69.1312368 |
| 69.4835689 | 69 69.1306088 |
| 69.574478  | 69 69.129418  |
| 69.4835689 | 69 69.129841  |
| 69.0290235 | 69 69.1654102 |
| 68.6653871 | 69 69.1940741 |
| 68.3926598 | 69 69.2336864 |
| 68.1199326 | 69 69.2860295 |
| 68.2108417 | 69 69.347801  |
| 68.3017507 | 69 69.3827556 |
| 68.2108417 | 69 69.407131  |
| 68.9381144 | 69 69.4232582 |
| 69.6653871 | 69 69.4457508 |
| 69.7562962 | 69 69.4658228 |
| 70.1199326 | 69 69.4808742 |
| 70.7562962 | 69 69.4961049 |
| 71.6362604 | 69 69.5155493 |
| 71.8810156 | 69 69.5383109 |
| 71.6922045 | 69 69.5674484 |
| 71.6082884 | 69 69.5872619 |
| 71.6642324 | 69 69.608241  |
| 71.7621345 | 69 69.6257235 |
| 71.8600366 | 69 69.643206  |
| 71.7970996 | 69 69.664185  |
| 71.6572394 | 69 69.6852737 |
| 72.5173793 | 69 69.7060151 |
| 70.9361413 | 69 69.7223321 |
| 71.2787987 | 69 69.7316561 |
| 70.3697078 | 69 69.7444767 |
| 70.60747   | 69 69.7666212 |
| 70.8242532 | 69 69.7887657 |
| 70.7473301 | 69 69.8132412 |

|            |    |            |
|------------|----|------------|
| 70.8801973 | 69 | 69.8388823 |
| 71.3277497 | 69 | 69.8586958 |
| 71.3557217 | 69 | 69.8738473 |
| 71.3836938 | 69 | 69.8866678 |
| 71.6774001 | 69 | 69.8959918 |
| 71.649428  | 69 | 69.8983228 |
| 71.649428  | 69 | 69.8948263 |
| 69.8891355 | 69 | 69.8924953 |
| 69.9361413 | 69 | 69.8948263 |
| 69.7892882 | 69 | 69.8936608 |
| 70.1249525 | 69 | 69.8889988 |
| 70.1739036 | 69 | 69.8878333 |
| 71.3005961 | 69 | 69.8889988 |
| 71.5663303 | 69 | 69.8936608 |
| 72.1199326 | 69 | 69.8983228 |
| 70.0282051 | 69 | 69.9146398 |
| 69.930303  | 69 | 69.9309568 |
| 69.8324009 | 69 | 69.9449429 |
| 70.4198135 | 69 | 69.9647564 |
| 70.3219114 | 69 | 69.9705839 |
| 69.930303  | 69 | 69.9717494 |
| 69.3079254 | 69 | 69.9717494 |
| 69.3638694 | 69 | 69.9677036 |
| 69.1680652 | 69 | 69.9572141 |
| 69.3926598 | 69 | 69.935443  |
| 68.7562962 | 69 | 69.903541  |
| 68.6653871 | 69 | 69.8705631 |
| 68.3926598 | 69 | 69.8386611 |
| 68.4835689 | 69 | 69.8048764 |
| 68.6653871 | 69 | 69.7721675 |
| 68.6653871 | 69 | 69.734707  |
| 68.6653871 | 69 | 69.6968878 |
| 68.4835689 | 69 | 69.6561997 |
| 68.2108417 | 69 | 69.6021532 |
| 68.3017507 | 69 | 69.5625515 |
| 68.574478  | 69 | 69.5127292 |
| 68.574478  | 69 | 69.4698999 |
| 69.0290235 | 69 | 69.4181949 |
| 69.0290235 | 69 | 69.3590486 |
| 68.6653871 | 69 | 69.3008885 |
| 68.574478  | 69 | 69.2398594 |
| 68.4835689 | 69 | 69.169596  |
| 68.3926598 | 69 | 69.11296   |
| 68.3926598 | 69 | 69.0606274 |
| 68.3017507 | 69 | 69.0056949 |



|            |    |            |
|------------|----|------------|
| 68.9381144 | 69 | 68.9534519 |
| 69.4835689 | 69 | 68.898878  |
| 69.3926598 | 69 | 68.8703684 |
| 69.2108417 | 69 | 68.8424216 |
| 69.3926598 | 69 | 68.8280127 |
| 69.1199326 | 69 | 68.7999763 |
| 69.0290235 | 69 | 68.7689813 |
| 68.7562962 | 69 | 68.7223761 |
| 69.3926598 | 69 | 68.672364  |
| 69.4835689 | 69 | 68.6140889 |
| 69.3926598 | 69 | 68.5837964 |
| 69.7562962 | 69 | 68.559421  |
| 69.3926598 | 69 | 68.5363008 |
| 69.7562962 | 69 | 68.5056496 |
| 69.7562962 | 69 | 68.4774191 |
| 69.8043599 | 69 | 68.4507127 |
| 69.9381144 | 69 | 68.4331511 |
| 69.9381144 | 69 | 68.4137066 |
| 69.3926598 | 69 | 68.3967725 |
| 69.1199326 | 69 | 68.3757935 |
| 69.1199326 | 69 | 68.367635  |
| 69.0290235 | 69 | 68.3664695 |
| 69.2108417 | 69 | 68.3734625 |
| 68.9381144 | 69 | 68.3874485 |
| 68.8472053 | 69 | 68.3991035 |
| 68.4835689 | 69 | 68.397206  |
| 68.3017507 | 69 | 68.3940533 |
| 67.8472053 | 69 | 68.3947557 |
| 67.3926598 | 69 | 68.3994926 |
| 67.0290235 | 69 | 68.3992985 |
| 66.574478  | 69 | 68.3930976 |
| 66.2108417 | 69 | 68.3868966 |
| 66.2108417 | 69 | 68.3671855 |
| 66.1199326 | 69 | 68.359027  |
| 65.8472053 | 69 | 68.3508685 |
| 66.9381144 | 69 | 68.34271   |
| 67.3017507 | 69 | 68.3345515 |
| 67.3926598 | 69 | 68.3275585 |
| 67.574478  | 69 | 68.3240619 |
| 67.3926598 | 69 | 68.3252274 |
| 67.6653871 | 69 | 68.3205654 |
| 67.7562962 | 69 | 68.3089104 |
| 68.6653871 | 69 | 68.2960899 |
| 67.9381144 | 69 | 68.2867659 |
| 67.7562962 | 69 | 68.2762764 |

|            |               |
|------------|---------------|
| 67.6653871 | 69 68.2681179 |
| 67.6653871 | 69 68.2634559 |
| 67.574478  | 69 68.2657869 |
| 67.6653871 | 69 68.2599594 |
| 68.0290235 | 69 68.2552974 |
| 68.0290235 | 69 68.2622904 |
| 68.0290235 | 69 68.2657869 |
| 68.1199326 | 69 68.2762764 |
| 67.8472053 | 69 68.2797729 |
| 67.9381144 | 69 68.2821039 |
| 67.8472053 | 69 68.2838187 |
| 67.8472053 | 69 68.2896462 |
| 67.7562962 | 69 68.2954737 |
| 68.1199326 | 69 68.3071287 |
| 68.574478  | 69 68.3164527 |
| 68.9381144 | 69 68.3234457 |
| 69.574478  | 69 68.3234457 |
| 69.574478  | 69 68.3106252 |
| 68.5173793 | 69 68.2978047 |
| 68.4194772 | 69 68.2861497 |
| 68.5383583 | 69 68.2756602 |
| 68.5803163 | 69 68.2663362 |
| 68.28661   | 69 68.2628397 |
| 68.0908059 | 69 68.2686672 |
| 68.0908059 | 69 68.2849842 |
| 67.4915542 | 69 68.3047977 |
| 68.3926598 | 69 68.3257768 |
| 68.0290235 | 69 68.3432593 |
| 67.9381144 | 69 68.3607418 |
| 67.8472053 | 69 68.3770588 |
| 67.8472053 | 69 68.3793898 |
| 68.1199326 | 69 68.3793898 |
| 68.3926598 | 69 68.3828863 |
| 68.574478  | 69 68.3922103 |
| 68.574478  | 69 68.4038653 |
| 68.3926598 | 69 68.4306719 |
| 68.4835689 | 69 68.4563129 |
| 68.574478  | 69 68.4796229 |
| 68.4835689 | 69 68.5122569 |
| 68.6653871 | 69 68.5460565 |
| 68.9381144 | 69 68.581057  |
| 68.9381144 | 69 68.616022  |
| 69.1199326 | 69 68.6498216 |
| 69.9381144 | 69 68.6836211 |
| 70.0290235 | 69 68.7174206 |

|            |    |            |
|------------|----|------------|
| 70.2108417 | 69 | 68.7535512 |
| 70.0290235 | 69 | 68.7966747 |
| 69.9381144 | 69 | 68.8374673 |
| 69.9381144 | 69 | 68.8840873 |
| 70.3926598 | 69 | 68.9248798 |
| 70.3926598 | 69 | 68.9761619 |
| 70.3017507 | 69 | 69.0309404 |
| 69.8472053 | 69 | 69.0868845 |
| 69.6653871 | 69 | 69.1451596 |
| 69.0290235 | 69 | 69.1964416 |
| 68.2108417 | 69 | 69.2327367 |
| 67.9381144 | 69 | 69.2816877 |
| 67.9381144 | 69 | 69.3294732 |
| 67.6653871 | 69 | 69.3873148 |
| 67.574478  | 69 | 69.4475771 |
| 67.574478  | 69 | 69.5063152 |
| 67.8472053 | 69 | 69.5621844 |
| 68.3017507 | 69 | 69.6229846 |
| 68.1199326 | 69 | 69.6886261 |
| 67.8472053 | 69 | 69.7565986 |
| 67.574478  | 69 | 69.8334193 |
| 67.4835689 | 69 | 69.9033493 |
| 67.1199326 | 69 | 69.9860999 |
| 67.1199326 | 69 | 70.0758435 |
| 67.3017507 | 69 | 70.1655871 |
| 67.6653871 | 69 | 70.2471722 |
| 68.3017507 | 69 | 70.3147713 |
| 68.3017507 | 69 | 70.3777083 |
| 69.7562962 | 69 | 70.4348179 |
| 69.7562962 | 69 | 70.4884309 |
| 70.4835689 | 69 | 70.5292235 |
| 70.4835689 | 69 | 70.5711815 |
| 70.3926598 | 69 | 70.6108085 |
| 70.395428  | 69 | 70.6550976 |
| 70.3926598 | 69 | 70.6982211 |
| 70.2108417 | 69 | 70.7308552 |
| 70.3017507 | 69 | 70.7681512 |
| 70.6653871 | 69 | 70.7916816 |
| 70.8472053 | 69 | 70.808757  |
| 71.3926598 | 69 | 70.8246668 |
| 71.3017507 | 69 | 70.8420111 |
| 71.4835689 | 69 | 70.8536661 |
| 71.1199326 | 69 | 70.8571626 |
| 71.8472053 | 69 | 70.8583281 |
| 72.1199326 | 69 | 70.8525006 |

|            |    |            |
|------------|----|------------|
| 72.1199326 | 69 | 70.8466731 |
| 72.6653871 | 69 | 70.8443421 |
| 72.574478  | 69 | 70.8536661 |
| 71.7691275 | 69 | 70.8618246 |
| 73.3926598 | 69 | 70.8778922 |
| 73.3017507 | 69 | 70.9057248 |
| 73.0290235 | 69 | 70.9368573 |
| 73.1199326 | 69 | 70.9720242 |
| 73.1199326 | 69 | 71.0129289 |
| 72.9381144 | 69 | 71.0549992 |
| 73.0290235 | 69 | 71.0983246 |
| 73.2108417 | 69 | 71.1290985 |
| 73.3926598 | 69 | 71.1540448 |
| 73.4835689 | 69 | 71.1790809 |
| 73.8472053 | 69 | 71.2063582 |
| 74.4835689 | 69 | 71.2346218 |
| 74.9381144 | 69 | 71.265306  |
| 74.8472053 | 69 | 71.2943764 |
| 74.2108417 | 69 | 71.318852  |
| 73.3926598 | 69 | 71.3409965 |
| 73.3017507 | 63 | 71.3549825 |
| 73.0290235 | 63 | 71.356148  |
| 72.7562962 | 63 | 71.351486  |
| 71.574478  | 63 | 71.3246795 |
| 71.7562962 | 63 | 71.3083624 |
| 71.6653871 | 63 | 71.2827214 |
| 71.9381144 | 63 | 71.2559149 |
| 72.0290235 | 63 | 71.2314394 |
| 71.4835689 | 63 | 71.2057629 |
| 71.8472053 | 63 | 71.1859493 |
| 70.9553055 | 63 | 71.1696323 |
| 71.2699908 | 63 | 71.1603083 |
| 71.2699908 | 63 | 71.1486533 |
| 71.5636971 | 63 | 71.1369983 |
| 70.9381144 | 63 | 71.1160193 |
| 70.2108417 | 63 | 71.1020333 |
| 70.0290235 | 63 | 71.0880472 |
| 69.9381144 | 63 | 71.0763922 |
| 69.9381144 | 63 | 71.0519167 |
| 70.1199326 | 63 | 70.9983036 |
| 70.574478  | 63 | 70.9307046 |
| 70.3017507 | 63 | 70.8537815 |
| 70.2822909 | 63 | 70.7803549 |
| 70.3817872 | 63 | 70.7137569 |
| 70.366448  | 63 | 70.6251788 |

|            |    |            |
|------------|----|------------|
| 70.6811333 | 63 | 70.5389317 |
| 70.8559585 | 63 | 70.4561811 |
| 70.8559585 | 63 | 70.3734305 |
| 70.9538606 | 63 | 70.2941764 |
| 70.2475669 | 63 | 70.2085421 |
| 70.2475669 | 63 | 70.1409431 |
| 70.0727417 | 63 | 70.073344  |
| 69.9748396 | 63 | 70.0045794 |
| 69.7790354 | 63 | 69.9486354 |
| 69.8769375 | 63 | 69.8891948 |
| 69.387427  | 63 | 69.8144562 |
| 69.0290235 | 63 | 69.7321867 |
| 69.0290235 | 63 | 69.6548481 |
| 68.7562962 | 63 | 69.5817716 |
| 68.3926598 | 63 | 69.5459428 |
| 67.9381144 | 63 | 69.5137898 |
| 67.6653871 | 63 | 69.482085  |
| 68.4835689 | 63 | 69.4533389 |
| 68.4835689 | 63 | 69.4397443 |
| 68.3926598 | 63 | 69.4350823 |
| 68.4835689 | 63 | 69.4339168 |
| 68.3926598 | 63 | 69.4315858 |
| 68.8472053 | 63 | 69.4339168 |
| 68.9381144 | 63 | 69.4397443 |
| 69.574478  | 63 | 69.4397443 |
| 69.7562962 | 63 | 69.4441859 |
| 69.9381144 | 63 | 69.4364345 |
| 69.7562962 | 63 | 69.4181937 |
| 70.2108417 | 63 | 69.3938564 |
| 70.3926598 | 63 | 69.3775394 |
| 70.2108417 | 63 | 69.3682154 |
| 69.9381144 | 63 | 69.3600569 |
| 67.9381144 | 63 | 69.3472364 |
| 66.8472053 | 63 | 69.3320848 |
| 66.6653871 | 63 | 69.3192643 |
| 66.8472053 | 63 | 69.3064438 |
| 66.574478  | 63 | 69.2971198 |
| 66.4835689 | 63 | 69.2903763 |
| 66.574478  | 63 | 69.2741987 |
| 66.574478  | 63 | 69.2558867 |
| 66.6653871 | 63 | 69.2335403 |
| 66.9381144 | 63 | 69.2112836 |
| 66.258638  | 63 | 69.1855303 |
| 67.7562962 | 63 | 69.1515289 |
| 67.9381144 | 63 | 69.125417  |

|            |    |            |
|------------|----|------------|
| 68.0290235 | 63 | 69.0981397 |
| 69.1199326 | 63 | 69.0707727 |
| 69.2108417 | 63 | 69.0399988 |
| 68.6539571 | 63 | 69.0082387 |
| 68.52109   | 63 | 68.9728925 |
| 68.8147963 | 63 | 68.9368291 |
| 68.5108737 | 63 | 68.9030295 |
| 70.5980131 | 63 | 68.8750575 |
| 70.7938173 | 63 | 68.8587405 |
| 70.556055  | 63 | 68.848251  |
| 70.514097  | 63 | 68.8517475 |
| 70.514097  | 63 | 68.862237  |
| 71.3926598 | 63 | 68.8657335 |
| 71.574478  | 63 | 68.8680645 |
| 71.7562962 | 63 | 68.8680645 |
| 72.2108417 | 63 | 68.8494165 |
| 71.9381144 | 63 | 68.827272  |
| 71.8472053 | 63 | 68.7958034 |
| 71.3017507 | 63 | 68.7643349 |
| 70.6653871 | 63 | 68.7165493 |
| 69.8472053 | 63 | 68.6652673 |
| 69.6653871 | 63 | 68.6046612 |
| 69.6653871 | 63 | 68.5459215 |
| 69.4835689 | 63 | 68.4807497 |
| 69.3926598 | 63 | 68.4084886 |
| 68.9381144 | 63 | 68.3362275 |
| 68.7562962 | 63 | 68.272125  |
| 69.1199326 | 63 | 68.2371599 |
| 69.574478  | 63 | 68.2173464 |
| 69.574478  | 63 | 68.2126844 |
| 69.7562962 | 63 | 68.2080224 |
| 69.1199326 | 63 | 68.2068569 |
| 68.9381144 | 63 | 68.2185119 |
| 68.9381144 | 63 | 68.2371599 |
| 69.1199326 | 63 | 68.2593044 |
| 68.8472053 | 63 | 68.281449  |
| 68.3017507 | 63 | 68.300097  |
| 68.2108417 | 63 | 68.3297872 |
| 68.1199326 | 63 | 68.3554283 |
| 67.9381144 | 63 | 68.3880623 |
| 67.574478  | 63 | 68.4195308 |
| 67.3017507 | 63 | 68.4358478 |
| 67.1199326 | 63 | 68.4568269 |
| 66.574478  | 63 | 68.4849454 |
| 66.3926598 | 63 | 68.5205949 |

|            |    |            |
|------------|----|------------|
| 66.8472053 | 63 | 68.557141  |
| 67.4835689 | 63 | 68.6045764 |
| 67.574478  | 63 | 68.6252537 |
| 68.2108417 | 63 | 68.629278  |
| 68.4835689 | 63 | 68.6391297 |
| 68.7562962 | 63 | 68.6503262 |
| 68.6653871 | 63 | 68.6677985 |
| 68.3926598 | 63 | 68.6677315 |
| 67.0290235 | 63 | 68.6640782 |
| 66.6653871 | 63 | 68.6477838 |
| 66.3926598 | 63 | 68.6191171 |
| 66.4835689 | 63 | 68.5886573 |
| 65.8472053 | 63 | 68.559363  |
| 65.7562962 | 63 | 68.5247792 |
| 65.2108417 | 63 | 68.4958435 |
| 65.1745986 | 63 | 68.4799077 |
| 65.1274368 | 63 | 68.4725786 |
| 64.7562962 | 63 | 68.4659668 |
| 64.574478  | 63 | 68.4596239 |
| 64.9381144 | 63 | 68.4596239 |
| 65.2108417 | 63 | 68.4607894 |
| 65.3017507 | 63 | 68.4584584 |
| 66.3017507 | 63 | 68.4404791 |
| 66.4835689 | 63 | 68.4264931 |
| 66.4835689 | 63 | 68.4160036 |
| 67.3926598 | 63 | 68.4043486 |
| 68.0290235 | 63 | 68.3996865 |
| 68.3017507 | 63 | 68.3903625 |
| 68.3926598 | 63 | 68.3693835 |
| 68.3926598 | 63 | 68.335584  |
| 68.574478  | 63 | 68.3017844 |
| 69.7562962 | 63 | 68.275079  |
| 70.4835689 | 63 | 68.2469501 |
| 70.4835689 | 63 | 68.2119851 |
| 70.3926598 | 63 | 68.1793511 |
| 70.8472053 | 63 | 68.1548755 |
| 70.8472053 | 63 | 68.135062  |
| 71.3017507 | 63 | 68.121076  |
| 71.6653871 | 63 | 68.1152485 |
| 72.2108417 | 63 | 68.1105865 |
| 72.2108417 | 63 | 68.100097  |
| 71.1077067 | 63 | 68.0826145 |
| 71.3244899 | 63 | 68.0604699 |
| 71.387427  | 63 | 68.0301669 |
| 71.8769375 | 63 | 67.9905399 |

|            |    |            |
|------------|----|------------|
| 71.387427  | 63 | 67.9497473 |
| 71.2895249 | 63 | 67.9112858 |
| 70.4853291 | 63 | 67.8798173 |
| 69.9748396 | 63 | 67.8681623 |
| 69.5622522 | 63 | 67.8623348 |
| 69.5622522 | 63 | 67.8611692 |
| 68.6042102 | 63 | 67.8576727 |
| 68.408406  | 63 | 67.8588382 |
| 68.6042102 | 63 | 67.8576727 |
| 69.0937207 | 63 | 67.8623348 |
| 69.1496648 | 63 | 67.8627994 |
| 68.9888256 | 63 | 67.8650342 |
| 69.3926598 | 63 | 67.8708617 |
| 69.0290235 | 63 | 67.8836822 |
| 68.574478  | 63 | 67.8941717 |
| 67.7175433 | 63 | 67.9011647 |
| 68.4835689 | 63 | 67.9069922 |
| 68.7562962 | 63 | 67.8988337 |
| 68.8472053 | 63 | 67.8871787 |
| 68.7562962 | 63 | 67.8813512 |
| 68.2108417 | 63 | 67.8638687 |
| 67.3017507 | 63 | 67.8428897 |
| 66.4835689 | 63 | 67.8230762 |
| 66.2108417 | 63 | 67.8184142 |
| 66.218728  | 63 | 67.8160832 |
| 66.0167881 | 63 | 67.7962696 |
| 65.3926598 | 63 | 67.7496496 |
| 65.3926598 | 63 | 67.704195  |
| 65.6653871 | 63 | 67.6610715 |
| 65.7562962 | 63 | 67.6167825 |
| 66.0290235 | 63 | 67.5561764 |
| 66.1199326 | 63 | 67.4803703 |
| 66.0290235 | 63 | 67.4050124 |
| 66.0290235 | 63 | 67.3277718 |
| 66.1199326 | 63 | 67.2741587 |
| 65.8472053 | 63 | 67.2310352 |
| 65.8472053 | 63 | 67.2067164 |
| 65.3926598 | 63 | 67.1796183 |
| 65.574478  | 63 | 67.1552099 |
| 65.6653871 | 63 | 67.1175327 |
| 65.9381144 | 63 | 67.0846964 |
| 66.1199326 | 63 | 67.0557156 |
| 66.2108417 | 63 | 67.0157952 |
| 66.3017507 | 63 | 66.986185  |
| 66.2108417 | 63 | 66.9749538 |



|            |    |            |
|------------|----|------------|
| 65.9381144 | 63 | 66.9637226 |
| 65.6653871 | 63 | 66.964774  |
| 65.574478  | 63 | 66.9683358 |
| 65.2108417 | 63 | 66.9718975 |
| 65.3017507 | 63 | 66.9679283 |
| 65.2108417 | 63 | 66.9471938 |
| 65.574478  | 63 | 66.9184801 |
| 65.7562962 | 63 | 66.8765202 |
| 65.7562962 | 63 | 66.8379672 |
| 65.7562962 | 63 | 66.8099951 |
| 65.6653871 | 63 | 66.798837  |
| 65.574478  | 63 | 66.7778579 |
| 66.0290235 | 63 | 66.7545479 |
| 66.0290235 | 63 | 66.7300724 |
| 66.3926598 | 63 | 66.7079279 |
| 66.7562962 | 63 | 66.6916108 |
| 68.0290235 | 63 | 66.6869488 |
| 68.2108417 | 63 | 66.6881143 |
| 67.0290235 | 63 | 66.6881143 |
| 66.1199326 | 63 | 66.6880132 |
| 66.9381144 | 63 | 66.6858391 |
| 67.1199326 | 63 | 66.6870046 |
| 66.9381144 | 63 | 66.6893356 |
| 66.1199326 | 63 | 66.6870046 |
| 64.9343265 | 63 | 66.6870046 |
| 65.423837  | 63 | 66.6881701 |
| 65.6406202 | 63 | 66.6881701 |
| 68.0290235 | 63 | 66.6881701 |
| 68.8472053 | 63 | 66.6916666 |
| 69.2108417 | 63 | 66.6963286 |
| 69.2108417 | 63 | 66.7149766 |
| 69.4835689 | 63 | 66.7429487 |
| 68.9381144 | 63 | 66.7779137 |
| 68.8261972 | 63 | 66.8117132 |
| 69.0290235 | 63 | 66.8513403 |
| 67.3715355 | 63 | 66.8874708 |
| 67.6652418 | 63 | 66.9154428 |
| 68.6862208 | 63 | 66.9422494 |
| 68.6862208 | 63 | 66.9608974 |
| 68.6862208 | 63 | 66.9760489 |
| 68.6862208 | 63 | 66.9888694 |
| 68.882025  | 63 | 67.0063519 |
| 68.7841229 | 63 | 67.0215034 |
| 67.5323746 | 63 | 67.0448135 |
| 66.7491579 | 63 | 67.069289  |

|            |    |            |
|------------|----|------------|
| 66.1197872 | 63 | 67.101923  |
| 66.0218851 | 63 | 67.129895  |
| 66.3926598 | 63 | 67.1497086 |
| 66.8472053 | 63 | 67.1741841 |
| 66.8472053 | 63 | 67.1986596 |
| 66.9381144 | 63 | 67.2120784 |
| 66.9381144 | 63 | 67.2342229 |
| 67.0290235 | 63 | 67.2563674 |
| 66.9381144 | 63 | 67.283174  |
| 66.9381144 | 63 | 67.285986  |
| 66.574478  | 63 | 67.302303  |
| 66.2108417 | 63 | 67.2793844 |
| 66.2108417 | 63 | 67.2506382 |
| 65.8472053 | 63 | 67.2433194 |
| 65.4835689 | 63 | 67.2501659 |
| 65.574478  | 63 | 67.2452677 |
| 65.4835689 | 63 | 67.234542  |
| 65.7562962 | 63 | 67.2211266 |
| 66.1199326 | 63 | 67.2232214 |
| 66.1199326 | 63 | 67.2400681 |
| 66.0290235 | 63 | 67.2569147 |
| 66.3017507 | 63 | 67.2772578 |
| 66.4835689 | 63 | 67.2682355 |
| 67.3017507 | 63 | 67.2537444 |
| 68.0290235 | 63 | 67.2320809 |
| 68.1199326 | 63 | 67.2106864 |
| 68.2108417 | 63 | 67.1892918 |
| 68.7562962 | 63 | 67.1774006 |
| 68.7562962 | 63 | 67.182332  |
| 68.3017507 | 63 | 67.1834975 |
| 68.3017507 | 63 | 67.2047473 |
| 67.7562962 | 63 | 67.2129077 |
| 67.3926598 | 63 | 67.2009856 |
| 66.9381144 | 63 | 67.176243  |
| 67.0290235 | 63 | 67.1351833 |
| 66.7562962 | 63 | 67.0917927 |
| 67.0290235 | 63 | 67.0482227 |
| 67.2108417 | 63 | 67.0129009 |
| 67.7562962 | 63 | 66.9924617 |
| 67.7562962 | 63 | 66.9925532 |
| 67.3017507 | 63 | 67.0042101 |
| 67.6653871 | 63 | 67.0171221 |
| 67.6653871 | 63 | 67.0229496 |
| 66.7120522 | 63 | 67.0299426 |
| 67.3017507 | 63 | 67.0381011 |

|            |    |            |
|------------|----|------------|
| 67.7562962 | 63 | 67.0439287 |
| 68.1199326 | 63 | 67.0450942 |
| 66.6119991 | 63 | 67.0415976 |
| 68.0290235 | 63 | 67.0346046 |
| 66.2413697 | 63 | 67.0159566 |
| 65.9686425 | 63 | 67.0008051 |
| 66.4581529 | 63 | 66.9868191 |
| 66.6539571 | 63 | 66.9611781 |
| 66.556055  | 63 | 66.9471921 |
| 66.2833278 | 63 | 66.9287803 |
| 65.8917194 | 63 | 66.9079479 |
| 66.2833278 | 63 | 66.8907913 |
| 66.2483627 | 63 | 66.8678969 |
| 66.7378732 | 63 | 66.8425258 |
| 67.2273837 | 63 | 66.8095921 |
| 67.3252858 | 63 | 66.7721737 |
| 67.7168942 | 63 | 66.7365484 |
| 67.52109   | 63 | 66.6993093 |
| 67.542069  | 63 | 66.6538221 |
| 67.8147963 | 63 | 66.6176916 |
| 68.0106005 | 63 | 66.586223  |
| 69.2108417 | 63 | 66.558251  |
| 69.1199326 | 63 | 66.5267825 |
| 69.0290235 | 63 | 66.4964794 |
| 68.3017507 | 63 | 66.4696729 |
| 67.7562962 | 63 | 66.4440319 |
| 66.7562962 | 63 | 66.4218874 |
| 65.4835689 | 63 | 66.3880878 |
| 65.3017507 | 63 | 66.3612813 |
| 65.4835689 | 63 | 66.3321438 |
| 66.0290235 | 63 | 66.3018407 |
| 65.9381144 | 63 | 66.2657102 |
| 66.7562962 | 63 | 66.2319107 |
| 67.0290235 | 63 | 66.1876216 |
| 67.0290235 | 63 | 66.1654771 |
| 66.8472053 | 63 | 66.1503256 |
| 67.3926598 | 63 | 66.1270156 |
| 67.4835689 | 63 | 66.0967125 |
| 67.3926598 | 63 | 66.0588182 |
| 67.0290235 | 63 | 66.0063707 |
| 66.7562962 | 63 | 65.9387716 |
| 66.3926598 | 63 | 65.8548555 |
| 65.4835689 | 63 | 65.7902719 |
| 65.3926598 | 63 | 65.7110178 |
| 65.1199326 | 63 | 65.6570134 |

|            |    |            |
|------------|----|------------|
| 64.2108417 | 63 | 65.6134985 |
| 64.7562962 | 63 | 65.5602113 |
| 64.0474529 | 63 | 65.5114068 |
| 63.9495509 | 63 | 65.4556989 |
| 64.145355  | 63 | 65.404653  |
| 63.9705299 | 63 | 65.3586278 |
| 64.140988  | 63 | 65.3157404 |
| 63.5511019 | 63 | 65.2826254 |
| 63.11039   | 63 | 65.2455655 |
| 63.5229774 | 63 | 65.2033954 |
| 63.5789215 | 63 | 65.1553081 |
| 63.7537467 | 63 | 65.0940417 |
| 65.2108417 | 63 | 65.0294581 |
| 65.6653871 | 63 | 64.96344   |
| 66.0290235 | 63 | 64.895091  |
| 66.3017507 | 63 | 64.8347211 |
| 66.3926598 | 63 | 64.76246   |
| 66.2108417 | 63 | 64.6820732 |
| 66.3017507 | 63 | 64.5993554 |
| 66.0290235 | 63 | 64.5237203 |
| 64.7562962 | 63 | 64.4600987 |
| 64.8472053 | 63 | 64.4105529 |
| 64.7562962 | 63 | 64.3719008 |
| 64.3926598 | 63 | 64.3519752 |
| 64.2108417 | 63 | 64.3269945 |
| 64.574478  | 63 | 64.2947518 |
| 64.3017507 | 63 | 64.2796003 |
| 66.0290235 | 63 | 64.2562903 |
| 66.1199326 | 63 | 64.2329803 |
| 65.8472053 | 63 | 64.2120013 |
| 65.3017507 | 63 | 64.1933532 |
| 63.7562962 | 63 | 64.1677122 |
| 63.2108417 | 63 | 64.1385747 |
| 62.4835689 | 63 | 64.1117682 |
| 61.574478  | 63 | 64.0931201 |
| 61.574478  | 63 | 64.0721411 |
| 61.8472053 | 63 | 64.0546586 |
| 62.0290235 | 63 | 64.0523276 |
| 62.574478  | 63 | 64.0569896 |
| 62.3017507 | 63 | 64.0709756 |
| 62.8472053 | 63 | 64.0977821 |
| 62.2108417 | 63 | 64.1222577 |
| 62.3017507 | 63 | 64.1604829 |
| 62.3017507 | 63 | 64.1914655 |
| 62.9381144 | 63 | 64.2235239 |

|            |               |
|------------|---------------|
| 63.6653871 | 63 64.2640995 |
| 63.8472053 | 63 64.3048207 |
| 63.9381144 | 63 64.3629664 |
| 63.574478  | 63 64.4270313 |
| 62.9381144 | 63 64.4870617 |
| 62.4835689 | 63 64.5413543 |
| 62.3926598 | 63 64.5896401 |
| 62.4835689 | 63 64.5946877 |
| 63.3017507 | 63 64.5912182 |
| 63.574478  | 63 64.5817419 |
| 62.8497613 | 63 64.5767406 |
| 62.5770341 | 63 64.5687807 |
| 62.4022089 | 63 64.5676344 |
| 62.7938173 | 63 64.5663089 |
| 62.8917194 | 63 64.5684799 |
| 62.46871   | 65 64.588223  |
| 63.7475478 | 65 64.6118213 |
| 63.535076  | 65 64.6428608 |
| 63.514097  | 65 64.6808037 |
| 64.7562962 | 65 64.7198225 |
| 64.9381144 | 65 64.7611722 |
| 65.2108417 | 65 64.809246  |
| 65.3926598 | 65 64.853535  |
| 65.3926598 | 65 64.8989896 |
| 65.3926598 | 65 64.9537681 |
| 65.2108417 | 65 65.0143742 |
| 65.3017507 | 65 65.0947938 |
| 65.574478  | 65 65.1798754 |
| 65.1199326 | 65 65.2614604 |
| 65.0290235 | 65 65.353535  |
| 65.3017507 | 65 65.4467751 |
| 65.7562962 | 65 65.535922  |
| 66.2108417 | 65 65.6070176 |
| 66.3017507 | 65 65.6687892 |
| 66.6653871 | 65 65.7328917 |
| 67.0290235 | 65 65.7865048 |
| 66.3661915 | 65 65.8517728 |
| 66.6459118 | 65 65.9088824 |
| 67.1354223 | 65 65.9648265 |
| 67.3172405 | 65 66.0161085 |
| 68.0864712 | 65 66.056901  |
| 68.1074503 | 65 66.0930316 |
| 68.2053524 | 65 66.1548031 |
| 67.813744  | 65 66.2270642 |
| 67.5200377 | 65 66.3086493 |

|            |    |            |
|------------|----|------------|
| 65.6045564 | 65 | 66.3948964 |
| 65.3947662 | 65 | 66.4834745 |
| 65.2898711 | 65 | 66.5708871 |
| 65.9116461 | 65 | 66.6443136 |
| 65.7717859 | 65 | 66.7142437 |
| 66.1214363 | 65 | 66.793465  |
| 66.1983593 | 65 | 66.8613572 |
| 66.1983593 | 65 | 66.9427872 |
| 66.2962614 | 65 | 67.0437048 |
| 66.6878698 | 65 | 67.1503602 |
| 67.1773803 | 65 | 67.2892453 |
| 67.3522055 | 65 | 67.4129006 |
| 67.2543034 | 65 | 67.5414509 |
| 67.7997579 | 65 | 67.6650701 |
| 68.0515062 | 65 | 67.7738396 |
| 69.4835689 | 65 | 67.857775  |
| 69.6653871 | 65 | 67.9392897 |
| 70.1199326 | 65 | 68.0227768 |
| 70.0290235 | 65 | 68.1090432 |
| 70.0290235 | 65 | 68.215661  |
| 69.8472053 | 65 | 68.3273891 |
| 68.8472053 | 65 | 68.4467377 |
| 68.7562962 | 65 | 68.55479   |
| 68.8472053 | 65 | 68.6598837 |
| 68.8006628 | 65 | 68.7598671 |
| 67.574478  | 65 | 68.8475679 |
| 67.3926598 | 65 | 68.9206552 |
| 67.3017507 | 65 | 68.9848667 |
| 67.0290235 | 65 | 69.0459403 |
| 67.3017507 | 65 | 69.1009174 |
| 66.7562962 | 65 | 69.1463016 |
| 66.6653871 | 65 | 69.2084125 |
| 66.9381144 | 65 | 69.2669372 |
| 66.8472053 | 65 | 69.3028692 |
| 66.6653871 | 65 | 69.3306426 |
| 68.7562962 | 65 | 69.3462231 |
| 69.2108417 | 65 | 69.3592037 |
| 69.3017507 | 65 | 69.3720946 |
| 69.2108417 | 65 | 69.3911716 |
| 69.3017507 | 65 | 69.411683  |
| 69.3017507 | 65 | 69.4559763 |
| 69.0290235 | 65 | 69.504718  |
| 69.0290235 | 65 | 69.5619799 |
| 69.0290235 | 65 | 69.6147668 |
| 67.8726278 | 65 | 69.6670158 |

|            |    |            |
|------------|----|------------|
| 68.7537467 | 65 | 69.717113  |
| 70.6653871 | 65 | 69.7638931 |
| 71.2108417 | 65 | 69.8141697 |
| 73.3017507 | 65 | 69.8643566 |
| 73.3926598 | 65 | 69.9095229 |
| 73.5619957 | 65 | 69.9507445 |
| 73.1564013 | 65 | 69.9873936 |
| 73.2403174 | 65 | 70.0218015 |
| 71.4850726 | 65 | 70.0445543 |
| 71.5689887 | 65 | 70.0468737 |
| 71.9046531 | 65 | 70.0323575 |
| 72.1214363 | 65 | 70.0192758 |
| 73.7088489 | 65 | 70.0016217 |
| 73.9256321 | 65 | 69.9791263 |
| 74.6109468 | 65 | 69.9516102 |
| 74.0025552 | 65 | 69.9314458 |
| 73.3172405 | 65 | 69.9228468 |
| 72.82773   | 65 | 69.9129029 |
| 72.1424153 | 65 | 69.8957867 |
| 71.4571006 | 65 | 69.869226  |
| 71.2193384 | 65 | 69.8528271 |
| 71.0654922 | 65 | 69.8349937 |
| 70.9536041 | 65 | 69.8104362 |
| 70.5689887 | 65 | 69.7822926 |
| 71.2108417 | 65 | 69.7659756 |
| 71.2108417 | 65 | 69.7508241 |
| 69.9381144 | 65 | 69.7403346 |
| 69.4835689 | 65 | 69.7251831 |
| 69.3017507 | 65 | 69.7123625 |
| 69.1199326 | 65 | 69.6873568 |
| 69.2108417 | 65 | 69.6355446 |
| 69.3017507 | 65 | 69.5753945 |
| 69.1199326 | 65 | 69.536933  |
| 69.0594281 | 65 | 69.4996369 |
| 69.1966247 | 65 | 69.4576789 |
| 69.7562962 | 65 | 69.4192173 |
| 70.0290235 | 65 | 69.3842523 |
| 69.8472053 | 65 | 69.3504528 |
| 70.0290235 | 65 | 69.3248118 |
| 69.8472053 | 65 | 69.3233203 |
| 70.1199326 | 65 | 69.325684  |
| 70.2108417 | 65 | 69.309367  |
| 70.2108417 | 65 | 69.2872225 |
| 70.3926598 | 65 | 69.2406024 |
| 70.2108417 | 65 | 69.1858239 |

|            |    |            |
|------------|----|------------|
| 69.9381144 | 65 | 69.1253778 |
| 69.574478  | 65 | 69.0643042 |
| 68.2324233 | 65 | 69.0033203 |
| 68.3513045 | 65 | 68.963674  |
| 68.6450107 | 65 | 68.921992  |
| 68.7429128 | 65 | 68.8897869 |
| 68.2743814 | 65 | 68.8559681 |
| 67.882773  | 65 | 68.8041289 |
| 68.2743814 | 65 | 68.7425173 |
| 68.1764793 | 65 | 68.6686232 |
| 67.9806751 | 65 | 68.5920395 |
| 67.5121436 | 65 | 68.5219108 |
| 66.7289268 | 65 | 68.4557269 |
| 66.2953604 | 65 | 68.4006601 |
| 66.0016541 | 65 | 68.3543794 |
| 65.3862695 | 65 | 68.311147  |
| 64.8338219 | 65 | 68.2628939 |
| 66.0290235 | 65 | 68.2114132 |
| 65.574478  | 65 | 68.1648636 |
| 65.8472053 | 65 | 68.105423  |
| 65.7562962 | 65 | 68.0483134 |
| 65.8472053 | 65 | 68.0016934 |
| 64.7149408 | 65 | 67.9609009 |
| 64.7149408 | 65 | 67.9236048 |
| 64.5191366 | 63 | 67.8933018 |
| 66.3017507 | 63 | 67.8734883 |
| 66.3017507 | 63 | 67.8606678 |
| 66.0290235 | 63 | 67.8571712 |
| 66.3017507 | 63 | 67.8486229 |
| 66.3017507 | 63 | 67.8383157 |
| 66.3926598 | 63 | 67.8161712 |
| 67.0290235 | 63 | 67.7847026 |
| 67.7562962 | 63 | 67.7555651 |
| 68.9381144 | 63 | 67.7229311 |
| 69.3926598 | 63 | 67.687966  |
| 69.4835689 | 63 | 67.648339  |
| 69.6653871 | 63 | 67.606381  |
| 69.1199326 | 63 | 67.5690849 |
| 68.8472053 | 63 | 67.5259614 |
| 68.3926598 | 63 | 67.4840033 |
| 68.4835689 | 63 | 67.4443763 |
| 68.3926598 | 63 | 67.4094113 |
| 68.317794  | 63 | 67.3904866 |
| 69.3926598 | 63 | 67.3758652 |
| 69.4835689 | 63 | 67.3598095 |



|            |    |            |
|------------|----|------------|
| 69.6653871 | 63 | 67.343664  |
| 69.1199326 | 63 | 67.3486769 |
| 68.8472053 | 63 | 67.3633724 |
| 68.0290235 | 63 | 67.3634533 |
| 67.8472053 | 63 | 67.36981   |
| 67.6653871 | 63 | 67.3827115 |
| 67.8472053 | 63 | 67.4254687 |
| 67.8472053 | 63 | 67.4608039 |
| 67.8472053 | 63 | 67.496677  |
| 67.3017507 | 63 | 67.5225089 |
| 66.9381144 | 63 | 67.5562303 |
| 66.9381144 | 63 | 67.5970344 |
| 66.574478  | 63 | 67.6187499 |
| 66.7562962 | 63 | 67.6538507 |
| 66.3017507 | 63 | 67.676642  |
| 66.3017507 | 63 | 67.6902887 |
| 66.3926598 | 63 | 67.7002596 |
| 66.7562962 | 63 | 67.7174847 |
| 67.6653871 | 63 | 67.7347098 |
| 68.3017507 | 63 | 67.7509487 |
| 68.8472053 | 63 | 67.7455888 |
| 68.3926598 | 63 | 67.7424702 |
| 68.3926598 | 63 | 67.7413239 |
| 68.0290235 | 63 | 67.7329157 |
| 67.574478  | 63 | 67.7399087 |
| 67.574478  | 63 | 67.7422397 |
| 67.4835689 | 63 | 67.7317502 |
| 67.1199326 | 63 | 67.7107712 |
| 67.0290235 | 63 | 67.6688132 |
| 66.9381144 | 63 | 67.6186966 |
| 67.3017507 | 63 | 67.5662491 |
| 67.0290235 | 63 | 67.510305  |
| 66.9381144 | 63 | 67.4695125 |
| 66.8472053 | 63 | 67.4333819 |
| 66.8472053 | 63 | 67.4054099 |
| 66.7562962 | 63 | 67.3739414 |
| 67.2108417 | 63 | 67.3424728 |
| 67.3926598 | 63 | 67.3154606 |
| 67.4835689 | 63 | 67.2828266 |
| 68.6653871 | 63 | 67.2525236 |
| 69.0290235 | 63 | 67.2198895 |
| 68.2806925 | 63 | 67.1942485 |
| 68.6723009 | 63 | 67.174435  |
| 68.9869862 | 63 | 67.158118  |
| 70.8472053 | 63 | 67.134808  |

|            |    |            |
|------------|----|------------|
| 69.4850726 | 63 | 67.1149944 |
| 69.0934642 | 63 | 67.0963464 |
| 68.0165412 | 63 | 67.0800294 |
| 68.0165412 | 63 | 67.0695399 |
| 68.0165412 | 63 | 67.0707054 |
| 67.7228349 | 63 | 67.0800294 |
| 68.3123354 | 63 | 67.0576054 |
| 67.6249328 | 63 | 67.0388573 |
| 66.820737  | 63 | 67.0180471 |
| 66.6249328 | 63 | 67.0017195 |
| 66.0584992 | 63 | 66.9900645 |
| 66.0584992 | 63 | 66.970251  |
| 65.7857719 | 63 | 66.9434445 |
| 65.883674  | 63 | 66.9108105 |
| 66.0584992 | 63 | 66.8700179 |
| 65.9396181 | 63 | 66.8245634 |
| 65.6459118 | 63 | 66.7826053 |
| 66.8472053 | 63 | 66.7441438 |
| 66.574478  | 63 | 66.7091788 |
| 66.2108417 | 63 | 66.6800412 |
| 66.1199326 | 63 | 66.6520692 |
| 65.6653871 | 63 | 66.6229317 |
| 65.4835689 | 63 | 66.5984561 |
| 65.3926598 | 63 | 66.5763116 |
| 65.3017507 | 63 | 66.5634911 |
| 65.9381144 | 63 | 66.5588291 |
| 66.0290235 | 63 | 66.5634911 |
| 66.2108417 | 63 | 66.5786426 |
| 66.0290235 | 63 | 66.5926286 |
| 65.9381144 | 63 | 66.6066147 |
| 66.2108417 | 63 | 66.6171042 |
| 66.8472053 | 63 | 66.6217662 |
| 67.1199326 | 63 | 66.6240972 |
| 67.1199326 | 63 | 66.6240972 |
| 67.1199326 | 63 | 66.6182697 |
| 67.3017507 | 63 | 66.6089457 |
| 66.7562962 | 63 | 66.6138776 |
| 66.0290235 | 63 | 66.6149545 |
| 66.1199326 | 63 | 66.6143279 |
| 66.3926598 | 63 | 66.5921834 |
| 66.574478  | 63 | 66.5805091 |
| 67.0290235 | 63 | 66.5715245 |
| 67.3926598 | 63 | 66.570519  |
| 67.6653871 | 63 | 66.568348  |
| 65.1890443 | 63 | 66.5650115 |

|            |    |            |
|------------|----|------------|
| 65.1121212 | 63 | 66.566606  |
| 65.1331002 | 63 | 66.5583118 |
| 65.0282051 | 63 | 66.564658  |
| 65.3926598 | 63 | 66.5894728 |
| 64.8472053 | 63 | 66.6202945 |
| 64.6653871 | 63 | 66.6595437 |
| 65.1199326 | 63 | 66.7057858 |
| 65.1199326 | 63 | 66.7531935 |
| 65.3017507 | 63 | 66.797015  |
| 65.1199326 | 63 | 66.8292711 |
| 65.3926598 | 63 | 66.8513963 |
| 65.3017507 | 63 | 66.874956  |
| 65.3017507 | 63 | 66.8842801 |
| 65.3926598 | 63 | 66.9064246 |
| 65.2108417 | 63 | 66.9390586 |
| 65.2108417 | 63 | 66.9775201 |
| 65.3017507 | 63 | 67.0183127 |
| 65.9381144 | 63 | 67.0614362 |
| 66.9381144 | 63 | 67.1045598 |
| 67.3926598 | 63 | 67.1453523 |
| 68.1199326 | 63 | 67.1724355 |
| 67.9381144 | 63 | 67.2066911 |
| 67.9381144 | 63 | 67.2268224 |
| 67.574478  | 63 | 67.2523329 |
| 67.574478  | 63 | 67.2894984 |
| 67.574478  | 63 | 67.3346432 |
| 67.4835689 | 63 | 67.3729742 |
| 68.2108417 | 63 | 67.4000985 |
| 68.3017507 | 63 | 67.4245332 |
| 68.6653871 | 63 | 67.4422439 |
| 68.7562962 | 63 | 67.4596856 |
| 68.9381144 | 63 | 67.4841202 |
| 69.1199326 | 63 | 67.5175403 |
| 68.574478  | 63 | 67.5470852 |
| 68.3926598 | 63 | 67.5812026 |
| 67.9381144 | 63 | 67.6149613 |
| 67.8472053 | 63 | 67.6553133 |
| 67.7562962 | 63 | 67.6872378 |
| 67.8472053 | 63 | 67.70939   |
| 67.6653871 | 63 | 67.7588076 |
| 68.1199326 | 63 | 67.8054458 |
| 68.7562962 | 63 | 67.8536082 |
| 69.0290235 | 63 | 67.9018602 |
| 69.1199326 | 63 | 67.9535086 |
| 69.6653871 | 63 | 68.0083846 |

|            |    |            |
|------------|----|------------|
| 69.4835689 | 63 | 68.0653226 |
| 69.3017507 | 63 | 68.13275   |
| 68.574478  | 63 | 68.1891501 |
| 67.6653871 | 63 | 68.2507501 |
| 67.4835689 | 63 | 68.3071501 |
| 67.574478  | 63 | 68.3537779 |
| 68.3017507 | 63 | 68.3796956 |
| 68.7562962 | 63 | 68.3943169 |
| 69.1199326 | 63 | 68.401497  |
| 68.8472053 | 63 | 68.4041943 |
| 68.8472053 | 63 | 68.4031262 |
| 68.7562962 | 63 | 68.3968581 |
| 68.4835689 | 63 | 68.3836867 |
| 68.0506052 | 63 | 68.3584121 |
| 68.7009548 | 63 | 68.3273099 |
| 67.781083  | 63 | 68.2916353 |
| 68.0188452 | 63 | 68.2746088 |
| 68.837027  | 63 | 68.2525617 |
| 69.7321319 | 63 | 68.2326662 |
| 69.837027  | 63 | 68.2039847 |
| 69.2356284 | 63 | 68.1753032 |
| 69.0258382 | 63 | 68.1452768 |
| 68.5013627 | 63 | 68.1084368 |
| 68.6622019 | 63 | 68.0754518 |
| 68.6622019 | 63 | 68.0428255 |
| 68.6357867 | 63 | 68.0143233 |
| 68.4244396 | 63 | 67.9897659 |
| 69.0538103 | 63 | 67.9669118 |
| 69.2076564 | 63 | 67.9535611 |
| 70.1764793 | 63 | 67.9470241 |
| 69.882773  | 63 | 67.948287  |
| 69.3932625 | 63 | 67.9532257 |
| 69.0436121 | 63 | 67.9673091 |
| 68.7499059 | 63 | 67.9814821 |
| 68.889766  | 63 | 68.0004965 |
| 68.7918639 | 69 | 68.029634  |
| 69.4212345 | 69 | 68.050613  |
| 69.1275282 | 69 | 68.0704266 |
| 69.1065492 | 69 | 68.1018951 |
| 70.3792765 | 69 | 68.1263706 |
| 69.5191366 | 69 | 68.1491016 |
| 70.1065492 | 69 | 68.1632243 |
| 69.5191366 | 69 | 68.1819813 |
| 69.0296261 | 69 | 68.1867933 |
| 67.3233324 | 69 | 68.1899916 |

|            |               |
|------------|---------------|
| 66.4422135 | 69 68.1802797 |
| 65.9527031 | 69 68.1605265 |
| 65.4212345 | 69 68.1214978 |
| 65.1275282 | 69 68.0787932 |
| 64.8128429 | 69 68.0378817 |
| 64.910745  | 69 67.9998877 |
| 64.9666891 | 69 67.9726522 |
| 64.9666891 | 69 67.9578786 |
| 65.3373184 | 69 67.9511661 |
| 66.6100457 | 69 67.9381778 |
| 66.2184373 | 69 67.9258657 |
| 66.0226331 | 69 67.9052158 |
| 65.3373184 | 69 67.8740763 |
| 65.3373184 | 69 67.8416817 |
| 65.1415142 | 69 67.8023837 |
| 65.3373184 | 69 67.7645202 |
| 65.7289268 | 69 67.7265671 |
| 66.1205352 | 69 67.6850278 |
| 66.5331226 | 69 67.6384678 |
| 67.0226331 | 69 67.5914596 |
| 67.3373184 | 69 67.5475694 |
| 67.5331226 | 69 67.5141886 |
| 67.882773  | 69 67.4827801 |
| 68.0366191 | 69 67.4506545 |
| 68.2324233 | 69 67.4096045 |
| 68.854801  | 69 67.3770717 |
| 68.9527031 | 69 67.3505457 |
| 69.1485073 | 69 67.3370195 |
| 70.3926598 | 69 67.3302174 |
| 70.3926598 | 69 67.3263738 |
| 70.574478  | 69 67.3187648 |
| 71.574478  | 69 67.3100799 |
| 71.574478  | 69 67.3093742 |
| 71.2565876 | 69 67.3274959 |
| 70.403322  | 69 67.3287626 |
| 70.0375202 | 69 67.3292224 |
| 68.0407253 | 69 67.3200892 |
| 67.733033  | 69 67.300418  |
| 66.8169491 | 69 67.2823606 |
| 66.761005  | 69 67.2865373 |
| 65.712054  | 69 67.3030862 |
| 65.788977  | 69 67.3360008 |
| 65.6561099 | 69 67.3569017 |
| 65.883674  | 69 67.3778026 |
| 66.6319258 | 69 67.3917105 |

|            |               |
|------------|---------------|
| 67.3312265 | 69 67.4043633 |
| 67.5270307 | 69 67.4185402 |
| 67.6878698 | 69 67.4261723 |
| 66.820737  | 69 67.4252873 |
| 66.4081496 | 69 67.4093773 |
| 66.4081496 | 69 67.3983647 |
| 67.2053524 | 69 67.3940729 |
| 66.7717859 | 69 67.406636  |
| 66.2822754 | 69 67.4275369 |
| 66.0654922 | 69 67.4509482 |
| 65.2612964 | 69 67.4570543 |
| 65.0305272 | 69 67.4472348 |
| 64.9955621 | 69 67.4390291 |
| 65.2123454 | 69 67.4416734 |
| 65.820737  | 69 67.4516366 |
| 66.6039538 | 69 67.4512895 |
| 66.7018559 | 69 67.4424253 |
| 66.9745831 | 69 67.4202923 |
| 67.3452125 | 69 67.3899112 |
| 67.3242335 | 69 67.3560336 |
| 67.9885691 | 71 67.3142992 |
| 68.2193384 | 71 67.2734613 |
| 68.5899677 | 71 67.2225822 |
| 68.1983593 | 71 67.1588006 |
| 68.7438139 | 71 67.0940329 |
| 69.0724852 | 71 67.0296237 |
| 70.5200377 | 71 66.9446839 |
| 70.4780796 | 71 66.8719041 |
| 69.5550027 | 71 66.8177046 |
| 69.3941635 | 71 66.7490916 |
| 67.9847812 | 71 66.6942041 |
| 67.6211449 | 71 66.6521153 |
| 67.6491169 | 71 66.6139713 |
| 67.733033  | 71 66.5900822 |
| 68.5200377 | 71 66.5656553 |
| 67.0515062 | 71 66.5509109 |
| 66.7577999 | 71 66.5376907 |
| 65.89766   | 71 66.5224085 |
| 65.89766   | 71 66.5054639 |
| 66.0724852 | 71 66.4864572 |
| 65.5619957 | 71 66.4746229 |
| 65.2682894 | 71 66.4715747 |
| 65.3690608 | 71 66.4639541 |
| 65.3594607 | 71 66.4636851 |
| 65.6878698 | 71 66.4674506 |

|            |    |            |
|------------|----|------------|
| 66.3172405 | 71 | 66.4681678 |
| 66.9675901 | 71 | 66.4533749 |
| 66.9675901 | 71 | 66.4431544 |
| 65.8135986 | 71 | 66.4454854 |
| 64.9630078 | 71 | 66.4648314 |
| 65.4804903 | 71 | 66.497984  |
| 66.7393769 | 71 | 66.5271023 |
| 67.7997579 | 71 | 66.5555033 |
| 67.3102475 | 71 | 66.5764631 |
| 66.841716  | 71 | 66.5849609 |
| 66.1564013 | 71 | 66.5857485 |
| 65.6668908 | 71 | 66.5841155 |
| 65.5899677 | 71 | 66.5813169 |
| 65.5995168 | 71 | 66.5748754 |
| 65.767349  | 71 | 66.5518396 |
| 65.1799364 | 71 | 66.5162277 |
| 65.4176986 | 71 | 66.4823192 |
| 65.3407755 | 71 | 66.4448246 |
| 65.5505657 | 71 | 66.4379916 |
| 64.9491671 | 71 | 66.4253311 |
| 65.89766   | 71 | 66.4131189 |
| 67.0290235 | 71 | 66.3811829 |
| 65.0515062 | 71 | 66.3497847 |
| 65.7562962 | 71 | 66.3313864 |
| 64.7577999 | 71 | 66.3150501 |
| 64.7577999 | 71 | 66.3167828 |
| 64.9536041 | 71 | 66.31735   |
| 64.855702  | 71 | 66.3187241 |
| 64.5619957 | 71 | 66.3213533 |
| 64.7577999 | 71 | 66.3138928 |
| 64.4640936 | 71 | 66.321763  |
| 64.5619957 | 71 | 66.3392263 |
| 65.1494083 | 71 | 66.367717  |
| 66.4081496 | 71 | 66.3938766 |
| 67.2892684 | 71 | 66.4131329 |
| 67.0934642 | 71 | 66.438934  |
| 66.7997579 | 71 | 66.4638385 |
| 66.7018559 | 71 | 66.4827891 |
| 66.4640936 | 71 | 66.5006972 |
| 66.0515062 | 71 | 66.516726  |
| 65.9745831 | 71 | 66.5363409 |
| 66.4640936 | 71 | 66.5476181 |
| 67.574478  | 71 | 66.5682192 |
| 67.8472053 | 71 | 66.5954566 |
| 67.3017507 | 71 | 66.63593   |

|            |    |            |
|------------|----|------------|
| 67.2108417 | 71 | 66.6639415 |
| 66.8472053 | 71 | 66.6699859 |
| 66.4835689 | 71 | 66.6566082 |
| 66.6653871 | 71 | 66.6448442 |
| 66.574478  | 71 | 66.6390871 |
| 66.7562962 | 71 | 66.646778  |
| 66.8427785 | 71 | 66.6665723 |
| 65.5274368 | 71 | 66.6920147 |
| 65.2108417 | 71 | 66.7003082 |
| 65.574478  | 71 | 66.7042087 |
| 65.6653871 | 71 | 66.7106194 |
| 67.6653871 | 71 | 66.7042097 |
| 67.7562962 | 71 | 66.697531  |
| 68.1199326 | 71 | 66.6908445 |
| 68.0290235 | 71 | 66.6848753 |
| 68.0290235 | 71 | 66.6632495 |
| 68.1199326 | 71 | 66.6271189 |
| 68.1199326 | 71 | 66.6198377 |
| 68.1199326 | 71 | 66.6058517 |
| 67.6653871 | 71 | 66.591724  |
| 67.7562962 | 71 | 66.5781343 |
| 67.9381144 | 71 | 66.5675928 |
| 67.9381144 | 71 | 66.5610579 |
| 67.6653871 | 71 | 66.5615165 |
| 68.1199326 | 71 | 66.5568025 |
| 68.1199326 | 71 | 66.555854  |
| 67.9381144 | 71 | 66.5561607 |
| 67.574478  | 71 | 66.5514467 |
| 67.574478  | 71 | 66.5444018 |
| 67.2108417 | 71 | 66.5227432 |
| 66.8472053 | 71 | 66.5207515 |
| 66.7562962 | 71 | 66.5330148 |
| 66.9381144 | 71 | 66.5511953 |
| 67.8472053 | 71 | 66.5735895 |
| 67.8472053 | 71 | 66.6082663 |
| 68.574478  | 71 | 66.6427638 |
| 67.9381144 | 71 | 66.6549702 |
| 68.1199326 | 71 | 66.6582305 |
| 67.6653871 | 71 | 66.6567392 |
| 67.2108417 | 71 | 66.6547099 |
| 66.7562962 | 71 | 66.6588668 |
| 66.3926598 | 71 | 66.6611409 |
| 66.3926598 | 71 | 66.6809544 |
| 66.7562962 | 71 | 66.6996024 |
| 67.2108417 | 71 | 66.7159194 |



|            |    |            |
|------------|----|------------|
| 67.574478  | 71 | 66.7322365 |
| 66.2464094 | 71 | 66.7486102 |
| 66.0715842 | 71 | 66.7981644 |
| 65.6799758 | 71 | 66.8420033 |
| 64.917738  | 71 | 66.8754423 |
| 64.8198359 | 71 | 66.9049366 |
| 65.0290235 | 71 | 66.9062796 |
| 64.4835689 | 71 | 66.9086106 |
| 64.2108417 | 71 | 66.9004521 |
| 64.2108417 | 71 | 66.8808168 |
| 64.4835689 | 71 | 66.8506921 |
| 64.6653871 | 71 | 66.8073882 |
| 63.6558446 | 71 | 66.7578086 |
| 63.6978026 | 71 | 66.7041945 |
| 64.131369  | 71 | 66.663132  |
| 64.3459737 | 71 | 66.6261039 |
| 64.5977713 | 71 | 66.5914965 |
| 64.3901103 | 71 | 66.5593993 |
| 64.3901103 | 71 | 66.5477443 |
| 64.5859145 | 71 | 66.5290963 |
| 64.7817187 | 71 | 66.5011243 |
| 65.8586418 | 71 | 66.4754833 |
| 65.5999005 | 71 | 66.4556697 |
| 66.9381144 | 71 | 66.4393527 |
| 67.7562962 | 71 | 66.4346907 |
| 68.1199326 | 71 | 66.4486767 |
| 68.2108417 | 71 | 66.4661593 |
| 68.7562962 | 71 | 66.4801453 |
| 68.6653871 | 71 | 66.4848073 |
| 67.4161949 | 71 | 66.4871383 |
| 67.8287823 | 71 | 66.4778143 |
| 67.7308802 | 71 | 66.4766488 |
| 67.1434676 | 71 | 66.4693784 |
| 67.535076  | 71 | 66.4612199 |
| 67.0245865 | 71 | 66.4542269 |
| 68.0290235 | 71 | 66.4495649 |
| 68.1199326 | 71 | 66.4507304 |
| 67.8472053 | 71 | 66.4495649 |
| 68.0290235 | 71 | 66.4355789 |
| 68.1199326 | 71 | 66.4111034 |
| 69.3926598 | 71 | 66.3901244 |
| 68.6302767 | 71 | 66.3885029 |
| 68.1827243 | 71 | 66.3926192 |
| 67.9659411 | 71 | 66.4075837 |
| 67.7701369 | 71 | 66.433486  |

|            |    |            |
|------------|----|------------|
| 67.9381144 | 71 | 66.4606434 |
| 67.4835689 | 71 | 66.4851189 |
| 66.4974757 | 71 | 66.5107599 |
| 65.6792939 | 71 | 66.5422285 |
| 64.742231  | 71 | 66.573697  |
| 64.2527205 | 71 | 66.6005035 |
| 63.9380352 | 71 | 66.613324  |
| 64.4625107 | 71 | 66.6344254 |
| 64.8681051 | 71 | 66.6596508 |
| 65.2387345 | 71 | 66.6839797 |
| 65.4345387 | 63 | 66.7055573 |
| 66.7562962 | 63 | 66.7285687 |
| 66.6653871 | 63 | 66.7612354 |
| 65.9381144 | 63 | 66.8020606 |
| 65.9381144 | 63 | 66.8485341 |
| 66.0290235 | 63 | 66.8936627 |
| 66.3017507 | 63 | 66.9273156 |
| 66.8472053 | 63 | 66.9794372 |
| 67.9381144 | 63 | 67.0202297 |
| 68.1199326 | 63 | 67.0680153 |
| 68.0290235 | 63 | 67.1192973 |
| 68.2108417 | 63 | 67.1717449 |
| 68.0290235 | 63 | 67.2113719 |
| 67.8472053 | 63 | 67.237013  |
| 67.8472053 | 63 | 67.2763383 |
| 67.5528472 | 63 | 67.3068775 |
| 67.0290235 | 63 | 67.3363409 |
| 66.6653871 | 63 | 67.3791627 |
| 66.3926598 | 63 | 67.4181294 |
| 66.4835689 | 63 | 67.4601443 |
| 66.3017507 | 63 | 67.4892818 |
| 65.6653871 | 63 | 67.5125919 |
| 65.3017507 | 63 | 67.5417294 |
| 65.9381144 | 63 | 67.5673704 |
| 66.1199326 | 63 | 67.5953424 |
| 66.3926598 | 63 | 67.6046664 |
| 66.8472053 | 63 | 67.6167716 |
| 66.9381144 | 63 | 67.6241251 |
| 66.9381144 | 63 | 67.6284303 |
| 66.9381144 | 63 | 67.6282529 |
| 66.4835689 | 63 | 67.6077616 |
| 66.6653871 | 63 | 67.5812568 |
| 66.6653871 | 63 | 67.569984  |
| 66.574478  | 63 | 67.5659732 |
| 65.6653871 | 63 | 67.5777414 |

|            |    |            |
|------------|----|------------|
| 65.3017507 | 63 | 67.5970406 |
| 65.6653871 | 63 | 67.5878626 |
| 66.0290235 | 63 | 67.577576  |
| 66.0290235 | 63 | 67.5445172 |
| 66.3926598 | 63 | 67.5004311 |
| 66.9381144 | 63 | 67.4510553 |
| 67.574478  | 63 | 67.3872443 |
| 68.2108417 | 63 | 67.3271091 |
| 68.3017507 | 63 | 67.2853529 |
| 68.4835689 | 63 | 67.2486174 |
| 69.6653871 | 63 | 67.2220127 |
| 70.1199326 | 63 | 67.195946  |
| 71.4835689 | 63 | 67.1747206 |
| 72.1199326 | 63 | 67.1413022 |
| 72.3017507 | 63 | 67.1080632 |
| 71.8472053 | 63 | 67.0777827 |
| 70.6653871 | 63 | 67.0388955 |
| 70.4835689 | 63 | 67.0048495 |
| 70.2108417 | 63 | 66.9619606 |
| 70.0290235 | 63 | 66.9234648 |
| 70.4835689 | 63 | 66.8998598 |
| 70.574478  | 63 | 66.8858395 |
| 70.3017507 | 63 | 66.895017  |
| 70.3017507 | 63 | 66.9110081 |
| 69.9381144 | 63 | 66.9220684 |
| 70.1199326 | 63 | 66.9291838 |
| 70.0290235 | 63 | 66.9510025 |
| 70.3017507 | 63 | 66.9817865 |
| 70.1199326 | 63 | 67.0179171 |
| 69.574478  | 63 | 67.0423926 |
| 68.7562962 | 63 | 67.0598751 |
| 68.3017507 | 63 | 67.0715301 |
| 67.7562962 | 63 | 67.0831851 |
| 66.3397954 | 63 | 67.0971711 |
| 65.4161949 | 63 | 67.1146537 |
| 65.6181962 | 63 | 67.1356327 |
| 65.366448  | 63 | 67.1507842 |
| 65.6601543 | 63 | 67.1647702 |
| 65.7580564 | 63 | 67.1764252 |
| 63.2221509 | 63 | 67.1974042 |
| 63.6601543 | 63 | 67.2113903 |
| 62.2895249 | 63 | 67.2125558 |
| 61.8000144 | 63 | 67.2090593 |
| 61.5832312 | 63 | 67.2102248 |
| 61.7790354 | 63 | 67.2090593 |

|            |    |            |
|------------|----|------------|
| 61.9748396 | 63 | 67.1985697 |
| 62.6811333 | 63 | 67.1740942 |
| 63.0727417 | 63 | 67.1461222 |
| 63.9538606 | 63 | 67.1123227 |
| 64.2685459 | 63 | 67.0766128 |
| 65.1916228 | 63 | 67.0271253 |
| 65.3314829 | 63 | 66.9711813 |
| 65.5272871 | 63 | 66.8861566 |
| 65.6671473 | 63 | 66.8103991 |
| 65.1776368 | 63 | 66.728814  |
| 65.373441  | 63 | 66.6414014 |
| 64.5018711 | 63 | 66.5691403 |
| 64.8445285 | 63 | 66.4957138 |
| 65.7116614 | 63 | 66.4257837 |
| 65.9354376 | 63 | 66.3581846 |
| 67.3812299 | 63 | 66.2882546 |
| 67.6399711 | 63 | 66.2090005 |
| 67.3462648 | 63 | 66.1379049 |
| 66.8567543 | 63 | 66.0726368 |
| 67.3672439 | 63 | 66.0108653 |
| 67.7029082 | 63 | 65.9479282 |
| 68.7562962 | 63 | 65.8884877 |
| 68.0290235 | 63 | 65.8290471 |
| 67.7562962 | 63 | 65.7835925 |
| 67.7562962 | 63 | 65.7579515 |
| 67.8472053 | 63 | 65.7439655 |
| 68.0290235 | 63 | 65.7393035 |
| 68.3017507 | 63 | 65.7416345 |
| 68.1199326 | 63 | 65.7675031 |
| 67.8472053 | 63 | 65.8167782 |
| 67.7562962 | 63 | 65.8622083 |
| 67.4835689 | 63 | 65.9055764 |
| 67.3017507 | 63 | 65.9486755 |
| 66.3926598 | 63 | 65.9930298 |
| 65.7562962 | 63 | 66.0837939 |
| 65.7562962 | 63 | 66.167777  |
| 66.1199326 | 63 | 66.2763254 |
| 66.3017507 | 63 | 66.3888185 |
| 66.1199326 | 63 | 66.5064219 |
| 65.6653871 | 63 | 66.6180185 |
| 66.0290235 | 63 | 66.7039933 |
| 65.6653871 | 63 | 66.7774166 |
| 65.698196  | 63 | 66.8435779 |
| 65.8053678 | 63 | 66.8984428 |
| 65.7562962 | 63 | 66.947032  |

|            |    |            |
|------------|----|------------|
| 64.8516488 | 63 | 66.9862971 |
| 66.2108417 | 63 | 67.0174934 |
| 65.9381144 | 63 | 67.0436691 |
| 65.0290235 | 63 | 67.0580104 |
| 65.0290235 | 63 | 67.0713656 |
| 64.7562962 | 63 | 67.0943137 |
| 64.7562962 | 63 | 67.131215  |
| 64.7562962 | 63 | 67.1574476 |
| 65.0290235 | 63 | 67.1738182 |
| 64.3926598 | 63 | 67.1835544 |
| 64.7562962 | 63 | 67.1900857 |
| 65.2108417 | 63 | 67.1920446 |
| 65.1199326 | 63 | 67.2025206 |
| 65.2108417 | 63 | 67.2227901 |
| 65.3926598 | 63 | 67.2351373 |
| 65.6653871 | 63 | 67.236379  |
| 66.574478  | 63 | 67.2258895 |
| 67.574478  | 63 | 67.2154    |
| 67.6653871 | 63 | 67.203745  |
| 67.9381144 | 63 | 67.1862624 |
| 67.9381144 | 63 | 67.1641179 |
| 68.3575495 | 63 | 67.1326494 |
| 69.2596474 | 63 | 67.0895258 |
| 69.1617453 | 63 | 67.0498988 |
| 68.7491579 | 63 | 67.0054382 |
| 69.0218851 | 63 | 66.9659085 |
| 69.2176893 | 63 | 66.934896  |
| 70.3017507 | 63 | 66.9127592 |
| 70.2108417 | 63 | 66.9098083 |
| 70.7562962 | 63 | 66.9175263 |
| 70.574478  | 63 | 66.9252443 |
| 70.7562962 | 63 | 66.9253416 |
| 70.4835689 | 63 | 66.9193426 |
| 68.6808768 | 63 | 66.91164   |
| 68.4081496 | 63 | 66.9072547 |
| 68.2333244 | 63 | 66.8994626 |
| 68.2333244 | 63 | 66.8942704 |
| 68.0584992 | 63 | 66.8911678 |
| 68.2543034 | 63 | 66.8954774 |
| 67.7647929 | 63 | 66.9082979 |
| 67.5689887 | 63 | 66.931551  |
| 66.7857719 | 63 | 66.936213  |
| 66.2193384 | 63 | 66.9350475 |
| 67.1633943 | 63 | 66.959523  |
| 67.3801775 | 63 | 66.9909915 |

|            |    |            |
|------------|----|------------|
| 66.890667  | 63 | 67.0306186 |
| 66.9885691 | 63 | 67.0690801 |
| 66.6948628 | 63 | 67.1075417 |
| 67.890667  | 63 | 67.1448377 |
| 67.7927649 | 63 | 67.1961197 |
| 68.1633943 | 63 | 67.2439053 |
| 68.4377767 | 63 | 67.2893598 |
| 68.3303282 | 63 | 67.3301524 |
| 67.7997579 | 63 | 67.3604554 |
| 67.9381144 | 63 | 67.3820601 |
| 67.2108417 | 63 | 67.4042028 |
| 66.8472053 | 63 | 67.4240163 |
| 66.3926598 | 63 | 67.4275128 |
| 66.1199326 | 63 | 67.4263473 |
| 65.574478  | 63 | 67.4158578 |
| 64.9381144 | 63 | 67.4018718 |
| 65.0290235 | 63 | 67.3895014 |
| 64.3792765 | 63 | 67.3678967 |
| 64.6729828 | 63 | 67.3370576 |
| 65.0645912 | 63 | 67.3115081 |
| 65.5750807 | 63 | 67.2847931 |
| 66.1624933 | 63 | 67.2520713 |
| 66.3582975 | 63 | 67.2042873 |
| 66.3582975 | 63 | 67.1527784 |
| 66.1275282 | 63 | 67.0933379 |
| 65.8338219 | 63 | 67.0455523 |
| 65.5191366 | 63 | 66.9989323 |
| 65.3233324 | 63 | 66.9488157 |
| 65.4212345 | 63 | 66.9159831 |
| 65.2603954 | 63 | 66.8878125 |
| 65.4561996 | 63 | 66.8630487 |
| 66.1415142 | 63 | 66.8266299 |
| 66.7562962 | 63 | 66.7877905 |
| 66.6653871 | 63 | 66.7429443 |
| 66.574478  | 63 | 66.7032083 |
| 65.8472053 | 63 | 66.6659826 |
| 66.9381144 | 63 | 66.6504532 |
| 67.4835689 | 63 | 66.6468478 |
| 67.8472053 | 63 | 66.6369666 |
| 67.7562962 | 63 | 66.6324646 |
| 67.7562962 | 63 | 66.6295764 |
| 67.9381144 | 63 | 66.634757  |
| 68.3926598 | 63 | 66.6471997 |
| 68.4835689 | 63 | 66.6378416 |
| 68.7562962 | 63 | 66.6355661 |

|            |    |            |
|------------|----|------------|
| 68.3017507 | 63 | 66.6247736 |
| 67.574478  | 63 | 66.6084909 |
| 67.0778292 | 63 | 66.5863238 |
| 67.3925145 | 63 | 66.5687176 |
| 68.1199326 | 63 | 66.5493375 |
| 67.8472053 | 63 | 66.5384746 |
| 67.574478  | 63 | 66.5360391 |
| 67.1199326 | 63 | 66.5466932 |
| 66.8472053 | 63 | 66.5653264 |
| 67.3926598 | 63 | 66.6072844 |
| 67.574478  | 63 | 66.6608975 |
| 66.7562962 | 63 | 66.715676  |
| 66.7562962 | 63 | 66.7799502 |
| 66.9381144 | 63 | 66.8497829 |
| 66.6653871 | 63 | 66.9134294 |
| 66.5745986 | 63 | 66.9235603 |
| 66.1931528 | 63 | 66.92365   |
| 66.1199326 | 63 | 66.9202431 |
| 66.8472053 | 63 | 66.9165673 |
| 67.1199326 | 63 | 66.9171052 |
| 66.574478  | 63 | 66.923381  |
| 66.1199326 | 63 | 66.9543935 |
| 66.2108417 | 63 | 66.9867509 |
| 66.3017507 | 63 | 67.0178531 |
| 65.3926598 | 63 | 67.0521828 |
| 65.0290235 | 63 | 67.0816712 |
| 64.7562962 | 63 | 67.1000426 |
| 64.6653871 | 63 | 67.1140286 |
| 64.6653871 | 63 | 67.1315111 |
| 65.574478  | 63 | 67.1548211 |
| 65.9381144 | 63 | 67.1897862 |
| 66.3926598 | 63 | 67.2086532 |
| 67.0290235 | 63 | 67.2151328 |
| 66.6653871 | 63 | 67.2244568 |
| 67.3926598 | 63 | 67.2489323 |
| 67.6653871 | 63 | 67.2734078 |
| 67.1607359 | 63 | 67.295372  |
| 67.6152814 | 63 | 67.3419921 |
| 67.3215751 | 63 | 67.3944396 |
| 67.1677289 | 63 | 67.4445562 |
| 66.6012954 | 63 | 67.5016657 |
| 66.4264702 | 63 | 67.5715958 |
| 66.4264702 | 63 | 67.6254787 |
| 66.3635331 | 63 | 67.6728168 |
| 66.6572394 | 63 | 67.6995326 |

|            |               |
|------------|---------------|
| 67.223673  | 63 67.7214072 |
| 67.5733233 | 63 67.7163152 |
| 68.8472053 | 63 67.7089818 |
| 69.1199326 | 63 67.7057725 |
| 69.3017507 | 63 67.7222881 |
| 69.3926598 | 63 67.7367417 |
| 70.1199326 | 63 67.7594434 |
| 70.0290235 | 63 67.7799038 |
| 66.3652905 | 63 67.7977642 |
| 66.1694863 | 63 67.8141005 |
| 66.0925632 | 63 67.8263112 |
| 66.0715842 | 63 67.8409019 |
| 66.1694863 | 63 67.8700394 |
| 66.3233324 | 63 67.8793634 |
| 67.9381144 | 63 67.8816944 |
| 67.8472053 | 63 67.8886874 |
| 67.8472053 | 63 67.8991769 |
| 67.9381144 | 63 67.9085009 |
| 67.7562962 | 63 67.9096664 |
| 67.574478  | 63 67.9201559 |
| 67.8472053 | 63 67.938804  |
| 68.0290235 | 63 67.962114  |
| 68.3926598 | 63 67.9819275 |
| 68.574478  | 63 67.9982445 |
| 68.4097438 | 63 68.0029065 |
| 67.9889752 | 63 68.0098995 |
| 68.574478  | 63 68.0308786 |
| 69.6653871 | 63 68.0311668 |
| 69.6653871 | 63 68.0398825 |
| 69.6513219 | 63 68.052703  |
| 72.0290235 | 63 68.066689  |
| 72.574478  | 63 68.0871449 |
| 72.6653871 | 63 68.1029388 |
| 72.7562962 | 63 68.1224982 |
| 73.0290235 | 63 68.1486919 |
| 71.2806925 | 63 68.1821477 |
| 71.0848883 | 63 68.2213412 |
| 70.2037694 | 63 68.2558728 |
| 69.5534198 | 63 68.2830528 |
| 67.1773011 | 63 68.3053017 |
| 66.5479305 | 63 68.319338  |
| 66.5968815 | 63 68.3248771 |
| 68.6808768 | 63 68.3143876 |
| 68.7018559 | 63 68.301567  |
| 68.5270307 | 63 68.2887465 |



|            |    |            |
|------------|----|------------|
| 68.3522055 | 63 | 68.2789976 |
| 68.3312265 | 63 | 68.2705756 |
| 67.9396181 | 63 | 68.2631516 |
| 67.5270307 | 63 | 68.3001344 |
| 67.3312265 | 63 | 68.3460378 |
| 68.3926598 | 63 | 68.3929274 |
| 67.574478  | 63 | 68.441368  |
| 67.3017507 | 63 | 68.4923996 |
| 67.1199326 | 63 | 68.5427409 |
| 66.9381144 | 63 | 68.577508  |
| 66.9381144 | 63 | 68.5975402 |
| 66.3926598 | 63 | 68.609239  |
| 66.2108417 | 63 | 68.6197723 |
| 66.4835689 | 63 | 68.6381922 |
| 66.574478  | 63 | 68.6634302 |
| 66.2108417 | 63 | 68.680643  |
| 65.9381144 | 63 | 68.6891056 |
| 65.9381144 | 63 | 68.6930062 |
| 66.4835689 | 63 | 68.6945866 |
| 68.0290235 | 63 | 68.6984358 |
| 67.0515062 | 63 | 68.7081545 |
| 67.3452125 | 63 | 68.7100111 |
| 68.3926598 | 63 | 68.6965551 |
| 68.7562962 | 63 | 68.6827146 |
| 68.7562962 | 63 | 68.6686768 |
| 68.8472053 | 63 | 68.61926   |
| 68.8472053 | 63 | 68.5602269 |
| 69.2108417 | 63 | 68.4980275 |
| 69.2108417 | 63 | 68.4325157 |
| 69.4835689 | 63 | 68.3606952 |
| 69.1199326 | 63 | 68.3143461 |
| 68.4835689 | 63 | 68.2696599 |
| 68.3926598 | 63 | 68.2379532 |
| 68.3185049 | 63 | 68.2160287 |
| 68.0053678 | 63 | 68.2336343 |
| 68.0290235 | 60 | 68.2626981 |
| 68.1199326 | 60 | 68.291923  |
| 68.3017507 | 60 | 68.2849774 |
| 68.6322432 | 60 | 68.2773978 |
| 69.4630124 |    | 68.272775  |
| 69.4499515 |    | 68.2712763 |
| 69.2499515 |    | 68.2701234 |
| 69.7499515 |    | 68.2766039 |
| 69.7499515 |    | 68.2915953 |
| 69.8499515 |    | 68.3111947 |

|            |            |
|------------|------------|
| 70.1499515 | 68.3094975 |
| 70.2499515 | 68.3251362 |
| 70.6499515 | 68.3473837 |
| 69.4097131 | 68.3746604 |
| 68.7597131 | 68.4073092 |
| 68.7597131 | 68.4414765 |
| 69.1930465 | 68.4902579 |
| 69.5430465 | 68.5458534 |
| 69.189805  | 68.5974105 |

mins

| Time     |         | Person 1   | Person 11  | Person 8   | Person 6   | Person 7   |
|----------|---------|------------|------------|------------|------------|------------|
| 18:00:32 | 0:00:01 | 63.8197433 | 84.8243232 | 64.1349434 | 74.5666434 | 69.6321585 |
| 18:00:33 | 0:00:02 | 63.8197433 | 84.8243232 | 61.1349434 | 74.5666434 | 70.6321585 |
| 18:00:34 | 0:00:03 | 63.8197433 | 84.8243232 | 60.1349434 | 74.5666434 | 71.6321585 |
| 18:00:35 | 0:00:04 | 63.8197433 | 84.8243232 | 59.1349434 | 74.5666434 | 71.6321585 |
| 18:00:36 | 0:00:05 | 63.8197433 | 84.8243232 | 58.1349434 | 74.5666434 | 71.6321585 |
| 18:00:37 | 0:00:06 | 64.8197433 | 75.037828  | 57.1349434 | 75.5666434 | 74.6321585 |
| 18:00:38 | 0:00:07 | 64.8197433 | 75.3711613 | 57.1349434 | 75.5666434 | 74.6321585 |
| 18:00:39 | 0:00:08 | 64.8197433 | 75.7044947 | 57.1349434 | 75.5666434 | 77.6321585 |
| 18:00:40 | 0:00:09 | 65.8197433 | 75.8156058 | 57.1349434 | 75.5666434 | 79.6321585 |
| 18:00:41 | 0:00:10 | 67.8197433 | 76.037828  | 57.1349434 | 73.5666434 | 81.6321585 |
| 18:00:42 | 0:00:11 | 67.8197433 | 77.4822724 | 64.1349434 | 71.5666434 | 82.6321585 |
| 18:00:43 | 0:00:12 | 66.8197433 | 77.4822724 | 65.1349434 | 71.5666434 | 83.6321585 |
| 18:00:44 | 0:00:13 | 64.8197433 | 76.8156058 | 65.1349434 | 66.5666434 | 83.6321585 |
| 18:00:45 | 0:00:14 | 62.8197433 | 76.9267169 | 66.1349434 | 66.5666434 | 84.6321585 |
| 18:00:46 | 0:00:15 | 62.8197433 | 77.037828  | 66.1349434 | 66.5666434 | 86.6321585 |
| 18:00:47 | 0:00:16 | 62.8197433 | 76.4822724 | 66.1349434 | 65.5666434 | 83.6321585 |
| 18:00:48 | 0:00:17 | 61.8197433 | 76.5933835 | 67.1349434 | 65.5666434 | 83.6321585 |
| 18:00:49 | 0:00:18 | 61.8197433 | 76.7044947 | 69.1349434 | 65.5666434 | 83.6321585 |
| 18:00:50 | 0:00:19 | 61.8197433 | 76.8156058 | 71.1349434 | 65.5666434 | 79.6321585 |
| 18:00:51 | 0:00:20 | 60.8197433 | 76.8156058 | 72.1349434 | 66.5666434 | 79.6321585 |
| 18:00:52 | 0:00:21 | 60.8197433 | 76.3711613 | 71.1349434 | 66.5666434 | 79.6321585 |
| 18:00:53 | 0:00:22 | 60.8197433 | 76.3711613 | 71.1349434 | 66.5666434 | 79.6321585 |
| 18:00:54 | 0:00:23 | 60.8197433 | 73.054455  | 71.1349434 | 66.5666434 | 79.6321585 |
| 18:00:55 | 0:00:24 | 60.8197433 | 78.641658  | 71.1349434 | 66.5666434 | 78.6321585 |
| 18:00:56 | 0:00:25 | 60.8197433 | 76.4822724 | 70.1349434 | 70.5666434 | 77.6321585 |
| 18:00:57 | 0:00:26 | 60.8197433 | 76.5933835 | 70.1349434 | 71.5666434 | 77.6321585 |
| 18:00:58 | 0:00:27 | 60.8197433 | 76.1489391 | 68.1349434 | 71.5666434 | 76.6321585 |
| 18:00:59 | 0:00:28 | 59.8197433 | 75.7044947 | 67.1349434 | 70.5666434 | 75.6321585 |
| 18:01:00 | 0:00:29 | 60.8197433 | 75.7044947 | 67.1349434 | 70.5666434 | 73.6321585 |
| 18:01:01 | 0:00:30 | 60.8197433 | 75.2600502 | 67.1349434 | 66.5666434 | 73.6321585 |
| 18:01:02 | 0:00:31 | 60.8197433 | 75.1489391 | 67.1349434 | 66.5666434 | 72.6321585 |
| 18:01:03 | 0:00:32 | 60.8197433 | 75.1489391 | 67.1349434 | 66.5666434 | 72.6321585 |
| 18:01:04 | 0:00:33 | 60.8197433 | 74.5933835 | 64.1349434 | 65.5666434 | 72.6321585 |
| 18:01:05 | 0:00:34 | 60.8197433 | 72.7044947 | 55.1349434 | 65.5666434 | 73.6321585 |
| 18:01:06 | 0:00:35 | 60.8197433 | 84.8243232 | 55.1349434 | 65.5666434 | 73.6321585 |
| 18:01:07 | 0:00:36 | 60.8197433 | 80.8243232 | 54.1349434 | 64.5666434 | 74.6321585 |
| 18:01:08 | 0:00:37 | 60.8197433 | 79.8243232 | 55.1349434 | 64.5666434 | 74.6321585 |
| 18:01:09 | 0:00:38 | 59.8197433 | 79.8243232 | 58.1349434 | 62.5666434 | 73.6321585 |
| 18:01:10 | 0:00:39 | 59.8197433 | 78.8243232 | 60.1349434 | 62.5666434 | 67.6321585 |
| 18:01:11 | 0:00:40 | 60.8197433 | 77.8243232 | 61.1349434 | 61.5666434 | 65.6321585 |
| 18:01:12 | 0:00:41 | 61.8197433 | 77.8243232 | 61.1349434 | 56.5666434 | 65.6321585 |

|          |         |            |            |            |            |            |
|----------|---------|------------|------------|------------|------------|------------|
| 18:01:13 | 0:00:42 | 61.8197433 | 70.8243232 | 61.1349434 | 56.5666434 | 63.6321585 |
| 18:01:14 | 0:00:43 | 61.8197433 | 70.8243232 | 61.1349434 | 55.5666434 | 63.6321585 |
| 18:01:15 | 0:00:44 | 61.8197433 | 70.8243232 | 64.1349434 | 55.5666434 | 62.6321585 |
| 18:01:16 | 0:00:45 | 61.8197433 | 69.8243232 | 64.1349434 | 55.5666434 | 62.6321585 |
| 18:01:17 | 0:00:46 | 61.8197433 | 69.8243232 | 64.1349434 | 55.5666434 | 62.6321585 |
| 18:01:18 | 0:00:47 | 61.8197433 | 68.8243232 | 65.1349434 | 54.5666434 | 59.6321585 |
| 18:01:19 | 0:00:48 | 61.8197433 | 68.8243232 | 66.1349434 | 52.5666434 | 59.6321585 |
| 18:01:20 | 0:00:49 | 63.8197433 | 67.8243232 | 68.1349434 | 52.5666434 | 59.6321585 |
| 18:01:21 | 0:00:50 | 63.8197433 | 67.8243232 | 71.1349434 | 52.5666434 | 61.6321585 |
| 18:01:22 | 0:00:51 | 62.8197433 | 66.8243232 | 71.1349434 | 52.5666434 | 62.6321585 |
| 18:01:23 | 0:00:52 | 62.8197433 | 67.8243232 | 71.1349434 | 53.5666434 | 62.6321585 |
| 18:01:24 | 0:00:53 | 63.8197433 | 67.8243232 | 71.1349434 | 56.5666434 | 62.6321585 |
| 18:01:25 | 0:00:54 | 63.8197433 | 67.8243232 | 70.1349434 | 56.5666434 | 62.6321585 |
| 18:01:26 | 0:00:55 | 63.8197433 | 71.8243232 | 70.1349434 | 56.5666434 | 62.6321585 |
| 18:01:27 | 0:00:56 | 64.8197433 | 71.8243232 | 70.1349434 | 57.5666434 | 62.6321585 |
| 18:01:28 | 0:00:57 | 66.8197433 | 73.8243232 | 70.1349434 | 58.5666434 | 62.6321585 |
| 18:01:29 | 0:00:58 | 68.8197433 | 68.8243232 | 70.1349434 | 58.5666434 | 62.6321585 |
| 18:01:30 | 0:00:59 | 71.8197433 | 62.8243232 | 70.1349434 | 58.5666434 | 62.6321585 |
| 18:01:31 | 0:01:00 | 73.8197433 | 60.8243232 | 71.1349434 | 59.5666434 | 62.6321585 |
| 18:01:32 | 0:01:01 | 74.8197433 | 60.8243232 | 71.1349434 | 57.5666434 | 61.6321585 |
| 18:01:33 | 0:01:02 | 74.8197433 | 58.8243232 | 71.1349434 | 56.5666434 | 61.6321585 |
| 18:01:34 | 0:01:03 | 70.8197433 | 58.8243232 | 70.1349434 | 55.5666434 | 62.6321585 |
| 18:01:35 | 0:01:04 | 66.8197433 | 57.8243232 | 70.1349434 | 54.5666434 | 62.6321585 |
| 18:01:36 | 0:01:05 | 64.8197433 | 57.8243232 | 70.1349434 | 54.5666434 | 62.6321585 |
| 18:01:37 | 0:01:06 | 63.8197433 | 57.8243232 | 70.1349434 | 53.5666434 | 63.6321585 |
| 18:01:38 | 0:01:07 | 62.8197433 | 58.8243232 | 70.1349434 | 54.5666434 | 64.6321585 |
| 18:01:39 | 0:01:08 | 63.8197433 | 59.8243232 | 70.1349434 | 54.5666434 | 64.6321585 |
| 18:01:40 | 0:01:09 | 63.8197433 | 59.8243232 | 69.1349434 | 54.5666434 | 64.6321585 |
| 18:01:41 | 0:01:10 | 62.8197433 | 59.8243232 | 69.1349434 | 54.5666434 | 64.6321585 |
| 18:01:42 | 0:01:11 | 62.8197433 | 59.8243232 | 69.1349434 | 54.5666434 | 64.6321585 |
| 18:01:43 | 0:01:12 | 62.8197433 | 63.8243232 | 69.1349434 | 53.5666434 | 64.6321585 |
| 18:01:44 | 0:01:13 | 61.8197433 | 63.8243232 | 71.1349434 | 53.5666434 | 64.6321585 |
| 18:01:45 | 0:01:14 | 61.8197433 | 63.8243232 | 71.1349434 | 54.5666434 | 64.6321585 |
| 18:01:46 | 0:01:15 | 61.8197433 | 64.8243232 | 73.1349434 | 56.5666434 | 64.6321585 |
| 18:01:47 | 0:01:16 | 61.8197433 | 64.8243232 | 73.1349434 | 56.5666434 | 64.6321585 |
| 18:01:48 | 0:01:17 | 61.8197433 | 64.8243232 | 73.1349434 | 56.5666434 | 64.6321585 |
| 18:01:49 | 0:01:18 | 62.8197433 | 65.8243232 | 76.1349434 | 57.5666434 | 64.6321585 |
| 18:01:50 | 0:01:19 | 62.8197433 | 66.8243232 | 76.1349434 | 58.5666434 | 63.6321585 |
| 18:01:51 | 0:01:20 | 65.8197433 | 67.8243232 | 73.1349434 | 58.5666434 | 63.6321585 |
| 18:01:52 | 0:01:21 | 66.8197433 | 68.8243232 | 71.1349434 | 57.5666434 | 64.6321585 |
| 18:01:53 | 0:01:22 | 66.8197433 | 68.8243232 | 71.1349434 | 57.5666434 | 66.6321585 |
| 18:01:54 | 0:01:23 | 67.8197433 | 69.8243232 | 71.1349434 | 57.5666434 | 68.6321585 |
| 18:01:55 | 0:01:24 | 67.8197433 | 69.8243232 | 71.1349434 | 57.5666434 | 69.6321585 |
| 18:01:56 | 0:01:25 | 67.8197433 | 69.8243232 | 71.1349434 | 57.5666434 | 70.6321585 |
| 18:01:57 | 0:01:26 | 67.8197433 | 69.8243232 | 66.1349434 | 58.5666434 | 72.6321585 |

|          |         |            |            |            |            |            |
|----------|---------|------------|------------|------------|------------|------------|
| 18:01:58 | 0:01:27 | 68.8197433 | 67.8243232 | 64.1349434 | 58.5666434 | 72.6321585 |
| 18:01:59 | 0:01:28 | 68.8197433 | 67.8243232 | 63.1349434 | 59.5666434 | 73.6321585 |
| 18:02:00 | 0:01:29 | 73.8197433 | 71.8243232 | 63.1349434 | 59.5666434 | 71.6321585 |
| 18:02:01 | 0:01:30 | 75.8197433 | 74.8243232 | 62.1349434 | 59.5666434 | 71.6321585 |
| 18:02:02 | 0:01:31 | 76.8197433 | 75.8243232 | 61.1349434 | 59.5666434 | 71.6321585 |
| 18:02:03 | 0:01:32 | 78.8197433 | 75.8243232 | 61.1349434 | 59.5666434 | 71.6321585 |
| 18:02:04 | 0:01:33 | 79.8197433 | 74.8243232 | 60.1349434 | 59.5666434 | 71.6321585 |
| 18:02:05 | 0:01:34 | 79.8197433 | 63.8243232 | 60.1349434 | 61.5666434 | 71.6321585 |
| 18:02:06 | 0:01:35 | 79.8197433 | 58.8243232 | 60.1349434 | 61.5666434 | 71.6321585 |
| 18:02:07 | 0:01:36 | 79.8197433 | 58.8243232 | 64.1349434 | 61.5666434 | 71.6321585 |
| 18:02:08 | 0:01:37 | 79.8197433 | 56.8243232 | 64.1349434 | 61.5666434 | 72.6321585 |
| 18:02:09 | 0:01:38 | 78.8197433 | 56.8243232 | 64.1349434 | 61.5666434 | 74.6321585 |
| 18:02:10 | 0:01:39 | 73.8197433 | 55.8243232 | 64.1349434 | 61.5666434 | 75.6321585 |
| 18:02:11 | 0:01:40 | 72.8197433 | 55.8243232 | 64.1349434 | 61.5666434 | 72.6321585 |
| 18:02:12 | 0:01:41 | 70.8197433 | 55.8243232 | 66.1349434 | 61.5666434 | 70.6321585 |
| 18:02:13 | 0:01:42 | 68.8197433 | 54.8243232 | 66.1349434 | 61.5666434 | 67.6321585 |
| 18:02:14 | 0:01:43 | 67.8197433 | 54.8243232 | 66.1349434 | 61.5666434 | 67.6321585 |
| 18:02:15 | 0:01:44 | 67.8197433 | 54.8243232 | 68.1349434 | 61.5666434 | 67.6321585 |
| 18:02:16 | 0:01:45 | 69.8197433 | 53.8243232 | 68.1349434 | 61.5666434 | 66.6321585 |
| 18:02:17 | 0:01:46 | 69.8197433 | 53.8243232 | 69.1349434 | 60.5666434 | 65.6321585 |
| 18:02:18 | 0:01:47 | 70.8197433 | 55.8243232 | 69.1349434 | 60.5666434 | 65.6321585 |
| 18:02:19 | 0:01:48 | 74.8197433 | 55.8243232 | 70.1349434 | 60.5666434 | 65.6321585 |
| 18:02:20 | 0:01:49 | 74.8197433 | 56.8243232 | 70.1349434 | 61.5666434 | 65.6321585 |
| 18:02:21 | 0:01:50 | 76.8197433 | 56.8243232 | 70.1349434 | 60.5666434 | 65.6321585 |
| 18:02:22 | 0:01:51 | 76.8197433 | 56.8243232 | 70.1349434 | 60.5666434 | 65.6321585 |
| 18:02:23 | 0:01:52 | 77.8197433 | 57.8243232 | 64.1349434 | 60.5666434 | 64.6321585 |
| 18:02:24 | 0:01:53 | 77.8197433 | 57.8243232 | 60.1349434 | 62.5666434 | 64.6321585 |
| 18:02:25 | 0:01:54 | 75.8197433 | 57.8243232 | 60.1349434 | 62.5666434 | 65.6321585 |
| 18:02:26 | 0:01:55 | 73.8197433 | 60.8243232 | 57.1349434 | 63.5666434 | 68.6321585 |
| 18:02:27 | 0:01:56 | 68.8197433 | 60.8243232 | 57.1349434 | 63.5666434 | 68.6321585 |
| 18:02:28 | 0:01:57 | 65.8197433 | 60.8243232 | 58.1349434 | 63.5666434 | 68.6321585 |
| 18:02:29 | 0:01:58 | 64.8197433 | 60.8243232 | 58.1349434 | 63.5666434 | 67.6321585 |
| 18:02:30 | 0:01:59 | 63.8197433 | 60.8243232 | 59.1349434 | 64.5666434 | 67.6321585 |
| 18:02:31 | 0:02:00 | 62.8197433 | 59.8243232 | 57.1349434 | 65.5666434 | 65.6321585 |
| 18:02:32 | 0:02:01 | 62.8197433 | 59.8243232 | 57.1349434 | 65.5666434 | 64.6321585 |
| 18:02:33 | 0:02:02 | 62.8197433 | 59.8243232 | 57.1349434 | 66.5666434 | 64.6321585 |
| 18:02:34 | 0:02:03 | 61.8197433 | 59.8243232 | 54.1349434 | 66.5666434 | 63.6321585 |
| 18:02:35 | 0:02:04 | 61.8197433 | 58.8243232 | 54.1349434 | 67.5666434 | 63.6321585 |
| 18:02:36 | 0:02:05 | 61.8197433 | 58.8243232 | 54.1349434 | 67.5666434 | 63.6321585 |
| 18:02:37 | 0:02:06 | 62.8197433 | 58.8243232 | 55.1349434 | 67.5666434 | 63.6321585 |
| 18:02:38 | 0:02:07 | 61.8197433 | 58.8243232 | 56.1349434 | 68.5666434 | 63.6321585 |
| 18:02:39 | 0:02:08 | 61.8197433 | 58.8243232 | 56.1349434 | 68.5666434 | 63.6321585 |
| 18:02:40 | 0:02:09 | 59.8197433 | 57.8243232 | 56.1349434 | 68.5666434 | 62.6321585 |
| 18:02:41 | 0:02:10 | 59.8197433 | 55.8243232 | 55.1349434 | 68.5666434 | 62.6321585 |
| 18:02:42 | 0:02:11 | 59.8197433 | 55.8243232 | 55.1349434 | 68.5666434 | 62.6321585 |

|          |         |            |            |            |            |            |
|----------|---------|------------|------------|------------|------------|------------|
| 18:02:43 | 0:02:12 | 59.8197433 | 55.8243232 | 54.1349434 | 63.5666434 | 62.6321585 |
| 18:02:44 | 0:02:13 | 59.8197433 | 55.8243232 | 54.1349434 | 63.5666434 | 62.6321585 |
| 18:02:45 | 0:02:14 | 59.8197433 | 56.8243232 | 53.1349434 | 62.5666434 | 62.6321585 |
| 18:02:46 | 0:02:15 | 58.8197433 | 56.8243232 | 53.1349434 | 62.5666434 | 62.6321585 |
| 18:02:47 | 0:02:16 | 58.8197433 | 56.8243232 | 53.1349434 | 61.5666434 | 61.6321585 |
| 18:02:48 | 0:02:17 | 58.8197433 | 55.8243232 | 55.1349434 | 63.5666434 | 62.6321585 |
| 18:02:49 | 0:02:18 | 57.8197433 | 53.8243232 | 58.1349434 | 63.5666434 | 63.6321585 |
| 18:02:50 | 0:02:19 | 57.8197433 | 53.8243232 | 59.1349434 | 63.5666434 | 63.6321585 |
| 18:02:51 | 0:02:20 | 57.8197433 | 53.8243232 | 61.1349434 | 63.5666434 | 64.6321585 |
| 18:02:52 | 0:02:21 | 58.8197433 | 53.8243232 | 61.1349434 | 65.5666434 | 64.6321585 |
| 18:02:53 | 0:02:22 | 58.8197433 | 52.8243232 | 63.1349434 | 66.5666434 | 64.6321585 |
| 18:02:54 | 0:02:23 | 58.8197433 | 52.8243232 | 65.1349434 | 67.5666434 | 64.6321585 |
| 18:02:55 | 0:02:24 | 58.8197433 | 52.8243232 | 66.1349434 | 67.5666434 | 65.6321585 |
| 18:02:56 | 0:02:25 | 59.8197433 | 52.8243232 | 66.1349434 | 68.5666434 | 65.6321585 |
| 18:02:57 | 0:02:26 | 59.8197433 | 53.8243232 | 68.1349434 | 69.5666434 | 66.6321585 |
| 18:02:58 | 0:02:27 | 60.8197433 | 54.8243232 | 72.1349434 | 70.5666434 | 66.6321585 |
| 18:02:59 | 0:02:28 | 61.8197433 | 54.8243232 | 72.1349434 | 70.5666434 | 66.6321585 |
| 18:03:00 | 0:02:29 | 61.8197433 | 54.8243232 | 72.1349434 | 70.5666434 | 66.6321585 |
| 18:03:01 | 0:02:30 | 61.8197433 | 54.8243232 | 72.1349434 | 71.5666434 | 65.6321585 |
| 18:03:02 | 0:02:31 | 60.8197433 | 54.8243232 | 71.1349434 | 71.5666434 | 61.6321585 |
| 18:03:03 | 0:02:32 | 60.8197433 | 55.8243232 | 70.1349434 | 71.5666434 | 60.6321585 |
| 18:03:04 | 0:02:33 | 61.8197433 | 55.8243232 | 69.1349434 | 71.5666434 | 60.6321585 |
| 18:03:05 | 0:02:34 | 61.8197433 | 55.8243232 | 68.1349434 | 71.5666434 | 60.6321585 |
| 18:03:06 | 0:02:35 | 61.8197433 | 55.8243232 | 66.1349434 | 72.5666434 | 60.6321585 |
| 18:03:07 | 0:02:36 | 62.8197433 | 56.8243232 | 66.1349434 | 72.5666434 | 60.6321585 |
| 18:03:08 | 0:02:37 | 63.8197433 | 56.8243232 | 66.1349434 | 71.5666434 | 60.6321585 |
| 18:03:09 | 0:02:38 | 63.8197433 | 56.8243232 | 62.1349434 | 71.5666434 | 60.6321585 |
| 18:03:10 | 0:02:39 | 63.8197433 | 56.8243232 | 59.1349434 | 71.5666434 | 59.6321585 |
| 18:03:11 | 0:02:40 | 63.8197433 | 57.8243232 | 59.1349434 | 71.5666434 | 58.6321585 |
| 18:03:12 | 0:02:41 | 65.8197433 | 57.8243232 | 59.1349434 | 70.5666434 | 57.6321585 |
| 18:03:13 | 0:02:42 | 67.8197433 | 57.8243232 | 57.1349434 | 70.5666434 | 58.6321585 |
| 18:03:14 | 0:02:43 | 68.8197433 | 57.8243232 | 57.1349434 | 70.5666434 | 58.6321585 |
| 18:03:15 | 0:02:44 | 70.8197433 | 57.8243232 | 57.1349434 | 70.5666434 | 61.6321585 |
| 18:03:16 | 0:02:45 | 73.8197433 | 57.8243232 | 56.1349434 | 70.5666434 | 61.6321585 |
| 18:03:17 | 0:02:46 | 70.8197433 | 56.8243232 | 56.1349434 | 70.5666434 | 61.6321585 |
| 18:03:18 | 0:02:47 | 69.8197433 | 56.8243232 | 55.1349434 | 70.5666434 | 61.6321585 |
| 18:03:19 | 0:02:48 | 66.8197433 | 56.8243232 | 55.1349434 | 70.5666434 | 62.6321585 |
| 18:03:20 | 0:02:49 | 64.8197433 | 56.8243232 | 54.1349434 | 70.5666434 | 64.6321585 |
| 18:03:21 | 0:02:50 | 63.8197433 | 56.8243232 | 54.1349434 | 71.5666434 | 64.6321585 |
| 18:03:22 | 0:02:51 | 62.8197433 | 56.8243232 | 53.1349434 | 73.5666434 | 65.6321585 |
| 18:03:23 | 0:02:52 | 61.8197433 | 56.8243232 | 52.1349434 | 73.5666434 | 64.6321585 |
| 18:03:24 | 0:02:53 | 60.8197433 | 57.8243232 | 53.1349434 | 76.5666434 | 64.6321585 |
| 18:03:25 | 0:02:54 | 60.8197433 | 58.8243232 | 53.1349434 | 78.5666434 | 64.6321585 |
| 18:03:26 | 0:02:55 | 60.8197433 | 59.8243232 | 54.1349434 | 79.5666434 | 64.6321585 |
| 18:03:27 | 0:02:56 | 60.8197433 | 59.8243232 | 60.1349434 | 79.5666434 | 64.6321585 |

|          |         |            |            |            |            |            |
|----------|---------|------------|------------|------------|------------|------------|
| 18:03:28 | 0:02:57 | 60.8197433 | 57.8243232 | 60.1349434 | 80.5666434 | 66.6321585 |
| 18:03:29 | 0:02:58 | 60.8197433 | 57.8243232 | 61.1349434 | 82.5666434 | 65.6321585 |
| 18:03:30 | 0:02:59 | 60.8197433 | 57.8243232 | 62.1349434 | 82.5666434 | 65.6321585 |
| 18:03:31 | 0:03:00 | 60.8197433 | 57.8243232 | 62.1349434 | 82.5666434 | 65.6321585 |
| 18:03:32 | 0:03:01 | 60.8197433 | 57.8243232 | 63.1349434 | 82.5666434 | 63.6321585 |
| 18:03:33 | 0:03:02 | 61.8197433 | 57.8243232 | 63.1349434 | 82.5666434 | 63.6321585 |
| 18:03:34 | 0:03:03 | 60.8197433 | 57.8243232 | 63.1349434 | 82.5666434 | 62.6321585 |
| 18:03:35 | 0:03:04 | 60.8197433 | 57.8243232 | 63.1349434 | 82.5666434 | 62.6321585 |
| 18:03:36 | 0:03:05 | 60.8197433 | 57.8243232 | 63.1349434 | 82.5666434 | 62.6321585 |
| 18:03:37 | 0:03:06 | 60.8197433 | 56.8243232 | 64.1349434 | 82.5666434 | 62.6321585 |
| 18:03:38 | 0:03:07 | 60.8197433 | 56.8243232 | 64.1349434 | 82.5666434 | 63.6321585 |
| 18:03:39 | 0:03:08 | 60.8197433 | 56.8243232 | 64.1349434 | 82.5666434 | 62.6321585 |
| 18:03:40 | 0:03:09 | 60.8197433 | 56.8243232 | 64.1349434 | 82.5666434 | 62.6321585 |
| 18:03:41 | 0:03:10 | 60.8197433 | 56.8243232 | 64.1349434 | 65.2407656 | 62.6321585 |
| 18:03:42 | 0:03:11 | 60.8197433 | 60.8243232 | 64.1349434 | 65.3316747 | 62.6321585 |
| 18:03:43 | 0:03:12 | 61.8197433 | 62.8243232 | 64.1349434 | 83.5666434 | 61.6321585 |
| 18:03:44 | 0:03:13 | 61.8197433 | 62.8243232 | 64.1349434 | 83.5666434 | 61.6321585 |
| 18:03:45 | 0:03:14 | 61.8197433 | 64.8243232 | 64.1349434 | 83.5666434 | 61.6321585 |
| 18:03:46 | 0:03:15 | 61.8197433 | 65.8243232 | 65.1349434 | 83.5666434 | 61.6321585 |
| 18:03:47 | 0:03:16 | 60.8197433 | 65.8243232 | 65.1349434 | 84.5666434 | 61.6321585 |
| 18:03:48 | 0:03:17 | 60.8197433 | 65.8243232 | 65.1349434 | 67.1498565 | 62.6321585 |
| 18:03:49 | 0:03:18 | 61.8197433 | 64.8243232 | 66.1349434 | 67.4225838 | 62.6321585 |
| 18:03:50 | 0:03:19 | 61.8197433 | 63.8243232 | 66.1349434 | 67.604402  | 62.6321585 |
| 18:03:51 | 0:03:20 | 63.8197433 | 63.8243232 | 66.1349434 | 68.0589474 | 62.6321585 |
| 18:03:52 | 0:03:21 | 63.8197433 | 62.8243232 | 62.1349434 | 67.604402  | 62.6321585 |
| 18:03:53 | 0:03:22 | 63.8197433 | 60.8243232 | 61.1349434 | 67.0589474 | 62.6321585 |
| 18:03:54 | 0:03:23 | 63.8197433 | 58.8243232 | 60.1349434 | 66.5134929 | 61.6321585 |
| 18:03:55 | 0:03:24 | 64.8197433 | 59.8243232 | 60.1349434 | 66.604402  | 61.6321585 |
| 18:03:56 | 0:03:25 | 64.8197433 | 59.8243232 | 59.1349434 | 66.4225838 | 61.6321585 |
| 18:03:57 | 0:03:26 | 64.8197433 | 60.8243232 | 59.1349434 | 66.8771293 | 62.6321585 |
| 18:03:58 | 0:03:27 | 64.8197433 | 60.8243232 | 59.1349434 | 67.2407656 | 62.6321585 |
| 18:03:59 | 0:03:28 | 63.8197433 | 60.8243232 | 58.1349434 | 67.2407656 | 63.6321585 |
| 18:04:00 | 0:03:29 | 62.8197433 | 58.8243232 | 58.1349434 | 66.604402  | 63.6321585 |
| 18:04:01 | 0:03:30 | 61.8197433 | 56.8243232 | 58.1349434 | 65.9680384 | 63.6321585 |
| 18:04:02 | 0:03:31 | 60.8197433 | 56.8243232 | 58.1349434 | 65.8771293 | 63.6321585 |
| 18:04:03 | 0:03:32 | 60.8197433 | 55.8243232 | 58.1349434 | 65.604402  | 63.6321585 |
| 18:04:04 | 0:03:33 | 61.8197433 | 55.8243232 | 59.1349434 | 65.7862202 | 63.6321585 |
| 18:04:05 | 0:03:34 | 61.8197433 | 55.8243232 | 60.1349434 | 65.5134929 | 64.6321585 |
| 18:04:06 | 0:03:35 | 62.8197433 | 55.8243232 | 60.1349434 | 65.6953111 | 65.6321585 |
| 18:04:07 | 0:03:36 | 62.8197433 | 54.8243232 | 60.1349434 | 64.8771293 | 65.6321585 |
| 18:04:08 | 0:03:37 | 62.8197433 | 54.8243232 | 60.1349434 | 64.9680384 | 67.6321585 |
| 18:04:09 | 0:03:38 | 62.8197433 | 53.8243232 | 60.1349434 | 64.7862202 | 67.6321585 |
| 18:04:10 | 0:03:39 | 62.8197433 | 53.8243232 | 61.1349434 | 64.9680384 | 67.6321585 |
| 18:04:11 | 0:03:40 | 62.8197433 | 53.8243232 | 61.1349434 | 64.8771293 | 67.6321585 |
| 18:04:12 | 0:03:41 | 61.8197433 | 52.8243232 | 61.1349434 | 64.7862202 | 66.6321585 |

|          |         |            |            |            |            |            |
|----------|---------|------------|------------|------------|------------|------------|
| 18:04:13 | 0:03:42 | 61.8197433 | 53.8243232 | 61.1349434 | 65.1498565 | 66.6321585 |
| 18:04:14 | 0:03:43 | 62.8197433 | 53.8243232 | 60.1349434 | 65.4225838 | 66.6321585 |
| 18:04:15 | 0:03:44 | 62.8197433 | 55.8243232 | 60.1349434 | 65.6953111 | 66.6321585 |
| 18:04:16 | 0:03:45 | 61.8197433 | 57.8243232 | 60.1349434 | 65.9680384 | 66.6321585 |
| 18:04:17 | 0:03:46 | 61.8197433 | 58.8243232 | 60.1349434 | 66.1498565 | 66.6321585 |
| 18:04:18 | 0:03:47 | 61.8197433 | 58.8243232 | 60.1349434 | 66.6953111 | 66.6321585 |
| 18:04:19 | 0:03:48 | 61.8197433 | 58.8243232 | 58.1349434 | 66.3316747 | 64.6321585 |
| 18:04:20 | 0:03:49 | 61.8197433 | 58.8243232 | 57.1349434 | 66.604402  | 65.6321585 |
| 18:04:21 | 0:03:50 | 61.8197433 | 59.8243232 | 57.1349434 | 66.6953111 | 65.6321585 |
| 18:04:22 | 0:03:51 | 61.8197433 | 60.8243232 | 58.1349434 | 66.3316747 | 61.6321585 |
| 18:04:23 | 0:03:52 | 61.8197433 | 60.8243232 | 59.1349434 | 66.5134929 | 61.6321585 |
| 18:04:24 | 0:03:53 | 61.8197433 | 60.8243232 | 59.1349434 | 66.1498565 | 61.6321585 |
| 18:04:25 | 0:03:54 | 61.8197433 | 61.8243232 | 59.1349434 | 66.0589474 | 61.6321585 |
| 18:04:26 | 0:03:55 | 61.8197433 | 62.8243232 | 59.1349434 | 66.0589474 | 61.6321585 |
| 18:04:27 | 0:03:56 | 64.8197433 | 62.8243232 | 59.1349434 | 66.4225838 | 62.6321585 |
| 18:04:28 | 0:03:57 | 65.8197433 | 62.8243232 | 59.1349434 | 66.8771293 | 65.6321585 |
| 18:04:29 | 0:03:58 | 64.8197433 | 62.8243232 | 60.1349434 | 66.8771293 | 67.6321585 |
| 18:04:30 | 0:03:59 | 64.8197433 | 62.8243232 | 60.1349434 | 67.2824099 | 67.6321585 |
| 18:04:31 | 0:04:00 | 64.8197433 | 61.8243232 | 59.1349434 | 66.7862202 | 69.6321585 |
| 18:04:32 | 0:04:01 | 65.8197433 | 58.8243232 | 59.1349434 | 66.5134929 | 69.6321585 |
| 18:04:33 | 0:04:02 | 65.8197433 | 57.8243232 | 60.1349434 | 66.8771293 | 69.6321585 |
| 18:04:34 | 0:04:03 | 65.8197433 | 57.8243232 | 64.1349434 | 67.4225838 | 69.6321585 |
| 18:04:35 | 0:04:04 | 65.8197433 | 57.8243232 | 65.1349434 | 81.5666434 | 68.6321585 |
| 18:04:36 | 0:04:05 | 64.8197433 | 57.8243232 | 65.1349434 | 74.5666434 | 68.6321585 |
| 18:04:37 | 0:04:06 | 64.8197433 | 56.8243232 | 65.1349434 | 63.5666434 | 67.6321585 |
| 18:04:38 | 0:04:07 | 64.8197433 | 56.8243232 | 65.1349434 | 63.5666434 | 66.6321585 |
| 18:04:39 | 0:04:08 | 63.8197433 | 56.8243232 | 64.1349434 | 61.5666434 | 65.6321585 |
| 18:04:40 | 0:04:09 | 62.8197433 | 56.8243232 | 62.1349434 | 60.5666434 | 65.6321585 |
| 18:04:41 | 0:04:10 | 62.8197433 | 56.8243232 | 61.1349434 | 60.5666434 | 65.6321585 |
| 18:04:42 | 0:04:11 | 62.8197433 | 56.8243232 | 60.1349434 | 59.5666434 | 66.6321585 |
| 18:04:43 | 0:04:12 | 61.8197433 | 56.8243232 | 61.1349434 | 58.5666434 | 66.6321585 |
| 18:04:44 | 0:04:13 | 61.8197433 | 56.8243232 | 63.1349434 | 58.5666434 | 66.6321585 |
| 18:04:45 | 0:04:14 | 62.8197433 | 56.8243232 | 63.1349434 | 58.5666434 | 66.6321585 |
| 18:04:46 | 0:04:15 | 62.8197433 | 58.8243232 | 62.1349434 | 58.5666434 | 66.6321585 |
| 18:04:47 | 0:04:16 | 62.8197433 | 64.8243232 | 62.1349434 | 58.5666434 | 65.6321585 |
| 18:04:48 | 0:04:17 | 63.8197433 | 64.8243232 | 62.1349434 | 58.5666434 | 65.6321585 |
| 18:04:49 | 0:04:18 | 63.8197433 | 64.8243232 | 63.1349434 | 58.5666434 | 65.6321585 |
| 18:04:50 | 0:04:19 | 64.8197433 | 62.8243232 | 65.1349434 | 57.5666434 | 65.6321585 |
| 18:04:51 | 0:04:20 | 64.8197433 | 61.8243232 | 66.1349434 | 57.5666434 | 66.6321585 |
| 18:04:52 | 0:04:21 | 64.8197433 | 61.8243232 | 67.1349434 | 57.5666434 | 66.6321585 |
| 18:04:53 | 0:04:22 | 65.8197433 | 62.8243232 | 67.1349434 | 58.5666434 | 67.6321585 |
| 18:04:54 | 0:04:23 | 67.8197433 | 63.8243232 | 68.1349434 | 59.5666434 | 67.6321585 |
| 18:04:55 | 0:04:24 | 68.8197433 | 63.8243232 | 68.1349434 | 59.5666434 | 66.6321585 |
| 18:04:56 | 0:04:25 | 69.8197433 | 63.8243232 | 69.1349434 | 59.5666434 | 65.6321585 |
| 18:04:57 | 0:04:26 | 70.8197433 | 62.8243232 | 69.1349434 | 59.5666434 | 65.6321585 |



|          |         |            |            |            |            |            |
|----------|---------|------------|------------|------------|------------|------------|
| 18:04:58 | 0:04:27 | 70.8197433 | 62.8243232 | 70.1349434 | 58.5666434 | 65.6321585 |
| 18:04:59 | 0:04:28 | 72.8197433 | 62.8243232 | 70.1349434 | 58.5666434 | 64.6321585 |
| 18:05:00 | 0:04:29 | 73.8197433 | 62.8243232 | 70.1349434 | 58.5666434 | 64.6321585 |
| 18:05:01 | 0:04:30 | 74.8197433 | 62.8243232 | 70.1349434 | 58.5666434 | 63.6321585 |
| 18:05:02 | 0:04:31 | 75.8197433 | 61.8243232 | 70.1349434 | 59.5666434 | 63.6321585 |
| 18:05:03 | 0:04:32 | 75.8197433 | 61.8243232 | 70.1349434 | 60.5666434 | 63.6321585 |
| 18:05:04 | 0:04:33 | 76.8197433 | 62.8243232 | 70.1349434 | 60.5666434 | 63.6321585 |
| 18:05:05 | 0:04:34 | 76.8197433 | 64.8243232 | 70.1349434 | 61.5666434 | 63.6321585 |
| 18:05:06 | 0:04:35 | 71.8197433 | 65.8243232 | 71.1349434 | 61.5666434 | 63.6321585 |
| 18:05:07 | 0:04:36 | 70.8197433 | 65.8243232 | 71.1349434 | 62.5666434 | 63.6321585 |
| 18:05:08 | 0:04:37 | 69.8197433 | 65.8243232 | 71.1349434 | 62.5666434 | 63.6321585 |
| 18:05:09 | 0:04:38 | 69.8197433 | 65.8243232 | 71.1349434 | 62.5666434 | 63.6321585 |
| 18:05:10 | 0:04:39 | 69.8197433 | 65.8243232 | 71.1349434 | 62.5666434 | 63.6321585 |
| 18:05:11 | 0:04:40 | 69.8197433 | 65.8243232 | 71.1349434 | 62.5666434 | 64.6321585 |
| 18:05:12 | 0:04:41 | 68.8197433 | 62.8243232 | 71.1349434 | 62.5666434 | 65.6321585 |
| 18:05:13 | 0:04:42 | 68.8197433 | 60.8243232 | 71.1349434 | 62.5666434 | 66.6321585 |
| 18:05:14 | 0:04:43 | 68.8197433 | 60.8243232 | 72.1349434 | 62.5666434 | 66.6321585 |
| 18:05:15 | 0:04:44 | 68.8197433 | 59.8243232 | 73.1349434 | 62.5666434 | 65.6321585 |
| 18:05:16 | 0:04:45 | 70.8197433 | 59.8243232 | 73.1349434 | 62.5666434 | 64.6321585 |
| 18:05:17 | 0:04:46 | 71.8197433 | 59.8243232 | 73.1349434 | 62.5666434 | 63.6321585 |
| 18:05:18 | 0:04:47 | 66.8197433 | 59.8243232 | 73.1349434 | 62.5666434 | 63.6321585 |
| 18:05:19 | 0:04:48 | 63.8197433 | 64.8243232 | 73.1349434 | 62.5666434 | 64.6321585 |
| 18:05:20 | 0:04:49 | 62.8197433 | 65.8243232 | 73.1349434 | 62.5666434 | 64.6321585 |
| 18:05:21 | 0:04:50 | 62.8197433 | 65.8243232 | 74.1349434 | 63.5666434 | 64.6321585 |
| 18:05:22 | 0:04:51 | 61.8197433 | 65.8243232 | 77.1349434 | 64.5666434 | 64.6321585 |
| 18:05:23 | 0:04:52 | 61.8197433 | 64.8243232 | 77.1349434 | 64.5666434 | 64.6321585 |
| 18:05:24 | 0:04:53 | 61.8197433 | 64.8243232 | 77.1349434 | 64.5666434 | 64.6321585 |
| 18:05:25 | 0:04:54 | 60.8197433 | 63.8243232 | 78.1349434 | 64.5666434 | 66.6321585 |
| 18:05:26 | 0:04:55 | 60.8197433 | 63.8243232 | 78.1349434 | 63.5666434 | 66.6321585 |
| 18:05:27 | 0:04:56 | 60.8197433 | 64.8243232 | 78.1349434 | 63.5666434 | 65.6321585 |
| 18:05:28 | 0:04:57 | 60.8197433 | 64.8243232 | 77.1349434 | 63.5666434 | 64.6321585 |
| 18:05:29 | 0:04:58 | 60.8197433 | 65.8243232 | 75.1349434 | 63.5666434 | 64.6321585 |
| 18:05:30 | 0:04:59 | 60.8197433 | 69.8243232 | 73.1349434 | 63.5666434 | 64.6321585 |
| 18:05:31 | 0:05:00 | 61.8197433 | 69.8243232 | 65.1349434 | 63.5666434 | 64.6321585 |
| 18:05:32 | 0:05:01 | 61.8197433 | 70.8243232 | 58.1349434 | 63.5666434 | 65.6321585 |
| 18:05:33 | 0:05:02 | 61.8197433 | 67.8243232 | 56.1349434 | 61.5666434 | 65.6321585 |
| 18:05:34 | 0:05:03 | 61.8197433 | 64.8243232 | 56.1349434 | 59.5666434 | 65.6321585 |
| 18:05:35 | 0:05:04 | 61.8197433 | 64.8243232 | 58.1349434 | 60.5666434 | 66.6321585 |
| 18:05:36 | 0:05:05 | 62.8197433 | 63.8243232 | 58.1349434 | 60.5666434 | 66.6321585 |
| 18:05:37 | 0:05:06 | 62.8197433 | 63.8243232 | 63.1349434 | 62.5666434 | 64.6321585 |
| 18:05:38 | 0:05:07 | 62.8197433 | 63.8243232 | 64.1349434 | 63.5666434 | 65.6321585 |
| 18:05:39 | 0:05:08 | 62.8197433 | 63.8243232 | 64.1349434 | 63.5666434 | 64.6321585 |
| 18:05:40 | 0:05:09 | 61.8197433 | 63.8243232 | 64.1349434 | 63.5666434 | 63.6321585 |
| 18:05:41 | 0:05:10 | 60.8197433 | 63.8243232 | 64.1349434 | 65.5666434 | 63.6321585 |
| 18:05:42 | 0:05:11 | 60.8197433 | 63.8243232 | 64.1349434 | 65.5666434 | 63.6321585 |

|          |         |            |            |            |            |            |
|----------|---------|------------|------------|------------|------------|------------|
| 18:05:43 | 0:05:12 | 59.8197433 | 63.8243232 | 64.1349434 | 66.5666434 | 63.6321585 |
| 18:05:44 | 0:05:13 | 59.8197433 | 63.8243232 | 64.1349434 | 66.5666434 | 63.6321585 |
| 18:05:45 | 0:05:14 | 59.8197433 | 63.8243232 | 66.1349434 | 66.5666434 | 63.6321585 |
| 18:05:46 | 0:05:15 | 59.8197433 | 64.8243232 | 67.1349434 | 66.5666434 | 65.6321585 |
| 18:05:47 | 0:05:16 | 59.8197433 | 64.8243232 | 67.1349434 | 66.5666434 | 66.6321585 |
| 18:05:48 | 0:05:17 | 60.8197433 | 68.8243232 | 67.1349434 | 66.5666434 | 65.6321585 |
| 18:05:49 | 0:05:18 | 61.8197433 | 69.8243232 | 68.1349434 | 66.5666434 | 65.6321585 |
| 18:05:50 | 0:05:19 | 61.8197433 | 69.8243232 | 68.1349434 | 67.5666434 | 65.6321585 |
| 18:05:51 | 0:05:20 | 61.8197433 | 69.8243232 | 67.1349434 | 67.5666434 | 65.6321585 |
| 18:05:52 | 0:05:21 | 61.8197433 | 75.8243232 | 66.1349434 | 67.5666434 | 65.6321585 |
| 18:05:53 | 0:05:22 | 61.8197433 | 77.8243232 | 65.1349434 | 67.5666434 | 64.6321585 |
| 18:05:54 | 0:05:23 | 61.8197433 | 79.8243232 | 65.1349434 | 68.5666434 | 64.6321585 |
| 18:05:55 | 0:05:24 | 62.8197433 | 79.8243232 | 65.1349434 | 68.5666434 | 64.6321585 |
| 18:05:56 | 0:05:25 | 62.8197433 | 80.8243232 | 64.1349434 | 70.5666434 | 64.6321585 |
| 18:05:57 | 0:05:26 | 61.8197433 | 80.8243232 | 64.1349434 | 70.5666434 | 64.6321585 |
| 18:05:58 | 0:05:27 | 61.8197433 | 80.8243232 | 64.1349434 | 70.5666434 | 64.6321585 |
| 18:05:59 | 0:05:28 | 61.8197433 | 80.8243232 | 63.1349434 | 70.5666434 | 64.6321585 |
| 18:06:00 | 0:05:29 | 61.8197433 | 80.8243232 | 63.1349434 | 71.5666434 | 64.6321585 |
| 18:06:01 | 0:05:30 | 61.8197433 | 80.8243232 | 63.1349434 | 72.5666434 | 64.6321585 |
| 18:06:02 | 0:05:31 | 61.8197433 | 80.8243232 | 62.1349434 | 72.5666434 | 64.6321585 |
| 18:06:03 | 0:05:32 | 60.8197433 | 77.8243232 | 62.1349434 | 72.5666434 | 65.6321585 |
| 18:06:04 | 0:05:33 | 60.8197433 | 77.8243232 | 62.1349434 | 73.5666434 | 65.6321585 |
| 18:06:05 | 0:05:34 | 60.8197433 | 77.8243232 | 62.1349434 | 73.5666434 | 65.6321585 |
| 18:06:06 | 0:05:35 | 60.8197433 | 77.8243232 | 62.1349434 | 74.5666434 | 64.6321585 |
| 18:06:07 | 0:05:36 | 60.8197433 | 77.8243232 | 61.1349434 | 78.5666434 | 64.6321585 |
| 18:06:08 | 0:05:37 | 60.8197433 | 75.8243232 | 61.1349434 | 78.5666434 | 64.6321585 |
| 18:06:09 | 0:05:38 | 60.8197433 | 75.8243232 | 61.1349434 | 79.5666434 | 64.6321585 |
| 18:06:10 | 0:05:39 | 60.8197433 | 75.8243232 | 61.1349434 | 80.5666434 | 64.6321585 |
| 18:06:11 | 0:05:40 | 60.8197433 | 75.8243232 | 61.1349434 | 80.5666434 | 63.6321585 |
| 18:06:12 | 0:05:41 | 60.8197433 | 76.8243232 | 66.1349434 | 80.5666434 | 63.6321585 |
| 18:06:13 | 0:05:42 | 60.8197433 | 76.8243232 | 62.1349434 | 80.5666434 | 63.6321585 |
| 18:06:14 | 0:05:43 | 60.8197433 | 78.8243232 | 57.1349434 | 80.5666434 | 63.6321585 |
| 18:06:15 | 0:05:44 | 60.8197433 | 78.8243232 | 57.1349434 | 79.5666434 | 64.6321585 |
| 18:06:16 | 0:05:45 | 60.8197433 | 81.8243232 | 55.1349434 | 79.5666434 | 64.6321585 |
| 18:06:17 | 0:05:46 | 60.8197433 | 81.8243232 | 56.1349434 | 80.5666434 | 64.6321585 |
| 18:06:18 | 0:05:47 | 60.8197433 | 81.8243232 | 56.1349434 | 80.5666434 | 64.6321585 |
| 18:06:19 | 0:05:48 | 61.8197433 | 79.8243232 | 56.1349434 | 81.5666434 | 64.6321585 |
| 18:06:20 | 0:05:49 | 60.8197433 | 76.8243232 | 56.1349434 | 81.5666434 | 63.6321585 |
| 18:06:21 | 0:05:50 | 60.8197433 | 74.8243232 | 58.1349434 | 83.5666434 | 62.6321585 |
| 18:06:22 | 0:05:51 | 60.8197433 | 74.8243232 | 59.1349434 | 84.5666434 | 62.6321585 |
| 18:06:23 | 0:05:52 | 60.8197433 | 74.8243232 | 59.1349434 | 84.5666434 | 62.6321585 |
| 18:06:24 | 0:05:53 | 60.8197433 | 68.8243232 | 59.1349434 | 66.6953111 | 62.6321585 |
| 18:06:25 | 0:05:54 | 60.8197433 | 63.8243232 | 58.1349434 | 66.604402  | 63.6321585 |
| 18:06:26 | 0:05:55 | 60.8197433 | 61.8243232 | 54.1349434 | 66.5134929 | 67.6321585 |
| 18:06:27 | 0:05:56 | 60.8197433 | 60.8243232 | 53.1349434 | 66.6953111 | 67.6321585 |

|          |         |            |            |            |            |            |
|----------|---------|------------|------------|------------|------------|------------|
| 18:06:28 | 0:05:57 | 61.8197433 | 60.8243232 | 53.1349434 | 67.4225838 | 70.6321585 |
| 18:06:29 | 0:05:58 | 60.8197433 | 60.8243232 | 55.1349434 | 67.6953111 | 72.6321585 |
| 18:06:30 | 0:05:59 | 60.8197433 | 60.8243232 | 55.1349434 | 67.9680384 | 72.6321585 |
| 18:06:31 | 0:06:00 | 60.8197433 | 60.8243232 | 55.1349434 | 67.7862202 | 71.6321585 |
| 18:06:32 | 0:06:01 | 60.8197433 | 60.8243232 | 56.1349434 | 67.7862202 | 70.6321585 |
| 18:06:33 | 0:06:02 | 60.8197433 | 60.8243232 | 57.1349434 | 68.6953111 | 70.6321585 |
| 18:06:34 | 0:06:03 | 60.8197433 | 61.8243232 | 58.1349434 | 68.1498565 | 70.6321585 |
| 18:06:35 | 0:06:04 | 61.8197433 | 61.8243232 | 58.1349434 | 68.6953111 | 69.6321585 |
| 18:06:36 | 0:06:05 | 61.8197433 | 61.8243232 | 59.1349434 | 68.3316747 | 67.6321585 |
| 18:06:37 | 0:06:06 | 61.8197433 | 61.8243232 | 60.1349434 | 68.3316747 | 67.6321585 |
| 18:06:38 | 0:06:07 | 61.8197433 | 66.8243232 | 62.1349434 | 68.604402  | 66.6321585 |
| 18:06:39 | 0:06:08 | 61.8197433 | 66.8243232 | 63.1349434 | 68.3316747 | 65.6321585 |
| 18:06:40 | 0:06:09 | 61.8197433 | 70.8243232 | 65.1349434 | 68.8771293 | 65.6321585 |
| 18:06:41 | 0:06:10 | 61.8197433 | 71.8243232 | 66.1349434 | 69.1498565 | 65.6321585 |
| 18:06:42 | 0:06:11 | 62.8197433 | 72.8243232 | 68.1349434 | 69.0589474 | 65.6321585 |
| 18:06:43 | 0:06:12 | 62.8197433 | 72.8243232 | 70.1349434 | 69.3316747 | 65.6321585 |
| 18:06:44 | 0:06:13 | 62.8197433 | 73.8243232 | 72.1349434 | 69.604402  | 65.6321585 |
| 18:06:45 | 0:06:14 | 63.8197433 | 72.8243232 | 72.1349434 | 69.4225838 | 64.6321585 |
| 18:06:46 | 0:06:15 | 63.8197433 | 72.8243232 | 72.1349434 | 69.6953111 | 64.6321585 |
| 18:06:47 | 0:06:16 | 64.8197433 | 72.8243232 | 72.1349434 | 69.604402  | 64.6321585 |
| 18:06:48 | 0:06:17 | 65.8197433 | 72.8243232 | 70.1349434 | 69.3316747 | 64.6321585 |
| 18:06:49 | 0:06:18 | 65.8197433 | 72.8243232 | 67.1349434 | 69.0589474 | 64.6321585 |
| 18:06:50 | 0:06:19 | 67.8197433 | 72.8243232 | 67.1349434 | 69.0589474 | 64.6321585 |
| 18:06:51 | 0:06:20 | 67.8197433 | 70.8243232 | 64.1349434 | 68.4225838 | 63.6321585 |
| 18:06:52 | 0:06:21 | 68.8197433 | 69.8243232 | 64.1349434 | 68.6953111 | 63.6321585 |
| 18:06:53 | 0:06:22 | 68.8197433 | 68.8243232 | 64.1349434 | 69.0589474 | 63.6321585 |
| 18:06:54 | 0:06:23 | 68.8197433 | 68.8243232 | 63.1349434 | 69.0589474 | 62.6321585 |
| 18:06:55 | 0:06:24 | 71.8197433 | 67.8243232 | 62.1349434 | 70.0589474 | 62.6321585 |
| 18:06:56 | 0:06:25 | 85.8197433 | 64.8243232 | 60.1349434 | 71.7862202 | 61.6321585 |
| 18:06:57 | 0:06:26 | 85.8197433 | 62.8243232 | 59.1349434 | 71.6953111 | 61.6321585 |
| 18:06:58 | 0:06:27 | 70.1498565 | 60.8243232 | 58.1349434 | 70.1498565 | 60.6321585 |
| 18:06:59 | 0:06:28 | 69.8771293 | 59.8243232 | 58.1349434 | 69.8771293 | 60.6321585 |
| 18:07:00 | 0:06:29 | 68.0589474 | 58.8243232 | 58.1349434 | 72.5666434 | 58.6321585 |
| 18:07:01 | 0:06:30 | 67.4225838 | 58.8243232 | 58.1349434 | 69.5666434 | 58.6321585 |
| 18:07:02 | 0:06:31 | 66.9680384 | 58.8243232 | 58.1349434 | 69.5666434 | 56.6321585 |
| 18:07:03 | 0:06:32 | 66.9680384 | 58.8243232 | 59.1349434 | 68.5666434 | 56.6321585 |
| 18:07:04 | 0:06:33 | 66.9680384 | 58.8243232 | 59.1349434 | 67.5666434 | 57.6321585 |
| 18:07:05 | 0:06:34 | 67.5134929 | 59.8243232 | 59.1349434 | 66.5666434 | 57.6321585 |
| 18:07:06 | 0:06:35 | 67.9680384 | 60.8243232 | 68.1349434 | 66.5666434 | 54.6321585 |
| 18:07:07 | 0:06:36 | 68.3316747 | 62.8243232 | 71.1349434 | 66.5666434 | 54.6321585 |
| 18:07:08 | 0:06:37 | 68.3316747 | 62.8243232 | 71.1349434 | 66.5666434 | 54.6321585 |
| 18:07:09 | 0:06:38 | 68.0589474 | 65.8243232 | 67.1349434 | 65.5666434 | 54.6321585 |
| 18:07:10 | 0:06:39 | 67.604402  | 66.8243232 | 61.1349434 | 65.5666434 | 54.6321585 |
| 18:07:11 | 0:06:40 | 66.9680384 | 66.8243232 | 58.1349434 | 65.5666434 | 50.6321585 |
| 18:07:12 | 0:06:41 | 66.9824099 | 66.8243232 | 58.1349434 | 65.5666434 | 50.6321585 |

|          |         |            |            |            |            |            |
|----------|---------|------------|------------|------------|------------|------------|
| 18:07:13 | 0:06:42 | 66.1925569 | 61.8243232 | 57.1349434 | 65.5666434 | 48.6321585 |
| 18:07:14 | 0:06:43 | 66.3316747 | 59.8243232 | 57.1349434 | 65.5666434 | 47.6321585 |
| 18:07:15 | 0:06:44 | 66.3316747 | 58.8243232 | 57.1349434 | 65.5666434 | 47.6321585 |
| 18:07:16 | 0:06:45 | 66.3316747 | 57.8243232 | 57.1349434 | 67.5666434 | 47.6321585 |
| 18:07:17 | 0:06:46 | 66.1498565 | 58.8243232 | 56.1349434 | 68.5666434 | 47.6321585 |
| 18:07:18 | 0:06:47 | 66.2407656 | 57.8243232 | 56.1349434 | 69.5666434 | 47.6321585 |
| 18:07:19 | 0:06:48 | 66.4225838 | 57.8243232 | 62.1349434 | 69.5666434 | 47.6321585 |
| 18:07:20 | 0:06:49 | 66.5134929 | 57.8243232 | 62.1349434 | 71.5666434 | 47.6321585 |
| 18:07:21 | 0:06:50 | 66.0589474 | 57.8243232 | 57.1349434 | 72.5666434 | 47.6321585 |
| 18:07:22 | 0:06:51 | 66.4225838 | 58.8243232 | 55.1349434 | 72.5666434 | 47.6321585 |
| 18:07:23 | 0:06:52 | 66.604402  | 59.8243232 | 54.1349434 | 72.5666434 | 47.6321585 |
| 18:07:24 | 0:06:53 | 66.5134929 | 60.8243232 | 53.1349434 | 70.5666434 | 47.6321585 |
| 18:07:25 | 0:06:54 | 66.604402  | 61.8243232 | 54.1349434 | 70.5666434 | 47.6321585 |
| 18:07:26 | 0:06:55 | 66.7862202 | 61.8243232 | 56.1349434 | 70.5666434 | 47.6321585 |
| 18:07:27 | 0:06:56 | 66.3316747 | 58.8243232 | 57.1349434 | 70.5666434 | 47.6321585 |
| 18:07:28 | 0:06:57 | 65.9680384 | 57.8243232 | 56.1349434 | 69.5666434 | 47.6321585 |
| 18:07:29 | 0:06:58 | 65.7862202 | 56.8243232 | 55.1349434 | 68.5666434 | 47.6321585 |
| 18:07:30 | 0:06:59 | 65.6953111 | 56.8243232 | 54.1349434 | 68.5666434 | 45.6321585 |
| 18:07:31 | 0:07:00 | 65.7862202 | 56.8243232 | 55.1349434 | 68.5666434 | 45.6321585 |
| 18:07:32 | 0:07:01 | 66.1498565 | 57.8243232 | 55.1349434 | 68.5666434 | 45.6321585 |
| 18:07:33 | 0:07:02 | 66.5134929 | 57.8243232 | 55.1349434 | 68.5666434 | 45.6321585 |
| 18:07:34 | 0:07:03 | 66.3316747 | 57.8243232 | 56.1349434 | 68.5666434 | 45.6321585 |
| 18:07:35 | 0:07:04 | 66.5134929 | 57.8243232 | 58.1349434 | 69.5666434 | 45.6321585 |
| 18:07:36 | 0:07:05 | 67.0589474 | 57.8243232 | 59.1349434 | 70.5666434 | 46.6321585 |
| 18:07:37 | 0:07:06 | 66.2407656 | 57.8243232 | 59.1349434 | 65.5666434 | 46.6321585 |
| 18:07:38 | 0:07:07 | 66.5134929 | 56.8243232 | 62.1349434 | 65.5666434 | 46.6321585 |
| 18:07:39 | 0:07:08 | 67.0589474 | 56.8243232 | 65.1349434 | 65.5666434 | 46.6321585 |
| 18:07:40 | 0:07:09 | 67.5134929 | 56.8243232 | 67.1349434 | 65.5666434 | 46.6321585 |
| 18:07:41 | 0:07:10 | 67.9680384 | 56.8243232 | 67.1349434 | 64.5666434 | 46.6321585 |
| 18:07:42 | 0:07:11 | 67.6953111 | 57.8243232 | 65.1349434 | 63.5666434 | 46.6321585 |
| 18:07:43 | 0:07:12 | 67.8771293 | 58.8243232 | 64.1349434 | 61.5666434 | 46.6321585 |
| 18:07:44 | 0:07:13 | 67.9680384 | 58.8243232 | 63.1349434 | 61.5666434 | 46.6321585 |
| 18:07:45 | 0:07:14 | 68.3316747 | 64.8243232 | 62.1349434 | 61.5666434 | 46.6321585 |
| 18:07:46 | 0:07:15 | 68.604402  | 64.8243232 | 61.1349434 | 61.5666434 | 47.6321585 |
| 18:07:47 | 0:07:16 | 68.7862202 | 64.8243232 | 61.1349434 | 62.5666434 | 47.6321585 |
| 18:07:48 | 0:07:17 | 69.2407656 | 69.8243232 | 62.1349434 | 61.5666434 | 47.6321585 |
| 18:07:49 | 0:07:18 | 69.2407656 | 69.8243232 | 63.1349434 | 61.5666434 | 47.6321585 |
| 18:07:50 | 0:07:19 | 69.6953111 | 69.8243232 | 64.1349434 | 61.5666434 | 48.6321585 |
| 18:07:51 | 0:07:20 | 70.3316747 | 69.8243232 | 64.1349434 | 61.5666434 | 52.6321585 |
| 18:07:52 | 0:07:21 | 70.5134929 | 67.8243232 | 64.1349434 | 60.5666434 | 55.6321585 |
| 18:07:53 | 0:07:22 | 71.6953111 | 67.8243232 | 64.1349434 | 61.5666434 | 55.6321585 |
| 18:07:54 | 0:07:23 | 71.8771293 | 66.8243232 | 63.1349434 | 61.5666434 | 58.6321585 |
| 18:07:55 | 0:07:24 | 71.6953111 | 66.8243232 | 62.1349434 | 61.5666434 | 64.6321585 |
| 18:07:56 | 0:07:25 | 70.3316747 | 66.8243232 | 59.1349434 | 62.5666434 | 67.6321585 |
| 18:07:57 | 0:07:26 | 83.8197433 | 66.8243232 | 57.1349434 | 62.5666434 | 68.6321585 |

|          |         |            |            |            |            |            |
|----------|---------|------------|------------|------------|------------|------------|
| 18:07:58 | 0:07:27 | 82.8197433 | 71.8243232 | 56.1349434 | 64.5666434 | 69.6321585 |
| 18:07:59 | 0:07:28 | 81.8197433 | 71.8243232 | 56.1349434 | 64.5666434 | 69.6321585 |
| 18:08:00 | 0:07:29 | 80.8197433 | 71.8243232 | 57.1349434 | 64.5666434 | 69.6321585 |
| 18:08:01 | 0:07:30 | 80.8197433 | 69.8243232 | 58.1349434 | 64.5666434 | 69.6321585 |
| 18:08:02 | 0:07:31 | 80.8197433 | 69.8243232 | 59.1349434 | 65.5666434 | 69.6321585 |
| 18:08:03 | 0:07:32 | 80.8197433 | 67.8243232 | 59.1349434 | 65.5666434 | 71.6321585 |
| 18:08:04 | 0:07:33 | 77.8197433 | 67.8243232 | 58.1349434 | 65.5666434 | 71.6321585 |
| 18:08:05 | 0:07:34 | 77.8197433 | 67.8243232 | 58.1349434 | 65.5666434 | 71.6321585 |
| 18:08:06 | 0:07:35 | 77.8197433 | 67.8243232 | 58.1349434 | 65.5666434 | 71.6321585 |
| 18:08:07 | 0:07:36 | 70.8197433 | 64.8243232 | 58.1349434 | 62.5666434 | 67.6321585 |
| 18:08:08 | 0:07:37 | 68.8197433 | 63.8243232 | 58.1349434 | 62.5666434 | 67.6321585 |
| 18:08:09 | 0:07:38 | 64.8197433 | 63.8243232 | 60.1349434 | 62.5666434 | 67.6321585 |
| 18:08:10 | 0:07:39 | 63.8197433 | 62.8243232 | 61.1349434 | 61.5666434 | 67.6321585 |
| 18:08:11 | 0:07:40 | 62.8197433 | 62.8243232 | 63.1349434 | 62.5666434 | 66.6321585 |
| 18:08:12 | 0:07:41 | 61.8197433 | 61.8243232 | 64.1349434 | 62.5666434 | 66.6321585 |
| 18:08:13 | 0:07:42 | 61.8197433 | 61.8243232 | 65.1349434 | 62.5666434 | 64.6321585 |
| 18:08:14 | 0:07:43 | 61.8197433 | 61.8243232 | 66.1349434 | 64.5666434 | 63.6321585 |
| 18:08:15 | 0:07:44 | 61.8197433 | 61.8243232 | 66.1349434 | 64.5666434 | 61.6321585 |
| 18:08:16 | 0:07:45 | 60.8197433 | 60.8243232 | 66.1349434 | 64.5666434 | 61.6321585 |
| 18:08:17 | 0:07:46 | 60.8197433 | 60.8243232 | 66.1349434 | 63.5666434 | 62.6321585 |
| 18:08:18 | 0:07:47 | 60.8197433 | 59.8243232 | 68.1349434 | 62.5666434 | 62.6321585 |
| 18:08:19 | 0:07:48 | 61.8197433 | 59.8243232 | 69.1349434 | 62.5666434 | 62.6321585 |
| 18:08:20 | 0:07:49 | 61.8197433 | 59.8243232 | 70.1349434 | 62.5666434 | 62.6321585 |
| 18:08:21 | 0:07:50 | 61.8197433 | 58.8243232 | 70.1349434 | 62.5666434 | 62.6321585 |
| 18:08:22 | 0:07:51 | 61.8197433 | 58.8243232 | 71.1349434 | 62.5666434 | 62.6321585 |
| 18:08:23 | 0:07:52 | 61.8197433 | 58.8243232 | 74.1349434 | 63.5666434 | 61.6321585 |
| 18:08:24 | 0:07:53 | 67.8197433 | 58.8243232 | 74.1349434 | 63.5666434 | 60.6321585 |
| 18:08:25 | 0:07:54 | 70.8197433 | 61.8243232 | 82.1349434 | 63.5666434 | 59.6321585 |
| 18:08:26 | 0:07:55 | 86.8197433 | 62.8243232 | 82.1349434 | 63.5666434 | 59.6321585 |
| 18:08:27 | 0:07:56 | 71.3316747 | 63.8243232 | 82.1349434 | 63.5666434 | 59.6321585 |
| 18:08:28 | 0:07:57 | 71.7862202 | 63.8243232 | 82.1349434 | 63.5666434 | 60.6321585 |
| 18:08:29 | 0:07:58 | 72.7862202 | 63.8243232 | 83.1349434 | 63.5666434 | 60.6321585 |
| 18:08:30 | 0:07:59 | 72.7862202 | 63.8243232 | 83.1349434 | 62.5666434 | 60.6321585 |
| 18:08:31 | 0:08:00 | 72.9680384 | 63.8243232 | 83.1349434 | 62.5666434 | 60.6321585 |
| 18:08:32 | 0:08:01 | 73.2407656 | 65.8243232 | 84.1349434 | 61.5666434 | 59.6321585 |
| 18:08:33 | 0:08:02 | 73.1498565 | 65.8243232 | 84.1349434 | 61.5666434 | 59.6321585 |
| 18:08:34 | 0:08:03 | 73.5134929 | 65.8243232 | 84.1349434 | 61.5666434 | 59.6321585 |
| 18:08:35 | 0:08:04 | 73.604402  | 63.8243232 | 84.1349434 | 61.5666434 | 59.6321585 |
| 18:08:36 | 0:08:05 | 73.6953111 | 62.8243232 | 84.1349434 | 61.5666434 | 61.6321585 |
| 18:08:37 | 0:08:06 | 73.6953111 | 62.8243232 | 84.1349434 | 61.5666434 | 60.6321585 |
| 18:08:38 | 0:08:07 | 73.604402  | 62.8243232 | 84.1349434 | 62.5666434 | 60.6321585 |
| 18:08:39 | 0:08:08 | 73.6953111 | 61.8243232 | 84.1349434 | 62.5666434 | 60.6321585 |
| 18:08:40 | 0:08:09 | 73.2407656 | 61.8243232 | 84.1349434 | 62.5666434 | 59.6321585 |
| 18:08:41 | 0:08:10 | 73.2407656 | 60.8243232 | 84.1349434 | 62.5666434 | 60.6321585 |
| 18:08:42 | 0:08:11 | 73.3316747 | 60.8243232 | 86.1349434 | 61.5666434 | 60.6321585 |

|          |         |            |            |            |            |            |
|----------|---------|------------|------------|------------|------------|------------|
| 18:08:43 | 0:08:12 | 73.5134929 | 63.8243232 | 86.1349434 | 61.5666434 | 60.6321585 |
| 18:08:44 | 0:08:13 | 73.4225838 | 63.8243232 | 87.1349434 | 61.5666434 | 61.6321585 |
| 18:08:45 | 0:08:14 | 73.3316747 | 63.8243232 | 87.1349434 | 61.5666434 | 60.6321585 |
| 18:08:46 | 0:08:15 | 73.604402  | 63.8243232 | 85.1349434 | 61.5666434 | 60.6321585 |
| 18:08:47 | 0:08:16 | 73.604402  | 63.8243232 | 78.1349434 | 62.5666434 | 60.6321585 |
| 18:08:48 | 0:08:17 | 73.5134929 | 62.8243232 | 78.1349434 | 62.5666434 | 61.6321585 |
| 18:08:49 | 0:08:18 | 73.6953111 | 62.8243232 | 75.1349434 | 65.5666434 | 61.6321585 |
| 18:08:50 | 0:08:19 | 74.0589474 | 63.8243232 | 75.1349434 | 66.5666434 | 61.6321585 |
| 18:08:51 | 0:08:20 | 74.6953111 | 63.8243232 | 75.1349434 | 68.5666434 | 61.6321585 |
| 18:08:52 | 0:08:21 | 74.5134929 | 63.8243232 | 74.1349434 | 71.5666434 | 62.6321585 |
| 18:08:53 | 0:08:22 | 74.2407656 | 60.8243232 | 74.1349434 | 71.5666434 | 62.6321585 |
| 18:08:54 | 0:08:23 | 73.8771293 | 60.8243232 | 70.1349434 | 71.5666434 | 62.6321585 |
| 18:08:55 | 0:08:24 | 74.1498565 | 58.8243232 | 71.1349434 | 71.5666434 | 62.6321585 |
| 18:08:56 | 0:08:25 | 74.2407656 | 57.8243232 | 69.1349434 | 69.5666434 | 63.6321585 |
| 18:08:57 | 0:08:26 | 74.1498565 | 58.8243232 | 66.1349434 | 69.5666434 | 63.6321585 |
| 18:08:58 | 0:08:27 | 74.5134929 | 59.8243232 | 65.1349434 | 69.5666434 | 63.6321585 |
| 18:08:59 | 0:08:28 | 73.7862202 | 59.8243232 | 64.1349434 | 69.5666434 | 64.6321585 |
| 18:09:00 | 0:08:29 | 76.4793861 | 59.8243232 | 64.1349434 | 69.5666434 | 64.6321585 |
| 18:09:01 | 0:08:30 | 73.4225838 | 59.8243232 | 65.1349434 | 66.5666434 | 66.6321585 |
| 18:09:02 | 0:08:31 | 73.1498565 | 59.8243232 | 65.1349434 | 65.5666434 | 66.6321585 |
| 18:09:03 | 0:08:32 | 72.7862202 | 59.8243232 | 65.1349434 | 65.5666434 | 66.6321585 |
| 18:09:04 | 0:08:33 | 72.5134929 | 59.8243232 | 65.1349434 | 65.5666434 | 64.6321585 |
| 18:09:05 | 0:08:34 | 72.5134929 | 58.8243232 | 66.1349434 | 65.5666434 | 63.6321585 |
| 18:09:06 | 0:08:35 | 72.4225838 | 59.8243232 | 67.1349434 | 65.5666434 | 63.6321585 |
| 18:09:07 | 0:08:36 | 71.1498565 | 59.8243232 | 68.1349434 | 65.5666434 | 63.6321585 |
| 18:09:08 | 0:08:37 | 70.4225838 | 59.8243232 | 68.1349434 | 65.5666434 | 63.6321585 |
| 18:09:09 | 0:08:38 | 70.7862202 | 60.8243232 | 68.1349434 | 65.5666434 | 63.6321585 |
| 18:09:10 | 0:08:39 | 69.8771293 | 60.8243232 | 68.1349434 | 65.5666434 | 62.6321585 |
| 18:09:11 | 0:08:40 | 69.4225838 | 62.8243232 | 64.1349434 | 65.5666434 | 60.6321585 |
| 18:09:12 | 0:08:41 | 77.8197433 | 62.8243232 | 64.1349434 | 65.5666434 | 59.6321585 |
| 18:09:13 | 0:08:42 | 68.8197433 | 63.8243232 | 67.1349434 | 63.5666434 | 59.6321585 |
| 18:09:14 | 0:08:43 | 65.8197433 | 64.8243232 | 67.1349434 | 63.5666434 | 59.6321585 |
| 18:09:15 | 0:08:44 | 63.8197433 | 65.8243232 | 65.1349434 | 63.5666434 | 59.6321585 |
| 18:09:16 | 0:08:45 | 63.8197433 | 65.8243232 | 65.1349434 | 63.5666434 | 59.6321585 |
| 18:09:17 | 0:08:46 | 62.8197433 | 65.8243232 | 65.1349434 | 63.5666434 | 59.6321585 |
| 18:09:18 | 0:08:47 | 62.8197433 | 65.8243232 | 66.1349434 | 61.5666434 | 59.6321585 |
| 18:09:19 | 0:08:48 | 62.8197433 | 65.8243232 | 66.1349434 | 61.5666434 | 59.6321585 |
| 18:09:20 | 0:08:49 | 62.8197433 | 65.8243232 | 72.1349434 | 61.5666434 | 63.6321585 |
| 18:09:21 | 0:08:50 | 62.8197433 | 64.8243232 | 72.1349434 | 60.5666434 | 63.6321585 |
| 18:09:22 | 0:08:51 | 62.8197433 | 65.8243232 | 72.1349434 | 60.5666434 | 63.6321585 |
| 18:09:23 | 0:08:52 | 62.8197433 | 65.8243232 | 72.1349434 | 60.5666434 | 63.6321585 |
| 18:09:24 | 0:08:53 | 62.8197433 | 66.8243232 | 72.1349434 | 60.5666434 | 64.6321585 |
| 18:09:25 | 0:08:54 | 62.8197433 | 66.8243232 | 72.1349434 | 59.5666434 | 63.6321585 |
| 18:09:26 | 0:08:55 | 62.8197433 | 67.8243232 | 72.1349434 | 59.5666434 | 63.6321585 |
| 18:09:27 | 0:08:56 | 62.8197433 | 67.8243232 | 71.1349434 | 59.5666434 | 62.6321585 |

|          |         |            |            |            |            |            |
|----------|---------|------------|------------|------------|------------|------------|
| 18:09:28 | 0:08:57 | 62.8197433 | 67.8243232 | 70.1349434 | 59.5666434 | 62.6321585 |
| 18:09:29 | 0:08:58 | 62.8197433 | 65.8243232 | 70.1349434 | 59.5666434 | 61.6321585 |
| 18:09:30 | 0:08:59 | 62.8197433 | 65.8243232 | 67.1349434 | 59.5666434 | 61.6321585 |
| 18:09:31 | 0:09:00 | 62.8197433 | 65.8243232 | 66.1349434 | 59.5666434 | 61.6321585 |
| 18:09:32 | 0:09:01 | 62.8197433 | 65.8243232 | 63.1349434 | 60.5666434 | 61.6321585 |
| 18:09:33 | 0:09:02 | 61.8197433 | 65.8243232 | 62.1349434 | 60.5666434 | 61.6321585 |
| 18:09:34 | 0:09:03 | 61.8197433 | 65.8243232 | 62.1349434 | 60.5666434 | 63.6321585 |
| 18:09:35 | 0:09:04 | 61.8197433 | 65.8243232 | 61.1349434 | 62.5666434 | 64.6321585 |
| 18:09:36 | 0:09:05 | 61.8197433 | 65.8243232 | 61.1349434 | 62.5666434 | 65.6321585 |
| 18:09:37 | 0:09:06 | 61.8197433 | 66.8243232 | 62.1349434 | 62.5666434 | 69.6321585 |
| 18:09:38 | 0:09:07 | 61.8197433 | 67.8243232 | 66.1349434 | 62.5666434 | 69.6321585 |
| 18:09:39 | 0:09:08 | 61.8197433 | 69.8243232 | 69.1349434 | 62.5666434 | 70.6321585 |
| 18:09:40 | 0:09:09 | 61.8197433 | 69.8243232 | 69.1349434 | 62.5666434 | 70.6321585 |
| 18:09:41 | 0:09:10 | 61.8197433 | 69.8243232 | 71.1349434 | 62.5666434 | 70.6321585 |
| 18:09:42 | 0:09:11 | 61.8197433 | 68.8243232 | 72.1349434 | 62.5666434 | 70.6321585 |
| 18:09:43 | 0:09:12 | 62.8197433 | 67.8243232 | 72.1349434 | 61.5666434 | 74.6321585 |
| 18:09:44 | 0:09:13 | 62.8197433 | 67.8243232 | 69.1349434 | 61.5666434 | 75.6321585 |
| 18:09:45 | 0:09:14 | 61.8197433 | 68.8243232 | 65.1349434 | 61.5666434 | 75.6321585 |
| 18:09:46 | 0:09:15 | 61.8197433 | 68.8243232 | 66.1349434 | 61.5666434 | 75.6321585 |
| 18:09:47 | 0:09:16 | 61.8197433 | 68.8243232 | 65.1349434 | 61.5666434 | 75.6321585 |
| 18:09:48 | 0:09:17 | 61.8197433 | 68.8243232 | 64.1349434 | 61.5666434 | 75.6321585 |
| 18:09:49 | 0:09:18 | 62.8197433 | 68.8243232 | 63.1349434 | 61.5666434 | 74.6321585 |
| 18:09:50 | 0:09:19 | 62.8197433 | 68.8243232 | 64.1349434 | 61.5666434 | 71.6321585 |
| 18:09:51 | 0:09:20 | 62.8197433 | 68.8243232 | 66.1349434 | 61.5666434 | 71.6321585 |
| 18:09:52 | 0:09:21 | 62.8197433 | 68.8243232 | 68.1349434 | 61.5666434 | 70.6321585 |
| 18:09:53 | 0:09:22 | 61.8197433 | 68.8243232 | 68.1349434 | 62.5666434 | 70.6321585 |
| 18:09:54 | 0:09:23 | 61.8197433 | 68.8243232 | 68.1349434 | 62.5666434 | 70.6321585 |
| 18:09:55 | 0:09:24 | 61.8197433 | 67.8243232 | 72.1349434 | 62.5666434 | 70.6321585 |
| 18:09:56 | 0:09:25 | 61.8197433 | 67.8243232 | 74.1349434 | 63.5666434 | 70.6321585 |
| 18:09:57 | 0:09:26 | 61.8197433 | 68.8243232 | 75.1349434 | 64.5666434 | 69.6321585 |
| 18:09:58 | 0:09:27 | 61.8197433 | 68.8243232 | 74.1349434 | 64.5666434 | 69.6321585 |
| 18:09:59 | 0:09:28 | 61.8197433 | 68.8243232 | 72.1349434 | 64.5666434 | 69.6321585 |
| 18:10:00 | 0:09:29 | 61.8197433 | 68.8243232 | 72.1349434 | 64.5666434 | 70.6321585 |
| 18:10:01 | 0:09:30 | 61.8197433 | 69.8243232 | 72.1349434 | 64.5666434 | 71.6321585 |
| 18:10:02 | 0:09:31 | 61.8197433 | 72.8243232 | 67.1349434 | 64.5666434 | 73.6321585 |
| 18:10:03 | 0:09:32 | 60.8197433 | 72.8243232 | 67.1349434 | 64.5666434 | 74.6321585 |
| 18:10:04 | 0:09:33 | 61.8197433 | 69.8243232 | 67.1349434 | 64.5666434 | 74.6321585 |
| 18:10:05 | 0:09:34 | 60.8197433 | 67.8243232 | 65.1349434 | 64.5666434 | 71.6321585 |
| 18:10:06 | 0:09:35 | 61.8197433 | 67.8243232 | 65.1349434 | 65.5666434 | 70.6321585 |
| 18:10:07 | 0:09:36 | 60.8197433 | 67.8243232 | 65.1349434 | 65.5666434 | 70.6321585 |
| 18:10:08 | 0:09:37 | 60.8197433 | 66.8243232 | 65.1349434 | 66.5666434 | 68.6321585 |
| 18:10:09 | 0:09:38 | 61.8197433 | 66.8243232 | 65.1349434 | 66.5666434 | 68.6321585 |
| 18:10:10 | 0:09:39 | 61.8197433 | 66.8243232 | 65.1349434 | 66.5666434 | 64.6321585 |
| 18:10:11 | 0:09:40 | 61.8197433 | 66.8243232 | 65.1349434 | 67.5666434 | 65.6321585 |
| 18:10:12 | 0:09:41 | 61.8197433 | 66.8243232 | 66.1349434 | 69.5666434 | 65.6321585 |

|          |         |            |            |            |            |            |
|----------|---------|------------|------------|------------|------------|------------|
| 18:10:13 | 0:09:42 | 61.8197433 | 66.8243232 | 66.1349434 | 70.5666434 | 65.6321585 |
| 18:10:14 | 0:09:43 | 61.8197433 | 66.8243232 | 66.1349434 | 70.5666434 | 66.6321585 |
| 18:10:15 | 0:09:44 | 61.8197433 | 66.8243232 | 69.1349434 | 70.5666434 | 66.6321585 |
| 18:10:16 | 0:09:45 | 61.8197433 | 66.8243232 | 77.1349434 | 71.5666434 | 66.6321585 |
| 18:10:17 | 0:09:46 | 61.8197433 | 66.8243232 | 81.1349434 | 71.5666434 | 67.6321585 |
| 18:10:18 | 0:09:47 | 61.8197433 | 66.8243232 | 81.1349434 | 70.5666434 | 68.6321585 |
| 18:10:19 | 0:09:48 | 61.8197433 | 66.8243232 | 81.1349434 | 70.5666434 | 69.6321585 |
| 18:10:20 | 0:09:49 | 61.8197433 | 64.8243232 | 81.1349434 | 70.5666434 | 71.6321585 |
| 18:10:21 | 0:09:50 | 61.8197433 | 64.8243232 | 81.1349434 | 69.5666434 | 72.6321585 |
| 18:10:22 | 0:09:51 | 61.8197433 | 64.8243232 | 81.1349434 | 69.5666434 | 72.6321585 |
| 18:10:23 | 0:09:52 | 61.8197433 | 64.8243232 | 65.1349434 | 69.5666434 | 72.6321585 |
| 18:10:24 | 0:09:53 | 61.8197433 | 64.8243232 | 62.1349434 | 69.5666434 | 73.6321585 |
| 18:10:25 | 0:09:54 | 61.8197433 | 65.8243232 | 60.1349434 | 68.5666434 | 73.6321585 |
| 18:10:26 | 0:09:55 | 61.8197433 | 65.8243232 | 59.1349434 | 68.5666434 | 73.6321585 |
| 18:10:27 | 0:09:56 | 61.8197433 | 65.8243232 | 59.1349434 | 68.5666434 | 73.6321585 |
| 18:10:28 | 0:09:57 | 61.8197433 | 64.8243232 | 59.1349434 | 68.5666434 | 73.6321585 |
| 18:10:29 | 0:09:58 | 61.8197433 | 61.8243232 | 59.1349434 | 67.5666434 | 72.6321585 |
| 18:10:30 | 0:09:59 | 61.8197433 | 61.8243232 | 61.1349434 | 67.5666434 | 72.6321585 |
| 18:10:31 | 0:10:00 | 61.8197433 | 62.8243232 | 63.1349434 | 67.5666434 | 71.6321585 |
| 18:10:32 | 0:10:01 | 61.8197433 | 62.8243232 | 62.1349434 | 67.5666434 | 70.6321585 |
| 18:10:33 | 0:10:02 | 61.8197433 | 62.8243232 | 61.1349434 | 65.5666434 | 70.6321585 |
| 18:10:34 | 0:10:03 | 61.8197433 | 62.8243232 | 60.1349434 | 65.5666434 | 70.6321585 |
| 18:10:35 | 0:10:04 | 61.8197433 | 62.8243232 | 60.1349434 | 64.5666434 | 68.6321585 |
| 18:10:36 | 0:10:05 | 61.8197433 | 62.8243232 | 61.1349434 | 64.5666434 | 66.6321585 |
| 18:10:37 | 0:10:06 | 61.8197433 | 63.8243232 | 61.1349434 | 64.5666434 | 66.6321585 |
| 18:10:38 | 0:10:07 | 61.8197433 | 64.8243232 | 63.1349434 | 64.5666434 | 66.6321585 |
| 18:10:39 | 0:10:08 | 61.8197433 | 64.8243232 | 63.1349434 | 64.5666434 | 64.6321585 |
| 18:10:40 | 0:10:09 | 60.8197433 | 64.8243232 | 63.1349434 | 64.5666434 | 61.6321585 |
| 18:10:41 | 0:10:10 | 61.8197433 | 63.8243232 | 63.1349434 | 63.5666434 | 61.6321585 |
| 18:10:42 | 0:10:11 | 61.8197433 | 63.8243232 | 63.1349434 | 64.5666434 | 61.6321585 |
| 18:10:43 | 0:10:12 | 61.8197433 | 64.8243232 | 63.1349434 | 64.5666434 | 59.6321585 |
| 18:10:44 | 0:10:13 | 61.8197433 | 64.8243232 | 63.1349434 | 63.5666434 | 58.6321585 |
| 18:10:45 | 0:10:14 | 61.8197433 | 65.8243232 | 64.1349434 | 63.5666434 | 56.6321585 |
| 18:10:46 | 0:10:15 | 61.8197433 | 66.8243232 | 66.1349434 | 63.5666434 | 56.6321585 |
| 18:10:47 | 0:10:16 | 61.8197433 | 67.8243232 | 66.1349434 | 63.5666434 | 55.6321585 |
| 18:10:48 | 0:10:17 | 61.8197433 | 67.8243232 | 66.1349434 | 63.5666434 | 55.6321585 |
| 18:10:49 | 0:10:18 | 61.8197433 | 70.8243232 | 66.1349434 | 63.5666434 | 58.6321585 |
| 18:10:50 | 0:10:19 | 61.8197433 | 71.8243232 | 65.1349434 | 63.5666434 | 60.6321585 |
| 18:10:51 | 0:10:20 | 61.8197433 | 73.8243232 | 65.1349434 | 64.5666434 | 60.6321585 |
| 18:10:52 | 0:10:21 | 61.8197433 | 73.8243232 | 65.1349434 | 64.5666434 | 60.6321585 |
| 18:10:53 | 0:10:22 | 61.8197433 | 71.8243232 | 65.1349434 | 64.5666434 | 62.6321585 |
| 18:10:54 | 0:10:23 | 61.8197433 | 69.8243232 | 66.1349434 | 64.5666434 | 62.6321585 |
| 18:10:55 | 0:10:24 | 61.8197433 | 69.8243232 | 67.1349434 | 64.5666434 | 63.6321585 |
| 18:10:56 | 0:10:25 | 61.8197433 | 68.8243232 | 67.1349434 | 64.5666434 | 63.6321585 |
| 18:10:57 | 0:10:26 | 61.8197433 | 68.8243232 | 67.1349434 | 64.5666434 | 66.6321585 |



|          |         |            |            |            |            |            |
|----------|---------|------------|------------|------------|------------|------------|
| 18:10:58 | 0:10:27 | 61.8197433 | 68.8243232 | 67.1349434 | 64.5666434 | 66.6321585 |
| 18:10:59 | 0:10:28 | 61.8197433 | 68.8243232 | 68.1349434 | 65.5666434 | 66.6321585 |
| 18:11:00 | 0:10:29 | 61.8197433 | 68.8243232 | 68.1349434 | 65.5666434 | 65.6321585 |
| 18:11:01 | 0:10:30 | 61.8197433 | 68.8243232 | 68.1349434 | 69.5666434 | 64.6321585 |
| 18:11:02 | 0:10:31 | 64.8197433 | 68.8243232 | 68.1349434 | 69.5666434 | 64.6321585 |
| 18:11:03 | 0:10:32 | 65.8197433 | 68.8243232 | 67.1349434 | 70.5666434 | 65.6321585 |
| 18:11:04 | 0:10:33 | 64.8197433 | 69.8243232 | 66.1349434 | 71.5666434 | 65.6321585 |
| 18:11:05 | 0:10:34 | 63.8197433 | 68.8243232 | 67.1349434 | 72.5666434 | 69.6321585 |
| 18:11:06 | 0:10:35 | 63.8197433 | 67.8243232 | 67.1349434 | 73.5666434 | 68.6321585 |
| 18:11:07 | 0:10:36 | 63.8197433 | 67.8243232 | 66.1349434 | 75.5666434 | 64.6321585 |
| 18:11:08 | 0:10:37 | 63.8197433 | 67.8243232 | 66.1349434 | 75.5666434 | 64.6321585 |
| 18:11:09 | 0:10:38 | 63.8197433 | 67.8243232 | 66.1349434 | 75.5666434 | 64.6321585 |
| 18:11:10 | 0:10:39 | 63.8197433 | 62.8243232 | 66.1349434 | 75.5666434 | 64.6321585 |
| 18:11:11 | 0:10:40 | 63.8197433 | 58.8243232 | 66.1349434 | 65.5666434 | 64.6321585 |
| 18:11:12 | 0:10:41 | 62.8197433 | 57.8243232 | 65.1349434 | 65.5666434 | 64.6321585 |
| 18:11:13 | 0:10:42 | 62.8197433 | 57.8243232 | 65.1349434 | 61.5666434 | 64.6321585 |
| 18:11:14 | 0:10:43 | 62.8197433 | 57.8243232 | 65.1349434 | 59.5666434 | 64.6321585 |
| 18:11:15 | 0:10:44 | 61.8197433 | 57.8243232 | 65.1349434 | 59.5666434 | 64.6321585 |
| 18:11:16 | 0:10:45 | 61.8197433 | 56.8243232 | 72.1349434 | 59.5666434 | 64.6321585 |
| 18:11:17 | 0:10:46 | 61.8197433 | 56.8243232 | 72.1349434 | 59.5666434 | 64.6321585 |
| 18:11:18 | 0:10:47 | 61.8197433 | 56.8243232 | 70.1349434 | 59.5666434 | 65.6321585 |
| 18:11:19 | 0:10:48 | 61.8197433 | 56.8243232 | 64.1349434 | 58.5666434 | 65.6321585 |
| 18:11:20 | 0:10:49 | 61.8197433 | 56.8243232 | 63.1349434 | 58.5666434 | 65.6321585 |
| 18:11:21 | 0:10:50 | 61.8197433 | 57.8243232 | 63.1349434 | 58.5666434 | 66.6321585 |
| 18:11:22 | 0:10:51 | 61.8197433 | 59.8243232 | 63.1349434 | 58.5666434 | 67.6321585 |
| 18:11:23 | 0:10:52 | 61.8197433 | 61.8243232 | 62.1349434 | 58.5666434 | 67.6321585 |
| 18:11:24 | 0:10:53 | 61.8197433 | 62.8243232 | 73.1349434 | 58.5666434 | 67.6321585 |
| 18:11:25 | 0:10:54 | 61.8197433 | 63.8243232 | 76.1349434 | 59.5666434 | 67.6321585 |
| 18:11:26 | 0:10:55 | 61.8197433 | 63.8243232 | 77.1349434 | 60.5666434 | 67.6321585 |
| 18:11:27 | 0:10:56 | 61.8197433 | 63.8243232 | 77.1349434 | 60.5666434 | 67.6321585 |
| 18:11:28 | 0:10:57 | 60.8197433 | 63.8243232 | 77.1349434 | 61.5666434 | 68.6321585 |
| 18:11:29 | 0:10:58 | 60.8197433 | 64.8243232 | 75.1349434 | 61.5666434 | 69.6321585 |
| 18:11:30 | 0:10:59 | 59.8197433 | 64.8243232 | 75.1349434 | 61.5666434 | 68.6321585 |
| 18:11:31 | 0:11:00 | 59.8197433 | 64.8243232 | 74.1349434 | 61.5666434 | 68.6321585 |
| 18:11:32 | 0:11:01 | 59.8197433 | 62.8243232 | 72.1349434 | 61.5666434 | 68.6321585 |
| 18:11:33 | 0:11:02 | 59.8197433 | 65.8243232 | 71.1349434 | 62.5666434 | 67.6321585 |
| 18:11:34 | 0:11:03 | 58.8197433 | 66.8243232 | 72.1349434 | 63.5666434 | 68.6321585 |
| 18:11:35 | 0:11:04 | 58.8197433 | 67.8243232 | 73.1349434 | 62.5666434 | 68.6321585 |
| 18:11:36 | 0:11:05 | 58.8197433 | 67.8243232 | 73.1349434 | 62.5666434 | 68.6321585 |
| 18:11:37 | 0:11:06 | 58.8197433 | 67.8243232 | 73.1349434 | 62.5666434 | 68.6321585 |
| 18:11:38 | 0:11:07 | 58.8197433 | 67.8243232 | 73.1349434 | 62.5666434 | 67.6321585 |
| 18:11:39 | 0:11:08 | 58.8197433 | 67.8243232 | 73.1349434 | 62.5666434 | 67.6321585 |
| 18:11:40 | 0:11:09 | 59.8197433 | 68.8243232 | 73.1349434 | 62.5666434 | 67.6321585 |
| 18:11:41 | 0:11:10 | 61.8197433 | 69.8243232 | 72.1349434 | 64.5666434 | 67.6321585 |
| 18:11:42 | 0:11:11 | 61.8197433 | 69.8243232 | 72.1349434 | 64.5666434 | 67.6321585 |

|          |         |            |            |            |            |            |
|----------|---------|------------|------------|------------|------------|------------|
| 18:11:43 | 0:11:12 | 63.8197433 | 69.8243232 | 70.1349434 | 65.5666434 | 67.6321585 |
| 18:11:44 | 0:11:13 | 64.8197433 | 70.8243232 | 68.1349434 | 65.5666434 | 67.6321585 |
| 18:11:45 | 0:11:14 | 67.8197433 | 70.8243232 | 68.1349434 | 65.5666434 | 67.6321585 |
| 18:11:46 | 0:11:15 | 69.8197433 | 70.8243232 | 68.1349434 | 65.5666434 | 68.6321585 |
| 18:11:47 | 0:11:16 | 69.8197433 | 70.8243232 | 67.1349434 | 65.5666434 | 68.6321585 |
| 18:11:48 | 0:11:17 | 69.8197433 | 70.8243232 | 63.1349434 | 69.5666434 | 68.6321585 |
| 18:11:49 | 0:11:18 | 69.8197433 | 70.8243232 | 63.1349434 | 70.5666434 | 68.6321585 |
| 18:11:50 | 0:11:19 | 69.8197433 | 69.8243232 | 58.1349434 | 70.5666434 | 68.6321585 |
| 18:11:51 | 0:11:20 | 70.8197433 | 68.8243232 | 58.1349434 | 70.5666434 | 68.6321585 |
| 18:11:52 | 0:11:21 | 71.8197433 | 66.8243232 | 59.1349434 | 71.5666434 | 67.6321585 |
| 18:11:53 | 0:11:22 | 72.8197433 | 66.8243232 | 60.1349434 | 65.5666434 | 67.6321585 |
| 18:11:54 | 0:11:23 | 73.8197433 | 66.8243232 | 61.1349434 | 65.5666434 | 66.6321585 |
| 18:11:55 | 0:11:24 | 75.8197433 | 66.8243232 | 62.1349434 | 65.5666434 | 65.6321585 |
| 18:11:56 | 0:11:25 | 75.8197433 | 65.8243232 | 62.1349434 | 62.5666434 | 65.6321585 |
| 18:11:57 | 0:11:26 | 75.8197433 | 65.8243232 | 62.1349434 | 62.5666434 | 65.6321585 |
| 18:11:58 | 0:11:27 | 76.8197433 | 65.8243232 | 62.1349434 | 60.5666434 | 65.6321585 |
| 18:11:59 | 0:11:28 | 76.8197433 | 64.8243232 | 62.1349434 | 59.5666434 | 65.6321585 |
| 18:12:00 | 0:11:29 | 72.8197433 | 63.8243232 | 62.1349434 | 59.5666434 | 65.6321585 |
| 18:12:01 | 0:11:30 | 67.8197433 | 63.8243232 | 62.1349434 | 60.5666434 | 65.6321585 |
| 18:12:02 | 0:11:31 | 65.8197433 | 63.8243232 | 62.1349434 | 60.5666434 | 66.6321585 |
| 18:12:03 | 0:11:32 | 65.8197433 | 63.8243232 | 62.1349434 | 59.5666434 | 66.6321585 |
| 18:12:04 | 0:11:33 | 65.8197433 | 63.8243232 | 63.1349434 | 59.5666434 | 66.6321585 |
| 18:12:05 | 0:11:34 | 65.8197433 | 64.8243232 | 63.1349434 | 59.5666434 | 66.6321585 |
| 18:12:06 | 0:11:35 | 64.8197433 | 68.8243232 | 64.1349434 | 59.5666434 | 66.6321585 |
| 18:12:07 | 0:11:36 | 64.8197433 | 76.8243232 | 65.1349434 | 59.5666434 | 66.6321585 |
| 18:12:08 | 0:11:37 | 64.8197433 | 76.8243232 | 65.1349434 | 59.5666434 | 66.6321585 |
| 18:12:09 | 0:11:38 | 64.8197433 | 77.8243232 | 66.1349434 | 59.5666434 | 66.6321585 |
| 18:12:10 | 0:11:39 | 64.8197433 | 77.8243232 | 66.1349434 | 59.5666434 | 66.6321585 |
| 18:12:11 | 0:11:40 | 64.8197433 | 77.8243232 | 66.1349434 | 60.5666434 | 66.6321585 |
| 18:12:12 | 0:11:41 | 64.8197433 | 77.8243232 | 67.1349434 | 60.5666434 | 66.6321585 |
| 18:12:13 | 0:11:42 | 64.8197433 | 77.8243232 | 68.1349434 | 59.5666434 | 66.6321585 |
| 18:12:14 | 0:11:43 | 62.8197433 | 78.8243232 | 69.1349434 | 59.5666434 | 67.6321585 |
| 18:12:15 | 0:11:44 | 62.8197433 | 78.8243232 | 69.1349434 | 61.5666434 | 69.6321585 |
| 18:12:16 | 0:11:45 | 61.8197433 | 76.8243232 | 71.1349434 | 62.5666434 | 69.6321585 |
| 18:12:17 | 0:11:46 | 61.8197433 | 76.8243232 | 71.1349434 | 62.5666434 | 70.6321585 |
| 18:12:18 | 0:11:47 | 61.8197433 | 76.8243232 | 72.1349434 | 62.5666434 | 70.6321585 |
| 18:12:19 | 0:11:48 | 61.8197433 | 76.8243232 | 74.1349434 | 62.5666434 | 70.6321585 |
| 18:12:20 | 0:11:49 | 61.8197433 | 76.8243232 | 74.1349434 | 62.5666434 | 70.6321585 |
| 18:12:21 | 0:11:50 | 61.8197433 | 76.8243232 | 74.1349434 | 62.5666434 | 70.6321585 |
| 18:12:22 | 0:11:51 | 61.8197433 | 75.8243232 | 71.1349434 | 62.5666434 | 70.6321585 |
| 18:12:23 | 0:11:52 | 61.8197433 | 70.8243232 | 68.1349434 | 62.5666434 | 68.6321585 |
| 18:12:24 | 0:11:53 | 61.8197433 | 70.8243232 | 63.1349434 | 62.5666434 | 69.6321585 |
| 18:12:25 | 0:11:54 | 61.8197433 | 64.8243232 | 61.1349434 | 62.5666434 | 71.6321585 |
| 18:12:26 | 0:11:55 | 61.8197433 | 63.8243232 | 61.1349434 | 63.5666434 | 72.6321585 |
| 18:12:27 | 0:11:56 | 61.8197433 | 63.8243232 | 62.1349434 | 63.5666434 | 72.6321585 |

|          |         |            |            |            |            |            |
|----------|---------|------------|------------|------------|------------|------------|
| 18:12:28 | 0:11:57 | 60.8197433 | 63.8243232 | 63.1349434 | 65.5666434 | 73.6321585 |
| 18:12:29 | 0:11:58 | 60.8197433 | 63.8243232 | 64.1349434 | 66.5666434 | 73.6321585 |
| 18:12:30 | 0:11:59 | 60.8197433 | 62.8243232 | 65.1349434 | 67.5666434 | 73.6321585 |
| 18:12:31 | 0:12:00 | 61.8197433 | 60.8243232 | 65.1349434 | 68.5666434 | 73.6321585 |
| 18:12:32 | 0:12:01 | 60.8197433 | 60.8243232 | 63.1349434 | 69.5666434 | 73.6321585 |
| 18:12:33 | 0:12:02 | 60.8197433 | 60.8243232 | 61.1349434 | 69.5666434 | 73.6321585 |
| 18:12:34 | 0:12:03 | 60.8197433 | 59.8243232 | 60.1349434 | 69.5666434 | 72.6321585 |
| 18:12:35 | 0:12:04 | 60.8197433 | 59.8243232 | 60.1349434 | 69.5666434 | 71.6321585 |
| 18:12:36 | 0:12:05 | 60.8197433 | 59.8243232 | 60.1349434 | 69.5666434 | 71.6321585 |
| 18:12:37 | 0:12:06 | 60.8197433 | 60.8243232 | 60.1349434 | 69.5666434 | 71.6321585 |
| 18:12:38 | 0:12:07 | 61.8197433 | 61.8243232 | 59.1349434 | 70.5666434 | 69.6321585 |
| 18:12:39 | 0:12:08 | 60.8197433 | 61.8243232 | 59.1349434 | 70.5666434 | 69.6321585 |
| 18:12:40 | 0:12:09 | 60.8197433 | 61.8243232 | 59.1349434 | 71.5666434 | 68.6321585 |
| 18:12:41 | 0:12:10 | 60.8197433 | 61.8243232 | 58.1349434 | 71.5666434 | 68.6321585 |
| 18:12:42 | 0:12:11 | 60.8197433 | 61.8243232 | 54.1349434 | 71.5666434 | 66.6321585 |
| 18:12:43 | 0:12:12 | 60.8197433 | 61.8243232 | 49.1349434 | 72.5666434 | 66.6321585 |
| 18:12:44 | 0:12:13 | 60.8197433 | 63.8243232 | 48.1349434 | 72.5666434 | 65.6321585 |
| 18:12:45 | 0:12:14 | 60.8197433 | 63.8243232 | 50.1349434 | 73.5666434 | 64.6321585 |
| 18:12:46 | 0:12:15 | 59.8197433 | 66.8243232 | 55.1349434 | 74.5666434 | 63.6321585 |
| 18:12:47 | 0:12:16 | 59.8197433 | 66.8243232 | 56.1349434 | 74.5666434 | 64.6321585 |
| 18:12:48 | 0:12:17 | 59.8197433 | 66.8243232 | 56.1349434 | 74.5666434 | 65.6321585 |
| 18:12:49 | 0:12:18 | 59.8197433 | 66.8243232 | 56.1349434 | 73.5666434 | 66.6321585 |
| 18:12:50 | 0:12:19 | 59.8197433 | 67.8243232 | 57.1349434 | 72.5666434 | 65.6321585 |
| 18:12:51 | 0:12:20 | 60.8197433 | 67.8243232 | 59.1349434 | 73.5666434 | 65.6321585 |
| 18:12:52 | 0:12:21 | 62.8197433 | 67.8243232 | 60.1349434 | 72.5666434 | 65.6321585 |
| 18:12:53 | 0:12:22 | 62.8197433 | 66.8243232 | 60.1349434 | 72.5666434 | 64.6321585 |
| 18:12:54 | 0:12:23 | 62.8197433 | 66.8243232 | 60.1349434 | 67.5666434 | 64.6321585 |
| 18:12:55 | 0:12:24 | 62.8197433 | 67.8243232 | 60.1349434 | 65.5666434 | 63.6321585 |
| 18:12:56 | 0:12:25 | 62.8197433 | 67.8243232 | 62.1349434 | 65.5666434 | 64.6321585 |
| 18:12:57 | 0:12:26 | 61.8197433 | 67.8243232 | 63.1349434 | 65.5666434 | 64.6321585 |
| 18:12:58 | 0:12:27 | 61.8197433 | 68.8243232 | 65.1349434 | 65.5666434 | 64.6321585 |
| 18:12:59 | 0:12:28 | 61.8197433 | 68.8243232 | 65.1349434 | 64.5666434 | 63.6321585 |
| 18:13:00 | 0:12:29 | 61.8197433 | 73.8243232 | 65.1349434 | 64.5666434 | 64.6321585 |
| 18:13:01 | 0:12:30 | 61.8197433 | 74.8243232 | 69.1349434 | 63.5666434 | 64.6321585 |
| 18:13:02 | 0:12:31 | 62.8197433 | 74.8243232 | 69.1349434 | 63.5666434 | 63.6321585 |
| 18:13:03 | 0:12:32 | 62.8197433 | 75.8243232 | 69.1349434 | 61.5666434 | 64.6321585 |
| 18:13:04 | 0:12:33 | 62.8197433 | 75.8243232 | 69.1349434 | 60.5666434 | 64.6321585 |
| 18:13:05 | 0:12:34 | 62.8197433 | 75.8243232 | 69.1349434 | 65.5666434 | 66.6321585 |
| 18:13:06 | 0:12:35 | 62.8197433 | 75.8243232 | 70.1349434 | 65.5666434 | 67.6321585 |
| 18:13:07 | 0:12:36 | 62.8197433 | 75.8243232 | 70.1349434 | 69.5666434 | 67.6321585 |
| 18:13:08 | 0:12:37 | 63.8197433 | 75.8243232 | 68.1349434 | 71.5666434 | 66.6321585 |
| 18:13:09 | 0:12:38 | 62.8197433 | 74.8243232 | 68.1349434 | 71.5666434 | 65.6321585 |
| 18:13:10 | 0:12:39 | 61.8197433 | 74.8243232 | 67.1349434 | 71.5666434 | 64.6321585 |
| 18:13:11 | 0:12:40 | 61.8197433 | 73.8243232 | 67.1349434 | 71.5666434 | 64.6321585 |
| 18:13:12 | 0:12:41 | 62.8197433 | 73.8243232 | 67.1349434 | 71.5666434 | 64.6321585 |

|          |         |            |            |            |            |            |
|----------|---------|------------|------------|------------|------------|------------|
| 18:13:13 | 0:12:42 | 63.8197433 | 72.8243232 | 67.1349434 | 72.5666434 | 64.6321585 |
| 18:13:14 | 0:12:43 | 63.8197433 | 72.8243232 | 67.1349434 | 73.5666434 | 64.6321585 |
| 18:13:15 | 0:12:44 | 62.8197433 | 70.8243232 | 64.1349434 | 73.5666434 | 64.6321585 |
| 18:13:16 | 0:12:45 | 62.8197433 | 71.8243232 | 64.1349434 | 74.5666434 | 64.6321585 |
| 18:13:17 | 0:12:46 | 61.8197433 | 71.8243232 | 63.1349434 | 76.5666434 | 64.6321585 |
| 18:13:18 | 0:12:47 | 61.8197433 | 71.8243232 | 63.1349434 | 76.5666434 | 63.6321585 |
| 18:13:19 | 0:12:48 | 61.8197433 | 71.8243232 | 63.1349434 | 79.5666434 | 63.6321585 |
| 18:13:20 | 0:12:49 | 61.8197433 | 71.8243232 | 61.1349434 | 82.5666434 | 63.6321585 |
| 18:13:21 | 0:12:50 | 61.8197433 | 71.8243232 | 61.1349434 | 82.5666434 | 63.6321585 |
| 18:13:22 | 0:12:51 | 61.8197433 | 72.8243232 | 60.1349434 | 82.5666434 | 62.6321585 |
| 18:13:23 | 0:12:52 | 61.8197433 | 72.8243232 | 59.1349434 | 83.5666434 | 62.6321585 |
| 18:13:24 | 0:12:53 | 61.8197433 | 69.8243232 | 59.1349434 | 83.5666434 | 62.6321585 |
| 18:13:25 | 0:12:54 | 61.8197433 | 67.8243232 | 60.1349434 | 85.5666434 | 61.6321585 |
| 18:13:26 | 0:12:55 | 61.8197433 | 64.8243232 | 61.1349434 | 85.5666434 | 61.6321585 |
| 18:13:27 | 0:12:56 | 61.8197433 | 64.8243232 | 61.1349434 | 86.5666434 | 62.6321585 |
| 18:13:28 | 0:12:57 | 61.8197433 | 60.8243232 | 61.1349434 | 68.2407656 | 62.6321585 |
| 18:13:29 | 0:12:58 | 61.8197433 | 58.8243232 | 61.1349434 | 68.3316747 | 63.6321585 |
| 18:13:30 | 0:12:59 | 61.8197433 | 58.8243232 | 61.1349434 | 68.3316747 | 63.6321585 |
| 18:13:31 | 0:13:00 | 61.8197433 | 57.8243232 | 61.1349434 | 66.4081779 | 62.6321585 |
| 18:13:32 | 0:13:01 | 61.8197433 | 57.8243232 | 60.1349434 | 68.1498565 | 62.6321585 |
| 18:13:33 | 0:13:02 | 61.8197433 | 58.8243232 | 60.1349434 | 68.6953111 | 65.6321585 |
| 18:13:34 | 0:13:03 | 62.8197433 | 58.8243232 | 59.1349434 | 68.6953111 | 66.6321585 |
| 18:13:35 | 0:13:04 | 63.8197433 | 58.8243232 | 60.1349434 | 68.1498565 | 66.6321585 |
| 18:13:36 | 0:13:05 | 64.8197433 | 58.8243232 | 60.1349434 | 67.7862202 | 66.6321585 |
| 18:13:37 | 0:13:06 | 65.8197433 | 58.8243232 | 60.1349434 | 66.9680384 | 67.6321585 |
| 18:13:38 | 0:13:07 | 69.8197433 | 57.8243232 | 60.1349434 | 66.9680384 | 67.6321585 |
| 18:13:39 | 0:13:08 | 69.8197433 | 57.8243232 | 61.1349434 | 67.4225838 | 67.6321585 |
| 18:13:40 | 0:13:09 | 70.8197433 | 57.8243232 | 64.1349434 | 68.0589474 | 67.6321585 |
| 18:13:41 | 0:13:10 | 71.8197433 | 57.8243232 | 64.1349434 | 68.8771293 | 67.6321585 |
| 18:13:42 | 0:13:11 | 73.8197433 | 58.8243232 | 65.1349434 | 69.604402  | 67.6321585 |
| 18:13:43 | 0:13:12 | 72.8197433 | 59.8243232 | 68.1349434 | 69.7862202 | 67.6321585 |
| 18:13:44 | 0:13:13 | 67.8197433 | 59.8243232 | 70.1349434 | 69.6953111 | 67.6321585 |
| 18:13:45 | 0:13:14 | 64.8197433 | 62.8243232 | 73.1349434 | 69.8771293 | 67.6321585 |
| 18:13:46 | 0:13:15 | 63.8197433 | 62.8243232 | 75.1349434 | 69.604402  | 67.6321585 |
| 18:13:47 | 0:13:16 | 62.8197433 | 62.8243232 | 76.1349434 | 69.6953111 | 67.6321585 |
| 18:13:48 | 0:13:17 | 61.8197433 | 62.8243232 | 76.1349434 | 69.8771293 | 67.6321585 |
| 18:13:49 | 0:13:18 | 61.8197433 | 63.8243232 | 76.1349434 | 70.2407656 | 66.6321585 |
| 18:13:50 | 0:13:19 | 61.8197433 | 63.8243232 | 76.1349434 | 69.6953111 | 67.6321585 |
| 18:13:51 | 0:13:20 | 60.8197433 | 63.8243232 | 75.1349434 | 69.5134929 | 67.6321585 |
| 18:13:52 | 0:13:21 | 60.8197433 | 63.8243232 | 75.1349434 | 68.9680384 | 66.6321585 |
| 18:13:53 | 0:13:22 | 61.8197433 | 64.8243232 | 75.1349434 | 68.6953111 | 66.6321585 |
| 18:13:54 | 0:13:23 | 61.8197433 | 64.8243232 | 74.1349434 | 68.0589474 | 66.6321585 |
| 18:13:55 | 0:13:24 | 61.8197433 | 65.8243232 | 74.1349434 | 67.9680384 | 66.6321585 |
| 18:13:56 | 0:13:25 | 61.8197433 | 65.8243232 | 74.1349434 | 67.7862202 | 66.6321585 |
| 18:13:57 | 0:13:26 | 61.8197433 | 68.8243232 | 73.1349434 | 67.7862202 | 66.6321585 |

|          |         |            |            |            |            |            |
|----------|---------|------------|------------|------------|------------|------------|
| 18:13:58 | 0:13:27 | 61.8197433 | 69.8243232 | 71.1349434 | 67.604402  | 66.6321585 |
| 18:13:59 | 0:13:28 | 61.8197433 | 68.8243232 | 70.1349434 | 67.6953111 | 67.6321585 |
| 18:14:00 | 0:13:29 | 61.8197433 | 65.8243232 | 71.1349434 | 67.6953111 | 68.6321585 |
| 18:14:01 | 0:13:30 | 61.8197433 | 63.8243232 | 74.1349434 | 67.9680384 | 68.6321585 |
| 18:14:02 | 0:13:31 | 61.8197433 | 63.8243232 | 74.1349434 | 84.5666434 | 71.6321585 |
| 18:14:03 | 0:13:32 | 63.8197433 | 63.8243232 | 76.1349434 | 81.5666434 | 71.6321585 |
| 18:14:04 | 0:13:33 | 66.8197433 | 63.8243232 | 76.1349434 | 81.5666434 | 71.6321585 |
| 18:14:05 | 0:13:34 | 73.8197433 | 62.8243232 | 76.1349434 | 81.5666434 | 71.6321585 |
| 18:14:06 | 0:13:35 | 74.8197433 | 62.8243232 | 73.1349434 | 81.5666434 | 70.6321585 |
| 18:14:07 | 0:13:36 | 75.8197433 | 63.8243232 | 69.1349434 | 80.5666434 | 70.6321585 |
| 18:14:08 | 0:13:37 | 77.8197433 | 63.8243232 | 66.1349434 | 80.5666434 | 70.6321585 |
| 18:14:09 | 0:13:38 | 77.8197433 | 62.8243232 | 65.1349434 | 80.5666434 | 70.6321585 |
| 18:14:10 | 0:13:39 | 80.8197433 | 62.8243232 | 65.1349434 | 80.5666434 | 70.6321585 |
| 18:14:11 | 0:13:40 | 83.8197433 | 59.8243232 | 65.1349434 | 80.5666434 | 70.6321585 |
| 18:14:12 | 0:13:41 | 84.8197433 | 59.8243232 | 65.1349434 | 80.5666434 | 72.6321585 |
| 18:14:13 | 0:13:42 | 84.8197433 | 60.8243232 | 65.1349434 | 81.5666434 | 72.6321585 |
| 18:14:14 | 0:13:43 | 83.8197433 | 59.8243232 | 65.1349434 | 84.5666434 | 73.6321585 |
| 18:14:15 | 0:13:44 | 83.8197433 | 59.8243232 | 65.1349434 | 84.5666434 | 73.6321585 |
| 18:14:16 | 0:13:45 | 80.8197433 | 59.8243232 | 65.1349434 | 84.5666434 | 72.6321585 |
| 18:14:17 | 0:13:46 | 75.8197433 | 60.8243232 | 64.1349434 | 83.5666434 | 72.6321585 |
| 18:14:18 | 0:13:47 | 75.8197433 | 60.8243232 | 66.1349434 | 83.5666434 | 72.6321585 |
| 18:14:19 | 0:13:48 | 65.8197433 | 59.8243232 | 68.1349434 | 83.5666434 | 72.6321585 |
| 18:14:20 | 0:13:49 | 63.8197433 | 59.8243232 | 68.1349434 | 83.5666434 | 71.6321585 |
| 18:14:21 | 0:13:50 | 63.8197433 | 59.8243232 | 65.1349434 | 84.5666434 | 69.6321585 |
| 18:14:22 | 0:13:51 | 63.8197433 | 59.8243232 | 62.1349434 | 84.5666434 | 69.6321585 |
| 18:14:23 | 0:13:52 | 62.8197433 | 59.8243232 | 61.1349434 | 84.5666434 | 68.6321585 |
| 18:14:24 | 0:13:53 | 62.8197433 | 59.8243232 | 61.1349434 | 84.5666434 | 68.6321585 |
| 18:14:25 | 0:13:54 | 61.8197433 | 59.8243232 | 64.1349434 | 66.4225838 | 68.6321585 |
| 18:14:26 | 0:13:55 | 61.8197433 | 59.8243232 | 64.1349434 | 66.4225838 | 68.6321585 |
| 18:14:27 | 0:13:56 | 61.8197433 | 59.8243232 | 61.1349434 | 66.3316747 | 68.6321585 |
| 18:14:28 | 0:13:57 | 61.8197433 | 59.8243232 | 56.1349434 | 65.8771293 | 69.6321585 |
| 18:14:29 | 0:13:58 | 61.8197433 | 59.8243232 | 54.1349434 | 65.604402  | 69.6321585 |
| 18:14:30 | 0:13:59 | 61.8197433 | 59.8243232 | 54.1349434 | 82.5666434 | 69.6321585 |
| 18:14:31 | 0:14:00 | 60.8197433 | 62.8243232 | 55.1349434 | 81.5666434 | 70.6321585 |
| 18:14:32 | 0:14:01 | 60.8197433 | 63.8243232 | 56.1349434 | 80.5666434 | 70.6321585 |
| 18:14:33 | 0:14:02 | 61.8197433 | 63.8243232 | 57.1349434 | 78.5666434 | 68.6321585 |
| 18:14:34 | 0:14:03 | 62.8197433 | 63.8243232 | 57.1349434 | 78.5666434 | 68.6321585 |
| 18:14:35 | 0:14:04 | 63.8197433 | 63.8243232 | 57.1349434 | 75.5666434 | 67.6321585 |
| 18:14:36 | 0:14:05 | 62.8197433 | 62.8243232 | 57.1349434 | 73.5666434 | 66.6321585 |
| 18:14:37 | 0:14:06 | 61.8197433 | 62.8243232 | 59.1349434 | 65.5666434 | 66.6321585 |
| 18:14:38 | 0:14:07 | 61.8197433 | 64.8243232 | 62.1349434 | 65.5666434 | 66.6321585 |
| 18:14:39 | 0:14:08 | 61.8197433 | 65.8243232 | 63.1349434 | 65.5666434 | 65.6321585 |
| 18:14:40 | 0:14:09 | 61.8197433 | 65.8243232 | 63.1349434 | 65.5666434 | 65.6321585 |
| 18:14:41 | 0:14:10 | 61.8197433 | 65.8243232 | 63.1349434 | 65.5666434 | 65.6321585 |
| 18:14:42 | 0:14:11 | 61.8197433 | 65.8243232 | 62.1349434 | 65.5666434 | 65.6321585 |

|          |         |            |            |            |            |            |
|----------|---------|------------|------------|------------|------------|------------|
| 18:14:43 | 0:14:12 | 61.8197433 | 65.8243232 | 61.1349434 | 65.5666434 | 65.6321585 |
| 18:14:44 | 0:14:13 | 61.8197433 | 66.8243232 | 60.1349434 | 66.5666434 | 66.6321585 |
| 18:14:45 | 0:14:14 | 61.8197433 | 66.8243232 | 61.1349434 | 66.5666434 | 66.6321585 |
| 18:14:46 | 0:14:15 | 61.8197433 | 66.8243232 | 62.1349434 | 69.5666434 | 66.6321585 |
| 18:14:47 | 0:14:16 | 61.8197433 | 66.8243232 | 63.1349434 | 69.5666434 | 66.6321585 |
| 18:14:48 | 0:14:17 | 61.8197433 | 67.8243232 | 63.1349434 | 69.5666434 | 66.6321585 |
| 18:14:49 | 0:14:18 | 61.8197433 | 68.8243232 | 62.1349434 | 69.5666434 | 66.6321585 |
| 18:14:50 | 0:14:19 | 61.8197433 | 68.8243232 | 60.1349434 | 69.5666434 | 67.6321585 |
| 18:14:51 | 0:14:20 | 61.8197433 | 68.8243232 | 59.1349434 | 69.5666434 | 68.6321585 |
| 18:14:52 | 0:14:21 | 61.8197433 | 68.8243232 | 60.1349434 | 69.5666434 | 69.6321585 |
| 18:14:53 | 0:14:22 | 61.8197433 | 68.8243232 | 61.1349434 | 70.5666434 | 69.6321585 |
| 18:14:54 | 0:14:23 | 62.8197433 | 66.8243232 | 61.1349434 | 69.5666434 | 69.6321585 |
| 18:14:55 | 0:14:24 | 63.8197433 | 65.8243232 | 60.1349434 | 69.5666434 | 67.6321585 |
| 18:14:56 | 0:14:25 | 64.8197433 | 65.8243232 | 61.1349434 | 69.5666434 | 67.6321585 |
| 18:14:57 | 0:14:26 | 64.8197433 | 65.8243232 | 64.1349434 | 69.5666434 | 66.6321585 |
| 18:14:58 | 0:14:27 | 65.8197433 | 65.8243232 | 64.1349434 | 70.5666434 | 66.6321585 |
| 18:14:59 | 0:14:28 | 66.8197433 | 70.8243232 | 67.1349434 | 70.5666434 | 66.6321585 |
| 18:15:00 | 0:14:29 | 66.8197433 | 75.8243232 | 68.1349434 | 70.5666434 | 66.6321585 |
| 18:15:01 | 0:14:30 | 68.8197433 | 78.8243232 | 68.1349434 | 70.5666434 | 67.6321585 |
| 18:15:02 | 0:14:31 | 75.8197433 | 78.8243232 | 68.1349434 | 70.5666434 | 67.6321585 |
| 18:15:03 | 0:14:32 | 80.8197433 | 80.8243232 | 72.1349434 | 71.5666434 | 68.6321585 |
| 18:15:04 | 0:14:33 | 79.8197433 | 80.8243232 | 72.1349434 | 73.5666434 | 68.6321585 |
| 18:15:05 | 0:14:34 | 79.8197433 | 74.8243232 | 73.1349434 | 73.5666434 | 68.6321585 |
| 18:15:06 | 0:14:35 | 76.8197433 | 74.8243232 | 72.1349434 | 73.5666434 | 68.6321585 |
| 18:15:07 | 0:14:36 | 72.8197433 | 74.8243232 | 70.1349434 | 74.5666434 | 67.6321585 |
| 18:15:08 | 0:14:37 | 70.8197433 | 74.8243232 | 70.1349434 | 74.5666434 | 66.6321585 |
| 18:15:09 | 0:14:38 | 68.8197433 | 74.8243232 | 69.1349434 | 75.5666434 | 66.6321585 |
| 18:15:10 | 0:14:39 | 66.8197433 | 73.8243232 | 68.1349434 | 74.5666434 | 65.6321585 |
| 18:15:11 | 0:14:40 | 66.8197433 | 73.8243232 | 68.1349434 | 74.5666434 | 65.6321585 |
| 18:15:12 | 0:14:41 | 65.8197433 | 71.8243232 | 67.1349434 | 74.5666434 | 65.6321585 |
| 18:15:13 | 0:14:42 | 66.8197433 | 70.8243232 | 67.1349434 | 72.5666434 | 64.6321585 |
| 18:15:14 | 0:14:43 | 66.8197433 | 70.8243232 | 67.1349434 | 72.5666434 | 64.6321585 |
| 18:15:15 | 0:14:44 | 67.8197433 | 70.8243232 | 67.1349434 | 71.5666434 | 64.6321585 |
| 18:15:16 | 0:14:45 | 78.8197433 | 72.8243232 | 66.1349434 | 70.5666434 | 65.6321585 |
| 18:15:17 | 0:14:46 | 81.8197433 | 72.8243232 | 67.1349434 | 70.5666434 | 65.6321585 |
| 18:15:18 | 0:14:47 | 81.8197433 | 72.8243232 | 67.1349434 | 70.5666434 | 65.6321585 |
| 18:15:19 | 0:14:48 | 85.8197433 | 72.8243232 | 71.1349434 | 70.5666434 | 66.6321585 |
| 18:15:20 | 0:14:49 | 69.5134929 | 59.8243232 | 72.1349434 | 71.5666434 | 65.6321585 |
| 18:15:21 | 0:14:50 | 69.8771293 | 58.8243232 | 72.1349434 | 71.5666434 | 65.6321585 |
| 18:15:22 | 0:14:51 | 70.0589474 | 58.8243232 | 71.1349434 | 72.5666434 | 65.6321585 |
| 18:15:23 | 0:14:52 | 70.604402  | 58.8243232 | 70.1349434 | 73.5666434 | 66.6321585 |
| 18:15:24 | 0:14:53 | 70.6953111 | 58.8243232 | 70.1349434 | 73.5666434 | 66.6321585 |
| 18:15:25 | 0:14:54 | 72.5134929 | 58.8243232 | 72.1349434 | 75.5666434 | 73.6321585 |
| 18:15:26 | 0:14:55 | 73.7862202 | 58.8243232 | 73.1349434 | 76.5666434 | 74.6321585 |
| 18:15:27 | 0:14:56 | 73.8771293 | 58.8243232 | 73.1349434 | 76.5666434 | 72.6321585 |

|          |         |            |            |            |            |            |
|----------|---------|------------|------------|------------|------------|------------|
| 18:15:28 | 0:14:57 | 73.9680384 | 58.8243232 | 74.1349434 | 78.5666434 | 70.6321585 |
| 18:15:29 | 0:14:58 | 73.1498565 | 58.8243232 | 68.1349434 | 79.5666434 | 69.6321585 |
| 18:15:30 | 0:14:59 | 71.3316747 | 61.8243232 | 62.1349434 | 82.5666434 | 68.6321585 |
| 18:15:31 | 0:15:00 | 81.8197433 | 62.8243232 | 59.1349434 | 84.5666434 | 68.6321585 |
| 18:15:32 | 0:15:01 | 73.8197433 | 62.8243232 | 57.1349434 | 86.5666434 | 68.6321585 |
| 18:15:33 | 0:15:02 | 69.8197433 | 64.8243232 | 57.1349434 | 68.4225838 | 68.6321585 |
| 18:15:34 | 0:15:03 | 66.8197433 | 67.8243232 | 57.1349434 | 67.6953111 | 68.6321585 |
| 18:15:35 | 0:15:04 | 65.8197433 | 68.8243232 | 57.1349434 | 67.6953111 | 68.6321585 |
| 18:15:36 | 0:15:05 | 65.8197433 | 68.8243232 | 54.1349434 | 67.2407656 | 69.6321585 |
| 18:15:37 | 0:15:06 | 65.8197433 | 68.8243232 | 52.1349434 | 66.7862202 | 69.6321585 |
| 18:15:38 | 0:15:07 | 65.8197433 | 68.8243232 | 51.1349434 | 83.5666434 | 69.6321585 |
| 18:15:39 | 0:15:08 | 65.8197433 | 68.8243232 | 50.1349434 | 76.5666434 | 69.6321585 |
| 18:15:40 | 0:15:09 | 65.8197433 | 69.8243232 | 50.1349434 | 70.5666434 | 69.6321585 |
| 18:15:41 | 0:15:10 | 65.8197433 | 69.8243232 | 49.1349434 | 64.5666434 | 69.6321585 |
| 18:15:42 | 0:15:11 | 65.8197433 | 70.8243232 | 49.1349434 | 64.5666434 | 70.6321585 |
| 18:15:43 | 0:15:12 | 65.8197433 | 70.8243232 | 50.1349434 | 60.5666434 | 70.6321585 |
| 18:15:44 | 0:15:13 | 65.8197433 | 69.8243232 | 50.1349434 | 60.5666434 | 68.6321585 |
| 18:15:45 | 0:15:14 | 65.8197433 | 69.8243232 | 50.1349434 | 59.5666434 | 68.6321585 |
| 18:15:46 | 0:15:15 | 65.8197433 | 70.8243232 | 50.1349434 | 59.5666434 | 66.6321585 |
| 18:15:47 | 0:15:16 | 65.8197433 | 71.8243232 | 51.1349434 | 59.5666434 | 66.6321585 |
| 18:15:48 | 0:15:17 | 65.8197433 | 71.8243232 | 53.1349434 | 60.5666434 | 66.6321585 |
| 18:15:49 | 0:15:18 | 64.8197433 | 71.8243232 | 54.1349434 | 60.5666434 | 67.6321585 |
| 18:15:50 | 0:15:19 | 68.8197433 | 71.8243232 | 55.1349434 | 60.5666434 | 67.6321585 |
| 18:15:51 | 0:15:20 | 72.8197433 | 71.8243232 | 56.1349434 | 60.5666434 | 67.6321585 |
| 18:15:52 | 0:15:21 | 70.8197433 | 71.8243232 | 57.1349434 | 60.5666434 | 69.6321585 |
| 18:15:53 | 0:15:22 | 66.8197433 | 72.8243232 | 57.1349434 | 60.5666434 | 70.6321585 |
| 18:15:54 | 0:15:23 | 63.8197433 | 72.8243232 | 58.1349434 | 59.5666434 | 67.6321585 |
| 18:15:55 | 0:15:24 | 62.8197433 | 72.8243232 | 59.1349434 | 59.5666434 | 67.6321585 |
| 18:15:56 | 0:15:25 | 62.8197433 | 74.8243232 | 60.1349434 | 59.5666434 | 66.6321585 |
| 18:15:57 | 0:15:26 | 61.8197433 | 74.8243232 | 60.1349434 | 59.5666434 | 66.6321585 |
| 18:15:58 | 0:15:27 | 61.8197433 | 74.8243232 | 60.1349434 | 59.5666434 | 65.6321585 |
| 18:15:59 | 0:15:28 | 61.8197433 | 74.8243232 | 62.1349434 | 58.5666434 | 65.6321585 |
| 18:16:00 | 0:15:29 | 61.8197433 | 74.8243232 | 62.1349434 | 58.5666434 | 65.6321585 |
| 18:16:01 | 0:15:30 | 61.8197433 | 74.8243232 | 61.1349434 | 59.5666434 | 65.6321585 |
| 18:16:02 | 0:15:31 | 61.8197433 | 75.8243232 | 62.1349434 | 59.5666434 | 67.6321585 |
| 18:16:03 | 0:15:32 | 61.8197433 | 75.8243232 | 62.1349434 | 59.5666434 | 67.6321585 |
| 18:16:04 | 0:15:33 | 61.8197433 | 75.8243232 | 64.1349434 | 59.5666434 | 67.6321585 |
| 18:16:05 | 0:15:34 | 61.8197433 | 74.8243232 | 65.1349434 | 59.5666434 | 67.6321585 |
| 18:16:06 | 0:15:35 | 62.8197433 | 73.8243232 | 65.1349434 | 59.5666434 | 68.6321585 |
| 18:16:07 | 0:15:36 | 62.8197433 | 73.8243232 | 66.1349434 | 59.5666434 | 68.6321585 |
| 18:16:08 | 0:15:37 | 62.8197433 | 73.8243232 | 66.1349434 | 59.5666434 | 68.6321585 |
| 18:16:09 | 0:15:38 | 63.8197433 | 73.8243232 | 67.1349434 | 61.5666434 | 68.6321585 |
| 18:16:10 | 0:15:39 | 63.8197433 | 73.8243232 | 67.1349434 | 63.5666434 | 68.6321585 |
| 18:16:11 | 0:15:40 | 63.8197433 | 70.8243232 | 69.1349434 | 63.5666434 | 68.6321585 |
| 18:16:12 | 0:15:41 | 63.8197433 | 70.8243232 | 69.1349434 | 63.5666434 | 68.6321585 |

|          |         |            |            |            |            |            |
|----------|---------|------------|------------|------------|------------|------------|
| 18:16:13 | 0:15:42 | 62.8197433 | 70.8243232 | 76.1349434 | 63.5666434 | 68.6321585 |
| 18:16:14 | 0:15:43 | 61.8197433 | 70.8243232 | 76.1349434 | 64.5666434 | 69.6321585 |
| 18:16:15 | 0:15:44 | 61.8197433 | 70.8243232 | 77.1349434 | 64.5666434 | 71.6321585 |
| 18:16:16 | 0:15:45 | 61.8197433 | 70.8243232 | 78.1349434 | 66.5666434 | 71.6321585 |
| 18:16:17 | 0:15:46 | 61.8197433 | 70.8243232 | 79.1349434 | 70.5666434 | 71.6321585 |
| 18:16:18 | 0:15:47 | 62.8197433 | 70.8243232 | 80.1349434 | 71.5666434 | 71.6321585 |
| 18:16:19 | 0:15:48 | 62.8197433 | 70.8243232 | 80.1349434 | 71.5666434 | 71.6321585 |
| 18:16:20 | 0:15:49 | 61.8197433 | 69.8243232 | 81.1349434 | 72.5666434 | 72.6321585 |
| 18:16:21 | 0:15:50 | 61.8197433 | 70.8243232 | 81.1349434 | 72.5666434 | 73.6321585 |
| 18:16:22 | 0:15:51 | 61.8197433 | 71.8243232 | 82.1349434 | 72.5666434 | 73.6321585 |
| 18:16:23 | 0:15:52 | 61.8197433 | 70.8243232 | 81.1349434 | 72.5666434 | 74.6321585 |
| 18:16:24 | 0:15:53 | 61.8197433 | 70.8243232 | 80.1349434 | 72.5666434 | 74.6321585 |
| 18:16:25 | 0:15:54 | 61.8197433 | 70.8243232 | 80.1349434 | 72.5666434 | 75.6321585 |
| 18:16:26 | 0:15:55 | 61.8197433 | 69.8243232 | 78.1349434 | 72.5666434 | 73.6321585 |
| 18:16:27 | 0:15:56 | 61.8197433 | 69.8243232 | 77.1349434 | 73.5666434 | 74.6321585 |
| 18:16:28 | 0:15:57 | 61.8197433 | 69.8243232 | 77.1349434 | 73.5666434 | 73.6321585 |
| 18:16:29 | 0:15:58 | 60.8197433 | 66.8243232 | 77.1349434 | 73.5666434 | 73.6321585 |
| 18:16:30 | 0:15:59 | 60.8197433 | 63.8243232 | 77.1349434 | 72.5666434 | 73.6321585 |
| 18:16:31 | 0:16:00 | 60.8197433 | 61.8243232 | 75.1349434 | 72.5666434 | 74.6321585 |
| 18:16:32 | 0:16:01 | 60.8197433 | 60.8243232 | 75.1349434 | 71.5666434 | 75.6321585 |
| 18:16:33 | 0:16:02 | 60.8197433 | 60.8243232 | 75.1349434 | 70.5666434 | 75.6321585 |
| 18:16:34 | 0:16:03 | 60.8197433 | 59.8243232 | 75.1349434 | 70.5666434 | 77.6321585 |
| 18:16:35 | 0:16:04 | 60.8197433 | 59.8243232 | 74.1349434 | 70.5666434 | 78.6321585 |
| 18:16:36 | 0:16:05 | 60.8197433 | 59.8243232 | 71.1349434 | 72.5666434 | 78.6321585 |
| 18:16:37 | 0:16:06 | 60.8197433 | 58.8243232 | 70.1349434 | 72.5666434 | 78.6321585 |
| 18:16:38 | 0:16:07 | 60.8197433 | 58.8243232 | 70.1349434 | 71.5666434 | 78.6321585 |
| 18:16:39 | 0:16:08 | 61.8197433 | 57.8243232 | 65.1349434 | 71.5666434 | 78.6321585 |
| 18:16:40 | 0:16:09 | 61.8197433 | 57.8243232 | 56.1349434 | 71.5666434 | 78.6321585 |
| 18:16:41 | 0:16:10 | 61.8197433 | 58.8243232 | 56.1349434 | 69.5666434 | 75.6321585 |
| 18:16:42 | 0:16:11 | 61.8197433 | 58.8243232 | 51.1349434 | 69.5666434 | 70.6321585 |
| 18:16:43 | 0:16:12 | 60.8197433 | 58.8243232 | 52.1349434 | 69.5666434 | 70.6321585 |
| 18:16:44 | 0:16:13 | 60.8197433 | 58.8243232 | 52.1349434 | 68.5666434 | 67.6321585 |
| 18:16:45 | 0:16:14 | 60.8197433 | 60.8243232 | 53.1349434 | 68.5666434 | 68.6321585 |
| 18:16:46 | 0:16:15 | 61.8197433 | 60.8243232 | 54.1349434 | 68.5666434 | 68.6321585 |
| 18:16:47 | 0:16:16 | 61.8197433 | 61.8243232 | 54.1349434 | 68.5666434 | 68.6321585 |
| 18:16:48 | 0:16:17 | 61.8197433 | 61.8243232 | 53.1349434 | 68.5666434 | 68.6321585 |
| 18:16:49 | 0:16:18 | 61.8197433 | 61.8243232 | 53.1349434 | 67.5666434 | 68.6321585 |
| 18:16:50 | 0:16:19 | 61.8197433 | 60.8243232 | 53.1349434 | 67.5666434 | 71.6321585 |
| 18:16:51 | 0:16:20 | 64.8197433 | 60.8243232 | 53.1349434 | 67.5666434 | 73.6321585 |
| 18:16:52 | 0:16:21 | 65.8197433 | 60.8243232 | 55.1349434 | 66.5666434 | 73.6321585 |
| 18:16:53 | 0:16:22 | 66.8197433 | 60.8243232 | 59.1349434 | 66.5666434 | 73.6321585 |
| 18:16:54 | 0:16:23 | 67.8197433 | 60.8243232 | 58.1349434 | 66.5666434 | 73.6321585 |
| 18:16:55 | 0:16:24 | 66.8197433 | 61.8243232 | 58.1349434 | 67.5666434 | 73.6321585 |
| 18:16:56 | 0:16:25 | 64.8197433 | 61.8243232 | 61.1349434 | 67.5666434 | 73.6321585 |
| 18:16:57 | 0:16:26 | 63.8197433 | 61.8243232 | 62.1349434 | 67.5666434 | 73.6321585 |



|          |         |            |            |            |            |            |
|----------|---------|------------|------------|------------|------------|------------|
| 18:16:58 | 0:16:27 | 62.8197433 | 61.8243232 | 62.1349434 | 68.5666434 | 75.6321585 |
| 18:16:59 | 0:16:28 | 62.8197433 | 62.8243232 | 61.1349434 | 68.5666434 | 77.6321585 |
| 18:17:00 | 0:16:29 | 62.8197433 | 64.8243232 | 62.1349434 | 68.5666434 | 78.6321585 |
| 18:17:01 | 0:16:30 | 61.8197433 | 66.8243232 | 62.1349434 | 68.5666434 | 78.6321585 |
| 18:17:02 | 0:16:31 | 61.8197433 | 65.8243232 | 64.1349434 | 70.5666434 | 79.6321585 |
| 18:17:03 | 0:16:32 | 61.8197433 | 64.8243232 | 65.1349434 | 69.5666434 | 79.6321585 |
| 18:17:04 | 0:16:33 | 61.8197433 | 64.8243232 | 66.1349434 | 69.5666434 | 79.6321585 |
| 18:17:05 | 0:16:34 | 61.8197433 | 63.8243232 | 66.1349434 | 68.5666434 | 76.6321585 |
| 18:17:06 | 0:16:35 | 61.8197433 | 63.8243232 | 66.1349434 | 68.5666434 | 76.6321585 |
| 18:17:07 | 0:16:36 | 61.8197433 | 58.8243232 | 65.1349434 | 69.5666434 | 76.6321585 |
| 18:17:08 | 0:16:37 | 61.8197433 | 58.8243232 | 65.1349434 | 67.5666434 | 73.6321585 |
| 18:17:09 | 0:16:38 | 61.8197433 | 57.8243232 | 65.1349434 | 66.5666434 | 73.6321585 |
| 18:17:10 | 0:16:39 | 61.8197433 | 56.8243232 | 65.1349434 | 66.5666434 | 73.6321585 |
| 18:17:11 | 0:16:40 | 61.8197433 | 55.8243232 | 65.1349434 | 66.5666434 | 74.6321585 |
| 18:17:12 | 0:16:41 | 61.8197433 | 55.8243232 | 66.1349434 | 67.5666434 | 74.6321585 |
| 18:17:13 | 0:16:42 | 61.8197433 | 56.8243232 | 66.1349434 | 67.5666434 | 74.6321585 |
| 18:17:14 | 0:16:43 | 61.8197433 | 56.8243232 | 66.1349434 | 68.5666434 | 74.6321585 |
| 18:17:15 | 0:16:44 | 61.8197433 | 57.8243232 | 66.1349434 | 69.5666434 | 77.6321585 |
| 18:17:16 | 0:16:45 | 61.8197433 | 58.8243232 | 65.1349434 | 69.5666434 | 78.6321585 |
| 18:17:17 | 0:16:46 | 61.8197433 | 58.8243232 | 65.1349434 | 70.5666434 | 79.6321585 |
| 18:17:18 | 0:16:47 | 62.8197433 | 57.8243232 | 61.1349434 | 70.5666434 | 79.6321585 |
| 18:17:19 | 0:16:48 | 64.8197433 | 57.8243232 | 61.1349434 | 71.5666434 | 81.6321585 |
| 18:17:20 | 0:16:49 | 65.8197433 | 57.8243232 | 61.1349434 | 71.5666434 | 81.6321585 |
| 18:17:21 | 0:16:50 | 66.8197433 | 58.8243232 | 61.1349434 | 74.5666434 | 81.6321585 |
| 18:17:22 | 0:16:51 | 67.8197433 | 59.8243232 | 61.1349434 | 79.5666434 | 81.6321585 |
| 18:17:23 | 0:16:52 | 70.8197433 | 61.8243232 | 60.1349434 | 80.5666434 | 80.6321585 |
| 18:17:24 | 0:16:53 | 72.8197433 | 61.8243232 | 60.1349434 | 80.5666434 | 80.6321585 |
| 18:17:25 | 0:16:54 | 74.8197433 | 62.8243232 | 60.1349434 | 81.5666434 | 80.6321585 |
| 18:17:26 | 0:16:55 | 74.8197433 | 62.8243232 | 61.1349434 | 81.5666434 | 74.6321585 |
| 18:17:27 | 0:16:56 | 73.8197433 | 62.8243232 | 68.1349434 | 81.5666434 | 74.6321585 |
| 18:17:28 | 0:16:57 | 71.8197433 | 61.8243232 | 68.1349434 | 81.5666434 | 73.6321585 |
| 18:17:29 | 0:16:58 | 68.8197433 | 61.8243232 | 67.1349434 | 81.5666434 | 72.6321585 |
| 18:17:30 | 0:16:59 | 68.8197433 | 60.8243232 | 68.1349434 | 80.5666434 | 71.6321585 |
| 18:17:31 | 0:17:00 | 68.8197433 | 59.8243232 | 69.1349434 | 80.5666434 | 71.6321585 |
| 18:17:32 | 0:17:01 | 68.8197433 | 59.8243232 | 70.1349434 | 77.5666434 | 71.6321585 |
| 18:17:33 | 0:17:02 | 69.8197433 | 59.8243232 | 72.1349434 | 77.5666434 | 71.6321585 |
| 18:17:34 | 0:17:03 | 69.8197433 | 59.8243232 | 72.1349434 | 78.5666434 | 71.6321585 |
| 18:17:35 | 0:17:04 | 69.8197433 | 59.8243232 | 71.1349434 | 77.5666434 | 71.6321585 |
| 18:17:36 | 0:17:05 | 67.8197433 | 59.8243232 | 69.1349434 | 77.5666434 | 72.6321585 |
| 18:17:37 | 0:17:06 | 66.8197433 | 59.8243232 | 69.1349434 | 77.5666434 | 72.6321585 |
| 18:17:38 | 0:17:07 | 65.8197433 | 59.8243232 | 69.1349434 | 75.5666434 | 72.6321585 |
| 18:17:39 | 0:17:08 | 65.8197433 | 59.8243232 | 69.1349434 | 72.5666434 | 69.6321585 |
| 18:17:40 | 0:17:09 | 65.8197433 | 59.8243232 | 69.1349434 | 71.5666434 | 68.6321585 |
| 18:17:41 | 0:17:10 | 65.8197433 | 60.8243232 | 68.1349434 | 71.5666434 | 68.6321585 |
| 18:17:42 | 0:17:11 | 65.8197433 | 59.8243232 | 68.1349434 | 66.5666434 | 68.6321585 |

|          |         |            |            |            |            |            |
|----------|---------|------------|------------|------------|------------|------------|
| 18:17:43 | 0:17:12 | 65.8197433 | 60.8243232 | 68.1349434 | 60.5666434 | 68.6321585 |
| 18:17:44 | 0:17:13 | 64.8197433 | 63.8243232 | 67.1349434 | 58.5666434 | 69.6321585 |
| 18:17:45 | 0:17:14 | 64.8197433 | 63.8243232 | 67.1349434 | 55.5666434 | 69.6321585 |
| 18:17:46 | 0:17:15 | 65.8197433 | 63.8243232 | 67.1349434 | 55.5666434 | 68.6321585 |
| 18:17:47 | 0:17:16 | 66.8197433 | 62.8243232 | 67.1349434 | 55.5666434 | 68.6321585 |
| 18:17:48 | 0:17:17 | 66.8197433 | 62.8243232 | 66.1349434 | 55.5666434 | 68.6321585 |
| 18:17:49 | 0:17:18 | 66.8197433 | 62.8243232 | 67.1349434 | 55.5666434 | 68.6321585 |
| 18:17:50 | 0:17:19 | 66.8197433 | 61.8243232 | 68.1349434 | 55.5666434 | 70.6321585 |
| 18:17:51 | 0:17:20 | 67.8197433 | 60.8243232 | 68.1349434 | 55.5666434 | 70.6321585 |
| 18:17:52 | 0:17:21 | 67.8197433 | 60.8243232 | 68.1349434 | 55.5666434 | 71.6321585 |
| 18:17:53 | 0:17:22 | 67.8197433 | 60.8243232 | 69.1349434 | 55.5666434 | 79.6321585 |
| 18:17:54 | 0:17:23 | 66.8197433 | 60.8243232 | 70.1349434 | 55.5666434 | 83.6321585 |
| 18:17:55 | 0:17:24 | 64.8197433 | 60.8243232 | 70.1349434 | 56.5666434 | 83.6321585 |
| 18:17:56 | 0:17:25 | 62.8197433 | 60.8243232 | 68.1349434 | 57.5666434 | 84.6321585 |
| 18:17:57 | 0:17:26 | 62.8197433 | 60.8243232 | 67.1349434 | 59.5666434 | 86.6321585 |
| 18:17:58 | 0:17:27 | 61.8197433 | 60.8243232 | 64.1349434 | 60.5666434 | 86.6321585 |
| 18:17:59 | 0:17:28 | 61.8197433 | 60.8243232 | 61.1349434 | 60.5666434 | 86.6321585 |
| 18:18:00 | 0:17:29 | 61.8197433 | 60.8243232 | 61.1349434 | 60.5666434 | 86.6321585 |
| 18:18:01 | 0:17:30 | 61.8197433 | 60.8243232 | 60.1349434 | 65.5666434 | 88.6321585 |
| 18:18:02 | 0:17:31 | 61.8197433 | 59.8243232 | 60.1349434 | 64.5666434 | 90.6321585 |
| 18:18:03 | 0:17:32 | 61.8197433 | 59.8243232 | 59.1349434 | 61.5666434 | 73.2407656 |
| 18:18:04 | 0:17:33 | 61.8197433 | 58.8243232 | 59.1349434 | 61.5666434 | 72.9680384 |
| 18:18:05 | 0:17:34 | 60.8197433 | 58.8243232 | 59.1349434 | 59.5666434 | 72.8771293 |
| 18:18:06 | 0:17:35 | 60.8197433 | 58.8243232 | 59.1349434 | 58.5666434 | 85.6321585 |
| 18:18:07 | 0:17:36 | 60.8197433 | 58.8243232 | 59.1349434 | 58.5666434 | 85.6321585 |
| 18:18:08 | 0:17:37 | 60.8197433 | 60.8243232 | 59.1349434 | 58.5666434 | 85.6321585 |
| 18:18:09 | 0:17:38 | 60.8197433 | 60.8243232 | 59.1349434 | 58.5666434 | 84.6321585 |
| 18:18:10 | 0:17:39 | 60.8197433 | 60.8243232 | 58.1349434 | 58.5666434 | 82.6321585 |
| 18:18:11 | 0:17:40 | 60.8197433 | 60.8243232 | 58.1349434 | 58.5666434 | 78.6321585 |
| 18:18:12 | 0:17:41 | 60.8197433 | 61.8243232 | 56.1349434 | 57.5666434 | 78.6321585 |
| 18:18:13 | 0:17:42 | 60.8197433 | 62.8243232 | 56.1349434 | 56.5666434 | 76.6321585 |
| 18:18:14 | 0:17:43 | 61.8197433 | 66.8243232 | 56.1349434 | 56.5666434 | 73.6321585 |
| 18:18:15 | 0:17:44 | 61.8197433 | 66.8243232 | 55.1349434 | 57.5666434 | 72.6321585 |
| 18:18:16 | 0:17:45 | 61.8197433 | 68.8243232 | 55.1349434 | 57.5666434 | 72.6321585 |
| 18:18:17 | 0:17:46 | 61.8197433 | 68.8243232 | 57.1349434 | 57.5666434 | 72.6321585 |
| 18:18:18 | 0:17:47 | 61.8197433 | 68.8243232 | 60.1349434 | 57.5666434 | 71.6321585 |
| 18:18:19 | 0:17:48 | 61.8197433 | 64.8243232 | 61.1349434 | 57.5666434 | 71.6321585 |
| 18:18:20 | 0:17:49 | 61.8197433 | 64.8243232 | 63.1349434 | 58.5666434 | 71.6321585 |
| 18:18:21 | 0:17:50 | 61.8197433 | 64.8243232 | 63.1349434 | 58.5666434 | 72.6321585 |
| 18:18:22 | 0:17:51 | 61.8197433 | 62.8243232 | 66.1349434 | 59.5666434 | 72.6321585 |
| 18:18:23 | 0:17:52 | 61.8197433 | 61.8243232 | 67.1349434 | 59.5666434 | 72.6321585 |
| 18:18:24 | 0:17:53 | 62.8197433 | 61.8243232 | 67.1349434 | 59.5666434 | 72.6321585 |
| 18:18:25 | 0:17:54 | 62.8197433 | 61.8243232 | 67.1349434 | 59.5666434 | 73.6321585 |
| 18:18:26 | 0:17:55 | 62.8197433 | 61.8243232 | 68.1349434 | 59.5666434 | 74.6321585 |
| 18:18:27 | 0:17:56 | 63.8197433 | 61.8243232 | 62.1349434 | 60.5666434 | 74.6321585 |

|          |         |            |            |            |            |            |
|----------|---------|------------|------------|------------|------------|------------|
| 18:18:28 | 0:17:57 | 63.8197433 | 61.8243232 | 60.1349434 | 60.5666434 | 76.6321585 |
| 18:18:29 | 0:17:58 | 63.8197433 | 61.8243232 | 58.1349434 | 61.5666434 | 76.6321585 |
| 18:18:30 | 0:17:59 | 63.8197433 | 61.8243232 | 56.1349434 | 61.5666434 | 71.604402  |
| 18:18:31 | 0:18:00 | 64.8197433 | 62.8243232 | 55.1349434 | 61.5666434 | 71.604402  |
| 18:18:32 | 0:18:01 | 62.8197433 | 62.8243232 | 54.1349434 | 61.5666434 | 71.3316747 |
| 18:18:33 | 0:18:02 | 62.8197433 | 62.8243232 | 54.1349434 | 61.5666434 | 71.7862202 |
| 18:18:34 | 0:18:03 | 61.8197433 | 62.8243232 | 53.1349434 | 61.5666434 | 71.1498565 |
| 18:18:35 | 0:18:04 | 61.8197433 | 62.8243232 | 53.1349434 | 61.5666434 | 71.8771293 |
| 18:18:36 | 0:18:05 | 61.8197433 | 63.8243232 | 53.1349434 | 61.5666434 | 72.2407656 |
| 18:18:37 | 0:18:06 | 61.8197433 | 64.8243232 | 52.1349434 | 62.5666434 | 72.5134929 |
| 18:18:38 | 0:18:07 | 61.8197433 | 64.8243232 | 52.1349434 | 63.5666434 | 73.3316747 |
| 18:18:39 | 0:18:08 | 60.8197433 | 65.8243232 | 52.1349434 | 63.5666434 | 71.7862202 |
| 18:18:40 | 0:18:09 | 60.8197433 | 85.8243232 | 51.1349434 | 64.5666434 | 81.6321585 |
| 18:18:41 | 0:18:10 | 61.8197433 | 83.8243232 | 52.1349434 | 65.5666434 | 81.6321585 |
| 18:18:42 | 0:18:11 | 61.8197433 | 83.8243232 | 52.1349434 | 67.5666434 | 74.6321585 |
| 18:18:43 | 0:18:12 | 61.8197433 | 83.8243232 | 52.1349434 | 69.5666434 | 73.6321585 |
| 18:18:44 | 0:18:13 | 61.8197433 | 78.8243232 | 52.1349434 | 71.5666434 | 73.6321585 |
| 18:18:45 | 0:18:14 | 61.8197433 | 77.8243232 | 58.1349434 | 70.5666434 | 73.6321585 |
| 18:18:46 | 0:18:15 | 61.8197433 | 74.8243232 | 59.1349434 | 70.5666434 | 73.6321585 |
| 18:18:47 | 0:18:16 | 61.8197433 | 73.8243232 | 60.1349434 | 70.5666434 | 73.6321585 |
| 18:18:48 | 0:18:17 | 61.8197433 | 71.8243232 | 61.1349434 | 70.5666434 | 73.6321585 |
| 18:18:49 | 0:18:18 | 61.8197433 | 70.8243232 | 63.1349434 | 70.5666434 | 72.6321585 |
| 18:18:50 | 0:18:19 | 61.8197433 | 70.8243232 | 64.1349434 | 69.5666434 | 72.6321585 |
| 18:18:51 | 0:18:20 | 61.8197433 | 69.8243232 | 64.1349434 | 69.5666434 | 72.6321585 |
| 18:18:52 | 0:18:21 | 61.8197433 | 63.8243232 | 64.1349434 | 70.5666434 | 71.6321585 |
| 18:18:53 | 0:18:22 | 61.8197433 | 61.8243232 | 64.1349434 | 69.5666434 | 71.6321585 |
| 18:18:54 | 0:18:23 | 61.8197433 | 61.8243232 | 64.1349434 | 69.5666434 | 71.6321585 |
| 18:18:55 | 0:18:24 | 61.8197433 | 58.8243232 | 52.1349434 | 61.5666434 | 71.6321585 |
| 18:18:56 | 0:18:25 | 61.8197433 | 58.8243232 | 52.1349434 | 61.5666434 | 71.6321585 |
| 18:18:57 | 0:18:26 | 61.8197433 | 57.8243232 | 52.1349434 | 59.5666434 | 71.6321585 |
| 18:18:58 | 0:18:27 | 61.8197433 | 57.8243232 | 52.1349434 | 59.5666434 | 71.6321585 |
| 18:18:59 | 0:18:28 | 61.8197433 | 56.8243232 | 52.1349434 | 61.5666434 | 71.6321585 |
| 18:19:00 | 0:18:29 | 62.8197433 | 56.8243232 | 52.1349434 | 61.5666434 | 72.6321585 |
| 18:19:01 | 0:18:30 | 62.8197433 | 56.8243232 | 55.1349434 | 61.5666434 | 73.6321585 |
| 18:19:02 | 0:18:31 | 62.8197433 | 56.8243232 | 57.1349434 | 61.5666434 | 73.6321585 |
| 18:19:03 | 0:18:32 | 62.8197433 | 56.8243232 | 58.1349434 | 61.5666434 | 74.6321585 |
| 18:19:04 | 0:18:33 | 62.8197433 | 58.8243232 | 58.1349434 | 61.5666434 | 75.6321585 |
| 18:19:05 | 0:18:34 | 61.8197433 | 58.8243232 | 55.1349434 | 60.5666434 | 76.6321585 |
| 18:19:06 | 0:18:35 | 61.8197433 | 58.8243232 | 55.1349434 | 60.5666434 | 76.6321585 |
| 18:19:07 | 0:18:36 | 61.8197433 | 58.8243232 | 54.1349434 | 61.5666434 | 78.6321585 |
| 18:19:08 | 0:18:37 | 61.8197433 | 59.8243232 | 54.1349434 | 61.5666434 | 79.6321585 |
| 18:19:09 | 0:18:38 | 61.8197433 | 59.8243232 | 55.1349434 | 61.5666434 | 79.6321585 |
| 18:19:10 | 0:18:39 | 61.8197433 | 59.8243232 | 57.1349434 | 60.5666434 | 85.6321585 |
| 18:19:11 | 0:18:40 | 61.8197433 | 59.8243232 | 57.1349434 | 57.5666434 | 85.6321585 |
| 18:19:12 | 0:18:41 | 61.8197433 | 59.8243232 | 56.1349434 | 57.5666434 | 86.6321585 |

|          |         |            |            |            |            |            |
|----------|---------|------------|------------|------------|------------|------------|
| 18:19:13 | 0:18:42 | 61.8197433 | 59.8243232 | 55.1349434 | 57.5666434 | 84.6321585 |
| 18:19:14 | 0:18:43 | 61.8197433 | 59.8243232 | 54.1349434 | 57.5666434 | 82.6321585 |
| 18:19:15 | 0:18:44 | 63.8197433 | 59.8243232 | 54.1349434 | 58.5666434 | 79.6321585 |
| 18:19:16 | 0:18:45 | 65.8197433 | 61.8243232 | 54.1349434 | 59.5666434 | 79.6321585 |
| 18:19:17 | 0:18:46 | 68.8197433 | 61.8243232 | 54.1349434 | 60.5666434 | 78.6321585 |
| 18:19:18 | 0:18:47 | 68.8197433 | 60.8243232 | 57.1349434 | 60.5666434 | 75.6321585 |
| 18:19:19 | 0:18:48 | 68.8197433 | 58.8243232 | 59.1349434 | 60.5666434 | 74.6321585 |
| 18:19:20 | 0:18:49 | 66.8197433 | 58.8243232 | 62.1349434 | 61.5666434 | 74.6321585 |
| 18:19:21 | 0:18:50 | 64.8197433 | 54.8243232 | 63.1349434 | 61.5666434 | 74.6321585 |
| 18:19:22 | 0:18:51 | 63.8197433 | 52.8243232 | 64.1349434 | 61.5666434 | 74.6321585 |
| 18:19:23 | 0:18:52 | 63.8197433 | 50.8243232 | 63.1349434 | 61.5666434 | 75.6321585 |
| 18:19:24 | 0:18:53 | 62.8197433 | 50.8243232 | 62.1349434 | 61.5666434 | 75.6321585 |
| 18:19:25 | 0:18:54 | 62.8197433 | 50.8243232 | 61.1349434 | 62.5666434 | 76.6321585 |
| 18:19:26 | 0:18:55 | 62.8197433 | 51.8243232 | 61.1349434 | 62.5666434 | 76.6321585 |
| 18:19:27 | 0:18:56 | 62.8197433 | 51.8243232 | 62.1349434 | 63.5666434 | 77.6321585 |
| 18:19:28 | 0:18:57 | 62.8197433 | 52.8243232 | 62.1349434 | 63.5666434 | 77.6321585 |
| 18:19:29 | 0:18:58 | 61.8197433 | 51.8243232 | 62.1349434 | 64.5666434 | 77.6321585 |
| 18:19:30 | 0:18:59 | 61.8197433 | 51.8243232 | 62.1349434 | 64.5666434 | 77.6321585 |
| 18:19:31 | 0:19:00 | 61.8197433 | 51.8243232 | 62.1349434 | 63.5666434 | 77.6321585 |
| 18:19:32 | 0:19:01 | 61.8197433 | 51.8243232 | 62.1349434 | 62.5666434 | 71.6321585 |
| 18:19:33 | 0:19:02 | 61.8197433 | 51.8243232 | 62.1349434 | 62.5666434 | 71.6321585 |
| 18:19:34 | 0:19:03 | 60.8197433 | 52.8243232 | 62.1349434 | 62.5666434 | 69.6321585 |
| 18:19:35 | 0:19:04 | 60.8197433 | 53.8243232 | 62.1349434 | 60.5666434 | 66.6321585 |
| 18:19:36 | 0:19:05 | 60.8197433 | 55.8243232 | 61.1349434 | 60.5666434 | 60.6321585 |
| 18:19:37 | 0:19:06 | 61.8197433 | 55.8243232 | 60.1349434 | 60.5666434 | 62.6321585 |
| 18:19:38 | 0:19:07 | 60.8197433 | 57.8243232 | 60.1349434 | 60.5666434 | 62.6321585 |
| 18:19:39 | 0:19:08 | 60.8197433 | 58.8243232 | 61.1349434 | 60.5666434 | 62.6321585 |
| 18:19:40 | 0:19:09 | 61.8197433 | 58.8243232 | 61.1349434 | 59.5666434 | 62.6321585 |
| 18:19:41 | 0:19:10 | 61.8197433 | 58.8243232 | 61.1349434 | 59.5666434 | 62.6321585 |
| 18:19:42 | 0:19:11 | 60.8197433 | 56.8243232 | 61.1349434 | 59.5666434 | 64.6321585 |
| 18:19:43 | 0:19:12 | 60.8197433 | 56.8243232 | 61.1349434 | 59.5666434 | 65.6321585 |
| 18:19:44 | 0:19:13 | 61.8197433 | 56.8243232 | 61.1349434 | 60.5666434 | 65.6321585 |
| 18:19:45 | 0:19:14 | 61.8197433 | 55.8243232 | 66.1349434 | 61.5666434 | 66.6321585 |
| 18:19:46 | 0:19:15 | 61.8197433 | 54.8243232 | 67.1349434 | 62.5666434 | 66.6321585 |
| 18:19:47 | 0:19:16 | 61.8197433 | 54.8243232 | 67.1349434 | 62.5666434 | 65.6321585 |
| 18:19:48 | 0:19:17 | 61.8197433 | 54.8243232 | 67.1349434 | 62.5666434 | 65.6321585 |
| 18:19:49 | 0:19:18 | 61.8197433 | 54.8243232 | 57.1349434 | 63.5666434 | 62.6321585 |
| 18:19:50 | 0:19:19 | 61.8197433 | 54.8243232 | 57.1349434 | 63.5666434 | 62.6321585 |
| 18:19:51 | 0:19:20 | 61.8197433 | 54.8243232 | 57.1349434 | 64.5666434 | 62.6321585 |
| 18:19:52 | 0:19:21 | 61.8197433 | 53.8243232 | 58.1349434 | 64.5666434 | 62.6321585 |
| 18:19:53 | 0:19:22 | 61.8197433 | 53.8243232 | 59.1349434 | 64.5666434 | 63.6321585 |
| 18:19:54 | 0:19:23 | 61.8197433 | 53.8243232 | 59.1349434 | 64.5666434 | 63.6321585 |
| 18:19:55 | 0:19:24 | 61.8197433 | 53.8243232 | 59.1349434 | 65.5666434 | 63.6321585 |
| 18:19:56 | 0:19:25 | 61.8197433 | 53.8243232 | 57.1349434 | 65.5666434 | 63.6321585 |
| 18:19:57 | 0:19:26 | 61.8197433 | 51.8243232 | 57.1349434 | 66.5666434 | 63.6321585 |

|          |         |            |            |            |            |            |
|----------|---------|------------|------------|------------|------------|------------|
| 18:19:58 | 0:19:27 | 61.8197433 | 51.8243232 | 57.1349434 | 66.5666434 | 65.6321585 |
| 18:19:59 | 0:19:28 | 61.8197433 | 51.8243232 | 59.1349434 | 66.5666434 | 65.6321585 |
| 18:20:00 | 0:19:29 | 61.8197433 | 51.8243232 | 61.1349434 | 66.5666434 | 67.6321585 |
| 18:20:01 | 0:19:30 | 61.8197433 | 51.8243232 | 61.1349434 | 66.5666434 | 67.6321585 |
| 18:20:02 | 0:19:31 | 61.8197433 | 52.8243232 | 61.1349434 | 66.5666434 | 68.6321585 |
| 18:20:03 | 0:19:32 | 61.8197433 | 53.8243232 | 60.1349434 | 66.5666434 | 68.6321585 |
| 18:20:04 | 0:19:33 | 61.8197433 | 53.8243232 | 64.1349434 | 66.5666434 | 66.6321585 |
| 18:20:05 | 0:19:34 | 61.8197433 | 55.8243232 | 65.1349434 | 66.5666434 | 66.6321585 |
| 18:20:06 | 0:19:35 | 61.8197433 | 55.8243232 | 66.1349434 | 66.5666434 | 66.6321585 |
| 18:20:07 | 0:19:36 | 61.8197433 | 56.8243232 | 66.1349434 | 65.5666434 | 66.6321585 |
| 18:20:08 | 0:19:37 | 61.8197433 | 56.8243232 | 66.1349434 | 65.5666434 | 66.6321585 |
| 18:20:09 | 0:19:38 | 61.8197433 | 56.8243232 | 60.1349434 | 64.5666434 | 65.6321585 |
| 18:20:10 | 0:19:39 | 61.8197433 | 56.8243232 | 55.1349434 | 64.5666434 | 65.6321585 |
| 18:20:11 | 0:19:40 | 61.8197433 | 56.8243232 | 55.1349434 | 63.5666434 | 65.6321585 |
| 18:20:12 | 0:19:41 | 61.8197433 | 57.8243232 | 55.1349434 | 63.5666434 | 65.6321585 |
| 18:20:13 | 0:19:42 | 61.8197433 | 58.8243232 | 58.1349434 | 63.5666434 | 65.6321585 |
| 18:20:14 | 0:19:43 | 61.8197433 | 58.8243232 | 59.1349434 | 63.5666434 | 65.6321585 |
| 18:20:15 | 0:19:44 | 61.8197433 | 59.8243232 | 59.1349434 | 63.5666434 | 65.6321585 |
| 18:20:16 | 0:19:45 | 61.8197433 | 59.8243232 | 60.1349434 | 63.5666434 | 65.6321585 |
| 18:20:17 | 0:19:46 | 61.8197433 | 60.8243232 | 63.1349434 | 58.5666434 | 65.6321585 |
| 18:20:18 | 0:19:47 | 61.8197433 | 61.8243232 | 64.1349434 | 57.5666434 | 65.6321585 |
| 18:20:19 | 0:19:48 | 61.8197433 | 61.8243232 | 64.1349434 | 56.5666434 | 66.6321585 |
| 18:20:20 | 0:19:49 | 61.8197433 | 61.8243232 | 63.1349434 | 55.5666434 | 66.6321585 |
| 18:20:21 | 0:19:50 | 61.8197433 | 61.8243232 | 58.1349434 | 55.5666434 | 66.6321585 |
| 18:20:22 | 0:19:51 | 61.8197433 | 57.8243232 | 57.1349434 | 55.5666434 | 66.6321585 |
| 18:20:23 | 0:19:52 | 60.8197433 | 56.8243232 | 58.1349434 | 58.5666434 | 67.6321585 |
| 18:20:24 | 0:19:53 | 60.8197433 | 56.8243232 | 59.1349434 | 59.5666434 | 67.6321585 |
| 18:20:25 | 0:19:54 | 60.8197433 | 59.8243232 | 59.1349434 | 59.5666434 | 67.6321585 |
| 18:20:26 | 0:19:55 | 60.8197433 | 60.8243232 | 58.1349434 | 59.5666434 | 67.6321585 |
| 18:20:27 | 0:19:56 | 60.8197433 | 60.8243232 | 58.1349434 | 59.5666434 | 67.6321585 |
| 18:20:28 | 0:19:57 | 60.8197433 | 62.8243232 | 57.1349434 | 60.5666434 | 67.6321585 |
| 18:20:29 | 0:19:58 | 60.8197433 | 62.8243232 | 57.1349434 | 61.5666434 | 67.6321585 |
| 18:20:30 | 0:19:59 | 60.8197433 | 60.8243232 | 58.1349434 | 61.5666434 | 65.6321585 |
| 18:20:31 | 0:20:00 | 60.8197433 | 59.8243232 | 58.1349434 | 62.5666434 | 66.6321585 |
| 18:20:32 | 0:20:01 | 60.8197433 | 58.8243232 | 59.1349434 | 64.5666434 | 66.6321585 |
| 18:20:33 | 0:20:02 | 60.8197433 | 57.8243232 | 60.1349434 | 66.5666434 | 66.6321585 |
| 18:20:34 | 0:20:03 | 60.8197433 | 56.8243232 | 61.1349434 | 68.5666434 | 66.6321585 |
| 18:20:35 | 0:20:04 | 60.8197433 | 56.8243232 | 61.1349434 | 69.5666434 | 66.6321585 |
| 18:20:36 | 0:20:05 | 61.8197433 | 56.8243232 | 61.1349434 | 70.5666434 | 66.6321585 |
| 18:20:37 | 0:20:06 | 61.8197433 | 57.8243232 | 60.1349434 | 70.5666434 | 67.6321585 |
| 18:20:38 | 0:20:07 | 61.8197433 | 58.8243232 | 60.1349434 | 70.5666434 | 66.6321585 |
| 18:20:39 | 0:20:08 | 61.8197433 | 58.8243232 | 63.1349434 | 70.5666434 | 65.6321585 |
| 18:20:40 | 0:20:09 | 61.8197433 | 60.8243232 | 65.1349434 | 71.5666434 | 65.6321585 |
| 18:20:41 | 0:20:10 | 61.8197433 | 61.8243232 | 67.1349434 | 71.5666434 | 66.6321585 |
| 18:20:42 | 0:20:11 | 61.8197433 | 61.8243232 | 67.1349434 | 71.5666434 | 66.6321585 |

|          |         |            |            |            |            |            |
|----------|---------|------------|------------|------------|------------|------------|
| 18:20:43 | 0:20:12 | 61.8197433 | 62.8243232 | 67.1349434 | 74.5666434 | 66.6321585 |
| 18:20:44 | 0:20:13 | 61.8197433 | 61.8243232 | 65.1349434 | 74.5666434 | 66.6321585 |
| 18:20:45 | 0:20:14 | 61.8197433 | 61.8243232 | 63.1349434 | 75.5666434 | 66.6321585 |
| 18:20:46 | 0:20:15 | 61.8197433 | 59.8243232 | 63.1349434 | 75.5666434 | 66.6321585 |
| 18:20:47 | 0:20:16 | 61.8197433 | 59.8243232 | 62.1349434 | 75.5666434 | 67.6321585 |
| 18:20:48 | 0:20:17 | 61.8197433 | 59.8243232 | 63.1349434 | 76.5666434 | 67.6321585 |
| 18:20:49 | 0:20:18 | 61.8197433 | 59.8243232 | 62.1349434 | 76.5666434 | 69.6321585 |
| 18:20:50 | 0:20:19 | 61.8197433 | 59.8243232 | 63.1349434 | 77.5666434 | 70.6321585 |
| 18:20:51 | 0:20:20 | 61.8197433 | 60.8243232 | 63.1349434 | 78.5666434 | 67.6321585 |
| 18:20:52 | 0:20:21 | 61.8197433 | 60.8243232 | 63.1349434 | 79.5666434 | 67.6321585 |
| 18:20:53 | 0:20:22 | 61.8197433 | 59.8243232 | 64.1349434 | 79.5666434 | 67.6321585 |
| 18:20:54 | 0:20:23 | 61.8197433 | 59.8243232 | 66.1349434 | 79.5666434 | 67.6321585 |
| 18:20:55 | 0:20:24 | 61.8197433 | 57.8243232 | 66.1349434 | 78.5666434 | 67.6321585 |
| 18:20:56 | 0:20:25 | 61.8197433 | 56.8243232 | 72.1349434 | 78.5666434 | 68.6321585 |
| 18:20:57 | 0:20:26 | 61.8197433 | 56.8243232 | 72.1349434 | 78.5666434 | 67.6321585 |
| 18:20:58 | 0:20:27 | 61.8197433 | 55.8243232 | 66.1349434 | 78.5666434 | 67.6321585 |
| 18:20:59 | 0:20:28 | 61.8197433 | 56.8243232 | 63.1349434 | 77.5666434 | 66.6321585 |
| 18:21:00 | 0:20:29 | 62.8197433 | 56.8243232 | 61.1349434 | 75.5666434 | 66.6321585 |
| 18:21:01 | 0:20:30 | 61.8197433 | 56.8243232 | 59.1349434 | 72.5666434 | 66.6321585 |
| 18:21:02 | 0:20:31 | 61.8197433 | 56.8243232 | 59.1349434 | 71.5666434 | 66.6321585 |
| 18:21:03 | 0:20:32 | 61.8197433 | 56.8243232 | 58.1349434 | 71.5666434 | 66.6321585 |
| 18:21:04 | 0:20:33 | 61.8197433 | 56.8243232 | 57.1349434 | 71.5666434 | 67.6321585 |
| 18:21:05 | 0:20:34 | 61.8197433 | 56.8243232 | 56.1349434 | 69.5666434 | 67.6321585 |
| 18:21:06 | 0:20:35 | 61.8197433 | 56.8243232 | 56.1349434 | 68.5666434 | 68.6321585 |
| 18:21:07 | 0:20:36 | 61.8197433 | 56.8243232 | 56.1349434 | 66.5666434 | 68.6321585 |
| 18:21:08 | 0:20:37 | 61.8197433 | 57.8243232 | 59.1349434 | 63.5666434 | 71.6321585 |
| 18:21:09 | 0:20:38 | 61.8197433 | 57.8243232 | 59.1349434 | 63.5666434 | 72.6321585 |
| 18:21:10 | 0:20:39 | 61.8197433 | 57.8243232 | 59.1349434 | 63.5666434 | 73.6321585 |
| 18:21:11 | 0:20:40 | 62.8197433 | 57.8243232 | 59.1349434 | 63.5666434 | 73.6321585 |
| 18:21:12 | 0:20:41 | 61.8197433 | 57.8243232 | 57.1349434 | 63.5666434 | 75.6321585 |
| 18:21:13 | 0:20:42 | 61.8197433 | 57.8243232 | 56.1349434 | 64.5666434 | 76.6321585 |
| 18:21:14 | 0:20:43 | 61.8197433 | 56.8243232 | 58.1349434 | 64.5666434 | 78.6321585 |
| 18:21:15 | 0:20:44 | 61.8197433 | 56.8243232 | 59.1349434 | 64.5666434 | 79.6321585 |
| 18:21:16 | 0:20:45 | 61.8197433 | 56.8243232 | 59.1349434 | 65.5666434 | 79.6321585 |
| 18:21:17 | 0:20:46 | 61.8197433 | 56.8243232 | 60.1349434 | 70.5666434 | 81.6321585 |
| 18:21:18 | 0:20:47 | 61.8197433 | 56.8243232 | 61.1349434 | 72.5666434 | 83.6321585 |
| 18:21:19 | 0:20:48 | 61.8197433 | 56.8243232 | 63.1349434 | 76.5666434 | 75.6321585 |
| 18:21:20 | 0:20:49 | 61.8197433 | 57.8243232 | 65.1349434 | 77.5666434 | 75.6321585 |
| 18:21:21 | 0:20:50 | 61.8197433 | 57.8243232 | 67.1349434 | 77.5666434 | 72.6321585 |
| 18:21:22 | 0:20:51 | 61.8197433 | 57.8243232 | 67.1349434 | 78.5666434 | 70.6321585 |
| 18:21:23 | 0:20:52 | 60.8197433 | 57.8243232 | 67.1349434 | 79.5666434 | 70.6321585 |
| 18:21:24 | 0:20:53 | 60.8197433 | 57.8243232 | 63.1349434 | 71.5666434 | 70.6321585 |
| 18:21:25 | 0:20:54 | 61.8197433 | 56.8243232 | 63.1349434 | 70.5666434 | 70.6321585 |
| 18:21:26 | 0:20:55 | 61.8197433 | 56.8243232 | 62.1349434 | 64.5666434 | 70.6321585 |
| 18:21:27 | 0:20:56 | 61.8197433 | 56.8243232 | 62.1349434 | 59.5666434 | 70.6321585 |

|          |         |            |            |            |            |            |
|----------|---------|------------|------------|------------|------------|------------|
| 18:21:28 | 0:20:57 | 61.8197433 | 57.8243232 | 62.1349434 | 57.5666434 | 70.6321585 |
| 18:21:29 | 0:20:58 | 61.8197433 | 57.8243232 | 62.1349434 | 57.5666434 | 70.6321585 |
| 18:21:30 | 0:20:59 | 61.8197433 | 58.8243232 | 61.1349434 | 56.5666434 | 70.6321585 |
| 18:21:31 | 0:21:00 | 61.8197433 | 59.8243232 | 62.1349434 | 56.5666434 | 70.6321585 |
| 18:21:32 | 0:21:01 | 61.8197433 | 59.8243232 | 63.1349434 | 56.5666434 | 70.6321585 |
| 18:21:33 | 0:21:02 | 61.8197433 | 59.8243232 | 64.1349434 | 56.5666434 | 70.6321585 |
| 18:21:34 | 0:21:03 | 61.8197433 | 58.8243232 | 64.1349434 | 56.5666434 | 69.6321585 |
| 18:21:35 | 0:21:04 | 61.8197433 | 57.8243232 | 64.1349434 | 56.5666434 | 69.6321585 |
| 18:21:36 | 0:21:05 | 61.8197433 | 57.8243232 | 64.1349434 | 56.5666434 | 69.6321585 |
| 18:21:37 | 0:21:06 | 61.8197433 | 56.8243232 | 64.1349434 | 56.5666434 | 67.6321585 |
| 18:21:38 | 0:21:07 | 61.8197433 | 55.8243232 | 65.1349434 | 59.5666434 | 69.6321585 |
| 18:21:39 | 0:21:08 | 61.8197433 | 55.8243232 | 65.1349434 | 59.5666434 | 69.6321585 |
| 18:21:40 | 0:21:09 | 61.8197433 | 54.8243232 | 66.1349434 | 59.5666434 | 68.6321585 |
| 18:21:41 | 0:21:10 | 61.8197433 | 54.8243232 | 66.1349434 | 60.5666434 | 68.6321585 |
| 18:21:42 | 0:21:11 | 61.8197433 | 56.8243232 | 64.1349434 | 61.5666434 | 67.6321585 |
| 18:21:43 | 0:21:12 | 61.8197433 | 58.8243232 | 64.1349434 | 61.5666434 | 67.6321585 |
| 18:21:44 | 0:21:13 | 61.8197433 | 59.8243232 | 63.1349434 | 61.5666434 | 67.6321585 |
| 18:21:45 | 0:21:14 | 61.8197433 | 61.8243232 | 64.1349434 | 61.5666434 | 67.6321585 |
| 18:21:46 | 0:21:15 | 61.8197433 | 61.8243232 | 64.1349434 | 62.5666434 | 67.6321585 |
| 18:21:47 | 0:21:16 | 61.8197433 | 66.8243232 | 64.1349434 | 62.5666434 | 68.6321585 |
| 18:21:48 | 0:21:17 | 61.8197433 | 68.8243232 | 64.1349434 | 62.5666434 | 68.6321585 |
| 18:21:49 | 0:21:18 | 61.8197433 | 68.8243232 | 64.1349434 | 62.5666434 | 68.6321585 |
| 18:21:50 | 0:21:19 | 61.8197433 | 66.8243232 | 64.1349434 | 61.5666434 | 69.6321585 |
| 18:21:51 | 0:21:20 | 61.8197433 | 63.8243232 | 68.1349434 | 61.5666434 | 69.6321585 |
| 18:21:52 | 0:21:21 | 61.8197433 | 63.8243232 | 69.1349434 | 61.5666434 | 71.6321585 |
| 18:21:53 | 0:21:22 | 61.8197433 | 59.8243232 | 69.1349434 | 62.5666434 | 71.6321585 |
| 18:21:54 | 0:21:23 | 61.8197433 | 59.8243232 | 69.1349434 | 62.5666434 | 71.6321585 |
| 18:21:55 | 0:21:24 | 61.8197433 | 59.8243232 | 69.1349434 | 62.5666434 | 71.6321585 |
| 18:21:56 | 0:21:25 | 61.8197433 | 59.8243232 | 57.1349434 | 61.5666434 | 69.6321585 |
| 18:21:57 | 0:21:26 | 61.8197433 | 58.8243232 | 55.1349434 | 61.5666434 | 69.6321585 |
| 18:21:58 | 0:21:27 | 61.8197433 | 57.8243232 | 57.1349434 | 60.5666434 | 67.6321585 |
| 18:21:59 | 0:21:28 | 62.8197433 | 57.8243232 | 57.1349434 | 60.5666434 | 67.6321585 |
| 18:22:00 | 0:21:29 | 62.8197433 | 57.8243232 | 57.1349434 | 60.5666434 | 65.6321585 |
| 18:22:01 | 0:21:30 | 63.8197433 | 57.8243232 | 57.1349434 | 59.5666434 | 65.6321585 |
| 18:22:02 | 0:21:31 | 64.8197433 | 55.8243232 | 52.1349434 | 58.5666434 | 65.6321585 |
| 18:22:03 | 0:21:32 | 63.8197433 | 55.8243232 | 53.1349434 | 58.5666434 | 64.6321585 |
| 18:22:04 | 0:21:33 | 63.8197433 | 55.8243232 | 54.1349434 | 58.5666434 | 64.6321585 |
| 18:22:05 | 0:21:34 | 62.8197433 | 56.8243232 | 54.1349434 | 55.5666434 | 64.6321585 |
| 18:22:06 | 0:21:35 | 62.8197433 | 56.8243232 | 58.1349434 | 54.5666434 | 65.6321585 |
| 18:22:07 | 0:21:36 | 62.8197433 | 56.8243232 | 58.1349434 | 54.5666434 | 67.6321585 |
| 18:22:08 | 0:21:37 | 62.8197433 | 55.8243232 | 55.1349434 | 54.5666434 | 67.6321585 |
| 18:22:09 | 0:21:38 | 62.8197433 | 55.8243232 | 54.1349434 | 53.5666434 | 68.6321585 |
| 18:22:10 | 0:21:39 | 62.8197433 | 56.8243232 | 55.1349434 | 54.5666434 | 67.6321585 |
| 18:22:11 | 0:21:40 | 61.8197433 | 56.8243232 | 56.1349434 | 54.5666434 | 67.6321585 |
| 18:22:12 | 0:21:41 | 61.8197433 | 57.8243232 | 57.1349434 | 55.5666434 | 66.6321585 |

|          |         |            |            |            |            |            |
|----------|---------|------------|------------|------------|------------|------------|
| 18:22:13 | 0:21:42 | 61.8197433 | 57.8243232 | 59.1349434 | 55.5666434 | 66.6321585 |
| 18:22:14 | 0:21:43 | 61.8197433 | 57.8243232 | 61.1349434 | 55.5666434 | 65.6321585 |
| 18:22:15 | 0:21:44 | 61.8197433 | 56.8243232 | 61.1349434 | 55.5666434 | 64.6321585 |
| 18:22:16 | 0:21:45 | 61.8197433 | 55.8243232 | 58.1349434 | 55.5666434 | 64.6321585 |
| 18:22:17 | 0:21:46 | 61.8197433 | 55.8243232 | 58.1349434 | 54.5666434 | 64.6321585 |
| 18:22:18 | 0:21:47 | 61.8197433 | 53.8243232 | 57.1349434 | 53.5666434 | 65.6321585 |
| 18:22:19 | 0:21:48 | 61.8197433 | 53.8243232 | 57.1349434 | 53.5666434 | 66.6321585 |
| 18:22:20 | 0:21:49 | 61.8197433 | 52.8243232 | 57.1349434 | 53.5666434 | 66.6321585 |
| 18:22:21 | 0:21:50 | 61.8197433 | 52.8243232 | 57.1349434 | 53.5666434 | 66.6321585 |
| 18:22:22 | 0:21:51 | 61.8197433 | 52.8243232 | 57.1349434 | 54.5666434 | 66.6321585 |
| 18:22:23 | 0:21:52 | 61.8197433 | 52.8243232 | 57.1349434 | 54.5666434 | 66.6321585 |
| 18:22:24 | 0:21:53 | 61.8197433 | 52.8243232 | 57.1349434 | 55.5666434 | 66.6321585 |
| 18:22:25 | 0:21:54 | 61.8197433 | 53.8243232 | 57.1349434 | 55.5666434 | 67.6321585 |
| 18:22:26 | 0:21:55 | 61.8197433 | 53.8243232 | 57.1349434 | 55.5666434 | 67.6321585 |
| 18:22:27 | 0:21:56 | 61.8197433 | 53.8243232 | 57.1349434 | 55.5666434 | 67.6321585 |
| 18:22:28 | 0:21:57 | 61.8197433 | 54.8243232 | 57.1349434 | 55.5666434 | 66.6321585 |
| 18:22:29 | 0:21:58 | 61.8197433 | 55.8243232 | 58.1349434 | 56.5666434 | 66.6321585 |
| 18:22:30 | 0:21:59 | 61.8197433 | 55.8243232 | 58.1349434 | 56.5666434 | 66.6321585 |
| 18:22:31 | 0:22:00 | 61.8197433 | 57.8243232 | 58.1349434 | 57.5666434 | 63.6321585 |
| 18:22:32 | 0:22:01 | 61.8197433 | 57.8243232 | 75.1349434 | 57.5666434 | 63.6321585 |
| 18:22:33 | 0:22:02 | 61.8197433 | 57.8243232 | 72.1349434 | 57.5666434 | 64.6321585 |
| 18:22:34 | 0:22:03 | 61.8197433 | 55.8243232 | 69.1349434 | 56.5666434 | 65.6321585 |
| 18:22:35 | 0:22:04 | 61.8197433 | 55.8243232 | 67.1349434 | 56.5666434 | 66.6321585 |
| 18:22:36 | 0:22:05 | 61.8197433 | 54.8243232 | 66.1349434 | 56.5666434 | 66.6321585 |
| 18:22:37 | 0:22:06 | 61.8197433 | 54.8243232 | 66.1349434 | 56.5666434 | 67.6321585 |
| 18:22:38 | 0:22:07 | 61.8197433 | 54.8243232 | 66.1349434 | 56.5666434 | 67.6321585 |
| 18:22:39 | 0:22:08 | 61.8197433 | 53.8243232 | 65.1349434 | 56.5666434 | 67.6321585 |
| 18:22:40 | 0:22:09 | 61.8197433 | 53.8243232 | 64.1349434 | 56.5666434 | 67.6321585 |
| 18:22:41 | 0:22:10 | 61.8197433 | 53.8243232 | 64.1349434 | 57.5666434 | 68.6321585 |
| 18:22:42 | 0:22:11 | 61.8197433 | 54.8243232 | 62.1349434 | 57.5666434 | 68.6321585 |
| 18:22:43 | 0:22:12 | 61.8197433 | 54.8243232 | 61.1349434 | 57.5666434 | 70.6321585 |
| 18:22:44 | 0:22:13 | 61.8197433 | 55.8243232 | 61.1349434 | 56.5666434 | 70.6321585 |
| 18:22:45 | 0:22:14 | 61.8197433 | 55.8243232 | 61.1349434 | 56.5666434 | 70.6321585 |
| 18:22:46 | 0:22:15 | 61.8197433 | 55.8243232 | 62.1349434 | 57.5666434 | 69.6321585 |
| 18:22:47 | 0:22:16 | 61.8197433 | 55.8243232 | 62.1349434 | 57.5666434 | 69.6321585 |
| 18:22:48 | 0:22:17 | 61.8197433 | 55.8243232 | 63.1349434 | 59.5666434 | 70.6321585 |
| 18:22:49 | 0:22:18 | 61.8197433 | 55.8243232 | 64.1349434 | 60.5666434 | 70.6321585 |
| 18:22:50 | 0:22:19 | 61.8197433 | 55.8243232 | 66.1349434 | 60.5666434 | 70.6321585 |
| 18:22:51 | 0:22:20 | 61.8197433 | 58.8243232 | 68.1349434 | 60.5666434 | 71.6321585 |
| 18:22:52 | 0:22:21 | 62.8197433 | 60.8243232 | 70.1349434 | 61.5666434 | 70.6321585 |
| 18:22:53 | 0:22:22 | 62.8197433 | 59.8243232 | 70.1349434 | 64.5666434 | 70.6321585 |
| 18:22:54 | 0:22:23 | 62.8197433 | 56.8243232 | 69.1349434 | 64.5666434 | 69.6321585 |
| 18:22:55 | 0:22:24 | 63.8197433 | 56.8243232 | 69.1349434 | 64.5666434 | 69.6321585 |
| 18:22:56 | 0:22:25 | 63.8197433 | 56.8243232 | 66.1349434 | 66.5666434 | 69.6321585 |
| 18:22:57 | 0:22:26 | 63.8197433 | 55.8243232 | 66.1349434 | 71.5666434 | 69.6321585 |



|          |         |            |            |            |            |            |
|----------|---------|------------|------------|------------|------------|------------|
| 18:22:58 | 0:22:27 | 63.8197433 | 55.8243232 | 66.1349434 | 71.5666434 | 70.6321585 |
| 18:22:59 | 0:22:28 | 64.8197433 | 55.8243232 | 66.1349434 | 71.5666434 | 70.6321585 |
| 18:23:00 | 0:22:29 | 64.8197433 | 55.8243232 | 67.1349434 | 71.5666434 | 72.6321585 |
| 18:23:01 | 0:22:30 | 70.8197433 | 55.8243232 | 67.1349434 | 70.5666434 | 72.6321585 |
| 18:23:02 | 0:22:31 | 71.8197433 | 54.8243232 | 66.1349434 | 70.5666434 | 72.6321585 |
| 18:23:03 | 0:22:32 | 71.8197433 | 54.8243232 | 66.1349434 | 70.5666434 | 73.6321585 |
| 18:23:04 | 0:22:33 | 71.8197433 | 53.8243232 | 65.1349434 | 70.5666434 | 74.6321585 |
| 18:23:05 | 0:22:34 | 71.8197433 | 52.8243232 | 64.1349434 | 70.5666434 | 74.6321585 |
| 18:23:06 | 0:22:35 | 71.8197433 | 52.8243232 | 64.1349434 | 70.5666434 | 74.6321585 |
| 18:23:07 | 0:22:36 | 70.8197433 | 52.8243232 | 64.1349434 | 70.5666434 | 74.6321585 |
| 18:23:08 | 0:22:37 | 70.8197433 | 51.8243232 | 64.1349434 | 71.5666434 | 73.6321585 |
| 18:23:09 | 0:22:38 | 70.8197433 | 52.8243232 | 64.1349434 | 71.5666434 | 73.6321585 |
| 18:23:10 | 0:22:39 | 68.8197433 | 52.8243232 | 64.1349434 | 69.5666434 | 72.6321585 |
| 18:23:11 | 0:22:40 | 68.8197433 | 52.8243232 | 64.1349434 | 69.5666434 | 69.6321585 |
| 18:23:12 | 0:22:41 | 68.8197433 | 58.8243232 | 64.1349434 | 69.5666434 | 67.6321585 |
| 18:23:13 | 0:22:42 | 64.8197433 | 58.8243232 | 64.1349434 | 69.5666434 | 66.6321585 |
| 18:23:14 | 0:22:43 | 63.8197433 | 58.8243232 | 64.1349434 | 68.5666434 | 66.6321585 |
| 18:23:15 | 0:22:44 | 63.8197433 | 58.8243232 | 65.1349434 | 68.5666434 | 65.6321585 |
| 18:23:16 | 0:22:45 | 63.8197433 | 57.8243232 | 65.1349434 | 68.5666434 | 65.6321585 |
| 18:23:17 | 0:22:46 | 63.8197433 | 56.8243232 | 65.1349434 | 68.5666434 | 65.6321585 |
| 18:23:18 | 0:22:47 | 63.8197433 | 55.8243232 | 65.1349434 | 68.5666434 | 64.6321585 |
| 18:23:19 | 0:22:48 | 64.8197433 | 55.8243232 | 65.1349434 | 70.5666434 | 64.6321585 |
| 18:23:20 | 0:22:49 | 62.8197433 | 55.8243232 | 65.1349434 | 73.5666434 | 64.6321585 |
| 18:23:21 | 0:22:50 | 62.8197433 | 55.8243232 | 65.1349434 | 74.5666434 | 64.6321585 |
| 18:23:22 | 0:22:51 | 61.8197433 | 55.8243232 | 65.1349434 | 74.5666434 | 66.6321585 |
| 18:23:23 | 0:22:52 | 62.8197433 | 55.8243232 | 65.1349434 | 74.5666434 | 66.6321585 |
| 18:23:24 | 0:22:53 | 62.8197433 | 55.8243232 | 65.1349434 | 74.5666434 | 66.6321585 |
| 18:23:25 | 0:22:54 | 63.8197433 | 55.8243232 | 65.1349434 | 74.5666434 | 64.6321585 |
| 18:23:26 | 0:22:55 | 64.8197433 | 62.8243232 | 65.1349434 | 74.5666434 | 64.6321585 |
| 18:23:27 | 0:22:56 | 64.8197433 | 68.8243232 | 67.1349434 | 73.5666434 | 65.6321585 |
| 18:23:28 | 0:22:57 | 65.8197433 | 68.8243232 | 68.1349434 | 74.5666434 | 65.6321585 |
| 18:23:29 | 0:22:58 | 66.8197433 | 66.8243232 | 68.1349434 | 75.5666434 | 65.6321585 |
| 18:23:30 | 0:22:59 | 67.8197433 | 62.8243232 | 69.1349434 | 75.5666434 | 65.6321585 |
| 18:23:31 | 0:23:00 | 70.8197433 | 62.8243232 | 69.1349434 | 75.5666434 | 65.6321585 |
| 18:23:32 | 0:23:01 | 73.8197433 | 60.8243232 | 65.1349434 | 76.5666434 | 65.6321585 |
| 18:23:33 | 0:23:02 | 76.8197433 | 57.8243232 | 61.1349434 | 76.5666434 | 66.6321585 |
| 18:23:34 | 0:23:03 | 77.8197433 | 56.8243232 | 60.1349434 | 76.5666434 | 66.6321585 |
| 18:23:35 | 0:23:04 | 77.8197433 | 56.8243232 | 60.1349434 | 76.5666434 | 66.6321585 |
| 18:23:36 | 0:23:05 | 78.8197433 | 55.8243232 | 62.1349434 | 76.5666434 | 67.6321585 |
| 18:23:37 | 0:23:06 | 81.8197433 | 54.8243232 | 67.1349434 | 76.5666434 | 67.6321585 |
| 18:23:38 | 0:23:07 | 84.8197433 | 55.8243232 | 73.1349434 | 76.5666434 | 66.6321585 |
| 18:23:39 | 0:23:08 | 84.8197433 | 55.8243232 | 77.1349434 | 75.5666434 | 66.6321585 |
| 18:23:40 | 0:23:09 | 79.8197433 | 57.8243232 | 77.1349434 | 74.5666434 | 66.6321585 |
| 18:23:41 | 0:23:10 | 72.8197433 | 58.8243232 | 78.1349434 | 74.5666434 | 65.6321585 |
| 18:23:42 | 0:23:11 | 68.8197433 | 57.8243232 | 75.1349434 | 72.5666434 | 66.6321585 |

|          |         |            |            |            |            |            |
|----------|---------|------------|------------|------------|------------|------------|
| 18:23:43 | 0:23:12 | 66.8197433 | 57.8243232 | 71.1349434 | 70.5666434 | 80.6321585 |
| 18:23:44 | 0:23:13 | 65.8197433 | 57.8243232 | 67.1349434 | 68.5666434 | 68.3316747 |
| 18:23:45 | 0:23:14 | 64.8197433 | 57.8243232 | 66.1349434 | 68.5666434 | 68.6953111 |
| 18:23:46 | 0:23:15 | 63.8197433 | 57.8243232 | 66.1349434 | 64.5666434 | 68.4225838 |
| 18:23:47 | 0:23:16 | 62.8197433 | 58.8243232 | 68.1349434 | 64.5666434 | 69.0589474 |
| 18:23:48 | 0:23:17 | 62.8197433 | 59.8243232 | 67.1349434 | 63.5666434 | 67.9680384 |
| 18:23:49 | 0:23:18 | 62.8197433 | 59.8243232 | 67.1349434 | 63.5666434 | 68.2407656 |
| 18:23:50 | 0:23:19 | 61.8197433 | 59.8243232 | 65.1349434 | 63.5666434 | 68.0589474 |
| 18:23:51 | 0:23:20 | 61.8197433 | 59.8243232 | 64.1349434 | 63.5666434 | 67.7862202 |
| 18:23:52 | 0:23:21 | 61.8197433 | 59.8243232 | 64.1349434 | 63.5666434 | 67.5134929 |
| 18:23:53 | 0:23:22 | 61.8197433 | 59.8243232 | 64.1349434 | 64.5666434 | 67.2407656 |
| 18:23:54 | 0:23:23 | 61.8197433 | 59.8243232 | 65.1349434 | 64.5666434 | 67.1498565 |
| 18:23:55 | 0:23:24 | 61.8197433 | 59.8243232 | 72.1349434 | 64.5666434 | 67.8771293 |
| 18:23:56 | 0:23:25 | 61.8197433 | 59.8243232 | 76.1349434 | 65.5666434 | 68.3316747 |
| 18:23:57 | 0:23:26 | 61.8197433 | 61.8243232 | 77.1349434 | 66.5666434 | 68.7862202 |
| 18:23:58 | 0:23:27 | 61.8197433 | 64.8243232 | 78.1349434 | 66.5666434 | 69.3316747 |
| 18:23:59 | 0:23:28 | 61.8197433 | 64.8243232 | 77.1349434 | 66.5666434 | 69.5134929 |
| 18:24:00 | 0:23:29 | 61.8197433 | 68.8243232 | 77.1349434 | 66.5666434 | 69.9680384 |
| 18:24:01 | 0:23:30 | 61.8197433 | 71.8243232 | 70.1349434 | 67.5666434 | 69.6953111 |
| 18:24:02 | 0:23:31 | 61.8197433 | 71.8243232 | 62.1349434 | 66.5666434 | 68.7862202 |
| 18:24:03 | 0:23:32 | 61.8197433 | 74.8243232 | 59.1349434 | 66.5666434 | 68.6953111 |
| 18:24:04 | 0:23:33 | 61.8197433 | 74.8243232 | 59.1349434 | 66.5666434 | 68.7862202 |
| 18:24:05 | 0:23:34 | 61.8197433 | 74.8243232 | 61.1349434 | 66.5666434 | 68.3316747 |
| 18:24:06 | 0:23:35 | 61.8197433 | 74.8243232 | 61.1349434 | 64.5666434 | 68.1498565 |
| 18:24:07 | 0:23:36 | 61.8197433 | 74.8243232 | 61.1349434 | 64.5666434 | 68.2407656 |
| 18:24:08 | 0:23:37 | 61.8197433 | 73.8243232 | 60.1349434 | 63.5666434 | 67.9680384 |
| 18:24:09 | 0:23:38 | 61.8197433 | 72.8243232 | 58.1349434 | 61.5666434 | 67.5134929 |
| 18:24:10 | 0:23:39 | 61.8197433 | 72.8243232 | 56.1349434 | 60.5666434 | 67.3316747 |
| 18:24:11 | 0:23:40 | 61.8197433 | 72.8243232 | 54.1349434 | 60.5666434 | 67.3316747 |
| 18:24:12 | 0:23:41 | 61.8197433 | 72.8243232 | 53.1349434 | 60.5666434 | 67.6953111 |
| 18:24:13 | 0:23:42 | 61.8197433 | 72.8243232 | 53.1349434 | 60.5666434 | 68.1498565 |
| 18:24:14 | 0:23:43 | 61.8197433 | 72.8243232 | 55.1349434 | 58.5666434 | 68.2407656 |
| 18:24:15 | 0:23:44 | 61.8197433 | 72.8243232 | 56.1349434 | 59.5666434 | 68.7862202 |
| 18:24:16 | 0:23:45 | 61.8197433 | 70.8243232 | 56.1349434 | 59.5666434 | 69.0589474 |
| 18:24:17 | 0:23:46 | 61.8197433 | 70.8243232 | 61.1349434 | 59.5666434 | 69.3316747 |
| 18:24:18 | 0:23:47 | 61.8197433 | 70.8243232 | 61.1349434 | 59.5666434 | 70.3081779 |
| 18:24:19 | 0:23:48 | 61.8197433 | 70.8243232 | 65.1349434 | 59.5666434 | 69.3656986 |
| 18:24:20 | 0:23:49 | 61.8197433 | 68.8243232 | 65.1349434 | 60.5666434 | 69.4225838 |
| 18:24:21 | 0:23:50 | 61.8197433 | 67.8243232 | 62.1349434 | 61.5666434 | 69.3316747 |
| 18:24:22 | 0:23:51 | 61.8197433 | 66.8243232 | 59.1349434 | 62.5666434 | 69.3316747 |
| 18:24:23 | 0:23:52 | 61.8197433 | 66.8243232 | 59.1349434 | 62.5666434 | 69.6953111 |
| 18:24:24 | 0:23:53 | 61.8197433 | 66.8243232 | 59.1349434 | 62.5666434 | 69.9680384 |
| 18:24:25 | 0:23:54 | 61.8197433 | 66.8243232 | 61.1349434 | 63.5666434 | 70.1498565 |
| 18:24:26 | 0:23:55 | 61.8197433 | 66.8243232 | 61.1349434 | 63.5666434 | 70.5134929 |
| 18:24:27 | 0:23:56 | 62.8197433 | 66.8243232 | 62.1349434 | 63.5666434 | 70.4225838 |

|          |         |            |            |            |            |            |
|----------|---------|------------|------------|------------|------------|------------|
| 18:24:28 | 0:23:57 | 62.8197433 | 63.8243232 | 63.1349434 | 67.5666434 | 70.604402  |
| 18:24:29 | 0:23:58 | 62.8197433 | 62.8243232 | 64.1349434 | 68.5666434 | 70.5134929 |
| 18:24:30 | 0:23:59 | 62.8197433 | 62.8243232 | 63.1349434 | 68.5666434 | 70.6953111 |
| 18:24:31 | 0:24:00 | 62.8197433 | 62.8243232 | 62.1349434 | 69.5666434 | 70.7862202 |
| 18:24:32 | 0:24:01 | 62.8197433 | 63.8243232 | 59.1349434 | 73.5666434 | 70.8771293 |
| 18:24:33 | 0:24:02 | 62.8197433 | 63.8243232 | 58.1349434 | 76.5666434 | 71.0589474 |
| 18:24:34 | 0:24:03 | 62.8197433 | 63.8243232 | 58.1349434 | 76.5666434 | 87.6321585 |
| 18:24:35 | 0:24:04 | 62.8197433 | 63.8243232 | 59.1349434 | 77.5666434 | 79.6321585 |
| 18:24:36 | 0:24:05 | 61.8197433 | 63.8243232 | 59.1349434 | 74.5666434 | 79.6321585 |
| 18:24:37 | 0:24:06 | 61.8197433 | 62.8243232 | 64.1349434 | 71.5666434 | 79.6321585 |
| 18:24:38 | 0:24:07 | 61.8197433 | 62.8243232 | 66.1349434 | 71.5666434 | 76.6321585 |
| 18:24:39 | 0:24:08 | 62.8197433 | 62.8243232 | 68.1349434 | 68.5666434 | 69.6321585 |
| 18:24:40 | 0:24:09 | 62.8197433 | 61.8243232 | 68.1349434 | 68.5666434 | 68.6321585 |
| 18:24:41 | 0:24:10 | 62.8197433 | 61.8243232 | 67.1349434 | 68.5666434 | 68.6321585 |
| 18:24:42 | 0:24:11 | 62.8197433 | 62.8243232 | 64.1349434 | 68.5666434 | 68.6321585 |
| 18:24:43 | 0:24:12 | 62.8197433 | 63.8243232 | 62.1349434 | 68.5666434 | 68.6321585 |
| 18:24:44 | 0:24:13 | 61.8197433 | 63.8243232 | 62.1349434 | 68.5666434 | 68.6321585 |
| 18:24:45 | 0:24:14 | 61.8197433 | 63.8243232 | 64.1349434 | 67.5666434 | 65.6321585 |
| 18:24:46 | 0:24:15 | 62.8197433 | 63.8243232 | 66.1349434 | 67.5666434 | 62.6321585 |
| 18:24:47 | 0:24:16 | 62.8197433 | 61.8243232 | 66.1349434 | 66.5666434 | 61.6321585 |
| 18:24:48 | 0:24:17 | 62.8197433 | 60.8243232 | 66.1349434 | 64.5666434 | 60.6321585 |
| 18:24:49 | 0:24:18 | 62.8197433 | 60.8243232 | 65.1349434 | 63.5666434 | 60.6321585 |
| 18:24:50 | 0:24:19 | 62.8197433 | 59.8243232 | 64.1349434 | 62.5666434 | 60.6321585 |
| 18:24:51 | 0:24:20 | 62.8197433 | 58.8243232 | 62.1349434 | 61.5666434 | 60.6321585 |
| 18:24:52 | 0:24:21 | 61.8197433 | 58.8243232 | 62.1349434 | 61.5666434 | 58.6321585 |
| 18:24:53 | 0:24:22 | 61.8197433 | 58.8243232 | 62.1349434 | 61.5666434 | 57.6321585 |
| 18:24:54 | 0:24:23 | 61.8197433 | 57.8243232 | 62.1349434 | 61.5666434 | 57.6321585 |
| 18:24:55 | 0:24:24 | 61.8197433 | 57.8243232 | 65.1349434 | 60.5666434 | 58.6321585 |
| 18:24:56 | 0:24:25 | 61.8197433 | 55.8243232 | 65.1349434 | 61.5666434 | 59.6321585 |
| 18:24:57 | 0:24:26 | 61.8197433 | 55.8243232 | 65.1349434 | 62.5666434 | 60.6321585 |
| 18:24:58 | 0:24:27 | 61.8197433 | 54.8243232 | 67.1349434 | 63.5666434 | 60.6321585 |
| 18:24:59 | 0:24:28 | 61.8197433 | 54.8243232 | 67.1349434 | 63.5666434 | 60.6321585 |
| 18:25:00 | 0:24:29 | 61.8197433 | 54.8243232 | 68.1349434 | 63.5666434 | 61.6321585 |
| 18:25:01 | 0:24:30 | 61.8197433 | 54.8243232 | 68.1349434 | 63.5666434 | 61.6321585 |
| 18:25:02 | 0:24:31 | 61.8197433 | 57.8243232 | 68.1349434 | 64.5666434 | 61.6321585 |
| 18:25:03 | 0:24:32 | 62.8197433 | 58.8243232 | 71.1349434 | 65.5666434 | 61.6321585 |
| 18:25:04 | 0:24:33 | 62.8197433 | 58.8243232 | 73.1349434 | 65.5666434 | 62.6321585 |
| 18:25:05 | 0:24:34 | 62.8197433 | 58.8243232 | 74.1349434 | 65.5666434 | 62.6321585 |
| 18:25:06 | 0:24:35 | 62.8197433 | 57.8243232 | 74.1349434 | 65.5666434 | 63.6321585 |
| 18:25:07 | 0:24:36 | 62.8197433 | 56.8243232 | 74.1349434 | 67.5666434 | 63.6321585 |
| 18:25:08 | 0:24:37 | 62.8197433 | 56.8243232 | 71.1349434 | 67.5666434 | 63.6321585 |
| 18:25:09 | 0:24:38 | 62.8197433 | 56.8243232 | 67.1349434 | 67.5666434 | 66.6321585 |
| 18:25:10 | 0:24:39 | 62.8197433 | 56.8243232 | 64.1349434 | 67.5666434 | 69.6321585 |
| 18:25:11 | 0:24:40 | 62.8197433 | 59.8243232 | 64.1349434 | 67.5666434 | 70.6321585 |
| 18:25:12 | 0:24:41 | 62.8197433 | 59.8243232 | 64.1349434 | 67.5666434 | 70.6321585 |

|          |         |            |            |            |            |            |
|----------|---------|------------|------------|------------|------------|------------|
| 18:25:13 | 0:24:42 | 62.8197433 | 61.8243232 | 64.1349434 | 68.5666434 | 74.6321585 |
| 18:25:14 | 0:24:43 | 62.8197433 | 61.8243232 | 64.1349434 | 68.5666434 | 75.6321585 |
| 18:25:15 | 0:24:44 | 63.8197433 | 62.8243232 | 68.1349434 | 68.5666434 | 75.6321585 |
| 18:25:16 | 0:24:45 | 63.8197433 | 62.8243232 | 68.1349434 | 67.5666434 | 73.6321585 |
| 18:25:17 | 0:24:46 | 64.8197433 | 63.8243232 | 71.1349434 | 67.5666434 | 71.6321585 |
| 18:25:18 | 0:24:47 | 65.8197433 | 65.8243232 | 72.1349434 | 67.5666434 | 71.6321585 |
| 18:25:19 | 0:24:48 | 69.8197433 | 65.8243232 | 72.1349434 | 67.5666434 | 71.6321585 |
| 18:25:20 | 0:24:49 | 71.8197433 | 65.8243232 | 72.1349434 | 62.5666434 | 70.6321585 |
| 18:25:21 | 0:24:50 | 72.8197433 | 65.8243232 | 72.1349434 | 61.5666434 | 71.6321585 |
| 18:25:22 | 0:24:51 | 73.8197433 | 65.8243232 | 77.1349434 | 61.5666434 | 71.6321585 |
| 18:25:23 | 0:24:52 | 74.8197433 | 66.8243232 | 79.1349434 | 61.5666434 | 71.6321585 |
| 18:25:24 | 0:24:53 | 76.8197433 | 66.8243232 | 79.1349434 | 61.5666434 | 71.6321585 |
| 18:25:25 | 0:24:54 | 78.8197433 | 68.8243232 | 79.1349434 | 62.5666434 | 71.6321585 |
| 18:25:26 | 0:24:55 | 79.8197433 | 69.8243232 | 78.1349434 | 63.5666434 | 69.6321585 |
| 18:25:27 | 0:24:56 | 79.8197433 | 69.8243232 | 74.1349434 | 63.5666434 | 66.6321585 |
| 18:25:28 | 0:24:57 | 79.8197433 | 72.8243232 | 69.1349434 | 59.5666434 | 66.6321585 |
| 18:25:29 | 0:24:58 | 79.8197433 | 72.8243232 | 66.1349434 | 59.5666434 | 67.6321585 |
| 18:25:30 | 0:24:59 | 79.8197433 | 67.8243232 | 65.1349434 | 60.5666434 | 67.6321585 |
| 18:25:31 | 0:25:00 | 79.8197433 | 66.8243232 | 63.1349434 | 60.5666434 | 67.6321585 |
| 18:25:32 | 0:25:01 | 79.8197433 | 64.8243232 | 61.1349434 | 62.5666434 | 67.6321585 |
| 18:25:33 | 0:25:02 | 80.8197433 | 65.8243232 | 59.1349434 | 63.5666434 | 67.6321585 |
| 18:25:34 | 0:25:03 | 81.8197433 | 70.8243232 | 57.1349434 | 63.5666434 | 67.6321585 |
| 18:25:35 | 0:25:04 | 81.8197433 | 70.8243232 | 57.1349434 | 63.5666434 | 67.6321585 |
| 18:25:36 | 0:25:05 | 82.8197433 | 71.8243232 | 54.1349434 | 63.5666434 | 66.6321585 |
| 18:25:37 | 0:25:06 | 82.8197433 | 71.8243232 | 54.1349434 | 64.5666434 | 65.6321585 |
| 18:25:38 | 0:25:07 | 84.8197433 | 71.8243232 | 54.1349434 | 64.5666434 | 65.6321585 |
| 18:25:39 | 0:25:08 | 86.8197433 | 71.8243232 | 54.1349434 | 64.5666434 | 65.6321585 |
| 18:25:40 | 0:25:09 | 86.8197433 | 71.8243232 | 54.1349434 | 64.5666434 | 65.6321585 |
| 18:25:41 | 0:25:10 | 87.8197433 | 71.8243232 | 55.1349434 | 65.5666434 | 64.6321585 |
| 18:25:42 | 0:25:11 | 70.6953111 | 72.8243232 | 55.1349434 | 66.5666434 | 63.6321585 |
| 18:25:43 | 0:25:12 | 70.1498565 | 72.8243232 | 55.1349434 | 65.5666434 | 63.6321585 |
| 18:25:44 | 0:25:13 | 69.1498565 | 73.8243232 | 56.1349434 | 64.5666434 | 63.6321585 |
| 18:25:45 | 0:25:14 | 69.1498565 | 73.8243232 | 56.1349434 | 64.5666434 | 63.6321585 |
| 18:25:46 | 0:25:15 | 69.0589474 | 73.8243232 | 56.1349434 | 64.5666434 | 62.6321585 |
| 18:25:47 | 0:25:16 | 69.1498565 | 73.8243232 | 57.1349434 | 65.5666434 | 62.6321585 |
| 18:25:48 | 0:25:17 | 69.0589474 | 73.8243232 | 60.1349434 | 66.5666434 | 62.6321585 |
| 18:25:49 | 0:25:18 | 69.5134929 | 74.8243232 | 62.1349434 | 68.5666434 | 62.6321585 |
| 18:25:50 | 0:25:19 | 81.8197433 | 74.8243232 | 63.1349434 | 70.5666434 | 62.6321585 |
| 18:25:51 | 0:25:20 | 79.8197433 | 74.8243232 | 65.1349434 | 70.5666434 | 63.6321585 |
| 18:25:52 | 0:25:21 | 78.8197433 | 64.8243232 | 65.1349434 | 72.5666434 | 63.6321585 |
| 18:25:53 | 0:25:22 | 78.8197433 | 61.8243232 | 65.1349434 | 77.5666434 | 63.6321585 |
| 18:25:54 | 0:25:23 | 78.8197433 | 60.8243232 | 66.1349434 | 79.5666434 | 64.6321585 |
| 18:25:55 | 0:25:24 | 78.8197433 | 59.8243232 | 66.1349434 | 83.5666434 | 64.6321585 |
| 18:25:56 | 0:25:25 | 78.8197433 | 59.8243232 | 67.1349434 | 85.5666434 | 64.6321585 |
| 18:25:57 | 0:25:26 | 79.8197433 | 58.8243232 | 67.1349434 | 85.5666434 | 65.6321585 |

|          |         |            |            |            |            |            |
|----------|---------|------------|------------|------------|------------|------------|
| 18:25:58 | 0:25:27 | 84.8197433 | 58.8243232 | 70.1349434 | 70.2407656 | 65.6321585 |
| 18:25:59 | 0:25:28 | 84.8197433 | 58.8243232 | 72.1349434 | 70.3316747 | 65.6321585 |
| 18:26:00 | 0:25:29 | 86.8197433 | 58.8243232 | 73.1349434 | 88.5666434 | 68.6321585 |
| 18:26:01 | 0:25:30 | 87.8197433 | 58.8243232 | 73.1349434 | 88.5666434 | 69.6321585 |
| 18:26:02 | 0:25:31 | 84.8197433 | 58.8243232 | 72.1349434 | 88.5666434 | 69.6321585 |
| 18:26:03 | 0:25:32 | 83.8197433 | 58.8243232 | 67.1349434 | 69.9680384 | 68.6321585 |
| 18:26:04 | 0:25:33 | 83.8197433 | 58.8243232 | 67.1349434 | 69.5134929 | 66.6321585 |
| 18:26:05 | 0:25:34 | 83.8197433 | 58.8243232 | 65.1349434 | 69.2407656 | 64.6321585 |
| 18:26:06 | 0:25:35 | 83.8197433 | 58.8243232 | 65.1349434 | 67.3081779 | 64.6321585 |
| 18:26:07 | 0:25:36 | 78.8197433 | 58.8243232 | 68.1349434 | 68.8771293 | 64.6321585 |
| 18:26:08 | 0:25:37 | 76.8197433 | 58.8243232 | 68.1349434 | 69.0589474 | 64.6321585 |
| 18:26:09 | 0:25:38 | 75.8197433 | 58.8243232 | 66.1349434 | 69.2407656 | 65.6321585 |
| 18:26:10 | 0:25:39 | 75.8197433 | 58.8243232 | 64.1349434 | 69.5134929 | 66.6321585 |
| 18:26:11 | 0:25:40 | 75.8197433 | 58.8243232 | 63.1349434 | 69.4225838 | 67.6321585 |
| 18:26:12 | 0:25:41 | 75.8197433 | 58.8243232 | 63.1349434 | 69.6953111 | 69.6321585 |
| 18:26:13 | 0:25:42 | 75.8197433 | 58.8243232 | 63.1349434 | 69.8771293 | 69.6321585 |
| 18:26:14 | 0:25:43 | 75.8197433 | 58.8243232 | 63.1349434 | 69.6953111 | 70.6321585 |
| 18:26:15 | 0:25:44 | 74.8197433 | 58.8243232 | 63.1349434 | 69.7862202 | 72.6321585 |
| 18:26:16 | 0:25:45 | 69.8197433 | 58.8243232 | 64.1349434 | 86.5666434 | 72.6321585 |
| 18:26:17 | 0:25:46 | 65.8197433 | 58.8243232 | 64.1349434 | 85.5666434 | 72.6321585 |
| 18:26:18 | 0:25:47 | 63.8197433 | 58.8243232 | 64.1349434 | 85.5666434 | 73.6321585 |
| 18:26:19 | 0:25:48 | 62.8197433 | 58.8243232 | 64.1349434 | 85.5666434 | 74.6321585 |
| 18:26:20 | 0:25:49 | 62.8197433 | 58.8243232 | 64.1349434 | 73.5666434 | 74.6321585 |
| 18:26:21 | 0:25:50 | 62.8197433 | 59.8243232 | 64.1349434 | 69.5666434 | 74.6321585 |
| 18:26:22 | 0:25:51 | 62.8197433 | 60.8243232 | 64.1349434 | 69.5666434 | 73.6321585 |
| 18:26:23 | 0:25:52 | 62.8197433 | 61.8243232 | 61.1349434 | 68.5666434 | 66.6321585 |
| 18:26:24 | 0:25:53 | 62.8197433 | 62.8243232 | 60.1349434 | 67.5666434 | 64.6321585 |
| 18:26:25 | 0:25:54 | 63.8197433 | 62.8243232 | 59.1349434 | 66.5666434 | 64.6321585 |
| 18:26:26 | 0:25:55 | 63.8197433 | 66.8243232 | 57.1349434 | 66.5666434 | 64.6321585 |
| 18:26:27 | 0:25:56 | 64.8197433 | 67.8243232 | 57.1349434 | 66.5666434 | 64.6321585 |
| 18:26:28 | 0:25:57 | 65.8197433 | 68.8243232 | 58.1349434 | 66.5666434 | 64.6321585 |
| 18:26:29 | 0:25:58 | 65.8197433 | 70.8243232 | 58.1349434 | 66.5666434 | 64.6321585 |
| 18:26:30 | 0:25:59 | 68.8197433 | 72.8243232 | 64.1349434 | 67.5666434 | 64.6321585 |
| 18:26:31 | 0:26:00 | 69.8197433 | 72.8243232 | 64.1349434 | 67.5666434 | 64.6321585 |
| 18:26:32 | 0:26:01 | 71.8197433 | 74.8243232 | 69.1349434 | 67.5666434 | 64.6321585 |
| 18:26:33 | 0:26:02 | 71.8197433 | 76.8243232 | 70.1349434 | 65.5666434 | 63.6321585 |
| 18:26:34 | 0:26:03 | 72.8197433 | 76.8243232 | 70.1349434 | 65.5666434 | 63.6321585 |
| 18:26:35 | 0:26:04 | 74.8197433 | 77.8243232 | 65.1349434 | 65.5666434 | 64.6321585 |
| 18:26:36 | 0:26:05 | 76.8197433 | 77.8243232 | 64.1349434 | 64.5666434 | 64.6321585 |
| 18:26:37 | 0:26:06 | 77.8197433 | 77.8243232 | 64.1349434 | 64.5666434 | 64.6321585 |
| 18:26:38 | 0:26:07 | 74.8197433 | 77.8243232 | 64.1349434 | 64.5666434 | 64.6321585 |
| 18:26:39 | 0:26:08 | 69.8197433 | 77.8243232 | 64.1349434 | 64.5666434 | 66.6321585 |
| 18:26:40 | 0:26:09 | 66.8197433 | 77.8243232 | 61.1349434 | 65.5666434 | 64.6321585 |
| 18:26:41 | 0:26:10 | 64.8197433 | 77.8243232 | 61.1349434 | 68.5666434 | 64.6321585 |
| 18:26:42 | 0:26:11 | 64.8197433 | 77.8243232 | 64.1349434 | 69.5666434 | 63.6321585 |

|          |         |            |            |            |            |            |
|----------|---------|------------|------------|------------|------------|------------|
| 18:26:43 | 0:26:12 | 63.8197433 | 77.8243232 | 68.1349434 | 70.5666434 | 63.6321585 |
| 18:26:44 | 0:26:13 | 64.8197433 | 77.8243232 | 70.1349434 | 70.5666434 | 62.6321585 |
| 18:26:45 | 0:26:14 | 64.8197433 | 79.8243232 | 70.1349434 | 70.5666434 | 63.6321585 |
| 18:26:46 | 0:26:15 | 63.8197433 | 81.8243232 | 70.1349434 | 71.5666434 | 63.6321585 |
| 18:26:47 | 0:26:16 | 63.8197433 | 83.8243232 | 70.1349434 | 71.5666434 | 63.6321585 |
| 18:26:48 | 0:26:17 | 63.8197433 | 84.8243232 | 70.1349434 | 71.5666434 | 63.6321585 |
| 18:26:49 | 0:26:18 | 64.8197433 | 84.8243232 | 69.1349434 | 74.5666434 | 63.6321585 |
| 18:26:50 | 0:26:19 | 65.8197433 | 83.8243232 | 68.1349434 | 74.5666434 | 63.6321585 |
| 18:26:51 | 0:26:20 | 66.8197433 | 76.8243232 | 68.1349434 | 74.5666434 | 63.6321585 |
| 18:26:52 | 0:26:21 | 67.8197433 | 74.8243232 | 68.1349434 | 72.5666434 | 63.6321585 |
| 18:26:53 | 0:26:22 | 68.8197433 | 73.8243232 | 68.1349434 | 71.5666434 | 64.6321585 |
| 18:26:54 | 0:26:23 | 68.8197433 | 73.8243232 | 68.1349434 | 63.5666434 | 64.6321585 |
| 18:26:55 | 0:26:24 | 70.8197433 | 73.8243232 | 66.1349434 | 60.5666434 | 64.6321585 |
| 18:26:56 | 0:26:25 | 67.8197433 | 73.8243232 | 66.1349434 | 61.5666434 | 64.6321585 |
| 18:26:57 | 0:26:26 | 64.8197433 | 73.8243232 | 66.1349434 | 61.5666434 | 65.6321585 |
| 18:26:58 | 0:26:27 | 63.8197433 | 73.8243232 | 66.1349434 | 65.5666434 | 64.6321585 |
| 18:26:59 | 0:26:28 | 62.8197433 | 69.8243232 | 64.1349434 | 66.5666434 | 64.6321585 |
| 18:27:00 | 0:26:29 | 62.8197433 | 69.8243232 | 64.1349434 | 66.5666434 | 64.6321585 |
| 18:27:01 | 0:26:30 | 62.8197433 | 61.8243232 | 63.1349434 | 67.5666434 | 64.6321585 |
| 18:27:02 | 0:26:31 | 63.8197433 | 61.8243232 | 63.1349434 | 67.5666434 | 64.6321585 |
| 18:27:03 | 0:26:32 | 62.8197433 | 61.8243232 | 64.1349434 | 66.5666434 | 64.6321585 |
| 18:27:04 | 0:26:33 | 61.8197433 | 61.8243232 | 64.1349434 | 66.5666434 | 64.6321585 |
| 18:27:05 | 0:26:34 | 61.8197433 | 60.8243232 | 64.1349434 | 66.5666434 | 64.6321585 |
| 18:27:06 | 0:26:35 | 61.8197433 | 60.8243232 | 64.1349434 | 63.5666434 | 64.6321585 |
| 18:27:07 | 0:26:36 | 61.8197433 | 56.8243232 | 64.1349434 | 63.5666434 | 63.6321585 |
| 18:27:08 | 0:26:37 | 60.8197433 | 54.8243232 | 64.1349434 | 63.5666434 | 64.6321585 |
| 18:27:09 | 0:26:38 | 60.8197433 | 53.8243232 | 65.1349434 | 63.5666434 | 64.6321585 |
| 18:27:10 | 0:26:39 | 60.8197433 | 53.8243232 | 66.1349434 | 63.5666434 | 65.6321585 |
| 18:27:11 | 0:26:40 | 60.8197433 | 53.8243232 | 66.1349434 | 62.5666434 | 65.6321585 |
| 18:27:12 | 0:26:41 | 60.8197433 | 52.8243232 | 66.1349434 | 62.5666434 | 66.6321585 |
| 18:27:13 | 0:26:42 | 60.8197433 | 52.8243232 | 66.1349434 | 62.5666434 | 67.6321585 |
| 18:27:14 | 0:26:43 | 59.8197433 | 52.8243232 | 66.1349434 | 61.5666434 | 66.6321585 |
| 18:27:15 | 0:26:44 | 59.8197433 | 53.8243232 | 67.1349434 | 61.5666434 | 66.6321585 |
| 18:27:16 | 0:26:45 | 59.8197433 | 54.8243232 | 69.1349434 | 61.5666434 | 65.6321585 |
| 18:27:17 | 0:26:46 | 59.8197433 | 54.8243232 | 70.1349434 | 63.5666434 | 63.6321585 |
| 18:27:18 | 0:26:47 | 59.8197433 | 53.8243232 | 70.1349434 | 63.5666434 | 62.6321585 |
| 18:27:19 | 0:26:48 | 59.8197433 | 53.8243232 | 69.1349434 | 64.5666434 | 62.6321585 |
| 18:27:20 | 0:26:49 | 59.8197433 | 53.8243232 | 69.1349434 | 65.5666434 | 63.6321585 |
| 18:27:21 | 0:26:50 | 59.8197433 | 53.8243232 | 70.1349434 | 65.5666434 | 63.6321585 |
| 18:27:22 | 0:26:51 | 60.8197433 | 53.8243232 | 70.1349434 | 65.5666434 | 63.6321585 |
| 18:27:23 | 0:26:52 | 61.8197433 | 54.8243232 | 70.1349434 | 65.5666434 | 63.6321585 |
| 18:27:24 | 0:26:53 | 62.8197433 | 55.8243232 | 70.1349434 | 65.5666434 | 63.6321585 |
| 18:27:25 | 0:26:54 | 61.8197433 | 55.8243232 | 70.1349434 | 63.5666434 | 63.6321585 |
| 18:27:26 | 0:26:55 | 61.8197433 | 57.8243232 | 70.1349434 | 60.5666434 | 63.6321585 |
| 18:27:27 | 0:26:56 | 61.8197433 | 56.8243232 | 70.1349434 | 60.5666434 | 63.6321585 |

|          |         |            |            |            |            |            |
|----------|---------|------------|------------|------------|------------|------------|
| 18:27:28 | 0:26:57 | 61.8197433 | 56.8243232 | 68.1349434 | 59.5666434 | 63.6321585 |
| 18:27:29 | 0:26:58 | 60.8197433 | 56.8243232 | 68.1349434 | 59.5666434 | 63.6321585 |
| 18:27:30 | 0:26:59 | 61.8197433 | 55.8243232 | 67.1349434 | 58.5666434 | 63.6321585 |
| 18:27:31 | 0:27:00 | 61.8197433 | 54.8243232 | 64.1349434 | 58.5666434 | 63.6321585 |
| 18:27:32 | 0:27:01 | 63.8197433 | 54.8243232 | 64.1349434 | 58.5666434 | 63.6321585 |
| 18:27:33 | 0:27:02 | 65.8197433 | 55.8243232 | 64.1349434 | 58.5666434 | 64.6321585 |
| 18:27:34 | 0:27:03 | 68.8197433 | 56.8243232 | 68.1349434 | 58.5666434 | 64.6321585 |
| 18:27:35 | 0:27:04 | 70.8197433 | 56.8243232 | 67.1349434 | 60.5666434 | 65.6321585 |
| 18:27:36 | 0:27:05 | 70.8197433 | 58.8243232 | 64.1349434 | 60.5666434 | 66.6321585 |
| 18:27:37 | 0:27:06 | 70.8197433 | 60.8243232 | 62.1349434 | 61.5666434 | 68.6321585 |
| 18:27:38 | 0:27:07 | 70.8197433 | 61.8243232 | 61.1349434 | 62.5666434 | 69.6321585 |
| 18:27:39 | 0:27:08 | 70.8197433 | 61.8243232 | 60.1349434 | 62.5666434 | 69.6321585 |
| 18:27:40 | 0:27:09 | 70.8197433 | 61.8243232 | 60.1349434 | 62.5666434 | 68.6321585 |
| 18:27:41 | 0:27:10 | 70.8197433 | 62.8243232 | 60.1349434 | 61.5666434 | 68.6321585 |
| 18:27:42 | 0:27:11 | 71.8197433 | 63.8243232 | 60.1349434 | 60.5666434 | 68.6321585 |
| 18:27:43 | 0:27:12 | 72.8197433 | 65.8243232 | 59.1349434 | 60.5666434 | 68.6321585 |
| 18:27:44 | 0:27:13 | 73.8197433 | 65.8243232 | 59.1349434 | 60.5666434 | 67.6321585 |
| 18:27:45 | 0:27:14 | 75.8197433 | 68.8243232 | 59.1349434 | 60.5666434 | 67.6321585 |
| 18:27:46 | 0:27:15 | 75.8197433 | 68.8243232 | 59.1349434 | 59.5666434 | 67.6321585 |
| 18:27:47 | 0:27:16 | 75.8197433 | 68.8243232 | 59.1349434 | 60.5666434 | 67.6321585 |
| 18:27:48 | 0:27:17 | 74.8197433 | 69.8243232 | 59.1349434 | 60.5666434 | 66.6321585 |
| 18:27:49 | 0:27:18 | 72.8197433 | 69.8243232 | 59.1349434 | 60.5666434 | 66.6321585 |
| 18:27:50 | 0:27:19 | 70.8197433 | 69.8243232 | 64.1349434 | 68.5666434 | 66.6321585 |
| 18:27:51 | 0:27:20 | 68.8197433 | 69.8243232 | 66.1349434 | 69.5666434 | 65.6321585 |
| 18:27:52 | 0:27:21 | 66.8197433 | 70.8243232 | 65.1349434 | 69.5666434 | 65.6321585 |
| 18:27:53 | 0:27:22 | 65.8197433 | 70.8243232 | 65.1349434 | 69.5666434 | 65.6321585 |
| 18:27:54 | 0:27:23 | 65.8197433 | 70.8243232 | 65.1349434 | 69.5666434 | 65.6321585 |
| 18:27:55 | 0:27:24 | 66.8197433 | 65.8243232 | 63.1349434 | 70.5666434 | 64.6321585 |
| 18:27:56 | 0:27:25 | 65.8197433 | 65.8243232 | 64.1349434 | 70.5666434 | 65.6321585 |
| 18:27:57 | 0:27:26 | 65.8197433 | 65.8243232 | 66.1349434 | 68.5666434 | 67.6321585 |
| 18:27:58 | 0:27:27 | 63.8197433 | 65.8243232 | 68.1349434 | 68.5666434 | 67.6321585 |
| 18:27:59 | 0:27:28 | 62.8197433 | 65.8243232 | 70.1349434 | 60.5666434 | 67.6321585 |
| 18:28:00 | 0:27:29 | 61.8197433 | 65.8243232 | 71.1349434 | 55.5666434 | 67.6321585 |
| 18:28:01 | 0:27:30 | 61.8197433 | 65.8243232 | 70.1349434 | 55.5666434 | 68.6321585 |
| 18:28:02 | 0:27:31 | 61.8197433 | 65.8243232 | 68.1349434 | 55.5666434 | 68.6321585 |
| 18:28:03 | 0:27:32 | 61.8197433 | 65.8243232 | 67.1349434 | 55.5666434 | 69.6321585 |
| 18:28:04 | 0:27:33 | 61.8197433 | 65.8243232 | 67.1349434 | 55.5666434 | 69.6321585 |
| 18:28:05 | 0:27:34 | 60.8197433 | 65.8243232 | 67.1349434 | 55.5666434 | 71.6321585 |
| 18:28:06 | 0:27:35 | 60.8197433 | 65.8243232 | 67.1349434 | 55.5666434 | 71.6321585 |
| 18:28:07 | 0:27:36 | 60.8197433 | 65.8243232 | 67.1349434 | 56.5666434 | 71.6321585 |
| 18:28:08 | 0:27:37 | 60.8197433 | 66.8243232 | 66.1349434 | 56.5666434 | 70.6321585 |
| 18:28:09 | 0:27:38 | 60.8197433 | 66.8243232 | 66.1349434 | 56.5666434 | 70.6321585 |
| 18:28:10 | 0:27:39 | 60.8197433 | 66.8243232 | 66.1349434 | 56.5666434 | 70.6321585 |
| 18:28:11 | 0:27:40 | 61.8197433 | 67.8243232 | 66.1349434 | 56.5666434 | 70.6321585 |
| 18:28:12 | 0:27:41 | 61.8197433 | 67.8243232 | 67.1349434 | 57.5666434 | 66.6321585 |

|          |         |            |            |            |            |            |
|----------|---------|------------|------------|------------|------------|------------|
| 18:28:13 | 0:27:42 | 60.8197433 | 67.8243232 | 67.1349434 | 57.5666434 | 65.6321585 |
| 18:28:14 | 0:27:43 | 61.8197433 | 67.8243232 | 66.1349434 | 58.5666434 | 65.6321585 |
| 18:28:15 | 0:27:44 | 61.8197433 | 66.8243232 | 66.1349434 | 58.5666434 | 65.6321585 |
| 18:28:16 | 0:27:45 | 61.8197433 | 66.8243232 | 66.1349434 | 58.5666434 | 64.6321585 |
| 18:28:17 | 0:27:46 | 61.8197433 | 67.8243232 | 69.1349434 | 60.5666434 | 64.6321585 |
| 18:28:18 | 0:27:47 | 61.8197433 | 69.8243232 | 68.1349434 | 64.5666434 | 64.6321585 |
| 18:28:19 | 0:27:48 | 61.8197433 | 69.8243232 | 68.1349434 | 64.5666434 | 60.6321585 |
| 18:28:20 | 0:27:49 | 61.8197433 | 68.8243232 | 68.1349434 | 66.5666434 | 60.6321585 |
| 18:28:21 | 0:27:50 | 61.8197433 | 67.8243232 | 69.1349434 | 66.5666434 | 60.6321585 |
| 18:28:22 | 0:27:51 | 61.8197433 | 67.8243232 | 70.1349434 | 66.5666434 | 60.6321585 |
| 18:28:23 | 0:27:52 | 61.8197433 | 66.8243232 | 70.1349434 | 65.5666434 | 60.6321585 |
| 18:28:24 | 0:27:53 | 61.8197433 | 66.8243232 | 69.1349434 | 65.5666434 | 61.6321585 |
| 18:28:25 | 0:27:54 | 61.8197433 | 65.8243232 | 67.1349434 | 65.5666434 | 61.6321585 |
| 18:28:26 | 0:27:55 | 61.8197433 | 65.8243232 | 66.1349434 | 64.5666434 | 61.6321585 |
| 18:28:27 | 0:27:56 | 62.8197433 | 65.8243232 | 66.1349434 | 64.5666434 | 60.6321585 |
| 18:28:28 | 0:27:57 | 62.8197433 | 65.8243232 | 67.1349434 | 64.5666434 | 60.6321585 |
| 18:28:29 | 0:27:58 | 62.8197433 | 66.8243232 | 67.1349434 | 61.5666434 | 60.6321585 |
| 18:28:30 | 0:27:59 | 62.8197433 | 68.8243232 | 68.1349434 | 61.5666434 | 60.6321585 |
| 18:28:31 | 0:28:00 | 62.8197433 | 68.8243232 | 68.1349434 | 61.5666434 | 60.6321585 |
| 18:28:32 | 0:28:01 | 62.8197433 | 73.8243232 | 68.1349434 | 61.5666434 | 61.6321585 |
| 18:28:33 | 0:28:02 | 62.8197433 | 73.8243232 | 70.1349434 | 61.5666434 | 61.6321585 |
| 18:28:34 | 0:28:03 | 61.8197433 | 74.8243232 | 70.1349434 | 61.5666434 | 63.6321585 |
| 18:28:35 | 0:28:04 | 61.8197433 | 74.8243232 | 70.1349434 | 62.5666434 | 64.6321585 |
| 18:28:36 | 0:28:05 | 62.8197433 | 81.8243232 | 70.1349434 | 62.5666434 | 64.6321585 |
| 18:28:37 | 0:28:06 | 62.8197433 | 85.8243232 | 70.1349434 | 62.5666434 | 64.6321585 |
| 18:28:38 | 0:28:07 | 62.8197433 | 86.8243232 | 72.1349434 | 62.5666434 | 64.6321585 |
| 18:28:39 | 0:28:08 | 62.8197433 | 86.8243232 | 73.1349434 | 63.5666434 | 62.6321585 |
| 18:28:40 | 0:28:09 | 62.8197433 | 84.8243232 | 73.1349434 | 63.5666434 | 61.6321585 |
| 18:28:41 | 0:28:10 | 62.8197433 | 79.8243232 | 73.1349434 | 63.5666434 | 60.6321585 |
| 18:28:42 | 0:28:11 | 62.8197433 | 79.8243232 | 73.1349434 | 66.5666434 | 60.6321585 |
| 18:28:43 | 0:28:12 | 62.8197433 | 79.8243232 | 73.1349434 | 67.5666434 | 60.6321585 |
| 18:28:44 | 0:28:13 | 62.8197433 | 76.8243232 | 73.1349434 | 67.5666434 | 61.6321585 |
| 18:28:45 | 0:28:14 | 62.8197433 | 76.8243232 | 73.1349434 | 67.5666434 | 61.6321585 |
| 18:28:46 | 0:28:15 | 62.8197433 | 76.8243232 | 73.1349434 | 68.5666434 | 61.6321585 |
| 18:28:47 | 0:28:16 | 62.8197433 | 72.8243232 | 73.1349434 | 68.5666434 | 61.6321585 |
| 18:28:48 | 0:28:17 | 62.8197433 | 72.8243232 | 73.1349434 | 68.5666434 | 61.6321585 |
| 18:28:49 | 0:28:18 | 63.8197433 | 72.8243232 | 74.1349434 | 69.5666434 | 62.6321585 |
| 18:28:50 | 0:28:19 | 63.8197433 | 65.8243232 | 75.1349434 | 70.5666434 | 62.6321585 |
| 18:28:51 | 0:28:20 | 63.8197433 | 63.8243232 | 75.1349434 | 72.5666434 | 60.6321585 |
| 18:28:52 | 0:28:21 | 63.8197433 | 63.8243232 | 75.1349434 | 74.5666434 | 60.6321585 |
| 18:28:53 | 0:28:22 | 64.8197433 | 62.8243232 | 75.1349434 | 74.5666434 | 60.6321585 |
| 18:28:54 | 0:28:23 | 65.8197433 | 60.8243232 | 74.1349434 | 74.5666434 | 60.6321585 |
| 18:28:55 | 0:28:24 | 66.8197433 | 57.8243232 | 73.1349434 | 74.5666434 | 60.6321585 |
| 18:28:56 | 0:28:25 | 67.8197433 | 57.8243232 | 72.1349434 | 75.5666434 | 60.6321585 |
| 18:28:57 | 0:28:26 | 66.8197433 | 53.8243232 | 72.1349434 | 75.5666434 | 60.6321585 |



|          |         |            |            |            |            |            |
|----------|---------|------------|------------|------------|------------|------------|
| 18:28:58 | 0:28:27 | 65.8197433 | 53.8243232 | 72.1349434 | 75.5666434 | 60.6321585 |
| 18:28:59 | 0:28:28 | 63.8197433 | 54.8243232 | 71.1349434 | 75.5666434 | 60.6321585 |
| 18:29:00 | 0:28:29 | 63.8197433 | 54.8243232 | 70.1349434 | 75.5666434 | 62.6321585 |
| 18:29:01 | 0:28:30 | 62.8197433 | 55.8243232 | 69.1349434 | 75.5666434 | 62.6321585 |
| 18:29:02 | 0:28:31 | 62.8197433 | 55.8243232 | 68.1349434 | 75.5666434 | 63.6321585 |
| 18:29:03 | 0:28:32 | 62.8197433 | 55.8243232 | 71.1349434 | 75.5666434 | 63.6321585 |
| 18:29:04 | 0:28:33 | 62.8197433 | 54.8243232 | 71.1349434 | 75.5666434 | 63.6321585 |
| 18:29:05 | 0:28:34 | 62.8197433 | 54.8243232 | 71.1349434 | 78.5666434 | 63.6321585 |
| 18:29:06 | 0:28:35 | 62.8197433 | 56.8243232 | 72.1349434 | 78.5666434 | 63.6321585 |
| 18:29:07 | 0:28:36 | 61.8197433 | 56.8243232 | 72.1349434 | 78.5666434 | 63.6321585 |
| 18:29:08 | 0:28:37 | 61.8197433 | 61.8243232 | 72.1349434 | 78.5666434 | 63.6321585 |
| 18:29:09 | 0:28:38 | 61.8197433 | 63.8243232 | 73.1349434 | 78.5666434 | 63.6321585 |
| 18:29:10 | 0:28:39 | 62.8197433 | 63.8243232 | 74.1349434 | 78.5666434 | 62.6321585 |
| 18:29:11 | 0:28:40 | 63.8197433 | 63.8243232 | 75.1349434 | 78.5666434 | 62.6321585 |
| 18:29:12 | 0:28:41 | 63.8197433 | 63.8243232 | 75.1349434 | 77.5666434 | 62.6321585 |
| 18:29:13 | 0:28:42 | 63.8197433 | 64.8243232 | 75.1349434 | 77.5666434 | 62.6321585 |
| 18:29:14 | 0:28:43 | 62.8197433 | 64.8243232 | 75.1349434 | 77.5666434 | 61.6321585 |
| 18:29:15 | 0:28:44 | 62.8197433 | 64.8243232 | 75.1349434 | 77.5666434 | 62.6321585 |
| 18:29:16 | 0:28:45 | 62.8197433 | 60.8243232 | 75.1349434 | 77.5666434 | 62.6321585 |
| 18:29:17 | 0:28:46 | 62.8197433 | 60.8243232 | 74.1349434 | 77.5666434 | 64.6321585 |
| 18:29:18 | 0:28:47 | 62.8197433 | 60.8243232 | 74.1349434 | 77.5666434 | 66.6321585 |
| 18:29:19 | 0:28:48 | 62.8197433 | 60.8243232 | 74.1349434 | 77.5666434 | 66.6321585 |
| 18:29:20 | 0:28:49 | 62.8197433 | 60.8243232 | 73.1349434 | 77.5666434 | 68.6321585 |
| 18:29:21 | 0:28:50 | 62.8197433 | 63.8243232 | 69.1349434 | 77.5666434 | 69.6321585 |
| 18:29:22 | 0:28:51 | 62.8197433 | 66.8243232 | 69.1349434 | 76.5666434 | 69.6321585 |
| 18:29:23 | 0:28:52 | 61.8197433 | 67.8243232 | 64.1349434 | 76.5666434 | 70.6321585 |
| 18:29:24 | 0:28:53 | 61.8197433 | 67.8243232 | 62.1349434 | 77.5666434 | 71.6321585 |
| 18:29:25 | 0:28:54 | 61.8197433 | 67.8243232 | 61.1349434 | 78.5666434 | 73.6321585 |
| 18:29:26 | 0:28:55 | 60.8197433 | 70.8243232 | 60.1349434 | 77.5666434 | 73.6321585 |
| 18:29:27 | 0:28:56 | 60.8197433 | 70.8243232 | 60.1349434 | 77.5666434 | 73.6321585 |
| 18:29:28 | 0:28:57 | 60.8197433 | 71.8243232 | 60.1349434 | 77.5666434 | 73.6321585 |
| 18:29:29 | 0:28:58 | 60.8197433 | 69.8243232 | 62.1349434 | 77.5666434 | 72.6321585 |
| 18:29:30 | 0:28:59 | 60.8197433 | 68.8243232 | 63.1349434 | 76.5666434 | 71.6321585 |
| 18:29:31 | 0:29:00 | 60.8197433 | 68.8243232 | 67.1349434 | 73.5666434 | 71.6321585 |
| 18:29:32 | 0:29:01 | 60.8197433 | 65.8243232 | 67.1349434 | 73.5666434 | 71.6321585 |
| 18:29:33 | 0:29:02 | 60.8197433 | 61.8243232 | 68.1349434 | 73.5666434 | 71.6321585 |
| 18:29:34 | 0:29:03 | 60.8197433 | 60.8243232 | 68.1349434 | 74.5666434 | 71.6321585 |
| 18:29:35 | 0:29:04 | 60.8197433 | 59.8243232 | 68.1349434 | 77.5666434 | 71.6321585 |
| 18:29:36 | 0:29:05 | 61.8197433 | 59.8243232 | 69.1349434 | 79.5666434 | 69.6321585 |
| 18:29:37 | 0:29:06 | 61.8197433 | 59.8243232 | 69.1349434 | 79.5666434 | 69.6321585 |
| 18:29:38 | 0:29:07 | 61.8197433 | 58.8243232 | 68.1349434 | 80.5666434 | 69.6321585 |
| 18:29:39 | 0:29:08 | 62.8197433 | 58.8243232 | 66.1349434 | 80.5666434 | 69.6321585 |
| 18:29:40 | 0:29:09 | 62.8197433 | 57.8243232 | 64.1349434 | 80.5666434 | 68.6321585 |
| 18:29:41 | 0:29:10 | 62.8197433 | 57.8243232 | 64.1349434 | 79.5666434 | 67.6321585 |
| 18:29:42 | 0:29:11 | 62.8197433 | 57.8243232 | 64.1349434 | 79.5666434 | 67.6321585 |

|          |         |            |            |            |            |            |
|----------|---------|------------|------------|------------|------------|------------|
| 18:29:43 | 0:29:12 | 62.8197433 | 57.8243232 | 65.1349434 | 79.5666434 | 67.6321585 |
| 18:29:44 | 0:29:13 | 62.8197433 | 58.8243232 | 66.1349434 | 77.5666434 | 66.6321585 |
| 18:29:45 | 0:29:14 | 65.8197433 | 59.8243232 | 66.1349434 | 76.5666434 | 63.6321585 |
| 18:29:46 | 0:29:15 | 66.8197433 | 59.8243232 | 66.1349434 | 67.5666434 | 63.6321585 |
| 18:29:47 | 0:29:16 | 66.8197433 | 59.8243232 | 66.1349434 | 62.5666434 | 63.6321585 |
| 18:29:48 | 0:29:17 | 66.8197433 | 59.8243232 | 66.1349434 | 61.5666434 | 64.6321585 |
| 18:29:49 | 0:29:18 | 66.8197433 | 59.8243232 | 65.1349434 | 60.5666434 | 64.6321585 |
| 18:29:50 | 0:29:19 | 66.8197433 | 59.8243232 | 65.1349434 | 60.5666434 | 64.6321585 |
| 18:29:51 | 0:29:20 | 64.8197433 | 60.8243232 | 65.1349434 | 60.5666434 | 63.6321585 |
| 18:29:52 | 0:29:21 | 62.8197433 | 61.8243232 | 65.1349434 | 60.5666434 | 63.6321585 |
| 18:29:53 | 0:29:22 | 62.8197433 | 61.8243232 | 65.1349434 | 60.5666434 | 63.6321585 |
| 18:29:54 | 0:29:23 | 61.8197433 | 62.8243232 | 64.1349434 | 60.5666434 | 63.6321585 |
| 18:29:55 | 0:29:24 | 61.8197433 | 63.8243232 | 64.1349434 | 61.5666434 | 63.6321585 |
| 18:29:56 | 0:29:25 | 61.8197433 | 64.8243232 | 63.1349434 | 61.5666434 | 63.6321585 |
| 18:29:57 | 0:29:26 | 62.8197433 | 63.8243232 | 59.1349434 | 61.5666434 | 63.6321585 |
| 18:29:58 | 0:29:27 | 61.8197433 | 63.8243232 | 59.1349434 | 62.5666434 | 63.6321585 |
| 18:29:59 | 0:29:28 | 61.8197433 | 63.8243232 | 55.1349434 | 61.5666434 | 63.6321585 |
| 18:30:00 | 0:29:29 | 61.8197433 | 63.8243232 | 55.1349434 | 60.5666434 | 63.6321585 |
| 18:30:01 | 0:29:30 | 63.8197433 | 63.8243232 | 55.1349434 | 60.5666434 | 63.6321585 |
| 18:30:02 | 0:29:31 | 63.8197433 | 64.8243232 | 55.1349434 | 61.5666434 | 63.6321585 |
| 18:30:03 | 0:29:32 | 63.8197433 | 64.8243232 | 55.1349434 | 61.5666434 | 63.6321585 |
| 18:30:04 | 0:29:33 | 63.8197433 | 66.8243232 | 55.1349434 | 61.5666434 | 63.6321585 |
| 18:30:05 | 0:29:34 | 63.8197433 | 68.8243232 | 55.1349434 | 62.5666434 | 63.6321585 |
| 18:30:06 | 0:29:35 | 63.8197433 | 69.8243232 | 55.1349434 | 62.5666434 | 63.6321585 |
| 18:30:07 | 0:29:36 | 66.8197433 | 69.8243232 | 55.1349434 | 61.5666434 | 64.6321585 |
| 18:30:08 | 0:29:37 | 69.8197433 | 68.8243232 | 55.1349434 | 61.5666434 | 64.6321585 |
| 18:30:09 | 0:29:38 | 76.8197433 | 66.8243232 | 55.1349434 | 61.5666434 | 68.6321585 |
| 18:30:10 | 0:29:39 | 81.8197433 | 66.8243232 | 57.1349434 | 61.5666434 | 68.6321585 |
| 18:30:11 | 0:29:40 | 81.8197433 | 65.8243232 | 59.1349434 | 61.5666434 | 69.6321585 |
| 18:30:12 | 0:29:41 | 80.8197433 | 64.8243232 | 60.1349434 | 61.5666434 | 69.6321585 |
| 18:30:13 | 0:29:42 | 72.8197433 | 64.8243232 | 60.1349434 | 61.5666434 | 72.6321585 |
| 18:30:14 | 0:29:43 | 69.8197433 | 64.8243232 | 59.1349434 | 60.5666434 | 73.6321585 |
| 18:30:15 | 0:29:44 | 67.8197433 | 64.8243232 | 59.1349434 | 60.5666434 | 75.6321585 |
| 18:30:16 | 0:29:45 | 67.8197433 | 66.8243232 | 59.1349434 | 60.5666434 | 75.6321585 |
| 18:30:17 | 0:29:46 | 66.8197433 | 67.8243232 | 58.1349434 | 60.5666434 | 79.6321585 |
| 18:30:18 | 0:29:47 | 65.8197433 | 68.8243232 | 58.1349434 | 59.5666434 | 79.6321585 |
| 18:30:19 | 0:29:48 | 63.8197433 | 73.8243232 | 58.1349434 | 59.5666434 | 78.6321585 |
| 18:30:20 | 0:29:49 | 62.8197433 | 74.8243232 | 58.1349434 | 59.5666434 | 78.6321585 |
| 18:30:21 | 0:29:50 | 61.8197433 | 75.8243232 | 58.1349434 | 59.5666434 | 78.6321585 |
| 18:30:22 | 0:29:51 | 62.8197433 | 75.8243232 | 58.1349434 | 60.5666434 | 77.6321585 |
| 18:30:23 | 0:29:52 | 62.8197433 | 75.8243232 | 59.1349434 | 61.5666434 | 77.6321585 |
| 18:30:24 | 0:29:53 | 61.8197433 | 71.8243232 | 59.1349434 | 61.5666434 | 77.6321585 |
| 18:30:25 | 0:29:54 | 61.8197433 | 66.8243232 | 62.1349434 | 61.5666434 | 77.6321585 |
| 18:30:26 | 0:29:55 | 61.8197433 | 63.8243232 | 66.1349434 | 62.5666434 | 77.6321585 |
| 18:30:27 | 0:29:56 | 62.8197433 | 62.8243232 | 67.1349434 | 62.5666434 | 77.6321585 |

|          |         |            |            |            |            |            |
|----------|---------|------------|------------|------------|------------|------------|
| 18:30:28 | 0:29:57 | 62.8197433 | 62.8243232 | 65.1349434 | 61.5666434 | 77.6321585 |
| 18:30:29 | 0:29:58 | 62.8197433 | 62.8243232 | 60.1349434 | 60.5666434 | 77.6321585 |
| 18:30:30 | 0:29:59 | 62.8197433 | 61.8243232 | 57.1349434 | 60.5666434 | 78.6321585 |
| 18:30:31 | 0:30:00 | 64.8197433 | 61.8243232 | 57.1349434 | 59.5666434 | 76.6321585 |
| 18:30:32 | 0:30:01 | 65.8197433 | 61.8243232 | 56.1349434 | 59.5666434 | 75.6321585 |
| 18:30:33 | 0:30:02 | 64.8197433 | 61.8243232 | 55.1349434 | 59.5666434 | 75.6321585 |
| 18:30:34 | 0:30:03 | 62.8197433 | 61.8243232 | 54.1349434 | 59.5666434 | 69.6321585 |
| 18:30:35 | 0:30:04 | 61.8197433 | 61.8243232 | 53.1349434 | 59.5666434 | 67.6321585 |
| 18:30:36 | 0:30:05 | 61.8197433 | 61.8243232 | 53.1349434 | 59.5666434 | 67.6321585 |
| 18:30:37 | 0:30:06 | 61.8197433 | 60.8243232 | 52.1349434 | 59.5666434 | 67.6321585 |
| 18:30:38 | 0:30:07 | 61.8197433 | 59.8243232 | 52.1349434 | 59.5666434 | 70.6321585 |
| 18:30:39 | 0:30:08 | 61.8197433 | 58.8243232 | 52.1349434 | 59.5666434 | 70.6321585 |
| 18:30:40 | 0:30:09 | 61.8197433 | 58.8243232 | 52.1349434 | 59.5666434 | 71.6321585 |
| 18:30:41 | 0:30:10 | 61.8197433 | 58.8243232 | 52.1349434 | 60.5666434 | 71.6321585 |
| 18:30:42 | 0:30:11 | 60.8197433 | 58.8243232 | 53.1349434 | 60.5666434 | 71.6321585 |
| 18:30:43 | 0:30:12 | 60.8197433 | 58.8243232 | 53.1349434 | 60.5666434 | 72.6321585 |
| 18:30:44 | 0:30:13 | 61.8197433 | 58.8243232 | 53.1349434 | 60.5666434 | 72.6321585 |
| 18:30:45 | 0:30:14 | 60.8197433 | 59.8243232 | 58.1349434 | 61.5666434 | 73.6321585 |
| 18:30:46 | 0:30:15 | 60.8197433 | 59.8243232 | 58.1349434 | 61.5666434 | 73.6321585 |
| 18:30:47 | 0:30:16 | 60.8197433 | 59.8243232 | 58.1349434 | 63.5666434 | 72.6321585 |
| 18:30:48 | 0:30:17 | 60.8197433 | 59.8243232 | 59.1349434 | 63.5666434 | 72.6321585 |
| 18:30:49 | 0:30:18 | 60.8197433 | 60.8243232 | 59.1349434 | 63.5666434 | 71.6321585 |
| 18:30:50 | 0:30:19 | 60.8197433 | 60.8243232 | 59.1349434 | 63.5666434 | 71.6321585 |
| 18:30:51 | 0:30:20 | 60.8197433 | 60.8243232 | 59.1349434 | 63.5666434 | 71.6321585 |
| 18:30:52 | 0:30:21 | 60.8197433 | 60.8243232 | 59.1349434 | 63.5666434 | 71.6321585 |
| 18:30:53 | 0:30:22 | 60.8197433 | 60.8243232 | 59.1349434 | 63.5666434 | 71.6321585 |
| 18:30:54 | 0:30:23 | 60.8197433 | 59.8243232 | 59.1349434 | 63.5666434 | 71.6321585 |
| 18:30:55 | 0:30:24 | 60.8197433 | 58.8243232 | 59.1349434 | 63.5666434 | 71.6321585 |
| 18:30:56 | 0:30:25 | 60.8197433 | 57.8243232 | 58.1349434 | 63.5666434 | 71.6321585 |
| 18:30:57 | 0:30:26 | 60.8197433 | 58.8243232 | 58.1349434 | 63.5666434 | 71.6321585 |
| 18:30:58 | 0:30:27 | 61.8197433 | 59.8243232 | 58.1349434 | 63.5666434 | 71.6321585 |
| 18:30:59 | 0:30:28 | 61.8197433 | 60.8243232 | 57.1349434 | 63.5666434 | 71.6321585 |
| 18:31:00 | 0:30:29 | 63.8197433 | 61.8243232 | 57.1349434 | 63.5666434 | 72.6321585 |
| 18:31:01 | 0:30:30 | 62.8197433 | 61.8243232 | 57.1349434 | 61.5666434 | 72.6321585 |
| 18:31:02 | 0:30:31 | 61.8197433 | 60.8243232 | 59.1349434 | 57.5666434 | 72.6321585 |
| 18:31:03 | 0:30:32 | 61.8197433 | 60.8243232 | 68.1349434 | 56.5666434 | 76.6321585 |
| 18:31:04 | 0:30:33 | 61.8197433 | 60.8243232 | 76.1349434 | 56.5666434 | 78.6321585 |
| 18:31:05 | 0:30:34 | 61.8197433 | 60.8243232 | 77.1349434 | 55.5666434 | 79.6321585 |
| 18:31:06 | 0:30:35 | 60.8197433 | 60.8243232 | 78.1349434 | 55.5666434 | 77.6321585 |
| 18:31:07 | 0:30:36 | 60.8197433 | 60.8243232 | 77.1349434 | 56.5666434 | 72.6321585 |
| 18:31:08 | 0:30:37 | 60.8197433 | 60.8243232 | 77.1349434 | 56.5666434 | 69.6321585 |
| 18:31:09 | 0:30:38 | 61.8197433 | 60.8243232 | 77.1349434 | 56.5666434 | 69.6321585 |
| 18:31:10 | 0:30:39 | 61.8197433 | 61.8243232 | 76.1349434 | 56.5666434 | 68.6321585 |
| 18:31:11 | 0:30:40 | 61.8197433 | 61.8243232 | 76.1349434 | 56.5666434 | 66.6321585 |
| 18:31:12 | 0:30:41 | 62.8197433 | 62.8243232 | 75.1349434 | 67.5666434 | 64.6321585 |

|          |         |            |            |            |            |            |
|----------|---------|------------|------------|------------|------------|------------|
| 18:31:13 | 0:30:42 | 62.8197433 | 63.8243232 | 75.1349434 | 69.5666434 | 64.6321585 |
| 18:31:14 | 0:30:43 | 62.8197433 | 64.8243232 | 76.1349434 | 69.5666434 | 65.6321585 |
| 18:31:15 | 0:30:44 | 62.8197433 | 64.8243232 | 77.1349434 | 69.5666434 | 66.6321585 |
| 18:31:16 | 0:30:45 | 62.8197433 | 64.8243232 | 76.1349434 | 68.5666434 | 66.6321585 |
| 18:31:17 | 0:30:46 | 61.8197433 | 64.8243232 | 73.1349434 | 68.5666434 | 66.6321585 |
| 18:31:18 | 0:30:47 | 61.8197433 | 64.8243232 | 73.1349434 | 68.5666434 | 66.6321585 |
| 18:31:19 | 0:30:48 | 61.8197433 | 61.8243232 | 73.1349434 | 68.5666434 | 67.6321585 |
| 18:31:20 | 0:30:49 | 61.8197433 | 60.8243232 | 73.1349434 | 68.5666434 | 68.6321585 |
| 18:31:21 | 0:30:50 | 63.8197433 | 59.8243232 | 73.1349434 | 68.5666434 | 68.6321585 |
| 18:31:22 | 0:30:51 | 65.8197433 | 59.8243232 | 72.1349434 | 68.5666434 | 68.6321585 |
| 18:31:23 | 0:30:52 | 66.8197433 | 59.8243232 | 72.1349434 | 68.5666434 | 69.6321585 |
| 18:31:24 | 0:30:53 | 67.8197433 | 59.8243232 | 70.1349434 | 67.5666434 | 72.6321585 |
| 18:31:25 | 0:30:54 | 67.8197433 | 61.8243232 | 67.1349434 | 66.5666434 | 72.6321585 |
| 18:31:26 | 0:30:55 | 68.8197433 | 62.8243232 | 67.1349434 | 66.5666434 | 73.6321585 |
| 18:31:27 | 0:30:56 | 72.8197433 | 62.8243232 | 66.1349434 | 66.5666434 | 75.6321585 |
| 18:31:28 | 0:30:57 | 73.8197433 | 62.8243232 | 66.1349434 | 66.5666434 | 75.6321585 |
| 18:31:29 | 0:30:58 | 73.8197433 | 60.8243232 | 66.1349434 | 67.5666434 | 75.6321585 |
| 18:31:30 | 0:30:59 | 73.8197433 | 60.8243232 | 66.1349434 | 67.5666434 | 75.6321585 |
| 18:31:31 | 0:31:00 | 65.8197433 | 60.8243232 | 70.1349434 | 67.5666434 | 73.6321585 |
| 18:31:32 | 0:31:01 | 63.8197433 | 58.8243232 | 70.1349434 | 68.5666434 | 71.6321585 |
| 18:31:33 | 0:31:02 | 62.8197433 | 58.8243232 | 68.1349434 | 68.5666434 | 68.6321585 |
| 18:31:34 | 0:31:03 | 62.8197433 | 58.8243232 | 68.1349434 | 67.5666434 | 68.6321585 |
| 18:31:35 | 0:31:04 | 61.8197433 | 58.8243232 | 68.1349434 | 67.5666434 | 66.6321585 |
| 18:31:36 | 0:31:05 | 61.8197433 | 59.8243232 | 70.1349434 | 67.5666434 | 65.6321585 |
| 18:31:37 | 0:31:06 | 61.8197433 | 59.8243232 | 70.1349434 | 67.5666434 | 63.6321585 |
| 18:31:38 | 0:31:07 | 60.8197433 | 59.8243232 | 72.1349434 | 66.5666434 | 62.6321585 |
| 18:31:39 | 0:31:08 | 59.8197433 | 59.8243232 | 74.1349434 | 66.5666434 | 62.6321585 |
| 18:31:40 | 0:31:09 | 59.8197433 | 59.8243232 | 74.1349434 | 69.5666434 | 62.6321585 |
| 18:31:41 | 0:31:10 | 59.8197433 | 59.8243232 | 73.1349434 | 69.5666434 | 62.6321585 |
| 18:31:42 | 0:31:11 | 59.8197433 | 59.8243232 | 71.1349434 | 69.5666434 | 65.6321585 |
| 18:31:43 | 0:31:12 | 59.8197433 | 59.8243232 | 68.1349434 | 69.5666434 | 65.6321585 |
| 18:31:44 | 0:31:13 | 59.8197433 | 59.8243232 | 66.1349434 | 69.5666434 | 66.6321585 |
| 18:31:45 | 0:31:14 | 60.8197433 | 59.8243232 | 66.1349434 | 69.5666434 | 66.6321585 |
| 18:31:46 | 0:31:15 | 60.8197433 | 60.8243232 | 65.1349434 | 69.5666434 | 66.6321585 |
| 18:31:47 | 0:31:16 | 61.8197433 | 60.8243232 | 63.1349434 | 69.5666434 | 67.6321585 |
| 18:31:48 | 0:31:17 | 62.8197433 | 63.8243232 | 63.1349434 | 69.5666434 | 67.6321585 |
| 18:31:49 | 0:31:18 | 62.8197433 | 69.8243232 | 63.1349434 | 70.5666434 | 68.6321585 |
| 18:31:50 | 0:31:19 | 62.8197433 | 69.8243232 | 64.1349434 | 70.5666434 | 69.6321585 |
| 18:31:51 | 0:31:20 | 62.8197433 | 69.8243232 | 62.1349434 | 69.5666434 | 69.6321585 |
| 18:31:52 | 0:31:21 | 62.8197433 | 70.8243232 | 61.1349434 | 69.5666434 | 81.6321585 |
| 18:31:53 | 0:31:22 | 62.8197433 | 70.8243232 | 60.1349434 | 69.5666434 | 77.6321585 |
| 18:31:54 | 0:31:23 | 65.8197433 | 71.8243232 | 61.1349434 | 69.5666434 | 77.6321585 |
| 18:31:55 | 0:31:24 | 66.8197433 | 72.8243232 | 63.1349434 | 67.5666434 | 70.6321585 |
| 18:31:56 | 0:31:25 | 65.8197433 | 72.8243232 | 66.1349434 | 64.5666434 | 67.6321585 |
| 18:31:57 | 0:31:26 | 67.8197433 | 72.8243232 | 69.1349434 | 64.5666434 | 66.6321585 |

|          |         |            |            |            |            |            |
|----------|---------|------------|------------|------------|------------|------------|
| 18:31:58 | 0:31:27 | 68.8197433 | 70.8243232 | 71.1349434 | 64.5666434 | 66.6321585 |
| 18:31:59 | 0:31:28 | 70.8197433 | 59.8243232 | 71.1349434 | 64.5666434 | 65.6321585 |
| 18:32:00 | 0:31:29 | 72.8197433 | 59.8243232 | 71.1349434 | 64.5666434 | 65.6321585 |
| 18:32:01 | 0:31:30 | 75.8197433 | 59.8243232 | 71.1349434 | 64.5666434 | 64.6321585 |
| 18:32:02 | 0:31:31 | 75.8197433 | 59.8243232 | 71.1349434 | 64.5666434 | 64.6321585 |
| 18:32:03 | 0:31:32 | 79.8197433 | 59.8243232 | 71.1349434 | 65.5666434 | 62.6321585 |
| 18:32:04 | 0:31:33 | 80.8197433 | 59.8243232 | 72.1349434 | 66.5666434 | 61.6321585 |
| 18:32:05 | 0:31:34 | 81.8197433 | 59.8243232 | 82.1349434 | 66.5666434 | 61.6321585 |
| 18:32:06 | 0:31:35 | 82.8197433 | 58.8243232 | 83.1349434 | 66.5666434 | 61.6321585 |
| 18:32:07 | 0:31:36 | 82.8197433 | 58.8243232 | 83.1349434 | 66.5666434 | 61.6321585 |
| 18:32:08 | 0:31:37 | 83.8197433 | 58.8243232 | 75.1349434 | 66.5666434 | 59.6321585 |
| 18:32:09 | 0:31:38 | 65.9925569 | 58.8243232 | 71.1349434 | 65.5666434 | 58.6321585 |
| 18:32:10 | 0:31:39 | 65.3925569 | 58.8243232 | 68.1349434 | 64.5666434 | 58.6321585 |
| 18:32:11 | 0:31:40 | 64.7925569 | 56.8243232 | 67.1349434 | 64.5666434 | 58.6321585 |
| 18:32:12 | 0:31:41 | 65.4925569 | 57.8243232 | 67.1349434 | 64.5666434 | 58.6321585 |
| 18:32:13 | 0:31:42 | 65.4925569 | 57.8243232 | 67.1349434 | 64.5666434 | 58.6321585 |
| 18:32:14 | 0:31:43 | 65.8925569 | 58.8243232 | 69.1349434 | 63.5666434 | 60.6321585 |
| 18:32:15 | 0:31:44 | 65.7925569 | 58.8243232 | 69.1349434 | 62.5666434 | 62.6321585 |
| 18:32:16 | 0:31:45 | 65.2925569 | 57.8243232 | 67.1349434 | 59.5666434 | 62.6321585 |
| 18:32:17 | 0:31:46 | 63.5925569 | 58.8243232 | 66.1349434 | 56.5666434 | 62.6321585 |
| 18:32:18 | 0:31:47 | 74.8197433 | 58.8243232 | 64.1349434 | 56.5666434 | 62.6321585 |
| 18:32:19 | 0:31:48 | 69.8197433 | 58.8243232 | 62.1349434 | 55.5666434 | 61.6321585 |
| 18:32:20 | 0:31:49 | 66.8197433 | 58.8243232 | 62.1349434 | 54.5666434 | 57.6321585 |
| 18:32:21 | 0:31:50 | 64.8197433 | 58.8243232 | 62.1349434 | 54.5666434 | 54.6321585 |
| 18:32:22 | 0:31:51 | 64.8197433 | 58.8243232 | 62.1349434 | 56.5666434 | 56.6321585 |
| 18:32:23 | 0:31:52 | 63.8197433 | 57.8243232 | 62.1349434 | 56.5666434 | 56.6321585 |
| 18:32:24 | 0:31:53 | 63.8197433 | 57.8243232 | 62.1349434 | 56.5666434 | 56.6321585 |
| 18:32:25 | 0:31:54 | 62.8197433 | 57.8243232 | 60.1349434 | 54.5666434 | 56.6321585 |
| 18:32:26 | 0:31:55 | 62.8197433 | 54.8243232 | 59.1349434 | 54.5666434 | 57.6321585 |
| 18:32:27 | 0:31:56 | 61.8197433 | 54.8243232 | 59.1349434 | 53.5666434 | 57.6321585 |
| 18:32:28 | 0:31:57 | 61.8197433 | 55.8243232 | 59.1349434 | 52.5666434 | 57.6321585 |
| 18:32:29 | 0:31:58 | 61.8197433 | 55.8243232 | 59.1349434 | 52.5666434 | 58.6321585 |
| 18:32:30 | 0:31:59 | 61.8197433 | 55.8243232 | 60.1349434 | 52.5666434 | 59.6321585 |
| 18:32:31 | 0:32:00 | 61.8197433 | 56.8243232 | 60.1349434 | 52.5666434 | 59.6321585 |
| 18:32:32 | 0:32:01 | 61.8197433 | 57.8243232 | 60.1349434 | 52.5666434 | 61.6321585 |
| 18:32:33 | 0:32:02 | 61.8197433 | 57.8243232 | 61.1349434 | 54.5666434 | 61.6321585 |
| 18:32:34 | 0:32:03 | 61.8197433 | 57.8243232 | 64.1349434 | 53.5666434 | 63.6321585 |
| 18:32:35 | 0:32:04 | 60.8197433 | 58.8243232 | 64.1349434 | 53.5666434 | 62.6321585 |
| 18:32:36 | 0:32:05 | 60.8197433 | 58.8243232 | 69.1349434 | 53.5666434 | 62.6321585 |
| 18:32:37 | 0:32:06 | 60.8197433 | 57.8243232 | 69.1349434 | 53.5666434 | 62.6321585 |
| 18:32:38 | 0:32:07 | 61.8197433 | 58.8243232 | 68.1349434 | 53.5666434 | 63.6321585 |
| 18:32:39 | 0:32:08 | 60.8197433 | 58.8243232 | 67.1349434 | 53.5666434 | 63.6321585 |
| 18:32:40 | 0:32:09 | 60.8197433 | 58.8243232 | 66.1349434 | 53.5666434 | 63.6321585 |
| 18:32:41 | 0:32:10 | 60.8197433 | 58.8243232 | 67.1349434 | 53.5666434 | 63.6321585 |
| 18:32:42 | 0:32:11 | 61.8197433 | 58.8243232 | 68.1349434 | 53.5666434 | 65.6321585 |

|          |         |            |            |            |            |            |
|----------|---------|------------|------------|------------|------------|------------|
| 18:32:43 | 0:32:12 | 61.8197433 | 58.8243232 | 68.1349434 | 54.5666434 | 67.6321585 |
| 18:32:44 | 0:32:13 | 61.8197433 | 58.8243232 | 71.1349434 | 54.5666434 | 64.6321585 |
| 18:32:45 | 0:32:14 | 61.8197433 | 58.8243232 | 73.1349434 | 54.5666434 | 64.6321585 |
| 18:32:46 | 0:32:15 | 61.8197433 | 58.8243232 | 70.1349434 | 54.5666434 | 63.6321585 |
| 18:32:47 | 0:32:16 | 61.8197433 | 58.8243232 | 69.1349434 | 54.5666434 | 63.6321585 |
| 18:32:48 | 0:32:17 | 61.8197433 | 58.8243232 | 68.1349434 | 54.5666434 | 63.6321585 |
| 18:32:49 | 0:32:18 | 61.8197433 | 58.8243232 | 67.1349434 | 54.5666434 | 63.6321585 |
| 18:32:50 | 0:32:19 | 61.8197433 | 57.8243232 | 67.1349434 | 54.5666434 | 62.6321585 |
| 18:32:51 | 0:32:20 | 61.8197433 | 57.8243232 | 67.1349434 | 58.5666434 | 62.6321585 |
| 18:32:52 | 0:32:21 | 61.8197433 | 57.8243232 | 68.1349434 | 58.5666434 | 62.6321585 |
| 18:32:53 | 0:32:22 | 61.8197433 | 57.8243232 | 68.1349434 | 59.5666434 | 62.6321585 |
| 18:32:54 | 0:32:23 | 62.8197433 | 57.8243232 | 68.1349434 | 60.5666434 | 62.6321585 |
| 18:32:55 | 0:32:24 | 65.8197433 | 56.8243232 | 68.1349434 | 59.5666434 | 60.6321585 |
| 18:32:56 | 0:32:25 | 67.8197433 | 57.8243232 | 68.1349434 | 58.5666434 | 60.6321585 |
| 18:32:57 | 0:32:26 | 70.8197433 | 56.8243232 | 69.1349434 | 58.5666434 | 60.6321585 |
| 18:32:58 | 0:32:27 | 71.8197433 | 56.8243232 | 69.1349434 | 58.5666434 | 60.6321585 |
| 18:32:59 | 0:32:28 | 71.8197433 | 56.8243232 | 69.1349434 | 57.5666434 | 60.6321585 |
| 18:33:00 | 0:32:29 | 71.8197433 | 56.8243232 | 69.1349434 | 58.5666434 | 60.6321585 |
| 18:33:01 | 0:32:30 | 71.8197433 | 57.8243232 | 69.1349434 | 58.5666434 | 60.6321585 |
| 18:33:02 | 0:32:31 | 70.8197433 | 57.8243232 | 69.1349434 | 58.5666434 | 59.6321585 |
| 18:33:03 | 0:32:32 | 70.8197433 | 58.8243232 | 64.1349434 | 58.5666434 | 59.6321585 |
| 18:33:04 | 0:32:33 | 71.8197433 | 58.8243232 | 60.1349434 | 58.5666434 | 59.6321585 |
| 18:33:05 | 0:32:34 | 70.8197433 | 58.8243232 | 60.1349434 | 58.5666434 | 59.6321585 |
| 18:33:06 | 0:32:35 | 70.8197433 | 58.8243232 | 61.1349434 | 58.5666434 | 59.6321585 |
| 18:33:07 | 0:32:36 | 70.8197433 | 61.8243232 | 62.1349434 | 58.5666434 | 59.6321585 |
| 18:33:08 | 0:32:37 | 71.8197433 | 61.8243232 | 62.1349434 | 58.5666434 | 59.6321585 |
| 18:33:09 | 0:32:38 | 73.8197433 | 62.8243232 | 62.1349434 | 58.5666434 | 59.6321585 |
| 18:33:10 | 0:32:39 | 73.8197433 | 62.8243232 | 62.1349434 | 58.5666434 | 59.6321585 |
| 18:33:11 | 0:32:40 | 69.8197433 | 61.8243232 | 62.1349434 | 58.5666434 | 64.6321585 |
| 18:33:12 | 0:32:41 | 67.8197433 | 60.8243232 | 62.1349434 | 59.5666434 | 65.6321585 |
| 18:33:13 | 0:32:42 | 64.8197433 | 61.8243232 | 62.1349434 | 59.5666434 | 66.6321585 |
| 18:33:14 | 0:32:43 | 63.8197433 | 61.8243232 | 64.1349434 | 58.5666434 | 66.6321585 |
| 18:33:15 | 0:32:44 | 62.8197433 | 60.8243232 | 62.1349434 | 57.5666434 | 67.6321585 |
| 18:33:16 | 0:32:45 | 62.8197433 | 60.8243232 | 62.1349434 | 57.5666434 | 67.6321585 |
| 18:33:17 | 0:32:46 | 61.8197433 | 60.8243232 | 55.1349434 | 57.5666434 | 69.6321585 |
| 18:33:18 | 0:32:47 | 61.8197433 | 60.8243232 | 55.1349434 | 57.5666434 | 69.6321585 |
| 18:33:19 | 0:32:48 | 61.8197433 | 58.8243232 | 52.1349434 | 58.5666434 | 70.6321585 |
| 18:33:20 | 0:32:49 | 61.8197433 | 58.8243232 | 52.1349434 | 58.5666434 | 72.6321585 |
| 18:33:21 | 0:32:50 | 60.8197433 | 58.8243232 | 54.1349434 | 58.5666434 | 77.6321585 |
| 18:33:22 | 0:32:51 | 60.8197433 | 58.8243232 | 56.1349434 | 58.5666434 | 79.6321585 |
| 18:33:23 | 0:32:52 | 60.8197433 | 58.8243232 | 56.1349434 | 58.5666434 | 79.6321585 |
| 18:33:24 | 0:32:53 | 60.8197433 | 58.8243232 | 57.1349434 | 58.5666434 | 65.1925569 |
| 18:33:25 | 0:32:54 | 60.8197433 | 58.8243232 | 56.1349434 | 58.5666434 | 65.2925569 |
| 18:33:26 | 0:32:55 | 60.8197433 | 58.8243232 | 56.1349434 | 57.5666434 | 65.5925569 |
| 18:33:27 | 0:32:56 | 60.8197433 | 59.8243232 | 56.1349434 | 57.5666434 | 65.7925569 |

|          |         |            |            |            |            |            |
|----------|---------|------------|------------|------------|------------|------------|
| 18:33:28 | 0:32:57 | 60.8197433 | 59.8243232 | 56.1349434 | 61.5666434 | 66.2925569 |
| 18:33:29 | 0:32:58 | 60.8197433 | 66.8243232 | 57.1349434 | 61.5666434 | 66.9925569 |
| 18:33:30 | 0:32:59 | 60.8197433 | 66.8243232 | 56.1349434 | 60.5666434 | 77.6321585 |
| 18:33:31 | 0:33:00 | 59.8197433 | 67.8243232 | 56.1349434 | 60.5666434 | 70.6321585 |
| 18:33:32 | 0:33:01 | 59.8197433 | 67.8243232 | 56.1349434 | 60.5666434 | 67.6321585 |
| 18:33:33 | 0:33:02 | 59.8197433 | 67.8243232 | 55.1349434 | 55.5666434 | 67.6321585 |
| 18:33:34 | 0:33:03 | 59.8197433 | 67.8243232 | 55.1349434 | 54.5666434 | 63.6321585 |
| 18:33:35 | 0:33:04 | 59.8197433 | 67.8243232 | 55.1349434 | 53.5666434 | 63.6321585 |
| 18:33:36 | 0:33:05 | 59.8197433 | 67.8243232 | 55.1349434 | 53.5666434 | 63.6321585 |
| 18:33:37 | 0:33:06 | 59.8197433 | 67.8243232 | 55.1349434 | 52.5666434 | 63.6321585 |
| 18:33:38 | 0:33:07 | 59.8197433 | 66.8243232 | 55.1349434 | 50.5666434 | 62.6321585 |
| 18:33:39 | 0:33:08 | 59.8197433 | 66.8243232 | 62.1349434 | 49.5666434 | 62.6321585 |
| 18:33:40 | 0:33:09 | 59.8197433 | 65.8243232 | 78.1349434 | 49.5666434 | 59.6321585 |
| 18:33:41 | 0:33:10 | 62.8197433 | 64.8243232 | 64.5925569 | 49.5666434 | 61.6321585 |
| 18:33:42 | 0:33:11 | 63.8197433 | 64.8243232 | 65.8925569 | 49.5666434 | 63.6321585 |
| 18:33:43 | 0:33:12 | 64.8197433 | 62.8243232 | 65.9925569 | 49.5666434 | 63.6321585 |
| 18:33:44 | 0:33:13 | 63.8197433 | 58.8243232 | 65.3925569 | 49.5666434 | 63.6321585 |
| 18:33:45 | 0:33:14 | 63.8197433 | 57.8243232 | 65.2925569 | 49.5666434 | 63.6321585 |
| 18:33:46 | 0:33:15 | 63.8197433 | 58.8243232 | 65.3925569 | 49.5666434 | 63.6321585 |
| 18:33:47 | 0:33:16 | 64.8197433 | 58.8243232 | 65.7925569 | 49.5666434 | 64.6321585 |
| 18:33:48 | 0:33:17 | 64.8197433 | 59.8243232 | 65.9925569 | 51.5666434 | 64.6321585 |
| 18:33:49 | 0:33:18 | 65.8197433 | 59.8243232 | 66.1925569 | 51.5666434 | 66.6321585 |
| 18:33:50 | 0:33:19 | 66.8197433 | 58.8243232 | 66.4925569 | 54.5666434 | 66.6321585 |
| 18:33:51 | 0:33:20 | 67.8197433 | 58.8243232 | 66.8925569 | 54.5666434 | 68.6321585 |
| 18:33:52 | 0:33:21 | 67.8197433 | 57.8243232 | 67.2925569 | 54.5666434 | 69.6321585 |
| 18:33:53 | 0:33:22 | 69.8197433 | 57.8243232 | 68.2925569 | 56.5666434 | 66.6321585 |
| 18:33:54 | 0:33:23 | 70.8197433 | 57.8243232 | 68.8925569 | 56.5666434 | 66.6321585 |
| 18:33:55 | 0:33:24 | 70.8197433 | 57.8243232 | 69.8925569 | 56.5666434 | 65.6321585 |
| 18:33:56 | 0:33:25 | 67.8197433 | 57.8243232 | 69.8925569 | 58.5666434 | 65.6321585 |
| 18:33:57 | 0:33:26 | 66.8197433 | 58.8243232 | 69.3925569 | 58.5666434 | 64.6321585 |
| 18:33:58 | 0:33:27 | 65.8197433 | 58.8243232 | 69.1925569 | 58.5666434 | 64.6321585 |
| 18:33:59 | 0:33:28 | 65.8197433 | 58.8243232 | 69.1925569 | 58.5666434 | 64.6321585 |
| 18:34:00 | 0:33:29 | 64.8197433 | 59.8243232 | 68.9925569 | 58.5666434 | 65.6321585 |
| 18:34:01 | 0:33:30 | 62.8197433 | 64.8243232 | 69.2925569 | 58.5666434 | 65.6321585 |
| 18:34:02 | 0:33:31 | 62.8197433 | 78.8243232 | 69.3925569 | 57.5666434 | 65.6321585 |
| 18:34:03 | 0:33:32 | 62.8197433 | 80.8243232 | 70.0925569 | 57.5666434 | 69.6321585 |
| 18:34:04 | 0:33:33 | 62.8197433 | 80.8243232 | 87.1349434 | 57.5666434 | 69.6321585 |
| 18:34:05 | 0:33:34 | 62.8197433 | 77.8243232 | 80.1349434 | 57.5666434 | 71.6321585 |
| 18:34:06 | 0:33:35 | 62.8197433 | 75.8243232 | 75.1349434 | 56.5666434 | 73.6321585 |
| 18:34:07 | 0:33:36 | 61.8197433 | 75.8243232 | 75.1349434 | 56.5666434 | 73.6321585 |
| 18:34:08 | 0:33:37 | 61.8197433 | 73.8243232 | 74.1349434 | 56.5666434 | 73.6321585 |
| 18:34:09 | 0:33:38 | 61.8197433 | 73.8243232 | 73.1349434 | 55.5666434 | 74.6321585 |
| 18:34:10 | 0:33:39 | 61.8197433 | 69.8243232 | 68.1349434 | 55.5666434 | 78.6321585 |
| 18:34:11 | 0:33:40 | 61.8197433 | 64.8243232 | 66.1349434 | 55.5666434 | 79.6321585 |
| 18:34:12 | 0:33:41 | 61.8197433 | 64.8243232 | 66.1349434 | 55.5666434 | 79.6321585 |

|          |         |            |            |            |            |            |
|----------|---------|------------|------------|------------|------------|------------|
| 18:34:13 | 0:33:42 | 60.8197433 | 61.8243232 | 66.1349434 | 54.5666434 | 81.6321585 |
| 18:34:14 | 0:33:43 | 60.8197433 | 57.8243232 | 65.1349434 | 54.5666434 | 81.6321585 |
| 18:34:15 | 0:33:44 | 60.8197433 | 57.8243232 | 62.1349434 | 52.5666434 | 81.6321585 |
| 18:34:16 | 0:33:45 | 61.8197433 | 57.8243232 | 61.1349434 | 52.5666434 | 76.6321585 |
| 18:34:17 | 0:33:46 | 61.8197433 | 56.8243232 | 62.1349434 | 52.5666434 | 75.6321585 |
| 18:34:18 | 0:33:47 | 61.8197433 | 57.8243232 | 65.1349434 | 52.5666434 | 75.6321585 |
| 18:34:19 | 0:33:48 | 61.8197433 | 57.8243232 | 65.1349434 | 52.5666434 | 75.6321585 |
| 18:34:20 | 0:33:49 | 61.8197433 | 57.8243232 | 64.1349434 | 54.5666434 | 75.6321585 |
| 18:34:21 | 0:33:50 | 61.8197433 | 57.8243232 | 62.1349434 | 56.5666434 | 76.6321585 |
| 18:34:22 | 0:33:51 | 61.8197433 | 57.8243232 | 61.1349434 | 56.5666434 | 76.6321585 |
| 18:34:23 | 0:33:52 | 61.8197433 | 56.8243232 | 61.1349434 | 56.5666434 | 79.6321585 |
| 18:34:24 | 0:33:53 | 61.8197433 | 56.8243232 | 61.1349434 | 56.5666434 | 79.6321585 |
| 18:34:25 | 0:33:54 | 61.8197433 | 56.8243232 | 61.1349434 | 56.5666434 | 63.7925569 |
| 18:34:26 | 0:33:55 | 61.8197433 | 56.8243232 | 61.1349434 | 56.5666434 | 64.3925569 |
| 18:34:27 | 0:33:56 | 61.8197433 | 55.8243232 | 61.1349434 | 57.5666434 | 64.6925569 |
| 18:34:28 | 0:33:57 | 62.8197433 | 55.8243232 | 61.1349434 | 61.5666434 | 65.9925569 |
| 18:34:29 | 0:33:58 | 62.8197433 | 55.8243232 | 62.1349434 | 61.5666434 | 65.9925569 |
| 18:34:30 | 0:33:59 | 61.8197433 | 54.8243232 | 62.1349434 | 61.5666434 | 65.7925569 |
| 18:34:31 | 0:34:00 | 60.8197433 | 54.8243232 | 61.1349434 | 61.5666434 | 65.3925569 |
| 18:34:32 | 0:34:01 | 60.8197433 | 54.8243232 | 60.1349434 | 61.5666434 | 65.1925569 |
| 18:34:33 | 0:34:02 | 60.8197433 | 57.8243232 | 58.1349434 | 62.5666434 | 64.8925569 |
| 18:34:34 | 0:34:03 | 60.8197433 | 57.8243232 | 56.1349434 | 62.5666434 | 64.6925569 |
| 18:34:35 | 0:34:04 | 61.8197433 | 58.8243232 | 56.1349434 | 62.5666434 | 64.6925569 |
| 18:34:36 | 0:34:05 | 61.8197433 | 57.8243232 | 56.1349434 | 62.5666434 | 64.5925569 |
| 18:34:37 | 0:34:06 | 61.8197433 | 58.8243232 | 56.1349434 | 60.5666434 | 64.2925569 |
| 18:34:38 | 0:34:07 | 61.8197433 | 58.8243232 | 57.1349434 | 60.5666434 | 82.6321585 |
| 18:34:39 | 0:34:08 | 61.8197433 | 58.8243232 | 58.1349434 | 60.5666434 | 82.6321585 |
| 18:34:40 | 0:34:09 | 61.8197433 | 58.8243232 | 58.1349434 | 60.5666434 | 71.6321585 |
| 18:34:41 | 0:34:10 | 61.8197433 | 58.8243232 | 58.1349434 | 61.5666434 | 67.6321585 |
| 18:34:42 | 0:34:11 | 61.8197433 | 60.8243232 | 58.1349434 | 61.5666434 | 65.6321585 |
| 18:34:43 | 0:34:12 | 62.8197433 | 60.8243232 | 58.1349434 | 61.5666434 | 65.6321585 |
| 18:34:44 | 0:34:13 | 61.8197433 | 64.8243232 | 59.1349434 | 61.5666434 | 64.6321585 |
| 18:34:45 | 0:34:14 | 61.8197433 | 67.8243232 | 62.1349434 | 61.5666434 | 63.6321585 |
| 18:34:46 | 0:34:15 | 61.8197433 | 69.8243232 | 64.1349434 | 61.5666434 | 63.6321585 |
| 18:34:47 | 0:34:16 | 61.8197433 | 69.8243232 | 64.1349434 | 61.5666434 | 63.6321585 |
| 18:34:48 | 0:34:17 | 61.8197433 | 70.8243232 | 64.1349434 | 60.5666434 | 63.6321585 |
| 18:34:49 | 0:34:18 | 61.8197433 | 70.8243232 | 67.1349434 | 60.5666434 | 63.6321585 |
| 18:34:50 | 0:34:19 | 61.8197433 | 70.8243232 | 67.1349434 | 60.5666434 | 63.6321585 |
| 18:34:51 | 0:34:20 | 61.8197433 | 70.8243232 | 67.1349434 | 61.5666434 | 63.6321585 |
| 18:34:52 | 0:34:21 | 62.8197433 | 71.8243232 | 61.1349434 | 61.5666434 | 63.6321585 |
| 18:34:53 | 0:34:22 | 61.8197433 | 71.8243232 | 58.1349434 | 61.5666434 | 63.6321585 |
| 18:34:54 | 0:34:23 | 61.8197433 | 71.8243232 | 59.1349434 | 61.5666434 | 63.6321585 |
| 18:34:55 | 0:34:24 | 61.8197433 | 72.8243232 | 59.1349434 | 61.5666434 | 63.6321585 |
| 18:34:56 | 0:34:25 | 61.8197433 | 72.8243232 | 59.1349434 | 62.5666434 | 63.6321585 |
| 18:34:57 | 0:34:26 | 61.8197433 | 73.8243232 | 59.1349434 | 62.5666434 | 65.6321585 |



|          |         |            |            |            |            |            |
|----------|---------|------------|------------|------------|------------|------------|
| 18:34:58 | 0:34:27 | 61.8197433 | 74.8243232 | 59.1349434 | 63.5666434 | 65.6321585 |
| 18:34:59 | 0:34:28 | 61.8197433 | 79.8243232 | 59.1349434 | 60.5666434 | 65.6321585 |
| 18:35:00 | 0:34:29 | 61.8197433 | 79.8243232 | 60.1349434 | 60.5666434 | 65.6321585 |
| 18:35:01 | 0:34:30 | 61.8197433 | 78.8243232 | 62.1349434 | 60.5666434 | 65.6321585 |
| 18:35:02 | 0:34:31 | 61.8197433 | 78.8243232 | 62.1349434 | 60.5666434 | 66.6321585 |
| 18:35:03 | 0:34:32 | 61.8197433 | 78.8243232 | 63.1349434 | 60.5666434 | 66.6321585 |
| 18:35:04 | 0:34:33 | 61.8197433 | 78.8243232 | 64.1349434 | 59.5666434 | 66.6321585 |
| 18:35:05 | 0:34:34 | 61.8197433 | 78.8243232 | 65.1349434 | 59.5666434 | 69.6321585 |
| 18:35:06 | 0:34:35 | 61.8197433 | 78.8243232 | 65.1349434 | 59.5666434 | 69.6321585 |
| 18:35:07 | 0:34:36 | 61.8197433 | 72.8243232 | 68.1349434 | 59.5666434 | 70.6321585 |
| 18:35:08 | 0:34:37 | 61.8197433 | 70.8243232 | 68.1349434 | 59.5666434 | 70.6321585 |
| 18:35:09 | 0:34:38 | 61.8197433 | 70.8243232 | 69.1349434 | 59.5666434 | 70.6321585 |
| 18:35:10 | 0:34:39 | 61.8197433 | 69.8243232 | 70.1349434 | 60.5666434 | 70.6321585 |
| 18:35:11 | 0:34:40 | 61.8197433 | 67.8243232 | 72.1349434 | 60.5666434 | 70.6321585 |
| 18:35:12 | 0:34:41 | 61.8197433 | 66.8243232 | 72.1349434 | 60.5666434 | 70.6321585 |
| 18:35:13 | 0:34:42 | 61.8197433 | 62.8243232 | 72.1349434 | 61.5666434 | 69.6321585 |
| 18:35:14 | 0:34:43 | 61.8197433 | 61.8243232 | 72.1349434 | 61.5666434 | 67.6321585 |
| 18:35:15 | 0:34:44 | 61.8197433 | 61.8243232 | 72.1349434 | 61.5666434 | 66.6321585 |
| 18:35:16 | 0:34:45 | 61.8197433 | 58.8243232 | 72.1349434 | 61.5666434 | 66.6321585 |
| 18:35:17 | 0:34:46 | 62.8197433 | 57.8243232 | 72.1349434 | 61.5666434 | 66.6321585 |
| 18:35:18 | 0:34:47 | 62.8197433 | 56.8243232 | 72.1349434 | 61.5666434 | 67.6321585 |
| 18:35:19 | 0:34:48 | 62.8197433 | 55.8243232 | 72.1349434 | 61.5666434 | 67.6321585 |
| 18:35:20 | 0:34:49 | 61.8197433 | 54.8243232 | 72.1349434 | 61.5666434 | 68.6321585 |
| 18:35:21 | 0:34:50 | 61.8197433 | 54.8243232 | 72.1349434 | 63.5666434 | 68.6321585 |
| 18:35:22 | 0:34:51 | 61.8197433 | 54.8243232 | 72.1349434 | 64.5666434 | 69.6321585 |
| 18:35:23 | 0:34:52 | 61.8197433 | 54.8243232 | 69.1349434 | 66.5666434 | 69.6321585 |
| 18:35:24 | 0:34:53 | 61.8197433 | 54.8243232 | 68.1349434 | 66.5666434 | 71.6321585 |
| 18:35:25 | 0:34:54 | 61.8197433 | 50.8243232 | 68.1349434 | 66.5666434 | 73.6321585 |
| 18:35:26 | 0:34:55 | 61.8197433 | 50.8243232 | 68.1349434 | 66.5666434 | 75.6321585 |
| 18:35:27 | 0:34:56 | 62.8197433 | 50.8243232 | 66.1349434 | 66.5666434 | 77.6321585 |
| 18:35:28 | 0:34:57 | 62.8197433 | 52.8243232 | 66.1349434 | 68.5666434 | 78.6321585 |
| 18:35:29 | 0:34:58 | 62.8197433 | 52.8243232 | 65.1349434 | 68.5666434 | 81.6321585 |
| 18:35:30 | 0:34:59 | 63.8197433 | 52.8243232 | 64.1349434 | 67.5666434 | 83.6321585 |
| 18:35:31 | 0:35:00 | 62.8197433 | 54.8243232 | 65.1349434 | 67.5666434 | 66.7925569 |
| 18:35:32 | 0:35:01 | 62.8197433 | 54.8243232 | 62.1349434 | 66.5666434 | 66.4925569 |
| 18:35:33 | 0:35:02 | 62.8197433 | 57.8243232 | 62.1349434 | 66.5666434 | 66.6925569 |
| 18:35:34 | 0:35:03 | 61.8197433 | 57.8243232 | 63.1349434 | 66.5666434 | 66.7925569 |
| 18:35:35 | 0:35:04 | 61.8197433 | 57.8243232 | 64.1349434 | 66.5666434 | 66.6925569 |
| 18:35:36 | 0:35:05 | 61.8197433 | 58.8243232 | 64.1349434 | 67.5666434 | 66.6925569 |
| 18:35:37 | 0:35:06 | 61.8197433 | 59.8243232 | 64.1349434 | 67.5666434 | 67.0925569 |
| 18:35:38 | 0:35:07 | 61.8197433 | 59.8243232 | 64.1349434 | 66.5666434 | 66.8925569 |
| 18:35:39 | 0:35:08 | 61.8197433 | 59.8243232 | 63.1349434 | 66.5666434 | 66.5925569 |
| 18:35:40 | 0:35:09 | 61.8197433 | 59.8243232 | 63.1349434 | 67.5666434 | 66.8925569 |
| 18:35:41 | 0:35:10 | 61.8197433 | 59.8243232 | 63.1349434 | 67.5666434 | 67.0925569 |
| 18:35:42 | 0:35:11 | 61.8197433 | 60.8243232 | 64.1349434 | 67.5666434 | 67.3925569 |

|          |         |            |            |            |            |            |
|----------|---------|------------|------------|------------|------------|------------|
| 18:35:43 | 0:35:12 | 61.8197433 | 59.8243232 | 65.1349434 | 67.5666434 | 78.6321585 |
| 18:35:44 | 0:35:13 | 61.8197433 | 59.8243232 | 65.1349434 | 69.5666434 | 78.6321585 |
| 18:35:45 | 0:35:14 | 61.8197433 | 61.8243232 | 64.1349434 | 69.5666434 | 78.6321585 |
| 18:35:46 | 0:35:15 | 61.8197433 | 65.8243232 | 59.1349434 | 69.5666434 | 74.6321585 |
| 18:35:47 | 0:35:16 | 61.8197433 | 65.8243232 | 57.1349434 | 68.5666434 | 72.6321585 |
| 18:35:48 | 0:35:17 | 61.8197433 | 70.8243232 | 57.1349434 | 68.5666434 | 69.6321585 |
| 18:35:49 | 0:35:18 | 61.8197433 | 68.8243232 | 57.1349434 | 68.5666434 | 68.6321585 |
| 18:35:50 | 0:35:19 | 62.8197433 | 67.8243232 | 58.1349434 | 68.5666434 | 65.6321585 |
| 18:35:51 | 0:35:20 | 61.8197433 | 66.8243232 | 58.1349434 | 69.5666434 | 65.6321585 |
| 18:35:52 | 0:35:21 | 61.8197433 | 66.8243232 | 59.1349434 | 70.5666434 | 65.6321585 |
| 18:35:53 | 0:35:22 | 61.8197433 | 66.8243232 | 58.1349434 | 70.5666434 | 65.6321585 |
| 18:35:54 | 0:35:23 | 61.8197433 | 63.8243232 | 58.1349434 | 75.5666434 | 65.6321585 |
| 18:35:55 | 0:35:24 | 61.8197433 | 61.8243232 | 58.1349434 | 77.5666434 | 66.6321585 |
| 18:35:56 | 0:35:25 | 61.8197433 | 61.8243232 | 59.1349434 | 78.5666434 | 66.6321585 |
| 18:35:57 | 0:35:26 | 61.8197433 | 61.8243232 | 61.1349434 | 78.5666434 | 66.6321585 |
| 18:35:58 | 0:35:27 | 61.8197433 | 60.8243232 | 62.1349434 | 78.5666434 | 66.6321585 |
| 18:35:59 | 0:35:28 | 61.8197433 | 59.8243232 | 61.1349434 | 78.5666434 | 66.6321585 |
| 18:36:00 | 0:35:29 | 61.8197433 | 59.8243232 | 61.1349434 | 78.5666434 | 66.6321585 |
| 18:36:01 | 0:35:30 | 61.8197433 | 59.8243232 | 59.1349434 | 77.5666434 | 67.6321585 |
| 18:36:02 | 0:35:31 | 61.8197433 | 62.8243232 | 59.1349434 | 77.5666434 | 67.6321585 |
| 18:36:03 | 0:35:32 | 61.8197433 | 63.8243232 | 59.1349434 | 76.5666434 | 68.6321585 |
| 18:36:04 | 0:35:33 | 61.8197433 | 63.8243232 | 59.1349434 | 74.5666434 | 69.6321585 |
| 18:36:05 | 0:35:34 | 61.8197433 | 63.8243232 | 59.1349434 | 70.5666434 | 69.6321585 |
| 18:36:06 | 0:35:35 | 61.8197433 | 64.8243232 | 57.1349434 | 68.5666434 | 69.6321585 |
| 18:36:07 | 0:35:36 | 61.8197433 | 64.8243232 | 56.1349434 | 68.5666434 | 69.6321585 |
| 18:36:08 | 0:35:37 | 61.8197433 | 64.8243232 | 56.1349434 | 66.5666434 | 70.6321585 |
| 18:36:09 | 0:35:38 | 61.8197433 | 64.8243232 | 71.1349434 | 64.5666434 | 63.6321585 |
| 18:36:10 | 0:35:39 | 61.8197433 | 63.8243232 | 72.1349434 | 62.5666434 | 63.6321585 |
| 18:36:11 | 0:35:40 | 61.8197433 | 62.8243232 | 72.1349434 | 61.5666434 | 61.6321585 |
| 18:36:12 | 0:35:41 | 61.8197433 | 62.8243232 | 69.1349434 | 58.5666434 | 62.6321585 |
| 18:36:13 | 0:35:42 | 61.8197433 | 62.8243232 | 66.1349434 | 58.5666434 | 66.6321585 |
| 18:36:14 | 0:35:43 | 61.8197433 | 62.8243232 | 66.1349434 | 58.5666434 | 68.6321585 |
| 18:36:15 | 0:35:44 | 61.8197433 | 63.8243232 | 66.1349434 | 58.5666434 | 68.6321585 |
| 18:36:16 | 0:35:45 | 61.8197433 | 64.8243232 | 65.1349434 | 59.5666434 | 68.6321585 |
| 18:36:17 | 0:35:46 | 61.8197433 | 65.8243232 | 65.1349434 | 59.5666434 | 68.6321585 |
| 18:36:18 | 0:35:47 | 61.8197433 | 64.8243232 | 65.1349434 | 59.5666434 | 68.6321585 |
| 18:36:19 | 0:35:48 | 61.8197433 | 63.8243232 | 65.1349434 | 59.5666434 | 67.6321585 |
| 18:36:20 | 0:35:49 | 61.8197433 | 62.8243232 | 65.1349434 | 58.5666434 | 64.6321585 |
| 18:36:21 | 0:35:50 | 61.8197433 | 61.8243232 | 66.1349434 | 58.5666434 | 64.6321585 |
| 18:36:22 | 0:35:51 | 61.8197433 | 61.8243232 | 68.1349434 | 58.5666434 | 64.6321585 |
| 18:36:23 | 0:35:52 | 62.8197433 | 59.8243232 | 69.1349434 | 59.5666434 | 64.6321585 |
| 18:36:24 | 0:35:53 | 62.8197433 | 59.8243232 | 69.1349434 | 61.5666434 | 64.6321585 |
| 18:36:25 | 0:35:54 | 64.8197433 | 59.8243232 | 71.1349434 | 61.5666434 | 64.6321585 |
| 18:36:26 | 0:35:55 | 64.8197433 | 59.8243232 | 71.1349434 | 61.5666434 | 64.6321585 |
| 18:36:27 | 0:35:56 | 64.8197433 | 58.8243232 | 73.1349434 | 62.5666434 | 64.6321585 |

|          |         |            |            |            |            |            |
|----------|---------|------------|------------|------------|------------|------------|
| 18:36:28 | 0:35:57 | 62.8197433 | 59.8243232 | 71.1349434 | 62.5666434 | 64.6321585 |
| 18:36:29 | 0:35:58 | 62.8197433 | 60.8243232 | 71.1349434 | 64.5666434 | 64.6321585 |
| 18:36:30 | 0:35:59 | 62.8197433 | 60.8243232 | 69.1349434 | 65.5666434 | 63.6321585 |
| 18:36:31 | 0:36:00 | 62.8197433 | 61.8243232 | 68.1349434 | 66.5666434 | 63.6321585 |
| 18:36:32 | 0:36:01 | 61.8197433 | 63.8243232 | 68.1349434 | 67.5666434 | 63.6321585 |
| 18:36:33 | 0:36:02 | 61.8197433 | 65.8243232 | 60.1349434 | 67.5666434 | 63.6321585 |
| 18:36:34 | 0:36:03 | 62.8197433 | 68.8243232 | 59.1349434 | 68.5666434 | 63.6321585 |
| 18:36:35 | 0:36:04 | 63.8197433 | 68.8243232 | 60.1349434 | 68.5666434 | 63.6321585 |
| 18:36:36 | 0:36:05 | 63.8197433 | 68.8243232 | 60.1349434 | 68.5666434 | 63.6321585 |
| 18:36:37 | 0:36:06 | 64.8197433 | 68.8243232 | 60.1349434 | 70.5666434 | 63.6321585 |
| 18:36:38 | 0:36:07 | 64.8197433 | 69.8243232 | 60.1349434 | 70.5666434 | 64.6321585 |
| 18:36:39 | 0:36:08 | 64.8197433 | 71.8243232 | 59.1349434 | 70.5666434 | 64.6321585 |
| 18:36:40 | 0:36:09 | 64.8197433 | 74.8243232 | 59.1349434 | 71.5666434 | 64.6321585 |
| 18:36:41 | 0:36:10 | 64.8197433 | 74.8243232 | 59.1349434 | 71.5666434 | 65.6321585 |
| 18:36:42 | 0:36:11 | 64.8197433 | 76.8243232 | 59.1349434 | 72.5666434 | 65.6321585 |
| 18:36:43 | 0:36:12 | 64.8197433 | 78.8243232 | 59.1349434 | 75.5666434 | 66.6321585 |
| 18:36:44 | 0:36:13 | 63.8197433 | 78.8243232 | 60.1349434 | 75.5666434 | 66.6321585 |
| 18:36:45 | 0:36:14 | 65.8197433 | 78.8243232 | 62.1349434 | 75.5666434 | 66.6321585 |
| 18:36:46 | 0:36:15 | 66.8197433 | 78.8243232 | 64.1349434 | 77.5666434 | 65.6321585 |
| 18:36:47 | 0:36:16 | 65.8197433 | 78.8243232 | 67.1349434 | 78.5666434 | 65.6321585 |
| 18:36:48 | 0:36:17 | 64.8197433 | 78.8243232 | 69.1349434 | 78.5666434 | 65.6321585 |
| 18:36:49 | 0:36:18 | 63.8197433 | 78.8243232 | 69.1349434 | 79.5666434 | 65.6321585 |
| 18:36:50 | 0:36:19 | 62.8197433 | 78.8243232 | 69.1349434 | 79.5666434 | 65.6321585 |
| 18:36:51 | 0:36:20 | 62.8197433 | 78.8243232 | 70.1349434 | 80.5666434 | 65.6321585 |
| 18:36:52 | 0:36:21 | 62.8197433 | 78.8243232 | 71.1349434 | 81.5666434 | 65.6321585 |
| 18:36:53 | 0:36:22 | 62.8197433 | 79.8243232 | 74.1349434 | 82.5666434 | 65.6321585 |
| 18:36:54 | 0:36:23 | 62.8197433 | 79.8243232 | 74.1349434 | 82.5666434 | 65.6321585 |
| 18:36:55 | 0:36:24 | 63.8197433 | 79.8243232 | 77.1349434 | 84.5666434 | 65.6321585 |
| 18:36:56 | 0:36:25 | 63.8197433 | 79.8243232 | 77.1349434 | 84.5666434 | 64.6321585 |
| 18:36:57 | 0:36:26 | 65.8197433 | 79.8243232 | 78.1349434 | 85.5666434 | 64.6321585 |
| 18:36:58 | 0:36:27 | 65.8197433 | 79.8243232 | 78.1349434 | 85.5666434 | 65.6321585 |
| 18:36:59 | 0:36:28 | 66.8197433 | 78.8243232 | 78.1349434 | 85.5666434 | 66.6321585 |
| 18:37:00 | 0:36:29 | 67.8197433 | 78.8243232 | 78.1349434 | 84.5666434 | 67.6321585 |
| 18:37:01 | 0:36:30 | 69.8197433 | 78.8243232 | 80.1349434 | 84.5666434 | 67.6321585 |
| 18:37:02 | 0:36:31 | 69.8197433 | 78.8243232 | 79.1349434 | 84.5666434 | 70.6321585 |
| 18:37:03 | 0:36:32 | 68.8197433 | 78.8243232 | 74.1349434 | 84.5666434 | 70.6321585 |
| 18:37:04 | 0:36:33 | 69.8197433 | 78.8243232 | 74.1349434 | 84.5666434 | 68.6321585 |
| 18:37:05 | 0:36:34 | 70.8197433 | 83.8243232 | 74.1349434 | 83.5666434 | 68.6321585 |
| 18:37:06 | 0:36:35 | 71.8197433 | 77.0925569 | 73.1349434 | 81.5666434 | 65.6321585 |
| 18:37:07 | 0:36:36 | 73.8197433 | 75.7925569 | 73.1349434 | 69.5666434 | 64.6321585 |
| 18:37:08 | 0:36:37 | 72.8197433 | 77.1925569 | 73.1349434 | 69.5666434 | 64.6321585 |
| 18:37:09 | 0:36:38 | 67.8197433 | 77.0925569 | 73.1349434 | 65.5666434 | 64.6321585 |
| 18:37:10 | 0:36:39 | 65.8197433 | 76.8925569 | 73.1349434 | 64.5666434 | 64.6321585 |
| 18:37:11 | 0:36:40 | 64.8197433 | 77.0925569 | 70.1349434 | 63.5666434 | 64.6321585 |
| 18:37:12 | 0:36:41 | 63.8197433 | 76.6925569 | 68.1349434 | 60.5666434 | 64.6321585 |

|          |         |            |            |            |            |            |
|----------|---------|------------|------------|------------|------------|------------|
| 18:37:13 | 0:36:42 | 63.8197433 | 76.3925569 | 66.1349434 | 60.5666434 | 65.6321585 |
| 18:37:14 | 0:36:43 | 63.8197433 | 75.1925569 | 65.1349434 | 60.5666434 | 65.6321585 |
| 18:37:15 | 0:36:44 | 63.8197433 | 74.8925569 | 65.1349434 | 60.5666434 | 65.6321585 |
| 18:37:16 | 0:36:45 | 64.8197433 | 74.2925569 | 64.1349434 | 59.5666434 | 65.6321585 |
| 18:37:17 | 0:36:46 | 65.8197433 | 74.2925569 | 64.1349434 | 59.5666434 | 65.6321585 |
| 18:37:18 | 0:36:47 | 66.8197433 | 74.2925569 | 64.1349434 | 59.5666434 | 65.6321585 |
| 18:37:19 | 0:36:48 | 66.8197433 | 73.9925569 | 64.1349434 | 59.5666434 | 65.6321585 |
| 18:37:20 | 0:36:49 | 66.8197433 | 73.9925569 | 63.1349434 | 59.5666434 | 68.6321585 |
| 18:37:21 | 0:36:50 | 66.8197433 | 73.8925569 | 62.1349434 | 59.5666434 | 68.6321585 |
| 18:37:22 | 0:36:51 | 68.8197433 | 74.0925569 | 62.1349434 | 58.5666434 | 68.6321585 |
| 18:37:23 | 0:36:52 | 69.8197433 | 74.2925569 | 64.1349434 | 58.5666434 | 69.6321585 |
| 18:37:24 | 0:36:53 | 70.8197433 | 74.3925569 | 65.1349434 | 59.5666434 | 69.6321585 |
| 18:37:25 | 0:36:54 | 70.8197433 | 74.3925569 | 65.1349434 | 59.5666434 | 70.6321585 |
| 18:37:26 | 0:36:55 | 70.8197433 | 74.3925569 | 66.1349434 | 59.5666434 | 70.6321585 |
| 18:37:27 | 0:36:56 | 70.8197433 | 74.2925569 | 68.1349434 | 59.5666434 | 69.6321585 |
| 18:37:28 | 0:36:57 | 70.8197433 | 74.1925569 | 68.1349434 | 59.5666434 | 69.6321585 |
| 18:37:29 | 0:36:58 | 68.8197433 | 74.3925569 | 74.1349434 | 59.5666434 | 69.6321585 |
| 18:37:30 | 0:36:59 | 68.8197433 | 74.1925569 | 74.1349434 | 59.5666434 | 69.6321585 |
| 18:37:31 | 0:37:00 | 66.8197433 | 74.1925569 | 73.1349434 | 59.5666434 | 69.6321585 |
| 18:37:32 | 0:37:01 | 63.8197433 | 73.3925569 | 71.1349434 | 57.5666434 | 69.6321585 |
| 18:37:33 | 0:37:02 | 62.8197433 | 74.4925569 | 70.1349434 | 58.5666434 | 69.6321585 |
| 18:37:34 | 0:37:03 | 62.8197433 | 74.4925569 | 69.1349434 | 58.5666434 | 68.6321585 |
| 18:37:35 | 0:37:04 | 62.8197433 | 74.1925569 | 67.1349434 | 58.5666434 | 66.6321585 |
| 18:37:36 | 0:37:05 | 62.8197433 | 74.3925569 | 67.1349434 | 58.5666434 | 65.6321585 |
| 18:37:37 | 0:37:06 | 62.8197433 | 74.3925569 | 67.1349434 | 58.5666434 | 66.6321585 |
| 18:37:38 | 0:37:07 | 62.8197433 | 74.0925569 | 67.1349434 | 58.5666434 | 66.6321585 |
| 18:37:39 | 0:37:08 | 63.8197433 | 73.5925569 | 69.1349434 | 58.5666434 | 66.6321585 |
| 18:37:40 | 0:37:09 | 62.8197433 | 73.4925569 | 70.1349434 | 58.5666434 | 67.6321585 |
| 18:37:41 | 0:37:10 | 62.8197433 | 73.1925569 | 68.1349434 | 58.5666434 | 68.6321585 |
| 18:37:42 | 0:37:11 | 62.8197433 | 72.3925569 | 64.1349434 | 58.5666434 | 69.6321585 |
| 18:37:43 | 0:37:12 | 62.8197433 | 71.4925569 | 60.1349434 | 59.5666434 | 69.6321585 |
| 18:37:44 | 0:37:13 | 62.8197433 | 71.2925569 | 57.1349434 | 59.5666434 | 69.6321585 |
| 18:37:45 | 0:37:14 | 62.8197433 | 71.3925569 | 55.1349434 | 59.5666434 | 69.6321585 |
| 18:37:46 | 0:37:15 | 62.8197433 | 70.7925569 | 55.1349434 | 58.5666434 | 66.6321585 |
| 18:37:47 | 0:37:16 | 62.8197433 | 70.2925569 | 55.1349434 | 57.5666434 | 65.6321585 |
| 18:37:48 | 0:37:17 | 62.8197433 | 71.3909651 | 55.1349434 | 57.5666434 | 65.6321585 |
| 18:37:49 | 0:37:18 | 63.8197433 | 63.9336359 | 53.1349434 | 58.5666434 | 65.6321585 |
| 18:37:50 | 0:37:19 | 63.8197433 | 71.1925569 | 51.1349434 | 59.5666434 | 66.6321585 |
| 18:37:51 | 0:37:20 | 63.8197433 | 71.0925569 | 50.1349434 | 60.5666434 | 66.6321585 |
| 18:37:52 | 0:37:21 | 62.8197433 | 70.9925569 | 50.1349434 | 60.5666434 | 66.6321585 |
| 18:37:53 | 0:37:22 | 62.8197433 | 70.5925569 | 52.1349434 | 60.5666434 | 65.6321585 |
| 18:37:54 | 0:37:23 | 62.8197433 | 71.0925569 | 54.1349434 | 61.5666434 | 65.6321585 |
| 18:37:55 | 0:37:24 | 62.8197433 | 71.2925569 | 55.1349434 | 61.5666434 | 65.6321585 |
| 18:37:56 | 0:37:25 | 62.8197433 | 71.4925569 | 58.1349434 | 61.5666434 | 65.6321585 |
| 18:37:57 | 0:37:26 | 63.8197433 | 71.9925569 | 60.1349434 | 62.5666434 | 65.6321585 |

|          |         |            |            |            |            |            |
|----------|---------|------------|------------|------------|------------|------------|
| 18:37:58 | 0:37:27 | 63.8197433 | 72.3925569 | 63.1349434 | 62.5666434 | 65.6321585 |
| 18:37:59 | 0:37:28 | 64.8197433 | 72.4925569 | 66.1349434 | 62.5666434 | 64.6321585 |
| 18:38:00 | 0:37:29 | 65.8197433 | 72.5925569 | 68.1349434 | 64.5666434 | 64.6321585 |
| 18:38:01 | 0:37:30 | 65.8197433 | 72.2925569 | 69.1349434 | 60.5666434 | 65.6321585 |
| 18:38:02 | 0:37:31 | 62.8197433 | 71.2925569 | 69.1349434 | 59.5666434 | 65.6321585 |
| 18:38:03 | 0:37:32 | 62.8197433 | 70.9925569 | 68.1349434 | 58.5666434 | 65.6321585 |
| 18:38:04 | 0:37:33 | 61.8197433 | 70.9925569 | 67.1349434 | 58.5666434 | 65.6321585 |
| 18:38:05 | 0:37:34 | 62.8197433 | 70.7925569 | 67.1349434 | 56.5666434 | 65.6321585 |
| 18:38:06 | 0:37:35 | 62.8197433 | 71.0925569 | 67.1349434 | 57.5666434 | 66.6321585 |
| 18:38:07 | 0:37:36 | 61.8197433 | 71.0925569 | 66.1349434 | 58.5666434 | 67.6321585 |
| 18:38:08 | 0:37:37 | 61.8197433 | 71.0925569 | 65.1349434 | 58.5666434 | 67.6321585 |
| 18:38:09 | 0:37:38 | 61.8197433 | 70.5925569 | 65.1349434 | 55.5666434 | 66.6321585 |
| 18:38:10 | 0:37:39 | 62.8197433 | 69.8925569 | 63.1349434 | 54.5666434 | 65.6321585 |
| 18:38:11 | 0:37:40 | 62.8197433 | 69.7925569 | 63.1349434 | 54.5666434 | 64.6321585 |
| 18:38:12 | 0:37:41 | 62.8197433 | 69.6925569 | 63.1349434 | 53.5666434 | 64.6321585 |
| 18:38:13 | 0:37:42 | 61.8197433 | 69.1925569 | 61.1349434 | 53.5666434 | 64.6321585 |
| 18:38:14 | 0:37:43 | 61.8197433 | 69.3925569 | 62.1349434 | 53.5666434 | 64.6321585 |
| 18:38:15 | 0:37:44 | 61.8197433 | 69.4925569 | 62.1349434 | 53.5666434 | 64.6321585 |
| 18:38:16 | 0:37:45 | 61.8197433 | 69.7925569 | 66.1349434 | 53.5666434 | 64.6321585 |
| 18:38:17 | 0:37:46 | 61.8197433 | 69.2925569 | 68.1349434 | 53.5666434 | 64.6321585 |
| 18:38:18 | 0:37:47 | 61.8197433 | 68.6925569 | 68.1349434 | 53.5666434 | 64.6321585 |
| 18:38:19 | 0:37:48 | 61.8197433 | 67.5925569 | 67.1349434 | 53.5666434 | 64.6321585 |
| 18:38:20 | 0:37:49 | 61.8197433 | 72.8243232 | 67.1349434 | 53.5666434 | 64.6321585 |
| 18:38:21 | 0:37:50 | 61.8197433 | 72.8243232 | 67.1349434 | 53.5666434 | 64.6321585 |
| 18:38:22 | 0:37:51 | 62.8197433 | 72.8243232 | 66.1349434 | 54.5666434 | 64.6321585 |
| 18:38:23 | 0:37:52 | 62.8197433 | 70.8243232 | 66.1349434 | 56.5666434 | 64.6321585 |
| 18:38:24 | 0:37:53 | 62.8197433 | 73.8243232 | 66.1349434 | 56.5666434 | 65.6321585 |
| 18:38:25 | 0:37:54 | 62.8197433 | 74.8243232 | 66.1349434 | 55.5666434 | 65.6321585 |
| 18:38:26 | 0:37:55 | 63.8197433 | 74.8243232 | 65.1349434 | 55.5666434 | 65.6321585 |
| 18:38:27 | 0:37:56 | 63.8197433 | 73.8243232 | 64.1349434 | 56.5666434 | 65.6321585 |
| 18:38:28 | 0:37:57 | 64.8197433 | 73.8243232 | 64.1349434 | 59.5666434 | 66.6321585 |
| 18:38:29 | 0:37:58 | 63.8197433 | 73.8243232 | 65.1349434 | 60.5666434 | 66.6321585 |
| 18:38:30 | 0:37:59 | 63.8197433 | 73.8243232 | 65.1349434 | 60.5666434 | 66.6321585 |
| 18:38:31 | 0:38:00 | 63.8197433 | 73.8243232 | 65.1349434 | 60.5666434 | 67.6321585 |
| 18:38:32 | 0:38:01 | 63.8197433 | 75.8243232 | 53.1349434 | 60.5666434 | 67.6321585 |
| 18:38:33 | 0:38:02 | 62.8197433 | 80.8243232 | 49.1349434 | 60.5666434 | 69.6321585 |
| 18:38:34 | 0:38:03 | 62.8197433 | 80.8243232 | 48.1349434 | 60.5666434 | 70.6321585 |
| 18:38:35 | 0:38:04 | 62.8197433 | 81.8243232 | 46.1349434 | 61.5666434 | 70.6321585 |
| 18:38:36 | 0:38:05 | 62.8197433 | 81.8243232 | 45.1349434 | 61.5666434 | 71.6321585 |
| 18:38:37 | 0:38:06 | 61.8197433 | 81.8243232 | 44.1349434 | 61.5666434 | 72.6321585 |
| 18:38:38 | 0:38:07 | 62.8197433 | 81.8243232 | 44.1349434 | 61.5666434 | 73.6321585 |
| 18:38:39 | 0:38:08 | 62.8197433 | 81.8243232 | 45.1349434 | 61.5666434 | 71.6321585 |
| 18:38:40 | 0:38:09 | 61.8197433 | 81.8243232 | 46.1349434 | 61.5666434 | 71.6321585 |
| 18:38:41 | 0:38:10 | 61.8197433 | 81.8243232 | 47.1349434 | 61.5666434 | 68.6321585 |
| 18:38:42 | 0:38:11 | 61.8197433 | 81.8243232 | 47.1349434 | 61.5666434 | 68.6321585 |

|          |         |            |            |            |            |            |
|----------|---------|------------|------------|------------|------------|------------|
| 18:38:43 | 0:38:12 | 62.8197433 | 82.8243232 | 47.1349434 | 62.5666434 | 61.6321585 |
| 18:38:44 | 0:38:13 | 61.8197433 | 82.8243232 | 48.1349434 | 61.5666434 | 61.6321585 |
| 18:38:45 | 0:38:14 | 61.8197433 | 82.8243232 | 54.1349434 | 61.5666434 | 61.6321585 |
| 18:38:46 | 0:38:15 | 61.8197433 | 82.8243232 | 61.1349434 | 61.5666434 | 61.6321585 |
| 18:38:47 | 0:38:16 | 61.8197433 | 84.8243232 | 63.1349434 | 61.5666434 | 61.6321585 |
| 18:38:48 | 0:38:17 | 61.8197433 | 68.2925569 | 65.1349434 | 59.5666434 | 60.6321585 |
| 18:38:49 | 0:38:18 | 60.8197433 | 68.0925569 | 65.1349434 | 58.5666434 | 60.6321585 |
| 18:38:50 | 0:38:19 | 60.8197433 | 76.8243232 | 66.1349434 | 58.5666434 | 60.6321585 |
| 18:38:51 | 0:38:20 | 60.8197433 | 64.8243232 | 65.1349434 | 58.5666434 | 60.6321585 |
| 18:38:52 | 0:38:21 | 61.8197433 | 60.8243232 | 63.1349434 | 58.5666434 | 60.6321585 |
| 18:38:53 | 0:38:22 | 61.8197433 | 60.8243232 | 60.1349434 | 58.5666434 | 58.6321585 |
| 18:38:54 | 0:38:23 | 61.8197433 | 59.8243232 | 59.1349434 | 58.5666434 | 62.6321585 |
| 18:38:55 | 0:38:24 | 61.8197433 | 59.8243232 | 59.1349434 | 58.5666434 | 63.6321585 |
| 18:38:56 | 0:38:25 | 60.8197433 | 63.8243232 | 60.1349434 | 59.5666434 | 63.6321585 |
| 18:38:57 | 0:38:26 | 60.8197433 | 66.8243232 | 60.1349434 | 59.5666434 | 63.6321585 |
| 18:38:58 | 0:38:27 | 61.8197433 | 66.8243232 | 59.1349434 | 60.5666434 | 63.6321585 |
| 18:38:59 | 0:38:28 | 61.8197433 | 62.8243232 | 57.1349434 | 60.5666434 | 65.6321585 |
| 18:39:00 | 0:38:29 | 63.8197433 | 61.8243232 | 56.1349434 | 61.5666434 | 66.6321585 |
| 18:39:01 | 0:38:30 | 68.8197433 | 61.8243232 | 56.1349434 | 61.5666434 | 66.6321585 |
| 18:39:02 | 0:38:31 | 69.8197433 | 61.8243232 | 56.1349434 | 61.5666434 | 67.6321585 |
| 18:39:03 | 0:38:32 | 69.8197433 | 61.8243232 | 57.1349434 | 62.5666434 | 67.6321585 |
| 18:39:04 | 0:38:33 | 71.8197433 | 61.8243232 | 57.1349434 | 62.5666434 | 68.6321585 |
| 18:39:05 | 0:38:34 | 73.8197433 | 61.8243232 | 57.1349434 | 61.5666434 | 68.6321585 |
| 18:39:06 | 0:38:35 | 77.8197433 | 62.8243232 | 57.1349434 | 59.5666434 | 68.6321585 |
| 18:39:07 | 0:38:36 | 78.8197433 | 62.8243232 | 57.1349434 | 59.5666434 | 68.6321585 |
| 18:39:08 | 0:38:37 | 77.8197433 | 62.8243232 | 58.1349434 | 59.5666434 | 67.6321585 |
| 18:39:09 | 0:38:38 | 77.8197433 | 63.8243232 | 59.1349434 | 64.5666434 | 67.6321585 |
| 18:39:10 | 0:38:39 | 79.8197433 | 63.8243232 | 59.1349434 | 64.5666434 | 67.6321585 |
| 18:39:11 | 0:38:40 | 79.8197433 | 64.8243232 | 58.1349434 | 64.5666434 | 67.6321585 |
| 18:39:12 | 0:38:41 | 79.8197433 | 67.8243232 | 58.1349434 | 61.5666434 | 67.6321585 |
| 18:39:13 | 0:38:42 | 79.8197433 | 69.8243232 | 59.1349434 | 59.5666434 | 66.6321585 |
| 18:39:14 | 0:38:43 | 79.8197433 | 67.8243232 | 59.1349434 | 59.5666434 | 66.6321585 |
| 18:39:15 | 0:38:44 | 77.8197433 | 65.8243232 | 61.1349434 | 59.5666434 | 66.6321585 |
| 18:39:16 | 0:38:45 | 78.8197433 | 64.8243232 | 62.1349434 | 59.5666434 | 66.6321585 |
| 18:39:17 | 0:38:46 | 81.8197433 | 64.8243232 | 63.1349434 | 59.5666434 | 65.6321585 |
| 18:39:18 | 0:38:47 | 82.8197433 | 62.8243232 | 63.1349434 | 59.5666434 | 66.6321585 |
| 18:39:19 | 0:38:48 | 85.8197433 | 62.8243232 | 63.1349434 | 58.5666434 | 66.6321585 |
| 18:39:20 | 0:38:49 | 68.1925569 | 56.8243232 | 63.1349434 | 58.5666434 | 66.6321585 |
| 18:39:21 | 0:38:50 | 78.8197433 | 55.8243232 | 63.1349434 | 58.5666434 | 69.6321585 |
| 18:39:22 | 0:38:51 | 78.8197433 | 55.8243232 | 65.1349434 | 58.5666434 | 71.6321585 |
| 18:39:23 | 0:38:52 | 70.8197433 | 55.8243232 | 67.1349434 | 58.5666434 | 71.6321585 |
| 18:39:24 | 0:38:53 | 66.8197433 | 56.8243232 | 68.1349434 | 58.5666434 | 73.6321585 |
| 18:39:25 | 0:38:54 | 64.8197433 | 55.8243232 | 68.1349434 | 58.5666434 | 72.6321585 |
| 18:39:26 | 0:38:55 | 63.8197433 | 55.8243232 | 67.1349434 | 59.5666434 | 68.6321585 |
| 18:39:27 | 0:38:56 | 62.8197433 | 55.8243232 | 66.1349434 | 59.5666434 | 67.6321585 |

|          |         |            |            |            |            |            |
|----------|---------|------------|------------|------------|------------|------------|
| 18:39:28 | 0:38:57 | 62.8197433 | 55.8243232 | 65.1349434 | 59.5666434 | 67.6321585 |
| 18:39:29 | 0:38:58 | 62.8197433 | 54.8243232 | 64.1349434 | 59.5666434 | 67.6321585 |
| 18:39:30 | 0:38:59 | 62.8197433 | 54.8243232 | 64.1349434 | 58.5666434 | 67.6321585 |
| 18:39:31 | 0:39:00 | 62.8197433 | 55.8243232 | 63.1349434 | 57.5666434 | 66.6321585 |
| 18:39:32 | 0:39:01 | 61.8197433 | 55.8243232 | 62.1349434 | 57.5666434 | 66.6321585 |
| 18:39:33 | 0:39:02 | 62.8197433 | 55.8243232 | 61.1349434 | 57.5666434 | 66.6321585 |
| 18:39:34 | 0:39:03 | 62.8197433 | 55.8243232 | 61.1349434 | 57.5666434 | 67.6321585 |
| 18:39:35 | 0:39:04 | 62.8197433 | 55.8243232 | 61.1349434 | 61.5666434 | 68.6321585 |
| 18:39:36 | 0:39:05 | 62.8197433 | 55.8243232 | 61.1349434 | 61.5666434 | 68.6321585 |
| 18:39:37 | 0:39:06 | 65.8197433 | 55.8243232 | 61.1349434 | 61.5666434 | 68.6321585 |
| 18:39:38 | 0:39:07 | 65.8197433 | 62.8243232 | 61.1349434 | 62.5666434 | 67.6321585 |
| 18:39:39 | 0:39:08 | 65.8197433 | 64.8243232 | 61.1349434 | 62.5666434 | 67.6321585 |
| 18:39:40 | 0:39:09 | 64.8197433 | 64.8243232 | 61.1349434 | 62.5666434 | 67.6321585 |
| 18:39:41 | 0:39:10 | 63.8197433 | 67.8243232 | 61.1349434 | 62.5666434 | 67.6321585 |
| 18:39:42 | 0:39:11 | 62.8197433 | 67.8243232 | 61.1349434 | 62.5666434 | 67.6321585 |
| 18:39:43 | 0:39:12 | 61.8197433 | 66.8243232 | 62.1349434 | 62.5666434 | 67.6321585 |
| 18:39:44 | 0:39:13 | 61.8197433 | 66.8243232 | 63.1349434 | 62.5666434 | 67.6321585 |
| 18:39:45 | 0:39:14 | 61.8197433 | 65.8243232 | 63.1349434 | 62.5666434 | 67.6321585 |
| 18:39:46 | 0:39:15 | 61.8197433 | 64.8243232 | 64.1349434 | 62.5666434 | 65.6321585 |
| 18:39:47 | 0:39:16 | 61.8197433 | 64.8243232 | 64.1349434 | 61.5666434 | 65.6321585 |
| 18:39:48 | 0:39:17 | 61.8197433 | 62.8243232 | 64.1349434 | 61.5666434 | 66.6321585 |
| 18:39:49 | 0:39:18 | 61.8197433 | 60.8243232 | 64.1349434 | 61.5666434 | 67.6321585 |
| 18:39:50 | 0:39:19 | 61.8197433 | 59.8243232 | 64.1349434 | 61.5666434 | 67.6321585 |
| 18:39:51 | 0:39:20 | 61.8197433 | 57.8243232 | 64.1349434 | 61.5666434 | 67.6321585 |
| 18:39:52 | 0:39:21 | 60.8197433 | 57.8243232 | 67.1349434 | 61.5666434 | 67.6321585 |
| 18:39:53 | 0:39:22 | 60.8197433 | 56.8243232 | 64.1349434 | 61.5666434 | 66.6321585 |
| 18:39:54 | 0:39:23 | 60.8197433 | 56.8243232 | 64.1349434 | 61.5666434 | 66.6321585 |
| 18:39:55 | 0:39:24 | 60.8197433 | 56.8243232 | 51.1349434 | 61.5666434 | 67.6321585 |
| 18:39:56 | 0:39:25 | 60.8197433 | 55.8243232 | 51.1349434 | 61.5666434 | 68.6321585 |
| 18:39:57 | 0:39:26 | 60.8197433 | 55.8243232 | 54.1349434 | 61.5666434 | 69.6321585 |
| 18:39:58 | 0:39:27 | 60.8197433 | 61.8243232 | 55.1349434 | 61.5666434 | 70.6321585 |
| 18:39:59 | 0:39:28 | 60.8197433 | 74.8243232 | 55.1349434 | 60.5666434 | 72.6321585 |
| 18:40:00 | 0:39:29 | 60.8197433 | 75.8243232 | 56.1349434 | 60.5666434 | 72.6321585 |
| 18:40:01 | 0:39:30 | 60.8197433 | 75.8243232 | 57.1349434 | 60.5666434 | 73.6321585 |
| 18:40:02 | 0:39:31 | 60.8197433 | 83.8243232 | 58.1349434 | 60.5666434 | 73.6321585 |
| 18:40:03 | 0:39:32 | 60.8197433 | 66.4925569 | 59.1349434 | 60.5666434 | 73.6321585 |
| 18:40:04 | 0:39:33 | 60.8197433 | 66.0925569 | 56.1349434 | 61.5666434 | 72.6321585 |
| 18:40:05 | 0:39:34 | 60.8197433 | 65.8925569 | 54.1349434 | 61.5666434 | 72.6321585 |
| 18:40:06 | 0:39:35 | 60.8197433 | 64.9925569 | 53.1349434 | 61.5666434 | 72.6321585 |
| 18:40:07 | 0:39:36 | 60.8197433 | 65.0925569 | 53.1349434 | 62.5666434 | 72.6321585 |
| 18:40:08 | 0:39:37 | 60.8197433 | 65.0925569 | 54.1349434 | 62.5666434 | 71.6321585 |
| 18:40:09 | 0:39:38 | 60.8197433 | 64.8925569 | 54.1349434 | 62.5666434 | 71.6321585 |
| 18:40:10 | 0:39:39 | 60.8197433 | 65.3925569 | 56.1349434 | 65.5666434 | 71.6321585 |
| 18:40:11 | 0:39:40 | 60.8197433 | 65.4925569 | 56.1349434 | 65.5666434 | 71.6321585 |
| 18:40:12 | 0:39:41 | 60.8197433 | 65.7925569 | 56.1349434 | 67.5666434 | 71.6321585 |

|          |         |            |            |            |            |            |
|----------|---------|------------|------------|------------|------------|------------|
| 18:40:13 | 0:39:42 | 60.8197433 | 66.2925569 | 58.1349434 | 67.5666434 | 72.6321585 |
| 18:40:14 | 0:39:43 | 60.8197433 | 66.2925569 | 59.1349434 | 67.5666434 | 72.6321585 |
| 18:40:15 | 0:39:44 | 60.8197433 | 67.3925569 | 59.1349434 | 67.5666434 | 72.6321585 |
| 18:40:16 | 0:39:45 | 60.8197433 | 78.8243232 | 61.1349434 | 67.5666434 | 72.6321585 |
| 18:40:17 | 0:39:46 | 60.8197433 | 73.8243232 | 63.1349434 | 68.5666434 | 73.6321585 |
| 18:40:18 | 0:39:47 | 60.8197433 | 71.8243232 | 64.1349434 | 68.5666434 | 73.6321585 |
| 18:40:19 | 0:39:48 | 60.8197433 | 71.8243232 | 63.1349434 | 68.5666434 | 72.6321585 |
| 18:40:20 | 0:39:49 | 60.8197433 | 71.8243232 | 63.1349434 | 68.5666434 | 72.6321585 |
| 18:40:21 | 0:39:50 | 60.8197433 | 70.8243232 | 64.1349434 | 68.5666434 | 71.6321585 |
| 18:40:22 | 0:39:51 | 60.8197433 | 69.8243232 | 66.1349434 | 69.5666434 | 72.6321585 |
| 18:40:23 | 0:39:52 | 61.8197433 | 68.8243232 | 68.1349434 | 70.5666434 | 72.6321585 |
| 18:40:24 | 0:39:53 | 61.8197433 | 65.8243232 | 68.1349434 | 72.5666434 | 76.6321585 |
| 18:40:25 | 0:39:54 | 61.8197433 | 64.8243232 | 65.1349434 | 72.5666434 | 76.6321585 |
| 18:40:26 | 0:39:55 | 61.8197433 | 64.8243232 | 64.1349434 | 74.5666434 | 77.6321585 |
| 18:40:27 | 0:39:56 | 61.8197433 | 64.8243232 | 63.1349434 | 74.5666434 | 79.6321585 |
| 18:40:28 | 0:39:57 | 61.8197433 | 63.8243232 | 63.1349434 | 74.5666434 | 79.6321585 |
| 18:40:29 | 0:39:58 | 61.8197433 | 63.8243232 | 63.1349434 | 74.5666434 | 80.6321585 |
| 18:40:30 | 0:39:59 | 61.8197433 | 63.8243232 | 63.1349434 | 74.5666434 | 80.6321585 |
| 18:40:31 | 0:40:00 | 61.8197433 | 64.8243232 | 63.1349434 | 73.5666434 | 81.6321585 |
| 18:40:32 | 0:40:01 | 61.8197433 | 64.8243232 | 63.1349434 | 72.5666434 | 82.6321585 |
| 18:40:33 | 0:40:02 | 61.8197433 | 65.8243232 | 63.1349434 | 71.5666434 | 82.6321585 |
| 18:40:34 | 0:40:03 | 61.8197433 | 66.8243232 | 63.1349434 | 71.5666434 | 84.6321585 |
| 18:40:35 | 0:40:04 | 61.8197433 | 68.8243232 | 66.1349434 | 68.5666434 | 85.6321585 |
| 18:40:36 | 0:40:05 | 61.8197433 | 68.8243232 | 67.1349434 | 66.5666434 | 86.6321585 |
| 18:40:37 | 0:40:06 | 61.8197433 | 74.8243232 | 67.1349434 | 65.5666434 | 86.6321585 |
| 18:40:38 | 0:40:07 | 61.8197433 | 75.8243232 | 69.1349434 | 65.5666434 | 69.4925569 |
| 18:40:39 | 0:40:08 | 61.8197433 | 78.8243232 | 70.1349434 | 64.5666434 | 69.6925569 |
| 18:40:40 | 0:40:09 | 61.8197433 | 78.8243232 | 70.1349434 | 64.5666434 | 69.7925569 |
| 18:40:41 | 0:40:10 | 61.8197433 | 78.8243232 | 70.1349434 | 64.5666434 | 69.5925569 |
| 18:40:42 | 0:40:11 | 61.8197433 | 78.8243232 | 70.1349434 | 64.5666434 | 69.6925569 |
| 18:40:43 | 0:40:12 | 61.8197433 | 77.8243232 | 70.1349434 | 64.5666434 | 70.0925569 |
| 18:40:44 | 0:40:13 | 61.8197433 | 77.8243232 | 73.1349434 | 64.5666434 | 70.0925569 |
| 18:40:45 | 0:40:14 | 61.8197433 | 75.8243232 | 76.1349434 | 65.5666434 | 69.3925569 |
| 18:40:46 | 0:40:15 | 61.8197433 | 74.8243232 | 78.1349434 | 65.5666434 | 81.6321585 |
| 18:40:47 | 0:40:16 | 61.8197433 | 71.8243232 | 80.1349434 | 65.5666434 | 81.6321585 |
| 18:40:48 | 0:40:17 | 61.8197433 | 71.8243232 | 82.1349434 | 66.5666434 | 78.6321585 |
| 18:40:49 | 0:40:18 | 61.8197433 | 70.8243232 | 82.1349434 | 66.5666434 | 75.6321585 |
| 18:40:50 | 0:40:19 | 61.8197433 | 70.8243232 | 82.1349434 | 66.5666434 | 72.6321585 |
| 18:40:51 | 0:40:20 | 60.8197433 | 70.8243232 | 81.1349434 | 67.5666434 | 65.6321585 |
| 18:40:52 | 0:40:21 | 61.8197433 | 70.8243232 | 77.1349434 | 68.5666434 | 63.6321585 |
| 18:40:53 | 0:40:22 | 61.8197433 | 70.8243232 | 69.1349434 | 69.5666434 | 63.6321585 |
| 18:40:54 | 0:40:23 | 60.8197433 | 70.8243232 | 62.1349434 | 69.5666434 | 63.6321585 |
| 18:40:55 | 0:40:24 | 61.8197433 | 70.8243232 | 60.1349434 | 69.5666434 | 64.6321585 |
| 18:40:56 | 0:40:25 | 61.8197433 | 70.8243232 | 60.1349434 | 69.5666434 | 64.6321585 |
| 18:40:57 | 0:40:26 | 61.8197433 | 71.8243232 | 61.1349434 | 70.5666434 | 65.6321585 |



|          |         |            |            |            |            |            |
|----------|---------|------------|------------|------------|------------|------------|
| 18:40:58 | 0:40:27 | 61.8197433 | 71.8243232 | 61.1349434 | 68.5666434 | 65.6321585 |
| 18:40:59 | 0:40:28 | 61.8197433 | 71.8243232 | 61.1349434 | 68.5666434 | 65.6321585 |
| 18:41:00 | 0:40:29 | 61.8197433 | 72.8243232 | 61.1349434 | 66.5666434 | 65.6321585 |
| 18:41:01 | 0:40:30 | 61.8197433 | 72.8243232 | 61.1349434 | 62.5666434 | 67.6321585 |
| 18:41:02 | 0:40:31 | 62.8197433 | 72.8243232 | 61.1349434 | 61.5666434 | 67.6321585 |
| 18:41:03 | 0:40:32 | 62.8197433 | 72.8243232 | 55.1349434 | 61.5666434 | 69.6321585 |
| 18:41:04 | 0:40:33 | 62.8197433 | 72.8243232 | 54.1349434 | 61.5666434 | 69.6321585 |
| 18:41:05 | 0:40:34 | 62.8197433 | 73.8243232 | 54.1349434 | 61.5666434 | 69.6321585 |
| 18:41:06 | 0:40:35 | 62.8197433 | 77.8243232 | 57.1349434 | 61.5666434 | 70.6321585 |
| 18:41:07 | 0:40:36 | 62.8197433 | 66.6925569 | 59.1349434 | 60.5666434 | 70.6321585 |
| 18:41:08 | 0:40:37 | 63.8197433 | 67.2925569 | 60.1349434 | 60.5666434 | 70.6321585 |
| 18:41:09 | 0:40:38 | 63.8197433 | 67.2925569 | 60.1349434 | 60.5666434 | 67.6321585 |
| 18:41:10 | 0:40:39 | 63.8197433 | 67.8925569 | 63.1349434 | 60.5666434 | 66.6321585 |
| 18:41:11 | 0:40:40 | 65.8197433 | 68.4925569 | 63.1349434 | 60.5666434 | 65.6321585 |
| 18:41:12 | 0:40:41 | 65.8197433 | 69.2925569 | 66.1349434 | 61.5666434 | 65.6321585 |
| 18:41:13 | 0:40:42 | 65.8197433 | 69.3925569 | 70.1349434 | 61.5666434 | 64.6321585 |
| 18:41:14 | 0:40:43 | 66.8197433 | 69.6925569 | 70.1349434 | 61.5666434 | 64.6321585 |
| 18:41:15 | 0:40:44 | 71.8197433 | 69.9925569 | 69.1349434 | 61.5666434 | 64.6321585 |
| 18:41:16 | 0:40:45 | 75.8197433 | 70.6925569 | 69.1349434 | 61.5666434 | 64.6321585 |
| 18:41:17 | 0:40:46 | 77.8197433 | 71.1925569 | 68.1349434 | 61.5666434 | 65.6321585 |
| 18:41:18 | 0:40:47 | 78.8197433 | 71.4925569 | 67.1349434 | 61.5666434 | 65.6321585 |
| 18:41:19 | 0:40:48 | 78.8197433 | 72.0925569 | 67.1349434 | 61.5666434 | 65.6321585 |
| 18:41:20 | 0:40:49 | 76.8197433 | 71.7925569 | 67.1349434 | 61.5666434 | 66.6321585 |
| 18:41:21 | 0:40:50 | 78.8197433 | 71.9925569 | 69.1349434 | 62.5666434 | 66.6321585 |
| 18:41:22 | 0:40:51 | 75.8197433 | 71.2925569 | 69.1349434 | 62.5666434 | 67.6321585 |
| 18:41:23 | 0:40:52 | 77.8197433 | 71.4925569 | 69.1349434 | 63.5666434 | 68.6321585 |
| 18:41:24 | 0:40:53 | 77.8197433 | 71.4925569 | 69.1349434 | 63.5666434 | 68.6321585 |
| 18:41:25 | 0:40:54 | 75.8197433 | 69.3445828 | 72.1349434 | 63.5666434 | 74.6321585 |
| 18:41:26 | 0:40:55 | 74.8197433 | 67.8243232 | 72.1349434 | 64.5666434 | 74.6321585 |
| 18:41:27 | 0:40:56 | 74.8197433 | 66.8243232 | 76.1349434 | 64.5666434 | 73.6321585 |
| 18:41:28 | 0:40:57 | 74.8197433 | 66.8243232 | 75.1349434 | 64.5666434 | 65.6321585 |
| 18:41:29 | 0:40:58 | 72.8197433 | 66.8243232 | 69.1349434 | 64.5666434 | 65.6321585 |
| 18:41:30 | 0:40:59 | 68.8197433 | 62.8243232 | 65.1349434 | 64.5666434 | 62.6321585 |
| 18:41:31 | 0:41:00 | 66.8197433 | 60.8243232 | 65.1349434 | 64.5666434 | 62.6321585 |
| 18:41:32 | 0:41:01 | 65.8197433 | 59.8243232 | 61.1349434 | 65.5666434 | 62.6321585 |
| 18:41:33 | 0:41:02 | 64.8197433 | 59.8243232 | 61.1349434 | 66.5666434 | 62.6321585 |
| 18:41:34 | 0:41:03 | 63.8197433 | 55.8243232 | 61.1349434 | 66.5666434 | 63.6321585 |
| 18:41:35 | 0:41:04 | 62.8197433 | 54.8243232 | 62.1349434 | 66.5666434 | 64.6321585 |
| 18:41:36 | 0:41:05 | 62.8197433 | 53.8243232 | 63.1349434 | 66.5666434 | 65.6321585 |
| 18:41:37 | 0:41:06 | 62.8197433 | 53.8243232 | 64.1349434 | 65.5666434 | 66.6321585 |
| 18:41:38 | 0:41:07 | 62.8197433 | 52.8243232 | 65.1349434 | 65.5666434 | 66.6321585 |
| 18:41:39 | 0:41:08 | 62.8197433 | 52.8243232 | 66.1349434 | 65.5666434 | 62.6321585 |
| 18:41:40 | 0:41:09 | 62.8197433 | 52.8243232 | 66.1349434 | 65.5666434 | 62.6321585 |
| 18:41:41 | 0:41:10 | 63.8197433 | 52.8243232 | 65.1349434 | 65.5666434 | 62.6321585 |
| 18:41:42 | 0:41:11 | 63.8197433 | 51.8243232 | 64.1349434 | 65.5666434 | 62.6321585 |

|          |         |            |            |            |            |            |
|----------|---------|------------|------------|------------|------------|------------|
| 18:41:43 | 0:41:12 | 64.8197433 | 52.8243232 | 63.1349434 | 66.5666434 | 62.6321585 |
| 18:41:44 | 0:41:13 | 64.8197433 | 52.8243232 | 65.1349434 | 66.5666434 | 62.6321585 |
| 18:41:45 | 0:41:14 | 64.8197433 | 53.8243232 | 65.1349434 | 67.5666434 | 63.6321585 |
| 18:41:46 | 0:41:15 | 64.8197433 | 53.8243232 | 65.1349434 | 68.5666434 | 64.6321585 |
| 18:41:47 | 0:41:16 | 65.8197433 | 53.8243232 | 65.1349434 | 68.5666434 | 64.6321585 |
| 18:41:48 | 0:41:17 | 66.8197433 | 53.8243232 | 68.1349434 | 69.5666434 | 64.6321585 |
| 18:41:49 | 0:41:18 | 66.8197433 | 53.8243232 | 71.1349434 | 71.5666434 | 66.6321585 |
| 18:41:50 | 0:41:19 | 65.8197433 | 53.8243232 | 72.1349434 | 71.5666434 | 66.6321585 |
| 18:41:51 | 0:41:20 | 61.8197433 | 54.8243232 | 72.1349434 | 72.5666434 | 66.6321585 |
| 18:41:52 | 0:41:21 | 62.8197433 | 54.8243232 | 71.1349434 | 72.5666434 | 66.6321585 |
| 18:41:53 | 0:41:22 | 62.8197433 | 61.8243232 | 71.1349434 | 72.5666434 | 66.6321585 |
| 18:41:54 | 0:41:23 | 63.8197433 | 61.8243232 | 71.1349434 | 73.5666434 | 65.6321585 |
| 18:41:55 | 0:41:24 | 62.8197433 | 62.8243232 | 71.1349434 | 74.5666434 | 64.6321585 |
| 18:41:56 | 0:41:25 | 62.8197433 | 64.8243232 | 71.1349434 | 74.5666434 | 64.6321585 |
| 18:41:57 | 0:41:26 | 62.8197433 | 67.8243232 | 70.1349434 | 74.5666434 | 64.6321585 |
| 18:41:58 | 0:41:27 | 62.8197433 | 67.8243232 | 69.1349434 | 70.5666434 | 63.6321585 |
| 18:41:59 | 0:41:28 | 63.8197433 | 69.8243232 | 69.1349434 | 70.5666434 | 63.6321585 |
| 18:42:00 | 0:41:29 | 63.8197433 | 70.8243232 | 68.1349434 | 69.5666434 | 63.6321585 |
| 18:42:01 | 0:41:30 | 63.8197433 | 70.8243232 | 67.1349434 | 70.5666434 | 63.6321585 |
| 18:42:02 | 0:41:31 | 63.8197433 | 70.8243232 | 67.1349434 | 70.5666434 | 63.6321585 |
| 18:42:03 | 0:41:32 | 63.8197433 | 70.8243232 | 66.1349434 | 68.5666434 | 63.6321585 |
| 18:42:04 | 0:41:33 | 64.8197433 | 70.8243232 | 60.1349434 | 67.5666434 | 62.6321585 |
| 18:42:05 | 0:41:34 | 64.8197433 | 72.8243232 | 54.1349434 | 67.5666434 | 62.6321585 |
| 18:42:06 | 0:41:35 | 67.8197433 | 74.8243232 | 52.1349434 | 68.5666434 | 62.6321585 |
| 18:42:07 | 0:41:36 | 71.8197433 | 74.8243232 | 52.1349434 | 68.5666434 | 62.6321585 |
| 18:42:08 | 0:41:37 | 69.8197433 | 74.8243232 | 53.1349434 | 68.5666434 | 63.6321585 |
| 18:42:09 | 0:41:38 | 68.8197433 | 73.8243232 | 54.1349434 | 68.5666434 | 63.6321585 |
| 18:42:10 | 0:41:39 | 68.8197433 | 73.8243232 | 55.1349434 | 68.5666434 | 63.6321585 |
| 18:42:11 | 0:41:40 | 67.8197433 | 73.8243232 | 55.1349434 | 63.5666434 | 63.6321585 |
| 18:42:12 | 0:41:41 | 65.8197433 | 74.8243232 | 56.1349434 | 59.5666434 | 63.6321585 |
| 18:42:13 | 0:41:42 | 64.8197433 | 74.8243232 | 60.1349434 | 56.5666434 | 63.6321585 |
| 18:42:14 | 0:41:43 | 64.8197433 | 74.8243232 | 63.1349434 | 56.5666434 | 64.6321585 |
| 18:42:15 | 0:41:44 | 65.8197433 | 74.8243232 | 64.1349434 | 56.5666434 | 64.6321585 |
| 18:42:16 | 0:41:45 | 66.8197433 | 76.8243232 | 65.1349434 | 56.5666434 | 64.6321585 |
| 18:42:17 | 0:41:46 | 67.8197433 | 76.8243232 | 64.1349434 | 58.5666434 | 64.6321585 |
| 18:42:18 | 0:41:47 | 67.8197433 | 76.8243232 | 64.1349434 | 58.5666434 | 64.6321585 |
| 18:42:19 | 0:41:48 | 68.8197433 | 74.8243232 | 63.1349434 | 60.5666434 | 68.6321585 |
| 18:42:20 | 0:41:49 | 70.8197433 | 74.8243232 | 64.1349434 | 61.5666434 | 68.6321585 |
| 18:42:21 | 0:41:50 | 75.8197433 | 68.8243232 | 64.1349434 | 61.5666434 | 68.6321585 |
| 18:42:22 | 0:41:51 | 80.8197433 | 68.8243232 | 62.1349434 | 61.5666434 | 68.6321585 |
| 18:42:23 | 0:41:52 | 81.8197433 | 68.8243232 | 61.1349434 | 62.5666434 | 68.6321585 |
| 18:42:24 | 0:41:53 | 69.2925569 | 62.8243232 | 61.1349434 | 63.5666434 | 67.6321585 |
| 18:42:25 | 0:41:54 | 69.4925569 | 62.8243232 | 61.1349434 | 64.5666434 | 67.6321585 |
| 18:42:26 | 0:41:55 | 69.1925569 | 59.8243232 | 59.1349434 | 64.5666434 | 67.6321585 |
| 18:42:27 | 0:41:56 | 68.5925569 | 59.8243232 | 58.1349434 | 64.5666434 | 67.6321585 |

|          |         |            |            |            |            |            |
|----------|---------|------------|------------|------------|------------|------------|
| 18:42:28 | 0:41:57 | 68.7925569 | 59.8243232 | 57.1349434 | 66.5666434 | 67.6321585 |
| 18:42:29 | 0:41:58 | 69.1925569 | 59.8243232 | 57.1349434 | 69.5666434 | 68.6321585 |
| 18:42:30 | 0:41:59 | 69.5925569 | 60.8243232 | 57.1349434 | 70.5666434 | 69.6321585 |
| 18:42:31 | 0:42:00 | 70.3925569 | 59.8243232 | 58.1349434 | 70.5666434 | 69.6321585 |
| 18:42:32 | 0:42:01 | 70.8925569 | 59.8243232 | 58.1349434 | 70.5666434 | 69.6321585 |
| 18:42:33 | 0:42:02 | 71.5925569 | 59.8243232 | 58.1349434 | 70.5666434 | 69.6321585 |
| 18:42:34 | 0:42:03 | 71.2925569 | 59.8243232 | 58.1349434 | 68.5666434 | 69.6321585 |
| 18:42:35 | 0:42:04 | 71.0925569 | 59.8243232 | 59.1349434 | 67.5666434 | 68.6321585 |
| 18:42:36 | 0:42:05 | 70.5925569 | 59.8243232 | 59.1349434 | 67.5666434 | 68.6321585 |
| 18:42:37 | 0:42:06 | 86.8197433 | 59.8243232 | 59.1349434 | 66.5666434 | 67.6321585 |
| 18:42:38 | 0:42:07 | 76.8197433 | 59.8243232 | 59.1349434 | 64.5666434 | 66.6321585 |
| 18:42:39 | 0:42:08 | 72.8197433 | 58.8243232 | 59.1349434 | 64.5666434 | 66.6321585 |
| 18:42:40 | 0:42:09 | 72.8197433 | 58.8243232 | 61.1349434 | 64.5666434 | 66.6321585 |
| 18:42:41 | 0:42:10 | 72.8197433 | 58.8243232 | 61.1349434 | 64.5666434 | 66.6321585 |
| 18:42:42 | 0:42:11 | 72.8197433 | 58.8243232 | 63.1349434 | 64.5666434 | 67.6321585 |
| 18:42:43 | 0:42:12 | 71.8197433 | 59.8243232 | 69.1349434 | 64.5666434 | 67.6321585 |
| 18:42:44 | 0:42:13 | 70.8197433 | 59.8243232 | 69.1349434 | 64.5666434 | 69.6321585 |
| 18:42:45 | 0:42:14 | 70.8197433 | 60.8243232 | 69.1349434 | 64.5666434 | 70.6321585 |
| 18:42:46 | 0:42:15 | 70.8197433 | 57.8243232 | 67.1349434 | 64.5666434 | 66.6321585 |
| 18:42:47 | 0:42:16 | 70.8197433 | 57.8243232 | 67.1349434 | 65.5666434 | 66.6321585 |
| 18:42:48 | 0:42:17 | 68.8197433 | 56.8243232 | 68.1349434 | 67.5666434 | 66.6321585 |
| 18:42:49 | 0:42:18 | 67.8197433 | 56.8243232 | 67.1349434 | 67.5666434 | 66.6321585 |
| 18:42:50 | 0:42:19 | 67.8197433 | 56.8243232 | 65.1349434 | 68.5666434 | 65.6321585 |
| 18:42:51 | 0:42:20 | 67.8197433 | 56.8243232 | 64.1349434 | 68.5666434 | 65.6321585 |
| 18:42:52 | 0:42:21 | 67.8197433 | 56.8243232 | 64.1349434 | 68.5666434 | 62.6321585 |
| 18:42:53 | 0:42:22 | 67.8197433 | 56.8243232 | 65.1349434 | 69.5666434 | 62.6321585 |
| 18:42:54 | 0:42:23 | 67.8197433 | 56.8243232 | 66.1349434 | 69.5666434 | 61.6321585 |
| 18:42:55 | 0:42:24 | 66.8197433 | 56.8243232 | 68.1349434 | 72.5666434 | 61.6321585 |
| 18:42:56 | 0:42:25 | 64.8197433 | 57.8243232 | 70.1349434 | 72.5666434 | 61.6321585 |
| 18:42:57 | 0:42:26 | 64.8197433 | 57.8243232 | 71.1349434 | 72.5666434 | 61.6321585 |
| 18:42:58 | 0:42:27 | 64.8197433 | 57.8243232 | 71.1349434 | 72.5666434 | 62.6321585 |
| 18:42:59 | 0:42:28 | 65.8197433 | 57.8243232 | 71.1349434 | 72.5666434 | 62.6321585 |
| 18:43:00 | 0:42:29 | 65.8197433 | 58.8243232 | 65.1349434 | 72.5666434 | 62.6321585 |
| 18:43:01 | 0:42:30 | 65.8197433 | 58.8243232 | 62.1349434 | 70.5666434 | 62.6321585 |
| 18:43:02 | 0:42:31 | 70.8197433 | 58.8243232 | 62.1349434 | 64.5666434 | 63.6321585 |
| 18:43:03 | 0:42:32 | 70.8197433 | 57.8243232 | 62.1349434 | 64.5666434 | 63.6321585 |
| 18:43:04 | 0:42:33 | 77.8197433 | 57.8243232 | 62.1349434 | 63.5666434 | 62.6321585 |
| 18:43:05 | 0:42:34 | 83.8197433 | 57.8243232 | 62.1349434 | 63.5666434 | 63.6321585 |
| 18:43:06 | 0:42:35 | 83.8197433 | 57.8243232 | 63.1349434 | 63.5666434 | 63.6321585 |
| 18:43:07 | 0:42:36 | 67.2925569 | 58.8243232 | 63.1349434 | 63.5666434 | 62.6321585 |
| 18:43:08 | 0:42:37 | 83.8197433 | 58.8243232 | 63.1349434 | 63.5666434 | 62.6321585 |
| 18:43:09 | 0:42:38 | 83.8197433 | 58.8243232 | 63.1349434 | 63.5666434 | 62.6321585 |
| 18:43:10 | 0:42:39 | 75.8197433 | 58.8243232 | 64.1349434 | 63.5666434 | 61.6321585 |
| 18:43:11 | 0:42:40 | 68.8197433 | 58.8243232 | 64.1349434 | 63.5666434 | 61.6321585 |
| 18:43:12 | 0:42:41 | 68.8197433 | 58.8243232 | 64.1349434 | 63.5666434 | 61.6321585 |

|          |         |            |            |            |            |            |
|----------|---------|------------|------------|------------|------------|------------|
| 18:43:13 | 0:42:42 | 64.8197433 | 59.8243232 | 65.1349434 | 64.5666434 | 61.6321585 |
| 18:43:14 | 0:42:43 | 63.8197433 | 59.8243232 | 65.1349434 | 64.5666434 | 61.6321585 |
| 18:43:15 | 0:42:44 | 63.8197433 | 59.8243232 | 69.1349434 | 66.5666434 | 61.6321585 |
| 18:43:16 | 0:42:45 | 62.8197433 | 59.8243232 | 71.1349434 | 66.5666434 | 61.6321585 |
| 18:43:17 | 0:42:46 | 61.8197433 | 59.8243232 | 71.1349434 | 67.5666434 | 61.6321585 |
| 18:43:18 | 0:42:47 | 61.8197433 | 58.8243232 | 71.1349434 | 68.5666434 | 61.6321585 |
| 18:43:19 | 0:42:48 | 61.8197433 | 58.8243232 | 70.1349434 | 68.5666434 | 63.6321585 |
| 18:43:20 | 0:42:49 | 61.8197433 | 58.8243232 | 70.1349434 | 72.5666434 | 63.6321585 |
| 18:43:21 | 0:42:50 | 61.8197433 | 59.8243232 | 64.1349434 | 72.5666434 | 63.6321585 |
| 18:43:22 | 0:42:51 | 61.8197433 | 59.8243232 | 56.1349434 | 72.5666434 | 62.6321585 |
| 18:43:23 | 0:42:52 | 61.8197433 | 59.8243232 | 56.1349434 | 73.5666434 | 62.6321585 |
| 18:43:24 | 0:42:53 | 61.8197433 | 59.8243232 | 56.1349434 | 73.5666434 | 62.6321585 |
| 18:43:25 | 0:42:54 | 61.8197433 | 59.8243232 | 56.1349434 | 74.5666434 | 62.6321585 |
| 18:43:26 | 0:42:55 | 61.8197433 | 59.8243232 | 56.1349434 | 74.5666434 | 62.6321585 |
| 18:43:27 | 0:42:56 | 61.8197433 | 59.8243232 | 56.1349434 | 74.5666434 | 62.6321585 |
| 18:43:28 | 0:42:57 | 61.8197433 | 59.8243232 | 60.1349434 | 75.5666434 | 62.6321585 |
| 18:43:29 | 0:42:58 | 61.8197433 | 60.8243232 | 61.1349434 | 75.5666434 | 62.6321585 |
| 18:43:30 | 0:42:59 | 61.8197433 | 60.8243232 | 60.1349434 | 74.5666434 | 62.6321585 |
| 18:43:31 | 0:43:00 | 61.8197433 | 59.8243232 | 55.1349434 | 69.5666434 | 63.6321585 |
| 18:43:32 | 0:43:01 | 61.8197433 | 59.8243232 | 53.1349434 | 68.5666434 | 64.6321585 |
| 18:43:33 | 0:43:02 | 62.8197433 | 58.8243232 | 53.1349434 | 68.5666434 | 66.6321585 |
| 18:43:34 | 0:43:03 | 62.8197433 | 58.8243232 | 55.1349434 | 66.5666434 | 66.6321585 |
| 18:43:35 | 0:43:04 | 63.8197433 | 58.8243232 | 57.1349434 | 63.5666434 | 66.6321585 |
| 18:43:36 | 0:43:05 | 65.8197433 | 57.8243232 | 59.1349434 | 62.5666434 | 67.6321585 |
| 18:43:37 | 0:43:06 | 65.8197433 | 54.8243232 | 62.1349434 | 59.5666434 | 68.6321585 |
| 18:43:38 | 0:43:07 | 66.8197433 | 51.8243232 | 66.1349434 | 59.5666434 | 68.6321585 |
| 18:43:39 | 0:43:08 | 67.8197433 | 51.8243232 | 68.1349434 | 56.5666434 | 68.6321585 |
| 18:43:40 | 0:43:09 | 66.8197433 | 51.8243232 | 68.1349434 | 55.5666434 | 69.6321585 |
| 18:43:41 | 0:43:10 | 66.8197433 | 51.8243232 | 67.1349434 | 55.5666434 | 69.6321585 |
| 18:43:42 | 0:43:11 | 66.8197433 | 50.8243232 | 65.1349434 | 54.5666434 | 70.6321585 |
| 18:43:43 | 0:43:12 | 66.8197433 | 50.8243232 | 65.1349434 | 54.5666434 | 71.6321585 |
| 18:43:44 | 0:43:13 | 67.8197433 | 50.8243232 | 65.1349434 | 53.5666434 | 71.6321585 |
| 18:43:45 | 0:43:14 | 68.8197433 | 49.8243232 | 65.1349434 | 53.5666434 | 72.6321585 |
| 18:43:46 | 0:43:15 | 70.8197433 | 49.8243232 | 67.1349434 | 53.5666434 | 73.6321585 |
| 18:43:47 | 0:43:16 | 71.8197433 | 49.8243232 | 68.1349434 | 53.5666434 | 75.6321585 |
| 18:43:48 | 0:43:17 | 71.8197433 | 49.8243232 | 70.1349434 | 53.5666434 | 75.6321585 |
| 18:43:49 | 0:43:18 | 70.8197433 | 54.8243232 | 72.1349434 | 52.5666434 | 79.6321585 |
| 18:43:50 | 0:43:19 | 69.8197433 | 56.8243232 | 73.1349434 | 52.5666434 | 81.6321585 |
| 18:43:51 | 0:43:20 | 67.8197433 | 56.8243232 | 73.1349434 | 53.5666434 | 82.6321585 |
| 18:43:52 | 0:43:21 | 65.8197433 | 54.8243232 | 72.1349434 | 53.5666434 | 82.6321585 |
| 18:43:53 | 0:43:22 | 64.8197433 | 54.8243232 | 71.1349434 | 53.5666434 | 82.6321585 |
| 18:43:54 | 0:43:23 | 63.8197433 | 53.8243232 | 68.1349434 | 54.5666434 | 64.3925569 |
| 18:43:55 | 0:43:24 | 62.8197433 | 53.8243232 | 67.1349434 | 54.5666434 | 64.3925569 |
| 18:43:56 | 0:43:25 | 61.8197433 | 54.8243232 | 67.1349434 | 54.5666434 | 80.6321585 |
| 18:43:57 | 0:43:26 | 61.8197433 | 54.8243232 | 67.1349434 | 54.5666434 | 79.6321585 |

|          |         |            |            |            |            |            |
|----------|---------|------------|------------|------------|------------|------------|
| 18:43:58 | 0:43:27 | 61.8197433 | 54.8243232 | 66.1349434 | 54.5666434 | 79.6321585 |
| 18:43:59 | 0:43:28 | 61.8197433 | 55.8243232 | 65.1349434 | 54.5666434 | 78.6321585 |
| 18:44:00 | 0:43:29 | 61.8197433 | 56.8243232 | 65.1349434 | 54.5666434 | 77.6321585 |
| 18:44:01 | 0:43:30 | 62.8197433 | 56.8243232 | 68.1349434 | 54.5666434 | 76.6321585 |
| 18:44:02 | 0:43:31 | 62.8197433 | 56.8243232 | 73.1349434 | 54.5666434 | 77.6321585 |
| 18:44:03 | 0:43:32 | 62.8197433 | 56.8243232 | 73.1349434 | 55.5666434 | 77.6321585 |
| 18:44:04 | 0:43:33 | 68.8197433 | 58.8243232 | 74.1349434 | 56.5666434 | 77.6321585 |
| 18:44:05 | 0:43:34 | 69.8197433 | 58.8243232 | 63.1349434 | 56.5666434 | 77.6321585 |
| 18:44:06 | 0:43:35 | 69.8197433 | 58.8243232 | 63.1349434 | 56.5666434 | 77.6321585 |
| 18:44:07 | 0:43:36 | 72.8197433 | 59.8243232 | 57.1349434 | 56.5666434 | 77.6321585 |
| 18:44:08 | 0:43:37 | 73.8197433 | 59.8243232 | 56.1349434 | 56.5666434 | 82.6321585 |
| 18:44:09 | 0:43:38 | 73.8197433 | 60.8243232 | 56.1349434 | 57.5666434 | 66.3925569 |
| 18:44:10 | 0:43:39 | 74.8197433 | 60.8243232 | 56.1349434 | 57.5666434 | 66.6925569 |
| 18:44:11 | 0:43:40 | 75.8197433 | 60.8243232 | 55.1349434 | 57.5666434 | 66.7925569 |
| 18:44:12 | 0:43:41 | 69.8197433 | 61.8243232 | 55.1349434 | 58.5666434 | 66.5925569 |
| 18:44:13 | 0:43:42 | 66.8197433 | 61.8243232 | 55.1349434 | 58.5666434 | 66.7925569 |
| 18:44:14 | 0:43:43 | 65.8197433 | 61.8243232 | 55.1349434 | 58.5666434 | 66.6925569 |
| 18:44:15 | 0:43:44 | 64.8197433 | 62.8243232 | 60.1349434 | 58.5666434 | 67.1925569 |
| 18:44:16 | 0:43:45 | 64.8197433 | 62.8243232 | 64.1349434 | 58.5666434 | 67.8925569 |
| 18:44:17 | 0:43:46 | 64.8197433 | 69.8243232 | 67.1349434 | 58.5666434 | 68.2925569 |
| 18:44:18 | 0:43:47 | 65.8197433 | 71.8243232 | 68.1349434 | 58.5666434 | 67.9925569 |
| 18:44:19 | 0:43:48 | 65.8197433 | 73.8243232 | 67.1349434 | 57.5666434 | 67.7925569 |
| 18:44:20 | 0:43:49 | 65.8197433 | 74.8243232 | 64.1349434 | 58.5666434 | 84.6321585 |
| 18:44:21 | 0:43:50 | 66.8197433 | 72.8243232 | 62.1349434 | 58.5666434 | 80.6321585 |
| 18:44:22 | 0:43:51 | 66.8197433 | 72.8243232 | 62.1349434 | 59.5666434 | 77.6321585 |
| 18:44:23 | 0:43:52 | 66.8197433 | 67.8243232 | 62.1349434 | 59.5666434 | 74.6321585 |
| 18:44:24 | 0:43:53 | 66.8197433 | 65.8243232 | 65.1349434 | 59.5666434 | 72.6321585 |
| 18:44:25 | 0:43:54 | 66.8197433 | 61.8243232 | 67.1349434 | 59.5666434 | 72.6321585 |
| 18:44:26 | 0:43:55 | 64.8197433 | 60.8243232 | 70.1349434 | 59.5666434 | 72.6321585 |
| 18:44:27 | 0:43:56 | 64.8197433 | 60.8243232 | 70.1349434 | 60.5666434 | 72.6321585 |
| 18:44:28 | 0:43:57 | 64.8197433 | 59.8243232 | 70.1349434 | 61.5666434 | 72.6321585 |
| 18:44:29 | 0:43:58 | 64.8197433 | 59.8243232 | 70.1349434 | 61.5666434 | 72.6321585 |
| 18:44:30 | 0:43:59 | 64.8197433 | 59.8243232 | 64.1349434 | 61.5666434 | 72.6321585 |
| 18:44:31 | 0:44:00 | 64.8197433 | 60.8243232 | 57.1349434 | 61.5666434 | 70.6321585 |
| 18:44:32 | 0:44:01 | 64.8197433 | 60.8243232 | 54.1349434 | 62.5666434 | 68.6321585 |
| 18:44:33 | 0:44:02 | 65.8197433 | 60.8243232 | 54.1349434 | 62.5666434 | 67.6321585 |
| 18:44:34 | 0:44:03 | 65.8197433 | 60.8243232 | 55.1349434 | 62.5666434 | 67.6321585 |
| 18:44:35 | 0:44:04 | 66.8197433 | 61.8243232 | 56.1349434 | 62.5666434 | 67.6321585 |
| 18:44:36 | 0:44:05 | 69.8197433 | 61.8243232 | 56.1349434 | 62.5666434 | 67.6321585 |
| 18:44:37 | 0:44:06 | 72.8197433 | 64.8243232 | 56.1349434 | 62.5666434 | 65.6321585 |
| 18:44:38 | 0:44:07 | 75.8197433 | 64.8243232 | 58.1349434 | 62.5666434 | 65.6321585 |
| 18:44:39 | 0:44:08 | 77.8197433 | 62.8243232 | 60.1349434 | 60.5666434 | 65.6321585 |
| 18:44:40 | 0:44:09 | 80.8197433 | 59.8243232 | 60.1349434 | 58.5666434 | 65.6321585 |
| 18:44:41 | 0:44:10 | 80.8197433 | 60.8243232 | 60.1349434 | 58.5666434 | 65.6321585 |
| 18:44:42 | 0:44:11 | 81.8197433 | 60.8243232 | 60.1349434 | 58.5666434 | 65.6321585 |

|          |         |            |            |            |            |            |
|----------|---------|------------|------------|------------|------------|------------|
| 18:44:43 | 0:44:12 | 79.8197433 | 62.8243232 | 61.1349434 | 57.5666434 | 65.6321585 |
| 18:44:44 | 0:44:13 | 77.8197433 | 63.8243232 | 64.1349434 | 55.5666434 | 65.6321585 |
| 18:44:45 | 0:44:14 | 72.8197433 | 63.8243232 | 65.1349434 | 56.5666434 | 65.6321585 |
| 18:44:46 | 0:44:15 | 70.8197433 | 63.8243232 | 65.1349434 | 56.5666434 | 65.6321585 |
| 18:44:47 | 0:44:16 | 68.8197433 | 64.8243232 | 66.1349434 | 54.5666434 | 65.6321585 |
| 18:44:48 | 0:44:17 | 68.8197433 | 65.8243232 | 66.1349434 | 54.5666434 | 64.6321585 |
| 18:44:49 | 0:44:18 | 67.8197433 | 63.8243232 | 66.1349434 | 55.5666434 | 64.6321585 |
| 18:44:50 | 0:44:19 | 65.8197433 | 62.8243232 | 66.1349434 | 56.5666434 | 64.6321585 |
| 18:44:51 | 0:44:20 | 65.8197433 | 62.8243232 | 66.1349434 | 55.5666434 | 64.6321585 |
| 18:44:52 | 0:44:21 | 63.8197433 | 62.8243232 | 66.1349434 | 55.5666434 | 63.6321585 |
| 18:44:53 | 0:44:22 | 63.8197433 | 62.8243232 | 66.1349434 | 55.5666434 | 63.6321585 |
| 18:44:54 | 0:44:23 | 63.8197433 | 62.8243232 | 66.1349434 | 55.5666434 | 63.6321585 |
| 18:44:55 | 0:44:24 | 63.8197433 | 62.8243232 | 66.1349434 | 55.5666434 | 63.6321585 |
| 18:44:56 | 0:44:25 | 63.8197433 | 63.8243232 | 66.1349434 | 55.5666434 | 63.6321585 |
| 18:44:57 | 0:44:26 | 63.8197433 | 65.8243232 | 68.1349434 | 56.5666434 | 63.6321585 |
| 18:44:58 | 0:44:27 | 63.8197433 | 67.8243232 | 74.1349434 | 56.5666434 | 71.6321585 |
| 18:44:59 | 0:44:28 | 64.8197433 | 67.8243232 | 74.1349434 | 56.5666434 | 73.6321585 |
| 18:45:00 | 0:44:29 | 64.8197433 | 67.8243232 | 74.1349434 | 56.5666434 | 73.6321585 |
| 18:45:01 | 0:44:30 | 66.8197433 | 67.8243232 | 69.1349434 | 57.5666434 | 74.6321585 |
| 18:45:02 | 0:44:31 | 66.8197433 | 67.8243232 | 69.1349434 | 59.5666434 | 74.6321585 |
| 18:45:03 | 0:44:32 | 67.8197433 | 67.8243232 | 72.1349434 | 59.5666434 | 74.6321585 |
| 18:45:04 | 0:44:33 | 66.8197433 | 68.8243232 | 73.1349434 | 59.5666434 | 76.6321585 |
| 18:45:05 | 0:44:34 | 65.8197433 | 69.8243232 | 73.1349434 | 59.5666434 | 76.6321585 |
| 18:45:06 | 0:44:35 | 65.8197433 | 61.8243232 | 72.1349434 | 60.5666434 | 78.6321585 |
| 18:45:07 | 0:44:36 | 64.8197433 | 60.8243232 | 67.1349434 | 60.5666434 | 80.6321585 |
| 18:45:08 | 0:44:37 | 64.8197433 | 60.8243232 | 66.1349434 | 61.5666434 | 81.6321585 |
| 18:45:09 | 0:44:38 | 64.8197433 | 60.8243232 | 66.1349434 | 62.5666434 | 81.6321585 |
| 18:45:10 | 0:44:39 | 63.8197433 | 60.8243232 | 66.1349434 | 62.5666434 | 70.6321585 |
| 18:45:11 | 0:44:40 | 63.8197433 | 59.8243232 | 66.1349434 | 63.5666434 | 71.6321585 |
| 18:45:12 | 0:44:41 | 64.8197433 | 60.8243232 | 65.1349434 | 63.5666434 | 71.6321585 |
| 18:45:13 | 0:44:42 | 64.8197433 | 61.8243232 | 65.1349434 | 59.5666434 | 72.6321585 |
| 18:45:14 | 0:44:43 | 64.8197433 | 61.8243232 | 65.1349434 | 59.5666434 | 72.6321585 |
| 18:45:15 | 0:44:44 | 65.8197433 | 61.8243232 | 66.1349434 | 59.5666434 | 72.6321585 |
| 18:45:16 | 0:44:45 | 65.8197433 | 61.8243232 | 66.1349434 | 59.5666434 | 72.6321585 |
| 18:45:17 | 0:44:46 | 66.8197433 | 62.8243232 | 67.1349434 | 58.5666434 | 67.6321585 |
| 18:45:18 | 0:44:47 | 68.8197433 | 61.8243232 | 70.1349434 | 59.5666434 | 66.6321585 |
| 18:45:19 | 0:44:48 | 69.8197433 | 61.8243232 | 73.1349434 | 60.5666434 | 65.6321585 |
| 18:45:20 | 0:44:49 | 69.8197433 | 61.8243232 | 76.1349434 | 60.5666434 | 64.6321585 |
| 18:45:21 | 0:44:50 | 69.8197433 | 61.8243232 | 79.1349434 | 60.5666434 | 64.6321585 |
| 18:45:22 | 0:44:51 | 70.8197433 | 61.8243232 | 81.1349434 | 60.5666434 | 64.6321585 |
| 18:45:23 | 0:44:52 | 71.8197433 | 61.8243232 | 80.1349434 | 60.5666434 | 64.6321585 |
| 18:45:24 | 0:44:53 | 71.8197433 | 61.8243232 | 77.1349434 | 60.5666434 | 63.6321585 |
| 18:45:25 | 0:44:54 | 72.8197433 | 60.8243232 | 75.1349434 | 61.5666434 | 63.6321585 |
| 18:45:26 | 0:44:55 | 72.8197433 | 58.8243232 | 73.1349434 | 61.5666434 | 64.6321585 |
| 18:45:27 | 0:44:56 | 72.8197433 | 58.8243232 | 65.1349434 | 61.5666434 | 63.6321585 |

|          |         |            |            |            |            |            |
|----------|---------|------------|------------|------------|------------|------------|
| 18:45:28 | 0:44:57 | 73.8197433 | 57.8243232 | 56.1349434 | 61.5666434 | 63.6321585 |
| 18:45:29 | 0:44:58 | 73.8197433 | 56.8243232 | 51.1349434 | 61.5666434 | 63.6321585 |
| 18:45:30 | 0:44:59 | 73.8197433 | 55.8243232 | 48.1349434 | 61.5666434 | 63.6321585 |
| 18:45:31 | 0:45:00 | 71.8197433 | 55.8243232 | 47.1349434 | 61.5666434 | 63.6321585 |
| 18:45:32 | 0:45:01 | 69.8197433 | 55.8243232 | 48.1349434 | 61.5666434 | 63.6321585 |
| 18:45:33 | 0:45:02 | 66.8197433 | 56.8243232 | 49.1349434 | 61.5666434 | 63.6321585 |
| 18:45:34 | 0:45:03 | 64.8197433 | 56.8243232 | 50.1349434 | 61.5666434 | 63.6321585 |
| 18:45:35 | 0:45:04 | 63.8197433 | 56.8243232 | 52.1349434 | 61.5666434 | 63.6321585 |
| 18:45:36 | 0:45:05 | 63.8197433 | 56.8243232 | 54.1349434 | 61.5666434 | 63.6321585 |
| 18:45:37 | 0:45:06 | 63.8197433 | 56.8243232 | 57.1349434 | 62.5666434 | 63.6321585 |
| 18:45:38 | 0:45:07 | 63.8197433 | 56.8243232 | 61.1349434 | 62.5666434 | 64.6321585 |
| 18:45:39 | 0:45:08 | 63.8197433 | 56.8243232 | 62.1349434 | 61.5666434 | 65.6321585 |
| 18:45:40 | 0:45:09 | 63.8197433 | 62.8243232 | 62.1349434 | 61.5666434 | 65.6321585 |
| 18:45:41 | 0:45:10 | 63.8197433 | 67.8243232 | 59.1349434 | 61.5666434 | 65.6321585 |
| 18:45:42 | 0:45:11 | 63.8197433 | 67.8243232 | 57.1349434 | 61.5666434 | 65.6321585 |
| 18:45:43 | 0:45:12 | 63.8197433 | 66.8243232 | 57.1349434 | 61.5666434 | 65.6321585 |
| 18:45:44 | 0:45:13 | 63.8197433 | 66.8243232 | 56.1349434 | 61.5666434 | 66.6321585 |
| 18:45:45 | 0:45:14 | 65.8197433 | 66.8243232 | 57.1349434 | 61.5666434 | 65.6321585 |
| 18:45:46 | 0:45:15 | 67.8197433 | 65.8243232 | 58.1349434 | 61.5666434 | 65.6321585 |
| 18:45:47 | 0:45:16 | 67.8197433 | 65.8243232 | 60.1349434 | 61.5666434 | 65.6321585 |
| 18:45:48 | 0:45:17 | 66.8197433 | 64.8243232 | 61.1349434 | 61.5666434 | 65.6321585 |
| 18:45:49 | 0:45:18 | 63.8197433 | 63.8243232 | 61.1349434 | 61.5666434 | 66.6321585 |
| 18:45:50 | 0:45:19 | 65.8197433 | 60.8243232 | 59.1349434 | 61.5666434 | 66.6321585 |
| 18:45:51 | 0:45:20 | 67.8197433 | 59.8243232 | 56.1349434 | 62.5666434 | 66.6321585 |
| 18:45:52 | 0:45:21 | 69.8197433 | 57.8243232 | 56.1349434 | 62.5666434 | 66.6321585 |
| 18:45:53 | 0:45:22 | 71.8197433 | 57.8243232 | 58.1349434 | 62.5666434 | 67.6321585 |
| 18:45:54 | 0:45:23 | 71.8197433 | 57.8243232 | 58.1349434 | 62.5666434 | 67.6321585 |
| 18:45:55 | 0:45:24 | 73.8197433 | 55.8243232 | 58.1349434 | 61.5666434 | 71.6321585 |
| 18:45:56 | 0:45:25 | 74.8197433 | 54.8243232 | 58.1349434 | 59.5666434 | 71.6321585 |
| 18:45:57 | 0:45:26 | 75.8197433 | 53.8243232 | 59.1349434 | 59.5666434 | 72.6321585 |
| 18:45:58 | 0:45:27 | 76.8197433 | 52.8243232 | 59.1349434 | 59.5666434 | 73.6321585 |
| 18:45:59 | 0:45:28 | 76.8197433 | 53.8243232 | 58.1349434 | 59.5666434 | 74.6321585 |
| 18:46:00 | 0:45:29 | 76.8197433 | 53.8243232 | 58.1349434 | 59.5666434 | 73.6321585 |
| 18:46:01 | 0:45:30 | 76.8197433 | 53.8243232 | 58.1349434 | 63.5666434 | 73.6321585 |
| 18:46:02 | 0:45:31 | 76.8197433 | 53.8243232 | 58.1349434 | 64.5666434 | 72.6321585 |
| 18:46:03 | 0:45:32 | 74.8197433 | 54.8243232 | 57.1349434 | 65.5666434 | 73.6321585 |
| 18:46:04 | 0:45:33 | 72.8197433 | 54.8243232 | 57.1349434 | 65.5666434 | 74.6321585 |
| 18:46:05 | 0:45:34 | 72.8197433 | 54.8243232 | 59.1349434 | 65.5666434 | 74.6321585 |
| 18:46:06 | 0:45:35 | 72.8197433 | 54.8243232 | 59.1349434 | 65.5666434 | 76.6321585 |
| 18:46:07 | 0:45:36 | 73.8197433 | 54.8243232 | 60.1349434 | 65.5666434 | 78.6321585 |
| 18:46:08 | 0:45:37 | 73.8197433 | 55.8243232 | 73.1349434 | 64.5666434 | 78.6321585 |
| 18:46:09 | 0:45:38 | 75.8197433 | 55.8243232 | 83.1349434 | 64.5666434 | 78.6321585 |
| 18:46:10 | 0:45:39 | 78.8197433 | 53.8243232 | 86.1349434 | 64.5666434 | 79.6321585 |
| 18:46:11 | 0:45:40 | 80.8197433 | 53.8243232 | 86.1349434 | 63.5666434 | 79.6321585 |
| 18:46:12 | 0:45:41 | 80.8197433 | 54.8243232 | 86.1349434 | 63.5666434 | 79.6321585 |

|          |         |            |            |            |            |            |
|----------|---------|------------|------------|------------|------------|------------|
| 18:46:13 | 0:45:42 | 80.8197433 | 55.8243232 | 84.1349434 | 63.5666434 | 79.6321585 |
| 18:46:14 | 0:45:43 | 80.8197433 | 55.8243232 | 84.1349434 | 63.5666434 | 81.6321585 |
| 18:46:15 | 0:45:44 | 82.8197433 | 55.8243232 | 64.1349434 | 63.5666434 | 83.6321585 |
| 18:46:16 | 0:45:45 | 81.8197433 | 56.8243232 | 61.1349434 | 64.5666434 | 83.6321585 |
| 18:46:17 | 0:45:46 | 79.8197433 | 57.8243232 | 56.1349434 | 74.5666434 | 84.6321585 |
| 18:46:18 | 0:45:47 | 77.8197433 | 57.8243232 | 54.1349434 | 76.5666434 | 84.6321585 |
| 18:46:19 | 0:45:48 | 78.8197433 | 57.8243232 | 54.1349434 | 77.5666434 | 68.0925569 |
| 18:46:20 | 0:45:49 | 79.8197433 | 57.8243232 | 53.1349434 | 79.5666434 | 68.3925569 |
| 18:46:21 | 0:45:50 | 81.8197433 | 57.8243232 | 52.1349434 | 79.5666434 | 68.3925569 |
| 18:46:22 | 0:45:51 | 83.8197433 | 58.8243232 | 52.1349434 | 80.5666434 | 68.3925569 |
| 18:46:23 | 0:45:52 | 67.9925569 | 58.8243232 | 52.1349434 | 75.5666434 | 67.9925569 |
| 18:46:24 | 0:45:53 | 67.9925569 | 58.8243232 | 54.1349434 | 69.5666434 | 67.9925569 |
| 18:46:25 | 0:45:54 | 67.2925569 | 58.8243232 | 54.1349434 | 66.5666434 | 67.2925569 |
| 18:46:26 | 0:45:55 | 66.5925569 | 58.8243232 | 55.1349434 | 61.5666434 | 84.6321585 |
| 18:46:27 | 0:45:56 | 66.6925569 | 59.8243232 | 55.1349434 | 61.5666434 | 81.6321585 |
| 18:46:28 | 0:45:57 | 84.8197433 | 59.8243232 | 55.1349434 | 60.5666434 | 81.6321585 |
| 18:46:29 | 0:45:58 | 84.8197433 | 59.8243232 | 58.1349434 | 60.5666434 | 76.6321585 |
| 18:46:30 | 0:45:59 | 84.8197433 | 65.8243232 | 58.1349434 | 60.5666434 | 75.6321585 |
| 18:46:31 | 0:46:00 | 84.8197433 | 65.8243232 | 61.1349434 | 60.5666434 | 75.6321585 |
| 18:46:32 | 0:46:01 | 84.8197433 | 66.8243232 | 62.1349434 | 60.5666434 | 75.6321585 |
| 18:46:33 | 0:46:02 | 85.8197433 | 66.8243232 | 62.1349434 | 60.5666434 | 72.6321585 |
| 18:46:34 | 0:46:03 | 85.8197433 | 67.8243232 | 63.1349434 | 60.5666434 | 70.6321585 |
| 18:46:35 | 0:46:04 | 68.2925569 | 67.8243232 | 63.1349434 | 59.5666434 | 69.6321585 |
| 18:46:36 | 0:46:05 | 68.0925569 | 68.8243232 | 66.1349434 | 59.5666434 | 69.6321585 |
| 18:46:37 | 0:46:06 | 80.8197433 | 68.8243232 | 66.1349434 | 58.5666434 | 66.6321585 |
| 18:46:38 | 0:46:07 | 80.8197433 | 69.8243232 | 67.1349434 | 58.5666434 | 65.6321585 |
| 18:46:39 | 0:46:08 | 78.8197433 | 74.8243232 | 67.1349434 | 58.5666434 | 65.6321585 |
| 18:46:40 | 0:46:09 | 73.8197433 | 73.8243232 | 67.1349434 | 58.5666434 | 65.6321585 |
| 18:46:41 | 0:46:10 | 72.8197433 | 73.8243232 | 67.1349434 | 59.5666434 | 65.6321585 |
| 18:46:42 | 0:46:11 | 71.8197433 | 72.8243232 | 67.1349434 | 60.5666434 | 65.6321585 |
| 18:46:43 | 0:46:12 | 70.8197433 | 72.8243232 | 67.1349434 | 60.5666434 | 65.6321585 |
| 18:46:44 | 0:46:13 | 70.8197433 | 72.8243232 | 67.1349434 | 60.5666434 | 65.6321585 |
| 18:46:45 | 0:46:14 | 69.8197433 | 72.8243232 | 67.1349434 | 60.5666434 | 65.6321585 |
| 18:46:46 | 0:46:15 | 69.8197433 | 73.8243232 | 67.1349434 | 60.5666434 | 65.6321585 |
| 18:46:47 | 0:46:16 | 68.8197433 | 73.8243232 | 65.1349434 | 61.5666434 | 65.6321585 |
| 18:46:48 | 0:46:17 | 68.8197433 | 73.8243232 | 65.1349434 | 61.5666434 | 65.6321585 |
| 18:46:49 | 0:46:18 | 66.8197433 | 74.8243232 | 65.1349434 | 61.5666434 | 65.6321585 |
| 18:46:50 | 0:46:19 | 66.8197433 | 75.8243232 | 64.1349434 | 60.5666434 | 66.6321585 |
| 18:46:51 | 0:46:20 | 63.8197433 | 75.8243232 | 64.1349434 | 60.5666434 | 66.6321585 |
| 18:46:52 | 0:46:21 | 63.8197433 | 77.8243232 | 64.1349434 | 59.5666434 | 66.6321585 |
| 18:46:53 | 0:46:22 | 63.8197433 | 76.8243232 | 63.1349434 | 58.5666434 | 66.6321585 |
| 18:46:54 | 0:46:23 | 63.8197433 | 71.8243232 | 65.1349434 | 56.5666434 | 66.6321585 |
| 18:46:55 | 0:46:24 | 63.8197433 | 71.8243232 | 66.1349434 | 56.5666434 | 64.6321585 |
| 18:46:56 | 0:46:25 | 64.8197433 | 68.8243232 | 66.1349434 | 56.5666434 | 63.6321585 |
| 18:46:57 | 0:46:26 | 65.8197433 | 67.8243232 | 67.1349434 | 56.5666434 | 63.6321585 |



|          |         |            |            |            |            |            |
|----------|---------|------------|------------|------------|------------|------------|
| 18:46:58 | 0:46:27 | 67.8197433 | 67.8243232 | 67.1349434 | 56.5666434 | 63.6321585 |
| 18:46:59 | 0:46:28 | 70.8197433 | 66.8243232 | 69.1349434 | 56.5666434 | 62.6321585 |
| 18:47:00 | 0:46:29 | 72.8197433 | 66.8243232 | 70.1349434 | 56.5666434 | 62.6321585 |
| 18:47:01 | 0:46:30 | 72.8197433 | 65.8243232 | 71.1349434 | 56.5666434 | 63.6321585 |
| 18:47:02 | 0:46:31 | 72.8197433 | 64.8243232 | 72.1349434 | 56.5666434 | 63.6321585 |
| 18:47:03 | 0:46:32 | 73.8197433 | 60.8243232 | 72.1349434 | 56.5666434 | 62.6321585 |
| 18:47:04 | 0:46:33 | 73.8197433 | 59.8243232 | 72.1349434 | 56.5666434 | 62.6321585 |
| 18:47:05 | 0:46:34 | 73.8197433 | 58.8243232 | 73.1349434 | 55.5666434 | 62.6321585 |
| 18:47:06 | 0:46:35 | 73.8197433 | 65.8243232 | 74.1349434 | 55.5666434 | 63.6321585 |
| 18:47:07 | 0:46:36 | 68.8197433 | 66.8243232 | 75.1349434 | 55.5666434 | 63.6321585 |
| 18:47:08 | 0:46:37 | 65.8197433 | 66.8243232 | 75.1349434 | 55.5666434 | 63.6321585 |
| 18:47:09 | 0:46:38 | 64.8197433 | 64.8243232 | 74.1349434 | 56.5666434 | 65.6321585 |
| 18:47:10 | 0:46:39 | 64.8197433 | 62.8243232 | 74.1349434 | 56.5666434 | 65.6321585 |
| 18:47:11 | 0:46:40 | 64.8197433 | 61.8243232 | 73.1349434 | 56.5666434 | 68.6321585 |
| 18:47:12 | 0:46:41 | 63.8197433 | 60.8243232 | 73.1349434 | 56.5666434 | 68.6321585 |
| 18:47:13 | 0:46:42 | 63.8197433 | 60.8243232 | 73.1349434 | 56.5666434 | 69.6321585 |
| 18:47:14 | 0:46:43 | 63.8197433 | 60.8243232 | 72.1349434 | 57.5666434 | 68.6321585 |
| 18:47:15 | 0:46:44 | 63.8197433 | 60.8243232 | 71.1349434 | 58.5666434 | 68.6321585 |
| 18:47:16 | 0:46:45 | 64.8197433 | 60.8243232 | 71.1349434 | 59.5666434 | 68.6321585 |
| 18:47:17 | 0:46:46 | 64.8197433 | 60.8243232 | 68.1349434 | 62.5666434 | 68.6321585 |
| 18:47:18 | 0:46:47 | 64.8197433 | 60.8243232 | 67.1349434 | 62.5666434 | 68.6321585 |
| 18:47:19 | 0:46:48 | 65.8197433 | 59.8243232 | 66.1349434 | 62.5666434 | 68.6321585 |
| 18:47:20 | 0:46:49 | 65.8197433 | 59.8243232 | 67.1349434 | 63.5666434 | 69.6321585 |
| 18:47:21 | 0:46:50 | 65.8197433 | 59.8243232 | 69.1349434 | 66.5666434 | 69.6321585 |
| 18:47:22 | 0:46:51 | 65.8197433 | 59.8243232 | 69.1349434 | 66.5666434 | 69.6321585 |
| 18:47:23 | 0:46:52 | 65.8197433 | 60.8243232 | 69.1349434 | 66.5666434 | 69.6321585 |
| 18:47:24 | 0:46:53 | 66.8197433 | 61.8243232 | 69.1349434 | 66.5666434 | 69.6321585 |
| 18:47:25 | 0:46:54 | 66.8197433 | 61.8243232 | 69.1349434 | 66.5666434 | 69.6321585 |
| 18:47:26 | 0:46:55 | 66.8197433 | 61.8243232 | 69.1349434 | 66.5666434 | 71.6321585 |
| 18:47:27 | 0:46:56 | 67.8197433 | 61.8243232 | 69.1349434 | 67.5666434 | 71.6321585 |
| 18:47:28 | 0:46:57 | 67.8197433 | 61.8243232 | 68.1349434 | 67.5666434 | 71.6321585 |
| 18:47:29 | 0:46:58 | 67.8197433 | 61.8243232 | 69.1349434 | 67.5666434 | 71.6321585 |
| 18:47:30 | 0:46:59 | 67.8197433 | 61.8243232 | 71.1349434 | 69.5666434 | 73.6321585 |
| 18:47:31 | 0:47:00 | 67.8197433 | 61.8243232 | 75.1349434 | 69.5666434 | 76.6321585 |
| 18:47:32 | 0:47:01 | 67.8197433 | 61.8243232 | 75.1349434 | 71.5666434 | 76.6321585 |
| 18:47:33 | 0:47:02 | 67.8197433 | 61.8243232 | 75.1349434 | 72.5666434 | 77.6321585 |
| 18:47:34 | 0:47:03 | 67.8197433 | 61.8243232 | 70.1349434 | 72.5666434 | 77.6321585 |
| 18:47:35 | 0:47:04 | 67.8197433 | 61.8243232 | 65.1349434 | 73.5666434 | 76.6321585 |
| 18:47:36 | 0:47:05 | 67.8197433 | 61.8243232 | 63.1349434 | 73.5666434 | 77.6321585 |
| 18:47:37 | 0:47:06 | 67.8197433 | 61.8243232 | 62.1349434 | 73.5666434 | 77.6321585 |
| 18:47:38 | 0:47:07 | 66.8197433 | 60.8243232 | 62.1349434 | 73.5666434 | 78.6321585 |
| 18:47:39 | 0:47:08 | 65.8197433 | 60.8243232 | 61.1349434 | 73.5666434 | 81.6321585 |
| 18:47:40 | 0:47:09 | 65.8197433 | 60.8243232 | 67.1349434 | 73.5666434 | 81.6321585 |
| 18:47:41 | 0:47:10 | 64.8197433 | 60.8243232 | 71.1349434 | 74.5666434 | 82.6321585 |
| 18:47:42 | 0:47:11 | 64.8197433 | 60.8243232 | 71.1349434 | 74.5666434 | 82.6321585 |

|          |         |            |            |            |            |            |
|----------|---------|------------|------------|------------|------------|------------|
| 18:47:43 | 0:47:12 | 64.8197433 | 60.8243232 | 68.1349434 | 62.5666434 | 81.6321585 |
| 18:47:44 | 0:47:13 | 63.8197433 | 60.8243232 | 66.1349434 | 62.5666434 | 81.6321585 |
| 18:47:45 | 0:47:14 | 63.8197433 | 60.8243232 | 66.1349434 | 60.5666434 | 80.6321585 |
| 18:47:46 | 0:47:15 | 62.8197433 | 60.8243232 | 68.1349434 | 60.5666434 | 80.6321585 |
| 18:47:47 | 0:47:16 | 62.8197433 | 60.8243232 | 69.1349434 | 60.5666434 | 80.6321585 |
| 18:47:48 | 0:47:17 | 62.8197433 | 60.8243232 | 69.1349434 | 60.5666434 | 81.6321585 |
| 18:47:49 | 0:47:18 | 62.8197433 | 58.8243232 | 66.1349434 | 63.5666434 | 81.6321585 |
| 18:47:50 | 0:47:19 | 62.8197433 | 58.8243232 | 61.1349434 | 66.5666434 | 81.6321585 |
| 18:47:51 | 0:47:20 | 62.8197433 | 57.8243232 | 59.1349434 | 69.5666434 | 81.6321585 |
| 18:47:52 | 0:47:21 | 62.8197433 | 57.8243232 | 58.1349434 | 69.5666434 | 79.6321585 |
| 18:47:53 | 0:47:22 | 62.8197433 | 59.8243232 | 60.1349434 | 72.5666434 | 79.6321585 |
| 18:47:54 | 0:47:23 | 62.8197433 | 59.8243232 | 62.1349434 | 73.5666434 | 77.6321585 |
| 18:47:55 | 0:47:24 | 62.8197433 | 59.8243232 | 63.1349434 | 73.5666434 | 76.6321585 |
| 18:47:56 | 0:47:25 | 62.8197433 | 58.8243232 | 63.1349434 | 73.5666434 | 76.6321585 |
| 18:47:57 | 0:47:26 | 62.8197433 | 58.8243232 | 63.1349434 | 73.5666434 | 75.6321585 |
| 18:47:58 | 0:47:27 | 63.8197433 | 58.8243232 | 64.1349434 | 73.5666434 | 73.6321585 |
| 18:47:59 | 0:47:28 | 65.8197433 | 57.8243232 | 64.1349434 | 72.5666434 | 73.6321585 |
| 18:48:00 | 0:47:29 | 64.8197433 | 57.8243232 | 65.1349434 | 72.5666434 | 71.6321585 |
| 18:48:01 | 0:47:30 | 63.8197433 | 57.8243232 | 65.1349434 | 70.5666434 | 71.6321585 |
| 18:48:02 | 0:47:31 | 63.8197433 | 57.8243232 | 65.1349434 | 70.5666434 | 70.6321585 |
| 18:48:03 | 0:47:32 | 62.8197433 | 57.8243232 | 65.1349434 | 68.5666434 | 68.6321585 |
| 18:48:04 | 0:47:33 | 62.8197433 | 56.8243232 | 67.1349434 | 68.5666434 | 66.6321585 |
| 18:48:05 | 0:47:34 | 62.8197433 | 55.8243232 | 67.1349434 | 66.5666434 | 66.6321585 |
| 18:48:06 | 0:47:35 | 62.8197433 | 55.8243232 | 69.1349434 | 65.5666434 | 66.6321585 |
| 18:48:07 | 0:47:36 | 62.8197433 | 55.8243232 | 69.1349434 | 65.5666434 | 66.6321585 |
| 18:48:08 | 0:47:37 | 62.8197433 | 55.8243232 | 69.1349434 | 65.5666434 | 67.6321585 |
| 18:48:09 | 0:47:38 | 62.8197433 | 55.8243232 | 68.1349434 | 65.5666434 | 67.6321585 |
| 18:48:10 | 0:47:39 | 62.8197433 | 55.8243232 | 68.1349434 | 65.5666434 | 66.6321585 |
| 18:48:11 | 0:47:40 | 62.8197433 | 55.8243232 | 68.1349434 | 66.5666434 | 65.6321585 |
| 18:48:12 | 0:47:41 | 62.8197433 | 55.8243232 | 67.1349434 | 65.5666434 | 65.6321585 |
| 18:48:13 | 0:47:42 | 62.8197433 | 55.8243232 | 67.1349434 | 65.5666434 | 65.6321585 |
| 18:48:14 | 0:47:43 | 62.8197433 | 57.8243232 | 66.1349434 | 64.5666434 | 65.6321585 |
| 18:48:15 | 0:47:44 | 63.8197433 | 58.8243232 | 65.1349434 | 62.5666434 | 66.6321585 |
| 18:48:16 | 0:47:45 | 63.8197433 | 53.8243232 | 65.1349434 | 62.5666434 | 67.6321585 |
| 18:48:17 | 0:47:46 | 63.8197433 | 53.8243232 | 65.1349434 | 59.5666434 | 67.6321585 |
| 18:48:18 | 0:47:47 | 63.8197433 | 52.8243232 | 65.1349434 | 59.5666434 | 67.6321585 |
| 18:48:19 | 0:47:48 | 63.8197433 | 52.8243232 | 63.1349434 | 58.5666434 | 67.6321585 |
| 18:48:20 | 0:47:49 | 63.8197433 | 52.8243232 | 63.1349434 | 58.5666434 | 67.6321585 |
| 18:48:21 | 0:47:50 | 63.8197433 | 53.8243232 | 61.1349434 | 58.5666434 | 66.6321585 |
| 18:48:22 | 0:47:51 | 63.8197433 | 53.8243232 | 60.1349434 | 59.5666434 | 66.6321585 |
| 18:48:23 | 0:47:52 | 63.8197433 | 55.8243232 | 62.1349434 | 59.5666434 | 65.6321585 |
| 18:48:24 | 0:47:53 | 62.8197433 | 54.8243232 | 62.1349434 | 59.5666434 | 65.6321585 |
| 18:48:25 | 0:47:54 | 62.8197433 | 53.8243232 | 62.1349434 | 58.5666434 | 65.6321585 |
| 18:48:26 | 0:47:55 | 62.8197433 | 53.8243232 | 62.1349434 | 58.5666434 | 65.6321585 |
| 18:48:27 | 0:47:56 | 62.8197433 | 54.8243232 | 62.1349434 | 58.5666434 | 65.6321585 |

|          |         |            |            |            |            |            |
|----------|---------|------------|------------|------------|------------|------------|
| 18:48:28 | 0:47:57 | 62.8197433 | 54.8243232 | 62.1349434 | 57.5666434 | 65.6321585 |
| 18:48:29 | 0:47:58 | 63.8197433 | 55.8243232 | 62.1349434 | 57.5666434 | 65.6321585 |
| 18:48:30 | 0:47:59 | 63.8197433 | 55.8243232 | 62.1349434 | 57.5666434 | 65.6321585 |
| 18:48:31 | 0:48:00 | 63.8197433 | 56.8243232 | 61.1349434 | 57.5666434 | 63.6321585 |
| 18:48:32 | 0:48:01 | 63.8197433 | 55.8243232 | 60.1349434 | 57.5666434 | 62.6321585 |
| 18:48:33 | 0:48:02 | 63.8197433 | 55.8243232 | 60.1349434 | 57.5666434 | 62.6321585 |
| 18:48:34 | 0:48:03 | 63.8197433 | 55.8243232 | 59.1349434 | 57.5666434 | 62.6321585 |
| 18:48:35 | 0:48:04 | 63.8197433 | 55.8243232 | 59.1349434 | 57.5666434 | 62.6321585 |
| 18:48:36 | 0:48:05 | 63.8197433 | 55.8243232 | 59.1349434 | 57.5666434 | 62.6321585 |
| 18:48:37 | 0:48:06 | 63.8197433 | 55.8243232 | 58.1349434 | 56.5666434 | 63.6321585 |
| 18:48:38 | 0:48:07 | 63.8197433 | 55.8243232 | 58.1349434 | 56.5666434 | 62.6321585 |
| 18:48:39 | 0:48:08 | 63.8197433 | 55.8243232 | 58.1349434 | 56.5666434 | 61.6321585 |
| 18:48:40 | 0:48:09 | 63.8197433 | 55.8243232 | 58.1349434 | 56.5666434 | 60.6321585 |
| 18:48:41 | 0:48:10 | 63.8197433 | 56.8243232 | 57.1349434 | 55.5666434 | 60.6321585 |
| 18:48:42 | 0:48:11 | 63.8197433 | 56.8243232 | 57.1349434 | 56.5666434 | 60.6321585 |
| 18:48:43 | 0:48:12 | 63.8197433 | 58.8243232 | 57.1349434 | 55.5666434 | 60.6321585 |
| 18:48:44 | 0:48:13 | 63.8197433 | 60.8243232 | 56.1349434 | 55.5666434 | 60.6321585 |
| 18:48:45 | 0:48:14 | 64.8197433 | 62.8243232 | 56.1349434 | 55.5666434 | 60.6321585 |
| 18:48:46 | 0:48:15 | 64.8197433 | 62.8243232 | 56.1349434 | 55.5666434 | 61.6321585 |
| 18:48:47 | 0:48:16 | 64.8197433 | 61.8243232 | 56.1349434 | 55.5666434 | 62.6321585 |
| 18:48:48 | 0:48:17 | 65.8197433 | 63.8243232 | 55.1349434 | 54.5666434 | 62.6321585 |
| 18:48:49 | 0:48:18 | 65.8197433 | 63.8243232 | 55.1349434 | 54.5666434 | 62.6321585 |
| 18:48:50 | 0:48:19 | 65.8197433 | 64.8243232 | 54.1349434 | 57.5666434 | 62.6321585 |
| 18:48:51 | 0:48:20 | 65.8197433 | 64.8243232 | 54.1349434 | 57.5666434 | 63.6321585 |
| 18:48:52 | 0:48:21 | 65.8197433 | 64.8243232 | 54.1349434 | 58.5666434 | 63.6321585 |
| 18:48:53 | 0:48:22 | 69.8197433 | 63.8243232 | 58.1349434 | 58.5666434 | 65.6321585 |
| 18:48:54 | 0:48:23 | 69.8197433 | 61.8243232 | 58.1349434 | 58.5666434 | 67.6321585 |
| 18:48:55 | 0:48:24 | 72.8197433 | 61.8243232 | 69.1349434 | 59.5666434 | 67.6321585 |
| 18:48:56 | 0:48:25 | 73.8197433 | 62.8243232 | 68.1349434 | 59.5666434 | 67.6321585 |
| 18:48:57 | 0:48:26 | 71.8197433 | 62.8243232 | 65.1349434 | 61.5666434 | 67.6321585 |
| 18:48:58 | 0:48:27 | 71.8197433 | 62.8243232 | 65.1349434 | 63.5666434 | 67.6321585 |
| 18:48:59 | 0:48:28 | 71.8197433 | 61.8243232 | 66.1349434 | 63.5666434 | 67.6321585 |
| 18:49:00 | 0:48:29 | 70.8197433 | 61.8243232 | 67.1349434 | 64.5666434 | 67.6321585 |
| 18:49:01 | 0:48:30 | 70.8197433 | 61.8243232 | 68.1349434 | 64.5666434 | 66.6321585 |
| 18:49:02 | 0:48:31 | 69.8197433 | 59.8243232 | 68.1349434 | 66.5666434 | 65.6321585 |
| 18:49:03 | 0:48:32 | 69.8197433 | 58.8243232 | 68.1349434 | 66.5666434 | 64.6321585 |
| 18:49:04 | 0:48:33 | 68.8197433 | 56.8243232 | 69.1349434 | 66.5666434 | 64.6321585 |
| 18:49:05 | 0:48:34 | 67.8197433 | 56.8243232 | 69.1349434 | 65.5666434 | 64.6321585 |
| 18:49:06 | 0:48:35 | 67.8197433 | 56.8243232 | 70.1349434 | 63.5666434 | 64.6321585 |
| 18:49:07 | 0:48:36 | 67.8197433 | 58.8243232 | 70.1349434 | 63.5666434 | 64.6321585 |
| 18:49:08 | 0:48:37 | 67.8197433 | 58.8243232 | 69.1349434 | 63.5666434 | 65.6321585 |
| 18:49:09 | 0:48:38 | 67.8197433 | 59.8243232 | 68.1349434 | 62.5666434 | 65.6321585 |
| 18:49:10 | 0:48:39 | 69.8197433 | 59.8243232 | 67.1349434 | 66.5666434 | 66.6321585 |
| 18:49:11 | 0:48:40 | 71.8197433 | 59.8243232 | 69.1349434 | 66.5666434 | 66.6321585 |
| 18:49:12 | 0:48:41 | 74.8197433 | 59.8243232 | 69.1349434 | 65.5666434 | 69.6321585 |

|          |         |            |            |            |            |            |
|----------|---------|------------|------------|------------|------------|------------|
| 18:49:13 | 0:48:42 | 72.8197433 | 59.8243232 | 70.1349434 | 65.5666434 | 69.6321585 |
| 18:49:14 | 0:48:43 | 70.8197433 | 59.8243232 | 72.1349434 | 65.5666434 | 69.6321585 |
| 18:49:15 | 0:48:44 | 66.8197433 | 57.8243232 | 74.1349434 | 65.5666434 | 68.6321585 |
| 18:49:16 | 0:48:45 | 65.8197433 | 56.8243232 | 76.1349434 | 64.5666434 | 67.6321585 |
| 18:49:17 | 0:48:46 | 64.8197433 | 56.8243232 | 78.1349434 | 64.5666434 | 67.6321585 |
| 18:49:18 | 0:48:47 | 64.8197433 | 55.8243232 | 79.1349434 | 64.5666434 | 67.6321585 |
| 18:49:19 | 0:48:48 | 64.8197433 | 55.8243232 | 79.1349434 | 63.5666434 | 66.6321585 |
| 18:49:20 | 0:48:49 | 64.8197433 | 55.8243232 | 79.1349434 | 63.5666434 | 66.6321585 |
| 18:49:21 | 0:48:50 | 64.8197433 | 55.8243232 | 79.1349434 | 63.5666434 | 66.6321585 |
| 18:49:22 | 0:48:51 | 64.8197433 | 55.8243232 | 79.1349434 | 63.5666434 | 67.6321585 |
| 18:49:23 | 0:48:52 | 64.8197433 | 56.8243232 | 80.1349434 | 64.5666434 | 67.6321585 |
| 18:49:24 | 0:48:53 | 65.8197433 | 56.8243232 | 80.1349434 | 64.5666434 | 67.6321585 |
| 18:49:25 | 0:48:54 | 66.8197433 | 56.8243232 | 80.1349434 | 64.5666434 | 66.6321585 |
| 18:49:26 | 0:48:55 | 66.8197433 | 57.8243232 | 80.1349434 | 64.5666434 | 66.6321585 |
| 18:49:27 | 0:48:56 | 64.8197433 | 60.8243232 | 79.1349434 | 64.5666434 | 67.6321585 |
| 18:49:28 | 0:48:57 | 65.8197433 | 60.8243232 | 79.1349434 | 63.5666434 | 67.6321585 |
| 18:49:29 | 0:48:58 | 65.8197433 | 64.8243232 | 78.1349434 | 63.5666434 | 68.6321585 |
| 18:49:30 | 0:48:59 | 65.8197433 | 64.8243232 | 78.1349434 | 63.5666434 | 68.6321585 |
| 18:49:31 | 0:49:00 | 66.8197433 | 66.8243232 | 77.1349434 | 62.5666434 | 70.6321585 |
| 18:49:32 | 0:49:01 | 65.8197433 | 66.8243232 | 77.1349434 | 62.5666434 | 71.6321585 |
| 18:49:33 | 0:49:02 | 64.8197433 | 66.8243232 | 78.1349434 | 62.5666434 | 72.6321585 |
| 18:49:34 | 0:49:03 | 63.8197433 | 66.8243232 | 78.1349434 | 62.5666434 | 73.6321585 |
| 18:49:35 | 0:49:04 | 62.8197433 | 66.8243232 | 79.1349434 | 62.5666434 | 75.6321585 |
| 18:49:36 | 0:49:05 | 62.8197433 | 66.8243232 | 69.1349434 | 63.5666434 | 77.6321585 |
| 18:49:37 | 0:49:06 | 62.8197433 | 66.8243232 | 68.1349434 | 63.5666434 | 77.6321585 |
| 18:49:38 | 0:49:07 | 61.8197433 | 66.8243232 | 68.1349434 | 63.5666434 | 80.6321585 |
| 18:49:39 | 0:49:08 | 61.8197433 | 69.8243232 | 68.1349434 | 61.5666434 | 80.6321585 |
| 18:49:40 | 0:49:09 | 61.8197433 | 69.8243232 | 66.1349434 | 61.5666434 | 81.6321585 |
| 18:49:41 | 0:49:10 | 61.8197433 | 69.8243232 | 66.1349434 | 60.5666434 | 85.6321585 |
| 18:49:42 | 0:49:11 | 61.8197433 | 70.8243232 | 62.1349434 | 60.5666434 | 85.6321585 |
| 18:49:43 | 0:49:12 | 60.8197433 | 64.8243232 | 62.1349434 | 60.5666434 | 70.8925569 |
| 18:49:44 | 0:49:13 | 60.8197433 | 62.8243232 | 62.1349434 | 60.5666434 | 71.0925569 |
| 18:49:45 | 0:49:14 | 60.8197433 | 62.8243232 | 61.1349434 | 60.5666434 | 71.1925569 |
| 18:49:46 | 0:49:15 | 60.8197433 | 61.8243232 | 61.1349434 | 60.5666434 | 71.0925569 |
| 18:49:47 | 0:49:16 | 60.8197433 | 56.8243232 | 60.1349434 | 60.5666434 | 70.3925569 |
| 18:49:48 | 0:49:17 | 60.8197433 | 56.8243232 | 60.1349434 | 62.5666434 | 70.0925569 |
| 18:49:49 | 0:49:18 | 60.8197433 | 55.8243232 | 60.1349434 | 62.5666434 | 70.2925569 |
| 18:49:50 | 0:49:19 | 61.8197433 | 55.8243232 | 58.1349434 | 63.5666434 | 70.5925569 |
| 18:49:51 | 0:49:20 | 61.8197433 | 55.8243232 | 56.1349434 | 65.5666434 | 70.6925569 |
| 18:49:52 | 0:49:21 | 64.8197433 | 54.8243232 | 55.1349434 | 65.5666434 | 70.8925569 |
| 18:49:53 | 0:49:22 | 65.8197433 | 54.8243232 | 55.1349434 | 66.5666434 | 71.1925569 |
| 18:49:54 | 0:49:23 | 65.8197433 | 54.8243232 | 54.1349434 | 66.5666434 | 70.9925569 |
| 18:49:55 | 0:49:24 | 64.8197433 | 53.8243232 | 54.1349434 | 66.5666434 | 70.2925569 |
| 18:49:56 | 0:49:25 | 64.8197433 | 54.8243232 | 54.1349434 | 69.5666434 | 70.4925569 |
| 18:49:57 | 0:49:26 | 64.8197433 | 54.8243232 | 55.1349434 | 72.5666434 | 70.4925569 |

|          |         |            |            |            |            |            |
|----------|---------|------------|------------|------------|------------|------------|
| 18:49:58 | 0:49:27 | 64.8197433 | 55.8243232 | 55.1349434 | 72.5666434 | 82.6321585 |
| 18:49:59 | 0:49:28 | 64.8197433 | 55.8243232 | 55.1349434 | 70.5666434 | 82.6321585 |
| 18:50:00 | 0:49:29 | 64.8197433 | 55.8243232 | 55.1349434 | 64.5666434 | 81.6321585 |
| 18:50:01 | 0:49:30 | 66.8197433 | 55.8243232 | 56.1349434 | 60.5666434 | 81.6321585 |
| 18:50:02 | 0:49:31 | 69.8197433 | 54.8243232 | 57.1349434 | 58.5666434 | 81.6321585 |
| 18:50:03 | 0:49:32 | 69.8197433 | 53.8243232 | 57.1349434 | 58.5666434 | 80.6321585 |
| 18:50:04 | 0:49:33 | 71.8197433 | 53.8243232 | 58.1349434 | 58.5666434 | 75.6321585 |
| 18:50:05 | 0:49:34 | 71.8197433 | 53.8243232 | 58.1349434 | 57.5666434 | 73.6321585 |
| 18:50:06 | 0:49:35 | 73.8197433 | 52.8243232 | 59.1349434 | 57.5666434 | 73.6321585 |
| 18:50:07 | 0:49:36 | 74.8197433 | 53.8243232 | 59.1349434 | 57.5666434 | 72.6321585 |
| 18:50:08 | 0:49:37 | 77.8197433 | 54.8243232 | 60.1349434 | 57.5666434 | 72.6321585 |
| 18:50:09 | 0:49:38 | 77.8197433 | 56.8243232 | 60.1349434 | 57.5666434 | 73.6321585 |
| 18:50:10 | 0:49:39 | 78.8197433 | 56.8243232 | 62.1349434 | 57.5666434 | 73.6321585 |
| 18:50:11 | 0:49:40 | 78.8197433 | 56.8243232 | 62.1349434 | 58.5666434 | 73.6321585 |
| 18:50:12 | 0:49:41 | 78.8197433 | 56.8243232 | 62.1349434 | 59.5666434 | 73.6321585 |
| 18:50:13 | 0:49:42 | 78.8197433 | 56.8243232 | 62.1349434 | 59.5666434 | 73.6321585 |
| 18:50:14 | 0:49:43 | 78.8197433 | 57.8243232 | 61.1349434 | 59.5666434 | 73.6321585 |
| 18:50:15 | 0:49:44 | 78.8197433 | 59.8243232 | 61.1349434 | 59.5666434 | 73.6321585 |
| 18:50:16 | 0:49:45 | 78.8197433 | 60.8243232 | 61.1349434 | 59.5666434 | 73.6321585 |
| 18:50:17 | 0:49:46 | 79.8197433 | 60.8243232 | 63.1349434 | 59.5666434 | 73.6321585 |
| 18:50:18 | 0:49:47 | 79.8197433 | 60.8243232 | 64.1349434 | 59.5666434 | 74.6321585 |
| 18:50:19 | 0:49:48 | 78.8197433 | 60.8243232 | 65.1349434 | 59.5666434 | 74.6321585 |
| 18:50:20 | 0:49:49 | 77.8197433 | 62.8243232 | 66.1349434 | 60.5666434 | 74.6321585 |
| 18:50:21 | 0:49:50 | 77.8197433 | 62.8243232 | 69.1349434 | 61.5666434 | 78.6321585 |
| 18:50:22 | 0:49:51 | 77.8197433 | 63.8243232 | 69.1349434 | 61.5666434 | 79.6321585 |
| 18:50:23 | 0:49:52 | 77.8197433 | 64.8243232 | 72.1349434 | 62.5666434 | 79.6321585 |
| 18:50:24 | 0:49:53 | 77.8197433 | 64.8243232 | 72.1349434 | 62.5666434 | 79.6321585 |
| 18:50:25 | 0:49:54 | 81.8197433 | 65.8243232 | 75.1349434 | 61.5666434 | 73.6321585 |
| 18:50:26 | 0:49:55 | 82.8197433 | 66.8243232 | 76.1349434 | 60.5666434 | 72.6321585 |
| 18:50:27 | 0:49:56 | 82.8197433 | 66.8243232 | 78.1349434 | 60.5666434 | 72.6321585 |
| 18:50:28 | 0:49:57 | 81.8197433 | 66.8243232 | 79.1349434 | 59.5666434 | 72.6321585 |
| 18:50:29 | 0:49:58 | 81.8197433 | 67.8243232 | 77.1349434 | 60.5666434 | 72.6321585 |
| 18:50:30 | 0:49:59 | 80.8197433 | 63.8243232 | 76.1349434 | 61.5666434 | 72.6321585 |
| 18:50:31 | 0:50:00 | 80.8197433 | 63.8243232 | 76.1349434 | 61.5666434 | 70.6321585 |
| 18:50:32 | 0:50:01 | 80.8197433 | 62.8243232 | 75.1349434 | 61.5666434 | 70.6321585 |
| 18:50:33 | 0:50:02 | 80.8197433 | 64.8243232 | 75.1349434 | 61.5666434 | 71.6321585 |
| 18:50:34 | 0:50:03 | 79.8197433 | 64.8243232 | 76.1349434 | 61.5666434 | 71.6321585 |
| 18:50:35 | 0:50:04 | 78.8197433 | 64.8243232 | 79.1349434 | 61.5666434 | 72.6321585 |
| 18:50:36 | 0:50:05 | 77.8197433 | 60.8243232 | 79.1349434 | 60.5666434 | 72.6321585 |
| 18:50:37 | 0:50:06 | 76.8197433 | 60.8243232 | 77.1349434 | 59.5666434 | 72.6321585 |
| 18:50:38 | 0:50:07 | 76.8197433 | 60.8243232 | 76.1349434 | 58.5666434 | 72.6321585 |
| 18:50:39 | 0:50:08 | 80.8197433 | 58.8243232 | 75.1349434 | 57.5666434 | 73.6321585 |
| 18:50:40 | 0:50:09 | 67.2925569 | 58.8243232 | 73.1349434 | 57.5666434 | 73.6321585 |
| 18:50:41 | 0:50:10 | 67.2925569 | 58.8243232 | 73.1349434 | 57.5666434 | 72.6321585 |
| 18:50:42 | 0:50:11 | 67.4925569 | 58.8243232 | 73.1349434 | 57.5666434 | 72.6321585 |

|          |         |            |            |            |            |            |
|----------|---------|------------|------------|------------|------------|------------|
| 18:50:43 | 0:50:12 | 67.2925569 | 58.8243232 | 73.1349434 | 53.5666434 | 72.6321585 |
| 18:50:44 | 0:50:13 | 67.0925569 | 58.8243232 | 72.1349434 | 53.5666434 | 72.6321585 |
| 18:50:45 | 0:50:14 | 67.1925569 | 58.8243232 | 71.1349434 | 53.5666434 | 72.6321585 |
| 18:50:46 | 0:50:15 | 66.7925569 | 57.8243232 | 66.1349434 | 53.5666434 | 72.6321585 |
| 18:50:47 | 0:50:16 | 66.8925569 | 57.8243232 | 58.1349434 | 53.5666434 | 72.6321585 |
| 18:50:48 | 0:50:17 | 66.7925569 | 57.8243232 | 55.1349434 | 53.5666434 | 72.6321585 |
| 18:50:49 | 0:50:18 | 66.2925569 | 57.8243232 | 53.1349434 | 53.5666434 | 72.6321585 |
| 18:50:50 | 0:50:19 | 66.0925569 | 57.8243232 | 52.1349434 | 53.5666434 | 72.6321585 |
| 18:50:51 | 0:50:20 | 66.1925569 | 57.8243232 | 51.1349434 | 53.5666434 | 73.6321585 |
| 18:50:52 | 0:50:21 | 66.5925569 | 57.8243232 | 51.1349434 | 55.5666434 | 75.6321585 |
| 18:50:53 | 0:50:22 | 66.8925569 | 58.8243232 | 50.1349434 | 55.5666434 | 75.6321585 |
| 18:50:54 | 0:50:23 | 67.1925569 | 58.8243232 | 50.1349434 | 56.5666434 | 76.6321585 |
| 18:50:55 | 0:50:24 | 67.7925569 | 58.8243232 | 50.1349434 | 59.5666434 | 75.6321585 |
| 18:50:56 | 0:50:25 | 68.2925569 | 58.8243232 | 51.1349434 | 59.5666434 | 75.6321585 |
| 18:50:57 |         | 69.2334717 |            | 51.1349434 | 59.5666434 | 74.6321585 |
| 18:50:58 |         | 69.1223606 |            | 52.1349434 | 59.5666434 | 72.6321585 |
| 18:50:59 |         | 69.2334717 |            | 52.1349434 | 59.5666434 | 71.6321585 |
| 18:51:00 |         | 69.6779162 |            | 52.1349434 | 60.5666434 | 71.6321585 |
| 18:51:01 |         | 69.3610643 |            | 52.1349434 | 61.5666434 | 71.6321585 |
| 18:51:02 |         | 70.8610643 |            | 63.1349434 | 64.5666434 | 70.6321585 |
| 18:51:03 |         | 71.4860643 |            | 65.1349434 | 65.5666434 | 70.6321585 |
| 18:51:04 |         | 71.6110643 |            | 66.1349434 | 66.5666434 | 70.6321585 |
| 18:51:05 |         | 88.8197433 |            | 66.1349434 | 66.5666434 | 69.6321585 |
| 18:51:06 |         | 87.8197433 |            | 66.1349434 | 67.5666434 | 70.6321585 |
| 18:51:07 |         | 86.8197433 |            | 66.1349434 | 67.5666434 | 68.6321585 |
| 18:51:08 |         | 86.8197433 |            | 65.1349434 | 66.5666434 | 67.6321585 |
| 18:51:09 |         | 85.8197433 |            | 65.1349434 | 66.5666434 | 65.6321585 |
| 18:51:10 |         | 85.8197433 |            | 66.1349434 | 68.5666434 | 65.6321585 |
| 18:51:11 |         | 85.8197433 |            | 67.1349434 | 69.5666434 | 64.6321585 |
| 18:51:12 |         | 84.8197433 |            | 67.1349434 | 69.5666434 | 64.6321585 |
| 18:51:13 |         | 84.8197433 |            | 67.1349434 | 70.5666434 | 64.6321585 |
| 18:51:14 |         | 83.8197433 |            | 67.1349434 | 70.5666434 | 63.6321585 |
| 18:51:15 |         | 82.8197433 |            | 65.1349434 | 71.5666434 | 63.6321585 |
| 18:51:16 |         | 82.8197433 |            | 65.1349434 | 70.5666434 | 63.6321585 |
| 18:51:17 |         | 81.8197433 |            | 65.1349434 | 70.5666434 | 63.6321585 |
| 18:51:18 |         | 81.8197433 |            | 65.1349434 | 70.5666434 | 63.6321585 |
| 18:51:19 |         | 81.8197433 |            | 65.1349434 | 70.5666434 | 63.6321585 |
| 18:51:20 |         | 81.8197433 |            | 65.1349434 | 70.5666434 | 63.6321585 |
| 18:51:21 |         | 81.8197433 |            | 65.1349434 | 72.5666434 | 67.6321585 |
| 18:51:22 |         | 81.8197433 |            | 67.1349434 | 74.5666434 | 67.6321585 |
| 18:51:23 |         | 81.8197433 |            | 67.1349434 | 74.5666434 | 67.6321585 |
| 18:51:24 |         | 81.8197433 |            | 67.1349434 | 74.5666434 | 67.6321585 |
| 18:51:25 |         | 81.8197433 |            | 67.1349434 | 74.5666434 | 67.6321585 |
| 18:51:26 |         | 81.8197433 |            | 67.1349434 | 74.5666434 | 67.6321585 |
| 18:51:27 |         | 81.8197433 |            | 68.1349434 | 74.5666434 | 68.6321585 |

18:51:28

82.8197433

69.1349434 74.5666434 68.6321585

18:51:29

82.8197433

69.1349434 74.5666434 68.6321585

Person 3      Person 9      Person 2      Person 4      Person 13      Person 12

|            |            |  |            |            |  |
|------------|------------|--|------------|------------|--|
| 69.3348948 | 66.2822025 |  | 73.5933835 | 73.2127309 |  |
| 71.3348948 | 66.2822025 |  | 73.2600502 | 72.2127309 |  |
| 72.3348948 | 67.2822025 |  | 73.4822724 | 72.2127309 |  |
| 72.3348948 | 68.2822025 |  | 73.5933835 | 71.2127309 |  |
| 73.3348948 | 69.2822025 |  | 73.8156058 | 70.2127309 |  |
| 73.3348948 | 69.2822025 |  | 75.037828  | 69.2127309 |  |
| 73.3348948 | 69.2822025 |  | 75.3711613 | 68.2127309 |  |
| 73.3348948 | 69.2822025 |  | 75.7044947 | 68.2127309 |  |
| 72.3348948 | 68.2822025 |  | 93.5328118 | 68.2127309 |  |
| 73.3348948 | 68.2822025 |  | 92.5328118 | 68.2127309 |  |
| 73.3348948 | 68.2822025 |  | 92.5328118 | 74.2127309 |  |
| 73.3348948 | 68.2822025 |  | 91.5328118 | 74.2127309 |  |
| 72.3348948 | 69.2822025 |  | 90.5328118 | 76.2127309 |  |
| 74.3348948 | 69.2822025 |  | 89.5328118 | 76.2127309 |  |
| 74.3348948 | 68.2822025 |  | 86.5328118 | 79.2127309 |  |
| 73.3348948 | 69.2822025 |  | 84.5328118 | 80.2127309 |  |
| 71.3348948 | 70.2822025 |  | 84.5328118 | 80.2127309 |  |
| 69.3348948 | 71.2822025 |  | 84.5328118 | 80.2127309 |  |
| 69.3348948 | 71.2822025 |  | 84.5328118 | 81.2127309 |  |
| 69.3348948 | 71.2822025 |  | 83.5328118 | 81.2127309 |  |
| 69.3348948 | 70.2822025 |  | 83.5328118 | 81.2127309 |  |
| 69.3348948 | 69.2822025 |  | 83.5328118 | 82.2127309 |  |
| 69.3348948 | 69.2822025 |  | 83.5328118 | 82.2127309 |  |
| 68.3348948 | 69.2822025 |  | 83.5328118 | 85.2127309 |  |
| 68.3348948 | 69.2822025 |  | 82.5328118 | 86.2127309 |  |
| 68.3348948 | 69.2822025 |  | 79.5328118 | 89.2127309 |  |
| 68.3348948 | 69.2822025 |  | 79.5328118 | 89.2127309 |  |
| 68.3348948 | 68.2822025 |  | 79.5328118 | 90.2127309 |  |
| 70.3348948 | 68.2822025 |  | 79.5328118 | 90.2127309 |  |
| 70.3348948 | 68.2822025 |  | 79.5328118 | 90.2127309 |  |
| 71.3348948 | 68.2822025 |  | 79.5328118 | 89.2127309 |  |
| 71.3348948 | 68.2822025 |  | 79.5328118 | 89.2127309 |  |
| 71.3348948 | 68.2822025 |  | 79.5328118 | 89.2127309 |  |
| 71.3348948 | 68.2822025 |  | 79.5328118 | 89.2127309 |  |
| 71.3348948 | 70.2822025 |  | 79.5328118 | 89.2127309 |  |
| 71.3348948 | 70.2822025 |  | 80.5328118 | 71.9267169 |  |
| 72.3348948 | 70.2822025 |  | 80.5328118 | 87.2127309 |  |
| 72.3348948 | 70.2822025 |  | 80.5328118 | 87.2127309 |  |
| 72.3348948 | 71.2822025 |  | 80.5328118 | 87.2127309 |  |
| 72.3348948 | 74.2822025 |  | 77.5328118 | 87.2127309 |  |
| 71.3348948 | 75.2822025 |  | 75.5328118 | 87.2127309 |  |



|            |            |            |            |            |            |
|------------|------------|------------|------------|------------|------------|
| 71.3348948 | 75.2822025 |            | 73.5328118 | 86.2127309 |            |
| 71.3348948 | 76.2822025 |            | 73.5328118 | 86.2127309 |            |
| 72.3348948 | 76.2822025 |            | 73.5328118 | 85.2127309 |            |
| 72.3348948 | 76.2822025 |            | 75.5328118 | 78.2127309 |            |
| 72.3348948 | 77.2822025 |            | 77.5328118 | 76.2127309 |            |
| 74.3348948 | 77.2822025 |            | 77.5328118 | 76.2127309 |            |
| 75.3348948 | 75.2822025 |            | 77.5328118 | 75.2127309 |            |
| 75.3348948 | 75.2822025 |            | 79.5328118 | 74.2127309 |            |
| 78.3348948 | 74.2822025 |            | 80.5328118 | 73.2127309 |            |
| 78.3348948 | 74.2822025 |            | 80.5328118 | 72.2127309 |            |
| 78.3348948 | 74.2822025 |            | 80.5328118 | 72.2127309 |            |
| 78.3348948 | 73.2822025 |            | 80.5328118 | 72.2127309 |            |
| 78.3348948 | 73.2822025 |            | 81.5328118 | 72.2127309 |            |
| 78.3348948 | 73.2822025 |            | 82.5328118 | 72.2127309 |            |
| 78.3348948 | 73.2822025 | 84.5851169 | 83.5328118 | 72.2127309 |            |
| 74.3348948 | 73.2822025 | 84.5851169 | 84.5328118 | 72.2127309 |            |
| 73.3348948 | 71.2822025 | 84.5851169 | 84.5328118 | 70.2127309 | 76.7228532 |
| 72.3348948 | 71.2822025 | 85.5851169 | 84.5328118 | 70.2127309 | 76.7228532 |
| 71.3348948 | 71.2822025 | 85.5851169 | 84.5328118 | 70.2127309 | 76.7228532 |
| 69.3348948 | 69.2822025 | 85.5851169 | 82.5328118 | 70.2127309 | 76.7228532 |
| 69.3348948 | 69.2822025 | 83.5851169 | 80.5328118 | 70.2127309 | 77.7228532 |
| 69.3348948 | 69.2822025 | 82.5851169 | 74.5328118 | 75.2127309 | 77.7228532 |
| 69.3348948 | 68.2822025 | 82.5851169 | 74.5328118 | 75.2127309 | 77.7228532 |
| 69.3348948 | 68.2822025 | 81.5851169 | 73.5328118 | 68.2127309 | 77.7228532 |
| 69.3348948 | 68.2822025 | 81.5851169 | 73.5328118 | 65.2127309 | 78.7228532 |
| 70.3348948 | 68.2822025 | 81.5851169 | 71.5328118 | 65.2127309 | 78.7228532 |
| 71.3348948 | 67.2822025 | 81.5851169 | 69.5328118 | 64.2127309 | 79.7228532 |
| 71.3348948 | 67.2822025 | 81.5851169 | 69.5328118 | 64.2127309 | 79.7228532 |
| 71.3348948 | 66.2822025 | 81.5851169 | 67.5328118 | 62.2127309 | 78.7228532 |
| 72.3348948 | 65.2822025 | 80.5851169 | 66.5328118 | 62.2127309 | 78.7228532 |
| 73.3348948 | 64.2822025 | 80.5851169 | 65.5328118 | 62.2127309 | 78.7228532 |
| 74.3348948 | 64.2822025 | 80.5851169 | 64.5328118 | 62.2127309 | 77.7228532 |
| 74.3348948 | 64.2822025 | 80.5851169 | 64.5328118 | 59.2127309 | 77.7228532 |
| 74.3348948 | 64.2822025 | 78.5851169 | 63.5328118 | 59.2127309 | 76.7228532 |
| 74.3348948 | 65.2822025 | 76.5851169 | 63.5328118 | 59.2127309 | 76.7228532 |
| 74.3348948 | 65.2822025 | 76.5851169 | 63.5328118 | 59.2127309 | 76.7228532 |
| 74.3348948 | 65.2822025 | 75.5851169 | 62.5328118 | 59.2127309 | 74.7228532 |
| 79.3348948 | 64.2822025 | 75.5851169 | 62.5328118 | 58.2127309 | 73.7228532 |
| 74.3348948 | 64.2822025 | 74.5851169 | 62.5328118 | 59.2127309 | 73.7228532 |
| 72.3348948 | 65.2822025 | 73.5851169 | 63.5328118 | 59.2127309 | 73.7228532 |
| 70.3348948 | 66.2822025 | 72.5851169 | 63.5328118 | 60.2127309 | 73.7228532 |
| 69.3348948 | 68.2822025 | 72.5851169 | 63.5328118 | 61.2127309 | 73.7228532 |
| 69.3348948 | 68.2822025 | 73.5851169 | 62.5328118 | 61.2127309 | 74.7228532 |
| 70.3348948 | 69.2822025 | 73.5851169 | 62.5328118 | 61.2127309 | 74.7228532 |
| 70.3348948 | 69.2822025 | 72.5851169 | 61.5328118 | 61.2127309 | 74.7228532 |

|            |            |            |            |            |            |
|------------|------------|------------|------------|------------|------------|
| 70.3348948 | 70.2822025 | 72.5851169 | 61.5328118 | 61.2127309 | 74.7228532 |
| 70.3348948 | 70.2822025 | 72.5851169 | 60.5328118 | 60.2127309 | 74.7228532 |
| 70.3348948 | 70.2822025 | 72.5851169 | 60.5328118 | 60.2127309 | 76.7228532 |
| 70.3348948 | 70.2822025 | 72.5851169 | 60.5328118 | 60.2127309 | 76.7228532 |
| 69.3348948 | 70.2822025 | 72.5851169 | 60.5328118 | 62.2127309 | 77.7228532 |
| 69.3348948 | 70.2822025 | 72.5851169 | 60.5328118 | 62.2127309 | 78.7228532 |
| 69.3348948 | 70.2822025 | 73.5851169 | 54.5328118 | 62.2127309 | 78.7228532 |
| 68.3348948 | 70.2822025 | 68.5851169 | 52.5328118 | 62.2127309 | 78.7228532 |
| 68.3348948 | 70.2822025 | 68.5851169 | 51.5328118 | 64.2127309 | 78.7228532 |
| 67.3348948 | 71.2822025 | 68.5851169 | 50.5328118 | 65.2127309 | 78.7228532 |
| 67.3348948 | 72.2822025 | 66.5851169 | 50.5328118 | 65.2127309 | 77.7228532 |
| 67.3348948 | 72.2822025 | 65.5851169 | 53.5328118 | 67.2127309 | 77.7228532 |
| 68.3348948 | 72.2822025 | 65.5851169 | 53.5328118 | 71.2127309 | 77.7228532 |
| 68.3348948 | 72.2822025 | 65.5851169 | 53.5328118 | 71.2127309 | 76.7228532 |
| 63.3348948 | 71.2822025 | 66.5851169 | 53.5328118 | 73.2127309 | 76.7228532 |
| 62.3348948 | 69.2822025 | 66.5851169 | 51.5328118 | 74.2127309 | 76.7228532 |
| 62.3348948 | 70.2822025 | 66.5851169 | 49.5328118 | 74.2127309 | 75.7228532 |
| 62.3348948 | 70.2822025 | 66.5851169 | 49.5328118 | 72.2127309 | 77.7228532 |
| 62.3348948 | 70.2822025 | 66.5851169 | 48.5328118 | 72.2127309 | 77.7228532 |
| 62.3348948 | 70.2822025 | 67.5851169 | 48.5328118 | 72.2127309 | 73.7228532 |
| 61.3348948 | 70.2822025 | 65.5851169 | 48.5328118 | 69.2127309 | 73.7228532 |
| 61.3348948 | 70.2822025 | 65.5851169 | 50.5328118 | 68.2127309 | 70.7228532 |
| 63.3348948 | 72.2822025 | 65.5851169 | 50.5328118 | 68.2127309 | 68.7228532 |
| 63.3348948 | 73.2822025 | 65.5851169 | 57.5328118 | 66.2127309 | 70.7228532 |
| 64.3348948 | 73.2822025 | 65.5851169 | 59.5328118 | 66.2127309 | 70.7228532 |
| 64.3348948 | 75.2822025 | 65.5851169 | 59.5328118 | 66.2127309 | 70.7228532 |
| 64.3348948 | 75.2822025 | 65.5851169 | 60.5328118 | 66.2127309 | 76.7228532 |
| 66.3348948 | 74.2822025 | 66.5851169 | 60.5328118 | 66.2127309 | 76.7228532 |
| 66.3348948 | 73.2822025 | 67.5851169 | 61.5328118 | 65.2127309 | 75.7228532 |
| 66.3348948 | 70.2822025 | 69.5851169 | 61.5328118 | 63.2127309 | 75.7228532 |
| 67.3348948 | 70.2822025 | 69.5851169 | 61.5328118 | 63.2127309 | 75.7228532 |
| 67.3348948 | 70.2822025 | 66.5851169 | 62.5328118 | 63.2127309 | 74.7228532 |
| 67.3348948 | 70.2822025 | 64.5851169 | 62.5328118 | 63.2127309 | 74.7228532 |
| 67.3348948 | 70.2822025 | 64.5851169 | 64.5328118 | 63.2127309 | 75.7228532 |
| 67.3348948 | 70.2822025 | 64.5851169 | 66.5328118 | 63.2127309 | 75.7228532 |
| 67.3348948 | 70.2822025 | 63.5851169 | 66.5328118 | 63.2127309 | 78.7228532 |
| 68.3348948 | 69.2822025 | 63.5851169 | 68.5328118 | 63.2127309 | 77.7228532 |
| 69.3348948 | 69.2822025 | 63.5851169 | 68.5328118 | 63.2127309 | 77.7228532 |
| 69.3348948 | 70.2822025 | 63.5851169 | 69.5328118 | 63.2127309 | 74.7228532 |
| 69.3348948 | 69.2822025 | 63.5851169 | 69.5328118 | 63.2127309 | 69.7228532 |
| 70.3348948 | 69.2822025 | 63.5851169 | 69.5328118 | 63.2127309 | 66.7228532 |
| 69.3348948 | 69.2822025 | 63.5851169 | 70.5328118 | 63.2127309 | 65.7228532 |
| 70.3348948 | 68.2822025 | 67.5851169 | 70.5328118 | 63.2127309 | 64.7228532 |
| 70.3348948 | 68.2822025 | 67.5851169 | 70.5328118 | 63.2127309 | 65.7228532 |
| 70.3348948 | 68.2822025 | 67.5851169 | 70.5328118 | 63.2127309 | 65.7228532 |

|            |            |            |            |            |            |
|------------|------------|------------|------------|------------|------------|
| 67.3348948 | 69.2822025 | 69.5851169 | 70.5328118 | 66.2127309 | 65.7228532 |
| 66.3348948 | 69.2822025 | 69.5851169 | 70.5328118 | 65.2127309 | 65.7228532 |
| 66.3348948 | 70.2822025 | 69.5851169 | 70.5328118 | 65.2127309 | 65.7228532 |
| 66.3348948 | 70.2822025 | 70.5851169 | 69.5328118 | 65.2127309 | 65.7228532 |
| 66.3348948 | 70.2822025 | 71.5851169 | 69.5328118 | 65.2127309 | 65.7228532 |
| 66.3348948 | 70.2822025 | 71.5851169 | 68.5328118 | 65.2127309 | 65.7228532 |
| 64.3348948 | 71.2822025 | 72.5851169 | 68.5328118 | 65.2127309 | 65.7228532 |
| 63.3348948 | 71.2822025 | 71.5851169 | 68.5328118 | 65.2127309 | 65.7228532 |
| 63.3348948 | 70.2822025 | 67.5851169 | 68.5328118 | 65.2127309 | 65.7228532 |
| 63.3348948 | 70.2822025 | 65.5851169 | 68.5328118 | 65.2127309 | 65.7228532 |
| 76.3348948 | 69.2822025 | 65.5851169 | 68.5328118 | 68.2127309 | 73.7228532 |
| 77.3348948 | 69.2822025 | 64.5851169 | 67.5328118 | 68.2127309 | 74.7228532 |
| 78.3348948 | 68.2822025 | 64.5851169 | 67.5328118 | 68.2127309 | 74.7228532 |
| 78.3348948 | 66.2822025 | 64.5851169 | 67.5328118 | 67.2127309 | 74.7228532 |
| 78.3348948 | 66.2822025 | 63.5851169 | 67.5328118 | 67.2127309 | 69.7228532 |
| 78.3348948 | 65.2822025 | 63.5851169 | 67.5328118 | 66.2127309 | 69.7228532 |
| 78.3348948 | 65.2822025 | 63.5851169 | 66.5328118 | 66.2127309 | 69.7228532 |
| 78.3348948 | 65.2822025 | 63.5851169 | 66.5328118 | 66.2127309 | 71.7228532 |
| 78.3348948 | 65.2822025 | 65.5851169 | 66.5328118 | 64.2127309 | 71.7228532 |
| 78.3348948 | 67.2822025 | 65.5851169 | 66.5328118 | 63.2127309 | 72.7228532 |
| 78.3348948 | 67.2822025 | 65.5851169 | 64.5328118 | 63.2127309 | 72.7228532 |
| 78.3348948 | 68.2822025 | 66.5851169 | 64.5328118 | 64.2127309 | 72.7228532 |
| 78.3348948 | 67.2822025 | 65.5851169 | 64.5328118 | 64.2127309 | 71.7228532 |
| 79.3348948 | 67.2822025 | 64.5851169 | 62.5328118 | 64.2127309 | 71.7228532 |
| 81.3348948 | 67.2822025 | 64.5851169 | 60.5328118 | 64.2127309 | 71.7228532 |
| 81.3348948 | 68.2822025 | 63.5851169 | 60.5328118 | 64.2127309 | 71.7228532 |
| 81.3348948 | 68.2822025 | 63.5851169 | 60.5328118 | 65.2127309 | 71.7228532 |
| 66.4225838 | 70.2822025 | 63.5851169 | 60.5328118 | 66.2127309 | 72.7228532 |
| 66.3316747 | 70.2822025 | 62.5851169 | 59.5328118 | 66.2127309 | 72.7228532 |
| 66.4225838 | 70.2822025 | 63.5851169 | 59.5328118 | 66.2127309 | 73.7228532 |
| 80.3348948 | 71.2822025 | 63.5851169 | 59.5328118 | 63.2127309 | 74.7228532 |
| 75.3348948 | 73.2822025 | 63.5851169 | 59.5328118 | 62.2127309 | 74.7228532 |
| 72.3348948 | 72.2822025 | 63.5851169 | 59.5328118 | 61.2127309 | 75.7228532 |
| 71.3348948 | 72.2822025 | 63.5851169 | 59.5328118 | 60.2127309 | 75.7228532 |
| 70.3348948 | 72.2822025 | 63.5851169 | 60.5328118 | 60.2127309 | 75.7228532 |
| 70.3348948 | 72.2822025 | 63.5851169 | 61.5328118 | 59.2127309 | 75.7228532 |
| 70.3348948 | 72.2822025 | 64.5851169 | 61.5328118 | 59.2127309 | 75.7228532 |
| 69.3348948 | 72.2822025 | 64.5851169 | 61.5328118 | 58.2127309 | 75.7228532 |
| 68.3348948 | 72.2822025 | 64.5851169 | 62.5328118 | 59.2127309 | 75.7228532 |
| 68.3348948 | 72.2822025 | 64.5851169 | 62.5328118 | 59.2127309 | 75.7228532 |
| 68.3348948 | 71.2822025 | 64.5851169 | 63.5328118 | 59.2127309 | 76.7228532 |
| 68.3348948 | 70.2822025 | 64.5851169 | 63.5328118 | 59.2127309 | 77.7228532 |
| 68.3348948 | 70.2822025 | 64.5851169 | 62.5328118 | 58.2127309 | 77.7228532 |
| 67.3348948 | 70.2822025 | 64.5851169 | 62.5328118 | 57.2127309 | 77.7228532 |
| 66.3348948 | 69.2822025 | 64.5851169 | 62.5328118 | 57.2127309 | 77.7228532 |

|            |            |            |            |            |            |
|------------|------------|------------|------------|------------|------------|
| 66.3348948 | 69.2822025 | 64.5851169 | 62.5328118 | 58.2127309 | 77.7228532 |
| 65.3348948 | 67.2822025 | 64.5851169 | 61.5328118 | 58.2127309 | 77.7228532 |
| 65.3348948 | 67.2822025 | 65.5851169 | 61.5328118 | 58.2127309 | 77.7228532 |
| 65.3348948 | 67.2822025 | 64.5851169 | 61.5328118 | 60.2127309 | 78.7228532 |
| 65.3348948 | 66.2822025 | 65.5851169 | 61.5328118 | 60.2127309 | 82.7228532 |
| 65.3348948 | 65.2822025 | 65.5851169 | 60.5328118 | 59.2127309 | 66.604402  |
| 65.3348948 | 65.2822025 | 65.5851169 | 60.5328118 | 59.2127309 | 66.6953111 |
| 65.3348948 | 65.2822025 | 65.5851169 | 60.5328118 | 59.2127309 | 66.604402  |
| 65.3348948 | 65.2822025 | 65.5851169 | 60.5328118 | 59.2127309 | 65.8719066 |
| 64.3348948 | 64.2822025 | 66.5851169 | 60.5328118 | 58.2127309 | 64.7200748 |
| 64.3348948 | 64.2822025 | 66.5851169 | 58.5328118 | 58.2127309 | 65.9680384 |
| 64.3348948 | 64.2822025 | 66.5851169 | 58.5328118 | 58.2127309 | 74.7228532 |
| 68.3348948 | 64.2822025 | 66.5851169 | 58.5328118 | 58.2127309 | 74.7228532 |
| 69.3348948 | 64.2822025 | 66.5851169 | 60.5328118 | 58.2127309 | 70.7228532 |
| 70.3348948 | 62.2822025 | 65.5851169 | 60.5328118 | 60.2127309 | 67.7228532 |
| 70.3348948 | 62.2822025 | 66.5851169 | 60.5328118 | 62.2127309 | 66.7228532 |
| 69.3348948 | 62.2822025 | 66.5851169 | 60.5328118 | 63.2127309 | 66.7228532 |
| 67.3348948 | 62.2822025 | 66.5851169 | 60.5328118 | 63.2127309 | 67.7228532 |
| 65.3348948 | 62.2822025 | 66.5851169 | 61.5328118 | 66.2127309 | 71.7228532 |
| 65.3348948 | 62.2822025 | 66.5851169 | 61.5328118 | 67.2127309 | 73.7228532 |
| 65.3348948 | 63.2822025 | 66.5851169 | 61.5328118 | 67.2127309 | 73.7228532 |
| 65.3348948 | 63.2822025 | 65.5851169 | 61.5328118 | 67.2127309 | 76.7228532 |
| 65.3348948 | 63.2822025 | 65.5851169 | 62.5328118 | 67.2127309 | 77.7228532 |
| 66.3348948 | 63.2822025 | 64.5851169 | 63.5328118 | 67.2127309 | 78.7228532 |
| 66.3348948 | 63.2822025 | 64.5851169 | 62.5328118 | 68.2127309 | 78.7228532 |
| 66.3348948 | 63.2822025 | 64.5851169 | 61.5328118 | 68.2127309 | 75.7228532 |
| 66.3348948 | 63.2822025 | 63.5851169 | 61.5328118 | 67.2127309 | 75.7228532 |
| 66.3348948 | 62.2822025 | 63.5851169 | 61.5328118 | 67.2127309 | 75.7228532 |
| 66.3348948 | 63.2822025 | 63.5851169 | 61.5328118 | 65.2127309 | 74.7228532 |
| 65.3348948 | 65.2822025 | 63.5851169 | 64.5328118 | 64.2127309 | 74.7228532 |
| 64.3348948 | 67.2822025 | 63.5851169 | 65.5328118 | 64.2127309 | 74.7228532 |
| 64.3348948 | 68.2822025 | 63.5851169 | 66.5328118 | 61.2127309 | 75.7228532 |
| 64.3348948 | 68.2822025 | 63.5851169 | 66.5328118 | 61.2127309 | 71.7228532 |
| 65.3348948 | 67.2822025 | 63.5851169 | 66.5328118 | 60.2127309 | 68.7228532 |
| 64.3348948 | 68.2822025 | 63.5851169 | 66.5328118 | 59.2127309 | 68.7228532 |
| 64.3348948 | 67.2822025 | 63.5851169 | 66.5328118 | 59.2127309 | 66.7228532 |
| 64.3348948 | 67.2822025 | 63.5851169 | 66.5328118 | 59.2127309 | 63.7228532 |
| 64.3348948 | 66.2822025 | 63.5851169 | 66.5328118 | 59.2127309 | 62.7228532 |
| 64.3348948 | 66.2822025 | 63.5851169 | 65.5328118 | 60.2127309 | 62.7228532 |
| 64.3348948 | 67.2822025 | 62.5851169 | 65.5328118 | 61.2127309 | 62.7228532 |
| 64.3348948 | 66.2822025 | 62.5851169 | 65.5328118 | 61.2127309 | 62.7228532 |
| 64.3348948 | 64.2822025 | 62.5851169 | 65.5328118 | 61.2127309 | 64.7228532 |
| 65.3348948 | 64.2822025 | 62.5851169 | 65.5328118 | 61.2127309 | 65.7228532 |
| 63.3348948 | 63.2822025 | 62.5851169 | 65.5328118 | 61.2127309 | 67.7228532 |
| 63.3348948 | 63.2822025 | 62.5851169 | 65.5328118 | 60.2127309 | 68.7228532 |



78.3348948 61.2822025 63.5851169 54.5328118 69.2127309 65.7228532  
77.3348948 61.2822025 63.5851169 56.5328118 70.2127309 64.7228532  
76.3348948 61.2822025 64.5851169 62.5328118 70.2127309 64.7228532  
75.3348948 61.2822025 65.5851169 63.5328118 72.2127309 66.7228532  
73.3348948 60.2822025 65.5851169 63.5328118 72.2127309 66.7228532  
73.3348948 62.2822025 65.5851169 64.5328118 72.2127309 67.7228532  
70.3348948 63.2822025 66.5851169 64.5328118 72.2127309 68.7228532  
70.3348948 63.2822025 66.5851169 64.5328118 70.2127309 68.7228532  
69.3348948 64.2822025 66.5851169 64.5328118 70.2127309 68.7228532  
69.3348948 63.2822025 65.5851169 64.5328118 67.2127309 69.7228532  
69.3348948 64.2822025 65.5851169 64.5328118 66.2127309 71.7228532  
69.3348948 65.2822025 65.5851169 64.5328118 65.2127309 71.7228532  
70.3348948 65.2822025 65.5851169 64.5328118 65.2127309 72.7228532  
70.3348948 65.2822025 65.5851169 64.5328118 65.2127309 72.7228532  
71.3348948 66.2822025 65.5851169 64.5328118 62.2127309 72.7228532  
71.3348948 66.2822025 65.5851169 64.5328118 63.2127309 72.7228532  
71.3348948 66.2822025 65.5851169 64.5328118 63.2127309 71.7228532  
71.3348948 65.2822025 65.5851169 65.5328118 63.2127309 71.7228532  
70.3348948 65.2822025 65.5851169 66.5328118 63.2127309 72.7228532  
73.3348948 64.2822025 65.5851169 66.5328118 63.2127309 72.7228532  
74.3348948 64.2822025 65.5851169 66.5328118 64.2127309 72.7228532  
73.3348948 64.2822025 64.5851169 66.5328118 65.2127309 68.7228532  
71.3348948 64.2822025 64.5851169 65.5328118 65.2127309 66.7228532  
71.3348948 65.2822025 64.5851169 65.5328118 65.2127309 65.7228532  
70.3348948 65.2822025 64.5851169 66.5328118 66.2127309 65.7228532  
70.3348948 65.2822025 64.5851169 68.5328118 66.2127309 64.7228532  
70.3348948 65.2822025 64.5851169 68.5328118 66.2127309 64.7228532  
70.3348948 64.2822025 64.5851169 69.5328118 65.2127309 63.7228532  
69.3348948 64.2822025 63.5851169 69.5328118 65.2127309 63.7228532  
69.3348948 64.2822025 63.5851169 69.5328118 66.2127309 63.7228532  
69.3348948 64.2822025 63.5851169 69.5328118 65.2127309 63.7228532  
69.3348948 64.2822025 63.5851169 69.5328118 65.2127309 63.7228532  
68.3348948 64.2822025 66.5851169 72.5328118 65.2127309 66.7228532  
67.3348948 65.2822025 67.5851169 74.5328118 65.2127309 67.7228532  
65.3348948 65.2822025 66.5851169 74.5328118 66.2127309 66.7228532  
65.3348948 65.2822025 65.5851169 70.5328118 67.2127309 65.7228532  
66.3348948 65.2822025 64.5851169 70.5328118 67.2127309 64.7228532  
66.3348948 65.2822025 64.5851169 70.5328118 67.2127309 64.7228532  
66.3348948 65.2822025 64.5851169 68.5328118 67.2127309 64.7228532  
65.3348948 65.2822025 64.5851169 68.5328118 67.2127309 63.7228532  
66.3348948 65.2822025 64.5851169 68.5328118 67.2127309 63.7228532  
68.3348948 64.2822025 64.5851169 67.5328118 67.2127309 67.7228532  
68.3348948 64.2822025 64.5851169 67.5328118 67.2127309 70.7228532  
69.3348948 61.2822025 65.5851169 67.5328118 69.2127309 70.7228532  
69.3348948 61.2822025 65.5851169 67.5328118 70.2127309 71.7228532

|            |            |            |            |            |            |
|------------|------------|------------|------------|------------|------------|
| 69.3348948 | 61.2822025 | 65.5851169 | 66.5328118 | 69.2127309 | 74.7228532 |
| 69.3348948 | 60.2822025 | 65.5851169 | 66.5328118 | 68.2127309 | 74.7228532 |
| 70.3348948 | 60.2822025 | 65.5851169 | 66.5328118 | 69.2127309 | 76.7228532 |
| 70.3348948 | 60.2822025 | 65.5851169 | 66.5328118 | 70.2127309 | 77.7228532 |
| 71.3348948 | 60.2822025 | 65.5851169 | 66.5328118 | 70.2127309 | 78.7228532 |
| 66.3348948 | 60.2822025 | 65.5851169 | 66.5328118 | 70.2127309 | 77.7228532 |
| 64.3348948 | 60.2822025 | 65.5851169 | 66.5328118 | 65.2127309 | 73.7228532 |
| 64.3348948 | 60.2822025 | 65.5851169 | 67.5328118 | 62.2127309 | 70.7228532 |
| 63.3348948 | 60.2822025 | 65.5851169 | 67.5328118 | 57.2127309 | 69.7228532 |
| 63.3348948 | 60.2822025 | 65.5851169 | 68.5328118 | 57.2127309 | 69.7228532 |
| 63.3348948 | 60.2822025 | 65.5851169 | 68.5328118 | 57.2127309 | 69.7228532 |
| 63.3348948 | 60.2822025 | 64.5851169 | 67.5328118 | 57.2127309 | 68.7228532 |
| 63.3348948 | 60.2822025 | 63.5851169 | 67.5328118 | 58.2127309 | 66.7228532 |
| 63.3348948 | 60.2822025 | 63.5851169 | 67.5328118 | 58.2127309 | 66.7228532 |
| 63.3348948 | 60.2822025 | 63.5851169 | 66.5328118 | 59.2127309 | 66.7228532 |
| 63.3348948 | 61.2822025 | 63.5851169 | 66.5328118 | 60.2127309 | 65.7228532 |
| 65.3348948 | 61.2822025 | 62.5851169 | 64.5328118 | 60.2127309 | 64.7228532 |
| 66.3348948 | 61.2822025 | 64.5851169 | 64.5328118 | 60.2127309 | 63.7228532 |
| 67.3348948 | 61.2822025 | 64.5851169 | 64.5328118 | 60.2127309 | 64.7228532 |
| 68.3348948 | 61.2822025 | 64.5851169 | 64.5328118 | 61.2127309 | 65.7228532 |
| 72.3348948 | 61.2822025 | 63.5851169 | 63.5328118 | 60.2127309 | 65.7228532 |
| 72.3348948 | 61.2822025 | 63.5851169 | 63.5328118 | 60.2127309 | 66.7228532 |
| 72.3348948 | 61.2822025 | 63.5851169 | 63.5328118 | 60.2127309 | 65.7228532 |
| 73.3348948 | 61.2822025 | 63.5851169 | 63.5328118 | 61.2127309 | 64.7228532 |
| 74.3348948 | 62.2822025 | 63.5851169 | 63.5328118 | 62.2127309 | 64.7228532 |
| 75.3348948 | 62.2822025 | 63.5851169 | 63.5328118 | 65.2127309 | 64.7228532 |
| 74.3348948 | 62.2822025 | 63.5851169 | 63.5328118 | 65.2127309 | 65.7228532 |
| 73.3348948 | 62.2822025 | 63.5851169 | 63.5328118 | 66.2127309 | 65.7228532 |
| 73.3348948 | 62.2822025 | 62.5851169 | 64.5328118 | 65.2127309 | 65.7228532 |
| 73.3348948 | 64.2822025 | 62.5851169 | 62.5328118 | 63.2127309 | 66.7228532 |
| 72.3348948 | 63.2822025 | 63.5851169 | 62.5328118 | 64.2127309 | 67.7228532 |
| 71.3348948 | 63.2822025 | 63.5851169 | 62.5328118 | 64.2127309 | 68.7228532 |
| 70.3348948 | 63.2822025 | 62.5851169 | 62.5328118 | 64.2127309 | 68.7228532 |
| 69.3348948 | 63.2822025 | 63.5851169 | 61.5328118 | 65.2127309 | 68.7228532 |
| 67.3348948 | 61.2822025 | 64.5851169 | 60.5328118 | 67.2127309 | 68.7228532 |
| 67.3348948 | 61.2822025 | 64.5851169 | 60.5328118 | 67.2127309 | 68.7228532 |
| 65.3348948 | 61.2822025 | 65.5851169 | 60.5328118 | 68.2127309 | 68.7228532 |
| 64.3348948 | 62.2822025 | 66.5851169 | 60.5328118 | 68.2127309 | 68.7228532 |
| 63.3348948 | 63.2822025 | 66.5851169 | 60.5328118 | 68.2127309 | 68.7228532 |
| 63.3348948 | 63.2822025 | 68.5851169 | 60.5328118 | 67.2127309 | 68.7228532 |
| 63.3348948 | 63.2822025 | 69.5851169 | 60.5328118 | 66.2127309 | 69.7228532 |
| 63.3348948 | 65.2822025 | 73.5851169 | 59.5328118 | 65.2127309 | 69.7228532 |
| 63.3348948 | 66.2822025 | 74.5851169 | 59.5328118 | 65.2127309 | 69.7228532 |
| 64.3348948 | 65.2822025 | 77.5851169 | 59.5328118 | 64.2127309 | 65.7228532 |
| 64.3348948 | 65.2822025 | 78.5851169 | 60.5328118 | 65.2127309 | 65.7228532 |

|            |            |            |            |            |            |
|------------|------------|------------|------------|------------|------------|
| 64.3348948 | 65.2822025 | 80.5851169 | 60.5328118 | 66.2127309 | 66.7228532 |
| 63.3348948 | 64.2822025 | 80.5851169 | 60.5328118 | 66.2127309 | 65.7228532 |
| 64.3348948 | 64.2822025 | 80.5851169 | 60.5328118 | 67.2127309 | 65.7228532 |
| 64.3348948 | 64.2822025 | 80.5851169 | 60.5328118 | 67.2127309 | 64.7228532 |
| 65.3348948 | 68.2822025 | 75.5851169 | 60.5328118 | 67.2127309 | 64.7228532 |
| 69.3348948 | 71.2822025 | 75.5851169 | 63.5328118 | 67.2127309 | 64.7228532 |
| 69.3348948 | 71.2822025 | 68.5851169 | 63.5328118 | 67.2127309 | 63.7228532 |
| 72.3348948 | 73.2822025 | 68.5851169 | 64.5328118 | 67.2127309 | 63.7228532 |
| 70.3348948 | 73.2822025 | 67.5851169 | 64.5328118 | 67.2127309 | 63.7228532 |
| 70.3348948 | 73.2822025 | 67.5851169 | 64.5328118 | 66.2127309 | 63.7228532 |
| 67.3348948 | 72.2822025 | 67.5851169 | 64.5328118 | 65.2127309 | 63.7228532 |
| 66.3348948 | 71.2822025 | 66.5851169 | 64.5328118 | 64.2127309 | 64.7228532 |
| 66.3348948 | 70.2822025 | 67.5851169 | 64.5328118 | 64.2127309 | 64.7228532 |
| 67.3348948 | 69.2822025 | 68.5851169 | 64.5328118 | 63.2127309 | 64.7228532 |
| 68.3348948 | 68.2822025 | 68.5851169 | 61.5328118 | 61.2127309 | 64.7228532 |
| 68.3348948 | 68.2822025 | 68.5851169 | 61.5328118 | 61.2127309 | 65.7228532 |
| 69.3348948 | 67.2822025 | 68.5851169 | 61.5328118 | 61.2127309 | 65.7228532 |
| 68.3348948 | 67.2822025 | 68.5851169 | 61.5328118 | 61.2127309 | 65.7228532 |
| 68.3348948 | 67.2822025 | 67.5851169 | 61.5328118 | 61.2127309 | 66.7228532 |
| 67.3348948 | 67.2822025 | 67.5851169 | 61.5328118 | 62.2127309 | 66.7228532 |
| 66.3348948 | 66.2822025 | 65.5851169 | 61.5328118 | 62.2127309 | 68.7228532 |
| 66.3348948 | 66.2822025 | 64.5851169 | 61.5328118 | 63.2127309 | 68.7228532 |
| 68.3348948 | 66.2822025 | 64.5851169 | 61.5328118 | 64.2127309 | 63.7228532 |
| 71.3348948 | 65.2822025 | 63.5851169 | 61.5328118 | 64.2127309 | 60.7228532 |
| 71.3348948 | 65.2822025 | 63.5851169 | 63.5328118 | 65.2127309 | 60.7228532 |
| 74.3348948 | 64.2822025 | 63.5851169 | 64.5328118 | 65.2127309 | 60.7228532 |
| 74.3348948 | 64.2822025 | 63.5851169 | 64.5328118 | 66.2127309 | 60.7228532 |
| 74.3348948 | 65.2822025 | 63.5851169 | 72.5328118 | 67.2127309 | 60.7228532 |
| 72.3348948 | 65.2822025 | 65.5851169 | 78.5328118 | 67.2127309 | 65.7228532 |
| 71.3348948 | 66.2822025 | 65.5851169 | 77.5328118 | 68.2127309 | 66.7228532 |
| 71.3348948 | 65.2822025 | 65.5851169 | 77.5328118 | 68.2127309 | 66.7228532 |
| 70.3348948 | 65.2822025 | 66.5851169 | 72.5328118 | 70.2127309 | 66.7228532 |
| 70.3348948 | 66.2822025 | 66.5851169 | 68.5328118 | 71.2127309 | 66.7228532 |
| 70.3348948 | 66.2822025 | 66.5851169 | 65.5328118 | 72.2127309 | 64.7228532 |
| 70.3348948 | 66.2822025 | 64.5851169 | 64.5328118 | 72.2127309 | 63.7228532 |
| 70.3348948 | 66.2822025 | 64.5851169 | 63.5328118 | 71.2127309 | 63.7228532 |
| 68.3348948 | 66.2822025 | 64.5851169 | 62.5328118 | 68.2127309 | 64.7228532 |
| 68.3348948 | 66.2822025 | 64.5851169 | 62.5328118 | 67.2127309 | 65.7228532 |
| 67.3348948 | 65.2822025 | 64.5851169 | 61.5328118 | 66.2127309 | 66.7228532 |
| 67.3348948 | 65.2822025 | 64.5851169 | 61.5328118 | 65.2127309 | 66.7228532 |
| 67.3348948 | 66.2822025 | 65.5851169 | 60.5328118 | 65.2127309 | 66.7228532 |
| 67.3348948 | 66.2822025 | 65.5851169 | 61.5328118 | 64.2127309 | 66.7228532 |
| 67.3348948 | 65.2822025 | 67.5851169 | 61.5328118 | 64.2127309 | 65.7228532 |
| 67.3348948 | 65.2822025 | 67.5851169 | 62.5328118 | 63.2127309 | 65.7228532 |
| 67.3348948 | 65.2822025 | 67.5851169 | 62.5328118 | 63.2127309 | 65.7228532 |



|            |            |            |            |            |            |
|------------|------------|------------|------------|------------|------------|
| 69.3348948 | 66.2822025 | 67.5851169 | 60.5328118 | 61.2127309 | 65.7228532 |
| 71.3348948 | 67.2822025 | 67.5851169 | 60.5328118 | 61.2127309 | 68.7228532 |
| 71.3348948 | 68.2822025 | 67.5851169 | 60.5328118 | 61.2127309 | 68.7228532 |
| 72.3348948 | 68.2822025 | 66.5851169 | 60.5328118 | 61.2127309 | 67.7228532 |
| 71.3348948 | 67.2822025 | 65.5851169 | 60.5328118 | 61.2127309 | 67.7228532 |
| 70.3348948 | 68.2822025 | 65.5851169 | 61.5328118 | 61.2127309 | 67.7228532 |
| 69.3348948 | 68.2822025 | 64.5851169 | 61.5328118 | 60.2127309 | 67.7228532 |
| 68.3348948 | 69.2822025 | 63.5851169 | 61.5328118 | 60.2127309 | 67.7228532 |
| 68.3348948 | 69.2822025 | 63.5851169 | 61.5328118 | 60.2127309 | 67.7228532 |
| 68.3348948 | 70.2822025 | 64.5851169 | 62.5328118 | 62.2127309 | 67.7228532 |
| 69.3348948 | 70.2822025 | 64.5851169 | 62.5328118 | 62.2127309 | 69.7228532 |
| 69.3348948 | 70.2822025 | 64.5851169 | 63.5328118 | 64.2127309 | 71.7228532 |
| 69.3348948 | 70.2822025 | 64.5851169 | 63.5328118 | 66.2127309 | 75.7228532 |
| 69.3348948 | 70.2822025 | 64.5851169 | 64.5328118 | 66.2127309 | 76.7228532 |
| 66.3348948 | 71.2822025 | 64.5851169 | 64.5328118 | 66.2127309 | 76.7228532 |
| 65.3348948 | 71.2822025 | 63.5851169 | 64.5328118 | 66.2127309 | 77.7228532 |
| 65.3348948 | 72.2822025 | 63.5851169 | 63.5328118 | 66.2127309 | 77.7228532 |
| 65.3348948 | 72.2822025 | 63.5851169 | 63.5328118 | 65.2127309 | 78.7228532 |
| 65.3348948 | 72.2822025 | 63.5851169 | 63.5328118 | 65.2127309 | 78.7228532 |
| 65.3348948 | 73.2822025 | 64.5851169 | 63.5328118 | 66.2127309 | 78.7228532 |
| 65.3348948 | 73.2822025 | 64.5851169 | 63.5328118 | 66.2127309 | 79.7228532 |
| 64.3348948 | 73.2822025 | 64.5851169 | 64.5328118 | 65.2127309 | 80.7228532 |
| 64.3348948 | 73.2822025 | 64.5851169 | 64.5328118 | 63.2127309 | 81.7228532 |
| 64.3348948 | 75.2822025 | 64.5851169 | 64.5328118 | 63.2127309 | 81.7228532 |
| 63.3348948 | 75.2822025 | 64.5851169 | 65.5328118 | 63.2127309 | 78.7228532 |
| 63.3348948 | 75.2822025 | 64.5851169 | 65.5328118 | 63.2127309 | 78.7228532 |
| 63.3348948 | 78.2822025 | 66.5851169 | 64.5328118 | 63.2127309 | 76.7228532 |
| 63.3348948 | 80.2822025 | 66.5851169 | 64.5328118 | 63.2127309 | 77.7228532 |
| 62.3348948 | 83.2822025 | 66.5851169 | 64.5328118 | 63.2127309 | 79.7228532 |
| 62.3348948 | 84.2822025 | 66.5851169 | 64.5328118 | 62.2127309 | 79.7228532 |
| 62.3348948 | 85.2822025 | 66.5851169 | 65.5328118 | 62.2127309 | 81.7228532 |
| 63.3348948 | 85.2822025 | 66.5851169 | 65.5328118 | 63.2127309 | 81.7228532 |
| 63.3348948 | 85.2822025 | 65.5851169 | 64.5328118 | 63.2127309 | 81.7228532 |
| 64.3348948 | 85.2822025 | 65.5851169 | 64.5328118 | 63.2127309 | 82.7228532 |
| 64.3348948 | 85.2822025 | 65.5851169 | 64.5328118 | 63.2127309 | 81.7228532 |
| 65.3348948 | 85.2822025 | 65.5851169 | 62.5328118 | 63.2127309 | 81.7228532 |
| 65.3348948 | 86.2822025 | 65.5851169 | 61.5328118 | 63.2127309 | 80.7228532 |
| 68.3348948 | 86.2822025 | 65.5851169 | 61.5328118 | 63.2127309 | 79.7228532 |
| 69.3348948 | 87.2822025 | 65.5851169 | 61.5328118 | 65.2127309 | 79.7228532 |
| 70.3348948 | 87.2822025 | 65.5851169 | 62.5328118 | 66.2127309 | 78.7228532 |
| 77.3348948 | 87.2822025 | 66.5851169 | 62.5328118 | 70.2127309 | 78.7228532 |
| 79.3348948 | 86.2822025 | 67.5851169 | 62.5328118 | 70.2127309 | 77.7228532 |
| 78.3348948 | 81.2822025 | 68.5851169 | 62.5328118 | 70.2127309 | 76.7228532 |
| 78.3348948 | 75.2822025 | 69.5851169 | 61.5328118 | 68.2127309 | 68.7228532 |
| 77.3348948 | 75.2822025 | 69.5851169 | 61.5328118 | 66.2127309 | 65.7228532 |

|            |            |            |            |            |            |
|------------|------------|------------|------------|------------|------------|
| 77.3348948 | 75.2822025 | 69.5851169 | 60.5328118 | 66.2127309 | 64.7228532 |
| 76.3348948 | 75.2822025 | 69.5851169 | 61.5328118 | 66.2127309 | 63.7228532 |
| 76.3348948 | 74.2822025 | 69.5851169 | 61.5328118 | 67.2127309 | 63.7228532 |
| 74.3348948 | 74.2822025 | 69.5851169 | 62.5328118 | 67.2127309 | 63.7228532 |
| 73.3348948 | 74.2822025 | 69.5851169 | 62.5328118 | 66.2127309 | 62.7228532 |
| 73.3348948 | 74.2822025 | 69.5851169 | 62.5328118 | 66.2127309 | 62.7228532 |
| 73.3348948 | 74.2822025 | 70.5851169 | 62.5328118 | 66.2127309 | 61.7228532 |
| 73.3348948 | 73.2822025 | 70.5851169 | 62.5328118 | 66.2127309 | 58.7228532 |
| 73.3348948 | 73.2822025 | 70.5851169 | 62.5328118 | 66.2127309 | 58.7228532 |
| 70.3348948 | 73.2822025 | 71.5851169 | 62.5328118 | 65.2127309 | 57.7228532 |
| 69.3348948 | 73.2822025 | 71.5851169 | 62.5328118 | 65.2127309 | 60.7228532 |
| 68.3348948 | 73.2822025 | 68.5851169 | 63.5328118 | 65.2127309 | 61.7228532 |
| 68.3348948 | 73.2822025 | 65.5851169 | 63.5328118 | 64.2127309 | 62.7228532 |
| 68.3348948 | 75.2822025 | 65.5851169 | 64.5328118 | 63.2127309 | 62.7228532 |
| 68.3348948 | 78.2822025 | 66.5851169 | 66.5328118 | 64.2127309 | 61.7228532 |
| 68.3348948 | 79.2822025 | 66.5851169 | 67.5328118 | 64.2127309 | 61.7228532 |
| 68.3348948 | 78.2822025 | 66.5851169 | 67.5328118 | 68.2127309 | 63.7228532 |
| 68.3348948 | 77.2822025 | 66.5851169 | 67.5328118 | 70.2127309 | 63.7228532 |
| 68.3348948 | 77.2822025 | 66.5851169 | 67.5328118 | 70.2127309 | 63.7228532 |
| 69.3348948 | 76.2822025 | 67.5851169 | 67.5328118 | 71.2127309 | 64.7228532 |
| 69.3348948 | 75.2822025 | 68.5851169 | 66.5328118 | 71.2127309 | 66.7228532 |
| 69.3348948 | 75.2822025 | 68.5851169 | 66.5328118 | 71.2127309 | 66.7228532 |
| 69.3348948 | 75.2822025 | 68.5851169 | 65.5328118 | 71.2127309 | 65.7228532 |
| 70.3348948 | 76.2822025 | 65.5851169 | 64.5328118 | 72.2127309 | 65.7228532 |
| 70.3348948 | 76.2822025 | 64.5851169 | 64.5328118 | 74.2127309 | 64.7228532 |
| 70.3348948 | 75.2822025 | 64.5851169 | 64.5328118 | 77.2127309 | 66.7228532 |
| 70.3348948 | 74.2822025 | 63.5851169 | 64.5328118 | 77.2127309 | 66.7228532 |
| 70.3348948 | 73.2822025 | 63.5851169 | 64.5328118 | 78.2127309 | 68.7228532 |
| 71.3348948 | 73.2822025 | 64.5851169 | 64.5328118 | 77.2127309 | 69.7228532 |
| 72.3348948 | 73.2822025 | 65.5851169 | 64.5328118 | 74.2127309 | 70.7228532 |
| 74.3348948 | 73.2822025 | 65.5851169 | 64.5328118 | 73.2127309 | 70.7228532 |
| 75.3348948 | 73.2822025 | 69.5851169 | 64.5328118 | 73.2127309 | 72.7228532 |
| 76.3348948 | 73.2822025 | 71.5851169 | 64.5328118 | 71.2127309 | 71.7228532 |
| 76.3348948 | 73.2822025 | 73.5851169 | 64.5328118 | 71.2127309 | 69.7228532 |
| 76.3348948 | 73.2822025 | 74.5851169 | 65.5328118 | 71.2127309 | 68.7228532 |
| 77.3348948 | 71.2822025 | 75.5851169 | 65.5328118 | 71.2127309 | 67.7228532 |
| 78.3348948 | 71.2822025 | 78.5851169 | 65.5328118 | 71.2127309 | 67.7228532 |
| 79.3348948 | 70.2822025 | 80.5851169 | 65.5328118 | 71.2127309 | 68.7228532 |
| 79.3348948 | 70.2822025 | 80.5851169 | 66.5328118 | 71.2127309 | 67.7228532 |
| 82.3348948 | 69.2822025 | 80.5851169 | 67.5328118 | 70.2127309 | 66.7228532 |
| 83.3348948 | 69.2822025 | 80.5851169 | 67.5328118 | 69.2127309 | 64.7228532 |
| 82.3348948 | 69.2822025 | 84.5851169 | 67.5328118 | 68.2127309 | 64.7228532 |
| 81.3348948 | 69.2822025 | 84.5851169 | 65.5328118 | 68.2127309 | 63.7228532 |
| 80.3348948 | 69.2822025 | 87.5851169 | 64.5328118 | 68.2127309 | 63.7228532 |
| 79.3348948 | 69.2822025 | 88.5851169 | 63.5328118 | 68.2127309 | 63.7228532 |

|            |            |            |            |            |            |
|------------|------------|------------|------------|------------|------------|
| 78.3348948 | 69.2822025 | 89.5851169 | 63.5328118 | 67.2127309 | 63.7228532 |
| 78.3348948 | 69.2822025 | 89.5851169 | 61.5328118 | 66.2127309 | 63.7228532 |
| 78.3348948 | 69.2822025 | 89.5851169 | 61.5328118 | 66.2127309 | 63.7228532 |
| 78.3348948 | 69.2822025 | 89.5851169 | 63.5328118 | 67.2127309 | 65.7228532 |
| 78.3348948 | 71.2822025 | 90.5851169 | 63.5328118 | 68.2127309 | 67.7228532 |
| 77.3348948 | 71.2822025 | 90.5851169 | 64.5328118 | 68.2127309 | 67.7228532 |
| 76.3348948 | 70.2822025 | 91.5851169 | 65.5328118 | 71.2127309 | 67.7228532 |
| 77.3348948 | 68.2822025 | 74.0589474 | 65.5328118 | 71.2127309 | 66.7228532 |
| 78.3348948 | 67.2822025 | 74.6953111 | 68.5328118 | 71.2127309 | 66.7228532 |
| 78.3348948 | 65.2822025 | 74.5134929 | 68.5328118 | 71.2127309 | 62.7228532 |
| 79.3348948 | 63.2822025 | 74.2407656 | 69.5328118 | 71.2127309 | 61.7228532 |
| 79.3348948 | 62.2822025 | 73.8771293 | 70.5328118 | 71.2127309 | 61.7228532 |
| 79.3348948 | 62.2822025 | 74.1498565 | 71.5328118 | 73.2127309 | 61.7228532 |
| 79.3348948 | 62.2822025 | 74.2407656 | 71.5328118 | 74.2127309 | 65.7228532 |
| 79.3348948 | 62.2822025 | 74.1498565 | 72.5328118 | 74.2127309 | 65.7228532 |
| 81.3348948 | 61.2822025 | 74.5134929 | 72.5328118 | 74.2127309 | 69.7228532 |
| 81.3348948 | 61.2822025 | 73.7862202 | 72.5328118 | 74.2127309 | 69.7228532 |
| 81.3348948 | 61.2822025 | 76.4793861 | 72.5328118 | 74.2127309 | 69.7228532 |
| 81.3348948 | 58.2822025 | 73.4225838 | 74.5328118 | 72.2127309 | 69.7228532 |
| 81.3348948 | 58.2822025 | 73.1498565 | 74.5328118 | 72.2127309 | 68.7228532 |
| 81.3348948 | 57.2822025 | 72.7862202 | 71.5328118 | 70.2127309 | 68.7228532 |
| 80.3348948 | 59.2822025 | 72.5134929 | 69.5328118 | 70.2127309 | 68.7228532 |
| 78.3348948 | 62.2822025 | 72.5134929 | 68.5328118 | 70.2127309 | 68.7228532 |
| 76.3348948 | 63.2822025 | 72.4225838 | 66.5328118 | 70.2127309 | 68.7228532 |
| 75.3348948 | 64.2822025 | 83.5851169 | 65.5328118 | 70.2127309 | 68.7228532 |
| 75.3348948 | 65.2822025 | 75.5851169 | 65.5328118 | 69.2127309 | 68.7228532 |
| 75.3348948 | 67.2822025 | 75.5851169 | 66.5328118 | 70.2127309 | 68.7228532 |
| 74.3348948 | 67.2822025 | 68.5851169 | 66.5328118 | 70.2127309 | 70.7228532 |
| 74.3348948 | 67.2822025 | 66.5851169 | 66.5328118 | 74.2127309 | 71.7228532 |
| 73.3348948 | 67.2822025 | 66.5851169 | 66.5328118 | 76.2127309 | 71.7228532 |
| 73.3348948 | 68.2822025 | 66.5851169 | 66.5328118 | 77.2127309 | 71.7228532 |
| 73.3348948 | 68.2822025 | 66.5851169 | 64.5328118 | 77.2127309 | 71.7228532 |
| 72.3348948 | 68.2822025 | 66.5851169 | 63.5328118 | 77.2127309 | 74.7228532 |
| 71.3348948 | 68.2822025 | 66.5851169 | 62.5328118 | 78.2127309 | 74.7228532 |
| 72.3348948 | 67.2822025 | 66.5851169 | 61.5328118 | 78.2127309 | 72.7228532 |
| 74.3348948 | 66.2822025 | 66.5851169 | 61.5328118 | 80.2127309 | 71.7228532 |
| 76.3348948 | 65.2822025 | 66.5851169 | 60.5328118 | 80.2127309 | 71.7228532 |
| 78.3348948 | 63.2822025 | 66.5851169 | 60.5328118 | 80.2127309 | 71.7228532 |
| 81.3348948 | 63.2822025 | 66.5851169 | 60.5328118 | 81.2127309 | 71.7228532 |
| 83.3348948 | 62.2822025 | 66.5851169 | 59.5328118 | 82.2127309 | 70.7228532 |
| 84.3348948 | 61.2822025 | 66.5851169 | 59.5328118 | 83.2127309 | 75.7228532 |
| 84.3348948 | 61.2822025 | 66.5851169 | 58.5328118 | 83.2127309 | 78.7228532 |
| 84.3348948 | 61.2822025 | 72.5851169 | 58.5328118 | 83.2127309 | 79.7228532 |
| 86.3348948 | 61.2822025 | 72.5851169 | 58.5328118 | 83.2127309 | 79.7228532 |
| 86.3348948 | 61.2822025 | 72.5851169 | 59.5328118 | 82.2127309 | 77.7228532 |

|            |            |            |            |            |            |
|------------|------------|------------|------------|------------|------------|
| 84.3348948 | 61.2822025 | 72.5851169 | 59.5328118 | 79.2127309 | 73.7228532 |
| 82.3348948 | 65.2822025 | 73.5851169 | 59.5328118 | 76.2127309 | 71.7228532 |
| 79.3348948 | 65.2822025 | 73.5851169 | 59.5328118 | 76.2127309 | 69.7228532 |
| 77.3348948 | 69.2822025 | 73.5851169 | 59.5328118 | 76.2127309 | 67.7228532 |
| 76.3348948 | 72.2822025 | 73.5851169 | 59.5328118 | 76.2127309 | 67.7228532 |
| 75.3348948 | 72.2822025 | 73.5851169 | 60.5328118 | 76.2127309 | 65.7228532 |
| 76.3348948 | 77.2822025 | 72.5851169 | 62.5328118 | 73.2127309 | 66.7228532 |
| 78.3348948 | 77.2822025 | 71.5851169 | 63.5328118 | 73.2127309 | 67.7228532 |
| 80.3348948 | 77.2822025 | 71.5851169 | 64.5328118 | 74.2127309 | 67.7228532 |
| 81.3348948 | 77.2822025 | 70.5851169 | 65.5328118 | 74.2127309 | 69.7228532 |
| 82.3348948 | 77.2822025 | 70.5851169 | 65.5328118 | 74.2127309 | 71.7228532 |
| 82.3348948 | 77.2822025 | 68.5851169 | 66.5328118 | 74.2127309 | 73.7228532 |
| 82.3348948 | 77.2822025 | 68.5851169 | 66.5328118 | 74.2127309 | 74.7228532 |
| 82.3348948 | 77.2822025 | 68.5851169 | 66.5328118 | 72.2127309 | 74.7228532 |
| 82.3348948 | 77.2822025 | 68.5851169 | 67.5328118 | 71.2127309 | 74.7228532 |
| 82.3348948 | 77.2822025 | 68.5851169 | 67.5328118 | 71.2127309 | 74.7228532 |
| 82.3348948 | 78.2822025 | 66.5851169 | 67.5328118 | 71.2127309 | 73.7228532 |
| 81.3348948 | 78.2822025 | 66.5851169 | 67.5328118 | 71.2127309 | 73.7228532 |
| 81.3348948 | 79.2822025 | 66.5851169 | 73.5328118 | 71.2127309 | 74.7228532 |
| 81.3348948 | 80.2822025 | 65.5851169 | 74.5328118 | 71.2127309 | 73.7228532 |
| 81.3348948 | 80.2822025 | 65.5851169 | 76.5328118 | 67.2127309 | 73.7228532 |
| 81.3348948 | 80.2822025 | 64.5851169 | 76.5328118 | 65.2127309 | 73.7228532 |
| 80.3348948 | 80.2822025 | 64.5851169 | 76.5328118 | 64.2127309 | 73.7228532 |
| 80.3348948 | 80.2822025 | 64.5851169 | 76.5328118 | 63.2127309 | 73.7228532 |
| 79.3348948 | 83.2822025 | 64.5851169 | 75.5328118 | 64.2127309 | 74.7228532 |
| 79.3348948 | 84.2822025 | 64.5851169 | 75.5328118 | 65.2127309 | 76.7228532 |
| 79.3348948 | 84.2822025 | 64.5851169 | 75.5328118 | 65.2127309 | 76.7228532 |
| 79.3348948 | 83.2822025 | 63.5851169 | 71.5328118 | 65.2127309 | 78.7228532 |
| 78.3348948 | 81.2822025 | 63.5851169 | 62.5328118 | 64.2127309 | 78.7228532 |
| 78.3348948 | 81.2822025 | 62.5851169 | 61.5328118 | 64.2127309 | 74.7228532 |
| 77.3348948 | 80.2822025 | 62.5851169 | 61.5328118 | 63.2127309 | 66.7228532 |
| 77.3348948 | 80.2822025 | 62.5851169 | 61.5328118 | 63.2127309 | 62.7228532 |
| 77.3348948 | 79.2822025 | 64.5851169 | 61.5328118 | 63.2127309 | 61.7228532 |
| 74.3348948 | 79.2822025 | 64.5851169 | 61.5328118 | 63.2127309 | 64.7228532 |
| 74.3348948 | 79.2822025 | 64.5851169 | 61.5328118 | 63.2127309 | 65.7228532 |
| 74.3348948 | 79.2822025 | 64.5851169 | 60.5328118 | 63.2127309 | 65.7228532 |
| 73.3348948 | 79.2822025 | 64.5851169 | 60.5328118 | 66.2127309 | 65.7228532 |
| 72.3348948 | 79.2822025 | 65.5851169 | 60.5328118 | 66.2127309 | 64.7228532 |
| 72.3348948 | 79.2822025 | 65.5851169 | 59.5328118 | 66.2127309 | 63.7228532 |
| 72.3348948 | 78.2822025 | 65.5851169 | 59.5328118 | 65.2127309 | 62.7228532 |
| 72.3348948 | 78.2822025 | 65.5851169 | 60.5328118 | 65.2127309 | 62.7228532 |
| 72.3348948 | 78.2822025 | 64.5851169 | 61.5328118 | 65.2127309 | 61.7228532 |
| 71.3348948 | 77.2822025 | 64.5851169 | 66.5328118 | 65.2127309 | 63.7228532 |
| 71.3348948 | 78.2822025 | 64.5851169 | 66.5328118 | 65.2127309 | 63.7228532 |

|            |            |            |            |            |            |
|------------|------------|------------|------------|------------|------------|
| 71.3348948 | 78.2822025 | 64.5851169 | 66.5328118 | 65.2127309 | 65.7228532 |
| 70.3348948 | 78.2822025 | 64.5851169 | 66.5328118 | 65.2127309 | 65.7228532 |
| 69.3348948 | 79.2822025 | 65.5851169 | 66.5328118 | 65.2127309 | 64.7228532 |
| 69.3348948 | 80.2822025 | 66.5851169 | 66.5328118 | 68.2127309 | 64.7228532 |
| 69.3348948 | 80.2822025 | 67.5851169 | 66.5328118 | 68.2127309 | 64.7228532 |
| 68.3348948 | 79.2822025 | 68.5851169 | 66.5328118 | 68.2127309 | 64.7228532 |
| 67.3348948 | 78.2822025 | 69.5851169 | 66.5328118 | 68.2127309 | 63.7228532 |
| 67.3348948 | 78.2822025 | 70.5851169 | 67.5328118 | 68.2127309 | 63.7228532 |
| 66.3348948 | 78.2822025 | 69.5851169 | 67.5328118 | 68.2127309 | 63.7228532 |
| 64.3348948 | 74.2822025 | 69.5851169 | 67.5328118 | 68.2127309 | 62.7228532 |
| 65.3348948 | 73.2822025 | 68.5851169 | 67.5328118 | 68.2127309 | 61.7228532 |
| 66.3348948 | 73.2822025 | 67.5851169 | 67.5328118 | 68.2127309 | 61.7228532 |
| 66.3348948 | 73.2822025 | 67.5851169 | 67.5328118 | 69.2127309 | 61.7228532 |
| 69.3348948 | 72.2822025 | 67.5851169 | 67.5328118 | 70.2127309 | 62.7228532 |
| 73.3348948 | 70.2822025 | 67.5851169 | 68.5328118 | 70.2127309 | 62.7228532 |
| 75.3348948 | 70.2822025 | 67.5851169 | 69.5328118 | 71.2127309 | 64.7228532 |
| 77.3348948 | 69.2822025 | 68.5851169 | 67.5328118 | 71.2127309 | 64.7228532 |
| 79.3348948 | 69.2822025 | 68.5851169 | 64.5328118 | 71.2127309 | 64.7228532 |
| 79.3348948 | 70.2822025 | 69.5851169 | 62.5328118 | 70.2127309 | 62.7228532 |
| 79.3348948 | 70.2822025 | 69.5851169 | 61.5328118 | 70.2127309 | 60.7228532 |
| 79.3348948 | 73.2822025 | 69.5851169 | 61.5328118 | 70.2127309 | 60.7228532 |
| 78.3348948 | 74.2822025 | 69.5851169 | 61.5328118 | 70.2127309 | 61.7228532 |
| 78.3348948 | 75.2822025 | 68.5851169 | 61.5328118 | 70.2127309 | 62.7228532 |
| 78.3348948 | 76.2822025 | 68.5851169 | 62.5328118 | 70.2127309 | 63.7228532 |
| 77.3348948 | 76.2822025 | 68.5851169 | 62.5328118 | 70.2127309 | 63.7228532 |
| 76.3348948 | 76.2822025 | 68.5851169 | 62.5328118 | 70.2127309 | 63.7228532 |
| 76.3348948 | 77.2822025 | 68.5851169 | 64.5328118 | 69.2127309 | 63.7228532 |
| 72.3348948 | 79.2822025 | 68.5851169 | 64.5328118 | 70.2127309 | 61.7228532 |
| 69.3348948 | 83.2822025 | 67.5851169 | 66.5328118 | 70.2127309 | 61.7228532 |
| 69.3348948 | 66.7862202 | 66.5851169 | 66.5328118 | 70.2127309 | 61.7228532 |
| 69.3348948 | 66.7862202 | 66.5851169 | 66.5328118 | 70.2127309 | 61.7228532 |
| 69.3348948 | 67.0589474 | 66.5851169 | 67.5328118 | 69.2127309 | 63.7228532 |
| 68.3348948 | 67.0589474 | 66.5851169 | 67.5328118 | 69.2127309 | 63.7228532 |
| 67.3348948 | 67.0589474 | 66.5851169 | 67.5328118 | 66.2127309 | 63.7228532 |
| 66.3348948 | 66.9680384 | 66.5851169 | 70.5328118 | 65.2127309 | 62.7228532 |
| 66.3348948 | 66.9680384 | 66.5851169 | 70.5328118 | 65.2127309 | 62.7228532 |
| 66.3348948 | 68.0878473 | 66.5851169 | 71.5328118 | 63.2127309 | 62.7228532 |
| 66.3348948 | 67.5134929 | 66.5851169 | 70.5328118 | 63.2127309 | 62.7228532 |
| 66.3348948 | 67.8771293 | 66.5851169 | 70.5328118 | 64.2127309 | 62.7228532 |
| 66.3348948 | 67.9680384 | 66.5851169 | 70.5328118 | 64.2127309 | 62.7228532 |
| 66.3348948 | 67.8771293 | 66.5851169 | 69.5328118 | 64.2127309 | 62.7228532 |
| 66.3348948 | 67.6953111 | 65.5851169 | 69.5328118 | 63.2127309 | 63.7228532 |
| 67.3348948 | 68.2407656 | 65.5851169 | 69.5328118 | 64.2127309 | 64.7228532 |
| 67.3348948 | 67.6953111 | 65.5851169 | 67.5328118 | 63.2127309 | 64.7228532 |
| 66.3348948 | 83.2822025 | 65.5851169 | 67.5328118 | 64.2127309 | 67.7228532 |

|            |            |            |            |            |            |
|------------|------------|------------|------------|------------|------------|
| 66.3348948 | 82.2822025 | 65.5851169 | 67.5328118 | 64.2127309 | 68.7228532 |
| 65.3348948 | 79.2822025 | 65.5851169 | 66.5328118 | 64.2127309 | 69.7228532 |
| 65.3348948 | 75.2822025 | 65.5851169 | 66.5328118 | 65.2127309 | 70.7228532 |
| 64.3348948 | 73.2822025 | 65.5851169 | 67.5328118 | 65.2127309 | 69.7228532 |
| 64.3348948 | 71.2822025 | 65.5851169 | 67.5328118 | 66.2127309 | 69.7228532 |
| 64.3348948 | 71.2822025 | 65.5851169 | 67.5328118 | 67.2127309 | 69.7228532 |
| 64.3348948 | 70.2822025 | 64.5851169 | 67.5328118 | 67.2127309 | 70.7228532 |
| 65.3348948 | 70.2822025 | 64.5851169 | 67.5328118 | 68.2127309 | 70.7228532 |
| 65.3348948 | 70.2822025 | 64.5851169 | 66.5328118 | 67.2127309 | 71.7228532 |
| 65.3348948 | 70.2822025 | 64.5851169 | 64.5328118 | 66.2127309 | 71.7228532 |
| 64.3348948 | 70.2822025 | 64.5851169 | 64.5328118 | 66.2127309 | 75.7228532 |
| 64.3348948 | 70.2822025 | 64.5851169 | 64.5328118 | 67.2127309 | 75.7228532 |
| 64.3348948 | 70.2822025 | 64.5851169 | 64.5328118 | 68.2127309 | 77.7228532 |
| 66.3348948 | 70.2822025 | 65.5851169 | 65.5328118 | 68.2127309 | 77.7228532 |
| 67.3348948 | 69.2822025 | 66.5851169 | 65.5328118 | 71.2127309 | 77.7228532 |
| 67.3348948 | 69.2822025 | 66.5851169 | 65.5328118 | 71.2127309 | 77.7228532 |
| 67.3348948 | 69.2822025 | 66.5851169 | 66.5328118 | 71.2127309 | 77.7228532 |
| 67.3348948 | 69.2822025 | 66.5851169 | 66.5328118 | 71.2127309 | 78.7228532 |
| 68.3348948 | 69.2822025 | 66.5851169 | 66.5328118 | 71.2127309 | 77.7228532 |
| 70.3348948 | 69.2822025 | 66.5851169 | 66.5328118 | 71.2127309 | 77.7228532 |
| 70.3348948 | 68.2822025 | 65.5851169 | 66.5328118 | 70.2127309 | 77.7228532 |
| 70.3348948 | 69.2822025 | 64.5851169 | 66.5328118 | 70.2127309 | 75.7228532 |
| 70.3348948 | 69.2822025 | 64.5851169 | 65.5328118 | 70.2127309 | 73.7228532 |
| 70.3348948 | 69.2822025 | 64.5851169 | 65.5328118 | 70.2127309 | 70.7228532 |
| 69.3348948 | 69.2822025 | 64.5851169 | 64.5328118 | 70.2127309 | 70.7228532 |
| 69.3348948 | 68.2822025 | 64.5851169 | 62.5328118 | 70.2127309 | 67.7228532 |
| 68.3348948 | 68.2822025 | 64.5851169 | 61.5328118 | 69.2127309 | 66.7228532 |
| 68.3348948 | 68.2822025 | 64.5851169 | 61.5328118 | 69.2127309 | 62.7228532 |
| 68.3348948 | 68.2822025 | 64.5851169 | 62.5328118 | 70.2127309 | 60.7228532 |
| 69.3348948 | 68.2822025 | 63.5851169 | 62.5328118 | 70.2127309 | 60.7228532 |
| 68.3348948 | 68.2822025 | 63.5851169 | 63.5328118 | 70.2127309 | 63.7228532 |
| 69.3348948 | 68.2822025 | 63.5851169 | 62.5328118 | 71.2127309 | 66.7228532 |
| 70.3348948 | 68.2822025 | 62.5851169 | 62.5328118 | 71.2127309 | 66.7228532 |
| 70.3348948 | 68.2822025 | 62.5851169 | 62.5328118 | 71.2127309 | 68.7228532 |
| 70.3348948 | 68.2822025 | 62.5851169 | 62.5328118 | 74.2127309 | 70.7228532 |
| 70.3348948 | 68.2822025 | 62.5851169 | 62.5328118 | 74.2127309 | 70.7228532 |
| 70.3348948 | 68.2822025 | 63.5851169 | 62.5328118 | 74.2127309 | 68.7228532 |
| 70.3348948 | 68.2822025 | 64.5851169 | 62.5328118 | 76.2127309 | 68.7228532 |
| 70.3348948 | 68.2822025 | 64.5851169 | 62.5328118 | 80.2127309 | 67.7228532 |
| 69.3348948 | 67.2822025 | 64.5851169 | 63.5328118 | 80.2127309 | 67.7228532 |
| 69.3348948 | 67.2822025 | 64.5851169 | 63.5328118 | 80.2127309 | 67.7228532 |
| 69.3348948 | 67.2822025 | 64.5851169 | 63.5328118 | 80.2127309 | 68.7228532 |
| 69.3348948 | 67.2822025 | 64.5851169 | 63.5328118 | 80.2127309 | 68.7228532 |

69.3348948 68.2822025 64.5851169 64.5328118 80.2127309 66.7228532  
69.3348948 70.2822025 65.5851169 64.5328118 76.2127309 64.7228532  
70.3348948 71.2822025 66.5851169 65.5328118 72.2127309 63.7228532  
71.3348948 71.2822025 66.5851169 65.5328118 68.2127309 63.7228532  
71.3348948 72.2822025 66.5851169 66.5328118 68.2127309 65.7228532  
70.3348948 74.2822025 67.5851169 66.5328118 65.2127309 65.7228532  
70.3348948 75.2822025 68.5851169 66.5328118 64.2127309 65.7228532  
70.3348948 75.2822025 67.5851169 66.5328118 63.2127309 65.7228532  
70.3348948 75.2822025 67.5851169 66.5328118 64.2127309 65.7228532  
70.3348948 75.2822025 66.5851169 66.5328118 64.2127309 65.7228532  
70.3348948 75.2822025 66.5851169 66.5328118 64.2127309 64.7228532  
70.3348948 75.2822025 65.5851169 66.5328118 63.2127309 64.7228532  
70.3348948 75.2822025 65.5851169 67.5328118 65.2127309 64.7228532  
70.3348948 75.2822025 65.5851169 67.5328118 65.2127309 65.7228532  
70.3348948 75.2822025 65.5851169 67.5328118 65.2127309 65.7228532  
70.3348948 75.2822025 65.5851169 67.5328118 66.2127309 70.7228532  
70.3348948 76.2822025 65.5851169 67.5328118 66.2127309 70.7228532  
70.3348948 77.2822025 65.5851169 67.5328118 66.2127309 74.7228532  
72.3348948 79.2822025 66.5851169 68.5328118 65.2127309 72.7228532  
79.3348948 79.2822025 66.5851169 68.5328118 66.2127309 69.7228532  
80.3348948 80.2822025 66.5851169 68.5328118 68.2127309 66.7228532  
79.3348948 80.2822025 66.5851169 67.5328118 68.2127309 66.7228532  
76.3348948 80.2822025 66.5851169 66.5328118 69.2127309 64.7228532  
76.3348948 80.2822025 66.5851169 65.5328118 69.2127309 64.7228532  
76.3348948 81.2822025 67.5851169 65.5328118 70.2127309 65.7228532  
76.3348948 81.2822025 66.5851169 64.5328118 70.2127309 65.7228532  
75.3348948 81.2822025 66.5851169 64.5328118 70.2127309 73.7228532  
73.3348948 81.2822025 66.5851169 63.5328118 68.2127309 73.7228532  
72.3348948 81.2822025 66.5851169 62.5328118 67.2127309 73.7228532  
71.3348948 81.2822025 65.5851169 61.5328118 66.2127309 70.7228532  
70.3348948 81.2822025 65.5851169 61.5328118 66.2127309 66.7228532  
70.3348948 80.2822025 64.5851169 61.5328118 66.2127309 66.7228532  
70.3348948 77.2822025 64.5851169 62.5328118 66.2127309 66.7228532  
69.3348948 77.2822025 64.5851169 63.5328118 67.2127309 61.7228532  
69.3348948 76.2822025 63.5851169 62.5328118 66.2127309 61.7228532  
68.3348948 75.2822025 63.5851169 61.5328118 66.2127309 65.7228532  
68.3348948 72.2822025 63.5851169 61.5328118 66.2127309 66.7228532  
67.3348948 71.2822025 63.5851169 61.5328118 65.2127309 67.7228532  
67.3348948 71.2822025 63.5851169 61.5328118 64.2127309 68.7228532  
68.3348948 71.2822025 63.5851169 63.5328118 64.2127309 68.7228532  
68.3348948 71.2822025 63.5851169 63.5328118 64.2127309 68.7228532  
68.3348948 71.2822025 63.5851169 63.5328118 66.2127309 68.7228532  
69.3348948 71.2822025 63.5851169 64.5328118 68.2127309 68.7228532  
68.3348948 72.2822025 63.5851169 64.5328118 70.2127309 68.7228532  
66.3348948 72.2822025 63.5851169 64.5328118 69.2127309 68.7228532

|            |            |            |            |            |            |
|------------|------------|------------|------------|------------|------------|
| 65.3348948 | 72.2822025 | 63.5851169 | 64.5328118 | 68.2127309 | 68.7228532 |
| 65.3348948 | 72.2822025 | 63.5851169 | 64.5328118 | 68.2127309 | 68.7228532 |
| 65.3348948 | 74.2822025 | 63.5851169 | 64.5328118 | 68.2127309 | 70.7228532 |
| 65.3348948 | 74.2822025 | 63.5851169 | 65.5328118 | 68.2127309 | 70.7228532 |
| 66.3348948 | 75.2822025 | 63.5851169 | 65.5328118 | 68.2127309 | 70.7228532 |
| 66.3348948 | 77.2822025 | 65.5851169 | 65.5328118 | 68.2127309 | 70.7228532 |
| 67.3348948 | 77.2822025 | 65.5851169 | 65.5328118 | 67.2127309 | 67.7228532 |
| 67.3348948 | 77.2822025 | 66.5851169 | 63.5328118 | 67.2127309 | 68.7228532 |
| 67.3348948 | 77.2822025 | 66.5851169 | 63.5328118 | 67.2127309 | 68.7228532 |
| 68.3348948 | 76.2822025 | 66.5851169 | 63.5328118 | 67.2127309 | 69.7228532 |
| 68.3348948 | 75.2822025 | 66.5851169 | 63.5328118 | 66.2127309 | 69.7228532 |
| 68.3348948 | 75.2822025 | 65.5851169 | 63.5328118 | 68.2127309 | 69.7228532 |
| 68.3348948 | 75.2822025 | 65.5851169 | 62.5328118 | 69.2127309 | 69.7228532 |
| 68.3348948 | 75.2822025 | 65.5851169 | 62.5328118 | 71.2127309 | 69.7228532 |
| 68.3348948 | 75.2822025 | 65.5851169 | 61.5328118 | 72.2127309 | 69.7228532 |
| 69.3348948 | 75.2822025 | 65.5851169 | 61.5328118 | 72.2127309 | 69.7228532 |
| 70.3348948 | 75.2822025 | 65.5851169 | 61.5328118 | 72.2127309 | 70.7228532 |
| 70.3348948 | 75.2822025 | 65.5851169 | 61.5328118 | 72.2127309 | 71.7228532 |
| 70.3348948 | 75.2822025 | 65.5851169 | 62.5328118 | 72.2127309 | 72.7228532 |
| 72.3348948 | 76.2822025 | 65.5851169 | 62.5328118 | 71.2127309 | 73.7228532 |
| 78.3348948 | 76.2822025 | 65.5851169 | 62.5328118 | 71.2127309 | 76.7228532 |
| 80.3348948 | 76.2822025 | 65.5851169 | 62.5328118 | 72.2127309 | 81.7228532 |
| 81.3348948 | 76.2822025 | 65.5851169 | 62.5328118 | 72.2127309 | 81.7228532 |
| 81.3348948 | 76.2822025 | 64.5851169 | 63.5328118 | 73.2127309 | 87.7228532 |
| 81.3348948 | 77.2822025 | 63.5851169 | 65.5328118 | 73.2127309 | 88.7228532 |
| 81.3348948 | 77.2822025 | 63.5851169 | 65.5328118 | 73.2127309 | 70.604402  |
| 82.3348948 | 80.2822025 | 63.5851169 | 65.5328118 | 73.2127309 | 70.5134929 |
| 82.3348948 | 82.2822025 | 63.5851169 | 65.5328118 | 72.2127309 | 70.4225838 |
| 83.3348948 | 83.2822025 | 63.5851169 | 65.5328118 | 71.2127309 | 88.7228532 |
| 84.3348948 | 83.2822025 | 63.5851169 | 66.5328118 | 71.2127309 | 86.7228532 |
| 84.3348948 | 83.2822025 | 63.5851169 | 66.5328118 | 71.2127309 | 86.7228532 |
| 84.3348948 | 84.2822025 | 63.5851169 | 66.5328118 | 72.2127309 | 86.7228532 |
| 84.3348948 | 84.2822025 | 63.5851169 | 66.5328118 | 74.2127309 | 86.7228532 |
| 84.3348948 | 85.2822025 | 64.5851169 | 68.5328118 | 76.2127309 | 86.7228532 |
| 84.3348948 | 85.2822025 | 64.5851169 | 68.5328118 | 77.2127309 | 86.7228532 |
| 84.3348948 | 86.2822025 | 64.5851169 | 68.5328118 | 77.2127309 | 85.7228532 |
| 82.3348948 | 86.2822025 | 64.5851169 | 68.5328118 | 74.2127309 | 85.7228532 |
| 82.3348948 | 86.2822025 | 64.5851169 | 68.5328118 | 70.2127309 | 86.7228532 |
| 81.3348948 | 87.2822025 | 64.5851169 | 68.5328118 | 70.2127309 | 87.7228532 |
| 81.3348948 | 88.2822025 | 64.5851169 | 68.5328118 | 69.2127309 | 87.7228532 |
| 81.3348948 | 89.2822025 | 64.5851169 | 68.5328118 | 67.2127309 | 87.7228532 |
| 69.3348948 | 71.7862202 | 64.5851169 | 68.5328118 | 68.2127309 | 85.7228532 |
| 67.3348948 | 71.5134929 | 64.5851169 | 68.5328118 | 70.2127309 | 85.7228532 |
| 67.3348948 | 71.1498565 | 64.5851169 | 68.5328118 | 70.2127309 | 82.7228532 |
| 66.3348948 | 70.9680384 | 63.5851169 | 69.5328118 | 70.2127309 | 80.7228532 |



|            |            |            |            |            |            |
|------------|------------|------------|------------|------------|------------|
| 66.3348948 | 71.2407656 | 64.5851169 | 69.5328118 | 70.2127309 | 79.7228532 |
| 66.3348948 | 70.9680384 | 65.5851169 | 69.5328118 | 69.2127309 | 74.7228532 |
| 66.3348948 | 69.8771293 | 65.5851169 | 69.5328118 | 69.2127309 | 68.7228532 |
| 66.3348948 | 69.9680384 | 65.5851169 | 69.5328118 | 67.2127309 | 67.7228532 |
| 66.3348948 | 69.6953111 | 65.5851169 | 68.5328118 | 66.2127309 | 66.7228532 |
| 70.3348948 | 70.0589474 | 65.5851169 | 68.5328118 | 65.2127309 | 67.7228532 |
| 68.3348948 | 70.2407656 | 65.5851169 | 66.5328118 | 67.2127309 | 67.7228532 |
| 68.3348948 | 70.3316747 | 65.5851169 | 65.5328118 | 67.2127309 | 68.7228532 |
| 64.3348948 | 70.3316747 | 68.5851169 | 65.5328118 | 67.2127309 | 69.7228532 |
| 64.3348948 | 70.5134929 | 68.5851169 | 65.5328118 | 69.2127309 | 71.7228532 |
| 63.3348948 | 69.8771293 | 69.5851169 | 62.5328118 | 69.2127309 | 71.7228532 |
| 62.3348948 | 69.3316747 | 69.5851169 | 62.5328118 | 69.2127309 | 71.7228532 |
| 62.3348948 | 69.0589474 | 69.5851169 | 60.5328118 | 70.2127309 | 71.7228532 |
| 62.3348948 | 68.604402  | 70.5851169 | 60.5328118 | 67.2127309 | 71.7228532 |
| 62.3348948 | 86.2822025 | 70.5851169 | 60.5328118 | 67.2127309 | 72.7228532 |
| 62.3348948 | 85.2822025 | 70.5851169 | 60.5328118 | 66.2127309 | 72.7228532 |
| 62.3348948 | 85.2822025 | 71.5851169 | 58.5328118 | 67.2127309 | 74.7228532 |
| 62.3348948 | 85.2822025 | 71.5851169 | 58.5328118 | 67.2127309 | 74.7228532 |
| 63.3348948 | 84.2822025 | 72.5851169 | 57.5328118 | 68.2127309 | 74.7228532 |
| 63.3348948 | 84.2822025 | 71.5851169 | 57.5328118 | 68.2127309 | 74.7228532 |
| 65.3348948 | 84.2822025 | 71.5851169 | 57.5328118 | 68.2127309 | 74.7228532 |
| 64.3348948 | 84.2822025 | 71.5851169 | 57.5328118 | 68.2127309 | 74.7228532 |
| 64.3348948 | 83.2822025 | 70.5851169 | 57.5328118 | 66.2127309 | 69.7228532 |
| 66.3348948 | 82.2822025 | 68.5851169 | 57.5328118 | 64.2127309 | 67.7228532 |
| 67.3348948 | 78.2822025 | 68.5851169 | 57.5328118 | 60.2127309 | 65.7228532 |
| 67.3348948 | 77.2822025 | 68.5851169 | 57.5328118 | 59.2127309 | 64.7228532 |
| 70.3348948 | 77.2822025 | 68.5851169 | 58.5328118 | 59.2127309 | 64.7228532 |
| 71.3348948 | 77.2822025 | 67.5851169 | 58.5328118 | 59.2127309 | 64.7228532 |
| 72.3348948 | 78.2822025 | 67.5851169 | 58.5328118 | 65.2127309 | 64.7228532 |
| 72.3348948 | 80.2822025 | 66.5851169 | 58.5328118 | 68.2127309 | 64.7228532 |
| 71.3348948 | 80.2822025 | 66.5851169 | 59.5328118 | 67.2127309 | 64.7228532 |
| 72.3348948 | 79.2822025 | 66.5851169 | 61.5328118 | 67.2127309 | 63.7228532 |
| 72.3348948 | 79.2822025 | 66.5851169 | 61.5328118 | 66.2127309 | 63.7228532 |
| 73.3348948 | 79.2822025 | 66.5851169 | 61.5328118 | 63.2127309 | 58.7228532 |
| 74.3348948 | 78.2822025 | 66.5851169 | 62.5328118 | 63.2127309 | 58.7228532 |
| 75.3348948 | 78.2822025 | 65.5851169 | 63.5328118 | 64.2127309 | 58.7228532 |
| 75.3348948 | 77.2822025 | 65.5851169 | 63.5328118 | 64.2127309 | 62.7228532 |
| 75.3348948 | 69.2822025 | 64.5851169 | 63.5328118 | 64.2127309 | 64.7228532 |
| 76.3348948 | 66.2822025 | 64.5851169 | 63.5328118 | 64.2127309 | 65.7228532 |
| 72.3348948 | 64.2822025 | 64.5851169 | 63.5328118 | 66.2127309 | 64.7228532 |
| 69.3348948 | 63.2822025 | 64.5851169 | 63.5328118 | 66.2127309 | 63.7228532 |
| 67.3348948 | 63.2822025 | 63.5851169 | 63.5328118 | 63.2127309 | 63.7228532 |
| 67.3348948 | 63.2822025 | 63.5851169 | 63.5328118 | 63.2127309 | 63.7228532 |
| 67.3348948 | 63.2822025 | 63.5851169 | 63.5328118 | 63.2127309 | 63.7228532 |
| 67.3348948 | 63.2822025 | 63.5851169 | 64.5328118 | 62.2127309 | 61.7228532 |



|            |            |            |            |            |            |
|------------|------------|------------|------------|------------|------------|
| 79.3348948 | 71.2822025 | 63.5851169 | 66.5328118 | 74.2127309 | 71.7228532 |
| 74.3348948 | 73.2822025 | 64.5851169 | 66.5328118 | 74.2127309 | 71.7228532 |
| 72.3348948 | 76.2822025 | 64.5851169 | 65.5328118 | 69.2127309 | 71.7228532 |
| 72.3348948 | 76.2822025 | 64.5851169 | 66.5328118 | 65.2127309 | 71.7228532 |
| 71.3348948 | 76.2822025 | 64.5851169 | 66.5328118 | 63.2127309 | 71.7228532 |
| 70.3348948 | 78.2822025 | 65.5851169 | 66.5328118 | 63.2127309 | 74.7228532 |
| 71.3348948 | 78.2822025 | 65.5851169 | 67.5328118 | 62.2127309 | 76.7228532 |
| 71.3348948 | 78.2822025 | 66.5851169 | 67.5328118 | 62.2127309 | 75.7228532 |
| 71.3348948 | 78.2822025 | 66.5851169 | 67.5328118 | 62.2127309 | 75.7228532 |
| 71.3348948 | 78.2822025 | 66.5851169 | 67.5328118 | 61.2127309 | 74.7228532 |
| 71.3348948 | 78.2822025 | 66.5851169 | 66.5328118 | 61.2127309 | 74.7228532 |
| 71.3348948 | 79.2822025 | 65.5851169 | 66.5328118 | 62.2127309 | 74.7228532 |
| 73.3348948 | 79.2822025 | 66.5851169 | 66.5328118 | 62.2127309 | 78.7228532 |
| 77.3348948 | 80.2822025 | 66.5851169 | 66.5328118 | 62.2127309 | 80.7228532 |
| 79.3348948 | 80.2822025 | 66.5851169 | 66.5328118 | 63.2127309 | 82.7228532 |
| 80.3348948 | 80.2822025 | 66.5851169 | 66.5328118 | 63.2127309 | 83.7228532 |
| 80.3348948 | 83.2822025 | 66.5851169 | 66.5328118 | 63.2127309 | 84.7228532 |
| 80.3348948 | 83.2822025 | 66.5851169 | 67.5328118 | 63.2127309 | 84.7228532 |
| 80.3348948 | 85.2822025 | 66.5851169 | 68.5328118 | 62.2127309 | 81.7228532 |
| 80.3348948 | 84.2822025 | 66.5851169 | 68.5328118 | 62.2127309 | 74.7228532 |
| 80.3348948 | 84.2822025 | 66.5851169 | 68.5328118 | 61.2127309 | 70.7228532 |
| 81.3348948 | 82.2822025 | 66.5851169 | 70.5328118 | 66.2127309 | 68.7228532 |
| 81.3348948 | 77.2822025 | 66.5851169 | 70.5328118 | 66.2127309 | 64.7228532 |
| 75.3348948 | 72.2822025 | 67.5851169 | 69.5328118 | 67.2127309 | 64.7228532 |
| 69.3348948 | 68.2822025 | 67.5851169 | 67.5328118 | 67.2127309 | 63.7228532 |
| 67.3348948 | 67.2822025 | 67.5851169 | 68.5328118 | 67.2127309 | 63.7228532 |
| 66.3348948 | 67.2822025 | 67.5851169 | 68.5328118 | 67.2127309 | 63.7228532 |
| 66.3348948 | 67.2822025 | 68.5851169 | 69.5328118 | 66.2127309 | 66.7228532 |
| 67.3348948 | 67.2822025 | 68.5851169 | 70.5328118 | 66.2127309 | 67.7228532 |
| 71.3348948 | 66.2822025 | 68.5851169 | 70.5328118 | 65.2127309 | 66.7228532 |
| 72.3348948 | 66.2822025 | 69.5851169 | 70.5328118 | 65.2127309 | 66.7228532 |
| 71.3348948 | 66.2822025 | 68.5851169 | 70.5328118 | 65.2127309 | 59.7228532 |
| 71.3348948 | 66.2822025 | 68.5851169 | 69.5328118 | 66.2127309 | 58.7228532 |
| 71.3348948 | 65.2822025 | 67.5851169 | 68.5328118 | 67.2127309 | 57.7228532 |
| 71.3348948 | 64.2822025 | 67.5851169 | 67.5328118 | 67.2127309 | 58.7228532 |
| 71.3348948 | 64.2822025 | 67.5851169 | 67.5328118 | 67.2127309 | 58.7228532 |
| 71.3348948 | 64.2822025 | 67.5851169 | 67.5328118 | 68.2127309 | 67.7228532 |
| 71.3348948 | 63.2822025 | 68.5851169 | 67.5328118 | 67.2127309 | 67.7228532 |
| 72.3348948 | 63.2822025 | 68.5851169 | 67.5328118 | 67.2127309 | 69.7228532 |
| 72.3348948 | 62.2822025 | 68.5851169 | 66.5328118 | 67.2127309 | 72.7228532 |
| 72.3348948 | 62.2822025 | 68.5851169 | 66.5328118 | 67.2127309 | 76.7228532 |
| 72.3348948 | 63.2822025 | 68.5851169 | 66.5328118 | 67.2127309 | 76.7228532 |
| 71.3348948 | 63.2822025 | 68.5851169 | 66.5328118 | 67.2127309 | 86.7228532 |
| 71.3348948 | 63.2822025 | 69.5851169 | 66.5328118 | 67.2127309 | 90.7228532 |
| 72.3348948 | 63.2822025 | 70.5851169 | 65.5328118 | 67.2127309 | 90.7228532 |

|            |            |            |            |            |            |
|------------|------------|------------|------------|------------|------------|
| 71.3348948 | 63.2822025 | 70.5851169 | 64.5328118 | 67.2127309 | 90.7228532 |
| 71.3348948 | 62.2822025 | 70.5851169 | 63.5328118 | 68.2127309 | 87.7228532 |
| 71.3348948 | 61.2822025 | 70.5851169 | 60.5328118 | 68.2127309 | 87.7228532 |
| 71.3348948 | 60.2822025 | 70.5851169 | 57.5328118 | 72.2127309 | 80.7228532 |
| 71.3348948 | 59.2822025 | 70.5851169 | 57.5328118 | 72.2127309 | 74.7228532 |
| 71.3348948 | 59.2822025 | 71.5851169 | 56.5328118 | 72.2127309 | 74.7228532 |
| 70.3348948 | 60.2822025 | 71.5851169 | 56.5328118 | 69.2127309 | 69.7228532 |
| 70.3348948 | 61.2822025 | 71.5851169 | 56.5328118 | 67.2127309 | 69.7228532 |
| 71.3348948 | 61.2822025 | 70.5851169 | 56.5328118 | 66.2127309 | 68.7228532 |
| 71.3348948 | 61.2822025 | 70.5851169 | 56.5328118 | 66.2127309 | 65.7228532 |
| 71.3348948 | 61.2822025 | 71.5851169 | 57.5328118 | 66.2127309 | 64.7228532 |
| 71.3348948 | 61.2822025 | 70.5851169 | 57.5328118 | 66.2127309 | 64.7228532 |
| 72.3348948 | 61.2822025 | 69.5851169 | 56.5328118 | 66.2127309 | 64.7228532 |
| 72.3348948 | 61.2822025 | 68.5851169 | 58.5328118 | 66.2127309 | 64.7228532 |
| 72.3348948 | 62.2822025 | 68.5851169 | 59.5328118 | 66.2127309 | 64.7228532 |
| 75.3348948 | 62.2822025 | 68.5851169 | 59.5328118 | 67.2127309 | 66.7228532 |
| 78.3348948 | 62.2822025 | 68.5851169 | 62.5328118 | 63.2127309 | 66.7228532 |
| 78.3348948 | 63.2822025 | 69.5851169 | 63.5328118 | 61.2127309 | 66.7228532 |
| 78.3348948 | 63.2822025 | 69.5851169 | 64.5328118 | 60.2127309 | 64.7228532 |
| 79.3348948 | 63.2822025 | 69.5851169 | 66.5328118 | 59.2127309 | 64.7228532 |
| 79.3348948 | 64.2822025 | 69.5851169 | 66.5328118 | 59.2127309 | 64.7228532 |
| 81.3348948 | 65.2822025 | 68.5851169 | 66.5328118 | 60.2127309 | 68.7228532 |
| 83.3348948 | 66.2822025 | 68.5851169 | 66.5328118 | 61.2127309 | 68.7228532 |
| 84.3348948 | 66.2822025 | 68.5851169 | 65.5328118 | 61.2127309 | 68.7228532 |
| 85.3348948 | 67.2822025 | 67.5851169 | 64.5328118 | 61.2127309 | 69.7228532 |
| 85.3348948 | 67.2822025 | 66.5851169 | 64.5328118 | 61.2127309 | 71.7228532 |
| 84.3348948 | 68.2822025 | 66.5851169 | 63.5328118 | 63.2127309 | 73.7228532 |
| 84.3348948 | 69.2822025 | 66.5851169 | 63.5328118 | 64.2127309 | 73.7228532 |
| 85.3348948 | 69.2822025 | 66.5851169 | 63.5328118 | 65.2127309 | 72.7228532 |
| 84.3348948 | 70.2822025 | 66.5851169 | 63.5328118 | 65.2127309 | 71.7228532 |
| 67.1498565 | 71.2822025 | 66.5851169 | 60.5328118 | 64.2127309 | 68.7228532 |
| 66.8771293 | 71.2822025 | 66.5851169 | 58.5328118 | 62.2127309 | 68.7228532 |
| 66.8771293 | 71.2822025 | 66.5851169 | 58.5328118 | 62.2127309 | 68.7228532 |
| 66.8771293 | 71.2822025 | 66.5851169 | 57.5328118 | 63.2127309 | 68.7228532 |
| 67.2407656 | 70.2822025 | 66.5851169 | 57.5328118 | 64.2127309 | 68.7228532 |
| 80.3348948 | 70.2822025 | 65.5851169 | 57.5328118 | 65.2127309 | 68.7228532 |
| 74.3348948 | 68.2822025 | 65.5851169 | 59.5328118 | 65.2127309 | 68.7228532 |
| 73.3348948 | 68.2822025 | 65.5851169 | 59.5328118 | 65.2127309 | 68.7228532 |
| 73.3348948 | 65.2822025 | 65.5851169 | 63.5328118 | 64.2127309 | 68.7228532 |
| 73.3348948 | 64.2822025 | 65.5851169 | 63.5328118 | 64.2127309 | 68.7228532 |
| 73.3348948 | 64.2822025 | 65.5851169 | 63.5328118 | 63.2127309 | 68.7228532 |
| 72.3348948 | 64.2822025 | 64.5851169 | 63.5328118 | 63.2127309 | 66.7228532 |
| 71.3348948 | 64.2822025 | 65.5851169 | 63.5328118 | 63.2127309 | 66.7228532 |
| 70.3348948 | 64.2822025 | 65.5851169 | 63.5328118 | 62.2127309 | 65.7228532 |
| 70.3348948 | 64.2822025 | 65.5851169 | 63.5328118 | 62.2127309 | 65.7228532 |



|            |            |            |            |            |            |
|------------|------------|------------|------------|------------|------------|
| 70.3348948 | 72.2822025 | 66.5851169 | 59.5328118 | 84.2127309 | 78.7228532 |
| 69.3348948 | 72.2822025 | 66.5851169 | 59.5328118 | 84.2127309 | 78.7228532 |
| 68.3348948 | 72.2822025 | 66.5851169 | 59.5328118 | 84.2127309 | 76.7228532 |
| 67.3348948 | 72.2822025 | 66.5851169 | 60.5328118 | 84.2127309 | 76.7228532 |
| 67.3348948 | 72.2822025 | 66.5851169 | 60.5328118 | 84.2127309 | 76.7228532 |
| 66.3348948 | 72.2822025 | 66.5851169 | 59.5328118 | 79.2127309 | 76.7228532 |
| 65.3348948 | 72.2822025 | 67.5851169 | 59.5328118 | 76.2127309 | 77.7228532 |
| 65.3348948 | 73.2822025 | 67.5851169 | 59.5328118 | 74.2127309 | 77.7228532 |
| 65.3348948 | 73.2822025 | 67.5851169 | 59.5328118 | 74.2127309 | 77.7228532 |
| 64.3348948 | 72.2822025 | 67.5851169 | 59.5328118 | 73.2127309 | 78.7228532 |
| 64.3348948 | 67.2822025 | 67.5851169 | 59.5328118 | 72.2127309 | 79.7228532 |
| 64.3348948 | 64.2822025 | 67.5851169 | 60.5328118 | 72.2127309 | 83.7228532 |
| 64.3348948 | 64.2822025 | 67.5851169 | 60.5328118 | 72.2127309 | 82.7228532 |
| 64.3348948 | 64.2822025 | 68.5851169 | 61.5328118 | 71.2127309 | 82.7228532 |
| 64.3348948 | 64.2822025 | 68.5851169 | 65.5328118 | 72.2127309 | 80.7228532 |
| 64.3348948 | 64.2822025 | 68.5851169 | 65.5328118 | 72.2127309 | 69.7228532 |
| 63.3348948 | 64.2822025 | 68.5851169 | 66.5328118 | 73.2127309 | 62.7228532 |
| 63.3348948 | 64.2822025 | 68.5851169 | 66.5328118 | 73.2127309 | 59.7228532 |
| 63.3348948 | 66.2822025 | 69.5851169 | 71.5328118 | 73.2127309 | 58.7228532 |
| 63.3348948 | 67.2822025 | 69.5851169 | 71.5328118 | 75.2127309 | 58.7228532 |
| 64.3348948 | 67.2822025 | 69.5851169 | 72.5328118 | 76.2127309 | 57.7228532 |
| 66.3348948 | 69.2822025 | 69.5851169 | 72.5328118 | 77.2127309 | 56.7228532 |
| 67.3348948 | 70.2822025 | 69.5851169 | 73.5328118 | 78.2127309 | 54.7228532 |
| 69.3348948 | 70.2822025 | 69.5851169 | 73.5328118 | 78.2127309 | 54.7228532 |
| 70.3348948 | 71.2822025 | 69.5851169 | 70.5328118 | 78.2127309 | 54.7228532 |
| 70.3348948 | 71.2822025 | 69.5851169 | 66.5328118 | 75.2127309 | 50.7228532 |
| 67.3348948 | 71.2822025 | 70.5851169 | 64.5328118 | 76.2127309 | 50.7228532 |
| 65.3348948 | 71.2822025 | 71.5851169 | 64.5328118 | 76.2127309 | 46.7228532 |
| 63.3348948 | 72.2822025 | 71.5851169 | 64.5328118 | 76.2127309 | 43.7228532 |
| 62.3348948 | 70.2407656 | 71.5851169 | 64.5328118 | 75.2127309 | 41.7228532 |
| 62.3348948 | 70.1498565 | 71.5851169 | 64.5328118 | 77.2127309 | 41.7228532 |
| 62.3348948 | 69.604402  | 72.5851169 | 64.5328118 | 78.2127309 | 38.7228532 |
| 64.3348948 | 69.604402  | 72.5851169 | 63.5328118 | 77.2127309 | 38.7228532 |
| 66.3348948 | 69.9680384 | 72.5851169 | 63.5328118 | 77.2127309 | 38.7228532 |
| 67.3348948 | 71.1498565 | 72.5851169 | 63.5328118 | 77.2127309 | 50.7228532 |
| 66.3348948 | 72.7862202 | 72.5851169 | 63.5328118 | 77.2127309 | 64.7228532 |
| 66.3348948 | 73.3316747 | 73.5851169 | 63.5328118 | 74.2127309 | 70.7228532 |
| 65.3348948 | 73.4225838 | 75.5851169 | 63.5328118 | 74.2127309 | 71.7228532 |
| 64.3348948 | 73.2407656 | 75.5851169 | 64.5328118 | 75.2127309 | 71.7228532 |
| 64.3348948 | 73.3316747 | 77.5851169 | 64.5328118 | 76.2127309 | 70.7228532 |
| 64.3348948 | 72.8771293 | 78.5851169 | 64.5328118 | 76.2127309 | 67.7228532 |
| 64.3348948 | 72.1498565 | 79.5851169 | 64.5328118 | 76.2127309 | 65.7228532 |
| 64.3348948 | 71.9680384 | 79.5851169 | 65.5328118 | 76.2127309 | 64.7228532 |
| 64.3348948 | 72.1498565 | 80.5851169 | 65.5328118 | 77.2127309 | 64.7228532 |
| 64.3348948 | 71.6953111 | 82.5851169 | 65.5328118 | 75.2127309 | 64.7228532 |

|            |            |            |            |            |            |
|------------|------------|------------|------------|------------|------------|
| 65.3348948 | 71.2407656 | 84.5851169 | 61.5328118 | 74.2127309 | 66.7228532 |
| 65.3348948 | 71.4225838 | 84.5851169 | 61.5328118 | 74.2127309 | 68.7228532 |
| 65.3348948 | 71.2407656 | 84.5851169 | 60.5328118 | 74.2127309 | 70.7228532 |
| 66.3348948 | 71.1498565 | 84.5851169 | 60.5328118 | 73.2127309 | 69.7228532 |
| 66.3348948 | 71.1498565 | 84.5851169 | 58.5328118 | 73.2127309 | 69.7228532 |
| 65.3348948 | 70.7862202 | 83.5851169 | 58.5328118 | 71.2127309 | 69.7228532 |
| 66.3348948 | 70.8771293 | 82.5851169 | 58.5328118 | 71.2127309 | 69.7228532 |
| 66.3348948 | 71.1498565 | 83.5851169 | 58.5328118 | 71.2127309 | 69.7228532 |
| 67.3348948 | 70.9680384 | 81.5851169 | 58.5328118 | 71.2127309 | 68.7228532 |
| 68.3348948 | 71.2407656 | 79.5851169 | 59.5328118 | 72.2127309 | 68.7228532 |
| 68.3348948 | 72.1498565 | 79.5851169 | 60.5328118 | 72.2127309 | 68.7228532 |
| 68.3348948 | 72.4225838 | 78.5851169 | 60.5328118 | 73.2127309 | 67.7228532 |
| 67.3348948 | 72.1498565 | 78.5851169 | 60.5328118 | 73.2127309 | 67.7228532 |
| 66.3348948 | 71.7862202 | 77.5851169 | 61.5328118 | 73.2127309 | 67.7228532 |
| 65.3348948 | 71.6953111 | 75.5851169 | 61.5328118 | 73.2127309 | 67.7228532 |
| 64.3348948 | 71.2407656 | 75.5851169 | 61.5328118 | 73.2127309 | 66.7228532 |
| 65.3348948 | 71.1498565 | 75.5851169 | 62.5328118 | 73.2127309 | 66.7228532 |
| 65.3348948 | 69.1219066 | 75.5851169 | 62.5328118 | 73.2127309 | 66.7228532 |
| 67.3348948 | 72.6558755 | 72.5851169 | 62.5328118 | 73.2127309 | 67.7228532 |
| 68.3348948 | 73.1498565 | 72.5851169 | 69.5328118 | 73.2127309 | 73.7228532 |
| 69.3348948 | 73.2407656 | 71.5851169 | 69.5328118 | 73.2127309 | 74.7228532 |
| 68.3348948 | 72.9680384 | 71.5851169 | 69.5328118 | 71.2127309 | 75.7228532 |
| 67.3348948 | 72.8771293 | 71.5851169 | 71.5328118 | 69.2127309 | 77.7228532 |
| 66.3348948 | 71.6953111 | 68.5851169 | 71.5328118 | 69.2127309 | 78.7228532 |
| 66.3348948 | 71.9680384 | 68.5851169 | 71.5328118 | 70.2127309 | 79.7228532 |
| 66.3348948 | 72.4225838 | 68.5851169 | 72.5328118 | 70.2127309 | 79.7228532 |
| 67.3348948 | 72.6953111 | 68.5851169 | 72.5328118 | 70.2127309 | 81.7228532 |
| 66.3348948 | 72.5134929 | 67.5851169 | 73.5328118 | 70.2127309 | 81.7228532 |
| 66.3348948 | 72.1498565 | 66.5851169 | 74.5328118 | 69.2127309 | 80.7228532 |
| 65.3348948 | 72.0589474 | 66.5851169 | 76.5328118 | 69.2127309 | 80.7228532 |
| 64.3348948 | 72.1498565 | 66.5851169 | 77.5328118 | 69.2127309 | 80.7228532 |
| 63.3348948 | 71.8771293 | 64.5851169 | 77.5328118 | 69.2127309 | 78.7228532 |
| 63.3348948 | 71.8771293 | 64.5851169 | 78.5328118 | 69.2127309 | 78.7228532 |
| 62.3348948 | 71.9680384 | 64.5851169 | 78.5328118 | 67.2127309 | 80.7228532 |
| 62.3348948 | 72.3316747 | 64.5851169 | 78.5328118 | 67.2127309 | 82.7228532 |
| 62.3348948 | 72.604402  | 65.5851169 | 78.5328118 | 67.2127309 | 82.7228532 |
| 62.3348948 | 72.1498565 | 65.5851169 | 78.5328118 | 64.2127309 | 82.7228532 |
| 62.3348948 | 72.3316747 | 65.5851169 | 78.5328118 | 64.2127309 | 81.7228532 |
| 62.3348948 | 71.9680384 | 64.5851169 | 76.5328118 | 64.2127309 | 79.7228532 |
| 62.3348948 | 71.4225838 | 64.5851169 | 72.5328118 | 60.2127309 | 79.7228532 |
| 62.3348948 | 70.8771293 | 65.5851169 | 66.5328118 | 59.2127309 | 79.7228532 |
| 62.3348948 | 71.1498565 | 66.5851169 | 66.5328118 | 59.2127309 | 79.7228532 |
| 63.3348948 | 71.5134929 | 67.5851169 | 66.5328118 | 59.2127309 | 79.7228532 |
| 64.3348948 | 71.7862202 | 69.5851169 | 65.5328118 | 58.2127309 | 79.7228532 |
| 65.3348948 | 71.5134929 | 70.5851169 | 65.5328118 | 58.2127309 | 78.7228532 |

|            |            |            |            |            |            |
|------------|------------|------------|------------|------------|------------|
| 67.3348948 | 70.6953111 | 72.5851169 | 65.5328118 | 59.2127309 | 64.7228532 |
| 67.3348948 | 70.604402  | 72.5851169 | 65.5328118 | 59.2127309 | 64.7228532 |
| 67.3348948 | 71.604402  | 72.5851169 | 65.5328118 | 59.2127309 | 63.7228532 |
| 67.3348948 | 71.604402  | 70.5851169 | 62.5328118 | 59.2127309 | 63.7228532 |
| 67.3348948 | 71.3316747 | 70.5851169 | 61.5328118 | 59.2127309 | 64.7228532 |
| 67.3348948 | 71.7862202 | 70.5851169 | 60.5328118 | 59.2127309 | 65.7228532 |
| 71.3348948 | 71.1498565 | 62.5851169 | 60.5328118 | 58.2127309 | 65.7228532 |
| 72.3348948 | 71.8771293 | 62.5851169 | 60.5328118 | 59.2127309 | 65.7228532 |
| 73.3348948 | 72.2407656 | 62.5851169 | 60.5328118 | 60.2127309 | 68.7228532 |
| 74.3348948 | 72.5134929 | 62.5851169 | 60.5328118 | 60.2127309 | 68.7228532 |
| 74.3348948 | 73.3316747 | 62.5851169 | 61.5328118 | 61.2127309 | 75.7228532 |
| 74.3348948 | 71.7862202 | 62.5851169 | 62.5328118 | 61.2127309 | 77.7228532 |
| 75.3348948 | 72.3316747 | 64.5851169 | 62.5328118 | 60.2127309 | 78.7228532 |
| 75.3348948 | 71.9680384 | 64.5851169 | 62.5328118 | 58.2127309 | 78.7228532 |
| 74.3348948 | 71.2407656 | 64.5851169 | 61.5328118 | 57.2127309 | 78.7228532 |
| 72.3348948 | 70.9680384 | 64.5851169 | 61.5328118 | 57.2127309 | 76.7228532 |
| 69.3348948 | 70.604402  | 64.5851169 | 62.5328118 | 59.2127309 | 74.7228532 |
| 67.3348948 | 70.6953111 | 64.5851169 | 62.5328118 | 58.2127309 | 74.7228532 |
| 67.3348948 | 71.0589474 | 65.5851169 | 66.5328118 | 59.2127309 | 74.7228532 |
| 66.3348948 | 71.0589474 | 65.5851169 | 66.5328118 | 60.2127309 | 75.7228532 |
| 65.3348948 | 70.9680384 | 65.5851169 | 67.5328118 | 60.2127309 | 76.7228532 |
| 64.3348948 | 70.7862202 | 65.5851169 | 67.5328118 | 59.2127309 | 76.7228532 |
| 64.3348948 | 70.604402  | 65.5851169 | 67.5328118 | 59.2127309 | 75.7228532 |
| 64.3348948 | 70.5134929 | 65.5851169 | 68.5328118 | 59.2127309 | 74.7228532 |
| 63.3348948 | 70.1498565 | 65.5851169 | 69.5328118 | 62.2127309 | 74.7228532 |
| 70.3348948 | 70.4225838 | 65.5851169 | 69.5328118 | 62.2127309 | 73.7228532 |
| 70.3348948 | 71.2200741 | 65.5851169 | 69.5328118 | 62.2127309 | 73.7228532 |
| 77.3348948 | 69.5337258 | 65.5851169 | 70.5328118 | 62.2127309 | 74.7228532 |
| 75.3348948 | 68.9680384 | 65.5851169 | 70.5328118 | 63.2127309 | 74.7228532 |
| 72.3348948 | 68.5134929 | 65.5851169 | 70.5328118 | 64.2127309 | 74.7228532 |
| 70.3348948 | 69.0589474 | 65.5851169 | 72.5328118 | 68.2127309 | 75.7228532 |
| 70.3348948 | 69.3316747 | 65.5851169 | 72.5328118 | 68.2127309 | 75.7228532 |
| 67.3348948 | 69.2407656 | 65.5851169 | 72.5328118 | 68.2127309 | 75.7228532 |
| 67.3348948 | 69.604402  | 65.5851169 | 72.5328118 | 68.2127309 | 75.7228532 |
| 67.3348948 | 70.3316747 | 66.5851169 | 72.5328118 | 68.2127309 | 79.7228532 |
| 68.3348948 | 70.5134929 | 66.5851169 | 71.5328118 | 68.2127309 | 79.7228532 |
| 69.3348948 | 71.7862202 | 66.5851169 | 73.5328118 | 72.2127309 | 83.7228532 |
| 69.3348948 | 71.5134929 | 66.5851169 | 73.5328118 | 72.2127309 | 84.7228532 |
| 69.3348948 | 71.604402  | 66.5851169 | 73.5328118 | 73.2127309 | 84.7228532 |
| 69.3348948 | 72.0589474 | 66.5851169 | 73.5328118 | 76.2127309 | 84.7228532 |
| 69.3348948 | 72.1498565 | 66.5851169 | 72.5328118 | 76.2127309 | 84.7228532 |
| 69.3348948 | 72.4225838 | 66.5851169 | 72.5328118 | 78.2127309 | 84.7228532 |
| 70.3348948 | 72.0589474 | 66.5851169 | 69.5328118 | 78.2127309 | 76.7228532 |
| 70.3348948 | 71.0589474 | 65.5851169 | 69.5328118 | 76.2127309 | 73.7228532 |
| 70.3348948 | 70.5134929 | 64.5851169 | 68.5328118 | 76.2127309 | 71.7228532 |



|            |            |            |            |            |            |
|------------|------------|------------|------------|------------|------------|
| 70.3348948 | 69.0589474 | 63.5851169 | 65.5328118 | 74.2127309 | 71.7228532 |
| 69.3348948 | 84.2822025 | 63.5851169 | 64.5328118 | 74.2127309 | 70.7228532 |
| 67.3348948 | 79.2822025 | 63.5851169 | 61.5328118 | 73.2127309 | 69.7228532 |
| 66.3348948 | 79.2822025 | 63.5851169 | 61.5328118 | 70.2127309 | 69.7228532 |
| 66.3348948 | 72.2822025 | 63.5851169 | 56.5328118 | 70.2127309 | 68.7228532 |
| 66.3348948 | 72.2822025 | 62.5851169 | 56.5328118 | 69.2127309 | 68.7228532 |
| 68.3348948 | 72.2822025 | 62.5851169 | 55.5328118 | 68.2127309 | 66.7228532 |
| 68.3348948 | 72.2822025 | 62.5851169 | 54.5328118 | 67.2127309 | 66.7228532 |
| 67.3348948 | 72.2822025 | 62.5851169 | 53.5328118 | 65.2127309 | 67.7228532 |
| 66.3348948 | 71.2822025 | 62.5851169 | 53.5328118 | 65.2127309 | 67.7228532 |
| 64.3348948 | 70.2822025 | 63.5851169 | 53.5328118 | 64.2127309 | 68.7228532 |
| 63.3348948 | 71.2822025 | 64.5851169 | 53.5328118 | 64.2127309 | 68.7228532 |
| 63.3348948 | 69.2822025 | 64.5851169 | 53.5328118 | 64.2127309 | 68.7228532 |
| 61.3348948 | 69.2822025 | 64.5851169 | 52.5328118 | 64.2127309 | 68.7228532 |
| 61.3348948 | 69.2822025 | 64.5851169 | 52.5328118 | 64.2127309 | 68.7228532 |
| 61.3348948 | 67.2822025 | 64.5851169 | 52.5328118 | 64.2127309 | 68.7228532 |
| 62.3348948 | 66.2822025 | 64.5851169 | 52.5328118 | 64.2127309 | 65.7228532 |
| 62.3348948 | 66.2822025 | 64.5851169 | 51.5328118 | 64.2127309 | 65.7228532 |
| 63.3348948 | 66.2822025 | 64.5851169 | 51.5328118 | 64.2127309 | 65.7228532 |
| 63.3348948 | 66.2822025 | 64.5851169 | 51.5328118 | 64.2127309 | 64.7228532 |
| 63.3348948 | 65.2822025 | 72.5851169 | 51.5328118 | 64.2127309 | 64.7228532 |
| 63.3348948 | 66.2822025 | 73.5851169 | 57.5328118 | 64.2127309 | 64.7228532 |
| 63.3348948 | 66.2822025 | 73.5851169 | 57.5328118 | 67.2127309 | 63.7228532 |
| 64.3348948 | 65.2822025 | 77.5851169 | 58.5328118 | 67.2127309 | 64.7228532 |
| 66.3348948 | 64.2822025 | 78.5851169 | 59.5328118 | 67.2127309 | 64.7228532 |
| 67.3348948 | 64.2822025 | 80.5851169 | 59.5328118 | 66.2127309 | 64.7228532 |
| 71.3348948 | 63.2822025 | 81.5851169 | 59.5328118 | 65.2127309 | 63.7228532 |
| 79.3348948 | 63.2822025 | 79.5851169 | 60.5328118 | 65.2127309 | 63.7228532 |
| 80.3348948 | 63.2822025 | 77.5851169 | 60.5328118 | 66.2127309 | 62.7228532 |
| 80.3348948 | 63.2822025 | 75.5851169 | 62.5328118 | 66.2127309 | 61.7228532 |
| 80.3348948 | 63.2822025 | 74.5851169 | 63.5328118 | 67.2127309 | 61.7228532 |
| 80.3348948 | 63.2822025 | 74.5851169 | 63.5328118 | 69.2127309 | 62.7228532 |
| 80.3348948 | 63.2822025 | 73.5851169 | 63.5328118 | 70.2127309 | 64.7228532 |
| 80.3348948 | 62.2822025 | 68.5851169 | 65.5328118 | 67.2127309 | 66.7228532 |
| 80.3348948 | 61.2822025 | 67.5851169 | 65.5328118 | 67.2127309 | 66.7228532 |
| 80.3348948 | 61.2822025 | 67.5851169 | 65.5328118 | 67.2127309 | 66.7228532 |
| 77.3348948 | 61.2822025 | 65.5851169 | 65.5328118 | 65.2127309 | 64.7228532 |
| 74.3348948 | 65.2822025 | 65.5851169 | 65.5328118 | 65.2127309 | 63.7228532 |
| 74.3348948 | 65.2822025 | 64.5851169 | 65.5328118 | 65.2127309 | 65.7228532 |
| 68.3348948 | 64.2822025 | 63.5851169 | 65.5328118 | 65.2127309 | 66.7228532 |
| 66.3348948 | 62.2822025 | 63.5851169 | 65.5328118 | 65.2127309 | 66.7228532 |
| 66.3348948 | 61.2822025 | 63.5851169 | 65.5328118 | 65.2127309 | 64.7228532 |
| 63.3348948 | 60.2822025 | 63.5851169 | 63.5328118 | 66.2127309 | 65.7228532 |
| 62.3348948 | 60.2822025 | 63.5851169 | 63.5328118 | 65.2127309 | 66.7228532 |
| 62.3348948 | 60.2822025 | 62.5851169 | 62.5328118 | 65.2127309 | 67.7228532 |



|            |            |            |            |            |            |
|------------|------------|------------|------------|------------|------------|
| 74.3348948 | 60.2822025 | 62.5851169 | 66.5328118 | 63.2127309 | 69.7228532 |
| 76.3348948 | 60.2822025 | 63.5851169 | 65.5328118 | 64.2127309 | 69.7228532 |
| 76.3348948 | 61.2822025 | 63.5851169 | 61.5328118 | 66.2127309 | 68.7228532 |
| 75.3348948 | 62.2822025 | 62.5851169 | 61.5328118 | 66.2127309 | 67.7228532 |
| 73.3348948 | 68.2822025 | 62.5851169 | 59.5328118 | 66.2127309 | 67.7228532 |
| 72.3348948 | 70.2822025 | 62.5851169 | 59.5328118 | 68.2127309 | 66.7228532 |
| 72.3348948 | 71.2822025 | 63.5851169 | 58.5328118 | 68.2127309 | 66.7228532 |
| 70.3348948 | 71.2822025 | 63.5851169 | 58.5328118 | 68.2127309 | 70.7228532 |
| 68.3348948 | 71.2822025 | 64.5851169 | 57.5328118 | 69.2127309 | 70.7228532 |
| 67.3348948 | 71.2822025 | 64.5851169 | 57.5328118 | 69.2127309 | 69.7228532 |
| 65.3348948 | 71.2822025 | 64.5851169 | 57.5328118 | 70.2127309 | 69.7228532 |
| 64.3348948 | 71.2822025 | 64.5851169 | 57.5328118 | 72.2127309 | 68.7228532 |
| 63.3348948 | 71.2822025 | 64.5851169 | 57.5328118 | 73.2127309 | 68.7228532 |
| 63.3348948 | 71.2822025 | 64.5851169 | 60.5328118 | 73.2127309 | 65.7228532 |
| 61.3348948 | 71.2822025 | 62.5851169 | 60.5328118 | 73.2127309 | 63.7228532 |
| 61.3348948 | 71.2822025 | 63.5851169 | 60.5328118 | 71.2127309 | 63.7228532 |
| 61.3348948 | 70.2822025 | 63.5851169 | 60.5328118 | 69.2127309 | 61.7228532 |
| 61.3348948 | 70.2822025 | 63.5851169 | 60.5328118 | 70.2127309 | 56.7228532 |
| 61.3348948 | 70.2822025 | 63.5851169 | 60.5328118 | 71.2127309 | 53.7228532 |
| 61.3348948 | 70.2822025 | 65.5851169 | 60.5328118 | 74.2127309 | 51.7228532 |
| 61.3348948 | 70.2822025 | 66.5851169 | 61.5328118 | 75.2127309 | 51.7228532 |
| 61.3348948 | 68.2822025 | 66.5851169 | 61.5328118 | 75.2127309 | 50.7228532 |
| 61.3348948 | 67.2822025 | 68.5851169 | 63.5328118 | 75.2127309 | 52.7228532 |
| 61.3348948 | 67.2822025 | 73.5851169 | 65.5328118 | 75.2127309 | 57.7228532 |
| 61.3348948 | 67.2822025 | 77.5851169 | 65.5328118 | 75.2127309 | 61.7228532 |
| 61.3348948 | 70.2822025 | 77.5851169 | 65.5328118 | 75.2127309 | 63.7228532 |
| 60.3348948 | 71.2822025 | 67.3316747 | 65.5328118 | 74.2127309 | 64.7228532 |
| 60.3348948 | 72.2822025 | 68.3316747 | 65.5328118 | 74.2127309 | 71.7228532 |
| 60.3348948 | 72.2822025 | 68.8771293 | 65.5328118 | 74.2127309 | 75.7228532 |
| 62.3348948 | 72.2822025 | 68.8771293 | 65.5328118 | 73.2127309 | 75.7228532 |
| 63.3348948 | 72.2822025 | 68.4225838 | 65.5328118 | 73.2127309 | 74.7228532 |
| 63.3348948 | 73.2822025 | 78.5851169 | 65.5328118 | 72.2127309 | 72.7228532 |
| 64.3348948 | 71.2822025 | 74.5851169 | 66.5328118 | 72.2127309 | 71.7228532 |
| 64.3348948 | 70.2822025 | 71.5851169 | 66.5328118 | 72.2127309 | 72.7228532 |
| 64.3348948 | 70.2822025 | 68.5851169 | 67.5328118 | 72.2127309 | 73.7228532 |
| 64.3348948 | 70.2822025 | 66.5851169 | 68.5328118 | 72.2127309 | 74.7228532 |
| 64.3348948 | 70.2822025 | 66.5851169 | 68.5328118 | 72.2127309 | 74.7228532 |
| 64.3348948 | 70.2822025 | 66.5851169 | 68.5328118 | 72.2127309 | 74.7228532 |
| 64.3348948 | 70.2822025 | 65.5851169 | 68.5328118 | 72.2127309 | 72.7228532 |
| 64.3348948 | 70.2822025 | 64.5851169 | 70.5328118 | 71.2127309 | 69.7228532 |
| 63.3348948 | 70.2822025 | 64.5851169 | 74.5328118 | 74.2127309 | 69.7228532 |
| 64.3348948 | 69.2822025 | 63.5851169 | 75.5328118 | 74.2127309 | 64.7228532 |
| 64.3348948 | 69.2822025 | 61.5851169 | 75.5328118 | 79.2127309 | 64.7228532 |
| 63.3348948 | 66.2822025 | 60.5851169 | 76.5328118 | 79.2127309 | 65.7228532 |
| 64.3348948 | 65.2822025 | 60.5851169 | 76.5328118 | 82.2127309 | 67.7228532 |

|            |            |            |            |            |            |
|------------|------------|------------|------------|------------|------------|
| 65.3348948 | 65.2822025 | 60.5851169 | 76.5328118 | 83.2127309 | 68.7228532 |
| 65.3348948 | 64.2822025 | 60.5851169 | 78.5328118 | 83.2127309 | 70.7228532 |
| 65.3348948 | 63.2822025 | 61.5851169 | 79.5328118 | 83.2127309 | 71.7228532 |
| 66.3348948 | 63.2822025 | 61.5851169 | 80.5328118 | 83.2127309 | 71.7228532 |
| 66.3348948 | 63.2822025 | 61.5851169 | 79.5328118 | 83.2127309 | 71.7228532 |
| 66.3348948 | 63.2822025 | 61.5851169 | 78.5328118 | 83.2127309 | 70.7228532 |
| 66.3348948 | 63.2822025 | 62.5851169 | 77.5328118 | 82.2127309 | 68.7228532 |
| 65.3348948 | 62.2822025 | 62.5851169 | 75.5328118 | 81.2127309 | 67.7228532 |
| 65.3348948 | 62.2822025 | 62.5851169 | 75.5328118 | 81.2127309 | 67.7228532 |
| 64.3348948 | 61.2822025 | 60.5851169 | 73.5328118 | 81.2127309 | 65.7228532 |
| 64.3348948 | 61.2822025 | 58.5851169 | 72.5328118 | 82.2127309 | 65.7228532 |
| 65.3348948 | 61.2822025 | 58.5851169 | 72.5328118 | 65.7862202 | 68.7228532 |
| 65.3348948 | 61.2822025 | 60.5851169 | 71.5328118 | 65.9680384 | 70.7228532 |
| 65.3348948 | 61.2822025 | 60.5851169 | 71.5328118 | 66.2407656 | 70.7228532 |
| 65.3348948 | 62.2822025 | 60.5851169 | 71.5328118 | 66.3316747 | 69.7228532 |
| 65.3348948 | 62.2822025 | 60.5851169 | 71.5328118 | 66.5134929 | 69.7228532 |
| 65.3348948 | 62.2822025 | 61.5851169 | 71.5328118 | 66.604402  | 69.7228532 |
| 66.3348948 | 62.2822025 | 62.5851169 | 70.5328118 | 66.9680384 | 69.7228532 |
| 67.3348948 | 61.2822025 | 62.5851169 | 70.5328118 | 84.2127309 | 68.7228532 |
| 67.3348948 | 60.2822025 | 62.5851169 | 70.5328118 | 80.2127309 | 68.7228532 |
| 67.3348948 | 60.2822025 | 62.5851169 | 70.5328118 | 73.2127309 | 68.7228532 |
| 67.3348948 | 60.2822025 | 62.5851169 | 70.5328118 | 69.2127309 | 68.7228532 |
| 66.3348948 | 60.2822025 | 62.5851169 | 70.5328118 | 69.2127309 | 69.7228532 |
| 66.3348948 | 60.2822025 | 62.5851169 | 69.5328118 | 68.2127309 | 67.7228532 |
| 66.3348948 | 61.2822025 | 63.5851169 | 68.5328118 | 69.2127309 | 66.7228532 |
| 66.3348948 | 62.2822025 | 63.5851169 | 67.5328118 | 71.2127309 | 67.7228532 |
| 64.3348948 | 62.2822025 | 63.5851169 | 67.5328118 | 71.2127309 | 67.7228532 |
| 63.3348948 | 61.2822025 | 62.5851169 | 67.5328118 | 71.2127309 | 68.7228532 |
| 62.3348948 | 61.2822025 | 62.5851169 | 67.5328118 | 67.2127309 | 68.7228532 |
| 61.3348948 | 61.2822025 | 61.5851169 | 69.5328118 | 65.2127309 | 68.7228532 |
| 60.3348948 | 61.2822025 | 61.5851169 | 69.5328118 | 64.2127309 | 69.7228532 |
| 60.3348948 | 61.2822025 | 61.5851169 | 73.5328118 | 63.2127309 | 70.7228532 |
| 59.3348948 | 61.2822025 | 61.5851169 | 76.5328118 | 63.2127309 | 69.7228532 |
| 59.3348948 | 61.2822025 | 62.5851169 | 76.5328118 | 63.2127309 | 69.7228532 |
| 59.3348948 | 62.2822025 | 62.5851169 | 77.5328118 | 63.2127309 | 69.7228532 |
| 59.3348948 | 62.2822025 | 62.5851169 | 75.5328118 | 64.2127309 | 69.7228532 |
| 59.3348948 | 62.2822025 | 62.5851169 | 73.5328118 | 64.2127309 | 68.7228532 |
| 60.3348948 | 63.2822025 | 62.5851169 | 72.5328118 | 68.2127309 | 70.7228532 |
| 61.3348948 | 63.2822025 | 62.5851169 | 72.5328118 | 71.2127309 | 72.7228532 |
| 60.3348948 | 63.2822025 | 63.5851169 | 72.5328118 | 72.2127309 | 72.7228532 |
| 60.3348948 | 64.2822025 | 65.5851169 | 73.5328118 | 72.2127309 | 75.7228532 |
| 61.3348948 | 65.2822025 | 65.5851169 | 73.5328118 | 74.2127309 | 74.7228532 |
| 60.3348948 | 67.2822025 | 66.5851169 | 73.5328118 | 73.2127309 | 74.7228532 |
| 61.3348948 | 67.2822025 | 68.5851169 | 72.5328118 | 69.2127309 | 70.7228532 |
| 61.3348948 | 67.2822025 | 68.5851169 | 72.5328118 | 67.2127309 | 70.7228532 |

|            |            |            |            |            |            |
|------------|------------|------------|------------|------------|------------|
| 61.3348948 | 69.2822025 | 71.5851169 | 70.5328118 | 67.2127309 | 68.7228532 |
| 62.3348948 | 68.2822025 | 73.5851169 | 67.5328118 | 67.2127309 | 67.7228532 |
| 63.3348948 | 67.2822025 | 74.5851169 | 64.5328118 | 66.2127309 | 67.7228532 |
| 62.3348948 | 66.2822025 | 74.5851169 | 64.5328118 | 66.2127309 | 67.7228532 |
| 63.3348948 | 66.2822025 | 77.5851169 | 64.5328118 | 65.2127309 | 70.7228532 |
| 63.3348948 | 66.2822025 | 70.5851169 | 64.5328118 | 65.2127309 | 70.7228532 |
| 63.3348948 | 67.2822025 | 69.5851169 | 64.5328118 | 65.2127309 | 70.7228532 |
| 62.3348948 | 68.2822025 | 68.5851169 | 64.5328118 | 65.2127309 | 70.7228532 |
| 62.3348948 | 68.2822025 | 67.5851169 | 63.5328118 | 65.2127309 | 69.7228532 |
| 62.3348948 | 72.2822025 | 67.5851169 | 63.5328118 | 65.2127309 | 69.7228532 |
| 63.3348948 | 72.2822025 | 67.5851169 | 63.5328118 | 65.2127309 | 66.7228532 |
| 63.3348948 | 72.2822025 | 65.5851169 | 63.5328118 | 65.2127309 | 64.7228532 |
| 63.3348948 | 72.2822025 | 65.5851169 | 63.5328118 | 65.2127309 | 64.7228532 |
| 63.3348948 | 69.2822025 | 64.5851169 | 63.5328118 | 65.2127309 | 63.7228532 |
| 63.3348948 | 69.2822025 | 64.5851169 | 63.5328118 | 66.2127309 | 64.7228532 |
| 63.3348948 | 67.2822025 | 64.5851169 | 63.5328118 | 66.2127309 | 64.7228532 |
| 62.3348948 | 67.2822025 | 64.5851169 | 63.5328118 | 65.2127309 | 68.7228532 |
| 62.3348948 | 67.2822025 | 64.5851169 | 63.5328118 | 65.2127309 | 68.7228532 |
| 63.3348948 | 64.2822025 | 64.5851169 | 61.5328118 | 65.2127309 | 67.7228532 |
| 64.3348948 | 64.2822025 | 64.5851169 | 62.5328118 | 67.2127309 | 65.7228532 |
| 65.3348948 | 63.2822025 | 64.5851169 | 62.5328118 | 67.2127309 | 65.7228532 |
| 64.3348948 | 63.2822025 | 64.5851169 | 61.5328118 | 67.2127309 | 64.7228532 |
| 64.3348948 | 63.2822025 | 64.5851169 | 61.5328118 | 67.2127309 | 61.7228532 |
| 64.3348948 | 63.2822025 | 64.5851169 | 61.5328118 | 65.2127309 | 59.7228532 |
| 64.3348948 | 62.2822025 | 65.5851169 | 61.5328118 | 64.2127309 | 58.7228532 |
| 64.3348948 | 60.2822025 | 64.5851169 | 62.5328118 | 63.2127309 | 56.7228532 |
| 64.3348948 | 60.2822025 | 64.5851169 | 62.5328118 | 63.2127309 | 56.7228532 |
| 64.3348948 | 60.2822025 | 64.5851169 | 61.5328118 | 62.2127309 | 56.7228532 |
| 64.3348948 | 61.2822025 | 64.5851169 | 61.5328118 | 63.2127309 | 58.7228532 |
| 64.3348948 | 61.2822025 | 64.5851169 | 61.5328118 | 63.2127309 | 59.7228532 |
| 63.3348948 | 61.2822025 | 64.5851169 | 61.5328118 | 64.2127309 | 58.7228532 |
| 64.3348948 | 61.2822025 | 64.5851169 | 61.5328118 | 65.2127309 | 57.7228532 |
| 64.3348948 | 61.2822025 | 64.5851169 | 61.5328118 | 66.2127309 | 57.7228532 |
| 65.3348948 | 62.2822025 | 65.5851169 | 63.5328118 | 66.2127309 | 57.7228532 |
| 65.3348948 | 63.2822025 | 65.5851169 | 65.5328118 | 67.2127309 | 58.7228532 |
| 66.3348948 | 63.2822025 | 65.5851169 | 68.5328118 | 67.2127309 | 61.7228532 |
| 66.3348948 | 63.2822025 | 65.5851169 | 71.5328118 | 66.2127309 | 64.7228532 |
| 66.3348948 | 63.2822025 | 65.5851169 | 71.5328118 | 66.2127309 | 65.7228532 |
| 67.3348948 | 66.2822025 | 65.5851169 | 72.5328118 | 68.2127309 | 68.7228532 |
| 67.3348948 | 66.2822025 | 66.5851169 | 72.5328118 | 68.2127309 | 71.7228532 |
| 67.3348948 | 66.2822025 | 68.5851169 | 72.5328118 | 68.2127309 | 72.7228532 |
| 68.3348948 | 68.2822025 | 68.5851169 | 72.5328118 | 69.2127309 | 74.7228532 |
| 68.3348948 | 69.2822025 | 68.5851169 | 73.5328118 | 69.2127309 | 74.7228532 |
| 70.3348948 | 66.2822025 | 68.5851169 | 75.5328118 | 68.2127309 | 75.7228532 |
| 72.3348948 | 65.2822025 | 68.5851169 | 75.5328118 | 66.2127309 | 75.7228532 |

|            |            |            |            |            |            |
|------------|------------|------------|------------|------------|------------|
| 73.3348948 | 63.2822025 | 69.5851169 | 72.5328118 | 66.2127309 | 74.7228532 |
| 74.3348948 | 63.2822025 | 71.5851169 | 67.5328118 | 65.2127309 | 73.7228532 |
| 76.3348948 | 63.2822025 | 73.5851169 | 65.5328118 | 65.2127309 | 71.7228532 |
| 78.3348948 | 63.2822025 | 75.5851169 | 64.5328118 | 65.2127309 | 70.7228532 |
| 79.3348948 | 64.2822025 | 75.5851169 | 64.5328118 | 65.2127309 | 70.7228532 |
| 82.3348948 | 64.2822025 | 76.5851169 | 64.5328118 | 65.2127309 | 70.7228532 |
| 83.3348948 | 66.2822025 | 76.5851169 | 64.5328118 | 65.2127309 | 73.7228532 |
| 83.3348948 | 68.2822025 | 75.5851169 | 65.5328118 | 65.2127309 | 73.7228532 |
| 83.3348948 | 69.2822025 | 75.5851169 | 65.5328118 | 64.2127309 | 72.7228532 |
| 83.3348948 | 69.2822025 | 75.5851169 | 64.5328118 | 64.2127309 | 70.7228532 |
| 83.3348948 | 69.2822025 | 74.5851169 | 64.5328118 | 64.2127309 | 70.7228532 |
| 83.3348948 | 70.2822025 | 70.5851169 | 65.5328118 | 64.2127309 | 70.7228532 |
| 83.3348948 | 73.2822025 | 67.5851169 | 65.5328118 | 63.2127309 | 69.7228532 |
| 84.3348948 | 73.2822025 | 67.5851169 | 65.5328118 | 62.2127309 | 69.7228532 |
| 83.3348948 | 76.2822025 | 66.5851169 | 65.5328118 | 61.2127309 | 69.7228532 |
| 83.3348948 | 73.2822025 | 66.5851169 | 64.5328118 | 61.2127309 | 69.7228532 |
| 83.3348948 | 73.2822025 | 66.5851169 | 64.5328118 | 61.2127309 | 69.7228532 |
| 83.3348948 | 74.2822025 | 66.5851169 | 63.5328118 | 65.2127309 | 74.7228532 |
| 83.3348948 | 76.2822025 | 66.5851169 | 63.5328118 | 65.2127309 | 75.7228532 |
| 83.3348948 | 76.2822025 | 67.5851169 | 64.5328118 | 65.2127309 | 81.7228532 |
| 82.3348948 | 76.2822025 | 67.5851169 | 65.5328118 | 65.2127309 | 84.7228532 |
| 78.3348948 | 74.2822025 | 68.5851169 | 65.5328118 | 65.2127309 | 84.7228532 |
| 78.3348948 | 73.2822025 | 69.5851169 | 65.5328118 | 65.2127309 | 82.7228532 |
| 78.3348948 | 73.2822025 | 69.5851169 | 65.5328118 | 65.2127309 | 81.7228532 |
| 77.3348948 | 73.2822025 | 69.5851169 | 65.5328118 | 65.2127309 | 80.7228532 |
| 74.3348948 | 71.2822025 | 70.5851169 | 64.5328118 | 65.2127309 | 73.7228532 |
| 74.3348948 | 71.2822025 | 70.5851169 | 64.5328118 | 65.2127309 | 73.7228532 |
| 70.3348948 | 72.2822025 | 72.5851169 | 66.5328118 | 65.2127309 | 65.7228532 |
| 69.3348948 | 73.2822025 | 75.5851169 | 68.5328118 | 64.2127309 | 66.7228532 |
| 69.3348948 | 73.2822025 | 75.5851169 | 68.5328118 | 64.2127309 | 66.7228532 |
| 69.3348948 | 73.2822025 | 75.5851169 | 68.5328118 | 64.2127309 | 67.7228532 |
| 66.3348948 | 73.2822025 | 79.5851169 | 68.5328118 | 64.2127309 | 68.7228532 |
| 64.3348948 | 72.2822025 | 79.5851169 | 68.5328118 | 62.2127309 | 68.7228532 |
| 64.3348948 | 72.2822025 | 79.5851169 | 68.5328118 | 64.2127309 | 70.7228532 |
| 64.3348948 | 73.2822025 | 71.5851169 | 68.5328118 | 64.2127309 | 72.7228532 |
| 64.3348948 | 73.2822025 | 70.5851169 | 68.5328118 | 63.2127309 | 72.7228532 |
| 62.3348948 | 74.2822025 | 69.5851169 | 67.5328118 | 63.2127309 | 65.7228532 |
| 62.3348948 | 75.2822025 | 69.5851169 | 66.5328118 | 62.2127309 | 60.7228532 |
| 62.3348948 | 76.2822025 | 69.5851169 | 66.5328118 | 62.2127309 | 60.7228532 |
| 62.3348948 | 76.2822025 | 66.5851169 | 66.5328118 | 61.2127309 | 60.7228532 |
| 62.3348948 | 76.2822025 | 66.5851169 | 65.5328118 | 61.2127309 | 60.7228532 |
| 62.3348948 | 76.2822025 | 66.5851169 | 65.5328118 | 66.2127309 | 65.7228532 |
| 62.3348948 | 76.2822025 | 66.5851169 | 65.5328118 | 69.2127309 | 68.7228532 |
| 62.3348948 | 77.2822025 | 64.5851169 | 62.5328118 | 68.2127309 | 70.7228532 |
| 63.3348948 | 78.2822025 | 64.5851169 | 62.5328118 | 68.2127309 | 70.7228532 |

|            |            |            |            |            |            |
|------------|------------|------------|------------|------------|------------|
| 64.3348948 | 78.2822025 | 64.5851169 | 62.5328118 | 66.2127309 | 69.7228532 |
| 67.3348948 | 79.2822025 | 64.5851169 | 61.5328118 | 65.2127309 | 67.7228532 |
| 72.3348948 | 79.2822025 | 64.5851169 | 61.5328118 | 65.2127309 | 65.7228532 |
| 75.3348948 | 77.2822025 | 65.5851169 | 62.5328118 | 63.2127309 | 64.7228532 |
| 76.3348948 | 77.2822025 | 65.5851169 | 62.5328118 | 63.2127309 | 67.7228532 |
| 76.3348948 | 61.2822025 | 70.5851169 | 62.5328118 | 63.2127309 | 67.7228532 |
| 77.3348948 | 61.2822025 | 71.5851169 | 62.5328118 | 64.2127309 | 67.7228532 |
| 78.3348948 | 60.2822025 | 71.5851169 | 62.5328118 | 66.2127309 | 66.7228532 |
| 74.3348948 | 60.2822025 | 71.5851169 | 62.5328118 | 68.2127309 | 66.7228532 |
| 71.3348948 | 60.2822025 | 71.5851169 | 62.5328118 | 68.2127309 | 66.7228532 |
| 69.3348948 | 60.2822025 | 71.5851169 | 62.5328118 | 69.2127309 | 65.7228532 |
| 68.3348948 | 60.2822025 | 71.5851169 | 63.5328118 | 69.2127309 | 63.7228532 |
| 68.3348948 | 61.2822025 | 71.5851169 | 63.5328118 | 69.2127309 | 63.7228532 |
| 68.3348948 | 61.2822025 | 71.5851169 | 64.5328118 | 69.2127309 | 63.7228532 |
| 67.3348948 | 61.2822025 | 71.5851169 | 64.5328118 | 69.2127309 | 65.7228532 |
| 66.3348948 | 62.2822025 | 71.5851169 | 65.5328118 | 69.2127309 | 66.7228532 |
| 66.3348948 | 61.2822025 | 71.5851169 | 66.5328118 | 69.2127309 | 69.7228532 |
| 65.3348948 | 61.2822025 | 72.5851169 | 66.5328118 | 69.2127309 | 70.7228532 |
| 65.3348948 | 61.2822025 | 72.5851169 | 66.5328118 | 69.2127309 | 70.7228532 |
| 65.3348948 | 61.2822025 | 72.5851169 | 66.5328118 | 68.2127309 | 70.7228532 |
| 63.3348948 | 61.2822025 | 72.5851169 | 67.5328118 | 69.2127309 | 69.7228532 |
| 63.3348948 | 61.2822025 | 72.5851169 | 68.5328118 | 69.2127309 | 69.7228532 |
| 62.3348948 | 61.2822025 | 70.5851169 | 64.5328118 | 69.2127309 | 69.7228532 |
| 63.3348948 | 62.2822025 | 69.5851169 | 64.5328118 | 69.2127309 | 68.7228532 |
| 63.3348948 | 66.2822025 | 68.5851169 | 62.5328118 | 69.2127309 | 68.7228532 |
| 63.3348948 | 66.2822025 | 68.5851169 | 62.5328118 | 68.2127309 | 69.7228532 |
| 63.3348948 | 66.2822025 | 68.5851169 | 62.5328118 | 68.2127309 | 69.7228532 |
| 64.3348948 | 66.2822025 | 68.5851169 | 62.5328118 | 68.2127309 | 69.7228532 |
| 66.3348948 | 67.2822025 | 68.5851169 | 62.5328118 | 68.2127309 | 68.7228532 |
| 68.3348948 | 68.2822025 | 69.5851169 | 63.5328118 | 68.2127309 | 68.7228532 |
| 71.3348948 | 70.2822025 | 69.5851169 | 64.5328118 | 68.2127309 | 67.7228532 |
| 72.3348948 | 70.2822025 | 69.5851169 | 64.5328118 | 68.2127309 | 66.7228532 |
| 73.3348948 | 71.2822025 | 70.5851169 | 65.5328118 | 68.2127309 | 66.7228532 |
| 72.3348948 | 71.2822025 | 70.5851169 | 68.5328118 | 69.2127309 | 67.7228532 |
| 71.3348948 | 71.2822025 | 69.5851169 | 69.5328118 | 69.2127309 | 67.7228532 |
| 71.3348948 | 71.2822025 | 69.5851169 | 69.5328118 | 69.2127309 | 67.7228532 |
| 70.3348948 | 71.2822025 | 69.5851169 | 69.5328118 | 70.2127309 | 66.7228532 |
| 70.3348948 | 71.2822025 | 69.5851169 | 69.5328118 | 70.2127309 | 66.7228532 |
| 70.3348948 | 72.2822025 | 69.5851169 | 70.5328118 | 70.2127309 | 66.7228532 |
| 71.3348948 | 73.2822025 | 69.5851169 | 70.5328118 | 70.2127309 | 66.7228532 |
| 71.3348948 | 75.2822025 | 70.5851169 | 70.5328118 | 71.2127309 | 66.7228532 |
| 71.3348948 | 75.2822025 | 72.5851169 | 70.5328118 | 71.2127309 | 66.7228532 |
| 71.3348948 | 75.2822025 | 72.5851169 | 67.5328118 | 73.2127309 | 65.7228532 |
| 72.3348948 | 75.2822025 | 74.5851169 | 66.5328118 | 75.2127309 | 65.7228532 |
| 75.3348948 | 75.2822025 | 71.5851169 | 66.5328118 | 75.2127309 | 62.7228532 |

|            |            |            |            |            |            |
|------------|------------|------------|------------|------------|------------|
| 75.3348948 | 78.2822025 | 68.5851169 | 66.5328118 | 75.2127309 | 60.7228532 |
| 75.3348948 | 78.2822025 | 66.5851169 | 65.5328118 | 77.2127309 | 59.7228532 |
| 75.3348948 | 77.2822025 | 66.5851169 | 65.5328118 | 80.2127309 | 59.7228532 |
| 75.3348948 | 77.2822025 | 66.5851169 | 65.5328118 | 82.2127309 | 57.7228532 |
| 78.3348948 | 77.2822025 | 66.5851169 | 65.5328118 | 82.2127309 | 57.7228532 |
| 78.3348948 | 77.2822025 | 66.5851169 | 64.5328118 | 82.2127309 | 58.7228532 |
| 77.3348948 | 77.2822025 | 67.5851169 | 64.5328118 | 83.2127309 | 60.7228532 |
| 72.3348948 | 77.2822025 | 68.5851169 | 63.5328118 | 81.2127309 | 65.7228532 |
| 69.3348948 | 75.2822025 | 68.5851169 | 63.5328118 | 80.2127309 | 69.7228532 |
| 66.3348948 | 74.2822025 | 68.5851169 | 63.5328118 | 80.2127309 | 75.7228532 |
| 64.3348948 | 74.2822025 | 68.5851169 | 63.5328118 | 80.2127309 | 79.7228532 |
| 63.3348948 | 73.2822025 | 68.5851169 | 63.5328118 | 79.2127309 | 79.7228532 |
| 63.3348948 | 71.2822025 | 68.5851169 | 63.5328118 | 79.2127309 | 81.7228532 |
| 63.3348948 | 70.2822025 | 69.5851169 | 62.5328118 | 72.2127309 | 81.7228532 |
| 62.3348948 | 69.2822025 | 68.5851169 | 62.5328118 | 70.2127309 | 81.7228532 |
| 62.3348948 | 69.2822025 | 68.5851169 | 62.5328118 | 70.2127309 | 81.7228532 |
| 62.3348948 | 69.2822025 | 67.5851169 | 62.5328118 | 68.2127309 | 81.7228532 |
| 61.3348948 | 65.2822025 | 67.5851169 | 62.5328118 | 68.2127309 | 83.7228532 |
| 61.3348948 | 65.2822025 | 67.5851169 | 62.5328118 | 69.2127309 | 66.8771293 |
| 60.3348948 | 65.2822025 | 67.5851169 | 62.5328118 | 69.2127309 | 66.6953111 |
| 60.3348948 | 64.2822025 | 67.5851169 | 62.5328118 | 70.2127309 | 66.4225838 |
| 60.3348948 | 62.2822025 | 67.5851169 | 62.5328118 | 70.2127309 | 66.0589474 |
| 60.3348948 | 62.2822025 | 68.5851169 | 63.5328118 | 69.2127309 | 65.7862202 |
| 59.3348948 | 62.2822025 | 68.5851169 | 63.5328118 | 69.2127309 | 77.7228532 |
| 59.3348948 | 62.2822025 | 69.5851169 | 63.5328118 | 68.2127309 | 68.7228532 |
| 60.3348948 | 62.2822025 | 69.5851169 | 63.5328118 | 70.2127309 | 62.7228532 |
| 63.3348948 | 62.2822025 | 74.5851169 | 64.5328118 | 68.2127309 | 58.7228532 |
| 70.3348948 | 62.2822025 | 75.5851169 | 64.5328118 | 68.2127309 | 58.7228532 |
| 72.3348948 | 61.2822025 | 76.5851169 | 65.5328118 | 68.2127309 | 56.7228532 |
| 71.3348948 | 61.2822025 | 76.5851169 | 65.5328118 | 67.2127309 | 54.7228532 |
| 71.3348948 | 61.2822025 | 76.5851169 | 65.5328118 | 67.2127309 | 54.7228532 |
| 69.3348948 | 60.2822025 | 75.5851169 | 64.5328118 | 67.2127309 | 53.7228532 |
| 67.3348948 | 60.2822025 | 74.5851169 | 63.5328118 | 66.2127309 | 53.7228532 |
| 65.3348948 | 60.2822025 | 74.5851169 | 63.5328118 | 66.2127309 | 57.7228532 |
| 64.3348948 | 60.2822025 | 73.5851169 | 63.5328118 | 65.2127309 | 58.7228532 |
| 63.3348948 | 63.2822025 | 71.5851169 | 63.5328118 | 66.2127309 | 59.7228532 |
| 63.3348948 | 64.2822025 | 70.5851169 | 63.5328118 | 66.2127309 | 60.7228532 |
| 63.3348948 | 64.2822025 | 67.5851169 | 63.5328118 | 66.2127309 | 60.7228532 |
| 62.3348948 | 64.2822025 | 66.5851169 | 64.5328118 | 66.2127309 | 61.7228532 |
| 61.3348948 | 65.2822025 | 66.5851169 | 65.5328118 | 66.2127309 | 61.7228532 |
| 61.3348948 | 67.2822025 | 65.5851169 | 66.5328118 | 66.2127309 | 59.7228532 |
| 61.3348948 | 67.2822025 | 65.5851169 | 69.5328118 | 64.2127309 | 58.7228532 |
| 61.3348948 | 68.2822025 | 65.5851169 | 75.5328118 | 64.2127309 | 58.7228532 |
| 61.3348948 | 68.2822025 | 65.5851169 | 76.5328118 | 64.2127309 | 58.7228532 |
| 61.3348948 | 68.2822025 | 65.5851169 | 76.5328118 | 64.2127309 | 58.7228532 |



|            |            |            |            |            |            |
|------------|------------|------------|------------|------------|------------|
| 62.3348948 | 72.2822025 | 66.5851169 | 76.5328118 | 64.2127309 | 59.7228532 |
| 62.3348948 | 73.2822025 | 66.5851169 | 77.5328118 | 64.2127309 | 58.7228532 |
| 62.3348948 | 75.2822025 | 66.5851169 | 77.5328118 | 64.2127309 | 58.7228532 |
| 62.3348948 | 75.2822025 | 66.5851169 | 77.5328118 | 64.2127309 | 59.7228532 |
| 62.3348948 | 76.2822025 | 67.5851169 | 74.5328118 | 64.2127309 | 60.7228532 |
| 64.3348948 | 77.2822025 | 67.5851169 | 69.5328118 | 63.2127309 | 61.7228532 |
| 66.3348948 | 78.2822025 | 67.5851169 | 67.5328118 | 62.2127309 | 63.7228532 |
| 66.3348948 | 78.2822025 | 66.5851169 | 65.5328118 | 62.2127309 | 63.7228532 |
| 65.3348948 | 77.2822025 | 66.5851169 | 65.5328118 | 61.2127309 | 68.7228532 |
| 65.3348948 | 76.2822025 | 67.5851169 | 65.5328118 | 61.2127309 | 70.7228532 |
| 65.3348948 | 74.2822025 | 67.5851169 | 65.5328118 | 61.2127309 | 71.7228532 |
| 65.3348948 | 73.2822025 | 68.5851169 | 64.5328118 | 62.2127309 | 71.7228532 |
| 64.3348948 | 73.2822025 | 68.5851169 | 65.5328118 | 62.2127309 | 71.7228532 |
| 64.3348948 | 72.2822025 | 68.5851169 | 64.5328118 | 64.2127309 | 71.7228532 |
| 64.3348948 | 71.2822025 | 68.5851169 | 64.5328118 | 66.2127309 | 71.7228532 |
| 64.3348948 | 71.2822025 | 68.5851169 | 64.5328118 | 66.2127309 | 71.7228532 |
| 64.3348948 | 71.2822025 | 68.5851169 | 64.5328118 | 67.2127309 | 71.7228532 |
| 62.3348948 | 70.2822025 | 70.5851169 | 64.5328118 | 68.2127309 | 71.7228532 |
| 62.3348948 | 70.2822025 | 71.5851169 | 63.5328118 | 68.2127309 | 71.7228532 |
| 62.3348948 | 70.2822025 | 71.5851169 | 63.5328118 | 68.2127309 | 72.7228532 |
| 63.3348948 | 70.2822025 | 72.5851169 | 63.5328118 | 68.2127309 | 70.7228532 |
| 64.3348948 | 70.2822025 | 73.5851169 | 63.5328118 | 69.2127309 | 67.7228532 |
| 65.3348948 | 72.2822025 | 73.5851169 | 63.5328118 | 70.2127309 | 65.7228532 |
| 66.3348948 | 72.2822025 | 74.5851169 | 64.5328118 | 69.2127309 | 65.7228532 |
| 66.3348948 | 72.2822025 | 74.5851169 | 64.5328118 | 69.2127309 | 67.7228532 |
| 66.3348948 | 73.2822025 | 74.5851169 | 64.5328118 | 68.2127309 | 67.7228532 |
| 66.3348948 | 74.2822025 | 74.5851169 | 64.5328118 | 68.2127309 | 71.7228532 |
| 67.3348948 | 75.2822025 | 74.5851169 | 65.5328118 | 68.2127309 | 73.7228532 |
| 67.3348948 | 79.2822025 | 74.5851169 | 65.5328118 | 68.2127309 | 73.7228532 |
| 67.3348948 | 80.2822025 | 75.5851169 | 65.5328118 | 69.2127309 | 71.7228532 |
| 67.3348948 | 77.2822025 | 75.5851169 | 65.5328118 | 68.2127309 | 69.7228532 |
| 67.3348948 | 74.2822025 | 73.5851169 | 64.5328118 | 61.2127309 | 68.7228532 |
| 68.3348948 | 74.2822025 | 70.5851169 | 66.5328118 | 61.2127309 | 67.7228532 |
| 68.3348948 | 74.2822025 | 69.5851169 | 68.5328118 | 60.2127309 | 67.7228532 |
| 68.3348948 | 74.2822025 | 68.5851169 | 69.5328118 | 58.2127309 | 68.7228532 |
| 68.3348948 | 73.2822025 | 68.5851169 | 69.5328118 | 58.2127309 | 68.7228532 |
| 68.3348948 | 73.2822025 | 68.5851169 | 69.5328118 | 58.2127309 | 70.7228532 |
| 68.3348948 | 70.2822025 | 68.5851169 | 68.5328118 | 58.2127309 | 71.7228532 |
| 69.3348948 | 70.2822025 | 68.5851169 | 68.5328118 | 59.2127309 | 71.7228532 |
| 69.3348948 | 70.2822025 | 68.5851169 | 68.5328118 | 61.2127309 | 71.7228532 |
| 69.3348948 | 69.2822025 | 68.5851169 | 68.5328118 | 61.2127309 | 71.7228532 |
| 69.3348948 | 69.2822025 | 68.5851169 | 68.5328118 | 62.2127309 | 72.7228532 |
| 69.3348948 | 70.2822025 | 68.5851169 | 67.5328118 | 61.2127309 | 72.7228532 |
| 69.3348948 | 70.2822025 | 66.5851169 | 67.5328118 | 61.2127309 | 72.7228532 |
| 68.3348948 | 70.2822025 | 66.5851169 | 66.5328118 | 59.2127309 | 74.7228532 |

|            |            |            |            |            |            |
|------------|------------|------------|------------|------------|------------|
| 68.3348948 | 70.2822025 | 66.5851169 | 65.5328118 | 58.2127309 | 75.7228532 |
| 66.3348948 | 70.2822025 | 66.5851169 | 65.5328118 | 58.2127309 | 76.7228532 |
| 64.3348948 | 70.2822025 | 66.5851169 | 64.5328118 | 58.2127309 | 76.7228532 |
| 64.3348948 | 70.2822025 | 65.5851169 | 64.5328118 | 58.2127309 | 76.7228532 |
| 64.3348948 | 71.2822025 | 65.5851169 | 64.5328118 | 59.2127309 | 76.7228532 |
| 64.3348948 | 71.2822025 | 65.5851169 | 64.5328118 | 62.2127309 | 74.7228532 |
| 63.3348948 | 71.2822025 | 65.5851169 | 64.5328118 | 62.2127309 | 72.7228532 |
| 63.3348948 | 71.2822025 | 65.5851169 | 64.5328118 | 63.2127309 | 72.7228532 |
| 63.3348948 | 71.2822025 | 65.5851169 | 64.5328118 | 63.2127309 | 72.7228532 |
| 62.3348948 | 72.2822025 | 65.5851169 | 63.5328118 | 62.2127309 | 73.7228532 |
| 64.3348948 | 75.2822025 | 65.5851169 | 63.5328118 | 62.2127309 | 72.7228532 |
| 65.3348948 | 76.2822025 | 66.5851169 | 63.5328118 | 63.2127309 | 72.7228532 |
| 67.3348948 | 76.2822025 | 68.5851169 | 64.5328118 | 63.2127309 | 70.7228532 |
| 71.3348948 | 77.2822025 | 68.5851169 | 65.5328118 | 63.2127309 | 63.7228532 |
| 73.3348948 | 77.2822025 | 69.5851169 | 65.5328118 | 63.2127309 | 61.7228532 |
| 75.3348948 | 77.2822025 | 69.5851169 | 65.5328118 | 63.2127309 | 61.7228532 |
| 76.3348948 | 75.2822025 | 69.5851169 | 65.5328118 | 62.2127309 | 60.7228532 |
| 75.3348948 | 75.2822025 | 69.5851169 | 65.5328118 | 62.2127309 | 61.7228532 |
| 75.3348948 | 74.2822025 | 69.5851169 | 65.5328118 | 62.2127309 | 62.7228532 |
| 75.3348948 | 74.2822025 | 68.5851169 | 65.5328118 | 62.2127309 | 64.7228532 |
| 75.3348948 | 73.2822025 | 67.5851169 | 65.5328118 | 62.2127309 | 64.7228532 |
| 74.3348948 | 73.2822025 | 66.5851169 | 65.5328118 | 62.2127309 | 64.7228532 |
| 73.3348948 | 74.2822025 | 66.5851169 | 66.5328118 | 62.2127309 | 62.7228532 |
| 72.3348948 | 75.2822025 | 65.5851169 | 66.5328118 | 65.2127309 | 59.7228532 |
| 71.3348948 | 75.2822025 | 65.5851169 | 68.5328118 | 66.2127309 | 57.7228532 |
| 71.3348948 | 75.2822025 | 65.5851169 | 68.5328118 | 65.2127309 | 56.7228532 |
| 71.3348948 | 75.2822025 | 65.5851169 | 68.5328118 | 65.2127309 | 57.7228532 |
| 70.3348948 | 75.2822025 | 65.5851169 | 68.5328118 | 66.2127309 | 57.7228532 |
| 70.3348948 | 74.2822025 | 65.5851169 | 68.5328118 | 67.2127309 | 56.7228532 |
| 70.3348948 | 74.2822025 | 65.5851169 | 68.5328118 | 67.2127309 | 56.7228532 |
| 71.3348948 | 74.2822025 | 65.5851169 | 68.5328118 | 67.2127309 | 56.7228532 |
| 71.3348948 | 73.2822025 | 65.5851169 | 68.5328118 | 67.2127309 | 57.7228532 |
| 71.3348948 | 73.2822025 | 67.5851169 | 70.5328118 | 68.2127309 | 60.7228532 |
| 70.3348948 | 72.2822025 | 68.5851169 | 70.5328118 | 68.2127309 | 59.7228532 |
| 69.3348948 | 70.2822025 | 69.5851169 | 70.5328118 | 68.2127309 | 58.7228532 |
| 69.3348948 | 70.2822025 | 69.5851169 | 71.5328118 | 67.2127309 | 58.7228532 |
| 70.3348948 | 70.2822025 | 69.5851169 | 71.5328118 | 67.2127309 | 60.7228532 |
| 69.3348948 | 70.2822025 | 71.5851169 | 72.5328118 | 68.2127309 | 60.7228532 |
| 69.3348948 | 70.2822025 | 71.5851169 | 72.5328118 | 67.2127309 | 60.7228532 |
| 67.3348948 | 70.2822025 | 70.5851169 | 72.5328118 | 67.2127309 | 60.7228532 |
| 66.3348948 | 70.2822025 | 70.5851169 | 72.5328118 | 68.2127309 | 61.7228532 |
| 66.3348948 | 70.2822025 | 70.5851169 | 70.5328118 | 68.2127309 | 62.7228532 |
| 66.3348948 | 70.2822025 | 69.5851169 | 67.5328118 | 68.2127309 | 62.7228532 |
| 65.3348948 | 70.2822025 | 69.5851169 | 67.5328118 | 68.2127309 | 59.7228532 |
| 65.3348948 | 70.2822025 | 69.5851169 | 67.5328118 | 68.2127309 | 58.7228532 |



|            |            |            |            |            |            |
|------------|------------|------------|------------|------------|------------|
| 73.3348948 | 69.2822025 | 70.5851169 | 63.5328118 | 73.2127309 | 66.7228532 |
| 72.3348948 | 69.2822025 | 70.5851169 | 63.5328118 | 73.2127309 | 66.7228532 |
| 71.3348948 | 70.2822025 | 71.5851169 | 63.5328118 | 73.2127309 | 66.7228532 |
| 71.3348948 | 71.2822025 | 71.5851169 | 63.5328118 | 75.2127309 | 65.7228532 |
| 72.3348948 | 71.2822025 | 70.5851169 | 62.5328118 | 75.2127309 | 65.7228532 |
| 73.3348948 | 71.2822025 | 70.5851169 | 63.5328118 | 76.2127309 | 64.7228532 |
| 73.3348948 | 69.2822025 | 70.5851169 | 63.5328118 | 76.2127309 | 63.7228532 |
| 72.3348948 | 69.2822025 | 70.5851169 | 63.5328118 | 77.2127309 | 63.7228532 |
| 70.3348948 | 69.2822025 | 71.5851169 | 63.5328118 | 77.2127309 | 63.7228532 |
| 68.3348948 | 68.2822025 | 72.5851169 | 63.5328118 | 77.2127309 | 64.7228532 |
| 67.3348948 | 68.2822025 | 74.5851169 | 63.5328118 | 77.2127309 | 64.7228532 |
| 66.3348948 | 72.2822025 | 75.5851169 | 63.5328118 | 77.2127309 | 64.7228532 |
| 65.3348948 | 72.2822025 | 77.5851169 | 63.5328118 | 77.2127309 | 64.7228532 |
| 65.3348948 | 72.2822025 | 78.5851169 | 63.5328118 | 77.2127309 | 67.7228532 |
| 66.3348948 | 74.2822025 | 78.5851169 | 63.5328118 | 75.2127309 | 67.7228532 |
| 67.3348948 | 75.2822025 | 78.5851169 | 64.5328118 | 75.2127309 | 67.7228532 |
| 69.3348948 | 72.2822025 | 75.5851169 | 64.5328118 | 75.2127309 | 70.7228532 |
| 69.3348948 | 72.2822025 | 74.5851169 | 64.5328118 | 74.2127309 | 72.7228532 |
| 68.3348948 | 74.2822025 | 70.5851169 | 64.5328118 | 74.2127309 | 71.7228532 |
| 67.3348948 | 78.2822025 | 68.5851169 | 63.5328118 | 74.2127309 | 71.7228532 |
| 67.3348948 | 78.2822025 | 68.5851169 | 63.5328118 | 73.2127309 | 70.7228532 |
| 66.3348948 | 78.2822025 | 68.5851169 | 63.5328118 | 71.2127309 | 70.7228532 |
| 66.3348948 | 78.2822025 | 67.5851169 | 63.5328118 | 71.2127309 | 70.7228532 |
| 66.3348948 | 79.2822025 | 67.5851169 | 63.5328118 | 69.2127309 | 70.7228532 |
| 67.3348948 | 82.2822025 | 67.5851169 | 63.5328118 | 69.2127309 | 70.7228532 |
| 67.3348948 | 86.2822025 | 68.5851169 | 63.5328118 | 70.2127309 | 70.7228532 |
| 67.3348948 | 86.2822025 | 68.5851169 | 63.5328118 | 70.2127309 | 70.7228532 |
| 66.3348948 | 69.0589474 | 69.5851169 | 63.5328118 | 70.2127309 | 70.7228532 |
| 65.3348948 | 69.1498565 | 69.5851169 | 63.5328118 | 70.2127309 | 70.7228532 |
| 65.3348948 | 69.9680384 | 69.5851169 | 67.5328118 | 71.2127309 | 70.7228532 |
| 64.3348948 | 70.1498565 | 69.5851169 | 68.5328118 | 71.2127309 | 70.7228532 |
| 64.3348948 | 69.604402  | 69.5851169 | 68.5328118 | 72.2127309 | 70.7228532 |
| 64.3348948 | 69.2407656 | 68.5851169 | 68.5328118 | 72.2127309 | 71.7228532 |
| 64.3348948 | 69.3316747 | 68.5851169 | 69.5328118 | 71.2127309 | 71.7228532 |
| 64.3348948 | 69.4225838 | 69.5851169 | 69.5328118 | 72.2127309 | 72.7228532 |
| 64.3348948 | 69.4225838 | 70.5851169 | 69.5328118 | 71.2127309 | 72.7228532 |
| 64.3348948 | 69.6953111 | 71.5851169 | 69.5328118 | 71.2127309 | 73.7228532 |
| 64.3348948 | 69.8771293 | 71.5851169 | 70.5328118 | 71.2127309 | 73.7228532 |
| 63.3348948 | 69.8771293 | 70.5851169 | 70.5328118 | 71.2127309 | 73.7228532 |
| 63.3348948 | 69.9680384 | 70.5851169 | 70.5328118 | 71.2127309 | 73.7228532 |
| 63.3348948 | 69.9680384 | 70.5851169 | 70.5328118 | 72.2127309 | 73.7228532 |
| 62.3348948 | 70.1498565 | 70.5851169 | 70.5328118 | 73.2127309 | 74.7228532 |
| 62.3348948 | 70.2407656 | 71.5851169 | 70.5328118 | 73.2127309 | 74.7228532 |
| 62.3348948 | 70.6953111 | 71.5851169 | 69.5328118 | 75.2127309 | 76.7228532 |
| 60.3348948 | 70.5134929 | 71.5851169 | 69.5328118 | 76.2127309 | 77.7228532 |

|            |            |            |            |            |            |
|------------|------------|------------|------------|------------|------------|
| 60.3348948 | 71.604402  | 71.5851169 | 69.5328118 | 76.2127309 | 77.7228532 |
| 60.3348948 | 72.4225838 | 72.5851169 | 69.5328118 | 76.2127309 | 77.7228532 |
| 61.3348948 | 72.604402  | 72.5851169 | 66.5328118 | 76.2127309 | 77.7228532 |
| 61.3348948 | 72.6953111 | 72.5851169 | 66.5328118 | 77.2127309 | 77.7228532 |
| 63.3348948 | 73.3316747 | 72.5851169 | 65.5328118 | 77.2127309 | 77.7228532 |
| 65.3348948 | 73.9680384 | 72.5851169 | 65.5328118 | 77.2127309 | 77.7228532 |
| 68.3348948 | 73.7862202 | 72.5851169 | 63.5328118 | 78.2127309 | 77.7228532 |
| 71.3348948 | 74.0589474 | 71.5851169 | 63.5328118 | 78.2127309 | 77.7228532 |
| 72.3348948 | 73.9680384 | 71.5851169 | 63.5328118 | 78.2127309 | 75.7228532 |
| 72.3348948 | 73.8771293 | 71.5851169 | 63.5328118 | 78.2127309 | 74.7228532 |
| 72.3348948 | 70.5134929 | 71.5851169 | 64.5328118 | 78.2127309 | 74.7228532 |
| 72.3348948 | 83.2822025 | 70.5851169 | 64.5328118 | 78.2127309 | 74.7228532 |
| 72.3348948 | 79.2822025 | 71.5851169 | 63.5328118 | 75.2127309 | 73.7228532 |
| 73.3348948 | 79.2822025 | 71.5851169 | 64.5328118 | 75.2127309 | 71.7228532 |
| 76.3348948 | 79.2822025 | 71.5851169 | 64.5328118 | 75.2127309 | 71.7228532 |
| 75.3348948 | 79.2822025 | 72.5851169 | 64.5328118 | 75.2127309 | 71.7228532 |
| 75.3348948 | 79.2822025 | 73.5851169 | 64.5328118 | 73.2127309 | 72.7228532 |
| 77.3348948 | 80.2822025 | 74.5851169 | 64.5328118 | 73.2127309 | 73.7228532 |
| 79.3348948 | 80.2822025 | 76.5851169 | 64.5328118 | 73.2127309 | 74.7228532 |
| 79.3348948 | 80.2822025 | 78.5851169 | 64.5328118 | 76.2127309 | 76.7228532 |
| 77.3348948 | 79.2822025 | 79.5851169 | 64.5328118 | 78.2127309 | 77.7228532 |
| 75.3348948 | 74.2822025 | 79.5851169 | 64.5328118 | 78.2127309 | 77.7228532 |
| 74.3348948 | 73.2822025 | 79.5851169 | 64.5328118 | 78.2127309 | 77.7228532 |
| 72.3348948 | 73.2822025 | 79.5851169 | 64.5328118 | 78.2127309 | 74.7228532 |
| 72.3348948 | 73.2822025 | 79.5851169 | 64.5328118 | 78.2127309 | 72.7228532 |
| 73.3348948 | 73.2822025 | 79.5851169 | 65.5328118 | 82.2127309 | 72.7228532 |
| 74.3348948 | 74.2822025 | 78.5851169 | 65.5328118 | 82.2127309 | 70.7228532 |
| 75.3348948 | 74.2822025 | 78.5851169 | 65.5328118 | 82.2127309 | 70.7228532 |
| 75.3348948 | 74.2822025 | 79.5851169 | 66.5328118 | 83.2127309 | 70.7228532 |
| 75.3348948 | 74.2822025 | 79.5851169 | 68.5328118 | 81.2127309 | 70.7228532 |
| 75.3348948 | 74.2822025 | 79.5851169 | 68.5328118 | 81.2127309 | 70.7228532 |
| 74.3348948 | 74.2822025 | 78.5851169 | 69.5328118 | 80.2127309 | 70.7228532 |
| 74.3348948 | 69.2822025 | 78.5851169 | 69.5328118 | 80.2127309 | 71.7228532 |
| 74.3348948 | 68.2822025 | 77.5851169 | 69.5328118 | 80.2127309 | 72.7228532 |
| 74.3348948 | 68.2822025 | 77.5851169 | 69.5328118 | 80.2127309 | 72.7228532 |
| 74.3348948 | 68.2822025 | 77.5851169 | 69.5328118 | 80.2127309 | 72.7228532 |
| 76.3348948 | 68.2822025 | 79.5851169 | 70.5328118 | 80.2127309 | 75.7228532 |
| 77.3348948 | 68.2822025 | 79.5851169 | 69.5328118 | 80.2127309 | 75.7228532 |
| 77.3348948 | 70.2822025 | 79.5851169 | 69.5328118 | 79.2127309 | 75.7228532 |
| 76.3348948 | 74.2822025 | 79.5851169 | 69.5328118 | 79.2127309 | 75.7228532 |
| 74.3348948 | 75.2822025 | 79.5851169 | 68.5328118 | 75.2127309 | 75.7228532 |
| 73.3348948 | 75.2822025 | 79.5851169 | 68.5328118 | 75.2127309 | 75.7228532 |
| 73.3348948 | 76.2822025 | 79.5851169 | 68.5328118 | 75.2127309 | 76.7228532 |
| 74.3348948 | 79.2822025 | 79.5851169 | 66.5328118 | 75.2127309 | 76.7228532 |
| 76.3348948 | 81.2822025 | 78.5851169 | 66.5328118 | 76.2127309 | 76.7228532 |

|            |            |            |            |            |            |
|------------|------------|------------|------------|------------|------------|
| 76.3348948 | 81.2822025 | 76.5851169 | 66.5328118 | 76.2127309 | 76.7228532 |
| 76.3348948 | 86.2822025 | 76.5851169 | 66.5328118 | 76.2127309 | 76.7228532 |
| 75.3348948 | 86.2822025 | 75.5851169 | 67.5328118 | 76.2127309 | 77.7228532 |
| 71.3348948 | 87.2822025 | 74.5851169 | 67.5328118 | 76.2127309 | 77.7228532 |
| 69.3348948 | 88.2822025 | 73.5851169 | 67.5328118 | 76.2127309 | 77.7228532 |
| 68.3348948 | 88.2822025 | 72.5851169 | 67.5328118 | 76.2127309 | 77.7228532 |
| 68.3348948 | 70.7862202 | 72.5851169 | 67.5328118 | 75.2127309 | 77.7228532 |
| 71.3348948 | 89.2822025 | 72.5851169 | 67.5328118 | 75.2127309 | 77.7228532 |
| 72.3348948 | 71.604402  | 72.5851169 | 66.5328118 | 74.2127309 | 77.7228532 |
| 71.3348948 | 71.3316747 | 72.5851169 | 65.5328118 | 74.2127309 | 77.7228532 |
| 70.3348948 | 71.1498565 | 72.5851169 | 61.5328118 | 73.2127309 | 77.7228532 |
| 70.3348948 | 89.2822025 | 72.5851169 | 61.5328118 | 73.2127309 | 80.7228532 |
| 70.3348948 | 89.2822025 | 72.5851169 | 61.5328118 | 73.2127309 | 82.7228532 |
| 69.3348948 | 89.2822025 | 72.5851169 | 61.5328118 | 73.2127309 | 82.7228532 |
| 69.3348948 | 89.2822025 | 72.5851169 | 61.5328118 | 73.2127309 | 86.7228532 |
| 69.3348948 | 88.2822025 | 72.5851169 | 61.5328118 | 73.2127309 | 84.7228532 |
| 69.3348948 | 88.2822025 | 72.5851169 | 61.5328118 | 73.2127309 | 84.7228532 |
| 69.3348948 | 88.2822025 | 73.5851169 | 61.5328118 | 72.2127309 | 84.7228532 |
| 69.3348948 | 84.2822025 | 73.5851169 | 60.5328118 | 72.2127309 | 84.7228532 |
| 71.3348948 | 84.2822025 | 73.5851169 | 61.5328118 | 72.2127309 | 84.7228532 |
| 72.3348948 | 78.2822025 | 72.5851169 | 61.5328118 | 72.2127309 | 86.7228532 |
| 73.3348948 | 77.2822025 | 69.5851169 | 61.5328118 | 73.2127309 | 86.7228532 |
| 73.3348948 | 76.2822025 | 67.5851169 | 62.5328118 | 73.2127309 | 86.7228532 |
| 73.3348948 | 75.2822025 | 66.5851169 | 64.5328118 | 75.2127309 | 86.7228532 |
| 73.3348948 | 75.2822025 | 66.5851169 | 66.5328118 | 75.2127309 | 86.7228532 |
| 75.3348948 | 75.2822025 | 67.5851169 | 66.5328118 | 75.2127309 | 86.7228532 |
| 74.3348948 | 75.2822025 | 67.5851169 | 66.5328118 | 75.2127309 | 86.7228532 |
| 74.3348948 | 75.2822025 | 67.5851169 | 64.5328118 | 75.2127309 | 85.7228532 |
| 75.3348948 | 75.2822025 | 67.5851169 | 64.5328118 | 76.2127309 | 84.7228532 |
| 75.3348948 | 75.2822025 | 66.5851169 | 64.5328118 | 76.2127309 | 84.7228532 |
| 75.3348948 | 75.2822025 | 66.5851169 | 64.5328118 | 76.2127309 | 81.7228532 |
| 75.3348948 | 75.2822025 | 66.5851169 | 64.5328118 | 76.2127309 | 81.7228532 |
| 74.3348948 | 76.2822025 | 66.5851169 | 64.5328118 | 76.2127309 | 81.7228532 |
| 73.3348948 | 77.2822025 | 66.5851169 | 65.5328118 | 77.2127309 | 81.7228532 |
| 73.3348948 | 77.2822025 | 66.5851169 | 66.5328118 | 77.2127309 | 80.7228532 |
| 73.3348948 | 78.2822025 | 68.5851169 | 66.5328118 | 80.2127309 | 80.7228532 |
| 73.3348948 | 82.2822025 | 69.5851169 | 66.5328118 | 80.2127309 | 78.7228532 |
| 74.3348948 | 82.2822025 | 69.5851169 | 66.5328118 | 84.2127309 | 75.7228532 |
| 77.3348948 | 84.2822025 | 69.5851169 | 67.5328118 | 84.2127309 | 73.7228532 |
| 77.3348948 | 84.2822025 | 69.5851169 | 67.5328118 | 84.2127309 | 73.7228532 |
| 77.3348948 | 84.2822025 | 68.5851169 | 67.5328118 | 74.2127309 | 71.7228532 |
| 77.3348948 | 88.2822025 | 68.5851169 | 67.5328118 | 69.2127309 | 71.7228532 |
| 76.3348948 | 70.7862202 | 68.5851169 | 67.5328118 | 69.2127309 | 72.7228532 |
| 76.3348948 | 70.6953111 | 68.5851169 | 67.5328118 | 69.2127309 | 73.7228532 |
| 76.3348948 | 90.2822025 | 68.5851169 | 67.5328118 | 69.2127309 | 73.7228532 |

|            |            |            |            |            |            |
|------------|------------|------------|------------|------------|------------|
| 70.3348948 | 70.6055133 | 68.5851169 | 69.5328118 | 67.2127309 | 75.7228532 |
| 68.3348948 | 71.0589474 | 71.5851169 | 69.5328118 | 66.2127309 | 73.7228532 |
| 68.3348948 | 71.1498565 | 72.5851169 | 70.5328118 | 66.2127309 | 71.7228532 |
| 68.3348948 | 70.9680384 | 80.5851169 | 70.5328118 | 65.2127309 | 69.7228532 |
| 67.3348948 | 70.6953111 | 82.5851169 | 70.5328118 | 66.2127309 | 69.7228532 |
| 66.3348948 | 70.9680384 | 82.5851169 | 71.5328118 | 69.2127309 | 68.7228532 |
| 66.3348948 | 70.9680384 | 84.5851169 | 72.5328118 | 69.2127309 | 66.7228532 |
| 66.3348948 | 71.1498565 | 84.5851169 | 72.5328118 | 70.2127309 | 66.7228532 |
| 67.3348948 | 70.9680384 | 86.5851169 | 71.5328118 | 70.2127309 | 64.7228532 |
| 68.3348948 | 71.9680384 | 71.9680384 | 71.5328118 | 70.2127309 | 64.7228532 |
| 71.3348948 | 72.5134929 | 72.5134929 | 72.5328118 | 70.2127309 | 64.7228532 |
| 73.3348948 | 72.0589474 | 72.0589474 | 72.5328118 | 70.2127309 | 64.7228532 |
| 73.3348948 | 73.0589474 | 73.0589474 | 72.5328118 | 74.2127309 | 64.7228532 |
| 71.3348948 | 91.2822025 | 73.4225838 | 72.5328118 | 75.2127309 | 66.7228532 |
| 68.3348948 | 91.2822025 | 73.5134929 | 72.5328118 | 75.2127309 | 70.7228532 |
| 66.3348948 | 90.2822025 | 73.7862202 | 72.5328118 | 76.2127309 | 75.7228532 |
| 66.3348948 | 87.2822025 | 73.3316747 | 72.5328118 | 76.2127309 | 77.7228532 |
| 66.3348948 | 83.2822025 | 72.8771293 | 72.5328118 | 76.2127309 | 77.7228532 |
| 66.3348948 | 83.2822025 | 73.0589474 | 72.5328118 | 76.2127309 | 78.7228532 |
| 66.3348948 | 82.2822025 | 73.1498565 | 72.5328118 | 76.2127309 | 78.7228532 |
| 66.3348948 | 82.2822025 | 72.7862202 | 71.5328118 | 76.2127309 | 77.7228532 |
| 66.3348948 | 82.2822025 | 72.6953111 | 71.5328118 | 76.2127309 | 75.7228532 |
| 66.3348948 | 82.2822025 | 72.3316747 | 71.5328118 | 74.2127309 | 73.7228532 |
| 65.3348948 | 82.2822025 | 71.7862202 | 69.5328118 | 71.2127309 | 72.7228532 |
| 63.3348948 | 82.2822025 | 71.604402  | 68.5328118 | 71.2127309 | 71.7228532 |
| 62.3348948 | 82.2822025 | 71.6953111 | 66.5328118 | 73.2127309 | 71.7228532 |
| 62.3348948 | 82.2822025 | 72.4225838 | 67.5328118 | 73.2127309 | 69.7228532 |
| 64.3348948 | 82.2822025 | 73.0589474 | 67.5328118 | 71.2127309 | 69.7228532 |
| 66.3348948 | 81.2822025 | 72.9680384 | 68.5328118 | 68.2127309 | 68.7228532 |
| 68.3348948 | 81.2822025 | 72.8771293 | 68.5328118 | 66.2127309 | 68.7228532 |
| 71.3348948 | 80.2822025 | 72.8771293 | 71.5328118 | 66.2127309 | 68.7228532 |
| 72.3348948 | 77.2822025 | 71.7862202 | 71.5328118 | 65.2127309 | 69.7228532 |
| 72.3348948 | 74.2822025 | 71.604402  | 71.5328118 | 65.2127309 | 70.7228532 |
| 71.3348948 | 73.2822025 | 71.8771293 | 73.5328118 | 66.2127309 | 70.7228532 |
| 70.3348948 | 73.2822025 | 71.9680384 | 73.5328118 | 67.2127309 | 70.7228532 |
| 69.3348948 | 72.2822025 | 71.7862202 | 74.5328118 | 67.2127309 | 70.7228532 |
| 66.3348948 | 71.2822025 | 71.6953111 | 74.5328118 | 69.2127309 | 69.7228532 |
| 66.3348948 | 68.2822025 | 71.3316747 | 74.5328118 | 70.2127309 | 68.7228532 |
| 66.3348948 | 65.2822025 | 71.1498565 | 76.5328118 | 71.2127309 | 65.7228532 |
| 68.3348948 | 63.2822025 | 71.2407656 | 77.5328118 | 71.2127309 | 64.7228532 |
| 68.3348948 | 62.2822025 | 71.0589474 | 77.5328118 | 71.2127309 | 63.7228532 |
| 68.3348948 | 62.2822025 | 70.5134929 | 79.5328118 | 71.2127309 | 61.7228532 |
| 68.3348948 | 62.2822025 | 70.0589474 | 81.5328118 | 68.2127309 | 61.7228532 |
| 67.3348948 | 61.2822025 | 69.9680384 | 82.5328118 | 68.2127309 | 61.7228532 |
| 65.3348948 | 60.2822025 | 68.5134929 | 82.5328118 | 67.2127309 | 58.7228532 |

|            |            |            |            |            |            |
|------------|------------|------------|------------|------------|------------|
| 65.3348948 | 60.2822025 | 77.5851169 | 67.6953111 | 67.2127309 | 57.7228532 |
| 66.3348948 | 62.2822025 | 77.5851169 | 67.5134929 | 66.2127309 | 58.7228532 |
| 67.3348948 | 65.2822025 | 71.5851169 | 67.0589474 | 65.2127309 | 59.7228532 |
| 68.3348948 | 65.2822025 | 68.5851169 | 67.2407656 | 65.2127309 | 61.7228532 |
| 71.3348948 | 66.2822025 | 67.5851169 | 67.5134929 | 65.2127309 | 62.7228532 |
| 72.3348948 | 66.2822025 | 66.5851169 | 67.2407656 | 63.2127309 | 62.7228532 |
| 72.3348948 | 66.2822025 | 65.5851169 | 66.5134929 | 63.2127309 | 64.7228532 |
| 71.3348948 | 67.2822025 | 65.5851169 | 66.2407656 | 63.2127309 | 65.7228532 |
| 71.3348948 | 67.2822025 | 65.5851169 | 66.2407656 | 63.2127309 | 65.7228532 |
| 67.3348948 | 68.2822025 | 64.5851169 | 66.27218   | 64.2127309 | 66.7228532 |
| 67.3348948 | 68.2822025 | 65.5851169 | 66.7862202 | 64.2127309 | 73.7228532 |
| 65.3348948 | 69.2822025 | 66.5851169 | 66.9680384 | 66.2127309 | 75.7228532 |
| 65.3348948 | 70.2822025 | 68.5851169 | 67.0589474 | 66.2127309 | 76.7228532 |
| 65.3348948 | 70.2822025 | 69.5851169 | 67.0589474 | 65.2127309 | 76.7228532 |
| 65.3348948 | 70.2822025 | 69.5851169 | 66.9680384 | 63.2127309 | 77.7228532 |
| 65.3348948 | 70.2822025 | 69.5851169 | 66.6953111 | 63.2127309 | 73.7228532 |
| 64.3348948 | 70.2822025 | 69.5851169 | 66.4225838 | 62.2127309 | 71.7228532 |
| 62.3348948 | 69.2822025 | 69.5851169 | 66.5134929 | 62.2127309 | 68.7228532 |
| 62.3348948 | 67.2822025 | 69.5851169 | 66.4225838 | 62.2127309 | 68.7228532 |
| 62.3348948 | 67.2822025 | 69.5851169 | 66.4225838 | 64.2127309 | 65.7228532 |
| 62.3348948 | 66.2822025 | 69.5851169 | 66.7862202 | 66.2127309 | 65.7228532 |
| 62.3348948 | 65.2822025 | 70.5851169 | 67.1498565 | 69.2127309 | 65.7228532 |
| 61.3348948 | 65.2822025 | 69.5851169 | 66.8771293 | 69.2127309 | 64.7228532 |
| 60.3348948 | 65.2822025 | 69.5851169 | 67.2407656 | 73.2127309 | 65.7228532 |
| 60.3348948 | 66.2822025 | 71.5851169 | 67.604402  | 74.2127309 | 65.7228532 |
| 65.3348948 | 66.2822025 | 73.5851169 | 68.1498565 | 74.2127309 | 64.7228532 |
| 72.3348948 | 66.2822025 | 74.5851169 | 68.6953111 | 74.2127309 | 63.7228532 |
| 72.3348948 | 66.2822025 | 70.5851169 | 68.2407656 | 74.2127309 | 63.7228532 |
| 72.3348948 | 66.2822025 | 67.5851169 | 67.6953111 | 74.2127309 | 63.7228532 |
| 70.3348948 | 65.2822025 | 66.5851169 | 67.4225838 | 75.2127309 | 63.7228532 |
| 68.3348948 | 65.2822025 | 66.5851169 | 67.3316747 | 75.2127309 | 63.7228532 |
| 66.3348948 | 65.2822025 | 66.5851169 | 84.5328118 | 75.2127309 | 65.7228532 |
| 64.3348948 | 65.2822025 | 65.5851169 | 84.5328118 | 75.2127309 | 66.7228532 |
| 63.3348948 | 65.2822025 | 65.5851169 | 84.5328118 | 75.2127309 | 71.7228532 |
| 63.3348948 | 65.2822025 | 65.5851169 | 84.5328118 | 73.2127309 | 83.7228532 |
| 63.3348948 | 65.2822025 | 65.5851169 | 84.5328118 | 73.2127309 | 86.7228532 |
| 63.3348948 | 65.2822025 | 65.5851169 | 86.5328118 | 73.2127309 | 86.7228532 |
| 61.3348948 | 66.2822025 | 65.5851169 | 87.5328118 | 74.2127309 | 86.7228532 |
| 60.3348948 | 66.2822025 | 65.5851169 | 87.5328118 | 75.2127309 | 86.7228532 |
| 60.3348948 | 67.2822025 | 64.5851169 | 87.5328118 | 75.2127309 | 86.7228532 |
| 60.3348948 | 68.2822025 | 64.5851169 | 87.5328118 | 76.2127309 | 85.7228532 |
| 60.3348948 | 70.2822025 | 64.5851169 | 69.3316747 | 76.2127309 | 77.7228532 |
| 60.3348948 | 70.2822025 | 64.5851169 | 69.2407656 | 76.2127309 | 77.7228532 |
| 60.3348948 | 71.2822025 | 64.5851169 | 69.0589474 | 76.2127309 | 76.7228532 |
| 60.3348948 | 71.2822025 | 63.5851169 | 87.5328118 | 77.2127309 | 76.7228532 |



|            |            |            |            |            |            |
|------------|------------|------------|------------|------------|------------|
| 63.3348948 | 71.2822025 | 63.5851169 | 86.5328118 | 77.2127309 | 77.7228532 |
| 63.3348948 | 71.2822025 | 63.5851169 | 84.5328118 | 77.2127309 | 78.7228532 |
| 63.3348948 | 71.2822025 | 63.5851169 | 84.5328118 | 77.2127309 | 78.7228532 |
| 64.3348948 | 70.2822025 | 63.5851169 | 82.5328118 | 77.2127309 | 78.7228532 |
| 65.3348948 | 70.2822025 | 63.5851169 | 82.5328118 | 77.2127309 | 79.7228532 |
| 65.3348948 | 70.2822025 | 63.5851169 | 82.5328118 | 78.2127309 | 79.7228532 |
| 65.3348948 | 69.2822025 | 64.5851169 | 83.5328118 | 78.2127309 | 79.7228532 |
| 66.3348948 | 70.2822025 | 64.5851169 | 83.5328118 | 78.2127309 | 78.7228532 |
| 66.3348948 | 70.2822025 | 64.5851169 | 84.5328118 | 78.2127309 | 78.7228532 |
| 67.3348948 | 71.2822025 | 64.5851169 | 84.5328118 | 78.2127309 | 77.7228532 |
| 68.3348948 | 71.2822025 | 64.5851169 | 83.5328118 | 78.2127309 | 77.7228532 |
| 68.3348948 | 75.2822025 | 64.5851169 | 83.5328118 | 68.2127309 | 77.7228532 |
| 67.3348948 | 75.2822025 | 66.5851169 | 82.5328118 | 68.2127309 | 75.7228532 |
| 67.3348948 | 78.2822025 | 66.5851169 | 80.5328118 | 64.2127309 | 73.7228532 |
| 66.3348948 | 80.2822025 | 67.5851169 | 80.5328118 | 63.2127309 | 72.7228532 |
| 66.3348948 | 85.2822025 | 68.5851169 | 80.5328118 | 63.2127309 | 72.7228532 |
| 66.3348948 | 86.2822025 | 70.5851169 | 80.5328118 | 67.2127309 | 74.7228532 |
| 66.3348948 | 86.2822025 | 70.5851169 | 80.5328118 | 67.2127309 | 74.7228532 |
| 68.3348948 | 70.2822025 | 77.5851169 | 80.5328118 | 68.2127309 | 75.7228532 |
| 68.3348948 | 68.2822025 | 79.5851169 | 80.5328118 | 69.2127309 | 75.7228532 |
| 68.3348948 | 68.2822025 | 78.5851169 | 81.5328118 | 69.2127309 | 73.7228532 |
| 67.3348948 | 68.2822025 | 71.5851169 | 80.5328118 | 69.2127309 | 71.7228532 |
| 67.3348948 | 68.2822025 | 68.5851169 | 80.5328118 | 69.2127309 | 71.7228532 |
| 65.3348948 | 68.2822025 | 66.5851169 | 77.5328118 | 69.2127309 | 71.7228532 |
| 64.3348948 | 68.2822025 | 66.5851169 | 77.5328118 | 69.2127309 | 69.7228532 |
| 63.3348948 | 68.2822025 | 66.5851169 | 73.5328118 | 70.2127309 | 69.7228532 |
| 63.3348948 | 67.2822025 | 66.5851169 | 71.5328118 | 70.2127309 | 69.7228532 |
| 63.3348948 | 66.2822025 | 66.5851169 | 71.5328118 | 73.2127309 | 70.7228532 |
| 63.3348948 | 66.2822025 | 66.5851169 | 67.5328118 | 73.2127309 | 71.7228532 |
| 63.3348948 | 66.2822025 | 65.5851169 | 65.5328118 | 73.2127309 | 71.7228532 |
| 63.3348948 | 66.2822025 | 65.5851169 | 64.5328118 | 73.2127309 | 72.7228532 |
| 63.3348948 | 65.2822025 | 65.5851169 | 63.5328118 | 73.2127309 | 72.7228532 |
| 63.3348948 | 67.2822025 | 65.5851169 | 63.5328118 | 73.2127309 |            |
| 63.3348948 | 68.2822025 | 65.5851169 | 63.5328118 | 73.2127309 |            |
| 64.3348948 | 69.2822025 | 65.5851169 | 63.5328118 | 74.2127309 |            |
| 65.3348948 | 69.2822025 | 64.5851169 | 63.5328118 | 74.2127309 |            |
| 65.3348948 | 69.2822025 | 64.5851169 | 63.5328118 | 74.2127309 |            |
| 65.3348948 | 69.2822025 | 66.5851169 | 63.5328118 | 73.2127309 |            |
| 65.3348948 | 70.2822025 | 67.5851169 | 63.5328118 | 72.2127309 |            |
| 65.3348948 | 71.2822025 | 69.5851169 | 63.5328118 | 71.2127309 |            |
| 66.3348948 | 74.2822025 | 72.5851169 | 63.5328118 | 70.2127309 |            |
| 65.3348948 | 75.2822025 | 72.5851169 | 63.5328118 | 70.2127309 |            |
| 65.3348948 | 74.2822025 | 71.5851169 | 63.5328118 | 70.2127309 |            |
| 63.3348948 | 74.2822025 | 69.5851169 | 64.5328118 | 70.2127309 |            |
| 63.3348948 | 76.2822025 | 68.5851169 | 64.5328118 | 71.2127309 |            |

|            |            |            |            |            |
|------------|------------|------------|------------|------------|
| 63.3348948 | 76.2822025 | 66.5851169 | 64.5328118 | 70.2127309 |
| 63.3348948 | 77.2822025 | 65.5851169 | 64.5328118 | 68.2127309 |
| 63.3348948 | 77.2822025 | 64.5851169 | 62.5328118 | 68.2127309 |
| 63.3348948 | 78.2822025 | 63.5851169 | 62.5328118 | 65.2127309 |
| 63.3348948 | 78.2822025 | 63.5851169 | 62.5328118 | 65.2127309 |
| 63.3348948 | 78.2822025 | 63.5851169 | 62.5328118 | 65.2127309 |
| 63.3348948 | 78.2822025 | 63.5851169 | 63.5328118 | 65.2127309 |
| 62.3348948 | 76.2822025 | 63.5851169 | 63.5328118 | 65.2127309 |
| 62.3348948 | 74.2822025 | 63.5851169 | 63.5328118 | 69.2127309 |
| 60.3348948 | 71.2822025 | 63.5851169 | 63.5328118 | 70.2127309 |
| 60.3348948 | 67.2822025 | 63.5851169 | 61.5328118 | 70.2127309 |
| 60.3348948 | 64.2822025 | 63.5851169 | 61.5328118 | 68.2127309 |
| 60.3348948 | 63.2822025 | 62.5851169 | 60.5328118 | 66.2127309 |
| 60.3348948 | 63.2822025 | 62.5851169 | 60.5328118 | 62.2127309 |
| 66.3348948 | 62.2822025 | 62.5851169 | 60.5328118 | 62.2127309 |
| 63.3348948 | 62.2822025 | 64.5851169 | 60.5328118 | 62.2127309 |
| 63.3348948 | 61.2822025 | 66.5851169 | 60.5328118 | 61.2127309 |
| 61.3348948 | 60.2822025 | 66.5851169 | 60.5328118 | 61.2127309 |
| 61.3348948 | 58.2822025 | 66.5851169 | 61.5328118 | 61.2127309 |
| 61.3348948 | 57.2822025 | 66.5851169 | 61.5328118 | 60.2127309 |
| 59.3348948 | 57.2822025 | 66.5851169 | 61.5328118 | 60.2127309 |
| 62.3348948 | 57.2822025 | 66.5851169 | 60.5328118 | 60.2127309 |
| 63.3348948 | 59.2822025 | 67.5851169 | 60.5328118 | 61.2127309 |
| 63.3348948 | 59.2822025 | 67.5851169 | 59.5328118 | 60.2127309 |
| 62.3348948 | 60.2822025 | 69.5851169 | 59.5328118 | 61.2127309 |
| 62.3348948 | 60.2822025 | 70.5851169 | 59.5328118 | 61.2127309 |
| 62.3348948 | 60.2822025 | 70.5851169 | 59.5328118 | 61.2127309 |
| 62.3348948 | 61.2822025 | 70.5851169 | 59.5328118 | 62.2127309 |
| 62.3348948 | 61.2822025 | 70.5851169 | 59.5328118 | 62.2127309 |
| 63.3348948 | 61.2822025 | 70.5851169 | 59.5328118 | 63.2127309 |
| 64.3348948 | 59.2822025 | 70.5851169 | 60.5328118 | 63.2127309 |
| 65.3348948 | 59.2822025 | 70.5851169 | 62.5328118 | 63.2127309 |
| 67.3348948 | 57.2822025 | 70.5851169 | 62.5328118 | 63.2127309 |
| 67.3348948 | 56.2822025 | 71.5851169 | 62.5328118 | 66.2127309 |
| 73.3348948 | 56.2822025 | 71.5851169 | 62.5328118 | 66.2127309 |
| 74.3348948 | 56.2822025 | 71.5851169 | 63.5328118 | 62.2127309 |
| 72.3348948 | 55.2822025 | 70.5851169 | 62.5328118 | 60.2127309 |
| 71.3348948 | 55.2822025 | 70.5851169 | 62.5328118 | 59.2127309 |
| 71.3348948 | 54.2822025 | 70.5851169 | 62.5328118 | 59.2127309 |
| 71.3348948 | 54.2822025 | 70.5851169 | 62.5328118 | 59.2127309 |
| 70.3348948 | 53.2822025 | 68.5851169 | 61.5328118 | 59.2127309 |
| 70.3348948 | 54.2822025 | 60.5851169 | 61.5328118 | 59.2127309 |
| 70.3348948 | 54.2822025 | 59.5851169 | 62.5328118 | 61.2127309 |
| 70.3348948 | 57.2822025 | 59.5851169 | 61.5328118 | 62.2127309 |
| 70.3348948 | 58.2822025 | 59.5851169 | 60.5328118 | 63.2127309 |

|            |            |            |            |            |
|------------|------------|------------|------------|------------|
| 70.3348948 | 59.2822025 | 58.5851169 | 60.5328118 | 65.2127309 |
| 70.3348948 | 60.2822025 | 58.5851169 | 59.5328118 | 65.2127309 |
| 70.3348948 | 60.2822025 | 58.5851169 | 59.5328118 | 65.2127309 |
| 70.3348948 | 61.2822025 | 58.5851169 | 60.5328118 | 64.2127309 |
| 70.3348948 | 61.2822025 | 58.5851169 | 60.5328118 | 66.2127309 |
| 71.3348948 | 61.2822025 | 58.5851169 | 60.5328118 | 66.2127309 |
| 71.3348948 | 61.2822025 | 59.5851169 | 60.5328118 | 66.2127309 |
| 71.3348948 | 62.2822025 | 63.5851169 | 61.5328118 | 70.2127309 |
| 71.3348948 | 63.2822025 | 63.5851169 | 60.5328118 | 70.2127309 |
| 71.3348948 | 64.2822025 | 65.5851169 | 61.5328118 | 70.2127309 |
| 71.3348948 | 66.2822025 | 66.5851169 | 62.5328118 | 70.2127309 |
| 70.3348948 | 67.2822025 | 66.5851169 | 62.5328118 | 71.2127309 |
| 69.3348948 | 67.2822025 | 67.5851169 | 62.5328118 | 68.2127309 |
| 69.3348948 | 67.2822025 | 68.5851169 | 62.5328118 | 68.2127309 |
| 68.3348948 | 67.2822025 | 69.5851169 | 62.5328118 | 67.2127309 |
| 68.3348948 | 69.2822025 | 69.5851169 | 62.5328118 | 68.2127309 |
| 68.3348948 | 69.2822025 | 69.5851169 | 62.5328118 | 68.2127309 |
| 67.3348948 | 70.2822025 | 69.5851169 | 62.5328118 | 68.2127309 |
| 67.3348948 | 69.2822025 | 70.5851169 | 62.5328118 | 68.2127309 |
| 68.3348948 | 68.2822025 | 71.5851169 | 64.5328118 | 67.2127309 |
| 68.3348948 | 67.2822025 | 71.5851169 | 64.5328118 | 65.2127309 |
| 68.3348948 | 66.2822025 | 72.5851169 | 64.5328118 | 64.2127309 |
| 69.3348948 | 64.2822025 | 72.5851169 | 65.5328118 | 64.2127309 |
| 69.3348948 | 63.2822025 | 72.5851169 | 65.5328118 | 62.2127309 |
| 69.3348948 | 62.2822025 | 73.5851169 | 65.5328118 | 61.2127309 |
| 69.3348948 | 60.2822025 | 73.5851169 | 64.5328118 | 59.2127309 |
| 69.3348948 | 58.2822025 | 74.5851169 | 62.5328118 | 59.2127309 |
| 69.3348948 | 58.2822025 | 75.5851169 | 60.5328118 | 60.2127309 |
| 70.3348948 | 59.2822025 | 75.5851169 | 60.5328118 | 60.2127309 |
| 71.3348948 | 58.2822025 | 76.5851169 | 60.5328118 | 62.2127309 |
| 71.3348948 | 58.2822025 | 80.5851169 | 60.5328118 | 62.2127309 |
| 71.3348948 | 58.2822025 | 81.5851169 | 61.5328118 | 62.2127309 |
| 71.3348948 | 58.2822025 | 81.5851169 | 60.5328118 | 63.2127309 |
| 71.3348948 | 58.2822025 | 82.5851169 | 59.5328118 | 63.2127309 |
| 72.3348948 | 58.2822025 | 64.0925569 | 59.5328118 | 63.2127309 |
| 72.3348948 | 58.2822025 | 82.5851169 | 59.5328118 | 63.2127309 |
| 72.3348948 | 58.2822025 | 78.5851169 | 58.5328118 | 63.2127309 |
| 72.3348948 | 58.2822025 | 75.5851169 | 58.5328118 | 63.2127309 |
| 73.3348948 | 58.2822025 | 73.5851169 | 58.5328118 | 63.2127309 |
| 73.3348948 | 58.2822025 | 73.5851169 | 58.5328118 | 63.2127309 |
| 76.3348948 | 58.2822025 | 73.5851169 | 58.5328118 | 64.2127309 |
| 79.3348948 | 58.2822025 | 73.5851169 | 58.5328118 | 62.2127309 |
| 79.3348948 | 58.2822025 | 73.5851169 | 58.5328118 | 62.2127309 |
| 80.3348948 | 58.2822025 | 73.5851169 | 59.5328118 | 62.2127309 |
| 80.3348948 | 58.2822025 | 73.5851169 | 60.5328118 | 62.2127309 |

|            |            |            |            |            |
|------------|------------|------------|------------|------------|
| 80.3348948 | 59.2822025 | 72.5851169 | 61.5328118 | 61.2127309 |
| 78.3348948 | 59.2822025 | 72.5851169 | 62.5328118 | 61.2127309 |
| 74.3348948 | 59.2822025 | 72.5851169 | 62.5328118 | 61.2127309 |
| 74.3348948 | 59.2822025 | 72.5851169 | 62.5328118 | 61.2127309 |
| 72.3348948 | 60.2822025 | 72.5851169 | 62.5328118 | 60.2127309 |
| 71.3348948 | 60.2822025 | 72.5851169 | 63.5328118 | 60.2127309 |
| 71.3348948 | 60.2822025 | 71.5851169 | 63.5328118 | 60.2127309 |
| 69.3348948 | 60.2822025 | 71.5851169 | 62.5328118 | 60.2127309 |
| 67.3348948 | 60.2822025 | 67.5851169 | 61.5328118 | 60.2127309 |
| 67.3348948 | 60.2822025 | 67.5851169 | 61.5328118 | 60.2127309 |
| 67.3348948 | 59.2822025 | 66.5851169 | 60.5328118 | 60.2127309 |
| 67.3348948 | 58.2822025 | 66.5851169 | 60.5328118 | 60.2127309 |
| 67.3348948 | 58.2822025 | 66.5851169 | 60.5328118 | 60.2127309 |
| 66.3348948 | 57.2822025 | 66.5851169 | 61.5328118 | 61.2127309 |
| 66.3348948 | 58.2822025 | 65.5851169 | 62.5328118 | 61.2127309 |
| 66.3348948 | 58.2822025 | 65.5851169 | 62.5328118 | 61.2127309 |
| 65.3348948 | 58.2822025 | 65.5851169 | 62.5328118 | 61.2127309 |
| 65.3348948 | 58.2822025 | 65.5851169 | 62.5328118 | 61.2127309 |
| 64.3348948 | 58.2822025 | 65.5851169 | 63.5328118 | 61.2127309 |
| 64.3348948 | 58.2822025 | 65.5851169 | 64.5328118 | 62.2127309 |
| 65.3348948 | 57.2822025 | 65.5851169 | 64.5328118 | 61.2127309 |
| 65.3348948 | 56.2822025 | 65.5851169 | 63.5328118 | 61.2127309 |
| 65.3348948 | 56.2822025 | 64.5851169 | 63.5328118 | 61.2127309 |
| 65.3348948 | 56.2822025 | 64.5851169 | 63.5328118 | 61.2127309 |
| 65.3348948 | 56.2822025 | 64.5851169 | 63.5328118 | 63.2127309 |
| 71.3348948 | 56.2822025 | 64.5851169 | 63.5328118 | 66.2127309 |
| 74.3348948 | 57.2822025 | 64.5851169 | 64.5328118 | 66.2127309 |
| 77.3348948 | 59.2822025 | 64.5851169 | 64.5328118 | 71.2127309 |
| 77.3348948 | 59.2822025 | 64.5851169 | 64.5328118 | 71.2127309 |
| 76.3348948 | 59.2822025 | 64.5851169 | 63.5328118 | 69.2127309 |
| 76.3348948 | 60.2822025 | 64.5851169 | 64.5328118 | 67.2127309 |
| 76.3348948 | 61.2822025 | 64.5851169 | 64.5328118 | 67.2127309 |
| 76.3348948 | 61.2822025 | 65.5851169 | 64.5328118 | 64.2127309 |
| 76.3348948 | 61.2822025 | 65.5851169 | 64.5328118 | 64.2127309 |
| 76.3348948 | 61.2822025 | 65.5851169 | 64.5328118 | 64.2127309 |
| 76.3348948 | 61.2822025 | 70.5851169 | 64.5328118 | 64.2127309 |
| 76.3348948 | 63.2822025 | 70.5851169 | 64.5328118 | 67.2127309 |
| 77.3348948 | 63.2822025 | 71.5851169 | 64.5328118 | 67.2127309 |
| 78.3348948 | 64.2822025 | 72.5851169 | 62.5328118 | 71.2127309 |
| 78.3348948 | 64.2822025 | 72.5851169 | 60.5328118 | 74.2127309 |
| 78.3348948 | 64.2822025 | 73.5851169 | 60.5328118 | 74.2127309 |
| 78.3348948 | 63.2822025 | 72.5851169 | 60.5328118 | 71.2127309 |
| 63.3348948 | 63.2822025 | 72.5851169 | 60.5328118 | 71.2127309 |
| 62.3348948 | 63.2822025 | 70.5851169 | 59.5328118 | 69.2127309 |
| 62.3348948 | 63.2822025 | 70.5851169 | 59.5328118 | 69.2127309 |

|            |            |            |            |            |
|------------|------------|------------|------------|------------|
| 60.3348948 | 62.2822025 | 70.5851169 | 60.5328118 | 69.2127309 |
| 60.3348948 | 62.2822025 | 69.5851169 | 62.5328118 | 67.2127309 |
| 61.3348948 | 62.2822025 | 68.5851169 | 67.5328118 | 68.2127309 |
| 61.3348948 | 62.2822025 | 67.5851169 | 67.5328118 | 70.2127309 |
| 60.3348948 | 62.2822025 | 67.5851169 | 67.5328118 | 71.2127309 |
| 58.3348948 | 63.2822025 | 67.5851169 | 68.5328118 | 71.2127309 |
| 58.3348948 | 65.2822025 | 66.5851169 | 68.5328118 | 71.2127309 |
| 58.3348948 | 66.2822025 | 65.5851169 | 68.5328118 | 71.2127309 |
| 58.3348948 | 66.2822025 | 65.5851169 | 69.5328118 | 66.2127309 |
| 58.3348948 | 66.2822025 | 65.5851169 | 69.5328118 | 61.2127309 |
| 58.3348948 | 66.2822025 | 65.5851169 | 65.5328118 | 61.2127309 |
| 58.3348948 | 67.2822025 | 65.5851169 | 65.5328118 | 60.2127309 |
| 59.3348948 | 68.2822025 | 65.5851169 | 65.5328118 | 60.2127309 |
| 59.3348948 | 68.2822025 | 66.5851169 | 65.5328118 | 60.2127309 |
| 59.3348948 | 68.2822025 | 65.5851169 | 65.5328118 | 61.2127309 |
| 63.3348948 | 69.2822025 | 65.5851169 | 65.5328118 | 62.2127309 |
| 63.3348948 | 70.2822025 | 65.5851169 | 63.5328118 | 62.2127309 |
| 64.3348948 | 70.2822025 | 65.5851169 | 62.5328118 | 62.2127309 |
| 64.3348948 | 68.2822025 | 65.5851169 | 60.5328118 | 63.2127309 |
| 64.3348948 | 68.2822025 | 65.5851169 | 60.5328118 | 63.2127309 |
| 64.3348948 | 68.2822025 | 65.5851169 | 60.5328118 | 62.2127309 |
| 64.3348948 | 68.2822025 | 65.5851169 | 60.5328118 | 62.2127309 |
| 65.3348948 | 68.2822025 | 65.5851169 | 59.5328118 | 62.2127309 |
| 65.3348948 | 69.2822025 | 65.5851169 | 59.5328118 | 62.2127309 |
| 65.3348948 | 70.2822025 | 65.5851169 | 59.5328118 | 62.2127309 |
| 65.3348948 | 70.2822025 | 66.5851169 | 59.5328118 | 64.2127309 |
| 66.3348948 | 70.2822025 | 68.5851169 | 59.5328118 | 66.2127309 |
| 66.3348948 | 70.2822025 | 70.5851169 | 60.5328118 | 66.2127309 |
| 66.3348948 | 70.2822025 | 71.5851169 | 61.5328118 | 65.2127309 |
| 66.3348948 | 67.2822025 | 71.5851169 | 61.5328118 | 65.2127309 |
| 68.3348948 | 66.2822025 | 71.5851169 | 61.5328118 | 64.2127309 |
| 69.3348948 | 65.2822025 | 71.5851169 | 61.5328118 | 63.2127309 |
| 70.3348948 | 64.2822025 | 72.5851169 | 62.5328118 | 64.2127309 |
| 70.3348948 | 63.2822025 | 72.5851169 | 64.5328118 | 64.2127309 |
| 70.3348948 | 63.2822025 | 72.5851169 | 65.5328118 | 64.2127309 |
| 71.3348948 | 63.2822025 | 73.5851169 | 64.5328118 | 63.2127309 |
| 73.3348948 | 64.2822025 | 73.5851169 | 64.5328118 | 62.2127309 |
| 75.3348948 | 64.2822025 | 75.5851169 | 63.5328118 | 62.2127309 |
| 76.3348948 | 65.2822025 | 78.5851169 | 63.5328118 | 62.2127309 |
| 74.3348948 | 65.2822025 | 79.5851169 | 63.5328118 | 58.2127309 |
| 73.3348948 | 65.2822025 | 79.5851169 | 63.5328118 | 58.2127309 |
| 71.3348948 | 65.2822025 | 79.5851169 | 63.5328118 | 58.2127309 |
| 70.3348948 | 65.2822025 | 80.5851169 | 60.5328118 | 58.2127309 |
| 69.3348948 | 65.2822025 | 80.5851169 | 59.5328118 | 58.2127309 |
| 69.3348948 | 65.2822025 | 80.5851169 | 57.5328118 | 58.2127309 |

|            |            |            |            |            |
|------------|------------|------------|------------|------------|
| 69.3348948 | 65.2822025 | 79.5851169 | 52.5328118 | 58.2127309 |
| 71.3348948 | 67.2822025 | 77.5851169 | 52.5328118 | 58.2127309 |
| 72.3348948 | 68.2822025 | 77.5851169 | 49.5328118 | 59.2127309 |
| 71.3348948 | 68.2822025 | 76.5851169 | 49.5328118 | 59.2127309 |
| 68.3348948 | 68.2822025 | 76.5851169 | 49.5328118 | 59.2127309 |
| 67.3348948 | 68.2822025 | 76.5851169 | 49.5328118 | 59.2127309 |
| 65.3348948 | 68.2822025 | 76.5851169 | 49.5328118 | 59.2127309 |
| 65.3348948 | 69.2822025 | 76.5851169 | 49.5328118 | 60.2127309 |
| 65.3348948 | 69.2822025 | 76.5851169 | 49.5328118 | 60.2127309 |
| 67.3348948 | 69.2822025 | 76.5851169 | 50.5328118 | 60.2127309 |
| 69.3348948 | 69.2822025 | 73.5851169 | 50.5328118 | 60.2127309 |
| 70.3348948 | 69.2822025 | 73.5851169 | 51.5328118 | 67.2127309 |
| 70.3348948 | 69.2822025 | 73.5851169 | 52.5328118 | 67.2127309 |
| 70.3348948 | 69.2822025 | 73.5851169 | 52.5328118 | 69.2127309 |
| 70.3348948 | 69.2822025 | 72.5851169 | 52.5328118 | 70.2127309 |
| 68.3348948 | 69.2822025 | 71.5851169 | 52.5328118 | 71.2127309 |
| 67.3348948 | 71.2822025 | 72.5851169 | 53.5328118 | 71.2127309 |
| 67.3348948 | 71.2822025 | 72.5851169 | 53.5328118 | 71.2127309 |
| 67.3348948 | 72.2822025 | 71.5851169 | 53.5328118 | 71.2127309 |
| 67.3348948 | 71.2822025 | 67.5851169 | 54.5328118 | 69.2127309 |
| 67.3348948 | 71.2822025 | 66.5851169 | 54.5328118 | 70.2127309 |
| 66.3348948 | 71.2822025 | 66.5851169 | 54.5328118 | 71.2127309 |
| 66.3348948 | 72.2822025 | 66.5851169 | 56.5328118 | 71.2127309 |
| 65.3348948 | 71.2822025 | 66.5851169 | 59.5328118 | 74.2127309 |
| 61.3348948 | 70.2822025 | 66.5851169 | 61.5328118 | 76.2127309 |
| 61.3348948 | 69.2822025 | 66.5851169 | 62.5328118 | 76.2127309 |
| 60.3348948 | 67.2822025 | 66.5851169 | 62.5328118 | 77.2127309 |
| 61.3348948 | 68.2822025 | 66.5851169 | 62.5328118 | 77.2127309 |
| 62.3348948 | 68.2822025 | 66.5851169 | 62.5328118 | 74.2127309 |
| 63.3348948 | 67.2822025 | 66.5851169 | 63.5328118 | 70.2127309 |
| 63.3348948 | 67.2822025 | 65.5851169 | 64.5328118 | 68.2127309 |
| 64.3348948 | 67.2822025 | 65.5851169 | 65.5328118 | 66.2127309 |
| 66.3348948 | 67.2822025 | 65.5851169 | 66.5328118 | 65.2127309 |
| 67.3348948 | 67.2822025 | 65.5851169 | 65.5328118 | 66.2127309 |
| 67.3348948 | 67.2822025 | 65.5851169 | 64.5328118 | 66.2127309 |
| 67.3348948 | 67.2822025 | 65.5851169 | 63.5328118 | 66.2127309 |
| 67.3348948 | 66.2822025 | 65.5851169 | 63.5328118 | 67.2127309 |
| 65.3348948 | 66.2822025 | 65.5851169 | 63.5328118 | 67.2127309 |
| 63.3348948 | 66.2822025 | 65.5851169 | 63.5328118 | 67.2127309 |
| 63.3348948 | 66.2822025 | 65.5851169 | 63.5328118 | 68.2127309 |
| 62.3348948 | 66.2822025 | 65.5851169 | 63.5328118 | 68.2127309 |
| 61.3348948 | 66.2822025 | 65.5851169 | 62.5328118 | 68.2127309 |
| 62.3348948 | 66.2822025 | 66.5851169 | 62.5328118 | 67.2127309 |
| 63.3348948 | 66.2822025 | 66.5851169 | 63.5328118 | 67.2127309 |
| 64.3348948 | 66.2822025 | 66.5851169 | 63.5328118 | 67.2127309 |

|            |            |            |            |            |
|------------|------------|------------|------------|------------|
| 64.3348948 | 65.2822025 | 66.5851169 | 63.5328118 | 67.2127309 |
| 64.3348948 | 65.2822025 | 66.5851169 | 63.5328118 | 66.2127309 |
| 64.3348948 | 63.2822025 | 67.5851169 | 63.5328118 | 65.2127309 |
| 64.3348948 | 64.2822025 | 69.5851169 | 63.5328118 | 64.2127309 |
| 63.3348948 | 64.2822025 | 70.5851169 | 63.5328118 | 64.2127309 |
| 63.3348948 | 64.2822025 | 70.5851169 | 63.5328118 | 64.2127309 |
| 63.3348948 | 64.2822025 | 71.5851169 | 62.5328118 | 64.2127309 |
| 63.3348948 | 64.2822025 | 71.5851169 | 62.5328118 | 63.2127309 |
| 63.3348948 | 64.2822025 | 71.5851169 | 62.5328118 | 64.2127309 |
| 63.3348948 | 65.2822025 | 71.5851169 | 62.5328118 | 64.2127309 |
| 63.3348948 | 65.2822025 | 71.5851169 | 62.5328118 | 65.2127309 |
| 67.3348948 | 67.2822025 | 71.5851169 | 62.5328118 | 65.2127309 |
| 68.3348948 | 68.2822025 | 70.5851169 | 62.5328118 | 65.2127309 |
| 68.3348948 | 68.2822025 | 68.5851169 | 62.5328118 | 65.2127309 |
| 68.3348948 | 68.2822025 | 67.5851169 | 62.5328118 | 64.2127309 |
| 68.3348948 | 68.2822025 | 67.5851169 | 59.5328118 | 64.2127309 |
| 68.3348948 | 68.2822025 | 67.5851169 | 57.5328118 | 64.2127309 |
| 68.3348948 | 68.2822025 | 67.5851169 | 57.5328118 | 64.2127309 |
| 67.3348948 | 70.2822025 | 66.5851169 | 56.5328118 | 65.2127309 |
| 67.3348948 | 70.2822025 | 66.5851169 | 56.5328118 | 65.2127309 |
| 67.3348948 | 70.2822025 | 66.5851169 | 56.5328118 | 65.2127309 |
| 68.3348948 | 72.2822025 | 66.5851169 | 56.5328118 | 65.2127309 |
| 68.3348948 | 72.2822025 | 66.5851169 | 56.5328118 | 66.2127309 |
| 69.3348948 | 72.2822025 | 67.5851169 | 56.5328118 | 65.2127309 |
| 69.3348948 | 73.2822025 | 66.5851169 | 56.5328118 | 65.2127309 |
| 68.3348948 | 73.2822025 | 66.5851169 | 56.5328118 | 65.2127309 |
| 66.3348948 | 73.2822025 | 66.5851169 | 56.5328118 | 64.2127309 |
| 63.3348948 | 74.2822025 | 67.5851169 | 56.5328118 | 64.2127309 |
| 63.3348948 | 74.2822025 | 68.5851169 | 57.5328118 | 64.2127309 |
| 62.3348948 | 74.2822025 | 68.5851169 | 57.5328118 | 66.2127309 |
| 63.3348948 | 74.2822025 | 68.5851169 | 57.5328118 | 66.2127309 |
| 66.3348948 | 74.2822025 | 68.5851169 | 57.5328118 | 67.2127309 |
| 67.3348948 | 74.2822025 | 68.5851169 | 58.5328118 | 68.2127309 |
| 69.3348948 | 75.2822025 | 68.5851169 | 58.5328118 | 69.2127309 |
| 69.3348948 | 75.2822025 | 68.5851169 | 58.5328118 | 69.2127309 |
| 69.3348948 | 75.2822025 | 68.5851169 | 58.5328118 | 69.2127309 |
| 68.3348948 | 76.2822025 | 69.5851169 | 58.5328118 | 69.2127309 |
| 68.3348948 | 77.2822025 | 69.5851169 | 58.5328118 | 69.2127309 |
| 67.3348948 | 80.2822025 | 69.5851169 | 56.5328118 | 69.2127309 |
| 67.3348948 | 81.2822025 | 69.5851169 | 56.5328118 | 70.2127309 |
| 67.3348948 | 81.2822025 | 69.5851169 | 56.5328118 | 70.2127309 |
| 67.3348948 | 81.2822025 | 71.5851169 | 56.5328118 | 70.2127309 |
| 66.3348948 | 80.2822025 | 71.5851169 | 56.5328118 | 70.2127309 |
| 65.3348948 | 79.2822025 | 71.5851169 | 56.5328118 | 70.2127309 |
| 66.3348948 | 79.2822025 | 71.5851169 | 56.5328118 | 70.2127309 |

|            |            |            |            |            |
|------------|------------|------------|------------|------------|
| 66.3348948 | 79.2822025 | 71.5851169 | 56.5328118 | 69.2127309 |
| 65.3348948 | 79.2822025 | 72.5851169 | 57.5328118 | 68.2127309 |
| 65.3348948 | 80.2822025 | 73.5851169 | 59.5328118 | 67.2127309 |
| 64.3348948 | 80.2822025 | 74.5851169 | 58.5328118 | 67.2127309 |
| 64.3348948 | 81.2822025 | 75.5851169 | 58.5328118 | 67.2127309 |
| 64.3348948 | 81.2822025 | 77.5851169 | 57.5328118 | 67.2127309 |
| 64.3348948 | 81.2822025 | 79.5851169 | 57.5328118 | 67.2127309 |
| 64.3348948 | 82.2822025 | 81.5851169 | 57.5328118 | 67.2127309 |
| 64.3348948 | 83.2822025 | 82.5851169 | 57.5328118 | 67.2127309 |
| 63.3348948 | 84.2822025 | 85.5851169 | 57.5328118 | 68.2127309 |
| 63.3348948 | 85.2822025 | 86.5851169 | 56.5328118 | 68.2127309 |
| 63.3348948 | 85.2822025 | 69.2925569 | 56.5328118 | 68.2127309 |
| 63.3348948 | 85.2822025 | 70.0925569 | 59.5328118 | 67.2127309 |
| 64.3348948 | 85.2822025 | 70.3925569 | 60.5328118 | 67.2127309 |
| 64.3348948 | 85.2822025 | 70.6925569 | 61.5328118 | 66.2127309 |
| 64.3348948 | 85.2822025 | 71.2925569 | 61.5328118 | 65.2127309 |
| 64.3348948 | 85.2822025 | 71.3925569 | 62.5328118 | 65.2127309 |
| 64.3348948 | 86.2822025 | 72.0925569 | 62.5328118 | 66.2127309 |
| 63.3348948 | 86.2822025 | 72.3925569 | 62.5328118 | 66.2127309 |
| 62.3348948 | 86.2822025 | 72.8925569 | 62.5328118 | 68.2127309 |
| 62.3348948 | 86.2822025 | 72.9925569 | 62.5328118 | 68.2127309 |
| 65.3348948 | 85.2822025 | 73.8925569 | 62.5328118 | 75.2127309 |
| 67.3348948 | 83.2822025 | 73.9925569 | 63.5328118 | 76.2127309 |
| 68.3348948 | 83.2822025 | 74.4925569 | 63.5328118 | 76.2127309 |
| 69.3348948 | 82.2822025 | 75.3925569 | 67.5328118 | 76.2127309 |
| 69.3348948 | 82.2822025 | 75.8925569 | 67.5328118 | 76.2127309 |
| 69.3348948 | 82.2822025 | 77.1350849 | 67.5328118 | 76.2127309 |
| 68.3348948 | 80.2822025 | 76.4925569 | 68.5328118 | 74.2127309 |
| 67.3348948 | 79.2822025 | 76.0925569 | 67.5328118 | 73.2127309 |
| 66.3348948 | 79.2822025 | 76.2925569 | 67.5328118 | 72.2127309 |
| 66.3348948 | 81.2822025 | 76.5925569 | 67.5328118 | 72.2127309 |
| 67.3348948 | 81.2822025 | 76.5925569 | 67.5328118 | 70.2127309 |
| 67.3348948 | 81.2822025 | 76.6925569 | 68.5328118 | 69.2127309 |
| 67.3348948 | 82.2822025 | 76.9925569 | 65.5328118 | 69.2127309 |
| 68.3348948 | 82.2822025 | 77.2925569 | 65.5328118 | 69.2127309 |
| 68.3348948 | 82.2822025 | 93.5851169 | 65.5328118 | 69.2127309 |
| 68.3348948 | 83.2822025 | 86.5851169 | 65.5328118 | 69.2127309 |
| 67.3348948 | 83.2822025 | 84.5851169 | 65.5328118 | 70.2127309 |
| 66.3348948 | 85.2822025 | 84.5851169 | 66.5328118 | 70.2127309 |
| 66.3348948 | 85.2822025 | 82.5851169 | 66.5328118 | 70.2127309 |
| 67.3348948 | 85.2822025 | 81.5851169 | 66.5328118 | 70.2127309 |
| 67.3348948 | 85.2822025 | 80.5851169 | 66.5328118 | 70.2127309 |
| 68.3348948 | 85.2822025 | 79.5851169 | 66.5328118 | 70.2127309 |
| 69.3348948 | 87.2822025 | 79.5851169 | 66.5328118 | 71.2127309 |
| 70.3348948 | 88.2822025 | 79.5851169 | 66.5328118 | 71.2127309 |



|            |            |            |            |            |
|------------|------------|------------|------------|------------|
| 71.3348948 | 84.2822025 | 79.5851169 | 66.5328118 | 71.2127309 |
| 71.3348948 | 71.2822025 | 79.5851169 | 65.5328118 | 72.2127309 |
| 71.3348948 | 66.2822025 | 79.5851169 | 65.5328118 | 73.2127309 |
| 70.3348948 | 65.2822025 | 76.5851169 | 65.5328118 | 73.2127309 |
| 69.3348948 | 65.2822025 | 74.5851169 | 65.5328118 | 75.2127309 |
| 68.3348948 | 65.2822025 | 73.5851169 | 66.5328118 | 75.2127309 |
| 67.3348948 | 65.2822025 | 72.5851169 | 67.5328118 | 73.2127309 |
| 67.3348948 | 65.2822025 | 72.5851169 | 68.5328118 | 70.2127309 |
| 69.3348948 | 64.2822025 | 72.5851169 | 68.5328118 | 70.2127309 |
| 71.3348948 | 64.2822025 | 72.5851169 | 68.5328118 | 69.2127309 |
| 71.3348948 | 64.2822025 | 71.5851169 | 66.5328118 | 70.2127309 |
| 71.3348948 | 62.2822025 | 71.5851169 | 66.5328118 | 70.2127309 |
| 71.3348948 | 59.2822025 | 71.5851169 | 66.5328118 | 72.2127309 |
| 70.3348948 | 59.2822025 | 71.5851169 | 66.5328118 | 72.2127309 |
| 70.3348948 | 59.2822025 | 71.5851169 | 64.5328118 | 72.2127309 |
| 70.3348948 | 58.2822025 | 71.5851169 | 64.5328118 | 72.2127309 |
| 70.3348948 | 58.2822025 | 70.5851169 | 64.5328118 | 72.2127309 |
| 69.3348948 | 59.2822025 | 70.5851169 | 63.5328118 | 71.2127309 |
| 69.3348948 | 59.2822025 | 69.5851169 | 63.5328118 | 70.2127309 |
| 69.3348948 | 59.2822025 | 67.5851169 | 64.5328118 | 70.2127309 |
| 68.3348948 | 63.2822025 | 67.5851169 | 64.5328118 | 74.2127309 |
| 68.3348948 | 63.2822025 | 67.5851169 | 64.5328118 | 76.2127309 |
| 68.3348948 | 63.2822025 | 67.5851169 | 65.5328118 | 76.2127309 |
| 68.3348948 | 63.2822025 | 67.5851169 | 67.5328118 | 76.2127309 |
| 68.3348948 | 63.2822025 | 65.5851169 | 67.5328118 | 77.2127309 |
| 70.3348948 | 62.2822025 | 62.5851169 | 67.5328118 | 77.2127309 |
| 72.3348948 | 62.2822025 | 57.5851169 | 66.5328118 | 77.2127309 |
| 72.3348948 | 62.2822025 | 55.5851169 | 66.5328118 | 77.2127309 |
| 72.3348948 | 62.2822025 | 55.5851169 | 66.5328118 | 75.2127309 |
| 70.3348948 | 63.2822025 | 55.5851169 | 63.5328118 | 75.2127309 |
| 67.3348948 | 64.2822025 | 55.5851169 | 61.5328118 | 75.2127309 |
| 70.3348948 | 64.2822025 | 55.5851169 | 60.5328118 | 75.2127309 |
| 72.3348948 | 64.2822025 | 56.5851169 | 60.5328118 | 75.2127309 |
| 73.3348948 | 64.2822025 | 56.5851169 | 59.5328118 | 75.2127309 |
| 73.3348948 | 64.2822025 | 56.5851169 | 59.5328118 | 75.2127309 |
| 71.3348948 | 62.2822025 | 64.5851169 | 64.5328118 | 73.2127309 |
| 70.3348948 | 60.2822025 | 70.5851169 | 64.5328118 | 72.2127309 |
| 70.3348948 | 59.2822025 | 72.5851169 | 64.5328118 | 70.2127309 |
| 70.3348948 | 59.2822025 | 73.5851169 | 64.5328118 | 70.2127309 |
| 69.3348948 | 59.2822025 | 75.5851169 | 64.5328118 | 63.2127309 |
| 69.3348948 | 59.2822025 | 78.5851169 | 64.5328118 | 62.2127309 |
| 76.3348948 | 59.2822025 | 80.5851169 | 64.5328118 | 63.2127309 |
| 77.3348948 | 59.2822025 | 79.5851169 | 63.5328118 | 63.2127309 |
| 78.3348948 | 59.2822025 | 79.5851169 | 63.5328118 | 63.2127309 |

|            |            |            |            |            |
|------------|------------|------------|------------|------------|
| 79.3348948 | 59.2822025 | 78.5851169 | 63.5328118 | 64.2127309 |
| 81.3348948 | 59.2822025 | 76.5851169 | 63.5328118 | 64.2127309 |
| 82.3348948 | 59.2822025 | 76.5851169 | 62.5328118 | 64.2127309 |
| 81.3348948 | 60.2822025 | 76.5851169 | 62.5328118 | 64.2127309 |
| 81.3348948 | 61.2822025 | 69.5851169 | 62.5328118 | 64.2127309 |
| 82.3348948 | 61.2822025 | 68.5851169 | 61.5328118 | 64.2127309 |
| 82.3348948 | 63.2822025 | 68.5851169 | 61.5328118 | 64.2127309 |
| 82.3348948 | 64.2822025 | 69.5851169 | 59.5328118 | 63.2127309 |
| 82.3348948 | 64.2822025 | 70.5851169 | 59.5328118 | 63.2127309 |
| 82.3348948 | 64.2822025 | 70.5851169 | 59.5328118 | 63.2127309 |
| 82.3348948 | 65.2822025 | 69.5851169 | 59.5328118 | 63.2127309 |
| 82.3348948 | 65.2822025 | 68.5851169 | 59.5328118 | 63.2127309 |
| 82.3348948 | 61.2822025 | 68.5851169 | 59.5328118 | 63.2127309 |
| 81.3348948 | 61.2822025 | 68.5851169 | 59.5328118 | 64.2127309 |
| 81.3348948 | 60.2822025 | 68.5851169 | 59.5328118 | 66.2127309 |
| 81.3348948 | 60.2822025 | 68.5851169 | 60.5328118 | 66.2127309 |
| 82.3348948 | 60.2822025 | 68.5851169 | 60.5328118 | 67.2127309 |
| 82.3348948 | 60.2822025 | 68.5851169 | 61.5328118 | 67.2127309 |
| 82.3348948 | 59.2822025 | 68.5851169 | 61.5328118 | 67.2127309 |
| 81.3348948 | 59.2822025 | 67.5851169 | 60.5328118 | 67.2127309 |
| 80.3348948 | 59.2822025 | 66.5851169 | 61.5328118 | 67.2127309 |
| 78.3348948 | 59.2822025 | 65.5851169 | 62.5328118 | 67.2127309 |
| 78.3348948 | 62.2822025 | 65.5851169 | 62.5328118 | 69.2127309 |
| 76.3348948 | 62.2822025 | 65.5851169 | 62.5328118 | 69.2127309 |
| 75.3348948 | 62.2822025 | 65.5851169 | 62.5328118 | 70.2127309 |
| 74.3348948 | 62.2822025 | 64.5851169 | 62.5328118 | 71.2127309 |
| 74.3348948 | 62.2822025 | 64.5851169 | 62.5328118 | 70.2127309 |
| 71.3348948 | 63.2822025 | 64.5851169 | 60.5328118 | 70.2127309 |
| 70.3348948 | 63.2822025 | 64.5851169 | 60.5328118 | 70.2127309 |
| 69.3348948 | 64.2822025 | 64.5851169 | 60.5328118 | 68.2127309 |
| 70.3348948 | 65.2822025 | 65.5851169 | 61.5328118 | 68.2127309 |
| 70.3348948 | 65.2822025 | 65.5851169 | 61.5328118 | 66.2127309 |
| 71.3348948 | 66.2822025 | 65.5851169 | 60.5328118 | 66.2127309 |
| 71.3348948 | 66.2822025 | 66.5851169 | 60.5328118 | 67.2127309 |
| 71.3348948 | 66.2822025 | 66.5851169 | 60.5328118 | 68.2127309 |
| 72.3348948 | 67.2822025 | 67.5851169 | 62.5328118 | 68.2127309 |
| 73.3348948 | 67.2822025 | 68.5851169 | 62.5328118 | 69.2127309 |
| 74.3348948 | 68.2822025 | 68.5851169 | 63.5328118 | 69.2127309 |
| 74.3348948 | 68.2822025 | 68.5851169 | 63.5328118 | 69.2127309 |
| 74.3348948 | 69.2822025 | 68.5851169 | 64.5328118 | 68.2127309 |
| 74.3348948 | 71.2822025 | 68.5851169 | 64.5328118 | 67.2127309 |
| 76.3348948 | 71.2822025 | 69.5851169 | 64.5328118 | 66.2127309 |
| 77.3348948 | 71.2822025 | 70.5851169 | 64.5328118 | 66.2127309 |
| 78.3348948 | 71.2822025 | 70.5851169 | 64.5328118 | 66.2127309 |
| 78.3348948 | 71.2822025 | 70.5851169 | 64.5328118 | 66.2127309 |

|            |            |            |            |            |
|------------|------------|------------|------------|------------|
| 78.3348948 | 72.2822025 | 71.5851169 | 63.5328118 | 66.2127309 |
| 78.3348948 | 72.2822025 | 71.5851169 | 63.5328118 | 66.2127309 |
| 74.3348948 | 72.2822025 | 70.5851169 | 63.5328118 | 66.2127309 |
| 71.3348948 | 73.2822025 | 69.5851169 | 63.5328118 | 66.2127309 |
| 70.3348948 | 73.2822025 | 69.5851169 | 63.5328118 | 69.2127309 |
| 69.3348948 | 73.2822025 | 68.5851169 | 63.5328118 | 73.2127309 |
| 69.3348948 | 73.2822025 | 68.5851169 | 63.5328118 | 73.2127309 |
| 70.3348948 | 74.2822025 | 68.5851169 | 63.5328118 | 75.2127309 |
| 71.3348948 | 74.2822025 | 68.5851169 | 63.5328118 | 75.2127309 |
| 72.3348948 | 74.2822025 | 67.5851169 | 64.5328118 | 75.2127309 |
| 72.3348948 | 75.2822025 | 66.5851169 | 64.5328118 | 75.2127309 |
| 71.3348948 | 75.2822025 | 66.5851169 | 64.5328118 | 75.2127309 |
| 70.3348948 | 76.2822025 | 65.5851169 | 64.5328118 | 75.2127309 |
| 68.3348948 | 77.2822025 | 65.5851169 | 64.5328118 | 74.2127309 |
| 68.3348948 | 77.2822025 | 65.5851169 | 64.5328118 | 73.2127309 |
| 68.3348948 | 78.2822025 | 65.5851169 | 64.5328118 | 73.2127309 |
| 68.3348948 | 78.2822025 | 65.5851169 | 64.5328118 | 72.2127309 |
| 68.3348948 | 77.2822025 | 65.5851169 | 64.5328118 | 69.2127309 |
| 68.3348948 | 76.2822025 | 65.5851169 | 65.5328118 | 69.2127309 |
| 68.3348948 | 73.2822025 | 65.5851169 | 65.5328118 | 69.2127309 |
| 69.3348948 | 74.2822025 | 65.5851169 | 65.5328118 | 69.2127309 |
| 70.3348948 | 74.2822025 | 64.5851169 | 64.5328118 | 69.2127309 |
| 70.3348948 | 74.2822025 | 64.5851169 | 63.5328118 | 70.2127309 |
| 70.3348948 | 73.2822025 | 64.5851169 | 64.5328118 | 70.2127309 |
| 69.3348948 | 73.2822025 | 64.5851169 | 65.5328118 | 70.2127309 |
| 68.3348948 | 73.2822025 | 64.5851169 | 65.5328118 | 70.2127309 |
| 67.3348948 | 72.2822025 | 65.5851169 | 65.5328118 | 70.2127309 |
| 67.3348948 | 72.2822025 | 65.5851169 | 65.5328118 | 71.2127309 |
| 67.3348948 | 72.2822025 | 65.5851169 | 65.5328118 | 71.2127309 |
| 68.3348948 | 72.2822025 | 65.5851169 | 63.5328118 | 72.2127309 |
| 69.3348948 | 73.2822025 | 65.5851169 | 62.5328118 | 73.2127309 |
| 70.3348948 | 73.2822025 | 65.5851169 | 62.5328118 | 74.2127309 |
| 70.3348948 | 74.2822025 | 65.5851169 | 62.5328118 | 74.2127309 |
| 70.3348948 | 75.2822025 | 65.5851169 | 62.5328118 | 75.2127309 |
| 70.3348948 | 75.2822025 | 64.5851169 | 62.5328118 | 76.2127309 |
| 70.3348948 | 76.2822025 | 64.5851169 | 62.5328118 | 76.2127309 |
| 71.3348948 | 77.2822025 | 63.5851169 | 62.5328118 | 76.2127309 |
| 69.3348948 | 77.2822025 | 63.5851169 | 62.5328118 | 76.2127309 |
| 68.3348948 | 78.2822025 | 63.5851169 | 62.5328118 | 77.2127309 |
| 68.3348948 | 79.2822025 | 63.5851169 | 63.5328118 | 77.2127309 |
| 66.3348948 | 81.2822025 | 63.5851169 | 63.5328118 | 78.2127309 |
| 66.3348948 | 81.2822025 | 64.5851169 | 63.5328118 | 79.2127309 |
| 66.3348948 | 81.2822025 | 65.5851169 | 62.5328118 | 79.2127309 |
| 66.3348948 | 80.2822025 | 65.5851169 | 63.5328118 | 80.2127309 |
| 66.3348948 | 79.2822025 | 65.5851169 | 63.5328118 | 81.2127309 |

|            |            |            |            |            |
|------------|------------|------------|------------|------------|
| 67.3348948 | 77.2822025 | 66.5851169 | 63.5328118 | 81.2127309 |
| 69.3348948 | 74.2822025 | 66.5851169 | 63.5328118 | 81.2127309 |
| 70.3348948 | 71.2822025 | 66.5851169 | 64.5328118 | 81.2127309 |
| 71.3348948 | 70.2822025 | 67.5851169 | 64.5328118 | 83.2127309 |
| 71.3348948 | 69.2822025 | 70.5851169 | 65.5328118 | 83.2127309 |
| 71.3348948 | 68.2822025 | 71.5851169 | 66.5328118 | 83.2127309 |
| 71.3348948 | 68.2822025 | 72.5851169 | 66.5328118 | 83.2127309 |
| 71.3348948 | 68.2822025 | 71.5851169 | 66.5328118 | 83.2127309 |
| 71.3348948 | 68.2822025 | 71.5851169 | 66.5328118 | 83.2127309 |
| 71.3348948 | 68.2822025 | 71.5851169 | 67.5328118 | 81.2127309 |
| 71.3348948 | 66.2822025 | 71.5851169 | 66.5328118 | 81.2127309 |
| 71.3348948 | 66.2822025 | 71.5851169 | 66.5328118 | 80.2127309 |
| 71.3348948 | 65.2822025 | 71.5851169 | 66.5328118 | 80.2127309 |
| 71.3348948 | 65.2822025 | 71.5851169 | 66.5328118 | 77.2127309 |
| 71.3348948 | 65.2822025 | 69.5851169 | 64.5328118 | 66.2127309 |
| 71.3348948 | 65.2822025 | 67.5851169 | 65.5328118 | 66.2127309 |
| 71.3348948 | 66.2822025 | 67.5851169 | 65.5328118 | 64.2127309 |
| 71.3348948 | 66.2822025 | 67.5851169 | 65.5328118 | 64.2127309 |
| 71.3348948 | 65.2822025 | 66.5851169 | 65.5328118 | 63.2127309 |
| 70.3348948 | 65.2822025 | 65.5851169 | 65.5328118 | 63.2127309 |
| 70.3348948 | 64.2822025 | 65.5851169 | 65.5328118 | 64.2127309 |
| 68.3348948 | 64.2822025 | 64.5851169 | 65.5328118 | 64.2127309 |
| 67.3348948 | 64.2822025 | 64.5851169 | 65.5328118 | 64.2127309 |
| 67.3348948 | 64.2822025 | 64.5851169 | 64.5328118 | 64.2127309 |
| 65.3348948 | 64.2822025 | 64.5851169 | 64.5328118 | 64.2127309 |
| 65.3348948 | 64.2822025 | 63.5851169 | 64.5328118 | 64.2127309 |
| 65.3348948 | 63.2822025 | 63.5851169 | 68.5328118 | 62.2127309 |
| 64.3348948 | 63.2822025 | 63.5851169 | 68.5328118 | 63.2127309 |
| 63.3348948 | 63.2822025 | 63.5851169 | 68.5328118 | 61.2127309 |
| 63.3348948 | 63.2822025 | 63.5851169 | 68.5328118 | 61.2127309 |
| 63.3348948 | 63.2822025 | 63.5851169 | 68.5328118 | 61.2127309 |
| 63.3348948 | 63.2822025 | 63.5851169 | 68.5328118 | 61.2127309 |
| 63.3348948 | 63.2822025 | 63.5851169 | 69.5328118 | 61.2127309 |
| 62.3348948 | 63.2822025 | 63.5851169 | 71.5328118 | 62.2127309 |
| 62.3348948 | 64.2822025 | 63.5851169 | 72.5328118 | 62.2127309 |
| 62.3348948 | 63.2822025 | 64.5851169 | 72.5328118 | 63.2127309 |
| 61.3348948 | 63.2822025 | 64.5851169 | 72.5328118 | 63.2127309 |
| 61.3348948 | 63.2822025 | 64.5851169 | 72.5328118 | 63.2127309 |
| 61.3348948 | 63.2822025 | 64.5851169 | 64.5328118 | 64.2127309 |
| 61.3348948 | 63.2822025 | 65.5851169 | 64.5328118 | 63.2127309 |
| 62.3348948 | 63.2822025 | 65.5851169 | 63.5328118 | 63.2127309 |
| 62.3348948 | 62.2822025 | 65.5851169 | 62.5328118 | 63.2127309 |
| 62.3348948 | 62.2822025 | 66.5851169 | 63.5328118 | 60.2127309 |
| 62.3348948 | 62.2822025 | 67.5851169 | 63.5328118 | 60.2127309 |
| 62.3348948 | 63.2822025 | 67.5851169 | 63.5328118 | 60.2127309 |

|            |            |            |            |            |
|------------|------------|------------|------------|------------|
| 62.3348948 | 63.2822025 | 66.5851169 | 64.5328118 | 60.2127309 |
| 61.3348948 | 63.2822025 | 66.5851169 | 64.5328118 | 59.2127309 |
| 61.3348948 | 63.2822025 | 66.5851169 | 64.5328118 | 70.2127309 |
| 56.3348948 | 63.2822025 | 67.5851169 | 65.5328118 | 74.2127309 |
| 51.3348948 | 63.2822025 | 67.5851169 | 66.5328118 | 74.2127309 |
| 51.3348948 | 63.2822025 | 68.5851169 | 66.5328118 | 75.2127309 |
| 50.3348948 | 63.2822025 | 70.5851169 | 65.5328118 | 73.2127309 |
| 49.3348948 | 64.2822025 | 70.5851169 | 65.5328118 | 73.2127309 |
| 49.3348948 | 66.2822025 | 70.5851169 | 66.5328118 | 74.2127309 |
| 47.3348948 | 66.2822025 | 70.5851169 | 66.5328118 | 76.2127309 |
| 47.3348948 | 66.2822025 | 70.5851169 | 66.5328118 | 78.2127309 |
| 47.3348948 | 67.2822025 | 70.5851169 | 66.5328118 | 78.2127309 |
| 47.3348948 | 68.2822025 | 70.5851169 | 67.5328118 | 78.2127309 |
| 46.3348948 | 69.2822025 | 70.5851169 | 67.5328118 | 78.2127309 |
| 46.3348948 | 71.2822025 | 68.5851169 | 66.5328118 | 78.2127309 |
| 46.3348948 | 73.2822025 | 68.5851169 | 66.5328118 | 78.2127309 |
| 45.3348948 | 73.2822025 | 68.5851169 | 66.5328118 | 78.2127309 |
| 45.3348948 | 73.2822025 | 68.5851169 | 66.5328118 | 78.2127309 |
| 45.3348948 | 75.2822025 | 68.5851169 | 66.5328118 | 77.2127309 |
| 45.3348948 | 76.2822025 | 68.5851169 | 66.5328118 | 77.2127309 |
| 48.3348948 | 77.2822025 | 69.5851169 | 66.5328118 | 77.2127309 |
| 49.3348948 | 78.2822025 | 69.5851169 | 65.5328118 | 77.2127309 |
| 49.3348948 | 79.2822025 | 69.5851169 | 66.5328118 | 74.2127309 |
| 50.3348948 | 79.2822025 | 70.5851169 | 66.5328118 | 74.2127309 |
| 51.3348948 | 82.2822025 | 70.5851169 | 66.5328118 | 68.2127309 |
| 51.3348948 | 82.2822025 | 65.5851169 | 66.5328118 | 68.2127309 |
| 51.3348948 | 82.2822025 | 64.5851169 | 66.5328118 | 67.2127309 |
| 52.3348948 | 80.2822025 | 64.5851169 | 66.5328118 | 67.2127309 |
| 52.3348948 | 77.2822025 | 63.5851169 | 67.5328118 | 67.2127309 |
| 55.3348948 | 75.2822025 | 64.5851169 | 67.5328118 | 66.2127309 |
| 64.3348948 | 71.2822025 | 64.5851169 | 68.5328118 | 65.2127309 |
| 64.3348948 | 71.2822025 | 64.5851169 | 68.5328118 | 63.2127309 |
| 65.3348948 | 65.2822025 | 63.5851169 | 69.5328118 | 63.2127309 |
| 65.3348948 | 63.2822025 | 63.5851169 | 69.5328118 | 63.2127309 |
| 66.3348948 | 63.2822025 | 63.5851169 | 69.5328118 | 66.2127309 |
| 66.3348948 | 61.2822025 | 63.5851169 | 69.5328118 | 65.2127309 |
| 66.3348948 | 59.2822025 | 63.5851169 | 68.5328118 | 64.2127309 |
| 66.3348948 | 59.2822025 | 63.5851169 | 67.5328118 | 64.2127309 |
| 66.3348948 | 59.2822025 | 63.5851169 | 66.5328118 | 62.2127309 |
| 65.3348948 | 59.2822025 | 63.5851169 | 66.5328118 | 60.2127309 |
| 66.3348948 | 59.2822025 | 63.5851169 | 66.5328118 | 59.2127309 |
| 66.3348948 | 59.2822025 | 63.5851169 | 66.5328118 | 59.2127309 |
| 66.3348948 | 59.2822025 | 63.5851169 | 65.5328118 | 59.2127309 |
| 66.3348948 | 59.2822025 | 63.5851169 | 65.5328118 | 59.2127309 |
| 65.3348948 | 59.2822025 | 63.5851169 | 65.5328118 | 59.2127309 |

|            |            |            |            |            |
|------------|------------|------------|------------|------------|
| 66.3348948 | 60.2822025 | 65.5851169 | 64.5328118 | 60.2127309 |
| 66.3348948 | 60.2822025 | 67.5851169 | 63.5328118 | 64.2127309 |
| 66.3348948 | 60.2822025 | 68.5851169 | 62.5328118 | 64.2127309 |
| 67.3348948 | 60.2822025 | 68.5851169 | 62.5328118 | 64.2127309 |
| 67.3348948 | 60.2822025 | 68.5851169 | 63.5328118 | 64.2127309 |
| 69.3348948 | 60.2822025 | 68.5851169 | 65.5328118 | 64.2127309 |
| 69.3348948 | 60.2822025 | 68.5851169 | 66.5328118 | 63.2127309 |
| 68.3348948 | 59.2822025 | 68.5851169 | 67.5328118 | 63.2127309 |
| 68.3348948 | 59.2822025 | 68.5851169 | 67.5328118 | 63.2127309 |
| 68.3348948 | 60.2822025 | 68.5851169 | 68.5328118 | 63.2127309 |
| 68.3348948 | 60.2822025 | 69.5851169 | 69.5328118 | 63.2127309 |
| 67.3348948 | 60.2822025 | 70.5851169 | 69.5328118 | 64.2127309 |
| 67.3348948 | 60.2822025 | 71.5851169 | 70.5328118 | 66.2127309 |
| 67.3348948 | 60.2822025 | 72.5851169 | 70.5328118 | 66.2127309 |
| 67.3348948 | 62.2822025 | 74.5851169 | 67.5328118 | 66.2127309 |
| 67.3348948 | 61.2822025 | 74.5851169 | 64.5328118 | 66.2127309 |
| 67.3348948 | 61.2822025 | 74.5851169 | 64.5328118 | 66.2127309 |
| 67.3348948 | 61.2822025 | 76.5851169 | 63.5328118 | 64.2127309 |
| 67.3348948 | 61.2822025 | 77.5851169 | 64.5328118 | 65.2127309 |
| 67.3348948 | 62.2822025 | 77.5851169 | 64.5328118 | 66.2127309 |
| 67.3348948 | 62.2822025 | 77.5851169 | 67.5328118 | 66.2127309 |
| 67.3348948 | 62.2822025 | 77.5851169 | 72.5328118 | 67.2127309 |
| 67.3348948 | 60.2822025 | 76.5851169 | 73.5328118 | 68.2127309 |
| 68.3348948 | 60.2822025 | 73.5851169 | 73.5328118 | 67.2127309 |
| 68.3348948 | 60.2822025 | 68.5851169 | 73.5328118 | 66.2127309 |
| 68.3348948 | 60.2822025 | 66.5851169 | 75.5328118 | 66.2127309 |
| 68.3348948 | 60.2822025 | 66.5851169 | 75.5328118 | 66.2127309 |
| 68.3348948 | 60.2822025 | 67.5851169 | 75.5328118 | 66.2127309 |
| 69.3348948 | 59.2822025 | 67.5851169 | 76.5328118 | 66.2127309 |
| 69.3348948 | 59.2822025 | 67.5851169 | 76.5328118 | 65.2127309 |
| 69.3348948 | 59.2822025 | 67.5851169 | 76.5328118 | 65.2127309 |
| 70.3348948 | 59.2822025 | 67.5851169 | 74.5328118 | 65.2127309 |
| 74.3348948 | 59.2822025 | 66.5851169 | 73.5328118 | 65.2127309 |
| 75.3348948 | 59.2822025 | 65.5851169 | 73.5328118 | 65.2127309 |
| 74.3348948 | 61.2822025 | 64.5851169 | 72.5328118 | 68.2127309 |
| 73.3348948 | 64.2822025 | 64.5851169 | 72.5328118 | 70.2127309 |
| 72.3348948 | 67.2822025 | 64.5851169 | 72.5328118 | 70.2127309 |
| 70.3348948 | 70.2822025 | 64.5851169 | 72.5328118 | 70.2127309 |
| 68.3348948 | 67.2822025 | 64.5851169 | 72.5328118 | 68.2127309 |
| 67.3348948 | 66.2822025 | 65.5851169 | 72.5328118 | 66.2127309 |
| 67.3348948 | 62.2822025 | 65.5851169 | 71.5328118 | 65.2127309 |
| 67.3348948 | 62.2822025 | 65.5851169 | 70.5328118 | 67.2127309 |
| 66.3348948 | 60.2822025 | 65.5851169 | 70.5328118 | 67.2127309 |
| 66.3348948 | 59.2822025 | 65.5851169 | 71.5328118 | 67.2127309 |
| 66.3348948 | 58.2822025 | 65.5851169 | 73.5328118 | 66.2127309 |

|            |            |            |            |            |
|------------|------------|------------|------------|------------|
| 66.3348948 | 58.2822025 | 65.5851169 | 79.5328118 | 67.2127309 |
| 66.3348948 | 57.2822025 | 66.5851169 | 80.5328118 | 68.2127309 |
| 66.3348948 | 57.2822025 | 66.5851169 | 80.5328118 | 68.2127309 |
| 67.3348948 | 57.2822025 | 66.5851169 | 80.5328118 | 67.2127309 |
| 71.3348948 | 57.2822025 | 66.5851169 | 81.5328118 | 67.2127309 |
| 74.3348948 | 57.2822025 | 66.5851169 | 81.5328118 | 67.2127309 |
| 75.3348948 | 57.2822025 | 65.5851169 | 82.5328118 | 67.2127309 |
| 75.3348948 | 57.2822025 | 65.5851169 | 82.5328118 | 67.2127309 |
| 75.3348948 | 57.2822025 | 65.5851169 | 83.5328118 | 71.2127309 |
| 75.3348948 | 57.2822025 | 65.5851169 | 83.5328118 | 73.2127309 |
| 76.3348948 | 57.2822025 | 65.5851169 | 83.5328118 | 74.2127309 |
| 76.3348948 | 57.2822025 | 65.5851169 | 84.5328118 | 74.2127309 |
| 77.3348948 | 57.2822025 | 65.5851169 | 84.5328118 | 76.2127309 |
| 77.3348948 | 57.2822025 | 66.5851169 | 84.5328118 | 76.2127309 |
| 79.3348948 | 57.2822025 | 68.5851169 | 84.5328118 | 75.2127309 |
| 79.3348948 | 57.2822025 | 68.5851169 | 84.5328118 | 74.2127309 |
| 79.3348948 | 57.2822025 | 66.5851169 | 85.5328118 | 74.2127309 |
| 79.3348948 | 57.2822025 | 66.5851169 | 85.5328118 | 74.2127309 |
| 79.3348948 | 57.2822025 | 65.5851169 | 70.0925569 | 74.2127309 |
| 71.3348948 | 57.2822025 | 65.5851169 | 69.2925569 | 74.2127309 |
| 68.3348948 | 57.2822025 | 65.5851169 | 68.5925569 | 73.2127309 |
| 66.3348948 | 57.2822025 | 65.5851169 | 67.6925569 | 73.2127309 |
| 65.3348948 | 57.2822025 | 65.5851169 | 66.9925569 | 71.2127309 |
| 65.3348948 | 60.2822025 | 65.5851169 | 67.6925569 | 71.2127309 |
| 65.3348948 | 60.2822025 | 65.5851169 | 68.0925569 | 71.2127309 |
| 65.3348948 | 59.2822025 | 65.5851169 | 67.8925569 | 70.2127309 |
| 65.3348948 | 59.2822025 | 65.5851169 | 67.6925569 | 69.2127309 |
| 65.3348948 | 60.2822025 | 65.5851169 | 67.7925569 | 68.2127309 |
| 64.3348948 | 60.2822025 | 65.5851169 | 66.9925569 | 68.2127309 |
| 64.3348948 | 60.2822025 | 65.5851169 | 66.4925569 | 67.2127309 |
| 64.3348948 | 60.2822025 | 65.5851169 | 66.4925569 | 66.2127309 |
| 64.3348948 | 60.2822025 | 66.5851169 | 66.9925569 | 66.2127309 |
| 64.3348948 | 59.2822025 | 69.5851169 | 67.2925569 | 66.2127309 |
| 64.3348948 | 58.2822025 | 69.5851169 | 67.4925569 | 65.2127309 |
| 63.3348948 | 59.2822025 | 72.5851169 | 67.9925569 | 66.2127309 |
| 63.3348948 | 59.2822025 | 72.5851169 | 67.0112495 | 66.2127309 |
| 63.3348948 | 59.2822025 | 73.5851169 | 85.5328118 | 65.2127309 |
| 64.3348948 | 60.2822025 | 73.5851169 | 85.5328118 | 65.2127309 |
| 64.3348948 | 60.2822025 | 73.5851169 | 85.5328118 | 65.2127309 |
| 64.3348948 | 61.2822025 | 73.5851169 | 84.5328118 | 65.2127309 |
| 63.3348948 | 61.2822025 | 73.5851169 | 83.5328118 | 66.2127309 |
| 63.3348948 | 61.2822025 | 73.5851169 | 83.5328118 | 66.2127309 |
| 63.3348948 | 60.2822025 | 73.5851169 | 83.5328118 | 67.2127309 |
| 63.3348948 | 60.2822025 | 72.5851169 | 83.5328118 | 68.2127309 |
| 60.3348948 | 59.2822025 | 71.5851169 | 82.5328118 | 68.2127309 |

|            |            |            |            |            |
|------------|------------|------------|------------|------------|
| 60.3348948 | 59.2822025 | 70.5851169 | 82.5328118 | 68.2127309 |
| 61.3348948 | 59.2822025 | 67.5851169 | 82.5328118 | 68.2127309 |
| 61.3348948 | 59.2822025 | 66.5851169 | 82.5328118 | 68.2127309 |
| 62.3348948 | 59.2822025 | 64.5851169 | 83.5328118 | 74.2127309 |
| 62.3348948 | 59.2822025 | 63.5851169 | 83.5328118 | 78.2127309 |
| 62.3348948 | 59.2822025 | 62.5851169 | 87.5328118 | 82.2127309 |
| 62.3348948 | 59.2822025 | 62.5851169 | 87.5328118 | 82.2127309 |
| 62.3348948 | 59.2822025 | 61.5851169 | 87.5328118 | 83.2127309 |
| 59.3348948 | 59.2822025 | 61.5851169 | 70.5925569 | 83.2127309 |
| 59.3348948 | 59.2822025 | 61.5851169 | 69.2925569 | 82.2127309 |
| 58.3348948 | 59.2822025 | 61.5851169 | 68.0925569 | 82.2127309 |
| 58.3348948 | 59.2822025 | 61.5851169 | 67.6925569 | 83.2127309 |
| 58.3348948 | 59.2822025 | 61.5851169 | 67.7925569 | 82.2127309 |
| 62.3348948 | 59.2822025 | 61.5851169 | 68.0925569 | 81.2127309 |
| 62.3348948 | 59.2822025 | 61.5851169 | 68.3925569 | 81.2127309 |
| 62.3348948 | 59.2822025 | 61.5851169 | 69.1925569 | 80.2127309 |
| 62.3348948 | 59.2822025 | 61.5851169 | 69.2925569 | 80.2127309 |
| 63.3348948 | 59.2822025 | 61.5851169 | 69.5925569 | 80.2127309 |
| 64.3348948 | 59.2822025 | 61.5851169 | 68.6925569 | 78.2127309 |
| 65.3348948 | 60.2822025 | 62.5851169 | 69.0925569 | 78.2127309 |
| 65.3348948 | 60.2822025 | 63.5851169 | 69.0925569 | 78.2127309 |
| 65.3348948 | 61.2822025 | 65.5851169 | 68.8925569 | 76.2127309 |
| 66.3348948 | 61.2822025 | 65.5851169 | 68.1925569 | 72.2127309 |
| 66.3348948 | 61.2822025 | 67.5851169 | 67.8925569 | 71.2127309 |
| 68.3348948 | 62.2822025 | 69.5851169 | 67.8925569 | 71.2127309 |
| 70.3348948 | 63.2822025 | 70.5851169 | 68.2925569 | 69.2127309 |
| 68.3348948 | 64.2822025 | 70.5851169 | 85.5328118 | 67.2127309 |
| 67.3348948 | 64.2822025 | 70.5851169 | 82.5328118 | 67.2127309 |
| 67.3348948 | 65.2822025 | 70.5851169 | 82.5328118 | 63.2127309 |
| 67.3348948 | 65.2822025 | 70.5851169 | 79.5328118 | 63.2127309 |
| 67.3348948 | 66.2822025 | 71.5851169 | 79.5328118 | 62.2127309 |
| 67.3348948 | 66.2822025 | 69.5851169 | 79.5328118 | 60.2127309 |
| 67.3348948 | 67.2822025 | 69.5851169 | 71.5328118 | 59.2127309 |
| 67.3348948 | 67.2822025 | 66.5851169 | 70.5328118 | 59.2127309 |
| 68.3348948 | 68.2822025 | 64.5851169 | 69.5328118 | 62.2127309 |
| 68.3348948 | 68.2822025 | 63.5851169 | 69.5328118 | 70.2127309 |
| 68.3348948 | 68.2822025 | 62.5851169 | 69.5328118 | 73.2127309 |
| 67.3348948 | 68.2822025 | 62.5851169 | 67.5328118 | 73.2127309 |
| 67.3348948 | 68.2822025 | 62.5851169 | 66.5328118 | 74.2127309 |
| 67.3348948 | 68.2822025 | 62.5851169 | 65.5328118 | 72.2127309 |
| 67.3348948 | 67.2822025 | 61.5851169 | 65.5328118 | 70.2127309 |
| 69.3348948 | 66.2822025 | 61.5851169 | 65.5328118 | 70.2127309 |
| 70.3348948 | 67.2822025 | 61.5851169 | 65.5328118 | 66.2127309 |
| 70.3348948 | 67.2822025 | 61.5851169 | 66.5328118 | 66.2127309 |
| 70.3348948 | 67.2822025 | 61.5851169 | 66.5328118 | 66.2127309 |



|            |            |            |            |            |
|------------|------------|------------|------------|------------|
| 70.3348948 | 67.2822025 | 62.5851169 | 66.5328118 | 66.2127309 |
| 70.3348948 | 67.2822025 | 62.5851169 | 66.5328118 | 68.2127309 |
| 71.3348948 | 67.2822025 | 62.5851169 | 66.5328118 | 68.2127309 |
| 71.3348948 | 66.2822025 | 62.5851169 | 66.5328118 | 68.2127309 |
| 72.3348948 | 66.2822025 | 62.5851169 | 66.5328118 | 68.2127309 |
| 76.3348948 | 66.2822025 | 63.5851169 | 65.5328118 | 68.2127309 |
| 76.3348948 | 66.2822025 | 63.5851169 | 64.5328118 | 67.2127309 |
| 75.3348948 | 65.2822025 | 63.5851169 | 64.5328118 | 67.2127309 |
| 74.3348948 | 65.2822025 | 66.5851169 | 61.5328118 | 67.2127309 |
| 73.3348948 | 65.2822025 | 66.5851169 | 61.5328118 | 69.2127309 |
| 72.3348948 | 65.2822025 | 66.5851169 | 60.5328118 | 69.2127309 |
| 72.3348948 | 65.2822025 | 66.5851169 | 60.5328118 | 69.2127309 |
| 69.3348948 | 64.2822025 | 67.5851169 | 59.5328118 | 67.2127309 |
| 66.3348948 | 64.2822025 | 67.5851169 | 59.5328118 | 65.2127309 |
| 65.3348948 | 65.2822025 | 66.5851169 | 59.5328118 | 65.2127309 |
| 65.3348948 | 64.2822025 | 68.5851169 | 61.5328118 | 65.2127309 |
| 62.3348948 | 62.2822025 | 67.5851169 | 62.5328118 | 64.2127309 |
| 61.3348948 | 61.2822025 | 67.5851169 | 63.5328118 | 66.2127309 |
| 60.3348948 | 61.2822025 | 67.5851169 | 63.5328118 | 67.2127309 |
| 60.3348948 | 61.2822025 | 67.5851169 | 63.5328118 | 68.2127309 |
| 60.3348948 | 61.2822025 | 67.5851169 | 63.5328118 | 69.2127309 |
| 59.3348948 | 59.2822025 | 66.5851169 | 62.5328118 | 70.2127309 |
| 59.3348948 | 57.2822025 | 66.5851169 | 62.5328118 | 70.2127309 |
| 59.3348948 | 56.2822025 | 66.5851169 | 62.5328118 | 70.2127309 |
| 59.3348948 | 56.2822025 | 66.5851169 | 62.5328118 | 70.2127309 |
| 58.3348948 | 57.2822025 | 66.5851169 | 62.5328118 | 70.2127309 |
| 58.3348948 | 57.2822025 | 67.5851169 | 63.5328118 | 70.2127309 |
| 58.3348948 | 57.2822025 | 67.5851169 | 65.5328118 | 70.2127309 |
| 58.3348948 | 57.2822025 | 67.5851169 | 65.5328118 | 72.2127309 |
| 58.3348948 | 57.2822025 | 67.5851169 | 67.5328118 | 71.2127309 |
| 58.3348948 | 57.2822025 | 67.5851169 | 68.5328118 | 68.2127309 |
| 58.3348948 | 57.2822025 | 68.5851169 | 68.5328118 | 68.2127309 |
| 58.3348948 | 57.2822025 | 69.5851169 | 68.5328118 | 66.2127309 |
| 58.3348948 | 57.2822025 | 68.5851169 | 67.5328118 | 66.2127309 |
| 58.3348948 | 56.2822025 | 68.5851169 | 67.5328118 | 66.2127309 |
| 58.3348948 | 57.2822025 | 69.5851169 | 65.5328118 | 66.2127309 |
| 57.3348948 | 58.2822025 | 69.5851169 | 64.5328118 | 65.2127309 |
| 58.3348948 | 58.2822025 | 70.5851169 | 64.5328118 | 62.2127309 |
| 60.3348948 | 58.2822025 | 70.5851169 | 64.5328118 | 62.2127309 |
| 61.3348948 | 59.2822025 | 70.5851169 | 64.5328118 | 66.2127309 |
| 61.3348948 | 61.2822025 | 66.5851169 | 64.5328118 | 67.2127309 |
| 62.3348948 | 62.2822025 | 65.5851169 | 63.5328118 | 67.2127309 |
| 64.3348948 | 63.2822025 | 65.5851169 | 63.5328118 | 66.2127309 |
| 64.3348948 | 66.2822025 | 65.5851169 | 63.5328118 | 66.2127309 |
| 64.3348948 | 66.2822025 | 65.5851169 | 63.5328118 | 68.2127309 |

|            |            |            |            |            |
|------------|------------|------------|------------|------------|
| 64.3348948 | 66.2822025 | 65.5851169 | 63.5328118 | 67.2127309 |
| 64.3348948 | 65.2822025 | 65.5851169 | 63.5328118 | 67.2127309 |
| 64.3348948 | 65.2822025 | 65.5851169 | 63.5328118 | 65.2127309 |
| 64.3348948 | 65.2822025 | 65.5851169 | 64.5328118 | 65.2127309 |
| 65.3348948 | 65.2822025 | 65.5851169 | 64.5328118 | 65.2127309 |
| 67.3348948 | 64.2822025 | 65.5851169 | 65.5328118 | 66.2127309 |
| 67.3348948 | 64.2822025 | 65.5851169 | 66.5328118 | 66.2127309 |
| 67.3348948 | 64.2822025 | 65.5851169 | 66.5328118 | 69.2127309 |
| 67.3348948 | 64.2822025 | 65.5851169 | 66.5328118 | 69.2127309 |
| 64.3348948 | 64.2822025 | 65.5851169 | 66.5328118 | 69.2127309 |
| 64.3348948 | 64.2822025 | 65.5851169 | 66.5328118 | 69.2127309 |
| 64.3348948 | 64.2822025 | 64.5851169 | 64.5328118 | 69.2127309 |
| 64.3348948 | 64.2822025 | 62.5851169 | 64.5328118 | 69.2127309 |
| 64.3348948 | 66.2822025 | 62.5851169 | 63.5328118 | 69.2127309 |
| 65.3348948 | 67.2822025 | 62.5851169 | 62.5328118 | 69.2127309 |
| 69.3348948 | 67.2822025 | 62.5851169 | 60.5328118 | 69.2127309 |
| 69.3348948 | 67.2822025 | 62.5851169 | 60.5328118 | 69.2127309 |
| 69.3348948 | 67.2822025 | 62.5851169 | 60.5328118 | 69.2127309 |
| 69.3348948 | 67.2822025 | 62.5851169 | 60.5328118 | 69.2127309 |
| 69.3348948 | 67.2822025 | 63.5851169 | 60.5328118 | 71.2127309 |
| 68.3348948 | 67.2822025 | 62.5851169 | 56.5328118 | 71.2127309 |
| 66.3348948 | 67.2822025 | 62.5851169 | 56.5328118 | 71.2127309 |
| 66.3348948 | 66.2822025 | 62.5851169 | 55.5328118 | 71.2127309 |
| 66.3348948 | 65.2822025 | 63.5851169 | 55.5328118 | 71.2127309 |
| 65.3348948 | 63.2822025 | 63.5851169 | 54.5328118 | 71.2127309 |
| 65.3348948 | 63.2822025 | 66.5851169 | 53.5328118 | 71.2127309 |
| 66.3348948 | 63.2822025 | 67.5851169 | 52.5328118 | 72.2127309 |
| 66.3348948 | 63.2822025 | 68.5851169 | 53.5328118 | 72.2127309 |
| 65.3348948 | 59.2822025 | 68.5851169 | 53.5328118 | 72.2127309 |
| 65.3348948 | 58.2822025 | 67.5851169 | 53.5328118 | 73.2127309 |
| 65.3348948 | 56.2822025 | 67.5851169 | 54.5328118 | 73.2127309 |
| 65.3348948 | 55.2822025 | 66.5851169 | 55.5328118 | 74.2127309 |
| 71.3348948 | 55.2822025 | 66.5851169 | 55.5328118 | 74.2127309 |
| 72.3348948 | 55.2822025 | 66.5851169 | 55.5328118 | 74.2127309 |
| 72.3348948 | 55.2822025 | 66.5851169 | 56.5328118 | 75.2127309 |
| 71.3348948 | 55.2822025 | 66.5851169 | 57.5328118 | 75.2127309 |
| 70.3348948 | 56.2822025 | 66.5851169 | 57.5328118 | 75.2127309 |
| 68.3348948 | 56.2822025 | 66.5851169 | 57.5328118 | 75.2127309 |
| 67.3348948 | 57.2822025 | 66.5851169 | 57.5328118 | 77.2127309 |
| 67.3348948 | 57.2822025 | 66.5851169 | 57.5328118 | 77.2127309 |
| 67.3348948 | 59.2822025 | 66.5851169 | 59.5328118 | 78.2127309 |
| 68.3348948 | 68.2822025 | 65.5851169 | 59.5328118 | 78.2127309 |
| 69.3348948 | 69.2822025 | 64.5851169 | 59.5328118 | 78.2127309 |
| 69.3348948 | 69.2822025 | 64.5851169 | 59.5328118 | 78.2127309 |
| 70.3348948 | 69.2822025 | 64.5851169 | 59.5328118 | 78.2127309 |
| 71.3348948 | 70.2822025 | 65.5851169 | 59.5328118 | 78.2127309 |



|            |            |            |            |            |
|------------|------------|------------|------------|------------|
| 73.3348948 | 75.2822025 | 69.5851169 | 65.5328118 | 70.2127309 |
| 73.3348948 | 73.2822025 | 69.5851169 | 65.5328118 | 70.2127309 |
| 73.3348948 | 72.2822025 | 69.5851169 | 67.5328118 | 70.2127309 |
| 72.3348948 | 72.2822025 | 70.5851169 | 67.5328118 | 70.2127309 |
| 71.3348948 | 72.2822025 | 70.5851169 | 66.5328118 | 70.2127309 |
| 71.3348948 | 71.2822025 | 70.5851169 | 67.5328118 | 66.2127309 |
| 71.3348948 | 71.2822025 | 68.5851169 | 67.5328118 | 65.2127309 |
| 71.3348948 | 71.2822025 | 68.5851169 | 67.5328118 | 65.2127309 |
| 70.3348948 | 71.2822025 | 66.5851169 | 65.5328118 | 64.2127309 |
| 70.3348948 | 70.2822025 | 65.5851169 | 64.5328118 | 65.2127309 |
| 70.3348948 | 70.2822025 | 64.5851169 | 64.5328118 | 69.2127309 |
| 68.3348948 | 70.2822025 | 64.5851169 | 64.5328118 | 69.2127309 |
| 67.3348948 | 70.2822025 | 64.5851169 | 64.5328118 | 69.2127309 |
| 67.3348948 | 70.2822025 | 64.5851169 | 63.5328118 | 68.2127309 |
| 67.3348948 | 69.2822025 | 64.5851169 | 62.5328118 | 67.2127309 |
| 67.3348948 | 68.2822025 | 63.5851169 | 62.5328118 | 66.2127309 |
| 67.3348948 | 68.2822025 | 63.5851169 | 62.5328118 | 63.2127309 |
| 67.3348948 | 66.2822025 | 63.5851169 | 63.5328118 | 63.2127309 |
| 69.3348948 | 66.2822025 | 63.5851169 | 63.5328118 | 63.2127309 |
| 69.3348948 | 66.2822025 | 62.5851169 | 62.5328118 | 63.2127309 |
| 71.3348948 | 63.2822025 | 62.5851169 | 62.5328118 | 64.2127309 |
| 72.3348948 | 63.2822025 | 62.5851169 | 61.5328118 | 65.2127309 |
| 73.3348948 | 60.2822025 | 62.5851169 | 61.5328118 | 65.2127309 |
| 73.3348948 | 60.2822025 | 62.5851169 | 61.5328118 | 65.2127309 |
| 73.3348948 | 60.2822025 | 63.5851169 | 61.5328118 | 65.2127309 |
| 73.3348948 | 60.2822025 | 64.5851169 | 61.5328118 | 66.2127309 |
| 73.3348948 | 60.2822025 | 64.5851169 | 61.5328118 | 66.2127309 |
| 73.3348948 | 60.2822025 | 64.5851169 | 61.5328118 | 66.2127309 |
| 72.3348948 | 59.2822025 | 64.5851169 | 63.5328118 | 66.2127309 |
| 72.3348948 | 59.2822025 | 64.5851169 | 63.5328118 | 65.2127309 |
| 72.3348948 | 59.2822025 | 64.5851169 | 63.5328118 | 64.2127309 |
| 72.3348948 | 59.2822025 | 64.5851169 | 63.5328118 | 64.2127309 |
| 72.3348948 | 59.2822025 | 64.5851169 | 63.5328118 | 64.2127309 |
| 71.3348948 | 59.2822025 | 64.5851169 | 63.5328118 | 65.2127309 |
| 68.3348948 | 59.2822025 | 64.5851169 | 64.5328118 | 67.2127309 |
| 66.3348948 | 60.2822025 | 67.5851169 | 64.5328118 | 68.2127309 |
| 66.3348948 | 60.2822025 | 67.5851169 | 64.5328118 | 69.2127309 |
| 65.3348948 | 60.2822025 | 67.5851169 | 64.5328118 | 69.2127309 |
| 64.3348948 | 60.2822025 | 67.5851169 | 64.5328118 | 69.2127309 |
| 64.3348948 | 60.2822025 | 66.5851169 | 64.5328118 | 70.2127309 |
| 64.3348948 | 60.2822025 | 65.5851169 | 61.5328118 | 67.2127309 |
| 65.3348948 | 60.2822025 | 65.5851169 | 61.5328118 | 67.2127309 |
| 66.3348948 | 61.2822025 | 65.5851169 | 61.5328118 | 66.2127309 |
| 66.3348948 | 61.2822025 | 65.5851169 | 61.5328118 | 63.2127309 |
| 66.3348948 | 61.2822025 | 66.5851169 | 61.5328118 | 63.2127309 |

|            |            |            |            |            |
|------------|------------|------------|------------|------------|
| 66.3348948 | 60.2822025 | 66.5851169 | 61.5328118 | 63.2127309 |
| 67.3348948 | 60.2822025 | 67.5851169 | 61.5328118 | 63.2127309 |
| 67.3348948 | 60.2822025 | 67.5851169 | 61.5328118 | 66.2127309 |
| 67.3348948 | 62.2822025 | 67.5851169 | 61.5328118 | 67.2127309 |
| 62.3348948 | 64.2822025 | 67.5851169 | 60.5328118 | 69.2127309 |
| 62.3348948 | 63.2822025 | 67.5851169 | 60.5328118 | 69.2127309 |
| 62.3348948 | 62.2822025 | 69.5851169 | 60.5328118 | 70.2127309 |
| 63.3348948 | 61.2822025 | 69.5851169 | 60.5328118 | 71.2127309 |
| 63.3348948 | 61.2822025 | 67.5851169 | 60.5328118 | 71.2127309 |
| 62.3348948 | 61.2822025 | 67.5851169 | 59.5328118 | 69.2127309 |
| 62.3348948 | 61.2822025 | 67.5851169 | 59.5328118 | 67.2127309 |
| 62.3348948 | 61.2822025 | 68.5851169 | 59.5328118 | 67.2127309 |
| 62.3348948 | 61.2822025 | 68.5851169 | 59.5328118 | 67.2127309 |
| 62.3348948 | 61.2822025 | 68.5851169 | 59.5328118 | 68.2127309 |
| 64.3348948 | 61.2822025 | 68.5851169 | 60.5328118 | 69.2127309 |
| 66.3348948 | 61.2822025 | 69.5851169 | 60.5328118 | 72.2127309 |
| 66.3348948 | 61.2822025 | 69.5851169 | 60.5328118 | 73.2127309 |
| 66.3348948 | 61.2822025 | 69.5851169 | 60.5328118 | 73.2127309 |
| 67.3348948 | 61.2822025 | 69.5851169 | 60.5328118 | 74.2127309 |
| 67.3348948 | 61.2822025 | 69.5851169 | 61.5328118 | 76.2127309 |
| 67.3348948 | 63.2822025 | 69.5851169 | 61.5328118 | 75.2127309 |
| 65.3348948 | 65.2822025 | 69.5851169 | 62.5328118 | 75.2127309 |
| 65.3348948 | 65.2822025 | 69.5851169 | 62.5328118 | 73.2127309 |
| 64.3348948 | 61.2822025 | 69.5851169 | 62.5328118 | 72.2127309 |
| 64.3348948 | 61.2822025 | 69.5851169 | 62.5328118 | 70.2127309 |
| 64.3348948 | 61.2822025 | 69.5851169 | 66.5328118 | 70.2127309 |
| 63.3348948 | 60.2822025 | 69.5851169 | 68.5328118 | 70.2127309 |
| 63.3348948 | 60.2822025 | 69.5851169 | 68.5328118 | 71.2127309 |
| 63.3348948 | 59.2822025 | 69.5851169 | 68.5328118 | 71.2127309 |
| 61.3348948 | 59.2822025 | 70.5851169 | 72.5328118 | 71.2127309 |
| 61.3348948 | 58.2822025 | 70.5851169 | 74.5328118 | 68.2127309 |
| 61.3348948 | 58.2822025 | 70.5851169 | 76.5328118 | 68.2127309 |
| 61.3348948 | 58.2822025 | 70.5851169 | 76.5328118 | 68.2127309 |
| 62.3348948 | 58.2822025 | 70.5851169 | 76.5328118 | 67.2127309 |
| 62.3348948 | 59.2822025 | 71.5851169 | 76.5328118 | 67.2127309 |
| 62.3348948 | 59.2822025 | 71.5851169 | 76.5328118 | 67.2127309 |
| 63.3348948 | 62.2822025 | 72.5851169 | 79.5328118 | 68.2127309 |
| 63.3348948 | 64.2822025 | 71.5851169 | 77.5328118 | 69.2127309 |
| 63.3348948 | 65.2822025 | 68.5851169 | 73.5328118 | 69.2127309 |
| 63.3348948 | 67.2822025 | 68.5851169 | 73.5328118 | 69.2127309 |
| 63.3348948 | 68.2822025 | 67.5851169 | 67.5328118 | 68.2127309 |
| 63.3348948 | 68.2822025 | 67.5851169 | 66.5328118 | 68.2127309 |
| 62.3348948 | 68.2822025 | 67.5851169 | 66.5328118 | 68.2127309 |
| 62.3348948 | 68.2822025 | 66.5851169 | 66.5328118 | 68.2127309 |
| 62.3348948 | 68.2822025 | 66.5851169 | 65.5328118 | 69.2127309 |

|            |            |            |            |            |
|------------|------------|------------|------------|------------|
| 62.3348948 | 68.2822025 | 66.5851169 | 65.5328118 | 69.2127309 |
| 62.3348948 | 67.2822025 | 64.5851169 | 65.5328118 | 69.2127309 |
| 63.3348948 | 66.2822025 | 63.5851169 | 65.5328118 | 69.2127309 |
| 64.3348948 | 66.2822025 | 63.5851169 | 65.5328118 | 69.2127309 |
| 64.3348948 | 65.2822025 | 63.5851169 | 65.5328118 | 70.2127309 |
| 72.3348948 | 65.2822025 | 63.5851169 | 65.5328118 | 71.2127309 |
| 79.3348948 | 64.2822025 | 63.5851169 | 65.5328118 | 71.2127309 |
| 79.3348948 | 64.2822025 | 63.5851169 | 65.5328118 | 75.2127309 |
| 85.3348948 | 62.2822025 | 63.5851169 | 65.5328118 | 75.2127309 |
| 85.3348948 | 62.2822025 | 63.5851169 | 65.5328118 | 75.2127309 |
| 84.3348948 | 62.2822025 | 64.5851169 | 65.5328118 | 75.2127309 |
| 83.3348948 | 62.2822025 | 64.5851169 | 65.5328118 | 75.2127309 |
| 81.3348948 | 62.2822025 | 64.5851169 | 63.5328118 | 75.2127309 |
| 80.3348948 | 62.2822025 | 67.5851169 | 63.5328118 | 75.2127309 |
| 77.3348948 | 62.2822025 | 69.5851169 | 63.5328118 | 75.2127309 |
| 75.3348948 | 62.2822025 | 69.5851169 | 62.5328118 | 75.2127309 |
| 74.3348948 | 62.2822025 | 72.5851169 | 62.5328118 | 75.2127309 |
| 72.3348948 | 62.2822025 | 72.5851169 | 61.5328118 | 76.2127309 |
| 72.3348948 | 62.2822025 | 72.5851169 | 61.5328118 | 77.2127309 |
| 73.3348948 | 62.2822025 | 73.5851169 | 62.5328118 | 77.2127309 |
| 74.3348948 | 62.2822025 | 73.5851169 | 62.5328118 | 79.2127309 |
| 74.3348948 | 62.2822025 | 73.5851169 | 62.5328118 | 81.2127309 |
| 75.3348948 | 62.2822025 | 73.5851169 | 68.5328118 | 79.2127309 |
| 75.3348948 | 62.2822025 | 72.5851169 | 69.5328118 | 75.2127309 |
| 74.3348948 | 62.2822025 | 71.5851169 | 69.5328118 | 75.2127309 |
| 73.3348948 | 62.2822025 | 70.5851169 | 69.5328118 | 72.2127309 |
| 73.3348948 | 65.2822025 | 70.5851169 | 69.5328118 | 71.2127309 |
| 72.3348948 | 64.2822025 | 69.5851169 | 69.5328118 | 71.2127309 |
| 71.3348948 | 64.2822025 | 69.5851169 | 69.5328118 | 70.2127309 |
| 72.3348948 | 63.2822025 | 68.5851169 | 70.5328118 | 70.2127309 |
| 72.3348948 | 63.2822025 | 69.5851169 | 71.5328118 | 69.2127309 |
| 71.3348948 | 64.2822025 | 70.5851169 | 71.5328118 | 69.2127309 |
| 72.3348948 | 64.2822025 | 68.5851169 | 72.5328118 | 67.2127309 |
| 72.3348948 | 64.2822025 | 68.5851169 | 75.5328118 | 65.2127309 |
| 72.3348948 | 63.2822025 | 64.5851169 | 75.5328118 | 66.2127309 |
| 72.3348948 | 63.2822025 | 63.5851169 | 75.5328118 | 67.2127309 |
| 72.3348948 | 63.2822025 | 62.5851169 | 76.5328118 | 70.2127309 |
| 73.3348948 | 63.2822025 | 62.5851169 | 77.5328118 | 70.2127309 |
| 74.3348948 | 63.2822025 | 62.5851169 | 77.5328118 | 73.2127309 |
| 74.3348948 | 63.2822025 | 62.5851169 | 79.5328118 | 73.2127309 |
| 73.3348948 | 63.2822025 | 62.5851169 | 79.5328118 | 73.2127309 |
| 74.3348948 | 63.2822025 | 63.5851169 | 79.5328118 | 72.2127309 |
| 76.3348948 | 62.2822025 | 63.5851169 | 78.5328118 | 71.2127309 |
| 76.3348948 | 63.2822025 | 63.5851169 | 77.5328118 | 70.2127309 |
| 76.3348948 | 63.2822025 | 63.5851169 | 77.5328118 | 70.2127309 |

|            |            |            |            |            |
|------------|------------|------------|------------|------------|
| 77.3348948 | 62.2822025 | 63.5851169 | 77.5328118 | 68.2127309 |
| 76.3348948 | 62.2822025 | 63.5851169 | 75.5328118 | 67.2127309 |
| 76.3348948 | 62.2822025 | 63.5851169 | 70.5328118 | 67.2127309 |
| 76.3348948 | 64.2822025 | 64.5851169 | 70.5328118 | 67.2127309 |
| 76.3348948 | 64.2822025 | 65.5851169 | 69.5328118 | 67.2127309 |
| 76.3348948 | 64.2822025 | 65.5851169 | 69.5328118 | 67.2127309 |
| 77.3348948 | 65.2822025 | 66.5851169 | 69.5328118 | 67.2127309 |
| 77.3348948 | 66.2822025 | 66.5851169 | 69.5328118 | 66.2127309 |
| 77.3348948 | 66.2822025 | 66.5851169 | 69.5328118 | 73.2127309 |
| 77.3348948 | 68.2822025 | 66.5851169 | 69.5328118 | 75.2127309 |
| 72.3348948 | 69.2822025 | 66.5851169 | 69.5328118 | 77.2127309 |
| 71.3348948 | 69.2822025 | 67.5851169 | 70.5328118 | 78.2127309 |
| 71.3348948 | 68.2822025 | 67.5851169 | 70.5328118 | 79.2127309 |
| 71.3348948 | 69.2822025 | 67.5851169 | 70.5328118 | 78.2127309 |
| 71.3348948 | 69.2822025 | 68.5851169 | 73.5328118 | 78.2127309 |
| 71.3348948 | 70.2822025 | 69.5851169 | 73.5328118 | 79.2127309 |
| 71.3348948 | 70.2822025 | 68.5851169 | 75.5328118 | 79.2127309 |
| 70.3348948 | 69.2822025 | 67.5851169 | 75.5328118 | 79.2127309 |
| 70.3348948 | 67.2822025 | 67.5851169 | 80.5328118 | 79.2127309 |
| 71.3348948 | 67.2822025 | 66.5851169 | 87.5328118 | 79.2127309 |
| 70.3348948 | 66.2822025 | 66.5851169 | 68.9925569 | 76.2127309 |
| 70.3348948 | 66.2822025 | 66.5851169 | 69.5925569 | 76.2127309 |
| 71.3348948 | 66.2822025 | 66.5851169 | 69.5925569 | 75.2127309 |
| 72.3348948 | 66.2822025 | 66.5851169 | 69.9925569 | 75.2127309 |
| 72.3348948 | 66.2822025 | 66.5851169 | 70.0925569 | 75.2127309 |
| 73.3348948 | 66.2822025 | 66.5851169 | 70.1925569 | 74.2127309 |
| 73.3348948 | 67.2822025 | 66.5851169 | 70.0925569 | 73.2127309 |
| 73.3348948 | 68.2822025 | 66.5851169 | 70.0925569 | 73.2127309 |
| 72.3348948 | 68.2822025 | 66.5851169 | 70.3925569 | 73.2127309 |
| 72.3348948 | 70.2822025 | 66.5851169 | 70.5925569 | 72.2127309 |
| 71.3348948 | 70.2822025 | 66.5851169 | 70.6925569 | 72.2127309 |
| 70.3348948 | 72.2822025 | 66.5851169 | 70.7925569 | 72.2127309 |
| 70.3348948 | 72.2822025 | 66.5851169 | 70.9925569 | 71.2127309 |
| 70.3348948 | 72.2822025 | 65.5851169 | 70.4925569 | 71.2127309 |
| 68.3348948 | 69.2822025 | 65.5851169 | 69.6925569 | 70.2127309 |
| 66.3348948 | 69.2822025 | 66.5851169 | 69.5925569 | 70.2127309 |
| 65.3348948 | 68.2822025 | 66.5851169 | 68.9925569 | 69.2127309 |
| 65.3348948 | 67.2822025 | 67.5851169 | 68.9925569 | 69.2127309 |
| 65.3348948 | 66.2822025 | 68.5851169 | 68.7925569 | 69.2127309 |
| 64.3348948 | 65.2822025 | 69.5851169 | 68.5925569 | 68.2127309 |
| 64.3348948 | 65.2822025 | 69.5851169 | 68.8925569 | 69.2127309 |
| 64.3348948 | 65.2822025 | 69.5851169 | 68.6925569 | 69.2127309 |
| 64.3348948 | 64.2822025 | 69.5851169 | 68.4925569 | 70.2127309 |
| 65.3348948 | 64.2822025 | 70.5851169 | 68.6925569 | 72.2127309 |
| 65.3348948 | 64.2822025 | 73.5851169 | 68.6925569 | 72.2127309 |

|            |            |            |            |            |
|------------|------------|------------|------------|------------|
| 65.3348948 | 64.2822025 | 73.5851169 | 68.3925569 | 71.2127309 |
| 64.3348948 | 64.2822025 | 71.5851169 | 67.9925569 | 69.2127309 |
| 64.3348948 | 64.2822025 | 70.5851169 | 67.8925569 | 69.2127309 |
| 64.3348948 | 64.2822025 | 69.5851169 | 67.5925569 | 69.2127309 |
| 64.3348948 | 64.2822025 | 69.5851169 | 67.0925569 | 68.2127309 |
| 66.3348948 | 64.2822025 | 69.5851169 | 67.2925569 | 68.2127309 |
| 68.3348948 | 64.2822025 | 69.5851169 | 67.3925569 | 69.2127309 |
| 69.3348948 | 64.2822025 | 69.5851169 | 67.8925569 | 74.2127309 |
| 69.3348948 | 64.2822025 | 69.5851169 | 67.8925569 | 74.2127309 |
| 70.3348948 | 64.2822025 | 69.5851169 | 67.7925569 | 74.2127309 |
| 70.3348948 | 65.2822025 | 69.5851169 | 67.6925569 | 73.2127309 |
| 70.3348948 | 65.2822025 | 69.5851169 | 67.5925569 | 73.2127309 |
| 72.3348948 | 66.2822025 | 69.5851169 | 67.5925569 | 71.2127309 |
| 73.3348948 | 68.2822025 | 69.5851169 | 67.4925569 | 69.2127309 |
| 74.3348948 | 71.2822025 | 69.5851169 | 67.8925569 | 68.2127309 |
| 73.3348948 | 72.2822025 | 70.5851169 | 68.1925569 | 69.2127309 |
| 73.3348948 | 72.2822025 | 69.5851169 | 68.1925569 | 70.2127309 |
| 72.3348948 | 72.2822025 | 69.5851169 | 68.3925569 | 70.2127309 |
| 71.3348948 | 72.2822025 | 69.5851169 | 68.2925569 | 69.2127309 |
| 70.3348948 | 72.2822025 | 69.5851169 | 67.9925569 | 68.2127309 |
| 70.3348948 | 75.2822025 | 68.5851169 | 68.2925569 | 68.2127309 |
| 70.3348948 | 76.2822025 | 66.5851169 | 67.9925569 | 66.2127309 |
| 71.3348948 | 76.2822025 | 65.5851169 | 68.1925569 | 65.2127309 |
| 71.3348948 | 76.2822025 | 65.5851169 | 68.1925569 | 64.2127309 |
| 70.3348948 | 71.2822025 | 65.5851169 | 67.4925569 | 64.2127309 |
| 70.3348948 | 71.2822025 | 65.5851169 | 67.9925569 | 63.2127309 |
| 70.3348948 | 71.2822025 | 65.5851169 | 67.9925569 | 63.2127309 |
| 70.3348948 | 71.2822025 | 65.5851169 | 69.3925569 | 63.2127309 |
| 70.3348948 | 72.2822025 | 66.5851169 | 69.5925569 | 63.2127309 |
| 70.3348948 | 72.2822025 | 67.5851169 | 69.3925569 | 63.2127309 |
| 69.3348948 | 72.2822025 | 68.5851169 | 69.5925569 | 64.2127309 |
| 68.3348948 | 72.2822025 | 68.5851169 | 69.4925569 | 64.2127309 |
| 67.3348948 | 72.2822025 | 67.5851169 | 69.3925569 | 65.2127309 |
| 66.3348948 | 72.2822025 | 67.5851169 | 86.5328118 | 65.2127309 |
| 66.3348948 | 72.2822025 | 67.5851169 | 86.5328118 | 64.2127309 |
| 67.3348948 | 69.2822025 | 67.5851169 | 68.2925569 | 64.2127309 |
| 68.3348948 | 74.2822025 | 67.5851169 | 85.5328118 | 65.2127309 |
| 68.3348948 | 74.2822025 | 67.5851169 | 85.5328118 | 65.2127309 |
| 68.3348948 | 77.2822025 | 67.5851169 | 84.5328118 | 64.2127309 |
| 67.3348948 | 77.2822025 | 65.5851169 | 84.5328118 | 64.2127309 |
| 65.3348948 | 77.2822025 | 65.5851169 | 84.5328118 | 64.2127309 |
| 65.3348948 | 81.2822025 | 65.5851169 | 83.5328118 | 64.2127309 |
| 65.3348948 | 85.2822025 | 65.5851169 | 81.5328118 | 64.2127309 |
| 65.3348948 | 85.2822025 | 65.5851169 | 81.5328118 | 64.2127309 |
| 65.3348948 | 85.2822025 | 65.5851169 | 81.5328118 | 64.2127309 |



|            |            |            |            |            |
|------------|------------|------------|------------|------------|
| 65.3348948 | 78.2822025 | 65.5851169 | 79.5328118 | 63.2127309 |
| 66.3348948 | 77.2822025 | 65.5851169 | 79.5328118 | 63.2127309 |
| 69.3348948 | 77.2822025 | 65.5851169 | 78.5328118 | 63.2127309 |
| 71.3348948 | 77.2822025 | 65.5851169 | 78.5328118 | 64.2127309 |
| 71.3348948 | 77.2822025 | 65.5851169 | 78.5328118 | 64.2127309 |
| 70.3348948 | 77.2822025 | 65.5851169 | 78.5328118 | 65.2127309 |
| 70.3348948 | 78.2822025 | 65.5851169 | 78.5328118 | 65.2127309 |
| 70.3348948 | 78.2822025 | 65.5851169 | 78.5328118 | 66.2127309 |
| 70.3348948 | 79.2822025 | 65.5851169 | 78.5328118 | 66.2127309 |
| 71.3348948 | 79.2822025 | 66.5851169 | 78.5328118 | 66.2127309 |
| 74.3348948 | 79.2822025 | 67.5851169 | 78.5328118 | 66.2127309 |
| 74.3348948 | 79.2822025 | 68.5851169 | 77.5328118 | 65.2127309 |
| 74.3348948 | 80.2822025 | 68.5851169 | 77.5328118 | 66.2127309 |
| 74.3348948 | 80.2822025 | 68.5851169 | 78.5328118 | 65.2127309 |
| 72.3348948 | 80.2822025 | 76.5851169 | 78.5328118 | 66.2127309 |
| 71.3348948 | 81.2822025 | 76.5851169 | 77.5328118 | 66.2127309 |
| 71.3348948 | 81.2822025 | 77.5851169 | 77.5328118 | 66.2127309 |
| 71.3348948 | 81.2822025 | 77.5851169 | 77.5328118 | 66.2127309 |
| 71.3348948 | 83.2822025 | 74.5851169 | 77.5328118 | 64.2127309 |
| 71.3348948 | 85.2822025 | 70.5851169 | 76.5328118 | 64.2127309 |
| 72.3348948 | 85.2822025 | 67.5851169 | 76.5328118 | 63.2127309 |
| 74.3348948 | 86.2822025 | 67.5851169 | 76.5328118 | 62.2127309 |
| 74.3348948 | 86.2822025 | 66.5851169 | 76.5328118 | 62.2127309 |
| 73.3348948 | 86.2822025 | 65.5851169 | 76.5328118 | 63.2127309 |
| 68.3348948 | 86.2822025 | 65.5851169 | 75.5328118 | 63.2127309 |
| 67.3348948 | 86.2822025 | 65.5851169 | 75.5328118 | 63.2127309 |
| 68.3348948 | 85.2822025 | 65.5851169 | 75.5328118 | 63.2127309 |
| 68.3348948 | 85.2822025 | 64.5851169 | 76.5328118 | 63.2127309 |
| 68.3348948 | 85.2822025 | 64.5851169 | 76.5328118 | 63.2127309 |
| 69.3348948 | 70.3925569 | 63.5851169 | 76.5328118 | 64.2127309 |
| 69.3348948 | 70.8925569 | 63.5851169 | 78.5328118 | 64.2127309 |
| 70.3348948 | 71.0925569 | 63.5851169 | 78.5328118 | 64.2127309 |
| 70.3348948 | 71.1925569 | 63.5851169 | 75.5328118 | 63.2127309 |
| 70.3348948 | 71.0925569 | 63.5851169 | 72.5328118 | 64.2127309 |
| 69.3348948 | 70.3925569 | 64.5851169 | 71.5328118 | 64.2127309 |
| 65.3348948 | 70.0925569 | 64.5851169 | 71.5328118 | 63.2127309 |
| 66.3348948 | 70.2925569 | 64.5851169 | 71.5328118 | 65.2127309 |
| 67.3348948 | 70.5925569 | 64.5851169 | 71.5328118 | 67.2127309 |
| 68.3348948 | 70.6925569 | 64.5851169 | 71.5328118 | 67.2127309 |
| 69.3348948 | 70.8925569 | 64.5851169 | 71.5328118 | 68.2127309 |
| 70.3348948 | 71.1925569 | 64.5851169 | 71.5328118 | 68.2127309 |
| 69.3348948 | 70.9925569 | 64.5851169 | 71.5328118 | 68.2127309 |
| 68.3348948 | 70.2925569 | 64.5851169 | 71.5328118 | 68.2127309 |
| 68.3348948 | 70.4925569 | 64.5851169 | 71.5328118 | 68.2127309 |
| 67.3348948 | 70.4925569 | 63.5851169 | 71.5328118 | 69.2127309 |

|            |            |            |            |            |
|------------|------------|------------|------------|------------|
| 67.3348948 | 69.8925569 | 63.5851169 | 71.5328118 | 69.2127309 |
| 66.3348948 | 69.5925569 | 63.5851169 | 71.5328118 | 69.2127309 |
| 66.3348948 | 68.7925569 | 63.5851169 | 70.5328118 | 69.2127309 |
| 66.3348948 | 68.6925569 | 64.5851169 | 70.5328118 | 69.2127309 |
| 66.3348948 | 68.7925569 | 64.5851169 | 70.5328118 | 69.2127309 |
| 66.3348948 | 68.6925569 | 64.5851169 | 70.5328118 | 69.2127309 |
| 66.3348948 | 68.3925569 | 63.5851169 | 70.5328118 | 69.2127309 |
| 66.3348948 | 68.5925569 | 63.5851169 | 70.5328118 | 71.2127309 |
| 66.3348948 | 68.7925569 | 63.5851169 | 70.5328118 | 71.2127309 |
| 67.3348948 | 69.0925569 | 63.5851169 | 70.5328118 | 72.2127309 |
| 68.3348948 | 69.6925569 | 63.5851169 | 70.5328118 | 72.2127309 |
| 70.3348948 | 70.2925569 | 64.5851169 | 70.5328118 | 71.2127309 |
| 71.3348948 | 70.7925569 | 64.5851169 | 70.5328118 | 72.2127309 |
| 72.3348948 | 71.0925569 | 65.5851169 | 70.5328118 | 72.2127309 |
| 73.3348948 | 71.2925569 | 66.5851169 | 70.5328118 | 72.2127309 |
| 73.3348948 | 70.8925569 | 66.5851169 | 70.5328118 | 72.2127309 |
| 72.3348948 | 70.7925569 | 68.5851169 | 70.5328118 | 72.2127309 |
| 72.3348948 | 85.2822025 | 68.5851169 | 70.5328118 | 72.2127309 |
| 72.3348948 | 79.2822025 | 69.5851169 | 70.5328118 | 72.2127309 |
| 72.3348948 | 76.2822025 | 69.5851169 | 71.5328118 | 72.2127309 |
| 72.3348948 | 73.2822025 | 69.5851169 | 72.5328118 | 72.2127309 |
| 72.3348948 | 70.2822025 | 69.5851169 | 72.5328118 | 72.2127309 |
| 71.3348948 | 67.2822025 | 69.5851169 | 72.5328118 | 72.2127309 |
| 69.3348948 | 65.2822025 | 70.5851169 | 72.5328118 | 72.2127309 |
| 69.3348948 | 65.2822025 | 68.5851169 | 72.5328118 | 72.2127309 |
| 68.3348948 | 65.2822025 | 68.5851169 | 74.5328118 | 71.2127309 |
| 68.3348948 | 65.2822025 | 68.5851169 | 74.5328118 | 71.2127309 |
| 68.3348948 | 64.2822025 | 67.5851169 | 75.5328118 | 71.2127309 |
| 65.3348948 | 63.2822025 | 67.5851169 | 76.5328118 | 74.2127309 |
| 65.3348948 | 62.2822025 | 67.5851169 | 76.5328118 | 75.2127309 |
| 64.3348948 | 61.2822025 | 67.5851169 | 77.5328118 | 75.2127309 |
| 65.3348948 | 61.2822025 | 68.5851169 | 77.5328118 | 76.2127309 |
| 65.3348948 | 61.2822025 | 68.5851169 | 76.5328118 | 76.2127309 |
| 66.3348948 | 61.2822025 | 68.5851169 | 73.5328118 | 73.2127309 |
| 66.3348948 | 61.2822025 | 68.5851169 | 69.5328118 | 72.2127309 |
| 66.3348948 | 60.2822025 | 68.5851169 | 66.5328118 | 71.2127309 |
| 66.3348948 | 60.2822025 | 68.5851169 | 66.5328118 | 70.2127309 |
| 67.3348948 | 57.2822025 | 68.5851169 | 66.5328118 | 70.2127309 |
| 67.3348948 | 56.2822025 | 67.5851169 | 66.5328118 | 68.2127309 |
| 67.3348948 | 56.2822025 | 67.5851169 | 66.5328118 | 68.2127309 |
| 67.3348948 | 56.2822025 | 67.5851169 | 66.5328118 | 70.2127309 |
| 67.3348948 | 56.2822025 | 66.5851169 | 67.5328118 | 69.2127309 |
| 67.3348948 | 54.2822025 | 66.5851169 | 66.5328118 | 69.2127309 |
| 66.3348948 | 54.2822025 | 67.5851169 | 66.5328118 | 68.2127309 |
| 66.3348948 | 54.2822025 | 66.5851169 | 65.5328118 | 68.2127309 |

|            |            |            |            |            |
|------------|------------|------------|------------|------------|
| 66.3348948 | 54.2822025 | 66.5851169 | 65.5328118 | 68.2127309 |
| 67.3348948 | 54.2822025 | 66.5851169 | 64.5328118 | 68.2127309 |
| 67.3348948 | 56.2822025 | 66.5851169 | 64.5328118 | 68.2127309 |
| 67.3348948 | 56.2822025 | 67.5851169 | 65.5328118 | 68.2127309 |
| 67.3348948 | 61.2822025 | 67.5851169 | 66.5328118 | 71.2127309 |
| 68.3348948 | 61.2822025 | 67.5851169 | 66.5328118 | 72.2127309 |
| 68.3348948 | 61.2822025 | 66.5851169 | 66.5328118 | 71.2127309 |
| 68.3348948 | 61.2822025 | 66.5851169 | 66.5328118 | 71.2127309 |
| 68.3348948 | 61.2822025 | 66.5851169 | 66.5328118 | 72.2127309 |
| 68.3348948 | 61.2822025 | 66.5851169 | 67.5328118 | 72.2127309 |
| 68.3348948 | 62.2822025 | 66.5851169 | 68.5328118 | 73.2127309 |
| 69.3348948 | 62.2822025 | 67.5851169 | 68.5328118 | 73.2127309 |
| 69.3348948 | 62.2822025 | 67.5851169 | 70.5328118 | 73.2127309 |
| 70.3348948 | 62.2822025 | 67.5851169 | 71.5328118 | 73.2127309 |
| 70.3348948 | 62.2822025 | 67.5851169 | 71.5328118 | 73.2127309 |
| 71.3348948 | 62.2822025 | 66.5851169 | 71.5328118 | 73.2127309 |
| 72.3348948 | 62.2822025 | 66.5851169 | 72.5328118 | 73.2127309 |
| 72.3348948 | 62.2822025 | 66.5851169 | 75.5328118 | 73.2127309 |
| 72.3348948 | 62.2822025 | 66.5851169 | 75.5328118 | 69.3610643 |
| 72.3348948 | 62.2822025 | 66.5851169 | 75.5328118 | 70.8610643 |
| 72.3348948 | 63.2822025 | 66.5851169 | 77.5328118 | 71.4860643 |
| 70.3348948 | 64.2822025 | 66.5851169 | 77.5328118 | 71.6110643 |
| 69.3348948 | 65.2822025 | 66.5851169 | 78.5328118 |            |
| 67.3348948 | 65.2822025 | 66.5851169 | 81.5328118 |            |
| 66.3348948 | 65.2822025 | 67.5851169 | 81.5328118 |            |
| 66.3348948 | 67.2822025 | 68.5851169 | 82.5328118 |            |
| 66.3348948 | 69.2822025 | 69.5851169 | 82.5328118 |            |
| 66.3348948 | 70.2822025 | 70.5851169 | 83.5328118 |            |
| 66.3348948 | 77.2822025 | 72.5851169 | 83.5328118 |            |
| 67.3348948 | 79.2822025 | 73.5851169 | 83.5328118 |            |
| 67.3348948 | 80.2822025 | 73.5851169 | 83.5328118 |            |
| 67.3348948 | 80.2822025 | 73.5851169 | 83.5328118 |            |
| 68.3348948 | 80.2822025 | 73.5851169 | 84.5328118 |            |
| 68.3348948 | 80.2822025 | 73.5851169 | 84.5328118 |            |
| 68.3348948 | 80.2822025 | 73.5851169 | 85.5328118 |            |
| 68.3348948 | 80.2822025 | 73.5851169 | 85.5328118 |            |
| 68.3348948 | 80.2822025 | 73.5851169 | 85.5328118 |            |
| 68.3348948 | 82.2822025 | 73.5851169 | 86.5328118 |            |
| 68.3348948 | 83.2822025 | 73.5851169 | 86.5328118 |            |
| 67.3348948 | 83.2822025 | 72.5851169 | 86.5328118 |            |
| 67.3348948 | 83.2822025 | 71.5851169 | 88.5328118 |            |
| 66.3348948 | 83.2822025 | 70.5851169 | 88.5328118 |            |
| 66.3348948 | 83.2822025 | 68.5851169 | 90.5328118 |            |
| 66.3348948 | 83.2822025 | 67.5851169 | 90.5328118 |            |
| 66.3348948 | 83.2822025 | 66.5851169 | 90.5328118 |            |

67.3348948 83.2822025 66.5851169 91.5328118  
68.3348948 83.2822025 66.5851169 91.5328118

behavior

| Activity | average of a behavior | moving average |
|----------|-----------------------|----------------|
|          | 71.0445582            | 63 72.7685406  |
|          | 70.89641              | 63 72.7655529  |
|          | 71.1433236            | 63 72.7594353  |
|          | 71.0445582            | 63 72.7333647  |
|          | 71.0692495            | 63 72.6709091  |
|          | 70.450997             | 63 72.6031718  |
|          | 70.41396              | 63 72.5350433  |
|          | 70.8213674            | 63 72.4610462  |
|          | 72.9257483            | 63 72.3886141  |
|          | 73.1726619            | 63 72.3148126  |
|          | 74.666489             | 63 72.2363163  |
|          | 74.666489             | 63 72.1640798  |
|          | 73.9257483            | 63 72.0966724  |
|          | 74.0492051            | 63 72.0269789  |
|          | 74.1726619            | 63 71.9480914  |
|          | 73.5553779            | 63 71.8703776  |
|          | 73.4566125            | 63 71.7909032  |
|          | 73.5800693            | 63 71.7227746  |
|          | 73.4813038            | 63 71.6792041  |
|          | 73.4813038            | 63 71.6402111  |
|          | 73.2096989            | 63 71.5951428  |
|          | 73.2096989            | 63 71.5391911  |
|          | 72.841176             | 63 71.4827593  |
|          | 73.5730874            | 63 71.4743477  |
|          | 73.5553779            | 63 71.4586947  |
|          | 73.6788347            | 63 71.4348652  |
|          | 73.2961186            | 63 71.4031863  |
|          | 72.8022915            | 63 71.3712794  |
|          | 72.9134026            | 63 71.3390283  |
|          | 72.4195754            | 63 71.2885654  |
|          | 72.2961186            | 63 71.2389256  |
|          | 72.2961186            | 63 71.193012   |
|          | 71.7899458            | 63 71.1386135  |
|          | 70.6911804            | 63 71.0804739  |
|          | 72.2600502            | 63 71.0231124  |
|          | 69.8949375            | 63 70.965751   |
|          | 71.7044947            | 63 70.9141957  |
|          | 71.5933835            | 63 70.8656633  |
|          | 71.1489391            | 63 70.8113097  |
|          | 70.9267169            | 63 70.7589314  |
|          | 70.2600502            | 63 70.7056852  |

|            |    |            |
|------------|----|------------|
| 68.9267169 | 63 | 70.6573922 |
| 68.9267169 | 63 | 70.6039215 |
| 69.1489391 | 63 | 70.5574821 |
| 68.4822724 | 63 | 70.5127486 |
| 68.5933835 | 63 | 70.4698557 |
| 68.3711613 | 63 | 70.4013287 |
| 68.037828  | 63 | 70.3331458 |
| 68.4822724 | 63 | 70.2401968 |
| 69.2600502 | 63 | 70.1448235 |
| 69.037828  | 63 | 70.0581146 |
| 69.2600502 | 63 | 69.9806688 |
| 69.5933835 | 63 | 69.9064253 |
| 69.5933835 | 63 | 69.8440486 |
| 70.1489391 | 63 | 69.7866252 |
| 71.8925569 | 63 | 69.720283  |
| 72.0925569 | 63 | 69.6346516 |
| 71.7862202 | 63 | 69.5441717 |
| 71.5134929 | 63 | 69.4621617 |
| 71.604402  | 63 | 69.3765153 |
| 70.8771293 | 63 | 69.3018431 |
| 70.3316747 | 63 | 69.2174122 |
| 69.6953111 | 63 | 69.1271567 |
| 69.0589474 | 63 | 69.0291946 |
| 68.0589474 | 63 | 68.9242141 |
| 67.7862202 | 63 | 68.8221817 |
| 67.8771293 | 63 | 68.721092  |
| 67.8771293 | 63 | 68.6253745 |
| 67.7862202 | 63 | 68.5264547 |
| 67.1498565 | 63 | 68.4238984 |
| 66.9680384 | 63 | 68.3317275 |
| 67.1498565 | 63 | 68.2590553 |
| 67.1498565 | 63 | 68.176374  |
| 66.9680384 | 63 | 68.1288638 |
| 67.0589474 | 63 | 68.0535898 |
| 66.9680384 | 63 | 67.985858  |
| 66.9680384 | 63 | 67.9252641 |
| 67.1498565 | 63 | 67.8688454 |
| 67.4225838 | 63 | 67.8116186 |
| 67.0589474 | 63 | 67.7709574 |
| 66.9680384 | 63 | 67.7242356 |
| 67.0589474 | 63 | 67.6733388 |
| 67.604402  | 63 | 67.6289066 |
| 67.7862202 | 63 | 67.584205  |
| 68.0589474 | 63 | 67.5461027 |
| 67.6953111 | 63 | 67.5075965 |

|            |    |            |
|------------|----|------------|
| 67.5134929 | 63 | 67.4643764 |
| 67.4225838 | 63 | 67.4095738 |
| 68.2407656 | 63 | 67.3528857 |
| 68.604402  | 63 | 67.2920225 |
| 68.8771293 | 63 | 67.2255027 |
| 69.1498565 | 63 | 67.1577709 |
| 68.604402  | 63 | 67.0802073 |
| 67.0589474 | 63 | 66.9793956 |
| 66.6953111 | 63 | 66.8722808 |
| 67.0589474 | 63 | 66.7668262 |
| 66.7862202 | 63 | 66.6650081 |
| 67.2407656 | 63 | 66.5607656 |
| 67.2407656 | 63 | 66.4650081 |
| 66.7862202 | 63 | 66.3801596 |
| 66.3316747 | 63 | 66.3050081 |
| 65.4225838 | 63 | 66.2371293 |
| 65.1498565 | 63 | 66.1801596 |
| 65.3316747 | 63 | 66.1280384 |
| 65.2407656 | 63 | 66.1050081 |
| 64.8771293 | 63 | 66.0856141 |
| 64.604402  | 63 | 66.0698565 |
| 64.8771293 | 63 | 66.0613717 |
| 65.2407656 | 63 | 66.054099  |
| 66.0589474 | 63 | 66.0504626 |
| 66.3316747 | 63 | 66.0468262 |
| 66.0589474 | 63 | 66.0480384 |
| 66.5134929 | 63 | 66.0480384 |
| 66.604402  | 63 | 66.044402  |
| 66.6953111 | 63 | 66.0371293 |
| 65.9680384 | 63 | 66.0310687 |
| 65.8771293 | 63 | 66.0165232 |
| 65.4225838 | 63 | 66.0031899 |
| 65.3316747 | 63 | 65.9934929 |
| 65.1498565 | 63 | 65.9825838 |
| 65.2407656 | 63 | 65.9607656 |
| 65.5134929 | 63 | 65.9184477 |
| 65.1498565 | 63 | 65.8699589 |
| 65.2407656 | 63 | 65.8288531 |
| 65.1498565 | 63 | 65.8070349 |
| 64.7862202 | 63 | 65.7827925 |
| 64.6953111 | 63 | 65.7488531 |
| 64.604402  | 63 | 65.7100652 |
| 64.5134929 | 63 | 65.6627925 |
| 64.3316747 | 63 | 65.6094592 |
| 64.3316747 | 63 | 65.5621864 |

|            |    |            |
|------------|----|------------|
| 64.0589474 | 63 | 65.5318834 |
| 63.8771293 | 63 | 65.507641  |
| 63.8771293 | 63 | 65.4797622 |
| 63.7862202 | 63 | 65.4530955 |
| 63.6953111 | 63 | 65.4252167 |
| 63.9680384 | 63 | 65.3985501 |
| 64.0589474 | 63 | 65.3791561 |
| 63.9680384 | 63 | 65.3706713 |
| 63.7862202 | 63 | 65.3767319 |
| 63.8771293 | 63 | 65.3840046 |
| 66.1498565 | 63 | 65.3912773 |
| 66.4225838 | 63 | 65.4021864 |
| 66.604402  | 63 | 65.4215804 |
| 66.5134929 | 63 | 65.4226489 |
| 66.4225838 | 63 | 65.417767  |
| 66.8771293 | 63 | 65.4079265 |
| 66.8771293 | 63 | 65.386289  |
| 67.0589474 | 63 | 65.3571947 |
| 67.0589474 | 63 | 65.3320374 |
| 66.6953111 | 63 | 65.3102192 |
| 66.4225838 | 63 | 65.2920374 |
| 66.6953111 | 63 | 65.2504302 |
| 66.3316747 | 63 | 65.2198424 |
| 66.0589474 | 63 | 65.2174181 |
| 66.2407656 | 63 | 65.2210545 |
| 66.2407656 | 63 | 65.2271151 |
| 65.9680384 | 63 | 65.2452969 |
| 64.6123737 | 63 | 65.265903  |
| 64.4222911 | 63 | 65.2641857 |
| 64.6123737 | 63 | 65.2712838 |
| 65.8771293 | 63 | 65.2786023 |
| 65.604402  | 63 | 65.2925323 |
| 65.6953111 | 63 | 65.3046993 |
| 65.6953111 | 63 | 65.3089324 |
| 65.3316747 | 63 | 65.3064438 |
| 65.1498565 | 63 | 65.3064895 |
| 65.0589474 | 63 | 65.3051028 |
| 64.7862202 | 63 | 65.3103276 |
| 64.8771293 | 63 | 65.3220538 |
| 64.9680384 | 63 | 65.3349922 |
| 64.7862202 | 63 | 65.3386743 |
| 65.1498565 | 63 | 65.3343123 |
| 65.2407656 | 63 | 65.3286281 |
| 65.3316747 | 63 | 65.3141284 |
| 65.6953111 | 63 | 65.2974249 |



|            |    |            |
|------------|----|------------|
| 65.8771293 | 63 | 65.2816029 |
| 65.6953111 | 63 | 65.2708497 |
| 65.8771293 | 63 | 65.2578927 |
| 66.0589474 | 63 | 65.215955  |
| 66.3316747 | 63 | 65.1689485 |
| 64.6845428 | 63 | 65.1233744 |
| 64.5109891 | 63 | 65.0776901 |
| 64.5027246 | 63 | 65.0294714 |
| 64.4361341 | 63 | 64.9780572 |
| 64.149604  | 63 | 64.9293977 |
| 64.1721461 | 63 | 64.8822809 |
| 64.8771293 | 63 | 64.8391311 |
| 65.2407656 | 63 | 64.8034744 |
| 63.5747767 | 63 | 64.7757516 |
| 63.6739503 | 63 | 64.7391031 |
| 65.6953111 | 63 | 64.7088458 |
| 65.6953111 | 63 | 64.6823351 |
| 65.7862202 | 63 | 64.6493231 |
| 66.5134929 | 63 | 64.6189556 |
| 66.7862202 | 63 | 64.5869353 |
| 65.3846941 | 63 | 64.5728802 |
| 65.6822148 | 63 | 64.5625718 |
| 65.7896528 | 63 | 64.5562303 |
| 66.1946115 | 63 | 64.5396369 |
| 65.6987437 | 63 | 64.5303163 |
| 65.0127933 | 63 | 64.5202748 |
| 64.4177519 | 63 | 64.510844  |
| 64.5169255 | 63 | 64.5022947 |
| 64.2276693 | 63 | 64.5014589 |
| 64.7235371 | 63 | 64.5097692 |
| 64.9384131 | 63 | 64.5437086 |
| 64.847504  | 63 | 64.5703752 |
| 64.1532891 | 63 | 64.5812843 |
| 63.4590743 | 63 | 64.5958298 |
| 63.2689916 | 63 | 64.6067389 |
| 62.8805619 | 63 | 64.6140116 |
| 62.8061817 | 63 | 64.6200722 |
| 62.7813883 | 63 | 64.6212843 |
| 62.9797354 | 63 | 64.6212843 |
| 62.9053553 | 63 | 64.6224964 |
| 63.0045288 | 63 | 64.6200722 |
| 62.8970908 | 63 | 64.6152237 |
| 63.186347  | 63 | 64.6127995 |
| 63.0871734 | 63 | 64.6311249 |
| 62.8061817 | 63 | 64.6505522 |

|            |               |
|------------|---------------|
| 63.0210577 | 63 64.6676655 |
| 63.2276693 | 63 64.6844545 |
| 63.52519   | 63 64.7050639 |
| 63.8227106 | 63 64.7302213 |
| 64.0210577 | 63 64.7508273 |
| 64.3433718 | 63 64.7641607 |
| 63.9466776 | 63 64.7948587 |
| 64.06238   | 63 64.8205981 |
| 64.0706445 | 63 64.8181738 |
| 63.7648594 | 63 64.8181738 |
| 63.9632065 | 63 64.8254465 |
| 63.5665123 | 63 64.8290829 |
| 63.5582478 | 63 64.8266587 |
| 63.6491569 | 63 64.848982  |
| 64.1367602 | 63 64.8697627 |
| 64.632628  | 63 64.890323  |
| 64.9053553 | 63 64.9018475 |
| 64.9421989 | 63 64.9151351 |
| 64.9879999 | 63 64.9387807 |
| 64.6904792 | 63 64.9703603 |
| 65.0871734 | 63 65.0030418 |
| 65.6822148 | 63 65.0407922 |
| 67.3316747 | 63 65.0670825 |
| 66.8771293 | 63 65.0905078 |
| 65.7862202 | 63 65.1151453 |
| 65.8771293 | 63 65.1478268 |
| 65.9680384 | 63 65.1921887 |
| 65.7862202 | 63 65.2415093 |
| 65.7862202 | 63 65.2923727 |
| 65.7862202 | 63 65.3418035 |
| 65.8771293 | 63 65.3855043 |
| 65.7862202 | 63 65.4289847 |
| 65.6953111 | 63 65.4783053 |
| 65.6953111 | 63 65.5263036 |
| 66.1498565 | 63 65.5757344 |
| 66.0589474 | 63 65.6200964 |
| 65.9680384 | 63 65.6621443 |
| 65.7862202 | 63 65.7091508 |
| 65.6953111 | 63 65.749656  |
| 65.6953111 | 63 65.7861943 |
| 66.0589474 | 63 65.8308868 |
| 66.4225838 | 63 65.867976  |
| 66.2407656 | 63 65.8927236 |
| 65.8771293 | 63 65.8986283 |
| 65.604402  | 63 65.9025495 |

|            |    |            |
|------------|----|------------|
| 65.5134929 | 63 | 65.9097764 |
| 65.6953111 | 63 | 65.9144689 |
| 66.3316747 | 63 | 65.926875  |
| 66.7862202 | 63 | 65.9414848 |
| 66.604402  | 63 | 65.9650203 |
| 67.0589474 | 63 | 65.9898782 |
| 67.2407656 | 63 | 66.0159481 |
| 67.3316747 | 63 | 66.0379409 |
| 67.0589474 | 63 | 66.0545342 |
| 66.6953111 | 63 | 66.065067  |
| 66.7862202 | 63 | 66.0823812 |
| 66.7862202 | 63 | 66.1063575 |
| 66.9680384 | 63 | 66.1379371 |
| 67.0589474 | 63 | 66.1618031 |
| 66.6953111 | 63 | 66.1680384 |
| 66.6953111 | 63 | 66.1474323 |
| 66.6953111 | 63 | 66.1231899 |
| 66.604402  | 63 | 66.1207656 |
| 66.7862202 | 63 | 66.1171293 |
| 66.9680384 | 63 | 66.1122808 |
| 66.6953111 | 63 | 66.1086444 |
| 66.5134929 | 63 | 66.1074323 |
| 66.0589474 | 63 | 66.1050081 |
| 66.2407656 | 63 | 66.1025838 |
| 66.604402  | 63 | 66.0977353 |
| 66.604402  | 63 | 66.0977353 |
| 66.604402  | 63 | 66.1013717 |
| 66.5134929 | 63 | 66.1013717 |
| 66.2407656 | 63 | 66.1001596 |
| 66.3316747 | 63 | 66.1025838 |
| 66.0589474 | 63 | 66.1062202 |
| 65.9680384 | 63 | 66.1122808 |
| 66.8771293 | 63 | 66.1256141 |
| 66.604402  | 63 | 66.1365232 |
| 65.8771293 | 63 | 66.1437959 |
| 64.7862202 | 63 | 66.154705  |
| 64.2407656 | 63 | 66.1680384 |
| 64.604402  | 63 | 66.1910687 |
| 64.4225838 | 63 | 66.2116747 |
| 64.6953111 | 63 | 66.2262202 |
| 65.0589474 | 63 | 66.2298565 |
| 65.3316747 | 63 | 66.2286444 |
| 65.4225838 | 63 | 66.2298565 |
| 65.604402  | 63 | 66.2250081 |
| 65.7862202 | 63 | 66.2177353 |

|            |    |            |
|------------|----|------------|
| 65.8771293 | 63 | 66.204402  |
| 65.6953111 | 63 | 66.1959171 |
| 66.2407656 | 63 | 66.1959171 |
| 66.7862202 | 63 | 66.1959171 |
| 67.0589474 | 63 | 66.1718307 |
| 66.8771293 | 63 | 66.1415734 |
| 66.1498565 | 63 | 66.1051454 |
| 65.7862202 | 63 | 66.0749983 |
| 65.0589474 | 63 | 66.0554297 |
| 65.604402  | 63 | 66.0361918 |
| 65.604402  | 63 | 66.0209207 |
| 65.604402  | 63 | 66.0005808 |
| 65.5134929 | 63 | 65.9778167 |
| 65.6953111 | 63 | 65.9731241 |
| 65.604402  | 63 | 65.962922  |
| 65.6953111 | 63 | 65.9667143 |
| 65.4225838 | 63 | 65.9627931 |
| 65.6953111 | 63 | 65.9540235 |
| 65.9680384 | 63 | 65.9467965 |
| 66.1498565 | 63 | 65.9356026 |
| 65.9680384 | 63 | 65.9335547 |
| 66.1498565 | 63 | 65.937898  |
| 66.0589474 | 63 | 65.9397068 |
| 66.1498565 | 63 | 65.949119  |
| 66.6953111 | 63 | 65.9637102 |
| 66.8771293 | 63 | 65.9635356 |
| 66.9680384 | 63 | 65.9673279 |
| 67.0589474 | 63 | 65.9819192 |
| 66.8771293 | 63 | 66.0070889 |
| 67.3316747 | 63 | 66.0355644 |
| 67.0589474 | 63 | 66.0591914 |
| 66.7862202 | 63 | 66.0747744 |
| 66.604402  | 63 | 66.0906879 |
| 66.6953111 | 63 | 66.104618  |
| 66.6953111 | 63 | 66.1136996 |
| 66.6953111 | 63 | 66.1361145 |
| 66.6953111 | 63 | 66.1812291 |
| 66.3316747 | 63 | 66.2213851 |
| 66.4225838 | 63 | 66.2334013 |
| 66.6953111 | 63 | 66.242332  |
| 66.7862202 | 63 | 66.2389856 |
| 64.9797354 | 63 | 66.2191102 |
| 64.6987437 | 63 | 66.1877748 |
| 64.3268429 | 63 | 66.1564394 |
| 64.4342809 | 63 | 66.1287404 |

|            |    |            |
|------------|----|------------|
| 65.2276693 | 63 | 66.106551  |
| 65.2524627 | 63 | 66.099458  |
| 65.4590743 | 63 | 66.0903816 |
| 65.2607272 | 63 | 66.0825173 |
| 65.2607272 | 63 | 66.0718981 |
| 66.3433718 | 63 | 66.0558795 |
| 65.7483305 | 63 | 66.0281805 |
| 66.3433718 | 63 | 66.001711  |
| 65.9466776 | 63 | 65.9621629 |
| 65.9466776 | 63 | 65.9300561 |
| 66.06238   | 63 | 65.894313  |
| 65.7648594 | 63 | 65.8549335 |
| 66.3599007 | 63 | 65.8104852 |
| 66.5665123 | 63 | 65.7697834 |
| 66.4673387 | 63 | 65.7305141 |
| 66.7648594 | 63 | 65.6937793 |
| 67.06238   | 63 | 65.6504329 |
| 66.8640329 | 63 | 65.605103  |
| 66.8888263 | 63 | 65.5612056 |
| 66.971471  | 63 | 65.5196222 |
| 66.6739503 | 63 | 65.486634  |
| 66.3764296 | 63 | 65.4611388 |
| 66.3764296 | 63 | 65.4241835 |
| 65.5913057 | 63 | 65.3855754 |
| 65.8888263 | 63 | 65.3467469 |
| 66.1037024 | 63 | 65.3065961 |
| 66.0127933 | 63 | 65.2665554 |
| 67.1037024 | 63 | 65.2318041 |
| 68.9879999 | 63 | 65.1987056 |
| 68.7979172 | 63 | 65.1665988 |
| 66.7783407 | 63 | 65.1419852 |
| 66.3651176 | 63 | 65.1228812 |
| 65.9897842 | 63 | 65.0894521 |
| 65.2955693 | 63 | 65.0575658 |
| 64.7087924 | 63 | 65.0564876 |
| 64.5269743 | 63 | 65.0657676 |
| 64.0724288 | 63 | 65.0841936 |
| 64.1220156 | 63 | 65.0984323 |
| 64.5269743 | 63 | 65.1047371 |
| 64.9236685 | 63 | 65.1120336 |
| 65.0145776 | 63 | 65.1206524 |
| 64.807966  | 63 | 65.1346707 |
| 64.3120982 | 63 | 65.1489094 |
| 63.6178834 | 63 | 65.1541122 |
| 63.6191899 | 63 | 65.167249  |

|            |    |            |
|------------|----|------------|
| 62.7292032 | 63 | 65.1778513 |
| 63.0145776 | 63 | 65.2042111 |
| 63.0145776 | 63 | 65.2332156 |
| 63.0145776 | 63 | 65.2778675 |
| 62.8162305 | 63 | 65.329131  |
| 62.915404  | 63 | 65.3710281 |
| 63.2046602 | 63 | 65.3903356 |
| 63.3038338 | 63 | 65.4188298 |
| 62.8988751 | 63 | 65.4482055 |
| 63.2955693 | 63 | 65.47119   |
| 63.5848255 | 63 | 65.4968192 |
| 63.8492883 | 63 | 65.5196935 |
| 64.5848255 | 63 | 65.5402538 |
| 64.9649908 | 63 | 65.5647811 |
| 64.5600321 | 63 | 65.5884268 |
| 64.1633379 | 63 | 65.607224  |
| 63.8740817 | 63 | 65.6364895 |
| 63.59309   | 63 | 65.6363335 |
| 63.6922635 | 63 | 65.6321004 |
| 64.0889577 | 63 | 65.624231  |
| 64.2129247 | 63 | 65.5957555 |
| 64.2873048 | 63 | 65.5457923 |
| 64.485652  | 63 | 65.5044242 |
| 64.9897842 | 63 | 65.491196  |
| 64.1881313 | 63 | 65.4919622 |
| 64.3947429 | 63 | 65.4965207 |
| 64.8988751 | 63 | 65.5079112 |
| 65.3947429 | 63 | 65.5307618 |
| 65.7087924 | 63 | 65.5572487 |
| 65.5021809 | 63 | 65.5922205 |
| 65.700528  | 63 | 65.6253189 |
| 65.7997015 | 63 | 65.6505937 |
| 66.1054867 | 63 | 65.6717914 |
| 66.3120982 | 63 | 65.7002618 |
| 66.3286272 | 63 | 65.7351234 |
| 66.7335858 | 63 | 65.7947783 |
| 66.7335858 | 63 | 65.8867198 |
| 67.1385445 | 63 | 65.9610825 |
| 67.9236685 | 63 | 66.050287  |
| 68.1220156 | 63 | 66.1465955 |
| 69.4112718 | 63 | 66.2416919 |
| 69.6096189 | 63 | 66.3370087 |
| 69.5021809 | 63 | 66.437725  |
| 68.0145776 | 63 | 66.5357966 |
| 68.604402  | 63 | 66.6353007 |

|            |    |            |
|------------|----|------------|
| 68.9680384 | 63 | 66.7348049 |
| 68.7862202 | 63 | 66.8410308 |
| 68.7862202 | 63 | 66.9419674 |
| 68.604402  | 63 | 67.037725  |
| 68.5134929 | 63 | 67.1312787 |
| 68.5134929 | 63 | 67.2084137 |
| 68.1498565 | 63 | 67.2816919 |
| 67.7862202 | 63 | 67.3604798 |
| 67.7862202 | 63 | 67.4472016 |
| 65.8771293 | 63 | 67.5364578 |
| 65.7862202 | 63 | 67.6281382 |
| 65.4225838 | 63 | 67.7224633 |
| 64.9680384 | 63 | 67.8114991 |
| 65.2407656 | 63 | 67.8987718 |
| 65.6953111 | 63 | 67.9889095 |
| 65.7862202 | 63 | 68.0555996 |
| 66.4225838 | 63 | 68.1231712 |
| 66.3316747 | 63 | 68.1973543 |
| 66.1498565 | 63 | 68.263273  |
| 66.4225838 | 63 | 68.3167399 |
| 66.5134929 | 63 | 68.3666807 |
| 66.6953111 | 63 | 68.4138666 |
| 66.604402  | 63 | 68.4623748 |
| 66.4225838 | 63 | 68.5151805 |
| 66.5134929 | 63 | 68.5649009 |
| 67.1498565 | 63 | 68.617073  |
| 67.4225838 | 63 | 68.6554435 |
| 68.7862202 | 63 | 68.6905082 |
| 70.5134929 | 60 | 68.7120191 |
| 69.1963958 | 60 | 68.7292326 |
| 69.4195363 | 60 | 68.7398345 |
| 70.2377181 | 60 | 68.7385355 |
| 70.146809  | 60 | 68.7465796 |
| 70.1633379 | 60 | 68.7268551 |
| 70.3699495 | 60 | 68.7109873 |
| 70.2707759 | 60 | 68.6869653 |
| 70.6674701 | 60 | 68.6810149 |
| 70.7666437 | 60 | 68.6773785 |
| 70.8658172 | 60 | 68.6628331 |
| 70.8658172 | 60 | 68.6458634 |
| 70.7666437 | 60 | 68.6264694 |
| 70.8658172 | 60 | 68.6082876 |
| 70.3699495 | 63 | 68.5864694 |
| 70.4608586 | 63 | 68.5658634 |
| 70.469123  | 63 | 68.5501058 |

|            |    |            |
|------------|----|------------|
| 70.6674701 | 63 | 68.5513179 |
| 70.5682966 | 63 | 68.5549543 |
| 70.469123  | 63 | 68.5852573 |
| 70.7666437 | 63 | 68.6240452 |
| 70.7666437 | 63 | 68.67253   |
| 70.7583792 | 63 | 68.7331361 |
| 71.0476354 | 63 | 68.7937422 |
| 69.4874051 | 63 | 68.8434391 |
| 70.0576531 | 63 | 68.8798028 |
| 69.751868  | 63 | 68.9016209 |
| 69.3386448 | 63 | 68.9149543 |
| 68.9088927 | 63 | 68.9294997 |
| 69.1402977 | 63 | 68.9404088 |
| 69.2477357 | 63 | 68.9452573 |
| 69.1402977 | 63 | 68.9561664 |
| 69.6609589 | 63 | 68.9743482 |
| 69.5287275 | 63 | 69.0010149 |
| 70.018394  | 63 | 69.0373785 |
| 69.1898845 | 63 | 69.0749543 |
| 68.9584795 | 63 | 69.1173785 |
| 68.3469093 | 63 | 69.1428331 |
| 68.0245952 | 63 | 69.1452573 |
| 67.9336861 | 63 | 69.1652428 |
| 67.8262481 | 63 | 69.1858895 |
| 68.7253214 | 63 | 69.1907787 |
| 67.9319329 | 63 | 69.1908193 |
| 68.4195363 | 63 | 69.2015486 |
| 67.700528  | 63 | 69.208311  |
| 67.5682966 | 63 | 69.2127594 |
| 68.3316747 | 63 | 69.20707   |
| 67.8771293 | 63 | 69.1952098 |
| 67.5134929 | 63 | 69.1832394 |
| 67.3316747 | 63 | 69.1761175 |
| 67.2407656 | 63 | 69.1751664 |
| 66.8771293 | 63 | 69.172893  |
| 66.9680384 | 63 | 69.176019  |
| 66.9680384 | 63 | 69.1658117 |
| 67.8771293 | 63 | 69.1506457 |
| 68.0589474 | 63 | 69.1182897 |
| 68.1498565 | 63 | 69.0799832 |
| 68.6953111 | 63 | 69.0442112 |
| 69.0589474 | 63 | 69.0068964 |
| 69.5134929 | 63 | 68.9707938 |
| 69.7862202 | 63 | 68.9335893 |
| 69.4225838 | 63 | 68.8901037 |



|            |    |            |
|------------|----|------------|
| 68.5134929 | 63 | 68.8601485 |
| 68.0589474 | 63 | 68.82259   |
| 67.3316747 | 63 | 68.7854723 |
| 67.2407656 | 63 | 68.7478036 |
| 67.2407656 | 63 | 68.7182892 |
| 66.8771293 | 63 | 68.6796288 |
| 67.5134929 | 63 | 68.6480207 |
| 67.9680384 | 63 | 68.6226936 |
| 68.4225838 | 63 | 68.5940607 |
| 69.2407656 | 63 | 68.5671909 |
| 69.9680384 | 63 | 68.5374286 |
| 70.604402  | 63 | 68.5356828 |
| 70.6953111 | 63 | 68.5442951 |
| 70.6953111 | 63 | 68.5598495 |
| 70.6953111 | 63 | 68.5784894 |
| 70.9680384 | 63 | 68.6007656 |
| 70.604402  | 63 | 68.6220501 |
| 70.1498565 | 63 | 68.622862  |
| 70.9680384 | 63 | 68.6124344 |
| 70.8771293 | 63 | 68.5930811 |
| 70.604402  | 63 | 68.5821024 |
| 70.2407656 | 63 | 68.5765232 |
| 69.8771293 | 63 | 68.564402  |
| 69.9680384 | 63 | 68.564402  |
| 70.3316747 | 63 | 68.5631899 |
| 70.6953111 | 63 | 68.5656141 |
| 70.6953111 | 63 | 68.5680384 |
| 70.604402  | 63 | 68.5692505 |
| 69.6953111 | 63 | 68.5692505 |
| 69.3316747 | 63 | 68.5692505 |
| 68.2407656 | 63 | 68.554705  |
| 67.6953111 | 63 | 68.5401596 |
| 67.7862202 | 63 | 68.524402  |
| 67.9680384 | 63 | 68.5037959 |
| 68.0589474 | 63 | 68.4783414 |
| 67.9680384 | 63 | 68.4383414 |
| 67.7862202 | 63 | 68.3959171 |
| 67.2407656 | 63 | 68.3383463 |
| 67.2407656 | 63 | 68.2916845 |
| 66.9680384 | 63 | 68.2514138 |
| 66.5134929 | 63 | 68.2196281 |
| 66.6953111 | 63 | 68.1878423 |
| 66.2407656 | 63 | 68.1559464 |
| 66.8771293 | 63 | 68.1288989 |
| 67.2407656 | 63 | 68.1007845 |

|            |    |            |
|------------|----|------------|
| 67.5134929 | 63 | 68.0671255 |
| 67.5134929 | 63 | 68.0326951 |
| 67.7862202 | 63 | 67.9874658 |
| 69.0589474 | 63 | 67.9312172 |
| 69.604402  | 63 | 67.8638392 |
| 69.5134929 | 63 | 67.8019708 |
| 69.4225838 | 63 | 67.7345927 |
| 69.604402  | 63 | 67.6933806 |
| 69.4225838 | 63 | 67.6485321 |
| 68.7862202 | 63 | 67.6061079 |
| 67.1498565 | 63 | 67.5661079 |
| 66.9680384 | 63 | 67.5151988 |
| 66.8771293 | 63 | 67.467926  |
| 67.1498565 | 63 | 67.427926  |
| 67.4225838 | 63 | 67.3915624 |
| 67.8771293 | 63 | 67.36732   |
| 67.4225838 | 63 | 67.3394412 |
| 67.5134929 | 63 | 67.2994412 |
| 67.4225838 | 63 | 67.2582291 |
| 66.9680384 | 63 | 67.2182291 |
| 66.9680384 | 63 | 67.177017  |
| 66.9680384 | 63 | 67.1358048 |
| 66.7862202 | 63 | 67.1006533 |
| 66.9680384 | 63 | 67.0751988 |
| 66.9680384 | 63 | 67.0558048 |
| 67.1498565 | 63 | 67.0351988 |
| 67.1498565 | 63 | 67.0194412 |
| 66.5134929 | 63 | 67.0048957 |
| 66.604402  | 63 | 66.9867139 |
| 65.1047672 | 63 | 66.9600473 |
| 65.0138581 | 63 | 66.9358048 |
| 65.0386515 | 63 | 66.9103503 |
| 64.9477424 | 63 | 66.8897442 |
| 64.8568333 | 63 | 66.8691382 |
| 64.8485689 | 63 | 66.8558048 |
| 64.8485689 | 63 | 66.8497442 |
| 65.4049152 | 63 | 66.837623  |
| 65.4436102 | 63 | 66.8206533 |
| 65.8403044 | 63 | 66.8048957 |
| 65.8485689 | 63 | 66.7939867 |
| 65.7493953 | 63 | 66.777017  |
| 65.5510482 | 63 | 66.7442897 |
| 66.0551805 | 63 | 66.7055018 |
| 65.6419573 | 63 | 66.6703503 |
| 67.604402  | 63 | 66.6400473 |

|            |    |            |
|------------|----|------------|
| 67.604402  | 63 | 66.60732   |
| 67.4225838 | 63 | 66.5806533 |
| 67.1498565 | 63 | 66.5624715 |
| 67.1498565 | 63 | 66.5685321 |
| 67.3316747 | 63 | 66.5758048 |
| 67.604402  | 63 | 66.5867139 |
| 67.5134929 | 63 | 66.6000473 |
| 68.0589474 | 63 | 66.6097442 |
| 67.8771293 | 63 | 66.6145927 |
| 67.3316747 | 63 | 66.6218654 |
| 67.604402  | 63 | 66.6303503 |
| 67.6953111 | 63 | 66.6400473 |
| 67.5134929 | 63 | 66.6594412 |
| 66.604402  | 63 | 66.677623  |
| 66.6953111 | 63 | 66.6982291 |
| 66.3316747 | 63 | 66.7115624 |
| 66.2407656 | 63 | 66.7236836 |
| 66.2407656 | 63 | 66.7345927 |
| 66.7862202 | 63 | 66.737017  |
| 66.9680384 | 63 | 66.7382291 |
| 66.604402  | 63 | 66.7539867 |
| 65.7862202 | 63 | 66.7636836 |
| 65.4225838 | 63 | 66.7945878 |
| 65.3316747 | 63 | 66.8327648 |
| 65.4225838 | 63 | 66.869399  |
| 64.9680384 | 63 | 66.9072454 |
| 65.6953111 | 63 | 66.9450918 |
| 65.7862202 | 63 | 66.9878968 |
| 65.9680384 | 63 | 67.0307019 |
| 65.9680384 | 63 | 67.0648769 |
| 66.3316747 | 63 | 67.0936874 |
| 66.6953111 | 63 | 67.1208451 |
| 66.5134929 | 63 | 67.1636501 |
| 66.604402  | 63 | 67.2053532 |
| 66.6953111 | 63 | 67.2606101 |
| 66.8771293 | 63 | 67.3030845 |
| 67.1498565 | 63 | 67.3486444 |
| 67.1498565 | 63 | 67.3607656 |
| 67.4225838 | 63 | 67.3668262 |
| 67.4225838 | 63 | 67.374099  |
| 67.604402  | 63 | 67.3874323 |
| 67.5134929 | 63 | 67.3959171 |
| 67.6953111 | 63 | 67.3983414 |
| 68.1498565 | 63 | 67.3995535 |
| 68.1498565 | 63 | 67.4019778 |

|            |    |            |
|------------|----|------------|
| 68.2407656 | 63 | 67.394705  |
| 67.9680384 | 63 | 67.3898565 |
| 68.1498565 | 63 | 67.3910687 |
| 68.1498565 | 63 | 67.3765232 |
| 68.4225838 | 63 | 67.3583414 |
| 68.3316747 | 63 | 67.3401596 |
| 68.5134929 | 63 | 67.3377353 |
| 67.7862202 | 63 | 67.3316747 |
| 67.8771293 | 63 | 67.3316747 |
| 67.7862202 | 63 | 67.3353111 |
| 67.3316747 | 63 | 67.3450081 |
| 67.2407656 | 63 | 67.3486444 |
| 67.6953111 | 63 | 67.3498565 |
| 67.3316747 | 63 | 67.3583414 |
| 67.4225838 | 63 | 67.3704626 |
| 67.8771293 | 63 | 67.3862202 |
| 67.7862202 | 63 | 67.4031899 |
| 67.7862202 | 63 | 67.4213717 |
| 67.6953111 | 63 | 67.4431899 |
| 68.0589474 | 63 | 67.4553111 |
| 68.0589474 | 63 | 67.4662202 |
| 67.9680384 | 63 | 67.4759171 |
| 67.604402  | 63 | 67.4783414 |
| 67.8771293 | 63 | 67.4722808 |
| 69.0589474 | 63 | 67.4637959 |
| 68.8771293 | 63 | 67.4613717 |
| 69.6953111 | 63 | 67.4686444 |
| 69.2407656 | 63 | 67.4807656 |
| 69.0589474 | 63 | 67.5025838 |
| 68.5134929 | 63 | 67.5304626 |
| 68.0589474 | 63 | 67.5595535 |
| 67.9680384 | 63 | 67.5983414 |
| 68.1498565 | 63 | 67.6431899 |
| 67.7862202 | 63 | 67.6612281 |
| 67.5134929 | 63 | 67.6791562 |
| 67.6953111 | 63 | 67.6933377 |
| 67.6953111 | 63 | 67.7284892 |
| 67.5134929 | 63 | 67.7636407 |
| 67.5134929 | 63 | 67.8012164 |
| 67.4225838 | 63 | 67.8424286 |
| 66.5134929 | 63 | 67.8909134 |
| 66.3316747 | 63 | 67.9515195 |
| 66.1498565 | 63 | 68.0097013 |
| 66.4225838 | 63 | 68.0690952 |
| 66.2407656 | 63 | 68.1187922 |

|            |    |            |
|------------|----|------------|
| 66.3316747 | 63 | 68.1830346 |
| 66.5134929 | 63 | 68.2497013 |
| 66.9680384 | 63 | 68.3224286 |
| 67.0589474 | 63 | 68.4000043 |
| 67.0589474 | 63 | 68.438191  |
| 67.2407656 | 63 | 68.4663501 |
| 66.6953111 | 63 | 68.4940685 |
| 66.604402  | 63 | 68.5179301 |
| 66.604402  | 63 | 68.5372738 |
| 66.7862202 | 63 | 68.5526506 |
| 66.604402  | 63 | 68.5521596 |
| 66.604402  | 63 | 68.5517788 |
| 66.604402  | 63 | 68.5425826 |
| 66.6953111 | 63 | 68.5374635 |
| 66.1498565 | 63 | 68.534989  |
| 65.8771293 | 63 | 68.5386853 |
| 66.0589474 | 63 | 68.5387453 |
| 66.3316747 | 63 | 68.5269045 |
| 67.1498565 | 63 | 68.5130801 |
| 67.604402  | 63 | 68.4828371 |
| 68.5134929 | 63 | 68.4571119 |
| 69.2407656 | 63 | 68.4284115 |
| 69.3316747 | 63 | 68.4320479 |
| 70.3316747 | 63 | 68.412259  |
| 70.7862202 | 63 | 68.3950045 |
| 68.9572701 | 63 | 68.3753257 |
| 68.8580965 | 63 | 68.3569518 |
| 68.758923  | 63 | 68.3419012 |
| 70.7862202 | 63 | 68.3323601 |
| 70.7862202 | 63 | 68.3228191 |
| 71.0589474 | 63 | 68.3065564 |
| 71.0589474 | 63 | 68.2850043 |
| 71.7862202 | 63 | 68.2551878 |
| 72.6953111 | 63 | 68.2374926 |
| 72.7862202 | 63 | 68.2288331 |
| 72.7862202 | 63 | 68.2282177 |
| 72.2407656 | 63 | 68.2358668 |
| 72.604402  | 63 | 68.2565186 |
| 72.8771293 | 63 | 68.2786029 |
| 73.2407656 | 63 | 68.2957286 |
| 73.1498565 | 63 | 68.3094383 |
| 70.1047672 | 63 | 68.3143325 |
| 69.8072466 | 63 | 68.3205491 |
| 69.4105524 | 63 | 68.3257739 |
| 69.2122053 | 63 | 68.3423486 |

|            |    |            |
|------------|----|------------|
| 69.3279077 | 63 | 68.3522016 |
| 68.939478  | 63 | 68.3581977 |
| 67.7493953 | 63 | 68.3538358 |
| 67.6667507 | 63 | 68.3479311 |
| 67.36923   | 63 | 68.3327703 |
| 67.6750152 | 63 | 68.3187114 |
| 67.7824532 | 63 | 68.30322   |
| 67.8816267 | 63 | 68.2950013 |
| 67.8816267 | 63 | 68.2877743 |
| 68.1708829 | 63 | 68.2794454 |
| 67.8403044 | 63 | 68.2674802 |
| 67.4270813 | 63 | 68.2485728 |
| 67.3113788 | 63 | 68.2485728 |
| 66.9064201 | 63 | 68.2388758 |
| 68.7862202 | 63 | 68.2231182 |
| 66.5747767 | 63 | 68.2170576 |
| 66.6739503 | 63 | 68.1964516 |
| 66.6739503 | 63 | 68.1685728 |
| 66.4081779 | 63 | 68.1638679 |
| 66.3846941 | 63 | 68.1629095 |
| 66.9797354 | 63 | 68.1669098 |
| 66.9797354 | 63 | 68.1450917 |
| 66.293785  | 63 | 68.128122  |
| 65.8970908 | 63 | 68.1123644 |
| 65.186347  | 63 | 68.0966068 |
| 65.186347  | 63 | 68.0711523 |
| 65.6822148 | 63 | 68.0263038 |
| 66.1037024 | 63 | 67.9729704 |
| 66.9962643 | 63 | 67.9232735 |
| 67.7896528 | 63 | 67.8711523 |
| 67.9879999 | 63 | 67.808122  |
| 67.7979172 | 63 | 67.7353947 |
| 67.9962643 | 63 | 67.6505462 |
| 67.4260164 | 63 | 67.5620614 |
| 67.52519   | 63 | 67.5141777 |
| 67.632628  | 63 | 67.4470561 |
| 67.9384131 | 63 | 67.3840116 |
| 67.3433718 | 63 | 67.3210773 |
| 67.0541156 | 63 | 67.2499887 |
| 66.4590743 | 63 | 67.1825365 |
| 66.1615536 | 63 | 67.1551487 |
| 65.4673387 | 63 | 67.1349234 |
| 65.5499834 | 63 | 67.117453  |
| 65.5334544 | 63 | 67.092269  |
| 65.5334544 | 63 | 67.0668647 |

|            |    |            |
|------------|----|------------|
| 65.3351073 | 63 | 67.038926  |
| 65.4342809 | 63 | 67.0073509 |
| 65.4342809 | 63 | 66.9743432 |
| 65.7318015 | 63 | 66.9639251 |
| 67.604402  | 63 | 66.97235   |
| 67.7862202 | 63 | 66.9835297 |
| 68.0589474 | 63 | 67.0049574 |
| 68.8771293 | 63 | 67.0001089 |
| 68.7862202 | 63 | 67.0174736 |
| 68.6953111 | 63 | 67.033516  |
| 68.604402  | 63 | 67.0447099 |
| 68.7862202 | 63 | 67.0606595 |
| 69.0589474 | 63 | 67.074498  |
| 69.1498565 | 63 | 67.0876754 |
| 69.5134929 | 63 | 67.1044892 |
| 69.8771293 | 63 | 67.1292368 |
| 69.8771293 | 63 | 67.1592737 |
| 69.8771293 | 63 | 67.1987871 |
| 69.3316747 | 63 | 67.2395127 |
| 68.7862202 | 63 | 67.2724146 |
| 69.0589474 | 63 | 67.3045451 |
| 68.3316747 | 63 | 67.3356839 |
| 67.8771293 | 63 | 67.3647291 |
| 67.4225838 | 63 | 67.3959781 |
| 66.8771293 | 63 | 67.4455191 |
| 66.5134929 | 63 | 67.5009003 |
| 66.5134929 | 63 | 67.5699455 |
| 64.7731238 | 63 | 67.6364562 |
| 64.6822148 | 63 | 67.7112313 |
| 64.4921321 | 63 | 67.78799   |
| 63.9962643 | 63 | 67.8557128 |
| 63.8805619 | 63 | 67.9103227 |
| 65.6953111 | 63 | 67.9498361 |
| 66.1498565 | 63 | 67.9872559 |
| 66.0589474 | 63 | 68.0302956 |
| 65.7862202 | 63 | 68.069809  |
| 65.8771293 | 63 | 68.1131792 |
| 65.7862202 | 63 | 68.1529131 |
| 65.5134929 | 63 | 68.1940794 |
| 65.6953111 | 63 | 68.2230144 |
| 67.0589474 | 63 | 68.2507372 |
| 68.0589474 | 63 | 68.2854022 |
| 68.1498565 | 63 | 68.2987355 |
| 68.5134929 | 63 | 68.3096446 |
| 68.4225838 | 63 | 68.3399476 |

|            |    |            |
|------------|----|------------|
| 67.8771293 | 63 | 68.3238188 |
| 67.8771293 | 63 | 68.3117672 |
| 67.5134929 | 63 | 68.3023602 |
| 67.604402  | 63 | 68.300887  |
| 67.4225838 | 63 | 68.298312  |
| 67.9680384 | 63 | 68.3185468 |
| 68.2407656 | 63 | 68.3488092 |
| 68.1498565 | 63 | 68.3731212 |
| 68.1498565 | 63 | 68.3914828 |
| 68.1498565 | 63 | 68.3967314 |
| 68.2407656 | 63 | 68.3937155 |
| 68.1498565 | 63 | 68.4022004 |
| 68.5134929 | 63 | 68.3997761 |
| 69.3316747 | 63 | 68.3692985 |
| 69.9680384 | 63 | 68.3379393 |
| 70.3316747 | 63 | 68.3114286 |
| 71.5134929 | 63 | 68.2855791 |
| 72.1498565 | 63 | 68.2603907 |
| 72.604402  | 63 | 68.2603907 |
| 72.5134929 | 63 | 68.2494816 |
| 73.2407656 | 63 | 68.2545047 |
| 73.6953111 | 63 | 68.2534672 |
| 72.4225838 | 63 | 68.2598126 |
| 71.1498565 | 63 | 68.2764059 |
| 69.4225838 | 63 | 68.2933299 |
| 68.9680384 | 63 | 68.2860571 |
| 68.6953111 | 63 | 68.2690874 |
| 68.5134929 | 63 | 68.2581783 |
| 68.7862202 | 63 | 68.2557541 |
| 68.5134929 | 63 | 68.2618147 |
| 68.4225838 | 63 | 68.2799965 |
| 67.604402  | 63 | 68.3078753 |
| 67.5134929 | 63 | 68.3357541 |
| 68.3316747 | 63 | 68.344239  |
| 68.604402  | 63 | 68.3357541 |
| 68.604402  | 63 | 68.3284814 |
| 70.3316747 | 63 | 68.3199965 |
| 67.6674701 | 63 | 68.3102996 |
| 67.8823462 | 63 | 68.2785601 |
| 67.9897842 | 63 | 68.2428537 |
| 68.4939164 | 63 | 68.2119958 |
| 68.59309   | 63 | 68.1799258 |
| 70.576561  | 63 | 68.1555693 |
| 71.4195363 | 63 | 68.1398117 |
| 71.3368916 | 63 | 68.1155693 |



|            |    |            |
|------------|----|------------|
| 71.254247  | 63 | 68.0913269 |
| 70.2707759 | 63 | 68.0682966 |
| 69.6509412 | 63 | 68.0452663 |
| 69.9680384 | 63 | 68.0198117 |
| 68.604402  | 63 | 67.9955693 |
| 66.7731238 | 63 | 67.9689026 |
| 65.9797354 | 63 | 67.9264784 |
| 65.8888263 | 63 | 67.8755693 |
| 65.4838676 | 63 | 67.8246602 |
| 64.9879999 | 63 | 67.7604178 |
| 66.5134929 | 63 | 67.6889026 |
| 65.6953111 | 63 | 67.6113269 |
| 65.1498565 | 63 | 67.542236  |
| 64.604402  | 63 | 67.4646602 |
| 64.9680384 | 63 | 67.3895087 |
| 65.2407656 | 63 | 67.3446602 |
| 65.1498565 | 63 | 67.3289026 |
| 65.1498565 | 63 | 67.3410238 |
| 64.8771293 | 63 | 67.3579935 |
| 65.2407656 | 63 | 67.3737511 |
| 65.604402  | 63 | 67.3919329 |
| 66.3316747 | 63 | 67.3943572 |
| 67.1498565 | 63 | 67.4016299 |
| 67.604402  | 63 | 67.4113269 |
| 67.7862202 | 63 | 67.4270845 |
| 67.6953111 | 63 | 67.4367814 |
| 67.4225838 | 63 | 67.4331451 |
| 67.604402  | 63 | 67.4270845 |
| 67.8771293 | 63 | 67.4113269 |
| 67.6953111 | 63 | 67.372539  |
| 65.4966712 | 63 | 67.3680617 |
| 65.1991506 | 63 | 67.3607194 |
| 65.1991506 | 69 | 67.3519446 |
| 65.1991506 | 69 | 67.3328117 |
| 65.5958448 | 69 | 67.297811  |
| 66.7862202 | 69 | 67.2218186 |
| 66.4225838 | 69 | 67.1273138 |
| 66.3316747 | 69 | 67.0230018 |
| 66.4225838 | 69 | 66.9197918 |
| 66.4225838 | 69 | 66.8284825 |
| 66.3316747 | 69 | 66.7587711 |
| 66.3316747 | 69 | 66.7018014 |
| 66.5134929 | 69 | 66.6666499 |
| 66.1498565 | 69 | 66.6583397 |
| 66.1498565 | 69 | 66.6618201 |

|            |    |            |
|------------|----|------------|
| 66.5134929 | 69 | 66.6701489 |
| 66.6953111 | 69 | 66.6935743 |
| 66.7862202 | 69 | 66.7272475 |
| 66.7862202 | 69 | 66.7490657 |
| 67.3316747 | 69 | 66.7866414 |
| 67.4225838 | 69 | 66.8363384 |
| 68.0589474 | 69 | 66.8981566 |
| 69.0589474 | 69 | 66.9539142 |
| 69.9680384 | 69 | 67.0084596 |
| 70.3316747 | 69 | 67.0654293 |
| 70.2407656 | 69 | 67.1236111 |
| 69.8771293 | 69 | 67.1866414 |
| 69.8771293 | 69 | 67.2496717 |
| 68.9680384 | 69 | 67.2981566 |
| 69.0589474 | 69 | 67.3357323 |
| 69.1498565 | 69 | 67.3551263 |
| 68.7862202 | 69 | 67.3684596 |
| 68.2407656 | 69 | 67.3708839 |
| 68.0589474 | 69 | 67.362399  |
| 68.1498565 | 69 | 67.3575505 |
| 67.4225838 | 69 | 67.3478536 |
| 67.4225838 | 69 | 67.3357323 |
| 67.3316747 | 69 | 67.332096  |
| 67.3316747 | 69 | 67.3456536 |
| 67.3316747 | 69 | 67.3571176 |
| 67.0589474 | 69 | 67.3710058 |
| 65.9680384 | 69 | 67.3945909 |
| 64.8771293 | 69 | 67.4189474 |
| 64.3316747 | 69 | 67.4250081 |
| 63.5134929 | 69 | 67.4468262 |
| 63.5134929 | 69 | 67.4734929 |
| 63.4225838 | 69 | 67.5074323 |
| 64.4225838 | 69 | 67.5486444 |
| 65.6953111 | 69 | 67.5825838 |
| 65.9680384 | 69 | 67.6153111 |
| 66.1498565 | 69 | 67.644402  |
| 66.2407656 | 69 | 67.6674323 |
| 66.5134929 | 63 | 67.6904124 |
| 67.2407656 | 63 | 67.7060095 |
| 67.5134929 | 63 | 67.7112486 |
| 68.1498565 | 63 | 67.7128512 |
| 68.5134929 | 63 | 67.7173189 |
| 68.8771293 | 63 | 67.7292797 |
| 69.2407656 | 63 | 67.7614058 |
| 69.1498565 | 63 | 67.7917688 |

|            |               |
|------------|---------------|
| 69.3316747 | 63 67.8089086 |
| 69.4225838 | 63 67.8112826 |
| 69.5134929 | 63 67.8101305 |
| 69.604402  | 63 67.8035789 |
| 69.9680384 | 63 67.7925094 |
| 69.2407656 | 63 67.7787952 |
| 69.1498565 | 63 67.7798469 |
| 68.604402  | 63 67.7718628 |
| 68.604402  | 63 67.756055  |
| 67.9680384 | 63 67.7477403 |
| 67.0589474 | 63 67.7440537 |
| 67.0589474 | 63 67.7414691 |
| 66.8771293 | 63 67.7352481 |
| 66.9680384 | 63 67.7322226 |
| 67.4225838 | 63 67.7305195 |
| 66.5134929 | 63 67.7339955 |
| 66.0589474 | 63 67.7348268 |
| 66.2407656 | 63 67.7384129 |
| 66.9680384 | 63 67.7588585 |
| 67.4225838 | 63 67.7978166 |
| 67.2407656 | 63 67.8485653 |
| 68.0589474 | 63 67.9025095 |
| 68.3316747 | 63 67.9672527 |
| 68.9680384 | 63 68.0253843 |
| 69.5134929 | 63 68.0834057 |
| 68.8771293 | 63 68.1256356 |
| 68.7862202 | 63 68.1624522 |
| 68.6953111 | 63 68.2132009 |
| 67.8771293 | 63 68.2369186 |
| 67.8733623 | 63 68.2551268 |
| 67.6832796 | 63 68.2670539 |
| 67.0882383 | 63 68.2784638 |
| 66.9064201 | 63 68.288992  |
| 67.1212962 | 63 68.2952228 |
| 68.2287342 | 63 68.2993599 |
| 69.83204   | 63 68.2935797 |
| 70.3361722 | 63 68.2752374 |
| 70.3444367 | 63 68.256785  |
| 70.1460895 | 63 68.2335943 |
| 70.2452631 | 63 68.2052245 |
| 69.7493953 | 63 68.1756426 |
| 69.046916  | 63 68.1461709 |
| 68.8485689 | 63 68.1171399 |
| 69.046916  | 63 68.1017729 |
| 68.4601391 | 63 68.0797943 |

|            |    |            |
|------------|----|------------|
| 67.9642714 | 63 | 68.067733  |
| 68.1626185 | 63 | 68.0503825 |
| 67.9642714 | 63 | 68.033583  |
| 67.8650978 | 63 | 68.0209708 |
| 67.6832796 | 63 | 68.0111134 |
| 67.1956763 | 63 | 68.0077574 |
| 67.2948499 | 63 | 68.0071562 |
| 67.5923705 | 63 | 67.9965275 |
| 67.3940234 | 63 | 67.9861191 |
| 67.600635  | 63 | 67.980449  |
| 68.5923705 | 63 | 67.9638363 |
| 68.8898912 | 63 | 67.932678  |
| 68.6832796 | 63 | 67.8911616 |
| 68.3774945 | 63 | 67.8531714 |
| 68.36923   | 63 | 67.7942446 |
| 67.8733623 | 63 | 67.7358687 |
| 67.7741887 | 63 | 67.6771622 |
| 67.5898296 | 63 | 67.6142684 |
| 68.4565541 | 63 | 67.5739642 |
| 69.7741887 | 63 | 67.5347619 |
| 67.9286902 | 63 | 67.5372461 |
| 67.6063761 | 63 | 67.5489865 |
| 67.408029  | 63 | 67.5501986 |
| 68.0965028 | 63 | 67.5499782 |
| 68.3031143 | 63 | 67.5511903 |
| 68.6171639 | 63 | 67.556149  |
| 68.8237755 | 63 | 67.5635319 |
| 68.4436102 | 63 | 67.5573611 |
| 67.8650978 | 63 | 67.5297027 |
| 67.7659243 | 63 | 67.4926779 |
| 67.5923705 | 63 | 67.4541104 |
| 67.2948499 | 63 | 67.4168653 |
| 67.2948499 | 63 | 67.3742206 |
| 67.3940234 | 63 | 67.3421545 |
| 67.7907176 | 63 | 67.3204214 |
| 68.0882383 | 63 | 67.2823192 |
| 67.5014614 | 63 | 67.2396746 |
| 67.6998086 | 63 | 67.1982421 |
| 67.3031143 | 63 | 67.1701429 |
| 66.708073  | 63 | 67.1409418 |
| 66.1130317 | 63 | 67.113063  |
| 66.3196433 | 63 | 67.0917958 |
| 66.6254284 | 63 | 67.0823192 |
| 66.9229491 | 63 | 67.0819887 |
| 66.6254284 | 63 | 67.0988482 |

|            |               |
|------------|---------------|
| 65.7328664 | 63 67.1077738 |
| 65.6336929 | 63 67.1206664 |
| 64.9948059 | 63 67.1374157 |
| 64.6311695 | 63 67.1422642 |
| 64.3088555 | 63 67.1471126 |
| 64.3915001 | 63 67.1506388 |
| 63.639434  | 63 67.1461209 |
| 63.9534836 | 63 67.1362035 |
| 64.5650538 | 63 67.1202256 |
| 64.7964588 | 63 67.1167496 |
| 65.85431   | 63 67.1011864 |
| 65.8460456 | 63 67.0752789 |
| 68.8816267 | 63 67.0196817 |
| 68.7576598 | 63 66.9850549 |
| 67.9642714 | 63 66.9510891 |
| 67.6667507 | 63 66.919768  |
| 67.1791474 | 63 66.8695703 |
| 67.278321  | 63 66.8117693 |
| 67.6750152 | 63 66.7449325 |
| 67.7659243 | 63 66.6741287 |
| 67.7576598 | 63 66.6071817 |
| 67.5593127 | 63 66.545524  |
| 67.4518747 | 63 66.4888249 |
| 67.3527011 | 63 66.4332277 |
| 67.046916  | 63 66.376749  |
| 67.3444367 | 63 66.3190582 |
| 67.4169358 | 63 66.2600451 |
| 65.9909041 | 63 66.1860457 |
| 65.8485689 | 63 66.1165642 |
| 65.3527011 | 63 66.0621792 |
| 65.8568333 | 63 66.0027253 |
| 65.9725358 | 63 65.9497728 |
| 65.8733623 | 63 65.9108147 |
| 66.2700565 | 63 65.8834269 |
| 66.9725358 | 63 65.8581328 |
| 67.1708829 | 63 65.8372464 |
| 68.5593127 | 63 65.8111809 |
| 68.261792  | 63 65.7866582 |
| 68.3609656 | 63 65.7764604 |
| 68.8568333 | 63 65.7736457 |
| 68.9560069 | 63 65.7890463 |
| 69.2535276 | 63 65.804447  |
| 68.9477424 | 63 65.8205088 |
| 68.0386515 | 63 65.8354687 |
| 67.6254284 | 63 65.8350017 |

|            |    |            |
|------------|----|------------|
| 66.6750152 | 63 | 65.8303472 |
| 67.5134929 | 63 | 65.8199628 |
| 66.4225838 | 63 | 65.7980081 |
| 66.5134929 | 63 | 65.7595245 |
| 65.604402  | 63 | 65.7175147 |
| 65.3316747 | 63 | 65.6313941 |
| 65.0589474 | 63 | 65.5432901 |
| 65.0589474 | 69 | 65.4633403 |
| 64.3316747 | 69 | 65.3909938 |
| 63.9680384 | 69 | 65.3287851 |
| 63.604402  | 69 | 65.2701025 |
| 63.5134929 | 69 | 65.2000701 |
| 63.4225838 | 69 | 65.1300377 |
| 63.2407656 | 69 | 65.0601155 |
| 63.5134929 | 69 | 65.0013227 |
| 63.4225838 | 69 | 64.9536595 |
| 63.0589474 | 69 | 64.9073185 |
| 62.9680384 | 69 | 64.8662668 |
| 62.9680384 | 69 | 64.820036  |
| 62.2407656 | 69 | 64.7655659 |
| 62.8771293 | 69 | 64.7228368 |
| 63.4225838 | 69 | 64.6820054 |
| 63.2407656 | 69 | 64.6502099 |
| 63.3316747 | 69 | 64.615329  |
| 63.7862202 | 69 | 64.5776933 |
| 64.0589474 | 69 | 64.5413799 |
| 64.4225838 | 69 | 64.5009894 |
| 65.0589474 | 69 | 64.4500203 |
| 64.9680384 | 69 | 64.3988309 |
| 64.7862202 | 69 | 64.3436745 |
| 64.9680384 | 69 | 64.2961214 |
| 65.4225838 | 69 | 64.2387612 |
| 66.1498565 | 69 | 64.171153  |
| 65.7862202 | 69 | 64.1107073 |
| 65.5134929 | 69 | 64.048719  |
| 65.5134929 | 69 | 63.9944442 |
| 63.604402  | 69 | 63.9510784 |
| 63.604402  | 69 | 63.910798  |
| 63.7862202 | 69 | 63.8856141 |
| 63.1498565 | 69 | 63.8419778 |
| 62.9680384 | 69 | 63.804402  |
| 62.6953111 | 69 | 63.7656141 |
| 62.4225838 | 69 | 63.7425838 |
| 62.1498565 | 69 | 63.7280384 |
| 61.9680384 | 69 | 63.7219778 |

|            |    |            |
|------------|----|------------|
| 62.2407656 | 69 | 63.7171293 |
| 62.5134929 | 69 | 63.7219778 |
| 62.8771293 | 69 | 63.7231899 |
| 62.4225838 | 69 | 63.7304626 |
| 62.5134929 | 69 | 63.7425838 |
| 62.5134929 | 69 | 63.7631899 |
| 63.1498565 | 69 | 63.7934929 |
| 63.8771293 | 69 | 63.8201596 |
| 63.8771293 | 69 | 63.8589474 |
| 63.9680384 | 69 | 63.9025838 |
| 63.8771293 | 69 | 63.9437959 |
| 63.3316747 | 69 | 63.9801596 |
| 62.7862202 | 69 | 64.0286444 |
| 62.7862202 | 69 | 64.0734929 |
| 62.9680384 | 69 | 64.1134929 |
| 63.2407656 | 69 | 64.1619778 |
| 63.1498565 | 69 | 64.2068262 |
| 63.1498565 | 69 | 64.244402  |
| 63.2407656 | 69 | 64.2771293 |
| 63.1498565 | 69 | 64.3074323 |
| 63.3316747 | 69 | 64.3256141 |
| 64.4225838 | 69 | 64.3522808 |
| 64.6953111 | 69 | 64.3728868 |
| 64.0589474 | 69 | 64.3813717 |
| 63.7862202 | 69 | 64.3728868 |
| 64.4225838 | 69 | 64.3462202 |
| 64.604402  | 69 | 64.314705  |
| 64.8771293 | 69 | 64.2892505 |
| 64.7862202 | 69 | 64.2662202 |
| 64.604402  | 69 | 64.2650081 |
| 64.7862202 | 69 | 64.2662202 |
| 64.2407656 | 69 | 64.2795535 |
| 63.604402  | 69 | 64.3086444 |
| 63.604402  | 69 | 64.3510687 |
| 63.8771293 | 69 | 64.385913  |
| 64.2407656 | 69 | 64.4365149 |
| 64.604402  | 69 | 64.4974749 |
| 64.6953111 | 69 | 64.5608591 |
| 64.6953111 | 69 | 64.6212682 |
| 64.0589474 | 69 | 64.6915712 |
| 64.1498565 | 69 | 64.7533894 |
| 64.4225838 | 69 | 64.8188439 |
| 64.9680384 | 69 | 64.8915712 |
| 65.5134929 | 69 | 64.9703591 |
| 65.5134929 | 69 | 65.0382379 |

|            |    |            |
|------------|----|------------|
| 66.3316747 | 69 | 65.1012682 |
| 66.3316747 | 69 | 65.15945   |
| 66.0589474 | 69 | 65.2115712 |
| 65.6953111 | 69 | 65.2721773 |
| 65.8771293 | 69 | 65.31945   |
| 66.2407656 | 69 | 65.3764197 |
| 66.4225838 | 69 | 65.4212682 |
| 66.8771293 | 69 | 65.4636924 |
| 66.6953111 | 69 | 65.5049045 |
| 66.604402  | 69 | 65.5509652 |
| 66.5134929 | 69 | 65.5982379 |
| 66.6953111 | 69 | 65.649147  |
| 66.4225838 | 69 | 65.7012682 |
| 66.9680384 | 69 | 65.749753  |
| 66.3316747 | 69 | 65.7776318 |
| 65.604402  | 69 | 65.7933894 |
| 64.7862202 | 69 | 65.8176318 |
| 64.1498565 | 69 | 65.8321773 |
| 63.4225838 | 69 | 65.8418742 |
| 63.604402  | 69 | 65.8340845 |
| 63.7862202 | 69 | 65.8253031 |
| 63.5134929 | 69 | 65.8192765 |
| 63.6953111 | 69 | 65.8157843 |
| 64.7862202 | 69 | 65.8125125 |
| 65.3316747 | 69 | 65.8178357 |
| 66.1498565 | 69 | 65.8369331 |
| 65.3086345 | 69 | 65.8769331 |
| 66.2177254 | 69 | 65.9145088 |
| 66.7218577 | 69 | 65.9411755 |
| 66.7218577 | 69 | 65.9581452 |
| 66.7714444 | 69 | 65.9714785 |
| 67.7862202 | 69 | 65.9811755 |
| 67.5134929 | 69 | 66.0042058 |
| 67.3316747 | 69 | 66.026024  |
| 67.9680384 | 69 | 66.0417815 |
| 68.4225838 | 69 | 66.0478421 |
| 68.2407656 | 69 | 66.0223876 |
| 68.604402  | 69 | 65.9908724 |
| 68.2407656 | 69 | 65.9448118 |
| 67.8771293 | 69 | 65.9048118 |
| 68.4225838 | 69 | 65.8672361 |
| 66.8771293 | 69 | 65.8357209 |
| 67.0589474 | 69 | 65.7957209 |
| 66.1498565 | 69 | 65.7484482 |
| 66.1498565 | 69 | 65.696327  |



|            |    |            |
|------------|----|------------|
| 66.3316747 | 69 | 65.6429937 |
| 66.604402  | 69 | 65.6042058 |
| 66.6953111 | 69 | 65.5702664 |
| 67.0589474 | 69 | 65.5411755 |
| 67.0589474 | 69 | 65.5120846 |
| 66.9680384 | 69 | 65.4902664 |
| 66.5134929 | 69 | 65.4539027 |
| 65.8771293 | 69 | 65.426024  |
| 65.8771293 | 69 | 65.4114785 |
| 64.8771293 | 69 | 65.40663   |
| 65.1498565 | 69 | 65.4042058 |
| 64.0201737 | 69 | 65.4042058 |
| 64.2185209 | 69 | 65.4078421 |
| 64.3342233 | 69 | 65.3969331 |
| 64.3424878 | 69 | 65.3908724 |
| 64.5408349 | 69 | 65.3799634 |
| 64.6400085 | 69 | 65.3508724 |
| 65.0367027 | 69 | 65.3205694 |
| 66.604402  | 69 | 65.2769331 |
| 66.6953111 | 69 | 65.2408766 |
| 66.2407656 | 69 | 65.1951232 |
| 65.8771293 | 69 | 65.1365874 |
| 65.6953111 | 69 | 65.0804759 |
| 65.4225838 | 69 | 65.021279  |
| 65.7862202 | 69 | 64.9546123 |
| 65.7862202 | 69 | 64.891582  |
| 65.604402  | 69 | 64.8249153 |
| 65.4225838 | 69 | 64.7727941 |
| 63.604402  | 69 | 64.7121881 |
| 63.1498565 | 69 | 64.6443093 |
| 62.8771293 | 69 | 64.5667335 |
| 63.3316747 | 69 | 64.4867335 |
| 63.2407656 | 69 | 64.4103699 |
| 63.3316747 | 69 | 64.3206729 |
| 62.8771293 | 69 | 64.2491578 |
| 62.6953111 | 69 | 64.171582  |
| 62.5134929 | 69 | 64.1134002 |
| 62.8771293 | 69 | 64.0552184 |
| 63.7862202 | 69 | 63.9946123 |
| 64.0589474 | 69 | 63.931582  |
| 64.3316747 | 69 | 63.8685517 |
| 64.5134929 | 69 | 63.8079456 |
| 64.7862202 | 63 | 63.7534002 |
| 64.2407656 | 63 | 63.7134002 |
| 64.2407656 | 63 | 63.6879456 |

|          |            |    |            |
|----------|------------|----|------------|
|          | 64.5134929 | 63 | 63.6746123 |
|          | 64.4225838 | 63 | 63.6806729 |
|          | 63.9680384 | 63 | 63.710976  |
|          | 63.4225838 | 63 | 63.7437032 |
|          | 63.8771293 | 63 | 63.7927051 |
|          | 62.9680384 | 63 | 63.8426986 |
|          | 63.0589474 | 63 | 63.8911495 |
| Before1  | 62.8771293 | 63 | 63.9431265 |
| Before2  | 62.604402  | 63 | 63.9888226 |
| Before3  | 63.0589474 | 63 | 64.0295599 |
| Before4  | 62.8771293 | 63 | 64.0686444 |
| Before5  | 62.604402  | 63 | 64.0953111 |
| Before6  | 62.7862202 | 63 | 64.1219778 |
| Before7  | 62.3316747 | 63 | 64.1607656 |
| Before8  | 62.5134929 | 63 | 64.2104626 |
| Before9  | 62.3316747 | 63 | 64.2625838 |
| Before10 | 62.7862202 | 63 | 64.3171293 |
| Before11 | 62.7862202 | 63 | 64.3619778 |
| Before12 | 62.3316747 | 63 | 64.404402  |
| Before13 | 64.0589474 | 63 | 64.4480384 |
| Before14 | 63.8771293 | 63 | 64.4856141 |
| Before15 | 63.1498565 | 63 | 64.5437959 |
| Before16 | 62.7862202 | 63 | 64.6128868 |
| Before17 | 62.2407656 | 63 | 64.674705  |
| Before18 | 62.1498565 | 63 | 64.7280384 |
| Before19 | 61.6953111 | 63 | 64.7934929 |
| Before20 | 61.5134929 | 63 | 64.8601596 |
| Before21 | 61.2407656 | 63 | 64.9413717 |
| Before22 | 61.7862202 | 63 | 65.0262202 |
| Before23 | 61.7862202 | 63 | 65.1110687 |
| Before24 | 61.7862202 | 63 | 65.1898565 |
| Before25 | 61.8771293 | 63 | 65.2565232 |
| Before26 | 61.9680384 | 63 | 65.3183414 |
| Before27 | 62.5134929 | 63 | 65.3631899 |
| Before28 | 62.9680384 | 63 | 65.4056141 |
| Before29 | 63.9680384 | 63 | 65.434705  |
| Before30 | 64.604402  | 63 | 65.4868262 |
| Before31 | 64.8771293 | 63 | 65.5486444 |
| Before32 | 66.3316747 | 63 | 65.6116747 |
| Before33 | 67.1498565 | 63 | 65.6783414 |
| Before34 | 67.604402  | 63 | 65.7425838 |
| Before35 | 67.6953111 | 63 | 65.8225838 |
| Before36 | 67.9680384 | 63 | 65.8880384 |
| Before37 | 67.9680384 | 63 | 65.9595535 |
| Before38 | 68.2407656 | 63 | 66.0165232 |

|          |            |    |            |
|----------|------------|----|------------|
| Before39 | 67.9680384 | 63 | 66.0686444 |
| Before40 | 67.6953111 | 63 | 66.1292505 |
| Before41 | 67.9680384 | 63 | 66.1874323 |
| Before42 | 68.604402  | 63 | 66.2577353 |
| Before43 | 68.6953111 | 63 | 66.3474323 |
| Before44 | 69.1498565 | 63 | 66.4371293 |
| Before45 | 69.604402  | 63 | 66.5219778 |
| Before46 | 69.604402  | 63 | 66.5959171 |
| Before47 | 69.5134929 | 63 | 66.6771293 |
| Before48 | 69.1498565 | 63 | 66.7288863 |
| Before49 | 68.9680384 | 63 | 66.7822961 |
| Before50 | 68.8771293 | 63 | 66.8353754 |
| Before51 | 68.2407656 | 63 | 66.8734685 |
| Before52 | 67.9680384 | 63 | 66.8981181 |
| Before53 | 68.3316747 | 63 | 66.9364315 |
| Before54 | 67.5134929 | 63 | 66.9769489 |
| Before55 | 67.3316747 | 63 | 67.020772  |
| Before56 | 68.1498565 | 63 | 67.0618402 |
| Before57 | 68.3316747 | 63 | 67.1074264 |
| Before58 | 68.9680384 | 63 | 67.1541146 |
| Before59 | 69.0589474 | 63 | 67.2150175 |
| Before60 | 68.8771293 | 63 | 67.2764715 |
| Before61 | 68.7862202 | 63 | 67.344537  |
| Before62 | 68.7862202 | 63 | 67.4205364 |
| Before63 | 68.6953111 | 63 | 67.4979684 |
| Before64 | 67.6953111 | 63 | 67.5807997 |
| Before65 | 67.6953111 | 63 | 67.6523914 |
| Before66 | 66.9680384 | 63 | 67.7046994 |
| Before67 | 68.1498565 | 63 | 67.7423517 |
| Before68 | 68.8771293 | 63 | 67.7728415 |
| Before69 | 69.2407656 | 63 | 67.7930833 |
| Before70 | 69.4225838 | 63 | 67.7912866 |
| Before71 | 68.7862202 | 63 | 67.7799031 |
| Before72 | 69.4225838 | 63 | 67.758492  |
| Before73 | 68.7862202 | 63 | 67.7292573 |
| Before74 | 68.3316747 | 63 | 67.6937415 |
| Before75 | 67.3316747 | 63 | 67.6582258 |
| Before76 | 66.7862202 | 63 | 67.6243629 |
| Before77 | 67.1498565 | 63 | 67.600748  |
| Before78 | 67.4225838 | 63 | 67.5808797 |
| Before79 | 68.1498565 | 63 | 67.5653088 |
| Before80 | 69.3316747 | 63 | 67.544008  |
| Before81 | 69.5134929 | 63 | 67.5266741 |
| Before82 | 68.6953111 | 63 | 67.5044632 |
| Before83 | 68.0589474 | 63 | 67.4786857 |

|           |            |    |            |
|-----------|------------|----|------------|
| Before84  | 68.4225838 | 63 | 67.451765  |
| Before85  | 66.6679944 | 63 | 67.4247341 |
| Before86  | 66.7919613 | 63 | 67.4013395 |
| Before87  | 66.3126225 | 63 | 67.3856585 |
| Before88  | 66.9159283 | 63 | 67.3739444 |
| Before89  | 65.7258456 | 63 | 67.3721477 |
| Before90  | 66.0233663 | 63 | 67.3792766 |
| Before91  | 65.8250192 | 63 | 67.3802347 |
| Before92  | 65.5274985 | 63 | 67.3923222 |
| Before93  | 65.2299778 | 63 | 67.4055117 |
| Before94  | 65.1142754 | 63 | 67.4092247 |
| Before95  | 65.0151018 | 63 | 67.4106235 |
| Before96  | 65.8084902 | 63 | 67.4097083 |
| Before97  | 66.3952671 | 63 | 67.4102257 |
| Before98  | 66.8911349 | 63 | 67.4368923 |
| Before99  | 67.4861762 | 63 | 67.4550741 |
| Before100 | 67.6845233 | 63 | 67.4659832 |
| Before101 | 68.1803911 | 63 | 67.4817408 |
| Before102 | 67.8828704 | 63 | 67.5120438 |
| Before103 | 66.8911349 | 63 | 67.5302257 |
| Before104 | 66.7919613 | 63 | 67.5556802 |
| Before105 | 66.8911349 | 63 | 67.5544681 |
| Before106 | 66.3952671 | 63 | 67.5350741 |
| Before107 | 66.19692   | 63 | 67.5096196 |
| Before108 | 66.2960935 | 63 | 67.4768923 |
| Before109 | 65.9985729 | 63 | 67.4465893 |
| Before110 | 65.5027051 | 63 | 67.3885945 |
| Before111 | 65.304358  | 63 | 67.3328035 |
| Before112 | 65.304358  | 63 | 67.2778941 |
| Before113 | 65.7010522 | 63 | 67.2310288 |
| Before114 | 66.19692   | 63 | 67.1886813 |
| Before115 | 66.2051845 | 63 | 67.1498934 |
| Before116 | 66.8002258 | 63 | 67.0929237 |
| Before117 | 67.0068374 | 63 | 67.0214086 |
| Before118 | 67.3952671 | 63 | 66.9365601 |
| Before119 | 67.4840401 | 63 | 66.8626207 |
| Before120 | 67.6710875 | 63 | 66.8008025 |
| Before121 | 67.5853497 | 63 | 66.745045  |
| Before122 | 67.4861762 | 63 | 66.6868631 |
| Before123 | 67.3952671 | 63 | 66.6448031 |
| Before124 | 67.7919613 | 63 | 66.5974538 |
| Before125 | 67.9985729 | 63 | 66.55892   |
| Before126 | 68.1060109 | 63 | 66.5147663 |
| Before127 | 68.5027051 | 63 | 66.4961774 |
| Before128 | 68.4035316 | 63 | 66.47847   |

|           |            |    |            |
|-----------|------------|----|------------|
| Before129 | 68.4200605 | 63 | 66.4609829 |
| Before130 | 68.3208869 | 63 | 66.4474629 |
| Before131 | 68.428325  | 63 | 66.440334  |
| Before132 | 68.4365894 | 63 | 66.4311114 |
| Before133 | 68.8993993 | 63 | 66.4219991 |
| Before134 | 69.0977464 | 63 | 66.410793  |
| Before135 | 70.8771293 | 63 | 66.3978239 |
| Before136 | 70.1498565 | 63 | 66.3782432 |
| Before137 | 69.604402  | 63 | 66.3676984 |
| Before138 | 69.8771293 | 63 | 66.3569331 |
| Before139 | 69.9680384 | 63 | 66.3492533 |
| Before140 | 69.0589474 | 63 | 66.3431161 |
| Before141 | 68.8771293 | 63 | 66.3538385 |
| Before142 | 68.0589474 | 63 | 66.3683074 |
| Before143 | 67.4225838 | 63 | 66.3887267 |
| Before144 | 67.3316747 | 63 | 66.4072727 |
| Before145 | 66.9680384 | 63 | 66.4320998 |
| Before146 | 66.5134929 | 63 | 66.4653015 |
| Before147 | 65.0729725 | 63 | 66.5061064 |
| Before148 | 64.6018982 | 63 | 66.5559473 |
| Before149 | 64.2134684 | 63 | 66.6144933 |
| Before150 | 63.8167742 | 63 | 66.6730393 |
| Before151 | 63.6101626 | 63 | 66.7190234 |
| Before152 | 64.2407656 | 63 | 66.7511232 |
| Before153 | 63.1498565 | 63 | 66.7819006 |
| Before154 | 62.7862202 | 63 | 66.7986836 |
| Before155 | 62.9680384 | 63 | 66.8090753 |
| Before156 | 63.9680384 | 63 | 66.8130759 |
| Before157 | 64.0589474 | 63 | 66.817105  |
| Before158 | 63.8771293 | 63 | 66.8234886 |
| Before159 | 64.0589474 | 63 | 66.8334396 |
| Before160 | 63.5134929 | 63 | 66.8447129 |
| Before161 | 63.2407656 | 63 | 66.8596226 |
| Before162 | 63.4225838 | 63 | 66.8716672 |
| Before163 | 63.604402  | 63 | 66.8894419 |
| Before164 | 64.3316747 | 63 | 66.9118447 |
| Before165 | 64.6953111 | 63 | 66.936231  |
| Before166 | 64.5134929 | 63 | 66.9436069 |
| Before167 | 64.5134929 | 63 | 66.9416164 |
| Before168 | 64.6953111 | 63 | 66.9239786 |
| Before169 | 64.4225838 | 63 | 66.9036961 |
| Before170 | 64.3316747 | 63 | 66.8819811 |
| Before171 | 64.9680384 | 63 | 66.8554177 |
| Before172 | 65.4225838 | 63 | 66.8297358 |
| Before173 | 65.4225838 | 63 | 66.7893645 |

|           |            |    |            |
|-----------|------------|----|------------|
| Before174 | 66.6953111 | 63 | 66.773607  |
| Before175 | 66.8771293 | 63 | 66.7687585 |
| Before176 | 67.604402  | 63 | 66.7517888 |
| Before177 | 67.4225838 | 63 | 66.7348191 |
| Before178 | 67.6953111 | 63 | 66.7360312 |
| Before179 | 67.8771293 | 63 | 66.7420918 |
| Before180 | 68.4225838 | 63 | 66.7602736 |
| Before181 | 67.7862202 | 63 | 66.7857282 |
| Before182 | 68.0589474 | 63 | 66.8023029 |
| Before183 | 68.7862202 | 63 | 66.8250484 |
| Before184 | 69.0589474 | 63 | 66.8795938 |
| Before185 | 69.2407656 | 63 | 66.9545583 |
| Before186 | 69.6953111 | 63 | 67.0333796 |
| Before187 | 69.6953111 | 63 | 67.0875634 |
| Before188 | 69.1498565 | 63 | 67.140425  |
| Before189 | 68.604402  | 63 | 67.1920744 |
| Before190 | 68.5134929 | 63 | 67.2329732 |
| Before191 | 68.0589474 | 63 | 67.2866829 |
| Before192 | 67.7862202 | 63 | 67.3478857 |
| Before193 | 67.6953111 | 63 | 67.4093088 |
| Before194 | 67.7862202 | 63 | 67.4601535 |
| Before195 | 68.1498565 | 63 | 67.5084637 |
| Before196 | 68.3316747 | 63 | 67.5631651 |
| Before197 | 68.3316747 | 63 | 67.6180869 |
| Before198 | 68.5134929 | 63 | 67.6776368 |
| Before199 | 68.6953111 | 63 | 67.7421454 |
| Before200 | 69.3316747 | 63 | 67.8197212 |
| Before201 | 69.7862202 | 63 | 67.8900242 |
| Before202 | 70.3316747 | 63 | 67.9469939 |
| Before203 | 68.9567263 | 63 | 67.9966909 |
| Before204 | 68.2707759 | 63 | 68.0330545 |
| Before205 | 66.9980486 | 63 | 68.0645697 |
| Before206 | 66.9071396 | 63 | 68.0936606 |
| Before207 | 66.807966  | 63 | 68.1118424 |
| Before208 | 66.9071396 | 63 | 68.1288121 |
| Before209 | 67.1716024 | 63 | 68.1360848 |
| Before210 | 67.8492883 | 63 | 68.1385091 |
| Before211 | 68.9680384 | 63 | 68.1433575 |
| Before212 | 69.2407656 | 63 | 68.1360848 |
| Before213 | 68.604402  | 63 | 68.1288121 |
| Before214 | 68.6953111 | 63 | 68.1360848 |
| Before215 | 69.1498565 | 63 | 68.1445697 |
| Before216 | 69.3316747 | 63 | 68.1566909 |
| Before217 | 69.4225838 | 63 | 68.1663879 |
| Before218 | 69.3316747 | 63 | 68.1736606 |

|           |            |    |            |
|-----------|------------|----|------------|
| Before219 | 68.5747767 | 63 | 68.1918424 |
| Before220 | 68.6739503 | 63 | 68.2051757 |
| Before221 | 70.604402  | 63 | 68.2063879 |
| Before222 | 70.6953111 | 63 | 68.2015394 |
| Before223 | 70.5134929 | 63 | 68.1894182 |
| Before224 | 68.2772561 | 63 | 68.157903  |
| Before225 | 67.7813883 | 63 | 68.1227515 |
| Before226 | 67.4838676 | 63 | 68.0972969 |
| Before227 | 67.3081779 | 63 | 68.0827515 |
| Before228 | 67.1780825 | 63 | 68.0718424 |
| Before229 | 67.3764296 | 63 | 68.0718424 |
| Before230 | 67.5747767 | 63 | 68.0803272 |
| Before231 | 67.7813883 | 63 | 68.0900242 |
| Before232 | 67.6822148 | 63 | 68.1021454 |
| Before233 | 67.9797354 | 63 | 68.1154788 |
| Before234 | 68.1780825 | 63 | 68.1251757 |
| Before235 | 67.9797354 | 63 | 68.1312363 |
| Before236 | 68.078909  | 63 | 68.1336606 |
| Before237 | 69.2407656 | 63 | 68.1372969 |
| Before238 | 68.8771293 | 63 | 68.1263879 |
| Before239 | 68.604402  | 63 | 68.1057818 |
| Before240 | 68.4225838 | 63 | 68.0742666 |
| minute1   | 67.2407656 | 63 | 68.0586599 |
| minute2   | 66.8771293 | 63 | 68.0546234 |
| minute3   | 66.8771293 | 63 | 68.0578596 |
| minute4   | 65.7862202 | 63 | 68.062308  |
| minute5   | 65.604402  | 63 | 68.0595938 |
| minute6   | 65.5134929 | 63 | 68.0579815 |
| minute7   | 65.604402  | 63 | 68.0528431 |
| minute8   | 65.7862202 | 63 | 68.0410931 |
| minute9   | 66.1498565 | 63 | 68.0132143 |
| minute10  | 66.3316747 | 63 | 67.9792749 |
| minute11  | 68.1498565 | 63 | 67.9513961 |
| minute12  | 68.0589474 | 63 | 67.9210931 |
| minute13  | 68.604402  | 63 | 67.8895779 |
| minute14  | 68.604402  | 63 | 67.8592749 |
| minute15  | 68.9680384 | 63 | 67.8229113 |
| minute16  | 69.1498565 | 63 | 67.7829113 |
| minute17  | 69.0589474 | 63 | 67.7530032 |
| minute18  | 68.8771293 | 63 | 67.7157123 |
| minute19  | 68.6953111 | 63 | 67.6538941 |
| minute20  | 68.3316747 | 63 | 67.5932881 |
| minute21  | 67.3316747 | 63 | 67.5375305 |
| minute22  | 67.0589474 | 63 | 67.5140136 |
| minute23  | 67.2407656 | 63 | 67.4971084 |

|          |            |    |            |
|----------|------------|----|------------|
| minute24 | 67.5134929 | 63 | 67.4890185 |
| minute25 | 67.6953111 | 63 | 67.4844833 |
| minute26 | 68.0589474 | 63 | 67.4816827 |
| minute27 | 68.4225838 | 63 | 67.4774496 |
| minute28 | 68.4225838 | 63 | 67.471784  |
| minute29 | 68.6953111 | 63 | 67.4597273 |
| minute30 | 69.1498565 | 63 | 67.4465685 |
| minute31 | 69.0589474 | 63 | 67.4270186 |
| minute32 | 68.7862202 | 63 | 67.3987635 |
| minute33 | 68.6953111 | 63 | 67.3707288 |
| minute34 | 68.9680384 | 63 | 67.3401596 |
| minute35 | 68.5134929 | 63 | 67.2916747 |
| minute36 | 68.2407656 | 63 | 67.2492505 |
| minute37 | 67.9680384 | 63 | 67.2177353 |
| minute38 | 67.7862202 | 63 | 67.194705  |
| minute39 | 67.9680384 | 63 | 67.1922808 |
| minute40 | 67.2407656 | 63 | 67.1934929 |
| minute41 | 67.2407656 | 63 | 67.1971293 |
| minute42 | 66.604402  | 63 | 67.2189474 |
| minute43 | 66.7862202 | 63 | 67.2468262 |
| minute44 | 66.7862202 | 63 | 67.2759171 |
| minute45 | 66.9680384 | 63 | 67.3086444 |
| minute46 | 66.8771293 | 63 | 67.3413717 |
| minute47 | 66.6953111 | 63 | 67.3753111 |
| minute48 | 66.5134929 | 63 | 67.4056141 |
| minute49 | 66.4225838 | 63 | 67.4177353 |
| minute50 | 66.7862202 | 63 | 67.4250081 |
| minute51 | 67.0589474 | 63 | 67.4262202 |
| minute52 | 66.6953111 | 63 | 67.4237959 |
| minute53 | 66.3316747 | 63 | 67.4104626 |
| minute54 | 66.3316747 | 63 | 67.4068262 |
| minute55 | 65.8771293 | 63 | 67.4031899 |
| minute56 | 65.9680384 | 63 | 67.404402  |
| minute57 | 66.1498565 | 63 | 67.414099  |
| minute58 | 66.3316747 | 63 | 67.4286444 |
| minute59 | 66.5134929 | 63 | 67.4283738 |
| minute60 | 66.5134929 | 63 | 67.4318497 |
| Activity | 66.8771293 | 73 | 67.442378  |
| Activity | 66.9680384 | 73 | 67.4494903 |
| Activity | 66.9680384 | 73 | 67.4462445 |
| Activity | 67.0589474 | 73 | 67.4316488 |
| Activity | 67.1498565 | 73 | 67.4123149 |
| Activity | 66.8771293 | 73 | 67.3943032 |
| Activity | 66.6953111 | 73 | 67.3726552 |
| Activity | 66.5134929 | 73 | 67.3477014 |



|          |            |    |            |
|----------|------------|----|------------|
| Activity | 66.0589474 | 73 | 67.3266043 |
| Activity | 65.8771293 | 73 | 67.3067194 |
| Activity | 65.7862202 | 73 | 67.2893689 |
| Activity | 65.604402  | 73 | 67.268382  |
| Activity | 65.6953111 | 73 | 67.2548883 |
| Activity | 66.2407656 | 73 | 67.2463532 |
| Activity | 66.6953111 | 73 | 67.248066  |
| Activity | 67.0589474 | 73 | 67.2495585 |
| Activity | 66.9680384 | 73 | 67.2475248 |
| Activity | 67.1498565 | 73 | 67.2586041 |
| Activity | 67.4225838 | 73 | 67.2662673 |
| Activity | 67.6953111 | 73 | 67.2825257 |
| Activity | 67.6953111 | 73 | 67.3056159 |
| Activity | 68.0589474 | 73 | 67.3379624 |
| Activity | 68.2407656 | 73 | 67.36524   |
| Activity | 68.6953111 | 73 | 67.3976967 |
| Activity | 68.604402  | 73 | 67.4312552 |
| Activity | 69.0589474 | 73 | 67.4671279 |
| Activity | 68.604402  | 73 | 67.4989234 |
| Activity | 68.6953111 | 73 | 67.5401355 |
| Activity | 68.4225838 | 73 | 67.5643779 |
| Activity | 67.9680384 | 73 | 67.5910446 |
| Activity | 68.8771293 | 73 | 67.6261961 |
| Activity | 68.7862202 | 73 | 67.6625597 |
| Activity | 68.9680384 | 73 | 67.7025597 |
| Activity | 69.4225838 | 73 | 67.7510446 |
| Activity | 69.4225838 | 73 | 67.8031658 |
| Activity | 67.3113788 | 73 | 67.8686204 |
| Activity | 67.3196433 | 73 | 67.935287  |
| Activity | 68.0303871 | 73 | 67.9958931 |
| Activity | 68.046916  | 73 | 68.0516507 |
| Activity | 67.4518747 | 73 | 68.1098325 |
| Activity | 66.9642714 | 73 | 68.1704385 |
| Activity | 66.9725358 | 73 | 68.2407416 |
| Activity | 67.0717094 | 73 | 68.3086204 |
| Activity | 67.0717094 | 73 | 68.3777113 |
| Activity | 67.278321  | 73 | 68.4455901 |
| Activity | 67.4766681 | 73 | 68.5195294 |
| Activity | 67.2948499 | 73 | 68.6007416 |
| Activity | 67.3940234 | 73 | 68.6795294 |
| Activity | 67.3940234 | 73 | 68.754681  |
| Activity | 67.5014614 | 73 | 68.8322567 |
| Activity | 67.600635  | 73 | 68.9037719 |
| Activity | 68.0965028 | 73 | 68.9680143 |
| Activity | 67.8981557 | 73 | 69.0407416 |

|          |            |    |            |
|----------|------------|----|------------|
| Activity | 67.815511  | 73 | 69.1025597 |
| Activity | 68.0717094 | 73 | 69.1643779 |
| Activity | 67.815511  | 73 | 69.2298325 |
| Activity | 67.8237755 | 73 | 69.2843779 |
| Activity | 68.5179904 | 73 | 69.3316507 |
| Activity | 69.2122053 | 73 | 69.3777113 |
| Activity | 69.0138581 | 73 | 69.4225597 |
| Activity | 69.3113788 | 73 | 69.4637719 |
| Activity | 69.2122053 | 73 | 69.495287  |
| Activity | 69.2039408 | 73 | 69.5316507 |
| Activity | 68.8072466 | 73 | 69.5631658 |
| Activity | 69.8771293 | 73 | 69.594681  |
| Activity | 68.8771293 | 73 | 69.6225597 |
| Activity | 68.6953111 | 73 | 69.655287  |
| Activity | 68.9680384 | 73 | 69.6704434 |
| Activity | 69.0589474 | 73 | 69.7031707 |
| Activity | 68.8771293 | 73 | 69.7181067 |
| Activity | 69.604402  | 73 | 69.7266515 |
| Activity | 70.0589474 | 73 | 69.7277032 |
| Activity | 71.2407656 | 73 | 69.7580062 |
| Activity | 71.5134929 | 73 | 69.820095  |
| Activity | 71.0589474 | 73 | 69.8832857 |
| Activity | 71.0589474 | 73 | 69.9406362 |
| Activity | 71.3316747 | 73 | 69.9953421 |
| Activity | 71.5134929 | 73 | 70.0555576 |
| Activity | 72.3316747 | 73 | 70.1234866 |
| Activity | 72.2407656 | 73 | 70.1803964 |
| Activity | 72.0589474 | 73 | 70.2408323 |
| Activity | 71.7862202 | 73 | 70.2988439 |
| Activity | 72.0589474 | 73 | 70.3516765 |
| Activity | 72.1498565 | 73 | 70.4006524 |
| Activity | 71.7862202 | 73 | 70.4544767 |
| Activity | 71.4225838 | 73 | 70.5118272 |
| Activity | 71.4225838 | 73 | 70.5679656 |
| Activity | 71.0589474 | 73 | 70.6214593 |
| Activity | 71.0589474 | 73 | 70.6724187 |
| Activity | 72.1498565 | 73 | 70.7179785 |
| Activity | 71.6953111 | 73 | 70.7649709 |
| Activity | 71.604402  | 73 | 70.810641  |
| Activity | 72.0589474 | 73 | 70.8516829 |
| Activity | 71.5134929 | 73 | 70.8937166 |
| Activity | 71.2407656 | 73 | 70.9392765 |
| Activity | 71.1498565 | 73 | 70.9719438 |
| Activity | 71.4225838 | 73 | 70.9989913 |
| Activity | 71.3316747 | 73 | 71.0323197 |

|          |            |    |            |
|----------|------------|----|------------|
| Activity | 71.0589474 | 73 | 71.0665297 |
| Activity | 71.3316747 | 73 | 71.1093348 |
| Activity | 71.4225838 | 73 | 71.15225   |
| Activity | 70.9680384 | 73 | 71.1834848 |
| Activity | 70.7862202 | 73 | 71.1980303 |
| Activity | 70.8771293 | 73 | 71.1998533 |
| Activity | 69.1047672 | 73 | 71.2027783 |
| Activity | 71.3316747 | 73 | 71.2258086 |
| Activity | 69.9064201 | 73 | 71.2201399 |
| Activity | 69.6088995 | 73 | 71.2138087 |
| Activity | 69.5014614 | 73 | 71.1978907 |
| Activity | 71.6953111 | 73 | 71.1720553 |
| Activity | 71.9680384 | 73 | 71.1264955 |
| Activity | 72.0589474 | 73 | 71.0800541 |
| Activity | 72.3316747 | 73 | 71.0384611 |
| Activity | 72.1498565 | 73 | 70.9983007 |
| Activity | 71.9680384 | 73 | 70.9518593 |
| Activity | 72.0589474 | 73 | 70.8864881 |
| Activity | 71.2407656 | 73 | 70.8163786 |
| Activity | 71.604402  | 73 | 70.7475914 |
| Activity | 71.4225838 | 73 | 70.6909255 |
| Activity | 71.2407656 | 73 | 70.6616375 |
| Activity | 71.1498565 | 73 | 70.6251871 |
| Activity | 71.3316747 | 73 | 70.5914915 |
| Activity | 71.6953111 | 73 | 70.5548206 |
| Activity | 71.604402  | 73 | 70.5163867 |
| Activity | 71.5134929 | 73 | 70.4818095 |
| Activity | 71.4225838 | 73 | 70.4534031 |
| Activity | 71.5134929 | 73 | 70.4221318 |
| Activity | 71.4225838 | 73 | 70.3762047 |
| Activity | 71.2407656 | 73 | 70.3346854 |
| Activity | 71.1498565 | 73 | 70.2864443 |
| Activity | 70.9680384 | 73 | 70.2307101 |
| Activity | 71.2407656 | 73 | 70.1835709 |
| Activity | 70.9680384 | 73 | 70.1506467 |
| Activity | 71.2407656 | 73 | 70.1281907 |
| Activity | 71.5134929 | 73 | 70.1019882 |
| Activity | 71.8771293 | 73 | 70.0756755 |
| Activity | 72.4225838 | 73 | 70.0529991 |
| Activity | 72.4225838 | 73 | 70.0180914 |
| Activity | 71.1498565 | 73 | 69.9793269 |
| Activity | 70.9680384 | 73 | 69.9505899 |
| Activity | 69.0138581 | 73 | 69.9280238 |
| Activity | 68.9146846 | 73 | 69.9016008 |
| Activity | 70.6953111 | 73 | 69.8974871 |

|          |            |    |            |
|----------|------------|----|------------|
| Activity | 68.6337939 | 73 | 69.8596042 |
| Activity | 68.4022879 | 73 | 69.8368678 |
| Activity | 68.4105524 | 73 | 69.8194208 |
| Activity | 68.1212962 | 73 | 69.8031859 |
| Activity | 67.8237755 | 73 | 69.7509778 |
| Activity | 68.0303871 | 73 | 69.6909461 |
| Activity | 67.939478  | 73 | 69.6308042 |
| Activity | 68.046916  | 73 | 69.5579901 |
| Activity | 67.8485689 | 73 | 69.4757628 |
| Activity | 66.6106527 | 73 | 69.392103  |
| Activity | 67.0734626 | 73 | 69.3006196 |
| Activity | 67.081727  | 73 | 69.2190535 |
| Activity | 67.8089998 | 73 | 69.1366058 |
| Activity | 69.5896263 | 73 | 69.0514033 |
| Activity | 69.3251635 | 73 | 68.9580466 |
| Activity | 69.6226841 | 73 | 68.861935  |
| Activity | 69.0359073 | 73 | 68.7633992 |
| Activity | 68.5400395 | 73 | 68.6552045 |
| Activity | 68.8292957 | 73 | 68.5609662 |
| Activity | 68.9284692 | 73 | 68.4717968 |
| Activity | 68.7135932 | 73 | 68.3900103 |
| Activity | 68.7053287 | 73 | 68.3082238 |
| Activity | 68.5813618 | 73 | 68.2263271 |
| Activity | 67.9863205 | 73 | 68.1428877 |
| Activity | 67.8788825 | 73 | 68.0566935 |
| Activity | 67.978056  | 73 | 67.9742458 |
| Activity | 68.7714444 | 73 | 67.8856273 |
| Activity | 69.4656593 | 73 | 67.8006452 |
| Activity | 69.4573949 | 73 | 67.7148918 |
| Activity | 69.3582213 | 73 | 67.6295791 |
| Activity | 69.3582213 | 73 | 67.535451  |
| Activity | 68.7135932 | 73 | 67.4393395 |
| Activity | 68.5152461 | 73 | 67.3485171 |
| Activity | 68.8127668 | 73 | 67.2825984 |
| Activity | 69.0937585 | 73 | 67.2270378 |
| Activity | 68.8954114 | 73 | 67.1909214 |
| Activity | 68.7962378 | 73 | 67.1494055 |
| Activity | 68.4904527 | 73 | 67.0813931 |
| Activity | 68.2011965 | 73 | 67.0407574 |
| Activity | 68.3003701 | 73 | 67.0240583 |
| Activity | 68.2838411 | 73 | 67.0096733 |
| Activity | 67.7797089 | 73 | 67.0003571 |
| Activity | 67.4656593 | 73 | 67.0022806 |
| Activity | 67.5483039 | 73 | 67.0196311 |
| Activity | 66.870618  | 73 | 67.0527392 |

|          |            |    |            |
|----------|------------|----|------------|
| Activity | 65.982811  | 73 | 67.086839  |
| Activity | 65.6935548 | 73 | 67.1211592 |
| Activity | 65.1976871 | 73 | 67.1659243 |
| Activity | 65.1233069 | 73 | 67.2020944 |
| Activity | 65.4208276 | 73 | 67.2100317 |
| Activity | 65.0323978 | 73 | 67.2069498 |
| Activity | 64.2390094 | 73 | 67.1774815 |
| Activity | 63.9414887 | 73 | 67.1860532 |
| Activity | 63.9414887 | 73 | 67.1979306 |
| Activity | 63.5807082 | 73 | 67.220056  |
| Activity | 64.53653   | 73 | 67.2512172 |
| Activity | 64.8257862 | 73 | 67.2736732 |
| Activity | 65.2885961 | 73 | 67.2923826 |
| Activity | 65.3795052 | 73 | 67.3151691 |
| Activity | 65.2803317 | 73 | 67.3368537 |
| Activity | 64.982811  | 73 | 67.3614033 |
| Activity | 64.6852904 | 73 | 67.3963111 |
| Activity | 64.7844639 | 73 | 67.4350756 |
| Activity | 64.5943813 | 73 | 67.474942  |
| Activity | 64.5943813 | 73 | 67.4981694 |
| Activity | 64.8092573 | 73 | 67.507292  |
| Activity | 65.1150424 | 73 | 67.5141006 |
| Activity | 64.8175218 | 73 | 67.5282921 |
| Activity | 65.214216  | 73 | 67.5509684 |
| Activity | 65.6109102 | 73 | 67.5919368 |
| Activity | 66.2059515 | 73 | 67.6355498 |
| Activity | 66.8009928 | 73 | 67.6618625 |
| Activity | 66.3051251 | 73 | 67.6795801 |
| Activity | 65.8009928 | 73 | 67.6902455 |
| Activity | 65.5943813 | 73 | 67.6876877 |
| Activity | 65.5861168 | 73 | 67.6819343 |
| Activity | 67.1498565 | 73 | 67.673977  |
| Activity | 67.3316747 | 73 | 67.6586368 |
| Activity | 67.4225838 | 73 | 67.6374564 |
| Activity | 67.9680384 | 73 | 67.6205735 |
| Activity | 69.3316747 | 73 | 67.6151507 |
| Minute1  | 70.4225838 | 71 | 67.6037775 |
| Minute2  | 70.604402  | 71 | 67.5990158 |
| Minute3  | 70.4225838 | 71 | 67.6024552 |
| Minute4  | 69.9680384 | 71 | 67.606115  |
| Minute5  | 69.7862202 | 71 | 67.6113799 |
| Minute6  | 67.6770259 | 71 | 67.6189699 |
| Minute7  | 67.5778523 | 71 | 67.626593  |
| Minute8  | 67.3795052 | 71 | 67.6447284 |
| Minute9  | 69.9680384 | 71 | 67.6841091 |

|          |            |    |            |
|----------|------------|----|------------|
| Minute10 | 70.5134929 | 71 | 67.7314566 |
| Minute11 | 70.6953111 | 71 | 67.7761375 |
| Minute12 | 70.8771293 | 71 | 67.8442955 |
| Minute13 | 70.5134929 | 71 | 67.9010425 |
| Minute14 | 70.3316747 | 71 | 67.9605995 |
| Minute15 | 70.4225838 | 71 | 68.0046523 |
| Minute16 | 70.3316747 | 71 | 68.0381597 |
| Minute17 | 70.4225838 | 71 | 68.0809893 |
| Minute18 | 70.604402  | 71 | 68.1251193 |
| Minute19 | 70.7862202 | 71 | 68.1572162 |
| Minute20 | 70.9680384 | 71 | 68.1866574 |
| Minute21 | 70.5134929 | 71 | 68.2172997 |
| Minute22 | 70.1498565 | 71 | 68.2479421 |
| Minute23 | 69.9680384 | 71 | 68.2797194 |
| Minute24 | 70.4225838 | 71 | 68.3114196 |
| Minute25 | 71.0589474 | 71 | 68.3577534 |
| Minute26 | 71.7862202 | 71 | 68.4027979 |
| Minute27 | 71.7862202 | 71 | 68.4372199 |
| Minute28 | 70.7862202 | 71 | 68.443708  |
| Minute29 | 70.4225838 | 71 | 68.4038259 |
| Minute30 | 69.6953111 | 71 | 68.3577554 |
| Minute31 | 68.604402  | 71 | 68.3082734 |
| Minute32 | 68.0589474 | 71 | 68.2704794 |
| Minute33 | 67.604402  | 71 | 68.2314624 |
| Minute34 | 67.1498565 | 71 | 68.1774622 |
| Minute35 | 66.6953111 | 71 | 68.1182377 |
| Minute36 | 66.5134929 | 71 | 68.0478011 |
| Minute37 | 67.0589474 | 71 | 67.9611584 |
| Minute38 | 66.6953111 | 71 | 67.8659702 |
| Minute39 | 66.5134929 | 71 | 67.7469031 |
| Minute40 | 66.2407656 | 71 | 67.6214119 |
| Minute41 | 65.9680384 | 71 | 67.4890115 |
| Minute42 | 65.5925569 | 71 | 67.3720051 |
| Minute43 | 65.6925569 | 71 | 67.2560896 |
| Minute44 | 65.9925569 | 71 | 67.1682967 |
| Minute45 | 66.3925569 | 71 | 67.077826  |
| Minute46 | 67.1925569 | 71 | 66.9860001 |
| Minute47 | 67.4925569 | 71 | 66.8596603 |
| Minute48 | 67.2925569 | 71 | 66.7260478 |
| Minute49 | 68.6925569 | 71 | 66.5953444 |
| Minute50 | 68.7925569 | 71 | 66.4648835 |
| Minute51 | 69.2925569 | 71 | 66.3446043 |
| Minute52 | 68.5925569 | 71 | 66.2387494 |
| Minute53 | 67.8925569 | 71 | 66.1330157 |
| Minute54 | 68.4925569 | 71 | 66.0244942 |

|          |            |    |            |
|----------|------------|----|------------|
| Minute55 | 68.2925569 | 71 | 65.9107605 |
| Minute56 | 67.0925569 | 71 | 65.7999359 |
| Minute57 | 66.9925569 | 71 | 65.6853537 |
| Minute58 | 66.8925569 | 71 | 65.5643473 |
| Minute59 | 66.8925569 | 71 | 65.4374015 |
| Minute60 | 67.1925569 | 71 | 65.3166375 |
| After1   | 67.4925569 | 71 | 65.203631  |
| After2   | 68.2925569 | 71 | 65.0912307 |
| After3   | 68.5925569 | 71 | 64.9770121 |
| After4   | 68.1925569 | 71 | 64.8530966 |
| After5   | 66.6925569 | 71 | 64.7318478 |
| After6   | 63.8098382 | 71 | 64.6199323 |
| After7   | 62.8498382 | 63 | 64.5141986 |
| After8   | 62.0898382 | 63 | 64.4181619 |
| After9   | 62.7598382 | 63 | 64.3366706 |
| After10  | 62.6598382 | 63 | 64.2731187 |
| After11  | 63.0998382 | 63 | 64.2209608 |
| After12  | 62.8898382 | 63 | 64.1815301 |
| After13  | 62.1398382 | 63 | 64.1548267 |
| After14  | 61.4698382 | 63 | 64.1345476 |
| After15  | 62.1925569 | 63 | 64.1016624 |
| After16  | 61.4925569 | 63 | 64.0776257 |
| After17  | 61.1925569 | 63 | 64.0586798 |
| After18  | 60.4925569 | 63 | 64.0487037 |
| After19  | 61.1925569 | 63 | 64.0410306 |
| After20  | 61.0925569 | 63 | 64.0396973 |
| After21  | 61.0925569 | 63 | 64.038364  |
| After22  | 60.7925569 | 63 | 64.0330306 |
| After23  | 60.4925569 | 63 | 64.0130306 |
| After24  | 60.4925569 | 63 | 63.9770306 |
| After25  | 60.4925569 | 63 | 63.9356973 |
| After26  | 60.8925569 | 63 | 63.894364  |
| After27  | 61.0925569 | 63 | 63.838364  |
| After28  | 61.4925569 | 63 | 63.7756973 |
| After29  | 62.3925569 | 63 | 63.706364  |
| After30  | 62.4925569 | 63 | 63.646364  |
| After31  | 62.1925569 | 63 | 63.598364  |
| After32  | 61.8925569 | 63 | 63.5450306 |
| After33  | 62.2925569 | 63 | 63.498364  |
| After34  | 62.1925569 | 63 | 63.470364  |
| After35  | 61.8925569 | 63 | 63.438364  |
| After36  | 60.9925569 | 63 | 63.4076973 |
| After37  | 61.0925569 | 63 | 63.3457072 |
| After38  | 61.4925569 | 63 | 63.3043739 |
| After39  | 61.9925569 | 63 | 63.2483739 |

|         |            |    |            |
|---------|------------|----|------------|
| After40 | 62.4925569 | 63 | 63.1803739 |
| After41 | 62.4925569 | 63 | 63.1150406 |
| After42 | 62.6925569 | 63 | 63.0603739 |
| After43 | 62.3925569 | 63 | 63.0310406 |
| After44 | 62.4925569 | 63 | 63.0235573 |
| After45 | 62.4925569 | 63 | 63.0276741 |
| After46 | 62.4925569 | 63 | 63.0436576 |
| After47 | 63.2925569 | 63 | 63.053641  |
| After48 | 63.6925569 | 63 | 63.0709578 |
| After49 | 64.1925569 | 63 | 63.0926746 |
| After50 | 64.6925569 | 63 | 63.1233775 |
| After51 | 64.9925569 | 63 | 63.1547471 |
| After52 | 64.5925569 | 63 | 63.1883833 |
| After53 | 64.8925569 | 63 | 63.2043833 |
| After54 | 65.0925569 | 63 | 63.2217167 |
| After55 | 65.4925569 | 63 | 63.2377167 |
| After56 | 65.3925569 | 63 | 63.2537167 |
| After57 | 65.4925569 | 63 | 63.25905   |
| After58 | 65.5925569 | 63 | 63.2563833 |
| After59 | 65.5925569 | 63 | 63.2603833 |
| After60 | 64.8925569 | 63 | 63.2843833 |
| After61 | 64.4925569 | 63 | 63.2996601 |
| After62 | 64.3925569 | 63 | 63.3220036 |
| After63 | 64.1925569 | 63 | 63.3431471 |
| After64 | 64.4925569 | 63 | 63.3501573 |
| After65 | 64.0925569 | 63 | 63.3530341 |
| After66 | 64.0925569 | 63 | 63.3520442 |
| After67 | 64.0925569 | 63 | 63.344921  |
| After68 | 64.2925569 | 63 | 63.3393979 |
| After69 | 64.4925569 | 63 | 63.3394747 |
| After70 | 64.7925569 | 63 | 63.3466182 |
| After71 | 64.9925569 | 63 | 63.3529616 |
| After72 | 64.5925569 | 63 | 63.3638385 |
| After73 | 64.5925569 | 63 | 63.393382  |
| After74 | 62.2433009 | 63 | 63.4437254 |
| After75 | 64.0925569 | 63 | 63.5060689 |
| After76 | 63.2925569 | 63 | 63.5617457 |
| After77 | 63.1925569 | 63 | 63.6034226 |
| After78 | 63.6925569 | 63 | 63.6368327 |
| After79 | 64.0925569 | 63 | 63.6715762 |
| After80 | 64.4925569 | 63 | 63.702053  |
| After81 | 63.2485967 | 63 | 63.7409298 |
| After82 | 63.1585967 | 63 | 63.79594   |
| After83 | 63.2885967 | 63 | 63.8665501 |
| After84 | 63.5085967 | 63 | 63.9665501 |



|          |            |    |            |
|----------|------------|----|------------|
| After85  | 63.9585967 | 63 | 64.0478835 |
| After86  | 64.7285967 | 63 | 64.1225501 |
| After87  | 65.1925569 | 63 | 64.1905501 |
| After88  | 64.4925569 | 63 | 64.2492168 |
| After89  | 63.9925569 | 63 | 64.2958835 |
| After90  | 63.3925569 | 63 | 64.3212168 |
| After91  | 62.7925569 | 63 | 64.3265501 |
| After92  | 62.3925569 | 63 | 64.3292168 |
| After93  | 61.6925569 | 63 | 64.3198835 |
| After94  | 61.5925569 | 63 | 64.3038835 |
| After95  | 60.8925569 | 63 | 64.2878835 |
| After96  | 61.3925569 | 63 | 64.2652168 |
| After97  | 62.5925569 | 63 | 64.2412168 |
| After98  | 61.6383182 | 63 | 64.2318835 |
| After99  | 62.1683182 | 63 | 64.2292168 |
| After100 | 62.0783182 | 63 | 64.2292168 |
| After101 | 61.4183182 | 63 | 64.2278835 |
| After102 | 61.3083182 | 63 | 64.2145501 |
| After103 | 61.4183182 | 63 | 64.2038835 |
| After104 | 61.8583182 | 63 | 64.1932168 |
| After105 | 62.0783182 | 63 | 64.1640973 |
| After106 | 62.1983182 | 63 | 64.1344445 |
| After107 | 62.4283182 | 63 | 64.1025251 |
| After108 | 62.7683182 | 63 | 64.0830056 |
| After109 | 63.0083182 | 63 | 64.0608195 |
| After110 | 64.1083182 | 63 | 64.0410333 |
| After111 | 64.7683182 | 63 | 64.0140472 |
| After112 | 65.7683182 | 63 | 64.0167845 |
| After113 | 65.6683182 | 63 | 63.9957983 |
| After114 | 65.1183182 | 63 | 63.9825455 |
| After115 | 64.9983182 | 63 | 63.9732927 |
| After116 | 65.0983182 | 63 | 63.9572399 |
| After117 | 64.9783182 | 63 | 63.9354538 |
| After118 | 65.3083182 | 63 | 63.9381204 |
| After119 | 66.6183182 | 63 | 63.9653733 |
| After120 | 67.7883182 | 63 | 63.9831594 |
| After121 | 69.9925569 | 63 | 63.9965455 |
| After122 | 69.3925569 | 63 | 64.0029983 |
| After123 | 69.2925569 | 63 | 64.0047845 |
| After124 | 69.2925569 | 63 | 63.9989706 |
| After125 | 69.0925569 | 63 | 63.9976373 |
| After126 | 68.4925569 | 63 | 64.0123039 |
| After127 | 66.4925569 | 63 | 64.0349706 |
| After128 | 65.2925569 | 63 | 64.0656373 |
| After129 | 65.2925569 | 63 | 64.1109706 |

|          |            |    |            |
|----------|------------|----|------------|
| After130 | 64.7925569 | 63 | 64.1656373 |
| After131 | 64.1925569 | 63 | 64.2376373 |
| After132 | 64.2925569 | 63 | 64.2989706 |
| After133 | 63.8925569 | 63 | 64.3629706 |
| After134 | 63.7925569 | 63 | 64.4189706 |
| After135 | 64.1925569 | 63 | 64.4563039 |
| After136 | 64.2925569 | 63 | 64.5050271 |
| After137 | 64.3925569 | 63 | 64.548017  |
| After138 | 64.0925569 | 63 | 64.5868735 |
| After139 | 63.4925569 | 63 | 64.6398633 |
| After140 | 63.2925569 | 63 | 64.6956532 |
| After141 | 63.2925569 | 63 | 64.748643  |
| After142 | 61.9085967 | 63 | 64.7930995 |
| After143 | 62.0685967 | 63 | 64.8346227 |
| After144 | 62.0985967 | 63 | 64.8718792 |
| After145 | 63.3285967 | 63 | 64.9140691 |
| After146 | 63.3285967 | 63 | 64.9517256 |
| After147 | 63.1085967 | 63 | 64.9875154 |
| After148 | 62.5685967 | 63 | 65.0046386 |
| After149 | 62.4485967 | 63 | 65.0262951 |
| After150 | 62.5185967 | 63 | 65.037285  |
| After151 | 62.2985967 | 63 | 65.0522748 |
| After152 | 62.4985967 | 63 | 65.0732647 |
| After153 | 62.4885967 | 63 | 65.0878545 |
| After154 | 62.4585967 | 63 | 65.1011111 |
| After155 | 64.6925569 | 63 | 65.1146342 |
| After156 | 65.2925569 | 63 | 65.1197574 |
| After157 | 64.4925569 | 63 | 65.0994139 |
| After158 | 64.2925569 | 63 | 65.0634704 |
| After159 | 63.9925569 | 63 | 64.9968038 |
| After160 | 64.0925569 | 63 | 64.9408038 |
| After161 | 64.2925569 | 63 | 64.8941371 |
| After162 | 65.0925569 | 63 | 64.8488038 |
| After163 | 65.5925569 | 63 | 64.8048038 |
| After164 | 65.6925569 | 63 | 64.7674704 |
| After165 | 65.6925569 | 63 | 64.7568038 |
| After166 | 66.1925569 | 63 | 64.7621371 |
| After167 | 66.4925569 | 63 | 64.7648038 |
| After168 | 67.0925569 | 63 | 64.7781371 |
| After169 | 66.1925569 | 63 | 64.8021371 |
| After170 | 65.6925569 | 63 | 64.8288038 |
| After171 | 65.5925569 | 63 | 64.842351  |
| After172 | 65.3925569 | 63 | 64.8501648 |
| After173 | 65.2925569 | 63 | 64.8555787 |
| After174 | 65.3925569 | 63 | 64.8597926 |

|          |            |    |            |
|----------|------------|----|------------|
| After175 | 64.9925569 | 63 | 64.8612064 |
| After176 | 65.3925569 | 63 | 64.8666203 |
| After177 | 65.4925569 | 63 | 64.8832342 |
| After178 | 65.3925569 | 63 | 64.8995814 |
| After179 | 65.1925569 | 63 | 64.9115286 |
| After180 | 65.1925569 | 63 | 64.9449952 |
| After181 | 64.9925569 | 63 | 64.9792619 |
| After182 | 65.5925569 | 63 | 65.0175286 |
| After183 | 65.5925569 | 63 | 65.053048  |
| After184 | 65.6925569 | 63 | 65.0899008 |
| After185 | 65.3925569 | 63 | 65.1283536 |
| After186 | 66.3925569 | 63 | 65.1700064 |
| After187 | 66.5925569 | 63 | 65.2065926 |
| After188 | 66.7925569 | 63 | 65.244912  |
| After189 | 66.6925569 | 63 | 65.2821648 |
| After190 | 66.0925569 | 63 | 65.312751  |
| After191 | 66.0925569 | 63 | 65.3434704 |
| After192 | 65.9925569 | 63 | 65.3785899 |
| After193 | 65.6925569 | 63 | 65.3839233 |
| After194 | 65.0925569 | 63 | 65.3919233 |
| After195 | 65.0925569 | 63 | 65.4132566 |
| After196 | 64.9925569 | 63 | 65.4372566 |
| After197 | 65.1925569 | 63 | 65.4652566 |
| After198 | 65.7925569 | 63 | 65.4879233 |
| After199 | 65.8925569 | 63 | 65.5025899 |
| After200 | 65.7925569 | 63 | 65.5065899 |
| After201 | 65.6925569 | 63 | 65.5012566 |
| After202 | 65.6925569 | 63 | 65.4985899 |
| After203 | 65.6925569 | 63 | 65.4972566 |
| After204 | 65.4925569 | 63 | 65.4919233 |
| After205 | 65.7925569 | 63 | 65.4785899 |
| After206 | 65.9925569 | 63 | 65.4545899 |
| After207 | 66.2925569 | 63 | 65.4412566 |
| After208 | 64.9085967 | 63 | 65.4319233 |
| After209 | 64.3785967 | 63 | 65.4279233 |
| After210 | 64.5985967 | 63 | 65.4225899 |
| After211 | 64.6085967 | 63 | 65.4159233 |
| After212 | 64.4985967 | 63 | 65.4025899 |
| After213 | 64.4985967 | 63 | 65.3972566 |
| After214 | 64.7385967 | 63 | 65.3945899 |
| After215 | 64.5185967 | 63 | 65.3959233 |
| After216 | 64.1885967 | 63 | 65.4052566 |
| After217 | 64.4185967 | 63 | 65.4185899 |
| After218 | 64.6385967 | 63 | 65.4305899 |
| After219 | 64.9685967 | 63 | 65.4439233 |

|          |            |    |            |
|----------|------------|----|------------|
| After220 | 65.9925569 | 63 | 65.4439233 |
| After221 | 66.0925569 | 63 | 65.4439233 |
| After222 | 65.9925569 | 63 | 65.4479233 |
| After223 | 65.6925569 | 63 | 65.4572566 |
| After224 | 65.1925569 | 63 | 65.4585899 |
| After225 | 65.3925569 | 63 | 65.4599233 |
| After226 | 65.0925569 | 63 | 65.4559233 |
| After227 | 64.7925569 | 63 | 65.4572566 |
| After228 | 64.7925569 | 63 | 65.4612566 |
| After229 | 65.0925569 | 63 | 65.4692566 |
| After230 | 65.0925569 | 63 | 65.4799233 |
| After231 | 65.8925569 | 63 | 65.4945899 |
| After232 | 66.0925569 | 63 | 65.5225899 |
| After233 | 66.0925569 | 63 | 65.5439233 |
| After234 | 66.0925569 | 63 | 65.5745899 |
| After235 | 65.7925569 | 63 | 65.6092566 |
| After236 | 65.3925569 | 63 | 65.6385899 |
| After237 | 65.3925569 | 63 | 65.6759233 |
| After238 | 65.1925569 | 63 | 65.7185899 |
| After239 | 65.4925569 | 63 | 65.7408665 |
| After240 | 65.5925569 | 63 | 65.7722098 |
|          | 65.7925569 | 63 | 65.807953  |
|          | 65.4925569 | 63 | 65.8507629 |
|          | 65.2925569 | 63 | 65.8970395 |
|          | 65.1925569 | 63 | 65.9421161 |
|          | 64.9925569 | 63 | 65.992126  |
|          | 65.2925569 | 63 | 66.0649887 |
|          | 64.9925569 | 63 | 66.1509181 |
|          | 64.7925569 | 63 | 66.2353809 |
|          | 64.3925569 | 63 | 66.3329102 |
|          | 64.5925569 | 63 | 66.433373  |
|          | 65.1925569 | 63 | 66.5385024 |
|          | 65.5925569 | 63 | 66.6496317 |
|          | 66.0925569 | 63 | 66.7710278 |
|          | 66.1925569 | 63 | 66.8984806 |
|          | 66.0925569 | 63 | 67.0246766 |
|          | 65.9925569 | 63 | 67.1407393 |
|          | 65.5925569 | 63 | 67.2553354 |
|          | 65.5925569 | 63 | 67.3606786 |
|          | 65.9925569 | 63 | 67.4646886 |
|          | 66.0925569 | 63 | 67.5714985 |
|          | 66.4925569 | 63 | 67.6853751 |
|          | 66.6925569 | 63 | 67.8103183 |
|          | 66.4925569 | 63 | 67.9463183 |
|          | 66.7925569 | 63 | 68.076985  |

|            |    |            |
|------------|----|------------|
| 66.3925569 | 63 | 68.2156517 |
| 66.6925569 | 63 | 68.3413426 |
| 66.7925569 | 63 | 68.443967  |
| 66.7925569 | 63 | 68.5471246 |
| 67.1925569 | 71 | 68.6261489 |
| 66.6925569 | 71 | 68.6982399 |
| 67.2925569 | 71 | 68.7692642 |
| 67.7925569 | 71 | 68.8344218 |
| 67.9925569 | 71 | 68.8978462 |
| 68.6925569 | 71 | 68.9463371 |
| 68.9925569 | 71 | 68.9890948 |
| 67.3633009 | 71 | 69.0257191 |
| 68.0433009 | 71 | 69.0583434 |
| 68.3733009 | 71 | 69.0896344 |
| 68.7033009 | 71 | 69.1138587 |
| 69.2633009 | 71 | 69.142083  |
| 69.3733009 | 71 | 69.1728406 |
| 70.0433009 | 71 | 69.207865  |
| 70.3733009 | 71 | 69.2484893 |
| 70.8233009 | 71 | 69.2865802 |
| 70.9333009 | 71 | 69.3286712 |
| 71.9233009 | 71 | 69.3734289 |
| 72.0333009 | 71 | 69.4220532 |
| 72.3833009 | 71 | 69.4665442 |
| 73.0733009 | 71 | 69.5073018 |
| 73.6233009 | 71 | 69.5397928 |
| 73.7475537 | 63 | 69.5589504 |
| 73.8833009 | 63 | 69.5650414 |
| 73.3433009 | 63 | 69.5819324 |
| 73.5633009 | 63 | 69.6001567 |
| 73.8933009 | 63 | 69.6193143 |
| 73.8933009 | 63 | 69.640072  |
| 74.0033009 | 63 | 69.6554963 |
| 74.2333009 | 63 | 69.6665206 |
| 74.5633009 | 63 | 69.6702116 |
| 75.5925569 | 63 | 69.6697692 |
| 74.8925569 | 69 | 69.6675935 |
| 75.1925569 | 69 | 69.6510179 |
| 74.2193802 | 69 | 69.6292422 |
| 72.7893802 | 69 | 69.6018665 |
| 72.8293802 | 69 | 69.5746241 |
| 71.8193802 | 69 | 69.5412484 |
| 71.4993802 | 69 | 69.4992061 |
| 71.4193802 | 69 | 69.4652949 |
| 70.9793802 | 69 | 69.422774  |

|            |    |            |
|------------|----|------------|
| 70.5493802 | 69 | 69.3859317 |
| 69.0293802 | 69 | 69.344956  |
| 68.5993802 | 69 | 69.2945136 |
| 67.9393802 | 69 | 69.2328713 |
| 67.9393802 | 69 | 69.2002857 |
| 67.9393802 | 69 | 69.1735667 |
| 67.6093802 | 69 | 69.1453811 |
| 67.6093802 | 69 | 69.1201288 |
| 67.5993802 | 69 | 69.0932766 |
| 67.8193802 | 69 | 69.069091  |
| 68.0393802 | 69 | 69.042772  |
| 68.1493802 | 69 | 69.0089864 |
| 68.1493802 | 69 | 68.9545341 |
| 68.1493802 | 69 | 68.8942152 |
| 68.0393802 | 69 | 68.8206962 |
| 67.9293802 | 69 | 68.7427773 |
| 68.2493802 | 69 | 68.6645917 |
| 68.0293802 | 63 | 68.5772061 |
| 67.5293802 | 63 | 68.4811538 |
| 66.6493802 | 63 | 68.3761115 |
| 67.3593802 | 63 | 68.2589926 |
| 67.3593802 | 63 | 68.1476069 |
| 67.0293802 | 63 | 68.0331547 |
| 67.1493802 | 63 | 67.9109691 |
| 67.1493802 | 63 | 67.7930501 |
| 66.9193802 | 63 | 67.6751312 |
| 66.7693802 | 63 | 67.5585456 |
| 66.6593802 | 63 | 67.43556   |
| 66.3293802 | 63 | 67.2967176 |
| 65.5493802 | 69 | 67.1617419 |
| 64.7593802 | 69 | 67.0364086 |
| 64.6393802 | 69 | 66.9213843 |
| 64.7493802 | 69 | 66.82676   |
| 64.2893802 | 69 | 66.730269  |
| 64.0393802 | 69 | 66.6512447 |
| 64.1492211 | 69 | 66.5711537 |
| 64.1034881 | 69 | 66.490796  |
| 65.0293802 | 69 | 66.4123051 |
| 64.9193802 | 69 | 66.3515474 |
| 64.9093802 | 69 | 66.3097231 |
| 64.3693802 | 69 | 66.2749655 |
| 64.9193802 | 69 | 66.2530078 |
| 66.0393802 | 69 | 66.2190502 |
| 66.2593802 | 69 | 66.1944259 |
| 66.8093802 | 69 | 66.1782016 |

|            |    |            |
|------------|----|------------|
| 67.2493802 | 69 | 66.1659772 |
| 67.5593802 | 69 | 66.1538863 |
| 68.0693802 | 69 | 66.138862  |
| 67.8393802 | 69 | 66.1249043 |
| 66.7393802 | 69 | 66.1108133 |
| 66.4093802 | 69 | 66.099389  |
| 66.4093802 | 69 | 66.0866314 |
| 66.1893802 | 69 | 66.0753404 |
| 66.5193802 | 69 | 66.0615161 |
| 66.5193802 | 69 | 66.0420918 |
| 66.4193802 | 69 | 66.0269341 |
| 65.8693802 | 69 | 66.0237765 |
| 65.0993802 | 69 | 66.0403522 |
| 64.9893802 | 69 | 66.0267522 |
| 64.9793802 | 69 | 66.0102188 |
| 64.7293802 | 69 | 66.0163945 |
| 65.0493802 | 69 | 66.0049702 |
| 65.1593802 | 69 | 65.9882126 |
| 65.4893802 | 69 | 65.9678549 |
| 65.3393802 | 69 | 65.9508306 |
| 65.1793802 | 69 | 65.935273  |
| 64.7693802 | 69 | 65.9281153 |
| 65.7925569 | 63 | 65.9340243 |
| 65.5925569 | 63 | 65.9531334 |
| 65.6925569 | 63 | 65.9671757 |
| 65.5925569 | 63 | 65.9770847 |
| 65.8925569 | 63 | 65.9997938 |
| 65.4925569 | 63 | 66.0245028 |
| 65.3925569 | 63 | 66.0530806 |
| 65.0925569 | 63 | 66.0849348 |
| 65.9925569 | 63 | 66.1057772 |
| 65.8925569 | 63 | 66.1320862 |
| 65.9925569 | 63 | 66.1598619 |
| 66.2925569 | 63 | 66.1921709 |
| 65.3925569 | 63 | 66.2251466 |
| 66.0925569 | 63 | 66.247189  |
| 66.3925569 | 63 | 66.266298  |
| 66.6925569 | 63 | 66.2780737 |
| 66.6925569 | 63 | 66.2866494 |
| 66.6925569 | 63 | 66.2910917 |
| 66.9925569 | 63 | 66.2874008 |
| 67.0925569 | 63 | 66.2907764 |
| 67.2925569 | 63 | 66.3128188 |
| 67.1925569 | 63 | 66.3405945 |
| 67.1925569 | 63 | 66.3723702 |

|            |    |            |
|------------|----|------------|
| 66.8925569 | 63 | 66.3729096 |
| 66.7925569 | 63 | 66.3872186 |
| 66.8925569 | 63 | 66.4095277 |
| 67.2925569 | 63 | 66.4265033 |
| 67.8925569 | 63 | 66.453479  |
| 66.3393802 | 63 | 66.4853881 |
| 66.1193802 | 63 | 66.5134304 |
| 67.4925569 | 63 | 66.5376061 |
| 66.2925569 | 63 | 66.5637818 |
| 65.8925569 | 63 | 66.5816908 |
| 65.3925569 | 63 | 66.5954665 |
| 65.4925569 | 63 | 66.6061755 |
| 65.4925569 | 63 | 66.6202179 |
| 65.7925569 | 63 | 66.6377269 |
| 65.9925569 | 63 | 66.6633693 |
| 66.1925569 | 63 | 66.6807026 |
| 65.6925569 | 63 | 66.7007026 |
| 65.4925569 | 63 | 66.7220359 |
| 65.9925569 | 63 | 66.7500359 |
| 65.8925569 | 63 | 66.7753693 |
| 66.2925569 | 63 | 66.8033693 |
| 66.4925569 | 63 | 66.8313693 |
| 66.5925569 | 63 | 66.8420359 |
| 66.8925569 | 63 | 66.8380359 |
| 66.9925569 | 63 | 66.8353693 |
| 66.7925569 | 63 | 66.8300359 |
| 67.3925569 | 63 | 66.8140359 |
| 67.6925569 | 63 | 66.8060359 |
| 67.6925569 | 63 | 66.7873693 |
| 67.6925569 | 63 | 66.7593693 |
| 67.8925569 | 63 | 66.7247026 |
| 67.8925569 | 63 | 66.6860359 |
| 67.7925569 | 63 | 66.6473693 |
| 68.0925569 | 63 | 66.5967026 |
| 68.3925569 | 63 | 66.5460359 |
| 68.4925569 | 63 | 66.4767026 |
| 68.7925569 | 63 | 66.4047026 |
| 66.2298382 | 63 | 66.3380359 |
| 67.5925569 | 63 | 66.2860359 |
| 68.1925569 | 63 | 66.2540359 |
| 67.6925569 | 63 | 66.2247026 |
| 67.8925569 | 63 | 66.1953693 |
| 67.4925569 | 63 | 66.1727026 |
| 67.0925569 | 63 | 66.1503026 |
| 66.7925569 | 63 | 66.1249693 |



|            |    |            |
|------------|----|------------|
| 66.6925569 | 63 | 66.0783936 |
| 66.3925569 | 63 | 66.0359512 |
| 66.1925569 | 63 | 66.0003089 |
| 66.2925569 | 63 | 65.9713332 |
| 66.3925569 | 63 | 65.9380908 |
| 66.4925569 | 63 | 65.9108485 |
| 66.6925569 | 63 | 65.8810728 |
| 67.0925569 | 63 | 65.8530304 |
| 67.0925569 | 63 | 65.8269881 |
| 67.2925569 | 63 | 65.806279  |
| 67.6925569 | 63 | 65.80437   |
| 67.7925569 | 63 | 65.8150367 |
| 67.5925569 | 63 | 65.82037   |
| 67.4925569 | 63 | 65.8217033 |
| 65.8925569 | 63 | 65.8150367 |
| 65.6925569 | 63 | 65.8070367 |
| 65.6925569 | 63 | 65.7990367 |
| 65.5925569 | 63 | 65.7937033 |
| 65.0925569 | 63 | 65.7977033 |
| 64.7925569 | 63 | 65.7990367 |
| 64.6925569 | 63 | 65.7937033 |
| 64.2925569 | 63 | 65.7910367 |
| 64.0925569 | 63 | 65.78837   |
| 63.7925569 | 63 | 65.78437   |
| 63.7925569 | 63 | 65.78037   |
| 63.1925569 | 63 | 65.7777033 |
| 63.2925569 | 63 | 65.7737033 |
| 62.0925569 | 63 | 65.7670367 |
| 61.7925569 | 63 | 65.7657033 |
| 62.1925569 | 63 | 65.7657033 |
| 62.9925569 | 63 | 65.8025396 |
| 64.3925569 | 63 | 65.8238729 |
| 64.6925569 | 63 | 65.8412063 |
| 65.0925569 | 63 | 65.8396868 |
| 66.1925569 | 63 | 65.8371007 |
| 64.6593802 | 63 | 65.8386479 |
| 64.2193802 | 63 | 65.8412617 |
| 63.9993802 | 63 | 65.8493423 |
| 63.1093802 | 63 | 65.8646228 |
| 63.2193802 | 63 | 65.8852366 |
| 63.2193802 | 63 | 65.9035838 |
| 62.9993802 | 63 | 65.9355838 |
| 63.4493802 | 63 | 65.9702505 |
| 63.5593802 | 63 | 65.9995838 |
| 63.8893802 | 63 | 66.0155838 |

|            |    |            |
|------------|----|------------|
| 64.2393802 | 63 | 66.0209172 |
| 64.1393802 | 63 | 66.0115838 |
| 65.3493802 | 63 | 65.9902505 |
| 66.7925569 | 63 | 65.9542505 |
| 66.2925569 | 63 | 65.9062505 |
| 66.3925569 | 63 | 65.8595838 |
| 65.9925569 | 63 | 65.8142505 |
| 65.9925569 | 63 | 65.7942505 |
| 66.2925569 | 63 | 65.7795838 |
| 66.5925569 | 63 | 65.7715838 |
| 67.0925569 | 63 | 65.7635838 |
| 67.4925569 | 63 | 65.7609172 |
| 67.2925569 | 63 | 65.7635838 |
| 67.4925569 | 63 | 65.7675838 |
| 67.4925569 | 63 | 65.7755838 |
| 67.5925569 | 63 | 65.7862505 |
| 67.5925569 | 63 | 65.8115838 |
| 67.5925569 | 63 | 65.8260748 |
| 67.7925569 | 63 | 65.8546991 |
| 67.8925569 | 63 | 65.8793234 |
| 68.3925569 | 63 | 65.9287478 |
| 68.7925569 | 63 | 65.9856387 |
| 68.9925569 | 63 | 66.0449297 |
| 69.1925569 | 63 | 66.092354  |
| 69.4925569 | 63 | 66.122845  |
| 67.5785967 | 63 | 66.153736  |
| 67.6985967 | 63 | 66.1895603 |
| 67.6085967 | 63 | 66.2167179 |
| 67.2885967 | 63 | 66.2687179 |
| 67.3985967 | 63 | 66.3353846 |
| 67.8385967 | 63 | 66.4019179 |
| 67.9385967 | 63 | 66.4832513 |
| 67.5685967 | 63 | 66.5515179 |
| 68.6925569 | 63 | 66.6253846 |
| 68.9925569 | 63 | 66.7021846 |
| 68.6925569 | 63 | 66.7807873 |
| 67.8925569 | 63 | 66.8572297 |
| 67.4925569 | 63 | 66.9306054 |
| 66.3925569 | 63 | 66.9873144 |
| 65.6925569 | 63 | 67.0333567 |
| 64.9925569 | 63 | 67.0459324 |
| 64.1925569 | 63 | 67.0339324 |
| 64.0925569 | 63 | 67.0245991 |
| 64.0925569 | 63 | 67.0192657 |
| 64.3925569 | 63 | 67.0165991 |

|            |    |            |
|------------|----|------------|
| 64.5925569 | 63 | 67.0152657 |
| 65.0925569 | 63 | 67.0019324 |
| 64.9925569 | 63 | 66.9819324 |
| 64.8925569 | 63 | 66.9472657 |
| 64.9925569 | 63 | 66.9045991 |
| 64.9925569 | 63 | 66.8605991 |
| 64.8925569 | 63 | 66.8139324 |
| 64.8925569 | 63 | 66.7645991 |
| 65.6925569 | 63 | 66.7259324 |
| 64.8793802 | 63 | 66.6925991 |
| 65.3393802 | 63 | 66.6632657 |
| 65.1393802 | 63 | 66.6339324 |
| 65.7993802 | 63 | 66.6112657 |
| 66.0593802 | 63 | 66.5925991 |
| 66.6393802 | 63 | 66.5792657 |
| 66.5493802 | 63 | 66.5632657 |
| 66.6793802 | 63 | 66.5485991 |
| 67.0093802 | 63 | 66.5325991 |
| 67.7793802 | 63 | 66.5541186 |
| 68.2293802 | 63 | 66.5767047 |
| 68.5593802 | 63 | 66.6044908 |
| 69.2193802 | 63 | 66.6405436 |
| 68.9893802 | 63 | 66.6817964 |
| 69.2093802 | 63 | 66.7078492 |
| 68.3393802 | 63 | 66.7352354 |
| 68.7593802 | 63 | 66.7662215 |
| 68.7593802 | 63 | 66.7603012 |
| 69.3445828 | 63 | 66.7386475 |
| 69.2925569 | 63 | 66.7107271 |
| 69.3925569 | 63 | 66.6802735 |
| 68.4925569 | 63 | 66.6448865 |
| 67.5925569 | 63 | 66.6344328 |
| 66.2925569 | 63 | 66.6391791 |
| 65.8925569 | 63 | 66.6503254 |
| 65.5925569 | 63 | 66.6692051 |
| 65.9925569 | 63 | 66.6908848 |
| 65.7925569 | 63 | 66.7021644 |
| 65.8925569 | 63 | 66.7021108 |
| 65.2925569 | 63 | 66.6980571 |
| 65.0925569 | 63 | 66.6946701 |
| 64.4925569 | 63 | 66.6983497 |
| 64.2925569 | 63 | 66.7062961 |
| 63.9925569 | 63 | 66.7215757 |
| 63.9925569 | 63 | 66.735547  |
| 63.7925569 | 63 | 66.7808803 |

|            |    |            |
|------------|----|------------|
| 64.6925569 | 63 | 66.8342136 |
| 65.0925569 | 63 | 66.875547  |
| 65.3925569 | 63 | 66.9317227 |
| 65.5925569 | 63 | 66.981765  |
| 66.1925569 | 63 | 67.0097711 |
| 66.9925569 | 63 | 67.0305772 |
| 67.7925569 | 63 | 67.04085   |
| 67.7925569 | 63 | 67.0332561 |
| 68.0925569 | 63 | 67.0271289 |
| 68.2925569 | 63 | 67.0224683 |
| 69.1925569 | 63 | 67.0166078 |
| 69.3925569 | 63 | 67.0095472 |
| 69.6925569 | 63 | 67.0011533 |
| 69.9925569 | 63 | 66.9986261 |
| 70.4925569 | 63 | 66.9842322 |
| 69.7925569 | 63 | 66.971305  |
| 69.9925569 | 63 | 66.9281907 |
| 69.8925569 | 69 | 66.9125794 |
| 68.2485314 | 69 | 66.8711014 |
| 67.3685314 | 69 | 66.8237568 |
| 66.5985314 | 69 | 66.7700761 |
| 65.6085314 | 69 | 66.7214891 |
| 64.8385314 | 69 | 66.6759687 |
| 65.6085314 | 69 | 66.6501817 |
| 66.0485314 | 69 | 66.6378614 |
| 65.8285314 | 69 | 66.6472744 |
| 65.6085314 | 69 | 66.6474874 |
| 65.7185314 | 69 | 66.657567  |
| 64.9385314 | 69 | 66.6636467 |
| 64.3885314 | 69 | 66.670793  |
| 64.2885314 | 69 | 66.669006  |
| 64.8385314 | 69 | 66.674819  |
| 65.2685314 | 69 | 66.6859653 |
| 65.4885314 | 69 | 66.7109783 |
| 66.1385314 | 69 | 66.757645  |
| 66.0404007 | 69 | 66.8083117 |
| 68.2925569 | 69 | 66.8563117 |
| 68.8925569 | 69 | 66.9043117 |
| 68.7925569 | 69 | 66.9429783 |
| 69.0925569 | 69 | 66.9723117 |
| 69.0925569 | 69 | 66.9803117 |
| 67.2398382 | 69 | 66.973645  |
| 67.3598382 | 69 | 66.961645  |
| 66.8298382 | 69 | 66.9469783 |
| 66.0698382 | 69 | 66.9309783 |

|            |    |            |
|------------|----|------------|
| 66.0898382 | 69 | 66.9203117 |
| 66.3298382 | 69 | 66.9069783 |
| 66.5698382 | 63 | 66.8649421 |
| 67.2498382 | 63 | 66.8276088 |
| 67.5998382 | 63 | 66.7889421 |
| 68.3698382 | 63 | 66.7329421 |
| 68.1398382 | 63 | 66.6649421 |
| 68.0198382 | 63 | 66.5902754 |
| 65.9758127 | 63 | 66.5249421 |
| 67.1685314 | 63 | 66.4582754 |
| 65.6485314 | 63 | 66.4022754 |
| 65.2085314 | 63 | 66.3681958 |
| 65.3185314 | 63 | 66.3471828 |
| 65.6485314 | 63 | 66.3417698 |
| 65.9785314 | 63 | 66.3482234 |
| 66.5585314 | 63 | 66.3676105 |
| 66.6685314 | 63 | 66.3687308 |
| 66.9985314 | 63 | 66.3533178 |
| 65.9085314 | 63 | 66.3395048 |
| 66.3485314 | 63 | 66.3286251 |
| 66.4485314 | 63 | 66.3096122 |
| 66.3285314 | 63 | 66.2943325 |
| 65.7585314 | 63 | 66.2850528 |
| 65.7285314 | 63 | 66.2877732 |
| 65.9285314 | 63 | 66.2778268 |
| 66.3685314 | 63 | 66.2608139 |
| 67.7925569 | 63 | 66.2275342 |
| 67.7925569 | 63 | 66.1842545 |
| 67.5925569 | 63 | 66.1462833 |
| 67.3925569 | 63 | 66.0729499 |
| 67.5925569 | 63 | 65.9889499 |
| 67.2925569 | 63 | 65.9089499 |
| 65.9925569 | 63 | 65.8222833 |
| 65.0925569 | 63 | 65.7382833 |
| 65.2925569 | 63 | 65.6816529 |
| 65.8925569 | 63 | 65.6247558 |
| 66.5925569 | 63 | 65.5762587 |
| 66.9925569 | 63 | 65.5352283 |
| 67.0925569 | 63 | 65.4925979 |
| 65.1398382 | 63 | 65.4481008 |
| 66.3925569 | 63 | 65.4004037 |
| 66.4925569 | 63 | 65.3476399 |
| 65.4925569 | 63 | 65.2942095 |
| 64.8925569 | 63 | 65.2331791 |
| 64.8925569 | 63 | 65.1845487 |

|            |    |            |
|------------|----|------------|
| 64.8925569 | 63 | 65.1415183 |
| 64.9925569 | 63 | 65.1284082 |
| 65.6925569 | 63 | 65.1007285 |
| 65.6925569 | 63 | 65.0893155 |
| 65.7925569 | 63 | 65.0541164 |
| 66.1925569 | 63 | 65.0174506 |
| 66.0925569 | 63 | 65.0020376 |
| 66.2925569 | 63 | 64.983558  |
| 65.6925569 | 63 | 64.9546783 |
| 64.8925569 | 63 | 64.9216653 |
| 64.7925569 | 63 | 64.8815856 |
| 64.7925569 | 63 | 64.8613726 |
| 64.2925569 | 63 | 64.8446263 |
| 63.7925569 | 63 | 64.83188   |
| 63.6925569 | 63 | 64.8354003 |
| 64.4925569 | 63 | 64.8371873 |
| 64.0925569 | 63 | 64.8393743 |
| 63.9925569 | 63 | 64.832228  |
| 62.9925569 | 63 | 64.8258817 |
| 62.8925569 | 63 | 64.7775622 |
| 63.1925569 | 63 | 64.7283094 |
| 62.7925569 | 63 | 64.68319   |
| 62.5925569 | 63 | 64.6364705 |
| 62.7925569 | 63 | 64.5860177 |
| 62.5925569 | 63 | 64.5380982 |
| 62.7925569 | 63 | 64.5148454 |
| 62.9925569 | 63 | 64.5138593 |
| 63.0925569 | 63 | 64.5160731 |
| 63.1925569 | 63 | 64.5125537 |
| 62.9925569 | 63 | 64.4967675 |
| 62.8925569 | 63 | 64.4967675 |
| 62.9925569 | 63 | 64.4807675 |
| 62.9925569 | 63 | 64.4908038 |
| 63.2925569 | 63 | 64.4761371 |
| 63.5925569 | 63 | 64.4614704 |
| 63.7925569 | 63 | 64.4508038 |
| 64.4925569 | 63 | 64.4468038 |
| 64.7925569 | 63 | 64.4428038 |
| 64.9925569 | 63 | 64.4388038 |
| 65.0925569 | 63 | 64.4414704 |
| 64.7925569 | 63 | 64.4281371 |
| 62.5685967 | 63 | 64.4068038 |
| 62.5685967 | 63 | 64.3788038 |
| 64.4925569 | 63 | 64.3454704 |
| 64.5925569 | 63 | 64.3121371 |

|            |    |            |
|------------|----|------------|
| 64.3925569 | 63 | 64.2828038 |
| 64.1925569 | 63 | 64.2654704 |
| 63.9925569 | 63 | 64.2708038 |
| 64.3925569 | 63 | 64.2961371 |
| 65.0925569 | 63 | 64.3228038 |
| 65.4925569 | 63 | 64.3534704 |
| 66.5925569 | 63 | 64.3934704 |
| 65.8925569 | 63 | 64.4401371 |
| 65.8925569 | 63 | 64.4814704 |
| 65.3925569 | 63 | 64.5281371 |
| 65.8925569 | 63 | 64.5708038 |
| 64.1685967 | 63 | 64.6228038 |
| 64.0985967 | 63 | 64.6788038 |
| 64.2085967 | 63 | 64.7308038 |
| 63.8885967 | 63 | 64.7828038 |
| 63.8085967 | 63 | 64.8348038 |
| 63.6985967 | 63 | 64.8828038 |
| 64.2485967 | 63 | 64.9321371 |
| 65.0185967 | 63 | 64.9788038 |
| 65.4585967 | 63 | 65.0228038 |
| 65.6285967 | 63 | 65.0654704 |
| 65.4085967 | 63 | 65.1041371 |
| 66.9925569 | 71 | 65.1561371 |
| 65.8925569 | 71 | 65.2308038 |
| 65.8925569 | 71 | 65.3081371 |
| 65.2925569 | 71 | 65.3854704 |
| 65.3925569 | 71 | 65.4588038 |
| 64.6925569 | 71 | 65.5308038 |
| 64.5925569 | 71 | 65.6054704 |
| 64.5925569 | 71 | 65.6734704 |
| 64.5925569 | 71 | 65.7348038 |
| 65.1925569 | 71 | 65.7801371 |
| 64.6925569 | 71 | 65.8121371 |
| 64.0925569 | 71 | 65.8481371 |
| 63.6925569 | 71 | 65.9137899 |
| 63.6925569 | 71 | 65.9621094 |
| 63.5925569 | 71 | 65.9847761 |
| 64.0925569 | 71 | 66.0074427 |
| 64.3925569 | 71 | 66.0301094 |
| 65.2925569 | 71 | 66.0554427 |
| 66.6925569 | 71 | 66.0914427 |
| 66.7925569 | 71 | 66.1261094 |
| 66.5925569 | 63 | 66.1461094 |
| 66.7925569 | 63 | 66.1647761 |
| 67.1925569 | 63 | 66.1754427 |

|            |    |            |
|------------|----|------------|
| 67.5925569 | 63 | 66.1981094 |
| 67.5925569 | 63 | 66.2234427 |
| 67.1925569 | 63 | 66.2594427 |
| 66.8925569 | 63 | 66.2901094 |
| 67.0925569 | 63 | 66.3450955 |
| 67.0925569 | 63 | 66.3996817 |
| 66.6925569 | 63 | 66.4501345 |
| 66.4925569 | 63 | 66.4981873 |
| 66.3925569 | 63 | 66.5366401 |
| 66.2925569 | 63 | 66.5658929 |
| 66.2925569 | 63 | 66.5838123 |
| 66.2925569 | 63 | 66.5874651 |
| 66.2925569 | 63 | 66.5812513 |
| 66.0925569 | 63 | 66.5661041 |
| 66.8925569 | 63 | 66.5485569 |
| 68.4925569 | 63 | 66.5112235 |
| 68.7925569 | 63 | 66.4832235 |
| 68.7925569 | 63 | 66.4578902 |
| 68.7925569 | 63 | 66.4512235 |
| 68.9925569 | 63 | 66.4418902 |
| 69.3925569 | 63 | 66.4485569 |
| 69.5925569 | 63 | 66.4565569 |
| 69.3925569 | 63 | 66.4578902 |
| 68.3925569 | 63 | 66.4538902 |
| 67.4925569 | 63 | 66.4378902 |
| 67.4925569 | 63 | 66.4298902 |
| 67.4925569 | 63 | 66.4352235 |
| 66.1925569 | 63 | 66.4458902 |
| 66.1925569 | 63 | 66.4552235 |
| 66.2925569 | 63 | 66.4632235 |
| 66.0925569 | 63 | 66.4578902 |
| 66.0925569 | 63 | 66.4472235 |
| 66.6925569 | 63 | 66.4258902 |
| 66.9925569 | 63 | 66.3952235 |
| 66.5925569 | 63 | 66.3632235 |
| 66.8925569 | 63 | 66.3378902 |
| 67.3925569 | 63 | 66.3072235 |
| 67.5925569 | 63 | 66.2725569 |
| 67.7925569 | 63 | 66.2325569 |
| 68.0925569 | 63 | 66.1938902 |
| 68.1925569 | 63 | 66.1592235 |
| 68.2925569 | 63 | 66.1338902 |
| 68.1925569 | 63 | 66.1058902 |
| 67.9925569 | 63 | 66.0818902 |
| 67.4925569 | 63 | 66.0632235 |



|            |    |            |
|------------|----|------------|
| 66.6925569 | 63 | 66.0485569 |
| 65.8925569 | 63 | 66.0365569 |
| 65.5925569 | 63 | 66.0312235 |
| 65.2925569 | 63 | 66.0338902 |
| 64.9925569 | 63 | 66.0538902 |
| 64.4925569 | 63 | 66.0818902 |
| 64.0925569 | 63 | 66.1098902 |
| 64.1925569 | 63 | 66.1298902 |
| 63.7925569 | 63 | 66.1258902 |
| 63.9925569 | 63 | 66.1232235 |
| 64.7925569 | 63 | 66.1032235 |
| 64.6925569 | 63 | 66.0845569 |
| 65.1925569 | 63 | 66.0672235 |
| 65.1925569 | 63 | 66.0405569 |
| 64.6925569 | 63 | 65.9945041 |
| 64.2925569 | 63 | 65.9555179 |
| 63.9925569 | 63 | 65.9285318 |
| 64.0925569 | 63 | 65.9135457 |
| 64.4925569 | 63 | 65.86759   |
| 64.4925569 | 63 | 65.8176342 |
| 64.3925569 | 63 | 65.7791452 |
| 64.1925569 | 63 | 65.7588423 |
| 63.6925569 | 63 | 65.740006  |
| 63.5925569 | 63 | 65.7546727 |
| 63.6925569 | 63 | 65.768006  |
| 64.3925569 | 63 | 65.780006  |
| 64.3925569 | 63 | 65.7946727 |
| 64.6925569 | 63 | 65.8213394 |
| 64.4925569 | 63 | 65.8426727 |
| 64.5925569 | 63 | 65.8586727 |
| 64.5925569 | 63 | 65.8433031 |
| 64.6925569 | 63 | 65.8223335 |
| 64.5925569 | 63 | 65.8063335 |
| 64.9925569 | 63 | 65.7956669 |
| 64.9925569 | 63 | 65.7876669 |
| 65.2925569 | 63 | 65.7743335 |
| 65.2925569 | 63 | 65.7623335 |
| 65.3925569 | 63 | 65.7596669 |
| 65.4925569 | 63 | 65.7636669 |
| 65.8925569 | 63 | 65.7810002 |
| 66.4925569 | 63 | 65.8010002 |
| 67.7925569 | 63 | 65.8263335 |
| 68.3925569 | 63 | 65.8556669 |
| 68.1925569 | 63 | 65.8916669 |
| 68.3925569 | 63 | 65.9436669 |

|            |    |            |
|------------|----|------------|
| 68.1925569 | 63 | 65.9943335 |
| 68.5925569 | 63 | 66.0383335 |
| 67.2925569 | 63 | 66.0836669 |
| 67.3925569 | 63 | 66.1050002 |
| 67.6925569 | 63 | 66.1196669 |
| 67.3925569 | 63 | 66.1250002 |
| 66.1385967 | 63 | 66.1250002 |
| 66.4685967 | 63 | 66.1330002 |
| 66.3685967 | 63 | 66.1490002 |
| 66.3685967 | 63 | 66.1690002 |
| 64.0458781 | 63 | 66.1903335 |
| 63.7458781 | 63 | 66.2090002 |
| 63.3058781 | 63 | 66.2276669 |
| 64.6698382 | 63 | 66.2543335 |
| 64.8798382 | 63 | 66.2903335 |
| 67.1925569 | 63 | 66.3370002 |
| 67.0925569 | 63 | 66.4023335 |
| 67.5925569 | 63 | 66.4623335 |
| 68.0925569 | 63 | 66.5090002 |
| 68.5925569 | 63 | 66.5530002 |
| 68.4925569 | 63 | 66.5850002 |
| 68.5925569 | 63 | 66.6236669 |
| 66.4398382 | 63 | 66.6570002 |
| 66.2198382 | 63 | 66.6876669 |
| 66.8925569 | 63 | 66.7183335 |
| 67.3925569 | 63 | 66.7476669 |
| 67.6925569 | 63 | 66.7756669 |
| 67.1925569 | 63 | 66.8076669 |
| 67.0925569 | 63 | 66.8383335 |
| 67.2925569 | 63 | 66.8703335 |
| 66.9925569 | 63 | 66.9116669 |
| 67.1925569 | 63 | 66.9530002 |
| 67.0925569 | 63 | 66.9863335 |
| 67.1925569 | 63 | 67.0063335 |
| 67.1925569 | 63 | 67.0143335 |
| 67.1925569 | 63 | 67.0103335 |
| 67.9925569 | 63 | 67.0090002 |
| 67.9925569 | 63 | 67.0076669 |
| 67.0925569 | 63 | 67.0090002 |
| 67.3925569 | 63 | 67.0076669 |
| 66.3925569 | 63 | 67.0290002 |
| 65.7925569 | 63 | 67.0596669 |
| 65.5925569 | 63 | 67.0836669 |
| 65.1925569 | 63 | 67.1143335 |
| 65.2925569 | 63 | 67.159053  |

|            |    |            |
|------------|----|------------|
| 65.4925569 | 63 | 67.1953725 |
| 65.4925569 | 63 | 67.2370253 |
| 65.6925569 | 63 | 67.2800114 |
| 65.8925569 | 63 | 67.3513004 |
| 65.8925569 | 63 | 67.4292562 |
| 66.3925569 | 63 | 67.5197452 |
| 66.8925569 | 63 | 67.5973815 |
| 67.1925569 | 63 | 67.6722177 |
| 68.4925569 | 63 | 67.6922177 |
| 68.1925569 | 63 | 67.7042177 |
| 67.8925569 | 63 | 67.6988844 |
| 67.6925569 | 63 | 67.6922177 |
| 67.0925569 | 63 | 67.6802177 |
| 67.3925569 | 63 | 67.6708844 |
| 67.0925569 | 63 | 67.661551  |
| 66.8925569 | 63 | 67.678254  |
| 66.9925569 | 63 | 67.7072235 |
| 66.7925569 | 63 | 67.7285569 |
| 67.0925569 | 63 | 67.7498902 |
| 67.3925569 | 63 | 67.7712235 |
| 67.5925569 | 63 | 67.7992235 |
| 67.6925569 | 63 | 67.8272235 |
| 68.4925569 | 63 | 67.8565569 |
| 68.5925569 | 63 | 67.8938902 |
| 68.3925569 | 63 | 67.9298902 |
| 67.9925569 | 63 | 67.9605569 |
| 68.3925569 | 63 | 67.9898902 |
| 68.0925569 | 63 | 68.0272235 |
| 68.0925569 | 63 | 68.0265032 |
| 68.2925569 | 63 | 68.0145829 |
| 68.2925569 | 63 | 67.9986625 |
| 68.4925569 | 63 | 67.9979422 |
| 68.8925569 | 63 | 67.9933552 |
| 69.6925569 | 63 | 68.0035682 |
| 69.4925569 | 63 | 68.0203145 |
| 69.6925569 | 63 | 68.0397275 |
| 69.4925569 | 63 | 68.0635405 |
| 69.1925569 | 63 | 68.0849535 |
| 69.4925569 | 63 | 68.1024998 |
| 69.5925569 | 63 | 68.1215128 |
| 69.3925569 | 63 | 68.1367925 |
| 69.5925569 | 63 | 68.1420721 |
| 70.0925569 | 63 | 68.1342851 |
| 70.4925569 | 63 | 68.1170314 |
| 70.4925569 | 63 | 68.0843111 |

|            |    |            |
|------------|----|------------|
| 68.6925569 | 63 | 68.0475908 |
| 67.9925569 | 63 | 67.9906038 |
| 67.1925569 | 63 | 67.9346834 |
| 67.5925569 | 63 | 67.8884964 |
| 67.6925569 | 63 | 67.8420427 |
| 67.7925569 | 63 | 67.8006557 |
| 67.8925569 | 63 | 67.7608687 |
| 67.6925569 | 63 | 67.730415  |
| 68.3925569 | 63 | 67.6995614 |
| 68.4925569 | 63 | 67.662841  |
| 68.9925569 | 63 | 67.6273207 |
| 69.2925569 | 63 | 67.5834004 |
| 69.2925569 | 63 | 67.52948   |
| 69.1925569 | 63 | 67.4758263 |
| 69.4925569 | 63 | 67.4236393 |
| 69.7925569 | 63 | 67.3694523 |
| 69.8925569 | 63 | 67.313932  |
| 69.3925569 | 63 | 67.260945  |
| 69.3925569 | 63 | 67.2118246 |
| 69.9925569 | 63 | 67.1559043 |
| 67.1385314 | 63 | 67.103984  |
| 67.0985314 | 63 | 67.0519303 |
| 66.7985314 | 63 | 67.0030766 |
| 67.0385314 | 63 | 66.9586229 |
| 67.0485314 | 63 | 66.9128359 |
| 67.1585314 | 63 | 66.8646489 |
| 67.0485314 | 63 | 66.8043286 |
| 67.0485314 | 63 | 66.7436083 |
| 66.9785314 | 63 | 66.6846212 |
| 66.8985314 | 63 | 66.6239009 |
| 66.8085314 | 63 | 66.5701139 |
| 66.9185314 | 63 | 66.5123269 |
| 66.8385314 | 63 | 66.4456066 |
| 66.2885314 | 63 | 66.3928862 |
| 65.3085314 | 63 | 66.3374992 |
| 65.0985314 | 63 | 66.2973122 |
| 64.4385314 | 63 | 66.2560585 |
| 64.4385314 | 63 | 66.2118715 |
| 64.2185314 | 63 | 66.1959512 |
| 63.9985314 | 63 | 66.1878975 |
| 64.4285314 | 63 | 66.1903772 |
| 64.2085314 | 63 | 66.2090438 |
| 63.9885314 | 63 | 66.2223772 |
| 64.4085314 | 63 | 66.2047235 |
| 64.8085314 | 63 | 66.2153902 |

|            |    |            |
|------------|----|------------|
| 64.5785314 | 63 | 66.2260568 |
| 64.2385314 | 63 | 66.2273902 |
| 64.1285314 | 63 | 66.2260568 |
| 63.7985314 | 63 | 66.2153902 |
| 63.3485314 | 63 | 66.2033902 |
| 63.5685314 | 63 | 66.2020568 |
| 63.7785314 | 63 | 66.2073902 |
| 64.4285314 | 63 | 66.2153902 |
| 64.4285314 | 63 | 66.2047235 |
| 64.4185314 | 63 | 66.1927235 |
| 64.3085314 | 63 | 66.1833902 |
| 64.1985314 | 63 | 66.1753902 |
| 64.1985314 | 63 | 66.1607235 |
| 64.1885314 | 63 | 66.1841105 |
| 64.6285314 | 63 | 66.2066975 |
| 64.9585314 | 63 | 66.2346178 |
| 65.0585314 | 63 | 66.2606715 |
| 65.2785314 | 63 | 66.2905919 |
| 65.1685314 | 63 | 66.3283789 |
| 64.9385314 | 63 | 66.3676325 |
| 65.2685314 | 63 | 66.4095529 |
| 64.9385314 | 63 | 66.4537399 |
| 65.1585314 | 63 | 66.5096602 |
| 65.1585314 | 63 | 66.5654472 |
| 64.5885314 | 63 | 66.6264342 |
| 65.4385314 | 63 | 66.6884879 |
| 65.4385314 | 63 | 66.7578749 |
| 67.0785314 | 63 | 66.8363286 |
| 67.3985314 | 63 | 66.9149156 |
| 67.1785314 | 63 | 67.0049693 |
| 67.4985314 | 63 | 67.0963563 |
| 67.3885314 | 63 | 67.18001   |
| 67.3785314 | 63 | 67.2572636 |
| 68.9925569 | 63 | 67.3301173 |
| 68.6925569 | 63 | 67.4072376 |
| 66.4685314 | 63 | 67.485958  |
| 68.6925569 | 63 | 67.5630783 |
| 68.4925569 | 63 | 67.6123458 |
| 68.4925569 | 63 | 67.6390271 |
| 68.3925569 | 63 | 67.6694418 |
| 68.1925569 | 63 | 67.6949232 |
| 68.3925569 | 63 | 67.7205378 |
| 69.1925569 | 63 | 67.7409525 |
| 69.5925569 | 63 | 67.7536339 |
| 70.0925569 | 63 | 67.7667152 |

|            |    |            |
|------------|----|------------|
| 68.9925569 | 63 | 67.7759299 |
| 68.9925569 | 63 | 67.7867446 |
| 68.6925569 | 63 | 67.8022259 |
| 68.7925569 | 63 | 67.8239739 |
| 68.8925569 | 63 | 67.8439886 |
| 68.8925569 | 63 | 67.8581366 |
| 68.7925569 | 63 | 67.8782846 |
| 68.8925569 | 63 | 67.8965659 |
| 68.9925569 | 63 | 67.9271668 |
| 69.2925569 | 63 | 67.9520342 |
| 69.9925569 | 63 | 67.9622351 |
| 69.9925569 | 63 | 67.9737692 |
| 70.1925569 | 63 | 67.9898367 |
| 70.2925569 | 63 | 67.9987042 |
| 71.0925569 | 63 | 68.0075716 |
| 70.9925569 | 63 | 68.0124391 |
| 71.4925569 | 63 | 68.0202399 |
| 71.4925569 | 63 | 68.0400407 |
| 71.4925569 | 63 | 68.0573082 |
| 71.1925569 | 63 | 68.0820424 |
| 70.9925569 | 63 | 68.0922432 |
| 71.1925569 | 63 | 68.1025773 |
| 71.2925569 | 63 | 68.1201115 |
| 70.4925569 | 63 | 68.1328456 |
| 69.7925569 | 63 | 68.1482464 |
| 69.8925569 | 63 | 68.1857668 |
| 69.9925569 | 63 | 68.1964334 |
| 69.8925569 | 63 | 68.2124334 |
| 70.1925569 | 63 | 68.2580871 |
| 68.5035923 | 63 | 68.2700871 |
| 66.5796321 | 63 | 68.2834204 |
| 66.5196321 | 63 | 68.3034204 |
| 66.0396321 | 63 | 68.3247538 |
| 65.7196321 | 63 | 68.3554204 |
| 64.8796321 | 63 | 68.3834204 |
| 64.5196321 | 63 | 68.4007538 |
| 64.7596321 | 63 | 68.4140871 |
| 65.1196321 | 63 | 68.4234204 |
| 65.2396321 | 63 | 68.4447538 |
| 65.5796321 | 63 | 68.4700871 |
| 65.9396321 | 63 | 68.4914204 |
| 65.6996321 | 63 | 68.5020871 |
| 65.2596321 | 63 | 68.5020871 |
| 65.6996321 | 63 | 68.4994204 |
| 65.9996321 | 63 | 68.4967538 |

|            |    |            |
|------------|----|------------|
| 67.2535923 | 63 | 68.4940871 |
| 66.9235923 | 63 | 68.4767538 |
| 66.0435923 | 63 | 68.4500871 |
| 66.0335923 | 63 | 68.4140871 |
| 66.1435923 | 63 | 68.3780871 |
| 65.9335923 | 63 | 68.3147175 |
| 65.6035923 | 63 | 68.2473479 |
| 65.5235923 | 63 | 68.1669117 |
| 65.7435923 | 63 | 68.0822088 |
| 66.0735923 | 63 | 67.9892392 |
| 66.7335923 | 63 | 67.8977363 |
| 67.2935923 | 63 | 67.8003667 |
| 67.8435923 | 63 | 67.7084638 |
| 68.1735923 | 63 | 67.6177609 |
| 68.4935923 | 63 | 67.5183913 |
| 68.4535923 | 63 | 67.4160884 |
| 68.5435923 | 63 | 67.3259188 |
| 70.1925569 | 63 | 67.2522825 |
| 69.7925569 | 63 | 67.181713  |
| 69.8925569 | 63 | 67.1155434 |
| 69.8925569 | 63 | 67.0568405 |
| 69.5925569 | 63 | 66.9988042 |
| 69.4925569 | 63 | 66.9735933 |
| 69.9925569 | 63 | 66.9723891 |
| 69.9925569 | 63 | 66.973631  |
| 70.4925569 | 63 | 66.9878573 |
| 70.4925569 | 63 | 67.0016561 |
| 70.4925569 | 63 | 67.0503587 |
| 70.5925569 | 63 | 67.1146019 |
| 70.7925569 | 63 | 67.1774971 |
| 70.5925569 | 63 | 67.2607162 |
| 70.8925569 | 63 | 67.3456686 |
| 70.2925569 | 63 | 67.4210877 |
| 69.5925569 | 63 | 67.4933734 |
| 68.8925569 | 63 | 67.5688592 |
| 68.6925569 | 63 | 67.6602116 |
| 68.5925569 | 63 | 67.7623641 |
| 68.6925569 | 63 | 67.8655165 |
| 67.6925569 | 63 | 67.9552828 |
| 67.2925569 | 63 | 68.0461157 |
| 67.2925569 | 63 | 68.148682  |
| 67.2925569 | 63 | 68.249715  |
| 65.4398382 | 63 | 68.3492813 |
| 65.2398382 | 63 | 68.4516476 |
| 65.0598382 | 63 | 68.5584139 |

|            |               |
|------------|---------------|
| 64.6398382 | 63 68.6712468 |
| 64.5198382 | 63 68.7928131 |
| 64.6298382 | 60 68.9133128 |
| 64.1898382 | 69.0266791    |
| 64.2998382 | 69.1292453    |
| 64.1898382 | 69.2244783    |
| 63.7398382 | 69.3136446    |
| 63.6198382 | 69.4002109    |
| 63.7298382 | 69.4939772    |
| 64.2698382 | 69.5882102    |
| 64.5998382 | 69.5800433    |
| 65.0298382 | 69.5771322    |
| 65.4898382 | 69.5727513    |
| 65.8398382 | 69.568247     |
| 66.6127749 | 69.5678997    |
| 66.4893181 | 69.5689916    |
| 66.6127749 | 69.5627627    |
| 67.106602  | 69.5563479    |
| 66.7545444 | 69.5421629    |
| 68.5323222 | 69.5275414    |
| 69.3378778 | 69.5124631    |
| 69.4767667 | 69.4953187    |
| 71.3610643 | 69.4743955    |
| 71.6110643 | 69.456065     |
| 71.2360643 | 69.4321235    |
| 71.3610643 | 69.4175399    |
| 71.3610643 | 69.4145223    |
| 72.1110643 | 69.4236796    |
| 73.3610643 | 69.4367354    |
| 73.7360643 | 69.4520841    |
| 73.9860643 | 69.4661494    |
| 73.7360643 | 69.4996134    |
| 73.7360643 | 69.5420568    |
| 73.6110643 | 69.5861646    |
| 73.6110643 | 69.6320368    |
| 73.6110643 | 69.7175919    |
| 73.6110643 | 69.8108784    |
| 73.9860643 | 69.9119644    |
| 74.8610643 | 70.0265758    |
| 75.1110643 | 70.1489477    |
| 75.2360643 | 70.274382     |
| 74.9860643 | 70.4158831    |
| 74.9860643 | 70.5615032    |
| 74.8610643 | 70.7169096    |
| 74.9860643 | 70.8913364    |



75.4860643  
75.6110643

71.0777851  
71.2711521

| Time     |         | Person 1   | Person 10  | Person 3   | Person 4 | Person 7   |
|----------|---------|------------|------------|------------|----------|------------|
| 17:01:03 | 0:00:01 | 74.2188035 | 75.2675012 | 84.1785034 |          | 77.8882694 |
| 17:01:04 | 0:00:02 | 75.2188035 | 72.2675012 | 84.1785034 |          | 77.2216027 |
| 17:01:05 | 0:00:03 | 80.2188035 | 72.2675012 | 86.1785034 |          | 79.554936  |
| 17:01:06 | 0:00:04 | 77.2188035 | 68.2675012 | 88.1785034 |          | 77.8882694 |
| 17:01:07 | 0:00:05 | 77.2188035 | 68.2675012 | 88.1785034 |          | 77.8882694 |
| 17:01:08 | 0:00:06 | 74.2188035 | 70.2675012 | 89.1785034 |          | 77.8882694 |
| 17:01:09 | 0:00:07 | 74.2188035 | 70.2675012 | 90.1785034 |          | 78.2216027 |
| 17:01:10 | 0:00:08 | 76.2188035 | 71.2675012 | 90.1785034 |          | 79.2216027 |
| 17:01:11 | 0:00:09 | 77.2188035 | 72.2675012 | 90.1785034 |          | 79.8882694 |
| 17:01:12 | 0:00:10 | 77.2188035 | 75.2675012 | 91.1785034 |          | 81.2216027 |
| 17:01:13 | 0:00:11 | 78.2188035 | 76.2675012 | 87.1785034 |          | 80.554936  |
| 17:01:14 | 0:00:12 | 79.2188035 | 76.2675012 | 87.1785034 |          | 80.8882694 |
| 17:01:15 | 0:00:13 | 80.2188035 | 78.2675012 | 84.1785034 |          | 80.8882694 |
| 17:01:16 | 0:00:14 | 80.2188035 | 79.2675012 | 84.1785034 |          | 81.2216027 |
| 17:01:17 | 0:00:15 | 80.2188035 | 79.2675012 | 84.1785034 |          | 81.2216027 |
| 17:01:18 | 0:00:16 | 81.2188035 | 79.2675012 | 84.1785034 |          | 81.554936  |
| 17:01:19 | 0:00:17 | 82.2188035 | 79.2675012 | 84.1785034 |          | 81.8882694 |
| 17:01:20 | 0:00:18 | 82.2188035 | 82.2675012 | 84.1785034 |          | 82.8882694 |
| 17:01:21 | 0:00:19 | 81.2188035 | 86.2675012 | 84.1785034 |          | 83.8882694 |
| 17:01:22 | 0:00:20 | 81.2188035 | 89.2675012 | 84.1785034 |          | 84.8882694 |
| 17:01:23 | 0:00:21 | 82.2188035 | 91.2675012 | 83.1785034 |          | 85.554936  |
| 17:01:24 | 0:00:22 | 82.2188035 | 91.2675012 | 82.1785034 |          | 85.2216027 |
| 17:01:25 | 0:00:23 | 82.2188035 | 91.2675012 | 83.1785034 |          | 85.554936  |
| 17:01:26 | 0:00:24 | 81.2188035 | 90.2675012 | 82.1785034 |          | 84.554936  |
| 17:01:27 | 0:00:25 | 81.2188035 | 86.2675012 | 81.1785034 |          | 82.8882694 |
| 17:01:28 | 0:00:26 | 81.2188035 | 86.2675012 | 79.1785034 |          | 82.2216027 |
| 17:01:29 | 0:00:27 | 81.2188035 | 83.2675012 | 79.1785034 |          | 81.2216027 |
| 17:01:30 | 0:00:28 | 81.2188035 | 83.2675012 | 79.1785034 |          | 81.2216027 |
| 17:01:31 | 0:00:29 | 81.2188035 | 83.2675012 | 75.1785034 |          | 83.7381651 |
| 17:01:32 | 0:00:30 | 81.2188035 | 85.2675012 | 75.1785034 |          | 84.2381651 |
| 17:01:33 | 0:00:31 | 81.2188035 | 85.2675012 | 75.1785034 |          | 84.2381651 |
| 17:01:34 | 0:00:32 | 82.2188035 | 84.2675012 | 75.1785034 |          | 83.9881651 |
| 17:01:35 | 0:00:33 | 82.2188035 | 84.2675012 | 76.1785034 |          | 84.2381651 |
| 17:01:36 | 0:00:34 | 83.2188035 | 80.2675012 | 76.1785034 |          | 83.4881651 |
| 17:01:37 | 0:00:35 | 83.2188035 | 79.2675012 | 76.1785034 |          | 83.2381651 |
| 17:01:38 | 0:00:36 | 84.2188035 | 78.2675012 | 76.1785034 |          | 82.9881651 |
| 17:01:39 | 0:00:37 | 84.2188035 | 78.2675012 | 77.1785034 |          | 83.2381651 |
| 17:01:40 | 0:00:38 | 83.2188035 | 77.2675012 | 77.1785034 |          | 82.7381651 |
| 17:01:41 | 0:00:39 | 82.2188035 | 76.2675012 | 77.1785034 |          | 83.4881651 |
| 17:01:42 | 0:00:40 | 80.2188035 | 75.2675012 | 77.1785034 |          | 82.4881651 |
| 17:01:43 | 0:00:41 | 80.2188035 | 75.2675012 | 77.1785034 |          | 71.122577  |

|          |         |            |            |            |            |           |
|----------|---------|------------|------------|------------|------------|-----------|
| 17:01:44 | 0:00:42 | 80.2188035 | 76.2675012 | 77.1785034 |            | 70.122577 |
| 17:01:45 | 0:00:43 | 79.2188035 | 76.2675012 | 77.1785034 |            | 70.122577 |
| 17:01:46 | 0:00:44 | 79.2188035 | 77.2675012 | 77.1785034 |            | 70.122577 |
| 17:01:47 | 0:00:45 | 79.2188035 | 78.2675012 | 78.1785034 |            | 70.122577 |
| 17:01:48 | 0:00:46 | 79.2188035 | 78.2675012 | 78.1785034 |            | 64.122577 |
| 17:01:49 | 0:00:47 | 80.2188035 | 77.2675012 | 79.1785034 |            | 63.122577 |
| 17:01:50 | 0:00:48 | 80.2188035 | 74.2675012 | 79.1785034 |            | 63.122577 |
| 17:01:51 | 0:00:49 | 80.2188035 | 73.2675012 | 79.1785034 |            | 63.122577 |
| 17:01:52 | 0:00:50 | 80.2188035 | 73.2675012 | 79.1785034 |            | 64.122577 |
| 17:01:53 | 0:00:51 | 80.2188035 | 73.2675012 | 79.1785034 |            | 65.122577 |
| 17:01:54 | 0:00:52 | 80.2188035 | 77.2675012 | 81.1785034 |            | 68.122577 |
| 17:01:55 | 0:00:53 | 80.2188035 | 77.2675012 | 81.1785034 |            | 68.122577 |
| 17:01:56 | 0:00:54 | 82.2188035 | 77.2675012 | 83.1785034 |            | 71.122577 |
| 17:01:57 | 0:00:55 | 82.2188035 | 77.2675012 | 83.1785034 |            | 71.122577 |
| 17:01:58 | 0:00:56 | 82.2188035 | 78.2675012 | 83.1785034 | 96.2878521 | 72.122577 |
| 17:01:59 | 0:00:57 | 82.2188035 | 78.2675012 | 82.1785034 | 94.2878521 | 72.122577 |
| 17:02:00 | 0:00:58 | 83.2188035 | 77.2675012 | 82.1785034 | 94.2878521 | 72.122577 |
| 17:02:01 | 0:00:59 | 83.2188035 | 77.2675012 | 82.1785034 | 94.2878521 | 72.122577 |
| 17:02:02 | 0:01:00 | 84.2188035 | 77.2675012 | 82.1785034 | 94.2878521 | 72.122577 |
| 17:02:03 | 0:01:01 | 84.2188035 | 80.2675012 | 82.1785034 | 93.2878521 | 72.122577 |
| 17:02:04 | 0:01:02 | 81.2188035 | 81.2675012 | 82.1785034 | 93.2878521 | 72.122577 |
| 17:02:05 | 0:01:03 | 81.2188035 | 81.2675012 | 82.1785034 | 93.2878521 | 72.122577 |
| 17:02:06 | 0:01:04 | 81.2188035 | 82.2675012 | 87.1785034 | 94.2878521 | 72.122577 |
| 17:02:07 | 0:01:05 | 81.2188035 | 82.2675012 | 89.1785034 | 94.2878521 | 72.122577 |
| 17:02:08 | 0:01:06 | 81.2188035 | 80.2675012 | 90.1785034 | 97.2878521 | 72.122577 |
| 17:02:09 | 0:01:07 | 81.2188035 | 80.2675012 | 90.1785034 | 98.2878521 | 72.122577 |
| 17:02:10 | 0:01:08 | 81.2188035 | 79.2675012 | 92.1785034 | 98.2878521 | 73.122577 |
| 17:02:11 | 0:01:09 | 80.2188035 | 78.2675012 | 90.1785034 | 97.2878521 | 73.122577 |
| 17:02:12 | 0:01:10 | 80.2188035 | 78.2675012 | 90.1785034 | 97.2878521 | 78.122577 |
| 17:02:13 | 0:01:11 | 80.2188035 | 78.2675012 | 90.1785034 | 97.2878521 | 84.122577 |
| 17:02:14 | 0:01:12 | 80.2188035 | 79.2675012 | 89.1785034 | 97.2878521 | 86.122577 |
| 17:02:15 | 0:01:13 | 80.2188035 | 80.2675012 | 88.1785034 | 98.2878521 | 86.122577 |
| 17:02:16 | 0:01:14 | 80.2188035 | 84.2675012 | 88.1785034 | 98.2878521 | 88.122577 |
| 17:02:17 | 0:01:15 | 80.2188035 | 84.2675012 | 88.1785034 | 98.2878521 | 94.122577 |
| 17:02:18 | 0:01:16 | 81.2188035 | 85.2675012 | 88.1785034 | 99.2878521 | 94.122577 |
| 17:02:19 | 0:01:17 | 81.2188035 | 81.2675012 | 88.1785034 | 99.2878521 | 95.122577 |
| 17:02:20 | 0:01:18 | 81.2188035 | 81.2675012 | 88.1785034 | 98.2878521 | 94.122577 |
| 17:02:21 | 0:01:19 | 81.2188035 | 80.2675012 | 85.1785034 | 98.2878521 | 88.122577 |
| 17:02:22 | 0:01:20 | 81.2188035 | 81.2675012 | 84.1785034 | 99.2878521 | 83.122577 |
| 17:02:23 | 0:01:21 | 81.2188035 | 82.2675012 | 84.1785034 | 99.2878521 | 83.122577 |
| 17:02:24 | 0:01:22 | 81.2188035 | 82.2675012 | 84.1785034 | 99.2878521 | 83.122577 |
| 17:02:25 | 0:01:23 | 84.2188035 | 83.2675012 | 84.1785034 | 99.2878521 | 83.122577 |
| 17:02:26 | 0:01:24 | 84.2188035 | 82.2675012 | 84.1785034 | 98.2878521 | 77.122577 |
| 17:02:27 | 0:01:25 | 84.2188035 | 81.2675012 | 84.1785034 | 98.2878521 | 76.122577 |
| 17:02:28 | 0:01:26 | 84.2188035 | 80.2675012 | 84.1785034 | 96.2878521 | 76.122577 |

|          |         |            |            |            |            |           |
|----------|---------|------------|------------|------------|------------|-----------|
| 17:02:29 | 0:01:27 | 83.2188035 | 80.2675012 | 83.1785034 | 96.2878521 | 75.122577 |
| 17:02:30 | 0:01:28 | 82.2188035 | 80.2675012 | 83.1785034 | 95.2878521 | 74.122577 |
| 17:02:31 | 0:01:29 | 81.2188035 | 81.2675012 | 82.1785034 | 94.2878521 | 72.122577 |
| 17:02:32 | 0:01:30 | 81.2188035 | 83.2675012 | 82.1785034 | 94.2878521 | 71.122577 |
| 17:02:33 | 0:01:31 | 81.2188035 | 83.2675012 | 82.1785034 | 94.2878521 | 70.122577 |
| 17:02:34 | 0:01:32 | 81.2188035 | 84.2675012 | 82.1785034 | 93.2878521 | 70.122577 |
| 17:02:35 | 0:01:33 | 81.2188035 | 85.2675012 | 81.1785034 | 93.2878521 | 70.122577 |
| 17:02:36 | 0:01:34 | 81.2188035 | 84.2675012 | 81.1785034 | 91.2878521 | 70.122577 |
| 17:02:37 | 0:01:35 | 81.2188035 | 81.2675012 | 80.1785034 | 90.2878521 | 70.122577 |
| 17:02:38 | 0:01:36 | 81.2188035 | 81.2675012 | 80.1785034 | 90.2878521 | 71.122577 |
| 17:02:39 | 0:01:37 | 80.2188035 | 82.2675012 | 83.1785034 | 90.2878521 | 71.122577 |
| 17:02:40 | 0:01:38 | 80.2188035 | 83.2675012 | 84.1785034 | 90.2878521 | 71.122577 |
| 17:02:41 | 0:01:39 | 79.2188035 | 83.2675012 | 84.1785034 | 90.2878521 | 71.122577 |
| 17:02:42 | 0:01:40 | 79.2188035 | 83.2675012 | 85.1785034 | 91.2878521 | 71.122577 |
| 17:02:43 | 0:01:41 | 80.2188035 | 83.2675012 | 85.1785034 | 91.2878521 | 71.122577 |
| 17:02:44 | 0:01:42 | 81.2188035 | 83.2675012 | 85.1785034 | 91.2878521 | 71.122577 |
| 17:02:45 | 0:01:43 | 81.2188035 | 82.2675012 | 85.1785034 | 91.2878521 | 71.122577 |
| 17:02:46 | 0:01:44 | 82.2188035 | 83.2675012 | 82.1785034 | 91.2878521 | 71.122577 |
| 17:02:47 | 0:01:45 | 82.2188035 | 83.2675012 | 82.1785034 | 91.2878521 | 71.122577 |
| 17:02:48 | 0:01:46 | 82.2188035 | 85.2675012 | 82.1785034 | 91.2878521 | 71.122577 |
| 17:02:49 | 0:01:47 | 82.2188035 | 85.2675012 | 82.1785034 | 91.2878521 | 71.122577 |
| 17:02:50 | 0:01:48 | 82.2188035 | 85.2675012 | 83.1785034 | 90.2878521 | 71.122577 |
| 17:02:51 | 0:01:49 | 82.2188035 | 82.2675012 | 83.1785034 | 90.2878521 | 71.122577 |
| 17:02:52 | 0:01:50 | 81.2188035 | 79.2675012 | 83.1785034 | 89.2878521 | 74.122577 |
| 17:02:53 | 0:01:51 | 81.2188035 | 78.2675012 | 81.1785034 | 89.2878521 | 75.122577 |
| 17:02:54 | 0:01:52 | 80.2188035 | 78.2675012 | 80.1785034 | 89.2878521 | 75.122577 |
| 17:02:55 | 0:01:53 | 80.2188035 | 78.2675012 | 80.1785034 | 89.2878521 | 78.122577 |
| 17:02:56 | 0:01:54 | 79.2188035 | 78.2675012 | 80.1785034 | 89.2878521 | 79.122577 |
| 17:02:57 | 0:01:55 | 79.2188035 | 79.2675012 | 79.1785034 | 89.2878521 | 80.122577 |
| 17:02:58 | 0:01:56 | 80.2188035 | 82.2675012 | 78.1785034 | 89.2878521 | 80.122577 |
| 17:02:59 | 0:01:57 | 80.2188035 | 82.2675012 | 77.1785034 | 89.2878521 | 81.122577 |
| 17:03:00 | 0:01:58 | 79.2188035 | 82.2675012 | 77.1785034 | 89.2878521 | 80.122577 |
| 17:03:01 | 0:01:59 | 79.2188035 | 81.2675012 | 76.1785034 | 87.2878521 | 80.122577 |
| 17:03:02 | 0:02:00 | 79.2188035 | 81.2675012 | 77.1785034 | 87.2878521 | 80.122577 |
| 17:03:03 | 0:02:01 | 79.2188035 | 81.2675012 | 77.1785034 | 87.2878521 | 80.122577 |
| 17:03:04 | 0:02:02 | 79.2188035 | 80.2675012 | 77.1785034 | 87.2878521 | 80.122577 |
| 17:03:05 | 0:02:03 | 79.2188035 | 80.2675012 | 78.1785034 | 88.2878521 | 79.122577 |
| 17:03:06 | 0:02:04 | 80.2188035 | 80.2675012 | 78.1785034 | 87.2878521 | 75.122577 |
| 17:03:07 | 0:02:05 | 81.2188035 | 80.2675012 | 78.1785034 | 87.2878521 | 74.122577 |
| 17:03:08 | 0:02:06 | 81.2188035 | 80.2675012 | 78.1785034 | 87.2878521 | 74.122577 |
| 17:03:09 | 0:02:07 | 81.2188035 | 76.2675012 | 80.1785034 | 87.2878521 | 74.122577 |
| 17:03:10 | 0:02:08 | 80.2188035 | 76.2675012 | 81.1785034 | 87.2878521 | 75.122577 |
| 17:03:11 | 0:02:09 | 79.2188035 | 75.2675012 | 81.1785034 | 88.2878521 | 75.122577 |
| 17:03:12 | 0:02:10 | 78.2188035 | 74.2675012 | 81.1785034 | 89.2878521 | 75.122577 |
| 17:03:13 | 0:02:11 | 78.2188035 | 74.2675012 | 81.1785034 | 89.2878521 | 75.122577 |

|          |         |            |            |            |            |           |
|----------|---------|------------|------------|------------|------------|-----------|
| 17:03:14 | 0:02:12 | 78.2188035 | 71.2675012 | 80.1785034 | 89.2878521 | 72.122577 |
| 17:03:15 | 0:02:13 | 77.2188035 | 71.2675012 | 79.1785034 | 89.2878521 | 70.122577 |
| 17:03:16 | 0:02:14 | 77.2188035 | 70.2675012 | 79.1785034 | 89.2878521 | 70.122577 |
| 17:03:17 | 0:02:15 | 77.2188035 | 70.2675012 | 80.1785034 | 89.2878521 | 70.122577 |
| 17:03:18 | 0:02:16 | 77.2188035 | 70.2675012 | 80.1785034 | 89.2878521 | 70.122577 |
| 17:03:19 | 0:02:17 | 77.2188035 | 70.2675012 | 81.1785034 | 87.2878521 | 70.122577 |
| 17:03:20 | 0:02:18 | 78.2188035 | 71.2675012 | 81.1785034 | 87.2878521 | 70.122577 |
| 17:03:21 | 0:02:19 | 78.2188035 | 71.2675012 | 81.1785034 | 87.2878521 | 71.122577 |
| 17:03:22 | 0:02:20 | 80.2188035 | 71.2675012 | 82.1785034 | 88.2878521 | 72.122577 |
| 17:03:23 | 0:02:21 | 80.2188035 | 71.2675012 | 80.1785034 | 88.2878521 | 72.122577 |
| 17:03:24 | 0:02:22 | 80.2188035 | 71.2675012 | 80.1785034 | 88.2878521 | 72.122577 |
| 17:03:25 | 0:02:23 | 80.2188035 | 70.2675012 | 79.1785034 | 88.2878521 | 72.122577 |
| 17:03:26 | 0:02:24 | 81.2188035 | 70.2675012 | 80.1785034 | 88.2878521 | 72.122577 |
| 17:03:27 | 0:02:25 | 81.2188035 | 71.2675012 | 80.1785034 | 88.2878521 | 72.122577 |
| 17:03:28 | 0:02:26 | 82.2188035 | 73.2675012 | 80.1785034 | 91.2878521 | 74.122577 |
| 17:03:29 | 0:02:27 | 82.2188035 | 73.2675012 | 80.1785034 | 91.2878521 | 74.122577 |
| 17:03:30 | 0:02:28 | 79.2188035 | 73.2675012 | 80.1785034 | 93.2878521 | 75.122577 |
| 17:03:31 | 0:02:29 | 78.2188035 | 74.2675012 | 79.1785034 | 79.2265792 | 75.122577 |
| 17:03:32 | 0:02:30 | 78.2188035 | 73.2675012 | 78.1785034 | 79.0837221 | 74.122577 |
| 17:03:33 | 0:02:31 | 78.2188035 | 70.2675012 | 78.1785034 | 78.2265792 | 70.122577 |
| 17:03:34 | 0:02:32 | 79.2188035 | 70.2675012 | 78.1785034 | 78.2265792 | 69.122577 |
| 17:03:35 | 0:02:33 | 79.2188035 | 70.2675012 | 78.1785034 | 78.5122935 | 68.122577 |
| 17:03:36 | 0:02:34 | 79.2188035 | 70.2675012 | 78.1785034 | 78.6551506 | 68.122577 |
| 17:03:37 | 0:02:35 | 79.2188035 | 73.2675012 | 78.1785034 | 78.7980078 | 66.122577 |
| 17:03:38 | 0:02:36 | 79.2188035 | 73.2675012 | 78.1785034 | 78.6551506 | 65.122577 |
| 17:03:39 | 0:02:37 | 79.2188035 | 73.2675012 | 78.1785034 | 78.9408649 | 65.122577 |
| 17:03:40 | 0:02:38 | 79.2188035 | 73.2675012 | 78.1785034 | 78.9408649 | 65.122577 |
| 17:03:41 | 0:02:39 | 79.2188035 | 72.2675012 | 77.1785034 | 78.9408649 | 65.122577 |
| 17:03:42 | 0:02:40 | 79.2188035 | 72.2675012 | 79.1785034 | 95.2878521 | 74.122577 |
| 17:03:43 | 0:02:41 | 81.2188035 | 72.2675012 | 79.1785034 | 95.2878521 | 76.122577 |
| 17:03:44 | 0:02:42 | 82.2188035 | 72.2675012 | 81.1785034 | 95.2878521 | 76.122577 |
| 17:03:45 | 0:02:43 | 82.2188035 | 72.2675012 | 82.1785034 | 95.2878521 | 76.122577 |
| 17:03:46 | 0:02:44 | 86.2188035 | 73.2675012 | 82.1785034 | 95.2878521 | 75.122577 |
| 17:03:47 | 0:02:45 | 87.2188035 | 73.2675012 | 82.1785034 | 97.2878521 | 75.122577 |
| 17:03:48 | 0:02:46 | 86.2188035 | 76.2675012 | 83.1785034 | 97.2878521 | 74.122577 |
| 17:03:49 | 0:02:47 | 85.2188035 | 76.2675012 | 84.1785034 | 97.2878521 | 73.122577 |
| 17:03:50 | 0:02:48 | 85.2188035 | 76.2675012 | 85.1785034 | 96.2878521 | 73.122577 |
| 17:03:51 | 0:02:49 | 85.2188035 | 76.2675012 | 85.1785034 | 95.2878521 | 73.122577 |
| 17:03:52 | 0:02:50 | 84.2188035 | 76.2675012 | 86.1785034 | 92.2878521 | 73.122577 |
| 17:03:53 | 0:02:51 | 84.2188035 | 77.2675012 | 86.1785034 | 92.2878521 | 72.122577 |
| 17:03:54 | 0:02:52 | 82.2188035 | 78.2675012 | 86.1785034 | 92.2878521 | 72.122577 |
| 17:03:55 | 0:02:53 | 82.2188035 | 78.2675012 | 87.1785034 | 92.2878521 | 72.122577 |
| 17:03:56 | 0:02:54 | 82.2188035 | 84.2675012 | 87.1785034 | 91.2878521 | 73.122577 |
| 17:03:57 | 0:02:55 | 82.2188035 | 86.2675012 | 87.1785034 | 93.2878521 | 73.122577 |
| 17:03:58 | 0:02:56 | 82.2188035 | 86.2675012 | 88.1785034 | 96.2878521 | 73.122577 |

|          |         |            |            |            |            |           |
|----------|---------|------------|------------|------------|------------|-----------|
| 17:03:59 | 0:02:57 | 82.2188035 | 87.2675012 | 91.1785034 | 98.2878521 | 74.122577 |
| 17:04:00 | 0:02:58 | 82.2188035 | 87.2675012 | 91.1785034 | 98.2878521 | 75.122577 |
| 17:04:01 | 0:02:59 | 82.2188035 | 85.2675012 | 88.1785034 | 98.2878521 | 75.122577 |
| 17:04:02 | 0:03:00 | 82.2188035 | 85.2675012 | 87.1785034 | 83.7980078 | 74.122577 |
| 17:04:03 | 0:03:01 | 82.2188035 | 85.2675012 | 86.1785034 | 83.6551506 | 74.122577 |
| 17:04:04 | 0:03:02 | 81.2188035 | 85.2675012 | 84.1785034 | 83.3694363 | 74.122577 |
| 17:04:05 | 0:03:03 | 81.2188035 | 86.2675012 | 84.1785034 | 97.2878521 | 74.122577 |
| 17:04:06 | 0:03:04 | 79.2188035 | 87.2675012 | 83.1785034 | 95.2878521 | 74.122577 |
| 17:04:07 | 0:03:05 | 77.2188035 | 87.2675012 | 84.1785034 | 92.2878521 | 74.122577 |
| 17:04:08 | 0:03:06 | 75.2188035 | 88.2675012 | 85.1785034 | 90.2878521 | 73.122577 |
| 17:04:09 | 0:03:07 | 75.2188035 | 88.2675012 | 85.1785034 | 90.2878521 | 73.122577 |
| 17:04:10 | 0:03:08 | 75.2188035 | 88.2675012 | 85.1785034 | 90.2878521 | 74.122577 |
| 17:04:11 | 0:03:09 | 73.2188035 | 87.2675012 | 85.1785034 | 88.2878521 | 75.122577 |
| 17:04:12 | 0:03:10 | 73.2188035 | 87.2675012 | 85.1785034 | 88.2878521 | 75.122577 |
| 17:04:13 | 0:03:11 | 73.2188035 | 88.2675012 | 83.1785034 | 88.2878521 | 76.122577 |
| 17:04:14 | 0:03:12 | 75.2188035 | 88.2675012 | 83.1785034 | 89.2878521 | 76.122577 |
| 17:04:15 | 0:03:13 | 74.2188035 | 88.2675012 | 83.1785034 | 89.2878521 | 78.122577 |
| 17:04:16 | 0:03:14 | 71.2188035 | 88.2675012 | 83.1785034 | 89.2878521 | 79.122577 |
| 17:04:17 | 0:03:15 | 71.2188035 | 87.2675012 | 84.1785034 | 90.2878521 | 81.122577 |
| 17:04:18 | 0:03:16 | 71.2188035 | 87.2675012 | 85.1785034 | 90.2878521 | 81.122577 |
| 17:04:19 | 0:03:17 | 71.2188035 | 87.2675012 | 86.1785034 | 90.2878521 | 81.122577 |
| 17:04:20 | 0:03:18 | 71.2188035 | 86.2675012 | 85.1785034 | 90.2878521 | 82.122577 |
| 17:04:21 | 0:03:19 | 71.2188035 | 86.2675012 | 84.1785034 | 90.2878521 | 81.122577 |
| 17:04:22 | 0:03:20 | 71.2188035 | 86.2675012 | 83.1785034 | 90.2878521 | 81.122577 |
| 17:04:23 | 0:03:21 | 71.2188035 | 85.2675012 | 83.1785034 | 91.2878521 | 80.122577 |
| 17:04:24 | 0:03:22 | 72.2188035 | 84.2675012 | 83.1785034 | 90.2878521 | 81.122577 |
| 17:04:25 | 0:03:23 | 72.2188035 | 82.2675012 | 84.1785034 | 89.2878521 | 81.122577 |
| 17:04:26 | 0:03:24 | 75.2188035 | 81.2675012 | 85.1785034 | 89.2878521 | 82.122577 |
| 17:04:27 | 0:03:25 | 75.2188035 | 81.2675012 | 85.1785034 | 89.2878521 | 82.122577 |
| 17:04:28 | 0:03:26 | 74.2188035 | 81.2675012 | 85.1785034 | 90.2878521 | 83.122577 |
| 17:04:29 | 0:03:27 | 74.2188035 | 81.2675012 | 85.1785034 | 91.2878521 | 84.122577 |
| 17:04:30 | 0:03:28 | 75.2188035 | 82.2675012 | 84.1785034 | 93.2878521 | 81.122577 |
| 17:04:31 | 0:03:29 | 75.2188035 | 81.2675012 | 83.1785034 | 94.2878521 | 80.122577 |
| 17:04:32 | 0:03:30 | 75.2188035 | 79.2675012 | 83.1785034 | 94.2878521 | 77.122577 |
| 17:04:33 | 0:03:31 | 75.2188035 | 79.2675012 | 83.1785034 | 94.2878521 | 77.122577 |
| 17:04:34 | 0:03:32 | 75.2188035 | 79.2675012 | 83.1785034 | 91.2878521 | 75.122577 |
| 17:04:35 | 0:03:33 | 75.2188035 | 79.2675012 | 83.1785034 | 91.2878521 | 76.122577 |
| 17:04:36 | 0:03:34 | 75.2188035 | 82.2675012 | 84.1785034 | 90.2878521 | 78.122577 |
| 17:04:37 | 0:03:35 | 74.2188035 | 82.2675012 | 84.1785034 | 89.2878521 | 80.122577 |
| 17:04:38 | 0:03:36 | 73.2188035 | 84.2675012 | 84.1785034 | 89.2878521 | 80.122577 |
| 17:04:39 | 0:03:37 | 72.2188035 | 85.2675012 | 83.1785034 | 87.2878521 | 80.122577 |
| 17:04:40 | 0:03:38 | 72.2188035 | 87.2675012 | 82.1785034 | 88.2878521 | 81.122577 |
| 17:04:41 | 0:03:39 | 72.2188035 | 87.2675012 | 82.1785034 | 88.2878521 | 81.122577 |
| 17:04:42 | 0:03:40 | 71.2188035 | 87.2675012 | 82.1785034 | 89.2878521 | 81.122577 |
| 17:04:43 | 0:03:41 | 71.2188035 | 88.2675012 | 81.1785034 | 90.2878521 | 81.122577 |

|          |         |            |            |            |            |           |
|----------|---------|------------|------------|------------|------------|-----------|
| 17:04:44 | 0:03:42 | 71.2188035 | 89.2675012 | 82.1785034 | 90.2878521 | 82.122577 |
| 17:04:45 | 0:03:43 | 71.2188035 | 89.2675012 | 82.1785034 | 90.2878521 | 82.122577 |
| 17:04:46 | 0:03:44 | 70.2188035 | 88.2675012 | 82.1785034 | 90.2878521 | 83.122577 |
| 17:04:47 | 0:03:45 | 71.2188035 | 88.2675012 | 82.1785034 | 89.2878521 | 82.122577 |
| 17:04:48 | 0:03:46 | 71.2188035 | 87.2675012 | 82.1785034 | 87.2878521 | 82.122577 |
| 17:04:49 | 0:03:47 | 71.2188035 | 87.2675012 | 82.1785034 | 87.2878521 | 82.122577 |
| 17:04:50 | 0:03:48 | 70.2188035 | 86.2675012 | 82.1785034 | 87.2878521 | 82.122577 |
| 17:04:51 | 0:03:49 | 70.2188035 | 86.2675012 | 81.1785034 | 86.2878521 | 82.122577 |
| 17:04:52 | 0:03:50 | 70.2188035 | 84.2675012 | 80.1785034 | 86.2878521 | 82.122577 |
| 17:04:53 | 0:03:51 | 70.2188035 | 81.2675012 | 80.1785034 | 88.2878521 | 82.122577 |
| 17:04:54 | 0:03:52 | 69.2188035 | 81.2675012 | 79.1785034 | 89.2878521 | 82.122577 |
| 17:04:55 | 0:03:53 | 69.2188035 | 80.2675012 | 79.1785034 | 89.2878521 | 82.122577 |
| 17:04:56 | 0:03:54 | 69.2188035 | 80.2675012 | 79.1785034 | 89.2878521 | 82.122577 |
| 17:04:57 | 0:03:55 | 69.2188035 | 80.2675012 | 79.1785034 | 89.2878521 | 84.122577 |
| 17:04:58 | 0:03:56 | 69.2188035 | 80.2675012 | 79.1785034 | 89.2878521 | 84.122577 |
| 17:04:59 | 0:03:57 | 71.2188035 | 79.2675012 | 79.1785034 | 89.2878521 | 84.122577 |
| 17:05:00 | 0:03:58 | 71.2188035 | 79.2675012 | 78.1785034 | 88.2878521 | 84.122577 |
| 17:05:01 | 0:03:59 | 72.2188035 | 79.2675012 | 78.1785034 | 87.2878521 | 84.122577 |
| 17:05:02 | 0:04:00 | 72.2188035 | 79.2675012 | 79.1785034 | 87.2878521 | 84.122577 |
| 17:05:03 | 0:04:01 | 72.2188035 | 79.2675012 | 82.1785034 | 86.2878521 | 84.122577 |
| 17:05:04 | 0:04:02 | 72.2188035 | 78.2675012 | 81.1785034 | 86.2878521 | 84.122577 |
| 17:05:05 | 0:04:03 | 72.2188035 | 78.2675012 | 81.1785034 | 90.2878521 | 84.122577 |
| 17:05:06 | 0:04:04 | 72.2188035 | 78.2675012 | 81.1785034 | 90.2878521 | 84.122577 |
| 17:05:07 | 0:04:05 | 72.2188035 | 78.2675012 | 79.1785034 | 88.2878521 | 84.122577 |
| 17:05:08 | 0:04:06 | 72.2188035 | 78.2675012 | 79.1785034 | 88.2878521 | 84.122577 |
| 17:05:09 | 0:04:07 | 72.2188035 | 78.2675012 | 79.1785034 | 88.2878521 | 84.122577 |
| 17:05:10 | 0:04:08 | 72.2188035 | 70.2675012 | 79.1785034 | 88.2878521 | 84.122577 |
| 17:05:11 | 0:04:09 | 72.2188035 | 69.2675012 | 79.1785034 | 88.2878521 | 85.122577 |
| 17:05:12 | 0:04:10 | 71.2188035 | 70.2675012 | 78.1785034 | 88.2878521 | 85.122577 |
| 17:05:13 | 0:04:11 | 71.2188035 | 72.2675012 | 77.1785034 | 85.2878521 | 86.122577 |
| 17:05:14 | 0:04:12 | 71.2188035 | 72.2675012 | 75.1785034 | 85.2878521 | 86.122577 |
| 17:05:15 | 0:04:13 | 71.2188035 | 80.2675012 | 75.1785034 | 84.2878521 | 87.122577 |
| 17:05:16 | 0:04:14 | 75.2188035 | 84.2675012 | 75.1785034 | 84.2878521 | 86.122577 |
| 17:05:17 | 0:04:15 | 75.2188035 | 85.2675012 | 76.1785034 | 84.2878521 | 77.122577 |
| 17:05:18 | 0:04:16 | 75.2188035 | 85.2675012 | 77.1785034 | 84.2878521 | 75.122577 |
| 17:05:19 | 0:04:17 | 74.2188035 | 83.2675012 | 79.1785034 | 83.2878521 | 75.122577 |
| 17:05:20 | 0:04:18 | 74.2188035 | 81.2675012 | 81.1785034 | 82.2878521 | 75.122577 |
| 17:05:21 | 0:04:19 | 72.2188035 | 81.2675012 | 81.1785034 | 82.2878521 | 75.122577 |
| 17:05:22 | 0:04:20 | 72.2188035 | 77.2675012 | 80.1785034 | 80.2878521 | 76.122577 |
| 17:05:23 | 0:04:21 | 71.2188035 | 77.2675012 | 80.1785034 | 78.2878521 | 76.122577 |
| 17:05:24 | 0:04:22 | 71.2188035 | 79.2675012 | 79.1785034 | 80.2878521 | 77.122577 |
| 17:05:25 | 0:04:23 | 71.2188035 | 80.2675012 | 78.1785034 | 80.2878521 | 77.122577 |
| 17:05:26 | 0:04:24 | 71.2188035 | 81.2675012 | 78.1785034 | 83.2878521 | 76.122577 |
| 17:05:27 | 0:04:25 | 72.2188035 | 82.2675012 | 76.1785034 | 84.2878521 | 76.122577 |
| 17:05:28 | 0:04:26 | 72.2188035 | 82.2675012 | 76.1785034 | 84.2878521 | 77.122577 |

|          |         |            |            |            |            |           |
|----------|---------|------------|------------|------------|------------|-----------|
| 17:05:29 | 0:04:27 | 72.2188035 | 79.2675012 | 76.1785034 | 84.2878521 | 78.122577 |
| 17:05:30 | 0:04:28 | 72.2188035 | 78.2675012 | 76.1785034 | 85.2878521 | 78.122577 |
| 17:05:31 | 0:04:29 | 72.2188035 | 77.2675012 | 76.1785034 | 83.2878521 | 78.122577 |
| 17:05:32 | 0:04:30 | 73.2188035 | 77.2675012 | 75.1785034 | 83.2878521 | 77.122577 |
| 17:05:33 | 0:04:31 | 73.2188035 | 78.2675012 | 75.1785034 | 81.2878521 | 77.122577 |
| 17:05:34 | 0:04:32 | 73.2188035 | 79.2675012 | 75.1785034 | 80.2878521 | 75.122577 |
| 17:05:35 | 0:04:33 | 73.2188035 | 80.2675012 | 77.1785034 | 80.2878521 | 74.122577 |
| 17:05:36 | 0:04:34 | 72.2188035 | 80.2675012 | 76.1785034 | 80.2878521 | 74.122577 |
| 17:05:37 | 0:04:35 | 72.2188035 | 80.2675012 | 76.1785034 | 82.2878521 | 74.122577 |
| 17:05:38 | 0:04:36 | 72.2188035 | 79.2675012 | 76.1785034 | 82.2878521 | 74.122577 |
| 17:05:39 | 0:04:37 | 72.2188035 | 79.2675012 | 76.1785034 | 82.2878521 | 75.122577 |
| 17:05:40 | 0:04:38 | 73.2188035 | 79.2675012 | 77.1785034 | 82.2878521 | 76.122577 |
| 17:05:41 | 0:04:39 | 73.2188035 | 79.2675012 | 77.1785034 | 82.2878521 | 76.122577 |
| 17:05:42 | 0:04:40 | 73.2188035 | 78.2675012 | 77.1785034 | 82.2878521 | 80.122577 |
| 17:05:43 | 0:04:41 | 73.2188035 | 78.2675012 | 83.1785034 | 82.2878521 | 81.122577 |
| 17:05:44 | 0:04:42 | 73.2188035 | 79.2675012 | 83.1785034 | 82.2878521 | 80.122577 |
| 17:05:45 | 0:04:43 | 74.2188035 | 79.2675012 | 83.1785034 | 82.2878521 | 79.122577 |
| 17:05:46 | 0:04:44 | 74.2188035 | 79.2675012 | 82.1785034 | 82.2878521 | 79.122577 |
| 17:05:47 | 0:04:45 | 74.2188035 | 79.2675012 | 80.1785034 | 82.2878521 | 77.122577 |
| 17:05:48 | 0:04:46 | 76.2188035 | 80.2675012 | 78.1785034 | 82.2878521 | 75.122577 |
| 17:05:49 | 0:04:47 | 76.2188035 | 80.2675012 | 78.1785034 | 82.2878521 | 75.122577 |
| 17:05:50 | 0:04:48 | 76.2188035 | 78.2675012 | 77.1785034 | 83.2878521 | 74.122577 |
| 17:05:51 | 0:04:49 | 76.2188035 | 78.2675012 | 77.1785034 | 84.2878521 | 74.122577 |
| 17:05:52 | 0:04:50 | 75.2188035 | 79.2675012 | 77.1785034 | 88.2878521 | 74.122577 |
| 17:05:53 | 0:04:51 | 75.2188035 | 80.2675012 | 77.1785034 | 89.2878521 | 74.122577 |
| 17:05:54 | 0:04:52 | 75.2188035 | 81.2675012 | 77.1785034 | 89.2878521 | 73.122577 |
| 17:05:55 | 0:04:53 | 75.2188035 | 81.2675012 | 76.1785034 | 91.2878521 | 73.122577 |
| 17:05:56 | 0:04:54 | 75.2188035 | 83.2675012 | 76.1785034 | 92.2878521 | 73.122577 |
| 17:05:57 | 0:04:55 | 75.2188035 | 84.2675012 | 76.1785034 | 93.2878521 | 72.122577 |
| 17:05:58 | 0:04:56 | 74.2188035 | 84.2675012 | 77.1785034 | 93.2878521 | 68.122577 |
| 17:05:59 | 0:04:57 | 74.2188035 | 84.2675012 | 77.1785034 | 92.2878521 | 67.122577 |
| 17:06:00 | 0:04:58 | 74.2188035 | 84.2675012 | 77.1785034 | 92.2878521 | 67.122577 |
| 17:06:01 | 0:04:59 | 74.2188035 | 83.2675012 | 77.1785034 | 91.2878521 | 67.122577 |
| 17:06:02 | 0:05:00 | 75.2188035 | 83.2675012 | 77.1785034 | 86.2878521 | 64.122577 |
| 17:06:03 | 0:05:01 | 75.2188035 | 83.2675012 | 77.1785034 | 86.2878521 | 64.122577 |
| 17:06:04 | 0:05:02 | 76.2188035 | 86.2675012 | 77.1785034 | 85.2878521 | 64.122577 |
| 17:06:05 | 0:05:03 | 76.2188035 | 85.2675012 | 77.1785034 | 85.2878521 | 64.122577 |
| 17:06:06 | 0:05:04 | 77.2188035 | 84.2675012 | 77.1785034 | 84.2878521 | 64.122577 |
| 17:06:07 | 0:05:05 | 78.2188035 | 83.2675012 | 77.1785034 | 83.2878521 | 64.122577 |
| 17:06:08 | 0:05:06 | 78.2188035 | 83.2675012 | 77.1785034 | 84.2878521 | 64.122577 |
| 17:06:09 | 0:05:07 | 78.2188035 | 81.2675012 | 78.1785034 | 84.2878521 | 64.122577 |
| 17:06:10 | 0:05:08 | 78.2188035 | 80.2675012 | 79.1785034 | 83.2878521 | 65.122577 |
| 17:06:11 | 0:05:09 | 78.2188035 | 78.2675012 | 80.1785034 | 82.2878521 | 65.122577 |
| 17:06:12 | 0:05:10 | 78.2188035 | 78.2675012 | 81.1785034 | 80.2878521 | 65.122577 |
| 17:06:13 | 0:05:11 | 78.2188035 | 77.2675012 | 81.1785034 | 80.2878521 | 65.122577 |



|          |         |            |            |            |            |           |
|----------|---------|------------|------------|------------|------------|-----------|
| 17:06:14 | 0:05:12 | 77.2188035 | 77.2675012 | 79.1785034 | 80.2878521 | 68.122577 |
| 17:06:15 | 0:05:13 | 77.2188035 | 79.2675012 | 76.1785034 | 80.2878521 | 68.122577 |
| 17:06:16 | 0:05:14 | 77.2188035 | 80.2675012 | 76.1785034 | 82.2878521 | 68.122577 |
| 17:06:17 | 0:05:15 | 77.2188035 | 77.2675012 | 72.1785034 | 82.2878521 | 73.122577 |
| 17:06:18 | 0:05:16 | 77.2188035 | 72.2675012 | 71.1785034 | 82.2878521 | 73.122577 |
| 17:06:19 | 0:05:17 | 77.2188035 | 72.2675012 | 70.1785034 | 80.2878521 | 73.122577 |
| 17:06:20 | 0:05:18 | 77.2188035 | 71.2675012 | 69.1785034 | 79.2878521 | 73.122577 |
| 17:06:21 | 0:05:19 | 77.2188035 | 71.2675012 | 69.1785034 | 76.2878521 | 73.122577 |
| 17:06:22 | 0:05:20 | 77.2188035 | 71.2675012 | 70.1785034 | 76.2878521 | 74.122577 |
| 17:06:23 | 0:05:21 | 76.2188035 | 74.2675012 | 70.1785034 | 76.2878521 | 74.122577 |
| 17:06:24 | 0:05:22 | 76.2188035 | 75.2675012 | 73.1785034 | 76.2878521 | 74.122577 |
| 17:06:25 | 0:05:23 | 77.2188035 | 77.2675012 | 75.1785034 | 82.2878521 | 74.122577 |
| 17:06:26 | 0:05:24 | 78.2188035 | 76.2675012 | 75.1785034 | 82.2878521 | 74.122577 |
| 17:06:27 | 0:05:25 | 78.2188035 | 76.2675012 | 75.1785034 | 85.2878521 | 74.122577 |
| 17:06:28 | 0:05:26 | 78.2188035 | 77.2675012 | 76.1785034 | 89.2878521 | 74.122577 |
| 17:06:29 | 0:05:27 | 78.2188035 | 77.2675012 | 76.1785034 | 90.2878521 | 74.122577 |
| 17:06:30 | 0:05:28 | 78.2188035 | 78.2675012 | 77.1785034 | 91.2878521 | 74.122577 |
| 17:06:31 | 0:05:29 | 77.2188035 | 80.2675012 | 77.1785034 | 91.2878521 | 74.122577 |
| 17:06:32 | 0:05:30 | 77.2188035 | 81.2675012 | 78.1785034 | 90.2878521 | 74.122577 |
| 17:06:33 | 0:05:31 | 76.2188035 | 81.2675012 | 77.1785034 | 90.2878521 | 74.122577 |
| 17:06:34 | 0:05:32 | 76.2188035 | 80.2675012 | 77.1785034 | 90.2878521 | 75.122577 |
| 17:06:35 | 0:05:33 | 76.2188035 | 79.2675012 | 77.1785034 | 90.2878521 | 76.122577 |
| 17:06:36 | 0:05:34 | 76.2188035 | 79.2675012 | 77.1785034 | 90.2878521 | 75.122577 |
| 17:06:37 | 0:05:35 | 77.2188035 | 79.2675012 | 77.1785034 | 89.2878521 | 74.122577 |
| 17:06:38 | 0:05:36 | 76.2188035 | 79.2675012 | 77.1785034 | 89.2878521 | 74.122577 |
| 17:06:39 | 0:05:37 | 76.2188035 | 79.2675012 | 77.1785034 | 88.2878521 | 74.122577 |
| 17:06:40 | 0:05:38 | 76.2188035 | 79.2675012 | 77.1785034 | 88.2878521 | 74.122577 |
| 17:06:41 | 0:05:39 | 77.2188035 | 79.2675012 | 77.1785034 | 87.2878521 | 74.122577 |
| 17:06:42 | 0:05:40 | 77.2188035 | 79.2675012 | 77.1785034 | 86.2878521 | 74.122577 |
| 17:06:43 | 0:05:41 | 77.2188035 | 80.2675012 | 76.1785034 | 85.2878521 | 74.122577 |
| 17:06:44 | 0:05:42 | 78.2188035 | 81.2675012 | 77.1785034 | 85.2878521 | 74.122577 |
| 17:06:45 | 0:05:43 | 78.2188035 | 81.2675012 | 77.1785034 | 85.2878521 | 75.122577 |
| 17:06:46 | 0:05:44 | 79.2188035 | 81.2675012 | 77.1785034 | 85.2878521 | 75.122577 |
| 17:06:47 | 0:05:45 | 79.2188035 | 81.2675012 | 76.1785034 | 85.2878521 | 75.122577 |
| 17:06:48 | 0:05:46 | 78.2188035 | 82.2675012 | 76.1785034 | 84.2878521 | 75.122577 |
| 17:06:49 | 0:05:47 | 78.2188035 | 82.2675012 | 76.1785034 | 84.2878521 | 77.122577 |
| 17:06:50 | 0:05:48 | 78.2188035 | 82.2675012 | 77.1785034 | 86.2878521 | 77.122577 |
| 17:06:51 | 0:05:49 | 78.2188035 | 82.2675012 | 78.1785034 | 86.2878521 | 77.122577 |
| 17:06:52 | 0:05:50 | 78.2188035 | 82.2675012 | 79.1785034 | 87.2878521 | 77.122577 |
| 17:06:53 | 0:05:51 | 78.2188035 | 80.2675012 | 80.1785034 | 89.2878521 | 77.122577 |
| 17:06:54 | 0:05:52 | 78.2188035 | 80.2675012 | 80.1785034 | 89.2878521 | 77.122577 |
| 17:06:55 | 0:05:53 | 78.2188035 | 79.2675012 | 80.1785034 | 89.2878521 | 77.122577 |
| 17:06:56 | 0:05:54 | 78.2188035 | 79.2675012 | 82.1785034 | 89.2878521 | 77.122577 |
| 17:06:57 | 0:05:55 | 78.2188035 | 81.2675012 | 82.1785034 | 89.2878521 | 78.122577 |
| 17:06:58 | 0:05:56 | 78.2188035 | 81.2675012 | 82.1785034 | 87.2878521 | 78.122577 |

|          |         |            |            |            |            |           |
|----------|---------|------------|------------|------------|------------|-----------|
| 17:06:59 | 0:05:57 | 78.2188035 | 82.2675012 | 81.1785034 | 87.2878521 | 78.122577 |
| 17:07:00 | 0:05:58 | 78.2188035 | 81.2675012 | 80.1785034 | 86.2878521 | 79.122577 |
| 17:07:01 | 0:05:59 | 78.2188035 | 80.2675012 | 80.1785034 | 86.2878521 | 81.122577 |
| 17:07:02 | 0:06:00 | 79.2188035 | 80.2675012 | 80.1785034 | 81.2878521 | 81.122577 |
| 17:07:03 | 0:06:01 | 79.2188035 | 79.2675012 | 81.1785034 | 80.2878521 | 81.122577 |
| 17:07:04 | 0:06:02 | 80.2188035 | 79.2675012 | 82.1785034 | 79.2878521 | 81.122577 |
| 17:07:05 | 0:06:03 | 80.2188035 | 79.2675012 | 82.1785034 | 79.2878521 | 80.122577 |
| 17:07:06 | 0:06:04 | 77.2188035 | 79.2675012 | 83.1785034 | 77.2878521 | 80.122577 |
| 17:07:07 | 0:06:05 | 77.2188035 | 78.2675012 | 83.1785034 | 77.2878521 | 79.122577 |
| 17:07:08 | 0:06:06 | 77.2188035 | 78.2675012 | 82.1785034 | 77.2878521 | 79.122577 |
| 17:07:09 | 0:06:07 | 77.2188035 | 78.2675012 | 82.1785034 | 77.2878521 | 79.122577 |
| 17:07:10 | 0:06:08 | 77.2188035 | 78.2675012 | 82.1785034 | 77.2878521 | 80.122577 |
| 17:07:11 | 0:06:09 | 76.2188035 | 79.2675012 | 82.1785034 | 78.2878521 | 80.122577 |
| 17:07:12 | 0:06:10 | 75.2188035 | 79.2675012 | 82.1785034 | 79.2878521 | 79.122577 |
| 17:07:13 | 0:06:11 | 75.2188035 | 79.2675012 | 81.1785034 | 79.2878521 | 79.122577 |
| 17:07:14 | 0:06:12 | 74.2188035 | 77.2675012 | 81.1785034 | 79.2878521 | 80.122577 |
| 17:07:15 | 0:06:13 | 74.2188035 | 77.2675012 | 81.1785034 | 79.2878521 | 80.122577 |
| 17:07:16 | 0:06:14 | 74.2188035 | 77.2675012 | 86.1785034 | 79.2878521 | 80.122577 |
| 17:07:17 | 0:06:15 | 75.2188035 | 78.2675012 | 86.1785034 | 79.2878521 | 83.122577 |
| 17:07:18 | 0:06:16 | 75.2188035 | 79.2675012 | 85.1785034 | 79.2878521 | 84.122577 |
| 17:07:19 | 0:06:17 | 75.2188035 | 80.2675012 | 83.1785034 | 79.2878521 | 83.122577 |
| 17:07:20 | 0:06:18 | 75.2188035 | 81.2675012 | 83.1785034 | 79.2878521 | 78.122577 |
| 17:07:21 | 0:06:19 | 76.2188035 | 81.2675012 | 80.1785034 | 79.2878521 | 78.122577 |
| 17:07:22 | 0:06:20 | 77.2188035 | 81.2675012 | 80.1785034 | 80.2878521 | 75.122577 |
| 17:07:23 | 0:06:21 | 77.2188035 | 80.2675012 | 79.1785034 | 81.2878521 | 75.122577 |
| 17:07:24 | 0:06:22 | 77.2188035 | 80.2675012 | 79.1785034 | 82.2878521 | 75.122577 |
| 17:07:25 | 0:06:23 | 76.2188035 | 80.2675012 | 80.1785034 | 82.2878521 | 75.122577 |
| 17:07:26 | 0:06:24 | 76.2188035 | 81.2675012 | 81.1785034 | 84.2878521 | 75.122577 |
| 17:07:27 | 0:06:25 | 77.2188035 | 82.2675012 | 80.1785034 | 84.2878521 | 75.122577 |
| 17:07:28 | 0:06:26 | 76.2188035 | 82.2675012 | 79.1785034 | 84.2878521 | 75.122577 |
| 17:07:29 | 0:06:27 | 75.2188035 | 82.2675012 | 78.1785034 | 84.2878521 | 74.122577 |
| 17:07:30 | 0:06:28 | 75.2188035 | 82.2675012 | 78.1785034 | 85.2878521 | 75.122577 |
| 17:07:31 | 0:06:29 | 75.2188035 | 82.2675012 | 76.1785034 | 86.2878521 | 77.122577 |
| 17:07:32 | 0:06:30 | 75.2188035 | 82.2675012 | 76.1785034 | 86.2878521 | 77.122577 |
| 17:07:33 | 0:06:31 | 74.2188035 | 82.2675012 | 76.1785034 | 86.2878521 | 78.122577 |
| 17:07:34 | 0:06:32 | 74.2188035 | 81.2675012 | 78.1785034 | 86.2878521 | 82.122577 |
| 17:07:35 | 0:06:33 | 74.2188035 | 81.2675012 | 79.1785034 | 86.2878521 | 82.122577 |
| 17:07:36 | 0:06:34 | 74.2188035 | 82.2675012 | 79.1785034 | 86.2878521 | 82.122577 |
| 17:07:37 | 0:06:35 | 75.2188035 | 82.2675012 | 79.1785034 | 86.2878521 | 80.122577 |
| 17:07:38 | 0:06:36 | 76.2188035 | 83.2675012 | 78.1785034 | 85.2878521 | 79.122577 |
| 17:07:39 | 0:06:37 | 76.2188035 | 84.2675012 | 78.1785034 | 84.2878521 | 78.122577 |
| 17:07:40 | 0:06:38 | 76.2188035 | 84.2675012 | 77.1785034 | 84.2878521 | 78.122577 |
| 17:07:41 | 0:06:39 | 76.2188035 | 85.2675012 | 77.1785034 | 84.2878521 | 78.122577 |
| 17:07:42 | 0:06:40 | 76.2188035 | 84.2675012 | 77.1785034 | 84.2878521 | 76.122577 |
| 17:07:43 | 0:06:41 | 76.2188035 | 81.2675012 | 77.1785034 | 85.2878521 | 76.122577 |

|          |         |            |            |            |            |           |
|----------|---------|------------|------------|------------|------------|-----------|
| 17:07:44 | 0:06:42 | 76.2188035 | 81.2675012 | 77.1785034 | 85.2878521 | 75.122577 |
| 17:07:45 | 0:06:43 | 76.2188035 | 80.2675012 | 77.1785034 | 86.2878521 | 74.122577 |
| 17:07:46 | 0:06:44 | 77.2188035 | 80.2675012 | 79.1785034 | 85.2878521 | 74.122577 |
| 17:07:47 | 0:06:45 | 77.2188035 | 84.2675012 | 79.1785034 | 83.2878521 | 74.122577 |
| 17:07:48 | 0:06:46 | 77.2188035 | 84.2675012 | 79.1785034 | 83.2878521 | 74.122577 |
| 17:07:49 | 0:06:47 | 78.2188035 | 84.2675012 | 78.1785034 | 83.2878521 | 75.122577 |
| 17:07:50 | 0:06:48 | 79.2188035 | 85.2675012 | 78.1785034 | 83.2878521 | 76.122577 |
| 17:07:51 | 0:06:49 | 79.2188035 | 84.2675012 | 77.1785034 | 85.2878521 | 76.122577 |
| 17:07:52 | 0:06:50 | 80.2188035 | 83.2675012 | 76.1785034 | 88.2878521 | 76.122577 |
| 17:07:53 | 0:06:51 | 80.2188035 | 83.2675012 | 76.1785034 | 88.2878521 | 77.122577 |
| 17:07:54 | 0:06:52 | 79.2188035 | 77.2675012 | 76.1785034 | 90.2878521 | 77.122577 |
| 17:07:55 | 0:06:53 | 79.2188035 | 77.2675012 | 76.1785034 | 90.2878521 | 77.122577 |
| 17:07:56 | 0:06:54 | 79.2188035 | 77.2675012 | 78.1785034 | 88.2878521 | 77.122577 |
| 17:07:57 | 0:06:55 | 80.2188035 | 78.2675012 | 79.1785034 | 88.2878521 | 78.122577 |
| 17:07:58 | 0:06:56 | 81.2188035 | 78.2675012 | 79.1785034 | 84.2878521 | 78.122577 |
| 17:07:59 | 0:06:57 | 81.2188035 | 79.2675012 | 78.1785034 | 83.2878521 | 79.122577 |
| 17:08:00 | 0:06:58 | 81.2188035 | 79.2675012 | 77.1785034 | 83.2878521 | 80.122577 |
| 17:08:01 | 0:06:59 | 81.2188035 | 77.2675012 | 76.1785034 | 81.2878521 | 80.122577 |
| 17:08:02 | 0:07:00 | 80.2188035 | 75.2675012 | 76.1785034 | 80.2878521 | 80.122577 |
| 17:08:03 | 0:07:01 | 79.2188035 | 75.2675012 | 76.1785034 | 80.2878521 | 80.122577 |
| 17:08:04 | 0:07:02 | 79.2188035 | 73.2675012 | 76.1785034 | 79.2878521 | 80.122577 |
| 17:08:05 | 0:07:03 | 78.2188035 | 74.2675012 | 76.1785034 | 78.2878521 | 80.122577 |
| 17:08:06 | 0:07:04 | 78.2188035 | 74.2675012 | 76.1785034 | 77.2878521 | 80.122577 |
| 17:08:07 | 0:07:05 | 78.2188035 | 74.2675012 | 76.1785034 | 77.2878521 | 80.122577 |
| 17:08:08 | 0:07:06 | 77.2188035 | 77.2675012 | 77.1785034 | 76.2878521 | 79.122577 |
| 17:08:09 | 0:07:07 | 77.2188035 | 77.2675012 | 77.1785034 | 75.2878521 | 78.122577 |
| 17:08:10 | 0:07:08 | 77.2188035 | 77.2675012 | 76.1785034 | 74.2878521 | 78.122577 |
| 17:08:11 | 0:07:09 | 77.2188035 | 77.2675012 | 76.1785034 | 74.2878521 | 77.122577 |
| 17:08:12 | 0:07:10 | 77.2188035 | 78.2675012 | 76.1785034 | 74.2878521 | 76.122577 |
| 17:08:13 | 0:07:11 | 77.2188035 | 80.2675012 | 76.1785034 | 74.2878521 | 75.122577 |
| 17:08:14 | 0:07:12 | 76.2188035 | 81.2675012 | 77.1785034 | 74.2878521 | 75.122577 |
| 17:08:15 | 0:07:13 | 76.2188035 | 82.2675012 | 77.1785034 | 74.2878521 | 75.122577 |
| 17:08:16 | 0:07:14 | 76.2188035 | 82.2675012 | 78.1785034 | 76.2878521 | 75.122577 |
| 17:08:17 | 0:07:15 | 76.2188035 | 80.2675012 | 78.1785034 | 76.2878521 | 75.122577 |
| 17:08:18 | 0:07:16 | 76.2188035 | 79.2675012 | 78.1785034 | 76.2878521 | 75.122577 |
| 17:08:19 | 0:07:17 | 76.2188035 | 78.2675012 | 80.1785034 | 76.2878521 | 75.122577 |
| 17:08:20 | 0:07:18 | 75.2188035 | 76.2675012 | 79.1785034 | 77.2878521 | 75.122577 |
| 17:08:21 | 0:07:19 | 76.2188035 | 76.2675012 | 79.1785034 | 77.2878521 | 74.122577 |
| 17:08:22 | 0:07:20 | 76.2188035 | 76.2675012 | 81.1785034 | 77.2878521 | 74.122577 |
| 17:08:23 | 0:07:21 | 76.2188035 | 76.2675012 | 80.1785034 | 79.2878521 | 74.122577 |
| 17:08:24 | 0:07:22 | 76.2188035 | 77.2675012 | 78.1785034 | 79.2878521 | 75.122577 |
| 17:08:25 | 0:07:23 | 77.2188035 | 77.2675012 | 77.1785034 | 80.2878521 | 75.122577 |
| 17:08:26 | 0:07:24 | 77.2188035 | 77.2675012 | 76.1785034 | 80.2878521 | 75.122577 |
| 17:08:27 | 0:07:25 | 77.2188035 | 77.2675012 | 76.1785034 | 78.2878521 | 76.122577 |
| 17:08:28 | 0:07:26 | 78.2188035 | 77.2675012 | 76.1785034 | 78.2878521 | 76.122577 |

|          |         |            |            |            |            |           |
|----------|---------|------------|------------|------------|------------|-----------|
| 17:08:29 | 0:07:27 | 78.2188035 | 78.2675012 | 77.1785034 | 79.2878521 | 76.122577 |
| 17:08:30 | 0:07:28 | 78.2188035 | 79.2675012 | 77.1785034 | 79.2878521 | 77.122577 |
| 17:08:31 | 0:07:29 | 78.2188035 | 71.2675012 | 77.1785034 | 79.2878521 | 78.122577 |
| 17:08:32 | 0:07:30 | 79.2188035 | 71.2675012 | 77.1785034 | 79.2878521 | 78.122577 |
| 17:08:33 | 0:07:31 | 79.2188035 | 67.2675012 | 78.1785034 | 79.2878521 | 79.122577 |
| 17:08:34 | 0:07:32 | 80.2188035 | 66.2675012 | 79.1785034 | 79.2878521 | 79.122577 |
| 17:08:35 | 0:07:33 | 85.2188035 | 66.2675012 | 80.1785034 | 77.2878521 | 79.122577 |
| 17:08:36 | 0:07:34 | 85.2188035 | 69.2675012 | 80.1785034 | 75.2878521 | 79.122577 |
| 17:08:37 | 0:07:35 | 85.2188035 | 74.2675012 | 85.1785034 | 74.2878521 | 79.122577 |
| 17:08:38 | 0:07:36 | 82.2188035 | 75.2675012 | 85.1785034 | 74.2878521 | 79.122577 |
| 17:08:39 | 0:07:37 | 79.2188035 | 75.2675012 | 85.1785034 | 74.2878521 | 78.122577 |
| 17:08:40 | 0:07:38 | 79.2188035 | 74.2675012 | 86.1785034 | 74.2878521 | 78.122577 |
| 17:08:41 | 0:07:39 | 79.2188035 | 74.2675012 | 85.1785034 | 75.2878521 | 78.122577 |
| 17:08:42 | 0:07:40 | 79.2188035 | 74.2675012 | 85.1785034 | 75.2878521 | 78.122577 |
| 17:08:43 | 0:07:41 | 81.2188035 | 75.2675012 | 77.1785034 | 75.2878521 | 79.122577 |
| 17:08:44 | 0:07:42 | 83.2188035 | 77.2675012 | 76.1785034 | 75.2878521 | 79.122577 |
| 17:08:45 | 0:07:43 | 83.2188035 | 78.2675012 | 76.1785034 | 75.2878521 | 78.122577 |
| 17:08:46 | 0:07:44 | 82.2188035 | 79.2675012 | 76.1785034 | 76.2878521 | 78.122577 |
| 17:08:47 | 0:07:45 | 81.2188035 | 79.2675012 | 77.1785034 | 76.2878521 | 78.122577 |
| 17:08:48 | 0:07:46 | 79.2188035 | 79.2675012 | 79.1785034 | 76.2878521 | 79.122577 |
| 17:08:49 | 0:07:47 | 79.2188035 | 80.2675012 | 79.1785034 | 76.2878521 | 79.122577 |
| 17:08:50 | 0:07:48 | 78.2188035 | 83.2675012 | 79.1785034 | 76.2878521 | 80.122577 |
| 17:08:51 | 0:07:49 | 77.2188035 | 83.2675012 | 76.1785034 | 76.2878521 | 81.122577 |
| 17:08:52 | 0:07:50 | 77.2188035 | 85.2675012 | 74.1785034 | 77.2878521 | 81.122577 |
| 17:08:53 | 0:07:51 | 78.2188035 | 86.2675012 | 74.1785034 | 77.2878521 | 80.122577 |
| 17:08:54 | 0:07:52 | 78.2188035 | 85.2675012 | 75.1785034 | 77.2878521 | 79.122577 |
| 17:08:55 | 0:07:53 | 78.2188035 | 83.2675012 | 76.1785034 | 77.2878521 | 79.122577 |
| 17:08:56 | 0:07:54 | 77.2188035 | 83.2675012 | 77.1785034 | 77.2878521 | 79.122577 |
| 17:08:57 | 0:07:55 | 77.2188035 | 83.2675012 | 77.1785034 | 77.2878521 | 77.122577 |
| 17:08:58 | 0:07:56 | 77.2188035 | 83.2675012 | 77.1785034 | 77.2878521 | 76.122577 |
| 17:08:59 | 0:07:57 | 77.2188035 | 84.2675012 | 79.1785034 | 78.2878521 | 75.122577 |
| 17:09:00 | 0:07:58 | 77.2188035 | 84.2675012 | 81.1785034 | 78.2878521 | 77.122577 |
| 17:09:01 | 0:07:59 | 77.2188035 | 84.2675012 | 81.1785034 | 78.2878521 | 78.122577 |
| 17:09:02 | 0:08:00 | 77.2188035 | 82.2675012 | 82.1785034 | 78.2878521 | 78.122577 |
| 17:09:03 | 0:08:01 | 77.2188035 | 81.2675012 | 82.1785034 | 78.2878521 | 78.122577 |
| 17:09:04 | 0:08:02 | 78.2188035 | 81.2675012 | 82.1785034 | 78.2878521 | 78.122577 |
| 17:09:05 | 0:08:03 | 78.2188035 | 80.2675012 | 76.1785034 | 78.2878521 | 78.122577 |
| 17:09:06 | 0:08:04 | 78.2188035 | 80.2675012 | 74.1785034 | 87.2878521 | 75.122577 |
| 17:09:07 | 0:08:05 | 80.2188035 | 80.2675012 | 74.1785034 | 89.2878521 | 74.122577 |
| 17:09:08 | 0:08:06 | 80.2188035 | 80.2675012 | 74.1785034 | 91.2878521 | 72.122577 |
| 17:09:09 | 0:08:07 | 80.2188035 | 80.2675012 | 75.1785034 | 91.2878521 | 72.122577 |
| 17:09:10 | 0:08:08 | 80.2188035 | 80.2675012 | 75.1785034 | 93.2878521 | 72.122577 |
| 17:09:11 | 0:08:09 | 78.2188035 | 80.2675012 | 76.1785034 | 93.2878521 | 72.122577 |
| 17:09:12 | 0:08:10 | 78.2188035 | 81.2675012 | 76.1785034 | 92.2878521 | 72.122577 |
| 17:09:13 | 0:08:11 | 78.2188035 | 81.2675012 | 76.1785034 | 92.2878521 | 72.122577 |

|          |         |            |            |            |            |           |
|----------|---------|------------|------------|------------|------------|-----------|
| 17:09:14 | 0:08:12 | 78.2188035 | 82.2675012 | 76.1785034 | 92.2878521 | 72.122577 |
| 17:09:15 | 0:08:13 | 78.2188035 | 82.2675012 | 76.1785034 | 92.2878521 | 72.122577 |
| 17:09:16 | 0:08:14 | 78.2188035 | 82.2675012 | 76.1785034 | 91.2878521 | 72.122577 |
| 17:09:17 | 0:08:15 | 78.2188035 | 82.2675012 | 76.1785034 | 91.2878521 | 72.122577 |
| 17:09:18 | 0:08:16 | 76.2188035 | 82.2675012 | 76.1785034 | 91.2878521 | 72.122577 |
| 17:09:19 | 0:08:17 | 76.2188035 | 82.2675012 | 78.1785034 | 91.2878521 | 73.122577 |
| 17:09:20 | 0:08:18 | 76.2188035 | 82.2675012 | 79.1785034 | 91.2878521 | 80.122577 |
| 17:09:21 | 0:08:19 | 77.2188035 | 83.2675012 | 79.1785034 | 91.2878521 | 81.122577 |
| 17:09:22 | 0:08:20 | 77.2188035 | 85.2675012 | 78.1785034 | 91.2878521 | 83.122577 |
| 17:09:23 | 0:08:21 | 80.2188035 | 85.2675012 | 78.1785034 | 88.2878521 | 85.122577 |
| 17:09:24 | 0:08:22 | 80.2188035 | 84.2675012 | 76.1785034 | 88.2878521 | 85.122577 |
| 17:09:25 | 0:08:23 | 79.2188035 | 82.2675012 | 76.1785034 | 88.2878521 | 87.122577 |
| 17:09:26 | 0:08:24 | 78.2188035 | 81.2675012 | 76.1785034 | 88.2878521 | 91.122577 |
| 17:09:27 | 0:08:25 | 76.2188035 | 81.2675012 | 77.1785034 | 87.2878521 | 91.122577 |
| 17:09:28 | 0:08:26 | 76.2188035 | 82.2675012 | 77.1785034 | 87.2878521 | 93.122577 |
| 17:09:29 | 0:08:27 | 77.2188035 | 82.2675012 | 79.1785034 | 86.2878521 | 93.122577 |
| 17:09:30 | 0:08:28 | 76.2188035 | 82.2675012 | 79.1785034 | 85.2878521 | 93.122577 |
| 17:09:31 | 0:08:29 | 76.2188035 | 83.2675012 | 79.1785034 | 85.2878521 | 94.122577 |
| 17:09:32 | 0:08:30 | 76.2188035 | 82.2675012 | 80.1785034 | 87.2878521 | 93.122577 |
| 17:09:33 | 0:08:31 | 76.2188035 | 82.2675012 | 81.1785034 | 86.2878521 | 90.122577 |
| 17:09:34 | 0:08:32 | 76.2188035 | 82.2675012 | 81.1785034 | 86.2878521 | 90.122577 |
| 17:09:35 | 0:08:33 | 76.2188035 | 83.2675012 | 80.1785034 | 84.2878521 | 89.122577 |
| 17:09:36 | 0:08:34 | 76.2188035 | 83.2675012 | 80.1785034 | 84.2878521 | 89.122577 |
| 17:09:37 | 0:08:35 | 76.2188035 | 83.2675012 | 79.1785034 | 83.2878521 | 84.122577 |
| 17:09:38 | 0:08:36 | 76.2188035 | 84.2675012 | 78.1785034 | 84.2878521 | 82.122577 |
| 17:09:39 | 0:08:37 | 76.2188035 | 84.2675012 | 78.1785034 | 84.2878521 | 82.122577 |
| 17:09:40 | 0:08:38 | 77.2188035 | 85.2675012 | 79.1785034 | 84.2878521 | 80.122577 |
| 17:09:41 | 0:08:39 | 76.2188035 | 85.2675012 | 80.1785034 | 84.2878521 | 79.122577 |
| 17:09:42 | 0:08:40 | 76.2188035 | 86.2675012 | 80.1785034 | 80.2878521 | 79.122577 |
| 17:09:43 | 0:08:41 | 76.2188035 | 85.2675012 | 79.1785034 | 80.2878521 | 79.122577 |
| 17:09:44 | 0:08:42 | 76.2188035 | 84.2675012 | 79.1785034 | 80.2878521 | 79.122577 |
| 17:09:45 | 0:08:43 | 76.2188035 | 84.2675012 | 79.1785034 | 71.2878521 | 79.122577 |
| 17:09:46 | 0:08:44 | 77.2188035 | 85.2675012 | 78.1785034 | 70.2878521 | 84.122577 |
| 17:09:47 | 0:08:45 | 77.2188035 | 85.2675012 | 78.1785034 | 70.2878521 | 84.122577 |
| 17:09:48 | 0:08:46 | 78.2188035 | 85.2675012 | 78.1785034 | 72.2878521 | 84.122577 |
| 17:09:49 | 0:08:47 | 79.2188035 | 84.2675012 | 78.1785034 | 72.2878521 | 83.122577 |
| 17:09:50 | 0:08:48 | 79.2188035 | 79.2675012 | 78.1785034 | 79.2878521 | 83.122577 |
| 17:09:51 | 0:08:49 | 80.2188035 | 78.2675012 | 79.1785034 | 80.2878521 | 83.122577 |
| 17:09:52 | 0:08:50 | 78.2188035 | 78.2675012 | 80.1785034 | 80.2878521 | 83.122577 |
| 17:09:53 | 0:08:51 | 78.2188035 | 79.2675012 | 79.1785034 | 80.2878521 | 83.122577 |
| 17:09:54 | 0:08:52 | 78.2188035 | 82.2675012 | 79.1785034 | 82.2878521 | 83.122577 |
| 17:09:55 | 0:08:53 | 78.2188035 | 82.2675012 | 78.1785034 | 84.2878521 | 84.122577 |
| 17:09:56 | 0:08:54 | 78.2188035 | 82.2675012 | 78.1785034 | 85.2878521 | 84.122577 |
| 17:09:57 | 0:08:55 | 78.2188035 | 80.2675012 | 78.1785034 | 85.2878521 | 84.122577 |
| 17:09:58 | 0:08:56 | 79.2188035 | 78.2675012 | 78.1785034 | 88.2878521 | 87.122577 |

|          |         |            |            |            |            |           |
|----------|---------|------------|------------|------------|------------|-----------|
| 17:09:59 | 0:08:57 | 80.2188035 | 77.2675012 | 78.1785034 | 88.2878521 | 87.122577 |
| 17:10:00 | 0:08:58 | 80.2188035 | 77.2675012 | 78.1785034 | 87.2878521 | 85.122577 |
| 17:10:01 | 0:08:59 | 80.2188035 | 78.2675012 | 78.1785034 | 87.2878521 | 85.122577 |
| 17:10:02 | 0:09:00 | 80.2188035 | 80.2675012 | 78.1785034 | 86.2878521 | 85.122577 |
| 17:10:03 | 0:09:01 | 80.2188035 | 80.2675012 | 78.1785034 | 86.2878521 | 79.122577 |
| 17:10:04 | 0:09:02 | 79.2188035 | 81.2675012 | 78.1785034 | 85.2878521 | 76.122577 |
| 17:10:05 | 0:09:03 | 78.2188035 | 81.2675012 | 79.1785034 | 85.2878521 | 76.122577 |
| 17:10:06 | 0:09:04 | 78.2188035 | 81.2675012 | 79.1785034 | 85.2878521 | 76.122577 |
| 17:10:07 | 0:09:05 | 78.2188035 | 80.2675012 | 79.1785034 | 85.2878521 | 72.122577 |
| 17:10:08 | 0:09:06 | 78.2188035 | 80.2675012 | 79.1785034 | 85.2878521 | 72.122577 |
| 17:10:09 | 0:09:07 | 77.2188035 | 80.2675012 | 79.1785034 | 84.2878521 | 71.122577 |
| 17:10:10 | 0:09:08 | 77.2188035 | 80.2675012 | 80.1785034 | 81.2878521 | 71.122577 |
| 17:10:11 | 0:09:09 | 77.2188035 | 83.2675012 | 80.1785034 | 77.2878521 | 72.122577 |
| 17:10:12 | 0:09:10 | 78.2188035 | 84.2675012 | 80.1785034 | 77.2878521 | 73.122577 |
| 17:10:13 | 0:09:11 | 78.2188035 | 84.2675012 | 81.1785034 | 77.2878521 | 73.122577 |
| 17:10:14 | 0:09:12 | 78.2188035 | 84.2675012 | 82.1785034 | 76.2878521 | 73.122577 |
| 17:10:15 | 0:09:13 | 78.2188035 | 84.2675012 | 82.1785034 | 76.2878521 | 73.122577 |
| 17:10:16 | 0:09:14 | 78.2188035 | 84.2675012 | 81.1785034 | 76.2878521 | 72.122577 |
| 17:10:17 | 0:09:15 | 79.2188035 | 84.2675012 | 81.1785034 | 76.2878521 | 72.122577 |
| 17:10:18 | 0:09:16 | 79.2188035 | 87.2675012 | 81.1785034 | 76.2878521 | 72.122577 |
| 17:10:19 | 0:09:17 | 80.2188035 | 87.2675012 | 81.1785034 | 76.2878521 | 72.122577 |
| 17:10:20 | 0:09:18 | 80.2188035 | 87.2675012 | 82.1785034 | 75.2878521 | 72.122577 |
| 17:10:21 | 0:09:19 | 79.2188035 | 87.2675012 | 82.1785034 | 77.2878521 | 72.122577 |
| 17:10:22 | 0:09:20 | 78.2188035 | 83.2675012 | 84.1785034 | 77.2878521 | 72.122577 |
| 17:10:23 | 0:09:21 | 77.2188035 | 76.2675012 | 85.1785034 | 77.2878521 | 73.122577 |
| 17:10:24 | 0:09:22 | 77.2188035 | 75.2675012 | 86.1785034 | 77.2878521 | 74.122577 |
| 17:10:25 | 0:09:23 | 76.2188035 | 75.2675012 | 86.1785034 | 76.2878521 | 74.122577 |
| 17:10:26 | 0:09:24 | 75.2188035 | 77.2675012 | 87.1785034 | 76.2878521 | 74.122577 |
| 17:10:27 | 0:09:25 | 75.2188035 | 77.2675012 | 88.1785034 | 76.2878521 | 74.122577 |
| 17:10:28 | 0:09:26 | 75.2188035 | 78.2675012 | 88.1785034 | 74.2878521 | 74.122577 |
| 17:10:29 | 0:09:27 | 73.2188035 | 79.2675012 | 88.1785034 | 74.2878521 | 74.122577 |
| 17:10:30 | 0:09:28 | 73.2188035 | 79.2675012 | 88.1785034 | 74.2878521 | 74.122577 |
| 17:10:31 | 0:09:29 | 73.2188035 | 79.2675012 | 88.1785034 | 73.2878521 | 74.122577 |
| 17:10:32 | 0:09:30 | 73.2188035 | 78.2675012 | 88.1785034 | 73.2878521 | 74.122577 |
| 17:10:33 | 0:09:31 | 73.2188035 | 79.2675012 | 88.1785034 | 73.2878521 | 74.122577 |
| 17:10:34 | 0:09:32 | 73.2188035 | 78.2675012 | 86.1785034 | 72.2878521 | 75.122577 |
| 17:10:35 | 0:09:33 | 74.2188035 | 78.2675012 | 85.1785034 | 73.2878521 | 75.122577 |
| 17:10:36 | 0:09:34 | 73.2188035 | 78.2675012 | 85.1785034 | 73.2878521 | 77.122577 |
| 17:10:37 | 0:09:35 | 73.2188035 | 79.2675012 | 85.1785034 | 73.2878521 | 81.122577 |
| 17:10:38 | 0:09:36 | 73.2188035 | 79.2675012 | 85.1785034 | 73.2878521 | 81.122577 |
| 17:10:39 | 0:09:37 | 73.2188035 | 79.2675012 | 84.1785034 | 73.2878521 | 82.122577 |
| 17:10:40 | 0:09:38 | 73.2188035 | 80.2675012 | 84.1785034 | 74.2878521 | 82.122577 |
| 17:10:41 | 0:09:39 | 73.2188035 | 80.2675012 | 84.1785034 | 74.2878521 | 82.122577 |
| 17:10:42 | 0:09:40 | 73.2188035 | 80.2675012 | 84.1785034 | 74.2878521 | 82.122577 |
| 17:10:43 | 0:09:41 | 74.2188035 | 78.2675012 | 84.1785034 | 75.2878521 | 87.122577 |

|          |         |            |            |            |            |            |
|----------|---------|------------|------------|------------|------------|------------|
| 17:10:44 | 0:09:42 | 74.2188035 | 77.2675012 | 84.1785034 | 75.2878521 | 87.122577  |
| 17:10:45 | 0:09:43 | 74.2188035 | 77.2675012 | 85.1785034 | 75.2878521 | 87.122577  |
| 17:10:46 | 0:09:44 | 74.2188035 | 74.2675012 | 85.1785034 | 77.2878521 | 88.122577  |
| 17:10:47 | 0:09:45 | 74.2188035 | 74.2675012 | 85.1785034 | 77.2878521 | 89.122577  |
| 17:10:48 | 0:09:46 | 74.2188035 | 76.2675012 | 84.1785034 | 77.2878521 | 89.122577  |
| 17:10:49 | 0:09:47 | 74.2188035 | 76.2675012 | 83.1785034 | 80.2878521 | 90.122577  |
| 17:10:50 | 0:09:48 | 74.2188035 | 76.2675012 | 76.1785034 | 81.2878521 | 92.122577  |
| 17:10:51 | 0:09:49 | 72.2188035 | 76.2675012 | 76.1785034 | 81.2878521 | 93.122577  |
| 17:10:52 | 0:09:50 | 72.2188035 | 73.2675012 | 76.1785034 | 80.2878521 | 93.122577  |
| 17:10:53 | 0:09:51 | 72.2188035 | 72.2675012 | 76.1785034 | 80.2878521 | 93.122577  |
| 17:10:54 | 0:09:52 | 73.2188035 | 73.2675012 | 75.1785034 | 79.2878521 | 93.122577  |
| 17:10:55 | 0:09:53 | 73.2188035 | 73.2675012 | 75.1785034 | 76.2878521 | 92.122577  |
| 17:10:56 | 0:09:54 | 73.2188035 | 74.2675012 | 75.1785034 | 75.2878521 | 92.122577  |
| 17:10:57 | 0:09:55 | 72.2188035 | 76.2675012 | 76.1785034 | 75.2878521 | 92.122577  |
| 17:10:58 | 0:09:56 | 73.2188035 | 76.2675012 | 75.1785034 | 75.2878521 | 92.122577  |
| 17:10:59 | 0:09:57 | 74.2188035 | 76.2675012 | 75.1785034 | 76.2878521 | 93.122577  |
| 17:11:00 | 0:09:58 | 74.2188035 | 76.2675012 | 75.1785034 | 77.2878521 | 93.122577  |
| 17:11:01 | 0:09:59 | 74.2188035 | 77.2675012 | 75.1785034 | 78.2878521 | 93.122577  |
| 17:11:02 | 0:10:00 | 73.2188035 | 77.2675012 | 75.1785034 | 78.2878521 | 93.122577  |
| 17:11:03 | 0:10:01 | 73.2188035 | 77.2675012 | 75.1785034 | 78.2878521 | 93.122577  |
| 17:11:04 | 0:10:02 | 73.2188035 | 80.2675012 | 75.1785034 | 77.2878521 | 94.122577  |
| 17:11:05 | 0:10:03 | 74.2188035 | 80.2675012 | 75.1785034 | 77.2878521 | 80.0251363 |
| 17:11:06 | 0:10:04 | 74.2188035 | 80.2675012 | 75.1785034 | 76.2878521 | 80.1501363 |
| 17:11:07 | 0:10:05 | 74.2188035 | 80.2675012 | 74.1785034 | 76.2878521 | 79.6501363 |
| 17:11:08 | 0:10:06 | 74.2188035 | 80.2675012 | 72.1785034 | 75.2878521 | 79.1501363 |
| 17:11:09 | 0:10:07 | 75.2188035 | 81.2675012 | 72.1785034 | 74.2878521 | 79.6501363 |
| 17:11:10 | 0:10:08 | 75.2188035 | 81.2675012 | 71.1785034 | 73.2878521 | 79.5251363 |
| 17:11:11 | 0:10:09 | 75.2188035 | 81.2675012 | 71.1785034 | 73.2878521 | 79.6501363 |
| 17:11:12 | 0:10:10 | 75.2188035 | 80.2675012 | 70.1785034 | 73.2878521 | 79.7751363 |
| 17:11:13 | 0:10:11 | 76.2188035 | 79.2675012 | 70.1785034 | 73.2878521 | 79.2751363 |
| 17:11:14 | 0:10:12 | 76.2188035 | 80.2675012 | 70.1785034 | 73.2878521 | 79.5251363 |
| 17:11:15 | 0:10:13 | 77.2188035 | 80.2675012 | 70.1785034 | 72.2878521 | 78.6501363 |
| 17:11:16 | 0:10:14 | 78.2188035 | 81.2675012 | 71.1785034 | 73.2878521 | 79.2751363 |
| 17:11:17 | 0:10:15 | 79.2188035 | 82.2675012 | 71.1785034 | 72.2878521 | 79.4001363 |
| 17:11:18 | 0:10:16 | 79.2188035 | 84.2675012 | 70.1785034 | 72.2878521 | 79.5251363 |
| 17:11:19 | 0:10:17 | 79.2188035 | 85.2675012 | 70.1785034 | 72.2878521 | 79.6501363 |
| 17:11:20 | 0:10:18 | 79.2188035 | 86.2675012 | 68.1785034 | 73.2878521 | 80.5251363 |
| 17:11:21 | 0:10:19 | 79.2188035 | 87.2675012 | 72.1785034 | 73.2878521 | 81.4001363 |
| 17:11:22 | 0:10:20 | 78.2188035 | 87.2675012 | 73.1785034 | 74.2878521 | 81.9001363 |
| 17:11:23 | 0:10:21 | 78.2188035 | 87.2675012 | 74.1785034 | 75.2878521 | 83.1501363 |
| 17:11:24 | 0:10:22 | 78.2188035 | 87.2675012 | 74.1785034 | 75.2878521 | 83.1501363 |
| 17:11:25 | 0:10:23 | 78.2188035 | 87.2675012 | 74.1785034 | 80.2878521 | 83.7751363 |
| 17:11:26 | 0:10:24 | 78.2188035 | 88.2675012 | 74.1785034 | 84.2878521 | 84.6501363 |
| 17:11:27 | 0:10:25 | 78.2188035 | 88.2675012 | 74.1785034 | 84.2878521 | 84.5251363 |
| 17:11:28 | 0:10:26 | 79.2188035 | 88.2675012 | 74.1785034 | 84.2878521 | 85.0251363 |

|          |         |            |            |            |            |            |
|----------|---------|------------|------------|------------|------------|------------|
| 17:11:29 | 0:10:27 | 80.2188035 | 87.2675012 | 73.1785034 | 87.2878521 | 85.1501363 |
| 17:11:30 | 0:10:28 | 80.2188035 | 85.2675012 | 73.1785034 | 87.2878521 | 85.0251363 |
| 17:11:31 | 0:10:29 | 79.2188035 | 83.2675012 | 71.1785034 | 89.2878521 | 84.4001363 |
| 17:11:32 | 0:10:30 | 79.2188035 | 83.2675012 | 71.1785034 | 89.2878521 | 84.4001363 |
| 17:11:33 | 0:10:31 | 76.2188035 | 83.2675012 | 70.1785034 | 88.2878521 | 83.7751363 |
| 17:11:34 | 0:10:32 | 76.2188035 | 83.2675012 | 71.1785034 | 87.2878521 | 83.4001363 |
| 17:11:35 | 0:10:33 | 76.2188035 | 81.2675012 | 71.1785034 | 87.2878521 | 83.1501363 |
| 17:11:36 | 0:10:34 | 76.2188035 | 81.2675012 | 73.1785034 | 86.2878521 | 83.2751363 |
| 17:11:37 | 0:10:35 | 76.2188035 | 80.2675012 | 73.1785034 | 86.2878521 | 83.2751363 |
| 17:11:38 | 0:10:36 | 76.2188035 | 79.2675012 | 73.1785034 | 84.2878521 | 83.1501363 |
| 17:11:39 | 0:10:37 | 76.2188035 | 79.2675012 | 73.1785034 | 84.2878521 | 83.2751363 |
| 17:11:40 | 0:10:38 | 76.2188035 | 79.2675012 | 72.1785034 | 81.2878521 | 83.1501363 |
| 17:11:41 | 0:10:39 | 76.2188035 | 79.2675012 | 69.1785034 | 80.2878521 | 82.2751363 |
| 17:11:42 | 0:10:40 | 76.2188035 | 79.2675012 | 69.1785034 | 80.2878521 | 82.1501363 |
| 17:11:43 | 0:10:41 | 76.2188035 | 78.2675012 | 69.1785034 | 79.2878521 | 81.7751363 |
| 17:11:44 | 0:10:42 | 76.2188035 | 79.2675012 | 69.1785034 | 78.2878521 | 81.7751363 |
| 17:11:45 | 0:10:43 | 76.2188035 | 80.2675012 | 69.1785034 | 77.2878521 | 81.7751363 |
| 17:11:46 | 0:10:44 | 75.2188035 | 80.2675012 | 69.1785034 | 75.2878521 | 80.6501363 |
| 17:11:47 | 0:10:45 | 75.2188035 | 80.2675012 | 69.1785034 | 75.2878521 | 80.6501363 |
| 17:11:48 | 0:10:46 | 75.2188035 | 78.2675012 | 72.1785034 | 74.2878521 | 79.9001363 |
| 17:11:49 | 0:10:47 | 75.2188035 | 78.2675012 | 74.1785034 | 74.2878521 | 79.4001363 |
| 17:11:50 | 0:10:48 | 75.2188035 | 76.2675012 | 75.1785034 | 74.2878521 | 78.5251363 |
| 17:11:51 | 0:10:49 | 75.2188035 | 75.2675012 | 74.1785034 | 76.2878521 | 78.5251363 |
| 17:11:52 | 0:10:50 | 79.2188035 | 75.2675012 | 74.1785034 | 76.2878521 | 79.1501363 |
| 17:11:53 | 0:10:51 | 79.2188035 | 75.2675012 | 74.1785034 | 77.2878521 | 79.5251363 |
| 17:11:54 | 0:10:52 | 80.2188035 | 76.2675012 | 75.1785034 | 77.2878521 | 94.122577  |
| 17:11:55 | 0:10:53 | 81.2188035 | 76.2675012 | 76.1785034 | 77.2878521 | 81.122577  |
| 17:11:56 | 0:10:54 | 80.2188035 | 76.2675012 | 77.1785034 | 78.2878521 | 80.122577  |
| 17:11:57 | 0:10:55 | 80.2188035 | 73.2675012 | 77.1785034 | 78.2878521 | 80.122577  |
| 17:11:58 | 0:10:56 | 80.2188035 | 72.2675012 | 77.1785034 | 78.2878521 | 80.122577  |
| 17:11:59 | 0:10:57 | 80.2188035 | 69.2675012 | 77.1785034 | 78.2878521 | 79.122577  |
| 17:12:00 | 0:10:58 | 78.2188035 | 69.2675012 | 77.1785034 | 79.2878521 | 79.122577  |
| 17:12:01 | 0:10:59 | 78.2188035 | 69.2675012 | 77.1785034 | 78.2878521 | 79.122577  |
| 17:12:02 | 0:11:00 | 78.2188035 | 70.2675012 | 76.1785034 | 75.2878521 | 79.122577  |
| 17:12:03 | 0:11:01 | 78.2188035 | 71.2675012 | 76.1785034 | 75.2878521 | 79.122577  |
| 17:12:04 | 0:11:02 | 79.2188035 | 71.2675012 | 76.1785034 | 74.2878521 | 79.122577  |
| 17:12:05 | 0:11:03 | 79.2188035 | 74.2675012 | 76.1785034 | 73.2878521 | 78.122577  |
| 17:12:06 | 0:11:04 | 79.2188035 | 75.2675012 | 77.1785034 | 73.2878521 | 78.122577  |
| 17:12:07 | 0:11:05 | 78.2188035 | 76.2675012 | 77.1785034 | 72.2878521 | 78.122577  |
| 17:12:08 | 0:11:06 | 79.2188035 | 76.2675012 | 77.1785034 | 72.2878521 | 77.122577  |
| 17:12:09 | 0:11:07 | 80.2188035 | 75.2675012 | 77.1785034 | 72.2878521 | 77.122577  |
| 17:12:10 | 0:11:08 | 79.2188035 | 75.2675012 | 77.1785034 | 71.2878521 | 78.122577  |
| 17:12:11 | 0:11:09 | 79.2188035 | 74.2675012 | 78.1785034 | 71.2878521 | 81.122577  |
| 17:12:12 | 0:11:10 | 79.2188035 | 75.2675012 | 80.1785034 | 71.2878521 | 81.122577  |
| 17:12:13 | 0:11:11 | 78.2188035 | 76.2675012 | 81.1785034 | 72.2878521 | 81.122577  |



|          |         |            |            |            |            |           |
|----------|---------|------------|------------|------------|------------|-----------|
| 17:12:14 | 0:11:12 | 76.2188035 | 77.2675012 | 80.1785034 | 72.2878521 | 81.122577 |
| 17:12:15 | 0:11:13 | 76.2188035 | 77.2675012 | 80.1785034 | 72.2878521 | 80.122577 |
| 17:12:16 | 0:11:14 | 76.2188035 | 77.2675012 | 79.1785034 | 73.2878521 | 80.122577 |
| 17:12:17 | 0:11:15 | 75.2188035 | 75.2675012 | 80.1785034 | 74.2878521 | 80.122577 |
| 17:12:18 | 0:11:16 | 75.2188035 | 75.2675012 | 80.1785034 | 74.2878521 | 80.122577 |
| 17:12:19 | 0:11:17 | 75.2188035 | 71.2675012 | 80.1785034 | 74.2878521 | 79.122577 |
| 17:12:20 | 0:11:18 | 77.2188035 | 71.2675012 | 80.1785034 | 74.2878521 | 79.122577 |
| 17:12:21 | 0:11:19 | 77.2188035 | 72.2675012 | 80.1785034 | 75.2878521 | 78.122577 |
| 17:12:22 | 0:11:20 | 77.2188035 | 74.2675012 | 79.1785034 | 75.2878521 | 78.122577 |
| 17:12:23 | 0:11:21 | 76.2188035 | 75.2675012 | 80.1785034 | 76.2878521 | 79.122577 |
| 17:12:24 | 0:11:22 | 74.2188035 | 75.2675012 | 80.1785034 | 77.2878521 | 79.122577 |
| 17:12:25 | 0:11:23 | 74.2188035 | 75.2675012 | 77.1785034 | 77.2878521 | 79.122577 |
| 17:12:26 | 0:11:24 | 74.2188035 | 72.2675012 | 76.1785034 | 77.2878521 | 80.122577 |
| 17:12:27 | 0:11:25 | 74.2188035 | 71.2675012 | 74.1785034 | 77.2878521 | 80.122577 |
| 17:12:28 | 0:11:26 | 75.2188035 | 71.2675012 | 74.1785034 | 79.2878521 | 79.122577 |
| 17:12:29 | 0:11:27 | 76.2188035 | 71.2675012 | 72.1785034 | 79.2878521 | 79.122577 |
| 17:12:30 | 0:11:28 | 77.2188035 | 74.2675012 | 71.1785034 | 78.2878521 | 79.122577 |
| 17:12:31 | 0:11:29 | 77.2188035 | 73.2675012 | 71.1785034 | 78.2878521 | 78.122577 |
| 17:12:32 | 0:11:30 | 76.2188035 | 73.2675012 | 71.1785034 | 78.2878521 | 78.122577 |
| 17:12:33 | 0:11:31 | 76.2188035 | 73.2675012 | 72.1785034 | 78.2878521 | 77.122577 |
| 17:12:34 | 0:11:32 | 76.2188035 | 72.2675012 | 72.1785034 | 79.2878521 | 77.122577 |
| 17:12:35 | 0:11:33 | 75.2188035 | 71.2675012 | 72.1785034 | 79.2878521 | 77.122577 |
| 17:12:36 | 0:11:34 | 75.2188035 | 71.2675012 | 73.1785034 | 80.2878521 | 77.122577 |
| 17:12:37 | 0:11:35 | 75.2188035 | 71.2675012 | 71.1785034 | 80.2878521 | 77.122577 |
| 17:12:38 | 0:11:36 | 74.2188035 | 72.2675012 | 72.1785034 | 80.2878521 | 76.122577 |
| 17:12:39 | 0:11:37 | 73.2188035 | 73.2675012 | 73.1785034 | 80.2878521 | 76.122577 |
| 17:12:40 | 0:11:38 | 73.2188035 | 72.2675012 | 75.1785034 | 79.2878521 | 75.122577 |
| 17:12:41 | 0:11:39 | 73.2188035 | 73.2675012 | 75.1785034 | 77.2878521 | 72.122577 |
| 17:12:42 | 0:11:40 | 73.2188035 | 73.2675012 | 78.1785034 | 77.2878521 | 72.122577 |
| 17:12:43 | 0:11:41 | 74.2188035 | 73.2675012 | 78.1785034 | 77.2878521 | 72.122577 |
| 17:12:44 | 0:11:42 | 78.2188035 | 73.2675012 | 78.1785034 | 77.2878521 | 72.122577 |
| 17:12:45 | 0:11:43 | 80.2188035 | 72.2675012 | 79.1785034 | 77.2878521 | 72.122577 |
| 17:12:46 | 0:11:44 | 80.2188035 | 72.2675012 | 80.1785034 | 78.2878521 | 72.122577 |
| 17:12:47 | 0:11:45 | 80.2188035 | 73.2675012 | 82.1785034 | 78.2878521 | 72.122577 |
| 17:12:48 | 0:11:46 | 80.2188035 | 74.2675012 | 83.1785034 | 78.2878521 | 72.122577 |
| 17:12:49 | 0:11:47 | 79.2188035 | 74.2675012 | 84.1785034 | 80.2878521 | 73.122577 |
| 17:12:50 | 0:11:48 | 78.2188035 | 74.2675012 | 85.1785034 | 81.2878521 | 74.122577 |
| 17:12:51 | 0:11:49 | 76.2188035 | 74.2675012 | 85.1785034 | 81.2878521 | 74.122577 |
| 17:12:52 | 0:11:50 | 74.2188035 | 72.2675012 | 85.1785034 | 81.2878521 | 74.122577 |
| 17:12:53 | 0:11:51 | 74.2188035 | 72.2675012 | 85.1785034 | 81.2878521 | 74.122577 |
| 17:12:54 | 0:11:52 | 74.2188035 | 72.2675012 | 85.1785034 | 81.2878521 | 73.122577 |
| 17:12:55 | 0:11:53 | 74.2188035 | 67.2675012 | 85.1785034 | 81.2878521 | 73.122577 |
| 17:12:56 | 0:11:54 | 75.2188035 | 68.2675012 | 85.1785034 | 83.2878521 | 73.122577 |
| 17:12:57 | 0:11:55 | 75.2188035 | 70.2675012 | 84.1785034 | 83.2878521 | 74.122577 |
| 17:12:58 | 0:11:56 | 74.2188035 | 72.2675012 | 84.1785034 | 84.2878521 | 74.122577 |

|          |         |            |            |            |            |           |
|----------|---------|------------|------------|------------|------------|-----------|
| 17:12:59 | 0:11:57 | 74.2188035 | 74.2675012 | 84.1785034 | 86.2878521 | 74.122577 |
| 17:13:00 | 0:11:58 | 75.2188035 | 75.2675012 | 83.1785034 | 88.2878521 | 74.122577 |
| 17:13:01 | 0:11:59 | 76.2188035 | 77.2675012 | 81.1785034 | 90.2878521 | 73.122577 |
| 17:13:02 | 0:12:00 | 76.2188035 | 78.2675012 | 80.1785034 | 90.2878521 | 73.122577 |
| 17:13:03 | 0:12:01 | 76.2188035 | 79.2675012 | 80.1785034 | 91.2878521 | 73.122577 |
| 17:13:04 | 0:12:02 | 76.2188035 | 80.2675012 | 78.1785034 | 90.2878521 | 73.122577 |
| 17:13:05 | 0:12:03 | 76.2188035 | 80.2675012 | 78.1785034 | 89.2878521 | 73.122577 |
| 17:13:06 | 0:12:04 | 76.2188035 | 81.2675012 | 78.1785034 | 86.2878521 | 73.122577 |
| 17:13:07 | 0:12:05 | 76.2188035 | 81.2675012 | 78.1785034 | 85.2878521 | 73.122577 |
| 17:13:08 | 0:12:06 | 76.2188035 | 81.2675012 | 77.1785034 | 85.2878521 | 73.122577 |
| 17:13:09 | 0:12:07 | 75.2188035 | 81.2675012 | 77.1785034 | 82.2878521 | 76.122577 |
| 17:13:10 | 0:12:08 | 75.2188035 | 81.2675012 | 77.1785034 | 82.2878521 | 76.122577 |
| 17:13:11 | 0:12:09 | 75.2188035 | 82.2675012 | 77.1785034 | 78.2878521 | 77.122577 |
| 17:13:12 | 0:12:10 | 75.2188035 | 82.2675012 | 77.1785034 | 78.2878521 | 77.122577 |
| 17:13:13 | 0:12:11 | 78.2188035 | 83.2675012 | 73.1785034 | 77.2878521 | 77.122577 |
| 17:13:14 | 0:12:12 | 80.2188035 | 83.2675012 | 73.1785034 | 77.2878521 | 77.122577 |
| 17:13:15 | 0:12:13 | 80.2188035 | 83.2675012 | 72.1785034 | 76.2878521 | 77.122577 |
| 17:13:16 | 0:12:14 | 80.2188035 | 83.2675012 | 69.1785034 | 80.2878521 | 77.122577 |
| 17:13:17 | 0:12:15 | 80.2188035 | 83.2675012 | 67.1785034 | 83.2878521 | 77.122577 |
| 17:13:18 | 0:12:16 | 80.2188035 | 83.2675012 | 66.1785034 | 83.2878521 | 77.122577 |
| 17:13:19 | 0:12:17 | 81.2188035 | 83.2675012 | 65.1785034 | 83.2878521 | 77.122577 |
| 17:13:20 | 0:12:18 | 81.2188035 | 83.2675012 | 65.1785034 | 83.2878521 | 77.122577 |
| 17:13:21 | 0:12:19 | 81.2188035 | 85.2675012 | 63.1785034 | 83.2878521 | 79.122577 |
| 17:13:22 | 0:12:20 | 81.2188035 | 85.2675012 | 63.1785034 | 83.2878521 | 79.122577 |
| 17:13:23 | 0:12:21 | 78.2188035 | 85.2675012 | 64.1785034 | 83.2878521 | 79.122577 |
| 17:13:24 | 0:12:22 | 78.2188035 | 86.2675012 | 63.1785034 | 84.2878521 | 80.122577 |
| 17:13:25 | 0:12:23 | 78.2188035 | 86.2675012 | 63.1785034 | 84.2878521 | 80.122577 |
| 17:13:26 | 0:12:24 | 77.2188035 | 86.2675012 | 62.1785034 | 84.2878521 | 79.122577 |
| 17:13:27 | 0:12:25 | 77.2188035 | 86.2675012 | 65.1785034 | 84.2878521 | 79.122577 |
| 17:13:28 | 0:12:26 | 77.2188035 | 86.2675012 | 67.1785034 | 83.2878521 | 79.122577 |
| 17:13:29 | 0:12:27 | 77.2188035 | 89.2675012 | 67.1785034 | 83.2878521 | 79.122577 |
| 17:13:30 | 0:12:28 | 77.2188035 | 90.2675012 | 66.1785034 | 83.2878521 | 79.122577 |
| 17:13:31 | 0:12:29 | 78.2188035 | 91.2675012 | 66.1785034 | 83.2878521 | 79.122577 |
| 17:13:32 | 0:12:30 | 78.2188035 | 91.2675012 | 67.1785034 | 83.2878521 | 79.122577 |
| 17:13:33 | 0:12:31 | 78.2188035 | 90.2675012 | 67.1785034 | 82.2878521 | 79.122577 |
| 17:13:34 | 0:12:32 | 78.2188035 | 89.2675012 | 67.1785034 | 82.2878521 | 79.122577 |
| 17:13:35 | 0:12:33 | 78.2188035 | 87.2675012 | 68.1785034 | 82.2878521 | 79.122577 |
| 17:13:36 | 0:12:34 | 78.2188035 | 86.2675012 | 68.1785034 | 82.2878521 | 79.122577 |
| 17:13:37 | 0:12:35 | 77.2188035 | 85.2675012 | 68.1785034 | 82.2878521 | 79.122577 |
| 17:13:38 | 0:12:36 | 76.2188035 | 84.2675012 | 69.1785034 | 81.2878521 | 80.122577 |
| 17:13:39 | 0:12:37 | 76.2188035 | 84.2675012 | 69.1785034 | 81.2878521 | 80.122577 |
| 17:13:40 | 0:12:38 | 77.2188035 | 83.2675012 | 70.1785034 | 81.2878521 | 80.122577 |
| 17:13:41 | 0:12:39 | 79.2188035 | 83.2675012 | 70.1785034 | 81.2878521 | 80.122577 |
| 17:13:42 | 0:12:40 | 80.2188035 | 83.2675012 | 71.1785034 | 76.2878521 | 79.122577 |
| 17:13:43 | 0:12:41 | 81.2188035 | 82.2675012 | 72.1785034 | 74.2878521 | 80.122577 |

|          |         |            |            |            |            |           |
|----------|---------|------------|------------|------------|------------|-----------|
| 17:13:44 | 0:12:42 | 80.2188035 | 82.2675012 | 72.1785034 | 74.2878521 | 80.122577 |
| 17:13:45 | 0:12:43 | 80.2188035 | 79.2675012 | 72.1785034 | 74.2878521 | 80.122577 |
| 17:13:46 | 0:12:44 | 79.2188035 | 77.2675012 | 72.1785034 | 74.2878521 | 80.122577 |
| 17:13:47 | 0:12:45 | 79.2188035 | 76.2675012 | 72.1785034 | 74.2878521 | 80.122577 |
| 17:13:48 | 0:12:46 | 79.2188035 | 76.2675012 | 71.1785034 | 79.2878521 | 80.122577 |
| 17:13:49 | 0:12:47 | 79.2188035 | 77.2675012 | 70.1785034 | 79.2878521 | 80.122577 |
| 17:13:50 | 0:12:48 | 78.2188035 | 77.2675012 | 69.1785034 | 78.2878521 | 80.122577 |
| 17:13:51 | 0:12:49 | 78.2188035 | 77.2675012 | 68.1785034 | 76.2878521 | 80.122577 |
| 17:13:52 | 0:12:50 | 79.2188035 | 78.2675012 | 68.1785034 | 76.2878521 | 80.122577 |
| 17:13:53 | 0:12:51 | 80.2188035 | 78.2675012 | 68.1785034 | 75.2878521 | 80.122577 |
| 17:13:54 | 0:12:52 | 81.2188035 | 77.2675012 | 68.1785034 | 75.2878521 | 79.122577 |
| 17:13:55 | 0:12:53 | 81.2188035 | 77.2675012 | 68.1785034 | 73.2878521 | 79.122577 |
| 17:13:56 | 0:12:54 | 81.2188035 | 77.2675012 | 68.1785034 | 72.2878521 | 79.122577 |
| 17:13:57 | 0:12:55 | 82.2188035 | 74.2675012 | 67.1785034 | 71.2878521 | 79.122577 |
| 17:13:58 | 0:12:56 | 84.2188035 | 74.2675012 | 67.1785034 | 71.2878521 | 79.122577 |
| 17:13:59 | 0:12:57 | 84.2188035 | 73.2675012 | 65.1785034 | 71.2878521 | 79.122577 |
| 17:14:00 | 0:12:58 | 84.2188035 | 73.2675012 | 65.1785034 | 72.2878521 | 79.122577 |
| 17:14:01 | 0:12:59 | 82.2188035 | 73.2675012 | 68.1785034 | 71.2878521 | 79.122577 |
| 17:14:02 | 0:13:00 | 81.2188035 | 73.2675012 | 71.1785034 | 72.2878521 | 80.122577 |
| 17:14:03 | 0:13:01 | 81.2188035 | 71.2675012 | 72.1785034 | 72.2878521 | 80.122577 |
| 17:14:04 | 0:13:02 | 80.2188035 | 69.2675012 | 73.1785034 | 70.2878521 | 80.122577 |
| 17:14:05 | 0:13:03 | 80.2188035 | 69.2675012 | 73.1785034 | 71.2878521 | 78.122577 |
| 17:14:06 | 0:13:04 | 80.2188035 | 69.2675012 | 73.1785034 | 71.2878521 | 78.122577 |
| 17:14:07 | 0:13:05 | 80.2188035 | 68.2675012 | 73.1785034 | 72.2878521 | 76.122577 |
| 17:14:08 | 0:13:06 | 79.2188035 | 68.2675012 | 73.1785034 | 74.2878521 | 76.122577 |
| 17:14:09 | 0:13:07 | 78.2188035 | 68.2675012 | 73.1785034 | 74.2878521 | 76.122577 |
| 17:14:10 | 0:13:08 | 77.2188035 | 67.2675012 | 73.1785034 | 77.2878521 | 75.122577 |
| 17:14:11 | 0:13:09 | 76.2188035 | 66.2675012 | 72.1785034 | 78.2878521 | 74.122577 |
| 17:14:12 | 0:13:10 | 76.2188035 | 66.2675012 | 72.1785034 | 79.2878521 | 73.122577 |
| 17:14:13 | 0:13:11 | 76.2188035 | 67.2675012 | 72.1785034 | 79.2878521 | 73.122577 |
| 17:14:14 | 0:13:12 | 76.2188035 | 67.2675012 | 72.1785034 | 79.2878521 | 73.122577 |
| 17:14:15 | 0:13:13 | 76.2188035 | 68.2675012 | 72.1785034 | 79.2878521 | 73.122577 |
| 17:14:16 | 0:13:14 | 77.2188035 | 67.2675012 | 73.1785034 | 79.2878521 | 73.122577 |
| 17:14:17 | 0:13:15 | 77.2188035 | 66.2675012 | 73.1785034 | 76.2878521 | 73.122577 |
| 17:14:18 | 0:13:16 | 78.2188035 | 64.2675012 | 74.1785034 | 74.2878521 | 73.122577 |
| 17:14:19 | 0:13:17 | 77.2188035 | 63.2675012 | 74.1785034 | 74.2878521 | 72.122577 |
| 17:14:20 | 0:13:18 | 77.2188035 | 62.2675012 | 74.1785034 | 72.2878521 | 72.122577 |
| 17:14:21 | 0:13:19 | 77.2188035 | 62.2675012 | 74.1785034 | 72.2878521 | 71.122577 |
| 17:14:22 | 0:13:20 | 77.2188035 | 62.2675012 | 74.1785034 | 73.2878521 | 70.122577 |
| 17:14:23 | 0:13:21 | 75.2188035 | 62.2675012 | 74.1785034 | 73.2878521 | 71.122577 |
| 17:14:24 | 0:13:22 | 75.2188035 | 62.2675012 | 74.1785034 | 73.2878521 | 71.122577 |
| 17:14:25 | 0:13:23 | 75.2188035 | 67.2675012 | 74.1785034 | 73.2878521 | 71.122577 |
| 17:14:26 | 0:13:24 | 76.2188035 | 67.2675012 | 75.1785034 | 74.2878521 | 71.122577 |
| 17:14:27 | 0:13:25 | 78.2188035 | 67.2675012 | 76.1785034 | 74.2878521 | 72.122577 |
| 17:14:28 | 0:13:26 | 79.2188035 | 63.2675012 | 77.1785034 | 74.2878521 | 70.122577 |

|          |         |            |            |            |            |           |
|----------|---------|------------|------------|------------|------------|-----------|
| 17:14:29 | 0:13:27 | 79.2188035 | 63.2675012 | 77.1785034 | 73.2878521 | 70.122577 |
| 17:14:30 | 0:13:28 | 79.2188035 | 61.2675012 | 76.1785034 | 72.2878521 | 70.122577 |
| 17:14:31 | 0:13:29 | 80.2188035 | 61.2675012 | 75.1785034 | 72.2878521 | 71.122577 |
| 17:14:32 | 0:13:30 | 79.2188035 | 62.2675012 | 75.1785034 | 73.2878521 | 73.122577 |
| 17:14:33 | 0:13:31 | 78.2188035 | 68.2675012 | 75.1785034 | 74.2878521 | 76.122577 |
| 17:14:34 | 0:13:32 | 78.2188035 | 70.2675012 | 76.1785034 | 74.2878521 | 80.122577 |
| 17:14:35 | 0:13:33 | 77.2188035 | 71.2675012 | 77.1785034 | 76.2878521 | 80.122577 |
| 17:14:36 | 0:13:34 | 76.2188035 | 71.2675012 | 78.1785034 | 76.2878521 | 81.122577 |
| 17:14:37 | 0:13:35 | 76.2188035 | 69.2675012 | 78.1785034 | 76.2878521 | 83.122577 |
| 17:14:38 | 0:13:36 | 76.2188035 | 67.2675012 | 77.1785034 | 76.2878521 | 83.122577 |
| 17:14:39 | 0:13:37 | 76.2188035 | 66.2675012 | 77.1785034 | 76.2878521 | 81.122577 |
| 17:14:40 | 0:13:38 | 75.2188035 | 67.2675012 | 77.1785034 | 77.2878521 | 81.122577 |
| 17:14:41 | 0:13:39 | 75.2188035 | 67.2675012 | 77.1785034 | 76.2878521 | 81.122577 |
| 17:14:42 | 0:13:40 | 73.2188035 | 67.2675012 | 77.1785034 | 76.2878521 | 82.122577 |
| 17:14:43 | 0:13:41 | 73.2188035 | 66.2675012 | 78.1785034 | 76.2878521 | 82.122577 |
| 17:14:44 | 0:13:42 | 73.2188035 | 65.2675012 | 79.1785034 | 75.2878521 | 82.122577 |
| 17:14:45 | 0:13:43 | 73.2188035 | 64.2675012 | 79.1785034 | 75.2878521 | 82.122577 |
| 17:14:46 | 0:13:44 | 73.2188035 | 64.2675012 | 78.1785034 | 74.2878521 | 80.122577 |
| 17:14:47 | 0:13:45 | 73.2188035 | 66.2675012 | 77.1785034 | 74.2878521 | 79.122577 |
| 17:14:48 | 0:13:46 | 74.2188035 | 67.2675012 | 76.1785034 | 74.2878521 | 79.122577 |
| 17:14:49 | 0:13:47 | 74.2188035 | 67.2675012 | 76.1785034 | 74.2878521 | 79.122577 |
| 17:14:50 | 0:13:48 | 74.2188035 | 70.2675012 | 77.1785034 | 74.2878521 | 80.122577 |
| 17:14:51 | 0:13:49 | 74.2188035 | 72.2675012 | 80.1785034 | 74.2878521 | 82.122577 |
| 17:14:52 | 0:13:50 | 74.2188035 | 73.2675012 | 81.1785034 | 75.2878521 | 82.122577 |
| 17:14:53 | 0:13:51 | 75.2188035 | 72.2675012 | 82.1785034 | 76.2878521 | 83.122577 |
| 17:14:54 | 0:13:52 | 75.2188035 | 70.2675012 | 82.1785034 | 76.2878521 | 83.122577 |
| 17:14:55 | 0:13:53 | 74.2188035 | 68.2675012 | 82.1785034 | 74.2878521 | 83.122577 |
| 17:14:56 | 0:13:54 | 74.2188035 | 68.2675012 | 82.1785034 | 74.2878521 | 82.122577 |
| 17:14:57 | 0:13:55 | 74.2188035 | 69.2675012 | 82.1785034 | 74.2878521 | 80.122577 |
| 17:14:58 | 0:13:56 | 74.2188035 | 72.2675012 | 82.1785034 | 74.2878521 | 80.122577 |
| 17:14:59 | 0:13:57 | 74.2188035 | 72.2675012 | 82.1785034 | 74.2878521 | 79.122577 |
| 17:15:00 | 0:13:58 | 74.2188035 | 72.2675012 | 82.1785034 | 74.2878521 | 79.122577 |
| 17:15:01 | 0:13:59 | 75.2188035 | 71.2675012 | 81.1785034 | 74.2878521 | 78.122577 |
| 17:15:02 | 0:14:00 | 74.2188035 | 70.2675012 | 81.1785034 | 74.2878521 | 78.122577 |
| 17:15:03 | 0:14:01 | 73.2188035 | 68.2675012 | 80.1785034 | 74.2878521 | 78.122577 |
| 17:15:04 | 0:14:02 | 72.2188035 | 66.2675012 | 80.1785034 | 73.2878521 | 77.122577 |
| 17:15:05 | 0:14:03 | 71.2188035 | 66.2675012 | 79.1785034 | 73.2878521 | 76.122577 |
| 17:15:06 | 0:14:04 | 71.2188035 | 66.2675012 | 85.1785034 | 70.2878521 | 76.122577 |
| 17:15:07 | 0:14:05 | 71.2188035 | 67.2675012 | 85.1785034 | 69.2878521 | 75.122577 |
| 17:15:08 | 0:14:06 | 71.2188035 | 68.2675012 | 86.1785034 | 69.2878521 | 75.122577 |
| 17:15:09 | 0:14:07 | 71.2188035 | 68.2675012 | 83.1785034 | 71.2878521 | 76.122577 |
| 17:15:10 | 0:14:08 | 71.2188035 | 68.2675012 | 79.1785034 | 72.2878521 | 76.122577 |
| 17:15:11 | 0:14:09 | 72.2188035 | 68.2675012 | 79.1785034 | 73.2878521 | 77.122577 |
| 17:15:12 | 0:14:10 | 73.2188035 | 68.2675012 | 74.1785034 | 73.2878521 | 77.122577 |
| 17:15:13 | 0:14:11 | 74.2188035 | 68.2675012 | 73.1785034 | 74.2878521 | 77.122577 |

|          |         |            |            |            |            |           |
|----------|---------|------------|------------|------------|------------|-----------|
| 17:15:14 | 0:14:12 | 74.2188035 | 67.2675012 | 73.1785034 | 75.2878521 | 77.122577 |
| 17:15:15 | 0:14:13 | 74.2188035 | 68.2675012 | 72.1785034 | 76.2878521 | 78.122577 |
| 17:15:16 | 0:14:14 | 75.2188035 | 68.2675012 | 72.1785034 | 77.2878521 | 78.122577 |
| 17:15:17 | 0:14:15 | 75.2188035 | 69.2675012 | 71.1785034 | 78.2878521 | 78.122577 |
| 17:15:18 | 0:14:16 | 75.2188035 | 69.2675012 | 70.1785034 | 80.2878521 | 79.122577 |
| 17:15:19 | 0:14:17 | 74.2188035 | 68.2675012 | 69.1785034 | 80.2878521 | 80.122577 |
| 17:15:20 | 0:14:18 | 74.2188035 | 68.2675012 | 69.1785034 | 82.2878521 | 80.122577 |
| 17:15:21 | 0:14:19 | 73.2188035 | 69.2675012 | 69.1785034 | 83.2878521 | 80.122577 |
| 17:15:22 | 0:14:20 | 73.2188035 | 70.2675012 | 69.1785034 | 83.2878521 | 81.122577 |
| 17:15:23 | 0:14:21 | 72.2188035 | 70.2675012 | 69.1785034 | 83.2878521 | 81.122577 |
| 17:15:24 | 0:14:22 | 73.2188035 | 70.2675012 | 70.1785034 | 84.2878521 | 81.122577 |
| 17:15:25 | 0:14:23 | 73.2188035 | 72.2675012 | 70.1785034 | 84.2878521 | 82.122577 |
| 17:15:26 | 0:14:24 | 73.2188035 | 72.2675012 | 70.1785034 | 86.2878521 | 82.122577 |
| 17:15:27 | 0:14:25 | 73.2188035 | 73.2675012 | 71.1785034 | 88.2878521 | 83.122577 |
| 17:15:28 | 0:14:26 | 75.2188035 | 73.2675012 | 73.1785034 | 89.2878521 | 78.122577 |
| 17:15:29 | 0:14:27 | 75.2188035 | 72.2675012 | 75.1785034 | 89.2878521 | 76.122577 |
| 17:15:30 | 0:14:28 | 76.2188035 | 72.2675012 | 77.1785034 | 89.2878521 | 76.122577 |
| 17:15:31 | 0:14:29 | 76.2188035 | 71.2675012 | 78.1785034 | 89.2878521 | 76.122577 |
| 17:15:32 | 0:14:30 | 76.2188035 | 71.2675012 | 77.1785034 | 89.2878521 | 77.122577 |
| 17:15:33 | 0:14:31 | 76.2188035 | 71.2675012 | 77.1785034 | 88.2878521 | 78.122577 |
| 17:15:34 | 0:14:32 | 77.2188035 | 71.2675012 | 76.1785034 | 88.2878521 | 78.122577 |
| 17:15:35 | 0:14:33 | 77.2188035 | 71.2675012 | 75.1785034 | 87.2878521 | 78.122577 |
| 17:15:36 | 0:14:34 | 77.2188035 | 74.2675012 | 75.1785034 | 86.2878521 | 78.122577 |
| 17:15:37 | 0:14:35 | 76.2188035 | 75.2675012 | 75.1785034 | 86.2878521 | 77.122577 |
| 17:15:38 | 0:14:36 | 76.2188035 | 74.2675012 | 75.1785034 | 86.2878521 | 76.122577 |
| 17:15:39 | 0:14:37 | 76.2188035 | 74.2675012 | 75.1785034 | 86.2878521 | 76.122577 |
| 17:15:40 | 0:14:38 | 76.2188035 | 74.2675012 | 75.1785034 | 86.2878521 | 76.122577 |
| 17:15:41 | 0:14:39 | 76.2188035 | 73.2675012 | 75.1785034 | 80.2878521 | 76.122577 |
| 17:15:42 | 0:14:40 | 76.2188035 | 74.2675012 | 75.1785034 | 79.2878521 | 76.122577 |
| 17:15:43 | 0:14:41 | 76.2188035 | 75.2675012 | 75.1785034 | 78.2878521 | 77.122577 |
| 17:15:44 | 0:14:42 | 75.2188035 | 75.2675012 | 75.1785034 | 78.2878521 | 77.122577 |
| 17:15:45 | 0:14:43 | 75.2188035 | 76.2675012 | 74.1785034 | 78.2878521 | 77.122577 |
| 17:15:46 | 0:14:44 | 74.2188035 | 75.2675012 | 74.1785034 | 78.2878521 | 78.122577 |
| 17:15:47 | 0:14:45 | 74.2188035 | 74.2675012 | 74.1785034 | 78.2878521 | 78.122577 |
| 17:15:48 | 0:14:46 | 74.2188035 | 72.2675012 | 77.1785034 | 78.2878521 | 78.122577 |
| 17:15:49 | 0:14:47 | 74.2188035 | 70.2675012 | 77.1785034 | 78.2878521 | 78.122577 |
| 17:15:50 | 0:14:48 | 74.2188035 | 70.2675012 | 77.1785034 | 78.2878521 | 77.122577 |
| 17:15:51 | 0:14:49 | 74.2188035 | 70.2675012 | 76.1785034 | 78.2878521 | 77.122577 |
| 17:15:52 | 0:14:50 | 74.2188035 | 70.2675012 | 77.1785034 | 78.2878521 | 76.122577 |
| 17:15:53 | 0:14:51 | 72.2188035 | 71.2675012 | 77.1785034 | 78.2878521 | 76.122577 |
| 17:15:54 | 0:14:52 | 72.2188035 | 71.2675012 | 77.1785034 | 78.2878521 | 76.122577 |
| 17:15:55 | 0:14:53 | 71.2188035 | 72.2675012 | 78.1785034 | 76.2878521 | 77.122577 |
| 17:15:56 | 0:14:54 | 71.2188035 | 73.2675012 | 78.1785034 | 75.2878521 | 78.122577 |
| 17:15:57 | 0:14:55 | 71.2188035 | 75.2675012 | 80.1785034 | 75.2878521 | 78.122577 |
| 17:15:58 | 0:14:56 | 71.2188035 | 75.2675012 | 80.1785034 | 74.2878521 | 77.122577 |

|          |         |            |            |            |            |           |
|----------|---------|------------|------------|------------|------------|-----------|
| 17:15:59 | 0:14:57 | 71.2188035 | 75.2675012 | 80.1785034 | 74.2878521 | 77.122577 |
| 17:16:00 | 0:14:58 | 72.2188035 | 76.2675012 | 79.1785034 | 74.2878521 | 75.122577 |
| 17:16:01 | 0:14:59 | 72.2188035 | 76.2675012 | 79.1785034 | 74.2878521 | 75.122577 |
| 17:16:02 | 0:15:00 | 72.2188035 | 76.2675012 | 79.1785034 | 75.2878521 | 75.122577 |
| 17:16:03 | 0:15:01 | 72.2188035 | 78.2675012 | 78.1785034 | 75.2878521 | 75.122577 |
| 17:16:04 | 0:15:02 | 73.2188035 | 78.2675012 | 74.1785034 | 75.2878521 | 75.122577 |
| 17:16:05 | 0:15:03 | 74.2188035 | 78.2675012 | 74.1785034 | 75.2878521 | 75.122577 |
| 17:16:06 | 0:15:04 | 75.2188035 | 77.2675012 | 74.1785034 | 74.2878521 | 76.122577 |
| 17:16:07 | 0:15:05 | 75.2188035 | 74.2675012 | 74.1785034 | 74.2878521 | 78.122577 |
| 17:16:08 | 0:15:06 | 75.2188035 | 74.2675012 | 80.1785034 | 74.2878521 | 80.122577 |
| 17:16:09 | 0:15:07 | 75.2188035 | 72.2675012 | 81.1785034 | 73.2878521 | 80.122577 |
| 17:16:10 | 0:15:08 | 75.2188035 | 72.2675012 | 81.1785034 | 73.2878521 | 80.122577 |
| 17:16:11 | 0:15:09 | 76.2188035 | 74.2675012 | 81.1785034 | 73.2878521 | 79.122577 |
| 17:16:12 | 0:15:10 | 76.2188035 | 74.2675012 | 79.1785034 | 75.2878521 | 79.122577 |
| 17:16:13 | 0:15:11 | 77.2188035 | 75.2675012 | 79.1785034 | 78.2878521 | 78.122577 |
| 17:16:14 | 0:15:12 | 77.2188035 | 75.2675012 | 79.1785034 | 79.2878521 | 78.122577 |
| 17:16:15 | 0:15:13 | 77.2188035 | 74.2675012 | 79.1785034 | 79.2878521 | 78.122577 |
| 17:16:16 | 0:15:14 | 77.2188035 | 74.2675012 | 79.1785034 | 80.2878521 | 78.122577 |
| 17:16:17 | 0:15:15 | 77.2188035 | 73.2675012 | 78.1785034 | 81.2878521 | 78.122577 |
| 17:16:18 | 0:15:16 | 77.2188035 | 72.2675012 | 78.1785034 | 82.2878521 | 78.122577 |
| 17:16:19 | 0:15:17 | 78.2188035 | 73.2675012 | 78.1785034 | 82.2878521 | 78.122577 |
| 17:16:20 | 0:15:18 | 79.2188035 | 73.2675012 | 78.1785034 | 83.2878521 | 78.122577 |
| 17:16:21 | 0:15:19 | 79.2188035 | 73.2675012 | 78.1785034 | 83.2878521 | 79.122577 |
| 17:16:22 | 0:15:20 | 79.2188035 | 73.2675012 | 78.1785034 | 82.2878521 | 77.122577 |
| 17:16:23 | 0:15:21 | 78.2188035 | 72.2675012 | 78.1785034 | 81.2878521 | 77.122577 |
| 17:16:24 | 0:15:22 | 78.2188035 | 72.2675012 | 79.1785034 | 77.2878521 | 77.122577 |
| 17:16:25 | 0:15:23 | 78.2188035 | 72.2675012 | 84.1785034 | 77.2878521 | 77.122577 |
| 17:16:26 | 0:15:24 | 78.2188035 | 72.2675012 | 88.1785034 | 73.2878521 | 76.122577 |
| 17:16:27 | 0:15:25 | 78.2188035 | 73.2675012 | 89.1785034 | 72.2878521 | 73.122577 |
| 17:16:28 | 0:15:26 | 78.2188035 | 73.2675012 | 89.1785034 | 72.2878521 | 73.122577 |
| 17:16:29 | 0:15:27 | 78.2188035 | 73.2675012 | 88.1785034 | 71.2878521 | 74.122577 |
| 17:16:30 | 0:15:28 | 78.2188035 | 73.2675012 | 87.1785034 | 71.2878521 | 74.122577 |
| 17:16:31 | 0:15:29 | 78.2188035 | 72.2675012 | 86.1785034 | 70.2878521 | 74.122577 |
| 17:16:32 | 0:15:30 | 78.2188035 | 72.2675012 | 86.1785034 | 69.2878521 | 75.122577 |
| 17:16:33 | 0:15:31 | 78.2188035 | 71.2675012 | 85.1785034 | 68.2878521 | 75.122577 |
| 17:16:34 | 0:15:32 | 78.2188035 | 70.2675012 | 83.1785034 | 68.2878521 | 75.122577 |
| 17:16:35 | 0:15:33 | 78.2188035 | 70.2675012 | 82.1785034 | 68.2878521 | 76.122577 |
| 17:16:36 | 0:15:34 | 77.2188035 | 70.2675012 | 81.1785034 | 68.2878521 | 77.122577 |
| 17:16:37 | 0:15:35 | 76.2188035 | 71.2675012 | 80.1785034 | 68.2878521 | 77.122577 |
| 17:16:38 | 0:15:36 | 76.2188035 | 72.2675012 | 79.1785034 | 68.2878521 | 77.122577 |
| 17:16:39 | 0:15:37 | 75.2188035 | 75.2675012 | 79.1785034 | 68.2878521 | 78.122577 |
| 17:16:40 | 0:15:38 | 75.2188035 | 78.2675012 | 80.1785034 | 68.2878521 | 78.122577 |
| 17:16:41 | 0:15:39 | 74.2188035 | 81.2675012 | 82.1785034 | 68.2878521 | 78.122577 |
| 17:16:42 | 0:15:40 | 74.2188035 | 81.2675012 | 85.1785034 | 69.2878521 | 78.122577 |
| 17:16:43 | 0:15:41 | 74.2188035 | 79.2675012 | 85.1785034 | 69.2878521 | 77.122577 |

|          |         |            |            |            |            |           |
|----------|---------|------------|------------|------------|------------|-----------|
| 17:16:44 | 0:15:42 | 74.2188035 | 77.2675012 | 85.1785034 | 68.2878521 | 77.122577 |
| 17:16:45 | 0:15:43 | 74.2188035 | 76.2675012 | 86.1785034 | 68.2878521 | 77.122577 |
| 17:16:46 | 0:15:44 | 73.2188035 | 75.2675012 | 86.1785034 | 67.2878521 | 74.122577 |
| 17:16:47 | 0:15:45 | 73.2188035 | 75.2675012 | 75.1785034 | 67.2878521 | 73.122577 |
| 17:16:48 | 0:15:46 | 73.2188035 | 75.2675012 | 75.1785034 | 67.2878521 | 73.122577 |
| 17:16:49 | 0:15:47 | 71.2188035 | 78.2675012 | 74.1785034 | 67.2878521 | 73.122577 |
| 17:16:50 | 0:15:48 | 70.2188035 | 78.2675012 | 76.1785034 | 66.2878521 | 73.122577 |
| 17:16:51 | 0:15:49 | 70.2188035 | 78.2675012 | 78.1785034 | 66.2878521 | 73.122577 |
| 17:16:52 | 0:15:50 | 70.2188035 | 76.2675012 | 80.1785034 | 66.2878521 | 73.122577 |
| 17:16:53 | 0:15:51 | 70.2188035 | 74.2675012 | 81.1785034 | 67.2878521 | 73.122577 |
| 17:16:54 | 0:15:52 | 71.2188035 | 74.2675012 | 81.1785034 | 69.2878521 | 73.122577 |
| 17:16:55 | 0:15:53 | 71.2188035 | 77.2675012 | 82.1785034 | 70.2878521 | 73.122577 |
| 17:16:56 | 0:15:54 | 72.2188035 | 79.2675012 | 81.1785034 | 72.2878521 | 74.122577 |
| 17:16:57 | 0:15:55 | 73.2188035 | 79.2675012 | 80.1785034 | 72.2878521 | 75.122577 |
| 17:16:58 | 0:15:56 | 73.2188035 | 80.2675012 | 78.1785034 | 74.2878521 | 75.122577 |
| 17:16:59 | 0:15:57 | 73.2188035 | 79.2675012 | 77.1785034 | 74.2878521 | 74.122577 |
| 17:17:00 | 0:15:58 | 73.2188035 | 79.2675012 | 75.1785034 | 75.2878521 | 74.122577 |
| 17:17:01 | 0:15:59 | 74.2188035 | 79.2675012 | 75.1785034 | 75.2878521 | 76.122577 |
| 17:17:02 | 0:16:00 | 75.2188035 | 78.2675012 | 76.1785034 | 75.2878521 | 76.122577 |
| 17:17:03 | 0:16:01 | 75.2188035 | 78.2675012 | 76.1785034 | 75.2878521 | 75.122577 |
| 17:17:04 | 0:16:02 | 75.2188035 | 78.2675012 | 76.1785034 | 75.2878521 | 75.122577 |
| 17:17:05 | 0:16:03 | 76.2188035 | 78.2675012 | 76.1785034 | 77.2878521 | 74.122577 |
| 17:17:06 | 0:16:04 | 76.2188035 | 78.2675012 | 76.1785034 | 77.2878521 | 74.122577 |
| 17:17:07 | 0:16:05 | 76.2188035 | 78.2675012 | 76.1785034 | 77.2878521 | 73.122577 |
| 17:17:08 | 0:16:06 | 76.2188035 | 78.2675012 | 75.1785034 | 77.2878521 | 73.122577 |
| 17:17:09 | 0:16:07 | 76.2188035 | 77.2675012 | 74.1785034 | 75.2878521 | 74.122577 |
| 17:17:10 | 0:16:08 | 75.2188035 | 77.2675012 | 74.1785034 | 75.2878521 | 74.122577 |
| 17:17:11 | 0:16:09 | 75.2188035 | 77.2675012 | 74.1785034 | 69.2878521 | 78.122577 |
| 17:17:12 | 0:16:10 | 75.2188035 | 77.2675012 | 74.1785034 | 69.2878521 | 78.122577 |
| 17:17:13 | 0:16:11 | 76.2188035 | 77.2675012 | 75.1785034 | 69.2878521 | 78.122577 |
| 17:17:14 | 0:16:12 | 76.2188035 | 77.2675012 | 75.1785034 | 72.2878521 | 78.122577 |
| 17:17:15 | 0:16:13 | 75.2188035 | 77.2675012 | 75.1785034 | 72.2878521 | 77.122577 |
| 17:17:16 | 0:16:14 | 75.2188035 | 75.2675012 | 75.1785034 | 72.2878521 | 77.122577 |
| 17:17:17 | 0:16:15 | 76.2188035 | 75.2675012 | 75.1785034 | 72.2878521 | 77.122577 |
| 17:17:18 | 0:16:16 | 76.2188035 | 76.2675012 | 74.1785034 | 71.2878521 | 77.122577 |
| 17:17:19 | 0:16:17 | 76.2188035 | 77.2675012 | 73.1785034 | 71.2878521 | 77.122577 |
| 17:17:20 | 0:16:18 | 76.2188035 | 80.2675012 | 73.1785034 | 71.2878521 | 78.122577 |
| 17:17:21 | 0:16:19 | 75.2188035 | 81.2675012 | 72.1785034 | 71.2878521 | 78.122577 |
| 17:17:22 | 0:16:20 | 74.2188035 | 81.2675012 | 73.1785034 | 71.2878521 | 78.122577 |
| 17:17:23 | 0:16:21 | 73.2188035 | 81.2675012 | 74.1785034 | 71.2878521 | 78.122577 |
| 17:17:24 | 0:16:22 | 72.2188035 | 81.2675012 | 74.1785034 | 71.2878521 | 80.122577 |
| 17:17:25 | 0:16:23 | 73.2188035 | 82.2675012 | 75.1785034 | 71.2878521 | 82.122577 |
| 17:17:26 | 0:16:24 | 73.2188035 | 82.2675012 | 75.1785034 | 71.2878521 | 82.122577 |
| 17:17:27 | 0:16:25 | 73.2188035 | 82.2675012 | 75.1785034 | 70.2878521 | 82.122577 |
| 17:17:28 | 0:16:26 | 74.2188035 | 81.2675012 | 75.1785034 | 70.2878521 | 83.122577 |

|          |         |            |            |            |            |            |
|----------|---------|------------|------------|------------|------------|------------|
| 17:17:29 | 0:16:27 | 74.2188035 | 80.2675012 | 75.1785034 | 71.2878521 | 82.122577  |
| 17:17:30 | 0:16:28 | 74.2188035 | 78.2675012 | 76.1785034 | 72.2878521 | 82.122577  |
| 17:17:31 | 0:16:29 | 74.2188035 | 77.2675012 | 76.1785034 | 72.2878521 | 81.122577  |
| 17:17:32 | 0:16:30 | 75.2188035 | 78.2675012 | 76.1785034 | 73.2878521 | 80.122577  |
| 17:17:33 | 0:16:31 | 75.2188035 | 78.2675012 | 77.1785034 | 75.2878521 | 80.122577  |
| 17:17:34 | 0:16:32 | 75.2188035 | 79.2675012 | 78.1785034 | 75.2878521 | 81.122577  |
| 17:17:35 | 0:16:33 | 75.2188035 | 83.2675012 | 77.1785034 | 75.2878521 | 81.122577  |
| 17:17:36 | 0:16:34 | 74.2188035 | 83.2675012 | 77.1785034 | 76.2878521 | 82.122577  |
| 17:17:37 | 0:16:35 | 73.2188035 | 84.2675012 | 77.1785034 | 76.2878521 | 86.122577  |
| 17:17:38 | 0:16:36 | 74.2188035 | 84.2675012 | 76.1785034 | 76.2878521 | 90.122577  |
| 17:17:39 | 0:16:37 | 74.2188035 | 84.2675012 | 76.1785034 | 76.2878521 | 90.122577  |
| 17:17:40 | 0:16:38 | 75.2188035 | 81.2675012 | 77.1785034 | 76.2878521 | 76.6501363 |
| 17:17:41 | 0:16:39 | 75.2188035 | 80.2675012 | 77.1785034 | 77.2878521 | 77.1501363 |
| 17:17:42 | 0:16:40 | 75.2188035 | 80.2675012 | 77.1785034 | 77.2878521 | 77.1501363 |
| 17:17:43 | 0:16:41 | 75.2188035 | 82.2675012 | 77.1785034 | 82.2878521 | 91.122577  |
| 17:17:44 | 0:16:42 | 76.2188035 | 82.2675012 | 78.1785034 | 82.2878521 | 91.122577  |
| 17:17:45 | 0:16:43 | 77.2188035 | 82.2675012 | 79.1785034 | 82.2878521 | 91.122577  |
| 17:17:46 | 0:16:44 | 78.2188035 | 82.2675012 | 79.1785034 | 83.2878521 | 90.122577  |
| 17:17:47 | 0:16:45 | 78.2188035 | 82.2675012 | 81.1785034 | 83.2878521 | 91.122577  |
| 17:17:48 | 0:16:46 | 77.2188035 | 81.2675012 | 81.1785034 | 80.2878521 | 90.122577  |
| 17:17:49 | 0:16:47 | 77.2188035 | 81.2675012 | 81.1785034 | 80.2878521 | 81.122577  |
| 17:17:50 | 0:16:48 | 77.2188035 | 82.2675012 | 81.1785034 | 77.2878521 | 81.122577  |
| 17:17:51 | 0:16:49 | 77.2188035 | 82.2675012 | 81.1785034 | 75.2878521 | 78.122577  |
| 17:17:52 | 0:16:50 | 77.2188035 | 82.2675012 | 81.1785034 | 74.2878521 | 77.122577  |
| 17:17:53 | 0:16:51 | 77.2188035 | 84.2675012 | 80.1785034 | 74.2878521 | 77.122577  |
| 17:17:54 | 0:16:52 | 77.2188035 | 85.2675012 | 80.1785034 | 74.2878521 | 77.122577  |
| 17:17:55 | 0:16:53 | 77.2188035 | 84.2675012 | 80.1785034 | 74.2878521 | 76.122577  |
| 17:17:56 | 0:16:54 | 78.2188035 | 80.2675012 | 79.1785034 | 73.2878521 | 79.122577  |
| 17:17:57 | 0:16:55 | 78.2188035 | 77.2675012 | 79.1785034 | 73.2878521 | 79.122577  |
| 17:17:58 | 0:16:56 | 78.2188035 | 77.2675012 | 79.1785034 | 73.2878521 | 80.122577  |
| 17:17:59 | 0:16:57 | 78.2188035 | 78.2675012 | 79.1785034 | 72.2878521 | 80.122577  |
| 17:18:00 | 0:16:58 | 78.2188035 | 80.2675012 | 79.1785034 | 71.2878521 | 81.122577  |
| 17:18:01 | 0:16:59 | 77.2188035 | 81.2675012 | 78.1785034 | 72.2878521 | 82.122577  |
| 17:18:02 | 0:17:00 | 76.2188035 | 81.2675012 | 75.1785034 | 74.2878521 | 83.122577  |
| 17:18:03 | 0:17:01 | 75.2188035 | 80.2675012 | 74.1785034 | 74.2878521 | 83.122577  |
| 17:18:04 | 0:17:02 | 76.2188035 | 79.2675012 | 74.1785034 | 75.2878521 | 84.122577  |
| 17:18:05 | 0:17:03 | 76.2188035 | 76.2675012 | 76.1785034 | 76.2878521 | 83.122577  |
| 17:18:06 | 0:17:04 | 76.2188035 | 75.2675012 | 83.1785034 | 78.2878521 | 83.122577  |
| 17:18:07 | 0:17:05 | 76.2188035 | 74.2675012 | 83.1785034 | 79.2878521 | 82.122577  |
| 17:18:08 | 0:17:06 | 77.2188035 | 75.2675012 | 84.1785034 | 79.2878521 | 82.122577  |
| 17:18:09 | 0:17:07 | 78.2188035 | 77.2675012 | 84.1785034 | 80.2878521 | 82.122577  |
| 17:18:10 | 0:17:08 | 79.2188035 | 77.2675012 | 85.1785034 | 83.2878521 | 83.122577  |
| 17:18:11 | 0:17:09 | 79.2188035 | 78.2675012 | 85.1785034 | 83.2878521 | 83.122577  |
| 17:18:12 | 0:17:10 | 79.2188035 | 79.2675012 | 88.1785034 | 83.2878521 | 84.122577  |
| 17:18:13 | 0:17:11 | 79.2188035 | 79.2675012 | 87.1785034 | 82.2878521 | 84.122577  |



|          |         |            |            |            |            |           |
|----------|---------|------------|------------|------------|------------|-----------|
| 17:18:14 | 0:17:12 | 79.2188035 | 79.2675012 | 86.1785034 | 80.2878521 | 84.122577 |
| 17:18:15 | 0:17:13 | 79.2188035 | 79.2675012 | 86.1785034 | 80.2878521 | 83.122577 |
| 17:18:16 | 0:17:14 | 78.2188035 | 79.2675012 | 86.1785034 | 79.2878521 | 83.122577 |
| 17:18:17 | 0:17:15 | 78.2188035 | 79.2675012 | 87.1785034 | 78.2878521 | 83.122577 |
| 17:18:18 | 0:17:16 | 79.2188035 | 79.2675012 | 88.1785034 | 78.2878521 | 81.122577 |
| 17:18:19 | 0:17:17 | 79.2188035 | 80.2675012 | 88.1785034 | 78.2878521 | 81.122577 |
| 17:18:20 | 0:17:18 | 78.2188035 | 80.2675012 | 88.1785034 | 78.2878521 | 81.122577 |
| 17:18:21 | 0:17:19 | 77.2188035 | 80.2675012 | 79.1785034 | 77.2878521 | 82.122577 |
| 17:18:22 | 0:17:20 | 77.2188035 | 77.2675012 | 79.1785034 | 77.2878521 | 82.122577 |
| 17:18:23 | 0:17:21 | 77.2188035 | 75.2675012 | 72.1785034 | 77.2878521 | 82.122577 |
| 17:18:24 | 0:17:22 | 76.2188035 | 74.2675012 | 70.1785034 | 77.2878521 | 82.122577 |
| 17:18:25 | 0:17:23 | 77.2188035 | 74.2675012 | 70.1785034 | 76.2878521 | 83.122577 |
| 17:18:26 | 0:17:24 | 77.2188035 | 71.2675012 | 70.1785034 | 76.2878521 | 83.122577 |
| 17:18:27 | 0:17:25 | 77.2188035 | 70.2675012 | 70.1785034 | 76.2878521 | 83.122577 |
| 17:18:28 | 0:17:26 | 77.2188035 | 70.2675012 | 72.1785034 | 76.2878521 | 83.122577 |
| 17:18:29 | 0:17:27 | 79.2188035 | 71.2675012 | 73.1785034 | 74.2878521 | 83.122577 |
| 17:18:30 | 0:17:28 | 79.2188035 | 72.2675012 | 73.1785034 | 68.2878521 | 79.122577 |
| 17:18:31 | 0:17:29 | 79.2188035 | 71.2675012 | 73.1785034 | 67.2878521 | 79.122577 |
| 17:18:32 | 0:17:30 | 79.2188035 | 71.2675012 | 73.1785034 | 67.2878521 | 78.122577 |
| 17:18:33 | 0:17:31 | 80.2188035 | 71.2675012 | 73.1785034 | 67.2878521 | 78.122577 |
| 17:18:34 | 0:17:32 | 81.2188035 | 69.2675012 | 74.1785034 | 67.2878521 | 78.122577 |
| 17:18:35 | 0:17:33 | 81.2188035 | 69.2675012 | 74.1785034 | 69.2878521 | 78.122577 |
| 17:18:36 | 0:17:34 | 81.2188035 | 69.2675012 | 74.1785034 | 69.2878521 | 78.122577 |
| 17:18:37 | 0:17:35 | 84.2188035 | 69.2675012 | 74.1785034 | 71.2878521 | 79.122577 |
| 17:18:38 | 0:17:36 | 84.2188035 | 69.2675012 | 77.1785034 | 71.2878521 | 79.122577 |
| 17:18:39 | 0:17:37 | 84.2188035 | 68.2675012 | 77.1785034 | 76.2878521 | 79.122577 |
| 17:18:40 | 0:17:38 | 82.2188035 | 67.2675012 | 77.1785034 | 80.2878521 | 79.122577 |
| 17:18:41 | 0:17:39 | 82.2188035 | 67.2675012 | 77.1785034 | 80.2878521 | 79.122577 |
| 17:18:42 | 0:17:40 | 82.2188035 | 67.2675012 | 77.1785034 | 80.2878521 | 81.122577 |
| 17:18:43 | 0:17:41 | 82.2188035 | 67.2675012 | 80.1785034 | 80.2878521 | 83.122577 |
| 17:18:44 | 0:17:42 | 82.2188035 | 68.2675012 | 80.1785034 | 80.2878521 | 84.122577 |
| 17:18:45 | 0:17:43 | 82.2188035 | 68.2675012 | 83.1785034 | 80.2878521 | 83.122577 |
| 17:18:46 | 0:17:44 | 77.2188035 | 69.2675012 | 83.1785034 | 80.2878521 | 83.122577 |
| 17:18:47 | 0:17:45 | 77.2188035 | 70.2675012 | 82.1785034 | 80.2878521 | 80.122577 |
| 17:18:48 | 0:17:46 | 77.2188035 | 70.2675012 | 82.1785034 | 80.2878521 | 79.122577 |
| 17:18:49 | 0:17:47 | 77.2188035 | 70.2675012 | 81.1785034 | 80.2878521 | 79.122577 |
| 17:18:50 | 0:17:48 | 77.2188035 | 70.2675012 | 80.1785034 | 79.2878521 | 78.122577 |
| 17:18:51 | 0:17:49 | 77.2188035 | 70.2675012 | 80.1785034 | 77.2878521 | 77.122577 |
| 17:18:52 | 0:17:50 | 79.2188035 | 68.2675012 | 79.1785034 | 75.2878521 | 77.122577 |
| 17:18:53 | 0:17:51 | 80.2188035 | 68.2675012 | 79.1785034 | 72.2878521 | 77.122577 |
| 17:18:54 | 0:17:52 | 80.2188035 | 65.2675012 | 79.1785034 | 72.2878521 | 76.122577 |
| 17:18:55 | 0:17:53 | 82.2188035 | 66.2675012 | 79.1785034 | 72.2878521 | 76.122577 |
| 17:18:56 | 0:17:54 | 81.2188035 | 67.2675012 | 79.1785034 | 72.2878521 | 75.122577 |
| 17:18:57 | 0:17:55 | 80.2188035 | 67.2675012 | 79.1785034 | 72.2878521 | 75.122577 |
| 17:18:58 | 0:17:56 | 79.2188035 | 68.2675012 | 79.1785034 | 74.2878521 | 74.122577 |

|          |         |            |            |            |            |           |
|----------|---------|------------|------------|------------|------------|-----------|
| 17:18:59 | 0:17:57 | 76.2188035 | 70.2675012 | 79.1785034 | 74.2878521 | 73.122577 |
| 17:19:00 | 0:17:58 | 76.2188035 | 70.2675012 | 79.1785034 | 74.2878521 | 73.122577 |
| 17:19:01 | 0:17:59 | 75.2188035 | 70.2675012 | 79.1785034 | 74.2878521 | 73.122577 |
| 17:19:02 | 0:18:00 | 75.2188035 | 70.2675012 | 80.1785034 | 75.2878521 | 73.122577 |
| 17:19:03 | 0:18:01 | 75.2188035 | 69.2675012 | 80.1785034 | 75.2878521 | 73.122577 |
| 17:19:04 | 0:18:02 | 76.2188035 | 68.2675012 | 83.1785034 | 74.2878521 | 73.122577 |
| 17:19:05 | 0:18:03 | 76.2188035 | 68.2675012 | 83.1785034 | 74.2878521 | 73.122577 |
| 17:19:06 | 0:18:04 | 76.2188035 | 68.2675012 | 83.1785034 | 74.2878521 | 73.122577 |
| 17:19:07 | 0:18:05 | 77.2188035 | 69.2675012 | 83.1785034 | 74.2878521 | 75.122577 |
| 17:19:08 | 0:18:06 | 77.2188035 | 69.2675012 | 83.1785034 | 74.2878521 | 75.122577 |
| 17:19:09 | 0:18:07 | 78.2188035 | 69.2675012 | 83.1785034 | 74.2878521 | 75.122577 |
| 17:19:10 | 0:18:08 | 78.2188035 | 68.2675012 | 83.1785034 | 73.2878521 | 78.122577 |
| 17:19:11 | 0:18:09 | 77.2188035 | 58.2675012 | 82.1785034 | 73.2878521 | 78.122577 |
| 17:19:12 | 0:18:10 | 77.2188035 | 58.2675012 | 82.1785034 | 72.2878521 | 78.122577 |
| 17:19:13 | 0:18:11 | 77.2188035 | 58.2675012 | 80.1785034 | 72.2878521 | 78.122577 |
| 17:19:14 | 0:18:12 | 77.2188035 | 58.2675012 | 79.1785034 | 72.2878521 | 78.122577 |
| 17:19:15 | 0:18:13 | 76.2188035 | 58.2675012 | 79.1785034 | 72.2878521 | 78.122577 |
| 17:19:16 | 0:18:14 | 76.2188035 | 61.2675012 | 79.1785034 | 72.2878521 | 75.122577 |
| 17:19:17 | 0:18:15 | 77.2188035 | 63.2675012 | 78.1785034 | 73.2878521 | 75.122577 |
| 17:19:18 | 0:18:16 | 77.2188035 | 64.2675012 | 77.1785034 | 74.2878521 | 74.122577 |
| 17:19:19 | 0:18:17 | 77.2188035 | 64.2675012 | 76.1785034 | 74.2878521 | 74.122577 |
| 17:19:20 | 0:18:18 | 77.2188035 | 63.2675012 | 76.1785034 | 75.2878521 | 74.122577 |
| 17:19:21 | 0:18:19 | 77.2188035 | 63.2675012 | 76.1785034 | 75.2878521 | 75.122577 |
| 17:19:22 | 0:18:20 | 77.2188035 | 63.2675012 | 77.1785034 | 75.2878521 | 75.122577 |
| 17:19:23 | 0:18:21 | 77.2188035 | 63.2675012 | 77.1785034 | 76.2878521 | 75.122577 |
| 17:19:24 | 0:18:22 | 77.2188035 | 66.2675012 | 77.1785034 | 76.2878521 | 76.122577 |
| 17:19:25 | 0:18:23 | 76.2188035 | 66.2675012 | 77.1785034 | 76.2878521 | 76.122577 |
| 17:19:26 | 0:18:24 | 76.2188035 | 67.2675012 | 77.1785034 | 78.2878521 | 79.122577 |
| 17:19:27 | 0:18:25 | 76.2188035 | 67.2675012 | 77.1785034 | 77.2878521 | 79.122577 |
| 17:19:28 | 0:18:26 | 76.2188035 | 68.2675012 | 78.1785034 | 77.2878521 | 79.122577 |
| 17:19:29 | 0:18:27 | 76.2188035 | 68.2675012 | 77.1785034 | 76.2878521 | 81.122577 |
| 17:19:30 | 0:18:28 | 76.2188035 | 68.2675012 | 77.1785034 | 76.2878521 | 81.122577 |
| 17:19:31 | 0:18:29 | 76.2188035 | 70.2675012 | 76.1785034 | 76.2878521 | 83.122577 |
| 17:19:32 | 0:18:30 | 76.2188035 | 70.2675012 | 75.1785034 | 76.2878521 | 87.122577 |
| 17:19:33 | 0:18:31 | 76.2188035 | 70.2675012 | 74.1785034 | 75.2878521 | 87.122577 |
| 17:19:34 | 0:18:32 | 76.2188035 | 70.2675012 | 71.1785034 | 75.2878521 | 87.122577 |
| 17:19:35 | 0:18:33 | 75.2188035 | 72.2675012 | 70.1785034 | 75.2878521 | 87.122577 |
| 17:19:36 | 0:18:34 | 74.2188035 | 72.2675012 | 70.1785034 | 75.2878521 | 86.122577 |
| 17:19:37 | 0:18:35 | 74.2188035 | 72.2675012 | 68.1785034 | 75.2878521 | 86.122577 |
| 17:19:38 | 0:18:36 | 75.2188035 | 72.2675012 | 67.1785034 | 76.2878521 | 87.122577 |
| 17:19:39 | 0:18:37 | 75.2188035 | 70.2675012 | 67.1785034 | 76.2878521 | 82.122577 |
| 17:19:40 | 0:18:38 | 74.2188035 | 68.2675012 | 67.1785034 | 76.2878521 | 82.122577 |
| 17:19:41 | 0:18:39 | 74.2188035 | 69.2675012 | 69.1785034 | 76.2878521 | 77.122577 |
| 17:19:42 | 0:18:40 | 74.2188035 | 70.2675012 | 70.1785034 | 76.2878521 | 75.122577 |
| 17:19:43 | 0:18:41 | 74.2188035 | 71.2675012 | 70.1785034 | 78.2878521 | 75.122577 |

|          |         |            |            |            |            |           |
|----------|---------|------------|------------|------------|------------|-----------|
| 17:19:44 | 0:18:42 | 74.2188035 | 73.2675012 | 70.1785034 | 78.2878521 | 75.122577 |
| 17:19:45 | 0:18:43 | 74.2188035 | 74.2675012 | 70.1785034 | 78.2878521 | 74.122577 |
| 17:19:46 | 0:18:44 | 74.2188035 | 74.2675012 | 70.1785034 | 78.2878521 | 74.122577 |
| 17:19:47 | 0:18:45 | 74.2188035 | 74.2675012 | 67.1785034 | 78.2878521 | 74.122577 |
| 17:19:48 | 0:18:46 | 73.2188035 | 75.2675012 | 67.1785034 | 81.2878521 | 75.122577 |
| 17:19:49 | 0:18:47 | 73.2188035 | 76.2675012 | 67.1785034 | 81.2878521 | 75.122577 |
| 17:19:50 | 0:18:48 | 74.2188035 | 76.2675012 | 68.1785034 | 81.2878521 | 75.122577 |
| 17:19:51 | 0:18:49 | 74.2188035 | 72.2675012 | 68.1785034 | 82.2878521 | 75.122577 |
| 17:19:52 | 0:18:50 | 74.2188035 | 71.2675012 | 68.1785034 | 82.2878521 | 75.122577 |
| 17:19:53 | 0:18:51 | 74.2188035 | 71.2675012 | 68.1785034 | 82.2878521 | 76.122577 |
| 17:19:54 | 0:18:52 | 74.2188035 | 71.2675012 | 68.1785034 | 83.2878521 | 77.122577 |
| 17:19:55 | 0:18:53 | 73.2188035 | 71.2675012 | 68.1785034 | 83.2878521 | 79.122577 |
| 17:19:56 | 0:18:54 | 73.2188035 | 72.2675012 | 68.1785034 | 80.2878521 | 79.122577 |
| 17:19:57 | 0:18:55 | 73.2188035 | 72.2675012 | 68.1785034 | 79.2878521 | 80.122577 |
| 17:19:58 | 0:18:56 | 73.2188035 | 73.2675012 | 67.1785034 | 79.2878521 | 80.122577 |
| 17:19:59 | 0:18:57 | 73.2188035 | 73.2675012 | 66.1785034 | 79.2878521 | 80.122577 |
| 17:20:00 | 0:18:58 | 73.2188035 | 74.2675012 | 66.1785034 | 79.2878521 | 78.122577 |
| 17:20:01 | 0:18:59 | 74.2188035 | 74.2675012 | 66.1785034 | 77.2878521 | 77.122577 |
| 17:20:02 | 0:19:00 | 74.2188035 | 74.2675012 | 65.1785034 | 77.2878521 | 77.122577 |
| 17:20:03 | 0:19:01 | 75.2188035 | 74.2675012 | 65.1785034 | 77.2878521 | 77.122577 |
| 17:20:04 | 0:19:02 | 75.2188035 | 74.2675012 | 64.1785034 | 78.2878521 | 76.122577 |
| 17:20:05 | 0:19:03 | 76.2188035 | 74.2675012 | 63.1785034 | 78.2878521 | 76.122577 |
| 17:20:06 | 0:19:04 | 76.2188035 | 72.2675012 | 63.1785034 | 77.2878521 | 75.122577 |
| 17:20:07 | 0:19:05 | 76.2188035 | 72.2675012 | 63.1785034 | 77.2878521 | 75.122577 |
| 17:20:08 | 0:19:06 | 76.2188035 | 72.2675012 | 63.1785034 | 77.2878521 | 75.122577 |
| 17:20:09 | 0:19:07 | 77.2188035 | 71.2675012 | 63.1785034 | 77.2878521 | 75.122577 |
| 17:20:10 | 0:19:08 | 77.2188035 | 71.2675012 | 64.1785034 | 77.2878521 | 75.122577 |
| 17:20:11 | 0:19:09 | 77.2188035 | 71.2675012 | 64.1785034 | 77.2878521 | 75.122577 |
| 17:20:12 | 0:19:10 | 77.2188035 | 71.2675012 | 64.1785034 | 78.2878521 | 74.122577 |
| 17:20:13 | 0:19:11 | 77.2188035 | 73.2675012 | 64.1785034 | 78.2878521 | 74.122577 |
| 17:20:14 | 0:19:12 | 77.2188035 | 74.2675012 | 64.1785034 | 79.2878521 | 74.122577 |
| 17:20:15 | 0:19:13 | 79.2188035 | 74.2675012 | 65.1785034 | 81.2878521 | 74.122577 |
| 17:20:16 | 0:19:14 | 81.2188035 | 74.2675012 | 66.1785034 | 81.2878521 | 74.122577 |
| 17:20:17 | 0:19:15 | 82.2188035 | 74.2675012 | 66.1785034 | 81.2878521 | 75.122577 |
| 17:20:18 | 0:19:16 | 82.2188035 | 73.2675012 | 68.1785034 | 82.2878521 | 76.122577 |
| 17:20:19 | 0:19:17 | 83.2188035 | 70.2675012 | 68.1785034 | 82.2878521 | 76.122577 |
| 17:20:20 | 0:19:18 | 86.2188035 | 70.2675012 | 69.1785034 | 82.2878521 | 78.122577 |
| 17:20:21 | 0:19:19 | 87.2188035 | 71.2675012 | 70.1785034 | 82.2878521 | 78.122577 |
| 17:20:22 | 0:19:20 | 87.2188035 | 72.2675012 | 71.1785034 | 82.2878521 | 77.122577 |
| 17:20:23 | 0:19:21 | 87.2188035 | 72.2675012 | 70.1785034 | 79.2878521 | 77.122577 |
| 17:20:24 | 0:19:22 | 87.2188035 | 72.2675012 | 70.1785034 | 79.2878521 | 77.122577 |
| 17:20:25 | 0:19:23 | 87.2188035 | 74.2675012 | 68.1785034 | 79.2878521 | 76.122577 |
| 17:20:26 | 0:19:24 | 88.2188035 | 74.2675012 | 67.1785034 | 79.2878521 | 80.122577 |
| 17:20:27 | 0:19:25 | 91.2188035 | 75.2675012 | 70.1785034 | 79.2878521 | 81.122577 |
| 17:20:28 | 0:19:26 | 79.7751363 | 75.2675012 | 77.1785034 | 81.2878521 | 82.122577 |

|          |         |            |            |            |            |           |
|----------|---------|------------|------------|------------|------------|-----------|
| 17:20:29 | 0:19:27 | 81.4001363 | 75.2675012 | 79.1785034 | 83.2878521 | 83.122577 |
| 17:20:30 | 0:19:28 | 91.2188035 | 78.2675012 | 79.1785034 | 85.2878521 | 83.122577 |
| 17:20:31 | 0:19:29 | 85.2188035 | 80.2675012 | 78.1785034 | 85.2878521 | 83.122577 |
| 17:20:32 | 0:19:30 | 83.2188035 | 84.2675012 | 77.1785034 | 85.2878521 | 83.122577 |
| 17:20:33 | 0:19:31 | 82.2188035 | 84.2675012 | 77.1785034 | 85.2878521 | 83.122577 |
| 17:20:34 | 0:19:32 | 82.2188035 | 87.2675012 | 78.1785034 | 81.2878521 | 83.122577 |
| 17:20:35 | 0:19:33 | 82.2188035 | 90.2675012 | 80.1785034 | 73.2878521 | 83.122577 |
| 17:20:36 | 0:19:34 | 81.2188035 | 94.2675012 | 80.1785034 | 73.2878521 | 83.122577 |
| 17:20:37 | 0:19:35 | 81.2188035 | 81.4001363 | 80.1785034 | 73.2878521 | 82.122577 |
| 17:20:38 | 0:19:36 | 80.2188035 | 81.0251363 | 79.1785034 | 73.2878521 | 81.122577 |
| 17:20:39 | 0:19:37 | 79.2188035 | 80.4001363 | 77.1785034 | 73.2878521 | 81.122577 |
| 17:20:40 | 0:19:38 | 79.2188035 | 80.1501363 | 77.1785034 | 73.2878521 | 81.122577 |
| 17:20:41 | 0:19:39 | 79.2188035 | 91.2675012 | 73.1785034 | 72.2878521 | 81.122577 |
| 17:20:42 | 0:19:40 | 77.2188035 | 89.2675012 | 73.1785034 | 72.2878521 | 81.122577 |
| 17:20:43 | 0:19:41 | 76.2188035 | 88.2675012 | 73.1785034 | 72.2878521 | 81.122577 |
| 17:20:44 | 0:19:42 | 76.2188035 | 88.2675012 | 73.1785034 | 72.2878521 | 81.122577 |
| 17:20:45 | 0:19:43 | 75.2188035 | 88.2675012 | 72.1785034 | 72.2878521 | 81.122577 |
| 17:20:46 | 0:19:44 | 75.2188035 | 87.2675012 | 71.1785034 | 72.2878521 | 80.122577 |
| 17:20:47 | 0:19:45 | 75.2188035 | 85.2675012 | 71.1785034 | 71.2878521 | 80.122577 |
| 17:20:48 | 0:19:46 | 77.2188035 | 85.2675012 | 71.1785034 | 71.2878521 | 80.122577 |
| 17:20:49 | 0:19:47 | 77.2188035 | 85.2675012 | 70.1785034 | 70.2878521 | 81.122577 |
| 17:20:50 | 0:19:48 | 78.2188035 | 87.2675012 | 70.1785034 | 69.2878521 | 81.122577 |
| 17:20:51 | 0:19:49 | 78.2188035 | 89.2675012 | 71.1785034 | 69.2878521 | 85.122577 |
| 17:20:52 | 0:19:50 | 77.2188035 | 89.2675012 | 73.1785034 | 70.2878521 | 84.122577 |
| 17:20:53 | 0:19:51 | 77.2188035 | 89.2675012 | 73.1785034 | 72.2878521 | 84.122577 |
| 17:20:54 | 0:19:52 | 77.2188035 | 79.2675012 | 73.1785034 | 72.2878521 | 78.122577 |
| 17:20:55 | 0:19:53 | 78.2188035 | 76.2675012 | 72.1785034 | 72.2878521 | 77.122577 |
| 17:20:56 | 0:19:54 | 78.2188035 | 76.2675012 | 72.1785034 | 71.2878521 | 74.122577 |
| 17:20:57 | 0:19:55 | 78.2188035 | 76.2675012 | 72.1785034 | 70.2878521 | 74.122577 |
| 17:20:58 | 0:19:56 | 79.2188035 | 76.2675012 | 72.1785034 | 70.2878521 | 74.122577 |
| 17:20:59 | 0:19:57 | 79.2188035 | 77.2675012 | 72.1785034 | 70.2878521 | 74.122577 |
| 17:21:00 | 0:19:58 | 78.2188035 | 77.2675012 | 72.1785034 | 71.2878521 | 74.122577 |
| 17:21:01 | 0:19:59 | 78.2188035 | 77.2675012 | 73.1785034 | 72.2878521 | 76.122577 |
| 17:21:02 | 0:20:00 | 77.2188035 | 75.2675012 | 73.1785034 | 72.2878521 | 76.122577 |
| 17:21:03 | 0:20:01 | 76.2188035 | 74.2675012 | 73.1785034 | 72.2878521 | 78.122577 |
| 17:21:04 | 0:20:02 | 76.2188035 | 74.2675012 | 72.1785034 | 71.2878521 | 79.122577 |
| 17:21:05 | 0:20:03 | 75.2188035 | 75.2675012 | 73.1785034 | 71.2878521 | 79.122577 |
| 17:21:06 | 0:20:04 | 75.2188035 | 75.2675012 | 72.1785034 | 68.2878521 | 77.122577 |
| 17:21:07 | 0:20:05 | 75.2188035 | 77.2675012 | 72.1785034 | 67.2878521 | 77.122577 |
| 17:21:08 | 0:20:06 | 74.2188035 | 77.2675012 | 71.1785034 | 66.2878521 | 76.122577 |
| 17:21:09 | 0:20:07 | 74.2188035 | 77.2675012 | 71.1785034 | 66.2878521 | 76.122577 |
| 17:21:10 | 0:20:08 | 74.2188035 | 73.2675012 | 71.1785034 | 66.2878521 | 76.122577 |
| 17:21:11 | 0:20:09 | 73.2188035 | 73.2675012 | 72.1785034 | 66.2878521 | 76.122577 |
| 17:21:12 | 0:20:10 | 73.2188035 | 72.2675012 | 74.1785034 | 66.2878521 | 77.122577 |
| 17:21:13 | 0:20:11 | 73.2188035 | 72.2675012 | 75.1785034 | 66.2878521 | 83.122577 |

|          |         |            |            |            |            |           |
|----------|---------|------------|------------|------------|------------|-----------|
| 17:21:14 | 0:20:12 | 73.2188035 | 72.2675012 | 75.1785034 | 66.2878521 | 83.122577 |
| 17:21:15 | 0:20:13 | 73.2188035 | 73.2675012 | 75.1785034 | 65.2878521 | 85.122577 |
| 17:21:16 | 0:20:14 | 73.2188035 | 76.2675012 | 76.1785034 | 64.2878521 | 86.122577 |
| 17:21:17 | 0:20:15 | 73.2188035 | 77.2675012 | 76.1785034 | 63.2878521 | 85.122577 |
| 17:21:18 | 0:20:16 | 73.2188035 | 77.2675012 | 76.1785034 | 63.2878521 | 85.122577 |
| 17:21:19 | 0:20:17 | 73.2188035 | 77.2675012 | 77.1785034 | 62.2878521 | 85.122577 |
| 17:21:20 | 0:20:18 | 73.2188035 | 73.2675012 | 77.1785034 | 62.2878521 | 84.122577 |
| 17:21:21 | 0:20:19 | 74.2188035 | 72.2675012 | 78.1785034 | 63.2878521 | 84.122577 |
| 17:21:22 | 0:20:20 | 76.2188035 | 72.2675012 | 81.1785034 | 63.2878521 | 84.122577 |
| 17:21:23 | 0:20:21 | 76.2188035 | 73.2675012 | 83.1785034 | 63.2878521 | 76.122577 |
| 17:21:24 | 0:20:22 | 76.2188035 | 73.2675012 | 85.1785034 | 63.2878521 | 76.122577 |
| 17:21:25 | 0:20:23 | 77.2188035 | 73.2675012 | 86.1785034 | 63.2878521 | 74.122577 |
| 17:21:26 | 0:20:24 | 77.2188035 | 74.2675012 | 86.1785034 | 63.2878521 | 72.122577 |
| 17:21:27 | 0:20:25 | 77.2188035 | 76.2675012 | 88.1785034 | 63.2878521 | 72.122577 |
| 17:21:28 | 0:20:26 | 77.2188035 | 76.2675012 | 87.1785034 | 65.2878521 | 72.122577 |
| 17:21:29 | 0:20:27 | 77.2188035 | 76.2675012 | 86.1785034 | 68.2878521 | 72.122577 |
| 17:21:30 | 0:20:28 | 76.2188035 | 76.2675012 | 86.1785034 | 68.2878521 | 72.122577 |
| 17:21:31 | 0:20:29 | 74.2188035 | 75.2675012 | 85.1785034 | 68.2878521 | 72.122577 |
| 17:21:32 | 0:20:30 | 75.2188035 | 75.2675012 | 85.1785034 | 65.2878521 | 71.122577 |
| 17:21:33 | 0:20:31 | 75.2188035 | 75.2675012 | 88.1785034 | 63.2878521 | 71.122577 |
| 17:21:34 | 0:20:32 | 75.2188035 | 74.2675012 | 89.1785034 | 62.2878521 | 70.122577 |
| 17:21:35 | 0:20:33 | 76.2188035 | 74.2675012 | 89.1785034 | 62.2878521 | 69.122577 |
| 17:21:36 | 0:20:34 | 75.2188035 | 73.2675012 | 88.1785034 | 60.2878521 | 69.122577 |
| 17:21:37 | 0:20:35 | 75.2188035 | 73.2675012 | 88.1785034 | 60.2878521 | 69.122577 |
| 17:21:38 | 0:20:36 | 76.2188035 | 78.2675012 | 83.1785034 | 60.2878521 | 69.122577 |
| 17:21:39 | 0:20:37 | 76.2188035 | 78.2675012 | 81.1785034 | 59.2878521 | 67.122577 |
| 17:21:40 | 0:20:38 | 76.2188035 | 79.2675012 | 79.1785034 | 60.2878521 | 67.122577 |
| 17:21:41 | 0:20:39 | 75.2188035 | 79.2675012 | 79.1785034 | 60.2878521 | 67.122577 |
| 17:21:42 | 0:20:40 | 75.2188035 | 79.2675012 | 80.1785034 | 63.2878521 | 67.122577 |
| 17:21:43 | 0:20:41 | 75.2188035 | 80.2675012 | 82.1785034 | 64.2878521 | 67.122577 |
| 17:21:44 | 0:20:42 | 75.2188035 | 79.2675012 | 84.1785034 | 64.2878521 | 67.122577 |
| 17:21:45 | 0:20:43 | 74.2188035 | 79.2675012 | 85.1785034 | 64.2878521 | 67.122577 |
| 17:21:46 | 0:20:44 | 74.2188035 | 79.2675012 | 85.1785034 | 64.2878521 | 67.122577 |
| 17:21:47 | 0:20:45 | 74.2188035 | 78.2675012 | 85.1785034 | 64.2878521 | 67.122577 |
| 17:21:48 | 0:20:46 | 74.2188035 | 78.2675012 | 85.1785034 | 67.2878521 | 67.122577 |
| 17:21:49 | 0:20:47 | 74.2188035 | 78.2675012 | 85.1785034 | 67.2878521 | 69.122577 |
| 17:21:50 | 0:20:48 | 74.2188035 | 78.2675012 | 86.1785034 | 69.2878521 | 69.122577 |
| 17:21:51 | 0:20:49 | 74.2188035 | 78.2675012 | 86.1785034 | 69.2878521 | 70.122577 |
| 17:21:52 | 0:20:50 | 75.2188035 | 78.2675012 | 86.1785034 | 73.2878521 | 70.122577 |
| 17:21:53 | 0:20:51 | 75.2188035 | 78.2675012 | 87.1785034 | 72.2878521 | 70.122577 |
| 17:21:54 | 0:20:52 | 75.2188035 | 79.2675012 | 87.1785034 | 72.2878521 | 73.122577 |
| 17:21:55 | 0:20:53 | 75.2188035 | 79.2675012 | 88.1785034 | 73.2878521 | 72.122577 |
| 17:21:56 | 0:20:54 | 74.2188035 | 79.2675012 | 88.1785034 | 74.2878521 | 72.122577 |
| 17:21:57 | 0:20:55 | 74.2188035 | 79.2675012 | 87.1785034 | 75.2878521 | 72.122577 |
| 17:21:58 | 0:20:56 | 73.2188035 | 79.2675012 | 87.1785034 | 77.2878521 | 72.122577 |

|          |         |            |            |            |            |           |
|----------|---------|------------|------------|------------|------------|-----------|
| 17:21:59 | 0:20:57 | 72.2188035 | 78.2675012 | 84.1785034 | 77.2878521 | 73.122577 |
| 17:22:00 | 0:20:58 | 73.2188035 | 78.2675012 | 77.1785034 | 80.2878521 | 73.122577 |
| 17:22:01 | 0:20:59 | 73.2188035 | 75.2675012 | 77.1785034 | 81.2878521 | 73.122577 |
| 17:22:02 | 0:21:00 | 74.2188035 | 75.2675012 | 72.1785034 | 82.2878521 | 73.122577 |
| 17:22:03 | 0:21:01 | 74.2188035 | 73.2675012 | 72.1785034 | 83.2878521 | 72.122577 |
| 17:22:04 | 0:21:02 | 74.2188035 | 74.2675012 | 74.1785034 | 83.2878521 | 72.122577 |
| 17:22:05 | 0:21:03 | 74.2188035 | 74.2675012 | 75.1785034 | 83.2878521 | 72.122577 |
| 17:22:06 | 0:21:04 | 74.2188035 | 74.2675012 | 76.1785034 | 81.2878521 | 72.122577 |
| 17:22:07 | 0:21:05 | 73.2188035 | 74.2675012 | 76.1785034 | 75.2878521 | 74.122577 |
| 17:22:08 | 0:21:06 | 73.2188035 | 74.2675012 | 76.1785034 | 73.2878521 | 74.122577 |
| 17:22:09 | 0:21:07 | 73.2188035 | 74.2675012 | 76.1785034 | 73.2878521 | 75.122577 |
| 17:22:10 | 0:21:08 | 73.2188035 | 73.2675012 | 76.1785034 | 74.2878521 | 75.122577 |
| 17:22:11 | 0:21:09 | 73.2188035 | 72.2675012 | 76.1785034 | 77.2878521 | 75.122577 |
| 17:22:12 | 0:21:10 | 73.2188035 | 72.2675012 | 76.1785034 | 77.2878521 | 75.122577 |
| 17:22:13 | 0:21:11 | 73.2188035 | 73.2675012 | 82.1785034 | 77.2878521 | 73.122577 |
| 17:22:14 | 0:21:12 | 73.2188035 | 73.2675012 | 83.1785034 | 81.2878521 | 72.122577 |
| 17:22:15 | 0:21:13 | 73.2188035 | 76.2675012 | 83.1785034 | 79.2878521 | 72.122577 |
| 17:22:16 | 0:21:14 | 73.2188035 | 76.2675012 | 80.1785034 | 79.2878521 | 71.122577 |
| 17:22:17 | 0:21:15 | 73.2188035 | 77.2675012 | 79.1785034 | 75.2878521 | 71.122577 |
| 17:22:18 | 0:21:16 | 73.2188035 | 74.2675012 | 79.1785034 | 74.2878521 | 74.122577 |
| 17:22:19 | 0:21:17 | 78.2188035 | 73.2675012 | 79.1785034 | 73.2878521 | 74.122577 |
| 17:22:20 | 0:21:18 | 78.2188035 | 73.2675012 | 79.1785034 | 73.2878521 | 74.122577 |
| 17:22:21 | 0:21:19 | 78.2188035 | 70.2675012 | 79.1785034 | 75.2878521 | 73.122577 |
| 17:22:22 | 0:21:20 | 77.2188035 | 70.2675012 | 79.1785034 | 75.2878521 | 72.122577 |
| 17:22:23 | 0:21:21 | 77.2188035 | 71.2675012 | 79.1785034 | 75.2878521 | 71.122577 |
| 17:22:24 | 0:21:22 | 76.2188035 | 73.2675012 | 80.1785034 | 75.2878521 | 71.122577 |
| 17:22:25 | 0:21:23 | 76.2188035 | 76.2675012 | 80.1785034 | 75.2878521 | 71.122577 |
| 17:22:26 | 0:21:24 | 76.2188035 | 76.2675012 | 80.1785034 | 76.2878521 | 71.122577 |
| 17:22:27 | 0:21:25 | 76.2188035 | 78.2675012 | 80.1785034 | 76.2878521 | 71.122577 |
| 17:22:28 | 0:21:26 | 76.2188035 | 78.2675012 | 80.1785034 | 76.2878521 | 72.122577 |
| 17:22:29 | 0:21:27 | 75.2188035 | 75.2675012 | 76.1785034 | 76.2878521 | 73.122577 |
| 17:22:30 | 0:21:28 | 75.2188035 | 75.2675012 | 75.1785034 | 74.2878521 | 74.122577 |
| 17:22:31 | 0:21:29 | 76.2188035 | 75.2675012 | 75.1785034 | 74.2878521 | 74.122577 |
| 17:22:32 | 0:21:30 | 76.2188035 | 76.2675012 | 75.1785034 | 65.2878521 | 74.122577 |
| 17:22:33 | 0:21:31 | 76.2188035 | 76.2675012 | 75.1785034 | 62.2878521 | 74.122577 |
| 17:22:34 | 0:21:32 | 76.2188035 | 76.2675012 | 75.1785034 | 62.2878521 | 74.122577 |
| 17:22:35 | 0:21:33 | 76.2188035 | 76.2675012 | 77.1785034 | 63.2878521 | 73.122577 |
| 17:22:36 | 0:21:34 | 76.2188035 | 79.2675012 | 77.1785034 | 63.2878521 | 73.122577 |
| 17:22:37 | 0:21:35 | 76.2188035 | 82.2675012 | 77.1785034 | 63.2878521 | 73.122577 |
| 17:22:38 | 0:21:36 | 76.2188035 | 83.2675012 | 77.1785034 | 62.2878521 | 74.122577 |
| 17:22:39 | 0:21:37 | 76.2188035 | 83.2675012 | 77.1785034 | 62.2878521 | 74.122577 |
| 17:22:40 | 0:21:38 | 76.2188035 | 83.2675012 | 77.1785034 | 62.2878521 | 74.122577 |
| 17:22:41 | 0:21:39 | 76.2188035 | 83.2675012 | 71.1785034 | 62.2878521 | 74.122577 |
| 17:22:42 | 0:21:40 | 78.2188035 | 84.2675012 | 68.1785034 | 63.2878521 | 73.122577 |
| 17:22:43 | 0:21:41 | 79.2188035 | 86.2675012 | 68.1785034 | 63.2878521 | 73.122577 |

|          |         |            |            |            |            |           |
|----------|---------|------------|------------|------------|------------|-----------|
| 17:22:44 | 0:21:42 | 79.2188035 | 85.2675012 | 68.1785034 | 67.2878521 | 73.122577 |
| 17:22:45 | 0:21:43 | 79.2188035 | 85.2675012 | 68.1785034 | 67.2878521 | 73.122577 |
| 17:22:46 | 0:21:44 | 79.2188035 | 85.2675012 | 68.1785034 | 66.2878521 | 73.122577 |
| 17:22:47 | 0:21:45 | 79.2188035 | 82.2675012 | 68.1785034 | 66.2878521 | 75.122577 |
| 17:22:48 | 0:21:46 | 79.2188035 | 82.2675012 | 68.1785034 | 65.2878521 | 75.122577 |
| 17:22:49 | 0:21:47 | 80.2188035 | 83.2675012 | 68.1785034 | 65.2878521 | 75.122577 |
| 17:22:50 | 0:21:48 | 80.2188035 | 84.2675012 | 68.1785034 | 65.2878521 | 75.122577 |
| 17:22:51 | 0:21:49 | 79.2188035 | 83.2675012 | 69.1785034 | 65.2878521 | 75.122577 |
| 17:22:52 | 0:21:50 | 79.2188035 | 82.2675012 | 69.1785034 | 65.2878521 | 75.122577 |
| 17:22:53 | 0:21:51 | 78.2188035 | 82.2675012 | 69.1785034 | 65.2878521 | 74.122577 |
| 17:22:54 | 0:21:52 | 78.2188035 | 80.2675012 | 69.1785034 | 65.2878521 | 74.122577 |
| 17:22:55 | 0:21:53 | 78.2188035 | 79.2675012 | 69.1785034 | 67.2878521 | 74.122577 |
| 17:22:56 | 0:21:54 | 78.2188035 | 79.2675012 | 72.1785034 | 69.2878521 | 74.122577 |
| 17:22:57 | 0:21:55 | 78.2188035 | 77.2675012 | 72.1785034 | 70.2878521 | 74.122577 |
| 17:22:58 | 0:21:56 | 77.2188035 | 76.2675012 | 72.1785034 | 71.2878521 | 74.122577 |
| 17:22:59 | 0:21:57 | 77.2188035 | 76.2675012 | 76.1785034 | 73.2878521 | 74.122577 |
| 17:23:00 | 0:21:58 | 77.2188035 | 76.2675012 | 76.1785034 | 77.2878521 | 75.122577 |
| 17:23:01 | 0:21:59 | 74.2188035 | 76.2675012 | 76.1785034 | 78.2878521 | 75.122577 |
| 17:23:02 | 0:22:00 | 74.2188035 | 76.2675012 | 77.1785034 | 79.2878521 | 75.122577 |
| 17:23:03 | 0:22:01 | 74.2188035 | 76.2675012 | 83.1785034 | 79.2878521 | 76.122577 |
| 17:23:04 | 0:22:02 | 75.2188035 | 75.2675012 | 82.1785034 | 79.2878521 | 76.122577 |
| 17:23:05 | 0:22:03 | 76.2188035 | 76.2675012 | 82.1785034 | 75.2878521 | 75.122577 |
| 17:23:06 | 0:22:04 | 76.2188035 | 76.2675012 | 82.1785034 | 75.2878521 | 75.122577 |
| 17:23:07 | 0:22:05 | 76.2188035 | 81.2675012 | 84.1785034 | 73.2878521 | 75.122577 |
| 17:23:08 | 0:22:06 | 80.2188035 | 81.2675012 | 85.1785034 | 73.2878521 | 76.122577 |
| 17:23:09 | 0:22:07 | 81.2188035 | 82.2675012 | 84.1785034 | 72.2878521 | 77.122577 |
| 17:23:10 | 0:22:08 | 81.2188035 | 81.2675012 | 83.1785034 | 71.2878521 | 77.122577 |
| 17:23:11 | 0:22:09 | 81.2188035 | 81.2675012 | 81.1785034 | 71.2878521 | 77.122577 |
| 17:23:12 | 0:22:10 | 81.2188035 | 81.2675012 | 78.1785034 | 71.2878521 | 78.122577 |
| 17:23:13 | 0:22:11 | 81.2188035 | 80.2675012 | 77.1785034 | 71.2878521 | 79.122577 |
| 17:23:14 | 0:22:12 | 83.2188035 | 80.2675012 | 76.1785034 | 71.2878521 | 79.122577 |
| 17:23:15 | 0:22:13 | 83.2188035 | 78.2675012 | 75.1785034 | 71.2878521 | 79.122577 |
| 17:23:16 | 0:22:14 | 81.2188035 | 76.2675012 | 74.1785034 | 74.2878521 | 83.122577 |
| 17:23:17 | 0:22:15 | 80.2188035 | 76.2675012 | 74.1785034 | 74.2878521 | 85.122577 |
| 17:23:18 | 0:22:16 | 80.2188035 | 75.2675012 | 74.1785034 | 74.2878521 | 85.122577 |
| 17:23:19 | 0:22:17 | 80.2188035 | 75.2675012 | 74.1785034 | 76.2878521 | 85.122577 |
| 17:23:20 | 0:22:18 | 83.2188035 | 75.2675012 | 73.1785034 | 77.2878521 | 83.122577 |
| 17:23:21 | 0:22:19 | 84.2188035 | 74.2675012 | 73.1785034 | 77.2878521 | 83.122577 |
| 17:23:22 | 0:22:20 | 84.2188035 | 73.2675012 | 74.1785034 | 77.2878521 | 80.122577 |
| 17:23:23 | 0:22:21 | 84.2188035 | 72.2675012 | 74.1785034 | 77.2878521 | 79.122577 |
| 17:23:24 | 0:22:22 | 84.2188035 | 72.2675012 | 74.1785034 | 77.2878521 | 78.122577 |
| 17:23:25 | 0:22:23 | 85.2188035 | 72.2675012 | 75.1785034 | 77.2878521 | 77.122577 |
| 17:23:26 | 0:22:24 | 85.2188035 | 72.2675012 | 75.1785034 | 77.2878521 | 76.122577 |
| 17:23:27 | 0:22:25 | 85.2188035 | 72.2675012 | 75.1785034 | 77.2878521 | 76.122577 |
| 17:23:28 | 0:22:26 | 80.2188035 | 72.2675012 | 75.1785034 | 76.2878521 | 76.122577 |

|          |         |            |            |            |            |           |
|----------|---------|------------|------------|------------|------------|-----------|
| 17:23:29 | 0:22:27 | 80.2188035 | 73.2675012 | 75.1785034 | 75.2878521 | 76.122577 |
| 17:23:30 | 0:22:28 | 78.2188035 | 74.2675012 | 75.1785034 | 75.2878521 | 76.122577 |
| 17:23:31 | 0:22:29 | 78.2188035 | 74.2675012 | 75.1785034 | 75.2878521 | 74.122577 |
| 17:23:32 | 0:22:30 | 78.2188035 | 74.2675012 | 76.1785034 | 74.2878521 | 74.122577 |
| 17:23:33 | 0:22:31 | 78.2188035 | 75.2675012 | 77.1785034 | 75.2878521 | 73.122577 |
| 17:23:34 | 0:22:32 | 76.2188035 | 75.2675012 | 77.1785034 | 76.2878521 | 72.122577 |
| 17:23:35 | 0:22:33 | 75.2188035 | 76.2675012 | 77.1785034 | 76.2878521 | 72.122577 |
| 17:23:36 | 0:22:34 | 75.2188035 | 76.2675012 | 77.1785034 | 76.2878521 | 72.122577 |
| 17:23:37 | 0:22:35 | 77.2188035 | 78.2675012 | 76.1785034 | 76.2878521 | 71.122577 |
| 17:23:38 | 0:22:36 | 78.2188035 | 79.2675012 | 76.1785034 | 78.2878521 | 70.122577 |
| 17:23:39 | 0:22:37 | 78.2188035 | 79.2675012 | 76.1785034 | 79.2878521 | 70.122577 |
| 17:23:40 | 0:22:38 | 78.2188035 | 81.2675012 | 76.1785034 | 79.2878521 | 70.122577 |
| 17:23:41 | 0:22:39 | 76.2188035 | 82.2675012 | 77.1785034 | 80.2878521 | 70.122577 |
| 17:23:42 | 0:22:40 | 76.2188035 | 81.2675012 | 77.1785034 | 80.2878521 | 70.122577 |
| 17:23:43 | 0:22:41 | 76.2188035 | 80.2675012 | 77.1785034 | 81.2878521 | 71.122577 |
| 17:23:44 | 0:22:42 | 76.2188035 | 80.2675012 | 77.1785034 | 81.2878521 | 72.122577 |
| 17:23:45 | 0:22:43 | 76.2188035 | 73.2675012 | 77.1785034 | 81.2878521 | 72.122577 |
| 17:23:46 | 0:22:44 | 76.2188035 | 71.2675012 | 77.1785034 | 80.2878521 | 72.122577 |
| 17:23:47 | 0:22:45 | 76.2188035 | 71.2675012 | 77.1785034 | 77.2878521 | 74.122577 |
| 17:23:48 | 0:22:46 | 76.2188035 | 72.2675012 | 79.1785034 | 77.2878521 | 74.122577 |
| 17:23:49 | 0:22:47 | 76.2188035 | 73.2675012 | 80.1785034 | 76.2878521 | 74.122577 |
| 17:23:50 | 0:22:48 | 76.2188035 | 75.2675012 | 81.1785034 | 76.2878521 | 73.122577 |
| 17:23:51 | 0:22:49 | 76.2188035 | 75.2675012 | 81.1785034 | 76.2878521 | 73.122577 |
| 17:23:52 | 0:22:50 | 77.2188035 | 75.2675012 | 82.1785034 | 79.2878521 | 73.122577 |
| 17:23:53 | 0:22:51 | 77.2188035 | 74.2675012 | 83.1785034 | 80.2878521 | 73.122577 |
| 17:23:54 | 0:22:52 | 76.2188035 | 72.2675012 | 83.1785034 | 80.2878521 | 73.122577 |
| 17:23:55 | 0:22:53 | 75.2188035 | 71.2675012 | 83.1785034 | 81.2878521 | 74.122577 |
| 17:23:56 | 0:22:54 | 75.2188035 | 71.2675012 | 86.1785034 | 82.2878521 | 73.122577 |
| 17:23:57 | 0:22:55 | 75.2188035 | 72.2675012 | 86.1785034 | 82.2878521 | 73.122577 |
| 17:23:58 | 0:22:56 | 75.2188035 | 72.2675012 | 86.1785034 | 86.2878521 | 73.122577 |
| 17:23:59 | 0:22:57 | 75.2188035 | 73.2675012 | 86.1785034 | 86.2878521 | 73.122577 |
| 17:24:00 | 0:22:58 | 75.2188035 | 73.2675012 | 86.1785034 | 86.2878521 | 73.122577 |
| 17:24:01 | 0:22:59 | 76.2188035 | 71.2675012 | 86.1785034 | 85.2878521 | 73.122577 |
| 17:24:02 | 0:23:00 | 76.2188035 | 71.2675012 | 86.1785034 | 84.2878521 | 74.122577 |
| 17:24:03 | 0:23:01 | 77.2188035 | 71.2675012 | 86.1785034 | 82.2878521 | 76.122577 |
| 17:24:04 | 0:23:02 | 78.2188035 | 71.2675012 | 80.1785034 | 76.2878521 | 76.122577 |
| 17:24:05 | 0:23:03 | 77.2188035 | 73.2675012 | 80.1785034 | 76.2878521 | 77.122577 |
| 17:24:06 | 0:23:04 | 77.2188035 | 73.2675012 | 82.1785034 | 76.2878521 | 76.122577 |
| 17:24:07 | 0:23:05 | 78.2188035 | 73.2675012 | 82.1785034 | 72.2878521 | 75.122577 |
| 17:24:08 | 0:23:06 | 77.2188035 | 73.2675012 | 82.1785034 | 71.2878521 | 75.122577 |
| 17:24:09 | 0:23:07 | 76.2188035 | 74.2675012 | 81.1785034 | 71.2878521 | 75.122577 |
| 17:24:10 | 0:23:08 | 76.2188035 | 74.2675012 | 78.1785034 | 67.2878521 | 75.122577 |
| 17:24:11 | 0:23:09 | 76.2188035 | 74.2675012 | 73.1785034 | 64.2878521 | 75.122577 |
| 17:24:12 | 0:23:10 | 76.2188035 | 76.2675012 | 71.1785034 | 64.2878521 | 75.122577 |
| 17:24:13 | 0:23:11 | 76.2188035 | 76.2675012 | 70.1785034 | 57.2878521 | 75.122577 |



|          |         |            |            |            |            |           |
|----------|---------|------------|------------|------------|------------|-----------|
| 17:24:14 | 0:23:12 | 76.2188035 | 76.2675012 | 69.1785034 | 57.2878521 | 75.122577 |
| 17:24:15 | 0:23:13 | 74.2188035 | 76.2675012 | 70.1785034 | 58.2878521 | 75.122577 |
| 17:24:16 | 0:23:14 | 74.2188035 | 76.2675012 | 71.1785034 | 62.2878521 | 75.122577 |
| 17:24:17 | 0:23:15 | 73.2188035 | 77.2675012 | 71.1785034 | 62.2878521 | 75.122577 |
| 17:24:18 | 0:23:16 | 73.2188035 | 76.2675012 | 71.1785034 | 63.2878521 | 74.122577 |
| 17:24:19 | 0:23:17 | 74.2188035 | 76.2675012 | 71.1785034 | 63.2878521 | 74.122577 |
| 17:24:20 | 0:23:18 | 74.2188035 | 75.2675012 | 71.1785034 | 64.2878521 | 75.122577 |
| 17:24:21 | 0:23:19 | 74.2188035 | 74.2675012 | 71.1785034 | 66.2878521 | 75.122577 |
| 17:24:22 | 0:23:20 | 74.2188035 | 74.2675012 | 71.1785034 | 73.2878521 | 73.122577 |
| 17:24:23 | 0:23:21 | 74.2188035 | 67.2675012 | 71.1785034 | 73.2878521 | 73.122577 |
| 17:24:24 | 0:23:22 | 74.2188035 | 65.2675012 | 71.1785034 | 74.2878521 | 75.122577 |
| 17:24:25 | 0:23:23 | 74.2188035 | 65.2675012 | 71.1785034 | 74.2878521 | 75.122577 |
| 17:24:26 | 0:23:24 | 74.2188035 | 63.2675012 | 71.1785034 | 73.2878521 | 74.122577 |
| 17:24:27 | 0:23:25 | 74.2188035 | 62.2675012 | 71.1785034 | 70.2878521 | 74.122577 |
| 17:24:28 | 0:23:26 | 74.2188035 | 62.2675012 | 71.1785034 | 70.2878521 | 73.122577 |
| 17:24:29 | 0:23:27 | 73.2188035 | 64.2675012 | 71.1785034 | 70.2878521 | 73.122577 |
| 17:24:30 | 0:23:28 | 73.2188035 | 65.2675012 | 78.1785034 | 70.2878521 | 73.122577 |
| 17:24:31 | 0:23:29 | 73.2188035 | 65.2675012 | 79.1785034 | 70.2878521 | 73.122577 |
| 17:24:32 | 0:23:30 | 73.2188035 | 65.2675012 | 79.1785034 | 70.2878521 | 73.122577 |
| 17:24:33 | 0:23:31 | 74.2188035 | 66.2675012 | 79.1785034 | 70.2878521 | 73.122577 |
| 17:24:34 | 0:23:32 | 74.2188035 | 67.2675012 | 79.1785034 | 69.2878521 | 73.122577 |
| 17:24:35 | 0:23:33 | 74.2188035 | 71.2675012 | 78.1785034 | 69.2878521 | 73.122577 |
| 17:24:36 | 0:23:34 | 74.2188035 | 73.2675012 | 77.1785034 | 69.2878521 | 73.122577 |
| 17:24:37 | 0:23:35 | 73.2188035 | 73.2675012 | 77.1785034 | 72.2878521 | 73.122577 |
| 17:24:38 | 0:23:36 | 73.2188035 | 72.2675012 | 76.1785034 | 72.2878521 | 73.122577 |
| 17:24:39 | 0:23:37 | 73.2188035 | 72.2675012 | 76.1785034 | 72.2878521 | 73.122577 |
| 17:24:40 | 0:23:38 | 73.2188035 | 71.2675012 | 76.1785034 | 72.2878521 | 73.122577 |
| 17:24:41 | 0:23:39 | 72.2188035 | 71.2675012 | 75.1785034 | 72.2878521 | 74.122577 |
| 17:24:42 | 0:23:40 | 72.2188035 | 68.2675012 | 74.1785034 | 72.2878521 | 74.122577 |
| 17:24:43 | 0:23:41 | 73.2188035 | 67.2675012 | 74.1785034 | 72.2878521 | 73.122577 |
| 17:24:44 | 0:23:42 | 73.2188035 | 70.2675012 | 74.1785034 | 72.2878521 | 72.122577 |
| 17:24:45 | 0:23:43 | 75.2188035 | 70.2675012 | 74.1785034 | 72.2878521 | 72.122577 |
| 17:24:46 | 0:23:44 | 76.2188035 | 70.2675012 | 74.1785034 | 73.2878521 | 72.122577 |
| 17:24:47 | 0:23:45 | 76.2188035 | 70.2675012 | 75.1785034 | 76.2878521 | 72.122577 |
| 17:24:48 | 0:23:46 | 76.2188035 | 70.2675012 | 75.1785034 | 76.2878521 | 71.122577 |
| 17:24:49 | 0:23:47 | 76.2188035 | 70.2675012 | 75.1785034 | 77.2878521 | 71.122577 |
| 17:24:50 | 0:23:48 | 76.2188035 | 70.2675012 | 75.1785034 | 78.2878521 | 70.122577 |
| 17:24:51 | 0:23:49 | 76.2188035 | 71.2675012 | 75.1785034 | 79.2878521 | 69.122577 |
| 17:24:52 | 0:23:50 | 76.2188035 | 76.2675012 | 75.1785034 | 81.2878521 | 68.122577 |
| 17:24:53 | 0:23:51 | 76.2188035 | 77.2675012 | 76.1785034 | 83.2878521 | 68.122577 |
| 17:24:54 | 0:23:52 | 76.2188035 | 77.2675012 | 76.1785034 | 83.2878521 | 68.122577 |
| 17:24:55 | 0:23:53 | 76.2188035 | 77.2675012 | 80.1785034 | 83.2878521 | 66.122577 |
| 17:24:56 | 0:23:54 | 76.2188035 | 74.2675012 | 81.1785034 | 83.2878521 | 66.122577 |
| 17:24:57 | 0:23:55 | 76.2188035 | 73.2675012 | 81.1785034 | 83.2878521 | 66.122577 |
| 17:24:58 | 0:23:56 | 79.2188035 | 73.2675012 | 82.1785034 | 83.2878521 | 65.122577 |

|          |         |            |            |            |            |           |
|----------|---------|------------|------------|------------|------------|-----------|
| 17:24:59 | 0:23:57 | 82.2188035 | 72.2675012 | 83.1785034 | 82.2878521 | 65.122577 |
| 17:25:00 | 0:23:58 | 83.2188035 | 72.2675012 | 82.1785034 | 82.2878521 | 65.122577 |
| 17:25:01 | 0:23:59 | 83.2188035 | 72.2675012 | 82.1785034 | 82.2878521 | 65.122577 |
| 17:25:02 | 0:24:00 | 84.2188035 | 74.2675012 | 82.1785034 | 82.2878521 | 65.122577 |
| 17:25:03 | 0:24:01 | 84.2188035 | 74.2675012 | 82.1785034 | 82.2878521 | 65.122577 |
| 17:25:04 | 0:24:02 | 86.2188035 | 75.2675012 | 81.1785034 | 82.2878521 | 66.122577 |
| 17:25:05 | 0:24:03 | 86.2188035 | 75.2675012 | 80.1785034 | 82.2878521 | 66.122577 |
| 17:25:06 | 0:24:04 | 87.2188035 | 75.2675012 | 80.1785034 | 82.2878521 | 66.122577 |
| 17:25:07 | 0:24:05 | 89.2188035 | 73.2675012 | 80.1785034 | 82.2878521 | 66.122577 |
| 17:25:08 | 0:24:06 | 91.2188035 | 73.2675012 | 80.1785034 | 83.2878521 | 67.122577 |
| 17:25:09 | 0:24:07 | 76.6501363 | 72.2675012 | 80.1785034 | 83.2878521 | 67.122577 |
| 17:25:10 | 0:24:08 | 76.7751363 | 73.2675012 | 80.1785034 | 82.2878521 | 69.122577 |
| 17:25:11 | 0:24:09 | 77.6501363 | 73.2675012 | 79.1785034 | 81.2878521 | 76.122577 |
| 17:25:12 | 0:24:10 | 77.9001363 | 73.2675012 | 79.1785034 | 81.2878521 | 78.122577 |
| 17:25:13 | 0:24:11 | 77.7751363 | 72.2675012 | 79.1785034 | 81.2878521 | 78.122577 |
| 17:25:14 | 0:24:12 | 78.0251363 | 72.2675012 | 79.1785034 | 81.2878521 | 77.122577 |
| 17:25:15 | 0:24:13 | 77.1501363 | 72.2675012 | 74.1785034 | 77.2878521 | 78.122577 |
| 17:25:16 | 0:24:14 | 76.5251363 | 71.2675012 | 75.1785034 | 71.2878521 | 78.122577 |
| 17:25:17 | 0:24:15 | 75.5251363 | 71.2675012 | 75.1785034 | 63.2878521 | 78.122577 |
| 17:25:18 | 0:24:16 | 74.6501363 | 71.2675012 | 75.1785034 | 59.2878521 | 77.122577 |
| 17:25:19 | 0:24:17 | 74.6501363 | 71.2675012 | 74.1785034 | 59.2878521 | 77.122577 |
| 17:25:20 | 0:24:18 | 74.0251363 | 72.2675012 | 73.1785034 | 59.2878521 | 76.122577 |
| 17:25:21 | 0:24:19 | 73.9001363 | 73.2675012 | 73.1785034 | 59.2878521 | 76.122577 |
| 17:25:22 | 0:24:20 | 73.6501363 | 73.2675012 | 72.1785034 | 59.2878521 | 74.122577 |
| 17:25:23 | 0:24:21 | 74.2751363 | 75.2675012 | 73.1785034 | 59.2878521 | 74.122577 |
| 17:25:24 | 0:24:22 | 74.2751363 | 75.2675012 | 73.1785034 | 59.2878521 | 73.122577 |
| 17:25:25 | 0:24:23 | 89.2188035 | 77.2675012 | 73.1785034 | 59.2878521 | 73.122577 |
| 17:25:26 | 0:24:24 | 88.2188035 | 78.2675012 | 72.1785034 | 60.2878521 | 73.122577 |
| 17:25:27 | 0:24:25 | 87.2188035 | 78.2675012 | 72.1785034 | 60.2878521 | 73.122577 |
| 17:25:28 | 0:24:26 | 87.2188035 | 78.2675012 | 71.1785034 | 60.2878521 | 73.122577 |
| 17:25:29 | 0:24:27 | 82.2188035 | 77.2675012 | 71.1785034 | 62.2878521 | 73.122577 |
| 17:25:30 | 0:24:28 | 78.2188035 | 77.2675012 | 71.1785034 | 62.2878521 | 74.122577 |
| 17:25:31 | 0:24:29 | 78.2188035 | 77.2675012 | 74.1785034 | 63.2878521 | 74.122577 |
| 17:25:32 | 0:24:30 | 74.2188035 | 77.2675012 | 78.1785034 | 63.2878521 | 74.122577 |
| 17:25:33 | 0:24:31 | 72.2188035 | 75.2675012 | 77.1785034 | 64.2878521 | 74.122577 |
| 17:25:34 | 0:24:32 | 72.2188035 | 76.2675012 | 73.1785034 | 63.2878521 | 74.122577 |
| 17:25:35 | 0:24:33 | 70.2188035 | 76.2675012 | 72.1785034 | 63.2878521 | 74.122577 |
| 17:25:36 | 0:24:34 | 70.2188035 | 76.2675012 | 72.1785034 | 63.2878521 | 72.122577 |
| 17:25:37 | 0:24:35 | 70.2188035 | 76.2675012 | 72.1785034 | 62.2878521 | 73.122577 |
| 17:25:38 | 0:24:36 | 69.2188035 | 76.2675012 | 72.1785034 | 66.2878521 | 73.122577 |
| 17:25:39 | 0:24:37 | 69.2188035 | 76.2675012 | 72.1785034 | 68.2878521 | 73.122577 |
| 17:25:40 | 0:24:38 | 69.2188035 | 76.2675012 | 72.1785034 | 69.2878521 | 73.122577 |
| 17:25:41 | 0:24:39 | 69.2188035 | 76.2675012 | 72.1785034 | 72.2878521 | 73.122577 |
| 17:25:42 | 0:24:40 | 70.2188035 | 77.2675012 | 72.1785034 | 72.2878521 | 73.122577 |
| 17:25:43 | 0:24:41 | 70.2188035 | 77.2675012 | 72.1785034 | 71.2878521 | 73.122577 |

|          |         |            |            |            |            |           |
|----------|---------|------------|------------|------------|------------|-----------|
| 17:25:44 | 0:24:42 | 69.2188035 | 77.2675012 | 72.1785034 | 70.2878521 | 73.122577 |
| 17:25:45 | 0:24:43 | 69.2188035 | 77.2675012 | 72.1785034 | 69.2878521 | 72.122577 |
| 17:25:46 | 0:24:44 | 69.2188035 | 78.2675012 | 72.1785034 | 69.2878521 | 72.122577 |
| 17:25:47 | 0:24:45 | 69.2188035 | 79.2675012 | 72.1785034 | 69.2878521 | 72.122577 |
| 17:25:48 | 0:24:46 | 69.2188035 | 79.2675012 | 72.1785034 | 69.2878521 | 72.122577 |
| 17:25:49 | 0:24:47 | 69.2188035 | 79.2675012 | 72.1785034 | 68.2878521 | 73.122577 |
| 17:25:50 | 0:24:48 | 69.2188035 | 79.2675012 | 72.1785034 | 68.2878521 | 73.122577 |
| 17:25:51 | 0:24:49 | 69.2188035 | 78.2675012 | 72.1785034 | 71.2878521 | 74.122577 |
| 17:25:52 | 0:24:50 | 71.2188035 | 78.2675012 | 77.1785034 | 72.2878521 | 74.122577 |
| 17:25:53 | 0:24:51 | 71.2188035 | 78.2675012 | 77.1785034 | 73.2878521 | 74.122577 |
| 17:25:54 | 0:24:52 | 72.2188035 | 78.2675012 | 75.1785034 | 73.2878521 | 74.122577 |
| 17:25:55 | 0:24:53 | 72.2188035 | 78.2675012 | 75.1785034 | 75.2878521 | 74.122577 |
| 17:25:56 | 0:24:54 | 72.2188035 | 81.2675012 | 76.1785034 | 76.2878521 | 72.122577 |
| 17:25:57 | 0:24:55 | 70.2188035 | 81.2675012 | 78.1785034 | 76.2878521 | 72.122577 |
| 17:25:58 | 0:24:56 | 69.2188035 | 81.2675012 | 78.1785034 | 76.2878521 | 70.122577 |
| 17:25:59 | 0:24:57 | 68.2188035 | 81.2675012 | 78.1785034 | 76.2878521 | 70.122577 |
| 17:26:00 | 0:24:58 | 68.2188035 | 78.2675012 | 78.1785034 | 76.2878521 | 70.122577 |
| 17:26:01 | 0:24:59 | 68.2188035 | 77.2675012 | 77.1785034 | 75.2878521 | 70.122577 |
| 17:26:02 | 0:25:00 | 68.2188035 | 72.2675012 | 76.1785034 | 75.2878521 | 71.122577 |
| 17:26:03 | 0:25:01 | 68.2188035 | 71.2675012 | 75.1785034 | 77.2878521 | 71.122577 |
| 17:26:04 | 0:25:02 | 68.2188035 | 71.2675012 | 75.1785034 | 79.2878521 | 71.122577 |
| 17:26:05 | 0:25:03 | 68.2188035 | 71.2675012 | 75.1785034 | 79.2878521 | 72.122577 |
| 17:26:06 | 0:25:04 | 68.2188035 | 71.2675012 | 76.1785034 | 78.2878521 | 72.122577 |
| 17:26:07 | 0:25:05 | 67.2188035 | 71.2675012 | 77.1785034 | 78.2878521 | 72.122577 |
| 17:26:08 | 0:25:06 | 66.2188035 | 72.2675012 | 76.1785034 | 78.2878521 | 72.122577 |
| 17:26:09 | 0:25:07 | 67.2188035 | 72.2675012 | 76.1785034 | 78.2878521 | 73.122577 |
| 17:26:10 | 0:25:08 | 66.2188035 | 72.2675012 | 76.1785034 | 77.2878521 | 73.122577 |
| 17:26:11 | 0:25:09 | 66.2188035 | 72.2675012 | 74.1785034 | 74.2878521 | 73.122577 |
| 17:26:12 | 0:25:10 | 66.2188035 | 72.2675012 | 74.1785034 | 71.2878521 | 74.122577 |
| 17:26:13 | 0:25:11 | 66.2188035 | 72.2675012 | 74.1785034 | 69.2878521 | 74.122577 |
| 17:26:14 | 0:25:12 | 67.2188035 | 72.2675012 | 74.1785034 | 69.2878521 | 74.122577 |
| 17:26:15 | 0:25:13 | 67.2188035 | 72.2675012 | 75.1785034 | 67.2878521 | 73.122577 |
| 17:26:16 | 0:25:14 | 67.2188035 | 72.2675012 | 75.1785034 | 62.2878521 | 72.122577 |
| 17:26:17 | 0:25:15 | 67.2188035 | 73.2675012 | 75.1785034 | 62.2878521 | 72.122577 |
| 17:26:18 | 0:25:16 | 66.2188035 | 73.2675012 | 75.1785034 | 61.2878521 | 72.122577 |
| 17:26:19 | 0:25:17 | 66.2188035 | 75.2675012 | 75.1785034 | 62.2878521 | 73.122577 |
| 17:26:20 | 0:25:18 | 66.2188035 | 77.2675012 | 75.1785034 | 65.2878521 | 73.122577 |
| 17:26:21 | 0:25:19 | 66.2188035 | 80.2675012 | 75.1785034 | 65.2878521 | 73.122577 |
| 17:26:22 | 0:25:20 | 66.2188035 | 81.2675012 | 75.1785034 | 66.2878521 | 73.122577 |
| 17:26:23 | 0:25:21 | 66.2188035 | 80.2675012 | 75.1785034 | 66.2878521 | 73.122577 |
| 17:26:24 | 0:25:22 | 66.2188035 | 80.2675012 | 75.1785034 | 65.2878521 | 73.122577 |
| 17:26:25 | 0:25:23 | 65.2188035 | 80.2675012 | 75.1785034 | 61.2878521 | 73.122577 |
| 17:26:26 | 0:25:24 | 66.2188035 | 80.2675012 | 75.1785034 | 61.2878521 | 72.122577 |
| 17:26:27 | 0:25:25 | 66.2188035 | 80.2675012 | 76.1785034 | 62.2878521 | 72.122577 |
| 17:26:28 | 0:25:26 | 66.2188035 | 80.2675012 | 76.1785034 | 62.2878521 | 72.122577 |

|          |         |            |            |            |            |           |
|----------|---------|------------|------------|------------|------------|-----------|
| 17:26:29 | 0:25:27 | 66.2188035 | 79.2675012 | 77.1785034 | 63.2878521 | 71.122577 |
| 17:26:30 | 0:25:28 | 67.2188035 | 79.2675012 | 80.1785034 | 63.2878521 | 71.122577 |
| 17:26:31 | 0:25:29 | 67.2188035 | 76.2675012 | 80.1785034 | 63.2878521 | 71.122577 |
| 17:26:32 | 0:25:30 | 67.2188035 | 76.2675012 | 81.1785034 | 62.2878521 | 73.122577 |
| 17:26:33 | 0:25:31 | 67.2188035 | 76.2675012 | 78.1785034 | 63.2878521 | 73.122577 |
| 17:26:34 | 0:25:32 | 66.2188035 | 73.2675012 | 76.1785034 | 64.2878521 | 73.122577 |
| 17:26:35 | 0:25:33 | 67.2188035 | 70.2675012 | 76.1785034 | 64.2878521 | 74.122577 |
| 17:26:36 | 0:25:34 | 67.2188035 | 70.2675012 | 76.1785034 | 65.2878521 | 74.122577 |
| 17:26:37 | 0:25:35 | 67.2188035 | 70.2675012 | 76.1785034 | 73.2878521 | 74.122577 |
| 17:26:38 | 0:25:36 | 67.2188035 | 71.2675012 | 75.1785034 | 73.2878521 | 74.122577 |
| 17:26:39 | 0:25:37 | 68.2188035 | 72.2675012 | 75.1785034 | 73.2878521 | 75.122577 |
| 17:26:40 | 0:25:38 | 68.2188035 | 71.2675012 | 75.1785034 | 73.2878521 | 78.122577 |
| 17:26:41 | 0:25:39 | 68.2188035 | 71.2675012 | 75.1785034 | 74.2878521 | 78.122577 |
| 17:26:42 | 0:25:40 | 68.2188035 | 71.2675012 | 75.1785034 | 74.2878521 | 78.122577 |
| 17:26:43 | 0:25:41 | 67.2188035 | 72.2675012 | 73.1785034 | 76.2878521 | 78.122577 |
| 17:26:44 | 0:25:42 | 67.2188035 | 72.2675012 | 73.1785034 | 76.2878521 | 78.122577 |
| 17:26:45 | 0:25:43 | 66.2188035 | 72.2675012 | 73.1785034 | 77.2878521 | 78.122577 |
| 17:26:46 | 0:25:44 | 66.2188035 | 72.2675012 | 72.1785034 | 78.2878521 | 78.122577 |
| 17:26:47 | 0:25:45 | 67.2188035 | 72.2675012 | 71.1785034 | 77.2878521 | 78.122577 |
| 17:26:48 | 0:25:46 | 67.2188035 | 72.2675012 | 70.1785034 | 75.2878521 | 77.122577 |
| 17:26:49 | 0:25:47 | 68.2188035 | 72.2675012 | 70.1785034 | 75.2878521 | 76.122577 |
| 17:26:50 | 0:25:48 | 68.2188035 | 73.2675012 | 69.1785034 | 71.2878521 | 75.122577 |
| 17:26:51 | 0:25:49 | 68.2188035 | 73.2675012 | 69.1785034 | 69.2878521 | 75.122577 |
| 17:26:52 | 0:25:50 | 68.2188035 | 73.2675012 | 69.1785034 | 69.2878521 | 72.122577 |
| 17:26:53 | 0:25:51 | 68.2188035 | 75.2675012 | 69.1785034 | 70.2878521 | 71.122577 |
| 17:26:54 | 0:25:52 | 68.2188035 | 77.2675012 | 67.1785034 | 71.2878521 | 71.122577 |
| 17:26:55 | 0:25:53 | 67.2188035 | 80.2675012 | 67.1785034 | 72.2878521 | 71.122577 |
| 17:26:56 | 0:25:54 | 67.2188035 | 81.2675012 | 67.1785034 | 73.2878521 | 71.122577 |
| 17:26:57 | 0:25:55 | 67.2188035 | 82.2675012 | 66.1785034 | 73.2878521 | 71.122577 |
| 17:26:58 | 0:25:56 | 67.2188035 | 81.2675012 | 66.1785034 | 75.2878521 | 71.122577 |
| 17:26:59 | 0:25:57 | 67.2188035 | 80.2675012 | 65.1785034 | 76.2878521 | 71.122577 |
| 17:27:00 | 0:25:58 | 67.2188035 | 79.2675012 | 64.1785034 | 76.2878521 | 71.122577 |
| 17:27:01 | 0:25:59 | 67.2188035 | 78.2675012 | 62.1785034 | 73.2878521 | 71.122577 |
| 17:27:02 | 0:26:00 | 67.2188035 | 78.2675012 | 61.1785034 | 70.2878521 | 72.122577 |
| 17:27:03 | 0:26:01 | 67.2188035 | 78.2675012 | 61.1785034 | 70.2878521 | 72.122577 |
| 17:27:04 | 0:26:02 | 67.2188035 | 78.2675012 | 60.1785034 | 68.2878521 | 71.122577 |
| 17:27:05 | 0:26:03 | 69.2188035 | 78.2675012 | 60.1785034 | 68.2878521 | 70.122577 |
| 17:27:06 | 0:26:04 | 69.2188035 | 78.2675012 | 59.1785034 | 68.2878521 | 70.122577 |
| 17:27:07 | 0:26:05 | 68.2188035 | 77.2675012 | 59.1785034 | 66.2878521 | 70.122577 |
| 17:27:08 | 0:26:06 | 68.2188035 | 74.2675012 | 59.1785034 | 65.2878521 | 70.122577 |
| 17:27:09 | 0:26:07 | 68.2188035 | 72.2675012 | 60.1785034 | 64.2878521 | 70.122577 |
| 17:27:10 | 0:26:08 | 67.2188035 | 70.2675012 | 62.1785034 | 64.2878521 | 69.122577 |
| 17:27:11 | 0:26:09 | 67.2188035 | 70.2675012 | 63.1785034 | 64.2878521 | 69.122577 |
| 17:27:12 | 0:26:10 | 67.2188035 | 68.2675012 | 63.1785034 | 68.2878521 | 69.122577 |
| 17:27:13 | 0:26:11 | 67.2188035 | 68.2675012 | 67.1785034 | 69.2878521 | 69.122577 |

|          |         |            |            |            |            |           |
|----------|---------|------------|------------|------------|------------|-----------|
| 17:27:14 | 0:26:12 | 67.2188035 | 68.2675012 | 68.1785034 | 69.2878521 | 71.122577 |
| 17:27:15 | 0:26:13 | 67.2188035 | 68.2675012 | 70.1785034 | 69.2878521 | 71.122577 |
| 17:27:16 | 0:26:14 | 68.2188035 | 67.2675012 | 73.1785034 | 69.2878521 | 73.122577 |
| 17:27:17 | 0:26:15 | 68.2188035 | 69.2675012 | 73.1785034 | 69.2878521 | 73.122577 |
| 17:27:18 | 0:26:16 | 68.2188035 | 73.2675012 | 74.1785034 | 69.2878521 | 72.122577 |
| 17:27:19 | 0:26:17 | 68.2188035 | 73.2675012 | 74.1785034 | 69.2878521 | 72.122577 |
| 17:27:20 | 0:26:18 | 69.2188035 | 73.2675012 | 74.1785034 | 69.2878521 | 72.122577 |
| 17:27:21 | 0:26:19 | 69.2188035 | 76.2675012 | 74.1785034 | 69.2878521 | 72.122577 |
| 17:27:22 | 0:26:20 | 68.2188035 | 77.2675012 | 73.1785034 | 70.2878521 | 72.122577 |
| 17:27:23 | 0:26:21 | 67.2188035 | 77.2675012 | 73.1785034 | 73.2878521 | 72.122577 |
| 17:27:24 | 0:26:22 | 67.2188035 | 77.2675012 | 74.1785034 | 76.2878521 | 73.122577 |
| 17:27:25 | 0:26:23 | 67.2188035 | 76.2675012 | 75.1785034 | 78.2878521 | 74.122577 |
| 17:27:26 | 0:26:24 | 67.2188035 | 75.2675012 | 75.1785034 | 78.2878521 | 74.122577 |
| 17:27:27 | 0:26:25 | 66.2188035 | 75.2675012 | 75.1785034 | 82.2878521 | 74.122577 |
| 17:27:28 | 0:26:26 | 67.2188035 | 77.2675012 | 76.1785034 | 82.2878521 | 74.122577 |
| 17:27:29 | 0:26:27 | 67.2188035 | 78.2675012 | 78.1785034 | 83.2878521 | 74.122577 |
| 17:27:30 | 0:26:28 | 67.2188035 | 78.2675012 | 78.1785034 | 84.2878521 | 74.122577 |
| 17:27:31 | 0:26:29 | 67.2188035 | 78.2675012 | 78.1785034 | 84.2878521 | 73.122577 |
| 17:27:32 | 0:26:30 | 68.2188035 | 77.2675012 | 78.1785034 | 84.2878521 | 73.122577 |
| 17:27:33 | 0:26:31 | 68.2188035 | 76.2675012 | 78.1785034 | 83.2878521 | 73.122577 |
| 17:27:34 | 0:26:32 | 68.2188035 | 76.2675012 | 79.1785034 | 82.2878521 | 72.122577 |
| 17:27:35 | 0:26:33 | 68.2188035 | 76.2675012 | 78.1785034 | 82.2878521 | 73.122577 |
| 17:27:36 | 0:26:34 | 68.2188035 | 76.2675012 | 78.1785034 | 82.2878521 | 73.122577 |
| 17:27:37 | 0:26:35 | 67.2188035 | 76.2675012 | 78.1785034 | 79.2878521 | 73.122577 |
| 17:27:38 | 0:26:36 | 67.2188035 | 76.2675012 | 78.1785034 | 79.2878521 | 73.122577 |
| 17:27:39 | 0:26:37 | 67.2188035 | 76.2675012 | 78.1785034 | 78.2878521 | 73.122577 |
| 17:27:40 | 0:26:38 | 67.2188035 | 76.2675012 | 77.1785034 | 78.2878521 | 73.122577 |
| 17:27:41 | 0:26:39 | 67.2188035 | 76.2675012 | 76.1785034 | 78.2878521 | 74.122577 |
| 17:27:42 | 0:26:40 | 67.2188035 | 76.2675012 | 76.1785034 | 78.2878521 | 74.122577 |
| 17:27:43 | 0:26:41 | 67.2188035 | 77.2675012 | 75.1785034 | 76.2878521 | 74.122577 |
| 17:27:44 | 0:26:42 | 67.2188035 | 77.2675012 | 76.1785034 | 76.2878521 | 74.122577 |
| 17:27:45 | 0:26:43 | 67.2188035 | 77.2675012 | 76.1785034 | 76.2878521 | 74.122577 |
| 17:27:46 | 0:26:44 | 66.2188035 | 77.2675012 | 76.1785034 | 79.2878521 | 73.122577 |
| 17:27:47 | 0:26:45 | 66.2188035 | 77.2675012 | 76.1785034 | 81.2878521 | 73.122577 |
| 17:27:48 | 0:26:46 | 67.2188035 | 76.2675012 | 76.1785034 | 81.2878521 | 73.122577 |
| 17:27:49 | 0:26:47 | 67.2188035 | 76.2675012 | 76.1785034 | 84.2878521 | 73.122577 |
| 17:27:50 | 0:26:48 | 67.2188035 | 80.2675012 | 76.1785034 | 85.2878521 | 72.122577 |
| 17:27:51 | 0:26:49 | 67.2188035 | 83.2675012 | 76.1785034 | 85.2878521 | 72.122577 |
| 17:27:52 | 0:26:50 | 67.2188035 | 83.2675012 | 77.1785034 | 85.2878521 | 71.122577 |
| 17:27:53 | 0:26:51 | 67.2188035 | 83.2675012 | 77.1785034 | 85.2878521 | 73.122577 |
| 17:27:54 | 0:26:52 | 67.2188035 | 85.2675012 | 79.1785034 | 85.2878521 | 74.122577 |
| 17:27:55 | 0:26:53 | 67.2188035 | 86.2675012 | 79.1785034 | 85.2878521 | 74.122577 |
| 17:27:56 | 0:26:54 | 66.2188035 | 87.2675012 | 81.1785034 | 85.2878521 | 74.122577 |
| 17:27:57 | 0:26:55 | 66.2188035 | 87.2675012 | 82.1785034 | 85.2878521 | 78.122577 |
| 17:27:58 | 0:26:56 | 66.2188035 | 86.2675012 | 82.1785034 | 85.2878521 | 78.122577 |

|          |         |            |            |            |            |           |
|----------|---------|------------|------------|------------|------------|-----------|
| 17:27:59 | 0:26:57 | 66.2188035 | 85.2675012 | 81.1785034 | 85.2878521 | 78.122577 |
| 17:28:00 | 0:26:58 | 66.2188035 | 85.2675012 | 81.1785034 | 85.2878521 | 75.122577 |
| 17:28:01 | 0:26:59 | 66.2188035 | 83.2675012 | 80.1785034 | 84.2878521 | 74.122577 |
| 17:28:02 | 0:27:00 | 66.2188035 | 83.2675012 | 79.1785034 | 77.2878521 | 73.122577 |
| 17:28:03 | 0:27:01 | 66.2188035 | 81.2675012 | 77.1785034 | 77.2878521 | 73.122577 |
| 17:28:04 | 0:27:02 | 67.2188035 | 78.2675012 | 75.1785034 | 57.2878521 | 73.122577 |
| 17:28:05 | 0:27:03 | 66.2188035 | 76.2675012 | 73.1785034 | 54.2878521 | 73.122577 |
| 17:28:06 | 0:27:04 | 66.2188035 | 75.2675012 | 73.1785034 | 53.2878521 | 73.122577 |
| 17:28:07 | 0:27:05 | 66.2188035 | 74.2675012 | 73.1785034 | 53.2878521 | 73.122577 |
| 17:28:08 | 0:27:06 | 66.2188035 | 74.2675012 | 74.1785034 | 53.2878521 | 73.122577 |
| 17:28:09 | 0:27:07 | 66.2188035 | 74.2675012 | 74.1785034 | 53.2878521 | 73.122577 |
| 17:28:10 | 0:27:08 | 66.2188035 | 73.2675012 | 73.1785034 | 54.2878521 | 73.122577 |
| 17:28:11 | 0:27:09 | 67.2188035 | 72.2675012 | 70.1785034 | 54.2878521 | 69.122577 |
| 17:28:12 | 0:27:10 | 67.2188035 | 70.2675012 | 69.1785034 | 54.2878521 | 69.122577 |
| 17:28:13 | 0:27:11 | 66.2188035 | 69.2675012 | 69.1785034 | 54.2878521 | 68.122577 |
| 17:28:14 | 0:27:12 | 66.2188035 | 69.2675012 | 69.1785034 | 54.2878521 | 68.122577 |
| 17:28:15 | 0:27:13 | 67.2188035 | 69.2675012 | 69.1785034 | 56.2878521 | 68.122577 |
| 17:28:16 | 0:27:14 | 67.2188035 | 70.2675012 | 68.1785034 | 56.2878521 | 68.122577 |
| 17:28:17 | 0:27:15 | 67.2188035 | 70.2675012 | 67.1785034 | 61.2878521 | 70.122577 |
| 17:28:18 | 0:27:16 | 66.2188035 | 70.2675012 | 67.1785034 | 63.2878521 | 70.122577 |
| 17:28:19 | 0:27:17 | 66.2188035 | 73.2675012 | 67.1785034 | 64.2878521 | 71.122577 |
| 17:28:20 | 0:27:18 | 66.2188035 | 74.2675012 | 67.1785034 | 64.2878521 | 72.122577 |
| 17:28:21 | 0:27:19 | 66.2188035 | 74.2675012 | 67.1785034 | 64.2878521 | 72.122577 |
| 17:28:22 | 0:27:20 | 66.2188035 | 84.2675012 | 66.1785034 | 63.2878521 | 72.122577 |
| 17:28:23 | 0:27:21 | 66.2188035 | 84.2675012 | 64.1785034 | 63.2878521 | 71.122577 |
| 17:28:24 | 0:27:22 | 66.2188035 | 84.2675012 | 62.1785034 | 64.2878521 | 71.122577 |
| 17:28:25 | 0:27:23 | 66.2188035 | 79.2675012 | 62.1785034 | 64.2878521 | 71.122577 |
| 17:28:26 | 0:27:24 | 66.2188035 | 77.2675012 | 64.1785034 | 64.2878521 | 70.122577 |
| 17:28:27 | 0:27:25 | 66.2188035 | 77.2675012 | 65.1785034 | 64.2878521 | 68.122577 |
| 17:28:28 | 0:27:26 | 66.2188035 | 76.2675012 | 65.1785034 | 63.2878521 | 68.122577 |
| 17:28:29 | 0:27:27 | 67.2188035 | 77.2675012 | 65.1785034 | 61.2878521 | 67.122577 |
| 17:28:30 | 0:27:28 | 67.2188035 | 77.2675012 | 65.1785034 | 61.2878521 | 67.122577 |
| 17:28:31 | 0:27:29 | 67.2188035 | 78.2675012 | 63.1785034 | 59.2878521 | 67.122577 |
| 17:28:32 | 0:27:30 | 67.2188035 | 78.2675012 | 62.1785034 | 59.2878521 | 67.122577 |
| 17:28:33 | 0:27:31 | 67.2188035 | 78.2675012 | 63.1785034 | 58.2878521 | 67.122577 |
| 17:28:34 | 0:27:32 | 67.2188035 | 77.2675012 | 64.1785034 | 58.2878521 | 67.122577 |
| 17:28:35 | 0:27:33 | 67.2188035 | 77.2675012 | 65.1785034 | 59.2878521 | 69.122577 |
| 17:28:36 | 0:27:34 | 67.2188035 | 77.2675012 | 65.1785034 | 59.2878521 | 70.122577 |
| 17:28:37 | 0:27:35 | 67.2188035 | 77.2675012 | 67.1785034 | 61.2878521 | 70.122577 |
| 17:28:38 | 0:27:36 | 66.2188035 | 76.2675012 | 67.1785034 | 64.2878521 | 70.122577 |
| 17:28:39 | 0:27:37 | 66.2188035 | 75.2675012 | 68.1785034 | 64.2878521 | 70.122577 |
| 17:28:40 | 0:27:38 | 67.2188035 | 74.2675012 | 68.1785034 | 69.2878521 | 69.122577 |
| 17:28:41 | 0:27:39 | 67.2188035 | 71.2675012 | 69.1785034 | 71.2878521 | 69.122577 |
| 17:28:42 | 0:27:40 | 67.2188035 | 69.2675012 | 69.1785034 | 71.2878521 | 70.122577 |
| 17:28:43 | 0:27:41 | 67.2188035 | 68.2675012 | 69.1785034 | 72.2878521 | 71.122577 |

|          |         |            |            |            |            |           |
|----------|---------|------------|------------|------------|------------|-----------|
| 17:28:44 | 0:27:42 | 67.2188035 | 68.2675012 | 69.1785034 | 72.2878521 | 71.122577 |
| 17:28:45 | 0:27:43 | 68.2188035 | 68.2675012 | 69.1785034 | 71.2878521 | 72.122577 |
| 17:28:46 | 0:27:44 | 69.2188035 | 69.2675012 | 71.1785034 | 69.2878521 | 72.122577 |
| 17:28:47 | 0:27:45 | 69.2188035 | 71.2675012 | 71.1785034 | 68.2878521 | 72.122577 |
| 17:28:48 | 0:27:46 | 69.2188035 | 72.2675012 | 75.1785034 | 68.2878521 | 72.122577 |
| 17:28:49 | 0:27:47 | 69.2188035 | 72.2675012 | 77.1785034 | 71.2878521 | 72.122577 |
| 17:28:50 | 0:27:48 | 68.2188035 | 70.2675012 | 77.1785034 | 73.2878521 | 74.122577 |
| 17:28:51 | 0:27:49 | 69.2188035 | 69.2675012 | 77.1785034 | 75.2878521 | 74.122577 |
| 17:28:52 | 0:27:50 | 68.2188035 | 69.2675012 | 76.1785034 | 75.2878521 | 74.122577 |
| 17:28:53 | 0:27:51 | 68.2188035 | 70.2675012 | 76.1785034 | 75.2878521 | 78.122577 |
| 17:28:54 | 0:27:52 | 68.2188035 | 70.2675012 | 76.1785034 | 73.2878521 | 81.122577 |
| 17:28:55 | 0:27:53 | 68.2188035 | 71.2675012 | 75.1785034 | 73.2878521 | 81.122577 |
| 17:28:56 | 0:27:54 | 68.2188035 | 71.2675012 | 75.1785034 | 73.2878521 | 80.122577 |
| 17:28:57 | 0:27:55 | 68.2188035 | 70.2675012 | 75.1785034 | 73.2878521 | 80.122577 |
| 17:28:58 | 0:27:56 | 69.2188035 | 68.2675012 | 75.1785034 | 76.2878521 | 80.122577 |
| 17:28:59 | 0:27:57 | 70.2188035 | 67.2675012 | 75.1785034 | 76.2878521 | 81.122577 |
| 17:29:00 | 0:27:58 | 69.2188035 | 67.2675012 | 75.1785034 | 76.2878521 | 82.122577 |
| 17:29:01 | 0:27:59 | 69.2188035 | 67.2675012 | 75.1785034 | 78.2878521 | 82.122577 |
| 17:29:02 | 0:28:00 | 69.2188035 | 67.2675012 | 74.1785034 | 79.2878521 | 82.122577 |
| 17:29:03 | 0:28:01 | 69.2188035 | 67.2675012 | 74.1785034 | 79.2878521 | 82.122577 |
| 17:29:04 | 0:28:02 | 68.2188035 | 67.2675012 | 73.1785034 | 79.2878521 | 81.122577 |
| 17:29:05 | 0:28:03 | 68.2188035 | 67.2675012 | 72.1785034 | 78.2878521 | 80.122577 |
| 17:29:06 | 0:28:04 | 68.2188035 | 67.2675012 | 72.1785034 | 77.2878521 | 80.122577 |
| 17:29:07 | 0:28:05 | 69.2188035 | 67.2675012 | 70.1785034 | 77.2878521 | 80.122577 |
| 17:29:08 | 0:28:06 | 69.2188035 | 68.2675012 | 71.1785034 | 77.2878521 | 80.122577 |
| 17:29:09 | 0:28:07 | 69.2188035 | 68.2675012 | 71.1785034 | 75.2878521 | 81.122577 |
| 17:29:10 | 0:28:08 | 71.2188035 | 72.2675012 | 73.1785034 | 75.2878521 | 81.122577 |
| 17:29:11 | 0:28:09 | 72.2188035 | 72.2675012 | 73.1785034 | 74.2878521 | 81.122577 |
| 17:29:12 | 0:28:10 | 72.2188035 | 72.2675012 | 73.1785034 | 74.2878521 | 82.122577 |
| 17:29:13 | 0:28:11 | 72.2188035 | 72.2675012 | 72.1785034 | 69.2878521 | 83.122577 |
| 17:29:14 | 0:28:12 | 71.2188035 | 73.2675012 | 71.1785034 | 68.2878521 | 82.122577 |
| 17:29:15 | 0:28:13 | 72.2188035 | 74.2675012 | 71.1785034 | 68.2878521 | 81.122577 |
| 17:29:16 | 0:28:14 | 72.2188035 | 74.2675012 | 70.1785034 | 67.2878521 | 81.122577 |
| 17:29:17 | 0:28:15 | 72.2188035 | 74.2675012 | 70.1785034 | 66.2878521 | 81.122577 |
| 17:29:18 | 0:28:16 | 71.2188035 | 74.2675012 | 70.1785034 | 66.2878521 | 82.122577 |
| 17:29:19 | 0:28:17 | 71.2188035 | 74.2675012 | 71.1785034 | 66.2878521 | 83.122577 |
| 17:29:20 | 0:28:18 | 69.2188035 | 73.2675012 | 72.1785034 | 66.2878521 | 83.122577 |
| 17:29:21 | 0:28:19 | 69.2188035 | 73.2675012 | 72.1785034 | 66.2878521 | 83.122577 |
| 17:29:22 | 0:28:20 | 69.2188035 | 75.2675012 | 73.1785034 | 66.2878521 | 84.122577 |
| 17:29:23 | 0:28:21 | 69.2188035 | 76.2675012 | 74.1785034 | 67.2878521 | 86.122577 |
| 17:29:24 | 0:28:22 | 69.2188035 | 76.2675012 | 74.1785034 | 67.2878521 | 86.122577 |
| 17:29:25 | 0:28:23 | 69.2188035 | 76.2675012 | 74.1785034 | 69.2878521 | 86.122577 |
| 17:29:26 | 0:28:24 | 68.2188035 | 75.2675012 | 75.1785034 | 70.2878521 | 86.122577 |
| 17:29:27 | 0:28:25 | 68.2188035 | 73.2675012 | 75.1785034 | 70.2878521 | 86.122577 |
| 17:29:28 | 0:28:26 | 68.2188035 | 71.2675012 | 75.1785034 | 69.2878521 | 86.122577 |

|          |         |            |            |            |            |           |
|----------|---------|------------|------------|------------|------------|-----------|
| 17:29:29 | 0:28:27 | 68.2188035 | 71.2675012 | 75.1785034 | 66.2878521 | 87.122577 |
| 17:29:30 | 0:28:28 | 68.2188035 | 70.2675012 | 75.1785034 | 64.2878521 | 87.122577 |
| 17:29:31 | 0:28:29 | 68.2188035 | 69.2675012 | 76.1785034 | 64.2878521 | 87.122577 |
| 17:29:32 | 0:28:30 | 68.2188035 | 70.2675012 | 76.1785034 | 64.2878521 | 81.122577 |
| 17:29:33 | 0:28:31 | 67.2188035 | 72.2675012 | 77.1785034 | 65.2878521 | 78.122577 |
| 17:29:34 | 0:28:32 | 68.2188035 | 73.2675012 | 77.1785034 | 67.2878521 | 78.122577 |
| 17:29:35 | 0:28:33 | 68.2188035 | 73.2675012 | 77.1785034 | 67.2878521 | 77.122577 |
| 17:29:36 | 0:28:34 | 68.2188035 | 69.2675012 | 80.1785034 | 68.2878521 | 75.122577 |
| 17:29:37 | 0:28:35 | 67.2188035 | 66.2675012 | 80.1785034 | 69.2878521 | 75.122577 |
| 17:29:38 | 0:28:36 | 67.2188035 | 66.2675012 | 80.1785034 | 69.2878521 | 73.122577 |
| 17:29:39 | 0:28:37 | 67.2188035 | 67.2675012 | 84.1785034 | 69.2878521 | 72.122577 |
| 17:29:40 | 0:28:38 | 67.2188035 | 68.2675012 | 84.1785034 | 69.2878521 | 72.122577 |
| 17:29:41 | 0:28:39 | 67.2188035 | 70.2675012 | 84.1785034 | 69.2878521 | 72.122577 |
| 17:29:42 | 0:28:40 | 68.2188035 | 72.2675012 | 84.1785034 | 68.2878521 | 72.122577 |
| 17:29:43 | 0:28:41 | 68.2188035 | 72.2675012 | 83.1785034 | 68.2878521 | 72.122577 |
| 17:29:44 | 0:28:42 | 68.2188035 | 72.2675012 | 82.1785034 | 69.2878521 | 72.122577 |
| 17:29:45 | 0:28:43 | 68.2188035 | 72.2675012 | 80.1785034 | 69.2878521 | 72.122577 |
| 17:29:46 | 0:28:44 | 70.2188035 | 66.2675012 | 79.1785034 | 70.2878521 | 73.122577 |
| 17:29:47 | 0:28:45 | 71.2188035 | 63.2675012 | 79.1785034 | 70.2878521 | 73.122577 |
| 17:29:48 | 0:28:46 | 72.2188035 | 62.2675012 | 79.1785034 | 69.2878521 | 73.122577 |
| 17:29:49 | 0:28:47 | 72.2188035 | 62.2675012 | 78.1785034 | 68.2878521 | 73.122577 |
| 17:29:50 | 0:28:48 | 74.2188035 | 61.2675012 | 78.1785034 | 67.2878521 | 74.122577 |
| 17:29:51 | 0:28:49 | 75.2188035 | 61.2675012 | 78.1785034 | 67.2878521 | 74.122577 |
| 17:29:52 | 0:28:50 | 76.2188035 | 61.2675012 | 78.1785034 | 67.2878521 | 74.122577 |
| 17:29:53 | 0:28:51 | 79.2188035 | 61.2675012 | 78.1785034 | 67.2878521 | 74.122577 |
| 17:29:54 | 0:28:52 | 79.2188035 | 61.2675012 | 78.1785034 | 67.2878521 | 76.122577 |
| 17:29:55 | 0:28:53 | 79.2188035 | 61.2675012 | 79.1785034 | 69.2878521 | 77.122577 |
| 17:29:56 | 0:28:54 | 80.2188035 | 61.2675012 | 79.1785034 | 70.2878521 | 77.122577 |
| 17:29:57 | 0:28:55 | 80.2188035 | 60.2675012 | 79.1785034 | 70.2878521 | 79.122577 |
| 17:29:58 | 0:28:56 | 79.2188035 | 60.2675012 | 79.1785034 | 70.2878521 | 80.122577 |
| 17:29:59 | 0:28:57 | 79.2188035 | 59.2675012 | 79.1785034 | 70.2878521 | 81.122577 |
| 17:30:00 | 0:28:58 | 79.2188035 | 59.2675012 | 79.1785034 | 71.2878521 | 80.122577 |
| 17:30:01 | 0:28:59 | 79.2188035 | 59.2675012 | 78.1785034 | 71.2878521 | 80.122577 |
| 17:30:02 | 0:29:00 | 79.2188035 | 59.2675012 | 77.1785034 | 71.2878521 | 73.122577 |
| 17:30:03 | 0:29:01 | 78.2188035 | 61.2675012 | 77.1785034 | 71.2878521 | 72.122577 |
| 17:30:04 | 0:29:02 | 78.2188035 | 61.2675012 | 77.1785034 | 71.2878521 | 72.122577 |
| 17:30:05 | 0:29:03 | 76.2188035 | 70.2675012 | 75.1785034 | 71.2878521 | 72.122577 |
| 17:30:06 | 0:29:04 | 75.2188035 | 74.2675012 | 74.1785034 | 71.2878521 | 72.122577 |
| 17:30:07 | 0:29:05 | 75.2188035 | 76.2675012 | 74.1785034 | 71.2878521 | 72.122577 |
| 17:30:08 | 0:29:06 | 75.2188035 | 78.2675012 | 74.1785034 | 71.2878521 | 72.122577 |
| 17:30:09 | 0:29:07 | 75.2188035 | 79.2675012 | 74.1785034 | 72.2878521 | 72.122577 |
| 17:30:10 | 0:29:08 | 74.2188035 | 79.2675012 | 74.1785034 | 72.2878521 | 72.122577 |
| 17:30:11 | 0:29:09 | 75.2188035 | 79.2675012 | 74.1785034 | 72.2878521 | 71.122577 |
| 17:30:12 | 0:29:10 | 75.2188035 | 79.2675012 | 74.1785034 | 72.2878521 | 71.122577 |
| 17:30:13 | 0:29:11 | 74.2188035 | 80.2675012 | 75.1785034 | 73.2878521 | 71.122577 |



|          |         |            |            |            |            |           |
|----------|---------|------------|------------|------------|------------|-----------|
| 17:30:14 | 0:29:12 | 74.2188035 | 80.2675012 | 77.1785034 | 74.2878521 | 71.122577 |
| 17:30:15 | 0:29:13 | 74.2188035 | 80.2675012 | 77.1785034 | 74.2878521 | 71.122577 |
| 17:30:16 | 0:29:14 | 75.2188035 | 80.2675012 | 73.1785034 | 76.2878521 | 72.122577 |
| 17:30:17 | 0:29:15 | 75.2188035 | 80.2675012 | 72.1785034 | 77.2878521 | 72.122577 |
| 17:30:18 | 0:29:16 | 75.2188035 | 80.2675012 | 72.1785034 | 77.2878521 | 72.122577 |
| 17:30:19 | 0:29:17 | 76.2188035 | 76.2675012 | 68.1785034 | 77.2878521 | 72.122577 |
| 17:30:20 | 0:29:18 | 76.2188035 | 74.2675012 | 68.1785034 | 77.2878521 | 73.122577 |
| 17:30:21 | 0:29:19 | 76.2188035 | 74.2675012 | 67.1785034 | 75.2878521 | 73.122577 |
| 17:30:22 | 0:29:20 | 75.2188035 | 74.2675012 | 77.1785034 | 74.2878521 | 72.122577 |
| 17:30:23 | 0:29:21 | 75.2188035 | 72.2675012 | 77.1785034 | 74.2878521 | 72.122577 |
| 17:30:24 | 0:29:22 | 76.2188035 | 71.2675012 | 79.1785034 | 74.2878521 | 73.122577 |
| 17:30:25 | 0:29:23 | 76.2188035 | 70.2675012 | 78.1785034 | 75.2878521 | 73.122577 |
| 17:30:26 | 0:29:24 | 76.2188035 | 70.2675012 | 77.1785034 | 75.2878521 | 73.122577 |
| 17:30:27 | 0:29:25 | 76.2188035 | 69.2675012 | 76.1785034 | 74.2878521 | 73.122577 |
| 17:30:28 | 0:29:26 | 76.2188035 | 69.2675012 | 76.1785034 | 74.2878521 | 73.122577 |
| 17:30:29 | 0:29:27 | 75.2188035 | 69.2675012 | 74.1785034 | 74.2878521 | 72.122577 |
| 17:30:30 | 0:29:28 | 75.2188035 | 69.2675012 | 73.1785034 | 74.2878521 | 72.122577 |
| 17:30:31 | 0:29:29 | 75.2188035 | 68.2675012 | 73.1785034 | 74.2878521 | 72.122577 |
| 17:30:32 | 0:29:30 | 74.2188035 | 68.2675012 | 73.1785034 | 74.2878521 | 72.122577 |
| 17:30:33 | 0:29:31 | 74.2188035 | 68.2675012 | 74.1785034 | 75.2878521 | 72.122577 |
| 17:30:34 | 0:29:32 | 74.2188035 | 69.2675012 | 74.1785034 | 75.2878521 | 71.122577 |
| 17:30:35 | 0:29:33 | 74.2188035 | 69.2675012 | 74.1785034 | 75.2878521 | 72.122577 |
| 17:30:36 | 0:29:34 | 75.2188035 | 67.2675012 | 74.1785034 | 76.2878521 | 73.122577 |
| 17:30:37 | 0:29:35 | 75.2188035 | 67.2675012 | 73.1785034 | 76.2878521 | 74.122577 |
| 17:30:38 | 0:29:36 | 75.2188035 | 68.2675012 | 73.1785034 | 76.2878521 | 74.122577 |
| 17:30:39 | 0:29:37 | 76.2188035 | 69.2675012 | 73.1785034 | 80.2878521 | 74.122577 |
| 17:30:40 | 0:29:38 | 76.2188035 | 69.2675012 | 73.1785034 | 80.2878521 | 74.122577 |
| 17:30:41 | 0:29:39 | 76.2188035 | 69.2675012 | 74.1785034 | 82.2878521 | 70.122577 |
| 17:30:42 | 0:29:40 | 77.2188035 | 70.2675012 | 74.1785034 | 82.2878521 | 70.122577 |
| 17:30:43 | 0:29:41 | 77.2188035 | 69.2675012 | 75.1785034 | 82.2878521 | 70.122577 |
| 17:30:44 | 0:29:42 | 77.2188035 | 69.2675012 | 75.1785034 | 82.2878521 | 69.122577 |
| 17:30:45 | 0:29:43 | 76.2188035 | 69.2675012 | 75.1785034 | 91.2878521 | 69.122577 |
| 17:30:46 | 0:29:44 | 76.2188035 | 69.2675012 | 76.1785034 | 91.2878521 | 69.122577 |
| 17:30:47 | 0:29:45 | 76.2188035 | 70.2675012 | 76.1785034 | 93.2878521 | 69.122577 |
| 17:30:48 | 0:29:46 | 75.2188035 | 71.2675012 | 76.1785034 | 77.7751363 | 69.122577 |
| 17:30:49 | 0:29:47 | 74.2188035 | 72.2675012 | 75.1785034 | 77.0251363 | 69.122577 |
| 17:30:50 | 0:29:48 | 74.2188035 | 71.2675012 | 75.1785034 | 76.6501363 | 69.122577 |
| 17:30:51 | 0:29:49 | 75.2188035 | 70.2675012 | 75.1785034 | 76.4001363 | 69.122577 |
| 17:30:52 | 0:29:50 | 75.2188035 | 70.2675012 | 74.1785034 | 76.1501363 | 69.122577 |
| 17:30:53 | 0:29:51 | 75.2188035 | 71.2675012 | 75.1785034 | 75.9001363 | 69.122577 |
| 17:30:54 | 0:29:52 | 75.2188035 | 71.2675012 | 75.1785034 | 88.2878521 | 69.122577 |
| 17:30:55 | 0:29:53 | 75.2188035 | 71.2675012 | 76.1785034 | 88.2878521 | 70.122577 |
| 17:30:56 | 0:29:54 | 74.2188035 | 71.2675012 | 77.1785034 | 83.2878521 | 70.122577 |
| 17:30:57 | 0:29:55 | 74.2188035 | 72.2675012 | 78.1785034 | 72.2878521 | 71.122577 |
| 17:30:58 | 0:29:56 | 74.2188035 | 72.2675012 | 78.1785034 | 65.2878521 | 74.122577 |

|          |         |            |            |            |            |            |
|----------|---------|------------|------------|------------|------------|------------|
| 17:30:59 | 0:29:57 | 74.2188035 | 72.2675012 | 80.1785034 | 64.2878521 | 76.122577  |
| 17:31:00 | 0:29:58 | 74.2188035 | 73.2675012 | 80.1785034 | 62.2878521 | 76.122577  |
| 17:31:01 | 0:29:59 | 74.2188035 | 73.2675012 | 81.1785034 | 62.2878521 | 76.122577  |
| 17:31:02 | 0:30:00 | 74.2188035 | 72.2675012 | 81.1785034 | 62.2878521 | 81.122577  |
| 17:31:03 | 0:30:01 | 76.2188035 | 72.2675012 | 81.1785034 | 62.2878521 | 84.122577  |
| 17:31:04 | 0:30:02 | 76.2188035 | 72.2675012 | 81.1785034 | 62.2878521 | 85.122577  |
| 17:31:05 | 0:30:03 | 76.2188035 | 73.2675012 | 83.1785034 | 62.2878521 | 85.122577  |
| 17:31:06 | 0:30:04 | 77.2188035 | 72.2675012 | 83.1785034 | 62.2878521 | 87.122577  |
| 17:31:07 | 0:30:05 | 77.2188035 | 68.2675012 | 83.1785034 | 62.2878521 | 88.122577  |
| 17:31:08 | 0:30:06 | 77.2188035 | 68.2675012 | 82.1785034 | 59.2878521 | 88.122577  |
| 17:31:09 | 0:30:07 | 78.2188035 | 68.2675012 | 82.1785034 | 58.2878521 | 88.122577  |
| 17:31:10 | 0:30:08 | 78.2188035 | 68.2675012 | 82.1785034 | 58.2878521 | 90.122577  |
| 17:31:11 | 0:30:09 | 78.2188035 | 68.2675012 | 81.1785034 | 59.2878521 | 76.1501363 |
| 17:31:12 | 0:30:10 | 78.2188035 | 68.2675012 | 81.1785034 | 59.2878521 | 76.1501363 |
| 17:31:13 | 0:30:11 | 79.2188035 | 67.2675012 | 81.1785034 | 60.2878521 | 75.9001363 |
| 17:31:14 | 0:30:12 | 80.2188035 | 67.2675012 | 77.1785034 | 60.2878521 | 75.5251363 |
| 17:31:15 | 0:30:13 | 82.2188035 | 69.2675012 | 76.1785034 | 60.2878521 | 77.4001363 |
| 17:31:16 | 0:30:14 | 82.2188035 | 68.2675012 | 76.1785034 | 60.2878521 | 77.2751363 |
| 17:31:17 | 0:30:15 | 80.2188035 | 67.2675012 | 76.1785034 | 60.2878521 | 77.0251363 |
| 17:31:18 | 0:30:16 | 80.2188035 | 67.2675012 | 76.1785034 | 61.2878521 | 77.6501363 |
| 17:31:19 | 0:30:17 | 79.2188035 | 67.2675012 | 76.1785034 | 61.2878521 | 77.6501363 |
| 17:31:20 | 0:30:18 | 79.2188035 | 67.2675012 | 75.1785034 | 62.2878521 | 77.7751363 |
| 17:31:21 | 0:30:19 | 79.2188035 | 69.2675012 | 75.1785034 | 60.2878521 | 78.0251363 |
| 17:31:22 | 0:30:20 | 80.2188035 | 71.2675012 | 76.1785034 | 60.2878521 | 79.0251363 |
| 17:31:23 | 0:30:21 | 80.2188035 | 71.2675012 | 77.1785034 | 59.2878521 | 79.4001363 |
| 17:31:24 | 0:30:22 | 80.2188035 | 70.2675012 | 77.1785034 | 58.2878521 | 79.4001363 |
| 17:31:25 | 0:30:23 | 79.2188035 | 70.2675012 | 78.1785034 | 57.2878521 | 79.2751363 |
| 17:31:26 | 0:30:24 | 79.2188035 | 70.2675012 | 77.1785034 | 57.2878521 | 79.4001363 |
| 17:31:27 | 0:30:25 | 79.2188035 | 71.2675012 | 77.1785034 | 56.2878521 | 77.2751363 |
| 17:31:28 | 0:30:26 | 77.2188035 | 71.2675012 | 76.1785034 | 56.2878521 | 87.122577  |
| 17:31:29 | 0:30:27 | 77.2188035 | 71.2675012 | 75.1785034 | 57.2878521 | 81.122577  |
| 17:31:30 | 0:30:28 | 76.2188035 | 71.2675012 | 75.1785034 | 57.2878521 | 81.122577  |
| 17:31:31 | 0:30:29 | 75.2188035 | 70.2675012 | 75.1785034 | 57.2878521 | 77.122577  |
| 17:31:32 | 0:30:30 | 76.2188035 | 69.2675012 | 75.1785034 | 57.2878521 | 77.122577  |
| 17:31:33 | 0:30:31 | 77.2188035 | 69.2675012 | 75.1785034 | 57.2878521 | 76.122577  |
| 17:31:34 | 0:30:32 | 77.2188035 | 69.2675012 | 75.1785034 | 57.2878521 | 75.122577  |
| 17:31:35 | 0:30:33 | 78.2188035 | 69.2675012 | 75.1785034 | 58.2878521 | 75.122577  |
| 17:31:36 | 0:30:34 | 79.2188035 | 70.2675012 | 75.1785034 | 58.2878521 | 75.122577  |
| 17:31:37 | 0:30:35 | 80.2188035 | 70.2675012 | 75.1785034 | 58.2878521 | 74.122577  |
| 17:31:38 | 0:30:36 | 81.2188035 | 70.2675012 | 74.1785034 | 58.2878521 | 74.122577  |
| 17:31:39 | 0:30:37 | 81.2188035 | 70.2675012 | 74.1785034 | 59.2878521 | 73.122577  |
| 17:31:40 | 0:30:38 | 81.2188035 | 70.2675012 | 73.1785034 | 60.2878521 | 73.122577  |
| 17:31:41 | 0:30:39 | 80.2188035 | 71.2675012 | 73.1785034 | 60.2878521 | 73.122577  |
| 17:31:42 | 0:30:40 | 80.2188035 | 72.2675012 | 73.1785034 | 61.2878521 | 74.122577  |
| 17:31:43 | 0:30:41 | 80.2188035 | 73.2675012 | 72.1785034 | 62.2878521 | 74.122577  |

|          |         |            |            |            |            |           |
|----------|---------|------------|------------|------------|------------|-----------|
| 17:31:44 | 0:30:42 | 79.2188035 | 75.2675012 | 75.1785034 | 62.2878521 | 74.122577 |
| 17:31:45 | 0:30:43 | 79.2188035 | 76.2675012 | 75.1785034 | 62.2878521 | 75.122577 |
| 17:31:46 | 0:30:44 | 78.2188035 | 77.2675012 | 76.1785034 | 62.2878521 | 75.122577 |
| 17:31:47 | 0:30:45 | 78.2188035 | 78.2675012 | 76.1785034 | 61.2878521 | 75.122577 |
| 17:31:48 | 0:30:46 | 79.2188035 | 78.2675012 | 76.1785034 | 61.2878521 | 74.122577 |
| 17:31:49 | 0:30:47 | 79.2188035 | 74.2675012 | 76.1785034 | 61.2878521 | 74.122577 |
| 17:31:50 | 0:30:48 | 79.2188035 | 73.2675012 | 75.1785034 | 62.2878521 | 71.122577 |
| 17:31:51 | 0:30:49 | 79.2188035 | 74.2675012 | 73.1785034 | 63.2878521 | 71.122577 |
| 17:31:52 | 0:30:50 | 79.2188035 | 76.2675012 | 71.1785034 | 63.2878521 | 69.122577 |
| 17:31:53 | 0:30:51 | 79.2188035 | 77.2675012 | 71.1785034 | 63.2878521 | 69.122577 |
| 17:31:54 | 0:30:52 | 78.2188035 | 78.2675012 | 71.1785034 | 62.2878521 | 69.122577 |
| 17:31:55 | 0:30:53 | 78.2188035 | 78.2675012 | 71.1785034 | 62.2878521 | 70.122577 |
| 17:31:56 | 0:30:54 | 78.2188035 | 78.2675012 | 71.1785034 | 62.2878521 | 70.122577 |
| 17:31:57 | 0:30:55 | 78.2188035 | 78.2675012 | 69.1785034 | 62.2878521 | 69.122577 |
| 17:31:58 | 0:30:56 | 77.2188035 | 78.2675012 | 68.1785034 | 62.2878521 | 69.122577 |
| 17:31:59 | 0:30:57 | 77.2188035 | 77.2675012 | 65.1785034 | 63.2878521 | 69.122577 |
| 17:32:00 | 0:30:58 | 77.2188035 | 77.2675012 | 65.1785034 | 63.2878521 | 68.122577 |
| 17:32:01 | 0:30:59 | 77.2188035 | 77.2675012 | 65.1785034 | 63.2878521 | 68.122577 |
| 17:32:02 | 0:31:00 | 77.2188035 | 77.2675012 | 71.1785034 | 63.2878521 | 68.122577 |
| 17:32:03 | 0:31:01 | 77.2188035 | 77.2675012 | 72.1785034 | 63.2878521 | 68.122577 |
| 17:32:04 | 0:31:02 | 77.2188035 | 77.2675012 | 72.1785034 | 63.2878521 | 68.122577 |
| 17:32:05 | 0:31:03 | 77.2188035 | 76.2675012 | 72.1785034 | 63.2878521 | 68.122577 |
| 17:32:06 | 0:31:04 | 77.2188035 | 76.2675012 | 72.1785034 | 63.2878521 | 68.122577 |
| 17:32:07 | 0:31:05 | 78.2188035 | 74.2675012 | 73.1785034 | 76.2878521 | 68.122577 |
| 17:32:08 | 0:31:06 | 78.2188035 | 72.2675012 | 73.1785034 | 77.2878521 | 68.122577 |
| 17:32:09 | 0:31:07 | 79.2188035 | 71.2675012 | 73.1785034 | 79.2878521 | 68.122577 |
| 17:32:10 | 0:31:08 | 77.2188035 | 71.2675012 | 73.1785034 | 79.2878521 | 68.122577 |
| 17:32:11 | 0:31:09 | 77.2188035 | 71.2675012 | 73.1785034 | 81.2878521 | 69.122577 |
| 17:32:12 | 0:31:10 | 77.2188035 | 71.2675012 | 74.1785034 | 83.2878521 | 69.122577 |
| 17:32:13 | 0:31:11 | 76.2188035 | 70.2675012 | 74.1785034 | 84.2878521 | 69.122577 |
| 17:32:14 | 0:31:12 | 76.2188035 | 71.2675012 | 74.1785034 | 85.2878521 | 70.122577 |
| 17:32:15 | 0:31:13 | 75.2188035 | 72.2675012 | 74.1785034 | 84.2878521 | 70.122577 |
| 17:32:16 | 0:31:14 | 75.2188035 | 73.2675012 | 74.1785034 | 83.2878521 | 70.122577 |
| 17:32:17 | 0:31:15 | 75.2188035 | 73.2675012 | 74.1785034 | 82.2878521 | 68.122577 |
| 17:32:18 | 0:31:16 | 75.2188035 | 73.2675012 | 75.1785034 | 82.2878521 | 68.122577 |
| 17:32:19 | 0:31:17 | 74.2188035 | 73.2675012 | 75.1785034 | 82.2878521 | 68.122577 |
| 17:32:20 | 0:31:18 | 74.2188035 | 74.2675012 | 75.1785034 | 82.2878521 | 68.122577 |
| 17:32:21 | 0:31:19 | 74.2188035 | 74.2675012 | 75.1785034 | 83.2878521 | 69.122577 |
| 17:32:22 | 0:31:20 | 74.2188035 | 75.2675012 | 76.1785034 | 82.2878521 | 70.122577 |
| 17:32:23 | 0:31:21 | 73.2188035 | 75.2675012 | 82.1785034 | 81.2878521 | 70.122577 |
| 17:32:24 | 0:31:22 | 73.2188035 | 75.2675012 | 82.1785034 | 81.2878521 | 71.122577 |
| 17:32:25 | 0:31:23 | 73.2188035 | 77.2675012 | 82.1785034 | 80.2878521 | 72.122577 |
| 17:32:26 | 0:31:24 | 73.2188035 | 77.2675012 | 82.1785034 | 76.2878521 | 72.122577 |
| 17:32:27 | 0:31:25 | 72.2188035 | 77.2675012 | 82.1785034 | 76.2878521 | 72.122577 |
| 17:32:28 | 0:31:26 | 72.2188035 | 77.2675012 | 82.1785034 | 73.2878521 | 72.122577 |

|          |         |            |            |            |            |           |
|----------|---------|------------|------------|------------|------------|-----------|
| 17:32:29 | 0:31:27 | 72.2188035 | 79.2675012 | 82.1785034 | 70.2878521 | 72.122577 |
| 17:32:30 | 0:31:28 | 72.2188035 | 79.2675012 | 83.1785034 | 70.2878521 | 72.122577 |
| 17:32:31 | 0:31:29 | 72.2188035 | 79.2675012 | 83.1785034 | 70.2878521 | 72.122577 |
| 17:32:32 | 0:31:30 | 72.2188035 | 76.2675012 | 84.1785034 | 74.2878521 | 73.122577 |
| 17:32:33 | 0:31:31 | 72.2188035 | 76.2675012 | 84.1785034 | 75.2878521 | 72.122577 |
| 17:32:34 | 0:31:32 | 72.2188035 | 75.2675012 | 84.1785034 | 75.2878521 | 72.122577 |
| 17:32:35 | 0:31:33 | 72.2188035 | 74.2675012 | 84.1785034 | 75.2878521 | 70.122577 |
| 17:32:36 | 0:31:34 | 72.2188035 | 74.2675012 | 84.1785034 | 76.2878521 | 69.122577 |
| 17:32:37 | 0:31:35 | 72.2188035 | 74.2675012 | 84.1785034 | 77.2878521 | 69.122577 |
| 17:32:38 | 0:31:36 | 73.2188035 | 74.2675012 | 85.1785034 | 78.2878521 | 70.122577 |
| 17:32:39 | 0:31:37 | 73.2188035 | 75.2675012 | 86.1785034 | 81.2878521 | 71.122577 |
| 17:32:40 | 0:31:38 | 74.2188035 | 75.2675012 | 86.1785034 | 81.2878521 | 71.122577 |
| 17:32:41 | 0:31:39 | 75.2188035 | 76.2675012 | 84.1785034 | 83.2878521 | 71.122577 |
| 17:32:42 | 0:31:40 | 76.2188035 | 76.2675012 | 83.1785034 | 84.2878521 | 72.122577 |
| 17:32:43 | 0:31:41 | 79.2188035 | 76.2675012 | 82.1785034 | 84.2878521 | 70.122577 |
| 17:32:44 | 0:31:42 | 81.2188035 | 73.2675012 | 80.1785034 | 84.2878521 | 70.122577 |
| 17:32:45 | 0:31:43 | 82.2188035 | 72.2675012 | 78.1785034 | 84.2878521 | 69.122577 |
| 17:32:46 | 0:31:44 | 84.2188035 | 72.2675012 | 78.1785034 | 84.2878521 | 68.122577 |
| 17:32:47 | 0:31:45 | 84.2188035 | 72.2675012 | 76.1785034 | 84.2878521 | 68.122577 |
| 17:32:48 | 0:31:46 | 84.2188035 | 73.2675012 | 76.1785034 | 84.2878521 | 68.122577 |
| 17:32:49 | 0:31:47 | 85.2188035 | 73.2675012 | 75.1785034 | 85.2878521 | 68.122577 |
| 17:32:50 | 0:31:48 | 85.2188035 | 73.2675012 | 75.1785034 | 85.2878521 | 68.122577 |
| 17:32:51 | 0:31:49 | 85.2188035 | 73.2675012 | 75.1785034 | 85.2878521 | 68.122577 |
| 17:32:52 | 0:31:50 | 85.2188035 | 73.2675012 | 75.1785034 | 85.2878521 | 68.122577 |
| 17:32:53 | 0:31:51 | 85.2188035 | 74.2675012 | 75.1785034 | 85.2878521 | 68.122577 |
| 17:32:54 | 0:31:52 | 84.2188035 | 74.2675012 | 75.1785034 | 85.2878521 | 68.122577 |
| 17:32:55 | 0:31:53 | 83.2188035 | 74.2675012 | 75.1785034 | 85.2878521 | 68.122577 |
| 17:32:56 | 0:31:54 | 82.2188035 | 72.2675012 | 75.1785034 | 85.2878521 | 68.122577 |
| 17:32:57 | 0:31:55 | 82.2188035 | 72.2675012 | 75.1785034 | 85.2878521 | 69.122577 |
| 17:32:58 | 0:31:56 | 80.2188035 | 72.2675012 | 75.1785034 | 84.2878521 | 69.122577 |
| 17:32:59 | 0:31:57 | 75.2188035 | 72.2675012 | 75.1785034 | 84.2878521 | 72.122577 |
| 17:33:00 | 0:31:58 | 75.2188035 | 72.2675012 | 75.1785034 | 84.2878521 | 72.122577 |
| 17:33:01 | 0:31:59 | 74.2188035 | 72.2675012 | 75.1785034 | 66.2878521 | 74.122577 |
| 17:33:02 | 0:32:00 | 74.2188035 | 74.2675012 | 76.1785034 | 65.2878521 | 74.122577 |
| 17:33:03 | 0:32:01 | 74.2188035 | 75.2675012 | 76.1785034 | 65.2878521 | 75.122577 |
| 17:33:04 | 0:32:02 | 74.2188035 | 76.2675012 | 76.1785034 | 63.2878521 | 74.122577 |
| 17:33:05 | 0:32:03 | 74.2188035 | 76.2675012 | 76.1785034 | 61.2878521 | 74.122577 |
| 17:33:06 | 0:32:04 | 75.2188035 | 75.2675012 | 76.1785034 | 61.2878521 | 74.122577 |
| 17:33:07 | 0:32:05 | 74.2188035 | 74.2675012 | 75.1785034 | 61.2878521 | 74.122577 |
| 17:33:08 | 0:32:06 | 74.2188035 | 73.2675012 | 75.1785034 | 63.2878521 | 70.122577 |
| 17:33:09 | 0:32:07 | 74.2188035 | 72.2675012 | 75.1785034 | 66.2878521 | 69.122577 |
| 17:33:10 | 0:32:08 | 73.2188035 | 72.2675012 | 75.1785034 | 66.2878521 | 69.122577 |
| 17:33:11 | 0:32:09 | 72.2188035 | 71.2675012 | 75.1785034 | 66.2878521 | 69.122577 |
| 17:33:12 | 0:32:10 | 72.2188035 | 71.2675012 | 75.1785034 | 66.2878521 | 69.122577 |
| 17:33:13 | 0:32:11 | 72.2188035 | 71.2675012 | 75.1785034 | 65.2878521 | 68.122577 |

|          |         |            |            |            |            |           |
|----------|---------|------------|------------|------------|------------|-----------|
| 17:33:14 | 0:32:12 | 71.2188035 | 71.2675012 | 75.1785034 | 65.2878521 | 68.122577 |
| 17:33:15 | 0:32:13 | 71.2188035 | 71.2675012 | 75.1785034 | 64.2878521 | 68.122577 |
| 17:33:16 | 0:32:14 | 70.2188035 | 72.2675012 | 75.1785034 | 64.2878521 | 68.122577 |
| 17:33:17 | 0:32:15 | 70.2188035 | 72.2675012 | 75.1785034 | 65.2878521 | 67.122577 |
| 17:33:18 | 0:32:16 | 71.2188035 | 74.2675012 | 75.1785034 | 68.2878521 | 66.122577 |
| 17:33:19 | 0:32:17 | 71.2188035 | 74.2675012 | 75.1785034 | 68.2878521 | 66.122577 |
| 17:33:20 | 0:32:18 | 71.2188035 | 75.2675012 | 76.1785034 | 68.2878521 | 66.122577 |
| 17:33:21 | 0:32:19 | 70.2188035 | 80.2675012 | 77.1785034 | 68.2878521 | 66.122577 |
| 17:33:22 | 0:32:20 | 71.2188035 | 88.2675012 | 76.1785034 | 68.2878521 | 66.122577 |
| 17:33:23 | 0:32:21 | 70.2188035 | 88.2675012 | 76.1785034 | 68.2878521 | 65.122577 |
| 17:33:24 | 0:32:22 | 70.2188035 | 89.2675012 | 75.1785034 | 68.2878521 | 65.122577 |
| 17:33:25 | 0:32:23 | 70.2188035 | 87.2675012 | 75.1785034 | 69.2878521 | 65.122577 |
| 17:33:26 | 0:32:24 | 71.2188035 | 81.2675012 | 75.1785034 | 69.2878521 | 66.122577 |
| 17:33:27 | 0:32:25 | 71.2188035 | 78.2675012 | 75.1785034 | 69.2878521 | 66.122577 |
| 17:33:28 | 0:32:26 | 71.2188035 | 75.2675012 | 75.1785034 | 69.2878521 | 66.122577 |
| 17:33:29 | 0:32:27 | 72.2188035 | 75.2675012 | 75.1785034 | 69.2878521 | 66.122577 |
| 17:33:30 | 0:32:28 | 73.2188035 | 66.2675012 | 75.1785034 | 73.2878521 | 66.122577 |
| 17:33:31 | 0:32:29 | 74.2188035 | 64.2675012 | 75.1785034 | 75.2878521 | 66.122577 |
| 17:33:32 | 0:32:30 | 73.2188035 | 63.2675012 | 74.1785034 | 76.2878521 | 66.122577 |
| 17:33:33 | 0:32:31 | 72.2188035 | 63.2675012 | 74.1785034 | 78.2878521 | 65.122577 |
| 17:33:34 | 0:32:32 | 71.2188035 | 64.2675012 | 73.1785034 | 79.2878521 | 65.122577 |
| 17:33:35 | 0:32:33 | 71.2188035 | 65.2675012 | 73.1785034 | 79.2878521 | 65.122577 |
| 17:33:36 | 0:32:34 | 71.2188035 | 64.2675012 | 73.1785034 | 79.2878521 | 66.122577 |
| 17:33:37 | 0:32:35 | 71.2188035 | 64.2675012 | 73.1785034 | 79.2878521 | 66.122577 |
| 17:33:38 | 0:32:36 | 71.2188035 | 64.2675012 | 74.1785034 | 77.2878521 | 67.122577 |
| 17:33:39 | 0:32:37 | 72.2188035 | 64.2675012 | 76.1785034 | 77.2878521 | 67.122577 |
| 17:33:40 | 0:32:38 | 73.2188035 | 64.2675012 | 76.1785034 | 67.2878521 | 68.122577 |
| 17:33:41 | 0:32:39 | 73.2188035 | 64.2675012 | 79.1785034 | 64.2878521 | 69.122577 |
| 17:33:42 | 0:32:40 | 73.2188035 | 64.2675012 | 79.1785034 | 58.2878521 | 69.122577 |
| 17:33:43 | 0:32:41 | 73.2188035 | 64.2675012 | 75.1785034 | 58.2878521 | 70.122577 |
| 17:33:44 | 0:32:42 | 72.2188035 | 64.2675012 | 73.1785034 | 54.2878521 | 70.122577 |
| 17:33:45 | 0:32:43 | 72.2188035 | 64.2675012 | 73.1785034 | 53.2878521 | 70.122577 |
| 17:33:46 | 0:32:44 | 70.2188035 | 64.2675012 | 72.1785034 | 53.2878521 | 69.122577 |
| 17:33:47 | 0:32:45 | 70.2188035 | 64.2675012 | 72.1785034 | 53.2878521 | 69.122577 |
| 17:33:48 | 0:32:46 | 71.2188035 | 64.2675012 | 73.1785034 | 53.2878521 | 70.122577 |
| 17:33:49 | 0:32:47 | 71.2188035 | 64.2675012 | 73.1785034 | 52.2878521 | 72.122577 |
| 17:33:50 | 0:32:48 | 71.2188035 | 64.2675012 | 74.1785034 | 51.2878521 | 74.122577 |
| 17:33:51 | 0:32:49 | 71.2188035 | 64.2675012 | 76.1785034 | 51.2878521 | 75.122577 |
| 17:33:52 | 0:32:50 | 71.2188035 | 62.2675012 | 76.1785034 | 50.2878521 | 74.122577 |
| 17:33:53 | 0:32:51 | 70.2188035 | 62.2675012 | 76.1785034 | 50.2878521 | 74.122577 |
| 17:33:54 | 0:32:52 | 70.2188035 | 62.2675012 | 76.1785034 | 50.2878521 | 74.122577 |
| 17:33:55 | 0:32:53 | 71.2188035 | 63.2675012 | 74.1785034 | 51.2878521 | 72.122577 |
| 17:33:56 | 0:32:54 | 70.2188035 | 64.2675012 | 74.1785034 | 51.2878521 | 72.122577 |
| 17:33:57 | 0:32:55 | 70.2188035 | 66.2675012 | 74.1785034 | 51.2878521 | 72.122577 |
| 17:33:58 | 0:32:56 | 69.2188035 | 66.2675012 | 75.1785034 | 52.2878521 | 72.122577 |

|          |         |            |            |            |            |           |
|----------|---------|------------|------------|------------|------------|-----------|
| 17:33:59 | 0:32:57 | 70.2188035 | 66.2675012 | 75.1785034 | 53.2878521 | 72.122577 |
| 17:34:00 | 0:32:58 | 69.2188035 | 66.2675012 | 75.1785034 | 54.2878521 | 72.122577 |
| 17:34:01 | 0:32:59 | 69.2188035 | 66.2675012 | 75.1785034 | 54.2878521 | 72.122577 |
| 17:34:02 | 0:33:00 | 69.2188035 | 66.2675012 | 75.1785034 | 60.2878521 | 72.122577 |
| 17:34:03 | 0:33:01 | 69.2188035 | 68.2675012 | 75.1785034 | 61.2878521 | 73.122577 |
| 17:34:04 | 0:33:02 | 68.2188035 | 69.2675012 | 78.1785034 | 64.2878521 | 73.122577 |
| 17:34:05 | 0:33:03 | 68.2188035 | 70.2675012 | 78.1785034 | 66.2878521 | 73.122577 |
| 17:34:06 | 0:33:04 | 67.2188035 | 71.2675012 | 79.1785034 | 67.2878521 | 73.122577 |
| 17:34:07 | 0:33:05 | 67.2188035 | 71.2675012 | 79.1785034 | 67.2878521 | 72.122577 |
| 17:34:08 | 0:33:06 | 67.2188035 | 71.2675012 | 79.1785034 | 67.2878521 | 72.122577 |
| 17:34:09 | 0:33:07 | 67.2188035 | 76.2675012 | 79.1785034 | 67.2878521 | 72.122577 |
| 17:34:10 | 0:33:08 | 67.2188035 | 81.2675012 | 79.1785034 | 67.2878521 | 72.122577 |
| 17:34:11 | 0:33:09 | 67.2188035 | 82.2675012 | 79.1785034 | 67.2878521 | 72.122577 |
| 17:34:12 | 0:33:10 | 67.2188035 | 83.2675012 | 80.1785034 | 67.2878521 | 72.122577 |
| 17:34:13 | 0:33:11 | 66.2188035 | 83.2675012 | 80.1785034 | 68.2878521 | 72.122577 |
| 17:34:14 | 0:33:12 | 66.2188035 | 83.2675012 | 82.1785034 | 69.2878521 | 72.122577 |
| 17:34:15 | 0:33:13 | 68.2188035 | 83.2675012 | 82.1785034 | 69.2878521 | 72.122577 |
| 17:34:16 | 0:33:14 | 68.2188035 | 83.2675012 | 83.1785034 | 72.2878521 | 72.122577 |
| 17:34:17 | 0:33:15 | 69.2188035 | 83.2675012 | 83.1785034 | 74.2878521 | 71.122577 |
| 17:34:18 | 0:33:16 | 69.2188035 | 83.2675012 | 83.1785034 | 75.2878521 | 71.122577 |
| 17:34:19 | 0:33:17 | 69.2188035 | 81.2675012 | 84.1785034 | 76.2878521 | 71.122577 |
| 17:34:20 | 0:33:18 | 70.2188035 | 78.2675012 | 85.1785034 | 76.2878521 | 71.122577 |
| 17:34:21 | 0:33:19 | 71.2188035 | 76.2675012 | 86.1785034 | 74.2878521 | 71.122577 |
| 17:34:22 | 0:33:20 | 73.2188035 | 76.2675012 | 87.1785034 | 73.2878521 | 72.122577 |
| 17:34:23 | 0:33:21 | 74.2188035 | 76.2675012 | 88.1785034 | 72.2878521 | 72.122577 |
| 17:34:24 | 0:33:22 | 74.2188035 | 75.2675012 | 87.1785034 | 72.2878521 | 73.122577 |
| 17:34:25 | 0:33:23 | 74.2188035 | 76.2675012 | 88.1785034 | 72.2878521 | 75.122577 |
| 17:34:26 | 0:33:24 | 75.2188035 | 79.2675012 | 88.1785034 | 73.2878521 | 76.122577 |
| 17:34:27 | 0:33:25 | 75.2188035 | 78.2675012 | 88.1785034 | 73.2878521 | 76.122577 |
| 17:34:28 | 0:33:26 | 76.2188035 | 76.2675012 | 78.1785034 | 73.2878521 | 76.122577 |
| 17:34:29 | 0:33:27 | 76.2188035 | 74.2675012 | 75.1785034 | 73.2878521 | 76.122577 |
| 17:34:30 | 0:33:28 | 76.2188035 | 72.2675012 | 73.1785034 | 71.2878521 | 75.122577 |
| 17:34:31 | 0:33:29 | 76.2188035 | 70.2675012 | 72.1785034 | 71.2878521 | 75.122577 |
| 17:34:32 | 0:33:30 | 76.2188035 | 70.2675012 | 72.1785034 | 71.2878521 | 73.122577 |
| 17:34:33 | 0:33:31 | 76.2188035 | 70.2675012 | 73.1785034 | 70.2878521 | 72.122577 |
| 17:34:34 | 0:33:32 | 76.2188035 | 71.2675012 | 76.1785034 | 70.2878521 | 72.122577 |
| 17:34:35 | 0:33:33 | 75.2188035 | 72.2675012 | 77.1785034 | 70.2878521 | 72.122577 |
| 17:34:36 | 0:33:34 | 74.2188035 | 72.2675012 | 77.1785034 | 70.2878521 | 72.122577 |
| 17:34:37 | 0:33:35 | 71.2188035 | 72.2675012 | 77.1785034 | 70.2878521 | 72.122577 |
| 17:34:38 | 0:33:36 | 70.2188035 | 73.2675012 | 77.1785034 | 70.2878521 | 72.122577 |
| 17:34:39 | 0:33:37 | 70.2188035 | 74.2675012 | 78.1785034 | 67.2878521 | 72.122577 |
| 17:34:40 | 0:33:38 | 69.2188035 | 74.2675012 | 79.1785034 | 65.2878521 | 72.122577 |
| 17:34:41 | 0:33:39 | 69.2188035 | 73.2675012 | 80.1785034 | 63.2878521 | 72.122577 |
| 17:34:42 | 0:33:40 | 70.2188035 | 72.2675012 | 80.1785034 | 63.2878521 | 73.122577 |
| 17:34:43 | 0:33:41 | 70.2188035 | 71.2675012 | 80.1785034 | 57.2878521 | 74.122577 |

|          |         |            |            |            |            |           |
|----------|---------|------------|------------|------------|------------|-----------|
| 17:34:44 | 0:33:42 | 70.2188035 | 71.2675012 | 80.1785034 | 56.2878521 | 75.122577 |
| 17:34:45 | 0:33:43 | 70.2188035 | 71.2675012 | 81.1785034 | 55.2878521 | 75.122577 |
| 17:34:46 | 0:33:44 | 70.2188035 | 72.2675012 | 81.1785034 | 55.2878521 | 76.122577 |
| 17:34:47 | 0:33:45 | 70.2188035 | 72.2675012 | 81.1785034 | 56.2878521 | 76.122577 |
| 17:34:48 | 0:33:46 | 70.2188035 | 72.2675012 | 81.1785034 | 56.2878521 | 76.122577 |
| 17:34:49 | 0:33:47 | 70.2188035 | 73.2675012 | 79.1785034 | 56.2878521 | 76.122577 |
| 17:34:50 | 0:33:48 | 70.2188035 | 73.2675012 | 78.1785034 | 57.2878521 | 76.122577 |
| 17:34:51 | 0:33:49 | 70.2188035 | 73.2675012 | 76.1785034 | 56.2878521 | 76.122577 |
| 17:34:52 | 0:33:50 | 70.2188035 | 73.2675012 | 76.1785034 | 56.2878521 | 76.122577 |
| 17:34:53 | 0:33:51 | 70.2188035 | 74.2675012 | 76.1785034 | 56.2878521 | 76.122577 |
| 17:34:54 | 0:33:52 | 70.2188035 | 74.2675012 | 76.1785034 | 58.2878521 | 75.122577 |
| 17:34:55 | 0:33:53 | 70.2188035 | 74.2675012 | 75.1785034 | 58.2878521 | 75.122577 |
| 17:34:56 | 0:33:54 | 70.2188035 | 74.2675012 | 75.1785034 | 58.2878521 | 74.122577 |
| 17:34:57 | 0:33:55 | 70.2188035 | 75.2675012 | 73.1785034 | 60.2878521 | 74.122577 |
| 17:34:58 | 0:33:56 | 69.2188035 | 76.2675012 | 73.1785034 | 60.2878521 | 73.122577 |
| 17:34:59 | 0:33:57 | 69.2188035 | 77.2675012 | 73.1785034 | 62.2878521 | 73.122577 |
| 17:35:00 | 0:33:58 | 69.2188035 | 78.2675012 | 73.1785034 | 62.2878521 | 73.122577 |
| 17:35:01 | 0:33:59 | 69.2188035 | 79.2675012 | 72.1785034 | 62.2878521 | 73.122577 |
| 17:35:02 | 0:34:00 | 69.2188035 | 80.2675012 | 71.1785034 | 62.2878521 | 73.122577 |
| 17:35:03 | 0:34:01 | 70.2188035 | 81.2675012 | 72.1785034 | 63.2878521 | 73.122577 |
| 17:35:04 | 0:34:02 | 70.2188035 | 81.2675012 | 72.1785034 | 65.2878521 | 70.122577 |
| 17:35:05 | 0:34:03 | 70.2188035 | 81.2675012 | 80.1785034 | 65.2878521 | 70.122577 |
| 17:35:06 | 0:34:04 | 71.2188035 | 81.2675012 | 80.1785034 | 66.2878521 | 70.122577 |
| 17:35:07 | 0:34:05 | 71.2188035 | 80.2675012 | 81.1785034 | 66.2878521 | 70.122577 |
| 17:35:08 | 0:34:06 | 71.2188035 | 80.2675012 | 81.1785034 | 66.2878521 | 70.122577 |
| 17:35:09 | 0:34:07 | 71.2188035 | 80.2675012 | 81.1785034 | 66.2878521 | 70.122577 |
| 17:35:10 | 0:34:08 | 71.2188035 | 80.2675012 | 80.1785034 | 66.2878521 | 70.122577 |
| 17:35:11 | 0:34:09 | 70.2188035 | 80.2675012 | 80.1785034 | 66.2878521 | 70.122577 |
| 17:35:12 | 0:34:10 | 70.2188035 | 80.2675012 | 80.1785034 | 66.2878521 | 69.122577 |
| 17:35:13 | 0:34:11 | 70.2188035 | 80.2675012 | 79.1785034 | 66.2878521 | 69.122577 |
| 17:35:14 | 0:34:12 | 71.2188035 | 80.2675012 | 79.1785034 | 65.2878521 | 70.122577 |
| 17:35:15 | 0:34:13 | 73.2188035 | 77.2675012 | 79.1785034 | 65.2878521 | 70.122577 |
| 17:35:16 | 0:34:14 | 74.2188035 | 76.2675012 | 79.1785034 | 65.2878521 | 70.122577 |
| 17:35:17 | 0:34:15 | 75.2188035 | 74.2675012 | 77.1785034 | 65.2878521 | 71.122577 |
| 17:35:18 | 0:34:16 | 75.2188035 | 73.2675012 | 74.1785034 | 65.2878521 | 72.122577 |
| 17:35:19 | 0:34:17 | 76.2188035 | 73.2675012 | 72.1785034 | 66.2878521 | 73.122577 |
| 17:35:20 | 0:34:18 | 77.2188035 | 72.2675012 | 71.1785034 | 66.2878521 | 73.122577 |
| 17:35:21 | 0:34:19 | 77.2188035 | 71.2675012 | 71.1785034 | 66.2878521 | 73.122577 |
| 17:35:22 | 0:34:20 | 76.2188035 | 70.2675012 | 71.1785034 | 66.2878521 | 73.122577 |
| 17:35:23 | 0:34:21 | 76.2188035 | 70.2675012 | 72.1785034 | 67.2878521 | 73.122577 |
| 17:35:24 | 0:34:22 | 75.2188035 | 70.2675012 | 72.1785034 | 67.2878521 | 73.122577 |
| 17:35:25 | 0:34:23 | 75.2188035 | 70.2675012 | 72.1785034 | 68.2878521 | 73.122577 |
| 17:35:26 | 0:34:24 | 75.2188035 | 70.2675012 | 72.1785034 | 68.2878521 | 75.122577 |
| 17:35:27 | 0:34:25 | 75.2188035 | 69.2675012 | 72.1785034 | 69.2878521 | 75.122577 |
| 17:35:28 | 0:34:26 | 75.2188035 | 69.2675012 | 72.1785034 | 69.2878521 | 75.122577 |

|          |         |            |            |            |            |           |
|----------|---------|------------|------------|------------|------------|-----------|
| 17:35:29 | 0:34:27 | 75.2188035 | 69.2675012 | 72.1785034 | 67.2878521 | 75.122577 |
| 17:35:30 | 0:34:28 | 75.2188035 | 69.2675012 | 72.1785034 | 67.2878521 | 76.122577 |
| 17:35:31 | 0:34:29 | 75.2188035 | 70.2675012 | 72.1785034 | 67.2878521 | 76.122577 |
| 17:35:32 | 0:34:30 | 75.2188035 | 70.2675012 | 73.1785034 | 68.2878521 | 75.122577 |
| 17:35:33 | 0:34:31 | 75.2188035 | 70.2675012 | 73.1785034 | 68.2878521 | 74.122577 |
| 17:35:34 | 0:34:32 | 74.2188035 | 70.2675012 | 72.1785034 | 66.2878521 | 74.122577 |
| 17:35:35 | 0:34:33 | 74.2188035 | 70.2675012 | 71.1785034 | 66.2878521 | 74.122577 |
| 17:35:36 | 0:34:34 | 75.2188035 | 68.2675012 | 71.1785034 | 65.2878521 | 74.122577 |
| 17:35:37 | 0:34:35 | 74.2188035 | 68.2675012 | 70.1785034 | 65.2878521 | 74.122577 |
| 17:35:38 | 0:34:36 | 73.2188035 | 69.2675012 | 71.1785034 | 63.2878521 | 74.122577 |
| 17:35:39 | 0:34:37 | 73.2188035 | 71.2675012 | 71.1785034 | 64.2878521 | 74.122577 |
| 17:35:40 | 0:34:38 | 73.2188035 | 72.2675012 | 71.1785034 | 65.2878521 | 74.122577 |
| 17:35:41 | 0:34:39 | 73.2188035 | 72.2675012 | 71.1785034 | 65.2878521 | 74.122577 |
| 17:35:42 | 0:34:40 | 73.2188035 | 72.2675012 | 71.1785034 | 65.2878521 | 74.122577 |
| 17:35:43 | 0:34:41 | 73.2188035 | 72.2675012 | 71.1785034 | 69.2878521 | 74.122577 |
| 17:35:44 | 0:34:42 | 72.2188035 | 72.2675012 | 70.1785034 | 69.2878521 | 73.122577 |
| 17:35:45 | 0:34:43 | 72.2188035 | 72.2675012 | 70.1785034 | 69.2878521 | 73.122577 |
| 17:35:46 | 0:34:44 | 72.2188035 | 72.2675012 | 70.1785034 | 68.2878521 | 73.122577 |
| 17:35:47 | 0:34:45 | 72.2188035 | 71.2675012 | 70.1785034 | 67.2878521 | 72.122577 |
| 17:35:48 | 0:34:46 | 71.2188035 | 71.2675012 | 70.1785034 | 67.2878521 | 71.122577 |
| 17:35:49 | 0:34:47 | 71.2188035 | 71.2675012 | 70.1785034 | 68.2878521 | 72.122577 |
| 17:35:50 | 0:34:48 | 71.2188035 | 71.2675012 | 70.1785034 | 68.2878521 | 72.122577 |
| 17:35:51 | 0:34:49 | 71.2188035 | 71.2675012 | 70.1785034 | 69.2878521 | 72.122577 |
| 17:35:52 | 0:34:50 | 71.2188035 | 71.2675012 | 69.1785034 | 69.2878521 | 72.122577 |
| 17:35:53 | 0:34:51 | 71.2188035 | 71.2675012 | 70.1785034 | 69.2878521 | 73.122577 |
| 17:35:54 | 0:34:52 | 71.2188035 | 70.2675012 | 70.1785034 | 69.2878521 | 74.122577 |
| 17:35:55 | 0:34:53 | 71.2188035 | 71.2675012 | 70.1785034 | 67.2878521 | 74.122577 |
| 17:35:56 | 0:34:54 | 71.2188035 | 72.2675012 | 70.1785034 | 67.2878521 | 74.122577 |
| 17:35:57 | 0:34:55 | 72.2188035 | 72.2675012 | 70.1785034 | 68.2878521 | 74.122577 |
| 17:35:58 | 0:34:56 | 72.2188035 | 72.2675012 | 71.1785034 | 69.2878521 | 74.122577 |
| 17:35:59 | 0:34:57 | 72.2188035 | 73.2675012 | 71.1785034 | 70.2878521 | 74.122577 |
| 17:36:00 | 0:34:58 | 73.2188035 | 73.2675012 | 71.1785034 | 70.2878521 | 74.122577 |
| 17:36:01 | 0:34:59 | 73.2188035 | 73.2675012 | 71.1785034 | 71.2878521 | 74.122577 |
| 17:36:02 | 0:35:00 | 73.2188035 | 72.2675012 | 72.1785034 | 70.2878521 | 74.122577 |
| 17:36:03 | 0:35:01 | 73.2188035 | 72.2675012 | 72.1785034 | 69.2878521 | 74.122577 |
| 17:36:04 | 0:35:02 | 74.2188035 | 72.2675012 | 72.1785034 | 69.2878521 | 74.122577 |
| 17:36:05 | 0:35:03 | 75.2188035 | 72.2675012 | 70.1785034 | 67.2878521 | 73.122577 |
| 17:36:06 | 0:35:04 | 75.2188035 | 72.2675012 | 70.1785034 | 67.2878521 | 73.122577 |
| 17:36:07 | 0:35:05 | 74.2188035 | 73.2675012 | 69.1785034 | 67.2878521 | 73.122577 |
| 17:36:08 | 0:35:06 | 74.2188035 | 73.2675012 | 69.1785034 | 67.2878521 | 73.122577 |
| 17:36:09 | 0:35:07 | 75.2188035 | 75.2675012 | 69.1785034 | 67.2878521 | 74.122577 |
| 17:36:10 | 0:35:08 | 74.2188035 | 78.2675012 | 69.1785034 | 67.2878521 | 74.122577 |
| 17:36:11 | 0:35:09 | 74.2188035 | 78.2675012 | 69.1785034 | 67.2878521 | 75.122577 |
| 17:36:12 | 0:35:10 | 74.2188035 | 78.2675012 | 69.1785034 | 68.2878521 | 76.122577 |
| 17:36:13 | 0:35:11 | 74.2188035 | 78.2675012 | 65.1785034 | 68.2878521 | 76.122577 |



|          |         |            |            |            |            |           |
|----------|---------|------------|------------|------------|------------|-----------|
| 17:36:14 | 0:35:12 | 74.2188035 | 78.2675012 | 66.1785034 | 68.2878521 | 76.122577 |
| 17:36:15 | 0:35:13 | 75.2188035 | 78.2675012 | 66.1785034 | 68.2878521 | 77.122577 |
| 17:36:16 | 0:35:14 | 74.2188035 | 78.2675012 | 67.1785034 | 68.2878521 | 77.122577 |
| 17:36:17 | 0:35:15 | 73.2188035 | 78.2675012 | 68.1785034 | 69.2878521 | 78.122577 |
| 17:36:18 | 0:35:16 | 73.2188035 | 76.2675012 | 68.1785034 | 69.2878521 | 78.122577 |
| 17:36:19 | 0:35:17 | 74.2188035 | 76.2675012 | 72.1785034 | 70.2878521 | 78.122577 |
| 17:36:20 | 0:35:18 | 73.2188035 | 75.2675012 | 73.1785034 | 70.2878521 | 76.122577 |
| 17:36:21 | 0:35:19 | 74.2188035 | 75.2675012 | 73.1785034 | 70.2878521 | 76.122577 |
| 17:36:22 | 0:35:20 | 74.2188035 | 75.2675012 | 73.1785034 | 70.2878521 | 75.122577 |
| 17:36:23 | 0:35:21 | 75.2188035 | 74.2675012 | 74.1785034 | 67.2878521 | 73.122577 |
| 17:36:24 | 0:35:22 | 75.2188035 | 74.2675012 | 74.1785034 | 67.2878521 | 73.122577 |
| 17:36:25 | 0:35:23 | 75.2188035 | 74.2675012 | 74.1785034 | 67.2878521 | 73.122577 |
| 17:36:26 | 0:35:24 | 75.2188035 | 74.2675012 | 74.1785034 | 68.2878521 | 73.122577 |
| 17:36:27 | 0:35:25 | 76.2188035 | 72.2675012 | 74.1785034 | 67.2878521 | 72.122577 |
| 17:36:28 | 0:35:26 | 76.2188035 | 70.2675012 | 74.1785034 | 65.2878521 | 71.122577 |
| 17:36:29 | 0:35:27 | 76.2188035 | 70.2675012 | 75.1785034 | 64.2878521 | 71.122577 |
| 17:36:30 | 0:35:28 | 77.2188035 | 70.2675012 | 75.1785034 | 64.2878521 | 70.122577 |
| 17:36:31 | 0:35:29 | 77.2188035 | 69.2675012 | 74.1785034 | 64.2878521 | 70.122577 |
| 17:36:32 | 0:35:30 | 77.2188035 | 68.2675012 | 74.1785034 | 64.2878521 | 70.122577 |
| 17:36:33 | 0:35:31 | 77.2188035 | 67.2675012 | 75.1785034 | 66.2878521 | 71.122577 |
| 17:36:34 | 0:35:32 | 76.2188035 | 65.2675012 | 75.1785034 | 74.2878521 | 71.122577 |
| 17:36:35 | 0:35:33 | 76.2188035 | 64.2675012 | 75.1785034 | 74.2878521 | 72.122577 |
| 17:36:36 | 0:35:34 | 76.2188035 | 64.2675012 | 75.1785034 | 74.2878521 | 72.122577 |
| 17:36:37 | 0:35:35 | 76.2188035 | 63.2675012 | 75.1785034 | 79.2878521 | 73.122577 |
| 17:36:38 | 0:35:36 | 76.2188035 | 63.2675012 | 75.1785034 | 80.2878521 | 73.122577 |
| 17:36:39 | 0:35:37 | 76.2188035 | 63.2675012 | 76.1785034 | 82.2878521 | 74.122577 |
| 17:36:40 | 0:35:38 | 77.2188035 | 63.2675012 | 77.1785034 | 82.2878521 | 74.122577 |
| 17:36:41 | 0:35:39 | 77.2188035 | 64.2675012 | 79.1785034 | 82.2878521 | 74.122577 |
| 17:36:42 | 0:35:40 | 77.2188035 | 64.2675012 | 81.1785034 | 83.2878521 | 74.122577 |
| 17:36:43 | 0:35:41 | 77.2188035 | 64.2675012 | 80.1785034 | 83.2878521 | 74.122577 |
| 17:36:44 | 0:35:42 | 77.2188035 | 63.2675012 | 79.1785034 | 83.2878521 | 73.122577 |
| 17:36:45 | 0:35:43 | 77.2188035 | 64.2675012 | 79.1785034 | 82.2878521 | 73.122577 |
| 17:36:46 | 0:35:44 | 77.2188035 | 65.2675012 | 78.1785034 | 82.2878521 | 73.122577 |
| 17:36:47 | 0:35:45 | 77.2188035 | 65.2675012 | 76.1785034 | 82.2878521 | 73.122577 |
| 17:36:48 | 0:35:46 | 77.2188035 | 65.2675012 | 74.1785034 | 82.2878521 | 75.122577 |
| 17:36:49 | 0:35:47 | 77.2188035 | 65.2675012 | 74.1785034 | 82.2878521 | 76.122577 |
| 17:36:50 | 0:35:48 | 77.2188035 | 66.2675012 | 74.1785034 | 84.2878521 | 76.122577 |
| 17:36:51 | 0:35:49 | 78.2188035 | 66.2675012 | 75.1785034 | 86.2878521 | 77.122577 |
| 17:36:52 | 0:35:50 | 78.2188035 | 66.2675012 | 75.1785034 | 87.2878521 | 78.122577 |
| 17:36:53 | 0:35:51 | 77.2188035 | 67.2675012 | 75.1785034 | 87.2878521 | 78.122577 |
| 17:36:54 | 0:35:52 | 76.2188035 | 67.2675012 | 75.1785034 | 84.2878521 | 77.122577 |
| 17:36:55 | 0:35:53 | 76.2188035 | 67.2675012 | 75.1785034 | 84.2878521 | 75.122577 |
| 17:36:56 | 0:35:54 | 76.2188035 | 68.2675012 | 75.1785034 | 79.2878521 | 75.122577 |
| 17:36:57 | 0:35:55 | 75.2188035 | 68.2675012 | 75.1785034 | 75.2878521 | 74.122577 |
| 17:36:58 | 0:35:56 | 74.2188035 | 69.2675012 | 75.1785034 | 74.2878521 | 76.122577 |

|          |         |            |            |            |            |           |
|----------|---------|------------|------------|------------|------------|-----------|
| 17:36:59 | 0:35:57 | 74.2188035 | 70.2675012 | 74.1785034 | 74.2878521 | 77.122577 |
| 17:37:00 | 0:35:58 | 74.2188035 | 71.2675012 | 72.1785034 | 77.2878521 | 77.122577 |
| 17:37:01 | 0:35:59 | 74.2188035 | 71.2675012 | 71.1785034 | 78.2878521 | 78.122577 |
| 17:37:02 | 0:36:00 | 73.2188035 | 71.2675012 | 70.1785034 | 78.2878521 | 78.122577 |
| 17:37:03 | 0:36:01 | 73.2188035 | 69.2675012 | 71.1785034 | 78.2878521 | 79.122577 |
| 17:37:04 | 0:36:02 | 74.2188035 | 68.2675012 | 72.1785034 | 75.2878521 | 79.122577 |
| 17:37:05 | 0:36:03 | 74.2188035 | 70.2675012 | 72.1785034 | 73.2878521 | 80.122577 |
| 17:37:06 | 0:36:04 | 74.2188035 | 72.2675012 | 76.1785034 | 73.2878521 | 80.122577 |
| 17:37:07 | 0:36:05 | 74.2188035 | 72.2675012 | 76.1785034 | 72.2878521 | 80.122577 |
| 17:37:08 | 0:36:06 | 74.2188035 | 72.2675012 | 75.1785034 | 74.2878521 | 80.122577 |
| 17:37:09 | 0:36:07 | 74.2188035 | 73.2675012 | 75.1785034 | 74.2878521 | 79.122577 |
| 17:37:10 | 0:36:08 | 75.2188035 | 73.2675012 | 74.1785034 | 78.2878521 | 74.122577 |
| 17:37:11 | 0:36:09 | 76.2188035 | 73.2675012 | 74.1785034 | 78.2878521 | 74.122577 |
| 17:37:12 | 0:36:10 | 76.2188035 | 72.2675012 | 74.1785034 | 78.2878521 | 73.122577 |
| 17:37:13 | 0:36:11 | 76.2188035 | 71.2675012 | 74.1785034 | 79.2878521 | 73.122577 |
| 17:37:14 | 0:36:12 | 76.2188035 | 71.2675012 | 75.1785034 | 79.2878521 | 73.122577 |
| 17:37:15 | 0:36:13 | 75.2188035 | 71.2675012 | 76.1785034 | 76.2878521 | 72.122577 |
| 17:37:16 | 0:36:14 | 75.2188035 | 70.2675012 | 81.1785034 | 74.2878521 | 71.122577 |
| 17:37:17 | 0:36:15 | 75.2188035 | 70.2675012 | 82.1785034 | 74.2878521 | 70.122577 |
| 17:37:18 | 0:36:16 | 75.2188035 | 70.2675012 | 82.1785034 | 74.2878521 | 69.122577 |
| 17:37:19 | 0:36:17 | 74.2188035 | 70.2675012 | 81.1785034 | 74.2878521 | 69.122577 |
| 17:37:20 | 0:36:18 | 74.2188035 | 70.2675012 | 77.1785034 | 76.2878521 | 67.122577 |
| 17:37:21 | 0:36:19 | 76.2188035 | 71.2675012 | 74.1785034 | 76.2878521 | 66.122577 |
| 17:37:22 | 0:36:20 | 76.2188035 | 71.2675012 | 73.1785034 | 79.2878521 | 66.122577 |
| 17:37:23 | 0:36:21 | 76.2188035 | 71.2675012 | 72.1785034 | 81.2878521 | 66.122577 |
| 17:37:24 | 0:36:22 | 76.2188035 | 72.2675012 | 73.1785034 | 81.2878521 | 65.122577 |
| 17:37:25 | 0:36:23 | 76.2188035 | 72.2675012 | 74.1785034 | 81.2878521 | 65.122577 |
| 17:37:26 | 0:36:24 | 76.2188035 | 73.2675012 | 74.1785034 | 79.2878521 | 66.122577 |
| 17:37:27 | 0:36:25 | 76.2188035 | 74.2675012 | 74.1785034 | 79.2878521 | 66.122577 |
| 17:37:28 | 0:36:26 | 77.2188035 | 74.2675012 | 74.1785034 | 78.2878521 | 66.122577 |
| 17:37:29 | 0:36:27 | 77.2188035 | 74.2675012 | 74.1785034 | 78.2878521 | 66.122577 |
| 17:37:30 | 0:36:28 | 77.2188035 | 74.2675012 | 74.1785034 | 78.2878521 | 66.122577 |
| 17:37:31 | 0:36:29 | 76.2188035 | 74.2675012 | 72.1785034 | 78.2878521 | 67.122577 |
| 17:37:32 | 0:36:30 | 73.2188035 | 74.2675012 | 72.1785034 | 78.2878521 | 67.122577 |
| 17:37:33 | 0:36:31 | 72.2188035 | 73.2675012 | 72.1785034 | 78.2878521 | 67.122577 |
| 17:37:34 | 0:36:32 | 71.2188035 | 74.2675012 | 73.1785034 | 73.2878521 | 67.122577 |
| 17:37:35 | 0:36:33 | 72.2188035 | 73.2675012 | 75.1785034 | 73.2878521 | 67.122577 |
| 17:37:36 | 0:36:34 | 73.2188035 | 73.2675012 | 77.1785034 | 73.2878521 | 67.122577 |
| 17:37:37 | 0:36:35 | 73.2188035 | 73.2675012 | 79.1785034 | 74.2878521 | 67.122577 |
| 17:37:38 | 0:36:36 | 73.2188035 | 73.2675012 | 80.1785034 | 74.2878521 | 67.122577 |
| 17:37:39 | 0:36:37 | 73.2188035 | 73.2675012 | 81.1785034 | 74.2878521 | 67.122577 |
| 17:37:40 | 0:36:38 | 73.2188035 | 73.2675012 | 81.1785034 | 74.2878521 | 68.122577 |
| 17:37:41 | 0:36:39 | 73.2188035 | 73.2675012 | 79.1785034 | 75.2878521 | 69.122577 |
| 17:37:42 | 0:36:40 | 72.2188035 | 73.2675012 | 77.1785034 | 74.2878521 | 69.122577 |
| 17:37:43 | 0:36:41 | 71.2188035 | 70.2675012 | 76.1785034 | 74.2878521 | 69.122577 |

|          |         |            |            |            |            |           |
|----------|---------|------------|------------|------------|------------|-----------|
| 17:37:44 | 0:36:42 | 70.2188035 | 70.2675012 | 76.1785034 | 74.2878521 | 69.122577 |
| 17:37:45 | 0:36:43 | 70.2188035 | 68.2675012 | 77.1785034 | 74.2878521 | 70.122577 |
| 17:37:46 | 0:36:44 | 72.2188035 | 68.2675012 | 77.1785034 | 73.2878521 | 73.122577 |
| 17:37:47 | 0:36:45 | 73.2188035 | 68.2675012 | 77.1785034 | 73.2878521 | 73.122577 |
| 17:37:48 | 0:36:46 | 73.2188035 | 67.2675012 | 77.1785034 | 73.2878521 | 78.122577 |
| 17:37:49 | 0:36:47 | 73.2188035 | 66.2675012 | 77.1785034 | 73.2878521 | 81.122577 |
| 17:37:50 | 0:36:48 | 73.2188035 | 64.2675012 | 76.1785034 | 74.2878521 | 81.122577 |
| 17:37:51 | 0:36:49 | 74.2188035 | 64.2675012 | 74.1785034 | 74.2878521 | 81.122577 |
| 17:37:52 | 0:36:50 | 75.2188035 | 65.2675012 | 74.1785034 | 75.2878521 | 81.122577 |
| 17:37:53 | 0:36:51 | 75.2188035 | 65.2675012 | 73.1785034 | 75.2878521 | 81.122577 |
| 17:37:54 | 0:36:52 | 75.2188035 | 68.2675012 | 73.1785034 | 75.2878521 | 81.122577 |
| 17:37:55 | 0:36:53 | 74.2188035 | 69.2675012 | 72.1785034 | 75.2878521 | 81.122577 |
| 17:37:56 | 0:36:54 | 74.2188035 | 69.2675012 | 72.1785034 | 76.2878521 | 80.122577 |
| 17:37:57 | 0:36:55 | 74.2188035 | 68.2675012 | 71.1785034 | 76.2878521 | 80.122577 |
| 17:37:58 | 0:36:56 | 73.2188035 | 68.2675012 | 71.1785034 | 76.2878521 | 79.122577 |
| 17:37:59 | 0:36:57 | 73.2188035 | 69.2675012 | 71.1785034 | 76.2878521 | 79.122577 |
| 17:38:00 | 0:36:58 | 73.2188035 | 71.2675012 | 71.1785034 | 76.2878521 | 79.122577 |
| 17:38:01 | 0:36:59 | 73.2188035 | 71.2675012 | 71.1785034 | 77.2878521 | 79.122577 |
| 17:38:02 | 0:37:00 | 73.2188035 | 71.2675012 | 71.1785034 | 77.2878521 | 79.122577 |
| 17:38:03 | 0:37:01 | 73.2188035 | 71.2675012 | 71.1785034 | 77.2878521 | 80.122577 |
| 17:38:04 | 0:37:02 | 73.2188035 | 73.2675012 | 71.1785034 | 77.2878521 | 81.122577 |
| 17:38:05 | 0:37:03 | 72.2188035 | 74.2675012 | 72.1785034 | 76.2878521 | 83.122577 |
| 17:38:06 | 0:37:04 | 73.2188035 | 73.2675012 | 73.1785034 | 76.2878521 | 83.122577 |
| 17:38:07 | 0:37:05 | 74.2188035 | 73.2675012 | 73.1785034 | 75.2878521 | 84.122577 |
| 17:38:08 | 0:37:06 | 74.2188035 | 73.2675012 | 73.1785034 | 70.2878521 | 81.122577 |
| 17:38:09 | 0:37:07 | 74.2188035 | 72.2675012 | 74.1785034 | 70.2878521 | 81.122577 |
| 17:38:10 | 0:37:08 | 75.2188035 | 71.2675012 | 76.1785034 | 69.2878521 | 81.122577 |
| 17:38:11 | 0:37:09 | 75.2188035 | 70.2675012 | 76.1785034 | 70.2878521 | 81.122577 |
| 17:38:12 | 0:37:10 | 74.2188035 | 70.2675012 | 77.1785034 | 70.2878521 | 81.122577 |
| 17:38:13 | 0:37:11 | 74.2188035 | 70.2675012 | 76.1785034 | 70.2878521 | 81.122577 |
| 17:38:14 | 0:37:12 | 73.2188035 | 71.2675012 | 76.1785034 | 71.2878521 | 81.122577 |
| 17:38:15 | 0:37:13 | 73.2188035 | 72.2675012 | 75.1785034 | 72.2878521 | 80.122577 |
| 17:38:16 | 0:37:14 | 73.2188035 | 74.2675012 | 75.1785034 | 72.2878521 | 80.122577 |
| 17:38:17 | 0:37:15 | 74.2188035 | 75.2675012 | 75.1785034 | 72.2878521 | 81.122577 |
| 17:38:18 | 0:37:16 | 74.2188035 | 76.2675012 | 75.1785034 | 72.2878521 | 81.122577 |
| 17:38:19 | 0:37:17 | 74.2188035 | 76.2675012 | 75.1785034 | 73.2878521 | 80.122577 |
| 17:38:20 | 0:37:18 | 74.2188035 | 76.2675012 | 75.1785034 | 73.2878521 | 81.122577 |
| 17:38:21 | 0:37:19 | 74.2188035 | 76.2675012 | 75.1785034 | 73.2878521 | 82.122577 |
| 17:38:22 | 0:37:20 | 74.2188035 | 77.2675012 | 75.1785034 | 73.2878521 | 82.122577 |
| 17:38:23 | 0:37:21 | 74.2188035 | 79.2675012 | 75.1785034 | 73.2878521 | 89.122577 |
| 17:38:24 | 0:37:22 | 74.2188035 | 79.2675012 | 75.1785034 | 73.2878521 | 89.122577 |
| 17:38:25 | 0:37:23 | 74.2188035 | 81.2675012 | 75.1785034 | 73.2878521 | 94.122577 |
| 17:38:26 | 0:37:24 | 74.2188035 | 81.2675012 | 77.1785034 | 73.2878521 | 94.122577 |
| 17:38:27 | 0:37:25 | 75.2188035 | 82.2675012 | 79.1785034 | 74.2878521 | 94.122577 |
| 17:38:28 | 0:37:26 | 76.2188035 | 82.2675012 | 79.1785034 | 74.2878521 | 94.122577 |

|          |         |            |            |            |            |           |
|----------|---------|------------|------------|------------|------------|-----------|
| 17:38:29 | 0:37:27 | 78.2188035 | 82.2675012 | 79.1785034 | 76.2878521 | 94.122577 |
| 17:38:30 | 0:37:28 | 78.2188035 | 80.2675012 | 79.1785034 | 76.2878521 | 93.122577 |
| 17:38:31 | 0:37:29 | 77.2188035 | 75.2675012 | 80.1785034 | 76.2878521 | 93.122577 |
| 17:38:32 | 0:37:30 | 76.2188035 | 72.2675012 | 82.1785034 | 75.2878521 | 93.122577 |
| 17:38:33 | 0:37:31 | 76.2188035 | 70.2675012 | 82.1785034 | 76.2878521 | 93.122577 |
| 17:38:34 | 0:37:32 | 76.2188035 | 70.2675012 | 82.1785034 | 76.2878521 | 91.122577 |
| 17:38:35 | 0:37:33 | 76.2188035 | 70.2675012 | 83.1785034 | 76.2878521 | 81.122577 |
| 17:38:36 | 0:37:34 | 76.2188035 | 70.2675012 | 83.1785034 | 76.2878521 | 81.122577 |
| 17:38:37 | 0:37:35 | 77.2188035 | 72.2675012 | 75.1785034 | 76.2878521 | 81.122577 |
| 17:38:38 | 0:37:36 | 77.2188035 | 73.2675012 | 74.1785034 | 76.2878521 | 80.122577 |
| 17:38:39 | 0:37:37 | 77.2188035 | 73.2675012 | 74.1785034 | 76.2878521 | 80.122577 |
| 17:38:40 | 0:37:38 | 78.2188035 | 72.2675012 | 73.1785034 | 76.2878521 | 80.122577 |
| 17:38:41 | 0:37:39 | 78.2188035 | 72.2675012 | 73.1785034 | 76.2878521 | 79.122577 |
| 17:38:42 | 0:37:40 | 78.2188035 | 72.2675012 | 73.1785034 | 76.2878521 | 79.122577 |
| 17:38:43 | 0:37:41 | 76.2188035 | 72.2675012 | 73.1785034 | 75.2878521 | 77.122577 |
| 17:38:44 | 0:37:42 | 76.2188035 | 77.2675012 | 73.1785034 | 75.2878521 | 76.122577 |
| 17:38:45 | 0:37:43 | 76.2188035 | 79.2675012 | 73.1785034 | 73.2878521 | 75.122577 |
| 17:38:46 | 0:37:44 | 76.2188035 | 80.2675012 | 72.1785034 | 73.2878521 | 74.122577 |
| 17:38:47 | 0:37:45 | 76.2188035 | 81.2675012 | 72.1785034 | 73.2878521 | 74.122577 |
| 17:38:48 | 0:37:46 | 76.2188035 | 80.2675012 | 72.1785034 | 73.2878521 | 73.122577 |
| 17:38:49 | 0:37:47 | 75.2188035 | 77.2675012 | 73.1785034 | 73.2878521 | 73.122577 |
| 17:38:50 | 0:37:48 | 75.2188035 | 73.2675012 | 74.1785034 | 73.2878521 | 73.122577 |
| 17:38:51 | 0:37:49 | 75.2188035 | 71.2675012 | 75.1785034 | 73.2878521 | 73.122577 |
| 17:38:52 | 0:37:50 | 75.2188035 | 70.2675012 | 75.1785034 | 73.2878521 | 74.122577 |
| 17:38:53 | 0:37:51 | 74.2188035 | 70.2675012 | 75.1785034 | 71.2878521 | 74.122577 |
| 17:38:54 | 0:37:52 | 74.2188035 | 70.2675012 | 75.1785034 | 63.2878521 | 75.122577 |
| 17:38:55 | 0:37:53 | 74.2188035 | 70.2675012 | 75.1785034 | 63.2878521 | 75.122577 |
| 17:38:56 | 0:37:54 | 73.2188035 | 71.2675012 | 75.1785034 | 63.2878521 | 75.122577 |
| 17:38:57 | 0:37:55 | 73.2188035 | 71.2675012 | 75.1785034 | 63.2878521 | 74.122577 |
| 17:38:58 | 0:37:56 | 72.2188035 | 71.2675012 | 75.1785034 | 64.2878521 | 74.122577 |
| 17:38:59 | 0:37:57 | 71.2188035 | 71.2675012 | 75.1785034 | 64.2878521 | 73.122577 |
| 17:39:00 | 0:37:58 | 71.2188035 | 71.2675012 | 75.1785034 | 64.2878521 | 73.122577 |
| 17:39:01 | 0:37:59 | 70.2188035 | 70.2675012 | 74.1785034 | 64.2878521 | 74.122577 |
| 17:39:02 | 0:38:00 | 70.2188035 | 70.2675012 | 74.1785034 | 65.2878521 | 75.122577 |
| 17:39:03 | 0:38:01 | 70.2188035 | 67.2675012 | 73.1785034 | 64.2878521 | 75.122577 |
| 17:39:04 | 0:38:02 | 72.2188035 | 66.2675012 | 73.1785034 | 64.2878521 | 75.122577 |
| 17:39:05 | 0:38:03 | 72.2188035 | 66.2675012 | 73.1785034 | 63.2878521 | 77.122577 |
| 17:39:06 | 0:38:04 | 72.2188035 | 67.2675012 | 74.1785034 | 63.2878521 | 77.122577 |
| 17:39:07 | 0:38:05 | 73.2188035 | 68.2675012 | 74.1785034 | 63.2878521 | 78.122577 |
| 17:39:08 | 0:38:06 | 74.2188035 | 69.2675012 | 74.1785034 | 63.2878521 | 80.122577 |
| 17:39:09 | 0:38:07 | 74.2188035 | 71.2675012 | 74.1785034 | 64.2878521 | 80.122577 |
| 17:39:10 | 0:38:08 | 73.2188035 | 71.2675012 | 74.1785034 | 68.2878521 | 81.122577 |
| 17:39:11 | 0:38:09 | 71.2188035 | 70.2675012 | 74.1785034 | 68.2878521 | 81.122577 |
| 17:39:12 | 0:38:10 | 71.2188035 | 69.2675012 | 74.1785034 | 70.2878521 | 81.122577 |
| 17:39:13 | 0:38:11 | 71.2188035 | 67.2675012 | 79.1785034 | 69.2878521 | 81.122577 |

|          |         |            |            |            |            |           |
|----------|---------|------------|------------|------------|------------|-----------|
| 17:39:14 | 0:38:12 | 70.2188035 | 66.2675012 | 78.1785034 | 69.2878521 | 81.122577 |
| 17:39:15 | 0:38:13 | 71.2188035 | 66.2675012 | 78.1785034 | 65.2878521 | 81.122577 |
| 17:39:16 | 0:38:14 | 71.2188035 | 67.2675012 | 77.1785034 | 65.2878521 | 80.122577 |
| 17:39:17 | 0:38:15 | 71.2188035 | 67.2675012 | 77.1785034 | 65.2878521 | 79.122577 |
| 17:39:18 | 0:38:16 | 71.2188035 | 67.2675012 | 77.1785034 | 65.2878521 | 79.122577 |
| 17:39:19 | 0:38:17 | 73.2188035 | 67.2675012 | 80.1785034 | 65.2878521 | 79.122577 |
| 17:39:20 | 0:38:18 | 74.2188035 | 67.2675012 | 81.1785034 | 68.2878521 | 80.122577 |
| 17:39:21 | 0:38:19 | 75.2188035 | 66.2675012 | 82.1785034 | 68.2878521 | 81.122577 |
| 17:39:22 | 0:38:20 | 74.2188035 | 65.2675012 | 80.1785034 | 69.2878521 | 81.122577 |
| 17:39:23 | 0:38:21 | 74.2188035 | 66.2675012 | 79.1785034 | 69.2878521 | 81.122577 |
| 17:39:24 | 0:38:22 | 74.2188035 | 68.2675012 | 78.1785034 | 69.2878521 | 81.122577 |
| 17:39:25 | 0:38:23 | 74.2188035 | 70.2675012 | 78.1785034 | 69.2878521 | 81.122577 |
| 17:39:26 | 0:38:24 | 74.2188035 | 70.2675012 | 78.1785034 | 69.2878521 | 82.122577 |
| 17:39:27 | 0:38:25 | 73.2188035 | 70.2675012 | 78.1785034 | 69.2878521 | 83.122577 |
| 17:39:28 | 0:38:26 | 72.2188035 | 70.2675012 | 78.1785034 | 69.2878521 | 83.122577 |
| 17:39:29 | 0:38:27 | 71.2188035 | 69.2675012 | 78.1785034 | 69.2878521 | 84.122577 |
| 17:39:30 | 0:38:28 | 70.2188035 | 67.2675012 | 81.1785034 | 70.2878521 | 84.122577 |
| 17:39:31 | 0:38:29 | 69.2188035 | 66.2675012 | 82.1785034 | 72.2878521 | 85.122577 |
| 17:39:32 | 0:38:30 | 69.2188035 | 68.2675012 | 82.1785034 | 73.2878521 | 86.122577 |
| 17:39:33 | 0:38:31 | 69.2188035 | 68.2675012 | 82.1785034 | 73.2878521 | 87.122577 |
| 17:39:34 | 0:38:32 | 69.2188035 | 70.2675012 | 82.1785034 | 73.2878521 | 87.122577 |
| 17:39:35 | 0:38:33 | 69.2188035 | 70.2675012 | 82.1785034 | 73.2878521 | 87.122577 |
| 17:39:36 | 0:38:34 | 70.2188035 | 70.2675012 | 79.1785034 | 74.2878521 | 87.122577 |
| 17:39:37 | 0:38:35 | 71.2188035 | 68.2675012 | 79.1785034 | 77.2878521 | 87.122577 |
| 17:39:38 | 0:38:36 | 70.2188035 | 66.2675012 | 79.1785034 | 79.2878521 | 85.122577 |
| 17:39:39 | 0:38:37 | 69.2188035 | 66.2675012 | 78.1785034 | 80.2878521 | 83.122577 |
| 17:39:40 | 0:38:38 | 69.2188035 | 66.2675012 | 78.1785034 | 82.2878521 | 83.122577 |
| 17:39:41 | 0:38:39 | 69.2188035 | 68.2675012 | 78.1785034 | 82.2878521 | 80.122577 |
| 17:39:42 | 0:38:40 | 69.2188035 | 69.2675012 | 77.1785034 | 83.2878521 | 80.122577 |
| 17:39:43 | 0:38:41 | 69.2188035 | 69.2675012 | 76.1785034 | 86.2878521 | 80.122577 |
| 17:39:44 | 0:38:42 | 68.2188035 | 68.2675012 | 76.1785034 | 87.2878521 | 80.122577 |
| 17:39:45 | 0:38:43 | 68.2188035 | 66.2675012 | 74.1785034 | 89.2878521 | 80.122577 |
| 17:39:46 | 0:38:44 | 69.2188035 | 66.2675012 | 73.1785034 | 89.2878521 | 80.122577 |
| 17:39:47 | 0:38:45 | 69.2188035 | 66.2675012 | 73.1785034 | 90.2878521 | 80.122577 |
| 17:39:48 | 0:38:46 | 69.2188035 | 69.2675012 | 73.1785034 | 91.2878521 | 81.122577 |
| 17:39:49 | 0:38:47 | 69.2188035 | 71.2675012 | 72.1785034 | 91.2878521 | 81.122577 |
| 17:39:50 | 0:38:48 | 70.2188035 | 71.2675012 | 70.1785034 | 92.2878521 | 81.122577 |
| 17:39:51 | 0:38:49 | 70.2188035 | 70.2675012 | 70.1785034 | 91.2878521 | 81.122577 |
| 17:39:52 | 0:38:50 | 69.2188035 | 70.2675012 | 70.1785034 | 89.2878521 | 81.122577 |
| 17:39:53 | 0:38:51 | 69.2188035 | 68.2675012 | 70.1785034 | 89.2878521 | 82.122577 |
| 17:39:54 | 0:38:52 | 69.2188035 | 69.2675012 | 70.1785034 | 88.2878521 | 82.122577 |
| 17:39:55 | 0:38:53 | 69.2188035 | 69.2675012 | 70.1785034 | 88.2878521 | 82.122577 |
| 17:39:56 | 0:38:54 | 70.2188035 | 69.2675012 | 70.1785034 | 88.2878521 | 82.122577 |
| 17:39:57 | 0:38:55 | 70.2188035 | 69.2675012 | 70.1785034 | 87.2878521 | 82.122577 |
| 17:39:58 | 0:38:56 | 70.2188035 | 68.2675012 | 71.1785034 | 85.2878521 | 82.122577 |

|          |         |            |            |            |            |           |
|----------|---------|------------|------------|------------|------------|-----------|
| 17:39:59 | 0:38:57 | 70.2188035 | 69.2675012 | 73.1785034 | 84.2878521 | 82.122577 |
| 17:40:00 | 0:38:58 | 70.2188035 | 69.2675012 | 75.1785034 | 84.2878521 | 75.122577 |
| 17:40:01 | 0:38:59 | 71.2188035 | 69.2675012 | 77.1785034 | 84.2878521 | 73.122577 |
| 17:40:02 | 0:39:00 | 71.2188035 | 68.2675012 | 77.1785034 | 83.2878521 | 73.122577 |
| 17:40:03 | 0:39:01 | 71.2188035 | 67.2675012 | 77.1785034 | 83.2878521 | 73.122577 |
| 17:40:04 | 0:39:02 | 71.2188035 | 67.2675012 | 77.1785034 | 84.2878521 | 73.122577 |
| 17:40:05 | 0:39:03 | 72.2188035 | 66.2675012 | 75.1785034 | 84.2878521 | 74.122577 |
| 17:40:06 | 0:39:04 | 72.2188035 | 66.2675012 | 75.1785034 | 84.2878521 | 74.122577 |
| 17:40:07 | 0:39:05 | 72.2188035 | 65.2675012 | 72.1785034 | 85.2878521 | 74.122577 |
| 17:40:08 | 0:39:06 | 73.2188035 | 65.2675012 | 72.1785034 | 84.2878521 | 74.122577 |
| 17:40:09 | 0:39:07 | 75.2188035 | 65.2675012 | 72.1785034 | 77.2878521 | 73.122577 |
| 17:40:10 | 0:39:08 | 80.2188035 | 65.2675012 | 72.1785034 | 70.2878521 | 73.122577 |
| 17:40:11 | 0:39:09 | 81.2188035 | 66.2675012 | 72.1785034 | 70.2878521 | 72.122577 |
| 17:40:12 | 0:39:10 | 81.2188035 | 66.2675012 | 72.1785034 | 70.2878521 | 72.122577 |
| 17:40:13 | 0:39:11 | 83.2188035 | 68.2675012 | 71.1785034 | 69.2878521 | 72.122577 |
| 17:40:14 | 0:39:12 | 83.2188035 | 69.2675012 | 71.1785034 | 68.2878521 | 71.122577 |
| 17:40:15 | 0:39:13 | 83.2188035 | 69.2675012 | 71.1785034 | 68.2878521 | 71.122577 |
| 17:40:16 | 0:39:14 | 82.2188035 | 69.2675012 | 71.1785034 | 66.2878521 | 70.122577 |
| 17:40:17 | 0:39:15 | 81.2188035 | 69.2675012 | 70.1785034 | 59.2878521 | 70.122577 |
| 17:40:18 | 0:39:16 | 80.2188035 | 69.2675012 | 69.1785034 | 60.2878521 | 70.122577 |
| 17:40:19 | 0:39:17 | 79.2188035 | 69.2675012 | 68.1785034 | 61.2878521 | 70.122577 |
| 17:40:20 | 0:39:18 | 78.2188035 | 67.2675012 | 68.1785034 | 61.2878521 | 70.122577 |
| 17:40:21 | 0:39:19 | 77.2188035 | 63.2675012 | 68.1785034 | 60.2878521 | 70.122577 |
| 17:40:22 | 0:39:20 | 76.2188035 | 61.2675012 | 67.1785034 | 58.2878521 | 70.122577 |
| 17:40:23 | 0:39:21 | 74.2188035 | 61.2675012 | 68.1785034 | 58.2878521 | 70.122577 |
| 17:40:24 | 0:39:22 | 74.2188035 | 61.2675012 | 68.1785034 | 57.2878521 | 70.122577 |
| 17:40:25 | 0:39:23 | 73.2188035 | 64.2675012 | 68.1785034 | 54.2878521 | 70.122577 |
| 17:40:26 | 0:39:24 | 73.2188035 | 65.2675012 | 68.1785034 | 54.2878521 | 71.122577 |
| 17:40:27 | 0:39:25 | 73.2188035 | 65.2675012 | 68.1785034 | 53.2878521 | 71.122577 |
| 17:40:28 | 0:39:26 | 74.2188035 | 66.2675012 | 68.1785034 | 54.2878521 | 71.122577 |
| 17:40:29 | 0:39:27 | 74.2188035 | 67.2675012 | 69.1785034 | 54.2878521 | 72.122577 |
| 17:40:30 | 0:39:28 | 75.2188035 | 67.2675012 | 69.1785034 | 54.2878521 | 72.122577 |
| 17:40:31 | 0:39:29 | 77.2188035 | 68.2675012 | 70.1785034 | 50.2878521 | 73.122577 |
| 17:40:32 | 0:39:30 | 77.2188035 | 69.2675012 | 72.1785034 | 50.2878521 | 76.122577 |
| 17:40:33 | 0:39:31 | 78.2188035 | 66.2675012 | 74.1785034 | 50.2878521 | 74.122577 |
| 17:40:34 | 0:39:32 | 79.2188035 | 65.2675012 | 74.1785034 | 50.2878521 | 73.122577 |
| 17:40:35 | 0:39:33 | 79.2188035 | 64.2675012 | 74.1785034 | 50.2878521 | 73.122577 |
| 17:40:36 | 0:39:34 | 79.2188035 | 62.2675012 | 74.1785034 | 50.2878521 | 72.122577 |
| 17:40:37 | 0:39:35 | 78.2188035 | 61.2675012 | 74.1785034 | 50.2878521 | 72.122577 |
| 17:40:38 | 0:39:36 | 78.2188035 | 60.2675012 | 74.1785034 | 50.2878521 | 71.122577 |
| 17:40:39 | 0:39:37 | 78.2188035 | 60.2675012 | 74.1785034 | 50.2878521 | 71.122577 |
| 17:40:40 | 0:39:38 | 77.2188035 | 61.2675012 | 74.1785034 | 50.2878521 | 71.122577 |
| 17:40:41 | 0:39:39 | 77.2188035 | 63.2675012 | 74.1785034 | 51.2878521 | 71.122577 |
| 17:40:42 | 0:39:40 | 77.2188035 | 65.2675012 | 74.1785034 | 53.2878521 | 71.122577 |
| 17:40:43 | 0:39:41 | 76.2188035 | 66.2675012 | 72.1785034 | 53.2878521 | 70.122577 |

|          |         |            |            |            |            |           |
|----------|---------|------------|------------|------------|------------|-----------|
| 17:40:44 | 0:39:42 | 76.2188035 | 65.2675012 | 72.1785034 | 54.2878521 | 70.122577 |
| 17:40:45 | 0:39:43 | 76.2188035 | 65.2675012 | 72.1785034 | 55.2878521 | 70.122577 |
| 17:40:46 | 0:39:44 | 75.2188035 | 63.2675012 | 72.1785034 | 57.2878521 | 70.122577 |
| 17:40:47 | 0:39:45 | 75.2188035 | 63.2675012 | 73.1785034 | 59.2878521 | 70.122577 |
| 17:40:48 | 0:39:46 | 74.2188035 | 62.2675012 | 73.1785034 | 63.2878521 | 70.122577 |
| 17:40:49 | 0:39:47 | 74.2188035 | 63.2675012 | 73.1785034 | 66.2878521 | 69.122577 |
| 17:40:50 | 0:39:48 | 73.2188035 | 64.2675012 | 74.1785034 | 69.2878521 | 69.122577 |
| 17:40:51 | 0:39:49 | 73.2188035 | 64.2675012 | 75.1785034 | 70.2878521 | 68.122577 |
| 17:40:52 | 0:39:50 | 73.2188035 | 64.2675012 | 75.1785034 | 73.2878521 | 70.122577 |
| 17:40:53 | 0:39:51 | 74.2188035 | 63.2675012 | 75.1785034 | 72.2878521 | 71.122577 |
| 17:40:54 | 0:39:52 | 74.2188035 | 61.2675012 | 75.1785034 | 70.2878521 | 71.122577 |
| 17:40:55 | 0:39:53 | 74.2188035 | 60.2675012 | 75.1785034 | 70.2878521 | 72.122577 |
| 17:40:56 | 0:39:54 | 74.2188035 | 60.2675012 | 75.1785034 | 62.2878521 | 73.122577 |
| 17:40:57 | 0:39:55 | 73.2188035 | 61.2675012 | 75.1785034 | 57.2878521 | 73.122577 |
| 17:40:58 | 0:39:56 | 71.2188035 | 61.2675012 | 75.1785034 | 56.2878521 | 78.122577 |
| 17:40:59 | 0:39:57 | 71.2188035 | 61.2675012 | 75.1785034 | 56.2878521 | 81.122577 |
| 17:41:00 | 0:39:58 | 70.2188035 | 63.2675012 | 76.1785034 | 57.2878521 | 81.122577 |
| 17:41:01 | 0:39:59 | 70.2188035 | 65.2675012 | 77.1785034 | 60.2878521 | 81.122577 |
| 17:41:02 | 0:40:00 | 70.2188035 | 67.2675012 | 80.1785034 | 60.2878521 | 81.122577 |
| 17:41:03 | 0:40:01 | 70.2188035 | 67.2675012 | 80.1785034 | 60.2878521 | 82.122577 |
| 17:41:04 | 0:40:02 | 70.2188035 | 69.2675012 | 84.1785034 | 61.2878521 | 77.122577 |
| 17:41:05 | 0:40:03 | 70.2188035 | 69.2675012 | 84.1785034 | 59.2878521 | 76.122577 |
| 17:41:06 | 0:40:04 | 70.2188035 | 69.2675012 | 84.1785034 | 59.2878521 | 76.122577 |
| 17:41:07 | 0:40:05 | 71.2188035 | 73.2675012 | 86.1785034 | 60.2878521 | 70.122577 |
| 17:41:08 | 0:40:06 | 71.2188035 | 74.2675012 | 87.1785034 | 59.2878521 | 69.122577 |
| 17:41:09 | 0:40:07 | 72.2188035 | 74.2675012 | 73.7751363 | 59.2878521 | 70.122577 |
| 17:41:10 | 0:40:08 | 72.2188035 | 74.2675012 | 73.7751363 | 60.2878521 | 71.122577 |
| 17:41:11 | 0:40:09 | 72.2188035 | 74.2675012 | 74.0251363 | 60.2878521 | 71.122577 |
| 17:41:12 | 0:40:10 | 73.2188035 | 69.2675012 | 73.5251363 | 62.2878521 | 71.122577 |
| 17:41:13 | 0:40:11 | 74.2188035 | 68.2675012 | 73.9001363 | 63.2878521 | 72.122577 |
| 17:41:14 | 0:40:12 | 74.2188035 | 68.2675012 | 77.1785034 | 63.2878521 | 72.122577 |
| 17:41:15 | 0:40:13 | 74.2188035 | 67.2675012 | 75.1785034 | 63.2878521 | 72.122577 |
| 17:41:16 | 0:40:14 | 74.2188035 | 67.2675012 | 73.1785034 | 63.2878521 | 72.122577 |
| 17:41:17 | 0:40:15 | 74.2188035 | 67.2675012 | 71.1785034 | 66.2878521 | 72.122577 |
| 17:41:18 | 0:40:16 | 73.2188035 | 65.2675012 | 71.1785034 | 65.2878521 | 72.122577 |
| 17:41:19 | 0:40:17 | 73.2188035 | 64.2675012 | 71.1785034 | 65.2878521 | 72.122577 |
| 17:41:20 | 0:40:18 | 73.2188035 | 64.2675012 | 71.1785034 | 60.2878521 | 72.122577 |
| 17:41:21 | 0:40:19 | 74.2188035 | 64.2675012 | 71.1785034 | 60.2878521 | 76.122577 |
| 17:41:22 | 0:40:20 | 74.2188035 | 66.2675012 | 71.1785034 | 59.2878521 | 76.122577 |
| 17:41:23 | 0:40:21 | 74.2188035 | 68.2675012 | 71.1785034 | 59.2878521 | 76.122577 |
| 17:41:24 | 0:40:22 | 74.2188035 | 69.2675012 | 71.1785034 | 59.2878521 | 76.122577 |
| 17:41:25 | 0:40:23 | 74.2188035 | 70.2675012 | 71.1785034 | 59.2878521 | 76.122577 |
| 17:41:26 | 0:40:24 | 74.2188035 | 70.2675012 | 71.1785034 | 59.2878521 | 77.122577 |
| 17:41:27 | 0:40:25 | 74.2188035 | 69.2675012 | 70.1785034 | 60.2878521 | 77.122577 |
| 17:41:28 | 0:40:26 | 74.2188035 | 68.2675012 | 70.1785034 | 61.2878521 | 77.122577 |

|          |         |            |            |            |            |            |
|----------|---------|------------|------------|------------|------------|------------|
| 17:41:29 | 0:40:27 | 73.2188035 | 66.2675012 | 70.1785034 | 62.2878521 | 77.122577  |
| 17:41:30 | 0:40:28 | 72.2188035 | 65.2675012 | 71.1785034 | 64.2878521 | 78.122577  |
| 17:41:31 | 0:40:29 | 72.2188035 | 66.2675012 | 75.1785034 | 64.2878521 | 78.122577  |
| 17:41:32 | 0:40:30 | 72.2188035 | 67.2675012 | 78.1785034 | 64.2878521 | 80.122577  |
| 17:41:33 | 0:40:31 | 73.2188035 | 68.2675012 | 78.1785034 | 63.2878521 | 80.122577  |
| 17:41:34 | 0:40:32 | 73.2188035 | 69.2675012 | 78.1785034 | 63.2878521 | 80.122577  |
| 17:41:35 | 0:40:33 | 74.2188035 | 69.2675012 | 78.1785034 | 63.2878521 | 80.122577  |
| 17:41:36 | 0:40:34 | 74.2188035 | 70.2675012 | 79.1785034 | 63.2878521 | 80.122577  |
| 17:41:37 | 0:40:35 | 74.2188035 | 71.2675012 | 79.1785034 | 63.2878521 | 80.122577  |
| 17:41:38 | 0:40:36 | 74.2188035 | 72.2675012 | 79.1785034 | 64.2878521 | 80.122577  |
| 17:41:39 | 0:40:37 | 74.2188035 | 72.2675012 | 76.1785034 | 64.2878521 | 80.122577  |
| 17:41:40 | 0:40:38 | 74.2188035 | 73.2675012 | 76.1785034 | 64.2878521 | 78.122577  |
| 17:41:41 | 0:40:39 | 74.2188035 | 72.2675012 | 76.1785034 | 64.2878521 | 77.122577  |
| 17:41:42 | 0:40:40 | 74.2188035 | 71.2675012 | 75.1785034 | 64.2878521 | 77.122577  |
| 17:41:43 | 0:40:41 | 73.2188035 | 71.2675012 | 75.1785034 | 64.2878521 | 77.122577  |
| 17:41:44 | 0:40:42 | 73.2188035 | 71.2675012 | 75.1785034 | 65.2878521 | 78.122577  |
| 17:41:45 | 0:40:43 | 72.2188035 | 74.2675012 | 75.1785034 | 63.2878521 | 78.122577  |
| 17:41:46 | 0:40:44 | 72.2188035 | 74.2675012 | 76.1785034 | 63.2878521 | 78.122577  |
| 17:41:47 | 0:40:45 | 73.2188035 | 76.2675012 | 76.1785034 | 63.2878521 | 78.122577  |
| 17:41:48 | 0:40:46 | 73.2188035 | 76.2675012 | 76.1785034 | 63.2878521 | 79.122577  |
| 17:41:49 | 0:40:47 | 72.2188035 | 76.2675012 | 76.1785034 | 63.2878521 | 80.122577  |
| 17:41:50 | 0:40:48 | 72.2188035 | 77.2675012 | 75.1785034 | 63.2878521 | 81.122577  |
| 17:41:51 | 0:40:49 | 72.2188035 | 75.2675012 | 75.1785034 | 64.2878521 | 81.122577  |
| 17:41:52 | 0:40:50 | 72.2188035 | 71.2675012 | 76.1785034 | 64.2878521 | 81.122577  |
| 17:41:53 | 0:40:51 | 71.2188035 | 69.2675012 | 76.1785034 | 64.2878521 | 81.122577  |
| 17:41:54 | 0:40:52 | 71.2188035 | 68.2675012 | 77.1785034 | 64.2878521 | 81.122577  |
| 17:41:55 | 0:40:53 | 71.2188035 | 68.2675012 | 77.1785034 | 64.2878521 | 81.122577  |
| 17:41:56 | 0:40:54 | 71.2188035 | 72.2675012 | 77.1785034 | 64.2878521 | 81.122577  |
| 17:41:57 | 0:40:55 | 71.2188035 | 71.2675012 | 78.1785034 | 64.2878521 | 81.122577  |
| 17:41:58 | 0:40:56 | 71.2188035 | 69.2675012 | 78.1785034 | 64.2878521 | 80.122577  |
| 17:41:59 | 0:40:57 | 70.2188035 | 67.2675012 | 78.1785034 | 64.2878521 | 80.122577  |
| 17:42:00 | 0:40:58 | 70.2188035 | 67.2675012 | 78.1785034 | 64.2878521 | 80.122577  |
| 17:42:01 | 0:40:59 | 71.2188035 | 66.2675012 | 77.1785034 | 65.2878521 | 80.122577  |
| 17:42:02 | 0:41:00 | 71.2188035 | 66.2675012 | 77.1785034 | 65.2878521 | 82.122577  |
| 17:42:03 | 0:41:01 | 72.2188035 | 67.2675012 | 77.1785034 | 65.2878521 | 83.122577  |
| 17:42:04 | 0:41:02 | 72.2188035 | 67.2675012 | 77.1785034 | 65.2878521 | 85.122577  |
| 17:42:05 | 0:41:03 | 73.2188035 | 67.2675012 | 77.1785034 | 64.2878521 | 85.122577  |
| 17:42:06 | 0:41:04 | 73.2188035 | 68.2675012 | 79.1785034 | 64.2878521 | 72.1501363 |
| 17:42:07 | 0:41:05 | 73.2188035 | 67.2675012 | 79.1785034 | 64.2878521 | 83.122577  |
| 17:42:08 | 0:41:06 | 72.2188035 | 67.2675012 | 79.1785034 | 64.2878521 | 80.122577  |
| 17:42:09 | 0:41:07 | 72.2188035 | 67.2675012 | 79.1785034 | 63.2878521 | 72.122577  |
| 17:42:10 | 0:41:08 | 71.2188035 | 68.2675012 | 81.1785034 | 63.2878521 | 70.122577  |
| 17:42:11 | 0:41:09 | 71.2188035 | 68.2675012 | 82.1785034 | 61.2878521 | 70.122577  |
| 17:42:12 | 0:41:10 | 71.2188035 | 68.2675012 | 80.1785034 | 61.2878521 | 69.122577  |
| 17:42:13 | 0:41:11 | 72.2188035 | 68.2675012 | 79.1785034 | 61.2878521 | 68.122577  |



|          |         |            |            |            |            |           |
|----------|---------|------------|------------|------------|------------|-----------|
| 17:42:14 | 0:41:12 | 72.2188035 | 67.2675012 | 79.1785034 | 62.2878521 | 68.122577 |
| 17:42:15 | 0:41:13 | 72.2188035 | 66.2675012 | 79.1785034 | 62.2878521 | 68.122577 |
| 17:42:16 | 0:41:14 | 73.2188035 | 66.2675012 | 80.1785034 | 62.2878521 | 68.122577 |
| 17:42:17 | 0:41:15 | 74.2188035 | 65.2675012 | 80.1785034 | 62.2878521 | 69.122577 |
| 17:42:18 | 0:41:16 | 74.2188035 | 64.2675012 | 80.1785034 | 61.2878521 | 68.122577 |
| 17:42:19 | 0:41:17 | 74.2188035 | 64.2675012 | 79.1785034 | 63.2878521 | 68.122577 |
| 17:42:20 | 0:41:18 | 73.2188035 | 64.2675012 | 79.1785034 | 63.2878521 | 68.122577 |
| 17:42:21 | 0:41:19 | 73.2188035 | 64.2675012 | 76.1785034 | 64.2878521 | 68.122577 |
| 17:42:22 | 0:41:20 | 73.2188035 | 64.2675012 | 76.1785034 | 64.2878521 | 68.122577 |
| 17:42:23 | 0:41:21 | 73.2188035 | 64.2675012 | 76.1785034 | 64.2878521 | 68.122577 |
| 17:42:24 | 0:41:22 | 74.2188035 | 67.2675012 | 75.1785034 | 67.2878521 | 68.122577 |
| 17:42:25 | 0:41:23 | 74.2188035 | 68.2675012 | 73.1785034 | 67.2878521 | 68.122577 |
| 17:42:26 | 0:41:24 | 74.2188035 | 64.2675012 | 73.1785034 | 68.2878521 | 68.122577 |
| 17:42:27 | 0:41:25 | 74.2188035 | 61.2675012 | 81.1785034 | 68.2878521 | 68.122577 |
| 17:42:28 | 0:41:26 | 73.2188035 | 60.2675012 | 81.1785034 | 68.2878521 | 68.122577 |
| 17:42:29 | 0:41:27 | 72.2188035 | 60.2675012 | 81.1785034 | 68.2878521 | 69.122577 |
| 17:42:30 | 0:41:28 | 71.2188035 | 61.2675012 | 81.1785034 | 68.2878521 | 69.122577 |
| 17:42:31 | 0:41:29 | 71.2188035 | 63.2675012 | 82.1785034 | 68.2878521 | 69.122577 |
| 17:42:32 | 0:41:30 | 71.2188035 | 64.2675012 | 82.1785034 | 67.2878521 | 69.122577 |
| 17:42:33 | 0:41:31 | 71.2188035 | 65.2675012 | 82.1785034 | 67.2878521 | 69.122577 |
| 17:42:34 | 0:41:32 | 72.2188035 | 65.2675012 | 80.1785034 | 66.2878521 | 70.122577 |
| 17:42:35 | 0:41:33 | 72.2188035 | 64.2675012 | 80.1785034 | 65.2878521 | 70.122577 |
| 17:42:36 | 0:41:34 | 73.2188035 | 64.2675012 | 78.1785034 | 65.2878521 | 71.122577 |
| 17:42:37 | 0:41:35 | 74.2188035 | 65.2675012 | 77.1785034 | 65.2878521 | 72.122577 |
| 17:42:38 | 0:41:36 | 74.2188035 | 64.2675012 | 77.1785034 | 61.2878521 | 72.122577 |
| 17:42:39 | 0:41:37 | 75.2188035 | 64.2675012 | 76.1785034 | 61.2878521 | 72.122577 |
| 17:42:40 | 0:41:38 | 74.2188035 | 64.2675012 | 74.1785034 | 60.2878521 | 72.122577 |
| 17:42:41 | 0:41:39 | 74.2188035 | 65.2675012 | 74.1785034 | 60.2878521 | 73.122577 |
| 17:42:42 | 0:41:40 | 74.2188035 | 65.2675012 | 72.1785034 | 58.2878521 | 74.122577 |
| 17:42:43 | 0:41:41 | 74.2188035 | 66.2675012 | 72.1785034 | 56.2878521 | 75.122577 |
| 17:42:44 | 0:41:42 | 74.2188035 | 67.2675012 | 72.1785034 | 56.2878521 | 75.122577 |
| 17:42:45 | 0:41:43 | 74.2188035 | 66.2675012 | 71.1785034 | 56.2878521 | 75.122577 |
| 17:42:46 | 0:41:44 | 74.2188035 | 64.2675012 | 70.1785034 | 56.2878521 | 75.122577 |
| 17:42:47 | 0:41:45 | 75.2188035 | 64.2675012 | 70.1785034 | 58.2878521 | 74.122577 |
| 17:42:48 | 0:41:46 | 75.2188035 | 62.2675012 | 69.1785034 | 58.2878521 | 74.122577 |
| 17:42:49 | 0:41:47 | 75.2188035 | 62.2675012 | 68.1785034 | 58.2878521 | 73.122577 |
| 17:42:50 | 0:41:48 | 75.2188035 | 61.2675012 | 68.1785034 | 58.2878521 | 75.122577 |
| 17:42:51 | 0:41:49 | 75.2188035 | 61.2675012 | 68.1785034 | 58.2878521 | 76.122577 |
| 17:42:52 | 0:41:50 | 75.2188035 | 61.2675012 | 68.1785034 | 58.2878521 | 76.122577 |
| 17:42:53 | 0:41:51 | 75.2188035 | 61.2675012 | 68.1785034 | 59.2878521 | 76.122577 |
| 17:42:54 | 0:41:52 | 75.2188035 | 61.2675012 | 68.1785034 | 59.2878521 | 76.122577 |
| 17:42:55 | 0:41:53 | 75.2188035 | 62.2675012 | 69.1785034 | 63.2878521 | 76.122577 |
| 17:42:56 | 0:41:54 | 75.2188035 | 65.2675012 | 69.1785034 | 63.2878521 | 74.122577 |
| 17:42:57 | 0:41:55 | 74.2188035 | 65.2675012 | 71.1785034 | 63.2878521 | 72.122577 |
| 17:42:58 | 0:41:56 | 74.2188035 | 66.2675012 | 71.1785034 | 63.2878521 | 72.122577 |

|          |         |            |            |            |            |           |
|----------|---------|------------|------------|------------|------------|-----------|
| 17:42:59 | 0:41:57 | 74.2188035 | 64.2675012 | 71.1785034 | 63.2878521 | 72.122577 |
| 17:43:00 | 0:41:58 | 74.2188035 | 63.2675012 | 71.1785034 | 63.2878521 | 72.122577 |
| 17:43:01 | 0:41:59 | 74.2188035 | 62.2675012 | 71.1785034 | 63.2878521 | 72.122577 |
| 17:43:02 | 0:42:00 | 74.2188035 | 62.2675012 | 71.1785034 | 63.2878521 | 72.122577 |
| 17:43:03 | 0:42:01 | 75.2188035 | 62.2675012 | 72.1785034 | 64.2878521 | 72.122577 |
| 17:43:04 | 0:42:02 | 75.2188035 | 65.2675012 | 72.1785034 | 66.2878521 | 71.122577 |
| 17:43:05 | 0:42:03 | 75.2188035 | 66.2675012 | 72.1785034 | 67.2878521 | 71.122577 |
| 17:43:06 | 0:42:04 | 76.2188035 | 68.2675012 | 72.1785034 | 67.2878521 | 71.122577 |
| 17:43:07 | 0:42:05 | 77.2188035 | 70.2675012 | 72.1785034 | 68.2878521 | 71.122577 |
| 17:43:08 | 0:42:06 | 78.2188035 | 71.2675012 | 72.1785034 | 69.2878521 | 71.122577 |
| 17:43:09 | 0:42:07 | 79.2188035 | 73.2675012 | 73.1785034 | 71.2878521 | 71.122577 |
| 17:43:10 | 0:42:08 | 79.2188035 | 74.2675012 | 73.1785034 | 71.2878521 | 71.122577 |
| 17:43:11 | 0:42:09 | 79.2188035 | 75.2675012 | 73.1785034 | 71.2878521 | 75.122577 |
| 17:43:12 | 0:42:10 | 79.2188035 | 75.2675012 | 73.1785034 | 69.2878521 | 75.122577 |
| 17:43:13 | 0:42:11 | 77.2188035 | 74.2675012 | 73.1785034 | 67.2878521 | 80.122577 |
| 17:43:14 | 0:42:12 | 76.2188035 | 72.2675012 | 72.1785034 | 67.2878521 | 83.122577 |
| 17:43:15 | 0:42:13 | 76.2188035 | 71.2675012 | 71.1785034 | 65.2878521 | 83.122577 |
| 17:43:16 | 0:42:14 | 75.2188035 | 69.2675012 | 71.1785034 | 62.2878521 | 84.122577 |
| 17:43:17 | 0:42:15 | 74.2188035 | 69.2675012 | 71.1785034 | 62.2878521 | 85.122577 |
| 17:43:18 | 0:42:16 | 74.2188035 | 68.2675012 | 71.1785034 | 60.2878521 | 85.122577 |
| 17:43:19 | 0:42:17 | 75.2188035 | 67.2675012 | 72.1785034 | 59.2878521 | 86.122577 |
| 17:43:20 | 0:42:18 | 75.2188035 | 68.2675012 | 72.1785034 | 58.2878521 | 86.122577 |
| 17:43:21 | 0:42:19 | 75.2188035 | 69.2675012 | 73.1785034 | 58.2878521 | 83.122577 |
| 17:43:22 | 0:42:20 | 75.2188035 | 72.2675012 | 74.1785034 | 58.2878521 | 79.122577 |
| 17:43:23 | 0:42:21 | 75.2188035 | 73.2675012 | 74.1785034 | 58.2878521 | 75.122577 |
| 17:43:24 | 0:42:22 | 75.2188035 | 73.2675012 | 74.1785034 | 60.2878521 | 75.122577 |
| 17:43:25 | 0:42:23 | 74.2188035 | 70.2675012 | 74.1785034 | 60.2878521 | 73.122577 |
| 17:43:26 | 0:42:24 | 73.2188035 | 70.2675012 | 75.1785034 | 60.2878521 | 73.122577 |
| 17:43:27 | 0:42:25 | 72.2188035 | 69.2675012 | 76.1785034 | 60.2878521 | 73.122577 |
| 17:43:28 | 0:42:26 | 72.2188035 | 68.2675012 | 77.1785034 | 62.2878521 | 73.122577 |
| 17:43:29 | 0:42:27 | 72.2188035 | 68.2675012 | 75.1785034 | 63.2878521 | 73.122577 |
| 17:43:30 | 0:42:28 | 72.2188035 | 67.2675012 | 75.1785034 | 64.2878521 | 73.122577 |
| 17:43:31 | 0:42:29 | 72.2188035 | 67.2675012 | 74.1785034 | 65.2878521 | 71.122577 |
| 17:43:32 | 0:42:30 | 72.2188035 | 69.2675012 | 74.1785034 | 66.2878521 | 71.122577 |
| 17:43:33 | 0:42:31 | 72.2188035 | 73.2675012 | 74.1785034 | 66.2878521 | 70.122577 |
| 17:43:34 | 0:42:32 | 72.2188035 | 75.2675012 | 75.1785034 | 66.2878521 | 70.122577 |
| 17:43:35 | 0:42:33 | 72.2188035 | 75.2675012 | 79.1785034 | 66.2878521 | 70.122577 |
| 17:43:36 | 0:42:34 | 73.2188035 | 73.2675012 | 81.1785034 | 70.2878521 | 70.122577 |
| 17:43:37 | 0:42:35 | 73.2188035 | 73.2675012 | 81.1785034 | 71.2878521 | 70.122577 |
| 17:43:38 | 0:42:36 | 73.2188035 | 70.2675012 | 80.1785034 | 71.2878521 | 71.122577 |
| 17:43:39 | 0:42:37 | 73.2188035 | 70.2675012 | 80.1785034 | 71.2878521 | 71.122577 |
| 17:43:40 | 0:42:38 | 74.2188035 | 73.2675012 | 80.1785034 | 70.2878521 | 72.122577 |
| 17:43:41 | 0:42:39 | 74.2188035 | 75.2675012 | 78.1785034 | 70.2878521 | 72.122577 |
| 17:43:42 | 0:42:40 | 74.2188035 | 75.2675012 | 78.1785034 | 68.2878521 | 72.122577 |
| 17:43:43 | 0:42:41 | 74.2188035 | 72.2675012 | 77.1785034 | 67.2878521 | 71.122577 |

|          |         |            |            |            |            |           |
|----------|---------|------------|------------|------------|------------|-----------|
| 17:43:44 | 0:42:42 | 75.2188035 | 72.2675012 | 75.1785034 | 67.2878521 | 71.122577 |
| 17:43:45 | 0:42:43 | 75.2188035 | 72.2675012 | 75.1785034 | 67.2878521 | 71.122577 |
| 17:43:46 | 0:42:44 | 75.2188035 | 67.2675012 | 75.1785034 | 68.2878521 | 69.122577 |
| 17:43:47 | 0:42:45 | 75.2188035 | 66.2675012 | 75.1785034 | 69.2878521 | 69.122577 |
| 17:43:48 | 0:42:46 | 75.2188035 | 66.2675012 | 75.1785034 | 69.2878521 | 69.122577 |
| 17:43:49 | 0:42:47 | 75.2188035 | 68.2675012 | 76.1785034 | 65.2878521 | 69.122577 |
| 17:43:50 | 0:42:48 | 74.2188035 | 68.2675012 | 76.1785034 | 66.2878521 | 69.122577 |
| 17:43:51 | 0:42:49 | 74.2188035 | 68.2675012 | 76.1785034 | 66.2878521 | 69.122577 |
| 17:43:52 | 0:42:50 | 74.2188035 | 68.2675012 | 76.1785034 | 66.2878521 | 70.122577 |
| 17:43:53 | 0:42:51 | 74.2188035 | 66.2675012 | 76.1785034 | 65.2878521 | 71.122577 |
| 17:43:54 | 0:42:52 | 73.2188035 | 66.2675012 | 74.1785034 | 65.2878521 | 72.122577 |
| 17:43:55 | 0:42:53 | 72.2188035 | 67.2675012 | 74.1785034 | 65.2878521 | 72.122577 |
| 17:43:56 | 0:42:54 | 72.2188035 | 67.2675012 | 74.1785034 | 58.2878521 | 72.122577 |
| 17:43:57 | 0:42:55 | 71.2188035 | 67.2675012 | 74.1785034 | 57.2878521 | 70.122577 |
| 17:43:58 | 0:42:56 | 71.2188035 | 66.2675012 | 74.1785034 | 56.2878521 | 69.122577 |
| 17:43:59 | 0:42:57 | 70.2188035 | 65.2675012 | 74.1785034 | 56.2878521 | 69.122577 |
| 17:44:00 | 0:42:58 | 70.2188035 | 65.2675012 | 75.1785034 | 56.2878521 | 69.122577 |
| 17:44:01 | 0:42:59 | 70.2188035 | 65.2675012 | 74.1785034 | 52.2878521 | 69.122577 |
| 17:44:02 | 0:43:00 | 70.2188035 | 64.2675012 | 74.1785034 | 52.2878521 | 70.122577 |
| 17:44:03 | 0:43:01 | 70.2188035 | 64.2675012 | 74.1785034 | 52.2878521 | 69.122577 |
| 17:44:04 | 0:43:02 | 70.2188035 | 64.2675012 | 73.1785034 | 51.2878521 | 68.122577 |
| 17:44:05 | 0:43:03 | 70.2188035 | 63.2675012 | 72.1785034 | 51.2878521 | 68.122577 |
| 17:44:06 | 0:43:04 | 70.2188035 | 63.2675012 | 71.1785034 | 52.2878521 | 67.122577 |
| 17:44:07 | 0:43:05 | 70.2188035 | 64.2675012 | 71.1785034 | 52.2878521 | 66.122577 |
| 17:44:08 | 0:43:06 | 70.2188035 | 64.2675012 | 70.1785034 | 52.2878521 | 66.122577 |
| 17:44:09 | 0:43:07 | 71.2188035 | 64.2675012 | 68.1785034 | 52.2878521 | 66.122577 |
| 17:44:10 | 0:43:08 | 70.2188035 | 64.2675012 | 67.1785034 | 54.2878521 | 66.122577 |
| 17:44:11 | 0:43:09 | 70.2188035 | 64.2675012 | 68.1785034 | 54.2878521 | 66.122577 |
| 17:44:12 | 0:43:10 | 71.2188035 | 64.2675012 | 71.1785034 | 54.2878521 | 66.122577 |
| 17:44:13 | 0:43:11 | 71.2188035 | 66.2675012 | 72.1785034 | 58.2878521 | 66.122577 |
| 17:44:14 | 0:43:12 | 70.2188035 | 66.2675012 | 72.1785034 | 59.2878521 | 66.122577 |
| 17:44:15 | 0:43:13 | 69.2188035 | 66.2675012 | 72.1785034 | 62.2878521 | 68.122577 |
| 17:44:16 | 0:43:14 | 69.2188035 | 67.2675012 | 71.1785034 | 65.2878521 | 69.122577 |
| 17:44:17 | 0:43:15 | 69.2188035 | 67.2675012 | 71.1785034 | 65.2878521 | 69.122577 |
| 17:44:18 | 0:43:16 | 68.2188035 | 67.2675012 | 72.1785034 | 65.2878521 | 69.122577 |
| 17:44:19 | 0:43:17 | 68.2188035 | 72.2675012 | 72.1785034 | 72.2878521 | 69.122577 |
| 17:44:20 | 0:43:18 | 69.2188035 | 74.2675012 | 72.1785034 | 72.2878521 | 69.122577 |
| 17:44:21 | 0:43:19 | 69.2188035 | 74.2675012 | 71.1785034 | 72.2878521 | 68.122577 |
| 17:44:22 | 0:43:20 | 69.2188035 | 86.2675012 | 70.1785034 | 76.2878521 | 68.122577 |
| 17:44:23 | 0:43:21 | 69.2188035 | 86.2675012 | 69.1785034 | 77.2878521 | 67.122577 |
| 17:44:24 | 0:43:22 | 70.2188035 | 86.2675012 | 69.1785034 | 77.2878521 | 67.122577 |
| 17:44:25 | 0:43:23 | 69.2188035 | 86.2675012 | 69.1785034 | 77.2878521 | 67.122577 |
| 17:44:26 | 0:43:24 | 69.2188035 | 86.2675012 | 68.1785034 | 77.2878521 | 66.122577 |
| 17:44:27 | 0:43:25 | 68.2188035 | 86.2675012 | 68.1785034 | 76.2878521 | 66.122577 |
| 17:44:28 | 0:43:26 | 68.2188035 | 86.2675012 | 67.1785034 | 77.2878521 | 66.122577 |

|          |         |            |            |            |            |           |
|----------|---------|------------|------------|------------|------------|-----------|
| 17:44:29 | 0:43:27 | 69.2188035 | 71.9001363 | 68.1785034 | 77.2878521 | 67.122577 |
| 17:44:30 | 0:43:28 | 69.2188035 | 72.5251363 | 68.1785034 | 79.2878521 | 67.122577 |
| 17:44:31 | 0:43:29 | 69.2188035 | 72.7751363 | 68.1785034 | 79.2878521 | 67.122577 |
| 17:44:32 | 0:43:30 | 69.2188035 | 72.9001363 | 68.1785034 | 79.2878521 | 67.122577 |
| 17:44:33 | 0:43:31 | 70.2188035 | 73.1501363 | 68.1785034 | 78.2878521 | 68.122577 |
| 17:44:34 | 0:43:32 | 70.2188035 | 72.5251363 | 68.1785034 | 75.2878521 | 68.122577 |
| 17:44:35 | 0:43:33 | 70.2188035 | 72.2751363 | 68.1785034 | 75.2878521 | 68.122577 |
| 17:44:36 | 0:43:34 | 71.2188035 | 87.2675012 | 68.1785034 | 73.2878521 | 70.122577 |
| 17:44:37 | 0:43:35 | 71.2188035 | 81.2675012 | 67.1785034 | 71.2878521 | 71.122577 |
| 17:44:38 | 0:43:36 | 72.2188035 | 78.2675012 | 65.1785034 | 66.2878521 | 70.122577 |
| 17:44:39 | 0:43:37 | 73.2188035 | 74.2675012 | 65.1785034 | 66.2878521 | 70.122577 |
| 17:44:40 | 0:43:38 | 74.2188035 | 73.2675012 | 65.1785034 | 65.2878521 | 70.122577 |
| 17:44:41 | 0:43:39 | 75.2188035 | 72.2675012 | 65.1785034 | 64.2878521 | 70.122577 |
| 17:44:42 | 0:43:40 | 75.2188035 | 72.2675012 | 65.1785034 | 64.2878521 | 70.122577 |
| 17:44:43 | 0:43:41 | 75.2188035 | 73.2675012 | 66.1785034 | 66.2878521 | 70.122577 |
| 17:44:44 | 0:43:42 | 75.2188035 | 73.2675012 | 66.1785034 | 67.2878521 | 72.122577 |
| 17:44:45 | 0:43:43 | 74.2188035 | 73.2675012 | 66.1785034 | 67.2878521 | 72.122577 |
| 17:44:46 | 0:43:44 | 73.2188035 | 73.2675012 | 67.1785034 | 67.2878521 | 72.122577 |
| 17:44:47 | 0:43:45 | 73.2188035 | 75.2675012 | 68.1785034 | 67.2878521 | 72.122577 |
| 17:44:48 | 0:43:46 | 72.2188035 | 76.2675012 | 69.1785034 | 67.2878521 | 72.122577 |
| 17:44:49 | 0:43:47 | 71.2188035 | 79.2675012 | 70.1785034 | 67.2878521 | 72.122577 |
| 17:44:50 | 0:43:48 | 71.2188035 | 80.2675012 | 72.1785034 | 66.2878521 | 72.122577 |
| 17:44:51 | 0:43:49 | 71.2188035 | 81.2675012 | 72.1785034 | 66.2878521 | 72.122577 |
| 17:44:52 | 0:43:50 | 71.2188035 | 83.2675012 | 72.1785034 | 66.2878521 | 72.122577 |
| 17:44:53 | 0:43:51 | 71.2188035 | 74.1501363 | 72.1785034 | 65.2878521 | 72.122577 |
| 17:44:54 | 0:43:52 | 71.2188035 | 74.2751363 | 72.1785034 | 65.2878521 | 72.122577 |
| 17:44:55 | 0:43:53 | 72.2188035 | 74.9001363 | 73.1785034 | 65.2878521 | 72.122577 |
| 17:44:56 | 0:43:54 | 72.2188035 | 74.7751363 | 75.1785034 | 65.2878521 | 72.122577 |
| 17:44:57 | 0:43:55 | 72.2188035 | 74.9001363 | 75.1785034 | 65.2878521 | 72.122577 |
| 17:44:58 | 0:43:56 | 72.2188035 | 75.0251363 | 76.1785034 | 65.2878521 | 72.122577 |
| 17:44:59 | 0:43:57 | 73.2188035 | 74.9001363 | 75.1785034 | 63.2878521 | 72.122577 |
| 17:45:00 | 0:43:58 | 73.2188035 | 74.7751363 | 75.1785034 | 63.2878521 | 71.122577 |
| 17:45:01 | 0:43:59 | 73.2188035 | 74.6501363 | 75.1785034 | 59.2878521 | 71.122577 |
| 17:45:02 | 0:44:00 | 73.2188035 | 74.9001363 | 74.1785034 | 59.2878521 | 71.122577 |
| 17:45:03 | 0:44:01 | 74.2188035 | 75.1501363 | 74.1785034 | 59.2878521 | 71.122577 |
| 17:45:04 | 0:44:02 | 74.2188035 | 74.7751363 | 74.1785034 | 59.2878521 | 71.122577 |
| 17:45:05 | 0:44:03 | 74.2188035 | 74.9001363 | 74.1785034 | 59.2878521 | 71.122577 |
| 17:45:06 | 0:44:04 | 73.2188035 | 74.1501363 | 74.1785034 | 57.2878521 | 71.122577 |
| 17:45:07 | 0:44:05 | 73.2188035 | 74.1501363 | 74.1785034 | 57.2878521 | 71.122577 |
| 17:45:08 | 0:44:06 | 74.2188035 | 74.1501363 | 74.1785034 | 57.2878521 | 70.122577 |
| 17:45:09 | 0:44:07 | 74.2188035 | 75.0251363 | 74.1785034 | 60.2878521 | 70.122577 |
| 17:45:10 | 0:44:08 | 75.2188035 | 75.0251363 | 74.1785034 | 60.2878521 | 70.122577 |
| 17:45:11 | 0:44:09 | 75.2188035 | 75.1501363 | 73.1785034 | 62.2878521 | 69.122577 |
| 17:45:12 | 0:44:10 | 76.2188035 | 75.7751363 | 72.1785034 | 66.2878521 | 69.122577 |
| 17:45:13 | 0:44:11 | 77.2188035 | 75.9001363 | 72.1785034 | 67.2878521 | 69.122577 |

|          |         |            |            |            |            |           |
|----------|---------|------------|------------|------------|------------|-----------|
| 17:45:14 | 0:44:12 | 79.2188035 | 76.0251363 | 72.1785034 | 67.2878521 | 70.122577 |
| 17:45:15 | 0:44:13 | 79.2188035 | 76.1501363 | 72.1785034 | 67.2878521 | 71.122577 |
| 17:45:16 | 0:44:14 | 79.2188035 | 76.0251363 | 72.1785034 | 65.2878521 | 73.122577 |
| 17:45:17 | 0:44:15 | 79.2188035 | 75.9001363 | 72.1785034 | 65.2878521 | 73.122577 |
| 17:45:18 | 0:44:16 | 79.2188035 | 75.6501363 | 73.1785034 | 65.2878521 | 73.122577 |
| 17:45:19 | 0:44:17 | 77.2188035 | 90.2675012 | 76.1785034 | 64.2878521 | 74.122577 |
| 17:45:20 | 0:44:18 | 77.2188035 | 89.2675012 | 76.1785034 | 63.2878521 | 72.122577 |
| 17:45:21 | 0:44:19 | 76.2188035 | 89.2675012 | 76.1785034 | 63.2878521 | 71.122577 |
| 17:45:22 | 0:44:20 | 75.2188035 | 89.2675012 | 76.1785034 | 63.2878521 | 71.122577 |
| 17:45:23 | 0:44:21 | 75.2188035 | 90.2675012 | 76.1785034 | 63.2878521 | 71.122577 |
| 17:45:24 | 0:44:22 | 76.2188035 | 75.0251363 | 72.1785034 | 63.2878521 | 72.122577 |
| 17:45:25 | 0:44:23 | 76.2188035 | 74.9001363 | 72.1785034 | 62.2878521 | 72.122577 |
| 17:45:26 | 0:44:24 | 76.2188035 | 90.2675012 | 73.1785034 | 63.2878521 | 73.122577 |
| 17:45:27 | 0:44:25 | 76.2188035 | 89.2675012 | 73.1785034 | 64.2878521 | 73.122577 |
| 17:45:28 | 0:44:26 | 76.2188035 | 89.2675012 | 73.1785034 | 70.2878521 | 73.122577 |
| 17:45:29 | 0:44:27 | 76.2188035 | 89.2675012 | 72.1785034 | 70.2878521 | 72.122577 |
| 17:45:30 | 0:44:28 | 76.2188035 | 89.2675012 | 71.1785034 | 70.2878521 | 72.122577 |
| 17:45:31 | 0:44:29 | 76.2188035 | 88.2675012 | 71.1785034 | 68.2878521 | 71.122577 |
| 17:45:32 | 0:44:30 | 76.2188035 | 87.2675012 | 69.1785034 | 67.2878521 | 71.122577 |
| 17:45:33 | 0:44:31 | 79.2188035 | 87.2675012 | 69.1785034 | 67.2878521 | 71.122577 |
| 17:45:34 | 0:44:32 | 79.2188035 | 86.2675012 | 69.1785034 | 65.2878521 | 71.122577 |
| 17:45:35 | 0:44:33 | 79.2188035 | 85.2675012 | 69.1785034 | 62.2878521 | 71.122577 |
| 17:45:36 | 0:44:34 | 79.2188035 | 85.2675012 | 69.1785034 | 62.2878521 | 71.122577 |
| 17:45:37 | 0:44:35 | 77.2188035 | 85.2675012 | 71.1785034 | 62.2878521 | 72.122577 |
| 17:45:38 | 0:44:36 | 77.2188035 | 84.2675012 | 71.1785034 | 58.2878521 | 72.122577 |
| 17:45:39 | 0:44:37 | 76.2188035 | 84.2675012 | 71.1785034 | 58.2878521 | 71.122577 |
| 17:45:40 | 0:44:38 | 75.2188035 | 84.2675012 | 71.1785034 | 56.2878521 | 71.122577 |
| 17:45:41 | 0:44:39 | 75.2188035 | 84.2675012 | 71.1785034 | 55.2878521 | 71.122577 |
| 17:45:42 | 0:44:40 | 73.2188035 | 83.2675012 | 71.1785034 | 55.2878521 | 70.122577 |
| 17:45:43 | 0:44:41 | 73.2188035 | 80.2675012 | 71.1785034 | 54.2878521 | 69.122577 |
| 17:45:44 | 0:44:42 | 73.2188035 | 73.2675012 | 72.1785034 | 56.2878521 | 69.122577 |
| 17:45:45 | 0:44:43 | 72.2188035 | 70.2675012 | 73.1785034 | 56.2878521 | 69.122577 |
| 17:45:46 | 0:44:44 | 72.2188035 | 69.2675012 | 74.1785034 | 56.2878521 | 69.122577 |
| 17:45:47 | 0:44:45 | 72.2188035 | 69.2675012 | 75.1785034 | 56.2878521 | 69.122577 |
| 17:45:48 | 0:44:46 | 72.2188035 | 68.2675012 | 75.1785034 | 56.2878521 | 68.122577 |
| 17:45:49 | 0:44:47 | 71.2188035 | 68.2675012 | 75.1785034 | 56.2878521 | 67.122577 |
| 17:45:50 | 0:44:48 | 71.2188035 | 67.2675012 | 76.1785034 | 56.2878521 | 67.122577 |
| 17:45:51 | 0:44:49 | 71.2188035 | 63.2675012 | 77.1785034 | 55.2878521 | 67.122577 |
| 17:45:52 | 0:44:50 | 71.2188035 | 63.2675012 | 77.1785034 | 55.2878521 | 68.122577 |
| 17:45:53 | 0:44:51 | 71.2188035 | 63.2675012 | 79.1785034 | 55.2878521 | 69.122577 |
| 17:45:54 | 0:44:52 | 70.2188035 | 65.2675012 | 79.1785034 | 54.2878521 | 70.122577 |
| 17:45:55 | 0:44:53 | 71.2188035 | 66.2675012 | 80.1785034 | 54.2878521 | 70.122577 |
| 17:45:56 | 0:44:54 | 72.2188035 | 67.2675012 | 81.1785034 | 54.2878521 | 70.122577 |
| 17:45:57 | 0:44:55 | 72.2188035 | 67.2675012 | 79.1785034 | 56.2878521 | 72.122577 |
| 17:45:58 | 0:44:56 | 72.2188035 | 67.2675012 | 78.1785034 | 56.2878521 | 72.122577 |

|          |         |            |            |            |            |           |
|----------|---------|------------|------------|------------|------------|-----------|
| 17:45:59 | 0:44:57 | 72.2188035 | 67.2675012 | 78.1785034 | 57.2878521 | 72.122577 |
| 17:46:00 | 0:44:58 | 73.2188035 | 66.2675012 | 78.1785034 | 57.2878521 | 72.122577 |
| 17:46:01 | 0:44:59 | 73.2188035 | 66.2675012 | 78.1785034 | 59.2878521 | 72.122577 |
| 17:46:02 | 0:45:00 | 73.2188035 | 66.2675012 | 78.1785034 | 61.2878521 | 72.122577 |
| 17:46:03 | 0:45:01 | 73.2188035 | 67.2675012 | 78.1785034 | 62.2878521 | 71.122577 |
| 17:46:04 | 0:45:02 | 73.2188035 | 68.2675012 | 77.1785034 | 62.2878521 | 71.122577 |
| 17:46:05 | 0:45:03 | 73.2188035 | 68.2675012 | 75.1785034 | 62.2878521 | 71.122577 |
| 17:46:06 | 0:45:04 | 72.2188035 | 68.2675012 | 73.1785034 | 67.2878521 | 72.122577 |
| 17:46:07 | 0:45:05 | 71.2188035 | 68.2675012 | 72.1785034 | 68.2878521 | 72.122577 |
| 17:46:08 | 0:45:06 | 71.2188035 | 68.2675012 | 71.1785034 | 68.2878521 | 73.122577 |
| 17:46:09 | 0:45:07 | 73.2188035 | 69.2675012 | 71.1785034 | 70.2878521 | 73.122577 |
| 17:46:10 | 0:45:08 | 77.2188035 | 70.2675012 | 71.1785034 | 69.2878521 | 73.122577 |
| 17:46:11 | 0:45:09 | 80.2188035 | 72.2675012 | 71.1785034 | 69.2878521 | 73.122577 |
| 17:46:12 | 0:45:10 | 81.2188035 | 72.2675012 | 71.1785034 | 69.2878521 | 73.122577 |
| 17:46:13 | 0:45:11 | 81.2188035 | 72.2675012 | 70.1785034 | 68.2878521 | 73.122577 |
| 17:46:14 | 0:45:12 | 79.2188035 | 72.2675012 | 71.1785034 | 58.2878521 | 73.122577 |
| 17:46:15 | 0:45:13 | 77.2188035 | 71.2675012 | 71.1785034 | 58.2878521 | 73.122577 |
| 17:46:16 | 0:45:14 | 76.2188035 | 71.2675012 | 70.1785034 | 57.2878521 | 73.122577 |
| 17:46:17 | 0:45:15 | 75.2188035 | 71.2675012 | 70.1785034 | 57.2878521 | 73.122577 |
| 17:46:18 | 0:45:16 | 74.2188035 | 71.2675012 | 70.1785034 | 56.2878521 | 73.122577 |
| 17:46:19 | 0:45:17 | 74.2188035 | 70.2675012 | 71.1785034 | 56.2878521 | 74.122577 |
| 17:46:20 | 0:45:18 | 73.2188035 | 72.2675012 | 72.1785034 | 56.2878521 | 74.122577 |
| 17:46:21 | 0:45:19 | 72.2188035 | 74.2675012 | 72.1785034 | 57.2878521 | 74.122577 |
| 17:46:22 | 0:45:20 | 71.2188035 | 74.2675012 | 72.1785034 | 58.2878521 | 74.122577 |
| 17:46:23 | 0:45:21 | 71.2188035 | 73.2675012 | 72.1785034 | 61.2878521 | 74.122577 |
| 17:46:24 | 0:45:22 | 71.2188035 | 73.2675012 | 73.1785034 | 62.2878521 | 74.122577 |
| 17:46:25 | 0:45:23 | 70.2188035 | 70.2675012 | 73.1785034 | 63.2878521 | 78.122577 |
| 17:46:26 | 0:45:24 | 70.2188035 | 66.2675012 | 73.1785034 | 64.2878521 | 78.122577 |
| 17:46:27 | 0:45:25 | 69.2188035 | 66.2675012 | 73.1785034 | 64.2878521 | 77.122577 |
| 17:46:28 | 0:45:26 | 69.2188035 | 66.2675012 | 73.1785034 | 64.2878521 | 76.122577 |
| 17:46:29 | 0:45:27 | 69.2188035 | 66.2675012 | 74.1785034 | 66.2878521 | 73.122577 |
| 17:46:30 | 0:45:28 | 69.2188035 | 66.2675012 | 74.1785034 | 66.2878521 | 73.122577 |
| 17:46:31 | 0:45:29 | 69.2188035 | 66.2675012 | 80.1785034 | 67.2878521 | 72.122577 |
| 17:46:32 | 0:45:30 | 70.2188035 | 65.2675012 | 81.1785034 | 67.2878521 | 72.122577 |
| 17:46:33 | 0:45:31 | 70.2188035 | 65.2675012 | 81.1785034 | 66.2878521 | 72.122577 |
| 17:46:34 | 0:45:32 | 70.2188035 | 66.2675012 | 79.1785034 | 66.2878521 | 72.122577 |
| 17:46:35 | 0:45:33 | 69.2188035 | 69.2675012 | 78.1785034 | 66.2878521 | 73.122577 |
| 17:46:36 | 0:45:34 | 69.2188035 | 70.2675012 | 75.1785034 | 66.2878521 | 73.122577 |
| 17:46:37 | 0:45:35 | 69.2188035 | 78.2675012 | 73.1785034 | 67.2878521 | 73.122577 |
| 17:46:38 | 0:45:36 | 69.2188035 | 82.2675012 | 72.1785034 | 68.2878521 | 73.122577 |
| 17:46:39 | 0:45:37 | 68.2188035 | 84.2675012 | 71.1785034 | 68.2878521 | 72.122577 |
| 17:46:40 | 0:45:38 | 69.2188035 | 85.2675012 | 70.1785034 | 69.2878521 | 71.122577 |
| 17:46:41 | 0:45:39 | 69.2188035 | 85.2675012 | 70.1785034 | 70.2878521 | 70.122577 |
| 17:46:42 | 0:45:40 | 70.2188035 | 84.2675012 | 71.1785034 | 71.2878521 | 69.122577 |
| 17:46:43 | 0:45:41 | 70.2188035 | 84.2675012 | 70.1785034 | 71.2878521 | 69.122577 |

|          |         |            |            |            |            |           |
|----------|---------|------------|------------|------------|------------|-----------|
| 17:46:44 | 0:45:42 | 70.2188035 | 84.2675012 | 69.1785034 | 68.2878521 | 69.122577 |
| 17:46:45 | 0:45:43 | 70.2188035 | 84.2675012 | 69.1785034 | 68.2878521 | 68.122577 |
| 17:46:46 | 0:45:44 | 70.2188035 | 82.2675012 | 67.1785034 | 68.2878521 | 68.122577 |
| 17:46:47 | 0:45:45 | 69.2188035 | 80.2675012 | 67.1785034 | 59.2878521 | 68.122577 |
| 17:46:48 | 0:45:46 | 69.2188035 | 78.2675012 | 67.1785034 | 57.2878521 | 69.122577 |
| 17:46:49 | 0:45:47 | 69.2188035 | 76.2675012 | 67.1785034 | 54.2878521 | 70.122577 |
| 17:46:50 | 0:45:48 | 69.2188035 | 75.2675012 | 69.1785034 | 53.2878521 | 71.122577 |
| 17:46:51 | 0:45:49 | 69.2188035 | 75.2675012 | 69.1785034 | 53.2878521 | 70.122577 |
| 17:46:52 | 0:45:50 | 69.2188035 | 73.2675012 | 74.1785034 | 53.2878521 | 70.122577 |
| 17:46:53 | 0:45:51 | 69.2188035 | 72.2675012 | 75.1785034 | 53.2878521 | 69.122577 |
| 17:46:54 | 0:45:52 | 70.2188035 | 72.2675012 | 75.1785034 | 53.2878521 | 69.122577 |
| 17:46:55 | 0:45:53 | 70.2188035 | 71.2675012 | 75.1785034 | 54.2878521 | 69.122577 |
| 17:46:56 | 0:45:54 | 70.2188035 | 71.2675012 | 76.1785034 | 55.2878521 | 69.122577 |
| 17:46:57 | 0:45:55 | 70.2188035 | 72.2675012 | 79.1785034 | 56.2878521 | 69.122577 |
| 17:46:58 | 0:45:56 | 70.2188035 | 72.2675012 | 79.1785034 | 56.2878521 | 69.122577 |
| 17:46:59 | 0:45:57 | 70.2188035 | 73.2675012 | 79.1785034 | 55.2878521 | 70.122577 |
| 17:47:00 | 0:45:58 | 70.2188035 | 73.2675012 | 79.1785034 | 56.2878521 | 70.122577 |
| 17:47:01 | 0:45:59 | 70.2188035 | 73.2675012 | 77.1785034 | 59.2878521 | 72.122577 |
| 17:47:02 | 0:46:00 | 71.2188035 | 73.2675012 | 77.1785034 | 59.2878521 | 73.122577 |
| 17:47:03 | 0:46:01 | 72.2188035 | 72.2675012 | 77.1785034 | 59.2878521 | 73.122577 |
| 17:47:04 | 0:46:02 | 73.2188035 | 72.2675012 | 77.1785034 | 59.2878521 | 70.122577 |
| 17:47:05 | 0:46:03 | 74.2188035 | 69.2675012 | 76.1785034 | 59.2878521 | 69.122577 |
| 17:47:06 | 0:46:04 | 74.2188035 | 69.2675012 | 76.1785034 | 59.2878521 | 68.122577 |
| 17:47:07 | 0:46:05 | 75.2188035 | 69.2675012 | 75.1785034 | 59.2878521 | 67.122577 |
| 17:47:08 | 0:46:06 | 75.2188035 | 68.2675012 | 75.1785034 | 61.2878521 | 67.122577 |
| 17:47:09 | 0:46:07 | 75.2188035 | 68.2675012 | 72.1785034 | 60.2878521 | 67.122577 |
| 17:47:10 | 0:46:08 | 75.2188035 | 66.2675012 | 70.1785034 | 60.2878521 | 67.122577 |
| 17:47:11 | 0:46:09 | 75.2188035 | 65.2675012 | 70.1785034 | 59.2878521 | 67.122577 |
| 17:47:12 | 0:46:10 | 74.2188035 | 63.2675012 | 70.1785034 | 59.2878521 | 67.122577 |
| 17:47:13 | 0:46:11 | 73.2188035 | 59.2675012 | 70.1785034 | 59.2878521 | 67.122577 |
| 17:47:14 | 0:46:12 | 73.2188035 | 57.2675012 | 70.1785034 | 59.2878521 | 68.122577 |
| 17:47:15 | 0:46:13 | 73.2188035 | 56.2675012 | 71.1785034 | 60.2878521 | 67.122577 |
| 17:47:16 | 0:46:14 | 73.2188035 | 56.2675012 | 71.1785034 | 60.2878521 | 67.122577 |
| 17:47:17 | 0:46:15 | 73.2188035 | 56.2675012 | 72.1785034 | 55.2878521 | 67.122577 |
| 17:47:18 | 0:46:16 | 73.2188035 | 56.2675012 | 73.1785034 | 55.2878521 | 67.122577 |
| 17:47:19 | 0:46:17 | 73.2188035 | 57.2675012 | 75.1785034 | 55.2878521 | 67.122577 |
| 17:47:20 | 0:46:18 | 73.2188035 | 58.2675012 | 74.1785034 | 55.2878521 | 67.122577 |
| 17:47:21 | 0:46:19 | 72.2188035 | 58.2675012 | 72.1785034 | 55.2878521 | 67.122577 |
| 17:47:22 | 0:46:20 | 74.2188035 | 59.2675012 | 71.1785034 | 55.2878521 | 67.122577 |
| 17:47:23 | 0:46:21 | 73.2188035 | 59.2675012 | 71.1785034 | 55.2878521 | 67.122577 |
| 17:47:24 | 0:46:22 | 73.2188035 | 59.2675012 | 71.1785034 | 55.2878521 | 67.122577 |
| 17:47:25 | 0:46:23 | 70.2188035 | 59.2675012 | 72.1785034 | 55.2878521 | 69.122577 |
| 17:47:26 | 0:46:24 | 69.2188035 | 58.2675012 | 72.1785034 | 55.2878521 | 71.122577 |
| 17:47:27 | 0:46:25 | 68.2188035 | 58.2675012 | 72.1785034 | 55.2878521 | 73.122577 |
| 17:47:28 | 0:46:26 | 68.2188035 | 59.2675012 | 73.1785034 | 55.2878521 | 73.122577 |

|          |         |            |            |            |            |           |
|----------|---------|------------|------------|------------|------------|-----------|
| 17:47:29 | 0:46:27 | 68.2188035 | 60.2675012 | 73.1785034 | 54.2878521 | 74.122577 |
| 17:47:30 | 0:46:28 | 69.2188035 | 60.2675012 | 72.1785034 | 54.2878521 | 75.122577 |
| 17:47:31 | 0:46:29 | 69.2188035 | 60.2675012 | 71.1785034 | 54.2878521 | 75.122577 |
| 17:47:32 | 0:46:30 | 70.2188035 | 61.2675012 | 71.1785034 | 54.2878521 | 75.122577 |
| 17:47:33 | 0:46:31 | 70.2188035 | 61.2675012 | 70.1785034 | 54.2878521 | 73.122577 |
| 17:47:34 | 0:46:32 | 70.2188035 | 61.2675012 | 70.1785034 | 56.2878521 | 72.122577 |
| 17:47:35 | 0:46:33 | 70.2188035 | 61.2675012 | 69.1785034 | 57.2878521 | 71.122577 |
| 17:47:36 | 0:46:34 | 70.2188035 | 60.2675012 | 69.1785034 | 59.2878521 | 71.122577 |
| 17:47:37 | 0:46:35 | 70.2188035 | 60.2675012 | 67.1785034 | 62.2878521 | 72.122577 |
| 17:47:38 | 0:46:36 | 70.2188035 | 60.2675012 | 65.1785034 | 64.2878521 | 74.122577 |
| 17:47:39 | 0:46:37 | 70.2188035 | 60.2675012 | 64.1785034 | 65.2878521 | 74.122577 |
| 17:47:40 | 0:46:38 | 70.2188035 | 60.2675012 | 64.1785034 | 65.2878521 | 75.122577 |
| 17:47:41 | 0:46:39 | 70.2188035 | 60.2675012 | 64.1785034 | 65.2878521 | 74.122577 |
| 17:47:42 | 0:46:40 | 70.2188035 | 60.2675012 | 63.1785034 | 67.2878521 | 73.122577 |
| 17:47:43 | 0:46:41 | 70.2188035 | 60.2675012 | 62.1785034 | 67.2878521 | 71.122577 |
| 17:47:44 | 0:46:42 | 70.2188035 | 60.2675012 | 61.1785034 | 69.2878521 | 69.122577 |
| 17:47:45 | 0:46:43 | 70.2188035 | 60.2675012 | 60.1785034 | 70.2878521 | 69.122577 |
| 17:47:46 | 0:46:44 | 70.2188035 | 61.2675012 | 61.1785034 | 70.2878521 | 69.122577 |
| 17:47:47 | 0:46:45 | 69.2188035 | 61.2675012 | 61.1785034 | 71.2878521 | 69.122577 |
| 17:47:48 | 0:46:46 | 68.2188035 | 62.2675012 | 61.1785034 | 71.2878521 | 69.122577 |
| 17:47:49 | 0:46:47 | 68.2188035 | 62.2675012 | 61.1785034 | 72.2878521 | 69.122577 |
| 17:47:50 | 0:46:48 | 68.2188035 | 62.2675012 | 62.1785034 | 73.2878521 | 69.122577 |
| 17:47:51 | 0:46:49 | 67.2188035 | 61.2675012 | 62.1785034 | 73.2878521 | 69.122577 |
| 17:47:52 | 0:46:50 | 67.2188035 | 61.2675012 | 63.1785034 | 73.2878521 | 70.122577 |
| 17:47:53 | 0:46:51 | 68.2188035 | 61.2675012 | 64.1785034 | 72.2878521 | 70.122577 |
| 17:47:54 | 0:46:52 | 69.2188035 | 61.2675012 | 65.1785034 | 73.2878521 | 70.122577 |
| 17:47:55 | 0:46:53 | 71.2188035 | 62.2675012 | 66.1785034 | 73.2878521 | 69.122577 |
| 17:47:56 | 0:46:54 | 71.2188035 | 62.2675012 | 66.1785034 | 73.2878521 | 69.122577 |
| 17:47:57 | 0:46:55 | 71.2188035 | 63.2675012 | 66.1785034 | 73.2878521 | 66.122577 |
| 17:47:58 | 0:46:56 | 71.2188035 | 63.2675012 | 66.1785034 | 73.2878521 | 64.122577 |
| 17:47:59 | 0:46:57 | 72.2188035 | 63.2675012 | 66.1785034 | 72.2878521 | 64.122577 |
| 17:48:00 | 0:46:58 | 72.2188035 | 63.2675012 | 66.1785034 | 72.2878521 | 64.122577 |
| 17:48:01 | 0:46:59 | 72.2188035 | 64.2675012 | 66.1785034 | 66.2878521 | 64.122577 |
| 17:48:02 | 0:47:00 | 73.2188035 | 64.2675012 | 66.1785034 | 65.2878521 | 65.122577 |
| 17:48:03 | 0:47:01 | 72.2188035 | 63.2675012 | 66.1785034 | 65.2878521 | 65.122577 |
| 17:48:04 | 0:47:02 | 73.2188035 | 63.2675012 | 66.1785034 | 63.2878521 | 65.122577 |
| 17:48:05 | 0:47:03 | 77.2188035 | 64.2675012 | 66.1785034 | 63.2878521 | 65.122577 |
| 17:48:06 | 0:47:04 | 77.2188035 | 65.2675012 | 68.1785034 | 63.2878521 | 65.122577 |
| 17:48:07 | 0:47:05 | 78.2188035 | 66.2675012 | 68.1785034 | 62.2878521 | 67.122577 |
| 17:48:08 | 0:47:06 | 78.2188035 | 66.2675012 | 67.1785034 | 62.2878521 | 67.122577 |
| 17:48:09 | 0:47:07 | 80.2188035 | 66.2675012 | 67.1785034 | 62.2878521 | 67.122577 |
| 17:48:10 | 0:47:08 | 80.2188035 | 65.2675012 | 65.1785034 | 61.2878521 | 67.122577 |
| 17:48:11 | 0:47:09 | 80.2188035 | 62.2675012 | 65.1785034 | 63.2878521 | 67.122577 |
| 17:48:12 | 0:47:10 | 81.2188035 | 61.2675012 | 64.1785034 | 65.2878521 | 67.122577 |
| 17:48:13 | 0:47:11 | 81.2188035 | 61.2675012 | 67.1785034 | 70.2878521 | 67.122577 |



|          |         |            |            |            |            |           |
|----------|---------|------------|------------|------------|------------|-----------|
| 17:48:14 | 0:47:12 | 81.2188035 | 62.2675012 | 66.1785034 | 75.2878521 | 67.122577 |
| 17:48:15 | 0:47:13 | 81.2188035 | 65.2675012 | 66.1785034 | 79.2878521 | 67.122577 |
| 17:48:16 | 0:47:14 | 79.2188035 | 65.2675012 | 66.1785034 | 81.2878521 | 67.122577 |
| 17:48:17 | 0:47:15 | 77.2188035 | 67.2675012 | 66.1785034 | 81.2878521 | 69.122577 |
| 17:48:18 | 0:47:16 | 77.2188035 | 67.2675012 | 66.1785034 | 81.2878521 | 69.122577 |
| 17:48:19 | 0:47:17 | 73.2188035 | 67.2675012 | 67.1785034 | 77.2878521 | 69.122577 |
| 17:48:20 | 0:47:18 | 73.2188035 | 67.2675012 | 67.1785034 | 75.2878521 | 73.122577 |
| 17:48:21 | 0:47:19 | 73.2188035 | 62.2675012 | 69.1785034 | 73.2878521 | 74.122577 |
| 17:48:22 | 0:47:20 | 72.2188035 | 59.2675012 | 69.1785034 | 73.2878521 | 73.122577 |
| 17:48:23 | 0:47:21 | 72.2188035 | 59.2675012 | 69.1785034 | 72.2878521 | 73.122577 |
| 17:48:24 | 0:47:22 | 71.2188035 | 60.2675012 | 69.1785034 | 72.2878521 | 73.122577 |
| 17:48:25 | 0:47:23 | 71.2188035 | 61.2675012 | 69.1785034 | 72.2878521 | 73.122577 |
| 17:48:26 | 0:47:24 | 71.2188035 | 60.2675012 | 68.1785034 | 71.2878521 | 73.122577 |
| 17:48:27 | 0:47:25 | 70.2188035 | 60.2675012 | 68.1785034 | 70.2878521 | 73.122577 |
| 17:48:28 | 0:47:26 | 70.2188035 | 61.2675012 | 68.1785034 | 69.2878521 | 72.122577 |
| 17:48:29 | 0:47:27 | 70.2188035 | 61.2675012 | 68.1785034 | 68.2878521 | 72.122577 |
| 17:48:30 | 0:47:28 | 70.2188035 | 61.2675012 | 68.1785034 | 68.2878521 | 71.122577 |
| 17:48:31 | 0:47:29 | 70.2188035 | 62.2675012 | 68.1785034 | 67.2878521 | 71.122577 |
| 17:48:32 | 0:47:30 | 70.2188035 | 62.2675012 | 68.1785034 | 67.2878521 | 71.122577 |
| 17:48:33 | 0:47:31 | 71.2188035 | 62.2675012 | 67.1785034 | 67.2878521 | 70.122577 |
| 17:48:34 | 0:47:32 | 71.2188035 | 63.2675012 | 67.1785034 | 67.2878521 | 70.122577 |
| 17:48:35 | 0:47:33 | 71.2188035 | 66.2675012 | 67.1785034 | 66.2878521 | 70.122577 |
| 17:48:36 | 0:47:34 | 71.2188035 | 66.2675012 | 67.1785034 | 66.2878521 | 70.122577 |
| 17:48:37 | 0:47:35 | 70.2188035 | 66.2675012 | 67.1785034 | 66.2878521 | 72.122577 |
| 17:48:38 | 0:47:36 | 70.2188035 | 66.2675012 | 68.1785034 | 66.2878521 | 72.122577 |
| 17:48:39 | 0:47:37 | 71.2188035 | 66.2675012 | 67.1785034 | 66.2878521 | 72.122577 |
| 17:48:40 | 0:47:38 | 71.2188035 | 70.2675012 | 67.1785034 | 66.2878521 | 73.122577 |
| 17:48:41 | 0:47:39 | 72.2188035 | 70.2675012 | 67.1785034 | 62.2878521 | 73.122577 |
| 17:48:42 | 0:47:40 | 71.2188035 | 68.2675012 | 68.1785034 | 63.2878521 | 74.122577 |
| 17:48:43 | 0:47:41 | 69.2188035 | 68.2675012 | 67.1785034 | 64.2878521 | 74.122577 |
| 17:48:44 | 0:47:42 | 68.2188035 | 63.2675012 | 67.1785034 | 66.2878521 | 74.122577 |
| 17:48:45 | 0:47:43 | 68.2188035 | 60.2675012 | 67.1785034 | 67.2878521 | 76.122577 |
| 17:48:46 | 0:47:44 | 67.2188035 | 59.2675012 | 66.1785034 | 67.2878521 | 76.122577 |
| 17:48:47 | 0:47:45 | 67.2188035 | 58.2675012 | 65.1785034 | 69.2878521 | 73.122577 |
| 17:48:48 | 0:47:46 | 67.2188035 | 58.2675012 | 65.1785034 | 70.2878521 | 72.122577 |
| 17:48:49 | 0:47:47 | 67.2188035 | 58.2675012 | 65.1785034 | 70.2878521 | 72.122577 |
| 17:48:50 | 0:47:48 | 67.2188035 | 58.2675012 | 65.1785034 | 70.2878521 | 72.122577 |
| 17:48:51 | 0:47:49 | 67.2188035 | 58.2675012 | 66.1785034 | 69.2878521 | 72.122577 |
| 17:48:52 | 0:47:50 | 67.2188035 | 58.2675012 | 66.1785034 | 68.2878521 | 72.122577 |
| 17:48:53 | 0:47:51 | 67.2188035 | 58.2675012 | 66.1785034 | 68.2878521 | 72.122577 |
| 17:48:54 | 0:47:52 | 67.2188035 | 57.2675012 | 66.1785034 | 68.2878521 | 72.122577 |
| 17:48:55 | 0:47:53 | 67.2188035 | 57.2675012 | 66.1785034 | 68.2878521 | 72.122577 |
| 17:48:56 | 0:47:54 | 66.2188035 | 60.2675012 | 66.1785034 | 68.2878521 | 72.122577 |
| 17:48:57 | 0:47:55 | 65.2188035 | 60.2675012 | 66.1785034 | 68.2878521 | 72.122577 |
| 17:48:58 | 0:47:56 | 65.2188035 | 65.2675012 | 67.1785034 | 68.2878521 | 72.122577 |

|          |         |            |            |            |            |           |
|----------|---------|------------|------------|------------|------------|-----------|
| 17:48:59 | 0:47:57 | 65.2188035 | 68.2675012 | 68.1785034 | 68.2878521 | 72.122577 |
| 17:49:00 | 0:47:58 | 65.2188035 | 68.2675012 | 67.1785034 | 67.2878521 | 71.122577 |
| 17:49:01 | 0:47:59 | 65.2188035 | 67.2675012 | 66.1785034 | 67.2878521 | 71.122577 |
| 17:49:02 | 0:48:00 | 65.2188035 | 64.2675012 | 66.1785034 | 67.2878521 | 71.122577 |
| 17:49:03 | 0:48:01 | 66.2188035 | 64.2675012 | 66.1785034 | 67.2878521 | 71.122577 |
| 17:49:04 | 0:48:02 | 66.2188035 | 65.2675012 | 66.1785034 | 67.2878521 | 72.122577 |
| 17:49:05 | 0:48:03 | 65.2188035 | 66.2675012 | 65.1785034 | 68.2878521 | 73.122577 |
| 17:49:06 | 0:48:04 | 65.2188035 | 67.2675012 | 65.1785034 | 68.2878521 | 73.122577 |
| 17:49:07 | 0:48:05 | 66.2188035 | 67.2675012 | 65.1785034 | 68.2878521 | 73.122577 |
| 17:49:08 | 0:48:06 | 65.2188035 | 68.2675012 | 67.1785034 | 67.2878521 | 73.122577 |
| 17:49:09 | 0:48:07 | 65.2188035 | 68.2675012 | 67.1785034 | 67.2878521 | 73.122577 |
| 17:49:10 | 0:48:08 | 64.2188035 | 67.2675012 | 67.1785034 | 68.2878521 | 73.122577 |
| 17:49:11 | 0:48:09 | 65.2188035 | 67.2675012 | 69.1785034 | 70.2878521 | 73.122577 |
| 17:49:12 | 0:48:10 | 65.2188035 | 67.2675012 | 69.1785034 | 70.2878521 | 73.122577 |
| 17:49:13 | 0:48:11 | 65.2188035 | 67.2675012 | 69.1785034 | 70.2878521 | 72.122577 |
| 17:49:14 | 0:48:12 | 65.2188035 | 70.2675012 | 68.1785034 | 70.2878521 | 73.122577 |
| 17:49:15 | 0:48:13 | 66.2188035 | 70.2675012 | 68.1785034 | 70.2878521 | 73.122577 |
| 17:49:16 | 0:48:14 | 67.2188035 | 70.2675012 | 68.1785034 | 70.2878521 | 74.122577 |
| 17:49:17 | 0:48:15 | 67.2188035 | 70.2675012 | 68.1785034 | 70.2878521 | 75.122577 |
| 17:49:18 | 0:48:16 | 66.2188035 | 71.2675012 | 68.1785034 | 70.2878521 | 75.122577 |
| 17:49:19 | 0:48:17 | 66.2188035 | 71.2675012 | 68.1785034 | 70.2878521 | 76.122577 |
| 17:49:20 | 0:48:18 | 67.2188035 | 70.2675012 | 68.1785034 | 66.2878521 | 76.122577 |
| 17:49:21 | 0:48:19 | 67.2188035 | 72.2675012 | 68.1785034 | 66.2878521 | 76.122577 |
| 17:49:22 | 0:48:20 | 67.2188035 | 72.2675012 | 68.1785034 | 65.2878521 | 77.122577 |
| 17:49:23 | 0:48:21 | 68.2188035 | 71.2675012 | 68.1785034 | 65.2878521 | 77.122577 |

behavior

| Person 5 | Person 8 | Person 2 | Activity   | average of all behavior |
|----------|----------|----------|------------|-------------------------|
|          |          |          | 77.8882694 | 71                      |
|          |          |          | 77.2216027 | 71                      |
|          |          |          | 79.554936  | 71                      |
|          |          |          | 77.8882694 | 71                      |
|          |          |          | 77.8882694 | 71                      |
|          |          |          | 77.8882694 | 71                      |
|          |          |          | 78.2216027 | 71                      |
|          |          |          | 79.2216027 | 71                      |
|          |          |          | 79.8882694 | 71                      |
|          |          |          | 81.2216027 | 71                      |
|          |          |          | 80.554936  | 71                      |
|          |          |          | 80.8882694 | 71                      |
|          |          |          | 80.8882694 | 71                      |
|          |          |          | 81.2216027 | 71                      |
|          |          |          | 81.2216027 | 71                      |
|          |          |          | 81.554936  | 71                      |
|          |          |          | 81.8882694 | 71                      |
|          |          |          | 82.8882694 | 71                      |
|          |          |          | 83.8882694 | 63                      |
|          |          |          | 84.8882694 | 63                      |
|          |          |          | 85.554936  | 63                      |
|          |          |          | 85.2216027 | 63                      |
|          |          |          | 85.554936  | 63                      |
|          |          |          | 84.554936  | 63                      |
|          |          |          | 82.8882694 | 63                      |
|          |          |          | 82.2216027 | 63                      |
|          |          |          | 81.2216027 | 63                      |
|          |          |          | 81.2216027 | 63                      |
|          |          |          | 80.8507433 | 63                      |
|          |          |          | 81.4757433 | 63                      |
|          |          |          | 81.4757433 | 63                      |
|          |          |          | 81.4132433 | 63                      |
|          |          |          | 81.7257433 | 63                      |
|          |          |          | 80.7882433 | 63                      |
|          |          |          | 80.4757433 | 63                      |
|          |          |          | 80.4132433 | 63                      |
|          |          |          | 80.7257433 | 63                      |
|          |          |          | 80.1007433 | 63                      |
|          |          |          | 79.7882433 | 63                      |
|          |          |          | 78.7882433 | 63                      |
|          |          |          | 75.9468463 | 63                      |

|            |    |
|------------|----|
| 75.9468463 | 63 |
| 75.6968463 | 63 |
| 75.9468463 | 63 |
| 76.4468463 | 63 |
| 74.9468463 | 63 |
| 74.9468463 | 63 |
| 74.1968463 | 63 |
| 73.9468463 | 63 |
| 74.1968463 | 63 |
| 74.4468463 | 63 |
| 76.6968463 | 63 |
| 76.6968463 | 63 |
| 78.4468463 | 63 |
| 78.4468463 | 63 |
| 82.4150475 | 63 |
| 81.8150475 | 63 |
| 81.8150475 | 63 |
| 81.8150475 | 63 |
| 82.0150475 | 63 |
| 82.4150475 | 63 |
| 82.0150475 | 63 |
| 82.0150475 | 63 |
| 83.4150475 | 63 |
| 83.8150475 | 63 |
| 84.2150475 | 63 |
| 84.4150475 | 63 |
| 84.8150475 | 63 |
| 83.8150475 | 63 |
| 84.8150475 | 63 |
| 86.0150475 | 63 |
| 86.4150475 | 63 |
| 86.6150475 | 63 |
| 87.8150475 | 63 |
| 89.0150475 | 63 |
| 89.6150475 | 63 |
| 89.0150475 | 63 |
| 88.6150475 | 63 |
| 86.6150475 | 63 |
| 85.8150475 | 63 |
| 86.0150475 | 63 |
| 86.0150475 | 63 |
| 86.8150475 | 63 |
| 85.2150475 | 63 |
| 84.8150475 | 63 |
| 84.2150475 | 63 |

|            |            |            |    |
|------------|------------|------------|----|
|            |            | 83.6150475 | 63 |
|            |            | 83.0150475 | 63 |
|            |            | 82.2150475 | 63 |
|            |            | 82.4150475 | 63 |
|            |            | 82.2150475 | 63 |
|            |            | 82.2150475 | 63 |
|            |            | 82.2150475 | 63 |
|            |            | 82.2150475 | 63 |
|            |            | 81.6150475 | 63 |
|            |            | 80.6150475 | 63 |
|            |            | 80.8150475 | 63 |
|            |            | 81.4150475 | 63 |
|            |            | 81.8150475 | 63 |
|            |            | 81.6150475 | 63 |
|            |            | 82.0150475 | 63 |
|            |            | 82.2150475 | 63 |
| 76.5930539 |            | 81.4447152 | 63 |
| 76.5930539 |            | 81.2780485 | 63 |
| 77.5930539 |            | 81.2780485 | 63 |
| 77.5930539 |            | 81.2780485 | 63 |
| 78.5930539 |            | 81.7780485 | 63 |
| 78.5930539 |            | 81.7780485 | 63 |
| 78.5930539 |            | 81.7780485 | 63 |
| 78.5930539 |            | 81.2780485 | 63 |
| 78.5930539 |            | 80.9447152 | 63 |
| 78.5930539 |            | 80.6113819 | 63 |
| 79.5930539 |            | 80.4447152 | 63 |
| 79.5930539 |            | 80.9447152 | 63 |
| 79.5930539 |            | 80.9447152 | 63 |
| 81.5930539 | 82.9177631 | 81.6551506 | 63 |
| 82.5930539 | 82.9177631 | 82.2265792 | 63 |
| 82.5930539 | 81.9177631 | 82.0837221 | 63 |
| 82.5930539 | 82.9177631 | 81.9408649 | 63 |
| 82.5930539 | 82.9177631 | 81.3694363 | 63 |
| 83.5930539 | 82.9177631 | 81.6551506 | 63 |
| 83.5930539 | 82.9177631 | 81.6551506 | 63 |
| 84.5930539 | 82.9177631 | 81.6551506 | 63 |
| 86.5930539 | 82.9177631 | 82.0837221 | 63 |
| 86.5930539 | 82.9177631 | 81.5122935 | 63 |
| 86.5930539 | 82.9177631 | 81.5122935 | 63 |
| 88.5930539 | 82.9177631 | 81.7980078 | 63 |
| 89.5930539 | 82.9177631 | 81.6551506 | 63 |
| 89.5930539 | 78.9177631 | 81.2265792 | 63 |
| 89.5930539 | 78.9177631 | 81.0837221 | 63 |
| 89.5930539 | 76.9177631 | 80.6551506 | 63 |
| 89.5930539 | 75.9177631 | 80.5122935 | 63 |

|            |            |            |    |
|------------|------------|------------|----|
| 89.5930539 | 75.9177631 | 79.5122935 | 63 |
| 89.5930539 | 77.9177631 | 79.2265792 | 63 |
| 85.5930539 | 77.9177631 | 78.5122935 | 63 |
| 84.5930539 | 77.9177631 | 78.5122935 | 63 |
| 84.5930539 | 77.9177631 | 78.5122935 | 63 |
| 84.5930539 | 77.9177631 | 78.3694363 | 63 |
| 78.5930539 | 77.9177631 | 77.7980078 | 63 |
| 76.5930539 | 78.9177631 | 77.7980078 | 63 |
| 74.5930539 | 79.9177631 | 78.3694363 | 63 |
| 74.5930539 | 79.9177631 | 78.0837221 | 63 |
| 74.5930539 | 79.9177631 | 78.0837221 | 63 |
| 73.5930539 | 79.9177631 | 77.6551506 | 63 |
| 72.5930539 | 83.9177631 | 78.3694363 | 63 |
| 71.5930539 | 85.9177631 | 78.6551506 | 63 |
| 71.5930539 | 85.9177631 | 79.7980078 | 63 |
| 69.5930539 | 86.9177631 | 79.6551506 | 63 |
| 69.5930539 | 85.9177631 | 79.5122935 | 63 |
| 70.5930539 | 82.9177631 | 77.0749688 | 63 |
| 72.5930539 | 82.9177631 | 76.9117035 | 63 |
| 72.5930539 | 82.9177631 | 75.7892545 | 63 |
| 73.5930539 | 81.9177631 | 75.7892545 | 63 |
| 74.5930539 | 83.9177631 | 76.1157851 | 63 |
| 74.5930539 | 84.9177631 | 76.2790504 | 63 |
| 74.5930539 | 84.9177631 | 76.4423157 | 63 |
| 74.5930539 | 84.9177631 | 76.2790504 | 63 |
| 76.5930539 | 84.9177631 | 76.605581  | 63 |
| 76.5930539 | 84.9177631 | 76.605581  | 63 |
| 76.5930539 | 86.9177631 | 76.605581  | 63 |
| 77.5930539 | 86.9177631 | 80.6551506 | 63 |
| 77.5930539 | 86.9177631 | 81.2265792 | 63 |
| 78.5930539 | 86.9177631 | 81.7980078 | 63 |
| 78.5930539 | 87.9177631 | 82.0837221 | 63 |
| 77.5930539 | 87.9177631 | 82.5122935 | 63 |
| 76.5930539 | 88.9177631 | 82.9408649 | 63 |
| 76.5930539 | 88.9177631 | 83.2265792 | 63 |
| 76.5930539 | 89.9177631 | 83.2265792 | 63 |
| 75.5930539 | 88.9177631 | 82.9408649 | 63 |
| 74.5930539 | 88.9177631 | 82.6551506 | 63 |
| 76.5930539 | 83.9177631 | 81.7980078 | 63 |
| 76.5930539 | 82.9177631 | 81.6551506 | 63 |
| 76.5930539 | 82.9177631 | 81.5122935 | 63 |
| 77.5930539 | 85.9177631 | 82.2265792 | 63 |
| 77.5930539 | 84.9177631 | 82.9408649 | 63 |
| 78.5930539 | 83.9177631 | 83.5122935 | 63 |
| 78.5930539 | 83.9177631 | 84.0837221 | 63 |

|            |            |           |            |    |
|------------|------------|-----------|------------|----|
| 78.5930539 | 82.9177631 |           | 84.9408649 | 63 |
| 78.5930539 | 80.9177631 |           | 84.7980078 | 63 |
| 78.5930539 | 80.9177631 |           | 84.0837221 | 63 |
| 78.5930539 | 79.9177631 |           | 81.5851729 | 63 |
| 78.5930539 | 79.9177631 |           | 81.4219076 | 63 |
| 79.5930539 | 79.9177631 |           | 81.0953769 | 63 |
| 80.5930539 | 79.9177631 |           | 83.3694363 | 63 |
| 80.5930539 | 79.9177631 |           | 82.7980078 | 63 |
| 80.5930539 | 79.9177631 |           | 82.2265792 | 63 |
| 80.5930539 | 80.9177631 |           | 81.9408649 | 63 |
| 79.5930539 | 80.9177631 |           | 81.7980078 | 63 |
| 77.5930539 | 80.9177631 |           | 81.6551506 | 63 |
| 77.5930539 | 80.9177631 |           | 81.0837221 | 63 |
| 77.5930539 | 80.9177631 |           | 81.0837221 | 63 |
| 77.5930539 | 80.9177631 | 79.615036 | 80.9001363 | 63 |
| 78.5930539 | 81.9177631 | 79.615036 | 81.5251363 | 63 |
| 78.5930539 | 81.9177631 | 76.615036 | 81.2751363 | 63 |
| 78.5930539 | 80.9177631 | 75.615036 | 80.7751363 | 63 |
| 79.5930539 | 80.9177631 | 75.615036 | 81.2751363 | 63 |
| 79.5930539 | 80.9177631 | 75.615036 | 81.4001363 | 63 |
| 79.5930539 | 79.9177631 | 77.615036 | 81.6501363 | 63 |
| 78.5930539 | 80.9177631 | 79.615036 | 81.7751363 | 63 |
| 78.5930539 | 82.9177631 | 79.615036 | 81.7751363 | 63 |
| 78.5930539 | 84.9177631 | 79.615036 | 81.9001363 | 63 |
| 78.5930539 | 85.9177631 | 78.615036 | 81.7751363 | 63 |
| 78.5930539 | 85.9177631 | 77.615036 | 81.6501363 | 63 |
| 78.5930539 | 85.9177631 | 77.615036 | 81.4001363 | 63 |
| 78.5930539 | 84.9177631 | 77.615036 | 81.7751363 | 63 |
| 78.5930539 | 81.9177631 | 77.615036 | 81.4001363 | 63 |
| 78.5930539 | 81.9177631 | 77.615036 | 81.5251363 | 63 |
| 78.5930539 | 78.9177631 | 77.615036 | 81.4001363 | 63 |
| 81.5930539 | 77.9177631 | 77.615036 | 81.6501363 | 63 |
| 85.5930539 | 77.9177631 | 76.615036 | 81.7751363 | 63 |
| 86.5930539 | 77.9177631 | 75.615036 | 81.1501363 | 63 |
| 87.5930539 | 77.9177631 | 76.615036 | 81.4001363 | 63 |
| 87.5930539 | 75.9177631 | 76.615036 | 80.5251363 | 63 |
| 87.5930539 | 73.9177631 | 76.615036 | 80.4001363 | 63 |
| 88.5930539 | 72.9177631 | 76.615036 | 81.0251363 | 63 |
| 88.5930539 | 71.9177631 | 77.615036 | 81.0251363 | 63 |
| 88.5930539 | 71.9177631 | 77.615036 | 81.1501363 | 63 |
| 88.5930539 | 71.9177631 | 76.615036 | 80.6501363 | 63 |
| 88.5930539 | 70.9177631 | 76.615036 | 80.9001363 | 63 |
| 87.5930539 | 69.9177631 | 76.615036 | 80.6501363 | 63 |
| 84.5930539 | 70.9177631 | 76.615036 | 80.4001363 | 63 |
| 84.5930539 | 71.9177631 | 81.615036 | 81.2751363 | 63 |

|            |            |           |            |    |
|------------|------------|-----------|------------|----|
| 84.5930539 | 71.9177631 | 81.615036 | 81.6501363 | 63 |
| 84.5930539 | 71.9177631 | 81.615036 | 81.6501363 | 63 |
| 83.5930539 | 71.9177631 | 86.615036 | 82.0251363 | 63 |
| 83.5930539 | 71.9177631 | 87.615036 | 82.0251363 | 63 |
| 83.5930539 | 71.9177631 | 89.615036 | 81.9001363 | 63 |
| 83.5930539 | 70.9177631 | 89.615036 | 81.7751363 | 63 |
| 80.5930539 | 68.9177631 | 89.615036 | 80.9001363 | 63 |
| 80.5930539 | 68.9177631 | 92.615036 | 81.0251363 | 63 |
| 83.5930539 | 68.9177631 | 92.615036 | 81.0251363 | 63 |
| 83.5930539 | 68.9177631 | 93.615036 | 81.0251363 | 63 |
| 83.5930539 | 68.9177631 | 93.615036 | 80.9001363 | 63 |
| 83.5930539 | 68.9177631 | 95.615036 | 81.0251363 | 63 |
| 82.5930539 | 68.9177631 | 95.615036 | 80.9001363 | 63 |
| 82.5930539 | 68.9177631 | 95.615036 | 81.1501363 | 63 |
| 82.5930539 | 68.9177631 | 93.615036 | 80.9001363 | 63 |
| 81.5930539 | 72.9177631 | 92.615036 | 81.2751363 | 63 |
| 81.5930539 | 73.9177631 | 92.615036 | 81.1501363 | 63 |
| 82.5930539 | 74.9177631 | 92.615036 | 81.4001363 | 63 |
| 82.5930539 | 74.9177631 | 92.615036 | 81.5251363 | 63 |
| 81.5930539 | 74.9177631 | 92.615036 | 81.6501363 | 63 |
| 79.5930539 | 74.9177631 | 83.615036 | 80.0251363 | 63 |
| 79.5930539 | 75.9177631 | 83.615036 | 80.6501363 | 63 |
| 79.5930539 | 75.9177631 | 83.615036 | 80.6501363 | 63 |
| 78.5930539 | 75.9177631 | 69.615036 | 78.2751363 | 63 |
| 78.5930539 | 75.9177631 | 67.615036 | 78.0251363 | 63 |
| 78.5930539 | 75.9177631 | 66.615036 | 77.9001363 | 63 |
| 78.5930539 | 75.9177631 | 66.615036 | 76.9001363 | 63 |
| 78.5930539 | 74.9177631 | 66.615036 | 76.7751363 | 63 |
| 78.5930539 | 74.9177631 | 66.615036 | 76.6501363 | 63 |
| 78.5930539 | 73.9177631 | 66.615036 | 76.4001363 | 63 |
| 80.5930539 | 73.9177631 | 66.615036 | 76.4001363 | 63 |
| 80.5930539 | 75.9177631 | 65.615036 | 77.5251363 | 63 |
| 80.5930539 | 76.9177631 | 65.615036 | 78.5251363 | 63 |
| 79.5930539 | 77.9177631 | 65.615036 | 77.6501363 | 63 |
| 79.5930539 | 78.9177631 | 65.615036 | 77.6501363 | 63 |
| 76.5930539 | 79.9177631 | 65.615036 | 77.1501363 | 63 |
| 76.5930539 | 79.9177631 | 65.615036 | 77.0251363 | 63 |
| 77.5930539 | 77.9177631 | 65.615036 | 76.6501363 | 63 |
| 79.5930539 | 74.9177631 | 65.615036 | 75.7751363 | 63 |
| 79.5930539 | 71.9177631 | 65.615036 | 75.0251363 | 63 |
| 80.5930539 | 71.9177631 | 65.615036 | 75.6501363 | 63 |
| 80.5930539 | 72.9177631 | 65.615036 | 75.7751363 | 63 |
| 80.5930539 | 72.9177631 | 65.615036 | 76.1501363 | 63 |
| 80.5930539 | 73.9177631 | 65.615036 | 76.4001363 | 63 |
| 80.5930539 | 73.9177631 | 65.615036 | 76.5251363 | 63 |



|            |            |           |            |    |
|------------|------------|-----------|------------|----|
| 80.5930539 | 69.9177631 | 65.615036 | 75.7751363 | 63 |
| 80.5930539 | 69.9177631 | 65.615036 | 75.7751363 | 63 |
| 81.5930539 | 71.9177631 | 69.615036 | 76.2751363 | 63 |
| 81.5930539 | 73.9177631 | 69.615036 | 76.4001363 | 63 |
| 81.5930539 | 73.9177631 | 65.615036 | 75.7751363 | 63 |
| 81.5930539 | 73.9177631 | 65.615036 | 75.5251363 | 63 |
| 81.5930539 | 73.9177631 | 67.615036 | 76.0251363 | 63 |
| 81.5930539 | 73.9177631 | 67.615036 | 75.7751363 | 63 |
| 81.5930539 | 73.9177631 | 74.615036 | 76.9001363 | 63 |
| 81.5930539 | 74.9177631 | 75.615036 | 77.0251363 | 63 |
| 82.5930539 | 75.9177631 | 75.615036 | 77.4001363 | 63 |
| 83.5930539 | 76.9177631 | 76.615036 | 78.1501363 | 63 |
| 83.5930539 | 77.9177631 | 76.615036 | 78.2751363 | 63 |
| 83.5930539 | 76.9177631 | 76.615036 | 78.5251363 | 63 |
| 83.5930539 | 76.9177631 | 76.615036 | 79.4001363 | 63 |
| 83.5930539 | 76.9177631 | 77.615036 | 79.5251363 | 63 |
| 82.5930539 | 77.9177631 | 83.615036 | 80.2751363 | 63 |
| 82.5930539 | 78.9177631 | 83.615036 | 80.2751363 | 63 |
| 82.5930539 | 79.9177631 | 85.615036 | 80.1501363 | 63 |
| 82.5930539 | 79.9177631 | 84.615036 | 79.9001363 | 63 |
| 83.5930539 | 79.9177631 | 84.615036 | 80.0251363 | 63 |
| 83.5930539 | 79.9177631 | 79.615036 | 79.0251363 | 63 |
| 84.5930539 | 79.9177631 | 79.615036 | 79.2751363 | 63 |
| 84.5930539 | 79.9177631 | 79.615036 | 79.7751363 | 63 |
| 84.5930539 | 77.9177631 | 79.615036 | 79.7751363 | 63 |
| 84.5930539 | 77.9177631 | 79.615036 | 79.7751363 | 63 |
| 84.5930539 | 77.9177631 | 79.615036 | 79.9001363 | 63 |
| 84.5930539 | 77.9177631 | 79.615036 | 80.2751363 | 63 |
| 84.5930539 | 77.9177631 | 79.615036 | 80.4001363 | 63 |
| 84.5930539 | 78.9177631 | 79.615036 | 80.0251363 | 63 |
| 84.5930539 | 78.9177631 | 80.615036 | 79.9001363 | 63 |
| 84.5930539 | 78.9177631 | 80.615036 | 79.9001363 | 63 |
| 84.5930539 | 77.9177631 | 82.615036 | 79.7751363 | 63 |
| 84.5930539 | 77.9177631 | 83.615036 | 79.0251363 | 63 |
| 78.5930539 | 77.9177631 | 83.615036 | 78.2751363 | 63 |
| 78.5930539 | 78.9177631 | 86.615036 | 79.1501363 | 63 |
| 77.5930539 | 77.9177631 | 86.615036 | 78.7751363 | 63 |
| 77.5930539 | 77.9177631 | 86.615036 | 78.6501363 | 63 |
| 76.5930539 | 77.9177631 | 82.615036 | 77.9001363 | 63 |
| 75.5930539 | 77.9177631 | 82.615036 | 77.9001363 | 63 |
| 75.5930539 | 77.9177631 | 83.615036 | 77.9001363 | 63 |
| 79.5930539 | 77.9177631 | 84.615036 | 78.5251363 | 63 |
| 80.5930539 | 77.9177631 | 84.615036 | 78.4001363 | 63 |
| 80.5930539 | 77.9177631 | 85.615036 | 78.4001363 | 63 |
| 79.5930539 | 77.9177631 | 85.615036 | 78.1501363 | 63 |

|            |            |           |            |    |
|------------|------------|-----------|------------|----|
| 78.5930539 | 81.9177631 | 85.615036 | 78.5251363 | 63 |
| 74.5930539 | 83.9177631 | 85.615036 | 78.1501363 | 63 |
| 74.5930539 | 84.9177631 | 85.615036 | 78.6501363 | 63 |
| 74.5930539 | 84.9177631 | 85.615036 | 78.4001363 | 63 |
| 74.5930539 | 84.9177631 | 85.615036 | 77.6501363 | 63 |
| 75.5930539 | 83.9177631 | 85.615036 | 77.2751363 | 63 |
| 75.5930539 | 83.9177631 | 85.615036 | 76.9001363 | 63 |
| 75.5930539 | 82.9177631 | 84.615036 | 76.2751363 | 63 |
| 76.5930539 | 81.9177631 | 84.615036 | 76.5251363 | 63 |
| 76.5930539 | 81.9177631 | 84.615036 | 76.7751363 | 63 |
| 76.5930539 | 81.9177631 | 82.615036 | 77.0251363 | 63 |
| 77.5930539 | 81.9177631 | 82.615036 | 78.5251363 | 63 |
| 77.5930539 | 83.9177631 | 82.615036 | 78.7751363 | 63 |
| 77.5930539 | 85.9177631 | 82.615036 | 79.4001363 | 63 |
| 77.5930539 | 86.9177631 | 82.615036 | 80.2751363 | 63 |
| 77.5930539 | 86.9177631 | 82.615036 | 80.4001363 | 63 |
| 78.5930539 | 86.9177631 | 84.615036 | 81.1501363 | 63 |
| 78.5930539 | 87.9177631 | 84.615036 | 81.4001363 | 63 |
| 78.5930539 | 87.9177631 | 84.615036 | 81.5251363 | 63 |
| 79.5930539 | 87.9177631 | 85.615036 | 81.5251363 | 63 |
| 80.5930539 | 87.9177631 | 85.615036 | 81.6501363 | 63 |
| 80.5930539 | 86.9177631 | 85.615036 | 81.5251363 | 63 |
| 80.5930539 | 87.9177631 | 85.615036 | 81.5251363 | 63 |
| 80.5930539 | 87.9177631 | 84.615036 | 81.2751363 | 63 |
| 81.5930539 | 88.9177631 | 84.615036 | 81.4001363 | 63 |
| 81.5930539 | 88.9177631 | 84.615036 | 81.2751363 | 63 |
| 81.5930539 | 89.9177631 | 84.615036 | 81.4001363 | 63 |
| 82.5930539 | 89.9177631 | 84.615036 | 81.5251363 | 63 |
| 82.5930539 | 89.9177631 | 84.615036 | 81.4001363 | 63 |
| 82.5930539 | 88.9177631 | 84.615036 | 81.1501363 | 63 |
| 82.5930539 | 88.9177631 | 84.615036 | 81.5251363 | 63 |
| 82.5930539 | 86.9177631 | 82.615036 | 81.1501363 | 63 |
| 82.5930539 | 83.9177631 | 83.615036 | 81.0251363 | 63 |
| 82.5930539 | 83.9177631 | 83.615036 | 80.9001363 | 63 |
| 82.5930539 | 83.9177631 | 83.615036 | 80.7751363 | 63 |
| 83.5930539 | 82.9177631 | 83.615036 | 81.0251363 | 63 |
| 85.5930539 | 81.9177631 | 83.615036 | 81.5251363 | 63 |
| 85.5930539 | 81.9177631 | 84.615036 | 81.7751363 | 63 |
| 86.5930539 | 81.9177631 | 83.615036 | 82.0251363 | 63 |
| 86.5930539 | 81.9177631 | 83.615036 | 82.1501363 | 63 |
| 86.5930539 | 81.9177631 | 83.615036 | 82.1501363 | 63 |
| 88.5930539 | 81.9177631 | 84.615036 | 82.4001363 | 63 |
| 89.5930539 | 81.9177631 | 86.615036 | 83.0251363 | 63 |
| 89.5930539 | 81.9177631 | 86.615036 | 83.4001363 | 63 |
| 89.5930539 | 80.9177631 | 89.615036 | 83.4001363 | 63 |

|            |            |           |            |    |
|------------|------------|-----------|------------|----|
| 89.5930539 | 80.9177631 | 90.615036 | 83.5251363 | 63 |
| 90.5930539 | 80.9177631 | 91.615036 | 83.5251363 | 63 |
| 91.5930539 | 80.9177631 | 91.615036 | 83.7751363 | 63 |
| 90.5930539 | 80.9177631 | 90.615036 | 83.0251363 | 63 |
| 90.5930539 | 80.9177631 | 89.615036 | 82.7751363 | 63 |
| 88.5930539 | 80.9177631 | 87.615036 | 82.4001363 | 63 |
| 87.5930539 | 81.9177631 | 87.615036 | 82.2751363 | 63 |
| 87.5930539 | 81.9177631 | 87.615036 | 81.7751363 | 63 |
| 85.5930539 | 81.9177631 | 87.615036 | 81.2751363 | 63 |
| 85.5930539 | 81.9177631 | 87.615036 | 81.1501363 | 63 |
| 85.5930539 | 83.9177631 | 87.615036 | 81.4001363 | 63 |
| 85.5930539 | 83.9177631 | 87.615036 | 81.5251363 | 63 |
| 85.5930539 | 83.9177631 | 87.615036 | 81.6501363 | 63 |
| 77.5930539 | 83.9177631 | 86.615036 | 80.4001363 | 63 |
| 77.5930539 | 83.9177631 | 86.615036 | 80.2751363 | 63 |
| 75.5930539 | 84.9177631 | 85.615036 | 79.7751363 | 63 |
| 74.5930539 | 84.9177631 | 85.615036 | 79.6501363 | 63 |
| 75.5930539 | 84.9177631 | 85.615036 | 80.4001363 | 63 |
| 75.5930539 | 84.9177631 | 84.615036 | 80.9001363 | 63 |
| 76.5930539 | 84.9177631 | 84.615036 | 81.1501363 | 63 |
| 76.5930539 | 83.9177631 | 84.615036 | 80.7751363 | 63 |
| 77.5930539 | 82.9177631 | 84.615036 | 80.2751363 | 63 |
| 76.5930539 | 81.9177631 | 83.615036 | 79.6501363 | 63 |
| 76.5930539 | 81.9177631 | 82.615036 | 79.4001363 | 63 |
| 76.5930539 | 79.9177631 | 82.615036 | 79.0251363 | 63 |
| 76.5930539 | 79.9177631 | 82.615036 | 79.1501363 | 63 |
| 77.5930539 | 79.9177631 | 82.615036 | 79.2751363 | 63 |
| 78.5930539 | 80.9177631 | 81.615036 | 79.9001363 | 63 |
| 79.5930539 | 83.9177631 | 80.615036 | 80.4001363 | 63 |
| 79.5930539 | 83.9177631 | 80.615036 | 80.1501363 | 63 |
| 79.5930539 | 83.9177631 | 79.615036 | 79.6501363 | 63 |
| 80.5930539 | 83.9177631 | 79.615036 | 80.0251363 | 63 |
| 80.5930539 | 83.9177631 | 81.615036 | 80.4001363 | 63 |
| 80.5930539 | 83.9177631 | 81.615036 | 80.4001363 | 63 |
| 80.5930539 | 83.9177631 | 85.615036 | 80.9001363 | 63 |
| 80.5930539 | 83.9177631 | 87.615036 | 81.7751363 | 63 |
| 80.5930539 | 85.9177631 | 88.615036 | 82.2751363 | 63 |
| 80.5930539 | 85.9177631 | 88.615036 | 82.4001363 | 63 |
| 80.5930539 | 85.9177631 | 89.615036 | 82.4001363 | 63 |
| 80.5930539 | 85.9177631 | 89.615036 | 82.2751363 | 63 |
| 81.5930539 | 86.9177631 | 89.615036 | 82.4001363 | 63 |
| 81.5930539 | 86.9177631 | 89.615036 | 82.2751363 | 63 |
| 81.5930539 | 85.9177631 | 89.615036 | 82.2751363 | 63 |
| 84.5930539 | 84.9177631 | 89.615036 | 82.1501363 | 63 |
| 84.5930539 | 84.9177631 | 89.615036 | 81.9001363 | 63 |

|            |            |           |            |    |
|------------|------------|-----------|------------|----|
| 82.5930539 | 82.9177631 | 89.615036 | 81.2751363 | 63 |
| 76.5930539 | 82.9177631 | 89.615036 | 80.4001363 | 63 |
| 76.5930539 | 82.9177631 | 90.615036 | 80.7751363 | 63 |
| 75.5930539 | 82.9177631 | 90.615036 | 80.9001363 | 63 |
| 75.5930539 | 82.9177631 | 90.615036 | 80.9001363 | 63 |
| 74.5930539 | 82.9177631 | 91.615036 | 81.0251363 | 63 |
| 74.5930539 | 80.9177631 | 90.615036 | 81.0251363 | 63 |
| 74.5930539 | 80.9177631 | 90.615036 | 81.0251363 | 63 |
| 74.5930539 | 80.9177631 | 88.615036 | 81.0251363 | 63 |
| 74.5930539 | 80.9177631 | 88.615036 | 81.1501363 | 63 |
| 74.5930539 | 80.9177631 | 88.615036 | 80.5251363 | 63 |
| 74.5930539 | 80.9177631 | 87.615036 | 80.4001363 | 63 |
| 74.5930539 | 80.9177631 | 87.615036 | 80.4001363 | 63 |
| 74.5930539 | 80.9177631 | 87.615036 | 80.9001363 | 63 |
| 74.5930539 | 80.9177631 | 87.615036 | 80.5251363 | 63 |
| 74.5930539 | 79.9177631 | 80.615036 | 79.5251363 | 63 |
| 75.5930539 | 79.9177631 | 80.615036 | 79.6501363 | 63 |
| 75.5930539 | 79.9177631 | 80.615036 | 79.0251363 | 71 |
| 75.5930539 | 79.9177631 | 80.615036 | 78.5251363 | 71 |
| 77.5930539 | 80.9177631 | 81.615036 | 78.9001363 | 71 |
| 77.5930539 | 80.9177631 | 81.615036 | 78.5251363 | 71 |
| 77.5930539 | 80.9177631 | 80.615036 | 78.2751363 | 71 |
| 77.5930539 | 80.9177631 | 77.615036 | 77.7751363 | 71 |
| 75.5930539 | 80.9177631 | 77.615036 | 77.5251363 | 71 |
| 75.5930539 | 78.9177631 | 77.615036 | 77.4001363 | 71 |
| 75.5930539 | 78.9177631 | 77.615036 | 77.1501363 | 71 |
| 76.5930539 | 77.9177631 | 83.615036 | 77.6501363 | 71 |
| 76.5930539 | 78.9177631 | 85.615036 | 77.9001363 | 71 |
| 76.5930539 | 78.9177631 | 87.615036 | 78.1501363 | 71 |
| 75.5930539 | 79.9177631 | 88.615036 | 78.4001363 | 71 |
| 75.5930539 | 79.9177631 | 89.615036 | 78.6501363 | 71 |
| 74.5930539 | 79.9177631 | 88.615036 | 78.5251363 | 71 |
| 74.5930539 | 79.9177631 | 87.615036 | 78.7751363 | 71 |
| 74.5930539 | 76.9177631 | 87.615036 | 78.1501363 | 71 |
| 74.5930539 | 76.9177631 | 87.615036 | 78.0251363 | 71 |
| 74.5930539 | 76.9177631 | 87.615036 | 78.1501363 | 71 |
| 75.5930539 | 78.9177631 | 87.615036 | 78.1501363 | 71 |
| 75.5930539 | 78.9177631 | 87.615036 | 78.1501363 | 71 |
| 76.5930539 | 78.9177631 | 86.615036 | 78.4001363 | 71 |
| 76.5930539 | 81.9177631 | 86.615036 | 78.9001363 | 71 |
| 76.5930539 | 78.9177631 | 86.615036 | 78.5251363 | 71 |
| 76.5930539 | 77.9177631 | 86.615036 | 78.5251363 | 71 |
| 76.5930539 | 77.9177631 | 86.615036 | 78.4001363 | 71 |
| 76.5930539 | 75.9177631 | 86.615036 | 78.0251363 | 71 |
| 77.5930539 | 75.9177631 | 87.615036 | 78.4001363 | 71 |

|            |            |            |            |    |
|------------|------------|------------|------------|----|
| 77.5930539 | 75.9177631 | 87.615036  | 78.7751363 | 71 |
| 77.5930539 | 75.9177631 | 87.615036  | 79.0251363 | 71 |
| 77.5930539 | 74.9177631 | 86.615036  | 77.9001363 | 71 |
| 78.5930539 | 74.9177631 | 86.615036  | 78.1501363 | 71 |
| 78.5930539 | 73.9177631 | 86.615036  | 77.7751363 | 71 |
| 78.5930539 | 73.9177631 | 87.615036  | 78.0251363 | 71 |
| 78.5930539 | 73.9177631 | 88.615036  | 78.6501363 | 71 |
| 78.5930539 | 73.9177631 | 89.615036  | 78.9001363 | 63 |
| 78.5930539 | 73.9177631 | 89.615036  | 80.0251363 | 63 |
| 78.5930539 | 74.9177631 | 89.615036  | 79.9001363 | 63 |
| 78.5930539 | 75.9177631 | 88.615036  | 79.4001363 | 63 |
| 78.5930539 | 75.9177631 | 88.615036  | 79.4001363 | 63 |
| 79.5930539 | 75.9177631 | 86.615036  | 79.2751363 | 63 |
| 79.5930539 | 75.9177631 | 86.615036  | 79.2751363 | 63 |
| 79.5930539 | 76.9177631 | 86.615036  | 78.9001363 | 63 |
| 79.5930539 | 77.9177631 | 88.615036  | 79.6501363 | 63 |
| 79.5930539 | 77.9177631 | 89.615036  | 79.7751363 | 63 |
| 79.5930539 | 77.9177631 | 90.615036  | 80.0251363 | 63 |
| 78.5930539 | 79.9177631 | 90.615036  | 80.1501363 | 63 |
| 78.5930539 | 80.9177631 | 95.615036  | 81.0251363 | 63 |
| 79.5930539 | 80.9177631 | 81.5251363 | 79.5138988 | 63 |
| 79.5930539 | 80.9177631 | 82.1501363 | 79.9670238 | 63 |
| 79.5930539 | 80.9177631 | 81.7751363 | 79.5451488 | 63 |
| 79.5930539 | 82.9177631 | 82.1501363 | 79.9670238 | 63 |
| 79.5930539 | 81.9177631 | 94.615036  | 81.5251363 | 63 |
| 79.5930539 | 80.9177631 | 92.615036  | 81.0251363 | 63 |
| 80.5930539 | 79.9177631 | 91.615036  | 80.7751363 | 63 |
| 80.5930539 | 79.9177631 | 91.615036  | 80.7751363 | 63 |
| 81.5930539 | 78.9177631 | 91.615036  | 80.5251363 | 63 |
| 81.5930539 | 78.9177631 | 86.615036  | 79.7751363 | 63 |
| 82.5930539 | 78.9177631 | 85.615036  | 80.1501363 | 63 |
| 82.5930539 | 78.9177631 | 85.615036  | 80.6501363 | 63 |
| 83.5930539 | 78.9177631 | 85.615036  | 80.9001363 | 63 |
| 83.5930539 | 80.9177631 | 85.615036  | 81.0251363 | 63 |
| 83.5930539 | 81.9177631 | 82.615036  | 80.6501363 | 63 |
| 83.5930539 | 81.9177631 | 82.615036  | 80.7751363 | 63 |
| 81.5930539 | 81.9177631 | 83.615036  | 79.7751363 | 63 |
| 81.5930539 | 80.9177631 | 83.615036  | 80.1501363 | 63 |
| 80.5930539 | 80.9177631 | 83.615036  | 80.4001363 | 63 |
| 80.5930539 | 80.9177631 | 81.615036  | 80.1501363 | 63 |
| 80.5930539 | 80.9177631 | 79.615036  | 80.0251363 | 63 |
| 80.5930539 | 80.9177631 | 79.615036  | 80.2751363 | 63 |
| 80.5930539 | 80.9177631 | 79.615036  | 80.1501363 | 63 |
| 79.5930539 | 80.9177631 | 79.615036  | 80.0251363 | 63 |
| 79.5930539 | 80.9177631 | 79.615036  | 80.0251363 | 63 |

|            |            |           |            |    |
|------------|------------|-----------|------------|----|
| 79.5930539 | 81.9177631 | 80.615036 | 80.4001363 | 63 |
| 79.5930539 | 83.9177631 | 79.615036 | 80.5251363 | 63 |
| 79.5930539 | 83.9177631 | 79.615036 | 80.4001363 | 63 |
| 79.5930539 | 83.9177631 | 79.615036 | 80.4001363 | 63 |
| 79.5930539 | 83.9177631 | 79.615036 | 80.1501363 | 63 |
| 79.5930539 | 83.9177631 | 79.615036 | 80.5251363 | 63 |
| 79.5930539 | 83.9177631 | 79.615036 | 81.5251363 | 63 |
| 79.5930539 | 82.9177631 | 79.615036 | 81.7751363 | 63 |
| 80.5930539 | 82.9177631 | 80.615036 | 82.4001363 | 63 |
| 80.5930539 | 83.9177631 | 80.615036 | 82.7751363 | 63 |
| 84.5930539 | 83.9177631 | 79.615036 | 82.7751363 | 63 |
| 84.5930539 | 80.9177631 | 79.615036 | 82.2751363 | 63 |
| 83.5930539 | 79.9177631 | 77.615036 | 82.0251363 | 63 |
| 83.5930539 | 79.9177631 | 77.615036 | 81.7751363 | 63 |
| 82.5930539 | 79.9177631 | 77.615036 | 82.0251363 | 63 |
| 82.5930539 | 79.9177631 | 76.615036 | 82.1501363 | 63 |
| 82.5930539 | 79.9177631 | 76.615036 | 81.9001363 | 63 |
| 81.5930539 | 79.9177631 | 73.615036 | 81.6501363 | 63 |
| 81.5930539 | 81.9177631 | 71.615036 | 81.7751363 | 63 |
| 81.5930539 | 81.9177631 | 70.615036 | 81.2751363 | 63 |
| 80.5930539 | 81.9177631 | 69.615036 | 81.0251363 | 63 |
| 80.5930539 | 81.9177631 | 69.615036 | 80.6501363 | 63 |
| 80.5930539 | 81.9177631 | 69.615036 | 80.6501363 | 63 |
| 78.5930539 | 82.9177631 | 85.615036 | 81.6501363 | 63 |
| 78.5930539 | 81.9177631 | 85.615036 | 81.4001363 | 63 |
| 81.5930539 | 81.9177631 | 85.615036 | 81.7751363 | 63 |
| 81.5930539 | 81.9177631 | 86.615036 | 82.0251363 | 63 |
| 81.5930539 | 81.9177631 | 86.615036 | 81.9001363 | 63 |
| 82.5930539 | 82.9177631 | 86.615036 | 81.7751363 | 63 |
| 81.5930539 | 82.9177631 | 86.615036 | 81.4001363 | 63 |
| 82.5930539 | 82.9177631 | 86.615036 | 81.4001363 | 63 |
| 82.5930539 | 82.9177631 | 87.615036 | 80.4001363 | 63 |
| 82.5930539 | 82.9177631 | 87.615036 | 81.0251363 | 63 |
| 82.5930539 | 82.9177631 | 87.615036 | 81.0251363 | 63 |
| 82.5930539 | 82.9177631 | 88.615036 | 81.5251363 | 63 |
| 82.5930539 | 82.9177631 | 90.615036 | 81.6501363 | 63 |
| 82.5930539 | 82.9177631 | 90.615036 | 81.9001363 | 63 |
| 82.5930539 | 82.9177631 | 90.615036 | 82.1501363 | 63 |
| 82.5930539 | 82.9177631 | 90.615036 | 82.0251363 | 63 |
| 82.5930539 | 82.9177631 | 90.615036 | 82.0251363 | 63 |
| 81.5930539 | 81.9177631 | 80.615036 | 81.1501363 | 63 |
| 81.5930539 | 81.9177631 | 78.615036 | 81.1501363 | 63 |
| 80.5930539 | 81.9177631 | 78.615036 | 81.1501363 | 63 |
| 78.5930539 | 79.9177631 | 78.615036 | 80.4001363 | 63 |
| 86.5930539 | 75.9177631 | 78.615036 | 81.5251363 | 63 |

|            |            |           |            |    |
|------------|------------|-----------|------------|----|
| 86.5930539 | 75.9177631 | 78.615036 | 81.5251363 | 63 |
| 86.5930539 | 75.9177631 | 78.615036 | 81.1501363 | 63 |
| 86.5930539 | 72.9177631 | 79.615036 | 81.0251363 | 63 |
| 85.5930539 | 71.9177631 | 79.615036 | 80.9001363 | 63 |
| 85.5930539 | 71.9177631 | 80.615036 | 80.2751363 | 63 |
| 83.5930539 | 70.9177631 | 81.615036 | 79.5251363 | 63 |
| 82.5930539 | 70.9177631 | 81.615036 | 79.4001363 | 63 |
| 82.5930539 | 70.9177631 | 81.615036 | 79.4001363 | 63 |
| 82.5930539 | 70.9177631 | 82.615036 | 78.9001363 | 63 |
| 80.5930539 | 71.9177631 | 83.615036 | 78.9001363 | 63 |
| 78.5930539 | 71.9177631 | 83.615036 | 78.2751363 | 63 |
| 78.5930539 | 71.9177631 | 83.615036 | 78.0251363 | 63 |
| 77.5930539 | 70.9177631 | 83.615036 | 77.7751363 | 63 |
| 77.5930539 | 70.9177631 | 83.615036 | 78.1501363 | 63 |
| 77.5930539 | 70.9177631 | 84.615036 | 78.4001363 | 63 |
| 77.5930539 | 70.9177631 | 86.615036 | 78.6501363 | 63 |
| 79.5930539 | 72.9177631 | 86.615036 | 79.1501363 | 63 |
| 80.5930539 | 73.9177631 | 83.615036 | 78.7751363 | 71 |
| 80.5930539 | 74.9177631 | 80.615036 | 78.6501363 | 71 |
| 80.5930539 | 74.9177631 | 79.615036 | 78.9001363 | 71 |
| 80.5930539 | 74.9177631 | 79.615036 | 79.0251363 | 71 |
| 79.5930539 | 74.9177631 | 79.615036 | 78.9001363 | 71 |
| 78.5930539 | 74.9177631 | 77.615036 | 78.6501363 | 71 |
| 78.5930539 | 73.9177631 | 78.615036 | 78.2751363 | 71 |
| 73.5930539 | 73.9177631 | 78.615036 | 76.9001363 | 71 |
| 73.5930539 | 73.9177631 | 78.615036 | 77.0251363 | 71 |
| 74.5930539 | 75.9177631 | 78.615036 | 77.1501363 | 71 |
| 74.5930539 | 76.9177631 | 78.615036 | 77.5251363 | 71 |
| 75.5930539 | 76.9177631 | 78.615036 | 77.7751363 | 71 |
| 74.5930539 | 76.9177631 | 79.615036 | 77.6501363 | 71 |
| 73.5930539 | 77.9177631 | 79.615036 | 77.5251363 | 71 |
| 73.5930539 | 77.9177631 | 79.615036 | 77.5251363 | 71 |
| 72.5930539 | 78.9177631 | 79.615036 | 77.4001363 | 71 |
| 72.5930539 | 79.9177631 | 79.615036 | 77.4001363 | 71 |
| 70.5930539 | 79.9177631 | 79.615036 | 77.2751363 | 71 |
| 70.5930539 | 78.9177631 | 79.615036 | 76.7751363 | 71 |
| 70.5930539 | 76.9177631 | 78.615036 | 76.5251363 | 71 |
| 71.5930539 | 75.9177631 | 78.615036 | 76.6501363 | 71 |
| 72.5930539 | 74.9177631 | 80.615036 | 77.5251363 | 71 |
| 72.5930539 | 74.9177631 | 80.615036 | 77.5251363 | 71 |
| 72.5930539 | 74.9177631 | 80.615036 | 77.5251363 | 71 |
| 72.5930539 | 73.9177631 | 80.615036 | 77.6501363 | 71 |
| 72.5930539 | 73.9177631 | 80.615036 | 77.6501363 | 71 |
| 72.5930539 | 72.9177631 | 80.615036 | 77.5251363 | 71 |
| 72.5930539 | 72.9177631 | 82.615036 | 78.4001363 | 71 |

|            |            |           |            |    |
|------------|------------|-----------|------------|----|
| 73.5930539 | 70.9177631 | 82.615036 | 78.1501363 | 71 |
| 73.5930539 | 71.9177631 | 81.615036 | 78.2751363 | 71 |
| 74.5930539 | 72.9177631 | 81.615036 | 78.5251363 | 71 |
| 73.5930539 | 78.9177631 | 81.615036 | 79.2751363 | 71 |
| 74.5930539 | 82.9177631 | 80.615036 | 79.9001363 | 71 |
| 74.5930539 | 83.9177631 | 81.615036 | 80.5251363 | 71 |
| 73.5930539 | 83.9177631 | 81.615036 | 79.9001363 | 71 |
| 73.5930539 | 84.9177631 | 81.615036 | 79.9001363 | 71 |
| 73.5930539 | 84.9177631 | 81.615036 | 79.4001363 | 71 |
| 73.5930539 | 84.9177631 | 81.615036 | 79.2751363 | 71 |
| 73.5930539 | 84.9177631 | 81.615036 | 79.2751363 | 71 |
| 73.5930539 | 84.9177631 | 81.615036 | 78.7751363 | 71 |
| 73.5930539 | 85.9177631 | 81.615036 | 78.9001363 | 63 |
| 72.5930539 | 85.9177631 | 79.615036 | 78.7751363 | 63 |
| 72.5930539 | 84.9177631 | 80.615036 | 78.7751363 | 63 |
| 76.5930539 | 84.9177631 | 81.615036 | 79.7751363 | 63 |
| 78.5930539 | 83.9177631 | 81.615036 | 80.0251363 | 63 |
| 79.5930539 | 81.9177631 | 82.615036 | 80.2751363 | 63 |
| 79.5930539 | 80.9177631 | 84.615036 | 80.2751363 | 63 |
| 79.5930539 | 77.9177631 | 85.615036 | 80.0251363 | 63 |
| 78.5930539 | 74.9177631 | 85.615036 | 79.9001363 | 63 |
| 77.5930539 | 74.9177631 | 84.615036 | 78.0129562 | 63 |
| 77.5930539 | 74.9177631 | 84.615036 | 77.9035812 | 63 |
| 75.5930539 | 75.9177631 | 82.615036 | 77.3410812 | 63 |
| 75.5930539 | 75.9177631 | 81.615036 | 76.7785812 | 63 |
| 75.5930539 | 76.9177631 | 83.615036 | 77.3410812 | 63 |
| 75.5930539 | 77.9177631 | 83.615036 | 77.2004562 | 63 |
| 75.5930539 | 77.9177631 | 83.615036 | 77.2160812 | 63 |
| 76.5930539 | 78.9177631 | 83.615036 | 77.2317062 | 63 |
| 76.5930539 | 79.9177631 | 78.615036 | 76.6692062 | 63 |
| 77.5930539 | 79.9177631 | 78.615036 | 76.9504562 | 63 |
| 77.5930539 | 79.9177631 | 75.615036 | 76.4660812 | 63 |
| 77.5930539 | 80.9177631 | 75.615036 | 77.1692062 | 63 |
| 77.5930539 | 80.9177631 | 75.615036 | 77.3098312 | 63 |
| 77.5930539 | 77.9177631 | 78.615036 | 77.4504562 | 63 |
| 76.5930539 | 77.9177631 | 78.615036 | 77.4660812 | 63 |
| 76.5930539 | 76.9177631 | 80.615036 | 77.7004562 | 63 |
| 77.5930539 | 74.9177631 | 83.615036 | 78.6848312 | 63 |
| 77.5930539 | 74.9177631 | 83.615036 | 78.8723312 | 63 |
| 81.5930539 | 74.9177631 | 83.615036 | 79.7785812 | 63 |
| 81.5930539 | 74.9177631 | 83.615036 | 79.7785812 | 63 |
| 81.5930539 | 75.9177631 | 82.615036 | 80.4817062 | 63 |
| 81.5930539 | 75.9177631 | 82.615036 | 81.2160812 | 63 |
| 81.5930539 | 74.9177631 | 82.615036 | 81.0754562 | 63 |
| 81.5930539 | 74.9177631 | 84.615036 | 81.5129562 | 63 |



|            |            |           |            |    |
|------------|------------|-----------|------------|----|
| 80.5930539 | 74.9177631 | 84.615036 | 81.6535812 | 63 |
| 79.5930539 | 74.9177631 | 87.615036 | 81.6379562 | 63 |
| 78.5930539 | 73.9177631 | 87.615036 | 80.9348312 | 63 |
| 78.5930539 | 73.9177631 | 87.615036 | 80.9348312 | 63 |
| 77.5930539 | 73.9177631 | 87.615036 | 80.1067062 | 63 |
| 76.5930539 | 73.9177631 | 85.615036 | 79.6848312 | 63 |
| 76.5930539 | 73.9177631 | 85.615036 | 79.4035812 | 63 |
| 76.5930539 | 73.9177631 | 85.615036 | 79.5442062 | 63 |
| 72.5930539 | 76.9177631 | 85.615036 | 79.2942062 | 63 |
| 73.5930539 | 78.9177631 | 84.615036 | 79.1535812 | 63 |
| 73.5930539 | 80.9177631 | 83.615036 | 79.2942062 | 63 |
| 75.5930539 | 80.9177631 | 82.615036 | 78.9035812 | 63 |
| 74.5930539 | 78.9177631 | 82.615036 | 77.9192062 | 63 |
| 74.5930539 | 77.9177631 | 82.615036 | 77.7785812 | 63 |
| 74.5930539 | 77.9177631 | 82.615036 | 77.4817062 | 63 |
| 74.5930539 | 77.9177631 | 82.615036 | 77.4817062 | 63 |
| 74.5930539 | 77.9177631 | 82.615036 | 77.4817062 | 63 |
| 73.5930539 | 77.9177631 | 78.615036 | 76.3410812 | 63 |
| 73.5930539 | 77.9177631 | 78.615036 | 76.3410812 | 63 |
| 73.5930539 | 76.9177631 | 78.615036 | 76.1223312 | 63 |
| 73.5930539 | 76.9177631 | 77.615036 | 76.1848312 | 63 |
| 73.5930539 | 76.9177631 | 77.615036 | 75.9504562 | 63 |
| 74.5930539 | 76.9177631 | 77.615036 | 76.0754562 | 63 |
| 74.5930539 | 76.9177631 | 79.615036 | 76.9035812 | 63 |
| 74.5930539 | 76.9177631 | 81.615036 | 77.3254562 | 63 |
| 73.5930539 | 78.9177631 | 81.615036 | 79.6501363 | 63 |
| 73.5930539 | 78.9177631 | 78.615036 | 77.9001363 | 63 |
| 72.5930539 | 80.9177631 | 77.615036 | 77.9001363 | 63 |
| 72.5930539 | 83.9177631 | 77.615036 | 77.9001363 | 63 |
| 72.5930539 | 84.9177631 | 76.615036 | 77.7751363 | 63 |
| 72.5930539 | 84.9177631 | 76.615036 | 77.2751363 | 63 |
| 74.5930539 | 84.9177631 | 76.615036 | 77.4001363 | 63 |
| 74.5930539 | 85.9177631 | 75.615036 | 77.2751363 | 63 |
| 76.5930539 | 86.9177631 | 67.615036 | 76.2751363 | 63 |
| 77.5930539 | 87.9177631 | 66.615036 | 76.5251363 | 63 |
| 78.5930539 | 87.9177631 | 66.615036 | 76.6501363 | 63 |
| 78.5930539 | 87.9177631 | 66.615036 | 76.7751363 | 63 |
| 79.5930539 | 89.9177631 | 65.615036 | 77.2751363 | 63 |
| 79.5930539 | 90.9177631 | 66.615036 | 77.4001363 | 63 |
| 79.5930539 | 91.9177631 | 68.615036 | 77.7751363 | 63 |
| 78.5930539 | 91.9177631 | 72.615036 | 78.1501363 | 63 |
| 77.5930539 | 90.9177631 | 74.615036 | 78.0251363 | 63 |
| 77.5930539 | 90.9177631 | 74.615036 | 78.4001363 | 63 |
| 76.5930539 | 90.9177631 | 74.615036 | 78.6501363 | 63 |
| 76.5930539 | 90.9177631 | 74.615036 | 78.9001363 | 63 |

|            |            |           |            |    |
|------------|------------|-----------|------------|----|
| 75.5930539 | 89.9177631 | 75.615036 | 78.5251363 | 63 |
| 75.5930539 | 91.9177631 | 80.615036 | 79.2751363 | 63 |
| 74.5930539 | 92.9177631 | 80.615036 | 79.2751363 | 63 |
| 72.5930539 | 92.9177631 | 84.615036 | 79.4001363 | 63 |
| 72.5930539 | 92.9177631 | 84.615036 | 79.4001363 | 63 |
| 71.5930539 | 92.9177631 | 84.615036 | 78.6501363 | 63 |
| 71.5930539 | 91.9177631 | 86.615036 | 79.0251363 | 63 |
| 71.5930539 | 90.9177631 | 86.615036 | 79.0251363 | 63 |
| 71.5930539 | 89.9177631 | 86.615036 | 79.0251363 | 63 |
| 72.5930539 | 89.9177631 | 87.615036 | 79.6501363 | 63 |
| 73.5930539 | 86.9177631 | 87.615036 | 79.2751363 | 63 |
| 73.5930539 | 85.9177631 | 87.615036 | 78.7751363 | 63 |
| 75.5930539 | 84.9177631 | 87.615036 | 78.5251363 | 63 |
| 77.5930539 | 84.9177631 | 87.615036 | 78.4001363 | 63 |
| 79.5930539 | 84.9177631 | 86.615036 | 78.7751363 | 63 |
| 79.5930539 | 84.9177631 | 84.615036 | 78.4001363 | 63 |
| 80.5930539 | 80.9177631 | 84.615036 | 78.2751363 | 63 |
| 80.5930539 | 80.9177631 | 83.615036 | 77.9001363 | 63 |
| 79.5930539 | 80.9177631 | 83.615036 | 77.6501363 | 63 |
| 79.5930539 | 80.9177631 | 82.615036 | 77.5251363 | 63 |
| 78.5930539 | 80.9177631 | 82.615036 | 77.4001363 | 63 |
| 77.5930539 | 80.9177631 | 82.615036 | 77.0251363 | 63 |
| 76.5930539 | 78.9177631 | 82.615036 | 76.9001363 | 63 |
| 77.5930539 | 77.9177631 | 81.615036 | 76.5251363 | 63 |
| 78.5930539 | 75.9177631 | 81.615036 | 76.4001363 | 63 |
| 78.5930539 | 73.9177631 | 80.615036 | 76.1501363 | 63 |
| 78.5930539 | 72.9177631 | 84.615036 | 76.4001363 | 63 |
| 77.5930539 | 72.9177631 | 84.615036 | 75.7751363 | 63 |
| 77.5930539 | 70.9177631 | 87.615036 | 76.2751363 | 63 |
| 77.5930539 | 68.9177631 | 88.615036 | 76.2751363 | 63 |
| 76.5930539 | 68.9177631 | 88.615036 | 76.6501363 | 63 |
| 74.5930539 | 68.9177631 | 87.615036 | 76.5251363 | 63 |
| 74.5930539 | 68.9177631 | 87.615036 | 76.7751363 | 63 |
| 73.5930539 | 68.9177631 | 87.615036 | 77.0251363 | 63 |
| 73.5930539 | 68.9177631 | 87.615036 | 77.2751363 | 63 |
| 73.5930539 | 68.9177631 | 87.615036 | 77.6501363 | 63 |
| 74.5930539 | 67.9177631 | 87.615036 | 77.9001363 | 63 |
| 74.5930539 | 67.9177631 | 87.615036 | 77.6501363 | 63 |
| 74.5930539 | 66.9177631 | 86.615036 | 76.9001363 | 63 |
| 73.5930539 | 68.9177631 | 86.615036 | 77.0251363 | 63 |
| 73.5930539 | 69.9177631 | 86.615036 | 77.0251363 | 63 |
| 73.5930539 | 72.9177631 | 86.615036 | 76.7751363 | 63 |
| 73.5930539 | 74.9177631 | 86.615036 | 77.5251363 | 63 |
| 71.5930539 | 75.9177631 | 86.615036 | 77.6501363 | 63 |
| 71.5930539 | 75.9177631 | 86.615036 | 77.9001363 | 63 |

|            |            |           |            |    |
|------------|------------|-----------|------------|----|
| 71.5930539 | 75.9177631 | 86.615036 | 78.4001363 | 63 |
| 71.5930539 | 76.9177631 | 86.615036 | 78.9001363 | 63 |
| 70.5930539 | 76.9177631 | 86.615036 | 79.0251363 | 63 |
| 70.5930539 | 76.9177631 | 83.615036 | 78.6501363 | 63 |
| 70.5930539 | 77.9177631 | 84.615036 | 79.1501363 | 63 |
| 70.5930539 | 78.9177631 | 84.615036 | 79.0251363 | 63 |
| 69.5930539 | 77.9177631 | 85.615036 | 78.7751363 | 63 |
| 69.5930539 | 77.9177631 | 85.615036 | 78.5251363 | 63 |
| 69.5930539 | 76.9177631 | 84.615036 | 78.1501363 | 63 |
| 69.5930539 | 76.9177631 | 84.615036 | 78.0251363 | 63 |
| 71.5930539 | 76.9177631 | 84.615036 | 78.1501363 | 63 |
| 72.5930539 | 74.9177631 | 84.615036 | 78.0251363 | 63 |
| 73.5930539 | 74.9177631 | 84.615036 | 77.9001363 | 63 |
| 73.5930539 | 74.9177631 | 84.615036 | 77.9001363 | 63 |
| 73.5930539 | 72.9177631 | 81.615036 | 77.1501363 | 63 |
| 73.5930539 | 72.9177631 | 81.615036 | 77.4001363 | 63 |
| 68.5930539 | 72.9177631 | 77.615036 | 76.0251363 | 63 |
| 67.5930539 | 73.9177631 | 76.615036 | 76.0251363 | 63 |
| 67.5930539 | 73.9177631 | 75.615036 | 76.0251363 | 63 |
| 68.5930539 | 73.9177631 | 74.615036 | 75.9001363 | 63 |
| 69.5930539 | 75.9177631 | 73.615036 | 76.1501363 | 63 |
| 69.5930539 | 75.9177631 | 73.615036 | 76.1501363 | 63 |
| 71.5930539 | 77.9177631 | 71.615036 | 76.6501363 | 63 |
| 71.5930539 | 77.9177631 | 69.615036 | 76.4001363 | 63 |
| 70.5930539 | 77.9177631 | 69.615036 | 76.0251363 | 63 |
| 70.5930539 | 77.9177631 | 68.615036 | 76.1501363 | 63 |
| 70.5930539 | 78.9177631 | 68.615036 | 76.2751363 | 63 |
| 70.5930539 | 78.9177631 | 66.615036 | 75.6501363 | 63 |
| 70.5930539 | 78.9177631 | 65.615036 | 75.9001363 | 63 |
| 71.5930539 | 79.9177631 | 65.615036 | 76.2751363 | 63 |
| 72.5930539 | 78.9177631 | 65.615036 | 76.6501363 | 63 |
| 72.5930539 | 78.9177631 | 65.615036 | 76.6501363 | 63 |
| 73.5930539 | 77.9177631 | 65.615036 | 76.9001363 | 63 |
| 73.5930539 | 77.9177631 | 64.615036 | 76.9001363 | 63 |
| 73.5930539 | 77.9177631 | 68.615036 | 77.1501363 | 63 |
| 70.5930539 | 77.9177631 | 68.615036 | 76.6501363 | 63 |
| 70.5930539 | 77.9177631 | 69.615036 | 76.6501363 | 63 |
| 69.5930539 | 77.9177631 | 69.615036 | 76.4001363 | 63 |
| 69.5930539 | 77.9177631 | 69.615036 | 76.1501363 | 63 |
| 69.5930539 | 77.9177631 | 69.615036 | 76.0251363 | 63 |
| 70.5930539 | 77.9177631 | 69.615036 | 76.1501363 | 63 |
| 70.5930539 | 77.9177631 | 71.615036 | 76.5251363 | 63 |
| 70.5930539 | 77.9177631 | 72.615036 | 76.9001363 | 63 |
| 70.5930539 | 77.9177631 | 73.615036 | 76.5251363 | 63 |
| 70.5930539 | 77.9177631 | 74.615036 | 76.6501363 | 63 |

|            |            |           |            |    |
|------------|------------|-----------|------------|----|
| 70.5930539 | 77.9177631 | 74.615036 | 76.5251363 | 63 |
| 71.5930539 | 77.9177631 | 75.615036 | 76.4001363 | 63 |
| 71.5930539 | 78.9177631 | 75.615036 | 76.1501363 | 63 |
| 72.5930539 | 78.9177631 | 75.615036 | 76.1501363 | 63 |
| 72.5930539 | 80.9177631 | 75.615036 | 76.9001363 | 63 |
| 73.5930539 | 84.9177631 | 76.615036 | 77.6501363 | 63 |
| 73.5930539 | 85.9177631 | 76.615036 | 77.4001363 | 63 |
| 74.5930539 | 86.9177631 | 79.615036 | 77.6501363 | 63 |
| 74.5930539 | 85.9177631 | 81.615036 | 78.0251363 | 63 |
| 74.5930539 | 85.9177631 | 81.615036 | 78.0251363 | 63 |
| 74.5930539 | 85.9177631 | 81.615036 | 77.9001363 | 63 |
| 75.5930539 | 85.9177631 | 82.615036 | 77.9001363 | 63 |
| 74.5930539 | 85.9177631 | 82.615036 | 77.6501363 | 63 |
| 74.5930539 | 85.9177631 | 82.615036 | 77.1501363 | 63 |
| 75.5930539 | 86.9177631 | 82.615036 | 77.6501363 | 63 |
| 75.5930539 | 86.9177631 | 82.615036 | 77.2751363 | 63 |
| 75.5930539 | 86.9177631 | 81.615036 | 77.2751363 | 63 |
| 75.5930539 | 86.9177631 | 80.615036 | 77.1501363 | 63 |
| 74.5930539 | 85.9177631 | 74.615036 | 76.6501363 | 63 |
| 74.5930539 | 85.9177631 | 74.615036 | 76.5251363 | 63 |
| 74.5930539 | 85.9177631 | 76.615036 | 76.2751363 | 63 |
| 75.5930539 | 85.9177631 | 76.615036 | 76.2751363 | 63 |
| 75.5930539 | 85.9177631 | 76.615036 | 76.2751363 | 63 |
| 75.5930539 | 82.9177631 | 77.615036 | 75.7751363 | 63 |
| 72.5930539 | 81.9177631 | 77.615036 | 75.4001363 | 63 |
| 70.5930539 | 81.9177631 | 77.615036 | 75.0251363 | 63 |
| 70.5930539 | 81.9177631 | 77.615036 | 75.0251363 | 63 |
| 71.5930539 | 81.9177631 | 77.615036 | 74.7751363 | 63 |
| 70.5930539 | 80.9177631 | 77.615036 | 74.5251363 | 63 |
| 70.5930539 | 80.9177631 | 77.615036 | 74.6501363 | 63 |
| 70.5930539 | 81.9177631 | 79.615036 | 75.0251363 | 63 |
| 70.5930539 | 81.9177631 | 83.615036 | 75.6501363 | 63 |
| 70.5930539 | 82.9177631 | 84.615036 | 76.0251363 | 63 |
| 70.5930539 | 82.9177631 | 84.615036 | 75.5251363 | 63 |
| 71.5930539 | 82.9177631 | 83.615036 | 75.2751363 | 63 |
| 72.5930539 | 82.9177631 | 73.615036 | 73.7751363 | 63 |
| 72.5930539 | 83.9177631 | 70.615036 | 73.1501363 | 63 |
| 72.5930539 | 83.9177631 | 70.615036 | 73.0251363 | 63 |
| 74.5930539 | 83.9177631 | 71.615036 | 73.4001363 | 63 |
| 73.5930539 | 84.9177631 | 74.615036 | 73.6501363 | 63 |
| 73.5930539 | 85.9177631 | 74.615036 | 73.7751363 | 63 |
| 73.5930539 | 85.9177631 | 77.615036 | 74.7751363 | 63 |
| 71.5930539 | 76.0251363 | 77.615036 | 73.6635579 | 63 |
| 69.5930539 | 76.4001363 | 77.615036 | 73.9604329 | 63 |
| 69.5930539 | 76.0251363 | 77.615036 | 73.4135579 | 63 |

|            |            |           |              |            |    |
|------------|------------|-----------|--------------|------------|----|
| 68.5930539 | 75.7751363 | 77.615036 |              | 73.1323079 | 63 |
| 68.5930539 | 75.4001363 | 78.615036 |              | 72.7104329 | 63 |
| 68.5930539 | 75.5251363 | 78.615036 |              | 72.8510579 | 63 |
| 69.5930539 | 76.1501363 | 78.615036 |              | 73.4291829 | 63 |
| 69.5930539 | 77.6501363 | 80.615036 |              | 74.9916829 | 63 |
| 69.5930539 | 78.7751363 | 81.615036 |              | 76.1323079 | 63 |
| 69.5930539 | 79.0251363 | 82.615036 |              | 76.6635579 | 63 |
| 69.5930539 | 88.9177631 | 82.615036 |              | 78.0251363 | 63 |
| 69.5930539 | 80.9177631 | 82.615036 |              | 77.0251363 | 63 |
| 69.5930539 | 77.9177631 | 82.615036 |              | 76.2751363 | 63 |
| 69.5930539 | 76.9177631 | 81.615036 |              | 75.6501363 | 63 |
| 69.5930539 | 76.9177631 | 81.615036 |              | 75.7751363 | 63 |
| 69.5930539 | 74.9177631 | 77.615036 |              | 74.9001363 | 63 |
| 69.5930539 | 73.9177631 | 77.615036 |              | 74.6501363 | 63 |
| 70.5930539 | 73.9177631 | 77.615036 |              | 74.7751363 | 63 |
| 70.5930539 | 73.9177631 | 78.615036 |              | 74.7751363 | 63 |
| 71.5930539 | 73.9177631 | 78.615036 |              | 74.7751363 | 63 |
| 72.5930539 | 73.9177631 | 78.615036 |              | 74.4001363 | 63 |
| 72.5930539 | 70.9177631 | 78.615036 |              | 74.0251363 | 63 |
| 72.5930539 | 69.9177631 | 78.615036 |              | 74.0251363 | 63 |
| 70.5930539 | 69.9177631 | 79.615036 |              | 73.9001363 | 63 |
| 70.5930539 | 69.9177631 | 79.615036 |              | 74.5251363 | 63 |
| 69.5930539 | 69.9177631 | 80.615036 |              | 75.4001363 | 63 |
| 69.5930539 | 69.9177631 | 80.615036 |              | 75.7751363 | 63 |
| 70.5930539 | 70.9177631 | 80.615036 |              | 76.4001363 | 63 |
| 70.5930539 | 70.9177631 | 80.615036 |              | 76.1501363 | 63 |
| 70.5930539 | 70.9177631 | 79.615036 |              | 75.4001363 | 63 |
| 71.5930539 | 70.9177631 | 75.615036 |              | 74.9001363 | 63 |
| 71.5930539 | 70.9177631 | 73.615036 |              | 74.5251363 | 63 |
| 71.5930539 | 70.9177631 | 73.615036 |              | 74.9001363 | 63 |
| 71.5930539 | 70.9177631 | 73.615036 |              | 74.7751363 | 63 |
| 71.5930539 | 70.9177631 | 73.615036 |              | 74.7751363 | 63 |
| 71.5930539 | 70.9177631 | 75.615036 |              | 74.7751363 | 63 |
| 71.5930539 | 70.9177631 | 76.615036 |              | 74.6501363 | 63 |
| 71.5930539 | 70.9177631 | 76.615036 |              | 74.1501363 | 63 |
| 71.5930539 | 69.9177631 | 76.615036 |              | 73.4001363 | 63 |
| 71.5930539 | 69.9177631 | 75.615036 | 100314.17.10 | 72.9001363 | 63 |
| 71.5930539 | 67.9177631 | 75.615036 | BEFORE1      | 73.0251363 | 63 |
| 71.5930539 | 67.9177631 | 75.615036 | BEFORE2      | 72.9001363 | 63 |
| 71.5930539 | 67.9177631 | 74.615036 | BEFORE3      | 73.0251363 | 63 |
| 71.5930539 | 62.9177631 | 73.615036 | BEFORE4      | 72.2751363 | 63 |
| 71.5930539 | 61.9177631 | 73.615036 | BEFORE5      | 71.7751363 | 63 |
| 71.5930539 | 61.9177631 | 73.615036 | BEFORE6      | 72.1501363 | 63 |
| 73.5930539 | 60.9177631 | 75.615036 | BEFORE7      | 72.0251363 | 63 |
| 73.5930539 | 61.9177631 | 80.615036 | BEFORE8      | 72.9001363 | 63 |

|            |            |           |          |            |    |
|------------|------------|-----------|----------|------------|----|
| 73.5930539 | 63.9177631 | 80.615036 | BEFORE9  | 73.1501363 | 63 |
| 73.5930539 | 64.9177631 | 81.615036 | BEFORE10 | 73.6501363 | 63 |
| 72.5930539 | 64.9177631 | 80.615036 | BEFORE11 | 73.6501363 | 63 |
| 71.5930539 | 65.9177631 | 80.615036 | BEFORE12 | 73.7751363 | 63 |
| 71.5930539 | 65.9177631 | 81.615036 | BEFORE13 | 74.1501363 | 63 |
| 69.5930539 | 65.9177631 | 83.615036 | BEFORE14 | 73.9001363 | 63 |
| 69.5930539 | 65.9177631 | 84.615036 | BEFORE15 | 74.2751363 | 63 |
| 69.5930539 | 66.9177631 | 85.615036 | BEFORE16 | 74.6501363 | 63 |
| 69.5930539 | 66.9177631 | 85.615036 | BEFORE17 | 74.9001363 | 63 |
| 69.5930539 | 66.9177631 | 86.615036 | BEFORE18 | 74.9001363 | 63 |
| 69.5930539 | 66.9177631 | 86.615036 | BEFORE19 | 75.2751363 | 63 |
| 68.5930539 | 65.9177631 | 86.615036 | BEFORE20 | 75.4001363 | 63 |
| 68.5930539 | 66.9177631 | 86.615036 | BEFORE21 | 75.7751363 | 63 |
| 68.5930539 | 66.9177631 | 86.615036 | BEFORE22 | 76.4001363 | 63 |
| 68.5930539 | 66.9177631 | 85.615036 | BEFORE23 | 76.2751363 | 63 |
| 68.5930539 | 67.9177631 | 85.615036 | BEFORE24 | 76.2751363 | 63 |
| 68.5930539 | 67.9177631 | 84.615036 | BEFORE25 | 76.5251363 | 63 |
| 68.5930539 | 67.9177631 | 84.615036 | BEFORE26 | 76.5251363 | 69 |
| 68.5930539 | 66.9177631 | 83.615036 | BEFORE27 | 76.2751363 | 69 |
| 70.5930539 | 67.9177631 | 82.615036 | BEFORE28 | 76.5251363 | 69 |
| 70.5930539 | 67.9177631 | 82.615036 | BEFORE29 | 76.5251363 | 69 |
| 70.5930539 | 66.9177631 | 83.615036 | BEFORE30 | 76.2751363 | 69 |
| 71.5930539 | 66.9177631 | 84.615036 | BEFORE31 | 76.7751363 | 69 |
| 71.5930539 | 66.9177631 | 84.615036 | BEFORE32 | 76.6501363 | 69 |
| 71.5930539 | 66.9177631 | 84.615036 | BEFORE33 | 76.4001363 | 69 |
| 71.5930539 | 65.9177631 | 84.615036 | BEFORE34 | 76.2751363 | 69 |
| 71.5930539 | 66.9177631 | 84.615036 | BEFORE35 | 76.4001363 | 69 |
| 71.5930539 | 66.9177631 | 84.615036 | BEFORE36 | 75.5251363 | 69 |
| 72.5930539 | 66.9177631 | 84.615036 | BEFORE37 | 75.6501363 | 69 |
| 72.5930539 | 66.9177631 | 85.615036 | BEFORE38 | 75.9001363 | 69 |
| 72.5930539 | 66.9177631 | 85.615036 | BEFORE39 | 75.7751363 | 69 |
| 74.5930539 | 66.9177631 | 85.615036 | BEFORE40 | 76.0251363 | 69 |
| 75.5930539 | 66.9177631 | 85.615036 | BEFORE41 | 76.0251363 | 69 |
| 75.5930539 | 65.9177631 | 84.615036 | BEFORE42 | 75.6501363 | 69 |
| 75.5930539 | 65.9177631 | 82.615036 | BEFORE43 | 75.5251363 | 69 |
| 72.5930539 | 65.9177631 | 82.615036 | BEFORE44 | 74.9001363 | 69 |
| 72.5930539 | 66.9177631 | 82.615036 | BEFORE45 | 74.9001363 | 69 |
| 71.5930539 | 66.9177631 | 82.615036 | BEFORE46 | 74.6501363 | 63 |
| 73.5930539 | 67.9177631 | 82.615036 | BEFORE47 | 75.0251363 | 63 |
| 73.5930539 | 69.9177631 | 80.615036 | BEFORE48 | 74.9001363 | 63 |
| 73.5930539 | 69.9177631 | 80.615036 | BEFORE49 | 74.9001363 | 63 |
| 76.5930539 | 70.9177631 | 80.615036 | BEFORE50 | 75.4001363 | 63 |
| 76.5930539 | 71.9177631 | 81.615036 | BEFORE51 | 75.7751363 | 63 |
| 78.5930539 | 71.9177631 | 82.615036 | BEFORE52 | 76.6501363 | 63 |
| 78.5930539 | 71.9177631 | 83.615036 | BEFORE53 | 76.5251363 | 63 |

|            |            |           |          |            |    |
|------------|------------|-----------|----------|------------|----|
| 78.5930539 | 71.9177631 | 83.615036 | BEFORE54 | 76.5251363 | 63 |
| 79.5930539 | 71.9177631 | 84.615036 | BEFORE55 | 76.6501363 | 63 |
| 79.5930539 | 72.9177631 | 81.615036 | BEFORE56 | 76.4001363 | 63 |
| 79.5930539 | 73.9177631 | 81.615036 | BEFORE57 | 76.6501363 | 63 |
| 79.5930539 | 74.9177631 | 81.615036 | BEFORE58 | 76.9001363 | 63 |
| 80.5930539 | 75.9177631 | 81.615036 | BEFORE59 | 76.7751363 | 63 |
| 81.5930539 | 77.9177631 | 81.615036 | BEFORE60 | 77.2751363 | 63 |
| 82.5930539 | 77.9177631 | 80.615036 | BEFORE61 | 77.2751363 | 63 |
| 83.5930539 | 77.9177631 | 80.615036 | BEFORE62 | 77.2751363 | 63 |
| 84.5930539 | 75.9177631 | 80.615036 | BEFORE63 | 78.1501363 | 63 |
| 84.5930539 | 74.9177631 | 80.615036 | BEFORE64 | 77.7751363 | 63 |
| 84.5930539 | 74.9177631 | 77.615036 | BEFORE65 | 77.4001363 | 63 |
| 84.5930539 | 74.9177631 | 77.615036 | BEFORE66 | 77.6501363 | 63 |
| 82.5930539 | 73.9177631 | 75.615036 | BEFORE67 | 77.0251363 | 63 |
| 82.5930539 | 73.9177631 | 74.615036 | BEFORE68 | 77.4001363 | 63 |
| 82.5930539 | 73.9177631 | 74.615036 | BEFORE69 | 77.5251363 | 63 |
| 84.5930539 | 74.9177631 | 74.615036 | BEFORE70 | 77.7751363 | 63 |
| 86.5930539 | 76.9177631 | 73.615036 | BEFORE71 | 78.2751363 | 63 |
| 86.5930539 | 79.9177631 | 73.615036 | BEFORE72 | 78.5251363 | 63 |
| 88.5930539 | 79.9177631 | 73.615036 | BEFORE73 | 78.7751363 | 63 |
| 92.5930539 | 80.9177631 | 73.615036 | BEFORE74 | 79.6501363 | 63 |
| 80.1501363 | 80.9177631 | 72.615036 | BEFORE75 | 78.2197716 | 63 |
| 80.6501363 | 83.9177631 | 72.615036 | BEFORE76 | 78.7822716 | 63 |
| 80.2751363 | 83.9177631 | 72.615036 | BEFORE77 | 78.3603966 | 63 |
| 80.0251363 | 84.9177631 | 72.615036 | BEFORE78 | 78.0791466 | 63 |
| 79.9001363 | 84.9177631 | 74.615036 | BEFORE79 | 77.9385216 | 63 |
| 90.5930539 | 84.9177631 | 72.615036 | BEFORE80 | 79.6501363 | 63 |
| 90.5930539 | 83.9177631 | 72.615036 | BEFORE81 | 79.4001363 | 63 |
| 85.5930539 | 82.9177631 | 72.615036 | BEFORE82 | 78.4001363 | 63 |
| 85.5930539 | 82.9177631 | 72.615036 | BEFORE83 | 78.4001363 | 63 |
| 85.5930539 | 82.9177631 | 72.615036 | BEFORE84 | 78.2751363 | 63 |
| 84.5930539 | 82.9177631 | 72.615036 | BEFORE85 | 78.0251363 | 63 |
| 84.5930539 | 82.9177631 | 72.615036 | BEFORE86 | 77.6501363 | 63 |
| 84.5930539 | 80.9177631 | 73.615036 | BEFORE87 | 77.5251363 | 63 |
| 83.5930539 | 78.9177631 | 78.615036 | BEFORE88 | 77.4001363 | 63 |
| 83.5930539 | 78.9177631 | 77.615036 | BEFORE89 | 76.9001363 | 63 |
| 84.5930539 | 78.9177631 | 76.615036 | BEFORE90 | 76.9001363 | 63 |
| 84.5930539 | 77.9177631 | 73.615036 | BEFORE91 | 76.2751363 | 63 |
| 84.5930539 | 80.9177631 | 73.615036 | BEFORE92 | 76.5251363 | 63 |
| 85.5930539 | 80.9177631 | 73.615036 | BEFORE93 | 76.6501363 | 63 |
| 85.5930539 | 80.9177631 | 74.615036 | BEFORE94 | 77.1501363 | 63 |
| 86.5930539 | 80.9177631 | 74.615036 | BEFORE95 | 77.7751363 | 63 |
| 86.5930539 | 81.9177631 | 74.615036 | BEFORE96 | 78.4001363 | 63 |
| 82.5930539 | 81.9177631 | 75.615036 | BEFORE97 | 78.5251363 | 63 |
| 79.5930539 | 81.9177631 | 72.615036 | BEFORE98 | 77.4001363 | 63 |

|            |            |           |           |            |    |
|------------|------------|-----------|-----------|------------|----|
| 77.5930539 | 82.9177631 | 69.615036 | BEFORE99  | 76.5251363 | 63 |
| 76.5930539 | 83.9177631 | 69.615036 | BEFORE100 | 76.5251363 | 63 |
| 76.5930539 | 85.9177631 | 67.615036 | BEFORE101 | 75.7751363 | 63 |
| 76.5930539 | 85.9177631 | 67.615036 | BEFORE102 | 74.2751363 | 63 |
| 76.5930539 | 85.9177631 | 67.615036 | BEFORE103 | 74.2751363 | 63 |
| 76.5930539 | 74.9001363 | 67.615036 | BEFORE104 | 72.8979329 | 63 |
| 76.5930539 | 75.4001363 | 70.615036 | BEFORE105 | 73.3354329 | 63 |
| 76.5930539 | 76.0251363 | 73.615036 | BEFORE106 | 74.0385579 | 63 |
| 75.5930539 | 76.2751363 | 76.615036 | BEFORE107 | 74.3198079 | 63 |
| 75.5930539 | 87.9177631 | 76.615036 | BEFORE108 | 75.7751363 | 63 |
| 75.5930539 | 84.9177631 | 76.615036 | BEFORE109 | 75.7751363 | 63 |
| 76.5930539 | 83.9177631 | 77.615036 | BEFORE110 | 76.5251363 | 63 |
| 76.5930539 | 81.9177631 | 77.615036 | BEFORE111 | 76.9001363 | 63 |
| 76.5930539 | 81.9177631 | 79.615036 | BEFORE112 | 77.2751363 | 63 |
| 78.5930539 | 81.9177631 | 80.615036 | BEFORE113 | 77.7751363 | 63 |
| 78.5930539 | 80.9177631 | 79.615036 | BEFORE114 | 77.1501363 | 63 |
| 78.5930539 | 80.9177631 | 77.615036 | BEFORE115 | 76.7751363 | 63 |
| 78.5930539 | 80.9177631 | 77.615036 | BEFORE116 | 77.1501363 | 63 |
| 78.5930539 | 79.9177631 | 77.615036 | BEFORE117 | 77.1501363 | 63 |
| 79.5930539 | 79.9177631 | 77.615036 | BEFORE118 | 77.1501363 | 63 |
| 81.5930539 | 77.9177631 | 76.615036 | BEFORE119 | 77.0251363 | 63 |
| 83.5930539 | 77.9177631 | 75.615036 | BEFORE120 | 77.4001363 | 63 |
| 83.5930539 | 77.9177631 | 73.615036 | BEFORE121 | 77.1501363 | 63 |
| 87.5930539 | 78.9177631 | 73.615036 | BEFORE122 | 77.6501363 | 63 |
| 90.5930539 | 78.9177631 | 73.615036 | BEFORE123 | 77.9001363 | 63 |
| 77.4001363 | 78.9177631 | 70.615036 | BEFORE124 | 75.5010216 | 63 |
| 77.2751363 | 78.9177631 | 70.615036 | BEFORE125 | 75.3603966 | 63 |
| 77.1501363 | 78.9177631 | 71.615036 | BEFORE126 | 75.2197716 | 63 |
| 77.2751363 | 78.9177631 | 72.615036 | BEFORE127 | 75.3603966 | 63 |
| 77.4001363 | 78.9177631 | 71.615036 | BEFORE128 | 75.5010216 | 63 |
| 92.5930539 | 78.9177631 | 71.615036 | BEFORE129 | 77.7751363 | 63 |
| 77.5251363 | 77.9177631 | 71.615036 | BEFORE130 | 75.5166466 | 63 |
| 77.0251363 | 77.9177631 | 69.615036 | BEFORE131 | 74.9541466 | 63 |
| 77.2751363 | 77.9177631 | 68.615036 | BEFORE132 | 74.9853966 | 63 |
| 77.2751363 | 77.9177631 | 68.615036 | BEFORE133 | 74.8603966 | 63 |
| 77.2751363 | 77.9177631 | 68.615036 | BEFORE134 | 74.8603966 | 63 |
| 77.9001363 | 77.9177631 | 69.615036 | BEFORE135 | 75.5635216 | 63 |
| 78.0251363 | 79.9177631 | 70.615036 | BEFORE136 | 75.8291466 | 63 |
| 78.1501363 | 79.9177631 | 71.615036 | BEFORE137 | 75.9697716 | 63 |
| 78.1501363 | 80.9177631 | 71.615036 | BEFORE138 | 76.0947716 | 63 |
| 78.4001363 | 81.9177631 | 71.615036 | BEFORE139 | 76.3760216 | 63 |
| 79.0251363 | 81.9177631 | 71.615036 | BEFORE140 | 77.0791466 | 63 |
| 91.5930539 | 81.9177631 | 70.615036 | BEFORE141 | 78.5251363 | 63 |
| 85.5930539 | 80.9177631 | 70.615036 | BEFORE142 | 77.5251363 | 63 |
| 85.5930539 | 79.9177631 | 70.615036 | BEFORE143 | 77.5251363 | 63 |



|            |            |           |           |            |    |
|------------|------------|-----------|-----------|------------|----|
| 77.5930539 | 79.9177631 | 70.615036 | BEFORE144 | 76.4001363 | 63 |
| 72.5930539 | 77.9177631 | 69.615036 | BEFORE145 | 75.4001363 | 63 |
| 69.5930539 | 77.9177631 | 70.615036 | BEFORE146 | 74.9001363 | 63 |
| 67.5930539 | 77.9177631 | 70.615036 | BEFORE147 | 74.9001363 | 63 |
| 67.5930539 | 77.9177631 | 69.615036 | BEFORE148 | 75.1501363 | 63 |
| 64.5930539 | 77.9177631 | 67.615036 | BEFORE149 | 74.9001363 | 63 |
| 64.5930539 | 77.9177631 | 67.615036 | BEFORE150 | 75.2751363 | 63 |
| 62.5930539 | 77.9177631 | 68.615036 | BEFORE151 | 75.2751363 | 63 |
| 61.5930539 | 76.9177631 | 68.615036 | BEFORE152 | 75.5251363 | 63 |
| 61.5930539 | 76.9177631 | 69.615036 | BEFORE153 | 76.1501363 | 63 |
| 65.5930539 | 71.9177631 | 69.615036 | BEFORE154 | 76.0251363 | 63 |
| 68.5930539 | 71.9177631 | 70.615036 | BEFORE155 | 74.7160812 | 63 |
| 71.5930539 | 71.9177631 | 71.615036 | BEFORE156 | 75.2785812 | 63 |
| 71.5930539 | 71.9177631 | 71.615036 | BEFORE157 | 75.2785812 | 63 |
| 72.5930539 | 73.9177631 | 71.615036 | BEFORE158 | 78.2751363 | 63 |
| 73.5930539 | 73.9177631 | 71.615036 | BEFORE159 | 78.6501363 | 63 |
| 75.5930539 | 74.9177631 | 72.615036 | BEFORE160 | 79.4001363 | 63 |
| 76.5930539 | 76.9177631 | 73.615036 | BEFORE161 | 80.0251363 | 63 |
| 76.5930539 | 76.9177631 | 75.615036 | BEFORE162 | 80.6501363 | 63 |
| 77.5930539 | 79.9177631 | 75.615036 | BEFORE163 | 80.4001363 | 63 |
| 77.5930539 | 79.9177631 | 75.615036 | BEFORE164 | 79.2751363 | 63 |
| 78.5930539 | 79.9177631 | 75.615036 | BEFORE165 | 79.1501363 | 63 |
| 78.5930539 | 79.9177631 | 75.615036 | BEFORE166 | 78.5251363 | 63 |
| 79.5930539 | 79.9177631 | 74.615036 | BEFORE167 | 78.2751363 | 63 |
| 80.5930539 | 79.9177631 | 75.615036 | BEFORE168 | 78.6501363 | 63 |
| 80.5930539 | 79.9177631 | 76.615036 | BEFORE169 | 78.9001363 | 63 |
| 80.5930539 | 79.9177631 | 76.615036 | BEFORE170 | 78.6501363 | 63 |
| 82.5930539 | 78.9177631 | 77.615036 | BEFORE171 | 78.6501363 | 63 |
| 82.5930539 | 78.9177631 | 78.615036 | BEFORE172 | 78.4001363 | 63 |
| 82.5930539 | 78.9177631 | 79.615036 | BEFORE173 | 78.6501363 | 63 |
| 82.5930539 | 78.9177631 | 80.615036 | BEFORE174 | 78.7751363 | 63 |
| 82.5930539 | 78.9177631 | 80.615036 | BEFORE175 | 79.0251363 | 63 |
| 82.5930539 | 78.9177631 | 80.615036 | BEFORE176 | 79.1501363 | 63 |
| 82.5930539 | 76.9177631 | 80.615036 | BEFORE177 | 78.7751363 | 63 |
| 82.5930539 | 77.9177631 | 75.615036 | BEFORE178 | 77.9001363 | 63 |
| 82.5930539 | 78.9177631 | 75.615036 | BEFORE179 | 78.2751363 | 63 |
| 82.5930539 | 78.9177631 | 72.615036 | BEFORE180 | 77.7751363 | 63 |
| 83.5930539 | 78.9177631 | 72.615036 | BEFORE181 | 78.9001363 | 63 |
| 83.5930539 | 78.9177631 | 74.615036 | BEFORE182 | 79.0251363 | 63 |
| 85.5930539 | 78.9177631 | 74.615036 | BEFORE183 | 79.6501363 | 63 |
| 83.5930539 | 79.9177631 | 74.615036 | BEFORE184 | 80.0251363 | 63 |
| 81.5930539 | 79.9177631 | 74.615036 | BEFORE185 | 80.5251363 | 63 |
| 81.5930539 | 79.9177631 | 77.615036 | BEFORE186 | 81.0251363 | 63 |
| 80.5930539 | 79.9177631 | 77.615036 | BEFORE187 | 81.5251363 | 63 |
| 80.5930539 | 79.9177631 | 78.615036 | BEFORE188 | 81.4001363 | 63 |

|            |            |           |           |            |    |
|------------|------------|-----------|-----------|------------|----|
| 79.5930539 | 79.9177631 | 78.615036 | BEFORE189 | 80.9001363 | 63 |
| 79.5930539 | 79.9177631 | 78.615036 | BEFORE190 | 80.7751363 | 63 |
| 79.5930539 | 79.9177631 | 78.615036 | BEFORE191 | 80.5251363 | 63 |
| 80.5930539 | 79.9177631 | 73.615036 | BEFORE192 | 80.0251363 | 63 |
| 80.5930539 | 79.9177631 | 72.615036 | BEFORE193 | 79.9001363 | 63 |
| 80.5930539 | 79.9177631 | 72.615036 | BEFORE194 | 80.0251363 | 63 |
| 80.5930539 | 79.9177631 | 72.615036 | BEFORE195 | 79.9001363 | 63 |
| 80.5930539 | 79.9177631 | 72.615036 | BEFORE196 | 78.6501363 | 63 |
| 80.5930539 | 79.9177631 | 72.615036 | BEFORE197 | 78.2751363 | 63 |
| 80.5930539 | 79.9177631 | 73.615036 | BEFORE198 | 77.2751363 | 63 |
| 79.5930539 | 79.9177631 | 72.615036 | BEFORE199 | 76.5251363 | 63 |
| 78.5930539 | 80.9177631 | 72.615036 | BEFORE200 | 76.6501363 | 63 |
| 77.5930539 | 80.9177631 | 71.615036 | BEFORE201 | 76.0251363 | 63 |
| 79.5930539 | 80.9177631 | 71.615036 | BEFORE202 | 76.1501363 | 63 |
| 79.5930539 | 81.9177631 | 72.615036 | BEFORE203 | 76.6501363 | 63 |
| 79.5930539 | 82.9177631 | 73.615036 | BEFORE204 | 77.1501363 | 63 |
| 79.5930539 | 83.9177631 | 73.615036 | BEFORE205 | 76.1501363 | 63 |
| 78.5930539 | 84.9177631 | 73.615036 | BEFORE206 | 75.9001363 | 63 |
| 78.5930539 | 84.9177631 | 71.615036 | BEFORE207 | 75.5251363 | 63 |
| 78.5930539 | 83.9177631 | 70.615036 | BEFORE208 | 75.4001363 | 63 |
| 77.5930539 | 83.9177631 | 70.615036 | BEFORE209 | 75.2751363 | 63 |
| 78.5930539 | 83.9177631 | 70.615036 | BEFORE210 | 75.6501363 | 63 |
| 78.5930539 | 83.9177631 | 70.615036 | BEFORE211 | 75.6501363 | 63 |
| 79.5930539 | 86.9177631 | 71.615036 | BEFORE212 | 77.0251363 | 63 |
| 79.5930539 | 87.9177631 | 72.615036 | BEFORE213 | 77.6501363 | 63 |
| 80.5930539 | 87.9177631 | 74.615036 | BEFORE214 | 78.5251363 | 63 |
| 80.5930539 | 87.9177631 | 74.615036 | BEFORE215 | 78.6501363 | 63 |
| 81.5930539 | 83.9177631 | 74.615036 | BEFORE216 | 78.2751363 | 63 |
| 81.5930539 | 76.9177631 | 74.615036 | BEFORE217 | 77.6501363 | 63 |
| 83.5930539 | 75.9177631 | 71.615036 | BEFORE218 | 78.0251363 | 63 |
| 83.5930539 | 74.9177631 | 71.615036 | BEFORE219 | 78.1501363 | 63 |
| 84.5930539 | 73.9177631 | 71.615036 | BEFORE220 | 78.4001363 | 63 |
| 86.5930539 | 73.9177631 | 71.615036 | BEFORE221 | 78.1501363 | 63 |
| 87.5930539 | 73.9177631 | 73.615036 | BEFORE222 | 78.1501363 | 63 |
| 88.5930539 | 73.9177631 | 75.615036 | BEFORE223 | 78.4001363 | 63 |
| 88.5930539 | 73.9177631 | 76.615036 | BEFORE224 | 78.4001363 | 63 |
| 89.5930539 | 73.9177631 | 77.615036 | BEFORE225 | 78.2751363 | 63 |
| 89.5930539 | 73.9177631 | 76.615036 | BEFORE226 | 77.7751363 | 63 |
| 89.5930539 | 73.9177631 | 75.615036 | BEFORE227 | 77.2751363 | 63 |
| 89.5930539 | 72.9177631 | 73.615036 | BEFORE228 | 76.6501363 | 63 |
| 86.5930539 | 72.9177631 | 73.615036 | BEFORE229 | 75.7751363 | 63 |
| 86.5930539 | 71.9177631 | 73.615036 | BEFORE230 | 76.0251363 | 63 |
| 85.5930539 | 68.9177631 | 73.615036 | BEFORE231 | 75.4001363 | 63 |
| 84.5930539 | 68.9177631 | 74.615036 | BEFORE232 | 75.2751363 | 63 |
| 84.5930539 | 65.9177631 | 77.615036 | BEFORE233 | 75.4001363 | 63 |

|            |            |           |           |            |    |
|------------|------------|-----------|-----------|------------|----|
| 84.5930539 | 65.9177631 | 79.615036 | BEFORE234 | 75.4001363 | 63 |
| 84.5930539 | 65.9177631 | 79.615036 | BEFORE235 | 75.4001363 | 63 |
| 83.5930539 | 64.9177631 | 79.615036 | BEFORE236 | 75.0251363 | 63 |
| 78.5930539 | 61.9177631 | 79.615036 | BEFORE237 | 74.2751363 | 63 |
| 77.5930539 | 61.9177631 | 79.615036 | BEFORE238 | 74.0251363 | 63 |
| 77.5930539 | 60.9177631 | 78.615036 | BEFORE239 | 74.0251363 | 63 |
| 76.5930539 | 60.9177631 | 78.615036 | BEFORE240 | 73.9001363 | 63 |
| 75.5930539 | 60.9177631 | 78.615036 | minute1   | 73.7751363 | 63 |
| 74.5930539 | 60.9177631 | 78.615036 | minute2   | 74.1501363 | 63 |
| 74.5930539 | 58.9177631 | 78.615036 | minute3   | 73.9001363 | 63 |
| 73.5930539 | 56.9177631 | 78.615036 | minute4   | 73.6501363 | 63 |
| 71.5930539 | 56.9177631 | 78.615036 | minute5   | 73.5251363 | 63 |
| 74.5930539 | 56.9177631 | 78.615036 | minute6   | 72.4001363 | 63 |
| 76.5930539 | 55.9177631 | 79.615036 | minute7   | 72.5251363 | 63 |
| 76.5930539 | 55.9177631 | 82.615036 | minute8   | 72.6501363 | 63 |
| 75.5930539 | 55.9177631 | 82.615036 | minute9   | 72.4001363 | 63 |
| 72.5930539 | 55.9177631 | 83.615036 | minute10  | 72.0251363 | 63 |
| 71.5930539 | 56.9177631 | 83.615036 | minute11  | 72.0251363 | 63 |
| 71.5930539 | 62.9177631 | 85.615036 | minute12  | 73.4001363 | 63 |
| 70.5930539 | 62.9177631 | 85.615036 | minute13  | 73.2751363 | 63 |
| 71.5930539 | 64.9177631 | 85.615036 | minute14  | 73.5251363 | 63 |
| 71.5930539 | 64.9177631 | 85.615036 | minute15  | 73.5251363 | 63 |
| 72.5930539 | 65.9177631 | 78.615036 | minute16  | 73.0251363 | 63 |
| 73.5930539 | 65.9177631 | 74.615036 | minute17  | 72.7751363 | 63 |
| 73.5930539 | 65.9177631 | 72.615036 | minute18  | 72.6501363 | 63 |
| 73.5930539 | 65.9177631 | 71.615036 | minute19  | 73.0251363 | 63 |
| 73.5930539 | 65.9177631 | 70.615036 | minute20  | 72.7751363 | 63 |
| 73.5930539 | 65.9177631 | 70.615036 | minute21  | 73.5251363 | 71 |
| 73.5930539 | 66.9177631 | 67.615036 | minute22  | 73.1501363 | 71 |
| 73.5930539 | 66.9177631 | 66.615036 | minute23  | 73.2751363 | 71 |
| 75.5930539 | 66.9177631 | 64.615036 | minute24  | 73.2751363 | 71 |
| 75.5930539 | 66.9177631 | 64.615036 | minute25  | 73.2751363 | 71 |
| 75.5930539 | 66.9177631 | 65.615036 | minute26  | 73.7751363 | 71 |
| 75.5930539 | 66.9177631 | 68.615036 | minute27  | 74.5251363 | 71 |
| 76.5930539 | 66.9177631 | 71.615036 | minute28  | 74.7751363 | 71 |
| 76.5930539 | 66.9177631 | 74.615036 | minute29  | 74.7751363 | 71 |
| 74.5930539 | 65.9177631 | 74.615036 | minute30  | 74.4001363 | 71 |
| 72.5930539 | 65.9177631 | 74.615036 | minute31  | 73.9001363 | 71 |
| 72.5930539 | 65.9177631 | 73.615036 | minute32  | 73.5251363 | 71 |
| 70.5930539 | 64.9177631 | 73.615036 | minute33  | 73.4001363 | 71 |
| 69.5930539 | 64.9177631 | 73.615036 | minute34  | 72.4001363 | 71 |
| 70.5930539 | 64.9177631 | 73.615036 | minute35  | 72.1501363 | 71 |
| 70.5930539 | 64.9177631 | 73.615036 | minute36  | 71.9001363 | 71 |
| 70.5930539 | 64.9177631 | 73.615036 | minute37  | 71.9001363 | 71 |
| 70.5930539 | 65.9177631 | 74.615036 | minute38  | 72.5251363 | 71 |

|            |            |           |          |            |    |
|------------|------------|-----------|----------|------------|----|
| 70.5930539 | 65.9177631 | 75.615036 | minute39 | 72.9001363 | 71 |
| 70.5930539 | 66.9177631 | 75.615036 | minute40 | 73.0251363 | 71 |
| 70.5930539 | 66.9177631 | 75.615036 | minute41 | 73.0251363 | 71 |
| 70.5930539 | 66.9177631 | 72.615036 | minute42 | 72.2751363 | 71 |
| 67.5930539 | 66.9177631 | 69.615036 | minute43 | 72.0251363 | 71 |
| 67.5930539 | 66.9177631 | 69.615036 | minute44 | 72.1501363 | 71 |
| 67.5930539 | 66.9177631 | 71.615036 | minute45 | 72.6501363 | 71 |
| 70.5930539 | 66.9177631 | 73.615036 | minute46 | 72.9001363 | 71 |
| 71.5930539 | 67.9177631 | 74.615036 | minute47 | 73.1501363 | 71 |
| 72.5930539 | 65.9177631 | 73.615036 | minute48 | 73.0251363 | 71 |
| 72.5930539 | 65.9177631 | 73.615036 | minute49 | 73.2751363 | 71 |
| 72.5930539 | 67.9177631 | 73.615036 | minute50 | 73.6501363 | 71 |
| 72.5930539 | 70.9177631 | 71.615036 | minute51 | 73.5251363 | 71 |
| 69.5930539 | 70.9177631 | 71.615036 | minute52 | 73.1501363 | 71 |
| 66.5930539 | 70.9177631 | 71.615036 | minute53 | 72.7751363 | 71 |
| 65.5930539 | 71.9177631 | 71.615036 | minute54 | 72.6501363 | 71 |
| 65.5930539 | 71.9177631 | 72.615036 | minute55 | 72.6501363 | 71 |
| 65.5930539 | 72.9177631 | 77.615036 | minute56 | 73.1501363 | 71 |
| 65.5930539 | 72.9177631 | 80.615036 | minute57 | 73.4001363 | 71 |
| 66.5930539 | 72.9177631 | 80.615036 | minute58 | 73.6501363 | 71 |
| 67.5930539 | 72.9177631 | 80.615036 | minute59 | 73.6501363 | 71 |
| 67.5930539 | 72.9177631 | 80.615036 | minute60 | 73.6501363 | 71 |
| 67.5930539 | 72.9177631 | 80.615036 | Activity | 73.1501363 | 73 |
| 67.5930539 | 72.9177631 | 80.615036 | Activity | 73.1501363 | 73 |
| 67.5930539 | 72.9177631 | 81.615036 | Activity | 73.2751363 | 73 |
| 67.5930539 | 72.9177631 | 81.615036 | Activity | 73.2751363 | 73 |
| 67.5930539 | 72.9177631 | 81.615036 | Activity | 73.4001363 | 73 |
| 69.5930539 | 72.9177631 | 81.615036 | Activity | 73.6501363 | 73 |
| 69.5930539 | 73.9177631 | 82.615036 | Activity | 73.9001363 | 73 |
| 71.5930539 | 73.9177631 | 82.615036 | Activity | 74.4001363 | 73 |
| 71.5930539 | 73.9177631 | 82.615036 | Activity | 74.6501363 | 73 |
| 71.5930539 | 73.9177631 | 82.615036 | Activity | 75.2751363 | 73 |
| 71.5930539 | 73.9177631 | 82.615036 | Activity | 75.6501363 | 73 |
| 71.5930539 | 73.9177631 | 86.615036 | Activity | 76.4001363 | 73 |
| 70.5930539 | 73.9177631 | 86.615036 | Activity | 76.6501363 | 73 |
| 69.5930539 | 73.9177631 | 87.615036 | Activity | 76.4001363 | 73 |
| 69.5930539 | 73.9177631 | 87.615036 | Activity | 77.1501363 | 73 |
| 68.5930539 | 73.9177631 | 87.615036 | Activity | 77.4001363 | 73 |
| 68.5930539 | 74.9177631 | 85.615036 | Activity | 77.4001363 | 73 |
| 68.5930539 | 75.9177631 | 85.615036 | Activity | 77.0251363 | 73 |
| 68.5930539 | 75.9177631 | 85.615036 | Activity | 77.0251363 | 73 |
| 67.5930539 | 75.9177631 | 83.615036 | Activity | 76.5251363 | 73 |
| 65.5930539 | 75.9177631 | 84.615036 | Activity | 76.9001363 | 73 |
| 64.5930539 | 74.9177631 | 84.615036 | Activity | 77.6501363 | 73 |
| 64.5930539 | 75.9177631 | 86.615036 | Activity | 77.8446779 | 73 |

|            |            |           |          |            |    |
|------------|------------|-----------|----------|------------|----|
| 65.5930539 | 75.9177631 | 86.615036 | Activity | 78.7978029 | 73 |
| 75.5930539 | 73.9177631 | 86.615036 | Activity | 81.6501363 | 73 |
| 75.5930539 | 73.9177631 | 86.615036 | Activity | 81.0251363 | 73 |
| 77.5930539 | 73.9177631 | 85.615036 | Activity | 81.2751363 | 73 |
| 80.5930539 | 72.9177631 | 85.615036 | Activity | 81.4001363 | 73 |
| 80.5930539 | 72.9177631 | 85.615036 | Activity | 81.4001363 | 73 |
| 80.5930539 | 71.9177631 | 85.615036 | Activity | 80.9001363 | 73 |
| 80.5930539 | 71.9177631 | 84.615036 | Activity | 81.1501363 | 73 |
| 79.5930539 | 71.9177631 | 85.615036 | Activity | 79.4167157 | 73 |
| 78.5930539 | 71.9177631 | 85.615036 | Activity | 78.8698407 | 73 |
| 75.5930539 | 73.9177631 | 85.615036 | Activity | 78.2917157 | 73 |
| 75.5930539 | 73.9177631 | 85.615036 | Activity | 78.2604657 | 73 |
| 74.5930539 | 73.9177631 | 85.615036 | Activity | 78.9001363 | 73 |
| 72.5930539 | 73.9177631 | 85.615036 | Activity | 78.1501363 | 73 |
| 72.5930539 | 73.9177631 | 86.615036 | Activity | 78.0251363 | 73 |
| 72.5930539 | 73.9177631 | 87.615036 | Activity | 78.1501363 | 73 |
| 72.5930539 | 82.9177631 | 87.615036 | Activity | 79.0251363 | 73 |
| 76.5930539 | 82.9177631 | 87.615036 | Activity | 79.1501363 | 73 |
| 77.5930539 | 82.9177631 | 87.615036 | Activity | 78.9001363 | 73 |
| 78.5930539 | 82.9177631 | 87.615036 | Activity | 79.2751363 | 73 |
| 78.5930539 | 82.9177631 | 87.615036 | Activity | 79.1501363 | 73 |
| 78.5930539 | 81.9177631 | 86.615036 | Activity | 79.1501363 | 73 |
| 78.5930539 | 80.9177631 | 86.615036 | Activity | 79.9001363 | 73 |
| 79.5930539 | 80.9177631 | 86.615036 | Activity | 80.1501363 | 73 |
| 81.5930539 | 80.9177631 | 86.615036 | Activity | 80.6501363 | 73 |
| 81.5930539 | 79.9177631 | 85.615036 | Activity | 78.4001363 | 73 |
| 81.5930539 | 79.9177631 | 85.615036 | Activity | 77.9001363 | 73 |
| 81.5930539 | 78.9177631 | 85.615036 | Activity | 77.2751363 | 73 |
| 81.5930539 | 78.9177631 | 85.615036 | Activity | 77.1501363 | 73 |
| 80.5930539 | 78.9177631 | 85.615036 | Activity | 77.1501363 | 73 |
| 80.5930539 | 77.9177631 | 85.615036 | Activity | 77.1501363 | 73 |
| 80.5930539 | 76.9177631 | 85.615036 | Activity | 77.0251363 | 73 |
| 79.5930539 | 76.9177631 | 82.615036 | Activity | 77.0251363 | 73 |
| 79.5930539 | 75.9177631 | 82.615036 | Activity | 76.5251363 | 73 |
| 78.5930539 | 75.9177631 | 83.615036 | Activity | 76.5251363 | 73 |
| 78.5930539 | 75.9177631 | 86.615036 | Activity | 76.7751363 | 73 |
| 78.5930539 | 73.9177631 | 84.615036 | Activity | 76.4001363 | 73 |
| 77.5930539 | 73.9177631 | 83.615036 | Activity | 75.4001363 | 73 |
| 76.5930539 | 72.9177631 | 82.615036 | Activity | 75.1501363 | 73 |
| 76.5930539 | 72.9177631 | 81.615036 | Activity | 74.5251363 | 73 |
| 76.5930539 | 73.9177631 | 81.615036 | Activity | 74.6501363 | 73 |
| 76.5930539 | 78.9177631 | 81.615036 | Activity | 74.7751363 | 73 |
| 78.5930539 | 78.9177631 | 80.615036 | Activity | 74.9001363 | 73 |
| 79.5930539 | 78.9177631 | 79.615036 | Activity | 75.1501363 | 73 |
| 81.5930539 | 78.9177631 | 80.615036 | Activity | 76.4001363 | 73 |

|            |            |           |          |            |    |
|------------|------------|-----------|----------|------------|----|
| 83.5930539 | 78.9177631 | 80.615036 | Activity | 76.6501363 | 73 |
| 82.5930539 | 78.9177631 | 80.615036 | Activity | 76.7751363 | 73 |
| 81.5930539 | 78.9177631 | 80.615036 | Activity | 77.1501363 | 73 |
| 80.5930539 | 80.9177631 | 81.615036 | Activity | 77.2751363 | 73 |
| 80.5930539 | 80.9177631 | 81.615036 | Activity | 77.2751363 | 73 |
| 79.5930539 | 79.9177631 | 82.615036 | Activity | 77.1501363 | 73 |
| 76.5930539 | 71.9177631 | 83.615036 | Activity | 75.2751363 | 73 |
| 76.5930539 | 71.9177631 | 85.615036 | Activity | 75.7751363 | 73 |
| 76.5930539 | 70.9177631 | 87.615036 | Activity | 76.5251363 | 73 |
| 76.5930539 | 70.9177631 | 87.615036 | Activity | 75.9001363 | 73 |
| 76.5930539 | 70.9177631 | 90.615036 | Activity | 76.5251363 | 73 |
| 78.5930539 | 71.9177631 | 90.615036 | Activity | 76.9001363 | 73 |
| 78.5930539 | 71.9177631 | 90.615036 | Activity | 76.7751363 | 73 |
| 79.5930539 | 75.9177631 | 89.615036 | Activity | 77.7751363 | 73 |
| 82.5930539 | 77.9177631 | 88.615036 | Activity | 78.4001363 | 73 |
| 83.5930539 | 77.9177631 | 88.615036 | Activity | 78.7751363 | 73 |
| 83.5930539 | 77.9177631 | 87.615036 | Activity | 78.5251363 | 73 |
| 84.5930539 | 77.9177631 | 86.615036 | Activity | 78.0251363 | 73 |
| 86.5930539 | 75.9177631 | 86.615036 | Activity | 77.6501363 | 73 |
| 89.5930539 | 71.9177631 | 86.615036 | Activity | 77.6501363 | 73 |
| 89.5930539 | 71.9177631 | 86.615036 | Activity | 77.4001363 | 73 |
| 89.5930539 | 71.9177631 | 86.615036 | Activity | 77.4001363 | 73 |
| 89.5930539 | 71.9177631 | 86.615036 | Activity | 76.7751363 | 73 |
| 77.0251363 | 71.9177631 | 85.615036 | Activity | 75.0791466 | 73 |
| 77.2751363 | 71.9177631 | 85.615036 | Activity | 75.2353966 | 73 |
| 76.7751363 | 71.9177631 | 85.615036 | Activity | 74.5478966 | 73 |
| 77.2751363 | 75.9177631 | 85.615036 | Activity | 75.1103966 | 73 |
| 77.1501363 | 75.9177631 | 85.615036 | Activity | 74.9697716 | 73 |
| 77.5251363 | 74.9177631 | 85.615036 | Activity | 75.3916466 | 73 |
| 77.9001363 | 73.9177631 | 85.615036 | Activity | 75.8135216 | 73 |
| 77.9001363 | 73.9177631 | 85.615036 | Activity | 75.9385216 | 73 |
| 91.5930539 | 71.9177631 | 88.615036 | Activity | 77.7751363 | 73 |
| 91.5930539 | 71.9177631 | 88.615036 | Activity | 77.7751363 | 73 |
| 88.5930539 | 71.9177631 | 87.615036 | Activity | 77.1501363 | 73 |
| 85.5930539 | 72.9177631 | 88.615036 | Activity | 77.4001363 | 73 |
| 84.5930539 | 74.9177631 | 88.615036 | Activity | 77.7751363 | 73 |
| 84.5930539 | 76.9177631 | 88.615036 | Activity | 78.4001363 | 73 |
| 84.5930539 | 76.9177631 | 88.615036 | Activity | 78.5251363 | 73 |
| 85.5930539 | 76.9177631 | 88.615036 | Activity | 79.2751363 | 73 |
| 86.5930539 | 76.9177631 | 88.615036 | Activity | 79.4001363 | 73 |
| 85.5930539 | 76.9177631 | 88.615036 | Activity | 79.7751363 | 73 |
| 84.5930539 | 76.9177631 | 87.615036 | Activity | 79.6501363 | 73 |
| 84.5930539 | 76.9177631 | 87.615036 | Activity | 79.6501363 | 73 |
| 80.5930539 | 76.9177631 | 87.615036 | Activity | 79.1501363 | 73 |
| 78.5930539 | 75.9177631 | 87.615036 | Activity | 78.9001363 | 73 |

|            |            |           |          |            |    |
|------------|------------|-----------|----------|------------|----|
| 76.5930539 | 75.9177631 | 86.615036 | Activity | 78.0251363 | 73 |
| 76.5930539 | 76.9177631 | 84.615036 | Activity | 77.5251363 | 73 |
| 74.5930539 | 74.9177631 | 82.615036 | Activity | 76.5251363 | 73 |
| 74.5930539 | 72.9177631 | 81.615036 | Activity | 75.7751363 | 73 |
| 74.5930539 | 72.9177631 | 81.615036 | Activity | 75.5251363 | 73 |
| 73.5930539 | 73.9177631 | 79.615036 | Activity | 75.6501363 | 73 |
| 73.5930539 | 74.9177631 | 79.615036 | Activity | 75.9001363 | 73 |
| 73.5930539 | 75.9177631 | 79.615036 | Activity | 75.9001363 | 73 |
| 73.5930539 | 74.9177631 | 79.615036 | Activity | 75.1501363 | 73 |
| 72.5930539 | 75.9177631 | 79.615036 | Activity | 74.9001363 | 73 |
| 72.5930539 | 75.9177631 | 79.615036 | Activity | 75.0251363 | 73 |
| 72.5930539 | 76.9177631 | 79.615036 | Activity | 75.1501363 | 73 |
| 72.5930539 | 74.9177631 | 84.615036 | Activity | 75.7751363 | 73 |
| 72.5930539 | 74.9177631 | 84.615036 | Activity | 75.7751363 | 73 |
| 72.5930539 | 72.9177631 | 85.615036 | Activity | 76.2751363 | 73 |
| 72.5930539 | 72.9177631 | 85.615036 | Activity | 76.7751363 | 73 |
| 70.5930539 | 71.9177631 | 85.615036 | Activity | 76.5251363 | 73 |
| 69.5930539 | 72.9177631 | 84.615036 | Activity | 75.9001363 | 73 |
| 69.5930539 | 72.9177631 | 84.615036 | Activity | 75.4001363 | 73 |
| 68.5930539 | 72.9177631 | 76.615036 | Activity | 74.1501363 | 73 |
| 68.5930539 | 72.9177631 | 72.615036 | Activity | 74.0251363 | 73 |
| 67.5930539 | 72.9177631 | 72.615036 | Activity | 73.9001363 | 73 |
| 65.5930539 | 73.9177631 | 72.615036 | Activity | 73.5251363 | 73 |
| 66.5930539 | 73.9177631 | 72.615036 | Activity | 73.4001363 | 73 |
| 66.5930539 | 74.9177631 | 71.615036 | Activity | 73.4001363 | 73 |
| 66.5930539 | 75.9177631 | 68.615036 | Activity | 73.4001363 | 73 |
| 66.5930539 | 75.9177631 | 66.615036 | Activity | 73.5251363 | 73 |
| 66.5930539 | 75.9177631 | 66.615036 | Activity | 73.6501363 | 73 |
| 67.5930539 | 76.9177631 | 66.615036 | Activity | 74.1501363 | 73 |
| 67.5930539 | 76.9177631 | 66.615036 | Activity | 74.2751363 | 73 |
| 67.5930539 | 76.9177631 | 66.615036 | Activity | 73.4001363 | 73 |
| 67.5930539 | 76.9177631 | 66.615036 | Activity | 73.1501363 | 73 |
| 67.5930539 | 77.9177631 | 66.615036 | Activity | 73.4001363 | 73 |
| 67.5930539 | 75.9177631 | 67.615036 | Activity | 72.2751363 | 73 |
| 67.5930539 | 74.9177631 | 67.615036 | Activity | 71.7751363 | 73 |
| 67.5930539 | 74.9177631 | 68.615036 | Activity | 71.9001363 | 73 |
| 67.5930539 | 74.9177631 | 69.615036 | Activity | 72.2751363 | 73 |
| 68.5930539 | 74.9177631 | 70.615036 | Activity | 72.9001363 | 73 |
| 68.5930539 | 74.9177631 | 70.615036 | Activity | 73.2751363 | 73 |
| 70.5930539 | 74.9177631 | 71.615036 | Activity | 73.7751363 | 73 |
| 70.5930539 | 74.9177631 | 74.615036 | Activity | 74.1501363 | 73 |
| 70.5930539 | 74.9177631 | 76.615036 | Activity | 74.4001363 | 73 |
| 69.5930539 | 74.9177631 | 79.615036 | Activity | 73.9001363 | 73 |
| 69.5930539 | 74.9177631 | 84.615036 | Activity | 74.5251363 | 73 |
| 70.5930539 | 74.9177631 | 84.615036 | Activity | 75.0251363 | 73 |

|            |            |           |          |            |    |
|------------|------------|-----------|----------|------------|----|
| 71.5930539 | 75.9177631 | 87.615036 | Activity | 76.0251363 | 73 |
| 71.5930539 | 75.9177631 | 87.615036 | Activity | 76.0251363 | 73 |
| 71.5930539 | 77.9177631 | 87.615036 | Activity | 76.1501363 | 73 |
| 72.5930539 | 87.9177631 | 85.615036 | Activity | 77.1501363 | 73 |
| 72.5930539 | 88.9177631 | 83.615036 | Activity | 76.9001363 | 73 |
| 73.5930539 | 89.9177631 | 80.615036 | Activity | 77.0251363 | 73 |
| 72.5930539 | 90.9177631 | 80.615036 | Activity | 77.1501363 | 73 |
| 72.5930539 | 90.9177631 | 78.615036 | Activity | 76.7751363 | 73 |
| 71.5930539 | 90.9177631 | 78.615036 | Activity | 76.5251363 | 73 |
| 70.5930539 | 90.9177631 | 79.615036 | Activity | 76.2751363 | 73 |
| 69.5930539 | 90.9177631 | 85.615036 | Activity | 76.6501363 | 73 |
| 68.5930539 | 88.9177631 | 87.615036 | Activity | 76.6501363 | 73 |
| 68.5930539 | 86.9177631 | 87.615036 | Activity | 77.0251363 | 73 |
| 69.5930539 | 85.9177631 | 88.615036 | Activity | 77.0251363 | 73 |
| 69.5930539 | 85.9177631 | 88.615036 | Activity | 76.9001363 | 73 |
| 69.5930539 | 84.9177631 | 86.615036 | Activity | 77.2751363 | 73 |
| 69.5930539 | 84.9177631 | 84.615036 | Activity | 77.6501363 | 73 |
| 68.5930539 | 84.9177631 | 83.615036 | Activity | 77.1501363 | 73 |
| 68.5930539 | 84.9177631 | 83.615036 | Activity | 77.4001363 | 73 |
| 70.5930539 | 83.9177631 | 83.615036 | Activity | 78.4001363 | 73 |
| 72.5930539 | 83.9177631 | 83.615036 | Activity | 78.5251363 | 73 |
| 72.5930539 | 84.9177631 | 83.615036 | Activity | 78.2751363 | 73 |
| 72.5930539 | 84.9177631 | 83.615036 | Activity | 78.2751363 | 73 |
| 73.5930539 | 85.9177631 | 83.615036 | Activity | 79.1501363 | 73 |
| 73.5930539 | 85.9177631 | 83.615036 | Activity | 79.9001363 | 73 |
| 73.5930539 | 85.9177631 | 83.615036 | Activity | 80.0251363 | 73 |
| 74.5930539 | 86.9177631 | 83.615036 | Activity | 79.9001363 | 73 |
| 74.5930539 | 87.9177631 | 82.615036 | Activity | 79.6501363 | 73 |
| 75.5930539 | 87.9177631 | 70.615036 | Activity | 78.0251363 | 73 |
| 76.5930539 | 87.9177631 | 70.615036 | Activity | 78.0251363 | 73 |
| 77.5930539 | 87.9177631 | 69.615036 | Activity | 78.1501363 | 73 |
| 77.5930539 | 90.9177631 | 69.615036 | Activity | 78.1501363 | 73 |
| 77.5930539 | 90.9177631 | 68.615036 | Activity | 78.2751363 | 73 |
| 77.5930539 | 91.9177631 | 70.615036 | Activity | 78.7751363 | 73 |
| 78.5930539 | 91.9177631 | 75.615036 | Activity | 79.4001363 | 73 |
| 78.5930539 | 91.9177631 | 79.615036 | Activity | 80.1501363 | 73 |
| 80.5930539 | 91.9177631 | 79.615036 | Activity | 80.5251363 | 73 |
| 80.5930539 | 90.9177631 | 79.615036 | Activity | 80.4001363 | 73 |
| 80.5930539 | 88.9177631 | 79.615036 | Activity | 79.7751363 | 73 |
| 80.5930539 | 84.9177631 | 80.615036 | Activity | 79.1501363 | 73 |
| 80.5930539 | 81.9177631 | 80.615036 | Activity | 78.6501363 | 73 |
| 80.5930539 | 80.9177631 | 80.615036 | Activity | 78.6501363 | 73 |
| 80.5930539 | 80.9177631 | 80.615036 | Activity | 78.5251363 | 73 |
| 78.5930539 | 80.9177631 | 83.615036 | Activity | 78.6501363 | 73 |
| 78.5930539 | 79.9177631 | 84.615036 | Activity | 77.9001363 | 73 |



|            |            |            |          |            |    |
|------------|------------|------------|----------|------------|----|
| 78.5930539 | 79.9177631 | 86.615036  | Activity | 78.1501363 | 73 |
| 77.5930539 | 80.9177631 | 88.615036  | Activity | 78.2751363 | 73 |
| 77.5930539 | 81.9177631 | 88.615036  | Activity | 78.1501363 | 73 |
| 76.5930539 | 82.9177631 | 88.615036  | Activity | 78.1501363 | 73 |
| 76.5930539 | 83.9177631 | 88.615036  | Activity | 78.5251363 | 73 |
| 76.5930539 | 83.9177631 | 88.615036  | Activity | 78.2751363 | 73 |
| 75.5930539 | 84.9177631 | 88.615036  | Activity | 78.2751363 | 73 |
| 75.5930539 | 84.9177631 | 87.615036  | Activity | 78.1501363 | 73 |
| 75.5930539 | 84.9177631 | 87.615036  | Activity | 78.4001363 | 73 |
| 73.5930539 | 84.9177631 | 87.615036  | Activity | 78.5251363 | 73 |
| 73.5930539 | 90.9177631 | 87.615036  | Activity | 79.4001363 | 73 |
| 73.5930539 | 90.9177631 | 87.615036  | Activity | 79.6501363 | 73 |
| 73.5930539 | 88.9177631 | 87.615036  | Activity | 79.5251363 | 73 |
| 73.5930539 | 88.9177631 | 87.615036  | Activity | 79.4001363 | 73 |
| 73.5930539 | 79.9177631 | 87.615036  | Activity | 78.4001363 | 73 |
| 73.5930539 | 75.9177631 | 88.615036  | Activity | 78.1501363 | 73 |
| 73.5930539 | 74.9177631 | 88.615036  | Activity | 77.1501363 | 73 |
| 73.5930539 | 74.9177631 | 88.615036  | Activity | 76.7751363 | 73 |
| 74.5930539 | 72.9177631 | 89.615036  | Activity | 76.6501363 | 73 |
| 73.5930539 | 72.9177631 | 91.615036  | Activity | 77.1501363 | 73 |
| 73.5930539 | 72.9177631 | 91.615036  | Activity | 77.2751363 | 73 |
| 73.5930539 | 73.9177631 | 77.9001363 | minute1  | 75.9357738 | 63 |
| 73.5930539 | 73.9177631 | 78.0251363 | minute2  | 75.9513988 | 63 |
| 73.5930539 | 73.9177631 | 78.6501363 | minute3  | 76.6545238 | 63 |
| 74.5930539 | 75.9177631 | 79.6501363 | minute4  | 77.2795238 | 63 |
| 74.5930539 | 76.9177631 | 78.9001363 | minute5  | 76.9357738 | 63 |
| 74.5930539 | 78.9177631 | 92.615036  | minute6  | 78.9001363 | 63 |
| 74.5930539 | 79.9177631 | 91.615036  | minute7  | 79.2751363 | 63 |
| 74.5930539 | 80.9177631 | 91.615036  | minute8  | 79.5251363 | 63 |
| 74.5930539 | 81.9177631 | 90.615036  | minute9  | 80.0251363 | 63 |
| 74.5930539 | 81.9177631 | 90.615036  | minute10 | 80.1501363 | 63 |
| 74.5930539 | 81.9177631 | 90.615036  | minute11 | 80.1501363 | 63 |
| 74.5930539 | 81.9177631 | 89.615036  | minute12 | 79.7751363 | 63 |
| 74.5930539 | 82.9177631 | 89.615036  | minute13 | 79.9001363 | 63 |
| 74.5930539 | 82.9177631 | 89.615036  | minute14 | 80.0251363 | 63 |
| 74.5930539 | 83.9177631 | 89.615036  | minute15 | 78.7751363 | 63 |
| 74.5930539 | 84.9177631 | 88.615036  | minute16 | 79.0251363 | 63 |
| 74.5930539 | 84.9177631 | 88.615036  | minute17 | 79.1501363 | 63 |
| 74.5930539 | 84.9177631 | 89.615036  | minute18 | 78.7751363 | 63 |
| 73.5930539 | 84.9177631 | 89.615036  | minute19 | 78.4001363 | 63 |
| 73.5930539 | 87.9177631 | 89.615036  | minute20 | 78.6501363 | 63 |
| 73.5930539 | 87.9177631 | 89.615036  | minute21 | 77.7751363 | 63 |
| 73.5930539 | 88.9177631 | 88.615036  | minute22 | 76.7751363 | 63 |
| 73.5930539 | 88.9177631 | 86.615036  | minute23 | 76.5251363 | 63 |
| 74.5930539 | 89.9177631 | 85.615036  | minute24 | 75.6501363 | 63 |

|            |            |           |          |            |    |
|------------|------------|-----------|----------|------------|----|
| 74.5930539 | 89.9177631 | 85.615036 | minute25 | 75.5251363 | 63 |
| 75.5930539 | 75.7751363 | 85.615036 | minute26 | 73.8823079 | 63 |
| 75.5930539 | 90.9177631 | 85.615036 | minute27 | 76.4001363 | 63 |
| 75.5930539 | 90.9177631 | 84.615036 | minute28 | 76.2751363 | 63 |
| 75.5930539 | 90.9177631 | 84.615036 | minute29 | 76.1501363 | 63 |
| 75.5930539 | 89.9177631 | 84.615036 | minute30 | 76.1501363 | 63 |
| 75.5930539 | 89.9177631 | 84.615036 | minute31 | 76.2751363 | 63 |
| 74.5930539 | 82.9177631 | 83.615036 | minute32 | 75.2751363 | 63 |
| 74.5930539 | 82.9177631 | 82.615036 | minute33 | 75.7751363 | 63 |
| 73.5930539 | 81.9177631 | 82.615036 | minute34 | 74.6501363 | 63 |
| 73.5930539 | 81.9177631 | 82.615036 | minute35 | 74.7751363 | 63 |
| 72.5930539 | 80.9177631 | 81.615036 | minute36 | 74.4001363 | 63 |
| 72.5930539 | 80.9177631 | 81.615036 | minute37 | 73.9001363 | 63 |
| 70.5930539 | 79.9177631 | 80.615036 | minute38 | 72.9001363 | 63 |
| 70.5930539 | 79.9177631 | 80.615036 | minute39 | 72.7751363 | 63 |
| 70.5930539 | 79.9177631 | 80.615036 | minute40 | 72.9001363 | 63 |
| 68.5930539 | 88.9177631 | 80.615036 | minute41 | 74.7751363 | 63 |
| 67.5930539 | 75.1501363 | 80.615036 | minute42 | 73.0541829 | 63 |
| 66.5930539 | 73.9001363 | 70.615036 | minute43 | 71.5229329 | 63 |
| 65.5930539 | 74.0251363 | 70.615036 | minute44 | 71.6635579 | 63 |
| 66.5930539 | 73.9001363 | 68.615036 | minute45 | 71.5229329 | 63 |
| 67.5930539 | 74.4001363 | 68.615036 | minute46 | 72.0854329 | 63 |
| 68.5930539 | 74.6501363 | 68.615036 | minute47 | 72.3666829 | 63 |
| 68.5930539 | 74.9001363 | 68.615036 | minute48 | 72.6479329 | 63 |
| 67.5930539 | 74.5251363 | 68.615036 | minute49 | 72.2260579 | 63 |
| 67.5930539 | 74.4001363 | 68.615036 | minute50 | 72.2104329 | 63 |
| 67.5930539 | 74.2751363 | 68.615036 | minute51 | 72.0698079 | 63 |
| 67.5930539 | 74.6501363 | 72.615036 | minute52 | 72.4916829 | 63 |
| 67.5930539 | 74.0251363 | 72.615036 | minute53 | 71.9135579 | 63 |
| 66.5930539 | 73.7751363 | 72.615036 | minute54 | 71.6323079 | 63 |
| 66.5930539 | 73.9001363 | 72.615036 | minute55 | 71.8979329 | 63 |
| 66.5930539 | 74.1501363 | 72.615036 | minute56 | 72.1791829 | 63 |
| 66.5930539 | 74.7751363 | 75.615036 | minute57 | 72.8823079 | 63 |
| 66.5930539 | 89.9177631 | 76.615036 | minute58 | 75.4001363 | 63 |
| 66.5930539 | 88.9177631 | 76.615036 | minute59 | 75.1501363 | 63 |
| 65.5930539 | 88.9177631 | 76.615036 | minute60 | 75.1501363 | 63 |
| 65.5930539 | 88.9177631 | 77.615036 | AFTER1   | 75.2751363 | 63 |
| 67.5930539 | 89.9177631 | 77.615036 | AFTER2   | 75.7751363 | 63 |
| 67.5930539 | 89.9177631 | 76.615036 | AFTER3   | 76.4001363 | 63 |
| 67.5930539 | 90.9177631 | 76.615036 | AFTER4   | 77.0251363 | 63 |
| 67.5930539 | 90.9177631 | 76.615036 | AFTER5   | 77.0251363 | 63 |
| 67.5930539 | 78.9177631 | 76.615036 | AFTER6   | 75.7751363 | 63 |
| 67.5930539 | 75.9177631 | 76.615036 | AFTER7   | 75.1501363 | 63 |
| 67.5930539 | 73.9177631 | 77.615036 | AFTER8   | 74.9001363 | 63 |
| 68.5930539 | 72.9177631 | 77.615036 | AFTER9   | 75.2751363 | 63 |

|            |            |           |         |            |    |
|------------|------------|-----------|---------|------------|----|
| 68.5930539 | 72.9177631 | 77.615036 | AFTER10 | 75.5251363 | 63 |
| 68.5930539 | 71.9177631 | 74.615036 | AFTER11 | 75.0251363 | 63 |
| 71.5930539 | 71.9177631 | 74.615036 | AFTER12 | 75.4001363 | 63 |
| 71.5930539 | 71.9177631 | 74.615036 | AFTER13 | 75.7751363 | 63 |
| 71.5930539 | 70.9177631 | 74.615036 | AFTER14 | 75.6501363 | 63 |
| 71.5930539 | 72.9177631 | 74.615036 | AFTER15 | 76.2751363 | 63 |
| 71.5930539 | 72.9177631 | 74.615036 | AFTER16 | 76.1501363 | 63 |
| 71.5930539 | 72.9177631 | 75.615036 | AFTER17 | 76.4001363 | 63 |
| 70.5930539 | 71.9177631 | 75.615036 | AFTER18 | 76.1501363 | 63 |
| 69.5930539 | 72.9177631 | 76.615036 | AFTER19 | 76.7751363 | 63 |
| 69.5930539 | 72.9177631 | 75.615036 | AFTER20 | 74.7040529 | 63 |
| 69.5930539 | 72.9177631 | 74.615036 | AFTER21 | 74.8446779 | 63 |
| 69.5930539 | 73.9177631 | 74.615036 | AFTER22 | 75.7040529 | 63 |
| 69.5930539 | 73.9177631 | 74.615036 | AFTER23 | 75.9853029 | 63 |
| 69.5930539 | 74.9177631 | 73.615036 | AFTER24 | 75.8446779 | 63 |
| 69.5930539 | 74.9177631 | 73.615036 | AFTER25 | 75.7509279 | 63 |
| 70.5930539 | 74.9177631 | 73.615036 | AFTER26 | 74.7665529 | 63 |
| 70.5930539 | 74.9177631 | 74.615036 | AFTER27 | 74.0634279 | 63 |
| 70.5930539 | 74.9177631 | 74.615036 | AFTER28 | 72.9384279 | 63 |
| 69.5930539 | 74.9177631 | 73.615036 | AFTER29 | 71.9540529 | 63 |
| 69.5930539 | 75.9177631 | 73.615036 | AFTER30 | 71.9540529 | 63 |
| 70.5930539 | 75.9177631 | 73.615036 | AFTER31 | 71.8759279 | 63 |
| 71.5930539 | 74.9177631 | 73.615036 | AFTER32 | 71.9853029 | 63 |
| 71.5930539 | 74.9177631 | 74.615036 | AFTER33 | 71.7040529 | 63 |
| 71.5930539 | 75.9177631 | 75.615036 | AFTER34 | 72.4071779 | 63 |
| 71.5930539 | 76.9177631 | 75.615036 | AFTER35 | 72.4071779 | 63 |
| 71.5930539 | 76.9177631 | 77.615036 | AFTER36 | 74.7751363 | 63 |
| 70.5930539 | 76.9177631 | 76.615036 | AFTER37 | 74.5251363 | 63 |
| 70.5930539 | 77.9177631 | 76.615036 | AFTER38 | 74.5251363 | 63 |
| 70.5930539 | 77.9177631 | 73.615036 | AFTER39 | 74.0251363 | 63 |
| 71.5930539 | 77.9177631 | 70.615036 | AFTER40 | 73.2751363 | 63 |
| 71.5930539 | 77.9177631 | 70.615036 | AFTER41 | 72.9001363 | 63 |
| 71.5930539 | 76.9177631 | 70.615036 | AFTER42 | 73.2751363 | 63 |
| 71.5930539 | 76.9177631 | 71.615036 | AFTER43 | 73.4001363 | 63 |
| 69.5930539 | 75.9177631 | 72.615036 | AFTER44 | 72.6501363 | 63 |
| 69.5930539 | 74.9177631 | 73.615036 | AFTER45 | 72.1501363 | 63 |
| 69.5930539 | 73.9177631 | 73.615036 | AFTER46 | 71.6501363 | 63 |
| 69.5930539 | 72.9177631 | 73.615036 | AFTER47 | 71.2751363 | 63 |
| 69.5930539 | 73.9177631 | 72.615036 | AFTER48 | 71.2751363 | 63 |
| 71.5930539 | 73.9177631 | 71.615036 | AFTER49 | 71.7751363 | 63 |
| 71.5930539 | 72.9177631 | 69.615036 | AFTER50 | 71.6501363 | 63 |
| 72.5930539 | 70.9177631 | 69.615036 | AFTER51 | 71.6501363 | 63 |
| 70.5930539 | 67.9177631 | 68.615036 | AFTER52 | 71.2751363 | 63 |
| 70.5930539 | 66.9177631 | 69.615036 | AFTER53 | 71.5251363 | 63 |
| 70.5930539 | 66.9177631 | 70.615036 | AFTER54 | 71.5251363 | 63 |

|            |            |           |         |            |    |
|------------|------------|-----------|---------|------------|----|
| 70.5930539 | 67.9177631 | 72.615036 | AFTER55 | 71.6501363 | 63 |
| 70.5930539 | 67.9177631 | 72.615036 | AFTER56 | 71.4001363 | 63 |
| 70.5930539 | 67.9177631 | 71.615036 | AFTER57 | 71.4001363 | 63 |
| 71.5930539 | 67.9177631 | 71.615036 | AFTER58 | 71.6501363 | 63 |
| 71.5930539 | 67.9177631 | 71.615036 | AFTER59 | 71.6501363 | 63 |
| 71.5930539 | 67.9177631 | 69.615036 | AFTER60 | 71.4001363 | 63 |
| 73.5930539 | 68.9177631 | 69.615036 | AFTER61 | 71.7751363 | 63 |
| 74.5930539 | 68.9177631 | 69.615036 | AFTER62 | 72.2751363 | 63 |
| 74.5930539 | 68.9177631 | 68.615036 | AFTER63 | 73.1501363 | 63 |
| 74.5930539 | 69.9177631 | 69.615036 | AFTER64 | 73.5251363 | 63 |
| 74.5930539 | 69.9177631 | 69.615036 | AFTER65 | 73.4001363 | 63 |
| 79.5930539 | 70.9177631 | 69.615036 | AFTER66 | 74.4001363 | 63 |
| 81.5930539 | 71.9177631 | 69.615036 | AFTER67 | 75.1501363 | 63 |
| 82.5930539 | 75.9177631 | 69.615036 | AFTER68 | 75.7751363 | 63 |
| 79.5930539 | 78.9177631 | 69.615036 | AFTER69 | 75.4001363 | 63 |
| 74.5930539 | 80.9177631 | 70.615036 | AFTER70 | 75.0251363 | 63 |
| 74.5930539 | 80.9177631 | 70.615036 | AFTER71 | 74.6501363 | 63 |
| 74.5930539 | 79.9177631 | 70.615036 | AFTER72 | 74.1501363 | 63 |
| 74.5930539 | 79.9177631 | 69.615036 | AFTER73 | 73.4001363 | 63 |
| 73.5930539 | 79.9177631 | 68.615036 | AFTER74 | 73.1501363 | 63 |
| 73.5930539 | 79.9177631 | 68.615036 | AFTER75 | 73.4001363 | 63 |
| 71.5930539 | 79.9177631 | 69.615036 | AFTER76 | 73.4001363 | 63 |
| 71.5930539 | 80.9177631 | 70.615036 | AFTER77 | 73.6501363 | 63 |
| 71.5930539 | 81.9177631 | 71.615036 | AFTER78 | 73.9001363 | 63 |
| 71.5930539 | 81.9177631 | 72.615036 | AFTER79 | 73.9001363 | 63 |
| 71.5930539 | 82.9177631 | 72.615036 | AFTER80 | 74.2751363 | 63 |
| 69.5930539 | 82.9177631 | 72.615036 | AFTER81 | 73.7751363 | 63 |
| 67.5930539 | 85.9177631 | 72.615036 | AFTER82 | 73.2751363 | 63 |
| 67.5930539 | 86.9177631 | 73.615036 | AFTER83 | 73.2751363 | 63 |
| 67.5930539 | 87.9177631 | 73.615036 | AFTER84 | 73.1501363 | 63 |
| 67.5930539 | 87.9177631 | 75.615036 | AFTER85 | 73.5251363 | 63 |
| 67.5930539 | 73.6501363 | 76.615036 | AFTER86 | 71.6166829 | 63 |
| 68.5930539 | 73.4001363 | 77.615036 | AFTER87 | 71.0854329 | 63 |
| 69.5930539 | 74.1501363 | 81.615036 | AFTER88 | 71.9291829 | 63 |
| 69.5930539 | 74.0251363 | 82.615036 | AFTER89 | 71.7885579 | 63 |
| 69.5930539 | 75.2751363 | 88.615036 | AFTER90 | 73.1948079 | 63 |
| 70.5930539 | 76.1501363 | 89.615036 | AFTER91 | 74.1791829 | 63 |
| 72.5930539 | 88.9177631 | 89.615036 | AFTER92 | 76.4001363 | 63 |
| 72.5930539 | 88.9177631 | 89.615036 | AFTER93 | 76.6501363 | 63 |
| 72.5930539 | 86.9177631 | 88.615036 | AFTER94 | 76.1501363 | 63 |
| 72.5930539 | 85.9177631 | 75.615036 | AFTER95 | 74.2751363 | 63 |
| 73.5930539 | 85.9177631 | 75.615036 | AFTER96 | 73.7751363 | 63 |
| 71.5930539 | 75.9177631 | 65.615036 | AFTER97 | 71.0251363 | 63 |
| 71.5930539 | 75.9177631 | 64.615036 | AFTER98 | 71.1501363 | 63 |
| 71.5930539 | 75.9177631 | 64.615036 | AFTER99 | 71.1501363 | 63 |

|            |            |            |          |            |    |
|------------|------------|------------|----------|------------|----|
| 70.5930539 | 75.9177631 | 64.615036  | AFTER100 | 71.0251363 | 63 |
| 69.5930539 | 74.9177631 | 64.615036  | AFTER101 | 71.2751363 | 63 |
| 67.5930539 | 73.9177631 | 65.615036  | AFTER102 | 70.6501363 | 63 |
| 67.5930539 | 72.9177631 | 65.615036  | AFTER103 | 70.7751363 | 63 |
| 67.5930539 | 62.9177631 | 64.615036  | AFTER104 | 69.1501363 | 63 |
| 67.5930539 | 61.9177631 | 64.615036  | AFTER105 | 68.4001363 | 63 |
| 67.5930539 | 62.9177631 | 65.615036  | AFTER106 | 68.5251363 | 63 |
| 67.5930539 | 66.9177631 | 65.615036  | AFTER107 | 69.1501363 | 63 |
| 67.5930539 | 68.9177631 | 65.615036  | AFTER108 | 70.4001363 | 63 |
| 67.5930539 | 69.9177631 | 65.615036  | AFTER109 | 70.5251363 | 63 |
| 67.5930539 | 69.9177631 | 65.615036  | AFTER110 | 70.9001363 | 63 |
| 67.5930539 | 69.9177631 | 65.615036  | AFTER111 | 71.1501363 | 63 |
| 67.5930539 | 69.9177631 | 65.615036  | AFTER112 | 71.2751363 | 63 |
| 67.5930539 | 69.9177631 | 65.615036  | AFTER113 | 71.2751363 | 63 |
| 67.5930539 | 69.9177631 | 65.615036  | AFTER114 | 71.2751363 | 63 |
| 67.5930539 | 74.9177631 | 65.615036  | AFTER115 | 71.9001363 | 63 |
| 68.5930539 | 74.9177631 | 65.615036  | AFTER116 | 72.0251363 | 63 |
| 68.5930539 | 75.9177631 | 71.615036  | AFTER117 | 72.9001363 | 63 |
| 68.5930539 | 75.9177631 | 73.615036  | AFTER118 | 73.0251363 | 63 |
| 69.5930539 | 74.9177631 | 74.615036  | AFTER119 | 72.6501363 | 63 |
| 74.5930539 | 73.9177631 | 74.615036  | AFTER120 | 73.1501363 | 63 |
| 81.5930539 | 73.9177631 | 75.615036  | AFTER121 | 73.5251363 | 63 |
| 85.5930539 | 76.9177631 | 77.615036  | AFTER122 | 74.4001363 | 63 |
| 85.5930539 | 78.9177631 | 79.615036  | AFTER123 | 74.5251363 | 63 |
| 75.5251363 | 79.9177631 | 79.615036  | AFTER124 | 73.6416466 | 63 |
| 75.7751363 | 79.9177631 | 79.615036  | AFTER125 | 73.7978966 | 63 |
| 75.9001363 | 77.9177631 | 79.615036  | AFTER126 | 73.9385216 | 63 |
| 90.5930539 | 77.9177631 | 78.615036  | AFTER127 | 75.9001363 | 63 |
| 76.0251363 | 77.9177631 | 78.615036  | AFTER128 | 74.0791466 | 63 |
| 76.2751363 | 78.9177631 | 78.615036  | AFTER129 | 74.3603966 | 63 |
| 76.4001363 | 78.9177631 | 78.615036  | AFTER130 | 74.2510216 | 63 |
| 76.1501363 | 78.9177631 | 78.615036  | AFTER131 | 73.9697716 | 63 |
| 75.4001363 | 78.9177631 | 78.615036  | AFTER132 | 73.1260216 | 63 |
| 75.2751363 | 78.9177631 | 78.615036  | AFTER133 | 72.7353966 | 63 |
| 75.4001363 | 78.9177631 | 79.615036  | AFTER134 | 72.8760216 | 63 |
| 75.2751363 | 80.9177631 | 79.615036  | AFTER135 | 72.6103966 | 63 |
| 75.4001363 | 79.9177631 | 80.615036  | AFTER136 | 72.7510216 | 63 |
| 75.1501363 | 77.9177631 | 81.615036  | AFTER137 | 72.4697716 | 63 |
| 74.7751363 | 77.9177631 | 82.615036  | AFTER138 | 72.0478966 | 63 |
| 74.0251363 | 77.9177631 | 83.615036  | AFTER139 | 71.5791466 | 63 |
| 80.5930539 | 77.9177631 | 84.615036  | AFTER140 | 72.2751363 | 63 |
| 71.5930539 | 77.9177631 | 84.615036  | AFTER141 | 70.9001363 | 63 |
| 71.5930539 | 76.9177631 | 85.615036  | AFTER142 | 71.0251363 | 63 |
| 70.5930539 | 76.9177631 | 71.2751363 | AFTER143 | 69.3576488 | 63 |
| 69.5930539 | 76.9177631 | 86.615036  | AFTER144 | 71.7751363 | 63 |

|            |            |           |          |            |    |
|------------|------------|-----------|----------|------------|----|
| 71.5930539 | 75.9177631 | 86.615036 | AFTER145 | 72.2751363 | 63 |
| 73.5930539 | 75.9177631 | 86.615036 | AFTER146 | 72.7751363 | 63 |
| 73.5930539 | 74.9177631 | 82.615036 | AFTER147 | 72.7751363 | 63 |
| 73.5930539 | 73.9177631 | 79.615036 | AFTER148 | 72.5251363 | 63 |
| 73.5930539 | 72.9177631 | 77.615036 | AFTER149 | 72.6501363 | 63 |
| 73.5930539 | 71.9177631 | 76.615036 | AFTER150 | 72.4001363 | 63 |
| 73.5930539 | 71.9177631 | 76.615036 | AFTER151 | 72.5251363 | 63 |
| 72.5930539 | 71.9177631 | 74.615036 | AFTER152 | 72.5251363 | 63 |
| 72.5930539 | 71.9177631 | 74.615036 | AFTER153 | 72.5251363 | 63 |
| 72.5930539 | 72.9177631 | 75.615036 | AFTER154 | 73.0251363 | 63 |
| 72.5930539 | 73.9177631 | 77.615036 | AFTER155 | 74.0251363 | 63 |
| 72.5930539 | 72.9177631 | 77.615036 | AFTER156 | 74.2751363 | 63 |
| 72.5930539 | 72.9177631 | 77.615036 | AFTER157 | 74.1501363 | 63 |
| 72.5930539 | 72.9177631 | 76.615036 | AFTER158 | 74.4001363 | 63 |
| 72.5930539 | 72.9177631 | 73.615036 | AFTER159 | 74.5251363 | 63 |
| 72.5930539 | 71.9177631 | 72.615036 | AFTER160 | 74.7751363 | 63 |
| 72.5930539 | 70.9177631 | 72.615036 | AFTER161 | 74.7751363 | 63 |
| 72.5930539 | 69.9177631 | 69.615036 | AFTER162 | 74.1501363 | 63 |
| 73.5930539 | 69.9177631 | 66.615036 | AFTER163 | 73.9001363 | 63 |
| 73.5930539 | 69.9177631 | 66.615036 | AFTER164 | 73.6501363 | 63 |
| 73.5930539 | 69.9177631 | 66.615036 | AFTER165 | 73.5251363 | 63 |
| 73.5930539 | 67.9177631 | 66.615036 | AFTER166 | 73.2751363 | 63 |
| 73.5930539 | 67.9177631 | 66.615036 | AFTER167 | 73.2751363 | 65 |
| 73.5930539 | 67.9177631 | 66.615036 | AFTER168 | 72.7751363 | 65 |
| 75.5930539 | 66.9177631 | 66.615036 | AFTER169 | 72.9001363 | 65 |
| 75.5930539 | 66.9177631 | 66.615036 | AFTER170 | 72.7751363 | 65 |
| 75.5930539 | 66.9177631 | 66.615036 | AFTER171 | 72.6501363 | 65 |
| 75.5930539 | 66.9177631 | 66.615036 | AFTER172 | 72.6501363 | 65 |
| 76.5930539 | 66.9177631 | 66.615036 | AFTER173 | 72.7751363 | 65 |
| 76.5930539 | 67.9177631 | 66.615036 | AFTER174 | 72.6501363 | 65 |
| 76.5930539 | 67.9177631 | 66.615036 | AFTER175 | 72.7751363 | 65 |
| 76.5930539 | 67.9177631 | 66.615036 | AFTER176 | 72.7751363 | 65 |
| 79.5930539 | 64.9177631 | 66.615036 | AFTER177 | 72.9001363 | 65 |
| 74.1501363 | 62.9177631 | 66.615036 | AFTER178 | 72.2197716 | 65 |
| 74.4001363 | 63.9177631 | 67.615036 | AFTER179 | 72.5010216 | 65 |
| 74.9001363 | 63.9177631 | 67.615036 | AFTER180 | 72.9385216 | 65 |
| 75.2751363 | 62.9177631 | 67.615036 | AFTER181 | 73.3603966 | 65 |
| 75.9001363 | 62.9177631 | 67.615036 | AFTER182 | 73.8135216 | 65 |
| 75.9001363 | 62.9177631 | 67.615036 | AFTER183 | 73.8135216 | 65 |
| 76.2751363 | 62.9177631 | 68.615036 | AFTER184 | 74.2353966 | 65 |
| 77.2751363 | 63.9177631 | 70.615036 | AFTER185 | 75.3603966 | 65 |
| 77.6501363 | 63.9177631 | 72.615036 | AFTER186 | 75.7822716 | 65 |
| 87.5930539 | 64.9177631 | 74.615036 | AFTER187 | 77.6501363 | 65 |
| 84.5930539 | 65.9177631 | 76.615036 | AFTER188 | 78.2751363 | 65 |
| 84.5930539 | 67.9177631 | 78.615036 | AFTER189 | 78.6501363 | 65 |

|            |            |           |          |            |    |
|------------|------------|-----------|----------|------------|----|
| 84.5930539 | 67.9177631 | 80.615036 | AFTER190 | 78.6501363 | 65 |
| 82.5930539 | 66.9177631 | 80.615036 | AFTER191 | 77.9001363 | 65 |
| 82.5930539 | 65.9177631 | 80.615036 | AFTER192 | 77.1501363 | 65 |
| 80.5930539 | 65.9177631 | 81.615036 | AFTER193 | 75.9001363 | 65 |
| 76.5930539 | 65.9177631 | 79.615036 | AFTER194 | 74.6501363 | 65 |
| 73.5930539 | 65.9177631 | 74.615036 | AFTER195 | 70.6501363 | 65 |
| 71.5930539 | 65.9177631 | 70.615036 | AFTER196 | 68.9001363 | 65 |
| 71.5930539 | 65.9177631 | 69.615036 | AFTER197 | 68.5251363 | 65 |
| 71.5930539 | 65.9177631 | 70.615036 | AFTER198 | 68.5251363 | 65 |
| 71.5930539 | 65.9177631 | 73.615036 | AFTER199 | 69.0251363 | 65 |
| 71.5930539 | 65.9177631 | 75.615036 | AFTER200 | 69.2751363 | 65 |
| 71.5930539 | 65.9177631 | 77.615036 | AFTER201 | 69.4001363 | 65 |
| 71.5930539 | 65.9177631 | 78.615036 | AFTER202 | 68.6501363 | 65 |
| 78.5930539 | 65.9177631 | 77.615036 | AFTER203 | 69.0251363 | 65 |
| 80.5930539 | 66.9177631 | 77.615036 | AFTER204 | 69.0251363 | 65 |
| 80.5930539 | 66.9177631 | 77.615036 | AFTER205 | 69.0251363 | 65 |
| 80.5930539 | 66.9177631 | 76.615036 | AFTER206 | 69.2751363 | 65 |
| 83.5930539 | 66.9177631 | 76.615036 | AFTER207 | 69.6501363 | 65 |
| 83.5930539 | 66.9177631 | 76.615036 | AFTER208 | 70.4001363 | 65 |
| 83.5930539 | 66.9177631 | 76.615036 | AFTER209 | 70.5251363 | 65 |
| 83.5930539 | 75.9177631 | 76.615036 | AFTER210 | 72.2751363 | 65 |
| 83.5930539 | 75.9177631 | 82.615036 | AFTER211 | 73.2751363 | 65 |
| 83.5930539 | 74.9177631 | 83.615036 | AFTER212 | 73.2751363 | 65 |
| 81.5930539 | 74.9177631 | 82.615036 | AFTER213 | 73.9001363 | 65 |
| 79.5930539 | 58.9177631 | 80.615036 | AFTER214 | 71.0251363 | 65 |
| 78.5930539 | 55.9177631 | 77.615036 | AFTER215 | 70.0251363 | 65 |
| 76.5930539 | 55.9177631 | 75.615036 | AFTER216 | 68.9001363 | 65 |
| 74.5930539 | 55.9177631 | 73.615036 | AFTER217 | 68.2751363 | 65 |
| 74.5930539 | 55.9177631 | 73.615036 | AFTER218 | 68.1501363 | 65 |
| 72.5930539 | 55.9177631 | 74.615036 | AFTER219 | 67.7751363 | 65 |
| 70.5930539 | 55.9177631 | 74.615036 | AFTER220 | 67.4001363 | 65 |
| 70.5930539 | 55.9177631 | 74.615036 | AFTER221 | 67.4001363 | 65 |
| 70.5930539 | 55.9177631 | 76.615036 | AFTER222 | 67.2751363 | 65 |
| 70.5930539 | 55.9177631 | 76.615036 | AFTER223 | 67.1501363 | 65 |
| 69.5930539 | 62.9177631 | 76.615036 | AFTER224 | 67.9001363 | 65 |
| 68.5930539 | 63.9177631 | 76.615036 | AFTER225 | 67.9001363 | 65 |
| 67.5930539 | 63.9177631 | 76.615036 | AFTER226 | 68.2751363 | 65 |
| 67.5930539 | 61.9177631 | 76.615036 | AFTER227 | 68.1501363 | 63 |
| 64.5930539 | 60.9177631 | 76.615036 | AFTER228 | 68.1501363 | 63 |
| 64.5930539 | 60.9177631 | 76.615036 | AFTER229 | 68.2751363 | 63 |
| 67.5930539 | 60.9177631 | 76.615036 | AFTER230 | 68.6501363 | 63 |
| 68.5930539 | 62.9177631 | 76.615036 | AFTER231 | 69.5251363 | 63 |
| 68.5930539 | 62.9177631 | 76.615036 | AFTER232 | 69.5251363 | 63 |
| 68.5930539 | 62.9177631 | 77.615036 | AFTER233 | 69.5251363 | 63 |
| 69.5930539 | 62.9177631 | 77.615036 | AFTER234 | 69.7751363 | 63 |

|            |            |           |          |            |    |
|------------|------------|-----------|----------|------------|----|
| 69.5930539 | 63.9177631 | 80.615036 | AFTER235 | 70.2751363 | 63 |
| 70.5930539 | 63.9177631 | 76.615036 | AFTER236 | 70.0251363 | 63 |
| 70.5930539 | 63.9177631 | 74.615036 | AFTER237 | 70.0251363 | 63 |
| 70.5930539 | 63.9177631 | 74.615036 | AFTER238 | 70.1501363 | 63 |
| 71.5930539 | 68.9177631 | 74.615036 | AFTER239 | 71.5251363 | 63 |
| 71.5930539 | 67.9177631 | 74.615036 | AFTER240 | 72.0251363 | 63 |
| 71.5930539 | 66.9177631 | 74.615036 |          | 72.0251363 | 63 |
| 73.5930539 | 66.9177631 | 74.615036 |          | 72.5251363 | 63 |
| 73.5930539 | 66.9177631 | 80.615036 |          | 73.0251363 | 63 |
| 73.5930539 | 65.9177631 | 80.615036 |          | 73.5251363 | 63 |
| 73.5930539 | 65.9177631 | 80.615036 |          | 73.6501363 | 63 |
| 73.5930539 | 65.9177631 | 79.615036 |          | 73.5251363 | 63 |
| 73.5930539 | 65.9177631 | 78.615036 |          | 73.2751363 | 63 |
| 74.5930539 | 65.9177631 | 77.615036 |          | 73.1501363 | 63 |
| 74.5930539 | 65.9177631 | 77.615036 |          | 73.4001363 | 63 |
| 74.5930539 | 65.9177631 | 77.615036 |          | 73.5251363 | 63 |
| 73.5930539 | 65.9177631 | 78.615036 |          | 73.5251363 | 63 |
| 73.5930539 | 66.9177631 | 79.615036 |          | 74.0251363 | 63 |
| 76.5930539 | 65.9177631 | 80.615036 |          | 74.4001363 | 63 |
| 75.5930539 | 65.9177631 | 81.615036 |          | 74.4001363 | 63 |
| 75.5930539 | 61.9177631 | 80.615036 |          | 73.4001363 | 63 |
| 73.5930539 | 60.9177631 | 80.615036 |          | 72.6501363 | 63 |
| 73.5930539 | 60.9177631 | 80.615036 |          | 72.5251363 | 63 |
| 73.5930539 | 60.9177631 | 79.615036 |          | 72.2751363 | 63 |
| 72.5930539 | 60.9177631 | 79.615036 |          | 72.4001363 | 63 |
| 73.5930539 | 62.9177631 | 79.615036 |          | 72.6501363 | 63 |
| 73.5930539 | 64.9177631 | 79.615036 |          | 73.9001363 | 63 |
| 73.5930539 | 66.9177631 | 81.615036 |          | 74.4001363 | 63 |
| 73.5930539 | 66.9177631 | 81.615036 |          | 74.5251363 | 63 |
| 73.5930539 | 66.9177631 | 81.615036 |          | 73.9001363 | 63 |
| 73.5930539 | 66.9177631 | 82.615036 |          | 73.6501363 | 63 |
| 74.5930539 | 66.9177631 | 82.615036 |          | 73.9001363 | 63 |
| 74.5930539 | 66.9177631 | 82.615036 |          | 73.6501363 | 63 |
| 73.5930539 | 65.9177631 | 82.615036 |          | 73.2751363 | 63 |
| 73.5930539 | 65.9177631 | 84.615036 |          | 73.5251363 | 63 |
| 73.5930539 | 65.9177631 | 84.615036 |          | 73.7751363 | 63 |
| 73.5930539 | 64.9177631 | 85.615036 |          | 73.5251363 | 63 |
| 73.5930539 | 64.9177631 | 85.615036 |          | 73.5251363 | 63 |
| 73.5930539 | 64.9177631 | 86.615036 |          | 74.1501363 | 63 |
| 72.5930539 | 63.9177631 | 86.615036 |          | 74.5251363 | 63 |
| 72.5930539 | 63.9177631 | 86.615036 |          | 74.5251363 | 63 |
| 72.5930539 | 63.9177631 | 86.615036 |          | 74.7751363 | 63 |
| 72.5930539 | 63.9177631 | 86.615036 |          | 74.7751363 | 63 |
| 73.5930539 | 63.9177631 | 86.615036 |          | 74.6501363 | 63 |
| 74.5930539 | 64.9177631 | 86.615036 |          | 74.5251363 | 63 |



|            |            |            |            |    |
|------------|------------|------------|------------|----|
| 74.5930539 | 64.9177631 | 86.615036  | 74.2751363 | 63 |
| 74.5930539 | 65.9177631 | 86.615036  | 74.0251363 | 63 |
| 74.5930539 | 65.9177631 | 86.615036  | 74.0251363 | 63 |
| 74.5930539 | 64.9177631 | 86.615036  | 73.2751363 | 63 |
| 75.5930539 | 64.9177631 | 85.615036  | 73.2751363 | 63 |
| 75.5930539 | 63.9177631 | 85.615036  | 73.6501363 | 63 |
| 75.5930539 | 63.9177631 | 84.615036  | 73.4001363 | 63 |
| 76.5930539 | 67.9177631 | 80.615036  | 73.2751363 | 63 |
| 78.5930539 | 67.9177631 | 80.615036  | 73.1501363 | 63 |
| 78.5930539 | 67.9177631 | 80.615036  | 72.9001363 | 63 |
| 81.5930539 | 70.9177631 | 81.615036  | 74.2751363 | 63 |
| 81.5930539 | 70.9177631 | 82.615036  | 74.5251363 | 63 |
| 81.5930539 | 72.9177631 | 82.615036  | 75.0251363 | 63 |
| 81.5930539 | 72.9177631 | 82.615036  | 75.2751363 | 63 |
| 84.5930539 | 72.9177631 | 86.615036  | 76.0251363 | 63 |
| 84.5930539 | 72.9177631 | 88.615036  | 76.2751363 | 63 |
| 85.5930539 | 72.9177631 | 88.615036  | 76.1501363 | 63 |
| 85.5930539 | 72.9177631 | 88.615036  | 75.7751363 | 63 |
| 86.5930539 | 72.9177631 | 88.615036  | 75.6501363 | 63 |
| 86.5930539 | 73.9177631 | 90.615036  | 75.9001363 | 63 |
| 86.5930539 | 73.9177631 | 75.6501363 | 73.7795238 | 63 |
| 86.5930539 | 73.9177631 | 90.615036  | 75.7751363 | 63 |
| 86.5930539 | 73.9177631 | 90.615036  | 75.9001363 | 63 |
| 87.5930539 | 73.9177631 | 90.615036  | 76.1501363 | 63 |
| 88.5930539 | 73.9177631 | 89.615036  | 76.5251363 | 63 |
| 88.5930539 | 74.9177631 | 89.615036  | 76.9001363 | 63 |
| 74.5930539 | 74.9177631 | 89.615036  | 75.6501363 | 63 |
| 74.5930539 | 75.9177631 | 88.615036  | 75.9001363 | 63 |
| 74.5930539 | 78.9177631 | 88.615036  | 76.4001363 | 63 |
| 76.5930539 | 78.9177631 | 88.615036  | 76.6501363 | 63 |
| 77.5930539 | 78.9177631 | 88.615036  | 76.7751363 | 63 |
| 78.5930539 | 79.9177631 | 87.615036  | 76.9001363 | 63 |
| 79.5930539 | 79.9177631 | 87.615036  | 76.9001363 | 63 |
| 79.5930539 | 80.9177631 | 87.615036  | 76.0251363 | 63 |
| 81.5930539 | 80.9177631 | 86.615036  | 76.1501363 | 63 |
| 81.5930539 | 80.9177631 | 85.615036  | 76.0251363 | 63 |
| 81.5930539 | 80.9177631 | 85.615036  | 76.6501363 | 63 |
| 81.5930539 | 80.9177631 | 84.615036  | 76.7751363 | 63 |
| 81.5930539 | 80.9177631 | 84.615036  | 77.0251363 | 63 |
| 81.5930539 | 80.9177631 | 84.615036  | 77.2751363 | 63 |
| 73.5930539 | 81.9177631 | 83.615036  | 76.5251363 | 63 |
| 73.5930539 | 81.9177631 | 83.615036  | 76.4001363 | 63 |
| 73.5930539 | 81.9177631 | 80.615036  | 76.0251363 | 63 |
| 73.5930539 | 81.9177631 | 80.615036  | 76.0251363 | 63 |
| 74.5930539 | 81.9177631 | 80.615036  | 76.4001363 | 63 |

|            |            |           |            |    |
|------------|------------|-----------|------------|----|
| 74.5930539 | 69.9177631 | 80.615036 | 75.2751363 | 63 |
| 75.5930539 | 65.9177631 | 80.615036 | 74.9001363 | 63 |
| 75.5930539 | 65.9177631 | 80.615036 | 74.9001363 | 63 |
| 74.5930539 | 65.9177631 | 80.615036 | 74.7751363 | 63 |
| 74.5930539 | 65.9177631 | 80.615036 | 74.7751363 | 63 |
| 73.5930539 | 66.9177631 | 80.615036 | 73.9001363 | 63 |
| 73.5930539 | 66.9177631 | 80.615036 | 73.7751363 | 63 |
| 73.5930539 | 67.9177631 | 81.615036 | 73.6501363 | 63 |
| 73.5930539 | 68.9177631 | 83.615036 | 74.9001363 | 63 |
| 73.5930539 | 68.9177631 | 85.615036 | 74.9001363 | 63 |
| 78.5930539 | 68.9177631 | 87.615036 | 76.1501363 | 63 |
| 80.5930539 | 68.9177631 | 87.615036 | 76.2751363 | 63 |
| 80.5930539 | 68.9177631 | 82.615036 | 75.5251363 | 63 |
| 80.5930539 | 68.9177631 | 80.615036 | 74.9001363 | 63 |
| 78.5930539 | 68.9177631 | 80.615036 | 74.6501363 | 63 |
| 78.5930539 | 68.9177631 | 79.615036 | 74.0251363 | 63 |
| 76.5930539 | 68.9177631 | 77.615036 | 73.4001363 | 63 |
| 76.5930539 | 69.9177631 | 75.615036 | 73.1501363 | 63 |
| 76.5930539 | 69.9177631 | 74.615036 | 72.9001363 | 63 |
| 77.5930539 | 70.9177631 | 75.615036 | 73.5251363 | 63 |
| 77.5930539 | 70.9177631 | 75.615036 | 73.5251363 | 63 |
| 77.5930539 | 70.9177631 | 76.615036 | 73.7751363 | 63 |
| 78.5930539 | 71.9177631 | 76.615036 | 74.1501363 | 63 |
| 78.5930539 | 72.9177631 | 76.615036 | 74.2751363 | 63 |
| 78.5930539 | 74.9177631 | 75.615036 | 74.5251363 | 63 |
| 78.5930539 | 74.9177631 | 74.615036 | 75.1501363 | 63 |
| 78.5930539 | 76.9177631 | 74.615036 | 75.4001363 | 63 |
| 78.5930539 | 76.9177631 | 75.615036 | 75.4001363 | 63 |
| 77.5930539 | 80.9177631 | 76.615036 | 76.1501363 | 63 |
| 77.5930539 | 80.9177631 | 76.615036 | 76.1501363 | 63 |
| 77.5930539 | 84.9177631 | 82.615036 | 77.2751363 | 63 |
| 76.5930539 | 85.9177631 | 82.615036 | 78.2751363 | 63 |
| 74.5930539 | 85.9177631 | 84.615036 | 78.4001363 | 63 |
| 71.5930539 | 85.9177631 | 84.615036 | 78.4001363 | 63 |
| 68.5930539 | 84.9177631 | 83.615036 | 75.8360468 | 63 |
| 66.5930539 | 82.9177631 | 82.615036 | 74.9922968 | 63 |
| 65.5930539 | 81.9177631 | 82.615036 | 74.5704218 | 63 |
| 65.5930539 | 81.9177631 | 81.615036 | 74.4141718 | 63 |
| 65.5930539 | 79.9177631 | 82.615036 | 74.1329218 | 63 |
| 62.5930539 | 78.9177631 | 82.615036 | 73.8516718 | 63 |
| 62.5930539 | 77.9177631 | 82.615036 | 75.2751363 | 63 |
| 61.5930539 | 76.9177631 | 82.615036 | 75.2751363 | 63 |
| 61.5930539 | 75.9177631 | 82.615036 | 74.5251363 | 63 |
| 59.5930539 | 76.9177631 | 82.615036 | 73.4001363 | 63 |
| 58.5930539 | 75.9177631 | 82.615036 | 72.6501363 | 63 |

|            |            |           |              |            |    |
|------------|------------|-----------|--------------|------------|----|
| 58.5930539 | 75.9177631 | 82.615036 |              | 73.0251363 | 63 |
| 58.5930539 | 74.9177631 | 82.615036 |              | 72.7751363 | 63 |
| 58.5930539 | 74.9177631 | 81.615036 |              | 72.7751363 | 63 |
| 57.5930539 | 74.9177631 | 80.615036 |              | 73.0251363 | 63 |
| 57.5930539 | 75.9177631 | 80.615036 |              | 73.7751363 | 63 |
| 58.5930539 | 75.9177631 | 79.615036 |              | 73.9001363 | 63 |
| 62.5930539 | 77.9177631 | 78.615036 |              | 74.9001363 | 63 |
| 62.5930539 | 77.9177631 | 79.615036 |              | 75.2751363 | 63 |
| 63.5930539 | 78.9177631 | 80.615036 |              | 75.2751363 | 63 |
| 64.5930539 | 76.9177631 | 80.615036 |              | 74.6501363 | 63 |
| 67.5930539 | 75.9177631 | 80.615036 |              | 74.9001363 | 63 |
| 69.5930539 | 75.9177631 | 80.615036 |              | 75.4001363 | 63 |
| 72.5930539 | 75.9177631 | 80.615036 |              | 74.0285812 | 63 |
| 72.5930539 | 75.9177631 | 80.615036 |              | 74.0285812 | 63 |
| 72.5930539 | 74.9177631 | 78.615036 |              | 73.7473312 | 63 |
| 71.5930539 | 74.9177631 | 79.615036 |              | 73.3254562 | 63 |
| 71.5930539 | 75.9177631 | 84.615036 |              | 74.6848312 | 63 |
| 71.5930539 | 75.9177631 | 84.615036 |              | 74.5442062 | 63 |
| 72.5930539 | 75.9177631 | 84.615036 |              | 74.2629562 | 63 |
| 73.5930539 | 75.9177631 | 84.615036 |              | 74.5910812 | 63 |
| 73.5930539 | 76.9177631 | 84.615036 |              | 74.5910812 | 63 |
| 73.5930539 | 76.9177631 | 83.615036 | 100314.17.10 | 74.4817062 | 63 |
| 73.5930539 | 77.9177631 | 83.615036 | BEFORE1      | 74.6379562 | 63 |
| 73.5930539 | 78.9177631 | 83.615036 | BEFORE2      | 75.3879562 | 63 |
| 73.5930539 | 78.9177631 | 83.615036 | BEFORE3      | 75.4348312 | 63 |
| 74.5930539 | 78.9177631 | 82.615036 | BEFORE4      | 75.1848312 | 63 |
| 74.5930539 | 78.9177631 | 82.615036 | BEFORE5      | 75.0442062 | 63 |
| 74.5930539 | 78.9177631 | 82.615036 | BEFORE6      | 74.9348312 | 63 |
| 75.5930539 | 78.9177631 | 82.615036 | BEFORE7      | 74.7942062 | 63 |
| 75.5930539 | 78.9177631 | 82.615036 | BEFORE8      | 75.6501363 | 63 |
| 76.5930539 | 73.9177631 | 79.615036 | BEFORE9      | 74.0251363 | 63 |
| 76.5930539 | 73.9177631 | 79.615036 | BEFORE10     | 73.9001363 | 63 |
| 77.5930539 | 73.9177631 | 78.615036 | BEFORE11     | 73.1501363 | 63 |
| 76.5930539 | 73.9177631 | 77.615036 | BEFORE12     | 72.9001363 | 63 |
| 76.5930539 | 73.9177631 | 77.615036 | BEFORE13     | 72.9001363 | 63 |
| 76.5930539 | 72.9177631 | 77.615036 | BEFORE14     | 72.6501363 | 63 |
| 76.5930539 | 72.9177631 | 77.615036 | BEFORE15     | 72.9001363 | 63 |
| 79.5930539 | 72.9177631 | 77.615036 | BEFORE16     | 73.5251363 | 63 |
| 80.5930539 | 72.9177631 | 77.615036 | BEFORE17     | 73.6501363 | 63 |
| 82.5930539 | 73.9177631 | 75.615036 | BEFORE18     | 73.7751363 | 63 |
| 82.5930539 | 73.9177631 | 74.615036 | BEFORE19     | 73.6501363 | 63 |
| 82.5930539 | 73.9177631 | 74.615036 | BEFORE20     | 73.6501363 | 63 |
| 82.5930539 | 73.9177631 | 74.615036 | BEFORE21     | 73.6501363 | 63 |
| 82.5930539 | 73.9177631 | 74.615036 | BEFORE22     | 74.0251363 | 63 |
| 82.5930539 | 73.9177631 | 74.615036 | BEFORE23     | 74.1501363 | 63 |

|            |            |           |          |            |    |
|------------|------------|-----------|----------|------------|----|
| 82.5930539 | 72.9177631 | 74.615036 | BEFORE24 | 74.5251363 | 63 |
| 90.5930539 | 72.9177631 | 74.615036 | BEFORE25 | 75.7751363 | 63 |
| 90.5930539 | 72.9177631 | 74.615036 | BEFORE26 | 75.9001363 | 63 |
| 77.7751363 | 78.9177631 | 74.615036 | BEFORE27 | 75.0478966 | 63 |
| 78.5251363 | 80.9177631 | 74.615036 | BEFORE28 | 75.3916466 | 63 |
| 78.2751363 | 80.9177631 | 75.615036 | BEFORE29 | 74.9853966 | 63 |
| 90.5930539 | 80.9177631 | 75.615036 | BEFORE30 | 76.0251363 | 63 |
| 75.5251363 | 75.9177631 | 76.615036 | BEFORE31 | 73.6416466 | 63 |
| 83.5930539 | 75.9177631 | 77.615036 | BEFORE32 | 74.5251363 | 63 |
| 81.5930539 | 75.9177631 | 80.615036 | BEFORE33 | 74.7751363 | 63 |
| 81.5930539 | 73.9177631 | 83.615036 | BEFORE34 | 74.7751363 | 63 |
| 81.5930539 | 72.9177631 | 85.615036 | BEFORE35 | 75.0251363 | 63 |
| 80.5930539 | 72.9177631 | 86.615036 | BEFORE36 | 75.0251363 | 63 |
| 80.5930539 | 71.9177631 | 86.615036 | BEFORE37 | 74.5251363 | 63 |
| 80.5930539 | 69.9177631 | 86.615036 | BEFORE38 | 74.0251363 | 63 |
| 80.5930539 | 68.9177631 | 86.615036 | BEFORE39 | 73.5251363 | 63 |
| 80.5930539 | 68.9177631 | 87.615036 | BEFORE40 | 73.5251363 | 63 |
| 80.5930539 | 68.9177631 | 87.615036 | BEFORE41 | 73.5251363 | 63 |
| 79.5930539 | 67.9177631 | 86.615036 | BEFORE42 | 73.9001363 | 63 |
| 78.5930539 | 66.9177631 | 85.615036 | BEFORE43 | 73.6501363 | 63 |
| 78.5930539 | 65.9177631 | 85.615036 | BEFORE44 | 73.5251363 | 63 |
| 84.5930539 | 65.9177631 | 85.615036 | BEFORE45 | 74.1501363 | 63 |
| 84.5930539 | 65.9177631 | 85.615036 | BEFORE46 | 74.1501363 | 63 |
| 88.5930539 | 64.9177631 | 86.615036 | BEFORE47 | 76.2751363 | 63 |
| 88.5930539 | 63.9177631 | 86.615036 | BEFORE48 | 76.0251363 | 63 |
| 89.5930539 | 63.9177631 | 86.615036 | BEFORE49 | 76.4001363 | 63 |
| 88.5930539 | 63.9177631 | 86.615036 | BEFORE50 | 76.0251363 | 63 |
| 87.5930539 | 64.9177631 | 86.615036 | BEFORE51 | 76.4001363 | 63 |
| 86.5930539 | 64.9177631 | 86.615036 | BEFORE52 | 76.6501363 | 63 |
| 86.5930539 | 64.9177631 | 87.615036 | BEFORE53 | 76.6501363 | 63 |
| 85.5930539 | 65.9177631 | 87.615036 | BEFORE54 | 77.0251363 | 63 |
| 85.5930539 | 65.9177631 | 87.615036 | BEFORE55 | 76.9001363 | 63 |
| 84.5930539 | 66.9177631 | 87.615036 | BEFORE56 | 76.9001363 | 63 |
| 84.5930539 | 67.9177631 | 87.615036 | BEFORE57 | 76.6501363 | 63 |
| 83.5930539 | 67.9177631 | 84.615036 | BEFORE58 | 76.2751363 | 63 |
| 83.5930539 | 70.9177631 | 84.615036 | BEFORE59 | 76.5251363 | 63 |
| 83.5930539 | 70.9177631 | 84.615036 | BEFORE60 | 76.6501363 | 63 |
| 82.5930539 | 70.9177631 | 84.615036 | BEFORE61 | 76.7751363 | 63 |
| 82.5930539 | 70.9177631 | 84.615036 | BEFORE62 | 77.0251363 | 63 |
| 82.5930539 | 70.9177631 | 80.615036 | BEFORE63 | 77.0251363 | 63 |
| 82.5930539 | 72.9177631 | 76.615036 | BEFORE64 | 76.9001363 | 63 |
| 81.5930539 | 74.9177631 | 72.615036 | BEFORE65 | 76.7751363 | 63 |
| 81.5930539 | 74.9177631 | 71.615036 | BEFORE66 | 76.1501363 | 63 |
| 81.5930539 | 74.9177631 | 71.615036 | BEFORE67 | 76.0251363 | 63 |
| 81.5930539 | 74.9177631 | 71.615036 | BEFORE68 | 75.6501363 | 63 |

|            |            |           |           |            |    |
|------------|------------|-----------|-----------|------------|----|
| 81.5930539 | 74.9177631 | 71.615036 | BEFORE69  | 75.5251363 | 63 |
| 78.5930539 | 74.9177631 | 72.615036 | BEFORE70  | 75.4001363 | 63 |
| 77.5930539 | 75.9177631 | 72.615036 | BEFORE71  | 75.4001363 | 63 |
| 76.5930539 | 75.9177631 | 73.615036 | BEFORE72  | 75.7751363 | 63 |
| 76.5930539 | 73.9177631 | 73.615036 | BEFORE73  | 75.5251363 | 63 |
| 75.5930539 | 72.9177631 | 73.615036 | BEFORE74  | 75.1501363 | 63 |
| 75.5930539 | 72.9177631 | 74.615036 | BEFORE75  | 74.9001363 | 63 |
| 74.5930539 | 71.9177631 | 76.615036 | BEFORE76  | 74.9001363 | 63 |
| 74.5930539 | 71.9177631 | 76.615036 | BEFORE77  | 75.0251363 | 63 |
| 74.5930539 | 71.9177631 | 82.615036 | BEFORE78  | 76.2751363 | 63 |
| 74.5930539 | 71.9177631 | 87.615036 | BEFORE79  | 77.6501363 | 63 |
| 74.5930539 | 71.9177631 | 87.615036 | BEFORE80  | 77.7751363 | 63 |
| 74.5930539 | 71.9177631 | 86.615036 | BEFORE81  | 77.9001363 | 63 |
| 74.5930539 | 72.9177631 | 83.615036 | BEFORE82  | 77.9001363 | 63 |
| 74.5930539 | 72.9177631 | 83.615036 | BEFORE83  | 77.9001363 | 63 |
| 74.5930539 | 72.9177631 | 77.615036 | BEFORE84  | 76.7751363 | 63 |
| 72.5930539 | 72.9177631 | 77.615036 | BEFORE85  | 76.1501363 | 63 |
| 72.5930539 | 72.9177631 | 78.615036 | BEFORE86  | 76.4001363 | 63 |
| 72.5930539 | 72.9177631 | 81.615036 | BEFORE87  | 76.5251363 | 63 |
| 71.5930539 | 72.9177631 | 82.615036 | BEFORE88  | 76.6501363 | 63 |
| 70.5930539 | 72.9177631 | 82.615036 | BEFORE89  | 76.6501363 | 63 |
| 70.5930539 | 72.9177631 | 82.615036 | BEFORE90  | 76.6501363 | 63 |
| 70.5930539 | 72.9177631 | 83.615036 | BEFORE91  | 76.7751363 | 63 |
| 69.5930539 | 72.9177631 | 83.615036 | BEFORE92  | 76.6501363 | 63 |
| 68.5930539 | 71.9177631 | 75.615036 | BEFORE93  | 75.5251363 | 63 |
| 68.5930539 | 71.9177631 | 75.615036 | BEFORE94  | 75.4001363 | 63 |
| 74.5930539 | 70.9177631 | 70.615036 | BEFORE95  | 75.2751363 | 63 |
| 74.5930539 | 70.9177631 | 71.615036 | BEFORE96  | 75.0251363 | 63 |
| 74.5930539 | 69.9177631 | 73.615036 | BEFORE97  | 75.2751363 | 63 |
| 76.5930539 | 69.9177631 | 74.615036 | BEFORE98  | 75.2751363 | 63 |
| 80.5930539 | 68.9177631 | 75.615036 | BEFORE99  | 75.5251363 | 63 |
| 80.5930539 | 68.9177631 | 75.615036 | BEFORE100 | 75.5251363 | 63 |
| 80.5930539 | 68.9177631 | 75.615036 | BEFORE101 | 73.4001363 | 63 |
| 81.5930539 | 68.9177631 | 76.615036 | BEFORE102 | 73.9001363 | 63 |
| 81.5930539 | 68.9177631 | 76.615036 | BEFORE103 | 74.1501363 | 63 |
| 82.5930539 | 68.9177631 | 77.615036 | BEFORE104 | 74.1501363 | 63 |
| 82.5930539 | 68.9177631 | 77.615036 | BEFORE105 | 73.9001363 | 63 |
| 82.5930539 | 73.9177631 | 78.615036 | BEFORE106 | 74.6501363 | 63 |
| 81.5930539 | 73.9177631 | 79.615036 | BEFORE107 | 74.2751363 | 63 |
| 81.5930539 | 75.9177631 | 79.615036 | BEFORE108 | 74.1501363 | 63 |
| 80.5930539 | 75.9177631 | 80.615036 | BEFORE109 | 74.2751363 | 63 |
| 78.5930539 | 77.9177631 | 81.615036 | BEFORE110 | 74.2751363 | 63 |
| 78.5930539 | 79.9177631 | 81.615036 | BEFORE111 | 74.2751363 | 71 |
| 78.5930539 | 79.9177631 | 82.615036 | BEFORE112 | 74.4001363 | 71 |
| 79.5930539 | 79.9177631 | 81.615036 | BEFORE113 | 74.1501363 | 71 |

|            |            |           |           |            |    |
|------------|------------|-----------|-----------|------------|----|
| 79.5930539 | 79.9177631 | 81.615036 | BEFORE114 | 74.0251363 | 71 |
| 81.5930539 | 79.9177631 | 82.615036 | BEFORE115 | 74.2751363 | 71 |
| 81.5930539 | 80.9177631 | 82.615036 | BEFORE116 | 74.4001363 | 71 |
| 81.5930539 | 82.9177631 | 82.615036 | BEFORE117 | 74.6501363 | 71 |
| 81.5930539 | 83.9177631 | 82.615036 | BEFORE118 | 75.4001363 | 71 |
| 81.5930539 | 83.9177631 | 82.615036 | BEFORE119 | 75.4001363 | 71 |
| 80.5930539 | 83.9177631 | 82.615036 | BEFORE120 | 75.5251363 | 71 |
| 83.5930539 | 83.9177631 | 83.615036 | BEFORE121 | 76.6501363 | 71 |
| 83.5930539 | 84.9177631 | 84.615036 | BEFORE122 | 77.9001363 | 71 |
| 85.5930539 | 84.9177631 | 85.615036 | BEFORE123 | 78.0251363 | 71 |
| 85.5930539 | 84.9177631 | 85.615036 | BEFORE124 | 78.0251363 | 71 |
| 85.5930539 | 84.9177631 | 85.615036 | BEFORE125 | 77.9001363 | 71 |
| 85.5930539 | 82.9177631 | 81.615036 | BEFORE126 | 76.6501363 | 71 |
| 86.5930539 | 83.9177631 | 78.615036 | BEFORE127 | 76.1501363 | 71 |
| 86.5930539 | 83.9177631 | 76.615036 | BEFORE128 | 75.5251363 | 71 |
| 85.5930539 | 83.9177631 | 78.615036 | BEFORE129 | 75.7751363 | 71 |
| 84.5930539 | 83.9177631 | 78.615036 | BEFORE130 | 75.1501363 | 71 |
| 83.5930539 | 78.9177631 | 77.615036 | BEFORE131 | 74.4001363 | 71 |
| 83.5930539 | 76.9177631 | 75.615036 | BEFORE132 | 73.6501363 | 71 |
| 83.5930539 | 73.9177631 | 75.615036 | BEFORE133 | 73.2751363 | 71 |
| 73.5930539 | 72.9177631 | 72.615036 | BEFORE134 | 71.5251363 | 71 |
| 72.5930539 | 72.9177631 | 71.615036 | BEFORE135 | 71.4001363 | 71 |
| 72.5930539 | 72.9177631 | 71.615036 | BEFORE136 | 71.4001363 | 71 |
| 72.5930539 | 72.9177631 | 71.615036 | BEFORE137 | 71.4001363 | 71 |
| 73.5930539 | 72.9177631 | 70.615036 | BEFORE138 | 71.4001363 | 71 |
| 74.5930539 | 72.9177631 | 69.615036 | BEFORE139 | 71.7751363 | 71 |
| 74.5930539 | 72.9177631 | 69.615036 | BEFORE140 | 70.7751363 | 71 |
| 74.5930539 | 72.9177631 | 69.615036 | BEFORE141 | 70.9001363 | 71 |
| 74.5930539 | 73.9177631 | 68.615036 | BEFORE142 | 70.1501363 | 71 |
| 73.5930539 | 72.9177631 | 69.615036 | BEFORE143 | 69.6501363 | 71 |
| 73.5930539 | 71.9177631 | 70.615036 | BEFORE144 | 68.7751363 | 71 |
| 72.5930539 | 71.9177631 | 70.615036 | BEFORE145 | 68.5251363 | 71 |
| 71.5930539 | 71.9177631 | 71.615036 | BEFORE146 | 68.0251363 | 71 |
| 70.5930539 | 72.9177631 | 71.615036 | BEFORE147 | 68.0251363 | 71 |
| 70.5930539 | 71.9177631 | 71.615036 | BEFORE148 | 68.2751363 | 71 |
| 69.5930539 | 72.9177631 | 71.615036 | BEFORE149 | 68.4001363 | 71 |
| 69.5930539 | 72.9177631 | 71.615036 | BEFORE150 | 68.6501363 | 71 |
| 68.5930539 | 73.9177631 | 72.615036 | BEFORE151 | 69.1501363 | 63 |
| 68.5930539 | 74.9177631 | 73.615036 | BEFORE152 | 68.9001363 | 63 |
| 68.5930539 | 74.9177631 | 78.615036 | BEFORE153 | 69.4001363 | 63 |
| 68.5930539 | 74.9177631 | 78.615036 | BEFORE154 | 69.4001363 | 63 |
| 67.5930539 | 74.9177631 | 81.615036 | BEFORE155 | 69.5251363 | 63 |
| 67.5930539 | 73.9177631 | 82.615036 | BEFORE156 | 69.5251363 | 63 |
| 67.5930539 | 73.9177631 | 82.615036 | BEFORE157 | 69.7751363 | 63 |
| 67.5930539 | 73.9177631 | 82.615036 | BEFORE158 | 69.9001363 | 63 |

|            |            |           |           |            |    |
|------------|------------|-----------|-----------|------------|----|
| 67.5930539 | 74.9177631 | 82.615036 | BEFORE159 | 70.2751363 | 63 |
| 67.5930539 | 74.9177631 | 82.615036 | BEFORE160 | 70.2751363 | 63 |
| 67.5930539 | 76.9177631 | 82.615036 | BEFORE161 | 70.5251363 | 63 |
| 67.5930539 | 77.9177631 | 83.615036 | BEFORE162 | 71.5251363 | 63 |
| 66.5930539 | 77.9177631 | 84.615036 | BEFORE163 | 72.0251363 | 63 |
| 70.5930539 | 78.9177631 | 84.615036 | BEFORE164 | 73.4001363 | 63 |
| 72.5930539 | 79.9177631 | 84.615036 | BEFORE165 | 74.1501363 | 63 |
| 73.5930539 | 79.9177631 | 84.615036 | BEFORE166 | 74.5251363 | 63 |
| 72.5930539 | 79.9177631 | 86.615036 | BEFORE167 | 74.5251363 | 63 |
| 72.5930539 | 79.9177631 | 85.615036 | BEFORE168 | 74.4001363 | 63 |
| 72.5930539 | 79.9177631 | 85.615036 | BEFORE169 | 75.0251363 | 63 |
| 73.5930539 | 79.9177631 | 85.615036 | BEFORE170 | 75.7751363 | 63 |
| 73.5930539 | 76.9177631 | 86.615036 | BEFORE171 | 75.6501363 | 63 |
| 73.5930539 | 76.9177631 | 87.615036 | BEFORE172 | 76.0251363 | 63 |
| 74.5930539 | 76.9177631 | 88.615036 | BEFORE173 | 76.2751363 | 63 |
| 77.5930539 | 76.9177631 | 88.615036 | BEFORE174 | 77.0251363 | 63 |
| 77.5930539 | 77.9177631 | 88.615036 | BEFORE175 | 77.4001363 | 63 |
| 77.5930539 | 77.9177631 | 88.615036 | BEFORE176 | 77.9001363 | 63 |
| 75.5930539 | 78.9177631 | 88.615036 | BEFORE177 | 78.0251363 | 63 |
| 76.5930539 | 78.9177631 | 88.615036 | BEFORE178 | 78.2751363 | 63 |
| 76.5930539 | 78.9177631 | 86.615036 | BEFORE179 | 78.0251363 | 63 |
| 76.5930539 | 78.9177631 | 85.615036 | BEFORE180 | 77.7751363 | 63 |
| 77.5930539 | 78.9177631 | 84.615036 | BEFORE181 | 77.5251363 | 63 |
| 77.5930539 | 77.9177631 | 84.615036 | BEFORE182 | 77.7751363 | 63 |
| 76.5930539 | 77.9177631 | 83.615036 | BEFORE183 | 77.6501363 | 63 |
| 74.5930539 | 77.9177631 | 82.615036 | BEFORE184 | 77.1501363 | 63 |
| 73.5930539 | 77.9177631 | 82.615036 | BEFORE185 | 77.5251363 | 63 |
| 73.5930539 | 77.9177631 | 82.615036 | BEFORE186 | 78.2751363 | 63 |
| 73.5930539 | 77.9177631 | 82.615036 | BEFORE187 | 78.1501363 | 63 |
| 73.5930539 | 77.9177631 | 82.615036 | BEFORE188 | 76.7751363 | 63 |
| 73.5930539 | 77.9177631 | 82.615036 | BEFORE189 | 76.1501363 | 63 |
| 73.5930539 | 77.9177631 | 83.615036 | BEFORE190 | 75.4001363 | 63 |
| 73.5930539 | 77.9177631 | 83.615036 | BEFORE191 | 75.0251363 | 63 |
| 73.5930539 | 77.9177631 | 83.615036 | BEFORE192 | 74.7751363 | 63 |
| 73.5930539 | 77.9177631 | 82.615036 | BEFORE193 | 74.5251363 | 63 |
| 71.5930539 | 78.9177631 | 82.615036 | BEFORE194 | 74.9001363 | 63 |
| 68.5930539 | 78.9177631 | 82.615036 | BEFORE195 | 74.6501363 | 63 |
| 67.5930539 | 79.9177631 | 83.615036 | BEFORE196 | 74.6501363 | 63 |
| 67.5930539 | 82.9177631 | 83.615036 | BEFORE197 | 74.6501363 | 63 |
| 67.5930539 | 82.9177631 | 83.615036 | BEFORE198 | 74.6501363 | 63 |
| 66.5930539 | 82.9177631 | 82.615036 | BEFORE199 | 74.2751363 | 63 |
| 67.5930539 | 82.9177631 | 82.615036 | BEFORE200 | 74.1501363 | 63 |
| 67.5930539 | 81.9177631 | 82.615036 | BEFORE201 | 73.7751363 | 63 |
| 67.5930539 | 79.9177631 | 82.615036 | BEFORE202 | 73.6501363 | 63 |
| 67.5930539 | 79.9177631 | 82.615036 | BEFORE203 | 72.9001363 | 63 |

|            |            |           |           |            |    |
|------------|------------|-----------|-----------|------------|----|
| 67.5930539 | 79.9177631 | 81.615036 | BEFORE204 | 72.7751363 | 63 |
| 66.5930539 | 78.9177631 | 79.615036 | BEFORE205 | 72.2751363 | 63 |
| 65.5930539 | 78.9177631 | 74.615036 | BEFORE206 | 71.7751363 | 63 |
| 64.5930539 | 78.9177631 | 74.615036 | BEFORE207 | 71.7751363 | 63 |
| 64.5930539 | 78.9177631 | 74.615036 | BEFORE208 | 71.7751363 | 63 |
| 65.5930539 | 78.9177631 | 74.615036 | BEFORE209 | 71.7751363 | 63 |
| 73.5930539 | 78.9177631 | 74.615036 | BEFORE210 | 72.7751363 | 63 |
| 74.5930539 | 78.9177631 | 74.615036 | BEFORE211 | 72.5251363 | 63 |
| 74.5930539 | 78.9177631 | 74.615036 | BEFORE212 | 72.5251363 | 63 |
| 73.5930539 | 79.9177631 | 75.615036 | BEFORE213 | 72.7751363 | 63 |
| 73.5930539 | 78.9177631 | 76.615036 | BEFORE214 | 72.9001363 | 63 |
| 72.5930539 | 78.9177631 | 76.615036 | BEFORE215 | 72.6501363 | 63 |
| 72.5930539 | 80.9177631 | 79.615036 | BEFORE216 | 73.1501363 | 63 |
| 72.5930539 | 81.9177631 | 81.615036 | BEFORE217 | 73.6501363 | 63 |
| 74.5930539 | 81.9177631 | 82.615036 | BEFORE218 | 73.9001363 | 63 |
| 74.5930539 | 81.9177631 | 84.615036 | BEFORE219 | 74.5251363 | 63 |
| 73.5930539 | 81.9177631 | 84.615036 | BEFORE220 | 74.5251363 | 63 |
| 71.5930539 | 82.9177631 | 85.615036 | BEFORE221 | 74.5251363 | 63 |
| 70.5930539 | 82.9177631 | 85.615036 | BEFORE222 | 74.4001363 | 63 |
| 70.5930539 | 82.9177631 | 84.615036 | BEFORE223 | 74.7751363 | 63 |
| 69.5930539 | 82.9177631 | 83.615036 | BEFORE224 | 74.4001363 | 63 |
| 67.5930539 | 82.9177631 | 83.615036 | BEFORE225 | 75.1501363 | 63 |
| 67.5930539 | 82.9177631 | 83.615036 | BEFORE226 | 75.4001363 | 63 |
| 66.5930539 | 81.9177631 | 82.615036 | BEFORE227 | 75.0251363 | 63 |
| 66.5930539 | 81.9177631 | 79.615036 | BEFORE228 | 74.6501363 | 63 |
| 65.5930539 | 81.9177631 | 79.615036 | BEFORE229 | 74.5251363 | 63 |
| 65.5930539 | 81.9177631 | 77.615036 | BEFORE230 | 74.1501363 | 63 |
| 65.5930539 | 81.9177631 | 76.615036 | BEFORE231 | 73.9001363 | 63 |
| 65.5930539 | 81.9177631 | 76.615036 | BEFORE232 | 73.7751363 | 63 |
| 65.5930539 | 80.9177631 | 76.615036 | BEFORE233 | 73.5251363 | 63 |
| 65.5930539 | 80.9177631 | 76.615036 | BEFORE234 | 73.6501363 | 63 |
| 65.5930539 | 80.9177631 | 76.615036 | BEFORE235 | 73.5251363 | 63 |
| 65.5930539 | 80.9177631 | 76.615036 | BEFORE236 | 73.5251363 | 63 |
| 65.5930539 | 80.9177631 | 76.615036 | BEFORE237 | 73.2751363 | 63 |
| 65.5930539 | 80.9177631 | 76.615036 | BEFORE238 | 72.9001363 | 63 |
| 65.5930539 | 84.9177631 | 76.615036 | BEFORE239 | 73.5251363 | 63 |
| 62.5930539 | 84.9177631 | 77.615036 | BEFORE240 | 73.1501363 | 63 |
| 62.5930539 | 84.9177631 | 76.615036 | minute1   | 72.9001363 | 63 |
| 61.5930539 | 84.9177631 | 76.615036 | minute2   | 72.5251363 | 63 |
| 60.5930539 | 83.9177631 | 77.615036 | minute3   | 72.6501363 | 63 |
| 60.5930539 | 82.9177631 | 79.615036 | minute4   | 72.6501363 | 63 |
| 62.5930539 | 79.9177631 | 81.615036 | minute5   | 72.9001363 | 63 |
| 69.5930539 | 79.9177631 | 82.615036 | minute6   | 74.1501363 | 63 |
| 71.5930539 | 79.9177631 | 82.615036 | minute7   | 74.4001363 | 63 |
| 71.5930539 | 79.9177631 | 82.615036 | minute8   | 74.4001363 | 63 |



|            |            |           |          |            |    |
|------------|------------|-----------|----------|------------|----|
| 73.5930539 | 79.9177631 | 82.615036 | minute9  | 74.4001363 | 63 |
| 73.5930539 | 79.9177631 | 81.615036 | minute10 | 74.4001363 | 63 |
| 73.5930539 | 80.9177631 | 80.615036 | minute11 | 74.5251363 | 63 |
| 73.5930539 | 80.9177631 | 79.615036 | minute12 | 74.5251363 | 63 |
| 73.5930539 | 80.9177631 | 76.615036 | minute13 | 74.0251363 | 63 |
| 73.5930539 | 80.9177631 | 75.615036 | minute14 | 73.4001363 | 63 |
| 73.5930539 | 79.9177631 | 77.615036 | minute15 | 73.4001363 | 63 |
| 73.5930539 | 79.9177631 | 78.615036 | minute16 | 73.2751363 | 71 |
| 73.5930539 | 79.9177631 | 79.615036 | minute17 | 73.1501363 | 71 |
| 73.5930539 | 79.9177631 | 80.615036 | minute18 | 73.1501363 | 71 |
| 75.5930539 | 79.9177631 | 80.615036 | minute19 | 73.7751363 | 71 |
| 75.5930539 | 79.9177631 | 80.615036 | minute20 | 74.0251363 | 71 |
| 79.5930539 | 79.9177631 | 79.615036 | minute21 | 74.4001363 | 71 |
| 79.5930539 | 79.9177631 | 79.615036 | minute22 | 74.4001363 | 71 |
| 80.5930539 | 77.9177631 | 79.615036 | minute23 | 74.7751363 | 71 |
| 80.5930539 | 77.9177631 | 77.615036 | minute24 | 74.1501363 | 71 |
| 84.5930539 | 77.9177631 | 77.615036 | minute25 | 74.6501363 | 71 |
| 84.5930539 | 78.9177631 | 77.615036 | minute26 | 74.6501363 | 71 |
| 88.5930539 | 78.9177631 | 77.615036 | minute27 | 74.7751363 | 71 |
| 87.5930539 | 78.9177631 | 78.615036 | minute28 | 74.5251363 | 71 |
| 87.5930539 | 74.9177631 | 81.615036 | minute29 | 74.6501363 | 71 |
| 83.5930539 | 73.9177631 | 81.615036 | minute30 | 74.0251363 | 71 |
| 80.5930539 | 74.9177631 | 83.615036 | minute31 | 74.1501363 | 71 |
| 80.5930539 | 74.9177631 | 83.615036 | minute32 | 74.0251363 | 71 |
| 80.5930539 | 75.9177631 | 83.615036 | minute33 | 74.4001363 | 71 |
| 77.5930539 | 75.9177631 | 82.615036 | minute34 | 73.9001363 | 71 |
| 77.5930539 | 75.9177631 | 81.615036 | minute35 | 73.6501363 | 71 |
| 77.5930539 | 75.9177631 | 79.615036 | minute36 | 73.5251363 | 71 |
| 74.5930539 | 76.9177631 | 78.615036 | minute37 | 73.4001363 | 71 |
| 74.5930539 | 75.9177631 | 78.615036 | minute38 | 73.5251363 | 71 |
| 74.5930539 | 75.9177631 | 78.615036 | minute39 | 73.7751363 | 71 |
| 74.5930539 | 74.9177631 | 79.615036 | minute40 | 73.9001363 | 71 |
| 74.5930539 | 74.9177631 | 80.615036 | minute41 | 74.1501363 | 71 |
| 75.5930539 | 74.9177631 | 81.615036 | minute42 | 74.2751363 | 71 |
| 75.5930539 | 74.9177631 | 81.615036 | minute43 | 74.1501363 | 71 |
| 75.5930539 | 74.9177631 | 80.615036 | minute44 | 74.1501363 | 71 |
| 75.5930539 | 75.9177631 | 80.615036 | minute45 | 73.7751363 | 71 |
| 75.5930539 | 75.9177631 | 78.615036 | minute46 | 73.5251363 | 71 |
| 75.5930539 | 75.9177631 | 76.615036 | minute47 | 73.1501363 | 71 |
| 75.5930539 | 73.9177631 | 75.615036 | minute48 | 72.7751363 | 71 |
| 75.5930539 | 74.9177631 | 76.615036 | minute49 | 73.5251363 | 71 |
| 76.5930539 | 74.9177631 | 77.615036 | minute50 | 74.0251363 | 71 |
| 76.5930539 | 74.9177631 | 78.615036 | minute51 | 74.2751363 | 71 |
| 78.5930539 | 76.9177631 | 78.615036 | minute52 | 75.0251363 | 71 |
| 77.5930539 | 76.9177631 | 79.615036 | minute53 | 74.5251363 | 71 |

|            |            |            |          |            |    |
|------------|------------|------------|----------|------------|----|
| 76.5930539 | 76.9177631 | 79.615036  | minute54 | 74.5251363 | 71 |
| 76.5930539 | 76.9177631 | 79.615036  | minute55 | 74.7751363 | 71 |
| 74.5930539 | 75.9177631 | 79.615036  | minute56 | 74.4001363 | 71 |
| 72.5930539 | 75.9177631 | 79.615036  | minute57 | 74.4001363 | 71 |
| 71.5930539 | 71.9177631 | 79.615036  | minute58 | 73.5251363 | 71 |
| 71.5930539 | 70.9177631 | 80.615036  | minute59 | 74.2751363 | 71 |
| 70.5930539 | 70.9177631 | 80.615036  | minute60 | 73.7751363 | 71 |
| 70.5930539 | 70.9177631 | 81.615036  | Activity | 74.0251363 | 73 |
| 69.5930539 | 72.9177631 | 82.615036  | Activity | 74.1501363 | 73 |
| 69.5930539 | 77.9177631 | 82.615036  | Activity | 74.2751363 | 73 |
| 69.5930539 | 77.9177631 | 83.615036  | Activity | 74.4001363 | 73 |
| 70.5930539 | 77.9177631 | 83.615036  | Activity | 74.5251363 | 73 |
| 70.5930539 | 77.9177631 | 83.615036  | Activity | 74.6501363 | 73 |
| 71.5930539 | 79.9177631 | 83.615036  | Activity | 74.6501363 | 73 |
| 71.5930539 | 81.9177631 | 83.615036  | Activity | 74.2751363 | 73 |
| 71.5930539 | 81.9177631 | 85.615036  | Activity | 74.5251363 | 73 |
| 71.5930539 | 81.9177631 | 88.615036  | Activity | 74.9001363 | 73 |
| 70.5930539 | 82.9177631 | 89.615036  | Activity | 74.7751363 | 73 |
| 70.5930539 | 82.9177631 | 74.6501363 | Activity | 72.7795238 | 73 |
| 70.5930539 | 82.9177631 | 75.2751363 | Activity | 73.2326488 | 73 |
| 70.5930539 | 82.9177631 | 76.0251363 | Activity | 73.9513988 | 73 |
| 70.5930539 | 81.9177631 | 75.9001363 | Activity | 73.8107738 | 73 |
| 70.5930539 | 81.9177631 | 75.9001363 | Activity | 73.8107738 | 73 |
| 82.7751363 | 81.9177631 | 92.615036  | Activity | 78.0478966 | 73 |
| 83.0251363 | 81.9177631 | 93.615036  | Activity | 78.3291466 | 73 |
| 84.5251363 | 80.9177631 | 93.615036  | Activity | 78.8916466 | 73 |
| 85.2751363 | 83.9177631 | 94.615036  | Activity | 79.7353966 | 73 |
| 85.6501363 | 83.9177631 | 94.615036  | Activity | 80.1572716 | 73 |
| 86.0251363 | 83.9177631 | 94.615036  | Activity | 80.5791466 | 73 |
| 85.7751363 | 81.9177631 | 94.615036  | Activity | 80.1728966 | 73 |
| 85.6501363 | 81.9177631 | 96.615036  | Activity | 80.0322716 | 73 |
| 86.2751363 | 83.9177631 | 96.615036  | Activity | 80.3603966 | 73 |
| 86.6501363 | 86.9177631 | 96.615036  | Activity | 80.7822716 | 73 |
| 87.9001363 | 88.9177631 | 96.615036  | Activity | 80.9385216 | 73 |
| 88.1501363 | 88.9177631 | 97.615036  | Activity | 81.0947716 | 73 |
| 88.1501363 | 87.9177631 | 97.615036  | Activity | 81.0947716 | 73 |
| 88.5251363 | 86.9177631 | 98.615036  | Activity | 81.5166466 | 73 |
| 89.1501363 | 85.9177631 | 97.615036  | Activity | 81.9697716 | 73 |
| 89.4001363 | 84.9177631 | 97.615036  | Activity | 82.1260216 | 73 |
| 89.4001363 | 84.9177631 | 97.615036  | Activity | 82.1260216 | 73 |
| 87.9001363 | 80.9177631 | 94.615036  | Activity | 80.4385216 | 73 |
| 86.4001363 | 73.9177631 | 90.615036  | Activity | 78.6260216 | 73 |
| 84.7751363 | 68.9177631 | 86.615036  | Activity | 76.7978966 | 73 |
| 83.2751363 | 65.9177631 | 83.615036  | Activity | 75.1103966 | 73 |
| 82.9001363 | 65.9177631 | 79.615036  | Activity | 74.6885216 | 73 |

|            |            |           |          |            |    |
|------------|------------|-----------|----------|------------|----|
| 82.6501363 | 62.9177631 | 79.615036 | Activity | 74.4072716 | 73 |
| 82.6501363 | 62.9177631 | 77.615036 | Activity | 74.4072716 | 73 |
| 82.7751363 | 62.9177631 | 77.615036 | Activity | 74.5478966 | 73 |
| 82.4001363 | 62.9177631 | 77.615036 | Activity | 74.2510216 | 73 |
| 83.2751363 | 68.9177631 | 78.615036 | Activity | 75.2353966 | 73 |
| 83.4001363 | 70.9177631 | 79.615036 | Activity | 75.3760216 | 73 |
| 83.6501363 | 70.9177631 | 80.615036 | Activity | 75.6572716 | 73 |
| 84.4001363 | 71.9177631 | 81.615036 | Activity | 76.7510216 | 73 |
| 84.5251363 | 73.9177631 | 81.615036 | Activity | 76.8916466 | 73 |
| 84.7751363 | 75.9177631 | 81.615036 | Activity | 77.2978966 | 73 |
| 84.2751363 | 77.9177631 | 81.615036 | Activity | 77.4853966 | 73 |
| 82.7751363 | 78.9177631 | 81.615036 | Activity | 77.2978966 | 73 |
| 81.5251363 | 79.9177631 | 81.615036 | Activity | 77.3916466 | 73 |
| 81.5251363 | 80.9177631 | 82.615036 | Activity | 77.3916466 | 73 |
| 88.5930539 | 81.9177631 | 83.615036 | Activity | 78.5251363 | 73 |
| 83.5930539 | 81.9177631 | 83.615036 | Activity | 78.0251363 | 73 |
| 81.5930539 | 80.9177631 | 83.615036 | Activity | 77.1501363 | 73 |
| 80.5930539 | 80.9177631 | 82.615036 | Activity | 77.0251363 | 73 |
| 80.5930539 | 80.9177631 | 82.615036 | Activity | 77.0251363 | 73 |
| 79.5930539 | 80.9177631 | 81.615036 | Activity | 76.6501363 | 73 |
| 79.5930539 | 79.9177631 | 81.615036 | Activity | 76.2751363 | 73 |
| 78.5930539 | 78.9177631 | 82.615036 | Activity | 75.6501363 | 73 |
| 77.5930539 | 78.9177631 | 82.615036 | Activity | 75.4001363 | 73 |
| 77.5930539 | 78.9177631 | 82.615036 | Activity | 75.6501363 | 73 |
| 76.5930539 | 79.9177631 | 82.615036 | Activity | 75.7751363 | 73 |
| 76.5930539 | 79.9177631 | 82.615036 | Activity | 75.9001363 | 73 |
| 76.5930539 | 79.9177631 | 82.615036 | Activity | 76.0251363 | 73 |
| 77.5930539 | 78.9177631 | 83.615036 | Activity | 76.1501363 | 73 |
| 77.5930539 | 78.9177631 | 84.615036 | Activity | 76.4001363 | 73 |
| 77.5930539 | 78.9177631 | 84.615036 | Activity | 76.4001363 | 73 |
| 77.5930539 | 78.9177631 | 84.615036 | Activity | 76.4001363 | 73 |
| 77.5930539 | 78.9177631 | 84.615036 | Activity | 76.4001363 | 73 |
| 78.5930539 | 78.9177631 | 85.615036 | Activity | 76.4001363 | 73 |
| 78.5930539 | 64.9177631 | 85.615036 | Activity | 74.2751363 | 73 |
| 78.5930539 | 63.9177631 | 85.615036 | Activity | 73.9001363 | 73 |
| 79.5930539 | 63.9177631 | 84.615036 | Activity | 73.4001363 | 73 |
| 79.5930539 | 63.9177631 | 84.615036 | Activity | 73.6501363 | 73 |
| 79.5930539 | 62.9177631 | 84.615036 | Activity | 73.9001363 | 73 |
| 79.5930539 | 62.9177631 | 84.615036 | Activity | 74.2751363 | 73 |
| 78.5930539 | 62.9177631 | 83.615036 | Activity | 74.1501363 | 73 |
| 77.5930539 | 62.9177631 | 81.615036 | Activity | 73.9001363 | 73 |
| 77.5930539 | 61.9177631 | 81.615036 | Activity | 73.9001363 | 73 |
| 74.5930539 | 61.9177631 | 81.615036 | Activity | 73.5251363 | 73 |
| 72.5930539 | 62.9177631 | 80.615036 | Activity | 72.7751363 | 73 |
| 70.5930539 | 61.9177631 | 79.615036 | Activity | 71.6501363 | 73 |

|            |            |            |          |            |    |
|------------|------------|------------|----------|------------|----|
| 70.5930539 | 61.9177631 | 79.615036  | Activity | 71.5251363 | 73 |
| 68.5930539 | 60.9177631 | 79.615036  | Activity | 71.1501363 | 73 |
| 68.5930539 | 58.9177631 | 79.615036  | Activity | 71.4001363 | 73 |
| 70.5930539 | 58.9177631 | 78.615036  | Activity | 71.6501363 | 73 |
| 70.5930539 | 57.9177631 | 77.615036  | Activity | 71.9001363 | 73 |
| 70.5930539 | 57.9177631 | 75.615036  | Activity | 71.9001363 | 73 |
| 68.5930539 | 57.9177631 | 75.615036  | Activity | 71.4001363 | 73 |
| 67.5930539 | 59.9177631 | 78.615036  | Activity | 71.7751363 | 73 |
| 67.5930539 | 59.9177631 | 78.615036  | Activity | 72.1501363 | 73 |
| 67.5930539 | 66.9177631 | 78.615036  | Activity | 72.9001363 | 73 |
| 67.5930539 | 72.9177631 | 78.615036  | Activity | 74.0251363 | 73 |
| 66.5930539 | 72.9177631 | 79.615036  | Activity | 73.9001363 | 73 |
| 66.5930539 | 72.9177631 | 81.615036  | Activity | 74.1501363 | 73 |
| 66.5930539 | 76.9177631 | 82.615036  | Activity | 74.5251363 | 73 |
| 69.5930539 | 77.9177631 | 86.615036  | Activity | 75.2751363 | 73 |
| 70.5930539 | 77.9177631 | 86.615036  | Activity | 75.5251363 | 73 |
| 71.5930539 | 76.9177631 | 86.615036  | Activity | 75.7751363 | 73 |
| 71.5930539 | 69.9177631 | 86.615036  | Activity | 75.0251363 | 73 |
| 72.5930539 | 63.9177631 | 86.615036  | Activity | 74.4001363 | 73 |
| 72.5930539 | 63.9177631 | 86.615036  | Activity | 74.5251363 | 73 |
| 72.5930539 | 63.9177631 | 88.615036  | Activity | 75.1501363 | 73 |
| 71.5930539 | 63.9177631 | 88.615036  | Activity | 75.2751363 | 73 |
| 69.5930539 | 63.9177631 | 88.615036  | Activity | 75.1501363 | 73 |
| 67.5930539 | 66.9177631 | 89.615036  | Activity | 75.5251363 | 73 |
| 69.5930539 | 68.9177631 | 75.2751363 | Activity | 73.2326488 | 73 |
| 75.5930539 | 69.9177631 | 76.1501363 | Activity | 74.2170238 | 73 |
| 80.5930539 | 70.9177631 | 91.615036  | Activity | 77.0251363 | 73 |
| 80.5930539 | 70.9177631 | 91.615036  | Activity | 77.0251363 | 73 |
| 80.5930539 | 71.9177631 | 91.615036  | Activity | 77.1501363 | 73 |
| 80.5930539 | 71.9177631 | 77.1501363 | Activity | 75.2170238 | 73 |
| 80.5930539 | 72.9177631 | 77.4001363 | Activity | 75.4982738 | 73 |
| 81.5930539 | 75.9177631 | 92.615036  | Activity | 77.9001363 | 73 |
| 82.5930539 | 78.9177631 | 92.615036  | Activity | 78.6501363 | 73 |
| 83.5930539 | 79.9177631 | 92.615036  | Activity | 79.2751363 | 73 |
| 83.5930539 | 82.9177631 | 92.615036  | Activity | 79.7751363 | 73 |
| 82.5930539 | 83.9177631 | 92.615036  | Activity | 79.7751363 | 73 |
| 82.5930539 | 84.9177631 | 92.615036  | Activity | 80.0251363 | 73 |
| 82.5930539 | 84.9177631 | 79.615036  | Activity | 78.5251363 | 73 |
| 82.5930539 | 82.9177631 | 79.615036  | Activity | 78.4001363 | 73 |
| 82.5930539 | 80.9177631 | 77.615036  | Activity | 79.0251363 | 73 |
| 82.5930539 | 80.9177631 | 77.615036  | Activity | 79.0251363 | 73 |
| 81.5930539 | 79.9177631 | 77.615036  | Activity | 79.6501363 | 73 |
| 80.5930539 | 79.9177631 | 77.615036  | Activity | 79.7751363 | 73 |
| 80.5930539 | 78.9177631 | 76.615036  | Activity | 80.1501363 | 73 |
| 79.5930539 | 78.9177631 | 76.615036  | Activity | 80.1501363 | 73 |

|            |            |           |          |            |    |
|------------|------------|-----------|----------|------------|----|
| 79.5930539 | 76.9177631 | 76.615036 | Activity | 80.4001363 | 73 |
| 78.5930539 | 76.9177631 | 76.615036 | Activity | 79.9001363 | 73 |
| 79.5930539 | 76.9177631 | 76.615036 | Activity | 79.4001363 | 73 |
| 81.5930539 | 76.9177631 | 76.615036 | Activity | 79.2751363 | 73 |
| 82.5930539 | 75.9177631 | 75.615036 | Activity | 79.0251363 | 73 |
| 82.5930539 | 75.9177631 | 74.615036 | Activity | 78.6501363 | 73 |
| 83.5930539 | 75.9177631 | 74.615036 | Activity | 77.6501363 | 73 |
| 83.5930539 | 76.9177631 | 75.615036 | Activity | 77.9001363 | 73 |
| 85.5930539 | 77.9177631 | 75.615036 | Activity | 77.6501363 | 73 |
| 85.5930539 | 76.9177631 | 76.615036 | Activity | 77.5251363 | 73 |
| 85.5930539 | 76.9177631 | 77.615036 | Activity | 77.6501363 | 73 |
| 87.5930539 | 76.9177631 | 81.615036 | Activity | 78.2751363 | 73 |
| 90.5930539 | 76.9177631 | 81.615036 | Activity | 78.5251363 | 73 |
| 90.5930539 | 75.9177631 | 80.615036 | Activity | 78.2751363 | 73 |
| 90.5930539 | 77.9177631 | 80.615036 | Activity | 77.9001363 | 73 |
| 91.5930539 | 79.9177631 | 80.615036 | Activity | 78.7751363 | 73 |
| 91.5930539 | 80.9177631 | 80.615036 | Activity | 78.7751363 | 73 |
| 91.5930539 | 79.9177631 | 80.615036 | Activity | 78.5251363 | 73 |
| 91.5930539 | 79.9177631 | 80.615036 | Activity | 78.6501363 | 73 |
| 91.5930539 | 79.9177631 | 80.615036 | Activity | 78.4001363 | 73 |
| 91.5930539 | 75.9177631 | 80.615036 | Activity | 77.5251363 | 73 |
| 76.5251363 | 70.9177631 | 80.615036 | Activity | 74.6416466 | 73 |
| 76.2751363 | 68.9177631 | 81.615036 | Activity | 74.3603966 | 73 |
| 90.5930539 | 68.9177631 | 86.615036 | Activity | 76.7751363 | 73 |
| 90.5930539 | 68.9177631 | 87.615036 | Activity | 76.5251363 | 73 |
| 89.5930539 | 68.9177631 | 87.615036 | Activity | 75.5251363 | 73 |
| 89.5930539 | 68.9177631 | 87.615036 | Activity | 75.5251363 | 73 |
| 89.5930539 | 68.9177631 | 88.615036 | Activity | 75.6501363 | 73 |
| 75.6501363 | 68.9177631 | 88.615036 | Activity | 73.7822716 | 73 |
| 75.6501363 | 68.9177631 | 88.615036 | Activity | 73.7822716 | 73 |
| 85.5930539 | 67.9177631 | 77.615036 | Activity | 73.2751363 | 73 |
| 71.5930539 | 68.9177631 | 76.615036 | Activity | 71.5251363 | 73 |
| 71.5930539 | 68.9177631 | 76.615036 | Activity | 71.2751363 | 73 |
| 69.5930539 | 69.9177631 | 76.615036 | Activity | 71.4001363 | 73 |
| 67.5930539 | 69.9177631 | 81.615036 | Activity | 71.1501363 | 73 |
| 67.5930539 | 69.9177631 | 84.615036 | Activity | 71.6501363 | 73 |
| 67.5930539 | 69.9177631 | 85.615036 | Activity | 71.9001363 | 73 |
| 66.5930539 | 69.9177631 | 85.615036 | Activity | 72.0251363 | 73 |
| 65.5930539 | 69.9177631 | 84.615036 | Activity | 72.1501363 | 73 |
| 65.5930539 | 69.9177631 | 83.615036 | Activity | 72.5251363 | 73 |
| 65.5930539 | 69.9177631 | 82.615036 | Activity | 72.7751363 | 73 |
| 65.5930539 | 69.9177631 | 82.615036 | Activity | 73.2751363 | 73 |
| 65.5930539 | 69.9177631 | 81.615036 | Activity | 72.7751363 | 73 |
| 65.5930539 | 68.9177631 | 81.615036 | Activity | 72.7751363 | 73 |
| 66.5930539 | 67.9177631 | 81.615036 | Activity | 73.0251363 | 73 |

|            |            |            |          |            |    |
|------------|------------|------------|----------|------------|----|
| 67.5930539 | 66.9177631 | 80.615036  | Activity | 72.5251363 | 73 |
| 67.5930539 | 66.9177631 | 81.615036  | Activity | 72.2751363 | 73 |
| 67.5930539 | 65.9177631 | 81.615036  | Activity | 72.0251363 | 73 |
| 68.5930539 | 64.9177631 | 81.615036  | Activity | 71.9001363 | 73 |
| 68.5930539 | 64.9177631 | 81.615036  | Activity | 71.9001363 | 73 |
| 68.5930539 | 65.9177631 | 82.615036  | Activity | 72.7751363 | 73 |
| 68.5930539 | 65.9177631 | 82.615036  | Activity | 73.5251363 | 73 |
| 68.5930539 | 65.9177631 | 83.615036  | Activity | 73.9001363 | 73 |
| 67.5930539 | 65.9177631 | 84.615036  | Activity | 73.5251363 | 73 |
| 67.5930539 | 65.9177631 | 84.615036  | Activity | 73.5251363 | 73 |
| 67.5930539 | 65.9177631 | 87.615036  | Activity | 74.0251363 | 73 |
| 67.5930539 | 66.9177631 | 87.615036  | Activity | 74.4001363 | 73 |
| 67.5930539 | 67.9177631 | 87.615036  | Activity | 74.6501363 | 73 |
| 68.5930539 | 67.9177631 | 87.615036  | Activity | 74.7751363 | 73 |
| 68.5930539 | 68.9177631 | 87.615036  | Activity | 74.7751363 | 73 |
| 69.5930539 | 69.9177631 | 87.615036  | Activity | 74.9001363 | 73 |
| 71.5930539 | 69.9177631 | 88.615036  | Activity | 75.4001363 | 73 |
| 71.5930539 | 69.9177631 | 88.615036  | Activity | 75.6501363 | 73 |
| 71.5930539 | 72.9177631 | 88.615036  | Activity | 76.5251363 | 73 |
| 71.5930539 | 72.9177631 | 88.615036  | Activity | 76.6501363 | 73 |
| 71.5930539 | 73.9177631 | 88.615036  | Activity | 77.0251363 | 73 |
| 71.5930539 | 73.9177631 | 88.615036  | Activity | 77.0251363 | 73 |
| 72.5930539 | 73.9177631 | 91.615036  | minute1  | 77.4001363 | 63 |
| 71.5930539 | 73.9177631 | 77.6501363 | minute2  | 75.7795238 | 63 |
| 71.5930539 | 74.9177631 | 77.6501363 | minute3  | 75.5295238 | 63 |
| 71.5930539 | 74.9177631 | 77.2751363 | minute4  | 75.1076488 | 63 |
| 70.5930539 | 74.9177631 | 77.4001363 | minute5  | 75.2482738 | 63 |
| 70.5930539 | 74.9177631 | 77.1501363 | minute6  | 75.0920238 | 63 |
| 70.5930539 | 74.9177631 | 77.1501363 | minute7  | 75.2170238 | 63 |
| 70.5930539 | 74.9177631 | 91.615036  | minute8  | 77.2751363 | 63 |
| 67.5930539 | 74.9177631 | 91.615036  | minute9  | 76.7751363 | 63 |
| 67.5930539 | 74.9177631 | 76.5251363 | minute10 | 74.6388988 | 63 |
| 66.5930539 | 74.9177631 | 76.4001363 | minute11 | 74.4982738 | 63 |
| 69.5930539 | 74.9177631 | 91.615036  | minute12 | 76.9001363 | 63 |
| 69.5930539 | 74.9177631 | 90.615036  | minute13 | 77.4001363 | 63 |
| 69.5930539 | 74.9177631 | 89.615036  | minute14 | 77.4001363 | 63 |
| 70.5930539 | 77.9177631 | 88.615036  | minute15 | 77.7751363 | 63 |
| 70.5930539 | 78.9177631 | 88.615036  | minute16 | 77.6501363 | 63 |
| 70.5930539 | 79.9177631 | 88.615036  | minute17 | 77.4001363 | 63 |
| 70.5930539 | 79.9177631 | 87.615036  | minute18 | 77.1501363 | 63 |
| 70.5930539 | 77.9177631 | 87.615036  | minute19 | 76.9001363 | 63 |
| 70.5930539 | 77.9177631 | 87.615036  | minute20 | 76.9001363 | 63 |
| 69.5930539 | 77.9177631 | 87.615036  | minute21 | 76.9001363 | 63 |
| 69.5930539 | 77.9177631 | 87.615036  | minute22 | 76.7751363 | 63 |
| 69.5930539 | 77.9177631 | 88.615036  | minute23 | 76.6501363 | 63 |

|            |            |            |          |            |    |
|------------|------------|------------|----------|------------|----|
| 68.5930539 | 78.9177631 | 88.615036  | minute24 | 76.9001363 | 63 |
| 68.5930539 | 78.9177631 | 89.615036  | minute25 | 76.4001363 | 63 |
| 68.5930539 | 78.9177631 | 88.615036  | minute26 | 76.4001363 | 63 |
| 68.5930539 | 77.9177631 | 88.615036  | minute27 | 76.0251363 | 63 |
| 68.5930539 | 77.9177631 | 87.615036  | minute28 | 75.7751363 | 63 |
| 68.5930539 | 76.9177631 | 85.615036  | minute29 | 75.5251363 | 63 |
| 68.5930539 | 77.9177631 | 85.615036  | minute30 | 75.5251363 | 63 |
| 66.5930539 | 77.9177631 | 84.615036  | minute31 | 75.1501363 | 63 |
| 64.5930539 | 77.9177631 | 84.615036  | minute32 | 74.5251363 | 63 |
| 64.5930539 | 77.9177631 | 84.615036  | minute33 | 74.5251363 | 63 |
| 64.5930539 | 78.9177631 | 84.615036  | minute34 | 73.9001363 | 63 |
| 64.5930539 | 77.9177631 | 84.615036  | minute35 | 73.5251363 | 63 |
| 64.5930539 | 74.9177631 | 86.615036  | minute36 | 73.5251363 | 63 |
| 64.5930539 | 74.9177631 | 86.615036  | minute37 | 73.5251363 | 63 |
| 64.5930539 | 70.9177631 | 86.615036  | minute38 | 73.2751363 | 63 |
| 64.5930539 | 69.9177631 | 86.615036  | minute39 | 73.0251363 | 63 |
| 64.5930539 | 69.9177631 | 86.615036  | minute40 | 73.0251363 | 63 |
| 65.5930539 | 69.9177631 | 86.615036  | minute41 | 72.6501363 | 63 |
| 65.5930539 | 69.9177631 | 71.6501363 | minute42 | 69.6545238 | 63 |
| 65.5930539 | 70.9177631 | 71.7751363 | minute43 | 69.6701488 | 63 |
| 65.5930539 | 71.9177631 | 71.7751363 | minute44 | 69.6701488 | 63 |
| 66.5930539 | 71.9177631 | 71.6501363 | minute45 | 69.4045238 | 63 |
| 66.5930539 | 71.9177631 | 70.9001363 | minute46 | 68.5607738 | 63 |
| 64.5930539 | 71.9177631 | 69.7751363 | minute47 | 67.4201488 | 63 |
| 65.5930539 | 71.9177631 | 69.6501363 | minute48 | 67.4045238 | 63 |
| 65.5930539 | 71.9177631 | 83.615036  | minute49 | 69.0251363 | 63 |
| 65.5930539 | 71.9177631 | 79.615036  | minute50 | 68.4001363 | 63 |
| 65.5930539 | 71.9177631 | 79.615036  | minute51 | 68.6501363 | 63 |
| 65.5930539 | 71.9177631 | 77.615036  | minute52 | 68.2751363 | 63 |
| 73.5930539 | 72.9177631 | 76.615036  | minute53 | 69.6501363 | 63 |
| 73.5930539 | 73.9177631 | 75.615036  | minute54 | 70.0251363 | 63 |
| 75.5930539 | 72.9177631 | 74.615036  | minute55 | 70.1501363 | 63 |
| 75.5930539 | 71.9177631 | 73.615036  | minute56 | 70.0251363 | 63 |
| 75.5930539 | 71.9177631 | 73.615036  | minute57 | 70.7751363 | 63 |
| 73.5930539 | 71.9177631 | 76.615036  | minute58 | 70.6501363 | 63 |
| 73.5930539 | 69.9177631 | 81.615036  | minute59 | 70.9001363 | 63 |
| 73.5930539 | 69.9177631 | 82.615036  | minute60 | 70.9001363 | 63 |
| 74.5930539 | 68.9177631 | 83.615036  | AFTER1   | 70.6501363 | 63 |
| 74.5930539 | 68.9177631 | 83.615036  | AFTER2   | 70.4001363 | 63 |
| 74.5930539 | 68.9177631 | 82.615036  | AFTER3   | 70.0251363 | 63 |
| 74.5930539 | 68.9177631 | 82.615036  | AFTER4   | 70.0251363 | 63 |
| 74.5930539 | 66.9177631 | 81.615036  | AFTER5   | 69.6501363 | 63 |
| 75.5930539 | 66.9177631 | 80.615036  | AFTER6   | 70.0251363 | 63 |
| 76.5930539 | 65.9177631 | 80.615036  | AFTER7   | 70.5251363 | 63 |
| 76.5930539 | 65.9177631 | 79.615036  | AFTER8   | 70.0251363 | 63 |

|            |            |           |         |            |    |
|------------|------------|-----------|---------|------------|----|
| 76.5930539 | 65.9177631 | 78.615036 | AFTER9  | 69.9001363 | 63 |
| 76.5930539 | 65.9177631 | 78.615036 | AFTER10 | 70.0251363 | 63 |
| 76.5930539 | 65.9177631 | 77.615036 | AFTER11 | 69.7751363 | 63 |
| 76.5930539 | 65.9177631 | 77.615036 | AFTER12 | 70.1501363 | 63 |
| 76.5930539 | 65.9177631 | 77.615036 | AFTER13 | 70.4001363 | 63 |
| 76.5930539 | 65.9177631 | 77.615036 | AFTER14 | 70.7751363 | 63 |
| 75.5930539 | 65.9177631 | 77.615036 | AFTER15 | 71.1501363 | 63 |
| 75.5930539 | 65.9177631 | 77.615036 | AFTER16 | 71.2751363 | 63 |
| 74.5930539 | 65.9177631 | 77.615036 | AFTER17 | 71.7751363 | 63 |
| 74.5930539 | 64.9177631 | 77.615036 | AFTER18 | 71.6501363 | 63 |
| 74.5930539 | 63.9177631 | 77.615036 | AFTER19 | 71.0251363 | 63 |
| 74.5930539 | 62.9177631 | 77.615036 | AFTER20 | 70.9001363 | 63 |
| 75.5930539 | 62.9177631 | 78.615036 | AFTER21 | 70.2751363 | 63 |
| 75.5930539 | 62.9177631 | 79.615036 | AFTER22 | 69.7751363 | 63 |
| 75.5930539 | 62.9177631 | 80.615036 | AFTER23 | 70.1501363 | 63 |
| 75.5930539 | 62.9177631 | 81.615036 | AFTER24 | 70.6501363 | 63 |
| 74.5930539 | 62.9177631 | 81.615036 | AFTER25 | 70.9001363 | 63 |
| 74.5930539 | 62.9177631 | 81.615036 | AFTER26 | 71.6501363 | 63 |
| 74.5930539 | 64.9177631 | 81.615036 | AFTER27 | 72.5251363 | 63 |
| 74.5930539 | 64.9177631 | 80.615036 | AFTER28 | 72.5251363 | 63 |
| 74.5930539 | 65.9177631 | 80.615036 | AFTER29 | 72.9001363 | 63 |
| 76.5930539 | 65.9177631 | 79.615036 | AFTER30 | 72.6501363 | 63 |
| 76.5930539 | 65.9177631 | 79.615036 | AFTER31 | 72.6501363 | 63 |
| 77.5930539 | 67.9177631 | 78.615036 | AFTER32 | 73.1501363 | 63 |
| 78.5930539 | 68.9177631 | 78.615036 | AFTER33 | 73.4001363 | 63 |
| 78.5930539 | 68.9177631 | 76.615036 | AFTER34 | 71.7247154 | 63 |
| 78.5930539 | 68.9177631 | 74.615036 | AFTER35 | 71.7247154 | 63 |
| 78.5930539 | 69.9177631 | 74.615036 | AFTER36 | 71.8809654 | 63 |
| 78.5930539 | 68.9177631 | 74.615036 | AFTER37 | 71.4434654 | 63 |
| 77.5930539 | 68.9177631 | 77.615036 | AFTER38 | 71.9903404 | 63 |
| 77.5930539 | 66.9177631 | 78.615036 | AFTER39 | 72.2751363 | 63 |
| 76.5930539 | 66.9177631 | 78.615036 | AFTER40 | 71.7751363 | 63 |
| 76.5930539 | 66.9177631 | 78.615036 | AFTER41 | 71.5251363 | 63 |
| 75.5930539 | 68.9177631 | 78.615036 | AFTER42 | 71.7751363 | 63 |
| 75.5930539 | 69.9177631 | 78.615036 | AFTER43 | 71.4001363 | 63 |
| 75.5930539 | 69.9177631 | 78.615036 | AFTER44 | 71.2751363 | 63 |
| 75.5930539 | 69.9177631 | 77.615036 | AFTER45 | 70.5251363 | 63 |
| 75.5930539 | 69.9177631 | 76.615036 | AFTER46 | 71.0251363 | 63 |
| 75.5930539 | 68.9177631 | 76.615036 | AFTER47 | 71.0251363 | 63 |
| 75.5930539 | 69.9177631 | 76.615036 | AFTER48 | 71.4001363 | 63 |
| 74.5930539 | 69.9177631 | 76.615036 | AFTER49 | 71.4001363 | 63 |
| 73.5930539 | 69.9177631 | 77.615036 | AFTER50 | 71.5251363 | 63 |
| 73.5930539 | 70.9177631 | 78.615036 | AFTER51 | 71.9001363 | 63 |
| 72.5930539 | 70.9177631 | 78.615036 | AFTER52 | 71.6501363 | 63 |
| 72.5930539 | 70.9177631 | 78.615036 | AFTER53 | 71.6501363 | 63 |



|            |            |           |         |            |    |
|------------|------------|-----------|---------|------------|----|
| 72.5930539 | 70.9177631 | 78.615036 | AFTER54 | 71.4001363 | 63 |
| 71.5930539 | 72.9177631 | 78.615036 | AFTER55 | 71.7751363 | 63 |
| 71.5930539 | 72.9177631 | 78.615036 | AFTER56 | 72.4001363 | 63 |
| 70.5930539 | 72.9177631 | 84.615036 | AFTER57 | 73.7751363 | 63 |
| 70.5930539 | 72.9177631 | 88.615036 | AFTER58 | 74.4001363 | 63 |
| 69.5930539 | 71.9177631 | 88.615036 | AFTER59 | 74.2751363 | 63 |
| 69.5930539 | 70.9177631 | 84.615036 | AFTER60 | 73.7751363 | 63 |
| 69.5930539 | 68.9177631 | 82.615036 | AFTER61 | 73.5251363 | 63 |
| 69.5930539 | 67.9177631 | 82.615036 | AFTER62 | 73.5251363 | 63 |
| 69.5930539 | 67.9177631 | 82.615036 | AFTER63 | 73.7751363 | 63 |
| 69.5930539 | 67.9177631 | 81.615036 | AFTER64 | 73.2751363 | 63 |
| 69.5930539 | 67.9177631 | 81.615036 | AFTER65 | 73.1501363 | 63 |
| 69.5930539 | 67.9177631 | 81.615036 | AFTER66 | 72.9001363 | 63 |
| 70.5930539 | 67.9177631 | 79.615036 | AFTER67 | 72.5251363 | 63 |
| 70.5930539 | 67.9177631 | 76.615036 | AFTER68 | 72.0251363 | 63 |
| 71.5930539 | 68.9177631 | 73.615036 | AFTER69 | 72.1501363 | 63 |
| 71.5930539 | 68.9177631 | 71.615036 | AFTER70 | 71.9001363 | 63 |
| 71.5930539 | 68.9177631 | 71.615036 | AFTER71 | 72.0251363 | 63 |
| 70.5930539 | 72.9177631 | 71.615036 | AFTER72 | 72.7751363 | 63 |
| 68.5930539 | 74.9177631 | 70.615036 | AFTER73 | 72.7751363 | 63 |
| 65.5930539 | 74.9177631 | 70.615036 | AFTER74 | 72.4001363 | 63 |
| 64.5930539 | 74.9177631 | 70.615036 | AFTER75 | 72.4001363 | 63 |
| 64.5930539 | 75.9177631 | 70.615036 | AFTER76 | 72.4001363 | 63 |
| 64.5930539 | 75.9177631 | 72.615036 | AFTER77 | 72.2751363 | 63 |
| 64.5930539 | 75.9177631 | 72.615036 | AFTER78 | 71.9001363 | 63 |
| 62.5930539 | 74.9177631 | 70.615036 | AFTER79 | 71.2751363 | 63 |
| 62.5930539 | 74.9177631 | 69.615036 | AFTER80 | 71.1501363 | 63 |
| 62.5930539 | 73.9177631 | 70.615036 | AFTER81 | 71.6501363 | 63 |
| 62.5930539 | 72.9177631 | 70.615036 | AFTER82 | 71.5251363 | 63 |
| 61.5930539 | 71.9177631 | 70.615036 | AFTER83 | 70.9001363 | 63 |
| 60.5930539 | 71.9177631 | 69.615036 | AFTER84 | 70.2751363 | 63 |
| 60.5930539 | 71.9177631 | 69.615036 | AFTER85 | 70.2751363 | 63 |
| 60.5930539 | 73.9177631 | 70.615036 | AFTER86 | 70.6501363 | 63 |
| 58.5930539 | 73.9177631 | 71.615036 | AFTER87 | 70.7751363 | 63 |
| 58.5930539 | 73.9177631 | 71.615036 | AFTER88 | 71.1501363 | 63 |
| 58.5930539 | 73.9177631 | 72.615036 | AFTER89 | 71.5251363 | 63 |
| 58.5930539 | 73.9177631 | 72.615036 | AFTER90 | 71.5251363 | 63 |
| 58.5930539 | 73.9177631 | 72.615036 | AFTER91 | 70.2785812 | 63 |
| 60.5930539 | 70.9177631 | 72.615036 | AFTER92 | 71.4001363 | 63 |
| 60.5930539 | 70.9177631 | 73.615036 | AFTER93 | 71.0251363 | 63 |
| 60.5930539 | 70.9177631 | 72.615036 | AFTER94 | 69.7751363 | 63 |
| 64.5930539 | 70.9177631 | 72.615036 | AFTER95 | 70.2751363 | 63 |
| 64.5930539 | 70.9177631 | 72.615036 | AFTER96 | 70.1501363 | 63 |
| 65.5930539 | 70.9177631 | 72.615036 | AFTER97 | 69.9001363 | 71 |
| 65.5930539 | 70.9177631 | 75.615036 | AFTER98 | 70.1501363 | 71 |

|            |            |           |          |            |    |
|------------|------------|-----------|----------|------------|----|
| 66.5930539 | 70.9177631 | 77.615036 | AFTER99  | 70.5251363 | 71 |
| 68.5930539 | 72.9177631 | 79.615036 | AFTER100 | 71.1501363 | 71 |
| 68.5930539 | 69.9177631 | 79.615036 | AFTER101 | 71.0251363 | 71 |
| 70.5930539 | 70.9177631 | 79.615036 | AFTER102 | 71.5251363 | 71 |
| 69.5930539 | 70.9177631 | 82.615036 | AFTER103 | 71.4001363 | 71 |
| 69.5930539 | 70.9177631 | 81.615036 | AFTER104 | 71.4001363 | 71 |
| 69.5930539 | 70.9177631 | 80.615036 | AFTER105 | 71.1501363 | 71 |
| 69.5930539 | 71.9177631 | 79.615036 | AFTER106 | 70.9001363 | 71 |
| 69.5930539 | 71.9177631 | 79.615036 | AFTER107 | 70.9001363 | 71 |
| 69.5930539 | 71.9177631 | 79.615036 | AFTER108 | 70.9001363 | 71 |
| 68.5930539 | 71.9177631 | 79.615036 | AFTER109 | 71.5251363 | 71 |
| 68.5930539 | 71.9177631 | 79.615036 | AFTER110 | 71.4001363 | 71 |
| 68.5930539 | 70.9177631 | 78.615036 | AFTER111 | 70.7751363 | 71 |
| 68.5930539 | 70.9177631 | 78.615036 | AFTER112 | 71.4001363 | 71 |
| 68.5930539 | 70.9177631 | 78.615036 | AFTER113 | 71.1501363 | 71 |
| 68.5930539 | 70.9177631 | 78.615036 | AFTER114 | 71.1501363 | 71 |
| 67.5930539 | 71.9177631 | 78.615036 | AFTER115 | 71.1501363 | 71 |
| 67.5930539 | 71.9177631 | 78.615036 | AFTER116 | 71.5251363 | 71 |
| 65.5930539 | 72.9177631 | 76.615036 | AFTER117 | 71.1501363 | 71 |
| 65.5930539 | 72.9177631 | 76.615036 | AFTER118 | 71.2751363 | 71 |
| 65.5930539 | 72.9177631 | 76.615036 | AFTER119 | 71.1501363 | 71 |
| 66.5930539 | 72.9177631 | 74.615036 | AFTER120 | 70.7751363 | 71 |
| 66.5930539 | 73.9177631 | 72.615036 | AFTER121 | 70.6501363 | 71 |
| 66.5930539 | 74.9177631 | 72.615036 | AFTER122 | 71.0251363 | 71 |
| 66.5930539 | 74.9177631 | 72.615036 | AFTER123 | 70.4001363 | 71 |
| 66.5930539 | 77.9177631 | 72.615036 | AFTER124 | 70.7751363 | 63 |
| 66.5930539 | 79.9177631 | 72.615036 | AFTER125 | 70.5251363 | 63 |
| 66.5930539 | 79.9177631 | 72.615036 | AFTER126 | 70.7751363 | 63 |
| 65.5930539 | 80.9177631 | 77.615036 | AFTER127 | 71.0251363 | 63 |
| 65.5930539 | 77.9177631 | 79.615036 | AFTER128 | 70.9001363 | 63 |
| 65.5930539 | 76.9177631 | 79.615036 | AFTER129 | 70.9001363 | 63 |
| 67.5930539 | 77.9177631 | 79.615036 | AFTER130 | 71.0251363 | 63 |
| 67.5930539 | 78.9177631 | 79.615036 | AFTER131 | 70.7751363 | 63 |
| 67.5930539 | 79.9177631 | 80.615036 | AFTER132 | 71.2751363 | 63 |
| 69.5930539 | 79.9177631 | 80.615036 | AFTER133 | 71.1501363 | 63 |
| 69.5930539 | 79.9177631 | 80.615036 | AFTER134 | 70.9001363 | 63 |
| 69.5930539 | 79.9177631 | 81.615036 | AFTER135 | 71.1501363 | 63 |
| 69.5930539 | 79.9177631 | 78.615036 | AFTER136 | 70.9001363 | 63 |
| 69.5930539 | 79.9177631 | 77.615036 | AFTER137 | 70.7751363 | 63 |
| 68.5930539 | 78.9177631 | 77.615036 | AFTER138 | 70.6501363 | 63 |
| 68.5930539 | 78.9177631 | 77.615036 | AFTER139 | 70.6501363 | 63 |
| 68.5930539 | 77.9177631 | 77.615036 | AFTER140 | 71.2751363 | 63 |
| 68.5930539 | 75.9177631 | 77.615036 | AFTER141 | 71.1501363 | 63 |
| 68.5930539 | 75.9177631 | 76.615036 | AFTER142 | 70.9001363 | 63 |
| 68.5930539 | 75.9177631 | 76.615036 | AFTER143 | 71.0251363 | 63 |

|            |            |           |          |            |    |
|------------|------------|-----------|----------|------------|----|
| 68.5930539 | 74.9177631 | 76.615036 | AFTER144 | 70.6501363 | 63 |
| 69.5930539 | 73.9177631 | 76.615036 | AFTER145 | 70.5251363 | 63 |
| 69.5930539 | 72.9177631 | 76.615036 | AFTER146 | 70.2751363 | 63 |
| 69.5930539 | 71.9177631 | 75.615036 | AFTER147 | 70.0251363 | 63 |
| 70.5930539 | 71.9177631 | 74.615036 | AFTER148 | 70.4001363 | 63 |
| 70.5930539 | 70.9177631 | 74.615036 | AFTER149 | 70.7751363 | 63 |
| 70.5930539 | 70.9177631 | 74.615036 | AFTER150 | 71.0251363 | 63 |
| 70.5930539 | 69.9177631 | 73.615036 | AFTER151 | 71.1501363 | 63 |
| 69.5930539 | 70.9177631 | 73.615036 | AFTER152 | 71.6501363 | 63 |
| 69.5930539 | 70.9177631 | 73.615036 | AFTER153 | 72.0251363 | 63 |
| 69.5930539 | 71.9177631 | 73.615036 | AFTER154 | 72.9001363 | 63 |
| 69.5930539 | 71.9177631 | 72.615036 | AFTER155 | 72.9001363 | 63 |
| 69.5930539 | 71.9177631 | 73.615036 | AFTER156 | 73.6501363 | 63 |
| 70.5930539 | 72.9177631 | 73.615036 | AFTER157 | 73.6501363 | 63 |
| 70.5930539 | 72.9177631 | 74.615036 | AFTER158 | 73.7751363 | 63 |
| 71.5930539 | 74.9177631 | 75.615036 | AFTER159 | 74.1501363 | 63 |
| 72.5930539 | 74.9177631 | 76.615036 | AFTER160 | 73.9001363 | 63 |
| 72.5930539 | 74.9177631 | 76.615036 | AFTER161 | 73.2751363 | 63 |
| 75.5930539 | 75.9177631 | 76.615036 | AFTER162 | 73.7751363 | 63 |
| 74.5930539 | 75.9177631 | 76.615036 | AFTER163 | 73.2751363 | 63 |
| 73.5930539 | 76.9177631 | 76.615036 | AFTER164 | 73.4001363 | 63 |
| 73.5930539 | 76.9177631 | 79.615036 | AFTER165 | 73.7751363 | 63 |
| 73.5930539 | 77.9177631 | 84.615036 | AFTER166 | 74.4001363 | 63 |
| 72.5930539 | 77.9177631 | 84.615036 | AFTER167 | 74.2751363 | 63 |
| 71.5930539 | 77.9177631 | 84.615036 | AFTER168 | 73.7751363 | 63 |
| 71.5930539 | 76.9177631 | 85.615036 | AFTER169 | 74.0251363 | 63 |
| 71.5930539 | 76.9177631 | 85.615036 | AFTER170 | 73.2751363 | 63 |
| 72.5930539 | 71.9177631 | 85.615036 | AFTER171 | 72.7751363 | 63 |
| 72.5930539 | 70.9177631 | 82.615036 | AFTER172 | 72.1501363 | 63 |
| 73.5930539 | 70.9177631 | 80.615036 | AFTER173 | 72.2751363 | 63 |
| 73.5930539 | 71.9177631 | 79.615036 | AFTER174 | 72.1501363 | 63 |
| 74.5930539 | 72.9177631 | 77.615036 | AFTER175 | 72.1501363 | 63 |
| 76.5930539 | 73.9177631 | 74.615036 | AFTER176 | 71.9001363 | 63 |
| 76.5930539 | 73.9177631 | 72.615036 | AFTER177 | 72.0251363 | 63 |
| 78.5930539 | 74.9177631 | 71.615036 | AFTER178 | 72.6501363 | 63 |
| 78.5930539 | 74.9177631 | 71.615036 | AFTER179 | 73.0251363 | 63 |
| 78.5930539 | 74.9177631 | 71.615036 | AFTER180 | 73.5251363 | 63 |
| 78.5930539 | 74.9177631 | 71.615036 | AFTER181 | 74.1501363 | 63 |
| 78.5930539 | 74.9177631 | 73.615036 | AFTER182 | 74.5251363 | 63 |
| 78.5930539 | 74.9177631 | 72.615036 | AFTER183 | 74.0251363 | 63 |
| 78.5930539 | 73.9177631 | 71.615036 | AFTER184 | 73.7751363 | 63 |
| 77.5930539 | 73.9177631 | 70.615036 | AFTER185 | 74.0251363 | 63 |
| 78.5930539 | 73.9177631 | 69.615036 | AFTER186 | 74.0251363 | 63 |
| 78.5930539 | 75.9177631 | 69.615036 | AFTER187 | 74.0251363 | 63 |
| 74.5930539 | 75.9177631 | 70.615036 | AFTER188 | 72.9001363 | 63 |

|            |            |           |          |            |    |
|------------|------------|-----------|----------|------------|----|
| 74.5930539 | 75.9177631 | 70.615036 | AFTER189 | 72.7751363 | 63 |
| 74.5930539 | 74.9177631 | 72.615036 | AFTER190 | 72.9001363 | 63 |
| 74.5930539 | 74.9177631 | 73.615036 | AFTER191 | 72.2751363 | 63 |
| 73.5930539 | 72.9177631 | 73.615036 | AFTER192 | 71.9001363 | 63 |
| 73.5930539 | 72.9177631 | 73.615036 | AFTER193 | 71.9001363 | 63 |
| 73.5930539 | 71.9177631 | 73.615036 | AFTER194 | 71.6501363 | 63 |
| 74.5930539 | 70.9177631 | 73.615036 | AFTER195 | 71.6501363 | 63 |
| 74.5930539 | 70.9177631 | 73.615036 | AFTER196 | 71.6501363 | 63 |
| 73.5930539 | 69.9177631 | 73.615036 | AFTER197 | 71.5251363 | 63 |
| 72.5930539 | 69.9177631 | 74.615036 | AFTER198 | 71.2751363 | 63 |
| 72.5930539 | 68.9177631 | 74.615036 | AFTER199 | 70.9001363 | 63 |
| 71.5930539 | 68.9177631 | 74.615036 | AFTER200 | 70.7751363 | 63 |
| 67.5930539 | 72.9177631 | 74.615036 | AFTER201 | 69.9001363 | 63 |
| 63.5930539 | 73.9177631 | 74.615036 | AFTER202 | 69.0251363 | 63 |
| 63.5930539 | 73.9177631 | 78.615036 | AFTER203 | 69.1501363 | 63 |
| 63.5930539 | 72.9177631 | 79.615036 | AFTER204 | 68.9001363 | 63 |
| 63.5930539 | 72.9177631 | 80.615036 | AFTER205 | 69.1501363 | 63 |
| 64.5930539 | 72.9177631 | 80.615036 | AFTER206 | 68.6501363 | 63 |
| 64.5930539 | 72.9177631 | 80.615036 | AFTER207 | 68.6501363 | 63 |
| 64.5930539 | 72.9177631 | 79.615036 | AFTER208 | 68.4001363 | 63 |
| 64.5930539 | 72.9177631 | 79.615036 | AFTER209 | 68.0251363 | 63 |
| 64.5930539 | 72.9177631 | 78.615036 | AFTER210 | 67.6501363 | 63 |
| 64.5930539 | 73.9177631 | 78.615036 | AFTER211 | 67.6501363 | 63 |
| 64.5930539 | 75.9177631 | 78.615036 | AFTER212 | 67.9001363 | 63 |
| 65.5930539 | 75.9177631 | 78.615036 | AFTER213 | 67.9001363 | 63 |
| 65.5930539 | 75.9177631 | 78.615036 | AFTER214 | 67.7751363 | 63 |
| 65.5930539 | 75.9177631 | 78.615036 | AFTER215 | 67.7751363 | 63 |
| 66.5930539 | 75.9177631 | 78.615036 | AFTER216 | 68.0251363 | 63 |
| 66.5930539 | 74.9177631 | 78.615036 | AFTER217 | 68.4001363 | 63 |
| 66.5930539 | 73.9177631 | 79.615036 | AFTER218 | 69.2751363 | 63 |
| 67.5930539 | 73.9177631 | 79.615036 | AFTER219 | 69.4001363 | 63 |
| 68.5930539 | 73.9177631 | 80.615036 | AFTER220 | 70.1501363 | 63 |
| 68.5930539 | 72.9177631 | 81.615036 | AFTER221 | 70.6501363 | 63 |
| 68.5930539 | 72.9177631 | 81.615036 | AFTER222 | 70.6501363 | 63 |
| 61.5930539 | 69.9177631 | 81.615036 | AFTER223 | 69.4001363 | 63 |
| 59.5930539 | 69.9177631 | 82.615036 | AFTER224 | 70.7751363 | 63 |
| 60.5930539 | 69.9177631 | 83.615036 | AFTER225 | 71.4001363 | 63 |
| 60.5930539 | 69.9177631 | 84.615036 | AFTER226 | 71.2751363 | 63 |
| 61.5930539 | 69.9177631 | 87.615036 | AFTER227 | 73.6501363 | 63 |
| 62.5930539 | 69.9177631 | 87.615036 | AFTER228 | 73.6501363 | 63 |
| 64.5930539 | 70.9177631 | 78.615036 | AFTER229 | 73.0251363 | 63 |
| 66.5930539 | 70.9177631 | 77.615036 | AFTER230 | 73.0251363 | 63 |
| 69.5930539 | 69.9177631 | 70.615036 | AFTER231 | 72.1501363 | 63 |
| 69.5930539 | 69.9177631 | 69.615036 | AFTER232 | 71.7751363 | 63 |
| 69.5930539 | 69.9177631 | 68.615036 | AFTER233 | 71.6501363 | 63 |

|            |            |           |          |            |    |
|------------|------------|-----------|----------|------------|----|
| 68.5930539 | 69.9177631 | 67.615036 | AFTER234 | 69.9792157 | 63 |
| 68.5930539 | 69.9177631 | 67.615036 | AFTER235 | 70.3073407 | 63 |
| 68.5930539 | 69.9177631 | 67.615036 | AFTER236 | 70.3385907 | 63 |
| 68.5930539 | 70.9177631 | 67.615036 | AFTER237 | 70.4792157 | 63 |
| 68.5930539 | 71.9177631 | 67.615036 | AFTER238 | 70.7604657 | 63 |
| 68.5930539 | 71.9177631 | 67.615036 | AFTER239 | 70.3073407 | 63 |
| 68.5930539 | 71.9177631 | 67.615036 | AFTER240 | 70.2760907 | 63 |
| 71.5930539 | 71.9177631 | 67.615036 |          | 72.6501363 | 63 |
| 71.5930539 | 71.9177631 | 64.615036 |          | 71.2751363 | 63 |
| 71.5930539 | 71.9177631 | 64.615036 |          | 70.0251363 | 63 |
| 70.5930539 | 71.9177631 | 64.615036 |          | 69.5251363 | 63 |
| 70.5930539 | 71.9177631 | 64.615036 |          | 69.4001363 | 63 |
| 70.5930539 | 71.9177631 | 64.615036 |          | 69.2751363 | 63 |
| 70.5930539 | 71.9177631 | 64.615036 |          | 69.2751363 | 63 |
| 70.5930539 | 69.9177631 | 65.615036 |          | 69.6501363 | 63 |
| 69.5930539 | 68.9177631 | 65.615036 |          | 69.7751363 | 63 |
| 69.5930539 | 69.9177631 | 65.615036 |          | 69.7751363 | 63 |
| 69.5930539 | 69.9177631 | 74.615036 |          | 70.9001363 | 63 |
| 74.5930539 | 69.9177631 | 82.615036 |          | 72.9001363 | 63 |
| 75.5930539 | 70.9177631 | 84.615036 |          | 73.5251363 | 63 |
| 75.5930539 | 70.9177631 | 84.615036 |          | 73.9001363 | 63 |
| 72.5930539 | 70.9177631 | 84.615036 |          | 73.7751363 | 63 |
| 71.5930539 | 68.9177631 | 84.615036 |          | 73.5251363 | 63 |
| 70.5930539 | 67.9177631 | 84.615036 |          | 73.5251363 | 63 |
| 70.5930539 | 67.9177631 | 84.615036 |          | 72.2604657 | 63 |
| 69.5930539 | 65.9177631 | 85.615036 |          | 72.0260907 | 63 |
| 70.5930539 | 65.9177631 | 84.615036 |          | 72.3542157 | 63 |
| 70.5930539 | 64.9177631 | 82.615036 |          | 72.2135907 | 63 |
| 71.5930539 | 63.9177631 | 82.615036 |          | 72.2292157 | 63 |
| 71.5930539 | 63.9177631 | 82.615036 |          | 72.3698407 | 63 |
| 71.5930539 | 62.9177631 | 82.615036 |          | 71.9792157 | 63 |
| 69.5930539 | 64.9177631 | 79.615036 |          | 71.4635907 | 63 |
| 70.5930539 | 68.9177631 | 75.615036 |          | 71.0729657 | 63 |
| 69.5930539 | 70.9177631 | 74.615036 |          | 70.9792157 | 63 |
| 69.5930539 | 71.9177631 | 74.615036 |          | 71.2604657 | 63 |
| 67.5930539 | 71.9177631 | 74.615036 |          | 70.9635907 | 63 |
| 67.5930539 | 71.9177631 | 75.615036 |          | 71.1042157 | 63 |
| 67.5930539 | 71.9177631 | 75.615036 |          | 70.6354657 | 63 |
| 67.5930539 | 71.9177631 | 75.615036 |          | 70.6354657 | 63 |
| 67.5930539 | 71.9177631 | 75.615036 |          | 70.6354657 | 63 |
| 66.5930539 | 73.9177631 | 78.615036 |          | 71.6198407 | 63 |
| 65.5930539 | 74.9177631 | 78.615036 |          | 71.7448407 | 63 |
| 65.5930539 | 74.9177631 | 79.615036 |          | 71.8854657 | 63 |
| 64.5930539 | 80.9177631 | 79.615036 |          | 73.0885907 | 63 |
| 63.5930539 | 81.9177631 | 79.615036 |          | 73.3542157 | 63 |

|            |            |           |            |    |
|------------|------------|-----------|------------|----|
| 63.5930539 | 80.9177631 | 79.615036 | 73.6198407 | 63 |
| 64.5930539 | 79.9177631 | 79.615036 | 73.7604657 | 63 |
| 65.5930539 | 77.9177631 | 80.615036 | 73.7448407 | 63 |
| 65.5930539 | 77.9177631 | 80.615036 | 73.7292157 | 63 |
| 65.5930539 | 77.9177631 | 79.615036 | 73.6979657 | 63 |
| 64.5930539 | 76.9177631 | 79.615036 | 75.4001363 | 63 |
| 64.5930539 | 76.9177631 | 84.615036 | 75.5251363 | 63 |
| 64.5930539 | 76.9177631 | 85.615036 | 75.4001363 | 63 |
| 64.5930539 | 76.9177631 | 85.615036 | 75.2751363 | 63 |
| 64.5930539 | 76.9177631 | 86.615036 | 75.5251363 | 63 |
| 64.5930539 | 74.9177631 | 86.615036 | 73.1198407 | 63 |
| 64.5930539 | 73.9177631 | 87.615036 | 72.9792157 | 63 |
| 64.5930539 | 73.9177631 | 88.615036 | 75.4001363 | 63 |
| 64.5930539 | 73.9177631 | 89.615036 | 75.5251363 | 63 |
| 64.5930539 | 74.9177631 | 89.615036 | 76.4001363 | 63 |
| 65.5930539 | 74.9177631 | 89.615036 | 76.2751363 | 63 |
| 65.5930539 | 75.9177631 | 88.615036 | 76.1501363 | 63 |
| 65.5930539 | 75.9177631 | 88.615036 | 75.6501363 | 63 |
| 65.5930539 | 75.9177631 | 87.615036 | 75.0251363 | 63 |
| 65.5930539 | 73.9177631 | 86.615036 | 75.0251363 | 63 |
| 65.5930539 | 71.9177631 | 86.615036 | 74.4001363 | 63 |
| 65.5930539 | 70.9177631 | 86.615036 | 73.7751363 | 63 |
| 65.5930539 | 70.9177631 | 86.615036 | 73.7751363 | 63 |
| 63.5930539 | 70.9177631 | 82.615036 | 73.1501363 | 63 |
| 63.5930539 | 69.9177631 | 82.615036 | 72.4001363 | 63 |
| 63.5930539 | 69.9177631 | 82.615036 | 72.1501363 | 63 |
| 63.5930539 | 68.9177631 | 79.615036 | 71.2751363 | 63 |
| 63.5930539 | 68.9177631 | 79.615036 | 71.1501363 | 63 |
| 63.5930539 | 67.9177631 | 78.615036 | 70.4001363 | 63 |
| 63.5930539 | 67.9177631 | 78.615036 | 69.7751363 | 63 |
| 64.5930539 | 66.9177631 | 78.615036 | 69.2751363 | 63 |
| 65.5930539 | 66.9177631 | 78.615036 | 69.0251363 | 63 |
| 65.5930539 | 64.9177631 | 79.615036 | 68.9001363 | 63 |
| 65.5930539 | 63.9177631 | 79.615036 | 68.9001363 | 63 |
| 65.5930539 | 63.9177631 | 79.615036 | 68.6501363 | 63 |
| 65.5930539 | 63.9177631 | 79.615036 | 68.4001363 | 63 |
| 65.5930539 | 64.9177631 | 79.615036 | 68.5251363 | 63 |
| 65.5930539 | 64.9177631 | 79.615036 | 68.0251363 | 63 |
| 65.5930539 | 65.9177631 | 79.615036 | 68.2751363 | 63 |
| 65.5930539 | 65.9177631 | 79.615036 | 68.6501363 | 63 |
| 65.5930539 | 66.9177631 | 79.615036 | 68.9001363 | 63 |
| 65.5930539 | 67.9177631 | 78.615036 | 69.2751363 | 63 |
| 65.5930539 | 65.9177631 | 78.615036 | 69.4001363 | 63 |
| 65.5930539 | 65.9177631 | 77.615036 | 69.5251363 | 63 |
| 65.5930539 | 65.9177631 | 77.615036 | 69.4001363 | 63 |

|            |            |           |            |    |
|------------|------------|-----------|------------|----|
| 65.5930539 | 65.9177631 | 77.615036 | 69.5251363 | 63 |
| 66.5930539 | 64.9177631 | 77.615036 | 69.5251363 | 63 |
| 67.5930539 | 64.9177631 | 76.615036 | 69.7751363 | 63 |
| 68.5930539 | 64.9177631 | 75.615036 | 70.0251363 | 63 |
| 68.5930539 | 64.9177631 | 75.615036 | 70.1501363 | 63 |
| 68.5930539 | 66.9177631 | 76.615036 | 70.5251363 | 63 |
| 68.5930539 | 67.9177631 | 79.615036 | 70.7751363 | 63 |
| 68.5930539 | 67.9177631 | 80.615036 | 71.2751363 | 63 |
| 68.5930539 | 67.9177631 | 81.615036 | 71.2751363 | 63 |
| 68.5930539 | 67.9177631 | 82.615036 | 71.4001363 | 63 |
| 68.5930539 | 67.9177631 | 81.615036 | 71.9001363 | 63 |
| 69.5930539 | 70.9177631 | 81.615036 | 72.9001363 | 63 |
| 70.5930539 | 70.9177631 | 81.615036 | 73.6501363 | 63 |
| 68.5930539 | 70.9177631 | 79.615036 | 73.2751363 | 63 |
| 68.5930539 | 69.9177631 | 79.615036 | 72.9001363 | 63 |
| 68.5930539 | 69.9177631 | 77.615036 | 71.2751363 | 63 |
| 71.5930539 | 68.9177631 | 74.615036 | 70.7751363 | 63 |
| 71.5930539 | 68.9177631 | 74.615036 | 70.4001363 | 63 |
| 71.5930539 | 67.9177631 | 74.615036 | 70.1501363 | 63 |
| 71.5930539 | 65.9177631 | 75.615036 | 69.7751363 | 63 |
| 71.5930539 | 65.9177631 | 74.615036 | 69.7751363 | 63 |
| 71.5930539 | 64.9177631 | 74.615036 | 69.9001363 | 63 |
| 72.5930539 | 63.9177631 | 71.615036 | 69.7751363 | 63 |
| 72.5930539 | 64.9177631 | 69.615036 | 69.6501363 | 63 |
| 72.5930539 | 67.9177631 | 68.615036 | 70.1501363 | 63 |
| 72.5930539 | 68.9177631 | 69.615036 | 70.6501363 | 63 |
| 71.5930539 | 68.9177631 | 70.615036 | 70.7751363 | 63 |
| 71.5930539 | 68.9177631 | 71.615036 | 70.5251363 | 63 |
| 71.5930539 | 68.9177631 | 71.615036 | 70.2751363 | 63 |
| 71.5930539 | 69.9177631 | 72.615036 | 70.4001363 | 63 |
| 72.5930539 | 69.9177631 | 72.615036 | 70.5251363 | 63 |
| 72.5930539 | 69.9177631 | 72.615036 | 70.5251363 | 63 |
| 72.5930539 | 69.9177631 | 72.615036 | 71.2751363 | 63 |
| 73.5930539 | 69.9177631 | 72.615036 | 71.5251363 | 63 |
| 73.5930539 | 69.9177631 | 72.615036 | 71.4001363 | 63 |
| 74.5930539 | 68.9177631 | 72.615036 | 71.2751363 | 63 |
| 75.5930539 | 68.9177631 | 76.615036 | 72.1501363 | 63 |
| 75.5930539 | 67.9177631 | 78.615036 | 72.0251363 | 63 |
| 77.5930539 | 67.9177631 | 78.615036 | 73.1501363 | 63 |
| 78.5930539 | 66.9177631 | 79.615036 | 73.7751363 | 63 |
| 81.5930539 | 69.9177631 | 80.615036 | 74.5251363 | 63 |
| 73.5930539 | 71.9177631 | 80.615036 | 73.9001363 | 63 |
| 69.5930539 | 71.9177631 | 80.615036 | 73.4001363 | 63 |
| 68.5930539 | 71.9177631 | 79.615036 | 73.2751363 | 63 |
| 68.5930539 | 70.9177631 | 79.615036 | 73.0251363 | 63 |

|            |            |            |            |    |
|------------|------------|------------|------------|----|
| 68.5930539 | 69.9177631 | 79.615036  | 72.4001363 | 63 |
| 69.5930539 | 69.9177631 | 79.615036  | 72.4001363 | 63 |
| 68.5930539 | 67.9177631 | 78.615036  | 71.4001363 | 63 |
| 67.5930539 | 65.9177631 | 79.615036  | 69.6501363 | 63 |
| 67.5930539 | 62.9177631 | 79.615036  | 68.9001363 | 63 |
| 67.5930539 | 62.9177631 | 78.615036  | 68.2751363 | 63 |
| 67.5930539 | 62.9177631 | 69.615036  | 67.2751363 | 63 |
| 67.5930539 | 65.9177631 | 66.615036  | 67.1501363 | 63 |
| 67.5930539 | 65.9177631 | 65.615036  | 67.4001363 | 63 |
| 68.5930539 | 65.9177631 | 64.615036  | 67.2751363 | 63 |
| 70.5930539 | 65.9177631 | 65.615036  | 67.7751363 | 63 |
| 70.5930539 | 65.9177631 | 67.615036  | 68.0251363 | 63 |
| 71.5930539 | 66.9177631 | 67.615036  | 68.5251363 | 63 |
| 71.5930539 | 69.9177631 | 71.615036  | 70.0251363 | 63 |
| 70.5930539 | 74.9177631 | 72.615036  | 70.6501363 | 63 |
| 70.5930539 | 76.9177631 | 73.615036  | 71.1501363 | 63 |
| 71.5930539 | 77.9177631 | 74.615036  | 71.6501363 | 63 |
| 73.5930539 | 76.9177631 | 75.615036  | 72.2751363 | 63 |
| 74.5930539 | 76.9177631 | 75.615036  | 72.6501363 | 63 |
| 74.5930539 | 76.9177631 | 76.615036  | 72.7751363 | 63 |
| 74.5930539 | 76.9177631 | 76.615036  | 72.5251363 | 63 |
| 74.5930539 | 76.9177631 | 77.615036  | 72.1501363 | 63 |
| 74.5930539 | 76.9177631 | 81.615036  | 72.5251363 | 63 |
| 73.5930539 | 77.9177631 | 82.615036  | 72.5251363 | 63 |
| 73.5930539 | 78.9177631 | 82.615036  | 72.7751363 | 63 |
| 72.5930539 | 78.9177631 | 83.615036  | 72.2751363 | 63 |
| 65.5930539 | 78.9177631 | 83.615036  | 70.9001363 | 63 |
| 65.5930539 | 78.9177631 | 85.615036  | 70.9001363 | 63 |
| 64.5930539 | 78.9177631 | 70.4001363 | 68.4982738 | 63 |
| 67.5930539 | 78.9177631 | 70.1501363 | 68.2170238 | 63 |
| 67.5930539 | 77.9177631 | 84.615036  | 69.7751363 | 63 |
| 67.5930539 | 76.9177631 | 83.615036  | 69.5251363 | 63 |
| 67.5930539 | 76.9177631 | 83.615036  | 69.5251363 | 63 |
| 67.5930539 | 76.9177631 | 82.615036  | 68.9001363 | 63 |
| 67.5930539 | 76.9177631 | 81.615036  | 68.9001363 | 63 |
| 67.5930539 | 76.9177631 | 80.615036  | 69.1501363 | 63 |
| 68.5930539 | 77.9177631 | 79.615036  | 69.2751363 | 63 |
| 68.5930539 | 76.9177631 | 79.615036  | 68.7751363 | 63 |
| 68.5930539 | 76.9177631 | 79.615036  | 69.0251363 | 63 |
| 68.5930539 | 76.9177631 | 79.615036  | 68.9001363 | 63 |
| 68.5930539 | 76.9177631 | 79.615036  | 68.9001363 | 63 |
| 69.5930539 | 77.9177631 | 81.615036  | 69.4001363 | 63 |
| 75.5930539 | 72.9177631 | 81.615036  | 69.5251363 | 63 |
| 75.5930539 | 72.9177631 | 81.615036  | 69.6501363 | 63 |
| 75.5930539 | 72.9177631 | 79.615036  | 69.6501363 | 63 |



|            |            |           |            |    |
|------------|------------|-----------|------------|----|
| 75.5930539 | 72.9177631 | 77.615036 | 69.5251363 | 63 |
| 75.5930539 | 73.9177631 | 77.615036 | 69.7751363 | 63 |
| 76.5930539 | 73.9177631 | 77.615036 | 69.7751363 | 63 |
| 76.5930539 | 73.9177631 | 77.615036 | 70.0251363 | 63 |
| 76.5930539 | 73.9177631 | 77.615036 | 69.6501363 | 63 |
| 76.5930539 | 73.9177631 | 76.615036 | 69.6501363 | 63 |
| 76.5930539 | 74.9177631 | 76.615036 | 69.6501363 | 63 |
| 74.5930539 | 74.9177631 | 76.615036 | 69.5251363 | 63 |
| 74.5930539 | 74.9177631 | 75.615036 | 69.6501363 | 63 |
| 74.5930539 | 74.9177631 | 75.615036 | 69.9001363 | 63 |
| 74.5930539 | 74.9177631 | 75.615036 | 69.9001363 | 63 |
| 74.5930539 | 74.9177631 | 74.615036 | 69.9001363 | 63 |
| 72.5930539 | 74.9177631 | 74.615036 | 69.5251363 | 63 |
| 72.5930539 | 74.9177631 | 74.615036 | 69.5251363 | 63 |
| 71.5930539 | 74.9177631 | 75.615036 | 69.1501363 | 63 |
| 70.5930539 | 75.9177631 | 75.615036 | 69.0251363 | 63 |
| 70.5930539 | 76.9177631 | 76.615036 | 69.2751363 | 63 |
| 67.5930539 | 76.9177631 | 78.615036 | 69.4001363 | 63 |
| 67.5930539 | 77.9177631 | 78.615036 | 69.5251363 | 63 |
| 65.5930539 | 79.9177631 | 79.615036 | 69.6501363 | 63 |
| 66.5930539 | 79.9177631 | 79.615036 | 69.9001363 | 63 |
| 67.5930539 | 80.9177631 | 79.615036 | 70.4001363 | 63 |
| 67.5930539 | 80.9177631 | 79.615036 | 70.1501363 | 63 |
| 67.5930539 | 80.9177631 | 80.615036 | 70.5251363 | 63 |
| 68.5930539 | 80.9177631 | 82.615036 | 71.0251363 | 63 |
| 68.5930539 | 80.9177631 | 83.615036 | 71.5251363 | 63 |
| 68.5930539 | 80.9177631 | 82.615036 | 71.7751363 | 63 |
| 69.5930539 | 81.9177631 | 81.615036 | 71.9001363 | 63 |
| 69.5930539 | 82.9177631 | 80.615036 | 71.6501363 | 63 |
| 70.5930539 | 82.9177631 | 78.615036 | 71.2751363 | 63 |
| 70.5930539 | 71.6501363 | 77.615036 | 69.7416829 | 63 |
| 70.5930539 | 71.6501363 | 77.615036 | 69.7416829 | 63 |
| 69.5930539 | 71.4001363 | 77.615036 | 68.9604329 | 63 |
| 69.5930539 | 72.0251363 | 78.615036 | 69.2885579 | 63 |
| 69.5930539 | 72.1501363 | 79.615036 | 69.1791829 | 63 |
| 69.5930539 | 72.1501363 | 80.615036 | 69.1791829 | 63 |
| 72.5930539 | 72.9001363 | 80.615036 | 70.2729329 | 63 |
| 72.5930539 | 72.9001363 | 79.615036 | 70.5229329 | 63 |
| 72.5930539 | 72.9001363 | 78.615036 | 70.7729329 | 63 |
| 70.5930539 | 83.9177631 | 77.615036 | 71.6501363 | 63 |
| 69.5930539 | 83.9177631 | 77.615036 | 71.7751363 | 63 |
| 68.5930539 | 80.9177631 | 77.615036 | 70.7751363 | 63 |
| 69.5930539 | 80.9177631 | 77.615036 | 70.7751363 | 63 |
| 69.5930539 | 80.9177631 | 79.615036 | 71.1501363 | 63 |
| 70.5930539 | 80.9177631 | 80.615036 | 72.4001363 | 63 |

|            |            |           |            |    |
|------------|------------|-----------|------------|----|
| 69.5930539 | 80.9177631 | 81.615036 | 73.0251363 | 63 |
| 69.5930539 | 81.9177631 | 81.615036 | 74.0251363 | 63 |
| 69.5930539 | 81.9177631 | 81.615036 | 74.0251363 | 63 |
| 68.5930539 | 81.9177631 | 81.615036 | 74.1501363 | 63 |
| 68.5930539 | 81.9177631 | 81.615036 | 74.1501363 | 63 |
| 69.5930539 | 82.9177631 | 81.615036 | 73.5251363 | 63 |
| 69.5930539 | 82.9177631 | 81.615036 | 73.7751363 | 63 |
| 69.5930539 | 84.9177631 | 80.615036 | 73.4001363 | 63 |
| 69.5930539 | 86.9177631 | 81.615036 | 73.1501363 | 63 |
| 69.5930539 | 87.9177631 | 83.615036 | 73.4001363 | 63 |
| 69.5930539 | 86.9177631 | 84.615036 | 73.4001363 | 63 |
| 69.5930539 | 85.9177631 | 84.615036 | 73.4001363 | 63 |
| 69.5930539 | 84.9177631 | 84.615036 | 72.9001363 | 63 |
| 70.5930539 | 83.9177631 | 84.615036 | 72.6501363 | 63 |
| 70.5930539 | 82.9177631 | 83.615036 | 72.2751363 | 63 |
| 70.5930539 | 81.9177631 | 82.615036 | 71.9001363 | 63 |
| 70.5930539 | 81.9177631 | 82.615036 | 71.7751363 | 63 |
| 70.5930539 | 81.9177631 | 81.615036 | 71.6501363 | 63 |
| 69.5930539 | 79.9177631 | 81.615036 | 71.2751363 | 63 |
| 70.5930539 | 79.9177631 | 81.615036 | 71.2751363 | 63 |
| 70.5930539 | 78.9177631 | 82.615036 | 71.4001363 | 63 |
| 70.5930539 | 78.9177631 | 83.615036 | 71.7751363 | 63 |
| 71.5930539 | 78.9177631 | 83.615036 | 71.9001363 | 63 |
| 71.5930539 | 79.9177631 | 82.615036 | 72.0251363 | 63 |
| 71.5930539 | 79.9177631 | 81.615036 | 72.0251363 | 63 |
| 71.5930539 | 79.9177631 | 79.615036 | 71.7751363 | 63 |
| 72.5930539 | 80.9177631 | 79.615036 | 72.6501363 | 63 |
| 72.5930539 | 81.9177631 | 79.615036 | 72.4001363 | 63 |
| 72.5930539 | 81.9177631 | 79.615036 | 72.4001363 | 63 |
| 72.5930539 | 81.9177631 | 79.615036 | 72.1501363 | 63 |
| 73.5930539 | 78.9177631 | 79.615036 | 71.4001363 | 63 |
| 73.5930539 | 77.9177631 | 78.615036 | 71.1501363 | 63 |
| 72.5930539 | 77.9177631 | 79.615036 | 70.7751363 | 63 |
| 71.5930539 | 76.9177631 | 79.615036 | 70.1501363 | 63 |
| 71.5930539 | 74.9177631 | 78.615036 | 69.7751363 | 63 |
| 71.5930539 | 76.9177631 | 77.615036 | 69.9001363 | 63 |
| 69.5930539 | 76.9177631 | 76.615036 | 69.5251363 | 63 |
| 69.5930539 | 76.9177631 | 77.615036 | 69.6501363 | 63 |
| 67.5930539 | 77.9177631 | 77.615036 | 69.4001363 | 63 |
| 67.5930539 | 77.9177631 | 77.615036 | 69.4001363 | 63 |
| 67.5930539 | 78.9177631 | 78.615036 | 69.5251363 | 63 |
| 70.5930539 | 80.9177631 | 78.615036 | 70.1501363 | 63 |
| 70.5930539 | 80.9177631 | 77.615036 | 70.2751363 | 63 |
| 71.5930539 | 81.9177631 | 77.615036 | 70.4001363 | 63 |
| 72.5930539 | 81.9177631 | 75.615036 | 71.0251363 | 63 |

|            |            |           |            |    |
|------------|------------|-----------|------------|----|
| 72.5930539 | 81.9177631 | 74.615036 | 71.4001363 | 63 |
| 71.5930539 | 81.9177631 | 74.615036 | 70.9001363 | 63 |
| 69.5930539 | 81.9177631 | 74.615036 | 70.4001363 | 63 |
| 68.5930539 | 81.9177631 | 75.615036 | 70.0251363 | 63 |
| 68.5930539 | 81.9177631 | 76.615036 | 70.2751363 | 63 |
| 68.5930539 | 80.9177631 | 76.615036 | 70.4001363 | 63 |
| 69.5930539 | 80.9177631 | 76.615036 | 70.6501363 | 63 |
| 69.5930539 | 80.9177631 | 75.615036 | 70.6501363 | 63 |
| 69.5930539 | 80.9177631 | 74.615036 | 70.6501363 | 63 |
| 70.5930539 | 78.9177631 | 74.615036 | 70.6501363 | 63 |
| 70.5930539 | 78.9177631 | 73.615036 | 70.5251363 | 63 |
| 72.5930539 | 78.9177631 | 74.615036 | 70.7751363 | 63 |
| 72.5930539 | 78.9177631 | 76.615036 | 71.6501363 | 63 |
| 72.5930539 | 78.9177631 | 76.615036 | 71.6501363 | 63 |
| 73.5930539 | 76.9177631 | 79.615036 | 71.7751363 | 63 |
| 73.5930539 | 77.9177631 | 79.615036 | 72.2751363 | 63 |
| 73.5930539 | 77.9177631 | 79.615036 | 72.4001363 | 63 |
| 73.5930539 | 77.9177631 | 79.615036 | 72.6501363 | 63 |
| 73.5930539 | 77.9177631 | 79.615036 | 72.7751363 | 63 |
| 73.5930539 | 77.9177631 | 79.615036 | 72.7751363 | 63 |
| 72.5930539 | 77.9177631 | 79.615036 | 72.7751363 | 63 |
| 72.5930539 | 77.9177631 | 80.615036 | 72.4001363 | 63 |
| 72.5930539 | 79.9177631 | 83.615036 | 73.2751363 | 63 |
| 72.5930539 | 79.9177631 | 84.615036 | 73.4001363 | 63 |
| 72.5930539 | 80.9177631 | 85.615036 | 73.6501363 | 63 |

moving average

77.6173009  
77.8324983  
78.0522002  
78.2944247  
78.5771896  
78.8284231  
79.048125  
79.2137728  
79.3523937  
79.4945048  
79.6670213  
79.8800783  
80.1319868  
80.3923411  
80.6273576  
80.8269012  
81.011242  
81.2040288  
81.174995  
81.1394372  
81.0806574  
81.0321218  
81.0002529  
80.9038007  
80.8552651  
80.8192295  
80.7456939  
80.663825  
80.5382061  
80.3896705  
80.2140516  
80.0613494  
79.9565638  
79.8517782  
79.7824093  
79.7130404  
79.7345432  
79.7327126  
79.7058821  
79.6540515  
79.582221

79.5037238  
79.4235599  
79.3350627  
79.3065655  
79.3297349  
79.379571  
79.4594072  
79.5492433  
79.6233509  
79.7068335  
79.8203161  
79.9453612  
80.0675938  
80.2432639  
80.4567465  
80.6867916  
80.8940242  
81.1068818  
81.2775519  
81.453222  
81.704927  
81.9566321  
82.2345871  
82.4662921  
82.6754972  
82.9072022  
83.1239072  
83.3443623  
83.5510673  
83.7565223  
83.9507273  
84.0886824  
84.2266374  
84.3058424  
84.3600475  
84.3200475  
84.3100475  
84.3100475  
84.3050475  
84.3050475  
84.3000475  
84.2857891  
84.2673642  
84.2139392  
84.1505142

84.0895893  
84.0236643  
83.9477393  
83.8843143  
83.787556  
83.6524644  
83.5032061  
83.3614478  
83.1896895  
83.0056921  
82.8209803  
82.6476972  
82.4808426  
82.3497024  
82.2457049  
82.1367075  
82.0277101  
81.909427  
81.8168581  
81.7342893  
81.6738633  
81.6248659  
81.5801542  
81.551871  
81.5078736  
81.4653047  
81.3977359  
81.3230242  
81.2454553  
81.1928865  
81.1353176  
81.0591774  
80.9587514  
80.8633254  
80.7721851  
80.668902  
80.5848771  
80.4943047  
80.4215894  
80.3560169  
80.3065159  
80.2534435  
80.1967996  
80.0917226  
79.9908973

79.8703441  
79.7539576  
79.6332344  
79.5165927  
79.3862719  
79.2375836  
79.1006301  
78.967248  
78.8481516  
78.8231516  
78.8124373  
78.8160088  
78.8160088  
78.8410088  
78.8767231  
78.9124373  
78.9517231  
78.9945802  
79.0338659  
79.0624373  
79.0910088  
79.1410088  
79.2160088  
79.3267231  
79.4517231  
79.5910088  
79.7552945  
79.9302945  
80.0874373  
80.1678308  
80.2512854  
80.3265768  
80.4694339  
80.5801482  
80.6694339  
80.7230053  
80.7765768  
80.8301482  
80.930367  
81.0346675  
81.1624395  
81.3058366  
81.4348204  
81.5472225  
81.668043

81.7960702  
81.9221841  
82.0514229  
82.1806618  
82.2117865  
82.2255004  
82.2218036  
82.204714  
82.186285  
82.1477668  
82.1052307  
82.0595697  
82.0273015  
82.0053011  
81.9891043  
81.982729  
81.95805  
81.9123889  
81.8644957  
81.8023168  
81.7289772  
81.6217089  
81.5242622  
81.4384225  
81.4087966  
81.4051273  
81.4189963  
81.3760138  
81.356692  
81.3516559  
81.3506377  
81.3500659  
81.3311906  
81.3297259  
81.3282613  
81.3313863  
81.3157613  
81.3095113  
81.3126363  
81.3095113  
81.2970113  
81.2876363  
81.2720113  
81.2626363  
81.2532613



81.2501363  
81.2095113  
81.1907613  
81.1626363  
81.0845113  
80.9970113  
80.9095113  
80.7907613  
80.6657613  
80.5532613  
80.4282613  
80.3251363  
80.2532613  
80.1907613  
80.1063863  
80.0188863  
79.9313863  
79.8345113  
79.7345113  
79.6188863  
79.4626363  
79.3126363  
79.1657613  
79.0188863  
78.8782613  
78.7438863  
78.5938863  
78.4657613  
78.3470113  
78.2313863  
78.1001363  
77.9657613  
77.8407613  
77.7126363  
77.6063863  
77.5095113  
77.4126363  
77.3376363  
77.2595113  
77.1845113  
77.1282613  
77.1157613  
77.1063863  
77.0970113  
77.1438863

77.1907613  
77.2438863  
77.2970113  
77.3595113  
77.4376363  
77.5220113  
77.6063863  
77.6657613  
77.7095113  
77.7782613  
77.8376363  
77.9063863  
77.9782613  
78.0563863  
78.1376363  
78.2188863  
78.3063863  
78.3813863  
78.4438863  
78.4813863  
78.5157613  
78.5688863  
78.6376363  
78.6907613  
78.7407613  
78.8001363  
78.8751363  
78.9282613  
79.0001363  
79.0376363  
79.0532613  
79.0501363  
79.0188863  
78.9688863  
78.9188863  
78.8532613  
78.7907613  
78.7470113  
78.7095113  
78.6907613  
78.7001363  
78.7095113  
78.7626363  
78.8157613  
78.8595113

78.9032613  
78.9501363  
78.9907613  
79.0220113  
79.0438863  
79.0782613  
79.1126363  
79.1501363  
79.1938863  
79.2532613  
79.3251363  
79.3845113  
79.4438863  
79.5032613  
79.5782613  
79.6501363  
79.7282613  
79.8032613  
79.8876363  
79.9782613  
80.0782613  
80.1688863  
80.2751363  
80.3845113  
80.5095113  
80.6532613  
80.8095113  
80.9751363  
81.1626363  
81.3251363  
81.4751363  
81.6095113  
81.7032613  
81.7782613  
81.8251363  
81.8470113  
81.8720113  
81.8813863  
81.8876363  
81.8595113  
81.8282613  
81.7813863  
81.7345113  
81.7063863  
81.6970113

81.6907613  
81.6782613  
81.6501363  
81.6032613  
81.5532613  
81.5001363  
81.4407613  
81.3938863  
81.3657613  
81.3532613  
81.3376363  
81.3032613  
81.2657613  
81.2313863  
81.1907613  
81.1595113  
81.1501363  
81.1470113  
81.1313863  
81.1063863  
81.0782613  
81.0501363  
81.0188863  
80.9813863  
80.9595113  
80.9376363  
80.9095113  
80.8626363  
80.8376363  
80.8282613  
80.8220113  
80.8126363  
80.8001363  
80.7845113  
80.8001363  
80.8220113  
80.8407613  
80.8595113  
80.8595113  
80.8595113  
80.8438863  
80.8126363  
80.7970113  
80.7813863  
80.7595113

80.7563863  
80.7407613  
80.7157613  
80.6626363  
80.5907613  
80.5220113  
80.4595113  
80.4001363  
80.3376363  
80.2813863  
80.2188863  
80.1407613  
80.0470113  
79.9563863  
79.8501363  
79.7438863  
79.6376363  
79.5345113  
79.4313863  
79.3376363  
79.2626363  
79.1938863  
79.1470113  
79.0876363  
79.0157613  
78.9532613  
78.8970113  
78.8470113  
78.7688863  
78.6970113  
78.6126363  
78.5501363  
78.5063863  
78.4688863  
78.4470113  
78.4313863  
78.4282613  
78.4220113  
78.4282613  
78.4470113  
78.4470113  
78.4751363  
78.5126363  
78.5688863  
78.6345113

78.7251363  
78.7842304  
78.8421525  
78.8832779  
78.9287  
79.006825  
79.0662  
79.12245  
79.17245  
79.231825  
79.275575  
79.325575  
79.388075  
79.456825  
79.52245  
79.5662  
79.62245  
79.6537  
79.69745  
79.756825  
79.800575  
79.831825  
79.863075  
79.919325  
79.9662  
80.02245  
80.081825  
80.1287  
80.1662  
80.175575  
80.181825  
80.20995  
80.263075  
80.325575  
80.4037  
80.500575  
80.5787  
80.6412  
80.6912  
80.731825  
80.756825  
80.822731  
80.8710588  
80.9236835  
80.9688863

80.9626363  
80.9626363  
80.9595113  
80.9563863  
80.9845113  
81.0251363  
81.0657613  
81.1001363  
81.1251363  
81.1438863  
81.1626363  
81.1782613  
81.1938863  
81.2157613  
81.2313863  
81.2657613  
81.3063863  
81.3470113  
81.3970113  
81.4470113  
81.4970113  
81.5157613  
81.5313863  
81.5501363  
81.5501363  
81.5845113  
81.6095113  
81.6001363  
81.5813863  
81.5438863  
81.4813863  
81.4001363  
81.3282613  
81.2626363  
81.1907613  
81.1126363  
81.0157613  
80.9188863  
80.8220113  
80.7313863  
80.6595113  
80.6001363  
80.5626363  
80.5157613  
80.4407613

80.3782613  
80.3095113  
80.2313863  
80.1501363  
80.0626363  
79.9501363  
79.8407613  
79.7595113  
79.6720113  
79.5907613  
79.4938863  
79.3907613  
79.2813863  
79.1626363  
79.0470113  
78.9282613  
78.8188863  
78.7032613  
78.5907613  
78.5188863  
78.4188863  
78.3188863  
78.2313863  
78.1470113  
78.0626363  
78.0157613  
77.9813863  
77.9532613  
77.9313863  
77.9407613  
77.9657613  
78.0220113  
78.0688863  
78.1220113  
78.1532613  
78.1751363  
78.1907613  
78.1813863  
78.1845113  
78.1876363  
78.1845113  
78.2032613  
78.2313863  
78.2720113  
78.3220113



78.4001363  
78.4720113  
78.4935818  
78.5030429  
78.4921915  
78.4704027  
78.4658013  
78.4576843  
78.4530829  
78.4488722  
78.4337239  
78.4381069  
78.4366305  
78.4496073  
78.4442246  
78.4423576  
78.4408813  
78.4421393  
78.4680066  
78.5016865  
78.5361476  
78.5768587  
78.632023  
78.6992966  
78.7443046  
78.7846251  
78.8128362  
78.8562817  
78.8821491  
78.9205165  
78.9413057  
78.9515481  
78.9672592  
78.983361  
78.9963377  
79.0057988  
78.9937756  
78.9657367  
78.9068385  
78.8444246  
78.7808388  
78.7203781  
78.7070968  
78.6680343  
78.6430343

78.6266281  
78.5977218  
78.5664718  
78.5379562  
78.5297531  
78.5461593  
78.6136513  
78.6495027  
78.667776  
78.6825336  
78.6906506  
78.685877  
78.678369  
78.6431266  
78.5781967  
78.4968606  
78.4186495  
78.3259852  
78.2274616  
78.1355786  
78.0421331  
77.954547  
77.8642265  
77.8008591  
77.7437417  
77.7135775  
77.6845851  
77.681374  
77.6746473  
77.6772955  
77.6834594  
77.6673576  
77.6703965  
77.6980448  
77.7292086  
77.7834194  
77.8282551  
77.8605909  
77.9151923  
77.9666687  
78.0329888  
78.0883714  
78.1464884  
78.1921054  
78.2107693

78.2157613  
78.1595113  
78.1376363  
78.1126363  
78.0782613  
78.0438863  
78.0157613  
77.9907613  
77.9532613  
77.9532613  
77.9470113  
77.9470113  
77.9407613  
77.9282613  
77.9188863  
77.9063863  
77.8938863  
77.8907613  
77.8720113  
77.8282613  
77.7813863  
77.7438863  
77.6813863  
77.6376363  
77.5938863  
77.5563863  
77.5501363  
77.5470113  
77.5470113  
77.5376363  
77.5251363  
77.5188863  
77.5188863  
77.5188863  
77.5126363  
77.4938863  
77.4876363  
77.4813863  
77.4813863  
77.4876363  
77.4782613  
77.4782613  
77.4532613  
77.4313863  
77.4188863

77.4063863  
77.4063863  
77.4001363  
77.4220113  
77.4251363  
77.4188863  
77.4063863  
77.4001363  
77.3720113  
77.3438863  
77.3188863  
77.2938863  
77.2626363  
77.2438863  
77.2438863  
77.2470113  
77.2376363  
77.2345113  
77.2063863  
77.1688863  
77.1220113  
77.0657613  
77.0063863  
76.9532613  
76.9001363  
76.8376363  
76.7751363  
76.7157613  
76.6563863  
76.6063863  
76.5782613  
76.5657613  
76.5501363  
76.5438863  
76.5470113  
76.5688863  
76.5813863  
76.6282613  
76.6688863  
76.6970113  
76.7407613  
76.7688863  
76.7970113  
76.8095113  
76.8157613

76.8282613  
76.8313863  
76.8313863  
76.8470113  
76.8438863  
76.8220113  
76.7813863  
76.7407613  
76.6876363  
76.6282613  
76.5657613  
76.5251363  
76.5001363  
76.4907613  
76.4751363  
76.4563863  
76.3970113  
76.3126363  
76.2157613  
76.1376363  
76.0626363  
75.9938863  
75.9532613  
75.8910968  
75.8363543  
75.7491898  
75.6362441  
75.5190015  
75.3990245  
75.2841257  
75.2082894  
75.1640937  
75.1331792  
75.1425542  
75.1394292  
75.1050542  
75.0644292  
75.0269292  
74.9706792  
74.9206792  
74.8769292  
74.8394292  
74.8019292  
74.7550542  
74.7113042

74.6769292  
74.6488042  
74.6363042  
74.6519292  
74.6831792  
74.7269292  
74.7550542  
74.7488042  
74.7206792  
74.6956792  
74.6863042  
74.7113042  
74.7519292  
74.7956792  
74.8269292  
74.8394292  
74.8300542  
74.7831792  
74.7672187  
74.7407112  
74.7310007  
74.7095714  
74.686189  
74.668666  
74.6335648  
74.5812761  
74.5067218  
74.4313863  
74.3220113  
74.2407613  
74.1876363  
74.1438863  
74.1063863  
74.1001363  
74.1063863  
74.1095113  
74.1220113  
74.1376363  
74.1720113  
74.2313863  
74.2876363  
74.3470113  
74.3970113  
74.4251363  
74.4376363

74.4407613  
74.4501363  
74.4720113  
74.5188863  
74.5720113  
74.6095113  
74.6470113  
74.6876363  
74.7063863  
74.7313863  
74.7751363  
74.8345113  
74.9126363  
74.9876363  
75.0563863  
75.1188863  
75.1845113  
75.2626363  
75.3251363  
75.4001363  
75.4501363  
75.4938863  
75.5376363  
75.5907613  
75.6626363  
75.7220113  
75.7876363  
75.8470113  
75.8907613  
75.9345113  
75.9845113  
76.0220113  
76.0688863  
76.1063863  
76.1282613  
76.1751363  
76.2126363  
76.2345113  
76.2626363  
76.2813863  
76.3032613  
76.3282613  
76.3657613  
76.4032613  
76.4501363

76.5095113  
76.5938863  
76.6393772  
76.7208056  
76.7885621  
76.8430373  
76.897122  
76.987747  
77.072122  
77.140872  
77.212747  
77.297122  
77.375247  
77.450247  
77.512747  
77.575247  
77.625247  
77.662747  
77.675247  
77.672122  
77.675247  
77.690872  
77.718997  
77.768997  
77.815872  
77.828372  
77.822122  
77.803372  
77.765872  
77.690872  
77.593997  
77.4720669  
77.3704493  
77.2801598  
77.2125266  
77.1719016  
77.1281516  
77.0969016  
77.0625266  
77.0312766  
77.0062766  
76.9437766  
76.9076607  
76.8668574  
76.8366008



76.8133756  
76.790541  
76.734291  
76.678041  
76.659291  
76.646791  
76.5774381  
76.5108196  
76.4500605  
76.395942  
76.3484641  
76.3703391  
76.3357519  
76.3027271  
76.2642336  
76.2194901  
76.1622467  
76.1069563  
76.0426815  
75.9787974  
75.9461633  
75.9424354  
75.9562857  
76.0250357  
76.1062857  
76.1875357  
76.2750908  
76.3267084  
76.3482478  
76.362756  
76.347131  
76.325256  
76.294006  
76.253381  
76.209631  
76.169006  
76.140881  
76.0894047  
76.0426158  
75.9958269  
76.0239519  
76.0645769  
76.1145769  
76.1864519  
76.2614519

76.3239519  
76.4183048  
76.5130483  
76.5956824  
76.6685509  
76.7472787  
76.7754037  
76.853741  
76.9461407  
77.0315092  
77.1262527  
77.2241212  
77.3106616  
77.3936863  
77.4638204  
77.5089546  
77.5564324  
77.5738322  
77.5832072  
77.6207072  
77.6738322  
77.7644572  
77.8925822  
78.0457072  
78.2113322  
78.3675822  
78.5175822  
78.6550822  
78.7863322  
78.8988322  
78.9925822  
79.0925822  
79.2221835  
79.3064724  
79.3813863  
79.3563863  
79.3032613  
79.2345113  
79.1345113  
79.0220113  
78.9282613  
78.8751363  
78.8001363  
78.7345113  
78.6657613

78.5845113  
78.4938863  
78.4188863  
78.3438863  
78.3095113  
78.2845113  
78.2782613  
78.2688863  
78.2470113  
78.2188863  
78.2220113  
78.2188863  
78.2345113  
78.2157613  
78.1938863  
78.1626363  
78.1220113  
78.0657613  
77.9845113  
77.8782613  
77.7595113  
77.6313863  
77.5126363  
77.3845113  
77.2657613  
77.1532613  
77.0376363  
76.9251363  
76.8345113  
76.7345113  
76.6532613  
76.5907613  
76.5220113  
76.4657613  
76.4157613  
76.3470113  
76.2595113  
76.1938863  
76.1063863  
76.0313863  
75.9626363  
75.8907613  
75.8001363  
75.7095113  
75.6188863

75.5095113  
75.3845113  
75.2563863  
75.1251363  
75.0032613  
74.8688863  
74.7407613  
74.6001363  
74.4845113  
74.3595113  
74.2313863  
74.1032613  
73.9782613  
73.8782613  
73.8095113  
73.7626363  
73.7376363  
73.6970113  
73.6595113  
73.6157613  
73.5657613  
73.4907613  
73.4095113  
73.3313863  
73.2720113  
73.2345113  
73.2063863  
73.1845113  
73.1657613  
73.1188863  
73.0720113  
73.0345113  
73.0126363  
73.0251363  
73.0407613  
73.0501363  
73.0720113  
73.1126363  
73.1501363  
73.1438863  
73.1313863  
73.1095113  
73.0876363  
73.0907613  
73.1063863

73.1313863  
73.1470113  
73.1688863  
73.1595113  
73.1595113  
73.1595113  
73.1595113  
73.1626363  
73.1595113  
73.1438863  
73.1345113  
73.1313863  
73.1532613  
73.1970113  
73.2688863  
73.3501363  
73.4501363  
73.5751363  
73.7126363  
73.8501363  
73.9626363  
74.0657613  
74.1532613  
74.2501363  
74.3845113  
74.5299998  
74.6961915  
74.9211915  
75.1243165  
75.3274415  
75.5368165  
75.7399415  
75.9211915  
76.1118165  
76.268481  
76.4208486  
76.5618881  
76.7021463  
76.8458963  
76.9646463  
77.0740213  
77.1865213  
77.3208963  
77.4708963  
77.6146463

77.7646463  
77.9115213  
78.0552713  
78.2115213  
78.3677713  
78.5240213  
78.6177713  
78.6833963  
78.7240213  
78.7427713  
78.7552713  
78.7740213  
78.7708963  
78.7615213  
78.7396463  
78.7271463  
78.7208963  
78.7177713  
78.6802713  
78.6177713  
78.5347828  
78.4310911  
78.2592161  
78.1060911  
77.9529661  
77.8279661  
77.7092161  
77.6060911  
77.5060911  
77.4525516  
77.412684  
77.3841445  
77.3095113  
77.2313863  
77.1907613  
77.1376363  
77.0970113  
77.0438863  
76.9845113  
76.9563863  
76.9345113  
76.9251363  
76.9095113  
76.8626363  
76.8001363

76.7251363  
76.7001363  
76.6876363  
76.6751363  
76.6233616  
76.5754931  
76.5104371  
76.4625686  
76.4111845  
76.3828472  
76.3650568  
76.3441415  
76.3785165  
76.4378915  
76.4878915  
76.5597665  
76.6378915  
76.7285165  
76.8191415  
76.9222665  
76.9972665  
77.0753915  
77.1472665  
77.2097665  
77.2566415  
77.2972665  
77.3191415  
77.3753915  
77.3941415  
77.3753915  
77.3660165  
77.3441415  
77.3191415  
77.2972665  
77.2316415  
77.1441415  
77.0503915  
76.9660165  
76.9097665  
76.8628915  
76.8285165  
76.8128915  
76.7910165  
76.7691415  
76.7771662

76.7500347  
76.7369657  
76.7067092  
76.6705933  
76.6208056  
76.5604709  
76.4970113  
76.3907613  
76.2876363  
76.2126363  
76.1345113  
76.0251363  
75.8938863  
75.7657613  
75.5907613  
75.4001363  
75.2032613  
75.0188863  
74.8501363  
74.7032613  
74.5751363  
74.4782613  
74.4001363  
74.3345113  
74.3032613  
74.2907613  
74.3001363  
74.3032613  
74.3095113  
74.3595113  
74.4095113  
74.4595113  
74.5095113  
74.5345113  
74.5532613  
74.5532613  
74.5501363  
74.5532613  
74.5813863  
74.6220113  
74.6907613  
74.7720113  
74.8657613  
74.9563863  
75.0563863



75.1813863  
75.3095113  
75.4282613  
75.5438863  
75.6688863  
75.8095113  
75.9751363  
76.1438863  
76.3001363  
76.4438863  
76.6001363  
76.7563863  
76.9032613  
77.0376363  
77.1751363  
77.3157613  
77.4657613  
77.6188863  
77.7813863  
77.9126363  
78.0157613  
78.0813863  
78.1470113  
78.2063863  
78.2438863  
78.2688863  
78.2970113  
78.3251363  
78.3595113  
78.4001363  
78.4563863  
78.4970113  
78.5376363  
78.5657613  
78.6001363  
78.6407613  
78.6938863  
78.7438863  
78.8032613  
78.8532613  
78.8532613  
78.8438863  
78.8157613  
78.7782613  
78.7157613

78.6470113  
78.5782613  
78.4791522  
78.3866838  
78.3524185  
78.3337782  
78.3034191  
78.3221691  
78.3471691  
78.3659191  
78.3815441  
78.3815441  
78.3721691  
78.3565441  
78.3596691  
78.3815441  
78.3846691  
78.3940441  
78.4096691  
78.4127941  
78.4252941  
78.4377941  
78.4252941  
78.3909191  
78.3502941  
78.2784191  
78.2096691  
78.0998484  
78.0560984  
78.0029734  
77.9435984  
77.8623484  
77.7779734  
77.6717234  
77.5810984  
77.4873484  
77.4029734  
77.3342234  
77.2623484  
77.1685984  
77.0592234  
76.9498484  
76.9208325  
76.8484021  
76.7201123

76.5797131  
76.4443921  
76.2740245  
76.1013132  
75.9293831  
75.7344062  
75.5359136  
75.3339054  
75.151819  
74.9521546  
74.7423339  
74.5704038  
74.399255  
74.2425592  
74.1581842  
74.0769342  
73.9894342  
73.9269342  
73.9019342  
73.8988092  
73.9331842  
73.9706842  
74.018005  
73.986755  
73.95238  
73.930505  
73.91488  
73.88363  
73.886755  
73.886755  
73.911755  
73.949255  
73.993005  
74.055505  
74.136755  
74.236755  
74.2818529  
74.2835914  
74.3498382  
74.4613974  
74.5659254  
74.6716253  
74.7386533  
74.7810719  
74.7883343

74.7815341  
74.7751246  
74.7702776  
74.7576181  
74.7523805  
74.7717523  
74.7844834  
74.8493822  
74.8904529  
74.8685779  
74.8404529  
74.7935779  
74.7342029  
74.6717029  
74.5967029  
74.4873279  
74.3654529  
74.2623279  
74.1654529  
74.0748279  
73.9873279  
73.8904529  
73.8060779  
73.7029529  
73.5967029  
73.4935779  
73.3779529  
73.2592029  
73.1342029  
73.0217029  
72.8935779  
72.81098  
72.7342415  
72.6485186  
72.5776394  
72.5196509  
72.4608811  
72.4517207  
72.4788884  
72.5498061  
72.6359582  
72.7127352  
72.7820905  
72.8362113  
72.8786134

72.8971873  
72.9220113  
72.8876363  
72.8657613  
72.8501363  
72.8470113  
72.8720113  
72.8938863  
72.8938863  
72.8907613  
72.9032613  
72.9376363  
72.9368  
72.9320574  
72.9484085  
72.9487441  
72.9873609  
73.050587  
73.178712  
73.306837  
73.422462  
73.488087  
73.547462  
73.538087  
73.525587  
73.513087  
73.503712  
73.491212  
73.450587  
73.391212  
73.281837  
73.156837  
73.009962  
72.859962  
72.725587  
72.603712  
72.500587  
72.413087  
72.341212  
72.288087  
72.241212  
72.203712  
72.169337  
72.150587  
72.128712

72.097462  
72.069337  
72.063087  
72.091212  
72.122462  
72.1347498  
72.1415688  
72.1996148  
72.3199824  
72.3737314  
72.4380274  
72.4644328  
72.4591975  
72.3773446  
72.2794761  
72.1976232  
72.1560047  
72.1304019  
72.1665178  
72.1889618  
72.199687  
72.230937  
72.221562  
72.230937  
72.1954998  
72.2611248  
72.3579998  
72.4642498  
72.5548748  
72.6079998  
72.6611248  
72.6986248  
72.7329998  
72.7642498  
72.7954998  
72.8392498  
72.8923748  
72.9486248  
72.9798748  
73.0142498  
73.0611248  
73.1017498  
73.1329998  
73.1267498  
73.1111248

73.1113371  
73.1045181  
73.0879334  
73.0223084  
72.9897082  
72.9532017  
72.9163045  
72.8833137  
72.8714165  
72.87241  
72.8667629  
72.8708814  
72.8714843  
72.8822434  
72.8865402  
72.9095871  
72.9261718  
72.9876783  
73.0573879  
73.1687847  
73.2302912  
73.3074227  
73.3826011  
73.5044761  
73.6482261  
73.7982261  
73.9544761  
74.0888511  
74.2044761  
74.2888511  
74.3294761  
74.2451011  
74.1107261  
73.9701011  
73.8232261  
73.6857261  
73.5482261  
73.4138511  
73.2763511  
73.1544761  
73.0388511  
72.9263511  
72.8263511  
72.7357261  
72.6763511

72.6169761  
72.6044761  
72.6201011  
72.6357261  
72.6638511  
72.6232261  
72.5544761  
72.4576011  
72.3419761  
72.2402352  
72.1220881  
71.9836285  
71.834622  
71.6711623  
71.5045777  
71.3461962  
71.1596897  
70.9720113  
70.7345113  
70.4813863  
70.2220113  
69.9720113  
69.7626363  
69.5720113  
69.4126363  
69.2907613  
69.2813863  
69.3095113  
69.3470113  
69.3876363  
69.4501363  
69.5188863  
69.5845113  
69.6813863  
69.7813863  
69.8938863  
70.0095113  
70.1157613  
70.2063863  
70.2751363  
70.3470113  
70.3782613  
70.3845113  
70.4032613  
70.4157613



70.5001363  
70.5845113  
70.6782613  
70.7845113  
70.8876363  
71.0032613  
71.1345113  
71.2970113  
71.4751363  
71.6595113  
71.8095113  
71.9532613  
72.0938863  
72.2313863  
72.3595113  
72.4907613  
72.6188863  
72.7188863  
72.8188863  
72.9345113  
73.0532613  
73.1595113  
73.2782613  
73.3970113  
73.5095113  
73.5845113  
73.6407613  
73.6907613  
73.7282613  
73.7345113  
73.7282613  
73.7282613  
73.7251363  
73.7251363  
73.7251363  
73.7126363  
73.7313863  
73.7563863  
73.7813863  
73.8032613  
73.8438863  
73.9157613  
74.0032613  
74.0845113  
74.1688863

74.2563863  
74.284621  
74.331496  
74.368996  
74.409621  
74.475246  
74.556496  
74.600246  
74.656496  
74.734621  
74.812746  
74.887746  
74.972121  
75.056496  
75.103371  
75.143996  
75.181496  
75.228371  
75.278371  
75.337746  
75.406496  
75.462746  
75.522121  
75.572121  
75.640871  
75.718996  
75.759621  
75.797121  
75.837746  
75.878371  
75.925246  
75.915871  
75.897121  
75.862746  
75.853371  
75.825246  
75.822121  
75.825246  
75.818996  
75.800246  
75.768996  
75.7751363  
75.7157613  
75.6470113  
75.5657613

75.4907613  
75.4063863  
75.3595113  
75.3157613  
75.2626363  
75.2095113  
75.1688863  
75.1313863  
75.0938863  
75.0970113  
75.0970113  
75.1282613  
75.1688863  
75.2095113  
75.2438863  
75.2079091  
75.1695881  
75.1238452  
75.0835711  
75.0362657  
74.9725541  
74.9725541  
74.9819291  
74.9725541  
74.9381791  
74.8850541  
74.8631791  
74.8381791  
74.8163041  
74.7694291  
74.7413041  
74.6850541  
74.6506791  
74.6444291  
74.6538041  
74.6538041  
74.6756791  
74.7256791  
74.7476402  
74.7758514  
74.7814062  
74.7764142  
74.7991566  
74.8090084  
74.8087039

74.8103525  
74.7963761  
74.7734153  
74.7543608  
74.7353063  
74.7174237  
74.6651661  
74.5843928  
74.4977602  
74.407612  
74.4029642  
74.3787852  
74.362028  
74.3304272  
74.2996075  
74.2758191  
74.2101941  
74.1508191  
74.1258191  
74.1320691  
74.1601941  
74.1758191  
74.1976941  
74.2195691  
74.2445691  
74.2539441  
74.2695691  
74.2914441  
74.3070691  
74.3013881  
74.3199259  
74.3220574  
74.3376824  
74.328009  
74.3404229  
74.366118  
74.40236  
74.4108677  
74.4228909  
74.4294454  
74.4152968  
74.3886482  
74.3647339  
74.3369134  
74.2997179

74.2551006  
74.2136082  
74.1912564  
74.1716391  
74.2086623  
74.2180373  
74.2774123  
74.3305373  
74.4117873  
74.5055373  
74.5992873  
74.7086623  
74.8086623  
74.8930373  
74.9680373  
75.0305373  
75.1024123  
75.1774123  
75.2555373  
75.3305373  
75.4024123  
75.4617873  
75.4867873  
75.4930373  
75.5174683  
75.5239306  
75.5374241  
75.5217991  
75.5657613  
75.5970113  
75.6157613  
75.6251363  
75.6220113  
75.6188863  
75.6313863  
75.6876363  
75.7907613  
75.8970113  
76.0063863  
76.1063863  
76.2126363  
76.2938863  
76.3438863  
76.4001363  
76.4063863

76.4220113  
76.4282613  
76.4438863  
76.4532613  
76.4532613  
76.4251363  
76.3845113  
76.3438863  
76.2970113  
76.2626363  
76.2376363  
76.2126363  
76.1845113  
76.1001363  
76.0220113  
75.9501363  
75.8813863  
75.8095113  
75.7720113  
75.7282613  
75.6907613  
75.6595113  
75.6313863  
75.6032613  
75.5688863  
75.5345113  
75.5063863  
75.4907613  
75.4782613  
75.4688863  
75.4470113  
75.3907613  
75.3345113  
75.3032613  
75.3032613  
75.3063863  
75.3376363  
75.3813863  
75.3876363  
75.3782613  
75.3501363  
75.3282613  
75.2907613  
75.2313863  
75.1563863

75.1001363  
75.0032613  
74.9063863  
74.8157613  
74.7188863  
74.6220113  
74.5282613  
74.4095113  
74.3470113  
74.2532613  
74.1407613  
74.0063863  
73.8720113  
73.7063863  
73.5501363  
73.4032613  
73.2563863  
73.1157613  
72.9876363  
72.8501363  
72.7313863  
72.6157613  
72.4970113  
72.3751363  
72.2532613  
72.1157613  
71.9876363  
71.8563863  
71.7032613  
71.5438863  
71.3938863  
71.2782613  
71.1845113  
71.1313863  
71.0907613  
71.0626363  
71.0438863  
71.0595113  
71.0907613  
71.1501363  
71.2251363  
71.3626363  
71.5126363  
71.6751363  
71.8407613

72.0126363  
72.1688863  
72.3438863  
72.5095113  
72.7001363  
72.9001363  
73.1095113  
73.3345113  
73.5907613  
73.8438863  
74.0563863  
74.2501363  
74.4188863  
74.5657613  
74.7126363  
74.8407613  
74.9782613  
75.1063863  
75.2345113  
75.3563863  
75.4751363  
75.5751363  
75.6720113  
75.7532613  
75.8063863  
75.8282613  
75.8126363  
75.7657613  
75.6970113  
75.6282613  
75.5626363  
75.4813863  
75.4063863  
75.3282613  
75.2407613  
75.1532613  
75.0501363  
74.9313863  
74.8126363  
74.7032613  
74.5938863  
74.5063863  
74.4251363  
74.3501363  
74.2657613



74.1938863  
74.1251363  
74.0657613  
73.9938863  
73.9157613  
73.8626363  
73.8220113  
73.7907613  
73.7626363  
73.7376363  
73.7126363  
73.6813863  
73.6532613  
73.6251363  
73.5907613  
73.5470113  
73.5282613  
73.5032613  
73.4813863  
73.4532613  
73.4470113  
73.4438863  
73.4595113  
73.5188863  
73.5845113  
73.6501363  
73.7157613  
73.7563863  
73.8063863  
73.8563863  
73.8876363  
73.9001363  
73.9188863  
73.9220113  
73.9095113  
73.8907613  
73.8720113  
73.8595113  
73.8563863  
73.8563863  
73.8563863  
73.8501363  
73.8376363  
73.8188863  
73.8126363

73.8095113  
73.8126363  
73.8095113  
73.8157613  
73.8220113  
73.8438863  
73.8501363  
73.8532613  
73.8532613  
73.8563863  
73.8720113  
73.8782613  
73.8970113  
73.9282613  
73.9720113  
74.0095113  
74.0470113  
74.0688863  
74.0532613  
74.0220113  
73.9813863  
73.9595113  
73.9501363  
73.9438863  
73.9563863  
73.9688863  
73.9970113  
74.0313863  
74.0595113  
74.0907613  
74.1001363  
74.1126363  
74.1063863  
74.0970113  
74.0907613  
74.0782613  
74.0845113  
74.0813863  
74.0813863  
74.0782613  
74.0720113  
74.0688863  
74.0907613  
74.1063863  
74.075246

74.0460588  
74.0473404  
74.0513563  
74.0584972  
74.1746912  
74.2947915  
74.4227043  
74.5685858  
74.7187641  
74.8763644  
75.0269334  
75.1739868  
75.3386183  
75.5200467  
75.7147563  
75.9227472  
76.1119881  
76.2992758  
76.4916417  
76.6691639  
76.859186  
77.0070206  
77.1032928  
77.1632368  
77.1809933  
77.2100779  
77.2133813  
77.2291847  
77.2422537  
77.2447758  
77.2687823  
77.2931794  
77.3214828  
77.374005  
77.4300427  
77.5056117  
77.5796182  
77.6395622  
77.704975  
77.8202781  
77.9525902  
78.0544337  
78.1379177  
78.2182768  
78.1927078

78.1507325  
78.0853198  
77.9831883  
77.8642599  
77.7410346  
77.6310906  
77.5277872  
77.4194057  
77.3036024  
77.1901427  
77.0727768  
76.955411  
76.8274982  
76.6882573  
76.4919852  
76.2863381  
76.1103784  
75.9859813  
75.9135373  
75.8926558  
75.8791961  
75.8665178  
75.8538394  
75.8282704  
75.7913732  
75.7017417  
75.6054696  
75.4927912  
75.3590191  
75.2279813  
75.0930373  
74.9534058  
74.8059618  
74.6655491  
74.5345113  
74.3938863  
74.2938863  
74.2126363  
74.1407613  
74.0782613  
74.0438863  
74.0251363  
74.0282613  
74.0188863  
73.9876363

73.9563863  
73.9376363  
73.9188863  
73.8938863  
73.8720113  
73.7928241  
73.7382463  
73.7538713  
73.7694963  
73.8413713  
73.8742935  
73.9267469  
74.0329969  
74.1517469  
74.2767469  
74.4173719  
74.5642469  
74.7173719  
74.8423719  
74.9829969  
75.1673719  
75.3548719  
75.5673719  
75.7767469  
75.9892469  
76.1954969  
76.4079969  
76.6204969  
76.8111219  
76.9892469  
77.1423719  
77.2579969  
77.3517469  
77.4454969  
77.5236219  
77.5798719  
77.6329969  
77.6954969  
77.7829969  
77.8798719  
77.9642469  
78.0548719  
78.1423719  
78.2267469  
78.3048719

78.4340591  
78.5167619  
78.4571747  
78.3905562  
78.3811812  
78.413884  
78.4145556  
78.3551806  
78.2801806  
78.1428589  
77.9930373  
77.8305373  
77.6180373  
77.4367873  
77.2617873  
77.0649123  
76.8805373  
76.6867873  
76.4930373  
76.2930373  
76.1024123  
75.9117873  
75.7461623  
75.5805373  
75.4180373  
75.2680373  
75.1149123  
74.9805373  
74.8336623  
74.6899123  
74.5492873  
74.4274123  
74.3086623  
74.1930373  
74.0742873  
73.9649123  
73.8461623  
73.7367873  
73.6399123  
73.5430373  
73.4524123  
73.3867873  
73.4057496  
73.4379931  
73.4317431

73.4348681  
73.4723681  
73.5098681  
73.5536181  
73.6035494  
73.6472307  
73.6930435  
73.7861219  
73.8815441  
73.9769663  
74.1300913  
74.2582163  
74.3266854  
74.3885138  
74.5072638  
74.6291388  
74.7447638  
74.8572638  
74.9791388  
75.0947638  
75.1978888  
75.3072638  
75.4228888  
75.5447638  
75.6666388  
75.7853888  
75.8885138  
75.9603888  
76.0228888  
76.0853888  
76.1416388  
76.1791388  
76.2072638  
76.2197638  
76.2135138  
76.2072638  
76.1822638  
76.1353888  
76.0822638  
76.0072638  
75.9228888  
75.8228888  
75.7228888  
75.6041388  
75.4510138

75.3045294  
75.1685919  
75.0224982  
74.8592169  
74.6642951  
74.4175297  
74.2237797  
74.0678107  
73.9216072  
73.7059822  
73.5122322  
73.3278572  
73.1372322  
72.9466072  
72.7809822  
72.6184822  
72.4684822  
72.3184822  
72.1622322  
72.0028572  
71.8372322  
71.6653572  
71.4966072  
71.3372322  
71.1997322  
71.0559822  
70.9153572  
70.7778572  
70.6434822  
70.5341072  
70.4309822  
70.3528572  
70.2934822  
70.2372322  
70.1934822  
70.1528572  
70.1028572  
70.0497322  
69.9903572  
69.9933725  
70.0053722  
70.0298719  
70.0672622  
70.1444963  
70.272121



70.4001363  
70.4970113  
70.6032613  
70.7032613  
70.8251363  
70.9188863  
70.9613758  
71.0007402  
71.047136  
71.0638442  
71.0973493  
71.1317243  
71.1535993  
71.1754743  
71.2098493  
71.2442243  
71.2754743  
71.2973493  
71.3223493  
71.3348493  
71.3692243  
71.4067243  
71.4442243  
71.4973493  
71.5348493  
71.5660993  
71.5817243  
71.5973493  
71.6254743  
71.6754743  
71.7442243  
71.8254743  
71.8973493  
71.9785993  
72.0723493  
72.1629743  
72.2285993  
72.2848493  
72.3160993  
72.3160993  
72.3035993  
72.2848493  
72.2660993  
72.2504743  
72.2410993

72.2254743  
72.2423598  
72.2592454  
72.2722246  
72.2930164  
72.2907613  
72.2657613  
72.2501363  
72.2532613  
72.2470113  
72.2345113  
72.2095113  
72.2032613  
72.1938863  
72.1876363  
72.1813863  
72.1845113  
72.1845113  
72.1439724  
72.1377224  
72.1220974  
72.0814724  
72.0439724  
71.9877224  
71.8908474  
71.7845974  
71.6908474  
71.6252224  
71.5627224  
71.5127224  
71.4533474  
71.4064724  
71.3564724  
71.3064724  
71.2658474  
71.2377224  
71.2220974  
71.2095974  
71.1783474  
71.1439724  
71.1033474  
71.0720974  
71.0408474  
71.0189724  
70.9908474

70.9752224  
70.9720974  
70.9627224  
70.9377224  
70.9252224  
70.9127224  
70.9252224  
70.9314724  
70.9345974  
70.9408474  
70.9345974  
70.9189724  
70.9064724  
70.9188863  
70.9157613  
70.9188863  
70.9470113  
70.9688863  
70.9876363  
71.0095113  
71.0220113  
71.0251363  
71.0282613  
71.0313863  
71.0157613  
71.0063863  
70.9876363  
70.9720113  
70.9563863  
70.9345113  
70.9220113  
70.9032613  
70.8938863  
70.9032613  
70.9095113  
70.9313863  
70.9751363  
71.0188863  
71.0720113  
71.1345113  
71.1970113  
71.2720113  
71.3501363  
71.4157613  
71.4845113

71.5563863  
71.6220113  
71.7032613  
71.7938863  
71.8751363  
71.9470113  
72.0251363  
72.0813863  
72.1313863  
72.1532613  
72.1813863  
72.2126363  
72.2376363  
72.2626363  
72.2938863  
72.3438863  
72.4032613  
72.4595113  
72.5345113  
72.6251363  
72.7001363  
72.7782613  
72.8657613  
72.9595113  
73.0595113  
73.1220113  
73.1720113  
73.2188863  
73.2470113  
73.2532613  
73.2501363  
73.2188863  
73.1876363  
73.1376363  
73.0845113  
73.0220113  
72.9407613  
72.8626363  
72.7782613  
72.6595113  
72.5563863  
72.4438863  
72.3282613  
72.1845113  
72.0438863

71.9095113  
71.7595113  
71.6188863  
71.4907613  
71.3845113  
71.2751363  
71.1657613  
71.0563863  
70.9595113  
70.8688863  
70.7845113  
70.6938863  
70.6095113  
70.5220113  
70.4251363  
70.3095113  
70.2345113  
70.1688863  
70.1001363  
70.0907613  
70.1095113  
70.1157613  
70.1188863  
70.1157613  
70.1126363  
70.1063863  
70.0646133  
70.0310434  
69.9982547  
69.9721067  
69.95924  
69.9444201  
69.9319439  
70.0006939  
70.0569439  
70.0788189  
70.0944439  
70.1006939  
70.1163189  
70.1319439  
70.1631939  
70.2069439  
70.2600689  
70.3413189  
70.4663189

70.6069439  
70.7600689  
70.9100689  
71.0475689  
71.1756939  
71.2503272  
71.315976  
71.371078  
71.4101644  
71.4496414  
71.523884  
71.553986  
71.5555723  
71.550518  
71.483745  
71.4240033  
71.3724646  
71.3244416  
71.2865748  
71.2580831  
71.2327163  
71.2737319  
71.3096694  
71.3483413  
71.4135757  
71.4784194  
71.5612319  
71.6483413  
71.6757089  
71.7370609  
71.8288816  
71.9757566  
72.1288816  
72.2820066  
72.4320066  
72.5788816  
72.6624993  
72.7426012  
72.8551012  
72.9207262  
72.9926012  
73.0519762  
73.1113512  
73.1644762  
73.2019762

73.271093  
73.3304441  
73.3659672  
73.4050058  
73.4280288  
73.4287862  
73.4330592  
73.4283479  
73.4302771  
73.4158001  
73.3786669  
73.3364555  
73.2844786  
73.2410953  
73.1977121  
73.1480789  
73.0675863  
72.9870936  
72.8905854  
72.770249  
72.6526471  
72.5346545  
72.4225212  
72.3139036  
72.2088016  
72.1013559  
71.9544809  
71.8044809  
71.6638559  
71.5326059  
71.3982309  
71.3333633  
71.2782613  
71.1751363  
71.0688863  
70.9438863  
70.8345113  
70.7532613  
70.7032613  
70.6595113  
70.6063863  
70.5282613  
70.4532613  
70.3688863  
70.2938863

70.2282613  
70.1688863  
70.1345113  
70.1001363  
70.0813863  
70.0907613  
70.1251363  
70.1688863  
70.2095113  
70.2438863  
70.2876363  
70.3407613  
70.3907613  
70.4720113  
70.5532613  
70.6220113  
70.6813863  
70.7532613  
70.8188863  
70.9095113  
71.0188863  
71.1438863  
71.2532613  
71.3438863  
71.4251363  
71.4970113  
71.5438863  
71.5845113  
71.5876363  
71.5470113  
71.4845113  
71.3938863  
71.2532613  
71.0907613  
70.9438863  
70.8032613  
70.7157613  
70.6470113  
70.6001363  
70.5970113  
70.6188863  
70.6532613  
70.6970113  
70.7595113  
70.8345113



70.9001363  
70.9470113  
70.9813863  
71.0313863  
71.0876363  
71.1470113  
71.1907613  
71.2001363  
71.1907613  
71.1150897  
71.0355119  
70.9980119  
70.9323869  
70.8698869  
70.7636369  
70.6417619  
70.5073869  
70.3917619  
70.2761369  
70.1698869  
70.0667619  
69.9792619  
69.9042619  
69.8573869  
69.8573869  
69.8761369  
69.9073869  
69.9698869  
70.0355119  
70.1011369  
70.1605119  
70.2073869  
70.2480119  
70.2730119  
70.2636369  
70.2448869  
70.2136369  
70.1698869  
70.1011369  
70.0230119  
69.9323869  
69.8448869  
69.7730119  
69.6948869  
69.6198869

69.5417619  
69.4823869  
69.4698869  
69.4511369  
69.5018085  
69.5720113  
69.6157613  
69.6720113  
69.7313863  
69.8001363  
69.8595113  
69.8743  
69.8859636  
69.890596  
69.8971816  
69.9041577  
69.9111339  
69.9329538  
69.9578987  
69.9859687  
70.0359687  
70.0922187  
70.1172187  
70.1422187  
70.1703437  
70.2390937  
70.3234687  
70.4328437  
70.5453437  
70.6578437  
70.7640937  
70.8547187  
70.9515937  
71.0484687  
71.1390937  
71.2453437  
71.3547187  
71.4578437  
71.5453437  
71.6234687  
71.6890937  
71.7390937  
71.7734687  
71.8109687  
71.8297187

71.8359687  
71.8328437  
71.8328437  
71.8328437  
71.8422187  
71.8609687  
71.911805  
71.9845163  
72.0705089  
72.1482984  
72.2225722  
72.278096  
72.3000261  
72.3063312  
72.2907613  
72.2438863  
72.1970113  
72.1657613  
72.1376363  
72.0938863  
72.0188863  
71.9313863  
71.8345113  
71.7407613  
71.6470113  
71.5688863  
71.5157613  
71.4438863  
71.3688863  
71.2907613  
71.2126363  
71.1376363  
71.0688863  
71.0126363  
70.9626363  
70.9220113  
70.8876363  
70.8626363  
70.8626363  
70.8720113  
70.8845113  
70.9063863  
70.9220113  
70.9407613  
70.9595113

70.9782613  
71.0032613  
70.9970113  
71.0188863  
71.0438863  
71.0813863  
71.1532159  
71.2348669  
71.3366072  
71.4539725  
71.5878557  
71.761471  
71.9408898  
72.1064694  
72.2747276  
72.4429857  
72.6045475  
72.7397699  
72.8611531  
72.9758398  
73.0356158  
73.0753025  
73.1274893  
73.1814617  
73.2448091

| Time     |         | Person 1   | Person 10  | Person 3   | Person 7  | Person 5   |
|----------|---------|------------|------------|------------|-----------|------------|
| 17:59:25 | 0:00:01 | 71.2188035 | 76.4799866 | 74.1785034 | 69.122577 | 69.5930539 |
| 17:59:26 | 0:00:02 | 72.2188035 | 76.9799866 | 74.1785034 | 73.122577 | 70.5930539 |
| 17:59:27 | 0:00:03 | 72.2188035 | 76.9799866 | 73.1785034 | 73.122577 | 72.5930539 |
| 17:59:28 | 0:00:04 | 72.2188035 | 76.8799866 | 73.1785034 | 73.122577 | 72.5930539 |
| 17:59:29 | 0:00:05 | 72.2188035 | 76.6799866 | 71.1785034 | 73.122577 | 73.5930539 |
| 17:59:30 | 0:00:06 | 72.2188035 | 90.2675012 | 70.1785034 | 73.122577 | 73.5930539 |
| 17:59:31 | 0:00:07 | 73.2188035 | 89.2675012 | 71.1785034 | 73.122577 | 71.5930539 |
| 17:59:32 | 0:00:08 | 74.2188035 | 89.2675012 | 71.1785034 | 73.122577 | 71.5930539 |
| 17:59:33 | 0:00:09 | 75.2188035 | 89.2675012 | 71.1785034 | 73.122577 | 70.5930539 |
| 17:59:34 | 0:00:10 | 75.2188035 | 89.2675012 | 71.1785034 | 72.122577 | 70.5930539 |
| 17:59:35 | 0:00:11 | 76.2188035 | 89.2675012 | 73.1785034 | 72.122577 | 70.5930539 |
| 17:59:36 | 0:00:12 | 77.2188035 | 87.2675012 | 79.1785034 | 71.122577 | 70.5930539 |
| 17:59:37 | 0:00:13 | 78.2188035 | 87.2675012 | 82.1785034 | 71.122577 | 70.5930539 |
| 17:59:38 | 0:00:14 | 78.2188035 | 87.2675012 | 81.1785034 | 73.122577 | 70.5930539 |
| 17:59:39 | 0:00:15 | 78.2188035 | 87.2675012 | 80.1785034 | 73.122577 | 70.5930539 |
| 17:59:40 | 0:00:16 | 79.2188035 | 87.2675012 | 79.1785034 | 73.122577 | 69.5930539 |
| 17:59:41 | 0:00:17 | 79.2188035 | 86.2675012 | 77.1785034 | 73.122577 | 69.5930539 |
| 17:59:42 | 0:00:18 | 79.2188035 | 86.2675012 | 78.1785034 | 74.122577 | 69.5930539 |
| 17:59:43 | 0:00:19 | 79.2188035 | 87.2675012 | 79.1785034 | 74.122577 | 69.5930539 |
| 17:59:44 | 0:00:20 | 81.2188035 | 87.2675012 | 80.1785034 | 74.122577 | 68.5930539 |
| 17:59:45 | 0:00:21 | 81.2188035 | 87.2675012 | 80.1785034 | 73.122577 | 68.5930539 |
| 17:59:46 | 0:00:22 | 81.2188035 | 87.2675012 | 79.1785034 | 73.122577 | 68.5930539 |
| 17:59:47 | 0:00:23 | 81.2188035 | 87.2675012 | 78.1785034 | 73.122577 | 68.5930539 |
| 17:59:48 | 0:00:24 | 75.2188035 | 87.2675012 | 78.1785034 | 75.122577 | 68.5930539 |
| 17:59:49 | 0:00:25 | 73.2188035 | 88.2675012 | 78.1785034 | 75.122577 | 68.5930539 |
| 17:59:50 | 0:00:26 | 72.2188035 | 88.2675012 | 78.1785034 | 75.122577 | 68.5930539 |
| 17:59:51 | 0:00:27 | 72.2188035 | 89.2675012 | 78.1785034 | 75.122577 | 68.5930539 |
| 17:59:52 | 0:00:28 | 72.2188035 | 89.2675012 | 78.1785034 | 76.122577 | 68.5930539 |
| 17:59:53 | 0:00:29 | 72.2188035 | 90.2675012 | 77.1785034 | 76.122577 | 67.5930539 |
| 17:59:54 | 0:00:30 | 72.2188035 | 90.2675012 | 77.1785034 | 76.122577 | 67.5930539 |
| 17:59:55 | 0:00:31 | 72.2188035 | 90.2675012 | 77.1785034 | 76.122577 | 67.5930539 |
| 17:59:56 | 0:00:32 | 70.2188035 | 90.2675012 | 77.1785034 | 77.122577 | 67.5930539 |
| 17:59:57 | 0:00:33 | 70.2188035 | 90.2675012 | 77.1785034 | 77.122577 | 67.5930539 |
| 17:59:58 | 0:00:34 | 69.2188035 | 90.2675012 | 77.1785034 | 77.122577 | 67.5930539 |
| 17:59:59 | 0:00:35 | 69.2188035 | 90.2675012 | 77.1785034 | 78.122577 | 67.5930539 |
| 18:00:00 | 0:00:36 | 69.2188035 | 90.2675012 | 77.1785034 | 78.122577 | 67.5930539 |
| 18:00:01 | 0:00:37 | 69.2188035 | 90.2675012 | 76.1785034 | 78.122577 | 71.5930539 |
| 18:00:02 | 0:00:38 | 68.2188035 | 75.4799866 | 76.1785034 | 79.122577 | 70.5930539 |
| 18:00:03 | 0:00:39 | 68.2188035 | 75.3799866 | 75.1785034 | 82.122577 | 70.5930539 |
| 18:00:04 | 0:00:40 | 69.2188035 | 75.3799866 | 75.1785034 | 82.122577 | 70.5930539 |
| 18:00:05 | 0:00:41 | 69.2188035 | 75.5799866 | 76.1785034 | 82.122577 | 70.5930539 |
| 18:00:06 | 0:00:42 | 69.2188035 | 75.5799866 | 77.1785034 | 82.122577 | 69.5930539 |
| 18:00:07 | 0:00:43 | 69.2188035 | 75.3799866 | 77.1785034 | 81.122577 | 69.5930539 |

|          |         |            |            |            |           |            |
|----------|---------|------------|------------|------------|-----------|------------|
| 18:00:08 | 0:00:44 | 68.2188035 | 75.1799866 | 77.1785034 | 81.122577 | 69.5930539 |
| 18:00:09 | 0:00:45 | 68.2188035 | 75.3799866 | 78.1785034 | 81.122577 | 68.5930539 |
| 18:00:10 | 0:00:46 | 68.2188035 | 73.9799866 | 78.1785034 | 76.122577 | 63.5930539 |
| 18:00:11 | 0:00:47 | 68.2188035 | 86.2675012 | 78.1785034 | 75.122577 | 63.5930539 |
| 18:00:12 | 0:00:48 | 68.2188035 | 86.2675012 | 77.1785034 | 73.122577 | 63.5930539 |
| 18:00:13 | 0:00:49 | 68.2188035 | 86.2675012 | 78.1785034 | 72.122577 | 63.5930539 |
| 18:00:14 | 0:00:50 | 68.2188035 | 84.2675012 | 80.1785034 | 72.122577 | 68.5930539 |
| 18:00:15 | 0:00:51 | 68.2188035 | 84.2675012 | 81.1785034 | 71.122577 | 68.5930539 |
| 18:00:16 | 0:00:52 | 68.2188035 | 83.2675012 | 81.1785034 | 71.122577 | 69.5930539 |
| 18:00:17 | 0:00:53 | 68.2188035 | 83.2675012 | 81.1785034 | 71.122577 | 72.5930539 |
| 18:00:18 | 0:00:54 | 68.2188035 | 81.2675012 | 83.1785034 | 71.122577 | 72.5930539 |
| 18:00:19 | 0:00:55 | 69.2188035 | 81.2675012 | 83.1785034 | 71.122577 | 72.5930539 |
| 18:00:20 | 0:00:56 | 69.2188035 | 81.2675012 | 83.1785034 | 71.122577 | 73.5930539 |
| 18:00:21 | 0:00:57 | 69.2188035 | 80.2675012 | 83.1785034 | 71.122577 | 73.5930539 |
| 18:00:22 | 0:00:58 | 70.2188035 | 79.2675012 | 83.1785034 | 71.122577 | 73.5930539 |
| 18:00:23 | 0:00:59 | 70.2188035 | 79.2675012 | 83.1785034 | 71.122577 | 73.5930539 |
| 18:00:24 | 0:01:00 | 69.2188035 | 79.2675012 | 83.1785034 | 71.122577 | 73.5930539 |
| 18:00:25 | 0:01:01 | 68.2188035 | 79.2675012 | 84.1785034 | 71.122577 | 73.5930539 |
| 18:00:26 | 0:01:02 | 68.2188035 | 78.2675012 | 85.1785034 | 71.122577 | 72.5930539 |
| 18:00:27 | 0:01:03 | 69.2188035 | 77.2675012 | 85.1785034 | 71.122577 | 72.5930539 |
| 18:00:28 | 0:01:04 | 70.2188035 | 77.2675012 | 85.1785034 | 71.122577 | 72.5930539 |
| 18:00:29 | 0:01:05 | 69.2188035 | 78.2675012 | 84.1785034 | 72.122577 | 72.5930539 |
| 18:00:30 | 0:01:06 | 69.2188035 | 78.2675012 | 82.1785034 | 72.122577 | 72.5930539 |
| 18:00:31 | 0:01:07 | 69.2188035 | 79.2675012 | 83.1785034 | 73.122577 | 72.5930539 |
| 18:00:32 | 0:01:08 | 69.2188035 | 80.2675012 | 86.1785034 | 72.122577 | 72.5930539 |
| 18:00:33 | 0:01:09 | 68.2188035 | 80.2675012 | 87.1785034 | 71.122577 | 72.5930539 |
| 18:00:34 | 0:01:10 | 69.2188035 | 80.2675012 | 87.1785034 | 70.122577 | 82.5930539 |
| 18:00:35 | 0:01:11 | 69.2188035 | 81.2675012 | 87.1785034 | 71.122577 | 85.5930539 |
| 18:00:36 | 0:01:12 | 69.2188035 | 81.2675012 | 87.1785034 | 71.122577 | 85.5930539 |
| 18:00:37 | 0:01:13 | 68.2188035 | 81.2675012 | 87.1785034 | 71.122577 | 86.5930539 |
| 18:00:38 | 0:01:14 | 68.2188035 | 79.2675012 | 88.1785034 | 71.122577 | 87.5930539 |
| 18:00:39 | 0:01:15 | 68.2188035 | 78.2675012 | 88.1785034 | 73.122577 | 88.5930539 |
| 18:00:40 | 0:01:16 | 69.2188035 | 77.2675012 | 88.1785034 | 73.122577 | 90.5930539 |
| 18:00:41 | 0:01:17 | 68.2188035 | 76.2675012 | 88.1785034 | 73.122577 | 75.8799866 |
| 18:00:42 | 0:01:18 | 68.2188035 | 76.2675012 | 89.1785034 | 73.122577 | 75.5799866 |
| 18:00:43 | 0:01:19 | 69.2188035 | 75.2675012 | 90.1785034 | 72.122577 | 88.5930539 |
| 18:00:44 | 0:01:20 | 69.2188035 | 75.2675012 | 75.2799866 | 71.122577 | 88.5930539 |
| 18:00:45 | 0:01:21 | 70.2188035 | 75.2675012 | 75.3799866 | 71.122577 | 88.5930539 |
| 18:00:46 | 0:01:22 | 71.2188035 | 75.2675012 | 75.1799866 | 70.122577 | 86.5930539 |
| 18:00:47 | 0:01:23 | 71.2188035 | 75.2675012 | 74.8799866 | 70.122577 | 86.5930539 |
| 18:00:48 | 0:01:24 | 71.2188035 | 76.2675012 | 74.9799866 | 70.122577 | 86.5930539 |
| 18:00:49 | 0:01:25 | 71.2188035 | 77.2675012 | 89.1785034 | 70.122577 | 83.5930539 |
| 18:00:50 | 0:01:26 | 72.2188035 | 79.2675012 | 87.1785034 | 70.122577 | 83.5930539 |
| 18:00:51 | 0:01:27 | 72.2188035 | 80.2675012 | 81.1785034 | 70.122577 | 82.5930539 |
| 18:00:52 | 0:01:28 | 72.2188035 | 80.2675012 | 79.1785034 | 69.122577 | 82.5930539 |

|          |         |            |            |            |           |            |
|----------|---------|------------|------------|------------|-----------|------------|
| 18:00:53 | 0:01:29 | 72.2188035 | 82.2675012 | 77.1785034 | 69.122577 | 81.5930539 |
| 18:00:54 | 0:01:30 | 72.2188035 | 82.2675012 | 77.1785034 | 69.122577 | 81.5930539 |
| 18:00:55 | 0:01:31 | 73.2188035 | 84.2675012 | 75.1785034 | 69.122577 | 81.5930539 |
| 18:00:56 | 0:01:32 | 74.2188035 | 84.2675012 | 74.1785034 | 69.122577 | 81.5930539 |
| 18:00:57 | 0:01:33 | 74.2188035 | 84.2675012 | 74.1785034 | 70.122577 | 81.5930539 |
| 18:00:58 | 0:01:34 | 74.2188035 | 84.2675012 | 75.1785034 | 71.122577 | 82.5930539 |
| 18:00:59 | 0:01:35 | 74.2188035 | 84.2675012 | 74.1785034 | 71.122577 | 82.5930539 |
| 18:01:00 | 0:01:36 | 74.2188035 | 81.2675012 | 74.1785034 | 72.122577 | 81.5930539 |
| 18:01:01 | 0:01:37 | 74.2188035 | 81.2675012 | 74.1785034 | 72.122577 | 79.5930539 |
| 18:01:02 | 0:01:38 | 75.2188035 | 82.2675012 | 74.1785034 | 72.122577 | 77.5930539 |
| 18:01:03 | 0:01:39 | 75.2188035 | 83.2675012 | 74.1785034 | 72.122577 | 77.5930539 |
| 18:01:04 | 0:01:40 | 76.2188035 | 84.2675012 | 74.1785034 | 72.122577 | 74.5930539 |
| 18:01:05 | 0:01:41 | 76.2188035 | 84.2675012 | 74.1785034 | 71.122577 | 73.5930539 |
| 18:01:06 | 0:01:42 | 77.2188035 | 84.2675012 | 74.1785034 | 71.122577 | 71.5930539 |
| 18:01:07 | 0:01:43 | 77.2188035 | 84.2675012 | 74.1785034 | 71.122577 | 70.5930539 |
| 18:01:08 | 0:01:44 | 77.2188035 | 84.2675012 | 74.1785034 | 71.122577 | 70.5930539 |
| 18:01:09 | 0:01:45 | 76.2188035 | 84.2675012 | 75.1785034 | 71.122577 | 71.5930539 |
| 18:01:10 | 0:01:46 | 76.2188035 | 84.2675012 | 76.1785034 | 71.122577 | 71.5930539 |
| 18:01:11 | 0:01:47 | 76.2188035 | 84.2675012 | 77.1785034 | 71.122577 | 71.5930539 |
| 18:01:12 | 0:01:48 | 77.2188035 | 84.2675012 | 77.1785034 | 71.122577 | 70.5930539 |
| 18:01:13 | 0:01:49 | 76.2188035 | 84.2675012 | 77.1785034 | 71.122577 | 69.5930539 |
| 18:01:14 | 0:01:50 | 76.2188035 | 84.2675012 | 77.1785034 | 70.122577 | 69.5930539 |
| 18:01:15 | 0:01:51 | 75.2188035 | 84.2675012 | 78.1785034 | 70.122577 | 70.5930539 |
| 18:01:16 | 0:01:52 | 75.2188035 | 83.2675012 | 79.1785034 | 69.122577 | 69.5930539 |
| 18:01:17 | 0:01:53 | 74.2188035 | 82.2675012 | 80.1785034 | 69.122577 | 69.5930539 |
| 18:01:18 | 0:01:54 | 73.2188035 | 82.2675012 | 81.1785034 | 70.122577 | 71.5930539 |
| 18:01:19 | 0:01:55 | 72.2188035 | 81.2675012 | 81.1785034 | 72.122577 | 71.5930539 |
| 18:01:20 | 0:01:56 | 72.2188035 | 81.2675012 | 83.1785034 | 72.122577 | 72.5930539 |
| 18:01:21 | 0:01:57 | 71.2188035 | 88.2675012 | 85.1785034 | 72.122577 | 71.5930539 |
| 18:01:22 | 0:01:58 | 71.2188035 | 91.2675012 | 88.1785034 | 73.122577 | 72.5930539 |
| 18:01:23 | 0:01:59 | 71.2188035 | 92.2675012 | 88.1785034 | 73.122577 | 71.5930539 |
| 18:01:24 | 0:02:00 | 70.2188035 | 92.2675012 | 88.1785034 | 73.122577 | 71.5930539 |
| 18:01:25 | 0:02:01 | 71.2188035 | 92.2675012 | 88.1785034 | 74.122577 | 71.5930539 |
| 18:01:26 | 0:02:02 | 72.2188035 | 92.2675012 | 88.1785034 | 76.122577 | 70.5930539 |
| 18:01:27 | 0:02:03 | 72.2188035 | 80.2675012 | 88.1785034 | 76.122577 | 69.5930539 |
| 18:01:28 | 0:02:04 | 72.2188035 | 74.2675012 | 88.1785034 | 78.122577 | 69.5930539 |
| 18:01:29 | 0:02:05 | 72.2188035 | 71.2675012 | 85.1785034 | 78.122577 | 69.5930539 |
| 18:01:30 | 0:02:06 | 71.2188035 | 71.2675012 | 83.1785034 | 78.122577 | 70.5930539 |
| 18:01:31 | 0:02:07 | 70.2188035 | 72.2675012 | 82.1785034 | 80.122577 | 71.5930539 |
| 18:01:32 | 0:02:08 | 69.2188035 | 72.2675012 | 82.1785034 | 80.122577 | 70.5930539 |
| 18:01:33 | 0:02:09 | 68.2188035 | 73.2675012 | 80.1785034 | 80.122577 | 71.5930539 |
| 18:01:34 | 0:02:10 | 69.2188035 | 73.2675012 | 78.1785034 | 80.122577 | 71.5930539 |
| 18:01:35 | 0:02:11 | 70.2188035 | 73.2675012 | 75.1785034 | 81.122577 | 71.5930539 |
| 18:01:36 | 0:02:12 | 70.2188035 | 73.2675012 | 75.1785034 | 81.122577 | 70.5930539 |
| 18:01:37 | 0:02:13 | 71.2188035 | 74.2675012 | 74.1785034 | 81.122577 | 71.5930539 |

|          |         |            |            |            |           |            |
|----------|---------|------------|------------|------------|-----------|------------|
| 18:01:38 | 0:02:14 | 72.2188035 | 76.2675012 | 74.1785034 | 81.122577 | 72.5930539 |
| 18:01:39 | 0:02:15 | 72.2188035 | 78.2675012 | 74.1785034 | 81.122577 | 72.5930539 |
| 18:01:40 | 0:02:16 | 71.2188035 | 80.2675012 | 74.1785034 | 83.122577 | 73.5930539 |
| 18:01:41 | 0:02:17 | 70.2188035 | 80.2675012 | 74.1785034 | 83.122577 | 74.5930539 |
| 18:01:42 | 0:02:18 | 69.2188035 | 81.2675012 | 74.1785034 | 81.122577 | 74.5930539 |
| 18:01:43 | 0:02:19 | 69.2188035 | 76.2675012 | 74.1785034 | 80.122577 | 74.5930539 |
| 18:01:44 | 0:02:20 | 70.2188035 | 72.2675012 | 72.1785034 | 79.122577 | 72.5930539 |
| 18:01:45 | 0:02:21 | 70.2188035 | 70.2675012 | 71.1785034 | 79.122577 | 72.5930539 |
| 18:01:46 | 0:02:22 | 70.2188035 | 70.2675012 | 71.1785034 | 79.122577 | 72.5930539 |
| 18:01:47 | 0:02:23 | 70.2188035 | 71.2675012 | 72.1785034 | 79.122577 | 71.5930539 |
| 18:01:48 | 0:02:24 | 70.2188035 | 71.2675012 | 72.1785034 | 79.122577 | 71.5930539 |
| 18:01:49 | 0:02:25 | 69.2188035 | 71.2675012 | 73.1785034 | 77.122577 | 72.5930539 |
| 18:01:50 | 0:02:26 | 70.2188035 | 71.2675012 | 73.1785034 | 75.122577 | 71.5930539 |
| 18:01:51 | 0:02:27 | 71.2188035 | 71.2675012 | 74.1785034 | 75.122577 | 70.5930539 |
| 18:01:52 | 0:02:28 | 71.2188035 | 71.2675012 | 74.1785034 | 75.122577 | 69.5930539 |
| 18:01:53 | 0:02:29 | 70.2188035 | 71.2675012 | 75.1785034 | 71.122577 | 69.5930539 |
| 18:01:54 | 0:02:30 | 69.2188035 | 71.2675012 | 77.1785034 | 70.122577 | 66.5930539 |
| 18:01:55 | 0:02:31 | 69.2188035 | 73.2675012 | 78.1785034 | 69.122577 | 65.5930539 |
| 18:01:56 | 0:02:32 | 69.2188035 | 73.2675012 | 79.1785034 | 69.122577 | 64.5930539 |
| 18:01:57 | 0:02:33 | 69.2188035 | 73.2675012 | 78.1785034 | 69.122577 | 64.5930539 |
| 18:01:58 | 0:02:34 | 69.2188035 | 73.2675012 | 78.1785034 | 67.122577 | 64.5930539 |
| 18:01:59 | 0:02:35 | 70.2188035 | 73.2675012 | 78.1785034 | 66.122577 | 64.5930539 |
| 18:02:00 | 0:02:36 | 70.2188035 | 73.2675012 | 78.1785034 | 65.122577 | 65.5930539 |
| 18:02:01 | 0:02:37 | 70.2188035 | 73.2675012 | 78.1785034 | 65.122577 | 65.5930539 |
| 18:02:02 | 0:02:38 | 70.2188035 | 72.2675012 | 77.1785034 | 68.122577 | 66.5930539 |
| 18:02:03 | 0:02:39 | 70.2188035 | 72.2675012 | 78.1785034 | 70.122577 | 67.5930539 |
| 18:02:04 | 0:02:40 | 70.2188035 | 72.2675012 | 78.1785034 | 70.122577 | 67.5930539 |
| 18:02:05 | 0:02:41 | 69.2188035 | 72.2675012 | 79.1785034 | 70.122577 | 67.5930539 |
| 18:02:06 | 0:02:42 | 69.2188035 | 72.2675012 | 78.1785034 | 69.122577 | 67.5930539 |
| 18:02:07 | 0:02:43 | 69.2188035 | 71.2675012 | 77.1785034 | 69.122577 | 67.5930539 |
| 18:02:08 | 0:02:44 | 69.2188035 | 68.2675012 | 76.1785034 | 69.122577 | 77.5930539 |
| 18:02:09 | 0:02:45 | 68.2188035 | 70.2675012 | 74.1785034 | 70.122577 | 79.5930539 |
| 18:02:10 | 0:02:46 | 68.2188035 | 70.2675012 | 75.1785034 | 70.122577 | 79.5930539 |
| 18:02:11 | 0:02:47 | 70.2188035 | 70.2675012 | 75.1785034 | 71.122577 | 79.5930539 |
| 18:02:12 | 0:02:48 | 70.2188035 | 70.2675012 | 75.1785034 | 72.122577 | 78.5930539 |
| 18:02:13 | 0:02:49 | 70.2188035 | 70.2675012 | 75.1785034 | 72.122577 | 77.5930539 |
| 18:02:14 | 0:02:50 | 69.2188035 | 71.2675012 | 75.1785034 | 71.122577 | 76.5930539 |
| 18:02:15 | 0:02:51 | 68.2188035 | 72.2675012 | 75.1785034 | 71.122577 | 75.5930539 |
| 18:02:16 | 0:02:52 | 67.2188035 | 72.2675012 | 75.1785034 | 71.122577 | 75.5930539 |
| 18:02:17 | 0:02:53 | 67.2188035 | 75.2675012 | 76.1785034 | 70.122577 | 75.5930539 |
| 18:02:18 | 0:02:54 | 67.2188035 | 77.2675012 | 76.1785034 | 70.122577 | 69.5930539 |
| 18:02:19 | 0:02:55 | 68.2188035 | 75.2675012 | 76.1785034 | 70.122577 | 69.5930539 |
| 18:02:20 | 0:02:56 | 68.2188035 | 75.2675012 | 76.1785034 | 71.122577 | 66.5930539 |
| 18:02:21 | 0:02:57 | 68.2188035 | 72.2675012 | 76.1785034 | 71.122577 | 65.5930539 |
| 18:02:22 | 0:02:58 | 67.2188035 | 73.2675012 | 77.1785034 | 71.122577 | 65.5930539 |



|          |         |            |            |            |           |            |
|----------|---------|------------|------------|------------|-----------|------------|
| 18:02:23 | 0:02:59 | 67.2188035 | 73.2675012 | 77.1785034 | 71.122577 | 64.5930539 |
| 18:02:24 | 0:03:00 | 67.2188035 | 73.2675012 | 81.1785034 | 71.122577 | 64.5930539 |
| 18:02:25 | 0:03:01 | 67.2188035 | 73.2675012 | 81.1785034 | 71.122577 | 63.5930539 |
| 18:02:26 | 0:03:02 | 67.2188035 | 71.2675012 | 82.1785034 | 71.122577 | 63.5930539 |
| 18:02:27 | 0:03:03 | 68.2188035 | 68.2675012 | 82.1785034 | 71.122577 | 62.5930539 |
| 18:02:28 | 0:03:04 | 68.2188035 | 68.2675012 | 82.1785034 | 70.122577 | 62.5930539 |
| 18:02:29 | 0:03:05 | 68.2188035 | 68.2675012 | 82.1785034 | 70.122577 | 62.5930539 |
| 18:02:30 | 0:03:06 | 68.2188035 | 71.2675012 | 82.1785034 | 70.122577 | 62.5930539 |
| 18:02:31 | 0:03:07 | 68.2188035 | 71.2675012 | 82.1785034 | 71.122577 | 62.5930539 |
| 18:02:32 | 0:03:08 | 68.2188035 | 71.2675012 | 83.1785034 | 74.122577 | 62.5930539 |
| 18:02:33 | 0:03:09 | 68.2188035 | 71.2675012 | 84.1785034 | 74.122577 | 62.5930539 |
| 18:02:34 | 0:03:10 | 68.2188035 | 71.2675012 | 84.1785034 | 76.122577 | 62.5930539 |
| 18:02:35 | 0:03:11 | 68.2188035 | 71.2675012 | 84.1785034 | 76.122577 | 61.5930539 |
| 18:02:36 | 0:03:12 | 69.2188035 | 71.2675012 | 84.1785034 | 74.122577 | 61.5930539 |
| 18:02:37 | 0:03:13 | 68.2188035 | 74.2675012 | 84.1785034 | 74.122577 | 61.5930539 |
| 18:02:38 | 0:03:14 | 69.2188035 | 74.2675012 | 84.1785034 | 73.122577 | 61.5930539 |
| 18:02:39 | 0:03:15 | 69.2188035 | 73.2675012 | 83.1785034 | 73.122577 | 61.5930539 |
| 18:02:40 | 0:03:16 | 69.2188035 | 72.2675012 | 83.1785034 | 73.122577 | 62.5930539 |
| 18:02:41 | 0:03:17 | 69.2188035 | 72.2675012 | 81.1785034 | 73.122577 | 63.5930539 |
| 18:02:42 | 0:03:18 | 69.2188035 | 72.2675012 | 81.1785034 | 73.122577 | 63.5930539 |
| 18:02:43 | 0:03:19 | 70.2188035 | 76.2675012 | 81.1785034 | 73.122577 | 63.5930539 |
| 18:02:44 | 0:03:20 | 70.2188035 | 76.2675012 | 80.1785034 | 73.122577 | 64.5930539 |
| 18:02:45 | 0:03:21 | 71.2188035 | 76.2675012 | 80.1785034 | 72.122577 | 65.5930539 |
| 18:02:46 | 0:03:22 | 72.2188035 | 75.2675012 | 80.1785034 | 71.122577 | 65.5930539 |
| 18:02:47 | 0:03:23 | 72.2188035 | 71.2675012 | 77.1785034 | 71.122577 | 65.5930539 |
| 18:02:48 | 0:03:24 | 73.2188035 | 70.2675012 | 75.1785034 | 71.122577 | 66.5930539 |
| 18:02:49 | 0:03:25 | 75.2188035 | 69.2675012 | 75.1785034 | 71.122577 | 66.5930539 |
| 18:02:50 | 0:03:26 | 75.2188035 | 69.2675012 | 73.1785034 | 71.122577 | 66.5930539 |
| 18:02:51 | 0:03:27 | 75.2188035 | 69.2675012 | 73.1785034 | 76.122577 | 66.5930539 |
| 18:02:52 | 0:03:28 | 76.2188035 | 69.2675012 | 73.1785034 | 77.122577 | 70.5930539 |
| 18:02:53 | 0:03:29 | 78.2188035 | 67.2675012 | 74.1785034 | 77.122577 | 71.5930539 |
| 18:02:54 | 0:03:30 | 81.2188035 | 67.2675012 | 73.1785034 | 79.122577 | 73.5930539 |
| 18:02:55 | 0:03:31 | 83.2188035 | 66.2675012 | 73.1785034 | 79.122577 | 73.5930539 |
| 18:02:56 | 0:03:32 | 83.2188035 | 66.2675012 | 73.1785034 | 79.122577 | 73.5930539 |
| 18:02:57 | 0:03:33 | 83.2188035 | 63.2675012 | 73.1785034 | 78.122577 | 73.5930539 |
| 18:02:58 | 0:03:34 | 83.2188035 | 63.2675012 | 73.1785034 | 77.122577 | 73.5930539 |
| 18:02:59 | 0:03:35 | 83.2188035 | 63.2675012 | 73.1785034 | 77.122577 | 73.5930539 |
| 18:03:00 | 0:03:36 | 83.2188035 | 65.2675012 | 73.1785034 | 74.122577 | 74.5930539 |
| 18:03:01 | 0:03:37 | 83.2188035 | 66.2675012 | 73.1785034 | 73.122577 | 74.5930539 |
| 18:03:02 | 0:03:38 | 82.2188035 | 66.2675012 | 73.1785034 | 72.122577 | 74.5930539 |
| 18:03:03 | 0:03:39 | 81.2188035 | 66.2675012 | 73.1785034 | 72.122577 | 74.5930539 |
| 18:03:04 | 0:03:40 | 80.2188035 | 66.2675012 | 73.1785034 | 72.122577 | 75.5930539 |
| 18:03:05 | 0:03:41 | 80.2188035 | 66.2675012 | 72.1785034 | 72.122577 | 77.5930539 |
| 18:03:06 | 0:03:42 | 80.2188035 | 65.2675012 | 73.1785034 | 72.122577 | 77.5930539 |
| 18:03:07 | 0:03:43 | 79.2188035 | 70.2675012 | 74.1785034 | 71.122577 | 77.5930539 |

|          |         |            |            |            |           |            |
|----------|---------|------------|------------|------------|-----------|------------|
| 18:03:08 | 0:03:44 | 78.2188035 | 74.2675012 | 73.1785034 | 71.122577 | 78.5930539 |
| 18:03:09 | 0:03:45 | 77.2188035 | 74.2675012 | 73.1785034 | 71.122577 | 78.5930539 |
| 18:03:10 | 0:03:46 | 76.2188035 | 76.2675012 | 72.1785034 | 70.122577 | 78.5930539 |
| 18:03:11 | 0:03:47 | 75.2188035 | 78.2675012 | 72.1785034 | 70.122577 | 78.5930539 |
| 18:03:12 | 0:03:48 | 75.2188035 | 78.2675012 | 72.1785034 | 70.122577 | 78.5930539 |
| 18:03:13 | 0:03:49 | 76.2188035 | 78.2675012 | 74.1785034 | 70.122577 | 78.5930539 |
| 18:03:14 | 0:03:50 | 76.2188035 | 79.2675012 | 75.1785034 | 70.122577 | 78.5930539 |
| 18:03:15 | 0:03:51 | 75.2188035 | 78.2675012 | 75.1785034 | 71.122577 | 78.5930539 |
| 18:03:16 | 0:03:52 | 75.2188035 | 78.2675012 | 75.1785034 | 71.122577 | 78.5930539 |
| 18:03:17 | 0:03:53 | 74.2188035 | 79.2675012 | 75.1785034 | 71.122577 | 78.5930539 |
| 18:03:18 | 0:03:54 | 75.2188035 | 79.2675012 | 75.1785034 | 71.122577 | 78.5930539 |
| 18:03:19 | 0:03:55 | 74.2188035 | 79.2675012 | 75.1785034 | 71.122577 | 78.5930539 |
| 18:03:20 | 0:03:56 | 74.2188035 | 79.2675012 | 75.1785034 | 71.122577 | 78.5930539 |
| 18:03:21 | 0:03:57 | 73.2188035 | 78.2675012 | 75.1785034 | 71.122577 | 77.5930539 |
| 18:03:22 | 0:03:58 | 73.2188035 | 77.2675012 | 75.1785034 | 72.122577 | 78.5930539 |
| 18:03:23 | 0:03:59 | 73.2188035 | 76.2675012 | 75.1785034 | 72.122577 | 78.5930539 |
| 18:03:24 | 0:04:00 | 73.2188035 | 73.2675012 | 73.1785034 | 72.122577 | 78.5930539 |
| 18:03:25 | 0:04:01 | 74.2188035 | 73.2675012 | 72.1785034 | 77.122577 | 78.5930539 |
| 18:03:26 | 0:04:02 | 75.2188035 | 74.2675012 | 71.1785034 | 80.122577 | 78.5930539 |
| 18:03:27 | 0:04:03 | 75.2188035 | 73.2675012 | 70.1785034 | 80.122577 | 78.5930539 |
| 18:03:28 | 0:04:04 | 76.2188035 | 73.2675012 | 70.1785034 | 83.122577 | 77.5930539 |
| 18:03:29 | 0:04:05 | 76.2188035 | 73.2675012 | 71.1785034 | 84.122577 | 77.5930539 |
| 18:03:30 | 0:04:06 | 76.2188035 | 73.2675012 | 70.1785034 | 84.122577 | 76.5930539 |
| 18:03:31 | 0:04:07 | 77.2188035 | 73.2675012 | 70.1785034 | 85.122577 | 76.5930539 |
| 18:03:32 | 0:04:08 | 78.2188035 | 73.2675012 | 70.1785034 | 86.122577 | 76.5930539 |
| 18:03:33 | 0:04:09 | 80.2188035 | 73.2675012 | 70.1785034 | 85.122577 | 76.5930539 |
| 18:03:34 | 0:04:10 | 81.2188035 | 77.2675012 | 71.1785034 | 84.122577 | 76.5930539 |
| 18:03:35 | 0:04:11 | 81.2188035 | 77.2675012 | 72.1785034 | 83.122577 | 75.5930539 |
| 18:03:36 | 0:04:12 | 81.2188035 | 77.2675012 | 72.1785034 | 83.122577 | 75.5930539 |
| 18:03:37 | 0:04:13 | 80.2188035 | 79.2675012 | 72.1785034 | 83.122577 | 76.5930539 |
| 18:03:38 | 0:04:14 | 79.2188035 | 79.2675012 | 72.1785034 | 81.122577 | 77.5930539 |
| 18:03:39 | 0:04:15 | 78.2188035 | 80.2675012 | 72.1785034 | 78.122577 | 78.5930539 |
| 18:03:40 | 0:04:16 | 78.2188035 | 81.2675012 | 73.1785034 | 77.122577 | 79.5930539 |
| 18:03:41 | 0:04:17 | 78.2188035 | 81.2675012 | 74.1785034 | 75.122577 | 79.5930539 |
| 18:03:42 | 0:04:18 | 79.2188035 | 81.2675012 | 75.1785034 | 72.122577 | 77.5930539 |
| 18:03:43 | 0:04:19 | 79.2188035 | 81.2675012 | 75.1785034 | 71.122577 | 76.5930539 |
| 18:03:44 | 0:04:20 | 79.2188035 | 81.2675012 | 75.1785034 | 71.122577 | 76.5930539 |
| 18:03:45 | 0:04:21 | 78.2188035 | 81.2675012 | 74.1785034 | 71.122577 | 73.5930539 |
| 18:03:46 | 0:04:22 | 77.2188035 | 79.2675012 | 74.1785034 | 71.122577 | 72.5930539 |
| 18:03:47 | 0:04:23 | 76.2188035 | 79.2675012 | 74.1785034 | 70.122577 | 72.5930539 |
| 18:03:48 | 0:04:24 | 76.2188035 | 79.2675012 | 73.1785034 | 68.122577 | 72.5930539 |
| 18:03:49 | 0:04:25 | 75.2188035 | 79.2675012 | 74.1785034 | 68.122577 | 72.5930539 |
| 18:03:50 | 0:04:26 | 74.2188035 | 78.2675012 | 74.1785034 | 68.122577 | 72.5930539 |
| 18:03:51 | 0:04:27 | 73.2188035 | 78.2675012 | 74.1785034 | 67.122577 | 73.5930539 |
| 18:03:52 | 0:04:28 | 73.2188035 | 78.2675012 | 74.1785034 | 67.122577 | 73.5930539 |

|          |         |            |            |            |           |            |
|----------|---------|------------|------------|------------|-----------|------------|
| 18:03:53 | 0:04:29 | 73.2188035 | 78.2675012 | 75.1785034 | 68.122577 | 78.5930539 |
| 18:03:54 | 0:04:30 | 73.2188035 | 78.2675012 | 75.1785034 | 69.122577 | 83.5930539 |
| 18:03:55 | 0:04:31 | 74.2188035 | 76.2675012 | 75.1785034 | 70.122577 | 86.5930539 |
| 18:03:56 | 0:04:32 | 74.2188035 | 76.2675012 | 74.1785034 | 70.122577 | 86.5930539 |
| 18:03:57 | 0:04:33 | 74.2188035 | 79.2675012 | 74.1785034 | 70.122577 | 87.5930539 |
| 18:03:58 | 0:04:34 | 73.2188035 | 79.2675012 | 75.1785034 | 69.122577 | 88.5930539 |
| 18:03:59 | 0:04:35 | 73.2188035 | 79.2675012 | 76.1785034 | 69.122577 | 88.5930539 |
| 18:04:00 | 0:04:36 | 74.2188035 | 79.2675012 | 76.1785034 | 69.122577 | 87.5930539 |
| 18:04:01 | 0:04:37 | 74.2188035 | 80.2675012 | 76.1785034 | 68.122577 | 87.5930539 |
| 18:04:02 | 0:04:38 | 73.2188035 | 79.2675012 | 75.1785034 | 68.122577 | 88.5930539 |
| 18:04:03 | 0:04:39 | 73.2188035 | 79.2675012 | 75.1785034 | 68.122577 | 76.5192862 |
| 18:04:04 | 0:04:40 | 72.2188035 | 79.2675012 | 74.1785034 | 68.122577 | 76.6101953 |
| 18:04:05 | 0:04:41 | 72.2188035 | 79.2675012 | 73.1785034 | 68.122577 | 76.4283771 |
| 18:04:06 | 0:04:42 | 71.2188035 | 78.2675012 | 73.1785034 | 68.122577 | 75.7920134 |
| 18:04:07 | 0:04:43 | 71.2188035 | 77.2675012 | 73.1785034 | 68.122577 | 75.7011044 |
| 18:04:08 | 0:04:44 | 70.2188035 | 77.2675012 | 73.1785034 | 69.122577 | 75.7011044 |
| 18:04:09 | 0:04:45 | 70.2188035 | 72.2675012 | 73.1785034 | 70.122577 | 75.5192862 |
| 18:04:10 | 0:04:46 | 70.2188035 | 72.2675012 | 74.1785034 | 71.122577 | 75.6101953 |
| 18:04:11 | 0:04:47 | 70.2188035 | 72.2675012 | 73.1785034 | 71.122577 | 75.6101953 |
| 18:04:12 | 0:04:48 | 70.2188035 | 72.2675012 | 73.1785034 | 71.122577 | 75.9738316 |
| 18:04:13 | 0:04:49 | 70.2188035 | 73.2675012 | 73.1785034 | 71.122577 | 76.337468  |
| 18:04:14 | 0:04:50 | 70.2188035 | 74.2675012 | 73.1785034 | 71.122577 | 76.6101953 |
| 18:04:15 | 0:04:51 | 71.2188035 | 74.2675012 | 73.1785034 | 71.122577 | 76.7011044 |
| 18:04:16 | 0:04:52 | 71.2188035 | 78.2675012 | 72.1785034 | 70.122577 | 76.8829225 |
| 18:04:17 | 0:04:53 | 71.2188035 | 78.2675012 | 71.1785034 | 70.122577 | 76.7920134 |
| 18:04:18 | 0:04:54 | 70.2188035 | 74.2675012 | 70.1785034 | 69.122577 | 74.6101953 |
| 18:04:19 | 0:04:55 | 70.2188035 | 74.2675012 | 70.1785034 | 68.122577 | 74.4283771 |
| 18:04:20 | 0:04:56 | 70.2188035 | 73.2675012 | 70.1785034 | 68.122577 | 74.337468  |
| 18:04:21 | 0:04:57 | 70.2188035 | 73.2675012 | 69.1785034 | 69.122577 | 74.7920134 |
| 18:04:22 | 0:04:58 | 70.2188035 | 73.2675012 | 69.1785034 | 70.122577 | 75.1556498 |
| 18:04:23 | 0:04:59 | 70.2188035 | 73.2675012 | 69.1785034 | 70.122577 | 75.0647407 |
| 18:04:24 | 0:05:00 | 70.2188035 | 73.2675012 | 69.1785034 | 71.122577 | 75.337468  |
| 18:04:25 | 0:05:01 | 70.2188035 | 78.2675012 | 68.1785034 | 71.122577 | 76.2465589 |
| 18:04:26 | 0:05:02 | 70.2188035 | 77.2675012 | 68.1785034 | 71.122577 | 76.2465589 |
| 18:04:27 | 0:05:03 | 70.2188035 | 76.2675012 | 70.1785034 | 71.122577 | 76.4283771 |
| 18:04:28 | 0:05:04 | 70.2188035 | 76.2675012 | 70.1785034 | 71.122577 | 76.7011044 |
| 18:04:29 | 0:05:05 | 71.2188035 | 74.2675012 | 69.1785034 | 72.122577 | 76.8829225 |
| 18:04:30 | 0:05:06 | 71.2188035 | 74.2675012 | 69.1785034 | 72.122577 | 76.8829225 |
| 18:04:31 | 0:05:07 | 72.2188035 | 74.2675012 | 72.1785034 | 73.122577 | 78.4283771 |
| 18:04:32 | 0:05:08 | 72.2188035 | 74.2675012 | 73.1785034 | 73.122577 | 78.337468  |
| 18:04:33 | 0:05:09 | 72.2188035 | 77.2675012 | 74.1785034 | 73.122577 | 78.9738316 |
| 18:04:34 | 0:05:10 | 71.2188035 | 78.2675012 | 75.1785034 | 73.122577 | 78.7920134 |
| 18:04:35 | 0:05:11 | 71.2188035 | 78.2675012 | 75.1785034 | 73.122577 | 78.6101953 |
| 18:04:36 | 0:05:12 | 72.2188035 | 78.2675012 | 77.1785034 | 73.122577 | 93.5930539 |
| 18:04:37 | 0:05:13 | 72.2188035 | 78.2675012 | 79.1785034 | 78.122577 | 93.5930539 |

|          |         |            |            |            |           |            |
|----------|---------|------------|------------|------------|-----------|------------|
| 18:04:38 | 0:05:14 | 71.2188035 | 77.2675012 | 79.1785034 | 78.122577 | 93.5930539 |
| 18:04:39 | 0:05:15 | 72.2188035 | 77.2675012 | 80.1785034 | 78.122577 | 93.5930539 |
| 18:04:40 | 0:05:16 | 72.2188035 | 78.2675012 | 80.1785034 | 78.122577 | 94.5930539 |
| 18:04:41 | 0:05:17 | 72.2188035 | 78.2675012 | 80.1785034 | 78.122577 | 94.5930539 |
| 18:04:42 | 0:05:18 | 73.2188035 | 78.2675012 | 80.1785034 | 77.122577 | 94.5930539 |
| 18:04:43 | 0:05:19 | 73.2188035 | 76.2675012 | 80.1785034 | 77.122577 | 94.5930539 |
| 18:04:44 | 0:05:20 | 74.2188035 | 74.2675012 | 80.1785034 | 77.122577 | 94.5930539 |
| 18:04:45 | 0:05:21 | 73.2188035 | 73.2675012 | 79.1785034 | 74.122577 | 93.5930539 |
| 18:04:46 | 0:05:22 | 73.2188035 | 73.2675012 | 77.1785034 | 73.122577 | 77.7011044 |
| 18:04:47 | 0:05:23 | 74.2188035 | 73.2675012 | 74.1785034 | 73.122577 | 77.337468  |
| 18:04:48 | 0:05:24 | 74.2188035 | 73.2675012 | 72.1785034 | 72.122577 | 76.9738316 |
| 18:04:49 | 0:05:25 | 74.2188035 | 73.2675012 | 72.1785034 | 72.122577 | 77.337468  |
| 18:04:50 | 0:05:26 | 74.2188035 | 74.2675012 | 72.1785034 | 71.122577 | 76.7011044 |
| 18:04:51 | 0:05:27 | 75.2188035 | 75.2675012 | 73.1785034 | 71.122577 | 77.337468  |
| 18:04:52 | 0:05:28 | 75.2188035 | 75.2675012 | 72.1785034 | 71.122577 | 78.7920134 |
| 18:04:53 | 0:05:29 | 75.2188035 | 75.2675012 | 72.1785034 | 71.122577 | 79.1556498 |
| 18:04:54 | 0:05:30 | 75.2188035 | 78.2675012 | 72.1785034 | 71.122577 | 79.7011044 |
| 18:04:55 | 0:05:31 | 75.2188035 | 81.2675012 | 73.1785034 | 71.122577 | 83.5930539 |
| 18:04:56 | 0:05:32 | 75.2188035 | 83.2675012 | 73.1785034 | 71.122577 | 77.5930539 |
| 18:04:57 | 0:05:33 | 74.2188035 | 84.2675012 | 72.1785034 | 71.122577 | 72.5930539 |
| 18:04:58 | 0:05:34 | 74.2188035 | 84.2675012 | 72.1785034 | 71.122577 | 72.5930539 |
| 18:04:59 | 0:05:35 | 73.2188035 | 85.2675012 | 72.1785034 | 71.122577 | 69.5930539 |
| 18:05:00 | 0:05:36 | 73.2188035 | 87.2675012 | 72.1785034 | 70.122577 | 68.5930539 |
| 18:05:01 | 0:05:37 | 73.2188035 | 88.2675012 | 71.1785034 | 71.122577 | 69.5930539 |
| 18:05:02 | 0:05:38 | 73.2188035 | 87.2675012 | 71.1785034 | 71.122577 | 69.5930539 |
| 18:05:03 | 0:05:39 | 73.2188035 | 85.2675012 | 71.1785034 | 71.122577 | 70.5930539 |
| 18:05:04 | 0:05:40 | 73.2188035 | 83.2675012 | 71.1785034 | 71.122577 | 70.5930539 |
| 18:05:05 | 0:05:41 | 73.2188035 | 81.2675012 | 70.1785034 | 71.122577 | 69.5930539 |
| 18:05:06 | 0:05:42 | 73.2188035 | 80.2675012 | 70.1785034 | 71.122577 | 69.5930539 |
| 18:05:07 | 0:05:43 | 74.2188035 | 79.2675012 | 70.1785034 | 71.122577 | 69.5930539 |
| 18:05:08 | 0:05:44 | 74.2188035 | 77.2675012 | 69.1785034 | 72.122577 | 71.5930539 |
| 18:05:09 | 0:05:45 | 74.2188035 | 77.2675012 | 66.1785034 | 72.122577 | 71.5930539 |
| 18:05:10 | 0:05:46 | 74.2188035 | 77.2675012 | 67.1785034 | 74.122577 | 71.5930539 |
| 18:05:11 | 0:05:47 | 74.2188035 | 76.2675012 | 68.1785034 | 76.122577 | 72.5930539 |
| 18:05:12 | 0:05:48 | 74.2188035 | 76.2675012 | 68.1785034 | 76.122577 | 73.5930539 |
| 18:05:13 | 0:05:49 | 73.2188035 | 76.2675012 | 69.1785034 | 78.122577 | 74.5930539 |
| 18:05:14 | 0:05:50 | 73.2188035 | 80.2675012 | 72.1785034 | 79.122577 | 74.5930539 |
| 18:05:15 | 0:05:51 | 73.2188035 | 81.2675012 | 74.1785034 | 79.122577 | 77.5930539 |
| 18:05:16 | 0:05:52 | 73.2188035 | 81.2675012 | 75.1785034 | 79.122577 | 78.5930539 |
| 18:05:17 | 0:05:53 | 73.2188035 | 80.2675012 | 75.1785034 | 79.122577 | 78.5930539 |
| 18:05:18 | 0:05:54 | 74.2188035 | 75.2675012 | 77.1785034 | 78.122577 | 78.5930539 |
| 18:05:19 | 0:05:55 | 74.2188035 | 74.2675012 | 78.1785034 | 78.122577 | 78.5930539 |
| 18:05:20 | 0:05:56 | 75.2188035 | 75.2675012 | 78.1785034 | 78.122577 | 78.5930539 |
| 18:05:21 | 0:05:57 | 76.2188035 | 76.2675012 | 82.1785034 | 78.122577 | 78.5930539 |
| 18:05:22 | 0:05:58 | 76.2188035 | 77.2675012 | 82.1785034 | 78.122577 | 78.5930539 |

|          |         |            |            |            |           |            |
|----------|---------|------------|------------|------------|-----------|------------|
| 18:05:23 | 0:05:59 | 76.2188035 | 77.2675012 | 82.1785034 | 78.122577 | 80.5930539 |
| 18:05:24 | 0:06:00 | 76.2188035 | 77.2675012 | 82.1785034 | 78.122577 | 80.5930539 |
| 18:05:25 | 0:06:01 | 74.2188035 | 75.2675012 | 81.1785034 | 78.122577 | 80.5930539 |
| 18:05:26 | 0:06:02 | 73.2188035 | 74.2675012 | 81.1785034 | 78.122577 | 80.5930539 |
| 18:05:27 | 0:06:03 | 72.2188035 | 73.2675012 | 81.1785034 | 78.122577 | 81.5930539 |
| 18:05:28 | 0:06:04 | 72.2188035 | 72.2675012 | 79.1785034 | 78.122577 | 82.5930539 |
| 18:05:29 | 0:06:05 | 72.2188035 | 71.2675012 | 79.1785034 | 77.122577 | 84.5930539 |
| 18:05:30 | 0:06:06 | 72.2188035 | 71.2675012 | 80.1785034 | 75.122577 | 84.5930539 |
| 18:05:31 | 0:06:07 | 72.2188035 | 71.2675012 | 79.1785034 | 74.122577 | 84.5930539 |
| 18:05:32 | 0:06:08 | 73.2188035 | 71.2675012 | 77.1785034 | 73.122577 | 88.5930539 |
| 18:05:33 | 0:06:09 | 73.2188035 | 71.2675012 | 74.1785034 | 73.122577 | 88.5930539 |
| 18:05:34 | 0:06:10 | 73.2188035 | 72.2675012 | 74.1785034 | 73.122577 | 85.5930539 |
| 18:05:35 | 0:06:11 | 74.2188035 | 72.2675012 | 74.1785034 | 72.122577 | 82.5930539 |
| 18:05:36 | 0:06:12 | 74.2188035 | 74.2675012 | 73.1785034 | 72.122577 | 81.5930539 |
| 18:05:37 | 0:06:13 | 74.2188035 | 76.2675012 | 73.1785034 | 71.122577 | 80.5930539 |
| 18:05:38 | 0:06:14 | 75.2188035 | 76.2675012 | 72.1785034 | 71.122577 | 79.5930539 |
| 18:05:39 | 0:06:15 | 75.2188035 | 76.2675012 | 72.1785034 | 72.122577 | 79.5930539 |
| 18:05:40 | 0:06:16 | 75.2188035 | 76.2675012 | 71.1785034 | 73.122577 | 79.5930539 |
| 18:05:41 | 0:06:17 | 74.2188035 | 76.2675012 | 71.1785034 | 73.122577 | 79.5930539 |
| 18:05:42 | 0:06:18 | 73.2188035 | 76.2675012 | 71.1785034 | 72.122577 | 79.5930539 |
| 18:05:43 | 0:06:19 | 73.2188035 | 76.2675012 | 70.1785034 | 71.122577 | 79.5930539 |
| 18:05:44 | 0:06:20 | 73.2188035 | 76.2675012 | 68.1785034 | 71.122577 | 80.5930539 |
| 18:05:45 | 0:06:21 | 73.2188035 | 78.2675012 | 67.1785034 | 71.122577 | 77.5930539 |
| 18:05:46 | 0:06:22 | 73.2188035 | 79.2675012 | 68.1785034 | 71.122577 | 75.5930539 |
| 18:05:47 | 0:06:23 | 73.2188035 | 80.2675012 | 68.1785034 | 72.122577 | 75.5930539 |
| 18:05:48 | 0:06:24 | 73.2188035 | 80.2675012 | 69.1785034 | 72.122577 | 74.5930539 |
| 18:05:49 | 0:06:25 | 73.2188035 | 80.2675012 | 69.1785034 | 72.122577 | 74.5930539 |
| 18:05:50 | 0:06:26 | 74.2188035 | 80.2675012 | 69.1785034 | 72.122577 | 72.5930539 |
| 18:05:51 | 0:06:27 | 74.2188035 | 79.2675012 | 69.1785034 | 72.122577 | 68.5930539 |
| 18:05:52 | 0:06:28 | 74.2188035 | 77.2675012 | 69.1785034 | 72.122577 | 68.5930539 |
| 18:05:53 | 0:06:29 | 74.2188035 | 76.2675012 | 70.1785034 | 72.122577 | 68.5930539 |
| 18:05:54 | 0:06:30 | 74.2188035 | 76.2675012 | 70.1785034 | 71.122577 | 68.5930539 |
| 18:05:55 | 0:06:31 | 74.2188035 | 75.2675012 | 70.1785034 | 71.122577 | 68.5930539 |
| 18:05:56 | 0:06:32 | 73.2188035 | 75.2675012 | 70.1785034 | 69.122577 | 68.5930539 |
| 18:05:57 | 0:06:33 | 73.2188035 | 75.2675012 | 71.1785034 | 69.122577 | 69.5930539 |
| 18:05:58 | 0:06:34 | 73.2188035 | 75.2675012 | 71.1785034 | 70.122577 | 69.5930539 |
| 18:05:59 | 0:06:35 | 74.2188035 | 76.2675012 | 72.1785034 | 70.122577 | 71.5930539 |
| 18:06:00 | 0:06:36 | 74.2188035 | 76.2675012 | 72.1785034 | 70.122577 | 70.5930539 |
| 18:06:01 | 0:06:37 | 74.2188035 | 75.2675012 | 73.1785034 | 70.122577 | 62.5930539 |
| 18:06:02 | 0:06:38 | 74.2188035 | 74.2675012 | 77.1785034 | 71.122577 | 62.5930539 |
| 18:06:03 | 0:06:39 | 75.2188035 | 73.2675012 | 78.1785034 | 71.122577 | 60.5930539 |
| 18:06:04 | 0:06:40 | 74.2188035 | 73.2675012 | 81.1785034 | 72.122577 | 60.5930539 |
| 18:06:05 | 0:06:41 | 74.2188035 | 73.2675012 | 85.1785034 | 72.122577 | 60.5930539 |
| 18:06:06 | 0:06:42 | 74.2188035 | 73.2675012 | 87.1785034 | 72.122577 | 60.5930539 |
| 18:06:07 | 0:06:43 | 73.2188035 | 73.2675012 | 89.1785034 | 72.122577 | 64.5930539 |

|          |         |            |            |            |           |            |
|----------|---------|------------|------------|------------|-----------|------------|
| 18:06:08 | 0:06:44 | 72.2188035 | 72.2675012 | 89.1785034 | 73.122577 | 64.5930539 |
| 18:06:09 | 0:06:45 | 71.2188035 | 73.2675012 | 87.1785034 | 74.122577 | 64.5930539 |
| 18:06:10 | 0:06:46 | 70.2188035 | 73.2675012 | 84.1785034 | 73.122577 | 62.5930539 |
| 18:06:11 | 0:06:47 | 70.2188035 | 72.2675012 | 80.1785034 | 73.122577 | 62.5930539 |
| 18:06:12 | 0:06:48 | 70.2188035 | 72.2675012 | 78.1785034 | 73.122577 | 62.5930539 |
| 18:06:13 | 0:06:49 | 70.2188035 | 71.2675012 | 77.1785034 | 72.122577 | 62.5930539 |
| 18:06:14 | 0:06:50 | 70.2188035 | 71.2675012 | 77.1785034 | 71.122577 | 62.5930539 |
| 18:06:15 | 0:06:51 | 71.2188035 | 71.2675012 | 77.1785034 | 71.122577 | 61.5930539 |
| 18:06:16 | 0:06:52 | 72.2188035 | 71.2675012 | 77.1785034 | 72.122577 | 61.5930539 |
| 18:06:17 | 0:06:53 | 72.2188035 | 70.2675012 | 76.1785034 | 72.122577 | 61.5930539 |
| 18:06:18 | 0:06:54 | 72.2188035 | 70.2675012 | 76.1785034 | 72.122577 | 61.5930539 |
| 18:06:19 | 0:06:55 | 71.2188035 | 71.2675012 | 75.1785034 | 72.122577 | 62.5930539 |
| 18:06:20 | 0:06:56 | 71.2188035 | 71.2675012 | 75.1785034 | 70.122577 | 62.5930539 |
| 18:06:21 | 0:06:57 | 70.2188035 | 73.2675012 | 73.1785034 | 70.122577 | 62.5930539 |
| 18:06:22 | 0:06:58 | 69.2188035 | 77.2675012 | 71.1785034 | 70.122577 | 65.5930539 |
| 18:06:23 | 0:06:59 | 69.2188035 | 77.2675012 | 69.1785034 | 70.122577 | 65.5930539 |
| 18:06:24 | 0:07:00 | 69.2188035 | 78.2675012 | 68.1785034 | 70.122577 | 65.5930539 |
| 18:06:25 | 0:07:01 | 69.2188035 | 78.2675012 | 68.1785034 | 70.122577 | 65.5930539 |
| 18:06:26 | 0:07:02 | 68.2188035 | 78.2675012 | 67.1785034 | 70.122577 | 65.5930539 |
| 18:06:27 | 0:07:03 | 68.2188035 | 78.2675012 | 67.1785034 | 70.122577 | 65.5930539 |
| 18:06:28 | 0:07:04 | 69.2188035 | 78.2675012 | 67.1785034 | 70.122577 | 65.5930539 |
| 18:06:29 | 0:07:05 | 69.2188035 | 77.2675012 | 66.1785034 | 71.122577 | 66.5930539 |
| 18:06:30 | 0:07:06 | 68.2188035 | 77.2675012 | 66.1785034 | 71.122577 | 66.5930539 |
| 18:06:31 | 0:07:07 | 69.2188035 | 77.2675012 | 66.1785034 | 72.122577 | 66.5930539 |
| 18:06:32 | 0:07:08 | 69.2188035 | 75.2675012 | 65.1785034 | 72.122577 | 66.5930539 |
| 18:06:33 | 0:07:09 | 69.2188035 | 75.2675012 | 65.1785034 | 72.122577 | 66.5930539 |
| 18:06:34 | 0:07:10 | 69.2188035 | 71.2675012 | 65.1785034 | 72.122577 | 67.5930539 |
| 18:06:35 | 0:07:11 | 68.2188035 | 71.2675012 | 64.1785034 | 72.122577 | 75.5930539 |
| 18:06:36 | 0:07:12 | 68.2188035 | 71.2675012 | 64.1785034 | 71.122577 | 74.5930539 |
| 18:06:37 | 0:07:13 | 67.2188035 | 71.2675012 | 64.1785034 | 70.122577 | 74.5930539 |
| 18:06:38 | 0:07:14 | 67.2188035 | 71.2675012 | 65.1785034 | 70.122577 | 74.5930539 |
| 18:06:39 | 0:07:15 | 67.2188035 | 71.2675012 | 69.1785034 | 69.122577 | 74.5930539 |
| 18:06:40 | 0:07:16 | 67.2188035 | 71.2675012 | 74.1785034 | 69.122577 | 75.5930539 |
| 18:06:41 | 0:07:17 | 67.2188035 | 70.2675012 | 75.1785034 | 69.122577 | 75.5930539 |
| 18:06:42 | 0:07:18 | 67.2188035 | 69.2675012 | 75.1785034 | 69.122577 | 75.5930539 |
| 18:06:43 | 0:07:19 | 67.2188035 | 69.2675012 | 74.1785034 | 69.122577 | 75.5930539 |
| 18:06:44 | 0:07:20 | 67.2188035 | 71.2675012 | 74.1785034 | 69.122577 | 76.5930539 |
| 18:06:45 | 0:07:21 | 67.2188035 | 73.2675012 | 74.1785034 | 68.122577 | 77.5930539 |
| 18:06:46 | 0:07:22 | 67.2188035 | 73.2675012 | 74.1785034 | 68.122577 | 77.5930539 |
| 18:06:47 | 0:07:23 | 68.2188035 | 76.2675012 | 73.1785034 | 70.122577 | 77.5930539 |
| 18:06:48 | 0:07:24 | 70.2188035 | 76.2675012 | 73.1785034 | 70.122577 | 81.5930539 |
| 18:06:49 | 0:07:25 | 70.2188035 | 76.2675012 | 73.1785034 | 71.122577 | 81.5930539 |
| 18:06:50 | 0:07:26 | 70.2188035 | 76.2675012 | 73.1785034 | 71.122577 | 82.5930539 |
| 18:06:51 | 0:07:27 | 71.2188035 | 75.2675012 | 73.1785034 | 71.122577 | 84.5930539 |
| 18:06:52 | 0:07:28 | 73.2188035 | 73.2675012 | 73.1785034 | 71.122577 | 86.5930539 |

|          |         |            |            |            |           |            |
|----------|---------|------------|------------|------------|-----------|------------|
| 18:06:53 | 0:07:29 | 74.2188035 | 71.2675012 | 69.1785034 | 71.122577 | 87.5930539 |
| 18:06:54 | 0:07:30 | 74.2188035 | 71.2675012 | 67.1785034 | 72.122577 | 87.5930539 |
| 18:06:55 | 0:07:31 | 74.2188035 | 71.2675012 | 67.1785034 | 72.122577 | 86.5930539 |
| 18:06:56 | 0:07:32 | 74.2188035 | 71.2675012 | 66.1785034 | 72.122577 | 86.5930539 |
| 18:06:57 | 0:07:33 | 75.2188035 | 72.2675012 | 66.1785034 | 72.122577 | 85.5930539 |
| 18:06:58 | 0:07:34 | 75.2188035 | 72.2675012 | 67.1785034 | 72.122577 | 84.5930539 |
| 18:06:59 | 0:07:35 | 74.2188035 | 72.2675012 | 67.1785034 | 74.122577 | 78.5930539 |
| 18:07:00 | 0:07:36 | 73.2188035 | 72.2675012 | 69.1785034 | 74.122577 | 68.5930539 |
| 18:07:01 | 0:07:37 | 73.2188035 | 71.2675012 | 69.1785034 | 74.122577 | 68.5930539 |
| 18:07:02 | 0:07:38 | 73.2188035 | 72.2675012 | 69.1785034 | 75.122577 | 64.5930539 |
| 18:07:03 | 0:07:39 | 72.2188035 | 71.2675012 | 68.1785034 | 77.122577 | 62.5930539 |
| 18:07:04 | 0:07:40 | 72.2188035 | 69.2675012 | 68.1785034 | 77.122577 | 62.5930539 |
| 18:07:05 | 0:07:41 | 72.2188035 | 68.2675012 | 67.1785034 | 75.122577 | 62.5930539 |
| 18:07:06 | 0:07:42 | 73.2188035 | 68.2675012 | 67.1785034 | 71.122577 | 62.5930539 |
| 18:07:07 | 0:07:43 | 75.2188035 | 69.2675012 | 68.1785034 | 70.122577 | 63.5930539 |
| 18:07:08 | 0:07:44 | 77.2188035 | 70.2675012 | 71.1785034 | 70.122577 | 65.5930539 |
| 18:07:09 | 0:07:45 | 80.2188035 | 70.2675012 | 74.1785034 | 70.122577 | 65.5930539 |
| 18:07:10 | 0:07:46 | 81.2188035 | 70.2675012 | 76.1785034 | 69.122577 | 65.5930539 |
| 18:07:11 | 0:07:47 | 83.2188035 | 70.2675012 | 77.1785034 | 69.122577 | 66.5930539 |
| 18:07:12 | 0:07:48 | 83.2188035 | 70.2675012 | 77.1785034 | 69.122577 | 66.5930539 |
| 18:07:13 | 0:07:49 | 83.2188035 | 69.2675012 | 79.1785034 | 70.122577 | 69.5930539 |
| 18:07:14 | 0:07:50 | 83.2188035 | 68.2675012 | 78.1785034 | 71.122577 | 66.5930539 |
| 18:07:15 | 0:07:51 | 83.2188035 | 68.2675012 | 77.1785034 | 72.122577 | 65.5930539 |
| 18:07:16 | 0:07:52 | 84.2188035 | 68.2675012 | 76.1785034 | 72.122577 | 65.5930539 |
| 18:07:17 | 0:07:53 | 86.2188035 | 69.2675012 | 76.1785034 | 71.122577 | 64.5930539 |
| 18:07:18 | 0:07:54 | 87.2188035 | 68.2675012 | 76.1785034 | 70.122577 | 63.5930539 |
| 18:07:19 | 0:07:55 | 85.2188035 | 68.2675012 | 76.1785034 | 69.122577 | 63.5930539 |
| 18:07:20 | 0:07:56 | 84.2188035 | 68.2675012 | 76.1785034 | 69.122577 | 63.5930539 |
| 18:07:21 | 0:07:57 | 83.2188035 | 68.2675012 | 75.1785034 | 69.122577 | 63.5930539 |
| 18:07:22 | 0:07:58 | 82.2188035 | 68.2675012 | 74.1785034 | 69.122577 | 63.5930539 |
| 18:07:23 | 0:07:59 | 82.2188035 | 69.2675012 | 73.1785034 | 69.122577 | 63.5930539 |
| 18:07:24 | 0:08:00 | 82.2188035 | 69.2675012 | 71.1785034 | 70.122577 | 64.5930539 |
| 18:07:25 | 0:08:01 | 81.2188035 | 67.2675012 | 70.1785034 | 69.122577 | 65.5930539 |
| 18:07:26 | 0:08:02 | 79.2188035 | 67.2675012 | 67.1785034 | 68.122577 | 65.5930539 |
| 18:07:27 | 0:08:03 | 74.2188035 | 68.2675012 | 67.1785034 | 68.122577 | 65.5930539 |
| 18:07:28 | 0:08:04 | 70.2188035 | 69.2675012 | 66.1785034 | 68.122577 | 65.5930539 |
| 18:07:29 | 0:08:05 | 69.2188035 | 69.2675012 | 66.1785034 | 67.122577 | 65.5930539 |
| 18:07:30 | 0:08:06 | 69.2188035 | 69.2675012 | 66.1785034 | 67.122577 | 65.5930539 |
| 18:07:31 | 0:08:07 | 68.2188035 | 69.2675012 | 66.1785034 | 67.122577 | 66.5930539 |
| 18:07:32 | 0:08:08 | 68.2188035 | 69.2675012 | 65.1785034 | 68.122577 | 66.5930539 |
| 18:07:33 | 0:08:09 | 68.2188035 | 68.2675012 | 65.1785034 | 68.122577 | 66.5930539 |
| 18:07:34 | 0:08:10 | 68.2188035 | 67.2675012 | 65.1785034 | 68.122577 | 66.5930539 |
| 18:07:35 | 0:08:11 | 68.2188035 | 66.2675012 | 66.1785034 | 68.122577 | 66.5930539 |
| 18:07:36 | 0:08:12 | 68.2188035 | 66.2675012 | 68.1785034 | 68.122577 | 66.5930539 |
| 18:07:37 | 0:08:13 | 68.2188035 | 66.2675012 | 69.1785034 | 68.122577 | 66.5930539 |

|          |         |            |            |            |           |            |
|----------|---------|------------|------------|------------|-----------|------------|
| 18:07:38 | 0:08:14 | 68.2188035 | 67.2675012 | 71.1785034 | 69.122577 | 66.5930539 |
| 18:07:39 | 0:08:15 | 68.2188035 | 68.2675012 | 71.1785034 | 69.122577 | 66.5930539 |
| 18:07:40 | 0:08:16 | 67.2188035 | 68.2675012 | 71.1785034 | 69.122577 | 67.5930539 |
| 18:07:41 | 0:08:17 | 66.2188035 | 68.2675012 | 70.1785034 | 69.122577 | 68.5930539 |
| 18:07:42 | 0:08:18 | 66.2188035 | 71.2675012 | 69.1785034 | 70.122577 | 73.5930539 |
| 18:07:43 | 0:08:19 | 67.2188035 | 72.2675012 | 68.1785034 | 70.122577 | 75.5930539 |
| 18:07:44 | 0:08:20 | 67.2188035 | 71.2675012 | 68.1785034 | 70.122577 | 75.5930539 |
| 18:07:45 | 0:08:21 | 67.2188035 | 71.2675012 | 69.1785034 | 70.122577 | 79.5930539 |
| 18:07:46 | 0:08:22 | 67.2188035 | 71.2675012 | 70.1785034 | 70.122577 | 85.5930539 |
| 18:07:47 | 0:08:23 | 67.2188035 | 73.2675012 | 70.1785034 | 71.122577 | 85.5930539 |
| 18:07:48 | 0:08:24 | 68.2188035 | 73.2675012 | 73.1785034 | 71.122577 | 85.5930539 |
| 18:07:49 | 0:08:25 | 68.2188035 | 74.2675012 | 73.1785034 | 71.122577 | 86.5930539 |
| 18:07:50 | 0:08:26 | 68.2188035 | 75.2675012 | 72.1785034 | 71.122577 | 72.337468  |
| 18:07:51 | 0:08:27 | 69.2188035 | 75.2675012 | 71.1785034 | 71.122577 | 71.6101953 |
| 18:07:52 | 0:08:28 | 69.2188035 | 76.2675012 | 70.1785034 | 71.122577 | 71.4283771 |
| 18:07:53 | 0:08:29 | 69.2188035 | 76.2675012 | 70.1785034 | 71.122577 | 71.2465589 |
| 18:07:54 | 0:08:30 | 69.2188035 | 76.2675012 | 70.1785034 | 72.122577 | 71.337468  |
| 18:07:55 | 0:08:31 | 70.2188035 | 76.2675012 | 71.1785034 | 72.122577 | 72.337468  |
| 18:07:56 | 0:08:32 | 70.2188035 | 75.2675012 | 72.1785034 | 72.122577 | 72.4283771 |
| 18:07:57 | 0:08:33 | 71.2188035 | 75.2675012 | 73.1785034 | 71.122577 | 72.337468  |
| 18:07:58 | 0:08:34 | 71.2188035 | 75.2675012 | 73.1785034 | 71.122577 | 72.6101953 |
| 18:07:59 | 0:08:35 | 71.2188035 | 75.2675012 | 73.1785034 | 71.122577 | 72.5192862 |
| 18:08:00 | 0:08:36 | 71.2188035 | 74.2675012 | 73.1785034 | 71.122577 | 72.6101953 |
| 18:08:01 | 0:08:37 | 72.2188035 | 74.2675012 | 73.1785034 | 71.122577 | 73.1556498 |
| 18:08:02 | 0:08:38 | 70.2188035 | 73.2675012 | 73.1785034 | 71.122577 | 72.6101953 |
| 18:08:03 | 0:08:39 | 70.2188035 | 73.2675012 | 72.1785034 | 72.122577 | 73.7011044 |
| 18:08:04 | 0:08:40 | 70.2188035 | 72.2675012 | 72.1785034 | 74.122577 | 73.8829225 |
| 18:08:05 | 0:08:41 | 70.2188035 | 72.2675012 | 72.1785034 | 75.122577 | 73.8829225 |
| 18:08:06 | 0:08:42 | 70.2188035 | 72.2675012 | 72.1785034 | 75.122577 | 73.8829225 |
| 18:08:07 | 0:08:43 | 69.2188035 | 73.2675012 | 72.1785034 | 78.122577 | 74.4283771 |
| 18:08:08 | 0:08:44 | 69.2188035 | 74.2675012 | 76.1785034 | 78.122577 | 81.5930539 |
| 18:08:09 | 0:08:45 | 69.2188035 | 75.2675012 | 76.1785034 | 77.122577 | 80.5930539 |
| 18:08:10 | 0:08:46 | 70.2188035 | 75.2675012 | 80.1785034 | 75.122577 | 80.5930539 |
| 18:08:11 | 0:08:47 | 70.2188035 | 75.2675012 | 81.1785034 | 75.122577 | 79.5930539 |
| 18:08:12 | 0:08:48 | 71.2188035 | 74.2675012 | 81.1785034 | 75.122577 | 75.5930539 |
| 18:08:13 | 0:08:49 | 72.2188035 | 74.2675012 | 81.1785034 | 74.122577 | 75.5930539 |
| 18:08:14 | 0:08:50 | 74.2188035 | 74.2675012 | 81.1785034 | 74.122577 | 71.5930539 |
| 18:08:15 | 0:08:51 | 75.2188035 | 74.2675012 | 81.1785034 | 73.122577 | 68.5930539 |
| 18:08:16 | 0:08:52 | 77.2188035 | 75.2675012 | 80.1785034 | 73.122577 | 67.5930539 |
| 18:08:17 | 0:08:53 | 78.2188035 | 75.2675012 | 80.1785034 | 73.122577 | 66.5930539 |
| 18:08:18 | 0:08:54 | 79.2188035 | 75.2675012 | 80.1785034 | 73.122577 | 66.5930539 |
| 18:08:19 | 0:08:55 | 79.2188035 | 75.2675012 | 79.1785034 | 72.122577 | 64.5930539 |
| 18:08:20 | 0:08:56 | 76.2188035 | 75.2675012 | 78.1785034 | 72.122577 | 65.5930539 |
| 18:08:21 | 0:08:57 | 73.2188035 | 76.2675012 | 75.1785034 | 69.122577 | 65.5930539 |
| 18:08:22 | 0:08:58 | 72.2188035 | 76.2675012 | 72.1785034 | 68.122577 | 65.5930539 |



|          |         |            |            |            |           |            |
|----------|---------|------------|------------|------------|-----------|------------|
| 18:08:23 | 0:08:59 | 71.2188035 | 73.2675012 | 71.1785034 | 67.122577 | 65.5930539 |
| 18:08:24 | 0:09:00 | 70.2188035 | 73.2675012 | 70.1785034 | 67.122577 | 65.5930539 |
| 18:08:25 | 0:09:01 | 70.2188035 | 73.2675012 | 70.1785034 | 67.122577 | 65.5930539 |
| 18:08:26 | 0:09:02 | 70.2188035 | 74.2675012 | 70.1785034 | 71.122577 | 64.5930539 |
| 18:08:27 | 0:09:03 | 70.2188035 | 76.2675012 | 70.1785034 | 70.122577 | 64.5930539 |
| 18:08:28 | 0:09:04 | 70.2188035 | 76.2675012 | 69.1785034 | 71.122577 | 64.5930539 |
| 18:08:29 | 0:09:05 | 71.2188035 | 76.2675012 | 72.1785034 | 71.122577 | 63.5930539 |
| 18:08:30 | 0:09:06 | 70.2188035 | 77.2675012 | 72.1785034 | 71.122577 | 61.5930539 |
| 18:08:31 | 0:09:07 | 70.2188035 | 77.2675012 | 72.1785034 | 71.122577 | 61.5930539 |
| 18:08:32 | 0:09:08 | 68.2188035 | 78.2675012 | 72.1785034 | 72.122577 | 61.5930539 |
| 18:08:33 | 0:09:09 | 68.2188035 | 78.2675012 | 72.1785034 | 72.122577 | 62.5930539 |
| 18:08:34 | 0:09:10 | 68.2188035 | 83.2675012 | 72.1785034 | 71.122577 | 63.5930539 |
| 18:08:35 | 0:09:11 | 67.2188035 | 83.2675012 | 72.1785034 | 70.122577 | 65.5930539 |
| 18:08:36 | 0:09:12 | 67.2188035 | 83.2675012 | 73.1785034 | 70.122577 | 65.5930539 |
| 18:08:37 | 0:09:13 | 67.2188035 | 83.2675012 | 73.1785034 | 70.122577 | 66.5930539 |
| 18:08:38 | 0:09:14 | 67.2188035 | 83.2675012 | 73.1785034 | 71.122577 | 66.5930539 |
| 18:08:39 | 0:09:15 | 67.2188035 | 83.2675012 | 73.1785034 | 72.122577 | 66.5930539 |
| 18:08:40 | 0:09:16 | 68.2188035 | 83.2675012 | 72.1785034 | 72.122577 | 67.5930539 |
| 18:08:41 | 0:09:17 | 68.2188035 | 83.2675012 | 72.1785034 | 72.122577 | 66.5930539 |
| 18:08:42 | 0:09:18 | 67.2188035 | 81.2675012 | 72.1785034 | 72.122577 | 66.5930539 |
| 18:08:43 | 0:09:19 | 67.2188035 | 81.2675012 | 73.1785034 | 71.122577 | 66.5930539 |
| 18:08:44 | 0:09:20 | 68.2188035 | 76.2675012 | 74.1785034 | 71.122577 | 66.5930539 |
| 18:08:45 | 0:09:21 | 68.2188035 | 75.2675012 | 75.1785034 | 71.122577 | 66.5930539 |
| 18:08:46 | 0:09:22 | 70.2188035 | 74.2675012 | 75.1785034 | 72.122577 | 66.5930539 |
| 18:08:47 | 0:09:23 | 71.2188035 | 74.2675012 | 75.1785034 | 72.122577 | 66.5930539 |
| 18:08:48 | 0:09:24 | 72.2188035 | 74.2675012 | 75.1785034 | 71.122577 | 66.5930539 |
| 18:08:49 | 0:09:25 | 73.2188035 | 73.2675012 | 74.1785034 | 70.122577 | 68.5930539 |
| 18:08:50 | 0:09:26 | 74.2188035 | 73.2675012 | 74.1785034 | 71.122577 | 69.5930539 |
| 18:08:51 | 0:09:27 | 74.2188035 | 73.2675012 | 74.1785034 | 71.122577 | 70.5930539 |
| 18:08:52 | 0:09:28 | 75.2188035 | 73.2675012 | 74.1785034 | 71.122577 | 70.5930539 |
| 18:08:53 | 0:09:29 | 75.2188035 | 73.2675012 | 75.1785034 | 72.122577 | 69.5930539 |
| 18:08:54 | 0:09:30 | 75.2188035 | 73.2675012 | 75.1785034 | 72.122577 | 68.5930539 |
| 18:08:55 | 0:09:31 | 77.2188035 | 73.2675012 | 76.1785034 | 72.122577 | 66.5930539 |
| 18:08:56 | 0:09:32 | 77.2188035 | 73.2675012 | 76.1785034 | 72.122577 | 66.5930539 |
| 18:08:57 | 0:09:33 | 76.2188035 | 73.2675012 | 76.1785034 | 72.122577 | 66.5930539 |
| 18:08:58 | 0:09:34 | 73.2188035 | 73.2675012 | 76.1785034 | 72.122577 | 66.5930539 |
| 18:08:59 | 0:09:35 | 71.2188035 | 73.2675012 | 76.1785034 | 72.122577 | 67.5930539 |
| 18:09:00 | 0:09:36 | 71.2188035 | 73.2675012 | 76.1785034 | 72.122577 | 67.5930539 |
| 18:09:01 | 0:09:37 | 71.2188035 | 74.2675012 | 77.1785034 | 70.122577 | 68.5930539 |
| 18:09:02 | 0:09:38 | 71.2188035 | 74.2675012 | 77.1785034 | 69.122577 | 68.5930539 |
| 18:09:03 | 0:09:39 | 70.2188035 | 74.2675012 | 82.1785034 | 69.122577 | 68.5930539 |
| 18:09:04 | 0:09:40 | 70.2188035 | 74.2675012 | 84.1785034 | 69.122577 | 68.5930539 |
| 18:09:05 | 0:09:41 | 68.2188035 | 73.2675012 | 84.1785034 | 70.122577 | 67.5930539 |
| 18:09:06 | 0:09:42 | 67.2188035 | 73.2675012 | 86.1785034 | 72.122577 | 67.5930539 |
| 18:09:07 | 0:09:43 | 66.2188035 | 72.2675012 | 87.1785034 | 72.122577 | 67.5930539 |

|          |         |            |            |            |           |            |
|----------|---------|------------|------------|------------|-----------|------------|
| 18:09:08 | 0:09:44 | 65.2188035 | 72.2675012 | 87.1785034 | 71.122577 | 67.5930539 |
| 18:09:09 | 0:09:45 | 66.2188035 | 72.2675012 | 72.2465589 | 70.122577 | 66.5930539 |
| 18:09:10 | 0:09:46 | 66.2188035 | 71.2675012 | 72.2465589 | 70.122577 | 69.5930539 |
| 18:09:11 | 0:09:47 | 66.2188035 | 71.2675012 | 71.9738316 | 70.122577 | 69.5930539 |
| 18:09:12 | 0:09:48 | 66.2188035 | 71.2675012 | 85.1785034 | 70.122577 | 70.5930539 |
| 18:09:13 | 0:09:49 | 65.2188035 | 70.2675012 | 84.1785034 | 70.122577 | 70.5930539 |
| 18:09:14 | 0:09:50 | 65.2188035 | 70.2675012 | 84.1785034 | 70.122577 | 71.5930539 |
| 18:09:15 | 0:09:51 | 66.2188035 | 70.2675012 | 82.1785034 | 69.122577 | 71.5930539 |
| 18:09:16 | 0:09:52 | 66.2188035 | 70.2675012 | 81.1785034 | 69.122577 | 71.5930539 |
| 18:09:17 | 0:09:53 | 65.2188035 | 71.2675012 | 81.1785034 | 69.122577 | 71.5930539 |
| 18:09:18 | 0:09:54 | 65.2188035 | 72.2675012 | 79.1785034 | 69.122577 | 71.5930539 |
| 18:09:19 | 0:09:55 | 66.2188035 | 72.2675012 | 79.1785034 | 69.122577 | 73.5930539 |
| 18:09:20 | 0:09:56 | 67.2188035 | 71.2675012 | 77.1785034 | 69.122577 | 73.5930539 |
| 18:09:21 | 0:09:57 | 66.2188035 | 71.2675012 | 75.1785034 | 71.122577 | 73.5930539 |
| 18:09:22 | 0:09:58 | 66.2188035 | 71.2675012 | 75.1785034 | 71.122577 | 73.5930539 |
| 18:09:23 | 0:09:59 | 66.2188035 | 70.2675012 | 73.1785034 | 71.122577 | 73.5930539 |
| 18:09:24 | 0:10:00 | 66.2188035 | 71.2675012 | 72.1785034 | 71.122577 | 74.5930539 |
| 18:09:25 | 0:10:01 | 66.2188035 | 72.2675012 | 72.1785034 | 71.122577 | 74.5930539 |
| 18:09:26 | 0:10:02 | 66.2188035 | 72.2675012 | 72.1785034 | 71.122577 | 74.5930539 |
| 18:09:27 | 0:10:03 | 65.2188035 | 72.2675012 | 72.1785034 | 71.122577 | 74.5930539 |
| 18:09:28 | 0:10:04 | 65.2188035 | 71.2675012 | 72.1785034 | 71.122577 | 74.5930539 |
| 18:09:29 | 0:10:05 | 65.2188035 | 71.2675012 | 72.1785034 | 71.122577 | 73.5930539 |
| 18:09:30 | 0:10:06 | 66.2188035 | 70.2675012 | 72.1785034 | 71.122577 | 74.5930539 |
| 18:09:31 | 0:10:07 | 66.2188035 | 70.2675012 | 72.1785034 | 70.122577 | 74.5930539 |
| 18:09:32 | 0:10:08 | 65.2188035 | 71.2675012 | 72.1785034 | 70.122577 | 75.5930539 |
| 18:09:33 | 0:10:09 | 66.2188035 | 71.2675012 | 72.1785034 | 70.122577 | 75.5930539 |
| 18:09:34 | 0:10:10 | 65.2188035 | 72.2675012 | 73.1785034 | 70.122577 | 75.5930539 |
| 18:09:35 | 0:10:11 | 65.2188035 | 72.2675012 | 72.1785034 | 70.122577 | 75.5930539 |
| 18:09:36 | 0:10:12 | 64.2188035 | 72.2675012 | 72.1785034 | 70.122577 | 75.5930539 |
| 18:09:37 | 0:10:13 | 64.2188035 | 72.2675012 | 71.1785034 | 70.122577 | 75.5930539 |
| 18:09:38 | 0:10:14 | 64.2188035 | 71.2675012 | 70.1785034 | 72.122577 | 75.5930539 |
| 18:09:39 | 0:10:15 | 64.2188035 | 71.2675012 | 70.1785034 | 72.122577 | 74.5930539 |
| 18:09:40 | 0:10:16 | 65.2188035 | 72.2675012 | 70.1785034 | 77.122577 | 74.5930539 |
| 18:09:41 | 0:10:17 | 65.2188035 | 72.2675012 | 71.1785034 | 79.122577 | 72.5930539 |
| 18:09:42 | 0:10:18 | 65.2188035 | 73.2675012 | 71.1785034 | 78.122577 | 72.5930539 |
| 18:09:43 | 0:10:19 | 66.2188035 | 74.2675012 | 71.1785034 | 78.122577 | 72.5930539 |
| 18:09:44 | 0:10:20 | 67.2188035 | 74.2675012 | 72.1785034 | 78.122577 | 72.5930539 |
| 18:09:45 | 0:10:21 | 67.2188035 | 72.2675012 | 72.1785034 | 78.122577 | 72.5930539 |
| 18:09:46 | 0:10:22 | 67.2188035 | 72.2675012 | 73.1785034 | 77.122577 | 72.5930539 |
| 18:09:47 | 0:10:23 | 69.2188035 | 73.2675012 | 73.1785034 | 79.122577 | 71.5930539 |
| 18:09:48 | 0:10:24 | 69.2188035 | 73.2675012 | 73.1785034 | 79.122577 | 71.5930539 |
| 18:09:49 | 0:10:25 | 69.2188035 | 74.2675012 | 74.1785034 | 79.122577 | 71.5930539 |
| 18:09:50 | 0:10:26 | 68.2188035 | 74.2675012 | 73.1785034 | 81.122577 | 71.5930539 |
| 18:09:51 | 0:10:27 | 68.2188035 | 76.2675012 | 73.1785034 | 81.122577 | 71.5930539 |
| 18:09:52 | 0:10:28 | 68.2188035 | 76.2675012 | 73.1785034 | 83.122577 | 71.5930539 |

|          |         |            |            |            |            |            |
|----------|---------|------------|------------|------------|------------|------------|
| 18:09:53 | 0:10:29 | 68.2188035 | 78.2675012 | 74.1785034 | 83.122577  | 72.5930539 |
| 18:09:54 | 0:10:30 | 68.2188035 | 78.2675012 | 74.1785034 | 83.122577  | 72.5930539 |
| 18:09:55 | 0:10:31 | 69.2188035 | 78.2675012 | 74.1785034 | 74.7011044 | 73.5930539 |
| 18:09:56 | 0:10:32 | 69.2188035 | 79.2675012 | 74.1785034 | 74.8829225 | 73.5930539 |
| 18:09:57 | 0:10:33 | 69.2188035 | 80.2675012 | 74.1785034 | 75.0647407 | 74.5930539 |
| 18:09:58 | 0:10:34 | 69.2188035 | 78.2675012 | 73.1785034 | 74.9738316 | 74.5930539 |
| 18:09:59 | 0:10:35 | 70.2188035 | 78.2675012 | 72.1785034 | 74.9738316 | 74.5930539 |
| 18:10:00 | 0:10:36 | 70.2188035 | 78.2675012 | 71.1785034 | 74.7920134 | 73.5930539 |
| 18:10:01 | 0:10:37 | 70.2188035 | 78.2675012 | 70.1785034 | 74.337468  | 73.5930539 |
| 18:10:02 | 0:10:38 | 70.2188035 | 78.2675012 | 70.1785034 | 74.337468  | 73.5930539 |
| 18:10:03 | 0:10:39 | 69.2188035 | 76.2675012 | 70.1785034 | 74.0647407 | 73.5930539 |
| 18:10:04 | 0:10:40 | 69.2188035 | 76.2675012 | 70.1785034 | 74.0647407 | 72.5930539 |
| 18:10:05 | 0:10:41 | 69.2188035 | 76.2675012 | 71.1785034 | 74.2465589 | 72.5930539 |
| 18:10:06 | 0:10:42 | 69.2188035 | 73.2675012 | 71.1785034 | 74.337468  | 73.5930539 |
| 18:10:07 | 0:10:43 | 68.2188035 | 71.2675012 | 71.1785034 | 74.337468  | 73.5930539 |
| 18:10:08 | 0:10:44 | 67.2188035 | 71.2675012 | 71.1785034 | 74.7920134 | 73.5930539 |
| 18:10:09 | 0:10:45 | 66.2188035 | 70.2675012 | 70.1785034 | 74.9738316 | 73.5930539 |
| 18:10:10 | 0:10:46 | 66.2188035 | 68.2675012 | 69.1785034 | 74.7920134 | 73.5930539 |
| 18:10:11 | 0:10:47 | 65.2188035 | 68.2675012 | 69.1785034 | 74.7920134 | 74.5930539 |
| 18:10:12 | 0:10:48 | 66.2188035 | 68.2675012 | 70.1785034 | 74.4283771 | 74.5930539 |
| 18:10:13 | 0:10:49 | 66.2188035 | 68.2675012 | 71.1785034 | 74.2465589 | 75.5930539 |
| 18:10:14 | 0:10:50 | 66.2188035 | 67.2675012 | 74.1785034 | 74.337468  | 76.5930539 |
| 18:10:15 | 0:10:51 | 67.2188035 | 65.2675012 | 76.1785034 | 74.5192862 | 77.5930539 |
| 18:10:16 | 0:10:52 | 67.2188035 | 65.2675012 | 77.1785034 | 74.6101953 | 77.5930539 |
| 18:10:17 | 0:10:53 | 66.2188035 | 67.2675012 | 77.1785034 | 74.337468  | 77.5930539 |
| 18:10:18 | 0:10:54 | 67.2188035 | 69.2675012 | 75.1785034 | 74.337468  | 77.5930539 |
| 18:10:19 | 0:10:55 | 67.2188035 | 69.2675012 | 75.1785034 | 74.5192862 | 78.5930539 |
| 18:10:20 | 0:10:56 | 68.2188035 | 69.2675012 | 76.1785034 | 74.7920134 | 79.5930539 |
| 18:10:21 | 0:10:57 | 67.2188035 | 70.2675012 | 78.1785034 | 75.1556498 | 80.5930539 |
| 18:10:22 | 0:10:58 | 67.2188035 | 69.2675012 | 78.1785034 | 74.5192862 | 80.5930539 |
| 18:10:23 | 0:10:59 | 67.2188035 | 67.2675012 | 79.1785034 | 74.1556498 | 80.5930539 |
| 18:10:24 | 0:11:00 | 67.2188035 | 67.2675012 | 79.1785034 | 73.9738316 | 80.5930539 |
| 18:10:25 | 0:11:01 | 66.2188035 | 68.2675012 | 80.1785034 | 75.0647407 | 81.5930539 |
| 18:10:26 | 0:11:02 | 66.2188035 | 68.2675012 | 80.1785034 | 85.122577  | 81.5930539 |
| 18:10:27 | 0:11:03 | 66.2188035 | 68.2675012 | 80.1785034 | 85.122577  | 79.5930539 |
| 18:10:28 | 0:11:04 | 66.2188035 | 68.2675012 | 80.1785034 | 84.122577  | 79.5930539 |
| 18:10:29 | 0:11:05 | 66.2188035 | 68.2675012 | 81.1785034 | 84.122577  | 79.5930539 |
| 18:10:30 | 0:11:06 | 66.2188035 | 68.2675012 | 81.1785034 | 83.122577  | 78.5930539 |
| 18:10:31 | 0:11:07 | 66.2188035 | 68.2675012 | 82.1785034 | 82.122577  | 78.5930539 |
| 18:10:32 | 0:11:08 | 67.2188035 | 68.2675012 | 83.1785034 | 80.122577  | 77.5930539 |
| 18:10:33 | 0:11:09 | 70.2188035 | 68.2675012 | 83.1785034 | 79.122577  | 77.5930539 |
| 18:10:34 | 0:11:10 | 72.2188035 | 68.2675012 | 81.1785034 | 75.122577  | 77.5930539 |
| 18:10:35 | 0:11:11 | 73.2188035 | 68.2675012 | 79.1785034 | 75.122577  | 77.5930539 |
| 18:10:36 | 0:11:12 | 76.2188035 | 71.2675012 | 79.1785034 | 75.122577  | 77.5930539 |
| 18:10:37 | 0:11:13 | 76.2188035 | 71.2675012 | 81.1785034 | 75.122577  | 77.5930539 |

|          |         |            |            |            |           |            |
|----------|---------|------------|------------|------------|-----------|------------|
| 18:10:38 | 0:11:14 | 76.2188035 | 71.2675012 | 82.1785034 | 76.122577 | 78.5930539 |
| 18:10:39 | 0:11:15 | 76.2188035 | 71.2675012 | 82.1785034 | 76.122577 | 78.5930539 |
| 18:10:40 | 0:11:16 | 76.2188035 | 72.2675012 | 82.1785034 | 75.122577 | 76.5930539 |
| 18:10:41 | 0:11:17 | 76.2188035 | 72.2675012 | 82.1785034 | 72.122577 | 76.5930539 |
| 18:10:42 | 0:11:18 | 75.2188035 | 72.2675012 | 82.1785034 | 70.122577 | 76.5930539 |
| 18:10:43 | 0:11:19 | 74.2188035 | 74.2675012 | 82.1785034 | 68.122577 | 75.5930539 |
| 18:10:44 | 0:11:20 | 74.2188035 | 75.2675012 | 83.1785034 | 68.122577 | 75.5930539 |
| 18:10:45 | 0:11:21 | 73.2188035 | 75.2675012 | 83.1785034 | 68.122577 | 75.5930539 |
| 18:10:46 | 0:11:22 | 73.2188035 | 75.2675012 | 82.1785034 | 68.122577 | 75.5930539 |
| 18:10:47 | 0:11:23 | 73.2188035 | 76.2675012 | 82.1785034 | 69.122577 | 75.5930539 |
| 18:10:48 | 0:11:24 | 73.2188035 | 76.2675012 | 82.1785034 | 69.122577 | 75.5930539 |
| 18:10:49 | 0:11:25 | 73.2188035 | 77.2675012 | 82.1785034 | 69.122577 | 75.5930539 |
| 18:10:50 | 0:11:26 | 73.2188035 | 77.2675012 | 81.1785034 | 69.122577 | 74.5930539 |
| 18:10:51 | 0:11:27 | 73.2188035 | 77.2675012 | 80.1785034 | 69.122577 | 70.5930539 |
| 18:10:52 | 0:11:28 | 73.2188035 | 79.2675012 | 80.1785034 | 69.122577 | 70.5930539 |
| 18:10:53 | 0:11:29 | 73.2188035 | 79.2675012 | 78.1785034 | 68.122577 | 68.5930539 |
| 18:10:54 | 0:11:30 | 71.2188035 | 81.2675012 | 74.1785034 | 68.122577 | 68.5930539 |
| 18:10:55 | 0:11:31 | 69.2188035 | 81.2675012 | 72.1785034 | 68.122577 | 67.5930539 |
| 18:10:56 | 0:11:32 | 68.2188035 | 81.2675012 | 70.1785034 | 68.122577 | 66.5930539 |
| 18:10:57 | 0:11:33 | 68.2188035 | 81.2675012 | 72.1785034 | 69.122577 | 66.5930539 |
| 18:10:58 | 0:11:34 | 68.2188035 | 81.2675012 | 72.1785034 | 70.122577 | 68.5930539 |
| 18:10:59 | 0:11:35 | 69.2188035 | 81.2675012 | 72.1785034 | 70.122577 | 70.5930539 |
| 18:11:00 | 0:11:36 | 69.2188035 | 81.2675012 | 72.1785034 | 70.122577 | 70.5930539 |
| 18:11:01 | 0:11:37 | 68.2188035 | 83.2675012 | 72.1785034 | 70.122577 | 73.5930539 |
| 18:11:02 | 0:11:38 | 68.2188035 | 84.2675012 | 73.1785034 | 70.122577 | 73.5930539 |
| 18:11:03 | 0:11:39 | 69.2188035 | 84.2675012 | 74.1785034 | 70.122577 | 73.5930539 |
| 18:11:04 | 0:11:40 | 69.2188035 | 84.2675012 | 74.1785034 | 70.122577 | 73.5930539 |
| 18:11:05 | 0:11:41 | 70.2188035 | 84.2675012 | 73.1785034 | 70.122577 | 74.5930539 |
| 18:11:06 | 0:11:42 | 70.2188035 | 84.2675012 | 73.1785034 | 70.122577 | 72.5930539 |
| 18:11:07 | 0:11:43 | 70.2188035 | 84.2675012 | 74.1785034 | 70.122577 | 72.5930539 |
| 18:11:08 | 0:11:44 | 70.2188035 | 84.2675012 | 74.1785034 | 70.122577 | 71.5930539 |
| 18:11:09 | 0:11:45 | 70.2188035 | 85.2675012 | 74.1785034 | 70.122577 | 71.5930539 |
| 18:11:10 | 0:11:46 | 70.2188035 | 85.2675012 | 74.1785034 | 70.122577 | 70.5930539 |
| 18:11:11 | 0:11:47 | 73.2188035 | 85.2675012 | 74.1785034 | 71.122577 | 70.5930539 |
| 18:11:12 | 0:11:48 | 72.2188035 | 85.2675012 | 73.1785034 | 71.122577 | 66.5930539 |
| 18:11:13 | 0:11:49 | 71.2188035 | 87.2675012 | 72.1785034 | 72.122577 | 64.5930539 |
| 18:11:14 | 0:11:50 | 71.2188035 | 87.2675012 | 72.1785034 | 72.122577 | 64.5930539 |
| 18:11:15 | 0:11:51 | 71.2188035 | 87.2675012 | 72.1785034 | 71.122577 | 63.5930539 |
| 18:11:16 | 0:11:52 | 71.2188035 | 86.2675012 | 75.1785034 | 71.122577 | 62.5930539 |
| 18:11:17 | 0:11:53 | 71.2188035 | 86.2675012 | 79.1785034 | 71.122577 | 62.5930539 |
| 18:11:18 | 0:11:54 | 70.2188035 | 87.2675012 | 79.1785034 | 72.122577 | 62.5930539 |
| 18:11:19 | 0:11:55 | 71.2188035 | 88.2675012 | 79.1785034 | 72.122577 | 64.5930539 |
| 18:11:20 | 0:11:56 | 70.2188035 | 73.8829225 | 79.1785034 | 72.122577 | 64.5930539 |
| 18:11:21 | 0:11:57 | 70.2188035 | 73.9738316 | 80.1785034 | 72.122577 | 65.5930539 |
| 18:11:22 | 0:11:58 | 70.2188035 | 88.2675012 | 80.1785034 | 72.122577 | 65.5930539 |

|          |         |            |            |            |           |            |
|----------|---------|------------|------------|------------|-----------|------------|
| 18:11:23 | 0:11:59 | 70.2188035 | 88.2675012 | 82.1785034 | 72.122577 | 65.5930539 |
| 18:11:24 | 0:12:00 | 70.2188035 | 88.2675012 | 82.1785034 | 73.122577 | 65.5930539 |
| 18:11:25 | 0:12:01 | 70.2188035 | 88.2675012 | 81.1785034 | 73.122577 | 65.5930539 |
| 18:11:26 | 0:12:02 | 70.2188035 | 87.2675012 | 79.1785034 | 73.122577 | 65.5930539 |
| 18:11:27 | 0:12:03 | 71.2188035 | 86.2675012 | 78.1785034 | 73.122577 | 67.5930539 |
| 18:11:28 | 0:12:04 | 71.2188035 | 86.2675012 | 78.1785034 | 73.122577 | 67.5930539 |
| 18:11:29 | 0:12:05 | 72.2188035 | 85.2675012 | 78.1785034 | 73.122577 | 67.5930539 |
| 18:11:30 | 0:12:06 | 71.2188035 | 85.2675012 | 77.1785034 | 72.122577 | 69.5930539 |
| 18:11:31 | 0:12:07 | 71.2188035 | 85.2675012 | 77.1785034 | 72.122577 | 70.5930539 |
| 18:11:32 | 0:12:08 | 71.2188035 | 84.2675012 | 77.1785034 | 71.122577 | 70.5930539 |
| 18:11:33 | 0:12:09 | 71.2188035 | 81.2675012 | 77.1785034 | 71.122577 | 69.5930539 |
| 18:11:34 | 0:12:10 | 71.2188035 | 81.2675012 | 77.1785034 | 73.122577 | 69.5930539 |
| 18:11:35 | 0:12:11 | 70.2188035 | 79.2675012 | 77.1785034 | 73.122577 | 69.5930539 |
| 18:11:36 | 0:12:12 | 70.2188035 | 79.2675012 | 76.1785034 | 73.122577 | 70.5930539 |
| 18:11:37 | 0:12:13 | 70.2188035 | 79.2675012 | 81.1785034 | 74.122577 | 70.5930539 |
| 18:11:38 | 0:12:14 | 70.2188035 | 78.2675012 | 83.1785034 | 76.122577 | 70.5930539 |
| 18:11:39 | 0:12:15 | 70.2188035 | 76.2675012 | 84.1785034 | 78.122577 | 70.5930539 |
| 18:11:40 | 0:12:16 | 70.2188035 | 76.2675012 | 84.1785034 | 78.122577 | 71.5930539 |
| 18:11:41 | 0:12:17 | 70.2188035 | 76.2675012 | 85.1785034 | 77.122577 | 71.5930539 |
| 18:11:42 | 0:12:18 | 70.2188035 | 76.2675012 | 85.1785034 | 77.122577 | 71.5930539 |
| 18:11:43 | 0:12:19 | 70.2188035 | 76.2675012 | 83.1785034 | 77.122577 | 71.5930539 |
| 18:11:44 | 0:12:20 | 70.2188035 | 78.2675012 | 81.1785034 | 76.122577 | 70.5930539 |
| 18:11:45 | 0:12:21 | 71.2188035 | 79.2675012 | 80.1785034 | 76.122577 | 70.5930539 |
| 18:11:46 | 0:12:22 | 71.2188035 | 79.2675012 | 78.1785034 | 74.122577 | 71.5930539 |
| 18:11:47 | 0:12:23 | 71.2188035 | 79.2675012 | 78.1785034 | 73.122577 | 72.5930539 |
| 18:11:48 | 0:12:24 | 71.2188035 | 79.2675012 | 77.1785034 | 72.122577 | 72.5930539 |
| 18:11:49 | 0:12:25 | 72.2188035 | 79.2675012 | 76.1785034 | 72.122577 | 72.5930539 |
| 18:11:50 | 0:12:26 | 72.2188035 | 79.2675012 | 76.1785034 | 72.122577 | 72.5930539 |
| 18:11:51 | 0:12:27 | 71.2188035 | 79.2675012 | 76.1785034 | 71.122577 | 72.5930539 |
| 18:11:52 | 0:12:28 | 71.2188035 | 78.2675012 | 75.1785034 | 71.122577 | 72.5930539 |
| 18:11:53 | 0:12:29 | 71.2188035 | 78.2675012 | 75.1785034 | 71.122577 | 72.5930539 |
| 18:11:54 | 0:12:30 | 71.2188035 | 76.2675012 | 75.1785034 | 71.122577 | 72.5930539 |
| 18:11:55 | 0:12:31 | 71.2188035 | 76.2675012 | 75.1785034 | 71.122577 | 72.5930539 |
| 18:11:56 | 0:12:32 | 72.2188035 | 76.2675012 | 75.1785034 | 71.122577 | 72.5930539 |
| 18:11:57 | 0:12:33 | 72.2188035 | 79.2675012 | 75.1785034 | 71.122577 | 72.5930539 |
| 18:11:58 | 0:12:34 | 72.2188035 | 80.2675012 | 74.1785034 | 70.122577 | 70.5930539 |
| 18:11:59 | 0:12:35 | 72.2188035 | 80.2675012 | 74.1785034 | 69.122577 | 70.5930539 |
| 18:12:00 | 0:12:36 | 72.2188035 | 80.2675012 | 72.1785034 | 68.122577 | 71.5930539 |
| 18:12:01 | 0:12:37 | 73.2188035 | 81.2675012 | 70.1785034 | 68.122577 | 71.5930539 |
| 18:12:02 | 0:12:38 | 73.2188035 | 82.2675012 | 70.1785034 | 68.122577 | 73.5930539 |
| 18:12:03 | 0:12:39 | 73.2188035 | 82.2675012 | 69.1785034 | 68.122577 | 73.5930539 |
| 18:12:04 | 0:12:40 | 73.2188035 | 82.2675012 | 68.1785034 | 68.122577 | 73.5930539 |
| 18:12:05 | 0:12:41 | 73.2188035 | 86.2675012 | 68.1785034 | 68.122577 | 73.5930539 |
| 18:12:06 | 0:12:42 | 73.2188035 | 88.2675012 | 68.1785034 | 71.122577 | 73.5930539 |
| 18:12:07 | 0:12:43 | 74.2188035 | 88.2675012 | 68.1785034 | 76.122577 | 72.5930539 |

|          |         |            |            |            |           |            |
|----------|---------|------------|------------|------------|-----------|------------|
| 18:12:08 | 0:12:44 | 74.2188035 | 87.2675012 | 68.1785034 | 81.122577 | 72.5930539 |
| 18:12:09 | 0:12:45 | 75.2188035 | 83.2675012 | 67.1785034 | 84.122577 | 72.5930539 |
| 18:12:10 | 0:12:46 | 76.2188035 | 81.2675012 | 67.1785034 | 84.122577 | 72.5930539 |
| 18:12:11 | 0:12:47 | 79.2188035 | 81.2675012 | 67.1785034 | 85.122577 | 71.5930539 |
| 18:12:12 | 0:12:48 | 79.2188035 | 78.2675012 | 68.1785034 | 85.122577 | 69.5930539 |
| 18:12:13 | 0:12:49 | 85.2188035 | 77.2675012 | 69.1785034 | 84.122577 | 66.5930539 |
| 18:12:14 | 0:12:50 | 89.2188035 | 78.2675012 | 70.1785034 | 84.122577 | 66.5930539 |
| 18:12:15 | 0:12:51 | 89.2188035 | 78.2675012 | 70.1785034 | 82.122577 | 65.5930539 |
| 18:12:16 | 0:12:52 | 90.2188035 | 78.2675012 | 70.1785034 | 82.122577 | 65.5930539 |
| 18:12:17 | 0:12:53 | 78.2465589 | 82.2675012 | 70.1785034 | 83.122577 | 67.5930539 |
| 18:12:18 | 0:12:54 | 93.2188035 | 82.2675012 | 70.1785034 | 82.122577 | 68.5930539 |
| 18:12:19 | 0:12:55 | 93.2188035 | 82.2675012 | 70.1785034 | 82.122577 | 68.5930539 |
| 18:12:20 | 0:12:56 | 92.2188035 | 81.2675012 | 70.1785034 | 81.122577 | 68.5930539 |
| 18:12:21 | 0:12:57 | 92.2188035 | 81.2675012 | 70.1785034 | 81.122577 | 66.5930539 |
| 18:12:22 | 0:12:58 | 92.2188035 | 81.2675012 | 71.1785034 | 79.122577 | 66.5930539 |
| 18:12:23 | 0:12:59 | 92.2188035 | 80.2675012 | 71.1785034 | 77.122577 | 66.5930539 |
| 18:12:24 | 0:13:00 | 92.2188035 | 80.2675012 | 71.1785034 | 75.122577 | 66.5930539 |
| 18:12:25 | 0:13:01 | 77.6101953 | 79.2675012 | 71.1785034 | 74.122577 | 67.5930539 |
| 18:12:26 | 0:13:02 | 77.6101953 | 79.2675012 | 71.1785034 | 74.122577 | 67.5930539 |
| 18:12:27 | 0:13:03 | 77.2465589 | 79.2675012 | 71.1785034 | 74.122577 | 67.5930539 |
| 18:12:28 | 0:13:04 | 77.5192862 | 78.2675012 | 72.1785034 | 75.122577 | 67.5930539 |
| 18:12:29 | 0:13:05 | 77.2465589 | 78.2675012 | 72.1785034 | 75.122577 | 67.5930539 |
| 18:12:30 | 0:13:06 | 76.6101953 | 74.2675012 | 72.1785034 | 75.122577 | 67.5930539 |
| 18:12:31 | 0:13:07 | 76.1556498 | 69.2675012 | 72.1785034 | 74.122577 | 67.5930539 |
| 18:12:32 | 0:13:08 | 75.9738316 | 68.2675012 | 73.1785034 | 73.122577 | 68.5930539 |
| 18:12:33 | 0:13:09 | 75.8829225 | 68.2675012 | 73.1785034 | 70.122577 | 69.5930539 |
| 18:12:34 | 0:13:10 | 75.7920134 | 66.2675012 | 74.1785034 | 70.122577 | 69.5930539 |
| 18:12:35 | 0:13:11 | 76.5192862 | 66.2675012 | 75.1785034 | 69.122577 | 71.5930539 |
| 18:12:36 | 0:13:12 | 76.5192862 | 66.2675012 | 75.1785034 | 69.122577 | 71.5930539 |
| 18:12:37 | 0:13:13 | 76.5192862 | 64.2675012 | 75.1785034 | 70.122577 | 70.5930539 |
| 18:12:38 | 0:13:14 | 84.2188035 | 64.2675012 | 75.1785034 | 70.122577 | 66.5930539 |
| 18:12:39 | 0:13:15 | 84.2188035 | 64.2675012 | 75.1785034 | 70.122577 | 64.5930539 |
| 18:12:40 | 0:13:16 | 78.2188035 | 64.2675012 | 76.1785034 | 70.122577 | 63.5930539 |
| 18:12:41 | 0:13:17 | 76.2188035 | 63.2675012 | 76.1785034 | 69.122577 | 63.5930539 |
| 18:12:42 | 0:13:18 | 76.2188035 | 61.2675012 | 77.1785034 | 68.122577 | 63.5930539 |
| 18:12:43 | 0:13:19 | 74.2188035 | 61.2675012 | 77.1785034 | 68.122577 | 62.5930539 |
| 18:12:44 | 0:13:20 | 73.2188035 | 61.2675012 | 77.1785034 | 67.122577 | 64.5930539 |
| 18:12:45 | 0:13:21 | 73.2188035 | 61.2675012 | 78.1785034 | 67.122577 | 65.5930539 |
| 18:12:46 | 0:13:22 | 72.2188035 | 63.2675012 | 78.1785034 | 68.122577 | 65.5930539 |
| 18:12:47 | 0:13:23 | 72.2188035 | 63.2675012 | 79.1785034 | 68.122577 | 64.5930539 |
| 18:12:48 | 0:13:24 | 71.2188035 | 63.2675012 | 79.1785034 | 69.122577 | 64.5930539 |
| 18:12:49 | 0:13:25 | 71.2188035 | 64.2675012 | 73.1785034 | 69.122577 | 64.5930539 |
| 18:12:50 | 0:13:26 | 71.2188035 | 63.2675012 | 73.1785034 | 69.122577 | 64.5930539 |
| 18:12:51 | 0:13:27 | 71.2188035 | 63.2675012 | 70.1785034 | 69.122577 | 64.5930539 |
| 18:12:52 | 0:13:28 | 70.2188035 | 63.2675012 | 69.1785034 | 68.122577 | 64.5930539 |

|          |         |            |            |            |           |            |
|----------|---------|------------|------------|------------|-----------|------------|
| 18:12:53 | 0:13:29 | 69.2188035 | 63.2675012 | 69.1785034 | 68.122577 | 64.5930539 |
| 18:12:54 | 0:13:30 | 69.2188035 | 63.2675012 | 68.1785034 | 68.122577 | 64.5930539 |
| 18:12:55 | 0:13:31 | 69.2188035 | 65.2675012 | 68.1785034 | 67.122577 | 64.5930539 |
| 18:12:56 | 0:13:32 | 68.2188035 | 66.2675012 | 68.1785034 | 67.122577 | 64.5930539 |
| 18:12:57 | 0:13:33 | 68.2188035 | 65.2675012 | 67.1785034 | 67.122577 | 63.5930539 |
| 18:12:58 | 0:13:34 | 68.2188035 | 65.2675012 | 67.1785034 | 67.122577 | 64.5930539 |
| 18:12:59 | 0:13:35 | 68.2188035 | 66.2675012 | 66.1785034 | 68.122577 | 65.5930539 |
| 18:13:00 | 0:13:36 | 68.2188035 | 66.2675012 | 67.1785034 | 69.122577 | 67.5930539 |
| 18:13:01 | 0:13:37 | 69.2188035 | 67.2675012 | 68.1785034 | 69.122577 | 67.5930539 |
| 18:13:02 | 0:13:38 | 69.2188035 | 67.2675012 | 70.1785034 | 70.122577 | 65.5930539 |
| 18:13:03 | 0:13:39 | 69.2188035 | 67.2675012 | 70.1785034 | 71.122577 | 63.5930539 |
| 18:13:04 | 0:13:40 | 69.2188035 | 67.2675012 | 70.1785034 | 72.122577 | 62.5930539 |
| 18:13:05 | 0:13:41 | 68.2188035 | 68.2675012 | 70.1785034 | 72.122577 | 62.5930539 |
| 18:13:06 | 0:13:42 | 68.2188035 | 69.2675012 | 70.1785034 | 72.122577 | 61.5930539 |
| 18:13:07 | 0:13:43 | 68.2188035 | 69.2675012 | 70.1785034 | 72.122577 | 63.5930539 |
| 18:13:08 | 0:13:44 | 68.2188035 | 72.2675012 | 71.1785034 | 72.122577 | 63.5930539 |
| 18:13:09 | 0:13:45 | 68.2188035 | 73.2675012 | 71.1785034 | 72.122577 | 65.5930539 |
| 18:13:10 | 0:13:46 | 67.2188035 | 71.2675012 | 70.1785034 | 72.122577 | 66.5930539 |
| 18:13:11 | 0:13:47 | 67.2188035 | 68.2675012 | 71.1785034 | 72.122577 | 66.5930539 |
| 18:13:12 | 0:13:48 | 67.2188035 | 66.2675012 | 71.1785034 | 72.122577 | 66.5930539 |
| 18:13:13 | 0:13:49 | 67.2188035 | 66.2675012 | 71.1785034 | 72.122577 | 67.5930539 |
| 18:13:14 | 0:13:50 | 66.2188035 | 66.2675012 | 71.1785034 | 73.122577 | 68.5930539 |
| 18:13:15 | 0:13:51 | 66.2188035 | 66.2675012 | 71.1785034 | 73.122577 | 68.5930539 |
| 18:13:16 | 0:13:52 | 66.2188035 | 65.2675012 | 71.1785034 | 73.122577 | 68.5930539 |
| 18:13:17 | 0:13:53 | 68.2188035 | 65.2675012 | 71.1785034 | 73.122577 | 68.5930539 |
| 18:13:18 | 0:13:54 | 69.2188035 | 65.2675012 | 70.1785034 | 74.122577 | 68.5930539 |
| 18:13:19 | 0:13:55 | 69.2188035 | 65.2675012 | 69.1785034 | 74.122577 | 68.5930539 |
| 18:13:20 | 0:13:56 | 69.2188035 | 65.2675012 | 68.1785034 | 74.122577 | 68.5930539 |
| 18:13:21 | 0:13:57 | 70.2188035 | 61.2675012 | 69.1785034 | 74.122577 | 70.5930539 |
| 18:13:22 | 0:13:58 | 70.2188035 | 59.2675012 | 71.1785034 | 74.122577 | 70.5930539 |
| 18:13:23 | 0:13:59 | 69.2188035 | 59.2675012 | 72.1785034 | 74.122577 | 70.5930539 |
| 18:13:24 | 0:14:00 | 70.2188035 | 59.2675012 | 73.1785034 | 74.122577 | 70.5930539 |
| 18:13:25 | 0:14:01 | 70.2188035 | 61.2675012 | 72.1785034 | 74.122577 | 69.5930539 |
| 18:13:26 | 0:14:02 | 70.2188035 | 62.2675012 | 71.1785034 | 74.122577 | 69.5930539 |
| 18:13:27 | 0:14:03 | 70.2188035 | 67.2675012 | 69.1785034 | 74.122577 | 68.5930539 |
| 18:13:28 | 0:14:04 | 71.2188035 | 69.2675012 | 69.1785034 | 73.122577 | 64.5930539 |
| 18:13:29 | 0:14:05 | 72.2188035 | 69.2675012 | 69.1785034 | 72.122577 | 64.5930539 |
| 18:13:30 | 0:14:06 | 72.2188035 | 69.2675012 | 69.1785034 | 72.122577 | 64.5930539 |
| 18:13:31 | 0:14:07 | 71.2188035 | 68.2675012 | 69.1785034 | 71.122577 | 63.5930539 |
| 18:13:32 | 0:14:08 | 71.2188035 | 68.2675012 | 69.1785034 | 71.122577 | 63.5930539 |
| 18:13:33 | 0:14:09 | 71.2188035 | 69.2675012 | 70.1785034 | 72.122577 | 63.5930539 |
| 18:13:34 | 0:14:10 | 72.2188035 | 69.2675012 | 70.1785034 | 72.122577 | 63.5930539 |
| 18:13:35 | 0:14:11 | 72.2188035 | 70.2675012 | 71.1785034 | 73.122577 | 63.5930539 |
| 18:13:36 | 0:14:12 | 71.2188035 | 70.2675012 | 72.1785034 | 73.122577 | 63.5930539 |
| 18:13:37 | 0:14:13 | 71.2188035 | 70.2675012 | 72.1785034 | 73.122577 | 62.5930539 |

|          |         |            |            |            |           |            |
|----------|---------|------------|------------|------------|-----------|------------|
| 18:13:38 | 0:14:14 | 71.2188035 | 70.2675012 | 76.1785034 | 73.122577 | 64.5930539 |
| 18:13:39 | 0:14:15 | 71.2188035 | 70.2675012 | 79.1785034 | 72.122577 | 70.5930539 |
| 18:13:40 | 0:14:16 | 71.2188035 | 71.2675012 | 80.1785034 | 72.122577 | 72.5930539 |
| 18:13:41 | 0:14:17 | 71.2188035 | 71.2675012 | 79.1785034 | 71.122577 | 72.5930539 |
| 18:13:42 | 0:14:18 | 71.2188035 | 70.2675012 | 79.1785034 | 72.122577 | 71.5930539 |
| 18:13:43 | 0:14:19 | 71.2188035 | 68.2675012 | 79.1785034 | 72.122577 | 68.5930539 |
| 18:13:44 | 0:14:20 | 71.2188035 | 67.2675012 | 79.1785034 | 72.122577 | 67.5930539 |
| 18:13:45 | 0:14:21 | 71.2188035 | 66.2675012 | 79.1785034 | 74.122577 | 66.5930539 |
| 18:13:46 | 0:14:22 | 70.2188035 | 67.2675012 | 79.1785034 | 76.122577 | 66.5930539 |
| 18:13:47 | 0:14:23 | 70.2188035 | 68.2675012 | 79.1785034 | 76.122577 | 66.5930539 |
| 18:13:48 | 0:14:24 | 70.2188035 | 72.2675012 | 80.1785034 | 75.122577 | 65.5930539 |
| 18:13:49 | 0:14:25 | 69.2188035 | 74.2675012 | 71.1785034 | 71.122577 | 65.5930539 |
| 18:13:50 | 0:14:26 | 69.2188035 | 75.2675012 | 66.1785034 | 71.122577 | 66.5930539 |
| 18:13:51 | 0:14:27 | 70.2188035 | 75.2675012 | 65.1785034 | 70.122577 | 67.5930539 |
| 18:13:52 | 0:14:28 | 70.2188035 | 74.2675012 | 65.1785034 | 70.122577 | 67.5930539 |
| 18:13:53 | 0:14:29 | 69.2188035 | 70.2675012 | 65.1785034 | 70.122577 | 68.5930539 |
| 18:13:54 | 0:14:30 | 69.2188035 | 70.2675012 | 65.1785034 | 71.122577 | 68.5930539 |
| 18:13:55 | 0:14:31 | 70.2188035 | 72.2675012 | 69.1785034 | 71.122577 | 69.5930539 |
| 18:13:56 | 0:14:32 | 70.2188035 | 75.2675012 | 69.1785034 | 71.122577 | 69.5930539 |
| 18:13:57 | 0:14:33 | 71.2188035 | 77.2675012 | 68.1785034 | 72.122577 | 72.5930539 |
| 18:13:58 | 0:14:34 | 72.2188035 | 77.2675012 | 68.1785034 | 71.122577 | 75.5930539 |
| 18:13:59 | 0:14:35 | 73.2188035 | 77.2675012 | 68.1785034 | 71.122577 | 75.5930539 |
| 18:14:00 | 0:14:36 | 72.2188035 | 74.2675012 | 66.1785034 | 71.122577 | 76.5930539 |
| 18:14:01 | 0:14:37 | 72.2188035 | 71.2675012 | 66.1785034 | 69.122577 | 78.5930539 |
| 18:14:02 | 0:14:38 | 72.2188035 | 69.2675012 | 66.1785034 | 69.122577 | 79.5930539 |
| 18:14:03 | 0:14:39 | 71.2188035 | 68.2675012 | 66.1785034 | 69.122577 | 73.5930539 |
| 18:14:04 | 0:14:40 | 71.2188035 | 67.2675012 | 67.1785034 | 70.122577 | 73.5930539 |
| 18:14:05 | 0:14:41 | 71.2188035 | 66.2675012 | 67.1785034 | 70.122577 | 73.5930539 |
| 18:14:06 | 0:14:42 | 70.2188035 | 66.2675012 | 67.1785034 | 70.122577 | 74.5930539 |
| 18:14:07 | 0:14:43 | 69.2188035 | 65.2675012 | 67.1785034 | 70.122577 | 75.5930539 |
| 18:14:08 | 0:14:44 | 68.2188035 | 66.2675012 | 68.1785034 | 70.122577 | 75.5930539 |
| 18:14:09 | 0:14:45 | 69.2188035 | 65.2675012 | 71.1785034 | 70.122577 | 75.5930539 |
| 18:14:10 | 0:14:46 | 68.2188035 | 65.2675012 | 71.1785034 | 71.122577 | 75.5930539 |
| 18:14:11 | 0:14:47 | 68.2188035 | 66.2675012 | 70.1785034 | 72.122577 | 65.5930539 |
| 18:14:12 | 0:14:48 | 68.2188035 | 67.2675012 | 69.1785034 | 72.122577 | 61.5930539 |
| 18:14:13 | 0:14:49 | 69.2188035 | 67.2675012 | 68.1785034 | 72.122577 | 61.5930539 |
| 18:14:14 | 0:14:50 | 68.2188035 | 67.2675012 | 67.1785034 | 72.122577 | 61.5930539 |
| 18:14:15 | 0:14:51 | 68.2188035 | 68.2675012 | 66.1785034 | 72.122577 | 61.5930539 |
| 18:14:16 | 0:14:52 | 68.2188035 | 68.2675012 | 66.1785034 | 72.122577 | 61.5930539 |
| 18:14:17 | 0:14:53 | 68.2188035 | 68.2675012 | 66.1785034 | 72.122577 | 61.5930539 |
| 18:14:18 | 0:14:54 | 67.2188035 | 67.2675012 | 68.1785034 | 71.122577 | 61.5930539 |
| 18:14:19 | 0:14:55 | 67.2188035 | 67.2675012 | 68.1785034 | 71.122577 | 61.5930539 |
| 18:14:20 | 0:14:56 | 66.2188035 | 65.2675012 | 68.1785034 | 71.122577 | 62.5930539 |
| 18:14:21 | 0:14:57 | 66.2188035 | 65.2675012 | 68.1785034 | 71.122577 | 62.5930539 |
| 18:14:22 | 0:14:58 | 67.2188035 | 65.2675012 | 69.1785034 | 71.122577 | 62.5930539 |



|          |         |            |            |            |           |            |
|----------|---------|------------|------------|------------|-----------|------------|
| 18:14:23 | 0:14:59 | 68.2188035 | 66.2675012 | 73.1785034 | 71.122577 | 62.5930539 |
| 18:14:24 | 0:15:00 | 68.2188035 | 66.2675012 | 73.1785034 | 71.122577 | 62.5930539 |
| 18:14:25 | 0:15:01 | 69.2188035 | 68.2675012 | 75.1785034 | 74.122577 | 62.5930539 |
| 18:14:26 | 0:15:02 | 70.2188035 | 68.2675012 | 74.1785034 | 74.122577 | 62.5930539 |
| 18:14:27 | 0:15:03 | 70.2188035 | 68.2675012 | 74.1785034 | 74.122577 | 63.5930539 |
| 18:14:28 | 0:15:04 | 71.2188035 | 68.2675012 | 74.1785034 | 74.122577 | 63.5930539 |
| 18:14:29 | 0:15:05 | 71.2188035 | 68.2675012 | 74.1785034 | 74.122577 | 63.5930539 |
| 18:14:30 | 0:15:06 | 72.2188035 | 69.2675012 | 75.1785034 | 74.122577 | 63.5930539 |
| 18:14:31 | 0:15:07 | 72.2188035 | 69.2675012 | 76.1785034 | 70.122577 | 63.5930539 |
| 18:14:32 | 0:15:08 | 71.2188035 | 69.2675012 | 76.1785034 | 70.122577 | 63.5930539 |
| 18:14:33 | 0:15:09 | 70.2188035 | 69.2675012 | 77.1785034 | 70.122577 | 64.5930539 |
| 18:14:34 | 0:15:10 | 70.2188035 | 69.2675012 | 77.1785034 | 72.122577 | 64.5930539 |
| 18:14:35 | 0:15:11 | 70.2188035 | 69.2675012 | 77.1785034 | 72.122577 | 64.5930539 |
| 18:14:36 | 0:15:12 | 71.2188035 | 69.2675012 | 79.1785034 | 72.122577 | 63.5930539 |
| 18:14:37 | 0:15:13 | 72.2188035 | 69.2675012 | 80.1785034 | 72.122577 | 63.5930539 |
| 18:14:38 | 0:15:14 | 72.2188035 | 69.2675012 | 83.1785034 | 72.122577 | 63.5930539 |
| 18:14:39 | 0:15:15 | 71.2188035 | 69.2675012 | 84.1785034 | 72.122577 | 64.5930539 |
| 18:14:40 | 0:15:16 | 71.2188035 | 69.2675012 | 84.1785034 | 72.122577 | 64.5930539 |
| 18:14:41 | 0:15:17 | 71.2188035 | 69.2675012 | 83.1785034 | 72.122577 | 64.5930539 |
| 18:14:42 | 0:15:18 | 70.2188035 | 68.2675012 | 83.1785034 | 72.122577 | 64.5930539 |
| 18:14:43 | 0:15:19 | 70.2188035 | 66.2675012 | 83.1785034 | 71.122577 | 64.5930539 |
| 18:14:44 | 0:15:20 | 70.2188035 | 66.2675012 | 83.1785034 | 71.122577 | 64.5930539 |
| 18:14:45 | 0:15:21 | 70.2188035 | 66.2675012 | 82.1785034 | 71.122577 | 65.5930539 |
| 18:14:46 | 0:15:22 | 70.2188035 | 66.2675012 | 81.1785034 | 71.122577 | 65.5930539 |
| 18:14:47 | 0:15:23 | 70.2188035 | 69.2675012 | 80.1785034 | 72.122577 | 65.5930539 |
| 18:14:48 | 0:15:24 | 70.2188035 | 72.2675012 | 78.1785034 | 73.122577 | 65.5930539 |
| 18:14:49 | 0:15:25 | 69.2188035 | 73.2675012 | 78.1785034 | 73.122577 | 69.5930539 |
| 18:14:50 | 0:15:26 | 69.2188035 | 74.2675012 | 78.1785034 | 74.122577 | 69.5930539 |
| 18:14:51 | 0:15:27 | 69.2188035 | 74.2675012 | 78.1785034 | 74.122577 | 70.5930539 |
| 18:14:52 | 0:15:28 | 69.2188035 | 76.2675012 | 78.1785034 | 75.122577 | 73.5930539 |
| 18:14:53 | 0:15:29 | 69.2188035 | 76.2675012 | 77.1785034 | 75.122577 | 73.5930539 |
| 18:14:54 | 0:15:30 | 69.2188035 | 81.2675012 | 75.1785034 | 75.122577 | 73.5930539 |
| 18:14:55 | 0:15:31 | 69.2188035 | 81.2675012 | 74.1785034 | 76.122577 | 74.5930539 |
| 18:14:56 | 0:15:32 | 69.2188035 | 80.2675012 | 74.1785034 | 76.122577 | 74.5930539 |
| 18:14:57 | 0:15:33 | 68.2188035 | 80.2675012 | 74.1785034 | 76.122577 | 74.5930539 |
| 18:14:58 | 0:15:34 | 68.2188035 | 77.2675012 | 75.1785034 | 76.122577 | 77.5930539 |
| 18:14:59 | 0:15:35 | 69.2188035 | 72.2675012 | 75.1785034 | 76.122577 | 78.5930539 |
| 18:15:00 | 0:15:36 | 69.2188035 | 71.2675012 | 75.1785034 | 77.122577 | 81.5930539 |
| 18:15:01 | 0:15:37 | 68.2188035 | 70.2675012 | 76.1785034 | 75.122577 | 81.5930539 |
| 18:15:02 | 0:15:38 | 68.2188035 | 68.2675012 | 76.1785034 | 74.122577 | 82.5930539 |
| 18:15:03 | 0:15:39 | 69.2188035 | 68.2675012 | 75.1785034 | 74.122577 | 82.5930539 |
| 18:15:04 | 0:15:40 | 69.2188035 | 68.2675012 | 74.1785034 | 70.122577 | 82.5930539 |
| 18:15:05 | 0:15:41 | 69.2188035 | 69.2675012 | 73.1785034 | 70.122577 | 83.5930539 |
| 18:15:06 | 0:15:42 | 69.2188035 | 69.2675012 | 73.1785034 | 72.122577 | 83.5930539 |
| 18:15:07 | 0:15:43 | 69.2188035 | 69.2675012 | 73.1785034 | 73.122577 | 83.5930539 |

|          |         |            |            |            |           |            |
|----------|---------|------------|------------|------------|-----------|------------|
| 18:15:08 | 0:15:44 | 69.2188035 | 68.2675012 | 73.1785034 | 74.122577 | 83.5930539 |
| 18:15:09 | 0:15:45 | 69.2188035 | 67.2675012 | 73.1785034 | 75.122577 | 83.5930539 |
| 18:15:10 | 0:15:46 | 69.2188035 | 66.2675012 | 73.1785034 | 75.122577 | 84.5930539 |
| 18:15:11 | 0:15:47 | 72.2188035 | 66.2675012 | 73.1785034 | 75.122577 | 83.5930539 |
| 18:15:12 | 0:15:48 | 73.2188035 | 65.2675012 | 72.1785034 | 76.122577 | 83.5930539 |
| 18:15:13 | 0:15:49 | 73.2188035 | 64.2675012 | 71.1785034 | 76.122577 | 83.5930539 |
| 18:15:14 | 0:15:50 | 73.2188035 | 65.2675012 | 68.1785034 | 77.122577 | 84.5930539 |
| 18:15:15 | 0:15:51 | 72.2188035 | 65.2675012 | 68.1785034 | 77.122577 | 84.5930539 |
| 18:15:16 | 0:15:52 | 72.2188035 | 65.2675012 | 70.1785034 | 76.122577 | 84.5930539 |
| 18:15:17 | 0:15:53 | 72.2188035 | 64.2675012 | 71.1785034 | 75.122577 | 84.5930539 |
| 18:15:18 | 0:15:54 | 72.2188035 | 64.2675012 | 71.1785034 | 75.122577 | 84.5930539 |
| 18:15:19 | 0:15:55 | 72.2188035 | 64.2675012 | 71.1785034 | 67.122577 | 84.5930539 |
| 18:15:20 | 0:15:56 | 72.2188035 | 64.2675012 | 72.1785034 | 67.122577 | 72.6101953 |
| 18:15:21 | 0:15:57 | 72.2188035 | 64.2675012 | 74.1785034 | 65.122577 | 87.5930539 |
| 18:15:22 | 0:15:58 | 72.2188035 | 65.2675012 | 75.1785034 | 65.122577 | 87.5930539 |
| 18:15:23 | 0:15:59 | 73.2188035 | 65.2675012 | 80.1785034 | 68.122577 | 87.5930539 |
| 18:15:24 | 0:16:00 | 73.2188035 | 64.2675012 | 85.1785034 | 68.122577 | 88.5930539 |
| 18:15:25 | 0:16:01 | 73.2188035 | 65.2675012 | 85.1785034 | 69.122577 | 88.5930539 |
| 18:15:26 | 0:16:02 | 72.2188035 | 64.2675012 | 86.1785034 | 69.122577 | 88.5930539 |
| 18:15:27 | 0:16:03 | 72.2188035 | 64.2675012 | 86.1785034 | 69.122577 | 74.2465589 |
| 18:15:28 | 0:16:04 | 71.2188035 | 63.2675012 | 86.1785034 | 70.122577 | 73.8829225 |
| 18:15:29 | 0:16:05 | 72.2188035 | 62.2675012 | 87.1785034 | 71.122577 | 73.9738316 |
| 18:15:30 | 0:16:06 | 72.2188035 | 62.2675012 | 87.1785034 | 71.122577 | 73.7011044 |
| 18:15:31 | 0:16:07 | 72.2188035 | 62.2675012 | 87.1785034 | 72.122577 | 73.8829225 |
| 18:15:32 | 0:16:08 | 71.2188035 | 64.2675012 | 87.1785034 | 72.122577 | 73.7920134 |
| 18:15:33 | 0:16:09 | 71.2188035 | 64.2675012 | 86.1785034 | 73.122577 | 74.1556498 |
| 18:15:34 | 0:16:10 | 72.2188035 | 63.2675012 | 80.1785034 | 72.122577 | 73.6101953 |
| 18:15:35 | 0:16:11 | 72.2188035 | 63.2675012 | 78.1785034 | 72.122577 | 73.5192862 |
| 18:15:36 | 0:16:12 | 72.2188035 | 63.2675012 | 76.1785034 | 72.122577 | 73.4283771 |
| 18:15:37 | 0:16:13 | 72.2188035 | 63.2675012 | 75.1785034 | 72.122577 | 73.5192862 |
| 18:15:38 | 0:16:14 | 72.2188035 | 63.2675012 | 75.1785034 | 72.122577 | 73.5192862 |
| 18:15:39 | 0:16:15 | 72.2188035 | 64.2675012 | 75.1785034 | 72.122577 | 73.6101953 |
| 18:15:40 | 0:16:16 | 72.2188035 | 64.2675012 | 75.1785034 | 72.122577 | 87.5930539 |
| 18:15:41 | 0:16:17 | 73.2188035 | 65.2675012 | 76.1785034 | 72.122577 | 87.5930539 |
| 18:15:42 | 0:16:18 | 73.2188035 | 65.2675012 | 76.1785034 | 72.122577 | 87.5930539 |
| 18:15:43 | 0:16:19 | 73.2188035 | 66.2675012 | 76.1785034 | 72.122577 | 85.5930539 |
| 18:15:44 | 0:16:20 | 74.2188035 | 66.2675012 | 76.1785034 | 72.122577 | 77.5930539 |
| 18:15:45 | 0:16:21 | 76.2188035 | 65.2675012 | 76.1785034 | 72.122577 | 77.5930539 |
| 18:15:46 | 0:16:22 | 78.2188035 | 64.2675012 | 76.1785034 | 72.122577 | 76.5930539 |
| 18:15:47 | 0:16:23 | 78.2188035 | 64.2675012 | 76.1785034 | 70.122577 | 76.5930539 |
| 18:15:48 | 0:16:24 | 78.2188035 | 64.2675012 | 77.1785034 | 70.122577 | 76.5930539 |
| 18:15:49 | 0:16:25 | 78.2188035 | 66.2675012 | 77.1785034 | 71.122577 | 76.5930539 |
| 18:15:50 | 0:16:26 | 78.2188035 | 68.2675012 | 77.1785034 | 71.122577 | 75.5930539 |
| 18:15:51 | 0:16:27 | 77.2188035 | 71.2675012 | 83.1785034 | 71.122577 | 75.5930539 |
| 18:15:52 | 0:16:28 | 75.2188035 | 73.2675012 | 82.1785034 | 71.122577 | 75.5930539 |

|          |         |            |            |            |           |            |
|----------|---------|------------|------------|------------|-----------|------------|
| 18:15:53 | 0:16:29 | 75.2188035 | 74.2675012 | 82.1785034 | 71.122577 | 74.5930539 |
| 18:15:54 | 0:16:30 | 75.2188035 | 74.2675012 | 82.1785034 | 71.122577 | 72.5930539 |
| 18:15:55 | 0:16:31 | 75.2188035 | 70.2675012 | 74.1785034 | 71.122577 | 72.5930539 |
| 18:15:56 | 0:16:32 | 75.2188035 | 67.2675012 | 74.1785034 | 71.122577 | 72.5930539 |
| 18:15:57 | 0:16:33 | 75.2188035 | 67.2675012 | 73.1785034 | 71.122577 | 72.5930539 |
| 18:15:58 | 0:16:34 | 74.2188035 | 65.2675012 | 74.1785034 | 70.122577 | 72.5930539 |
| 18:15:59 | 0:16:35 | 74.2188035 | 65.2675012 | 74.1785034 | 70.122577 | 72.5930539 |
| 18:16:00 | 0:16:36 | 74.2188035 | 65.2675012 | 77.1785034 | 70.122577 | 69.5930539 |
| 18:16:01 | 0:16:37 | 75.2188035 | 67.2675012 | 77.1785034 | 70.122577 | 69.5930539 |
| 18:16:02 | 0:16:38 | 74.2188035 | 65.2675012 | 77.1785034 | 69.122577 | 67.5930539 |
| 18:16:03 | 0:16:39 | 74.2188035 | 63.2675012 | 75.1785034 | 69.122577 | 67.5930539 |
| 18:16:04 | 0:16:40 | 73.2188035 | 62.2675012 | 71.1785034 | 68.122577 | 63.5930539 |
| 18:16:05 | 0:16:41 | 73.2188035 | 62.2675012 | 71.1785034 | 68.122577 | 62.5930539 |
| 18:16:06 | 0:16:42 | 73.2188035 | 61.2675012 | 66.1785034 | 67.122577 | 62.5930539 |
| 18:16:07 | 0:16:43 | 74.2188035 | 60.2675012 | 65.1785034 | 67.122577 | 60.5930539 |
| 18:16:08 | 0:16:44 | 74.2188035 | 60.2675012 | 65.1785034 | 68.122577 | 60.5930539 |
| 18:16:09 | 0:16:45 | 74.2188035 | 60.2675012 | 66.1785034 | 68.122577 | 59.5930539 |
| 18:16:10 | 0:16:46 | 75.2188035 | 60.2675012 | 67.1785034 | 69.122577 | 60.5930539 |
| 18:16:11 | 0:16:47 | 75.2188035 | 63.2675012 | 67.1785034 | 69.122577 | 60.5930539 |
| 18:16:12 | 0:16:48 | 75.2188035 | 63.2675012 | 67.1785034 | 69.122577 | 60.5930539 |
| 18:16:13 | 0:16:49 | 76.2188035 | 64.2675012 | 77.1785034 | 69.122577 | 60.5930539 |
| 18:16:14 | 0:16:50 | 79.2188035 | 64.2675012 | 77.1785034 | 69.122577 | 60.5930539 |
| 18:16:15 | 0:16:51 | 70.7920134 | 65.2675012 | 79.1785034 | 70.122577 | 60.5930539 |
| 18:16:16 | 0:16:52 | 70.1556498 | 65.2675012 | 76.1785034 | 71.122577 | 61.5930539 |
| 18:16:17 | 0:16:53 | 71.7920134 | 67.2675012 | 76.1785034 | 71.122577 | 61.5930539 |
| 18:16:18 | 0:16:54 | 71.9738316 | 69.2675012 | 71.1785034 | 75.122577 | 61.5930539 |
| 18:16:19 | 0:16:55 | 71.7920134 | 69.2675012 | 69.1785034 | 76.122577 | 60.5930539 |
| 18:16:20 | 0:16:56 | 71.8829225 | 69.2675012 | 69.1785034 | 75.122577 | 61.5930539 |
| 18:16:21 | 0:16:57 | 72.337468  | 69.2675012 | 69.1785034 | 74.122577 | 61.5930539 |
| 18:16:22 | 0:16:58 | 73.2465589 | 69.2675012 | 70.1785034 | 74.122577 | 63.5930539 |
| 18:16:23 | 0:16:59 | 73.7011044 | 69.2675012 | 70.1785034 | 74.122577 | 63.5930539 |
| 18:16:24 | 0:17:00 | 73.8829225 | 68.2675012 | 72.1785034 | 73.122577 | 63.5930539 |
| 18:16:25 | 0:17:01 | 74.1556498 | 67.2675012 | 73.1785034 | 73.122577 | 63.5930539 |
| 18:16:26 | 0:17:02 | 74.0647407 | 67.2675012 | 73.1785034 | 73.122577 | 60.5930539 |
| 18:16:27 | 0:17:03 | 74.1556498 | 67.2675012 | 72.1785034 | 73.122577 | 61.5930539 |
| 18:16:28 | 0:17:04 | 74.0647407 | 67.2675012 | 71.1785034 | 73.122577 | 60.5930539 |
| 18:16:29 | 0:17:05 | 74.9738316 | 68.2675012 | 71.1785034 | 73.122577 | 60.5930539 |
| 18:16:30 | 0:17:06 | 75.0647407 | 68.2675012 | 71.1785034 | 73.122577 | 62.5930539 |
| 18:16:31 | 0:17:07 | 74.8829225 | 67.2675012 | 70.1785034 | 73.122577 | 63.5930539 |
| 18:16:32 | 0:17:08 | 74.4283771 | 67.2675012 | 70.1785034 | 72.122577 | 63.5930539 |
| 18:16:33 | 0:17:09 | 74.337468  | 68.2675012 | 70.1785034 | 72.122577 | 63.5930539 |
| 18:16:34 | 0:17:10 | 74.2465589 | 69.2675012 | 70.1785034 | 72.122577 | 64.5930539 |
| 18:16:35 | 0:17:11 | 74.4283771 | 70.2675012 | 70.1785034 | 74.122577 | 64.5930539 |
| 18:16:36 | 0:17:12 | 74.7011044 | 72.2675012 | 70.1785034 | 73.122577 | 65.5930539 |
| 18:16:37 | 0:17:13 | 74.7011044 | 72.2675012 | 70.1785034 | 71.122577 | 65.5930539 |

|          |         |            |            |            |           |            |
|----------|---------|------------|------------|------------|-----------|------------|
| 18:16:38 | 0:17:14 | 74.5192862 | 70.2675012 | 70.1785034 | 71.122577 | 66.5930539 |
| 18:16:39 | 0:17:15 | 74.7920134 | 68.2675012 | 70.1785034 | 71.122577 | 67.5930539 |
| 18:16:40 | 0:17:16 | 74.8829225 | 67.2675012 | 70.1785034 | 71.122577 | 67.5930539 |
| 18:16:41 | 0:17:17 | 73.7920134 | 67.2675012 | 70.1785034 | 71.122577 | 67.5930539 |
| 18:16:42 | 0:17:18 | 72.4283771 | 67.2675012 | 71.1785034 | 71.122577 | 66.5930539 |
| 18:16:43 | 0:17:19 | 72.0647407 | 67.2675012 | 71.1785034 | 72.122577 | 66.5930539 |
| 18:16:44 | 0:17:20 | 71.9738316 | 67.2675012 | 71.1785034 | 72.122577 | 67.5930539 |
| 18:16:45 | 0:17:21 | 71.8829225 | 67.2675012 | 73.1785034 | 74.122577 | 67.5930539 |
| 18:16:46 | 0:17:22 | 71.6101953 | 66.2675012 | 73.1785034 | 72.122577 | 67.5930539 |
| 18:16:47 | 0:17:23 | 71.5192862 | 64.2675012 | 74.1785034 | 71.122577 | 67.5930539 |
| 18:16:48 | 0:17:24 | 71.6101953 | 64.2675012 | 74.1785034 | 71.122577 | 68.5930539 |
| 18:16:49 | 0:17:25 | 72.337468  | 64.2675012 | 77.1785034 | 71.122577 | 69.5930539 |
| 18:16:50 | 0:17:26 | 72.2465589 | 64.2675012 | 77.1785034 | 71.122577 | 69.5930539 |
| 18:16:51 | 0:17:27 | 72.2465589 | 64.2675012 | 78.1785034 | 71.122577 | 69.5930539 |
| 18:16:52 | 0:17:28 | 83.2188035 | 63.2675012 | 78.1785034 | 71.122577 | 69.5930539 |
| 18:16:53 | 0:17:29 | 81.2188035 | 64.2675012 | 78.1785034 | 72.122577 | 68.5930539 |
| 18:16:54 | 0:17:30 | 80.2188035 | 64.2675012 | 78.1785034 | 72.122577 | 68.5930539 |
| 18:16:55 | 0:17:31 | 80.2188035 | 64.2675012 | 78.1785034 | 72.122577 | 65.5930539 |
| 18:16:56 | 0:17:32 | 79.2188035 | 64.2675012 | 78.1785034 | 72.122577 | 64.5930539 |
| 18:16:57 | 0:17:33 | 79.2188035 | 64.2675012 | 78.1785034 | 71.122577 | 65.5930539 |
| 18:16:58 | 0:17:34 | 78.2188035 | 64.2675012 | 78.1785034 | 71.122577 | 65.5930539 |
| 18:16:59 | 0:17:35 | 79.2188035 | 64.2675012 | 78.1785034 | 70.122577 | 65.5930539 |
| 18:17:00 | 0:17:36 | 79.2188035 | 65.2675012 | 78.1785034 | 69.122577 | 65.5930539 |
| 18:17:01 | 0:17:37 | 78.2188035 | 66.2675012 | 78.1785034 | 67.122577 | 65.5930539 |
| 18:17:02 | 0:17:38 | 77.2188035 | 66.2675012 | 78.1785034 | 68.122577 | 64.5930539 |
| 18:17:03 | 0:17:39 | 78.2188035 | 66.2675012 | 78.1785034 | 74.122577 | 64.5930539 |
| 18:17:04 | 0:17:40 | 78.2188035 | 66.2675012 | 78.1785034 | 77.122577 | 64.5930539 |
| 18:17:05 | 0:17:41 | 78.2188035 | 67.2675012 | 78.1785034 | 79.122577 | 58.5930539 |
| 18:17:06 | 0:17:42 | 78.2188035 | 67.2675012 | 78.1785034 | 79.122577 | 58.5930539 |
| 18:17:07 | 0:17:43 | 78.2188035 | 69.2675012 | 77.1785034 | 83.122577 | 57.5930539 |
| 18:17:08 | 0:17:44 | 77.2188035 | 71.2675012 | 75.1785034 | 83.122577 | 57.5930539 |
| 18:17:09 | 0:17:45 | 76.2188035 | 71.2675012 | 74.1785034 | 83.122577 | 57.5930539 |
| 18:17:10 | 0:17:46 | 75.2188035 | 71.2675012 | 74.1785034 | 84.122577 | 57.5930539 |
| 18:17:11 | 0:17:47 | 75.2188035 | 71.2675012 | 74.1785034 | 84.122577 | 58.5930539 |
| 18:17:12 | 0:17:48 | 74.2188035 | 72.2675012 | 74.1785034 | 84.122577 | 59.5930539 |
| 18:17:13 | 0:17:49 | 73.2188035 | 72.2675012 | 73.1785034 | 85.122577 | 64.5930539 |
| 18:17:14 | 0:17:50 | 73.2188035 | 73.2675012 | 72.1785034 | 85.122577 | 64.5930539 |
| 18:17:15 | 0:17:51 | 74.2188035 | 73.2675012 | 70.1785034 | 87.122577 | 65.5930539 |
| 18:17:16 | 0:17:52 | 74.2188035 | 73.2675012 | 70.1785034 | 87.122577 | 66.5930539 |
| 18:17:17 | 0:17:53 | 75.2188035 | 73.2675012 | 71.1785034 | 87.122577 | 66.5930539 |
| 18:17:18 | 0:17:54 | 75.2188035 | 73.2675012 | 71.1785034 | 87.122577 | 66.5930539 |
| 18:17:19 | 0:17:55 | 76.2188035 | 73.2675012 | 71.1785034 | 80.122577 | 66.5930539 |
| 18:17:20 | 0:17:56 | 76.2188035 | 73.2675012 | 71.1785034 | 80.122577 | 66.5930539 |
| 18:17:21 | 0:17:57 | 77.2188035 | 73.2675012 | 71.1785034 | 77.122577 | 66.5930539 |
| 18:17:22 | 0:17:58 | 77.2188035 | 73.2675012 | 71.1785034 | 73.122577 | 66.5930539 |

|          |         |            |            |            |           |            |
|----------|---------|------------|------------|------------|-----------|------------|
| 18:17:23 | 0:17:59 | 77.2188035 | 71.2675012 | 71.1785034 | 72.122577 | 66.5930539 |
| 18:17:24 | 0:18:00 | 77.2188035 | 70.2675012 | 71.1785034 | 72.122577 | 66.5930539 |
| 18:17:25 | 0:18:01 | 76.2188035 | 70.2675012 | 71.1785034 | 72.122577 | 67.5930539 |
| 18:17:26 | 0:18:02 | 76.2188035 | 70.2675012 | 71.1785034 | 72.122577 | 69.5930539 |
| 18:17:27 | 0:18:03 | 76.2188035 | 67.2675012 | 71.1785034 | 72.122577 | 70.5930539 |
| 18:17:28 | 0:18:04 | 76.2188035 | 67.2675012 | 71.1785034 | 72.122577 | 70.5930539 |
| 18:17:29 | 0:18:05 | 76.2188035 | 65.2675012 | 71.1785034 | 72.122577 | 70.5930539 |
| 18:17:30 | 0:18:06 | 76.2188035 | 65.2675012 | 71.1785034 | 72.122577 | 71.5930539 |
| 18:17:31 | 0:18:07 | 76.2188035 | 65.2675012 | 73.1785034 | 72.122577 | 72.5930539 |
| 18:17:32 | 0:18:08 | 76.2188035 | 65.2675012 | 74.1785034 | 71.122577 | 72.5930539 |
| 18:17:33 | 0:18:09 | 76.2188035 | 65.2675012 | 74.1785034 | 70.122577 | 72.5930539 |
| 18:17:34 | 0:18:10 | 76.2188035 | 65.2675012 | 75.1785034 | 69.122577 | 73.5930539 |
| 18:17:35 | 0:18:11 | 77.2188035 | 64.2675012 | 75.1785034 | 68.122577 | 73.5930539 |
| 18:17:36 | 0:18:12 | 78.2188035 | 64.2675012 | 75.1785034 | 68.122577 | 73.5930539 |
| 18:17:37 | 0:18:13 | 79.2188035 | 64.2675012 | 74.1785034 | 68.122577 | 74.5930539 |
| 18:17:38 | 0:18:14 | 80.2188035 | 65.2675012 | 74.1785034 | 68.122577 | 74.5930539 |
| 18:17:39 | 0:18:15 | 87.2188035 | 64.2675012 | 74.1785034 | 68.122577 | 73.5930539 |
| 18:17:40 | 0:18:16 | 87.2188035 | 65.2675012 | 74.1785034 | 68.122577 | 73.5930539 |
| 18:17:41 | 0:18:17 | 74.8829225 | 66.2675012 | 74.1785034 | 68.122577 | 73.5930539 |
| 18:17:42 | 0:18:18 | 75.2465589 | 66.2675012 | 74.1785034 | 69.122577 | 70.5930539 |
| 18:17:43 | 0:18:19 | 75.5192862 | 68.2675012 | 74.1785034 | 69.122577 | 67.5930539 |
| 18:17:44 | 0:18:20 | 75.5192862 | 68.2675012 | 74.1785034 | 69.122577 | 64.5930539 |
| 18:17:45 | 0:18:21 | 75.5192862 | 68.2675012 | 74.1785034 | 69.122577 | 63.5930539 |
| 18:17:46 | 0:18:22 | 75.5192862 | 68.2675012 | 75.1785034 | 69.122577 | 63.5930539 |
| 18:17:47 | 0:18:23 | 74.6101953 | 68.2675012 | 75.1785034 | 69.122577 | 63.5930539 |
| 18:17:48 | 0:18:24 | 74.7011044 | 69.2675012 | 74.1785034 | 69.122577 | 63.5930539 |
| 18:17:49 | 0:18:25 | 74.7920134 | 71.2675012 | 74.1785034 | 68.122577 | 63.5930539 |
| 18:17:50 | 0:18:26 | 74.7920134 | 71.2675012 | 74.1785034 | 68.122577 | 62.5930539 |
| 18:17:51 | 0:18:27 | 74.7920134 | 73.2675012 | 74.1785034 | 68.122577 | 61.5930539 |
| 18:17:52 | 0:18:28 | 74.2465589 | 74.2675012 | 72.1785034 | 69.122577 | 60.5930539 |
| 18:17:53 | 0:18:29 | 74.7920134 | 74.2675012 | 72.1785034 | 71.122577 | 60.5930539 |
| 18:17:54 | 0:18:30 | 73.337468  | 73.2675012 | 71.1785034 | 71.122577 | 60.5930539 |
| 18:17:55 | 0:18:31 | 73.6101953 | 72.2675012 | 71.1785034 | 71.122577 | 61.5930539 |
| 18:17:56 | 0:18:32 | 72.6101953 | 72.2675012 | 71.1785034 | 71.122577 | 62.5930539 |
| 18:17:57 | 0:18:33 | 86.2188035 | 72.2675012 | 73.1785034 | 71.122577 | 62.5930539 |
| 18:17:58 | 0:18:34 | 83.2188035 | 71.2675012 | 74.1785034 | 70.122577 | 64.5930539 |
| 18:17:59 | 0:18:35 | 82.2188035 | 71.2675012 | 73.1785034 | 69.122577 | 64.5930539 |
| 18:18:00 | 0:18:36 | 82.2188035 | 71.2675012 | 73.1785034 | 69.122577 | 64.5930539 |
| 18:18:01 | 0:18:37 | 81.2188035 | 68.2675012 | 73.1785034 | 68.122577 | 65.5930539 |
| 18:18:02 | 0:18:38 | 80.2188035 | 68.2675012 | 74.1785034 | 68.122577 | 65.5930539 |
| 18:18:03 | 0:18:39 | 79.2188035 | 67.2675012 | 73.1785034 | 68.122577 | 65.5930539 |
| 18:18:04 | 0:18:40 | 79.2188035 | 66.2675012 | 73.1785034 | 68.122577 | 65.5930539 |
| 18:18:05 | 0:18:41 | 78.2188035 | 66.2675012 | 74.1785034 | 68.122577 | 65.5930539 |
| 18:18:06 | 0:18:42 | 78.2188035 | 66.2675012 | 74.1785034 | 68.122577 | 64.5930539 |
| 18:18:07 | 0:18:43 | 77.2188035 | 68.2675012 | 74.1785034 | 68.122577 | 64.5930539 |

|          |         |            |            |            |           |            |
|----------|---------|------------|------------|------------|-----------|------------|
| 18:18:08 | 0:18:44 | 77.2188035 | 73.2675012 | 75.1785034 | 68.122577 | 64.5930539 |
| 18:18:09 | 0:18:45 | 77.2188035 | 73.2675012 | 75.1785034 | 68.122577 | 64.5930539 |
| 18:18:10 | 0:18:46 | 76.2188035 | 75.2675012 | 76.1785034 | 68.122577 | 63.5930539 |
| 18:18:11 | 0:18:47 | 77.2188035 | 76.2675012 | 76.1785034 | 69.122577 | 63.5930539 |
| 18:18:12 | 0:18:48 | 77.2188035 | 76.2675012 | 76.1785034 | 69.122577 | 63.5930539 |
| 18:18:13 | 0:18:49 | 78.2188035 | 76.2675012 | 76.1785034 | 69.122577 | 63.5930539 |
| 18:18:14 | 0:18:50 | 78.2188035 | 76.2675012 | 77.1785034 | 70.122577 | 63.5930539 |
| 18:18:15 | 0:18:51 | 78.2188035 | 75.2675012 | 77.1785034 | 71.122577 | 63.5930539 |
| 18:18:16 | 0:18:52 | 78.2188035 | 74.2675012 | 76.1785034 | 71.122577 | 63.5930539 |
| 18:18:17 | 0:18:53 | 78.2188035 | 74.2675012 | 76.1785034 | 71.122577 | 64.5930539 |
| 18:18:18 | 0:18:54 | 78.2188035 | 74.2675012 | 76.1785034 | 74.122577 | 64.5930539 |
| 18:18:19 | 0:18:55 | 78.2188035 | 74.2675012 | 76.1785034 | 74.122577 | 65.5930539 |
| 18:18:20 | 0:18:56 | 77.2188035 | 71.2675012 | 76.1785034 | 74.122577 | 64.5930539 |
| 18:18:21 | 0:18:57 | 78.2188035 | 71.2675012 | 76.1785034 | 74.122577 | 64.5930539 |
| 18:18:22 | 0:18:58 | 78.2188035 | 69.2675012 | 76.1785034 | 74.122577 | 64.5930539 |
| 18:18:23 | 0:18:59 | 78.2188035 | 69.2675012 | 76.1785034 | 74.122577 | 64.5930539 |
| 18:18:24 | 0:19:00 | 78.2188035 | 68.2675012 | 76.1785034 | 73.122577 | 63.5930539 |
| 18:18:25 | 0:19:01 | 78.2188035 | 68.2675012 | 76.1785034 | 73.122577 | 63.5930539 |
| 18:18:26 | 0:19:02 | 78.2188035 | 66.2675012 | 76.1785034 | 73.122577 | 65.5930539 |
| 18:18:27 | 0:19:03 | 79.2188035 | 68.2675012 | 76.1785034 | 72.122577 | 63.5930539 |
| 18:18:28 | 0:19:04 | 79.2188035 | 68.2675012 | 78.1785034 | 72.122577 | 63.5930539 |
| 18:18:29 | 0:19:05 | 79.2188035 | 68.2675012 | 80.1785034 | 72.122577 | 57.5930539 |
| 18:18:30 | 0:19:06 | 80.2188035 | 68.2675012 | 81.1785034 | 71.122577 | 57.5930539 |
| 18:18:31 | 0:19:07 | 80.2188035 | 68.2675012 | 81.1785034 | 71.122577 | 57.5930539 |
| 18:18:32 | 0:19:08 | 80.2188035 | 69.2675012 | 80.1785034 | 71.122577 | 58.5930539 |
| 18:18:33 | 0:19:09 | 81.2188035 | 70.2675012 | 78.1785034 | 71.122577 | 60.5930539 |
| 18:18:34 | 0:19:10 | 79.2188035 | 70.2675012 | 76.1785034 | 70.122577 | 65.5930539 |
| 18:18:35 | 0:19:11 | 79.2188035 | 71.2675012 | 75.1785034 | 70.122577 | 65.5930539 |
| 18:18:36 | 0:19:12 | 79.2188035 | 71.2675012 | 76.1785034 | 70.122577 | 66.5930539 |
| 18:18:37 | 0:19:13 | 78.2188035 | 71.2675012 | 76.1785034 | 70.122577 | 65.5930539 |
| 18:18:38 | 0:19:14 | 78.2188035 | 70.2675012 | 75.1785034 | 70.122577 | 65.5930539 |
| 18:18:39 | 0:19:15 | 78.2188035 | 69.2675012 | 75.1785034 | 70.122577 | 62.5930539 |
| 18:18:40 | 0:19:16 | 77.2188035 | 69.2675012 | 74.1785034 | 70.122577 | 61.5930539 |
| 18:18:41 | 0:19:17 | 78.2188035 | 68.2675012 | 74.1785034 | 70.122577 | 60.5930539 |
| 18:18:42 | 0:19:18 | 78.2188035 | 68.2675012 | 74.1785034 | 71.122577 | 60.5930539 |
| 18:18:43 | 0:19:19 | 78.2188035 | 68.2675012 | 74.1785034 | 72.122577 | 60.5930539 |
| 18:18:44 | 0:19:20 | 77.2188035 | 68.2675012 | 72.1785034 | 74.122577 | 60.5930539 |
| 18:18:45 | 0:19:21 | 77.2188035 | 69.2675012 | 72.1785034 | 74.122577 | 59.5930539 |
| 18:18:46 | 0:19:22 | 77.2188035 | 69.2675012 | 72.1785034 | 74.122577 | 58.5930539 |
| 18:18:47 | 0:19:23 | 76.2188035 | 69.2675012 | 72.1785034 | 74.122577 | 58.5930539 |
| 18:18:48 | 0:19:24 | 75.2188035 | 70.2675012 | 71.1785034 | 74.122577 | 58.5930539 |
| 18:18:49 | 0:19:25 | 74.2188035 | 70.2675012 | 72.1785034 | 72.122577 | 60.5930539 |
| 18:18:50 | 0:19:26 | 74.2188035 | 70.2675012 | 75.1785034 | 70.122577 | 62.5930539 |
| 18:18:51 | 0:19:27 | 73.2188035 | 70.2675012 | 75.1785034 | 70.122577 | 65.5930539 |
| 18:18:52 | 0:19:28 | 73.2188035 | 71.2675012 | 75.1785034 | 70.122577 | 65.5930539 |

|          |         |            |            |            |           |            |
|----------|---------|------------|------------|------------|-----------|------------|
| 18:18:53 | 0:19:29 | 72.2188035 | 71.2675012 | 75.1785034 | 69.122577 | 65.5930539 |
| 18:18:54 | 0:19:30 | 72.2188035 | 71.2675012 | 75.1785034 | 69.122577 | 65.5930539 |
| 18:18:55 | 0:19:31 | 72.2188035 | 68.2675012 | 75.1785034 | 69.122577 | 67.5930539 |
| 18:18:56 | 0:19:32 | 73.2188035 | 63.2675012 | 75.1785034 | 69.122577 | 67.5930539 |
| 18:18:57 | 0:19:33 | 72.2188035 | 63.2675012 | 76.1785034 | 69.122577 | 68.5930539 |
| 18:18:58 | 0:19:34 | 72.2188035 | 63.2675012 | 76.1785034 | 69.122577 | 68.5930539 |
| 18:18:59 | 0:19:35 | 73.2188035 | 65.2675012 | 75.1785034 | 69.122577 | 68.5930539 |
| 18:19:00 | 0:19:36 | 73.2188035 | 66.2675012 | 75.1785034 | 69.122577 | 69.5930539 |
| 18:19:01 | 0:19:37 | 73.2188035 | 67.2675012 | 75.1785034 | 69.122577 | 71.5930539 |
| 18:19:02 | 0:19:38 | 73.2188035 | 67.2675012 | 74.1785034 | 69.122577 | 71.5930539 |
| 18:19:03 | 0:19:39 | 73.2188035 | 66.2675012 | 74.1785034 | 69.122577 | 78.5930539 |
| 18:19:04 | 0:19:40 | 73.2188035 | 66.2675012 | 75.1785034 | 70.122577 | 79.5930539 |
| 18:19:05 | 0:19:41 | 73.2188035 | 65.2675012 | 76.1785034 | 70.122577 | 79.5930539 |
| 18:19:06 | 0:19:42 | 74.2188035 | 64.2675012 | 76.1785034 | 71.122577 | 79.5930539 |
| 18:19:07 | 0:19:43 | 74.2188035 | 64.2675012 | 76.1785034 | 74.122577 | 80.5930539 |
| 18:19:08 | 0:19:44 | 73.2188035 | 64.2675012 | 76.1785034 | 74.122577 | 80.5930539 |
| 18:19:09 | 0:19:45 | 73.2188035 | 61.2675012 | 76.1785034 | 74.122577 | 82.5930539 |
| 18:19:10 | 0:19:46 | 72.2188035 | 61.2675012 | 76.1785034 | 73.122577 | 82.5930539 |
| 18:19:11 | 0:19:47 | 71.2188035 | 62.2675012 | 76.1785034 | 72.122577 | 82.5930539 |
| 18:19:12 | 0:19:48 | 71.2188035 | 62.2675012 | 76.1785034 | 72.122577 | 79.5930539 |
| 18:19:13 | 0:19:49 | 71.2188035 | 64.2675012 | 75.1785034 | 73.122577 | 75.5930539 |
| 18:19:14 | 0:19:50 | 71.2188035 | 64.2675012 | 75.1785034 | 75.122577 | 72.5930539 |
| 18:19:15 | 0:19:51 | 71.2188035 | 64.2675012 | 75.1785034 | 76.122577 | 69.5930539 |
| 18:19:16 | 0:19:52 | 71.2188035 | 64.2675012 | 76.1785034 | 77.122577 | 67.5930539 |
| 18:19:17 | 0:19:53 | 71.2188035 | 64.2675012 | 76.1785034 | 77.122577 | 66.5930539 |
| 18:19:18 | 0:19:54 | 72.2188035 | 64.2675012 | 75.1785034 | 77.122577 | 66.5930539 |
| 18:19:19 | 0:19:55 | 72.2188035 | 64.2675012 | 75.1785034 | 77.122577 | 67.5930539 |
| 18:19:20 | 0:19:56 | 73.2188035 | 64.2675012 | 75.1785034 | 79.122577 | 67.5930539 |
| 18:19:21 | 0:19:57 | 74.2188035 | 64.2675012 | 75.1785034 | 79.122577 | 67.5930539 |
| 18:19:22 | 0:19:58 | 74.2188035 | 64.2675012 | 76.1785034 | 78.122577 | 67.5930539 |
| 18:19:23 | 0:19:59 | 74.2188035 | 64.2675012 | 76.1785034 | 78.122577 | 68.5930539 |
| 18:19:24 | 0:20:00 | 75.2188035 | 64.2675012 | 77.1785034 | 78.122577 | 69.5930539 |
| 18:19:25 | 0:20:01 | 75.2188035 | 67.2675012 | 77.1785034 | 76.122577 | 69.5930539 |
| 18:19:26 | 0:20:02 | 75.2188035 | 66.2675012 | 81.1785034 | 76.122577 | 70.5930539 |
| 18:19:27 | 0:20:03 | 75.2188035 | 65.2675012 | 86.1785034 | 76.122577 | 68.5930539 |
| 18:19:28 | 0:20:04 | 75.2188035 | 65.2675012 | 87.1785034 | 75.122577 | 67.5930539 |
| 18:19:29 | 0:20:05 | 75.2188035 | 65.2675012 | 72.5192862 | 74.122577 | 66.5930539 |
| 18:19:30 | 0:20:06 | 75.2188035 | 63.2675012 | 71.9738316 | 72.122577 | 65.5930539 |
| 18:19:31 | 0:20:07 | 75.2188035 | 63.2675012 | 71.7920134 | 72.122577 | 64.5930539 |
| 18:19:32 | 0:20:08 | 76.2188035 | 65.2675012 | 86.1785034 | 72.122577 | 64.5930539 |
| 18:19:33 | 0:20:09 | 76.2188035 | 67.2675012 | 84.1785034 | 72.122577 | 63.5930539 |
| 18:19:34 | 0:20:10 | 76.2188035 | 67.2675012 | 82.1785034 | 73.122577 | 60.5930539 |
| 18:19:35 | 0:20:11 | 75.2188035 | 71.2675012 | 78.1785034 | 73.122577 | 58.5930539 |
| 18:19:36 | 0:20:12 | 76.2188035 | 72.2675012 | 76.1785034 | 75.122577 | 57.5930539 |
| 18:19:37 | 0:20:13 | 77.2188035 | 72.2675012 | 74.1785034 | 75.122577 | 57.5930539 |

|          |         |            |            |            |           |            |
|----------|---------|------------|------------|------------|-----------|------------|
| 18:19:38 | 0:20:14 | 77.2188035 | 72.2675012 | 72.1785034 | 75.122577 | 56.5930539 |
| 18:19:39 | 0:20:15 | 77.2188035 | 71.2675012 | 71.1785034 | 75.122577 | 55.5930539 |
| 18:19:40 | 0:20:16 | 77.2188035 | 71.2675012 | 71.1785034 | 75.122577 | 55.5930539 |
| 18:19:41 | 0:20:17 | 74.2188035 | 71.2675012 | 70.1785034 | 74.122577 | 61.5930539 |
| 18:19:42 | 0:20:18 | 74.2188035 | 72.2675012 | 70.1785034 | 74.122577 | 64.5930539 |
| 18:19:43 | 0:20:19 | 74.2188035 | 72.2675012 | 70.1785034 | 74.122577 | 64.5930539 |
| 18:19:44 | 0:20:20 | 74.2188035 | 72.2675012 | 70.1785034 | 74.122577 | 65.5930539 |
| 18:19:45 | 0:20:21 | 74.2188035 | 72.2675012 | 69.1785034 | 74.122577 | 65.5930539 |
| 18:19:46 | 0:20:22 | 73.2188035 | 72.2675012 | 69.1785034 | 77.122577 | 66.5930539 |
| 18:19:47 | 0:20:23 | 72.2188035 | 72.2675012 | 69.1785034 | 76.122577 | 66.5930539 |
| 18:19:48 | 0:20:24 | 72.2188035 | 72.2675012 | 69.1785034 | 76.122577 | 66.5930539 |
| 18:19:49 | 0:20:25 | 70.2188035 | 75.2675012 | 69.1785034 | 76.122577 | 67.5930539 |
| 18:19:50 | 0:20:26 | 70.2188035 | 75.2675012 | 69.1785034 | 71.122577 | 64.5930539 |
| 18:19:51 | 0:20:27 | 70.2188035 | 77.2675012 | 71.1785034 | 70.122577 | 66.5930539 |
| 18:19:52 | 0:20:28 | 70.2188035 | 77.2675012 | 71.1785034 | 69.122577 | 67.5930539 |
| 18:19:53 | 0:20:29 | 70.2188035 | 77.2675012 | 72.1785034 | 69.122577 | 69.5930539 |
| 18:19:54 | 0:20:30 | 70.2188035 | 77.2675012 | 75.1785034 | 69.122577 | 69.5930539 |
| 18:19:55 | 0:20:31 | 71.2188035 | 76.2675012 | 77.1785034 | 69.122577 | 69.5930539 |
| 18:19:56 | 0:20:32 | 70.2188035 | 74.2675012 | 80.1785034 | 69.122577 | 69.5930539 |
| 18:19:57 | 0:20:33 | 70.2188035 | 74.2675012 | 80.1785034 | 69.122577 | 69.5930539 |
| 18:19:58 | 0:20:34 | 70.2188035 | 74.2675012 | 81.1785034 | 69.122577 | 69.5930539 |
| 18:19:59 | 0:20:35 | 70.2188035 | 77.2675012 | 81.1785034 | 68.122577 | 69.5930539 |
| 18:20:00 | 0:20:36 | 70.2188035 | 77.2675012 | 81.1785034 | 68.122577 | 70.5930539 |
| 18:20:01 | 0:20:37 | 70.2188035 | 77.2675012 | 82.1785034 | 68.122577 | 71.5930539 |
| 18:20:02 | 0:20:38 | 71.2188035 | 77.2675012 | 82.1785034 | 68.122577 | 72.5930539 |
| 18:20:03 | 0:20:39 | 71.2188035 | 77.2675012 | 82.1785034 | 69.122577 | 72.5930539 |
| 18:20:04 | 0:20:40 | 71.2188035 | 78.2675012 | 82.1785034 | 70.122577 | 72.5930539 |
| 18:20:05 | 0:20:41 | 72.2188035 | 79.2675012 | 82.1785034 | 70.122577 | 73.5930539 |
| 18:20:06 | 0:20:42 | 72.2188035 | 79.2675012 | 82.1785034 | 71.122577 | 74.5930539 |
| 18:20:07 | 0:20:43 | 72.2188035 | 79.2675012 | 82.1785034 | 71.122577 | 74.5930539 |
| 18:20:08 | 0:20:44 | 71.2188035 | 79.2675012 | 82.1785034 | 71.122577 | 74.5930539 |
| 18:20:09 | 0:20:45 | 71.2188035 | 78.2675012 | 82.1785034 | 71.122577 | 75.5930539 |
| 18:20:10 | 0:20:46 | 71.2188035 | 73.2675012 | 82.1785034 | 70.122577 | 79.5930539 |
| 18:20:11 | 0:20:47 | 71.2188035 | 69.2675012 | 84.1785034 | 70.122577 | 79.5930539 |
| 18:20:12 | 0:20:48 | 71.2188035 | 69.2675012 | 85.1785034 | 70.122577 | 80.5930539 |
| 18:20:13 | 0:20:49 | 71.2188035 | 63.2675012 | 85.1785034 | 69.122577 | 81.5930539 |
| 18:20:14 | 0:20:50 | 71.2188035 | 63.2675012 | 83.1785034 | 69.122577 | 81.5930539 |
| 18:20:15 | 0:20:51 | 71.2188035 | 63.2675012 | 81.1785034 | 69.122577 | 83.5930539 |
| 18:20:16 | 0:20:52 | 71.2188035 | 63.2675012 | 78.1785034 | 71.122577 | 84.5930539 |
| 18:20:17 | 0:20:53 | 71.2188035 | 63.2675012 | 76.1785034 | 71.122577 | 86.5930539 |
| 18:20:18 | 0:20:54 | 71.2188035 | 64.2675012 | 76.1785034 | 76.122577 | 86.5930539 |
| 18:20:19 | 0:20:55 | 71.2188035 | 65.2675012 | 76.1785034 | 76.122577 | 86.5930539 |
| 18:20:20 | 0:20:56 | 72.2188035 | 65.2675012 | 76.1785034 | 79.122577 | 86.5930539 |
| 18:20:21 | 0:20:57 | 72.2188035 | 63.2675012 | 76.1785034 | 79.122577 | 84.5930539 |
| 18:20:22 | 0:20:58 | 72.2188035 | 63.2675012 | 76.1785034 | 80.122577 | 83.5930539 |



|          |         |            |            |            |           |            |
|----------|---------|------------|------------|------------|-----------|------------|
| 18:20:23 | 0:20:59 | 73.2188035 | 63.2675012 | 76.1785034 | 78.122577 | 83.5930539 |
| 18:20:24 | 0:21:00 | 72.2188035 | 63.2675012 | 75.1785034 | 78.122577 | 83.5930539 |
| 18:20:25 | 0:21:01 | 71.2188035 | 63.2675012 | 75.1785034 | 77.122577 | 83.5930539 |
| 18:20:26 | 0:21:02 | 70.2188035 | 64.2675012 | 74.1785034 | 76.122577 | 75.5930539 |
| 18:20:27 | 0:21:03 | 70.2188035 | 64.2675012 | 74.1785034 | 75.122577 | 75.5930539 |
| 18:20:28 | 0:21:04 | 70.2188035 | 64.2675012 | 74.1785034 | 72.122577 | 71.5930539 |
| 18:20:29 | 0:21:05 | 70.2188035 | 65.2675012 | 74.1785034 | 71.122577 | 68.5930539 |
| 18:20:30 | 0:21:06 | 68.2188035 | 65.2675012 | 74.1785034 | 71.122577 | 68.5930539 |
| 18:20:31 | 0:21:07 | 68.2188035 | 65.2675012 | 74.1785034 | 70.122577 | 68.5930539 |
| 18:20:32 | 0:21:08 | 67.2188035 | 66.2675012 | 74.1785034 | 70.122577 | 67.5930539 |
| 18:20:33 | 0:21:09 | 67.2188035 | 67.2675012 | 74.1785034 | 70.122577 | 67.5930539 |
| 18:20:34 | 0:21:10 | 68.2188035 | 67.2675012 | 71.1785034 | 69.122577 | 66.5930539 |
| 18:20:35 | 0:21:11 | 68.2188035 | 68.2675012 | 69.1785034 | 70.122577 | 66.5930539 |
| 18:20:36 | 0:21:12 | 69.2188035 | 67.2675012 | 69.1785034 | 70.122577 | 66.5930539 |
| 18:20:37 | 0:21:13 | 69.2188035 | 66.2675012 | 69.1785034 | 70.122577 | 66.5930539 |
| 18:20:38 | 0:21:14 | 69.2188035 | 66.2675012 | 69.1785034 | 70.122577 | 66.5930539 |
| 18:20:39 | 0:21:15 | 69.2188035 | 66.2675012 | 69.1785034 | 69.122577 | 66.5930539 |
| 18:20:40 | 0:21:16 | 69.2188035 | 66.2675012 | 73.1785034 | 67.122577 | 66.5930539 |
| 18:20:41 | 0:21:17 | 69.2188035 | 66.2675012 | 73.1785034 | 67.122577 | 65.5930539 |
| 18:20:42 | 0:21:18 | 69.2188035 | 66.2675012 | 73.1785034 | 67.122577 | 65.5930539 |
| 18:20:43 | 0:21:19 | 70.2188035 | 66.2675012 | 73.1785034 | 67.122577 | 65.5930539 |
| 18:20:44 | 0:21:20 | 70.2188035 | 66.2675012 | 73.1785034 | 66.122577 | 65.5930539 |
| 18:20:45 | 0:21:21 | 71.2188035 | 68.2675012 | 73.1785034 | 66.122577 | 66.5930539 |
| 18:20:46 | 0:21:22 | 71.2188035 | 70.2675012 | 73.1785034 | 67.122577 | 66.5930539 |
| 18:20:47 | 0:21:23 | 71.2188035 | 70.2675012 | 73.1785034 | 68.122577 | 67.5930539 |
| 18:20:48 | 0:21:24 | 71.2188035 | 66.2675012 | 73.1785034 | 68.122577 | 67.5930539 |
| 18:20:49 | 0:21:25 | 71.2188035 | 66.2675012 | 73.1785034 | 68.122577 | 68.5930539 |
| 18:20:50 | 0:21:26 | 71.2188035 | 65.2675012 | 73.1785034 | 68.122577 | 69.5930539 |
| 18:20:51 | 0:21:27 | 71.2188035 | 66.2675012 | 73.1785034 | 66.122577 | 70.5930539 |
| 18:20:52 | 0:21:28 | 70.2188035 | 65.2675012 | 73.1785034 | 66.122577 | 70.5930539 |
| 18:20:53 | 0:21:29 | 70.2188035 | 66.2675012 | 73.1785034 | 66.122577 | 70.5930539 |
| 18:20:54 | 0:21:30 | 71.2188035 | 66.2675012 | 73.1785034 | 66.122577 | 71.5930539 |
| 18:20:55 | 0:21:31 | 71.2188035 | 66.2675012 | 73.1785034 | 67.122577 | 71.5930539 |
| 18:20:56 | 0:21:32 | 72.2188035 | 66.2675012 | 76.1785034 | 68.122577 | 71.5930539 |
| 18:20:57 | 0:21:33 | 73.2188035 | 68.2675012 | 76.1785034 | 69.122577 | 71.5930539 |
| 18:20:58 | 0:21:34 | 73.2188035 | 69.2675012 | 75.1785034 | 69.122577 | 74.5930539 |
| 18:20:59 | 0:21:35 | 73.2188035 | 69.2675012 | 75.1785034 | 68.122577 | 74.5930539 |
| 18:21:00 | 0:21:36 | 73.2188035 | 69.2675012 | 74.1785034 | 68.122577 | 74.5930539 |
| 18:21:01 | 0:21:37 | 72.2188035 | 69.2675012 | 74.1785034 | 67.122577 | 73.5930539 |
| 18:21:02 | 0:21:38 | 72.2188035 | 69.2675012 | 74.1785034 | 67.122577 | 73.5930539 |
| 18:21:03 | 0:21:39 | 72.2188035 | 69.2675012 | 74.1785034 | 67.122577 | 73.5930539 |
| 18:21:04 | 0:21:40 | 72.2188035 | 69.2675012 | 75.1785034 | 68.122577 | 72.5930539 |
| 18:21:05 | 0:21:41 | 72.2188035 | 69.2675012 | 75.1785034 | 68.122577 | 71.5930539 |
| 18:21:06 | 0:21:42 | 72.2188035 | 69.2675012 | 74.1785034 | 68.122577 | 72.5930539 |
| 18:21:07 | 0:21:43 | 72.2188035 | 70.2675012 | 74.1785034 | 68.122577 | 72.5930539 |

|          |         |            |            |            |           |            |
|----------|---------|------------|------------|------------|-----------|------------|
| 18:21:08 | 0:21:44 | 71.2188035 | 70.2675012 | 72.1785034 | 68.122577 | 72.5930539 |
| 18:21:09 | 0:21:45 | 71.2188035 | 69.2675012 | 72.1785034 | 68.122577 | 72.5930539 |
| 18:21:10 | 0:21:46 | 71.2188035 | 69.2675012 | 71.1785034 | 68.122577 | 72.5930539 |
| 18:21:11 | 0:21:47 | 70.2188035 | 70.2675012 | 72.1785034 | 68.122577 | 73.5930539 |
| 18:21:12 | 0:21:48 | 73.2188035 | 70.2675012 | 73.1785034 | 68.122577 | 74.5930539 |
| 18:21:13 | 0:21:49 | 73.2188035 | 72.2675012 | 74.1785034 | 67.122577 | 74.5930539 |
| 18:21:14 | 0:21:50 | 73.2188035 | 75.2675012 | 75.1785034 | 68.122577 | 74.5930539 |
| 18:21:15 | 0:21:51 | 74.2188035 | 75.2675012 | 75.1785034 | 68.122577 | 74.5930539 |
| 18:21:16 | 0:21:52 | 74.2188035 | 76.2675012 | 73.1785034 | 69.122577 | 74.5930539 |
| 18:21:17 | 0:21:53 | 75.2188035 | 76.2675012 | 72.1785034 | 70.122577 | 74.5930539 |
| 18:21:18 | 0:21:54 | 75.2188035 | 76.2675012 | 72.1785034 | 70.122577 | 74.5930539 |
| 18:21:19 | 0:21:55 | 74.2188035 | 76.2675012 | 73.1785034 | 69.122577 | 75.5930539 |
| 18:21:20 | 0:21:56 | 74.2188035 | 76.2675012 | 72.1785034 | 69.122577 | 75.5930539 |
| 18:21:21 | 0:21:57 | 75.2188035 | 71.2675012 | 71.1785034 | 70.122577 | 75.5930539 |
| 18:21:22 | 0:21:58 | 74.2188035 | 68.2675012 | 69.1785034 | 70.122577 | 75.5930539 |
| 18:21:23 | 0:21:59 | 74.2188035 | 67.2675012 | 68.1785034 | 70.122577 | 75.5930539 |
| 18:21:24 | 0:22:00 | 74.2188035 | 67.2675012 | 67.1785034 | 70.122577 | 74.5930539 |
| 18:21:25 | 0:22:01 | 73.2188035 | 66.2675012 | 67.1785034 | 71.122577 | 74.5930539 |
| 18:21:26 | 0:22:02 | 73.2188035 | 66.2675012 | 67.1785034 | 72.122577 | 74.5930539 |
| 18:21:27 | 0:22:03 | 72.2188035 | 66.2675012 | 67.1785034 | 72.122577 | 73.5930539 |
| 18:21:28 | 0:22:04 | 69.2188035 | 65.2675012 | 67.1785034 | 72.122577 | 72.5930539 |
| 18:21:29 | 0:22:05 | 68.2188035 | 64.2675012 | 68.1785034 | 72.122577 | 72.5930539 |
| 18:21:30 | 0:22:06 | 67.2188035 | 64.2675012 | 68.1785034 | 74.122577 | 71.5930539 |
| 18:21:31 | 0:22:07 | 67.2188035 | 64.2675012 | 73.1785034 | 76.122577 | 71.5930539 |
| 18:21:32 | 0:22:08 | 67.2188035 | 64.2675012 | 77.1785034 | 76.122577 | 71.5930539 |
| 18:21:33 | 0:22:09 | 70.2188035 | 64.2675012 | 77.1785034 | 79.122577 | 71.5930539 |
| 18:21:34 | 0:22:10 | 71.2188035 | 66.2675012 | 77.1785034 | 78.122577 | 71.5930539 |
| 18:21:35 | 0:22:11 | 71.2188035 | 66.2675012 | 77.1785034 | 75.122577 | 71.5930539 |
| 18:21:36 | 0:22:12 | 71.2188035 | 66.2675012 | 77.1785034 | 75.122577 | 71.5930539 |
| 18:21:37 | 0:22:13 | 74.2188035 | 65.2675012 | 77.1785034 | 72.122577 | 71.5930539 |
| 18:21:38 | 0:22:14 | 77.2188035 | 65.2675012 | 77.1785034 | 71.122577 | 70.5930539 |
| 18:21:39 | 0:22:15 | 77.2188035 | 64.2675012 | 76.1785034 | 71.122577 | 70.5930539 |
| 18:21:40 | 0:22:16 | 79.2188035 | 64.2675012 | 76.1785034 | 71.122577 | 70.5930539 |
| 18:21:41 | 0:22:17 | 78.2188035 | 64.2675012 | 78.1785034 | 71.122577 | 70.5930539 |
| 18:21:42 | 0:22:18 | 73.2188035 | 64.2675012 | 80.1785034 | 72.122577 | 70.5930539 |
| 18:21:43 | 0:22:19 | 72.2188035 | 64.2675012 | 81.1785034 | 72.122577 | 70.5930539 |
| 18:21:44 | 0:22:20 | 72.2188035 | 64.2675012 | 81.1785034 | 72.122577 | 70.5930539 |
| 18:21:45 | 0:22:21 | 71.2188035 | 64.2675012 | 80.1785034 | 72.122577 | 70.5930539 |
| 18:21:46 | 0:22:22 | 69.2188035 | 65.2675012 | 78.1785034 | 72.122577 | 70.5930539 |
| 18:21:47 | 0:22:23 | 68.2188035 | 66.2675012 | 74.1785034 | 71.122577 | 71.5930539 |
| 18:21:48 | 0:22:24 | 69.2188035 | 65.2675012 | 74.1785034 | 71.122577 | 75.5930539 |
| 18:21:49 | 0:22:25 | 69.2188035 | 65.2675012 | 74.1785034 | 72.122577 | 76.5930539 |
| 18:21:50 | 0:22:26 | 70.2188035 | 62.2675012 | 74.1785034 | 72.122577 | 75.5930539 |
| 18:21:51 | 0:22:27 | 71.2188035 | 63.2675012 | 74.1785034 | 71.122577 | 70.5930539 |
| 18:21:52 | 0:22:28 | 71.2188035 | 64.2675012 | 75.1785034 | 71.122577 | 69.5930539 |

|          |         |            |            |            |            |            |
|----------|---------|------------|------------|------------|------------|------------|
| 18:21:53 | 0:22:29 | 70.2188035 | 66.2675012 | 75.1785034 | 71.122577  | 69.5930539 |
| 18:21:54 | 0:22:30 | 68.2188035 | 67.2675012 | 75.1785034 | 71.122577  | 69.5930539 |
| 18:21:55 | 0:22:31 | 68.2188035 | 68.2675012 | 76.1785034 | 72.122577  | 69.5930539 |
| 18:21:56 | 0:22:32 | 68.2188035 | 69.2675012 | 75.1785034 | 72.122577  | 68.5930539 |
| 18:21:57 | 0:22:33 | 68.2188035 | 69.2675012 | 75.1785034 | 72.122577  | 68.5930539 |
| 18:21:58 | 0:22:34 | 68.2188035 | 69.2675012 | 74.1785034 | 72.122577  | 68.5930539 |
| 18:21:59 | 0:22:35 | 68.2188035 | 69.2675012 | 74.1785034 | 72.122577  | 68.5930539 |
| 18:22:00 | 0:22:36 | 68.2188035 | 69.2675012 | 74.1785034 | 84.122577  | 69.5930539 |
| 18:22:01 | 0:22:37 | 68.2188035 | 69.2675012 | 75.1785034 | 75.0647407 | 69.5930539 |
| 18:22:02 | 0:22:38 | 68.2188035 | 72.2675012 | 73.1785034 | 90.122577  | 69.5930539 |
| 18:22:03 | 0:22:39 | 68.2188035 | 73.2675012 | 73.1785034 | 75.7011044 | 71.5930539 |
| 18:22:04 | 0:22:40 | 69.2188035 | 75.2675012 | 73.1785034 | 76.1556498 | 71.5930539 |
| 18:22:05 | 0:22:41 | 70.2188035 | 75.2675012 | 73.1785034 | 76.0647407 | 71.5930539 |
| 18:22:06 | 0:22:42 | 70.2188035 | 77.2675012 | 73.1785034 | 75.8829225 | 71.5930539 |
| 18:22:07 | 0:22:43 | 73.2188035 | 79.2675012 | 72.1785034 | 76.0647407 | 71.5930539 |
| 18:22:08 | 0:22:44 | 73.2188035 | 84.2675012 | 72.1785034 | 91.122577  | 71.5930539 |
| 18:22:09 | 0:22:45 | 73.2188035 | 88.2675012 | 71.1785034 | 91.122577  | 71.5930539 |
| 18:22:10 | 0:22:46 | 74.2188035 | 89.2675012 | 71.1785034 | 90.122577  | 71.5930539 |
| 18:22:11 | 0:22:47 | 74.2188035 | 89.2675012 | 71.1785034 | 90.122577  | 72.5930539 |
| 18:22:12 | 0:22:48 | 74.2188035 | 89.2675012 | 71.1785034 | 90.122577  | 73.5930539 |
| 18:22:13 | 0:22:49 | 74.2188035 | 81.2675012 | 70.1785034 | 89.122577  | 73.5930539 |
| 18:22:14 | 0:22:50 | 74.2188035 | 77.2675012 | 69.1785034 | 89.122577  | 73.5930539 |
| 18:22:15 | 0:22:51 | 74.2188035 | 77.2675012 | 69.1785034 | 86.122577  | 76.5930539 |
| 18:22:16 | 0:22:52 | 74.2188035 | 78.2675012 | 69.1785034 | 83.122577  | 76.5930539 |
| 18:22:17 | 0:22:53 | 74.2188035 | 80.2675012 | 69.1785034 | 82.122577  | 78.5930539 |
| 18:22:18 | 0:22:54 | 73.2188035 | 80.2675012 | 69.1785034 | 82.122577  | 81.5930539 |
| 18:22:19 | 0:22:55 | 72.2188035 | 79.2675012 | 69.1785034 | 82.122577  | 81.5930539 |
| 18:22:20 | 0:22:56 | 70.2188035 | 78.2675012 | 70.1785034 | 81.122577  | 81.5930539 |
| 18:22:21 | 0:22:57 | 68.2188035 | 78.2675012 | 70.1785034 | 79.122577  | 81.5930539 |
| 18:22:22 | 0:22:58 | 68.2188035 | 78.2675012 | 70.1785034 | 79.122577  | 81.5930539 |
| 18:22:23 | 0:22:59 | 68.2188035 | 78.2675012 | 70.1785034 | 79.122577  | 81.5930539 |
| 18:22:24 | 0:23:00 | 69.2188035 | 74.2675012 | 71.1785034 | 80.122577  | 81.5930539 |
| 18:22:25 | 0:23:01 | 69.2188035 | 73.2675012 | 72.1785034 | 80.122577  | 81.5930539 |
| 18:22:26 | 0:23:02 | 69.2188035 | 75.2675012 | 72.1785034 | 82.122577  | 81.5930539 |
| 18:22:27 | 0:23:03 | 69.2188035 | 75.2675012 | 72.1785034 | 82.122577  | 82.5930539 |
| 18:22:28 | 0:23:04 | 68.2188035 | 77.2675012 | 72.1785034 | 82.122577  | 82.5930539 |
| 18:22:29 | 0:23:05 | 68.2188035 | 80.2675012 | 72.1785034 | 82.122577  | 82.5930539 |
| 18:22:30 | 0:23:06 | 68.2188035 | 80.2675012 | 72.1785034 | 82.122577  | 82.5930539 |
| 18:22:31 | 0:23:07 | 68.2188035 | 82.2675012 | 72.1785034 | 78.122577  | 82.5930539 |
| 18:22:32 | 0:23:08 | 68.2188035 | 82.2675012 | 73.1785034 | 75.122577  | 82.5930539 |
| 18:22:33 | 0:23:09 | 68.2188035 | 82.2675012 | 73.1785034 | 75.122577  | 82.5930539 |
| 18:22:34 | 0:23:10 | 69.2188035 | 80.2675012 | 76.1785034 | 75.122577  | 82.5930539 |
| 18:22:35 | 0:23:11 | 70.2188035 | 78.2675012 | 77.1785034 | 75.122577  | 81.5930539 |
| 18:22:36 | 0:23:12 | 69.2188035 | 78.2675012 | 77.1785034 | 75.122577  | 82.5930539 |
| 18:22:37 | 0:23:13 | 69.2188035 | 76.2675012 | 78.1785034 | 75.122577  | 82.5930539 |

|          |         |            |            |            |           |            |
|----------|---------|------------|------------|------------|-----------|------------|
| 18:22:38 | 0:23:14 | 69.2188035 | 74.2675012 | 78.1785034 | 75.122577 | 81.5930539 |
| 18:22:39 | 0:23:15 | 69.2188035 | 74.2675012 | 78.1785034 | 75.122577 | 81.5930539 |
| 18:22:40 | 0:23:16 | 69.2188035 | 74.2675012 | 79.1785034 | 74.122577 | 81.5930539 |
| 18:22:41 | 0:23:17 | 69.2188035 | 74.2675012 | 79.1785034 | 74.122577 | 76.5930539 |
| 18:22:42 | 0:23:18 | 69.2188035 | 74.2675012 | 79.1785034 | 72.122577 | 76.5930539 |
| 18:22:43 | 0:23:19 | 69.2188035 | 74.2675012 | 79.1785034 | 70.122577 | 76.5930539 |
| 18:22:44 | 0:23:20 | 70.2188035 | 74.2675012 | 81.1785034 | 70.122577 | 76.5930539 |
| 18:22:45 | 0:23:21 | 71.2188035 | 74.2675012 | 81.1785034 | 70.122577 | 76.5930539 |
| 18:22:46 | 0:23:22 | 69.2188035 | 75.2675012 | 84.1785034 | 68.122577 | 76.5930539 |
| 18:22:47 | 0:23:23 | 68.2188035 | 75.2675012 | 85.1785034 | 68.122577 | 76.5930539 |
| 18:22:48 | 0:23:24 | 69.2188035 | 75.2675012 | 85.1785034 | 65.122577 | 79.5930539 |
| 18:22:49 | 0:23:25 | 70.2188035 | 75.2675012 | 85.1785034 | 65.122577 | 79.5930539 |
| 18:22:50 | 0:23:26 | 70.2188035 | 76.2675012 | 85.1785034 | 64.122577 | 81.5930539 |
| 18:22:51 | 0:23:27 | 70.2188035 | 76.2675012 | 85.1785034 | 63.122577 | 82.5930539 |
| 18:22:52 | 0:23:28 | 70.2188035 | 76.2675012 | 86.1785034 | 63.122577 | 82.5930539 |
| 18:22:53 | 0:23:29 | 70.2188035 | 76.2675012 | 86.1785034 | 63.122577 | 82.5930539 |
| 18:22:54 | 0:23:30 | 70.2188035 | 76.2675012 | 86.1785034 | 63.122577 | 82.5930539 |
| 18:22:55 | 0:23:31 | 71.2188035 | 76.2675012 | 86.1785034 | 63.122577 | 84.5930539 |
| 18:22:56 | 0:23:32 | 73.2188035 | 75.2675012 | 85.1785034 | 63.122577 | 85.5930539 |
| 18:22:57 | 0:23:33 | 75.2188035 | 72.2675012 | 85.1785034 | 63.122577 | 85.5930539 |
| 18:22:58 | 0:23:34 | 75.2188035 | 71.2675012 | 85.1785034 | 63.122577 | 85.5930539 |
| 18:22:59 | 0:23:35 | 76.2188035 | 71.2675012 | 84.1785034 | 62.122577 | 82.5930539 |
| 18:23:00 | 0:23:36 | 79.2188035 | 71.2675012 | 84.1785034 | 62.122577 | 82.5930539 |
| 18:23:01 | 0:23:37 | 85.2188035 | 70.2675012 | 82.1785034 | 63.122577 | 82.5930539 |
| 18:23:02 | 0:23:38 | 87.2188035 | 69.2675012 | 81.1785034 | 64.122577 | 82.5930539 |
| 18:23:03 | 0:23:39 | 87.2188035 | 69.2675012 | 81.1785034 | 64.122577 | 82.5930539 |
| 18:23:04 | 0:23:40 | 86.2188035 | 72.2675012 | 80.1785034 | 65.122577 | 83.5930539 |
| 18:23:05 | 0:23:41 | 81.2188035 | 74.2675012 | 80.1785034 | 67.122577 | 85.5930539 |
| 18:23:06 | 0:23:42 | 79.2188035 | 73.2675012 | 80.1785034 | 69.122577 | 85.5930539 |
| 18:23:07 | 0:23:43 | 80.2188035 | 73.2675012 | 80.1785034 | 69.122577 | 85.5930539 |
| 18:23:08 | 0:23:44 | 80.2188035 | 71.2675012 | 74.1785034 | 69.122577 | 86.5930539 |
| 18:23:09 | 0:23:45 | 79.2188035 | 72.2675012 | 74.1785034 | 69.122577 | 86.5930539 |
| 18:23:10 | 0:23:46 | 79.2188035 | 72.2675012 | 74.1785034 | 69.122577 | 87.5930539 |
| 18:23:11 | 0:23:47 | 76.2188035 | 72.2675012 | 73.1785034 | 67.122577 | 73.5192862 |
| 18:23:12 | 0:23:48 | 76.2188035 | 72.2675012 | 73.1785034 | 66.122577 | 88.5930539 |
| 18:23:13 | 0:23:49 | 75.2188035 | 72.2675012 | 73.1785034 | 66.122577 | 88.5930539 |
| 18:23:14 | 0:23:50 | 73.2188035 | 72.2675012 | 73.1785034 | 64.122577 | 73.8829225 |
| 18:23:15 | 0:23:51 | 72.2188035 | 70.2675012 | 73.1785034 | 64.122577 | 73.7920134 |
| 18:23:16 | 0:23:52 | 72.2188035 | 68.2675012 | 73.1785034 | 66.122577 | 74.2465589 |
| 18:23:17 | 0:23:53 | 72.2188035 | 68.2675012 | 73.1785034 | 67.122577 | 74.4283771 |
| 18:23:18 | 0:23:54 | 71.2188035 | 66.2675012 | 74.1785034 | 68.122577 | 74.7920134 |
| 18:23:19 | 0:23:55 | 69.2188035 | 63.2675012 | 75.1785034 | 68.122577 | 74.2465589 |
| 18:23:20 | 0:23:56 | 68.2188035 | 63.2675012 | 74.1785034 | 68.122577 | 74.1556498 |
| 18:23:21 | 0:23:57 | 69.2188035 | 63.2675012 | 71.1785034 | 67.122577 | 74.337468  |
| 18:23:22 | 0:23:58 | 69.2188035 | 63.2675012 | 69.1785034 | 67.122577 | 74.2465589 |

|          |         |            |            |            |           |            |
|----------|---------|------------|------------|------------|-----------|------------|
| 18:23:23 | 0:23:59 | 69.2188035 | 63.2675012 | 69.1785034 | 67.122577 | 88.5930539 |
| 18:23:24 | 0:24:00 | 69.2188035 | 63.2675012 | 69.1785034 | 67.122577 | 88.5930539 |
| 18:23:25 | 0:24:01 | 69.2188035 | 64.2675012 | 70.1785034 | 67.122577 | 88.5930539 |
| 18:23:26 | 0:24:02 | 70.2188035 | 66.2675012 | 70.1785034 | 66.122577 | 86.5930539 |
| 18:23:27 | 0:24:03 | 71.2188035 | 66.2675012 | 70.1785034 | 66.122577 | 86.5930539 |
| 18:23:28 | 0:24:04 | 72.2188035 | 65.2675012 | 70.1785034 | 66.122577 | 85.5930539 |
| 18:23:29 | 0:24:05 | 73.2188035 | 64.2675012 | 69.1785034 | 66.122577 | 85.5930539 |
| 18:23:30 | 0:24:06 | 73.2188035 | 64.2675012 | 69.1785034 | 66.122577 | 85.5930539 |
| 18:23:31 | 0:24:07 | 73.2188035 | 64.2675012 | 69.1785034 | 66.122577 | 85.5930539 |
| 18:23:32 | 0:24:08 | 72.2188035 | 63.2675012 | 69.1785034 | 66.122577 | 85.5930539 |
| 18:23:33 | 0:24:09 | 72.2188035 | 62.2675012 | 68.1785034 | 66.122577 | 83.5930539 |
| 18:23:34 | 0:24:10 | 71.2188035 | 62.2675012 | 68.1785034 | 66.122577 | 82.5930539 |
| 18:23:35 | 0:24:11 | 71.2188035 | 63.2675012 | 67.1785034 | 67.122577 | 81.5930539 |
| 18:23:36 | 0:24:12 | 71.2188035 | 64.2675012 | 66.1785034 | 67.122577 | 81.5930539 |
| 18:23:37 | 0:24:13 | 70.2188035 | 64.2675012 | 64.1785034 | 67.122577 | 79.5930539 |
| 18:23:38 | 0:24:14 | 70.2188035 | 64.2675012 | 62.1785034 | 66.122577 | 78.5930539 |
| 18:23:39 | 0:24:15 | 70.2188035 | 64.2675012 | 62.1785034 | 67.122577 | 77.5930539 |
| 18:23:40 | 0:24:16 | 70.2188035 | 64.2675012 | 62.1785034 | 67.122577 | 75.5930539 |
| 18:23:41 | 0:24:17 | 71.2188035 | 65.2675012 | 62.1785034 | 67.122577 | 74.5930539 |
| 18:23:42 | 0:24:18 | 72.2188035 | 65.2675012 | 61.1785034 | 67.122577 | 74.5930539 |
| 18:23:43 | 0:24:19 | 72.2188035 | 65.2675012 | 61.1785034 | 67.122577 | 72.5930539 |
| 18:23:44 | 0:24:20 | 71.2188035 | 65.2675012 | 62.1785034 | 67.122577 | 72.5930539 |
| 18:23:45 | 0:24:21 | 71.2188035 | 64.2675012 | 64.1785034 | 67.122577 | 72.5930539 |
| 18:23:46 | 0:24:22 | 71.2188035 | 64.2675012 | 67.1785034 | 67.122577 | 71.5930539 |
| 18:23:47 | 0:24:23 | 71.2188035 | 64.2675012 | 69.1785034 | 66.122577 | 71.5930539 |
| 18:23:48 | 0:24:24 | 71.2188035 | 63.2675012 | 71.1785034 | 65.122577 | 71.5930539 |
| 18:23:49 | 0:24:25 | 69.2188035 | 63.2675012 | 74.1785034 | 65.122577 | 71.5930539 |
| 18:23:50 | 0:24:26 | 70.2188035 | 63.2675012 | 74.1785034 | 65.122577 | 71.5930539 |
| 18:23:51 | 0:24:27 | 70.2188035 | 63.2675012 | 75.1785034 | 65.122577 | 71.5930539 |
| 18:23:52 | 0:24:28 | 69.2188035 | 63.2675012 | 75.1785034 | 65.122577 | 70.5930539 |
| 18:23:53 | 0:24:29 | 69.2188035 | 64.2675012 | 76.1785034 | 65.122577 | 70.5930539 |
| 18:23:54 | 0:24:30 | 70.2188035 | 66.2675012 | 76.1785034 | 64.122577 | 70.5930539 |
| 18:23:55 | 0:24:31 | 70.2188035 | 66.2675012 | 76.1785034 | 64.122577 | 68.5930539 |
| 18:23:56 | 0:24:32 | 69.2188035 | 66.2675012 | 76.1785034 | 64.122577 | 65.5930539 |
| 18:23:57 | 0:24:33 | 69.2188035 | 67.2675012 | 77.1785034 | 66.122577 | 65.5930539 |
| 18:23:58 | 0:24:34 | 69.2188035 | 67.2675012 | 79.1785034 | 66.122577 | 65.5930539 |
| 18:23:59 | 0:24:35 | 70.2188035 | 69.2675012 | 80.1785034 | 66.122577 | 65.5930539 |
| 18:24:00 | 0:24:36 | 70.2188035 | 69.2675012 | 81.1785034 | 66.122577 | 65.5930539 |
| 18:24:01 | 0:24:37 | 70.2188035 | 71.2675012 | 81.1785034 | 66.122577 | 64.5930539 |
| 18:24:02 | 0:24:38 | 70.2188035 | 71.2675012 | 82.1785034 | 68.122577 | 65.5930539 |
| 18:24:03 | 0:24:39 | 70.2188035 | 71.2675012 | 83.1785034 | 68.122577 | 66.5930539 |
| 18:24:04 | 0:24:40 | 70.2188035 | 69.2675012 | 83.1785034 | 68.122577 | 68.5930539 |
| 18:24:05 | 0:24:41 | 70.2188035 | 70.2675012 | 83.1785034 | 68.122577 | 69.5930539 |
| 18:24:06 | 0:24:42 | 71.2188035 | 70.2675012 | 77.1785034 | 69.122577 | 69.5930539 |
| 18:24:07 | 0:24:43 | 71.2188035 | 71.2675012 | 75.1785034 | 71.122577 | 69.5930539 |

|          |         |            |            |            |           |            |
|----------|---------|------------|------------|------------|-----------|------------|
| 18:24:08 | 0:24:44 | 71.2188035 | 73.2675012 | 75.1785034 | 74.122577 | 67.5930539 |
| 18:24:09 | 0:24:45 | 70.2188035 | 73.2675012 | 75.1785034 | 74.122577 | 67.5930539 |
| 18:24:10 | 0:24:46 | 70.2188035 | 74.2675012 | 74.1785034 | 74.122577 | 67.5930539 |
| 18:24:11 | 0:24:47 | 69.2188035 | 77.2675012 | 73.1785034 | 74.122577 | 68.5930539 |
| 18:24:12 | 0:24:48 | 69.2188035 | 77.2675012 | 71.1785034 | 74.122577 | 70.5930539 |
| 18:24:13 | 0:24:49 | 69.2188035 | 77.2675012 | 71.1785034 | 75.122577 | 71.5930539 |
| 18:24:14 | 0:24:50 | 69.2188035 | 77.2675012 | 70.1785034 | 75.122577 | 71.5930539 |
| 18:24:15 | 0:24:51 | 69.2188035 | 77.2675012 | 70.1785034 | 75.122577 | 73.5930539 |
| 18:24:16 | 0:24:52 | 69.2188035 | 75.2675012 | 71.1785034 | 75.122577 | 73.5930539 |
| 18:24:17 | 0:24:53 | 69.2188035 | 75.2675012 | 72.1785034 | 75.122577 | 73.5930539 |
| 18:24:18 | 0:24:54 | 69.2188035 | 75.2675012 | 72.1785034 | 75.122577 | 73.5930539 |
| 18:24:19 | 0:24:55 | 70.2188035 | 75.2675012 | 71.1785034 | 79.122577 | 73.5930539 |
| 18:24:20 | 0:24:56 | 70.2188035 | 75.2675012 | 70.1785034 | 79.122577 | 74.5930539 |
| 18:24:21 | 0:24:57 | 69.2188035 | 75.2675012 | 70.1785034 | 79.122577 | 74.5930539 |
| 18:24:22 | 0:24:58 | 70.2188035 | 75.2675012 | 70.1785034 | 79.122577 | 75.5930539 |
| 18:24:23 | 0:24:59 | 70.2188035 | 77.2675012 | 70.1785034 | 78.122577 | 78.5930539 |
| 18:24:24 | 0:25:00 | 70.2188035 | 77.2675012 | 69.1785034 | 79.122577 | 82.5930539 |
| 18:24:25 | 0:25:01 | 71.2188035 | 73.2675012 | 69.1785034 | 80.122577 | 84.5930539 |
| 18:24:26 | 0:25:02 | 71.2188035 | 72.2675012 | 69.1785034 | 80.122577 | 84.5930539 |
| 18:24:27 | 0:25:03 | 70.2188035 | 72.2675012 | 69.1785034 | 79.122577 | 86.5930539 |
| 18:24:28 | 0:25:04 | 69.2188035 | 72.2675012 | 69.1785034 | 77.122577 | 86.5930539 |
| 18:24:29 | 0:25:05 | 69.2188035 | 73.2675012 | 68.1785034 | 76.122577 | 89.5930539 |
| 18:24:30 | 0:25:06 | 69.2188035 | 73.2675012 | 68.1785034 | 76.122577 | 90.5930539 |
| 18:24:31 | 0:25:07 | 70.2188035 | 73.2675012 | 68.1785034 | 76.122577 | 89.5930539 |
| 18:24:32 | 0:25:08 | 70.2188035 | 73.2675012 | 67.1785034 | 75.122577 | 89.5930539 |
| 18:24:33 | 0:25:09 | 70.2188035 | 73.2675012 | 68.1785034 | 75.122577 | 89.5930539 |
| 18:24:34 | 0:25:10 | 70.2188035 | 73.2675012 | 70.1785034 | 75.122577 | 87.5930539 |
| 18:24:35 | 0:25:11 | 70.2188035 | 70.2675012 | 69.1785034 | 74.122577 | 87.5930539 |
| 18:24:36 | 0:25:12 | 70.2188035 | 69.2675012 | 69.1785034 | 74.122577 | 87.5930539 |
| 18:24:37 | 0:25:13 | 70.2188035 | 69.2675012 | 69.1785034 | 72.122577 | 86.5930539 |
| 18:24:38 | 0:25:14 | 69.2188035 | 69.2675012 | 68.1785034 | 72.122577 | 84.5930539 |
| 18:24:39 | 0:25:15 | 69.2188035 | 69.2675012 | 68.1785034 | 72.122577 | 81.5930539 |
| 18:24:40 | 0:25:16 | 69.2188035 | 69.2675012 | 68.1785034 | 72.122577 | 75.5930539 |
| 18:24:41 | 0:25:17 | 70.2188035 | 69.2675012 | 67.1785034 | 72.122577 | 75.5930539 |
| 18:24:42 | 0:25:18 | 70.2188035 | 69.2675012 | 66.1785034 | 72.122577 | 71.5930539 |
| 18:24:43 | 0:25:19 | 70.2188035 | 70.2675012 | 66.1785034 | 72.122577 | 70.5930539 |
| 18:24:44 | 0:25:20 | 70.2188035 | 70.2675012 | 65.1785034 | 72.122577 | 70.5930539 |
| 18:24:45 | 0:25:21 | 71.2188035 | 70.2675012 | 65.1785034 | 72.122577 | 69.5930539 |
| 18:24:46 | 0:25:22 | 71.2188035 | 69.2675012 | 66.1785034 | 73.122577 | 69.5930539 |
| 18:24:47 | 0:25:23 | 72.2188035 | 69.2675012 | 65.1785034 | 74.122577 | 67.5930539 |
| 18:24:48 | 0:25:24 | 72.2188035 | 69.2675012 | 65.1785034 | 75.122577 | 66.5930539 |
| 18:24:49 | 0:25:25 | 72.2188035 | 69.2675012 | 65.1785034 | 75.122577 | 64.5930539 |
| 18:24:50 | 0:25:26 | 73.2188035 | 69.2675012 | 65.1785034 | 79.122577 | 63.5930539 |
| 18:24:51 | 0:25:27 | 73.2188035 | 69.2675012 | 65.1785034 | 79.122577 | 63.5930539 |
| 18:24:52 | 0:25:28 | 74.2188035 | 68.2675012 | 71.1785034 | 79.122577 | 63.5930539 |

|          |         |            |            |            |           |            |
|----------|---------|------------|------------|------------|-----------|------------|
| 18:24:53 | 0:25:29 | 74.2188035 | 68.2675012 | 75.1785034 | 80.122577 | 62.5930539 |
| 18:24:54 | 0:25:30 | 74.2188035 | 67.2675012 | 77.1785034 | 81.122577 | 62.5930539 |
| 18:24:55 | 0:25:31 | 74.2188035 | 67.2675012 | 77.1785034 | 81.122577 | 62.5930539 |
| 18:24:56 | 0:25:32 | 73.2188035 | 67.2675012 | 78.1785034 | 80.122577 | 62.5930539 |
| 18:24:57 | 0:25:33 | 73.2188035 | 68.2675012 | 79.1785034 | 80.122577 | 63.5930539 |
| 18:24:58 | 0:25:34 | 74.2188035 | 68.2675012 | 78.1785034 | 80.122577 | 64.5930539 |
| 18:24:59 | 0:25:35 | 75.2188035 | 68.2675012 | 78.1785034 | 80.122577 | 64.5930539 |
| 18:25:00 | 0:25:36 | 75.2188035 | 69.2675012 | 76.1785034 | 80.122577 | 66.5930539 |
| 18:25:01 | 0:25:37 | 74.2188035 | 69.2675012 | 71.1785034 | 80.122577 | 67.5930539 |
| 18:25:02 | 0:25:38 | 73.2188035 | 70.2675012 | 68.1785034 | 78.122577 | 66.5930539 |
| 18:25:03 | 0:25:39 | 73.2188035 | 72.2675012 | 67.1785034 | 77.122577 | 66.5930539 |
| 18:25:04 | 0:25:40 | 73.2188035 | 72.2675012 | 67.1785034 | 76.122577 | 65.5930539 |
| 18:25:05 | 0:25:41 | 73.2188035 | 74.2675012 | 67.1785034 | 75.122577 | 65.5930539 |
| 18:25:06 | 0:25:42 | 72.2188035 | 75.2675012 | 67.1785034 | 74.122577 | 66.5930539 |
| 18:25:07 | 0:25:43 | 74.2188035 | 76.2675012 | 67.1785034 | 74.122577 | 66.5930539 |
| 18:25:08 | 0:25:44 | 75.2188035 | 76.2675012 | 66.1785034 | 73.122577 | 66.5930539 |
| 18:25:09 | 0:25:45 | 75.2188035 | 77.2675012 | 66.1785034 | 72.122577 | 66.5930539 |
| 18:25:10 | 0:25:46 | 74.2188035 | 78.2675012 | 67.1785034 | 71.122577 | 66.5930539 |
| 18:25:11 | 0:25:47 | 72.2188035 | 80.2675012 | 67.1785034 | 67.122577 | 66.5930539 |
| 18:25:12 | 0:25:48 | 72.2188035 | 80.2675012 | 67.1785034 | 67.122577 | 66.5930539 |
| 18:25:13 | 0:25:49 | 70.2188035 | 81.2675012 | 67.1785034 | 65.122577 | 66.5930539 |
| 18:25:14 | 0:25:50 | 70.2188035 | 82.2675012 | 68.1785034 | 65.122577 | 66.5930539 |
| 18:25:15 | 0:25:51 | 70.2188035 | 82.2675012 | 68.1785034 | 65.122577 | 65.5930539 |
| 18:25:16 | 0:25:52 | 70.2188035 | 81.2675012 | 70.1785034 | 64.122577 | 65.5930539 |
| 18:25:17 | 0:25:53 | 70.2188035 | 80.2675012 | 70.1785034 | 64.122577 | 66.5930539 |
| 18:25:18 | 0:25:54 | 70.2188035 | 80.2675012 | 75.1785034 | 64.122577 | 66.5930539 |
| 18:25:19 | 0:25:55 | 69.2188035 | 79.2675012 | 78.1785034 | 64.122577 | 72.5930539 |
| 18:25:20 | 0:25:56 | 69.2188035 | 79.2675012 | 78.1785034 | 65.122577 | 72.5930539 |
| 18:25:21 | 0:25:57 | 69.2188035 | 78.2675012 | 79.1785034 | 65.122577 | 72.5930539 |
| 18:25:22 | 0:25:58 | 69.2188035 | 76.2675012 | 82.1785034 | 66.122577 | 70.5930539 |
| 18:25:23 | 0:25:59 | 69.2188035 | 76.2675012 | 84.1785034 | 66.122577 | 70.5930539 |
| 18:25:24 | 0:26:00 | 69.2188035 | 74.2675012 | 71.1556498 | 66.122577 | 70.5930539 |
| 18:25:25 | 0:26:01 | 69.2188035 | 73.2675012 | 70.8829225 | 66.122577 | 70.5930539 |
| 18:25:26 | 0:26:02 | 69.2188035 | 74.2675012 | 71.0647407 | 66.122577 | 71.5930539 |
| 18:25:27 | 0:26:03 | 69.2188035 | 74.2675012 | 70.9738316 | 66.122577 | 71.5930539 |
| 18:25:28 | 0:26:04 | 70.2188035 | 73.2675012 | 70.6101953 | 66.122577 | 71.5930539 |
| 18:25:29 | 0:26:05 | 70.2188035 | 73.2675012 | 70.6101953 | 66.122577 | 71.5930539 |
| 18:25:30 | 0:26:06 | 70.2188035 | 73.2675012 | 70.337468  | 65.122577 | 71.5930539 |
| 18:25:31 | 0:26:07 | 70.2188035 | 74.2675012 | 70.6101953 | 65.122577 | 71.5930539 |
| 18:25:32 | 0:26:08 | 69.2188035 | 74.2675012 | 83.1785034 | 65.122577 | 73.5930539 |
| 18:25:33 | 0:26:09 | 69.2188035 | 73.2675012 | 81.1785034 | 65.122577 | 74.5930539 |
| 18:25:34 | 0:26:10 | 69.2188035 | 71.2675012 | 80.1785034 | 64.122577 | 74.5930539 |
| 18:25:35 | 0:26:11 | 69.2188035 | 71.2675012 | 80.1785034 | 64.122577 | 72.5930539 |
| 18:25:36 | 0:26:12 | 67.2188035 | 71.2675012 | 80.1785034 | 65.122577 | 72.5930539 |
| 18:25:37 | 0:26:13 | 67.2188035 | 71.2675012 | 80.1785034 | 66.122577 | 72.5930539 |

|          |         |            |            |            |           |            |
|----------|---------|------------|------------|------------|-----------|------------|
| 18:25:38 | 0:26:14 | 67.2188035 | 70.2675012 | 76.1785034 | 66.122577 | 74.5930539 |
| 18:25:39 | 0:26:15 | 67.2188035 | 70.2675012 | 73.1785034 | 66.122577 | 74.5930539 |
| 18:25:40 | 0:26:16 | 68.2188035 | 70.2675012 | 72.1785034 | 66.122577 | 74.5930539 |
| 18:25:41 | 0:26:17 | 68.2188035 | 70.2675012 | 70.1785034 | 66.122577 | 74.5930539 |
| 18:25:42 | 0:26:18 | 68.2188035 | 70.2675012 | 71.1785034 | 66.122577 | 74.5930539 |
| 18:25:43 | 0:26:19 | 68.2188035 | 70.2675012 | 71.1785034 | 66.122577 | 74.5930539 |
| 18:25:44 | 0:26:20 | 68.2188035 | 70.2675012 | 72.1785034 | 66.122577 | 74.5930539 |
| 18:25:45 | 0:26:21 | 68.2188035 | 69.2675012 | 72.1785034 | 66.122577 | 74.5930539 |
| 18:25:46 | 0:26:22 | 68.2188035 | 69.2675012 | 73.1785034 | 66.122577 | 74.5930539 |
| 18:25:47 | 0:26:23 | 68.2188035 | 69.2675012 | 73.1785034 | 67.122577 | 74.5930539 |
| 18:25:48 | 0:26:24 | 68.2188035 | 69.2675012 | 73.1785034 | 67.122577 | 74.5930539 |
| 18:25:49 | 0:26:25 | 68.2188035 | 69.2675012 | 73.1785034 | 68.122577 | 74.5930539 |
| 18:25:50 | 0:26:26 | 67.2188035 | 69.2675012 | 73.1785034 | 68.122577 | 74.5930539 |
| 18:25:51 | 0:26:27 | 67.2188035 | 69.2675012 | 73.1785034 | 68.122577 | 74.5930539 |
| 18:25:52 | 0:26:28 | 67.2188035 | 72.2675012 | 73.1785034 | 68.122577 | 74.5930539 |
| 18:25:53 | 0:26:29 | 67.2188035 | 71.2675012 | 72.1785034 | 68.122577 | 74.5930539 |
| 18:25:54 | 0:26:30 | 67.2188035 | 71.2675012 | 72.1785034 | 67.122577 | 74.5930539 |
| 18:25:55 | 0:26:31 | 68.2188035 | 71.2675012 | 71.1785034 | 67.122577 | 73.5930539 |
| 18:25:56 | 0:26:32 | 68.2188035 | 71.2675012 | 71.1785034 | 67.122577 | 74.5930539 |
| 18:25:57 | 0:26:33 | 68.2188035 | 71.2675012 | 71.1785034 | 68.122577 | 73.5930539 |
| 18:25:58 | 0:26:34 | 68.2188035 | 73.2675012 | 71.1785034 | 68.122577 | 73.5930539 |
| 18:25:59 | 0:26:35 | 68.2188035 | 73.2675012 | 71.1785034 | 68.122577 | 73.5930539 |
| 18:26:00 | 0:26:36 | 68.2188035 | 72.2675012 | 71.1785034 | 68.122577 | 72.5930539 |
| 18:26:01 | 0:26:37 | 69.2188035 | 72.2675012 | 71.1785034 | 69.122577 | 68.5930539 |
| 18:26:02 | 0:26:38 | 69.2188035 | 72.2675012 | 71.1785034 | 69.122577 | 64.5930539 |
| 18:26:03 | 0:26:39 | 69.2188035 | 72.2675012 | 72.1785034 | 69.122577 | 64.5930539 |
| 18:26:04 | 0:26:40 | 69.2188035 | 72.2675012 | 73.1785034 | 70.122577 | 64.5930539 |
| 18:26:05 | 0:26:41 | 69.2188035 | 71.2675012 | 74.1785034 | 71.122577 | 64.5930539 |
| 18:26:06 | 0:26:42 | 69.2188035 | 71.2675012 | 74.1785034 | 71.122577 | 64.5930539 |
| 18:26:07 | 0:26:43 | 71.2188035 | 71.2675012 | 74.1785034 | 73.122577 | 63.5930539 |
| 18:26:08 | 0:26:44 | 74.2188035 | 71.2675012 | 74.1785034 | 73.122577 | 63.5930539 |
| 18:26:09 | 0:26:45 | 74.2188035 | 71.2675012 | 74.1785034 | 74.122577 | 63.5930539 |
| 18:26:10 | 0:26:46 | 75.2188035 | 71.2675012 | 77.1785034 | 72.122577 | 63.5930539 |
| 18:26:11 | 0:26:47 | 75.2188035 | 71.2675012 | 79.1785034 | 72.122577 | 64.5930539 |
| 18:26:12 | 0:26:48 | 75.2188035 | 71.2675012 | 79.1785034 | 72.122577 | 64.5930539 |
| 18:26:13 | 0:26:49 | 75.2188035 | 71.2675012 | 80.1785034 | 74.122577 | 66.5930539 |
| 18:26:14 | 0:26:50 | 74.2188035 | 71.2675012 | 80.1785034 | 74.122577 | 66.5930539 |
| 18:26:15 | 0:26:51 | 74.2188035 | 72.2675012 | 81.1785034 | 74.122577 | 75.5930539 |
| 18:26:16 | 0:26:52 | 74.2188035 | 72.2675012 | 83.1785034 | 73.122577 | 76.337468  |
| 18:26:17 | 0:26:53 | 74.2188035 | 71.2675012 | 82.1785034 | 73.122577 | 76.9738316 |
| 18:26:18 | 0:26:54 | 74.2188035 | 71.2675012 | 78.1785034 | 73.122577 | 76.8829225 |
| 18:26:19 | 0:26:55 | 74.2188035 | 71.2675012 | 77.1785034 | 70.122577 | 76.7920134 |
| 18:26:20 | 0:26:56 | 73.2188035 | 71.2675012 | 77.1785034 | 68.122577 | 76.7011044 |
| 18:26:21 | 0:26:57 | 74.2188035 | 73.2675012 | 76.1785034 | 68.122577 | 77.337468  |
| 18:26:22 | 0:26:58 | 74.2188035 | 73.2675012 | 76.1785034 | 68.122577 | 77.5192862 |



|          |         |            |            |            |           |            |
|----------|---------|------------|------------|------------|-----------|------------|
| 18:26:23 | 0:26:59 | 73.2188035 | 73.2675012 | 75.1785034 | 67.122577 | 77.1556498 |
| 18:26:24 | 0:27:00 | 73.2188035 | 73.2675012 | 74.1785034 | 67.122577 | 76.9738316 |
| 18:26:25 | 0:27:01 | 73.2188035 | 74.2675012 | 74.1785034 | 67.122577 | 87.5930539 |
| 18:26:26 | 0:27:02 | 71.2188035 | 75.2675012 | 73.1785034 | 67.122577 | 87.5930539 |
| 18:26:27 | 0:27:03 | 71.2188035 | 75.2675012 | 73.1785034 | 66.122577 | 84.5930539 |
| 18:26:28 | 0:27:04 | 71.2188035 | 76.2675012 | 73.1785034 | 66.122577 | 77.5930539 |
| 18:26:29 | 0:27:05 | 71.2188035 | 76.2675012 | 73.1785034 | 65.122577 | 77.5930539 |
| 18:26:30 | 0:27:06 | 71.2188035 | 77.2675012 | 72.1785034 | 65.122577 | 76.5930539 |
| 18:26:31 | 0:27:07 | 71.2188035 | 77.2675012 | 72.1785034 | 66.122577 | 76.5930539 |
| 18:26:32 | 0:27:08 | 71.2188035 | 77.2675012 | 70.1785034 | 67.122577 | 75.5930539 |
| 18:26:33 | 0:27:09 | 72.2188035 | 77.2675012 | 72.1785034 | 67.122577 | 75.5930539 |
| 18:26:34 | 0:27:10 | 71.2188035 | 78.2675012 | 73.1785034 | 68.122577 | 74.5930539 |
| 18:26:35 | 0:27:11 | 70.2188035 | 79.2675012 | 72.1785034 | 69.122577 | 74.5930539 |
| 18:26:36 | 0:27:12 | 70.2188035 | 81.2675012 | 71.1785034 | 69.122577 | 71.5930539 |
| 18:26:37 | 0:27:13 | 68.2188035 | 81.2675012 | 70.1785034 | 69.122577 | 69.5930539 |
| 18:26:38 | 0:27:14 | 68.2188035 | 80.2675012 | 69.1785034 | 69.122577 | 69.5930539 |
| 18:26:39 | 0:27:15 | 66.2188035 | 80.2675012 | 69.1785034 | 69.122577 | 69.5930539 |
| 18:26:40 | 0:27:16 | 65.2188035 | 76.2675012 | 69.1785034 | 70.122577 | 69.5930539 |
| 18:26:41 | 0:27:17 | 66.2188035 | 74.2675012 | 68.1785034 | 69.122577 | 68.5930539 |
| 18:26:42 | 0:27:18 | 66.2188035 | 73.2675012 | 68.1785034 | 68.122577 | 67.5930539 |
| 18:26:43 | 0:27:19 | 66.2188035 | 73.2675012 | 68.1785034 | 68.122577 | 66.5930539 |
| 18:26:44 | 0:27:20 | 66.2188035 | 72.2675012 | 68.1785034 | 68.122577 | 66.5930539 |
| 18:26:45 | 0:27:21 | 66.2188035 | 72.2675012 | 68.1785034 | 68.122577 | 67.5930539 |
| 18:26:46 | 0:27:22 | 66.2188035 | 72.2675012 | 68.1785034 | 69.122577 | 67.5930539 |
| 18:26:47 | 0:27:23 | 66.2188035 | 71.2675012 | 67.1785034 | 69.122577 | 67.5930539 |
| 18:26:48 | 0:27:24 | 66.2188035 | 71.2675012 | 67.1785034 | 69.122577 | 67.5930539 |
| 18:26:49 | 0:27:25 | 66.2188035 | 68.2675012 | 67.1785034 | 69.122577 | 68.5930539 |
| 18:26:50 | 0:27:26 | 66.2188035 | 68.2675012 | 67.1785034 | 68.122577 | 68.5930539 |
| 18:26:51 | 0:27:27 | 66.2188035 | 68.2675012 | 67.1785034 | 68.122577 | 68.5930539 |
| 18:26:52 | 0:27:28 | 66.2188035 | 67.2675012 | 67.1785034 | 68.122577 | 67.5930539 |
| 18:26:53 | 0:27:29 | 66.2188035 | 66.2675012 | 66.1785034 | 67.122577 | 67.5930539 |
| 18:26:54 | 0:27:30 | 66.2188035 | 66.2675012 | 66.1785034 | 68.122577 | 67.5930539 |
| 18:26:55 | 0:27:31 | 66.2188035 | 65.2675012 | 64.1785034 | 68.122577 | 67.5930539 |
| 18:26:56 | 0:27:32 | 66.2188035 | 65.2675012 | 65.1785034 | 68.122577 | 66.5930539 |
| 18:26:57 | 0:27:33 | 66.2188035 | 65.2675012 | 65.1785034 | 68.122577 | 66.5930539 |
| 18:26:58 | 0:27:34 | 66.2188035 | 66.2675012 | 67.1785034 | 69.122577 | 68.5930539 |
| 18:26:59 | 0:27:35 | 66.2188035 | 66.2675012 | 72.1785034 | 70.122577 | 68.5930539 |
| 18:27:00 | 0:27:36 | 66.2188035 | 66.2675012 | 72.1785034 | 70.122577 | 68.5930539 |
| 18:27:01 | 0:27:37 | 65.2188035 | 63.2675012 | 72.1785034 | 70.122577 | 71.5930539 |
| 18:27:02 | 0:27:38 | 66.2188035 | 63.2675012 | 72.1785034 | 70.122577 | 73.5930539 |
| 18:27:03 | 0:27:39 | 66.2188035 | 63.2675012 | 72.1785034 | 70.122577 | 73.5930539 |
| 18:27:04 | 0:27:40 | 66.2188035 | 63.2675012 | 71.1785034 | 70.122577 | 73.5930539 |
| 18:27:05 | 0:27:41 | 67.2188035 | 63.2675012 | 71.1785034 | 69.122577 | 73.5930539 |
| 18:27:06 | 0:27:42 | 67.2188035 | 63.2675012 | 71.1785034 | 69.122577 | 74.5930539 |
| 18:27:07 | 0:27:43 | 67.2188035 | 63.2675012 | 71.1785034 | 69.122577 | 74.5930539 |

|          |         |            |            |            |           |            |
|----------|---------|------------|------------|------------|-----------|------------|
| 18:27:08 | 0:27:44 | 67.2188035 | 63.2675012 | 72.1785034 | 69.122577 | 74.5930539 |
| 18:27:09 | 0:27:45 | 68.2188035 | 62.2675012 | 72.1785034 | 70.122577 | 73.5930539 |
| 18:27:10 | 0:27:46 | 67.2188035 | 61.2675012 | 72.1785034 | 70.122577 | 72.5930539 |
| 18:27:11 | 0:27:47 | 67.2188035 | 61.2675012 | 72.1785034 | 70.122577 | 71.5930539 |
| 18:27:12 | 0:27:48 | 67.2188035 | 62.2675012 | 72.1785034 | 70.122577 | 70.5930539 |
| 18:27:13 | 0:27:49 | 66.2188035 | 64.2675012 | 72.1785034 | 71.122577 | 70.5930539 |
| 18:27:14 | 0:27:50 | 66.2188035 | 65.2675012 | 72.1785034 | 71.122577 | 70.5930539 |
| 18:27:15 | 0:27:51 | 66.2188035 | 65.2675012 | 73.1785034 | 70.122577 | 69.5930539 |
| 18:27:16 | 0:27:52 | 66.2188035 | 65.2675012 | 74.1785034 | 70.122577 | 69.5930539 |
| 18:27:17 | 0:27:53 | 67.2188035 | 64.2675012 | 74.1785034 | 70.122577 | 69.5930539 |
| 18:27:18 | 0:27:54 | 67.2188035 | 62.2675012 | 74.1785034 | 69.122577 | 69.5930539 |
| 18:27:19 | 0:27:55 | 67.2188035 | 62.2675012 | 74.1785034 | 70.122577 | 72.5930539 |
| 18:27:20 | 0:27:56 | 67.2188035 | 61.2675012 | 74.1785034 | 72.122577 | 74.5930539 |
| 18:27:21 | 0:27:57 | 67.2188035 | 60.2675012 | 74.1785034 | 77.122577 | 75.5930539 |
| 18:27:22 | 0:27:58 | 68.2188035 | 60.2675012 | 74.1785034 | 81.122577 | 74.5930539 |
| 18:27:23 | 0:27:59 | 68.2188035 | 60.2675012 | 74.1785034 | 81.122577 | 74.5930539 |
| 18:27:24 | 0:28:00 | 68.2188035 | 59.2675012 | 75.1785034 | 81.122577 | 74.5930539 |
| 18:27:25 | 0:28:01 | 68.2188035 | 58.2675012 | 75.1785034 | 84.122577 | 73.5930539 |
| 18:27:26 | 0:28:02 | 68.2188035 | 58.2675012 | 75.1785034 | 81.122577 | 72.5930539 |
| 18:27:27 | 0:28:03 | 67.2188035 | 58.2675012 | 75.1785034 | 80.122577 | 71.5930539 |
| 18:27:28 | 0:28:04 | 67.2188035 | 58.2675012 | 76.1785034 | 80.122577 | 71.5930539 |
| 18:27:29 | 0:28:05 | 67.2188035 | 58.2675012 | 77.1785034 | 79.122577 | 71.5930539 |
| 18:27:30 | 0:28:06 | 67.2188035 | 62.2675012 | 77.1785034 | 79.122577 | 71.5930539 |
| 18:27:31 | 0:28:07 | 67.2188035 | 62.2675012 | 78.1785034 | 79.122577 | 70.5930539 |
| 18:27:32 | 0:28:08 | 67.2188035 | 61.2675012 | 77.1785034 | 79.122577 | 69.5930539 |
| 18:27:33 | 0:28:09 | 68.2188035 | 60.2675012 | 76.1785034 | 79.122577 | 66.5930539 |
| 18:27:34 | 0:28:10 | 68.2188035 | 59.2675012 | 76.1785034 | 79.122577 | 64.5930539 |
| 18:27:35 | 0:28:11 | 67.2188035 | 59.2675012 | 76.1785034 | 79.122577 | 63.5930539 |
| 18:27:36 | 0:28:12 | 67.2188035 | 60.2675012 | 77.1785034 | 79.122577 | 63.5930539 |
| 18:27:37 | 0:28:13 | 67.2188035 | 61.2675012 | 77.1785034 | 80.122577 | 63.5930539 |
| 18:27:38 | 0:28:14 | 66.2188035 | 65.2675012 | 78.1785034 | 79.122577 | 64.5930539 |
| 18:27:39 | 0:28:15 | 66.2188035 | 67.2675012 | 78.1785034 | 79.122577 | 64.5930539 |
| 18:27:40 | 0:28:16 | 66.2188035 | 67.2675012 | 79.1785034 | 79.122577 | 64.5930539 |
| 18:27:41 | 0:28:17 | 67.2188035 | 65.2675012 | 71.1785034 | 79.122577 | 65.5930539 |
| 18:27:42 | 0:28:18 | 67.2188035 | 65.2675012 | 70.1785034 | 79.122577 | 66.5930539 |
| 18:27:43 | 0:28:19 | 67.2188035 | 64.2675012 | 69.1785034 | 80.122577 | 66.5930539 |
| 18:27:44 | 0:28:20 | 68.2188035 | 64.2675012 | 68.1785034 | 78.122577 | 71.5930539 |
| 18:27:45 | 0:28:21 | 68.2188035 | 66.2675012 | 68.1785034 | 72.122577 | 71.5930539 |
| 18:27:46 | 0:28:22 | 69.2188035 | 66.2675012 | 68.1785034 | 70.122577 | 71.5930539 |
| 18:27:47 | 0:28:23 | 69.2188035 | 69.2675012 | 66.1785034 | 70.122577 | 71.5930539 |
| 18:27:48 | 0:28:24 | 69.2188035 | 71.2675012 | 65.1785034 | 70.122577 | 71.5930539 |
| 18:27:49 | 0:28:25 | 69.2188035 | 72.2675012 | 65.1785034 | 72.122577 | 72.5930539 |
| 18:27:50 | 0:28:26 | 70.2188035 | 73.2675012 | 65.1785034 | 72.122577 | 72.5930539 |
| 18:27:51 | 0:28:27 | 71.2188035 | 77.2675012 | 65.1785034 | 72.122577 | 71.5930539 |
| 18:27:52 | 0:28:28 | 70.2188035 | 77.2675012 | 65.1785034 | 72.122577 | 69.5930539 |

|          |         |            |            |            |           |            |
|----------|---------|------------|------------|------------|-----------|------------|
| 18:27:53 | 0:28:29 | 70.2188035 | 79.2675012 | 66.1785034 | 72.122577 | 66.5930539 |
| 18:27:54 | 0:28:30 | 70.2188035 | 79.2675012 | 66.1785034 | 72.122577 | 66.5930539 |
| 18:27:55 | 0:28:31 | 70.2188035 | 80.2675012 | 66.1785034 | 71.122577 | 66.5930539 |
| 18:27:56 | 0:28:32 | 70.2188035 | 80.2675012 | 66.1785034 | 70.122577 | 65.5930539 |
| 18:27:57 | 0:28:33 | 69.2188035 | 80.2675012 | 66.1785034 | 70.122577 | 65.5930539 |
| 18:27:58 | 0:28:34 | 69.2188035 | 80.2675012 | 66.1785034 | 70.122577 | 65.5930539 |
| 18:27:59 | 0:28:35 | 69.2188035 | 73.2675012 | 67.1785034 | 70.122577 | 66.5930539 |
| 18:28:00 | 0:28:36 | 69.2188035 | 69.2675012 | 67.1785034 | 71.122577 | 66.5930539 |
| 18:28:01 | 0:28:37 | 70.2188035 | 67.2675012 | 67.1785034 | 71.122577 | 66.5930539 |
| 18:28:02 | 0:28:38 | 71.2188035 | 67.2675012 | 67.1785034 | 71.122577 | 65.5930539 |
| 18:28:03 | 0:28:39 | 71.2188035 | 67.2675012 | 66.1785034 | 71.122577 | 65.5930539 |
| 18:28:04 | 0:28:40 | 71.2188035 | 66.2675012 | 65.1785034 | 70.122577 | 65.5930539 |
| 18:28:05 | 0:28:41 | 71.2188035 | 65.2675012 | 68.1785034 | 70.122577 | 65.5930539 |
| 18:28:06 | 0:28:42 | 70.2188035 | 64.2675012 | 68.1785034 | 71.122577 | 66.5930539 |
| 18:28:07 | 0:28:43 | 70.2188035 | 65.2675012 | 68.1785034 | 71.122577 | 66.5930539 |
| 18:28:08 | 0:28:44 | 71.2188035 | 65.2675012 | 68.1785034 | 69.122577 | 66.5930539 |
| 18:28:09 | 0:28:45 | 72.2188035 | 64.2675012 | 68.1785034 | 69.122577 | 67.5930539 |
| 18:28:10 | 0:28:46 | 73.2188035 | 63.2675012 | 68.1785034 | 68.122577 | 69.5930539 |
| 18:28:11 | 0:28:47 | 74.2188035 | 63.2675012 | 68.1785034 | 67.122577 | 69.5930539 |
| 18:28:12 | 0:28:48 | 74.2188035 | 63.2675012 | 68.1785034 | 67.122577 | 68.5930539 |
| 18:28:13 | 0:28:49 | 75.2188035 | 63.2675012 | 67.1785034 | 67.122577 | 68.5930539 |
| 18:28:14 | 0:28:50 | 75.2188035 | 63.2675012 | 68.1785034 | 67.122577 | 68.5930539 |
| 18:28:15 | 0:28:51 | 74.2188035 | 67.2675012 | 68.1785034 | 68.122577 | 68.5930539 |
| 18:28:16 | 0:28:52 | 74.2188035 | 68.2675012 | 70.1785034 | 68.122577 | 68.5930539 |
| 18:28:17 | 0:28:53 | 74.2188035 | 69.2675012 | 70.1785034 | 68.122577 | 69.5930539 |
| 18:28:18 | 0:28:54 | 74.2188035 | 69.2675012 | 71.1785034 | 68.122577 | 69.5930539 |
| 18:28:19 | 0:28:55 | 74.2188035 | 69.2675012 | 70.1785034 | 68.122577 | 69.5930539 |
| 18:28:20 | 0:28:56 | 75.2188035 | 69.2675012 | 70.1785034 | 71.122577 | 69.5930539 |
| 18:28:21 | 0:28:57 | 75.2188035 | 69.2675012 | 70.1785034 | 72.122577 | 69.5930539 |
| 18:28:22 | 0:28:58 | 76.2188035 | 68.2675012 | 69.1785034 | 75.122577 | 72.5930539 |
| 18:28:23 | 0:28:59 | 76.2188035 | 68.2675012 | 69.1785034 | 78.122577 | 72.5930539 |
| 18:28:24 | 0:29:00 | 75.2188035 | 68.2675012 | 69.1785034 | 80.122577 | 72.5930539 |
| 18:28:25 | 0:29:01 | 75.2188035 | 69.2675012 | 69.1785034 | 81.122577 | 75.5930539 |
| 18:28:26 | 0:29:02 | 76.2188035 | 69.2675012 | 69.1785034 | 81.122577 | 75.5930539 |
| 18:28:27 | 0:29:03 | 76.2188035 | 70.2675012 | 69.1785034 | 81.122577 | 78.5930539 |
| 18:28:28 | 0:29:04 | 76.2188035 | 71.2675012 | 68.1785034 | 79.122577 | 78.5930539 |
| 18:28:29 | 0:29:05 | 76.2188035 | 71.2675012 | 68.1785034 | 77.122577 | 78.5930539 |
| 18:28:30 | 0:29:06 | 76.2188035 | 74.2675012 | 68.1785034 | 75.122577 | 77.5930539 |
| 18:28:31 | 0:29:07 | 75.2188035 | 74.2675012 | 68.1785034 | 74.122577 | 77.5930539 |
| 18:28:32 | 0:29:08 | 74.2188035 | 75.2675012 | 68.1785034 | 70.122577 | 77.5930539 |
| 18:28:33 | 0:29:09 | 73.2188035 | 76.2675012 | 66.1785034 | 69.122577 | 77.5930539 |
| 18:28:34 | 0:29:10 | 72.2188035 | 76.2675012 | 64.1785034 | 69.122577 | 80.5930539 |
| 18:28:35 | 0:29:11 | 72.2188035 | 73.2675012 | 64.1785034 | 68.122577 | 82.5930539 |
| 18:28:36 | 0:29:12 | 72.2188035 | 73.2675012 | 64.1785034 | 69.122577 | 84.5930539 |
| 18:28:37 | 0:29:13 | 72.2188035 | 69.2675012 | 64.1785034 | 69.122577 | 85.5930539 |

|          |         |            |            |            |           |            |
|----------|---------|------------|------------|------------|-----------|------------|
| 18:28:38 | 0:29:14 | 72.2188035 | 68.2675012 | 64.1785034 | 69.122577 | 86.5930539 |
| 18:28:39 | 0:29:15 | 73.2188035 | 67.2675012 | 64.1785034 | 69.122577 | 86.5930539 |
| 18:28:40 | 0:29:16 | 74.2188035 | 68.2675012 | 64.1785034 | 69.122577 | 85.5930539 |
| 18:28:41 | 0:29:17 | 75.2188035 | 68.2675012 | 64.1785034 | 69.122577 | 80.5930539 |
| 18:28:42 | 0:29:18 | 75.2188035 | 71.2675012 | 64.1785034 | 70.122577 | 76.5930539 |
| 18:28:43 | 0:29:19 | 75.2188035 | 72.2675012 | 65.1785034 | 71.122577 | 76.5930539 |
| 18:28:44 | 0:29:20 | 75.2188035 | 72.2675012 | 67.1785034 | 71.122577 | 76.5930539 |
| 18:28:45 | 0:29:21 | 75.2188035 | 73.2675012 | 67.1785034 | 71.122577 | 75.5930539 |
| 18:28:46 | 0:29:22 | 75.2188035 | 72.2675012 | 66.1785034 | 71.122577 | 75.5930539 |
| 18:28:47 | 0:29:23 | 75.2188035 | 72.2675012 | 65.1785034 | 72.122577 | 75.5930539 |
| 18:28:48 | 0:29:24 | 75.2188035 | 72.2675012 | 65.1785034 | 72.122577 | 75.5930539 |
| 18:28:49 | 0:29:25 | 75.2188035 | 71.2675012 | 65.1785034 | 72.122577 | 76.5930539 |
| 18:28:50 | 0:29:26 | 75.2188035 | 71.2675012 | 65.1785034 | 72.122577 | 76.5930539 |
| 18:28:51 | 0:29:27 | 75.2188035 | 71.2675012 | 65.1785034 | 72.122577 | 76.5930539 |
| 18:28:52 | 0:29:28 | 74.2188035 | 72.2675012 | 65.1785034 | 70.122577 | 76.5930539 |
| 18:28:53 | 0:29:29 | 73.2188035 | 72.2675012 | 65.1785034 | 69.122577 | 76.5930539 |
| 18:28:54 | 0:29:30 | 72.2188035 | 73.2675012 | 65.1785034 | 68.122577 | 76.5930539 |
| 18:28:55 | 0:29:31 | 72.2188035 | 73.2675012 | 65.1785034 | 67.122577 | 76.5930539 |
| 18:28:56 | 0:29:32 | 71.2188035 | 73.2675012 | 65.1785034 | 67.122577 | 77.5930539 |
| 18:28:57 | 0:29:33 | 71.2188035 | 73.2675012 | 65.1785034 | 67.122577 | 76.5930539 |
| 18:28:58 | 0:29:34 | 70.2188035 | 72.2675012 | 65.1785034 | 67.122577 | 76.5930539 |
| 18:28:59 | 0:29:35 | 70.2188035 | 71.2675012 | 65.1785034 | 67.122577 | 76.5930539 |
| 18:29:00 | 0:29:36 | 70.2188035 | 72.2675012 | 66.1785034 | 67.122577 | 77.5930539 |
| 18:29:01 | 0:29:37 | 71.2188035 | 74.2675012 | 66.1785034 | 67.122577 | 78.5930539 |
| 18:29:02 | 0:29:38 | 72.2188035 | 75.2675012 | 66.1785034 | 68.122577 | 79.5930539 |
| 18:29:03 | 0:29:39 | 72.2188035 | 75.2675012 | 67.1785034 | 68.122577 | 79.5930539 |
| 18:29:04 | 0:29:40 | 74.2188035 | 75.2675012 | 69.1785034 | 69.122577 | 79.5930539 |
| 18:29:05 | 0:29:41 | 75.2188035 | 76.2675012 | 76.1785034 | 69.122577 | 80.5930539 |
| 18:29:06 | 0:29:42 | 75.2188035 | 76.2675012 | 78.1785034 | 70.122577 | 80.5930539 |
| 18:29:07 | 0:29:43 | 75.2188035 | 75.2675012 | 78.1785034 | 70.122577 | 79.5930539 |
| 18:29:08 | 0:29:44 | 74.2188035 | 75.2675012 | 77.1785034 | 69.122577 | 79.5930539 |
| 18:29:09 | 0:29:45 | 75.2188035 | 73.2675012 | 77.1785034 | 69.122577 | 78.5930539 |
| 18:29:10 | 0:29:46 | 74.2188035 | 73.2675012 | 75.1785034 | 70.122577 | 77.5930539 |
| 18:29:11 | 0:29:47 | 74.2188035 | 73.2675012 | 73.1785034 | 71.122577 | 77.5930539 |
| 18:29:12 | 0:29:48 | 74.2188035 | 73.2675012 | 73.1785034 | 73.122577 | 77.5930539 |
| 18:29:13 | 0:29:49 | 74.2188035 | 73.2675012 | 71.1785034 | 73.122577 | 77.5930539 |
| 18:29:14 | 0:29:50 | 74.2188035 | 74.2675012 | 70.1785034 | 74.122577 | 75.5930539 |
| 18:29:15 | 0:29:51 | 74.2188035 | 74.2675012 | 70.1785034 | 74.122577 | 75.5930539 |
| 18:29:16 | 0:29:52 | 75.2188035 | 72.2675012 | 70.1785034 | 75.122577 | 75.5930539 |
| 18:29:17 | 0:29:53 | 75.2188035 | 72.2675012 | 70.1785034 | 76.122577 | 75.5930539 |
| 18:29:18 | 0:29:54 | 74.2188035 | 69.2675012 | 70.1785034 | 76.122577 | 75.5930539 |
| 18:29:19 | 0:29:55 | 74.2188035 | 68.2675012 | 68.1785034 | 76.122577 | 75.5930539 |
| 18:29:20 | 0:29:56 | 73.2188035 | 68.2675012 | 68.1785034 | 80.122577 | 73.5930539 |
| 18:29:21 | 0:29:57 | 73.2188035 | 69.2675012 | 68.1785034 | 78.122577 | 73.5930539 |
| 18:29:22 | 0:29:58 | 71.2188035 | 70.2675012 | 68.1785034 | 74.122577 | 73.5930539 |

|          |         |            |            |            |           |            |
|----------|---------|------------|------------|------------|-----------|------------|
| 18:29:23 | 0:29:59 | 72.2188035 | 70.2675012 | 68.1785034 | 74.122577 | 74.5930539 |
| 18:29:24 | 0:30:00 | 72.2188035 | 71.2675012 | 68.1785034 | 74.122577 | 74.5930539 |
| 18:29:25 | 0:30:01 | 73.2188035 | 71.2675012 | 70.1785034 | 73.122577 | 75.5930539 |
| 18:29:26 | 0:30:02 | 73.2188035 | 69.2675012 | 71.1785034 | 72.122577 | 75.5930539 |
| 18:29:27 | 0:30:03 | 74.2188035 | 68.2675012 | 71.1785034 | 72.122577 | 75.5930539 |
| 18:29:28 | 0:30:04 | 74.2188035 | 69.2675012 | 71.1785034 | 71.122577 | 76.5930539 |
| 18:29:29 | 0:30:05 | 72.2188035 | 69.2675012 | 70.1785034 | 71.122577 | 76.5930539 |
| 18:29:30 | 0:30:06 | 72.2188035 | 70.2675012 | 70.1785034 | 71.122577 | 77.5930539 |
| 18:29:31 | 0:30:07 | 73.2188035 | 72.2675012 | 69.1785034 | 70.122577 | 81.5930539 |
| 18:29:32 | 0:30:08 | 74.2188035 | 73.2675012 | 69.1785034 | 70.122577 | 83.5930539 |
| 18:29:33 | 0:30:09 | 76.2188035 | 73.2675012 | 69.1785034 | 70.122577 | 83.5930539 |
| 18:29:34 | 0:30:10 | 77.2188035 | 73.2675012 | 71.1785034 | 70.122577 | 83.5930539 |
| 18:29:35 | 0:30:11 | 78.2188035 | 73.2675012 | 72.1785034 | 70.122577 | 86.5930539 |
| 18:29:36 | 0:30:12 | 78.2188035 | 73.2675012 | 72.1785034 | 70.122577 | 86.5930539 |
| 18:29:37 | 0:30:13 | 78.2188035 | 72.2675012 | 70.1785034 | 71.122577 | 86.5930539 |
| 18:29:38 | 0:30:14 | 78.2188035 | 72.2675012 | 70.1785034 | 71.122577 | 86.5930539 |
| 18:29:39 | 0:30:15 | 77.2188035 | 72.2675012 | 70.1785034 | 70.122577 | 86.5930539 |
| 18:29:40 | 0:30:16 | 76.2188035 | 73.2675012 | 69.1785034 | 70.122577 | 86.5930539 |
| 18:29:41 | 0:30:17 | 76.2188035 | 73.2675012 | 69.1785034 | 68.122577 | 86.5930539 |
| 18:29:42 | 0:30:18 | 76.2188035 | 73.2675012 | 69.1785034 | 68.122577 | 86.5930539 |
| 18:29:43 | 0:30:19 | 76.2188035 | 74.2675012 | 71.1785034 | 68.122577 | 86.5930539 |
| 18:29:44 | 0:30:20 | 76.2188035 | 74.2675012 | 72.1785034 | 70.122577 | 86.5930539 |
| 18:29:45 | 0:30:21 | 76.2188035 | 74.2675012 | 72.1785034 | 70.122577 | 84.5930539 |
| 18:29:46 | 0:30:22 | 76.2188035 | 75.2675012 | 71.1785034 | 69.122577 | 84.5930539 |
| 18:29:47 | 0:30:23 | 76.2188035 | 74.2675012 | 70.1785034 | 69.122577 | 84.5930539 |
| 18:29:48 | 0:30:24 | 75.2188035 | 73.2675012 | 70.1785034 | 69.122577 | 84.5930539 |
| 18:29:49 | 0:30:25 | 74.2188035 | 72.2675012 | 68.1785034 | 69.122577 | 82.5930539 |
| 18:29:50 | 0:30:26 | 73.2188035 | 72.2675012 | 68.1785034 | 69.122577 | 81.5930539 |
| 18:29:51 | 0:30:27 | 73.2188035 | 72.2675012 | 68.1785034 | 69.122577 | 80.5930539 |
| 18:29:52 | 0:30:28 | 72.2188035 | 72.2675012 | 68.1785034 | 69.122577 | 78.5930539 |
| 18:29:53 | 0:30:29 | 71.2188035 | 72.2675012 | 69.1785034 | 69.122577 | 76.5930539 |
| 18:29:54 | 0:30:30 | 71.2188035 | 71.2675012 | 69.1785034 | 72.122577 | 76.5930539 |
| 18:29:55 | 0:30:31 | 72.2188035 | 71.2675012 | 69.1785034 | 73.122577 | 69.5930539 |
| 18:29:56 | 0:30:32 | 72.2188035 | 69.2675012 | 69.1785034 | 73.122577 | 66.5930539 |
| 18:29:57 | 0:30:33 | 71.2188035 | 69.2675012 | 69.1785034 | 72.122577 | 66.5930539 |
| 18:29:58 | 0:30:34 | 71.2188035 | 67.2675012 | 69.1785034 | 72.122577 | 66.5930539 |
| 18:29:59 | 0:30:35 | 71.2188035 | 67.2675012 | 70.1785034 | 71.122577 | 69.5930539 |
| 18:30:00 | 0:30:36 | 71.2188035 | 67.2675012 | 70.1785034 | 71.122577 | 69.5930539 |
| 18:30:01 | 0:30:37 | 71.2188035 | 68.2675012 | 70.1785034 | 71.122577 | 71.5930539 |
| 18:30:02 | 0:30:38 | 71.2188035 | 67.2675012 | 71.1785034 | 71.122577 | 71.5930539 |
| 18:30:03 | 0:30:39 | 71.2188035 | 67.2675012 | 71.1785034 | 71.122577 | 77.5930539 |
| 18:30:04 | 0:30:40 | 71.2188035 | 67.2675012 | 73.1785034 | 71.122577 | 81.5930539 |
| 18:30:05 | 0:30:41 | 70.2188035 | 67.2675012 | 74.1785034 | 71.122577 | 83.5930539 |
| 18:30:06 | 0:30:42 | 70.2188035 | 67.2675012 | 75.1785034 | 72.122577 | 85.5930539 |
| 18:30:07 | 0:30:43 | 70.2188035 | 68.2675012 | 75.1785034 | 72.122577 | 73.5192862 |

|          |         |            |            |            |           |            |
|----------|---------|------------|------------|------------|-----------|------------|
| 18:30:08 | 0:30:44 | 70.2188035 | 68.2675012 | 76.1785034 | 72.122577 | 73.6101953 |
| 18:30:09 | 0:30:45 | 70.2188035 | 69.2675012 | 76.1785034 | 71.122577 | 74.5192862 |
| 18:30:10 | 0:30:46 | 70.2188035 | 71.2675012 | 76.1785034 | 71.122577 | 74.7011044 |
| 18:30:11 | 0:30:47 | 70.2188035 | 72.2675012 | 76.1785034 | 72.122577 | 74.9738316 |
| 18:30:12 | 0:30:48 | 70.2188035 | 71.2675012 | 76.1785034 | 72.122577 | 75.0647407 |
| 18:30:13 | 0:30:49 | 69.2188035 | 71.2675012 | 75.1785034 | 72.122577 | 74.8829225 |
| 18:30:14 | 0:30:50 | 69.2188035 | 71.2675012 | 75.1785034 | 72.122577 | 74.8829225 |
| 18:30:15 | 0:30:51 | 70.2188035 | 71.2675012 | 75.1785034 | 72.122577 | 75.2465589 |
| 18:30:16 | 0:30:52 | 70.2188035 | 71.2675012 | 75.1785034 | 73.122577 | 75.5192862 |
| 18:30:17 | 0:30:53 | 70.2188035 | 73.2675012 | 75.1785034 | 73.122577 | 75.8829225 |
| 18:30:18 | 0:30:54 | 70.2188035 | 74.2675012 | 76.1785034 | 73.122577 | 77.0647407 |
| 18:30:19 | 0:30:55 | 70.2188035 | 74.2675012 | 76.1785034 | 70.122577 | 77.0647407 |
| 18:30:20 | 0:30:56 | 70.2188035 | 73.2675012 | 76.1785034 | 69.122577 | 76.7920134 |
| 18:30:21 | 0:30:57 | 70.2188035 | 70.2675012 | 76.1785034 | 69.122577 | 76.337468  |
| 18:30:22 | 0:30:58 | 71.2188035 | 68.2675012 | 75.1785034 | 69.122577 | 76.1556498 |
| 18:30:23 | 0:30:59 | 71.2188035 | 66.2675012 | 75.1785034 | 69.122577 | 75.6101953 |
| 18:30:24 | 0:31:00 | 71.2188035 | 66.2675012 | 75.1785034 | 69.122577 | 75.5192862 |
| 18:30:25 | 0:31:01 | 71.2188035 | 66.2675012 | 71.1785034 | 69.122577 | 75.0647407 |
| 18:30:26 | 0:31:02 | 71.2188035 | 66.2675012 | 70.1785034 | 69.122577 | 74.8829225 |
| 18:30:27 | 0:31:03 | 71.2188035 | 67.2675012 | 69.1785034 | 69.122577 | 75.1556498 |
| 18:30:28 | 0:31:04 | 71.2188035 | 66.2675012 | 69.1785034 | 70.122577 | 74.8829225 |
| 18:30:29 | 0:31:05 | 71.2188035 | 66.2675012 | 69.1785034 | 70.122577 | 74.6101953 |
| 18:30:30 | 0:31:06 | 72.2188035 | 66.2675012 | 68.1785034 | 70.122577 | 75.0647407 |
| 18:30:31 | 0:31:07 | 72.2188035 | 66.2675012 | 69.1785034 | 70.122577 | 74.4283771 |
| 18:30:32 | 0:31:08 | 71.2188035 | 66.2675012 | 69.1785034 | 70.122577 | 73.7920134 |
| 18:30:33 | 0:31:09 | 71.2188035 | 68.2675012 | 69.1785034 | 70.122577 | 74.1556498 |
| 18:30:34 | 0:31:10 | 71.2188035 | 68.2675012 | 69.1785034 | 70.122577 | 84.5930539 |
| 18:30:35 | 0:31:11 | 71.2188035 | 68.2675012 | 67.1785034 | 70.122577 | 84.5930539 |
| 18:30:36 | 0:31:12 | 71.2188035 | 68.2675012 | 67.1785034 | 70.122577 | 84.5930539 |
| 18:30:37 | 0:31:13 | 71.2188035 | 68.2675012 | 67.1785034 | 70.122577 | 84.5930539 |
| 18:30:38 | 0:31:14 | 71.2188035 | 69.2675012 | 67.1785034 | 70.122577 | 83.5930539 |
| 18:30:39 | 0:31:15 | 71.2188035 | 73.2675012 | 68.1785034 | 70.122577 | 82.5930539 |
| 18:30:40 | 0:31:16 | 70.2188035 | 73.2675012 | 68.1785034 | 71.122577 | 82.5930539 |
| 18:30:41 | 0:31:17 | 71.2188035 | 73.2675012 | 68.1785034 | 71.122577 | 75.5930539 |
| 18:30:42 | 0:31:18 | 72.2188035 | 73.2675012 | 69.1785034 | 71.122577 | 74.5930539 |
| 18:30:43 | 0:31:19 | 73.2188035 | 74.2675012 | 69.1785034 | 71.122577 | 74.5930539 |
| 18:30:44 | 0:31:20 | 74.2188035 | 74.2675012 | 68.1785034 | 71.122577 | 74.5930539 |
| 18:30:45 | 0:31:21 | 74.2188035 | 74.2675012 | 68.1785034 | 72.122577 | 74.5930539 |
| 18:30:46 | 0:31:22 | 74.2188035 | 77.2675012 | 68.1785034 | 72.122577 | 74.5930539 |
| 18:30:47 | 0:31:23 | 74.2188035 | 77.2675012 | 68.1785034 | 72.122577 | 73.5930539 |
| 18:30:48 | 0:31:24 | 72.2188035 | 75.2675012 | 68.1785034 | 72.122577 | 72.5930539 |
| 18:30:49 | 0:31:25 | 72.2188035 | 74.2675012 | 67.1785034 | 73.122577 | 72.5930539 |
| 18:30:50 | 0:31:26 | 72.2188035 | 74.2675012 | 67.1785034 | 73.122577 | 72.5930539 |
| 18:30:51 | 0:31:27 | 72.2188035 | 74.2675012 | 67.1785034 | 73.122577 | 74.5930539 |
| 18:30:52 | 0:31:28 | 72.2188035 | 74.2675012 | 67.1785034 | 73.122577 | 74.5930539 |

|          |         |            |            |            |           |            |
|----------|---------|------------|------------|------------|-----------|------------|
| 18:30:53 | 0:31:29 | 72.2188035 | 73.2675012 | 66.1785034 | 73.122577 | 75.5930539 |
| 18:30:54 | 0:31:30 | 73.2188035 | 73.2675012 | 66.1785034 | 78.122577 | 76.5930539 |
| 18:30:55 | 0:31:31 | 72.2188035 | 73.2675012 | 64.1785034 | 78.122577 | 77.5930539 |
| 18:30:56 | 0:31:32 | 72.2188035 | 73.2675012 | 64.1785034 | 80.122577 | 77.5930539 |
| 18:30:57 | 0:31:33 | 72.2188035 | 73.2675012 | 64.1785034 | 78.122577 | 77.5930539 |
| 18:30:58 | 0:31:34 | 72.2188035 | 73.2675012 | 63.1785034 | 75.122577 | 77.5930539 |
| 18:30:59 | 0:31:35 | 71.2188035 | 74.2675012 | 62.1785034 | 74.122577 | 75.5930539 |
| 18:31:00 | 0:31:36 | 71.2188035 | 74.2675012 | 62.1785034 | 74.122577 | 73.5930539 |
| 18:31:01 | 0:31:37 | 73.2188035 | 76.2675012 | 62.1785034 | 74.122577 | 73.5930539 |
| 18:31:02 | 0:31:38 | 74.2188035 | 75.2675012 | 59.1785034 | 73.122577 | 73.5930539 |
| 18:31:03 | 0:31:39 | 74.2188035 | 71.2675012 | 58.1785034 | 73.122577 | 73.5930539 |
| 18:31:04 | 0:31:40 | 71.2188035 | 71.2675012 | 60.1785034 | 73.122577 | 73.5930539 |
| 18:31:05 | 0:31:41 | 71.2188035 | 69.2675012 | 60.1785034 | 73.122577 | 75.5930539 |
| 18:31:06 | 0:31:42 | 71.2188035 | 69.2675012 | 60.1785034 | 72.122577 | 76.5930539 |
| 18:31:07 | 0:31:43 | 72.2188035 | 69.2675012 | 61.1785034 | 71.122577 | 79.5930539 |
| 18:31:08 | 0:31:44 | 73.2188035 | 70.2675012 | 62.1785034 | 70.122577 | 81.5930539 |
| 18:31:09 | 0:31:45 | 73.2188035 | 69.2675012 | 63.1785034 | 70.122577 | 81.5930539 |
| 18:31:10 | 0:31:46 | 74.2188035 | 69.2675012 | 63.1785034 | 70.122577 | 84.5930539 |
| 18:31:11 | 0:31:47 | 75.2188035 | 69.2675012 | 63.1785034 | 70.122577 | 86.5930539 |
| 18:31:12 | 0:31:48 | 75.2188035 | 69.2675012 | 68.1785034 | 70.122577 | 86.5930539 |
| 18:31:13 | 0:31:49 | 75.2188035 | 68.2675012 | 70.1785034 | 70.122577 | 87.5930539 |
| 18:31:14 | 0:31:50 | 75.2188035 | 68.2675012 | 72.1785034 | 70.122577 | 85.5930539 |
| 18:31:15 | 0:31:51 | 75.2188035 | 67.2675012 | 72.1785034 | 71.122577 | 85.5930539 |
| 18:31:16 | 0:31:52 | 75.2188035 | 67.2675012 | 72.1785034 | 70.122577 | 82.5930539 |
| 18:31:17 | 0:31:53 | 74.2188035 | 65.2675012 | 73.1785034 | 70.122577 | 80.5930539 |
| 18:31:18 | 0:31:54 | 71.2188035 | 65.2675012 | 73.1785034 | 70.122577 | 77.5930539 |
| 18:31:19 | 0:31:55 | 70.2188035 | 65.2675012 | 73.1785034 | 70.122577 | 75.5930539 |
| 18:31:20 | 0:31:56 | 69.2188035 | 65.2675012 | 74.1785034 | 70.122577 | 73.5930539 |
| 18:31:21 | 0:31:57 | 68.2188035 | 65.2675012 | 75.1785034 | 70.122577 | 73.5930539 |
| 18:31:22 | 0:31:58 | 68.2188035 | 65.2675012 | 75.1785034 | 69.122577 | 69.5930539 |
| 18:31:23 | 0:31:59 | 68.2188035 | 65.2675012 | 76.1785034 | 69.122577 | 69.5930539 |
| 18:31:24 | 0:32:00 | 68.2188035 | 65.2675012 | 76.1785034 | 69.122577 | 68.5930539 |
| 18:31:25 | 0:32:01 | 68.2188035 | 71.2675012 | 76.1785034 | 68.122577 | 68.5930539 |
| 18:31:26 | 0:32:02 | 68.2188035 | 71.2675012 | 76.1785034 | 68.122577 | 68.5930539 |
| 18:31:27 | 0:32:03 | 68.2188035 | 72.2675012 | 77.1785034 | 68.122577 | 68.5930539 |
| 18:31:28 | 0:32:04 | 68.2188035 | 70.2675012 | 81.1785034 | 69.122577 | 68.5930539 |
| 18:31:29 | 0:32:05 | 68.2188035 | 68.2675012 | 81.1785034 | 69.122577 | 67.5930539 |
| 18:31:30 | 0:32:06 | 68.2188035 | 68.2675012 | 81.1785034 | 69.122577 | 67.5930539 |
| 18:31:31 | 0:32:07 | 68.2188035 | 68.2675012 | 78.1785034 | 69.122577 | 67.5930539 |
| 18:31:32 | 0:32:08 | 68.2188035 | 69.2675012 | 77.1785034 | 68.122577 | 66.5930539 |
| 18:31:33 | 0:32:09 | 68.2188035 | 71.2675012 | 77.1785034 | 68.122577 | 69.5930539 |
| 18:31:34 | 0:32:10 | 67.2188035 | 71.2675012 | 77.1785034 | 68.122577 | 71.5930539 |
| 18:31:35 | 0:32:11 | 67.2188035 | 71.2675012 | 77.1785034 | 68.122577 | 71.5930539 |
| 18:31:36 | 0:32:12 | 67.2188035 | 71.2675012 | 76.1785034 | 68.122577 | 71.5930539 |
| 18:31:37 | 0:32:13 | 68.2188035 | 70.2675012 | 76.1785034 | 69.122577 | 70.5930539 |

|          |         |            |            |            |           |            |
|----------|---------|------------|------------|------------|-----------|------------|
| 18:31:38 | 0:32:14 | 67.2188035 | 68.2675012 | 77.1785034 | 69.122577 | 69.5930539 |
| 18:31:39 | 0:32:15 | 68.2188035 | 67.2675012 | 73.1785034 | 71.122577 | 68.5930539 |
| 18:31:40 | 0:32:16 | 68.2188035 | 66.2675012 | 71.1785034 | 71.122577 | 67.5930539 |
| 18:31:41 | 0:32:17 | 68.2188035 | 66.2675012 | 69.1785034 | 71.122577 | 67.5930539 |
| 18:31:42 | 0:32:18 | 69.2188035 | 66.2675012 | 68.1785034 | 70.122577 | 64.5930539 |
| 18:31:43 | 0:32:19 | 68.2188035 | 67.2675012 | 67.1785034 | 69.122577 | 64.5930539 |
| 18:31:44 | 0:32:20 | 69.2188035 | 69.2675012 | 67.1785034 | 69.122577 | 64.5930539 |
| 18:31:45 | 0:32:21 | 69.2188035 | 68.2675012 | 67.1785034 | 68.122577 | 64.5930539 |
| 18:31:46 | 0:32:22 | 68.2188035 | 68.2675012 | 67.1785034 | 68.122577 | 63.5930539 |
| 18:31:47 | 0:32:23 | 68.2188035 | 66.2675012 | 67.1785034 | 68.122577 | 63.5930539 |
| 18:31:48 | 0:32:24 | 68.2188035 | 65.2675012 | 64.1785034 | 69.122577 | 63.5930539 |
| 18:31:49 | 0:32:25 | 68.2188035 | 65.2675012 | 63.1785034 | 69.122577 | 63.5930539 |
| 18:31:50 | 0:32:26 | 68.2188035 | 65.2675012 | 62.1785034 | 69.122577 | 64.5930539 |
| 18:31:51 | 0:32:27 | 69.2188035 | 65.2675012 | 61.1785034 | 70.122577 | 64.5930539 |
| 18:31:52 | 0:32:28 | 72.2188035 | 65.2675012 | 61.1785034 | 69.122577 | 63.5930539 |
| 18:31:53 | 0:32:29 | 74.2188035 | 65.2675012 | 61.1785034 | 69.122577 | 63.5930539 |
| 18:31:54 | 0:32:30 | 74.2188035 | 66.2675012 | 61.1785034 | 69.122577 | 62.5930539 |
| 18:31:55 | 0:32:31 | 74.2188035 | 66.2675012 | 63.1785034 | 69.122577 | 62.5930539 |
| 18:31:56 | 0:32:32 | 74.2188035 | 64.2675012 | 64.1785034 | 68.122577 | 63.5930539 |
| 18:31:57 | 0:32:33 | 74.2188035 | 64.2675012 | 64.1785034 | 68.122577 | 64.5930539 |
| 18:31:58 | 0:32:34 | 74.2188035 | 63.2675012 | 65.1785034 | 67.122577 | 64.5930539 |
| 18:31:59 | 0:32:35 | 74.2188035 | 64.2675012 | 65.1785034 | 67.122577 | 64.5930539 |
| 18:32:00 | 0:32:36 | 75.2188035 | 64.2675012 | 65.1785034 | 67.122577 | 66.5930539 |
| 18:32:01 | 0:32:37 | 75.2188035 | 65.2675012 | 65.1785034 | 67.122577 | 67.5930539 |
| 18:32:02 | 0:32:38 | 75.2188035 | 65.2675012 | 65.1785034 | 67.122577 | 67.5930539 |
| 18:32:03 | 0:32:39 | 75.2188035 | 65.2675012 | 65.1785034 | 68.122577 | 68.5930539 |
| 18:32:04 | 0:32:40 | 76.2188035 | 64.2675012 | 65.1785034 | 68.122577 | 68.5930539 |
| 18:32:05 | 0:32:41 | 76.2188035 | 64.2675012 | 65.1785034 | 69.122577 | 68.5930539 |
| 18:32:06 | 0:32:42 | 75.2188035 | 64.2675012 | 65.1785034 | 69.122577 | 69.5930539 |
| 18:32:07 | 0:32:43 | 76.2188035 | 64.2675012 | 67.1785034 | 70.122577 | 70.5930539 |
| 18:32:08 | 0:32:44 | 76.2188035 | 64.2675012 | 67.1785034 | 70.122577 | 70.5930539 |
| 18:32:09 | 0:32:45 | 78.2188035 | 66.2675012 | 67.1785034 | 70.122577 | 70.5930539 |
| 18:32:10 | 0:32:46 | 80.2188035 | 67.2675012 | 67.1785034 | 71.122577 | 71.5930539 |
| 18:32:11 | 0:32:47 | 80.2188035 | 67.2675012 | 66.1785034 | 70.122577 | 72.5930539 |
| 18:32:12 | 0:32:48 | 80.2188035 | 68.2675012 | 66.1785034 | 70.122577 | 72.5930539 |
| 18:32:13 | 0:32:49 | 82.2188035 | 68.2675012 | 66.1785034 | 70.122577 | 72.5930539 |
| 18:32:14 | 0:32:50 | 82.2188035 | 68.2675012 | 66.1785034 | 71.122577 | 72.5930539 |
| 18:32:15 | 0:32:51 | 82.2188035 | 70.2675012 | 66.1785034 | 71.122577 | 73.5930539 |
| 18:32:16 | 0:32:52 | 84.2188035 | 70.2675012 | 65.1785034 | 72.122577 | 73.5930539 |
| 18:32:17 | 0:32:53 | 85.2188035 | 70.2675012 | 65.1785034 | 73.122577 | 73.5930539 |
| 18:32:18 | 0:32:54 | 87.2188035 | 71.2675012 | 65.1785034 | 73.122577 | 74.5930539 |
| 18:32:19 | 0:32:55 | 87.2188035 | 71.2675012 | 64.1785034 | 73.122577 | 74.5930539 |
| 18:32:20 | 0:32:56 | 88.2188035 | 73.2675012 | 64.1785034 | 73.122577 | 71.5930539 |
| 18:32:21 | 0:32:57 | 88.2188035 | 77.2675012 | 64.1785034 | 72.122577 | 71.5930539 |
| 18:32:22 | 0:32:58 | 88.2188035 | 78.2675012 | 65.1785034 | 72.122577 | 71.5930539 |



|          |         |            |            |            |           |            |
|----------|---------|------------|------------|------------|-----------|------------|
| 18:32:23 | 0:32:59 | 86.2188035 | 80.2675012 | 66.1785034 | 73.122577 | 71.5930539 |
| 18:32:24 | 0:33:00 | 86.2188035 | 80.2675012 | 66.1785034 | 73.122577 | 71.5930539 |
| 18:32:25 | 0:33:01 | 82.2188035 | 84.2675012 | 66.1785034 | 73.122577 | 67.5930539 |
| 18:32:26 | 0:33:02 | 77.2188035 | 85.2675012 | 66.1785034 | 74.122577 | 67.5930539 |
| 18:32:27 | 0:33:03 | 75.2188035 | 85.2675012 | 68.1785034 | 75.122577 | 66.5930539 |
| 18:32:28 | 0:33:04 | 75.2188035 | 85.2675012 | 69.1785034 | 75.122577 | 66.5930539 |
| 18:32:29 | 0:33:05 | 73.2188035 | 84.2675012 | 68.1785034 | 75.122577 | 67.5930539 |
| 18:32:30 | 0:33:06 | 73.2188035 | 83.2675012 | 68.1785034 | 75.122577 | 68.5930539 |
| 18:32:31 | 0:33:07 | 73.2188035 | 83.2675012 | 68.1785034 | 75.122577 | 70.5930539 |
| 18:32:32 | 0:33:08 | 73.2188035 | 82.2675012 | 68.1785034 | 76.122577 | 70.5930539 |
| 18:32:33 | 0:33:09 | 73.2188035 | 78.2675012 | 69.1785034 | 76.122577 | 70.5930539 |
| 18:32:34 | 0:33:10 | 73.2188035 | 75.2675012 | 68.1785034 | 76.122577 | 70.5930539 |
| 18:32:35 | 0:33:11 | 70.2188035 | 72.2675012 | 67.1785034 | 77.122577 | 71.5930539 |
| 18:32:36 | 0:33:12 | 69.2188035 | 70.2675012 | 65.1785034 | 78.122577 | 67.5930539 |
| 18:32:37 | 0:33:13 | 69.2188035 | 68.2675012 | 64.1785034 | 76.122577 | 64.5930539 |
| 18:32:38 | 0:33:14 | 68.2188035 | 68.2675012 | 63.1785034 | 76.122577 | 61.5930539 |
| 18:32:39 | 0:33:15 | 68.2188035 | 68.2675012 | 62.1785034 | 75.122577 | 60.5930539 |
| 18:32:40 | 0:33:16 | 68.2188035 | 69.2675012 | 61.1785034 | 74.122577 | 61.5930539 |
| 18:32:41 | 0:33:17 | 66.2188035 | 69.2675012 | 60.1785034 | 74.122577 | 62.5930539 |
| 18:32:42 | 0:33:18 | 65.2188035 | 69.2675012 | 60.1785034 | 73.122577 | 62.5930539 |
| 18:32:43 | 0:33:19 | 65.2188035 | 68.2675012 | 60.1785034 | 73.122577 | 62.5930539 |
| 18:32:44 | 0:33:20 | 66.2188035 | 68.2675012 | 60.1785034 | 73.122577 | 63.5930539 |
| 18:32:45 | 0:33:21 | 66.2188035 | 68.2675012 | 60.1785034 | 73.122577 | 63.5930539 |
| 18:32:46 | 0:33:22 | 66.2188035 | 67.2675012 | 60.1785034 | 73.122577 | 63.5930539 |
| 18:32:47 | 0:33:23 | 66.2188035 | 67.2675012 | 60.1785034 | 72.122577 | 64.5930539 |
| 18:32:48 | 0:33:24 | 64.2188035 | 66.2675012 | 60.1785034 | 71.122577 | 64.5930539 |
| 18:32:49 | 0:33:25 | 64.2188035 | 66.2675012 | 60.1785034 | 70.122577 | 64.5930539 |
| 18:32:50 | 0:33:26 | 64.2188035 | 67.2675012 | 59.1785034 | 70.122577 | 64.5930539 |
| 18:32:51 | 0:33:27 | 63.2188035 | 68.2675012 | 59.1785034 | 69.122577 | 63.5930539 |
| 18:32:52 | 0:33:28 | 63.2188035 | 69.2675012 | 59.1785034 | 69.122577 | 63.5930539 |
| 18:32:53 | 0:33:29 | 63.2188035 | 69.2675012 | 59.1785034 | 69.122577 | 63.5930539 |
| 18:32:54 | 0:33:30 | 63.2188035 | 68.2675012 | 60.1785034 | 70.122577 | 63.5930539 |
| 18:32:55 | 0:33:31 | 64.2188035 | 67.2675012 | 61.1785034 | 70.122577 | 64.5930539 |
| 18:32:56 | 0:33:32 | 64.2188035 | 67.2675012 | 63.1785034 | 71.122577 | 67.5930539 |
| 18:32:57 | 0:33:33 | 64.2188035 | 67.2675012 | 64.1785034 | 72.122577 | 69.5930539 |
| 18:32:58 | 0:33:34 | 64.2188035 | 66.2675012 | 63.1785034 | 72.122577 | 69.5930539 |
| 18:32:59 | 0:33:35 | 64.2188035 | 67.2675012 | 62.1785034 | 72.122577 | 69.5930539 |
| 18:33:00 | 0:33:36 | 64.2188035 | 66.2675012 | 61.1785034 | 72.122577 | 70.5930539 |
| 18:33:01 | 0:33:37 | 65.2188035 | 66.2675012 | 61.1785034 | 71.122577 | 71.5930539 |
| 18:33:02 | 0:33:38 | 65.2188035 | 66.2675012 | 61.1785034 | 71.122577 | 72.5930539 |
| 18:33:03 | 0:33:39 | 65.2188035 | 66.2675012 | 62.1785034 | 71.122577 | 73.5930539 |
| 18:33:04 | 0:33:40 | 66.2188035 | 66.2675012 | 62.1785034 | 71.122577 | 72.5930539 |
| 18:33:05 | 0:33:41 | 68.2188035 | 67.2675012 | 62.1785034 | 70.122577 | 72.5930539 |
| 18:33:06 | 0:33:42 | 69.2188035 | 69.2675012 | 62.1785034 | 73.122577 | 72.5930539 |
| 18:33:07 | 0:33:43 | 71.2188035 | 72.2675012 | 62.1785034 | 73.122577 | 73.5930539 |

|          |         |            |            |            |           |            |
|----------|---------|------------|------------|------------|-----------|------------|
| 18:33:08 | 0:33:44 | 72.2188035 | 73.2675012 | 61.1785034 | 73.122577 | 76.5930539 |
| 18:33:09 | 0:33:45 | 72.2188035 | 74.2675012 | 61.1785034 | 73.122577 | 78.5930539 |
| 18:33:10 | 0:33:46 | 74.2188035 | 74.2675012 | 60.1785034 | 74.122577 | 77.5930539 |
| 18:33:11 | 0:33:47 | 75.2188035 | 72.2675012 | 60.1785034 | 73.122577 | 75.5930539 |
| 18:33:12 | 0:33:48 | 76.2188035 | 72.2675012 | 61.1785034 | 73.122577 | 75.5930539 |
| 18:33:13 | 0:33:49 | 79.2188035 | 69.2675012 | 61.1785034 | 72.122577 | 75.5930539 |
| 18:33:14 | 0:33:50 | 82.2188035 | 69.2675012 | 61.1785034 | 71.122577 | 75.5930539 |
| 18:33:15 | 0:33:51 | 82.2188035 | 69.2675012 | 61.1785034 | 70.122577 | 75.5930539 |
| 18:33:16 | 0:33:52 | 84.2188035 | 70.2675012 | 62.1785034 | 71.122577 | 74.5930539 |
| 18:33:17 | 0:33:53 | 85.2188035 | 70.2675012 | 62.1785034 | 71.122577 | 74.5930539 |
| 18:33:18 | 0:33:54 | 85.2188035 | 70.2675012 | 62.1785034 | 71.122577 | 74.5930539 |
| 18:33:19 | 0:33:55 | 85.2188035 | 71.2675012 | 62.1785034 | 71.122577 | 74.5930539 |
| 18:33:20 | 0:33:56 | 69.9738316 | 71.2675012 | 62.1785034 | 70.122577 | 70.5930539 |
| 18:33:21 | 0:33:57 | 69.1556498 | 72.2675012 | 63.1785034 | 69.122577 | 67.5930539 |
| 18:33:22 | 0:33:58 | 69.0647407 | 74.2675012 | 63.1785034 | 69.122577 | 65.5930539 |
| 18:33:23 | 0:33:59 | 83.2188035 | 76.2675012 | 63.1785034 | 68.122577 | 65.5930539 |
| 18:33:24 | 0:34:00 | 81.2188035 | 77.2675012 | 63.1785034 | 68.122577 | 65.5930539 |
| 18:33:25 | 0:34:01 | 79.2188035 | 77.2675012 | 64.1785034 | 68.122577 | 65.5930539 |
| 18:33:26 | 0:34:02 | 75.2188035 | 77.2675012 | 64.1785034 | 69.122577 | 65.5930539 |
| 18:33:27 | 0:34:03 | 74.2188035 | 76.2675012 | 65.1785034 | 69.122577 | 64.5930539 |
| 18:33:28 | 0:34:04 | 74.2188035 | 76.2675012 | 66.1785034 | 70.122577 | 64.5930539 |
| 18:33:29 | 0:34:05 | 74.2188035 | 81.2675012 | 65.1785034 | 70.122577 | 62.5930539 |
| 18:33:30 | 0:34:06 | 74.2188035 | 83.2675012 | 65.1785034 | 70.122577 | 60.5930539 |
| 18:33:31 | 0:34:07 | 74.2188035 | 83.2675012 | 65.1785034 | 70.122577 | 60.5930539 |
| 18:33:32 | 0:34:08 | 74.2188035 | 83.2675012 | 66.1785034 | 70.122577 | 60.5930539 |
| 18:33:33 | 0:34:09 | 74.2188035 | 83.2675012 | 66.1785034 | 70.122577 | 60.5930539 |
| 18:33:34 | 0:34:10 | 74.2188035 | 83.2675012 | 66.1785034 | 70.122577 | 59.5930539 |
| 18:33:35 | 0:34:11 | 74.2188035 | 83.2675012 | 70.1785034 | 70.122577 | 56.5930539 |
| 18:33:36 | 0:34:12 | 74.2188035 | 83.2675012 | 72.1785034 | 71.122577 | 56.5930539 |
| 18:33:37 | 0:34:13 | 72.2188035 | 83.2675012 | 74.1785034 | 71.122577 | 55.5930539 |
| 18:33:38 | 0:34:14 | 71.2188035 | 83.2675012 | 74.1785034 | 71.122577 | 55.5930539 |
| 18:33:39 | 0:34:15 | 69.2188035 | 83.2675012 | 73.1785034 | 72.122577 | 55.5930539 |
| 18:33:40 | 0:34:16 | 68.2188035 | 69.337468  | 72.1785034 | 73.122577 | 55.5930539 |
| 18:33:41 | 0:34:17 | 66.2188035 | 79.2675012 | 70.1785034 | 73.122577 | 55.5930539 |
| 18:33:42 | 0:34:18 | 66.2188035 | 79.2675012 | 70.1785034 | 74.122577 | 55.5930539 |
| 18:33:43 | 0:34:19 | 65.2188035 | 73.2675012 | 68.1785034 | 74.122577 | 55.5930539 |
| 18:33:44 | 0:34:20 | 63.2188035 | 74.2675012 | 68.1785034 | 73.122577 | 55.5930539 |
| 18:33:45 | 0:34:21 | 64.2188035 | 75.2675012 | 67.1785034 | 73.122577 | 56.5930539 |
| 18:33:46 | 0:34:22 | 63.2188035 | 76.2675012 | 67.1785034 | 74.122577 | 57.5930539 |
| 18:33:47 | 0:34:23 | 63.2188035 | 77.2675012 | 67.1785034 | 74.122577 | 58.5930539 |
| 18:33:48 | 0:34:24 | 63.2188035 | 77.2675012 | 67.1785034 | 74.122577 | 60.5930539 |
| 18:33:49 | 0:34:25 | 62.2188035 | 77.2675012 | 67.1785034 | 74.122577 | 60.5930539 |
| 18:33:50 | 0:34:26 | 62.2188035 | 76.2675012 | 68.1785034 | 74.122577 | 60.5930539 |
| 18:33:51 | 0:34:27 | 62.2188035 | 75.2675012 | 68.1785034 | 73.122577 | 57.5930539 |
| 18:33:52 | 0:34:28 | 62.2188035 | 74.2675012 | 68.1785034 | 73.122577 | 56.5930539 |

|          |         |            |            |            |           |            |
|----------|---------|------------|------------|------------|-----------|------------|
| 18:33:53 | 0:34:29 | 62.2188035 | 74.2675012 | 67.1785034 | 73.122577 | 57.5930539 |
| 18:33:54 | 0:34:30 | 63.2188035 | 74.2675012 | 66.1785034 | 73.122577 | 57.5930539 |
| 18:33:55 | 0:34:31 | 63.2188035 | 79.2675012 | 66.1785034 | 73.122577 | 58.5930539 |
| 18:33:56 | 0:34:32 | 63.2188035 | 79.2675012 | 67.1785034 | 73.122577 | 58.5930539 |
| 18:33:57 | 0:34:33 | 63.2188035 | 78.2675012 | 67.1785034 | 73.122577 | 58.5930539 |
| 18:33:58 | 0:34:34 | 64.2188035 | 78.2675012 | 66.1785034 | 73.122577 | 60.5930539 |
| 18:33:59 | 0:34:35 | 64.2188035 | 78.2675012 | 65.1785034 | 73.122577 | 60.5930539 |
| 18:34:00 | 0:34:36 | 63.2188035 | 77.2675012 | 64.1785034 | 72.122577 | 60.5930539 |
| 18:34:01 | 0:34:37 | 63.2188035 | 76.2675012 | 63.1785034 | 71.122577 | 61.5930539 |
| 18:34:02 | 0:34:38 | 63.2188035 | 74.2675012 | 62.1785034 | 70.122577 | 61.5930539 |
| 18:34:03 | 0:34:39 | 63.2188035 | 72.2675012 | 61.1785034 | 70.122577 | 61.5930539 |
| 18:34:04 | 0:34:40 | 63.2188035 | 72.2675012 | 61.1785034 | 70.122577 | 61.5930539 |
| 18:34:05 | 0:34:41 | 63.2188035 | 74.2675012 | 61.1785034 | 69.122577 | 61.5930539 |
| 18:34:06 | 0:34:42 | 63.2188035 | 74.2675012 | 61.1785034 | 70.122577 | 61.5930539 |
| 18:34:07 | 0:34:43 | 63.2188035 | 73.2675012 | 61.1785034 | 70.122577 | 63.5930539 |
| 18:34:08 | 0:34:44 | 63.2188035 | 72.2675012 | 61.1785034 | 70.122577 | 63.5930539 |
| 18:34:09 | 0:34:45 | 64.2188035 | 71.2675012 | 61.1785034 | 70.122577 | 64.5930539 |
| 18:34:10 | 0:34:46 | 66.2188035 | 71.2675012 | 61.1785034 | 70.122577 | 64.5930539 |
| 18:34:11 | 0:34:47 | 67.2188035 | 72.2675012 | 61.1785034 | 70.122577 | 63.5930539 |
| 18:34:12 | 0:34:48 | 67.2188035 | 72.2675012 | 61.1785034 | 70.122577 | 63.5930539 |
| 18:34:13 | 0:34:49 | 68.2188035 | 74.2675012 | 61.1785034 | 70.122577 | 62.5930539 |
| 18:34:14 | 0:34:50 | 68.2188035 | 73.2675012 | 61.1785034 | 70.122577 | 62.5930539 |
| 18:34:15 | 0:34:51 | 68.2188035 | 73.2675012 | 61.1785034 | 70.122577 | 62.5930539 |
| 18:34:16 | 0:34:52 | 68.2188035 | 73.2675012 | 63.1785034 | 70.122577 | 62.5930539 |
| 18:34:17 | 0:34:53 | 69.2188035 | 69.2675012 | 64.1785034 | 70.122577 | 62.5930539 |
| 18:34:18 | 0:34:54 | 69.2188035 | 68.2675012 | 64.1785034 | 70.122577 | 62.5930539 |
| 18:34:19 | 0:34:55 | 69.2188035 | 67.2675012 | 64.1785034 | 72.122577 | 62.5930539 |
| 18:34:20 | 0:34:56 | 68.2188035 | 67.2675012 | 63.1785034 | 72.122577 | 63.5930539 |
| 18:34:21 | 0:34:57 | 68.2188035 | 67.2675012 | 63.1785034 | 72.122577 | 65.5930539 |
| 18:34:22 | 0:34:58 | 67.2188035 | 67.2675012 | 63.1785034 | 73.122577 | 66.5930539 |
| 18:34:23 | 0:34:59 | 66.2188035 | 68.2675012 | 63.1785034 | 73.122577 | 66.5930539 |
| 18:34:24 | 0:35:00 | 66.2188035 | 70.2675012 | 64.1785034 | 74.122577 | 66.5930539 |
| 18:34:25 | 0:35:01 | 66.2188035 | 71.2675012 | 66.1785034 | 74.122577 | 66.5930539 |
| 18:34:26 | 0:35:02 | 66.2188035 | 73.2675012 | 70.1785034 | 75.122577 | 77.5930539 |
| 18:34:27 | 0:35:03 | 66.2188035 | 73.2675012 | 72.1785034 | 77.122577 | 78.5930539 |
| 18:34:28 | 0:35:04 | 65.2188035 | 74.2675012 | 72.1785034 | 77.122577 | 78.5930539 |
| 18:34:29 | 0:35:05 | 65.2188035 | 74.2675012 | 72.1785034 | 82.122577 | 78.5930539 |
| 18:34:30 | 0:35:06 | 65.2188035 | 75.2675012 | 72.1785034 | 82.122577 | 78.5930539 |
| 18:34:31 | 0:35:07 | 65.2188035 | 75.2675012 | 72.1785034 | 80.122577 | 77.5930539 |
| 18:34:32 | 0:35:08 | 70.2188035 | 75.2675012 | 73.1785034 | 78.122577 | 77.5930539 |
| 18:34:33 | 0:35:09 | 74.2188035 | 75.2675012 | 73.1785034 | 78.122577 | 77.5930539 |
| 18:34:34 | 0:35:10 | 76.2188035 | 72.2675012 | 73.1785034 | 78.122577 | 77.5930539 |
| 18:34:35 | 0:35:11 | 77.2188035 | 72.2675012 | 73.1785034 | 78.122577 | 78.5930539 |
| 18:34:36 | 0:35:12 | 76.2188035 | 72.2675012 | 72.1785034 | 80.122577 | 79.5930539 |
| 18:34:37 | 0:35:13 | 76.2188035 | 74.2675012 | 71.1785034 | 83.122577 | 79.5930539 |

|          |         |            |            |            |           |            |
|----------|---------|------------|------------|------------|-----------|------------|
| 18:34:38 | 0:35:14 | 72.2188035 | 74.2675012 | 71.1785034 | 83.122577 | 79.5930539 |
| 18:34:39 | 0:35:15 | 68.2188035 | 75.2675012 | 70.1785034 | 84.122577 | 78.5930539 |
| 18:34:40 | 0:35:16 | 65.2188035 | 74.2675012 | 70.1785034 | 81.122577 | 77.5930539 |
| 18:34:41 | 0:35:17 | 64.2188035 | 74.2675012 | 70.1785034 | 78.122577 | 76.5930539 |
| 18:34:42 | 0:35:18 | 64.2188035 | 73.2675012 | 70.1785034 | 78.122577 | 75.5930539 |
| 18:34:43 | 0:35:19 | 64.2188035 | 72.2675012 | 71.1785034 | 76.122577 | 75.5930539 |
| 18:34:44 | 0:35:20 | 63.2188035 | 71.2675012 | 71.1785034 | 76.122577 | 75.5930539 |
| 18:34:45 | 0:35:21 | 63.2188035 | 71.2675012 | 72.1785034 | 76.122577 | 75.5930539 |
| 18:34:46 | 0:35:22 | 63.2188035 | 71.2675012 | 72.1785034 | 75.122577 | 75.5930539 |
| 18:34:47 | 0:35:23 | 62.2188035 | 71.2675012 | 72.1785034 | 75.122577 | 75.5930539 |
| 18:34:48 | 0:35:24 | 62.2188035 | 71.2675012 | 72.1785034 | 74.122577 | 75.5930539 |
| 18:34:49 | 0:35:25 | 62.2188035 | 70.2675012 | 72.1785034 | 72.122577 | 75.5930539 |
| 18:34:50 | 0:35:26 | 63.2188035 | 70.2675012 | 71.1785034 | 70.122577 | 75.5930539 |
| 18:34:51 | 0:35:27 | 63.2188035 | 71.2675012 | 71.1785034 | 70.122577 | 75.5930539 |
| 18:34:52 | 0:35:28 | 63.2188035 | 71.2675012 | 70.1785034 | 69.122577 | 76.5930539 |
| 18:34:53 | 0:35:29 | 63.2188035 | 70.2675012 | 70.1785034 | 69.122577 | 76.5930539 |
| 18:34:54 | 0:35:30 | 64.2188035 | 68.2675012 | 69.1785034 | 69.122577 | 76.5930539 |
| 18:34:55 | 0:35:31 | 64.2188035 | 68.2675012 | 68.1785034 | 69.122577 | 76.5930539 |
| 18:34:56 | 0:35:32 | 64.2188035 | 66.2675012 | 68.1785034 | 69.122577 | 75.5930539 |
| 18:34:57 | 0:35:33 | 65.2188035 | 66.2675012 | 67.1785034 | 69.122577 | 75.5930539 |
| 18:34:58 | 0:35:34 | 67.2188035 | 66.2675012 | 67.1785034 | 69.122577 | 68.5930539 |
| 18:34:59 | 0:35:35 | 69.2188035 | 65.2675012 | 67.1785034 | 69.122577 | 68.5930539 |
| 18:35:00 | 0:35:36 | 70.2188035 | 65.2675012 | 67.1785034 | 70.122577 | 68.5930539 |
| 18:35:01 | 0:35:37 | 70.2188035 | 65.2675012 | 67.1785034 | 70.122577 | 64.5930539 |
| 18:35:02 | 0:35:38 | 71.2188035 | 67.2675012 | 66.1785034 | 70.122577 | 63.5930539 |
| 18:35:03 | 0:35:39 | 72.2188035 | 67.2675012 | 66.1785034 | 70.122577 | 63.5930539 |
| 18:35:04 | 0:35:40 | 72.2188035 | 68.2675012 | 65.1785034 | 71.122577 | 63.5930539 |
| 18:35:05 | 0:35:41 | 73.2188035 | 70.2675012 | 64.1785034 | 71.122577 | 64.5930539 |
| 18:35:06 | 0:35:42 | 73.2188035 | 70.2675012 | 64.1785034 | 71.122577 | 64.5930539 |
| 18:35:07 | 0:35:43 | 73.2188035 | 70.2675012 | 65.1785034 | 71.122577 | 65.5930539 |
| 18:35:08 | 0:35:44 | 69.2188035 | 73.2675012 | 66.1785034 | 71.122577 | 65.5930539 |
| 18:35:09 | 0:35:45 | 69.2188035 | 73.2675012 | 69.1785034 | 71.122577 | 65.5930539 |
| 18:35:10 | 0:35:46 | 69.2188035 | 74.2675012 | 70.1785034 | 71.122577 | 63.5930539 |
| 18:35:11 | 0:35:47 | 69.2188035 | 74.2675012 | 72.1785034 | 71.122577 | 64.5930539 |
| 18:35:12 | 0:35:48 | 68.2188035 | 75.2675012 | 72.1785034 | 70.122577 | 64.5930539 |
| 18:35:13 | 0:35:49 | 68.2188035 | 75.2675012 | 72.1785034 | 69.122577 | 64.5930539 |
| 18:35:14 | 0:35:50 | 67.2188035 | 75.2675012 | 70.1785034 | 69.122577 | 65.5930539 |
| 18:35:15 | 0:35:51 | 66.2188035 | 75.2675012 | 68.1785034 | 69.122577 | 65.5930539 |
| 18:35:16 | 0:35:52 | 65.2188035 | 74.2675012 | 68.1785034 | 70.122577 | 66.5930539 |
| 18:35:17 | 0:35:53 | 66.2188035 | 73.2675012 | 66.1785034 | 70.122577 | 66.5930539 |
| 18:35:18 | 0:35:54 | 66.2188035 | 73.2675012 | 67.1785034 | 70.122577 | 66.5930539 |
| 18:35:19 | 0:35:55 | 67.2188035 | 72.2675012 | 67.1785034 | 71.122577 | 65.5930539 |
| 18:35:20 | 0:35:56 | 68.2188035 | 72.2675012 | 67.1785034 | 71.122577 | 64.5930539 |
| 18:35:21 | 0:35:57 | 68.2188035 | 72.2675012 | 68.1785034 | 71.122577 | 62.5930539 |
| 18:35:22 | 0:35:58 | 68.2188035 | 73.2675012 | 69.1785034 | 73.122577 | 62.5930539 |

|          |         |            |            |            |            |            |
|----------|---------|------------|------------|------------|------------|------------|
| 18:35:23 | 0:35:59 | 68.2188035 | 73.2675012 | 70.1785034 | 73.122577  | 62.5930539 |
| 18:35:24 | 0:36:00 | 68.2188035 | 76.2675012 | 71.1785034 | 73.122577  | 62.5930539 |
| 18:35:25 | 0:36:01 | 68.2188035 | 73.2675012 | 70.1785034 | 74.122577  | 59.5930539 |
| 18:35:26 | 0:36:02 | 69.2188035 | 71.2675012 | 69.1785034 | 74.122577  | 59.5930539 |
| 18:35:27 | 0:36:03 | 71.2188035 | 71.2675012 | 67.1785034 | 74.122577  | 59.5930539 |
| 18:35:28 | 0:36:04 | 70.2188035 | 71.2675012 | 66.1785034 | 75.122577  | 61.5930539 |
| 18:35:29 | 0:36:05 | 69.2188035 | 71.2675012 | 65.1785034 | 76.122577  | 61.5930539 |
| 18:35:30 | 0:36:06 | 69.2188035 | 72.2675012 | 65.1785034 | 77.122577  | 60.5930539 |
| 18:35:31 | 0:36:07 | 69.2188035 | 72.2675012 | 65.1785034 | 79.122577  | 60.5930539 |
| 18:35:32 | 0:36:08 | 69.2188035 | 74.2675012 | 66.1785034 | 82.122577  | 59.5930539 |
| 18:35:33 | 0:36:09 | 69.2188035 | 74.2675012 | 66.1785034 | 82.122577  | 59.5930539 |
| 18:35:34 | 0:36:10 | 68.2188035 | 72.2675012 | 66.1785034 | 84.122577  | 57.5930539 |
| 18:35:35 | 0:36:11 | 66.2188035 | 71.2675012 | 67.1785034 | 69.1556498 | 57.5930539 |
| 18:35:36 | 0:36:12 | 64.2188035 | 69.2675012 | 67.1785034 | 83.122577  | 56.5930539 |
| 18:35:37 | 0:36:13 | 63.2188035 | 69.2675012 | 69.1785034 | 83.122577  | 58.5930539 |
| 18:35:38 | 0:36:14 | 63.2188035 | 68.2675012 | 69.1785034 | 83.122577  | 59.5930539 |
| 18:35:39 | 0:36:15 | 63.2188035 | 68.2675012 | 69.1785034 | 83.122577  | 61.5930539 |
| 18:35:40 | 0:36:16 | 63.2188035 | 68.2675012 | 68.1785034 | 83.122577  | 61.5930539 |
| 18:35:41 | 0:36:17 | 63.2188035 | 68.2675012 | 67.1785034 | 82.122577  | 65.5930539 |
| 18:35:42 | 0:36:18 | 63.2188035 | 68.2675012 | 67.1785034 | 79.122577  | 66.5930539 |
| 18:35:43 | 0:36:19 | 63.2188035 | 68.2675012 | 67.1785034 | 77.122577  | 66.5930539 |
| 18:35:44 | 0:36:20 | 63.2188035 | 68.2675012 | 68.1785034 | 77.122577  | 66.5930539 |
| 18:35:45 | 0:36:21 | 63.2188035 | 67.2675012 | 68.1785034 | 76.122577  | 66.5930539 |
| 18:35:46 | 0:36:22 | 63.2188035 | 73.2675012 | 68.1785034 | 74.122577  | 66.5930539 |
| 18:35:47 | 0:36:23 | 63.2188035 | 73.2675012 | 69.1785034 | 74.122577  | 67.5930539 |
| 18:35:48 | 0:36:24 | 63.2188035 | 75.2675012 | 69.1785034 | 74.122577  | 68.5930539 |
| 18:35:49 | 0:36:25 | 64.2188035 | 75.2675012 | 69.1785034 | 74.122577  | 68.5930539 |
| 18:35:50 | 0:36:26 | 64.2188035 | 75.2675012 | 69.1785034 | 74.122577  | 68.5930539 |
| 18:35:51 | 0:36:27 | 64.2188035 | 73.2675012 | 69.1785034 | 74.122577  | 72.5930539 |
| 18:35:52 | 0:36:28 | 64.2188035 | 67.2675012 | 68.1785034 | 74.122577  | 73.5930539 |
| 18:35:53 | 0:36:29 | 64.2188035 | 64.2675012 | 68.1785034 | 74.122577  | 71.5930539 |
| 18:35:54 | 0:36:30 | 64.2188035 | 63.2675012 | 69.1785034 | 74.122577  | 69.5930539 |
| 18:35:55 | 0:36:31 | 65.2188035 | 63.2675012 | 70.1785034 | 74.122577  | 69.5930539 |
| 18:35:56 | 0:36:32 | 65.2188035 | 64.2675012 | 70.1785034 | 74.122577  | 64.5930539 |
| 18:35:57 | 0:36:33 | 65.2188035 | 66.2675012 | 71.1785034 | 73.122577  | 65.5930539 |
| 18:35:58 | 0:36:34 | 65.2188035 | 66.2675012 | 70.1785034 | 69.122577  | 65.5930539 |
| 18:35:59 | 0:36:35 | 65.2188035 | 66.2675012 | 70.1785034 | 69.122577  | 65.5930539 |
| 18:36:00 | 0:36:36 | 65.2188035 | 66.2675012 | 70.1785034 | 69.122577  | 65.5930539 |
| 18:36:01 | 0:36:37 | 67.2188035 | 66.2675012 | 68.1785034 | 69.122577  | 68.5930539 |
| 18:36:02 | 0:36:38 | 67.2188035 | 67.2675012 | 68.1785034 | 68.122577  | 70.5930539 |
| 18:36:03 | 0:36:39 | 67.2188035 | 67.2675012 | 69.1785034 | 68.122577  | 70.5930539 |
| 18:36:04 | 0:36:40 | 67.2188035 | 68.2675012 | 70.1785034 | 72.122577  | 70.5930539 |
| 18:36:05 | 0:36:41 | 67.2188035 | 67.2675012 | 70.1785034 | 74.122577  | 71.5930539 |
| 18:36:06 | 0:36:42 | 67.2188035 | 67.2675012 | 72.1785034 | 74.122577  | 71.5930539 |
| 18:36:07 | 0:36:43 | 67.2188035 | 67.2675012 | 73.1785034 | 76.122577  | 71.5930539 |

|          |         |            |            |            |            |            |
|----------|---------|------------|------------|------------|------------|------------|
| 18:36:08 | 0:36:44 | 66.2188035 | 72.2675012 | 73.1785034 | 76.122577  | 72.5930539 |
| 18:36:09 | 0:36:45 | 66.2188035 | 75.2675012 | 73.1785034 | 76.122577  | 72.5930539 |
| 18:36:10 | 0:36:46 | 66.2188035 | 75.2675012 | 72.1785034 | 76.122577  | 68.5930539 |
| 18:36:11 | 0:36:47 | 67.2188035 | 75.2675012 | 72.1785034 | 76.122577  | 66.5930539 |
| 18:36:12 | 0:36:48 | 67.2188035 | 75.2675012 | 69.1785034 | 75.122577  | 65.5930539 |
| 18:36:13 | 0:36:49 | 67.2188035 | 75.2675012 | 69.1785034 | 75.122577  | 66.5930539 |
| 18:36:14 | 0:36:50 | 67.2188035 | 78.2675012 | 68.1785034 | 75.122577  | 66.5930539 |
| 18:36:15 | 0:36:51 | 67.2188035 | 68.8829225 | 68.1785034 | 79.122577  | 66.5930539 |
| 18:36:16 | 0:36:52 | 67.2188035 | 69.0647407 | 67.1785034 | 79.122577  | 66.5930539 |
| 18:36:17 | 0:36:53 | 66.2188035 | 69.5192862 | 69.1785034 | 81.122577  | 67.5930539 |
| 18:36:18 | 0:36:54 | 65.2188035 | 69.5192862 | 69.1785034 | 81.122577  | 67.5930539 |
| 18:36:19 | 0:36:55 | 64.2188035 | 69.6101953 | 69.1785034 | 69.6101953 | 67.5930539 |
| 18:36:20 | 0:36:56 | 64.2188035 | 69.7920134 | 66.1785034 | 69.7920134 | 67.5930539 |
| 18:36:21 | 0:36:57 | 64.2188035 | 70.337468  | 65.1785034 | 70.337468  | 68.5930539 |
| 18:36:22 | 0:36:58 | 63.2188035 | 70.337468  | 65.1785034 | 70.337468  | 68.5930539 |
| 18:36:23 | 0:36:59 | 63.2188035 | 70.337468  | 65.1785034 | 70.337468  | 68.5930539 |
| 18:36:24 | 0:37:00 | 63.2188035 | 70.8829225 | 65.1785034 | 70.8829225 | 68.5930539 |
| 18:36:25 | 0:37:01 | 63.2188035 | 71.0647407 | 65.1785034 | 71.0647407 | 68.5930539 |
| 18:36:26 | 0:37:02 | 63.2188035 | 71.2465589 | 66.1785034 | 71.2465589 | 67.5930539 |
| 18:36:27 | 0:37:03 | 63.2188035 | 71.2465589 | 67.1785034 | 71.2465589 | 67.5930539 |
| 18:36:28 | 0:37:04 | 64.2188035 | 83.2675012 | 67.1785034 | 70.6101953 | 67.5930539 |
| 18:36:29 | 0:37:05 | 64.2188035 | 75.2675012 | 68.1785034 | 69.7920134 | 67.5930539 |
| 18:36:30 | 0:37:06 | 64.2188035 | 75.2675012 | 68.1785034 | 76.122577  | 67.5930539 |
| 18:36:31 | 0:37:07 | 64.2188035 | 72.2675012 | 68.1785034 | 73.122577  | 67.5930539 |
| 18:36:32 | 0:37:08 | 64.2188035 | 70.2675012 | 67.1785034 | 72.122577  | 67.5930539 |
| 18:36:33 | 0:37:09 | 64.2188035 | 70.2675012 | 67.1785034 | 71.122577  | 67.5930539 |
| 18:36:34 | 0:37:10 | 65.2188035 | 71.2675012 | 66.1785034 | 71.122577  | 67.5930539 |
| 18:36:35 | 0:37:11 | 65.2188035 | 72.2675012 | 67.1785034 | 70.122577  | 66.5930539 |
| 18:36:36 | 0:37:12 | 65.2188035 | 72.2675012 | 67.1785034 | 70.122577  | 66.5930539 |
| 18:36:37 | 0:37:13 | 65.2188035 | 72.2675012 | 68.1785034 | 70.122577  | 66.5930539 |
| 18:36:38 | 0:37:14 | 65.2188035 | 72.2675012 | 69.1785034 | 70.122577  | 67.5930539 |
| 18:36:39 | 0:37:15 | 65.2188035 | 71.2675012 | 69.1785034 | 70.122577  | 67.5930539 |
| 18:36:40 | 0:37:16 | 65.2188035 | 68.2675012 | 69.1785034 | 70.122577  | 67.5930539 |
| 18:36:41 | 0:37:17 | 64.2188035 | 65.2675012 | 69.1785034 | 71.122577  | 64.5930539 |
| 18:36:42 | 0:37:18 | 64.2188035 | 65.2675012 | 68.1785034 | 69.122577  | 64.5930539 |
| 18:36:43 | 0:37:19 | 64.2188035 | 66.2675012 | 68.1785034 | 68.122577  | 64.5930539 |
| 18:36:44 | 0:37:20 | 64.2188035 | 68.2675012 | 68.1785034 | 68.122577  | 63.5930539 |
| 18:36:45 | 0:37:21 | 65.2188035 | 69.2675012 | 69.1785034 | 68.122577  | 62.5930539 |
| 18:36:46 | 0:37:22 | 65.2188035 | 68.2675012 | 70.1785034 | 68.122577  | 62.5930539 |
| 18:36:47 | 0:37:23 | 65.2188035 | 67.2675012 | 72.1785034 | 67.122577  | 62.5930539 |
| 18:36:48 | 0:37:24 | 65.2188035 | 66.2675012 | 73.1785034 | 67.122577  | 63.5930539 |
| 18:36:49 | 0:37:25 | 65.2188035 | 65.2675012 | 73.1785034 | 67.122577  | 63.5930539 |
| 18:36:50 | 0:37:26 | 65.2188035 | 65.2675012 | 73.1785034 | 67.122577  | 64.5930539 |
| 18:36:51 | 0:37:27 | 65.2188035 | 66.2675012 | 71.1785034 | 67.122577  | 65.5930539 |
| 18:36:52 | 0:37:28 | 65.2188035 | 67.2675012 | 70.1785034 | 67.122577  | 65.5930539 |

|          |         |            |            |            |           |            |
|----------|---------|------------|------------|------------|-----------|------------|
| 18:36:53 | 0:37:29 | 64.2188035 | 70.2675012 | 69.1785034 | 67.122577 | 68.5930539 |
| 18:36:54 | 0:37:30 | 64.2188035 | 70.2675012 | 69.1785034 | 67.122577 | 68.5930539 |
| 18:36:55 | 0:37:31 | 64.2188035 | 73.2675012 | 68.1785034 | 68.122577 | 68.5930539 |
| 18:36:56 | 0:37:32 | 64.2188035 | 73.2675012 | 68.1785034 | 68.122577 | 69.5930539 |
| 18:36:57 | 0:37:33 | 64.2188035 | 74.2675012 | 68.1785034 | 68.122577 | 69.5930539 |
| 18:36:58 | 0:37:34 | 64.2188035 | 75.2675012 | 69.1785034 | 68.122577 | 68.5930539 |
| 18:36:59 | 0:37:35 | 64.2188035 | 76.2675012 | 71.1785034 | 71.122577 | 68.5930539 |
| 18:37:00 | 0:37:36 | 64.2188035 | 77.2675012 | 72.1785034 | 72.122577 | 68.5930539 |
| 18:37:01 | 0:37:37 | 63.2188035 | 77.2675012 | 72.1785034 | 71.122577 | 68.5930539 |
| 18:37:02 | 0:37:38 | 63.2188035 | 77.2675012 | 73.1785034 | 71.122577 | 69.5930539 |
| 18:37:03 | 0:37:39 | 63.2188035 | 76.2675012 | 73.1785034 | 70.122577 | 69.5930539 |
| 18:37:04 | 0:37:40 | 63.2188035 | 75.2675012 | 74.1785034 | 69.122577 | 69.5930539 |
| 18:37:05 | 0:37:41 | 63.2188035 | 75.2675012 | 74.1785034 | 68.122577 | 70.5930539 |
| 18:37:06 | 0:37:42 | 63.2188035 | 75.2675012 | 75.1785034 | 68.122577 | 71.5930539 |
| 18:37:07 | 0:37:43 | 63.2188035 | 70.2675012 | 75.1785034 | 68.122577 | 70.5930539 |
| 18:37:08 | 0:37:44 | 63.2188035 | 70.2675012 | 75.1785034 | 68.122577 | 68.5930539 |
| 18:37:09 | 0:37:45 | 63.2188035 | 70.2675012 | 75.1785034 | 68.122577 | 68.5930539 |
| 18:37:10 | 0:37:46 | 65.2188035 | 68.2675012 | 77.1785034 | 68.122577 | 66.5930539 |
| 18:37:11 | 0:37:47 | 65.2188035 | 68.2675012 | 79.1785034 | 68.122577 | 66.5930539 |
| 18:37:12 | 0:37:48 | 64.2188035 | 68.2675012 | 80.1785034 | 68.122577 | 66.5930539 |
| 18:37:13 | 0:37:49 | 64.2188035 | 68.2675012 | 80.1785034 | 68.122577 | 66.5930539 |
| 18:37:14 | 0:37:50 | 65.2188035 | 67.2675012 | 80.1785034 | 68.122577 | 65.5930539 |
| 18:37:15 | 0:37:51 | 66.2188035 | 65.2675012 | 80.1785034 | 68.122577 | 65.5930539 |
| 18:37:16 | 0:37:52 | 65.2188035 | 65.2675012 | 80.1785034 | 68.122577 | 65.5930539 |
| 18:37:17 | 0:37:53 | 66.2188035 | 65.2675012 | 80.1785034 | 68.122577 | 65.5930539 |
| 18:37:18 | 0:37:54 | 66.2188035 | 65.2675012 | 79.1785034 | 68.122577 | 65.5930539 |
| 18:37:19 | 0:37:55 | 65.2188035 | 64.2675012 | 78.1785034 | 68.122577 | 64.5930539 |
| 18:37:20 | 0:37:56 | 66.2188035 | 64.2675012 | 78.1785034 | 67.122577 | 64.5930539 |
| 18:37:21 | 0:37:57 | 67.2188035 | 63.2675012 | 77.1785034 | 65.122577 | 65.5930539 |
| 18:37:22 | 0:37:58 | 67.2188035 | 63.2675012 | 77.1785034 | 65.122577 | 65.5930539 |
| 18:37:23 | 0:37:59 | 66.2188035 | 63.2675012 | 77.1785034 | 64.122577 | 65.5930539 |
| 18:37:24 | 0:38:00 | 66.2188035 | 63.2675012 | 77.1785034 | 64.122577 | 66.5930539 |
| 18:37:25 | 0:38:01 | 66.2188035 | 63.2675012 | 77.1785034 | 64.122577 | 66.5930539 |
| 18:37:26 | 0:38:02 | 66.2188035 | 63.2675012 | 77.1785034 | 64.122577 | 66.5930539 |
| 18:37:27 | 0:38:03 | 65.2188035 | 63.2675012 | 77.1785034 | 64.122577 | 68.5930539 |
| 18:37:28 | 0:38:04 | 65.2188035 | 65.2675012 | 76.1785034 | 64.122577 | 68.5930539 |
| 18:37:29 | 0:38:05 | 65.2188035 | 64.2675012 | 76.1785034 | 65.122577 | 68.5930539 |
| 18:37:30 | 0:38:06 | 65.2188035 | 62.2675012 | 75.1785034 | 65.122577 | 68.5930539 |
| 18:37:31 | 0:38:07 | 66.2188035 | 63.2675012 | 75.1785034 | 65.122577 | 68.5930539 |
| 18:37:32 | 0:38:08 | 65.2188035 | 63.2675012 | 76.1785034 | 67.122577 | 68.5930539 |
| 18:37:33 | 0:38:09 | 66.2188035 | 63.2675012 | 76.1785034 | 68.122577 | 69.5930539 |
| 18:37:34 | 0:38:10 | 66.2188035 | 66.2675012 | 76.1785034 | 68.122577 | 70.5930539 |
| 18:37:35 | 0:38:11 | 66.2188035 | 66.2675012 | 75.1785034 | 68.122577 | 70.5930539 |
| 18:37:36 | 0:38:12 | 66.2188035 | 66.2675012 | 75.1785034 | 69.122577 | 70.5930539 |
| 18:37:37 | 0:38:13 | 66.2188035 | 66.2675012 | 74.1785034 | 69.122577 | 70.5930539 |

|          |         |            |            |            |           |            |
|----------|---------|------------|------------|------------|-----------|------------|
| 18:37:38 | 0:38:14 | 66.2188035 | 66.2675012 | 74.1785034 | 70.122577 | 70.5930539 |
| 18:37:39 | 0:38:15 | 66.2188035 | 66.2675012 | 74.1785034 | 70.122577 | 71.5930539 |
| 18:37:40 | 0:38:16 | 66.2188035 | 66.2675012 | 74.1785034 | 70.122577 | 79.5930539 |
| 18:37:41 | 0:38:17 | 65.2188035 | 66.2675012 | 74.1785034 | 71.122577 | 82.5930539 |
| 18:37:42 | 0:38:18 | 65.2188035 | 66.2675012 | 74.1785034 | 71.122577 | 69.7920134 |
| 18:37:43 | 0:38:19 | 64.2188035 | 66.2675012 | 73.1785034 | 70.122577 | 69.6101953 |
| 18:37:44 | 0:38:20 | 64.2188035 | 71.2675012 | 72.1785034 | 70.122577 | 69.8829225 |
| 18:37:45 | 0:38:21 | 64.2188035 | 73.2675012 | 72.1785034 | 69.122577 | 70.337468  |
| 18:37:46 | 0:38:22 | 64.2188035 | 73.2675012 | 73.1785034 | 69.122577 | 70.8829225 |
| 18:37:47 | 0:38:23 | 65.2188035 | 66.2675012 | 73.1785034 | 69.122577 | 70.4283771 |
| 18:37:48 | 0:38:24 | 65.2188035 | 66.2675012 | 73.1785034 | 69.122577 | 70.4283771 |
| 18:37:49 | 0:38:25 | 65.2188035 | 65.2675012 | 71.1785034 | 70.122577 | 77.5930539 |
| 18:37:50 | 0:38:26 | 65.2188035 | 65.2675012 | 70.1785034 | 71.122577 | 73.5930539 |
| 18:37:51 | 0:38:27 | 65.2188035 | 68.2675012 | 69.1785034 | 71.122577 | 73.5930539 |
| 18:37:52 | 0:38:28 | 64.2188035 | 70.2675012 | 69.1785034 | 73.122577 | 69.5930539 |
| 18:37:53 | 0:38:29 | 64.2188035 | 71.2675012 | 68.1785034 | 75.122577 | 68.5930539 |
| 18:37:54 | 0:38:30 | 64.2188035 | 71.2675012 | 69.1785034 | 74.122577 | 66.5930539 |
| 18:37:55 | 0:38:31 | 64.2188035 | 72.2675012 | 69.1785034 | 74.122577 | 66.5930539 |
| 18:37:56 | 0:38:32 | 63.2188035 | 73.2675012 | 70.1785034 | 69.122577 | 66.5930539 |
| 18:37:57 | 0:38:33 | 63.2188035 | 74.2675012 | 71.1785034 | 68.122577 | 65.5930539 |
| 18:37:58 | 0:38:34 | 63.2188035 | 76.2675012 | 70.1785034 | 68.122577 | 64.5930539 |
| 18:37:59 | 0:38:35 | 63.2188035 | 76.2675012 | 70.1785034 | 68.122577 | 64.5930539 |
| 18:38:00 | 0:38:36 | 63.2188035 | 75.2675012 | 70.1785034 | 68.122577 | 64.5930539 |
| 18:38:01 | 0:38:37 | 64.2188035 | 74.2675012 | 69.1785034 | 67.122577 | 64.5930539 |
| 18:38:02 | 0:38:38 | 64.2188035 | 73.2675012 | 69.1785034 | 67.122577 | 63.5930539 |
| 18:38:03 | 0:38:39 | 65.2188035 | 73.2675012 | 69.1785034 | 67.122577 | 62.5930539 |
| 18:38:04 | 0:38:40 | 66.2188035 | 72.2675012 | 69.1785034 | 67.122577 | 62.5930539 |
| 18:38:05 | 0:38:41 | 66.2188035 | 72.2675012 | 69.1785034 | 67.122577 | 62.5930539 |
| 18:38:06 | 0:38:42 | 66.2188035 | 72.2675012 | 68.1785034 | 67.122577 | 62.5930539 |
| 18:38:07 | 0:38:43 | 66.2188035 | 72.2675012 | 68.1785034 | 67.122577 | 62.5930539 |
| 18:38:08 | 0:38:44 | 66.2188035 | 70.2675012 | 69.1785034 | 67.122577 | 64.5930539 |
| 18:38:09 | 0:38:45 | 66.2188035 | 68.2675012 | 70.1785034 | 67.122577 | 63.5930539 |
| 18:38:10 | 0:38:46 | 66.2188035 | 68.2675012 | 70.1785034 | 66.122577 | 64.5930539 |
| 18:38:11 | 0:38:47 | 66.2188035 | 69.2675012 | 71.1785034 | 66.122577 | 64.5930539 |
| 18:38:12 | 0:38:48 | 67.2188035 | 69.2675012 | 72.1785034 | 66.122577 | 64.5930539 |
| 18:38:13 | 0:38:49 | 67.2188035 | 69.2675012 | 72.1785034 | 67.122577 | 64.5930539 |
| 18:38:14 | 0:38:50 | 66.2188035 | 69.2675012 | 72.1785034 | 69.122577 | 64.5930539 |
| 18:38:15 | 0:38:51 | 67.2188035 | 67.2675012 | 72.1785034 | 69.122577 | 64.5930539 |
| 18:38:16 | 0:38:52 | 67.2188035 | 65.2675012 | 67.1785034 | 72.122577 | 64.5930539 |
| 18:38:17 | 0:38:53 | 67.2188035 | 64.2675012 | 66.1785034 | 73.122577 | 64.5930539 |
| 18:38:18 | 0:38:54 | 67.2188035 | 64.2675012 | 64.1785034 | 73.122577 | 64.5930539 |
| 18:38:19 | 0:38:55 | 67.2188035 | 66.2675012 | 65.1785034 | 73.122577 | 62.5930539 |
| 18:38:20 | 0:38:56 | 67.2188035 | 67.2675012 | 65.1785034 | 73.122577 | 62.5930539 |
| 18:38:21 | 0:38:57 | 66.2188035 | 68.2675012 | 65.1785034 | 71.122577 | 62.5930539 |
| 18:38:22 | 0:38:58 | 66.2188035 | 68.2675012 | 65.1785034 | 70.122577 | 61.5930539 |



|          |         |            |            |            |           |            |
|----------|---------|------------|------------|------------|-----------|------------|
| 18:38:23 | 0:38:59 | 66.2188035 | 68.2675012 | 65.1785034 | 70.122577 | 61.5930539 |
| 18:38:24 | 0:39:00 | 66.2188035 | 67.2675012 | 65.1785034 | 70.122577 | 62.5930539 |
| 18:38:25 | 0:39:01 | 66.2188035 | 66.2675012 | 65.1785034 | 71.122577 | 62.5930539 |
| 18:38:26 | 0:39:02 | 66.2188035 | 67.2675012 | 65.1785034 | 71.122577 | 63.5930539 |
| 18:38:27 | 0:39:03 | 66.2188035 | 68.2675012 | 65.1785034 | 72.122577 | 65.5930539 |
| 18:38:28 | 0:39:04 | 66.2188035 | 69.2675012 | 65.1785034 | 73.122577 | 69.5930539 |
| 18:38:29 | 0:39:05 | 66.2188035 | 67.2675012 | 65.1785034 | 73.122577 | 70.5930539 |
| 18:38:30 | 0:39:06 | 66.2188035 | 66.2675012 | 67.1785034 | 73.122577 | 69.5930539 |
| 18:38:31 | 0:39:07 | 66.2188035 | 66.2675012 | 68.1785034 | 74.122577 | 69.5930539 |
| 18:38:32 | 0:39:08 | 66.2188035 | 66.2675012 | 69.1785034 | 74.122577 | 68.5930539 |
| 18:38:33 | 0:39:09 | 66.2188035 | 66.2675012 | 70.1785034 | 74.122577 | 68.5930539 |
| 18:38:34 | 0:39:10 | 66.2188035 | 66.2675012 | 71.1785034 | 74.122577 | 66.5930539 |
| 18:38:35 | 0:39:11 | 66.2188035 | 66.2675012 | 71.1785034 | 72.122577 | 66.5930539 |
| 18:38:36 | 0:39:12 | 67.2188035 | 66.2675012 | 71.1785034 | 72.122577 | 66.5930539 |
| 18:38:37 | 0:39:13 | 67.2188035 | 66.2675012 | 71.1785034 | 72.122577 | 65.5930539 |
| 18:38:38 | 0:39:14 | 68.2188035 | 66.2675012 | 72.1785034 | 73.122577 | 65.5930539 |
| 18:38:39 | 0:39:15 | 68.2188035 | 66.2675012 | 74.1785034 | 81.122577 | 62.5930539 |
| 18:38:40 | 0:39:16 | 69.2188035 | 66.2675012 | 73.1785034 | 82.122577 | 61.5930539 |
| 18:38:41 | 0:39:17 | 70.2188035 | 66.2675012 | 73.1785034 | 82.122577 | 62.5930539 |
| 18:38:42 | 0:39:18 | 70.2188035 | 66.2675012 | 73.1785034 | 82.122577 | 62.5930539 |
| 18:38:43 | 0:39:19 | 74.2188035 | 69.2675012 | 73.1785034 | 81.122577 | 64.5930539 |
| 18:38:44 | 0:39:20 | 74.2188035 | 70.2675012 | 73.1785034 | 80.122577 | 64.5930539 |
| 18:38:45 | 0:39:21 | 74.2188035 | 71.2675012 | 74.1785034 | 80.122577 | 64.5930539 |
| 18:38:46 | 0:39:22 | 74.2188035 | 73.2675012 | 74.1785034 | 79.122577 | 63.5930539 |
| 18:38:47 | 0:39:23 | 74.2188035 | 73.2675012 | 74.1785034 | 79.122577 | 62.5930539 |
| 18:38:48 | 0:39:24 | 73.2188035 | 73.2675012 | 74.1785034 | 79.122577 | 61.5930539 |
| 18:38:49 | 0:39:25 | 73.2188035 | 66.2675012 | 74.1785034 | 79.122577 | 61.5930539 |
| 18:38:50 | 0:39:26 | 73.2188035 | 65.2675012 | 74.1785034 | 78.122577 | 61.5930539 |
| 18:38:51 | 0:39:27 | 72.2188035 | 65.2675012 | 75.1785034 | 78.122577 | 62.5930539 |
| 18:38:52 | 0:39:28 | 72.2188035 | 67.2675012 | 75.1785034 | 78.122577 | 62.5930539 |
| 18:38:53 | 0:39:29 | 72.2188035 | 67.2675012 | 75.1785034 | 78.122577 | 62.5930539 |
| 18:38:54 | 0:39:30 | 71.2188035 | 67.2675012 | 74.1785034 | 78.122577 | 62.5930539 |
| 18:38:55 | 0:39:31 | 70.2188035 | 67.2675012 | 73.1785034 | 78.122577 | 63.5930539 |
| 18:38:56 | 0:39:32 | 70.2188035 | 67.2675012 | 71.1785034 | 78.122577 | 63.5930539 |
| 18:38:57 | 0:39:33 | 70.2188035 | 68.2675012 | 71.1785034 | 78.122577 | 63.5930539 |
| 18:38:58 | 0:39:34 | 70.2188035 | 68.2675012 | 71.1785034 | 76.122577 | 62.5930539 |
| 18:38:59 | 0:39:35 | 70.2188035 | 67.2675012 | 71.1785034 | 76.122577 | 62.5930539 |
| 18:39:00 | 0:39:36 | 69.2188035 | 66.2675012 | 70.1785034 | 76.122577 | 62.5930539 |
| 18:39:01 | 0:39:37 | 69.2188035 | 66.2675012 | 68.1785034 | 74.122577 | 62.5930539 |
| 18:39:02 | 0:39:38 | 69.2188035 | 65.2675012 | 68.1785034 | 72.122577 | 65.5930539 |
| 18:39:03 | 0:39:39 | 69.2188035 | 64.2675012 | 67.1785034 | 72.122577 | 70.5930539 |
| 18:39:04 | 0:39:40 | 69.2188035 | 64.2675012 | 67.1785034 | 72.122577 | 70.5930539 |
| 18:39:05 | 0:39:41 | 69.2188035 | 63.2675012 | 67.1785034 | 72.122577 | 69.5930539 |
| 18:39:06 | 0:39:42 | 69.2188035 | 63.2675012 | 67.1785034 | 73.122577 | 69.5930539 |
| 18:39:07 | 0:39:43 | 69.2188035 | 63.2675012 | 67.1785034 | 73.122577 | 69.5930539 |

|          |         |            |            |            |           |            |
|----------|---------|------------|------------|------------|-----------|------------|
| 18:39:08 | 0:39:44 | 69.2188035 | 63.2675012 | 67.1785034 | 73.122577 | 69.5930539 |
| 18:39:09 | 0:39:45 | 69.2188035 | 63.2675012 | 67.1785034 | 73.122577 | 69.5930539 |
| 18:39:10 | 0:39:46 | 69.2188035 | 63.2675012 | 67.1785034 | 73.122577 | 69.5930539 |
| 18:39:11 | 0:39:47 | 69.2188035 | 62.2675012 | 67.1785034 | 72.122577 | 69.5930539 |
| 18:39:12 | 0:39:48 | 69.2188035 | 62.2675012 | 67.1785034 | 72.122577 | 70.5930539 |
| 18:39:13 | 0:39:49 | 69.2188035 | 65.2675012 | 66.1785034 | 72.122577 | 69.5930539 |
| 18:39:14 | 0:39:50 | 69.2188035 | 65.2675012 | 65.1785034 | 79.122577 | 69.5930539 |
| 18:39:15 | 0:39:51 | 69.2188035 | 68.2675012 | 65.1785034 | 80.122577 | 67.5930539 |
| 18:39:16 | 0:39:52 | 69.2188035 | 69.2675012 | 65.1785034 | 81.122577 | 66.5930539 |
| 18:39:17 | 0:39:53 | 69.2188035 | 69.2675012 | 65.1785034 | 80.122577 | 66.5930539 |
| 18:39:18 | 0:39:54 | 69.2188035 | 69.2675012 | 65.1785034 | 79.122577 | 67.5930539 |
| 18:39:19 | 0:39:55 | 69.2188035 | 69.2675012 | 65.1785034 | 78.122577 | 67.5930539 |
| 18:39:20 | 0:39:56 | 69.2188035 | 75.2675012 | 66.1785034 | 78.122577 | 67.5930539 |
| 18:39:21 | 0:39:57 | 69.2188035 | 78.2675012 | 66.1785034 | 78.122577 | 68.5930539 |
| 18:39:22 | 0:39:58 | 69.2188035 | 78.2675012 | 66.1785034 | 78.122577 | 69.5930539 |
| 18:39:23 | 0:39:59 | 69.2188035 | 77.2675012 | 67.1785034 | 77.122577 | 69.5930539 |
| 18:39:24 | 0:40:00 | 69.2188035 | 75.2675012 | 68.1785034 | 76.122577 | 69.5930539 |
| 18:39:25 | 0:40:01 | 69.2188035 | 73.2675012 | 70.1785034 | 76.122577 | 67.5930539 |
| 18:39:26 | 0:40:02 | 69.2188035 | 73.2675012 | 70.1785034 | 76.122577 | 65.5930539 |
| 18:39:27 | 0:40:03 | 67.2188035 | 73.2675012 | 71.1785034 | 76.122577 | 65.5930539 |
| 18:39:28 | 0:40:04 | 67.2188035 | 75.2675012 | 71.1785034 | 77.122577 | 65.5930539 |
| 18:39:29 | 0:40:05 | 67.2188035 | 76.2675012 | 71.1785034 | 77.122577 | 65.5930539 |
| 18:39:30 | 0:40:06 | 66.2188035 | 77.2675012 | 71.1785034 | 76.122577 | 64.5930539 |
| 18:39:31 | 0:40:07 | 66.2188035 | 77.2675012 | 71.1785034 | 75.122577 | 64.5930539 |
| 18:39:32 | 0:40:08 | 66.2188035 | 76.2675012 | 72.1785034 | 75.122577 | 62.5930539 |
| 18:39:33 | 0:40:09 | 66.2188035 | 74.2675012 | 73.1785034 | 75.122577 | 61.5930539 |
| 18:39:34 | 0:40:10 | 66.2188035 | 73.2675012 | 73.1785034 | 70.122577 | 60.5930539 |
| 18:39:35 | 0:40:11 | 66.2188035 | 72.2675012 | 74.1785034 | 69.122577 | 59.5930539 |
| 18:39:36 | 0:40:12 | 66.2188035 | 72.2675012 | 74.1785034 | 69.122577 | 59.5930539 |
| 18:39:37 | 0:40:13 | 67.2188035 | 72.2675012 | 74.1785034 | 68.122577 | 59.5930539 |
| 18:39:38 | 0:40:14 | 67.2188035 | 74.2675012 | 74.1785034 | 67.122577 | 59.5930539 |
| 18:39:39 | 0:40:15 | 68.2188035 | 75.2675012 | 74.1785034 | 67.122577 | 61.5930539 |
| 18:39:40 | 0:40:16 | 68.2188035 | 76.2675012 | 74.1785034 | 67.122577 | 62.5930539 |
| 18:39:41 | 0:40:17 | 69.2188035 | 77.2675012 | 75.1785034 | 67.122577 | 62.5930539 |
| 18:39:42 | 0:40:18 | 68.2188035 | 77.2675012 | 75.1785034 | 66.122577 | 60.5930539 |
| 18:39:43 | 0:40:19 | 68.2188035 | 76.2675012 | 74.1785034 | 66.122577 | 60.5930539 |
| 18:39:44 | 0:40:20 | 67.2188035 | 76.2675012 | 74.1785034 | 66.122577 | 60.5930539 |
| 18:39:45 | 0:40:21 | 67.2188035 | 76.2675012 | 74.1785034 | 66.122577 | 60.5930539 |
| 18:39:46 | 0:40:22 | 66.2188035 | 70.2675012 | 72.1785034 | 66.122577 | 61.5930539 |
| 18:39:47 | 0:40:23 | 65.2188035 | 70.2675012 | 72.1785034 | 66.122577 | 62.5930539 |
| 18:39:48 | 0:40:24 | 65.2188035 | 71.2675012 | 71.1785034 | 66.122577 | 63.5930539 |
| 18:39:49 | 0:40:25 | 66.2188035 | 73.2675012 | 70.1785034 | 67.122577 | 63.5930539 |
| 18:39:50 | 0:40:26 | 66.2188035 | 73.2675012 | 70.1785034 | 68.122577 | 64.5930539 |
| 18:39:51 | 0:40:27 | 67.2188035 | 75.2675012 | 70.1785034 | 67.122577 | 64.5930539 |
| 18:39:52 | 0:40:28 | 68.2188035 | 74.2675012 | 70.1785034 | 67.122577 | 65.5930539 |

|          |         |            |            |            |           |            |
|----------|---------|------------|------------|------------|-----------|------------|
| 18:39:53 | 0:40:29 | 68.2188035 | 73.2675012 | 69.1785034 | 66.122577 | 64.5930539 |
| 18:39:54 | 0:40:30 | 68.2188035 | 71.2675012 | 69.1785034 | 66.122577 | 64.5930539 |
| 18:39:55 | 0:40:31 | 68.2188035 | 69.2675012 | 70.1785034 | 65.122577 | 64.5930539 |
| 18:39:56 | 0:40:32 | 68.2188035 | 68.2675012 | 70.1785034 | 65.122577 | 62.5930539 |
| 18:39:57 | 0:40:33 | 68.2188035 | 68.2675012 | 70.1785034 | 65.122577 | 62.5930539 |
| 18:39:58 | 0:40:34 | 68.2188035 | 69.2675012 | 70.1785034 | 66.122577 | 62.5930539 |
| 18:39:59 | 0:40:35 | 69.2188035 | 70.2675012 | 70.1785034 | 66.122577 | 62.5930539 |
| 18:40:00 | 0:40:36 | 69.2188035 | 71.2675012 | 71.1785034 | 68.122577 | 63.5930539 |
| 18:40:01 | 0:40:37 | 69.2188035 | 73.2675012 | 71.1785034 | 68.122577 | 64.5930539 |
| 18:40:02 | 0:40:38 | 69.2188035 | 74.2675012 | 71.1785034 | 68.122577 | 64.5930539 |
| 18:40:03 | 0:40:39 | 70.2188035 | 74.2675012 | 71.1785034 | 67.122577 | 65.5930539 |
| 18:40:04 | 0:40:40 | 70.2188035 | 74.2675012 | 72.1785034 | 67.122577 | 65.5930539 |
| 18:40:05 | 0:40:41 | 69.2188035 | 71.2675012 | 72.1785034 | 67.122577 | 65.5930539 |
| 18:40:06 | 0:40:42 | 70.2188035 | 69.2675012 | 72.1785034 | 67.122577 | 65.5930539 |
| 18:40:07 | 0:40:43 | 70.2188035 | 70.2675012 | 72.1785034 | 68.122577 | 65.5930539 |
| 18:40:08 | 0:40:44 | 70.2188035 | 72.2675012 | 72.1785034 | 70.122577 | 64.5930539 |
| 18:40:09 | 0:40:45 | 71.2188035 | 72.2675012 | 73.1785034 | 70.122577 | 62.5930539 |
| 18:40:10 | 0:40:46 | 71.2188035 | 74.2675012 | 75.1785034 | 69.122577 | 62.5930539 |
| 18:40:11 | 0:40:47 | 71.2188035 | 73.2675012 | 75.1785034 | 69.122577 | 62.5930539 |
| 18:40:12 | 0:40:48 | 72.2188035 | 72.2675012 | 75.1785034 | 68.122577 | 62.5930539 |
| 18:40:13 | 0:40:49 | 73.2188035 | 71.2675012 | 75.1785034 | 68.122577 | 62.5930539 |
| 18:40:14 | 0:40:50 | 73.2188035 | 71.2675012 | 75.1785034 | 68.122577 | 63.5930539 |
| 18:40:15 | 0:40:51 | 74.2188035 | 71.2675012 | 75.1785034 | 69.122577 | 63.5930539 |
| 18:40:16 | 0:40:52 | 74.2188035 | 71.2675012 | 77.1785034 | 69.122577 | 63.5930539 |
| 18:40:17 | 0:40:53 | 74.2188035 | 71.2675012 | 77.1785034 | 70.122577 | 63.5930539 |
| 18:40:18 | 0:40:54 | 74.2188035 | 71.2675012 | 76.1785034 | 70.122577 | 62.5930539 |
| 18:40:19 | 0:40:55 | 75.2188035 | 68.2675012 | 76.1785034 | 70.122577 | 62.5930539 |
| 18:40:20 | 0:40:56 | 75.2188035 | 66.2675012 | 76.1785034 | 69.122577 | 61.5930539 |
| 18:40:21 | 0:40:57 | 75.2188035 | 66.2675012 | 76.1785034 | 68.122577 | 61.5930539 |
| 18:40:22 | 0:40:58 | 75.2188035 | 66.2675012 | 76.1785034 | 68.122577 | 61.5930539 |
| 18:40:23 | 0:40:59 | 75.2188035 | 66.2675012 | 76.1785034 | 68.122577 | 61.5930539 |
| 18:40:24 | 0:41:00 | 75.2188035 | 67.2675012 | 76.1785034 | 68.122577 | 63.5930539 |
| 18:40:25 | 0:41:01 | 75.2188035 | 68.2675012 | 76.1785034 | 69.122577 | 64.5930539 |
| 18:40:26 | 0:41:02 | 74.2188035 | 69.2675012 | 75.1785034 | 71.122577 | 65.5930539 |
| 18:40:27 | 0:41:03 | 73.2188035 | 70.2675012 | 77.1785034 | 71.122577 | 65.5930539 |
| 18:40:28 | 0:41:04 | 73.2188035 | 70.2675012 | 79.1785034 | 71.122577 | 67.5930539 |
| 18:40:29 | 0:41:05 | 74.2188035 | 70.2675012 | 80.1785034 | 71.122577 | 68.5930539 |
| 18:40:30 | 0:41:06 | 74.2188035 | 70.2675012 | 80.1785034 | 71.122577 | 68.5930539 |
| 18:40:31 | 0:41:07 | 74.2188035 | 67.2675012 | 80.1785034 | 71.122577 | 68.5930539 |
| 18:40:32 | 0:41:08 | 75.2188035 | 66.2675012 | 80.1785034 | 75.122577 | 68.5930539 |
| 18:40:33 | 0:41:09 | 75.2188035 | 66.2675012 | 80.1785034 | 77.122577 | 69.5930539 |
| 18:40:34 | 0:41:10 | 76.2188035 | 64.2675012 | 80.1785034 | 80.122577 | 69.5930539 |
| 18:40:35 | 0:41:11 | 76.2188035 | 63.2675012 | 80.1785034 | 80.122577 | 71.5930539 |
| 18:40:36 | 0:41:12 | 77.2188035 | 63.2675012 | 80.1785034 | 80.122577 | 74.5930539 |
| 18:40:37 | 0:41:13 | 77.2188035 | 63.2675012 | 80.1785034 | 80.122577 | 75.5930539 |

|          |         |            |            |            |           |            |
|----------|---------|------------|------------|------------|-----------|------------|
| 18:40:38 | 0:41:14 | 77.2188035 | 63.2675012 | 77.1785034 | 80.122577 | 75.5930539 |
| 18:40:39 | 0:41:15 | 78.2188035 | 65.2675012 | 76.1785034 | 78.122577 | 73.5930539 |
| 18:40:40 | 0:41:16 | 79.2188035 | 66.2675012 | 76.1785034 | 76.122577 | 73.5930539 |
| 18:40:41 | 0:41:17 | 74.7011044 | 69.2675012 | 74.1785034 | 75.122577 | 71.5930539 |
| 18:40:42 | 0:41:18 | 75.8829225 | 71.2675012 | 74.1785034 | 73.122577 | 70.5930539 |
| 18:40:43 | 0:41:19 | 76.5192862 | 71.2675012 | 75.1785034 | 73.122577 | 70.5930539 |
| 18:40:44 | 0:41:20 | 75.8829225 | 67.2675012 | 77.1785034 | 71.122577 | 70.5930539 |
| 18:40:45 | 0:41:21 | 74.2465589 | 67.2675012 | 77.1785034 | 70.122577 | 70.5930539 |
| 18:40:46 | 0:41:22 | 73.7011044 | 66.2675012 | 78.1785034 | 70.122577 | 71.5930539 |
| 18:40:47 | 0:41:23 | 73.6101953 | 67.2675012 | 78.1785034 | 68.122577 | 71.5930539 |
| 18:40:48 | 0:41:24 | 73.6101953 | 67.2675012 | 78.1785034 | 68.122577 | 71.5930539 |
| 18:40:49 | 0:41:25 | 72.7011044 | 66.2675012 | 78.1785034 | 68.122577 | 71.5930539 |
| 18:40:50 | 0:41:26 | 72.7011044 | 65.2675012 | 78.1785034 | 68.122577 | 71.5930539 |
| 18:40:51 | 0:41:27 | 72.6101953 | 65.2675012 | 78.1785034 | 68.122577 | 71.5930539 |
| 18:40:52 | 0:41:28 | 74.0647407 | 64.2675012 | 76.1785034 | 70.122577 | 72.5930539 |
| 18:40:53 | 0:41:29 | 74.6101953 | 62.2675012 | 76.1785034 | 70.122577 | 73.5930539 |
| 18:40:54 | 0:41:30 | 74.7920134 | 61.2675012 | 76.1785034 | 70.122577 | 73.5930539 |
| 18:40:55 | 0:41:31 | 75.1556498 | 61.2675012 | 76.1785034 | 70.122577 | 72.5930539 |
| 18:40:56 | 0:41:32 | 74.8829225 | 61.2675012 | 76.1785034 | 71.122577 | 72.5930539 |
| 18:40:57 | 0:41:33 | 73.0647407 | 61.2675012 | 76.1785034 | 72.122577 | 71.5930539 |
| 18:40:58 | 0:41:34 | 81.2188035 | 62.2675012 | 76.1785034 | 72.122577 | 71.5930539 |
| 18:40:59 | 0:41:35 | 80.2188035 | 63.2675012 | 75.1785034 | 72.122577 | 69.5930539 |
| 18:41:00 | 0:41:36 | 79.2188035 | 66.2675012 | 72.1785034 | 72.122577 | 69.5930539 |
| 18:41:01 | 0:41:37 | 79.2188035 | 67.2675012 | 70.1785034 | 72.122577 | 69.5930539 |
| 18:41:02 | 0:41:38 | 79.2188035 | 66.2675012 | 70.1785034 | 71.122577 | 69.5930539 |
| 18:41:03 | 0:41:39 | 78.2188035 | 66.2675012 | 71.1785034 | 71.122577 | 70.5930539 |
| 18:41:04 | 0:41:40 | 76.2188035 | 64.2675012 | 71.1785034 | 71.122577 | 70.5930539 |
| 18:41:05 | 0:41:41 | 74.2188035 | 64.2675012 | 71.1785034 | 72.122577 | 69.5930539 |
| 18:41:06 | 0:41:42 | 73.2188035 | 65.2675012 | 71.1785034 | 72.122577 | 67.5930539 |
| 18:41:07 | 0:41:43 | 73.2188035 | 68.2675012 | 71.1785034 | 72.122577 | 66.5930539 |
| 18:41:08 | 0:41:44 | 71.2188035 | 70.2675012 | 71.1785034 | 73.122577 | 66.5930539 |
| 18:41:09 | 0:41:45 | 70.2188035 | 70.2675012 | 71.1785034 | 73.122577 | 66.5930539 |
| 18:41:10 | 0:41:46 | 69.2188035 | 70.2675012 | 71.1785034 | 74.122577 | 66.5930539 |
| 18:41:11 | 0:41:47 | 67.2188035 | 69.2675012 | 70.1785034 | 74.122577 | 69.5930539 |
| 18:41:12 | 0:41:48 | 66.2188035 | 69.2675012 | 70.1785034 | 76.122577 | 70.5930539 |
| 18:41:13 | 0:41:49 | 65.2188035 | 67.2675012 | 70.1785034 | 76.122577 | 70.5930539 |
| 18:41:14 | 0:41:50 | 65.2188035 | 67.2675012 | 70.1785034 | 77.122577 | 71.5930539 |
| 18:41:15 | 0:41:51 | 64.2188035 | 68.2675012 | 70.1785034 | 78.122577 | 71.5930539 |
| 18:41:16 | 0:41:52 | 64.2188035 | 69.2675012 | 70.1785034 | 79.122577 | 71.5930539 |
| 18:41:17 | 0:41:53 | 64.2188035 | 71.2675012 | 70.1785034 | 79.122577 | 71.5930539 |
| 18:41:18 | 0:41:54 | 64.2188035 | 71.2675012 | 71.1785034 | 77.122577 | 70.5930539 |
| 18:41:19 | 0:41:55 | 64.2188035 | 73.2675012 | 71.1785034 | 75.122577 | 70.5930539 |
| 18:41:20 | 0:41:56 | 64.2188035 | 74.2675012 | 71.1785034 | 75.122577 | 70.5930539 |
| 18:41:21 | 0:41:57 | 66.2188035 | 74.2675012 | 72.1785034 | 72.122577 | 70.5930539 |
| 18:41:22 | 0:41:58 | 66.2188035 | 74.2675012 | 72.1785034 | 72.122577 | 71.5930539 |

|          |         |            |            |            |           |            |
|----------|---------|------------|------------|------------|-----------|------------|
| 18:41:23 | 0:41:59 | 66.2188035 | 75.2675012 | 72.1785034 | 72.122577 | 72.5930539 |
| 18:41:24 | 0:42:00 | 66.2188035 | 75.2675012 | 72.1785034 | 72.122577 | 72.5930539 |
| 18:41:25 | 0:42:01 | 66.2188035 | 74.2675012 | 72.1785034 | 76.122577 | 70.5930539 |
| 18:41:26 | 0:42:02 | 66.2188035 | 74.2675012 | 71.1785034 | 76.122577 | 70.5930539 |
| 18:41:27 | 0:42:03 | 67.2188035 | 75.2675012 | 71.1785034 | 77.122577 | 70.5930539 |
| 18:41:28 | 0:42:04 | 67.2188035 | 76.2675012 | 71.1785034 | 76.122577 | 70.5930539 |
| 18:41:29 | 0:42:05 | 67.2188035 | 77.2675012 | 72.1785034 | 74.122577 | 71.5930539 |
| 18:41:30 | 0:42:06 | 68.2188035 | 77.2675012 | 75.1785034 | 73.122577 | 72.5930539 |
| 18:41:31 | 0:42:07 | 68.2188035 | 76.2675012 | 75.1785034 | 73.122577 | 72.5930539 |
| 18:41:32 | 0:42:08 | 68.2188035 | 75.2675012 | 75.1785034 | 73.122577 | 72.5930539 |
| 18:41:33 | 0:42:09 | 69.2188035 | 73.2675012 | 75.1785034 | 72.122577 | 73.5930539 |
| 18:41:34 | 0:42:10 | 69.2188035 | 73.2675012 | 75.1785034 | 72.122577 | 73.5930539 |
| 18:41:35 | 0:42:11 | 68.2188035 | 69.2675012 | 72.1785034 | 72.122577 | 73.5930539 |
| 18:41:36 | 0:42:12 | 68.2188035 | 68.2675012 | 69.1785034 | 75.122577 | 74.5930539 |
| 18:41:37 | 0:42:13 | 67.2188035 | 68.2675012 | 68.1785034 | 76.122577 | 75.5930539 |
| 18:41:38 | 0:42:14 | 69.2188035 | 68.2675012 | 68.1785034 | 77.122577 | 75.5930539 |
| 18:41:39 | 0:42:15 | 69.2188035 | 68.2675012 | 68.1785034 | 77.122577 | 75.5930539 |
| 18:41:40 | 0:42:16 | 69.2188035 | 67.2675012 | 68.1785034 | 76.122577 | 75.5930539 |
| 18:41:41 | 0:42:17 | 69.2188035 | 65.2675012 | 68.1785034 | 75.122577 | 75.5930539 |
| 18:41:42 | 0:42:18 | 69.2188035 | 65.2675012 | 68.1785034 | 74.122577 | 75.5930539 |
| 18:41:43 | 0:42:19 | 69.2188035 | 64.2675012 | 68.1785034 | 73.122577 | 76.5930539 |
| 18:41:44 | 0:42:20 | 69.2188035 | 64.2675012 | 68.1785034 | 73.122577 | 76.5930539 |
| 18:41:45 | 0:42:21 | 69.2188035 | 69.2675012 | 69.1785034 | 73.122577 | 77.5930539 |
| 18:41:46 | 0:42:22 | 69.2188035 | 71.2675012 | 69.1785034 | 73.122577 | 77.5930539 |
| 18:41:47 | 0:42:23 | 71.2188035 | 71.2675012 | 70.1785034 | 73.122577 | 73.5930539 |
| 18:41:48 | 0:42:24 | 71.2188035 | 71.2675012 | 71.1785034 | 75.122577 | 72.5930539 |
| 18:41:49 | 0:42:25 | 70.2188035 | 70.2675012 | 71.1785034 | 76.122577 | 72.5930539 |
| 18:41:50 | 0:42:26 | 69.2188035 | 70.2675012 | 70.1785034 | 71.122577 | 70.5930539 |
| 18:41:51 | 0:42:27 | 69.2188035 | 70.2675012 | 70.1785034 | 71.122577 | 70.5930539 |
| 18:41:52 | 0:42:28 | 69.2188035 | 70.2675012 | 70.1785034 | 68.122577 | 70.5930539 |
| 18:41:53 | 0:42:29 | 69.2188035 | 70.2675012 | 70.1785034 | 68.122577 | 68.5930539 |
| 18:41:54 | 0:42:30 | 69.2188035 | 71.2675012 | 69.1785034 | 68.122577 | 68.5930539 |
| 18:41:55 | 0:42:31 | 69.2188035 | 71.2675012 | 69.1785034 | 69.122577 | 68.5930539 |
| 18:41:56 | 0:42:32 | 68.2188035 | 72.2675012 | 67.1785034 | 69.122577 | 70.5930539 |
| 18:41:57 | 0:42:33 | 67.2188035 | 72.2675012 | 66.1785034 | 69.122577 | 73.5930539 |
| 18:41:58 | 0:42:34 | 67.2188035 | 72.2675012 | 66.1785034 | 70.122577 | 76.5930539 |
| 18:41:59 | 0:42:35 | 67.2188035 | 73.2675012 | 67.1785034 | 71.122577 | 76.5930539 |
| 18:42:00 | 0:42:36 | 67.2188035 | 73.2675012 | 67.1785034 | 73.122577 | 76.5930539 |
| 18:42:01 | 0:42:37 | 67.2188035 | 73.2675012 | 67.1785034 | 73.122577 | 76.5930539 |
| 18:42:02 | 0:42:38 | 67.2188035 | 75.2675012 | 67.1785034 | 74.122577 | 75.5930539 |
| 18:42:03 | 0:42:39 | 67.2188035 | 76.2675012 | 67.1785034 | 78.122577 | 75.5930539 |
| 18:42:04 | 0:42:40 | 67.2188035 | 77.2675012 | 67.1785034 | 78.122577 | 75.5930539 |
| 18:42:05 | 0:42:41 | 67.2188035 | 78.2675012 | 67.1785034 | 78.122577 | 74.5930539 |
| 18:42:06 | 0:42:42 | 67.2188035 | 78.2675012 | 67.1785034 | 78.122577 | 72.5930539 |
| 18:42:07 | 0:42:43 | 67.2188035 | 76.2675012 | 67.1785034 | 78.122577 | 71.5930539 |

|          |         |            |            |            |            |            |
|----------|---------|------------|------------|------------|------------|------------|
| 18:42:08 | 0:42:44 | 68.2188035 | 74.2675012 | 67.1785034 | 78.122577  | 70.5930539 |
| 18:42:09 | 0:42:45 | 68.2188035 | 66.2675012 | 68.1785034 | 77.122577  | 70.5930539 |
| 18:42:10 | 0:42:46 | 65.2188035 | 65.2675012 | 69.1785034 | 81.122577  | 69.5930539 |
| 18:42:11 | 0:42:47 | 65.2188035 | 65.2675012 | 69.1785034 | 81.122577  | 68.5930539 |
| 18:42:12 | 0:42:48 | 65.2188035 | 71.2675012 | 69.1785034 | 69.0647407 | 68.5930539 |
| 18:42:13 | 0:42:49 | 65.2188035 | 74.2675012 | 69.1785034 | 83.122577  | 68.5930539 |
| 18:42:14 | 0:42:50 | 66.2188035 | 74.2675012 | 69.1785034 | 81.122577  | 66.5930539 |
| 18:42:15 | 0:42:51 | 66.2188035 | 73.2675012 | 71.1785034 | 77.122577  | 67.5930539 |
| 18:42:16 | 0:42:52 | 66.2188035 | 71.2675012 | 73.1785034 | 77.122577  | 69.5930539 |
| 18:42:17 | 0:42:53 | 66.2188035 | 68.2675012 | 73.1785034 | 76.122577  | 69.5930539 |
| 18:42:18 | 0:42:54 | 67.2188035 | 68.2675012 | 73.1785034 | 76.122577  | 69.5930539 |
| 18:42:19 | 0:42:55 | 67.2188035 | 66.2675012 | 69.1785034 | 76.122577  | 72.5930539 |
| 18:42:20 | 0:42:56 | 68.2188035 | 66.2675012 | 69.1785034 | 73.122577  | 72.5930539 |
| 18:42:21 | 0:42:57 | 71.2188035 | 66.2675012 | 69.1785034 | 73.122577  | 72.5930539 |
| 18:42:22 | 0:42:58 | 72.2188035 | 68.2675012 | 69.1785034 | 73.122577  | 72.5930539 |
| 18:42:23 | 0:42:59 | 72.2188035 | 68.2675012 | 69.1785034 | 73.122577  | 72.5930539 |
| 18:42:24 | 0:43:00 | 72.2188035 | 69.2675012 | 70.1785034 | 73.122577  | 71.5930539 |
| 18:42:25 | 0:43:01 | 72.2188035 | 69.2675012 | 70.1785034 | 73.122577  | 71.5930539 |
| 18:42:26 | 0:43:02 | 71.2188035 | 66.2675012 | 70.1785034 | 73.122577  | 71.5930539 |
| 18:42:27 | 0:43:03 | 70.2188035 | 64.2675012 | 70.1785034 | 78.122577  | 71.5930539 |
| 18:42:28 | 0:43:04 | 70.2188035 | 64.2675012 | 70.1785034 | 78.122577  | 71.5930539 |
| 18:42:29 | 0:43:05 | 70.2188035 | 64.2675012 | 69.1785034 | 80.122577  | 70.5930539 |
| 18:42:30 | 0:43:06 | 70.2188035 | 64.2675012 | 69.1785034 | 80.122577  | 69.5930539 |
| 18:42:31 | 0:43:07 | 70.2188035 | 65.2675012 | 69.1785034 | 80.122577  | 69.5930539 |
| 18:42:32 | 0:43:08 | 70.2188035 | 65.2675012 | 69.1785034 | 69.122577  | 71.5930539 |
| 18:42:33 | 0:43:09 | 71.2188035 | 65.2675012 | 69.1785034 | 69.122577  | 72.5930539 |
| 18:42:34 | 0:43:10 | 72.2188035 | 65.2675012 | 69.1785034 | 69.122577  | 72.5930539 |
| 18:42:35 | 0:43:11 | 72.2188035 | 67.2675012 | 74.1785034 | 67.122577  | 73.5930539 |
| 18:42:36 | 0:43:12 | 74.2188035 | 68.2675012 | 75.1785034 | 67.122577  | 73.5930539 |
| 18:42:37 | 0:43:13 | 74.2188035 | 68.2675012 | 75.1785034 | 67.122577  | 71.5930539 |
| 18:42:38 | 0:43:14 | 73.2188035 | 66.2675012 | 76.1785034 | 67.122577  | 71.5930539 |
| 18:42:39 | 0:43:15 | 72.2188035 | 63.2675012 | 77.1785034 | 67.122577  | 71.5930539 |
| 18:42:40 | 0:43:16 | 71.2188035 | 62.2675012 | 77.1785034 | 67.122577  | 73.5930539 |
| 18:42:41 | 0:43:17 | 72.2188035 | 62.2675012 | 78.1785034 | 67.122577  | 73.5930539 |
| 18:42:42 | 0:43:18 | 72.2188035 | 62.2675012 | 78.1785034 | 67.122577  | 73.5930539 |
| 18:42:43 | 0:43:19 | 72.2188035 | 63.2675012 | 78.1785034 | 67.122577  | 72.5930539 |
| 18:42:44 | 0:43:20 | 72.2188035 | 64.2675012 | 79.1785034 | 67.122577  | 71.5930539 |
| 18:42:45 | 0:43:21 | 73.2188035 | 64.2675012 | 69.9738316 | 67.122577  | 71.5930539 |
| 18:42:46 | 0:43:22 | 73.2188035 | 62.2675012 | 70.1556498 | 67.122577  | 71.5930539 |
| 18:42:47 | 0:43:23 | 73.2188035 | 62.2675012 | 86.1785034 | 73.122577  | 72.5930539 |
| 18:42:48 | 0:43:24 | 74.2188035 | 62.2675012 | 86.1785034 | 73.122577  | 72.5930539 |
| 18:42:49 | 0:43:25 | 74.2188035 | 66.2675012 | 86.1785034 | 74.122577  | 72.5930539 |
| 18:42:50 | 0:43:26 | 74.2188035 | 67.2675012 | 86.1785034 | 74.122577  | 72.5930539 |
| 18:42:51 | 0:43:27 | 74.2188035 | 67.2675012 | 89.1785034 | 74.122577  | 70.5930539 |
| 18:42:52 | 0:43:28 | 74.2188035 | 67.2675012 | 89.1785034 | 75.122577  | 69.5930539 |

|          |         |            |            |            |           |            |
|----------|---------|------------|------------|------------|-----------|------------|
| 18:42:53 | 0:43:29 | 75.2188035 | 67.2675012 | 89.1785034 | 77.122577 | 68.5930539 |
| 18:42:54 | 0:43:30 | 75.2188035 | 69.2675012 | 88.1785034 | 77.122577 | 68.5930539 |
| 18:42:55 | 0:43:31 | 75.2188035 | 69.2675012 | 88.1785034 | 77.122577 | 67.5930539 |
| 18:42:56 | 0:43:32 | 75.2188035 | 67.2675012 | 87.1785034 | 77.122577 | 66.5930539 |
| 18:42:57 | 0:43:33 | 75.2188035 | 68.2675012 | 86.1785034 | 77.122577 | 65.5930539 |
| 18:42:58 | 0:43:34 | 78.2188035 | 70.2675012 | 85.1785034 | 76.122577 | 65.5930539 |
| 18:42:59 | 0:43:35 | 80.2188035 | 70.2675012 | 85.1785034 | 76.122577 | 65.5930539 |
| 18:43:00 | 0:43:36 | 81.2188035 | 70.2675012 | 83.1785034 | 76.122577 | 65.5930539 |
| 18:43:01 | 0:43:37 | 81.2188035 | 70.2675012 | 83.1785034 | 77.122577 | 65.5930539 |
| 18:43:02 | 0:43:38 | 81.2188035 | 70.2675012 | 81.1785034 | 78.122577 | 64.5930539 |
| 18:43:03 | 0:43:39 | 82.2188035 | 70.2675012 | 81.1785034 | 78.122577 | 64.5930539 |
| 18:43:04 | 0:43:40 | 82.2188035 | 70.2675012 | 81.1785034 | 75.122577 | 64.5930539 |
| 18:43:05 | 0:43:41 | 82.2188035 | 70.2675012 | 81.1785034 | 75.122577 | 64.5930539 |
| 18:43:06 | 0:43:42 | 82.2188035 | 69.2675012 | 82.1785034 | 75.122577 | 64.5930539 |
| 18:43:07 | 0:43:43 | 82.2188035 | 69.2675012 | 82.1785034 | 75.122577 | 64.5930539 |
| 18:43:08 | 0:43:44 | 84.2188035 | 68.2675012 | 80.1785034 | 75.122577 | 62.5930539 |
| 18:43:09 | 0:43:45 | 85.2188035 | 68.2675012 | 79.1785034 | 75.122577 | 62.5930539 |
| 18:43:10 | 0:43:46 | 85.2188035 | 68.2675012 | 79.1785034 | 75.122577 | 62.5930539 |
| 18:43:11 | 0:43:47 | 85.2188035 | 68.2675012 | 78.1785034 | 73.122577 | 62.5930539 |
| 18:43:12 | 0:43:48 | 85.2188035 | 68.2675012 | 78.1785034 | 73.122577 | 62.5930539 |
| 18:43:13 | 0:43:49 | 86.2188035 | 69.2675012 | 77.1785034 | 71.122577 | 63.5930539 |
| 18:43:14 | 0:43:50 | 86.2188035 | 70.2675012 | 77.1785034 | 71.122577 | 63.5930539 |
| 18:43:15 | 0:43:51 | 86.2188035 | 70.2675012 | 77.1785034 | 70.122577 | 62.5930539 |
| 18:43:16 | 0:43:52 | 86.2188035 | 70.2675012 | 77.1785034 | 70.122577 | 62.5930539 |
| 18:43:17 | 0:43:53 | 86.2188035 | 69.2675012 | 77.1785034 | 70.122577 | 60.5930539 |
| 18:43:18 | 0:43:54 | 70.9738316 | 65.2675012 | 77.1785034 | 71.122577 | 60.5930539 |
| 18:43:19 | 0:43:55 | 83.2188035 | 64.2675012 | 76.1785034 | 71.122577 | 59.5930539 |
| 18:43:20 | 0:43:56 | 81.2188035 | 64.2675012 | 76.1785034 | 70.122577 | 59.5930539 |
| 18:43:21 | 0:43:57 | 77.2188035 | 66.2675012 | 76.1785034 | 69.122577 | 60.5930539 |
| 18:43:22 | 0:43:58 | 74.2188035 | 67.2675012 | 76.1785034 | 69.122577 | 60.5930539 |
| 18:43:23 | 0:43:59 | 73.2188035 | 67.2675012 | 76.1785034 | 70.122577 | 60.5930539 |
| 18:43:24 | 0:44:00 | 72.2188035 | 66.2675012 | 77.1785034 | 70.122577 | 61.5930539 |
| 18:43:25 | 0:44:01 | 70.2188035 | 63.2675012 | 77.1785034 | 70.122577 | 61.5930539 |
| 18:43:26 | 0:44:02 | 68.2188035 | 61.2675012 | 77.1785034 | 70.122577 | 62.5930539 |
| 18:43:27 | 0:44:03 | 67.2188035 | 61.2675012 | 76.1785034 | 70.122577 | 62.5930539 |
| 18:43:28 | 0:44:04 | 67.2188035 | 61.2675012 | 73.1785034 | 70.122577 | 62.5930539 |
| 18:43:29 | 0:44:05 | 67.2188035 | 61.2675012 | 64.1785034 | 69.122577 | 63.5930539 |
| 18:43:30 | 0:44:06 | 67.2188035 | 60.2675012 | 64.1785034 | 69.122577 | 66.5930539 |
| 18:43:31 | 0:44:07 | 67.2188035 | 60.2675012 | 65.1785034 | 68.122577 | 66.5930539 |
| 18:43:32 | 0:44:08 | 68.2188035 | 57.2675012 | 66.1785034 | 67.122577 | 71.5192862 |
| 18:43:33 | 0:44:09 | 69.2188035 | 57.2675012 | 66.1785034 | 69.122577 | 72.1556498 |
| 18:43:34 | 0:44:10 | 69.2188035 | 61.2675012 | 66.1785034 | 69.122577 | 71.9738316 |
| 18:43:35 | 0:44:11 | 68.2188035 | 61.2675012 | 66.1785034 | 71.122577 | 72.4283771 |
| 18:43:36 | 0:44:12 | 68.2188035 | 61.2675012 | 64.1785034 | 73.122577 | 72.6101953 |
| 18:43:37 | 0:44:13 | 68.2188035 | 61.2675012 | 63.1785034 | 74.122577 | 72.8829225 |

|          |         |            |            |            |           |            |
|----------|---------|------------|------------|------------|-----------|------------|
| 18:43:38 | 0:44:14 | 67.2188035 | 61.2675012 | 63.1785034 | 73.122577 | 72.7011044 |
| 18:43:39 | 0:44:15 | 66.2188035 | 61.2675012 | 63.1785034 | 73.122577 | 72.7920134 |
| 18:43:40 | 0:44:16 | 65.2188035 | 65.2675012 | 63.1785034 | 72.122577 | 72.8829225 |
| 18:43:41 | 0:44:17 | 65.2188035 | 65.2675012 | 63.1785034 | 72.122577 | 72.7011044 |
| 18:43:42 | 0:44:18 | 65.2188035 | 65.2675012 | 61.1785034 | 69.122577 | 70.8829225 |
| 18:43:43 | 0:44:19 | 65.2188035 | 65.2675012 | 61.1785034 | 69.122577 | 70.7011044 |
| 18:43:44 | 0:44:20 | 65.2188035 | 65.2675012 | 61.1785034 | 69.122577 | 70.337468  |
| 18:43:45 | 0:44:21 | 65.2188035 | 63.2675012 | 61.1785034 | 69.122577 | 70.0647407 |
| 18:43:46 | 0:44:22 | 66.2188035 | 63.2675012 | 61.1785034 | 69.122577 | 70.1556498 |
| 18:43:47 | 0:44:23 | 65.2188035 | 66.2675012 | 61.1785034 | 70.122577 | 71.1556498 |
| 18:43:48 | 0:44:24 | 65.2188035 | 66.2675012 | 62.1785034 | 69.122577 | 71.1556498 |
| 18:43:49 | 0:44:25 | 65.2188035 | 72.2675012 | 63.1785034 | 69.122577 | 71.7920134 |
| 18:43:50 | 0:44:26 | 65.2188035 | 73.2675012 | 63.1785034 | 71.122577 | 72.1556498 |
| 18:43:51 | 0:44:27 | 65.2188035 | 73.2675012 | 64.1785034 | 71.122577 | 72.7011044 |
| 18:43:52 | 0:44:28 | 64.2188035 | 72.2675012 | 64.1785034 | 71.122577 | 72.5192862 |
| 18:43:53 | 0:44:29 | 64.2188035 | 72.2675012 | 70.1785034 | 71.122577 | 72.8829225 |
| 18:43:54 | 0:44:30 | 64.2188035 | 70.2675012 | 72.1785034 | 71.122577 | 72.7011044 |
| 18:43:55 | 0:44:31 | 64.2188035 | 70.2675012 | 73.1785034 | 70.122577 | 72.5192862 |
| 18:43:56 | 0:44:32 | 64.2188035 | 71.2675012 | 73.1785034 | 69.122577 | 71.2465589 |
| 18:43:57 | 0:44:33 | 64.2188035 | 71.2675012 | 73.1785034 | 68.122577 | 70.7920134 |
| 18:43:58 | 0:44:34 | 65.2188035 | 71.2675012 | 73.1785034 | 68.122577 | 84.5930539 |
| 18:43:59 | 0:44:35 | 65.2188035 | 71.2675012 | 74.1785034 | 69.122577 | 84.5930539 |
| 18:44:00 | 0:44:36 | 65.2188035 | 71.2675012 | 73.1785034 | 68.122577 | 74.5930539 |
| 18:44:01 | 0:44:37 | 66.2188035 | 70.2675012 | 73.1785034 | 69.122577 | 66.5930539 |
| 18:44:02 | 0:44:38 | 66.2188035 | 70.2675012 | 76.1785034 | 71.122577 | 64.5930539 |
| 18:44:03 | 0:44:39 | 67.2188035 | 70.2675012 | 77.1785034 | 71.122577 | 64.5930539 |
| 18:44:04 | 0:44:40 | 67.2188035 | 70.2675012 | 77.1785034 | 72.122577 | 63.5930539 |
| 18:44:05 | 0:44:41 | 67.2188035 | 70.2675012 | 78.1785034 | 72.122577 | 63.5930539 |
| 18:44:06 | 0:44:42 | 67.2188035 | 70.2675012 | 78.1785034 | 72.122577 | 63.5930539 |
| 18:44:07 | 0:44:43 | 67.2188035 | 71.2675012 | 79.1785034 | 72.122577 | 63.5930539 |
| 18:44:08 | 0:44:44 | 67.2188035 | 71.2675012 | 80.1785034 | 69.122577 | 63.5930539 |
| 18:44:09 | 0:44:45 | 66.2188035 | 70.2675012 | 83.1785034 | 69.122577 | 61.5930539 |
| 18:44:10 | 0:44:46 | 66.2188035 | 72.2675012 | 84.1785034 | 69.122577 | 61.5930539 |
| 18:44:11 | 0:44:47 | 66.2188035 | 72.2675012 | 84.1785034 | 68.122577 | 60.5930539 |
| 18:44:12 | 0:44:48 | 66.2188035 | 72.2675012 | 84.1785034 | 68.122577 | 61.5930539 |
| 18:44:13 | 0:44:49 | 68.2188035 | 69.2675012 | 84.1785034 | 68.122577 | 61.5930539 |
| 18:44:14 | 0:44:50 | 69.2188035 | 69.2675012 | 84.1785034 | 68.122577 | 61.5930539 |
| 18:44:15 | 0:44:51 | 69.2188035 | 67.2675012 | 84.1785034 | 68.122577 | 61.5930539 |
| 18:44:16 | 0:44:52 | 70.2188035 | 67.2675012 | 83.1785034 | 68.122577 | 61.5930539 |
| 18:44:17 | 0:44:53 | 71.2188035 | 61.2675012 | 80.1785034 | 68.122577 | 61.5930539 |
| 18:44:18 | 0:44:54 | 70.2188035 | 60.2675012 | 74.1785034 | 68.122577 | 61.5930539 |
| 18:44:19 | 0:44:55 | 70.2188035 | 60.2675012 | 73.1785034 | 68.122577 | 61.5930539 |
| 18:44:20 | 0:44:56 | 70.2188035 | 60.2675012 | 73.1785034 | 69.122577 | 61.5930539 |
| 18:44:21 | 0:44:57 | 70.2188035 | 60.2675012 | 73.1785034 | 69.122577 | 61.5930539 |
| 18:44:22 | 0:44:58 | 70.2188035 | 60.2675012 | 73.1785034 | 70.122577 | 61.5930539 |



|          |         |            |            |            |           |            |
|----------|---------|------------|------------|------------|-----------|------------|
| 18:44:23 | 0:44:59 | 70.2188035 | 58.2675012 | 73.1785034 | 70.122577 | 62.5930539 |
| 18:44:24 | 0:45:00 | 69.2188035 | 57.2675012 | 72.1785034 | 71.122577 | 62.5930539 |
| 18:44:25 | 0:45:01 | 69.2188035 | 57.2675012 | 71.1785034 | 71.122577 | 62.5930539 |
| 18:44:26 | 0:45:02 | 70.2188035 | 57.2675012 | 69.1785034 | 69.122577 | 62.5930539 |
| 18:44:27 | 0:45:03 | 70.2188035 | 58.2675012 | 69.1785034 | 69.122577 | 61.5930539 |
| 18:44:28 | 0:45:04 | 70.2188035 | 58.2675012 | 69.1785034 | 69.122577 | 61.5930539 |
| 18:44:29 | 0:45:05 | 70.2188035 | 59.2675012 | 68.1785034 | 69.122577 | 61.5930539 |
| 18:44:30 | 0:45:06 | 70.2188035 | 60.2675012 | 68.1785034 | 69.122577 | 61.5930539 |
| 18:44:31 | 0:45:07 | 69.2188035 | 61.2675012 | 68.1785034 | 67.122577 | 61.5930539 |
| 18:44:32 | 0:45:08 | 69.2188035 | 62.2675012 | 68.1785034 | 67.122577 | 61.5930539 |
| 18:44:33 | 0:45:09 | 69.2188035 | 62.2675012 | 68.1785034 | 66.122577 | 62.5930539 |
| 18:44:34 | 0:45:10 | 69.2188035 | 62.2675012 | 68.1785034 | 66.122577 | 62.5930539 |
| 18:44:35 | 0:45:11 | 68.2188035 | 62.2675012 | 68.1785034 | 65.122577 | 63.5930539 |
| 18:44:36 | 0:45:12 | 67.2188035 | 61.2675012 | 68.1785034 | 66.122577 | 64.5930539 |
| 18:44:37 | 0:45:13 | 66.2188035 | 61.2675012 | 68.1785034 | 66.122577 | 64.5930539 |
| 18:44:38 | 0:45:14 | 66.2188035 | 61.2675012 | 68.1785034 | 67.122577 | 64.5930539 |
| 18:44:39 | 0:45:15 | 67.2188035 | 61.2675012 | 68.1785034 | 69.122577 | 64.5930539 |
| 18:44:40 | 0:45:16 | 68.2188035 | 62.2675012 | 68.1785034 | 69.122577 | 63.5930539 |
| 18:44:41 | 0:45:17 | 68.2188035 | 61.2675012 | 69.1785034 | 69.122577 | 62.5930539 |
| 18:44:42 | 0:45:18 | 69.2188035 | 61.2675012 | 70.1785034 | 70.122577 | 62.5930539 |
| 18:44:43 | 0:45:19 | 69.2188035 | 61.2675012 | 71.1785034 | 70.122577 | 62.5930539 |
| 18:44:44 | 0:45:20 | 69.2188035 | 60.2675012 | 72.1785034 | 70.122577 | 62.5930539 |
| 18:44:45 | 0:45:21 | 70.2188035 | 60.2675012 | 72.1785034 | 71.122577 | 63.5930539 |
| 18:44:46 | 0:45:22 | 72.2188035 | 60.2675012 | 72.1785034 | 72.122577 | 63.5930539 |
| 18:44:47 | 0:45:23 | 74.2188035 | 60.2675012 | 72.1785034 | 72.122577 | 65.5930539 |
| 18:44:48 | 0:45:24 | 77.2188035 | 62.2675012 | 72.1785034 | 72.122577 | 65.5930539 |
| 18:44:49 | 0:45:25 | 77.2188035 | 66.2675012 | 72.1785034 | 72.122577 | 65.5930539 |
| 18:44:50 | 0:45:26 | 77.2188035 | 69.2675012 | 72.1785034 | 73.122577 | 63.5930539 |
| 18:44:51 | 0:45:27 | 77.2188035 | 70.2675012 | 72.1785034 | 74.122577 | 63.5930539 |
| 18:44:52 | 0:45:28 | 77.2188035 | 70.2675012 | 73.1785034 | 74.122577 | 63.5930539 |
| 18:44:53 | 0:45:29 | 75.2188035 | 65.2675012 | 73.1785034 | 74.122577 | 63.5930539 |
| 18:44:54 | 0:45:30 | 73.2188035 | 62.2675012 | 74.1785034 | 76.122577 | 63.5930539 |
| 18:44:55 | 0:45:31 | 73.2188035 | 60.2675012 | 73.1785034 | 76.122577 | 63.5930539 |
| 18:44:56 | 0:45:32 | 70.2188035 | 60.2675012 | 70.1785034 | 76.122577 | 65.5930539 |
| 18:44:57 | 0:45:33 | 69.2188035 | 60.2675012 | 68.1785034 | 72.122577 | 65.5930539 |
| 18:44:58 | 0:45:34 | 70.2188035 | 61.2675012 | 67.1785034 | 71.122577 | 65.5930539 |
| 18:44:59 | 0:45:35 | 69.2188035 | 62.2675012 | 66.1785034 | 71.122577 | 65.5930539 |
| 18:45:00 | 0:45:36 | 69.2188035 | 62.2675012 | 66.1785034 | 71.122577 | 65.5930539 |
| 18:45:01 | 0:45:37 | 68.2188035 | 62.2675012 | 66.1785034 | 69.122577 | 64.5930539 |
| 18:45:02 | 0:45:38 | 68.2188035 | 62.2675012 | 65.1785034 | 69.122577 | 64.5930539 |
| 18:45:03 | 0:45:39 | 68.2188035 | 62.2675012 | 65.1785034 | 68.122577 | 64.5930539 |
| 18:45:04 | 0:45:40 | 69.2188035 | 62.2675012 | 65.1785034 | 68.122577 | 64.5930539 |
| 18:45:05 | 0:45:41 | 69.2188035 | 59.2675012 | 65.1785034 | 67.122577 | 65.5930539 |
| 18:45:06 | 0:45:42 | 70.2188035 | 59.2675012 | 65.1785034 | 66.122577 | 65.5930539 |
| 18:45:07 | 0:45:43 | 70.2188035 | 59.2675012 | 65.1785034 | 66.122577 | 66.5930539 |

|          |         |            |            |            |           |            |
|----------|---------|------------|------------|------------|-----------|------------|
| 18:45:08 | 0:45:44 | 71.2188035 | 60.2675012 | 64.1785034 | 67.122577 | 68.5930539 |
| 18:45:09 | 0:45:45 | 71.2188035 | 60.2675012 | 63.1785034 | 67.122577 | 68.5930539 |
| 18:45:10 | 0:45:46 | 71.2188035 | 58.2675012 | 62.1785034 | 67.122577 | 70.5930539 |
| 18:45:11 | 0:45:47 | 74.2188035 | 57.2675012 | 61.1785034 | 68.122577 | 70.5930539 |
| 18:45:12 | 0:45:48 | 75.2188035 | 57.2675012 | 60.1785034 | 69.122577 | 69.5930539 |
| 18:45:13 | 0:45:49 | 75.2188035 | 56.2675012 | 60.1785034 | 69.122577 | 69.5930539 |
| 18:45:14 | 0:45:50 | 74.2188035 | 56.2675012 | 60.1785034 | 68.122577 | 69.5930539 |
| 18:45:15 | 0:45:51 | 74.2188035 | 55.2675012 | 61.1785034 | 69.122577 | 68.5930539 |
| 18:45:16 | 0:45:52 | 73.2188035 | 55.2675012 | 61.1785034 | 69.122577 | 67.5930539 |
| 18:45:17 | 0:45:53 | 73.2188035 | 57.2675012 | 61.1785034 | 69.122577 | 67.5930539 |
| 18:45:18 | 0:45:54 | 72.2188035 | 58.2675012 | 61.1785034 | 69.122577 | 66.5930539 |
| 18:45:19 | 0:45:55 | 70.2188035 | 60.2675012 | 61.1785034 | 69.122577 | 66.5930539 |
| 18:45:20 | 0:45:56 | 69.2188035 | 60.2675012 | 61.1785034 | 69.122577 | 66.5930539 |
| 18:45:21 | 0:45:57 | 68.2188035 | 61.2675012 | 61.1785034 | 69.122577 | 66.5930539 |
| 18:45:22 | 0:45:58 | 67.2188035 | 61.2675012 | 62.1785034 | 69.122577 | 66.5930539 |
| 18:45:23 | 0:45:59 | 67.2188035 | 61.2675012 | 62.1785034 | 72.122577 | 66.5930539 |
| 18:45:24 | 0:46:00 | 66.2188035 | 61.2675012 | 62.1785034 | 74.122577 | 66.5930539 |
| 18:45:25 | 0:46:01 | 66.2188035 | 62.2675012 | 63.1785034 | 76.122577 | 66.5930539 |
| 18:45:26 | 0:46:02 | 66.2188035 | 65.2675012 | 64.1785034 | 76.122577 | 66.5930539 |
| 18:45:27 | 0:46:03 | 67.2188035 | 70.2675012 | 64.1785034 | 77.122577 | 67.5930539 |
| 18:45:28 | 0:46:04 | 68.2188035 | 75.2675012 | 65.1785034 | 77.122577 | 67.5930539 |
| 18:45:29 | 0:46:05 | 68.2188035 | 75.2675012 | 65.1785034 | 77.122577 | 67.5930539 |
| 18:45:30 | 0:46:06 | 68.2188035 | 72.2675012 | 66.1785034 | 77.122577 | 68.5930539 |
| 18:45:31 | 0:46:07 | 66.2188035 | 72.2675012 | 67.1785034 | 77.122577 | 68.5930539 |
| 18:45:32 | 0:46:08 | 66.2188035 | 72.2675012 | 69.1785034 | 77.122577 | 68.5930539 |
| 18:45:33 | 0:46:09 | 67.2188035 | 72.2675012 | 70.1785034 | 77.122577 | 64.5930539 |
| 18:45:34 | 0:46:10 | 66.2188035 | 73.2675012 | 70.1785034 | 77.122577 | 64.5930539 |
| 18:45:35 | 0:46:11 | 66.2188035 | 75.2675012 | 70.1785034 | 76.122577 | 64.5930539 |
| 18:45:36 | 0:46:12 | 66.2188035 | 76.2675012 | 70.1785034 | 75.122577 | 65.5930539 |
| 18:45:37 | 0:46:13 | 66.2188035 | 76.2675012 | 70.1785034 | 75.122577 | 65.5930539 |
| 18:45:38 | 0:46:14 | 66.2188035 | 76.2675012 | 70.1785034 | 74.122577 | 66.5930539 |
| 18:45:39 | 0:46:15 | 65.2188035 | 75.2675012 | 70.1785034 | 74.122577 | 66.5930539 |
| 18:45:40 | 0:46:16 | 65.2188035 | 74.2675012 | 70.1785034 | 72.122577 | 66.5930539 |
| 18:45:41 | 0:46:17 | 65.2188035 | 74.2675012 | 70.1785034 | 71.122577 | 66.5930539 |
| 18:45:42 | 0:46:18 | 64.2188035 | 70.2675012 | 70.1785034 | 71.122577 | 64.5930539 |
| 18:45:43 | 0:46:19 | 64.2188035 | 68.2675012 | 70.1785034 | 69.122577 | 63.5930539 |
| 18:45:44 | 0:46:20 | 64.2188035 | 68.2675012 | 70.1785034 | 68.122577 | 62.5930539 |
| 18:45:45 | 0:46:21 | 63.2188035 | 67.2675012 | 70.1785034 | 68.122577 | 60.5930539 |
| 18:45:46 | 0:46:22 | 64.2188035 | 66.2675012 | 70.1785034 | 68.122577 | 60.5930539 |
| 18:45:47 | 0:46:23 | 64.2188035 | 65.2675012 | 70.1785034 | 69.122577 | 54.5930539 |
| 18:45:48 | 0:46:24 | 64.2188035 | 65.2675012 | 70.1785034 | 69.122577 | 54.5930539 |
| 18:45:49 | 0:46:25 | 65.2188035 | 63.2675012 | 70.1785034 | 69.122577 | 54.5930539 |
| 18:45:50 | 0:46:26 | 67.2188035 | 62.2675012 | 71.1785034 | 70.122577 | 55.5930539 |
| 18:45:51 | 0:46:27 | 67.2188035 | 62.2675012 | 71.1785034 | 70.122577 | 56.5930539 |
| 18:45:52 | 0:46:28 | 68.2188035 | 60.2675012 | 71.1785034 | 71.122577 | 56.5930539 |

|          |         |            |            |            |           |            |
|----------|---------|------------|------------|------------|-----------|------------|
| 18:45:53 | 0:46:29 | 67.2188035 | 59.2675012 | 71.1785034 | 70.122577 | 56.5930539 |
| 18:45:54 | 0:46:30 | 67.2188035 | 59.2675012 | 71.1785034 | 70.122577 | 56.5930539 |
| 18:45:55 | 0:46:31 | 67.2188035 | 60.2675012 | 74.1785034 | 70.122577 | 57.5930539 |
| 18:45:56 | 0:46:32 | 65.2188035 | 60.2675012 | 75.1785034 | 70.122577 | 57.5930539 |
| 18:45:57 | 0:46:33 | 65.2188035 | 61.2675012 | 74.1785034 | 71.122577 | 57.5930539 |
| 18:45:58 | 0:46:34 | 65.2188035 | 60.2675012 | 74.1785034 | 71.122577 | 57.5930539 |
| 18:45:59 | 0:46:35 | 65.2188035 | 60.2675012 | 74.1785034 | 70.122577 | 57.5930539 |
| 18:46:00 | 0:46:36 | 65.2188035 | 60.2675012 | 74.1785034 | 70.122577 | 57.5930539 |
| 18:46:01 | 0:46:37 | 65.2188035 | 60.2675012 | 75.1785034 | 70.122577 | 58.5930539 |
| 18:46:02 | 0:46:38 | 65.2188035 | 60.2675012 | 75.1785034 | 69.122577 | 57.5930539 |
| 18:46:03 | 0:46:39 | 65.2188035 | 60.2675012 | 75.1785034 | 68.122577 | 57.5930539 |
| 18:46:04 | 0:46:40 | 65.2188035 | 60.2675012 | 75.1785034 | 68.122577 | 59.5930539 |
| 18:46:05 | 0:46:41 | 65.2188035 | 62.2675012 | 75.1785034 | 65.122577 | 59.5930539 |
| 18:46:06 | 0:46:42 | 65.2188035 | 63.2675012 | 74.1785034 | 65.122577 | 59.5930539 |
| 18:46:07 | 0:46:43 | 73.2188035 | 63.2675012 | 65.1785034 | 69.122577 | 63.5930539 |
| 18:46:08 | 0:46:44 | 75.2188035 | 63.2675012 | 65.1785034 | 69.122577 | 67.5930539 |
| 18:46:09 | 0:46:45 | 75.2188035 | 62.2675012 | 64.1785034 | 69.122577 | 67.5930539 |
| 18:46:10 | 0:46:46 | 73.2188035 | 59.2675012 | 64.1785034 | 70.122577 | 67.5930539 |
| 18:46:11 | 0:46:47 | 72.2188035 | 57.2675012 | 64.1785034 | 71.122577 | 68.5930539 |
| 18:46:12 | 0:46:48 | 72.2188035 | 57.2675012 | 65.1785034 | 72.122577 | 69.5930539 |
| 18:46:13 | 0:46:49 | 72.2188035 | 58.2675012 | 64.1785034 | 72.122577 | 70.5930539 |
| 18:46:14 | 0:46:50 | 71.2188035 | 60.2675012 | 64.1785034 | 74.122577 | 71.5930539 |
| 18:46:15 | 0:46:51 | 71.2188035 | 63.2675012 | 65.1785034 | 73.122577 | 71.5930539 |
| 18:46:16 | 0:46:52 | 70.2188035 | 63.2675012 | 65.1785034 | 73.122577 | 71.5930539 |
| 18:46:17 | 0:46:53 | 70.2188035 | 63.2675012 | 65.1785034 | 72.122577 | 71.5930539 |
| 18:46:18 | 0:46:54 | 70.2188035 | 60.2675012 | 65.1785034 | 72.122577 | 73.5930539 |
| 18:46:19 | 0:46:55 | 70.2188035 | 59.2675012 | 65.1785034 | 72.122577 | 73.5930539 |
| 18:46:20 | 0:46:56 | 70.2188035 | 59.2675012 | 65.1785034 | 72.122577 | 75.5930539 |
| 18:46:21 | 0:46:57 | 71.2188035 | 58.2675012 | 65.1785034 | 72.122577 | 79.5930539 |
| 18:46:22 | 0:46:58 | 72.2188035 | 60.2675012 | 66.1785034 | 71.122577 | 79.5930539 |
| 18:46:23 | 0:46:59 | 72.2188035 | 62.2675012 | 66.1785034 | 69.122577 | 79.5930539 |
| 18:46:24 | 0:47:00 | 72.2188035 | 63.2675012 | 67.1785034 | 69.122577 | 79.5930539 |
| 18:46:25 | 0:47:01 | 72.2188035 | 63.2675012 | 67.1785034 | 69.122577 | 77.5930539 |
| 18:46:26 | 0:47:02 | 72.2188035 | 62.2675012 | 67.1785034 | 69.122577 | 77.5930539 |
| 18:46:27 | 0:47:03 | 73.2188035 | 61.2675012 | 67.1785034 | 68.122577 | 76.5930539 |
| 18:46:28 | 0:47:04 | 72.2188035 | 61.2675012 | 67.1785034 | 68.122577 | 74.5930539 |
| 18:46:29 | 0:47:05 | 72.2188035 | 61.2675012 | 67.1785034 | 67.122577 | 73.5930539 |
| 18:46:30 | 0:47:06 | 72.2188035 | 61.2675012 | 67.1785034 | 67.122577 | 72.5930539 |
| 18:46:31 | 0:47:07 | 72.2188035 | 60.2675012 | 68.1785034 | 67.122577 | 72.5930539 |
| 18:46:32 | 0:47:08 | 73.2188035 | 61.2675012 | 68.1785034 | 67.122577 | 72.5930539 |
| 18:46:33 | 0:47:09 | 73.2188035 | 61.2675012 | 68.1785034 | 68.122577 | 72.5930539 |
| 18:46:34 | 0:47:10 | 73.2188035 | 61.2675012 | 68.1785034 | 69.122577 | 72.5930539 |
| 18:46:35 | 0:47:11 | 76.2188035 | 61.2675012 | 68.1785034 | 69.122577 | 72.5930539 |
| 18:46:36 | 0:47:12 | 76.2188035 | 61.2675012 | 70.1785034 | 68.122577 | 72.5930539 |
| 18:46:37 | 0:47:13 | 76.2188035 | 62.2675012 | 70.1785034 | 66.122577 | 71.5930539 |

|          |         |            |            |            |           |            |
|----------|---------|------------|------------|------------|-----------|------------|
| 18:46:38 | 0:47:14 | 76.2188035 | 62.2675012 | 70.1785034 | 66.122577 | 71.5930539 |
| 18:46:39 | 0:47:15 | 76.2188035 | 63.2675012 | 70.1785034 | 66.122577 | 70.5930539 |
| 18:46:40 | 0:47:16 | 76.2188035 | 64.2675012 | 70.1785034 | 66.122577 | 70.5930539 |
| 18:46:41 | 0:47:17 | 77.2188035 | 64.2675012 | 70.1785034 | 66.122577 | 70.5930539 |
| 18:46:42 | 0:47:18 | 80.2188035 | 66.2675012 | 71.1785034 | 66.122577 | 70.5930539 |
| 18:46:43 | 0:47:19 | 82.2188035 | 66.2675012 | 70.1785034 | 66.122577 | 69.5930539 |
| 18:46:44 | 0:47:20 | 82.2188035 | 66.2675012 | 69.1785034 | 66.122577 | 68.5930539 |
| 18:46:45 | 0:47:21 | 83.2188035 | 67.2675012 | 69.1785034 | 66.122577 | 68.5930539 |
| 18:46:46 | 0:47:22 | 83.2188035 | 67.2675012 | 69.1785034 | 67.122577 | 68.5930539 |
| 18:46:47 | 0:47:23 | 82.2188035 | 66.2675012 | 66.1785034 | 67.122577 | 68.5930539 |
| 18:46:48 | 0:47:24 | 82.2188035 | 66.2675012 | 66.1785034 | 67.122577 | 68.5930539 |
| 18:46:49 | 0:47:25 | 83.2188035 | 66.2675012 | 66.1785034 | 68.122577 | 67.5930539 |
| 18:46:50 | 0:47:26 | 83.2188035 | 65.2675012 | 66.1785034 | 69.122577 | 63.5930539 |
| 18:46:51 | 0:47:27 | 83.2188035 | 64.2675012 | 65.1785034 | 69.122577 | 63.5930539 |
| 18:46:52 | 0:47:28 | 83.2188035 | 64.2675012 | 65.1785034 | 69.122577 | 63.5930539 |
| 18:46:53 | 0:47:29 | 83.2188035 | 65.2675012 | 65.1785034 | 70.122577 | 63.5930539 |
| 18:46:54 | 0:47:30 | 83.2188035 | 66.2675012 | 64.1785034 | 70.122577 | 60.5930539 |
| 18:46:55 | 0:47:31 | 82.2188035 | 65.2675012 | 64.1785034 | 70.122577 | 59.5930539 |
| 18:46:56 | 0:47:32 | 80.2188035 | 63.2675012 | 64.1785034 | 70.122577 | 59.5930539 |
| 18:46:57 | 0:47:33 | 78.2188035 | 62.2675012 | 64.1785034 | 70.122577 | 60.5930539 |
| 18:46:58 | 0:47:34 | 78.2188035 | 62.2675012 | 64.1785034 | 71.122577 | 61.5930539 |
| 18:46:59 | 0:47:35 | 77.2188035 | 63.2675012 | 64.1785034 | 74.122577 | 63.5930539 |
| 18:47:00 | 0:47:36 | 77.2188035 | 65.2675012 | 64.1785034 | 76.122577 | 64.5930539 |
| 18:47:01 | 0:47:37 | 77.2188035 | 67.2675012 | 64.1785034 | 76.122577 | 64.5930539 |
| 18:47:02 | 0:47:38 | 78.2188035 | 67.2675012 | 62.1785034 | 73.122577 | 64.5930539 |
| 18:47:03 | 0:47:39 | 79.2188035 | 67.2675012 | 62.1785034 | 69.122577 | 65.5930539 |
| 18:47:04 | 0:47:40 | 79.2188035 | 66.2675012 | 62.1785034 | 69.122577 | 65.5930539 |
| 18:47:05 | 0:47:41 | 78.2188035 | 64.2675012 | 62.1785034 | 69.122577 | 66.5930539 |
| 18:47:06 | 0:47:42 | 77.2188035 | 61.2675012 | 62.1785034 | 69.122577 | 66.5930539 |
| 18:47:07 | 0:47:43 | 77.2188035 | 59.2675012 | 62.1785034 | 68.122577 | 66.5930539 |
| 18:47:08 | 0:47:44 | 77.2188035 | 59.2675012 | 60.1785034 | 68.122577 | 67.5930539 |
| 18:47:09 | 0:47:45 | 77.2188035 | 60.2675012 | 60.1785034 | 68.122577 | 67.5930539 |
| 18:47:10 | 0:47:46 | 77.2188035 | 63.2675012 | 59.1785034 | 68.122577 | 68.5930539 |
| 18:47:11 | 0:47:47 | 76.2188035 | 64.2675012 | 59.1785034 | 68.122577 | 70.5930539 |
| 18:47:12 | 0:47:48 | 75.2188035 | 63.2675012 | 59.1785034 | 71.122577 | 71.5930539 |
| 18:47:13 | 0:47:49 | 73.2188035 | 61.2675012 | 59.1785034 | 71.122577 | 71.5930539 |
| 18:47:14 | 0:47:50 | 73.2188035 | 60.2675012 | 59.1785034 | 71.122577 | 71.5930539 |
| 18:47:15 | 0:47:51 | 73.2188035 | 59.2675012 | 59.1785034 | 71.122577 | 71.5930539 |
| 18:47:16 | 0:47:52 | 73.2188035 | 58.2675012 | 57.1785034 | 71.122577 | 70.5930539 |
| 18:47:17 | 0:47:53 | 72.2188035 | 59.2675012 | 53.1785034 | 72.122577 | 70.5930539 |
| 18:47:18 | 0:47:54 | 72.2188035 | 60.2675012 | 51.1785034 | 71.122577 | 70.5930539 |
| 18:47:19 | 0:47:55 | 72.2188035 | 62.2675012 | 51.1785034 | 71.122577 | 70.5930539 |
| 18:47:20 | 0:47:56 | 72.2188035 | 63.2675012 | 51.1785034 | 71.122577 | 71.5930539 |
| 18:47:21 | 0:47:57 | 72.2188035 | 64.2675012 | 52.1785034 | 71.122577 | 72.5930539 |
| 18:47:22 | 0:47:58 | 73.2188035 | 65.2675012 | 53.1785034 | 71.122577 | 73.5930539 |

|          |         |            |            |            |           |            |
|----------|---------|------------|------------|------------|-----------|------------|
| 18:47:23 | 0:47:59 | 73.2188035 | 65.2675012 | 53.1785034 | 72.122577 | 72.5930539 |
| 18:47:24 | 0:48:00 | 72.2188035 | 66.2675012 | 55.1785034 | 72.122577 | 68.5930539 |
| 18:47:25 | 0:48:01 | 72.2188035 | 66.2675012 | 55.1785034 | 75.122577 | 67.5930539 |
| 18:47:26 | 0:48:02 | 72.2188035 | 66.2675012 | 57.1785034 | 75.122577 | 67.5930539 |
| 18:47:27 | 0:48:03 | 72.2188035 | 65.2675012 | 57.1785034 | 75.122577 | 65.5930539 |
| 18:47:28 | 0:48:04 | 72.2188035 | 65.2675012 | 57.1785034 | 75.122577 | 65.5930539 |
| 18:47:29 | 0:48:05 | 72.2188035 | 65.2675012 | 62.1785034 | 74.122577 | 65.5930539 |
| 18:47:30 | 0:48:06 | 72.2188035 | 65.2675012 | 63.1785034 | 74.122577 | 65.5930539 |
| 18:47:31 | 0:48:07 | 72.2188035 | 66.2675012 | 64.1785034 | 74.122577 | 65.5930539 |
| 18:47:32 | 0:48:08 | 72.2188035 | 67.2675012 | 64.1785034 | 74.122577 | 65.5930539 |
| 18:47:33 | 0:48:09 | 71.2188035 | 68.2675012 | 65.1785034 | 74.122577 | 63.5930539 |
| 18:47:34 | 0:48:10 | 71.2188035 | 68.2675012 | 66.1785034 | 74.122577 | 63.5930539 |
| 18:47:35 | 0:48:11 | 71.2188035 | 68.2675012 | 67.1785034 | 74.122577 | 62.5930539 |
| 18:47:36 | 0:48:12 | 71.2188035 | 68.2675012 | 67.1785034 | 74.122577 | 61.5930539 |
| 18:47:37 | 0:48:13 | 71.2188035 | 68.2675012 | 67.1785034 | 74.122577 | 61.5930539 |
| 18:47:38 | 0:48:14 | 71.2188035 | 69.2675012 | 68.1785034 | 74.122577 | 61.5930539 |
| 18:47:39 | 0:48:15 | 71.2188035 | 70.2675012 | 68.1785034 | 74.122577 | 61.5930539 |
| 18:47:40 | 0:48:16 | 71.2188035 | 70.2675012 | 70.1785034 | 73.122577 | 63.5930539 |
| 18:47:41 | 0:48:17 | 71.2188035 | 69.2675012 | 70.1785034 | 70.122577 | 63.5930539 |
| 18:47:42 | 0:48:18 | 71.2188035 | 69.2675012 | 70.1785034 | 70.122577 | 63.5930539 |
| 18:47:43 | 0:48:19 | 72.2188035 | 66.2675012 | 71.1785034 | 68.122577 | 64.5930539 |
| 18:47:44 | 0:48:20 | 72.2188035 | 67.2675012 | 71.1785034 | 67.122577 | 64.5930539 |
| 18:47:45 | 0:48:21 | 72.2188035 | 67.2675012 | 71.1785034 | 67.122577 | 64.5930539 |
| 18:47:46 | 0:48:22 | 72.2188035 | 71.2675012 | 71.1785034 | 67.122577 | 64.5930539 |
| 18:47:47 | 0:48:23 | 72.2188035 | 71.2675012 | 71.1785034 | 67.122577 | 64.5930539 |
| 18:47:48 | 0:48:24 | 72.2188035 | 71.2675012 | 71.1785034 | 67.122577 | 64.5930539 |
| 18:47:49 | 0:48:25 | 72.2188035 | 71.2675012 | 71.1785034 | 67.122577 | 66.5930539 |
| 18:47:50 | 0:48:26 | 72.2188035 | 68.2675012 | 71.1785034 | 67.122577 | 66.5930539 |
| 18:47:51 | 0:48:27 | 72.2188035 | 66.2675012 | 71.1785034 | 67.122577 | 66.5930539 |
| 18:47:52 | 0:48:28 | 72.2188035 | 66.2675012 | 70.1785034 | 67.122577 | 67.5930539 |
| 18:47:53 | 0:48:29 | 75.2188035 | 65.2675012 | 70.1785034 | 67.122577 | 67.5930539 |
| 18:47:54 | 0:48:30 | 77.2188035 | 67.2675012 | 70.1785034 | 67.122577 | 67.5930539 |
| 18:47:55 | 0:48:31 | 77.2188035 | 68.2675012 | 70.1785034 | 67.122577 | 67.5930539 |
| 18:47:56 | 0:48:32 | 77.2188035 | 67.2675012 | 70.1785034 | 68.122577 | 67.5930539 |
| 18:47:57 | 0:48:33 | 77.2188035 | 66.2675012 | 70.1785034 | 68.122577 | 67.5930539 |
| 18:47:58 | 0:48:34 | 77.2188035 | 65.2675012 | 70.1785034 | 67.122577 | 67.5930539 |
| 18:47:59 | 0:48:35 | 78.2188035 | 65.2675012 | 68.1785034 | 67.122577 | 67.5930539 |
| 18:48:00 | 0:48:36 | 69.2097112 | 63.2675012 | 66.1785034 | 67.122577 | 67.5930539 |
| 18:48:01 | 0:48:37 | 69.5097112 | 63.2675012 | 67.1785034 | 66.122577 | 67.5930539 |
| 18:48:02 | 0:48:38 | 69.5097112 | 63.2675012 | 67.1785034 | 67.122577 | 64.5930539 |
| 18:48:03 | 0:48:39 | 69.8097112 | 63.2675012 | 67.1785034 | 68.122577 | 64.5930539 |
| 18:48:04 | 0:48:40 | 69.8097112 | 63.2675012 | 67.1785034 | 68.122577 | 64.5930539 |
| 18:48:05 | 0:48:41 | 71.3097112 | 64.2675012 | 67.1785034 | 68.122577 | 65.5930539 |
| 18:48:06 | 0:48:42 | 72.6097112 | 63.2675012 | 67.1785034 | 68.122577 | 65.5930539 |
| 18:48:07 | 0:48:43 | 72.6097112 | 63.2675012 | 67.1785034 | 68.122577 | 64.5930539 |

|          |         |            |            |            |           |            |
|----------|---------|------------|------------|------------|-----------|------------|
| 18:48:08 | 0:48:44 | 72.6097112 | 62.2675012 | 67.1785034 | 68.122577 | 64.5930539 |
| 18:48:09 | 0:48:45 | 72.8097112 | 61.2675012 | 68.1785034 | 68.122577 | 64.5930539 |
| 18:48:10 | 0:48:46 | 72.5097112 | 60.2675012 | 68.1785034 | 68.122577 | 63.5930539 |
| 18:48:11 | 0:48:47 | 72.4097112 | 61.2675012 | 68.1785034 | 69.122577 | 63.5930539 |
| 18:48:12 | 0:48:48 | 72.8097112 | 64.2675012 | 68.1785034 | 69.122577 | 63.5930539 |
| 18:48:13 | 0:48:49 | 72.5097112 | 67.2675012 | 69.1785034 | 71.122577 | 63.5930539 |
| 18:48:14 | 0:48:50 | 72.8097112 | 68.2675012 | 69.1785034 | 71.122577 | 70.5930539 |
| 18:48:15 | 0:48:51 | 72.4097112 | 66.2675012 | 70.1785034 | 70.122577 | 70.5930539 |
| 18:48:16 | 0:48:52 | 71.7097112 | 63.2675012 | 70.1785034 | 69.122577 | 70.5930539 |
| 18:48:17 | 0:48:53 | 71.7097112 | 63.2675012 | 70.1785034 | 69.122577 | 70.5930539 |
| 18:48:18 | 0:48:54 | 72.3097112 | 64.2675012 | 70.1785034 | 69.122577 | 70.5930539 |
| 18:48:19 | 0:48:55 | 72.5097112 | 64.2675012 | 70.1785034 | 69.122577 | 70.5930539 |
| 18:48:20 | 0:48:56 | 73.0097112 | 65.2675012 | 72.1785034 | 67.122577 | 71.5930539 |
| 18:48:21 | 0:48:57 | 73.0097112 | 64.2675012 | 71.1785034 | 67.122577 | 71.5930539 |
| 18:48:22 | 0:48:58 | 73.1097112 | 65.2675012 | 69.1785034 | 67.122577 | 69.5930539 |
| 18:48:23 | 0:48:59 | 72.8097112 | 65.2675012 | 69.1785034 | 67.122577 | 68.5930539 |
| 18:48:24 | 0:49:00 | 73.2097112 | 65.2675012 | 69.1785034 | 67.122577 | 68.5930539 |
| 18:48:25 | 0:49:01 | 73.0097112 | 71.2675012 | 69.1785034 | 67.122577 | 65.5930539 |
| 18:48:26 | 0:49:02 | 72.8097112 | 73.2675012 | 69.1785034 | 66.122577 | 65.5930539 |
| 18:48:27 | 0:49:03 | 73.0097112 | 74.2675012 | 71.1785034 | 66.122577 | 65.5930539 |
| 18:48:28 | 0:49:04 | 73.4097112 | 75.2675012 | 72.1785034 | 66.122577 | 65.5930539 |
| 18:48:29 | 0:49:05 | 73.7097112 | 75.2675012 | 71.1785034 | 66.122577 | 63.5930539 |
| 18:48:30 | 0:49:06 | 73.7097112 | 75.2675012 | 70.1785034 | 66.122577 | 63.5930539 |
| 18:48:31 | 0:49:07 | 73.7097112 | 72.2675012 | 70.1785034 | 66.122577 | 63.5930539 |
| 18:48:32 | 0:49:08 | 73.3097112 | 66.2675012 | 70.1785034 | 66.122577 | 64.5930539 |
| 18:48:33 | 0:49:09 | 72.6097112 | 62.2675012 | 70.1785034 | 66.122577 | 64.5930539 |
| 18:48:34 | 0:49:10 | 72.5097112 | 61.2675012 | 70.1785034 | 67.122577 | 64.5930539 |
| 18:48:35 | 0:49:11 | 72.5097112 | 61.2675012 | 70.1785034 | 67.122577 | 64.5930539 |
| 18:48:36 | 0:49:12 | 72.5097112 | 61.2675012 | 70.1785034 | 67.122577 | 64.5930539 |
| 18:48:37 | 0:49:13 | 73.7097112 | 65.2675012 | 70.1785034 | 67.122577 | 65.5930539 |
| 18:48:38 | 0:49:14 | 74.0097112 | 67.2675012 | 70.1785034 | 67.122577 | 65.5930539 |
| 18:48:39 | 0:49:15 | 74.4097112 | 67.2675012 | 70.1785034 | 68.122577 | 66.5930539 |
| 18:48:40 | 0:49:16 | 74.4097112 | 65.2675012 | 72.1785034 | 68.122577 | 66.5930539 |
| 18:48:41 | 0:49:17 | 74.7097112 | 65.2675012 | 73.1785034 | 69.122577 | 66.5930539 |
| 18:48:42 | 0:49:18 | 75.1097112 | 65.2675012 | 73.1785034 | 69.122577 | 66.5930539 |
| 18:48:43 | 0:49:19 | 75.4097112 | 66.2675012 | 74.1785034 | 70.122577 | 65.5930539 |
| 18:48:44 | 0:49:20 | 75.7097112 | 67.2675012 | 76.1785034 | 70.122577 | 65.5930539 |
| 18:48:45 | 0:49:21 | 76.2097112 | 68.2675012 | 77.1785034 | 71.122577 | 65.5930539 |
| 18:48:46 | 0:49:22 | 76.4097112 | 68.2675012 | 78.1785034 | 71.122577 | 64.5930539 |
| 18:48:47 | 0:49:23 | 77.0097112 | 67.2675012 | 78.1785034 | 71.122577 | 64.5930539 |
| 18:48:48 | 0:49:24 | 77.1097112 | 66.2675012 | 78.1785034 | 71.122577 | 64.5930539 |
| 18:48:49 | 0:49:25 | 76.7097112 | 66.2675012 | 78.1785034 | 69.122577 | 62.5930539 |
| 18:48:50 | 0:49:26 | 76.4097112 | 66.2675012 | 78.1785034 | 68.122577 | 62.5930539 |
| 18:48:51 | 0:49:27 | 76.8097112 | 68.2675012 | 76.1785034 | 68.122577 | 68.5930539 |
| 18:48:52 | 0:49:28 | 76.6097112 | 70.2675012 | 70.1785034 | 68.122577 | 69.5930539 |

|          |         |            |            |            |           |            |
|----------|---------|------------|------------|------------|-----------|------------|
| 18:48:53 | 0:49:29 | 76.8097112 | 72.2675012 | 67.1785034 | 68.122577 | 70.5930539 |
| 18:48:54 | 0:49:30 | 77.1097112 | 73.2675012 | 67.1785034 | 68.122577 | 72.5930539 |
| 18:48:55 | 0:49:31 | 77.5097112 | 73.2675012 | 68.1785034 | 68.122577 | 74.5930539 |
| 18:48:56 | 0:49:32 | 77.6097112 | 72.2675012 | 68.1785034 | 68.122577 | 74.5930539 |
| 18:48:57 | 0:49:33 | 76.6097112 | 71.2675012 | 68.1785034 | 67.122577 | 72.5930539 |
| 18:48:58 | 0:49:34 | 76.0097112 | 71.2675012 | 68.1785034 | 66.122577 | 71.5930539 |
| 18:48:59 | 0:49:35 | 75.8097112 | 71.2675012 | 67.1785034 | 66.122577 | 70.5930539 |
| 18:49:00 | 0:49:36 | 75.3097112 | 71.2675012 | 66.1785034 | 66.122577 | 68.5930539 |
| 18:49:01 | 0:49:37 | 75.3097112 | 72.2675012 | 66.1785034 | 66.122577 | 67.5930539 |
| 18:49:02 | 0:49:38 | 75.2097112 | 72.2675012 | 66.1785034 | 66.122577 | 67.5930539 |
| 18:49:03 | 0:49:39 | 74.2097112 | 76.2675012 | 66.1785034 | 66.122577 | 67.5930539 |
| 18:49:04 | 0:49:40 | 74.2097112 | 78.2675012 | 66.1785034 | 65.122577 | 67.5930539 |
| 18:49:05 | 0:49:41 | 74.0097112 | 79.2675012 | 67.1785034 | 65.122577 | 66.5930539 |
| 18:49:06 | 0:49:42 | 72.6097112 | 78.2675012 | 67.1785034 | 65.122577 | 66.5930539 |
| 18:49:07 | 0:49:43 | 72.3097112 | 77.2675012 | 67.1785034 | 65.122577 | 67.5930539 |
| 18:49:08 | 0:49:44 | 71.7097112 | 76.2675012 | 67.1785034 | 65.122577 | 66.5930539 |
| 18:49:09 | 0:49:45 | 71.7097112 | 77.2675012 | 67.1785034 | 65.122577 | 65.5930539 |
| 18:49:10 | 0:49:46 | 83.2188035 | 77.2675012 | 66.1785034 | 65.122577 | 65.5930539 |
| 18:49:11 | 0:49:47 | 77.2188035 | 78.2675012 | 66.1785034 | 65.122577 | 65.5930539 |
| 18:49:12 | 0:49:48 | 73.2188035 | 78.2675012 | 66.1785034 | 65.122577 | 68.5930539 |
| 18:49:13 | 0:49:49 | 69.2188035 | 78.2675012 | 67.1785034 | 65.122577 | 70.5930539 |
| 18:49:14 | 0:49:50 | 68.2188035 | 78.2675012 | 67.1785034 | 66.122577 | 71.5930539 |
| 18:49:15 | 0:49:51 | 68.2188035 | 78.2675012 | 69.1785034 | 66.122577 | 70.5930539 |
| 18:49:16 | 0:49:52 | 68.2188035 | 78.2675012 | 69.1785034 | 66.122577 | 70.5930539 |
| 18:49:17 | 0:49:53 | 69.2188035 | 78.2675012 | 69.1785034 | 66.122577 | 67.5930539 |
| 18:49:18 | 0:49:54 | 70.2188035 | 77.2675012 | 69.1785034 | 66.122577 | 67.5930539 |
| 18:49:19 | 0:49:55 | 70.2188035 | 78.2675012 | 69.1785034 | 65.122577 | 67.5930539 |
| 18:49:20 | 0:49:56 | 70.2188035 | 79.2675012 | 69.1785034 | 65.122577 | 66.5930539 |
| 18:49:21 | 0:49:57 | 70.2188035 | 79.2675012 | 69.1785034 | 65.122577 | 66.5930539 |
| 18:49:22 | 0:49:58 | 70.2188035 | 76.2675012 | 68.1785034 | 66.122577 | 66.5930539 |
| 18:49:23 | 0:49:59 | 70.2188035 | 74.2675012 | 68.1785034 | 66.122577 | 66.5930539 |
| 18:49:24 | 0:50:00 | 70.2188035 | 72.2675012 | 69.1785034 | 66.122577 | 66.5930539 |
| 18:49:25 | 0:50:01 | 70.2188035 | 70.2675012 | 69.1785034 | 66.122577 | 65.5930539 |
| 18:49:26 | 0:50:02 | 70.2188035 | 70.2675012 | 70.1785034 | 67.122577 | 65.5930539 |
| 18:49:27 | 0:50:03 | 70.2188035 | 71.2675012 | 70.1785034 | 68.122577 | 64.5930539 |
| 18:49:28 | 0:50:04 | 70.2188035 | 70.2675012 | 70.1785034 | 68.122577 | 63.5930539 |
| 18:49:29 | 0:50:05 | 69.2188035 | 68.2675012 | 70.1785034 | 69.122577 | 63.5930539 |
| 18:49:30 | 0:50:06 | 69.2188035 | 68.2675012 | 70.1785034 | 69.122577 | 63.5930539 |
| 18:49:31 | 0:50:07 | 67.2188035 | 68.2675012 | 71.1785034 | 76.122577 | 60.5930539 |
| 18:49:32 | 0:50:08 | 67.2188035 | 69.2675012 | 71.1785034 | 76.122577 | 60.5930539 |
| 18:49:33 | 0:50:09 | 68.2188035 | 71.2675012 | 71.1785034 | 78.122577 | 60.5930539 |
| 18:49:34 | 0:50:10 | 69.2188035 | 71.2675012 | 72.1785034 | 74.122577 | 61.5930539 |
| 18:49:35 | 0:50:11 | 69.2188035 | 73.2675012 | 72.1785034 | 71.122577 | 65.5930539 |
| 18:49:36 | 0:50:12 | 69.2188035 | 75.2675012 | 75.1785034 | 70.122577 | 67.5930539 |
| 18:49:37 | 0:50:13 | 69.2188035 | 76.2675012 | 75.1785034 | 70.122577 | 67.5930539 |

|          |         |            |            |            |           |            |
|----------|---------|------------|------------|------------|-----------|------------|
| 18:49:38 | 0:50:14 | 69.2188035 | 76.2675012 | 75.1785034 | 71.122577 | 67.5930539 |
| 18:49:39 | 0:50:15 | 69.2188035 | 74.2675012 | 75.1785034 | 71.122577 | 66.5930539 |
| 18:49:40 | 0:50:16 | 69.2188035 | 73.2675012 | 75.1785034 | 71.122577 | 66.5930539 |
| 18:49:41 | 0:50:17 | 69.2188035 | 73.2675012 | 75.1785034 | 70.122577 | 66.5930539 |
| 18:49:42 | 0:50:18 | 69.2188035 | 73.2675012 | 75.1785034 | 70.122577 | 66.5930539 |
| 18:49:43 | 0:50:19 | 69.2188035 | 77.2675012 | 74.1785034 | 70.122577 | 66.5930539 |
| 18:49:44 | 0:50:20 | 69.2188035 | 78.2675012 | 74.1785034 | 70.122577 | 66.5930539 |
| 18:49:45 | 0:50:21 | 69.2188035 | 77.2675012 | 74.1785034 | 69.122577 | 65.5930539 |
| 18:49:46 | 0:50:22 | 69.2188035 | 75.2675012 | 73.1785034 | 69.122577 | 65.5930539 |
| 18:49:47 | 0:50:23 | 69.2188035 | 72.2675012 | 73.1785034 | 69.122577 | 65.5930539 |
| 18:49:48 | 0:50:24 | 70.2188035 | 72.2675012 | 72.1785034 | 68.122577 | 67.5930539 |
| 18:49:49 | 0:50:25 | 70.2188035 | 72.2675012 | 70.1785034 | 67.122577 | 68.5930539 |
| 18:49:50 | 0:50:26 | 69.2188035 | 72.2675012 | 70.1785034 | 67.122577 | 69.5930539 |
| 18:49:51 | 0:50:27 | 69.2188035 | 71.2675012 | 69.1785034 | 67.122577 | 70.5930539 |
| 18:49:52 | 0:50:28 | 69.2188035 | 70.2675012 | 69.1785034 | 67.122577 | 70.5930539 |
| 18:49:53 | 0:50:29 | 67.2188035 | 68.2675012 | 69.1785034 | 66.122577 | 70.5930539 |
| 18:49:54 | 0:50:30 | 67.2188035 | 68.2675012 | 68.1785034 | 66.122577 | 69.5930539 |
| 18:49:55 | 0:50:31 | 67.2188035 | 68.2675012 | 68.1785034 | 65.122577 | 67.5930539 |
| 18:49:56 | 0:50:32 | 66.2188035 | 69.2675012 | 68.1785034 | 65.122577 | 65.5930539 |
| 18:49:57 | 0:50:33 | 66.2188035 | 70.2675012 | 68.1785034 | 65.122577 | 64.5930539 |
| 18:49:58 | 0:50:34 | 66.2188035 | 71.2675012 | 70.1785034 | 65.122577 | 62.5930539 |
| 18:49:59 | 0:50:35 | 66.2188035 | 71.2675012 | 70.1785034 | 66.122577 | 62.5930539 |
| 18:50:00 | 0:50:36 | 69.2188035 | 70.2675012 | 71.1785034 | 66.122577 | 62.5930539 |
| 18:50:01 | 0:50:37 | 70.2188035 | 69.2675012 | 71.1785034 | 66.122577 | 62.5930539 |
| 18:50:02 | 0:50:38 | 72.2188035 | 69.2675012 | 73.1785034 | 66.122577 | 62.5930539 |
| 18:50:03 | 0:50:39 | 72.2188035 | 69.2675012 | 74.1785034 | 65.122577 | 62.5930539 |
| 18:50:04 | 0:50:40 | 72.2188035 | 69.2675012 | 74.1785034 | 65.122577 | 63.5930539 |
| 18:50:05 | 0:50:41 | 73.2188035 | 69.2675012 | 75.1785034 | 65.122577 | 62.5930539 |
| 18:50:06 | 0:50:42 | 73.2188035 | 69.2675012 | 75.1785034 | 65.122577 | 63.5930539 |
| 18:50:07 | 0:50:43 | 73.2188035 | 69.2675012 | 75.1785034 | 65.122577 | 63.5930539 |
| 18:50:08 | 0:50:44 | 73.2188035 | 68.2675012 | 75.1785034 | 65.122577 | 63.5930539 |
| 18:50:09 | 0:50:45 | 73.2188035 | 68.2675012 | 75.1785034 | 65.122577 | 65.5930539 |
| 18:50:10 | 0:50:46 | 73.2188035 | 68.2675012 | 76.1785034 | 65.122577 | 67.5930539 |
| 18:50:11 | 0:50:47 | 72.2188035 | 69.2675012 | 76.1785034 | 65.122577 | 68.5930539 |
| 18:50:12 | 0:50:48 | 71.2188035 | 69.2675012 | 76.1785034 | 65.122577 | 69.5930539 |
| 18:50:13 | 0:50:49 | 71.2188035 | 69.2675012 | 76.1785034 | 65.122577 | 69.5930539 |
| 18:50:14 | 0:50:50 | 71.2188035 | 70.2675012 | 76.1785034 | 65.122577 | 66.5930539 |
| 18:50:15 | 0:50:51 | 71.2188035 | 69.2675012 | 76.1785034 | 65.122577 | 66.5930539 |
| 18:50:16 | 0:50:52 | 71.2188035 | 67.2675012 | 76.1785034 | 66.122577 | 63.5930539 |
| 18:50:17 | 0:50:53 | 71.2188035 | 66.2675012 | 76.1785034 | 66.122577 | 62.5930539 |
| 18:50:18 | 0:50:54 | 72.2188035 | 66.2675012 | 76.1785034 | 66.122577 | 63.5930539 |
| 18:50:19 | 0:50:55 | 73.2188035 | 66.2675012 | 76.1785034 | 66.122577 | 64.5930539 |
| 18:50:20 | 0:50:56 | 75.2188035 | 67.2675012 | 76.1785034 | 66.122577 | 65.5930539 |
| 18:50:21 | 0:50:57 | 75.2188035 | 68.2675012 | 77.1785034 | 67.122577 | 65.5930539 |
| 18:50:22 | 0:50:58 | 74.2188035 | 67.2675012 | 75.1785034 | 67.122577 | 66.5930539 |



|          |         |            |            |            |           |            |
|----------|---------|------------|------------|------------|-----------|------------|
| 18:50:23 | 0:50:59 | 73.2188035 | 66.2675012 | 74.1785034 | 67.122577 | 66.5930539 |
| 18:50:24 | 0:51:00 | 73.2188035 | 66.2675012 | 74.1785034 | 67.122577 | 66.5930539 |
| 18:50:25 | 0:51:01 | 71.2188035 | 64.2675012 | 73.1785034 | 67.122577 | 68.5930539 |
| 18:50:26 | 0:51:02 | 71.2188035 | 63.2675012 | 71.1785034 | 66.122577 | 68.5930539 |
| 18:50:27 | 0:51:03 | 70.2188035 | 63.2675012 | 70.1785034 | 66.122577 | 68.5930539 |
| 18:50:28 | 0:51:04 | 69.2188035 | 60.2675012 | 69.1785034 | 66.122577 | 68.5930539 |
| 18:50:29 | 0:51:05 | 68.2188035 | 60.2675012 | 69.1785034 | 66.122577 | 68.5930539 |
| 18:50:30 | 0:51:06 | 68.2188035 | 60.2675012 | 68.1785034 | 66.122577 | 70.5930539 |
| 18:50:31 | 0:51:07 | 67.2188035 | 61.2675012 | 68.1785034 | 66.122577 | 70.5930539 |
| 18:50:32 | 0:51:08 | 66.2188035 | 62.2675012 | 68.1785034 | 66.122577 | 69.5930539 |
| 18:50:33 | 0:51:09 | 66.2188035 | 62.2675012 | 68.1785034 | 66.122577 | 69.5930539 |
| 18:50:34 | 0:51:10 | 67.2188035 | 63.2675012 | 68.1785034 | 66.122577 | 67.5930539 |
| 18:50:35 | 0:51:11 | 67.2188035 | 64.2675012 | 67.1785034 | 66.122577 | 65.5930539 |
| 18:50:36 | 0:51:12 | 67.2188035 | 64.2675012 | 67.1785034 | 66.122577 | 63.5930539 |
| 18:50:37 | 0:51:13 | 67.2188035 | 66.2675012 | 67.1785034 | 66.122577 | 63.5930539 |
| 18:50:38 | 0:51:14 | 67.2188035 | 67.2675012 | 67.1785034 | 66.122577 | 63.5930539 |
| 18:50:39 | 0:51:15 | 67.2188035 | 67.2675012 | 67.1785034 | 66.122577 | 62.5930539 |
| 18:50:40 | 0:51:16 | 67.2188035 | 69.2675012 | 67.1785034 | 66.122577 | 61.5930539 |
| 18:50:41 | 0:51:17 | 66.2188035 | 70.2675012 | 67.1785034 | 66.122577 | 61.5930539 |
| 18:50:42 | 0:51:18 | 66.2188035 | 70.2675012 | 67.1785034 | 66.122577 | 60.5930539 |
| 18:50:43 | 0:51:19 | 68.2188035 | 71.2675012 | 67.1785034 | 66.122577 | 60.5930539 |
| 18:50:44 | 0:51:20 | 68.2188035 | 70.2675012 | 67.1785034 | 65.122577 | 59.5930539 |
| 18:50:45 | 0:51:21 | 70.2188035 | 70.2675012 | 68.1785034 | 65.122577 | 59.5930539 |
| 18:50:46 | 0:51:22 | 70.2188035 | 67.2675012 | 68.1785034 | 65.122577 | 59.5930539 |
| 18:50:47 | 0:51:23 | 70.2188035 | 66.2675012 | 68.1785034 | 65.122577 | 59.5930539 |
| 18:50:48 | 0:51:24 | 70.2188035 | 66.2675012 | 67.1785034 | 65.122577 | 59.5930539 |
| 18:50:49 | 0:51:25 | 70.2188035 | 65.2675012 | 67.1785034 | 65.122577 | 59.5930539 |
| 18:50:50 | 0:51:26 | 71.2188035 | 64.2675012 | 67.1785034 | 65.122577 | 60.5930539 |
| 18:50:51 | 0:51:27 | 73.2188035 | 64.2675012 | 67.1785034 | 65.122577 | 60.5930539 |
| 18:50:52 | 0:51:28 | 73.2188035 | 62.2675012 | 68.1785034 | 65.122577 | 59.5930539 |
| 18:50:53 | 0:51:29 | 73.2188035 | 62.2675012 | 68.1785034 | 65.122577 | 59.5930539 |
| 18:50:54 | 0:51:30 | 73.2188035 | 62.2675012 | 68.1785034 | 65.122577 | 59.5930539 |
| 18:50:55 | 0:51:31 | 74.2188035 | 63.2675012 | 68.1785034 | 65.122577 | 58.5930539 |
| 18:50:56 | 0:51:32 | 74.2188035 | 63.2675012 | 68.1785034 | 65.122577 | 58.5930539 |
| 18:50:57 | 0:51:33 | 73.2188035 | 63.2675012 | 66.1785034 | 64.122577 | 59.5930539 |
| 18:50:58 | 0:51:34 | 72.2188035 | 62.2675012 | 67.1785034 | 64.122577 | 59.5930539 |
| 18:50:59 | 0:51:35 | 72.2188035 | 62.2675012 | 67.1785034 | 64.122577 | 59.5930539 |
| 18:51:00 | 0:51:36 | 72.2188035 | 62.2675012 | 67.1785034 | 64.122577 | 59.5930539 |
| 18:51:01 | 0:51:37 | 73.2188035 | 62.2675012 | 67.1785034 | 64.122577 | 59.5930539 |
| 18:51:02 | 0:51:38 | 72.2188035 | 63.2675012 | 67.1785034 | 65.122577 | 59.5930539 |
| 18:51:03 | 0:51:39 | 71.2188035 | 63.2675012 | 67.1785034 | 65.122577 | 59.5930539 |
| 18:51:04 | 0:51:40 | 71.2188035 | 63.2675012 | 68.1785034 | 65.122577 | 59.5930539 |
| 18:51:05 | 0:51:41 | 71.2188035 | 64.2675012 | 68.1785034 | 65.122577 | 61.5930539 |
| 18:51:06 | 0:51:42 | 71.2188035 | 66.2675012 | 68.1785034 | 65.122577 | 61.5930539 |
| 18:51:07 | 0:51:43 | 69.2188035 | 67.2675012 | 68.1785034 | 65.122577 | 62.5930539 |

|          |         |            |            |            |           |            |
|----------|---------|------------|------------|------------|-----------|------------|
| 18:51:08 | 0:51:44 | 69.2188035 | 68.2675012 | 68.1785034 | 65.122577 | 66.5930539 |
| 18:51:09 | 0:51:45 | 70.2188035 | 67.2675012 | 68.1785034 | 65.122577 | 69.5930539 |
| 18:51:10 | 0:51:46 | 69.2188035 | 67.2675012 | 69.1785034 | 66.122577 | 73.5930539 |
| 18:51:11 | 0:51:47 | 69.2188035 | 67.2675012 | 69.1785034 | 69.122577 | 73.5930539 |
| 18:51:12 | 0:51:48 | 70.2188035 | 66.2675012 | 69.1785034 | 71.122577 | 73.5930539 |
| 18:51:13 | 0:51:49 | 69.2188035 | 66.2675012 | 69.1785034 | 72.122577 | 71.5930539 |
| 18:51:14 | 0:51:50 | 69.2188035 | 66.2675012 | 69.1785034 | 74.122577 | 69.5930539 |
| 18:51:15 | 0:51:51 | 70.2188035 | 66.2675012 | 70.1785034 | 77.122577 | 65.5930539 |
| 18:51:16 | 0:51:52 | 70.2188035 | 66.2675012 | 71.1785034 | 78.122577 | 63.5930539 |
| 18:51:17 | 0:51:53 | 70.2188035 | 65.2675012 | 72.1785034 | 79.122577 | 62.5930539 |
| 18:51:18 | 0:51:54 | 70.2188035 | 65.2675012 | 72.1785034 | 79.122577 | 62.5930539 |
| 18:51:19 | 0:51:55 | 70.2188035 | 65.2675012 | 72.1785034 | 79.122577 | 62.5930539 |
| 18:51:20 | 0:51:56 | 71.2188035 | 65.2675012 | 72.1785034 | 80.122577 | 60.5930539 |
| 18:51:21 | 0:51:57 | 71.2188035 | 65.2675012 | 72.1785034 | 81.122577 | 60.5930539 |
| 18:51:22 | 0:51:58 | 70.2188035 | 65.2675012 | 72.1785034 | 81.122577 | 60.5930539 |
| 18:51:23 | 0:51:59 | 70.2188035 | 65.2675012 | 69.1785034 | 82.122577 | 60.5930539 |
| 18:51:24 | 0:52:00 | 70.2188035 | 66.2675012 | 69.1785034 | 83.122577 | 60.5930539 |
| 18:51:25 | 0:52:01 | 70.2188035 | 67.2675012 | 69.1785034 | 83.122577 | 60.5930539 |
| 18:51:26 | 0:52:02 | 70.2188035 | 67.2675012 | 69.1785034 | 84.122577 | 60.5930539 |
| 18:51:27 | 0:52:03 | 69.2188035 | 67.2675012 | 69.1785034 | 83.122577 | 60.5930539 |
| 18:51:28 | 0:52:04 | 70.2188035 | 67.2675012 | 69.1785034 | 83.122577 | 60.5930539 |
| 18:51:29 | 0:52:05 | 70.2188035 | 66.2675012 | 69.1785034 | 83.122577 | 60.5930539 |
| 18:51:30 | 0:52:06 | 70.2188035 | 66.2675012 | 69.1785034 | 83.122577 | 60.5930539 |
| 18:51:31 | 0:52:07 | 70.2188035 | 66.2675012 | 63.1785034 | 83.122577 | 60.5930539 |
| 18:51:32 | 0:52:08 | 70.2188035 | 66.2675012 | 63.1785034 | 83.122577 | 59.5930539 |
| 18:51:33 | 0:52:09 | 71.2188035 | 73.2675012 | 63.1785034 | 75.122577 | 59.5930539 |
| 18:51:34 | 0:52:10 | 71.2188035 | 73.2675012 | 63.1785034 | 72.122577 | 59.5930539 |
| 18:51:35 | 0:52:11 | 71.2188035 | 74.2675012 | 62.1785034 | 72.122577 | 59.5930539 |
| 18:51:36 | 0:52:12 | 71.2188035 | 74.2675012 | 61.1785034 | 69.122577 | 59.5930539 |
| 18:51:37 | 0:52:13 | 72.2188035 | 73.2675012 | 61.1785034 | 69.122577 | 59.5930539 |
| 18:51:38 | 0:52:14 | 72.2188035 | 73.2675012 | 61.1785034 | 68.122577 | 60.5930539 |
| 18:51:39 | 0:52:15 | 72.2188035 | 73.2675012 | 61.1785034 | 66.122577 | 63.5930539 |
| 18:51:40 | 0:52:16 | 72.2188035 | 70.2675012 | 64.1785034 | 65.122577 | 63.5930539 |
| 18:51:41 | 0:52:17 | 72.2188035 | 69.2675012 | 64.1785034 | 63.122577 | 67.5930539 |
| 18:51:42 | 0:52:18 | 72.2188035 | 69.2675012 | 63.1785034 | 62.122577 | 67.5930539 |
| 18:51:43 | 0:52:19 | 72.2188035 | 69.2675012 | 63.1785034 | 62.122577 | 68.5930539 |
| 18:51:44 | 0:52:20 | 72.2188035 | 65.2675012 | 62.1785034 | 63.122577 | 68.5930539 |
| 18:51:45 | 0:52:21 | 72.2188035 | 65.2675012 | 62.1785034 | 63.122577 | 66.5930539 |
| 18:51:46 | 0:52:22 | 71.2188035 | 66.2675012 | 60.1785034 | 64.122577 | 61.5930539 |
| 18:51:47 | 0:52:23 | 71.2188035 | 67.2675012 | 57.1785034 | 65.122577 | 56.5930539 |
| 18:51:48 | 0:52:24 | 70.2188035 | 68.2675012 | 56.1785034 | 69.122577 | 50.5930539 |
| 18:51:49 | 0:52:25 | 70.2188035 | 68.2675012 | 56.1785034 | 70.122577 | 48.5930539 |
| 18:51:50 | 0:52:26 | 70.2188035 | 70.2675012 | 57.1785034 | 72.122577 | 47.5930539 |
| 18:51:51 | 0:52:27 | 70.2188035 | 70.2675012 | 57.1785034 | 72.122577 | 47.5930539 |
| 18:51:52 | 0:52:28 | 70.2188035 | 70.2675012 | 58.1785034 | 72.122577 | 47.5930539 |

|          |         |            |            |            |            |            |
|----------|---------|------------|------------|------------|------------|------------|
| 18:51:53 | 0:52:29 | 71.2188035 | 70.2675012 | 59.1785034 | 72.122577  | 61.5930539 |
| 18:51:54 | 0:52:30 | 72.2188035 | 70.2675012 | 61.1785034 | 71.122577  | 66.5930539 |
| 18:51:55 | 0:52:31 | 72.2188035 | 70.2675012 | 61.1785034 | 71.122577  | 67.5930539 |
| 18:51:56 | 0:52:32 | 72.2188035 | 67.2675012 | 61.1785034 | 71.122577  | 68.5930539 |
| 18:51:57 | 0:52:33 | 71.2188035 | 67.2675012 | 62.1785034 | 71.122577  | 68.5930539 |
| 18:51:58 | 0:52:34 | 71.2188035 | 65.2675012 | 62.1785034 | 71.122577  | 69.5930539 |
| 18:51:59 | 0:52:35 | 71.2188035 | 65.2675012 | 62.1785034 | 70.122577  | 69.5930539 |
| 18:52:00 | 0:52:36 | 72.2188035 | 66.2675012 | 63.1785034 | 71.122577  | 69.5930539 |
| 18:52:01 | 0:52:37 | 72.2188035 | 66.2675012 | 63.1785034 | 73.122577  | 69.5930539 |
| 18:52:02 | 0:52:38 | 72.2188035 | 66.2675012 | 64.1785034 | 73.122577  | 69.5930539 |
| 18:52:03 | 0:52:39 | 72.2188035 | 67.2675012 | 65.1785034 | 75.122577  | 69.5930539 |
| 18:52:04 | 0:52:40 | 73.2188035 | 65.2675012 | 65.1785034 | 76.122577  | 69.5930539 |
| 18:52:05 | 0:52:41 | 73.2188035 | 65.2675012 | 65.1785034 | 76.122577  | 70.5930539 |
| 18:52:06 | 0:52:42 | 73.2188035 | 65.2675012 | 65.1785034 | 75.122577  | 71.5930539 |
| 18:52:07 | 0:52:43 | 74.2188035 | 65.2675012 | 66.1785034 | 71.122577  | 71.5930539 |
| 18:52:08 | 0:52:44 | 74.2188035 | 65.2675012 | 67.1785034 | 68.122577  | 71.5930539 |
| 18:52:09 | 0:52:45 | 74.2188035 | 66.2675012 | 67.1785034 | 68.122577  | 73.5930539 |
| 18:52:10 | 0:52:46 | 74.2188035 | 67.2675012 | 67.1785034 | 68.122577  | 72.5930539 |
| 18:52:11 | 0:52:47 | 74.2188035 | 66.2675012 | 68.1785034 | 72.6522851 | 70.5930539 |

| Person 8   | Person 13 | Person 9   | Person 4   | Person 12  | Person 11 |
|------------|-----------|------------|------------|------------|-----------|
| 69.9177631 | 77.615036 | 85.0756734 | 81.4780886 |            |           |
| 69.9177631 | 76.615036 | 85.0756734 | 81.4780886 |            |           |
| 68.9177631 | 76.615036 | 85.0756734 | 81.4780886 |            |           |
| 68.9177631 | 76.615036 | 85.0756734 | 81.4780886 |            |           |
| 68.9177631 | 74.615036 | 85.0756734 | 81.4780886 |            |           |
| 68.9177631 | 73.615036 | 85.0756734 | 81.4780886 |            |           |
| 68.9177631 | 72.615036 | 87.0756734 | 81.4780886 |            |           |
| 68.9177631 | 72.615036 | 87.0756734 | 81.4780886 |            |           |
| 68.9177631 | 70.615036 | 86.0756734 | 81.4780886 |            |           |
| 68.9177631 | 70.615036 | 86.0756734 | 86.4780886 |            |           |
| 68.9177631 | 70.615036 | 86.0756734 | 88.4780886 |            |           |
| 69.9177631 | 70.615036 | 83.0756734 | 87.4780886 |            |           |
| 69.9177631 | 72.615036 | 83.0756734 | 87.4780886 |            |           |
| 69.9177631 | 74.615036 | 83.0756734 | 84.4780886 |            |           |
| 70.9177631 | 74.615036 | 83.0756734 | 83.4780886 |            |           |
| 72.9177631 | 73.615036 | 82.0756734 | 82.4780886 |            |           |
| 73.9177631 | 73.615036 | 81.0756734 | 82.4780886 |            |           |
| 73.9177631 | 73.615036 | 79.0756734 | 80.4780886 |            |           |
| 73.9177631 | 73.615036 | 79.0756734 | 80.4780886 |            |           |
| 74.9177631 | 74.615036 | 78.0756734 | 80.4780886 |            |           |
| 74.9177631 | 76.615036 | 78.0756734 | 80.4780886 |            |           |
| 74.9177631 | 76.615036 | 78.0756734 | 77.4780886 |            |           |
| 74.9177631 | 77.615036 | 77.0756734 | 77.4780886 |            |           |
| 74.9177631 | 77.615036 | 77.0756734 | 75.4780886 | 77.3328655 |           |
| 74.9177631 | 77.615036 | 76.0756734 | 75.4780886 | 82.3328655 |           |
| 75.9177631 | 76.615036 | 76.0756734 | 74.4780886 | 85.3328655 |           |
| 75.9177631 | 75.615036 | 76.0756734 | 74.4780886 | 86.3328655 |           |
| 77.9177631 | 75.615036 | 76.0756734 | 74.4780886 | 86.3328655 |           |
| 77.9177631 | 75.615036 | 76.0756734 | 76.4780886 | 86.3328655 |           |
| 77.9177631 | 75.615036 | 76.0756734 | 81.4780886 | 83.3328655 |           |
| 77.9177631 | 75.615036 | 76.0756734 | 84.4780886 | 83.3328655 |           |
| 78.9177631 | 75.615036 | 76.0756734 | 85.4780886 | 78.3328655 |           |
| 78.9177631 | 74.615036 | 76.0756734 | 85.4780886 | 74.3328655 |           |
| 78.9177631 | 72.615036 | 75.0756734 | 81.4780886 | 71.3328655 |           |
| 78.9177631 | 73.615036 | 75.0756734 | 75.4780886 | 68.3328655 |           |
| 78.9177631 | 73.615036 | 75.0756734 | 75.4780886 | 68.3328655 |           |
| 78.9177631 | 74.615036 | 75.0756734 | 73.4780886 | 67.3328655 |           |
| 79.9177631 | 74.615036 | 75.0756734 | 72.4780886 | 66.3328655 |           |
| 79.9177631 | 74.615036 | 75.0756734 | 70.4780886 | 64.3328655 |           |
| 79.9177631 | 74.615036 | 75.0756734 | 69.4780886 | 63.3328655 |           |
| 79.9177631 | 75.615036 | 75.0756734 | 69.4780886 | 63.3328655 |           |
| 79.9177631 | 77.615036 | 75.0756734 | 68.4780886 | 62.3328655 |           |
| 79.9177631 | 78.615036 | 75.0756734 | 67.4780886 | 61.3328655 |           |

|            |           |            |            |            |
|------------|-----------|------------|------------|------------|
| 79.9177631 | 78.615036 | 75.0756734 | 66.4780886 | 61.3328655 |
| 79.9177631 | 78.615036 | 76.0756734 | 65.4780886 | 63.3328655 |
| 79.9177631 | 78.615036 | 76.0756734 | 65.4780886 | 64.3328655 |
| 80.9177631 | 75.615036 | 76.0756734 | 65.4780886 | 64.3328655 |
| 81.9177631 | 73.615036 | 78.0756734 | 65.4780886 | 64.3328655 |
| 83.9177631 | 73.615036 | 78.0756734 | 65.4780886 | 64.3328655 |
| 86.9177631 | 73.615036 | 78.0756734 | 65.4780886 | 64.3328655 |
| 86.9177631 | 73.615036 | 78.0756734 | 68.4780886 | 64.3328655 |
| 85.9177631 | 74.615036 | 79.0756734 | 68.4780886 | 63.3328655 |
| 85.9177631 | 74.615036 | 79.0756734 | 74.4780886 | 64.3328655 |
| 84.9177631 | 74.615036 | 82.0756734 | 73.4780886 | 64.3328655 |
| 83.9177631 | 74.615036 | 85.0756734 | 73.4780886 | 65.3328655 |
| 82.9177631 | 74.615036 | 85.0756734 | 73.4780886 | 69.3328655 |
| 81.9177631 | 74.615036 | 85.0756734 | 72.4780886 | 72.3328655 |
| 80.9177631 | 75.615036 | 86.0756734 | 71.4780886 | 72.3328655 |
| 76.9177631 | 75.615036 | 86.0756734 | 71.4780886 | 73.3328655 |
| 76.9177631 | 75.615036 | 86.0756734 | 71.4780886 | 80.3328655 |
| 75.9177631 | 75.615036 | 87.0756734 | 69.4780886 | 80.3328655 |
| 76.9177631 | 75.615036 | 80.0756734 | 69.4780886 | 82.3328655 |
| 76.9177631 | 75.615036 | 77.0756734 | 69.4780886 | 85.3328655 |
| 76.9177631 | 80.615036 | 77.0756734 | 66.4780886 | 85.3328655 |
| 77.9177631 | 80.615036 | 77.0756734 | 66.4780886 | 84.3328655 |
| 78.9177631 | 80.615036 | 77.0756734 | 66.4780886 | 78.3328655 |
| 78.9177631 | 80.615036 | 77.0756734 | 65.4780886 | 74.3328655 |
| 78.9177631 | 80.615036 | 76.0756734 | 65.4780886 | 72.3328655 |
| 78.9177631 | 70.615036 | 75.0756734 | 65.4780886 | 72.3328655 |
| 78.9177631 | 66.615036 | 75.0756734 | 64.4780886 | 72.3328655 |
| 78.9177631 | 64.615036 | 75.0756734 | 64.4780886 | 73.3328655 |
| 78.9177631 | 64.615036 | 75.0756734 | 64.4780886 | 75.3328655 |
| 78.9177631 | 64.615036 | 75.0756734 | 64.4780886 | 78.3328655 |
| 78.9177631 | 64.615036 | 75.0756734 | 66.4780886 | 79.3328655 |
| 75.9177631 | 64.615036 | 75.0756734 | 66.4780886 | 79.3328655 |
| 75.9177631 | 64.615036 | 75.0756734 | 66.4780886 | 79.3328655 |
| 75.9177631 | 64.615036 | 75.0756734 | 66.4780886 | 79.3328655 |
| 74.9177631 | 64.615036 | 75.0756734 | 66.4780886 | 77.3328655 |
| 74.9177631 | 64.615036 | 76.0756734 | 66.4780886 | 76.3328655 |
| 72.9177631 | 65.615036 | 77.0756734 | 66.4780886 | 75.3328655 |
| 69.9177631 | 65.615036 | 78.0756734 | 68.4780886 | 75.3328655 |
| 69.9177631 | 64.615036 | 78.0756734 | 69.4780886 | 75.3328655 |
| 67.9177631 | 64.615036 | 79.0756734 | 69.4780886 | 73.3328655 |
| 66.9177631 | 64.615036 | 80.0756734 | 69.4780886 | 74.3328655 |
| 66.9177631 | 64.615036 | 80.0756734 | 71.4780886 | 76.3328655 |
| 66.9177631 | 64.615036 | 80.0756734 | 71.4780886 | 76.3328655 |
| 66.9177631 | 66.615036 | 80.0756734 | 72.4780886 | 76.3328655 |
| 67.9177631 | 66.615036 | 81.0756734 | 72.4780886 | 76.3328655 |

|            |           |            |            |            |            |
|------------|-----------|------------|------------|------------|------------|
| 68.9177631 | 66.615036 | 81.0756734 | 76.4780886 | 76.3328655 |            |
| 68.9177631 | 66.615036 | 81.0756734 | 76.4780886 | 76.3328655 |            |
| 69.9177631 | 67.615036 | 81.0756734 | 76.4780886 | 76.3328655 |            |
| 69.9177631 | 67.615036 | 81.0756734 | 77.4780886 | 76.3328655 |            |
| 69.9177631 | 67.615036 | 81.0756734 | 77.4780886 | 76.3328655 |            |
| 69.9177631 | 67.615036 | 81.0756734 | 76.4780886 | 76.3328655 |            |
| 72.9177631 | 67.615036 | 81.0756734 | 76.4780886 | 75.3328655 |            |
| 72.9177631 | 67.615036 | 81.0756734 | 75.4780886 | 74.3328655 |            |
| 72.9177631 | 67.615036 | 81.0756734 | 74.4780886 | 73.3328655 |            |
| 74.9177631 | 68.615036 | 81.0756734 | 74.4780886 | 73.3328655 |            |
| 74.9177631 | 68.615036 | 81.0756734 | 74.4780886 | 73.3328655 |            |
| 74.9177631 | 68.615036 | 80.0756734 | 74.4780886 | 73.3328655 |            |
| 74.9177631 | 69.615036 | 80.0756734 | 74.4780886 | 74.3328655 |            |
| 73.9177631 | 69.615036 | 80.0756734 | 77.4780886 | 73.3328655 |            |
| 71.9177631 | 69.615036 | 80.0756734 | 77.4780886 | 70.3328655 |            |
| 71.9177631 | 69.615036 | 78.0756734 | 81.4780886 | 68.3328655 |            |
| 70.9177631 | 69.615036 | 78.0756734 | 84.4780886 | 68.3328655 |            |
| 70.9177631 | 69.615036 | 78.0756734 | 85.4780886 | 68.3328655 |            |
| 71.9177631 | 69.615036 | 78.0756734 | 82.4780886 | 68.3328655 |            |
| 74.9177631 | 70.615036 | 77.0756734 | 82.4780886 | 69.3328655 |            |
| 74.9177631 | 70.615036 | 77.0756734 | 81.4780886 | 70.3328655 |            |
| 74.9177631 | 71.615036 | 77.0756734 | 80.4780886 | 71.3328655 |            |
| 75.9177631 | 71.615036 | 77.0756734 | 80.4780886 | 73.3328655 |            |
| 75.9177631 | 71.615036 | 79.0756734 | 79.4780886 | 72.3328655 |            |
| 75.9177631 | 70.615036 | 79.0756734 | 77.4780886 | 72.3328655 |            |
| 75.9177631 | 69.615036 | 80.0756734 | 76.4780886 | 72.3328655 |            |
| 76.9177631 | 69.615036 | 80.0756734 | 76.4780886 | 73.3328655 |            |
| 76.9177631 | 68.615036 | 81.0756734 | 76.4780886 | 75.3328655 |            |
| 70.9177631 | 68.615036 | 81.0756734 | 77.4780886 | 77.3328655 |            |
| 66.9177631 | 68.615036 | 82.0756734 | 80.4780886 | 77.3328655 |            |
| 64.9177631 | 69.615036 | 82.0756734 | 82.4780886 | 79.3328655 |            |
| 64.9177631 | 70.615036 | 82.0756734 | 82.4780886 | 81.3328655 |            |
| 63.9177631 | 70.615036 | 82.0756734 | 83.4780886 | 82.3328655 |            |
| 63.9177631 | 71.615036 | 82.0756734 | 83.4780886 | 83.3328655 |            |
| 62.9177631 | 71.615036 | 79.0756734 | 83.4780886 | 84.3328655 |            |
| 62.9177631 | 71.615036 | 78.0756734 | 82.4780886 | 83.3328655 |            |
| 61.9177631 | 71.615036 | 78.0756734 | 80.4780886 | 83.3328655 |            |
| 62.9177631 | 71.615036 | 77.0756734 | 80.4780886 | 83.3328655 |            |
| 63.9177631 | 71.615036 | 77.0756734 | 78.4780886 | 83.3328655 |            |
| 64.9177631 | 71.615036 | 77.0756734 | 76.4780886 | 83.3328655 |            |
| 67.9177631 | 71.615036 | 77.0756734 | 75.4780886 | 83.3328655 |            |
| 70.9177631 | 71.615036 | 77.0756734 | 74.4780886 | 82.3328655 |            |
| 71.9177631 | 71.615036 | 77.0756734 | 74.4780886 | 82.3328655 |            |
| 73.9177631 | 72.615036 | 77.0756734 | 74.4780886 | 83.3328655 | 88.9122821 |
| 73.9177631 | 73.615036 | 76.0756734 | 74.4780886 | 83.3328655 | 88.9122821 |

|            |           |            |            |            |            |
|------------|-----------|------------|------------|------------|------------|
| 77.9177631 | 73.615036 | 76.0756734 | 75.4780886 | 81.3328655 | 88.9122821 |
| 78.9177631 | 74.615036 | 77.0756734 | 75.4780886 | 78.3328655 | 87.9122821 |
| 79.9177631 | 74.615036 | 77.0756734 | 75.4780886 | 76.3328655 | 83.9122821 |
| 79.9177631 | 74.615036 | 77.0756734 | 76.4780886 | 76.3328655 | 83.9122821 |
| 80.9177631 | 74.615036 | 78.0756734 | 76.4780886 | 80.3328655 | 83.9122821 |
| 81.9177631 | 74.615036 | 79.0756734 | 76.4780886 | 81.3328655 | 83.9122821 |
| 81.9177631 | 74.615036 | 79.0756734 | 78.4780886 | 82.3328655 | 82.9122821 |
| 83.9177631 | 75.615036 | 79.0756734 | 78.4780886 | 82.3328655 | 82.9122821 |
| 82.9177631 | 75.615036 | 79.0756734 | 77.4780886 | 83.3328655 | 82.9122821 |
| 82.9177631 | 75.615036 | 79.0756734 | 77.4780886 | 81.3328655 | 81.9122821 |
| 82.9177631 | 75.615036 | 79.0756734 | 77.4780886 | 81.3328655 | 81.9122821 |
| 80.9177631 | 76.615036 | 79.0756734 | 78.4780886 | 80.3328655 | 81.9122821 |
| 80.9177631 | 74.615036 | 79.0756734 | 79.4780886 | 80.3328655 | 79.9122821 |
| 79.9177631 | 73.615036 | 79.0756734 | 79.4780886 | 82.3328655 | 77.9122821 |
| 80.9177631 | 73.615036 | 79.0756734 | 79.4780886 | 83.3328655 | 77.9122821 |
| 83.9177631 | 71.615036 | 79.0756734 | 75.4780886 | 83.3328655 | 75.9122821 |
| 85.9177631 | 71.615036 | 79.0756734 | 75.4780886 | 83.3328655 | 74.9122821 |
| 87.9177631 | 70.615036 | 80.0756734 | 74.4780886 | 84.3328655 | 74.9122821 |
| 87.9177631 | 70.615036 | 80.0756734 | 74.4780886 | 83.3328655 | 74.9122821 |
| 89.9177631 | 70.615036 | 81.0756734 | 73.4780886 | 83.3328655 | 74.9122821 |
| 89.9177631 | 71.615036 | 85.0756734 | 73.4780886 | 82.3328655 | 75.9122821 |
| 88.9177631 | 72.615036 | 85.0756734 | 73.4780886 | 80.3328655 | 75.9122821 |
| 88.9177631 | 70.615036 | 86.0756734 | 74.4780886 | 78.3328655 | 75.9122821 |
| 87.9177631 | 70.615036 | 90.0756734 | 74.4780886 | 78.3328655 | 75.9122821 |
| 87.9177631 | 68.615036 | 90.0756734 | 73.4780886 | 78.3328655 | 75.9122821 |
| 87.9177631 | 68.615036 | 90.0756734 | 73.4780886 | 78.3328655 | 76.9122821 |
| 85.9177631 | 68.615036 | 90.0756734 | 73.4780886 | 78.3328655 | 76.9122821 |
| 85.9177631 | 68.615036 | 90.0756734 | 73.4780886 | 78.3328655 | 76.9122821 |
| 85.9177631 | 68.615036 | 87.0756734 | 73.4780886 | 84.3328655 | 76.9122821 |
| 85.9177631 | 68.615036 | 87.0756734 | 73.4780886 | 87.3328655 | 76.9122821 |
| 85.9177631 | 68.615036 | 87.0756734 | 73.4780886 | 87.3328655 | 75.9122821 |
| 85.9177631 | 68.615036 | 86.0756734 | 76.4780886 | 88.3328655 | 76.9122821 |
| 85.9177631 | 66.615036 | 85.0756734 | 75.4780886 | 89.3328655 | 76.9122821 |
| 86.9177631 | 66.615036 | 85.0756734 | 76.4780886 | 88.3328655 | 76.9122821 |
| 87.9177631 | 66.615036 | 85.0756734 | 76.4780886 | 86.3328655 | 76.9122821 |
| 88.9177631 | 66.615036 | 83.0756734 | 76.4780886 | 84.3328655 | 77.9122821 |
| 88.9177631 | 65.615036 | 83.0756734 | 82.4780886 | 82.3328655 | 77.9122821 |
| 88.9177631 | 66.615036 | 83.0756734 | 82.4780886 | 80.3328655 | 77.9122821 |
| 88.9177631 | 66.615036 | 80.0756734 | 86.4780886 | 80.3328655 | 77.9122821 |
| 88.9177631 | 65.615036 | 80.0756734 | 88.4780886 | 79.3328655 | 78.9122821 |
| 87.9177631 | 65.615036 | 80.0756734 | 88.4780886 | 77.3328655 | 79.9122821 |
| 87.9177631 | 65.615036 | 81.0756734 | 88.4780886 | 77.3328655 | 79.9122821 |
| 87.9177631 | 64.615036 | 81.0756734 | 89.4780886 | 75.3328655 | 81.9122821 |
| 87.9177631 | 65.615036 | 82.0756734 | 89.4780886 | 75.3328655 | 85.9122821 |
| 86.9177631 | 65.615036 | 84.0756734 | 89.4780886 | 75.3328655 | 86.9122821 |

|            |           |            |            |            |            |
|------------|-----------|------------|------------|------------|------------|
| 86.9177631 | 65.615036 | 84.0756734 | 89.4780886 | 75.3328655 | 86.9122821 |
| 85.9177631 | 65.615036 | 85.0756734 | 85.4780886 | 75.3328655 | 87.9122821 |
| 84.9177631 | 66.615036 | 84.0756734 | 85.4780886 | 76.3328655 | 87.9122821 |
| 84.9177631 | 66.615036 | 84.0756734 | 84.4780886 | 76.3328655 | 86.9122821 |
| 83.9177631 | 65.615036 | 84.0756734 | 84.4780886 | 76.3328655 | 86.9122821 |
| 87.9177631 | 65.615036 | 83.0756734 | 81.4780886 | 76.3328655 | 85.9122821 |
| 87.9177631 | 65.615036 | 83.0756734 | 81.4780886 | 76.3328655 | 84.9122821 |
| 87.9177631 | 65.615036 | 83.0756734 | 80.4780886 | 76.3328655 | 83.9122821 |
| 87.9177631 | 65.615036 | 86.0756734 | 80.4780886 | 77.3328655 | 83.9122821 |
| 87.9177631 | 66.615036 | 86.0756734 | 80.4780886 | 79.3328655 | 83.9122821 |
| 87.9177631 | 67.615036 | 88.0756734 | 80.4780886 | 80.3328655 | 80.9122821 |
| 82.9177631 | 67.615036 | 76.9738316 | 80.4780886 | 80.3328655 | 79.9122821 |
| 75.9177631 | 67.615036 | 76.1556498 | 80.4780886 | 81.3328655 | 77.9122821 |
| 75.9177631 | 67.615036 | 76.2465589 | 80.4780886 | 83.3328655 | 77.9122821 |
| 72.9177631 | 66.615036 | 76.8829225 | 81.4780886 | 83.3328655 | 73.9122821 |
| 71.9177631 | 66.615036 | 77.1556498 | 86.4780886 | 83.3328655 | 72.9122821 |
| 71.9177631 | 66.615036 | 77.5192862 | 90.4780886 | 83.3328655 | 72.9122821 |
| 70.9177631 | 66.615036 | 77.9738316 | 90.4780886 | 84.3328655 | 72.9122821 |
| 70.9177631 | 66.615036 | 77.9738316 | 90.4780886 | 85.3328655 | 72.9122821 |
| 70.9177631 | 66.615036 | 77.9738316 | 90.4780886 | 85.3328655 | 72.9122821 |
| 68.9177631 | 68.615036 | 78.1556498 | 92.4780886 | 74.3328655 | 78.9122821 |
| 68.9177631 | 68.615036 | 78.6101953 | 78.6101953 | 73.3328655 | 78.9122821 |
| 70.9177631 | 69.615036 | 79.1556498 | 79.1556498 | 73.3328655 | 78.9122821 |
| 71.9177631 | 69.615036 | 79.0647407 | 79.0647407 | 73.3328655 | 76.9122821 |
| 72.9177631 | 69.615036 | 78.337468  | 78.337468  | 72.3328655 | 75.9122821 |
| 72.9177631 | 70.615036 | 77.9738316 | 77.9738316 | 71.3328655 | 75.9122821 |
| 72.9177631 | 71.615036 | 77.7011044 | 77.7011044 | 71.3328655 | 75.9122821 |
| 72.9177631 | 71.615036 | 77.5192862 | 77.5192862 | 72.3328655 | 78.9122821 |
| 73.9177631 | 71.615036 | 77.1556498 | 85.4780886 | 71.3328655 | 79.9122821 |
| 73.9177631 | 73.615036 | 77.2465589 | 82.4780886 | 71.3328655 | 79.9122821 |
| 74.9177631 | 74.615036 | 77.337468  | 82.4780886 | 71.3328655 | 76.9122821 |
| 74.9177631 | 75.615036 | 77.0647407 | 79.4780886 | 70.3328655 | 71.9122821 |
| 74.9177631 | 75.615036 | 76.5192862 | 75.4780886 | 70.3328655 | 71.9122821 |
| 74.9177631 | 75.615036 | 76.337468  | 75.4780886 | 70.3328655 | 69.9122821 |
| 75.9177631 | 75.615036 | 75.8829225 | 74.4780886 | 70.3328655 | 68.9122821 |
| 75.9177631 | 75.615036 | 75.8829225 | 74.4780886 | 71.3328655 | 67.9122821 |
| 75.9177631 | 73.615036 | 75.7920134 | 74.4780886 | 72.3328655 | 67.9122821 |
| 75.9177631 | 72.615036 | 75.7920134 | 74.4780886 | 72.3328655 | 67.9122821 |
| 75.9177631 | 71.615036 | 81.0756734 | 75.4780886 | 76.3328655 | 67.9122821 |
| 75.9177631 | 71.615036 | 81.0756734 | 76.4780886 | 77.3328655 | 67.9122821 |
| 75.9177631 | 71.615036 | 79.0756734 | 76.4780886 | 76.3328655 | 67.9122821 |
| 76.9177631 | 72.615036 | 79.0756734 | 75.4780886 | 75.3328655 | 74.9122821 |
| 77.9177631 | 73.615036 | 75.0756734 | 74.4780886 | 75.3328655 | 74.9122821 |
| 77.9177631 | 73.615036 | 75.0756734 | 74.4780886 | 73.3328655 | 76.9122821 |
| 77.9177631 | 73.615036 | 74.0756734 | 74.4780886 | 75.3328655 | 81.9122821 |



|            |           |            |            |            |            |
|------------|-----------|------------|------------|------------|------------|
| 77.9177631 | 73.615036 | 74.0756734 | 73.4780886 | 76.3328655 | 81.9122821 |
| 77.9177631 | 72.615036 | 74.0756734 | 74.4780886 | 76.3328655 | 76.9122821 |
| 77.9177631 | 70.615036 | 74.0756734 | 75.4780886 | 76.3328655 | 76.9122821 |
| 77.9177631 | 69.615036 | 74.0756734 | 75.4780886 | 76.3328655 | 75.9122821 |
| 75.9177631 | 69.615036 | 70.0756734 | 73.4780886 | 76.3328655 | 75.9122821 |
| 74.9177631 | 69.615036 | 69.0756734 | 73.4780886 | 77.3328655 | 75.9122821 |
| 73.9177631 | 69.615036 | 69.0756734 | 73.4780886 | 77.3328655 | 75.9122821 |
| 72.9177631 | 69.615036 | 69.0756734 | 76.4780886 | 77.3328655 | 78.9122821 |
| 71.9177631 | 69.615036 | 69.0756734 | 78.4780886 | 77.3328655 | 78.9122821 |
| 71.9177631 | 69.615036 | 69.0756734 | 78.4780886 | 76.3328655 | 78.9122821 |
| 71.9177631 | 69.615036 | 69.0756734 | 78.4780886 | 77.3328655 | 78.9122821 |
| 71.9177631 | 69.615036 | 69.0756734 | 81.4780886 | 77.3328655 | 77.9122821 |
| 72.9177631 | 68.615036 | 70.0756734 | 81.4780886 | 77.3328655 | 75.9122821 |
| 74.9177631 | 68.615036 | 70.0756734 | 82.4780886 | 78.3328655 | 75.9122821 |
| 75.9177631 | 67.615036 | 70.0756734 | 83.4780886 | 79.3328655 | 73.9122821 |
| 75.9177631 | 67.615036 | 70.0756734 | 84.4780886 | 82.3328655 | 70.9122821 |
| 77.9177631 | 68.615036 | 70.0756734 | 84.4780886 | 84.3328655 | 69.9122821 |
| 79.9177631 | 68.615036 | 70.0756734 | 84.4780886 | 84.3328655 | 69.9122821 |
| 79.9177631 | 70.615036 | 70.0756734 | 84.4780886 | 86.3328655 | 69.9122821 |
| 78.9177631 | 70.615036 | 70.0756734 | 85.4780886 | 86.3328655 | 69.9122821 |
| 78.9177631 | 70.615036 | 70.0756734 | 86.4780886 | 85.3328655 | 69.9122821 |
| 78.9177631 | 70.615036 | 70.0756734 | 86.4780886 | 85.3328655 | 70.9122821 |
| 78.9177631 | 70.615036 | 70.0756734 | 82.4780886 | 85.3328655 | 71.9122821 |
| 78.9177631 | 69.615036 | 70.0756734 | 82.4780886 | 85.3328655 | 71.9122821 |
| 78.9177631 | 69.615036 | 70.0756734 | 78.4780886 | 83.3328655 | 73.9122821 |
| 78.9177631 | 69.615036 | 71.0756734 | 76.4780886 | 83.3328655 | 73.9122821 |
| 77.9177631 | 69.615036 | 71.0756734 | 75.4780886 | 82.3328655 | 79.9122821 |
| 76.9177631 | 73.615036 | 72.0756734 | 75.4780886 | 82.3328655 | 79.9122821 |
| 76.9177631 | 73.615036 | 72.0756734 | 75.4780886 | 82.3328655 | 79.9122821 |
| 77.9177631 | 73.615036 | 75.0756734 | 74.4780886 | 81.3328655 | 79.9122821 |
| 77.9177631 | 74.615036 | 75.0756734 | 74.4780886 | 81.3328655 | 80.9122821 |
| 75.9177631 | 74.615036 | 75.0756734 | 74.4780886 | 81.3328655 | 79.9122821 |
| 76.9177631 | 78.615036 | 74.0756734 | 74.4780886 | 81.3328655 | 78.9122821 |
| 74.9177631 | 79.615036 | 74.0756734 | 80.4780886 | 80.3328655 | 77.9122821 |
| 74.9177631 | 78.615036 | 74.0756734 | 81.4780886 | 80.3328655 | 77.9122821 |
| 74.9177631 | 78.615036 | 74.0756734 | 81.4780886 | 81.3328655 | 78.9122821 |
| 75.9177631 | 78.615036 | 72.0756734 | 79.4780886 | 81.3328655 | 83.9122821 |
| 75.9177631 | 78.615036 | 72.0756734 | 79.4780886 | 81.3328655 | 83.9122821 |
| 75.9177631 | 78.615036 | 72.0756734 | 78.4780886 | 81.3328655 | 84.9122821 |
| 76.9177631 | 78.615036 | 72.0756734 | 78.4780886 | 81.3328655 | 84.9122821 |
| 76.9177631 | 78.615036 | 72.0756734 | 78.4780886 | 81.3328655 | 84.9122821 |
| 76.9177631 | 75.615036 | 72.0756734 | 78.4780886 | 80.3328655 | 83.9122821 |
| 76.9177631 | 72.615036 | 72.0756734 | 78.4780886 | 80.3328655 | 78.9122821 |
| 76.9177631 | 69.615036 | 72.0756734 | 78.4780886 | 80.3328655 | 73.9122821 |
| 77.9177631 | 67.615036 | 72.0756734 | 78.4780886 | 82.3328655 | 73.9122821 |

|            |           |            |            |            |            |
|------------|-----------|------------|------------|------------|------------|
| 78.9177631 | 67.615036 | 72.0756734 | 75.4780886 | 82.3328655 | 73.9122821 |
| 79.9177631 | 66.615036 | 73.0756734 | 75.4780886 | 82.3328655 | 73.9122821 |
| 79.9177631 | 64.615036 | 73.0756734 | 75.4780886 | 81.3328655 | 73.9122821 |
| 79.9177631 | 63.615036 | 73.0756734 | 75.4780886 | 81.3328655 | 71.9122821 |
| 79.9177631 | 63.615036 | 76.0756734 | 71.4780886 | 80.3328655 | 71.9122821 |
| 80.9177631 | 63.615036 | 76.0756734 | 71.4780886 | 80.3328655 | 71.9122821 |
| 80.9177631 | 64.615036 | 76.0756734 | 72.4780886 | 79.3328655 | 71.9122821 |
| 80.9177631 | 65.615036 | 77.0756734 | 74.4780886 | 79.3328655 | 71.9122821 |
| 80.9177631 | 65.615036 | 77.0756734 | 75.4780886 | 79.3328655 | 71.9122821 |
| 80.9177631 | 65.615036 | 77.0756734 | 75.4780886 | 78.3328655 | 71.9122821 |
| 80.9177631 | 65.615036 | 83.0756734 | 74.4780886 | 78.3328655 | 70.9122821 |
| 81.9177631 | 65.615036 | 83.0756734 | 73.4780886 | 78.3328655 | 70.9122821 |
| 81.9177631 | 64.615036 | 83.0756734 | 73.4780886 | 78.3328655 | 70.9122821 |
| 80.9177631 | 64.615036 | 83.0756734 | 73.4780886 | 73.3328655 | 70.9122821 |
| 80.9177631 | 64.615036 | 84.0756734 | 71.4780886 | 73.3328655 | 70.9122821 |
| 80.9177631 | 64.615036 | 84.0756734 | 73.4780886 | 71.3328655 | 70.9122821 |
| 80.9177631 | 65.615036 | 85.0756734 | 74.4780886 | 70.3328655 | 70.9122821 |
| 79.9177631 | 65.615036 | 85.0756734 | 74.4780886 | 70.3328655 | 70.9122821 |
| 79.9177631 | 65.615036 | 85.0756734 | 75.4780886 | 70.3328655 | 70.9122821 |
| 78.9177631 | 65.615036 | 84.0756734 | 73.4780886 | 78.3328655 | 70.9122821 |
| 78.9177631 | 65.615036 | 84.0756734 | 73.4780886 | 79.3328655 | 70.9122821 |
| 79.9177631 | 65.615036 | 84.0756734 | 73.4780886 | 81.3328655 | 69.9122821 |
| 79.9177631 | 66.615036 | 84.0756734 | 73.4780886 | 82.3328655 | 68.9122821 |
| 80.9177631 | 66.615036 | 84.0756734 | 73.4780886 | 82.3328655 | 68.9122821 |
| 80.9177631 | 66.615036 | 84.0756734 | 73.4780886 | 83.3328655 | 68.9122821 |
| 80.9177631 | 66.615036 | 70.0756734 | 71.4780886 | 82.3328655 | 68.9122821 |
| 81.9177631 | 66.615036 | 69.0756734 | 71.4780886 | 81.3328655 | 68.9122821 |
| 81.9177631 | 66.615036 | 69.0756734 | 71.4780886 | 81.3328655 | 68.9122821 |
| 81.9177631 | 66.615036 | 69.0756734 | 70.4780886 | 81.3328655 | 72.9122821 |
| 82.9177631 | 66.615036 | 68.0756734 | 70.4780886 | 80.3328655 | 76.9122821 |
| 83.9177631 | 66.615036 | 68.0756734 | 70.4780886 | 79.3328655 | 76.9122821 |
| 83.9177631 | 66.615036 | 68.0756734 | 70.4780886 | 79.3328655 | 78.9122821 |
| 83.9177631 | 67.615036 | 70.0756734 | 73.4780886 | 80.3328655 | 78.9122821 |
| 82.9177631 | 69.615036 | 70.0756734 | 74.4780886 | 80.3328655 | 78.9122821 |
| 82.9177631 | 69.615036 | 70.0756734 | 74.4780886 | 81.3328655 | 78.9122821 |
| 81.9177631 | 72.615036 | 71.0756734 | 74.4780886 | 82.3328655 | 77.9122821 |
| 81.9177631 | 72.615036 | 71.0756734 | 76.4780886 | 82.3328655 | 78.9122821 |
| 81.9177631 | 72.615036 | 71.0756734 | 76.4780886 | 82.3328655 | 78.9122821 |
| 92.9177631 | 72.615036 | 71.0756734 | 78.4780886 | 82.3328655 | 77.9122821 |
| 78.337468  | 71.615036 | 71.0756734 | 78.4780886 | 80.3328655 | 76.9122821 |
| 78.9738316 | 71.615036 | 71.0756734 | 80.4780886 | 80.3328655 | 75.9122821 |
| 78.7920134 | 71.615036 | 71.0756734 | 80.4780886 | 78.3328655 | 75.9122821 |
| 78.6101953 | 71.615036 | 71.0756734 | 82.4780886 | 77.3328655 | 74.9122821 |
| 78.7920134 | 70.615036 | 70.0756734 | 83.4780886 | 77.3328655 | 74.9122821 |
| 79.337468  | 70.615036 | 71.0756734 | 83.4780886 | 76.3328655 | 73.9122821 |

|            |           |            |            |            |            |
|------------|-----------|------------|------------|------------|------------|
| 79.6101953 | 70.615036 | 71.0756734 | 87.4780886 | 76.3328655 | 73.9122821 |
| 79.9738316 | 70.615036 | 71.0756734 | 89.4780886 | 76.3328655 | 73.9122821 |
| 80.337468  | 69.615036 | 71.0756734 | 91.4780886 | 76.3328655 | 73.9122821 |
| 80.5192862 | 69.615036 | 71.0756734 | 93.4780886 | 76.3328655 | 73.9122821 |
| 80.7011044 | 68.615036 | 71.0756734 | 95.4780886 | 76.3328655 | 73.9122821 |
| 80.6101953 | 68.615036 | 70.0756734 | 95.4780886 | 77.3328655 | 73.9122821 |
| 80.0647407 | 68.615036 | 70.0756734 | 80.0647407 | 76.3328655 | 70.9122821 |
| 79.1556498 | 68.615036 | 70.0756734 | 79.1556498 | 76.3328655 | 70.9122821 |
| 77.7011044 | 68.615036 | 70.0756734 | 77.7011044 | 69.3328655 | 67.9122821 |
| 77.337468  | 67.615036 | 70.0756734 | 77.337468  | 68.3328655 | 67.9122821 |
| 76.9738316 | 67.615036 | 70.0756734 | 76.9738316 | 68.3328655 | 67.9122821 |
| 90.9177631 | 67.615036 | 70.0756734 | 77.337468  | 67.3328655 | 73.9122821 |
| 79.9177631 | 68.615036 | 70.0756734 | 76.7011044 | 67.3328655 | 75.9122821 |
| 77.9177631 | 70.615036 | 72.0756734 | 77.337468  | 67.3328655 | 75.9122821 |
| 75.9177631 | 72.615036 | 72.0756734 | 78.7920134 | 78.3328655 | 79.9122821 |
| 75.9177631 | 72.615036 | 72.0756734 | 79.1556498 | 80.3328655 | 81.9122821 |
| 75.9177631 | 73.615036 | 72.0756734 | 79.7011044 | 80.3328655 | 81.9122821 |
| 75.9177631 | 73.615036 | 72.0756734 | 78.9738316 | 80.3328655 | 81.9122821 |
| 76.9177631 | 73.615036 | 72.0756734 | 78.1556498 | 78.3328655 | 76.9122821 |
| 78.9177631 | 72.615036 | 72.0756734 | 77.5192862 | 78.3328655 | 72.9122821 |
| 76.9177631 | 73.615036 | 72.0756734 | 76.9738316 | 73.3328655 | 71.9122821 |
| 76.9177631 | 73.615036 | 73.0756734 | 76.7920134 | 73.3328655 | 71.9122821 |
| 75.9177631 | 73.615036 | 70.0756734 | 76.4283771 | 73.3328655 | 71.9122821 |
| 75.9177631 | 73.615036 | 70.0756734 | 76.7011044 | 74.3328655 | 71.9122821 |
| 75.9177631 | 73.615036 | 69.0756734 | 76.7011044 | 76.3328655 | 71.9122821 |
| 76.9177631 | 71.615036 | 68.0756734 | 76.5192862 | 78.3328655 | 71.9122821 |
| 77.9177631 | 72.615036 | 68.0756734 | 76.6101953 | 79.3328655 | 71.9122821 |
| 77.9177631 | 72.615036 | 68.0756734 | 76.337468  | 79.3328655 | 72.9122821 |
| 77.9177631 | 73.615036 | 68.0756734 | 76.2465589 | 78.3328655 | 72.9122821 |
| 78.9177631 | 73.615036 | 68.0756734 | 75.7011044 | 75.3328655 | 70.9122821 |
| 78.9177631 | 75.615036 | 69.0756734 | 75.7920134 | 73.3328655 | 70.9122821 |
| 79.9177631 | 75.615036 | 69.0756734 | 75.6101953 | 72.3328655 | 71.9122821 |
| 79.9177631 | 76.615036 | 69.0756734 | 76.0647407 | 72.3328655 | 72.9122821 |
| 79.9177631 | 76.615036 | 69.0756734 | 76.5192862 | 74.3328655 | 72.9122821 |
| 79.9177631 | 76.615036 | 69.0756734 | 76.8829225 | 77.3328655 | 72.9122821 |
| 79.9177631 | 76.615036 | 68.0756734 | 77.1556498 | 78.3328655 | 72.9122821 |
| 79.9177631 | 76.615036 | 68.0756734 | 77.9738316 | 79.3328655 | 73.9122821 |
| 78.9177631 | 78.615036 | 68.0756734 | 78.6101953 | 79.3328655 | 74.9122821 |
| 78.9177631 | 79.615036 | 68.0756734 | 78.6101953 | 76.3328655 | 74.9122821 |
| 76.9177631 | 80.615036 | 68.0756734 | 77.9738316 | 75.3328655 | 74.9122821 |
| 76.9177631 | 79.615036 | 68.0756734 | 77.5192862 | 74.3328655 | 74.9122821 |
| 77.9177631 | 79.615036 | 68.0756734 | 77.5192862 | 74.3328655 | 74.9122821 |
| 78.9177631 | 79.615036 | 68.0756734 | 77.8829225 | 74.3328655 | 75.9122821 |
| 78.9177631 | 79.615036 | 68.0756734 | 90.4780886 | 74.3328655 | 75.9122821 |
| 79.9177631 | 80.615036 | 68.0756734 | 90.4780886 | 74.3328655 | 75.9122821 |

|            |           |            |            |            |            |
|------------|-----------|------------|------------|------------|------------|
| 80.9177631 | 81.615036 | 81.9738316 | 89.4780886 | 82.3328655 | 75.9122821 |
| 80.9177631 | 81.615036 | 81.9738316 | 89.4780886 | 82.3328655 | 75.9122821 |
| 81.9177631 | 81.615036 | 96.0756734 | 89.4780886 | 82.3328655 | 75.9122821 |
| 81.9177631 | 75.615036 | 82.0756734 | 88.4780886 | 86.3328655 | 75.9122821 |
| 82.9177631 | 71.615036 | 73.0756734 | 90.4780886 | 83.3328655 | 75.9122821 |
| 82.9177631 | 71.615036 | 73.0756734 | 89.4780886 | 83.3328655 | 74.9122821 |
| 82.9177631 | 72.615036 | 71.0756734 | 83.4780886 | 76.3328655 | 74.9122821 |
| 82.9177631 | 72.615036 | 71.0756734 | 83.4780886 | 74.3328655 | 76.9122821 |
| 80.9177631 | 71.615036 | 71.0756734 | 79.4780886 | 70.3328655 | 77.9122821 |
| 77.9177631 | 71.615036 | 71.0756734 | 76.4780886 | 68.3328655 | 78.9122821 |
| 77.9177631 | 71.615036 | 71.0756734 | 69.4780886 | 68.3328655 | 79.9122821 |
| 76.9177631 | 70.615036 | 71.0756734 | 69.4780886 | 68.3328655 | 79.9122821 |
| 76.9177631 | 70.615036 | 70.0756734 | 66.4780886 | 67.3328655 | 79.9122821 |
| 76.9177631 | 70.615036 | 69.0756734 | 65.4780886 | 67.3328655 | 79.9122821 |
| 76.9177631 | 70.615036 | 69.0756734 | 66.4780886 | 66.3328655 | 76.9122821 |
| 75.9177631 | 70.615036 | 69.0756734 | 66.4780886 | 65.3328655 | 73.9122821 |
| 75.9177631 | 70.615036 | 68.0756734 | 67.4780886 | 64.3328655 | 72.9122821 |
| 73.9177631 | 70.615036 | 68.0756734 | 67.4780886 | 63.3328655 | 72.9122821 |
| 72.9177631 | 70.615036 | 68.0756734 | 67.4780886 | 63.3328655 | 68.9122821 |
| 71.9177631 | 70.615036 | 68.0756734 | 66.4780886 | 62.3328655 | 67.9122821 |
| 68.9177631 | 70.615036 | 68.0756734 | 66.4780886 | 62.3328655 | 68.9122821 |
| 67.9177631 | 70.615036 | 68.0756734 | 66.4780886 | 60.3328655 | 68.9122821 |
| 67.9177631 | 70.615036 | 68.0756734 | 68.4780886 | 58.3328655 | 71.9122821 |
| 64.9177631 | 69.615036 | 68.0756734 | 68.4780886 | 57.3328655 | 71.9122821 |
| 63.9177631 | 68.615036 | 68.0756734 | 70.4780886 | 77.3328655 | 71.9122821 |
| 66.9177631 | 68.615036 | 68.0756734 | 71.4780886 | 84.3328655 | 71.9122821 |
| 66.9177631 | 67.615036 | 69.0756734 | 71.4780886 | 84.3328655 | 71.9122821 |
| 68.9177631 | 66.615036 | 70.0756734 | 71.4780886 | 85.3328655 | 72.9122821 |
| 68.9177631 | 66.615036 | 70.0756734 | 71.4780886 | 85.3328655 | 72.9122821 |
| 70.9177631 | 65.615036 | 72.0756734 | 72.4780886 | 85.3328655 | 75.9122821 |
| 70.9177631 | 65.615036 | 72.0756734 | 75.4780886 | 83.3328655 | 75.9122821 |
| 70.9177631 | 65.615036 | 72.0756734 | 79.4780886 | 83.3328655 | 72.9122821 |
| 70.9177631 | 65.615036 | 72.0756734 | 81.4780886 | 83.3328655 | 70.9122821 |
| 74.9177631 | 65.615036 | 72.0756734 | 81.4780886 | 83.3328655 | 70.9122821 |
| 74.9177631 | 65.615036 | 72.0756734 | 82.4780886 | 84.3328655 | 68.9122821 |
| 75.9177631 | 65.615036 | 72.0756734 | 82.4780886 | 84.3328655 | 67.9122821 |
| 76.9177631 | 66.615036 | 72.0756734 | 82.4780886 | 84.3328655 | 67.9122821 |
| 76.9177631 | 68.615036 | 73.0756734 | 81.4780886 | 84.3328655 | 67.9122821 |
| 77.9177631 | 70.615036 | 72.0756734 | 81.4780886 | 84.3328655 | 69.9122821 |
| 77.9177631 | 71.615036 | 72.0756734 | 81.4780886 | 84.3328655 | 69.9122821 |
| 78.9177631 | 71.615036 | 69.0756734 | 81.4780886 | 84.3328655 | 71.9122821 |
| 78.9177631 | 72.615036 | 65.0756734 | 74.4780886 | 85.3328655 | 72.9122821 |
| 78.9177631 | 73.615036 | 65.0756734 | 72.4780886 | 86.3328655 | 72.9122821 |
| 78.9177631 | 74.615036 | 65.0756734 | 72.4780886 | 86.3328655 | 71.9122821 |
| 79.9177631 | 74.615036 | 65.0756734 | 71.4780886 | 86.3328655 | 68.9122821 |

|            |           |            |            |            |            |
|------------|-----------|------------|------------|------------|------------|
| 79.9177631 | 74.615036 | 65.0756734 | 71.4780886 | 86.3328655 | 68.9122821 |
| 79.9177631 | 74.615036 | 65.0756734 | 71.4780886 | 86.3328655 | 67.9122821 |
| 79.9177631 | 73.615036 | 65.0756734 | 71.4780886 | 85.3328655 | 67.9122821 |
| 79.9177631 | 73.615036 | 65.0756734 | 70.4780886 | 83.3328655 | 66.9122821 |
| 79.9177631 | 70.615036 | 65.0756734 | 70.4780886 | 79.3328655 | 66.9122821 |
| 79.9177631 | 69.615036 | 65.0756734 | 70.4780886 | 76.3328655 | 66.9122821 |
| 79.9177631 | 69.615036 | 65.0756734 | 72.4780886 | 75.3328655 | 66.9122821 |
| 78.9177631 | 67.615036 | 65.0756734 | 73.4780886 | 74.3328655 | 66.9122821 |
| 78.9177631 | 67.615036 | 65.0756734 | 72.4780886 | 74.3328655 | 66.9122821 |
| 77.9177631 | 67.615036 | 65.0756734 | 71.4780886 | 77.3328655 | 66.9122821 |
| 77.9177631 | 67.615036 | 65.0756734 | 71.4780886 | 77.3328655 | 66.9122821 |
| 75.9177631 | 67.615036 | 67.0756734 | 71.4780886 | 77.3328655 | 66.9122821 |
| 74.9177631 | 67.615036 | 67.0756734 | 71.4780886 | 75.3328655 | 67.9122821 |
| 74.9177631 | 67.615036 | 67.0756734 | 70.4780886 | 74.3328655 | 67.9122821 |
| 74.9177631 | 67.615036 | 68.0756734 | 70.4780886 | 73.3328655 | 63.9122821 |
| 74.9177631 | 66.615036 | 67.0756734 | 70.4780886 | 73.3328655 | 61.9122821 |
| 75.9177631 | 66.615036 | 67.0756734 | 70.4780886 | 76.3328655 | 63.9122821 |
| 75.9177631 | 64.615036 | 67.0756734 | 74.4780886 | 76.3328655 | 63.9122821 |
| 75.9177631 | 64.615036 | 67.0756734 | 77.4780886 | 76.3328655 | 64.9122821 |
| 75.9177631 | 65.615036 | 69.0756734 | 78.4780886 | 75.3328655 | 64.9122821 |
| 75.9177631 | 65.615036 | 69.0756734 | 78.4780886 | 75.3328655 | 64.9122821 |
| 74.9177631 | 65.615036 | 69.0756734 | 79.4780886 | 76.3328655 | 64.9122821 |
| 76.9177631 | 67.615036 | 69.0756734 | 79.4780886 | 78.3328655 | 65.9122821 |
| 78.9177631 | 69.615036 | 69.0756734 | 78.4780886 | 81.3328655 | 65.9122821 |
| 79.9177631 | 69.615036 | 70.0756734 | 78.4780886 | 82.3328655 | 65.9122821 |
| 80.9177631 | 70.615036 | 70.0756734 | 78.4780886 | 83.3328655 | 66.9122821 |
| 81.9177631 | 70.615036 | 71.0756734 | 78.4780886 | 83.3328655 | 66.9122821 |
| 81.9177631 | 69.615036 | 71.0756734 | 76.4780886 | 83.3328655 | 66.9122821 |
| 81.9177631 | 68.615036 | 71.0756734 | 76.4780886 | 83.3328655 | 70.9122821 |
| 81.9177631 | 67.615036 | 71.0756734 | 73.4780886 | 81.3328655 | 71.9122821 |
| 82.9177631 | 67.615036 | 71.0756734 | 73.4780886 | 81.3328655 | 71.9122821 |
| 82.9177631 | 67.615036 | 71.0756734 | 72.4780886 | 80.3328655 | 71.9122821 |
| 82.9177631 | 67.615036 | 72.0756734 | 72.4780886 | 79.3328655 | 71.9122821 |
| 83.9177631 | 67.615036 | 72.0756734 | 71.4780886 | 79.3328655 | 71.9122821 |
| 83.9177631 | 66.615036 | 72.0756734 | 70.4780886 | 81.3328655 | 71.9122821 |
| 83.9177631 | 66.615036 | 73.0756734 | 69.4780886 | 81.3328655 | 71.9122821 |
| 83.9177631 | 65.615036 | 73.0756734 | 70.4780886 | 82.3328655 | 72.9122821 |
| 80.9177631 | 65.615036 | 74.0756734 | 70.4780886 | 83.3328655 | 72.9122821 |
| 80.9177631 | 65.615036 | 74.0756734 | 70.4780886 | 83.3328655 | 73.9122821 |
| 80.9177631 | 64.615036 | 74.0756734 | 70.4780886 | 83.3328655 | 73.9122821 |
| 80.9177631 | 64.615036 | 77.0756734 | 71.4780886 | 83.3328655 | 73.9122821 |
| 79.9177631 | 65.615036 | 79.0756734 | 71.4780886 | 83.3328655 | 73.9122821 |
| 79.9177631 | 65.615036 | 79.0756734 | 75.4780886 | 83.3328655 | 75.9122821 |
| 77.9177631 | 65.615036 | 79.0756734 | 75.4780886 | 83.3328655 | 75.9122821 |
| 75.9177631 | 65.615036 | 79.0756734 | 76.4780886 | 83.3328655 | 75.9122821 |

|            |           |            |            |            |            |
|------------|-----------|------------|------------|------------|------------|
| 74.9177631 | 66.615036 | 79.0756734 | 76.4780886 | 83.3328655 | 69.9122821 |
| 74.9177631 | 68.615036 | 79.0756734 | 77.4780886 | 83.3328655 | 69.9122821 |
| 74.9177631 | 72.615036 | 78.0756734 | 77.4780886 | 83.3328655 | 69.9122821 |
| 75.9177631 | 72.615036 | 78.0756734 | 78.4780886 | 83.3328655 | 70.9122821 |
| 76.9177631 | 74.615036 | 78.0756734 | 78.4780886 | 84.3328655 | 71.9122821 |
| 77.9177631 | 68.615036 | 78.0756734 | 79.4780886 | 84.3328655 | 72.9122821 |
| 78.9177631 | 66.615036 | 78.0756734 | 79.4780886 | 84.3328655 | 72.9122821 |
| 78.9177631 | 65.615036 | 78.0756734 | 82.4780886 | 84.3328655 | 72.9122821 |
| 78.9177631 | 65.615036 | 78.0756734 | 82.4780886 | 84.3328655 | 70.9122821 |
| 78.9177631 | 65.615036 | 78.0756734 | 83.4780886 | 85.3328655 | 70.9122821 |
| 78.9177631 | 65.615036 | 78.0756734 | 84.4780886 | 84.3328655 | 70.9122821 |
| 78.9177631 | 64.615036 | 78.0756734 | 84.4780886 | 82.3328655 | 69.9122821 |
| 78.9177631 | 64.615036 | 78.0756734 | 84.4780886 | 82.3328655 | 68.9122821 |
| 77.9177631 | 64.615036 | 79.0756734 | 84.4780886 | 81.3328655 | 66.9122821 |
| 76.9177631 | 64.615036 | 79.0756734 | 84.4780886 | 79.3328655 | 66.9122821 |
| 75.9177631 | 64.615036 | 79.0756734 | 84.4780886 | 77.3328655 | 65.9122821 |
| 75.9177631 | 64.615036 | 80.0756734 | 84.4780886 | 70.3328655 | 65.9122821 |
| 74.9177631 | 64.615036 | 73.7011044 | 84.4780886 | 67.3328655 | 65.9122821 |
| 74.9177631 | 63.615036 | 74.0647407 | 85.4780886 | 66.3328655 | 65.9122821 |
| 74.9177631 | 63.615036 | 74.0647407 | 85.4780886 | 66.3328655 | 65.9122821 |
| 73.9177631 | 63.615036 | 74.7920134 | 86.4780886 | 68.3328655 | 66.9122821 |
| 72.9177631 | 63.615036 | 74.4283771 | 86.4780886 | 69.3328655 | 66.9122821 |
| 72.9177631 | 83.615036 | 76.2465589 | 85.4780886 | 69.3328655 | 67.9122821 |
| 71.9177631 | 83.615036 | 75.8829225 | 82.4780886 | 69.3328655 | 67.9122821 |
| 71.9177631 | 83.615036 | 75.2465589 | 74.4780886 | 69.3328655 | 67.9122821 |
| 71.9177631 | 83.615036 | 74.8829225 | 72.4780886 | 69.3328655 | 67.9122821 |
| 72.9177631 | 83.615036 | 74.7920134 | 72.4780886 | 69.3328655 | 68.9122821 |
| 72.9177631 | 82.615036 | 74.6101953 | 71.4780886 | 70.3328655 | 68.9122821 |
| 72.9177631 | 80.615036 | 74.4283771 | 72.4780886 | 70.3328655 | 68.9122821 |
| 74.9177631 | 78.615036 | 74.4283771 | 73.4780886 | 71.3328655 | 68.9122821 |
| 79.9177631 | 74.615036 | 74.6101953 | 73.4780886 | 71.3328655 | 69.9122821 |
| 79.9177631 | 70.615036 | 74.4283771 | 74.4780886 | 71.3328655 | 70.9122821 |
| 76.9177631 | 69.615036 | 73.7011044 | 74.4780886 | 71.3328655 | 70.9122821 |
| 74.9177631 | 67.615036 | 73.0647407 | 74.4780886 | 72.3328655 | 72.9122821 |
| 73.9177631 | 67.615036 | 72.1556498 | 74.4780886 | 72.3328655 | 73.9122821 |
| 72.9177631 | 67.615036 | 71.8829225 | 75.4780886 | 73.3328655 | 73.9122821 |
| 70.9177631 | 67.615036 | 82.0756734 | 75.4780886 | 74.3328655 | 73.9122821 |
| 70.9177631 | 66.615036 | 77.0756734 | 75.4780886 | 75.3328655 | 74.9122821 |
| 70.9177631 | 65.615036 | 77.0756734 | 75.4780886 | 75.3328655 | 74.9122821 |
| 69.9177631 | 64.615036 | 77.0756734 | 75.4780886 | 76.3328655 | 74.9122821 |
| 69.9177631 | 63.615036 | 77.0756734 | 75.4780886 | 76.3328655 | 76.9122821 |
| 69.9177631 | 63.615036 | 76.0756734 | 75.4780886 | 76.3328655 | 76.9122821 |
| 68.9177631 | 62.615036 | 76.0756734 | 73.4780886 | 77.3328655 | 77.9122821 |
| 67.9177631 | 60.615036 | 76.0756734 | 73.4780886 | 77.3328655 | 78.9122821 |
| 67.9177631 | 60.615036 | 75.0756734 | 72.4780886 | 76.3328655 | 75.9122821 |

|            |           |            |            |            |            |
|------------|-----------|------------|------------|------------|------------|
| 66.9177631 | 60.615036 | 73.0756734 | 72.4780886 | 76.3328655 | 70.9122821 |
| 66.9177631 | 60.615036 | 72.0756734 | 71.4780886 | 78.3328655 | 68.9122821 |
| 66.9177631 | 60.615036 | 72.0756734 | 69.4780886 | 80.3328655 | 68.9122821 |
| 66.9177631 | 60.615036 | 72.0756734 | 69.4780886 | 81.3328655 | 66.9122821 |
| 66.9177631 | 60.615036 | 71.0756734 | 68.4780886 | 81.3328655 | 66.9122821 |
| 65.9177631 | 67.615036 | 70.0756734 | 68.4780886 | 81.3328655 | 66.9122821 |
| 62.9177631 | 67.615036 | 69.0756734 | 68.4780886 | 81.3328655 | 69.9122821 |
| 61.9177631 | 69.615036 | 68.0756734 | 67.4780886 | 83.3328655 | 73.9122821 |
| 60.9177631 | 69.615036 | 68.0756734 | 67.4780886 | 84.3328655 | 75.9122821 |
| 60.9177631 | 69.615036 | 68.0756734 | 66.4780886 | 82.3328655 | 77.9122821 |
| 60.9177631 | 69.615036 | 68.0756734 | 63.4780886 | 80.3328655 | 79.9122821 |
| 60.9177631 | 70.615036 | 68.0756734 | 63.4780886 | 76.3328655 | 79.9122821 |
| 58.9177631 | 70.615036 | 69.0756734 | 63.4780886 | 76.3328655 | 78.9122821 |
| 57.9177631 | 70.615036 | 60.0756734 | 63.4780886 | 72.3328655 | 77.9122821 |
| 57.9177631 | 70.615036 | 60.0756734 | 62.4780886 | 71.3328655 | 77.9122821 |
| 59.9177631 | 70.615036 | 60.0756734 | 62.4780886 | 71.3328655 | 73.9122821 |
| 60.9177631 | 70.615036 | 59.0756734 | 61.4780886 | 73.3328655 | 72.9122821 |
| 66.9177631 | 71.615036 | 59.0756734 | 62.4780886 | 75.3328655 | 71.9122821 |
| 66.9177631 | 71.615036 | 59.0756734 | 62.4780886 | 77.3328655 | 70.9122821 |
| 66.9177631 | 71.615036 | 59.0756734 | 62.4780886 | 77.3328655 | 70.9122821 |
| 67.9177631 | 72.615036 | 60.0756734 | 63.4780886 | 77.3328655 | 70.9122821 |
| 67.9177631 | 72.615036 | 60.0756734 | 63.4780886 | 76.3328655 | 70.9122821 |
| 68.9177631 | 74.615036 | 60.0756734 | 64.4780886 | 76.3328655 | 69.9122821 |
| 70.9177631 | 74.615036 | 60.0756734 | 65.4780886 | 74.3328655 | 73.9122821 |
| 72.9177631 | 74.615036 | 60.0756734 | 65.4780886 | 73.3328655 | 73.9122821 |
| 73.9177631 | 74.615036 | 61.0756734 | 75.4780886 | 73.3328655 | 73.9122821 |
| 72.9177631 | 74.615036 | 61.0756734 | 75.4780886 | 74.3328655 | 74.9122821 |
| 69.9177631 | 74.615036 | 63.0756734 | 75.4780886 | 75.3328655 | 74.9122821 |
| 69.9177631 | 74.615036 | 63.0756734 | 75.4780886 | 75.3328655 | 74.9122821 |
| 66.9177631 | 75.615036 | 63.0756734 | 75.4780886 | 80.3328655 | 74.9122821 |
| 66.9177631 | 75.615036 | 63.0756734 | 76.4780886 | 81.3328655 | 74.9122821 |
| 66.9177631 | 75.615036 | 63.0756734 | 77.4780886 | 82.3328655 | 73.9122821 |
| 66.9177631 | 75.615036 | 63.0756734 | 78.4780886 | 82.3328655 | 73.9122821 |
| 67.9177631 | 75.615036 | 63.0756734 | 79.4780886 | 83.3328655 | 71.9122821 |
| 67.9177631 | 73.615036 | 63.0756734 | 79.4780886 | 84.3328655 | 72.9122821 |
| 68.9177631 | 73.615036 | 63.0756734 | 79.4780886 | 82.3328655 | 72.9122821 |
| 69.9177631 | 73.615036 | 63.0756734 | 79.4780886 | 82.3328655 | 71.9122821 |
| 68.9177631 | 73.615036 | 60.0756734 | 73.4780886 | 81.3328655 | 71.9122821 |
| 68.9177631 | 73.615036 | 60.0756734 | 73.4780886 | 80.3328655 | 71.9122821 |
| 68.9177631 | 73.615036 | 60.0756734 | 73.4780886 | 78.3328655 | 73.9122821 |
| 68.9177631 | 73.615036 | 60.0756734 | 75.4780886 | 78.3328655 | 75.9122821 |
| 67.9177631 | 73.615036 | 60.0756734 | 76.4780886 | 78.3328655 | 75.9122821 |
| 67.9177631 | 73.615036 | 61.0756734 | 72.4780886 | 78.3328655 | 74.9122821 |
| 65.9177631 | 73.615036 | 61.0756734 | 69.4780886 | 77.3328655 | 72.9122821 |
| 64.9177631 | 73.615036 | 61.0756734 | 67.4780886 | 80.3328655 | 71.9122821 |

|            |           |            |            |            |            |
|------------|-----------|------------|------------|------------|------------|
| 64.9177631 | 74.615036 | 61.0756734 | 65.4780886 | 79.3328655 | 71.9122821 |
| 65.9177631 | 74.615036 | 61.0756734 | 65.4780886 | 79.3328655 | 71.9122821 |
| 66.9177631 | 75.615036 | 61.0756734 | 65.4780886 | 79.3328655 | 71.9122821 |
| 66.9177631 | 77.615036 | 60.0756734 | 64.4780886 | 79.3328655 | 71.9122821 |
| 65.9177631 | 80.615036 | 61.0756734 | 63.4780886 | 79.3328655 | 71.9122821 |
| 64.9177631 | 80.615036 | 61.0756734 | 62.4780886 | 78.3328655 | 71.9122821 |
| 64.9177631 | 79.615036 | 60.0756734 | 62.4780886 | 78.3328655 | 71.9122821 |
| 65.9177631 | 78.615036 | 60.0756734 | 62.4780886 | 78.3328655 | 72.9122821 |
| 65.9177631 | 75.615036 | 60.0756734 | 62.4780886 | 77.3328655 | 74.9122821 |
| 65.9177631 | 72.615036 | 61.0756734 | 61.4780886 | 77.3328655 | 76.9122821 |
| 65.9177631 | 69.615036 | 61.0756734 | 61.4780886 | 76.3328655 | 76.9122821 |
| 64.9177631 | 69.615036 | 61.0756734 | 61.4780886 | 76.3328655 | 77.9122821 |
| 64.9177631 | 69.615036 | 61.0756734 | 64.4780886 | 75.3328655 | 79.9122821 |
| 64.9177631 | 69.615036 | 63.0756734 | 64.4780886 | 75.3328655 | 79.9122821 |
| 64.9177631 | 69.615036 | 63.0756734 | 70.4780886 | 74.3328655 | 79.9122821 |
| 64.9177631 | 69.615036 | 63.0756734 | 72.4780886 | 77.3328655 | 79.9122821 |
| 64.9177631 | 69.615036 | 64.0756734 | 71.4780886 | 77.3328655 | 74.9122821 |
| 64.9177631 | 66.615036 | 64.0756734 | 71.4780886 | 76.3328655 | 74.9122821 |
| 62.9177631 | 66.615036 | 65.0756734 | 68.4780886 | 72.3328655 | 74.9122821 |
| 62.9177631 | 66.615036 | 66.0756734 | 67.4780886 | 72.3328655 | 74.9122821 |
| 61.9177631 | 66.615036 | 66.0756734 | 68.4780886 | 71.3328655 | 73.9122821 |
| 62.9177631 | 67.615036 | 66.0756734 | 68.4780886 | 71.3328655 | 73.9122821 |
| 60.9177631 | 68.615036 | 66.0756734 | 68.4780886 | 71.3328655 | 73.9122821 |
| 60.9177631 | 68.615036 | 66.0756734 | 68.4780886 | 71.3328655 | 73.9122821 |
| 60.9177631 | 69.615036 | 66.0756734 | 68.4780886 | 72.3328655 | 72.9122821 |
| 60.9177631 | 69.615036 | 66.0756734 | 68.4780886 | 72.3328655 | 72.9122821 |
| 60.9177631 | 69.615036 | 66.0756734 | 68.4780886 | 72.3328655 | 72.9122821 |
| 63.9177631 | 70.615036 | 66.0756734 | 67.4780886 | 73.3328655 | 72.9122821 |
| 63.9177631 | 70.615036 | 66.0756734 | 67.4780886 | 73.3328655 | 72.9122821 |
| 64.9177631 | 71.615036 | 66.0756734 | 67.4780886 | 73.3328655 | 69.9122821 |
| 64.9177631 | 72.615036 | 66.0756734 | 67.4780886 | 73.3328655 | 67.9122821 |
| 65.9177631 | 74.615036 | 66.0756734 | 66.4780886 | 73.3328655 | 67.9122821 |
| 66.9177631 | 75.615036 | 65.0756734 | 65.4780886 | 74.3328655 | 66.9122821 |
| 67.9177631 | 75.615036 | 65.0756734 | 65.4780886 | 74.3328655 | 66.9122821 |
| 67.9177631 | 76.615036 | 65.0756734 | 68.4780886 | 84.3328655 | 66.9122821 |
| 72.9177631 | 77.615036 | 66.0756734 | 68.4780886 | 85.3328655 | 66.9122821 |
| 72.9177631 | 77.615036 | 66.0756734 | 66.4780886 | 84.3328655 | 68.9122821 |
| 73.9177631 | 77.615036 | 67.0756734 | 66.4780886 | 77.3328655 | 69.9122821 |
| 73.9177631 | 77.615036 | 67.0756734 | 66.4780886 | 77.3328655 | 69.9122821 |
| 73.9177631 | 79.615036 | 67.0756734 | 70.4780886 | 74.3328655 | 73.9122821 |
| 73.9177631 | 79.615036 | 67.0756734 | 72.4780886 | 74.3328655 | 73.9122821 |
| 73.9177631 | 80.615036 | 67.0756734 | 72.4780886 | 72.3328655 | 74.9122821 |
| 73.9177631 | 81.615036 | 67.0756734 | 72.4780886 | 72.3328655 | 73.9122821 |
| 73.9177631 | 81.615036 | 68.0756734 | 72.4780886 | 72.3328655 | 72.9122821 |
| 70.9177631 | 82.615036 | 68.0756734 | 72.4780886 | 72.3328655 | 71.9122821 |
| 69.9177631 | 82.615036 | 69.0756734 | 70.4780886 | 72.3328655 | 71.9122821 |



|            |           |            |            |            |            |
|------------|-----------|------------|------------|------------|------------|
| 69.9177631 | 82.615036 | 67.0756734 | 70.4780886 | 71.3328655 | 71.9122821 |
| 69.9177631 | 82.615036 | 67.0756734 | 70.4780886 | 71.3328655 | 70.9122821 |
| 69.9177631 | 82.615036 | 67.0756734 | 69.4780886 | 70.3328655 | 70.9122821 |
| 69.9177631 | 82.615036 | 67.0756734 | 69.4780886 | 67.3328655 | 70.9122821 |
| 69.9177631 | 82.615036 | 67.0756734 | 69.4780886 | 65.3328655 | 70.9122821 |
| 69.9177631 | 81.615036 | 67.0756734 | 69.4780886 | 65.3328655 | 71.9122821 |
| 70.9177631 | 81.615036 | 66.0756734 | 69.4780886 | 65.3328655 | 71.9122821 |
| 70.9177631 | 81.615036 | 68.0756734 | 69.4780886 | 65.3328655 | 72.9122821 |
| 71.9177631 | 81.615036 | 68.0756734 | 69.4780886 | 65.3328655 | 73.9122821 |
| 71.9177631 | 71.615036 | 68.0756734 | 69.4780886 | 65.3328655 | 73.9122821 |
| 71.9177631 | 66.615036 | 71.0756734 | 70.4780886 | 65.3328655 | 75.9122821 |
| 71.9177631 | 65.615036 | 71.0756734 | 70.4780886 | 65.3328655 | 75.9122821 |
| 72.9177631 | 64.615036 | 71.0756734 | 71.4780886 | 64.3328655 | 76.9122821 |
| 72.9177631 | 64.615036 | 72.0756734 | 67.4780886 | 64.3328655 | 76.9122821 |
| 75.9177631 | 64.615036 | 72.0756734 | 67.4780886 | 64.3328655 | 75.9122821 |
| 76.9177631 | 63.615036 | 72.0756734 | 66.4780886 | 67.3328655 | 75.9122821 |
| 76.9177631 | 64.615036 | 72.0756734 | 67.4780886 | 69.3328655 | 74.9122821 |
| 76.9177631 | 65.615036 | 72.0756734 | 68.4780886 | 69.3328655 | 74.9122821 |
| 76.9177631 | 66.615036 | 72.0756734 | 70.4780886 | 71.3328655 | 74.9122821 |
| 76.9177631 | 66.615036 | 71.0756734 | 69.4780886 | 73.3328655 | 74.9122821 |
| 76.9177631 | 66.615036 | 71.0756734 | 69.4780886 | 75.3328655 | 74.9122821 |
| 76.9177631 | 67.615036 | 71.0756734 | 69.4780886 | 75.3328655 | 74.9122821 |
| 76.9177631 | 68.615036 | 71.0756734 | 69.4780886 | 75.3328655 | 74.9122821 |
| 76.9177631 | 68.615036 | 71.0756734 | 66.4780886 | 79.3328655 | 74.9122821 |
| 77.9177631 | 68.615036 | 71.0756734 | 66.4780886 | 81.3328655 | 74.9122821 |
| 77.9177631 | 69.615036 | 72.0756734 | 65.4780886 | 83.3328655 | 74.9122821 |
| 77.9177631 | 69.615036 | 72.0756734 | 67.4780886 | 83.3328655 | 74.9122821 |
| 78.9177631 | 69.615036 | 73.0756734 | 67.4780886 | 83.3328655 | 74.9122821 |
| 79.9177631 | 71.615036 | 74.0756734 | 69.4780886 | 82.3328655 | 74.9122821 |
| 79.9177631 | 71.615036 | 74.0756734 | 70.4780886 | 80.3328655 | 74.9122821 |
| 79.9177631 | 71.615036 | 74.0756734 | 70.4780886 | 77.3328655 | 75.9122821 |
| 80.9177631 | 69.615036 | 75.0756734 | 70.4780886 | 76.3328655 | 75.9122821 |
| 81.9177631 | 69.615036 | 75.0756734 | 70.4780886 | 76.3328655 | 75.9122821 |
| 81.9177631 | 69.615036 | 74.0756734 | 73.4780886 | 77.3328655 | 75.9122821 |
| 82.9177631 | 69.615036 | 69.0756734 | 73.4780886 | 77.3328655 | 76.9122821 |
| 82.9177631 | 69.615036 | 69.0756734 | 73.4780886 | 75.3328655 | 76.9122821 |
| 82.9177631 | 69.615036 | 68.0756734 | 73.4780886 | 75.3328655 | 77.9122821 |
| 82.9177631 | 69.615036 | 68.0756734 | 74.4780886 | 73.3328655 | 77.9122821 |
| 83.9177631 | 69.615036 | 68.0756734 | 75.4780886 | 69.3328655 | 77.9122821 |
| 83.9177631 | 70.615036 | 68.0756734 | 77.4780886 | 69.3328655 | 79.9122821 |
| 84.9177631 | 70.615036 | 68.0756734 | 77.4780886 | 66.3328655 | 75.9122821 |
| 85.9177631 | 70.615036 | 68.0756734 | 77.4780886 | 66.3328655 | 75.9122821 |
| 85.9177631 | 70.615036 | 68.0756734 | 77.4780886 | 65.3328655 | 75.9122821 |
| 85.9177631 | 70.615036 | 66.0756734 | 78.4780886 | 66.3328655 | 74.9122821 |
| 85.9177631 | 70.615036 | 66.0756734 | 78.4780886 | 66.3328655 | 74.9122821 |

|            |           |            |            |            |            |
|------------|-----------|------------|------------|------------|------------|
| 85.9177631 | 70.615036 | 66.0756734 | 78.4780886 | 67.3328655 | 73.9122821 |
| 85.9177631 | 70.615036 | 66.0756734 | 78.4780886 | 67.3328655 | 73.9122821 |
| 80.9177631 | 70.615036 | 66.0756734 | 78.4780886 | 67.3328655 | 72.9122821 |
| 78.9177631 | 69.615036 | 66.0756734 | 80.4780886 | 68.3328655 | 71.9122821 |
| 77.9177631 | 69.615036 | 67.0756734 | 81.4780886 | 68.3328655 | 70.9122821 |
| 76.9177631 | 69.615036 | 67.0756734 | 81.4780886 | 70.3328655 | 71.9122821 |
| 76.9177631 | 68.615036 | 67.0756734 | 81.4780886 | 71.3328655 | 71.9122821 |
| 76.9177631 | 67.615036 | 66.0756734 | 81.4780886 | 71.3328655 | 72.9122821 |
| 76.9177631 | 67.615036 | 66.0756734 | 81.4780886 | 70.3328655 | 69.9122821 |
| 76.9177631 | 67.615036 | 66.0756734 | 81.4780886 | 70.3328655 | 68.9122821 |
| 77.9177631 | 67.615036 | 65.0756734 | 81.4780886 | 69.3328655 | 68.9122821 |
| 77.9177631 | 67.615036 | 65.0756734 | 81.4780886 | 69.3328655 | 68.9122821 |
| 77.9177631 | 68.615036 | 65.0756734 | 81.4780886 | 70.3328655 | 67.9122821 |
| 77.9177631 | 69.615036 | 65.0756734 | 81.4780886 | 70.3328655 | 68.9122821 |
| 77.9177631 | 69.615036 | 65.0756734 | 81.4780886 | 71.3328655 | 70.9122821 |
| 77.9177631 | 69.615036 | 65.0756734 | 83.4780886 | 72.3328655 | 72.9122821 |
| 77.9177631 | 69.615036 | 66.0756734 | 85.4780886 | 72.3328655 | 74.9122821 |
| 77.9177631 | 69.615036 | 66.0756734 | 85.4780886 | 72.3328655 | 74.9122821 |
| 77.9177631 | 69.615036 | 66.0756734 | 85.4780886 | 72.3328655 | 74.9122821 |
| 78.9177631 | 69.615036 | 65.0756734 | 84.4780886 | 72.3328655 | 73.9122821 |
| 78.9177631 | 69.615036 | 65.0756734 | 83.4780886 | 72.3328655 | 70.9122821 |
| 80.9177631 | 70.615036 | 65.0756734 | 82.4780886 | 72.3328655 | 68.9122821 |
| 80.9177631 | 70.615036 | 65.0756734 | 82.4780886 | 73.3328655 | 67.9122821 |
| 77.9177631 | 77.615036 | 65.0756734 | 79.4780886 | 73.3328655 | 67.9122821 |
| 76.9177631 | 77.615036 | 65.0756734 | 78.4780886 | 73.3328655 | 66.9122821 |
| 74.9177631 | 76.615036 | 64.0756734 | 77.4780886 | 75.3328655 | 68.9122821 |
| 74.9177631 | 76.615036 | 64.0756734 | 77.4780886 | 76.3328655 | 68.9122821 |
| 73.9177631 | 76.615036 | 64.0756734 | 75.4780886 | 76.3328655 | 69.9122821 |
| 73.9177631 | 76.615036 | 64.0756734 | 75.4780886 | 76.3328655 | 69.9122821 |
| 71.9177631 | 76.615036 | 64.0756734 | 71.4780886 | 76.3328655 | 69.9122821 |
| 70.9177631 | 76.615036 | 64.0756734 | 70.4780886 | 75.3328655 | 69.9122821 |
| 70.9177631 | 76.615036 | 64.0756734 | 69.4780886 | 76.3328655 | 69.9122821 |
| 72.9177631 | 76.615036 | 68.0756734 | 68.4780886 | 80.3328655 | 70.9122821 |
| 72.9177631 | 77.615036 | 68.0756734 | 68.4780886 | 83.3328655 | 70.9122821 |
| 72.9177631 | 77.615036 | 68.0756734 | 68.4780886 | 84.3328655 | 70.9122821 |
| 71.9177631 | 77.615036 | 68.0756734 | 69.4780886 | 84.3328655 | 70.9122821 |
| 72.9177631 | 77.615036 | 68.0756734 | 69.4780886 | 79.3328655 | 70.9122821 |
| 73.9177631 | 77.615036 | 68.0756734 | 70.4780886 | 76.3328655 | 76.9122821 |
| 74.9177631 | 77.615036 | 68.0756734 | 69.4780886 | 76.3328655 | 78.9122821 |
| 75.9177631 | 78.615036 | 68.0756734 | 70.4780886 | 76.3328655 | 78.9122821 |
| 75.9177631 | 78.615036 | 68.0756734 | 70.4780886 | 76.3328655 | 78.9122821 |
| 75.9177631 | 78.615036 | 68.0756734 | 71.4780886 | 76.3328655 | 74.9122821 |
| 75.9177631 | 79.615036 | 68.0756734 | 71.4780886 | 76.3328655 | 71.9122821 |
| 75.9177631 | 80.615036 | 68.0756734 | 72.4780886 | 78.3328655 | 70.9122821 |
| 75.9177631 | 80.615036 | 68.0756734 | 72.4780886 | 78.3328655 | 70.9122821 |

|            |           |            |            |            |            |
|------------|-----------|------------|------------|------------|------------|
| 75.9177631 | 80.615036 | 69.0756734 | 73.4780886 | 79.3328655 | 69.9122821 |
| 75.9177631 | 78.615036 | 69.0756734 | 74.4780886 | 79.3328655 | 68.9122821 |
| 74.9177631 | 75.615036 | 69.0756734 | 73.4780886 | 78.3328655 | 67.9122821 |
| 71.9177631 | 74.615036 | 69.0756734 | 73.4780886 | 78.3328655 | 67.9122821 |
| 71.9177631 | 74.615036 | 69.0756734 | 73.4780886 | 77.3328655 | 67.9122821 |
| 72.9177631 | 77.615036 | 69.0756734 | 75.4780886 | 77.3328655 | 67.9122821 |
| 72.9177631 | 78.615036 | 66.0756734 | 79.4780886 | 76.3328655 | 66.9122821 |
| 72.9177631 | 78.615036 | 66.0756734 | 79.4780886 | 76.3328655 | 67.9122821 |
| 73.9177631 | 78.615036 | 66.0756734 | 84.4780886 | 76.3328655 | 67.9122821 |
| 74.9177631 | 78.615036 | 65.0756734 | 83.4780886 | 79.3328655 | 67.9122821 |
| 74.9177631 | 78.615036 | 65.0756734 | 83.4780886 | 79.3328655 | 67.9122821 |
| 75.9177631 | 77.615036 | 65.0756734 | 79.4780886 | 77.3328655 | 82.9122821 |
| 78.9177631 | 77.615036 | 66.0756734 | 78.4780886 | 76.3328655 | 83.9122821 |
| 78.9177631 | 76.615036 | 66.0756734 | 78.4780886 | 75.3328655 | 83.9122821 |
| 80.9177631 | 76.615036 | 66.0756734 | 78.4780886 | 75.3328655 | 83.9122821 |
| 81.9177631 | 76.615036 | 66.0756734 | 78.4780886 | 75.3328655 | 84.9122821 |
| 81.9177631 | 74.615036 | 66.0756734 | 78.4780886 | 75.3328655 | 85.9122821 |
| 84.9177631 | 74.615036 | 66.0756734 | 78.4780886 | 76.3328655 | 85.9122821 |
| 84.9177631 | 73.615036 | 66.0756734 | 77.4780886 | 76.3328655 | 85.9122821 |
| 84.9177631 | 73.615036 | 66.0756734 | 77.4780886 | 76.3328655 | 85.9122821 |
| 85.9177631 | 73.615036 | 66.0756734 | 76.4780886 | 79.3328655 | 85.9122821 |
| 86.9177631 | 73.615036 | 65.0756734 | 75.4780886 | 79.3328655 | 84.9122821 |
| 86.9177631 | 73.615036 | 65.0756734 | 75.4780886 | 81.3328655 | 84.9122821 |
| 86.9177631 | 74.615036 | 65.0756734 | 75.4780886 | 81.3328655 | 84.9122821 |
| 86.9177631 | 74.615036 | 67.0756734 | 75.4780886 | 82.3328655 | 84.9122821 |
| 86.9177631 | 74.615036 | 67.0756734 | 74.4780886 | 82.3328655 | 84.9122821 |
| 86.9177631 | 74.615036 | 67.0756734 | 76.4780886 | 84.3328655 | 84.9122821 |
| 85.9177631 | 74.615036 | 67.0756734 | 76.4780886 | 85.3328655 | 84.9122821 |
| 84.9177631 | 75.615036 | 70.0756734 | 77.4780886 | 85.3328655 | 84.9122821 |
| 84.9177631 | 75.615036 | 70.0756734 | 79.4780886 | 84.3328655 | 84.9122821 |
| 84.9177631 | 75.615036 | 70.0756734 | 79.4780886 | 83.3328655 | 84.9122821 |
| 83.9177631 | 76.615036 | 69.0756734 | 79.4780886 | 83.3328655 | 83.9122821 |
| 82.9177631 | 78.615036 | 69.0756734 | 79.4780886 | 83.3328655 | 83.9122821 |
| 82.9177631 | 81.615036 | 69.0756734 | 83.4780886 | 82.3328655 | 81.9122821 |
| 79.9177631 | 82.615036 | 68.0756734 | 84.4780886 | 82.3328655 | 81.9122821 |
| 77.9177631 | 81.615036 | 68.0756734 | 84.4780886 | 82.3328655 | 80.9122821 |
| 74.9177631 | 81.615036 | 67.0756734 | 85.4780886 | 80.3328655 | 78.9122821 |
| 74.9177631 | 80.615036 | 67.0756734 | 86.4780886 | 80.3328655 | 78.9122821 |
| 74.9177631 | 79.615036 | 67.0756734 | 85.4780886 | 78.3328655 | 76.9122821 |
| 75.9177631 | 79.615036 | 67.0756734 | 84.4780886 | 78.3328655 | 73.9122821 |
| 75.9177631 | 80.615036 | 67.0756734 | 84.4780886 | 78.3328655 | 73.9122821 |
| 74.9177631 | 80.615036 | 67.0756734 | 68.4780886 | 78.3328655 | 72.9122821 |
| 74.9177631 | 80.615036 | 67.0756734 | 66.4780886 | 75.3328655 | 72.9122821 |
| 74.9177631 | 81.615036 | 67.0756734 | 64.4780886 | 75.3328655 | 72.9122821 |
| 74.9177631 | 81.615036 | 67.0756734 | 63.4780886 | 70.3328655 | 73.9122821 |

|            |           |            |            |            |            |
|------------|-----------|------------|------------|------------|------------|
| 75.9177631 | 81.615036 | 68.0756734 | 63.4780886 | 70.3328655 | 73.9122821 |
| 75.9177631 | 81.615036 | 68.0756734 | 63.4780886 | 70.3328655 | 73.9122821 |
| 76.9177631 | 82.615036 | 68.0756734 | 64.4780886 | 72.3328655 | 73.9122821 |
| 78.9177631 | 82.615036 | 69.0756734 | 64.4780886 | 73.3328655 | 74.9122821 |
| 78.9177631 | 83.615036 | 72.0756734 | 63.4780886 | 73.3328655 | 74.9122821 |
| 78.9177631 | 83.615036 | 73.0756734 | 62.4780886 | 74.3328655 | 74.9122821 |
| 78.9177631 | 83.615036 | 73.0756734 | 61.4780886 | 73.3328655 | 74.9122821 |
| 78.9177631 | 83.615036 | 73.0756734 | 62.4780886 | 73.3328655 | 74.9122821 |
| 78.9177631 | 84.615036 | 73.0756734 | 63.4780886 | 71.3328655 | 74.9122821 |
| 77.9177631 | 85.615036 | 65.0756734 | 63.4780886 | 71.3328655 | 74.9122821 |
| 77.9177631 | 84.615036 | 65.0756734 | 68.4780886 | 71.3328655 | 74.9122821 |
| 77.9177631 | 83.615036 | 65.0756734 | 72.4780886 | 71.3328655 | 74.9122821 |
| 77.9177631 | 79.615036 | 66.0756734 | 74.4780886 | 74.3328655 | 74.9122821 |
| 76.9177631 | 75.615036 | 67.0756734 | 75.4780886 | 74.3328655 | 73.9122821 |
| 75.9177631 | 73.615036 | 67.0756734 | 76.4780886 | 74.3328655 | 73.9122821 |
| 75.9177631 | 73.615036 | 67.0756734 | 76.4780886 | 77.3328655 | 73.9122821 |
| 74.9177631 | 72.615036 | 67.0756734 | 68.4780886 | 77.3328655 | 73.9122821 |
| 74.9177631 | 73.615036 | 67.0756734 | 67.4780886 | 79.3328655 | 73.9122821 |
| 75.9177631 | 73.615036 | 66.0756734 | 67.4780886 | 79.3328655 | 74.9122821 |
| 75.9177631 | 73.615036 | 66.0756734 | 67.4780886 | 79.3328655 | 74.9122821 |
| 78.9177631 | 73.615036 | 64.0756734 | 67.4780886 | 80.3328655 | 74.9122821 |
| 79.9177631 | 73.615036 | 63.0756734 | 67.4780886 | 79.3328655 | 74.9122821 |
| 78.9177631 | 74.615036 | 63.0756734 | 67.4780886 | 79.3328655 | 74.9122821 |
| 78.9177631 | 74.615036 | 64.0756734 | 66.4780886 | 79.3328655 | 74.9122821 |
| 78.9177631 | 74.615036 | 64.0756734 | 66.4780886 | 79.3328655 | 74.9122821 |
| 78.9177631 | 74.615036 | 65.0756734 | 66.4780886 | 79.3328655 | 74.9122821 |
| 79.9177631 | 74.615036 | 65.0756734 | 66.4780886 | 78.3328655 | 74.9122821 |
| 79.9177631 | 74.615036 | 63.0756734 | 67.4780886 | 77.3328655 | 74.9122821 |
| 80.9177631 | 75.615036 | 63.0756734 | 69.4780886 | 77.3328655 | 74.9122821 |
| 80.9177631 | 76.615036 | 63.0756734 | 69.4780886 | 77.3328655 | 74.9122821 |
| 81.9177631 | 77.615036 | 63.0756734 | 69.4780886 | 77.3328655 | 75.9122821 |
| 81.9177631 | 77.615036 | 62.0756734 | 70.4780886 | 77.3328655 | 75.9122821 |
| 81.9177631 | 79.615036 | 62.0756734 | 70.4780886 | 74.3328655 | 76.9122821 |
| 81.9177631 | 83.615036 | 62.0756734 | 70.4780886 | 72.3328655 | 77.9122821 |
| 81.9177631 | 84.615036 | 62.0756734 | 71.4780886 | 72.3328655 | 77.9122821 |
| 79.9177631 | 84.615036 | 62.0756734 | 72.4780886 | 72.3328655 | 77.9122821 |
| 78.9177631 | 84.615036 | 62.0756734 | 77.4780886 | 74.3328655 | 78.9122821 |
| 77.9177631 | 84.615036 | 62.0756734 | 77.4780886 | 75.3328655 | 78.9122821 |
| 77.9177631 | 84.615036 | 62.0756734 | 79.4780886 | 76.3328655 | 77.9122821 |
| 72.9177631 | 85.615036 | 63.0756734 | 78.4780886 | 76.3328655 | 76.9122821 |
| 72.9177631 | 85.615036 | 65.0756734 | 78.4780886 | 76.3328655 | 76.9122821 |
| 69.9177631 | 84.615036 | 66.0756734 | 71.4780886 | 76.3328655 | 76.9122821 |
| 68.9177631 | 84.615036 | 66.0756734 | 68.4780886 | 75.3328655 | 75.9122821 |
| 70.9177631 | 85.615036 | 66.0756734 | 66.4780886 | 75.3328655 | 75.9122821 |
| 70.9177631 | 85.615036 | 66.0756734 | 65.4780886 | 75.3328655 | 75.9122821 |

|            |            |            |            |            |            |
|------------|------------|------------|------------|------------|------------|
| 70.9177631 | 87.615036  | 67.0756734 | 65.4780886 | 76.3328655 | 75.9122821 |
| 70.9177631 | 87.615036  | 67.0756734 | 67.4780886 | 78.3328655 | 75.9122821 |
| 71.9177631 | 88.615036  | 67.0756734 | 67.4780886 | 78.3328655 | 75.9122821 |
| 72.9177631 | 88.615036  | 68.0756734 | 67.4780886 | 78.3328655 | 75.9122821 |
| 72.9177631 | 87.615036  | 68.0756734 | 67.4780886 | 77.3328655 | 75.9122821 |
| 73.9177631 | 87.615036  | 71.0756734 | 67.4780886 | 77.3328655 | 75.9122821 |
| 74.9177631 | 87.615036  | 71.0756734 | 68.4780886 | 76.3328655 | 76.9122821 |
| 75.9177631 | 87.615036  | 72.0756734 | 70.4780886 | 76.3328655 | 76.9122821 |
| 76.9177631 | 87.615036  | 73.0756734 | 70.4780886 | 76.3328655 | 76.9122821 |
| 77.9177631 | 87.615036  | 74.0756734 | 71.4780886 | 76.3328655 | 76.9122821 |
| 80.9177631 | 87.615036  | 74.0756734 | 71.4780886 | 76.3328655 | 79.9122821 |
| 81.9177631 | 87.615036  | 75.0756734 | 71.4780886 | 76.3328655 | 79.9122821 |
| 81.9177631 | 87.615036  | 73.0756734 | 71.4780886 | 76.3328655 | 78.9122821 |
| 81.9177631 | 87.615036  | 73.0756734 | 72.4780886 | 76.3328655 | 77.9122821 |
| 81.9177631 | 87.615036  | 73.0756734 | 72.4780886 | 76.3328655 | 77.9122821 |
| 82.9177631 | 87.615036  | 72.0756734 | 71.4780886 | 76.3328655 | 76.9122821 |
| 82.9177631 | 87.615036  | 72.0756734 | 71.4780886 | 77.3328655 | 77.9122821 |
| 82.9177631 | 87.615036  | 72.0756734 | 70.4780886 | 77.3328655 | 77.9122821 |
| 82.9177631 | 87.615036  | 72.0756734 | 70.4780886 | 76.3328655 | 78.9122821 |
| 82.9177631 | 87.615036  | 70.0756734 | 70.4780886 | 75.3328655 | 78.9122821 |
| 82.9177631 | 87.615036  | 69.0756734 | 71.4780886 | 74.3328655 | 80.9122821 |
| 82.9177631 | 87.615036  | 68.0756734 | 72.4780886 | 74.3328655 | 77.9122821 |
| 82.9177631 | 87.615036  | 68.0756734 | 72.4780886 | 74.3328655 | 74.9122821 |
| 81.9177631 | 87.615036  | 68.0756734 | 72.4780886 | 75.3328655 | 74.9122821 |
| 81.9177631 | 87.615036  | 68.0756734 | 72.4780886 | 75.3328655 | 72.9122821 |
| 81.9177631 | 87.615036  | 68.0756734 | 71.4780886 | 76.3328655 | 73.9122821 |
| 81.9177631 | 87.615036  | 68.0756734 | 71.4780886 | 76.3328655 | 73.9122821 |
| 82.9177631 | 87.615036  | 68.0756734 | 71.4780886 | 78.3328655 | 74.9122821 |
| 82.9177631 | 87.615036  | 68.0756734 | 71.4780886 | 78.3328655 | 74.9122821 |
| 81.9177631 | 89.615036  | 68.0756734 | 72.4780886 | 80.3328655 | 74.9122821 |
| 81.9177631 | 89.615036  | 68.0756734 | 72.4780886 | 82.3328655 | 73.9122821 |
| 81.9177631 | 75.0647407 | 68.0756734 | 72.4780886 | 82.3328655 | 71.9122821 |
| 81.9177631 | 74.4283771 | 68.0756734 | 71.4780886 | 82.3328655 | 70.9122821 |
| 81.9177631 | 74.2465589 | 68.0756734 | 70.4780886 | 85.3328655 | 70.9122821 |
| 81.9177631 | 73.9738316 | 67.0756734 | 70.4780886 | 84.3328655 | 71.9122821 |
| 82.9177631 | 73.5192862 | 67.0756734 | 70.4780886 | 84.3328655 | 71.9122821 |
| 82.9177631 | 81.615036  | 67.0756734 | 70.4780886 | 83.3328655 | 70.9122821 |
| 81.9177631 | 78.615036  | 67.0756734 | 70.4780886 | 83.3328655 | 70.9122821 |
| 80.9177631 | 73.615036  | 67.0756734 | 70.4780886 | 83.3328655 | 70.9122821 |
| 80.9177631 | 69.615036  | 67.0756734 | 70.4780886 | 84.3328655 | 70.9122821 |
| 80.9177631 | 68.615036  | 67.0756734 | 70.4780886 | 84.3328655 | 70.9122821 |
| 79.9177631 | 68.615036  | 67.0756734 | 70.4780886 | 84.3328655 | 70.9122821 |
| 79.9177631 | 68.615036  | 68.0756734 | 70.4780886 | 84.3328655 | 72.9122821 |
| 79.9177631 | 67.615036  | 68.0756734 | 70.4780886 | 84.3328655 | 72.9122821 |
| 77.9177631 | 66.615036  | 70.0756734 | 70.4780886 | 84.3328655 | 72.9122821 |

|            |           |            |            |            |            |
|------------|-----------|------------|------------|------------|------------|
| 76.9177631 | 65.615036 | 70.0756734 | 71.4780886 | 84.3328655 | 72.9122821 |
| 75.9177631 | 64.615036 | 70.0756734 | 72.4780886 | 84.3328655 | 72.9122821 |
| 75.9177631 | 64.615036 | 70.0756734 | 73.4780886 | 70.2465589 | 68.9122821 |
| 74.9177631 | 64.615036 | 69.0756734 | 73.4780886 | 70.0647407 | 68.9122821 |
| 75.9177631 | 64.615036 | 69.0756734 | 74.4780886 | 84.3328655 | 65.9122821 |
| 78.9177631 | 63.615036 | 68.0756734 | 74.4780886 | 84.3328655 | 64.9122821 |
| 78.9177631 | 63.615036 | 68.0756734 | 74.4780886 | 84.3328655 | 64.9122821 |
| 78.9177631 | 62.615036 | 68.0756734 | 74.4780886 | 84.3328655 | 64.9122821 |
| 78.9177631 | 62.615036 | 68.0756734 | 74.4780886 | 84.3328655 | 66.9122821 |
| 79.9177631 | 63.615036 | 69.0756734 | 74.4780886 | 85.3328655 | 67.9122821 |
| 79.9177631 | 63.615036 | 71.0756734 | 75.4780886 | 71.4283771 | 67.9122821 |
| 80.9177631 | 63.615036 | 71.0756734 | 75.4780886 | 71.7011044 | 67.9122821 |
| 80.9177631 | 63.615036 | 71.0756734 | 77.4780886 | 71.8829225 | 67.9122821 |
| 80.9177631 | 63.615036 | 71.0756734 | 77.4780886 | 72.0647407 | 68.9122821 |
| 80.9177631 | 63.615036 | 71.0756734 | 77.4780886 | 72.2465589 | 68.9122821 |
| 77.9177631 | 64.615036 | 71.0756734 | 77.4780886 | 72.6101953 | 69.9122821 |
| 76.9177631 | 64.615036 | 73.0756734 | 76.4780886 | 72.9738316 | 70.9122821 |
| 75.9177631 | 64.615036 | 73.0756734 | 76.4780886 | 86.3328655 | 70.9122821 |
| 75.9177631 | 62.615036 | 73.0756734 | 75.4780886 | 85.3328655 | 70.9122821 |
| 75.9177631 | 61.615036 | 73.0756734 | 75.4780886 | 85.3328655 | 70.9122821 |
| 76.9177631 | 62.615036 | 73.0756734 | 75.4780886 | 85.3328655 | 69.9122821 |
| 76.9177631 | 63.615036 | 74.0756734 | 74.4780886 | 85.3328655 | 68.9122821 |
| 76.9177631 | 63.615036 | 78.0756734 | 74.4780886 | 85.3328655 | 68.9122821 |
| 74.9177631 | 63.615036 | 78.0756734 | 71.4780886 | 86.3328655 | 67.9122821 |
| 75.9177631 | 64.615036 | 82.0756734 | 71.4780886 | 86.3328655 | 67.9122821 |
| 77.9177631 | 64.615036 | 82.0756734 | 70.4780886 | 86.3328655 | 67.9122821 |
| 77.9177631 | 64.615036 | 82.0756734 | 70.4780886 | 85.3328655 | 68.9122821 |
| 77.9177631 | 65.615036 | 76.0756734 | 69.4780886 | 84.3328655 | 68.9122821 |
| 77.9177631 | 67.615036 | 76.0756734 | 69.4780886 | 82.3328655 | 68.9122821 |
| 77.9177631 | 72.615036 | 75.0756734 | 69.4780886 | 83.3328655 | 69.9122821 |
| 77.9177631 | 74.615036 | 75.0756734 | 69.4780886 | 83.3328655 | 70.9122821 |
| 77.9177631 | 75.615036 | 75.0756734 | 68.4780886 | 83.3328655 | 71.9122821 |
| 77.9177631 | 76.615036 | 74.0756734 | 68.4780886 | 84.3328655 | 72.9122821 |
| 77.9177631 | 77.615036 | 74.0756734 | 69.4780886 | 83.3328655 | 72.9122821 |
| 77.9177631 | 77.615036 | 74.0756734 | 69.4780886 | 75.3328655 | 72.9122821 |
| 77.9177631 | 76.615036 | 74.0756734 | 69.4780886 | 70.3328655 | 72.9122821 |
| 76.9177631 | 75.615036 | 74.0756734 | 70.4780886 | 70.3328655 | 76.9122821 |
| 76.9177631 | 75.615036 | 74.0756734 | 70.4780886 | 70.3328655 | 76.9122821 |
| 76.9177631 | 73.615036 | 74.0756734 | 71.4780886 | 70.3328655 | 76.9122821 |
| 76.9177631 | 73.615036 | 73.0756734 | 71.4780886 | 71.3328655 | 77.9122821 |
| 76.9177631 | 72.615036 | 73.0756734 | 71.4780886 | 71.3328655 | 77.9122821 |
| 75.9177631 | 72.615036 | 73.0756734 | 71.4780886 | 73.3328655 | 76.9122821 |
| 75.9177631 | 72.615036 | 72.0756734 | 69.4780886 | 75.3328655 | 76.9122821 |
| 74.9177631 | 72.615036 | 72.0756734 | 69.4780886 | 75.3328655 | 76.9122821 |
| 73.9177631 | 72.615036 | 72.0756734 | 69.4780886 | 75.3328655 | 74.9122821 |

|            |           |            |            |            |            |
|------------|-----------|------------|------------|------------|------------|
| 71.9177631 | 72.615036 | 72.0756734 | 69.4780886 | 75.3328655 | 74.9122821 |
| 69.9177631 | 73.615036 | 72.0756734 | 69.4780886 | 74.3328655 | 74.9122821 |
| 70.9177631 | 73.615036 | 72.0756734 | 69.4780886 | 74.3328655 | 74.9122821 |
| 70.9177631 | 73.615036 | 72.0756734 | 69.4780886 | 72.3328655 | 73.9122821 |
| 71.9177631 | 73.615036 | 70.0756734 | 69.4780886 | 70.3328655 | 72.9122821 |
| 71.9177631 | 72.615036 | 70.0756734 | 69.4780886 | 70.3328655 | 70.9122821 |
| 72.9177631 | 72.615036 | 72.0756734 | 70.4780886 | 70.3328655 | 68.9122821 |
| 72.9177631 | 72.615036 | 72.0756734 | 70.4780886 | 70.3328655 | 68.9122821 |
| 73.9177631 | 72.615036 | 72.0756734 | 70.4780886 | 71.3328655 | 68.9122821 |
| 72.9177631 | 70.615036 | 73.0756734 | 70.4780886 | 73.3328655 | 67.9122821 |
| 72.9177631 | 66.615036 | 73.0756734 | 69.4780886 | 75.3328655 | 67.9122821 |
| 72.9177631 | 65.615036 | 73.0756734 | 68.4780886 | 75.3328655 | 66.9122821 |
| 72.9177631 | 64.615036 | 73.0756734 | 68.4780886 | 72.3328655 | 66.9122821 |
| 71.9177631 | 64.615036 | 75.0756734 | 69.4780886 | 71.3328655 | 65.9122821 |
| 70.9177631 | 64.615036 | 75.0756734 | 69.4780886 | 71.3328655 | 65.9122821 |
| 70.9177631 | 65.615036 | 75.0756734 | 70.4780886 | 70.3328655 | 66.9122821 |
| 70.9177631 | 66.615036 | 77.0756734 | 71.4780886 | 69.3328655 | 70.9122821 |
| 70.9177631 | 66.615036 | 77.0756734 | 71.4780886 | 69.3328655 | 69.9122821 |
| 70.9177631 | 66.615036 | 77.0756734 | 71.4780886 | 70.3328655 | 69.9122821 |
| 70.9177631 | 66.615036 | 79.0756734 | 71.4780886 | 71.3328655 | 68.9122821 |
| 70.9177631 | 64.615036 | 79.0756734 | 71.4780886 | 72.3328655 | 68.9122821 |
| 71.9177631 | 63.615036 | 78.0756734 | 71.4780886 | 72.3328655 | 68.9122821 |
| 71.9177631 | 63.615036 | 78.0756734 | 70.4780886 | 74.3328655 | 70.9122821 |
| 70.9177631 | 63.615036 | 79.0756734 | 69.4780886 | 76.3328655 | 74.9122821 |
| 69.9177631 | 63.615036 | 79.0756734 | 69.4780886 | 77.3328655 | 76.9122821 |
| 68.9177631 | 64.615036 | 80.0756734 | 69.4780886 | 77.3328655 | 79.9122821 |
| 69.9177631 | 64.615036 | 80.0756734 | 68.4780886 | 75.3328655 | 81.9122821 |
| 68.9177631 | 64.615036 | 80.0756734 | 68.4780886 | 74.3328655 | 81.9122821 |
| 68.9177631 | 64.615036 | 80.0756734 | 68.4780886 | 74.3328655 | 81.9122821 |
| 69.9177631 | 64.615036 | 80.0756734 | 68.4780886 | 73.3328655 | 81.9122821 |
| 69.9177631 | 64.615036 | 80.0756734 | 68.4780886 | 75.3328655 | 80.9122821 |
| 71.9177631 | 65.615036 | 80.0756734 | 69.4780886 | 75.3328655 | 76.9122821 |
| 71.9177631 | 65.615036 | 80.0756734 | 69.4780886 | 75.3328655 | 76.9122821 |
| 72.9177631 | 65.615036 | 81.0756734 | 69.4780886 | 75.3328655 | 75.9122821 |
| 72.9177631 | 66.615036 | 81.0756734 | 69.4780886 | 74.3328655 | 63.9122821 |
| 73.9177631 | 66.615036 | 81.0756734 | 71.4780886 | 74.3328655 | 62.9122821 |
| 73.9177631 | 66.615036 | 81.0756734 | 71.4780886 | 74.3328655 | 62.9122821 |
| 74.9177631 | 66.615036 | 70.0756734 | 71.4780886 | 74.3328655 | 60.9122821 |
| 75.9177631 | 66.615036 | 70.0756734 | 71.4780886 | 74.3328655 | 60.9122821 |
| 80.9177631 | 66.615036 | 68.0756734 | 71.4780886 | 74.3328655 | 59.9122821 |
| 79.9177631 | 67.615036 | 68.0756734 | 71.4780886 | 74.3328655 | 59.9122821 |
| 77.9177631 | 67.615036 | 68.0756734 | 72.4780886 | 74.3328655 | 59.9122821 |
| 73.9177631 | 68.615036 | 68.0756734 | 74.4780886 | 74.3328655 | 59.9122821 |
| 70.9177631 | 68.615036 | 68.0756734 | 74.4780886 | 74.3328655 | 59.9122821 |
| 67.9177631 | 68.615036 | 69.0756734 | 74.4780886 | 74.3328655 | 58.9122821 |

|            |            |            |            |            |            |
|------------|------------|------------|------------|------------|------------|
| 64.9177631 | 73.615036  | 70.0756734 | 74.4780886 | 75.3328655 | 58.9122821 |
| 64.9177631 | 73.615036  | 70.0756734 | 74.4780886 | 75.3328655 | 58.9122821 |
| 65.9177631 | 77.615036  | 70.0756734 | 74.4780886 | 75.3328655 | 58.9122821 |
| 65.9177631 | 79.615036  | 70.0756734 | 74.4780886 | 75.3328655 | 58.9122821 |
| 67.9177631 | 79.615036  | 70.0756734 | 74.4780886 | 77.3328655 | 58.9122821 |
| 67.9177631 | 80.615036  | 70.0756734 | 74.4780886 | 78.3328655 | 58.9122821 |
| 67.9177631 | 81.615036  | 70.0756734 | 74.4780886 | 78.3328655 | 58.9122821 |
| 68.9177631 | 84.615036  | 70.0756734 | 74.4780886 | 78.3328655 | 58.9122821 |
| 67.9177631 | 84.615036  | 70.0756734 | 74.4780886 | 78.3328655 | 58.9122821 |
| 67.9177631 | 72.337468  | 70.0756734 | 74.4780886 | 81.3328655 | 60.9122821 |
| 67.9177631 | 72.8829225 | 69.0756734 | 74.4780886 | 84.3328655 | 60.9122821 |
| 67.9177631 | 73.6101953 | 69.0756734 | 74.4780886 | 84.3328655 | 66.9122821 |
| 66.9177631 | 73.8829225 | 69.0756734 | 74.4780886 | 85.3328655 | 67.9122821 |
| 66.9177631 | 74.2465589 | 69.0756734 | 76.4780886 | 85.3328655 | 67.9122821 |
| 66.9177631 | 74.0647407 | 69.0756734 | 77.4780886 | 85.3328655 | 62.9122821 |
| 66.9177631 | 74.0647407 | 67.0756734 | 77.4780886 | 85.3328655 | 61.9122821 |
| 67.9177631 | 74.2465589 | 67.0756734 | 78.4780886 | 84.3328655 | 61.9122821 |
| 68.9177631 | 73.9738316 | 67.0756734 | 78.4780886 | 81.3328655 | 60.9122821 |
| 67.9177631 | 73.7920134 | 70.0756734 | 76.4780886 | 80.3328655 | 60.9122821 |
| 63.9177631 | 73.2465589 | 70.0756734 | 76.4780886 | 80.3328655 | 60.9122821 |
| 63.9177631 | 72.8829225 | 71.0756734 | 75.4780886 | 79.3328655 | 60.9122821 |
| 63.9177631 | 72.9738316 | 71.0756734 | 75.4780886 | 79.3328655 | 61.9122821 |
| 64.9177631 | 73.5192862 | 73.0756734 | 75.4780886 | 80.3328655 | 63.9122821 |
| 64.9177631 | 73.4283771 | 74.0756734 | 75.4780886 | 79.3328655 | 63.9122821 |
| 64.9177631 | 73.9738316 | 74.0756734 | 75.4780886 | 79.3328655 | 65.9122821 |
| 64.9177631 | 74.2465589 | 74.0756734 | 75.4780886 | 79.3328655 | 66.9122821 |
| 66.9177631 | 74.4283771 | 73.0756734 | 75.4780886 | 78.3328655 | 64.9122821 |
| 66.9177631 | 74.337468  | 72.0756734 | 75.4780886 | 78.3328655 | 62.9122821 |
| 72.9177631 | 74.9738316 | 72.0756734 | 75.4780886 | 78.3328655 | 62.9122821 |
| 72.9177631 | 75.5192862 | 72.0756734 | 75.4780886 | 79.3328655 | 61.9122821 |
| 72.9177631 | 75.2465589 | 71.0756734 | 75.4780886 | 79.3328655 | 61.9122821 |
| 72.9177631 | 75.4283771 | 71.0756734 | 75.4780886 | 79.3328655 | 61.9122821 |
| 72.9177631 | 75.2465589 | 71.0756734 | 76.4780886 | 79.3328655 | 60.9122821 |
| 72.9177631 | 88.615036  | 71.0756734 | 78.4780886 | 79.3328655 | 60.9122821 |
| 72.9177631 | 82.615036  | 71.0756734 | 77.4780886 | 77.3328655 | 60.9122821 |
| 71.9177631 | 74.615036  | 71.0756734 | 77.4780886 | 76.3328655 | 62.9122821 |
| 69.9177631 | 70.615036  | 70.0756734 | 73.4780886 | 75.3328655 | 63.9122821 |
| 70.9177631 | 68.615036  | 70.0756734 | 67.4780886 | 75.3328655 | 63.9122821 |
| 71.9177631 | 66.615036  | 71.0756734 | 67.4780886 | 76.3328655 | 65.9122821 |
| 71.9177631 | 66.615036  | 72.0756734 | 67.4780886 | 77.3328655 | 65.9122821 |
| 72.9177631 | 66.615036  | 72.0756734 | 67.4780886 | 78.3328655 | 78.9122821 |
| 72.9177631 | 66.615036  | 72.0756734 | 67.4780886 | 79.3328655 | 78.9122821 |
| 72.9177631 | 66.615036  | 71.0756734 | 67.4780886 | 80.3328655 | 79.9122821 |
| 73.9177631 | 66.615036  | 71.0756734 | 67.4780886 | 81.3328655 | 79.9122821 |
| 75.9177631 | 66.615036  | 71.0756734 | 66.4780886 | 80.3328655 | 77.9122821 |



|            |           |            |            |            |            |
|------------|-----------|------------|------------|------------|------------|
| 77.9177631 | 66.615036 | 70.0756734 | 65.4780886 | 79.3328655 | 71.9122821 |
| 80.9177631 | 66.615036 | 70.0756734 | 65.4780886 | 79.3328655 | 67.9122821 |
| 81.9177631 | 66.615036 | 70.0756734 | 65.4780886 | 79.3328655 | 64.9122821 |
| 82.9177631 | 66.615036 | 70.0756734 | 66.4780886 | 80.3328655 | 62.9122821 |
| 82.9177631 | 66.615036 | 70.0756734 | 66.4780886 | 80.3328655 | 62.9122821 |
| 82.9177631 | 67.615036 | 70.0756734 | 67.4780886 | 80.3328655 | 61.9122821 |
| 82.9177631 | 67.615036 | 70.0756734 | 67.4780886 | 81.3328655 | 60.9122821 |
| 82.9177631 | 67.615036 | 70.0756734 | 67.4780886 | 81.3328655 | 60.9122821 |
| 83.9177631 | 67.615036 | 70.0756734 | 67.4780886 | 81.3328655 | 60.9122821 |
| 85.9177631 | 66.615036 | 70.0756734 | 67.4780886 | 82.3328655 | 60.9122821 |
| 85.9177631 | 66.615036 | 70.0756734 | 67.4780886 | 82.3328655 | 60.9122821 |
| 72.1556498 | 64.615036 | 71.0756734 | 67.4780886 | 81.3328655 | 60.9122821 |
| 72.6101953 | 64.615036 | 71.0756734 | 68.4780886 | 81.3328655 | 60.9122821 |
| 72.7920134 | 66.615036 | 71.0756734 | 70.4780886 | 80.3328655 | 60.9122821 |
| 72.8829225 | 66.615036 | 71.0756734 | 70.4780886 | 79.3328655 | 60.9122821 |
| 86.9177631 | 66.615036 | 71.0756734 | 71.4780886 | 77.3328655 | 60.9122821 |
| 85.9177631 | 66.615036 | 71.0756734 | 71.4780886 | 77.3328655 | 60.9122821 |
| 84.9177631 | 66.615036 | 71.0756734 | 70.4780886 | 78.3328655 | 64.9122821 |
| 84.9177631 | 66.615036 | 68.0756734 | 70.4780886 | 79.3328655 | 64.9122821 |
| 84.9177631 | 66.615036 | 68.0756734 | 71.4780886 | 78.3328655 | 64.9122821 |
| 82.9177631 | 66.615036 | 68.0756734 | 70.4780886 | 78.3328655 | 63.9122821 |
| 82.9177631 | 66.615036 | 67.0756734 | 70.4780886 | 78.3328655 | 63.9122821 |
| 80.9177631 | 66.615036 | 67.0756734 | 69.4780886 | 78.3328655 | 63.9122821 |
| 80.9177631 | 68.615036 | 66.0756734 | 69.4780886 | 78.3328655 | 63.9122821 |
| 80.9177631 | 68.615036 | 65.0756734 | 69.4780886 | 77.3328655 | 63.9122821 |
| 79.9177631 | 70.615036 | 65.0756734 | 69.4780886 | 77.3328655 | 65.9122821 |
| 78.9177631 | 70.615036 | 65.0756734 | 69.4780886 | 76.3328655 | 65.9122821 |
| 78.9177631 | 69.615036 | 64.0756734 | 69.4780886 | 75.3328655 | 69.9122821 |
| 79.9177631 | 68.615036 | 64.0756734 | 69.4780886 | 75.3328655 | 70.9122821 |
| 79.9177631 | 67.615036 | 64.0756734 | 69.4780886 | 77.3328655 | 71.9122821 |
| 79.9177631 | 67.615036 | 65.0756734 | 69.4780886 | 79.3328655 | 73.9122821 |
| 78.9177631 | 67.615036 | 65.0756734 | 69.4780886 | 79.3328655 | 74.9122821 |
| 76.9177631 | 66.615036 | 66.0756734 | 68.4780886 | 79.3328655 | 74.9122821 |
| 76.9177631 | 65.615036 | 66.0756734 | 68.4780886 | 79.3328655 | 74.9122821 |
| 74.9177631 | 63.615036 | 66.0756734 | 69.4780886 | 80.3328655 | 74.9122821 |
| 74.9177631 | 63.615036 | 66.0756734 | 69.4780886 | 77.3328655 | 74.9122821 |
| 74.9177631 | 62.615036 | 66.0756734 | 70.4780886 | 76.3328655 | 74.9122821 |
| 74.9177631 | 62.615036 | 66.0756734 | 70.4780886 | 76.3328655 | 74.9122821 |
| 75.9177631 | 63.615036 | 66.0756734 | 70.4780886 | 76.3328655 | 74.9122821 |
| 75.9177631 | 63.615036 | 66.0756734 | 69.4780886 | 75.3328655 | 74.9122821 |
| 76.9177631 | 63.615036 | 66.0756734 | 69.4780886 | 75.3328655 | 74.9122821 |
| 76.9177631 | 63.615036 | 68.0756734 | 68.4780886 | 75.3328655 | 74.9122821 |
| 76.9177631 | 63.615036 | 73.0756734 | 67.4780886 | 75.3328655 | 74.9122821 |
| 76.9177631 | 63.615036 | 73.0756734 | 67.4780886 | 76.3328655 | 75.9122821 |
| 77.9177631 | 63.615036 | 74.0756734 | 67.4780886 | 76.3328655 | 75.9122821 |

|            |           |            |            |            |            |
|------------|-----------|------------|------------|------------|------------|
| 77.9177631 | 63.615036 | 76.0756734 | 68.4780886 | 77.3328655 | 75.9122821 |
| 75.9177631 | 63.615036 | 76.0756734 | 68.4780886 | 80.3328655 | 76.9122821 |
| 74.9177631 | 63.615036 | 78.0756734 | 69.4780886 | 80.3328655 | 76.9122821 |
| 74.9177631 | 63.615036 | 79.0756734 | 69.4780886 | 80.3328655 | 76.9122821 |
| 72.9177631 | 63.615036 | 79.0756734 | 69.4780886 | 80.3328655 | 77.9122821 |
| 72.9177631 | 63.615036 | 79.0756734 | 69.4780886 | 80.3328655 | 78.9122821 |
| 71.9177631 | 63.615036 | 74.0756734 | 69.4780886 | 81.3328655 | 78.9122821 |
| 71.9177631 | 57.615036 | 74.0756734 | 69.4780886 | 82.3328655 | 77.9122821 |
| 71.9177631 | 56.615036 | 73.0756734 | 69.4780886 | 84.3328655 | 71.9122821 |
| 71.9177631 | 56.615036 | 71.0756734 | 69.4780886 | 84.3328655 | 71.9122821 |
| 72.9177631 | 56.615036 | 71.0756734 | 69.4780886 | 82.3328655 | 66.9122821 |
| 73.9177631 | 56.615036 | 72.0756734 | 69.4780886 | 80.3328655 | 66.9122821 |
| 74.9177631 | 57.615036 | 72.0756734 | 69.4780886 | 80.3328655 | 65.9122821 |
| 75.9177631 | 59.615036 | 72.0756734 | 70.4780886 | 78.3328655 | 65.9122821 |
| 69.9177631 | 60.615036 | 73.0756734 | 70.4780886 | 77.3328655 | 65.9122821 |
| 68.9177631 | 61.615036 | 73.0756734 | 73.4780886 | 77.3328655 | 64.9122821 |
| 66.9177631 | 61.615036 | 73.0756734 | 74.4780886 | 73.3328655 | 64.9122821 |
| 66.9177631 | 61.615036 | 73.0756734 | 74.4780886 | 71.3328655 | 64.9122821 |
| 66.9177631 | 62.615036 | 73.0756734 | 74.4780886 | 71.3328655 | 64.9122821 |
| 66.9177631 | 62.615036 | 73.0756734 | 74.4780886 | 71.3328655 | 64.9122821 |
| 66.9177631 | 62.615036 | 72.0756734 | 75.4780886 | 68.3328655 | 67.9122821 |
| 66.9177631 | 63.615036 | 72.0756734 | 75.4780886 | 64.3328655 | 67.9122821 |
| 66.9177631 | 63.615036 | 71.0756734 | 76.4780886 | 63.3328655 | 67.9122821 |
| 65.9177631 | 62.615036 | 71.0756734 | 75.4780886 | 62.3328655 | 62.9122821 |
| 65.9177631 | 62.615036 | 71.0756734 | 75.4780886 | 62.3328655 | 62.9122821 |
| 64.9177631 | 62.615036 | 71.0756734 | 74.4780886 | 62.3328655 | 60.9122821 |
| 64.9177631 | 62.615036 | 70.0756734 | 72.4780886 | 64.3328655 | 59.9122821 |
| 63.9177631 | 63.615036 | 69.0756734 | 72.4780886 | 64.3328655 | 59.9122821 |
| 64.9177631 | 63.615036 | 69.0756734 | 72.4780886 | 66.3328655 | 61.9122821 |
| 64.9177631 | 64.615036 | 69.0756734 | 72.4780886 | 71.3328655 | 61.9122821 |
| 65.9177631 | 64.615036 | 70.0756734 | 72.4780886 | 71.3328655 | 62.9122821 |
| 65.9177631 | 64.615036 | 70.0756734 | 71.4780886 | 71.3328655 | 63.9122821 |
| 66.9177631 | 65.615036 | 69.0756734 | 71.4780886 | 71.3328655 | 64.9122821 |
| 66.9177631 | 65.615036 | 70.0756734 | 70.4780886 | 72.3328655 | 65.9122821 |
| 66.9177631 | 66.615036 | 70.0756734 | 70.4780886 | 72.3328655 | 65.9122821 |
| 66.9177631 | 66.615036 | 71.0756734 | 70.4780886 | 72.3328655 | 65.9122821 |
| 66.9177631 | 66.615036 | 71.0756734 | 72.4780886 | 78.3328655 | 66.9122821 |
| 66.9177631 | 66.615036 | 71.0756734 | 71.4780886 | 78.3328655 | 66.9122821 |
| 67.9177631 | 65.615036 | 71.0756734 | 71.4780886 | 77.3328655 | 66.9122821 |
| 67.9177631 | 65.615036 | 71.0756734 | 71.4780886 | 73.3328655 | 66.9122821 |
| 68.9177631 | 65.615036 | 71.0756734 | 71.4780886 | 70.3328655 | 66.9122821 |
| 69.9177631 | 65.615036 | 71.0756734 | 71.4780886 | 67.3328655 | 65.9122821 |
| 70.9177631 | 64.615036 | 71.0756734 | 71.4780886 | 66.3328655 | 65.9122821 |
| 71.9177631 | 64.615036 | 71.0756734 | 71.4780886 | 66.3328655 | 65.9122821 |
| 72.9177631 | 64.615036 | 71.0756734 | 72.4780886 | 66.3328655 | 65.9122821 |

|            |           |            |            |            |            |
|------------|-----------|------------|------------|------------|------------|
| 72.9177631 | 64.615036 | 70.0756734 | 72.4780886 | 67.3328655 | 64.9122821 |
| 72.9177631 | 64.615036 | 70.0756734 | 74.4780886 | 69.3328655 | 63.9122821 |
| 73.9177631 | 64.615036 | 69.0756734 | 74.4780886 | 69.3328655 | 63.9122821 |
| 73.9177631 | 64.615036 | 67.0756734 | 74.4780886 | 70.3328655 | 63.9122821 |
| 73.9177631 | 64.615036 | 67.0756734 | 73.4780886 | 72.3328655 | 64.9122821 |
| 73.9177631 | 64.615036 | 67.0756734 | 73.4780886 | 73.3328655 | 66.9122821 |
| 72.9177631 | 65.615036 | 66.0756734 | 73.4780886 | 72.3328655 | 66.9122821 |
| 72.9177631 | 68.615036 | 66.0756734 | 71.4780886 | 72.3328655 | 66.9122821 |
| 71.9177631 | 70.615036 | 66.0756734 | 71.4780886 | 72.3328655 | 65.9122821 |
| 71.9177631 | 71.615036 | 67.0756734 | 71.4780886 | 73.3328655 | 63.9122821 |
| 70.9177631 | 71.615036 | 67.0756734 | 71.4780886 | 74.3328655 | 63.9122821 |
| 70.9177631 | 71.615036 | 70.0756734 | 71.4780886 | 75.3328655 | 63.9122821 |
| 70.9177631 | 71.615036 | 72.0756734 | 70.4780886 | 75.3328655 | 62.9122821 |
| 70.9177631 | 71.615036 | 72.0756734 | 70.4780886 | 75.3328655 | 62.9122821 |
| 69.9177631 | 71.615036 | 72.0756734 | 76.4780886 | 75.3328655 | 63.9122821 |
| 67.9177631 | 71.615036 | 76.0756734 | 76.4780886 | 75.3328655 | 63.9122821 |
| 66.9177631 | 69.615036 | 76.0756734 | 77.4780886 | 75.3328655 | 64.9122821 |
| 65.9177631 | 69.615036 | 77.0756734 | 77.4780886 | 75.3328655 | 63.9122821 |
| 65.9177631 | 69.615036 | 77.0756734 | 77.4780886 | 75.3328655 | 63.9122821 |
| 65.9177631 | 69.615036 | 77.0756734 | 81.4780886 | 75.3328655 | 63.9122821 |
| 65.9177631 | 69.615036 | 75.0756734 | 80.4780886 | 75.3328655 | 63.9122821 |
| 65.9177631 | 70.615036 | 74.0756734 | 79.4780886 | 75.3328655 | 63.9122821 |
| 65.9177631 | 70.615036 | 74.0756734 | 78.4780886 | 73.3328655 | 63.9122821 |
| 64.9177631 | 71.615036 | 74.0756734 | 76.4780886 | 69.3328655 | 63.9122821 |
| 64.9177631 | 72.615036 | 72.0756734 | 75.4780886 | 68.3328655 | 63.9122821 |
| 65.9177631 | 72.615036 | 72.0756734 | 75.4780886 | 66.3328655 | 63.9122821 |
| 65.9177631 | 71.615036 | 71.0756734 | 72.4780886 | 66.3328655 | 64.9122821 |
| 65.9177631 | 71.615036 | 71.0756734 | 71.4780886 | 66.3328655 | 73.9122821 |
| 65.9177631 | 71.615036 | 71.0756734 | 71.4780886 | 66.3328655 | 73.9122821 |
| 65.9177631 | 70.615036 | 70.0756734 | 69.4780886 | 64.3328655 | 73.9122821 |
| 66.9177631 | 70.615036 | 70.0756734 | 69.4780886 | 64.3328655 | 78.9122821 |
| 66.9177631 | 70.615036 | 70.0756734 | 69.4780886 | 65.3328655 | 78.9122821 |
| 66.9177631 | 68.615036 | 70.0756734 | 69.4780886 | 65.3328655 | 79.9122821 |
| 66.9177631 | 69.615036 | 70.0756734 | 70.4780886 | 71.3328655 | 79.9122821 |
| 66.9177631 | 70.615036 | 70.0756734 | 70.4780886 | 74.3328655 | 80.9122821 |
| 66.9177631 | 70.615036 | 68.0756734 | 70.4780886 | 74.3328655 | 80.9122821 |
| 66.9177631 | 70.615036 | 68.0756734 | 70.4780886 | 76.3328655 | 80.9122821 |
| 67.9177631 | 69.615036 | 68.0756734 | 70.4780886 | 76.3328655 | 79.9122821 |
| 67.9177631 | 69.615036 | 69.0756734 | 69.4780886 | 76.3328655 | 79.9122821 |
| 67.9177631 | 65.615036 | 69.0756734 | 69.4780886 | 76.3328655 | 79.9122821 |
| 68.9177631 | 63.615036 | 69.0756734 | 70.4780886 | 76.3328655 | 79.9122821 |
| 70.9177631 | 63.615036 | 69.0756734 | 70.4780886 | 77.3328655 | 79.9122821 |
| 72.9177631 | 63.615036 | 69.0756734 | 70.4780886 | 77.3328655 | 80.9122821 |
| 70.9177631 | 64.615036 | 69.0756734 | 69.4780886 | 77.3328655 | 80.9122821 |
| 70.9177631 | 65.615036 | 69.0756734 | 68.4780886 | 78.3328655 | 74.9122821 |

|            |           |            |            |            |            |
|------------|-----------|------------|------------|------------|------------|
| 70.9177631 | 65.615036 | 69.0756734 | 67.4780886 | 79.3328655 | 73.9122821 |
| 70.9177631 | 65.615036 | 69.0756734 | 67.4780886 | 80.3328655 | 73.9122821 |
| 70.9177631 | 65.615036 | 69.0756734 | 67.4780886 | 80.3328655 | 74.9122821 |
| 70.9177631 | 65.615036 | 69.0756734 | 67.4780886 | 81.3328655 | 74.9122821 |
| 70.9177631 | 65.615036 | 69.0756734 | 67.4780886 | 81.3328655 | 73.9122821 |
| 72.9177631 | 66.615036 | 69.0756734 | 67.4780886 | 81.3328655 | 73.9122821 |
| 72.9177631 | 66.615036 | 80.0756734 | 67.4780886 | 82.3328655 | 69.9122821 |
| 72.9177631 | 66.615036 | 80.0756734 | 67.4780886 | 83.3328655 | 68.9122821 |
| 73.9177631 | 66.615036 | 81.0756734 | 68.4780886 | 83.3328655 | 68.9122821 |
| 73.9177631 | 66.615036 | 81.0756734 | 68.4780886 | 81.3328655 | 67.9122821 |
| 75.9177631 | 66.615036 | 81.0756734 | 69.4780886 | 79.3328655 | 67.9122821 |
| 76.9177631 | 66.615036 | 82.0756734 | 69.4780886 | 78.3328655 | 66.9122821 |
| 76.9177631 | 67.615036 | 83.0756734 | 69.4780886 | 78.3328655 | 66.9122821 |
| 76.9177631 | 68.615036 | 83.0756734 | 70.4780886 | 77.3328655 | 66.9122821 |
| 77.9177631 | 67.615036 | 84.0756734 | 75.4780886 | 75.3328655 | 68.9122821 |
| 76.9177631 | 66.615036 | 83.0756734 | 76.4780886 | 74.3328655 | 69.9122821 |
| 75.9177631 | 65.615036 | 83.0756734 | 76.4780886 | 74.3328655 | 69.9122821 |
| 75.9177631 | 64.615036 | 82.0756734 | 77.4780886 | 74.3328655 | 68.9122821 |
| 73.9177631 | 64.615036 | 82.0756734 | 79.4780886 | 75.3328655 | 67.9122821 |
| 73.9177631 | 63.615036 | 82.0756734 | 82.4780886 | 75.3328655 | 67.9122821 |
| 73.9177631 | 63.615036 | 82.0756734 | 83.4780886 | 75.3328655 | 67.9122821 |
| 73.9177631 | 63.615036 | 82.0756734 | 84.4780886 | 73.3328655 | 67.9122821 |
| 72.9177631 | 63.615036 | 82.0756734 | 84.4780886 | 73.3328655 | 68.9122821 |
| 71.9177631 | 64.615036 | 82.0756734 | 84.4780886 | 71.3328655 | 69.9122821 |
| 68.9177631 | 63.615036 | 76.0756734 | 84.4780886 | 68.3328655 | 69.9122821 |
| 67.9177631 | 63.615036 | 76.0756734 | 84.4780886 | 68.3328655 | 69.9122821 |
| 65.9177631 | 63.615036 | 76.0756734 | 84.4780886 | 67.3328655 | 71.9122821 |
| 65.9177631 | 63.615036 | 75.0756734 | 85.4780886 | 67.3328655 | 71.9122821 |
| 65.9177631 | 63.615036 | 75.0756734 | 84.4780886 | 67.3328655 | 71.9122821 |
| 63.9177631 | 62.615036 | 75.0756734 | 83.4780886 | 67.3328655 | 71.9122821 |
| 66.9177631 | 63.615036 | 75.0756734 | 83.4780886 | 67.3328655 | 72.9122821 |
| 67.9177631 | 63.615036 | 75.0756734 | 83.4780886 | 67.3328655 | 72.9122821 |
| 68.9177631 | 63.615036 | 75.0756734 | 84.4780886 | 68.3328655 | 72.9122821 |
| 69.9177631 | 63.615036 | 73.0756734 | 84.4780886 | 69.3328655 | 72.9122821 |
| 69.9177631 | 63.615036 | 73.0756734 | 84.4780886 | 69.3328655 | 72.9122821 |
| 70.9177631 | 63.615036 | 73.0756734 | 84.4780886 | 70.3328655 | 72.9122821 |
| 70.9177631 | 63.615036 | 71.0756734 | 85.4780886 | 72.3328655 | 72.9122821 |
| 70.9177631 | 63.615036 | 71.0756734 | 85.4780886 | 72.3328655 | 72.9122821 |
| 70.9177631 | 63.615036 | 70.0756734 | 86.4780886 | 84.3328655 | 68.9122821 |
| 70.9177631 | 63.615036 | 68.0756734 | 87.4780886 | 86.3328655 | 66.9122821 |
| 68.9177631 | 63.615036 | 68.0756734 | 72.0647407 | 86.3328655 | 64.9122821 |
| 66.9177631 | 66.615036 | 68.0756734 | 71.9738316 | 86.3328655 | 63.9122821 |
| 66.9177631 | 68.615036 | 68.0756734 | 71.9738316 | 84.3328655 | 63.9122821 |
| 66.9177631 | 69.615036 | 68.0756734 | 72.2465589 | 84.3328655 | 64.9122821 |
| 66.9177631 | 72.615036 | 68.0756734 | 72.4283771 | 81.3328655 | 64.9122821 |

|            |           |            |            |            |            |
|------------|-----------|------------|------------|------------|------------|
| 66.9177631 | 72.615036 | 68.0756734 | 73.1556498 | 81.3328655 | 65.9122821 |
| 65.9177631 | 74.615036 | 68.0756734 | 73.4283771 | 81.3328655 | 67.9122821 |
| 65.9177631 | 75.615036 | 68.0756734 | 73.6101953 | 81.3328655 | 67.9122821 |
| 65.9177631 | 77.615036 | 68.0756734 | 74.4283771 | 83.3328655 | 69.9122821 |
| 67.9177631 | 77.615036 | 68.0756734 | 77.4780886 | 83.3328655 | 70.9122821 |
| 67.9177631 | 77.615036 | 68.0756734 | 74.4780886 | 85.3328655 | 71.9122821 |
| 68.9177631 | 77.615036 | 68.0756734 | 73.4780886 | 86.3328655 | 73.9122821 |
| 68.9177631 | 77.615036 | 68.0756734 | 73.4780886 | 86.3328655 | 72.9122821 |
| 68.9177631 | 77.615036 | 69.0756734 | 74.4780886 | 84.3328655 | 72.9122821 |
| 68.9177631 | 76.615036 | 70.0756734 | 74.4780886 | 80.3328655 | 72.9122821 |
| 69.9177631 | 73.615036 | 70.0756734 | 77.4780886 | 80.3328655 | 72.9122821 |
| 69.9177631 | 71.615036 | 70.0756734 | 79.4780886 | 77.3328655 | 72.9122821 |
| 70.9177631 | 65.615036 | 71.0756734 | 80.4780886 | 77.3328655 | 73.9122821 |
| 70.9177631 | 63.615036 | 71.0756734 | 80.4780886 | 78.3328655 | 73.9122821 |
| 75.9177631 | 62.615036 | 71.0756734 | 81.4780886 | 80.3328655 | 73.9122821 |
| 74.9177631 | 61.615036 | 69.0756734 | 81.4780886 | 82.3328655 | 73.9122821 |
| 72.9177631 | 60.615036 | 69.0756734 | 82.4780886 | 83.3328655 | 73.9122821 |
| 72.9177631 | 60.615036 | 69.0756734 | 82.4780886 | 84.3328655 | 73.9122821 |
| 72.9177631 | 60.615036 | 70.0756734 | 82.4780886 | 84.3328655 | 72.9122821 |
| 72.9177631 | 62.615036 | 70.0756734 | 82.4780886 | 83.3328655 | 72.9122821 |
| 72.9177631 | 63.615036 | 69.0756734 | 83.4780886 | 81.3328655 | 72.9122821 |
| 72.9177631 | 63.615036 | 67.0756734 | 85.4780886 | 79.3328655 | 71.9122821 |
| 72.9177631 | 63.615036 | 67.0756734 | 85.4780886 | 78.3328655 | 70.9122821 |
| 73.9177631 | 63.615036 | 66.0756734 | 85.4780886 | 77.3328655 | 69.9122821 |
| 74.9177631 | 64.615036 | 66.0756734 | 85.4780886 | 76.3328655 | 69.9122821 |
| 74.9177631 | 64.615036 | 66.0756734 | 84.4780886 | 75.3328655 | 69.9122821 |
| 74.9177631 | 65.615036 | 66.0756734 | 83.4780886 | 71.3328655 | 71.9122821 |
| 73.9177631 | 65.615036 | 65.0756734 | 83.4780886 | 66.3328655 | 75.9122821 |
| 73.9177631 | 66.615036 | 65.0756734 | 83.4780886 | 64.3328655 | 75.9122821 |
| 73.9177631 | 68.615036 | 65.0756734 | 82.4780886 | 63.3328655 | 78.9122821 |
| 68.9177631 | 68.615036 | 65.0756734 | 81.4780886 | 64.3328655 | 79.9122821 |
| 66.9177631 | 68.615036 | 66.0756734 | 80.4780886 | 64.3328655 | 78.9122821 |
| 64.9177631 | 66.615036 | 66.0756734 | 80.4780886 | 64.3328655 | 78.9122821 |
| 63.9177631 | 65.615036 | 66.0756734 | 79.4780886 | 64.3328655 | 78.9122821 |
| 62.9177631 | 65.615036 | 66.0756734 | 79.4780886 | 70.3328655 | 78.9122821 |
| 62.9177631 | 64.615036 | 66.0756734 | 79.4780886 | 74.3328655 | 80.9122821 |
| 62.9177631 | 64.615036 | 66.0756734 | 79.4780886 | 76.3328655 | 80.9122821 |
| 62.9177631 | 63.615036 | 66.0756734 | 79.4780886 | 77.3328655 | 80.9122821 |
| 62.9177631 | 62.615036 | 66.0756734 | 79.4780886 | 77.3328655 | 79.9122821 |
| 62.9177631 | 62.615036 | 68.0756734 | 79.4780886 | 76.3328655 | 79.9122821 |
| 63.9177631 | 62.615036 | 68.0756734 | 78.4780886 | 76.3328655 | 79.9122821 |
| 66.9177631 | 62.615036 | 69.0756734 | 78.4780886 | 77.3328655 | 78.9122821 |
| 66.9177631 | 63.615036 | 69.0756734 | 76.4780886 | 77.3328655 | 78.9122821 |
| 74.9177631 | 63.615036 | 69.0756734 | 76.4780886 | 76.3328655 | 78.9122821 |
| 75.9177631 | 62.615036 | 69.0756734 | 76.4780886 | 75.3328655 | 78.9122821 |

|            |           |            |            |            |            |
|------------|-----------|------------|------------|------------|------------|
| 75.9177631 | 60.615036 | 69.0756734 | 75.4780886 | 75.3328655 | 79.9122821 |
| 75.9177631 | 60.615036 | 69.0756734 | 75.4780886 | 75.3328655 | 79.9122821 |
| 79.9177631 | 60.615036 | 71.0756734 | 75.4780886 | 74.3328655 | 79.9122821 |
| 81.9177631 | 60.615036 | 71.0756734 | 72.4780886 | 74.3328655 | 79.9122821 |
| 83.9177631 | 60.615036 | 71.0756734 | 71.4780886 | 75.3328655 | 79.9122821 |
| 81.9177631 | 59.615036 | 71.0756734 | 71.4780886 | 75.3328655 | 79.9122821 |
| 80.9177631 | 59.615036 | 71.0756734 | 74.4780886 | 75.3328655 | 80.9122821 |
| 80.9177631 | 62.615036 | 71.0756734 | 74.4780886 | 73.3328655 | 80.9122821 |
| 79.9177631 | 63.615036 | 70.0756734 | 74.4780886 | 72.3328655 | 81.9122821 |
| 79.9177631 | 63.615036 | 70.0756734 | 73.4780886 | 71.3328655 | 81.9122821 |
| 79.9177631 | 63.615036 | 70.0756734 | 71.4780886 | 73.3328655 | 80.9122821 |
| 79.9177631 | 62.615036 | 70.0756734 | 71.4780886 | 75.3328655 | 79.9122821 |
| 79.9177631 | 63.615036 | 68.0756734 | 73.4780886 | 75.3328655 | 79.9122821 |
| 79.9177631 | 63.615036 | 68.0756734 | 73.4780886 | 75.3328655 | 77.9122821 |
| 80.9177631 | 64.615036 | 68.0756734 | 73.4780886 | 73.3328655 | 73.9122821 |
| 80.9177631 | 64.615036 | 69.0756734 | 73.4780886 | 72.3328655 | 71.9122821 |
| 78.9177631 | 65.615036 | 69.0756734 | 73.4780886 | 71.3328655 | 69.9122821 |
| 74.9177631 | 65.615036 | 69.0756734 | 73.4780886 | 71.3328655 | 69.9122821 |
| 74.9177631 | 65.615036 | 69.0756734 | 70.4780886 | 73.3328655 | 69.9122821 |
| 70.9177631 | 65.615036 | 69.0756734 | 69.4780886 | 74.3328655 | 69.9122821 |
| 70.9177631 | 65.615036 | 69.0756734 | 69.4780886 | 74.3328655 | 69.9122821 |
| 70.9177631 | 64.615036 | 69.0756734 | 69.4780886 | 73.3328655 | 68.9122821 |
| 70.9177631 | 64.615036 | 69.0756734 | 69.4780886 | 72.3328655 | 67.9122821 |
| 69.9177631 | 64.615036 | 68.0756734 | 70.4780886 | 72.3328655 | 67.9122821 |
| 63.9177631 | 64.615036 | 68.0756734 | 71.4780886 | 72.3328655 | 67.9122821 |
| 60.9177631 | 64.615036 | 66.0756734 | 72.4780886 | 73.3328655 | 68.9122821 |
| 60.9177631 | 64.615036 | 67.0756734 | 72.4780886 | 74.3328655 | 68.9122821 |
| 60.9177631 | 65.615036 | 67.0756734 | 73.4780886 | 74.3328655 | 69.9122821 |
| 60.9177631 | 64.615036 | 68.0756734 | 75.4780886 | 74.3328655 | 73.9122821 |
| 60.9177631 | 64.615036 | 67.0756734 | 76.4780886 | 70.3328655 | 73.9122821 |
| 60.9177631 | 64.615036 | 67.0756734 | 76.4780886 | 69.3328655 | 76.9122821 |
| 61.9177631 | 64.615036 | 67.0756734 | 76.4780886 | 68.3328655 | 76.9122821 |
| 62.9177631 | 64.615036 | 67.0756734 | 76.4780886 | 68.3328655 | 76.9122821 |
| 60.9177631 | 64.615036 | 67.0756734 | 77.4780886 | 71.3328655 | 79.9122821 |
| 59.9177631 | 64.615036 | 67.0756734 | 77.4780886 | 73.3328655 | 79.9122821 |
| 59.9177631 | 65.615036 | 68.0756734 | 78.4780886 | 73.3328655 | 79.9122821 |
| 60.9177631 | 65.615036 | 68.0756734 | 79.4780886 | 73.3328655 | 80.9122821 |
| 61.9177631 | 65.615036 | 68.0756734 | 81.4780886 | 69.3328655 | 80.9122821 |
| 62.9177631 | 65.615036 | 68.0756734 | 82.4780886 | 67.3328655 | 80.9122821 |
| 63.9177631 | 65.615036 | 69.0756734 | 83.4780886 | 67.3328655 | 80.9122821 |
| 63.9177631 | 65.615036 | 69.0756734 | 82.4780886 | 65.3328655 | 77.9122821 |
| 63.9177631 | 64.615036 | 69.0756734 | 82.4780886 | 66.3328655 | 75.9122821 |
| 64.9177631 | 64.615036 | 69.0756734 | 82.4780886 | 66.3328655 | 74.9122821 |
| 64.9177631 | 64.615036 | 69.0756734 | 82.4780886 | 71.3328655 | 74.9122821 |
| 63.9177631 | 64.615036 | 69.0756734 | 82.4780886 | 71.3328655 | 73.9122821 |

|            |           |            |            |            |            |
|------------|-----------|------------|------------|------------|------------|
| 63.9177631 | 64.615036 | 69.0756734 | 82.4780886 | 70.3328655 | 72.9122821 |
| 62.9177631 | 64.615036 | 70.0756734 | 84.4780886 | 70.3328655 | 70.9122821 |
| 62.9177631 | 64.615036 | 70.0756734 | 84.4780886 | 70.3328655 | 67.9122821 |
| 62.9177631 | 63.615036 | 70.0756734 | 70.1556498 | 70.3328655 | 67.9122821 |
| 62.9177631 | 63.615036 | 70.0756734 | 84.4780886 | 71.3328655 | 66.9122821 |
| 62.9177631 | 63.615036 | 69.0756734 | 84.4780886 | 71.3328655 | 66.9122821 |
| 63.9177631 | 63.615036 | 67.0756734 | 82.4780886 | 71.3328655 | 66.9122821 |
| 65.9177631 | 62.615036 | 67.0756734 | 81.4780886 | 70.3328655 | 65.9122821 |
| 65.9177631 | 62.615036 | 67.0756734 | 79.4780886 | 70.3328655 | 61.9122821 |
| 66.9177631 | 62.615036 | 68.0756734 | 77.4780886 | 71.3328655 | 60.9122821 |
| 66.9177631 | 62.615036 | 68.0756734 | 77.4780886 | 71.3328655 | 60.9122821 |
| 66.9177631 | 62.615036 | 68.0756734 | 76.4780886 | 75.3328655 | 60.9122821 |
| 68.9177631 | 62.615036 | 69.0756734 | 76.4780886 | 75.3328655 | 58.9122821 |
| 69.9177631 | 62.615036 | 69.0756734 | 76.4780886 | 78.3328655 | 58.9122821 |
| 68.9177631 | 64.615036 | 70.0756734 | 76.4780886 | 80.3328655 | 59.9122821 |
| 68.9177631 | 65.615036 | 70.0756734 | 76.4780886 | 81.3328655 | 59.9122821 |
| 69.9177631 | 65.615036 | 70.0756734 | 74.4780886 | 82.3328655 | 59.9122821 |
| 70.9177631 | 65.615036 | 70.0756734 | 73.4780886 | 81.3328655 | 60.9122821 |
| 69.9177631 | 65.615036 | 71.0756734 | 71.4780886 | 78.3328655 | 62.9122821 |
| 68.9177631 | 65.615036 | 71.0756734 | 69.4780886 | 74.3328655 | 62.9122821 |
| 68.9177631 | 65.615036 | 71.0756734 | 69.4780886 | 73.3328655 | 62.9122821 |
| 68.9177631 | 65.615036 | 71.0756734 | 68.4780886 | 73.3328655 | 62.9122821 |
| 71.9177631 | 65.615036 | 71.0756734 | 67.4780886 | 74.3328655 | 62.9122821 |
| 73.9177631 | 64.615036 | 71.0756734 | 66.4780886 | 74.3328655 | 63.9122821 |
| 74.9177631 | 64.615036 | 71.0756734 | 66.4780886 | 74.3328655 | 64.9122821 |
| 76.9177631 | 64.615036 | 71.0756734 | 65.4780886 | 74.3328655 | 64.9122821 |
| 78.9177631 | 64.615036 | 71.0756734 | 64.4780886 | 74.3328655 | 64.9122821 |
| 78.9177631 | 64.615036 | 72.0756734 | 64.4780886 | 74.3328655 | 66.9122821 |
| 79.9177631 | 63.615036 | 73.0756734 | 64.4780886 | 72.3328655 | 66.9122821 |
| 81.9177631 | 63.615036 | 73.0756734 | 65.4780886 | 70.3328655 | 68.9122821 |
| 82.9177631 | 63.615036 | 73.0756734 | 65.4780886 | 69.3328655 | 69.9122821 |
| 84.9177631 | 63.615036 | 74.0756734 | 66.4780886 | 68.3328655 | 70.9122821 |
| 85.9177631 | 63.615036 | 74.0756734 | 66.4780886 | 68.3328655 | 70.9122821 |
| 85.9177631 | 63.615036 | 73.0756734 | 66.4780886 | 69.3328655 | 71.9122821 |
| 86.9177631 | 63.615036 | 73.0756734 | 67.4780886 | 70.3328655 | 73.9122821 |
| 86.9177631 | 62.615036 | 71.0756734 | 67.4780886 | 70.3328655 | 73.9122821 |
| 86.9177631 | 62.615036 | 71.0756734 | 67.4780886 | 70.3328655 | 74.9122821 |
| 86.9177631 | 61.615036 | 71.0756734 | 67.4780886 | 70.3328655 | 74.9122821 |
| 81.9177631 | 60.615036 | 71.0756734 | 69.4780886 | 70.3328655 | 74.9122821 |
| 77.9177631 | 60.615036 | 71.0756734 | 69.4780886 | 69.3328655 | 73.9122821 |
| 69.9177631 | 60.615036 | 71.0756734 | 69.4780886 | 69.3328655 | 73.9122821 |
| 68.9177631 | 61.615036 | 72.0756734 | 70.4780886 | 69.3328655 | 74.9122821 |
| 68.9177631 | 61.615036 | 73.0756734 | 72.4780886 | 69.3328655 | 74.9122821 |
| 67.9177631 | 61.615036 | 74.0756734 | 77.4780886 | 69.3328655 | 74.9122821 |
| 67.9177631 | 62.615036 | 78.0756734 | 79.4780886 | 69.3328655 | 74.9122821 |

|            |           |            |            |            |            |
|------------|-----------|------------|------------|------------|------------|
| 67.9177631 | 62.615036 | 78.0756734 | 80.4780886 | 69.3328655 | 74.9122821 |
| 69.9177631 | 62.615036 | 79.0756734 | 79.4780886 | 69.3328655 | 75.9122821 |
| 70.9177631 | 62.615036 | 73.0756734 | 79.4780886 | 69.3328655 | 75.9122821 |
| 72.9177631 | 62.615036 | 73.0756734 | 79.4780886 | 69.3328655 | 75.9122821 |
| 72.9177631 | 62.615036 | 73.0756734 | 79.4780886 | 69.3328655 | 75.9122821 |
| 72.9177631 | 62.615036 | 73.0756734 | 78.4780886 | 69.3328655 | 75.9122821 |
| 71.9177631 | 63.615036 | 72.0756734 | 77.4780886 | 69.3328655 | 76.9122821 |
| 71.9177631 | 63.615036 | 72.0756734 | 77.4780886 | 70.3328655 | 76.9122821 |
| 71.9177631 | 63.615036 | 71.0756734 | 77.4780886 | 70.3328655 | 76.9122821 |
| 71.9177631 | 63.615036 | 71.0756734 | 76.4780886 | 71.3328655 | 76.9122821 |
| 72.9177631 | 63.615036 | 72.0756734 | 76.4780886 | 73.3328655 | 76.9122821 |
| 76.9177631 | 63.615036 | 73.0756734 | 76.4780886 | 84.3328655 | 75.9122821 |
| 76.9177631 | 63.615036 | 73.0756734 | 78.4780886 | 84.3328655 | 77.9122821 |
| 78.9177631 | 63.615036 | 73.0756734 | 80.4780886 | 87.3328655 | 84.9122821 |
| 79.9177631 | 64.615036 | 73.0756734 | 80.4780886 | 73.9738316 | 84.9122821 |
| 79.9177631 | 64.615036 | 73.0756734 | 80.4780886 | 74.1556498 | 85.9122821 |
| 80.9177631 | 64.615036 | 73.0756734 | 80.4780886 | 74.337468  | 86.9122821 |
| 80.9177631 | 64.615036 | 72.0756734 | 80.4780886 | 74.337468  | 85.9122821 |
| 80.9177631 | 64.615036 | 72.0756734 | 80.4780886 | 73.8829225 | 83.9122821 |
| 80.9177631 | 64.615036 | 72.0756734 | 80.4780886 | 73.8829225 | 83.9122821 |
| 81.9177631 | 64.615036 | 72.0756734 | 81.4780886 | 88.3328655 | 83.9122821 |
| 81.9177631 | 64.615036 | 73.0756734 | 78.4780886 | 86.3328655 | 76.9122821 |
| 81.9177631 | 64.615036 | 73.0756734 | 78.4780886 | 85.3328655 | 75.9122821 |
| 81.9177631 | 64.615036 | 74.0756734 | 78.4780886 | 84.3328655 | 73.9122821 |
| 81.9177631 | 64.615036 | 74.0756734 | 74.4780886 | 84.3328655 | 73.9122821 |
| 83.9177631 | 64.615036 | 74.0756734 | 74.4780886 | 84.3328655 | 72.9122821 |
| 83.9177631 | 64.615036 | 74.0756734 | 69.4780886 | 84.3328655 | 71.9122821 |
| 84.9177631 | 64.615036 | 74.0756734 | 69.4780886 | 84.3328655 | 71.9122821 |
| 84.9177631 | 65.615036 | 74.0756734 | 68.4780886 | 84.3328655 | 71.9122821 |
| 85.9177631 | 65.615036 | 74.0756734 | 68.4780886 | 84.3328655 | 72.9122821 |
| 85.9177631 | 64.615036 | 74.0756734 | 69.4780886 | 83.3328655 | 72.9122821 |
| 85.9177631 | 65.615036 | 74.0756734 | 71.4780886 | 82.3328655 | 76.9122821 |
| 85.9177631 | 65.615036 | 74.0756734 | 71.4780886 | 82.3328655 | 76.9122821 |
| 84.9177631 | 65.615036 | 74.0756734 | 71.4780886 | 79.3328655 | 74.9122821 |
| 84.9177631 | 65.615036 | 73.0756734 | 71.4780886 | 79.3328655 | 72.9122821 |
| 84.9177631 | 65.615036 | 73.0756734 | 68.4780886 | 78.3328655 | 72.9122821 |
| 84.9177631 | 65.615036 | 73.0756734 | 67.4780886 | 77.3328655 | 69.9122821 |
| 84.9177631 | 65.615036 | 74.0756734 | 68.4780886 | 77.3328655 | 69.9122821 |
| 84.9177631 | 65.615036 | 76.0756734 | 68.4780886 | 75.3328655 | 69.9122821 |
| 84.9177631 | 65.615036 | 76.0756734 | 68.4780886 | 74.3328655 | 69.9122821 |
| 83.9177631 | 65.615036 | 76.0756734 | 68.4780886 | 72.3328655 | 69.9122821 |
| 81.9177631 | 65.615036 | 76.0756734 | 69.4780886 | 71.3328655 | 69.9122821 |
| 81.9177631 | 65.615036 | 77.0756734 | 69.4780886 | 71.3328655 | 69.9122821 |
| 81.9177631 | 67.615036 | 77.0756734 | 70.4780886 | 70.3328655 | 69.9122821 |
| 81.9177631 | 67.615036 | 77.0756734 | 70.4780886 | 70.3328655 | 69.9122821 |



|            |           |            |            |            |            |
|------------|-----------|------------|------------|------------|------------|
| 82.9177631 | 67.615036 | 77.0756734 | 70.4780886 | 71.3328655 | 69.9122821 |
| 83.9177631 | 67.615036 | 77.0756734 | 73.4780886 | 71.3328655 | 68.9122821 |
| 83.9177631 | 67.615036 | 77.0756734 | 77.4780886 | 72.3328655 | 68.9122821 |
| 83.9177631 | 67.615036 | 71.0756734 | 81.4780886 | 72.3328655 | 68.9122821 |
| 82.9177631 | 67.615036 | 70.0756734 | 81.4780886 | 72.3328655 | 68.9122821 |
| 81.9177631 | 67.615036 | 70.0756734 | 82.4780886 | 73.3328655 | 68.9122821 |
| 79.9177631 | 67.615036 | 70.0756734 | 82.4780886 | 73.3328655 | 72.9122821 |
| 76.9177631 | 67.615036 | 70.0756734 | 82.4780886 | 74.3328655 | 72.9122821 |
| 74.9177631 | 69.615036 | 72.0756734 | 83.4780886 | 75.3328655 | 70.9122821 |
| 74.9177631 | 69.615036 | 72.0756734 | 83.4780886 | 77.3328655 | 70.9122821 |
| 74.9177631 | 69.615036 | 72.0756734 | 83.4780886 | 77.3328655 | 70.9122821 |
| 74.9177631 | 69.615036 | 74.0756734 | 83.4780886 | 77.3328655 | 70.9122821 |
| 74.9177631 | 69.615036 | 74.0756734 | 83.4780886 | 77.3328655 | 70.9122821 |
| 75.9177631 | 68.615036 | 74.0756734 | 82.4780886 | 77.3328655 | 70.9122821 |
| 75.9177631 | 67.615036 | 74.0756734 | 77.4780886 | 77.3328655 | 70.9122821 |
| 76.9177631 | 67.615036 | 74.0756734 | 73.4780886 | 77.3328655 | 70.9122821 |
| 76.9177631 | 64.615036 | 73.0756734 | 73.4780886 | 79.3328655 | 71.9122821 |
| 76.9177631 | 63.615036 | 71.0756734 | 71.4780886 | 80.3328655 | 71.9122821 |
| 77.9177631 | 63.615036 | 71.0756734 | 69.4780886 | 84.3328655 | 71.9122821 |
| 77.9177631 | 64.615036 | 69.0756734 | 69.4780886 | 72.2465589 | 71.9122821 |
| 77.9177631 | 65.615036 | 68.0756734 | 69.4780886 | 71.8829225 | 71.9122821 |
| 77.9177631 | 65.615036 | 68.0756734 | 70.4780886 | 71.6101953 | 71.9122821 |
| 77.9177631 | 67.615036 | 68.0756734 | 70.4780886 | 71.7920134 | 71.9122821 |
| 78.9177631 | 67.615036 | 70.0756734 | 70.4780886 | 72.7011044 | 71.9122821 |
| 78.9177631 | 66.615036 | 70.0756734 | 69.4780886 | 81.3328655 | 72.9122821 |
| 78.9177631 | 66.615036 | 70.0756734 | 69.4780886 | 73.3328655 | 72.9122821 |
| 77.9177631 | 66.615036 | 69.0756734 | 69.4780886 | 72.3328655 | 73.9122821 |
| 78.9177631 | 67.615036 | 69.0756734 | 71.4780886 | 72.3328655 | 84.9122821 |
| 78.9177631 | 67.615036 | 69.0756734 | 71.4780886 | 72.3328655 | 84.9122821 |
| 81.9177631 | 67.615036 | 69.0756734 | 71.4780886 | 72.3328655 | 81.9122821 |
| 81.9177631 | 67.615036 | 69.0756734 | 71.4780886 | 72.3328655 | 81.9122821 |
| 79.9177631 | 68.615036 | 69.0756734 | 72.4780886 | 74.3328655 | 80.9122821 |
| 75.9177631 | 68.615036 | 70.0756734 | 72.4780886 | 74.3328655 | 78.9122821 |
| 74.9177631 | 68.615036 | 70.0756734 | 72.4780886 | 74.9738316 | 77.9122821 |
| 73.9177631 | 68.615036 | 70.0756734 | 73.4780886 | 75.0647407 | 76.9122821 |
| 75.9177631 | 69.615036 | 71.0756734 | 73.4780886 | 75.6101953 | 76.9122821 |
| 76.9177631 | 67.615036 | 71.0756734 | 73.4780886 | 75.1556498 | 76.9122821 |
| 76.9177631 | 65.615036 | 71.0756734 | 73.4780886 | 74.7920134 | 76.9122821 |
| 74.9177631 | 64.615036 | 71.0756734 | 72.4780886 | 86.3328655 | 76.9122821 |
| 73.9177631 | 64.615036 | 71.0756734 | 71.4780886 | 82.3328655 | 76.9122821 |
| 73.9177631 | 64.615036 | 72.0756734 | 70.4780886 | 81.3328655 | 76.9122821 |
| 72.9177631 | 64.615036 | 71.0756734 | 70.4780886 | 81.3328655 | 76.9122821 |
| 71.9177631 | 63.615036 | 71.0756734 | 75.4780886 | 79.3328655 | 76.9122821 |
| 70.9177631 | 63.615036 | 72.0756734 | 75.4780886 | 78.3328655 | 76.9122821 |
| 70.9177631 | 63.615036 | 70.0756734 | 78.4780886 | 76.3328655 | 76.9122821 |

|            |           |            |            |            |            |
|------------|-----------|------------|------------|------------|------------|
| 70.9177631 | 60.615036 | 70.0756734 | 83.4780886 | 75.3328655 | 76.9122821 |
| 69.9177631 | 61.615036 | 70.0756734 | 83.4780886 | 75.3328655 | 76.9122821 |
| 68.9177631 | 62.615036 | 70.0756734 | 83.4780886 | 75.3328655 | 76.9122821 |
| 66.9177631 | 61.615036 | 70.0756734 | 83.4780886 | 75.3328655 | 76.9122821 |
| 66.9177631 | 60.615036 | 71.0756734 | 83.4780886 | 82.3328655 | 76.9122821 |
| 64.9177631 | 60.615036 | 71.0756734 | 82.4780886 | 84.3328655 | 76.9122821 |
| 64.9177631 | 61.615036 | 71.0756734 | 82.4780886 | 86.3328655 | 81.9122821 |
| 64.9177631 | 62.615036 | 71.0756734 | 82.4780886 | 87.3328655 | 81.9122821 |
| 64.9177631 | 62.615036 | 72.0756734 | 81.4780886 | 87.3328655 | 84.9122821 |
| 64.9177631 | 62.615036 | 72.0756734 | 81.4780886 | 87.3328655 | 87.9122821 |
| 65.9177631 | 62.615036 | 72.0756734 | 80.4780886 | 85.3328655 | 88.9122821 |
| 65.9177631 | 61.615036 | 75.0756734 | 80.4780886 | 85.3328655 | 88.9122821 |
| 64.9177631 | 60.615036 | 75.0756734 | 80.4780886 | 85.3328655 | 88.9122821 |
| 63.9177631 | 59.615036 | 75.0756734 | 80.4780886 | 83.3328655 | 88.9122821 |
| 63.9177631 | 59.615036 | 75.0756734 | 79.4780886 | 82.3328655 | 88.9122821 |
| 63.9177631 | 59.615036 | 75.0756734 | 80.4780886 | 81.3328655 | 88.9122821 |
| 63.9177631 | 59.615036 | 75.0756734 | 80.4780886 | 80.3328655 | 88.9122821 |
| 62.9177631 | 60.615036 | 75.0756734 | 84.4780886 | 80.3328655 | 88.9122821 |
| 63.9177631 | 60.615036 | 75.0756734 | 84.4780886 | 79.3328655 | 85.9122821 |
| 63.9177631 | 60.615036 | 79.0756734 | 85.4780886 | 80.3328655 | 85.9122821 |
| 64.9177631 | 60.615036 | 77.0756734 | 85.4780886 | 79.3328655 | 85.9122821 |
| 67.9177631 | 60.615036 | 77.0756734 | 84.4780886 | 79.3328655 | 83.9122821 |
| 68.9177631 | 60.615036 | 77.0756734 | 84.4780886 | 79.3328655 | 83.9122821 |
| 68.9177631 | 59.615036 | 75.0756734 | 84.4780886 | 77.3328655 | 83.9122821 |
| 69.9177631 | 57.615036 | 75.0756734 | 84.4780886 | 73.3328655 | 82.9122821 |
| 69.9177631 | 56.615036 | 71.0756734 | 80.4780886 | 71.3328655 | 82.9122821 |
| 69.9177631 | 56.615036 | 63.0756734 | 80.4780886 | 71.3328655 | 82.9122821 |
| 69.9177631 | 60.615036 | 63.0756734 | 77.4780886 | 71.3328655 | 82.9122821 |
| 69.9177631 | 61.615036 | 62.0756734 | 77.4780886 | 72.3328655 | 82.9122821 |
| 70.9177631 | 61.615036 | 63.0756734 | 76.4780886 | 74.3328655 | 82.9122821 |
| 70.9177631 | 61.615036 | 63.0756734 | 76.4780886 | 76.3328655 | 83.9122821 |
| 70.9177631 | 61.615036 | 63.0756734 | 76.4780886 | 76.3328655 | 83.9122821 |
| 70.9177631 | 61.615036 | 63.0756734 | 77.4780886 | 76.3328655 | 83.9122821 |
| 70.9177631 | 63.615036 | 63.0756734 | 76.4780886 | 76.3328655 | 84.9122821 |
| 70.9177631 | 65.615036 | 63.0756734 | 76.4780886 | 76.3328655 | 85.9122821 |
| 70.9177631 | 65.615036 | 67.0756734 | 75.4780886 | 75.3328655 | 85.9122821 |
| 70.9177631 | 65.615036 | 67.0756734 | 75.4780886 | 75.3328655 | 85.9122821 |
| 70.9177631 | 65.615036 | 67.0756734 | 75.4780886 | 75.3328655 | 85.9122821 |
| 70.9177631 | 65.615036 | 69.0756734 | 74.4780886 | 75.3328655 | 84.9122821 |
| 70.9177631 | 65.615036 | 69.0756734 | 73.4780886 | 76.3328655 | 83.9122821 |
| 70.9177631 | 64.615036 | 69.0756734 | 74.4780886 | 76.3328655 | 83.9122821 |
| 71.9177631 | 64.615036 | 68.0756734 | 74.4780886 | 75.3328655 | 83.9122821 |
| 72.9177631 | 65.615036 | 68.0756734 | 75.4780886 | 74.3328655 | 83.9122821 |
| 74.9177631 | 65.615036 | 68.0756734 | 75.4780886 | 73.3328655 | 83.9122821 |
| 74.9177631 | 64.615036 | 70.0756734 | 75.4780886 | 73.3328655 | 83.9122821 |

|            |           |            |            |            |            |
|------------|-----------|------------|------------|------------|------------|
| 74.9177631 | 64.615036 | 70.0756734 | 75.4780886 | 74.3328655 | 83.9122821 |
| 74.9177631 | 63.615036 | 71.0756734 | 75.4780886 | 74.3328655 | 83.9122821 |
| 74.9177631 | 63.615036 | 71.0756734 | 75.4780886 | 74.3328655 | 83.9122821 |
| 74.9177631 | 64.615036 | 71.0756734 | 74.4780886 | 75.3328655 | 83.9122821 |
| 74.9177631 | 64.615036 | 72.0756734 | 74.4780886 | 74.3328655 | 83.9122821 |
| 75.9177631 | 63.615036 | 73.0756734 | 74.4780886 | 73.3328655 | 83.9122821 |
| 75.9177631 | 63.615036 | 73.0756734 | 74.4780886 | 72.3328655 | 82.9122821 |
| 77.9177631 | 63.615036 | 73.0756734 | 74.4780886 | 70.3328655 | 83.9122821 |
| 77.9177631 | 63.615036 | 74.0756734 | 75.4780886 | 70.3328655 | 83.9122821 |
| 78.9177631 | 64.615036 | 74.0756734 | 75.4780886 | 70.3328655 | 76.9122821 |
| 80.9177631 | 64.615036 | 74.0756734 | 75.4780886 | 70.3328655 | 73.9122821 |
| 80.9177631 | 64.615036 | 75.0756734 | 76.4780886 | 70.3328655 | 73.9122821 |
| 80.9177631 | 64.615036 | 75.0756734 | 76.4780886 | 71.3328655 | 72.9122821 |
| 80.9177631 | 64.615036 | 75.0756734 | 77.4780886 | 71.3328655 | 72.9122821 |
| 80.9177631 | 64.615036 | 74.0756734 | 77.4780886 | 71.3328655 | 71.9122821 |
| 79.9177631 | 65.615036 | 74.0756734 | 77.4780886 | 71.3328655 | 68.9122821 |
| 76.9177631 | 65.615036 | 74.0756734 | 77.4780886 | 71.3328655 | 68.9122821 |
| 72.9177631 | 65.615036 | 76.0756734 | 77.4780886 | 71.3328655 | 68.9122821 |
| 71.9177631 | 65.615036 | 76.0756734 | 76.4780886 | 73.3328655 | 67.9122821 |
| 70.9177631 | 65.615036 | 76.0756734 | 76.4780886 | 73.3328655 | 66.9122821 |
| 70.9177631 | 65.615036 | 78.0756734 | 76.4780886 | 74.3328655 | 66.9122821 |
| 70.9177631 | 65.615036 | 78.0756734 | 75.4780886 | 74.3328655 | 66.9122821 |
| 70.9177631 | 65.615036 | 74.0756734 | 74.4780886 | 74.3328655 | 66.9122821 |
| 70.9177631 | 64.615036 | 70.0756734 | 74.4780886 | 73.3328655 | 66.9122821 |
| 69.9177631 | 64.615036 | 70.0756734 | 74.4780886 | 73.3328655 | 66.9122821 |
| 69.9177631 | 64.615036 | 69.0756734 | 74.4780886 | 73.3328655 | 66.9122821 |
| 69.9177631 | 64.615036 | 69.0756734 | 73.4780886 | 72.3328655 | 66.9122821 |
| 69.9177631 | 64.615036 | 69.0756734 | 73.4780886 | 71.3328655 | 67.9122821 |
| 69.9177631 | 63.615036 | 69.0756734 | 73.4780886 | 73.3328655 | 67.9122821 |
| 69.9177631 | 64.615036 | 69.0756734 | 72.4780886 | 78.3328655 | 68.9122821 |
| 69.9177631 | 65.615036 | 69.0756734 | 72.4780886 | 81.3328655 | 68.9122821 |
| 69.9177631 | 65.615036 | 69.0756734 | 72.4780886 | 82.3328655 | 68.9122821 |
| 69.9177631 | 65.615036 | 70.0756734 | 74.4780886 | 82.3328655 | 68.9122821 |
| 69.9177631 | 66.615036 | 70.0756734 | 74.4780886 | 81.3328655 | 68.9122821 |
| 72.9177631 | 66.615036 | 70.0756734 | 74.4780886 | 81.3328655 | 68.9122821 |
| 77.9177631 | 68.615036 | 70.0756734 | 74.4780886 | 80.3328655 | 68.9122821 |
| 75.9177631 | 70.615036 | 70.0756734 | 74.4780886 | 79.3328655 | 69.9122821 |
| 74.9177631 | 71.615036 | 70.0756734 | 75.4780886 | 78.3328655 | 70.9122821 |
| 74.9177631 | 72.615036 | 69.0756734 | 78.4780886 | 76.3328655 | 70.9122821 |
| 74.9177631 | 75.615036 | 69.0756734 | 78.4780886 | 75.3328655 | 70.9122821 |
| 74.9177631 | 78.615036 | 70.0756734 | 78.4780886 | 72.3328655 | 74.9122821 |
| 74.9177631 | 79.615036 | 70.0756734 | 78.4780886 | 72.3328655 | 74.9122821 |
| 74.9177631 | 79.615036 | 70.0756734 | 78.4780886 | 72.3328655 | 76.9122821 |
| 74.9177631 | 80.615036 | 70.0756734 | 79.4780886 | 75.3328655 | 76.9122821 |
| 74.9177631 | 79.615036 | 70.0756734 | 81.4780886 | 75.3328655 | 76.9122821 |

|            |           |            |            |            |            |
|------------|-----------|------------|------------|------------|------------|
| 73.9177631 | 78.615036 | 70.0756734 | 82.4780886 | 75.3328655 | 76.9122821 |
| 73.9177631 | 78.615036 | 70.0756734 | 82.4780886 | 75.3328655 | 76.9122821 |
| 77.9177631 | 70.615036 | 70.0756734 | 80.4780886 | 73.3328655 | 81.9122821 |
| 77.9177631 | 68.615036 | 70.0756734 | 77.4780886 | 72.3328655 | 86.9122821 |
| 79.9177631 | 66.615036 | 70.0756734 | 77.4780886 | 72.3328655 | 86.9122821 |
| 79.9177631 | 65.615036 | 70.0756734 | 77.4780886 | 72.3328655 | 86.9122821 |
| 79.9177631 | 65.615036 | 70.0756734 | 77.4780886 | 74.3328655 | 86.9122821 |
| 78.9177631 | 64.615036 | 70.0756734 | 76.4780886 | 75.3328655 | 86.9122821 |
| 78.9177631 | 64.615036 | 72.0756734 | 75.4780886 | 73.3328655 | 86.9122821 |
| 78.9177631 | 64.615036 | 72.0756734 | 75.4780886 | 72.3328655 | 86.9122821 |
| 78.9177631 | 64.615036 | 72.0756734 | 75.4780886 | 70.3328655 | 86.9122821 |
| 77.9177631 | 64.615036 | 72.0756734 | 75.4780886 | 70.3328655 | 86.9122821 |
| 79.9177631 | 63.615036 | 72.0756734 | 75.4780886 | 70.3328655 | 86.9122821 |
| 79.9177631 | 63.615036 | 72.0756734 | 74.4780886 | 70.3328655 | 72.6101953 |
| 78.9177631 | 63.615036 | 75.0756734 | 74.4780886 | 72.3328655 | 72.5192862 |
| 75.9177631 | 63.615036 | 75.0756734 | 73.4780886 | 74.3328655 | 85.9122821 |
| 76.9177631 | 63.615036 | 75.0756734 | 74.4780886 | 76.3328655 | 85.9122821 |
| 78.9177631 | 63.615036 | 75.0756734 | 74.4780886 | 78.3328655 | 85.9122821 |
| 78.9177631 | 64.615036 | 75.0756734 | 76.4780886 | 78.3328655 | 85.9122821 |
| 78.9177631 | 64.615036 | 75.0756734 | 76.4780886 | 79.3328655 | 85.9122821 |
| 78.9177631 | 64.615036 | 75.0756734 | 74.4780886 | 78.3328655 | 85.9122821 |
| 77.9177631 | 64.615036 | 75.0756734 | 73.4780886 | 76.3328655 | 85.9122821 |
| 77.9177631 | 64.615036 | 77.0756734 | 73.4780886 | 74.3328655 | 86.9122821 |
| 77.9177631 | 64.615036 | 77.0756734 | 73.4780886 | 72.3328655 | 86.9122821 |
| 77.9177631 | 65.615036 | 77.0756734 | 73.4780886 | 70.3328655 | 86.9122821 |
| 76.9177631 | 65.615036 | 80.0756734 | 73.4780886 | 70.3328655 | 72.4283771 |
| 76.9177631 | 65.615036 | 80.0756734 | 76.4780886 | 72.3328655 | 86.9122821 |
| 76.9177631 | 64.615036 | 80.0756734 | 77.4780886 | 74.3328655 | 86.9122821 |
| 76.9177631 | 64.615036 | 83.0756734 | 76.4780886 | 76.3328655 | 86.9122821 |
| 76.9177631 | 64.615036 | 83.0756734 | 76.4780886 | 77.3328655 | 85.9122821 |
| 76.9177631 | 64.615036 | 83.0756734 | 73.4780886 | 77.3328655 | 85.9122821 |
| 76.9177631 | 70.615036 | 89.0756734 | 72.4780886 | 78.3328655 | 82.9122821 |
| 76.9177631 | 70.615036 | 73.9738316 | 71.4780886 | 78.3328655 | 81.9122821 |
| 75.9177631 | 70.615036 | 73.6101953 | 71.4780886 | 77.3328655 | 83.9122821 |
| 73.9177631 | 78.615036 | 89.0756734 | 70.4780886 | 77.3328655 | 83.9122821 |
| 73.9177631 | 79.615036 | 89.0756734 | 70.4780886 | 77.3328655 | 83.9122821 |
| 73.9177631 | 79.615036 | 89.0756734 | 70.4780886 | 77.3328655 | 83.9122821 |
| 73.9177631 | 79.615036 | 75.1556498 | 70.4780886 | 77.3328655 | 82.9122821 |
| 73.9177631 | 79.615036 | 90.0756734 | 70.4780886 | 77.3328655 | 82.9122821 |
| 73.9177631 | 77.615036 | 90.0756734 | 69.4780886 | 77.3328655 | 82.9122821 |
| 73.9177631 | 76.615036 | 89.0756734 | 69.4780886 | 76.3328655 | 82.9122821 |
| 72.9177631 | 75.615036 | 89.0756734 | 69.4780886 | 76.3328655 | 82.9122821 |
| 72.9177631 | 75.615036 | 89.0756734 | 68.4780886 | 76.3328655 | 82.9122821 |
| 67.9177631 | 75.615036 | 89.0756734 | 68.4780886 | 76.3328655 | 81.9122821 |
| 66.9177631 | 75.615036 | 89.0756734 | 69.4780886 | 76.3328655 | 81.9122821 |

|            |           |            |            |            |            |
|------------|-----------|------------|------------|------------|------------|
| 66.9177631 | 75.615036 | 89.0756734 | 69.4780886 | 76.3328655 | 80.9122821 |
| 64.9177631 | 75.615036 | 74.8829225 | 70.4780886 | 77.3328655 | 81.9122821 |
| 64.9177631 | 75.615036 | 74.8829225 | 70.4780886 | 77.3328655 | 81.9122821 |
| 64.9177631 | 77.615036 | 75.9738316 | 71.4780886 | 79.3328655 | 86.9122821 |
| 65.9177631 | 78.615036 | 76.2465589 | 71.4780886 | 79.3328655 | 86.9122821 |
| 66.9177631 | 79.615036 | 76.5192862 | 73.4780886 | 76.3328655 | 85.9122821 |
| 67.9177631 | 84.615036 | 76.7920134 | 73.4780886 | 74.3328655 | 85.9122821 |
| 67.9177631 | 86.615036 | 77.0647407 | 73.4780886 | 73.3328655 | 85.9122821 |
| 67.9177631 | 86.615036 | 76.8829225 | 72.4780886 | 72.3328655 | 84.9122821 |
| 68.9177631 | 86.615036 | 76.9738316 | 72.4780886 | 71.3328655 | 84.9122821 |
| 68.9177631 | 86.615036 | 76.9738316 | 72.4780886 | 71.3328655 | 84.9122821 |
| 70.9177631 | 86.615036 | 77.1556498 | 70.4780886 | 70.3328655 | 83.9122821 |
| 70.9177631 | 86.615036 | 77.0647407 | 70.4780886 | 70.3328655 | 82.9122821 |
| 72.9177631 | 86.615036 | 77.2465589 | 70.4780886 | 70.3328655 | 83.9122821 |
| 73.9177631 | 85.615036 | 77.5192862 | 69.4780886 | 70.3328655 | 85.9122821 |
| 74.9177631 | 85.615036 | 78.1556498 | 70.4780886 | 70.3328655 | 86.9122821 |
| 74.9177631 | 84.615036 | 78.337468  | 70.4780886 | 69.3328655 | 86.9122821 |
| 74.9177631 | 83.615036 | 78.6101953 | 71.4780886 | 69.3328655 | 89.9122821 |
| 74.9177631 | 82.615036 | 78.7011044 | 72.4780886 | 69.3328655 | 91.9122821 |
| 74.9177631 | 82.615036 | 78.8829225 | 73.4780886 | 69.3328655 | 92.9122821 |
| 74.9177631 | 82.615036 | 78.2465589 | 73.4780886 | 65.3328655 | 92.9122821 |
| 74.9177631 | 83.615036 | 78.4283771 | 73.4780886 | 63.3328655 | 78.4283771 |
| 74.9177631 | 82.615036 | 78.2465589 | 73.4780886 | 63.3328655 | 78.2465589 |
| 74.9177631 | 82.615036 | 78.4283771 | 73.4780886 | 63.3328655 | 78.4283771 |
| 74.9177631 | 76.615036 | 77.9738316 | 73.4780886 | 63.3328655 | 77.9738316 |
| 73.9177631 | 76.615036 | 92.0756734 | 72.4780886 | 63.3328655 | 77.5192862 |
| 72.9177631 | 72.615036 | 85.0756734 | 72.4780886 | 63.3328655 | 76.4283771 |
| 72.9177631 | 68.615036 | 85.0756734 | 72.4780886 | 63.3328655 | 75.337468  |
| 72.9177631 | 66.615036 | 85.0756734 | 72.4780886 | 63.3328655 | 74.9738316 |
| 72.9177631 | 65.615036 | 85.0756734 | 72.4780886 | 64.3328655 | 74.7011044 |
| 72.9177631 | 65.615036 | 85.0756734 | 72.4780886 | 66.3328655 | 74.5192862 |
| 72.9177631 | 64.615036 | 84.0756734 | 72.4780886 | 66.3328655 | 74.0647407 |
| 72.9177631 | 64.615036 | 81.0756734 | 72.4780886 | 68.3328655 | 73.337468  |
| 71.9177631 | 64.615036 | 78.0756734 | 73.4780886 | 68.3328655 | 73.0647407 |
| 71.9177631 | 64.615036 | 78.0756734 | 73.4780886 | 68.3328655 | 72.8829225 |
| 72.9177631 | 64.615036 | 76.0756734 | 73.4780886 | 68.3328655 | 72.7011044 |
| 72.9177631 | 64.615036 | 76.0756734 | 72.4780886 | 68.3328655 | 72.5192862 |
| 72.9177631 | 64.615036 | 76.0756734 | 72.4780886 | 68.3328655 | 72.4283771 |
| 73.9177631 | 65.615036 | 76.0756734 | 72.4780886 | 68.3328655 | 72.7011044 |
| 73.9177631 | 65.615036 | 76.0756734 | 72.4780886 | 68.3328655 | 72.6101953 |
| 74.9177631 | 65.615036 | 73.0756734 | 72.4780886 | 68.3328655 | 72.4283771 |
| 75.9177631 | 65.615036 | 73.0756734 | 72.4780886 | 69.3328655 | 72.4283771 |
| 75.9177631 | 66.615036 | 74.0756734 | 75.4780886 | 70.3328655 | 73.1556498 |
| 75.9177631 | 66.615036 | 74.0756734 | 75.4780886 | 70.3328655 | 73.0647407 |
| 77.9177631 | 66.615036 | 74.0756734 | 74.4780886 | 71.3328655 | 73.7920134 |

|            |           |            |            |            |            |
|------------|-----------|------------|------------|------------|------------|
| 81.9177631 | 66.615036 | 74.0756734 | 74.4780886 | 70.3328655 | 88.9122821 |
| 80.9177631 | 65.615036 | 73.0756734 | 76.4780886 | 70.3328655 | 88.9122821 |
| 80.9177631 | 64.615036 | 73.0756734 | 76.4780886 | 70.3328655 | 87.9122821 |
| 80.9177631 | 63.615036 | 73.0756734 | 80.4780886 | 70.3328655 | 87.9122821 |
| 80.9177631 | 63.615036 | 74.0756734 | 81.4780886 | 70.3328655 | 87.9122821 |
| 80.9177631 | 63.615036 | 74.0756734 | 81.4780886 | 72.3328655 | 87.9122821 |
| 79.9177631 | 62.615036 | 74.0756734 | 79.4780886 | 78.3328655 | 87.9122821 |
| 77.9177631 | 62.615036 | 74.0756734 | 78.4780886 | 78.3328655 | 87.9122821 |
| 76.9177631 | 62.615036 | 75.0756734 | 78.4780886 | 83.3328655 | 87.9122821 |
| 76.9177631 | 62.615036 | 73.0756734 | 72.4780886 | 83.3328655 | 86.9122821 |
| 75.9177631 | 62.615036 | 71.0756734 | 71.4780886 | 82.3328655 | 86.9122821 |
| 75.9177631 | 61.615036 | 71.0756734 | 70.4780886 | 70.3328655 | 71.8829225 |
| 76.9177631 | 61.615036 | 70.0756734 | 70.4780886 | 65.3328655 | 71.5192862 |
| 76.9177631 | 61.615036 | 68.0756734 | 71.4780886 | 64.3328655 | 71.337468  |
| 76.9177631 | 60.615036 | 68.0756734 | 71.4780886 | 65.3328655 | 71.7011044 |
| 76.9177631 | 60.615036 | 68.0756734 | 71.4780886 | 66.3328655 | 71.7920134 |
| 76.9177631 | 60.615036 | 68.0756734 | 71.4780886 | 67.3328655 | 71.8829225 |
| 76.9177631 | 60.615036 | 69.0756734 | 71.4780886 | 67.3328655 | 72.0647407 |
| 75.9177631 | 60.615036 | 69.0756734 | 70.4780886 | 65.3328655 | 71.337468  |
| 75.9177631 | 60.615036 | 69.0756734 | 70.4780886 | 65.3328655 | 71.337468  |
| 73.9177631 | 60.615036 | 68.0756734 | 69.4780886 | 64.3328655 | 70.7011044 |
| 73.9177631 | 60.615036 | 68.0756734 | 69.4780886 | 65.3328655 | 70.9738316 |
| 74.9177631 | 60.615036 | 68.0756734 | 70.4780886 | 66.3328655 | 71.1556498 |
| 74.9177631 | 60.615036 | 68.0756734 | 70.4780886 | 66.3328655 | 71.0647407 |
| 74.9177631 | 60.615036 | 68.0756734 | 70.4780886 | 65.3328655 | 70.8829225 |
| 74.9177631 | 60.615036 | 68.0756734 | 74.4780886 | 65.3328655 | 71.5192862 |
| 74.9177631 | 60.615036 | 67.0756734 | 75.4780886 | 66.3328655 | 86.9122821 |
| 74.9177631 | 58.615036 | 67.0756734 | 75.4780886 | 68.3328655 | 81.9122821 |
| 74.9177631 | 58.615036 | 66.0756734 | 76.4780886 | 69.3328655 | 78.9122821 |
| 76.9177631 | 58.615036 | 66.0756734 | 73.4780886 | 69.3328655 | 71.9122821 |
| 77.9177631 | 59.615036 | 66.0756734 | 73.4780886 | 69.3328655 | 68.9122821 |
| 77.9177631 | 59.615036 | 66.0756734 | 73.4780886 | 69.3328655 | 68.9122821 |
| 77.9177631 | 58.615036 | 65.0756734 | 73.4780886 | 69.3328655 | 65.9122821 |
| 77.9177631 | 58.615036 | 65.0756734 | 71.4780886 | 69.3328655 | 65.9122821 |
| 77.9177631 | 58.615036 | 65.0756734 | 71.4780886 | 69.3328655 | 65.9122821 |
| 77.9177631 | 58.615036 | 64.0756734 | 70.4780886 | 69.3328655 | 64.9122821 |
| 77.9177631 | 58.615036 | 64.0756734 | 70.4780886 | 70.3328655 | 63.9122821 |
| 77.9177631 | 57.615036 | 64.0756734 | 69.4780886 | 71.3328655 | 63.9122821 |
| 78.9177631 | 57.615036 | 65.0756734 | 69.4780886 | 73.3328655 | 62.9122821 |
| 79.9177631 | 57.615036 | 65.0756734 | 69.4780886 | 73.3328655 | 63.9122821 |
| 80.9177631 | 58.615036 | 66.0756734 | 68.4780886 | 74.3328655 | 63.9122821 |
| 80.9177631 | 58.615036 | 66.0756734 | 68.4780886 | 74.3328655 | 63.9122821 |
| 80.9177631 | 58.615036 | 66.0756734 | 68.4780886 | 74.3328655 | 63.9122821 |
| 78.9177631 | 58.615036 | 66.0756734 | 68.4780886 | 74.3328655 | 63.9122821 |
| 77.9177631 | 59.615036 | 65.0756734 | 68.4780886 | 76.3328655 | 63.9122821 |

|            |           |            |            |            |            |
|------------|-----------|------------|------------|------------|------------|
| 75.9177631 | 59.615036 | 65.0756734 | 68.4780886 | 76.3328655 | 64.9122821 |
| 75.9177631 | 60.615036 | 63.0756734 | 68.4780886 | 75.3328655 | 64.9122821 |
| 76.9177631 | 61.615036 | 63.0756734 | 68.4780886 | 74.3328655 | 64.9122821 |
| 76.9177631 | 61.615036 | 63.0756734 | 68.4780886 | 74.3328655 | 64.9122821 |
| 78.9177631 | 61.615036 | 65.0756734 | 68.4780886 | 74.3328655 | 65.9122821 |
| 80.9177631 | 61.615036 | 67.0756734 | 68.4780886 | 74.3328655 | 68.9122821 |
| 80.9177631 | 61.615036 | 67.0756734 | 67.4780886 | 74.3328655 | 73.9122821 |
| 81.9177631 | 61.615036 | 68.0756734 | 66.4780886 | 72.3328655 | 74.9122821 |
| 81.9177631 | 61.615036 | 68.0756734 | 66.4780886 | 71.3328655 | 74.9122821 |
| 81.9177631 | 61.615036 | 68.0756734 | 66.4780886 | 72.3328655 | 74.9122821 |
| 81.9177631 | 62.615036 | 68.0756734 | 66.4780886 | 72.3328655 | 74.9122821 |
| 83.9177631 | 63.615036 | 68.0756734 | 66.4780886 | 76.3328655 | 74.9122821 |
| 83.9177631 | 63.615036 | 69.0756734 | 66.4780886 | 79.3328655 | 74.9122821 |
| 83.9177631 | 63.615036 | 71.0756734 | 66.4780886 | 80.3328655 | 74.9122821 |
| 84.9177631 | 62.615036 | 71.0756734 | 66.4780886 | 80.3328655 | 74.9122821 |
| 82.9177631 | 62.615036 | 71.0756734 | 65.4780886 | 80.3328655 | 74.9122821 |
| 78.9177631 | 61.615036 | 72.0756734 | 66.4780886 | 79.3328655 | 74.9122821 |
| 74.9177631 | 61.615036 | 72.0756734 | 67.4780886 | 79.3328655 | 75.9122821 |
| 73.9177631 | 60.615036 | 72.0756734 | 67.4780886 | 78.3328655 | 75.9122821 |
| 73.9177631 | 60.615036 | 72.0756734 | 69.4780886 | 78.3328655 | 75.9122821 |
| 73.9177631 | 59.615036 | 72.0756734 | 70.4780886 | 77.3328655 | 76.9122821 |
| 75.9177631 | 59.615036 | 72.0756734 | 70.4780886 | 78.3328655 | 76.9122821 |
| 75.9177631 | 58.615036 | 71.0756734 | 75.4780886 | 78.3328655 | 76.9122821 |
| 76.9177631 | 58.615036 | 71.0756734 | 75.4780886 | 78.3328655 | 76.9122821 |
| 75.9177631 | 57.615036 | 71.0756734 | 74.4780886 | 78.3328655 | 77.9122821 |
| 75.9177631 | 57.615036 | 71.0756734 | 74.4780886 | 77.3328655 | 77.9122821 |
| 75.9177631 | 57.615036 | 71.0756734 | 73.4780886 | 75.3328655 | 77.9122821 |
| 74.9177631 | 57.615036 | 70.0756734 | 71.4780886 | 75.3328655 | 78.9122821 |
| 74.9177631 | 57.615036 | 70.0756734 | 71.4780886 | 75.3328655 | 78.9122821 |
| 74.9177631 | 57.615036 | 70.0756734 | 68.4780886 | 77.3328655 | 78.9122821 |
| 74.9177631 | 57.615036 | 70.0756734 | 67.4780886 | 77.3328655 | 79.9122821 |
| 75.9177631 | 58.615036 | 70.0756734 | 67.4780886 | 77.3328655 | 79.9122821 |
| 76.9177631 | 59.615036 | 70.0756734 | 67.4780886 | 78.3328655 | 79.9122821 |
| 76.9177631 | 59.615036 | 70.0756734 | 67.4780886 | 78.3328655 | 79.9122821 |
| 78.9177631 | 59.615036 | 71.0756734 | 67.4780886 | 77.3328655 | 78.9122821 |
| 78.9177631 | 60.615036 | 71.0756734 | 67.4780886 | 77.3328655 | 75.9122821 |
| 78.9177631 | 65.615036 | 71.0756734 | 69.4780886 | 77.3328655 | 75.9122821 |
| 78.9177631 | 67.615036 | 71.0756734 | 69.4780886 | 75.3328655 | 76.9122821 |
| 78.9177631 | 68.615036 | 71.0756734 | 68.4780886 | 74.3328655 | 78.9122821 |
| 78.9177631 | 70.615036 | 71.0756734 | 67.4780886 | 74.3328655 | 85.9122821 |
| 78.9177631 | 71.615036 | 71.0756734 | 67.4780886 | 74.3328655 | 86.9122821 |
| 78.9177631 | 72.615036 | 72.0756734 | 67.4780886 | 75.3328655 | 86.9122821 |
| 76.9177631 | 72.615036 | 72.0756734 | 67.4780886 | 75.3328655 | 89.9122821 |
| 76.9177631 | 72.615036 | 72.0756734 | 67.4780886 | 75.3328655 | 77.337468  |
| 76.9177631 | 72.615036 | 73.0756734 | 66.4780886 | 74.3328655 | 77.5192862 |

|            |           |            |            |            |            |
|------------|-----------|------------|------------|------------|------------|
| 76.9177631 | 72.615036 | 73.0756734 | 66.4780886 | 73.3328655 | 77.1556498 |
| 76.9177631 | 72.615036 | 73.0756734 | 66.4780886 | 73.3328655 | 76.9738316 |
| 74.9177631 | 72.615036 | 73.0756734 | 66.4780886 | 73.3328655 | 75.337468  |
| 73.9177631 | 65.615036 | 74.0756734 | 72.4780886 | 73.3328655 | 83.9122821 |
| 74.9177631 | 61.615036 | 76.0756734 | 73.4780886 | 74.3328655 | 83.9122821 |
| 74.9177631 | 59.615036 | 76.0756734 | 73.4780886 | 74.3328655 | 81.9122821 |
| 74.9177631 | 57.615036 | 76.0756734 | 75.4780886 | 73.3328655 | 79.9122821 |
| 74.9177631 | 57.615036 | 74.0756734 | 76.4780886 | 73.3328655 | 72.9122821 |
| 74.9177631 | 57.615036 | 74.0756734 | 75.4780886 | 71.3328655 | 71.9122821 |
| 74.9177631 | 57.615036 | 74.0756734 | 74.4780886 | 70.3328655 | 71.9122821 |
| 74.9177631 | 57.615036 | 73.0756734 | 74.4780886 | 69.3328655 | 71.9122821 |
| 73.9177631 | 58.615036 | 73.0756734 | 71.4780886 | 70.3328655 | 71.9122821 |
| 72.9177631 | 58.615036 | 72.0756734 | 69.4780886 | 71.3328655 | 71.9122821 |
| 71.9177631 | 57.615036 | 72.0756734 | 69.4780886 | 71.3328655 | 71.9122821 |
| 72.9177631 | 57.615036 | 72.0756734 | 69.4780886 | 71.3328655 | 71.9122821 |
| 72.9177631 | 57.615036 | 71.0756734 | 69.4780886 | 71.3328655 | 73.9122821 |
| 72.9177631 | 56.615036 | 70.0756734 | 69.4780886 | 71.3328655 | 73.9122821 |
| 72.9177631 | 56.615036 | 70.0756734 | 68.4780886 | 71.3328655 | 73.9122821 |
| 72.9177631 | 56.615036 | 70.0756734 | 68.4780886 | 71.3328655 | 74.9122821 |
| 72.9177631 | 56.615036 | 68.0756734 | 69.4780886 | 76.3328655 | 74.9122821 |
| 73.9177631 | 56.615036 | 68.0756734 | 69.4780886 | 76.3328655 | 74.9122821 |
| 73.9177631 | 56.615036 | 67.0756734 | 69.4780886 | 76.3328655 | 74.9122821 |
| 73.9177631 | 56.615036 | 67.0756734 | 69.4780886 | 76.3328655 | 74.9122821 |
| 73.9177631 | 55.615036 | 67.0756734 | 69.4780886 | 77.3328655 | 74.9122821 |
| 73.9177631 | 55.615036 | 67.0756734 | 69.4780886 | 77.3328655 | 74.9122821 |
| 73.9177631 | 57.615036 | 68.0756734 | 68.4780886 | 78.3328655 | 74.9122821 |
| 74.9177631 | 58.615036 | 68.0756734 | 68.4780886 | 78.3328655 | 75.9122821 |
| 76.9177631 | 58.615036 | 68.0756734 | 68.4780886 | 79.3328655 | 75.9122821 |
| 82.9177631 | 59.615036 | 68.0756734 | 68.4780886 | 79.3328655 | 75.9122821 |
| 84.9177631 | 59.615036 | 69.0756734 | 68.4780886 | 78.3328655 | 76.9122821 |
| 69.8829225 | 60.615036 | 69.0756734 | 67.4780886 | 76.3328655 | 76.9122821 |
| 69.8829225 | 60.615036 | 71.0756734 | 67.4780886 | 74.3328655 | 75.9122821 |
| 69.4283771 | 60.615036 | 71.0756734 | 67.4780886 | 73.3328655 | 74.9122821 |
| 83.9177631 | 62.615036 | 71.0756734 | 67.4780886 | 73.3328655 | 73.9122821 |
| 83.9177631 | 62.615036 | 71.0756734 | 67.4780886 | 75.3328655 | 73.9122821 |
| 83.9177631 | 62.615036 | 71.0756734 | 67.4780886 | 76.3328655 | 72.9122821 |
| 83.9177631 | 61.615036 | 73.0756734 | 67.4780886 | 77.3328655 | 72.9122821 |
| 83.9177631 | 61.615036 | 73.0756734 | 67.4780886 | 77.3328655 | 72.9122821 |
| 83.9177631 | 61.615036 | 72.0756734 | 67.4780886 | 77.3328655 | 72.9122821 |
| 82.9177631 | 60.615036 | 72.0756734 | 69.4780886 | 77.3328655 | 72.9122821 |
| 81.9177631 | 60.615036 | 72.0756734 | 69.4780886 | 77.3328655 | 71.9122821 |
| 79.9177631 | 60.615036 | 72.0756734 | 71.4780886 | 77.3328655 | 71.9122821 |
| 78.9177631 | 60.615036 | 72.0756734 | 72.4780886 | 77.3328655 | 71.9122821 |
| 76.9177631 | 61.615036 | 72.0756734 | 73.4780886 | 78.3328655 | 71.9122821 |
| 76.9177631 | 61.615036 | 72.0756734 | 74.4780886 | 78.3328655 | 72.9122821 |



|            |           |            |            |            |            |
|------------|-----------|------------|------------|------------|------------|
| 75.9177631 | 60.615036 | 70.0756734 | 74.4780886 | 78.3328655 | 72.9122821 |
| 75.9177631 | 60.615036 | 71.0756734 | 74.4780886 | 83.3328655 | 72.9122821 |
| 76.9177631 | 60.615036 | 71.0756734 | 74.4780886 | 85.3328655 | 72.9122821 |
| 76.9177631 | 60.615036 | 71.0756734 | 74.4780886 | 71.4283771 | 72.9122821 |
| 77.9177631 | 59.615036 | 72.0756734 | 74.4780886 | 71.7920134 | 75.9122821 |
| 79.9177631 | 60.615036 | 74.0756734 | 75.4780886 | 72.8829225 | 78.9122821 |
| 80.9177631 | 60.615036 | 74.0756734 | 75.4780886 | 73.0647407 | 78.9122821 |
| 82.9177631 | 60.615036 | 77.0756734 | 74.4780886 | 87.3328655 | 78.9122821 |
| 82.9177631 | 59.615036 | 81.0756734 | 74.4780886 | 86.3328655 | 78.9122821 |
| 82.9177631 | 59.615036 | 82.0756734 | 74.4780886 | 84.3328655 | 78.9122821 |
| 82.9177631 | 58.615036 | 84.0756734 | 74.4780886 | 82.3328655 | 78.9122821 |
| 82.9177631 | 58.615036 | 84.0756734 | 74.4780886 | 82.3328655 | 77.9122821 |
| 81.9177631 | 58.615036 | 84.0756734 | 74.4780886 | 81.3328655 | 77.9122821 |
| 81.9177631 | 58.615036 | 86.0756734 | 76.4780886 | 81.3328655 | 77.9122821 |
| 81.9177631 | 58.615036 | 86.0756734 | 76.4780886 | 80.3328655 | 77.9122821 |
| 81.9177631 | 58.615036 | 86.0756734 | 76.4780886 | 79.3328655 | 77.9122821 |
| 81.9177631 | 58.615036 | 86.0756734 | 78.4780886 | 78.3328655 | 78.9122821 |
| 81.9177631 | 58.615036 | 85.0756734 | 80.4780886 | 78.3328655 | 77.9122821 |
| 81.9177631 | 58.615036 | 85.0756734 | 80.4780886 | 78.3328655 | 76.9122821 |
| 81.9177631 | 58.615036 | 83.0756734 | 80.4780886 | 78.3328655 | 76.9122821 |
| 82.9177631 | 57.615036 | 83.0756734 | 80.4780886 | 77.3328655 | 76.9122821 |
| 82.9177631 | 57.615036 | 82.0756734 | 82.4780886 | 76.3328655 | 75.9122821 |
| 82.9177631 | 57.615036 | 81.0756734 | 84.4780886 | 73.3328655 | 74.9122821 |
| 82.9177631 | 58.615036 | 81.0756734 | 86.4780886 | 69.3328655 | 74.9122821 |
| 82.9177631 | 58.615036 | 81.0756734 | 87.4780886 | 68.3328655 | 75.9122821 |
| 81.9177631 | 59.615036 | 80.0756734 | 73.2465589 | 68.3328655 | 75.9122821 |
| 81.9177631 | 59.615036 | 80.0756734 | 73.0647407 | 68.3328655 | 76.9122821 |
| 81.9177631 | 59.615036 | 80.0756734 | 72.8829225 | 68.3328655 | 76.9122821 |
| 80.9177631 | 59.615036 | 78.0756734 | 72.7920134 | 68.3328655 | 76.9122821 |
| 78.9177631 | 59.615036 | 78.0756734 | 72.7920134 | 68.3328655 | 76.9122821 |
| 77.9177631 | 58.615036 | 78.0756734 | 72.7920134 | 68.3328655 | 74.9122821 |
| 76.9177631 | 58.615036 | 78.0756734 | 72.7011044 | 68.3328655 | 73.9122821 |
| 76.9177631 | 58.615036 | 77.0756734 | 87.4780886 | 68.3328655 | 73.9122821 |
| 77.9177631 | 58.615036 | 77.0756734 | 84.4780886 | 72.3328655 | 73.9122821 |
| 77.9177631 | 58.615036 | 76.0756734 | 84.4780886 | 72.3328655 | 73.9122821 |
| 80.9177631 | 58.615036 | 76.0756734 | 84.4780886 | 69.3328655 | 73.9122821 |
| 83.9177631 | 60.615036 | 76.0756734 | 84.4780886 | 67.3328655 | 69.9122821 |
| 84.9177631 | 62.615036 | 76.0756734 | 84.4780886 | 66.3328655 | 67.9122821 |
| 84.9177631 | 62.615036 | 76.0756734 | 84.4780886 | 65.3328655 | 67.9122821 |
| 84.9177631 | 65.615036 | 76.0756734 | 84.4780886 | 65.3328655 | 64.9122821 |
| 84.9177631 | 65.615036 | 77.0756734 | 84.4780886 | 65.3328655 | 61.9122821 |
| 84.9177631 | 65.615036 | 77.0756734 | 84.4780886 | 66.3328655 | 61.9122821 |
| 84.9177631 | 65.615036 | 77.0756734 | 84.4780886 | 66.3328655 | 58.9122821 |
| 82.9177631 | 64.615036 | 82.0756734 | 84.4780886 | 73.3328655 | 58.9122821 |
| 80.9177631 | 64.615036 | 82.0756734 | 84.4780886 | 76.3328655 | 58.9122821 |

|            |           |            |            |            |            |
|------------|-----------|------------|------------|------------|------------|
| 78.9177631 | 63.615036 | 82.0756734 | 84.4780886 | 76.3328655 | 63.9122821 |
| 78.9177631 | 63.615036 | 82.0756734 | 84.4780886 | 76.3328655 | 63.9122821 |
| 73.9177631 | 62.615036 | 81.0756734 | 84.4780886 | 76.3328655 | 71.9122821 |
| 73.9177631 | 62.615036 | 80.0756734 | 82.4780886 | 72.3328655 | 72.9122821 |
| 72.9177631 | 62.615036 | 78.0756734 | 82.4780886 | 71.3328655 | 73.9122821 |
| 72.9177631 | 62.615036 | 78.0756734 | 82.4780886 | 73.3328655 | 73.9122821 |
| 73.9177631 | 61.615036 | 77.0756734 | 80.4780886 | 74.3328655 | 73.9122821 |
| 74.9177631 | 61.615036 | 77.0756734 | 74.4780886 | 76.3328655 | 73.9122821 |
| 74.9177631 | 61.615036 | 76.0756734 | 72.4780886 | 78.3328655 | 73.9122821 |
| 75.9177631 | 60.615036 | 76.0756734 | 69.4780886 | 79.3328655 | 76.9122821 |
| 75.9177631 | 60.615036 | 79.0756734 | 68.4780886 | 80.3328655 | 78.9122821 |
| 75.9177631 | 60.615036 | 79.0756734 | 68.4780886 | 80.3328655 | 78.9122821 |
| 76.9177631 | 61.615036 | 82.0756734 | 68.4780886 | 81.3328655 | 78.9122821 |
| 77.9177631 | 61.615036 | 84.0756734 | 68.4780886 | 81.3328655 | 78.9122821 |
| 78.9177631 | 61.615036 | 84.0756734 | 68.4780886 | 81.3328655 | 79.9122821 |
| 79.9177631 | 60.615036 | 84.0756734 | 64.4780886 | 80.3328655 | 79.9122821 |
| 79.9177631 | 60.615036 | 85.0756734 | 64.4780886 | 79.3328655 | 81.9122821 |
| 80.9177631 | 60.615036 | 85.0756734 | 64.4780886 | 75.3328655 | 81.9122821 |
| 80.9177631 | 60.615036 | 84.0756734 | 63.4780886 | 73.3328655 | 81.9122821 |
| 79.9177631 | 60.615036 | 83.0756734 | 61.4780886 | 72.3328655 | 81.9122821 |
| 79.9177631 | 60.615036 | 83.0756734 | 61.4780886 | 71.3328655 | 85.9122821 |
| 76.9177631 | 60.615036 | 83.0756734 | 58.4780886 | 69.3328655 | 70.6101953 |
| 75.9177631 | 61.615036 | 83.0756734 | 54.4780886 | 69.3328655 | 83.9122821 |
| 74.9177631 | 62.615036 | 83.0756734 | 52.4780886 | 69.3328655 | 78.9122821 |
| 74.9177631 | 62.615036 | 81.0756734 | 52.4780886 | 69.3328655 | 78.9122821 |
| 74.9177631 | 62.615036 | 80.0756734 | 52.4780886 | 69.3328655 | 78.9122821 |
| 74.9177631 | 62.615036 | 80.0756734 | 51.4780886 | 69.3328655 | 79.9122821 |
| 73.9177631 | 62.615036 | 80.0756734 | 50.4780886 | 69.3328655 | 78.9122821 |
| 73.9177631 | 62.615036 | 79.0756734 | 49.4780886 | 69.3328655 | 77.9122821 |
| 73.9177631 | 62.615036 | 79.0756734 | 49.4780886 | 69.3328655 | 77.9122821 |
| 73.9177631 | 62.615036 | 79.0756734 | 49.4780886 | 68.3328655 | 77.9122821 |
| 73.9177631 | 62.615036 | 79.0756734 | 50.4780886 | 68.3328655 | 77.9122821 |
| 73.9177631 | 64.615036 | 79.0756734 | 53.4780886 | 68.3328655 | 77.9122821 |
| 73.9177631 | 65.615036 | 79.0756734 | 53.4780886 | 68.3328655 | 77.9122821 |
| 74.9177631 | 65.615036 | 81.0756734 | 55.4780886 | 67.3328655 | 77.9122821 |
| 74.9177631 | 65.615036 | 81.0756734 | 60.4780886 | 67.3328655 | 76.9122821 |
| 74.9177631 | 65.615036 | 81.0756734 | 67.4780886 | 72.3328655 | 77.9122821 |
| 74.9177631 | 65.615036 | 80.0756734 | 67.4780886 | 73.3328655 | 77.9122821 |
| 74.9177631 | 65.615036 | 80.0756734 | 67.4780886 | 73.3328655 | 77.9122821 |
| 75.9177631 | 66.615036 | 79.0756734 | 68.4780886 | 73.3328655 | 78.9122821 |
| 76.9177631 | 67.615036 | 77.0756734 | 70.4780886 | 73.3328655 | 79.9122821 |
| 76.9177631 | 68.615036 | 77.0756734 | 70.4780886 | 75.3328655 | 79.9122821 |
| 76.9177631 | 68.615036 | 76.0756734 | 74.4780886 | 75.3328655 | 79.9122821 |
| 76.9177631 | 70.615036 | 75.0756734 | 77.4780886 | 77.3328655 | 80.9122821 |
| 75.9177631 | 70.615036 | 75.0756734 | 77.4780886 | 78.3328655 | 80.9122821 |

|            |           |            |            |            |            |
|------------|-----------|------------|------------|------------|------------|
| 74.9177631 | 71.615036 | 75.0756734 | 78.4780886 | 78.3328655 | 80.9122821 |
| 73.9177631 | 71.615036 | 75.0756734 | 78.4780886 | 78.3328655 | 80.9122821 |
| 73.9177631 | 71.615036 | 75.0756734 | 78.4780886 | 78.3328655 | 81.9122821 |
| 73.9177631 | 66.615036 | 74.0756734 | 80.4780886 | 78.3328655 | 81.9122821 |
| 72.9177631 | 63.615036 | 73.0756734 | 81.4780886 | 78.3328655 | 82.9122821 |
| 72.9177631 | 62.615036 | 73.0756734 | 81.4780886 | 79.3328655 | 85.9122821 |
| 71.9177631 | 62.615036 | 73.0756734 | 81.4780886 | 80.3328655 | 85.9122821 |
| 70.9177631 | 62.615036 | 78.0756734 | 80.4780886 | 80.3328655 | 86.9122821 |
| 71.9177631 | 61.615036 | 77.0756734 | 80.4780886 | 79.3328655 | 85.9122821 |
| 72.9177631 | 61.615036 | 77.0756734 | 80.4780886 | 77.3328655 | 85.9122821 |
| 72.9177631 | 61.615036 | 77.0756734 | 80.4780886 | 77.3328655 | 85.9122821 |
| 74.9177631 | 62.615036 | 77.0756734 | 80.4780886 | 77.3328655 | 85.9122821 |
| 74.9177631 | 63.615036 | 75.0756734 | 80.4780886 | 76.3328655 | 85.9122821 |
| 74.9177631 | 64.615036 | 73.0756734 | 79.4780886 | 73.3328655 | 87.9122821 |
| 73.9177631 | 65.615036 | 73.0756734 | 78.4780886 | 70.3328655 | 87.9122821 |
| 73.9177631 | 66.615036 | 72.0756734 | 78.4780886 | 68.3328655 | 87.9122821 |
| 73.9177631 | 67.615036 | 74.0756734 | 77.4780886 | 67.3328655 | 87.9122821 |
| 72.9177631 | 68.615036 | 74.0756734 | 76.4780886 | 68.3328655 | 72.9738316 |
| 71.9177631 | 68.615036 | 75.0756734 | 76.4780886 | 69.3328655 | 87.9122821 |
| 71.9177631 | 69.615036 | 77.0756734 | 76.4780886 | 69.3328655 | 87.9122821 |
| 72.9177631 | 69.615036 | 77.0756734 | 76.4780886 | 69.3328655 | 73.337468  |
| 72.9177631 | 69.615036 | 77.0756734 | 75.4780886 | 70.3328655 | 73.2465589 |
| 72.9177631 | 69.615036 | 77.0756734 | 75.4780886 | 70.3328655 | 73.5192862 |
| 72.9177631 | 69.615036 | 77.0756734 | 74.4780886 | 70.3328655 | 73.7920134 |
| 72.9177631 | 69.615036 | 77.0756734 | 74.4780886 | 71.3328655 | 74.337468  |
| 73.9177631 | 69.615036 | 77.0756734 | 75.4780886 | 72.3328655 | 74.7011044 |
| 73.9177631 | 70.615036 | 76.0756734 | 80.4780886 | 75.3328655 | 75.8829225 |
| 73.9177631 | 69.615036 | 76.0756734 | 80.4780886 | 75.3328655 | 76.7920134 |
| 82.9177631 | 68.615036 | 75.0756734 | 80.4780886 | 77.3328655 | 91.9122821 |
| 85.9177631 | 66.615036 | 75.0756734 | 86.4780886 | 77.3328655 | 91.9122821 |
| 85.9177631 | 65.615036 | 75.0756734 | 87.4780886 | 77.3328655 | 91.9122821 |
| 85.9177631 | 65.615036 | 76.0756734 | 87.4780886 | 73.3328655 | 91.9122821 |
| 86.9177631 | 65.615036 | 76.0756734 | 89.4780886 | 70.3328655 | 90.9122821 |
| 87.9177631 | 65.615036 | 76.0756734 | 90.4780886 | 69.3328655 | 90.9122821 |
| 87.9177631 | 64.615036 | 76.0756734 | 90.4780886 | 70.3328655 | 90.9122821 |
| 87.9177631 | 64.615036 | 76.0756734 | 91.4780886 | 70.3328655 | 90.9122821 |
| 88.9177631 | 63.615036 | 76.0756734 | 91.4780886 | 72.3328655 | 90.9122821 |
| 89.9177631 | 62.615036 | 75.0756734 | 91.4780886 | 72.3328655 | 89.9122821 |
| 90.9177631 | 61.615036 | 75.0756734 | 91.4780886 | 72.3328655 | 89.9122821 |
| 90.9177631 | 61.615036 | 74.0756734 | 91.4780886 | 72.3328655 | 88.9122821 |
| 90.9177631 | 60.615036 | 74.0756734 | 76.337468  | 72.3328655 | 84.9122821 |
| 90.9177631 | 60.615036 | 74.0756734 | 76.0647407 | 72.3328655 | 84.9122821 |
| 75.7011044 | 60.615036 | 74.0756734 | 75.7011044 | 71.3328655 | 80.9122821 |
| 75.5192862 | 60.615036 | 73.0756734 | 75.5192862 | 71.3328655 | 80.9122821 |
| 74.9738316 | 60.615036 | 73.0756734 | 74.9738316 | 71.3328655 | 80.9122821 |

|            |           |            |            |            |            |
|------------|-----------|------------|------------|------------|------------|
| 75.0647407 | 60.615036 | 73.0756734 | 75.0647407 | 71.3328655 | 78.9122821 |
| 74.9177631 | 60.615036 | 73.0756734 | 73.7011044 | 71.3328655 | 79.9122821 |
| 70.9177631 | 59.615036 | 70.0756734 | 73.2465589 | 71.3328655 | 79.9122821 |
| 68.9177631 | 60.615036 | 69.0756734 | 72.7920134 | 68.3328655 | 80.9122821 |
| 67.9177631 | 60.615036 | 70.0756734 | 72.4283771 | 63.3328655 | 81.9122821 |
| 66.9177631 | 62.615036 | 70.0756734 | 72.337468  | 60.3328655 | 81.9122821 |
| 65.9177631 | 62.615036 | 70.0756734 | 72.2465589 | 60.3328655 | 84.9122821 |
| 66.9177631 | 63.615036 | 70.0756734 | 72.6101953 | 60.3328655 | 84.9122821 |
| 67.9177631 | 63.615036 | 70.0756734 | 73.1556498 | 60.3328655 | 84.9122821 |
| 66.9177631 | 64.615036 | 70.0756734 | 73.5192862 | 61.3328655 | 83.9122821 |
| 67.9177631 | 64.615036 | 71.0756734 | 73.7011044 | 61.3328655 | 83.9122821 |
| 68.9177631 | 64.615036 | 71.0756734 | 87.4780886 | 61.3328655 | 82.9122821 |
| 69.9177631 | 63.615036 | 72.0756734 | 87.4780886 | 61.3328655 | 82.9122821 |
| 69.9177631 | 64.615036 | 72.0756734 | 87.4780886 | 64.3328655 | 82.9122821 |
| 69.9177631 | 64.615036 | 73.0756734 | 87.4780886 | 66.3328655 | 82.9122821 |
| 69.9177631 | 64.615036 | 73.0756734 | 86.4780886 | 66.3328655 | 82.9122821 |
| 69.9177631 | 64.615036 | 72.0756734 | 82.4780886 | 66.3328655 | 81.9122821 |
| 69.9177631 | 64.615036 | 72.0756734 | 82.4780886 | 66.3328655 | 81.9122821 |
| 69.9177631 | 64.615036 | 72.0756734 | 82.4780886 | 66.3328655 | 81.9122821 |
| 69.9177631 | 64.615036 | 72.0756734 | 82.4780886 | 66.3328655 | 81.9122821 |
| 69.9177631 | 64.615036 | 73.0756734 | 82.4780886 | 65.3328655 | 80.9122821 |
| 69.9177631 | 65.615036 | 74.0756734 | 78.4780886 | 65.3328655 | 80.9122821 |
| 69.9177631 | 65.615036 | 75.0756734 | 74.4780886 | 65.3328655 | 80.9122821 |
| 69.9177631 | 65.615036 | 75.0756734 | 73.4780886 | 65.3328655 | 80.9122821 |
| 69.9177631 | 65.615036 | 75.0756734 | 73.4780886 | 66.3328655 | 80.9122821 |
| 73.9177631 | 65.615036 | 75.0756734 | 73.4780886 | 65.3328655 | 81.9122821 |
| 76.9177631 | 65.615036 | 75.0756734 | 73.4780886 | 65.3328655 | 79.9122821 |
| 76.9177631 | 64.615036 | 75.0756734 | 72.4780886 | 65.3328655 | 80.9122821 |
| 75.9177631 | 64.615036 | 76.0756734 | 72.4780886 | 65.3328655 | 78.9122821 |
| 73.9177631 | 64.615036 | 76.0756734 | 72.4780886 | 66.3328655 | 78.9122821 |
| 72.9177631 | 64.615036 | 76.0756734 | 72.4780886 | 68.3328655 | 76.9122821 |
| 71.9177631 | 64.615036 | 75.0756734 | 72.4780886 | 68.3328655 | 74.9122821 |
| 70.9177631 | 64.615036 | 75.0756734 | 70.4780886 | 69.3328655 | 74.9122821 |
| 68.9177631 | 64.615036 | 74.0756734 | 70.4780886 | 71.3328655 | 73.9122821 |
| 68.9177631 | 64.615036 | 74.0756734 | 70.4780886 | 73.3328655 | 73.9122821 |
| 68.9177631 | 64.615036 | 74.0756734 | 71.4780886 | 74.3328655 | 73.9122821 |
| 68.9177631 | 64.615036 | 75.0756734 | 71.4780886 | 74.3328655 | 73.9122821 |
| 68.9177631 | 64.615036 | 74.0756734 | 71.4780886 | 74.3328655 | 74.9122821 |
| 68.9177631 | 64.615036 | 74.0756734 | 71.4780886 | 73.3328655 | 77.9122821 |
| 71.9177631 | 64.615036 | 74.0756734 | 71.4780886 | 72.3328655 | 77.9122821 |
| 71.9177631 | 63.615036 | 72.0756734 | 74.4780886 | 71.3328655 | 77.9122821 |
| 71.9177631 | 63.615036 | 72.0756734 | 74.4780886 | 71.3328655 | 78.9122821 |
| 71.9177631 | 63.615036 | 72.0756734 | 74.4780886 | 71.3328655 | 80.9122821 |
| 71.9177631 | 63.615036 | 71.0756734 | 74.4780886 | 71.3328655 | 83.9122821 |
| 71.9177631 | 63.615036 | 71.0756734 | 73.4780886 | 71.3328655 | 81.9122821 |

|            |            |            |            |            |            |
|------------|------------|------------|------------|------------|------------|
| 71.9177631 | 65.615036  | 71.0756734 | 73.4780886 | 71.3328655 | 79.9122821 |
| 71.9177631 | 65.615036  | 71.0756734 | 73.4780886 | 76.3328655 | 79.9122821 |
| 71.9177631 | 65.615036  | 71.0756734 | 73.4780886 | 76.3328655 | 76.9122821 |
| 72.9177631 | 66.615036  | 71.0756734 | 73.4780886 | 76.3328655 | 74.9122821 |
| 72.9177631 | 69.615036  | 71.0756734 | 73.4780886 | 74.3328655 | 74.9122821 |
| 72.9177631 | 70.615036  | 71.0756734 | 73.4780886 | 73.3328655 | 74.9122821 |
| 72.9177631 | 69.615036  | 71.0756734 | 73.4780886 | 73.3328655 | 75.9122821 |
| 73.9177631 | 70.615036  | 72.0756734 | 73.4780886 | 73.3328655 | 75.9122821 |
| 73.9177631 | 71.615036  | 72.0756734 | 72.4780886 | 73.3328655 | 76.9122821 |
| 73.9177631 | 72.615036  | 73.0756734 | 72.4780886 | 73.3328655 | 76.9122821 |
| 74.9177631 | 73.615036  | 74.0756734 | 71.4780886 | 79.3328655 | 77.9122821 |
| 74.9177631 | 72.615036  | 74.0756734 | 71.4780886 | 83.3328655 | 77.9122821 |
| 74.9177631 | 72.615036  | 74.0756734 | 70.4780886 | 83.3328655 | 77.9122821 |
| 73.9177631 | 72.615036  | 74.0756734 | 70.4780886 | 86.3328655 | 73.9122821 |
| 73.9177631 | 73.615036  | 74.0756734 | 70.4780886 | 85.3328655 | 73.9122821 |
| 73.9177631 | 73.615036  | 74.0756734 | 70.4780886 | 80.3328655 | 74.9122821 |
| 73.9177631 | 73.615036  | 75.0756734 | 70.4780886 | 75.3328655 | 77.9122821 |
| 73.9177631 | 75.615036  | 75.0756734 | 70.4780886 | 73.3328655 | 77.9122821 |
| 72.9177631 | 76.615036  | 76.0756734 | 70.4780886 | 71.3328655 | 77.9122821 |
| 72.9177631 | 79.615036  | 76.0756734 | 71.4780886 | 70.3328655 | 77.9122821 |
| 71.9177631 | 79.615036  | 76.0756734 | 72.4780886 | 70.3328655 | 74.9122821 |
| 71.9177631 | 82.615036  | 73.0756734 | 71.4780886 | 69.3328655 | 73.9122821 |
| 71.9177631 | 87.615036  | 73.0756734 | 71.4780886 | 69.3328655 | 73.9122821 |
| 71.9177631 | 88.615036  | 73.0756734 | 70.4780886 | 69.3328655 | 70.9122821 |
| 71.9177631 | 73.7920134 | 74.0756734 | 71.4780886 | 68.3328655 | 69.9122821 |
| 70.9177631 | 74.1556498 | 74.0756734 | 74.4780886 | 68.3328655 | 69.9122821 |
| 70.9177631 | 86.615036  | 74.0756734 | 76.4780886 | 69.3328655 | 70.9122821 |
| 70.9177631 | 83.615036  | 74.0756734 | 76.4780886 | 69.3328655 | 72.9122821 |
| 70.9177631 | 83.615036  | 74.0756734 | 76.4780886 | 69.3328655 | 72.9122821 |
| 74.9177631 | 78.615036  | 74.0756734 | 80.4780886 | 69.3328655 | 73.9122821 |
| 74.9177631 | 75.615036  | 74.0756734 | 80.4780886 | 69.3328655 | 73.9122821 |
| 77.9177631 | 71.615036  | 73.0756734 | 80.4780886 | 69.3328655 | 73.9122821 |
| 79.9177631 | 69.615036  | 73.0756734 | 82.4780886 | 69.3328655 | 73.9122821 |
| 79.9177631 | 68.615036  | 73.0756734 | 83.4780886 | 70.3328655 | 73.9122821 |
| 81.9177631 | 68.615036  | 71.0756734 | 83.4780886 | 70.3328655 | 73.9122821 |
| 81.9177631 | 68.615036  | 71.0756734 | 84.4780886 | 70.3328655 | 73.9122821 |
| 81.9177631 | 68.615036  | 71.0756734 | 84.4780886 | 70.3328655 | 73.9122821 |
| 81.9177631 | 68.615036  | 71.0756734 | 84.4780886 | 71.3328655 | 73.9122821 |
| 81.9177631 | 67.615036  | 71.0756734 | 83.4780886 | 71.3328655 | 77.9122821 |
| 81.9177631 | 67.615036  | 72.0756734 | 83.4780886 | 74.3328655 | 78.9122821 |
| 81.9177631 | 68.615036  | 72.0756734 | 81.4780886 | 76.3328655 | 78.9122821 |
| 81.9177631 | 66.615036  | 72.0756734 | 81.4780886 | 77.3328655 | 78.9122821 |
| 79.9177631 | 65.615036  | 72.0756734 | 81.4780886 | 78.3328655 | 78.9122821 |
| 71.9177631 | 64.615036  | 72.0756734 | 78.4780886 | 80.3328655 | 77.9122821 |
| 68.9177631 | 64.615036  | 72.0756734 | 78.4780886 | 81.3328655 | 69.9122821 |

|            |           |            |            |            |            |
|------------|-----------|------------|------------|------------|------------|
| 66.9177631 | 63.615036 | 72.0756734 | 75.4780886 | 82.3328655 | 66.9122821 |
| 63.9177631 | 63.615036 | 74.0756734 | 75.4780886 | 83.3328655 | 66.9122821 |
| 61.9177631 | 63.615036 | 74.0756734 | 74.4780886 | 83.3328655 | 66.9122821 |
| 59.9177631 | 63.615036 | 75.0756734 | 75.4780886 | 84.3328655 | 69.9122821 |
| 59.9177631 | 63.615036 | 78.0756734 | 75.4780886 | 84.3328655 | 70.9122821 |
| 61.9177631 | 63.615036 | 78.0756734 | 75.4780886 | 84.3328655 | 70.9122821 |
| 62.9177631 | 63.615036 | 79.0756734 | 75.4780886 | 83.3328655 | 70.9122821 |
| 62.9177631 | 63.615036 | 79.0756734 | 75.4780886 | 82.3328655 | 70.9122821 |
| 62.9177631 | 63.615036 | 79.0756734 | 75.4780886 | 82.3328655 | 69.9122821 |
| 62.9177631 | 63.615036 | 79.0756734 | 75.4780886 | 82.3328655 | 69.9122821 |
| 62.9177631 | 63.615036 | 79.0756734 | 74.4780886 | 82.3328655 | 69.9122821 |
| 63.9177631 | 64.615036 | 79.0756734 | 73.4780886 | 82.3328655 | 69.9122821 |
| 65.9177631 | 64.615036 | 78.0756734 | 73.4780886 | 82.3328655 | 70.9122821 |
| 65.9177631 | 64.615036 | 76.0756734 | 74.4780886 | 82.3328655 | 70.9122821 |
| 65.9177631 | 63.615036 | 76.0756734 | 75.4780886 | 81.3328655 | 70.9122821 |
| 65.9177631 | 64.615036 | 76.0756734 | 75.4780886 | 81.3328655 | 70.9122821 |
| 65.9177631 | 64.615036 | 78.0756734 | 75.4780886 | 80.3328655 | 70.9122821 |
| 65.9177631 | 64.615036 | 78.0756734 | 76.4780886 | 78.3328655 | 70.9122821 |
| 65.9177631 | 64.615036 | 78.0756734 | 76.4780886 | 78.3328655 | 70.9122821 |
| 63.9177631 | 63.615036 | 78.0756734 | 75.4780886 | 76.3328655 | 72.9122821 |
| 63.9177631 | 63.615036 | 78.0756734 | 75.4780886 | 76.3328655 | 72.9122821 |
| 63.9177631 | 61.615036 | 79.0756734 | 75.4780886 | 76.3328655 | 72.9122821 |
| 62.9177631 | 61.615036 | 79.0756734 | 75.4780886 | 76.3328655 | 74.9122821 |
| 63.9177631 | 60.615036 | 79.0756734 | 75.4780886 | 76.3328655 | 74.9122821 |
| 63.9177631 | 60.615036 | 79.0756734 | 75.4780886 | 76.3328655 | 74.9122821 |
| 63.9177631 | 60.615036 | 79.0756734 | 74.4780886 | 76.3328655 | 76.9122821 |
| 63.9177631 | 60.615036 | 79.0756734 | 74.4780886 | 77.3328655 | 76.9122821 |
| 64.9177631 | 60.615036 | 79.0756734 | 74.4780886 | 77.3328655 | 76.9122821 |
| 64.9177631 | 60.615036 | 79.0756734 | 74.4780886 | 77.3328655 | 76.9122821 |
| 64.9177631 | 60.615036 | 79.0756734 | 71.4780886 | 78.3328655 | 79.9122821 |
| 64.9177631 | 60.615036 | 79.0756734 | 71.4780886 | 78.3328655 | 79.9122821 |
| 65.9177631 | 60.615036 | 81.0756734 | 71.4780886 | 80.3328655 | 79.9122821 |
| 66.9177631 | 60.615036 | 81.0756734 | 71.4780886 | 77.3328655 | 78.9122821 |
| 66.9177631 | 60.615036 | 81.0756734 | 71.4780886 | 77.3328655 | 77.9122821 |
| 66.9177631 | 60.615036 | 81.0756734 | 71.4780886 | 73.3328655 | 74.9122821 |
| 66.9177631 | 63.615036 | 81.0756734 | 71.4780886 | 73.3328655 | 74.9122821 |
| 66.9177631 | 64.615036 | 81.0756734 | 71.4780886 | 73.3328655 | 73.9122821 |
| 66.9177631 | 64.615036 | 81.0756734 | 71.4780886 | 73.3328655 | 73.9122821 |
| 66.9177631 | 64.615036 | 76.0756734 | 73.4780886 | 73.3328655 | 73.9122821 |
| 67.9177631 | 68.615036 | 76.0756734 | 73.4780886 | 73.3328655 | 73.9122821 |
| 67.9177631 | 68.615036 | 75.0756734 | 87.4780886 | 75.3328655 | 74.9122821 |
| 68.9177631 | 72.615036 | 75.0756734 | 74.1556498 | 75.3328655 | 76.9122821 |
| 67.9177631 | 75.615036 | 75.0756734 | 74.8829225 | 75.3328655 | 77.9122821 |
| 67.9177631 | 76.615036 | 74.0756734 | 74.337468  | 70.3328655 | 77.9122821 |
| 67.9177631 | 76.615036 | 74.0756734 | 74.5192862 | 68.3328655 | 77.9122821 |

|            |           |            |            |            |            |
|------------|-----------|------------|------------|------------|------------|
| 67.9177631 | 76.615036 | 74.0756734 | 74.2465589 | 68.3328655 | 77.9122821 |
| 68.9177631 | 76.615036 | 73.0756734 | 73.9738316 | 68.3328655 | 77.9122821 |
| 68.9177631 | 77.615036 | 73.0756734 | 73.7011044 | 68.3328655 | 77.9122821 |
| 67.9177631 | 77.615036 | 72.0756734 | 73.5192862 | 68.3328655 | 78.9122821 |
| 67.9177631 | 78.615036 | 72.0756734 | 73.0647407 | 67.3328655 | 77.9122821 |
| 67.9177631 | 78.615036 | 71.0756734 | 72.6101953 | 65.3328655 | 77.9122821 |
| 67.9177631 | 77.615036 | 71.0756734 | 72.0647407 | 65.3328655 | 69.9122821 |
| 67.9177631 | 74.615036 | 71.0756734 | 70.5192862 | 63.3328655 | 58.9122821 |
| 67.9177631 | 72.615036 | 71.0756734 | 70.0647407 | 63.3328655 | 57.9122821 |
| 68.9177631 | 71.615036 | 72.0756734 | 70.2465589 | 65.3328655 | 57.9122821 |
| 69.9177631 | 70.615036 | 74.0756734 | 70.1556498 | 66.3328655 | 56.9122821 |
| 69.9177631 | 70.615036 | 74.0756734 | 70.0647407 | 66.3328655 | 56.9122821 |
| 69.9177631 | 70.615036 | 74.0756734 | 70.0647407 | 66.3328655 | 56.9122821 |
| 69.9177631 | 70.615036 | 74.0756734 | 70.2465589 | 66.3328655 | 57.9122821 |
| 65.9177631 | 70.615036 | 74.0756734 | 69.9738316 | 66.3328655 | 58.9122821 |
| 64.9177631 | 70.615036 | 74.0756734 | 70.1556498 | 67.3328655 | 58.9122821 |
| 64.9177631 | 70.615036 | 73.0756734 | 70.2465589 | 69.3328655 | 58.9122821 |
| 63.9177631 | 71.615036 | 73.0756734 | 70.4283771 | 70.3328655 | 58.9122821 |
| 63.9177631 | 71.615036 | 73.0756734 | 70.4283771 | 71.3328655 | 58.9122821 |
| 63.9177631 | 71.615036 | 73.0756734 | 70.5192862 | 71.3328655 | 58.9122821 |
| 62.9177631 | 71.615036 | 73.0756734 | 70.8829225 | 74.3328655 | 61.9122821 |
| 61.9177631 | 71.615036 | 73.0756734 | 70.8829225 | 74.3328655 | 62.9122821 |
| 65.9177631 | 71.615036 | 73.0756734 | 71.6101953 | 73.3328655 | 64.9122821 |
| 65.9177631 | 71.615036 | 73.0756734 | 71.5192862 | 71.3328655 | 64.9122821 |
| 65.9177631 | 71.615036 | 74.0756734 | 71.5192862 | 70.3328655 | 64.9122821 |
| 64.9177631 | 72.615036 | 74.0756734 | 71.7011044 | 70.3328655 | 64.9122821 |
| 65.9177631 | 72.615036 | 74.0756734 | 71.7920134 | 70.3328655 | 64.9122821 |
| 65.9177631 | 71.615036 | 75.0756734 | 72.0647407 | 71.3328655 | 65.9122821 |
| 66.9177631 | 71.615036 | 75.0756734 | 72.2465589 | 71.3328655 | 66.9122821 |
| 66.9177631 | 71.615036 | 75.0756734 | 72.7920134 | 71.3328655 | 68.9122821 |
| 66.9177631 | 70.615036 | 76.0756734 | 72.7920134 | 71.3328655 | 68.9122821 |
| 66.9177631 | 68.615036 | 76.0756734 | 73.1556498 | 72.3328655 | 70.9122821 |
| 66.9177631 | 66.615036 | 76.0756734 | 73.5192862 | 73.3328655 | 70.9122821 |
| 66.9177631 | 66.615036 | 76.0756734 | 73.8829225 | 74.3328655 | 75.9122821 |
| 66.9177631 | 66.615036 | 76.0756734 | 73.9738316 | 73.3328655 | 76.9122821 |
| 67.9177631 | 65.615036 | 75.0756734 | 73.7011044 | 70.3328655 | 76.9122821 |
| 68.9177631 | 65.615036 | 76.0756734 | 72.9738316 | 68.3328655 | 67.9122821 |
| 67.9177631 | 64.615036 | 76.0756734 | 72.8829225 | 67.3328655 | 66.9122821 |
| 67.9177631 | 63.615036 | 76.0756734 | 73.0647407 | 68.3328655 | 66.9122821 |
| 67.9177631 | 64.615036 | 75.0756734 | 73.337468  | 69.3328655 | 66.9122821 |
| 63.9177631 | 64.615036 | 75.0756734 | 73.7920134 | 72.3328655 | 68.9122821 |
| 61.9177631 | 64.615036 | 74.0756734 | 73.6101953 | 73.3328655 | 69.9122821 |
| 61.9177631 | 64.615036 | 73.0756734 | 73.7920134 | 74.3328655 | 71.9122821 |
| 61.9177631 | 64.615036 | 73.0756734 | 74.337468  | 75.3328655 | 71.9122821 |
| 63.9177631 | 64.615036 | 73.0756734 | 75.337468  | 75.3328655 | 75.9122821 |

|            |           |            |            |            |            |
|------------|-----------|------------|------------|------------|------------|
| 63.9177631 | 64.615036 | 72.0756734 | 75.5192862 | 75.3328655 | 75.9122821 |
| 63.9177631 | 64.615036 | 72.0756734 | 75.5192862 | 75.3328655 | 75.9122821 |
| 61.9177631 | 59.615036 | 72.0756734 | 74.4283771 | 76.3328655 | 72.9122821 |
| 61.9177631 | 59.615036 | 72.0756734 | 74.2465589 | 78.3328655 | 71.9122821 |
| 60.9177631 | 57.615036 | 70.0756734 | 73.8829225 | 79.3328655 | 71.9122821 |
| 61.9177631 | 53.615036 | 70.0756734 | 73.5192862 | 79.3328655 | 68.9122821 |
| 62.9177631 | 53.615036 | 69.0756734 | 73.2465589 | 79.3328655 | 68.9122821 |
| 63.9177631 | 49.615036 | 71.0756734 | 73.1556498 | 79.3328655 | 68.9122821 |
| 63.9177631 | 53.615036 | 71.0756734 | 73.7011044 | 79.3328655 | 68.9122821 |
| 64.9177631 | 57.615036 | 72.0756734 | 74.2465589 | 79.3328655 | 67.9122821 |
| 64.9177631 | 58.615036 | 72.0756734 | 73.9738316 | 79.3328655 | 67.9122821 |
| 64.9177631 | 61.615036 | 72.0756734 | 73.7011044 | 77.3328655 | 67.9122821 |
| 64.9177631 | 62.615036 | 73.0756734 | 73.2465589 | 75.3328655 | 67.9122821 |
| 65.9177631 | 64.615036 | 73.0756734 | 72.7920134 | 74.3328655 | 67.9122821 |
| 66.9177631 | 64.615036 | 73.0756734 | 73.0647407 | 72.3328655 | 79.9122821 |
| 67.9177631 | 64.615036 | 73.0756734 | 73.1556498 | 71.3328655 | 82.9122821 |
| 68.9177631 | 64.615036 | 74.0756734 | 72.9738316 | 70.3328655 | 82.9122821 |
| 68.9177631 | 64.615036 | 74.0756734 | 72.9738316 | 70.3328655 | 82.9122821 |
| 69.9177631 | 64.615036 | 75.0756734 | 72.7920134 | 69.3328655 | 82.9122821 |
| 69.9177631 | 64.615036 | 75.0756734 | 72.7920134 | 69.3328655 | 84.9122821 |
| 70.9177631 | 64.615036 | 75.0756734 | 72.0647407 | 68.3328655 | 84.9122821 |
| 71.9177631 | 65.615036 | 75.0756734 | 72.4283771 | 68.3328655 | 85.9122821 |
| 72.9177631 | 65.615036 | 76.0756734 | 72.6101953 | 69.3328655 | 85.9122821 |
| 72.9177631 | 64.615036 | 76.0756734 | 72.7920134 | 74.3328655 | 85.9122821 |
| 72.9177631 | 64.615036 | 76.0756734 | 72.8829225 | 75.3328655 | 85.9122821 |
| 72.9177631 | 63.615036 | 76.0756734 | 72.337468  | 76.3328655 | 83.9122821 |
| 71.9177631 | 62.615036 | 76.0756734 | 71.8829225 | 76.3328655 | 83.9122821 |
| 70.9177631 | 62.615036 | 76.0756734 | 71.7920134 | 77.3328655 | 83.9122821 |
| 70.9177631 | 62.615036 | 76.0756734 | 71.6101953 | 78.3328655 | 82.9122821 |
| 69.9177631 | 61.615036 | 76.0756734 | 71.5192862 | 80.3328655 | 82.9122821 |
| 68.9177631 | 61.615036 | 75.0756734 | 71.4283771 | 82.3328655 | 81.9122821 |
| 68.9177631 | 61.615036 | 75.0756734 | 71.337468  | 82.3328655 | 79.9122821 |
| 63.9177631 | 60.615036 | 75.0756734 | 70.9738316 | 81.3328655 | 80.9122821 |
| 63.9177631 | 59.615036 | 75.0756734 | 70.9738316 | 79.3328655 | 77.9122821 |
| 62.9177631 | 58.615036 | 73.0756734 | 70.7011044 | 77.3328655 | 76.9122821 |
| 62.9177631 | 57.615036 | 73.0756734 | 70.2465589 | 75.3328655 | 76.9122821 |
| 63.9177631 | 57.615036 | 73.0756734 | 70.1556498 | 75.3328655 | 75.9122821 |
| 63.9177631 | 57.615036 | 73.0756734 | 69.6101953 | 75.3328655 | 74.9122821 |
| 63.9177631 | 57.615036 | 76.0756734 | 70.1556498 | 75.3328655 | 76.9122821 |
| 63.9177631 | 58.615036 | 77.0756734 | 73.4780886 | 75.3328655 | 76.9122821 |
| 64.9177631 | 59.615036 | 77.0756734 | 73.4780886 | 76.3328655 | 78.9122821 |
| 64.9177631 | 60.615036 | 77.0756734 | 71.4780886 | 77.3328655 | 79.9122821 |
| 64.9177631 | 60.615036 | 78.0756734 | 71.4780886 | 76.3328655 | 79.9122821 |
| 64.9177631 | 60.615036 | 78.0756734 | 71.4780886 | 75.3328655 | 77.9122821 |
| 64.9177631 | 61.615036 | 78.0756734 | 71.4780886 | 69.3328655 | 77.9122821 |



|            |           |            |            |            |            |
|------------|-----------|------------|------------|------------|------------|
| 61.9177631 | 61.615036 | 78.0756734 | 71.4780886 | 66.3328655 | 76.9122821 |
| 59.9177631 | 60.615036 | 78.0756734 | 70.4780886 | 65.3328655 | 76.9122821 |
| 60.9177631 | 60.615036 | 79.0756734 | 70.4780886 | 65.3328655 | 75.9122821 |
| 60.9177631 | 60.615036 | 78.0756734 | 69.4780886 | 64.3328655 | 74.9122821 |
| 60.9177631 | 59.615036 | 78.0756734 | 69.4780886 | 64.3328655 | 72.9122821 |
| 60.9177631 | 59.615036 | 77.0756734 | 69.4780886 | 65.3328655 | 72.9122821 |
| 61.9177631 | 59.615036 | 77.0756734 | 70.4780886 | 66.3328655 | 71.9122821 |
| 62.9177631 | 59.615036 | 76.0756734 | 70.4780886 | 69.3328655 | 70.9122821 |
| 63.9177631 | 59.615036 | 76.0756734 | 70.4780886 | 71.3328655 | 70.9122821 |
| 63.9177631 | 59.615036 | 76.0756734 | 70.4780886 | 73.3328655 | 71.9122821 |
| 63.9177631 | 59.615036 | 76.0756734 | 70.4780886 | 73.3328655 | 71.9122821 |
| 63.9177631 | 59.615036 | 74.0756734 | 70.4780886 | 71.3328655 | 73.9122821 |
| 61.9177631 | 58.615036 | 73.0756734 | 70.4780886 | 71.3328655 | 74.9122821 |
| 60.9177631 | 58.615036 | 73.0756734 | 69.4780886 | 67.3328655 | 74.9122821 |
| 62.9177631 | 58.615036 | 72.0756734 | 68.4780886 | 65.3328655 | 74.9122821 |
| 63.9177631 | 58.615036 | 71.0756734 | 68.4780886 | 64.3328655 | 74.9122821 |
| 64.9177631 | 57.615036 | 71.0756734 | 69.4780886 | 63.3328655 | 74.9122821 |
| 65.9177631 | 57.615036 | 71.0756734 | 69.4780886 | 63.3328655 | 74.9122821 |
| 65.9177631 | 57.615036 | 71.0756734 | 69.4780886 | 64.3328655 | 74.9122821 |
| 66.9177631 | 57.615036 | 71.0756734 | 69.4780886 | 65.3328655 | 74.9122821 |
| 67.9177631 | 56.615036 | 71.0756734 | 69.4780886 | 66.3328655 | 73.9122821 |
| 67.9177631 | 56.615036 | 71.0756734 | 68.4780886 | 68.3328655 | 73.9122821 |
| 67.9177631 | 56.615036 | 71.0756734 | 69.4780886 | 68.3328655 | 73.9122821 |
| 67.9177631 | 56.615036 | 71.0756734 | 69.4780886 | 67.3328655 | 74.9122821 |
| 67.9177631 | 56.615036 | 71.0756734 | 69.4780886 | 65.3328655 | 74.9122821 |
| 66.9177631 | 56.615036 | 71.0756734 | 69.4780886 | 65.3328655 | 74.9122821 |
| 65.9177631 | 56.615036 | 72.0756734 | 69.4780886 | 66.3328655 | 74.9122821 |
| 65.9177631 | 57.615036 | 73.0756734 | 69.4780886 | 68.3328655 | 71.9122821 |
| 65.9177631 | 57.615036 | 73.0756734 | 67.4780886 | 68.3328655 | 70.9122821 |
| 66.9177631 | 57.615036 | 73.0756734 | 67.4780886 | 69.3328655 | 69.9122821 |
| 66.9177631 | 57.615036 | 73.0756734 | 68.4780886 | 70.3328655 | 68.9122821 |
| 66.9177631 | 57.615036 | 74.0756734 | 71.4780886 | 70.3328655 | 68.9122821 |
| 66.9177631 | 57.615036 | 74.0756734 | 71.4780886 | 71.3328655 | 67.9122821 |
| 67.9177631 | 57.615036 | 75.0756734 | 71.4780886 | 72.3328655 | 67.9122821 |
| 67.9177631 | 58.615036 | 77.0756734 | 71.4780886 | 71.3328655 | 67.9122821 |
| 67.9177631 | 59.615036 | 78.0756734 | 74.4780886 | 69.3328655 | 67.9122821 |
| 67.9177631 | 60.615036 | 76.0756734 | 74.4780886 | 66.3328655 | 67.9122821 |
| 67.9177631 | 60.615036 | 76.0756734 | 75.4780886 | 63.3328655 | 66.9122821 |
| 66.9177631 | 60.615036 | 76.0756734 | 75.4780886 | 62.3328655 | 66.9122821 |
| 66.9177631 | 60.615036 | 76.0756734 | 76.4780886 | 60.3328655 | 67.9122821 |
| 65.9177631 | 60.615036 | 76.0756734 | 75.4780886 | 60.3328655 | 67.9122821 |
| 65.9177631 | 60.615036 | 75.0756734 | 75.4780886 | 60.3328655 | 67.9122821 |
| 65.9177631 | 61.615036 | 74.0756734 | 75.4780886 | 59.3328655 | 67.9122821 |
| 65.9177631 | 61.615036 | 74.0756734 | 70.4780886 | 59.3328655 | 68.9122821 |
| 64.9177631 | 61.615036 | 74.0756734 | 70.4780886 | 60.3328655 | 68.9122821 |

|            |           |            |            |            |            |
|------------|-----------|------------|------------|------------|------------|
| 64.9177631 | 61.615036 | 73.0756734 | 69.4780886 | 60.3328655 | 68.9122821 |
| 64.9177631 | 60.615036 | 73.0756734 | 69.4780886 | 64.3328655 | 68.9122821 |
| 64.9177631 | 59.615036 | 73.0756734 | 69.4780886 | 66.3328655 | 68.9122821 |
| 64.9177631 | 58.615036 | 73.0756734 | 68.4780886 | 68.3328655 | 67.9122821 |
| 65.9177631 | 58.615036 | 73.0756734 | 67.4780886 | 68.3328655 | 67.9122821 |
| 66.9177631 | 58.615036 | 73.0756734 | 67.4780886 | 68.3328655 | 67.9122821 |
| 66.9177631 | 58.615036 | 73.0756734 | 66.4780886 | 67.3328655 | 67.9122821 |
| 68.9177631 | 58.615036 | 73.0756734 | 66.4780886 | 66.3328655 | 68.9122821 |
| 68.9177631 | 58.615036 | 74.0756734 | 66.4780886 | 65.3328655 | 69.9122821 |
| 68.9177631 | 57.615036 | 73.0756734 | 66.4780886 | 65.3328655 | 69.9122821 |
| 70.9177631 | 57.615036 | 73.0756734 | 65.4780886 | 67.3328655 | 70.9122821 |
| 70.9177631 | 57.615036 | 73.0756734 | 64.4780886 | 68.3328655 | 70.9122821 |
| 70.9177631 | 57.615036 | 72.0756734 | 66.4780886 | 67.3328655 | 71.9122821 |
| 69.9177631 | 57.615036 | 72.0756734 | 66.4780886 | 67.3328655 | 74.9122821 |
| 70.9177631 | 57.615036 | 72.0756734 | 66.4780886 | 66.3328655 | 77.9122821 |
| 70.9177631 | 57.615036 | 73.0756734 | 66.4780886 | 65.3328655 | 77.9122821 |
| 71.9177631 | 57.615036 | 73.0756734 | 66.4780886 | 66.3328655 | 77.9122821 |
| 71.9177631 | 57.615036 | 73.0756734 | 66.4780886 | 66.3328655 | 78.9122821 |
| 70.9177631 | 57.615036 | 73.0756734 | 67.4780886 | 66.3328655 | 80.9122821 |
| 70.9177631 | 57.615036 | 73.0756734 | 67.4780886 | 66.3328655 | 80.9122821 |
| 70.9177631 | 57.615036 | 73.0756734 | 67.4780886 | 67.3328655 | 77.9122821 |
| 70.9177631 | 57.615036 | 73.0756734 | 67.4780886 | 67.3328655 | 77.9122821 |
| 66.9177631 | 57.615036 | 73.0756734 | 66.4780886 | 67.3328655 | 77.9122821 |
| 68.9177631 | 57.615036 | 74.0756734 | 66.4780886 | 67.3328655 | 77.9122821 |
| 70.9177631 | 57.615036 | 74.0756734 | 67.4780886 | 67.3328655 | 77.9122821 |
| 70.9177631 | 57.615036 | 74.0756734 | 67.4780886 | 69.3328655 | 77.9122821 |
| 70.9177631 | 57.615036 | 74.0756734 | 67.4780886 | 70.3328655 | 76.9122821 |
| 68.9177631 | 57.615036 | 74.0756734 | 68.4780886 | 70.3328655 | 75.9122821 |
| 66.9177631 | 57.615036 | 74.0756734 | 68.4780886 | 70.3328655 | 76.9122821 |
| 67.9177631 | 58.615036 | 74.0756734 | 69.4780886 | 70.3328655 | 76.9122821 |
| 67.9177631 | 58.615036 | 73.0756734 | 70.4780886 | 70.3328655 | 79.9122821 |
| 67.9177631 | 58.615036 | 73.0756734 | 70.4780886 | 68.3328655 | 79.9122821 |
| 67.9177631 | 59.615036 | 73.0756734 | 70.4780886 | 67.3328655 | 79.9122821 |
| 68.9177631 | 59.615036 | 72.0756734 | 70.4780886 | 67.3328655 | 78.9122821 |
| 70.9177631 | 59.615036 | 72.0756734 | 71.4780886 | 68.3328655 | 78.9122821 |
| 71.9177631 | 59.615036 | 72.0756734 | 72.4780886 | 68.3328655 | 74.9122821 |
| 71.9177631 | 59.615036 | 73.0756734 | 72.4780886 | 68.3328655 | 71.9122821 |
| 71.9177631 | 59.615036 | 73.0756734 | 72.4780886 | 68.3328655 | 71.9122821 |
| 71.9177631 | 59.615036 | 73.0756734 | 72.4780886 | 70.3328655 | 74.9122821 |
| 71.9177631 | 59.615036 | 73.0756734 | 71.4780886 | 71.3328655 | 74.9122821 |
| 72.9177631 | 59.615036 | 73.0756734 | 70.4780886 | 71.3328655 | 73.9122821 |
| 72.9177631 | 60.615036 | 73.0756734 | 70.4780886 | 71.3328655 | 73.9122821 |
| 72.9177631 | 60.615036 | 72.0756734 | 70.4780886 | 71.3328655 | 72.9122821 |
| 72.9177631 | 60.615036 | 72.0756734 | 72.4780886 | 70.3328655 | 71.9122821 |
| 71.9177631 | 61.615036 | 72.0756734 | 73.4780886 | 70.3328655 | 68.9122821 |

|            |           |            |            |            |            |
|------------|-----------|------------|------------|------------|------------|
| 71.9177631 | 61.615036 | 72.0756734 | 73.4780886 | 70.3328655 | 68.9122821 |
| 70.9177631 | 60.615036 | 72.0756734 | 72.4780886 | 70.3328655 | 67.9122821 |
| 70.9177631 | 60.615036 | 72.0756734 | 67.4780886 | 71.3328655 | 66.9122821 |
| 70.9177631 | 60.615036 | 72.0756734 | 66.4780886 | 71.3328655 | 66.9122821 |
| 70.9177631 | 60.615036 | 72.0756734 | 66.4780886 | 71.3328655 | 66.9122821 |
| 70.9177631 | 60.615036 | 72.0756734 | 65.4780886 | 72.3328655 | 67.9122821 |
| 69.9177631 | 60.615036 | 73.0756734 | 64.4780886 | 77.3328655 | 67.9122821 |
| 67.9177631 | 67.615036 | 73.0756734 | 64.4780886 | 80.3328655 | 68.9122821 |
| 66.9177631 | 66.615036 | 73.0756734 | 64.4780886 | 81.3328655 | 68.9122821 |
| 66.9177631 | 66.615036 | 72.0756734 | 65.4780886 | 81.3328655 | 68.9122821 |
| 66.9177631 | 66.615036 | 72.0756734 | 66.4780886 | 79.3328655 | 67.9122821 |
| 66.9177631 | 66.615036 | 72.0756734 | 66.4780886 | 74.3328655 | 67.9122821 |
| 66.9177631 | 65.615036 | 72.0756734 | 66.4780886 | 70.3328655 | 67.9122821 |
| 66.9177631 | 65.615036 | 72.0756734 | 67.4780886 | 67.3328655 | 67.9122821 |
| 66.9177631 | 65.615036 | 72.0756734 | 68.4780886 | 65.3328655 | 67.9122821 |
| 66.9177631 | 65.615036 | 72.0756734 | 69.4780886 | 64.3328655 | 67.9122821 |
| 66.9177631 | 71.615036 | 72.0756734 | 70.4780886 | 63.3328655 | 68.9122821 |
| 66.9177631 | 71.615036 | 72.0756734 | 70.4780886 | 63.3328655 | 68.9122821 |
| 66.9177631 | 73.615036 | 73.0756734 | 70.4780886 | 64.3328655 | 63.9122821 |
| 66.9177631 | 74.615036 | 73.0756734 | 71.4780886 | 64.3328655 | 64.9122821 |
| 71.9177631 | 75.615036 | 74.0756734 | 72.4780886 | 65.3328655 | 64.9122821 |
| 74.9177631 | 79.615036 | 73.0756734 | 72.4780886 | 66.3328655 | 64.9122821 |
| 75.9177631 | 82.615036 | 73.0756734 | 72.4780886 | 65.3328655 | 66.9122821 |
| 77.9177631 | 82.615036 | 73.0756734 | 72.4780886 | 64.3328655 | 67.9122821 |
| 77.9177631 | 80.615036 | 73.0756734 | 72.4780886 | 64.3328655 | 68.9122821 |
| 77.9177631 | 80.615036 | 73.0756734 | 71.4780886 | 64.3328655 | 68.9122821 |
| 78.9177631 | 70.615036 | 74.0756734 | 71.4780886 | 65.3328655 | 68.9122821 |
| 73.9177631 | 66.615036 | 76.0756734 | 71.4780886 | 68.3328655 | 67.9122821 |
| 73.9177631 | 66.615036 | 76.0756734 | 71.4780886 | 68.3328655 | 67.9122821 |
| 72.9177631 | 62.615036 | 75.0756734 | 67.4780886 | 70.3328655 | 67.9122821 |
| 72.9177631 | 61.615036 | 73.0756734 | 67.4780886 | 70.3328655 | 66.9122821 |
| 71.9177631 | 59.615036 | 73.0756734 | 67.4780886 | 70.3328655 | 65.9122821 |
| 71.9177631 | 58.615036 | 73.0756734 | 67.4780886 | 70.3328655 | 67.9122821 |
| 70.9177631 | 57.615036 | 73.0756734 | 66.4780886 | 70.3328655 | 67.9122821 |
| 70.9177631 | 56.615036 | 73.0756734 | 66.4780886 | 70.3328655 | 68.9122821 |
| 67.9177631 | 54.615036 | 73.0756734 | 65.4780886 | 70.3328655 | 70.9122821 |
| 66.9177631 | 54.615036 | 73.0756734 | 65.4780886 | 70.3328655 | 70.9122821 |
| 65.9177631 | 54.615036 | 73.0756734 | 64.4780886 | 70.3328655 | 71.9122821 |
| 65.9177631 | 54.615036 | 73.0756734 | 64.4780886 | 70.3328655 | 74.9122821 |
| 64.9177631 | 54.615036 | 71.0756734 | 64.4780886 | 70.3328655 | 76.9122821 |
| 64.9177631 | 53.615036 | 71.0756734 | 65.4780886 | 70.3328655 | 76.9122821 |
| 64.9177631 | 54.615036 | 70.0756734 | 66.4780886 | 70.3328655 | 74.9122821 |
| 66.9177631 | 57.615036 | 69.0756734 | 67.4780886 | 70.3328655 | 71.9122821 |
| 69.9177631 | 61.615036 | 69.0756734 | 67.4780886 | 70.3328655 | 70.9122821 |
| 70.9177631 | 62.615036 | 69.0756734 | 67.4780886 | 69.3328655 | 69.9122821 |

|            |           |            |            |            |            |
|------------|-----------|------------|------------|------------|------------|
| 69.9177631 | 62.615036 | 69.0756734 | 67.4780886 | 70.3328655 | 69.9122821 |
| 65.9177631 | 62.615036 | 69.0756734 | 67.4780886 | 70.3328655 | 71.9122821 |
| 65.9177631 | 60.615036 | 70.0756734 | 66.4780886 | 70.3328655 | 74.9122821 |
| 65.9177631 | 60.615036 | 70.0756734 | 66.4780886 | 69.3328655 | 76.9122821 |
| 65.9177631 | 59.615036 | 70.0756734 | 66.4780886 | 69.3328655 | 77.9122821 |
| 64.9177631 | 58.615036 | 70.0756734 | 66.4780886 | 69.3328655 | 77.9122821 |
| 63.9177631 | 58.615036 | 70.0756734 | 65.4780886 | 69.3328655 | 77.9122821 |
| 63.9177631 | 57.615036 | 70.0756734 | 64.4780886 | 70.3328655 | 77.9122821 |
| 64.9177631 | 57.615036 | 70.0756734 | 64.4780886 | 71.3328655 | 77.9122821 |
| 64.9177631 | 57.615036 | 73.0756734 | 64.4780886 | 72.3328655 | 77.9122821 |
| 63.9177631 | 58.615036 | 73.0756734 | 63.4780886 | 73.3328655 | 77.9122821 |
| 63.9177631 | 58.615036 | 73.0756734 | 64.4780886 | 75.3328655 | 77.9122821 |
| 63.9177631 | 58.615036 | 74.0756734 | 64.4780886 | 75.3328655 | 77.9122821 |
| 63.9177631 | 58.615036 | 74.0756734 | 64.4780886 | 77.3328655 | 77.9122821 |
| 63.9177631 | 58.615036 | 74.0756734 | 64.4780886 | 78.3328655 | 77.9122821 |
| 62.9177631 | 58.615036 | 74.0756734 | 64.4780886 | 77.3328655 | 77.9122821 |
| 62.9177631 | 58.615036 | 74.0756734 | 64.4780886 | 76.3328655 | 77.9122821 |
| 62.9177631 | 58.615036 | 74.0756734 | 64.4780886 | 73.3328655 | 78.9122821 |
| 62.9177631 | 58.615036 | 77.0756734 | 64.4780886 | 71.3328655 | 78.9122821 |
| 62.9177631 | 58.615036 | 77.0756734 | 64.4780886 | 70.3328655 | 78.9122821 |
| 62.9177631 | 59.615036 | 77.0756734 | 63.4780886 | 69.3328655 | 78.9122821 |
| 61.9177631 | 59.615036 | 77.0756734 | 62.4780886 | 70.3328655 | 78.9122821 |
| 61.9177631 | 59.615036 | 77.0756734 | 61.4780886 | 69.3328655 | 78.9122821 |
| 59.9177631 | 59.615036 | 77.0756734 | 61.4780886 | 68.3328655 | 78.9122821 |
| 59.9177631 | 60.615036 | 69.0756734 | 59.4780886 | 67.3328655 | 79.9122821 |
| 59.9177631 | 60.615036 | 69.0756734 | 53.4780886 | 67.3328655 | 79.9122821 |
| 59.9177631 | 59.615036 | 68.0756734 | 53.4780886 | 67.3328655 | 79.9122821 |
| 58.9177631 | 59.615036 | 66.0756734 | 53.4780886 | 67.3328655 | 80.9122821 |
| 58.9177631 | 58.615036 | 66.0756734 | 53.4780886 | 67.3328655 | 77.9122821 |
| 58.9177631 | 58.615036 | 67.0756734 | 53.4780886 | 67.3328655 | 77.9122821 |
| 58.9177631 | 58.615036 | 67.0756734 | 52.4780886 | 67.3328655 | 67.9122821 |
| 58.9177631 | 58.615036 | 67.0756734 | 48.4780886 | 67.3328655 | 64.9122821 |
| 58.9177631 | 58.615036 | 67.0756734 | 48.4780886 | 67.3328655 | 62.9122821 |
| 58.9177631 | 58.615036 | 67.0756734 | 48.4780886 | 67.3328655 | 59.9122821 |
| 58.9177631 | 58.615036 | 67.0756734 | 48.4780886 | 67.3328655 | 59.9122821 |
| 58.9177631 | 58.615036 | 69.0756734 | 52.4780886 | 67.3328655 | 56.9122821 |
| 59.9177631 | 58.615036 | 70.0756734 | 52.4780886 | 67.3328655 | 56.9122821 |
| 59.9177631 | 58.615036 | 70.0756734 | 52.4780886 | 67.3328655 | 56.9122821 |
| 58.9177631 | 58.615036 | 70.0756734 | 56.4780886 | 67.3328655 | 56.9122821 |
| 58.9177631 | 59.615036 | 73.0756734 | 60.4780886 | 67.3328655 | 60.9122821 |
| 58.9177631 | 60.615036 | 73.0756734 | 65.4780886 | 70.3328655 | 62.9122821 |
| 58.9177631 | 59.615036 | 74.0756734 | 65.4780886 | 70.3328655 | 62.9122821 |
| 58.9177631 | 59.615036 | 75.0756734 | 65.4780886 | 72.3328655 | 66.9122821 |
| 58.9177631 | 58.615036 | 75.0756734 | 65.4780886 | 72.3328655 | 66.9122821 |
| 58.9177631 | 58.615036 | 75.0756734 | 66.4780886 | 72.3328655 | 66.9122821 |

|            |           |            |            |            |            |
|------------|-----------|------------|------------|------------|------------|
| 57.9177631 | 58.615036 | 75.0756734 | 63.4780886 | 72.3328655 | 66.9122821 |
| 55.9177631 | 58.615036 | 75.0756734 | 62.4780886 | 70.3328655 | 66.9122821 |
| 55.9177631 | 58.615036 | 75.0756734 | 62.4780886 | 70.3328655 | 66.9122821 |
| 55.9177631 | 58.615036 | 75.0756734 | 61.4780886 | 67.3328655 | 66.9122821 |
| 55.9177631 | 58.615036 | 75.0756734 | 61.4780886 | 68.3328655 | 66.9122821 |
| 57.9177631 | 58.615036 | 75.0756734 | 59.4780886 | 68.3328655 | 65.9122821 |
| 63.9177631 | 58.615036 | 75.0756734 | 59.4780886 | 68.3328655 | 65.9122821 |
| 65.9177631 | 58.615036 | 75.0756734 | 59.4780886 | 67.3328655 | 65.9122821 |
| 65.9177631 | 58.615036 | 75.0756734 | 60.4780886 | 67.3328655 | 65.9122821 |
| 65.9177631 | 58.615036 | 75.0756734 | 62.4780886 | 66.3328655 | 65.9122821 |
| 65.9177631 | 58.615036 | 75.0756734 | 63.4780886 | 66.3328655 | 64.9122821 |
| 64.9177631 | 58.615036 | 73.0756734 | 63.4780886 | 65.3328655 | 64.9122821 |
| 64.9177631 | 60.615036 | 73.0756734 | 65.4780886 | 64.3328655 | 64.9122821 |
| 64.9177631 | 62.615036 | 73.0756734 | 68.4780886 | 64.3328655 | 64.9122821 |
| 65.9177631 | 63.615036 | 72.0756734 | 69.4780886 | 64.3328655 | 63.9122821 |
| 65.9177631 | 63.615036 | 73.0756734 | 68.4780886 | 64.3328655 | 63.9122821 |
| 66.9177631 | 64.615036 | 73.0756734 | 68.4780886 | 63.3328655 | 63.9122821 |
| 66.9177631 | 64.615036 | 73.0756734 | 68.4780886 | 63.3328655 | 63.9122821 |
| 66.9177631 | 63.615036 | 75.0756734 | 68.4780886 | 62.3328655 | 64.9122821 |
| 67.9177631 | 63.615036 | 75.0756734 | 67.4780886 | 61.3328655 | 64.9122821 |
| 67.9177631 | 63.615036 | 75.0756734 | 67.4780886 | 61.3328655 | 64.9122821 |
| 67.9177631 | 63.615036 | 75.0756734 | 66.4780886 | 61.3328655 | 64.9122821 |
| 67.9177631 | 63.615036 | 75.0756734 | 65.4780886 | 63.3328655 | 64.9122821 |
| 67.9177631 | 64.615036 | 75.0756734 | 64.4780886 | 63.3328655 | 65.9122821 |
| 67.9177631 | 67.615036 | 75.0756734 | 64.4780886 | 64.3328655 | 66.9122821 |
| 68.9177631 | 67.615036 | 75.0756734 | 63.4780886 | 64.3328655 | 68.9122821 |
| 68.9177631 | 67.615036 | 75.0756734 | 63.4780886 | 67.3328655 | 70.9122821 |
| 68.9177631 | 66.615036 | 75.0756734 | 62.4780886 | 72.3328655 | 69.9122821 |
| 68.9177631 | 65.615036 | 76.0756734 | 65.4780886 | 72.3328655 | 66.9122821 |
| 69.9177631 | 64.615036 | 76.0756734 | 65.4780886 | 72.3328655 | 66.9122821 |
| 72.9177631 | 63.615036 | 76.0756734 | 65.4780886 | 72.3328655 | 66.9122821 |
| 74.9177631 | 63.615036 | 76.0756734 | 65.4780886 | 72.3328655 | 65.9122821 |
| 75.9177631 | 62.615036 | 81.0756734 | 65.4780886 | 72.3328655 | 65.9122821 |
| 75.9177631 | 63.615036 | 81.0756734 | 65.4780886 | 72.3328655 | 65.9122821 |
| 75.9177631 | 64.615036 | 82.0756734 | 65.4780886 | 72.3328655 | 63.9122821 |
| 74.9177631 | 64.615036 | 82.0756734 | 64.4780886 | 72.3328655 | 62.9122821 |
| 73.9177631 | 64.615036 | 82.0756734 | 66.4780886 | 72.3328655 | 61.9122821 |
| 72.9177631 | 63.615036 | 82.0756734 | 69.4780886 | 72.3328655 | 61.9122821 |
| 70.9177631 | 62.615036 | 82.0756734 | 69.4780886 | 71.3328655 | 61.9122821 |
| 70.9177631 | 61.615036 | 82.0756734 | 67.4780886 | 70.3328655 | 61.9122821 |
| 70.9177631 | 60.615036 | 82.0756734 | 67.4780886 | 69.3328655 | 61.9122821 |
| 69.9177631 | 60.615036 | 67.7920134 | 66.4780886 | 68.3328655 | 61.9122821 |
| 69.9177631 | 60.615036 | 67.8829225 | 66.4780886 | 68.3328655 | 62.9122821 |
| 68.9177631 | 60.615036 | 67.7920134 | 66.4780886 | 68.3328655 | 62.9122821 |

|            |           |            |            |            |            |
|------------|-----------|------------|------------|------------|------------|
| 70.9177631 | 61.615036 | 68.5192862 | 66.4780886 | 67.3328655 | 62.9122821 |
| 70.9177631 | 61.615036 | 68.5192862 | 66.4780886 | 67.3328655 | 62.9122821 |
| 72.9177631 | 64.615036 | 69.2465589 | 66.4780886 | 67.3328655 | 62.9122821 |
| 72.9177631 | 64.615036 | 69.6101953 | 66.4780886 | 69.3328655 | 63.9122821 |
| 72.9177631 | 68.615036 | 85.0756734 | 66.4780886 | 74.3328655 | 64.9122821 |
| 73.9177631 | 67.615036 | 85.0756734 | 66.4780886 | 75.3328655 | 64.9122821 |
| 70.9177631 | 67.615036 | 85.0756734 | 66.4780886 | 76.3328655 | 64.9122821 |
| 67.9177631 | 64.615036 | 85.0756734 | 66.4780886 | 76.3328655 | 65.9122821 |
| 65.9177631 | 62.615036 | 81.0756734 | 66.4780886 | 77.3328655 | 65.9122821 |
| 63.9177631 | 62.615036 | 81.0756734 | 66.4780886 | 77.3328655 | 65.9122821 |
| 62.9177631 | 60.615036 | 81.0756734 | 66.4780886 | 78.3328655 | 65.9122821 |
| 62.9177631 | 60.615036 | 75.0756734 | 66.4780886 | 77.3328655 | 65.9122821 |
| 62.9177631 | 59.615036 | 75.0756734 | 67.4780886 | 75.3328655 | 65.9122821 |
| 63.9177631 | 59.615036 | 75.0756734 | 67.4780886 | 74.3328655 | 62.9122821 |
| 63.9177631 | 58.615036 | 74.0756734 | 67.4780886 | 74.3328655 | 59.9122821 |
| 62.9177631 | 58.615036 | 74.0756734 | 69.4780886 | 74.3328655 | 56.9122821 |
| 61.9177631 | 58.615036 | 74.0756734 | 71.4780886 | 74.3328655 | 56.9122821 |
| 60.9177631 | 58.615036 | 71.0756734 | 74.4780886 | 74.3328655 | 51.9122821 |
| 59.9177631 | 57.615036 | 71.0756734 | 74.4780886 | 74.3328655 | 51.9122821 |
| 58.9177631 | 57.615036 | 71.0756734 | 76.4780886 | 74.3328655 | 51.9122821 |
| 59.9177631 | 57.615036 | 69.0756734 | 75.4780886 | 74.3328655 | 48.9122821 |
| 59.9177631 | 57.615036 | 69.0756734 | 75.4780886 | 73.3328655 | 48.9122821 |
| 60.9177631 | 56.615036 | 69.0756734 | 72.4780886 | 74.3328655 | 48.9122821 |
| 60.9177631 | 56.615036 | 69.0756734 | 71.4780886 | 74.3328655 | 48.9122821 |
| 60.9177631 | 56.615036 | 69.0756734 | 71.4780886 | 74.3328655 | 48.9122821 |
| 62.9177631 | 56.615036 | 69.0756734 | 70.4780886 | 75.3328655 | 48.9122821 |
| 63.9177631 | 56.615036 | 69.0756734 | 70.4780886 | 75.3328655 | 48.9122821 |
| 63.9177631 | 56.615036 | 70.0756734 | 70.4780886 | 75.3328655 | 49.9122821 |
| 64.9177631 | 56.615036 | 70.0756734 | 70.4780886 | 75.3328655 | 49.9122821 |
| 64.9177631 | 54.615036 | 68.0756734 | 69.4780886 | 77.3328655 | 55.9122821 |
| 64.9177631 | 53.615036 | 68.0756734 | 69.4780886 | 79.3328655 | 68.9122821 |
| 65.9177631 | 53.615036 | 68.0756734 | 68.4780886 | 79.3328655 | 70.9122821 |
| 65.9177631 | 52.615036 | 68.0756734 | 68.4780886 | 72.3328655 | 71.9122821 |
| 66.9177631 | 52.615036 | 68.0756734 | 65.4780886 | 67.3328655 | 71.9122821 |
| 67.9177631 | 52.615036 | 68.0756734 | 64.4780886 | 65.3328655 | 71.9122821 |
| 67.9177631 | 53.615036 | 68.0756734 | 64.4780886 | 64.3328655 | 72.9122821 |
| 67.9177631 | 53.615036 | 68.0756734 | 64.4780886 | 64.3328655 | 73.9122821 |
| 66.9177631 | 53.615036 | 68.0756734 | 64.4780886 | 66.3328655 | 73.9122821 |
| 65.9177631 | 53.615036 | 68.0756734 | 63.4780886 | 66.3328655 | 73.9122821 |
| 65.9177631 | 53.615036 | 68.0756734 | 64.4780886 | 66.3328655 | 73.9122821 |
| 65.9177631 | 53.615036 | 68.0756734 | 64.4780886 | 66.3328655 | 73.9122821 |
| 66.9177631 | 53.615036 | 68.0756734 | 65.4780886 | 67.3328655 | 69.9122821 |
| 68.9177631 | 53.615036 | 68.0756734 | 66.4780886 | 67.3328655 | 67.9122821 |
| 69.9177631 | 54.615036 | 68.0756734 | 65.4780886 | 67.3328655 | 66.9122821 |
| 70.9177631 | 55.615036 | 68.0756734 | 65.4780886 | 67.3328655 | 66.9122821 |

|            |           |            |            |            |            |
|------------|-----------|------------|------------|------------|------------|
| 70.9177631 | 59.615036 | 68.0756734 | 65.4780886 | 67.3328655 | 66.9122821 |
| 70.9177631 | 61.615036 | 68.0756734 | 65.4780886 | 67.3328655 | 66.9122821 |
| 69.9177631 | 63.615036 | 68.0756734 | 65.4780886 | 68.3328655 | 66.9122821 |
| 68.9177631 | 65.615036 | 68.0756734 | 65.4780886 | 68.3328655 | 66.9122821 |
| 68.9177631 | 65.615036 | 67.0756734 | 65.4780886 | 68.3328655 | 66.9122821 |
| 67.9177631 | 65.615036 | 68.0756734 | 65.4780886 | 68.3328655 | 66.9122821 |
| 67.9177631 | 65.615036 | 68.0756734 | 64.4780886 | 68.3328655 | 66.9122821 |
| 68.9177631 | 65.615036 | 68.0756734 | 64.4780886 | 69.3328655 | 66.9122821 |
| 68.9177631 | 66.615036 | 68.0756734 | 65.4780886 | 70.3328655 | 71.9122821 |
| 67.9177631 | 66.615036 | 71.0756734 | 65.4780886 | 70.3328655 | 71.9122821 |
| 67.9177631 | 66.615036 | 71.0756734 | 65.4780886 | 70.3328655 | 71.9122821 |
| 69.9177631 | 66.615036 | 72.0756734 | 65.4780886 | 73.3328655 | 73.9122821 |
| 69.9177631 | 66.615036 | 72.0756734 | 65.4780886 | 73.3328655 | 67.9122821 |
| 69.9177631 | 66.615036 | 72.0756734 | 67.4780886 | 73.3328655 | 67.9122821 |
| 69.9177631 | 69.615036 | 71.0756734 | 67.4780886 | 73.3328655 | 66.9122821 |
| 70.9177631 | 67.615036 | 71.0756734 | 67.4780886 | 73.3328655 | 66.9122821 |
| 70.9177631 | 67.615036 | 71.0756734 | 65.4780886 | 75.3328655 | 66.9122821 |
| 70.9177631 | 66.615036 | 71.0756734 | 65.4780886 | 75.3328655 | 66.9122821 |
| 71.9177631 | 66.615036 | 70.0756734 | 65.4780886 | 75.3328655 | 66.9122821 |
| 72.9177631 | 66.615036 | 70.0756734 | 65.4780886 | 75.3328655 | 66.9122821 |
| 72.9177631 | 67.615036 | 69.0756734 | 65.4780886 | 74.3328655 | 66.9122821 |
| 72.9177631 | 67.615036 | 69.0756734 | 66.4780886 | 77.3328655 | 66.9122821 |
| 72.9177631 | 67.615036 | 69.0756734 | 66.4780886 | 77.3328655 | 67.9122821 |
| 72.9177631 | 67.615036 | 69.0756734 | 65.4780886 | 77.3328655 | 69.9122821 |
| 70.9177631 | 66.615036 | 69.0756734 | 65.4780886 | 77.3328655 | 69.9122821 |
| 70.9177631 | 66.615036 | 69.0756734 | 65.4780886 | 78.3328655 | 71.9122821 |
| 69.9177631 | 66.615036 | 69.0756734 | 65.4780886 | 78.3328655 | 77.9122821 |
| 68.9177631 | 66.615036 | 70.0756734 | 65.4780886 | 78.3328655 | 77.9122821 |
| 68.9177631 | 66.615036 | 70.0756734 | 65.4780886 | 78.3328655 | 77.9122821 |
| 68.9177631 | 66.615036 | 70.0756734 | 66.4780886 | 78.3328655 | 77.9122821 |
| 68.9177631 | 65.615036 | 71.0756734 | 66.4780886 | 78.3328655 | 77.9122821 |
| 67.9177631 | 65.615036 | 71.0756734 | 67.4780886 | 76.3328655 | 78.9122821 |
| 66.9177631 | 64.615036 | 72.0756734 | 67.4780886 | 76.3328655 | 79.9122821 |
| 66.9177631 | 64.615036 | 72.0756734 | 67.4780886 | 74.3328655 | 81.9122821 |
| 66.9177631 | 64.615036 | 72.0756734 | 68.4780886 | 72.3328655 | 83.9122821 |
| 66.9177631 | 63.615036 | 72.0756734 | 69.4780886 | 72.3328655 | 69.9738316 |
| 66.9177631 | 62.615036 | 74.0756734 | 69.4780886 | 67.3328655 | 83.9122821 |
| 66.9177631 | 62.615036 | 74.0756734 | 68.4780886 | 66.3328655 | 83.9122821 |
| 67.9177631 | 64.615036 | 74.0756734 | 68.4780886 | 66.3328655 | 83.9122821 |
| 67.9177631 | 68.615036 | 73.0756734 | 67.4780886 | 66.3328655 | 82.9122821 |
| 66.9177631 | 69.615036 | 73.0756734 | 67.4780886 | 66.3328655 | 81.9122821 |
| 66.9177631 | 69.615036 | 71.0756734 | 67.4780886 | 65.3328655 | 81.9122821 |
| 66.9177631 | 69.615036 | 71.0756734 | 67.4780886 | 69.3328655 | 75.9122821 |
| 67.9177631 | 70.615036 | 71.0756734 | 69.4780886 | 69.3328655 | 74.9122821 |
| 67.9177631 | 71.615036 | 71.0756734 | 70.4780886 | 69.3328655 | 74.9122821 |

|            |           |            |            |            |            |
|------------|-----------|------------|------------|------------|------------|
| 67.9177631 | 72.615036 | 71.0756734 | 70.4780886 | 68.3328655 | 74.9122821 |
| 67.9177631 | 71.615036 | 71.0756734 | 70.4780886 | 69.3328655 | 74.9122821 |
| 67.9177631 | 71.615036 | 71.0756734 | 69.4780886 | 69.3328655 | 74.9122821 |
| 67.9177631 | 71.615036 | 71.0756734 | 69.4780886 | 68.3328655 | 72.9122821 |
| 68.9177631 | 71.615036 | 71.0756734 | 69.4780886 | 69.3328655 | 73.9122821 |
| 69.9177631 | 71.615036 | 70.0756734 | 69.4780886 | 69.3328655 | 73.9122821 |
| 70.9177631 | 71.615036 | 70.0756734 | 68.4780886 | 69.3328655 | 73.9122821 |
| 71.9177631 | 72.615036 | 70.0756734 | 68.4780886 | 69.3328655 | 74.9122821 |
| 71.9177631 | 72.615036 | 71.0756734 | 68.4780886 | 69.3328655 | 75.9122821 |
| 71.9177631 | 75.615036 | 71.0756734 | 68.4780886 | 72.3328655 | 76.9122821 |
| 71.9177631 | 74.615036 | 71.0756734 | 68.4780886 | 75.3328655 | 76.9122821 |
| 69.9177631 | 72.615036 | 72.0756734 | 66.4780886 | 75.3328655 | 76.9122821 |
| 69.9177631 | 72.615036 | 72.0756734 | 66.4780886 | 74.3328655 | 75.9122821 |
| 68.9177631 | 70.615036 | 72.0756734 | 65.4780886 | 74.3328655 | 74.9122821 |
| 66.9177631 | 70.615036 | 72.0756734 | 65.4780886 | 74.3328655 | 75.9122821 |
| 65.9177631 | 70.615036 | 72.0756734 | 64.4780886 | 74.3328655 | 75.9122821 |
| 63.9177631 | 70.615036 | 72.0756734 | 63.4780886 | 74.3328655 | 77.9122821 |
| 62.9177631 | 70.615036 | 73.0756734 | 63.4780886 | 75.3328655 | 77.9122821 |
| 62.9177631 | 69.615036 | 73.0756734 | 63.4780886 | 71.3328655 | 77.9122821 |
| 62.9177631 | 69.615036 | 73.0756734 | 63.4780886 | 71.3328655 | 77.9122821 |
| 62.9177631 | 70.615036 | 73.0756734 | 64.4780886 | 69.3328655 | 77.9122821 |
| 60.9177631 | 71.615036 | 73.0756734 | 64.4780886 | 69.3328655 | 77.9122821 |
| 58.9177631 | 71.615036 | 73.0756734 | 64.4780886 | 69.3328655 | 75.9122821 |
| 59.9177631 | 71.615036 | 73.0756734 | 65.4780886 | 69.3328655 | 74.9122821 |
| 59.9177631 | 71.615036 | 73.0756734 | 65.4780886 | 69.3328655 | 70.9122821 |
| 60.9177631 | 71.615036 | 73.0756734 | 65.4780886 | 69.3328655 | 69.9122821 |
| 61.9177631 | 71.615036 | 75.0756734 | 65.4780886 | 69.3328655 | 70.9122821 |
| 61.9177631 | 70.615036 | 75.0756734 | 65.4780886 | 69.3328655 | 70.9122821 |
| 61.9177631 | 70.615036 | 75.0756734 | 65.4780886 | 69.3328655 | 69.9122821 |
| 61.9177631 | 70.615036 | 76.0756734 | 65.4780886 | 68.3328655 | 69.9122821 |
| 61.9177631 | 69.615036 | 76.0756734 | 65.4780886 | 70.3328655 | 68.9122821 |
| 62.9177631 | 68.615036 | 76.0756734 | 66.4780886 | 70.3328655 | 68.9122821 |
| 62.9177631 | 67.615036 | 78.0756734 | 66.4780886 | 70.3328655 | 67.9122821 |
| 58.9177631 | 67.615036 | 78.0756734 | 70.4780886 | 70.3328655 | 67.9122821 |
| 59.9177631 | 69.615036 | 77.0756734 | 71.4780886 | 70.3328655 | 67.9122821 |
| 59.9177631 | 70.615036 | 77.0756734 | 72.4780886 | 72.3328655 | 69.9122821 |
| 59.9177631 | 71.615036 | 77.0756734 | 72.4780886 | 73.3328655 | 72.9122821 |
| 56.9177631 | 71.615036 | 77.0756734 | 73.4780886 | 73.3328655 | 75.9122821 |
| 56.9177631 | 71.615036 | 74.0756734 | 73.4780886 | 77.3328655 | 76.9122821 |
| 56.9177631 | 68.615036 | 70.0756734 | 72.4780886 | 77.3328655 | 76.9122821 |
| 56.9177631 | 65.615036 | 70.0756734 | 72.4780886 | 77.3328655 | 76.9122821 |
| 58.9177631 | 64.615036 | 68.0756734 | 72.4780886 | 78.3328655 | 75.9122821 |
| 63.9177631 | 63.615036 | 68.0756734 | 71.4780886 | 78.3328655 | 75.9122821 |
| 64.9177631 | 63.615036 | 68.0756734 | 70.4780886 | 78.3328655 | 77.9122821 |
| 64.9177631 | 63.615036 | 68.0756734 | 69.4780886 | 78.3328655 | 79.9122821 |



|            |           |            |            |            |            |
|------------|-----------|------------|------------|------------|------------|
| 64.9177631 | 63.615036 | 68.0756734 | 69.4780886 | 78.3328655 | 80.9122821 |
| 64.9177631 | 62.615036 | 68.0756734 | 68.4780886 | 78.3328655 | 80.9122821 |
| 64.9177631 | 60.615036 | 68.0756734 | 69.4780886 | 79.3328655 | 70.1556498 |
| 64.9177631 | 60.615036 | 68.0756734 | 69.4780886 | 79.3328655 | 69.9738316 |
| 64.9177631 | 61.615036 | 68.0756734 | 69.4780886 | 78.3328655 | 69.9738316 |
| 65.9177631 | 62.615036 | 66.0756734 | 69.4780886 | 77.3328655 | 77.9122821 |
| 64.9177631 | 64.615036 | 66.0756734 | 70.4780886 | 75.3328655 | 77.9122821 |
| 64.9177631 | 65.615036 | 66.0756734 | 70.4780886 | 75.3328655 | 70.9122821 |
| 64.9177631 | 65.615036 | 67.0756734 | 70.4780886 | 74.3328655 | 69.9122821 |
| 64.9177631 | 66.615036 | 67.0756734 | 70.4780886 | 73.3328655 | 69.9122821 |
| 64.9177631 | 66.615036 | 67.0756734 | 70.4780886 | 72.3328655 | 70.9122821 |
| 64.9177631 | 66.615036 | 67.0756734 | 70.4780886 | 72.3328655 | 70.9122821 |
| 64.9177631 | 66.615036 | 67.0756734 | 67.4780886 | 71.3328655 | 73.9122821 |
| 66.9177631 | 67.615036 | 67.0756734 | 66.4780886 | 70.3328655 | 74.9122821 |
| 67.9177631 | 68.615036 | 67.0756734 | 66.4780886 | 70.3328655 | 74.9122821 |
| 67.9177631 | 68.615036 | 68.0756734 | 65.4780886 | 69.3328655 | 74.9122821 |
| 67.9177631 | 68.615036 | 68.0756734 | 64.4780886 | 68.3328655 | 74.9122821 |
| 67.9177631 | 70.615036 | 68.0756734 | 64.4780886 | 67.3328655 | 73.9122821 |
| 67.9177631 | 70.615036 | 69.0756734 | 64.4780886 | 66.3328655 | 70.9122821 |
| 67.9177631 | 70.615036 | 73.0756734 | 64.4780886 | 64.3328655 | 70.9122821 |
| 68.9177631 | 70.615036 | 73.0756734 | 63.4780886 | 63.3328655 | 70.9122821 |
| 68.9177631 | 70.615036 | 73.0756734 | 63.4780886 | 62.3328655 | 70.9122821 |
| 69.9177631 | 69.615036 | 72.0756734 | 63.4780886 | 60.3328655 | 71.9122821 |
| 72.9177631 | 67.615036 | 72.0756734 | 62.4780886 | 59.3328655 | 70.9122821 |
| 72.9177631 | 65.615036 | 70.0756734 | 62.4780886 | 59.3328655 | 70.9122821 |
| 72.9177631 | 65.615036 | 70.0756734 | 62.4780886 | 59.3328655 | 70.9122821 |
| 72.9177631 | 65.615036 | 70.0756734 | 62.4780886 | 60.3328655 | 70.9122821 |
| 72.9177631 | 64.615036 | 70.0756734 | 62.4780886 | 61.3328655 | 70.9122821 |
| 72.9177631 | 64.615036 | 70.0756734 | 62.4780886 | 61.3328655 | 70.9122821 |
| 72.9177631 | 62.615036 | 68.0756734 | 63.4780886 | 67.3328655 | 70.9122821 |
| 73.9177631 | 62.615036 | 68.0756734 | 64.4780886 | 68.3328655 | 71.9122821 |
| 78.9177631 | 62.615036 | 68.0756734 | 66.4780886 | 68.3328655 | 78.9122821 |
| 81.9177631 | 62.615036 | 68.0756734 | 66.4780886 | 68.3328655 | 78.9122821 |
| 82.9177631 | 62.615036 | 67.0756734 | 66.4780886 | 64.3328655 | 78.9122821 |
| 81.9177631 | 61.615036 | 67.0756734 | 66.4780886 | 61.3328655 | 77.9122821 |
| 81.9177631 | 61.615036 | 67.0756734 | 67.4780886 | 60.3328655 | 75.9122821 |
| 81.9177631 | 61.615036 | 67.0756734 | 67.4780886 | 60.3328655 | 75.9122821 |
| 81.9177631 | 61.615036 | 67.0756734 | 66.4780886 | 62.3328655 | 73.9122821 |
| 80.9177631 | 61.615036 | 67.0756734 | 66.4780886 | 64.3328655 | 70.9122821 |
| 73.9177631 | 62.615036 | 67.0756734 | 68.4780886 | 65.3328655 | 69.9122821 |
| 73.9177631 | 62.615036 | 67.0756734 | 68.4780886 | 66.3328655 | 68.9122821 |
| 68.9177631 | 62.615036 | 67.0756734 | 70.4780886 | 67.3328655 | 68.9122821 |
| 66.9177631 | 62.615036 | 67.0756734 | 71.4780886 | 67.3328655 | 68.9122821 |
| 66.9177631 | 62.615036 | 67.0756734 | 71.4780886 | 66.3328655 | 67.9122821 |
| 66.9177631 | 62.615036 | 67.0756734 | 72.4780886 | 65.3328655 | 64.9122821 |

|            |           |            |            |            |            |
|------------|-----------|------------|------------|------------|------------|
| 65.9177631 | 62.615036 | 68.0756734 | 72.4780886 | 64.3328655 | 63.9122821 |
| 65.9177631 | 62.615036 | 68.0756734 | 72.4780886 | 64.3328655 | 63.9122821 |
| 66.9177631 | 62.615036 | 68.0756734 | 71.4780886 | 65.3328655 | 62.9122821 |
| 66.9177631 | 62.615036 | 71.0756734 | 71.4780886 | 67.3328655 | 61.9122821 |
| 66.9177631 | 62.615036 | 71.0756734 | 71.4780886 | 69.3328655 | 61.9122821 |
| 66.9177631 | 62.615036 | 70.0756734 | 67.4780886 | 69.3328655 | 60.9122821 |
| 67.9177631 | 63.615036 | 69.0756734 | 67.4780886 | 69.3328655 | 60.9122821 |
| 67.9177631 | 66.615036 | 69.0756734 | 67.4780886 | 68.3328655 | 60.9122821 |
| 67.9177631 | 68.615036 | 68.0756734 | 67.4780886 | 66.3328655 | 63.9122821 |
| 67.9177631 | 68.615036 | 68.0756734 | 67.4780886 | 64.3328655 | 63.9122821 |
| 67.9177631 | 67.615036 | 67.0756734 | 68.4780886 | 63.3328655 | 64.9122821 |
| 67.9177631 | 64.615036 | 66.0756734 | 67.4780886 | 65.3328655 | 64.9122821 |
| 67.9177631 | 62.615036 | 66.0756734 | 67.4780886 | 66.3328655 | 65.9122821 |
| 68.9177631 | 61.615036 | 66.0756734 | 67.4780886 | 67.3328655 | 64.9122821 |
| 68.9177631 | 60.615036 | 67.0756734 | 61.4780886 | 69.3328655 | 64.9122821 |
| 70.9177631 | 60.615036 | 67.0756734 | 61.4780886 | 69.3328655 | 62.9122821 |
| 70.9177631 | 59.615036 | 67.0756734 | 61.4780886 | 70.3328655 | 61.9122821 |
| 75.9177631 | 59.615036 | 67.0756734 | 61.4780886 | 71.3328655 | 60.9122821 |
| 76.9177631 | 59.615036 | 67.0756734 | 61.4780886 | 71.3328655 | 60.9122821 |
| 77.9177631 | 59.615036 | 67.0756734 | 61.4780886 | 70.3328655 | 60.9122821 |
| 77.9177631 | 59.615036 | 67.0756734 | 62.4780886 | 70.3328655 | 60.9122821 |
| 77.9177631 | 59.615036 | 66.0756734 | 63.4780886 | 70.3328655 | 60.9122821 |
| 77.9177631 | 59.615036 | 66.0756734 | 63.4780886 | 69.3328655 | 60.9122821 |
| 77.9177631 | 60.615036 | 66.0756734 | 63.4780886 | 67.3328655 | 60.9122821 |
| 77.9177631 | 61.615036 | 66.0756734 | 63.4780886 | 67.3328655 | 59.9122821 |
| 76.9177631 | 62.615036 | 66.0756734 | 65.4780886 | 67.3328655 | 59.9122821 |
| 75.9177631 | 62.615036 | 66.0756734 | 65.4780886 | 67.3328655 | 60.9122821 |
| 75.9177631 | 63.615036 | 66.0756734 | 65.4780886 | 67.3328655 | 61.9122821 |
| 75.9177631 | 63.615036 | 66.0756734 | 65.4780886 | 66.3328655 | 61.9122821 |
| 77.9177631 | 63.615036 | 66.0756734 | 65.4780886 | 66.3328655 | 61.9122821 |
| 77.9177631 | 63.615036 | 66.0756734 | 65.4780886 | 66.3328655 | 62.9122821 |
| 78.9177631 | 62.615036 | 67.0756734 | 65.4780886 | 66.3328655 | 62.9122821 |
| 79.9177631 | 64.615036 | 69.0756734 | 64.4780886 | 66.3328655 | 62.9122821 |
| 79.9177631 | 64.615036 | 69.0756734 | 64.4780886 | 66.3328655 | 64.9122821 |
| 80.9177631 | 64.615036 | 69.0756734 | 64.4780886 | 66.3328655 | 66.9122821 |
| 80.9177631 | 64.615036 | 69.0756734 | 67.4780886 | 67.3328655 | 67.9122821 |
| 80.9177631 | 63.615036 | 69.0756734 | 66.4780886 | 67.3328655 | 67.9122821 |
| 80.9177631 | 63.615036 | 69.0756734 | 66.4780886 | 67.3328655 | 67.9122821 |
| 81.9177631 | 63.615036 | 69.0756734 | 66.4780886 | 68.3328655 | 69.9122821 |
| 81.9177631 | 65.615036 | 69.0756734 | 65.4780886 | 68.3328655 | 70.9122821 |
| 82.9177631 | 65.615036 | 69.0756734 | 65.4780886 | 68.3328655 | 70.9122821 |
| 82.9177631 | 65.615036 | 66.0756734 | 64.4780886 | 68.3328655 | 70.9122821 |
| 83.9177631 | 65.615036 | 66.0756734 | 65.4780886 | 69.3328655 | 71.9122821 |
| 83.9177631 | 65.615036 | 65.0756734 | 65.4780886 | 67.3328655 | 71.9122821 |
| 83.9177631 | 67.615036 | 65.0756734 | 65.4780886 | 65.3328655 | 72.9122821 |

|            |           |            |            |            |            |
|------------|-----------|------------|------------|------------|------------|
| 83.9177631 | 69.615036 | 65.0756734 | 66.4780886 | 65.3328655 | 73.9122821 |
| 83.9177631 | 69.615036 | 65.0756734 | 66.4780886 | 65.3328655 | 72.9122821 |
| 83.9177631 | 69.615036 | 62.0756734 | 66.4780886 | 65.3328655 | 71.9122821 |
| 83.9177631 | 70.615036 | 80.0756734 | 67.4780886 | 65.3328655 | 71.9122821 |
| 84.9177631 | 69.615036 | 80.0756734 | 70.4780886 | 65.3328655 | 71.9122821 |
| 84.9177631 | 69.615036 | 83.0756734 | 70.4780886 | 65.3328655 | 71.9122821 |
| 80.9177631 | 67.615036 | 83.0756734 | 71.4780886 | 65.3328655 | 71.9122821 |
| 65.9177631 | 66.615036 | 82.0756734 | 71.4780886 | 65.3328655 | 71.9122821 |
| 61.9177631 | 66.615036 | 80.0756734 | 72.4780886 | 65.3328655 | 71.9122821 |
| 60.9177631 | 66.615036 | 80.0756734 | 73.4780886 | 65.3328655 | 71.9122821 |
| 60.9177631 | 66.615036 | 80.0756734 | 74.4780886 | 65.3328655 | 71.9122821 |
| 60.9177631 | 63.615036 | 79.0756734 | 74.4780886 | 65.3328655 | 71.9122821 |
| 60.9177631 | 62.615036 | 80.0756734 | 76.4780886 | 66.3328655 | 70.9122821 |
| 60.9177631 | 61.615036 | 80.0756734 | 76.4780886 | 66.3328655 | 70.9122821 |
| 60.9177631 | 59.615036 | 81.0756734 | 77.4780886 | 66.3328655 | 86.9122821 |
| 60.9177631 | 58.615036 | 82.0756734 | 78.4780886 | 66.3328655 | 74.6101953 |
| 60.9177631 | 57.615036 | 83.0756734 | 78.4780886 | 67.3328655 | 74.7920134 |
| 60.9177631 | 57.615036 | 83.0756734 | 78.4780886 | 67.3328655 | 75.1556498 |
| 57.9177631 | 57.615036 | 83.0756734 | 79.4780886 | 68.3328655 | 87.9122821 |
| 55.9177631 | 57.615036 | 83.0756734 | 81.4780886 | 68.3328655 | 87.9122821 |
| 55.9177631 | 57.615036 | 80.0756734 | 83.4780886 | 68.3328655 | 84.9122821 |
| 55.9177631 | 57.615036 | 80.0756734 | 83.4780886 | 70.3328655 | 81.9122821 |
| 56.9177631 | 57.615036 | 80.0756734 | 83.4780886 | 70.3328655 | 79.9122821 |
| 56.9177631 | 57.615036 | 79.0756734 | 83.4780886 | 69.3328655 | 79.9122821 |
| 56.9177631 | 58.615036 | 78.0756734 | 84.4780886 | 69.3328655 | 79.9122821 |
| 55.9177631 | 58.615036 | 78.0756734 | 84.4780886 | 69.3328655 | 73.9122821 |
| 55.9177631 | 58.615036 | 77.0756734 | 84.4780886 | 69.3328655 | 73.9122821 |
| 53.9177631 | 57.615036 | 77.0756734 | 84.4780886 | 68.3328655 | 73.9122821 |
| 53.9177631 | 57.615036 | 77.0756734 | 69.2465589 | 66.3328655 | 71.9122821 |
| 53.9177631 | 57.615036 | 79.0756734 | 77.4780886 | 66.3328655 | 72.9122821 |
| 53.9177631 | 57.615036 | 79.0756734 | 77.4780886 | 67.3328655 | 73.9122821 |
| 53.9177631 | 57.615036 | 79.0756734 | 74.4780886 | 67.3328655 | 73.9122821 |
| 53.9177631 | 57.615036 | 79.0756734 | 73.4780886 | 67.3328655 | 73.9122821 |
| 53.9177631 | 58.615036 | 78.0756734 | 71.4780886 | 67.3328655 | 75.9122821 |
| 53.9177631 | 58.615036 | 77.0756734 | 69.4780886 | 66.3328655 | 79.9122821 |
| 53.9177631 | 58.615036 | 75.0756734 | 68.4780886 | 66.3328655 | 80.9122821 |
| 53.9177631 | 58.615036 | 75.0756734 | 67.4780886 | 73.3328655 | 80.9122821 |
| 55.9177631 | 58.615036 | 75.0756734 | 66.4780886 | 75.3328655 | 81.9122821 |
| 54.9177631 | 58.615036 | 73.0756734 | 66.4780886 | 77.3328655 | 80.9122821 |
| 54.9177631 | 58.615036 | 73.0756734 | 65.4780886 | 78.3328655 | 81.9122821 |
| 52.9177631 | 58.615036 | 73.0756734 | 65.4780886 | 78.3328655 | 81.9122821 |
| 52.9177631 | 58.615036 | 73.0756734 | 64.4780886 | 78.3328655 | 83.9122821 |
| 52.9177631 | 58.615036 | 73.0756734 | 63.4780886 | 78.3328655 | 83.9122821 |
| 52.9177631 | 58.615036 | 73.0756734 | 63.4780886 | 77.3328655 | 83.9122821 |
| 57.9177631 | 60.615036 | 73.0756734 | 63.4780886 | 76.3328655 | 83.9122821 |

|            |           |            |            |            |            |
|------------|-----------|------------|------------|------------|------------|
| 57.9177631 | 60.615036 | 73.0756734 | 63.4780886 | 76.3328655 | 77.9122821 |
| 57.9177631 | 60.615036 | 73.0756734 | 63.4780886 | 76.3328655 | 77.9122821 |
| 57.9177631 | 62.615036 | 73.0756734 | 64.4780886 | 78.3328655 | 75.9122821 |
| 58.9177631 | 62.615036 | 73.0756734 | 65.4780886 | 79.3328655 | 74.9122821 |
| 58.9177631 | 62.615036 | 74.0756734 | 65.4780886 | 81.3328655 | 73.9122821 |
| 58.9177631 | 63.615036 | 74.0756734 | 65.4780886 | 81.3328655 | 73.9122821 |
| 58.9177631 | 63.615036 | 74.0756734 | 65.4780886 | 81.3328655 | 73.9122821 |
| 58.9177631 | 63.615036 | 74.0756734 | 65.4780886 | 81.3328655 | 73.9122821 |
| 57.9177631 | 65.615036 | 75.0756734 | 73.4780886 | 82.3328655 | 74.9122821 |
| 58.9177631 | 65.615036 | 75.0756734 | 80.4780886 | 82.3328655 | 76.9122821 |
| 58.9177631 | 64.615036 | 76.0756734 | 80.4780886 | 83.3328655 | 76.9122821 |
| 59.9177631 | 64.615036 | 79.0756734 | 80.4780886 | 83.3328655 | 76.9122821 |
| 59.9177631 | 64.615036 | 79.0756734 | 77.4780886 | 82.3328655 | 76.9122821 |
| 59.9177631 | 64.615036 | 80.0756734 | 77.4780886 | 82.3328655 | 75.9122821 |
| 59.9177631 | 65.615036 | 81.0756734 | 77.4780886 | 78.3328655 | 75.9122821 |
| 62.9177631 | 65.615036 | 81.0756734 | 77.4780886 | 77.3328655 | 75.9122821 |
| 64.9177631 | 65.615036 | 81.0756734 | 77.4780886 | 77.3328655 | 76.9122821 |
| 65.9177631 | 65.615036 | 82.0756734 | 77.4780886 | 77.3328655 | 76.9122821 |
| 65.9177631 | 66.615036 | 82.0756734 | 76.4780886 | 77.3328655 | 76.9122821 |
| 65.9177631 | 66.615036 | 82.0756734 | 73.4780886 | 77.3328655 | 76.9122821 |
| 65.9177631 | 66.615036 | 82.0756734 | 73.4780886 | 77.3328655 | 76.9122821 |
| 67.9177631 | 66.615036 | 82.0756734 | 72.4780886 | 77.3328655 | 76.9122821 |
| 68.9177631 | 65.615036 | 82.0756734 | 72.4780886 | 77.3328655 | 77.9122821 |
| 70.9177631 | 65.615036 | 80.0756734 | 69.4780886 | 76.3328655 | 78.9122821 |
| 70.9177631 | 65.615036 | 80.0756734 | 68.4780886 | 76.3328655 | 78.9122821 |
| 75.9177631 | 65.615036 | 80.0756734 | 67.4780886 | 76.3328655 | 79.9122821 |
| 77.9177631 | 65.615036 | 81.0756734 | 67.4780886 | 76.3328655 | 79.9122821 |
| 78.9177631 | 65.615036 | 81.0756734 | 67.4780886 | 76.3328655 | 80.9122821 |
| 77.9177631 | 65.615036 | 81.0756734 | 70.4780886 | 76.3328655 | 80.9122821 |
| 75.9177631 | 64.615036 | 81.0756734 | 71.4780886 | 76.3328655 | 80.9122821 |
| 75.9177631 | 62.615036 | 81.0756734 | 71.4780886 | 76.3328655 | 80.9122821 |
| 74.9177631 | 61.615036 | 83.0756734 | 71.4780886 | 76.3328655 | 79.9122821 |
| 74.9177631 | 60.615036 | 82.0756734 | 72.4780886 | 76.3328655 | 78.9122821 |
| 74.9177631 | 60.615036 | 82.0756734 | 73.4780886 | 77.3328655 | 78.9122821 |
| 75.9177631 | 60.615036 | 83.0756734 | 74.4780886 | 76.3328655 | 78.9122821 |
| 75.9177631 | 60.615036 | 83.0756734 | 76.4780886 | 76.3328655 | 77.9122821 |
| 75.9177631 | 60.615036 | 83.0756734 | 76.4780886 | 76.3328655 | 77.9122821 |
| 75.9177631 | 60.615036 | 83.0756734 | 77.4780886 | 75.3328655 | 77.9122821 |
| 75.9177631 | 59.615036 | 83.0756734 | 77.4780886 | 74.3328655 | 73.9122821 |
| 72.9177631 | 59.615036 | 83.0756734 | 77.4780886 | 72.3328655 | 73.9122821 |
| 70.9177631 | 59.615036 | 83.0756734 | 77.4780886 | 70.3328655 | 73.9122821 |
| 70.9177631 | 59.615036 | 83.0756734 | 70.4780886 | 66.3328655 | 72.9122821 |
| 70.9177631 | 60.615036 | 83.0756734 | 66.4780886 | 64.3328655 | 72.9122821 |
| 70.9177631 | 60.615036 | 80.0756734 | 66.4780886 | 63.3328655 | 70.9122821 |
| 70.9177631 | 60.615036 | 78.0756734 | 65.4780886 | 62.3328655 | 70.9122821 |

|            |           |            |            |            |            |
|------------|-----------|------------|------------|------------|------------|
| 69.9177631 | 60.615036 | 78.0756734 | 65.4780886 | 62.3328655 | 70.9122821 |
| 70.9177631 | 59.615036 | 77.0756734 | 65.4780886 | 62.3328655 | 67.9122821 |
| 71.9177631 | 58.615036 | 77.0756734 | 65.4780886 | 62.3328655 | 66.9122821 |
| 71.9177631 | 58.615036 | 77.0756734 | 65.4780886 | 62.3328655 | 66.9122821 |
| 71.9177631 | 58.615036 | 77.0756734 | 65.4780886 | 62.3328655 | 65.9122821 |
| 71.9177631 | 58.615036 | 77.0756734 | 63.4780886 | 62.3328655 | 65.9122821 |
| 69.9177631 | 58.615036 | 77.0756734 | 63.4780886 | 62.3328655 | 65.9122821 |
| 69.9177631 | 58.615036 | 77.0756734 | 63.4780886 | 62.3328655 | 65.9122821 |
| 66.9177631 | 60.615036 | 77.0756734 | 63.4780886 | 61.3328655 | 65.9122821 |
| 66.9177631 | 61.615036 | 77.0756734 | 63.4780886 | 66.3328655 | 65.9122821 |
| 66.9177631 | 61.615036 | 77.0756734 | 63.4780886 | 66.3328655 | 65.9122821 |
| 64.9177631 | 62.615036 | 83.0756734 | 63.4780886 | 74.3328655 | 66.9122821 |
| 64.9177631 | 62.615036 | 83.0756734 | 63.4780886 | 74.3328655 | 65.9122821 |
| 63.9177631 | 63.615036 | 83.0756734 | 63.4780886 | 74.3328655 | 62.9122821 |
| 63.9177631 | 63.615036 | 82.0756734 | 63.4780886 | 74.3328655 | 62.9122821 |
| 63.9177631 | 63.615036 | 82.0756734 | 63.4780886 | 74.3328655 | 62.9122821 |
| 62.9177631 | 63.615036 | 82.0756734 | 63.4780886 | 74.3328655 | 62.9122821 |
| 61.9177631 | 63.615036 | 78.0756734 | 63.4780886 | 74.3328655 | 61.9122821 |
| 58.9177631 | 63.615036 | 78.0756734 | 63.4780886 | 74.3328655 | 60.9122821 |
| 57.9177631 | 63.615036 | 77.0756734 | 61.4780886 | 74.3328655 | 60.9122821 |
| 57.9177631 | 63.615036 | 77.0756734 | 61.4780886 | 74.3328655 | 60.9122821 |
| 59.9177631 | 63.615036 | 77.0756734 | 61.4780886 | 73.3328655 | 60.9122821 |
| 59.9177631 | 63.615036 | 77.0756734 | 60.4780886 | 71.3328655 | 56.9122821 |
| 60.9177631 | 63.615036 | 77.0756734 | 60.4780886 | 71.3328655 | 54.9122821 |
| 61.9177631 | 63.615036 | 77.0756734 | 60.4780886 | 71.3328655 | 54.9122821 |
| 64.9177631 | 63.615036 | 78.0756734 | 61.4780886 | 71.3328655 | 54.9122821 |
| 64.9177631 | 63.615036 | 77.0756734 | 61.4780886 | 71.3328655 | 54.9122821 |
| 64.9177631 | 63.615036 | 77.0756734 | 61.4780886 | 71.3328655 | 53.9122821 |
| 65.9177631 | 63.615036 | 78.0756734 | 61.4780886 | 71.3328655 | 53.9122821 |
| 66.9177631 | 63.615036 | 77.0756734 | 62.4780886 | 70.3328655 | 53.9122821 |
| 67.9177631 | 60.615036 | 77.0756734 | 62.4780886 | 69.3328655 | 53.9122821 |
| 67.9177631 | 59.615036 | 76.0756734 | 66.4780886 | 69.3328655 | 53.9122821 |
| 68.9177631 | 59.615036 | 73.0756734 | 67.4780886 | 68.3328655 | 53.9122821 |
| 68.9177631 | 59.615036 | 73.0756734 | 70.4780886 | 69.337468  | 52.9122821 |
| 68.9177631 | 59.615036 | 72.0756734 | 70.4780886 | 69.1556498 | 51.9122821 |
| 68.9177631 | 59.615036 | 72.0756734 | 70.4780886 | 69.1556498 | 51.9122821 |
| 68.9177631 | 57.615036 | 72.0756734 | 70.4780886 | 68.9738316 | 50.9122821 |
| 68.9177631 | 58.615036 | 72.0756734 | 71.4780886 | 69.9738316 | 50.9122821 |
| 67.9177631 | 60.615036 | 73.0756734 | 71.4780886 | 70.1556498 | 50.9122821 |
| 67.9177631 | 60.615036 | 73.0756734 | 71.4780886 | 71.4283771 | 56.9122821 |
| 67.9177631 | 60.615036 | 73.0756734 | 75.4780886 | 88.3328655 | 75.9122821 |
| 68.9177631 | 60.615036 | 73.0756734 | 75.4780886 | 88.3328655 | 75.9122821 |
| 68.9177631 | 60.615036 | 74.0756734 | 75.4780886 | 86.3328655 | 77.9122821 |
| 68.9177631 | 60.615036 | 74.0756734 | 77.4780886 | 85.3328655 | 78.9122821 |
| 70.9177631 | 58.615036 | 73.0756734 | 75.4780886 | 85.3328655 | 78.9122821 |

|            |           |            |            |            |            |
|------------|-----------|------------|------------|------------|------------|
| 70.9177631 | 58.615036 | 73.0756734 | 75.4780886 | 84.3328655 | 80.9122821 |
| 69.9177631 | 57.615036 | 72.0756734 | 75.4780886 | 83.3328655 | 81.9122821 |
| 68.9177631 | 57.615036 | 70.0756734 | 75.4780886 | 79.3328655 | 82.9122821 |
| 66.9177631 | 56.615036 | 70.0756734 | 75.4780886 | 77.3328655 | 82.9122821 |
| 66.9177631 | 56.615036 | 70.0756734 | 76.4780886 | 76.3328655 | 82.9122821 |
| 65.9177631 | 56.615036 | 69.0756734 | 76.4780886 | 75.3328655 | 81.9122821 |
| 65.9177631 | 55.615036 | 69.0756734 | 77.4780886 | 75.3328655 | 80.9122821 |
| 65.9177631 | 55.615036 | 69.0756734 | 77.4780886 | 76.3328655 | 74.9122821 |
| 66.9177631 | 55.615036 | 69.0756734 | 78.4780886 | 76.3328655 | 74.9122821 |
| 67.9177631 | 55.615036 | 69.0756734 | 77.4780886 | 76.3328655 | 73.9122821 |
| 67.9177631 | 55.615036 | 69.0756734 | 75.4780886 | 75.3328655 | 72.9122821 |
| 67.9177631 | 59.615036 | 69.0756734 | 75.4780886 | 78.3328655 | 66.9122821 |
| 67.9177631 | 62.615036 | 69.0756734 | 73.4780886 | 78.3328655 | 66.9122821 |
| 66.9177631 | 62.615036 | 74.0756734 | 70.4780886 | 79.3328655 | 66.9122821 |
| 66.9177631 | 62.615036 | 74.0756734 | 67.4780886 | 79.3328655 | 66.9122821 |
| 65.9177631 | 62.615036 | 74.0756734 | 67.4780886 | 79.3328655 | 67.9122821 |
| 65.9177631 | 61.615036 | 74.0756734 | 66.4780886 | 82.3328655 | 67.9122821 |
| 64.9177631 | 60.615036 | 74.0756734 | 66.4780886 | 85.3328655 | 67.9122821 |
| 64.9177631 | 59.615036 | 74.0756734 | 66.4780886 | 71.7011044 | 67.9122821 |
| 64.9177631 | 59.615036 | 74.0756734 | 66.4780886 | 71.7011044 | 67.9122821 |
| 66.9177631 | 59.615036 | 76.0756734 | 66.4780886 | 72.2465589 | 68.9122821 |
| 66.9177631 | 59.615036 | 76.0756734 | 65.4780886 | 72.2465589 | 68.9122821 |
| 68.9177631 | 59.615036 | 77.0756734 | 65.4780886 | 72.2465589 | 68.9122821 |
| 69.9177631 | 59.615036 | 78.0756734 | 65.4780886 | 82.3328655 | 69.9122821 |
| 69.9177631 | 59.615036 | 78.0756734 | 65.4780886 | 78.3328655 | 69.9122821 |
| 69.9177631 | 59.615036 | 79.0756734 | 65.4780886 | 76.3328655 | 69.9122821 |
| 71.9177631 | 59.615036 | 81.0756734 | 67.4780886 | 76.3328655 | 68.9122821 |
| 76.9177631 | 58.615036 | 81.0756734 | 67.4780886 | 74.3328655 | 68.9122821 |
| 78.9177631 | 57.615036 | 81.0756734 | 67.4780886 | 71.3328655 | 67.9122821 |
| 79.9177631 | 66.615036 | 81.0756734 | 67.4780886 | 69.3328655 | 67.9122821 |
| 80.9177631 | 68.615036 | 83.0756734 | 67.4780886 | 68.3328655 | 67.9122821 |
| 80.9177631 | 71.615036 | 83.0756734 | 67.4780886 | 67.3328655 | 67.9122821 |
| 78.9177631 | 74.615036 | 83.0756734 | 68.4780886 | 67.3328655 | 67.9122821 |
| 77.9177631 | 74.615036 | 83.0756734 | 69.4780886 | 69.3328655 | 67.9122821 |
| 76.9177631 | 73.615036 | 83.0756734 | 71.4780886 | 70.3328655 | 71.9122821 |
| 72.9177631 | 73.615036 | 83.0756734 | 71.4780886 | 71.3328655 | 72.9122821 |
| 72.9177631 | 73.615036 | 83.0756734 | 71.4780886 | 71.3328655 | 72.9122821 |
| 69.9177631 | 73.615036 | 83.0756734 | 71.4780886 | 71.3328655 | 71.9122821 |
| 69.9177631 | 73.615036 | 83.0756734 | 75.4780886 | 71.3328655 | 67.9122821 |
| 69.9177631 | 73.615036 | 83.0756734 | 75.4780886 | 70.3328655 | 66.9122821 |
| 69.9177631 | 73.615036 | 83.0756734 | 76.4780886 | 69.3328655 | 66.9122821 |
| 68.9177631 | 73.615036 | 81.0756734 | 76.4780886 | 69.3328655 | 63.9122821 |
| 68.9177631 | 72.615036 | 81.0756734 | 76.4780886 | 69.3328655 | 62.9122821 |
| 68.9177631 | 71.615036 | 80.0756734 | 76.4780886 | 71.3328655 | 62.9122821 |
| 68.9177631 | 71.615036 | 80.0756734 | 76.4780886 | 74.3328655 | 62.9122821 |

|            |           |            |            |            |            |
|------------|-----------|------------|------------|------------|------------|
| 68.9177631 | 71.615036 | 80.0756734 | 74.4780886 | 74.3328655 | 64.9122821 |
| 69.9177631 | 71.615036 | 80.0756734 | 74.4780886 | 74.3328655 | 65.9122821 |
| 70.9177631 | 71.615036 | 80.0756734 | 74.4780886 | 71.3328655 | 65.9122821 |
| 69.9177631 | 70.615036 | 80.0756734 | 73.4780886 | 71.3328655 | 65.9122821 |
| 64.9177631 | 69.615036 | 78.0756734 | 70.4780886 | 67.3328655 | 65.9122821 |
| 63.9177631 | 68.615036 | 78.0756734 | 70.4780886 | 66.3328655 | 65.9122821 |
| 62.9177631 | 66.615036 | 78.0756734 | 69.4780886 | 66.3328655 | 65.9122821 |
| 61.9177631 | 66.615036 | 78.0756734 | 68.4780886 | 67.3328655 | 65.9122821 |
| 64.9177631 | 65.615036 | 78.0756734 | 68.4780886 | 67.3328655 | 64.9122821 |
| 67.9177631 | 65.615036 | 78.0756734 | 70.4780886 | 70.3328655 | 64.9122821 |
| 67.9177631 | 65.615036 | 79.0756734 | 70.4780886 | 70.3328655 | 63.9122821 |
| 67.9177631 | 65.615036 | 79.0756734 | 70.4780886 | 70.3328655 | 63.9122821 |
| 68.9177631 | 64.615036 | 79.0756734 | 70.4780886 | 71.3328655 | 63.9122821 |
| 68.9177631 | 64.615036 | 84.0756734 | 70.4780886 | 71.3328655 | 63.9122821 |
| 68.9177631 | 64.615036 | 84.0756734 | 70.4780886 | 71.3328655 | 63.9122821 |
| 69.9177631 | 64.615036 | 84.0756734 | 67.4780886 | 71.3328655 | 63.9122821 |
| 70.9177631 | 67.615036 | 81.0756734 | 67.4780886 | 68.3328655 | 63.9122821 |
| 70.9177631 | 67.615036 | 81.0756734 | 67.4780886 | 66.3328655 | 63.9122821 |
| 71.9177631 | 68.615036 | 81.0756734 | 66.4780886 | 65.3328655 | 63.9122821 |
| 72.9177631 | 68.615036 | 77.0756734 | 67.4780886 | 65.3328655 | 63.9122821 |
| 72.9177631 | 69.615036 | 77.0756734 | 67.4780886 | 65.3328655 | 64.9122821 |
| 71.9177631 | 69.615036 | 77.0756734 | 67.4780886 | 65.3328655 | 65.9122821 |
| 69.9177631 | 70.615036 | 77.0756734 | 68.4780886 | 68.3328655 | 65.9122821 |
| 69.9177631 | 72.615036 | 77.0756734 | 68.4780886 | 69.3328655 | 66.9122821 |
| 68.9177631 | 74.615036 | 77.0756734 | 68.4780886 | 69.3328655 | 66.9122821 |
| 68.9177631 | 75.615036 | 77.0756734 | 68.4780886 | 69.3328655 | 67.9122821 |
| 68.9177631 | 76.615036 | 77.0756734 | 68.4780886 | 69.3328655 | 67.9122821 |
| 68.9177631 | 79.615036 | 77.0756734 | 68.4780886 | 69.3328655 | 67.9122821 |
| 68.9177631 | 79.615036 | 77.0756734 | 68.4780886 | 69.3328655 | 67.9122821 |
| 67.9177631 | 79.615036 | 76.0756734 | 68.4780886 | 69.3328655 | 68.9122821 |
| 67.9177631 | 79.615036 | 76.0756734 | 68.4780886 | 69.3328655 | 68.9122821 |
| 68.9177631 | 78.615036 | 76.0756734 | 68.4780886 | 69.3328655 | 69.9122821 |
| 69.9177631 | 74.615036 | 79.0756734 | 66.4780886 | 71.3328655 | 70.9122821 |
| 71.9177631 | 72.615036 | 79.0756734 | 66.4780886 | 76.3328655 | 71.9122821 |
| 72.9177631 | 69.615036 | 82.0756734 | 66.4780886 | 78.3328655 | 71.9122821 |
| 73.9177631 | 68.615036 | 82.0756734 | 65.4780886 | 79.3328655 | 70.9122821 |
| 74.9177631 | 68.615036 | 82.0756734 | 67.4780886 | 78.3328655 | 69.9122821 |
| 75.9177631 | 69.615036 | 83.0756734 | 68.4780886 | 78.3328655 | 68.9122821 |
| 75.9177631 | 70.615036 | 84.0756734 | 68.4780886 | 78.3328655 | 68.9122821 |
| 73.9177631 | 73.615036 | 84.0756734 | 68.4780886 | 78.3328655 | 68.9122821 |
| 70.9177631 | 74.615036 | 85.0756734 | 68.4780886 | 78.3328655 | 68.9122821 |
| 69.9177631 | 75.615036 | 85.0756734 | 68.4780886 | 78.3328655 | 69.9122821 |
| 68.9177631 | 75.615036 | 85.0756734 | 68.4780886 | 79.3328655 | 70.9122821 |
| 69.9177631 | 75.615036 | 85.0756734 | 68.4780886 | 78.3328655 | 70.9122821 |
| 69.9177631 | 75.615036 | 86.0756734 | 69.4780886 | 77.3328655 | 70.9122821 |

|            |           |            |            |            |            |
|------------|-----------|------------|------------|------------|------------|
| 68.9177631 | 75.615036 | 70.7920134 | 67.4780886 | 75.3328655 | 70.9122821 |
| 67.9177631 | 75.615036 | 70.337468  | 67.4780886 | 74.3328655 | 69.9122821 |
| 66.9177631 | 75.615036 | 70.0647407 | 66.4780886 | 74.3328655 | 69.9122821 |
| 66.9177631 | 75.615036 | 69.4283771 | 66.4780886 | 74.3328655 | 65.9122821 |
| 66.9177631 | 75.615036 | 69.5192862 | 66.4780886 | 75.3328655 | 65.9122821 |
| 65.9177631 | 75.615036 | 69.6101953 | 68.4780886 | 75.3328655 | 65.9122821 |
| 64.9177631 | 75.615036 | 69.5192862 | 68.4780886 | 75.3328655 | 65.9122821 |
| 64.9177631 | 75.615036 | 69.4283771 | 69.4780886 | 72.3328655 | 65.9122821 |
| 65.9177631 | 75.615036 | 69.4283771 | 69.4780886 | 72.3328655 | 66.9122821 |
| 64.9177631 | 73.615036 | 68.9738316 | 69.4780886 | 70.3328655 | 65.9122821 |
| 63.9177631 | 72.615036 | 68.6101953 | 68.4780886 | 69.3328655 | 65.9122821 |
| 62.9177631 | 72.615036 | 68.7011044 | 68.4780886 | 69.3328655 | 65.9122821 |
| 62.9177631 | 72.615036 | 68.4283771 | 68.4780886 | 67.3328655 | 65.9122821 |
| 62.9177631 | 72.615036 | 68.2465589 | 68.4780886 | 67.3328655 | 63.9122821 |
| 61.9177631 | 72.615036 | 67.9738316 | 68.4780886 | 67.3328655 | 62.9122821 |
| 61.9177631 | 72.615036 | 68.1556498 | 68.4780886 | 66.3328655 | 62.9122821 |
| 63.9177631 | 72.615036 | 68.6101953 | 67.4780886 | 66.3328655 | 63.9122821 |
| 64.9177631 | 73.615036 | 69.0647407 | 66.4780886 | 66.3328655 | 64.9122821 |
| 65.9177631 | 73.615036 | 69.1556498 | 66.4780886 | 66.3328655 | 65.9122821 |
| 66.9177631 | 73.615036 | 69.7920134 | 66.4780886 | 67.3328655 | 66.9122821 |
| 66.9177631 | 73.615036 | 69.9738316 | 65.4780886 | 67.3328655 | 67.9122821 |
| 66.9177631 | 74.615036 | 70.337468  | 65.4780886 | 67.3328655 | 70.9122821 |
| 65.9177631 | 74.615036 | 70.7011044 | 65.4780886 | 67.3328655 | 70.9122821 |
| 65.9177631 | 74.615036 | 70.9738316 | 64.4780886 | 67.3328655 | 71.9122821 |
| 65.9177631 | 74.615036 | 71.4283771 | 64.4780886 | 68.3328655 | 71.9122821 |
| 65.9177631 | 74.615036 | 71.7920134 | 64.4780886 | 68.3328655 | 70.9122821 |
| 65.9177631 | 74.615036 | 72.0647407 | 65.4780886 | 68.3328655 | 68.9122821 |
| 65.9177631 | 74.615036 | 72.337468  | 66.4780886 | 68.3328655 | 67.9122821 |
| 68.9177631 | 73.615036 | 73.2465589 | 67.4780886 | 72.3328655 | 67.9122821 |
| 70.9177631 | 73.615036 | 73.5192862 | 67.4780886 | 72.3328655 | 67.9122821 |
| 71.9177631 | 76.615036 | 73.5192862 | 67.4780886 | 74.3328655 | 68.9122821 |
| 72.9177631 | 77.615036 | 84.0756734 | 67.4780886 | 73.3328655 | 69.9122821 |
| 73.9177631 | 77.615036 | 84.0756734 | 67.4780886 | 73.3328655 | 69.9122821 |
| 72.9177631 | 79.615036 | 80.0756734 | 70.4780886 | 72.3328655 | 68.9122821 |
| 71.9177631 | 80.615036 | 80.0756734 | 71.4780886 | 72.3328655 | 68.9122821 |
| 70.9177631 | 80.615036 | 77.0756734 | 71.4780886 | 72.3328655 | 67.9122821 |
| 69.9177631 | 81.615036 | 77.0756734 | 70.4780886 | 71.3328655 | 67.9122821 |
| 69.9177631 | 81.615036 | 77.0756734 | 70.4780886 | 71.3328655 | 67.9122821 |
| 68.9177631 | 83.615036 | 76.0756734 | 71.4780886 | 72.3328655 | 67.9122821 |
| 69.9177631 | 84.615036 | 76.0756734 | 71.4780886 | 74.3328655 | 67.9122821 |
| 70.9177631 |           | 75.0756734 | 71.4780886 | 74.3328655 | 68.9122821 |
| 70.9177631 |           | 75.0756734 | 71.4780886 | 74.3328655 | 68.9122821 |
| 71.9177631 |           | 75.0756734 | 70.4780886 | 74.3328655 | 68.9122821 |
| 71.9177631 |           | 75.0756734 | 70.4780886 | 74.3328655 | 69.9122821 |
| 71.9177631 |           | 74.0756734 | 69.4780886 | 74.3328655 | 69.9122821 |



|            |            |            |            |            |
|------------|------------|------------|------------|------------|
| 71.9177631 | 74.0756734 | 67.4780886 | 74.3328655 | 70.9122821 |
| 71.9177631 | 72.0756734 | 67.4780886 | 75.3328655 | 70.9122821 |
| 71.9177631 | 72.0756734 | 65.4780886 | 75.3328655 | 76.9122821 |
| 71.9177631 | 72.0756734 | 65.4780886 | 75.3328655 | 76.9122821 |
| 70.9177631 | 72.0756734 | 64.4780886 | 75.3328655 | 76.9122821 |
| 70.9177631 | 72.0756734 | 64.4780886 | 76.3328655 | 79.9122821 |
| 70.9177631 | 72.0756734 | 63.4780886 | 77.3328655 | 80.9122821 |
| 69.9177631 | 71.0756734 | 63.4780886 | 77.3328655 | 80.9122821 |
| 67.9177631 | 71.0756734 | 64.4780886 | 76.3328655 | 80.9122821 |
| 66.9177631 | 71.0756734 | 64.4780886 | 75.3328655 | 78.9122821 |
| 65.9177631 | 70.0756734 | 65.4780886 | 74.3328655 | 78.9122821 |
| 64.9177631 | 70.0756734 | 66.4780886 | 74.3328655 | 78.9122821 |
| 63.9177631 | 70.0756734 | 67.4780886 | 74.3328655 | 78.9122821 |
| 63.9177631 | 69.0756734 | 67.4780886 | 74.3328655 | 78.9122821 |
| 62.9177631 | 69.0756734 | 67.4780886 | 74.3328655 | 78.9122821 |
| 61.9177631 | 69.0756734 | 67.4780886 | 74.3328655 | 77.9122821 |
| 61.9177631 | 69.0756734 | 68.4780886 | 74.3328655 | 77.9122821 |
| 61.9177631 | 68.0756734 | 70.4780886 | 74.3328655 | 75.9122821 |
| 62.9177631 | 68.0756734 | 70.4780886 | 74.3328655 | 75.9122821 |
| 62.9177631 | 66.0756734 | 71.4780886 | 74.3328655 | 75.9122821 |
| 63.9177631 | 73.0756734 | 71.4780886 | 77.3328655 | 75.9122821 |
| 63.9177631 | 73.0756734 | 72.4780886 | 75.3328655 | 75.9122821 |
| 63.9177631 | 73.0756734 | 73.4780886 | 72.3328655 | 74.9122821 |
| 63.9177631 | 73.0756734 | 74.4780886 | 69.3328655 | 69.9122821 |
| 64.9177631 | 73.0756734 | 76.4780886 | 69.3328655 | 69.9122821 |
| 64.9177631 | 73.0756734 | 77.4780886 | 69.3328655 | 70.9122821 |
| 64.9177631 | 73.0756734 | 77.4780886 | 70.3328655 | 71.9122821 |
| 65.9177631 | 73.0756734 | 78.4780886 | 71.3328655 | 72.9122821 |
| 66.9177631 | 73.0756734 | 79.4780886 | 71.3328655 | 73.9122821 |
| 71.9177631 | 74.0756734 | 80.4780886 | 71.3328655 | 73.9122821 |
| 75.9177631 | 74.0756734 | 80.4780886 | 71.3328655 | 73.9122821 |
| 76.9177631 | 74.0756734 | 79.4780886 | 72.3328655 | 73.9122821 |
| 76.9177631 | 76.0756734 | 79.4780886 | 72.3328655 | 73.9122821 |
| 76.9177631 | 78.0756734 | 79.4780886 | 71.3328655 | 73.9122821 |
| 76.9177631 | 79.0756734 | 77.4780886 | 71.3328655 | 73.9122821 |
| 78.9177631 | 79.0756734 | 77.4780886 | 71.3328655 | 73.9122821 |
| 78.9177631 | 79.0756734 | 76.4780886 | 71.3328655 | 73.9122821 |
| 78.9177631 | 79.0756734 | 75.4780886 | 71.3328655 | 72.9122821 |
| 78.9177631 | 79.0756734 | 75.4780886 | 71.3328655 | 72.9122821 |
| 78.9177631 | 79.0756734 | 75.4780886 | 71.3328655 | 72.9122821 |
| 78.9177631 | 79.0756734 | 75.4780886 | 71.3328655 | 72.9122821 |
| 72.9177631 | 79.0756734 | 74.4780886 | 73.3328655 | 71.9122821 |
| 70.9177631 | 79.0756734 | 74.4780886 | 74.3328655 | 70.9122821 |
| 69.9177631 | 79.0756734 | 73.4780886 | 71.3328655 | 70.9122821 |
| 67.9177631 | 76.0756734 | 72.4780886 | 68.3328655 | 70.9122821 |
| 66.9177631 | 71.0756734 | 72.4780886 | 68.3328655 | 70.9122821 |

|            |            |            |            |            |
|------------|------------|------------|------------|------------|
| 66.9177631 | 71.0756734 | 72.4780886 | 65.3328655 | 69.9122821 |
| 66.9177631 | 71.0756734 | 72.4780886 | 65.3328655 | 69.9122821 |
| 65.9177631 | 71.0756734 | 72.4780886 | 66.3328655 | 70.9122821 |
| 65.9177631 | 71.0756734 | 72.4780886 | 67.3328655 | 70.9122821 |
| 64.9177631 | 71.0756734 | 72.4780886 | 67.3328655 | 69.9122821 |
| 64.9177631 | 69.0756734 | 71.4780886 | 67.3328655 | 69.9122821 |
| 63.9177631 | 69.0756734 | 71.4780886 | 66.3328655 | 68.9122821 |
| 63.9177631 | 69.0756734 | 71.4780886 | 66.3328655 | 67.9122821 |
| 63.9177631 | 69.0756734 | 73.4780886 | 66.3328655 | 67.9122821 |
| 63.9177631 | 69.0756734 | 73.4780886 | 66.3328655 | 66.9122821 |
| 63.9177631 | 69.0756734 | 73.4780886 | 67.3328655 | 68.9122821 |
| 67.9177631 | 69.0756734 | 73.4780886 | 67.3328655 | 68.9122821 |
| 69.9177631 | 69.0756734 | 73.4780886 | 67.3328655 | 68.9122821 |
| 71.9177631 | 69.0756734 | 73.4780886 | 70.3328655 | 68.9122821 |
| 71.9177631 | 67.0756734 | 73.4780886 | 71.3328655 | 68.9122821 |
| 72.9177631 | 67.0756734 | 74.4780886 | 72.3328655 | 68.9122821 |
| 73.9177631 | 67.0756734 | 74.4780886 | 72.3328655 | 67.9122821 |
| 73.9177631 | 66.0756734 | 74.4780886 | 72.3328655 | 68.9122821 |
| 73.9177631 | 66.0756734 | 75.4780886 | 72.3328655 | 69.9122821 |
| 72.9177631 | 66.0756734 | 75.4780886 | 73.3328655 | 70.9122821 |
| 71.9177631 | 65.0756734 | 75.4780886 | 75.3328655 | 70.9122821 |
| 71.9177631 | 65.0756734 | 77.4780886 | 75.3328655 | 71.9122821 |
| 69.9177631 | 65.0756734 | 77.4780886 | 79.3328655 | 71.9122821 |
| 68.9177631 | 66.0756734 | 77.4780886 | 80.3328655 | 71.9122821 |
| 68.9177631 | 66.0756734 | 77.4780886 | 79.3328655 | 71.9122821 |
| 68.9177631 | 66.0756734 | 72.4780886 | 70.3328655 | 73.9122821 |
| 68.9177631 | 68.0756734 | 72.4780886 | 64.3328655 | 74.9122821 |
| 68.9177631 | 68.0756734 | 70.4780886 | 64.3328655 | 74.9122821 |
| 68.9177631 | 69.0756734 | 70.4780886 | 64.3328655 | 74.9122821 |
| 68.9177631 | 70.0756734 | 70.4780886 | 65.3328655 | 74.9122821 |
| 68.9177631 | 71.0756734 | 70.4780886 | 66.3328655 | 74.9122821 |
| 69.9177631 | 73.0756734 | 70.4780886 | 67.3328655 | 75.9122821 |
| 69.9177631 | 73.0756734 | 70.4780886 | 67.3328655 | 75.9122821 |
| 69.9177631 | 73.0756734 | 70.4780886 | 67.3328655 | 75.9122821 |
| 71.9177631 | 71.0756734 | 70.4780886 | 68.3328655 | 75.9122821 |
| 71.9177631 | 71.0756734 | 70.4780886 | 68.3328655 | 75.9122821 |
| 70.9177631 | 72.0756734 | 70.4780886 | 69.3328655 | 74.9122821 |
| 70.9177631 | 76.0756734 | 69.4780886 | 69.3328655 | 72.9122821 |
| 70.9177631 | 76.0756734 | 69.4780886 | 69.3328655 | 71.9122821 |
| 70.9177631 | 76.0756734 | 69.4780886 | 72.3328655 | 70.9122821 |
| 69.9177631 | 76.0756734 | 68.4780886 | 72.3328655 | 69.9122821 |
| 69.9177631 | 78.0756734 | 67.4780886 | 74.3328655 | 69.9122821 |
| 69.9177631 | 78.0756734 | 67.4780886 | 74.3328655 | 69.9122821 |
| 70.9177631 | 80.0756734 | 66.4780886 | 75.3328655 | 70.9122821 |
| 70.9177631 | 71.0756734 | 66.4780886 | 74.3328655 | 71.9122821 |

|            |            |            |            |            |
|------------|------------|------------|------------|------------|
| 70.9177631 | 71.0756734 | 66.4780886 | 73.3328655 | 71.9122821 |
| 70.9177631 | 69.0756734 | 66.4780886 | 73.3328655 | 71.9122821 |
| 70.9177631 | 69.0756734 | 66.4780886 | 73.3328655 | 72.9122821 |
| 70.9177631 | 69.0756734 | 65.4780886 | 73.3328655 | 71.9122821 |
| 71.9177631 | 69.0756734 | 65.4780886 | 73.3328655 | 70.9122821 |
| 71.9177631 | 70.0756734 | 65.4780886 | 73.3328655 | 69.9122821 |
| 72.9177631 | 70.0756734 | 65.4780886 | 73.3328655 | 69.9122821 |
| 72.9177631 | 70.0756734 | 65.4780886 | 74.3328655 | 68.9122821 |
| 72.9177631 | 71.0756734 | 66.4780886 | 73.3328655 | 67.9122821 |
| 71.9177631 | 69.0756734 | 66.4780886 | 73.3328655 | 67.9122821 |
| 71.9177631 | 69.0756734 | 66.4780886 | 73.3328655 | 67.9122821 |
| 69.9177631 | 68.0756734 | 66.4780886 | 74.3328655 | 69.9122821 |
| 69.9177631 | 68.0756734 | 67.4780886 | 73.3328655 | 69.9122821 |
| 70.9177631 | 67.0756734 | 67.4780886 | 71.3328655 | 69.9122821 |
| 70.9177631 | 67.0756734 | 67.4780886 | 70.3328655 | 69.9122821 |
| 70.9177631 | 67.0756734 | 67.4780886 | 70.3328655 | 70.9122821 |
| 72.9177631 | 67.0756734 | 67.4780886 | 71.3328655 | 70.9122821 |
| 72.9177631 | 67.0756734 | 67.4780886 | 73.3328655 | 70.9122821 |
| 72.9177631 | 67.0756734 | 65.4780886 | 77.3328655 | 70.9122821 |
| 72.9177631 | 67.0756734 | 64.4780886 | 77.3328655 | 71.9122821 |
| 74.9177631 | 66.0756734 | 66.4780886 | 77.3328655 | 72.9122821 |
| 76.9177631 | 66.0756734 | 67.4780886 | 77.3328655 | 72.9122821 |
| 79.9177631 | 65.0756734 | 68.4780886 | 78.3328655 | 72.9122821 |
| 82.9177631 | 65.0756734 | 69.4780886 | 81.3328655 | 72.9122821 |
| 84.9177631 | 65.0756734 | 69.4780886 | 81.3328655 | 77.9122821 |
| 72.6097112 | 63.0756734 | 69.4780886 | 81.3328655 | 80.9122821 |
| 72.3097112 | 63.0756734 | 69.4780886 | 78.3328655 | 80.9122821 |
| 72.0097112 | 63.0756734 | 70.4780886 | 75.3328655 | 82.9122821 |
| 71.4097112 | 66.0756734 | 71.4780886 | 69.3328655 | 82.9122821 |
| 71.3097112 | 67.0756734 | 71.4780886 | 69.3328655 | 83.9122821 |
| 78.9177631 | 67.0756734 | 71.4780886 | 66.3328655 | 83.9122821 |
| 78.9177631 | 68.0756734 | 71.4780886 | 64.3328655 | 83.9122821 |
| 78.9177631 | 68.0756734 | 71.4780886 | 63.3328655 | 84.9122821 |
| 78.9177631 | 68.0756734 | 74.4780886 | 62.3328655 | 84.9122821 |
| 78.9177631 | 68.0756734 | 74.4780886 | 62.3328655 | 71.0097112 |
| 78.9177631 | 68.0756734 | 73.4780886 | 62.3328655 | 70.5097112 |
| 79.9177631 | 68.0756734 | 73.4780886 | 62.3328655 | 70.5097112 |
| 79.9177631 | 68.0756734 | 73.4780886 | 62.3328655 | 70.5097112 |
| 75.9177631 | 68.0756734 | 73.4780886 | 63.3328655 | 69.9097112 |
| 74.9177631 | 68.0756734 | 71.4780886 | 63.3328655 | 69.3097112 |
| 73.9177631 | 69.0756734 | 71.4780886 | 63.3328655 | 69.2097112 |
| 73.9177631 | 69.0756734 | 71.4780886 | 63.3328655 | 69.4097112 |
| 73.9177631 | 70.0756734 | 70.4780886 | 63.3328655 | 69.5097112 |
| 73.9177631 | 69.0756734 | 70.4780886 | 63.3328655 | 69.7097112 |
| 73.9177631 | 69.0756734 | 69.4780886 | 64.3328655 | 70.1097112 |

|            |            |            |            |            |
|------------|------------|------------|------------|------------|
| 74.9177631 | 69.0756734 | 75.4780886 | 64.3328655 | 70.8097112 |
| 74.9177631 | 70.0756734 | 79.4780886 | 66.3328655 | 85.9122821 |
| 74.9177631 | 70.0756734 | 79.4780886 | 67.3328655 | 85.9122821 |
| 74.9177631 | 73.0756734 | 79.4780886 | 68.3328655 | 81.9122821 |
| 73.9177631 | 74.0756734 | 82.4780886 | 69.3328655 | 79.9122821 |
| 73.9177631 | 74.0756734 | 82.4780886 | 72.3328655 | 78.9122821 |
| 73.9177631 | 74.0756734 | 82.4780886 | 73.3328655 | 78.9122821 |
| 73.9177631 | 76.0756734 | 81.4780886 | 74.3328655 | 77.9122821 |
| 75.9177631 | 76.0756734 | 81.4780886 | 74.3328655 | 77.9122821 |
| 76.9177631 | 76.0756734 | 80.4780886 | 73.3328655 | 77.9122821 |
| 76.9177631 | 76.0756734 | 79.4780886 | 73.3328655 | 77.9122821 |
| 76.9177631 | 76.0756734 | 78.4780886 | 72.3328655 | 77.9122821 |
| 76.9177631 | 76.0756734 | 75.4780886 | 68.3328655 | 77.9122821 |
| 76.9177631 | 76.0756734 | 72.4780886 | 66.3328655 | 77.9122821 |
| 75.9177631 | 76.0756734 | 71.4780886 | 65.3328655 | 77.9122821 |
| 75.9177631 | 76.0756734 | 71.4780886 | 67.3328655 | 76.9122821 |
| 75.9177631 | 76.0756734 | 71.4780886 | 68.3328655 | 76.9122821 |
| 75.9177631 | 76.0756734 | 71.4780886 | 67.3328655 | 76.9122821 |
| 75.9177631 | 75.0756734 | 71.4780886 | 66.3328655 | 76.9122821 |
| 75.9177631 | 75.0756734 | 71.4780886 | 66.3328655 | 76.9122821 |
| 76.9177631 | 75.0756734 | 71.4780886 | 64.3328655 | 75.9122821 |
| 76.9177631 | 75.0756734 | 71.4780886 | 64.3328655 | 75.9122821 |
| 75.9177631 | 73.0756734 | 71.4780886 | 64.3328655 | 75.9122821 |
| 74.9177631 | 73.0756734 | 71.4780886 | 63.3328655 | 75.9122821 |
| 74.9177631 | 71.0756734 | 71.4780886 | 64.3328655 | 75.9122821 |
| 74.9177631 | 67.0756734 | 68.4780886 | 65.3328655 | 75.9122821 |
| 72.9177631 | 67.0756734 | 68.4780886 | 67.3328655 | 74.9122821 |
| 72.9177631 | 66.0756734 | 66.4780886 | 67.3328655 | 74.9122821 |
| 73.9177631 | 64.0756734 | 66.4780886 | 66.3328655 | 73.9122821 |
| 73.9177631 | 64.0756734 | 65.4780886 | 64.3328655 | 72.9122821 |
| 73.9177631 | 64.0756734 | 64.4780886 | 64.3328655 | 72.9122821 |
| 73.9177631 | 64.0756734 | 64.4780886 | 62.3328655 | 72.9122821 |
| 73.9177631 | 64.0756734 | 64.4780886 | 61.3328655 | 72.9122821 |
| 73.9177631 | 66.0756734 | 63.4780886 | 61.3328655 | 72.9122821 |
| 71.9177631 | 70.0756734 | 64.4780886 | 62.3328655 | 71.9122821 |
| 69.9177631 | 70.0756734 | 64.4780886 | 64.3328655 | 71.9122821 |
| 69.9177631 | 69.0756734 | 66.4780886 | 64.3328655 | 72.9122821 |
| 68.9177631 | 69.0756734 | 66.4780886 | 64.3328655 | 72.9122821 |
| 68.9177631 | 69.0756734 | 68.4780886 | 64.3328655 | 72.9122821 |
| 68.9177631 | 68.0756734 | 69.4780886 | 65.3328655 | 72.9122821 |
| 68.9177631 | 68.0756734 | 69.4780886 | 65.3328655 | 74.9122821 |
| 68.9177631 | 68.0756734 | 69.4780886 | 64.3328655 | 74.9122821 |
| 68.9177631 | 68.0756734 | 69.4780886 | 65.3328655 | 85.9122821 |
| 69.9177631 | 68.0756734 | 69.4780886 | 66.3328655 | 72.6097112 |
| 71.9177631 | 68.0756734 | 69.4780886 | 67.3328655 | 72.6097112 |

|            |            |            |            |            |
|------------|------------|------------|------------|------------|
| 71.9177631 | 69.0756734 | 69.4780886 | 67.3328655 | 72.6097112 |
| 72.9177631 | 70.0756734 | 68.4780886 | 68.3328655 | 72.8097112 |
| 72.9177631 | 70.0756734 | 68.4780886 | 67.3328655 | 72.5097112 |
| 72.9177631 | 70.0756734 | 68.4780886 | 67.3328655 | 85.9122821 |
| 72.9177631 | 70.0756734 | 67.4780886 | 68.3328655 | 85.9122821 |
| 72.9177631 | 70.0756734 | 67.4780886 | 68.3328655 | 76.9122821 |
| 73.9177631 | 70.0756734 | 67.4780886 | 68.3328655 | 70.9122821 |
| 73.9177631 | 70.0756734 | 67.4780886 | 69.3328655 | 67.9122821 |
| 73.9177631 | 70.0756734 | 66.4780886 | 69.3328655 | 66.9122821 |
| 73.9177631 | 72.0756734 | 66.4780886 | 69.3328655 | 64.9122821 |
| 73.9177631 | 75.0756734 | 66.4780886 | 70.3328655 | 64.9122821 |
| 73.9177631 | 75.0756734 | 66.4780886 | 71.3328655 | 63.9122821 |
| 73.9177631 | 75.0756734 | 66.4780886 | 71.3328655 | 64.9122821 |
| 73.9177631 | 77.0756734 | 66.4780886 | 71.3328655 | 64.9122821 |
| 72.9177631 | 77.0756734 | 66.4780886 | 71.3328655 | 69.9122821 |
| 68.9177631 | 79.0756734 | 66.4780886 | 71.3328655 | 69.9122821 |
| 68.9177631 | 81.0756734 | 66.4780886 | 71.3328655 | 69.9122821 |
| 67.9177631 | 81.0756734 | 64.4780886 | 69.3328655 | 68.9122821 |
| 66.9177631 | 81.0756734 | 63.4780886 | 68.3328655 | 68.9122821 |
| 66.9177631 | 81.0756734 | 63.4780886 | 68.3328655 | 67.9122821 |
| 66.9177631 | 81.0756734 | 63.4780886 | 69.3328655 | 66.9122821 |
| 66.9177631 | 82.0756734 | 67.4780886 | 69.3328655 | 66.9122821 |
| 67.9177631 | 82.0756734 | 67.4780886 | 70.3328655 | 65.9122821 |
| 69.9177631 | 82.0756734 | 68.4780886 | 70.3328655 | 64.9122821 |
| 69.9177631 | 82.0756734 | 69.4780886 | 70.3328655 | 64.9122821 |
| 70.9177631 | 79.0756734 | 69.4780886 | 70.3328655 | 63.9122821 |
| 70.9177631 | 79.0756734 | 69.4780886 | 70.3328655 | 62.9122821 |
| 70.9177631 | 79.0756734 | 70.4780886 | 70.3328655 | 61.9122821 |
| 70.9177631 | 79.0756734 | 70.4780886 | 70.3328655 | 61.9122821 |
| 70.9177631 | 85.0756734 | 72.4780886 | 70.3328655 | 60.9122821 |
| 70.9177631 | 85.0756734 | 72.4780886 | 70.3328655 | 60.9122821 |
| 70.9177631 | 86.0756734 | 73.4780886 | 70.3328655 | 60.9122821 |
| 71.9177631 | 86.0756734 | 72.4780886 | 71.3328655 | 61.9122821 |
| 71.9177631 | 86.0756734 | 72.4780886 | 72.3328655 | 62.9122821 |
| 71.9177631 | 86.0756734 | 75.4780886 | 73.3328655 | 62.9122821 |
| 71.9177631 | 86.0756734 | 75.4780886 | 73.3328655 | 63.9122821 |
| 71.9177631 | 87.0756734 | 75.4780886 | 70.3328655 | 64.9122821 |
| 71.9177631 | 88.0756734 | 75.4780886 | 70.3328655 | 64.9122821 |
| 71.9177631 | 88.0756734 | 75.4780886 | 69.3328655 | 65.9122821 |
| 77.9177631 | 88.0756734 | 76.4780886 | 69.3328655 | 65.9122821 |
| 78.9177631 | 89.0756734 | 76.4780886 | 69.3328655 | 64.9122821 |
| 78.9177631 | 89.0756734 | 76.4780886 | 69.3328655 | 64.9122821 |
| 77.9177631 | 89.0756734 | 75.4780886 | 70.3328655 | 63.9122821 |
| 75.9177631 | 88.0756734 | 75.4780886 | 71.3328655 | 63.9122821 |
| 75.9177631 | 88.0756734 | 75.4780886 | 72.3328655 | 63.9122821 |

|            |            |            |            |            |
|------------|------------|------------|------------|------------|
| 75.9177631 | 88.0756734 | 75.4780886 | 73.3328655 | 64.9122821 |
| 75.9177631 | 89.0756734 | 75.4780886 | 73.3328655 | 64.9122821 |
| 76.9177631 | 89.0756734 | 75.4780886 | 73.3328655 | 64.9122821 |
| 77.9177631 | 89.0756734 | 75.4780886 | 73.3328655 | 65.9122821 |
| 77.9177631 | 89.0756734 | 73.4780886 | 70.3328655 | 66.9122821 |
| 77.9177631 | 89.0756734 | 72.4780886 | 68.3328655 | 66.9122821 |
| 77.9177631 | 89.0756734 | 72.4780886 | 67.3328655 | 66.9122821 |
| 77.9177631 | 85.0756734 | 73.4780886 | 67.3328655 | 67.9122821 |
| 75.9177631 | 85.0756734 | 74.4780886 | 67.3328655 | 67.9122821 |
| 74.9177631 | 85.0756734 | 75.4780886 | 67.3328655 | 67.9122821 |
| 74.9177631 | 70.0756734 | 75.4780886 | 67.3328655 | 68.9122821 |
| 74.9177631 | 70.0756734 | 75.4780886 | 66.3328655 | 68.9122821 |
| 74.9177631 | 67.0756734 | 75.4780886 | 65.3328655 | 69.9122821 |
| 73.9177631 | 64.0756734 | 73.4780886 | 65.3328655 | 71.9122821 |
| 73.9177631 | 64.0756734 | 73.4780886 | 66.3328655 | 74.9122821 |
| 73.9177631 | 63.0756734 | 73.4780886 | 66.3328655 | 77.9122821 |
| 73.9177631 | 63.0756734 | 73.4780886 | 66.3328655 | 77.9122821 |
| 73.9177631 | 63.0756734 | 73.4780886 | 66.3328655 | 77.9122821 |
| 73.9177631 | 63.0756734 | 73.4780886 | 66.3328655 | 77.9122821 |
| 72.9177631 | 62.0756734 | 73.4780886 | 66.3328655 | 77.9122821 |
| 72.9177631 | 62.0756734 | 73.4780886 | 67.3328655 | 79.9122821 |
| 72.9177631 | 62.0756734 | 73.4780886 | 66.3328655 | 79.9122821 |
| 72.9177631 | 62.0756734 | 74.4780886 | 66.3328655 | 79.9122821 |
| 71.9177631 | 62.0756734 | 74.4780886 | 65.3328655 | 80.9122821 |
| 71.9177631 | 62.0756734 | 74.4780886 | 63.3328655 | 80.9122821 |
| 71.9177631 | 62.0756734 | 74.4780886 | 62.3328655 | 80.9122821 |
| 71.9177631 | 62.0756734 | 74.4780886 | 62.3328655 | 79.9122821 |
| 71.9177631 | 62.0756734 | 74.4780886 | 64.3328655 | 79.9122821 |
| 70.9177631 | 61.0756734 | 74.4780886 | 66.3328655 | 79.9122821 |
| 70.9177631 | 61.0756734 | 72.4780886 | 67.3328655 | 76.9122821 |
| 70.9177631 | 62.0756734 | 72.4780886 | 67.3328655 | 74.9122821 |
| 70.9177631 | 61.0756734 | 70.4780886 | 68.3328655 | 74.9122821 |
| 66.9177631 | 61.0756734 | 70.4780886 | 67.3328655 | 74.9122821 |
| 64.9177631 | 60.0756734 | 70.4780886 | 64.3328655 | 74.9122821 |
| 62.9177631 | 60.0756734 | 70.4780886 | 62.3328655 | 73.9122821 |
| 62.9177631 | 60.0756734 | 70.4780886 | 61.3328655 | 73.9122821 |
| 63.9177631 | 60.0756734 | 70.4780886 | 61.3328655 | 73.9122821 |
| 63.9177631 | 60.0756734 | 70.4780886 | 61.3328655 | 73.9122821 |
| 65.9177631 | 61.0756734 | 70.4780886 | 63.3328655 | 73.9122821 |
| 66.9177631 | 62.0756734 | 69.4780886 | 62.3328655 | 73.9122821 |
| 67.9177631 | 65.0756734 | 70.4780886 | 62.3328655 | 71.9122821 |
| 67.9177631 | 65.0756734 | 70.4780886 | 63.3328655 | 68.9122821 |
| 67.9177631 | 65.0756734 | 70.4780886 | 63.3328655 | 68.9122821 |
| 66.9177631 | 64.0756734 | 71.4780886 | 63.3328655 | 68.9122821 |
| 66.9177631 | 64.0756734 | 71.4780886 | 63.3328655 | 68.9122821 |

|            |            |            |            |            |
|------------|------------|------------|------------|------------|
| 66.9177631 | 63.0756734 | 72.4780886 | 63.3328655 | 68.9122821 |
| 66.9177631 | 63.0756734 | 72.4780886 | 64.3328655 | 68.9122821 |
| 67.9177631 | 63.0756734 | 72.4780886 | 65.3328655 | 68.9122821 |
| 69.9177631 | 63.0756734 | 70.4780886 | 65.3328655 | 68.9122821 |
| 69.9177631 | 64.0756734 | 70.4780886 | 65.3328655 | 68.9122821 |
| 73.9177631 | 64.0756734 | 70.4780886 | 65.3328655 | 68.9122821 |
| 74.9177631 | 64.0756734 | 70.4780886 | 66.3328655 | 69.9122821 |
| 75.9177631 | 65.0756734 | 70.4780886 | 66.3328655 | 69.9122821 |
| 75.9177631 | 65.0756734 | 69.4780886 | 66.3328655 | 70.9122821 |
| 75.9177631 | 65.0756734 | 68.4780886 | 66.3328655 | 70.9122821 |
| 74.9177631 | 64.0756734 | 68.4780886 | 66.3328655 | 71.9122821 |
| 73.9177631 | 64.0756734 | 68.4780886 | 66.3328655 | 71.9122821 |
| 73.9177631 | 64.0756734 | 69.4780886 | 66.3328655 | 71.9122821 |
| 72.9177631 | 62.0756734 | 71.4780886 | 66.3328655 | 71.9122821 |
| 72.9177631 | 62.0756734 | 71.4780886 | 66.3328655 | 71.9122821 |
| 72.9177631 | 62.0756734 | 73.4780886 | 66.3328655 | 73.9122821 |
| 71.9177631 | 62.0756734 | 73.4780886 | 70.3328655 | 76.9122821 |
| 72.9177631 | 62.0756734 | 73.4780886 | 70.3328655 | 76.9122821 |
| 73.9177631 | 62.0756734 | 72.4780886 | 70.3328655 | 76.9122821 |
| 73.9177631 | 63.0756734 | 71.4780886 | 70.3328655 | 76.9122821 |
| 73.9177631 | 63.0756734 | 71.4780886 | 70.3328655 | 77.9122821 |
| 73.9177631 | 72.0756734 | 70.4780886 | 70.3328655 | 77.9122821 |
| 72.9177631 | 72.3097112 | 70.4780886 | 73.3328655 | 77.9122821 |
| 70.9177631 | 72.4097112 | 70.4780886 | 76.3328655 | 77.9122821 |
| 67.9177631 | 73.5097112 | 70.4780886 | 76.3328655 | 77.9122821 |
| 65.9177631 | 74.9097112 | 70.4780886 | 77.3328655 | 77.9122821 |
| 65.9177631 | 75.0097112 | 69.4780886 | 78.3328655 | 77.9122821 |
| 65.9177631 | 75.2097112 | 69.4780886 | 78.3328655 | 74.9122821 |
| 65.9177631 | 75.3097112 | 69.4780886 | 78.3328655 | 73.9122821 |
| 65.9177631 | 74.6097112 | 69.4780886 | 71.3328655 | 73.9122821 |
| 65.9177631 | 74.3097112 | 68.4780886 | 71.3328655 | 72.9122821 |
| 65.9177631 | 74.9738052 | 69.4780886 |            | 72.9122821 |
| 66.9177631 | 75.5293607 | 71.4780886 |            | 71.9122821 |
| 66.9177631 | 75.6404718 | 71.4780886 |            | 71.9122821 |
| 66.9177631 | 75.6404718 | 71.4780886 |            | 71.9122821 |
| 66.9177631 | 75.862694  | 72.4780886 |            | 72.9122821 |
| 66.9177631 | 75.6404718 | 72.4780886 |            | 72.9122821 |
| 66.9177631 | 75.4182496 | 72.4780886 |            | 72.9122821 |
| 66.9177631 | 74.862694  | 72.4780886 |            | 71.9122821 |
| 66.9177631 | 73.9738052 | 72.4780886 |            | 71.9122821 |
| 66.9177631 | 74.1960274 | 72.4780886 |            | 71.9122821 |
| 64.9177631 | 74.1960274 | 72.4780886 |            | 71.9122821 |
| 64.9177631 | 84.0756734 | 70.4780886 |            | 72.9122821 |
| 64.9177631 | 84.0756734 | 68.4780886 |            | 72.9122821 |
| 63.9177631 | 84.0756734 | 68.4780886 |            | 76.9122821 |

|            |            |            |            |
|------------|------------|------------|------------|
| 65.9177631 | 81.0756734 | 66.4780886 | 77.9122821 |
| 65.9177631 | 81.0756734 | 66.4780886 | 77.9122821 |
| 65.9177631 | 81.0756734 | 66.4780886 | 71.7515829 |
| 65.9177631 | 64.0756734 | 64.4780886 | 69.7515829 |
| 65.9177631 | 64.0756734 | 64.4780886 | 69.5293607 |
| 66.9177631 | 64.0756734 | 64.4780886 | 68.7515829 |
| 66.9177631 | 63.0756734 | 64.4780886 | 68.1960274 |
| 66.9177631 | 63.0756734 | 64.4780886 | 68.1960274 |
| 66.9177631 | 63.0756734 | 64.4780886 | 68.0849163 |
| 66.9177631 | 62.0756734 | 64.4780886 | 67.862694  |
| 66.9177631 | 62.0756734 | 64.4780886 | 67.862694  |
| 67.9177631 | 62.0756734 | 64.4780886 | 67.862694  |
| 67.9177631 | 67.0756734 | 63.4780886 | 68.0849163 |
| 66.9177631 | 67.0756734 | 62.4780886 | 67.5293607 |
| 66.9177631 | 67.0756734 | 62.4780886 | 67.7515829 |
| 66.9177631 | 73.5293607 | 63.4780886 | 84.9122821 |
| 65.9177631 | 73.1960274 | 63.4780886 | 83.9122821 |
| 59.9177631 | 72.862694  | 65.4780886 | 83.9122821 |
| 58.9177631 | 70.6404718 | 65.4780886 | 83.9122821 |
| 58.9177631 | 69.0849163 | 65.4780886 | 74.9122821 |
| 59.9177631 | 69.5293607 | 66.4780886 | 73.9122821 |
| 60.9177631 | 69.3071385 | 66.4780886 | 73.9122821 |
| 60.9177631 | 69.3071385 | 65.4780886 | 74.9122821 |
| 61.9177631 | 69.0849163 | 65.4780886 | 74.9122821 |
| 65.9177631 | 82.0756734 | 65.4780886 | 74.9122821 |
| 66.9177631 | 81.0756734 | 65.4780886 | 74.9122821 |
| 66.9177631 | 81.0756734 | 66.4780886 | 75.9122821 |
| 66.9177631 | 80.0756734 | 66.4780886 | 76.9122821 |
| 66.9177631 | 74.0756734 | 66.4780886 | 77.9122821 |
| 67.9177631 | 74.0756734 | 66.4780886 | 77.9122821 |
| 67.9177631 | 72.0756734 | 66.4780886 | 77.9122821 |
| 68.9177631 | 72.0756734 | 66.4780886 | 77.9122821 |
| 68.9177631 | 72.0756734 | 66.4780886 | 77.9122821 |
| 68.9177631 | 72.0756734 | 67.4780886 | 76.9122821 |
| 68.9177631 | 72.0756734 | 67.4780886 | 76.9122821 |
| 69.9177631 | 70.0756734 | 66.4780886 | 76.9122821 |
| 68.9177631 | 68.0756734 | 66.4780886 | 76.9122821 |
| 68.9177631 | 66.0756734 | 66.4780886 | 76.9122821 |
| 67.9177631 | 66.0756734 | 70.4780886 | 75.9122821 |
| 67.9177631 | 66.0756734 | 75.4780886 | 78.9122821 |
| 67.9177631 | 65.0756734 | 76.4780886 | 81.9122821 |
| 67.9177631 | 65.0756734 | 76.4780886 | 81.9122821 |
| 67.9177631 | 65.0756734 | 76.4780886 | 81.9122821 |
| 67.9177631 | 66.0756734 | 77.4780886 | 81.9122821 |
| 67.9177631 | 66.0756734 | 77.4780886 | 81.9122821 |



|            |            |            |            |
|------------|------------|------------|------------|
| 67.9177631 | 66.0756734 | 77.4780886 | 82.9122821 |
| 67.9177631 | 66.0756734 | 73.4780886 | 82.9122821 |
| 67.9177631 | 66.0756734 | 72.4780886 | 84.9122821 |
| 68.9177631 | 66.0756734 | 72.4780886 | 84.9122821 |
| 69.9177631 | 66.0756734 | 72.4780886 | 85.9122821 |
| 69.9177631 | 66.0756734 | 71.4780886 | 85.9122821 |
| 68.9177631 | 66.0756734 | 71.4780886 | 84.9122821 |
| 69.9177631 | 67.0756734 | 71.4780886 | 83.9122821 |
| 71.9177631 | 67.0756734 | 70.4780886 | 83.9122821 |
| 72.9177631 | 68.0756734 | 70.4780886 | 83.9122821 |
| 72.9177631 | 68.0756734 | 70.4780886 | 83.9122821 |
| 75.9177631 | 68.0756734 | 70.4780886 | 83.9122821 |
| 75.9177631 | 68.0756734 | 70.4780886 | 85.9122821 |
| 79.9177631 | 67.0756734 | 71.4780886 | 86.9122821 |
| 79.9177631 | 67.0756734 | 73.4780886 | 86.9122821 |
| 82.9177631 | 66.0756734 | 73.4780886 | 85.9122821 |
| 83.9177631 | 66.0756734 | 73.4780886 | 85.9122821 |
| 83.9177631 | 66.0756734 | 73.4780886 | 85.9122821 |
| 82.9177631 | 66.0756734 | 73.4780886 | 85.9122821 |
| 81.9177631 | 66.0756734 | 74.4780886 | 85.9122821 |
| 81.9177631 | 66.0756734 | 74.4780886 | 85.9122821 |
| 81.9177631 | 66.0756734 | 74.4780886 | 86.9122821 |
| 81.9177631 | 66.0756734 | 74.4780886 | 87.9122821 |
| 80.9177631 | 66.0756734 | 74.4780886 | 72.5293607 |
| 76.9177631 | 65.0756734 | 75.4780886 | 71.9738052 |
| 72.9177631 | 65.0756734 | 75.4780886 | 75.9122821 |
| 71.9177631 | 66.0756734 | 77.4780886 | 71.9122821 |
| 71.9177631 | 66.0756734 | 78.4780886 | 71.9122821 |
| 68.9177631 | 70.0756734 | 80.4780886 | 71.9122821 |
| 68.9177631 | 70.0756734 | 81.4780886 | 71.9122821 |
| 68.9177631 | 69.0756734 | 82.4780886 | 71.9122821 |
| 68.9177631 | 67.0756734 | 82.4780886 | 72.9122821 |
| 67.9177631 | 67.0756734 | 82.4780886 | 74.9122821 |
| 67.9177631 | 66.0756734 | 81.4780886 | 74.9122821 |
| 67.9177631 | 66.0756734 | 81.4780886 | 74.9122821 |
| 67.9177631 | 66.0756734 | 81.4780886 | 71.9122821 |
| 67.9177631 | 68.8360716 | 82.4780886 | 68.9122821 |
| 67.9177631 |            | 83.4780886 | 68.9122821 |
| 66.9177631 |            | 67.8360716 | 68.9122821 |
| 67.9177631 |            | 67.2110716 | 68.9122821 |
| 66.9177631 |            | 67.0860716 | 70.9122821 |
| 66.9177631 |            | 67.2110716 | 72.9122821 |
| 66.9177631 |            | 67.5860716 | 72.9122821 |
| 66.9177631 |            | 83.4780886 | 80.9122821 |
| 66.9177631 |            | 82.4780886 | 81.9122821 |

|            |            |            |
|------------|------------|------------|
| 66.9177631 | 82.4780886 | 81.9122821 |
| 66.9177631 | 82.4780886 | 81.9122821 |
| 66.9177631 | 82.4780886 | 81.9122821 |
| 66.9177631 | 82.4780886 | 85.9122821 |
| 66.9177631 | 82.4780886 | 86.9122821 |
| 66.9177631 | 81.4780886 | 72.0860716 |
| 66.9177631 | 82.4780886 | 72.2110716 |
| 65.9177631 | 82.4780886 | 85.9122821 |
| 65.9177631 | 82.4780886 | 85.9122821 |
| 65.9177631 | 81.4780886 | 83.9122821 |
| 65.9177631 | 81.4780886 | 83.9122821 |
| 65.9177631 | 81.4780886 | 83.9122821 |
| 65.9177631 | 81.4780886 | 80.9122821 |
| 65.9177631 | 81.4780886 | 79.9122821 |
| 65.9177631 | 81.4780886 | 79.9122821 |
| 68.9177631 | 81.4780886 | 77.9122821 |
| 69.9177631 | 81.4780886 | 77.9122821 |
| 69.9177631 | 81.4780886 | 76.9122821 |
| 69.9177631 | 82.4780886 | 76.9122821 |

| Activity | behavior | average of a behavior | moving avg    |
|----------|----------|-----------------------|---------------|
|          |          | 74.9643873            | 61 75.5886641 |
|          |          | 75.5754984            | 61 75.6636458 |
|          |          | 75.5754984            | 61 75.7275163 |
|          |          | 75.5643873            | 61 75.8068189 |
|          |          | 75.2088317            | 61 75.8712684 |
|          |          | 76.4963334            | 61 75.9463044 |
|          |          | 76.4963334            | 61 76.0238403 |
|          |          | 76.6074445            | 61 76.1004812 |
|          |          | 76.2741111            | 61 76.1935726 |
|          |          | 76.7185556            | 61 76.3015098 |
|          |          | 77.2741111            | 61 76.4021013 |
|          |          | 77.3852223            | 61 76.5098841 |
|          |          | 78.0518889            | 61 76.6261855 |
|          |          | 78.0518889            | 61 76.7015918 |
|          |          | 77.9407778            | 61 76.7494981 |
|          |          | 77.7185556            | 61 76.7706452 |
|          |          | 77.3852223            | 61 76.7797552 |
|          |          | 77.163                | 61 76.7765504 |
|          |          | 77.3852223            | 61 76.7347718 |
|          |          | 77.7185556            | 61 76.6726198 |
|          |          | 77.8296667            | 61 76.6237086 |
|          |          | 77.3852223            | 61 76.5923798 |
|          |          | 77.2741111            | 61 76.5457732 |
|          |          | 76.6799866            | 61 76.4936666 |
|          |          | 76.9799866            | 61 76.4363378 |
|          |          | 77.0799866            | 61 76.3933979 |
|          |          | 77.1799866            | 61 76.2922704 |
|          |          | 77.4799866            | 61 76.2143618 |
|          |          | 77.5799866            | 61 76.1286753 |
|          |          | 77.7799866            | 63 76.0563222 |
|          |          | 78.0799866            | 63 75.992858  |
|          |          | 77.6799866            | 63 75.9230049 |
|          |          | 77.1799866            | 63 75.850374  |
|          |          | 76.0799866            | 63 75.7860764 |
|          |          | 75.3799866            | 63 75.7242789 |
|          |          | 75.3799866            | 63 75.6752591 |
|          |          | 75.4799866            | 63 75.6417949 |
|          |          | 73.8012351            | 63 75.616664  |
|          |          | 73.5912351            | 63 75.5970886 |
|          |          | 73.4912351            | 63 75.5644577 |
|          |          | 73.7112351            | 63 75.5384935 |
|          |          | 73.7112351            | 63 75.5047515 |
|          |          | 73.4912351            | 63 75.4696206 |

|            |    |            |
|------------|----|------------|
| 73.2712351 | 63 | 75.4372675 |
| 73.4912351 | 63 | 75.4272675 |
| 72.4512351 | 63 | 75.4097675 |
| 73.3799866 | 63 | 75.3722675 |
| 73.1799866 | 63 | 75.3272675 |
| 73.3799866 | 63 | 75.2747675 |
| 74.1799866 | 63 | 75.1897675 |
| 74.4799866 | 63 | 75.1122675 |
| 74.4799866 | 63 | 75.0372675 |
| 75.4799866 | 63 | 74.9772675 |
| 75.5799866 | 63 | 74.9372675 |
| 75.9799866 | 63 | 74.9322675 |
| 76.3799866 | 63 | 74.9422675 |
| 76.3799866 | 63 | 74.9572675 |
| 76.3799866 | 63 | 74.9279848 |
| 76.0799866 | 63 | 74.934921  |
| 76.6799866 | 63 | 74.9796397 |
| 76.4799866 | 63 | 74.9846122 |
| 75.9799866 | 63 | 74.9868347 |
| 75.9799866 | 63 | 74.9835572 |
| 76.2799866 | 63 | 74.9775297 |
| 76.2799866 | 63 | 74.9822522 |
| 75.5799866 | 63 | 75.021971  |
| 75.3799866 | 63 | 75.0901898 |
| 75.3799866 | 63 | 75.1276898 |
| 74.1799866 | 63 | 75.1676898 |
| 74.6799866 | 63 | 75.2126898 |
| 75.0799866 | 63 | 75.2376898 |
| 75.2799866 | 63 | 75.2626898 |
| 75.5799866 | 63 | 75.2901898 |
| 75.8799866 | 63 | 75.2951898 |
| 75.7799866 | 63 | 75.3026898 |
| 75.9799866 | 63 | 75.3026898 |
| 74.3086798 | 63 | 75.2801898 |
| 74.0786798 | 63 | 75.2476898 |
| 75.3799866 | 63 | 75.2226898 |
| 73.6901349 | 63 | 75.2076898 |
| 73.8001349 | 63 | 75.1726898 |
| 73.5801349 | 63 | 75.1426898 |
| 73.2501349 | 63 | 75.1251898 |
| 73.4601349 | 63 | 75.0926898 |
| 75.0799866 | 63 | 75.0526898 |
| 75.1799866 | 63 | 75.0201898 |
| 74.8799866 | 63 | 75.0101898 |
| 74.7799866 | 63 | 75.0026898 |

|            |    |            |
|------------|----|------------|
| 75.1799866 | 63 | 75.0051898 |
| 75.1799866 | 63 | 75.0326898 |
| 75.4799866 | 63 | 75.0476898 |
| 75.5799866 | 63 | 75.0626898 |
| 75.6799866 | 63 | 75.0676898 |
| 75.8799866 | 63 | 75.0551898 |
| 75.9799866 | 63 | 75.0401898 |
| 75.4799866 | 63 | 75.0326898 |
| 75.0799866 | 63 | 75.0326898 |
| 75.3799866 | 63 | 75.0844725 |
| 75.4799866 | 63 | 75.1620051 |
| 75.2799866 | 63 | 75.2145051 |
| 75.2799866 | 63 | 75.3142514 |
| 75.2799866 | 63 | 75.4187477 |
| 74.6799866 | 63 | 75.538744  |
| 74.6799866 | 63 | 75.6269903 |
| 74.9799866 | 63 | 75.6924866 |
| 75.1799866 | 63 | 75.6949866 |
| 75.0799866 | 63 | 75.6899866 |
| 75.4799866 | 63 | 75.6949866 |
| 75.2799866 | 63 | 75.6949866 |
| 75.2799866 | 63 | 75.6874866 |
| 75.6799866 | 63 | 75.6799866 |
| 75.4799866 | 63 | 75.6649866 |
| 75.0799866 | 63 | 75.6861963 |
| 75.2799866 | 63 | 75.7094516 |
| 75.4799866 | 63 | 75.7436159 |
| 75.9799866 | 63 | 75.7775529 |
| 76.3799866 | 63 | 75.8217172 |
| 77.1799866 | 63 | 75.8781542 |
| 77.4799866 | 63 | 75.9361822 |
| 77.6799866 | 63 | 75.984892  |
| 77.9799866 | 63 | 76.0249654 |
| 78.3799866 | 63 | 76.0650388 |
| 76.7799866 | 63 | 76.1028394 |
| 76.0799866 | 63 | 76.1510946 |
| 75.1799866 | 63 | 76.1993499 |
| 74.9799866 | 63 | 76.2355596 |
| 75.0799866 | 63 | 76.2554057 |
| 74.7799866 | 63 | 76.2754791 |
| 74.8799866 | 63 | 76.2878253 |
| 74.8799866 | 63 | 76.2847169 |
| 74.8799866 | 63 | 76.277063  |
| 76.4283771 | 63 | 76.2662273 |
| 76.6101953 | 63 | 76.2581189 |

|            |    |            |
|------------|----|------------|
| 77.2465589 | 63 | 76.2622832 |
| 77.337468  | 63 | 76.2682657 |
| 77.2465589 | 63 | 76.2647027 |
| 77.337468  | 63 | 76.2440943 |
| 77.7011044 | 63 | 76.220304  |
| 77.4283771 | 63 | 76.1742411 |
| 76.8829225 | 63 | 76.1320417 |
| 76.8829225 | 63 | 76.080297  |
| 76.7920134 | 63 | 76.0210522 |
| 76.6101953 | 63 | 75.9540801 |
| 76.6101953 | 63 | 75.9293808 |
| 76.4283771 | 63 | 75.9335451 |
| 75.9738316 | 63 | 75.9738458 |
| 75.8829225 | 63 | 76.014601  |
| 75.9738316 | 63 | 76.0619471 |
| 75.1556498 | 63 | 76.1145205 |
| 74.9738316 | 63 | 76.1577757 |
| 75.2465589 | 63 | 76.2033037 |
| 75.1556498 | 63 | 76.2442862 |
| 75.2465589 | 63 | 76.2465589 |
| 75.5192862 | 63 | 76.2533771 |
| 75.337468  | 63 | 76.2306498 |
| 75.1556498 | 63 | 76.2056498 |
| 75.4283771 | 63 | 76.1783771 |
| 75.337468  | 63 | 76.1533771 |
| 75.7920134 | 63 | 76.1261044 |
| 75.6101953 | 63 | 76.1033771 |
| 75.6101953 | 63 | 76.0965589 |
| 75.7011044 | 63 | 76.087468  |
| 75.7920134 | 63 | 76.0738316 |
| 76.2465589 | 63 | 76.0533771 |
| 76.7920134 | 63 | 76.0283771 |
| 76.6101953 | 63 | 76.0056498 |
| 76.9738316 | 63 | 75.9965589 |
| 76.8829225 | 63 | 76.0011044 |
| 76.6101953 | 63 | 76.0192862 |
| 76.7011044 | 63 | 76.062468  |
| 76.5192862 | 63 | 76.0758729 |
| 76.5192862 | 63 | 76.0601456 |
| 76.8829225 | 63 | 76.0491703 |
| 76.337468  | 63 | 76.026005  |
| 76.337468  | 63 | 76.0034595 |
| 76.1556498 | 63 | 75.9908313 |
| 76.337468  | 63 | 75.9837817 |
| 76.6101953 | 63 | 75.9699138 |

|            |    |            |
|------------|----|------------|
| 76.5192862 | 63 | 75.9583187 |
| 76.6101953 | 63 | 75.9403187 |
| 76.5192862 | 63 | 75.8941065 |
| 76.2465589 | 63 | 75.8594645 |
| 75.7920134 | 63 | 75.8175912 |
| 75.6101953 | 63 | 75.7519575 |
| 75.5192862 | 63 | 75.6710345 |
| 75.6101953 | 63 | 75.579781  |
| 76.0647407 | 63 | 75.4967919 |
| 76.7011044 | 63 | 75.43561   |
| 76.8829225 | 63 | 75.3882711 |
| 75.5100278 | 63 | 75.3502298 |
| 74.6174658 | 63 | 75.3047504 |
| 74.7166394 | 63 | 75.2557586 |
| 74.3199452 | 63 | 75.2018081 |
| 74.6174658 | 63 | 75.1263701 |
| 74.8323419 | 63 | 75.0622956 |
| 74.8736642 | 63 | 74.9957418 |
| 74.8736642 | 63 | 74.9314608 |
| 74.8736642 | 63 | 74.8837335 |
| 75.0720113 | 63 | 74.8291881 |
| 73.7617069 | 63 | 74.7678244 |
| 74.2245169 | 63 | 74.7200972 |
| 74.0261698 | 63 | 74.6700972 |
| 73.1666656 | 63 | 74.6269153 |
| 73.0096408 | 63 | 74.6178244 |
| 73.1418722 | 63 | 74.6200972 |
| 73.2906326 | 63 | 74.6110063 |
| 74.5265568 | 63 | 74.5950972 |
| 74.9893667 | 63 | 74.5655517 |
| 75.0885402 | 63 | 74.5019153 |
| 74.8819287 | 63 | 74.438279  |
| 74.5596146 | 63 | 74.4112377 |
| 74.3612675 | 63 | 74.4156014 |
| 73.8653997 | 63 | 74.4197585 |
| 73.7744906 | 63 | 74.4315602 |
| 73.6753171 | 63 | 74.4404693 |
| 73.584408  | 63 | 74.4462793 |
| 74.4283771 | 63 | 74.4487835 |
| 74.4283771 | 63 | 74.4535604 |
| 74.0647407 | 63 | 74.46061   |
| 74.7011044 | 63 | 74.462701  |
| 74.5192862 | 63 | 74.4952768 |
| 74.5192862 | 63 | 74.5321915 |
| 75.4283771 | 63 | 74.5922467 |

|            |    |            |
|------------|----|------------|
| 75.7011044 | 63 | 74.6692441 |
| 75.1556498 | 63 | 74.7569852 |
| 74.9738316 | 63 | 74.8482387 |
| 74.8829225 | 63 | 74.9244096 |
| 74.1556498 | 63 | 74.9719551 |
| 74.337468  | 63 | 75.0033849 |
| 74.4283771 | 63 | 75.0323354 |
| 74.7920134 | 63 | 75.084633  |
| 74.8829225 | 63 | 75.1518066 |
| 74.7920134 | 63 | 75.2239388 |
| 74.9738316 | 63 | 75.3175587 |
| 75.0647407 | 63 | 75.4134514 |
| 74.9738316 | 63 | 75.5004597 |
| 75.0647407 | 63 | 75.6011044 |
| 75.1556498 | 63 | 75.6851953 |
| 75.1556498 | 63 | 75.762468  |
| 75.0647407 | 63 | 75.8488316 |
| 75.7011044 | 63 | 75.9238316 |
| 76.4283771 | 63 | 75.9920134 |
| 76.2465589 | 63 | 76.0511044 |
| 76.5192862 | 63 | 76.0851953 |
| 76.7920134 | 63 | 76.1056498 |
| 76.337468  | 63 | 76.1283771 |
| 76.4283771 | 63 | 76.1329225 |
| 76.2465589 | 63 | 76.1192862 |
| 76.2465589 | 63 | 76.1261044 |
| 76.9738316 | 63 | 76.1397407 |
| 77.2465589 | 63 | 76.1670134 |
| 77.2465589 | 63 | 76.1851953 |
| 77.6101953 | 63 | 76.1920134 |
| 77.6101953 | 63 | 76.2056498 |
| 77.1556498 | 63 | 76.2170134 |
| 77.6101953 | 63 | 76.2306498 |
| 77.7920134 | 63 | 76.2556498 |
| 77.5192862 | 63 | 76.2806498 |
| 77.5192862 | 63 | 76.2965589 |
| 77.7011044 | 63 | 76.2941185 |
| 77.2465589 | 63 | 76.289612  |
| 76.8829225 | 63 | 76.2642378 |
| 76.7920134 | 63 | 76.2010536 |
| 76.5192862 | 63 | 76.1376628 |
| 76.0647407 | 63 | 76.0674538 |
| 75.1556498 | 63 | 75.985468  |
| 74.337468  | 63 | 75.9173251 |
| 74.4283771 | 63 | 75.8469095 |



|            |    |            |
|------------|----|------------|
| 74.8829225 | 63 | 75.7909567 |
| 75.5192862 | 63 | 75.7403759 |
| 75.5192862 | 63 | 75.6790512 |
| 75.1556498 | 63 | 75.6156604 |
| 75.337468  | 63 | 75.559501  |
| 75.4283771 | 63 | 75.4940441 |
| 75.6101953 | 63 | 75.369083  |
| 75.9738316 | 63 | 75.250527  |
| 76.0647407 | 63 | 75.1181279 |
| 75.7920134 | 63 | 74.9890346 |
| 75.0580346 | 63 | 74.8766769 |
| 74.8844808 | 63 | 74.7641125 |
| 74.6861337 | 63 | 74.6544408 |
| 73.9010098 | 63 | 74.5831987 |
| 73.7109271 | 63 | 74.5233203 |
| 73.7109271 | 63 | 74.4706733 |
| 73.51258   | 63 | 74.4322825 |
| 73.6117536 | 63 | 74.4102141 |
| 73.6117536 | 63 | 74.4108729 |
| 74.0084478 | 63 | 74.4741349 |
| 74.2233238 | 63 | 74.4949625 |
| 74.5208445 | 63 | 74.5186826 |
| 74.7109271 | 63 | 74.5233944 |
| 75.0001833 | 63 | 74.5272798 |
| 74.9919189 | 63 | 74.5792668 |
| 72.6117536 | 63 | 74.6415843 |
| 72.4134065 | 63 | 74.7067943 |
| 72.3142329 | 63 | 74.7773763 |
| 72.6282825 | 63 | 74.846512  |
| 73.0249767 | 63 | 74.9183337 |
| 73.0167122 | 63 | 74.9996594 |
| 73.3142329 | 63 | 75.0945826 |
| 74.3968775 | 63 | 75.146211  |
| 74.4877866 | 63 | 75.1827567 |
| 74.6861337 | 63 | 75.1666555 |
| 74.9836544 | 63 | 75.143736  |
| 75.1820015 | 63 | 75.1115191 |
| 75.1820015 | 63 | 75.1289681 |
| 76.8679519 | 63 | 75.1228634 |
| 75.2614788 | 63 | 75.1310149 |
| 75.8317267 | 63 | 75.1676787 |
| 75.7077598 | 63 | 75.2097145 |
| 75.6747019 | 63 | 75.2558825 |
| 77.2351271 | 63 | 75.3135818 |
| 77.8301684 | 63 | 75.3394629 |

|            |    |            |
|------------|----|------------|
| 78.03678   | 63 | 75.3436498 |
| 78.4334742 | 63 | 75.3901921 |
| 78.7392593 | 63 | 75.4367344 |
| 78.9376064 | 63 | 75.4758387 |
| 79.0450445 | 63 | 75.5145297 |
| 78.8549618 | 63 | 75.5433034 |
| 76.9496161 | 63 | 75.5695977 |
| 76.1479632 | 63 | 75.5909334 |
| 73.2569596 | 63 | 75.5777649 |
| 72.7941496 | 63 | 75.5598444 |
| 72.4222488 | 63 | 75.5266346 |
| 74.2105401 | 63 | 75.4884661 |
| 73.3675649 | 63 | 75.4403803 |
| 73.9378128 | 63 | 75.4046912 |
| 75.4750029 | 63 | 75.33925   |
| 75.904755  | 63 | 75.323888  |
| 76.3675649 | 63 | 75.3017078 |
| 77.0188992 | 63 | 75.3072135 |
| 76.0354281 | 63 | 75.3331738 |
| 75.159395  | 63 | 75.3201235 |
| 74.4734446 | 63 | 75.2839327 |
| 74.2750975 | 63 | 75.2301799 |
| 73.8784033 | 63 | 75.1687825 |
| 74.175924  | 63 | 75.1096577 |
| 74.175924  | 63 | 75.0878361 |
| 74.0684859 | 63 | 75.0701467 |
| 74.1676595 | 63 | 75.1137961 |
| 73.8701388 | 63 | 75.2050791 |
| 73.7709653 | 63 | 75.3393622 |
| 73.3577421 | 63 | 75.5027385 |
| 73.4569157 | 63 | 75.6458669 |
| 73.2585686 | 63 | 75.7892019 |
| 73.7544364 | 63 | 75.8560115 |
| 74.2503041 | 63 | 75.9416227 |
| 74.6469983 | 63 | 75.985705  |
| 74.944519  | 63 | 75.9799939 |
| 75.9279901 | 63 | 75.9430845 |
| 76.713114  | 63 | 75.8855139 |
| 76.713114  | 63 | 75.7934781 |
| 76.3825355 | 63 | 75.7214836 |
| 75.8866678 | 63 | 75.6645718 |
| 75.9775769 | 63 | 75.6111724 |
| 76.3742711 | 63 | 75.5604589 |
| 78.0647407 | 63 | 75.5128446 |
| 78.337468  | 63 | 75.444156  |

|            |    |            |
|------------|----|------------|
| 80.6009369 | 63 | 75.3618309 |
| 80.6009369 | 63 | 75.2731009 |
| 81.5192862 | 63 | 75.1728007 |
| 79.7920134 | 63 | 75.0822112 |
| 78.5192862 | 63 | 74.9827374 |
| 78.1556498 | 63 | 74.9435942 |
| 76.8829225 | 63 | 74.9269716 |
| 76.7920134 | 63 | 74.9153077 |
| 75.7011044 | 63 | 74.8980653 |
| 75.2465589 | 63 | 74.8570626 |
| 74.4283771 | 63 | 74.8175062 |
| 74.0647407 | 63 | 74.7727845 |
| 73.337468  | 63 | 74.7034759 |
| 73.1556498 | 63 | 74.6122666 |
| 72.8829225 | 63 | 74.52333   |
| 72.337468  | 63 | 74.4472033 |
| 72.2465589 | 63 | 74.3857461 |
| 71.9738316 | 63 | 74.3379252 |
| 71.4283771 | 63 | 74.2824596 |
| 70.8829225 | 63 | 74.1756414 |
| 70.5192862 | 63 | 74.0733687 |
| 70.1556498 | 63 | 73.9122365 |
| 70.2465589 | 63 | 73.7397407 |
| 69.7920134 | 63 | 73.5533771 |
| 71.7920134 | 63 | 73.4147407 |
| 72.7920134 | 63 | 73.312468  |
| 72.7920134 | 63 | 73.2170134 |
| 73.0647407 | 63 | 73.1488316 |
| 72.6101953 | 63 | 73.062468  |
| 73.0647407 | 63 | 72.9829225 |
| 73.1556498 | 63 | 72.8942862 |
| 73.1556498 | 63 | 72.8101953 |
| 73.0647407 | 63 | 72.7351953 |
| 73.1556498 | 63 | 72.6715589 |
| 73.337468  | 63 | 72.6147407 |
| 73.4283771 | 63 | 72.562468  |
| 74.0647407 | 63 | 72.5238316 |
| 74.1556498 | 63 | 72.487468  |
| 73.7920134 | 63 | 72.4488316 |
| 74.2465589 | 63 | 72.4170134 |
| 74.1556498 | 63 | 72.3988316 |
| 73.7011044 | 63 | 72.3761044 |
| 74.0647407 | 63 | 72.3761044 |
| 74.2465589 | 63 | 72.3783771 |
| 74.4283771 | 63 | 72.3965589 |

|            |    |            |
|------------|----|------------|
| 74.337468  | 63 | 72.3715589 |
| 74.1556498 | 63 | 72.3238316 |
| 73.337468  | 63 | 72.2783771 |
| 72.5192862 | 63 | 72.2397407 |
| 71.7011044 | 63 | 72.2306498 |
| 71.0647407 | 63 | 72.2101953 |
| 71.0647407 | 63 | 72.1965589 |
| 70.7920134 | 63 | 72.1806498 |
| 70.8829225 | 63 | 72.1738316 |
| 70.7920134 | 63 | 72.1670134 |
| 70.7920134 | 63 | 72.1397407 |
| 70.7920134 | 63 | 72.1147407 |
| 70.4283771 | 63 | 72.0761044 |
| 70.1556498 | 63 | 72.0488316 |
| 70.1556498 | 63 | 72.0306498 |
| 69.6101953 | 63 | 71.9988316 |
| 70.1556498 | 63 | 71.9670134 |
| 70.337468  | 63 | 71.9579225 |
| 70.5192862 | 63 | 71.9420134 |
| 70.7920134 | 63 | 71.9238316 |
| 70.8829225 | 63 | 71.9101953 |
| 70.9738316 | 63 | 71.9215589 |
| 71.5192862 | 63 | 71.9442862 |
| 72.2465589 | 63 | 72.0033771 |
| 72.2465589 | 63 | 72.0829225 |
| 72.6101953 | 63 | 72.1851953 |
| 72.5192862 | 63 | 72.2806498 |
| 72.7920134 | 63 | 72.3806498 |
| 72.8829225 | 63 | 72.4920134 |
| 72.2465589 | 63 | 72.6056498 |
| 72.4283771 | 63 | 72.7351953 |
| 72.5192862 | 63 | 72.8579225 |
| 73.0647407 | 63 | 72.9670134 |
| 73.0647407 | 63 | 73.0692862 |
| 72.9738316 | 63 | 73.1715589 |
| 72.8829225 | 63 | 73.2738316 |
| 73.337468  | 63 | 73.3829225 |
| 73.4283771 | 63 | 73.4647407 |
| 73.5192862 | 63 | 73.5306498 |
| 73.8829225 | 63 | 73.5783771 |
| 74.7920134 | 63 | 73.6215589 |
| 75.0647407 | 63 | 73.6715589 |
| 75.7011044 | 63 | 73.7192862 |
| 75.7011044 | 63 | 73.734344  |
| 75.7920134 | 63 | 73.7388646 |

|            |    |            |
|------------|----|------------|
| 74.8829225 | 63 | 73.7433852 |
| 75.0647407 | 63 | 73.7586496 |
| 75.2465589 | 63 | 73.7662694 |
| 75.4283771 | 63 | 73.814385  |
| 75.9738316 | 63 | 73.8503106 |
| 75.7011044 | 63 | 73.8847899 |
| 75.1556498 | 63 | 73.9048064 |
| 74.5192862 | 63 | 73.9200708 |
| 74.2465589 | 63 | 73.9167401 |
| 74.2465589 | 63 | 73.9061781 |
| 73.9738316 | 63 | 73.8978888 |
| 73.4283771 | 63 | 73.8968309 |
| 72.9738316 | 63 | 73.8794507 |
| 72.4283771 | 63 | 73.839963  |
| 72.5192862 | 63 | 73.7808472 |
| 72.8829225 | 63 | 73.7014836 |
| 72.8829225 | 63 | 73.5919546 |
| 72.1215981 | 63 | 73.4919546 |
| 72.4273832 | 63 | 73.3669546 |
| 72.4273832 | 63 | 73.2396818 |
| 73.2207716 | 63 | 73.1078637 |
| 72.8240774 | 63 | 72.9987728 |
| 74.7166394 | 63 | 72.8805909 |
| 74.3199452 | 63 | 72.7533182 |
| 73.6257303 | 63 | 72.6215    |
| 73.2290361 | 63 | 72.4646818 |
| 73.1298625 | 63 | 72.3055909 |
| 72.9315154 | 63 | 72.1578637 |
| 72.6422592 | 63 | 72.0260455 |
| 72.6422592 | 63 | 71.8965    |
| 72.8406063 | 63 | 71.7805909 |
| 72.6422592 | 63 | 71.6896818 |
| 71.8488708 | 63 | 71.6078637 |
| 71.1546559 | 63 | 71.5601364 |
| 70.7083749 | 63 | 71.5465    |
| 70.4108543 | 63 | 71.5351364 |
| 71.0647407 | 63 | 71.5169546 |
| 70.7011044 | 63 | 71.4965    |
| 70.6101953 | 63 | 71.4581341 |
| 70.5192862 | 63 | 71.3763797 |
| 70.5192862 | 63 | 71.2896666 |
| 70.337468  | 63 | 71.1781602 |
| 70.1556498 | 63 | 71.0790505 |
| 70.1556498 | 63 | 70.9598994 |
| 69.7011044 | 63 | 70.853145  |

|            |    |            |
|------------|----|------------|
| 69.337468  | 63 | 70.7658121 |
| 69.2465589 | 63 | 70.6981073 |
| 69.2465589 | 63 | 70.6304025 |
| 69.0647407 | 63 | 70.5724085 |
| 69.6101953 | 63 | 70.5365219 |
| 70.337468  | 63 | 70.4948501 |
| 70.1556498 | 63 | 70.4779718 |
| 71.0647407 | 63 | 70.4710108 |
| 71.8829225 | 63 | 70.4861573 |
| 72.0647407 | 63 | 70.5186591 |
| 72.1556498 | 63 | 70.577194  |
| 72.0647407 | 63 | 70.6753593 |
| 70.5869602 | 63 | 70.7571775 |
| 69.1572081 | 63 | 70.8571775 |
| 68.958861  | 63 | 70.9617229 |
| 68.7605139 | 63 | 71.0594502 |
| 68.8596874 | 63 | 71.1549048 |
| 69.9505965 | 63 | 71.2503593 |
| 70.0497701 | 63 | 71.3185411 |
| 70.1324147 | 63 | 71.3867229 |
| 70.5208445 | 63 | 71.4662684 |
| 70.4216709 | 63 | 71.5662684 |
| 70.6117536 | 63 | 71.6594502 |
| 71.2067949 | 63 | 71.7367229 |
| 70.9753899 | 63 | 71.7821775 |
| 72.1654726 | 63 | 71.8003593 |
| 72.3638197 | 63 | 71.7821775 |
| 72.4547288 | 63 | 71.7662684 |
| 72.4547288 | 63 | 71.7321775 |
| 73.0497701 | 63 | 71.6867229 |
| 74.337468  | 63 | 71.6435411 |
| 74.337468  | 63 | 71.5912684 |
| 74.7011044 | 63 | 71.5435411 |
| 74.7920134 | 63 | 71.5304856 |
| 74.4283771 | 63 | 71.5486285 |
| 74.337468  | 63 | 71.5694573 |
| 74.1556498 | 63 | 71.5884266 |
| 72.8829225 | 63 | 71.6162802 |
| 72.8829225 | 63 | 71.625952  |
| 72.8829225 | 63 | 71.6399626 |
| 73.337468  | 63 | 71.6655435 |
| 72.9738316 | 63 | 71.69505   |
| 72.337468  | 63 | 71.7179449 |
| 70.8829225 | 63 | 71.7292696 |
| 70.337468  | 63 | 71.7052637 |

|            |    |            |
|------------|----|------------|
| 69.6101953 | 63 | 71.6802248 |
| 69.5192862 | 63 | 71.6208883 |
| 69.7011044 | 63 | 71.5543204 |
| 70.0647407 | 63 | 71.4832071 |
| 70.337468  | 63 | 71.4166392 |
| 70.0647407 | 63 | 71.3397407 |
| 70.1556498 | 63 | 71.2306498 |
| 70.0647407 | 63 | 71.1306498 |
| 69.8829225 | 63 | 71.0283771 |
| 69.7920134 | 63 | 70.9238316 |
| 69.5192862 | 63 | 70.8283771 |
| 69.9738316 | 63 | 70.7420134 |
| 70.337468  | 63 | 70.6579225 |
| 70.6101953 | 63 | 70.6101953 |
| 71.1556498 | 63 | 70.5942862 |
| 71.7011044 | 63 | 70.5942862 |
| 71.337468  | 63 | 70.5738316 |
| 71.0647407 | 63 | 70.5511044 |
| 70.2465589 | 63 | 70.5442862 |
| 69.9738316 | 63 | 70.5920134 |
| 69.7920134 | 63 | 70.6556498 |
| 69.7011044 | 63 | 70.7465589 |
| 69.6101953 | 63 | 70.8442862 |
| 69.7920134 | 63 | 70.9306498 |
| 69.9738316 | 63 | 71.0079225 |
| 69.9738316 | 63 | 71.0715589 |
| 70.337468  | 63 | 71.1306498 |
| 70.6101953 | 63 | 71.1489863 |
| 70.6101953 | 63 | 71.1695955 |
| 70.6101953 | 63 | 71.1873122 |
| 70.8829225 | 63 | 71.2350394 |
| 70.7920134 | 63 | 71.2827667 |
| 70.9738316 | 63 | 71.3214031 |
| 72.2465589 | 63 | 71.3532213 |
| 72.8829225 | 63 | 71.380494  |
| 72.5192862 | 63 | 71.3714031 |
| 72.0647407 | 63 | 71.3486758 |
| 72.0647407 | 63 | 71.3395849 |
| 72.7920134 | 63 | 71.3350394 |
| 72.8829225 | 63 | 71.3418576 |
| 73.2465589 | 63 | 71.3600394 |
| 73.4283771 | 63 | 71.380494  |
| 73.1556498 | 63 | 71.4123122 |
| 73.1556498 | 63 | 71.4532213 |
| 72.8829225 | 63 | 71.5009485 |

|            |    |            |
|------------|----|------------|
| 72.4283771 | 63 | 71.5418576 |
| 70.8891094 | 63 | 71.5850394 |
| 70.8891094 | 63 | 71.6191304 |
| 70.5915887 | 63 | 71.6509485 |
| 71.7011044 | 63 | 71.6827667 |
| 71.4283771 | 63 | 71.7236758 |
| 71.5192862 | 63 | 71.7668576 |
| 71.6101953 | 63 | 71.8191304 |
| 71.7011044 | 63 | 71.8691304 |
| 70.7920134 | 63 | 71.8964031 |
| 70.7920134 | 63 | 71.9032213 |
| 70.9738316 | 63 | 71.9145849 |
| 70.8829225 | 63 | 71.9327667 |
| 70.5192862 | 63 | 71.9691304 |
| 70.7011044 | 63 | 71.9964031 |
| 70.6101953 | 63 | 72.0145849 |
| 70.9738316 | 63 | 72.0236758 |
| 71.2465589 | 63 | 72.0327667 |
| 71.7011044 | 63 | 72.0418576 |
| 71.6101953 | 63 | 72.0464031 |
| 71.7011044 | 63 | 72.0782213 |
| 71.7011044 | 63 | 72.1077667 |
| 71.8829225 | 63 | 72.182612  |
| 71.8829225 | 63 | 72.2551846 |
| 72.2465589 | 63 | 72.337468  |
| 72.6101953 | 63 | 72.3965589 |
| 72.8829225 | 63 | 72.4715589 |
| 72.9738316 | 63 | 72.5442862 |
| 73.337468  | 63 | 72.5865101 |
| 73.1556498 | 63 | 72.6268745 |
| 72.9738316 | 63 | 72.6949249 |
| 72.7920134 | 63 | 72.7604959 |
| 73.5192862 | 63 | 72.8215215 |
| 73.8829225 | 63 | 72.8775884 |
| 73.6101953 | 63 | 72.9303495 |
| 73.6101953 | 63 | 72.9762925 |
| 73.7920134 | 63 | 73.0147974 |
| 73.5192862 | 63 | 73.0419387 |
| 73.337468  | 63 | 73.0672204 |
| 74.1556498 | 63 | 73.0813452 |
| 73.6101953 | 63 | 73.0977427 |
| 73.8829225 | 63 | 73.1219914 |
| 73.7920134 | 63 | 73.1511988 |
| 73.8829225 | 63 | 73.1686293 |
| 74.0647407 | 63 | 73.1860599 |



|            |    |            |
|------------|----|------------|
| 74.4283771 | 63 | 73.193573  |
| 74.4283771 | 63 | 73.1870366 |
| 73.2991523 | 63 | 73.1807068 |
| 73.3156812 | 63 | 73.177063  |
| 73.5140283 | 63 | 73.1690803 |
| 73.4148548 | 63 | 73.1604778 |
| 73.4148548 | 63 | 73.1564207 |
| 73.1255986 | 63 | 73.1618678 |
| 72.6297308 | 63 | 73.1520256 |
| 72.5388217 | 63 | 73.1407371 |
| 72.150392  | 63 | 73.1189115 |
| 72.0594829 | 63 | 73.0871684 |
| 72.25783   | 63 | 73.0504668 |
| 72.2660944 | 63 | 73.0503353 |
| 72.2660944 | 63 | 73.0866989 |
| 72.6710531 | 63 | 73.1003353 |
| 72.8694002 | 63 | 73.1253353 |
| 72.580144  | 63 | 73.1366989 |
| 72.580144  | 63 | 73.1571535 |
| 72.5470862 | 63 | 73.1798808 |
| 72.3487391 | 63 | 73.202608  |
| 72.6297308 | 63 | 73.2207899 |
| 72.8280779 | 63 | 73.2230626 |
| 73.0181606 | 63 | 73.2467477 |
| 72.811549  | 63 | 73.2904742 |
| 72.811549  | 63 | 73.3337875 |
| 73.0098961 | 63 | 73.3909437 |
| 73.1255986 | 63 | 73.4435545 |
| 73.4313837 | 63 | 73.4829422 |
| 72.7371688 | 63 | 73.5188174 |
| 72.3404746 | 63 | 73.5478745 |
| 72.3239457 | 63 | 73.5957332 |
| 73.5140283 | 63 | 73.6504101 |
| 74.7920134 | 63 | 73.7001283 |
| 74.7011044 | 63 | 73.7610036 |
| 74.6101953 | 63 | 73.8309697 |
| 74.337468  | 63 | 73.8908119 |
| 74.6101953 | 63 | 73.9684227 |
| 74.7920134 | 63 | 74.0555376 |
| 74.9738316 | 63 | 74.1267434 |
| 75.1556498 | 63 | 74.2078666 |
| 74.5192862 | 63 | 74.2871303 |
| 74.2465589 | 63 | 74.3480056 |
| 75.0647407 | 63 | 74.4016494 |
| 75.2465589 | 63 | 74.4369048 |

|            |    |            |
|------------|----|------------|
| 75.7011044 | 63 | 74.4841437 |
| 75.5192862 | 63 | 74.5450189 |
| 74.7011044 | 63 | 74.6032082 |
| 74.0647407 | 63 | 74.6630504 |
| 73.7011044 | 63 | 74.7266116 |
| 74.0647407 | 63 | 74.8188918 |
| 74.2465589 | 63 | 74.9233621 |
| 74.2465589 | 63 | 75.0373365 |
| 74.7011044 | 63 | 75.1238316 |
| 75.0647407 | 63 | 75.1829225 |
| 75.0647407 | 63 | 75.2488316 |
| 75.9738316 | 63 | 75.312468  |
| 76.0647407 | 63 | 75.3806498 |
| 75.4283771 | 63 | 75.4420134 |
| 75.7920134 | 63 | 75.5170134 |
| 75.5192862 | 63 | 75.5692862 |
| 75.0647407 | 63 | 75.6056498 |
| 74.9738316 | 63 | 75.6420134 |
| 74.4283771 | 63 | 75.6806498 |
| 74.7011044 | 63 | 75.687468  |
| 75.2465589 | 63 | 75.6920134 |
| 75.337468  | 63 | 75.6897407 |
| 75.5192862 | 63 | 75.6601953 |
| 75.9738316 | 63 | 75.6047758 |
| 76.4283771 | 63 | 75.5677447 |
| 76.5192862 | 63 | 75.5609265 |
| 76.8829225 | 63 | 75.5541083 |
| 76.9738316 | 63 | 75.5450174 |
| 77.1556498 | 63 | 75.5450174 |
| 77.337468  | 63 | 75.5381992 |
| 77.1556498 | 63 | 75.5313811 |
| 77.0647407 | 63 | 75.5268356 |
| 77.0647407 | 63 | 75.4950174 |
| 77.7920134 | 63 | 75.4609265 |
| 77.0647407 | 63 | 75.4450174 |
| 76.6101953 | 63 | 75.3972902 |
| 75.9738316 | 63 | 75.3563811 |
| 75.7920134 | 63 | 75.3381992 |
| 75.337468  | 63 | 75.3200174 |
| 75.4283771 | 63 | 75.3063811 |
| 75.6101953 | 63 | 75.2950174 |
| 74.337468  | 63 | 75.2836538 |
| 72.4843245 | 63 | 75.2495629 |
| 72.583498  | 63 | 75.2177447 |
| 73.4283771 | 63 | 75.1768356 |

|            |    |            |
|------------|----|------------|
| 73.7920134 | 63 | 75.1245629 |
| 73.8829225 | 63 | 75.0700174 |
| 74.2465589 | 63 | 74.9995629 |
| 74.4283771 | 63 | 74.9291083 |
| 74.7920134 | 63 | 74.8472902 |
| 74.8829225 | 63 | 74.7609265 |
| 74.7011044 | 63 | 74.6768356 |
| 74.7011044 | 63 | 74.5950174 |
| 74.7920134 | 63 | 74.5086538 |
| 73.8829225 | 63 | 74.4086538 |
| 73.8829225 | 63 | 74.3245629 |
| 74.337468  | 63 | 74.2586538 |
| 74.2465589 | 63 | 74.2041083 |
| 73.8829225 | 63 | 74.1541083 |
| 74.2465589 | 63 | 74.1245629 |
| 74.7920134 | 63 | 74.1041083 |
| 73.9738316 | 63 | 74.0700174 |
| 74.2465589 | 63 | 74.0813811 |
| 74.337468  | 63 | 74.1345278 |
| 74.337468  | 63 | 74.1897407 |
| 74.337468  | 63 | 74.2192862 |
| 74.0647407 | 63 | 74.2420134 |
| 74.1556498 | 63 | 74.237468  |
| 73.8829225 | 63 | 74.2192862 |
| 73.8829225 | 63 | 74.2101953 |
| 73.7920134 | 63 | 74.2011044 |
| 73.7920134 | 63 | 74.2079225 |
| 73.6101953 | 63 | 74.2261044 |
| 73.7920134 | 63 | 74.2465589 |
| 73.7011044 | 63 | 74.2761044 |
| 73.9738316 | 63 | 74.3147407 |
| 73.7920134 | 63 | 74.3670134 |
| 73.7920134 | 63 | 74.4261044 |
| 74.1556498 | 63 | 74.4897407 |
| 74.6101953 | 63 | 74.5692862 |
| 74.2465589 | 63 | 74.6352583 |
| 74.7920134 | 63 | 74.7352583 |
| 74.6101953 | 63 | 74.8602583 |
| 74.7920134 | 63 | 74.9648038 |
| 74.6101953 | 63 | 75.0625311 |
| 74.7011044 | 63 | 75.1579856 |
| 73.7011044 | 63 | 75.2420765 |
| 73.5192862 | 63 | 75.3329856 |
| 74.0647407 | 63 | 75.3838751 |
| 74.4283771 | 63 | 75.4415829 |

|            |    |            |
|------------|----|------------|
| 75.1556498 | 63 | 75.4916459 |
| 75.4283771 | 63 | 75.549147  |
| 75.5192862 | 63 | 75.5992101 |
| 75.9738316 | 63 | 75.6364633 |
| 75.4283771 | 63 | 75.6545016 |
| 75.9738316 | 63 | 75.6698539 |
| 76.7011044 | 63 | 75.6759087 |
| 76.7920134 | 63 | 75.6840296 |
| 77.0647407 | 63 | 75.7074398 |
| 76.8854458 | 63 | 75.7217591 |
| 78.7920134 | 63 | 75.7292602 |
| 78.9738316 | 63 | 75.7565329 |
| 78.4283771 | 63 | 75.7280095 |
| 78.2465589 | 63 | 75.6844035 |
| 78.1556498 | 63 | 75.6312933 |
| 77.7011044 | 63 | 75.5752906 |
| 77.7011044 | 63 | 75.5114366 |
| 76.1912309 | 63 | 75.4864366 |
| 76.1912309 | 63 | 75.4614366 |
| 75.8854458 | 63 | 75.4137093 |
| 76.0920573 | 63 | 75.350073  |
| 75.7945367 | 63 | 75.2659821 |
| 75.1003218 | 63 | 75.1614366 |
| 74.5135449 | 63 | 75.0591639 |
| 74.3151978 | 63 | 74.9364366 |
| 74.2160243 | 63 | 74.8182548 |
| 74.1168507 | 63 | 74.6818911 |
| 74.728421  | 63 | 74.5228002 |
| 74.728421  | 63 | 74.3248768 |
| 74.9102391 | 63 | 74.1151765 |
| 75.337468  | 63 | 73.9332953 |
| 73.6510775 | 63 | 73.7060225 |
| 72.8659535 | 63 | 73.4787498 |
| 72.6676064 | 63 | 73.2719316 |
| 72.3700858 | 63 | 73.0810225 |
| 72.1469453 | 63 | 72.9060225 |
| 72.7011044 | 63 | 72.7153305 |
| 72.5192862 | 63 | 72.5275311 |
| 72.1556498 | 63 | 72.3824371 |
| 71.8829225 | 63 | 72.2400291 |
| 71.7920134 | 63 | 72.1102244 |
| 71.2465589 | 63 | 71.9828991 |
| 71.4283771 | 63 | 71.8729291 |
| 71.0647407 | 63 | 71.8015851 |
| 70.7011044 | 63 | 71.731274  |

|            |    |            |
|------------|----|------------|
| 70.5192862 | 63 | 71.6591035 |
| 70.337468  | 63 | 71.5939578 |
| 68.8750765 | 63 | 71.5335641 |
| 68.6767294 | 63 | 71.4669721 |
| 69.6101953 | 63 | 71.3867438 |
| 69.7011044 | 63 | 71.3201518 |
| 69.8829225 | 63 | 71.2474245 |
| 70.1556498 | 63 | 71.2145842 |
| 70.6101953 | 63 | 71.1831903 |
| 71.1556498 | 63 | 71.156755  |
| 70.0734236 | 63 | 71.1513941 |
| 70.1891261 | 63 | 71.1584299 |
| 70.3874732 | 63 | 71.1584299 |
| 70.4949112 | 63 | 71.1675208 |
| 70.6932583 | 63 | 71.1879754 |
| 70.9990434 | 63 | 71.2016117 |
| 71.3957376 | 63 | 71.199339  |
| 72.2465589 | 63 | 71.2175208 |
| 71.7011044 | 63 | 71.2311572 |
| 71.4283771 | 63 | 71.2425208 |
| 71.6101953 | 63 | 71.2652481 |
| 71.7011044 | 63 | 71.2970663 |
| 72.0647407 | 63 | 71.3357026 |
| 71.5192862 | 63 | 71.4154442 |
| 72.2465589 | 63 | 71.4978718 |
| 72.4283771 | 63 | 71.5478718 |
| 72.337468  | 63 | 71.60469   |
| 71.6101953 | 63 | 71.6705991 |
| 71.6101953 | 63 | 71.7410536 |
| 72.1556498 | 63 | 71.7887809 |
| 72.4283771 | 63 | 71.8115082 |
| 72.7011044 | 63 | 71.8431093 |
| 72.8829225 | 63 | 71.8718178 |
| 72.9738316 | 63 | 71.8955677 |
| 72.4283771 | 63 | 71.9257225 |
| 71.7011044 | 63 | 71.9509187 |
| 71.9738316 | 63 | 71.9684702 |
| 71.9738316 | 63 | 71.9420134 |
| 71.5192862 | 63 | 71.8783771 |
| 71.6101953 | 63 | 71.8283771 |
| 71.7920134 | 63 | 71.7806498 |
| 71.8829225 | 63 | 71.7238316 |
| 72.0647407 | 63 | 71.6829225 |
| 71.9738316 | 63 | 71.6488316 |
| 71.6101953 | 63 | 71.637468  |

|            |    |            |
|------------|----|------------|
| 71.9738316 | 63 | 71.6261044 |
| 72.5192862 | 63 | 71.6147407 |
| 72.9738316 | 63 | 71.6056498 |
| 72.5192862 | 63 | 71.6101953 |
| 72.0647407 | 63 | 71.6192862 |
| 71.337468  | 63 | 71.6170134 |
| 71.337468  | 63 | 71.5988316 |
| 71.337468  | 63 | 71.5761044 |
| 71.7011044 | 63 | 71.5420134 |
| 71.7011044 | 63 | 71.5056498 |
| 71.7011044 | 63 | 71.4806498 |
| 70.337468  | 63 | 71.4783771 |
| 69.7011044 | 63 | 71.4761044 |
| 69.7011044 | 63 | 71.4738316 |
| 69.5192862 | 63 | 71.4647407 |
| 69.337468  | 63 | 71.4170134 |
| 70.0647407 | 63 | 71.3692862 |
| 70.7011044 | 63 | 71.3147407 |
| 71.0647407 | 63 | 71.2283771 |
| 71.7920134 | 63 | 71.1465589 |
| 71.9738316 | 63 | 71.0783771 |
| 71.9738316 | 63 | 70.9988316 |
| 71.7920134 | 63 | 70.9033771 |
| 71.9738316 | 63 | 70.7897407 |
| 72.0647407 | 63 | 70.6806498 |
| 71.7011044 | 63 | 70.5806498 |
| 71.7920134 | 63 | 70.5215589 |
| 71.5192862 | 63 | 70.462468  |
| 71.5192862 | 63 | 70.4329225 |
| 71.4283771 | 63 | 70.3988316 |
| 71.6101953 | 63 | 70.3761044 |
| 71.8829225 | 63 | 70.3601953 |
| 71.8829225 | 63 | 70.3806498 |
| 71.1556498 | 63 | 70.4329225 |
| 69.7011044 | 63 | 70.4761044 |
| 69.8829225 | 63 | 70.505019  |
| 69.7011044 | 63 | 70.5465369 |
| 68.6101953 | 63 | 70.5897077 |
| 68.7011044 | 63 | 70.619862  |
| 68.8829225 | 63 | 70.6508427 |
| 68.7920134 | 63 | 70.658683  |
| 68.7011044 | 63 | 70.6619778 |
| 68.4283771 | 63 | 70.6702312 |
| 68.1556498 | 63 | 70.6755921 |
| 68.0647407 | 63 | 70.6714489 |

|          |            |    |            |
|----------|------------|----|------------|
|          | 68.9738316 | 63 | 70.6501569 |
|          | 68.9738316 | 63 | 70.6280384 |
|          | 70.1556498 | 63 | 70.6061266 |
|          | 70.337468  | 63 | 70.605909  |
|          | 70.7920134 | 63 | 70.6032121 |
|          | 71.0647407 | 63 | 70.6153911 |
|          | 71.1556498 | 63 | 70.6304628 |
|          | 71.7920134 | 63 | 70.6436749 |
|          | 71.4283771 | 63 | 70.6544077 |
|          | 70.6758709 | 63 | 70.7006777 |
|          | 70.9981849 | 63 | 70.7981874 |
|          | 71.7915734 | 63 | 70.8859863 |
|          | 71.9072759 | 63 | 70.9855621 |
|          | 72.3039701 | 63 | 71.1142701 |
|          | 72.105623  | 63 | 71.273361  |
|          | 72.105623  | 63 | 71.4051792 |
|          | 72.3039701 | 63 | 71.523361  |
|          | 72.0064494 | 63 | 71.6119973 |
| BEFORE1  | 71.8081023 | 63 | 71.698361  |
| BEFORE2  | 71.213061  | 63 | 71.7915428 |
| BEFORE3  | 70.8163668 | 63 | 71.8869973 |
| BEFORE4  | 70.9155403 | 63 | 71.9938155 |
| BEFORE5  | 71.5105816 | 63 | 72.0915428 |
| BEFORE6  | 71.4114081 | 63 | 72.1642701 |
| BEFORE7  | 71.9155403 | 63 | 72.2415428 |
| BEFORE8  | 72.213061  | 63 | 72.3051792 |
| BEFORE9  | 72.4114081 | 63 | 72.3460882 |
| BEFORE10 | 72.3122345 | 63 | 72.3824519 |
| BEFORE11 | 73.0064494 | 63 | 72.398361  |
| BEFORE12 | 73.6014907 | 63 | 72.4301792 |
| BEFORE13 | 73.3948792 | 63 | 72.48081   |
| BEFORE14 | 73.6841354 | 63 | 72.5211103 |
| BEFORE15 | 73.7585155 | 63 | 72.5415758 |
| BEFORE16 | 75.0647407 | 63 | 72.5568761 |
| BEFORE17 | 74.1556498 | 63 | 72.5668044 |
| BEFORE18 | 73.5192862 | 63 | 72.5839642 |
| BEFORE19 | 72.2465589 | 63 | 72.6011239 |
| BEFORE20 | 71.8829225 | 63 | 72.5593202 |
| BEFORE21 | 71.8829225 | 63 | 72.5032993 |
| BEFORE22 | 71.8829225 | 63 | 72.4935203 |
| BEFORE23 | 73.2465589 | 63 | 72.5010968 |
| BEFORE24 | 72.8829225 | 63 | 72.5686698 |
| BEFORE25 | 73.0647407 | 63 | 72.6428543 |
| BEFORE26 | 73.4283771 | 63 | 72.7135265 |
| BEFORE27 | 73.337468  | 63 | 72.7798598 |

|          |            |    |            |
|----------|------------|----|------------|
| BEFORE28 | 72.7011044 | 63 | 72.8009841 |
| BEFORE29 | 72.6101953 | 63 | 72.8024804 |
| BEFORE30 | 72.4283771 | 63 | 72.8014973 |
| BEFORE31 | 72.7011044 | 63 | 72.7955555 |
| BEFORE32 | 72.7011044 | 63 | 72.777217  |
| BEFORE33 | 72.6101953 | 63 | 72.7415232 |
| BEFORE34 | 72.6101953 | 63 | 72.7186393 |
| BEFORE35 | 72.5192862 | 63 | 72.6668297 |
| BEFORE36 | 72.7011044 | 63 | 72.6106813 |
| BEFORE37 | 72.7920134 | 63 | 72.519398  |
| BEFORE38 | 72.7920134 | 63 | 72.4533212 |
| BEFORE39 | 70.6318213 | 63 | 72.4145172 |
| BEFORE40 | 69.765611  | 63 | 72.4100107 |
| BEFORE41 | 71.4169453 | 63 | 72.4395562 |
| BEFORE42 | 71.5161188 | 63 | 72.4736471 |
| BEFORE43 | 73.5192862 | 63 | 72.5031925 |
| BEFORE44 | 73.8829225 | 63 | 72.4895562 |
| BEFORE45 | 74.337468  | 63 | 72.4668289 |
| BEFORE46 | 74.0647407 | 63 | 72.4418289 |
| BEFORE47 | 72.7605139 | 63 | 72.4122834 |
| BEFORE48 | 72.2729106 | 63 | 72.3759198 |
| BEFORE49 | 72.3720841 | 63 | 72.3600107 |
| BEFORE50 | 72.0745635 | 63 | 72.3554653 |
| BEFORE51 | 72.2729106 | 63 | 72.3668289 |
| BEFORE52 | 72.173737  | 63 | 72.3941016 |
| BEFORE53 | 72.4795222 | 63 | 72.4236471 |
| BEFORE54 | 71.6117536 | 63 | 72.4645562 |
| BEFORE55 | 71.51258   | 63 | 72.5054653 |
| BEFORE56 | 71.4134065 | 63 | 72.5259198 |
| BEFORE57 | 71.51258   | 63 | 72.5372834 |
| BEFORE58 | 71.9671255 | 63 | 72.5418289 |
| BEFORE59 | 72.066299  | 63 | 72.5418289 |
| BEFORE60 | 73.0647407 | 63 | 72.5844701 |
| BEFORE61 | 73.2465589 | 63 | 72.6351301 |
| BEFORE62 | 73.0647407 | 63 | 72.6376886 |
| BEFORE63 | 72.7011044 | 63 | 72.619586  |
| BEFORE64 | 71.9738316 | 63 | 72.5286769 |
| BEFORE65 | 72.0647407 | 63 | 72.4036769 |
| BEFORE66 | 72.2465589 | 63 | 72.2673133 |
| BEFORE67 | 71.8829225 | 63 | 72.1264042 |
| BEFORE68 | 72.0647407 | 63 | 71.999919  |
| BEFORE69 | 72.4283771 | 63 | 71.892442  |
| BEFORE70 | 72.8829225 | 63 | 71.771122  |
| BEFORE71 | 73.7920134 | 63 | 71.6617856 |
| BEFORE72 | 73.8829225 | 63 | 71.5565813 |



|           |            |    |            |
|-----------|------------|----|------------|
| BEFORE73  | 74.2465589 | 63 | 71.4538564 |
| BEFORE74  | 74.2465589 | 63 | 71.3707596 |
| BEFORE75  | 73.337468  | 63 | 71.309357  |
| BEFORE76  | 73.1556498 | 63 | 71.2381001 |
| BEFORE77  | 72.9738316 | 63 | 71.145149  |
| BEFORE78  | 72.7920134 | 63 | 71.0579831 |
| BEFORE79  | 72.337468  | 63 | 70.9530485 |
| BEFORE80  | 71.7920134 | 63 | 70.8361305 |
| BEFORE81  | 71.5192862 | 63 | 70.6921853 |
| BEFORE82  | 70.7920134 | 63 | 70.5538186 |
| BEFORE83  | 69.8829225 | 63 | 70.4425181 |
| BEFORE84  | 68.8829225 | 63 | 70.3481597 |
| BEFORE85  | 68.8829225 | 63 | 70.2723963 |
| BEFORE86  | 68.4283771 | 63 | 70.1995255 |
| BEFORE87  | 67.7011044 | 63 | 70.1196299 |
| BEFORE88  | 67.9738316 | 63 | 70.0513046 |
| BEFORE89  | 67.5192862 | 63 | 69.9759544 |
| BEFORE90  | 67.7011044 | 63 | 69.9163068 |
| BEFORE91  | 68.0647407 | 63 | 69.8477748 |
| BEFORE92  | 68.0647407 | 63 | 69.7515569 |
| BEFORE93  | 69.1556498 | 63 | 69.6406696 |
| BEFORE94  | 69.1556498 | 63 | 69.518212  |
| BEFORE95  | 68.6623053 | 63 | 69.3932751 |
| BEFORE96  | 67.6953631 | 63 | 69.2960241 |
| BEFORE97  | 68.0259416 | 63 | 69.2107566 |
| BEFORE98  | 67.7697433 | 63 | 69.1300345 |
| BEFORE99  | 67.389578  | 63 | 69.0488993 |
| BEFORE100 | 67.3069334 | 63 | 68.9842929 |
| BEFORE101 | 67.711892  | 63 | 68.9312568 |
| BEFORE102 | 68.6127185 | 63 | 68.8802869 |
| BEFORE103 | 68.9267681 | 63 | 68.848945  |
| BEFORE104 | 68.943297  | 63 | 68.8485948 |
| BEFORE105 | 69.1499086 | 63 | 68.8707654 |
| BEFORE106 | 69.050735  | 63 | 68.9040929 |
| BEFORE107 | 69.1499086 | 63 | 68.9413461 |
| BEFORE108 | 69.050735  | 63 | 68.9943017 |
| BEFORE109 | 70.0424705 | 63 | 69.0429185 |
| BEFORE110 | 70.1416441 | 63 | 69.1227337 |
| BEFORE111 | 69.943297  | 63 | 69.1977967 |
| BEFORE112 | 69.4474292 | 63 | 69.2660416 |
| BEFORE113 | 69.3482557 | 63 | 69.3705871 |
| BEFORE114 | 69.2490821 | 63 | 69.4501325 |
| BEFORE115 | 69.4474292 | 63 | 69.5251325 |
| BEFORE116 | 69.7449499 | 63 | 69.6033752 |
| BEFORE117 | 69.7449499 | 63 | 69.7012461 |

|           |            |    |            |
|-----------|------------|----|------------|
| BEFORE118 | 69.5466028 | 63 | 69.7999433 |
| BEFORE119 | 69.7532143 | 63 | 69.8959546 |
| BEFORE120 | 69.6705697 | 63 | 69.9991973 |
| BEFORE121 | 69.4804871 | 63 | 70.0976879 |
| BEFORE122 | 69.5383383 | 63 | 70.1678728 |
| BEFORE123 | 69.8689168 | 63 | 70.2064461 |
| BEFORE124 | 69.7697433 | 63 | 70.2508045 |
| BEFORE125 | 70.2160243 | 63 | 70.2924769 |
| BEFORE126 | 69.9185036 | 63 | 70.3403477 |
| BEFORE127 | 69.81933   | 63 | 70.3906979 |
| BEFORE128 | 69.9185036 | 63 | 70.4340232 |
| BEFORE129 | 70.711892  | 63 | 70.4911916 |
| BEFORE130 | 70.7036276 | 63 | 70.5212938 |
| BEFORE131 | 70.7945367 | 63 | 70.5466439 |
| BEFORE132 | 72.2465589 | 63 | 70.5974073 |
| BEFORE133 | 72.337468  | 63 | 70.6742037 |
| BEFORE134 | 72.1556498 | 63 | 70.7580249 |
| BEFORE135 | 71.7920134 | 63 | 70.8488709 |
| BEFORE136 | 71.6101953 | 63 | 70.937031  |
| BEFORE137 | 71.9738316 | 63 | 71.0200258 |
| BEFORE138 | 71.6101953 | 63 | 71.0984751 |
| BEFORE139 | 71.5192862 | 63 | 71.1818831 |
| BEFORE140 | 71.2465589 | 63 | 71.2533076 |
| BEFORE141 | 70.5192862 | 63 | 71.3336164 |
| BEFORE142 | 70.1556498 | 63 | 71.4095864 |
| BEFORE143 | 70.7011044 | 63 | 71.4636555 |
| BEFORE144 | 70.6101953 | 63 | 71.5003693 |
| BEFORE145 | 71.0647407 | 63 | 71.5395624 |
| BEFORE146 | 71.0647407 | 63 | 71.5698713 |
| BEFORE147 | 70.8829225 | 63 | 71.6144363 |
| BEFORE148 | 71.337468  | 63 | 71.6546625 |
| BEFORE149 | 71.2465589 | 63 | 71.6992275 |
| BEFORE150 | 71.1556498 | 63 | 71.7375942 |
| BEFORE151 | 71.9738316 | 63 | 71.7784402 |
| BEFORE152 | 72.5192862 | 63 | 71.8306498 |
| BEFORE153 | 72.7011044 | 63 | 71.8397407 |
| BEFORE154 | 72.8829225 | 63 | 71.8465589 |
| BEFORE155 | 72.9738316 | 63 | 71.8601953 |
| BEFORE156 | 73.0647407 | 63 | 71.8851953 |
| BEFORE157 | 72.8829225 | 63 | 71.9192862 |
| BEFORE158 | 72.8829225 | 63 | 71.9601953 |
| BEFORE159 | 72.6101953 | 63 | 72.0101953 |
| BEFORE160 | 72.8829225 | 63 | 72.0692862 |
| BEFORE161 | 72.5192862 | 63 | 72.1329225 |
| BEFORE162 | 71.7011044 | 63 | 72.1889774 |

|           |            |    |            |
|-----------|------------|----|------------|
| BEFORE163 | 71.337468  | 63 | 72.2549495 |
| BEFORE164 | 71.337468  | 63 | 72.3079052 |
| BEFORE165 | 71.4283771 | 63 | 72.3540426 |
| BEFORE166 | 71.7011044 | 63 | 72.3865437 |
| BEFORE167 | 71.4283771 | 63 | 72.4190448 |
| BEFORE168 | 71.7011044 | 63 | 72.4244798 |
| BEFORE169 | 72.2465589 | 63 | 72.416485  |
| BEFORE170 | 72.337468  | 63 | 72.4109696 |
| BEFORE171 | 72.8829225 | 63 | 72.4054542 |
| BEFORE172 | 72.6101953 | 63 | 72.3794842 |
| BEFORE173 | 72.6101953 | 63 | 72.3272745 |
| BEFORE174 | 72.7011044 | 63 | 72.2876682 |
| BEFORE175 | 72.7920134 | 63 | 72.2379379 |
| BEFORE176 | 72.9738316 | 63 | 72.1933729 |
| BEFORE177 | 73.6101953 | 63 | 72.1465351 |
| BEFORE178 | 73.6101953 | 63 | 72.1397169 |
| BEFORE179 | 73.8829225 | 63 | 72.1328988 |
| BEFORE180 | 73.7920134 | 63 | 72.1283533 |
| BEFORE181 | 72.7614788 | 63 | 72.1169897 |
| BEFORE182 | 72.7945367 | 63 | 72.1238079 |
| BEFORE183 | 72.81933   | 63 | 72.1488079 |
| BEFORE184 | 72.4556937 | 63 | 72.1319593 |
| BEFORE185 | 72.3647846 | 63 | 72.1126315 |
| BEFORE186 | 72.3647846 | 63 | 72.0910309 |
| BEFORE187 | 71.1003218 | 63 | 72.0655047 |
| BEFORE188 | 71.0176772 | 63 | 72.0494826 |
| BEFORE189 | 71.0259416 | 63 | 72.0442044 |
| BEFORE190 | 70.9350325 | 63 | 72.0327277 |
| BEFORE191 | 70.9350325 | 63 | 72.0239371 |
| BEFORE192 | 70.4309003 | 63 | 72.0238241 |
| BEFORE193 | 71.1168507 | 63 | 72.0442786 |
| BEFORE194 | 70.8937102 | 63 | 72.0670059 |
| BEFORE195 | 71.1912309 | 63 | 72.0988241 |
| BEFORE196 | 71.1912309 | 63 | 72.1260968 |
| BEFORE197 | 72.6101953 | 63 | 72.1442786 |
| BEFORE198 | 72.6101953 | 63 | 72.1397332 |
| BEFORE199 | 72.4283771 | 63 | 72.1442786 |
| BEFORE200 | 72.4283771 | 63 | 72.1374604 |
| BEFORE201 | 72.7920134 | 63 | 72.1170059 |
| BEFORE202 | 72.7011044 | 63 | 72.1223147 |
| BEFORE203 | 70.6635273 | 63 | 72.1381607 |
| BEFORE204 | 70.5643537 | 63 | 72.1488415 |
| BEFORE205 | 70.5643537 | 63 | 72.1595222 |
| BEFORE206 | 70.6800562 | 63 | 72.1747484 |
| BEFORE207 | 70.7874942 | 63 | 72.1899745 |

|           |            |    |            |
|-----------|------------|----|------------|
| BEFORE208 | 71.4899736 | 63 | 72.239085  |
| BEFORE209 | 71.7874942 | 63 | 72.2925343 |
| BEFORE210 | 71.9858413 | 63 | 72.3298679 |
| BEFORE211 | 72.8784033 | 63 | 72.3672015 |
| BEFORE212 | 73.4283771 | 63 | 72.3999897 |
| BEFORE213 | 73.5192862 | 63 | 72.4499266 |
| BEFORE214 | 73.9738316 | 63 | 72.4827148 |
| BEFORE215 | 73.8829225 | 63 | 72.516536  |
| BEFORE216 | 73.7011044 | 63 | 72.536101  |
| BEFORE217 | 73.4283771 | 63 | 72.5579388 |
| BEFORE218 | 73.7920134 | 63 | 72.5465751 |
| BEFORE219 | 73.6101953 | 63 | 72.5215751 |
| BEFORE220 | 72.9738316 | 63 | 72.4852115 |
| BEFORE221 | 72.9738316 | 63 | 72.4329388 |
| BEFORE222 | 73.4283771 | 63 | 72.3624842 |
| BEFORE223 | 73.2465589 | 63 | 72.3079388 |
| BEFORE224 | 72.8829225 | 63 | 72.3179691 |
| BEFORE225 | 72.9738316 | 63 | 72.3327515 |
| BEFORE226 | 72.9738316 | 63 | 72.3475339 |
| BEFORE227 | 73.0647407 | 63 | 72.3526056 |
| BEFORE228 | 73.1556498 | 63 | 72.3549913 |
| BEFORE229 | 72.5192862 | 63 | 72.3375423 |
| BEFORE230 | 72.4283771 | 63 | 72.3217462 |
| BEFORE231 | 72.2465589 | 63 | 72.3055368 |
| BEFORE232 | 72.4283771 | 63 | 72.287468  |
| BEFORE233 | 72.4283771 | 63 | 72.2556498 |
| BEFORE234 | 72.2465589 | 63 | 72.212468  |
| BEFORE235 | 71.9738316 | 63 | 72.1579225 |
| BEFORE236 | 72.0647407 | 63 | 72.1147407 |
| BEFORE237 | 72.1556498 | 63 | 72.0647407 |
| BEFORE238 | 71.6101953 | 63 | 72.0283771 |
| BEFORE239 | 70.9738316 | 63 | 71.9761044 |
| BEFORE240 | 70.337468  | 63 | 71.9397407 |
| minute1   | 69.9738316 | 63 | 71.9261044 |
| minute2   | 70.5192862 | 63 | 71.9170134 |
| minute3   | 71.0647407 | 63 | 71.8897407 |
| minute4   | 71.1556498 | 63 | 71.8783771 |
| minute5   | 71.1556498 | 63 | 71.8829225 |
| minute6   | 70.8829225 | 63 | 71.887468  |
| minute7   | 70.8829225 | 63 | 71.8897407 |
| minute8   | 70.7920134 | 63 | 71.8897407 |
| minute9   | 71.1556498 | 63 | 71.8806498 |
| minute10  | 71.337468  | 63 | 71.8761044 |
| minute11  | 72.1556498 | 63 | 71.8601953 |
| minute12  | 72.1556498 | 63 | 71.8442862 |

|          |            |    |            |
|----------|------------|----|------------|
| minute13 | 71.7920134 | 63 | 71.8079225 |
| minute14 | 71.7920134 | 63 | 71.7670134 |
| minute15 | 72.1556498 | 63 | 71.7215589 |
| minute16 | 71.7011044 | 63 | 71.6738316 |
| minute17 | 71.9738316 | 63 | 71.6215589 |
| minute18 | 71.7011044 | 63 | 71.5533771 |
| minute19 | 72.1556498 | 63 | 71.4942862 |
| minute20 | 72.4283771 | 63 | 71.4579225 |
| minute21 | 72.6101953 | 63 | 71.4511044 |
| minute22 | 72.337468  | 63 | 71.4692862 |
| minute23 | 72.7920134 | 63 | 71.4647407 |
| minute24 | 73.0647407 | 63 | 71.4533771 |
| minute25 | 73.1556498 | 63 | 71.4465589 |
| minute26 | 73.0647407 | 63 | 71.4442862 |
| minute27 | 73.0647407 | 63 | 71.4692862 |
| minute28 | 72.7920134 | 63 | 71.5011044 |
| minute29 | 72.337468  | 63 | 71.5397407 |
| minute30 | 71.7920134 | 63 | 71.5382425 |
| minute31 | 71.6101953 | 63 | 71.5173228 |
| minute32 | 70.9738316 | 63 | 71.4732626 |
| minute33 | 70.7920134 | 63 | 71.4755353 |
| minute34 | 70.4283771 | 63 | 71.4709899 |
| minute35 | 70.0647407 | 63 | 71.452808  |
| minute36 | 69.9738316 | 63 | 71.4187171 |
| minute37 | 69.4283771 | 63 | 71.4096262 |
| minute38 | 69.2465589 | 63 | 71.3868989 |
| minute39 | 69.5192862 | 63 | 71.3596262 |
| minute40 | 70.0647407 | 63 | 71.3141717 |
| minute41 | 70.7011044 | 63 | 71.2550808 |
| minute42 | 70.337468  | 63 | 71.1588934 |
| minute43 | 70.6101953 | 63 | 71.1111661 |
| minute44 | 70.8829225 | 63 | 71.0498025 |
| minute45 | 71.0647407 | 63 | 70.9770752 |
| minute46 | 71.8829225 | 63 | 70.895257  |
| minute47 | 72.1556498 | 63 | 70.8088934 |
| minute48 | 72.337468  | 63 | 70.7179843 |
| minute49 | 71.095721  | 63 | 70.6338934 |
| minute50 | 70.5006796 | 63 | 70.5725298 |
| minute51 | 70.3932416 | 63 | 70.5088934 |
| minute52 | 72.2465589 | 63 | 70.470257  |
| minute53 | 71.6101953 | 63 | 70.4588934 |
| minute54 | 71.0647407 | 63 | 70.4634389 |
| minute55 | 70.7920134 | 63 | 70.4838934 |
| minute56 | 71.337468  | 63 | 70.5179843 |
| minute57 | 71.0647407 | 63 | 70.5475298 |

|          |            |    |            |
|----------|------------|----|------------|
| minute58 | 70.6101953 | 63 | 70.5748025 |
| minute59 | 70.337468  | 63 | 70.6066207 |
| minute60 | 70.0647407 | 63 | 70.6338934 |
| Activity | 68.7627008 | 73 | 70.6566207 |
| Activity | 70.4283771 | 73 | 70.670257  |
| Activity | 70.337468  | 73 | 70.7020752 |
| Activity | 70.1556498 | 73 | 70.7316207 |
| Activity | 69.8829225 | 73 | 70.7611661 |
| Activity | 69.6101953 | 73 | 70.7998025 |
| Activity | 69.4283771 | 73 | 70.820257  |
| Activity | 69.4283771 | 73 | 70.8407116 |
| Activity | 69.8829225 | 73 | 70.8566207 |
| Activity | 69.2465589 | 73 | 70.9126644 |
| Activity | 70.0647407 | 73 | 70.9813113 |
| Activity | 70.5192862 | 73 | 71.0503715 |
| Activity | 70.9738316 | 73 | 71.0890079 |
| Activity | 71.2465589 | 73 | 71.1230988 |
| Activity | 71.4283771 | 73 | 71.1685534 |
| Activity | 71.1556498 | 73 | 71.2185534 |
| Activity | 70.5192862 | 73 | 71.2458261 |
| Activity | 70.5192862 | 73 | 71.2662806 |
| Activity | 70.6101953 | 73 | 71.2935534 |
| Activity | 70.9738316 | 73 | 71.3367352 |
| Activity | 71.2465589 | 73 | 71.4026443 |
| Activity | 71.6101953 | 73 | 71.5033771 |
| Activity | 71.7920134 | 73 | 71.5783771 |
| Activity | 72.0647407 | 73 | 71.6556498 |
| Activity | 72.6101953 | 73 | 71.7397407 |
| Activity | 72.7011044 | 73 | 71.8147407 |
| Activity | 72.9738316 | 73 | 71.8783771 |
| Activity | 72.9738316 | 73 | 71.9442862 |
| Activity | 73.337468  | 73 | 71.9920134 |
| Activity | 73.2465589 | 73 | 72.0192862 |
| Activity | 73.1556498 | 73 | 72.0601953 |
| Activity | 73.7920134 | 73 | 72.0761044 |
| Activity | 72.9738316 | 73 | 72.0783771 |
| Activity | 72.8829225 | 73 | 72.0806498 |
| Activity | 72.7920134 | 73 | 72.1011044 |
| Activity | 72.4283771 | 73 | 72.1261044 |
| Activity | 71.8829225 | 73 | 72.1897407 |
| Activity | 71.7011044 | 73 | 72.2411975 |
| Activity | 72.0647407 | 73 | 72.2953402 |
| Activity | 72.7011044 | 73 | 72.3498961 |
| Activity | 72.7920134 | 73 | 72.3953611 |
| Activity | 73.4283771 | 73 | 72.4261567 |

|          |            |    |            |
|----------|------------|----|------------|
| Activity | 73.4283771 | 73 | 72.4478613 |
| Activity | 73.5192862 | 73 | 72.5046795 |
| Activity | 72.8829225 | 73 | 72.5274068 |
| Activity | 72.1556498 | 73 | 72.5410431 |
| Activity | 72.0647407 | 73 | 72.5546795 |
| Activity | 71.337468  | 73 | 72.5569522 |
| Activity | 70.9738316 | 73 | 72.5524068 |
| Activity | 70.8829225 | 73 | 72.5274068 |
| Activity | 70.7011044 | 73 | 72.5069522 |
| Activity | 70.6101953 | 73 | 72.4887704 |
| Activity | 71.0647407 | 73 | 72.4546795 |
| Activity | 72.0647407 | 73 | 72.4410431 |
| Activity | 72.4283771 | 73 | 72.4478613 |
| Activity | 73.7011044 | 73 | 72.459225  |
| Activity | 72.5775558 | 73 | 72.4774068 |
| Activity | 72.6849938 | 73 | 72.5114977 |
| Activity | 72.7924319 | 73 | 72.5478613 |
| Activity | 72.7924319 | 73 | 72.5614977 |
| Activity | 72.4783823 | 73 | 72.5614977 |
| Activity | 72.4783823 | 73 | 72.5524068 |
| Activity | 74.0647407 | 73 | 72.5251341 |
| Activity | 72.9738316 | 73 | 72.4910431 |
| Activity | 73.1556498 | 73 | 72.4524068 |
| Activity | 73.2465589 | 73 | 72.4296795 |
| Activity | 73.0647407 | 73 | 72.4296795 |
| Activity | 72.7920134 | 73 | 72.434225  |
| Activity | 72.337468  | 73 | 72.4546795 |
| Activity | 72.4283771 | 73 | 72.4887704 |
| Activity | 72.4283771 | 73 | 72.534225  |
| Activity | 72.4283771 | 73 | 72.584225  |
| Activity | 72.4283771 | 73 | 72.6433159 |
| Activity | 73.1556498 | 73 | 72.6978613 |
| Activity | 73.2465589 | 73 | 72.7433159 |
| Activity | 73.1556498 | 73 | 72.7774068 |
| Activity | 73.2465589 | 73 | 72.784225  |
| Activity | 73.1556498 | 73 | 72.82595   |
| Activity | 72.6101953 | 73 | 72.8649892 |
| Activity | 72.7011044 | 73 | 72.9058878 |
| Activity | 72.4283771 | 73 | 72.9445137 |
| Activity | 72.337468  | 73 | 72.9796272 |
| Activity | 72.0647407 | 73 | 72.987468  |
| Activity | 71.9738316 | 73 | 72.9442862 |
| Activity | 71.9738316 | 73 | 72.9215589 |
| Activity | 72.1556498 | 73 | 72.8829225 |
| Activity | 72.2465589 | 73 | 72.8511044 |

|          |            |    |            |
|----------|------------|----|------------|
| Activity | 72.1556498 | 73 | 72.7895446 |
| Activity | 72.337468  | 73 | 72.7226129 |
| Activity | 72.7011044 | 73 | 72.666425  |
| Activity | 72.7011044 | 73 | 72.6129231 |
| Activity | 72.9738316 | 73 | 72.5842145 |
| Activity | 73.2465589 | 73 | 72.5819418 |
| Activity | 73.8829225 | 73 | 72.5751236 |
| Activity | 73.7920134 | 73 | 72.5501236 |
| Activity | 73.9738316 | 73 | 72.5501236 |
| Activity | 74.2465589 | 73 | 72.5523963 |
| Activity | 74.2465589 | 73 | 72.5501236 |
| Activity | 74.4283771 | 73 | 72.5523963 |
| Activity | 74.337468  | 73 | 72.5660327 |
| Activity | 73.8829225 | 73 | 72.5705781 |
| Activity | 72.7920134 | 73 | 72.5811258 |
| Activity | 72.337468  | 73 | 72.5873346 |
| Activity | 72.0647407 | 73 | 72.6106922 |
| Activity | 71.6101953 | 73 | 72.6330167 |
| Activity | 71.9738316 | 73 | 72.6454238 |
| Activity | 70.6023492 | 73 | 72.6636057 |
| Activity | 70.1147459 | 73 | 72.6567875 |
| Activity | 70.0899525 | 73 | 72.6590602 |
| Activity | 70.2882996 | 73 | 72.6567875 |
| Activity | 71.2800352 | 73 | 72.6408784 |
| Activity | 72.337468  | 73 | 72.6136057 |
| Activity | 72.1556498 | 73 | 72.5795147 |
| Activity | 72.1556498 | 73 | 72.5431511 |
| Activity | 73.2465589 | 73 | 72.4886057 |
| Activity | 73.2465589 | 73 | 72.4431511 |
| Activity | 73.1556498 | 73 | 72.3840602 |
| Activity | 73.2465589 | 73 | 72.3340602 |
| Activity | 73.1556498 | 73 | 72.2795147 |
| Activity | 72.8829225 | 73 | 72.2386057 |
| Activity | 72.8502831 | 73 | 72.2340602 |
| Activity | 72.5858203 | 73 | 72.2293833 |
| Activity | 72.9990434 | 73 | 72.2952924 |
| Activity | 72.866812  | 73 | 72.3443345 |
| Activity | 72.4701178 | 73 | 72.4125915 |
| Activity | 72.8829225 | 73 | 72.4897328 |
| Activity | 71.9738316 | 73 | 72.5528245 |
| Activity | 72.2465589 | 73 | 72.6551619 |
| Activity | 72.2465589 | 73 | 72.8152754 |
| Activity | 72.0647407 | 73 | 72.9805542 |
| Activity | 71.6101953 | 73 | 73.1522379 |
| Activity | 71.6101953 | 73 | 73.2945829 |



|          |            |    |            |
|----------|------------|----|------------|
| Activity | 71.7920134 | 73 | 73.426401  |
| Activity | 71.7011044 | 73 | 73.5354919 |
| Activity | 71.9738316 | 73 | 73.6332192 |
| Activity | 71.6101953 | 73 | 73.7059465 |
| Activity | 72.2465589 | 73 | 73.7627647 |
| Activity | 72.0647407 | 73 | 73.8150374 |
| Activity | 72.7920134 | 73 | 73.8445829 |
| Activity | 74.1556498 | 73 | 73.8536738 |
| Activity | 73.6958465 | 73 | 73.8650374 |
| Activity | 75.4283771 | 73 | 73.8703988 |
| Activity | 74.2991523 | 73 | 73.88919   |
| Activity | 74.7950201 | 73 | 73.9044688 |
| Activity | 74.6958465 | 73 | 73.9207807 |
| Activity | 74.4974994 | 73 | 73.9492826 |
| Activity | 74.6958465 | 73 | 73.9811008 |
| Activity | 76.5192862 | 73 | 74.0447372 |
| Activity | 76.7011044 | 73 | 74.1083735 |
| Activity | 77.1556498 | 73 | 74.1788281 |
| Activity | 76.9738316 | 73 | 74.2538281 |
| Activity | 77.6101953 | 73 | 74.3356463 |
| Activity | 76.5192862 | 73 | 74.4106463 |
| Activity | 76.0647407 | 73 | 74.4811008 |
| Activity | 76.1556498 | 73 | 74.5561008 |
| Activity | 75.5192862 | 73 | 74.6265553 |
| Activity | 75.2465589 | 73 | 74.7083735 |
| Activity | 74.4283771 | 73 | 74.7742826 |
| Activity | 73.5192862 | 73 | 74.8401917 |
| Activity | 73.337468  | 73 | 74.887919  |
| Activity | 73.0647407 | 73 | 74.9015553 |
| Activity | 73.337468  | 73 | 74.9175959 |
| Activity | 73.6101953 | 73 | 74.8857777 |
| Activity | 73.5192862 | 73 | 74.8776447 |
| Activity | 73.6101953 | 73 | 74.8593877 |
| Activity | 74.1556498 | 73 | 74.8481555 |
| Activity | 74.5192862 | 73 | 74.8464275 |
| Activity | 74.7920134 | 73 | 74.8283771 |
| Activity | 75.0647407 | 73 | 74.7647407 |
| Activity | 75.0647407 | 73 | 74.7033771 |
| Activity | 74.8829225 | 73 | 74.6351953 |
| Activity | 74.6101953 | 73 | 74.5738316 |
| Activity | 74.6101953 | 73 | 74.4942862 |
| Activity | 74.7011044 | 73 | 74.4351953 |
| Activity | 74.7920134 | 73 | 74.3806498 |
| Activity | 74.8829225 | 73 | 74.3261044 |
| Activity | 74.8829225 | 73 | 74.287468  |

|          |            |    |            |
|----------|------------|----|------------|
| Activity | 74.7011044 | 73 | 74.2488316 |
| Activity | 74.7011044 | 73 | 74.2351953 |
| Activity | 74.7011044 | 73 | 74.2329225 |
| Activity | 74.337468  | 73 | 74.2306498 |
| Activity | 74.1556498 | 73 | 74.2306498 |
| Activity | 73.9738316 | 73 | 74.2238316 |
| Activity | 74.0647407 | 73 | 74.2079225 |
| Activity | 74.2465589 | 73 | 74.1965589 |
| Activity | 74.4283771 | 73 | 74.1851953 |
| Activity | 73.9738316 | 73 | 74.1601953 |
| Activity | 73.9738316 | 73 | 74.1420134 |
| Activity | 74.2465589 | 73 | 74.1101953 |
| Activity | 74.4283771 | 73 | 74.0738316 |
| Activity | 74.5192862 | 73 | 74.0465589 |
| Activity | 74.4283771 | 73 | 73.9782094 |
| Activity | 74.1556498 | 73 | 73.9554822 |
| Activity | 73.8829225 | 73 | 73.9441185 |
| Activity | 73.9738316 | 73 | 73.8879591 |
| Activity | 73.9738316 | 73 | 73.8247749 |
| Activity | 73.7011044 | 73 | 73.7626238 |
| Activity | 73.8829225 | 73 | 73.7077041 |
| Activity | 73.4283771 | 73 | 73.6672472 |
| Activity | 73.2465589 | 73 | 73.6187324 |
| Activity | 73.0647407 | 73 | 73.5700111 |
| Activity | 73.0647407 | 73 | 73.5353393 |
| Activity | 72.9738316 | 73 | 73.5027336 |
| Activity | 73.0647407 | 73 | 73.5050063 |
| Activity | 73.1556498 | 73 | 73.5050063 |
| Activity | 73.1556498 | 73 | 73.4981881 |
| Activity | 73.7920134 | 73 | 73.4845518 |
| Activity | 73.5192862 | 73 | 73.4845518 |
| Activity | 73.6101953 | 73 | 73.4800063 |
| Activity | 73.9738316 | 73 | 73.4709154 |
| Activity | 72.1489436 | 73 | 73.4527336 |
| Activity | 73.7011044 | 73 | 73.4300063 |
| Activity | 74.1556498 | 73 | 73.4027336 |
| Activity | 72.4547288 | 73 | 73.3686427 |
| Activity | 72.2646461 | 73 | 73.3345518 |
| Activity | 72.3968775 | 73 | 73.3004609 |
| Activity | 72.6861337 | 73 | 73.2315925 |
| Activity | 73.0828279 | 73 | 73.167063  |
| Activity | 72.7605139 | 73 | 73.1147902 |
| Activity | 72.7522494 | 73 | 73.082972  |
| Activity | 72.9505965 | 73 | 73.0602448 |
| Activity | 72.851423  | 73 | 73.0511539 |

|          |            |    |            |
|----------|------------|----|------------|
| Activity | 74.0647407 | 73 | 73.0443357 |
| Activity | 74.0647407 | 73 | 73.0284266 |
| Activity | 73.9738316 | 73 | 73.0011539 |
| Activity | 73.8829225 | 73 | 72.9761539 |
| Activity | 73.9738316 | 73 | 72.9511539 |
| Activity | 73.7920134 | 73 | 72.9102448 |
| Activity | 73.8829225 | 73 | 72.8477814 |
| Activity | 73.7011044 | 73 | 72.8295995 |
| Activity | 73.6101953 | 73 | 72.809145  |
| Activity | 73.337468  | 73 | 72.8456763 |
| Activity | 72.7920134 | 73 | 72.8388581 |
| Activity | 72.5192862 | 73 | 72.8184036 |
| Activity | 72.6101953 | 73 | 72.865472  |
| Activity | 71.2190965 | 73 | 72.8738793 |
| Activity | 71.1199229 | 73 | 72.8690634 |
| Activity | 71.7920134 | 73 | 72.9126195 |
| Activity | 72.1556498 | 73 | 72.9530764 |
| Activity | 72.337468  | 73 | 73.0106821 |
| Activity | 72.7011044 | 73 | 73.036858  |
| Activity | 72.7920134 | 73 | 73.094257  |
| Activity | 72.337468  | 73 | 73.1564081 |
| Activity | 71.9738316 | 73 | 73.1859536 |
| Activity | 72.1556498 | 73 | 73.2109536 |
| Activity | 72.1556498 | 73 | 73.2404991 |
| Activity | 72.1556498 | 73 | 73.24959   |
| Activity | 71.0207494 | 73 | 73.2586809 |
| Activity | 72.8829225 | 73 | 73.2768627 |
| Activity | 73.1556498 | 73 | 73.2605155 |
| Activity | 73.6101953 | 73 | 73.2487138 |
| Activity | 73.4283771 | 73 | 73.2689369 |
| Activity | 73.337468  | 73 | 73.3011435 |
| Activity | 74.337468  | 73 | 73.3521517 |
| Activity | 72.6009369 | 73 | 73.4174161 |
| Activity | 72.2042427 | 73 | 73.4878458 |
| Activity | 74.4283771 | 73 | 73.5835488 |
| Activity | 74.7011044 | 73 | 73.6842105 |
| minute1  | 75.0647407 | 63 | 73.76807   |
| minute2  | 73.799284  | 63 | 73.8477972 |
| minute3  | 75.2465589 | 63 | 73.9204996 |
| minute4  | 75.337468  | 63 | 73.9890698 |
| minute5  | 75.2465589 | 63 | 74.0628053 |
| minute6  | 75.0647407 | 63 | 74.1652598 |
| minute7  | 75.1556498 | 63 | 74.2817639 |
| minute8  | 74.2465589 | 63 | 74.4011605 |
| minute9  | 74.337468  | 63 | 74.5230365 |

|          |            |    |            |
|----------|------------|----|------------|
| minute10 | 74.5192862 | 63 | 74.6498712 |
| minute11 | 73.2290361 | 63 | 74.787723  |
| minute12 | 73.2290361 | 63 | 74.8487884 |
| minute13 | 74.4191187 | 63 | 74.9022092 |
| minute14 | 74.6257303 | 63 | 74.9450929 |
| minute15 | 74.8323419 | 63 | 74.972274  |
| minute16 | 75.1298625 | 63 | 75.0304718 |
| minute17 | 75.4273832 | 63 | 75.0339174 |
| minute18 | 75.0472179 | 63 | 75.0578425 |
| minute19 | 75.1463915 | 63 | 75.0840403 |
| minute20 | 75.1463915 | 63 | 75.0471967 |
| minute21 | 75.3447386 | 63 | 74.9985762 |
| minute22 | 75.245565  | 63 | 74.9284682 |
| minute23 | 75.4439121 | 63 | 74.8724346 |
| minute24 | 75.7414328 | 63 | 74.7727811 |
| minute25 | 76.4356477 | 63 | 74.659078  |
| minute26 | 76.6339948 | 63 | 74.5449617 |
| minute27 | 76.9315154 | 63 | 74.4304321 |
| minute28 | 77.030689  | 63 | 74.3134233 |
| minute29 | 77.2290361 | 63 | 74.2265797 |
| minute30 | 76.5348212 | 63 | 74.134984  |
| minute31 | 75.3255406 | 63 | 74.0338842 |
| minute32 | 75.2924827 | 63 | 73.9650407 |
| minute33 | 75.3255406 | 63 | 73.9205773 |
| minute34 | 74.5156232 | 63 | 73.8461553 |
| minute35 | 75.6653775 | 63 | 73.7864027 |
| minute36 | 74.4752948 | 63 | 73.7717581 |
| minute37 | 73.5579394 | 63 | 73.7519482 |
| minute38 | 73.2521543 | 63 | 73.7201549 |
| minute39 | 72.9546337 | 63 | 73.7024112 |
| minute40 | 72.7562865 | 63 | 73.6935517 |
| minute41 | 72.2604188 | 63 | 73.6915104 |
| minute42 | 71.5579394 | 63 | 73.6913287 |
| minute43 | 71.2604188 | 63 | 73.6890808 |
| minute44 | 70.7893444 | 63 | 73.6818742 |
| minute45 | 70.6819064 | 63 | 73.6331388 |
| minute46 | 70.4835593 | 63 | 73.5556843 |
| minute47 | 70.4752948 | 63 | 73.4027498 |
| minute48 | 70.7728155 | 63 | 73.23246   |
| minute49 | 70.6736419 | 63 | 73.0547322 |
| minute50 | 70.4752948 | 63 | 72.8796903 |
| minute51 | 70.4752948 | 63 | 72.7222104 |
| minute52 | 71.4505014 | 63 | 72.5974419 |
| minute53 | 71.442237  | 63 | 72.4761857 |
| minute54 | 72.2356254 | 63 | 72.3342684 |

|          |            |    |            |
|----------|------------|----|------------|
| minute55 | 74.2465589 | 63 | 72.212599  |
| minute56 | 74.337468  | 63 | 72.0425577 |
| minute57 | 74.1556498 | 63 | 71.9097065 |
| minute58 | 74.337468  | 63 | 71.8047478 |
| minute59 | 74.7920134 | 63 | 71.7072271 |
| minute60 | 75.0647407 | 63 | 71.6144585 |
| AFter1   | 75.337468  | 63 | 71.5485495 |
| AFter2   | 75.1556498 | 63 | 71.548203  |
| AFter3   | 75.1556498 | 63 | 71.5563275 |
| AFter4   | 73.7920134 | 63 | 71.5673447 |
| AFter5   | 73.337468  | 63 | 71.5719569 |
| AFter6   | 70.5166171 | 63 | 71.5815277 |
| AFter7   | 70.1199229 | 63 | 71.5619144 |
| AFter8   | 69.9215758 | 63 | 71.5282515 |
| AFter9   | 70.2273609 | 63 | 71.4875638 |
| AFter10  | 70.2356254 | 63 | 71.4491488 |
| AFter11  | 70.3347989 | 63 | 71.4080479 |
| AFter12  | 70.442237  | 63 | 71.366947  |
| AFter13  | 69.6488485 | 63 | 71.2963006 |
| AFter14  | 69.6488485 | 63 | 71.2355716 |
| AFter15  | 68.8637246 | 63 | 71.1903904 |
| AFter16  | 69.1612452 | 63 | 71.0972086 |
| AFter17  | 69.3595923 | 63 | 70.9926631 |
| AFter18  | 69.3513279 | 63 | 70.8881177 |
| AFter19  | 69.2438898 | 63 | 70.7722086 |
| AFter20  | 70.1199229 | 63 | 70.6494813 |
| AFter21  | 72.2465589 | 63 | 70.510845  |
| AFter22  | 71.8829225 | 63 | 70.3540268 |
| AFter23  | 71.7011044 | 63 | 70.2040268 |
| AFter24  | 70.9738316 | 63 | 70.0494813 |
| AFter25  | 71.0647407 | 63 | 69.9426631 |
| AFter26  | 69.6990268 | 63 | 69.8631177 |
| AFter27  | 69.1287788 | 63 | 69.8654571 |
| AFter28  | 69.1453077 | 63 | 69.8754412 |
| AFter29  | 69.1370433 | 63 | 69.890384  |
| AFter30  | 68.8312582 | 63 | 69.9022276 |
| AFter31  | 68.8312582 | 63 | 69.9161373 |
| AFter32  | 68.6246466 | 63 | 69.9457495 |
| AFter33  | 69.0130763 | 63 | 69.9794939 |
| AFter34  | 70.4283771 | 63 | 70.0398912 |
| AFter35  | 70.5192862 | 63 | 70.1071067 |
| AFter36  | 70.1556498 | 63 | 70.1825866 |
| AFter37  | 69.9738316 | 63 | 70.2392649 |
| AFter38  | 69.7011044 | 63 | 70.2841663 |
| AFter39  | 69.8829225 | 63 | 70.3247289 |

|         |            |    |            |
|---------|------------|----|------------|
| AFter40 | 69.5192862 | 63 | 70.3725229 |
| AFter41 | 69.0647407 | 63 | 70.4029616 |
| AFter42 | 69.1556498 | 63 | 70.3870525 |
| AFter43 | 68.9738316 | 63 | 70.382507  |
| AFter44 | 69.5192862 | 63 | 70.3802343 |
| AFter45 | 70.1556498 | 63 | 70.382507  |
| AFter46 | 70.6101953 | 63 | 70.382507  |
| AFter47 | 70.5192862 | 63 | 70.4143771 |
| AFter48 | 70.5192862 | 63 | 70.455958  |
| AFter49 | 70.7011044 | 63 | 70.4971256 |
| AFter50 | 70.7920134 | 63 | 70.5430454 |
| AFter51 | 71.5192862 | 63 | 70.6034279 |
| AFter52 | 71.7920134 | 63 | 70.6706286 |
| AFter53 | 72.0647407 | 63 | 70.7543582 |
| AFter54 | 72.337468  | 63 | 70.8351953 |
| AFter55 | 71.8829225 | 63 | 70.8829225 |
| AFter56 | 71.4283771 | 63 | 70.9351953 |
| AFter57 | 71.1556498 | 63 | 71.0101953 |
| AFter58 | 70.9738316 | 63 | 71.1170134 |
| AFter59 | 71.1556498 | 63 | 71.2368871 |
| AFter60 | 71.337468  | 63 | 71.367298  |
| AFter61 | 71.6101953 | 63 | 71.5020477 |
| AFter62 | 71.7011044 | 63 | 71.6456817 |
| AFter63 | 71.6101953 | 63 | 71.7822909 |
| AFter64 | 71.0647407 | 63 | 71.9008581 |
| AFter65 | 71.0647407 | 63 | 72.0043428 |
| AFter66 | 70.9738316 | 63 | 72.0811745 |
| AFter67 | 70.7920134 | 63 | 72.1435434 |
| AFter68 | 70.7920134 | 63 | 72.226328  |
| AFter69 | 70.9738316 | 63 | 72.3217825 |
| AFter70 | 71.2465589 | 63 | 72.4058734 |
| AFter71 | 71.5192862 | 63 | 72.4649643 |
| AFter72 | 71.9738316 | 63 | 72.4967825 |
| AFter73 | 72.2465589 | 63 | 72.501328  |
| AFter74 | 72.337468  | 63 | 72.492237  |
| AFter75 | 72.6101953 | 63 | 72.467237  |
| AFter76 | 73.1556498 | 63 | 72.4558734 |
| AFter77 | 74.2465589 | 63 | 72.4536007 |
| AFter78 | 74.4960511 | 63 | 72.451328  |
| AFter79 | 75.0993569 | 63 | 72.4445098 |
| AFter80 | 74.9092742 | 63 | 72.4240552 |
| AFter81 | 74.8101007 | 63 | 72.3967825 |
| AFter82 | 74.620018  | 63 | 72.3536007 |
| AFter83 | 73.7165225 | 63 | 72.2967825 |
| AFter84 | 73.6586713 | 63 | 72.2354189 |

|          |            |    |            |
|----------|------------|----|------------|
| AFter85  | 73.2289192 | 63 | 72.1899643 |
| AFter86  | 73.1049523 | 63 | 72.1445098 |
| AFter87  | 73.8306667 | 63 | 72.0967825 |
| AFter88  | 74.337468  | 63 | 72.0558734 |
| AFter89  | 74.0647407 | 63 | 72.017237  |
| AFter90  | 73.1556498 | 63 | 71.9695098 |
| AFter91  | 72.7920134 | 63 | 71.9217825 |
| AFter92  | 71.9738316 | 63 | 71.8695098 |
| AFter93  | 71.7011044 | 63 | 71.8104189 |
| AFter94  | 71.337468  | 63 | 71.7604189 |
| AFter95  | 71.4283771 | 63 | 71.7104189 |
| AFter96  | 71.337468  | 63 | 71.608067  |
| AFter97  | 71.0647407 | 63 | 71.4920787 |
| AFter98  | 70.7011044 | 63 | 71.336421  |
| AFter99  | 70.337468  | 63 | 71.2097291 |
| AFter100 | 70.2465589 | 63 | 71.0725001 |
| AFter101 | 69.8829225 | 63 | 70.9536595 |
| AFter102 | 69.4283771 | 63 | 70.85548   |
| AFter103 | 69.1556498 | 63 | 70.7620526 |
| AFter104 | 69.2465589 | 63 | 70.6866672 |
| AFter105 | 69.2465589 | 63 | 70.6195462 |
| AFter106 | 69.0647407 | 63 | 70.5586235 |
| AFter107 | 69.1556498 | 63 | 70.4985274 |
| AFter108 | 69.2465589 | 63 | 70.4202883 |
| AFter109 | 69.0647407 | 63 | 70.3339247 |
| AFter110 | 69.337468  | 63 | 70.2589247 |
| AFter111 | 69.4283771 | 63 | 70.1998337 |
| AFter112 | 69.6101953 | 63 | 70.1634701 |
| AFter113 | 70.2465589 | 63 | 70.147561  |
| AFter114 | 70.337468  | 63 | 70.1045963 |
| AFter115 | 68.5161188 | 63 | 70.0806398 |
| AFter116 | 68.5161188 | 63 | 70.0818899 |
| AFter117 | 68.0202511 | 63 | 70.0903715 |
| AFter118 | 69.4283771 | 63 | 70.1449169 |
| AFter119 | 69.6101953 | 63 | 70.2153715 |
| AFter120 | 70.1556498 | 63 | 70.2926442 |
| AFter121 | 70.8829225 | 63 | 70.3630987 |
| AFter122 | 70.8829225 | 63 | 70.4494624 |
| AFter123 | 70.7011044 | 63 | 70.5494624 |
| AFter124 | 70.9738316 | 63 | 70.6767351 |
| AFter125 | 70.7920134 | 63 | 70.8085533 |
| AFter126 | 70.7011044 | 63 | 70.9380987 |
| AFter127 | 70.7011044 | 63 | 71.0767351 |
| AFter128 | 70.8829225 | 63 | 71.2153715 |
| AFter129 | 71.0647407 | 63 | 71.3403715 |

|          |            |    |            |
|----------|------------|----|------------|
| AFter130 | 70.7920134 | 63 | 71.4585533 |
| AFter131 | 71.337468  | 63 | 71.5699169 |
| AFter132 | 71.337468  | 63 | 71.6767351 |
| AFter133 | 69.9825145 | 63 | 71.7812805 |
| AFter134 | 70.3792087 | 63 | 71.8676442 |
| AFter135 | 71.4783823 | 63 | 71.9471896 |
| AFter136 | 71.6767294 | 63 | 72.0285608 |
| AFter137 | 73.2465589 | 63 | 72.1049733 |
| AFter138 | 73.5192862 | 63 | 72.1888238 |
| AFter139 | 73.4283771 | 63 | 72.2349918 |
| AFter140 | 73.0647407 | 63 | 72.2766143 |
| AFter141 | 73.337468  | 63 | 72.3046005 |
| AFter142 | 73.4283771 | 63 | 72.3141983 |
| AFter143 | 74.2465589 | 63 | 72.3573801 |
| AFter144 | 74.5192862 | 63 | 72.391471  |
| AFter145 | 74.4283771 | 63 | 72.416471  |
| AFter146 | 74.6101953 | 63 | 72.4437438 |
| AFter147 | 74.7011044 | 63 | 72.4778347 |
| AFter148 | 74.2465589 | 63 | 72.5028347 |
| AFter149 | 73.7920134 | 63 | 72.5187438 |
| AFter150 | 73.7920134 | 63 | 72.5323801 |
| AFter151 | 73.7011044 | 63 | 72.5505619 |
| AFter152 | 73.7920134 | 63 | 72.566471  |
| AFter153 | 73.7011044 | 63 | 72.5801074 |
| AFter154 | 73.5192862 | 63 | 72.6571631 |
| AFter155 | 71.7709653 | 63 | 72.7197559 |
| AFter156 | 71.5726182 | 63 | 72.7594149 |
| AFter157 | 71.3742711 | 63 | 72.7941151 |
| AFter158 | 71.2750975 | 63 | 72.7918424 |
| AFter159 | 71.2750975 | 63 | 72.7645697 |
| AFter160 | 71.2750975 | 63 | 72.7304788 |
| AFter161 | 71.2668331 | 63 | 72.7100242 |
| AFter162 | 72.6101953 | 63 | 72.6668424 |
| AFter163 | 72.0647407 | 63 | 72.6077515 |
| AFter164 | 71.9738316 | 63 | 72.5236606 |
| AFter165 | 71.8829225 | 63 | 72.4350242 |
| AFter166 | 72.0647407 | 63 | 72.3577515 |
| AFter167 | 71.7011044 | 63 | 72.2691151 |
| AFter168 | 71.5192862 | 63 | 72.1963879 |
| AFter169 | 71.6101953 | 63 | 72.1418424 |
| AFter170 | 71.5192862 | 63 | 72.1054788 |
| AFter171 | 71.9738316 | 63 | 72.0554788 |
| AFter172 | 71.8829225 | 63 | 72.0145697 |
| AFter173 | 73.0647407 | 63 | 71.9668424 |
| AFter174 | 72.8829225 | 63 | 71.912297  |



|          |            |    |            |
|----------|------------|----|------------|
| AFter175 | 73.0647407 | 63 | 71.8486606 |
| AFter176 | 73.0647407 | 63 | 71.8355504 |
| AFter177 | 73.1556498 | 63 | 71.7767124 |
| AFter178 | 72.4283771 | 63 | 71.753065  |
| AFter179 | 72.0647407 | 63 | 71.7228061 |
| AFter180 | 72.2465589 | 63 | 71.6925472 |
| AFter181 | 71.6101953 | 63 | 71.6622883 |
| AFter182 | 71.0647407 | 63 | 71.6299632 |
| AFter183 | 70.8829225 | 63 | 71.5663269 |
| AFter184 | 70.9738316 | 63 | 71.5117814 |
| AFter185 | 71.337468  | 63 | 71.4708723 |
| AFter186 | 71.0647407 | 63 | 71.4367814 |
| AFter187 | 71.7920134 | 63 | 71.4026905 |
| AFter188 | 72.0647407 | 63 | 71.4004178 |
| AFter189 | 72.337468  | 63 | 71.407236  |
| AFter190 | 71.7920134 | 63 | 71.4299632 |
| AFter191 | 72.0647407 | 63 | 71.4595087 |
| AFter192 | 71.8829225 | 63 | 71.5026905 |
| AFter193 | 71.5192862 | 63 | 71.5481451 |
| AFter194 | 70.9738316 | 63 | 71.5595087 |
| AFter195 | 71.2465589 | 63 | 71.5731451 |
| AFter196 | 69.2190965 | 63 | 71.582236  |
| AFter197 | 70.4283771 | 63 | 71.5981451 |
| AFter198 | 70.0647407 | 63 | 71.6140542 |
| AFter199 | 70.0647407 | 63 | 71.6708723 |
| AFter200 | 70.0647407 | 63 | 71.7299632 |
| AFter201 | 69.9738316 | 63 | 71.7867814 |
| AFter202 | 70.0647407 | 63 | 71.857236  |
| AFter203 | 69.8829225 | 63 | 71.9458723 |
| AFter204 | 70.337468  | 63 | 72.0208723 |
| AFter205 | 70.5192862 | 63 | 72.0867814 |
| AFter206 | 70.7011044 | 63 | 72.157236  |
| AFter207 | 71.6101953 | 63 | 72.2390542 |
| AFter208 | 71.7920134 | 63 | 72.3117814 |
| AFter209 | 72.5192862 | 63 | 72.3663269 |
| AFter210 | 72.7011044 | 63 | 72.4117814 |
| AFter211 | 73.7011044 | 63 | 72.4708723 |
| AFter212 | 73.7011044 | 63 | 72.5299632 |
| AFter213 | 73.5192862 | 63 | 72.5890542 |
| AFter214 | 73.4283771 | 63 | 72.6504178 |
| AFter215 | 73.4283771 | 63 | 72.7117814 |
| AFter216 | 73.7011044 | 63 | 72.757236  |
| AFter217 | 73.7920134 | 63 | 72.8533771 |
| AFter218 | 74.7011044 | 63 | 72.8830624 |
| AFter219 | 74.4283771 | 63 | 72.9580624 |

|          |            |    |            |
|----------|------------|----|------------|
| AFter220 | 74.5192862 | 63 | 73.0376079 |
| AFter221 | 74.4283771 | 63 | 73.081756  |
| AFter222 | 74.6101953 | 63 | 73.1256976 |
| AFter223 | 73.8829225 | 63 | 73.1748044 |
| AFter224 | 73.6101953 | 63 | 73.2358947 |
| AFter225 | 74.1556498 | 63 | 73.2982247 |
| AFter226 | 74.337468  | 63 | 73.3659265 |
| AFter227 | 74.7011044 | 63 | 73.4613143 |
| AFter228 | 74.2465589 | 63 | 73.5564956 |
| AFter229 | 74.1556498 | 63 | 73.7087683 |
| AFter230 | 74.1556498 | 63 | 73.8542228 |
| AFter231 | 74.4283771 | 63 | 73.9883137 |
| AFter232 | 74.2465589 | 63 | 74.086041  |
| AFter233 | 73.9738316 | 63 | 74.1746774 |
| AFter234 | 73.4283771 | 63 | 74.2678592 |
| AFter235 | 73.0647407 | 63 | 74.3678592 |
| AFter236 | 73.0647407 | 63 | 74.4655865 |
| AFter237 | 71.6157907 | 63 | 74.5587683 |
| AFter238 | 73.0647407 | 63 | 74.6451319 |
| AFter239 | 73.2465589 | 63 | 74.7087683 |
| AFter240 | 71.8306667 | 63 | 74.7769501 |
|          | 71.7314932 | 63 | 74.7879941 |
|          | 72.0290138 | 63 | 74.7938729 |
|          | 72.3265345 | 63 | 74.7507055 |
|          | 72.8306667 | 63 | 74.7203481 |
|          | 73.2273609 | 63 | 74.6829658 |
|          | 74.5166171 | 63 | 74.6323604 |
|          | 75.4174436 | 63 | 74.5783218 |
|          | 77.8829225 | 63 | 74.5027956 |
|          | 78.337468  | 63 | 74.4239636 |
|          | 78.0647407 | 63 | 74.337487  |
|          | 77.6101953 | 63 | 74.2485311 |
|          | 77.2465589 | 63 | 74.1502776 |
|          | 77.2465589 | 63 | 74.0664869 |
|          | 77.4283771 | 63 | 74.0043905 |
|          | 77.337468  | 63 | 73.9658477 |
|          | 77.4283771 | 63 | 73.9459001 |
|          | 77.2465589 | 63 | 73.9640819 |
|          | 77.2465589 | 63 | 74.0321238 |
|          | 77.1556498 | 63 | 74.0730329 |
|          | 74.9610479 | 63 | 74.1116693 |
|          | 74.6635273 | 63 | 74.1834302 |
|          | 72.8835004 | 63 | 74.2394887 |
|          | 72.6686244 | 63 | 74.2858364 |
|          | 72.1149054 | 63 | 74.3202006 |

|            |    |            |
|------------|----|------------|
| 72.1314343 | 63 | 74.3419616 |
| 72.175924  | 63 | 74.3583506 |
| 71.6800562 | 63 | 74.344781  |
| 71.0932793 | 63 | 74.297327  |
| 70.6965851 | 63 | 74.1836907 |
| 70.5974116 | 63 | 74.0564179 |
| 70.498238  | 63 | 73.9405089 |
| 70.8949322 | 63 | 73.8245998 |
| 71.4899736 | 63 | 73.7109634 |
| 71.8866678 | 63 | 73.5905089 |
| 72.2668331 | 63 | 73.4564179 |
| 73.7920134 | 63 | 73.3177816 |
| 74.337468  | 63 | 73.172327  |
| 74.7011044 | 63 | 73.0155089 |
| 74.7920134 | 63 | 72.8427816 |
| 74.7011044 | 63 | 72.672327  |
| 73.9738316 | 63 | 72.5567375 |
| 73.8829225 | 63 | 72.457677  |
| 73.7011044 | 63 | 72.4031171 |
| 73.7011044 | 63 | 72.3652927 |
| 73.8829225 | 63 | 72.3458568 |
| 73.9738316 | 63 | 72.3373712 |
| 73.5192862 | 63 | 72.3436826 |
| 73.337468  | 63 | 72.3714815 |
| 73.2465589 | 63 | 72.4275862 |
| 73.4283771 | 63 | 72.4616225 |
| 72.9738316 | 63 | 72.5006174 |
| 72.7011044 | 63 | 72.5555214 |
| 72.4283771 | 63 | 72.5986485 |
| 72.0647407 | 63 | 72.6320649 |
| 71.7920134 | 63 | 72.6557706 |
| 71.6101953 | 63 | 72.6650134 |
| 70.9738316 | 63 | 72.6361268 |
| 70.337468  | 63 | 72.6035211 |
| 70.337468  | 63 | 72.5669898 |
| 70.337468  | 63 | 72.5381031 |
| 70.7011044 | 63 | 72.5391752 |
| 70.7011044 | 63 | 72.558429  |
| 71.1556498 | 63 | 72.5725175 |
| 71.337468  | 63 | 72.5787548 |
| 71.7920134 | 63 | 72.5800335 |
| 72.4283771 | 63 | 72.5618906 |
| 72.7920134 | 63 | 72.5389957 |
| 73.337468  | 63 | 72.5173404 |
| 72.0580346 | 63 | 72.4952719 |

|            |    |            |
|------------|----|------------|
| 72.1572081 | 63 | 72.4829142 |
| 72.6943982 | 63 | 72.458573  |
| 72.620018  | 63 | 72.4381574 |
| 72.8266296 | 63 | 72.4369567 |
| 72.8348941 | 63 | 72.4365824 |
| 72.636547  | 63 | 72.4078914 |
| 72.636547  | 63 | 72.3967623 |
| 73.0332412 | 63 | 72.4513078 |
| 73.2398527 | 63 | 72.5149441 |
| 73.636547  | 63 | 72.5944896 |
| 74.743985  | 63 | 72.6831259 |
| 74.743985  | 63 | 72.7649441 |
| 74.4464643 | 63 | 72.8422168 |
| 73.9505965 | 63 | 72.924035  |
| 73.7522494 | 63 | 72.9831259 |
| 73.1572081 | 63 | 73.0399441 |
| 73.0580346 | 63 | 73.0922168 |
| 72.6530759 | 63 | 73.1285805 |
| 72.4547288 | 63 | 73.1603987 |
| 72.7522494 | 63 | 73.1899441 |
| 72.4547288 | 63 | 73.2605663 |
| 72.1572081 | 63 | 73.3196183 |
| 72.6530759 | 63 | 73.360695  |
| 72.4134065 | 63 | 73.3990858 |
| 70.9170986 | 63 | 73.4118568 |
| 71.3468507 | 63 | 73.4016938 |
| 73.7920134 | 63 | 73.3760351 |
| 73.5192862 | 63 | 73.3662854 |
| 73.5192862 | 63 | 73.3352547 |
| 73.8829225 | 63 | 73.312695  |
| 73.6101953 | 63 | 73.2847635 |
| 73.7920134 | 63 | 73.2246006 |
| 73.9738316 | 63 | 73.1576195 |
| 73.5192862 | 63 | 73.0912582 |
| 73.6101953 | 63 | 73.0441118 |
| 73.8829225 | 63 | 72.9928332 |
| 73.8829225 | 63 | 72.9427942 |
| 74.0647407 | 63 | 72.8952346 |
| 74.5192862 | 63 | 72.8623444 |
| 74.8829225 | 63 | 72.8321402 |
| 74.5192862 | 63 | 72.8013161 |
| 74.337468  | 63 | 72.7892937 |
| 74.1556498 | 63 | 72.786982  |
| 73.337468  | 63 | 72.7790918 |
| 72.4283771 | 63 | 72.7840115 |

|            |    |            |
|------------|----|------------|
| 71.6101953 | 63 | 72.8286116 |
| 72.2465589 | 63 | 72.8670134 |
| 71.7920134 | 63 | 72.8420134 |
| 72.337468  | 63 | 72.8261044 |
| 72.5192862 | 63 | 72.8011044 |
| 72.337468  | 63 | 72.7579225 |
| 72.0647407 | 63 | 72.7101953 |
| 71.7920134 | 63 | 72.6533771 |
| 72.0647407 | 63 | 72.5897407 |
| 71.7011044 | 63 | 72.537468  |
| 71.1556498 | 63 | 72.4738316 |
| 71.1556498 | 69 | 72.4056498 |
| 71.337468  | 69 | 72.3465589 |
| 71.2465589 | 69 | 72.287468  |
| 71.5192862 | 69 | 72.2147407 |
| 71.9738316 | 69 | 72.1215589 |
| 72.0647407 | 69 | 72.0511044 |
| 72.337468  | 69 | 71.9783771 |
| 72.6101953 | 69 | 71.9101953 |
| 72.7011044 | 69 | 71.8488316 |
| 72.8829225 | 69 | 71.8170134 |
| 72.7920134 | 69 | 71.8533771 |
| 72.8829225 | 69 | 71.8617352 |
| 72.5192862 | 69 | 71.889928  |
| 72.1556498 | 69 | 71.8896084 |
| 71.7011044 | 69 | 71.8806111 |
| 71.5192862 | 69 | 71.8687213 |
| 71.4283771 | 69 | 71.8562116 |
| 71.4283771 | 69 | 71.8430821 |
| 71.0647407 | 69 | 71.815903  |
| 71.1556498 | 69 | 71.7854181 |
| 71.5192862 | 69 | 71.7561729 |
| 71.7011044 | 69 | 71.7120516 |
| 71.6101953 | 69 | 71.6189635 |
| 71.1556498 | 69 | 71.5157513 |
| 71.7011044 | 69 | 71.4084069 |
| 71.4283771 | 69 | 71.2872196 |
| 71.4283771 | 69 | 71.1612801 |
| 70.8829225 | 69 | 71.0285225 |
| 71.1556498 | 69 | 70.8939054 |
| 73.0647407 | 69 | 70.7518503 |
| 72.5808826 | 63 | 70.6102084 |
| 72.9197256 | 63 | 70.4733185 |
| 72.3246843 | 63 | 70.3413874 |
| 72.159395  | 63 | 70.2185471 |

|            |    |            |
|------------|----|------------|
| 71.8618744 | 63 | 70.1072771 |
| 71.5643537 | 63 | 70.0172881 |
| 71.2668331 | 63 | 69.9341173 |
| 70.9775769 | 63 | 69.8730539 |
| 70.4817091 | 63 | 69.8117839 |
| 69.9858413 | 63 | 69.7596048 |
| 69.3908    | 63 | 69.7101116 |
| 67.6139405 | 63 | 69.6540069 |
| 67.1180727 | 63 | 69.6007948 |
| 67.2255107 | 63 | 69.554814  |
| 67.1263372 | 63 | 69.5373457 |
| 67.0271636 | 63 | 69.5062409 |
| 67.0271636 | 63 | 69.4941445 |
| 67.2255107 | 63 | 69.4919654 |
| 67.0188992 | 63 | 69.5156127 |
| 67.2172463 | 63 | 69.5349212 |
| 67.3164198 | 63 | 69.5013372 |
| 67.605676  | 63 | 69.4600149 |
| 67.605676  | 63 | 69.4077421 |
| 67.7048496 | 63 | 69.3753041 |
| 68.1015438 | 63 | 69.3544364 |
| 68.1924529 | 63 | 69.3534033 |
| 68.9858413 | 63 | 69.3548496 |
| 68.9775769 | 63 | 69.3686926 |
| 68.9775769 | 63 | 69.4000975 |
| 69.175924  | 63 | 69.4643537 |
| 69.2750975 | 63 | 69.5436926 |
| 69.5726182 | 63 | 69.6379074 |
| 69.7709653 | 63 | 69.744519  |
| 70.4569157 | 63 | 69.8585686 |
| 70.4569157 | 63 | 69.9600149 |
| 70.944519  | 63 | 70.0517504 |
| 71.3412132 | 63 | 70.1385273 |
| 71.8288165 | 63 | 70.2228248 |
| 71.9279901 | 63 | 70.3170397 |
| 71.7213785 | 63 | 70.4290231 |
| 70.9279901 | 63 | 70.5308826 |
| 70.8288165 | 63 | 70.6228248 |
| 71.0271636 | 63 | 70.6951388 |
| 71.3246843 | 63 | 70.7527835 |
| 71.8205521 | 63 | 70.8153868 |
| 71.622205  | 63 | 70.8637339 |
| 71.8205521 | 63 | 70.9048496 |
| 72.2337752 | 63 | 70.9261306 |
| 73.051957  | 63 | 70.9449322 |

|            |    |            |
|------------|----|------------|
| 73.159395  | 63 | 70.9637339 |
| 73.159395  | 63 | 70.9736512 |
| 71.8784033 | 63 | 70.9932793 |
| 71.6800562 | 63 | 71.0127008 |
| 71.283362  | 63 | 71.034395  |
| 70.7957587 | 63 | 71.0414198 |
| 70.498238  | 63 | 71.0335686 |
| 70.3990645 | 63 | 71.005676  |
| 70.9941058 | 63 | 70.9676595 |
| 71.498238  | 63 | 70.9124942 |
| 71.2916264 | 63 | 70.8569157 |
| 70.9941058 | 63 | 70.8040231 |
| 70.498238  | 63 | 70.7684859 |
| 69.9114612 | 63 | 70.7255107 |
| 70.2089818 | 63 | 70.6775769 |
| 70.0354281 | 63 | 70.6147669 |
| 69.837081  | 63 | 70.5271636 |
| 69.837081  | 63 | 70.4443124 |
| 69.729643  | 63 | 70.3507174 |
| 69.729643  | 63 | 70.2616678 |
| 69.5726182 | 63 | 70.1665328 |
| 70.0602215 | 63 | 70.084621  |
| 70.3494777 | 63 | 70.0049819 |
| 70.6387339 | 63 | 69.9619131 |
| 70.7379074 | 63 | 69.9306211 |
| 70.1428661 | 63 | 69.9115192 |
| 69.8288165 | 63 | 69.8977892 |
| 69.8205521 | 63 | 69.8869518 |
| 69.622205  | 63 | 69.8831391 |
| 69.7048496 | 63 | 69.8462686 |
| 69.605676  | 63 | 69.7945221 |
| 69.5065025 | 63 | 69.7456682 |
| 69.1098083 | 63 | 69.7133431 |
| 69.1098083 | 63 | 69.6956875 |
| 68.8122876 | 63 | 69.7086104 |
| 68.3164198 | 63 | 69.7231862 |
| 68.3081554 | 63 | 69.7421008 |
| 68.0767504 | 63 | 69.7637014 |
| 68.6717917 | 63 | 69.7324725 |
| 69.2465589 | 63 | 69.6838883 |
| 69.8829225 | 63 | 69.6305519 |
| 69.9738316 | 63 | 69.6133095 |
| 70.1556498 | 63 | 69.5816043 |
| 70.4283771 | 63 | 69.5426677 |
| 70.5192862 | 63 | 69.4919543 |

|            |    |            |
|------------|----|------------|
| 70.2465589 | 63 | 69.4387615 |
| 70.0647407 | 63 | 69.4049901 |
| 70.2465589 | 63 | 69.3858882 |
| 69.5192862 | 63 | 69.3692657 |
| 69.4283771 | 63 | 69.3576018 |
| 69.337468  | 63 | 69.3415991 |
| 69.7011044 | 63 | 69.325803  |
| 69.7920134 | 63 | 69.3124862 |
| 70.4283771 | 63 | 69.3136322 |
| 70.7920134 | 63 | 69.3147783 |
| 70.7920134 | 63 | 69.3233623 |
| 70.7011044 | 63 | 69.3443431 |
| 68.5879251 | 63 | 69.3700759 |
| 67.7862722 | 63 | 69.3676619 |
| 67.5961896 | 63 | 69.3706675 |
| 68.8829225 | 63 | 69.366122  |
| 68.7920134 | 63 | 69.3320311 |
| 68.7920134 | 63 | 69.2820311 |
| 68.6101953 | 63 | 69.2252129 |
| 68.6101953 | 63 | 69.1615766 |
| 68.7920134 | 63 | 69.1002129 |
| 69.0647407 | 63 | 69.0456675 |
| 69.1556498 | 63 | 68.991122  |
| 69.1556498 | 63 | 68.9297584 |
| 69.0647407 | 63 | 68.866122  |
| 68.9738316 | 63 | 68.8002129 |
| 68.9738316 | 63 | 68.7320311 |
| 69.1556498 | 63 | 68.6615766 |
| 69.1556498 | 63 | 68.6047584 |
| 69.1556498 | 63 | 68.5320311 |
| 69.1556498 | 63 | 68.4479402 |
| 69.337468  | 63 | 68.3706675 |
| 67.9801922 | 63 | 68.2888493 |
| 68.7920134 | 63 | 68.2553152 |
| 69.0647407 | 63 | 68.2395496 |
| 68.5192862 | 63 | 68.2148997 |
| 67.9738316 | 63 | 68.1603543 |
| 67.8829225 | 63 | 68.1080816 |
| 67.8829225 | 63 | 68.0603543 |
| 68.0647407 | 63 | 68.0239906 |
| 68.0647407 | 63 | 67.9967179 |
| 67.8829225 | 63 | 67.962627  |
| 67.7920134 | 63 | 67.9285361 |
| 66.9738316 | 63 | 67.8989906 |
| 66.7920134 | 63 | 67.8762634 |



|            |    |            |
|------------|----|------------|
| 66.6101953 | 63 | 67.8558088 |
| 66.8829225 | 63 | 67.837627  |
| 67.5192862 | 63 | 67.8171725 |
| 67.5192862 | 63 | 67.7808088 |
| 67.4283771 | 63 | 67.7558088 |
| 67.7011044 | 63 | 67.7330816 |
| 67.4283771 | 63 | 67.712627  |
| 67.2465589 | 63 | 67.6898997 |
| 67.1556498 | 63 | 67.6942862 |
| 66.6101953 | 63 | 67.6806498 |
| 66.7011044 | 63 | 67.6692862 |
| 66.7011044 | 63 | 67.6783771 |
| 66.8829225 | 63 | 67.7056498 |
| 67.1556498 | 63 | 67.7420134 |
| 67.5192862 | 63 | 67.8170134 |
| 67.4283771 | 63 | 67.9079225 |
| 67.7011044 | 63 | 67.9942862 |
| 67.9738316 | 63 | 68.0920134 |
| 68.2465589 | 63 | 68.1942862 |
| 68.2465589 | 63 | 68.3215589 |
| 68.2465589 | 63 | 68.462468  |
| 68.1556498 | 69 | 68.6147407 |
| 67.7011044 | 69 | 68.7601953 |
| 68.1556498 | 69 | 68.8897407 |
| 68.2465589 | 69 | 69.0215589 |
| 68.337468  | 69 | 69.1601953 |
| 68.4283771 | 69 | 69.2829225 |
| 68.1556498 | 69 | 69.3942862 |
| 68.2465589 | 69 | 69.4806498 |
| 68.6101953 | 69 | 69.5556498 |
| 68.8829225 | 69 | 69.6397407 |
| 69.0647407 | 69 | 69.7192862 |
| 69.337468  | 69 | 69.8033771 |
| 70.8829225 | 69 | 69.9056498 |
| 71.7011044 | 69 | 69.9965589 |
| 71.5192862 | 69 | 70.0761044 |
| 71.7920134 | 69 | 70.1511044 |
| 71.8829225 | 69 | 70.2011044 |
| 72.0647407 | 69 | 70.2283771 |
| 72.4283771 | 69 | 70.2465589 |
| 72.7011044 | 69 | 70.2601953 |
| 72.7011044 | 69 | 70.2715589 |
| 72.7011044 | 69 | 70.2965589 |
| 72.7920134 | 69 | 70.3306498 |
| 72.9738316 | 69 | 70.3442862 |

|              |            |    |            |
|--------------|------------|----|------------|
|              | 72.6101953 | 69 | 70.362468  |
|              | 71.8829225 | 69 | 70.387468  |
|              | 70.7011044 | 69 | 70.4283771 |
|              | 70.1556498 | 69 | 70.4920134 |
|              | 69.9738316 | 69 | 70.5488316 |
|              | 69.8829225 | 69 | 70.5965589 |
|              | 70.0647407 | 69 | 70.637468  |
|              | 70.9738316 | 69 | 70.6601953 |
|              | 70.7920134 | 69 | 70.6715589 |
|              | 70.7011044 | 69 | 70.6442862 |
| 100314.18.1: | 70.4283771 | 69 | 70.5829225 |
| BEFORE1      | 69.7011044 | 69 | 70.5170134 |
| BEFORE2      | 69.0647407 | 69 | 70.4420134 |
| BEFORE3      | 68.9738316 | 69 | 70.3670134 |
| BEFORE4      | 68.7920134 | 69 | 70.287468  |
| BEFORE5      | 68.7011044 | 69 | 70.1965589 |
| BEFORE6      | 69.1556498 | 69 | 70.087468  |
| BEFORE7      | 69.0647407 | 69 | 69.9715589 |
| BEFORE8      | 68.7011044 | 69 | 69.8465589 |
| BEFORE9      | 68.9738316 | 69 | 69.7261044 |
| BEFORE10     | 69.337468  | 69 | 69.5942862 |
| BEFORE11     | 70.0647407 | 69 | 69.4738316 |
| BEFORE12     | 70.7011044 | 69 | 69.3692862 |
| BEFORE13     | 70.5192862 | 69 | 69.2988316 |
| BEFORE14     | 70.5192862 | 69 | 69.2533771 |
| BEFORE15     | 70.5192862 | 69 | 69.2215589 |
| BEFORE16     | 69.9738316 | 69 | 69.1942862 |
| BEFORE17     | 69.7920134 | 69 | 69.1670134 |
| BEFORE18     | 69.7920134 | 69 | 69.1056498 |
| BEFORE19     | 69.2465589 | 69 | 69.0465589 |
| BEFORE20     | 68.8829225 | 69 | 68.9897407 |
| BEFORE21     | 68.7920134 | 69 | 68.937468  |
| BEFORE22     | 68.8829225 | 69 | 68.8965589 |
| BEFORE23     | 68.8829225 | 69 | 68.8715589 |
| BEFORE24     | 68.7920134 | 69 | 68.8579225 |
| BEFORE25     | 68.337468  | 69 | 68.8692862 |
| BEFORE26     | 68.0647407 | 69 | 68.8829225 |
| BEFORE27     | 67.7011044 | 69 | 68.8851953 |
| BEFORE28     | 67.9738316 | 69 | 68.8534522 |
| BEFORE29     | 67.7011044 | 69 | 68.855725  |
| BEFORE30     | 67.7920134 | 69 | 68.8602704 |
| BEFORE31     | 67.7011044 | 69 | 68.8511795 |
| BEFORE32     | 67.8829225 | 69 | 68.8261795 |
| BEFORE33     | 68.337468  | 69 | 68.7784522 |
| BEFORE34     | 68.7011044 | 69 | 68.7420886 |

|          |            |    |            |
|----------|------------|----|------------|
| BEFORE35 | 68.7920134 | 69 | 68.6989068 |
| BEFORE36 | 68.9738316 | 69 | 68.6489068 |
| BEFORE37 | 68.5192862 | 69 | 68.6125432 |
| BEFORE38 | 68.4283771 | 69 | 68.5716341 |
| BEFORE39 | 68.4283771 | 69 | 68.5329977 |
| BEFORE40 | 68.337468  | 69 | 68.4920886 |
| BEFORE41 | 68.0647407 | 69 | 68.4534522 |
| BEFORE42 | 68.0647407 | 69 | 68.4148159 |
| BEFORE43 | 68.4283771 | 69 | 68.3693613 |
| BEFORE44 | 69.2465589 | 69 | 68.3193613 |
| BEFORE45 | 69.2465589 | 69 | 68.2602704 |
| BEFORE46 | 69.2465589 | 69 | 68.1761795 |
| BEFORE47 | 67.7950201 | 69 | 68.0784522 |
| BEFORE48 | 68.7920134 | 69 | 67.9898159 |
| BEFORE49 | 69.1556498 | 69 | 67.8784522 |
| BEFORE50 | 68.9738316 | 69 | 67.780725  |
| BEFORE51 | 69.0647407 | 63 | 67.6761795 |
| BEFORE52 | 68.7920134 | 63 | 67.5784522 |
| BEFORE53 | 69.0647407 | 63 | 67.4761795 |
| BEFORE54 | 68.7920134 | 63 | 67.3761795 |
| BEFORE55 | 68.5192862 | 63 | 67.2989068 |
| BEFORE56 | 68.5192862 | 63 | 67.2466341 |
| BEFORE57 | 68.1556498 | 63 | 67.2034522 |
| BEFORE58 | 68.2465589 | 63 | 67.1920886 |
| BEFORE59 | 67.6101953 | 63 | 67.1852704 |
| BEFORE60 | 67.337468  | 63 | 67.1875432 |
| BEFORE61 | 67.2465589 | 63 | 67.1943613 |
| BEFORE62 | 67.0647407 | 63 | 67.2034522 |
| BEFORE63 | 66.8829225 | 63 | 67.2011795 |
| BEFORE64 | 66.4283771 | 63 | 67.1784522 |
| BEFORE65 | 64.9738316 | 63 | 67.1261795 |
| BEFORE66 | 64.1556498 | 63 | 67.0739068 |
| BEFORE67 | 64.1556498 | 63 | 67.0398159 |
| BEFORE68 | 63.5192862 | 63 | 67.0320485 |
| BEFORE69 | 63.7920134 | 63 | 66.9997695 |
| BEFORE70 | 63.6101953 | 63 | 66.9707963 |
| BEFORE71 | 63.7920134 | 63 | 66.9440958 |
| BEFORE72 | 63.7920134 | 63 | 66.877801  |
| BEFORE73 | 64.337468  | 63 | 66.8191509 |
| BEFORE74 | 65.6101953 | 63 | 66.7675256 |
| BEFORE75 | 66.7011044 | 63 | 66.7227185 |
| BEFORE76 | 67.2465589 | 63 | 66.6847295 |
| BEFORE77 | 68.0647407 | 63 | 66.6514926 |
| BEFORE78 | 68.1556498 | 63 | 66.6281731 |
| BEFORE79 | 68.5192862 | 63 | 66.60568   |

|           |            |    |            |
|-----------|------------|----|------------|
| BEFORE80  | 68.6101953 | 63 | 66.599096  |
| BEFORE81  | 68.4283771 | 63 | 66.6274769 |
| BEFORE82  | 67.9738316 | 63 | 66.6380893 |
| BEFORE83  | 67.5192862 | 63 | 66.6699075 |
| BEFORE84  | 67.1556498 | 63 | 66.6926347 |
| BEFORE85  | 67.1556498 | 63 | 66.7199075 |
| BEFORE86  | 67.8829225 | 63 | 66.7926347 |
| BEFORE87  | 67.4843245 | 63 | 66.8926347 |
| BEFORE88  | 67.5008534 | 63 | 67.0039984 |
| BEFORE89  | 67.9967212 | 63 | 67.1358166 |
| BEFORE90  | 67.9058121 | 63 | 67.2630893 |
| BEFORE91  | 66.4129509 | 63 | 67.3994529 |
| BEFORE92  | 66.4460088 | 63 | 67.5335438 |
| BEFORE93  | 66.9997278 | 63 | 67.6630893 |
| BEFORE94  | 66.9997278 | 63 | 67.7767256 |
| BEFORE95  | 66.9997278 | 63 | 67.8539984 |
| BEFORE96  | 67.1898104 | 63 | 67.9039984 |
| BEFORE97  | 67.2228683 | 63 | 67.9358166 |
| BEFORE98  | 67.3468352 | 63 | 67.9517256 |
| BEFORE99  | 67.3468352 | 63 | 67.9676347 |
| BEFORE100 | 68.472706  | 63 | 67.965362  |
| BEFORE101 | 67.6710531 | 63 | 67.9539984 |
| BEFORE102 | 68.337468  | 63 | 67.940362  |
| BEFORE103 | 67.7920134 | 63 | 67.901081  |
| BEFORE104 | 67.5192862 | 63 | 67.8756429 |
| BEFORE105 | 67.8829225 | 63 | 67.8568164 |
| BEFORE106 | 68.1556498 | 63 | 67.8532792 |
| BEFORE107 | 68.6101953 | 63 | 67.8315601 |
| BEFORE108 | 68.7920134 | 63 | 67.8396407 |
| BEFORE109 | 68.8829225 | 63 | 67.8572254 |
| BEFORE110 | 69.0647407 | 63 | 67.9225623 |
| BEFORE111 | 69.1556498 | 63 | 67.9947173 |
| BEFORE112 | 68.9738316 | 63 | 68.1132848 |
| BEFORE113 | 68.8829225 | 63 | 68.2264804 |
| BEFORE114 | 68.7011044 | 63 | 68.3053784 |
| BEFORE115 | 68.7011044 | 63 | 68.3842765 |
| BEFORE116 | 68.5192862 | 63 | 68.4540836 |
| BEFORE117 | 68.7011044 | 63 | 68.5009569 |
| BEFORE118 | 68.7920134 | 63 | 68.5424582 |
| BEFORE119 | 68.4283771 | 63 | 68.5785877 |
| BEFORE120 | 68.1556498 | 63 | 68.5897171 |
| BEFORE121 | 67.8829225 | 63 | 68.5636089 |
| BEFORE122 | 66.4025898 | 63 | 68.5598147 |
| BEFORE123 | 66.5017634 | 63 | 68.5257238 |
| BEFORE124 | 66.4025898 | 63 | 68.5052693 |

|           |            |    |            |
|-----------|------------|----|------------|
| BEFORE125 | 67.0141601 | 63 | 68.4939056 |
| BEFORE126 | 67.0141601 | 63 | 68.4620874 |
| BEFORE127 | 67.8075485 | 63 | 68.4189056 |
| BEFORE128 | 68.2042427 | 63 | 68.357542  |
| BEFORE129 | 70.6101953 | 63 | 68.2870874 |
| BEFORE130 | 70.7920134 | 63 | 68.2166329 |
| BEFORE131 | 71.1556498 | 63 | 68.1439056 |
| BEFORE132 | 70.9738316 | 63 | 68.0620874 |
| BEFORE133 | 70.1556498 | 63 | 67.9893602 |
| BEFORE134 | 70.1556498 | 63 | 67.9166329 |
| BEFORE135 | 69.7920134 | 63 | 67.8552693 |
| BEFORE136 | 69.0647407 | 63 | 67.8211784 |
| BEFORE137 | 68.8829225 | 63 | 67.7984511 |
| BEFORE138 | 68.7920134 | 63 | 67.7552693 |
| BEFORE139 | 67.7920134 | 63 | 67.6939056 |
| BEFORE140 | 67.4283771 | 63 | 67.6393602 |
| BEFORE141 | 67.5192862 | 63 | 67.5961784 |
| BEFORE142 | 66.9738316 | 63 | 67.5620874 |
| BEFORE143 | 66.9738316 | 63 | 67.5604594 |
| BEFORE144 | 67.0647407 | 63 | 67.556352  |
| BEFORE145 | 66.6101953 | 63 | 67.5615422 |
| BEFORE146 | 66.4283771 | 63 | 67.5582612 |
| BEFORE147 | 66.1556498 | 63 | 67.5617985 |
| BEFORE148 | 65.9738316 | 63 | 67.545501  |
| BEFORE149 | 66.0647407 | 63 | 67.5215589 |
| BEFORE150 | 66.1556498 | 63 | 67.4397407 |
| BEFORE151 | 65.8829225 | 63 | 67.3647407 |
| BEFORE152 | 66.0647407 | 63 | 67.287468  |
| BEFORE153 | 65.9738316 | 63 | 67.237468  |
| BEFORE154 | 66.2465589 | 63 | 67.2170134 |
| BEFORE155 | 67.337468  | 63 | 67.1651929 |
| BEFORE156 | 67.6101953 | 63 | 67.1152319 |
| BEFORE157 | 66.9738316 | 63 | 67.0908906 |
| BEFORE158 | 66.337468  | 63 | 67.0789461 |
| BEFORE159 | 66.2465589 | 63 | 67.0909686 |
| BEFORE160 | 66.4283771 | 63 | 67.117867  |
| BEFORE161 | 66.5192862 | 63 | 67.1538564 |
| BEFORE162 | 66.337468  | 63 | 67.2174928 |
| BEFORE163 | 66.337468  | 63 | 67.2720382 |
| BEFORE164 | 66.6101953 | 63 | 67.3356746 |
| BEFORE165 | 66.8829225 | 63 | 67.3970382 |
| BEFORE166 | 67.1556498 | 69 | 67.4697655 |
| BEFORE167 | 67.1556498 | 69 | 67.5424928 |
| BEFORE168 | 67.2465589 | 69 | 67.6220382 |
| BEFORE169 | 67.337468  | 69 | 67.6970382 |

|           |            |    |            |
|-----------|------------|----|------------|
| BEFORE170 | 67.7920134 | 69 | 67.7720382 |
| BEFORE171 | 68.0647407 | 69 | 67.8424928 |
| BEFORE172 | 68.9738316 | 69 | 67.9288564 |
| BEFORE173 | 69.337468  | 69 | 68.0106746 |
| BEFORE174 | 68.0828279 | 69 | 68.0924928 |
| BEFORE175 | 67.7935717 | 69 | 68.1561291 |
| BEFORE176 | 68.0910924 | 69 | 68.1993109 |
| BEFORE177 | 68.405142  | 69 | 68.2470382 |
| BEFORE178 | 69.2729106 | 69 | 68.3106746 |
| BEFORE179 | 68.8679519 | 69 | 68.3879473 |
| BEFORE180 | 68.8679519 | 69 | 68.4697655 |
| BEFORE181 | 70.0647407 | 69 | 68.5493109 |
| BEFORE182 | 69.1556498 | 69 | 68.6197655 |
| BEFORE183 | 69.5192862 | 69 | 68.6947655 |
| BEFORE184 | 69.5192862 | 69 | 68.7743109 |
| BEFORE185 | 69.5192862 | 69 | 68.8538564 |
| BEFORE186 | 69.337468  | 69 | 68.8971781 |
| BEFORE187 | 69.337468  | 69 | 68.9585417 |
| BEFORE188 | 68.9738316 | 69 | 69.0130872 |
| BEFORE189 | 69.0647407 | 69 | 69.0630872 |
| BEFORE190 | 68.9738316 | 69 | 69.1108145 |
| BEFORE191 | 69.337468  | 69 | 69.1403599 |
| BEFORE192 | 69.337468  | 69 | 69.1585417 |
| BEFORE193 | 69.2465589 | 69 | 69.1517236 |
| BEFORE194 | 68.7920134 | 69 | 69.1380872 |
| BEFORE195 | 69.0647407 | 69 | 69.1558168 |
| BEFORE196 | 69.5192862 | 69 | 69.1807779 |
| BEFORE197 | 69.5192862 | 69 | 69.1983009 |
| BEFORE198 | 69.4283771 | 69 | 69.2057    |
| BEFORE199 | 69.5192862 | 69 | 69.1891321 |
| BEFORE200 | 69.6101953 | 69 | 69.1985972 |
| BEFORE201 | 69.337468  | 69 | 69.2216988 |
| BEFORE202 | 69.337468  | 69 | 69.2126079 |
| BEFORE203 | 69.5192862 | 69 | 69.2330624 |
| BEFORE204 | 69.7920134 | 69 | 69.253517  |
| BEFORE205 | 68.6157907 | 69 | 69.2898806 |
| BEFORE206 | 69.6101953 | 69 | 69.3330624 |
| BEFORE207 | 69.337468  | 69 | 69.3671533 |
| BEFORE208 | 69.2465589 | 69 | 69.3921533 |
| BEFORE209 | 69.2465589 | 69 | 69.4171533 |
| BEFORE210 | 68.9738316 | 69 | 69.4353351 |
| BEFORE211 | 68.7920134 | 63 | 69.4580624 |
| BEFORE212 | 68.7011044 | 63 | 69.4853351 |
| BEFORE213 | 68.7920134 | 63 | 69.5148806 |
| BEFORE214 | 68.7920134 | 63 | 69.5398806 |

|           |            |    |            |
|-----------|------------|----|------------|
| BEFORE215 | 68.7920134 | 63 | 69.5762442 |
| BEFORE216 | 68.7920134 | 63 | 69.6239715 |
| BEFORE217 | 68.7011044 | 63 | 69.6580624 |
| BEFORE218 | 68.6101953 | 63 | 69.6876079 |
| BEFORE219 | 69.2465589 | 63 | 69.7216988 |
| BEFORE220 | 69.7920134 | 63 | 69.7421533 |
| BEFORE221 | 69.7011044 | 63 | 69.7557897 |
| BEFORE222 | 69.9738316 | 63 | 69.7694261 |
| BEFORE223 | 70.337468  | 63 | 69.7762442 |
| BEFORE224 | 70.9738316 | 63 | 69.778517  |
| BEFORE225 | 71.2465589 | 63 | 69.778517  |
| BEFORE226 | 70.7011044 | 63 | 69.8079225 |
| BEFORE227 | 70.337468  | 63 | 69.8101953 |
| BEFORE228 | 69.9738316 | 63 | 69.8170134 |
| BEFORE229 | 69.7920134 | 63 | 69.8215589 |
| BEFORE230 | 69.8829225 | 63 | 69.8351953 |
| BEFORE231 | 70.4283771 | 63 | 69.862468  |
| BEFORE232 | 70.5192862 | 63 | 69.9033771 |
| BEFORE233 | 70.2465589 | 63 | 69.9420134 |
| BEFORE234 | 70.2465589 | 63 | 69.9738316 |
| BEFORE235 | 70.9738316 | 63 | 69.987468  |
| BEFORE236 | 70.8829225 | 63 | 70.0011044 |
| BEFORE237 | 70.7011044 | 63 | 70.012468  |
| BEFORE238 | 70.7920134 | 63 | 70.0283771 |
| BEFORE239 | 70.337468  | 63 | 70.0533771 |
| BEFORE240 | 70.1556498 | 63 | 70.0647407 |
| minute1   | 69.8829225 | 63 | 70.0647407 |
| minute2   | 69.6101953 | 63 | 70.062468  |
| minute3   | 69.6101953 | 63 | 70.0289302 |
| minute4   | 69.7920134 | 63 | 69.9813428 |
| minute5   | 69.7920134 | 63 | 69.9201191 |
| minute6   | 69.7011044 | 63 | 69.8701191 |
| minute7   | 69.6101953 | 63 | 69.8473918 |
| minute8   | 69.4283771 | 63 | 69.8246645 |
| minute9   | 69.7920134 | 63 | 69.8110281 |
| minute10  | 70.0647407 | 63 | 69.7996645 |
| minute11  | 70.4283771 | 63 | 69.7860281 |
| minute12  | 70.2465589 | 63 | 69.7564827 |
| minute13  | 70.0647407 | 63 | 69.7383009 |
| minute14  | 69.337468  | 63 | 69.7405736 |
| minute15  | 69.337468  | 63 | 69.7496645 |
| minute16  | 69.2465589 | 63 | 69.7360281 |
| minute17  | 69.337468  | 63 | 69.7155736 |
| minute18  | 69.6101953 | 63 | 69.6951191 |
| minute19  | 69.7011044 | 63 | 69.6610281 |

|          |            |    |            |
|----------|------------|----|------------|
| minute20 | 69.7920134 | 63 | 69.6405736 |
| minute21 | 69.6101953 | 63 | 69.62921   |
| minute22 | 68.6323196 | 63 | 69.6246645 |
| minute23 | 68.4339725 | 63 | 69.6178463 |
| minute24 | 68.5248816 | 63 | 69.60421   |
| minute25 | 69.2465589 | 63 | 69.5723918 |
| minute26 | 69.7920134 | 63 | 69.5360281 |
| minute27 | 69.4283771 | 63 | 69.4883009 |
| minute28 | 69.4283771 | 63 | 69.4383009 |
| minute29 | 69.337468  | 63 | 69.3928463 |
| minute30 | 69.337468  | 63 | 69.3451191 |
| minute31 | 69.2465589 | 63 | 69.3019372 |
| minute32 | 69.7920134 | 63 | 69.2905736 |
| minute33 | 70.337468  | 63 | 69.2951191 |
| minute34 | 70.6101953 | 63 | 69.3019372 |
| minute35 | 70.4283771 | 63 | 69.30421   |
| minute36 | 70.0647407 | 63 | 69.2973918 |
| minute37 | 69.8829225 | 63 | 69.2905736 |
| minute38 | 69.4283771 | 63 | 69.27921   |
| minute39 | 69.5192862 | 63 | 69.2383009 |
| minute40 | 69.7011044 | 63 | 69.1860281 |
| minute41 | 69.7011044 | 63 | 69.1337554 |
| minute42 | 69.337468  | 63 | 69.0883009 |
| minute43 | 69.0647407 | 63 | 69.0695659 |
| minute44 | 68.5192862 | 63 | 69.0557897 |
| minute45 | 68.337468  | 63 | 69.0351953 |
| minute46 | 67.7920134 | 63 | 68.9829225 |
| minute47 | 67.6101953 | 63 | 68.912468  |
| minute48 | 67.6101953 | 63 | 68.8465589 |
| minute49 | 67.8829225 | 63 | 68.7829225 |
| minute50 | 68.337468  | 63 | 68.7261044 |
| minute51 | 69.9738316 | 63 | 68.6601953 |
| minute52 | 70.4283771 | 63 | 68.6033771 |
| minute53 | 70.337468  | 63 | 68.5488316 |
| minute54 | 69.4283771 | 63 | 68.4920134 |
| minute55 | 69.0647407 | 63 | 68.4261044 |
| minute56 | 68.9738316 | 63 | 68.3647407 |
| minute57 | 68.8829225 | 63 | 68.3079225 |
| minute58 | 67.9738316 | 63 | 68.2465589 |
| minute59 | 67.6101953 | 63 | 68.1942862 |
| minute60 | 67.7011044 | 63 | 68.1351953 |
| Activity | 67.7920134 | 73 | 68.0783771 |
| Activity | 67.8829225 | 73 | 68.0192862 |
| Activity | 67.8829225 | 73 | 67.987468  |
| Activity | 67.7011044 | 73 | 67.962468  |



|          |            |    |            |
|----------|------------|----|------------|
| Activity | 67.1556498 | 73 | 67.9488316 |
| Activity | 66.9738316 | 73 | 67.9420134 |
| Activity | 66.7920134 | 73 | 67.9511044 |
| Activity | 66.8829225 | 73 | 67.9670134 |
| Activity | 67.0647407 | 73 | 67.9851953 |
| Activity | 66.7011044 | 73 | 67.9988316 |
| Activity | 66.9738316 | 73 | 68.0011044 |
| Activity | 67.6101953 | 73 | 67.9579225 |
| Activity | 68.0647407 | 73 | 67.8988316 |
| Activity | 67.9738316 | 73 | 67.837468  |
| Activity | 67.9738316 | 73 | 67.8033771 |
| Activity | 67.7920134 | 73 | 67.7806498 |
| Activity | 67.4283771 | 73 | 67.7692862 |
| Activity | 67.337468  | 73 | 67.7761044 |
| Activity | 67.1556498 | 73 | 67.8147407 |
| Activity | 67.4283771 | 73 | 67.8738316 |
| Activity | 67.337468  | 73 | 67.9511044 |
| Activity | 68.0647407 | 73 | 68.0283771 |
| Activity | 68.0647407 | 73 | 68.1033771 |
| Activity | 67.9738316 | 73 | 68.1806498 |
| Activity | 68.0647407 | 73 | 68.2761044 |
| Activity | 68.1556498 | 73 | 68.3942862 |
| Activity | 68.2465589 | 73 | 68.512468  |
| Activity | 68.337468  | 73 | 68.6465589 |
| Activity | 68.4283771 | 73 | 68.7806498 |
| Activity | 68.4283771 | 73 | 68.9147407 |
| Activity | 68.2465589 | 73 | 69.0601953 |
| Activity | 68.0647407 | 73 | 69.1920134 |
| Activity | 67.8829225 | 73 | 69.2988316 |
| Activity | 68.0647407 | 73 | 69.4249278 |
| Activity | 68.1556498 | 73 | 69.560528  |
| Activity | 68.5192862 | 73 | 69.7066655 |
| Activity | 69.1556498 | 73 | 69.8354476 |
| Activity | 69.5192862 | 73 | 69.9286925 |
| Activity | 69.9738316 | 73 | 70.0138795 |
| Activity | 70.7920134 | 73 | 70.1011327 |
| Activity | 70.8829225 | 73 | 70.1838404 |
| Activity | 70.8829225 | 73 | 70.2553911 |
| Activity | 70.9738316 | 73 | 70.3110327 |
| Activity | 71.5192862 | 73 | 70.3641949 |
| Activity | 71.8829225 | 73 | 70.4592993 |
| Activity | 71.7011044 | 73 | 70.5254114 |
| Activity | 72.1556498 | 73 | 70.5900772 |
| Activity | 72.2465589 | 73 | 70.6518504 |
| Activity | 72.4283771 | 73 | 70.7397234 |

|          |            |    |            |
|----------|------------|----|------------|
| Activity | 72.5192862 | 73 | 70.8211914 |
| Activity | 72.2465589 | 73 | 70.9143732 |
| Activity | 71.8829225 | 73 | 71.0030096 |
| Activity | 73.1085862 | 73 | 71.091646  |
| Activity | 73.3978424 | 73 | 71.1780096 |
| Activity | 73.81933   | 73 | 71.2575551 |
| Activity | 72.943297  | 73 | 71.3211914 |
| Activity | 71.158173  | 73 | 71.3643732 |
| Activity | 70.7449499 | 73 | 71.3780096 |
| Activity | 70.6457763 | 73 | 71.3343016 |
| Activity | 70.7366854 | 73 | 71.3093016 |
| Activity | 70.1994953 | 73 | 71.2706652 |
| Activity | 70.2904044 | 73 | 71.2206652 |
| Activity | 70.1912309 | 73 | 71.1683925 |
| Activity | 71.7780077 | 73 | 71.1115743 |
| Activity | 70.709223  | 73 | 71.0456652 |
| Activity | 70.7422808 | 73 | 70.9593016 |
| Activity | 70.7174874 | 73 | 70.8956652 |
| Activity | 71.8523879 | 73 | 70.8320288 |
| Activity | 71.6870986 | 73 | 70.7661198 |
| Activity | 72.1556498 | 73 | 70.7024834 |
| Activity | 71.7920134 | 73 | 70.6274834 |
| Activity | 71.6101953 | 73 | 70.5615743 |
| Activity | 71.337468  | 73 | 70.5047561 |
| Activity | 71.2465589 | 73 | 70.4150236 |
| Activity | 70.7011044 | 73 | 70.3339688 |
| Activity | 70.2465589 | 73 | 70.2332859 |
| Activity | 69.7011044 | 73 | 70.1545038 |
| Activity | 67.7709653 | 73 | 70.1294407 |
| Activity | 68.9738316 | 73 | 70.1169809 |
| Activity | 69.2465589 | 73 | 70.1183641 |
| Activity | 68.8829225 | 73 | 70.1197473 |
| Activity | 68.7920134 | 73 | 70.136833  |
| Activity | 68.7011044 | 73 | 70.1607369 |
| Activity | 68.8829225 | 73 | 70.2121201 |
| Activity | 68.4283771 | 73 | 70.2442884 |
| Activity | 69.1556498 | 73 | 70.3031764 |
| Activity | 69.6101953 | 73 | 70.3703288 |
| Activity | 69.6101953 | 73 | 70.4108283 |
| Activity | 69.8829225 | 73 | 70.4229553 |
| Activity | 69.5192862 | 73 | 70.4346691 |
| Activity | 69.6101953 | 73 | 70.4460327 |
| Activity | 69.6101953 | 73 | 70.4733054 |
| Activity | 69.5192862 | 73 | 70.5051236 |
| Activity | 70.1556498 | 73 | 70.5369418 |

|          |            |    |            |
|----------|------------|----|------------|
| Activity | 69.7920134 | 73 | 70.5619418 |
| Activity | 69.7920134 | 73 | 70.5983054 |
| Activity | 70.1556498 | 73 | 70.6483054 |
| Activity | 70.2465589 | 73 | 70.7301236 |
| Activity | 70.7011044 | 73 | 70.8579225 |
| Activity | 70.7920134 | 73 | 70.9511044 |
| Activity | 70.8829225 | 73 | 71.0533771 |
| Activity | 71.2465589 | 73 | 71.1692862 |
| Activity | 72.2465589 | 73 | 71.2715589 |
| Activity | 73.0647407 | 73 | 71.3806498 |
| Activity | 73.0647407 | 73 | 71.4738316 |
| Activity | 73.4283771 | 73 | 71.5692862 |
| Activity | 72.337468  | 73 | 71.6442862 |
| Activity | 72.337468  | 73 | 71.7056498 |
| Activity | 72.1556498 | 73 | 71.7715589 |
| Activity | 72.6101953 | 73 | 71.837468  |
| Activity | 72.8829225 | 73 | 71.9238316 |
| Activity | 72.8829225 | 73 | 72.0147407 |
| Activity | 72.6101953 | 73 | 72.1101953 |
| Activity | 72.2465589 | 73 | 72.1942862 |
| Activity | 72.1556498 | 73 | 72.2556498 |
| Activity | 72.2465589 | 73 | 72.3283771 |
| Activity | 72.9738316 | 73 | 72.3761044 |
| Activity | 72.8829225 | 73 | 72.4033771 |
| Activity | 72.7011044 | 73 | 72.4101953 |
| Activity | 73.337468  | 73 | 72.3897407 |
| Activity | 73.5192862 | 73 | 72.3601953 |
| Activity | 72.8829225 | 73 | 72.3011044 |
| Activity | 73.0647407 | 73 | 72.2306498 |
| Activity | 72.6101953 | 73 | 72.1329225 |
| Activity | 72.2465589 | 73 | 71.9987002 |
| Activity | 72.1556498 | 73 | 71.8987002 |
| Activity | 72.0647407 | 73 | 71.7782456 |
| Activity | 72.2465589 | 73 | 71.6805184 |
| Activity | 72.5192862 | 73 | 71.5827911 |
| Activity | 72.9738316 | 73 | 71.4941547 |
| Activity | 73.2465589 | 73 | 71.3964275 |
| Activity | 73.4283771 | 73 | 71.316882  |
| Activity | 72.8829225 | 73 | 71.2305184 |
| Activity | 72.6101953 | 73 | 71.1509729 |
| Activity | 72.7011044 | 73 | 71.0850638 |
| Activity | 71.7011044 | 73 | 71.0214275 |
| Activity | 71.2465589 | 73 | 70.9555184 |
| Activity | 70.5192862 | 73 | 70.8577911 |
| Activity | 69.8829225 | 73 | 70.7441547 |

|          |            |    |            |
|----------|------------|----|------------|
| Activity | 69.6101953 | 73 | 70.6305184 |
| Activity | 68.5192862 | 73 | 70.5009729 |
| Activity | 68.4283771 | 73 | 70.3691547 |
| Activity | 68.337468  | 73 | 70.2350638 |
| Activity | 67.6958465 | 73 | 70.0964275 |
| Activity | 69.0647407 | 73 | 69.9509729 |
| Activity | 68.6101953 | 73 | 69.8305184 |
| Activity | 68.4283771 | 73 | 69.7123365 |
| Activity | 68.4283771 | 73 | 69.6077911 |
| Activity | 68.6101953 | 73 | 69.5123365 |
| Activity | 68.7011044 | 73 | 69.4055184 |
| Activity | 69.7011044 | 73 | 69.2759729 |
| Activity | 69.4283771 | 73 | 69.1373365 |
| Activity | 69.4283771 | 73 | 68.9896093 |
| Activity | 69.6101953 | 73 | 68.8668925 |
| Activity | 69.6101953 | 73 | 68.7460352 |
| Activity | 69.6101953 | 73 | 68.6229051 |
| Activity | 69.0647407 | 73 | 68.5198164 |
| Activity | 68.337468  | 73 | 68.4162625 |
| Activity | 68.1556498 | 73 | 68.3317169 |
| Activity | 68.1556498 | 73 | 68.331934  |
| Activity | 68.2465589 | 73 | 68.431934  |
| Activity | 67.5192862 | 73 | 68.5728431 |
| Activity | 67.5192862 | 73 | 68.7205703 |
| Activity | 66.7920134 | 73 | 68.8773885 |
| Activity | 67.4283771 | 73 | 69.0434291 |
| minute1  | 67.4283771 | 69 | 69.1820654 |
| minute2  | 67.8829225 | 69 | 69.32752   |
| minute3  | 68.4283771 | 69 | 69.4616109 |
| minute4  | 68.2465589 | 69 | 69.5752472 |
| minute5  | 67.7920134 | 69 | 69.6820654 |
| minute6  | 67.7011044 | 69 | 69.7843382 |
| minute7  | 67.5192862 | 69 | 69.8638836 |
| minute8  | 67.97425   | 69 | 69.9366109 |
| minute9  | 67.7759029 | 69 | 70.0161563 |
| minute10 | 67.7759029 | 69 | 70.0843382 |
| minute11 | 67.5775558 | 69 | 70.1457018 |
| minute12 | 67.1044038 | 69 | 70.20252   |
| minute13 | 67.1374617 | 69 | 70.2752472 |
| minute14 | 69.8916054 | 69 | 70.3707018 |
| minute15 | 73.6101953 | 69 | 70.4638836 |
| minute16 | 74.1556498 | 69 | 70.5502472 |
| minute17 | 74.337468  | 69 | 70.6366109 |
| minute18 | 74.6101953 | 69 | 70.7434291 |
| minute19 | 74.337468  | 69 | 70.8101751 |

|          |            |    |            |
|----------|------------|----|------------|
| minute20 | 74.6101953 | 69 | 70.8951029 |
| minute21 | 74.4283771 | 69 | 70.9767249 |
| minute22 | 73.7920134 | 69 | 71.0583469 |
| minute23 | 72.9738316 | 69 | 71.1308781 |
| minute24 | 72.8829225 | 69 | 71.2195144 |
| minute25 | 72.7920134 | 69 | 71.2967872 |
| minute26 | 72.8829225 | 69 | 71.3416849 |
| minute27 | 72.337468  | 69 | 71.4212304 |
| minute28 | 72.6101953 | 69 | 71.5030486 |
| minute29 | 72.337468  | 69 | 71.562129  |
| minute30 | 72.0647407 | 69 | 71.6398045 |
| minute31 | 71.8829225 | 69 | 71.7265709 |
| minute32 | 71.9738316 | 69 | 71.8228415 |
| minute33 | 72.1556498 | 69 | 71.9241226 |
| minute34 | 71.8829225 | 69 | 72.0223046 |
| minute35 | 71.6101953 | 69 | 72.0584511 |
| minute36 | 71.7011044 | 69 | 71.9902693 |
| minute37 | 71.7920134 | 69 | 71.8879966 |
| minute38 | 70.1891261 | 69 | 71.776633  |
| minute39 | 70.1891261 | 69 | 71.6584511 |
| minute40 | 70.6932583 | 69 | 71.5491926 |
| minute41 | 70.6932583 | 69 | 71.4413803 |
| minute42 | 70.7841674 | 69 | 71.3331548 |
| minute43 | 71.9738316 | 69 | 71.2395987 |
| minute44 | 71.337468  | 69 | 71.1669104 |
| minute45 | 69.5879251 | 69 | 71.1039328 |
| minute46 | 70.8829225 | 69 | 71.0382693 |
| minute47 | 70.7920134 | 69 | 70.9728124 |
| minute48 | 70.337468  | 69 | 70.9211985 |
| minute49 | 70.8829225 | 69 | 70.8555349 |
| minute50 | 71.2465589 | 69 | 70.7471028 |
| minute51 | 71.4283771 | 69 | 70.6382575 |
| minute52 | 71.1556498 | 69 | 70.5240402 |
| minute53 | 71.0647407 | 69 | 70.4001122 |
| minute54 | 71.337468  | 69 | 70.2763909 |
| minute55 | 70.8829225 | 69 | 70.1867604 |
| minute56 | 70.0647407 | 69 | 70.1039481 |
| minute57 | 69.8829225 | 69 | 70.0362185 |
| minute58 | 69.8829225 | 69 | 69.9761335 |
| minute59 | 69.9671255 | 69 | 69.9709967 |
| minute60 | 70.297704  | 69 | 69.9609012 |
| AFter1   | 70.0993569 | 69 | 69.9481198 |
| AFter2   | 70.0497701 | 69 | 69.9303797 |
| AFter3   | 70.066299  | 69 | 69.9054082 |
| AFter4   | 70.3638197 | 69 | 69.8478025 |

|         |            |    |            |
|---------|------------|----|------------|
| AFter5  | 70.1654726 | 69 | 69.7982547 |
| AFter6  | 70.2646461 | 69 | 69.8306296 |
| AFter7  | 70.2729106 | 69 | 69.8351751 |
| AFter8  | 69.9836544 | 69 | 69.8215387 |
| AFter9  | 68.0001833 | 69 | 69.8124478 |
| AFter10 | 67.7109271 | 69 | 69.7988115 |
| AFter11 | 67.3142329 | 69 | 69.7851751 |
| AFter12 | 67.0167122 | 69 | 69.769266  |
| AFter13 | 67.2067949 | 69 | 69.769266  |
| AFter14 | 68.297704  | 69 | 69.7715387 |
| AFter15 | 68.297704  | 69 | 69.769266  |
| AFter16 | 68.9919189 | 69 | 69.7738115 |
| AFter17 | 69.3886131 | 69 | 69.7988115 |
| AFter18 | 69.9836544 | 69 | 69.8374478 |
| AFter19 | 69.7853073 | 69 | 69.8851751 |
| AFter20 | 70.1820015 | 69 | 69.9398882 |
| AFter21 | 69.9836544 | 69 | 69.9817914 |
| AFter22 | 69.7853073 | 69 | 70.0331987 |
| AFter23 | 69.6696048 | 69 | 70.0881184 |
| AFter24 | 69.3555552 | 69 | 70.1471704 |
| AFter25 | 70.8829225 | 69 | 70.1828752 |
| AFter26 | 71.0647407 | 69 | 70.2030842 |
| AFter27 | 70.2465589 | 69 | 70.2208139 |
| AFter28 | 69.9738316 | 69 | 70.2428823 |
| AFter29 | 70.337468  | 69 | 70.2721822 |
| AFter30 | 70.7011044 | 69 | 70.3556143 |
| AFter31 | 70.7920134 | 69 | 70.3979059 |
| AFter32 | 71.1556498 | 69 | 70.4377181 |
| AFter33 | 71.1556498 | 69 | 70.4775304 |
| AFter34 | 71.2465589 | 69 | 70.4952352 |
| AFter35 | 71.0647407 | 69 | 70.4881466 |
| AFter36 | 71.0647407 | 69 | 70.4835373 |
| AFter37 | 71.4283771 | 69 | 70.4590933 |
| AFter38 | 71.7920134 | 69 | 70.4222527 |
| AFter39 | 72.1556498 | 69 | 70.370536  |
| AFter40 | 71.9738316 | 69 | 70.3113812 |
| AFter41 | 72.1556498 | 69 | 70.2323918 |
| AFter42 | 72.2465589 | 69 | 70.156295  |
| AFter43 | 72.4283771 | 69 | 70.0777188 |
| AFter44 | 71.7920134 | 69 | 69.9970764 |
| AFter45 | 70.9738316 | 69 | 69.9168474 |
| AFter46 | 70.9738316 | 69 | 69.7988473 |
| AFter47 | 71.1556498 | 69 | 69.6886985 |
| AFter48 | 71.1556498 | 69 | 69.6068555 |
| AFter49 | 71.337468  | 69 | 69.5343099 |

|         |            |    |            |
|---------|------------|----|------------|
| AFter50 | 69.4025898 | 69 | 69.4677562 |
| AFter51 | 68.906722  | 69 | 69.3947974 |
| AFter52 | 68.6092014 | 69 | 69.3294833 |
| AFter53 | 67.9149865 | 69 | 69.2604502 |
| AFter54 | 68.0141601 | 69 | 69.1988551 |
| AFter55 | 68.1133336 | 69 | 69.147384  |
| AFter56 | 68.0141601 | 69 | 69.1103757 |
| AFter57 | 67.9149865 | 69 | 69.0808054 |
| AFter58 | 67.9149865 | 69 | 69.0473095 |
| AFter59 | 67.4191187 | 69 | 69.0272433 |
| AFter60 | 67.0224245 | 69 | 69.0055242 |
| AFter61 | 66.9397799 | 69 | 68.9883506 |
| AFter62 | 66.6422592 | 69 | 68.9906234 |
| AFter63 | 66.4439121 | 69 | 68.9860779 |
| AFter64 | 66.1463915 | 69 | 68.9633506 |
| AFter65 | 66.1629204 | 69 | 68.9428961 |
| AFter66 | 66.6587882 | 69 | 68.9315324 |
| AFter67 | 66.9728377 | 69 | 68.9133506 |
| AFter68 | 67.0720113 | 69 | 68.8906234 |
| AFter69 | 67.6753171 | 69 | 68.8633506 |
| AFter70 | 67.7827551 | 69 | 68.8383506 |
| AFter71 | 68.1794493 | 69 | 68.8260287 |
| AFter72 | 68.3943253 | 69 | 68.8286034 |
| AFter73 | 68.691846  | 69 | 68.8311161 |
| AFter74 | 69.1877138 | 69 | 68.8534842 |
| AFter75 | 69.584408  | 69 | 68.870873  |
| AFter76 | 69.8819287 | 69 | 68.8932825 |
| AFter77 | 70.0885402 | 69 | 68.9131712 |
| AFter78 | 70.9893667 | 69 | 68.9430394 |
| AFter79 | 71.2868873 | 69 | 68.9779075 |
| AFter80 | 71.2868873 | 69 | 69.0201723 |
| AFter81 | 72.2465589 | 69 | 69.0798545 |
| AFter82 | 72.0647407 | 69 | 69.1391027 |
| AFter83 | 71.5192862 | 69 | 69.200789  |
| AFter84 | 70.9738316 | 69 | 69.257434  |
| AFter85 | 70.5192862 | 69 | 69.316517  |
| AFter86 | 70.2465589 | 69 | 69.3676868 |
| AFter87 | 70.2465589 | 69 | 69.4064599 |
| AFter88 | 70.0647407 | 69 | 69.4348817 |
| AFter89 | 70.337468  | 69 | 69.4583242 |
| AFter90 | 68.9097112 | 69 | 69.464184  |
| AFter91 | 69.0097112 | 69 | 69.4698579 |
| AFter92 | 68.7097112 | 69 | 69.4706145 |
| AFter93 | 68.8097112 | 69 | 69.4734991 |
| AFter94 | 68.7097112 | 69 | 69.4814458 |

|          |            |    |            |
|----------|------------|----|------------|
| AFter95  | 69.0097112 | 69 | 69.4944957 |
| AFter96  | 68.8097112 | 69 | 69.5426283 |
| AFter97  | 69.1097112 | 69 | 69.5808228 |
| AFter98  | 69.3097112 | 69 | 69.6038521 |
| AFter99  | 69.1097112 | 69 | 69.5843607 |
| AFter100 | 69.4097112 | 69 | 69.5699313 |
| AFter101 | 69.3097112 | 69 | 69.5555019 |
| AFter102 | 69.1097112 | 69 | 69.5220807 |
| AFter103 | 68.7097112 | 69 | 69.505705  |
| AFter104 | 68.5097112 | 69 | 69.5129656 |
| AFter105 | 68.2097112 | 69 | 69.5513626 |
| AFter106 | 68.2097112 | 69 | 69.6111232 |
| AFter107 | 68.1097112 | 69 | 69.675202  |
| AFter108 | 68.0097112 | 69 | 69.7367808 |
| AFter109 | 67.9097112 | 69 | 69.8029051 |
| AFter110 | 68.0097112 | 69 | 69.8422112 |
| AFter111 | 68.2097112 | 69 | 69.9097112 |
| AFter112 | 68.5097112 | 69 | 69.9672112 |
| AFter113 | 69.0097112 | 69 | 70.0172112 |
| AFter114 | 69.7097112 | 69 | 70.0647112 |
| AFter115 | 71.5097112 | 69 | 70.0997112 |
| AFter116 | 71.4097112 | 69 | 70.1122112 |
| AFter117 | 71.0097112 | 69 | 70.1222112 |
| AFter118 | 70.2097112 | 69 | 70.1222112 |
| AFter119 | 70.7097112 | 69 | 70.0972112 |
| AFter120 | 70.7097112 | 69 | 70.0622112 |
| AFter121 | 70.9097112 | 63 | 70.0022112 |
| AFter122 | 71.4097112 | 63 | 69.9447112 |
| AFter123 | 71.8097112 | 63 | 69.9072112 |
| AFter124 | 72.5097112 | 63 | 69.8797112 |
| AFter125 | 72.9097112 | 63 | 69.8547112 |
| AFter126 | 72.8097112 | 63 | 69.8272112 |
| AFter127 | 72.7097112 | 63 | 69.7897112 |
| AFter128 | 72.7097112 | 63 | 69.7522112 |
| AFter129 | 71.9097112 | 63 | 69.7272112 |
| AFter130 | 71.6097112 | 63 | 69.6972112 |
| AFter131 | 71.3097112 | 63 | 69.6697112 |
| AFter132 | 70.7097112 | 63 | 69.6522112 |
| AFter133 | 70.7097112 | 63 | 69.6297112 |
| AFter134 | 70.1097112 | 63 | 69.6072112 |
| AFter135 | 69.5097112 | 63 | 69.5822112 |
| AFter136 | 69.2097112 | 63 | 69.5347112 |
| AFter137 | 69.1097112 | 63 | 69.4847112 |
| AFter138 | 68.3097112 | 63 | 69.4347112 |
| AFter139 | 67.7097112 | 63 | 69.4072112 |



|          |            |    |            |
|----------|------------|----|------------|
| AFter140 | 67.0097112 | 63 | 69.3772112 |
| AFter141 | 67.0097112 | 63 | 69.3497112 |
| AFter142 | 67.6097112 | 63 | 69.3347112 |
| AFter143 | 67.6097112 | 63 | 69.3197112 |
| AFter144 | 67.5097112 | 63 | 69.2947112 |
| AFter145 | 67.1097112 | 63 | 69.2472112 |
| AFter146 | 66.7097112 | 63 | 69.1572112 |
| AFter147 | 66.6097112 | 63 | 69.0597112 |
| AFter148 | 67.0097112 | 63 | 68.9647112 |
| AFter149 | 66.7097112 | 63 | 68.8822112 |
| AFter150 | 66.9097112 | 63 | 68.8322112 |
| AFter151 | 67.5097112 | 63 | 68.7947112 |
| AFter152 | 67.6097112 | 63 | 68.7822112 |
| AFter153 | 68.1097112 | 63 | 68.7797112 |
| AFter154 | 68.7097112 | 63 | 68.7747112 |
| AFter155 | 69.6097112 | 63 | 68.7822112 |
| AFter156 | 69.4097112 | 63 | 68.7972112 |
| AFter157 | 69.0097112 | 63 | 68.8147112 |
| AFter158 | 69.1097112 | 63 | 68.8347112 |
| AFter159 | 69.5097112 | 63 | 68.8722112 |
| AFter160 | 69.6097112 | 63 | 68.9347112 |
| AFter161 | 70.3097112 | 63 | 69.0097112 |
| AFter162 | 70.8097112 | 63 | 69.0947112 |
| AFter163 | 70.8097112 | 63 | 69.1722112 |
| AFter164 | 70.6097112 | 63 | 69.2622112 |
| AFter165 | 69.3097112 | 63 | 69.3272112 |
| AFter166 | 68.9097112 | 63 | 69.3997112 |
| AFter167 | 68.9097112 | 63 | 69.4772112 |
| AFter168 | 69.4097112 | 63 | 69.5622112 |
| AFter169 | 69.9097112 | 63 | 69.6347112 |
| AFter170 | 70.1097112 | 63 | 69.7297112 |
| AFter171 | 70.8097112 | 63 | 69.8197112 |
| AFter172 | 70.6097112 | 63 | 69.8922112 |
| AFter173 | 70.5097112 | 63 | 69.9672112 |
| AFter174 | 70.4097112 | 63 | 70.0322112 |
| AFter175 | 70.1097112 | 63 | 70.0622112 |
| AFter176 | 69.9097112 | 63 | 70.0697112 |
| AFter177 | 69.9097112 | 63 | 70.0847112 |
| AFter178 | 69.8097112 | 63 | 70.0997112 |
| AFter179 | 70.2097112 | 63 | 70.1022112 |
| AFter180 | 70.0097112 | 63 | 70.0922112 |
| AFter181 | 70.4097112 | 63 | 70.0872112 |
| AFter182 | 70.7097112 | 63 | 70.0647112 |
| AFter183 | 71.2097112 | 63 | 70.0272112 |
| AFter184 | 70.1097112 | 63 | 69.9847112 |

|          |            |    |            |
|----------|------------|----|------------|
| AFter185 | 70.0097112 | 63 | 69.9422112 |
| AFter186 | 69.8097112 | 63 | 69.9472112 |
| AFter187 | 70.0097112 | 63 | 69.9822112 |
| AFter188 | 69.9097112 | 63 | 70.0397112 |
| AFter189 | 70.5097112 | 63 | 70.1072112 |
| AFter190 | 70.5097112 | 63 | 70.1697112 |
| AFter191 | 70.4097112 | 63 | 70.1939411 |
| AFter192 | 70.6097112 | 63 | 70.1899209 |
| AFter193 | 70.7097112 | 63 | 70.1851508 |
| AFter194 | 69.9097112 | 63 | 70.1663807 |
| AFter195 | 69.9097112 | 63 | 70.1473605 |
| AFter196 | 70.0097112 | 63 | 70.1448605 |
| AFter197 | 69.6097112 | 63 | 70.1473605 |
| AFter198 | 69.2097112 | 63 | 70.1573605 |
| AFter199 | 69.1097112 | 63 | 70.1798605 |
| AFter200 | 69.4097112 | 63 | 70.1626041 |
| AFter201 | 69.4097112 | 63 | 70.1365977 |
| AFter202 | 69.3097112 | 63 | 70.1005913 |
| AFter203 | 69.1097112 | 63 | 70.0545848 |
| AFter204 | 68.9097112 | 63 | 69.9770784 |
| AFter205 | 69.5097112 | 63 | 69.910572  |
| AFter206 | 70.3097112 | 63 | 69.8413155 |
| AFter207 | 71.2097112 | 63 | 69.7825591 |
| AFter208 | 72.1097112 | 63 | 69.7240527 |
| AFter209 | 72.4097112 | 63 | 69.6735463 |
| AFter210 | 71.078906  | 63 | 69.6190398 |
| AFter211 | 70.648906  | 63 | 69.5837834 |
| AFter212 | 70.418906  | 63 | 69.6012834 |
| AFter213 | 69.758906  | 63 | 69.6212834 |
| AFter214 | 69.648906  | 63 | 69.6437834 |
| AFter215 | 70.0097112 | 63 | 69.6837834 |
| AFter216 | 70.0097112 | 63 | 69.7287834 |
| AFter217 | 70.3097112 | 63 | 69.7837834 |
| AFter218 | 70.7097112 | 63 | 69.8537834 |
| AFter219 | 69.5194541 | 63 | 69.9437834 |
| AFter220 | 68.9694541 | 63 | 70.0362834 |
| AFter221 | 68.9694541 | 63 | 70.1162834 |
| AFter222 | 68.8694541 | 63 | 70.1937834 |
| AFter223 | 68.1094541 | 63 | 70.2562834 |
| AFter224 | 67.4494541 | 63 | 70.3087834 |
| AFter225 | 67.2394541 | 63 | 70.3587834 |
| AFter226 | 67.4594541 | 63 | 70.4012834 |
| AFter227 | 67.6694541 | 63 | 70.4287834 |
| AFter228 | 67.8894541 | 63 | 70.4387834 |
| AFter229 | 68.3294541 | 63 | 70.4112834 |

|          |            |    |            |
|----------|------------|----|------------|
| AFter230 | 69.0994541 | 63 | 70.3762834 |
| AFter231 | 71.1097112 | 63 | 70.3645535 |
| AFter232 | 71.4097112 | 63 | 70.3635737 |
| AFter233 | 71.6097112 | 63 | 70.3608438 |
| AFter234 | 71.5097112 | 63 | 70.3796139 |
| AFter235 | 71.7097112 | 63 | 70.3986341 |
| AFter236 | 72.2097112 | 63 | 70.3936341 |
| AFter237 | 72.4097112 | 63 | 70.3911341 |
| AFter238 | 72.8097112 | 63 | 70.3661341 |
| AFter239 | 72.8097112 | 63 | 70.3186341 |
| AFter240 | 72.6097112 | 63 | 70.2908905 |
|          | 72.5097112 | 63 | 70.2793969 |
|          | 71.8097112 | 63 | 70.2729033 |
|          | 71.2097112 | 63 | 70.2689098 |
|          | 70.9097112 | 63 | 70.2864162 |
|          | 71.2097112 | 63 | 70.3254226 |
|          | 71.4097112 | 63 | 70.3646791 |
|          | 71.6097112 | 63 | 70.4009355 |
|          | 71.0097112 | 63 | 70.3969192 |
|          | 71.0097112 | 63 | 70.3931529 |
|          | 70.6097112 | 63 | 70.3758866 |
|          | 70.6097112 | 63 | 70.3476203 |
|          | 70.3097112 | 63 | 70.2665975 |
|          | 70.5097112 | 63 | 70.2168248 |
|          | 70.4097112 | 63 | 70.1345456 |
|          | 69.8097112 | 63 | 70.0597665 |
|          | 69.9097112 | 63 | 69.9799873 |
|          | 69.3097112 | 63 | 69.8937082 |
|          | 68.8097112 | 63 | 69.793429  |
|          | 68.4097112 | 63 | 69.7214063 |
|          | 68.5097112 | 63 | 69.6578836 |
|          | 68.7097112 | 63 | 69.5911108 |
|          | 68.7097112 | 63 | 69.5350881 |
|          | 68.8097112 | 63 | 69.4855654 |
|          | 69.0097112 | 63 | 69.4342926 |
|          | 68.8097112 | 63 | 69.3905199 |
|          | 68.9097112 | 63 | 69.3532472 |
|          | 67.508802  | 63 | 69.3114744 |
|          | 67.738802  | 63 | 69.2734517 |
|          | 67.638802  | 63 | 69.250429  |
|          | 67.968802  | 63 | 69.2301562 |
|          | 67.868802  | 63 | 69.2116335 |
|          | 69.418802  | 63 | 69.1991108 |
|          | 68.3185449 | 63 | 69.1860881 |
|          | 68.5185449 | 63 | 69.1625653 |

|            |    |            |
|------------|----|------------|
| 68.5185449 | 63 | 69.1470426 |
| 68.7585449 | 63 | 69.1525199 |
| 68.3985449 | 63 | 69.1612471 |
| 69.928802  | 63 | 69.1849744 |
| 70.268802  | 63 | 69.2187017 |
| 69.938802  | 63 | 69.2514289 |
| 70.268802  | 63 | 69.2624062 |
| 69.828802  | 63 | 69.2656335 |
| 69.158802  | 63 | 69.2688607 |
| 69.158802  | 63 | 69.269588  |
| 69.718802  | 63 | 69.2983153 |
| 69.738802  | 63 | 69.3377925 |
| 70.088802  | 63 | 69.3857698 |
| 70.088802  | 63 | 69.4737698 |
| 70.198802  | 63 | 69.5667698 |
| 69.868802  | 63 | 69.6732698 |
| 70.108802  | 63 | 69.7797698 |
| 69.788802  | 63 | 69.8945198 |
| 69.568802  | 63 | 69.9817698 |
| 69.788802  | 63 | 70.0970262 |
| 70.028802  | 63 | 70.2237827 |
| 70.258802  | 63 | 70.3507891 |
| 70.258802  | 63 | 70.4607955 |
| 70.158802  | 63 | 70.571552  |
| 69.718802  | 63 | 70.655052  |
| 68.948802  | 63 | 70.724552  |
| 68.838802  | 63 | 70.807802  |
| 68.838802  | 63 | 70.893552  |
| 68.838802  | 63 | 71.001302  |
| 70.158802  | 63 | 71.128552  |
| 70.388802  | 63 | 71.233302  |
| 70.828802  | 63 | 71.310052  |
| 71.028802  | 63 | 71.378302  |
| 71.458802  | 63 | 71.424052  |
| 71.898802  | 63 | 71.467302  |
| 72.228802  | 63 | 71.507552  |
| 72.458802  | 63 | 71.528552  |
| 72.908802  | 63 | 71.543552  |
| 72.928802  | 63 | 71.561052  |
| 73.588802  | 63 | 71.568052  |
| 73.598802  | 63 | 71.578802  |
| 73.158802  | 63 | 71.582052  |
| 72.828802  | 63 | 71.579552  |
| 73.268802  | 63 | 71.6033247 |
| 73.048802  | 63 | 71.6170974 |

|            |    |            |
|------------|----|------------|
| 73.268802  | 63 | 71.6343701 |
| 73.698802  | 63 | 71.6758929 |
| 74.138802  | 63 | 71.7201656 |
| 74.248802  | 63 | 71.7694383 |
| 73.348802  | 63 | 71.8162111 |
| 72.788802  | 63 | 71.8199838 |
| 72.468802  | 63 | 71.8155065 |
| 71.918802  | 63 | 71.7975293 |
| 71.818802  | 63 | 71.779552  |
| 71.808802  | 63 | 71.7508247 |
| 70.708802  | 63 | 71.6935975 |
| 70.708802  | 63 | 71.6206202 |
| 70.488802  | 63 | 71.5343929 |
| 69.848802  | 63 | 71.4169156 |
| 70.218802  | 63 | 71.2889384 |
| 70.158802  | 63 | 71.1344611 |
| 70.158802  | 63 | 70.9722338 |
| 71.2097112 | 63 | 70.8185066 |
| 70.7097112 | 63 | 70.6730293 |
| 70.4097112 | 63 | 70.536552  |
| 70.6097112 | 63 | 70.4080748 |
| 70.6097112 | 63 | 70.2940975 |
| 70.8097112 | 63 | 70.1618702 |
| 70.7097112 | 63 | 70.026143  |
| 70.3097112 | 63 | 69.9001657 |
| 70.2097112 | 63 | 69.7991884 |
| 70.1097112 | 63 | 69.7147112 |
| 70.3097112 | 63 | 69.6332339 |
| 70.3097112 | 63 | 69.5680066 |
| 69.6097112 | 63 | 69.5027793 |
| 69.3097112 | 63 | 69.4403021 |
| 69.0097112 | 69 | 69.4228248 |
| 68.2097112 | 69 | 69.4153475 |
| 67.8097112 | 69 | 69.4108703 |
| 67.4097112 | 69 | 69.414893  |
| 67.1097112 | 69 | 69.3996657 |
| 67.0097112 | 69 | 69.3859385 |
| 67.0097112 | 69 | 69.3647112 |
| 67.8097112 | 69 | 69.3197112 |
| 67.9097112 | 69 | 69.2822112 |
| 68.7097112 | 69 | 69.2497112 |
| 68.4097112 | 69 | 69.2097112 |
| 68.7097112 | 69 | 69.1797112 |
| 69.2097112 | 69 | 69.1397112 |
| 69.3097112 | 69 | 69.0972112 |

|            |    |            |
|------------|----|------------|
| 69.4097112 | 69 | 69.0647112 |
| 69.2097112 | 63 | 69.0397112 |
| 69.3097112 | 63 | 69.0397112 |
| 69.2097112 | 63 | 69.0477963 |
| 69.3097112 | 63 | 69.0586314 |
| 70.0097112 | 63 | 69.0922165 |
| 70.4097112 | 63 | 69.1343016 |
| 70.3097112 | 63 | 69.1866367 |
| 70.0097112 | 63 | 69.2544718 |
| 69.6097112 | 63 | 69.3325569 |
| 69.6097112 | 63 | 69.4013919 |
| 69.3097112 | 63 | 69.469477  |
| 69.4097112 | 63 | 69.5460742 |
| 69.2097112 | 63 | 69.6381035 |
| 69.1097112 | 63 | 69.7132191 |
| 69.0097112 | 63 | 69.7858348 |
| 69.4097112 | 63 | 69.8446233 |
| 69.2097112 | 63 | 69.904739  |
| 69.0097112 | 63 | 69.9539596 |
| 69.0097112 | 63 | 69.9752481 |
| 69.2097112 | 63 | 69.986012  |
| 70.1097112 | 63 | 70.0004486 |
| 70.633115  | 63 | 70.0198853 |
| 70.743115  | 63 | 70.0725988 |
| 70.953115  | 63 | 70.13059   |
| 70.993115  | 63 | 70.1860812 |
| 71.103115  | 63 | 70.2101836 |
| 70.923115  | 63 | 70.2242859 |
| 70.933115  | 63 | 70.2154419 |
| 70.163115  | 63 | 70.1446534 |
| 69.833115  | 63 | 70.0776921 |
| 70.0735976 | 63 | 69.9974592 |
| 70.6908815 | 63 | 69.9176275 |
| 70.8143383 | 63 | 69.8380736 |
| 70.8143383 | 63 | 69.763211  |
| 71.0612519 | 63 | 69.6846756 |
| 70.8143383 | 63 | 69.6086402 |
| 70.6785358 | 63 | 69.5253826 |
| 70.0612519 | 63 | 69.4532978 |
| 69.7402642 | 63 | 69.3735587 |
| 69.9871778 | 63 | 69.2999925 |
| 69.9871778 | 63 | 69.2925773 |
| 71.4182496 | 63 | 69.2534028 |
| 71.5293607 | 63 | 69.191884  |
| 71.5293607 | 63 | 69.1186646 |

|            |    |            |
|------------|----|------------|
| 70.9738052 | 63 | 69.0080964 |
| 70.9738052 | 63 | 68.9088739 |
| 69.9559497 | 63 | 68.8007286 |
| 67.1781719 | 63 | 68.7054166 |
| 66.9312583 | 63 | 68.6036817 |
| 66.4003941 | 63 | 68.5656157 |
| 66.1164435 | 63 | 68.5330218 |
| 66.2275546 | 63 | 68.4971937 |
| 66.215209  | 63 | 68.4487112 |
| 65.9682954 | 63 | 68.388809  |
| 65.9682954 | 63 | 68.326129  |
| 66.0794065 | 63 | 68.2517206 |
| 66.3263201 | 63 | 68.1862628 |
| 65.8201472 | 63 | 68.1269779 |
| 66.0670608 | 63 | 68.083125  |
| 68.9131037 | 63 | 68.0389636 |
| 68.5427334 | 63 | 67.9802959 |
| 68.172363  | 63 | 67.9132949 |
| 67.8143383 | 63 | 67.8049616 |
| 66.5303877 | 63 | 67.7021838 |
| 67.0242149 | 63 | 67.624406  |
| 66.7773013 | 63 | 67.5660727 |
| 67.1106346 | 63 | 67.5105172 |
| 66.863721  | 63 | 67.4887413 |
| 68.6404718 | 63 | 67.547521  |
| 68.5293607 | 63 | 67.6124736 |
| 68.6404718 | 63 | 67.7073644 |
| 68.7515829 | 63 | 67.8065762 |
| 68.4182496 | 63 | 67.919677  |
| 68.3071385 | 63 | 68.0441974 |
| 68.0849163 | 63 | 68.1860018 |
| 68.1960274 | 63 | 68.3194729 |
| 68.3071385 | 63 | 68.4446106 |
| 68.3071385 | 63 | 68.5691311 |
| 67.9738052 | 63 | 68.7090837 |
| 67.6404718 | 63 | 68.8484189 |
| 67.3071385 | 63 | 68.9166031 |
| 67.0849163 | 63 | 69.0023799 |
| 67.4182496 | 63 | 69.1029715 |
| 68.4182496 | 63 | 69.2291804 |
| 68.6404718 | 63 | 69.3902659 |
| 68.7515829 | 63 | 69.5362279 |
| 69.0849163 | 63 | 69.696696  |
| 69.5293607 | 63 | 69.8516086 |
| 69.5293607 | 63 | 70.012694  |

|            |    |            |
|------------|----|------------|
| 70.1960274 | 63 | 70.1238052 |
| 70.0849163 | 61 | 70.2404718 |
| 70.7515829 | 61 | 70.3543607 |
| 71.1960274 | 61 | 70.4682496 |
| 71.6404718 | 61 | 70.528297  |
| 71.3071385 | 61 | 70.5756902 |
| 71.0849163 | 61 | 70.6284679 |
| 71.3071385 | 61 | 70.664579  |
| 71.4182496 | 61 | 70.7006902 |
| 71.6404718 | 61 | 70.7340235 |
| 71.6404718 | 61 | 70.7784679 |
| 71.9738052 | 61 | 70.8312457 |
| 72.1960274 | 61 | 70.8923568 |
| 72.862694  | 61 | 70.9590235 |
| 72.9738052 | 61 | 71.014579  |
| 72.862694  | 61 | 71.039579  |
| 73.1960274 | 61 | 71.0534679 |
| 73.3071385 | 61 | 71.0555802 |
| 73.3071385 | 61 | 71.046234  |
| 73.0849163 | 61 | 70.9550205 |
| 73.1960274 | 61 | 70.8462289 |
| 73.1960274 | 61 | 70.7141299 |
| 73.3071385 | 61 | 70.5883244 |
| 70.8201472 | 61 | 70.459524  |
| 70.2028633 | 61 | 70.3942751 |
| 70.1960274 | 61 | 70.3210401 |
| 69.6404718 | 61 | 70.3061385 |
| 69.7515829 | 61 | 70.3186673 |
| 69.6404718 | 61 | 70.3287657 |
| 69.7515829 | 61 | 70.3423362 |
| 69.7515829 | 61 | 70.3534762 |
| 69.7515829 | 61 | 70.3120343 |
| 69.7515829 | 61 | 70.2626497 |
| 69.6404718 | 61 | 70.2599008 |
| 69.4182496 | 61 | 70.2467352 |
| 69.1960274 | 61 | 70.2245419 |
| 68.8360716 | 61 | 70.2176263 |
| 68.7110716 | 61 | 70.2023774 |
| 65.8808195 | 61 | 70.1781008 |
| 65.1776945 | 61 | 70.1506991 |
| 64.9120695 | 61 | 70.122603  |
| 65.0526945 | 61 | 70.0886041 |
| 65.5995695 | 61 | 70.0671052 |
| 68.5860716 | 61 | 70.0397035 |
| 68.7110716 | 61 | 70.085507  |



|            |    |            |
|------------|----|------------|
| 70.7110716 | 61 | 70.0824978 |
| 71.5860716 | 61 | 70.0795102 |
| 71.7110716 | 61 | 70.0913761 |
| 71.9610716 | 61 | 70.1008148 |
| 72.0860716 | 61 | 70.1139675 |
| 69.9827953 | 61 | 70.1246258 |
| 69.9984203 | 61 | 70.1359302 |
| 72.0860716 | 61 | 70.147941  |
| 72.3360716 | 61 | 70.1607268 |
| 72.0860716 | 61 | 70.1780686 |
| 72.5860716 | 61 | 70.2042692 |
| 72.5860716 | 61 | 70.2402779 |
| 72.3360716 | 61 | 70.2922855 |
| 72.2110716 | 61 | 70.3531014 |
| 71.9610716 | 61 | 70.5319927 |
| 71.8360716 | 61 | 70.7550885 |
| 72.3360716 | 61 | 71.0091328 |
| 72.2110716 | 61 | 71.27988   |
| 72.6522851 | 61 | 71.5503709 |

| Time     | Person 4           | Person 8   | Person 7   | Person 1   | Person 11  |
|----------|--------------------|------------|------------|------------|------------|
| 16:13:36 | 68.5722324         | 63.7204764 | 71.1216949 | 66.5369818 | 77.8770368 |
| 16:13:37 | 69.5722324         | 63.7204764 | 73.1216949 | 66.5369818 | 78.3770368 |
| 16:13:38 | 69.5722324         | 65.7204764 | 72.1216949 | 67.5369818 | 78.8770368 |
| 16:13:39 | 69.5722324         | 68.7204764 | 71.1216949 | 67.5369818 | 79.0437035 |
| 16:13:40 | 70.5722324         | 69.7204764 | 71.1216949 | 67.5369818 | 79.3770368 |
| 16:13:41 | 71.5722324         | 70.7204764 | 71.1216949 | 67.5369818 | 80.0437035 |
| 16:13:42 | 72.5722324         | 69.7204764 | 71.1216949 | 67.5369818 | 80.0437035 |
| 16:13:43 | 72.5722324         | 69.7204764 | 71.1216949 | 67.5369818 | 79.7103701 |
| 16:13:44 | 72.5722324         | 70.7204764 | 71.1216949 | 66.5369818 | 78.2103701 |
| 16:13:45 | 74.5722324         | 72.7204764 | 71.1216949 | 66.5369818 | 86.9211002 |
| 16:13:46 | 74.5722324         | 74.7204764 | 72.1216949 | 66.5369818 | 84.9211002 |
| 16:13:47 | 74.5722324         | 74.7204764 | 73.1216949 | 66.5369818 | 84.9211002 |
| 16:13:48 | 74.5722324         | 74.7204764 | 73.1216949 | 66.5369818 | 84.9211002 |
| 16:13:49 | 76.5722324         | 72.7204764 | 75.1216949 | 66.5369818 | 84.9211002 |
| 16:13:50 | 77.5722324         | 72.7204764 | 75.1216949 | 67.5369818 | 83.9211002 |
| 16:13:51 | 77.5722324         | 75.7204764 | 75.1216949 | 67.5369818 | 83.9211002 |
| 16:13:52 | 77.5722324         | 77.7204764 | 75.1216949 | 67.5369818 | 83.9211002 |
| 16:13:53 | 80.5722324         | 80.7204764 | 74.1216949 | 67.5369818 | 83.9211002 |
| 16:13:54 | 80.5722324         | 80.7204764 | 74.1216949 | 67.5369818 | 80.9211002 |
| 16:13:55 | 80.5722324         | 81.7204764 | 74.1216949 | 69.5369818 | 80.9211002 |
| 16:13:56 | 80.5722324         | 76.7204764 | 74.1216949 | 69.5369818 | 80.9211002 |
| 16:13:57 | 83.5722324         | 72.7204764 | 74.1216949 | 69.5369818 | 80.9211002 |
| 16:13:58 | 83.5722324         | 70.7204764 | 73.1216949 | 69.5369818 | 80.9211002 |
| 16:13:59 | 84.5722324         | 68.7204764 | 73.1216949 | 69.5369818 | 82.9211002 |
| 16:14:00 | 84.5722324         | 68.7204764 | 73.1216949 | 69.5369818 | 82.9211002 |
| 16:14:01 | 84.5722324         | 68.7204764 | 72.1216949 | 68.5369818 | 82.9211002 |
| 16:14:02 | 82.5722324         | 68.7204764 | 71.1216949 | 68.5369818 | 82.9211002 |
| 16:14:03 | 82.5722324         | 70.7204764 | 70.1216949 | 68.5369818 | 82.9211002 |
| 16:14:04 | 78.5722324         | 71.7204764 | 69.1216949 | 67.5369818 | 82.9211002 |
| 16:14:05 | 75.5722324         | 73.7204764 | 68.1216949 | 68.5369818 | 82.9211002 |
| 16:14:06 | 73.5722324         | 73.7204764 | 67.1216949 | 68.5369818 | 83.9211002 |
| 16:14:07 | 72.5722324         | 74.7204764 | 67.1216949 | 68.5369818 | 84.9211002 |
| 16:14:08 | 67.5722324         | 74.7204764 | 67.1216949 | 68.5369818 | 84.9211002 |
| 16:14:09 | 67.5722324         | 79.7204764 | 68.1216949 | 68.5369818 | 84.9211002 |
| 16:14:10 | 66.5722324         | 81.7204764 | 68.1216949 | 68.5369818 | 84.9211002 |
| 16:14:11 | 68.5722324         | 81.7204764 | 67.1216949 | 68.5369818 | 82.9211002 |
| 16:14:12 | 69.5722324         | 81.7204764 | 67.1216949 | 68.5369818 | 82.9211002 |
| 16:14:13 | 69.5722324         | 78.7204764 | 67.1216949 | 68.5369818 | 82.9211002 |
| 16:14:14 | 71.5722324         | 76.7204764 | 67.1216949 | 68.5369818 | 80.9211002 |
| 16:14:15 | 74.5722324         | 75.7204764 | 67.1216949 | 69.5369818 | 80.9211002 |
| 16:14:16 | 74.5722324         | 73.7204764 | 67.1216949 | 69.5369818 | 80.9211002 |
| 16:14:17 | 0:00:01 74.5722324 | 70.7204764 | 67.1216949 | 69.5369818 | 80.9211002 |

|          |         |            |            |            |            |            |
|----------|---------|------------|------------|------------|------------|------------|
| 16:14:18 | 0:00:02 | 74.5722324 | 70.7204764 | 67.1216949 | 68.5369818 | 80.9211002 |
| 16:14:19 | 0:00:03 | 74.5722324 | 68.7204764 | 67.1216949 | 68.5369818 | 80.9211002 |
| 16:14:20 | 0:00:04 | 74.5722324 | 71.7204764 | 67.1216949 | 68.5369818 | 80.9211002 |
| 16:14:21 | 0:00:05 | 74.5722324 | 71.7204764 | 67.1216949 | 68.5369818 | 82.9211002 |
| 16:14:22 | 0:00:06 | 73.5722324 | 71.7204764 | 67.1216949 | 68.5369818 | 83.9211002 |
| 16:14:23 | 0:00:07 | 73.5722324 | 72.7204764 | 67.1216949 | 68.5369818 | 85.9211002 |
| 16:14:24 | 0:00:08 | 72.5722324 | 72.7204764 | 67.1216949 | 68.5369818 | 85.9211002 |
| 16:14:25 | 0:00:09 | 71.5722324 | 72.7204764 | 67.1216949 | 68.5369818 | 87.9211002 |
| 16:14:26 | 0:00:10 | 71.5722324 | 72.7204764 | 67.1216949 | 67.5369818 | 89.9211002 |
| 16:14:27 | 0:00:11 | 72.5722324 | 73.7204764 | 68.1216949 | 67.5369818 | 89.9211002 |
| 16:14:28 | 0:00:12 | 73.5722324 | 74.7204764 | 68.1216949 | 67.5369818 | 89.9211002 |
| 16:14:29 | 0:00:13 | 76.5722324 | 74.7204764 | 68.1216949 | 67.5369818 | 90.9211002 |
| 16:14:30 | 0:00:14 | 76.5722324 | 75.7204764 | 68.1216949 | 67.5369818 | 90.9211002 |
| 16:14:31 | 0:00:15 | 76.5722324 | 76.7204764 | 68.1216949 | 67.5369818 | 90.9211002 |
| 16:14:32 | 0:00:16 | 77.5722324 | 76.7204764 | 66.1216949 | 68.5369818 | 90.9211002 |
| 16:14:33 | 0:00:17 | 77.5722324 | 77.7204764 | 66.1216949 | 68.5369818 | 90.9211002 |
| 16:14:34 | 0:00:18 | 77.5722324 | 77.7204764 | 66.1216949 | 68.5369818 | 89.9211002 |
| 16:14:35 | 0:00:19 | 76.5722324 | 78.7204764 | 66.1216949 | 68.5369818 | 89.9211002 |
| 16:14:36 | 0:00:20 | 75.5722324 | 78.7204764 | 66.1216949 | 68.5369818 | 89.9211002 |
| 16:14:37 | 0:00:21 | 74.5722324 | 82.7204764 | 66.1216949 | 68.5369818 | 87.9211002 |
| 16:14:38 | 0:00:22 | 73.5722324 | 83.7204764 | 66.1216949 | 68.5369818 | 87.9211002 |
| 16:14:39 | 0:00:23 | 73.5722324 | 82.7204764 | 66.1216949 | 68.5369818 | 87.9211002 |
| 16:14:40 | 0:00:24 | 73.5722324 | 82.7204764 | 66.1216949 | 68.5369818 | 87.9211002 |
| 16:14:41 | 0:00:25 | 73.5722324 | 76.7204764 | 66.1216949 | 68.5369818 | 87.9211002 |
| 16:14:42 | 0:00:26 | 73.5722324 | 76.7204764 | 66.1216949 | 68.5369818 | 87.9211002 |
| 16:14:43 | 0:00:27 | 73.5722324 | 75.7204764 | 68.1216949 | 69.5369818 | 90.9211002 |
| 16:14:44 | 0:00:28 | 73.5722324 | 74.7204764 | 68.1216949 | 70.5369818 | 90.9211002 |
| 16:14:45 | 0:00:29 | 73.5722324 | 70.7204764 | 72.1216949 | 70.5369818 | 92.9211002 |
| 16:14:46 | 0:00:30 | 75.5722324 | 68.7204764 | 67.1216949 | 70.5369818 | 93.9211002 |
| 16:14:47 | 0:00:31 | 75.5722324 | 68.7204764 | 65.1216949 | 70.5369818 | 80.0437035 |
| 16:14:48 | 0:00:32 | 75.5722324 | 69.7204764 | 65.1216949 | 69.5369818 | 80.0437035 |
| 16:14:49 | 0:00:33 | 75.5722324 | 68.7204764 | 63.1216949 | 70.5369818 | 80.0437035 |
| 16:14:50 | 0:00:34 | 74.5722324 | 67.7204764 | 64.1216949 | 70.5369818 | 80.3770368 |
| 16:14:51 | 0:00:35 | 72.5722324 | 67.7204764 | 66.1216949 | 71.5369818 | 80.7103701 |
| 16:14:52 | 0:00:36 | 71.5722324 | 66.7204764 | 66.1216949 | 71.5369818 | 80.5437035 |
| 16:14:53 | 0:00:37 | 71.5722324 | 65.7204764 | 68.1216949 | 72.5369818 | 81.0437035 |
| 16:14:54 | 0:00:38 | 71.5722324 | 62.7204764 | 69.1216949 | 72.5369818 | 81.0437035 |
| 16:14:55 | 0:00:39 | 70.5722324 | 61.7204764 | 69.1216949 | 70.5369818 | 80.3770368 |
| 16:14:56 | 0:00:40 | 70.5722324 | 61.7204764 | 68.1216949 | 69.5369818 | 76.2103701 |
| 16:14:57 | 0:00:41 | 69.5722324 | 61.7204764 | 68.1216949 | 69.5369818 | 74.5437035 |
| 16:14:58 | 0:00:42 | 68.5722324 | 61.7204764 | 68.1216949 | 69.5369818 | 73.7103701 |
| 16:14:59 | 0:00:43 | 68.5722324 | 64.7204764 | 68.1216949 | 66.5369818 | 72.7103701 |
| 16:15:00 | 0:00:44 | 68.5722324 | 64.7204764 | 68.1216949 | 66.5369818 | 71.7103701 |
| 16:15:01 | 0:00:45 | 68.5722324 | 64.7204764 | 68.1216949 | 66.5369818 | 71.7103701 |
| 16:15:02 | 0:00:46 | 67.5722324 | 65.7204764 | 68.1216949 | 66.5369818 | 71.7103701 |

|          |         |            |            |            |            |            |
|----------|---------|------------|------------|------------|------------|------------|
| 16:15:03 | 0:00:47 | 67.5722324 | 67.7204764 | 68.1216949 | 65.5369818 | 71.7103701 |
| 16:15:04 | 0:00:48 | 67.5722324 | 67.7204764 | 69.1216949 | 65.5369818 | 71.7103701 |
| 16:15:05 | 0:00:49 | 67.5722324 | 67.7204764 | 69.1216949 | 64.5369818 | 71.5437035 |
| 16:15:06 | 0:00:50 | 67.5722324 | 67.7204764 | 70.1216949 | 64.5369818 | 71.7103701 |
| 16:15:07 | 0:00:51 | 67.5722324 | 68.7204764 | 71.1216949 | 64.5369818 | 71.8770368 |
| 16:15:08 | 0:00:52 | 67.5722324 | 68.7204764 | 71.1216949 | 65.5369818 | 71.5437035 |
| 16:15:09 | 0:00:53 | 67.5722324 | 68.7204764 | 71.1216949 | 67.5369818 | 71.8770368 |
| 16:15:10 | 0:00:54 | 67.5722324 | 69.7204764 | 71.1216949 | 68.5369818 | 88.9211002 |
| 16:15:11 | 0:00:55 | 67.5722324 | 69.7204764 | 71.1216949 | 68.5369818 | 88.9211002 |
| 16:15:12 | 0:00:56 | 68.5722324 | 72.7204764 | 71.1216949 | 74.5369818 | 87.9211002 |
| 16:15:13 | 0:00:57 | 68.5722324 | 72.7204764 | 71.1216949 | 75.5369818 | 85.9211002 |
| 16:15:14 | 0:00:58 | 68.5722324 | 70.7204764 | 71.1216949 | 73.5369818 | 85.9211002 |
| 16:15:15 | 0:00:59 | 69.5722324 | 70.7204764 | 73.1216949 | 73.5369818 | 88.9211002 |
| 16:15:16 | 0:01:00 | 69.5722324 | 70.7204764 | 72.1216949 | 73.5369818 | 88.9211002 |
| 16:15:17 | 0:01:01 | 69.5722324 | 70.7204764 | 71.1216949 | 73.5369818 | 89.9211002 |
| 16:15:18 | 0:01:02 | 71.5722324 | 69.7204764 | 71.1216949 | 73.5369818 | 90.9211002 |
| 16:15:19 | 0:01:03 | 71.5722324 | 69.7204764 | 72.1216949 | 73.5369818 | 86.9211002 |
| 16:15:20 | 0:01:04 | 72.5722324 | 69.7204764 | 73.1216949 | 71.5369818 | 82.9211002 |
| 16:15:21 | 0:01:05 | 72.5722324 | 69.7204764 | 73.1216949 | 71.5369818 | 82.9211002 |
| 16:15:22 | 0:01:06 | 72.5722324 | 69.7204764 | 74.1216949 | 70.5369818 | 69.9211002 |
| 16:15:23 | 0:01:07 | 72.5722324 | 67.7204764 | 74.1216949 | 70.5369818 | 66.9211002 |
| 16:15:24 | 0:01:08 | 72.5722324 | 66.7204764 | 74.1216949 | 69.5369818 | 66.9211002 |
| 16:15:25 | 0:01:09 | 72.5722324 | 65.7204764 | 73.1216949 | 69.5369818 | 66.9211002 |
| 16:15:26 | 0:01:10 | 72.5722324 | 65.7204764 | 73.1216949 | 68.5369818 | 66.9211002 |
| 16:15:27 | 0:01:11 | 71.5722324 | 65.7204764 | 68.1216949 | 68.5369818 | 66.9211002 |
| 16:15:28 | 0:01:12 | 71.5722324 | 65.7204764 | 66.1216949 | 69.5369818 | 66.9211002 |
| 16:15:29 | 0:01:13 | 72.5722324 | 65.7204764 | 66.1216949 | 69.5369818 | 65.9211002 |
| 16:15:30 | 0:01:14 | 72.5722324 | 68.7204764 | 66.1216949 | 69.5369818 | 65.9211002 |
| 16:15:31 | 0:01:15 | 74.5722324 | 69.7204764 | 66.1216949 | 69.5369818 | 64.9211002 |
| 16:15:32 | 0:01:16 | 74.5722324 | 69.7204764 | 66.1216949 | 70.5369818 | 64.9211002 |
| 16:15:33 | 0:01:17 | 73.5722324 | 69.7204764 | 66.1216949 | 70.5369818 | 64.9211002 |
| 16:15:34 | 0:01:18 | 73.5722324 | 67.7204764 | 66.1216949 | 70.5369818 | 64.9211002 |
| 16:15:35 | 0:01:19 | 72.5722324 | 66.7204764 | 66.1216949 | 71.5369818 | 64.9211002 |
| 16:15:36 | 0:01:20 | 72.5722324 | 66.7204764 | 66.1216949 | 71.5369818 | 64.9211002 |
| 16:15:37 | 0:01:21 | 70.5722324 | 66.7204764 | 66.1216949 | 71.5369818 | 64.9211002 |
| 16:15:38 | 0:01:22 | 70.5722324 | 66.7204764 | 68.1216949 | 72.5369818 | 64.9211002 |
| 16:15:39 | 0:01:23 | 71.5722324 | 66.7204764 | 69.1216949 | 74.5369818 | 65.9211002 |
| 16:15:40 | 0:01:24 | 71.5722324 | 67.7204764 | 69.1216949 | 74.5369818 | 65.9211002 |
| 16:15:41 | 0:01:25 | 70.5722324 | 68.7204764 | 70.1216949 | 75.5369818 | 66.9211002 |
| 16:15:42 | 0:01:26 | 68.5722324 | 68.7204764 | 70.1216949 | 76.5369818 | 66.9211002 |
| 16:15:43 | 0:01:27 | 68.5722324 | 68.7204764 | 71.1216949 | 76.5369818 | 66.9211002 |
| 16:15:44 | 0:01:28 | 68.5722324 | 68.7204764 | 70.1216949 | 75.5369818 | 64.9211002 |
| 16:15:45 | 0:01:29 | 68.5722324 | 68.7204764 | 70.1216949 | 74.5369818 | 64.9211002 |
| 16:15:46 | 0:01:30 | 68.5722324 | 68.7204764 | 70.1216949 | 72.5369818 | 64.9211002 |
| 16:15:47 | 0:01:31 | 67.5722324 | 68.7204764 | 70.1216949 | 70.5369818 | 64.9211002 |

|          |         |            |            |            |            |            |
|----------|---------|------------|------------|------------|------------|------------|
| 16:15:48 | 0:01:32 | 64.5722324 | 66.7204764 | 69.1216949 | 70.5369818 | 86.9211002 |
| 16:15:49 | 0:01:33 | 63.5722324 | 64.7204764 | 67.1216949 | 70.5369818 | 74.3770368 |
| 16:15:50 | 0:01:34 | 63.5722324 | 63.7204764 | 67.1216949 | 70.5369818 | 74.5437035 |
| 16:15:51 | 0:01:35 | 63.5722324 | 63.7204764 | 72.1216949 | 70.5369818 | 75.3770368 |
| 16:15:52 | 0:01:36 | 64.5722324 | 66.7204764 | 74.1216949 | 71.5369818 | 90.9211002 |
| 16:15:53 | 0:01:37 | 64.5722324 | 68.7204764 | 76.1216949 | 71.5369818 | 89.9211002 |
| 16:15:54 | 0:01:38 | 65.5722324 | 68.7204764 | 82.1216949 | 71.5369818 | 88.9211002 |
| 16:15:55 | 0:01:39 | 66.5722324 | 68.7204764 | 84.1216949 | 68.5369818 | 88.9211002 |
| 16:15:56 | 0:01:40 | 67.5722324 | 68.7204764 | 85.1216949 | 67.5369818 | 88.9211002 |
| 16:15:57 | 0:01:41 | 66.5722324 | 68.7204764 | 85.1216949 | 67.5369818 | 87.9211002 |
| 16:15:58 | 0:01:42 | 66.5722324 | 70.7204764 | 85.1216949 | 67.5369818 | 87.9211002 |
| 16:15:59 | 0:01:43 | 63.5722324 | 71.7204764 | 85.1216949 | 67.5369818 | 87.9211002 |
| 16:16:00 | 0:01:44 | 63.5722324 | 71.7204764 | 84.1216949 | 68.5369818 | 88.9211002 |
| 16:16:01 | 0:01:45 | 63.5722324 | 71.7204764 | 81.1216949 | 68.5369818 | 89.9211002 |
| 16:16:02 | 0:01:46 | 63.5722324 | 71.7204764 | 77.1216949 | 68.5369818 | 82.9211002 |
| 16:16:03 | 0:01:47 | 63.5722324 | 74.7204764 | 73.1216949 | 68.5369818 | 74.9211002 |
| 16:16:04 | 0:01:48 | 63.5722324 | 75.7204764 | 70.1216949 | 68.5369818 | 72.9211002 |
| 16:16:05 | 0:01:49 | 64.5722324 | 75.7204764 | 70.1216949 | 68.5369818 | 72.9211002 |
| 16:16:06 | 0:01:50 | 64.5722324 | 73.7204764 | 70.1216949 | 67.5369818 | 70.9211002 |
| 16:16:07 | 0:01:51 | 66.5722324 | 71.7204764 | 68.1216949 | 68.5369818 | 70.9211002 |
| 16:16:08 | 0:01:52 | 66.5722324 | 71.7204764 | 68.1216949 | 68.5369818 | 71.9211002 |
| 16:16:09 | 0:01:53 | 67.5722324 | 70.7204764 | 68.1216949 | 68.5369818 | 72.9211002 |
| 16:16:10 | 0:01:54 | 67.5722324 | 70.7204764 | 68.1216949 | 68.5369818 | 68.9211002 |
| 16:16:11 | 0:01:55 | 67.5722324 | 71.7204764 | 68.1216949 | 67.5369818 | 68.9211002 |
| 16:16:12 | 0:01:56 | 67.5722324 | 71.7204764 | 62.1216949 | 66.5369818 | 66.9211002 |
| 16:16:13 | 0:01:57 | 67.5722324 | 71.7204764 | 62.1216949 | 66.5369818 | 67.9211002 |
| 16:16:14 | 0:01:58 | 68.5722324 | 71.7204764 | 61.1216949 | 65.5369818 | 68.9211002 |
| 16:16:15 | 0:01:59 | 69.5722324 | 71.7204764 | 61.1216949 | 65.5369818 | 70.9211002 |
| 16:16:16 | 0:02:00 | 69.5722324 | 71.7204764 | 61.1216949 | 65.5369818 | 71.9211002 |
| 16:16:17 | 0:02:01 | 69.5722324 | 71.7204764 | 62.1216949 | 65.5369818 | 71.9211002 |
| 16:16:18 | 0:02:02 | 72.5722324 | 71.7204764 | 62.1216949 | 66.5369818 | 72.9211002 |
| 16:16:19 | 0:02:03 | 73.5722324 | 71.7204764 | 61.1216949 | 67.5369818 | 72.9211002 |
| 16:16:20 | 0:02:04 | 73.5722324 | 71.7204764 | 61.1216949 | 67.5369818 | 71.9211002 |
| 16:16:21 | 0:02:05 | 70.5722324 | 71.7204764 | 62.1216949 | 67.5369818 | 68.9211002 |
| 16:16:22 | 0:02:06 | 69.5722324 | 71.7204764 | 62.1216949 | 68.5369818 | 68.9211002 |
| 16:16:23 | 0:02:07 | 69.5722324 | 71.7204764 | 62.1216949 | 68.5369818 | 67.9211002 |
| 16:16:24 | 0:02:08 | 69.5722324 | 71.7204764 | 62.1216949 | 68.5369818 | 66.9211002 |
| 16:16:25 | 0:02:09 | 69.5722324 | 71.7204764 | 62.1216949 | 68.5369818 | 66.9211002 |
| 16:16:26 | 0:02:10 | 68.5722324 | 71.7204764 | 62.1216949 | 70.5369818 | 65.9211002 |
| 16:16:27 | 0:02:11 | 67.5722324 | 71.7204764 | 62.1216949 | 70.5369818 | 65.9211002 |
| 16:16:28 | 0:02:12 | 67.5722324 | 72.7204764 | 62.1216949 | 70.5369818 | 63.9211002 |
| 16:16:29 | 0:02:13 | 67.5722324 | 72.7204764 | 62.1216949 | 71.5369818 | 62.9211002 |
| 16:16:30 | 0:02:14 | 67.5722324 | 72.7204764 | 62.1216949 | 71.5369818 | 62.9211002 |
| 16:16:31 | 0:02:15 | 67.5722324 | 74.7204764 | 63.1216949 | 68.5369818 | 62.9211002 |
| 16:16:32 | 0:02:16 | 67.5722324 | 74.7204764 | 63.1216949 | 68.5369818 | 61.9211002 |

|          |         |            |            |            |            |            |
|----------|---------|------------|------------|------------|------------|------------|
| 16:16:33 | 0:02:17 | 66.5722324 | 74.7204764 | 64.1216949 | 67.5369818 | 61.9211002 |
| 16:16:34 | 0:02:18 | 65.5722324 | 75.7204764 | 65.1216949 | 67.5369818 | 61.9211002 |
| 16:16:35 | 0:02:19 | 65.5722324 | 75.7204764 | 67.1216949 | 67.5369818 | 60.9211002 |
| 16:16:36 | 0:02:20 | 65.5722324 | 76.7204764 | 67.1216949 | 67.5369818 | 59.9211002 |
| 16:16:37 | 0:02:21 | 65.5722324 | 76.7204764 | 68.1216949 | 68.5369818 | 59.9211002 |
| 16:16:38 | 0:02:22 | 63.5722324 | 76.7204764 | 68.1216949 | 68.5369818 | 59.9211002 |
| 16:16:39 | 0:02:23 | 63.5722324 | 76.7204764 | 69.1216949 | 68.5369818 | 60.9211002 |
| 16:16:40 | 0:02:24 | 63.5722324 | 78.7204764 | 68.1216949 | 68.5369818 | 62.9211002 |
| 16:16:41 | 0:02:25 | 63.5722324 | 78.7204764 | 67.1216949 | 68.5369818 | 66.9211002 |
| 16:16:42 | 0:02:26 | 63.5722324 | 78.7204764 | 66.1216949 | 68.5369818 | 65.9211002 |
| 16:16:43 | 0:02:27 | 63.5722324 | 78.7204764 | 66.1216949 | 68.5369818 | 61.9211002 |
| 16:16:44 | 0:02:28 | 64.5722324 | 78.7204764 | 66.1216949 | 68.5369818 | 61.9211002 |
| 16:16:45 | 0:02:29 | 64.5722324 | 78.7204764 | 66.1216949 | 68.5369818 | 59.9211002 |
| 16:16:46 | 0:02:30 | 65.5722324 | 82.7204764 | 66.1216949 | 68.5369818 | 59.9211002 |
| 16:16:47 | 0:02:31 | 66.5722324 | 83.7204764 | 66.1216949 | 68.5369818 | 59.9211002 |
| 16:16:48 | 0:02:32 | 66.5722324 | 83.7204764 | 65.1216949 | 68.5369818 | 59.9211002 |
| 16:16:49 | 0:02:33 | 66.5722324 | 83.7204764 | 65.1216949 | 67.5369818 | 59.9211002 |
| 16:16:50 | 0:02:34 | 67.5722324 | 82.7204764 | 65.1216949 | 67.5369818 | 59.9211002 |
| 16:16:51 | 0:02:35 | 67.5722324 | 82.7204764 | 65.1216949 | 66.5369818 | 59.9211002 |
| 16:16:52 | 0:02:36 | 67.5722324 | 81.7204764 | 65.1216949 | 66.5369818 | 59.9211002 |
| 16:16:53 | 0:02:37 | 68.5722324 | 81.7204764 | 66.1216949 | 66.5369818 | 59.9211002 |
| 16:16:54 | 0:02:38 | 69.5722324 | 81.7204764 | 69.1216949 | 67.5369818 | 61.9211002 |
| 16:16:55 | 0:02:39 | 69.5722324 | 83.7204764 | 70.1216949 | 67.5369818 | 64.9211002 |
| 16:16:56 | 0:02:40 | 69.5722324 | 82.7204764 | 70.1216949 | 69.5369818 | 69.9211002 |
| 16:16:57 | 0:02:41 | 70.5722324 | 79.7204764 | 70.1216949 | 71.5369818 | 79.9211002 |
| 16:16:58 | 0:02:42 | 69.5722324 | 76.7204764 | 66.1216949 | 71.5369818 | 79.9211002 |
| 16:16:59 | 0:02:43 | 68.5722324 | 74.7204764 | 65.1216949 | 73.5369818 | 88.9211002 |
| 16:17:00 | 0:02:44 | 68.5722324 | 72.7204764 | 65.1216949 | 73.5369818 | 88.9211002 |
| 16:17:01 | 0:02:45 | 67.5722324 | 72.7204764 | 65.1216949 | 72.5369818 | 89.9211002 |
| 16:17:02 | 0:02:46 | 67.5722324 | 72.7204764 | 65.1216949 | 71.5369818 | 88.9211002 |
| 16:17:03 | 0:02:47 | 67.5722324 | 75.7204764 | 65.1216949 | 70.5369818 | 88.9211002 |
| 16:17:04 | 0:02:48 | 66.5722324 | 75.7204764 | 65.1216949 | 69.5369818 | 88.9211002 |
| 16:17:05 | 0:02:49 | 66.5722324 | 76.7204764 | 65.1216949 | 69.5369818 | 84.9211002 |
| 16:17:06 | 0:02:50 | 65.5722324 | 76.7204764 | 65.1216949 | 68.5369818 | 84.9211002 |
| 16:17:07 | 0:02:51 | 65.5722324 | 76.7204764 | 66.1216949 | 68.5369818 | 85.9211002 |
| 16:17:08 | 0:02:52 | 64.5722324 | 75.7204764 | 66.1216949 | 68.5369818 | 85.9211002 |
| 16:17:09 | 0:02:53 | 64.5722324 | 75.7204764 | 65.1216949 | 67.5369818 | 63.9211002 |
| 16:17:10 | 0:02:54 | 65.5722324 | 76.7204764 | 65.1216949 | 67.5369818 | 61.9211002 |
| 16:17:11 | 0:02:55 | 65.5722324 | 78.7204764 | 65.1216949 | 68.5369818 | 60.9211002 |
| 16:17:12 | 0:02:56 | 65.5722324 | 79.7204764 | 65.1216949 | 68.5369818 | 60.9211002 |
| 16:17:13 | 0:02:57 | 64.5722324 | 78.7204764 | 65.1216949 | 68.5369818 | 60.9211002 |
| 16:17:14 | 0:02:58 | 64.5722324 | 76.7204764 | 65.1216949 | 68.5369818 | 58.9211002 |
| 16:17:15 | 0:02:59 | 64.5722324 | 75.7204764 | 65.1216949 | 67.5369818 | 57.9211002 |
| 16:17:16 | 0:03:00 | 65.5722324 | 73.7204764 | 66.1216949 | 66.5369818 | 57.9211002 |
| 16:17:17 | 0:03:01 | 66.5722324 | 71.7204764 | 66.1216949 | 65.5369818 | 57.9211002 |

|          |         |            |            |            |            |            |
|----------|---------|------------|------------|------------|------------|------------|
| 16:17:18 | 0:03:02 | 66.5722324 | 71.7204764 | 67.1216949 | 64.5369818 | 57.9211002 |
| 16:17:19 | 0:03:03 | 66.5722324 | 71.7204764 | 67.1216949 | 64.5369818 | 57.9211002 |
| 16:17:20 | 0:03:04 | 66.5722324 | 71.7204764 | 67.1216949 | 65.5369818 | 56.9211002 |
| 16:17:21 | 0:03:05 | 66.5722324 | 70.7204764 | 67.1216949 | 65.5369818 | 56.9211002 |
| 16:17:22 | 0:03:06 | 66.5722324 | 70.7204764 | 67.1216949 | 66.5369818 | 56.9211002 |
| 16:17:23 | 0:03:07 | 66.5722324 | 69.7204764 | 66.1216949 | 66.5369818 | 56.9211002 |
| 16:17:24 | 0:03:08 | 66.5722324 | 69.7204764 | 66.1216949 | 66.5369818 | 56.9211002 |
| 16:17:25 | 0:03:09 | 65.5722324 | 81.7204764 | 66.1216949 | 67.5369818 | 55.9211002 |
| 16:17:26 | 0:03:10 | 65.5722324 | 82.7204764 | 66.1216949 | 67.5369818 | 55.9211002 |
| 16:17:27 | 0:03:11 | 65.5722324 | 82.7204764 | 66.1216949 | 66.5369818 | 57.9211002 |
| 16:17:28 | 0:03:12 | 65.5722324 | 82.7204764 | 66.1216949 | 67.5369818 | 59.9211002 |
| 16:17:29 | 0:03:13 | 65.5722324 | 78.7204764 | 66.1216949 | 67.5369818 | 67.9211002 |
| 16:17:30 | 0:03:14 | 65.5722324 | 75.7204764 | 66.1216949 | 67.5369818 | 76.9211002 |
| 16:17:31 | 0:03:15 | 65.5722324 | 75.7204764 | 66.1216949 | 67.5369818 | 76.9211002 |
| 16:17:32 | 0:03:16 | 64.5722324 | 75.7204764 | 66.1216949 | 67.5369818 | 78.9211002 |
| 16:17:33 | 0:03:17 | 63.5722324 | 74.7204764 | 67.1216949 | 68.5369818 | 68.9211002 |
| 16:17:34 | 0:03:18 | 63.5722324 | 74.7204764 | 68.1216949 | 68.5369818 | 64.9211002 |
| 16:17:35 | 0:03:19 | 63.5722324 | 74.7204764 | 68.1216949 | 68.5369818 | 64.9211002 |
| 16:17:36 | 0:03:20 | 63.5722324 | 74.7204764 | 68.1216949 | 68.5369818 | 63.9211002 |
| 16:17:37 | 0:03:21 | 64.5722324 | 74.7204764 | 67.1216949 | 68.5369818 | 64.9211002 |
| 16:17:38 | 0:03:22 | 65.5722324 | 74.7204764 | 67.1216949 | 68.5369818 | 64.9211002 |
| 16:17:39 | 0:03:23 | 66.5722324 | 72.7204764 | 67.1216949 | 68.5369818 | 67.9211002 |
| 16:17:40 | 0:03:24 | 66.5722324 | 70.7204764 | 67.1216949 | 68.5369818 | 73.9211002 |
| 16:17:41 | 0:03:25 | 66.5722324 | 70.7204764 | 67.1216949 | 68.5369818 | 73.9211002 |
| 16:17:42 | 0:03:26 | 66.5722324 | 70.7204764 | 67.1216949 | 68.5369818 | 79.9211002 |
| 16:17:43 | 0:03:27 | 65.5722324 | 70.7204764 | 67.1216949 | 68.5369818 | 81.9211002 |
| 16:17:44 | 0:03:28 | 65.5722324 | 72.7204764 | 67.1216949 | 68.5369818 | 82.9211002 |
| 16:17:45 | 0:03:29 | 64.5722324 | 73.7204764 | 67.1216949 | 68.5369818 | 82.9211002 |
| 16:17:46 | 0:03:30 | 64.5722324 | 74.7204764 | 66.1216949 | 68.5369818 | 78.9211002 |
| 16:17:47 | 0:03:31 | 64.5722324 | 74.7204764 | 66.1216949 | 68.5369818 | 75.9211002 |
| 16:17:48 | 0:03:32 | 64.5722324 | 74.7204764 | 66.1216949 | 68.5369818 | 75.9211002 |
| 16:17:49 | 0:03:33 | 62.5722324 | 76.7204764 | 66.1216949 | 68.5369818 | 75.9211002 |
| 16:17:50 | 0:03:34 | 62.5722324 | 76.7204764 | 66.1216949 | 68.5369818 | 75.9211002 |
| 16:17:51 | 0:03:35 | 62.5722324 | 77.7204764 | 66.1216949 | 68.5369818 | 75.9211002 |
| 16:17:52 | 0:03:36 | 62.5722324 | 77.7204764 | 66.1216949 | 67.5369818 | 71.9211002 |
| 16:17:53 | 0:03:37 | 61.5722324 | 75.7204764 | 66.1216949 | 67.5369818 | 68.9211002 |
| 16:17:54 | 0:03:38 | 61.5722324 | 74.7204764 | 66.1216949 | 67.5369818 | 65.9211002 |
| 16:17:55 | 0:03:39 | 61.5722324 | 71.7204764 | 66.1216949 | 66.5369818 | 63.9211002 |
| 16:17:56 | 0:03:40 | 61.5722324 | 71.7204764 | 66.1216949 | 66.5369818 | 61.9211002 |
| 16:17:57 | 0:03:41 | 63.5722324 | 70.7204764 | 66.1216949 | 66.5369818 | 62.9211002 |
| 16:17:58 | 0:03:42 | 63.5722324 | 70.7204764 | 66.1216949 | 67.5369818 | 63.9211002 |
| 16:17:59 | 0:03:43 | 66.5722324 | 70.7204764 | 66.1216949 | 67.5369818 | 62.9211002 |
| 16:18:00 | 0:03:44 | 67.5722324 | 70.7204764 | 66.1216949 | 67.5369818 | 62.9211002 |
| 16:18:01 | 0:03:45 | 67.5722324 | 70.7204764 | 67.1216949 | 67.5369818 | 62.9211002 |
| 16:18:02 | 0:03:46 | 67.5722324 | 70.7204764 | 67.1216949 | 66.5369818 | 62.9211002 |

|          |         |            |            |            |            |            |
|----------|---------|------------|------------|------------|------------|------------|
| 16:18:03 | 0:03:47 | 68.5722324 | 70.7204764 | 67.1216949 | 66.5369818 | 63.9211002 |
| 16:18:04 | 0:03:48 | 69.5722324 | 70.7204764 | 66.1216949 | 65.5369818 | 64.9211002 |
| 16:18:05 | 0:03:49 | 69.5722324 | 70.7204764 | 66.1216949 | 64.5369818 | 63.9211002 |
| 16:18:06 | 0:03:50 | 79.5722324 | 75.7204764 | 66.1216949 | 64.5369818 | 63.9211002 |
| 16:18:07 | 0:03:51 | 81.5722324 | 77.7204764 | 68.1216949 | 64.5369818 | 65.9211002 |
| 16:18:08 | 0:03:52 | 81.5722324 | 77.7204764 | 67.1216949 | 63.5369818 | 65.9211002 |
| 16:18:09 | 0:03:53 | 81.5722324 | 78.7204764 | 67.1216949 | 63.5369818 | 69.9211002 |
| 16:18:10 | 0:03:54 | 79.5722324 | 79.7204764 | 66.1216949 | 64.5369818 | 70.9211002 |
| 16:18:11 | 0:03:55 | 79.5722324 | 78.7204764 | 66.1216949 | 64.5369818 | 70.9211002 |
| 16:18:12 | 0:03:56 | 79.5722324 | 78.7204764 | 67.1216949 | 65.5369818 | 70.9211002 |
| 16:18:13 | 0:03:57 | 77.5722324 | 80.7204764 | 68.1216949 | 65.5369818 | 70.9211002 |
| 16:18:14 | 0:03:58 | 77.5722324 | 80.7204764 | 68.1216949 | 65.5369818 | 67.9211002 |
| 16:18:15 | 0:03:59 | 77.5722324 | 79.7204764 | 72.1216949 | 65.5369818 | 66.9211002 |
| 16:18:16 | 0:04:00 | 76.5722324 | 76.7204764 | 74.1216949 | 67.5369818 | 66.9211002 |
| 16:18:17 | 0:04:01 | 72.5722324 | 74.7204764 | 74.1216949 | 67.5369818 | 66.9211002 |
| 16:18:18 | 0:04:02 | 72.5722324 | 74.7204764 | 74.1216949 | 67.5369818 | 66.9211002 |
| 16:18:19 | 0:04:03 | 70.5722324 | 73.7204764 | 71.1216949 | 69.5369818 | 67.9211002 |
| 16:18:20 | 0:04:04 | 70.5722324 | 72.7204764 | 69.1216949 | 71.5369818 | 70.9211002 |
| 16:18:21 | 0:04:05 | 70.5722324 | 69.7204764 | 68.1216949 | 71.5369818 | 72.9211002 |
| 16:18:22 | 0:04:06 | 70.5722324 | 68.7204764 | 68.1216949 | 70.5369818 | 73.9211002 |
| 16:18:23 | 0:04:07 | 70.5722324 | 67.7204764 | 68.1216949 | 68.5369818 | 73.9211002 |
| 16:18:24 | 0:04:08 | 70.5722324 | 67.7204764 | 66.1216949 | 68.5369818 | 74.9211002 |
| 16:18:25 | 0:04:09 | 69.5722324 | 67.7204764 | 66.1216949 | 67.5369818 | 76.9211002 |
| 16:18:26 | 0:04:10 | 68.5722324 | 68.7204764 | 66.1216949 | 67.5369818 | 79.9211002 |
| 16:18:27 | 0:04:11 | 68.5722324 | 68.7204764 | 67.1216949 | 67.5369818 | 81.9211002 |
| 16:18:28 | 0:04:12 | 67.5722324 | 73.7204764 | 67.1216949 | 67.5369818 | 83.9211002 |
| 16:18:29 | 0:04:13 | 66.5722324 | 74.7204764 | 68.1216949 | 68.5369818 | 83.9211002 |
| 16:18:30 | 0:04:14 | 66.5722324 | 73.7204764 | 67.1216949 | 68.5369818 | 84.9211002 |
| 16:18:31 | 0:04:15 | 65.5722324 | 71.7204764 | 67.1216949 | 68.5369818 | 85.9211002 |
| 16:18:32 | 0:04:16 | 64.5722324 | 68.7204764 | 67.1216949 | 68.5369818 | 85.9211002 |
| 16:18:33 | 0:04:17 | 64.5722324 | 68.7204764 | 66.1216949 | 68.5369818 | 84.9211002 |
| 16:18:34 | 0:04:18 | 63.5722324 | 68.7204764 | 65.1216949 | 69.5369818 | 84.9211002 |
| 16:18:35 | 0:04:19 | 63.5722324 | 68.7204764 | 65.1216949 | 71.5369818 | 83.9211002 |
| 16:18:36 | 0:04:20 | 63.5722324 | 68.7204764 | 64.1216949 | 72.5369818 | 83.9211002 |
| 16:18:37 | 0:04:21 | 62.5722324 | 68.7204764 | 64.1216949 | 71.5369818 | 83.9211002 |
| 16:18:38 | 0:04:22 | 62.5722324 | 68.7204764 | 64.1216949 | 71.5369818 | 83.9211002 |
| 16:18:39 | 0:04:23 | 61.5722324 | 68.7204764 | 64.1216949 | 71.5369818 | 82.9211002 |
| 16:18:40 | 0:04:24 | 61.5722324 | 66.7204764 | 65.1216949 | 71.5369818 | 82.9211002 |
| 16:18:41 | 0:04:25 | 62.5722324 | 66.7204764 | 65.1216949 | 71.5369818 | 82.9211002 |
| 16:18:42 | 0:04:26 | 64.5722324 | 68.7204764 | 65.1216949 | 71.5369818 | 82.9211002 |
| 16:18:43 | 0:04:27 | 66.5722324 | 69.7204764 | 66.1216949 | 70.5369818 | 87.9211002 |
| 16:18:44 | 0:04:28 | 66.5722324 | 70.7204764 | 66.1216949 | 70.5369818 | 75.4003646 |
| 16:18:45 | 0:04:29 | 69.5722324 | 70.7204764 | 67.1216949 | 70.5369818 | 75.6860789 |
| 16:18:46 | 0:04:30 | 70.5722324 | 70.7204764 | 68.1216949 | 71.5369818 | 75.9717932 |
| 16:18:47 | 0:04:31 | 70.5722324 | 70.7204764 | 68.1216949 | 71.5369818 | 75.9717932 |



|          |         |            |            |            |            |            |
|----------|---------|------------|------------|------------|------------|------------|
| 16:18:48 | 0:04:32 | 71.5722324 | 70.7204764 | 68.1216949 | 72.5369818 | 76.2575075 |
| 16:18:49 | 0:04:33 | 71.5722324 | 70.7204764 | 69.1216949 | 73.5369818 | 76.6860789 |
| 16:18:50 | 0:04:34 | 71.5722324 | 70.7204764 | 69.1216949 | 73.5369818 | 77.1146503 |
| 16:18:51 | 0:04:35 | 71.5722324 | 72.7204764 | 68.1216949 | 73.5369818 | 92.9211002 |
| 16:18:52 | 0:04:36 | 71.5722324 | 73.7204764 | 66.1216949 | 72.5369818 | 77.1146503 |
| 16:18:53 | 0:04:37 | 71.5722324 | 73.7204764 | 66.1216949 | 72.5369818 | 77.1146503 |
| 16:18:54 | 0:04:38 | 71.5722324 | 74.7204764 | 66.1216949 | 71.5369818 | 75.9717932 |
| 16:18:55 | 0:04:39 | 71.5722324 | 74.7204764 | 66.1216949 | 71.5369818 | 75.5432218 |
| 16:18:56 | 0:04:40 | 71.5722324 | 74.7204764 | 65.1216949 | 71.5369818 | 75.1146503 |
| 16:18:57 | 0:04:41 | 73.5722324 | 75.7204764 | 64.1216949 | 70.5369818 | 75.1146503 |
| 16:18:58 | 0:04:42 | 76.5722324 | 76.7204764 | 63.1216949 | 70.5369818 | 75.5432218 |
| 16:18:59 | 0:04:43 | 78.5722324 | 77.7204764 | 63.1216949 | 69.5369818 | 90.9211002 |
| 16:19:00 | 0:04:44 | 78.5722324 | 77.7204764 | 61.1216949 | 69.5369818 | 75.4003646 |
| 16:19:01 | 0:04:45 | 78.5722324 | 77.7204764 | 60.1216949 | 68.5369818 | 74.9717932 |
| 16:19:02 | 0:04:46 | 78.5722324 | 77.7204764 | 59.1216949 | 68.5369818 | 74.828936  |
| 16:19:03 | 0:04:47 | 78.5722324 | 78.7204764 | 59.1216949 | 67.5369818 | 87.9211002 |
| 16:19:04 | 0:04:48 | 78.5722324 | 78.7204764 | 59.1216949 | 66.5369818 | 87.9211002 |
| 16:19:05 | 0:04:49 | 78.5722324 | 78.7204764 | 59.1216949 | 65.5369818 | 87.9211002 |
| 16:19:06 | 0:04:50 | 77.5722324 | 78.7204764 | 60.1216949 | 66.5369818 | 87.9211002 |
| 16:19:07 | 0:04:51 | 77.5722324 | 77.7204764 | 60.1216949 | 65.5369818 | 86.9211002 |
| 16:19:08 | 0:04:52 | 77.5722324 | 74.7204764 | 60.1216949 | 64.5369818 | 84.9211002 |
| 16:19:09 | 0:04:53 | 74.5722324 | 69.7204764 | 68.1216949 | 64.5369818 | 84.9211002 |
| 16:19:10 | 0:04:54 | 73.5722324 | 69.7204764 | 68.1216949 | 64.5369818 | 80.9211002 |
| 16:19:11 | 0:04:55 | 72.5722324 | 69.7204764 | 75.1216949 | 63.5369818 | 83.9211002 |
| 16:19:12 | 0:04:56 | 72.5722324 | 69.7204764 | 75.1216949 | 63.5369818 | 83.9211002 |
| 16:19:13 | 0:04:57 | 72.5722324 | 71.7204764 | 77.1216949 | 63.5369818 | 84.9211002 |
| 16:19:14 | 0:04:58 | 72.5722324 | 70.7204764 | 78.1216949 | 63.5369818 | 84.9211002 |
| 16:19:15 | 0:04:59 | 71.5722324 | 69.7204764 | 78.1216949 | 62.5369818 | 84.9211002 |
| 16:19:16 | 0:05:00 | 71.5722324 | 67.7204764 | 78.1216949 | 62.5369818 | 84.9211002 |
| 16:19:17 | 0:05:01 | 71.5722324 | 65.7204764 | 78.1216949 | 62.5369818 | 83.9211002 |
| 16:19:18 | 0:05:02 | 69.5722324 | 63.7204764 | 79.1216949 | 62.5369818 | 83.9211002 |
| 16:19:19 | 0:05:03 | 68.5722324 | 63.7204764 | 79.1216949 | 62.5369818 | 81.9211002 |
| 16:19:20 | 0:05:04 | 68.5722324 | 63.7204764 | 75.1216949 | 62.5369818 | 81.9211002 |
| 16:19:21 | 0:05:05 | 68.5722324 | 64.7204764 | 69.1216949 | 62.5369818 | 81.9211002 |
| 16:19:22 | 0:05:06 | 67.5722324 | 64.7204764 | 68.1216949 | 62.5369818 | 81.9211002 |
| 16:19:23 | 0:05:07 | 66.5722324 | 66.7204764 | 67.1216949 | 62.5369818 | 81.9211002 |
| 16:19:24 | 0:05:08 | 66.5722324 | 72.7204764 | 67.1216949 | 63.5369818 | 80.9211002 |
| 16:19:25 | 0:05:09 | 66.5722324 | 73.7204764 | 67.1216949 | 64.5369818 | 80.9211002 |
| 16:19:26 | 0:05:10 | 66.5722324 | 73.7204764 | 67.1216949 | 64.5369818 | 80.9211002 |
| 16:19:27 | 0:05:11 | 66.5722324 | 70.7204764 | 67.1216949 | 64.5369818 | 80.9211002 |
| 16:19:28 | 0:05:12 | 67.5722324 | 67.7204764 | 68.1216949 | 65.5369818 | 80.9211002 |
| 16:19:29 | 0:05:13 | 66.5722324 | 65.7204764 | 69.1216949 | 65.5369818 | 80.9211002 |
| 16:19:30 | 0:05:14 | 66.5722324 | 65.7204764 | 69.1216949 | 64.5369818 | 82.9211002 |
| 16:19:31 | 0:05:15 | 66.5722324 | 65.7204764 | 69.1216949 | 63.5369818 | 86.9211002 |
| 16:19:32 | 0:05:16 | 66.5722324 | 65.7204764 | 69.1216949 | 63.5369818 | 86.9211002 |

|          |         |            |            |            |            |            |
|----------|---------|------------|------------|------------|------------|------------|
| 16:19:33 | 0:05:17 | 65.5722324 | 66.7204764 | 68.1216949 | 63.5369818 | 71.6860789 |
| 16:19:34 | 0:05:18 | 65.5722324 | 68.7204764 | 68.1216949 | 63.5369818 | 72.4003646 |
| 16:19:35 | 0:05:19 | 65.5722324 | 67.7204764 | 68.1216949 | 63.5369818 | 72.4003646 |
| 16:19:36 | 0:05:20 | 65.5722324 | 66.7204764 | 68.1216949 | 64.5369818 | 72.4003646 |
| 16:19:37 | 0:05:21 | 66.5722324 | 66.7204764 | 69.1216949 | 66.5369818 | 73.1146503 |
| 16:19:38 | 0:05:22 | 66.5722324 | 66.7204764 | 69.1216949 | 67.5369818 | 73.2575075 |
| 16:19:39 | 0:05:23 | 66.5722324 | 67.7204764 | 69.1216949 | 67.5369818 | 73.5432218 |
| 16:19:40 | 0:05:24 | 67.5722324 | 67.7204764 | 69.1216949 | 66.5369818 | 73.5432218 |
| 16:19:41 | 0:05:25 | 67.5722324 | 68.7204764 | 68.1216949 | 65.5369818 | 73.5432218 |
| 16:19:42 | 0:05:26 | 67.5722324 | 68.7204764 | 68.1216949 | 65.5369818 | 73.4003646 |
| 16:19:43 | 0:05:27 | 69.5722324 | 68.7204764 | 68.1216949 | 65.5369818 | 73.9717932 |
| 16:19:44 | 0:05:28 | 70.5722324 | 65.7204764 | 68.1216949 | 65.5369818 | 73.828936  |
| 16:19:45 | 0:05:29 | 71.5722324 | 64.7204764 | 68.1216949 | 65.5369818 | 73.6860789 |
| 16:19:46 | 0:05:30 | 72.5722324 | 63.7204764 | 68.1216949 | 65.5369818 | 74.2575075 |
| 16:19:47 | 0:05:31 | 72.5722324 | 62.7204764 | 67.1216949 | 65.5369818 | 74.9211002 |
| 16:19:48 | 0:05:32 | 73.5722324 | 61.7204764 | 66.1216949 | 65.5369818 | 74.9211002 |
| 16:19:49 | 0:05:33 | 72.5722324 | 61.7204764 | 66.1216949 | 64.5369818 | 64.9211002 |
| 16:19:50 | 0:05:34 | 70.5722324 | 61.7204764 | 66.1216949 | 65.5369818 | 61.9211002 |
| 16:19:51 | 0:05:35 | 70.5722324 | 62.7204764 | 66.1216949 | 65.5369818 | 60.9211002 |
| 16:19:52 | 0:05:36 | 70.5722324 | 65.7204764 | 66.1216949 | 64.5369818 | 59.9211002 |
| 16:19:53 | 0:05:37 | 69.5722324 | 66.7204764 | 66.1216949 | 63.5369818 | 59.9211002 |
| 16:19:54 | 0:05:38 | 71.5722324 | 66.7204764 | 65.1216949 | 63.5369818 | 59.9211002 |
| 16:19:55 | 0:05:39 | 72.5722324 | 66.7204764 | 65.1216949 | 63.5369818 | 57.9211002 |
| 16:19:56 | 0:05:40 | 75.5722324 | 64.7204764 | 65.1216949 | 63.5369818 | 57.9211002 |
| 16:19:57 | 0:05:41 | 75.5722324 | 62.7204764 | 63.1216949 | 63.5369818 | 57.9211002 |
| 16:19:58 | 0:05:42 | 75.5722324 | 62.7204764 | 63.1216949 | 62.5369818 | 58.9211002 |
| 16:19:59 | 0:05:43 | 75.5722324 | 63.7204764 | 63.1216949 | 62.5369818 | 60.9211002 |
| 16:20:00 | 0:05:44 | 75.5722324 | 65.7204764 | 63.1216949 | 62.5369818 | 61.9211002 |
| 16:20:01 | 0:05:45 | 74.5722324 | 65.7204764 | 63.1216949 | 63.5369818 | 59.9211002 |
| 16:20:02 | 0:05:46 | 74.5722324 | 66.7204764 | 63.1216949 | 63.5369818 | 59.9211002 |
| 16:20:03 | 0:05:47 | 74.5722324 | 66.7204764 | 64.1216949 | 63.5369818 | 59.9211002 |
| 16:20:04 | 0:05:48 | 74.5722324 | 65.7204764 | 66.1216949 | 65.5369818 | 58.9211002 |
| 16:20:05 | 0:05:49 | 74.5722324 | 64.7204764 | 68.1216949 | 65.5369818 | 58.9211002 |
| 16:20:06 | 0:05:50 | 74.5722324 | 64.7204764 | 68.1216949 | 65.5369818 | 58.9211002 |
| 16:20:07 | 0:05:51 | 74.5722324 | 64.7204764 | 70.1216949 | 67.5369818 | 58.9211002 |
| 16:20:08 | 0:05:52 | 74.5722324 | 64.7204764 | 71.1216949 | 66.5369818 | 58.9211002 |
| 16:20:09 | 0:05:53 | 74.5722324 | 64.7204764 | 71.1216949 | 66.5369818 | 58.9211002 |
| 16:20:10 | 0:05:54 | 66.5722324 | 61.7204764 | 70.1216949 | 65.5369818 | 58.9211002 |
| 16:20:11 | 0:05:55 | 66.5722324 | 59.7204764 | 71.1216949 | 64.5369818 | 59.9211002 |
| 16:20:12 | 0:05:56 | 66.5722324 | 59.7204764 | 72.1216949 | 65.5369818 | 62.9211002 |
| 16:20:13 | 0:05:57 | 65.5722324 | 59.7204764 | 73.1216949 | 64.5369818 | 62.9211002 |
| 16:20:14 | 0:05:58 | 65.5722324 | 59.7204764 | 73.1216949 | 65.5369818 | 59.9211002 |
| 16:20:15 | 0:05:59 | 65.5722324 | 59.7204764 | 73.1216949 | 65.5369818 | 59.9211002 |
| 16:20:16 | 0:06:00 | 66.5722324 | 59.7204764 | 73.1216949 | 65.5369818 | 57.9211002 |
| 16:20:17 | 0:06:01 | 66.5722324 | 61.7204764 | 70.1216949 | 65.5369818 | 56.9211002 |

|          |         |            |            |            |            |            |
|----------|---------|------------|------------|------------|------------|------------|
| 16:20:18 | 0:06:02 | 66.5722324 | 61.7204764 | 69.1216949 | 65.5369818 | 56.9211002 |
| 16:20:19 | 0:06:03 | 66.5722324 | 62.7204764 | 68.1216949 | 66.5369818 | 56.9211002 |
| 16:20:20 | 0:06:04 | 66.5722324 | 63.7204764 | 68.1216949 | 66.5369818 | 56.9211002 |
| 16:20:21 | 0:06:05 | 66.5722324 | 63.7204764 | 68.1216949 | 65.5369818 | 56.9211002 |
| 16:20:22 | 0:06:06 | 66.5722324 | 72.7204764 | 68.1216949 | 65.5369818 | 56.9211002 |
| 16:20:23 | 0:06:07 | 66.5722324 | 74.7204764 | 68.1216949 | 65.5369818 | 56.9211002 |
| 16:20:24 | 0:06:08 | 66.5722324 | 73.7204764 | 68.1216949 | 65.5369818 | 57.9211002 |
| 16:20:25 | 0:06:09 | 66.5722324 | 73.7204764 | 68.1216949 | 65.5369818 | 57.9211002 |
| 16:20:26 | 0:06:10 | 66.5722324 | 72.7204764 | 66.1216949 | 65.5369818 | 57.9211002 |
| 16:20:27 | 0:06:11 | 66.5722324 | 71.7204764 | 66.1216949 | 66.5369818 | 57.9211002 |
| 16:20:28 | 0:06:12 | 66.5722324 | 71.7204764 | 65.1216949 | 66.5369818 | 57.9211002 |
| 16:20:29 | 0:06:13 | 66.5722324 | 71.7204764 | 65.1216949 | 66.5369818 | 57.9211002 |
| 16:20:30 | 0:06:14 | 66.5722324 | 70.7204764 | 65.1216949 | 66.5369818 | 57.9211002 |
| 16:20:31 | 0:06:15 | 66.5722324 | 69.7204764 | 65.1216949 | 65.5369818 | 58.9211002 |
| 16:20:32 | 0:06:16 | 66.5722324 | 69.7204764 | 66.1216949 | 65.5369818 | 60.9211002 |
| 16:20:33 | 0:06:17 | 66.5722324 | 68.7204764 | 66.1216949 | 66.5369818 | 60.9211002 |
| 16:20:34 | 0:06:18 | 66.5722324 | 67.7204764 | 66.1216949 | 65.5369818 | 61.9211002 |
| 16:20:35 | 0:06:19 | 66.5722324 | 67.7204764 | 66.1216949 | 65.5369818 | 61.9211002 |
| 16:20:36 | 0:06:20 | 66.5722324 | 66.7204764 | 66.1216949 | 65.5369818 | 61.9211002 |
| 16:20:37 | 0:06:21 | 66.5722324 | 66.7204764 | 67.1216949 | 64.5369818 | 61.9211002 |
| 16:20:38 | 0:06:22 | 66.5722324 | 66.7204764 | 69.1216949 | 64.5369818 | 61.9211002 |
| 16:20:39 | 0:06:23 | 66.5722324 | 65.7204764 | 69.1216949 | 64.5369818 | 61.9211002 |
| 16:20:40 | 0:06:24 | 66.5722324 | 65.7204764 | 69.1216949 | 64.5369818 | 61.9211002 |
| 16:20:41 | 0:06:25 | 67.5722324 | 65.7204764 | 69.1216949 | 64.5369818 | 61.9211002 |
| 16:20:42 | 0:06:26 | 67.5722324 | 68.7204764 | 69.1216949 | 64.5369818 | 61.9211002 |
| 16:20:43 | 0:06:27 | 67.5722324 | 69.7204764 | 70.1216949 | 65.5369818 | 61.9211002 |
| 16:20:44 | 0:06:28 | 68.5722324 | 69.7204764 | 70.1216949 | 65.5369818 | 61.9211002 |
| 16:20:45 | 0:06:29 | 68.5722324 | 69.7204764 | 70.1216949 | 65.5369818 | 59.9211002 |
| 16:20:46 | 0:06:30 | 68.5722324 | 69.7204764 | 70.1216949 | 66.5369818 | 59.9211002 |
| 16:20:47 | 0:06:31 | 68.5722324 | 69.7204764 | 67.1216949 | 67.5369818 | 58.9211002 |
| 16:20:48 | 0:06:32 | 68.5722324 | 69.7204764 | 63.1216949 | 67.5369818 | 58.9211002 |
| 16:20:49 | 0:06:33 | 68.5722324 | 69.7204764 | 63.1216949 | 66.5369818 | 59.9211002 |
| 16:20:50 | 0:06:34 | 68.5722324 | 72.7204764 | 64.1216949 | 65.5369818 | 59.9211002 |
| 16:20:51 | 0:06:35 | 68.5722324 | 72.7204764 | 64.1216949 | 65.5369818 | 60.9211002 |
| 16:20:52 | 0:06:36 | 67.5722324 | 72.7204764 | 63.1216949 | 65.5369818 | 60.9211002 |
| 16:20:53 | 0:06:37 | 67.5722324 | 70.7204764 | 63.1216949 | 65.5369818 | 60.9211002 |
| 16:20:54 | 0:06:38 | 67.5722324 | 69.7204764 | 63.1216949 | 65.5369818 | 61.9211002 |
| 16:20:55 | 0:06:39 | 67.5722324 | 69.7204764 | 63.1216949 | 65.5369818 | 63.9211002 |
| 16:20:56 | 0:06:40 | 67.5722324 | 68.7204764 | 63.1216949 | 66.5369818 | 63.9211002 |
| 16:20:57 | 0:06:41 | 67.5722324 | 66.7204764 | 63.1216949 | 66.5369818 | 63.9211002 |
| 16:20:58 | 0:06:42 | 67.5722324 | 65.7204764 | 64.1216949 | 66.5369818 | 65.9211002 |
| 16:20:59 | 0:06:43 | 67.5722324 | 66.7204764 | 65.1216949 | 67.5369818 | 65.9211002 |
| 16:21:00 | 0:06:44 | 67.5722324 | 66.7204764 | 65.1216949 | 67.5369818 | 65.9211002 |
| 16:21:01 | 0:06:45 | 66.5722324 | 64.7204764 | 66.1216949 | 68.5369818 | 65.9211002 |
| 16:21:02 | 0:06:46 | 66.5722324 | 63.7204764 | 66.1216949 | 68.5369818 | 66.9211002 |

|          |         |            |            |            |            |            |
|----------|---------|------------|------------|------------|------------|------------|
| 16:21:03 | 0:06:47 | 66.5722324 | 63.7204764 | 67.1216949 | 68.5369818 | 66.9211002 |
| 16:21:04 | 0:06:48 | 66.5722324 | 63.7204764 | 70.1216949 | 68.5369818 | 68.9211002 |
| 16:21:05 | 0:06:49 | 67.5722324 | 63.7204764 | 70.1216949 | 68.5369818 | 69.9211002 |
| 16:21:06 | 0:06:50 | 67.5722324 | 63.7204764 | 70.1216949 | 68.5369818 | 69.9211002 |
| 16:21:07 | 0:06:51 | 67.5722324 | 63.7204764 | 68.1216949 | 68.5369818 | 69.9211002 |
| 16:21:08 | 0:06:52 | 67.5722324 | 63.7204764 | 68.1216949 | 68.5369818 | 69.9211002 |
| 16:21:09 | 0:06:53 | 67.5722324 | 67.7204764 | 68.1216949 | 68.5369818 | 68.9211002 |
| 16:21:10 | 0:06:54 | 66.5722324 | 69.7204764 | 68.1216949 | 68.5369818 | 68.9211002 |
| 16:21:11 | 0:06:55 | 66.5722324 | 69.7204764 | 68.1216949 | 69.5369818 | 67.9211002 |
| 16:21:12 | 0:06:56 | 66.5722324 | 69.7204764 | 68.1216949 | 69.5369818 | 66.9211002 |
| 16:21:13 | 0:06:57 | 66.5722324 | 69.7204764 | 67.1216949 | 69.5369818 | 66.9211002 |
| 16:21:14 | 0:06:58 | 66.5722324 | 71.7204764 | 67.1216949 | 69.5369818 | 67.9211002 |
| 16:21:15 | 0:06:59 | 66.5722324 | 75.7204764 | 67.1216949 | 69.5369818 | 67.9211002 |
| 16:21:16 | 0:07:00 | 66.5722324 | 78.7204764 | 67.1216949 | 69.5369818 | 67.9211002 |
| 16:21:17 | 0:07:01 | 66.5722324 | 78.7204764 | 67.1216949 | 68.5369818 | 67.9211002 |
| 16:21:18 | 0:07:02 | 66.5722324 | 80.7204764 | 65.1216949 | 68.5369818 | 67.9211002 |
| 16:21:19 | 0:07:03 | 66.5722324 | 81.7204764 | 64.1216949 | 68.5369818 | 67.9211002 |
| 16:21:20 | 0:07:04 | 66.5722324 | 86.7204764 | 64.1216949 | 68.5369818 | 67.9211002 |
| 16:21:21 | 0:07:05 | 66.5722324 | 86.7204764 | 64.1216949 | 68.5369818 | 68.9211002 |
| 16:21:22 | 0:07:06 | 66.5722324 | 73.828936  | 63.1216949 | 68.5369818 | 66.9211002 |
| 16:21:23 | 0:07:07 | 67.5722324 | 73.5432218 | 63.1216949 | 67.5369818 | 66.9211002 |
| 16:21:24 | 0:07:08 | 67.5722324 | 72.9717932 | 63.1216949 | 67.5369818 | 62.9211002 |
| 16:21:25 | 0:07:09 | 66.5722324 | 72.5432218 | 63.1216949 | 67.5369818 | 60.9211002 |
| 16:21:26 | 0:07:10 | 66.5722324 | 72.6860789 | 63.1216949 | 66.5369818 | 61.9211002 |
| 16:21:27 | 0:07:11 | 67.5722324 | 72.5432218 | 64.1216949 | 65.5369818 | 61.9211002 |
| 16:21:28 | 0:07:12 | 67.5722324 | 72.828936  | 67.1216949 | 65.5369818 | 61.9211002 |
| 16:21:29 | 0:07:13 | 68.5722324 | 73.4003646 | 69.1216949 | 66.5369818 | 61.9211002 |
| 16:21:30 | 0:07:14 | 70.5722324 | 74.2575075 | 69.1216949 | 66.5369818 | 64.9211002 |
| 16:21:31 | 0:07:15 | 72.5722324 | 74.6860789 | 71.1216949 | 66.5369818 | 64.9211002 |
| 16:21:32 | 0:07:16 | 72.5722324 | 74.5432218 | 71.1216949 | 65.5369818 | 65.9211002 |
| 16:21:33 | 0:07:17 | 72.5722324 | 74.5432218 | 72.1216949 | 65.5369818 | 64.9211002 |
| 16:21:34 | 0:07:18 | 70.5722324 | 74.1146503 | 72.1216949 | 65.5369818 | 64.9211002 |
| 16:21:35 | 0:07:19 | 69.5722324 | 73.828936  | 72.1216949 | 66.5369818 | 64.9211002 |
| 16:21:36 | 0:07:20 | 68.5722324 | 73.6860789 | 72.1216949 | 65.5369818 | 64.9211002 |
| 16:21:37 | 0:07:21 | 68.5722324 | 87.7204764 | 72.1216949 | 65.5369818 | 64.9211002 |
| 16:21:38 | 0:07:22 | 68.5722324 | 85.7204764 | 74.1216949 | 64.5369818 | 64.9211002 |
| 16:21:39 | 0:07:23 | 68.5722324 | 84.7204764 | 76.1216949 | 63.5369818 | 64.9211002 |
| 16:21:40 | 0:07:24 | 68.5722324 | 84.7204764 | 78.1216949 | 63.5369818 | 64.9211002 |
| 16:21:41 | 0:07:25 | 68.5722324 | 82.7204764 | 77.1216949 | 64.5369818 | 64.9211002 |
| 16:21:42 | 0:07:26 | 67.5722324 | 81.7204764 | 77.1216949 | 64.5369818 | 64.9211002 |
| 16:21:43 | 0:07:27 | 66.5722324 | 82.7204764 | 77.1216949 | 64.5369818 | 64.9211002 |
| 16:21:44 | 0:07:28 | 66.5722324 | 82.7204764 | 76.1216949 | 64.5369818 | 67.9211002 |
| 16:21:45 | 0:07:29 | 66.5722324 | 82.7204764 | 73.1216949 | 63.5369818 | 59.9211002 |
| 16:21:46 | 0:07:30 | 66.5722324 | 84.7204764 | 73.1216949 | 63.5369818 | 59.9211002 |
| 16:21:47 | 0:07:31 | 66.5722324 | 86.7204764 | 71.1216949 | 62.5369818 | 58.9211002 |

|          |         |            |            |            |            |            |
|----------|---------|------------|------------|------------|------------|------------|
| 16:21:48 | 0:07:32 | 66.5722324 | 71.6860789 | 71.1216949 | 62.5369818 | 58.9211002 |
| 16:21:49 | 0:07:33 | 66.5722324 | 71.9717932 | 71.1216949 | 62.5369818 | 61.9211002 |
| 16:21:50 | 0:07:34 | 66.5722324 | 87.7204764 | 71.1216949 | 64.5369818 | 71.9211002 |
| 16:21:51 | 0:07:35 | 66.5722324 | 87.7204764 | 71.1216949 | 66.5369818 | 71.9211002 |
| 16:21:52 | 0:07:36 | 64.5722324 | 86.7204764 | 72.1216949 | 67.5369818 | 72.9211002 |
| 16:21:53 | 0:07:37 | 63.5722324 | 86.7204764 | 72.1216949 | 67.5369818 | 74.9211002 |
| 16:21:54 | 0:07:38 | 63.5722324 | 86.7204764 | 72.1216949 | 67.5369818 | 74.9211002 |
| 16:21:55 | 0:07:39 | 63.5722324 | 87.7204764 | 75.1216949 | 67.5369818 | 62.9211002 |
| 16:21:56 | 0:07:40 | 63.5722324 | 88.7204764 | 76.1216949 | 67.5369818 | 60.9211002 |
| 16:21:57 | 0:07:41 | 62.5722324 | 73.4003646 | 76.1216949 | 67.5369818 | 60.9211002 |
| 16:21:58 | 0:07:42 | 62.5722324 | 73.4003646 | 77.1216949 | 66.5369818 | 60.9211002 |
| 16:21:59 | 0:07:43 | 62.5722324 | 86.7204764 | 78.1216949 | 65.5369818 | 60.9211002 |
| 16:22:00 | 0:07:44 | 62.5722324 | 86.7204764 | 78.1216949 | 64.5369818 | 63.9211002 |
| 16:22:01 | 0:07:45 | 61.5722324 | 85.7204764 | 79.1216949 | 64.5369818 | 64.9211002 |
| 16:22:02 | 0:07:46 | 61.5722324 | 84.7204764 | 79.1216949 | 64.5369818 | 64.9211002 |
| 16:22:03 | 0:07:47 | 61.5722324 | 83.7204764 | 73.1216949 | 64.5369818 | 65.9211002 |
| 16:22:04 | 0:07:48 | 61.5722324 | 82.7204764 | 71.1216949 | 64.5369818 | 66.9211002 |
| 16:22:05 | 0:07:49 | 61.5722324 | 82.7204764 | 70.1216949 | 64.5369818 | 66.9211002 |
| 16:22:06 | 0:07:50 | 60.5722324 | 82.7204764 | 69.1216949 | 64.5369818 | 67.9211002 |
| 16:22:07 | 0:07:51 | 54.5722324 | 80.7204764 | 69.1216949 | 64.5369818 | 67.9211002 |
| 16:22:08 | 0:07:52 | 53.5722324 | 79.7204764 | 68.1216949 | 65.5369818 | 68.9211002 |
| 16:22:09 | 0:07:53 | 52.5722324 | 79.7204764 | 69.1216949 | 65.5369818 | 68.9211002 |
| 16:22:10 | 0:07:54 | 52.5722324 | 79.7204764 | 69.1216949 | 65.5369818 | 68.9211002 |
| 16:22:11 | 0:07:55 | 51.5722324 | 79.7204764 | 71.1216949 | 64.5369818 | 65.9211002 |
| 16:22:12 | 0:07:56 | 51.5722324 | 79.7204764 | 71.1216949 | 64.5369818 | 62.9211002 |
| 16:22:13 | 0:07:57 | 51.5722324 | 80.7204764 | 72.1216949 | 64.5369818 | 62.9211002 |
| 16:22:14 | 0:07:58 | 52.5722324 | 81.7204764 | 72.1216949 | 64.5369818 | 61.9211002 |
| 16:22:15 | 0:07:59 | 52.5722324 | 81.7204764 | 72.1216949 | 64.5369818 | 61.9211002 |
| 16:22:16 | 0:08:00 | 54.5722324 | 82.7204764 | 72.1216949 | 64.5369818 | 60.9211002 |
| 16:22:17 | 0:08:01 | 54.5722324 | 82.7204764 | 72.1216949 | 64.5369818 | 59.9211002 |
| 16:22:18 | 0:08:02 | 54.5722324 | 82.7204764 | 73.1216949 | 64.5369818 | 59.9211002 |
| 16:22:19 | 0:08:03 | 55.5722324 | 82.7204764 | 74.1216949 | 64.5369818 | 58.9211002 |
| 16:22:20 | 0:08:04 | 59.5722324 | 83.7204764 | 77.1216949 | 63.5369818 | 57.9211002 |
| 16:22:21 | 0:08:05 | 59.5722324 | 83.7204764 | 77.1216949 | 63.5369818 | 56.9211002 |
| 16:22:22 | 0:08:06 | 62.5722324 | 83.7204764 | 79.1216949 | 63.5369818 | 56.9211002 |
| 16:22:23 | 0:08:07 | 64.5722324 | 83.7204764 | 79.1216949 | 62.5369818 | 56.9211002 |
| 16:22:24 | 0:08:08 | 65.5722324 | 84.7204764 | 79.1216949 | 62.5369818 | 56.9211002 |
| 16:22:25 | 0:08:09 | 66.5722324 | 84.7204764 | 80.1216949 | 62.5369818 | 58.9211002 |
| 16:22:26 | 0:08:10 | 65.5722324 | 84.7204764 | 80.1216949 | 62.5369818 | 59.9211002 |
| 16:22:27 | 0:08:11 | 65.5722324 | 85.7204764 | 81.1216949 | 62.5369818 | 59.9211002 |
| 16:22:28 | 0:08:12 | 65.5722324 | 88.7204764 | 82.1216949 | 62.5369818 | 59.9211002 |
| 16:22:29 | 0:08:13 | 65.5722324 | 89.7204764 | 82.1216949 | 62.5369818 | 59.9211002 |
| 16:22:30 | 0:08:14 | 65.5722324 | 90.7204764 | 82.1216949 | 63.5369818 | 59.9211002 |
| 16:22:31 | 0:08:15 | 65.5722324 | 74.1146503 | 74.1216949 | 63.5369818 | 59.9211002 |
| 16:22:32 | 0:08:16 | 64.5722324 | 73.1146503 | 69.1216949 | 63.5369818 | 59.9211002 |

|          |         |            |            |            |            |            |
|----------|---------|------------|------------|------------|------------|------------|
| 16:22:33 | 0:08:17 | 64.5722324 | 73.1146503 | 69.1216949 | 63.5369818 | 59.9211002 |
| 16:22:34 | 0:08:18 | 64.5722324 | 72.9717932 | 68.1216949 | 62.5369818 | 60.9211002 |
| 16:22:35 | 0:08:19 | 66.5722324 | 73.5432218 | 68.1216949 | 62.5369818 | 60.9211002 |
| 16:22:36 | 0:08:20 | 67.5722324 | 73.828936  | 69.1216949 | 62.5369818 | 60.9211002 |
| 16:22:37 | 0:08:21 | 66.5722324 | 74.1146503 | 70.1216949 | 62.5369818 | 61.9211002 |
| 16:22:38 | 0:08:22 | 65.5722324 | 74.2575075 | 70.1216949 | 63.5369818 | 62.9211002 |
| 16:22:39 | 0:08:23 | 65.5722324 | 74.1146503 | 70.1216949 | 63.5369818 | 62.9211002 |
| 16:22:40 | 0:08:24 | 64.5722324 | 74.2575075 | 70.1216949 | 64.5369818 | 62.9211002 |
| 16:22:41 | 0:08:25 | 64.5722324 | 73.9717932 | 69.1216949 | 65.5369818 | 62.9211002 |
| 16:22:42 | 0:08:26 | 64.5722324 | 73.4003646 | 69.1216949 | 65.5369818 | 62.9211002 |
| 16:22:43 | 0:08:27 | 63.5722324 | 80.7204764 | 68.1216949 | 64.5369818 | 63.9211002 |
| 16:22:44 | 0:08:28 | 62.5722324 | 76.7204764 | 67.1216949 | 63.5369818 | 63.9211002 |
| 16:22:45 | 0:08:29 | 63.5722324 | 74.7204764 | 67.1216949 | 63.5369818 | 63.9211002 |
| 16:22:46 | 0:08:30 | 63.5722324 | 73.7204764 | 67.1216949 | 64.5369818 | 63.9211002 |
| 16:22:47 | 0:08:31 | 63.5722324 | 73.7204764 | 67.1216949 | 64.5369818 | 60.9211002 |
| 16:22:48 | 0:08:32 | 63.5722324 | 73.7204764 | 67.1216949 | 64.5369818 | 60.9211002 |
| 16:22:49 | 0:08:33 | 66.5722324 | 73.7204764 | 67.1216949 | 63.5369818 | 60.9211002 |
| 16:22:50 | 0:08:34 | 66.5722324 | 73.7204764 | 68.1216949 | 64.5369818 | 60.9211002 |
| 16:22:51 | 0:08:35 | 66.5722324 | 73.7204764 | 68.1216949 | 65.5369818 | 62.9211002 |
| 16:22:52 | 0:08:36 | 67.5722324 | 73.7204764 | 68.1216949 | 65.5369818 | 62.9211002 |
| 16:22:53 | 0:08:37 | 68.5722324 | 72.7204764 | 68.1216949 | 65.5369818 | 64.9211002 |
| 16:22:54 | 0:08:38 | 67.5722324 | 70.7204764 | 68.1216949 | 65.5369818 | 65.9211002 |
| 16:22:55 | 0:08:39 | 67.5722324 | 69.7204764 | 68.1216949 | 66.5369818 | 65.9211002 |
| 16:22:56 | 0:08:40 | 66.5722324 | 68.7204764 | 67.1216949 | 66.5369818 | 68.9211002 |
| 16:22:57 | 0:08:41 | 67.5722324 | 66.7204764 | 67.1216949 | 65.5369818 | 70.9211002 |
| 16:22:58 | 0:08:42 | 67.5722324 | 66.7204764 | 67.1216949 | 64.5369818 | 73.9211002 |
| 16:22:59 | 0:08:43 | 67.5722324 | 66.7204764 | 67.1216949 | 64.5369818 | 73.9211002 |
| 16:23:00 | 0:08:44 | 67.5722324 | 66.7204764 | 67.1216949 | 64.5369818 | 73.9211002 |
| 16:23:01 | 0:08:45 | 67.5722324 | 66.7204764 | 68.1216949 | 65.5369818 | 73.9211002 |
| 16:23:02 | 0:08:46 | 67.5722324 | 66.7204764 | 68.1216949 | 65.5369818 | 73.9211002 |
| 16:23:03 | 0:08:47 | 67.5722324 | 68.7204764 | 69.1216949 | 65.5369818 | 74.9211002 |
| 16:23:04 | 0:08:48 | 67.5722324 | 68.7204764 | 69.1216949 | 65.5369818 | 75.9211002 |
| 16:23:05 | 0:08:49 | 67.5722324 | 70.7204764 | 69.1216949 | 66.5369818 | 76.9211002 |
| 16:23:06 | 0:08:50 | 67.5722324 | 70.7204764 | 69.1216949 | 66.5369818 | 76.9211002 |
| 16:23:07 | 0:08:51 | 67.5722324 | 70.7204764 | 69.1216949 | 66.5369818 | 77.9211002 |
| 16:23:08 | 0:08:52 | 68.5722324 | 74.7204764 | 70.1216949 | 66.5369818 | 76.9211002 |
| 16:23:09 | 0:08:53 | 68.5722324 | 74.7204764 | 70.1216949 | 66.5369818 | 75.9211002 |
| 16:23:10 | 0:08:54 | 68.5722324 | 74.7204764 | 70.1216949 | 67.5369818 | 74.9211002 |
| 16:23:11 | 0:08:55 | 68.5722324 | 74.7204764 | 70.1216949 | 68.5369818 | 75.9211002 |
| 16:23:12 | 0:08:56 | 68.5722324 | 74.7204764 | 70.1216949 | 71.5369818 | 75.9211002 |
| 16:23:13 | 0:08:57 | 68.5722324 | 74.7204764 | 70.1216949 | 71.5369818 | 75.9211002 |
| 16:23:14 | 0:08:58 | 68.5722324 | 74.7204764 | 69.1216949 | 71.5369818 | 75.9211002 |
| 16:23:15 | 0:08:59 | 68.5722324 | 74.7204764 | 69.1216949 | 71.5369818 | 75.9211002 |
| 16:23:16 | 0:09:00 | 68.5722324 | 74.7204764 | 70.1216949 | 72.5369818 | 75.9211002 |
| 16:23:17 | 0:09:01 | 68.5722324 | 76.7204764 | 70.1216949 | 73.5369818 | 74.9211002 |

|          |         |            |            |            |            |            |
|----------|---------|------------|------------|------------|------------|------------|
| 16:23:18 | 0:09:02 | 69.5722324 | 82.7204764 | 70.1216949 | 73.5369818 | 74.9211002 |
| 16:23:19 | 0:09:03 | 69.5722324 | 82.7204764 | 70.1216949 | 73.5369818 | 63.9211002 |
| 16:23:20 | 0:09:04 | 69.5722324 | 81.7204764 | 70.1216949 | 73.5369818 | 60.9211002 |
| 16:23:21 | 0:09:05 | 69.5722324 | 78.7204764 | 70.1216949 | 73.5369818 | 59.9211002 |
| 16:23:22 | 0:09:06 | 69.5722324 | 78.7204764 | 69.1216949 | 74.5369818 | 59.9211002 |
| 16:23:23 | 0:09:07 | 68.5722324 | 72.7204764 | 69.1216949 | 73.5369818 | 58.9211002 |
| 16:23:24 | 0:09:08 | 69.5722324 | 72.7204764 | 69.1216949 | 72.5369818 | 58.9211002 |
| 16:23:25 | 0:09:09 | 69.5722324 | 72.7204764 | 69.1216949 | 72.5369818 | 58.9211002 |
| 16:23:26 | 0:09:10 | 70.5722324 | 72.7204764 | 69.1216949 | 71.5369818 | 59.9211002 |
| 16:23:27 | 0:09:11 | 70.5722324 | 72.7204764 | 68.1216949 | 71.5369818 | 59.9211002 |
| 16:23:28 | 0:09:12 | 70.5722324 | 72.7204764 | 68.1216949 | 71.5369818 | 60.9211002 |
| 16:23:29 | 0:09:13 | 70.5722324 | 72.7204764 | 68.1216949 | 71.5369818 | 58.9211002 |
| 16:23:30 | 0:09:14 | 71.5722324 | 72.7204764 | 68.1216949 | 71.5369818 | 58.9211002 |
| 16:23:31 | 0:09:15 | 70.5722324 | 72.7204764 | 68.1216949 | 71.5369818 | 60.9211002 |
| 16:23:32 | 0:09:16 | 67.5722324 | 70.7204764 | 68.1216949 | 71.5369818 | 60.9211002 |
| 16:23:33 | 0:09:17 | 67.5722324 | 70.7204764 | 68.1216949 | 70.5369818 | 59.9211002 |
| 16:23:34 | 0:09:18 | 67.5722324 | 69.7204764 | 70.1216949 | 70.5369818 | 58.9211002 |
| 16:23:35 | 0:09:19 | 66.5722324 | 69.7204764 | 71.1216949 | 70.5369818 | 59.9211002 |
| 16:23:36 | 0:09:20 | 64.5722324 | 69.7204764 | 73.1216949 | 70.5369818 | 59.9211002 |
| 16:23:37 | 0:09:21 | 63.5722324 | 71.7204764 | 74.1216949 | 70.5369818 | 59.9211002 |
| 16:23:38 | 0:09:22 | 63.5722324 | 71.7204764 | 75.1216949 | 71.5369818 | 58.9211002 |
| 16:23:39 | 0:09:23 | 63.5722324 | 72.7204764 | 75.1216949 | 71.5369818 | 58.9211002 |
| 16:23:40 | 0:09:24 | 64.5722324 | 72.7204764 | 74.1216949 | 70.5369818 | 58.9211002 |
| 16:23:41 | 0:09:25 | 64.5722324 | 72.7204764 | 74.1216949 | 69.5369818 | 58.9211002 |
| 16:23:42 | 0:09:26 | 64.5722324 | 72.7204764 | 74.1216949 | 69.5369818 | 58.9211002 |
| 16:23:43 | 0:09:27 | 61.5722324 | 72.7204764 | 73.1216949 | 67.5369818 | 60.9211002 |
| 16:23:44 | 0:09:28 | 62.5722324 | 71.7204764 | 73.1216949 | 67.5369818 | 61.9211002 |
| 16:23:45 | 0:09:29 | 62.5722324 | 71.7204764 | 73.1216949 | 67.5369818 | 61.9211002 |
| 16:23:46 | 0:09:30 | 62.5722324 | 71.7204764 | 74.1216949 | 65.5369818 | 65.9211002 |
| 16:23:47 | 0:09:31 | 63.5722324 | 71.7204764 | 74.1216949 | 65.5369818 | 65.9211002 |
| 16:23:48 | 0:09:32 | 63.5722324 | 71.7204764 | 74.1216949 | 65.5369818 | 66.9211002 |
| 16:23:49 | 0:09:33 | 63.5722324 | 71.7204764 | 71.1216949 | 65.5369818 | 66.9211002 |
| 16:23:50 | 0:09:34 | 67.5722324 | 71.7204764 | 70.1216949 | 64.5369818 | 66.9211002 |
| 16:23:51 | 0:09:35 | 67.5722324 | 80.7204764 | 69.1216949 | 63.5369818 | 67.9211002 |
| 16:23:52 | 0:09:36 | 67.5722324 | 79.7204764 | 69.1216949 | 63.5369818 | 67.9211002 |
| 16:23:53 | 0:09:37 | 67.5722324 | 77.7204764 | 69.1216949 | 63.5369818 | 68.9211002 |
| 16:23:54 | 0:09:38 | 68.5722324 | 75.7204764 | 68.1216949 | 65.5369818 | 67.9211002 |
| 16:23:55 | 0:09:39 | 68.5722324 | 74.7204764 | 67.1216949 | 65.5369818 | 67.9211002 |
| 16:23:56 | 0:09:40 | 67.5722324 | 74.7204764 | 67.1216949 | 70.5369818 | 68.9211002 |
| 16:23:57 | 0:09:41 | 67.5722324 | 73.7204764 | 67.1216949 | 72.5369818 | 69.9211002 |
| 16:23:58 | 0:09:42 | 67.5722324 | 72.7204764 | 67.1216949 | 73.5369818 | 69.9211002 |
| 16:23:59 | 0:09:43 | 67.5722324 | 71.7204764 | 67.1216949 | 74.5369818 | 71.9211002 |
| 16:24:00 | 0:09:44 | 67.5722324 | 71.7204764 | 66.1216949 | 71.5369818 | 68.9211002 |
| 16:24:01 | 0:09:45 | 68.5722324 | 70.7204764 | 66.1216949 | 70.5369818 | 67.9211002 |
| 16:24:02 | 0:09:46 | 68.5722324 | 70.7204764 | 66.1216949 | 70.5369818 | 67.9211002 |

|          |         |            |            |            |            |            |
|----------|---------|------------|------------|------------|------------|------------|
| 16:24:03 | 0:09:47 | 68.5722324 | 69.7204764 | 65.1216949 | 70.5369818 | 64.9211002 |
| 16:24:04 | 0:09:48 | 68.5722324 | 68.7204764 | 65.1216949 | 70.5369818 | 64.9211002 |
| 16:24:05 | 0:09:49 | 67.5722324 | 68.7204764 | 65.1216949 | 70.5369818 | 64.9211002 |
| 16:24:06 | 0:09:50 | 66.5722324 | 68.7204764 | 65.1216949 | 70.5369818 | 64.9211002 |
| 16:24:07 | 0:09:51 | 66.5722324 | 69.7204764 | 66.1216949 | 71.5369818 | 64.9211002 |
| 16:24:08 | 0:09:52 | 66.5722324 | 70.7204764 | 66.1216949 | 71.5369818 | 69.9211002 |
| 16:24:09 | 0:09:53 | 66.5722324 | 70.7204764 | 66.1216949 | 71.5369818 | 70.9211002 |
| 16:24:10 | 0:09:54 | 67.5722324 | 75.7204764 | 66.1216949 | 71.5369818 | 70.9211002 |
| 16:24:11 | 0:09:55 | 67.5722324 | 77.7204764 | 66.1216949 | 70.5369818 | 71.9211002 |
| 16:24:12 | 0:09:56 | 67.5722324 | 79.7204764 | 66.1216949 | 69.5369818 | 71.9211002 |
| 16:24:13 | 0:09:57 | 67.5722324 | 80.7204764 | 66.1216949 | 69.5369818 | 71.9211002 |
| 16:24:14 | 0:09:58 | 67.5722324 | 81.7204764 | 66.1216949 | 68.5369818 | 69.9211002 |
| 16:24:15 | 0:09:59 | 67.5722324 | 81.7204764 | 66.1216949 | 68.5369818 | 69.9211002 |
| 16:24:16 | 0:10:00 | 68.5722324 | 82.7204764 | 66.1216949 | 68.5369818 | 69.9211002 |
| 16:24:17 | 0:10:01 | 68.5722324 | 82.7204764 | 66.1216949 | 68.5369818 | 70.9211002 |
| 16:24:18 | 0:10:02 | 68.5722324 | 82.7204764 | 66.1216949 | 68.5369818 | 70.9211002 |
| 16:24:19 | 0:10:03 | 69.5722324 | 83.7204764 | 66.1216949 | 69.5369818 | 70.9211002 |
| 16:24:20 | 0:10:04 | 70.5722324 | 84.7204764 | 66.1216949 | 69.5369818 | 71.9211002 |
| 16:24:21 | 0:10:05 | 70.5722324 | 84.7204764 | 66.1216949 | 69.5369818 | 71.9211002 |
| 16:24:22 | 0:10:06 | 70.5722324 | 84.7204764 | 66.1216949 | 69.5369818 | 71.9211002 |
| 16:24:23 | 0:10:07 | 70.5722324 | 84.7204764 | 67.1216949 | 70.5369818 | 75.9211002 |
| 16:24:24 | 0:10:08 | 70.5722324 | 80.7204764 | 67.1216949 | 70.5369818 | 78.9211002 |
| 16:24:25 | 0:10:09 | 70.5722324 | 78.7204764 | 68.1216949 | 70.5369818 | 79.9211002 |
| 16:24:26 | 0:10:10 | 71.5722324 | 77.7204764 | 68.1216949 | 70.5369818 | 78.9211002 |
| 16:24:27 | 0:10:11 | 73.5722324 | 77.7204764 | 68.1216949 | 70.5369818 | 78.9211002 |
| 16:24:28 | 0:10:12 | 73.5722324 | 77.7204764 | 69.1216949 | 70.5369818 | 78.9211002 |
| 16:24:29 | 0:10:13 | 73.5722324 | 77.7204764 | 68.1216949 | 70.5369818 | 79.9211002 |
| 16:24:30 | 0:10:14 | 73.5722324 | 78.7204764 | 68.1216949 | 70.5369818 | 78.9211002 |
| 16:24:31 | 0:10:15 | 71.5722324 | 79.7204764 | 67.1216949 | 71.5369818 | 78.9211002 |
| 16:24:32 | 0:10:16 | 69.5722324 | 79.7204764 | 67.1216949 | 71.5369818 | 78.9211002 |
| 16:24:33 | 0:10:17 | 68.5722324 | 79.7204764 | 67.1216949 | 72.5369818 | 78.9211002 |
| 16:24:34 | 0:10:18 | 68.5722324 | 79.7204764 | 68.1216949 | 71.5369818 | 77.9211002 |
| 16:24:35 | 0:10:19 | 67.5722324 | 79.7204764 | 68.1216949 | 71.5369818 | 75.9211002 |
| 16:24:36 | 0:10:20 | 67.5722324 | 79.7204764 | 68.1216949 | 71.5369818 | 75.9211002 |
| 16:24:37 | 0:10:21 | 66.5722324 | 79.7204764 | 68.1216949 | 70.5369818 | 73.9211002 |
| 16:24:38 | 0:10:22 | 65.5722324 | 78.7204764 | 69.1216949 | 69.5369818 | 72.9211002 |
| 16:24:39 | 0:10:23 | 65.5722324 | 78.7204764 | 70.1216949 | 68.5369818 | 72.9211002 |
| 16:24:40 | 0:10:24 | 65.5722324 | 75.7204764 | 70.1216949 | 68.5369818 | 72.9211002 |
| 16:24:41 | 0:10:25 | 66.5722324 | 72.7204764 | 69.1216949 | 68.5369818 | 72.9211002 |
| 16:24:42 | 0:10:26 | 65.5722324 | 72.7204764 | 68.1216949 | 68.5369818 | 73.9211002 |
| 16:24:43 | 0:10:27 | 65.5722324 | 71.7204764 | 68.1216949 | 68.5369818 | 61.9211002 |
| 16:24:44 | 0:10:28 | 65.5722324 | 75.7204764 | 68.1216949 | 68.5369818 | 57.9211002 |
| 16:24:45 | 0:10:29 | 65.5722324 | 76.7204764 | 69.1216949 | 68.5369818 | 57.9211002 |
| 16:24:46 | 0:10:30 | 65.5722324 | 75.7204764 | 70.1216949 | 69.5369818 | 55.9211002 |
| 16:24:47 | 0:10:31 | 65.5722324 | 72.7204764 | 70.1216949 | 69.5369818 | 54.9211002 |



|          |         |            |            |            |            |            |
|----------|---------|------------|------------|------------|------------|------------|
| 16:24:48 | 0:10:32 | 65.5722324 | 70.7204764 | 71.1216949 | 68.5369818 | 54.9211002 |
| 16:24:49 | 0:10:33 | 66.5722324 | 70.7204764 | 71.1216949 | 67.5369818 | 54.9211002 |
| 16:24:50 | 0:10:34 | 66.5722324 | 70.7204764 | 71.1216949 | 67.5369818 | 59.9211002 |
| 16:24:51 | 0:10:35 | 66.5722324 | 69.7204764 | 71.1216949 | 67.5369818 | 68.9211002 |
| 16:24:52 | 0:10:36 | 66.5722324 | 68.7204764 | 71.1216949 | 65.5369818 | 68.9211002 |
| 16:24:53 | 0:10:37 | 66.5722324 | 69.7204764 | 71.1216949 | 64.5369818 | 73.9211002 |
| 16:24:54 | 0:10:38 | 66.5722324 | 69.7204764 | 71.1216949 | 64.5369818 | 75.9211002 |
| 16:24:55 | 0:10:39 | 66.5722324 | 69.7204764 | 71.1216949 | 64.5369818 | 75.9211002 |
| 16:24:56 | 0:10:40 | 67.5722324 | 69.7204764 | 71.1216949 | 64.5369818 | 69.9211002 |
| 16:24:57 | 0:10:41 | 67.5722324 | 69.7204764 | 71.1216949 | 63.5369818 | 69.9211002 |
| 16:24:58 | 0:10:42 | 68.5722324 | 69.7204764 | 71.1216949 | 63.5369818 | 66.9211002 |
| 16:24:59 | 0:10:43 | 70.5722324 | 70.7204764 | 71.1216949 | 64.5369818 | 66.9211002 |
| 16:25:00 | 0:10:44 | 72.5722324 | 71.7204764 | 71.1216949 | 64.5369818 | 68.9211002 |
| 16:25:01 | 0:10:45 | 72.5722324 | 72.7204764 | 71.1216949 | 64.5369818 | 71.9211002 |
| 16:25:02 | 0:10:46 | 72.5722324 | 71.7204764 | 71.1216949 | 64.5369818 | 74.9211002 |
| 16:25:03 | 0:10:47 | 72.5722324 | 70.7204764 | 71.1216949 | 63.5369818 | 76.9211002 |
| 16:25:04 | 0:10:48 | 72.5722324 | 68.7204764 | 71.1216949 | 63.5369818 | 76.9211002 |
| 16:25:05 | 0:10:49 | 68.5722324 | 67.7204764 | 70.1216949 | 62.5369818 | 77.9211002 |
| 16:25:06 | 0:10:50 | 67.5722324 | 67.7204764 | 70.1216949 | 62.5369818 | 70.9211002 |
| 16:25:07 | 0:10:51 | 66.5722324 | 68.7204764 | 70.1216949 | 63.5369818 | 67.9211002 |
| 16:25:08 | 0:10:52 | 66.5722324 | 69.7204764 | 70.1216949 | 63.5369818 | 67.9211002 |
| 16:25:09 | 0:10:53 | 66.5722324 | 70.7204764 | 71.1216949 | 63.5369818 | 65.9211002 |
| 16:25:10 | 0:10:54 | 66.5722324 | 71.7204764 | 71.1216949 | 64.5369818 | 65.9211002 |
| 16:25:11 | 0:10:55 | 66.5722324 | 72.7204764 | 71.1216949 | 65.5369818 | 66.9211002 |
| 16:25:12 | 0:10:56 | 66.5722324 | 71.7204764 | 70.1216949 | 65.5369818 | 66.9211002 |
| 16:25:13 | 0:10:57 | 67.5722324 | 70.7204764 | 70.1216949 | 65.5369818 | 66.9211002 |
| 16:25:14 | 0:10:58 | 67.5722324 | 70.7204764 | 70.1216949 | 65.5369818 | 64.9211002 |
| 16:25:15 | 0:10:59 | 67.5722324 | 70.7204764 | 70.1216949 | 64.5369818 | 64.9211002 |
| 16:25:16 | 0:11:00 | 67.5722324 | 70.7204764 | 69.1216949 | 63.5369818 | 64.9211002 |
| 16:25:17 | 0:11:01 | 67.5722324 | 70.7204764 | 69.1216949 | 63.5369818 | 65.9211002 |
| 16:25:18 | 0:11:02 | 67.5722324 | 71.7204764 | 70.1216949 | 63.5369818 | 63.9211002 |
| 16:25:19 | 0:11:03 | 67.5722324 | 71.7204764 | 71.1216949 | 63.5369818 | 62.9211002 |
| 16:25:20 | 0:11:04 | 68.5722324 | 71.7204764 | 71.1216949 | 63.5369818 | 61.9211002 |
| 16:25:21 | 0:11:05 | 69.5722324 | 71.7204764 | 72.1216949 | 64.5369818 | 61.9211002 |
| 16:25:22 | 0:11:06 | 70.5722324 | 71.7204764 | 73.1216949 | 64.5369818 | 61.9211002 |
| 16:25:23 | 0:11:07 | 70.5722324 | 71.7204764 | 73.1216949 | 64.5369818 | 62.9211002 |
| 16:25:24 | 0:11:08 | 70.5722324 | 71.7204764 | 72.1216949 | 64.5369818 | 62.9211002 |
| 16:25:25 | 0:11:09 | 71.5722324 | 71.7204764 | 71.1216949 | 64.5369818 | 65.9211002 |
| 16:25:26 | 0:11:10 | 71.5722324 | 71.7204764 | 70.1216949 | 64.5369818 | 66.9211002 |
| 16:25:27 | 0:11:11 | 71.5722324 | 70.7204764 | 69.1216949 | 64.5369818 | 66.9211002 |
| 16:25:28 | 0:11:12 | 72.5722324 | 70.7204764 | 69.1216949 | 56.5369818 | 63.9211002 |
| 16:25:29 | 0:11:13 | 72.5722324 | 70.7204764 | 68.1216949 | 53.5369818 | 63.9211002 |
| 16:25:30 | 0:11:14 | 72.5722324 | 70.7204764 | 68.1216949 | 53.5369818 | 63.9211002 |
| 16:25:31 | 0:11:15 | 71.5722324 | 71.7204764 | 69.1216949 | 53.5369818 | 60.9211002 |
| 16:25:32 | 0:11:16 | 70.5722324 | 72.7204764 | 69.1216949 | 53.5369818 | 59.9211002 |

|          |         |            |            |            |            |            |
|----------|---------|------------|------------|------------|------------|------------|
| 16:25:33 | 0:11:17 | 70.5722324 | 71.7204764 | 69.1216949 | 61.5369818 | 60.9211002 |
| 16:25:34 | 0:11:18 | 70.5722324 | 71.7204764 | 69.1216949 | 67.5369818 | 60.9211002 |
| 16:25:35 | 0:11:19 | 68.5722324 | 71.7204764 | 69.1216949 | 67.5369818 | 60.9211002 |
| 16:25:36 | 0:11:20 | 68.5722324 | 71.7204764 | 69.1216949 | 68.5369818 | 60.9211002 |
| 16:25:37 | 0:11:21 | 67.5722324 | 71.7204764 | 70.1216949 | 68.5369818 | 61.9211002 |
| 16:25:38 | 0:11:22 | 66.5722324 | 71.7204764 | 70.1216949 | 67.5369818 | 65.9211002 |
| 16:25:39 | 0:11:23 | 66.5722324 | 72.7204764 | 70.1216949 | 67.5369818 | 68.9211002 |
| 16:25:40 | 0:11:24 | 66.5722324 | 74.7204764 | 70.1216949 | 67.5369818 | 68.9211002 |
| 16:25:41 | 0:11:25 | 66.5722324 | 74.7204764 | 70.1216949 | 66.5369818 | 60.9211002 |
| 16:25:42 | 0:11:26 | 66.5722324 | 74.7204764 | 70.1216949 | 67.5369818 | 58.9211002 |
| 16:25:43 | 0:11:27 | 66.5722324 | 75.7204764 | 70.1216949 | 66.5369818 | 58.9211002 |
| 16:25:44 | 0:11:28 | 66.5722324 | 75.7204764 | 71.1216949 | 66.5369818 | 58.9211002 |
| 16:25:45 | 0:11:29 | 66.5722324 | 75.7204764 | 71.1216949 | 65.5369818 | 63.9211002 |
| 16:25:46 | 0:11:30 | 66.5722324 | 76.7204764 | 71.1216949 | 65.5369818 | 65.9211002 |
| 16:25:47 | 0:11:31 | 66.5722324 | 77.7204764 | 71.1216949 | 64.5369818 | 66.9211002 |
| 16:25:48 | 0:11:32 | 66.5722324 | 77.7204764 | 70.1216949 | 64.5369818 | 66.9211002 |
| 16:25:49 | 0:11:33 | 67.5722324 | 77.7204764 | 70.1216949 | 64.5369818 | 66.9211002 |
| 16:25:50 | 0:11:34 | 68.5722324 | 77.7204764 | 69.1216949 | 64.5369818 | 65.9211002 |
| 16:25:51 | 0:11:35 | 68.5722324 | 79.7204764 | 69.1216949 | 64.5369818 | 65.9211002 |
| 16:25:52 | 0:11:36 | 70.5722324 | 84.7204764 | 71.1216949 | 63.5369818 | 70.9211002 |
| 16:25:53 | 0:11:37 | 70.5722324 | 84.7204764 | 71.1216949 | 62.5369818 | 72.9211002 |
| 16:25:54 | 0:11:38 | 70.5722324 | 84.7204764 | 72.1216949 | 62.5369818 | 72.9211002 |
| 16:25:55 | 0:11:39 | 71.5722324 | 85.7204764 | 76.1216949 | 63.5369818 | 76.9211002 |
| 16:25:56 | 0:11:40 | 71.5722324 | 85.7204764 | 76.1216949 | 62.5369818 | 76.9211002 |
| 16:25:57 | 0:11:41 | 71.5722324 | 83.7204764 | 75.1216949 | 62.5369818 | 74.9211002 |
| 16:25:58 | 0:11:42 | 71.5722324 | 82.7204764 | 74.1216949 | 62.5369818 | 72.9211002 |
| 16:25:59 | 0:11:43 | 72.5722324 | 81.7204764 | 71.1216949 | 62.5369818 | 69.9211002 |
| 16:26:00 | 0:11:44 | 77.5722324 | 81.7204764 | 71.1216949 | 62.5369818 | 67.9211002 |
| 16:26:01 | 0:11:45 | 77.5722324 | 81.7204764 | 71.1216949 | 62.5369818 | 67.9211002 |
| 16:26:02 | 0:11:46 | 78.5722324 | 80.7204764 | 70.1216949 | 61.5369818 | 66.9211002 |
| 16:26:03 | 0:11:47 | 78.5722324 | 80.7204764 | 70.1216949 | 60.5369818 | 67.9211002 |
| 16:26:04 | 0:11:48 | 78.5722324 | 79.7204764 | 70.1216949 | 58.5369818 | 67.9211002 |
| 16:26:05 | 0:11:49 | 78.5722324 | 79.7204764 | 70.1216949 | 58.5369818 | 67.9211002 |
| 16:26:06 | 0:11:50 | 78.5722324 | 79.7204764 | 71.1216949 | 60.5369818 | 67.9211002 |
| 16:26:07 | 0:11:51 | 72.5722324 | 79.7204764 | 70.1216949 | 63.5369818 | 67.9211002 |
| 16:26:08 | 0:11:52 | 71.5722324 | 79.7204764 | 70.1216949 | 64.5369818 | 67.9211002 |
| 16:26:09 | 0:11:53 | 71.5722324 | 79.7204764 | 69.1216949 | 65.5369818 | 67.9211002 |
| 16:26:10 | 0:11:54 | 71.5722324 | 79.7204764 | 69.1216949 | 65.5369818 | 67.9211002 |
| 16:26:11 | 0:11:55 | 68.5722324 | 78.7204764 | 69.1216949 | 68.5369818 | 67.9211002 |
| 16:26:12 | 0:11:56 | 68.5722324 | 78.7204764 | 68.1216949 | 69.5369818 | 67.9211002 |
| 16:26:13 | 0:11:57 | 67.5722324 | 78.7204764 | 68.1216949 | 69.5369818 | 70.9211002 |
| 16:26:14 | 0:11:58 | 67.5722324 | 76.7204764 | 68.1216949 | 69.5369818 | 81.9211002 |
| 16:26:15 | 0:11:59 | 67.5722324 | 74.7204764 | 68.1216949 | 69.5369818 | 85.9211002 |
| 16:26:16 | 0:12:00 | 67.5722324 | 72.7204764 | 68.1216949 | 70.5369818 | 87.9211002 |
| 16:26:17 | 0:12:01 | 67.5722324 | 71.7204764 | 68.1216949 | 70.5369818 | 87.9211002 |

|          |         |            |            |            |            |            |
|----------|---------|------------|------------|------------|------------|------------|
| 16:26:18 | 0:12:02 | 67.5722324 | 70.7204764 | 68.1216949 | 69.5369818 | 86.9211002 |
| 16:26:19 | 0:12:03 | 67.5722324 | 70.7204764 | 68.1216949 | 69.5369818 | 86.9211002 |
| 16:26:20 | 0:12:04 | 67.5722324 | 70.7204764 | 68.1216949 | 69.5369818 | 86.9211002 |
| 16:26:21 | 0:12:05 | 68.5722324 | 69.7204764 | 69.1216949 | 69.5369818 | 86.9211002 |
| 16:26:22 | 0:12:06 | 69.5722324 | 69.7204764 | 69.1216949 | 68.5369818 | 85.9211002 |
| 16:26:23 | 0:12:07 | 69.5722324 | 67.7204764 | 69.1216949 | 68.5369818 | 81.9211002 |
| 16:26:24 | 0:12:08 | 69.5722324 | 67.7204764 | 69.1216949 | 68.5369818 | 81.9211002 |
| 16:26:25 | 0:12:09 | 68.5722324 | 67.7204764 | 69.1216949 | 69.5369818 | 81.9211002 |
| 16:26:26 | 0:12:10 | 68.5722324 | 66.7204764 | 71.1216949 | 69.5369818 | 81.9211002 |
| 16:26:27 | 0:12:11 | 69.5722324 | 65.7204764 | 71.1216949 | 68.5369818 | 81.9211002 |
| 16:26:28 | 0:12:12 | 69.5722324 | 65.7204764 | 71.1216949 | 68.5369818 | 77.9211002 |
| 16:26:29 | 0:12:13 | 70.5722324 | 65.7204764 | 71.1216949 | 68.5369818 | 77.9211002 |
| 16:26:30 | 0:12:14 | 71.5722324 | 66.7204764 | 71.1216949 | 68.5369818 | 75.9211002 |
| 16:26:31 | 0:12:15 | 71.5722324 | 65.7204764 | 70.1216949 | 68.5369818 | 69.9211002 |
| 16:26:32 | 0:12:16 | 71.5722324 | 65.7204764 | 70.1216949 | 67.5369818 | 66.9211002 |
| 16:26:33 | 0:12:17 | 69.5722324 | 64.7204764 | 70.1216949 | 66.5369818 | 62.9211002 |
| 16:26:34 | 0:12:18 | 68.5722324 | 63.7204764 | 70.1216949 | 66.5369818 | 62.9211002 |
| 16:26:35 | 0:12:19 | 67.5722324 | 63.7204764 | 69.1216949 | 66.5369818 | 62.9211002 |
| 16:26:36 | 0:12:20 | 67.5722324 | 63.7204764 | 69.1216949 | 66.5369818 | 62.9211002 |
| 16:26:37 | 0:12:21 | 66.5722324 | 62.7204764 | 67.1216949 | 66.5369818 | 62.9211002 |
| 16:26:38 | 0:12:22 | 66.5722324 | 62.7204764 | 67.1216949 | 66.5369818 | 61.9211002 |
| 16:26:39 | 0:12:23 | 66.5722324 | 60.7204764 | 67.1216949 | 66.5369818 | 61.9211002 |
| 16:26:40 | 0:12:24 | 66.5722324 | 60.7204764 | 66.1216949 | 67.5369818 | 61.9211002 |
| 16:26:41 | 0:12:25 | 66.5722324 | 66.7204764 | 66.1216949 | 67.5369818 | 62.9211002 |
| 16:26:42 | 0:12:26 | 66.5722324 | 69.7204764 | 66.1216949 | 67.5369818 | 63.9211002 |
| 16:26:43 | 0:12:27 | 67.5722324 | 70.7204764 | 67.1216949 | 67.5369818 | 63.9211002 |
| 16:26:44 | 0:12:28 | 67.5722324 | 71.7204764 | 67.1216949 | 67.5369818 | 63.9211002 |
| 16:26:45 | 0:12:29 | 66.5722324 | 72.7204764 | 68.1216949 | 66.5369818 | 63.9211002 |
| 16:26:46 | 0:12:30 | 66.5722324 | 72.7204764 | 68.1216949 | 66.5369818 | 63.9211002 |
| 16:26:47 | 0:12:31 | 66.5722324 | 72.7204764 | 68.1216949 | 65.5369818 | 63.9211002 |
| 16:26:48 | 0:12:32 | 68.5722324 | 72.7204764 | 69.1216949 | 65.5369818 | 63.9211002 |
| 16:26:49 | 0:12:33 | 71.5722324 | 73.7204764 | 69.1216949 | 66.5369818 | 64.9211002 |
| 16:26:50 | 0:12:34 | 71.5722324 | 75.7204764 | 68.1216949 | 66.5369818 | 64.9211002 |
| 16:26:51 | 0:12:35 | 71.5722324 | 81.7204764 | 68.1216949 | 67.5369818 | 65.9211002 |
| 16:26:52 | 0:12:36 | 73.5722324 | 84.7204764 | 67.1216949 | 67.5369818 | 65.9211002 |
| 16:26:53 | 0:12:37 | 73.5722324 | 84.7204764 | 67.1216949 | 67.5369818 | 65.9211002 |
| 16:26:54 | 0:12:38 | 72.5722324 | 84.7204764 | 67.1216949 | 67.5369818 | 65.9211002 |
| 16:26:55 | 0:12:39 | 72.5722324 | 81.7204764 | 67.1216949 | 68.5369818 | 65.9211002 |
| 16:26:56 | 0:12:40 | 72.5722324 | 79.7204764 | 67.1216949 | 68.5369818 | 65.9211002 |
| 16:26:57 | 0:12:41 | 72.5722324 | 79.7204764 | 67.1216949 | 68.5369818 | 67.9211002 |
| 16:26:58 | 0:12:42 | 72.5722324 | 78.7204764 | 67.1216949 | 69.5369818 | 67.9211002 |
| 16:26:59 | 0:12:43 | 72.5722324 | 77.7204764 | 67.1216949 | 68.5369818 | 68.9211002 |
| 16:27:00 | 0:12:44 | 72.5722324 | 77.7204764 | 67.1216949 | 68.5369818 | 68.9211002 |
| 16:27:01 | 0:12:45 | 74.5722324 | 76.7204764 | 67.1216949 | 68.5369818 | 68.9211002 |
| 16:27:02 | 0:12:46 | 74.5722324 | 76.7204764 | 67.1216949 | 68.5369818 | 75.9211002 |

|          |         |            |            |            |            |            |
|----------|---------|------------|------------|------------|------------|------------|
| 16:27:03 | 0:12:47 | 74.5722324 | 76.7204764 | 67.1216949 | 68.5369818 | 78.9211002 |
| 16:27:04 | 0:12:48 | 74.5722324 | 75.7204764 | 66.1216949 | 67.5369818 | 81.9211002 |
| 16:27:05 | 0:12:49 | 74.5722324 | 74.7204764 | 67.1216949 | 67.5369818 | 84.9211002 |
| 16:27:06 | 0:12:50 | 75.5722324 | 74.7204764 | 67.1216949 | 67.5369818 | 86.9211002 |
| 16:27:07 | 0:12:51 | 75.5722324 | 72.7204764 | 67.1216949 | 67.5369818 | 84.9211002 |
| 16:27:08 | 0:12:52 | 75.5722324 | 73.7204764 | 67.1216949 | 67.5369818 | 84.9211002 |
| 16:27:09 | 0:12:53 | 75.5722324 | 73.7204764 | 67.1216949 | 67.5369818 | 84.9211002 |
| 16:27:10 | 0:12:54 | 71.5722324 | 73.7204764 | 66.1216949 | 67.5369818 | 77.9211002 |
| 16:27:11 | 0:12:55 | 71.5722324 | 73.7204764 | 66.1216949 | 67.5369818 | 77.9211002 |
| 16:27:12 | 0:12:56 | 71.5722324 | 73.7204764 | 68.1216949 | 67.5369818 | 61.9211002 |
| 16:27:13 | 0:12:57 | 71.5722324 | 72.7204764 | 68.1216949 | 67.5369818 | 61.9211002 |
| 16:27:14 | 0:12:58 | 71.5722324 | 72.7204764 | 69.1216949 | 67.5369818 | 61.9211002 |
| 16:27:15 | 0:12:59 | 71.5722324 | 72.7204764 | 69.1216949 | 67.5369818 | 61.9211002 |
| 16:27:16 | 0:13:00 | 71.5722324 | 72.7204764 | 69.1216949 | 67.5369818 | 60.9211002 |
| 16:27:17 | 0:13:01 | 67.5722324 | 76.7204764 | 69.1216949 | 66.5369818 | 60.9211002 |
| 16:27:18 | 0:13:02 | 67.5722324 | 76.7204764 | 69.1216949 | 66.5369818 | 60.9211002 |
| 16:27:19 | 0:13:03 | 71.5722324 | 75.7204764 | 68.1216949 | 67.5369818 | 59.9211002 |
| 16:27:20 | 0:13:04 | 71.5722324 | 75.7204764 | 68.1216949 | 67.5369818 | 59.9211002 |
| 16:27:21 | 0:13:05 | 71.5722324 | 76.7204764 | 68.1216949 | 68.5369818 | 60.9211002 |
| 16:27:22 | 0:13:06 | 71.5722324 | 78.7204764 | 69.1216949 | 68.5369818 | 60.9211002 |
| 16:27:23 | 0:13:07 | 72.5722324 | 78.7204764 | 70.1216949 | 68.5369818 | 62.9211002 |
| 16:27:24 | 0:13:08 | 72.5722324 | 79.7204764 | 71.1216949 | 67.5369818 | 66.9211002 |
| 16:27:25 | 0:13:09 | 72.5722324 | 79.7204764 | 71.1216949 | 67.5369818 | 69.9211002 |
| 16:27:26 | 0:13:10 | 73.5722324 | 79.7204764 | 71.1216949 | 66.5369818 | 69.9211002 |
| 16:27:27 | 0:13:11 | 73.5722324 | 79.7204764 | 70.1216949 | 66.5369818 | 72.9211002 |
| 16:27:28 | 0:13:12 | 71.5722324 | 80.7204764 | 69.1216949 | 66.5369818 | 72.9211002 |
| 16:27:29 | 0:13:13 | 69.5722324 | 81.7204764 | 69.1216949 | 66.5369818 | 72.9211002 |
| 16:27:30 | 0:13:14 | 69.5722324 | 79.7204764 | 68.1216949 | 64.5369818 | 72.9211002 |
| 16:27:31 | 0:13:15 | 66.5722324 | 77.7204764 | 69.1216949 | 64.5369818 | 84.9211002 |
| 16:27:32 | 0:13:16 | 66.5722324 | 75.7204764 | 72.1216949 | 64.5369818 | 84.9211002 |
| 16:27:33 | 0:13:17 | 66.5722324 | 74.7204764 | 75.1216949 | 64.5369818 | 86.9211002 |
| 16:27:34 | 0:13:18 | 66.5722324 | 74.7204764 | 75.1216949 | 64.5369818 | 86.9211002 |
| 16:27:35 | 0:13:19 | 68.5722324 | 72.7204764 | 75.1216949 | 65.5369818 | 86.9211002 |
| 16:27:36 | 0:13:20 | 68.5722324 | 71.7204764 | 75.1216949 | 65.5369818 | 76.9211002 |
| 16:27:37 | 0:13:21 | 69.5722324 | 72.7204764 | 75.1216949 | 66.5369818 | 73.9211002 |
| 16:27:38 | 0:13:22 | 69.5722324 | 73.7204764 | 75.1216949 | 67.5369818 | 69.9211002 |
| 16:27:39 | 0:13:23 | 69.5722324 | 73.7204764 | 75.1216949 | 68.5369818 | 68.9211002 |
| 16:27:40 | 0:13:24 | 69.5722324 | 75.7204764 | 75.1216949 | 68.5369818 | 68.9211002 |
| 16:27:41 | 0:13:25 | 67.5722324 | 75.7204764 | 79.1216949 | 68.5369818 | 68.9211002 |
| 16:27:42 | 0:13:26 | 67.5722324 | 74.7204764 | 79.1216949 | 69.5369818 | 68.9211002 |
| 16:27:43 | 0:13:27 | 67.5722324 | 74.7204764 | 77.1216949 | 70.5369818 | 68.9211002 |
| 16:27:44 | 0:13:28 | 65.5722324 | 73.7204764 | 75.1216949 | 71.5369818 | 68.9211002 |
| 16:27:45 | 0:13:29 | 64.5722324 | 74.7204764 | 73.1216949 | 70.5369818 | 67.9211002 |
| 16:27:46 | 0:13:30 | 64.5722324 | 76.7204764 | 73.1216949 | 70.5369818 | 67.9211002 |
| 16:27:47 | 0:13:31 | 64.5722324 | 78.7204764 | 72.1216949 | 70.5369818 | 65.9211002 |

|          |         |            |            |            |            |            |
|----------|---------|------------|------------|------------|------------|------------|
| 16:27:48 | 0:13:32 | 65.5722324 | 80.7204764 | 70.1216949 | 69.5369818 | 65.9211002 |
| 16:27:49 | 0:13:33 | 65.5722324 | 81.7204764 | 70.1216949 | 69.5369818 | 65.9211002 |
| 16:27:50 | 0:13:34 | 65.5722324 | 81.7204764 | 69.1216949 | 69.5369818 | 64.9211002 |
| 16:27:51 | 0:13:35 | 65.5722324 | 79.7204764 | 69.1216949 | 69.5369818 | 64.9211002 |
| 16:27:52 | 0:13:36 | 64.5722324 | 79.7204764 | 68.1216949 | 69.5369818 | 64.9211002 |
| 16:27:53 | 0:13:37 | 64.5722324 | 76.7204764 | 68.1216949 | 69.5369818 | 64.9211002 |
| 16:27:54 | 0:13:38 | 64.5722324 | 76.7204764 | 69.1216949 | 69.5369818 | 65.9211002 |
| 16:27:55 | 0:13:39 | 64.5722324 | 76.7204764 | 69.1216949 | 69.5369818 | 65.9211002 |
| 16:27:56 | 0:13:40 | 64.5722324 | 76.7204764 | 69.1216949 | 69.5369818 | 66.9211002 |
| 16:27:57 | 0:13:41 | 64.5722324 | 77.7204764 | 70.1216949 | 69.5369818 | 69.9211002 |
| 16:27:58 | 0:13:42 | 65.5722324 | 78.7204764 | 70.1216949 | 69.5369818 | 73.9211002 |
| 16:27:59 | 0:13:43 | 65.5722324 | 77.7204764 | 70.1216949 | 69.5369818 | 75.9211002 |
| 16:28:00 | 0:13:44 | 65.5722324 | 75.7204764 | 69.1216949 | 69.5369818 | 75.9211002 |
| 16:28:01 | 0:13:45 | 65.5722324 | 74.7204764 | 69.1216949 | 68.5369818 | 77.9211002 |
| 16:28:02 | 0:13:46 | 65.5722324 | 74.7204764 | 69.1216949 | 68.5369818 | 78.9211002 |
| 16:28:03 | 0:13:47 | 65.5722324 | 74.7204764 | 69.1216949 | 69.5369818 | 78.9211002 |
| 16:28:04 | 0:13:48 | 65.5722324 | 73.7204764 | 69.1216949 | 69.5369818 | 78.9211002 |
| 16:28:05 | 0:13:49 | 65.5722324 | 73.7204764 | 70.1216949 | 69.5369818 | 78.9211002 |
| 16:28:06 | 0:13:50 | 66.5722324 | 74.7204764 | 69.1216949 | 69.5369818 | 78.9211002 |
| 16:28:07 | 0:13:51 | 66.5722324 | 74.7204764 | 69.1216949 | 69.5369818 | 78.9211002 |
| 16:28:08 | 0:13:52 | 65.5722324 | 74.7204764 | 69.1216949 | 69.5369818 | 78.9211002 |
| 16:28:09 | 0:13:53 | 66.5722324 | 74.7204764 | 69.1216949 | 70.5369818 | 78.9211002 |
| 16:28:10 | 0:13:54 | 66.5722324 | 74.7204764 | 69.1216949 | 70.5369818 | 82.9211002 |
| 16:28:11 | 0:13:55 | 66.5722324 | 73.7204764 | 68.1216949 | 70.5369818 | 82.9211002 |
| 16:28:12 | 0:13:56 | 66.5722324 | 73.7204764 | 68.1216949 | 70.5369818 | 82.9211002 |
| 16:28:13 | 0:13:57 | 66.5722324 | 73.7204764 | 68.1216949 | 69.5369818 | 81.9211002 |
| 16:28:14 | 0:13:58 | 66.5722324 | 73.7204764 | 68.1216949 | 68.5369818 | 81.9211002 |
| 16:28:15 | 0:13:59 | 66.5722324 | 73.7204764 | 68.1216949 | 68.5369818 | 81.9211002 |
| 16:28:16 | 0:14:00 | 66.5722324 | 73.7204764 | 68.1216949 | 68.5369818 | 80.9211002 |
| 16:28:17 | 0:14:01 | 66.5722324 | 73.7204764 | 68.1216949 | 68.5369818 | 80.9211002 |
| 16:28:18 | 0:14:02 | 65.5722324 | 73.7204764 | 68.1216949 | 69.5369818 | 76.9211002 |
| 16:28:19 | 0:14:03 | 66.5722324 | 76.7204764 | 68.1216949 | 90.5369818 | 75.9211002 |
| 16:28:20 | 0:14:04 | 67.5722324 | 76.7204764 | 68.1216949 | 81.828936  | 74.9211002 |
| 16:28:21 | 0:14:05 | 67.5722324 | 77.7204764 | 68.1216949 | 82.6860789 | 74.9211002 |
| 16:28:22 | 0:14:06 | 67.5722324 | 77.7204764 | 68.1216949 | 83.2575075 | 74.9211002 |
| 16:28:23 | 0:14:07 | 68.5722324 | 77.7204764 | 67.1216949 | 83.5432218 | 75.9211002 |
| 16:28:24 | 0:14:08 | 68.5722324 | 75.7204764 | 67.1216949 | 82.2575075 | 76.9211002 |
| 16:28:25 | 0:14:09 | 69.5722324 | 75.7204764 | 67.1216949 | 86.5369818 | 77.9211002 |
| 16:28:26 | 0:14:10 | 68.5722324 | 74.7204764 | 67.1216949 | 86.5369818 | 77.9211002 |
| 16:28:27 | 0:14:11 | 68.5722324 | 74.7204764 | 68.1216949 | 78.5369818 | 77.9211002 |
| 16:28:28 | 0:14:12 | 68.5722324 | 74.7204764 | 68.1216949 | 77.5369818 | 78.9211002 |
| 16:28:29 | 0:14:13 | 67.5722324 | 74.7204764 | 69.1216949 | 76.5369818 | 81.9211002 |
| 16:28:30 | 0:14:14 | 67.5722324 | 74.7204764 | 69.1216949 | 77.5369818 | 81.9211002 |
| 16:28:31 | 0:14:15 | 67.5722324 | 71.7204764 | 70.1216949 | 77.5369818 | 81.9211002 |
| 16:28:32 | 0:14:16 | 67.5722324 | 71.7204764 | 70.1216949 | 77.5369818 | 81.9211002 |

|          |         |            |            |            |            |            |
|----------|---------|------------|------------|------------|------------|------------|
| 16:28:33 | 0:14:17 | 67.5722324 | 69.7204764 | 70.1216949 | 77.5369818 | 81.9211002 |
| 16:28:34 | 0:14:18 | 67.5722324 | 68.7204764 | 70.1216949 | 71.5369818 | 81.9211002 |
| 16:28:35 | 0:14:19 | 67.5722324 | 67.7204764 | 71.1216949 | 71.5369818 | 81.9211002 |
| 16:28:36 | 0:14:20 | 67.5722324 | 67.7204764 | 71.1216949 | 68.5369818 | 81.9211002 |
| 16:28:37 | 0:14:21 | 67.5722324 | 65.7204764 | 71.1216949 | 67.5369818 | 81.9211002 |
| 16:28:38 | 0:14:22 | 67.5722324 | 64.7204764 | 71.1216949 | 67.5369818 | 81.9211002 |
| 16:28:39 | 0:14:23 | 67.5722324 | 64.7204764 | 71.1216949 | 67.5369818 | 81.9211002 |
| 16:28:40 | 0:14:24 | 67.5722324 | 64.7204764 | 71.1216949 | 67.5369818 | 81.9211002 |
| 16:28:41 | 0:14:25 | 67.5722324 | 63.7204764 | 71.1216949 | 67.5369818 | 81.9211002 |
| 16:28:42 | 0:14:26 | 67.5722324 | 62.7204764 | 70.1216949 | 67.5369818 | 75.9211002 |
| 16:28:43 | 0:14:27 | 67.5722324 | 62.7204764 | 69.1216949 | 68.5369818 | 74.9211002 |
| 16:28:44 | 0:14:28 | 67.5722324 | 59.7204764 | 69.1216949 | 68.5369818 | 74.9211002 |
| 16:28:45 | 0:14:29 | 68.5722324 | 56.7204764 | 70.1216949 | 68.5369818 | 74.9211002 |
| 16:28:46 | 0:14:30 | 68.5722324 | 53.7204764 | 71.1216949 | 67.5369818 | 78.9211002 |
| 16:28:47 | 0:14:31 | 69.5722324 | 52.7204764 | 72.1216949 | 67.5369818 | 79.9211002 |
| 16:28:48 | 0:14:32 | 70.5722324 | 52.7204764 | 72.1216949 | 67.5369818 | 79.9211002 |
| 16:28:49 | 0:14:33 | 67.5722324 | 52.7204764 | 72.1216949 | 67.5369818 | 79.9211002 |
| 16:28:50 | 0:14:34 | 67.5722324 | 52.7204764 | 73.1216949 | 67.5369818 | 79.9211002 |
| 16:28:51 | 0:14:35 | 66.5722324 | 51.7204764 | 73.1216949 | 68.5369818 | 80.9211002 |
| 16:28:52 | 0:14:36 | 66.5722324 | 50.7204764 | 73.1216949 | 68.5369818 | 82.9211002 |
| 16:28:53 | 0:14:37 | 66.5722324 | 50.7204764 | 74.1216949 | 67.5369818 | 82.9211002 |
| 16:28:54 | 0:14:38 | 66.5722324 | 50.7204764 | 75.1216949 | 67.5369818 | 86.9211002 |
| 16:28:55 | 0:14:39 | 66.5722324 | 49.7204764 | 76.1216949 | 67.5369818 | 86.9211002 |
| 16:28:56 | 0:14:40 | 66.5722324 | 49.7204764 | 77.1216949 | 68.5369818 | 86.9211002 |
| 16:28:57 | 0:14:41 | 66.5722324 | 49.7204764 | 77.1216949 | 68.5369818 | 71.6860789 |
| 16:28:58 | 0:14:42 | 67.5722324 | 49.7204764 | 78.1216949 | 68.5369818 | 71.9717932 |
| 16:28:59 | 0:14:43 | 66.5722324 | 49.7204764 | 79.1216949 | 68.5369818 | 71.9717932 |
| 16:29:00 | 0:14:44 | 65.5722324 | 49.7204764 | 79.1216949 | 68.5369818 | 72.1146503 |
| 16:29:01 | 0:14:45 | 65.5722324 | 49.7204764 | 80.1216949 | 69.5369818 | 72.2575075 |
| 16:29:02 | 0:14:46 | 65.5722324 | 49.7204764 | 80.1216949 | 68.5369818 | 84.9211002 |
| 16:29:03 | 0:14:47 | 65.5722324 | 49.7204764 | 81.1216949 | 67.5369818 | 84.9211002 |
| 16:29:04 | 0:14:48 | 64.5722324 | 49.7204764 | 81.1216949 | 67.5369818 | 84.9211002 |
| 16:29:05 | 0:14:49 | 63.5722324 | 49.7204764 | 80.1216949 | 67.5369818 | 73.9211002 |
| 16:29:06 | 0:14:50 | 63.5722324 | 49.7204764 | 80.1216949 | 67.5369818 | 73.9211002 |
| 16:29:07 | 0:14:51 | 64.5722324 | 51.7204764 | 76.1216949 | 66.5369818 | 73.9211002 |
| 16:29:08 | 0:14:52 | 64.5722324 | 52.7204764 | 70.1216949 | 66.5369818 | 71.9211002 |
| 16:29:09 | 0:14:53 | 64.5722324 | 51.7204764 | 69.1216949 | 66.5369818 | 71.9211002 |
| 16:29:10 | 0:14:54 | 65.5722324 | 50.7204764 | 69.1216949 | 66.5369818 | 71.9211002 |
| 16:29:11 | 0:14:55 | 65.5722324 | 50.7204764 | 68.1216949 | 65.5369818 | 71.9211002 |
| 16:29:12 | 0:14:56 | 65.5722324 | 50.7204764 | 68.1216949 | 65.5369818 | 79.9211002 |
| 16:29:13 | 0:14:57 | 66.5722324 | 51.7204764 | 68.1216949 | 65.5369818 | 81.9211002 |
| 16:29:14 | 0:14:58 | 68.5722324 | 51.7204764 | 68.1216949 | 65.5369818 | 83.9211002 |
| 16:29:15 | 0:14:59 | 70.5722324 | 51.7204764 | 67.1216949 | 64.5369818 | 85.9211002 |
| 16:29:16 | 0:15:00 | 74.5722324 | 53.7204764 | 67.1216949 | 64.5369818 | 85.9211002 |
| 16:29:17 | 0:15:01 | 74.5722324 | 55.7204764 | 67.1216949 | 65.5369818 | 72.4003646 |

|          |         |            |            |            |            |            |
|----------|---------|------------|------------|------------|------------|------------|
| 16:29:18 | 0:15:02 | 74.5722324 | 56.7204764 | 66.1216949 | 66.5369818 | 72.4003646 |
| 16:29:19 | 0:15:03 | 75.5722324 | 57.7204764 | 66.1216949 | 66.5369818 | 72.6860789 |
| 16:29:20 | 0:15:04 | 76.5722324 | 57.7204764 | 66.1216949 | 67.5369818 | 73.1146503 |
| 16:29:21 | 0:15:05 | 74.5722324 | 69.7204764 | 66.1216949 | 67.5369818 | 74.6860789 |
| 16:29:22 | 0:15:06 | 74.5722324 | 73.7204764 | 66.1216949 | 67.5369818 | 75.4003646 |
| 16:29:23 | 0:15:07 | 72.5722324 | 72.7204764 | 66.1216949 | 66.5369818 | 74.828936  |
| 16:29:24 | 0:15:08 | 71.5722324 | 72.7204764 | 66.1216949 | 65.5369818 | 88.9211002 |
| 16:29:25 | 0:15:09 | 70.5722324 | 72.7204764 | 66.1216949 | 65.5369818 | 87.9211002 |
| 16:29:26 | 0:15:10 | 70.5722324 | 76.7204764 | 67.1216949 | 66.5369818 | 87.9211002 |
| 16:29:27 | 0:15:11 | 68.5722324 | 76.7204764 | 67.1216949 | 67.5369818 | 87.9211002 |
| 16:29:28 | 0:15:12 | 68.5722324 | 77.7204764 | 67.1216949 | 68.5369818 | 87.9211002 |
| 16:29:29 | 0:15:13 | 68.5722324 | 77.7204764 | 67.1216949 | 69.5369818 | 87.9211002 |
| 16:29:30 | 0:15:14 | 68.5722324 | 77.7204764 | 68.1216949 | 69.5369818 | 88.9211002 |
| 16:29:31 | 0:15:15 | 67.5722324 | 77.7204764 | 68.1216949 | 69.5369818 | 88.9211002 |
| 16:29:32 | 0:15:16 | 68.5722324 | 77.7204764 | 68.1216949 | 69.5369818 | 88.9211002 |
| 16:29:33 | 0:15:17 | 68.5722324 | 77.7204764 | 68.1216949 | 69.5369818 | 88.9211002 |
| 16:29:34 | 0:15:18 | 67.5722324 | 77.7204764 | 69.1216949 | 69.5369818 | 88.9211002 |
| 16:29:35 | 0:15:19 | 67.5722324 | 77.7204764 | 68.1216949 | 69.5369818 | 87.9211002 |
| 16:29:36 | 0:15:20 | 67.5722324 | 77.7204764 | 66.1216949 | 70.5369818 | 86.9211002 |
| 16:29:37 | 0:15:21 | 67.5722324 | 77.7204764 | 66.1216949 | 71.5369818 | 86.9211002 |
| 16:29:38 | 0:15:22 | 67.5722324 | 77.7204764 | 66.1216949 | 71.5369818 | 86.9211002 |
| 16:29:39 | 0:15:23 | 67.5722324 | 77.7204764 | 67.1216949 | 72.5369818 | 83.9211002 |
| 16:29:40 | 0:15:24 | 66.5722324 | 77.7204764 | 67.1216949 | 71.5369818 | 83.9211002 |
| 16:29:41 | 0:15:25 | 66.5722324 | 76.7204764 | 69.1216949 | 71.5369818 | 82.9211002 |
| 16:29:42 | 0:15:26 | 66.5722324 | 76.7204764 | 68.1216949 | 70.5369818 | 79.9211002 |
| 16:29:43 | 0:15:27 | 66.5722324 | 76.7204764 | 68.1216949 | 68.5369818 | 80.9211002 |
| 16:29:44 | 0:15:28 | 65.5722324 | 74.7204764 | 67.1216949 | 68.5369818 | 80.9211002 |
| 16:29:45 | 0:15:29 | 65.5722324 | 74.7204764 | 67.1216949 | 67.5369818 | 80.9211002 |
| 16:29:46 | 0:15:30 | 64.5722324 | 74.7204764 | 68.1216949 | 67.5369818 | 81.9211002 |
| 16:29:47 | 0:15:31 | 64.5722324 | 73.7204764 | 68.1216949 | 66.5369818 | 81.9211002 |
| 16:29:48 | 0:15:32 | 64.5722324 | 73.7204764 | 68.1216949 | 65.5369818 | 81.9211002 |
| 16:29:49 | 0:15:33 | 64.5722324 | 72.7204764 | 69.1216949 | 65.5369818 | 81.9211002 |
| 16:29:50 | 0:15:34 | 64.5722324 | 71.7204764 | 68.1216949 | 65.5369818 | 83.9211002 |
| 16:29:51 | 0:15:35 | 64.5722324 | 71.7204764 | 68.1216949 | 64.5369818 | 83.9211002 |
| 16:29:52 | 0:15:36 | 64.5722324 | 71.7204764 | 68.1216949 | 64.5369818 | 85.9211002 |
| 16:29:53 | 0:15:37 | 64.5722324 | 70.7204764 | 68.1216949 | 64.5369818 | 77.9211002 |
| 16:29:54 | 0:15:38 | 64.5722324 | 70.7204764 | 68.1216949 | 65.5369818 | 71.9211002 |
| 16:29:55 | 0:15:39 | 65.5722324 | 70.7204764 | 68.1216949 | 65.5369818 | 71.9211002 |
| 16:29:56 | 0:15:40 | 66.5722324 | 74.7204764 | 68.1216949 | 64.5369818 | 70.9211002 |
| 16:29:57 | 0:15:41 | 68.5722324 | 74.7204764 | 68.1216949 | 64.5369818 | 69.9211002 |
| 16:29:58 | 0:15:42 | 69.5722324 | 74.7204764 | 70.1216949 | 64.5369818 | 69.9211002 |
| 16:29:59 | 0:15:43 | 68.5722324 | 74.7204764 | 73.1216949 | 65.5369818 | 70.9211002 |
| 16:30:00 | 0:15:44 | 68.5722324 | 74.7204764 | 73.1216949 | 65.5369818 | 70.9211002 |
| 16:30:01 | 0:15:45 | 67.5722324 | 73.7204764 | 72.1216949 | 65.5369818 | 70.9211002 |
| 16:30:02 | 0:15:46 | 67.5722324 | 73.7204764 | 72.1216949 | 65.5369818 | 70.9211002 |

|          |         |            |            |            |            |            |
|----------|---------|------------|------------|------------|------------|------------|
| 16:30:03 | 0:15:47 | 67.5722324 | 73.7204764 | 72.1216949 | 66.5369818 | 71.9211002 |
| 16:30:04 | 0:15:48 | 67.5722324 | 73.7204764 | 71.1216949 | 65.5369818 | 71.9211002 |
| 16:30:05 | 0:15:49 | 66.5722324 | 74.7204764 | 72.1216949 | 65.5369818 | 71.9211002 |
| 16:30:06 | 0:15:50 | 66.5722324 | 74.7204764 | 72.1216949 | 65.5369818 | 73.9211002 |
| 16:30:07 | 0:15:51 | 66.5722324 | 74.7204764 | 71.1216949 | 66.5369818 | 74.9211002 |
| 16:30:08 | 0:15:52 | 66.5722324 | 75.7204764 | 70.1216949 | 66.5369818 | 74.9211002 |
| 16:30:09 | 0:15:53 | 66.5722324 | 76.7204764 | 70.1216949 | 66.5369818 | 74.9211002 |
| 16:30:10 | 0:15:54 | 65.5722324 | 78.7204764 | 70.1216949 | 66.5369818 | 74.9211002 |
| 16:30:11 | 0:15:55 | 65.5722324 | 79.7204764 | 70.1216949 | 66.5369818 | 74.9211002 |
| 16:30:12 | 0:15:56 | 65.5722324 | 81.7204764 | 69.1216949 | 66.5369818 | 74.9211002 |
| 16:30:13 | 0:15:57 | 65.5722324 | 84.7204764 | 69.1216949 | 66.5369818 | 72.9211002 |
| 16:30:14 | 0:15:58 | 66.5722324 | 84.7204764 | 68.1216949 | 66.5369818 | 71.9211002 |
| 16:30:15 | 0:15:59 | 66.5722324 | 84.7204764 | 68.1216949 | 66.5369818 | 70.9211002 |
| 16:30:16 | 0:16:00 | 66.5722324 | 82.7204764 | 67.1216949 | 67.5369818 | 70.9211002 |
| 16:30:17 | 0:16:01 | 66.5722324 | 81.7204764 | 67.1216949 | 67.5369818 | 70.9211002 |
| 16:30:18 | 0:16:02 | 66.5722324 | 81.7204764 | 67.1216949 | 67.5369818 | 73.9211002 |
| 16:30:19 | 0:16:03 | 66.5722324 | 81.7204764 | 67.1216949 | 67.5369818 | 75.9211002 |
| 16:30:20 | 0:16:04 | 66.5722324 | 81.7204764 | 67.1216949 | 70.5369818 | 75.9211002 |
| 16:30:21 | 0:16:05 | 66.5722324 | 81.7204764 | 69.1216949 | 71.5369818 | 75.9211002 |
| 16:30:22 | 0:16:06 | 66.5722324 | 81.7204764 | 70.1216949 | 73.5369818 | 72.9211002 |
| 16:30:23 | 0:16:07 | 66.5722324 | 80.7204764 | 70.1216949 | 76.5369818 | 70.9211002 |
| 16:30:24 | 0:16:08 | 66.5722324 | 79.7204764 | 70.1216949 | 77.5369818 | 70.9211002 |
| 16:30:25 | 0:16:09 | 66.5722324 | 79.7204764 | 69.1216949 | 77.5369818 | 67.9211002 |
| 16:30:26 | 0:16:10 | 66.5722324 | 79.7204764 | 69.1216949 | 76.5369818 | 66.9211002 |
| 16:30:27 | 0:16:11 | 66.5722324 | 80.7204764 | 68.1216949 | 76.5369818 | 65.9211002 |
| 16:30:28 | 0:16:12 | 66.5722324 | 78.7204764 | 68.1216949 | 75.5369818 | 63.9211002 |
| 16:30:29 | 0:16:13 | 66.5722324 | 77.7204764 | 68.1216949 | 75.5369818 | 63.9211002 |
| 16:30:30 | 0:16:14 | 66.5722324 | 78.7204764 | 68.1216949 | 75.5369818 | 63.9211002 |
| 16:30:31 | 0:16:15 | 66.5722324 | 79.7204764 | 68.1216949 | 75.5369818 | 63.9211002 |
| 16:30:32 | 0:16:16 | 67.5722324 | 79.7204764 | 68.1216949 | 76.5369818 | 63.9211002 |
| 16:30:33 | 0:16:17 | 67.5722324 | 78.7204764 | 68.1216949 | 76.5369818 | 62.9211002 |
| 16:30:34 | 0:16:18 | 67.5722324 | 72.7204764 | 67.1216949 | 75.5369818 | 62.9211002 |
| 16:30:35 | 0:16:19 | 67.5722324 | 69.7204764 | 67.1216949 | 75.5369818 | 61.9211002 |
| 16:30:36 | 0:16:20 | 65.5722324 | 67.7204764 | 67.1216949 | 70.5369818 | 60.9211002 |
| 16:30:37 | 0:16:21 | 65.5722324 | 68.7204764 | 67.1216949 | 70.5369818 | 60.9211002 |
| 16:30:38 | 0:16:22 | 65.5722324 | 70.7204764 | 67.1216949 | 68.5369818 | 60.9211002 |
| 16:30:39 | 0:16:23 | 65.5722324 | 72.7204764 | 67.1216949 | 67.5369818 | 58.9211002 |
| 16:30:40 | 0:16:24 | 65.5722324 | 72.7204764 | 67.1216949 | 68.5369818 | 59.9211002 |
| 16:30:41 | 0:16:25 | 64.5722324 | 72.7204764 | 67.1216949 | 68.5369818 | 60.9211002 |
| 16:30:42 | 0:16:26 | 62.5722324 | 72.7204764 | 78.1216949 | 68.5369818 | 61.9211002 |
| 16:30:43 | 0:16:27 | 63.5722324 | 74.7204764 | 78.1216949 | 67.5369818 | 61.9211002 |
| 16:30:44 | 0:16:28 | 64.5722324 | 75.7204764 | 78.1216949 | 67.5369818 | 61.9211002 |
| 16:30:45 | 0:16:29 | 64.5722324 | 75.7204764 | 79.1216949 | 67.5369818 | 63.9211002 |
| 16:30:46 | 0:16:30 | 65.5722324 | 76.7204764 | 79.1216949 | 67.5369818 | 64.9211002 |
| 16:30:47 | 0:16:31 | 65.5722324 | 76.7204764 | 78.1216949 | 66.5369818 | 64.9211002 |



|          |         |            |            |            |            |            |
|----------|---------|------------|------------|------------|------------|------------|
| 16:30:48 | 0:16:32 | 65.5722324 | 76.7204764 | 77.1216949 | 65.5369818 | 64.9211002 |
| 16:30:49 | 0:16:33 | 66.5722324 | 76.7204764 | 75.1216949 | 64.5369818 | 64.9211002 |
| 16:30:50 | 0:16:34 | 66.5722324 | 76.7204764 | 75.1216949 | 63.5369818 | 65.9211002 |
| 16:30:51 | 0:16:35 | 66.5722324 | 76.7204764 | 75.1216949 | 63.5369818 | 64.9211002 |
| 16:30:52 | 0:16:36 | 66.5722324 | 76.7204764 | 73.1216949 | 63.5369818 | 65.9211002 |
| 16:30:53 | 0:16:37 | 66.5722324 | 76.7204764 | 71.1216949 | 64.5369818 | 66.9211002 |
| 16:30:54 | 0:16:38 | 66.5722324 | 76.7204764 | 71.1216949 | 64.5369818 | 66.9211002 |
| 16:30:55 | 0:16:39 | 69.5722324 | 78.7204764 | 71.1216949 | 66.5369818 | 66.9211002 |
| 16:30:56 | 0:16:40 | 71.5722324 | 78.7204764 | 69.1216949 | 66.5369818 | 68.9211002 |
| 16:30:57 | 0:16:41 | 71.5722324 | 73.7204764 | 69.1216949 | 68.5369818 | 68.9211002 |
| 16:30:58 | 0:16:42 | 73.5722324 | 72.7204764 | 67.1216949 | 68.5369818 | 68.9211002 |
| 16:30:59 | 0:16:43 | 73.5722324 | 71.7204764 | 66.1216949 | 68.5369818 | 70.9211002 |
| 16:31:00 | 0:16:44 | 73.5722324 | 72.7204764 | 66.1216949 | 67.5369818 | 71.9211002 |
| 16:31:01 | 0:16:45 | 72.5722324 | 71.7204764 | 67.1216949 | 67.5369818 | 71.9211002 |
| 16:31:02 | 0:16:46 | 71.5722324 | 72.7204764 | 67.1216949 | 67.5369818 | 75.9211002 |
| 16:31:03 | 0:16:47 | 69.5722324 | 72.7204764 | 67.1216949 | 66.5369818 | 76.9211002 |
| 16:31:04 | 0:16:48 | 69.5722324 | 72.7204764 | 67.1216949 | 66.5369818 | 76.9211002 |
| 16:31:05 | 0:16:49 | 69.5722324 | 72.7204764 | 67.1216949 | 66.5369818 | 80.9211002 |
| 16:31:06 | 0:16:50 | 68.5722324 | 71.7204764 | 67.1216949 | 66.5369818 | 81.9211002 |
| 16:31:07 | 0:16:51 | 68.5722324 | 70.7204764 | 67.1216949 | 66.5369818 | 82.9211002 |
| 16:31:08 | 0:16:52 | 68.5722324 | 70.7204764 | 67.1216949 | 66.5369818 | 83.9211002 |
| 16:31:09 | 0:16:53 | 68.5722324 | 69.7204764 | 67.1216949 | 66.5369818 | 83.9211002 |
| 16:31:10 | 0:16:54 | 68.5722324 | 68.7204764 | 67.1216949 | 68.5369818 | 74.5432218 |
| 16:31:11 | 0:16:55 | 68.5722324 | 69.7204764 | 67.1216949 | 69.5369818 | 74.828936  |
| 16:31:12 | 0:16:56 | 67.5722324 | 70.7204764 | 68.1216949 | 68.5369818 | 74.828936  |
| 16:31:13 | 0:16:57 | 67.5722324 | 69.7204764 | 68.1216949 | 68.5369818 | 74.4003646 |
| 16:31:14 | 0:16:58 | 66.5722324 | 69.7204764 | 68.1216949 | 68.5369818 | 73.9717932 |
| 16:31:15 | 0:16:59 | 66.5722324 | 69.7204764 | 68.1216949 | 67.5369818 | 73.5432218 |
| 16:31:16 | 0:17:00 | 66.5722324 | 69.7204764 | 70.1216949 | 67.5369818 | 74.1146503 |
| 16:31:17 | 0:17:01 | 66.5722324 | 69.7204764 | 70.1216949 | 67.5369818 | 74.2575075 |
| 16:31:18 | 0:17:02 | 65.5722324 | 70.7204764 | 70.1216949 | 67.5369818 | 84.9211002 |
| 16:31:19 | 0:17:03 | 65.5722324 | 70.7204764 | 70.1216949 | 67.5369818 | 76.9211002 |
| 16:31:20 | 0:17:04 | 65.5722324 | 70.7204764 | 70.1216949 | 68.5369818 | 73.9211002 |
| 16:31:21 | 0:17:05 | 66.5722324 | 70.7204764 | 70.1216949 | 67.5369818 | 69.9211002 |
| 16:31:22 | 0:17:06 | 66.5722324 | 70.7204764 | 69.1216949 | 67.5369818 | 67.9211002 |
| 16:31:23 | 0:17:07 | 66.5722324 | 69.7204764 | 69.1216949 | 68.5369818 | 61.9211002 |
| 16:31:24 | 0:17:08 | 66.5722324 | 67.7204764 | 69.1216949 | 68.5369818 | 61.9211002 |
| 16:31:25 | 0:17:09 | 66.5722324 | 65.7204764 | 68.1216949 | 68.5369818 | 61.9211002 |
| 16:31:26 | 0:17:10 | 66.5722324 | 65.7204764 | 69.1216949 | 68.5369818 | 61.9211002 |
| 16:31:27 | 0:17:11 | 66.5722324 | 65.7204764 | 69.1216949 | 68.5369818 | 61.9211002 |
| 16:31:28 | 0:17:12 | 66.5722324 | 65.7204764 | 69.1216949 | 68.5369818 | 61.9211002 |
| 16:31:29 | 0:17:13 | 67.5722324 | 65.7204764 | 69.1216949 | 68.5369818 | 64.9211002 |
| 16:31:30 | 0:17:14 | 68.5722324 | 65.7204764 | 68.1216949 | 68.5369818 | 64.9211002 |
| 16:31:31 | 0:17:15 | 69.5722324 | 65.7204764 | 68.1216949 | 68.5369818 | 64.9211002 |
| 16:31:32 | 0:17:16 | 71.5722324 | 65.7204764 | 68.1216949 | 68.5369818 | 65.9211002 |

|          |         |            |            |            |            |            |
|----------|---------|------------|------------|------------|------------|------------|
| 16:31:33 | 0:17:17 | 73.5722324 | 64.7204764 | 68.1216949 | 69.5369818 | 65.9211002 |
| 16:31:34 | 0:17:18 | 73.5722324 | 64.7204764 | 66.1216949 | 68.5369818 | 69.9211002 |
| 16:31:35 | 0:17:19 | 72.5722324 | 65.7204764 | 66.1216949 | 68.5369818 | 69.9211002 |
| 16:31:36 | 0:17:20 | 72.5722324 | 68.7204764 | 67.1216949 | 68.5369818 | 70.9211002 |
| 16:31:37 | 0:17:21 | 72.5722324 | 69.7204764 | 67.1216949 | 68.5369818 | 70.9211002 |
| 16:31:38 | 0:17:22 | 71.5722324 | 70.7204764 | 67.1216949 | 68.5369818 | 71.9211002 |
| 16:31:39 | 0:17:23 | 71.5722324 | 72.7204764 | 68.1216949 | 68.5369818 | 71.9211002 |
| 16:31:40 | 0:17:24 | 70.5722324 | 72.7204764 | 69.1216949 | 69.5369818 | 72.9211002 |
| 16:31:41 | 0:17:25 | 70.5722324 | 75.7204764 | 70.1216949 | 69.5369818 | 79.9211002 |
| 16:31:42 | 0:17:26 | 69.5722324 | 77.7204764 | 70.1216949 | 69.5369818 | 79.9211002 |
| 16:31:43 | 0:17:27 | 69.5722324 | 78.7204764 | 72.1216949 | 69.5369818 | 79.9211002 |
| 16:31:44 | 0:17:28 | 70.5722324 | 78.7204764 | 70.1216949 | 69.5369818 | 67.9211002 |
| 16:31:45 | 0:17:29 | 70.5722324 | 78.7204764 | 69.1216949 | 69.5369818 | 67.9211002 |
| 16:31:46 | 0:17:30 | 70.5722324 | 78.7204764 | 68.1216949 | 69.5369818 | 59.9211002 |
| 16:31:47 | 0:17:31 | 70.5722324 | 77.7204764 | 68.1216949 | 69.5369818 | 56.9211002 |
| 16:31:48 | 0:17:32 | 70.5722324 | 77.7204764 | 68.1216949 | 69.5369818 | 56.9211002 |
| 16:31:49 | 0:17:33 | 68.5722324 | 75.7204764 | 68.1216949 | 70.5369818 | 53.9211002 |
| 16:31:50 | 0:17:34 | 68.5722324 | 74.7204764 | 67.1216949 | 71.5369818 | 53.9211002 |
| 16:31:51 | 0:17:35 | 68.5722324 | 74.7204764 | 67.1216949 | 71.5369818 | 53.9211002 |
| 16:31:52 | 0:17:36 | 67.5722324 | 74.7204764 | 67.1216949 | 70.5369818 | 54.9211002 |
| 16:31:53 | 0:17:37 | 68.5722324 | 74.7204764 | 67.1216949 | 69.5369818 | 54.9211002 |
| 16:31:54 | 0:17:38 | 68.5722324 | 74.7204764 | 67.1216949 | 69.5369818 | 54.9211002 |
| 16:31:55 | 0:17:39 | 68.5722324 | 74.7204764 | 67.1216949 | 69.5369818 | 56.9211002 |
| 16:31:56 | 0:17:40 | 67.5722324 | 74.7204764 | 67.1216949 | 69.5369818 | 56.9211002 |
| 16:31:57 | 0:17:41 | 67.5722324 | 74.7204764 | 66.1216949 | 68.5369818 | 57.9211002 |
| 16:31:58 | 0:17:42 | 67.5722324 | 74.7204764 | 66.1216949 | 68.5369818 | 57.9211002 |
| 16:31:59 | 0:17:43 | 67.5722324 | 74.7204764 | 66.1216949 | 69.5369818 | 57.9211002 |
| 16:32:00 | 0:17:44 | 67.5722324 | 77.7204764 | 66.1216949 | 69.5369818 | 59.9211002 |
| 16:32:01 | 0:17:45 | 67.5722324 | 77.7204764 | 66.1216949 | 69.5369818 | 59.9211002 |
| 16:32:02 | 0:17:46 | 67.5722324 | 77.7204764 | 66.1216949 | 69.5369818 | 59.9211002 |
| 16:32:03 | 0:17:47 | 67.5722324 | 77.7204764 | 66.1216949 | 68.5369818 | 59.9211002 |
| 16:32:04 | 0:17:48 | 66.5722324 | 77.7204764 | 66.1216949 | 67.5369818 | 60.9211002 |
| 16:32:05 | 0:17:49 | 66.5722324 | 78.7204764 | 66.1216949 | 67.5369818 | 61.9211002 |
| 16:32:06 | 0:17:50 | 66.5722324 | 78.7204764 | 66.1216949 | 66.5369818 | 61.9211002 |
| 16:32:07 | 0:17:51 | 66.5722324 | 78.7204764 | 67.1216949 | 66.5369818 | 63.9211002 |
| 16:32:08 | 0:17:52 | 66.5722324 | 77.7204764 | 67.1216949 | 65.5369818 | 63.9211002 |
| 16:32:09 | 0:17:53 | 67.5722324 | 77.7204764 | 66.1216949 | 64.5369818 | 64.9211002 |
| 16:32:10 | 0:17:54 | 67.5722324 | 77.7204764 | 65.1216949 | 64.5369818 | 64.9211002 |
| 16:32:11 | 0:17:55 | 67.5722324 | 77.7204764 | 65.1216949 | 63.5369818 | 64.9211002 |
| 16:32:12 | 0:17:56 | 67.5722324 | 76.7204764 | 63.1216949 | 63.5369818 | 65.9211002 |
| 16:32:13 | 0:17:57 | 67.5722324 | 76.7204764 | 63.1216949 | 63.5369818 | 64.9211002 |
| 16:32:14 | 0:17:58 | 66.5722324 | 73.7204764 | 63.1216949 | 63.5369818 | 64.9211002 |
| 16:32:15 | 0:17:59 | 66.5722324 | 73.7204764 | 63.1216949 | 63.5369818 | 64.9211002 |
| 16:32:16 | 0:18:00 | 66.5722324 | 70.7204764 | 63.1216949 | 63.5369818 | 64.9211002 |
| 16:32:17 | 0:18:01 | 66.5722324 | 69.7204764 | 64.1216949 | 63.5369818 | 66.9211002 |

|          |         |            |            |            |            |            |
|----------|---------|------------|------------|------------|------------|------------|
| 16:32:18 | 0:18:02 | 66.5722324 | 67.7204764 | 64.1216949 | 63.5369818 | 67.9211002 |
| 16:32:19 | 0:18:03 | 66.5722324 | 67.7204764 | 64.1216949 | 64.5369818 | 68.9211002 |
| 16:32:20 | 0:18:04 | 67.5722324 | 67.7204764 | 64.1216949 | 64.5369818 | 69.9211002 |
| 16:32:21 | 0:18:05 | 67.5722324 | 69.7204764 | 64.1216949 | 63.5369818 | 71.9211002 |
| 16:32:22 | 0:18:06 | 67.5722324 | 75.7204764 | 65.1216949 | 63.5369818 | 71.9211002 |
| 16:32:23 | 0:18:07 | 66.5722324 | 76.7204764 | 65.1216949 | 64.5369818 | 71.9211002 |
| 16:32:24 | 0:18:08 | 66.5722324 | 78.7204764 | 65.1216949 | 65.5369818 | 71.9211002 |
| 16:32:25 | 0:18:09 | 66.5722324 | 78.7204764 | 65.1216949 | 65.5369818 | 72.9211002 |
| 16:32:26 | 0:18:10 | 66.5722324 | 78.7204764 | 66.1216949 | 65.5369818 | 73.9211002 |
| 16:32:27 | 0:18:11 | 66.5722324 | 78.7204764 | 73.1216949 | 65.5369818 | 76.9211002 |
| 16:32:28 | 0:18:12 | 66.5722324 | 78.7204764 | 74.1216949 | 65.5369818 | 76.9211002 |
| 16:32:29 | 0:18:13 | 67.5722324 | 78.7204764 | 74.1216949 | 65.5369818 | 79.9211002 |
| 16:32:30 | 0:18:14 | 67.5722324 | 77.7204764 | 76.1216949 | 65.5369818 | 80.9211002 |
| 16:32:31 | 0:18:15 | 67.5722324 | 75.7204764 | 80.1216949 | 64.5369818 | 80.9211002 |
| 16:32:32 | 0:18:16 | 67.5722324 | 75.7204764 | 83.1216949 | 64.5369818 | 83.9211002 |
| 16:32:33 | 0:18:17 | 69.5722324 | 75.7204764 | 83.1216949 | 63.5369818 | 83.9211002 |
| 16:32:34 | 0:18:18 | 69.5722324 | 75.7204764 | 81.1216949 | 63.5369818 | 85.9211002 |
| 16:32:35 | 0:18:19 | 69.5722324 | 78.7204764 | 78.1216949 | 62.5369818 | 85.9211002 |
| 16:32:36 | 0:18:20 | 69.5722324 | 78.7204764 | 78.1216949 | 62.5369818 | 85.9211002 |
| 16:32:37 | 0:18:21 | 69.5722324 | 78.7204764 | 78.1216949 | 62.5369818 | 85.9211002 |
| 16:32:38 | 0:18:22 | 68.5722324 | 78.7204764 | 77.1216949 | 61.5369818 | 85.9211002 |
| 16:32:39 | 0:18:23 | 68.5722324 | 77.7204764 | 76.1216949 | 61.5369818 | 86.9211002 |
| 16:32:40 | 0:18:24 | 68.5722324 | 75.7204764 | 75.1216949 | 62.5369818 | 86.9211002 |
| 16:32:41 | 0:18:25 | 68.5722324 | 72.7204764 | 75.1216949 | 64.5369818 | 86.9211002 |
| 16:32:42 | 0:18:26 | 68.5722324 | 72.7204764 | 75.1216949 | 64.5369818 | 86.9211002 |
| 16:32:43 | 0:18:27 | 68.5722324 | 69.7204764 | 75.1216949 | 67.5369818 | 86.9211002 |
| 16:32:44 | 0:18:28 | 68.5722324 | 68.7204764 | 74.1216949 | 67.5369818 | 87.9211002 |
| 16:32:45 | 0:18:29 | 68.5722324 | 67.7204764 | 72.1216949 | 68.5369818 | 87.9211002 |
| 16:32:46 | 0:18:30 | 69.5722324 | 67.7204764 | 72.1216949 | 68.5369818 | 79.9211002 |
| 16:32:47 | 0:18:31 | 70.5722324 | 67.7204764 | 72.1216949 | 68.5369818 | 78.9211002 |
| 16:32:48 | 0:18:32 | 70.5722324 | 67.7204764 | 72.1216949 | 67.5369818 | 78.9211002 |
| 16:32:49 | 0:18:33 | 70.5722324 | 67.7204764 | 73.1216949 | 67.5369818 | 74.9211002 |
| 16:32:50 | 0:18:34 | 70.5722324 | 68.7204764 | 75.1216949 | 67.5369818 | 72.9211002 |
| 16:32:51 | 0:18:35 | 70.5722324 | 69.7204764 | 76.1216949 | 67.5369818 | 72.9211002 |
| 16:32:52 | 0:18:36 | 70.5722324 | 69.7204764 | 76.1216949 | 67.5369818 | 72.9211002 |
| 16:32:53 | 0:18:37 | 70.5722324 | 70.7204764 | 76.1216949 | 67.5369818 | 73.9211002 |
| 16:32:54 | 0:18:38 | 70.5722324 | 70.7204764 | 76.1216949 | 68.5369818 | 75.9211002 |
| 16:32:55 | 0:18:39 | 70.5722324 | 70.7204764 | 76.1216949 | 68.5369818 | 78.9211002 |
| 16:32:56 | 0:18:40 | 70.5722324 | 70.7204764 | 71.1216949 | 68.5369818 | 77.9211002 |
| 16:32:57 | 0:18:41 | 70.5722324 | 70.7204764 | 67.1216949 | 67.5369818 | 70.9211002 |
| 16:32:58 | 0:18:42 | 70.5722324 | 71.7204764 | 66.1216949 | 65.5369818 | 66.9211002 |
| 16:32:59 | 0:18:43 | 70.5722324 | 71.7204764 | 66.1216949 | 65.5369818 | 66.9211002 |
| 16:33:00 | 0:18:44 | 70.5722324 | 73.7204764 | 66.1216949 | 63.5369818 | 64.9211002 |
| 16:33:01 | 0:18:45 | 70.5722324 | 77.7204764 | 65.1216949 | 63.5369818 | 62.9211002 |
| 16:33:02 | 0:18:46 | 70.5722324 | 77.7204764 | 65.1216949 | 63.5369818 | 62.9211002 |

|          |         |            |            |            |            |            |
|----------|---------|------------|------------|------------|------------|------------|
| 16:33:03 | 0:18:47 | 70.5722324 | 76.7204764 | 65.1216949 | 64.5369818 | 62.9211002 |
| 16:33:04 | 0:18:48 | 70.5722324 | 73.7204764 | 65.1216949 | 64.5369818 | 67.9211002 |
| 16:33:05 | 0:18:49 | 71.5722324 | 72.7204764 | 66.1216949 | 64.5369818 | 68.9211002 |
| 16:33:06 | 0:18:50 | 71.5722324 | 71.7204764 | 67.1216949 | 64.5369818 | 68.9211002 |
| 16:33:07 | 0:18:51 | 71.5722324 | 71.7204764 | 65.1216949 | 64.5369818 | 68.9211002 |
| 16:33:08 | 0:18:52 | 71.5722324 | 70.7204764 | 65.1216949 | 64.5369818 | 68.9211002 |
| 16:33:09 | 0:18:53 | 71.5722324 | 70.7204764 | 65.1216949 | 64.5369818 | 68.9211002 |
| 16:33:10 | 0:18:54 | 71.5722324 | 70.7204764 | 65.1216949 | 64.5369818 | 68.9211002 |
| 16:33:11 | 0:18:55 | 70.5722324 | 70.7204764 | 65.1216949 | 64.5369818 | 69.9211002 |
| 16:33:12 | 0:18:56 | 69.5722324 | 69.7204764 | 65.1216949 | 63.5369818 | 69.9211002 |
| 16:33:13 | 0:18:57 | 69.5722324 | 68.7204764 | 65.1216949 | 63.5369818 | 70.9211002 |
| 16:33:14 | 0:18:58 | 69.5722324 | 66.7204764 | 65.1216949 | 63.5369818 | 72.9211002 |
| 16:33:15 | 0:18:59 | 71.5722324 | 66.7204764 | 65.1216949 | 62.5369818 | 68.9211002 |
| 16:33:16 | 0:19:00 | 72.5722324 | 66.7204764 | 65.1216949 | 62.5369818 | 65.9211002 |
| 16:33:17 | 0:19:01 | 72.5722324 | 66.7204764 | 65.1216949 | 63.5369818 | 64.9211002 |
| 16:33:18 | 0:19:02 | 73.5722324 | 67.7204764 | 65.1216949 | 63.5369818 | 64.9211002 |
| 16:33:19 | 0:19:03 | 73.5722324 | 67.7204764 | 65.1216949 | 63.5369818 | 64.9211002 |
| 16:33:20 | 0:19:04 | 74.5722324 | 67.7204764 | 65.1216949 | 63.5369818 | 65.9211002 |
| 16:33:21 | 0:19:05 | 75.5722324 | 67.7204764 | 65.1216949 | 63.5369818 | 65.9211002 |
| 16:33:22 | 0:19:06 | 75.5722324 | 68.7204764 | 65.1216949 | 63.5369818 | 65.9211002 |
| 16:33:23 | 0:19:07 | 76.5722324 | 70.7204764 | 65.1216949 | 62.5369818 | 71.9211002 |
| 16:33:24 | 0:19:08 | 78.5722324 | 71.7204764 | 65.1216949 | 62.5369818 | 73.9211002 |
| 16:33:25 | 0:19:09 | 78.5722324 | 70.7204764 | 64.1216949 | 61.5369818 | 73.9211002 |
| 16:33:26 | 0:19:10 | 81.5722324 | 70.7204764 | 64.1216949 | 62.5369818 | 73.9211002 |
| 16:33:27 | 0:19:11 | 82.5722324 | 70.7204764 | 64.1216949 | 62.5369818 | 75.9211002 |
| 16:33:28 | 0:19:12 | 82.5722324 | 72.7204764 | 64.1216949 | 62.5369818 | 76.9211002 |
| 16:33:29 | 0:19:13 | 84.5722324 | 77.7204764 | 64.1216949 | 62.5369818 | 77.9211002 |
| 16:33:30 | 0:19:14 | 84.5722324 | 79.7204764 | 64.1216949 | 62.5369818 | 77.9211002 |
| 16:33:31 | 0:19:15 | 84.5722324 | 80.7204764 | 64.1216949 | 62.5369818 | 78.9211002 |
| 16:33:32 | 0:19:16 | 81.5722324 | 80.7204764 | 64.1216949 | 61.5369818 | 78.9211002 |
| 16:33:33 | 0:19:17 | 79.5722324 | 80.7204764 | 64.1216949 | 60.5369818 | 78.9211002 |
| 16:33:34 | 0:19:18 | 78.5722324 | 80.7204764 | 64.1216949 | 60.5369818 | 78.9211002 |
| 16:33:35 | 0:19:19 | 78.5722324 | 79.7204764 | 64.1216949 | 61.5369818 | 76.9211002 |
| 16:33:36 | 0:19:20 | 78.5722324 | 79.7204764 | 64.1216949 | 61.5369818 | 76.9211002 |
| 16:33:37 | 0:19:21 | 76.5722324 | 79.7204764 | 64.1216949 | 61.5369818 | 76.9211002 |
| 16:33:38 | 0:19:22 | 76.5722324 | 79.7204764 | 64.1216949 | 61.5369818 | 77.9211002 |
| 16:33:39 | 0:19:23 | 76.5722324 | 79.7204764 | 68.1216949 | 61.5369818 | 77.9211002 |
| 16:33:40 | 0:19:24 | 76.5722324 | 79.7204764 | 69.1216949 | 61.5369818 | 77.9211002 |
| 16:33:41 | 0:19:25 | 75.5722324 | 83.7204764 | 72.1216949 | 61.5369818 | 77.9211002 |
| 16:33:42 | 0:19:26 | 73.5722324 | 85.7204764 | 74.1216949 | 61.5369818 | 66.9211002 |
| 16:33:43 | 0:19:27 | 69.5722324 | 85.7204764 | 74.1216949 | 61.5369818 | 65.9211002 |
| 16:33:44 | 0:19:28 | 69.5722324 | 85.7204764 | 75.1216949 | 61.5369818 | 65.9211002 |
| 16:33:45 | 0:19:29 | 69.5722324 | 85.7204764 | 76.1216949 | 63.5369818 | 65.9211002 |
| 16:33:46 | 0:19:30 | 69.5722324 | 85.7204764 | 76.1216949 | 63.5369818 | 65.9211002 |
| 16:33:47 | 0:19:31 | 68.5722324 | 83.7204764 | 76.1216949 | 63.5369818 | 65.9211002 |

|          |         |            |            |            |            |            |
|----------|---------|------------|------------|------------|------------|------------|
| 16:33:48 | 0:19:32 | 68.5722324 | 80.7204764 | 76.1216949 | 63.5369818 | 66.9211002 |
| 16:33:49 | 0:19:33 | 68.5722324 | 78.7204764 | 75.1216949 | 64.5369818 | 66.9211002 |
| 16:33:50 | 0:19:34 | 64.5722324 | 76.7204764 | 75.1216949 | 65.5369818 | 65.9211002 |
| 16:33:51 | 0:19:35 | 63.5722324 | 75.7204764 | 75.1216949 | 64.5369818 | 64.9211002 |
| 16:33:52 | 0:19:36 | 63.5722324 | 74.7204764 | 75.1216949 | 63.5369818 | 64.9211002 |
| 16:33:53 | 0:19:37 | 62.5722324 | 75.7204764 | 75.1216949 | 63.5369818 | 64.9211002 |
| 16:33:54 | 0:19:38 | 62.5722324 | 76.7204764 | 75.1216949 | 64.5369818 | 64.9211002 |
| 16:33:55 | 0:19:39 | 62.5722324 | 76.7204764 | 70.1216949 | 64.5369818 | 64.9211002 |
| 16:33:56 | 0:19:40 | 62.5722324 | 76.7204764 | 69.1216949 | 64.5369818 | 64.9211002 |
| 16:33:57 | 0:19:41 | 62.5722324 | 75.7204764 | 68.1216949 | 64.5369818 | 65.9211002 |
| 16:33:58 | 0:19:42 | 62.5722324 | 74.7204764 | 68.1216949 | 64.5369818 | 65.9211002 |
| 16:33:59 | 0:19:43 | 62.5722324 | 72.7204764 | 68.1216949 | 64.5369818 | 65.9211002 |
| 16:34:00 | 0:19:44 | 63.5722324 | 69.7204764 | 68.1216949 | 64.5369818 | 63.9211002 |
| 16:34:01 | 0:19:45 | 64.5722324 | 68.7204764 | 68.1216949 | 64.5369818 | 63.9211002 |
| 16:34:02 | 0:19:46 | 65.5722324 | 68.7204764 | 67.1216949 | 64.5369818 | 63.9211002 |
| 16:34:03 | 0:19:47 | 65.5722324 | 67.7204764 | 67.1216949 | 64.5369818 | 63.9211002 |
| 16:34:04 | 0:19:48 | 65.5722324 | 66.7204764 | 67.1216949 | 63.5369818 | 63.9211002 |
| 16:34:05 | 0:19:49 | 65.5722324 | 66.7204764 | 67.1216949 | 63.5369818 | 63.9211002 |
| 16:34:06 | 0:19:50 | 65.5722324 | 66.7204764 | 66.1216949 | 62.5369818 | 63.9211002 |
| 16:34:07 | 0:19:51 | 65.5722324 | 66.7204764 | 65.1216949 | 63.5369818 | 63.9211002 |
| 16:34:08 | 0:19:52 | 65.5722324 | 70.7204764 | 65.1216949 | 63.5369818 | 64.9211002 |
| 16:34:09 | 0:19:53 | 66.5722324 | 70.7204764 | 64.1216949 | 64.5369818 | 65.9211002 |
| 16:34:10 | 0:19:54 | 66.5722324 | 70.7204764 | 63.1216949 | 64.5369818 | 65.9211002 |
| 16:34:11 | 0:19:55 | 66.5722324 | 70.7204764 | 63.1216949 | 65.5369818 | 65.9211002 |
| 16:34:12 | 0:19:56 | 66.5722324 | 71.7204764 | 63.1216949 | 66.5369818 | 66.9211002 |
| 16:34:13 | 0:19:57 | 67.5722324 | 71.7204764 | 63.1216949 | 66.5369818 | 66.9211002 |
| 16:34:14 | 0:19:58 | 67.5722324 | 71.7204764 | 63.1216949 | 66.5369818 | 66.9211002 |
| 16:34:15 | 0:19:59 | 67.5722324 | 72.7204764 | 66.1216949 | 66.5369818 | 66.9211002 |
| 16:34:16 | 0:20:00 | 67.5722324 | 72.7204764 | 70.1216949 | 65.5369818 | 67.9211002 |
| 16:34:17 | 0:20:01 | 67.5722324 | 71.7204764 | 70.1216949 | 65.5369818 | 67.9211002 |
| 16:34:18 | 0:20:02 | 70.5722324 | 71.7204764 | 71.1216949 | 64.5369818 | 67.9211002 |
| 16:34:19 | 0:20:03 | 70.5722324 | 71.7204764 | 70.1216949 | 64.5369818 | 67.9211002 |
| 16:34:20 | 0:20:04 | 70.5722324 | 71.7204764 | 70.1216949 | 64.5369818 | 68.9211002 |
| 16:34:21 | 0:20:05 | 70.5722324 | 71.7204764 | 69.1216949 | 64.5369818 | 69.9211002 |
| 16:34:22 | 0:20:06 | 69.5722324 | 71.7204764 | 68.1216949 | 65.5369818 | 71.9211002 |
| 16:34:23 | 0:20:07 | 68.5722324 | 72.7204764 | 67.1216949 | 65.5369818 | 72.9211002 |
| 16:34:24 | 0:20:08 | 68.5722324 | 72.7204764 | 67.1216949 | 67.5369818 | 72.9211002 |
| 16:34:25 | 0:20:09 | 68.5722324 | 74.7204764 | 66.1216949 | 67.5369818 | 74.9211002 |
| 16:34:26 | 0:20:10 | 68.5722324 | 72.7204764 | 66.1216949 | 69.5369818 | 76.9211002 |
| 16:34:27 | 0:20:11 | 68.5722324 | 70.7204764 | 66.1216949 | 70.5369818 | 76.9211002 |
| 16:34:28 | 0:20:12 | 68.5722324 | 69.7204764 | 66.1216949 | 70.5369818 | 78.9211002 |
| 16:34:29 | 0:20:13 | 70.5722324 | 69.7204764 | 66.1216949 | 69.5369818 | 78.9211002 |
| 16:34:30 | 0:20:14 | 70.5722324 | 69.7204764 | 66.1216949 | 69.5369818 | 78.9211002 |
| 16:34:31 | 0:20:15 | 69.5722324 | 71.7204764 | 66.1216949 | 67.5369818 | 83.9211002 |
| 16:34:32 | 0:20:16 | 67.5722324 | 71.7204764 | 65.1216949 | 64.5369818 | 68.9211002 |

|          |         |            |            |            |            |            |
|----------|---------|------------|------------|------------|------------|------------|
| 16:34:33 | 0:20:17 | 66.5722324 | 70.7204764 | 65.1216949 | 63.5369818 | 64.9211002 |
| 16:34:34 | 0:20:18 | 66.5722324 | 70.7204764 | 64.1216949 | 62.5369818 | 64.9211002 |
| 16:34:35 | 0:20:19 | 66.5722324 | 70.7204764 | 64.1216949 | 62.5369818 | 65.9211002 |
| 16:34:36 | 0:20:20 | 65.5722324 | 70.7204764 | 64.1216949 | 62.5369818 | 65.9211002 |
| 16:34:37 | 0:20:21 | 65.5722324 | 72.7204764 | 64.1216949 | 63.5369818 | 65.9211002 |
| 16:34:38 | 0:20:22 | 65.5722324 | 73.7204764 | 64.1216949 | 63.5369818 | 65.9211002 |
| 16:34:39 | 0:20:23 | 66.5722324 | 73.7204764 | 64.1216949 | 63.5369818 | 66.9211002 |
| 16:34:40 | 0:20:24 | 66.5722324 | 71.7204764 | 64.1216949 | 63.5369818 | 68.9211002 |
| 16:34:41 | 0:20:25 | 66.5722324 | 68.7204764 | 65.1216949 | 64.5369818 | 70.9211002 |
| 16:34:42 | 0:20:26 | 66.5722324 | 66.7204764 | 65.1216949 | 65.5369818 | 71.9211002 |
| 16:34:43 | 0:20:27 | 66.5722324 | 66.7204764 | 65.1216949 | 65.5369818 | 71.9211002 |
| 16:34:44 | 0:20:28 | 66.5722324 | 67.7204764 | 65.1216949 | 67.5369818 | 71.9211002 |
| 16:34:45 | 0:20:29 | 66.5722324 | 68.7204764 | 65.1216949 | 67.5369818 | 72.9211002 |
| 16:34:46 | 0:20:30 | 66.5722324 | 70.7204764 | 65.1216949 | 67.5369818 | 72.9211002 |
| 16:34:47 | 0:20:31 | 66.5722324 | 70.7204764 | 65.1216949 | 67.5369818 | 72.9211002 |
| 16:34:48 | 0:20:32 | 66.5722324 | 71.7204764 | 65.1216949 | 67.5369818 | 73.9211002 |
| 16:34:49 | 0:20:33 | 66.5722324 | 72.7204764 | 66.1216949 | 67.5369818 | 83.9211002 |
| 16:34:50 | 0:20:34 | 66.5722324 | 71.7204764 | 66.1216949 | 67.5369818 | 83.9211002 |
| 16:34:51 | 0:20:35 | 66.5722324 | 71.7204764 | 66.1216949 | 67.5369818 | 84.9211002 |
| 16:34:52 | 0:20:36 | 66.5722324 | 68.7204764 | 67.1216949 | 67.5369818 | 74.9211002 |
| 16:34:53 | 0:20:37 | 66.5722324 | 67.7204764 | 66.1216949 | 67.5369818 | 64.9211002 |
| 16:34:54 | 0:20:38 | 66.5722324 | 67.7204764 | 66.1216949 | 66.5369818 | 64.9211002 |
| 16:34:55 | 0:20:39 | 67.5722324 | 68.7204764 | 65.1216949 | 66.5369818 | 62.9211002 |
| 16:34:56 | 0:20:40 | 67.5722324 | 69.7204764 | 65.1216949 | 68.5369818 | 62.9211002 |
| 16:34:57 | 0:20:41 | 66.5722324 | 71.7204764 | 65.1216949 | 68.5369818 | 62.9211002 |
| 16:34:58 | 0:20:42 | 66.5722324 | 71.7204764 | 66.1216949 | 68.5369818 | 62.9211002 |
| 16:34:59 | 0:20:43 | 66.5722324 | 69.7204764 | 66.1216949 | 68.5369818 | 62.9211002 |
| 16:35:00 | 0:20:44 | 66.5722324 | 67.7204764 | 66.1216949 | 68.5369818 | 67.9211002 |
| 16:35:01 | 0:20:45 | 66.5722324 | 66.7204764 | 65.1216949 | 67.5369818 | 68.9211002 |
| 16:35:02 | 0:20:46 | 66.5722324 | 65.7204764 | 64.1216949 | 67.5369818 | 68.9211002 |
| 16:35:03 | 0:20:47 | 66.5722324 | 64.7204764 | 64.1216949 | 67.5369818 | 68.9211002 |
| 16:35:04 | 0:20:48 | 66.5722324 | 65.7204764 | 64.1216949 | 67.5369818 | 65.9211002 |
| 16:35:05 | 0:20:49 | 67.5722324 | 66.7204764 | 64.1216949 | 67.5369818 | 61.9211002 |
| 16:35:06 | 0:20:50 | 67.5722324 | 67.7204764 | 64.1216949 | 67.5369818 | 60.9211002 |
| 16:35:07 | 0:20:51 | 66.5722324 | 68.7204764 | 64.1216949 | 67.5369818 | 60.9211002 |
| 16:35:08 | 0:20:52 | 66.5722324 | 68.7204764 | 64.1216949 | 67.5369818 | 59.9211002 |
| 16:35:09 | 0:20:53 | 66.5722324 | 68.7204764 | 65.1216949 | 67.5369818 | 58.9211002 |
| 16:35:10 | 0:20:54 | 66.5722324 | 69.7204764 | 64.1216949 | 68.5369818 | 60.9211002 |
| 16:35:11 | 0:20:55 | 65.5722324 | 70.7204764 | 64.1216949 | 68.5369818 | 60.9211002 |
| 16:35:12 | 0:20:56 | 65.5722324 | 70.7204764 | 64.1216949 | 68.5369818 | 61.9211002 |
| 16:35:13 | 0:20:57 | 67.5722324 | 70.7204764 | 65.1216949 | 68.5369818 | 60.9211002 |
| 16:35:14 | 0:20:58 | 67.5722324 | 71.7204764 | 66.1216949 | 68.5369818 | 60.9211002 |
| 16:35:15 | 0:20:59 | 67.5722324 | 71.7204764 | 66.1216949 | 67.5369818 | 60.9211002 |
| 16:35:16 | 0:21:00 | 66.5722324 | 71.7204764 | 66.1216949 | 66.5369818 | 60.9211002 |
| 16:35:17 | 0:21:01 | 66.5722324 | 71.7204764 | 66.1216949 | 65.5369818 | 60.9211002 |

|          |         |            |            |            |            |            |
|----------|---------|------------|------------|------------|------------|------------|
| 16:35:18 | 0:21:02 | 66.5722324 | 70.7204764 | 65.1216949 | 65.5369818 | 60.9211002 |
| 16:35:19 | 0:21:03 | 66.5722324 | 69.7204764 | 65.1216949 | 64.5369818 | 60.9211002 |
| 16:35:20 | 0:21:04 | 66.5722324 | 68.7204764 | 65.1216949 | 64.5369818 | 63.9211002 |
| 16:35:21 | 0:21:05 | 66.5722324 | 67.7204764 | 65.1216949 | 64.5369818 | 63.9211002 |
| 16:35:22 | 0:21:06 | 66.5722324 | 66.7204764 | 64.1216949 | 65.5369818 | 61.9211002 |
| 16:35:23 | 0:21:07 | 66.5722324 | 66.7204764 | 64.1216949 | 65.5369818 | 61.9211002 |
| 16:35:24 | 0:21:08 | 66.5722324 | 66.7204764 | 64.1216949 | 65.5369818 | 61.9211002 |
| 16:35:25 | 0:21:09 | 65.5722324 | 67.7204764 | 65.1216949 | 65.5369818 | 62.9211002 |
| 16:35:26 | 0:21:10 | 63.5722324 | 67.7204764 | 65.1216949 | 66.5369818 | 62.9211002 |
| 16:35:27 | 0:21:11 | 63.5722324 | 65.7204764 | 65.1216949 | 66.5369818 | 63.9211002 |
| 16:35:28 | 0:21:12 | 63.5722324 | 65.7204764 | 65.1216949 | 65.5369818 | 63.9211002 |
| 16:35:29 | 0:21:13 | 63.5722324 | 66.7204764 | 66.1216949 | 65.5369818 | 64.9211002 |
| 16:35:30 | 0:21:14 | 65.5722324 | 68.7204764 | 66.1216949 | 65.5369818 | 64.9211002 |
| 16:35:31 | 0:21:15 | 65.5722324 | 69.7204764 | 66.1216949 | 65.5369818 | 64.9211002 |
| 16:35:32 | 0:21:16 | 65.5722324 | 69.7204764 | 66.1216949 | 65.5369818 | 63.9211002 |
| 16:35:33 | 0:21:17 | 65.5722324 | 68.7204764 | 65.1216949 | 64.5369818 | 63.9211002 |
| 16:35:34 | 0:21:18 | 65.5722324 | 68.7204764 | 65.1216949 | 64.5369818 | 63.9211002 |
| 16:35:35 | 0:21:19 | 66.5722324 | 68.7204764 | 65.1216949 | 65.5369818 | 63.9211002 |
| 16:35:36 | 0:21:20 | 67.5722324 | 68.7204764 | 65.1216949 | 65.5369818 | 63.9211002 |
| 16:35:37 | 0:21:21 | 67.5722324 | 68.7204764 | 66.1216949 | 64.5369818 | 61.9211002 |
| 16:35:38 | 0:21:22 | 69.5722324 | 68.7204764 | 66.1216949 | 64.5369818 | 61.9211002 |
| 16:35:39 | 0:21:23 | 69.5722324 | 68.7204764 | 66.1216949 | 64.5369818 | 61.9211002 |
| 16:35:40 | 0:21:24 | 69.5722324 | 68.7204764 | 70.1216949 | 64.5369818 | 61.9211002 |
| 16:35:41 | 0:21:25 | 70.5722324 | 68.7204764 | 71.1216949 | 63.5369818 | 62.9211002 |
| 16:35:42 | 0:21:26 | 72.5722324 | 68.7204764 | 71.1216949 | 63.5369818 | 65.9211002 |
| 16:35:43 | 0:21:27 | 72.5722324 | 68.7204764 | 69.1216949 | 63.5369818 | 70.9211002 |
| 16:35:44 | 0:21:28 | 73.5722324 | 68.7204764 | 69.1216949 | 63.5369818 | 70.9211002 |
| 16:35:45 | 0:21:29 | 73.5722324 | 68.7204764 | 68.1216949 | 64.5369818 | 70.9211002 |
| 16:35:46 | 0:21:30 | 74.5722324 | 68.7204764 | 68.1216949 | 64.5369818 | 71.9211002 |
| 16:35:47 | 0:21:31 | 76.5722324 | 68.7204764 | 67.1216949 | 65.5369818 | 73.9211002 |
| 16:35:48 | 0:21:32 | 78.5722324 | 68.7204764 | 66.1216949 | 65.5369818 | 74.9211002 |
| 16:35:49 | 0:21:33 | 79.5722324 | 68.7204764 | 67.1216949 | 65.5369818 | 75.9211002 |
| 16:35:50 | 0:21:34 | 79.5722324 | 68.7204764 | 67.1216949 | 65.5369818 | 64.9211002 |
| 16:35:51 | 0:21:35 | 79.5722324 | 68.7204764 | 67.1216949 | 66.5369818 | 60.9211002 |
| 16:35:52 | 0:21:36 | 80.5722324 | 68.7204764 | 67.1216949 | 66.5369818 | 59.9211002 |
| 16:35:53 | 0:21:37 | 80.5722324 | 68.7204764 | 66.1216949 | 66.5369818 | 58.9211002 |
| 16:35:54 | 0:21:38 | 80.5722324 | 69.7204764 | 65.1216949 | 66.5369818 | 57.9211002 |
| 16:35:55 | 0:21:39 | 80.5722324 | 69.7204764 | 65.1216949 | 66.5369818 | 57.9211002 |
| 16:35:56 | 0:21:40 | 80.5722324 | 69.7204764 | 65.1216949 | 66.5369818 | 57.9211002 |
| 16:35:57 | 0:21:41 | 78.5722324 | 69.7204764 | 65.1216949 | 66.5369818 | 59.9211002 |
| 16:35:58 | 0:21:42 | 77.5722324 | 69.7204764 | 65.1216949 | 67.5369818 | 60.9211002 |
| 16:35:59 | 0:21:43 | 77.5722324 | 69.7204764 | 65.1216949 | 67.5369818 | 60.9211002 |
| 16:36:00 | 0:21:44 | 77.5722324 | 69.7204764 | 65.1216949 | 66.5369818 | 60.9211002 |
| 16:36:01 | 0:21:45 | 75.5722324 | 68.7204764 | 65.1216949 | 66.5369818 | 60.9211002 |
| 16:36:02 | 0:21:46 | 75.5722324 | 66.7204764 | 65.1216949 | 66.5369818 | 59.9211002 |

|          |         |            |            |            |            |            |
|----------|---------|------------|------------|------------|------------|------------|
| 16:36:03 | 0:21:47 | 75.5722324 | 65.7204764 | 65.1216949 | 66.5369818 | 60.9211002 |
| 16:36:04 | 0:21:48 | 75.5722324 | 64.7204764 | 65.1216949 | 65.5369818 | 60.9211002 |
| 16:36:05 | 0:21:49 | 74.5722324 | 63.7204764 | 66.1216949 | 64.5369818 | 60.9211002 |
| 16:36:06 | 0:21:50 | 74.5722324 | 63.7204764 | 69.1216949 | 64.5369818 | 60.9211002 |
| 16:36:07 | 0:21:51 | 74.5722324 | 63.7204764 | 69.1216949 | 63.5369818 | 60.9211002 |
| 16:36:08 | 0:21:52 | 74.5722324 | 64.7204764 | 69.1216949 | 63.5369818 | 61.9211002 |
| 16:36:09 | 0:21:53 | 71.5722324 | 64.7204764 | 70.1216949 | 63.5369818 | 62.9211002 |
| 16:36:10 | 0:21:54 | 71.5722324 | 70.7204764 | 70.1216949 | 62.5369818 | 63.9211002 |
| 16:36:11 | 0:21:55 | 71.5722324 | 70.7204764 | 70.1216949 | 62.5369818 | 63.9211002 |
| 16:36:12 | 0:21:56 | 70.5722324 | 70.7204764 | 71.1216949 | 62.5369818 | 63.9211002 |
| 16:36:13 | 0:21:57 | 70.5722324 | 70.7204764 | 71.1216949 | 63.5369818 | 63.9211002 |
| 16:36:14 | 0:21:58 | 70.5722324 | 70.7204764 | 72.1216949 | 62.5369818 | 59.9211002 |
| 16:36:15 | 0:21:59 | 70.5722324 | 70.7204764 | 75.1216949 | 62.5369818 | 59.9211002 |
| 16:36:16 | 0:22:00 | 70.5722324 | 70.7204764 | 75.1216949 | 63.5369818 | 59.9211002 |
| 16:36:17 | 0:22:01 | 70.5722324 | 70.7204764 | 78.1216949 | 63.5369818 | 59.9211002 |
| 16:36:18 | 0:22:02 | 70.5722324 | 70.7204764 | 78.1216949 | 63.5369818 | 59.9211002 |
| 16:36:19 | 0:22:03 | 68.5722324 | 70.7204764 | 81.1216949 | 63.5369818 | 59.9211002 |
| 16:36:20 | 0:22:04 | 68.5722324 | 70.7204764 | 81.1216949 | 62.5369818 | 59.9211002 |
| 16:36:21 | 0:22:05 | 69.5722324 | 72.7204764 | 81.1216949 | 62.5369818 | 61.9211002 |
| 16:36:22 | 0:22:06 | 69.5722324 | 72.7204764 | 81.1216949 | 62.5369818 | 61.9211002 |
| 16:36:23 | 0:22:07 | 70.5722324 | 72.7204764 | 81.1216949 | 62.5369818 | 62.9211002 |
| 16:36:24 | 0:22:08 | 68.5722324 | 71.7204764 | 81.1216949 | 61.5369818 | 61.9211002 |
| 16:36:25 | 0:22:09 | 68.5722324 | 71.7204764 | 81.1216949 | 61.5369818 | 61.9211002 |
| 16:36:26 | 0:22:10 | 67.5722324 | 70.7204764 | 81.1216949 | 61.5369818 | 61.9211002 |
| 16:36:27 | 0:22:11 | 67.5722324 | 68.7204764 | 81.1216949 | 61.5369818 | 62.9211002 |
| 16:36:28 | 0:22:12 | 67.5722324 | 68.7204764 | 82.1216949 | 61.5369818 | 55.9211002 |
| 16:36:29 | 0:22:13 | 72.5722324 | 64.7204764 | 82.1216949 | 61.5369818 | 54.9211002 |
| 16:36:30 | 0:22:14 | 70.5722324 | 62.7204764 | 82.1216949 | 61.5369818 | 59.9211002 |
| 16:36:31 | 0:22:15 | 70.5722324 | 62.7204764 | 82.1216949 | 62.5369818 | 59.9211002 |
| 16:36:32 | 0:22:16 | 69.5722324 | 63.7204764 | 83.1216949 | 62.5369818 | 67.9211002 |
| 16:36:33 | 0:22:17 | 69.5722324 | 65.7204764 | 83.1216949 | 62.5369818 | 67.9211002 |
| 16:36:34 | 0:22:18 | 68.5722324 | 65.7204764 | 83.1216949 | 63.5369818 | 73.9211002 |
| 16:36:35 | 0:22:19 | 68.5722324 | 67.7204764 | 84.1216949 | 63.5369818 | 76.9211002 |
| 16:36:36 | 0:22:20 | 67.5722324 | 67.7204764 | 89.1216949 | 63.5369818 | 77.1146503 |
| 16:36:37 | 0:22:21 | 67.5722324 | 67.7204764 | 88.1216949 | 62.5369818 | 77.2575075 |
| 16:36:38 | 0:22:22 | 66.5722324 | 71.7204764 | 88.1216949 | 62.5369818 | 77.6860789 |
| 16:36:39 | 0:22:23 | 66.5722324 | 76.7204764 | 88.1216949 | 62.5369818 | 78.2575075 |
| 16:36:40 | 0:22:24 | 66.5722324 | 76.7204764 | 88.1216949 | 62.5369818 | 78.828936  |
| 16:36:41 | 0:22:25 | 66.5722324 | 74.7204764 | 88.1216949 | 62.5369818 | 78.828936  |
| 16:36:42 | 0:22:26 | 66.5722324 | 74.7204764 | 89.1216949 | 62.5369818 | 79.4003646 |
| 16:36:43 | 0:22:27 | 66.5722324 | 74.7204764 | 89.1216949 | 63.5369818 | 78.828936  |
| 16:36:44 | 0:22:28 | 65.5722324 | 73.7204764 | 90.1216949 | 64.5369818 | 78.828936  |
| 16:36:45 | 0:22:29 | 64.5722324 | 73.7204764 | 91.1216949 | 64.5369818 | 78.2575075 |
| 16:36:46 | 0:22:30 | 64.5722324 | 73.7204764 | 91.1216949 | 65.5369818 | 77.828936  |
| 16:36:47 | 0:22:31 | 64.5722324 | 72.7204764 | 91.1216949 | 65.5369818 | 77.2575075 |



|          |         |            |            |            |            |            |
|----------|---------|------------|------------|------------|------------|------------|
| 16:36:48 | 0:22:32 | 64.5722324 | 72.7204764 | 78.5432218 | 66.5369818 | 78.5432218 |
| 16:36:49 | 0:22:33 | 64.5722324 | 70.7204764 | 95.1216949 | 65.5369818 | 80.6860789 |
| 16:36:50 | 0:22:34 | 64.5722324 | 67.7204764 | 76.9717932 | 65.5369818 | 76.9717932 |
| 16:36:51 | 0:22:35 | 64.5722324 | 66.7204764 | 77.1146503 | 66.5369818 | 77.1146503 |
| 16:36:52 | 0:22:36 | 64.5722324 | 65.7204764 | 76.828936  | 65.5369818 | 76.828936  |
| 16:36:53 | 0:22:37 | 65.5722324 | 64.7204764 | 76.6860789 | 64.5369818 | 76.6860789 |
| 16:36:54 | 0:22:38 | 65.5722324 | 63.7204764 | 72.9717932 | 64.5369818 | 76.9211002 |
| 16:36:55 | 0:22:39 | 65.5722324 | 63.7204764 | 72.4003646 | 64.5369818 | 72.9211002 |
| 16:36:56 | 0:22:40 | 65.5722324 | 64.7204764 | 71.9717932 | 65.5369818 | 67.9211002 |
| 16:36:57 | 0:22:41 | 65.5722324 | 66.7204764 | 72.5432218 | 65.5369818 | 66.9211002 |
| 16:36:58 | 0:22:42 | 65.5722324 | 66.7204764 | 72.5432218 | 64.5369818 | 66.9211002 |
| 16:36:59 | 0:22:43 | 65.5722324 | 67.7204764 | 72.5432218 | 64.5369818 | 62.9211002 |
| 16:37:00 | 0:22:44 | 66.5722324 | 68.7204764 | 72.828936  | 65.5369818 | 62.9211002 |
| 16:37:01 | 0:22:45 | 66.5722324 | 68.7204764 | 72.6860789 | 65.5369818 | 61.9211002 |
| 16:37:02 | 0:22:46 | 66.5722324 | 68.7204764 | 72.6860789 | 65.5369818 | 61.9211002 |
| 16:37:03 | 0:22:47 | 67.5722324 | 68.7204764 | 72.6860789 | 64.5369818 | 61.9211002 |
| 16:37:04 | 0:22:48 | 67.5722324 | 68.7204764 | 72.6860789 | 65.5369818 | 62.9211002 |
| 16:37:05 | 0:22:49 | 67.5722324 | 68.7204764 | 72.4003646 | 64.5369818 | 62.9211002 |
| 16:37:06 | 0:22:50 | 66.5722324 | 68.7204764 | 72.2575075 | 63.5369818 | 63.9211002 |
| 16:37:07 | 0:22:51 | 66.5722324 | 68.7204764 | 71.9717932 | 63.5369818 | 63.9211002 |
| 16:37:08 | 0:22:52 | 66.5722324 | 68.7204764 | 72.4003646 | 63.5369818 | 63.9211002 |
| 16:37:09 | 0:22:53 | 66.5722324 | 68.7204764 | 72.2575075 | 64.5369818 | 63.9211002 |
| 16:37:10 | 0:22:54 | 66.5722324 | 68.7204764 | 72.1146503 | 64.5369818 | 63.9211002 |
| 16:37:11 | 0:22:55 | 68.5722324 | 68.7204764 | 72.1146503 | 63.5369818 | 63.9211002 |
| 16:37:12 | 0:22:56 | 68.5722324 | 68.7204764 | 71.4021362 | 63.5369818 | 63.9211002 |
| 16:37:13 | 0:22:57 | 68.5722324 | 68.7204764 | 69.021725  | 63.5369818 | 66.9211002 |
| 16:37:14 | 0:22:58 | 70.5722324 | 68.7204764 | 72.6860789 | 62.5369818 | 72.9211002 |
| 16:37:15 | 0:22:59 | 70.5722324 | 68.7204764 | 72.5432218 | 62.5369818 | 74.9211002 |
| 16:37:16 | 0:23:00 | 70.5722324 | 68.7204764 | 87.1216949 | 62.5369818 | 76.9211002 |
| 16:37:17 | 0:23:01 | 70.5722324 | 68.7204764 | 87.1216949 | 62.5369818 | 76.9211002 |
| 16:37:18 | 0:23:02 | 68.5722324 | 68.7204764 | 79.1216949 | 63.5369818 | 77.9211002 |
| 16:37:19 | 0:23:03 | 66.5722324 | 67.7204764 | 79.1216949 | 63.5369818 | 72.9211002 |
| 16:37:20 | 0:23:04 | 66.5722324 | 68.7204764 | 68.1216949 | 64.5369818 | 66.9211002 |
| 16:37:21 | 0:23:05 | 65.5722324 | 68.7204764 | 68.1216949 | 65.5369818 | 63.9211002 |
| 16:37:22 | 0:23:06 | 63.5722324 | 68.7204764 | 68.1216949 | 66.5369818 | 62.9211002 |
| 16:37:23 | 0:23:07 | 63.5722324 | 68.7204764 | 68.1216949 | 65.5369818 | 62.9211002 |
| 16:37:24 | 0:23:08 | 64.5722324 | 69.7204764 | 68.1216949 | 65.5369818 | 62.9211002 |
| 16:37:25 | 0:23:09 | 64.5722324 | 72.7204764 | 68.1216949 | 66.5369818 | 59.9211002 |
| 16:37:26 | 0:23:10 | 64.5722324 | 74.7204764 | 68.1216949 | 65.5369818 | 68.9211002 |
| 16:37:27 | 0:23:11 | 64.5722324 | 74.7204764 | 73.1216949 | 65.5369818 | 74.9211002 |
| 16:37:28 | 0:23:12 | 64.5722324 | 74.7204764 | 75.1216949 | 63.5369818 | 75.9211002 |
| 16:37:29 | 0:23:13 | 64.5722324 | 74.7204764 | 75.1216949 | 63.5369818 | 75.9211002 |
| 16:37:30 | 0:23:14 | 64.5722324 | 74.7204764 | 75.1216949 | 63.5369818 | 75.9211002 |
| 16:37:31 | 0:23:15 | 64.5722324 | 74.7204764 | 75.1216949 | 63.5369818 | 71.9211002 |
| 16:37:32 | 0:23:16 | 67.5722324 | 74.7204764 | 74.1216949 | 63.5369818 | 71.9211002 |

|          |         |            |            |            |            |            |
|----------|---------|------------|------------|------------|------------|------------|
| 16:37:33 | 0:23:17 | 69.5722324 | 76.7204764 | 74.1216949 | 64.5369818 | 63.9211002 |
| 16:37:34 | 0:23:18 | 69.5722324 | 76.7204764 | 74.1216949 | 65.5369818 | 62.9211002 |
| 16:37:35 | 0:23:19 | 68.5722324 | 75.7204764 | 74.1216949 | 65.5369818 | 61.9211002 |
| 16:37:36 | 0:23:20 | 68.5722324 | 67.7204764 | 77.1216949 | 65.5369818 | 61.9211002 |
| 16:37:37 | 0:23:21 | 68.5722324 | 66.7204764 | 80.1216949 | 65.5369818 | 61.9211002 |
| 16:37:38 | 0:23:22 | 69.5722324 | 66.7204764 | 81.1216949 | 65.5369818 | 59.9211002 |
| 16:37:39 | 0:23:23 | 69.5722324 | 68.7204764 | 81.1216949 | 65.5369818 | 59.9211002 |
| 16:37:40 | 0:23:24 | 69.5722324 | 69.7204764 | 84.1216949 | 65.5369818 | 59.9211002 |
| 16:37:41 | 0:23:25 | 68.5722324 | 71.7204764 | 73.1216949 | 65.5369818 | 61.9211002 |
| 16:37:42 | 0:23:26 | 68.5722324 | 71.7204764 | 73.1216949 | 64.5369818 | 63.9211002 |
| 16:37:43 | 0:23:27 | 69.5722324 | 71.7204764 | 73.1216949 | 64.5369818 | 63.9211002 |
| 16:37:44 | 0:23:28 | 69.5722324 | 71.7204764 | 73.1216949 | 64.5369818 | 63.9211002 |
| 16:37:45 | 0:23:29 | 69.5722324 | 71.7204764 | 72.1216949 | 64.5369818 | 63.9211002 |
| 16:37:46 | 0:23:30 | 70.5722324 | 71.7204764 | 71.1216949 | 64.5369818 | 62.9211002 |
| 16:37:47 | 0:23:31 | 74.5722324 | 71.7204764 | 70.1216949 | 64.5369818 | 62.9211002 |
| 16:37:48 | 0:23:32 | 75.5722324 | 71.7204764 | 68.1216949 | 64.5369818 | 62.9211002 |
| 16:37:49 | 0:23:33 | 75.5722324 | 71.7204764 | 67.1216949 | 65.5369818 | 62.9211002 |
| 16:37:50 | 0:23:34 | 75.5722324 | 71.7204764 | 66.1216949 | 65.5369818 | 62.9211002 |
| 16:37:51 | 0:23:35 | 76.5722324 | 72.7204764 | 66.1216949 | 65.5369818 | 63.9211002 |
| 16:37:52 | 0:23:36 | 76.5722324 | 72.7204764 | 67.1216949 | 65.5369818 | 65.9211002 |
| 16:37:53 | 0:23:37 | 77.5722324 | 72.7204764 | 67.1216949 | 64.5369818 | 66.9211002 |
| 16:37:54 | 0:23:38 | 77.5722324 | 72.7204764 | 67.1216949 | 64.5369818 | 66.9211002 |
| 16:37:55 | 0:23:39 | 78.5722324 | 72.7204764 | 70.1216949 | 65.5369818 | 66.9211002 |
| 16:37:56 | 0:23:40 | 78.5722324 | 74.7204764 | 71.1216949 | 65.5369818 | 67.9211002 |
| 16:37:57 | 0:23:41 | 78.5722324 | 75.7204764 | 74.1216949 | 65.5369818 | 67.9211002 |
| 16:37:58 | 0:23:42 | 79.5722324 | 75.7204764 | 80.1216949 | 65.5369818 | 67.9211002 |
| 16:37:59 | 0:23:43 | 79.5722324 | 75.7204764 | 82.1216949 | 65.5369818 | 67.9211002 |
| 16:38:00 | 0:23:44 | 80.5722324 | 75.7204764 | 87.1216949 | 65.5369818 | 67.9211002 |
| 16:38:01 | 0:23:45 | 80.5722324 | 75.7204764 | 90.1216949 | 65.5369818 | 68.9211002 |
| 16:38:02 | 0:23:46 | 80.5722324 | 75.7204764 | 76.5432218 | 65.5369818 | 69.9211002 |
| 16:38:03 | 0:23:47 | 80.5722324 | 75.7204764 | 76.2575075 | 65.5369818 | 67.9211002 |
| 16:38:04 | 0:23:48 | 81.5722324 | 75.7204764 | 76.4003646 | 65.5369818 | 67.9211002 |
| 16:38:05 | 0:23:49 | 81.5722324 | 74.7204764 | 76.2575075 | 65.5369818 | 68.9211002 |
| 16:38:06 | 0:23:50 | 81.5722324 | 74.7204764 | 79.1450478 | 65.5369818 | 68.9211002 |
| 16:38:07 | 0:23:51 | 81.5722324 | 73.7204764 | 73.5519514 | 65.5369818 | 68.9211002 |
| 16:38:08 | 0:23:52 | 81.5722324 | 73.7204764 | 77.5432218 | 68.5369818 | 75.9211002 |
| 16:38:09 | 0:23:53 | 82.5722324 | 73.7204764 | 78.2575075 | 68.5369818 | 78.9211002 |
| 16:38:10 | 0:23:54 | 82.5722324 | 73.7204764 | 78.4003646 | 68.5369818 | 78.9211002 |
| 16:38:11 | 0:23:55 | 82.5722324 | 73.7204764 | 79.2575075 | 69.5369818 | 81.9211002 |
| 16:38:12 | 0:23:56 | 78.5722324 | 73.7204764 | 79.4003646 | 69.5369818 | 84.9211002 |
| 16:38:13 | 0:23:57 | 76.5722324 | 73.7204764 | 88.1216949 | 70.5369818 | 84.9211002 |
| 16:38:14 | 0:23:58 | 70.5722324 | 74.7204764 | 73.1216949 | 71.5369818 | 85.9211002 |
| 16:38:15 | 0:23:59 | 70.5722324 | 74.7204764 | 67.1216949 | 71.5369818 | 85.9211002 |
| 16:38:16 | 0:24:00 | 69.5722324 | 73.7204764 | 67.1216949 | 72.5369818 | 85.9211002 |
| 16:38:17 | 0:24:01 | 68.5722324 | 72.7204764 | 67.1216949 | 73.5369818 | 87.9211002 |

|          |         |            |            |            |            |            |
|----------|---------|------------|------------|------------|------------|------------|
| 16:38:18 | 0:24:02 | 68.5722324 | 72.7204764 | 67.1216949 | 73.5369818 | 87.9211002 |
| 16:38:19 | 0:24:03 | 68.5722324 | 72.7204764 | 67.1216949 | 72.5369818 | 87.9211002 |
| 16:38:20 | 0:24:04 | 68.5722324 | 72.7204764 | 67.1216949 | 72.5369818 | 72.9717932 |
| 16:38:21 | 0:24:05 | 68.5722324 | 72.7204764 | 66.1216949 | 71.5369818 | 82.9211002 |
| 16:38:22 | 0:24:06 | 72.5722324 | 72.7204764 | 66.1216949 | 71.5369818 | 82.9211002 |
| 16:38:23 | 0:24:07 | 72.5722324 | 72.7204764 | 66.1216949 | 71.5369818 | 77.9211002 |
| 16:38:24 | 0:24:08 | 72.5722324 | 72.7204764 | 66.1216949 | 70.5369818 | 68.9211002 |
| 16:38:25 | 0:24:09 | 71.5722324 | 71.7204764 | 66.1216949 | 69.5369818 | 67.9211002 |
| 16:38:26 | 0:24:10 | 71.5722324 | 78.7204764 | 66.1216949 | 69.5369818 | 68.9211002 |
| 16:38:27 | 0:24:11 | 71.5722324 | 81.7204764 | 66.1216949 | 69.5369818 | 68.9211002 |
| 16:38:28 | 0:24:12 | 71.5722324 | 81.7204764 | 65.1216949 | 69.5369818 | 68.9211002 |
| 16:38:29 | 0:24:13 | 71.5722324 | 79.7204764 | 65.1216949 | 70.5369818 | 68.9211002 |
| 16:38:30 | 0:24:14 | 71.5722324 | 76.7204764 | 66.1216949 | 70.5369818 | 66.9211002 |
| 16:38:31 | 0:24:15 | 70.5722324 | 74.7204764 | 66.1216949 | 70.5369818 | 66.9211002 |
| 16:38:32 | 0:24:16 | 68.5722324 | 74.7204764 | 65.1216949 | 71.5369818 | 68.9211002 |
| 16:38:33 | 0:24:17 | 68.5722324 | 74.7204764 | 68.1216949 | 71.5369818 | 68.9211002 |
| 16:38:34 | 0:24:18 | 68.5722324 | 74.7204764 | 68.1216949 | 71.5369818 | 67.9211002 |
| 16:38:35 | 0:24:19 | 68.5722324 | 74.7204764 | 67.1216949 | 72.5369818 | 66.9211002 |
| 16:38:36 | 0:24:20 | 68.5722324 | 74.7204764 | 67.1216949 | 72.5369818 | 67.9211002 |
| 16:38:37 | 0:24:21 | 69.5722324 | 76.7204764 | 66.1216949 | 72.5369818 | 67.9211002 |
| 16:38:38 | 0:24:22 | 70.5722324 | 76.7204764 | 66.1216949 | 73.5369818 | 66.9211002 |
| 16:38:39 | 0:24:23 | 70.5722324 | 76.7204764 | 66.1216949 | 73.5369818 | 66.9211002 |
| 16:38:40 | 0:24:24 | 71.5722324 | 77.7204764 | 66.1216949 | 74.5369818 | 67.9211002 |
| 16:38:41 | 0:24:25 | 72.5722324 | 77.7204764 | 66.1216949 | 73.5369818 | 67.9211002 |
| 16:38:42 | 0:24:26 | 72.5722324 | 81.7204764 | 66.1216949 | 75.5369818 | 67.9211002 |
| 16:38:43 | 0:24:27 | 73.5722324 | 80.7204764 | 66.1216949 | 77.5369818 | 67.9211002 |
| 16:38:44 | 0:24:28 | 73.5722324 | 78.7204764 | 66.1216949 | 77.5369818 | 67.9211002 |
| 16:38:45 | 0:24:29 | 73.5722324 | 76.7204764 | 67.1216949 | 77.5369818 | 68.9211002 |
| 16:38:46 | 0:24:30 | 73.5722324 | 73.7204764 | 67.1216949 | 77.5369818 | 70.9211002 |
| 16:38:47 | 0:24:31 | 74.5722324 | 72.7204764 | 67.1216949 | 78.5369818 | 70.9211002 |
| 16:38:48 | 0:24:32 | 74.5722324 | 71.7204764 | 68.1216949 | 78.5369818 | 70.9211002 |
| 16:38:49 | 0:24:33 | 76.5722324 | 70.7204764 | 68.1216949 | 78.5369818 | 70.9211002 |
| 16:38:50 | 0:24:34 | 76.5722324 | 68.7204764 | 68.1216949 | 78.5369818 | 70.9211002 |
| 16:38:51 | 0:24:35 | 76.5722324 | 66.7204764 | 69.1216949 | 78.5369818 | 72.9211002 |
| 16:38:52 | 0:24:36 | 76.5722324 | 66.7204764 | 70.1216949 | 79.5369818 | 73.9211002 |
| 16:38:53 | 0:24:37 | 76.5722324 | 66.7204764 | 70.1216949 | 76.5369818 | 71.9211002 |
| 16:38:54 | 0:24:38 | 76.5722324 | 66.7204764 | 67.1216949 | 75.5369818 | 71.9211002 |
| 16:38:55 | 0:24:39 | 75.5722324 | 65.7204764 | 66.1216949 | 75.5369818 | 70.9211002 |
| 16:38:56 | 0:24:40 | 74.5722324 | 65.7204764 | 65.1216949 | 73.5369818 | 70.9211002 |
| 16:38:57 | 0:24:41 | 74.5722324 | 65.7204764 | 65.1216949 | 71.5369818 | 70.9211002 |
| 16:38:58 | 0:24:42 | 74.5722324 | 64.7204764 | 65.1216949 | 71.5369818 | 71.9211002 |
| 16:38:59 | 0:24:43 | 74.5722324 | 65.7204764 | 65.1216949 | 70.5369818 | 71.9211002 |
| 16:39:00 | 0:24:44 | 74.5722324 | 65.7204764 | 65.1216949 | 70.5369818 | 71.9211002 |
| 16:39:01 | 0:24:45 | 74.5722324 | 66.7204764 | 65.1216949 | 68.5369818 | 77.9211002 |
| 16:39:02 | 0:24:46 | 73.5722324 | 67.7204764 | 65.1216949 | 68.5369818 | 80.9211002 |

|          |         |            |            |            |            |            |
|----------|---------|------------|------------|------------|------------|------------|
| 16:39:03 | 0:24:47 | 73.5722324 | 66.7204764 | 65.1216949 | 68.5369818 | 82.9211002 |
| 16:39:04 | 0:24:48 | 74.5722324 | 65.7204764 | 65.1216949 | 68.5369818 | 84.9211002 |
| 16:39:05 | 0:24:49 | 74.5722324 | 65.7204764 | 65.1216949 | 68.5369818 | 85.9211002 |
| 16:39:06 | 0:24:50 | 74.5722324 | 65.7204764 | 65.1216949 | 68.5369818 | 85.9211002 |
| 16:39:07 | 0:24:51 | 75.5722324 | 67.7204764 | 65.1216949 | 68.5369818 | 85.9211002 |
| 16:39:08 | 0:24:52 | 74.5722324 | 67.7204764 | 65.1216949 | 67.5369818 | 76.9211002 |
| 16:39:09 | 0:24:53 | 74.5722324 | 65.7204764 | 65.1216949 | 66.5369818 | 73.9211002 |
| 16:39:10 | 0:24:54 | 74.5722324 | 64.7204764 | 66.1216949 | 66.5369818 | 73.9211002 |
| 16:39:11 | 0:24:55 | 74.5722324 | 63.7204764 | 65.1216949 | 66.5369818 | 74.9211002 |
| 16:39:12 | 0:24:56 | 74.5722324 | 63.7204764 | 65.1216949 | 65.5369818 | 74.9211002 |
| 16:39:13 | 0:24:57 | 74.5722324 | 62.7204764 | 65.1216949 | 65.5369818 | 75.9211002 |
| 16:39:14 | 0:24:58 | 73.5722324 | 61.7204764 | 65.1216949 | 65.5369818 | 69.9211002 |
| 16:39:15 | 0:24:59 | 73.5722324 | 61.7204764 | 65.1216949 | 65.5369818 | 67.9211002 |
| 16:39:16 | 0:25:00 | 72.5722324 | 61.7204764 | 65.1216949 | 65.5369818 | 67.9211002 |
| 16:39:17 | 0:25:01 | 72.5722324 | 61.7204764 | 66.1216949 | 65.5369818 | 67.9211002 |
| 16:39:18 | 0:25:02 | 72.5722324 | 61.7204764 | 66.1216949 | 65.5369818 | 67.9211002 |
| 16:39:19 | 0:25:03 | 72.5722324 | 61.7204764 | 66.1216949 | 65.5369818 | 67.9211002 |
| 16:39:20 | 0:25:04 | 72.5722324 | 61.7204764 | 67.1216949 | 65.5369818 | 68.9211002 |
| 16:39:21 | 0:25:05 | 72.5722324 | 66.7204764 | 67.1216949 | 65.5369818 | 68.9211002 |
| 16:39:22 | 0:25:06 | 72.5722324 | 70.7204764 | 67.1216949 | 64.5369818 | 70.9211002 |
| 16:39:23 | 0:25:07 | 72.5722324 | 71.7204764 | 68.1216949 | 64.5369818 | 71.9211002 |
| 16:39:24 | 0:25:08 | 72.5722324 | 70.7204764 | 68.1216949 | 65.5369818 | 70.9211002 |
| 16:39:25 | 0:25:09 | 72.5722324 | 69.7204764 | 68.1216949 | 65.5369818 | 70.9211002 |
| 16:39:26 | 0:25:10 | 72.5722324 | 68.7204764 | 68.1216949 | 64.5369818 | 70.9211002 |
| 16:39:27 | 0:25:11 | 72.5722324 | 66.7204764 | 68.1216949 | 64.5369818 | 71.9211002 |
| 16:39:28 | 0:25:12 | 72.5722324 | 66.7204764 | 68.1216949 | 64.5369818 | 74.9211002 |
| 16:39:29 | 0:25:13 | 70.5722324 | 67.7204764 | 68.1216949 | 65.5369818 | 79.9211002 |
| 16:39:30 | 0:25:14 | 70.5722324 | 67.7204764 | 68.1216949 | 64.5369818 | 81.9211002 |
| 16:39:31 | 0:25:15 | 69.5722324 | 66.7204764 | 69.1216949 | 64.5369818 | 80.9211002 |
| 16:39:32 | 0:25:16 | 69.5722324 | 66.7204764 | 69.1216949 | 64.5369818 | 80.9211002 |
| 16:39:33 | 0:25:17 | 69.5722324 | 65.7204764 | 69.1216949 | 65.5369818 | 74.9211002 |
| 16:39:34 | 0:25:18 | 69.5722324 | 65.7204764 | 69.1216949 | 65.5369818 | 69.9211002 |
| 16:39:35 | 0:25:19 | 69.5722324 | 65.7204764 | 70.1216949 | 65.5369818 | 68.9211002 |
| 16:39:36 | 0:25:20 | 69.5722324 | 65.7204764 | 70.1216949 | 65.5369818 | 68.9211002 |
| 16:39:37 | 0:25:21 | 68.5722324 | 65.7204764 | 70.1216949 | 66.5369818 | 71.9211002 |
| 16:39:38 | 0:25:22 | 68.5722324 | 65.7204764 | 70.1216949 | 66.5369818 | 74.9211002 |
| 16:39:39 | 0:25:23 | 68.5722324 | 65.7204764 | 70.1216949 | 67.5369818 | 74.9211002 |
| 16:39:40 | 0:25:24 | 68.5722324 | 65.7204764 | 73.1216949 | 67.5369818 | 73.9211002 |
| 16:39:41 | 0:25:25 | 69.5722324 | 68.7204764 | 73.1216949 | 67.5369818 | 73.9211002 |
| 16:39:42 | 0:25:26 | 69.5722324 | 68.7204764 | 74.1216949 | 67.5369818 | 74.9211002 |
| 16:39:43 | 0:25:27 | 70.5722324 | 70.7204764 | 74.1216949 | 67.5369818 | 75.9211002 |
| 16:39:44 | 0:25:28 | 70.5722324 | 71.7204764 | 74.1216949 | 67.5369818 | 77.9211002 |
| 16:39:45 | 0:25:29 | 70.5722324 | 71.7204764 | 74.1216949 | 67.5369818 | 77.9211002 |
| 16:39:46 | 0:25:30 | 70.5722324 | 71.7204764 | 76.1216949 | 68.5369818 | 80.9211002 |
| 16:39:47 | 0:25:31 | 70.5722324 | 71.7204764 | 79.1216949 | 68.5369818 | 80.9211002 |

|          |         |            |            |            |            |            |
|----------|---------|------------|------------|------------|------------|------------|
| 16:39:48 | 0:25:32 | 69.5722324 | 70.7204764 | 79.1216949 | 68.5369818 | 81.9211002 |
| 16:39:49 | 0:25:33 | 68.5722324 | 68.7204764 | 80.1216949 | 68.5369818 | 81.9211002 |
| 16:39:50 | 0:25:34 | 68.5722324 | 67.7204764 | 80.1216949 | 68.5369818 | 81.9211002 |
| 16:39:51 | 0:25:35 | 68.5722324 | 66.7204764 | 76.1216949 | 67.5369818 | 82.9211002 |
| 16:39:52 | 0:25:36 | 68.5722324 | 65.7204764 | 76.1216949 | 68.5369818 | 83.9211002 |
| 16:39:53 | 0:25:37 | 68.5722324 | 65.7204764 | 76.1216949 | 67.5369818 | 83.9211002 |
| 16:39:54 | 0:25:38 | 68.5722324 | 65.7204764 | 76.1216949 | 67.5369818 | 83.9211002 |
| 16:39:55 | 0:25:39 | 68.5722324 | 65.7204764 | 75.1216949 | 67.5369818 | 81.9211002 |
| 16:39:56 | 0:25:40 | 68.5722324 | 65.7204764 | 75.1216949 | 67.5369818 | 81.9211002 |
| 16:39:57 | 0:25:41 | 68.5722324 | 66.7204764 | 75.1216949 | 67.5369818 | 78.9211002 |
| 16:39:58 | 0:25:42 | 68.5722324 | 65.7204764 | 75.1216949 | 67.5369818 | 78.9211002 |
| 16:39:59 | 0:25:43 | 69.5722324 | 65.7204764 | 75.1216949 | 67.5369818 | 81.9211002 |
| 16:40:00 | 0:25:44 | 70.5722324 | 65.7204764 | 73.1216949 | 70.5369818 | 83.9211002 |
| 16:40:01 | 0:25:45 | 70.5722324 | 68.7204764 | 73.1216949 | 72.5369818 | 84.9211002 |
| 16:40:02 | 0:25:46 | 70.5722324 | 68.7204764 | 72.1216949 | 72.5369818 | 84.9211002 |
| 16:40:03 | 0:25:47 | 70.5722324 | 69.7204764 | 72.1216949 | 71.5369818 | 84.9211002 |
| 16:40:04 | 0:25:48 | 70.5722324 | 69.7204764 | 72.1216949 | 71.5369818 | 83.9211002 |
| 16:40:05 | 0:25:49 | 70.5722324 | 68.7204764 | 72.1216949 | 71.5369818 | 82.9211002 |
| 16:40:06 | 0:25:50 | 70.5722324 | 67.7204764 | 72.1216949 | 70.5369818 | 81.9211002 |
| 16:40:07 | 0:25:51 | 71.5722324 | 67.7204764 | 71.1216949 | 70.5369818 | 81.9211002 |
| 16:40:08 | 0:25:52 | 71.5722324 | 67.7204764 | 69.1216949 | 70.5369818 | 81.9211002 |
| 16:40:09 | 0:25:53 | 71.5722324 | 70.7204764 | 69.1216949 | 70.5369818 | 82.9211002 |
| 16:40:10 | 0:25:54 | 71.5722324 | 70.7204764 | 69.1216949 | 70.5369818 | 82.9211002 |
| 16:40:11 | 0:25:55 | 71.5722324 | 70.7204764 | 69.1216949 | 70.5369818 | 81.9211002 |
| 16:40:12 | 0:25:56 | 71.5722324 | 69.7204764 | 70.1216949 | 71.5369818 | 81.9211002 |
| 16:40:13 | 0:25:57 | 69.5722324 | 68.7204764 | 71.1216949 | 71.5369818 | 76.9211002 |
| 16:40:14 | 0:25:58 | 69.5722324 | 68.7204764 | 72.1216949 | 70.5369818 | 75.9211002 |
| 16:40:15 | 0:25:59 | 69.5722324 | 68.7204764 | 72.1216949 | 70.5369818 | 74.9211002 |
| 16:40:16 | 0:26:00 | 69.5722324 | 68.7204764 | 74.1216949 | 69.5369818 | 72.9211002 |
| 16:40:17 | 0:26:01 | 69.5722324 | 68.7204764 | 73.1216949 | 69.5369818 | 71.9211002 |
| 16:40:18 | 0:26:02 | 69.5722324 | 68.7204764 | 73.1216949 | 68.5369818 | 71.9211002 |
| 16:40:19 | 0:26:03 | 70.5722324 | 66.7204764 | 70.1216949 | 68.5369818 | 71.9211002 |
| 16:40:20 | 0:26:04 | 70.5722324 | 64.7204764 | 67.1216949 | 67.5369818 | 73.9211002 |
| 16:40:21 | 0:26:05 | 70.5722324 | 64.7204764 | 66.1216949 | 67.5369818 | 73.9211002 |
| 16:40:22 | 0:26:06 | 79.5722324 | 65.7204764 | 66.1216949 | 67.5369818 | 73.9211002 |
| 16:40:23 | 0:26:07 | 79.5722324 | 65.7204764 | 66.1216949 | 67.5369818 | 73.9211002 |
| 16:40:24 | 0:26:08 | 76.5722324 | 65.7204764 | 66.1216949 | 67.5369818 | 72.9211002 |
| 16:40:25 | 0:26:09 | 76.5722324 | 66.7204764 | 66.1216949 | 68.5369818 | 72.9211002 |
| 16:40:26 | 0:26:10 | 75.5722324 | 66.7204764 | 68.1216949 | 68.5369818 | 72.9211002 |
| 16:40:27 | 0:26:11 | 74.5722324 | 66.7204764 | 69.1216949 | 68.5369818 | 71.9211002 |
| 16:40:28 | 0:26:12 | 73.5722324 | 66.7204764 | 69.1216949 | 68.5369818 | 71.9211002 |
| 16:40:29 | 0:26:13 | 73.5722324 | 67.7204764 | 69.1216949 | 68.5369818 | 71.9211002 |
| 16:40:30 | 0:26:14 | 71.5722324 | 67.7204764 | 69.1216949 | 68.5369818 | 73.9211002 |
| 16:40:31 | 0:26:15 | 70.5722324 | 68.7204764 | 69.1216949 | 69.5369818 | 81.9211002 |
| 16:40:32 | 0:26:16 | 70.5722324 | 70.7204764 | 71.1216949 | 69.5369818 | 84.9211002 |

|          |         |            |            |            |            |            |
|----------|---------|------------|------------|------------|------------|------------|
| 16:40:33 | 0:26:17 | 68.5722324 | 71.7204764 | 71.1216949 | 66.5369818 | 84.9211002 |
| 16:40:34 | 0:26:18 | 68.5722324 | 75.7204764 | 71.1216949 | 65.5369818 | 86.9211002 |
| 16:40:35 | 0:26:19 | 68.5722324 | 79.7204764 | 67.1216949 | 65.5369818 | 86.9211002 |
| 16:40:36 | 0:26:20 | 68.5722324 | 80.7204764 | 66.1216949 | 66.5369818 | 86.9211002 |
| 16:40:37 | 0:26:21 | 67.5722324 | 79.7204764 | 66.1216949 | 66.5369818 | 86.9211002 |
| 16:40:38 | 0:26:22 | 67.5722324 | 79.7204764 | 66.1216949 | 65.5369818 | 85.9211002 |
| 16:40:39 | 0:26:23 | 67.5722324 | 79.7204764 | 66.1216949 | 65.5369818 | 85.9211002 |
| 16:40:40 | 0:26:24 | 68.5722324 | 78.7204764 | 66.1216949 | 65.5369818 | 85.9211002 |
| 16:40:41 | 0:26:25 | 68.5722324 | 78.7204764 | 66.1216949 | 65.5369818 | 77.9211002 |
| 16:40:42 | 0:26:26 | 68.5722324 | 77.7204764 | 66.1216949 | 66.5369818 | 74.9211002 |
| 16:40:43 | 0:26:27 | 69.5722324 | 77.7204764 | 66.1216949 | 67.5369818 | 70.9211002 |
| 16:40:44 | 0:26:28 | 69.5722324 | 77.7204764 | 66.1216949 | 71.5369818 | 70.9211002 |
| 16:40:45 | 0:26:29 | 67.5722324 | 70.7204764 | 66.1216949 | 71.5369818 | 67.9211002 |
| 16:40:46 | 0:26:30 | 67.5722324 | 63.7204764 | 66.1216949 | 71.5369818 | 67.9211002 |
| 16:40:47 | 0:26:31 | 67.5722324 | 62.7204764 | 66.1216949 | 70.5369818 | 67.9211002 |
| 16:40:48 | 0:26:32 | 67.5722324 | 62.7204764 | 66.1216949 | 70.5369818 | 67.9211002 |
| 16:40:49 | 0:26:33 | 67.5722324 | 62.7204764 | 66.1216949 | 68.5369818 | 67.9211002 |
| 16:40:50 | 0:26:34 | 67.5722324 | 63.7204764 | 67.1216949 | 67.5369818 | 64.9211002 |
| 16:40:51 | 0:26:35 | 66.5722324 | 63.7204764 | 67.1216949 | 66.5369818 | 64.9211002 |
| 16:40:52 | 0:26:36 | 66.5722324 | 63.7204764 | 66.1216949 | 66.5369818 | 68.9211002 |
| 16:40:53 | 0:26:37 | 66.5722324 | 59.7204764 | 66.1216949 | 66.5369818 | 70.9211002 |
| 16:40:54 | 0:26:38 | 66.5722324 | 59.7204764 | 66.1216949 | 65.5369818 | 73.9211002 |
| 16:40:55 | 0:26:39 | 66.5722324 | 59.7204764 | 66.1216949 | 65.5369818 | 74.9211002 |
| 16:40:56 | 0:26:40 | 66.5722324 | 59.7204764 | 67.1216949 | 66.5369818 | 75.9211002 |
| 16:40:57 | 0:26:41 | 66.5722324 | 59.7204764 | 66.1216949 | 66.5369818 | 75.9211002 |
| 16:40:58 | 0:26:42 | 66.5722324 | 59.7204764 | 66.1216949 | 65.5369818 | 69.9211002 |
| 16:40:59 | 0:26:43 | 66.5722324 | 60.7204764 | 66.1216949 | 66.5369818 | 68.9211002 |
| 16:41:00 | 0:26:44 | 66.5722324 | 61.7204764 | 66.1216949 | 66.5369818 | 68.9211002 |
| 16:41:01 | 0:26:45 | 66.5722324 | 62.7204764 | 66.1216949 | 65.5369818 | 66.9211002 |
| 16:41:02 | 0:26:46 | 66.5722324 | 62.7204764 | 66.1216949 | 65.5369818 | 66.9211002 |
| 16:41:03 | 0:26:47 | 66.5722324 | 62.7204764 | 67.1216949 | 64.5369818 | 67.9211002 |
| 16:41:04 | 0:26:48 | 65.5722324 | 63.7204764 | 67.1216949 | 64.5369818 | 67.9211002 |
| 16:41:05 | 0:26:49 | 63.5722324 | 63.7204764 | 67.1216949 | 64.5369818 | 67.9211002 |
| 16:41:06 | 0:26:50 | 63.5722324 | 63.7204764 | 67.1216949 | 64.5369818 | 65.9211002 |
| 16:41:07 | 0:26:51 | 63.5722324 | 63.7204764 | 67.1216949 | 63.5369818 | 65.9211002 |
| 16:41:08 | 0:26:52 | 63.5722324 | 61.7204764 | 67.1216949 | 63.5369818 | 65.9211002 |
| 16:41:09 | 0:26:53 | 63.5722324 | 60.7204764 | 67.1216949 | 63.5369818 | 65.9211002 |
| 16:41:10 | 0:26:54 | 63.5722324 | 61.7204764 | 67.1216949 | 63.5369818 | 65.9211002 |
| 16:41:11 | 0:26:55 | 62.5722324 | 62.7204764 | 68.1216949 | 63.5369818 | 65.9211002 |
| 16:41:12 | 0:26:56 | 63.5722324 | 63.7204764 | 72.1216949 | 63.5369818 | 65.9211002 |
| 16:41:13 | 0:26:57 | 63.5722324 | 63.7204764 | 73.1216949 | 62.5369818 | 66.9211002 |
| 16:41:14 | 0:26:58 | 64.5722324 | 64.7204764 | 73.1216949 | 62.5369818 | 66.9211002 |
| 16:41:15 | 0:26:59 | 65.5722324 | 64.7204764 | 72.1216949 | 62.5369818 | 66.9211002 |
| 16:41:16 | 0:27:00 | 65.5722324 | 64.7204764 | 69.1216949 | 63.5369818 | 66.9211002 |
| 16:41:17 | 0:27:01 | 65.5722324 | 67.7204764 | 69.1216949 | 63.5369818 | 67.9211002 |

|          |         |            |            |            |            |            |
|----------|---------|------------|------------|------------|------------|------------|
| 16:41:18 | 0:27:02 | 65.5722324 | 67.7204764 | 68.1216949 | 63.5369818 | 70.9211002 |
| 16:41:19 | 0:27:03 | 65.5722324 | 68.7204764 | 68.1216949 | 63.5369818 | 70.9211002 |
| 16:41:20 | 0:27:04 | 66.5722324 | 69.7204764 | 69.1216949 | 63.5369818 | 74.9211002 |
| 16:41:21 | 0:27:05 | 66.5722324 | 69.7204764 | 68.1216949 | 64.5369818 | 75.9211002 |
| 16:41:22 | 0:27:06 | 67.5722324 | 71.7204764 | 68.1216949 | 64.5369818 | 80.9211002 |
| 16:41:23 | 0:27:07 | 68.5722324 | 73.7204764 | 68.1216949 | 63.5369818 | 80.9211002 |
| 16:41:24 | 0:27:08 | 68.5722324 | 75.7204764 | 68.1216949 | 63.5369818 | 81.9211002 |
| 16:41:25 | 0:27:09 | 68.5722324 | 76.7204764 | 68.1216949 | 63.5369818 | 81.9211002 |
| 16:41:26 | 0:27:10 | 68.5722324 | 78.7204764 | 68.1216949 | 63.5369818 | 77.9211002 |
| 16:41:27 | 0:27:11 | 63.5722324 | 78.7204764 | 69.1216949 | 62.5369818 | 73.9211002 |
| 16:41:28 | 0:27:12 | 63.5722324 | 78.7204764 | 68.1216949 | 62.5369818 | 71.9211002 |
| 16:41:29 | 0:27:13 | 63.5722324 | 79.7204764 | 68.1216949 | 62.5369818 | 71.9211002 |
| 16:41:30 | 0:27:14 | 63.5722324 | 77.7204764 | 68.1216949 | 63.5369818 | 72.9211002 |
| 16:41:31 | 0:27:15 | 64.5722324 | 77.7204764 | 66.1216949 | 63.5369818 | 72.9211002 |
| 16:41:32 | 0:27:16 | 64.5722324 | 77.7204764 | 66.1216949 | 63.5369818 | 72.9211002 |
| 16:41:33 | 0:27:17 | 65.5722324 | 77.7204764 | 66.1216949 | 63.5369818 | 72.9211002 |
| 16:41:34 | 0:27:18 | 64.5722324 | 77.7204764 | 66.1216949 | 63.5369818 | 71.9211002 |
| 16:41:35 | 0:27:19 | 64.5722324 | 74.7204764 | 66.1216949 | 63.5369818 | 71.9211002 |
| 16:41:36 | 0:27:20 | 64.5722324 | 73.7204764 | 68.1216949 | 62.5369818 | 70.9211002 |
| 16:41:37 | 0:27:21 | 64.5722324 | 70.7204764 | 68.1216949 | 63.5369818 | 70.9211002 |
| 16:41:38 | 0:27:22 | 64.5722324 | 67.7204764 | 68.1216949 | 63.5369818 | 70.9211002 |
| 16:41:39 | 0:27:23 | 63.5722324 | 66.7204764 | 68.1216949 | 64.5369818 | 71.9211002 |
| 16:41:40 | 0:27:24 | 62.5722324 | 66.7204764 | 68.1216949 | 64.5369818 | 72.9211002 |
| 16:41:41 | 0:27:25 | 62.5722324 | 67.7204764 | 68.1216949 | 64.5369818 | 72.9211002 |
| 16:41:42 | 0:27:26 | 62.5722324 | 67.7204764 | 68.1216949 | 64.5369818 | 72.9211002 |
| 16:41:43 | 0:27:27 | 62.5722324 | 67.7204764 | 67.1216949 | 64.5369818 | 72.9211002 |
| 16:41:44 | 0:27:28 | 62.5722324 | 67.7204764 | 67.1216949 | 68.5369818 | 73.9211002 |
| 16:41:45 | 0:27:29 | 62.5722324 | 67.7204764 | 67.1216949 | 68.5369818 | 73.9211002 |
| 16:41:46 | 0:27:30 | 64.5722324 | 67.7204764 | 66.1216949 | 69.5369818 | 73.9211002 |
| 16:41:47 | 0:27:31 | 64.5722324 | 67.7204764 | 66.1216949 | 69.5369818 | 73.9211002 |
| 16:41:48 | 0:27:32 | 64.5722324 | 66.7204764 | 66.1216949 | 69.5369818 | 73.9211002 |
| 16:41:49 | 0:27:33 | 64.5722324 | 66.7204764 | 66.1216949 | 71.5369818 | 74.9211002 |
| 16:41:50 | 0:27:34 | 64.5722324 | 66.7204764 | 66.1216949 | 71.5369818 | 75.9211002 |
| 16:41:51 | 0:27:35 | 64.5722324 | 66.7204764 | 66.1216949 | 72.5369818 | 78.9211002 |
| 16:41:52 | 0:27:36 | 64.5722324 | 66.7204764 | 66.1216949 | 72.5369818 | 78.9211002 |
| 16:41:53 | 0:27:37 | 64.5722324 | 67.7204764 | 66.1216949 | 72.5369818 | 78.9211002 |
| 16:41:54 | 0:27:38 | 64.5722324 | 67.7204764 | 66.1216949 | 81.5369818 | 78.9211002 |
| 16:41:55 | 0:27:39 | 63.5722324 | 67.7204764 | 66.1216949 | 87.5369818 | 78.9211002 |
| 16:41:56 | 0:27:40 | 63.5722324 | 67.7204764 | 66.1216949 | 87.5369818 | 78.9211002 |
| 16:41:57 | 0:27:41 | 63.5722324 | 67.7204764 | 67.1216949 | 74.2575075 | 79.9211002 |
| 16:41:58 | 0:27:42 | 63.5722324 | 67.7204764 | 68.1216949 | 75.9717932 | 82.9211002 |
| 16:41:59 | 0:27:43 | 63.5722324 | 67.7204764 | 69.1216949 | 76.4003646 | 82.9211002 |
| 16:42:00 | 0:27:44 | 63.5722324 | 68.7204764 | 69.1216949 | 76.6860789 | 84.9211002 |
| 16:42:01 | 0:27:45 | 63.5722324 | 68.7204764 | 70.1216949 | 76.9717932 | 84.9211002 |
| 16:42:02 | 0:27:46 | 63.5722324 | 68.7204764 | 70.1216949 | 76.5432218 | 84.9211002 |

|          |         |            |            |            |            |            |
|----------|---------|------------|------------|------------|------------|------------|
| 16:42:03 | 0:27:47 | 63.5722324 | 69.7204764 | 70.1216949 | 76.9717932 | 84.9211002 |
| 16:42:04 | 0:27:48 | 64.5722324 | 68.7204764 | 72.1216949 | 77.4003646 | 84.9211002 |
| 16:42:05 | 0:27:49 | 64.5722324 | 68.7204764 | 72.1216949 | 77.4003646 | 84.9211002 |
| 16:42:06 | 0:27:50 | 64.5722324 | 68.7204764 | 73.1216949 | 77.5432218 | 84.9211002 |
| 16:42:07 | 0:27:51 | 64.5722324 | 68.7204764 | 74.1216949 | 77.9717932 | 86.9211002 |
| 16:42:08 | 0:27:52 | 64.5722324 | 68.7204764 | 74.1216949 | 78.1146503 | 86.9211002 |
| 16:42:09 | 0:27:53 | 64.5722324 | 68.7204764 | 76.1216949 | 78.5432218 | 86.9211002 |
| 16:42:10 | 0:27:54 | 64.5722324 | 68.7204764 | 77.1216949 | 78.5432218 | 85.9211002 |
| 16:42:11 | 0:27:55 | 64.5722324 | 69.7204764 | 77.1216949 | 83.5369818 | 86.9211002 |
| 16:42:12 | 0:27:56 | 64.5722324 | 76.7204764 | 77.1216949 | 81.5369818 | 86.9211002 |
| 16:42:13 | 0:27:57 | 64.5722324 | 83.7204764 | 77.1216949 | 78.5369818 | 88.9211002 |
| 16:42:14 | 0:27:58 | 64.5722324 | 86.7204764 | 77.1216949 | 75.5369818 | 88.9211002 |
| 16:42:15 | 0:27:59 | 65.5722324 | 86.7204764 | 76.1216949 | 74.5369818 | 88.9211002 |
| 16:42:16 | 0:28:00 | 65.5722324 | 86.7204764 | 76.1216949 | 72.5369818 | 89.9211002 |
| 16:42:17 | 0:28:01 | 65.5722324 | 85.7204764 | 76.1216949 | 70.5369818 | 89.9211002 |
| 16:42:18 | 0:28:02 | 66.5722324 | 77.7204764 | 83.1216949 | 70.5369818 | 90.9211002 |
| 16:42:19 | 0:28:03 | 66.5722324 | 74.7204764 | 88.1216949 | 70.5369818 | 90.9211002 |
| 16:42:20 | 0:28:04 | 67.5722324 | 74.7204764 | 89.1216949 | 70.5369818 | 77.2575075 |
| 16:42:21 | 0:28:05 | 68.5722324 | 73.7204764 | 89.1216949 | 71.5369818 | 77.5432218 |
| 16:42:22 | 0:28:06 | 68.5722324 | 72.7204764 | 89.1216949 | 71.5369818 | 77.4003646 |
| 16:42:23 | 0:28:07 | 68.5722324 | 72.7204764 | 89.1216949 | 71.5369818 | 77.4003646 |
| 16:42:24 | 0:28:08 | 67.5722324 | 72.7204764 | 88.1216949 | 71.5369818 | 76.9717932 |
| 16:42:25 | 0:28:09 | 66.5722324 | 73.7204764 | 88.1216949 | 69.5369818 | 87.9211002 |
| 16:42:26 | 0:28:10 | 65.5722324 | 73.7204764 | 82.1216949 | 67.5369818 | 77.9211002 |
| 16:42:27 | 0:28:11 | 65.5722324 | 70.7204764 | 71.1216949 | 66.5369818 | 73.9211002 |
| 16:42:28 | 0:28:12 | 64.5722324 | 68.7204764 | 70.1216949 | 66.5369818 | 71.9211002 |
| 16:42:29 | 0:28:13 | 65.5722324 | 68.7204764 | 70.1216949 | 66.5369818 | 71.9211002 |
| 16:42:30 | 0:28:14 | 65.5722324 | 66.7204764 | 69.1216949 | 66.5369818 | 72.9211002 |
| 16:42:31 | 0:28:15 | 65.5722324 | 65.7204764 | 68.1216949 | 65.5369818 | 72.9211002 |
| 16:42:32 | 0:28:16 | 65.5722324 | 65.7204764 | 68.1216949 | 65.5369818 | 72.9211002 |
| 16:42:33 | 0:28:17 | 66.5722324 | 65.7204764 | 67.1216949 | 66.5369818 | 74.9211002 |
| 16:42:34 | 0:28:18 | 66.5722324 | 65.7204764 | 66.1216949 | 66.5369818 | 75.9211002 |
| 16:42:35 | 0:28:19 | 67.5722324 | 65.7204764 | 66.1216949 | 66.5369818 | 75.9211002 |
| 16:42:36 | 0:28:20 | 67.5722324 | 65.7204764 | 66.1216949 | 66.5369818 | 75.9211002 |
| 16:42:37 | 0:28:21 | 67.5722324 | 64.7204764 | 66.1216949 | 66.5369818 | 75.9211002 |
| 16:42:38 | 0:28:22 | 67.5722324 | 63.7204764 | 66.1216949 | 66.5369818 | 75.9211002 |
| 16:42:39 | 0:28:23 | 67.5722324 | 63.7204764 | 65.1216949 | 66.5369818 | 75.9211002 |
| 16:42:40 | 0:28:24 | 67.5722324 | 62.7204764 | 65.1216949 | 66.5369818 | 74.9211002 |
| 16:42:41 | 0:28:25 | 67.5722324 | 69.7204764 | 65.1216949 | 66.5369818 | 74.9211002 |
| 16:42:42 | 0:28:26 | 68.5722324 | 71.7204764 | 65.1216949 | 66.5369818 | 74.9211002 |
| 16:42:43 | 0:28:27 | 68.5722324 | 71.7204764 | 65.1216949 | 67.5369818 | 74.9211002 |
| 16:42:44 | 0:28:28 | 68.5722324 | 71.7204764 | 65.1216949 | 69.5369818 | 74.9211002 |
| 16:42:45 | 0:28:29 | 69.5722324 | 72.7204764 | 65.1216949 | 71.5369818 | 74.9211002 |
| 16:42:46 | 0:28:30 | 71.5722324 | 72.7204764 | 65.1216949 | 74.5369818 | 74.9211002 |
| 16:42:47 | 0:28:31 | 71.5722324 | 72.7204764 | 65.1216949 | 73.5369818 | 74.9211002 |



|          |         |            |            |            |            |            |
|----------|---------|------------|------------|------------|------------|------------|
| 16:42:48 | 0:28:32 | 71.5722324 | 76.7204764 | 65.1216949 | 73.5369818 | 74.9211002 |
| 16:42:49 | 0:28:33 | 71.5722324 | 76.7204764 | 65.1216949 | 68.5369818 | 74.9211002 |
| 16:42:50 | 0:28:34 | 72.5722324 | 74.7204764 | 65.1216949 | 67.5369818 | 74.9211002 |
| 16:42:51 | 0:28:35 | 72.5722324 | 74.7204764 | 65.1216949 | 67.5369818 | 74.9211002 |
| 16:42:52 | 0:28:36 | 71.5722324 | 71.7204764 | 65.1216949 | 67.5369818 | 74.9211002 |
| 16:42:53 | 0:28:37 | 71.5722324 | 70.7204764 | 67.1216949 | 67.5369818 | 77.9211002 |
| 16:42:54 | 0:28:38 | 73.5722324 | 70.7204764 | 68.1216949 | 67.5369818 | 77.9211002 |
| 16:42:55 | 0:28:39 | 73.5722324 | 68.7204764 | 67.1216949 | 67.5369818 | 78.9211002 |
| 16:42:56 | 0:28:40 | 74.5722324 | 68.7204764 | 66.1216949 | 67.5369818 | 79.9211002 |
| 16:42:57 | 0:28:41 | 74.5722324 | 68.7204764 | 66.1216949 | 66.5369818 | 79.9211002 |
| 16:42:58 | 0:28:42 | 74.5722324 | 68.7204764 | 66.1216949 | 66.5369818 | 79.9211002 |
| 16:42:59 | 0:28:43 | 74.5722324 | 67.7204764 | 67.1216949 | 65.5369818 | 79.9211002 |
| 16:43:00 | 0:28:44 | 74.5722324 | 67.7204764 | 67.1216949 | 65.5369818 | 79.9211002 |
| 16:43:01 | 0:28:45 | 70.5722324 | 65.7204764 | 68.1216949 | 65.5369818 | 82.9211002 |
| 16:43:02 | 0:28:46 | 70.5722324 | 65.7204764 | 69.1216949 | 65.5369818 | 85.9211002 |
| 16:43:03 | 0:28:47 | 67.5722324 | 65.7204764 | 69.1216949 | 65.5369818 | 85.9211002 |
| 16:43:04 | 0:28:48 | 67.5722324 | 65.7204764 | 69.1216949 | 65.5369818 | 84.9211002 |
| 16:43:05 | 0:28:49 | 67.5722324 | 65.7204764 | 69.1216949 | 65.5369818 | 84.9211002 |
| 16:43:06 | 0:28:50 | 67.5722324 | 65.7204764 | 69.1216949 | 63.5369818 | 84.9211002 |
| 16:43:07 | 0:28:51 | 67.5722324 | 65.7204764 | 68.1216949 | 64.5369818 | 81.9211002 |
| 16:43:08 | 0:28:52 | 67.5722324 | 65.7204764 | 67.1216949 | 66.5369818 | 81.9211002 |
| 16:43:09 | 0:28:53 | 67.5722324 | 65.7204764 | 66.1216949 | 66.5369818 | 82.9211002 |
| 16:43:10 | 0:28:54 | 67.5722324 | 68.7204764 | 66.1216949 | 66.5369818 | 82.9211002 |
| 16:43:11 | 0:28:55 | 69.5722324 | 68.7204764 | 66.1216949 | 67.5369818 | 82.9211002 |
| 16:43:12 | 0:28:56 | 69.5722324 | 68.7204764 | 66.1216949 | 67.5369818 | 82.9211002 |
| 16:43:13 | 0:28:57 | 69.5722324 | 69.7204764 | 66.1216949 | 67.5369818 | 79.9211002 |
| 16:43:14 | 0:28:58 | 68.5722324 | 69.7204764 | 66.1216949 | 68.5369818 | 78.9211002 |
| 16:43:15 | 0:28:59 | 68.5722324 | 69.7204764 | 66.1216949 | 69.5369818 | 78.9211002 |
| 16:43:16 | 0:29:00 | 68.5722324 | 68.7204764 | 65.1216949 | 71.5369818 | 78.9211002 |
| 16:43:17 | 0:29:01 | 68.5722324 | 68.7204764 | 65.1216949 | 72.5369818 | 78.9211002 |
| 16:43:18 | 0:29:02 | 67.5722324 | 68.7204764 | 65.1216949 | 73.5369818 | 77.9211002 |
| 16:43:19 | 0:29:03 | 67.5722324 | 68.7204764 | 65.1216949 | 77.5369818 | 77.9211002 |
| 16:43:20 | 0:29:04 | 67.5722324 | 67.7204764 | 65.1216949 | 80.5369818 | 77.9211002 |
| 16:43:21 | 0:29:05 | 68.5722324 | 66.7204764 | 65.1216949 | 86.5369818 | 76.9211002 |
| 16:43:22 | 0:29:06 | 68.5722324 | 66.7204764 | 65.1216949 | 73.5432218 | 76.9211002 |
| 16:43:23 | 0:29:07 | 68.5722324 | 66.7204764 | 65.1216949 | 73.6860789 | 76.9211002 |
| 16:43:24 | 0:29:08 | 68.5722324 | 66.7204764 | 65.1216949 | 81.5369818 | 73.9211002 |
| 16:43:25 | 0:29:09 | 68.5722324 | 69.7204764 | 65.1216949 | 77.5369818 | 72.9211002 |
| 16:43:26 | 0:29:10 | 68.5722324 | 69.7204764 | 66.1216949 | 71.5369818 | 72.9211002 |
| 16:43:27 | 0:29:11 | 70.5722324 | 69.7204764 | 66.1216949 | 68.5369818 | 72.9211002 |
| 16:43:28 | 0:29:12 | 71.5722324 | 69.7204764 | 68.1216949 | 68.5369818 | 71.9211002 |
| 16:43:29 | 0:29:13 | 72.5722324 | 70.7204764 | 67.1216949 | 67.5369818 | 70.9211002 |
| 16:43:30 | 0:29:14 | 72.5722324 | 70.7204764 | 67.1216949 | 67.5369818 | 70.9211002 |
| 16:43:31 | 0:29:15 | 70.5722324 | 66.7204764 | 67.1216949 | 65.5369818 | 70.9211002 |
| 16:43:32 | 0:29:16 | 70.5722324 | 65.7204764 | 67.1216949 | 65.5369818 | 70.9211002 |

|          |         |            |            |            |            |            |
|----------|---------|------------|------------|------------|------------|------------|
| 16:43:33 | 0:29:17 | 70.5722324 | 65.7204764 | 66.1216949 | 65.5369818 | 70.9211002 |
| 16:43:34 | 0:29:18 | 70.5722324 | 65.7204764 | 67.1216949 | 65.5369818 | 72.9211002 |
| 16:43:35 | 0:29:19 | 70.5722324 | 65.7204764 | 67.1216949 | 65.5369818 | 75.9211002 |
| 16:43:36 | 0:29:20 | 71.5722324 | 65.7204764 | 68.1216949 | 65.5369818 | 75.9211002 |
| 16:43:37 | 0:29:21 | 71.5722324 | 65.7204764 | 69.1216949 | 66.5369818 | 83.9211002 |
| 16:43:38 | 0:29:22 | 71.5722324 | 67.7204764 | 69.1216949 | 66.5369818 | 85.9211002 |
| 16:43:39 | 0:29:23 | 71.5722324 | 74.7204764 | 69.1216949 | 66.5369818 | 84.9211002 |
| 16:43:40 | 0:29:24 | 71.5722324 | 74.7204764 | 68.1216949 | 66.5369818 | 81.9211002 |
| 16:43:41 | 0:29:25 | 70.5722324 | 72.7204764 | 68.1216949 | 66.5369818 | 81.9211002 |
| 16:43:42 | 0:29:26 | 70.5722324 | 71.7204764 | 69.1216949 | 67.5369818 | 80.9211002 |
| 16:43:43 | 0:29:27 | 67.5722324 | 69.7204764 | 69.1216949 | 68.5369818 | 80.9211002 |
| 16:43:44 | 0:29:28 | 67.5722324 | 69.7204764 | 69.1216949 | 68.5369818 | 80.9211002 |
| 16:43:45 | 0:29:29 | 67.5722324 | 63.7204764 | 71.1216949 | 68.5369818 | 79.9211002 |
| 16:43:46 | 0:29:30 | 67.5722324 | 63.7204764 | 71.1216949 | 68.5369818 | 77.9211002 |
| 16:43:47 | 0:29:31 | 67.5722324 | 64.7204764 | 72.1216949 | 68.5369818 | 77.9211002 |
| 16:43:48 | 0:29:32 | 66.5722324 | 65.7204764 | 72.1216949 | 68.5369818 | 77.9211002 |
| 16:43:49 | 0:29:33 | 66.5722324 | 65.7204764 | 73.1216949 | 68.5369818 | 74.9211002 |
| 16:43:50 | 0:29:34 | 66.5722324 | 65.7204764 | 73.1216949 | 68.5369818 | 73.9211002 |
| 16:43:51 | 0:29:35 | 65.5722324 | 64.7204764 | 74.1216949 | 68.5369818 | 71.9211002 |
| 16:43:52 | 0:29:36 | 64.5722324 | 63.7204764 | 75.1216949 | 68.5369818 | 70.9211002 |
| 16:43:53 | 0:29:37 | 64.5722324 | 63.7204764 | 75.1216949 | 68.5369818 | 70.9211002 |
| 16:43:54 | 0:29:38 | 64.5722324 | 62.7204764 | 76.1216949 | 69.5369818 | 70.9211002 |
| 16:43:55 | 0:29:39 | 64.5722324 | 62.7204764 | 75.1216949 | 69.5369818 | 70.9211002 |
| 16:43:56 | 0:29:40 | 64.5722324 | 61.7204764 | 73.1216949 | 68.5369818 | 70.9211002 |
| 16:43:57 | 0:29:41 | 64.5722324 | 61.7204764 | 70.1216949 | 68.5369818 | 70.9211002 |
| 16:43:58 | 0:29:42 | 65.5722324 | 61.7204764 | 70.1216949 | 67.5369818 | 69.9211002 |
| 16:43:59 | 0:29:43 | 65.5722324 | 61.7204764 | 70.1216949 | 67.5369818 | 72.9211002 |
| 16:44:00 | 0:29:44 | 65.5722324 | 61.7204764 | 70.1216949 | 67.5369818 | 75.9211002 |
| 16:44:01 | 0:29:45 | 66.5722324 | 61.7204764 | 70.1216949 | 67.5369818 | 77.9211002 |
| 16:44:02 | 0:29:46 | 65.5722324 | 61.7204764 | 70.1216949 | 66.5369818 | 79.9211002 |
| 16:44:03 | 0:29:47 | 66.5722324 | 67.7204764 | 71.1216949 | 66.5369818 | 81.9211002 |
| 16:44:04 | 0:29:48 | 66.5722324 | 69.7204764 | 71.1216949 | 67.5369818 | 81.9211002 |
| 16:44:05 | 0:29:49 | 66.5722324 | 69.7204764 | 70.1216949 | 67.5369818 | 81.9211002 |
| 16:44:06 | 0:29:50 | 67.5722324 | 69.7204764 | 70.1216949 | 67.5369818 | 80.9211002 |
| 16:44:07 | 0:29:51 | 67.5722324 | 69.7204764 | 70.1216949 | 67.5369818 | 80.9211002 |
| 16:44:08 | 0:29:52 | 68.5722324 | 69.7204764 | 69.1216949 | 67.5369818 | 77.9211002 |
| 16:44:09 | 0:29:53 | 70.5722324 | 69.7204764 | 69.1216949 | 66.5369818 | 76.9211002 |
| 16:44:10 | 0:29:54 | 69.5722324 | 71.7204764 | 70.1216949 | 66.5369818 | 75.9211002 |
| 16:44:11 | 0:29:55 | 69.5722324 | 66.7204764 | 69.1216949 | 64.5369818 | 75.9211002 |
| 16:44:12 | 0:29:56 | 66.5722324 | 64.7204764 | 69.1216949 | 65.5369818 | 75.9211002 |
| 16:44:13 | 0:29:57 | 65.5722324 | 62.7204764 | 69.1216949 | 65.5369818 | 78.9211002 |
| 16:44:14 | 0:29:58 | 65.5722324 | 62.7204764 | 69.1216949 | 65.5369818 | 79.9211002 |
| 16:44:15 | 0:29:59 | 65.5722324 | 60.7204764 | 69.1216949 | 66.5369818 | 80.9211002 |
| 16:44:16 | 0:30:00 | 65.5722324 | 60.7204764 | 69.1216949 | 67.5369818 | 82.9211002 |
| 16:44:17 | 0:30:01 | 64.5722324 | 61.7204764 | 69.1216949 | 67.5369818 | 84.9211002 |

|          |         |            |            |            |            |            |
|----------|---------|------------|------------|------------|------------|------------|
| 16:44:18 | 0:30:02 | 64.5722324 | 61.7204764 | 69.1216949 | 68.5369818 | 84.9211002 |
| 16:44:19 | 0:30:03 | 63.5722324 | 61.7204764 | 69.1216949 | 68.5369818 | 83.9211002 |
| 16:44:20 | 0:30:04 | 63.5722324 | 61.7204764 | 70.1216949 | 69.5369818 | 82.9211002 |
| 16:44:21 | 0:30:05 | 63.5722324 | 61.7204764 | 71.1216949 | 69.5369818 | 83.9211002 |
| 16:44:22 | 0:30:06 | 63.5722324 | 60.7204764 | 72.1216949 | 70.5369818 | 83.9211002 |
| 16:44:23 | 0:30:07 | 62.5722324 | 60.7204764 | 71.1216949 | 70.5369818 | 81.9211002 |
| 16:44:24 | 0:30:08 | 62.5722324 | 60.7204764 | 71.1216949 | 70.5369818 | 81.9211002 |
| 16:44:25 | 0:30:09 | 62.5722324 | 60.7204764 | 71.1216949 | 73.5369818 | 77.9211002 |
| 16:44:26 | 0:30:10 | 63.5722324 | 60.7204764 | 71.1216949 | 73.5369818 | 74.9211002 |
| 16:44:27 | 0:30:11 | 63.5722324 | 61.7204764 | 71.1216949 | 74.5369818 | 71.9211002 |
| 16:44:28 | 0:30:12 | 64.5722324 | 61.7204764 | 72.1216949 | 76.5369818 | 69.9211002 |
| 16:44:29 | 0:30:13 | 64.5722324 | 61.7204764 | 73.1216949 | 79.5369818 | 69.9211002 |
| 16:44:30 | 0:30:14 | 64.5722324 | 62.7204764 | 74.1216949 | 81.5369818 | 69.9211002 |
| 16:44:31 | 0:30:15 | 64.5722324 | 62.7204764 | 74.1216949 | 79.5369818 | 69.9211002 |
| 16:44:32 | 0:30:16 | 63.5722324 | 61.7204764 | 72.1216949 | 79.5369818 | 72.9211002 |
| 16:44:33 | 0:30:17 | 63.5722324 | 62.7204764 | 71.1216949 | 75.5369818 | 74.9211002 |
| 16:44:34 | 0:30:18 | 63.5722324 | 61.7204764 | 71.1216949 | 69.5369818 | 77.9211002 |
| 16:44:35 | 0:30:19 | 63.5722324 | 61.7204764 | 71.1216949 | 66.5369818 | 76.9211002 |
| 16:44:36 | 0:30:20 | 63.5722324 | 61.7204764 | 71.1216949 | 65.5369818 | 76.9211002 |
| 16:44:37 | 0:30:21 | 63.5722324 | 61.7204764 | 71.1216949 | 64.5369818 | 76.9211002 |
| 16:44:38 | 0:30:22 | 63.5722324 | 61.7204764 | 71.1216949 | 63.5369818 | 76.9211002 |
| 16:44:39 | 0:30:23 | 63.5722324 | 61.7204764 | 71.1216949 | 63.5369818 | 79.9211002 |
| 16:44:40 | 0:30:24 | 63.5722324 | 61.7204764 | 71.1216949 | 63.5369818 | 82.9211002 |
| 16:44:41 | 0:30:25 | 63.5722324 | 61.7204764 | 71.1216949 | 62.5369818 | 70.4003646 |
| 16:44:42 | 0:30:26 | 63.5722324 | 61.7204764 | 71.1216949 | 62.5369818 | 70.5432218 |
| 16:44:43 | 0:30:27 | 63.5722324 | 62.7204764 | 71.1216949 | 62.5369818 | 70.828936  |
| 16:44:44 | 0:30:28 | 63.5722324 | 62.7204764 | 68.1216949 | 63.5369818 | 70.828936  |
| 16:44:45 | 0:30:29 | 63.5722324 | 62.7204764 | 68.1216949 | 63.5369818 | 70.828936  |
| 16:44:46 | 0:30:30 | 63.5722324 | 63.7204764 | 68.1216949 | 62.5369818 | 70.9717932 |
| 16:44:47 | 0:30:31 | 63.5722324 | 63.7204764 | 68.1216949 | 62.5369818 | 70.9717932 |
| 16:44:48 | 0:30:32 | 63.5722324 | 63.7204764 | 68.1216949 | 62.5369818 | 84.9211002 |
| 16:44:49 | 0:30:33 | 63.5722324 | 63.7204764 | 69.1216949 | 63.5369818 | 79.9211002 |
| 16:44:50 | 0:30:34 | 63.5722324 | 64.7204764 | 70.1216949 | 63.5369818 | 78.9211002 |
| 16:44:51 | 0:30:35 | 64.5722324 | 64.7204764 | 70.1216949 | 63.5369818 | 76.9211002 |
| 16:44:52 | 0:30:36 | 66.5722324 | 65.7204764 | 70.1216949 | 64.5369818 | 74.9211002 |
| 16:44:53 | 0:30:37 | 66.5722324 | 65.7204764 | 71.1216949 | 64.5369818 | 74.9211002 |
| 16:44:54 | 0:30:38 | 66.5722324 | 63.7204764 | 70.1216949 | 63.5369818 | 74.9211002 |
| 16:44:55 | 0:30:39 | 67.5722324 | 64.7204764 | 70.1216949 | 63.5369818 | 79.9211002 |
| 16:44:56 | 0:30:40 | 67.5722324 | 64.7204764 | 70.1216949 | 64.5369818 | 80.9211002 |
| 16:44:57 | 0:30:41 | 67.5722324 | 63.7204764 | 70.1216949 | 63.5369818 | 80.9211002 |
| 16:44:58 | 0:30:42 | 67.5722324 | 63.7204764 | 70.1216949 | 62.5369818 | 79.9211002 |
| 16:44:59 | 0:30:43 | 67.5722324 | 64.7204764 | 69.1216949 | 62.5369818 | 79.9211002 |
| 16:45:00 | 0:30:44 | 67.5722324 | 64.7204764 | 69.1216949 | 63.5369818 | 79.9211002 |
| 16:45:01 | 0:30:45 | 66.5722324 | 64.7204764 | 68.1216949 | 64.5369818 | 79.9211002 |
| 16:45:02 | 0:30:46 | 66.5722324 | 64.7204764 | 68.1216949 | 64.5369818 | 79.9211002 |

|          |         |            |            |            |            |            |
|----------|---------|------------|------------|------------|------------|------------|
| 16:45:03 | 0:30:47 | 66.5722324 | 64.7204764 | 68.1216949 | 64.5369818 | 79.9211002 |
| 16:45:04 | 0:30:48 | 66.5722324 | 64.7204764 | 68.1216949 | 64.5369818 | 80.9211002 |
| 16:45:05 | 0:30:49 | 67.5722324 | 65.7204764 | 68.1216949 | 64.5369818 | 80.9211002 |
| 16:45:06 | 0:30:50 | 67.5722324 | 69.7204764 | 68.1216949 | 66.5369818 | 80.9211002 |
| 16:45:07 | 0:30:51 | 67.5722324 | 71.7204764 | 69.1216949 | 67.5369818 | 81.9211002 |
| 16:45:08 | 0:30:52 | 67.5722324 | 71.7204764 | 69.1216949 | 68.5369818 | 81.9211002 |
| 16:45:09 | 0:30:53 | 67.5722324 | 71.7204764 | 70.1216949 | 70.5369818 | 81.9211002 |
| 16:45:10 | 0:30:54 | 67.5722324 | 71.7204764 | 70.1216949 | 72.5369818 | 82.9211002 |
| 16:45:11 | 0:30:55 | 68.5722324 | 70.7204764 | 71.1216949 | 74.5369818 | 81.9211002 |
| 16:45:12 | 0:30:56 | 68.5722324 | 70.7204764 | 71.1216949 | 74.5369818 | 80.9211002 |
| 16:45:13 | 0:30:57 | 68.5722324 | 70.7204764 | 71.1216949 | 74.5369818 | 80.9211002 |
| 16:45:14 | 0:30:58 | 72.5722324 | 70.7204764 | 71.1216949 | 75.5369818 | 80.9211002 |
| 16:45:15 | 0:30:59 | 72.5722324 | 70.7204764 | 70.1216949 | 73.5369818 | 80.9211002 |
| 16:45:16 | 0:31:00 | 72.5722324 | 74.7204764 | 69.1216949 | 73.5369818 | 80.9211002 |
| 16:45:17 | 0:31:01 | 73.5722324 | 76.7204764 | 68.1216949 | 72.5369818 | 80.9211002 |
| 16:45:18 | 0:31:02 | 73.5722324 | 76.7204764 | 68.1216949 | 72.5369818 | 80.9211002 |
| 16:45:19 | 0:31:03 | 73.5722324 | 75.7204764 | 68.1216949 | 72.5369818 | 81.9211002 |
| 16:45:20 | 0:31:04 | 74.5722324 | 73.7204764 | 68.1216949 | 71.5369818 | 81.9211002 |
| 16:45:21 | 0:31:05 | 72.5722324 | 72.7204764 | 68.1216949 | 71.5369818 | 81.9211002 |
| 16:45:22 | 0:31:06 | 70.5722324 | 71.7204764 | 69.1216949 | 70.5369818 | 85.9211002 |
| 16:45:23 | 0:31:07 | 70.5722324 | 69.7204764 | 70.1216949 | 70.5369818 | 85.9211002 |
| 16:45:24 | 0:31:08 | 70.5722324 | 67.7204764 | 70.1216949 | 70.5369818 | 84.9211002 |
| 16:45:25 | 0:31:09 | 69.5722324 | 66.7204764 | 70.1216949 | 70.5369818 | 84.9211002 |
| 16:45:26 | 0:31:10 | 69.5722324 | 65.7204764 | 69.1216949 | 69.5369818 | 84.9211002 |
| 16:45:27 | 0:31:11 | 68.5722324 | 64.7204764 | 68.1216949 | 69.5369818 | 84.9211002 |
| 16:45:28 | 0:31:12 | 68.5722324 | 64.7204764 | 68.1216949 | 69.5369818 | 83.9211002 |
| 16:45:29 | 0:31:13 | 67.5722324 | 64.7204764 | 67.1216949 | 69.5369818 | 84.9211002 |
| 16:45:30 | 0:31:14 | 67.5722324 | 64.7204764 | 67.1216949 | 69.5369818 | 84.9211002 |
| 16:45:31 | 0:31:15 | 66.5722324 | 64.7204764 | 67.1216949 | 69.5369818 | 83.9211002 |
| 16:45:32 | 0:31:16 | 66.5722324 | 67.7204764 | 67.1216949 | 69.5369818 | 82.9211002 |
| 16:45:33 | 0:31:17 | 65.5722324 | 68.7204764 | 66.1216949 | 71.5369818 | 81.9211002 |
| 16:45:34 | 0:31:18 | 65.5722324 | 67.7204764 | 66.1216949 | 71.5369818 | 81.9211002 |
| 16:45:35 | 0:31:19 | 65.5722324 | 67.7204764 | 66.1216949 | 71.5369818 | 81.9211002 |
| 16:45:36 | 0:31:20 | 65.5722324 | 67.7204764 | 66.1216949 | 72.5369818 | 81.9211002 |
| 16:45:37 | 0:31:21 | 65.5722324 | 67.7204764 | 68.1216949 | 72.5369818 | 81.9211002 |
| 16:45:38 | 0:31:22 | 65.5722324 | 67.7204764 | 68.1216949 | 72.5369818 | 76.9211002 |
| 16:45:39 | 0:31:23 | 64.5722324 | 66.7204764 | 67.1216949 | 72.5369818 | 76.9211002 |
| 16:45:40 | 0:31:24 | 64.5722324 | 66.7204764 | 66.1216949 | 72.5369818 | 73.9211002 |
| 16:45:41 | 0:31:25 | 64.5722324 | 67.7204764 | 66.1216949 | 72.5369818 | 71.9211002 |
| 16:45:42 | 0:31:26 | 64.5722324 | 67.7204764 | 66.1216949 | 72.5369818 | 71.9211002 |
| 16:45:43 | 0:31:27 | 65.5722324 | 67.7204764 | 65.1216949 | 73.5369818 | 70.9211002 |
| 16:45:44 | 0:31:28 | 65.5722324 | 68.7204764 | 65.1216949 | 74.5369818 | 66.9211002 |
| 16:45:45 | 0:31:29 | 65.5722324 | 68.7204764 | 64.1216949 | 74.5369818 | 66.9211002 |
| 16:45:46 | 0:31:30 | 65.5722324 | 68.7204764 | 65.1216949 | 74.5369818 | 66.9211002 |
| 16:45:47 | 0:31:31 | 65.5722324 | 69.7204764 | 65.1216949 | 74.5369818 | 66.9211002 |

|          |         |            |            |            |            |            |
|----------|---------|------------|------------|------------|------------|------------|
| 16:45:48 | 0:31:32 | 65.5722324 | 68.7204764 | 65.1216949 | 73.5369818 | 66.9211002 |
| 16:45:49 | 0:31:33 | 66.5722324 | 68.7204764 | 65.1216949 | 74.5369818 | 66.9211002 |
| 16:45:50 | 0:31:34 | 66.5722324 | 67.7204764 | 66.1216949 | 74.5369818 | 67.9211002 |
| 16:45:51 | 0:31:35 | 66.5722324 | 67.7204764 | 67.1216949 | 72.5369818 | 67.9211002 |
| 16:45:52 | 0:31:36 | 66.5722324 | 69.7204764 | 68.1216949 | 71.5369818 | 67.9211002 |
| 16:45:53 | 0:31:37 | 67.5722324 | 69.7204764 | 69.1216949 | 70.5369818 | 68.9211002 |
| 16:45:54 | 0:31:38 | 67.5722324 | 68.7204764 | 69.1216949 | 69.5369818 | 70.9211002 |
| 16:45:55 | 0:31:39 | 67.5722324 | 66.7204764 | 69.1216949 | 68.5369818 | 70.9211002 |
| 16:45:56 | 0:31:40 | 67.5722324 | 66.7204764 | 70.1216949 | 69.5369818 | 70.9211002 |
| 16:45:57 | 0:31:41 | 67.5722324 | 66.7204764 | 69.1216949 | 69.5369818 | 70.9211002 |
| 16:45:58 | 0:31:42 | 66.5722324 | 66.7204764 | 68.1216949 | 68.5369818 | 74.9211002 |
| 16:45:59 | 0:31:43 | 66.5722324 | 66.7204764 | 68.1216949 | 68.5369818 | 74.9211002 |
| 16:46:00 | 0:31:44 | 65.5722324 | 66.7204764 | 69.1216949 | 68.5369818 | 74.9211002 |
| 16:46:01 | 0:31:45 | 65.5722324 | 67.7204764 | 70.1216949 | 68.5369818 | 70.9211002 |
| 16:46:02 | 0:31:46 | 65.5722324 | 68.7204764 | 70.1216949 | 68.5369818 | 69.9211002 |
| 16:46:03 | 0:31:47 | 65.5722324 | 69.7204764 | 70.1216949 | 68.5369818 | 69.9211002 |
| 16:46:04 | 0:31:48 | 65.5722324 | 73.7204764 | 70.1216949 | 68.5369818 | 68.9211002 |
| 16:46:05 | 0:31:49 | 65.5722324 | 79.7204764 | 69.1216949 | 70.5369818 | 68.9211002 |
| 16:46:06 | 0:31:50 | 65.5722324 | 81.7204764 | 68.1216949 | 71.5369818 | 68.9211002 |
| 16:46:07 | 0:31:51 | 65.5722324 | 82.7204764 | 67.1216949 | 71.5369818 | 68.9211002 |
| 16:46:08 | 0:31:52 | 64.5722324 | 83.7204764 | 67.1216949 | 72.5369818 | 68.9211002 |
| 16:46:09 | 0:31:53 | 64.5722324 | 83.7204764 | 67.1216949 | 74.5369818 | 67.9211002 |
| 16:46:10 | 0:31:54 | 64.5722324 | 82.7204764 | 67.1216949 | 76.5369818 | 67.9211002 |
| 16:46:11 | 0:31:55 | 65.5722324 | 82.7204764 | 68.1216949 | 76.5369818 | 70.9211002 |
| 16:46:12 | 0:31:56 | 65.5722324 | 82.7204764 | 68.1216949 | 76.5369818 | 70.9211002 |
| 16:46:13 | 0:31:57 | 72.5722324 | 83.7204764 | 69.1216949 | 80.5369818 | 70.9211002 |
| 16:46:14 | 0:31:58 | 74.5722324 | 84.7204764 | 69.1216949 | 81.5369818 | 66.9211002 |
| 16:46:15 | 0:31:59 | 75.5722324 | 84.7204764 | 69.1216949 | 82.5369818 | 68.9211002 |
| 16:46:16 | 0:32:00 | 75.5722324 | 83.7204764 | 69.1216949 | 84.5369818 | 68.9211002 |
| 16:46:17 | 0:32:01 | 75.5722324 | 83.7204764 | 68.1216949 | 86.5369818 | 70.9211002 |
| 16:46:18 | 0:32:02 | 76.5722324 | 83.7204764 | 67.1216949 | 86.5369818 | 69.9211002 |
| 16:46:19 | 0:32:03 | 76.5722324 | 81.7204764 | 66.1216949 | 87.5369818 | 68.9211002 |
| 16:46:20 | 0:32:04 | 72.5722324 | 81.7204764 | 66.1216949 | 90.5369818 | 68.9211002 |
| 16:46:21 | 0:32:05 | 70.5722324 | 81.7204764 | 66.1216949 | 74.6860789 | 67.9211002 |
| 16:46:22 | 0:32:06 | 70.5722324 | 80.7204764 | 67.1216949 | 74.5432218 | 66.9211002 |
| 16:46:23 | 0:32:07 | 67.5722324 | 80.7204764 | 67.1216949 | 74.1146503 | 66.9211002 |
| 16:46:24 | 0:32:08 | 67.5722324 | 79.7204764 | 67.1216949 | 89.5369818 | 68.9211002 |
| 16:46:25 | 0:32:09 | 67.5722324 | 78.7204764 | 68.1216949 | 86.5369818 | 71.9211002 |
| 16:46:26 | 0:32:10 | 67.5722324 | 77.7204764 | 68.1216949 | 84.5369818 | 72.9211002 |
| 16:46:27 | 0:32:11 | 66.5722324 | 75.7204764 | 68.1216949 | 80.5369818 | 74.9211002 |
| 16:46:28 | 0:32:12 | 66.5722324 | 75.7204764 | 67.1216949 | 74.5369818 | 74.9211002 |
| 16:46:29 | 0:32:13 | 66.5722324 | 74.7204764 | 66.1216949 | 72.5369818 | 79.9211002 |
| 16:46:30 | 0:32:14 | 66.5722324 | 70.7204764 | 66.1216949 | 72.5369818 | 83.9211002 |
| 16:46:31 | 0:32:15 | 66.5722324 | 70.7204764 | 66.1216949 | 70.5369818 | 83.9211002 |
| 16:46:32 | 0:32:16 | 66.5722324 | 69.7204764 | 67.1216949 | 70.5369818 | 82.9211002 |

|          |         |            |            |            |            |            |
|----------|---------|------------|------------|------------|------------|------------|
| 16:46:33 | 0:32:17 | 66.5722324 | 69.7204764 | 67.1216949 | 68.5369818 | 82.9211002 |
| 16:46:34 | 0:32:18 | 67.5722324 | 68.7204764 | 67.1216949 | 66.5369818 | 81.9211002 |
| 16:46:35 | 0:32:19 | 75.5722324 | 68.7204764 | 68.1216949 | 66.5369818 | 81.9211002 |
| 16:46:36 | 0:32:20 | 75.5722324 | 68.7204764 | 69.1216949 | 66.5369818 | 80.9211002 |
| 16:46:37 | 0:32:21 | 76.5722324 | 68.7204764 | 70.1216949 | 65.5369818 | 79.9211002 |
| 16:46:38 | 0:32:22 | 77.5722324 | 68.7204764 | 70.1216949 | 64.5369818 | 78.9211002 |
| 16:46:39 | 0:32:23 | 79.5722324 | 68.7204764 | 70.1216949 | 64.5369818 | 77.9211002 |
| 16:46:40 | 0:32:24 | 80.5722324 | 68.7204764 | 69.1216949 | 63.5369818 | 77.9211002 |
| 16:46:41 | 0:32:25 | 80.5722324 | 67.7204764 | 69.1216949 | 62.5369818 | 77.9211002 |
| 16:46:42 | 0:32:26 | 80.5722324 | 67.7204764 | 68.1216949 | 62.5369818 | 77.9211002 |
| 16:46:43 | 0:32:27 | 79.5722324 | 67.7204764 | 68.1216949 | 62.5369818 | 78.9211002 |
| 16:46:44 | 0:32:28 | 83.5722324 | 67.7204764 | 69.1216949 | 62.5369818 | 79.9211002 |
| 16:46:45 | 0:32:29 | 85.5722324 | 67.7204764 | 69.1216949 | 62.5369818 | 77.9211002 |
| 16:46:46 | 0:32:30 | 86.5722324 | 66.7204764 | 70.1216949 | 62.5369818 | 69.9211002 |
| 16:46:47 | 0:32:31 | 86.5722324 | 66.7204764 | 70.1216949 | 62.5369818 | 67.9211002 |
| 16:46:48 | 0:32:32 | 86.5722324 | 64.7204764 | 70.1216949 | 61.5369818 | 67.9211002 |
| 16:46:49 | 0:32:33 | 71.9717932 | 64.7204764 | 70.1216949 | 61.5369818 | 67.9211002 |
| 16:46:50 | 0:32:34 | 71.828936  | 63.7204764 | 71.1216949 | 61.5369818 | 66.9211002 |
| 16:46:51 | 0:32:35 | 72.2575075 | 63.7204764 | 71.1216949 | 61.5369818 | 66.9211002 |
| 16:46:52 | 0:32:36 | 87.5722324 | 63.7204764 | 71.1216949 | 61.5369818 | 66.9211002 |
| 16:46:53 | 0:32:37 | 71.4003646 | 61.7204764 | 70.1216949 | 61.5369818 | 65.9211002 |
| 16:46:54 | 0:32:38 | 71.4003646 | 61.7204764 | 70.1216949 | 61.5369818 | 65.9211002 |
| 16:46:55 | 0:32:39 | 70.828936  | 61.7204764 | 69.1216949 | 61.5369818 | 64.9211002 |
| 16:46:56 | 0:32:40 | 70.9717932 | 62.7204764 | 69.1216949 | 61.5369818 | 64.9211002 |
| 16:46:57 | 0:32:41 | 70.828936  | 63.7204764 | 69.1216949 | 61.5369818 | 63.9211002 |
| 16:46:58 | 0:32:42 | 70.6860789 | 63.7204764 | 69.1216949 | 61.5369818 | 64.9211002 |
| 16:46:59 | 0:32:43 | 70.828936  | 65.7204764 | 69.1216949 | 60.5369818 | 64.9211002 |
| 16:47:00 | 0:32:44 | 70.6860789 | 65.7204764 | 70.1216949 | 60.5369818 | 64.9211002 |
| 16:47:01 | 0:32:45 | 70.5432218 | 67.7204764 | 70.1216949 | 59.5369818 | 63.9211002 |
| 16:47:02 | 0:32:46 | 85.5722324 | 67.7204764 | 70.1216949 | 59.5369818 | 63.9211002 |
| 16:47:03 | 0:32:47 | 85.5722324 | 68.7204764 | 71.1216949 | 58.5369818 | 63.9211002 |
| 16:47:04 | 0:32:48 | 82.5722324 | 70.7204764 | 70.1216949 | 58.5369818 | 65.9211002 |
| 16:47:05 | 0:32:49 | 81.5722324 | 73.7204764 | 70.1216949 | 58.5369818 | 65.9211002 |
| 16:47:06 | 0:32:50 | 81.5722324 | 73.7204764 | 70.1216949 | 58.5369818 | 65.9211002 |
| 16:47:07 | 0:32:51 | 78.5722324 | 79.7204764 | 68.1216949 | 58.5369818 | 65.9211002 |
| 16:47:08 | 0:32:52 | 78.5722324 | 81.7204764 | 68.1216949 | 59.5369818 | 67.9211002 |
| 16:47:09 | 0:32:53 | 78.5722324 | 82.7204764 | 69.1216949 | 59.5369818 | 67.9211002 |
| 16:47:10 | 0:32:54 | 76.5722324 | 84.7204764 | 70.1216949 | 58.5369818 | 67.9211002 |
| 16:47:11 | 0:32:55 | 76.5722324 | 85.7204764 | 70.1216949 | 58.5369818 | 67.9211002 |
| 16:47:12 | 0:32:56 | 76.5722324 | 86.7204764 | 70.1216949 | 59.5369818 | 72.9211002 |
| 16:47:13 | 0:32:57 | 76.5722324 | 86.7204764 | 70.1216949 | 59.5369818 | 72.9211002 |
| 16:47:14 | 0:32:58 | 76.5722324 | 87.7204764 | 70.1216949 | 60.5369818 | 73.9211002 |
| 16:47:15 | 0:32:59 | 76.5722324 | 86.7204764 | 70.1216949 | 60.5369818 | 74.9211002 |
| 16:47:16 | 0:33:00 | 72.5722324 | 81.7204764 | 70.1216949 | 61.5369818 | 76.9211002 |
| 16:47:17 | 0:33:01 | 71.5722324 | 75.7204764 | 70.1216949 | 62.5369818 | 76.9211002 |

|          |         |            |            |            |            |            |
|----------|---------|------------|------------|------------|------------|------------|
| 16:47:18 | 0:33:02 | 71.5722324 | 70.7204764 | 70.1216949 | 62.5369818 | 78.9211002 |
| 16:47:19 | 0:33:03 | 71.5722324 | 68.7204764 | 70.1216949 | 62.5369818 | 78.9211002 |
| 16:47:20 | 0:33:04 | 71.5722324 | 68.7204764 | 70.1216949 | 62.5369818 | 78.9211002 |
| 16:47:21 | 0:33:05 | 71.5722324 | 68.7204764 | 71.1216949 | 62.5369818 | 77.9211002 |
| 16:47:22 | 0:33:06 | 72.5722324 | 70.7204764 | 72.1216949 | 62.5369818 | 72.9211002 |
| 16:47:23 | 0:33:07 | 72.5722324 | 73.7204764 | 72.1216949 | 63.5369818 | 69.9211002 |
| 16:47:24 | 0:33:08 | 72.5722324 | 72.7204764 | 74.1216949 | 63.5369818 | 69.9211002 |
| 16:47:25 | 0:33:09 | 75.5722324 | 72.7204764 | 76.1216949 | 63.5369818 | 65.9211002 |
| 16:47:26 | 0:33:10 | 75.5722324 | 72.7204764 | 76.1216949 | 64.5369818 | 66.9211002 |
| 16:47:27 | 0:33:11 | 76.5722324 | 72.7204764 | 76.1216949 | 64.5369818 | 66.9211002 |
| 16:47:28 | 0:33:12 | 78.5722324 | 72.7204764 | 75.1216949 | 64.5369818 | 65.9211002 |
| 16:47:29 | 0:33:13 | 78.5722324 | 72.7204764 | 75.1216949 | 64.5369818 | 63.9211002 |
| 16:47:30 | 0:33:14 | 78.5722324 | 72.7204764 | 74.1216949 | 65.5369818 | 62.9211002 |
| 16:47:31 | 0:33:15 | 71.5722324 | 75.7204764 | 74.1216949 | 65.5369818 | 62.9211002 |
| 16:47:32 | 0:33:16 | 71.5722324 | 76.7204764 | 71.1216949 | 65.5369818 | 63.9211002 |
| 16:47:33 | 0:33:17 | 71.5722324 | 76.7204764 | 71.1216949 | 65.5369818 | 63.9211002 |
| 16:47:34 | 0:33:18 | 71.5722324 | 76.7204764 | 83.1216949 | 65.5369818 | 62.9211002 |
| 16:47:35 | 0:33:19 | 71.5722324 | 76.7204764 | 86.1216949 | 66.5369818 | 62.9211002 |
| 16:47:36 | 0:33:20 | 71.5722324 | 76.7204764 | 86.1216949 | 65.5369818 | 65.9211002 |
| 16:47:37 | 0:33:21 | 71.5722324 | 75.7204764 | 87.1216949 | 65.5369818 | 65.9211002 |
| 16:47:38 | 0:33:22 | 69.5722324 | 76.7204764 | 87.1216949 | 66.5369818 | 64.9211002 |
| 16:47:39 | 0:33:23 | 68.5722324 | 77.7204764 | 87.1216949 | 66.5369818 | 64.9211002 |
| 16:47:40 | 0:33:24 | 68.5722324 | 78.7204764 | 86.1216949 | 65.5369818 | 65.9211002 |
| 16:47:41 | 0:33:25 | 68.5722324 | 78.7204764 | 82.1216949 | 64.5369818 | 65.9211002 |
| 16:47:42 | 0:33:26 | 68.5722324 | 77.7204764 | 79.1216949 | 65.5369818 | 64.9211002 |
| 16:47:43 | 0:33:27 | 68.5722324 | 76.7204764 | 77.1216949 | 65.5369818 | 64.9211002 |
| 16:47:44 | 0:33:28 | 68.5722324 | 76.7204764 | 77.1216949 | 65.5369818 | 64.9211002 |
| 16:47:45 | 0:33:29 | 68.5722324 | 76.7204764 | 76.1216949 | 65.5369818 | 66.9211002 |
| 16:47:46 | 0:33:30 | 68.5722324 | 76.7204764 | 74.1216949 | 66.5369818 | 67.9211002 |
| 16:47:47 | 0:33:31 | 69.5722324 | 74.7204764 | 74.1216949 | 65.5369818 | 66.9211002 |
| 16:47:48 | 0:33:32 | 70.5722324 | 73.7204764 | 74.1216949 | 65.5369818 | 66.9211002 |
| 16:47:49 | 0:33:33 | 70.5722324 | 72.7204764 | 74.1216949 | 64.5369818 | 67.9211002 |
| 16:47:50 | 0:33:34 | 70.5722324 | 71.7204764 | 74.1216949 | 64.5369818 | 67.9211002 |
| 16:47:51 | 0:33:35 | 70.5722324 | 71.7204764 | 74.1216949 | 64.5369818 | 70.9211002 |
| 16:47:52 | 0:33:36 | 70.5722324 | 69.7204764 | 74.1216949 | 64.5369818 | 71.9211002 |
| 16:47:53 | 0:33:37 | 70.5722324 | 68.7204764 | 73.1216949 | 64.5369818 | 71.9211002 |
| 16:47:54 | 0:33:38 | 71.5722324 | 68.7204764 | 72.1216949 | 64.5369818 | 72.9211002 |
| 16:47:55 | 0:33:39 | 71.5722324 | 68.7204764 | 71.1216949 | 65.5369818 | 74.9211002 |
| 16:47:56 | 0:33:40 | 71.5722324 | 68.7204764 | 71.1216949 | 65.5369818 | 74.9211002 |
| 16:47:57 | 0:33:41 | 72.5722324 | 68.7204764 | 69.1216949 | 65.5369818 | 74.9211002 |
| 16:47:58 | 0:33:42 | 69.5722324 | 67.7204764 | 68.1216949 | 65.5369818 | 75.9211002 |
| 16:47:59 | 0:33:43 | 69.5722324 | 67.7204764 | 68.1216949 | 66.5369818 | 75.9211002 |
| 16:48:00 | 0:33:44 | 69.5722324 | 67.7204764 | 68.1216949 | 66.5369818 | 75.9211002 |
| 16:48:01 | 0:33:45 | 69.5722324 | 67.7204764 | 67.1216949 | 66.5369818 | 75.9211002 |
| 16:48:02 | 0:33:46 | 69.5722324 | 66.7204764 | 67.1216949 | 66.5369818 | 75.9211002 |

|          |         |            |            |            |            |            |
|----------|---------|------------|------------|------------|------------|------------|
| 16:48:03 | 0:33:47 | 69.5722324 | 67.7204764 | 67.1216949 | 66.5369818 | 76.9211002 |
| 16:48:04 | 0:33:48 | 69.5722324 | 67.7204764 | 67.1216949 | 66.5369818 | 79.9211002 |
| 16:48:05 | 0:33:49 | 68.5722324 | 67.7204764 | 67.1216949 | 66.5369818 | 79.9211002 |
| 16:48:06 | 0:33:50 | 67.5722324 | 65.7204764 | 67.1216949 | 66.5369818 | 79.9211002 |
| 16:48:07 | 0:33:51 | 67.5722324 | 66.7204764 | 66.1216949 | 67.5369818 | 79.9211002 |
| 16:48:08 | 0:33:52 | 68.5722324 | 66.7204764 | 66.1216949 | 67.5369818 | 78.9211002 |
| 16:48:09 | 0:33:53 | 68.5722324 | 66.7204764 | 66.1216949 | 67.5369818 | 77.9211002 |
| 16:48:10 | 0:33:54 | 68.5722324 | 66.7204764 | 65.1216949 | 67.5369818 | 76.9211002 |
| 16:48:11 | 0:33:55 | 68.5722324 | 67.7204764 | 65.1216949 | 67.5369818 | 75.9211002 |
| 16:48:12 | 0:33:56 | 68.5722324 | 68.7204764 | 65.1216949 | 66.5369818 | 75.9211002 |
| 16:48:13 | 0:33:57 | 69.5722324 | 68.7204764 | 65.1216949 | 65.5369818 | 65.9211002 |
| 16:48:14 | 0:33:58 | 69.5722324 | 68.7204764 | 65.1216949 | 64.5369818 | 63.9211002 |
| 16:48:15 | 0:33:59 | 69.5722324 | 68.7204764 | 65.1216949 | 64.5369818 | 64.9211002 |
| 16:48:16 | 0:34:00 | 69.5722324 | 68.7204764 | 65.1216949 | 64.5369818 | 64.9211002 |
| 16:48:17 | 0:34:01 | 70.5722324 | 70.7204764 | 65.1216949 | 64.5369818 | 64.9211002 |
| 16:48:18 | 0:34:02 | 70.5722324 | 69.7204764 | 65.1216949 | 63.5369818 | 63.9211002 |
| 16:48:19 | 0:34:03 | 70.5722324 | 66.7204764 | 65.1216949 | 63.5369818 | 62.9211002 |
| 16:48:20 | 0:34:04 | 71.5722324 | 64.7204764 | 66.1216949 | 63.5369818 | 62.9211002 |
| 16:48:21 | 0:34:05 | 71.5722324 | 64.7204764 | 66.1216949 | 63.5369818 | 61.9211002 |
| 16:48:22 | 0:34:06 | 71.5722324 | 65.7204764 | 66.1216949 | 64.5369818 | 61.9211002 |
| 16:48:23 | 0:34:07 | 71.5722324 | 65.7204764 | 65.1216949 | 64.5369818 | 61.9211002 |
| 16:48:24 | 0:34:08 | 71.5722324 | 65.7204764 | 65.1216949 | 64.5369818 | 61.9211002 |
| 16:48:25 | 0:34:09 | 71.5722324 | 65.7204764 | 65.1216949 | 64.5369818 | 61.9211002 |
| 16:48:26 | 0:34:10 | 71.5722324 | 65.7204764 | 65.1216949 | 64.5369818 | 61.9211002 |
| 16:48:27 | 0:34:11 | 74.5722324 | 65.7204764 | 65.1216949 | 64.5369818 | 61.9211002 |
| 16:48:28 | 0:34:12 | 74.5722324 | 65.7204764 | 65.1216949 | 64.5369818 | 61.9211002 |
| 16:48:29 | 0:34:13 | 74.5722324 | 65.7204764 | 66.1216949 | 65.5369818 | 61.9211002 |
| 16:48:30 | 0:34:14 | 78.5722324 | 65.7204764 | 66.1216949 | 65.5369818 | 61.9211002 |
| 16:48:31 | 0:34:15 | 77.5722324 | 66.7204764 | 66.1216949 | 65.5369818 | 61.9211002 |
| 16:48:32 | 0:34:16 | 75.5722324 | 67.7204764 | 66.1216949 | 65.5369818 | 61.9211002 |
| 16:48:33 | 0:34:17 | 74.5722324 | 67.7204764 | 67.1216949 | 66.5369818 | 61.9211002 |
| 16:48:34 | 0:34:18 | 73.5722324 | 69.7204764 | 67.1216949 | 66.5369818 | 61.9211002 |
| 16:48:35 | 0:34:19 | 71.5722324 | 70.7204764 | 66.1216949 | 66.5369818 | 61.9211002 |
| 16:48:36 | 0:34:20 | 69.5722324 | 70.7204764 | 67.1216949 | 69.5369818 | 61.9211002 |
| 16:48:37 | 0:34:21 | 69.5722324 | 70.7204764 | 67.1216949 | 66.5369818 | 61.9211002 |
| 16:48:38 | 0:34:22 | 69.5722324 | 71.7204764 | 67.1216949 | 65.5369818 | 61.9211002 |
| 16:48:39 | 0:34:23 | 68.5722324 | 71.7204764 | 66.1216949 | 65.5369818 | 61.9211002 |
| 16:48:40 | 0:34:24 | 67.5722324 | 73.7204764 | 66.1216949 | 64.5369818 | 71.9211002 |
| 16:48:41 | 0:34:25 | 67.5722324 | 75.7204764 | 65.1216949 | 64.5369818 | 78.9211002 |
| 16:48:42 | 0:34:26 | 67.5722324 | 76.7204764 | 65.1216949 | 64.5369818 | 84.9211002 |
| 16:48:43 | 0:34:27 | 68.5722324 | 75.7204764 | 65.1216949 | 65.5369818 | 80.9211002 |
| 16:48:44 | 0:34:28 | 70.5722324 | 72.7204764 | 65.1216949 | 65.5369818 | 80.9211002 |
| 16:48:45 | 0:34:29 | 70.5722324 | 69.7204764 | 66.1216949 | 66.5369818 | 75.9211002 |
| 16:48:46 | 0:34:30 | 71.5722324 | 68.7204764 | 66.1216949 | 66.5369818 | 74.9211002 |
| 16:48:47 | 0:34:31 | 72.5722324 | 69.7204764 | 66.1216949 | 66.5369818 | 74.9211002 |



|          |         |            |            |            |            |            |
|----------|---------|------------|------------|------------|------------|------------|
| 16:48:48 | 0:34:32 | 73.5722324 | 70.7204764 | 66.1216949 | 66.5369818 | 74.9211002 |
| 16:48:49 | 0:34:33 | 73.5722324 | 70.7204764 | 66.1216949 | 66.5369818 | 74.9211002 |
| 16:48:50 | 0:34:34 | 72.5722324 | 73.7204764 | 66.1216949 | 67.5369818 | 72.9211002 |
| 16:48:51 | 0:34:35 | 72.5722324 | 73.7204764 | 66.1216949 | 67.5369818 | 71.9211002 |
| 16:48:52 | 0:34:36 | 71.5722324 | 73.7204764 | 66.1216949 | 68.5369818 | 71.9211002 |
| 16:48:53 | 0:34:37 | 71.5722324 | 73.7204764 | 67.1216949 | 68.5369818 | 70.9211002 |
| 16:48:54 | 0:34:38 | 71.5722324 | 73.7204764 | 67.1216949 | 68.5369818 | 70.9211002 |
| 16:48:55 | 0:34:39 | 71.5722324 | 73.7204764 | 68.1216949 | 68.5369818 | 74.9211002 |
| 16:48:56 | 0:34:40 | 71.5722324 | 73.7204764 | 68.1216949 | 67.5369818 | 74.9211002 |
| 16:48:57 | 0:34:41 | 73.5722324 | 73.7204764 | 69.1216949 | 67.5369818 | 76.9211002 |
| 16:48:58 | 0:34:42 | 73.5722324 | 73.7204764 | 69.1216949 | 67.5369818 | 76.9211002 |
| 16:48:59 | 0:34:43 | 74.5722324 | 73.7204764 | 69.1216949 | 66.5369818 | 76.9211002 |
| 16:49:00 | 0:34:44 | 74.5722324 | 75.7204764 | 69.1216949 | 65.5369818 | 76.9211002 |
| 16:49:01 | 0:34:45 | 72.5722324 | 75.7204764 | 69.1216949 | 65.5369818 | 76.9211002 |
| 16:49:02 | 0:34:46 | 72.5722324 | 75.7204764 | 69.1216949 | 66.5369818 | 76.9211002 |
| 16:49:03 | 0:34:47 | 71.5722324 | 77.7204764 | 69.1216949 | 66.5369818 | 76.9211002 |
| 16:49:04 | 0:34:48 | 68.5722324 | 79.7204764 | 69.1216949 | 66.5369818 | 75.9211002 |
| 16:49:05 | 0:34:49 | 68.5722324 | 79.7204764 | 69.1216949 | 66.5369818 | 73.9211002 |
| 16:49:06 | 0:34:50 | 67.5722324 | 80.7204764 | 69.1216949 | 66.5369818 | 72.9211002 |
| 16:49:07 | 0:34:51 | 67.5722324 | 80.7204764 | 69.1216949 | 65.5369818 | 72.9211002 |
| 16:49:08 | 0:34:52 | 67.5722324 | 80.7204764 | 70.1216949 | 65.5369818 | 70.9211002 |
| 16:49:09 | 0:34:53 | 68.5722324 | 79.7204764 | 71.1216949 | 64.5369818 | 69.9211002 |
| 16:49:10 | 0:34:54 | 69.5722324 | 75.7204764 | 71.1216949 | 65.5369818 | 69.9211002 |
| 16:49:11 | 0:34:55 | 70.5722324 | 72.7204764 | 70.1216949 | 65.5369818 | 72.9211002 |
| 16:49:12 | 0:34:56 | 70.5722324 | 71.7204764 | 70.1216949 | 64.5369818 | 74.9211002 |
| 16:49:13 | 0:34:57 | 70.5722324 | 71.7204764 | 74.1216949 | 64.5369818 | 74.9211002 |
| 16:49:14 | 0:34:58 | 69.5722324 | 72.7204764 | 74.1216949 | 65.5369818 | 75.9211002 |
| 16:49:15 | 0:34:59 | 68.5722324 | 72.7204764 | 78.1216949 | 65.5369818 | 74.9211002 |
| 16:49:16 | 0:35:00 | 68.5722324 | 73.7204764 | 82.1216949 | 65.5369818 | 71.9211002 |
| 16:49:17 | 0:35:01 | 67.5722324 | 73.7204764 | 82.1216949 | 65.5369818 | 70.9211002 |
| 16:49:18 | 0:35:02 | 67.5722324 | 74.7204764 | 86.1216949 | 65.5369818 | 71.9211002 |
| 16:49:19 | 0:35:03 | 67.5722324 | 75.7204764 | 89.1216949 | 66.5369818 | 74.9211002 |
| 16:49:20 | 0:35:04 | 67.5722324 | 75.7204764 | 89.1216949 | 66.5369818 | 74.9211002 |
| 16:49:21 | 0:35:05 | 67.5722324 | 74.7204764 | 74.5432218 | 68.5369818 | 75.9211002 |
| 16:49:22 | 0:35:06 | 67.5722324 | 74.7204764 | 74.6860789 | 69.5369818 | 75.9211002 |
| 16:49:23 | 0:35:07 | 67.5722324 | 74.7204764 | 75.1146503 | 69.5369818 | 75.9211002 |
| 16:49:24 | 0:35:08 | 67.5722324 | 72.7204764 | 75.4003646 | 69.5369818 | 72.9211002 |
| 16:49:25 | 0:35:09 | 67.5722324 | 72.7204764 | 84.1216949 | 70.5369818 | 71.9211002 |
| 16:49:26 | 0:35:10 | 67.5722324 | 72.7204764 | 80.1216949 | 71.5369818 | 70.9211002 |
| 16:49:27 | 0:35:11 | 68.5722324 | 72.7204764 | 79.1216949 | 72.5369818 | 68.9211002 |
| 16:49:28 | 0:35:12 | 68.5722324 | 72.7204764 | 79.1216949 | 72.5369818 | 71.9211002 |
| 16:49:29 | 0:35:13 | 74.5722324 | 71.7204764 | 80.1216949 | 75.5369818 | 71.9211002 |
| 16:49:30 | 0:35:14 | 73.5722324 | 71.7204764 | 80.1216949 | 75.5369818 | 71.9211002 |
| 16:49:31 | 0:35:15 | 73.5722324 | 72.7204764 | 78.1216949 | 76.5369818 | 71.9211002 |
| 16:49:32 | 0:35:16 | 73.5722324 | 72.7204764 | 78.1216949 | 76.5369818 | 69.9211002 |

|          |         |            |            |            |            |            |
|----------|---------|------------|------------|------------|------------|------------|
| 16:49:33 | 0:35:17 | 73.5722324 | 72.7204764 | 76.1216949 | 76.5369818 | 67.9211002 |
| 16:49:34 | 0:35:18 | 73.5722324 | 71.7204764 | 74.1216949 | 72.5369818 | 66.9211002 |
| 16:49:35 | 0:35:19 | 73.5722324 | 71.7204764 | 74.1216949 | 69.5369818 | 66.9211002 |
| 16:49:36 | 0:35:20 | 74.5722324 | 71.7204764 | 74.1216949 | 68.5369818 | 65.9211002 |
| 16:49:37 | 0:35:21 | 75.5722324 | 71.7204764 | 73.1216949 | 67.5369818 | 65.9211002 |
| 16:49:38 | 0:35:22 | 75.5722324 | 70.7204764 | 73.1216949 | 66.5369818 | 68.9211002 |
| 16:49:39 | 0:35:23 | 75.5722324 | 70.7204764 | 73.1216949 | 66.5369818 | 74.9211002 |
| 16:49:40 | 0:35:24 | 77.5722324 | 70.7204764 | 73.1216949 | 66.5369818 | 74.9211002 |
| 16:49:41 | 0:35:25 | 77.5722324 | 71.7204764 | 73.1216949 | 66.5369818 | 77.9211002 |
| 16:49:42 | 0:35:26 | 76.5722324 | 71.7204764 | 72.1216949 | 66.5369818 | 78.9211002 |
| 16:49:43 | 0:35:27 | 76.5722324 | 72.7204764 | 72.1216949 | 67.5369818 | 70.9211002 |
| 16:49:44 | 0:35:28 | 76.5722324 | 72.7204764 | 72.1216949 | 69.5369818 | 66.9211002 |
| 16:49:45 | 0:35:29 | 73.5722324 | 72.7204764 | 72.1216949 | 70.5369818 | 64.9211002 |
| 16:49:46 | 0:35:30 | 73.5722324 | 73.7204764 | 70.1216949 | 70.5369818 | 64.9211002 |
| 16:49:47 | 0:35:31 | 69.5722324 | 73.7204764 | 70.1216949 | 70.5369818 | 63.9211002 |
| 16:49:48 | 0:35:32 | 69.5722324 | 73.7204764 | 70.1216949 | 70.5369818 | 63.9211002 |
| 16:49:49 | 0:35:33 | 66.5722324 | 75.7204764 | 70.1216949 | 67.5369818 | 61.9211002 |
| 16:49:50 | 0:35:34 | 65.5722324 | 75.7204764 | 70.1216949 | 66.5369818 | 61.9211002 |
| 16:49:51 | 0:35:35 | 65.5722324 | 75.7204764 | 70.1216949 | 66.5369818 | 61.9211002 |
| 16:49:52 | 0:35:36 | 65.5722324 | 75.7204764 | 70.1216949 | 66.5369818 | 61.9211002 |
| 16:49:53 | 0:35:37 | 65.5722324 | 75.7204764 | 70.1216949 | 65.5369818 | 61.9211002 |
| 16:49:54 | 0:35:38 | 65.5722324 | 75.7204764 | 69.1216949 | 65.5369818 | 60.9211002 |
| 16:49:55 | 0:35:39 | 65.5722324 | 74.7204764 | 69.1216949 | 65.5369818 | 59.9211002 |
| 16:49:56 | 0:35:40 | 65.5722324 | 73.7204764 | 68.1216949 | 66.5369818 | 58.9211002 |
| 16:49:57 | 0:35:41 | 65.5722324 | 73.7204764 | 68.1216949 | 66.5369818 | 58.9211002 |
| 16:49:58 | 0:35:42 | 65.5722324 | 73.7204764 | 68.1216949 | 66.5369818 | 59.9211002 |
| 16:49:59 | 0:35:43 | 66.5722324 | 69.7204764 | 68.1216949 | 66.5369818 | 60.9211002 |
| 16:50:00 | 0:35:44 | 74.5722324 | 67.7204764 | 69.1216949 | 67.5369818 | 61.9211002 |
| 16:50:01 | 0:35:45 | 75.5722324 | 67.7204764 | 70.1216949 | 67.5369818 | 61.9211002 |
| 16:50:02 | 0:35:46 | 75.5722324 | 67.7204764 | 69.1216949 | 67.5369818 | 61.9211002 |
| 16:50:03 | 0:35:47 | 76.5722324 | 67.7204764 | 69.1216949 | 67.5369818 | 61.9211002 |
| 16:50:04 | 0:35:48 | 75.5722324 | 67.7204764 | 69.1216949 | 73.5369818 | 61.9211002 |
| 16:50:05 | 0:35:49 | 75.5722324 | 70.7204764 | 70.1216949 | 75.5369818 | 59.9211002 |
| 16:50:06 | 0:35:50 | 74.5722324 | 71.7204764 | 69.1216949 | 68.5369818 | 58.9211002 |
| 16:50:07 | 0:35:51 | 74.5722324 | 72.7204764 | 69.1216949 | 66.5369818 | 58.9211002 |
| 16:50:08 | 0:35:52 | 73.5722324 | 72.7204764 | 68.1216949 | 66.5369818 | 59.9211002 |
| 16:50:09 | 0:35:53 | 72.5722324 | 72.7204764 | 68.1216949 | 65.5369818 | 60.9211002 |
| 16:50:10 | 0:35:54 | 72.5722324 | 71.7204764 | 68.1216949 | 64.5369818 | 60.9211002 |
| 16:50:11 | 0:35:55 | 70.5722324 | 71.7204764 | 68.1216949 | 64.5369818 | 61.9211002 |
| 16:50:12 | 0:35:56 | 70.5722324 | 70.7204764 | 69.1216949 | 65.5369818 | 62.9211002 |
| 16:50:13 | 0:35:57 | 70.5722324 | 71.7204764 | 69.1216949 | 64.5369818 | 62.9211002 |
| 16:50:14 | 0:35:58 | 70.5722324 | 71.7204764 | 70.1216949 | 64.5369818 | 76.9211002 |
| 16:50:15 | 0:35:59 | 70.5722324 | 71.7204764 | 71.1216949 | 64.5369818 | 78.9211002 |
| 16:50:16 | 0:36:00 | 71.5722324 | 71.7204764 | 71.1216949 | 63.5369818 | 78.9211002 |
| 16:50:17 | 0:36:01 | 71.5722324 | 70.7204764 | 71.1216949 | 63.5369818 | 76.9211002 |

|          |         |            |            |            |            |            |
|----------|---------|------------|------------|------------|------------|------------|
| 16:50:18 | 0:36:02 | 69.5722324 | 71.7204764 | 71.1216949 | 63.5369818 | 71.9211002 |
| 16:50:19 | 0:36:03 | 68.5722324 | 71.7204764 | 69.1216949 | 63.5369818 | 70.9211002 |
| 16:50:20 | 0:36:04 | 68.5722324 | 72.7204764 | 69.1216949 | 63.5369818 | 70.9211002 |
| 16:50:21 | 0:36:05 | 68.5722324 | 72.7204764 | 69.1216949 | 63.5369818 | 70.9211002 |
| 16:50:22 | 0:36:06 | 68.5722324 | 72.7204764 | 70.1216949 | 64.5369818 | 70.9211002 |
| 16:50:23 | 0:36:07 | 68.5722324 | 72.7204764 | 70.1216949 | 64.5369818 | 70.9211002 |
| 16:50:24 | 0:36:08 | 68.5722324 | 72.7204764 | 70.1216949 | 64.5369818 | 67.9211002 |
| 16:50:25 | 0:36:09 | 68.5722324 | 71.7204764 | 69.1216949 | 64.5369818 | 66.9211002 |
| 16:50:26 | 0:36:10 | 68.5722324 | 70.7204764 | 69.1216949 | 65.5369818 | 66.9211002 |
| 16:50:27 | 0:36:11 | 68.5722324 | 69.7204764 | 69.1216949 | 66.5369818 | 66.9211002 |
| 16:50:28 | 0:36:12 | 68.5722324 | 68.7204764 | 69.1216949 | 66.5369818 | 64.9211002 |
| 16:50:29 | 0:36:13 | 69.5722324 | 68.7204764 | 67.1216949 | 66.5369818 | 64.9211002 |
| 16:50:30 | 0:36:14 | 68.5722324 | 66.7204764 | 67.1216949 | 66.5369818 | 64.9211002 |
| 16:50:31 | 0:36:15 | 67.5722324 | 65.7204764 | 68.1216949 | 66.5369818 | 64.9211002 |
| 16:50:32 | 0:36:16 | 67.5722324 | 64.7204764 | 69.1216949 | 66.5369818 | 64.9211002 |
| 16:50:33 | 0:36:17 | 63.5722324 | 61.7204764 | 69.1216949 | 66.5369818 | 65.9211002 |
| 16:50:34 | 0:36:18 | 62.5722324 | 59.7204764 | 69.1216949 | 66.5369818 | 65.9211002 |
| 16:50:35 | 0:36:19 | 62.5722324 | 59.7204764 | 69.1216949 | 66.5369818 | 67.9211002 |
| 16:50:36 | 0:36:20 | 62.5722324 | 59.7204764 | 70.1216949 | 66.5369818 | 67.9211002 |
| 16:50:37 | 0:36:21 | 62.5722324 | 60.7204764 | 70.1216949 | 66.5369818 | 67.9211002 |
| 16:50:38 | 0:36:22 | 62.5722324 | 63.7204764 | 70.1216949 | 65.5369818 | 67.9211002 |
| 16:50:39 | 0:36:23 | 61.5722324 | 63.7204764 | 70.1216949 | 64.5369818 | 68.9211002 |
| 16:50:40 | 0:36:24 | 61.5722324 | 63.7204764 | 70.1216949 | 64.5369818 | 67.9211002 |
| 16:50:41 | 0:36:25 | 60.5722324 | 63.7204764 | 69.1216949 | 64.5369818 | 67.9211002 |
| 16:50:42 | 0:36:26 | 60.5722324 | 63.7204764 | 69.1216949 | 64.5369818 | 67.9211002 |
| 16:50:43 | 0:36:27 | 60.5722324 | 63.7204764 | 69.1216949 | 64.5369818 | 66.9211002 |
| 16:50:44 | 0:36:28 | 60.5722324 | 63.7204764 | 69.1216949 | 64.5369818 | 66.9211002 |
| 16:50:45 | 0:36:29 | 60.5722324 | 63.7204764 | 68.1216949 | 64.5369818 | 66.9211002 |
| 16:50:46 | 0:36:30 | 60.5722324 | 62.7204764 | 68.1216949 | 64.5369818 | 65.9211002 |
| 16:50:47 | 0:36:31 | 60.5722324 | 61.7204764 | 67.1216949 | 64.5369818 | 65.9211002 |
| 16:50:48 | 0:36:32 | 60.5722324 | 60.7204764 | 67.1216949 | 65.5369818 | 64.9211002 |
| 16:50:49 | 0:36:33 | 60.5722324 | 58.7204764 | 67.1216949 | 64.5369818 | 64.9211002 |
| 16:50:50 | 0:36:34 | 59.5722324 | 54.7204764 | 68.1216949 | 64.5369818 | 64.9211002 |
| 16:50:51 | 0:36:35 | 59.5722324 | 53.7204764 | 68.1216949 | 64.5369818 | 64.9211002 |
| 16:50:52 | 0:36:36 | 60.5722324 | 51.7204764 | 69.1216949 | 65.5369818 | 64.9211002 |
| 16:50:53 | 0:36:37 | 60.5722324 | 54.7204764 | 69.1216949 | 65.5369818 | 63.9211002 |
| 16:50:54 | 0:36:38 | 60.5722324 | 56.7204764 | 69.1216949 | 64.5369818 | 63.9211002 |
| 16:50:55 | 0:36:39 | 66.5722324 | 56.7204764 | 69.1216949 | 64.5369818 | 62.9211002 |
| 16:50:56 | 0:36:40 | 67.5722324 | 57.7204764 | 70.1216949 | 65.5369818 | 62.9211002 |
| 16:50:57 | 0:36:41 | 71.5722324 | 58.7204764 | 70.1216949 | 65.5369818 | 61.9211002 |
| 16:50:58 | 0:36:42 | 71.5722324 | 58.7204764 | 70.1216949 | 65.5369818 | 61.9211002 |
| 16:50:59 | 0:36:43 | 72.5722324 | 60.7204764 | 69.1216949 | 66.5369818 | 61.9211002 |
| 16:51:00 | 0:36:44 | 72.5722324 | 64.7204764 | 69.1216949 | 66.5369818 | 59.9211002 |
| 16:51:01 | 0:36:45 | 71.5722324 | 69.7204764 | 69.1216949 | 67.5369818 | 58.9211002 |
| 16:51:02 | 0:36:46 | 71.5722324 | 67.7204764 | 69.1216949 | 67.5369818 | 58.9211002 |

|          |         |            |            |            |            |            |
|----------|---------|------------|------------|------------|------------|------------|
| 16:51:03 | 0:36:47 | 71.5722324 | 66.7204764 | 68.1216949 | 68.5369818 | 58.9211002 |
| 16:51:04 | 0:36:48 | 71.5722324 | 65.7204764 | 68.1216949 | 68.5369818 | 59.9211002 |
| 16:51:05 | 0:36:49 | 71.5722324 | 64.7204764 | 68.1216949 | 68.5369818 | 59.9211002 |
| 16:51:06 | 0:36:50 | 72.5722324 | 64.7204764 | 67.1216949 | 68.5369818 | 59.9211002 |
| 16:51:07 | 0:36:51 | 72.5722324 | 64.7204764 | 67.1216949 | 68.5369818 | 61.9211002 |
| 16:51:08 | 0:36:52 | 72.5722324 | 63.7204764 | 67.1216949 | 68.5369818 | 62.9211002 |
| 16:51:09 | 0:36:53 | 73.5722324 | 63.7204764 | 67.1216949 | 68.5369818 | 61.9211002 |
| 16:51:10 | 0:36:54 | 73.5722324 | 63.7204764 | 67.1216949 | 68.5369818 | 60.9211002 |
| 16:51:11 | 0:36:55 | 72.5722324 | 63.7204764 | 67.1216949 | 67.5369818 | 59.9211002 |
| 16:51:12 | 0:36:56 | 71.5722324 | 66.7204764 | 68.1216949 | 67.5369818 | 59.9211002 |
| 16:51:13 | 0:36:57 | 70.5722324 | 66.7204764 | 68.1216949 | 67.5369818 | 60.9211002 |
| 16:51:14 | 0:36:58 | 70.5722324 | 66.7204764 | 68.1216949 | 68.5369818 | 60.9211002 |
| 16:51:15 | 0:36:59 | 70.5722324 | 63.7204764 | 68.1216949 | 68.5369818 | 60.9211002 |
| 16:51:16 | 0:37:00 | 70.5722324 | 61.7204764 | 68.1216949 | 68.5369818 | 60.9211002 |
| 16:51:17 | 0:37:01 | 70.5722324 | 62.7204764 | 68.1216949 | 68.5369818 | 60.9211002 |
| 16:51:18 | 0:37:02 | 70.5722324 | 62.7204764 | 68.1216949 | 68.5369818 | 60.9211002 |
| 16:51:19 | 0:37:03 | 71.5722324 | 63.7204764 | 67.1216949 | 69.5369818 | 61.9211002 |
| 16:51:20 | 0:37:04 | 73.5722324 | 63.7204764 | 67.1216949 | 69.5369818 | 64.9211002 |
| 16:51:21 | 0:37:05 | 73.5722324 | 63.7204764 | 67.1216949 | 69.5369818 | 64.9211002 |
| 16:51:22 | 0:37:06 | 74.5722324 | 64.7204764 | 67.1216949 | 73.5369818 | 64.9211002 |
| 16:51:23 | 0:37:07 | 74.5722324 | 64.7204764 | 67.1216949 | 75.5369818 | 65.9211002 |
| 16:51:24 | 0:37:08 | 74.5722324 | 63.7204764 | 67.1216949 | 75.5369818 | 65.9211002 |
| 16:51:25 | 0:37:09 | 73.5722324 | 63.7204764 | 67.1216949 | 78.5369818 | 64.9211002 |
| 16:51:26 | 0:37:10 | 72.5722324 | 64.7204764 | 65.1216949 | 79.5369818 | 63.9211002 |
| 16:51:27 | 0:37:11 | 72.5722324 | 64.7204764 | 63.1216949 | 80.5369818 | 63.9211002 |
| 16:51:28 | 0:37:12 | 71.5722324 | 64.7204764 | 62.1216949 | 83.5369818 | 64.9211002 |
| 16:51:29 | 0:37:13 | 71.5722324 | 64.7204764 | 62.1216949 | 68.1146503 | 63.9211002 |
| 16:51:30 | 0:37:14 | 71.5722324 | 64.7204764 | 62.1216949 | 67.9717932 | 62.9211002 |
| 16:51:31 | 0:37:15 | 69.5722324 | 65.7204764 | 62.1216949 | 69.5432218 | 62.9211002 |
| 16:51:32 | 0:37:16 | 68.5722324 | 67.7204764 | 67.1216949 | 71.4003646 | 62.9211002 |
| 16:51:33 | 0:37:17 | 68.5722324 | 67.7204764 | 67.1216949 | 71.828936  | 62.9211002 |
| 16:51:34 | 0:37:18 | 68.5722324 | 65.7204764 | 66.1216949 | 70.6860789 | 62.9211002 |
| 16:51:35 | 0:37:19 | 68.5722324 | 63.7204764 | 66.1216949 | 69.6860789 | 63.9211002 |
| 16:51:36 | 0:37:20 | 68.5722324 | 63.7204764 | 66.1216949 | 70.7744972 | 63.9211002 |
| 16:51:37 | 0:37:21 | 67.5722324 | 60.7204764 | 65.1216949 | 79.5369818 | 63.9211002 |
| 16:51:38 | 0:37:22 | 69.5722324 | 60.7204764 | 65.1216949 | 73.5369818 | 62.9211002 |
| 16:51:39 | 0:37:23 | 68.5722324 | 60.7204764 | 64.1216949 | 68.5369818 | 61.9211002 |
| 16:51:40 | 0:37:24 | 68.5722324 | 61.7204764 | 64.1216949 | 65.5369818 | 61.9211002 |
| 16:51:41 | 0:37:25 | 67.5722324 | 60.7204764 | 64.1216949 | 64.5369818 | 59.9211002 |
| 16:51:42 | 0:37:26 | 67.5722324 | 60.7204764 | 64.1216949 | 63.5369818 | 58.9211002 |
| 16:51:43 | 0:37:27 | 67.5722324 | 60.7204764 | 64.1216949 | 63.5369818 | 59.9211002 |
| 16:51:44 | 0:37:28 | 67.5722324 | 60.7204764 | 64.1216949 | 63.5369818 | 59.9211002 |
| 16:51:45 | 0:37:29 | 67.5722324 | 60.7204764 | 64.1216949 | 63.5369818 | 59.9211002 |
| 16:51:46 | 0:37:30 | 67.5722324 | 60.7204764 | 64.1216949 | 63.5369818 | 59.9211002 |
| 16:51:47 | 0:37:31 | 67.5722324 | 61.7204764 | 65.1216949 | 63.5369818 | 59.9211002 |

|          |         |            |            |            |            |            |
|----------|---------|------------|------------|------------|------------|------------|
| 16:51:48 | 0:37:32 | 68.5722324 | 62.7204764 | 65.1216949 | 62.5369818 | 60.9211002 |
| 16:51:49 | 0:37:33 | 68.5722324 | 62.7204764 | 66.1216949 | 61.5369818 | 60.9211002 |
| 16:51:50 | 0:37:34 | 69.5722324 | 62.7204764 | 66.1216949 | 60.5369818 | 61.9211002 |
| 16:51:51 | 0:37:35 | 69.5722324 | 62.7204764 | 66.1216949 | 60.5369818 | 61.9211002 |
| 16:51:52 | 0:37:36 | 69.5722324 | 62.7204764 | 67.1216949 | 60.5369818 | 61.9211002 |
| 16:51:53 | 0:37:37 | 69.5722324 | 62.7204764 | 67.1216949 | 60.5369818 | 61.9211002 |
| 16:51:54 | 0:37:38 | 69.5722324 | 62.7204764 | 67.1216949 | 60.5369818 | 61.9211002 |
| 16:51:55 | 0:37:39 | 69.5722324 | 63.7204764 | 66.1216949 | 60.5369818 | 62.9211002 |
| 16:51:56 | 0:37:40 | 69.5722324 | 63.7204764 | 66.1216949 | 60.5369818 | 62.9211002 |
| 16:51:57 | 0:37:41 | 71.5722324 | 64.7204764 | 67.1216949 | 60.5369818 | 63.9211002 |
| 16:51:58 | 0:37:42 | 71.5722324 | 63.7204764 | 67.1216949 | 61.5369818 | 63.9211002 |
| 16:51:59 | 0:37:43 | 71.5722324 | 62.7204764 | 67.1216949 | 60.5369818 | 63.9211002 |
| 16:52:00 | 0:37:44 | 71.5722324 | 62.7204764 | 68.1216949 | 60.5369818 | 63.9211002 |
| 16:52:01 | 0:37:45 | 70.5722324 | 61.7204764 | 68.1216949 | 60.5369818 | 63.9211002 |
| 16:52:02 | 0:37:46 | 68.5722324 | 61.7204764 | 68.1216949 | 61.5369818 | 63.9211002 |
| 16:52:03 | 0:37:47 | 68.5722324 | 61.7204764 | 68.1216949 | 61.5369818 | 65.9211002 |
| 16:52:04 | 0:37:48 | 68.5722324 | 61.7204764 | 68.1216949 | 61.5369818 | 65.9211002 |
| 16:52:05 | 0:37:49 | 68.5722324 | 61.7204764 | 68.1216949 | 61.5369818 | 64.9211002 |
| 16:52:06 | 0:37:50 | 68.5722324 | 60.7204764 | 67.1216949 | 61.5369818 | 63.9211002 |
| 16:52:07 | 0:37:51 | 67.5722324 | 60.7204764 | 67.1216949 | 61.5369818 | 63.9211002 |
| 16:52:08 | 0:37:52 | 67.5722324 | 61.7204764 | 65.1216949 | 61.5369818 | 64.9211002 |
| 16:52:09 | 0:37:53 | 66.5722324 | 63.7204764 | 65.1216949 | 62.5369818 | 66.9211002 |
| 16:52:10 | 0:37:54 | 66.5722324 | 64.7204764 | 64.1216949 | 62.5369818 | 66.9211002 |
| 16:52:11 | 0:37:55 | 66.5722324 | 67.7204764 | 64.1216949 | 62.5369818 | 68.9211002 |
| 16:52:12 | 0:37:56 | 66.5722324 | 68.7204764 | 64.1216949 | 62.5369818 | 68.9211002 |
| 16:52:13 | 0:37:57 | 66.5722324 | 67.7204764 | 64.1216949 | 62.5369818 | 66.9211002 |
| 16:52:14 | 0:37:58 | 66.5722324 | 64.7204764 | 65.1216949 | 62.5369818 | 65.9211002 |
| 16:52:15 | 0:37:59 | 64.5722324 | 64.7204764 | 65.1216949 | 62.5369818 | 65.9211002 |
| 16:52:16 | 0:38:00 | 64.5722324 | 64.7204764 | 65.1216949 | 62.5369818 | 64.9211002 |
| 16:52:17 | 0:38:01 | 64.5722324 | 65.7204764 | 64.1216949 | 61.5369818 | 64.9211002 |
| 16:52:18 | 0:38:02 | 64.5722324 | 67.7204764 | 64.1216949 | 60.5369818 | 62.9211002 |
| 16:52:19 | 0:38:03 | 63.5722324 | 67.7204764 | 64.1216949 | 60.5369818 | 62.9211002 |
| 16:52:20 | 0:38:04 | 63.5722324 | 67.7204764 | 64.1216949 | 60.5369818 | 63.9211002 |
| 16:52:21 | 0:38:05 | 61.5722324 | 65.7204764 | 64.1216949 | 59.5369818 | 65.9211002 |
| 16:52:22 | 0:38:06 | 61.5722324 | 64.7204764 | 64.1216949 | 59.5369818 | 66.9211002 |
| 16:52:23 | 0:38:07 | 61.5722324 | 64.7204764 | 65.1216949 | 61.5369818 | 66.9211002 |
| 16:52:24 | 0:38:08 | 63.5722324 | 64.7204764 | 65.1216949 | 63.5369818 | 66.9211002 |
| 16:52:25 | 0:38:09 | 63.5722324 | 64.7204764 | 65.1216949 | 63.5369818 | 64.9211002 |
| 16:52:26 | 0:38:10 | 63.5722324 | 64.7204764 | 65.1216949 | 63.5369818 | 63.9211002 |
| 16:52:27 | 0:38:11 | 64.5722324 | 64.7204764 | 65.1216949 | 64.5369818 | 62.9211002 |
| 16:52:28 | 0:38:12 | 65.5722324 | 64.7204764 | 68.1216949 | 64.5369818 | 60.9211002 |
| 16:52:29 | 0:38:13 | 65.5722324 | 64.7204764 | 68.1216949 | 64.5369818 | 58.9211002 |
| 16:52:30 | 0:38:14 | 65.5722324 | 64.7204764 | 68.1216949 | 64.5369818 | 58.9211002 |
| 16:52:31 | 0:38:15 | 65.5722324 | 64.7204764 | 73.1216949 | 64.5369818 | 60.9211002 |
| 16:52:32 | 0:38:16 | 65.5722324 | 66.7204764 | 73.1216949 | 64.5369818 | 60.9211002 |

|          |         |            |            |            |            |            |
|----------|---------|------------|------------|------------|------------|------------|
| 16:52:33 | 0:38:17 | 65.5722324 | 65.7204764 | 71.1216949 | 64.5369818 | 60.9211002 |
| 16:52:34 | 0:38:18 | 65.5722324 | 65.7204764 | 70.1216949 | 65.5369818 | 60.9211002 |
| 16:52:35 | 0:38:19 | 65.5722324 | 65.7204764 | 67.1216949 | 68.5369818 | 62.9211002 |
| 16:52:36 | 0:38:20 | 65.5722324 | 65.7204764 | 67.1216949 | 69.5369818 | 63.9211002 |
| 16:52:37 | 0:38:21 | 65.5722324 | 65.7204764 | 67.1216949 | 69.5369818 | 63.9211002 |
| 16:52:38 | 0:38:22 | 65.5722324 | 65.7204764 | 67.1216949 | 69.5369818 | 63.9211002 |
| 16:52:39 | 0:38:23 | 66.5722324 | 65.7204764 | 66.1216949 | 67.5369818 | 64.9211002 |
| 16:52:40 | 0:38:24 | 66.5722324 | 67.7204764 | 65.1216949 | 66.5369818 | 64.9211002 |
| 16:52:41 | 0:38:25 | 65.5722324 | 69.7204764 | 65.1216949 | 65.5369818 | 65.9211002 |
| 16:52:42 | 0:38:26 | 65.5722324 | 70.7204764 | 64.1216949 | 65.5369818 | 65.9211002 |
| 16:52:43 | 0:38:27 | 65.5722324 | 70.7204764 | 63.1216949 | 65.5369818 | 65.9211002 |
| 16:52:44 | 0:38:28 | 65.5722324 | 70.7204764 | 63.1216949 | 64.5369818 | 65.9211002 |
| 16:52:45 | 0:38:29 | 65.5722324 | 70.7204764 | 63.1216949 | 64.5369818 | 67.9211002 |
| 16:52:46 | 0:38:30 | 65.5722324 | 70.7204764 | 63.1216949 | 64.5369818 | 68.9211002 |
| 16:52:47 | 0:38:31 | 64.5722324 | 69.7204764 | 63.1216949 | 64.5369818 | 68.9211002 |
| 16:52:48 | 0:38:32 | 65.5722324 | 69.7204764 | 63.1216949 | 64.5369818 | 68.9211002 |
| 16:52:49 | 0:38:33 | 65.5722324 | 69.7204764 | 63.1216949 | 64.5369818 | 68.9211002 |
| 16:52:50 | 0:38:34 | 65.5722324 | 69.7204764 | 64.1216949 | 64.5369818 | 68.9211002 |
| 16:52:51 | 0:38:35 | 66.5722324 | 69.7204764 | 64.1216949 | 63.5369818 | 68.9211002 |
| 16:52:52 | 0:38:36 | 66.5722324 | 76.7204764 | 64.1216949 | 62.5369818 | 71.9211002 |
| 16:52:53 | 0:38:37 | 67.5722324 | 77.7204764 | 64.1216949 | 61.5369818 | 75.9211002 |
| 16:52:54 | 0:38:38 | 67.5722324 | 77.7204764 | 64.1216949 | 61.5369818 | 76.9211002 |
| 16:52:55 | 0:38:39 | 66.5722324 | 70.7204764 | 63.1216949 | 61.5369818 | 76.9211002 |
| 16:52:56 | 0:38:40 | 64.5722324 | 67.7204764 | 63.1216949 | 62.5369818 | 77.9211002 |
| 16:52:57 | 0:38:41 | 64.5722324 | 66.7204764 | 63.1216949 | 62.5369818 | 78.9211002 |
| 16:52:58 | 0:38:42 | 64.5722324 | 66.7204764 | 63.1216949 | 61.5369818 | 60.9211002 |
| 16:52:59 | 0:38:43 | 66.5722324 | 65.7204764 | 63.1216949 | 61.5369818 | 58.9211002 |
| 16:53:00 | 0:38:44 | 68.5722324 | 65.7204764 | 63.1216949 | 61.5369818 | 58.9211002 |
| 16:53:01 | 0:38:45 | 69.5722324 | 65.7204764 | 64.1216949 | 61.5369818 | 57.9211002 |
| 16:53:02 | 0:38:46 | 69.5722324 | 67.7204764 | 64.1216949 | 60.5369818 | 55.9211002 |
| 16:53:03 | 0:38:47 | 69.5722324 | 67.7204764 | 63.1216949 | 60.5369818 | 54.9211002 |
| 16:53:04 | 0:38:48 | 68.5722324 | 61.7204764 | 63.1216949 | 60.5369818 | 54.9211002 |
| 16:53:05 | 0:38:49 | 68.5722324 | 57.7204764 | 63.1216949 | 61.5369818 | 53.9211002 |
| 16:53:06 | 0:38:50 | 68.5722324 | 57.7204764 | 63.1216949 | 61.5369818 | 53.9211002 |
| 16:53:07 | 0:38:51 | 67.5722324 | 57.7204764 | 63.1216949 | 61.5369818 | 53.9211002 |
| 16:53:08 | 0:38:52 | 67.5722324 | 58.7204764 | 63.1216949 | 60.5369818 | 54.9211002 |
| 16:53:09 | 0:38:53 | 67.5722324 | 59.7204764 | 63.1216949 | 60.5369818 | 55.9211002 |
| 16:53:10 | 0:38:54 | 67.5722324 | 59.7204764 | 63.1216949 | 60.5369818 | 55.9211002 |
| 16:53:11 | 0:38:55 | 69.5722324 | 60.7204764 | 63.1216949 | 61.5369818 | 55.9211002 |
| 16:53:12 | 0:38:56 | 69.5722324 | 60.7204764 | 66.1216949 | 61.5369818 | 55.9211002 |
| 16:53:13 | 0:38:57 | 70.5722324 | 59.7204764 | 66.1216949 | 61.5369818 | 58.9211002 |
| 16:53:14 | 0:38:58 | 71.5722324 | 58.7204764 | 65.1216949 | 60.5369818 | 58.9211002 |
| 16:53:15 | 0:38:59 | 72.5722324 | 58.7204764 | 65.1216949 | 60.5369818 | 58.9211002 |
| 16:53:16 | 0:39:00 | 72.5722324 | 59.7204764 | 64.1216949 | 60.5369818 | 58.9211002 |
| 16:53:17 | 0:39:01 | 72.5722324 | 60.7204764 | 63.1216949 | 60.5369818 | 56.9211002 |

|          |         |            |            |            |            |            |
|----------|---------|------------|------------|------------|------------|------------|
| 16:53:18 | 0:39:02 | 72.5722324 | 62.7204764 | 63.1216949 | 60.5369818 | 55.9211002 |
| 16:53:19 | 0:39:03 | 75.5722324 | 64.7204764 | 64.1216949 | 65.5369818 | 55.9211002 |
| 16:53:20 | 0:39:04 | 77.5722324 | 63.7204764 | 64.1216949 | 65.5369818 | 55.9211002 |
| 16:53:21 | 0:39:05 | 78.5722324 | 63.7204764 | 64.1216949 | 67.5369818 | 57.9211002 |
| 16:53:22 | 0:39:06 | 78.5722324 | 63.7204764 | 64.1216949 | 68.5369818 | 59.9211002 |
| 16:53:23 | 0:39:07 | 78.5722324 | 63.7204764 | 64.1216949 | 69.5369818 | 59.9211002 |
| 16:53:24 | 0:39:08 | 63.0383866 | 63.7204764 | 64.1216949 | 69.5369818 | 59.9211002 |
| 16:53:25 | 0:39:09 | 80.5722324 | 66.7204764 | 63.1216949 | 69.5369818 | 60.9211002 |
| 16:53:26 | 0:39:10 | 80.5722324 | 66.7204764 | 63.1216949 | 65.5369818 | 60.9211002 |
| 16:53:27 | 0:39:11 | 65.2575075 | 66.7204764 | 63.1216949 | 65.5369818 | 59.9211002 |
| 16:53:28 | 0:39:12 | 65.6860789 | 66.7204764 | 62.1216949 | 65.5369818 | 59.9211002 |
| 16:53:29 | 0:39:13 | 65.6860789 | 67.7204764 | 62.1216949 | 64.5369818 | 59.9211002 |
| 16:53:30 | 0:39:14 | 65.4003646 | 67.7204764 | 61.1216949 | 63.5369818 | 58.9211002 |
| 16:53:31 | 0:39:15 | 65.2575075 | 67.7204764 | 61.1216949 | 62.5369818 | 58.9211002 |
| 16:53:32 | 0:39:16 | 65.1146503 | 66.7204764 | 61.1216949 | 62.5369818 | 58.9211002 |
| 16:53:33 | 0:39:17 | 64.828936  | 65.7204764 | 61.1216949 | 62.5369818 | 57.9211002 |
| 16:53:34 | 0:39:18 | 64.9717932 | 65.7204764 | 61.1216949 | 62.5369818 | 57.9211002 |
| 16:53:35 | 0:39:19 | 65.2575075 | 64.7204764 | 61.1216949 | 62.5369818 | 57.9211002 |
| 16:53:36 | 0:39:20 | 64.9717932 | 63.7204764 | 62.1216949 | 62.5369818 | 57.9211002 |
| 16:53:37 | 0:39:21 | 65.2575075 | 62.7204764 | 62.1216949 | 65.5369818 | 56.9211002 |
| 16:53:38 | 0:39:22 | 65.6860789 | 61.7204764 | 62.1216949 | 69.5369818 | 56.9211002 |
| 16:53:39 | 0:39:23 | 66.2575075 | 61.7204764 | 62.1216949 | 70.5369818 | 56.9211002 |
| 16:53:40 | 0:39:24 | 65.9717932 | 61.7204764 | 61.1216949 | 70.5369818 | 54.9211002 |
| 16:53:41 | 0:39:25 | 66.6860789 | 61.7204764 | 62.1216949 | 72.5369818 | 53.9211002 |
| 16:53:42 | 0:39:26 | 81.5722324 | 61.7204764 | 62.1216949 | 70.5369818 | 53.9211002 |
| 16:53:43 | 0:39:27 | 81.5722324 | 61.7204764 | 62.1216949 | 70.5369818 | 56.9211002 |
| 16:53:44 | 0:39:28 | 80.5722324 | 61.7204764 | 62.1216949 | 70.5369818 | 57.9211002 |
| 16:53:45 | 0:39:29 | 77.5722324 | 60.7204764 | 62.1216949 | 70.5369818 | 57.9211002 |
| 16:53:46 | 0:39:30 | 77.5722324 | 59.7204764 | 62.1216949 | 67.5369818 | 57.9211002 |
| 16:53:47 | 0:39:31 | 77.5722324 | 59.7204764 | 64.1216949 | 68.5369818 | 57.9211002 |
| 16:53:48 | 0:39:32 | 77.5722324 | 59.7204764 | 64.1216949 | 70.5369818 | 59.9211002 |
| 16:53:49 | 0:39:33 | 77.5722324 | 60.7204764 | 65.1216949 | 70.5369818 | 60.9211002 |
| 16:53:50 | 0:39:34 | 70.5722324 | 62.7204764 | 65.1216949 | 69.5369818 | 60.9211002 |
| 16:53:51 | 0:39:35 | 70.5722324 | 62.7204764 | 65.1216949 | 69.5369818 | 60.9211002 |
| 16:53:52 | 0:39:36 | 69.5722324 | 62.7204764 | 65.1216949 | 67.5369818 | 61.9211002 |
| 16:53:53 | 0:39:37 | 69.5722324 | 61.7204764 | 64.1216949 | 63.5369818 | 61.9211002 |
| 16:53:54 | 0:39:38 | 69.5722324 | 60.7204764 | 64.1216949 | 62.5369818 | 63.9211002 |
| 16:53:55 | 0:39:39 | 68.5722324 | 59.7204764 | 57.1216949 | 61.5369818 | 63.9211002 |
| 16:53:56 | 0:39:40 | 68.5722324 | 60.7204764 | 57.1216949 | 61.5369818 | 65.9211002 |
| 16:53:57 | 0:39:41 | 68.5722324 | 60.7204764 | 61.1216949 | 60.5369818 | 63.9211002 |
| 16:53:58 | 0:39:42 | 68.5722324 | 61.7204764 | 61.1216949 | 60.5369818 | 63.9211002 |
| 16:53:59 | 0:39:43 | 69.5722324 | 62.7204764 | 67.1216949 | 60.5369818 | 62.9211002 |
| 16:54:00 | 0:39:44 | 70.5722324 | 61.7204764 | 70.1216949 | 60.5369818 | 62.9211002 |
| 16:54:01 | 0:39:45 | 70.5722324 | 61.7204764 | 70.1216949 | 61.5369818 | 58.9211002 |
| 16:54:02 | 0:39:46 | 73.5722324 | 61.7204764 | 70.1216949 | 61.5369818 | 57.9211002 |

|          |         |            |            |            |            |            |
|----------|---------|------------|------------|------------|------------|------------|
| 16:54:03 | 0:39:47 | 73.5722324 | 62.7204764 | 69.1216949 | 60.5369818 | 57.9211002 |
| 16:54:04 | 0:39:48 | 75.5722324 | 64.7204764 | 69.1216949 | 61.5369818 | 57.9211002 |
| 16:54:05 | 0:39:49 | 75.5722324 | 66.7204764 | 69.1216949 | 61.5369818 | 57.9211002 |
| 16:54:06 | 0:39:50 | 75.5722324 | 68.7204764 | 68.1216949 | 63.5369818 | 54.9211002 |
| 16:54:07 | 0:39:51 | 75.5722324 | 68.7204764 | 69.1216949 | 63.5369818 | 52.9211002 |
| 16:54:08 | 0:39:52 | 74.5722324 | 67.7204764 | 69.1216949 | 63.5369818 | 52.9211002 |
| 16:54:09 | 0:39:53 | 74.5722324 | 66.7204764 | 69.1216949 | 64.5369818 | 52.9211002 |
| 16:54:10 | 0:39:54 | 70.5722324 | 65.7204764 | 68.1216949 | 65.5369818 | 52.9211002 |
| 16:54:11 | 0:39:55 | 68.5722324 | 64.7204764 | 67.1216949 | 64.5369818 | 53.9211002 |
| 16:54:12 | 0:39:56 | 67.5722324 | 63.7204764 | 67.1216949 | 64.5369818 | 54.9211002 |
| 16:54:13 | 0:39:57 | 66.5722324 | 62.7204764 | 66.1216949 | 64.5369818 | 55.9211002 |
| 16:54:14 | 0:39:58 | 66.5722324 | 64.7204764 | 67.1216949 | 64.5369818 | 55.9211002 |
| 16:54:15 | 0:39:59 | 65.5722324 | 65.7204764 | 67.1216949 | 64.5369818 | 55.9211002 |
| 16:54:16 | 0:40:00 | 65.5722324 | 64.7204764 | 67.1216949 | 64.5369818 | 54.9211002 |
| 16:54:17 | 0:40:01 | 65.5722324 | 63.7204764 | 67.1216949 | 65.5369818 | 54.9211002 |
| 16:54:18 | 0:40:02 | 65.5722324 | 63.7204764 | 67.1216949 | 65.5369818 | 54.9211002 |
| 16:54:19 | 0:40:03 | 64.5722324 | 63.7204764 | 67.1216949 | 65.5369818 | 54.9211002 |
| 16:54:20 | 0:40:04 | 64.5722324 | 62.7204764 | 67.1216949 | 65.5369818 | 54.9211002 |
| 16:54:21 | 0:40:05 | 64.5722324 | 62.7204764 | 67.1216949 | 66.5369818 | 55.9211002 |
| 16:54:22 | 0:40:06 | 64.5722324 | 62.7204764 | 67.1216949 | 66.5369818 | 55.9211002 |
| 16:54:23 | 0:40:07 | 64.5722324 | 62.7204764 | 67.1216949 | 66.5369818 | 55.9211002 |
| 16:54:24 | 0:40:08 | 64.5722324 | 62.7204764 | 67.1216949 | 70.5369818 | 57.9211002 |
| 16:54:25 | 0:40:09 | 64.5722324 | 62.7204764 | 65.1216949 | 74.5369818 | 76.9211002 |
| 16:54:26 | 0:40:10 | 64.5722324 | 62.7204764 | 65.1216949 | 74.5369818 | 76.9211002 |
| 16:54:27 | 0:40:11 | 65.5722324 | 62.7204764 | 65.1216949 | 74.5369818 | 76.9211002 |
| 16:54:28 | 0:40:12 | 68.5722324 | 62.7204764 | 66.1216949 | 75.5369818 | 68.9211002 |
| 16:54:29 | 0:40:13 | 70.5722324 | 62.7204764 | 66.1216949 | 76.5369818 | 65.9211002 |
| 16:54:30 | 0:40:14 | 70.5722324 | 62.7204764 | 66.1216949 | 76.5369818 | 64.9211002 |
| 16:54:31 | 0:40:15 | 70.5722324 | 62.7204764 | 66.1216949 | 75.5369818 | 64.9211002 |
| 16:54:32 | 0:40:16 | 70.5722324 | 62.7204764 | 67.1216949 | 75.5369818 | 63.9211002 |
| 16:54:33 | 0:40:17 | 70.5722324 | 63.7204764 | 67.1216949 | 75.5369818 | 63.9211002 |
| 16:54:34 | 0:40:18 | 70.5722324 | 63.7204764 | 67.1216949 | 75.5369818 | 63.9211002 |
| 16:54:35 | 0:40:19 | 70.5722324 | 74.7204764 | 67.1216949 | 74.5369818 | 63.9211002 |
| 16:54:36 | 0:40:20 | 70.5722324 | 75.7204764 | 67.1216949 | 72.5369818 | 63.9211002 |
| 16:54:37 | 0:40:21 | 70.5722324 | 74.7204764 | 68.1216949 | 72.5369818 | 63.9211002 |
| 16:54:38 | 0:40:22 | 70.5722324 | 73.7204764 | 69.1216949 | 75.5369818 | 64.9211002 |
| 16:54:39 | 0:40:23 | 70.5722324 | 73.7204764 | 71.1216949 | 77.5369818 | 65.9211002 |
| 16:54:40 | 0:40:24 | 71.5722324 | 71.7204764 | 71.1216949 | 79.5369818 | 66.9211002 |
| 16:54:41 | 0:40:25 | 71.5722324 | 69.7204764 | 71.1216949 | 81.5369818 | 66.9211002 |
| 16:54:42 | 0:40:26 | 72.5722324 | 69.7204764 | 70.1216949 | 82.5369818 | 69.9211002 |
| 16:54:43 | 0:40:27 | 72.5722324 | 67.7204764 | 69.1216949 | 82.5369818 | 76.9211002 |
| 16:54:44 | 0:40:28 | 72.5722324 | 67.7204764 | 68.1216949 | 79.5369818 | 62.9211002 |
| 16:54:45 | 0:40:29 | 73.5722324 | 68.7204764 | 68.1216949 | 79.5369818 | 59.9211002 |
| 16:54:46 | 0:40:30 | 73.5722324 | 68.7204764 | 68.1216949 | 76.5369818 | 59.9211002 |
| 16:54:47 | 0:40:31 | 73.5722324 | 68.7204764 | 68.1216949 | 74.5369818 | 58.9211002 |



|          |         |            |            |            |            |            |
|----------|---------|------------|------------|------------|------------|------------|
| 16:54:48 | 0:40:32 | 74.5722324 | 67.7204764 | 68.1216949 | 74.5369818 | 58.9211002 |
| 16:54:49 | 0:40:33 | 70.5722324 | 66.7204764 | 68.1216949 | 72.5369818 | 59.9211002 |
| 16:54:50 | 0:40:34 | 69.5722324 | 67.7204764 | 67.1216949 | 70.5369818 | 59.9211002 |
| 16:54:51 | 0:40:35 | 69.5722324 | 67.7204764 | 67.1216949 | 70.5369818 | 59.9211002 |
| 16:54:52 | 0:40:36 | 69.5722324 | 67.7204764 | 67.1216949 | 66.5369818 | 59.9211002 |
| 16:54:53 | 0:40:37 | 69.5722324 | 67.7204764 | 67.1216949 | 66.5369818 | 58.9211002 |
| 16:54:54 | 0:40:38 | 68.5722324 | 67.7204764 | 67.1216949 | 66.5369818 | 58.9211002 |
| 16:54:55 | 0:40:39 | 68.5722324 | 68.7204764 | 66.1216949 | 65.5369818 | 58.9211002 |
| 16:54:56 | 0:40:40 | 68.5722324 | 69.7204764 | 66.1216949 | 65.5369818 | 60.9211002 |
| 16:54:57 | 0:40:41 | 64.5722324 | 71.7204764 | 66.1216949 | 65.5369818 | 60.9211002 |
| 16:54:58 | 0:40:42 | 64.5722324 | 72.7204764 | 66.1216949 | 65.5369818 | 59.9211002 |
| 16:54:59 | 0:40:43 | 64.5722324 | 69.7204764 | 67.1216949 | 65.5369818 | 58.9211002 |
| 16:55:00 | 0:40:44 | 64.5722324 | 69.7204764 | 67.1216949 | 65.5369818 | 58.9211002 |
| 16:55:01 | 0:40:45 | 63.5722324 | 64.7204764 | 67.1216949 | 67.5369818 | 57.9211002 |
| 16:55:02 | 0:40:46 | 63.5722324 | 61.7204764 | 67.1216949 | 68.5369818 | 57.9211002 |
| 16:55:03 | 0:40:47 | 63.5722324 | 61.7204764 | 67.1216949 | 69.5369818 | 57.9211002 |
| 16:55:04 | 0:40:48 | 63.5722324 | 60.7204764 | 66.1216949 | 68.5369818 | 56.9211002 |
| 16:55:05 | 0:40:49 | 62.5722324 | 60.7204764 | 66.1216949 | 68.5369818 | 57.9211002 |
| 16:55:06 | 0:40:50 | 62.5722324 | 60.7204764 | 66.1216949 | 68.5369818 | 57.9211002 |
| 16:55:07 | 0:40:51 | 62.5722324 | 60.7204764 | 66.1216949 | 66.5369818 | 59.9211002 |
| 16:55:08 | 0:40:52 | 62.5722324 | 60.7204764 | 66.1216949 | 65.5369818 | 59.9211002 |
| 16:55:09 | 0:40:53 | 62.5722324 | 60.7204764 | 66.1216949 | 65.5369818 | 59.9211002 |
| 16:55:10 | 0:40:54 | 62.5722324 | 60.7204764 | 66.1216949 | 65.5369818 | 59.9211002 |
| 16:55:11 | 0:40:55 | 63.5722324 | 60.7204764 | 67.1216949 | 64.5369818 | 59.9211002 |
| 16:55:12 | 0:40:56 | 63.5722324 | 60.7204764 | 67.1216949 | 64.5369818 | 59.9211002 |
| 16:55:13 | 0:40:57 | 61.5722324 | 60.7204764 | 68.1216949 | 63.5369818 | 59.9211002 |
| 16:55:14 | 0:40:58 | 59.5722324 | 57.7204764 | 68.1216949 | 63.5369818 | 61.9211002 |
| 16:55:15 | 0:40:59 | 59.5722324 | 57.7204764 | 68.1216949 | 63.5369818 | 61.9211002 |
| 16:55:16 | 0:41:00 | 59.5722324 | 58.7204764 | 68.1216949 | 62.5369818 | 59.9211002 |
| 16:55:17 | 0:41:01 | 59.5722324 | 57.7204764 | 68.1216949 | 62.5369818 | 59.9211002 |
| 16:55:18 | 0:41:02 | 59.5722324 | 58.7204764 | 69.1216949 | 63.5369818 | 59.9211002 |
| 16:55:19 | 0:41:03 | 59.5722324 | 60.7204764 | 69.1216949 | 63.5369818 | 59.9211002 |
| 16:55:20 | 0:41:04 | 58.5722324 | 60.7204764 | 71.1216949 | 63.5369818 | 58.9211002 |
| 16:55:21 | 0:41:05 | 57.5722324 | 59.7204764 | 71.1216949 | 63.5369818 | 58.9211002 |
| 16:55:22 | 0:41:06 | 56.5722324 | 58.7204764 | 72.1216949 | 64.5369818 | 60.9211002 |
| 16:55:23 | 0:41:07 | 56.5722324 | 58.7204764 | 72.1216949 | 67.5369818 | 60.9211002 |
| 16:55:24 | 0:41:08 | 56.5722324 | 57.7204764 | 72.1216949 | 68.5369818 | 61.9211002 |
| 16:55:25 | 0:41:09 | 56.5722324 | 56.7204764 | 71.1216949 | 71.5369818 | 61.9211002 |
| 16:55:26 | 0:41:10 | 56.5722324 | 56.7204764 | 70.1216949 | 69.5369818 | 61.9211002 |
| 16:55:27 | 0:41:11 | 56.5722324 | 58.7204764 | 70.1216949 | 67.5369818 | 61.9211002 |
| 16:55:28 | 0:41:12 | 59.5722324 | 58.7204764 | 69.1216949 | 67.5369818 | 59.9211002 |
| 16:55:29 | 0:41:13 | 59.5722324 | 58.7204764 | 69.1216949 | 67.5369818 | 59.9211002 |
| 16:55:30 | 0:41:14 | 59.5722324 | 57.7204764 | 70.1216949 | 69.5369818 | 60.9211002 |
| 16:55:31 | 0:41:15 | 59.5722324 | 57.7204764 | 70.1216949 | 72.5369818 | 60.9211002 |
| 16:55:32 | 0:41:16 | 60.5722324 | 57.7204764 | 71.1216949 | 78.5369818 | 60.9211002 |

|          |         |            |            |            |            |            |
|----------|---------|------------|------------|------------|------------|------------|
| 16:55:33 | 0:41:17 | 60.5722324 | 58.7204764 | 71.1216949 | 78.5369818 | 60.9211002 |
| 16:55:34 | 0:41:18 | 60.5722324 | 60.7204764 | 71.1216949 | 75.5369818 | 60.9211002 |
| 16:55:35 | 0:41:19 | 61.5722324 | 60.7204764 | 71.1216949 | 73.5369818 | 60.9211002 |
| 16:55:36 | 0:41:20 | 61.5722324 | 61.7204764 | 71.1216949 | 73.5369818 | 60.9211002 |
| 16:55:37 | 0:41:21 | 62.5722324 | 62.7204764 | 71.1216949 | 74.5369818 | 60.9211002 |
| 16:55:38 | 0:41:22 | 63.5722324 | 62.7204764 | 71.1216949 | 77.5369818 | 60.9211002 |
| 16:55:39 | 0:41:23 | 63.5722324 | 63.7204764 | 71.1216949 | 77.5369818 | 60.9211002 |
| 16:55:40 | 0:41:24 | 63.5722324 | 63.7204764 | 69.1216949 | 80.5369818 | 60.9211002 |
| 16:55:41 | 0:41:25 | 63.5722324 | 64.7204764 | 69.1216949 | 80.5369818 | 59.9211002 |
| 16:55:42 | 0:41:26 | 63.5722324 | 64.7204764 | 70.1216949 | 81.5369818 | 59.9211002 |
| 16:55:43 | 0:41:27 | 63.5722324 | 65.7204764 | 71.1216949 | 81.5369818 | 59.9211002 |
| 16:55:44 | 0:41:28 | 64.5722324 | 66.7204764 | 71.1216949 | 81.5369818 | 59.9211002 |
| 16:55:45 | 0:41:29 | 64.5722324 | 67.7204764 | 72.1216949 | 81.5369818 | 57.9211002 |
| 16:55:46 | 0:41:30 | 64.5722324 | 67.7204764 | 71.1216949 | 82.5369818 | 57.9211002 |
| 16:55:47 | 0:41:31 | 66.5722324 | 66.7204764 | 71.1216949 | 82.5369818 | 58.9211002 |
| 16:55:48 | 0:41:32 | 66.5722324 | 64.7204764 | 71.1216949 | 78.5369818 | 58.9211002 |
| 16:55:49 | 0:41:33 | 66.5722324 | 63.7204764 | 71.1216949 | 76.5369818 | 57.9211002 |
| 16:55:50 | 0:41:34 | 66.5722324 | 63.7204764 | 70.1216949 | 76.5369818 | 58.9211002 |
| 16:55:51 | 0:41:35 | 66.5722324 | 62.7204764 | 70.1216949 | 75.5369818 | 58.9211002 |
| 16:55:52 | 0:41:36 | 66.5722324 | 63.7204764 | 70.1216949 | 74.5369818 | 59.9211002 |
| 16:55:53 | 0:41:37 | 67.5722324 | 63.7204764 | 70.1216949 | 74.5369818 | 60.9211002 |
| 16:55:54 | 0:41:38 | 66.5722324 | 63.7204764 | 70.1216949 | 75.5369818 | 60.9211002 |
| 16:55:55 | 0:41:39 | 67.5722324 | 63.7204764 | 70.1216949 | 76.5369818 | 60.9211002 |
| 16:55:56 | 0:41:40 | 69.5722324 | 63.7204764 | 71.1216949 | 76.5369818 | 60.9211002 |
| 16:55:57 | 0:41:41 | 70.5722324 | 62.7204764 | 71.1216949 | 76.5369818 | 64.9211002 |
| 16:55:58 | 0:41:42 | 70.5722324 | 60.7204764 | 72.1216949 | 76.5369818 | 64.9211002 |
| 16:55:59 | 0:41:43 | 70.5722324 | 60.7204764 | 73.1216949 | 77.5369818 | 65.9211002 |
| 16:56:00 | 0:41:44 | 70.5722324 | 60.7204764 | 73.1216949 | 77.5369818 | 65.9211002 |
| 16:56:01 | 0:41:45 | 70.5722324 | 61.7204764 | 70.1216949 | 77.5369818 | 66.9211002 |
| 16:56:02 | 0:41:46 | 70.5722324 | 61.7204764 | 69.1216949 | 76.5369818 | 66.9211002 |
| 16:56:03 | 0:41:47 | 71.5722324 | 62.7204764 | 69.1216949 | 74.5369818 | 66.9211002 |
| 16:56:04 | 0:41:48 | 71.5722324 | 62.7204764 | 69.1216949 | 69.5369818 | 66.9211002 |
| 16:56:05 | 0:41:49 | 69.5722324 | 61.7204764 | 71.1216949 | 69.5369818 | 66.9211002 |
| 16:56:06 | 0:41:50 | 69.5722324 | 61.7204764 | 71.1216949 | 69.5369818 | 66.9211002 |
| 16:56:07 | 0:41:51 | 69.5722324 | 60.7204764 | 71.1216949 | 64.5369818 | 63.9211002 |
| 16:56:08 | 0:41:52 | 69.5722324 | 59.7204764 | 70.1216949 | 63.5369818 | 62.9211002 |
| 16:56:09 | 0:41:53 | 69.5722324 | 58.7204764 | 70.1216949 | 63.5369818 | 61.9211002 |
| 16:56:10 | 0:41:54 | 69.5722324 | 58.7204764 | 69.1216949 | 63.5369818 | 61.9211002 |
| 16:56:11 | 0:41:55 | 69.5722324 | 57.7204764 | 68.1216949 | 63.5369818 | 61.9211002 |
| 16:56:12 | 0:41:56 | 69.5722324 | 57.7204764 | 68.1216949 | 64.5369818 | 62.9211002 |
| 16:56:13 | 0:41:57 | 69.5722324 | 57.7204764 | 67.1216949 | 64.5369818 | 62.9211002 |
| 16:56:14 | 0:41:58 | 69.5722324 | 60.7204764 | 68.1216949 | 64.5369818 | 62.9211002 |
| 16:56:15 | 0:41:59 | 71.5722324 | 60.7204764 | 68.1216949 | 64.5369818 | 62.9211002 |
| 16:56:16 | 0:42:00 | 72.5722324 | 60.7204764 | 68.1216949 | 63.5369818 | 63.9211002 |
| 16:56:17 | 0:42:01 | 72.5722324 | 62.7204764 | 67.1216949 | 63.5369818 | 63.9211002 |

|          |         |            |            |            |            |            |
|----------|---------|------------|------------|------------|------------|------------|
| 16:56:18 | 0:42:02 | 72.5722324 | 62.7204764 | 67.1216949 | 63.5369818 | 63.9211002 |
| 16:56:19 | 0:42:03 | 72.5722324 | 62.7204764 | 67.1216949 | 63.5369818 | 64.9211002 |
| 16:56:20 | 0:42:04 | 72.5722324 | 62.7204764 | 66.1216949 | 63.5369818 | 64.9211002 |
| 16:56:21 | 0:42:05 | 73.5722324 | 62.7204764 | 66.1216949 | 62.5369818 | 64.9211002 |
| 16:56:22 | 0:42:06 | 76.5722324 | 62.7204764 | 66.1216949 | 62.5369818 | 62.9211002 |
| 16:56:23 | 0:42:07 | 79.5722324 | 63.7204764 | 66.1216949 | 62.5369818 | 58.9211002 |
| 16:56:24 | 0:42:08 | 79.5722324 | 63.7204764 | 65.1216949 | 62.5369818 | 57.9211002 |
| 16:56:25 | 0:42:09 | 79.5722324 | 63.7204764 | 65.1216949 | 62.5369818 | 56.9211002 |
| 16:56:26 | 0:42:10 | 80.5722324 | 63.7204764 | 64.1216949 | 61.5369818 | 56.9211002 |
| 16:56:27 | 0:42:11 | 80.5722324 | 64.7204764 | 64.1216949 | 62.5369818 | 56.9211002 |
| 16:56:28 | 0:42:12 | 80.5722324 | 64.7204764 | 64.1216949 | 62.5369818 | 56.9211002 |
| 16:56:29 | 0:42:13 | 80.5722324 | 64.7204764 | 64.1216949 | 61.5369818 | 55.9211002 |
| 16:56:30 | 0:42:14 | 80.5722324 | 64.7204764 | 64.1216949 | 61.5369818 | 55.9211002 |
| 16:56:31 | 0:42:15 | 79.5722324 | 64.7204764 | 64.1216949 | 61.5369818 | 52.9211002 |
| 16:56:32 | 0:42:16 | 78.5722324 | 61.7204764 | 65.1216949 | 61.5369818 | 50.9211002 |
| 16:56:33 | 0:42:17 | 78.5722324 | 58.7204764 | 65.1216949 | 61.5369818 | 49.9211002 |
| 16:56:34 | 0:42:18 | 77.5722324 | 58.7204764 | 65.1216949 | 61.5369818 | 49.9211002 |
| 16:56:35 | 0:42:19 | 75.5722324 | 56.7204764 | 65.1216949 | 61.5369818 | 48.9211002 |
| 16:56:36 | 0:42:20 | 75.5722324 | 56.7204764 | 64.1216949 | 63.5369818 | 48.9211002 |
| 16:56:37 | 0:42:21 | 73.5722324 | 57.7204764 | 65.1216949 | 62.5369818 | 47.9211002 |
| 16:56:38 | 0:42:22 | 74.5722324 | 58.7204764 | 65.1216949 | 62.5369818 | 47.9211002 |
| 16:56:39 | 0:42:23 | 75.5722324 | 59.7204764 | 65.1216949 | 63.5369818 | 48.9211002 |
| 16:56:40 | 0:42:24 | 75.5722324 | 59.7204764 | 65.1216949 | 63.5369818 | 49.9211002 |
| 16:56:41 | 0:42:25 | 76.5722324 | 59.7204764 | 65.1216949 | 62.5369818 | 49.9211002 |
| 16:56:42 | 0:42:26 | 75.5722324 | 59.7204764 | 65.1216949 | 62.5369818 | 50.9211002 |
| 16:56:43 | 0:42:27 | 73.5722324 | 59.7204764 | 64.1216949 | 62.5369818 | 52.9211002 |
| 16:56:44 | 0:42:28 | 69.5722324 | 60.7204764 | 63.1216949 | 62.5369818 | 53.9211002 |
| 16:56:45 | 0:42:29 | 69.5722324 | 63.7204764 | 63.1216949 | 62.5369818 | 53.9211002 |
| 16:56:46 | 0:42:30 | 69.5722324 | 64.7204764 | 63.1216949 | 62.5369818 | 53.9211002 |
| 16:56:47 | 0:42:31 | 68.5722324 | 64.7204764 | 63.1216949 | 62.5369818 | 51.9211002 |
| 16:56:48 | 0:42:32 | 67.5722324 | 64.7204764 | 64.1216949 | 62.5369818 | 51.9211002 |
| 16:56:49 | 0:42:33 | 65.5722324 | 64.7204764 | 64.1216949 | 62.5369818 | 51.9211002 |
| 16:56:50 | 0:42:34 | 65.5722324 | 61.7204764 | 65.1216949 | 62.5369818 | 52.9211002 |
| 16:56:51 | 0:42:35 | 64.5722324 | 60.7204764 | 65.1216949 | 62.5369818 | 52.9211002 |
| 16:56:52 | 0:42:36 | 64.5722324 | 60.7204764 | 65.1216949 | 62.5369818 | 53.9211002 |
| 16:56:53 | 0:42:37 | 64.5722324 | 60.7204764 | 65.1216949 | 63.5369818 | 54.9211002 |
| 16:56:54 | 0:42:38 | 64.5722324 | 62.7204764 | 65.1216949 | 63.5369818 | 55.9211002 |
| 16:56:55 | 0:42:39 | 64.5722324 | 63.7204764 | 65.1216949 | 63.5369818 | 56.9211002 |
| 16:56:56 | 0:42:40 | 64.5722324 | 65.7204764 | 65.1216949 | 64.5369818 | 56.9211002 |
| 16:56:57 | 0:42:41 | 64.5722324 | 64.7204764 | 65.1216949 | 64.5369818 | 57.9211002 |
| 16:56:58 | 0:42:42 | 64.5722324 | 63.7204764 | 65.1216949 | 63.5369818 | 55.9211002 |
| 16:56:59 | 0:42:43 | 62.5722324 | 63.7204764 | 65.1216949 | 62.5369818 | 55.9211002 |
| 16:57:00 | 0:42:44 | 62.5722324 | 63.7204764 | 65.1216949 | 62.5369818 | 55.9211002 |
| 16:57:01 | 0:42:45 | 62.5722324 | 61.7204764 | 65.1216949 | 62.5369818 | 54.9211002 |
| 16:57:02 | 0:42:46 | 62.5722324 | 61.7204764 | 64.1216949 | 62.5369818 | 54.9211002 |

|          |         |            |            |            |            |            |
|----------|---------|------------|------------|------------|------------|------------|
| 16:57:03 | 0:42:47 | 63.5722324 | 63.7204764 | 64.1216949 | 62.5369818 | 54.9211002 |
| 16:57:04 | 0:42:48 | 64.5722324 | 64.7204764 | 65.1216949 | 63.5369818 | 56.9211002 |
| 16:57:05 | 0:42:49 | 64.5722324 | 64.7204764 | 65.1216949 | 64.5369818 | 56.9211002 |
| 16:57:06 | 0:42:50 | 67.5722324 | 64.7204764 | 65.1216949 | 65.5369818 | 57.9211002 |
| 16:57:07 | 0:42:51 | 68.5722324 | 64.7204764 | 65.1216949 | 65.5369818 | 57.9211002 |
| 16:57:08 | 0:42:52 | 68.5722324 | 68.7204764 | 65.1216949 | 65.5369818 | 57.9211002 |
| 16:57:09 | 0:42:53 | 68.5722324 | 70.7204764 | 65.1216949 | 65.5369818 | 57.9211002 |
| 16:57:10 | 0:42:54 | 69.5722324 | 71.7204764 | 67.1216949 | 66.5369818 | 57.9211002 |
| 16:57:11 | 0:42:55 | 72.5722324 | 71.7204764 | 67.1216949 | 66.5369818 | 57.9211002 |
| 16:57:12 | 0:42:56 | 73.5722324 | 73.7204764 | 67.1216949 | 69.5369818 | 58.9211002 |
| 16:57:13 | 0:42:57 | 73.5722324 | 74.7204764 | 68.1216949 | 70.5369818 | 58.9211002 |
| 16:57:14 | 0:42:58 | 73.5722324 | 74.7204764 | 68.1216949 | 70.5369818 | 58.9211002 |

| Person 6   | Person 2 | Activity | average of all | moving average |
|------------|----------|----------|----------------|----------------|
| 91.3897351 |          |          | 73.2030262     | 70.7961146     |
| 91.3897351 |          |          | 73.7863596     | 70.8931538     |
| 91.3897351 |          |          | 74.2030262     | 70.9907293     |
| 89.3897351 |          |          | 74.230804      | 71.080422      |
| 88.3897351 |          |          | 74.4530262     | 71.1810005     |
| 90.3897351 |          |          | 75.230804      | 71.2844211     |
| 90.3897351 |          |          | 75.230804      | 71.3957246     |
| 91.3897351 |          |          | 75.3419151     | 71.5103529     |
| 91.3897351 |          |          | 75.0919151     | 71.6318988     |
| 91.3897351 |          |          | 77.2103701     | 71.7671191     |
| 91.3897351 |          |          | 77.3770368     | 71.9035728     |
| 91.3897351 |          |          | 77.5437035     | 72.0426541     |
| 91.3897351 |          |          | 77.5437035     | 72.1874733     |
| 91.3897351 |          |          | 77.8770368     | 72.3382448     |
| 91.3897351 |          |          | 78.0437035     | 72.4942716     |
| 92.3897351 |          |          | 78.7103701     | 72.6588785     |
| 92.3897351 |          |          | 79.0437035     | 72.8241824     |
| 93.3897351 |          |          | 80.0437035     | 72.9901835     |
| 93.3897351 |          |          | 79.5437035     | 73.1581151     |
| 93.3897351 |          |          | 80.0437035     | 73.3363963     |
| 79.5437035 |          |          | 76.9026982     | 73.5178414     |
| 79.7103701 |          |          | 76.7638093     | 73.6992865     |
| 79.2103701 |          |          | 76.180476      | 73.8834664     |
| 79.3770368 |          |          | 76.3749204     | 74.070274      |
| 79.3770368 |          |          | 76.3749204     | 74.2512901     |
| 79.0437035 |          |          | 75.9860315     | 74.4219566     |
| 78.5437035 |          |          | 75.4026982     | 74.5906925     |
| 78.7103701 |          |          | 75.5971427     | 74.7359407     |
| 77.7103701 |          |          | 74.5971427     | 74.8714985     |
| 77.5437035 |          |          | 74.4026982     | 75.0244687     |
| 77.2103701 |          |          | 74.0138093     | 75.1755084     |
| 77.2103701 |          |          | 74.180476      | 75.3240813     |
| 76.3770368 |          |          | 73.2082538     | 75.4544217     |
| 77.3770368 |          |          | 74.3749204     | 75.5076573     |
| 77.3770368 |          |          | 74.5415871     | 75.5203524     |
| 77.2103701 |          |          | 74.3471427     | 75.4918634     |
| 77.3770368 |          |          | 74.5415871     | 75.457984      |
| 76.8770368 |          |          | 73.9582538     | 75.4286511     |
| 76.3770368 |          |          | 73.5415871     | 75.3950297     |
| 77.0437035 |          |          | 74.1526982     | 75.396806      |
| 76.7103701 |          |          | 73.7638093     | 75.3866775     |
| 76.2103701 |          | before46 | 73.180476      | 63 75.3595937  |

|            |          |            |    |            |
|------------|----------|------------|----|------------|
| 76.0437035 | before47 | 72.9860315 | 63 | 75.3166644 |
| 75.8770368 | before48 | 72.6249204 | 63 | 75.2650771 |
| 76.3770368 | before49 | 73.2082538 | 63 | 75.1907625 |
| 76.7103701 | before50 | 73.5971427 | 63 | 75.1099544 |
| 77.2103701 | before51 | 73.680476  | 63 | 75.0255389 |
| 77.7103701 | before52 | 74.2638093 | 63 | 74.94437   |
| 77.5437035 | before53 | 74.0693649 | 63 | 74.8356888 |
| 77.7103701 | before54 | 74.2638093 | 63 | 74.7248431 |
| 77.5437035 | before55 | 74.4026982 | 63 | 74.6118328 |
| 78.0437035 | before56 | 74.9860315 | 63 | 74.4962973 |
| 78.3770368 | before57 | 75.3749204 | 63 | 74.3789581 |
| 79.0437035 | before58 | 76.1526982 | 63 | 74.2619796 |
| 79.2103701 | before59 | 76.3471427 | 63 | 74.1312926 |
| 79.3770368 | before60 | 76.5415871 | 63 | 74.0013271 |
| 79.3770368 | before61 | 76.5415871 | 63 | 73.9169115 |
| 79.5437035 | before62 | 76.7360315 | 63 | 73.8411539 |
| 79.3770368 | before63 | 76.5415871 | 63 | 73.7848769 |
| 79.3770368 | before64 | 76.5415871 | 63 | 73.7715566 |
| 79.8770368 | before65 | 76.4582538 | 63 | 73.7535466 |
| 80.0437035 | before66 | 76.6526982 | 63 | 73.7560993 |
| 80.0437035 | before67 | 76.6526982 | 63 | 73.7539623 |
| 79.8770368 | before68 | 76.4582538 | 63 | 73.7518253 |
| 79.8770368 | before69 | 76.4582538 | 63 | 73.7590678 |
| 78.8770368 | before70 | 75.2915871 | 63 | 73.7673925 |
| 74.5744972 | before71 | 74.5744972 | 63 | 73.764534  |
| 79.8770368 | before72 | 76.2915871 | 63 | 73.7746625 |
| 79.8770368 | before73 | 76.2915871 | 63 | 73.7613422 |
| 80.2103701 | before74 | 76.680476  | 63 | 73.7422499 |
| 79.5437035 | before75 | 75.9026982 | 63 | 73.7166641 |
| 80.0437035 | before76 | 73.3397988 | 63 | 73.7037046 |
| 80.0437035 | before77 | 73.3397988 | 63 | 73.6734291 |
| 80.0437035 | before78 | 73.0064654 | 63 | 73.6301665 |
| 80.3770368 | before79 | 72.9509099 | 63 | 73.5872647 |
| 80.7103701 | before80 | 73.2286876 | 63 | 73.5396731 |
| 80.5437035 | before81 | 72.8397988 | 63 | 73.5061508 |
| 81.0437035 | before82 | 73.3397988 | 63 | 73.4823688 |
| 81.0437035 | before83 | 73.0064654 | 63 | 73.4506502 |
| 80.3770368 | before84 | 72.1175765 | 63 | 73.4218177 |
| 79.3897351 | before85 | 70.9252485 | 63 | 73.3962319 |
| 79.3897351 | before86 | 70.480804  | 63 | 73.3710069 |
| 75.3897351 | before87 | 69.5085818 | 63 | 73.3158066 |
| 73.3897351 | before88 | 69.0085818 | 63 | 73.2833665 |
| 73.3897351 | before89 | 68.8419151 | 63 | 73.254534  |
| 73.3897351 | before90 | 68.8419151 | 63 | 73.2354417 |
| 73.3897351 | before91 | 68.8419151 | 63 | 73.2109382 |

|            |           |            |    |            |
|------------|-----------|------------|----|------------|
| 72.3897351 | before92  | 68.8419151 | 63 | 73.1954534 |
| 71.3897351 | before93  | 68.8419151 | 63 | 73.1752788 |
| 71.3897351 | before94  | 68.6474707 | 63 | 73.1554651 |
| 71.3897351 | before95  | 68.8419151 | 63 | 73.1194175 |
| 70.3897351 | before96  | 69.0363596 | 63 | 73.0761549 |
| 67.3897351 | before97  | 68.6474707 | 63 | 73.0184624 |
| 67.3897351 | before98  | 69.0363596 | 63 | 72.9217813 |
| 75.3897351 | before99  | 73.5437035 | 63 | 72.8958347 |
| 76.3897351 | before100 | 73.7103701 | 63 | 72.831914  |
| 79.3897351 | before101 | 75.7103701 | 63 | 72.7636643 |
| 81.3897351 | before102 | 75.8770368 | 63 | 72.7105661 |
| 82.3897351 | before103 | 75.3770368 | 63 | 72.7062646 |
| 82.3897351 | before104 | 76.3770368 | 63 | 72.7095389 |
| 82.3897351 | before105 | 76.2103701 | 63 | 72.7232749 |
| 82.3897351 | before106 | 76.2103701 | 63 | 72.7370109 |
| 82.3897351 | before107 | 76.5437035 | 63 | 72.7554366 |
| 82.3897351 | before108 | 76.0437035 | 63 | 72.7621059 |
| 82.3897351 | before109 | 75.3770368 | 63 | 72.7876374 |
| 82.3897351 | before110 | 75.3770368 | 63 | 72.8169158 |
| 83.3897351 | before111 | 73.3770368 | 63 | 72.8276049 |
| 83.3897351 | before112 | 72.5437035 | 63 | 72.8345835 |
| 83.3897351 | before113 | 72.2103701 | 63 | 72.8161034 |
| 85.3897351 | before114 | 72.2103701 | 63 | 72.7605667 |
| 85.3897351 | before115 | 72.0437035 | 63 | 72.7319534 |
| 86.3897351 | before116 | 71.2103701 | 63 | 72.7054605 |
| 86.3897351 | before117 | 71.0437035 | 63 | 72.6726949 |
| 85.3897351 | before118 | 70.8770368 | 63 | 72.6385305 |
| 85.3897351 | before119 | 71.3770368 | 63 | 72.6028789 |
| 85.3897351 | before120 | 71.7103701 | 63 | 72.5767835 |
| 84.3897351 | before121 | 71.7103701 | 63 | 72.5357133 |
| 84.3897351 | before122 | 71.5437035 | 63 | 72.5010925 |
| 84.3897351 | before123 | 71.2103701 | 63 | 72.4565473 |
| 84.3897351 | before124 | 71.0437035 | 63 | 72.4296072 |
| 68.3744972 | before125 | 68.3744972 | 63 | 72.4105595 |
| 84.3897351 | before126 | 70.7103701 | 63 | 72.410499  |
| 85.3897351 | before127 | 71.3770368 | 63 | 72.4193174 |
| 85.3897351 | before128 | 72.2103701 | 63 | 72.4324206 |
| 85.3897351 | before129 | 72.3770368 | 63 | 72.4563905 |
| 85.3897351 | before130 | 72.8770368 | 63 | 72.4867214 |
| 85.3897351 | before131 | 72.7103701 | 63 | 72.5149319 |
| 85.3897351 | before132 | 72.8770368 | 63 | 72.5367815 |
| 85.3897351 | before133 | 72.2103701 | 63 | 72.5635417 |
| 85.3897351 | before134 | 72.0437035 | 63 | 72.5792953 |
| 85.3897351 | before135 | 71.7103701 | 63 | 72.5861627 |
| 71.5437035 | before136 | 68.9026982 | 63 | 72.5980806 |

|            |            |           |            |    |            |
|------------|------------|-----------|------------|----|------------|
| 89.3897351 |            | before137 | 74.5437035 | 63 | 72.6007073 |
| 89.3897351 |            | before138 | 71.6196929 | 63 | 72.5426768 |
| 89.3897351 |            | before139 | 71.480804  | 63 | 72.4803614 |
| 89.3897351 |            | before140 | 72.4530262 | 63 | 72.392072  |
| 89.3897351 |            | before141 | 76.2103701 | 63 | 72.3046639 |
| 89.3897351 |            | before142 | 76.7103701 | 63 | 72.222064  |
| 89.3897351 |            | before143 | 77.7103701 | 63 | 72.1229962 |
| 89.3897351 |            | before144 | 77.7103701 | 63 | 72.025828  |
| 89.3897351 |            | before145 | 77.8770368 | 63 | 71.93078   |
| 89.3897351 | 73.5403314 | before146 | 76.9717932 | 63 | 71.8332584 |
| 89.3897351 | 73.5403314 | before147 | 77.2575075 | 63 | 71.7422302 |
| 89.3897351 | 72.5403314 | before148 | 76.828936  | 63 | 71.6630406 |
| 90.3897351 | 72.5403314 | before149 | 77.1146503 | 63 | 71.57749   |
| 90.3897351 | 72.5403314 | before150 | 76.828936  | 63 | 71.5443977 |
| 90.3897351 | 72.5403314 | before151 | 75.2575075 | 63 | 71.5276939 |
| 73.9717932 | 72.5403314 | before152 | 71.6263729 | 63 | 71.5208849 |
| 73.5432218 | 73.5403314 | before153 | 71.136577  | 63 | 71.5140759 |
| 73.6860789 | 73.5403314 | before154 | 71.2998423 | 63 | 71.5020103 |
| 72.9717932 | 73.5403314 | before155 | 70.4835158 | 63 | 71.5026225 |
| 72.828936  | 73.5403314 | before156 | 70.3202505 | 63 | 71.4757343 |
| 72.9717932 | 73.5403314 | before157 | 70.4835158 | 63 | 71.4616122 |
| 73.4003646 | 74.5403314 | before158 | 70.8304545 | 63 | 71.4455024 |
| 72.828936  | 74.5403314 | before159 | 70.1773933 | 63 | 71.4271838 |
| 72.9717932 | 75.5403314 | before160 | 70.3406586 | 63 | 71.4067449 |
| 71.4003646 | 74.5403314 | before161 | 68.6875974 | 63 | 71.3884706 |
| 71.5432218 | 74.5403314 | before162 | 68.8508627 | 63 | 71.3724049 |
| 71.6860789 | 75.5403314 | before163 | 69.014128  | 63 | 71.3537329 |
| 72.1146503 | 75.5403314 | before164 | 69.5039239 | 63 | 71.4023064 |
| 72.4003646 | 75.5403314 | before165 | 69.6875974 | 63 | 71.4335308 |
| 72.5432218 | 75.5403314 | before166 | 69.8508627 | 63 | 71.4672289 |
| 73.4003646 | 75.5403314 | before167 | 70.6875974 | 63 | 71.5012363 |
| 73.828936  | 77.5403314 | before168 | 71.1773933 | 63 | 71.5479214 |
| 73.6860789 | 77.5403314 | before169 | 71.014128  | 63 | 71.5732707 |
| 73.2575075 | 79.5403314 | before170 | 70.5243321 | 63 | 71.6082057 |
| 73.5432218 | 80.5403314 | before171 | 70.7080056 | 63 | 71.6391209 |
| 72.9717932 | 77.5403314 | before172 | 70.0549443 | 63 | 71.6768389 |
| 72.5432218 | 75.5403314 | before173 | 69.5651484 | 63 | 71.7111554 |
| 72.5432218 | 75.5403314 | before174 | 69.5651484 | 63 | 71.7535116 |
| 72.2575075 | 73.5403314 | before175 | 69.2386178 | 63 | 71.8286204 |
| 72.1146503 | 73.5403314 | before176 | 69.0753525 | 63 | 71.8267589 |
| 71.9717932 | 73.5403314 | before177 | 68.9120872 | 63 | 71.8610162 |
| 71.9717932 | 73.5403314 | before178 | 68.9120872 | 63 | 71.9026432 |
| 73.6134762 | 73.5403314 | before179 | 69.1466133 | 63 | 71.9279333 |
| 72.7050533 | 73.5403314 | before180 | 69.0168386 | 63 | 71.8598998 |
| 71.828936  | 73.5403314 | before181 | 68.7488219 | 63 | 71.7853728 |



|            |            |           |            |    |            |
|------------|------------|-----------|------------|----|------------|
| 71.6860789 | 74.5403314 | before182 | 68.7284137 | 63 | 71.7034247 |
| 71.828936  | 74.5403314 | before183 | 68.891679  | 63 | 71.6344636 |
| 71.828936  | 74.5403314 | before184 | 69.0345362 | 63 | 71.5633338 |
| 71.828936  | 74.5403314 | before185 | 69.0345362 | 63 | 71.4676779 |
| 71.5432218 | 74.5403314 | before186 | 69.2794341 | 63 | 71.3934664 |
| 71.1146503 | 73.5403314 | before187 | 68.7896382 | 63 | 71.3211101 |
| 83.3897351 | 73.5403314 | before188 | 70.828936  | 63 | 71.2339116 |
| 83.3897351 | 73.5403314 | before189 | 71.2575075 | 63 | 71.1138534 |
| 83.3897351 | 73.5403314 | before190 | 71.6860789 | 63 | 71.0147334 |
| 85.3897351 | 73.5403314 | before191 | 71.6860789 | 63 | 70.962771  |
| 85.3897351 | 73.5403314 | before192 | 71.1146503 | 63 | 70.9176996 |
| 85.3897351 | 73.5403314 | before193 | 71.2575075 | 63 | 70.8731584 |
| 71.4003646 | 73.5403314 | before194 | 68.9733117 | 63 | 70.8352431 |
| 72.1146503 | 73.5403314 | before195 | 69.7896382 | 63 | 70.8007312 |
| 72.5432218 | 73.5403314 | before196 | 70.136577  | 63 | 70.7864046 |
| 72.6860789 | 75.5403314 | before197 | 70.2998423 | 63 | 70.7956613 |
| 72.5432218 | 75.5403314 | before198 | 70.136577  | 63 | 70.8152547 |
| 72.5432218 | 75.5403314 | before199 | 70.136577  | 63 | 70.8271618 |
| 72.4003646 | 75.5403314 | before200 | 69.9733117 | 63 | 70.8679584 |
| 71.828936  | 74.5403314 | before201 | 69.6059647 | 63 | 70.9159111 |
| 87.3897351 | 74.5403314 | before202 | 72.1146503 | 63 | 70.9617435 |
| 87.3897351 | 74.5403314 | before203 | 73.1146503 | 63 | 71.0030702 |
| 87.3897351 | 74.5403314 | before204 | 73.9717932 | 63 | 71.0234586 |
| 87.3897351 | 74.5403314 | before205 | 74.828936  | 63 | 71.0398714 |
| 85.3897351 | 74.5403314 | before206 | 75.9717932 | 63 | 71.0454176 |
| 85.3897351 | 74.5403314 | before207 | 74.828936  | 63 | 71.046458  |
| 82.3897351 | 74.5403314 | before208 | 75.4003646 | 63 | 71.0514741 |
| 82.3897351 | 75.5403314 | before209 | 75.2575075 | 63 | 71.0665617 |
| 82.3897351 | 75.5403314 | before210 | 75.1146503 | 63 | 71.0829745 |
| 82.3897351 | 74.5403314 | before211 | 74.6860789 | 63 | 71.1152898 |
| 82.3897351 | 74.5403314 | before212 | 74.9717932 | 63 | 71.1521108 |
| 82.3897351 | 74.5403314 | before213 | 74.6860789 | 63 | 71.1982082 |
| 83.3897351 | 74.5403314 | before214 | 74.4003646 | 63 | 71.2504016 |
| 84.3897351 | 74.5403314 | before215 | 74.2575075 | 63 | 71.3102812 |
| 85.3897351 | 74.5403314 | before216 | 74.6860789 | 63 | 71.3648599 |
| 85.3897351 | 74.5403314 | before217 | 74.4003646 | 63 | 71.4120175 |
| 84.3897351 | 75.5403314 | before218 | 70.9717932 | 63 | 71.4524187 |
| 84.3897351 | 75.5403314 | before219 | 70.9717932 | 63 | 71.4926501 |
| 84.3897351 | 76.5403314 | before220 | 71.4003646 | 63 | 71.5382174 |
| 86.3897351 | 80.5403314 | before221 | 72.4003646 | 63 | 71.5821945 |
| 87.3897351 | 81.5403314 | before222 | 72.4003646 | 63 | 71.622196  |
| 71.828936  | 81.5403314 | before223 | 69.6059647 | 63 | 71.6510657 |
| 85.3897351 | 84.5403314 | before224 | 71.5432218 | 63 | 71.6688038 |
| 84.3897351 | 84.5403314 | before225 | 71.2575075 | 63 | 71.6648084 |
| 80.3897351 | 84.5403314 | before226 | 70.4003646 | 63 | 71.6560424 |

|            |            |           |            |    |            |
|------------|------------|-----------|------------|----|------------|
| 75.3897351 | 69.828936  | before227 | 67.584451  | 63 | 71.6170813 |
| 75.3897351 | 70.1146503 | before228 | 67.6252673 | 63 | 71.576265  |
| 75.3897351 | 70.1146503 | before229 | 67.6252673 | 63 | 71.5317381 |
| 76.3897351 | 70.4003646 | before230 | 67.6660836 | 63 | 71.4890665 |
| 76.3897351 | 70.828936  | before231 | 67.8701653 | 63 | 71.4556713 |
| 76.3897351 | 70.6860789 | before232 | 67.5640428 | 63 | 71.4222761 |
| 76.3897351 | 71.3775951 | before233 | 67.6628309 | 63 | 71.4148353 |
| 76.3897351 | 72.4003646 | before234 | 69.3803694 | 63 | 71.4005033 |
| 76.3897351 | 86.5403314 | before235 | 71.5432218 | 63 | 71.3890868 |
| 76.3897351 | 86.5403314 | before236 | 71.6860789 | 63 | 71.3718394 |
| 76.3897351 | 80.5403314 | before237 | 71.2575075 | 63 | 71.386397  |
| 76.3897351 | 80.5403314 | before238 | 71.828936  | 63 | 71.4157968 |
| 76.3897351 | 79.5403314 | before239 | 72.5432218 | 63 | 71.447317  |
| 76.3897351 | 79.5403314 | before240 | 72.5432218 | 63 | 71.4947396 |
| 76.3897351 | 79.5403314 | minute1   | 72.6860789 | 63 | 71.5095819 |
| 76.3897351 | 79.5403314 | minute2   | 71.2575075 | 63 | 71.5114372 |
| 78.3897351 | 79.5403314 | minute3   | 71.1146503 | 63 | 71.5077266 |
| 78.3897351 | 79.5403314 | minute4   | 71.1146503 | 63 | 71.4965949 |
| 80.3897351 | 79.5403314 | minute5   | 71.2575075 | 63 | 71.4669103 |
| 80.3897351 | 79.5403314 | minute6   | 71.4003646 | 63 | 71.4557786 |
| 81.3897351 | 79.5403314 | minute7   | 71.6860789 | 63 | 71.4409363 |
| 81.3897351 | 79.5403314 | minute8   | 71.9717932 | 63 | 71.4168175 |
| 81.3897351 | 79.5403314 | minute9   | 72.5432218 | 63 | 71.3945541 |
| 82.3897351 | 77.5403314 | minute10  | 72.4003646 | 63 | 71.3704353 |
| 82.3897351 | 76.5403314 | minute11  | 73.1146503 | 63 | 71.3407507 |
| 82.3897351 | 76.5403314 | minute12  | 73.2575075 | 63 | 71.3110661 |
| 82.3897351 | 76.5403314 | minute13  | 73.6860789 | 63 | 71.2832368 |
| 80.3897351 | 74.5403314 | minute14  | 73.1146503 | 63 | 71.2535522 |
| 80.3897351 | 74.5403314 | minute15  | 72.5432218 | 63 | 71.2164465 |
| 81.3897351 | 74.5403314 | minute16  | 72.2575075 | 63 | 71.1793407 |
| 80.3897351 | 74.5403314 | minute17  | 72.1146503 | 63 | 71.1923277 |
| 81.3897351 | 74.5403314 | minute18  | 72.2575075 | 63 | 71.2108806 |
| 81.3897351 | 73.5403314 | minute19  | 72.1146503 | 63 | 71.2349994 |
| 79.3897351 | 73.5403314 | minute20  | 71.9717932 | 63 | 71.2498417 |
| 79.3897351 | 73.5403314 | minute21  | 71.2575075 | 63 | 71.264684  |
| 79.3897351 | 73.5403314 | minute22  | 70.4003646 | 63 | 71.3121066 |
| 73.3897351 | 73.5403314 | minute23  | 68.9717932 | 63 | 71.3269489 |
| 72.3897351 | 74.5403314 | minute24  | 68.1146503 | 63 | 71.3417912 |
| 72.3897351 | 74.5403314 | minute25  | 67.828936  | 63 | 71.3714758 |
| 72.3897351 | 74.5403314 | minute26  | 68.1146503 | 63 | 71.439586  |
| 71.3897351 | 74.5403314 | minute27  | 68.2575075 | 63 | 71.5071661 |
| 70.3897351 | 74.5403314 | minute28  | 68.4003646 | 63 | 71.5747462 |
| 70.3897351 | 74.5403314 | minute29  | 68.5432218 | 63 | 71.6436515 |
| 70.3897351 | 74.5403314 | minute30  | 68.6860789 | 63 | 71.7061959 |
| 69.3897351 | 74.5403314 | minute31  | 68.4003646 | 63 | 71.745687  |

|            |            |          |            |    |            |
|------------|------------|----------|------------|----|------------|
| 69.3897351 | 74.5403314 | minute32 | 68.6860789 | 63 | 71.8127793 |
| 70.3897351 | 77.5403314 | minute33 | 69.2575075 | 63 | 71.864987  |
| 70.3897351 | 77.5403314 | minute34 | 68.9717932 | 63 | 71.903948  |
| 71.3897351 | 77.5403314 | minute35 | 71.2575075 | 63 | 71.9215348 |
| 71.3897351 | 77.5403314 | minute36 | 72.4003646 | 63 | 71.9489281 |
| 72.3897351 | 78.5403314 | minute37 | 72.4003646 | 63 | 71.9712856 |
| 72.3897351 | 79.5403314 | minute38 | 73.2575075 | 63 | 71.9843666 |
| 71.3897351 | 80.5403314 | minute39 | 73.2575075 | 63 | 72.0016884 |
| 71.3897351 | 81.5403314 | minute40 | 73.2575075 | 63 | 72.0235158 |
| 72.3897351 | 81.5403314 | minute41 | 73.6860789 | 63 | 72.0702571 |
| 72.3897351 | 82.5403314 | minute42 | 73.9717932 | 63 | 72.153745  |
| 73.3897351 | 82.5403314 | minute43 | 73.6860789 | 63 | 72.2023416 |
| 73.3897351 | 82.5403314 | minute44 | 73.9717932 | 63 | 72.2472276 |
| 73.3897351 | 84.5403314 | minute45 | 74.2575075 | 63 | 72.2770062 |
| 73.3897351 | 84.5403314 | minute46 | 73.4003646 | 63 | 72.2967133 |
| 73.3897351 | 84.5403314 | minute47 | 73.4003646 | 63 | 72.3063488 |
| 73.3897351 | 83.5403314 | minute48 | 72.828936  | 63 | 72.3085632 |
| 70.3897351 | 83.5403314 | minute49 | 72.6860789 | 63 | 72.3189939 |
| 69.3897351 | 84.5403314 | minute50 | 72.4003646 | 63 | 72.352389  |
| 69.3897351 | 84.5403314 | minute51 | 72.2575075 | 63 | 72.3514229 |
| 69.3897351 | 85.5403314 | minute52 | 71.9717932 | 63 | 72.33853   |
| 69.3897351 | 85.5403314 | minute53 | 71.828936  | 63 | 72.3309378 |
| 68.3897351 | 84.5403314 | minute54 | 71.5432218 | 63 | 72.3532013 |
| 68.3897351 | 84.5403314 | minute55 | 71.9717932 | 63 | 72.3791753 |
| 68.3897351 | 84.5403314 | minute56 | 72.4003646 | 63 | 72.4051493 |
| 68.3897351 | 84.5403314 | minute57 | 73.2575075 | 63 | 72.4292681 |
| 68.3897351 | 84.5403314 | minute58 | 73.5432218 | 63 | 72.4515315 |
| 69.3897351 | 84.5403314 | minute59 | 73.5432218 | 63 | 72.4626632 |
| 69.3897351 | 84.5403314 | minute60 | 73.2575075 | 73 | 72.4886373 |
| 69.3897351 | 84.5403314 | ACTIVITY | 72.6860789 | 73 | 72.5220324 |
| 69.3897351 | 84.5403314 | ACTIVITY | 72.4003646 | 73 | 72.5925334 |
| 70.3897351 | 86.5403314 | ACTIVITY | 72.6860789 | 73 | 72.674166  |
| 70.3897351 | 86.5403314 | ACTIVITY | 72.828936  | 73 | 72.7687857 |
| 70.3897351 | 86.5403314 | ACTIVITY | 72.828936  | 73 | 72.8596948 |
| 72.3897351 | 86.5403314 | ACTIVITY | 72.828936  | 73 | 72.945038  |
| 73.3897351 | 86.5403314 | ACTIVITY | 72.9717932 | 73 | 73.0285259 |
| 73.3897351 | 86.5403314 | ACTIVITY | 72.6860789 | 73 | 73.1083033 |
| 73.3897351 | 72.9717932 | ACTIVITY | 70.6048592 | 73 | 73.1788042 |
| 73.3897351 | 87.5403314 | ACTIVITY | 72.828936  | 73 | 73.2474499 |
| 73.3897351 | 87.5403314 | ACTIVITY | 73.4003646 | 73 | 73.3049638 |
| 73.3897351 | 87.5403314 | ACTIVITY | 74.5432218 | 73 | 73.3420695 |
| 74.3897351 | 87.5403314 | ACTIVITY | 73.0402595 | 73 | 73.3810306 |
| 73.3897351 | 86.5403314 | ACTIVITY | 73.3667901 | 73 | 73.390307  |
| 72.3897351 | 85.5403314 | ACTIVITY | 73.5504636 | 73 | 73.3828859 |
| 71.3897351 | 86.5403314 | ACTIVITY | 73.5504636 | 73 | 73.3661883 |

|            |            |          |            |    |            |
|------------|------------|----------|------------|----|------------|
| 71.3897351 | 86.5403314 | ACTIVITY | 73.8769942 | 73 | 73.3402143 |
| 71.3897351 | 87.5403314 | ACTIVITY | 74.3667901 | 73 | 73.3086744 |
| 72.3897351 | 89.5403314 | ACTIVITY | 74.8565861 | 73 | 73.2771345 |
| 74.3897351 | 89.5403314 | ACTIVITY | 77.5432218 | 73 | 73.241884  |
| 74.3897351 | 88.5403314 | ACTIVITY | 74.8565861 | 73 | 73.2066335 |
| 74.3897351 | 87.5403314 | ACTIVITY | 74.7137289 | 73 | 73.1788042 |
| 74.3897351 | 81.5403314 | ACTIVITY | 73.6933208 | 73 | 73.1472643 |
| 75.3897351 | 77.5403314 | ACTIVITY | 73.2035248 | 73 | 73.0818932 |
| 75.3897351 | 75.5403314 | ACTIVITY | 72.7137289 | 73 | 73.0326897 |
| 74.3897351 | 75.5403314 | ACTIVITY | 72.7137289 | 73 | 72.9834861 |
| 74.3897351 | 75.5403314 | ACTIVITY | 73.2035248 | 73 | 72.9417036 |
| 74.3897351 | 75.5403314 | ACTIVITY | 75.6860789 | 73 | 72.9105228 |
| 74.3897351 | 75.5403314 | ACTIVITY | 73.1831167 | 73 | 72.8851729 |
| 74.3897351 | 74.5403314 | ACTIVITY | 72.6933208 | 73 | 72.8640637 |
| 74.3897351 | 74.5403314 | ACTIVITY | 72.5300554 | 73 | 72.846665  |
| 73.3897351 | 74.5403314 | ACTIVITY | 74.2575075 | 73 | 72.8311217 |
| 73.3897351 | 75.5403314 | ACTIVITY | 74.2575075 | 73 | 72.8190238 |
| 73.3897351 | 75.5403314 | ACTIVITY | 74.1146503 | 73 | 72.8098414 |
| 73.3897351 | 74.5403314 | ACTIVITY | 74.1146503 | 73 | 72.7929729 |
| 74.3897351 | 74.5403314 | ACTIVITY | 73.828936  | 73 | 72.7647075 |
| 74.3897351 | 73.5403314 | ACTIVITY | 72.828936  | 73 | 72.7430682 |
| 75.3897351 | 75.5403314 | ACTIVITY | 73.2575075 | 73 | 72.7263706 |
| 75.3897351 | 78.5403314 | minute1  | 72.9717932 | 71 | 72.7059624 |
| 77.3897351 | 78.5403314 | minute2  | 74.4003646 | 71 | 72.657725  |
| 77.3897351 | 78.5403314 | minute3  | 74.4003646 | 71 | 72.6039216 |
| 77.3897351 | 78.5403314 | minute4  | 75.1146503 | 71 | 72.5315654 |
| 77.3897351 | 78.5403314 | minute5  | 75.1146503 | 71 | 72.4592092 |
| 78.3897351 | 78.5403314 | minute6  | 74.828936  | 71 | 72.3831424 |
| 79.3897351 | 79.5403314 | minute7  | 74.828936  | 71 | 72.3089309 |
| 79.3897351 | 81.5403314 | minute8  | 74.6860789 | 71 | 72.2310088 |
| 78.3897351 | 81.5403314 | minute9  | 74.1146503 | 71 | 72.1586526 |
| 77.3897351 | 82.5403314 | minute10 | 73.6860789 | 71 | 72.1059041 |
| 77.3897351 | 82.5403314 | minute11 | 73.1146503 | 71 | 72.0242714 |
| 75.3897351 | 82.5403314 | minute12 | 72.1146503 | 71 | 71.9407835 |
| 75.3897351 | 83.5403314 | minute13 | 71.9717932 | 71 | 71.853585  |
| 75.3897351 | 83.5403314 | minute14 | 71.9717932 | 71 | 71.7859054 |
| 74.3897351 | 77.5403314 | minute15 | 71.828936  | 71 | 71.7158405 |
| 74.3897351 | 70.5403314 | minute16 | 71.1146503 | 71 | 71.6452456 |
| 76.3897351 | 69.5403314 | minute17 | 71.2575075 | 71 | 71.5783612 |
| 76.3897351 | 69.5403314 | minute18 | 70.828936  | 71 | 71.5090914 |
| 76.3897351 | 69.5403314 | minute19 | 70.828936  | 71 | 71.4334606 |
| 77.3897351 | 71.5403314 | minute20 | 70.9717932 | 71 | 71.3663112 |
| 78.3897351 | 71.5403314 | minute21 | 71.2575075 | 71 | 71.2624151 |
| 78.3897351 | 70.5403314 | minute22 | 71.5432218 | 71 | 71.1952656 |
| 78.3897351 | 70.5403314 | minute23 | 71.5432218 | 71 | 71.1058527 |

|            |            |          |            |    |            |
|------------|------------|----------|------------|----|------------|
| 78.3897351 | 70.5403314 | minute24 | 69.223933  | 71 | 71.0278366 |
| 78.3897351 | 70.5403314 | minute25 | 69.6116881 | 71 | 70.9654579 |
| 78.3897351 | 71.5403314 | minute26 | 69.6116881 | 71 | 70.9075849 |
| 78.3897351 | 71.5403314 | minute27 | 69.6116881 | 71 | 70.8460013 |
| 79.3897351 | 70.5403314 | minute28 | 70.2851575 | 71 | 70.7780568 |
| 79.3897351 | 70.5403314 | minute29 | 70.4484228 | 71 | 70.6760159 |
| 79.3897351 | 70.5403314 | minute30 | 70.6320963 | 71 | 70.6009153 |
| 79.3897351 | 70.5403314 | minute31 | 70.6320963 | 71 | 70.5303203 |
| 79.3897351 | 71.5403314 | minute32 | 70.6320963 | 71 | 70.4729774 |
| 79.3897351 | 71.5403314 | minute33 | 70.6116881 | 71 | 70.3950553 |
| 80.3897351 | 72.5403314 | minute34 | 71.2647493 | 71 | 70.3208438 |
| 81.3897351 | 72.5403314 | minute35 | 71.101484  | 71 | 70.2651852 |
| 81.3897351 | 72.5403314 | minute36 | 71.0810759 | 71 | 70.2206583 |
| 81.3897351 | 77.5403314 | minute37 | 71.8769942 | 71 | 70.1798419 |
| 81.3897351 | 81.5403314 | minute38 | 72.2575075 | 71 | 70.1501573 |
| 78.3897351 | 81.5403314 | minute39 | 71.6860789 | 71 | 70.1074857 |
| 69.3897351 | 83.5403314 | minute40 | 68.9717932 | 71 | 70.07038   |
| 69.3897351 | 82.5403314 | minute41 | 68.2575075 | 71 | 70.0110108 |
| 69.3897351 | 74.5403314 | minute42 | 67.1146503 | 71 | 69.9516416 |
| 69.3897351 | 74.5403314 | minute43 | 67.2575075 | 71 | 69.8829959 |
| 69.3897351 | 73.5403314 | minute44 | 66.9717932 | 71 | 69.8143503 |
| 70.3897351 | 72.5403314 | minute45 | 67.1146503 | 71 | 69.7531258 |
| 70.3897351 | 72.5403314 | minute46 | 66.9717932 | 71 | 69.6919013 |
| 70.3897351 | 72.5403314 | minute47 | 67.1146503 | 71 | 69.6325321 |
| 70.3897351 | 72.5403314 | minute48 | 66.5432218 | 71 | 69.5842946 |
| 70.3897351 | 72.5403314 | minute49 | 66.5432218 | 71 | 69.541623  |
| 70.3897351 | 72.5403314 | minute50 | 66.9717932 | 71 | 69.5063725 |
| 72.3897351 | 73.5403314 | minute51 | 67.828936  | 71 | 69.4859644 |
| 74.3897351 | 73.5403314 | minute52 | 67.828936  | 71 | 69.4655562 |
| 74.3897351 | 73.5403314 | minute53 | 67.9717932 | 71 | 69.4470033 |
| 74.3897351 | 73.5403314 | minute54 | 68.1146503 | 71 | 69.432161  |
| 74.3897351 | 73.5403314 | minute55 | 68.4003646 | 71 | 69.432161  |
| 74.3897351 | 73.5403314 | minute56 | 68.5432218 | 71 | 69.4358716 |
| 74.3897351 | 73.5403314 | minute57 | 68.5432218 | 71 | 69.4199745 |
| 78.3897351 | 73.5403314 | minute58 | 69.6860789 | 71 | 69.3955961 |
| 78.3897351 | 72.5403314 | minute59 | 69.5432218 | 71 | 69.3714827 |
| 79.3897351 | 72.5403314 | minute60 | 69.6860789 | 71 | 69.3330571 |
| 79.3897351 | 72.5403314 | AFTER1   | 67.828936  | 71 | 69.2824396 |
| 79.3897351 | 72.5403314 | AFTER2   | 67.6860789 | 71 | 69.2297018 |
| 79.3897351 | 72.5403314 | AFTER3   | 68.4003646 | 71 | 69.2121204 |
| 79.3897351 | 72.5403314 | AFTER4   | 68.2575075 | 71 | 69.1897683 |
| 79.3897351 | 72.5403314 | AFTER5   | 67.9717932 | 71 | 69.1631755 |
| 79.3897351 | 72.5403314 | AFTER6   | 67.9717932 | 71 | 69.1328721 |
| 79.3897351 | 72.5403314 | AFTER7   | 67.828936  | 71 | 69.0938224 |
| 78.3897351 | 72.5403314 | AFTER8   | 67.4003646 | 71 | 69.0529174 |

|            |            |         |            |    |            |
|------------|------------|---------|------------|----|------------|
| 78.3897351 | 72.5403314 | AFTER9  | 67.2575075 | 71 | 69.0276444 |
| 80.3897351 | 75.5403314 | AFTER10 | 68.1146503 | 71 | 68.9986609 |
| 80.3897351 | 75.5403314 | AFTER11 | 68.2575075 | 71 | 68.9715327 |
| 81.3897351 | 77.5403314 | AFTER12 | 68.5432218 | 71 | 68.94838   |
| 81.3897351 | 77.5403314 | AFTER13 | 69.828936  | 71 | 68.9167461 |
| 81.3897351 | 81.5403314 | AFTER14 | 70.6860789 | 71 | 68.8835219 |
| 81.3897351 | 81.5403314 | AFTER15 | 70.6860789 | 71 | 68.8468522 |
| 81.3897351 | 80.5403314 | AFTER16 | 70.5432218 | 71 | 68.8017012 |
| 81.3897351 | 79.5403314 | AFTER17 | 69.9717932 | 71 | 68.7645954 |
| 82.3897351 | 79.5403314 | AFTER18 | 70.1146503 | 71 | 68.7386214 |
| 82.3897351 | 78.5403314 | AFTER19 | 69.828936  | 71 | 68.7497531 |
| 82.3897351 | 78.5403314 | AFTER20 | 69.828936  | 71 | 68.7664507 |
| 83.3897351 | 78.5403314 | AFTER21 | 69.828936  | 71 | 68.7998459 |
| 84.3897351 | 78.5403314 | AFTER22 | 69.828936  | 71 | 68.8369516 |
| 83.3897351 | 78.5403314 | AFTER23 | 70.1146503 | 71 | 68.8870444 |
| 83.3897351 | 78.5403314 | AFTER24 | 70.1146503 | 71 | 68.9315713 |
| 82.3897351 | 80.5403314 | AFTER25 | 70.1146503 | 71 | 68.9760982 |
| 81.3897351 | 83.5403314 | AFTER26 | 70.4003646 | 71 | 69.0224804 |
| 81.3897351 | 84.5403314 | AFTER27 | 70.4003646 | 71 | 69.0855602 |
| 81.3897351 | 84.5403314 | AFTER28 | 70.4003646 | 71 | 69.1597717 |
| 80.3897351 | 84.5403314 | AFTER29 | 70.5432218 | 71 | 69.2321279 |
| 80.3897351 | 84.5403314 | AFTER30 | 70.4003646 | 71 | 69.2914971 |
| 80.3897351 | 85.5403314 | AFTER31 | 70.5432218 | 71 | 69.3508663 |
| 80.3897351 | 85.5403314 | AFTER32 | 70.6860789 | 71 | 69.4083802 |
| 80.3897351 | 85.5403314 | AFTER33 | 71.1146503 | 71 | 69.4770258 |
| 79.3897351 | 86.5403314 | AFTER34 | 71.5432218 | 71 | 69.5438162 |
| 79.3897351 | 71.9717932 | AFTER35 | 69.6048592 | 71 | 69.5792679 |
| 77.3897351 | 71.4003646 | AFTER36 | 68.9517979 | 71 | 69.6104789 |
| 77.3897351 | 71.5432218 | AFTER37 | 69.1150632 | 71 | 69.6183663 |
| 75.3897351 | 70.828936  | AFTER38 | 68.2987367 | 71 | 69.621748  |
| 75.3897351 | 70.2575075 | AFTER39 | 67.6456755 | 71 | 69.6253948 |
| 74.3897351 | 70.1146503 | AFTER40 | 67.4824102 | 71 | 69.65104   |
| 73.3897351 | 70.828936  | AFTER41 | 67.8701653 | 71 | 69.6827811 |
| 72.3897351 | 70.9717932 | AFTER42 | 67.8905734 | 71 | 69.7137271 |
| 72.3897351 | 70.6860789 | AFTER43 | 67.5640428 | 71 | 69.757395  |
| 72.3897351 | 70.6860789 | AFTER44 | 67.2783285 | 71 | 69.8129898 |
| 72.3897351 | 70.6860789 | AFTER45 | 67.2783285 | 71 | 69.8664643 |
| 71.3897351 | 69.828936  | AFTER46 | 67.2987367 | 71 | 69.9217941 |
| 71.3897351 | 79.5403314 | AFTER47 | 68.6860789 | 71 | 69.9763287 |
| 71.3897351 | 79.5403314 | AFTER48 | 68.4003646 | 71 | 70.0303333 |
| 71.3897351 | 78.5403314 | AFTER49 | 68.5432218 | 71 | 70.0710858 |
| 71.3897351 | 77.5403314 | AFTER50 | 68.828936  | 71 | 70.1341656 |
| 71.3897351 | 77.5403314 | AFTER51 | 68.828936  | 71 | 70.1916795 |
| 71.3897351 | 76.5403314 | AFTER52 | 68.5432218 | 71 | 70.2343511 |
| 70.3897351 | 75.5403314 | AFTER53 | 68.2575075 | 71 | 70.2677463 |

|            |            |         |            |    |            |
|------------|------------|---------|------------|----|------------|
| 70.3897351 | 75.5403314 | AFTER54 | 68.4003646 | 71 | 70.2974309 |
| 73.3897351 | 74.5403314 | AFTER55 | 69.4003646 | 71 | 70.3252602 |
| 73.3897351 | 74.5403314 | AFTER56 | 69.6860789 | 63 | 70.3605107 |
| 74.3897351 | 74.5403314 | AFTER57 | 69.828936  | 63 | 70.3994717 |
| 74.3897351 | 74.5403314 | AFTER58 | 69.5432218 | 63 | 70.4198799 |
| 75.3897351 | 74.5403314 | AFTER59 | 69.6860789 | 63 | 70.4477092 |
| 75.3897351 | 74.5403314 | AFTER60 | 70.1146503 | 63 | 70.4718279 |
| 79.3897351 | 74.5403314 | AFTER61 | 70.828936  | 63 | 70.4661982 |
| 79.3897351 | 72.5403314 | AFTER62 | 70.5432218 | 63 | 70.4610986 |
| 79.3897351 | 72.5403314 | AFTER63 | 70.4003646 | 63 | 70.5074808 |
| 80.3897351 | 74.5403314 | AFTER64 | 70.6860789 | 63 | 70.5557183 |
| 81.3897351 | 75.5403314 | AFTER65 | 71.4003646 | 63 | 70.6002452 |
| 82.3897351 | 76.5403314 | AFTER66 | 72.2575075 | 63 | 70.6447721 |
| 83.3897351 | 74.5403314 | AFTER67 | 72.5432218 | 63 | 70.689299  |
| 83.3897351 | 74.5403314 | AFTER68 | 72.4003646 | 63 | 70.7226942 |
| 83.3897351 | 74.5403314 | AFTER69 | 72.4003646 | 63 | 70.7635105 |
| 83.3897351 | 74.5403314 | AFTER70 | 72.4003646 | 63 | 70.7703378 |
| 84.3897351 | 75.5403314 | AFTER71 | 73.4003646 | 63 | 70.7753097 |
| 84.3897351 | 75.5403314 | AFTER72 | 73.5432218 | 63 | 70.8012838 |
| 84.3897351 | 75.5403314 | AFTER73 | 71.2730017 | 63 | 70.8216919 |
| 82.3897351 | 75.5403314 | AFTER74 | 70.9464711 | 63 | 70.8672736 |
| 82.3897351 | 75.5403314 | AFTER75 | 70.2934099 | 63 | 70.9213366 |
| 82.3897351 | 75.5403314 | AFTER76 | 69.8036139 | 63 | 70.9621476 |
| 82.3897351 | 76.5403314 | AFTER77 | 69.9668793 | 63 | 71.0117049 |
| 80.3897351 | 76.5403314 | AFTER78 | 69.8036139 | 63 | 71.0697436 |
| 78.3897351 | 77.5403314 | AFTER79 | 70.1301446 | 63 | 71.1280472 |
| 78.3897351 | 77.5403314 | AFTER80 | 70.7832058 | 63 | 71.1664728 |
| 78.3897351 | 77.5403314 | AFTER81 | 71.6199405 | 63 | 71.2027781 |
| 78.3897351 | 77.5403314 | AFTER82 | 72.2525935 | 63 | 71.2359029 |
| 77.3897351 | 77.5403314 | AFTER83 | 72.0893282 | 63 | 71.2727382 |
| 77.3897351 | 77.5403314 | AFTER84 | 72.0893282 | 63 | 71.3040077 |
| 77.3897351 | 76.5403314 | AFTER85 | 71.5995323 | 63 | 71.3294463 |
| 76.3897351 | 76.5403314 | AFTER86 | 71.4158588 | 63 | 71.340578  |
| 77.3897351 | 76.5403314 | AFTER87 | 71.2525935 | 63 | 71.3628415 |
| 77.3897351 | 75.5403314 | AFTER88 | 73.1146503 | 63 | 71.3869602 |
| 77.3897351 | 75.5403314 | AFTER89 | 72.9717932 | 63 | 71.3888352 |
| 77.3897351 | 76.5403314 | AFTER90 | 73.1146503 | 63 | 71.3885899 |
| 77.3897351 | 75.5403314 | AFTER91 | 73.2575075 | 63 | 71.3941755 |
| 77.3897351 | 75.5403314 | AFTER92 | 72.9717932 | 63 | 71.406122  |
| 77.3897351 | 75.5403314 | AFTER93 | 72.6860789 | 63 | 71.4318507 |
| 77.3897351 | 75.5403314 | AFTER94 | 72.6860789 | 63 | 71.4424721 |
| 77.3897351 | 76.5403314 | AFTER95 | 73.1146503 | 63 | 71.4602496 |
| 77.3897351 | 76.5403314 | AFTER96 | 71.4003646 | 63 | 71.4785571 |
| 78.3897351 | 77.5403314 | AFTER97 | 71.9717932 | 63 | 71.505081  |
| 78.3897351 | 77.5403314 | AFTER98 | 71.6860789 | 63 | 71.5384959 |

|            |            |          |            |    |            |
|------------|------------|----------|------------|----|------------|
| 77.3897351 | 77.5403314 | AFTER99  | 69.3954507 | 63 | 71.5663449 |
| 77.3897351 | 76.5403314 | AFTER100 | 69.7219813 | 63 | 71.5891581 |
| 77.3897351 | 76.5403314 | AFTER101 | 73.6860789 | 63 | 71.6241633 |
| 76.3897351 | 76.5403314 | AFTER102 | 73.828936  | 63 | 71.662614  |
| 76.3897351 | 76.5403314 | AFTER103 | 73.828936  | 63 | 71.6952337 |
| 75.3897351 | 76.5403314 | AFTER104 | 73.828936  | 63 | 71.6996756 |
| 75.3897351 | 76.5403314 | AFTER105 | 73.828936  | 63 | 71.6762882 |
| 78.3897351 | 76.5403314 | AFTER106 | 73.1146503 | 63 | 71.6491902 |
| 81.3897351 | 76.5403314 | AFTER107 | 73.5432218 | 63 | 71.6199718 |
| 81.3897351 | 75.5403314 | AFTER108 | 71.0689201 | 63 | 71.5973795 |
| 81.3897351 | 75.5403314 | AFTER109 | 71.0689201 | 63 | 71.5790279 |
| 82.3897351 | 75.5403314 | AFTER110 | 73.1146503 | 63 | 71.5519299 |
| 82.3897351 | 73.5403314 | AFTER111 | 73.1146503 | 63 | 71.5250969 |
| 82.3897351 | 73.5403314 | AFTER112 | 73.1146503 | 63 | 71.525627  |
| 83.3897351 | 73.5403314 | AFTER113 | 73.1146503 | 63 | 71.5306628 |
| 83.3897351 | 73.5403314 | AFTER114 | 72.2575075 | 63 | 71.5417945 |
| 84.3897351 | 73.5403314 | AFTER115 | 72.1146503 | 63 | 71.558227  |
| 84.3897351 | 74.5403314 | AFTER116 | 72.1146503 | 63 | 71.5824096 |
| 84.3897351 | 74.5403314 | AFTER117 | 71.9717932 | 63 | 71.5975808 |
| 83.3897351 | 75.5403314 | AFTER118 | 70.828936  | 63 | 71.606656  |
| 83.3897351 | 75.5403314 | AFTER119 | 70.6860789 | 63 | 71.6053946 |
| 79.3897351 | 75.5403314 | AFTER120 | 70.1146503 | 63 | 71.5877007 |
| 79.3897351 | 75.5403314 | AFTER121 | 70.1146503 | 63 | 71.5617904 |
| 79.3897351 | 75.5403314 | AFTER122 | 69.6860789 | 63 | 71.5417111 |
| 79.3897351 | 75.5403314 | AFTER123 | 69.2575075 | 63 | 71.529053  |
| 79.3897351 | 75.5403314 | AFTER124 | 69.5432218 | 63 | 71.5283217 |
| 82.3897351 | 75.5403314 | AFTER125 | 70.1146503 | 63 | 71.531831  |
| 83.3897351 | 76.5403314 | AFTER126 | 70.4003646 | 63 | 71.5411713 |
| 71.4003646 | 76.5403314 | AFTER127 | 68.9733117 | 63 | 71.5226184 |
| 71.2575075 | 76.5403314 | AFTER128 | 68.8100464 | 63 | 71.5059208 |
| 71.4003646 | 76.5403314 | AFTER129 | 68.9733117 | 63 | 71.4855127 |
| 71.828936  | 76.5403314 | AFTER130 | 69.1773933 | 63 | 71.4613939 |
| 73.2575075 | 77.5403314 | AFTER131 | 70.3814749 | 63 | 71.4484069 |
| 73.1146503 | 77.5403314 | AFTER132 | 70.2182096 | 63 | 71.4391305 |
| 73.9717932 | 77.5403314 | AFTER133 | 71.0549443 | 63 | 71.4317093 |
| 74.2575075 | 77.5403314 | AFTER134 | 71.2386178 | 63 | 71.4224329 |
| 74.6860789 | 77.5403314 | AFTER135 | 71.5855566 | 63 | 71.4354199 |
| 75.4003646 | 77.5403314 | AFTER136 | 72.259026  | 63 | 71.4484069 |
| 75.4003646 | 77.5403314 | AFTER137 | 72.259026  | 63 | 71.4669598 |
| 75.6860789 | 77.5403314 | AFTER138 | 72.5855566 | 63 | 71.5226822 |
| 76.2575075 | 77.5403314 | AFTER139 | 73.2386178 | 63 | 71.5778746 |
| 76.1146503 | 77.5403314 | AFTER140 | 73.3610668 | 63 | 71.5834405 |
| 75.9717932 | 74.5403314 | AFTER141 | 73.1978015 | 63 | 71.5927169 |
| 89.3897351 | 75.5403314 | AFTER142 | 71.7423895 | 63 | 71.600138  |
| 87.3897351 | 75.5403314 | AFTER143 | 70.4566752 | 63 | 71.5982828 |



|            |            |          |            |    |            |
|------------|------------|----------|------------|----|------------|
| 86.3897351 | 76.5403314 | AFTER144 | 70.4566752 | 63 | 71.5964275 |
| 85.3897351 | 76.5403314 | AFTER145 | 70.1505527 | 63 | 71.6094145 |
| 85.3897351 | 77.5403314 | AFTER146 | 70.6607568 | 63 | 71.6168356 |
| 85.3897351 | 77.5403314 | AFTER147 | 70.9872874 | 63 | 71.65268   |
| 85.3897351 | 78.5403314 | AFTER148 | 71.313818  | 63 | 71.6866691 |
| 85.3897351 | 78.5403314 | AFTER149 | 71.4770833 | 63 | 71.6959455 |
| 84.3897351 | 78.5403314 | AFTER150 | 71.313818  | 63 | 71.7126431 |
| 84.3897351 | 78.5403314 | AFTER151 | 71.3342262 | 63 | 71.7423277 |
| 83.3897351 | 78.5403314 | AFTER152 | 71.1505527 | 63 | 71.7516041 |
| 83.3897351 | 78.5403314 | AFTER153 | 71.0689201 | 63 | 71.7645911 |
| 83.3897351 | 78.5403314 | AFTER154 | 71.828936  | 63 | 71.7775782 |
| 84.3897351 | 78.5403314 | AFTER155 | 70.9717932 | 63 | 71.7905652 |
| 84.3897351 | 78.5403314 | AFTER156 | 70.828936  | 63 | 71.7905652 |
| 83.3897351 | 78.5403314 | AFTER157 | 70.6860789 | 63 | 71.8054075 |
| 83.3897351 | 78.5403314 | AFTER158 | 70.2575075 | 63 | 71.8202498 |
| 83.3897351 | 78.5403314 | AFTER159 | 70.2575075 | 63 | 71.8425132 |
| 83.3897351 | 78.5403314 | AFTER160 | 70.5432218 | 63 | 71.8629214 |
| 83.3897351 | 80.5403314 | AFTER161 | 71.1146503 | 63 | 71.8888954 |
| 83.3897351 | 80.5403314 | AFTER162 | 71.5432218 | 63 | 71.9167247 |
| 82.3897351 | 81.5403314 | AFTER163 | 71.6860789 | 63 | 71.9294664 |
| 82.3897351 | 81.5403314 | AFTER164 | 71.9717932 | 63 | 71.9358471 |
| 82.3897351 | 81.5403314 | AFTER165 | 71.6860789 | 63 | 71.9525447 |
| 82.3897351 | 81.5403314 | AFTER166 | 71.6860789 | 63 | 71.9822096 |
| 81.3897351 | 81.5403314 | AFTER167 | 71.5432218 | 63 | 72.0121395 |
| 81.3897351 | 80.5403314 | AFTER168 | 71.4003646 | 63 | 72.0418044 |
| 81.3897351 | 82.5403314 | AFTER169 | 71.9717932 | 63 | 72.0743847 |
| 81.3897351 | 82.5403314 | AFTER170 | 71.9717932 | 63 | 72.0950382 |
| 81.3897351 | 83.5403314 | AFTER171 | 72.1146503 | 63 | 72.1196673 |
| 81.3897351 | 83.5403314 | AFTER172 | 72.4003646 | 63 | 72.135285  |
| 81.3897351 | 83.5403314 | AFTER173 | 72.4003646 | 63 | 72.1466621 |
| 81.3897351 | 83.5403314 | AFTER174 | 72.9717932 | 63 | 72.1479675 |
| 81.3897351 | 83.5403314 | AFTER175 | 73.1146503 | 63 | 72.1405267 |
| 81.3897351 | 83.5403314 | AFTER176 | 73.6860789 | 63 | 72.1256647 |
| 83.3897351 | 83.5403314 | AFTER177 | 73.9717932 | 63 | 72.1084173 |
| 83.3897351 | 83.5403314 | AFTER178 | 74.1146503 | 63 | 72.0826886 |
| 82.3897351 | 82.5403314 | AFTER179 | 74.5432218 | 63 | 72.0553696 |
| 82.3897351 | 82.5403314 | AFTER180 | 74.4003646 | 63 | 72.030171  |
| 82.3897351 | 77.5403314 | AFTER181 | 73.6860789 | 63 | 72.0238738 |
| 79.3897351 | 78.5403314 | AFTER182 | 73.6860789 | 63 | 72.0305637 |
| 79.3897351 | 78.5403314 | AFTER183 | 74.1146503 | 63 | 72.0372535 |
| 79.3897351 | 78.5403314 | AFTER184 | 74.1146503 | 63 | 72.0627613 |
| 79.3897351 | 77.5403314 | AFTER185 | 73.828936  | 63 | 72.0723666 |
| 79.3897351 | 76.5403314 | AFTER186 | 73.6860789 | 63 | 72.0758759 |
| 79.3897351 | 75.5403314 | AFTER187 | 73.828936  | 63 | 72.0732893 |
| 81.3897351 | 75.5403314 | AFTER188 | 74.4003646 | 63 | 72.0648718 |

|            |            |          |            |    |            |
|------------|------------|----------|------------|----|------------|
| 81.3897351 | 75.5403314 | AFTER189 | 75.4003646 | 63 | 72.0678511 |
| 81.3897351 | 75.5403314 | AFTER190 | 73.828936  | 63 | 72.0742759 |
| 81.3897351 | 75.5403314 | AFTER191 | 73.2575075 | 63 | 72.0830861 |
| 81.3897351 | 78.5403314 | AFTER192 | 73.1146503 | 63 | 72.096667  |
| 81.3897351 | 78.5403314 | AFTER193 | 73.1146503 | 63 | 72.0873905 |
| 81.3897351 | 79.5403314 | AFTER194 | 71.9717932 | 63 | 72.0855352 |
| 81.3897351 | 79.5403314 | AFTER195 | 71.9717932 | 63 | 72.0873905 |
| 81.3897351 | 78.5403314 | AFTER196 | 71.828936  | 63 | 72.0855352 |
| 80.3897351 | 78.5403314 | AFTER197 | 71.828936  | 63 | 72.0873905 |
| 80.3897351 | 78.5403314 | AFTER198 | 71.6860789 | 63 | 72.0892458 |
| 80.3897351 | 77.5403314 | AFTER199 | 71.6860789 | 63 | 72.0911011 |
| 80.3897351 | 77.5403314 | AFTER200 | 71.4003646 | 63 | 72.0892458 |
| 73.2575075 | 77.5403314 | AFTER201 | 70.5243321 | 63 | 72.0929564 |
| 72.828936  | 77.5403314 | AFTER202 | 70.6059647 | 63 | 72.096667  |
| 85.3897351 | 77.5403314 | AFTER203 | 71.6860789 | 63 | 72.1077987 |
| 84.3897351 | 77.5403314 | AFTER204 | 71.2575075 | 63 | 72.1244963 |
| 83.3897351 | 77.5403314 | AFTER205 | 71.1146503 | 63 | 72.1430492 |
| 82.3897351 | 78.5403314 | AFTER206 | 71.2575075 | 63 | 72.1653126 |
| 81.3897351 | 82.5403314 | AFTER207 | 71.6860789 | 63 | 72.1875761 |
| 81.3897351 | 82.5403314 | AFTER208 | 71.9717932 | 63 | 72.2042737 |
| 81.3897351 | 82.5403314 | AFTER209 | 72.1146503 | 63 | 72.2228265 |
| 81.3897351 | 82.5403314 | AFTER210 | 72.2575075 | 63 | 72.2395241 |
| 81.3897351 | 82.5403314 | AFTER211 | 72.1146503 | 63 | 72.2525111 |
| 81.3897351 | 80.5403314 | AFTER212 | 71.6860789 | 63 | 72.2673534 |
| 81.3897351 | 80.5403314 | AFTER213 | 71.6860789 | 63 | 72.2821957 |
| 81.3897351 | 80.5403314 | AFTER214 | 71.1146503 | 63 | 72.297038  |
| 81.3897351 | 80.5403314 | AFTER215 | 71.2575075 | 63 | 72.3044592 |
| 81.3897351 | 80.5403314 | AFTER216 | 71.2575075 | 63 | 72.3174462 |
| 81.3897351 | 77.5403314 | AFTER217 | 71.2575075 | 63 | 72.3267226 |
| 81.3897351 | 76.5403314 | AFTER218 | 71.2575075 | 63 | 72.3304332 |
| 81.3897351 | 75.5403314 | AFTER219 | 71.2575075 | 63 | 72.3267226 |
| 82.3897351 | 75.5403314 | AFTER220 | 70.9717932 | 63 | 72.3304332 |
| 81.3897351 | 74.5403314 | AFTER221 | 70.9717932 | 63 | 72.3378544 |
| 81.3897351 | 74.5403314 | AFTER222 | 72.1146503 | 63 | 72.3359991 |
| 78.3897351 | 73.5403314 | AFTER223 | 71.4003646 | 63 | 72.3322885 |
| 78.3897351 | 73.5403314 | AFTER224 | 71.2575075 | 63 | 72.3322885 |
| 78.3897351 | 73.5403314 | AFTER225 | 71.1146503 | 63 | 72.3285779 |
| 78.3897351 | 73.5403314 | AFTER226 | 70.828936  | 63 | 72.3230121 |
| 78.3897351 | 73.5403314 | AFTER227 | 71.5432218 | 63 | 72.3081698 |
| 78.3897351 | 73.5403314 | AFTER228 | 71.828936  | 63 | 72.2747746 |
| 78.3897351 | 73.5403314 | AFTER229 | 71.828936  | 63 | 72.2617876 |
| 78.3897351 | 73.5403314 | AFTER230 | 72.1146503 | 63 | 72.2488006 |
| 78.3897351 | 73.5403314 | AFTER231 | 71.1146503 | 63 | 72.2339583 |
| 78.3897351 | 73.5403314 | AFTER232 | 70.828936  | 63 | 72.219116  |
| 79.3897351 | 73.5403314 | AFTER233 | 70.9717932 | 63 | 72.2135501 |

|            |            |          |            |    |            |
|------------|------------|----------|------------|----|------------|
| 80.3897351 | 74.5403314 | AFTER234 | 70.5432218 | 63 | 72.2005631 |
| 80.3897351 | 74.5403314 | AFTER235 | 70.4003646 | 63 | 72.1931419 |
| 80.3897351 | 75.5403314 | AFTER236 | 70.4003646 | 63 | 72.1597468 |
| 83.3897351 | 75.5403314 | AFTER237 | 70.6860789 | 63 | 72.1263516 |
| 82.3897351 | 75.5403314 | AFTER238 | 70.9717932 | 63 | 72.096667  |
| 82.3897351 | 75.5403314 | AFTER239 | 71.828936  | 63 | 72.0688377 |
| 82.3897351 | 75.5403314 | AFTER240 | 71.9717932 | 63 | 72.0449642 |
| 82.3897351 | 75.5403314 |          | 72.828936  | 63 | 72.0163201 |
| 81.3897351 | 75.5403314 |          | 72.9717932 | 63 | 71.977359  |
| 80.3897351 | 76.5403314 |          | 73.1146503 | 63 | 71.9550956 |
| 80.3897351 | 76.5403314 |          | 73.2575075 | 63 | 71.9495297 |
| 81.3897351 | 76.5403314 |          | 73.1146503 | 63 | 71.9365427 |
| 81.3897351 | 77.5403314 |          | 73.2575075 | 63 | 71.9272663 |
| 80.3897351 | 77.5403314 |          | 73.4003646 | 63 | 71.9179898 |
| 79.3897351 | 77.5403314 |          | 73.4003646 | 63 | 71.9068581 |
| 79.3897351 | 77.5403314 |          | 73.4003646 | 63 | 71.8827394 |
| 76.3897351 | 78.5403314 |          | 73.5432218 | 63 | 71.8586206 |
| 76.3897351 | 79.5403314 |          | 74.1146503 | 63 | 71.8363572 |
| 77.3897351 | 79.5403314 |          | 74.2575075 | 63 | 71.8233702 |
| 77.3897351 | 79.5403314 |          | 74.2575075 | 63 | 71.8270808 |
| 77.3897351 | 78.5403314 |          | 74.9717932 | 63 | 71.8363572 |
| 77.3897351 | 78.5403314 |          | 74.828936  | 63 | 71.8493442 |
| 77.3897351 | 78.5403314 |          | 74.828936  | 63 | 71.8623312 |
| 74.3897351 | 77.5403314 |          | 74.1146503 | 63 | 71.8697524 |
| 71.3897351 | 77.5403314 |          | 73.9717932 | 63 | 71.8697524 |
| 71.3897351 | 78.5403314 |          | 74.2575075 | 63 | 71.8567654 |
| 69.3897351 | 78.5403314 |          | 73.9717932 | 63 | 71.8382125 |
| 68.3897351 | 78.5403314 |          | 73.828936  | 63 | 71.8066726 |
| 67.3897351 | 80.5403314 |          | 73.828936  | 63 | 71.7862644 |
| 67.3897351 | 79.5403314 |          | 73.4003646 | 63 | 71.7714221 |
| 67.3897351 | 79.5403314 |          | 73.4003646 | 63 | 71.7658563 |
| 67.3897351 | 79.5403314 |          | 73.2575075 | 63 | 71.7602904 |
| 67.3897351 | 79.5403314 |          | 72.828936  | 63 | 71.7454481 |
| 67.3897351 | 79.5403314 |          | 72.828936  | 63 | 71.7231846 |
| 67.3897351 | 79.5403314 |          | 72.2575075 | 63 | 71.6990659 |
| 68.3897351 | 79.5403314 |          | 71.9717932 | 63 | 71.667526  |
| 68.3897351 | 79.5403314 |          | 71.9717932 | 63 | 71.654539  |
| 68.3897351 | 79.5403314 |          | 71.5432218 | 63 | 71.6434073 |
| 68.3897351 | 78.5403314 |          | 70.9717932 | 63 | 71.6304203 |
| 73.3897351 | 76.5403314 |          | 71.2575075 | 63 | 71.6211438 |
| 73.3897351 | 75.5403314 |          | 69.2575075 | 63 | 71.6211438 |
| 73.3897351 | 74.5403314 |          | 69.1146503 | 63 | 71.6267097 |
| 73.3897351 | 74.5403314 |          | 69.4003646 | 63 | 71.6304203 |
| 73.3897351 | 74.5403314 |          | 69.2575075 | 63 | 71.6304203 |
| 73.3897351 | 74.5403314 |          | 68.6860789 | 63 | 71.6267097 |

|            |            |            |    |            |
|------------|------------|------------|----|------------|
| 73.3897351 | 74.5403314 | 68.4003646 | 63 | 71.6211438 |
| 75.3897351 | 74.5403314 | 68.6860789 | 63 | 71.6007357 |
| 76.3897351 | 74.5403314 | 69.5432218 | 63 | 71.5580641 |
| 76.3897351 | 74.5403314 | 70.6860789 | 63 | 71.5042607 |
| 76.3897351 | 74.5403314 | 70.2575075 | 63 | 71.4486021 |
| 76.3897351 | 74.5403314 | 70.9717932 | 63 | 71.3910882 |
| 76.3897351 | 74.5403314 | 71.2575075 | 63 | 71.3298637 |
| 76.3897351 | 74.5403314 | 71.2575075 | 63 | 71.2834815 |
| 75.3897351 | 74.5403314 | 70.4003646 | 63 | 71.248231  |
| 75.3897351 | 74.5403314 | 70.2575075 | 63 | 71.2129806 |
| 75.3897351 | 74.5403314 | 69.9717932 | 63 | 71.1777301 |
| 75.3897351 | 75.5403314 | 70.6860789 | 63 | 71.1387691 |
| 75.3897351 | 75.5403314 | 71.4003646 | 63 | 71.1016633 |
| 75.3897351 | 75.5403314 | 71.9717932 | 63 | 71.0719787 |
| 75.3897351 | 75.5403314 | 72.2575075 | 63 | 71.034873  |
| 74.3897351 | 76.5403314 | 72.2575075 | 63 | 70.9810696 |
| 74.3897351 | 75.5403314 | 71.828936  | 63 | 70.9235557 |
| 76.3897351 | 75.5403314 | 71.2575075 | 63 | 70.8753182 |
| 75.3897351 | 75.5403314 | 69.9717932 | 63 | 70.8307913 |
| 75.3897351 | 74.5403314 | 69.5432218 | 63 | 70.7918303 |
| 75.3897351 | 74.5403314 | 69.6860789 | 63 | 70.7621457 |
| 75.3897351 | 75.5403314 | 69.828936  | 63 | 70.7380269 |
| 75.3897351 | 75.5403314 | 70.1146503 | 63 | 70.7101976 |
| 76.3897351 | 75.5403314 | 70.6860789 | 63 | 70.6897895 |
| 76.3897351 | 75.5403314 | 70.4003646 | 63 | 70.667526  |
| 76.3897351 | 75.5403314 | 70.4003646 | 63 | 70.6489731 |
| 76.3897351 | 75.5403314 | 70.1146503 | 63 | 70.6601049 |
| 76.3897351 | 75.5403314 | 69.9717932 | 63 | 70.6749472 |
| 76.3897351 | 75.5403314 | 69.6860789 | 63 | 70.6990659 |
| 77.3897351 | 76.5403314 | 70.1146503 | 63 | 70.7473034 |
| 77.3897351 | 75.5403314 | 69.9717932 | 63 | 70.7918303 |
| 77.3897351 | 75.5403314 | 69.9717932 | 63 | 70.8326466 |
| 77.3897351 | 74.5403314 | 69.828936  | 63 | 70.8734629 |
| 78.3897351 | 74.5403314 | 70.4003646 | 63 | 70.899437  |
| 78.3897351 | 75.5403314 | 70.828936  | 63 | 70.9569509 |
| 78.3897351 | 75.5403314 | 70.9717932 | 63 | 71.0126095 |
| 78.3897351 | 76.5403314 | 70.9717932 | 63 | 71.0571364 |
| 79.3897351 | 76.5403314 | 71.5432218 | 63 | 71.1016633 |
| 79.3897351 | 76.5403314 | 71.5432218 | 63 | 71.1443349 |
| 79.3897351 | 76.5403314 | 71.2575075 | 63 | 71.1870065 |
| 79.3897351 | 75.5403314 | 69.6860789 | 63 | 71.2296782 |
| 79.3897351 | 74.5403314 | 68.9717932 | 63 | 71.2537969 |
| 79.3897351 | 74.5403314 | 68.9717932 | 63 | 71.2649286 |
| 79.3897351 | 74.5403314 | 68.6860789 | 63 | 71.2816262 |
| 80.3897351 | 73.5403314 | 68.5432218 | 63 | 71.2890474 |

|            |            |            |    |            |
|------------|------------|------------|----|------------|
| 80.3897351 | 74.5403314 | 69.828936  | 63 | 71.2890474 |
| 80.3897351 | 74.5403314 | 70.6860789 | 63 | 71.2890474 |
| 80.3897351 | 76.5403314 | 70.6860789 | 63 | 71.3038897 |
| 80.3897351 | 76.5403314 | 70.828936  | 63 | 71.3391401 |
| 80.3897351 | 77.5403314 | 71.1146503 | 63 | 71.3818117 |
| 80.3897351 | 77.5403314 | 71.4003646 | 63 | 71.4170622 |
| 80.3897351 | 77.5403314 | 71.9717932 | 63 | 71.4448915 |
| 79.3897351 | 77.5403314 | 72.1146503 | 63 | 71.4634444 |
| 79.3897351 | 76.5403314 | 70.6860789 | 63 | 71.4782867 |
| 79.3897351 | 75.5403314 | 70.4003646 | 63 | 71.493129  |
| 79.3897351 | 75.5403314 | 70.4003646 | 63 | 71.5172477 |
| 79.3897351 | 75.5403314 | 70.5432218 | 63 | 71.5469323 |
| 79.3897351 | 76.5403314 | 71.2575075 | 63 | 71.5840381 |
| 79.3897351 | 76.5403314 | 71.6860789 | 63 | 71.6267097 |
| 79.3897351 | 77.5403314 | 71.9717932 | 63 | 71.6656707 |
| 79.3897351 | 76.5403314 | 71.6860789 | 63 | 71.7046318 |
| 79.3897351 | 76.5403314 | 71.828936  | 63 | 71.7380269 |
| 79.3897351 | 76.5403314 | 71.6860789 | 63 | 71.7565798 |
| 78.3897351 | 76.5403314 | 71.828936  | 63 | 71.7788433 |
| 78.3897351 | 76.5403314 | 73.6860789 | 63 | 71.8011067 |
| 79.3897351 | 76.5403314 | 73.9717932 | 63 | 71.8122385 |
| 79.3897351 | 76.5403314 | 74.1146503 | 63 | 71.8196596 |
| 79.3897351 | 76.5403314 | 75.6860789 | 63 | 71.815949  |
| 78.3897351 | 76.5403314 | 75.4003646 | 63 | 71.8048173 |
| 78.3897351 | 76.5403314 | 74.6860789 | 63 | 71.7918303 |
| 78.3897351 | 76.5403314 | 74.1146503 | 63 | 71.7732774 |
| 78.3897351 | 76.5403314 | 73.2575075 | 63 | 71.7473034 |
| 78.3897351 | 76.5403314 | 73.6860789 | 63 | 71.7120529 |
| 77.3897351 | 75.5403314 | 73.4003646 | 63 | 71.6693813 |
| 77.3897351 | 74.5403314 | 72.828936  | 63 | 71.6248544 |
| 76.3897351 | 74.5403314 | 72.6860789 | 63 | 71.5933145 |
| 76.3897351 | 72.5403314 | 71.9717932 | 63 | 71.5599193 |
| 74.3897351 | 72.5403314 | 71.6860789 | 63 | 71.53209   |
| 73.3897351 | 72.5403314 | 71.9717932 | 63 | 71.5098266 |
| 73.3897351 | 72.5403314 | 71.4003646 | 63 | 71.506116  |
| 74.3897351 | 72.5403314 | 71.5432218 | 63 | 71.5116819 |
| 74.3897351 | 72.5403314 | 71.5432218 | 63 | 71.5153924 |
| 74.3897351 | 72.5403314 | 71.5432218 | 63 | 71.5283795 |
| 73.3897351 | 72.5403314 | 71.2575075 | 63 | 71.5599193 |
| 73.3897351 | 72.5403314 | 71.2575075 | 63 | 71.5747616 |
| 73.3897351 | 72.5403314 | 71.5432218 | 63 | 71.5970251 |
| 73.3897351 | 73.5403314 | 72.9717932 | 63 | 71.6248544 |
| 72.3897351 | 74.5403314 | 73.2575075 | 63 | 71.6508284 |
| 72.3897351 | 74.5403314 | 73.4003646 | 63 | 71.6693813 |
| 74.3897351 | 74.5403314 | 73.5432218 | 63 | 71.680513  |

|            |            |            |    |            |
|------------|------------|------------|----|------------|
| 76.3897351 | 74.5403314 | 73.4003646 | 63 | 71.6823683 |
| 76.3897351 | 74.5403314 | 73.4003646 | 63 | 71.6842236 |
| 76.3897351 | 74.5403314 | 73.4003646 | 63 | 71.7083423 |
| 77.3897351 | 74.5403314 | 73.6860789 | 63 | 71.7306058 |
| 77.3897351 | 74.5403314 | 73.5432218 | 63 | 71.751014  |
| 77.3897351 | 75.5403314 | 72.828936  | 63 | 71.7732774 |
| 77.3897351 | 75.5403314 | 72.828936  | 63 | 71.7992514 |
| 76.3897351 | 75.5403314 | 72.6860789 | 63 | 71.8215149 |
| 76.3897351 | 75.5403314 | 72.828936  | 63 | 71.8400678 |
| 75.3897351 | 76.5403314 | 72.6860789 | 63 | 71.8678971 |
| 75.3897351 | 76.5403314 | 72.1146503 | 63 | 71.899437  |
| 75.3897351 | 75.5403314 | 72.1146503 | 63 | 71.925411  |
| 75.3897351 | 75.5403314 | 72.1146503 | 63 | 71.9476744 |
| 75.3897351 | 75.5403314 | 70.9717932 | 63 | 71.9458192 |
| 76.3897351 | 75.5403314 | 70.5432218 | 63 | 71.9179898 |
| 76.3897351 | 75.5403314 | 69.4003646 | 63 | 71.88645   |
| 76.3897351 | 76.5403314 | 69.2575075 | 63 | 71.8066726 |
| 76.3897351 | 76.5403314 | 68.9717932 | 63 | 71.7287505 |
| 72.3897351 | 77.5403314 | 68.5432218 | 63 | 71.6619602 |
| 71.3897351 | 77.5403314 | 67.828936  | 63 | 71.602591  |
| 71.3897351 | 77.5403314 | 67.6860789 | 63 | 71.5524982 |
| 71.3897351 | 78.5403314 | 67.5432218 | 63 | 71.4949843 |
| 71.3897351 | 78.5403314 | 67.5432218 | 63 | 71.4411809 |
| 71.3897351 | 78.5403314 | 68.5432218 | 63 | 71.4003646 |
| 70.3897351 | 78.5403314 | 68.9717932 | 63 | 71.3614036 |
| 70.3897351 | 78.5403314 | 69.4003646 | 63 | 71.3372848 |
| 70.3897351 | 78.5403314 | 69.5432218 | 63 | 71.3224425 |
| 69.3897351 | 78.5403314 | 69.4003646 | 63 | 71.3113108 |
| 69.3897351 | 78.5403314 | 69.4003646 | 63 | 71.318732  |
| 69.3897351 | 78.5403314 | 69.2575075 | 63 | 71.3280084 |
| 69.3897351 | 78.5403314 | 69.6860789 | 63 | 71.3372848 |
| 72.3897351 | 78.5403314 | 70.9717932 | 63 | 71.3502718 |
| 72.3897351 | 77.5403314 | 70.9717932 | 63 | 71.3632589 |
| 74.3897351 | 77.5403314 | 72.4003646 | 63 | 71.3743906 |
| 74.3897351 | 76.5403314 | 72.828936  | 63 | 71.3725353 |
| 74.3897351 | 76.5403314 | 72.828936  | 63 | 71.3688247 |
| 74.3897351 | 75.5403314 | 72.5432218 | 63 | 71.3632589 |
| 75.3897351 | 74.5403314 | 72.2575075 | 63 | 71.3651141 |
| 76.3897351 | 74.5403314 | 72.1146503 | 63 | 71.3632589 |
| 76.3897351 | 73.5403314 | 72.2575075 | 63 | 71.3688247 |
| 77.3897351 | 74.5403314 | 72.5432218 | 63 | 71.3595483 |
| 75.3897351 | 74.5403314 | 72.1146503 | 63 | 71.3558377 |
| 74.3897351 | 74.5403314 | 71.9717932 | 63 | 71.3465613 |
| 74.3897351 | 75.5403314 | 72.2575075 | 63 | 71.3391401 |
| 74.3897351 | 75.5403314 | 73.2575075 | 63 | 71.344706  |

|            |            |            |    |            |
|------------|------------|------------|----|------------|
| 72.3897351 | 75.5403314 | 73.4003646 | 63 | 71.3558377 |
| 72.3897351 | 75.5403314 | 73.4003646 | 63 | 71.3669694 |
| 72.3897351 | 75.5403314 | 73.828936  | 63 | 71.3725353 |
| 72.3897351 | 75.5403314 | 74.2575075 | 63 | 71.3632589 |
| 72.3897351 | 75.5403314 | 73.6860789 | 63 | 71.3558377 |
| 71.3897351 | 74.5403314 | 73.5432218 | 63 | 71.3484166 |
| 71.3897351 | 74.5403314 | 73.5432218 | 63 | 71.3354295 |
| 71.3897351 | 74.5403314 | 71.828936  | 63 | 71.3391401 |
| 71.3897351 | 73.5403314 | 71.6860789 | 63 | 71.3521271 |
| 70.3897351 | 73.5403314 | 69.5432218 | 63 | 71.3762459 |
| 70.3897351 | 73.5403314 | 69.4003646 | 63 | 71.4003646 |
| 70.3897351 | 73.5403314 | 69.5432218 | 63 | 71.4319045 |
| 70.3897351 | 73.5403314 | 69.5432218 | 63 | 71.4634444 |
| 70.3897351 | 73.5403314 | 69.4003646 | 63 | 71.5098266 |
| 70.3897351 | 73.5403314 | 69.2575075 | 63 | 71.5599193 |
| 70.3897351 | 73.5403314 | 69.2575075 | 63 | 71.6137227 |
| 71.3897351 | 73.5403314 | 69.6860789 | 63 | 71.6768025 |
| 71.3897351 | 73.5403314 | 69.6860789 | 63 | 71.7547245 |
| 71.3897351 | 73.5403314 | 70.1146503 | 63 | 71.8326466 |
| 71.3897351 | 73.5403314 | 70.5432218 | 63 | 71.8700371 |
| 71.3897351 | 73.5403314 | 71.1146503 | 63 | 71.9058374 |
| 71.3897351 | 74.5403314 | 71.9717932 | 63 | 71.9461434 |
| 71.3897351 | 73.5403314 | 72.2575075 | 63 | 71.9898949 |
| 71.3897351 | 73.5403314 | 72.2575075 | 63 | 72.037622  |
| 71.3897351 | 73.5403314 | 72.5432218 | 63 | 72.0824336 |
| 71.3897351 | 73.5403314 | 72.2575075 | 63 | 72.112668  |
| 71.3897351 | 73.5403314 | 72.1146503 | 63 | 72.1405171 |
| 71.3897351 | 73.5403314 | 71.4003646 | 63 | 72.1455726 |
| 72.3897351 | 73.5403314 | 72.6860789 | 63 | 72.1514232 |
| 72.3897351 | 73.5403314 | 72.828936  | 63 | 72.1657551 |
| 74.3897351 | 72.5403314 | 73.5432218 | 63 | 72.179557  |
| 73.3897351 | 72.5403314 | 73.4003646 | 63 | 72.2019194 |
| 73.3897351 | 74.5403314 | 73.828936  | 63 | 72.2199597 |
| 73.3897351 | 77.5403314 | 72.6860789 | 63 | 72.2356169 |
| 73.3897351 | 80.5403314 | 73.1146503 | 63 | 72.2475634 |
| 73.3897351 | 81.5403314 | 72.9717932 | 63 | 72.2629555 |
| 73.3897351 | 81.5403314 | 72.9717932 | 63 | 72.2802029 |
| 73.3897351 | 81.5403314 | 73.2575075 | 63 | 72.2852584 |
| 73.3897351 | 82.5403314 | 73.6860789 | 63 | 72.3282148 |
| 72.3897351 | 82.5403314 | 73.5432218 | 63 | 72.3574006 |
| 71.3897351 | 82.5403314 | 73.2575075 | 63 | 72.3916222 |
| 69.3897351 | 79.5403314 | 71.9717932 | 63 | 72.4223983 |
| 70.3897351 | 79.5403314 | 71.5432218 | 63 | 72.4523792 |
| 70.3897351 | 77.5403314 | 71.5432218 | 63 | 72.4831553 |
| 70.3897351 | 75.5403314 | 71.1146503 | 63 | 72.5245214 |

|            |            |            |    |            |
|------------|------------|------------|----|------------|
| 71.3897351 | 75.5403314 | 71.2575075 | 63 | 72.5595266 |
| 71.3897351 | 76.5403314 | 71.5432218 | 63 | 72.6019529 |
| 71.3897351 | 76.5403314 | 71.2575075 | 63 | 72.6464995 |
| 72.3897351 | 76.5403314 | 71.1146503 | 63 | 72.7231161 |
| 76.3897351 | 76.5403314 | 71.4003646 | 63 | 72.8037083 |
| 76.3897351 | 76.5403314 | 70.9717932 | 63 | 72.8752891 |
| 76.3897351 | 77.5403314 | 71.4003646 | 63 | 72.9399788 |
| 77.3897351 | 77.5403314 | 71.5432218 | 63 | 72.9998978 |
| 77.3897351 | 77.5403314 | 71.6860789 | 63 | 73.0425892 |
| 77.3897351 | 77.5403314 | 72.4003646 | 63 | 73.0850155 |
| 87.3897351 | 76.5403314 | 74.5432218 | 63 | 73.1176352 |
| 90.3897351 | 75.5403314 | 74.9717932 | 63 | 73.1454843 |
| 74.5432218 | 75.5403314 | 72.2794341 | 63 | 73.165117  |
| 74.6860789 | 75.5403314 | 72.2998423 | 63 | 73.2059334 |
| 75.1146503 | 75.5403314 | 72.5039239 | 63 | 73.2393285 |
| 75.9717932 | 75.5403314 | 72.76923   | 63 | 73.2597367 |
| 77.1146503 | 76.5403314 | 72.9324954 | 63 | 73.2319271 |
| 77.5432218 | 76.5403314 | 73.136577  | 63 | 73.2027923 |
| 77.6860789 | 76.5403314 | 73.2998423 | 63 | 73.163851  |
| 76.4003646 | 76.5403314 | 73.1161688 | 63 | 73.1264999 |
| 76.1146503 | 75.5403314 | 72.7896382 | 63 | 73.0920643 |
| 76.5432218 | 76.5403314 | 73.2794341 | 63 | 73.0976302 |
| 77.1146503 | 76.5403314 | 73.9324954 | 63 | 73.0827879 |
| 76.828936  | 76.5403314 | 73.6059647 | 63 | 73.0605244 |
| 79.4430595 | 76.5403314 | 73.9794109 | 63 | 73.0289845 |
| 78.1134762 | 76.5403314 | 73.5037562 | 63 | 73.0011552 |
| 76.828936  | 78.5403314 | 73.4631076 | 63 | 72.9696153 |
| 76.828936  | 78.5403314 | 73.4631076 | 63 | 72.9529177 |
| 76.6860789 | 78.5403314 | 73.2998423 | 63 | 72.9399307 |
| 76.6860789 | 78.5403314 | 73.2998423 | 63 | 72.9232331 |
| 76.1146503 | 78.5403314 | 72.6467811 | 63 | 72.9065355 |
| 79.5432218 | 78.5403314 | 76.5651484 | 63 | 72.8560067 |
| 81.828936  | 78.5403314 | 75.6476725 | 63 | 72.8041527 |
| 82.6860789 | 78.5403314 | 76.0354276 | 63 | 72.754154  |
| 83.2575075 | 78.5403314 | 76.1986929 | 63 | 72.7099862 |
| 83.5432218 | 79.5403314 | 76.5660398 | 63 | 72.6846363 |
| 82.2575075 | 79.5403314 | 76.0558358 | 63 | 72.6864916 |
| 80.6860789 | 79.5403314 | 76.7284137 | 63 | 72.6883469 |
| 80.2575075 | 78.5403314 | 76.2386178 | 63 | 72.6939128 |
| 79.2575075 | 78.5403314 | 75.0957607 | 63 | 72.6772152 |
| 79.4003646 | 78.5403314 | 75.1161688 | 63 | 72.656807  |
| 79.6860789 | 78.5403314 | 75.4426994 | 63 | 72.6363988 |
| 79.828936  | 78.5403314 | 75.6059647 | 63 | 72.6067142 |
| 78.9717932 | 77.5403314 | 75.0549443 | 63 | 72.5677532 |
| 78.2575075 | 74.5403314 | 74.5243321 | 63 | 72.5362133 |



|            |            |            |    |            |
|------------|------------|------------|----|------------|
| 77.6860789 | 73.5403314 | 74.014128  | 63 | 72.495397  |
| 75.4003646 | 72.5403314 | 72.5447403 | 63 | 72.4675677 |
| 75.2575075 | 72.5403314 | 72.5243321 | 63 | 72.4471595 |
| 74.9717932 | 73.5403314 | 72.1978015 | 63 | 72.4248961 |
| 74.4003646 | 74.5403314 | 71.8304545 | 63 | 72.3803692 |
| 73.9717932 | 74.5403314 | 71.6263729 | 63 | 72.3414081 |
| 88.3897351 | 74.5403314 | 73.6860789 | 63 | 72.3123279 |
| 88.3897351 | 74.5403314 | 73.6860789 | 63 | 72.2829827 |
| 88.3897351 | 74.5403314 | 73.5432218 | 63 | 72.2552277 |
| 72.4003646 | 74.5403314 | 70.1161688 | 63 | 72.2285329 |
| 72.6860789 | 74.5403314 | 70.014128  | 63 | 72.2211861 |
| 72.4003646 | 74.5403314 | 69.5447403 | 63 | 72.2217905 |
| 72.2575075 | 74.5403314 | 69.3814749 | 63 | 72.2117933 |
| 71.828936  | 74.5403314 | 69.4631076 | 63 | 72.2266158 |
| 86.3897351 | 74.5403314 | 71.828936  | 63 | 72.2419685 |
| 83.3897351 | 74.5403314 | 71.5432218 | 63 | 72.256526  |
| 83.3897351 | 74.5403314 | 71.1146503 | 63 | 72.260747  |
| 82.3897351 | 74.5403314 | 71.1146503 | 63 | 72.2729191 |
| 82.3897351 | 75.5403314 | 71.2575075 | 63 | 72.2820967 |
| 82.3897351 | 75.5403314 | 71.4003646 | 63 | 72.3011621 |
| 81.3897351 | 76.5403314 | 71.4003646 | 63 | 72.3207554 |
| 81.3897351 | 76.5403314 | 72.1146503 | 63 | 72.342204  |
| 78.3897351 | 76.5403314 | 71.6860789 | 63 | 72.3676282 |
| 76.3897351 | 76.5403314 | 71.6860789 | 63 | 72.3930524 |
| 75.3897351 | 76.5403314 | 69.3667901 | 63 | 72.4232474 |
| 74.3897351 | 77.5403314 | 69.6933208 | 63 | 72.3969886 |
| 74.3897351 | 77.5403314 | 69.6933208 | 63 | 72.3826451 |
| 75.3897351 | 78.5403314 | 69.8565861 | 63 | 72.3651211 |
| 75.3897351 | 77.5403314 | 70.0198514 | 63 | 72.3436215 |
| 75.3897351 | 77.5403314 | 71.6860789 | 63 | 72.3136405 |
| 75.3897351 | 77.5403314 | 71.6860789 | 63 | 72.2884303 |
| 76.3897351 | 76.5403314 | 71.5432218 | 63 | 72.2452089 |
| 78.3897351 | 76.5403314 | 69.9717932 | 63 | 72.2064932 |
| 78.3897351 | 76.5403314 | 69.9717932 | 63 | 72.1751986 |
| 78.3897351 | 76.5403314 | 69.6860789 | 63 | 72.1380731 |
| 79.3897351 | 76.5403314 | 68.828936  | 63 | 72.096707  |
| 78.3897351 | 76.5403314 | 68.4003646 | 63 | 72.0476547 |
| 78.3897351 | 77.5403314 | 68.5432218 | 63 | 72.0039032 |
| 78.3897351 | 77.5403314 | 68.2575075 | 63 | 71.9670428 |
| 78.3897351 | 77.5403314 | 69.4003646 | 63 | 71.9349531 |
| 78.3897351 | 78.5403314 | 70.1146503 | 63 | 71.9219463 |
| 78.3897351 | 78.5403314 | 70.6860789 | 63 | 71.9129152 |
| 78.3897351 | 79.5403314 | 71.1146503 | 63 | 71.8932825 |
| 78.3897351 | 79.5403314 | 71.9717932 | 63 | 71.8654334 |
| 75.3897351 | 79.5403314 | 70.0402595 | 63 | 71.8272478 |

|            |            |            |    |            |
|------------|------------|------------|----|------------|
| 74.3897351 | 79.5403314 | 70.0402595 | 63 | 71.7660233 |
| 75.3897351 | 78.5403314 | 70.3667901 | 63 | 71.7066541 |
| 75.3897351 | 78.5403314 | 70.7137289 | 63 | 71.6565613 |
| 75.3897351 | 78.5403314 | 72.3667901 | 63 | 71.6583969 |
| 76.3897351 | 78.5403314 | 73.1831167 | 63 | 71.6615577 |
| 76.3897351 | 78.5403314 | 72.5300554 | 63 | 71.6633932 |
| 77.3897351 | 77.5403314 | 74.2575075 | 63 | 71.6673491 |
| 77.3897351 | 77.5403314 | 73.9717932 | 63 | 71.6758107 |
| 76.3897351 | 75.5403314 | 74.4003646 | 63 | 71.651692  |
| 76.3897351 | 75.5403314 | 74.2575075 | 63 | 71.6349944 |
| 76.3897351 | 75.5403314 | 74.5432218 | 63 | 71.6349944 |
| 76.3897351 | 75.5403314 | 74.6860789 | 63 | 71.6405603 |
| 76.3897351 | 75.5403314 | 74.9717932 | 63 | 71.6442708 |
| 77.3897351 | 75.5403314 | 74.9717932 | 63 | 71.6498367 |
| 77.3897351 | 75.5403314 | 75.1146503 | 63 | 71.6554026 |
| 77.3897351 | 76.5403314 | 75.2575075 | 63 | 71.6535473 |
| 77.3897351 | 76.5403314 | 75.2575075 | 63 | 71.6665343 |
| 77.3897351 | 76.5403314 | 74.9717932 | 63 | 71.6813766 |
| 77.3897351 | 75.5403314 | 74.5432218 | 63 | 71.7244842 |
| 77.3897351 | 74.5403314 | 74.5432218 | 63 | 71.7652065 |
| 78.3897351 | 74.5403314 | 74.6860789 | 63 | 71.8022182 |
| 78.3897351 | 74.5403314 | 74.5432218 | 63 | 71.8371096 |
| 78.3897351 | 74.5403314 | 74.2575075 | 63 | 71.8754465 |
| 77.3897351 | 74.5403314 | 74.1146503 | 63 | 71.8958547 |
| 77.3897351 | 74.5403314 | 73.4003646 | 63 | 71.9218287 |
| 77.3897351 | 74.5403314 | 73.2575075 | 63 | 71.9570792 |
| 77.3897351 | 74.5403314 | 72.6860789 | 63 | 72.0145931 |
| 75.3897351 | 74.5403314 | 72.2575075 | 63 | 72.0758176 |
| 74.3897351 | 74.5403314 | 72.2575075 | 63 | 72.137042  |
| 74.3897351 | 73.5403314 | 71.828936  | 63 | 72.2019771 |
| 74.3897351 | 73.5403314 | 71.6860789 | 63 | 72.2687675 |
| 74.3897351 | 73.5403314 | 71.6860789 | 63 | 72.3281367 |
| 74.3897351 | 72.5403314 | 71.5432218 | 63 | 72.3837953 |
| 74.3897351 | 73.5403314 | 71.5432218 | 63 | 72.420901  |
| 74.3897351 | 73.5403314 | 71.828936  | 63 | 72.4505856 |
| 74.3897351 | 74.5403314 | 70.6860789 | 63 | 72.4728491 |
| 72.3897351 | 74.5403314 | 69.6860789 | 63 | 72.4932573 |
| 64.3897351 | 74.5403314 | 68.6860789 | 63 | 72.4969678 |
| 63.3897351 | 74.5403314 | 68.9717932 | 63 | 72.510921  |
| 63.3897351 | 74.5403314 | 69.1146503 | 63 | 72.5174529 |
| 63.3897351 | 75.5403314 | 69.6860789 | 63 | 72.5011914 |
| 63.3897351 | 75.5403314 | 70.2575075 | 63 | 72.4822794 |
| 63.3897351 | 75.5403314 | 70.2575075 | 63 | 72.4418991 |
| 63.3897351 | 74.5403314 | 69.6860789 | 63 | 72.3890619 |
| 63.3897351 | 74.5403314 | 69.6860789 | 63 | 72.3521271 |

|            |            |            |    |            |
|------------|------------|------------|----|------------|
| 64.3897351 | 74.5403314 | 70.1146503 | 63 | 72.2927579 |
| 65.3897351 | 74.5403314 | 69.9717932 | 63 | 72.2593628 |
| 65.3897351 | 75.5403314 | 70.2575075 | 63 | 72.2241123 |
| 70.3897351 | 74.5403314 | 71.1146503 | 63 | 72.1925724 |
| 72.3897351 | 74.5403314 | 71.5432218 | 63 | 72.1628878 |
| 72.3897351 | 74.5403314 | 71.5432218 | 63 | 72.1350585 |
| 73.3897351 | 74.5403314 | 71.828936  | 63 | 72.1016633 |
| 73.3897351 | 73.5403314 | 71.828936  | 63 | 72.0645576 |
| 73.3897351 | 73.5403314 | 71.9717932 | 63 | 72.0237412 |
| 77.3897351 | 73.5403314 | 72.6860789 | 63 | 71.9829249 |
| 77.3897351 | 73.5403314 | 72.828936  | 63 | 71.938398  |
| 77.3897351 | 73.5403314 | 72.6860789 | 63 | 71.8975817 |
| 78.3897351 | 74.5403314 | 72.828936  | 63 | 71.8623312 |
| 78.3897351 | 74.5403314 | 72.5432218 | 63 | 71.8270808 |
| 79.3897351 | 74.5403314 | 72.5432218 | 63 | 71.8103832 |
| 79.3897351 | 74.5403314 | 72.9717932 | 63 | 71.7992514 |
| 79.3897351 | 74.5403314 | 73.2575075 | 63 | 71.7825539 |
| 79.3897351 | 74.5403314 | 73.6860789 | 63 | 71.764001  |
| 80.3897351 | 74.5403314 | 74.2575075 | 63 | 71.7565798 |
| 80.3897351 | 75.5403314 | 74.4003646 | 63 | 71.7547245 |
| 82.3897351 | 75.5403314 | 74.6860789 | 63 | 71.7547245 |
| 80.3897351 | 75.5403314 | 74.4003646 | 63 | 71.7658563 |
| 80.3897351 | 75.5403314 | 73.828936  | 63 | 71.7732774 |
| 80.3897351 | 75.5403314 | 73.5432218 | 63 | 71.7844091 |
| 79.3897351 | 74.5403314 | 73.1146503 | 63 | 71.8066726 |
| 79.3897351 | 75.5403314 | 72.5432218 | 63 | 71.8270808 |
| 77.3897351 | 76.5403314 | 72.2575075 | 63 | 71.8493442 |
| 77.3897351 | 76.5403314 | 72.4003646 | 63 | 71.8716077 |
| 77.3897351 | 75.5403314 | 72.4003646 | 63 | 71.8883052 |
| 77.3897351 | 75.5403314 | 72.6860789 | 63 | 71.9024465 |
| 77.3897351 | 74.5403314 | 72.2575075 | 63 | 71.9301048 |
| 77.3897351 | 74.5403314 | 71.1146503 | 63 | 71.9707501 |
| 77.3897351 | 74.5403314 | 70.5432218 | 63 | 72.0013239 |
| 77.3897351 | 74.5403314 | 69.1146503 | 63 | 72.0255367 |
| 77.3897351 | 74.5403314 | 69.2575075 | 63 | 72.0378226 |
| 77.3897351 | 74.5403314 | 69.2575075 | 63 | 72.0474582 |
| 77.3897351 | 74.5403314 | 69.1146503 | 63 | 72.0555034 |
| 79.3897351 | 74.5403314 | 69.6860789 | 63 | 72.0926092 |
| 79.3897351 | 74.5403314 | 69.6860789 | 63 | 72.1148726 |
| 80.3897351 | 75.5403314 | 71.4003646 | 63 | 72.1278597 |
| 80.3897351 | 75.5403314 | 71.6860789 | 63 | 72.1352808 |
| 79.3897351 | 75.5403314 | 71.828936  | 63 | 72.1334255 |
| 79.3897351 | 75.5403314 | 72.2575075 | 63 | 72.1074515 |
| 78.3897351 | 75.5403314 | 72.5432218 | 63 | 72.072201  |
| 79.3897351 | 75.5403314 | 72.4003646 | 63 | 72.0313847 |

|            |            |            |    |            |
|------------|------------|------------|----|------------|
| 79.3897351 | 75.5403314 | 72.1146503 | 63 | 71.9887131 |
| 80.3897351 | 75.5403314 | 71.9717932 | 63 | 71.9460415 |
| 81.3897351 | 75.5403314 | 72.1146503 | 63 | 71.9015146 |
| 81.3897351 | 74.5403314 | 71.828936  | 63 | 71.8551324 |
| 82.3897351 | 74.5403314 | 71.828936  | 63 | 71.8068949 |
| 82.3897351 | 74.5403314 | 71.828936  | 63 | 71.762368  |
| 82.3897351 | 74.5403314 | 71.828936  | 63 | 71.723407  |
| 86.3897351 | 74.5403314 | 73.4003646 | 63 | 71.6955777 |
| 86.3897351 | 74.5403314 | 73.6860789 | 63 | 71.6733142 |
| 84.3897351 | 74.5403314 | 72.9717932 | 63 | 71.6491955 |
| 83.3897351 | 74.5403314 | 72.6860789 | 63 | 71.6306426 |
| 83.3897351 | 75.5403314 | 72.828936  | 63 | 71.6120897 |
| 83.3897351 | 76.5403314 | 73.1146503 | 63 | 71.587971  |
| 81.3897351 | 76.5403314 | 72.6860789 | 63 | 71.5675628 |
| 79.3897351 | 77.5403314 | 73.1146503 | 63 | 71.5471546 |
| 79.3897351 | 77.5403314 | 72.828936  | 63 | 71.5527205 |
| 78.3897351 | 77.5403314 | 72.6860789 | 63 | 71.5731287 |
| 78.3897351 | 78.5403314 | 73.4003646 | 63 | 71.600958  |
| 78.3897351 | 78.5403314 | 73.2575075 | 63 | 71.6120897 |
| 78.3897351 | 78.5403314 | 73.2575075 | 63 | 71.6306426 |
| 77.3897351 | 78.5403314 | 73.2575075 | 63 | 71.6362085 |
| 77.3897351 | 78.5403314 | 73.1146503 | 63 | 71.6324979 |
| 77.3897351 | 77.5403314 | 71.7749534 | 63 | 71.6287873 |
| 76.3897351 | 76.5403314 | 71.8157697 | 63 | 71.6083791 |
| 76.3897351 | 76.5403314 | 71.8157697 | 63 | 71.5991027 |
| 75.3897351 | 75.5403314 | 71.3259738 | 63 | 71.6046686 |
| 75.3897351 | 74.5403314 | 70.979035  | 63 | 71.6195109 |
| 75.3897351 | 73.5403314 | 70.6320963 | 63 | 71.652906  |
| 75.3897351 | 73.5403314 | 70.9994432 | 63 | 71.6825906 |
| 75.3897351 | 72.5403314 | 70.8769942 | 63 | 71.7141305 |
| 76.3897351 | 72.5403314 | 72.5432218 | 63 | 71.7456704 |
| 76.3897351 | 72.5403314 | 71.4003646 | 63 | 71.7586574 |
| 76.3897351 | 72.5403314 | 71.1146503 | 63 | 71.7716444 |
| 76.3897351 | 72.5403314 | 70.5432218 | 63 | 71.762368  |
| 76.3897351 | 72.5403314 | 70.1146503 | 63 | 71.7586574 |
| 75.3897351 | 72.5403314 | 69.1146503 | 63 | 71.7530916 |
| 75.3897351 | 72.5403314 | 68.828936  | 63 | 71.736394  |
| 75.3897351 | 72.5403314 | 68.4003646 | 63 | 71.7141305 |
| 75.3897351 | 72.5403314 | 68.5432218 | 63 | 71.6900118 |
| 75.3897351 | 72.5403314 | 68.5432218 | 63 | 71.6733142 |
| 75.3897351 | 72.5403314 | 68.5432218 | 63 | 71.6547613 |
| 76.3897351 | 71.5403314 | 69.1146503 | 63 | 71.639919  |
| 76.3897351 | 71.5403314 | 69.1146503 | 63 | 71.6232214 |
| 76.3897351 | 71.5403314 | 69.2575075 | 63 | 71.6046686 |
| 76.3897351 | 72.5403314 | 69.828936  | 63 | 71.5861157 |

|            |            |            |    |            |
|------------|------------|------------|----|------------|
| 77.3897351 | 73.5403314 | 70.4003646 | 63 | 71.5675628 |
| 78.3897351 | 74.5403314 | 70.828936  | 63 | 71.5248912 |
| 78.3897351 | 76.5403314 | 71.1146503 | 63 | 71.4766537 |
| 78.3897351 | 76.5403314 | 71.828936  | 63 | 71.4302715 |
| 78.3897351 | 78.5403314 | 72.2575075 | 63 | 71.3913105 |
| 78.3897351 | 78.5403314 | 72.4003646 | 63 | 71.3449283 |
| 78.3897351 | 78.5403314 | 72.828936  | 63 | 71.2985461 |
| 78.3897351 | 78.5403314 | 73.1146503 | 63 | 71.2521639 |
| 79.3897351 | 78.5403314 | 74.828936  | 63 | 71.1983606 |
| 79.3897351 | 81.5403314 | 75.4003646 | 63 | 71.1501231 |
| 78.3897351 | 81.5403314 | 75.6860789 | 63 | 71.1055962 |
| 77.3897351 | 83.5403314 | 73.9717932 | 63 | 71.0629246 |
| 77.3897351 | 84.5403314 | 73.9717932 | 63 | 71.0221083 |
| 77.3897351 | 84.5403314 | 72.6860789 | 63 | 70.9850025 |
| 77.3897351 | 84.5403314 | 72.1146503 | 63 | 70.9497521 |
| 77.3897351 | 84.5403314 | 72.1146503 | 63 | 70.9219227 |
| 77.3897351 | 83.5403314 | 71.1146503 | 63 | 70.930045  |
| 81.3897351 | 83.5403314 | 71.5432218 | 63 | 70.9376371 |
| 81.3897351 | 83.5403314 | 71.5432218 | 63 | 70.9507951 |
| 84.3897351 | 82.5403314 | 71.6860789 | 63 | 70.9740247 |
| 84.3897351 | 82.5403314 | 71.6860789 | 63 | 71.0036152 |
| 84.3897351 | 81.5403314 | 71.5432218 | 63 | 71.0488432 |
| 83.3897351 | 81.5403314 | 71.6860789 | 63 | 71.0911557 |
| 83.3897351 | 81.5403314 | 71.5432218 | 63 | 71.1350585 |
| 80.3897351 | 79.5403314 | 70.6860789 | 63 | 71.1554667 |
| 80.3897351 | 79.5403314 | 70.6860789 | 63 | 71.1888618 |
| 79.3897351 | 79.5403314 | 70.6860789 | 63 | 71.2259676 |
| 79.3897351 | 79.5403314 | 71.4003646 | 63 | 71.2649286 |
| 79.3897351 | 79.5403314 | 71.4003646 | 63 | 71.3057449 |
| 78.3897351 | 77.5403314 | 70.9717932 | 63 | 71.357693  |
| 78.3897351 | 77.5403314 | 70.828936  | 63 | 71.4133516 |
| 77.3897351 | 77.5403314 | 70.5432218 | 63 | 71.4745761 |
| 77.3897351 | 77.5403314 | 70.828936  | 63 | 71.5524982 |
| 77.3897351 | 76.5403314 | 70.5432218 | 63 | 71.628565  |
| 77.3897351 | 76.5403314 | 70.9717932 | 63 | 71.6972106 |
| 76.3897351 | 76.5403314 | 70.5432218 | 63 | 71.7417375 |
| 76.3897351 | 75.5403314 | 70.4003646 | 63 | 71.7825539 |
| 77.3897351 | 75.5403314 | 70.4003646 | 63 | 71.8196596 |
| 77.3897351 | 76.5403314 | 70.4003646 | 63 | 71.8474889 |
| 77.3897351 | 76.5403314 | 70.1146503 | 63 | 71.8697524 |
| 77.3897351 | 76.5403314 | 69.9717932 | 63 | 71.8975817 |
| 76.3897351 | 77.5403314 | 69.4003646 | 63 | 71.9217004 |
| 76.3897351 | 79.5403314 | 69.6860789 | 63 | 71.9402533 |
| 76.3897351 | 79.5403314 | 69.2575075 | 63 | 71.964372  |
| 76.3897351 | 79.5403314 | 69.5432218 | 63 | 71.9903461 |

|            |            |            |    |            |
|------------|------------|------------|----|------------|
| 74.3897351 | 79.5403314 | 69.1146503 | 63 | 72.0033331 |
| 74.3897351 | 76.5403314 | 68.9717932 | 63 | 71.9884908 |
| 74.3897351 | 75.5403314 | 69.1146503 | 63 | 71.9402533 |
| 74.3897351 | 73.5403314 | 69.2575075 | 63 | 71.8845947 |
| 73.3897351 | 73.5403314 | 70.1146503 | 63 | 71.7968714 |
| 72.3897351 | 73.5403314 | 70.1146503 | 63 | 71.7359173 |
| 71.3897351 | 73.5403314 | 70.4003646 | 63 | 71.695101  |
| 71.3897351 | 73.5403314 | 70.5432218 | 63 | 71.6654164 |
| 72.3897351 | 73.5403314 | 70.9717932 | 63 | 71.6450083 |
| 72.3897351 | 73.5403314 | 72.4003646 | 63 | 71.630166  |
| 71.3897351 | 73.5403314 | 72.4003646 | 63 | 71.6283107 |
| 71.3897351 | 72.5403314 | 72.828936  | 63 | 71.6171789 |
| 71.3897351 | 72.5403314 | 73.1146503 | 63 | 71.6023366 |
| 70.3897351 | 73.5403314 | 73.2575075 | 63 | 71.5856391 |
| 70.3897351 | 73.5403314 | 74.1146503 | 63 | 71.572652  |
| 70.3897351 | 73.5403314 | 74.2575075 | 63 | 71.5615203 |
| 69.3897351 | 74.5403314 | 74.2575075 | 63 | 71.5429674 |
| 69.3897351 | 74.5403314 | 74.1146503 | 63 | 71.5262699 |
| 69.3897351 | 73.5403314 | 73.9717932 | 63 | 71.5188487 |
| 69.3897351 | 73.5403314 | 73.9717932 | 63 | 71.507717  |
| 69.3897351 | 73.5403314 | 73.5432218 | 63 | 71.4928747 |
| 69.3897351 | 72.5403314 | 73.2575075 | 63 | 71.4687559 |
| 70.3897351 | 72.5403314 | 73.1146503 | 63 | 71.4483478 |
| 70.3897351 | 73.5403314 | 73.1146503 | 63 | 71.4335055 |
| 70.3897351 | 73.5403314 | 73.1146503 | 63 | 71.4205185 |
| 77.3897351 | 76.5403314 | 74.5432218 | 63 | 71.4093867 |
| 77.3897351 | 76.5403314 | 74.4003646 | 63 | 71.3963997 |
| 75.3897351 | 76.5403314 | 73.828936  | 63 | 71.4019656 |
| 73.3897351 | 76.5403314 | 72.5432218 | 63 | 71.411242  |
| 71.3897351 | 76.5403314 | 72.2575075 | 63 | 71.4205185 |
| 71.3897351 | 76.5403314 | 72.1146503 | 63 | 71.4390713 |
| 71.3897351 | 78.5403314 | 71.9717932 | 63 | 71.4631901 |
| 71.3897351 | 78.5403314 | 72.1146503 | 63 | 71.4910194 |
| 73.3897351 | 80.5403314 | 72.9717932 | 63 | 71.5374016 |
| 72.3897351 | 81.5403314 | 72.9717932 | 63 | 71.5912049 |
| 72.3897351 | 81.5403314 | 73.2575075 | 63 | 71.6598506 |
| 71.3897351 | 85.5403314 | 74.1146503 | 63 | 71.7173645 |
| 70.3897351 | 85.5403314 | 74.4003646 | 63 | 71.7767337 |
| 72.3897351 | 85.5403314 | 73.828936  | 63 | 71.8286817 |
| 71.3897351 | 85.5403314 | 71.9717932 | 63 | 71.8824851 |
| 71.3897351 | 85.5403314 | 71.1146503 | 63 | 71.9381437 |
| 71.3897351 | 85.5403314 | 71.1146503 | 63 | 71.9956576 |
| 72.3897351 | 71.2575075 | 68.9313898 | 63 | 72.0531715 |
| 73.3897351 | 71.6860789 | 69.2783285 | 63 | 72.1069749 |
| 73.3897351 | 82.5403314 | 70.828936  | 63 | 72.1626335 |

|            |            |            |    |            |
|------------|------------|------------|----|------------|
| 73.3897351 | 79.5403314 | 70.4003646 | 63 | 72.2257133 |
| 74.3897351 | 77.5403314 | 70.5432218 | 63 | 72.2702402 |
| 76.3897351 | 76.5403314 | 70.9717932 | 63 | 72.3017801 |
| 76.3897351 | 76.5403314 | 70.9717932 | 63 | 72.3203329 |
| 76.3897351 | 76.5403314 | 70.6860789 | 63 | 72.3386405 |
| 77.3897351 | 74.5403314 | 70.4003646 | 63 | 72.3513822 |
| 77.3897351 | 74.5403314 | 70.4003646 | 63 | 72.3540523 |
| 78.3897351 | 75.5403314 | 70.6860789 | 63 | 72.3506265 |
| 78.3897351 | 75.5403314 | 70.6860789 | 63 | 72.3318283 |
| 78.3897351 | 75.5403314 | 70.2575075 | 63 | 72.316986  |
| 78.3897351 | 75.5403314 | 70.2575075 | 63 | 72.2835908 |
| 77.3897351 | 75.5403314 | 70.1146503 | 63 | 72.2446298 |
| 78.3897351 | 75.5403314 | 69.828936  | 63 | 72.2093793 |
| 78.3897351 | 75.5403314 | 69.5432218 | 63 | 72.1741289 |
| 78.3897351 | 75.5403314 | 69.5432218 | 63 | 72.1314572 |
| 78.3897351 | 75.5403314 | 69.828936  | 63 | 72.0906409 |
| 78.3897351 | 75.5403314 | 69.828936  | 63 | 72.0479693 |
| 77.3897351 | 74.5403314 | 69.828936  | 63 | 72.0015871 |
| 75.3897351 | 74.5403314 | 69.6860789 | 63 | 71.9496391 |
| 75.3897351 | 74.5403314 | 69.828936  | 63 | 71.8698617 |
| 75.3897351 | 74.5403314 | 70.9717932 | 63 | 71.7900843 |
| 75.3897351 | 74.5403314 | 71.6860789 | 63 | 71.7195834 |
| 75.3897351 | 74.5403314 | 71.2575075 | 63 | 71.6620695 |
| 75.3897351 | 74.5403314 | 71.828936  | 63 | 71.6045556 |
| 75.3897351 | 74.5403314 | 72.2575075 | 63 | 71.5470417 |
| 74.3897351 | 74.5403314 | 72.5432218 | 63 | 71.4839619 |
| 74.3897351 | 74.5403314 | 73.6860789 | 63 | 71.4190268 |
| 75.3897351 | 74.5403314 | 74.1146503 | 63 | 71.3522365 |
| 75.3897351 | 76.5403314 | 74.6860789 | 63 | 71.2873014 |
| 75.3897351 | 76.5403314 | 74.1146503 | 63 | 71.2168005 |
| 75.3897351 | 77.5403314 | 73.828936  | 63 | 71.1370231 |
| 75.3897351 | 76.5403314 | 73.5432218 | 63 | 71.0572457 |
| 75.3897351 | 76.5403314 | 73.2575075 | 63 | 70.9886001 |
| 75.3897351 | 76.5403314 | 73.2575075 | 63 | 70.9496391 |
| 78.3897351 | 77.5403314 | 73.5432218 | 63 | 70.9329415 |
| 78.3897351 | 77.5403314 | 73.6860789 | 63 | 70.923665  |
| 78.3897351 | 77.5403314 | 74.2575075 | 63 | 70.9390321 |
| 78.3897351 | 77.5403314 | 74.4003646 | 63 | 70.9554592 |
| 79.3897351 | 76.5403314 | 75.2575075 | 63 | 70.9498934 |
| 79.3897351 | 76.5403314 | 73.9717932 | 63 | 70.9517487 |
| 79.3897351 | 77.5403314 | 73.4003646 | 63 | 70.9517487 |
| 80.3897351 | 78.5403314 | 73.828936  | 63 | 70.9480381 |
| 77.2575075 | 78.5403314 | 73.8100464 | 63 | 70.9443275 |
| 77.2575075 | 78.5403314 | 73.8100464 | 63 | 70.9480381 |
| 76.828936  | 78.5403314 | 73.3202505 | 63 | 70.9591698 |

|            |            |            |    |            |
|------------|------------|------------|----|------------|
| 76.5432218 | 78.5403314 | 72.9937198 | 63 | 70.9740121 |
| 76.2575075 | 78.5403314 | 72.6671892 | 63 | 70.9832886 |
| 85.3897351 | 78.5403314 | 73.1146503 | 63 | 70.9981309 |
| 78.3897351 | 79.5403314 | 71.6860789 | 63 | 71.0203943 |
| 74.3897351 | 81.5403314 | 71.1146503 | 63 | 71.0426578 |
| 74.3897351 | 82.5403314 | 71.2575075 | 63 | 71.0723424 |
| 72.3897351 | 82.5403314 | 71.2575075 | 63 | 71.0667765 |
| 70.3897351 | 82.5403314 | 70.2575075 | 63 | 71.0519342 |
| 70.3897351 | 82.5403314 | 70.1146503 | 63 | 71.0333813 |
| 70.3897351 | 81.5403314 | 69.828936  | 63 | 71.0129732 |
| 69.3897351 | 81.5403314 | 69.5432218 | 63 | 70.9907097 |
| 69.3897351 | 80.5403314 | 69.1146503 | 63 | 70.9758674 |
| 69.3897351 | 79.5403314 | 68.4003646 | 63 | 70.9647357 |
| 69.3897351 | 78.5403314 | 68.2575075 | 63 | 70.9554592 |
| 70.3897351 | 78.5403314 | 68.4003646 | 63 | 70.9331958 |
| 70.3897351 | 77.5403314 | 68.1146503 | 63 | 70.9035112 |
| 70.3897351 | 77.5403314 | 67.828936  | 63 | 70.8793924 |
| 70.3897351 | 76.5403314 | 67.6860789 | 63 | 70.8459973 |
| 68.3897351 | 76.5403314 | 67.1146503 | 63 | 70.8126021 |
| 68.3897351 | 76.5403314 | 67.1146503 | 63 | 70.7792069 |
| 68.3897351 | 76.5403314 | 67.828936  | 63 | 70.73468   |
| 69.3897351 | 74.5403314 | 67.9717932 | 63 | 70.6845873 |
| 69.3897351 | 74.5403314 | 67.828936  | 63 | 70.6382051 |
| 69.3897351 | 74.5403314 | 67.9717932 | 63 | 70.6196522 |
| 68.3897351 | 74.5403314 | 68.2575075 | 63 | 70.6010993 |
| 68.3897351 | 75.5403314 | 68.5432218 | 63 | 70.5844017 |
| 71.3897351 | 75.5403314 | 68.9717932 | 63 | 70.5454407 |
| 71.3897351 | 77.5403314 | 69.828936  | 63 | 70.4823609 |
| 71.3897351 | 77.5403314 | 70.4003646 | 63 | 70.41186   |
| 71.3897351 | 76.5403314 | 70.1146503 | 63 | 70.3376485 |
| 71.3897351 | 76.5403314 | 70.5432218 | 63 | 70.263437  |
| 70.3897351 | 77.5403314 | 70.4003646 | 63 | 70.1892255 |
| 70.3897351 | 77.5403314 | 70.5432218 | 63 | 70.1057375 |
| 70.3897351 | 77.5403314 | 70.5432218 | 63 | 70.0333813 |
| 70.3897351 | 77.5403314 | 70.6860789 | 63 | 69.9758674 |
| 70.3897351 | 77.5403314 | 70.6860789 | 63 | 69.9053665 |
| 70.3897351 | 77.5403314 | 70.9717932 | 63 | 69.8314003 |
| 69.3897351 | 77.5403314 | 71.2575075 | 63 | 69.7555788 |
| 68.3897351 | 78.5403314 | 71.5432218 | 63 | 69.6842631 |
| 68.3897351 | 78.5403314 | 71.4003646 | 63 | 69.6153326 |
| 68.3897351 | 80.5403314 | 71.828936  | 63 | 69.5487876 |
| 68.3897351 | 80.5403314 | 71.9717932 | 63 | 69.4764314 |
| 68.3897351 | 80.5403314 | 71.9717932 | 63 | 69.4189175 |
| 67.3897351 | 80.5403314 | 72.4003646 | 63 | 69.3688247 |
| 67.3897351 | 80.5403314 | 69.4003646 | 63 | 69.3224425 |



|            |            |            |    |            |
|------------|------------|------------|----|------------|
| 67.3897351 | 80.5403314 | 68.4003646 | 63 | 69.2760603 |
| 68.3897351 | 79.5403314 | 68.1146503 | 63 | 69.2445205 |
| 68.3897351 | 79.5403314 | 68.2575075 | 63 | 69.2204017 |
| 68.3897351 | 79.5403314 | 68.1146503 | 63 | 69.2037041 |
| 68.3897351 | 80.5403314 | 68.6860789 | 63 | 69.1907171 |
| 68.3897351 | 80.5403314 | 68.828936  | 63 | 69.1777301 |
| 68.3897351 | 80.5403314 | 69.1146503 | 63 | 69.1721642 |
| 69.3897351 | 80.5403314 | 69.2575075 | 63 | 69.1684537 |
| 69.3897351 | 80.5403314 | 69.4003646 | 63 | 69.1591772 |
| 70.3897351 | 79.5403314 | 69.4003646 | 63 | 69.1573219 |
| 70.3897351 | 78.5403314 | 69.2575075 | 63 | 69.1647431 |
| 70.3897351 | 78.5403314 | 69.6860789 | 63 | 69.170309  |
| 70.3897351 | 78.5403314 | 69.9717932 | 63 | 69.1888618 |
| 70.3897351 | 78.5403314 | 70.2575075 | 63 | 69.2074147 |
| 69.3897351 | 79.5403314 | 70.2575075 | 63 | 69.222257  |
| 69.3897351 | 83.5403314 | 71.1146503 | 63 | 69.2333887 |
| 69.3897351 | 82.5403314 | 72.6860789 | 63 | 69.2426652 |
| 69.3897351 | 81.5403314 | 72.4003646 | 63 | 69.2463757 |
| 68.3897351 | 80.5403314 | 72.2575075 | 63 | 69.2500863 |
| 67.3897351 | 79.5403314 | 70.2575075 | 63 | 69.2500863 |
| 67.3897351 | 78.5403314 | 68.4003646 | 63 | 69.2463757 |
| 67.3897351 | 77.5403314 | 68.1146503 | 63 | 69.2315334 |
| 67.3897351 | 77.5403314 | 67.9717932 | 63 | 69.2037041 |
| 69.3897351 | 76.5403314 | 68.5432218 | 63 | 69.1814407 |
| 71.3897351 | 74.5403314 | 68.6860789 | 63 | 69.1573219 |
| 71.3897351 | 74.5403314 | 68.828936  | 63 | 69.1369138 |
| 70.3897351 | 74.5403314 | 68.4003646 | 63 | 69.1090845 |
| 71.3897351 | 74.5403314 | 68.9717932 | 63 | 69.0831104 |
| 71.3897351 | 72.5403314 | 68.4003646 | 63 | 69.0552811 |
| 71.3897351 | 72.5403314 | 68.1146503 | 63 | 69.0293071 |
| 71.3897351 | 72.5403314 | 67.9717932 | 63 | 69.0051884 |
| 71.3897351 | 73.5403314 | 67.828936  | 63 | 68.9847802 |
| 72.3897351 | 73.5403314 | 67.6860789 | 63 | 68.9662273 |
| 71.3897351 | 73.5403314 | 67.5432218 | 63 | 68.951385  |
| 71.3897351 | 73.5403314 | 67.5432218 | 63 | 68.9328321 |
| 70.3897351 | 73.5403314 | 67.2575075 | 63 | 68.9179898 |
| 70.3897351 | 73.5403314 | 67.2575075 | 63 | 68.9105687 |
| 70.3897351 | 73.5403314 | 67.6860789 | 63 | 68.9012923 |
| 70.3897351 | 73.5403314 | 67.6860789 | 63 | 68.938398  |
| 70.3897351 | 73.5403314 | 67.828936  | 63 | 68.9680826 |
| 70.3897351 | 74.5403314 | 68.2575075 | 63 | 68.9959119 |
| 70.3897351 | 74.5403314 | 68.5432218 | 63 | 69.0218859 |
| 71.3897351 | 74.5403314 | 68.5432218 | 63 | 69.0460047 |
| 71.3897351 | 73.5403314 | 68.1146503 | 63 | 69.060847  |
| 71.3897351 | 73.5403314 | 67.9717932 | 63 | 69.073834  |

|            |            |            |    |            |
|------------|------------|------------|----|------------|
| 73.3897351 | 73.5403314 | 67.9717932 | 63 | 69.0831104 |
| 73.3897351 | 73.5403314 | 67.6860789 | 63 | 69.0905316 |
| 71.3897351 | 75.5403314 | 67.9717932 | 63 | 69.0923869 |
| 73.3897351 | 77.5403314 | 68.4003646 | 63 | 69.0942422 |
| 73.3897351 | 78.5403314 | 68.1146503 | 63 | 69.1072292 |
| 75.3897351 | 79.5403314 | 68.5432218 | 63 | 69.1109398 |
| 75.3897351 | 79.5403314 | 68.5432218 | 63 | 69.1053739 |
| 76.3897351 | 79.5403314 | 68.9717932 | 63 | 69.0942422 |
| 76.3897351 | 79.5403314 | 68.828936  | 63 | 69.0812552 |
| 75.3897351 | 79.5403314 | 68.5432218 | 63 | 69.0534258 |
| 74.3897351 | 79.5403314 | 68.2575075 | 63 | 69.0144648 |
| 73.3897351 | 79.5403314 | 68.5432218 | 63 | 68.977359  |
| 69.3897351 | 79.5403314 | 68.5432218 | 63 | 68.9458192 |
| 69.3897351 | 79.5403314 | 68.6860789 | 63 | 68.938398  |
| 69.3897351 | 80.5403314 | 68.6860789 | 63 | 68.9699379 |
| 69.3897351 | 80.5403314 | 68.2575075 | 63 | 69.0014778 |
| 69.3897351 | 81.5403314 | 68.4003646 | 63 | 69.034873  |
| 69.3897351 | 81.5403314 | 68.6860789 | 63 | 69.0571364 |
| 69.3897351 | 81.5403314 | 68.828936  | 63 | 69.0719787 |
| 69.3897351 | 80.5403314 | 68.4003646 | 63 | 69.0886763 |
| 69.3897351 | 79.5403314 | 68.5432218 | 63 | 69.112795  |
| 69.3897351 | 79.5403314 | 68.5432218 | 63 | 69.1350585 |
| 68.3897351 | 77.5403314 | 68.6860789 | 63 | 69.1647431 |
| 69.3897351 | 77.5403314 | 69.1146503 | 63 | 69.1999936 |
| 68.3897351 | 77.5403314 | 69.6860789 | 63 | 69.235244  |
| 68.3897351 | 77.5403314 | 70.1146503 | 63 | 69.2816262 |
| 68.3897351 | 77.5403314 | 70.2575075 | 63 | 69.3280084 |
| 68.3897351 | 78.5403314 | 70.4003646 | 63 | 69.3743906 |
| 69.3897351 | 78.5403314 | 70.828936  | 63 | 69.4114963 |
| 69.3897351 | 78.5403314 | 71.4003646 | 63 | 69.4504574 |
| 69.3897351 | 78.5403314 | 71.6860789 | 63 | 69.4857078 |
| 69.3897351 | 79.5403314 | 72.2575075 | 63 | 69.5135372 |
| 69.3897351 | 79.5403314 | 70.6860789 | 63 | 69.5358006 |
| 69.3897351 | 79.5403314 | 70.2575075 | 63 | 69.5562088 |
| 69.3897351 | 79.5403314 | 70.2575075 | 63 | 69.5747616 |
| 69.3897351 | 79.5403314 | 69.9717932 | 63 | 69.5951698 |
| 69.3897351 | 79.5403314 | 69.828936  | 63 | 69.6452626 |
| 69.3897351 | 79.5403314 | 69.828936  | 63 | 69.7064871 |
| 69.3897351 | 79.5403314 | 69.828936  | 63 | 69.7806986 |
| 70.3897351 | 78.5403314 | 69.828936  | 63 | 69.8623312 |
| 71.3897351 | 74.5403314 | 69.5432218 | 63 | 69.9535994 |
| 71.3897351 | 74.5403314 | 69.5432218 | 63 | 70.0340009 |
| 77.3897351 | 74.5403314 | 70.2575075 | 63 | 70.1151975 |
| 79.3897351 | 73.5403314 | 69.9717932 | 63 | 70.208586  |
| 79.3897351 | 73.5403314 | 69.5432218 | 63 | 70.2937583 |

|            |            |            |    |            |
|------------|------------|------------|----|------------|
| 79.3897351 | 72.5403314 | 69.4003646 | 63 | 70.3715094 |
| 80.3897351 | 72.5403314 | 69.2575075 | 63 | 70.44661   |
| 80.3897351 | 72.5403314 | 68.9717932 | 63 | 70.5262164 |
| 82.3897351 | 72.5403314 | 69.6860789 | 63 | 70.6095334 |
| 83.3897351 | 71.5403314 | 69.5432218 | 63 | 70.6936454 |
| 83.3897351 | 71.5403314 | 69.828936  | 63 | 70.7695412 |
| 83.3897351 | 71.5403314 | 69.6860789 | 63 | 70.8369557 |
| 84.3897351 | 72.5403314 | 70.828936  | 63 | 70.8834189 |
| 82.3897351 | 72.5403314 | 70.5432218 | 63 | 70.9571943 |
| 82.3897351 | 72.5403314 | 70.5432218 | 63 | 70.9866949 |
| 79.3897351 | 72.5403314 | 70.2575075 | 63 | 71.0148702 |
| 79.3897351 | 73.5403314 | 69.828936  | 63 | 71.0364195 |
| 79.3897351 | 72.5403314 | 70.1146503 | 63 | 71.0537282 |
| 79.3897351 | 72.5403314 | 70.2575075 | 63 | 71.0682924 |
| 79.3897351 | 72.5403314 | 70.6860789 | 63 | 71.07252   |
| 79.3897351 | 72.5403314 | 70.6860789 | 63 | 71.0703866 |
| 79.3897351 | 72.5403314 | 70.828936  | 63 | 71.0711686 |
| 79.3897351 | 72.5403314 | 70.6860789 | 63 | 71.0663848 |
| 79.3897351 | 72.5403314 | 71.4003646 | 63 | 71.0523246 |
| 79.3897351 | 71.5403314 | 71.2575075 | 63 | 71.0406497 |
| 76.3897351 | 71.5403314 | 71.1146503 | 63 | 71.0249992 |
| 76.3897351 | 71.5403314 | 70.4003646 | 63 | 71.0074934 |
| 75.3897351 | 71.5403314 | 70.2575075 | 63 | 70.9844218 |
| 75.3897351 | 71.5403314 | 69.9717932 | 63 | 70.9557843 |
| 75.3897351 | 71.5403314 | 69.828936  | 63 | 70.9210508 |
| 75.3897351 | 74.5403314 | 69.4003646 | 63 | 70.8767759 |
| 75.3897351 | 74.5403314 | 69.4003646 | 63 | 70.852379  |
| 76.3897351 | 74.5403314 | 69.6860789 | 63 | 70.839909  |
| 77.3897351 | 75.5403314 | 70.1146503 | 63 | 70.8253187 |
| 78.3897351 | 81.5403314 | 72.4003646 | 63 | 70.8123186 |
| 78.3897351 | 82.5403314 | 72.828936  | 63 | 70.8030291 |
| 78.3897351 | 82.5403314 | 73.6860789 | 63 | 70.7924177 |
| 77.3897351 | 81.5403314 | 74.2575075 | 63 | 70.7811005 |
| 77.3897351 | 80.5403314 | 74.7137289 | 63 | 70.7858582 |
| 76.3897351 | 79.5403314 | 74.1627085 | 63 | 70.7959166 |
| 76.3897351 | 79.5403314 | 74.6525044 | 63 | 70.836733  |
| 76.3897351 | 78.5403314 | 75.3055656 | 63 | 70.8682729 |
| 74.3897351 | 78.5403314 | 75.101484  | 63 | 70.8905363 |
| 74.3897351 | 76.5403314 | 74.5300554 | 63 | 70.9053786 |
| 73.3897351 | 77.5403314 | 74.7545452 | 63 | 70.8942469 |
| 73.3897351 | 78.5403314 | 74.9586269 | 63 | 70.8794046 |
| 73.3897351 | 78.5403314 | 74.9586269 | 63 | 70.8645623 |
| 73.3897351 | 77.5403314 | 74.7341371 | 63 | 70.8385883 |
| 73.3897351 | 74.5403314 | 74.3871983 | 63 | 70.8181801 |
| 73.3897351 | 71.5403314 | 73.7341371 | 63 | 70.7959166 |

|            |            |            |    |            |
|------------|------------|------------|----|------------|
| 73.3897351 | 71.5403314 | 72.263743  | 63 | 70.7940614 |
| 73.3897351 | 70.5403314 | 74.3667901 | 63 | 70.8014825 |
| 72.3897351 | 69.5403314 | 70.5290491 | 63 | 70.8181801 |
| 72.3897351 | 69.5403314 | 70.5698654 | 63 | 70.836733  |
| 72.3897351 | 70.5403314 | 70.3453756 | 63 | 70.8608517 |
| 72.3897351 | 70.5403314 | 70.1617021 | 63 | 70.8831152 |
| 72.3897351 | 70.5403314 | 69.5218072 | 63 | 70.9109445 |
| 72.3897351 | 70.5403314 | 68.868746  | 63 | 70.9350632 |
| 72.3897351 | 70.5403314 | 68.3789501 | 63 | 70.9573267 |
| 73.3897351 | 70.5403314 | 68.746297  | 63 | 70.9777348 |
| 73.3897351 | 71.5403314 | 68.746297  | 63 | 70.9870113 |
| 75.3897351 | 71.5403314 | 68.6034399 | 63 | 70.9999983 |
| 76.3897351 | 71.5403314 | 69.2156848 | 63 | 71.0018536 |
| 76.3897351 | 71.5403314 | 69.0524195 | 63 | 71.0092747 |
| 76.3897351 | 71.5403314 | 69.0524195 | 63 | 71.0204064 |
| 76.3897351 | 71.5403314 | 69.0524195 | 63 | 71.0259723 |
| 76.3897351 | 70.5403314 | 69.1952766 | 63 | 71.0352487 |
| 76.3897351 | 70.5403314 | 69.0116031 | 63 | 71.050091  |
| 76.3897351 | 70.5403314 | 68.8483378 | 63 | 71.0667886 |
| 76.3897351 | 70.5403314 | 68.8075215 | 63 | 71.0871968 |
| 79.3897351 | 70.5403314 | 69.2973174 | 63 | 71.107605  |
| 77.3897351 | 70.5403314 | 69.1340521 | 63 | 71.1298684 |
| 76.3897351 | 70.5403314 | 68.9707868 | 63 | 71.1484213 |
| 76.3897351 | 70.5403314 | 69.113644  | 63 | 71.1354343 |
| 76.3897351 | 70.5403314 | 69.0118562 | 63 | 71.1150261 |
| 76.3897351 | 69.5403314 | 68.9575118 | 63 | 71.0890521 |
| 74.3897351 | 69.5403314 | 70.1952766 | 63 | 71.0612228 |
| 73.3897351 | 69.5403314 | 70.3177256 | 63 | 71.0237579 |
| 73.3897351 | 69.5403314 | 72.6860789 | 63 | 70.9971598 |
| 73.3897351 | 69.5403314 | 72.6860789 | 63 | 70.9734771 |
| 73.3897351 | 70.5403314 | 71.6860789 | 63 | 70.9487342 |
| 74.3897351 | 70.5403314 | 70.6860789 | 63 | 70.928497  |
| 74.3897351 | 70.5403314 | 68.5432218 | 63 | 70.9249574 |
| 74.3897351 | 70.5403314 | 68.1146503 | 63 | 70.922213  |
| 74.3897351 | 70.5403314 | 67.828936  | 63 | 70.9279498 |
| 74.3897351 | 70.5403314 | 67.6860789 | 63 | 70.9411078 |
| 74.3897351 | 70.5403314 | 67.9717932 | 63 | 70.9319893 |
| 74.3897351 | 70.5403314 | 68.1146503 | 63 | 70.9212805 |
| 74.3897351 | 70.5403314 | 69.5432218 | 63 | 70.9211734 |
| 75.3897351 | 71.5403314 | 71.4003646 | 63 | 70.938042  |
| 77.3897351 | 71.5403314 | 71.828936  | 63 | 70.9329555 |
| 78.3897351 | 71.5403314 | 71.9717932 | 63 | 70.9636224 |
| 79.3897351 | 71.5403314 | 72.1146503 | 63 | 71.0215724 |
| 79.3897351 | 71.5403314 | 71.5432218 | 63 | 71.0930394 |
| 79.3897351 | 74.5403314 | 72.2575075 | 63 | 71.1690121 |

|            |            |            |    |            |
|------------|------------|------------|----|------------|
| 80.3897351 | 75.5403314 | 72.1146503 | 63 | 71.2660172 |
| 80.3897351 | 77.5403314 | 72.4003646 | 63 | 71.3736239 |
| 82.3897351 | 77.5403314 | 72.2575075 | 63 | 71.5019168 |
| 82.3897351 | 77.5403314 | 71.5432218 | 63 | 71.5920439 |
| 82.3897351 | 76.5403314 | 71.6860789 | 63 | 71.6691839 |
| 82.3897351 | 75.5403314 | 71.5432218 | 63 | 71.7463239 |
| 83.3897351 | 74.5403314 | 71.828936  | 63 | 71.817368  |
| 81.3897351 | 73.5403314 | 71.9717932 | 63 | 71.8794007 |
| 81.3897351 | 73.5403314 | 70.828936  | 63 | 71.9321569 |
| 81.3897351 | 73.5403314 | 70.9717932 | 63 | 71.9534673 |
| 81.3897351 | 73.5403314 | 71.1146503 | 63 | 71.9876707 |
| 81.3897351 | 73.5403314 | 71.1146503 | 63 | 72.0316806 |
| 81.3897351 | 73.5403314 | 70.9717932 | 63 | 72.0666791 |
| 83.3897351 | 72.5403314 | 70.9717932 | 63 | 72.0836548 |
| 83.3897351 | 72.5403314 | 71.4003646 | 63 | 72.084993  |
| 85.3897351 | 72.5403314 | 71.5432218 | 63 | 72.1032939 |
| 85.3897351 | 71.5403314 | 71.4003646 | 63 | 72.129281  |
| 85.3897351 | 71.5403314 | 71.2575075 | 63 | 72.1497023 |
| 85.3897351 | 71.5403314 | 71.6860789 | 63 | 72.1658796 |
| 85.3897351 | 71.5403314 | 72.1146503 | 63 | 72.1753415 |
| 82.3897351 | 71.5403314 | 71.828936  | 63 | 72.1631626 |
| 82.3897351 | 73.5403314 | 72.1146503 | 63 | 72.1512489 |
| 82.3897351 | 73.5403314 | 72.828936  | 63 | 72.1159984 |
| 82.3897351 | 73.5403314 | 73.4003646 | 63 | 72.0844585 |
| 79.3897351 | 73.5403314 | 73.5432218 | 63 | 72.0640504 |
| 77.3897351 | 73.5403314 | 74.2575075 | 63 | 72.0603398 |
| 77.3897351 | 73.5403314 | 74.5432218 | 63 | 72.0918797 |
| 77.3897351 | 73.5403314 | 75.4003646 | 63 | 72.1364066 |
| 77.3897351 | 73.5403314 | 75.9717932 | 63 | 72.184644  |
| 77.3897351 | 72.5403314 | 74.0320113 | 63 | 72.2458685 |
| 76.3897351 | 72.5403314 | 73.5626236 | 63 | 72.3015272 |
| 76.3897351 | 72.5403314 | 73.7258889 | 63 | 72.3683175 |
| 75.3897351 | 72.5403314 | 73.5626236 | 63 | 72.4202656 |
| 75.3897351 | 72.5403314 | 73.9751293 | 63 | 72.4443843 |
| 74.3897351 | 72.5403314 | 72.8904013 | 63 | 72.4666478 |
| 75.3897351 | 72.5403314 | 75.0320113 | 63 | 72.4870559 |
| 75.3897351 | 73.5403314 | 75.8483378 | 63 | 72.5148852 |
| 75.3897351 | 74.5403314 | 76.0116031 | 63 | 72.5501357 |
| 77.3897351 | 74.5403314 | 76.991195  | 63 | 72.5816756 |
| 77.3897351 | 76.5403314 | 77.1544603 | 63 | 72.6076496 |
| 77.3897351 | 76.5403314 | 78.2575075 | 63 | 72.6336236 |
| 77.3897351 | 76.5403314 | 75.6860789 | 63 | 72.6651635 |
| 75.3897351 | 77.5403314 | 74.6860789 | 63 | 72.6967034 |
| 75.3897351 | 77.5403314 | 74.5432218 | 63 | 72.7189669 |
| 75.3897351 | 77.5403314 | 74.6860789 | 63 | 72.7356645 |

|            |            |            |    |            |
|------------|------------|------------|----|------------|
| 71.3897351 | 75.5403314 | 73.828936  | 63 | 72.7412303 |
| 67.3897351 | 75.5403314 | 73.1146503 | 63 | 72.7412303 |
| 65.3897351 | 75.5403314 | 70.6933208 | 63 | 72.7579279 |
| 65.3897351 | 75.5403314 | 71.828936  | 63 | 72.7709149 |
| 65.3897351 | 75.5403314 | 72.4003646 | 63 | 72.7820466 |
| 64.3897351 | 75.5403314 | 71.5432218 | 63 | 72.7968889 |
| 64.3897351 | 75.5403314 | 70.1146503 | 63 | 72.8191524 |
| 63.3897351 | 75.5403314 | 69.4003646 | 63 | 72.8414158 |
| 63.3897351 | 75.5403314 | 70.5432218 | 63 | 72.8599687 |
| 63.3897351 | 75.5403314 | 70.9717932 | 63 | 72.874811  |
| 61.3897351 | 76.5403314 | 70.6860789 | 63 | 72.887798  |
| 61.3897351 | 74.5403314 | 70.2575075 | 63 | 72.9063509 |
| 61.3897351 | 74.5403314 | 69.6860789 | 63 | 72.8989298 |
| 61.3897351 | 74.5403314 | 69.2575075 | 63 | 72.8729557 |
| 61.3897351 | 75.5403314 | 69.4003646 | 63 | 72.848837  |
| 61.3897351 | 76.5403314 | 69.9717932 | 63 | 72.8191524 |
| 61.3897351 | 79.5403314 | 70.2575075 | 63 | 72.7764808 |
| 61.3897351 | 79.5403314 | 70.1146503 | 63 | 72.726388  |
| 61.3897351 | 80.5403314 | 70.4003646 | 63 | 72.6577424 |
| 61.3897351 | 82.5403314 | 70.9717932 | 63 | 72.5723991 |
| 62.3897351 | 84.5403314 | 71.5432218 | 63 | 72.4814901 |
| 62.3897351 | 84.5403314 | 71.5432218 | 63 | 72.3831598 |
| 63.3897351 | 85.5403314 | 72.4003646 | 63 | 72.2792637 |
| 63.3897351 | 84.5403314 | 72.2575075 | 63 | 72.2005596 |
| 64.3897351 | 84.5403314 | 73.2575075 | 63 | 72.131662  |
| 64.3897351 | 84.5403314 | 73.5432218 | 63 | 72.0717758 |
| 65.3897351 | 83.5403314 | 73.2575075 | 63 | 72.0288522 |
| 67.3897351 | 83.5403314 | 73.5432218 | 63 | 71.9898478 |
| 68.3897351 | 83.5403314 | 73.5432218 | 63 | 71.9649308 |
| 72.3897351 | 83.5403314 | 74.2575075 | 63 | 71.9084901 |
| 72.3897351 | 83.5403314 | 74.2575075 | 63 | 71.8377372 |
| 74.3897351 | 83.5403314 | 74.6860789 | 63 | 71.7630087 |
| 76.3897351 | 79.5403314 | 74.1146503 | 63 | 71.6811241 |
| 77.3897351 | 79.5403314 | 74.4003646 | 63 | 71.6063956 |
| 77.3897351 | 78.5403314 | 74.6860789 | 63 | 71.5191971 |
| 77.3897351 | 78.5403314 | 73.9717932 | 63 | 71.4616832 |
| 77.3897351 | 78.5403314 | 73.4003646 | 63 | 71.4190115 |
| 77.3897351 | 78.5403314 | 72.828936  | 63 | 71.3670635 |
| 77.3897351 | 78.5403314 | 72.2575075 | 63 | 71.3039837 |
| 77.3897351 | 78.5403314 | 71.9717932 | 63 | 71.2501804 |
| 77.3897351 | 79.5403314 | 72.1146503 | 63 | 71.2056535 |
| 77.3897351 | 78.5403314 | 71.9717932 | 63 | 71.1981383 |
| 77.3897351 | 78.5403314 | 71.9717932 | 63 | 71.1795854 |
| 75.3897351 | 77.5403314 | 72.2575075 | 63 | 71.1573219 |
| 75.3897351 | 77.5403314 | 72.6860789 | 63 | 71.1536114 |

|            |            |            |    |            |
|------------|------------|------------|----|------------|
| 75.3897351 | 76.5403314 | 72.6860789 | 63 | 71.1758748 |
| 75.3897351 | 75.5403314 | 72.828936  | 63 | 71.2129806 |
| 74.3897351 | 74.5403314 | 72.6860789 | 63 | 71.2426652 |
| 73.3897351 | 73.5403314 | 72.4003646 | 63 | 71.2723498 |
| 72.3897351 | 73.5403314 | 72.6860789 | 63 | 71.3057449 |
| 72.3897351 | 73.5403314 | 71.1146503 | 63 | 71.3539824 |
| 71.3897351 | 73.5403314 | 70.1146503 | 63 | 71.4170622 |
| 70.3897351 | 73.5403314 | 69.9717932 | 63 | 71.4838526 |
| 70.3897351 | 73.5403314 | 69.828936  | 63 | 71.545077  |
| 69.3897351 | 73.5403314 | 69.5432218 | 63 | 71.5970251 |
| 69.3897351 | 73.5403314 | 69.5432218 | 63 | 71.6396967 |
| 69.3897351 | 72.5403314 | 68.2575075 | 63 | 71.6879342 |
| 68.3897351 | 71.5403314 | 67.6860789 | 63 | 71.7324611 |
| 68.3897351 | 71.5403314 | 67.5432218 | 63 | 71.7695668 |
| 69.3897351 | 71.5403314 | 67.828936  | 63 | 71.7936856 |
| 69.3897351 | 72.5403314 | 67.9717932 | 63 | 71.815949  |
| 69.3897351 | 72.5403314 | 67.9717932 | 63 | 71.8233702 |
| 69.3897351 | 72.5403314 | 68.2575075 | 63 | 71.8307913 |
| 70.3897351 | 72.5403314 | 69.1146503 | 63 | 71.8326466 |
| 73.3897351 | 72.5403314 | 70.2575075 | 63 | 71.8326466 |
| 73.3897351 | 74.5403314 | 70.9717932 | 63 | 71.8474889 |
| 74.3897351 | 74.5403314 | 70.9717932 | 63 | 71.8567654 |
| 74.3897351 | 73.5403314 | 70.6860789 | 63 | 71.8660418 |
| 74.3897351 | 73.5403314 | 70.4003646 | 63 | 71.8623312 |
| 74.3897351 | 73.5403314 | 70.2575075 | 63 | 71.8586206 |
| 74.3897351 | 73.5403314 | 70.6860789 | 63 | 71.8437783 |
| 75.3897351 | 72.5403314 | 71.4003646 | 63 | 71.8252255 |
| 75.3897351 | 72.5403314 | 71.5432218 | 63 | 71.7992514 |
| 75.3897351 | 72.5403314 | 71.2575075 | 63 | 71.776988  |
| 75.3897351 | 73.5403314 | 71.4003646 | 63 | 71.7602904 |
| 75.3897351 | 73.5403314 | 70.5432218 | 63 | 71.7491587 |
| 75.3897351 | 73.5403314 | 69.828936  | 63 | 71.7473034 |
| 74.3897351 | 73.5403314 | 69.6860789 | 63 | 71.7361717 |
| 74.3897351 | 73.5403314 | 69.6860789 | 63 | 71.7268952 |
| 74.3897351 | 73.5403314 | 70.1146503 | 63 | 71.7139082 |
| 73.3897351 | 73.5403314 | 70.4003646 | 63 | 71.7009212 |
| 73.3897351 | 74.5403314 | 70.6860789 | 63 | 71.6842236 |
| 73.3897351 | 76.5403314 | 71.2575075 | 63 | 71.6601049 |
| 72.3897351 | 77.5403314 | 71.828936  | 63 | 71.6229991 |
| 73.3897351 | 77.5403314 | 72.2575075 | 63 | 71.5766169 |
| 73.3897351 | 77.5403314 | 72.828936  | 63 | 71.5265242 |
| 73.3897351 | 77.5403314 | 73.2575075 | 63 | 71.4949843 |
| 73.3897351 | 77.5403314 | 73.2575075 | 63 | 71.4690103 |
| 73.3897351 | 76.5403314 | 73.9717932 | 63 | 71.4319045 |
| 74.3897351 | 76.5403314 | 74.5432218 | 63 | 71.4170622 |

|            |            |            |    |            |
|------------|------------|------------|----|------------|
| 74.3897351 | 76.5403314 | 74.4003646 | 63 | 71.4170622 |
| 74.3897351 | 76.5403314 | 74.1146503 | 63 | 71.4170622 |
| 74.3897351 | 76.5403314 | 73.9717932 | 63 | 71.4170622 |
| 76.3897351 | 76.5403314 | 73.5432218 | 63 | 71.4207728 |
| 77.3897351 | 76.5403314 | 73.828936  | 63 | 71.4281939 |
| 78.3897351 | 76.5403314 | 73.828936  | 63 | 71.4690103 |
| 78.3897351 | 76.5403314 | 73.828936  | 63 | 71.5302347 |
| 78.3897351 | 76.5403314 | 73.4003646 | 63 | 71.5840381 |
| 79.3897351 | 74.5403314 | 73.2575075 | 63 | 71.641552  |
| 79.3897351 | 74.5403314 | 72.9717932 | 63 | 71.6972106 |
| 79.3897351 | 74.5403314 | 72.828936  | 63 | 71.7547245 |
| 78.3897351 | 75.5403314 | 73.4003646 | 63 | 71.7992514 |
| 75.3897351 | 75.5403314 | 73.5432218 | 63 | 71.8382125 |
| 75.3897351 | 75.5403314 | 74.4003646 | 63 | 71.8623312 |
| 75.3897351 | 75.5403314 | 74.2575075 | 63 | 71.8920158 |
| 75.3897351 | 75.5403314 | 74.2575075 | 63 | 71.9105687 |
| 74.3897351 | 75.5403314 | 73.9717932 | 63 | 71.9272663 |
| 74.3897351 | 77.5403314 | 73.9717932 | 63 | 71.9365427 |
| 74.3897351 | 77.5403314 | 73.5432218 | 63 | 71.9550956 |
| 73.3897351 | 72.5403314 | 72.6860789 | 63 | 71.9439639 |
| 73.3897351 | 72.5403314 | 72.4003646 | 63 | 71.9105687 |
| 73.3897351 | 72.5403314 | 72.9717932 | 63 | 71.8697524 |
| 72.3897351 | 71.5403314 | 72.6860789 | 63 | 71.8326466 |
| 72.3897351 | 71.5403314 | 72.5432218 | 63 | 71.789975  |
| 72.3897351 | 71.5403314 | 72.6860789 | 63 | 71.751014  |
| 70.3897351 | 71.5403314 | 71.4003646 | 63 | 71.7139082 |
| 70.3897351 | 71.5403314 | 71.2575075 | 63 | 71.6860789 |
| 70.3897351 | 71.5403314 | 71.1146503 | 63 | 71.654539  |
| 70.3897351 | 71.5403314 | 70.9717932 | 63 | 71.6174333 |
| 70.3897351 | 71.5403314 | 70.6860789 | 63 | 71.5803275 |
| 69.3897351 | 71.5403314 | 70.4003646 | 63 | 71.545077  |
| 69.3897351 | 71.5403314 | 69.828936  | 63 | 71.5005501 |
| 68.3897351 | 71.5403314 | 69.1146503 | 63 | 71.4356151 |
| 68.3897351 | 71.5403314 | 68.9717932 | 63 | 71.3669694 |
| 67.3897351 | 71.5403314 | 70.2575075 | 63 | 71.2983238 |
| 67.3897351 | 72.5403314 | 70.4003646 | 63 | 71.2259676 |
| 67.3897351 | 72.5403314 | 69.828936  | 71 | 71.1554667 |
| 67.3897351 | 71.5403314 | 69.9717932 | 71 | 71.0793999 |
| 67.3897351 | 71.5403314 | 70.1146503 | 71 | 71.0014778 |
| 67.3897351 | 71.5403314 | 69.9717932 | 71 | 70.925411  |
| 67.3897351 | 71.5403314 | 69.828936  | 71 | 70.8474889 |
| 67.3897351 | 70.5403314 | 69.828936  | 71 | 70.7695668 |
| 68.3897351 | 71.5403314 | 70.1146503 | 71 | 70.6953553 |
| 68.3897351 | 71.5403314 | 71.4003646 | 71 | 70.615578  |
| 68.3897351 | 71.5403314 | 72.4003646 | 71 | 70.5395112 |



|            |            |            |    |            |
|------------|------------|------------|----|------------|
| 67.3897351 | 71.5403314 | 71.6860789 | 71 | 70.4652997 |
| 66.3897351 | 71.5403314 | 72.2575075 | 71 | 70.4077858 |
| 66.3897351 | 71.5403314 | 72.2575075 | 71 | 70.3558377 |
| 66.3897351 | 71.5403314 | 72.4003646 | 71 | 70.3131661 |
| 64.3897351 | 70.5403314 | 71.6860789 | 71 | 70.2742051 |
| 69.3897351 | 70.5403314 | 72.1146503 | 71 | 70.2259676 |
| 69.3897351 | 70.5403314 | 72.1146503 | 71 | 70.1814407 |
| 76.3897351 | 71.5403314 | 73.2575075 | 71 | 70.1257821 |
| 78.3897351 | 71.5403314 | 72.4003646 | 71 | 70.0701234 |
| 78.3897351 | 71.5403314 | 71.9717932 | 71 | 70.0255965 |
| 74.3897351 | 71.5403314 | 71.1146503 | 71 | 69.9847802 |
| 73.3897351 | 72.5403314 | 71.6860789 | 71 | 69.9588062 |
| 72.3897351 | 72.5403314 | 69.828936  | 71 | 69.938398  |
| 72.3897351 | 72.5403314 | 68.828936  | 71 | 69.9309769 |
| 71.3897351 | 72.5403314 | 68.4003646 | 63 | 69.9272663 |
| 71.3897351 | 72.5403314 | 68.4003646 | 63 | 69.9105687 |
| 71.3897351 | 72.5403314 | 68.1146503 | 63 | 69.8808841 |
| 70.3897351 | 71.5403314 | 67.5432218 | 63 | 69.8474889 |
| 68.3897351 | 71.5403314 | 66.9717932 | 63 | 69.8122385 |
| 69.3897351 | 71.5403314 | 67.5432218 | 63 | 69.789975  |
| 69.3897351 | 71.5403314 | 67.2575075 | 63 | 69.7677116 |
| 69.3897351 | 69.5403314 | 67.2575075 | 63 | 69.7491587 |
| 69.3897351 | 70.5403314 | 67.5432218 | 63 | 69.7361717 |
| 69.3897351 | 70.5403314 | 67.9717932 | 63 | 69.7231846 |
| 69.3897351 | 70.5403314 | 67.828936  | 63 | 69.7083423 |
| 69.3897351 | 70.5403314 | 66.828936  | 63 | 69.7027765 |
| 69.3897351 | 70.5403314 | 66.9717932 | 63 | 69.7027765 |
| 71.3897351 | 71.5403314 | 67.5432218 | 63 | 69.6990659 |
| 72.3897351 | 73.5403314 | 67.6860789 | 63 | 69.6786577 |
| 72.3897351 | 74.5403314 | 67.828936  | 63 | 69.6489731 |
| 73.3897351 | 74.5403314 | 68.1146503 | 63 | 69.628565  |
| 74.3897351 | 76.5403314 | 68.5432218 | 63 | 69.6063015 |
| 75.3897351 | 77.5403314 | 68.5432218 | 63 | 69.5766169 |
| 75.3897351 | 76.5403314 | 68.1146503 | 63 | 69.5580641 |
| 76.3897351 | 75.5403314 | 67.9717932 | 63 | 69.5413665 |
| 76.3897351 | 76.5403314 | 67.828936  | 63 | 69.5302347 |
| 75.3897351 | 77.5403314 | 67.6860789 | 63 | 69.5153924 |
| 75.3897351 | 78.5403314 | 67.9717932 | 63 | 69.4819973 |
| 75.3897351 | 78.5403314 | 68.1146503 | 63 | 69.4430362 |
| 75.3897351 | 78.5403314 | 68.9717932 | 63 | 69.4170622 |
| 76.3897351 | 78.5403314 | 69.2575075 | 63 | 69.3910882 |
| 76.3897351 | 79.5403314 | 69.6860789 | 63 | 69.3632589 |
| 77.3897351 | 79.5403314 | 69.828936  | 63 | 69.3354295 |
| 77.3897351 | 80.5403314 | 69.6860789 | 63 | 69.3335743 |
| 77.3897351 | 79.5403314 | 70.1146503 | 63 | 69.3372848 |

|            |            |            |    |            |
|------------|------------|------------|----|------------|
| 76.3897351 | 78.5403314 | 70.1146503 | 63 | 69.3409954 |
| 75.3897351 | 77.5403314 | 69.9717932 | 63 | 69.3126476 |
| 74.3897351 | 77.5403314 | 70.828936  | 63 | 69.3078884 |
| 73.3897351 | 77.5403314 | 70.828936  | 63 | 69.3113455 |
| 73.3897351 | 77.5403314 | 71.9717932 | 63 | 69.330175  |
| 73.3897351 | 75.5403314 | 71.9717932 | 63 | 69.3439687 |
| 72.3897351 | 74.5403314 | 72.1146503 | 63 | 69.3718096 |
| 72.3897351 | 73.5403314 | 72.1146503 | 63 | 69.415288  |
| 72.3897351 | 72.5403314 | 71.6860789 | 63 | 69.4688378 |
| 72.3897351 | 72.5403314 | 70.4003646 | 63 | 69.5223877 |
| 72.3897351 | 72.5403314 | 69.9717932 | 63 | 69.5817685 |
| 71.3897351 | 72.5403314 | 69.9717932 | 63 | 69.6530761 |
| 69.3897351 | 72.5403314 | 69.6860789 | 63 | 69.7320699 |
| 69.3897351 | 72.5403314 | 69.5432218 | 63 | 69.8100036 |
| 70.3897351 | 72.5403314 | 69.6860789 | 63 | 69.8916478 |
| 71.3897351 | 72.5403314 | 69.9717932 | 63 | 69.9862675 |
| 71.3897351 | 72.5403314 | 69.6860789 | 63 | 70.0883083 |
| 71.3897351 | 72.5403314 | 69.2575075 | 63 | 70.2014808 |
| 72.3897351 | 73.5403314 | 69.4003646 | 63 | 70.3165087 |
| 72.3897351 | 73.5403314 | 69.1146503 | 63 | 70.4463788 |
| 72.3897351 | 73.5403314 | 68.6860789 | 63 | 70.5688278 |
| 72.3897351 | 73.5403314 | 68.6860789 | 63 | 70.6764345 |
| 68.3897351 | 73.5403314 | 68.1146503 | 63 | 70.7840411 |
| 67.3897351 | 74.5403314 | 68.2575075 | 63 | 70.8953584 |
| 67.3897351 | 74.5403314 | 68.2575075 | 63 | 70.983181  |
| 65.3897351 | 74.5403314 | 67.828936  | 63 | 71.0678232 |
| 65.3897351 | 74.5403314 | 68.5432218 | 63 | 71.150345  |
| 65.3897351 | 74.5403314 | 68.5432218 | 63 | 71.2384327 |
| 66.3897351 | 74.5403314 | 68.9717932 | 63 | 71.32387   |
| 66.3897351 | 74.5403314 | 68.9717932 | 63 | 71.4277661 |
| 66.3897351 | 74.5403314 | 68.828936  | 63 | 71.4964117 |
| 67.3897351 | 74.5403314 | 69.4003646 | 63 | 71.5260963 |
| 67.3897351 | 75.5403314 | 69.6860789 | 63 | 71.5446492 |
| 67.3897351 | 75.5403314 | 70.2575075 | 63 | 71.5520704 |
| 67.3897351 | 74.5403314 | 70.1146503 | 63 | 71.5520704 |
| 67.3897351 | 74.5403314 | 70.2575075 | 63 | 71.5427939 |
| 67.3897351 | 74.5403314 | 71.5432218 | 63 | 71.5335175 |
| 68.3897351 | 74.5403314 | 72.4003646 | 63 | 71.5316622 |
| 68.3897351 | 74.5403314 | 72.4003646 | 63 | 71.5260963 |
| 70.3897351 | 74.5403314 | 71.0747254 | 63 | 71.5260963 |
| 71.3897351 | 74.5403314 | 72.0339091 | 63 | 71.5279516 |
| 71.3897351 | 74.5403314 | 72.2379907 | 63 | 71.5168199 |
| 71.3897351 | 73.5403314 | 72.5645213 | 63 | 71.5019776 |
| 72.3897351 | 72.5403314 | 72.7481948 | 63 | 71.4704377 |
| 69.3897351 | 70.5403314 | 71.9726846 | 63 | 71.433332  |

|            |            |            |    |            |
|------------|------------|------------|----|------------|
| 69.3897351 | 70.5403314 | 72.1767662 | 63 | 71.4073579 |
| 69.3897351 | 70.5403314 | 72.523705  | 63 | 71.388805  |
| 69.3897351 | 70.5403314 | 72.523705  | 63 | 71.3795286 |
| 69.3897351 | 70.5403314 | 72.6869703 | 63 | 71.3925156 |
| 68.3897351 | 70.5403314 | 73.0339091 | 63 | 71.4184896 |
| 68.3897351 | 70.5403314 | 73.0543173 | 63 | 71.4555954 |
| 68.3897351 | 71.5403314 | 73.5441132 | 63 | 71.498267  |
| 68.3897351 | 71.5403314 | 73.5441132 | 63 | 71.5539256 |
| 68.3897351 | 71.5403314 | 74.5432218 | 63 | 71.5984525 |
| 69.3897351 | 71.5403314 | 75.4003646 | 63 | 71.6392689 |
| 71.3897351 | 72.5403314 | 76.6860789 | 63 | 71.6875063 |
| 71.3897351 | 72.5403314 | 76.6860789 | 63 | 71.7394544 |
| 71.3897351 | 74.5403314 | 76.828936  | 63 | 71.7969683 |
| 69.3897351 | 74.5403314 | 76.4003646 | 63 | 71.8619034 |
| 69.3897351 | 73.5403314 | 75.828936  | 63 | 71.9249832 |
| 69.3897351 | 73.5403314 | 75.9717932 | 63 | 71.9899182 |
| 69.3897351 | 74.5403314 | 76.4003646 | 63 | 72.0604191 |
| 69.3897351 | 75.5403314 | 74.8769942 | 63 | 72.1197884 |
| 69.3897351 | 75.5403314 | 75.0606677 | 63 | 72.1773023 |
| 69.3897351 | 75.5403314 | 74.8974024 | 63 | 72.2422373 |
| 70.3897351 | 74.5403314 | 74.8974024 | 63 | 72.297896  |
| 70.3897351 | 74.5403314 | 74.5504636 | 63 | 72.3609757 |
| 70.3897351 | 74.5403314 | 75.828936  | 63 | 72.4184896 |
| 69.3897351 | 74.5403314 | 72.9717932 | 63 | 72.4834247 |
| 69.3897351 | 74.5403314 | 70.2575075 | 63 | 72.5502151 |
| 70.3897351 | 74.5403314 | 69.5432218 | 63 | 72.5984525 |
| 69.3897351 | 74.5403314 | 69.5432218 | 63 | 72.6299924 |
| 69.3897351 | 74.5403314 | 69.2575075 | 63 | 72.6522559 |
| 68.3897351 | 76.5403314 | 68.9717932 | 63 | 72.672664  |
| 69.3897351 | 76.5403314 | 69.1146503 | 63 | 72.6967828 |
| 69.3897351 | 76.5403314 | 69.5432218 | 63 | 72.7097698 |
| 70.3897351 | 76.5403314 | 69.6860789 | 63 | 72.7134804 |
| 70.3897351 | 78.5403314 | 70.1146503 | 63 | 72.7116251 |
| 70.3897351 | 78.5403314 | 70.1146503 | 63 | 72.7269859 |
| 70.3897351 | 78.5403314 | 69.9717932 | 63 | 72.7317451 |
| 70.3897351 | 77.5403314 | 69.6860789 | 63 | 72.7338538 |
| 70.3897351 | 77.5403314 | 69.5432218 | 63 | 72.7335772 |
| 70.3897351 | 76.5403314 | 69.1146503 | 63 | 72.7197835 |
| 70.3897351 | 76.5403314 | 70.1146503 | 63 | 72.7216272 |
| 71.3897351 | 76.5403314 | 70.6860789 | 63 | 72.7245311 |
| 72.3897351 | 76.5403314 | 70.9717932 | 63 | 72.7303504 |
| 73.3897351 | 76.5403314 | 71.4003646 | 63 | 72.7120626 |
| 73.3897351 | 76.5403314 | 71.9717932 | 63 | 72.6919194 |
| 73.3897351 | 77.5403314 | 72.828936  | 63 | 72.6762704 |
| 75.3897351 | 77.5403314 | 72.9717932 | 63 | 72.6566458 |

|            |            |            |    |            |
|------------|------------|------------|----|------------|
| 77.3897351 | 77.5403314 | 73.828936  | 63 | 72.6213838 |
| 77.3897351 | 77.5403314 | 73.1146503 | 63 | 72.5861217 |
| 78.3897351 | 78.5403314 | 73.1146503 | 63 | 72.5415948 |
| 80.3897351 | 78.5403314 | 73.4003646 | 63 | 72.4840809 |
| 81.3897351 | 80.5403314 | 73.2575075 | 63 | 72.4098694 |
| 81.3897351 | 80.5403314 | 73.828936  | 63 | 72.3226709 |
| 80.3897351 | 80.5403314 | 74.1146503 | 63 | 72.2336171 |
| 78.3897351 | 80.5403314 | 73.5432218 | 63 | 72.1482739 |
| 78.3897351 | 80.5403314 | 73.6860789 | 63 | 72.0759177 |
| 78.3897351 | 80.5403314 | 73.5432218 | 63 | 72.0054167 |
| 73.3897351 | 80.5403314 | 72.828936  | 63 | 71.9330605 |
| 73.3897351 | 80.5403314 | 72.6860789 | 63 | 71.8990412 |
| 73.3897351 | 81.5403314 | 72.828936  | 63 | 71.8700577 |
| 74.3897351 | 82.5403314 | 72.828936  | 63 | 71.8543262 |
| 74.3897351 | 82.5403314 | 73.4003646 | 63 | 71.8330289 |
| 74.3897351 | 85.5403314 | 73.4003646 | 63 | 71.8106714 |
| 76.3897351 | 88.5403314 | 73.9717932 | 63 | 71.7754209 |
| 76.3897351 | 88.5403314 | 73.9717932 | 63 | 71.7717103 |
| 78.3897351 | 82.5403314 | 73.1146503 | 63 | 71.8013949 |
| 78.3897351 | 78.5403314 | 72.1146503 | 63 | 71.8310795 |
| 79.3897351 | 75.5403314 | 71.9717932 | 63 | 71.8626194 |
| 79.3897351 | 73.5403314 | 71.6860789 | 63 | 71.9034357 |
| 79.3897351 | 73.5403314 | 72.1146503 | 69 | 71.9498179 |
| 79.3897351 | 73.5403314 | 72.5432218 | 69 | 71.9943448 |
| 79.3897351 | 74.5403314 | 72.6860789 | 69 | 72.0295953 |
| 79.3897351 | 73.5403314 | 72.2575075 | 69 | 72.0611352 |
| 79.3897351 | 74.5403314 | 72.2575075 | 69 | 72.0815433 |
| 79.3897351 | 74.5403314 | 72.4003646 | 69 | 72.1019515 |
| 79.3897351 | 74.5403314 | 72.4003646 | 69 | 72.1167938 |
| 79.3897351 | 74.5403314 | 72.5432218 | 69 | 72.1334914 |
| 75.3897351 | 73.5403314 | 71.6860789 | 69 | 72.1464784 |
| 74.3897351 | 73.5403314 | 72.1146503 | 69 | 72.1594654 |
| 74.3897351 | 73.5403314 | 72.4003646 | 69 | 72.1557548 |
| 73.3897351 | 73.5403314 | 72.9717932 | 69 | 72.1427678 |
| 73.3897351 | 73.5403314 | 71.1155417 | 69 | 72.1297808 |
| 73.3897351 | 73.5403314 | 71.1359499 | 69 | 72.1075174 |
| 73.3897351 | 73.5403314 | 71.828936  | 69 | 72.0722669 |
| 73.3897351 | 73.5403314 | 71.5432218 | 69 | 72.0425823 |
| 73.3897351 | 73.5403314 | 70.828936  | 69 | 72.014753  |
| 73.3897351 | 74.5403314 | 70.828936  | 69 | 71.9739367 |
| 73.3897351 | 74.5403314 | 71.1146503 | 69 | 71.9423968 |
| 73.3897351 | 74.5403314 | 70.9717932 | 69 | 71.9090016 |
| 73.3897351 | 74.5403314 | 70.9717932 | 69 | 71.8700406 |
| 73.3897351 | 75.5403314 | 69.9717932 | 69 | 71.8329348 |
| 73.3897351 | 76.5403314 | 69.9717932 | 69 | 71.7921185 |

|            |            |            |    |            |
|------------|------------|------------|----|------------|
| 73.3897351 | 76.5403314 | 69.828936  | 69 | 71.7290387 |
| 73.3897351 | 76.5403314 | 70.2575075 | 69 | 71.6659589 |
| 72.3897351 | 76.5403314 | 70.5432218 | 69 | 71.6010239 |
| 72.3897351 | 76.5403314 | 70.828936  | 69 | 71.5397994 |
| 72.3897351 | 76.5403314 | 72.2575075 | 69 | 71.4897066 |
| 72.3897351 | 76.5403314 | 72.828936  | 69 | 71.4451797 |
| 72.3897351 | 76.5403314 | 73.6860789 | 69 | 71.4062187 |
| 73.3897351 | 76.5403314 | 73.2575075 | 69 | 71.3728235 |
| 73.3897351 | 76.5403314 | 72.828936  | 63 | 71.3357177 |
| 75.3897351 | 76.5403314 | 73.1146503 | 63 | 71.3023226 |
| 76.3897351 | 76.5403314 | 72.6860789 | 63 | 71.272638  |
| 76.3897351 | 75.5403314 | 72.5432218 | 63 | 71.2429534 |
| 76.3897351 | 75.5403314 | 71.828936  | 63 | 71.2169793 |
| 79.3897351 | 75.5403314 | 71.9717932 | 63 | 71.2039923 |
| 80.3897351 | 75.5403314 | 72.4003646 | 63 | 71.1947159 |
| 81.3897351 | 75.5403314 | 72.5432218 | 63 | 71.1854394 |
| 83.3897351 | 75.5403314 | 72.5432218 | 63 | 71.1687419 |
| 83.3897351 | 74.5403314 | 72.2575075 | 63 | 71.150189  |
| 85.3897351 | 74.5403314 | 72.1146503 | 63 | 71.1334914 |
| 85.3897351 | 73.5403314 | 71.6860789 | 63 | 71.1279255 |
| 85.3897351 | 73.5403314 | 71.6860789 | 63 | 71.1167938 |
| 80.3897351 | 73.5403314 | 71.1146503 | 63 | 71.1186491 |
| 80.3897351 | 73.5403314 | 70.9717932 | 63 | 71.1130832 |
| 81.3897351 | 73.5403314 | 70.5432218 | 63 | 71.0926751 |
| 81.3897351 | 73.5403314 | 70.1146503 | 63 | 71.0759775 |
| 80.3897351 | 73.5403314 | 69.828936  | 63 | 71.0481482 |
| 76.3897351 | 73.5403314 | 69.6860789 | 63 | 71.014753  |
| 75.3897351 | 73.5403314 | 69.9717932 | 63 | 70.9702261 |
| 70.3897351 | 73.5403314 | 69.6860789 | 63 | 70.9498064 |
| 67.3897351 | 73.5403314 | 69.2575075 | 63 | 70.9346874 |
| 66.3897351 | 73.5403314 | 70.5432218 | 63 | 70.8854838 |
| 65.3897351 | 73.5403314 | 70.828936  | 63 | 70.8421112 |
| 65.3897351 | 73.5403314 | 70.6860789 | 63 | 70.8104003 |
| 65.3897351 | 73.5403314 | 70.6860789 | 63 | 70.7768341 |
| 64.3897351 | 73.5403314 | 70.5432218 | 63 | 70.7395574 |
| 64.3897351 | 75.5403314 | 70.4003646 | 63 | 70.7081115 |
| 63.3897351 | 76.5403314 | 70.4003646 | 63 | 70.6766657 |
| 63.3897351 | 77.5403314 | 70.6860789 | 63 | 70.6859421 |
| 61.3897351 | 77.5403314 | 69.2575075 | 63 | 70.6896527 |
| 61.3897351 | 77.5403314 | 68.6860789 | 63 | 70.6970739 |
| 62.3897351 | 76.5403314 | 68.6860789 | 63 | 70.6952186 |
| 62.3897351 | 76.5403314 | 68.828936  | 63 | 70.6933633 |
| 63.3897351 | 76.5403314 | 68.9717932 | 63 | 70.6896527 |
| 63.3897351 | 75.5403314 | 69.2575075 | 63 | 70.6599681 |
| 64.3897351 | 76.5403314 | 69.828936  | 63 | 70.6339941 |

|            |            |            |    |            |
|------------|------------|------------|----|------------|
| 66.3897351 | 76.5403314 | 70.2575075 | 63 | 70.6005989 |
| 70.3897351 | 76.5403314 | 70.5432218 | 63 | 70.569059  |
| 70.3897351 | 77.5403314 | 70.828936  | 63 | 70.5412297 |
| 74.3897351 | 77.5403314 | 71.6860789 | 63 | 70.5096898 |
| 73.3897351 | 77.5403314 | 71.6860789 | 63 | 70.4837158 |
| 73.3897351 | 77.5403314 | 71.1146503 | 63 | 70.4577418 |
| 73.3897351 | 77.5403314 | 71.1146503 | 63 | 70.4410442 |
| 73.3897351 | 79.5403314 | 71.2575075 | 63 | 70.4224913 |
| 72.3897351 | 80.5403314 | 70.9717932 | 63 | 70.4002278 |
| 72.3897351 | 80.5403314 | 70.828936  | 63 | 70.3798197 |
| 72.3897351 | 80.5403314 | 71.1146503 | 63 | 70.3705432 |
| 72.3897351 | 78.5403314 | 71.4003646 | 63 | 70.3761091 |
| 72.3897351 | 77.5403314 | 71.828936  | 63 | 70.3853855 |
| 72.3897351 | 76.5403314 | 71.4003646 | 63 | 70.4020831 |
| 81.3897351 | 76.5403314 | 72.5432218 | 63 | 70.4243466 |
| 79.3897351 | 76.5403314 | 71.9717932 | 63 | 70.4577418 |
| 77.3897351 | 75.5403314 | 70.9717932 | 63 | 70.4911369 |
| 77.3897351 | 75.5403314 | 70.4003646 | 63 | 70.530098  |
| 74.3897351 | 76.5403314 | 69.9717932 | 63 | 70.5857566 |
| 74.3897351 | 76.5403314 | 69.828936  | 63 | 70.6395599 |
| 73.3897351 | 76.5403314 | 69.5432218 | 63 | 70.7007844 |
| 73.3897351 | 73.5403314 | 69.5432218 | 63 | 70.7601536 |
| 73.3897351 | 73.5403314 | 69.9717932 | 63 | 70.8232334 |
| 73.3897351 | 73.5403314 | 68.0402595 | 63 | 70.8863132 |
| 74.3897351 | 73.5403314 | 68.2035248 | 63 | 70.9289848 |
| 74.3897351 | 73.5403314 | 68.3871983 | 63 | 70.9586694 |
| 75.3897351 | 73.5403314 | 68.2443412 | 63 | 70.9939199 |
| 75.3897351 | 73.5403314 | 68.2443412 | 63 | 71.027315  |
| 77.3897351 | 73.5403314 | 68.5504636 | 63 | 71.0569996 |
| 77.3897351 | 73.5403314 | 68.5504636 | 63 | 71.0866842 |
| 78.3897351 | 73.5403314 | 70.6860789 | 63 | 71.1145136 |
| 78.3897351 | 73.5403314 | 70.2575075 | 63 | 71.1349217 |
| 78.3897351 | 73.5403314 | 70.4003646 | 63 | 71.1664616 |
| 77.3897351 | 73.5403314 | 70.1146503 | 63 | 71.1998568 |
| 77.3897351 | 73.5403314 | 70.4003646 | 63 | 71.2295414 |
| 77.3897351 | 73.5403314 | 70.5432218 | 63 | 71.2499495 |
| 77.3897351 | 73.5403314 | 69.9717932 | 63 | 71.272213  |
| 76.3897351 | 73.5403314 | 70.828936  | 63 | 71.2889106 |
| 75.3897351 | 74.5403314 | 71.1146503 | 63 | 71.2926212 |
| 75.3897351 | 74.5403314 | 70.828936  | 63 | 71.2889106 |
| 76.3897351 | 74.5403314 | 70.6860789 | 63 | 71.2852    |
| 76.3897351 | 74.5403314 | 70.6860789 | 63 | 71.2814894 |
| 76.3897351 | 73.5403314 | 70.6860789 | 63 | 71.259226  |
| 76.3897351 | 73.5403314 | 70.5432218 | 63 | 71.2295414 |
| 76.3897351 | 73.5403314 | 70.5432218 | 63 | 71.1998568 |

|            |            |            |    |            |
|------------|------------|------------|----|------------|
| 76.3897351 | 73.5403314 | 70.5432218 | 63 | 71.1664616 |
| 76.3897351 | 73.5403314 | 70.6860789 | 63 | 71.1349217 |
| 76.3897351 | 73.5403314 | 70.9717932 | 63 | 71.1052371 |
| 76.3897351 | 73.5403314 | 71.828936  | 63 | 71.0736972 |
| 76.3897351 | 74.5403314 | 72.6860789 | 63 | 71.0365915 |
| 76.3897351 | 74.5403314 | 72.828936  | 63 | 70.9976304 |
| 74.3897351 | 74.5403314 | 72.9717932 | 63 | 70.9531035 |
| 73.3897351 | 75.5403314 | 73.4003646 | 63 | 70.9104319 |
| 72.3897351 | 76.5403314 | 73.6860789 | 63 | 70.8584839 |
| 72.3897351 | 76.5403314 | 73.5432218 | 63 | 70.8158123 |
| 72.3897351 | 76.5403314 | 73.5432218 | 63 | 70.7861277 |
| 72.3897351 | 77.5403314 | 74.4003646 | 63 | 70.7694301 |
| 72.3897351 | 77.5403314 | 73.9717932 | 63 | 70.7620089 |
| 72.3897351 | 77.5403314 | 74.4003646 | 63 | 70.7564431 |
| 72.3897351 | 77.5403314 | 74.5432218 | 63 | 70.7490219 |
| 72.3897351 | 77.5403314 | 74.5432218 | 63 | 70.7453113 |
| 69.3897351 | 77.5403314 | 74.1146503 | 63 | 70.7323243 |
| 69.3897351 | 77.5403314 | 73.828936  | 63 | 70.7462774 |
| 67.3897351 | 77.5403314 | 73.1146503 | 63 | 70.7618208 |
| 68.3897351 | 77.5403314 | 73.4003646 | 63 | 70.7749788 |
| 68.3897351 | 77.5403314 | 73.2575075 | 63 | 70.7937027 |
| 68.3897351 | 77.5403314 | 72.828936  | 63 | 70.8142818 |
| 68.3897351 | 78.5403314 | 72.6860789 | 63 | 70.834596  |
| 68.3897351 | 80.5403314 | 72.5432218 | 63 | 70.8623312 |
| 69.3897351 | 80.5403314 | 72.2575075 | 63 | 70.8753182 |
| 69.3897351 | 77.5403314 | 71.6860789 | 63 | 70.8975817 |
| 69.3897351 | 75.5403314 | 71.2575075 | 63 | 70.9198451 |
| 68.3897351 | 74.5403314 | 70.9717932 | 63 | 70.9476744 |
| 67.3897351 | 73.5403314 | 70.4003646 | 63 | 70.9736485 |
| 67.3897351 | 73.5403314 | 70.6860789 | 63 | 70.9977672 |
| 67.3897351 | 72.5403314 | 70.5432218 | 63 | 71.0385835 |
| 67.3897351 | 70.5403314 | 70.1146503 | 69 | 71.0682681 |
| 67.3897351 | 69.5403314 | 69.9717932 | 69 | 71.1183609 |
| 67.3897351 | 70.5403314 | 70.2575075 | 69 | 71.1721642 |
| 67.3897351 | 70.5403314 | 70.5432218 | 69 | 71.2333887 |
| 68.3897351 | 70.5403314 | 69.9717932 | 69 | 71.3001791 |
| 67.3897351 | 70.5403314 | 69.4003646 | 69 | 71.3725353 |
| 67.3897351 | 70.5403314 | 68.828936  | 69 | 71.4448915 |
| 66.3897351 | 70.5403314 | 68.5432218 | 69 | 71.5079713 |
| 66.3897351 | 72.5403314 | 68.828936  | 69 | 71.5673405 |
| 65.3897351 | 72.5403314 | 68.6860789 | 69 | 71.5898806 |
| 65.3897351 | 72.5403314 | 68.4003646 | 69 | 71.6065897 |
| 65.3897351 | 72.5403314 | 68.2575075 | 69 | 71.6058062 |
| 65.3897351 | 72.5403314 | 68.4003646 | 69 | 71.6243591 |
| 65.3897351 | 71.5403314 | 68.4003646 | 69 | 71.6410566 |

|            |            |            |    |            |
|------------|------------|------------|----|------------|
| 65.3897351 | 71.5403314 | 68.1146503 | 69 | 71.6540437 |
| 66.3897351 | 71.5403314 | 68.5432218 | 69 | 71.6558989 |
| 66.3897351 | 71.5403314 | 68.6860789 | 69 | 71.6410566 |
| 66.3897351 | 72.5403314 | 68.6860789 | 69 | 71.6317802 |
| 66.3897351 | 73.5403314 | 69.1146503 | 69 | 71.6243591 |
| 66.3897351 | 73.5403314 | 69.4003646 | 69 | 71.598385  |
| 67.3897351 | 72.5403314 | 69.4003646 | 69 | 71.5761216 |
| 67.3897351 | 72.5403314 | 68.9717932 | 69 | 71.5427264 |
| 67.3897351 | 72.5403314 | 69.2575075 | 69 | 71.5019101 |
| 68.3897351 | 70.5403314 | 68.9717932 | 69 | 71.4759361 |
| 68.3897351 | 70.5403314 | 69.1146503 | 69 | 71.4555279 |
| 69.3897351 | 71.5403314 | 69.4003646 | 69 | 71.4388303 |
| 69.3897351 | 71.5403314 | 69.4003646 | 69 | 71.4314091 |
| 70.3897351 | 74.5403314 | 69.6860789 | 69 | 71.4221327 |
| 70.3897351 | 75.5403314 | 69.828936  | 69 | 71.4128563 |
| 70.3897351 | 76.5403314 | 70.1146503 | 69 | 71.4054351 |
| 71.3897351 | 76.5403314 | 70.6860789 | 69 | 71.398014  |
| 71.3897351 | 76.5403314 | 71.6860789 | 69 | 71.3924481 |
| 71.3897351 | 76.5403314 | 71.9717932 | 69 | 71.4035798 |
| 72.3897351 | 76.5403314 | 72.1146503 | 69 | 71.4221327 |
| 72.3897351 | 76.5403314 | 72.2575075 | 69 | 71.4332644 |
| 72.3897351 | 76.5403314 | 72.4003646 | 69 | 71.4481067 |
| 71.3897351 | 76.5403314 | 72.4003646 | 69 | 71.4648043 |
| 70.3897351 | 77.5403314 | 73.1146503 | 63 | 71.4525586 |
| 70.3897351 | 77.5403314 | 73.1146503 | 63 | 71.4400479 |
| 70.3897351 | 77.5403314 | 74.9717932 | 63 | 71.4376087 |
| 70.3897351 | 77.5403314 | 74.9717932 | 63 | 71.465438  |
| 69.3897351 | 77.5403314 | 75.4003646 | 63 | 71.4502768 |
| 69.3897351 | 79.5403314 | 75.828936  | 63 | 71.4295498 |
| 69.3897351 | 79.5403314 | 76.2575075 | 63 | 71.4077626 |
| 69.3897351 | 79.5403314 | 76.1146503 | 63 | 71.3955169 |
| 69.3897351 | 77.5403314 | 75.4003646 | 63 | 71.388572  |
| 69.3897351 | 76.5403314 | 75.1146503 | 63 | 71.3832173 |
| 69.3897351 | 76.5403314 | 72.4216642 | 63 | 71.3762725 |
| 69.3897351 | 76.5403314 | 72.2583989 | 63 | 71.3709178 |
| 69.3897351 | 76.5403314 | 71.768603  | 63 | 71.3671534 |
| 69.3897351 | 76.5403314 | 74.1146503 | 63 | 71.3949827 |
| 69.3897351 | 76.5403314 | 74.1146503 | 63 | 71.4246673 |
| 70.3897351 | 76.5403314 | 73.9717932 | 63 | 71.4580625 |
| 72.3897351 | 76.5403314 | 73.5432218 | 63 | 71.4970235 |
| 72.3897351 | 76.5403314 | 72.5432218 | 63 | 71.5304187 |
| 73.3897351 | 76.5403314 | 72.828936  | 63 | 71.5619586 |
| 73.3897351 | 77.5403314 | 72.9717932 | 63 | 71.6027749 |
| 72.3897351 | 76.5403314 | 72.4003646 | 63 | 71.641736  |
| 72.3897351 | 76.5403314 | 72.2575075 | 63 | 71.6732759 |



|            |            |            |    |            |
|------------|------------|------------|----|------------|
| 71.3897351 | 76.5403314 | 71.828936  | 63 | 71.7048157 |
| 71.3897351 | 76.5403314 | 71.4003646 | 63 | 71.7567638 |
| 70.3897351 | 76.5403314 | 72.5432218 | 63 | 71.8050013 |
| 70.3897351 | 76.5403314 | 72.5432218 | 63 | 71.8643705 |
| 70.3897351 | 76.5403314 | 72.5432218 | 63 | 71.9218844 |
| 70.3897351 | 77.5403314 | 72.5432218 | 63 | 71.964556  |
| 70.3897351 | 77.5403314 | 72.6860789 | 63 | 71.9960959 |
| 70.3897351 | 77.5403314 | 72.5432218 | 63 | 72.0165041 |
| 70.3897351 | 77.5403314 | 72.2575075 | 63 | 72.0332016 |
| 70.3897351 | 77.5403314 | 72.1146503 | 63 | 72.0461887 |
| 70.3897351 | 77.5403314 | 72.1146503 | 63 | 72.0517545 |
| 72.3897351 | 76.5403314 | 73.1146503 | 63 | 72.0424781 |
| 72.3897351 | 76.5403314 | 73.1146503 | 63 | 72.0332016 |
| 72.3897351 | 76.5403314 | 72.1146503 | 63 | 72.0239252 |
| 73.3897351 | 77.5403314 | 72.1146503 | 63 | 72.0146488 |
| 73.3897351 | 77.5403314 | 71.6860789 | 63 | 72.0072276 |
| 73.3897351 | 78.5403314 | 69.743159  | 63 | 71.9998065 |
| 73.3897351 | 78.5403314 | 69.5798937 | 63 | 71.9812536 |
| 74.3897351 | 79.5403314 | 69.9268325 | 63 | 71.9571349 |
| 74.3897351 | 79.5403314 | 72.1146503 | 63 | 71.9107527 |
| 74.3897351 | 78.5403314 | 69.0900978 | 63 | 71.8569493 |
| 74.3897351 | 77.5403314 | 68.9472406 | 63 | 71.7957248 |
| 74.3897351 | 75.5403314 | 68.2941794 | 63 | 71.7252239 |
| 74.3897351 | 75.5403314 | 68.4574447 | 63 | 71.6714206 |
| 74.3897351 | 74.5403314 | 68.2941794 | 63 | 71.6250384 |
| 73.3897351 | 73.5403314 | 68.1309141 | 63 | 71.5916432 |
| 73.3897351 | 73.5403314 | 68.2941794 | 63 | 71.5601033 |
| 72.3897351 | 73.5403314 | 68.2737713 | 63 | 71.5561161 |
| 71.3897351 | 73.5403314 | 68.1105059 | 63 | 71.5542493 |
| 72.3897351 | 73.5403314 | 70.4003646 | 63 | 71.5587434 |
| 72.3897351 | 74.5403314 | 70.6860789 | 63 | 71.5234929 |
| 73.3897351 | 75.5403314 | 70.9717932 | 63 | 71.4808213 |
| 73.3897351 | 74.5403314 | 71.1146503 | 63 | 71.4344391 |
| 73.3897351 | 74.5403314 | 71.1146503 | 63 | 71.3936228 |
| 72.3897351 | 74.5403314 | 71.1146503 | 63 | 71.3676488 |
| 72.3897351 | 74.5403314 | 71.828936  | 63 | 71.3379642 |
| 71.3897351 | 75.5403314 | 72.1146503 | 63 | 71.3027137 |
| 69.3897351 | 75.5403314 | 71.828936  | 63 | 71.2748844 |
| 69.3897351 | 74.5403314 | 71.828936  | 63 | 71.2470551 |
| 70.3897351 | 74.5403314 | 72.9717932 | 63 | 71.2247916 |
| 70.3897351 | 74.5403314 | 72.9717932 | 63 | 71.2155152 |
| 70.3897351 | 75.5403314 | 73.5432218 | 63 | 71.1913964 |
| 70.3897351 | 75.5403314 | 73.5432218 | 63 | 71.1635671 |
| 70.3897351 | 75.5403314 | 72.6860789 | 63 | 71.1375931 |
| 70.3897351 | 75.5403314 | 71.828936  | 63 | 71.1116191 |

|            |            |            |    |            |
|------------|------------|------------|----|------------|
| 69.3897351 | 75.5403314 | 71.2575075 | 63 | 71.0837898 |
| 69.3897351 | 76.5403314 | 71.1146503 | 63 | 71.0578157 |
| 69.3897351 | 76.5403314 | 71.1146503 | 63 | 71.0281311 |
| 69.3897351 | 76.5403314 | 71.1146503 | 63 | 71.0003018 |
| 69.3897351 | 76.5403314 | 70.9717932 | 63 | 70.9724725 |
| 69.3897351 | 77.5403314 | 71.2575075 | 63 | 70.9316562 |
| 69.3897351 | 77.5403314 | 71.4003646 | 63 | 70.8871293 |
| 69.3897351 | 77.5403314 | 71.5432218 | 63 | 70.8593    |
| 68.3897351 | 78.5403314 | 71.828936  | 63 | 70.8370365 |
| 67.3897351 | 78.5403314 | 71.828936  | 63 | 70.8184836 |
| 67.3897351 | 77.5403314 | 71.6860789 | 63 | 70.8214529 |
| 67.3897351 | 76.5403314 | 71.2575075 | 63 | 70.8302531 |
| 67.3897351 | 78.5403314 | 71.4003646 | 63 | 70.830837  |
| 67.3897351 | 78.5403314 | 70.828936  | 63 | 70.8011524 |
| 66.3897351 | 79.5403314 | 70.6860789 | 63 | 70.8051818 |
| 64.3897351 | 79.5403314 | 70.4003646 | 63 | 70.807356  |
| 64.3897351 | 80.5403314 | 72.1146503 | 63 | 70.8180115 |
| 63.3897351 | 80.5403314 | 72.5432218 | 63 | 70.8079937 |
| 63.3897351 | 80.5403314 | 72.828936  | 63 | 70.7926752 |
| 62.3897351 | 80.5403314 | 72.6860789 | 63 | 70.7831875 |
| 62.3897351 | 77.5403314 | 72.1146503 | 63 | 70.7734348 |
| 62.3897351 | 77.5403314 | 72.1146503 | 63 | 70.7713683 |
| 62.3897351 | 77.5403314 | 72.1146503 | 63 | 70.7658563 |
| 62.3897351 | 77.5403314 | 71.4003646 | 63 | 70.7250399 |
| 62.3897351 | 77.5403314 | 70.828936  | 63 | 70.680513  |
| 62.3897351 | 77.5403314 | 70.4003646 | 63 | 70.6341308 |
| 62.3897351 | 77.5403314 | 70.4003646 | 63 | 70.5896039 |
| 62.3897351 | 77.5403314 | 70.5432218 | 63 | 70.5432218 |
| 62.3897351 | 77.5403314 | 70.5432218 | 63 | 70.4986949 |
| 63.3897351 | 77.5403314 | 70.2575075 | 63 | 70.4448915 |
| 63.3897351 | 77.5403314 | 70.2575075 | 63 | 70.3892329 |
| 63.3897351 | 77.5403314 | 70.1146503 | 63 | 70.3428507 |
| 64.3897351 | 77.5403314 | 70.1146503 | 63 | 70.3001791 |
| 65.3897351 | 77.5403314 | 70.6860789 | 63 | 70.248231  |
| 65.3897351 | 78.5403314 | 70.6860789 | 63 | 70.2074147 |
| 65.3897351 | 78.5403314 | 70.4003646 | 63 | 70.1591772 |
| 65.3897351 | 78.5403314 | 70.5432218 | 63 | 70.1109398 |
| 65.3897351 | 76.5403314 | 70.5432218 | 63 | 70.0812552 |
| 65.3897351 | 76.5403314 | 70.5432218 | 63 | 70.0664128 |
| 67.3897351 | 75.5403314 | 70.5432218 | 63 | 70.0552811 |
| 67.3897351 | 75.5403314 | 69.9717932 | 63 | 70.0497153 |
| 67.3897351 | 74.5403314 | 69.9717932 | 63 | 70.0367282 |
| 67.3897351 | 74.5403314 | 69.9717932 | 63 | 70.0107542 |
| 68.3897351 | 74.5403314 | 69.9717932 | 63 | 69.9810696 |
| 68.3897351 | 73.5403314 | 69.6860789 | 63 | 69.9662273 |

|            |            |            |    |            |
|------------|------------|------------|----|------------|
| 68.3897351 | 73.5403314 | 69.9717932 | 63 | 69.9662273 |
| 68.3897351 | 73.5403314 | 70.4003646 | 63 | 69.977359  |
| 68.3897351 | 73.5403314 | 70.2575075 | 63 | 69.9810696 |
| 69.3897351 | 73.5403314 | 69.9717932 | 63 | 69.9866355 |
| 70.3897351 | 73.5403314 | 70.2575075 | 63 | 69.9829249 |
| 69.3897351 | 72.5403314 | 69.9717932 | 63 | 69.9847802 |
| 69.3897351 | 72.5403314 | 69.828936  | 63 | 69.9847802 |
| 68.3897351 | 72.5403314 | 69.4003646 | 63 | 69.9940566 |
| 66.3897351 | 72.5403314 | 69.1146503 | 63 | 70.0051884 |
| 66.3897351 | 72.5403314 | 69.1146503 | 63 | 70.0218859 |
| 66.3897351 | 72.5403314 | 67.6860789 | 63 | 70.0144648 |
| 66.3897351 | 71.5403314 | 67.1146503 | 63 | 70.0014778 |
| 66.3897351 | 72.5403314 | 67.4003646 | 63 | 69.9847802 |
| 67.3897351 | 72.5403314 | 67.5432218 | 63 | 69.9699379 |
| 67.3897351 | 73.5403314 | 68.1146503 | 63 | 69.9717932 |
| 67.3897351 | 73.5403314 | 67.6860789 | 63 | 69.9717932 |
| 68.3897351 | 73.5403314 | 67.2575075 | 63 | 69.9662273 |
| 68.3897351 | 73.5403314 | 67.2575075 | 63 | 69.9680826 |
| 70.3897351 | 73.5403314 | 67.4003646 | 63 | 69.9755038 |
| 70.3897351 | 73.5403314 | 67.6860789 | 63 | 69.9884908 |
| 70.3897351 | 73.5403314 | 67.5432218 | 63 | 69.9959119 |
| 71.3897351 | 73.5403314 | 67.6860789 | 63 | 70.0051884 |
| 71.3897351 | 73.5403314 | 67.6860789 | 63 | 70.0181754 |
| 72.3897351 | 73.5403314 | 67.828936  | 63 | 70.0404388 |
| 72.3897351 | 73.5403314 | 68.2575075 | 63 | 70.0627023 |
| 74.3897351 | 73.5403314 | 68.5432218 | 63 | 70.0849657 |
| 75.3897351 | 73.5403314 | 68.9717932 | 63 | 70.1053739 |
| 76.3897351 | 74.5403314 | 69.828936  | 63 | 70.1165056 |
| 76.3897351 | 74.5403314 | 69.828936  | 63 | 70.1257821 |
| 76.3897351 | 75.5403314 | 69.828936  | 63 | 70.1350585 |
| 77.3897351 | 77.5403314 | 70.4003646 | 63 | 70.1443349 |
| 78.3897351 | 77.5403314 | 70.6860789 | 63 | 70.1517561 |
| 78.3897351 | 77.5403314 | 70.4003646 | 63 | 70.1665984 |
| 78.3897351 | 77.5403314 | 70.6860789 | 63 | 70.183296  |
| 77.3897351 | 77.5403314 | 70.1146503 | 63 | 70.2111253 |
| 70.3897351 | 77.5403314 | 69.1146503 | 63 | 70.2463757 |
| 69.3897351 | 77.5403314 | 68.6860789 | 63 | 70.2797709 |
| 69.3897351 | 77.5403314 | 70.1146503 | 63 | 70.3242978 |
| 70.3897351 | 77.5403314 | 71.4003646 | 63 | 70.3799564 |
| 70.3897351 | 77.5403314 | 72.4003646 | 63 | 70.4337598 |
| 71.3897351 | 77.5403314 | 72.1146503 | 63 | 70.4568053 |
| 73.3897351 | 77.5403314 | 72.2575075 | 63 | 70.4838264 |
| 73.3897351 | 77.5403314 | 71.4003646 | 63 | 70.5153532 |
| 74.3897351 | 77.5403314 | 71.4003646 | 63 | 70.5418443 |
| 72.3897351 | 77.5403314 | 71.4003646 | 63 | 70.5882265 |

|            |            |            |    |            |
|------------|------------|------------|----|------------|
| 72.3897351 | 76.5403314 | 71.5432218 | 63 | 70.6308981 |
| 72.3897351 | 76.5403314 | 71.5432218 | 63 | 70.6772803 |
| 72.3897351 | 76.5403314 | 71.6860789 | 69 | 70.7329389 |
| 72.3897351 | 76.5403314 | 71.5432218 | 69 | 70.8052951 |
| 72.3897351 | 76.5403314 | 71.5432218 | 69 | 70.8962042 |
| 72.3897351 | 76.5403314 | 71.5432218 | 69 | 70.998245  |
| 72.3897351 | 76.5403314 | 71.5432218 | 69 | 71.0928647 |
| 72.3897351 | 76.5403314 | 72.2575075 | 69 | 71.1800632 |
| 72.3897351 | 76.5403314 | 72.1146503 | 69 | 71.2468535 |
| 66.3897351 | 74.5403314 | 71.6860789 | 69 | 71.3136439 |
| 65.3897351 | 74.5403314 | 71.5432218 | 69 | 71.3841448 |
| 65.3897351 | 73.5403314 | 71.4003646 | 69 | 71.4546458 |
| 64.3897351 | 73.5403314 | 71.4003646 | 69 | 71.5288573 |
| 64.3897351 | 72.5403314 | 70.9717932 | 69 | 71.6104899 |
| 65.3897351 | 72.5403314 | 71.2575075 | 69 | 71.6958331 |
| 66.3897351 | 72.5403314 | 71.5432218 | 69 | 71.7811764 |
| 71.3897351 | 72.5403314 | 71.9717932 | 69 | 71.8665196 |
| 74.3897351 | 71.5403314 | 71.9717932 | 63 | 71.9388758 |
| 74.3897351 | 71.5403314 | 71.828936  | 63 | 72.0019556 |
| 74.3897351 | 71.5403314 | 71.6860789 | 63 | 72.0539036 |
| 74.3897351 | 71.5403314 | 71.5432218 | 63 | 72.1002858 |
| 74.3897351 | 71.5403314 | 71.4003646 | 63 | 72.1281151 |
| 74.3897351 | 71.5403314 | 71.1146503 | 63 | 72.1559445 |
| 75.3897351 | 71.5403314 | 71.2575075 | 63 | 72.172642  |
| 75.3897351 | 70.5403314 | 71.1146503 | 63 | 72.1800632 |
| 75.3897351 | 70.5403314 | 71.6860789 | 63 | 72.1837738 |
| 75.3897351 | 69.5403314 | 71.828936  | 63 | 72.1930502 |
| 75.3897351 | 69.5403314 | 72.1146503 | 63 | 72.1837738 |
| 77.3897351 | 69.5403314 | 72.6860789 | 63 | 72.1744973 |
| 77.3897351 | 70.5403314 | 72.5432218 | 63 | 72.1744973 |
| 77.3897351 | 70.5403314 | 73.4003646 | 63 | 72.1744973 |
| 71.3897351 | 72.5403314 | 73.9717932 | 63 | 72.1559445 |
| 70.3897351 | 74.5403314 | 74.1146503 | 63 | 72.120694  |
| 69.3897351 | 74.5403314 | 72.1748684 | 63 | 72.0687459 |
| 69.3897351 | 74.5403314 | 72.3381338 | 63 | 72.0409166 |
| 69.3897351 | 74.5403314 | 72.3993582 | 63 | 72.0149426 |
| 72.3897351 | 75.5403314 | 72.2973174 | 63 | 71.998245  |
| 72.3897351 | 75.5403314 | 73.5432218 | 63 | 71.9871133 |
| 72.3897351 | 76.5403314 | 73.1146503 | 63 | 71.985258  |
| 72.3897351 | 76.5403314 | 72.9717932 | 63 | 71.9889686 |
| 72.3897351 | 76.5403314 | 73.4003646 | 63 | 71.9815474 |
| 72.3897351 | 76.5403314 | 74.6860789 | 63 | 71.9667051 |
| 73.3897351 | 76.5403314 | 74.6860789 | 63 | 71.9518628 |
| 74.3897351 | 77.5403314 | 74.9717932 | 63 | 71.9425864 |
| 74.3897351 | 77.5403314 | 74.6860789 | 63 | 71.9314547 |

|            |            |            |    |            |
|------------|------------|------------|----|------------|
| 75.3897351 | 77.5403314 | 74.2575075 | 63 | 71.8911881 |
| 77.3897351 | 76.5403314 | 73.2575075 | 63 | 71.8461509 |
| 77.3897351 | 76.5403314 | 72.828936  | 63 | 71.8029689 |
| 77.3897351 | 76.5403314 | 72.6860789 | 63 | 71.8252323 |
| 77.3897351 | 77.5403314 | 72.6860789 | 63 | 71.8456405 |
| 79.3897351 | 77.5403314 | 73.1146503 | 63 | 71.8641934 |
| 79.3897351 | 77.5403314 | 73.9717932 | 63 | 71.8790357 |
| 78.3897351 | 77.5403314 | 74.1146503 | 63 | 71.8883121 |
| 75.3897351 | 77.5403314 | 74.2575075 | 63 | 71.8846016 |
| 75.3897351 | 78.5403314 | 74.2575075 | 63 | 71.8790357 |
| 75.3897351 | 78.5403314 | 73.4003646 | 63 | 71.8660487 |
| 75.3897351 | 78.5403314 | 73.1146503 | 63 | 71.8567722 |
| 75.3897351 | 78.5403314 | 72.5432218 | 63 | 71.8512064 |
| 75.3897351 | 79.5403314 | 72.5432218 | 63 | 71.8419299 |
| 75.3897351 | 80.5403314 | 71.9717932 | 63 | 71.8307982 |
| 75.3897351 | 80.5403314 | 71.9717932 | 63 | 71.8215218 |
| 75.3897351 | 80.5403314 | 71.1146503 | 63 | 71.8196665 |
| 75.3897351 | 81.5403314 | 70.9717932 | 63 | 71.81039   |
| 75.3897351 | 81.5403314 | 70.9717932 | 63 | 71.7992583 |
| 75.3897351 | 82.5403314 | 71.1146503 | 63 | 71.7751396 |
| 75.3897351 | 75.5403314 | 69.9717932 | 63 | 71.745455  |
| 75.3897351 | 73.5403314 | 69.4003646 | 63 | 71.7139151 |
| 76.3897351 | 72.5403314 | 69.1146503 | 63 | 71.6675329 |
| 76.3897351 | 71.5403314 | 68.6860789 | 63 | 71.6174401 |
| 76.3897351 | 71.5403314 | 68.6860789 | 63 | 71.5562157 |
| 76.3897351 | 70.5403314 | 68.6860789 | 63 | 71.4857147 |
| 76.3897351 | 70.5403314 | 68.4003646 | 63 | 71.4152138 |
| 77.3897351 | 71.5403314 | 69.9717932 | 63 | 71.3736154 |
| 77.3897351 | 71.5403314 | 70.2575075 | 63 | 71.3280414 |
| 77.3897351 | 71.5403314 | 70.1146503 | 63 | 71.2528025 |
| 78.3897351 | 72.5403314 | 70.5432218 | 63 | 71.173058  |
| 78.3897351 | 72.5403314 | 71.2575075 | 63 | 71.0771328 |
| 78.3897351 | 72.5403314 | 71.828936  | 63 | 70.9778165 |
| 81.3897351 | 72.5403314 | 70.9717932 | 63 | 70.8887824 |
| 80.3897351 | 71.5403314 | 70.5432218 | 63 | 70.7923272 |
| 80.3897351 | 71.5403314 | 70.4003646 | 63 | 70.677054  |
| 84.3897351 | 71.5403314 | 70.828936  | 63 | 70.5898555 |
| 85.3897351 | 71.5403314 | 70.6860789 | 63 | 70.4989464 |
| 70.6860789 | 71.5403314 | 68.4426994 | 63 | 70.4043267 |
| 71.1146503 | 71.5403314 | 68.7896382 | 63 | 70.3059965 |
| 71.1146503 | 71.5403314 | 68.7896382 | 63 | 70.2169427 |
| 88.3897351 | 71.5403314 | 73.4003646 | 63 | 70.1334547 |
| 83.3897351 | 71.5403314 | 73.1146503 | 63 | 70.0555327 |
| 81.3897351 | 71.5403314 | 72.828936  | 63 | 69.9794659 |
| 81.3897351 | 72.5403314 | 72.5432218 | 63 | 69.9071097 |

|            |            |            |    |            |
|------------|------------|------------|----|------------|
| 80.3897351 | 73.5403314 | 71.6860789 | 63 | 69.8291876 |
| 79.3897351 | 73.5403314 | 70.9717932 | 63 | 69.7568314 |
| 79.3897351 | 73.5403314 | 71.1146503 | 67 | 69.6807646 |
| 78.3897351 | 73.5403314 | 70.9717932 | 67 | 69.6102637 |
| 78.3897351 | 73.5403314 | 71.2575075 | 67 | 69.554605  |
| 79.3897351 | 73.5403314 | 71.4003646 | 67 | 69.5100781 |
| 79.3897351 | 73.5403314 | 70.9717932 | 67 | 69.4692618 |
| 80.3897351 | 73.5403314 | 70.6860789 | 67 | 69.4265902 |
| 80.3897351 | 73.5403314 | 70.6860789 | 67 | 69.3894844 |
| 82.3897351 | 73.5403314 | 70.9717932 | 67 | 69.3468128 |
| 82.3897351 | 73.5403314 | 70.5432218 | 67 | 69.3152729 |
| 82.3897351 | 72.5403314 | 70.2575075 | 67 | 69.2855883 |
| 82.3897351 | 72.5403314 | 69.828936  | 67 | 69.2559037 |
| 81.3897351 | 72.5403314 | 69.5432218 | 67 | 69.2243638 |
| 81.3897351 | 73.5403314 | 69.6860789 | 67 | 69.205811  |
| 81.3897351 | 75.5403314 | 69.1146503 | 67 | 69.1909687 |
| 81.3897351 | 75.5403314 | 68.6860789 | 67 | 69.1872581 |
| 81.3897351 | 73.5403314 | 68.6860789 | 67 | 69.1909687 |
| 81.3897351 | 71.5403314 | 68.5432218 | 67 | 69.1946792 |
| 82.3897351 | 70.5403314 | 68.6860789 | 67 | 69.2002451 |
| 83.3897351 | 69.5403314 | 68.9717932 | 67 | 69.2039557 |
| 83.3897351 | 69.5403314 | 68.828936  | 67 | 69.1909687 |
| 68.828936  | 69.5403314 | 66.6059647 | 67 | 69.1742711 |
| 68.6860789 | 68.5403314 | 66.1569852 | 67 | 69.1649946 |
| 68.6860789 | 68.5403314 | 66.1569852 | 67 | 69.1594288 |
| 64.8582245 | 68.5403314 | 65.4672917 | 67 | 69.1371653 |
| 68.4003646 | 69.5403314 | 66.1161688 | 67 | 69.109336  |
| 68.4003646 | 69.5403314 | 65.9733117 | 67 | 69.0926384 |
| 68.2575075 | 70.5403314 | 65.8100464 | 67 | 69.0759408 |
| 83.3897351 | 72.5403314 | 67.9717932 | 67 | 69.0592432 |
| 83.3897351 | 73.5403314 | 67.9717932 | 67 | 69.0258481 |
| 82.3897351 | 73.5403314 | 67.4003646 | 67 | 68.9905976 |
| 81.3897351 | 73.5403314 | 66.6860789 | 67 | 68.9881925 |
| 81.3897351 | 72.5403314 | 66.4003646 | 67 | 68.947103  |
| 80.3897351 | 72.5403314 | 66.4003646 | 67 | 68.9038932 |
| 80.3897351 | 72.5403314 | 66.6860789 | 67 | 68.8018639 |
| 80.3897351 | 72.5403314 | 66.828936  | 67 | 68.7236884 |
| 80.3897351 | 72.5403314 | 67.5432218 | 67 | 68.6537291 |
| 80.3897351 | 71.5403314 | 67.9717932 | 67 | 68.5797942 |
| 79.3897351 | 72.5403314 | 68.5432218 | 67 | 68.5132805 |
| 79.3897351 | 71.5403314 | 68.4003646 | 67 | 68.4580625 |
| 79.3897351 | 71.5403314 | 68.828936  | 67 | 68.4042592 |
| 79.3897351 | 71.5403314 | 69.1146503 | 67 | 68.3411794 |
| 79.3897351 | 71.5403314 | 69.6860789 | 67 | 68.2576915 |
| 79.3897351 | 71.5403314 | 69.4003646 | 67 | 68.1686377 |

|            |            |            |    |            |
|------------|------------|------------|----|------------|
| 79.3897351 | 71.5403314 | 69.2575075 | 67 | 68.0795839 |
| 78.3897351 | 71.5403314 | 69.1146503 | 67 | 67.9905301 |
| 76.3897351 | 71.5403314 | 68.6860789 | 67 | 67.9051868 |
| 76.3897351 | 71.5403314 | 68.6860789 | 67 | 67.8105672 |
| 74.3897351 | 71.5403314 | 68.6860789 | 67 | 67.7196581 |
| 74.3897351 | 71.5403314 | 68.6860789 | 67 | 67.628749  |
| 74.3897351 | 71.5403314 | 68.6860789 | 67 | 67.5526822 |
| 74.3897351 | 71.5403314 | 68.5432218 | 67 | 67.4840366 |
| 75.3897351 | 71.5403314 | 68.2575075 | 67 | 67.4191015 |
| 76.3897351 | 71.5403314 | 68.828936  | 67 | 67.3615876 |
| 76.3897351 | 72.5403314 | 68.9717932 | 67 | 67.3114948 |
| 76.3897351 | 71.5403314 | 68.9717932 | 67 | 67.261402  |
| 80.3897351 | 71.5403314 | 69.1146503 | 67 | 67.2131646 |
| 79.3897351 | 71.5403314 | 68.6860789 | 67 | 67.1612165 |
| 79.3897351 | 72.5403314 | 68.9717932 | 67 | 67.1092685 |
| 79.3897351 | 72.5403314 | 68.9717932 | 67 | 67.0628863 |
| 79.3897351 | 72.5403314 | 69.4003646 | 67 | 67.0546503 |
| 79.3897351 | 72.5403314 | 70.1146503 | 67 | 67.0522452 |
| 76.3897351 | 71.5403314 | 69.5432218 | 67 | 67.0498401 |
| 72.3897351 | 70.5403314 | 69.6860789 | 67 | 67.040495  |
| 69.3897351 | 70.5403314 | 69.6860789 | 67 | 67.0168919 |
| 68.3897351 | 69.5403314 | 69.2575075 | 67 | 66.9932889 |
| 66.3897351 | 69.5403314 | 69.1146503 | 67 | 66.9752518 |
| 62.3897351 | 69.5403314 | 68.2575075 | 67 | 66.92914   |
| 60.3897351 | 70.5403314 | 67.9717932 | 67 | 66.9068765 |
| 60.3897351 | 70.5403314 | 68.2575075 | 67 | 66.8920342 |
| 58.3897351 | 70.5403314 | 65.6257458 | 67 | 66.8846131 |
| 58.3897351 | 70.5403314 | 65.4624805 | 67 | 66.8809025 |
| 58.3897351 | 70.5403314 | 65.5441132 | 67 | 66.8846131 |
| 61.3897351 | 70.5403314 | 67.0951336 | 67 | 66.8827578 |
| 63.3897351 | 70.5403314 | 67.4420724 | 67 | 66.8644753 |
| 63.3897351 | 70.5403314 | 66.8502356 | 67 | 66.8663306 |
| 63.3897351 | 70.5403314 | 66.5645213 | 67 | 66.8533436 |
| 63.3897351 | 70.5403314 | 66.7200097 | 67 | 66.8199484 |
| 61.3897351 | 70.5403314 | 66.9717932 | 67 | 66.7828427 |
| 60.3897351 | 70.5403314 | 66.1146503 | 67 | 66.7383158 |
| 59.3897351 | 70.5403314 | 64.828936  | 67 | 66.6863677 |
| 59.3897351 | 70.5403314 | 64.5432218 | 67 | 66.6251432 |
| 61.3897351 | 70.5403314 | 64.1146503 | 67 | 66.5639187 |
| 61.3897351 | 70.5403314 | 63.828936  | 67 | 66.5064048 |
| 62.3897351 | 70.5403314 | 64.1146503 | 67 | 66.4377592 |
| 60.3897351 | 69.5403314 | 63.6860789 | 67 | 66.3709688 |
| 59.3897351 | 69.5403314 | 63.5432218 | 67 | 66.3097444 |
| 57.3897351 | 69.5403314 | 63.2575075 | 67 | 66.2522304 |
| 57.3897351 | 72.5403314 | 63.9717932 | 67 | 66.1910059 |

|            |            |            |    |            |
|------------|------------|------------|----|------------|
| 57.3897351 | 72.5403314 | 64.2575075 | 67 | 66.1279262 |
| 59.3897351 | 73.5403314 | 64.6860789 | 67 | 66.068557  |
| 58.3897351 | 73.5403314 | 64.6860789 | 67 | 66.0184642 |
| 58.3897351 | 74.5403314 | 64.828936  | 67 | 65.959095  |
| 57.3897351 | 74.5403314 | 64.828936  | 67 | 65.8978705 |
| 57.3897351 | 74.5403314 | 64.828936  | 67 | 65.849633  |
| 56.3897351 | 74.5403314 | 64.6860789 | 67 | 65.8013956 |
| 57.3897351 | 74.5403314 | 64.9717932 | 67 | 65.7531581 |
| 58.3897351 | 75.5403314 | 65.2575075 | 67 | 65.70121   |
| 57.3897351 | 76.5403314 | 65.9717932 | 67 | 65.6529726 |
| 57.3897351 | 76.5403314 | 65.9717932 | 67 | 65.6028798 |
| 58.3897351 | 77.5403314 | 65.9717932 | 67 | 65.5435106 |
| 59.3897351 | 66.9717932 | 64.7477163 | 67 | 65.4934178 |
| 58.3897351 | 66.828936  | 64.2987367 | 67 | 65.4433251 |
| 58.3897351 | 66.828936  | 64.1558796 | 67 | 65.3932323 |
| 58.3897351 | 66.6860789 | 64.4211857 | 67 | 65.3505607 |
| 58.3897351 | 66.6860789 | 64.4211857 | 67 | 65.3153102 |
| 58.3897351 | 80.5403314 | 66.2575075 | 67 | 65.2911915 |
| 61.3897351 | 80.5403314 | 66.2575075 | 67 | 65.2726386 |
| 61.3897351 | 80.5403314 | 66.1146503 | 67 | 65.2540857 |
| 61.3897351 | 80.5403314 | 66.1146503 | 67 | 65.2734221 |
| 61.3897351 | 80.5403314 | 66.6860789 | 67 | 65.2930236 |
| 60.3897351 | 80.5403314 | 66.5432218 | 67 | 65.3152755 |
| 60.3897351 | 67.6860789 | 65.4211857 | 67 | 65.3192395 |
| 60.3897351 | 82.5403314 | 67.6860789 | 67 | 65.3242637 |
| 60.3897351 | 80.5403314 | 66.9717932 | 67 | 65.3369741 |
| 60.3897351 | 76.5403314 | 65.9717932 | 67 | 65.371948  |
| 60.3897351 | 75.5403314 | 65.5432218 | 67 | 65.4141789 |
| 60.3897351 | 75.5403314 | 65.4003646 | 67 | 65.4568505 |
| 60.3897351 | 74.5403314 | 65.1146503 | 67 | 65.4939563 |
| 60.3897351 | 74.5403314 | 64.9717932 | 67 | 65.5477596 |
| 60.3897351 | 73.5403314 | 64.6860789 | 67 | 65.601563  |
| 60.3897351 | 73.5403314 | 64.828936  | 67 | 65.6256817 |
| 57.3897351 | 72.5403314 | 63.828936  | 67 | 65.6246269 |
| 56.3897351 | 71.5403314 | 63.5432218 | 67 | 65.6524562 |
| 56.3897351 | 71.5403314 | 63.9717932 | 67 | 65.6858514 |
| 54.3897351 | 71.5403314 | 64.2575075 | 67 | 65.7173913 |
| 54.3897351 | 71.5403314 | 63.9717932 | 67 | 65.7396547 |
| 54.3897351 | 71.5403314 | 63.828936  | 67 | 65.7359442 |
| 55.3897351 | 70.5403314 | 63.9717932 | 67 | 65.7173913 |
| 56.3897351 | 70.5403314 | 64.4003646 | 67 | 65.6914173 |
| 57.3897351 | 70.5403314 | 64.2575075 | 67 | 65.6635879 |
| 57.3897351 | 70.5403314 | 64.2575075 | 67 | 65.6357586 |
| 57.3897351 | 70.5403314 | 65.2575075 | 67 | 65.6097846 |
| 57.3897351 | 69.5403314 | 65.4003646 | 67 | 65.5838106 |



|            |            |            |    |            |
|------------|------------|------------|----|------------|
| 57.3897351 | 69.5403314 | 64.9717932 | 67 | 65.5634024 |
| 57.3897351 | 69.5403314 | 64.9717932 | 67 | 65.5429943 |
| 57.3897351 | 69.5403314 | 65.2575075 | 67 | 65.5244414 |
| 57.3897351 | 69.5403314 | 65.5432218 | 67 | 65.4929015 |
| 57.3897351 | 69.5403314 | 65.5432218 | 67 | 65.457651  |
| 58.3897351 | 69.5403314 | 65.6860789 | 67 | 65.4168347 |
| 60.3897351 | 69.5403314 | 65.828936  | 67 | 65.3882049 |
| 60.3897351 | 69.5403314 | 65.828936  | 67 | 65.3672613 |
| 60.3897351 | 69.5403314 | 65.9717932 | 67 | 65.3685811 |
| 63.3897351 | 69.5403314 | 66.4003646 | 67 | 65.3683107 |
| 64.3897351 | 69.5403314 | 66.4003646 | 67 | 65.3754615 |
| 66.3897351 | 69.5403314 | 66.5432218 | 67 | 65.3643297 |
| 66.3897351 | 69.5403314 | 66.828936  | 67 | 65.3513427 |
| 66.3897351 | 70.5403314 | 67.1146503 | 67 | 65.3113913 |
| 66.3897351 | 71.5403314 | 66.9717932 | 67 | 65.3076807 |
| 66.3897351 | 72.5403314 | 67.2575075 | 67 | 65.2891278 |
| 66.3897351 | 73.5403314 | 67.4003646 | 67 | 65.2421617 |
| 66.3897351 | 75.5403314 | 67.828936  | 67 | 65.2142732 |
| 66.3897351 | 75.5403314 | 67.828936  | 67 | 65.1569705 |
| 66.3897351 | 76.5403314 | 69.2575075 | 67 | 65.1047036 |
| 66.3897351 | 76.5403314 | 69.9717932 | 67 | 65.0633034 |
| 67.3897351 | 76.5403314 | 70.2575075 | 67 | 65.027204  |
| 67.3897351 | 76.5403314 | 68.9717932 | 67 | 64.9905745 |
| 68.3897351 | 78.5403314 | 68.9717932 | 67 | 64.9579206 |
| 65.3897351 | 79.5403314 | 68.6860789 | 67 | 64.9313627 |
| 65.3897351 | 79.5403314 | 65.9717932 | 67 | 64.9042746 |
| 64.3897351 | 65.9717932 | 63.7477163 | 67 | 64.879572  |
| 64.3897351 | 81.5403314 | 66.2575075 | 67 | 64.8742174 |
| 64.3897351 | 80.5403314 | 66.2575075 | 67 | 64.8791993 |
| 64.3897351 | 79.5403314 | 65.9717932 | 67 | 64.8743748 |
| 62.3897351 | 76.5403314 | 64.9717932 | 67 | 64.8764413 |
| 61.3897351 | 75.5403314 | 63.6860789 | 67 | 64.9116917 |
| 59.3897351 | 75.5403314 | 62.828936  | 67 | 64.9599292 |
| 59.3897351 | 74.5403314 | 62.6860789 | 67 | 65.010022  |
| 59.3897351 | 74.5403314 | 62.5432218 | 67 | 65.0545489 |
| 59.3897351 | 74.5403314 | 62.6860789 | 67 | 65.0972205 |
| 59.3897351 | 73.5403314 | 62.828936  | 67 | 65.1398921 |
| 59.3897351 | 73.5403314 | 62.828936  | 67 | 65.1769978 |
| 59.3897351 | 71.5403314 | 63.1146503 | 67 | 65.2141036 |
| 59.3897351 | 70.5403314 | 63.4003646 | 67 | 65.2437882 |
| 59.3897351 | 70.5403314 | 63.828936  | 67 | 65.2679069 |
| 59.3897351 | 70.5403314 | 63.5432218 | 67 | 65.2846045 |
| 55.3897351 | 71.5403314 | 63.2575075 | 67 | 65.2883151 |
| 51.3897351 | 72.5403314 | 62.828936  | 67 | 65.2901704 |
| 51.3897351 | 72.5403314 | 62.5432218 | 67 | 65.2716175 |

|            |            |            |    |            |
|------------|------------|------------|----|------------|
| 51.3897351 | 72.5403314 | 62.6860789 | 67 | 65.2567752 |
| 51.3897351 | 72.5403314 | 64.2575075 | 67 | 65.2437882 |
| 51.3897351 | 72.5403314 | 64.4003646 | 67 | 65.2308012 |
| 50.3897351 | 72.5403314 | 64.9717932 | 67 | 65.2252353 |
| 50.3897351 | 72.5403314 | 65.4003646 | 67 | 65.2215247 |
| 49.3897351 | 71.5403314 | 65.2575075 | 67 | 65.210393  |
| 49.3897351 | 71.5403314 | 63.0383866 | 67 | 65.1992613 |
| 48.3897351 | 71.5403314 | 65.828936  | 67 | 65.1862743 |
| 48.3897351 | 71.5403314 | 65.2575075 | 67 | 65.184419  |
| 48.3897351 | 71.5403314 | 62.9268325 | 67 | 65.184419  |
| 51.3897351 | 71.5403314 | 63.2737713 | 67 | 65.1825637 |
| 52.3897351 | 70.5403314 | 63.2737713 | 67 | 65.1769978 |
| 53.3897351 | 70.5403314 | 62.9472406 | 67 | 65.1695767 |
| 53.3897351 | 70.5403314 | 62.7839753 | 67 | 65.1436027 |
| 54.3897351 | 70.5403314 | 62.7635672 | 67 | 65.1009311 |
| 55.3897351 | 70.5403314 | 62.5798937 | 67 | 65.0452724 |
| 55.3897351 | 70.5403314 | 62.6003019 | 67 | 65.0081667 |
| 58.3897351 | 70.5403314 | 62.9268325 | 67 | 64.9562186 |
| 60.3897351 | 66.5403314 | 62.6003019 | 67 | 64.913547  |
| 61.3897351 | 66.5403314 | 62.9268325 | 67 | 64.9042706 |
| 61.3897351 | 66.5403314 | 63.4166284 | 67 | 64.9201677 |
| 63.3897351 | 66.5403314 | 63.9268325 | 67 | 64.9034701 |
| 64.3897351 | 66.5403314 | 63.6003019 | 67 | 64.8867725 |
| 66.3897351 | 67.5403314 | 64.4166284 | 67 | 64.8682196 |
| 66.3897351 | 70.5403314 | 66.6860789 | 67 | 64.8607985 |
| 68.3897351 | 71.5403314 | 67.5432218 | 67 | 64.8719302 |
| 70.3897351 | 71.5403314 | 67.828936  | 67 | 64.8979042 |
| 73.3897351 | 72.5403314 | 67.828936  | 67 | 64.9257335 |
| 75.3897351 | 72.5403314 | 67.5432218 | 67 | 64.9665499 |
| 72.3897351 | 72.5403314 | 67.5432218 | 67 | 65.0444719 |
| 72.3897351 | 72.5403314 | 68.1146503 | 67 | 65.1205387 |
| 70.3897351 | 72.5403314 | 68.2575075 | 67 | 65.1984608 |
| 69.3897351 | 72.5403314 | 67.2575075 | 67 | 65.2671065 |
| 67.3897351 | 71.5403314 | 66.828936  | 67 | 65.3320415 |
| 67.3897351 | 71.5403314 | 66.5432218 | 67 | 65.3895554 |
| 68.3897351 | 71.5403314 | 65.828936  | 67 | 65.4433588 |
| 69.3897351 | 69.5403314 | 65.6860789 | 67 | 65.5008727 |
| 69.3897351 | 69.5403314 | 64.2575075 | 67 | 65.5658078 |
| 69.3897351 | 69.5403314 | 64.6860789 | 67 | 65.6344534 |
| 69.3897351 | 69.5403314 | 64.828936  | 67 | 65.7197966 |
| 69.3897351 | 69.5403314 | 64.9717932 | 67 | 65.7847317 |
| 69.3897351 | 69.5403314 | 65.9717932 | 67 | 65.8478115 |
| 68.3897351 | 68.5403314 | 66.1146503 | 67 | 65.9071807 |
| 68.3897351 | 68.5403314 | 65.6860789 | 67 | 65.9665499 |
| 68.3897351 | 68.5403314 | 65.9717932 | 67 | 66.0314849 |

|            |            |            |    |            |
|------------|------------|------------|----|------------|
| 68.3897351 | 70.5403314 | 66.1146503 | 67 | 66.1252397 |
| 68.3897351 | 70.5403314 | 66.828936  | 67 | 66.1883195 |
| 67.3897351 | 72.5403314 | 67.2575075 | 67 | 66.2662416 |
| 67.3897351 | 72.5403314 | 67.2575075 | 67 | 66.3391817 |
| 67.3897351 | 74.5403314 | 67.4003646 | 67 | 66.4039056 |
| 67.3897351 | 75.5403314 | 67.2575075 | 67 | 66.4630636 |
| 67.3897351 | 75.5403314 | 67.2575075 | 67 | 66.5208963 |
| 67.3897351 | 76.5403314 | 66.6860789 | 67 | 66.5808494 |
| 65.3897351 | 77.5403314 | 65.9717932 | 67 | 66.6280806 |
| 65.3897351 | 79.5403314 | 66.1146503 | 67 | 66.6721312 |
| 65.3897351 | 73.5403314 | 64.9717932 | 67 | 66.7214827 |
| 65.3897351 | 73.5403314 | 65.4003646 | 67 | 66.7610276 |
| 64.3897351 | 73.5403314 | 65.2575075 | 67 | 66.8048132 |
| 64.3897351 | 73.5403314 | 64.9717932 | 67 | 66.8573452 |
| 64.3897351 | 73.5403314 | 64.9717932 | 67 | 66.9053714 |
| 64.3897351 | 73.5403314 | 64.9717932 | 67 | 66.9523375 |
| 64.3897351 | 71.5403314 | 64.5432218 | 67 | 66.9998337 |
| 64.3897351 | 71.5403314 | 64.4003646 | 67 | 67.0404388 |
| 63.3897351 | 71.5403314 | 64.5432218 | 67 | 67.0218913 |
| 65.3897351 | 71.5403314 | 64.828936  | 67 | 66.9969828 |
| 66.3897351 | 70.5403314 | 64.828936  | 67 | 66.9606775 |
| 66.3897351 | 70.5403314 | 65.6860789 | 67 | 66.929143  |
| 66.3897351 | 70.5403314 | 68.6860789 | 67 | 66.9034394 |
| 67.3897351 | 69.5403314 | 68.6860789 | 67 | 66.8716398 |
| 67.3897351 | 69.5403314 | 68.828936  | 67 | 66.8345394 |
| 67.3897351 | 69.5403314 | 68.4003646 | 67 | 66.7953187 |
| 67.3897351 | 69.5403314 | 68.4003646 | 67 | 66.7685549 |
| 67.3897351 | 69.5403314 | 68.2575075 | 67 | 66.747357  |
| 66.3897351 | 67.5403314 | 67.6860789 | 67 | 66.7298697 |
| 66.3897351 | 67.5403314 | 67.6860789 | 67 | 66.7213937 |
| 66.3897351 | 67.5403314 | 67.828936  | 67 | 66.7166283 |
| 66.3897351 | 67.5403314 | 67.828936  | 67 | 66.7304158 |
| 66.3897351 | 67.5403314 | 69.2575075 | 67 | 66.7436401 |
| 67.3897351 | 67.5403314 | 69.2575075 | 67 | 66.7521268 |
| 67.3897351 | 67.5403314 | 69.2575075 | 67 | 66.7582281 |
| 65.3897351 | 67.5403314 | 69.5432218 | 67 | 66.742331  |
| 64.3897351 | 66.5403314 | 69.9717932 | 67 | 66.7094713 |
| 63.3897351 | 67.5403314 | 70.2575075 | 67 | 66.7168924 |
| 63.3897351 | 67.5403314 | 70.2575075 | 67 | 66.6909238 |
| 62.3897351 | 67.5403314 | 70.6860789 | 67 | 66.6593892 |
| 62.3897351 | 67.5403314 | 71.2575075 | 67 | 66.6122173 |
| 60.3897351 | 68.5403314 | 68.5432218 | 67 | 66.5645153 |
| 58.3897351 | 69.5403314 | 68.2575075 | 67 | 66.5231742 |
| 58.3897351 | 69.5403314 | 67.828936  | 67 | 66.4789177 |
| 58.3897351 | 69.5403314 | 67.4003646 | 67 | 66.4389019 |

|            |            |            |    |            |
|------------|------------|------------|----|------------|
| 58.3897351 | 69.5403314 | 67.4003646 | 67 | 66.391995  |
| 57.3897351 | 69.5403314 | 66.4003646 | 67 | 66.3437628 |
| 57.3897351 | 69.5403314 | 65.9717932 | 67 | 66.2979161 |
| 58.3897351 | 71.5403314 | 66.4003646 | 67 | 66.2502141 |
| 59.3897351 | 71.5403314 | 65.9717932 | 67 | 66.2234503 |
| 59.3897351 | 72.5403314 | 65.9717932 | 67 | 66.1974816 |
| 60.3897351 | 79.5403314 | 66.9717932 | 67 | 66.1903309 |
| 61.3897351 | 80.5403314 | 67.1146503 | 67 | 66.1868907 |
| 61.3897351 | 80.5403314 | 67.5432218 | 67 | 66.1815952 |
| 61.3897351 | 80.5403314 | 67.2575075 | 67 | 66.1741795 |
| 61.3897351 | 82.5403314 | 67.5432218 | 67 | 66.1747149 |
| 63.3897351 | 67.5432218 | 65.2579204 | 67 | 66.1837317 |
| 65.3897351 | 68.1146503 | 65.6252673 | 67 | 66.1972541 |
| 66.3897351 | 67.9717932 | 65.0334306 | 67 | 66.2094514 |
| 70.3897351 | 68.5432218 | 65.4007775 | 67 | 66.2237689 |
| 70.3897351 | 68.6860789 | 65.5640428 | 67 | 66.2269548 |
| 71.3897351 | 68.4003646 | 65.0946551 | 67 | 66.1954203 |
| 72.3897351 | 68.5432218 | 65.2579204 | 67 | 66.1683914 |
| 72.3897351 | 68.4003646 | 65.2375122 | 67 | 66.143748  |
| 72.3897351 | 68.1146503 | 65.1966959 | 67 | 66.1249354 |
| 73.3897351 | 68.1146503 | 65.1966959 | 67 | 66.1146042 |
| 73.3897351 | 68.1146503 | 65.1966959 | 67 | 66.1124892 |
| 73.3897351 | 67.9717932 | 65.1762877 | 67 | 66.1050734 |
| 73.3897351 | 67.9717932 | 65.3191449 | 67 | 66.0928869 |
| 73.3897351 | 67.9717932 | 65.3191449 | 67 | 66.0830858 |
| 79.3897351 | 66.6682241 | 65.7043493 | 67 | 66.069574  |
| 79.3897351 | 68.1146503 | 65.4824102 | 67 | 66.0398948 |
| 79.3897351 | 67.828936  | 65.4415938 | 67 | 66.0144562 |
| 77.3897351 | 66.9717932 | 64.7477163 | 67 | 65.9908729 |
| 71.3897351 | 65.828936  | 63.584451  | 67 | 65.9656994 |
| 71.3897351 | 81.5403314 | 66.2575075 | 67 | 65.941321  |
| 68.3897351 | 66.5432218 | 63.9722061 | 67 | 65.9217133 |
| 66.3897351 | 66.5432218 | 63.6864918 | 67 | 65.8997202 |
| 65.3897351 | 66.1146503 | 63.1966959 | 67 | 65.8785223 |
| 65.3897351 | 66.828936  | 63.584451  | 67 | 65.8493731 |
| 65.3897351 | 67.2575075 | 64.0742469 | 67 | 65.8575948 |
| 63.3897351 | 67.6860789 | 63.9926143 | 67 | 65.8652863 |
| 63.3897351 | 67.9717932 | 64.1762877 | 67 | 65.8785438 |
| 63.3897351 | 67.2575075 | 63.6456755 | 67 | 65.8825247 |
| 59.3897351 | 66.5432218 | 62.9722061 | 67 | 65.8843854 |
| 56.3897351 | 65.828936  | 62.4415938 | 67 | 65.9016925 |
| 56.3897351 | 65.828936  | 62.4415938 | 67 | 65.9030231 |
| 56.3897351 | 66.1146503 | 62.9109816 | 67 | 65.8924268 |
| 56.3897351 | 66.5432218 | 63.4007775 | 67 | 65.8831558 |
| 56.3897351 | 67.6860789 | 64.7069    | 67 | 65.8717644 |

|            |            |            |    |            |
|------------|------------|------------|----|------------|
| 55.3897351 | 67.6860789 | 64.7069    | 67 | 65.8431453 |
| 55.3897351 | 67.6860789 | 64.5640428 | 67 | 65.8187669 |
| 55.3897351 | 67.5432218 | 64.4007775 | 67 | 65.7864372 |
| 55.3897351 | 67.828936  | 64.584451  | 67 | 65.7660344 |
| 55.3897351 | 68.4003646 | 65.0946551 | 67 | 65.7461617 |
| 54.3897351 | 68.828936  | 65.584451  | 67 | 65.7580885 |
| 54.3897351 | 69.1146503 | 65.7681245 | 67 | 65.7697504 |
| 54.3897351 | 69.2575075 | 65.9313898 | 67 | 65.7890984 |
| 54.3897351 | 69.2575075 | 65.9313898 | 67 | 65.806061  |
| 54.3897351 | 69.5432218 | 66.2579204 | 67 | 65.8182529 |
| 54.3897351 | 69.9717932 | 66.6048592 | 67 | 65.8346854 |
| 54.3897351 | 70.2575075 | 66.9313898 | 67 | 65.851118  |
| 54.3897351 | 70.4003646 | 66.9517979 | 67 | 65.8728513 |
| 58.3897351 | 70.9717932 | 67.6048592 | 67 | 65.8908741 |
| 59.3897351 | 71.4003646 | 68.0946551 | 67 | 65.9115473 |
| 59.3897351 | 70.5432218 | 67.1150632 | 67 | 65.9343409 |
| 61.3897351 | 69.9717932 | 66.7477163 | 67 | 65.9616401 |
| 63.3897351 | 70.2575075 | 67.0742469 | 67 | 65.9873491 |
| 63.3897351 | 70.2575075 | 66.7885326 | 67 | 66.0088174 |
| 63.3897351 | 70.5432218 | 66.9722061 | 67 | 66.0252831 |
| 63.3897351 | 70.828936  | 67.2987367 | 67 | 66.0361498 |
| 63.3897351 | 71.828936  | 67.4415938 | 67 | 66.0369449 |
| 62.3897351 | 71.9717932 | 67.6048592 | 67 | 66.0427758 |
| 62.3897351 | 72.4003646 | 68.0946551 | 67 | 66.0613287 |
| 62.3897351 | 72.9717932 | 68.7477163 | 67 | 66.0361551 |
| 62.3897351 | 72.6860789 | 68.5640428 | 67 | 66.0406608 |
| 62.3897351 | 73.1146503 | 69.0538387 | 67 | 66.0446364 |
| 62.3897351 | 72.828936  | 69.0130224 | 67 | 66.041986  |
| 64.3897351 | 72.9717932 | 69.1762877 | 67 | 66.0382755 |
| 64.3897351 | 72.6860789 | 68.8497571 | 67 | 66.0303242 |
| 64.3897351 | 72.6860789 | 68.8497571 | 67 | 66.0207827 |
| 62.3897351 | 71.6860789 | 67.7069    | 67 | 66.0088559 |
| 62.3897351 | 71.5432218 | 67.5436347 | 67 | 66.0001095 |
| 62.3897351 | 72.868894  | 67.7330164 | 67 | 65.9934835 |
| 62.3897351 | 70.2575075 | 66.0742469 | 67 | 65.9937486 |
| 63.3897351 | 69.828936  | 65.584451  | 67 | 65.9961339 |
| 63.3897351 | 69.5432218 | 65.2579204 | 67 | 65.9860624 |
| 63.3897351 | 69.4003646 | 65.0946551 | 67 | 65.9632688 |
| 63.3897351 | 69.1146503 | 64.7681245 | 67 | 65.919272  |
| 64.3897351 | 69.4003646 | 65.2375122 | 67 | 65.8734199 |
| 64.3897351 | 69.1146503 | 65.0538387 | 67 | 65.8251824 |
| 64.3897351 | 69.5432218 | 65.6864918 | 67 | 65.7811856 |
| 64.3897351 | 69.828936  | 66.0130224 | 67 | 65.7348034 |
| 64.3897351 | 69.9717932 | 66.1762877 | 67 | 65.6857708 |
| 65.3897351 | 70.4003646 | 66.5232265 | 67 | 65.6324976 |

|            |            |            |    |            |
|------------|------------|------------|----|------------|
| 65.3897351 | 70.4003646 | 66.5232265 | 67 | 65.5789593 |
| 65.3897351 | 70.6860789 | 66.7069    | 67 | 65.5230356 |
| 65.3897351 | 70.2575075 | 66.5028183 | 67 | 65.4586306 |
| 64.3897351 | 70.2575075 | 66.3599612 | 67 | 65.3873346 |
| 64.3897351 | 70.4003646 | 66.5232265 | 67 | 65.3115328 |
| 66.3897351 | 71.1146503 | 66.9109816 | 67 | 65.2582542 |
| 66.3897351 | 70.828936  | 66.584451  | 67 | 65.2047105 |
| 68.3897351 | 71.2575075 | 66.7885326 | 67 | 65.1482514 |
| 70.3897351 | 71.4003646 | 66.9517979 | 67 | 65.0928525 |
| 70.3897351 | 71.6860789 | 67.2783285 | 67 | 65.0520308 |
| 70.3897351 | 71.828936  | 67.2987367 | 67 | 65.023401  |
| 70.3897351 | 71.5432218 | 66.9722061 | 67 | 64.9905305 |
| 70.3897351 | 71.5432218 | 66.9722061 | 67 | 64.9669365 |
| 70.3897351 | 70.9717932 | 66.3191449 | 67 | 64.9428124 |
| 70.3897351 | 70.2575075 | 65.5028183 | 67 | 64.9218688 |
| 73.3897351 | 69.1146503 | 65.1966959 | 67 | 64.9064911 |
| 73.3897351 | 68.828936  | 65.0130224 | 67 | 64.9298093 |
| 74.3897351 | 67.9717932 | 64.3191449 | 67 | 64.9298093 |
| 73.3897351 | 67.9717932 | 64.3191449 | 67 | 64.9263638 |
| 73.3897351 | 67.6860789 | 63.9926143 | 67 | 64.8784996 |
| 65.3897351 | 66.6860789 | 62.9926143 | 67 | 64.8228284 |
| 63.3897351 | 66.828936  | 63.2987367 | 67 | 64.7662041 |
| 63.3897351 | 66.9717932 | 63.462002  | 67 | 64.705792  |
| 62.3897351 | 66.5432218 | 63.2579204 | 67 | 64.648237  |
| 62.3897351 | 66.5432218 | 63.2579204 | 67 | 64.5890606 |
| 62.3897351 | 65.5432218 | 62.9722061 | 67 | 64.5445201 |
| 62.3897351 | 64.9717932 | 62.462002  | 67 | 64.5010546 |
| 59.3897351 | 64.9717932 | 62.462002  | 67 | 64.4535258 |
| 59.3897351 | 65.1146503 | 62.6252673 | 67 | 64.4293359 |
| 59.3897351 | 64.6860789 | 62.1354714 | 67 | 64.4118342 |
| 56.3897351 | 64.2575075 | 61.6456755 | 67 | 64.3988175 |
| 56.3897351 | 63.9717932 | 61.3191449 | 67 | 64.387945  |
| 56.3897351 | 63.9717932 | 61.1762877 | 67 | 64.3819104 |
| 56.3897351 | 63.6860789 | 60.8497571 | 67 | 64.3681104 |
| 56.3897351 | 63.828936  | 61.0130224 | 67 | 64.3568689 |
| 54.3897351 | 63.828936  | 61.0130224 | 67 | 64.3347085 |
| 53.3897351 | 63.9717932 | 61.3191449 | 67 | 64.3062625 |
| 52.3897351 | 64.1146503 | 61.4824102 | 67 | 64.2740207 |
| 50.3897351 | 64.2575075 | 61.6456755 | 67 | 64.234561  |
| 50.3897351 | 64.1146503 | 61.6252673 | 67 | 64.193692  |
| 50.3897351 | 63.5432218 | 60.9722061 | 67 | 64.1479973 |
| 52.3897351 | 63.1146503 | 60.7681245 | 67 | 64.1043895 |
| 52.3897351 | 63.1146503 | 60.7681245 | 67 | 64.0618315 |
| 57.3897351 | 75.5403314 | 62.828936  | 67 | 64.014497  |
| 58.3897351 | 75.5403314 | 62.828936  | 67 | 63.9577032 |

|            |            |            |    |            |
|------------|------------|------------|----|------------|
| 58.3897351 | 75.5403314 | 63.2575075 | 67 | 63.9051682 |
| 56.3897351 | 75.5403314 | 63.828936  | 67 | 63.846324  |
| 57.3897351 | 74.5403314 | 63.9717932 | 67 | 63.7816267 |
| 59.3897351 | 71.5403314 | 64.5432218 | 67 | 63.7072288 |
| 59.3897351 | 70.5403314 | 64.5432218 | 67 | 63.6291525 |
| 59.3897351 | 69.5403314 | 64.9717932 | 67 | 63.5548624 |
| 59.3897351 | 68.5403314 | 65.1146503 | 67 | 63.4771955 |
| 59.3897351 | 67.5403314 | 65.6860789 | 67 | 63.4111037 |
| 59.3897351 | 68.5403314 | 66.2575075 | 67 | 63.3613009 |
| 58.3897351 | 84.5403314 | 69.4003646 | 67 | 63.3165352 |
| 58.3897351 | 72.4003646 | 68.0946551 | 67 | 63.274123  |
| 58.3897351 | 75.1146503 | 68.4824102 |    | 63.2473276 |

age





































































































































| time     | Person 1   | Person 14  | Person 10  | Person 6   | Person 5   |
|----------|------------|------------|------------|------------|------------|
| 16:02:05 | 82.2189819 | 86.401158  | 65.1396628 | 70.8049643 | 76.5026774 |
| 16:02:06 | 82.2189819 | 86.401158  | 65.1396628 | 70.8049643 | 76.5026774 |
| 16:02:07 | 82.2189819 | 86.401158  | 68.1396628 | 69.8049643 | 74.5026774 |
| 16:02:08 | 82.2189819 | 86.401158  | 67.1396628 | 70.8049643 | 74.5026774 |
| 16:02:09 | 82.2189819 | 86.401158  | 67.1396628 | 70.8049643 | 72.5026774 |
| 16:02:10 | 82.2189819 | 86.401158  | 67.1396628 | 69.8049643 | 72.5026774 |
| 16:02:11 | 81.2189819 | 86.401158  | 67.1396628 | 70.8049643 | 72.5026774 |
| 16:02:12 | 81.2189819 | 86.401158  | 68.1396628 | 71.8049643 | 72.5026774 |
| 16:02:13 | 82.2189819 | 86.401158  | 69.1396628 | 71.8049643 | 71.5026774 |
| 16:02:14 | 82.2189819 | 87.401158  | 69.1396628 | 72.8049643 | 71.5026774 |
| 16:02:15 | 82.2189819 | 87.401158  | 70.1396628 | 73.8049643 | 72.5026774 |
| 16:02:16 | 82.2189819 | 73.1259669 | 73.1396628 | 73.8049643 | 72.5026774 |
| 16:02:17 | 83.2189819 | 88.401158  | 73.1396628 | 72.8049643 | 73.5026774 |
| 16:02:18 | 84.2189819 | 88.401158  | 73.1396628 | 72.8049643 | 73.5026774 |
| 16:02:19 | 84.2189819 | 73.9037447 | 73.1396628 | 73.8049643 | 73.5026774 |
| 16:02:20 | 86.2189819 | 73.7926336 | 73.1396628 | 73.8049643 | 73.5026774 |
| 16:02:21 | 86.2189819 | 73.237078  | 72.1396628 | 73.8049643 | 73.5026774 |
| 16:02:22 | 86.2189819 | 73.6815224 | 71.1396628 | 73.8049643 | 73.5026774 |
| 16:02:23 | 86.2189819 | 73.7926336 | 71.1396628 | 73.8049643 | 73.5026774 |
| 16:02:24 | 86.2189819 | 74.1259669 | 71.1396628 | 73.8049643 | 74.5026774 |
| 16:02:25 | 87.2189819 | 74.4593002 | 70.1396628 | 73.8049643 | 74.5026774 |
| 16:02:26 | 86.2189819 | 74.237078  | 69.1396628 | 73.8049643 | 74.5026774 |
| 16:02:27 | 86.2189819 | 74.4593002 | 69.1396628 | 73.8049643 | 74.5026774 |
| 16:02:28 | 86.2189819 | 74.0148558 | 68.1396628 | 73.8049643 | 74.5026774 |
| 16:02:29 | 86.2189819 | 74.6815224 | 67.1396628 | 73.8049643 | 74.5026774 |
| 16:02:30 | 85.2189819 | 74.237078  | 67.1396628 | 73.8049643 | 73.5026774 |
| 16:02:31 | 83.2189819 | 74.0148558 | 67.1396628 | 73.8049643 | 73.5026774 |
| 16:02:32 | 82.2189819 | 73.5704113 | 67.1396628 | 72.8049643 | 72.5026774 |
| 16:02:33 | 81.2189819 | 73.7926336 | 70.1396628 | 72.8049643 | 72.5026774 |
| 16:02:34 | 81.2189819 | 73.5704113 | 71.1396628 | 72.8049643 | 72.5026774 |
| 16:02:35 | 81.2189819 | 76.401158  | 71.1396628 | 73.8049643 | 72.5026774 |
| 16:02:36 | 81.2189819 | 76.401158  | 71.1396628 | 73.8049643 | 72.5026774 |
| 16:02:37 | 81.2189819 | 76.401158  | 71.1396628 | 73.8049643 | 73.5026774 |
| 16:02:38 | 80.2189819 | 76.401158  | 71.1396628 | 75.8049643 | 73.5026774 |
| 16:02:39 | 80.2189819 | 77.401158  | 71.1396628 | 75.8049643 | 73.5026774 |
| 16:02:40 | 80.2189819 | 78.401158  | 71.1396628 | 77.8049643 | 73.5026774 |
| 16:02:41 | 79.2189819 | 79.401158  | 71.1396628 | 77.8049643 | 73.5026774 |
| 16:02:42 | 79.2189819 | 79.401158  | 71.1396628 | 79.8049643 | 72.5026774 |
| 16:02:43 | 79.2189819 | 80.401158  | 70.1396628 | 81.8049643 | 72.5026774 |
| 16:02:44 | 79.2189819 | 82.401158  | 70.1396628 | 81.8049643 | 71.5026774 |
| 16:02:45 | 78.2189819 | 83.401158  | 70.1396628 | 81.8049643 | 71.5026774 |
| 16:02:46 | 76.2189819 | 83.401158  | 71.1396628 | 79.8049643 | 71.5026774 |
| 16:02:47 | 73.2189819 | 84.401158  | 71.1396628 | 79.8049643 | 71.5026774 |

|          |            |           |            |            |            |            |
|----------|------------|-----------|------------|------------|------------|------------|
| 16:02:48 | 72.2189819 | 85.401158 | 72.1396628 | 75.8049643 | 72.5026774 |            |
| 16:02:49 | 71.2189819 | 85.401158 | 72.1396628 | 75.8049643 | 71.5026774 |            |
| 16:02:50 | 71.2189819 | 86.401158 | 72.1396628 | 75.8049643 | 71.5026774 |            |
| 16:02:51 | 70.2189819 | 87.401158 | 73.1396628 | 75.8049643 | 71.5026774 |            |
| 16:02:52 | 71.2189819 | 88.401158 | 74.1396628 | 74.8049643 | 71.5026774 |            |
| 16:02:53 | 71.2189819 | 88.401158 | 74.1396628 | 74.8049643 | 72.5026774 |            |
| 16:02:54 | 71.2189819 | 73.7      | 74.1396628 | 74.8049643 | 72.5026774 |            |
| 16:02:55 | 71.2189819 | 73.5      | 74.1396628 | 74.8049643 | 72.5026774 |            |
| 16:02:56 | 71.2189819 | 73.3      | 74.1396628 | 74.8049643 | 71.5026774 |            |
| 16:02:57 | 71.2189819 | 72.6      | 70.1396628 | 74.8049643 | 71.5026774 |            |
| 16:02:58 | 75.2189819 | 73.3      | 69.1396628 | 74.8049643 | 71.5026774 |            |
| 16:02:59 | 75.2189819 | 73.3      | 69.1396628 | 74.8049643 | 71.5026774 |            |
| 16:03:00 | 75.2189819 | 89.401158 | 69.1396628 | 74.8049643 | 71.5026774 |            |
| 16:03:01 | 75.2189819 | 87.401158 | 69.1396628 | 72.8049643 | 71.5026774 |            |
| 16:03:02 | 75.2189819 | 87.401158 | 69.1396628 | 72.8049643 | 72.5026774 |            |
| 16:03:03 | 77.2189819 | 86.401158 | 69.1396628 | 72.8049643 | 73.5026774 |            |
| 16:03:04 | 80.2189819 | 85.401158 | 69.1396628 | 76.8049643 | 73.5026774 |            |
| 16:03:05 | 83.2189819 | 85.401158 | 69.1396628 | 75.8049643 | 74.5026774 |            |
| 16:03:06 | 83.2189819 | 84.401158 | 69.1396628 | 75.8049643 | 74.5026774 |            |
| 16:03:07 | 89.2189819 | 84.401158 | 69.1396628 | 75.8049643 | 74.5026774 |            |
| 16:03:08 | 89.2189819 | 83.401158 | 69.1396628 | 74.8049643 | 74.5026774 |            |
| 16:03:09 |            | 74.9      | 83.401158  | 69.1396628 | 74.8049643 | 75.5026774 |
| 16:03:10 |            | 76.4      | 83.401158  | 72.1396628 | 77.8049643 | 77.5026774 |
| 16:03:11 |            | 77.9      | 84.401158  | 74.1396628 | 79.8049643 | 77.5026774 |
| 16:03:12 |            | 78.7      | 84.401158  | 75.1396628 | 80.8049643 | 78.5026774 |
| 16:03:13 |            | 77.9      | 84.401158  | 76.1396628 | 80.8049643 | 78.5026774 |
| 16:03:14 |            | 77.8      | 84.401158  | 76.1396628 | 80.8049643 | 78.5026774 |
| 16:03:15 | 87.2189819 | 85.401158 | 76.1396628 | 80.8049643 | 78.5026774 |            |
| 16:03:16 | 82.2189819 | 87.401158 | 76.1396628 | 80.8049643 | 78.5026774 |            |
| 16:03:17 | 82.2189819 | 87.401158 | 76.1396628 | 79.8049643 | 78.5026774 |            |
| 16:03:18 | 81.2189819 | 87.401158 | 74.1396628 | 79.8049643 | 78.5026774 |            |
| 16:03:19 | 80.2189819 | 86.401158 | 72.1396628 | 79.8049643 | 66.5026774 |            |
| 16:03:20 | 80.2189819 | 83.401158 | 69.1396628 | 79.8049643 | 66.5026774 |            |
| 16:03:21 | 80.2189819 | 81.401158 | 69.1396628 | 78.8049643 | 65.5026774 |            |
| 16:03:22 | 80.2189819 | 79.401158 | 69.1396628 | 78.8049643 | 65.5026774 |            |
| 16:03:23 | 81.2189819 | 79.401158 | 69.1396628 | 78.8049643 | 66.5026774 |            |
| 16:03:24 | 81.2189819 | 79.401158 | 69.1396628 | 78.8049643 | 66.5026774 |            |
| 16:03:25 | 81.2189819 | 79.401158 | 69.1396628 | 80.8049643 | 67.5026774 |            |
| 16:03:26 | 78.2189819 | 80.401158 | 70.1396628 | 80.8049643 | 65.5026774 |            |
| 16:03:27 | 77.2189819 | 80.401158 | 71.1396628 | 80.8049643 | 65.5026774 |            |
| 16:03:28 | 77.2189819 | 80.401158 | 71.1396628 | 81.8049643 | 65.5026774 |            |
| 16:03:29 | 77.2189819 | 80.401158 | 72.1396628 | 81.8049643 | 65.5026774 |            |
| 16:03:30 | 77.2189819 | 80.401158 | 72.1396628 | 82.8049643 | 65.5026774 |            |
| 16:03:31 | 78.2189819 | 79.401158 | 73.1396628 | 83.8049643 | 65.5026774 |            |
| 16:03:32 | 79.2189819 | 78.401158 | 73.1396628 | 84.8049643 | 65.5026774 |            |

|          |            |           |            |            |            |
|----------|------------|-----------|------------|------------|------------|
| 16:03:33 | 80.2189819 | 78.401158 | 81.1396628 | 86.8049643 | 65.5026774 |
| 16:03:34 | 80.2189819 | 78.401158 | 82.1396628 | 85.8049643 | 64.5026774 |
| 16:03:35 | 80.2189819 | 79.401158 | 83.1396628 | 85.8049643 | 64.5026774 |
| 16:03:36 | 80.2189819 | 80.401158 | 82.1396628 | 85.8049643 | 64.5026774 |
| 16:03:37 | 81.2189819 | 80.401158 | 81.1396628 | 87.8049643 | 64.5026774 |
| 16:03:38 | 82.2189819 | 82.401158 | 81.1396628 | 87.8049643 | 64.5026774 |
| 16:03:39 | 82.2189819 | 82.401158 | 81.1396628 | 88.8049643 | 64.5026774 |
| 16:03:40 | 83.2189819 | 82.401158 | 81.1396628 | 88.8049643 | 64.5026774 |
| 16:03:41 | 87.2189819 | 82.401158 | 80.1396628 | 89.8049643 | 67.5026774 |
| 16:03:42 | 89.2189819 | 82.401158 | 74.1396628 | 90.8049643 | 68.5026774 |
| 16:03:43 | 90.2189819 | 82.401158 | 74.1396628 | 90.8049643 | 68.5026774 |
| 16:03:44 | 90.2189819 | 81.401158 | 73.1396628 | 90.8049643 | 68.5026774 |
| 16:03:45 | 91.2189819 | 81.401158 | 72.1396628 | 90.8049643 | 68.5026774 |
| 16:03:46 | 91.2189819 | 81.401158 | 72.1396628 | 91.8049643 | 68.5026774 |
| 16:03:47 | 88.2189819 | 85.401158 | 72.1396628 | 91.8049643 | 68.5026774 |
| 16:03:48 | 86.2189819 | 85.401158 | 71.1396628 | 91.8049643 | 68.5026774 |
| 16:03:49 | 85.2189819 | 85.401158 | 70.1396628 | 92.8049643 | 69.5026774 |
| 16:03:50 | 85.2189819 | 84.401158 | 70.1396628 | 91.8049643 | 69.5026774 |
| 16:03:51 | 85.2189819 | 84.401158 | 69.1396628 | 73.8049643 | 69.5026774 |
| 16:03:52 | 83.2189819 | 80.401158 | 69.1396628 | 73.8049643 | 70.5026774 |
| 16:03:53 | 83.2189819 | 79.401158 | 70.1396628 | 63.8049643 | 70.5026774 |
| 16:03:54 | 83.2189819 | 79.401158 | 70.1396628 | 63.8049643 | 70.5026774 |
| 16:03:55 | 82.2189819 | 79.401158 | 72.1396628 | 62.8049643 | 70.5026774 |
| 16:03:56 | 82.2189819 | 81.401158 | 72.1396628 | 62.8049643 | 70.5026774 |
| 16:03:57 | 81.2189819 | 81.401158 | 70.1396628 | 62.8049643 | 71.5026774 |
| 16:03:58 | 82.2189819 | 83.401158 | 70.1396628 | 62.8049643 | 71.5026774 |
| 16:03:59 | 82.2189819 | 83.401158 | 65.1396628 | 62.8049643 | 71.5026774 |
| 16:04:00 | 81.2189819 | 83.401158 | 64.1396628 | 64.8049643 | 71.5026774 |
| 16:04:01 | 82.2189819 | 80.401158 | 64.1396628 | 66.8049643 | 70.5026774 |
| 16:04:02 | 83.2189819 | 80.401158 | 64.1396628 | 66.8049643 | 70.5026774 |
| 16:04:03 | 83.2189819 | 80.401158 | 64.1396628 | 68.8049643 | 70.5026774 |
| 16:04:04 | 86.2189819 | 80.401158 | 69.1396628 | 68.8049643 | 68.5026774 |
| 16:04:05 | 73.4       | 81.401158 | 70.1396628 | 67.8049643 | 68.5026774 |
| 16:04:06 | 73.3       | 81.401158 | 70.1396628 | 66.8049643 | 68.5026774 |
| 16:04:07 | 73.7       | 82.401158 | 71.1396628 | 66.8049643 | 70.5026774 |
| 16:04:08 | 73.7       | 82.401158 | 70.1396628 | 66.8049643 | 71.5026774 |
| 16:04:09 | 73.8       | 83.401158 | 69.1396628 | 65.8049643 | 72.5026774 |
| 16:04:10 | 73.9       | 83.401158 | 69.1396628 | 64.8049643 | 72.5026774 |
| 16:04:11 | 74.2       | 83.401158 | 69.1396628 | 64.8049643 | 74.5026774 |
| 16:04:12 | 74.3       | 83.401158 | 69.1396628 | 64.8049643 | 74.5026774 |
| 16:04:13 | 75.4       | 83.401158 | 70.1396628 | 64.8049643 | 74.5026774 |
| 16:04:14 | 75.2       | 82.401158 | 70.1396628 | 64.8049643 | 74.5026774 |
| 16:04:15 | 74.4       | 81.401158 | 70.1396628 | 65.8049643 | 74.5026774 |
| 16:04:16 | 74         | 81.401158 | 70.1396628 | 65.8049643 | 74.5026774 |
| 16:04:17 | 73.9       | 81.401158 | 70.1396628 | 66.8049643 | 73.5026774 |

|          |            |           |            |            |            |
|----------|------------|-----------|------------|------------|------------|
| 16:04:18 | 73.4       | 81.401158 | 70.1396628 | 66.8049643 | 72.5026774 |
| 16:04:19 | 72.8       | 81.401158 | 70.1396628 | 66.8049643 | 72.5026774 |
| 16:04:20 | 86.2189819 | 81.401158 | 70.1396628 | 66.8049643 | 75.5026774 |
| 16:04:21 | 84.2189819 | 81.401158 | 70.1396628 | 66.8049643 | 75.5026774 |
| 16:04:22 | 83.2189819 | 81.401158 | 70.1396628 | 68.8049643 | 76.5026774 |
| 16:04:23 | 82.2189819 | 79.401158 | 70.1396628 | 68.8049643 | 76.5026774 |
| 16:04:24 | 81.2189819 | 77.401158 | 69.1396628 | 68.8049643 | 76.5026774 |
| 16:04:25 | 81.2189819 | 76.401158 | 69.1396628 | 70.8049643 | 77.5026774 |
| 16:04:26 | 81.2189819 | 76.401158 | 71.1396628 | 70.8049643 | 77.5026774 |
| 16:04:27 | 80.2189819 | 76.401158 | 71.1396628 | 70.8049643 | 78.5026774 |
| 16:04:28 | 80.2189819 | 81.401158 | 72.1396628 | 75.8049643 | 78.5026774 |
| 16:04:29 | 80.2189819 | 81.401158 | 72.1396628 | 75.8049643 | 78.5026774 |
| 16:04:30 | 80.2189819 | 78.401158 | 72.1396628 | 77.8049643 | 78.5026774 |
| 16:04:31 | 80.2189819 | 75.401158 | 72.1396628 | 77.8049643 | 78.5026774 |
| 16:04:32 | 80.2189819 | 75.401158 | 72.1396628 | 76.8049643 | 78.5026774 |
| 16:04:33 | 81.2189819 | 73.401158 | 71.1396628 | 77.8049643 | 79.5026774 |
| 16:04:34 | 81.2189819 | 73.401158 | 71.1396628 | 77.8049643 | 79.5026774 |
| 16:04:35 | 80.2189819 | 73.401158 | 70.1396628 | 75.8049643 | 79.5026774 |
| 16:04:36 | 79.2189819 | 73.401158 | 70.1396628 | 75.8049643 | 78.5026774 |
| 16:04:37 | 79.2189819 | 73.401158 | 70.1396628 | 75.8049643 | 78.5026774 |
| 16:04:38 | 78.2189819 | 73.401158 | 70.1396628 | 73.8049643 | 77.5026774 |
| 16:04:39 | 77.2189819 | 73.401158 | 69.1396628 | 72.8049643 | 76.5026774 |
| 16:04:40 | 77.2189819 | 73.401158 | 70.1396628 | 71.8049643 | 76.5026774 |
| 16:04:41 | 77.2189819 | 73.401158 | 70.1396628 | 70.8049643 | 75.5026774 |
| 16:04:42 | 76.2189819 | 73.401158 | 72.1396628 | 70.8049643 | 75.5026774 |
| 16:04:43 | 75.2189819 | 73.401158 | 71.1396628 | 70.8049643 | 75.5026774 |
| 16:04:44 | 75.2189819 | 73.401158 | 70.1396628 | 69.8049643 | 70.5026774 |
| 16:04:45 | 74.2189819 | 73.401158 | 70.1396628 | 69.8049643 | 70.5026774 |
| 16:04:46 | 73.2189819 | 73.401158 | 69.1396628 | 69.8049643 | 67.5026774 |
| 16:04:47 | 73.2189819 | 73.401158 | 69.1396628 | 67.8049643 | 66.5026774 |
| 16:04:48 | 73.2189819 | 73.401158 | 69.1396628 | 67.8049643 | 66.5026774 |
| 16:04:49 | 73.2189819 | 75.401158 | 69.1396628 | 67.8049643 | 67.5026774 |
| 16:04:50 | 73.2189819 | 75.401158 | 69.1396628 | 67.8049643 | 64.5026774 |
| 16:04:51 | 74.2189819 | 75.401158 | 69.1396628 | 67.8049643 | 63.5026774 |
| 16:04:52 | 73.2189819 | 75.401158 | 69.1396628 | 67.8049643 | 63.5026774 |
| 16:04:53 | 73.2189819 | 75.401158 | 69.1396628 | 68.8049643 | 63.5026774 |
| 16:04:54 | 72.2189819 | 76.401158 | 69.1396628 | 68.8049643 | 61.5026774 |
| 16:04:55 | 72.2189819 | 77.401158 | 67.1396628 | 71.8049643 | 61.5026774 |
| 16:04:56 | 72.2189819 | 77.401158 | 67.1396628 | 71.8049643 | 61.5026774 |
| 16:04:57 | 73.2189819 | 77.401158 | 67.1396628 | 71.8049643 | 61.5026774 |
| 16:04:58 | 72.2189819 | 77.401158 | 67.1396628 | 71.8049643 | 64.5026774 |
| 16:04:59 | 72.2189819 | 77.401158 | 67.1396628 | 74.8049643 | 64.5026774 |
| 16:05:00 | 72.2189819 | 78.401158 | 67.1396628 | 76.8049643 | 64.5026774 |
| 16:05:01 | 71.2189819 | 78.401158 | 67.1396628 | 76.8049643 | 62.5026774 |
| 16:05:02 | 72.2189819 | 78.401158 | 68.1396628 | 78.8049643 | 62.5026774 |

|          |            |           |            |            |            |
|----------|------------|-----------|------------|------------|------------|
| 16:05:03 | 72.2189819 | 78.401158 | 68.1396628 | 78.8049643 | 61.5026774 |
| 16:05:04 | 72.2189819 | 78.401158 | 68.1396628 | 81.8049643 | 61.5026774 |
| 16:05:05 | 72.2189819 | 78.401158 | 68.1396628 | 72.5       | 60.5026774 |
| 16:05:06 | 72.2189819 | 78.401158 | 67.1396628 | 72.2       | 60.5026774 |
| 16:05:07 | 73.2189819 | 78.401158 | 67.1396628 | 72.2       | 60.5026774 |
| 16:05:08 | 73.2189819 | 77.401158 | 68.1396628 | 72.2       | 60.5026774 |
| 16:05:09 | 73.2189819 | 77.401158 | 68.1396628 | 72.1       | 58.5026774 |
| 16:05:10 | 73.2189819 | 76.401158 | 68.1396628 | 71.8       | 55.5026774 |
| 16:05:11 | 73.2189819 | 78.401158 | 70.1396628 | 72.3       | 55.5026774 |
| 16:05:12 | 74.2189819 | 78.401158 | 70.1396628 | 72.6       | 55.5026774 |
| 16:05:13 | 74.2189819 | 80.401158 | 70.1396628 | 72.8       | 55.5026774 |
| 16:05:14 | 75.2189819 | 80.401158 | 70.1396628 | 74.4       | 68.5026774 |
| 16:05:15 | 77.2189819 | 80.401158 | 70.1396628 | 74.9       | 71.5026774 |
| 16:05:16 | 78.2189819 | 80.401158 | 68.1396628 | 89.8049643 | 71.5026774 |
| 16:05:17 | 77.2189819 | 82.401158 | 68.1396628 | 89.8049643 | 72.5026774 |
| 16:05:18 | 76.2189819 | 74.401158 | 69.1396628 | 74.4       | 72.5026774 |
| 16:05:19 | 76.2189819 | 74.401158 | 69.1396628 | 74.5       | 72.5026774 |
| 16:05:20 | 73.2189819 | 75.401158 | 69.1396628 | 88.8049643 | 72.5026774 |
| 16:05:21 | 72.2189819 | 75.401158 | 69.1396628 | 82.8049643 | 72.5026774 |
| 16:05:22 | 72.2189819 | 76.401158 | 70.1396628 | 82.8049643 | 72.5026774 |
| 16:05:23 | 72.2189819 | 77.401158 | 70.1396628 | 81.8049643 | 71.5026774 |
| 16:05:24 | 72.2189819 | 81.401158 | 71.1396628 | 81.8049643 | 71.5026774 |
| 16:05:25 | 72.2189819 | 84.401158 | 71.1396628 | 81.8049643 | 70.5026774 |
| 16:05:26 | 72.2189819 | 85.401158 | 72.1396628 | 81.8049643 | 70.5026774 |
| 16:05:27 | 72.2189819 | 85.401158 | 72.1396628 | 81.8049643 | 67.5026774 |
| 16:05:28 | 72.2189819 | 88.401158 | 72.1396628 | 81.8049643 | 67.5026774 |
| 16:05:29 | 73.2189819 | 83.401158 | 71.1396628 | 80.8049643 | 66.5026774 |
| 16:05:30 | 75.2189819 | 80.401158 | 71.1396628 | 78.8049643 | 66.5026774 |
| 16:05:31 | 79.2189819 | 79.401158 | 70.1396628 | 78.8049643 | 66.5026774 |
| 16:05:32 | 79.2189819 | 79.401158 | 70.1396628 | 77.8049643 | 66.5026774 |
| 16:05:33 | 80.2189819 | 79.401158 | 70.1396628 | 77.8049643 | 65.5026774 |
| 16:05:34 | 81.2189819 | 78.401158 | 69.1396628 | 76.8049643 | 65.5026774 |
| 16:05:35 | 81.2189819 | 78.401158 | 69.1396628 | 76.8049643 | 65.5026774 |
| 16:05:36 | 82.2189819 | 78.401158 | 69.1396628 | 75.8049643 | 65.5026774 |
| 16:05:37 | 82.2189819 | 78.401158 | 76.1396628 | 75.8049643 | 66.5026774 |
| 16:05:38 | 82.2189819 | 80.401158 | 77.1396628 | 76.8049643 | 66.5026774 |
| 16:05:39 | 82.2189819 | 81.401158 | 76.1396628 | 76.8049643 | 68.5026774 |
| 16:05:40 | 81.2189819 | 81.401158 | 76.1396628 | 78.8049643 | 68.5026774 |
| 16:05:41 | 81.2189819 | 81.401158 | 76.1396628 | 81.8049643 | 69.5026774 |
| 16:05:42 | 81.2189819 | 81.401158 | 76.1396628 | 81.8049643 | 69.5026774 |
| 16:05:43 | 81.2189819 | 81.401158 | 72.1396628 | 89.8049643 | 70.5026774 |
| 16:05:44 | 80.2189819 | 77.7      | 70.1396628 | 77.7       | 70.5026774 |
| 16:05:45 | 77.2189819 | 77.5      | 66.1396628 | 77.5       | 70.5026774 |
| 16:05:46 | 77.2189819 | 77.2      | 66.1396628 | 77.2       | 70.5026774 |
| 16:05:47 | 77.2189819 | 78        | 65.1396628 | 78         | 70.5026774 |

|          |            |           |            |            |            |
|----------|------------|-----------|------------|------------|------------|
| 16:05:48 | 76.2189819 | 79.1      | 65.1396628 | 93.8049643 | 67.5026774 |
| 16:05:49 | 75.2189819 | 80.3      | 66.1396628 | 93.8049643 | 67.5026774 |
| 16:05:50 | 73.2189819 | 77.9      | 66.1396628 | 77.9       | 65.5026774 |
| 16:05:51 | 73.2189819 | 77.2      | 67.1396628 | 77.2       | 65.5026774 |
| 16:05:52 | 73.2189819 | 77.1      | 67.1396628 | 91.8049643 | 65.5026774 |
| 16:05:53 | 73.2189819 | 88.401158 | 65.1396628 | 89.8049643 | 65.5026774 |
| 16:05:54 | 73.2189819 | 85.401158 | 65.1396628 | 89.8049643 | 66.5026774 |
| 16:05:55 | 73.2189819 | 84.401158 | 64.1396628 | 84.8049643 | 66.5026774 |
| 16:05:56 | 74.2189819 | 84.401158 | 63.1396628 | 84.8049643 | 66.5026774 |
| 16:05:57 | 76.2189819 | 84.401158 | 63.1396628 | 84.8049643 | 66.5026774 |
| 16:05:58 | 78.2189819 | 83.401158 | 63.1396628 | 80.8049643 | 66.5026774 |
| 16:05:59 | 79.2189819 | 83.401158 | 63.1396628 | 79.8049643 | 66.5026774 |
| 16:06:00 | 78.2189819 | 83.401158 | 63.1396628 | 79.8049643 | 65.5026774 |
| 16:06:01 | 75.2189819 | 83.401158 | 63.1396628 | 79.8049643 | 63.5026774 |
| 16:06:02 | 75.2189819 | 83.401158 | 62.1396628 | 79.8049643 | 63.5026774 |
| 16:06:03 | 75.2189819 | 85.401158 | 61.1396628 | 79.8049643 | 63.5026774 |
| 16:06:04 | 74.2189819 | 87.401158 | 61.1396628 | 79.8049643 | 65.5026774 |
| 16:06:05 | 74.2189819 | 87.401158 | 61.1396628 | 78.8049643 | 65.5026774 |
| 16:06:06 | 74.2189819 | 88.401158 | 60.1396628 | 78.8049643 | 67.5026774 |
| 16:06:07 | 74.2189819 | 76.4      | 60.1396628 | 78.8049643 | 70.5026774 |
| 16:06:08 | 74.2189819 | 76.5      | 60.1396628 | 78.8049643 | 70.5026774 |
| 16:06:09 | 74.2189819 | 77.8      | 60.1396628 | 77.8049643 | 72.5026774 |
| 16:06:10 | 75.2189819 | 80.6      | 61.1396628 | 77.8049643 | 72.5026774 |
| 16:06:11 | 75.2189819 | 80.6      | 62.1396628 | 77.8049643 | 71.5026774 |
| 16:06:12 | 76.2189819 | 81.7      | 64.1396628 | 77.8049643 | 71.5026774 |
| 16:06:13 | 76.2189819 | 80.4      | 65.1396628 | 73.8049643 | 72.5026774 |
| 16:06:14 | 76.2189819 | 80.1      | 65.1396628 | 72.8049643 | 73.5026774 |
| 16:06:15 | 76.2189819 | 78.6      | 65.1396628 | 72.8049643 | 73.5026774 |
| 16:06:16 | 75.2189819 | 77.2      | 67.1396628 | 71.8049643 | 73.5026774 |
| 16:06:17 | 74.2189819 | 76.4      | 67.1396628 | 72.8049643 | 76.5026774 |
| 16:06:18 | 74.2189819 | 75.3      | 68.1396628 | 72.8049643 | 76.5026774 |
| 16:06:19 | 74.2189819 | 75.6      | 68.1396628 | 73.8049643 | 77.5026774 |
| 16:06:20 | 74.2189819 | 75.2      | 66.1396628 | 75.8049643 | 77.5026774 |
| 16:06:21 | 74.2189819 | 74.7      | 66.1396628 | 75.8049643 | 77.5026774 |
| 16:06:22 | 75.2189819 | 74.7      | 66.1396628 | 75.8049643 | 76.5026774 |
| 16:06:23 | 75.2189819 | 86.401158 | 66.1396628 | 75.8049643 | 76.5026774 |
| 16:06:24 | 75.2189819 | 84.401158 | 66.1396628 | 75.8049643 | 75.5026774 |
| 16:06:25 | 75.2189819 | 83.401158 | 67.1396628 | 75.8049643 | 75.5026774 |
| 16:06:26 | 75.2189819 | 82.401158 | 67.1396628 | 75.8049643 | 74.5026774 |
| 16:06:27 | 75.2189819 | 82.401158 | 67.1396628 | 73.8049643 | 73.5026774 |
| 16:06:28 | 76.2189819 | 82.401158 | 68.1396628 | 73.8049643 | 73.5026774 |
| 16:06:29 | 78.2189819 | 81.401158 | 68.1396628 | 72.8049643 | 72.5026774 |
| 16:06:30 | 78.2189819 | 82.401158 | 70.1396628 | 72.8049643 | 72.5026774 |
| 16:06:31 | 78.2189819 | 83.401158 | 71.1396628 | 72.8049643 | 72.5026774 |
| 16:06:32 | 79.2189819 | 83.401158 | 71.1396628 | 72.8049643 | 72.5026774 |



|          |            |           |            |            |            |
|----------|------------|-----------|------------|------------|------------|
| 16:06:33 | 80.2189819 | 83.401158 | 71.1396628 | 71.8049643 | 71.5026774 |
| 16:06:34 | 80.2189819 | 83.401158 | 72.1396628 | 71.8049643 | 70.5026774 |
| 16:06:35 | 80.2189819 | 85.401158 | 74.1396628 | 78.8049643 | 69.5026774 |
| 16:06:36 | 80.2189819 | 85.401158 | 74.1396628 | 78.8049643 | 69.5026774 |
| 16:06:37 | 82.2189819 | 85.401158 | 79.1396628 | 79.8049643 | 69.5026774 |
| 16:06:38 | 82.2189819 | 78        | 80.1396628 | 79.8049643 | 69.5026774 |
| 16:06:39 | 82.2189819 | 79.5      | 80.1396628 | 79.8049643 | 69.5026774 |
| 16:06:40 | 82.2189819 | 79.8      | 79.1396628 | 79.8049643 | 69.5026774 |
| 16:06:41 | 82.2189819 | 80.4      | 79.1396628 | 79.8049643 | 69.5026774 |
| 16:06:42 | 83.2189819 | 80.5      | 79.1396628 | 79.8049643 | 69.5026774 |
| 16:06:43 | 83.2189819 | 80.2      | 77.1396628 | 78.8049643 | 73.5026774 |
| 16:06:44 | 83.2189819 | 80.1      | 77.1396628 | 78.8049643 | 73.5026774 |
| 16:06:45 | 83.2189819 | 81.1      | 76.1396628 | 78.8049643 | 74.5026774 |
| 16:06:46 | 82.2189819 | 81.3      | 75.1396628 | 78.8049643 | 75.5026774 |
| 16:06:47 | 79.2189819 | 78.7      | 74.1396628 | 77.8049643 | 75.5026774 |
| 16:06:48 | 78.2189819 | 77.3      | 74.1396628 | 77.8049643 | 72.5026774 |
| 16:06:49 | 76.2189819 | 77        | 74.1396628 | 77.8049643 | 72.5026774 |
| 16:06:50 | 75.2189819 | 76.6      | 75.1396628 | 77.8049643 | 71.5026774 |
| 16:06:51 | 75.2189819 | 76.9      | 79.1396628 | 77.8049643 | 69.5026774 |
| 16:06:52 | 75.2189819 | 75.7      | 80.1396628 | 76.8049643 | 68.5026774 |
| 16:06:53 | 75.2189819 | 75.4      | 81.1396628 | 76.8049643 | 68.5026774 |
| 16:06:54 | 74.2189819 | 75.2      | 80.1396628 | 76.8049643 | 68.5026774 |
| 16:06:55 | 74.2189819 | 75.2      | 80.1396628 | 76.8049643 | 68.5026774 |
| 16:06:56 | 74.2189819 | 74.8      | 80.1396628 | 75.8049643 | 68.5026774 |
| 16:06:57 | 73.2189819 | 74.5      | 80.1396628 | 75.8049643 | 68.5026774 |
| 16:06:58 | 73.2189819 | 88.401158 | 80.1396628 | 75.8049643 | 68.5026774 |
| 16:06:59 | 73.2189819 | 81.401158 | 80.1396628 | 74.8049643 | 67.5026774 |
| 16:07:00 | 74.2189819 | 81.401158 | 80.1396628 | 73.8049643 | 65.5026774 |
| 16:07:01 | 73.2189819 | 81.401158 | 81.1396628 | 73.8049643 | 64.5026774 |
| 16:07:02 | 72.2189819 | 81.401158 | 80.1396628 | 73.8049643 | 64.5026774 |
| 16:07:03 | 72.2189819 | 79.401158 | 75.1396628 | 73.8049643 | 62.5026774 |
| 16:07:04 | 71.2189819 | 75.401158 | 71.1396628 | 71.8049643 | 59.5026774 |
| 16:07:05 | 71.2189819 | 73.401158 | 71.1396628 | 71.8049643 | 59.5026774 |
| 16:07:06 | 70.2189819 | 73.401158 | 72.1396628 | 70.8049643 | 61.5026774 |
| 16:07:07 | 70.2189819 | 72.401158 | 72.1396628 | 70.8049643 | 63.5026774 |
| 16:07:08 | 71.2189819 | 73.401158 | 71.1396628 | 71.8049643 | 63.5026774 |
| 16:07:09 | 71.2189819 | 74.401158 | 71.1396628 | 72.8049643 | 62.5026774 |
| 16:07:10 | 71.2189819 | 74.401158 | 70.1396628 | 73.8049643 | 62.5026774 |
| 16:07:11 | 71.2189819 | 74.401158 | 70.1396628 | 73.8049643 | 62.5026774 |
| 16:07:12 | 71.2189819 | 76.401158 | 71.1396628 | 73.8049643 | 62.5026774 |
| 16:07:13 | 78.2189819 | 76.401158 | 72.1396628 | 74.8049643 | 63.5026774 |
| 16:07:14 | 78.2189819 | 76.401158 | 73.1396628 | 76.8049643 | 63.5026774 |
| 16:07:15 | 80.2189819 | 76.401158 | 73.1396628 | 76.8049643 | 63.5026774 |
| 16:07:16 | 80.2189819 | 76.401158 | 73.1396628 | 76.8049643 | 63.5026774 |
| 16:07:17 | 81.2189819 | 76.401158 | 72.1396628 | 76.8049643 | 63.5026774 |

|          |            |           |            |            |            |
|----------|------------|-----------|------------|------------|------------|
| 16:07:18 | 81.2189819 | 76.401158 | 72.1396628 | 76.8049643 | 63.5026774 |
| 16:07:19 | 82.2189819 | 77.401158 | 72.1396628 | 77.8049643 | 63.5026774 |
| 16:07:20 | 82.2189819 | 77.401158 | 71.1396628 | 78.8049643 | 63.5026774 |
| 16:07:21 | 82.2189819 | 77.401158 | 71.1396628 | 79.8049643 | 65.5026774 |
| 16:07:22 | 84.2189819 | 77.401158 | 69.1396628 | 80.8049643 | 65.5026774 |
| 16:07:23 | 84.2189819 | 76.401158 | 69.1396628 | 80.8049643 | 65.5026774 |
| 16:07:24 | 84.2189819 | 76.401158 | 69.1396628 | 81.8049643 | 68.5026774 |
| 16:07:25 | 84.2189819 | 75.401158 | 69.1396628 | 81.8049643 | 73.5026774 |
| 16:07:26 | 84.2189819 | 74.401158 | 69.1396628 | 82.8049643 | 77.5026774 |
| 16:07:27 | 84.2189819 | 74.401158 | 67.1396628 | 82.8049643 | 77.5026774 |
| 16:07:28 | 83.2189819 | 74.401158 | 67.1396628 | 83.8049643 | 83.5026774 |
| 16:07:29 | 83.2189819 | 73.401158 | 67.1396628 | 83.8049643 | 83.5026774 |
| 16:07:30 | 83.2189819 | 73.401158 | 67.1396628 | 83.8049643 | 83.5026774 |
| 16:07:31 | 85.2189819 | 73.401158 | 66.1396628 | 83.8049643 | 80.5026774 |
| 16:07:32 | 85.2189819 | 75.401158 | 66.1396628 | 83.8049643 | 79.5026774 |
| 16:07:33 | 85.2189819 | 78.401158 | 65.1396628 | 83.8049643 | 79.5026774 |
| 16:07:34 | 85.2189819 | 81.401158 | 65.1396628 | 83.8049643 | 79.5026774 |
| 16:07:35 | 85.2189819 | 81.401158 | 65.1396628 | 83.8049643 | 79.5026774 |
| 16:07:36 | 85.2189819 | 81.401158 | 65.1396628 | 83.8049643 | 79.5026774 |
| 16:07:37 | 87.2189819 | 81.401158 | 65.1396628 | 83.8049643 | 76.5026774 |
| 16:07:38 | 88.2189819 | 82.401158 | 67.1396628 | 83.8049643 | 74.5026774 |
| 16:07:39 | 89.2189819 | 82.401158 | 68.1396628 | 83.8049643 | 71.5026774 |
| 16:07:40 | 89.2189819 | 82.401158 | 69.1396628 | 86.8049643 | 71.5026774 |
| 16:07:41 | 89.2189819 | 83.401158 | 70.1396628 | 86.8049643 | 71.5026774 |
| 16:07:42 | 87.2189819 | 85.401158 | 70.1396628 | 88.8049643 | 71.5026774 |
| 16:07:43 | 84.2189819 | 85.401158 | 70.1396628 | 88.8049643 | 74.5026774 |
| 16:07:44 | 82.2189819 | 85.401158 | 70.1396628 | 88.8049643 | 76.5026774 |
| 16:07:45 | 81.2189819 | 86.401158 | 71.1396628 | 88.8049643 | 76.5026774 |
| 16:07:46 | 79.2189819 | 88.401158 | 72.1396628 | 88.8049643 | 77.5026774 |
| 16:07:47 | 79.2189819 | 88.401158 | 73.1396628 | 88.8049643 | 78.5026774 |
| 16:07:48 | 76.2189819 | 84.401158 | 75.1396628 | 87.8049643 | 78.5026774 |
| 16:07:49 | 76.2189819 | 84.401158 | 75.1396628 | 87.8049643 | 78.5026774 |
| 16:07:50 | 75.2189819 | 79.401158 | 76.1396628 | 87.8049643 | 79.5026774 |
| 16:07:51 | 74.2189819 | 76.401158 | 76.1396628 | 87.8049643 | 77.5026774 |
| 16:07:52 | 74.2189819 | 75.401158 | 77.1396628 | 87.8049643 | 77.5026774 |
| 16:07:53 | 74.2189819 | 75.401158 | 77.1396628 | 88.8049643 | 75.5026774 |
| 16:07:54 | 74.2189819 | 75.401158 | 77.1396628 | 88.8049643 | 74.5026774 |
| 16:07:55 | 74.2189819 | 76.401158 | 77.1396628 | 89.8049643 | 73.5026774 |
| 16:07:56 | 74.2189819 | 78.401158 | 78.1396628 | 89.8049643 | 73.5026774 |
| 16:07:57 | 74.2189819 | 80.401158 | 78.1396628 | 89.8049643 | 73.5026774 |
| 16:07:58 | 74.2189819 | 80.401158 | 78.1396628 | 87.8049643 | 72.5026774 |
| 16:07:59 | 74.2189819 | 82.401158 | 77.1396628 | 79.8049643 | 72.5026774 |
| 16:08:00 | 74.2189819 | 83.401158 | 77.1396628 | 77.8049643 | 75.5026774 |
| 16:08:01 | 74.2189819 | 84.401158 | 77.1396628 | 77.8049643 | 75.5026774 |
| 16:08:02 | 75.2189819 | 85.401158 | 76.1396628 | 77.8049643 | 75.5026774 |

|          |            |           |            |            |            |
|----------|------------|-----------|------------|------------|------------|
| 16:08:03 | 75.2189819 | 85.401158 | 75.1396628 | 77.8049643 | 75.5026774 |
| 16:08:04 | 79.2189819 | 85.401158 | 75.1396628 | 76.8049643 | 75.5026774 |
| 16:08:05 | 80.2189819 | 84.401158 | 74.1396628 | 75.8049643 | 76.5026774 |
| 16:08:06 | 80.2189819 | 84.401158 | 74.1396628 | 75.8049643 | 70.5026774 |
| 16:08:07 | 80.2189819 | 77.401158 | 74.1396628 | 73.8049643 | 70.5026774 |
| 16:08:08 | 80.2189819 | 75.401158 | 74.1396628 | 73.8049643 | 70.5026774 |
| 16:08:09 | 80.2189819 | 74.401158 | 73.1396628 | 71.8049643 | 70.5026774 |
| 16:08:10 | 76.2189819 | 74.401158 | 72.1396628 | 70.8049643 | 70.5026774 |
| 16:08:11 | 75.2189819 | 71.401158 | 71.1396628 | 70.8049643 | 71.5026774 |
| 16:08:12 | 75.2189819 | 71.401158 | 70.1396628 | 70.8049643 | 72.5026774 |
| 16:08:13 | 74.2189819 | 71.401158 | 69.1396628 | 70.8049643 | 72.5026774 |
| 16:08:14 | 74.2189819 | 69.401158 | 66.1396628 | 70.8049643 | 72.5026774 |
| 16:08:15 | 74.2189819 | 68.401158 | 66.1396628 | 70.8049643 | 73.5026774 |
| 16:08:16 | 74.2189819 | 68.401158 | 66.1396628 | 70.8049643 | 74.5026774 |
| 16:08:17 | 75.2189819 | 69.401158 | 66.1396628 | 70.8049643 | 74.5026774 |
| 16:08:18 | 77.2189819 | 72.401158 | 66.1396628 | 70.8049643 | 74.5026774 |
| 16:08:19 | 78.2189819 | 72.401158 | 66.1396628 | 70.8049643 | 74.5026774 |
| 16:08:20 | 78.2189819 | 74.401158 | 66.1396628 | 70.8049643 | 75.5026774 |
| 16:08:21 | 76.2189819 | 75.401158 | 66.1396628 | 71.8049643 | 75.5026774 |
| 16:08:22 | 75.2189819 | 76.401158 | 65.1396628 | 71.8049643 | 76.5026774 |
| 16:08:23 | 74.2189819 | 76.401158 | 65.1396628 | 71.8049643 | 76.5026774 |
| 16:08:24 | 74.2189819 | 76.401158 | 65.1396628 | 71.8049643 | 76.5026774 |
| 16:08:25 | 73.2189819 | 78.401158 | 62.1396628 | 71.8049643 | 76.5026774 |
| 16:08:26 | 73.2189819 | 78.401158 | 62.1396628 | 71.8049643 | 75.5026774 |
| 16:08:27 | 73.2189819 | 78.401158 | 63.1396628 | 71.8049643 | 74.5026774 |
| 16:08:28 | 71.2189819 | 78.401158 | 64.1396628 | 72.8049643 | 74.5026774 |
| 16:08:29 | 69.2189819 | 78.401158 | 64.1396628 | 72.8049643 | 74.5026774 |
| 16:08:30 | 68.2189819 | 79.401158 | 64.1396628 | 72.8049643 | 74.5026774 |
| 16:08:31 | 67.2189819 | 76.401158 | 64.1396628 | 72.8049643 | 73.5026774 |
| 16:08:32 | 67.2189819 | 76.401158 | 64.1396628 | 72.8049643 | 73.5026774 |
| 16:08:33 | 67.2189819 | 76.401158 | 64.1396628 | 74.8049643 | 72.5026774 |
| 16:08:34 | 67.2189819 | 76.401158 | 62.1396628 | 74.8049643 | 72.5026774 |
| 16:08:35 | 66.2189819 | 76.401158 | 62.1396628 | 74.8049643 | 73.5026774 |
| 16:08:36 | 66.2189819 | 76.401158 | 60.1396628 | 74.8049643 | 73.5026774 |
| 16:08:37 | 68.2189819 | 76.401158 | 59.1396628 | 74.8049643 | 74.5026774 |
| 16:08:38 | 68.2189819 | 77.401158 | 58.1396628 | 74.8049643 | 75.5026774 |
| 16:08:39 | 68.2189819 | 78.401158 | 57.1396628 | 72.8049643 | 76.5026774 |
| 16:08:40 | 69.2189819 | 78.401158 | 57.1396628 | 72.8049643 | 75.5026774 |
| 16:08:41 | 68.2189819 | 79.401158 | 57.1396628 | 72.8049643 | 75.5026774 |
| 16:08:42 | 67.2189819 | 79.401158 | 56.1396628 | 72.8049643 | 74.5026774 |
| 16:08:43 | 67.2189819 | 80.401158 | 59.1396628 | 72.8049643 | 73.5026774 |
| 16:08:44 | 67.2189819 | 81.401158 | 61.1396628 | 72.8049643 | 73.5026774 |
| 16:08:45 | 67.2189819 | 82.401158 | 61.1396628 | 70.8049643 | 72.5026774 |
| 16:08:46 | 66.2189819 | 82.401158 | 62.1396628 | 70.8049643 | 72.5026774 |
| 16:08:47 | 66.2189819 | 82.401158 | 63.1396628 | 70.8049643 | 71.5026774 |

|          |            |           |            |            |            |
|----------|------------|-----------|------------|------------|------------|
| 16:08:48 | 66.2189819 | 80.401158 | 63.1396628 | 70.8049643 | 69.5026774 |
| 16:08:49 | 67.2189819 | 81.401158 | 64.1396628 | 70.8049643 | 69.5026774 |
| 16:08:50 | 67.2189819 | 81.401158 | 64.1396628 | 70.8049643 | 69.5026774 |
| 16:08:51 | 67.2189819 | 81.401158 | 64.1396628 | 70.8049643 | 69.5026774 |
| 16:08:52 | 67.2189819 | 80.401158 | 67.1396628 | 69.8049643 | 69.5026774 |
| 16:08:53 | 66.2189819 | 80.401158 | 69.1396628 | 68.8049643 | 69.5026774 |
| 16:08:54 | 65.2189819 | 78.401158 | 69.1396628 | 68.8049643 | 69.5026774 |
| 16:08:55 | 64.2189819 | 76.401158 | 70.1396628 | 68.8049643 | 71.5026774 |
| 16:08:56 | 64.2189819 | 76.401158 | 68.1396628 | 68.8049643 | 71.5026774 |
| 16:08:57 | 65.2189819 | 74.401158 | 67.1396628 | 68.8049643 | 72.5026774 |
| 16:08:58 | 65.2189819 | 73.401158 | 67.1396628 | 68.8049643 | 72.5026774 |
| 16:08:59 | 65.2189819 | 73.401158 | 67.1396628 | 69.8049643 | 72.5026774 |
| 16:09:00 | 65.2189819 | 73.401158 | 68.1396628 | 69.8049643 | 72.5026774 |
| 16:09:01 | 65.2189819 | 73.401158 | 70.1396628 | 69.8049643 | 70.5026774 |
| 16:09:02 | 66.2189819 | 74.401158 | 72.1396628 | 69.8049643 | 70.5026774 |
| 16:09:03 | 68.2189819 | 74.401158 | 75.1396628 | 69.8049643 | 70.5026774 |
| 16:09:04 | 68.2189819 | 74.401158 | 74.1396628 | 68.8049643 | 70.5026774 |
| 16:09:05 | 74.2189819 | 75.401158 | 74.1396628 | 68.8049643 | 70.5026774 |
| 16:09:06 | 76.2189819 | 75.401158 | 73.1396628 | 68.8049643 | 70.5026774 |
| 16:09:07 | 76.2189819 | 75.401158 | 71.1396628 | 69.8049643 | 70.5026774 |
| 16:09:08 | 76.2189819 | 75.401158 | 71.1396628 | 69.8049643 | 71.5026774 |
| 16:09:09 | 76.2189819 | 76.401158 | 71.1396628 | 71.8049643 | 71.5026774 |
| 16:09:10 | 76.2189819 | 76.401158 | 71.1396628 | 71.8049643 | 71.5026774 |
| 16:09:11 | 76.2189819 | 76.401158 | 72.1396628 | 71.8049643 | 71.5026774 |
| 16:09:12 | 76.2189819 | 77.401158 | 72.1396628 | 73.8049643 | 71.5026774 |
| 16:09:13 | 76.2189819 | 77.401158 | 72.1396628 | 73.8049643 | 73.5026774 |
| 16:09:14 | 76.2189819 | 77.401158 | 73.1396628 | 73.8049643 | 74.5026774 |
| 16:09:15 | 76.2189819 | 77.401158 | 74.1396628 | 73.8049643 | 75.5026774 |
| 16:09:16 | 76.2189819 | 77.401158 | 74.1396628 | 73.8049643 | 75.5026774 |
| 16:09:17 | 78.2189819 | 77.401158 | 74.1396628 | 74.8049643 | 75.5026774 |
| 16:09:18 | 78.2189819 | 77.401158 | 74.1396628 | 74.8049643 | 75.5026774 |
| 16:09:19 | 78.2189819 | 79.401158 | 74.1396628 | 75.8049643 | 75.5026774 |
| 16:09:20 | 79.2189819 | 80.401158 | 75.1396628 | 75.8049643 | 75.5026774 |
| 16:09:21 | 79.2189819 | 80.401158 | 75.1396628 | 75.8049643 | 71.5026774 |
| 16:09:22 | 79.2189819 | 91.401158 | 77.1396628 | 75.8049643 | 71.5026774 |
| 16:09:23 | 79.2189819 | 91.401158 | 78.1396628 | 75.8049643 | 71.5026774 |
| 16:09:24 | 78.2189819 | 76.6      | 78.1396628 | 75.8049643 | 71.5026774 |
| 16:09:25 | 78.2189819 | 76.7      | 78.1396628 | 75.8049643 | 72.5026774 |
| 16:09:26 | 78.2189819 | 77.1      | 78.1396628 | 75.8049643 | 73.5026774 |
| 16:09:27 | 78.2189819 | 76.9      | 78.1396628 | 75.8049643 | 73.5026774 |
| 16:09:28 | 77.2189819 | 91.401158 | 78.1396628 | 75.8049643 | 73.5026774 |
| 16:09:29 | 77.2189819 | 90.401158 | 78.1396628 | 76.8049643 | 74.5026774 |
| 16:09:30 | 76.2189819 | 89.401158 | 77.1396628 | 77.8049643 | 75.5026774 |
| 16:09:31 | 76.2189819 | 89.401158 | 73.1396628 | 78.8049643 | 76.5026774 |
| 16:09:32 | 75.2189819 | 89.401158 | 72.1396628 | 79.8049643 | 76.5026774 |

|          |            |           |            |            |            |
|----------|------------|-----------|------------|------------|------------|
| 16:09:33 | 75.2189819 | 88.401158 | 72.1396628 | 79.8049643 | 76.5026774 |
| 16:09:34 | 72.2189819 | 88.401158 | 69.1396628 | 80.8049643 | 76.5026774 |
| 16:09:35 | 71.2189819 | 88.401158 | 67.1396628 | 80.8049643 | 76.5026774 |
| 16:09:36 | 70.2189819 | 87.401158 | 67.1396628 | 80.8049643 | 78.5026774 |
| 16:09:37 | 70.2189819 | 86.401158 | 68.1396628 | 80.8049643 | 78.5026774 |
| 16:09:38 | 69.2189819 | 86.401158 | 70.1396628 | 80.8049643 | 79.5026774 |
| 16:09:39 | 69.2189819 | 83.401158 | 70.1396628 | 83.8049643 | 80.5026774 |
| 16:09:40 | 69.2189819 | 82.401158 | 70.1396628 | 83.8049643 | 84.5026774 |
| 16:09:41 | 69.2189819 | 82.401158 | 70.1396628 | 83.8049643 | 84.5026774 |
| 16:09:42 | 69.2189819 | 83.401158 | 70.1396628 | 83.8049643 | 84.5026774 |
| 16:09:43 | 69.2189819 | 83.401158 | 70.1396628 | 82.8049643 | 84.5026774 |
| 16:09:44 | 69.2189819 | 84.401158 | 71.1396628 | 82.8049643 | 84.5026774 |
| 16:09:45 | 69.2189819 | 84.401158 | 71.1396628 | 82.8049643 | 85.5026774 |
| 16:09:46 | 68.2189819 | 84.401158 | 72.1396628 | 82.8049643 | 86.5026774 |
| 16:09:47 | 68.2189819 | 84.401158 | 73.1396628 | 82.8049643 | 85.5026774 |
| 16:09:48 | 68.2189819 | 83.401158 | 74.1396628 | 82.8049643 | 76.5026774 |
| 16:09:49 | 68.2189819 | 83.401158 | 74.1396628 | 81.8049643 | 76.5026774 |
| 16:09:50 | 67.2189819 | 81.401158 | 74.1396628 | 81.8049643 | 74.5026774 |
| 16:09:51 | 66.2189819 | 81.401158 | 74.1396628 | 80.8049643 | 74.5026774 |
| 16:09:52 | 66.2189819 | 75.401158 | 75.1396628 | 79.8049643 | 74.5026774 |
| 16:09:53 | 66.2189819 | 75.401158 | 75.1396628 | 79.8049643 | 74.5026774 |
| 16:09:54 | 68.2189819 | 66.401158 | 75.1396628 | 79.8049643 | 74.5026774 |
| 16:09:55 | 69.2189819 | 67.401158 | 75.1396628 | 79.8049643 | 74.5026774 |
| 16:09:56 | 69.2189819 | 68.401158 | 75.1396628 | 76.8049643 | 74.5026774 |
| 16:09:57 | 69.2189819 | 69.401158 | 75.1396628 | 77.8049643 | 74.5026774 |
| 16:09:58 | 71.2189819 | 70.401158 | 75.1396628 | 77.8049643 | 74.5026774 |
| 16:09:59 | 71.2189819 | 70.401158 | 75.1396628 | 77.8049643 | 74.5026774 |
| 16:10:00 | 74.2189819 | 71.401158 | 75.1396628 | 78.8049643 | 74.5026774 |
| 16:10:01 | 76.2189819 | 71.401158 | 75.1396628 | 75.8049643 | 75.5026774 |
| 16:10:02 | 76.2189819 | 70.401158 | 72.1396628 | 75.8049643 | 75.5026774 |
| 16:10:03 | 76.2189819 | 70.401158 | 71.1396628 | 68.8049643 | 76.5026774 |
| 16:10:04 | 76.2189819 | 65.401158 | 71.1396628 | 67.8049643 | 76.5026774 |
| 16:10:05 | 74.2189819 | 63.401158 | 71.1396628 | 67.8049643 | 76.5026774 |
| 16:10:06 | 73.2189819 | 63.401158 | 72.1396628 | 67.8049643 | 77.5026774 |
| 16:10:07 | 73.2189819 | 64.401158 | 71.1396628 | 67.8049643 | 78.5026774 |
| 16:10:08 | 72.2189819 | 70.401158 | 70.1396628 | 67.8049643 | 78.5026774 |
| 16:10:09 | 73.2189819 | 73.401158 | 69.1396628 | 67.8049643 | 78.5026774 |
| 16:10:10 | 73.2189819 | 73.401158 | 69.1396628 | 67.8049643 | 78.5026774 |
| 16:10:11 | 73.2189819 | 78.401158 | 68.1396628 | 66.8049643 | 77.5026774 |
| 16:10:12 | 73.2189819 | 78.401158 | 68.1396628 | 66.8049643 | 77.5026774 |
| 16:10:13 | 77.2189819 | 78.401158 | 68.1396628 | 66.8049643 | 76.5026774 |
| 16:10:14 | 78.2189819 | 80.401158 | 68.1396628 | 66.8049643 | 76.5026774 |
| 16:10:15 | 78.2189819 | 80.401158 | 70.1396628 | 66.8049643 | 76.5026774 |
| 16:10:16 | 79.2189819 | 80.401158 | 71.1396628 | 65.8049643 | 76.5026774 |
| 16:10:17 | 78.2189819 | 79.401158 | 72.1396628 | 65.8049643 | 76.5026774 |

|          |            |           |            |            |            |
|----------|------------|-----------|------------|------------|------------|
| 16:10:18 | 77.2189819 | 79.401158 | 72.1396628 | 65.8049643 | 76.5026774 |
| 16:10:19 | 77.2189819 | 79.401158 | 73.1396628 | 65.8049643 | 76.5026774 |
| 16:10:20 | 77.2189819 | 79.401158 | 73.1396628 | 67.8049643 | 76.5026774 |
| 16:10:21 | 77.2189819 | 79.401158 | 73.1396628 | 68.8049643 | 76.5026774 |
| 16:10:22 | 77.2189819 | 79.401158 | 71.1396628 | 69.8049643 | 76.5026774 |
| 16:10:23 | 77.2189819 | 79.401158 | 72.1396628 | 70.8049643 | 76.5026774 |
| 16:10:24 | 79.2189819 | 79.401158 | 72.1396628 | 70.8049643 | 76.5026774 |
| 16:10:25 | 84.2189819 | 79.401158 | 73.1396628 | 70.8049643 | 75.5026774 |
| 16:10:26 | 83.2189819 | 79.401158 | 73.1396628 | 70.8049643 | 75.5026774 |
| 16:10:27 | 83.2189819 | 79.401158 | 74.1396628 | 70.8049643 | 74.5026774 |
| 16:10:28 | 82.2189819 | 81.401158 | 74.1396628 | 70.8049643 | 74.5026774 |
| 16:10:29 | 82.2189819 | 81.401158 | 74.1396628 | 71.8049643 | 74.5026774 |
| 16:10:30 | 82.2189819 | 81.401158 | 74.1396628 | 73.8049643 | 74.5026774 |
| 16:10:31 | 82.2189819 | 81.401158 | 75.1396628 | 73.8049643 | 74.5026774 |
| 16:10:32 | 82.2189819 | 81.401158 | 76.1396628 | 71.8049643 | 74.5026774 |
| 16:10:33 | 82.2189819 | 81.401158 | 77.1396628 | 70.8049643 | 74.5026774 |
| 16:10:34 | 82.2189819 | 80.401158 | 78.1396628 | 70.8049643 | 74.5026774 |
| 16:10:35 | 81.2189819 | 79.401158 | 79.1396628 | 70.8049643 | 74.5026774 |
| 16:10:36 | 81.2189819 | 79.401158 | 80.1396628 | 70.8049643 | 73.5026774 |
| 16:10:37 | 81.2189819 | 77.401158 | 80.1396628 | 70.8049643 | 65.5026774 |
| 16:10:38 | 81.2189819 | 77.401158 | 79.1396628 | 71.8049643 | 65.5026774 |
| 16:10:39 | 81.2189819 | 77.401158 | 77.1396628 | 71.8049643 | 65.5026774 |
| 16:10:40 | 80.2189819 | 77.401158 | 76.1396628 | 71.8049643 | 65.5026774 |
| 16:10:41 | 79.2189819 | 88.401158 | 75.1396628 | 71.8049643 | 65.5026774 |
| 16:10:42 | 79.2189819 | 88.401158 | 75.1396628 | 72.8049643 | 65.5026774 |
| 16:10:43 | 79.2189819 | 86.401158 | 75.1396628 | 72.8049643 | 64.5026774 |
| 16:10:44 | 79.2189819 | 86.401158 | 75.1396628 | 72.8049643 | 64.5026774 |
| 16:10:45 | 80.2189819 | 80.401158 | 77.1396628 | 72.8049643 | 63.5026774 |
| 16:10:46 | 80.2189819 | 80.401158 | 78.1396628 | 72.8049643 | 61.5026774 |
| 16:10:47 | 80.2189819 | 80.401158 | 79.1396628 | 72.8049643 | 61.5026774 |
| 16:10:48 | 80.2189819 | 80.401158 | 79.1396628 | 72.8049643 | 60.5026774 |
| 16:10:49 | 81.2189819 | 80.401158 | 78.1396628 | 72.8049643 | 60.5026774 |
| 16:10:50 | 80.2189819 | 80.401158 | 77.1396628 | 72.8049643 | 62.5026774 |
| 16:10:51 | 80.2189819 | 80.401158 | 77.1396628 | 72.8049643 | 64.5026774 |
| 16:10:52 | 80.2189819 | 80.401158 | 77.1396628 | 72.8049643 | 64.5026774 |
| 16:10:53 | 79.2189819 | 80.401158 | 77.1396628 | 72.8049643 | 65.5026774 |
| 16:10:54 | 78.2189819 | 80.401158 | 78.1396628 | 71.8049643 | 65.5026774 |
| 16:10:55 | 78.2189819 | 80.401158 | 79.1396628 | 71.8049643 | 66.5026774 |
| 16:10:56 | 78.2189819 | 80.401158 | 79.1396628 | 71.8049643 | 66.5026774 |
| 16:10:57 | 78.2189819 | 80.401158 | 79.1396628 | 71.8049643 | 66.5026774 |
| 16:10:58 | 81.2189819 | 80.401158 | 79.1396628 | 72.8049643 | 65.5026774 |
| 16:10:59 | 80.2189819 | 82.401158 | 78.1396628 | 72.8049643 | 65.5026774 |
| 16:11:00 | 79.2189819 | 82.401158 | 77.1396628 | 72.8049643 | 65.5026774 |
| 16:11:01 | 78.2189819 | 82.401158 | 77.1396628 | 71.8049643 | 65.5026774 |
| 16:11:02 | 77.2189819 | 84.401158 | 77.1396628 | 71.8049643 | 65.5026774 |

|          |            |           |            |            |            |
|----------|------------|-----------|------------|------------|------------|
| 16:11:03 | 77.2189819 | 84.401158 | 76.1396628 | 71.8049643 | 66.5026774 |
| 16:11:04 | 78.2189819 | 84.401158 | 76.1396628 | 75.8049643 | 67.5026774 |
| 16:11:05 | 78.2189819 | 84.401158 | 76.1396628 | 75.8049643 | 67.5026774 |
| 16:11:06 | 78.2189819 | 84.401158 | 76.1396628 | 75.8049643 | 67.5026774 |
| 16:11:07 | 78.2189819 | 76.401158 | 76.1396628 | 71.8049643 | 68.5026774 |
| 16:11:08 | 77.2189819 | 75.401158 | 76.1396628 | 68.8049643 | 68.5026774 |
| 16:11:09 | 77.2189819 | 75.401158 | 76.1396628 | 68.8049643 | 67.5026774 |
| 16:11:10 | 77.2189819 | 71.401158 | 76.1396628 | 68.8049643 | 67.5026774 |
| 16:11:11 | 77.2189819 | 69.401158 | 76.1396628 | 68.8049643 | 67.5026774 |
| 16:11:12 | 77.2189819 | 69.401158 | 76.1396628 | 69.8049643 | 67.5026774 |
| 16:11:13 | 78.2189819 | 69.401158 | 76.1396628 | 69.8049643 | 70.5026774 |
| 16:11:14 | 78.2189819 | 70.401158 | 76.1396628 | 70.8049643 | 71.5026774 |
| 16:11:15 | 78.2189819 | 71.401158 | 74.1396628 | 70.8049643 | 71.5026774 |
| 16:11:16 | 78.2189819 | 73.401158 | 74.1396628 | 71.8049643 | 73.5026774 |
| 16:11:17 | 78.2189819 | 73.401158 | 74.1396628 | 71.8049643 | 74.5026774 |
| 16:11:18 | 78.2189819 | 73.401158 | 75.1396628 | 71.8049643 | 74.5026774 |
| 16:11:19 | 78.2189819 | 73.401158 | 75.1396628 | 71.8049643 | 75.5026774 |
| 16:11:20 | 78.2189819 | 70.401158 | 75.1396628 | 72.8049643 | 75.5026774 |
| 16:11:21 | 79.2189819 | 69.401158 | 75.1396628 | 73.8049643 | 75.5026774 |
| 16:11:22 | 79.2189819 | 71.401158 | 75.1396628 | 73.8049643 | 74.5026774 |
| 16:11:23 | 79.2189819 | 74.401158 | 75.1396628 | 72.8049643 | 74.5026774 |
| 16:11:24 | 79.2189819 | 74.401158 | 75.1396628 | 71.8049643 | 73.5026774 |
| 16:11:25 | 80.2189819 | 76.401158 | 75.1396628 | 71.8049643 | 72.5026774 |
| 16:11:26 | 81.2189819 | 77.401158 | 74.1396628 | 71.8049643 | 72.5026774 |
| 16:11:27 | 83.2189819 | 77.401158 | 73.1396628 | 70.8049643 | 72.5026774 |
| 16:11:28 | 84.2189819 | 77.401158 | 73.1396628 | 68.8049643 | 71.5026774 |
| 16:11:29 | 87.2189819 | 76.401158 | 72.1396628 | 68.8049643 | 71.5026774 |
| 16:11:30 | 88.2189819 | 76.401158 | 72.1396628 | 66.8049643 | 71.5026774 |
| 16:11:31 | 88.2189819 | 76.401158 | 71.1396628 | 66.8049643 | 71.5026774 |
| 16:11:32 | 87.2189819 | 76.401158 | 70.1396628 | 66.8049643 | 71.5026774 |
| 16:11:33 | 81.2189819 | 76.401158 | 71.1396628 | 66.8049643 | 71.5026774 |
| 16:11:34 | 81.2189819 | 76.401158 | 71.1396628 | 66.8049643 | 71.5026774 |
| 16:11:35 | 81.2189819 | 78.401158 | 71.1396628 | 69.8049643 | 71.5026774 |
| 16:11:36 | 80.2189819 | 80.401158 | 71.1396628 | 69.8049643 | 70.5026774 |
| 16:11:37 | 80.2189819 | 80.401158 | 71.1396628 | 69.8049643 | 69.5026774 |
| 16:11:38 | 80.2189819 | 80.401158 | 71.1396628 | 70.8049643 | 69.5026774 |
| 16:11:39 | 79.2189819 | 81.401158 | 72.1396628 | 70.8049643 | 69.5026774 |
| 16:11:40 | 78.2189819 | 81.401158 | 74.1396628 | 70.8049643 | 69.5026774 |
| 16:11:41 | 78.2189819 | 81.401158 | 75.1396628 | 70.8049643 | 69.5026774 |
| 16:11:42 | 77.2189819 | 81.401158 | 74.1396628 | 70.8049643 | 69.5026774 |
| 16:11:43 | 76.2189819 | 79.401158 | 72.1396628 | 70.8049643 | 69.5026774 |
| 16:11:44 | 76.2189819 | 82.401158 | 72.1396628 | 72.8049643 | 68.5026774 |
| 16:11:45 | 76.2189819 | 82.401158 | 74.1396628 | 75.8049643 | 68.5026774 |
| 16:11:46 | 76.2189819 | 83.401158 | 74.1396628 | 75.8049643 | 70.5026774 |
| 16:11:47 | 84.2189819 | 83.401158 | 74.1396628 | 76.8049643 | 71.5026774 |

|          |            |           |            |            |            |
|----------|------------|-----------|------------|------------|------------|
| 16:11:48 | 83.2189819 | 81.401158 | 74.1396628 | 75.8049643 | 71.5026774 |
| 16:11:49 | 83.2189819 | 79.401158 | 74.1396628 | 72.8049643 | 71.5026774 |
| 16:11:50 | 81.2189819 | 79.401158 | 74.1396628 | 72.8049643 | 72.5026774 |
| 16:11:51 | 81.2189819 | 77.401158 | 74.1396628 | 72.8049643 | 72.5026774 |
| 16:11:52 | 79.2189819 | 76.401158 | 74.1396628 | 73.8049643 | 72.5026774 |
| 16:11:53 | 79.2189819 | 75.401158 | 73.1396628 | 73.8049643 | 73.5026774 |
| 16:11:54 | 78.2189819 | 75.401158 | 73.1396628 | 73.8049643 | 73.5026774 |
| 16:11:55 | 77.2189819 | 75.401158 | 74.1396628 | 73.8049643 | 72.5026774 |
| 16:11:56 | 77.2189819 | 77.401158 | 74.1396628 | 73.8049643 | 70.5026774 |
| 16:11:57 | 77.2189819 | 77.401158 | 74.1396628 | 73.8049643 | 69.5026774 |
| 16:11:58 | 77.2189819 | 77.401158 | 74.1396628 | 74.8049643 | 69.5026774 |
| 16:11:59 | 76.2189819 | 76.401158 | 74.1396628 | 74.8049643 | 69.5026774 |
| 16:12:00 | 76.2189819 | 76.401158 | 74.1396628 | 74.8049643 | 69.5026774 |
| 16:12:01 | 76.2189819 | 72.401158 | 74.1396628 | 75.8049643 | 69.5026774 |
| 16:12:02 | 76.2189819 | 71.401158 | 75.1396628 | 75.8049643 | 70.5026774 |
| 16:12:03 | 76.2189819 | 71.401158 | 75.1396628 | 78.8049643 | 70.5026774 |
| 16:12:04 | 76.2189819 | 71.401158 | 75.1396628 | 78.8049643 | 70.5026774 |
| 16:12:05 | 77.2189819 | 71.401158 | 75.1396628 | 77.8049643 | 70.5026774 |
| 16:12:06 | 77.2189819 | 71.401158 | 75.1396628 | 74.8049643 | 70.5026774 |
| 16:12:07 | 77.2189819 | 71.401158 | 75.1396628 | 74.8049643 | 70.5026774 |
| 16:12:08 | 76.2189819 | 71.401158 | 75.1396628 | 75.8049643 | 70.5026774 |
| 16:12:09 | 76.2189819 | 71.401158 | 75.1396628 | 75.8049643 | 71.5026774 |
| 16:12:10 | 75.2189819 | 71.401158 | 74.1396628 | 76.8049643 | 71.5026774 |
| 16:12:11 | 75.2189819 | 75.401158 | 72.1396628 | 76.8049643 | 71.5026774 |
| 16:12:12 | 75.2189819 | 75.401158 | 71.1396628 | 76.8049643 | 72.5026774 |
| 16:12:13 | 75.2189819 | 77.401158 | 70.1396628 | 76.8049643 | 72.5026774 |
| 16:12:14 | 75.2189819 | 77.401158 | 70.1396628 | 77.8049643 | 72.5026774 |
| 16:12:15 | 75.2189819 | 77.401158 | 71.1396628 | 77.8049643 | 73.5026774 |
| 16:12:16 | 75.2189819 | 78.401158 | 72.1396628 | 76.8049643 | 73.5026774 |
| 16:12:17 | 75.2189819 | 78.401158 | 73.1396628 | 76.8049643 | 73.5026774 |
| 16:12:18 | 76.2189819 | 78.401158 | 72.1396628 | 76.8049643 | 72.5026774 |
| 16:12:19 | 76.2189819 | 82.401158 | 70.1396628 | 76.8049643 | 72.5026774 |
| 16:12:20 | 75.2189819 | 82.401158 | 70.1396628 | 76.8049643 | 72.5026774 |
| 16:12:21 | 75.2189819 | 85.401158 | 69.1396628 | 75.8049643 | 72.5026774 |
| 16:12:22 | 74.2189819 | 85.401158 | 69.1396628 | 75.8049643 | 73.5026774 |
| 16:12:23 | 73.2189819 | 84.401158 | 69.1396628 | 75.8049643 | 76.5026774 |
| 16:12:24 | 73.2189819 | 79.401158 | 69.1396628 | 75.8049643 | 76.5026774 |
| 16:12:25 | 73.2189819 | 79.401158 | 68.1396628 | 74.8049643 | 76.5026774 |
| 16:12:26 | 73.2189819 | 76.401158 | 67.1396628 | 73.8049643 | 76.5026774 |
| 16:12:27 | 73.2189819 | 74.401158 | 67.1396628 | 73.8049643 | 76.5026774 |
| 16:12:28 | 73.2189819 | 74.401158 | 65.1396628 | 73.8049643 | 77.5026774 |
| 16:12:29 | 73.2189819 | 75.401158 | 65.1396628 | 73.8049643 | 77.5026774 |
| 16:12:30 | 73.2189819 | 76.401158 | 65.1396628 | 73.8049643 | 79.5026774 |
| 16:12:31 | 73.2189819 | 76.401158 | 65.1396628 | 73.8049643 | 79.5026774 |
| 16:12:32 | 73.2189819 | 76.401158 | 66.1396628 | 73.8049643 | 78.5026774 |



|          |            |           |            |            |            |
|----------|------------|-----------|------------|------------|------------|
| 16:12:33 | 73.2189819 | 76.401158 | 68.1396628 | 73.8049643 | 77.5026774 |
| 16:12:34 | 73.2189819 | 75.401158 | 68.1396628 | 72.8049643 | 74.5026774 |
| 16:12:35 | 73.2189819 | 75.401158 | 69.1396628 | 72.8049643 | 74.5026774 |
| 16:12:36 | 73.2189819 | 74.401158 | 70.1396628 | 71.8049643 | 73.5026774 |
| 16:12:37 | 73.2189819 | 73.401158 | 70.1396628 | 71.8049643 | 71.5026774 |
| 16:12:38 | 73.2189819 | 73.401158 | 71.1396628 | 71.8049643 | 70.5026774 |
| 16:12:39 | 73.2189819 | 73.401158 | 71.1396628 | 70.8049643 | 70.5026774 |
| 16:12:40 | 74.2189819 | 73.401158 | 73.1396628 | 70.8049643 | 70.5026774 |
| 16:12:41 | 74.2189819 | 76.401158 | 74.1396628 | 70.8049643 | 70.5026774 |
| 16:12:42 | 74.2189819 | 76.401158 | 75.1396628 | 69.8049643 | 70.5026774 |
| 16:12:43 | 74.2189819 | 75.401158 | 76.1396628 | 69.8049643 | 70.5026774 |
| 16:12:44 | 74.2189819 | 70.401158 | 77.1396628 | 69.8049643 | 69.5026774 |
| 16:12:45 | 74.2189819 | 70.401158 | 77.1396628 | 70.8049643 | 69.5026774 |
| 16:12:46 | 74.2189819 | 67.401158 | 76.1396628 | 72.8049643 | 68.5026774 |
| 16:12:47 | 75.2189819 | 69.401158 | 76.1396628 | 72.8049643 | 69.5026774 |
| 16:12:48 | 76.2189819 | 69.401158 | 76.1396628 | 72.8049643 | 69.5026774 |
| 16:12:49 | 76.2189819 | 69.401158 | 76.1396628 | 73.8049643 | 69.5026774 |
| 16:12:50 | 77.2189819 | 77.401158 | 76.1396628 | 73.8049643 | 69.5026774 |
| 16:12:51 | 77.2189819 | 79.401158 | 78.1396628 | 73.8049643 | 69.5026774 |
| 16:12:52 | 78.2189819 | 79.401158 | 78.1396628 | 74.8049643 | 69.5026774 |
| 16:12:53 | 77.2189819 | 80.401158 | 77.1396628 | 73.8049643 | 69.5026774 |
| 16:12:54 | 77.2189819 | 80.401158 | 77.1396628 | 73.8049643 | 69.5026774 |
| 16:12:55 | 76.2189819 | 81.401158 | 76.1396628 | 73.8049643 | 68.5026774 |
| 16:12:56 | 76.2189819 | 81.401158 | 76.1396628 | 73.8049643 | 68.5026774 |
| 16:12:57 | 76.2189819 | 81.401158 | 76.1396628 | 73.8049643 | 66.5026774 |
| 16:12:58 | 76.2189819 | 81.401158 | 76.1396628 | 72.8049643 | 66.5026774 |
| 16:12:59 | 76.2189819 | 83.401158 | 76.1396628 | 72.8049643 | 66.5026774 |
| 16:13:00 | 76.2189819 | 83.401158 | 74.1396628 | 71.8049643 | 66.5026774 |
| 16:13:01 | 76.2189819 | 85.401158 | 73.1396628 | 70.8049643 | 65.5026774 |
| 16:13:02 | 77.2189819 | 85.401158 | 74.1396628 | 70.8049643 | 64.5026774 |
| 16:13:03 | 77.2189819 | 82.401158 | 74.1396628 | 68.8049643 | 63.5026774 |
| 16:13:04 | 77.2189819 | 81.401158 | 74.1396628 | 67.8049643 | 63.5026774 |
| 16:13:05 | 76.2189819 | 81.401158 | 74.1396628 | 67.8049643 | 63.5026774 |
| 16:13:06 | 75.2189819 | 80.401158 | 73.1396628 | 67.8049643 | 64.5026774 |
| 16:13:07 | 75.2189819 | 79.401158 | 73.1396628 | 67.8049643 | 65.5026774 |
| 16:13:08 | 74.2189819 | 79.401158 | 73.1396628 | 68.8049643 | 65.5026774 |
| 16:13:09 | 74.2189819 | 79.401158 | 71.1396628 | 68.8049643 | 65.5026774 |
| 16:13:10 | 74.2189819 | 82.401158 | 70.1396628 | 68.8049643 | 65.5026774 |
| 16:13:11 | 75.2189819 | 85.401158 | 71.1396628 | 68.8049643 | 65.5026774 |
| 16:13:12 | 74.2189819 | 85.401158 | 71.1396628 | 69.8049643 | 65.5026774 |
| 16:13:13 | 74.2189819 | 86.401158 | 73.1396628 | 69.8049643 | 65.5026774 |
| 16:13:14 | 75.2189819 | 86.401158 | 73.1396628 | 69.8049643 | 65.5026774 |
| 16:13:15 | 75.2189819 | 81.401158 | 73.1396628 | 69.8049643 | 64.5026774 |
| 16:13:16 | 74.2189819 | 81.401158 | 74.1396628 | 69.8049643 | 64.5026774 |
| 16:13:17 | 74.2189819 | 75.401158 | 73.1396628 | 69.8049643 | 64.5026774 |

|          |            |           |            |            |            |
|----------|------------|-----------|------------|------------|------------|
| 16:13:18 | 74.2189819 | 73.401158 | 72.1396628 | 69.8049643 | 64.5026774 |
| 16:13:19 | 74.2189819 | 73.401158 | 72.1396628 | 69.8049643 | 64.5026774 |
| 16:13:20 | 73.2189819 | 73.401158 | 71.1396628 | 70.8049643 | 67.5026774 |
| 16:13:21 | 73.2189819 | 75.401158 | 71.1396628 | 71.8049643 | 68.5026774 |
| 16:13:22 | 73.2189819 | 75.401158 | 70.1396628 | 70.8049643 | 68.5026774 |
| 16:13:23 | 72.2189819 | 75.401158 | 70.1396628 | 71.8049643 | 68.5026774 |
| 16:13:24 | 72.2189819 | 75.401158 | 69.1396628 | 71.8049643 | 69.5026774 |
| 16:13:25 | 72.2189819 | 75.401158 | 76.1396628 | 71.8049643 | 68.5026774 |
| 16:13:26 | 72.2189819 | 75.401158 | 76.1396628 | 72.8049643 | 68.5026774 |
| 16:13:27 | 72.2189819 | 75.401158 | 76.1396628 | 72.8049643 | 68.5026774 |
| 16:13:28 | 72.2189819 | 75.401158 | 76.1396628 | 72.8049643 | 68.5026774 |
| 16:13:29 | 72.2189819 | 75.401158 | 77.1396628 | 73.8049643 | 68.5026774 |
| 16:13:30 | 72.2189819 | 75.401158 | 77.1396628 | 73.8049643 | 69.5026774 |
| 16:13:31 | 72.2189819 | 76.401158 | 74.1396628 | 71.8049643 | 70.5026774 |
| 16:13:32 | 72.2189819 | 76.401158 | 76.1396628 | 69.8049643 | 70.5026774 |
| 16:13:33 | 72.2189819 | 76.401158 | 78.1396628 | 69.8049643 | 71.5026774 |
| 16:13:34 | 72.2189819 | 76.401158 | 79.1396628 | 69.8049643 | 70.5026774 |
| 16:13:35 | 72.2189819 | 76.401158 | 79.1396628 | 70.8049643 | 70.5026774 |
| 16:13:36 | 72.2189819 | 80.401158 | 78.1396628 | 70.8049643 | 71.5026774 |
| 16:13:37 | 72.2189819 | 80.401158 | 75.1396628 | 71.8049643 | 69.5026774 |
| 16:13:38 | 72.2189819 | 80.401158 | 71.1396628 | 71.8049643 | 68.5026774 |
| 16:13:39 | 72.2189819 | 80.401158 | 70.1396628 | 71.8049643 | 67.5026774 |
| 16:13:40 | 73.2189819 | 72.6      | 69.1396628 | 69.8049643 | 68.5026774 |
| 16:13:41 | 72.2189819 | 77.401158 | 69.1396628 | 69.8049643 | 68.5026774 |
| 16:13:42 | 72.2189819 | 75.401158 | 69.1396628 | 69.8049643 | 69.5026774 |
| 16:13:43 | 73.2189819 | 75.401158 | 70.1396628 | 69.8049643 | 69.5026774 |
| 16:13:44 | 73.2189819 | 75.401158 | 71.1396628 | 70.8049643 | 69.5026774 |
| 16:13:45 | 73.2189819 | 75.401158 | 73.1396628 | 70.8049643 | 69.5026774 |
| 16:13:46 | 73.2189819 | 76.401158 | 71.1396628 | 72.8049643 | 68.5026774 |
| 16:13:47 | 73.2189819 | 76.401158 | 70.1396628 | 72.8049643 | 69.5026774 |
| 16:13:48 | 73.2189819 | 76.401158 | 70.1396628 | 72.8049643 | 69.5026774 |
| 16:13:49 | 73.2189819 | 76.401158 | 69.1396628 | 73.8049643 | 70.5026774 |
| 16:13:50 | 72.2189819 | 76.401158 | 68.1396628 | 73.8049643 | 71.5026774 |
| 16:13:51 | 73.2189819 | 76.401158 | 70.1396628 | 74.8049643 | 71.5026774 |
| 16:13:52 | 73.2189819 | 76.401158 | 72.1396628 | 76.8049643 | 72.5026774 |
| 16:13:53 | 73.2189819 | 77.401158 | 72.1396628 | 78.8049643 | 73.5026774 |
| 16:13:54 | 74.2189819 | 79.401158 | 72.1396628 | 79.8049643 | 73.5026774 |
| 16:13:55 | 74.2189819 | 80.401158 | 71.1396628 | 79.8049643 | 73.5026774 |
| 16:13:56 | 75.2189819 | 80.401158 | 69.1396628 | 80.8049643 | 73.5026774 |
| 16:13:57 | 75.2189819 | 80.401158 | 67.1396628 | 80.8049643 | 73.5026774 |
| 16:13:58 | 75.2189819 | 81.401158 | 66.1396628 | 80.8049643 | 73.5026774 |
| 16:13:59 | 74.2189819 | 80.401158 | 65.1396628 | 78.8049643 | 73.5026774 |
| 16:14:00 | 74.2189819 | 80.401158 | 64.1396628 | 77.8049643 | 72.5026774 |
| 16:14:01 | 74.2189819 | 80.401158 | 63.1396628 | 77.8049643 | 72.5026774 |
| 16:14:02 | 74.2189819 | 80.401158 | 63.1396628 | 76.8049643 | 72.5026774 |

|          |            |           |            |            |            |
|----------|------------|-----------|------------|------------|------------|
| 16:14:03 | 74.2189819 | 81.401158 | 63.1396628 | 76.8049643 | 72.5026774 |
| 16:14:04 | 74.2189819 | 85.401158 | 62.1396628 | 76.8049643 | 72.5026774 |
| 16:14:05 | 74.2189819 | 85.401158 | 62.1396628 | 75.8049643 | 71.5026774 |
| 16:14:06 | 75.2189819 | 85.401158 | 61.1396628 | 73.8049643 | 71.5026774 |
| 16:14:07 | 75.2189819 | 84.401158 | 62.1396628 | 73.8049643 | 71.5026774 |
| 16:14:08 | 76.2189819 | 82.401158 | 62.1396628 | 73.8049643 | 70.5026774 |
| 16:14:09 | 76.2189819 | 79.401158 | 62.1396628 | 73.8049643 | 70.5026774 |
| 16:14:10 | 76.2189819 | 76.401158 | 63.1396628 | 73.8049643 | 69.5026774 |
| 16:14:11 | 77.2189819 | 76.401158 | 62.1396628 | 73.8049643 | 69.5026774 |
| 16:14:12 | 77.2189819 | 76.401158 | 62.1396628 | 73.8049643 | 69.5026774 |
| 16:14:13 | 77.2189819 | 77.401158 | 63.1396628 | 72.8049643 | 69.5026774 |
| 16:14:14 | 80.2189819 | 78.401158 | 64.1396628 | 72.8049643 | 68.5026774 |
| 16:14:15 | 80.2189819 | 77.401158 | 65.1396628 | 72.8049643 | 68.5026774 |
| 16:14:16 | 80.2189819 | 76.401158 | 65.1396628 | 72.8049643 | 67.5026774 |
| 16:14:17 | 80.2189819 | 76.401158 | 66.1396628 | 72.8049643 | 67.5026774 |
| 16:14:18 | 80.2189819 | 74.401158 | 67.1396628 | 75.8049643 | 66.5026774 |
| 16:14:19 | 80.2189819 | 72.401158 | 68.1396628 | 75.8049643 | 67.5026774 |
| 16:14:20 | 79.2189819 | 71.401158 | 68.1396628 | 75.8049643 | 68.5026774 |
| 16:14:21 | 78.2189819 | 71.401158 | 68.1396628 | 71.8049643 | 70.5026774 |
| 16:14:22 | 78.2189819 | 72.401158 | 68.1396628 | 71.8049643 | 74.5026774 |
| 16:14:23 | 76.2189819 | 74.401158 | 68.1396628 | 71.8049643 | 74.5026774 |
| 16:14:24 | 76.2189819 | 74.401158 | 68.1396628 | 71.8049643 | 74.5026774 |
| 16:14:25 | 76.2189819 | 75.401158 | 69.1396628 | 71.8049643 | 76.5026774 |
| 16:14:26 | 76.2189819 | 75.401158 | 69.1396628 | 71.8049643 | 77.5026774 |
| 16:14:27 | 76.2189819 | 76.401158 | 70.1396628 | 74.8049643 | 76.5026774 |
| 16:14:28 | 76.2189819 | 76.401158 | 69.1396628 | 74.8049643 | 76.5026774 |
| 16:14:29 | 76.2189819 | 75.401158 | 67.1396628 | 74.8049643 | 76.5026774 |
| 16:14:30 | 76.2189819 | 75.401158 | 65.1396628 | 74.8049643 | 75.5026774 |
| 16:14:31 | 76.2189819 | 75.401158 | 65.1396628 | 74.8049643 | 75.5026774 |
| 16:14:32 | 76.2189819 | 76.401158 | 66.1396628 | 74.8049643 | 75.5026774 |
| 16:14:33 | 77.2189819 | 76.401158 | 67.1396628 | 73.8049643 | 75.5026774 |
| 16:14:34 | 77.2189819 | 76.401158 | 67.1396628 | 71.8049643 | 77.5026774 |
| 16:14:35 | 77.2189819 | 76.401158 | 68.1396628 | 71.8049643 | 78.5026774 |
| 16:14:36 | 77.2189819 | 78.401158 | 68.1396628 | 71.8049643 | 78.5026774 |
| 16:14:37 | 77.2189819 | 78.401158 | 71.1396628 | 71.8049643 | 78.5026774 |
| 16:14:38 | 78.2189819 | 78.401158 | 73.1396628 | 72.8049643 | 77.5026774 |
| 16:14:39 | 78.2189819 | 78.401158 | 74.1396628 | 72.8049643 | 76.5026774 |
| 16:14:40 | 77.2189819 | 78.401158 | 74.1396628 | 72.8049643 | 75.5026774 |
| 16:14:41 | 77.2189819 | 78.401158 | 73.1396628 | 72.8049643 | 76.5026774 |
| 16:14:42 | 77.2189819 | 78.401158 | 73.1396628 | 72.8049643 | 76.5026774 |
| 16:14:43 | 76.2189819 | 80.401158 | 72.1396628 | 71.8049643 | 76.5026774 |
| 16:14:44 | 76.2189819 | 81.401158 | 73.1396628 | 71.8049643 | 76.5026774 |
| 16:14:45 | 75.2189819 | 81.401158 | 73.1396628 | 70.8049643 | 76.5026774 |
| 16:14:46 | 76.2189819 | 82.401158 | 73.1396628 | 70.8049643 | 76.5026774 |
| 16:14:47 | 76.2189819 | 82.401158 | 72.1396628 | 70.8049643 | 76.5026774 |

|          |            |           |            |            |            |
|----------|------------|-----------|------------|------------|------------|
| 16:14:48 | 76.2189819 | 82.401158 | 72.1396628 | 70.8049643 | 76.5026774 |
| 16:14:49 | 77.2189819 | 82.401158 | 70.1396628 | 72.8049643 | 76.5026774 |
| 16:14:50 | 77.2189819 | 82.401158 | 69.1396628 | 73.8049643 | 76.5026774 |
| 16:14:51 | 77.2189819 | 82.401158 | 69.1396628 | 73.8049643 | 76.5026774 |
| 16:14:52 | 77.2189819 | 82.401158 | 70.1396628 | 73.8049643 | 76.5026774 |
| 16:14:53 | 77.2189819 | 83.401158 | 72.1396628 | 73.8049643 | 75.5026774 |
| 16:14:54 | 77.2189819 | 84.401158 | 75.1396628 | 74.8049643 | 75.5026774 |
| 16:14:55 | 78.2189819 | 83.401158 | 76.1396628 | 76.8049643 | 75.5026774 |
| 16:14:56 | 78.2189819 | 81.401158 | 76.1396628 | 76.8049643 | 73.5026774 |
| 16:14:57 | 78.2189819 | 81.401158 | 76.1396628 | 76.8049643 | 73.5026774 |
| 16:14:58 | 78.2189819 | 78.401158 | 76.1396628 | 75.8049643 | 72.5026774 |
| 16:14:59 | 79.2189819 | 76.401158 | 74.1396628 | 74.8049643 | 72.5026774 |
| 16:15:00 | 79.2189819 | 76.401158 | 75.1396628 | 73.8049643 | 72.5026774 |
| 16:15:01 | 78.2189819 | 76.401158 | 75.1396628 | 73.8049643 | 72.5026774 |
| 16:15:02 | 79.2189819 | 76.401158 | 76.1396628 | 74.8049643 | 72.5026774 |
| 16:15:03 | 79.2189819 | 76.401158 | 77.1396628 | 73.8049643 | 72.5026774 |
| 16:15:04 | 78.2189819 | 76.401158 | 76.1396628 | 73.8049643 | 72.5026774 |
| 16:15:05 | 77.2189819 | 76.401158 | 76.1396628 | 73.8049643 | 75.5026774 |
| 16:15:06 | 78.2189819 | 76.401158 | 75.1396628 | 73.8049643 | 75.5026774 |
| 16:15:07 | 78.2189819 | 77.401158 | 75.1396628 | 73.8049643 | 75.5026774 |
| 16:15:08 | 78.2189819 | 82.401158 | 75.1396628 | 72.8049643 | 77.5026774 |
| 16:15:09 | 78.2189819 | 84.401158 | 75.1396628 | 72.8049643 | 77.5026774 |
| 16:15:10 | 79.2189819 | 84.401158 | 75.1396628 | 71.8049643 | 79.5026774 |
| 16:15:11 | 79.2189819 | 86.401158 | 75.1396628 | 71.8049643 | 79.5026774 |
| 16:15:12 | 79.2189819 | 86.401158 | 75.1396628 | 71.8049643 | 79.5026774 |
| 16:15:13 | 79.2189819 | 86.401158 | 74.1396628 | 70.8049643 | 79.5026774 |
| 16:15:14 | 78.2189819 | 85.401158 | 74.1396628 | 70.8049643 | 79.5026774 |
| 16:15:15 | 76.2189819 | 83.401158 | 74.1396628 | 70.8049643 | 79.5026774 |
| 16:15:16 | 74.2189819 | 79.401158 | 74.1396628 | 66.8049643 | 79.5026774 |
| 16:15:17 | 74.2189819 | 79.401158 | 73.1396628 | 66.8049643 | 80.5026774 |
| 16:15:18 | 73.2189819 | 74.401158 | 73.1396628 | 66.8049643 | 79.5026774 |
| 16:15:19 | 73.2189819 | 74.401158 | 73.1396628 | 65.8049643 | 79.5026774 |
| 16:15:20 | 73.2189819 | 74.401158 | 74.1396628 | 65.8049643 | 77.5026774 |
| 16:15:21 | 74.2189819 | 75.401158 | 75.1396628 | 66.8049643 | 76.5026774 |
| 16:15:22 | 73.2189819 | 75.401158 | 75.1396628 | 66.8049643 | 75.5026774 |
| 16:15:23 | 74.2189819 | 76.401158 | 76.1396628 | 66.8049643 | 74.5026774 |
| 16:15:24 | 75.2189819 | 76.401158 | 76.1396628 | 68.8049643 | 74.5026774 |
| 16:15:25 | 75.2189819 | 76.401158 | 76.1396628 | 68.8049643 | 74.5026774 |
| 16:15:26 | 74.2189819 | 75.401158 | 75.1396628 | 69.8049643 | 74.5026774 |
| 16:15:27 | 74.2189819 | 74.401158 | 75.1396628 | 69.8049643 | 74.5026774 |
| 16:15:28 | 74.2189819 | 74.401158 | 75.1396628 | 69.8049643 | 72.5026774 |
| 16:15:29 | 74.2189819 | 73.401158 | 75.1396628 | 70.8049643 | 72.5026774 |
| 16:15:30 | 74.2189819 | 73.401158 | 76.1396628 | 71.8049643 | 68.5026774 |
| 16:15:31 | 74.2189819 | 73.401158 | 76.1396628 | 71.8049643 | 67.5026774 |
| 16:15:32 | 74.2189819 | 74.401158 | 74.1396628 | 71.8049643 | 67.5026774 |

|          |            |           |            |            |            |
|----------|------------|-----------|------------|------------|------------|
| 16:15:33 | 74.2189819 | 75.401158 | 74.1396628 | 71.8049643 | 67.5026774 |
| 16:15:34 | 75.2189819 | 75.401158 | 73.1396628 | 71.8049643 | 67.5026774 |
| 16:15:35 | 75.2189819 | 75.401158 | 72.1396628 | 72.8049643 | 67.5026774 |
| 16:15:36 | 75.2189819 | 75.401158 | 72.1396628 | 72.8049643 | 67.5026774 |
| 16:15:37 | 75.2189819 | 75.401158 | 68.1396628 | 73.8049643 | 66.5026774 |
| 16:15:38 | 77.2189819 | 75.401158 | 67.1396628 | 73.8049643 | 66.5026774 |
| 16:15:39 | 81.2189819 | 75.401158 | 67.1396628 | 74.8049643 | 64.5026774 |
| 16:15:40 | 85.2189819 | 77.401158 | 67.1396628 | 74.8049643 | 63.5026774 |
| 16:15:41 | 86.2189819 | 77.401158 | 68.1396628 | 74.8049643 | 63.5026774 |
| 16:15:42 | 86.2189819 | 80.401158 | 69.1396628 | 74.8049643 | 62.5026774 |
| 16:15:43 | 87.2189819 | 80.401158 | 72.1396628 | 74.8049643 | 62.5026774 |
| 16:15:44 | 87.2189819 | 80.401158 | 72.1396628 | 74.8049643 | 63.5026774 |
| 16:15:45 | 87.2189819 | 79.401158 | 73.1396628 | 74.8049643 | 65.5026774 |
| 16:15:46 | 89.2189819 | 78.401158 | 74.1396628 | 74.8049643 | 66.5026774 |
| 16:15:47 | 74.4       | 77.401158 | 74.1396628 | 74.8049643 | 66.5026774 |
| 16:15:48 | 74.4       | 77.401158 | 72.1396628 | 74.8049643 | 66.5026774 |
| 16:15:49 | 74.6       | 77.401158 | 72.1396628 | 76.8049643 | 66.5026774 |
| 16:15:50 | 74.2       | 78.401158 | 72.1396628 | 76.8049643 | 65.5026774 |
| 16:15:51 | 73.9       | 79.401158 | 72.1396628 | 75.8049643 | 65.5026774 |
| 16:15:52 | 87.2189819 | 80.401158 | 72.1396628 | 75.8049643 | 65.5026774 |
| 16:15:53 | 84.2189819 | 80.401158 | 72.1396628 | 74.8049643 | 65.5026774 |
| 16:15:54 | 79.2189819 | 80.401158 | 72.1396628 | 75.8049643 | 66.5026774 |
| 16:15:55 | 79.2189819 | 81.401158 | 72.1396628 | 75.8049643 | 67.5026774 |
| 16:15:56 | 78.2189819 | 82.401158 | 72.1396628 | 76.8049643 | 68.5026774 |
| 16:15:57 | 77.2189819 | 82.401158 | 69.1396628 | 79.8049643 | 68.5026774 |
| 16:15:58 | 77.2189819 | 81.401158 | 69.1396628 | 81.8049643 | 69.5026774 |
| 16:15:59 | 77.2189819 | 80.401158 | 67.1396628 | 81.8049643 | 69.5026774 |
| 16:16:00 | 78.2189819 | 80.401158 | 68.1396628 | 84.8049643 | 69.5026774 |
| 16:16:01 | 78.2189819 | 79.401158 | 68.1396628 | 84.8049643 | 69.5026774 |
| 16:16:02 | 78.2189819 | 79.401158 | 68.1396628 | 84.8049643 | 70.5026774 |
| 16:16:03 | 77.2189819 | 78.401158 | 69.1396628 | 86.8049643 | 72.5026774 |
| 16:16:04 | 73.2189819 | 78.401158 | 69.1396628 | 87.8049643 | 72.5026774 |
| 16:16:05 | 71.2189819 | 78.401158 | 69.1396628 | 87.8049643 | 75.5026774 |
| 16:16:06 | 70.2189819 | 77.401158 | 69.1396628 | 72.3       | 75.5026774 |
| 16:16:07 | 70.2189819 | 77.401158 | 69.1396628 | 72.1       | 75.5026774 |
| 16:16:08 | 70.2189819 | 76.401158 | 68.1396628 | 71.9       | 75.5026774 |
| 16:16:09 | 71.2189819 | 76.401158 | 68.1396628 | 85.8049643 | 75.5026774 |
| 16:16:10 | 72.2189819 | 77.401158 | 68.1396628 | 85.8049643 | 72.5026774 |
| 16:16:11 | 72.2189819 | 77.401158 | 68.1396628 | 84.8049643 | 71.5026774 |
| 16:16:12 | 72.2189819 | 80.401158 | 68.1396628 | 83.8049643 | 71.5026774 |
| 16:16:13 | 72.2189819 | 80.401158 | 68.1396628 | 82.8049643 | 71.5026774 |
| 16:16:14 | 72.2189819 | 80.401158 | 68.1396628 | 82.8049643 | 71.5026774 |
| 16:16:15 | 72.2189819 | 81.401158 | 68.1396628 | 82.8049643 | 70.5026774 |
| 16:16:16 | 73.2189819 | 81.401158 | 68.1396628 | 82.8049643 | 69.5026774 |
| 16:16:17 | 74.2189819 | 81.401158 | 70.1396628 | 81.8049643 | 70.5026774 |

|          |            |           |            |            |            |
|----------|------------|-----------|------------|------------|------------|
| 16:16:18 | 77.2189819 | 81.401158 | 70.1396628 | 81.8049643 | 69.5026774 |
| 16:16:19 | 82.2189819 | 82.401158 | 70.1396628 | 77.8049643 | 69.5026774 |
| 16:16:20 | 82.2189819 | 82.401158 | 70.1396628 | 77.8049643 | 69.5026774 |
| 16:16:21 | 81.2189819 | 86.401158 | 68.1396628 | 76.8049643 | 69.5026774 |
| 16:16:22 | 81.2189819 | 87.401158 | 68.1396628 | 76.8049643 | 70.5026774 |
| 16:16:23 | 81.2189819 | 87.401158 | 70.1396628 | 74.8049643 | 69.5026774 |
| 16:16:24 | 81.2189819 | 87.401158 | 71.1396628 | 73.8049643 | 68.5026774 |
| 16:16:25 | 81.2189819 | 87.401158 | 74.1396628 | 72.8049643 | 66.5026774 |
| 16:16:26 | 79.2189819 | 87.401158 | 74.1396628 | 71.8049643 | 65.5026774 |
| 16:16:27 | 79.2189819 | 87.401158 | 76.1396628 | 71.8049643 | 65.5026774 |
| 16:16:28 | 78.2189819 | 87.401158 | 76.1396628 | 68.8049643 | 66.5026774 |
| 16:16:29 | 77.2189819 | 87.401158 | 76.1396628 | 68.8049643 | 66.5026774 |
| 16:16:30 | 77.2189819 | 87.401158 | 76.1396628 | 68.8049643 | 66.5026774 |
| 16:16:31 | 77.2189819 | 88.401158 | 74.1396628 | 67.8049643 | 67.5026774 |
| 16:16:32 | 77.2189819 | 89.401158 | 75.1396628 | 67.8049643 | 67.5026774 |
| 16:16:33 | 77.2189819 | 89.401158 | 74.1396628 | 71.8049643 | 67.5026774 |
| 16:16:34 | 76.2189819 | 89.401158 | 74.1396628 | 73.8049643 | 66.5026774 |
| 16:16:35 | 76.2189819 | 89.401158 | 73.1396628 | 74.8049643 | 65.5026774 |
| 16:16:36 | 77.2189819 | 89.401158 | 72.1396628 | 74.8049643 | 65.5026774 |
| 16:16:37 | 77.2189819 | 89.401158 | 72.1396628 | 74.8049643 | 65.5026774 |
| 16:16:38 | 80.2189819 | 76.1      | 72.1396628 | 75.8049643 | 64.5026774 |
| 16:16:39 | 82.2189819 | 76.6      | 73.1396628 | 75.8049643 | 65.5026774 |
| 16:16:40 | 83.2189819 | 73.401158 | 73.1396628 | 75.8049643 | 65.5026774 |
| 16:16:41 | 83.2189819 | 71.401158 | 73.1396628 | 75.8049643 | 65.5026774 |
| 16:16:42 | 82.2189819 | 71.401158 | 72.1396628 | 76.8049643 | 65.5026774 |
| 16:16:43 | 81.2189819 | 70.401158 | 71.1396628 | 76.8049643 | 64.5026774 |
| 16:16:44 | 79.2189819 | 70.401158 | 71.1396628 | 75.8049643 | 64.5026774 |
| 16:16:45 | 79.2189819 | 70.401158 | 71.1396628 | 74.8049643 | 66.5026774 |
| 16:16:46 | 74.2189819 | 70.401158 | 70.1396628 | 74.8049643 | 66.5026774 |
| 16:16:47 | 74.2189819 | 70.401158 | 70.1396628 | 73.8049643 | 66.5026774 |
| 16:16:48 | 74.2189819 | 70.401158 | 70.1396628 | 73.8049643 | 66.5026774 |
| 16:16:49 | 75.2189819 | 70.401158 | 72.1396628 | 73.8049643 | 67.5026774 |
| 16:16:50 | 76.2189819 | 70.401158 | 71.1396628 | 74.8049643 | 69.5026774 |
| 16:16:51 | 76.2189819 | 70.401158 | 71.1396628 | 76.8049643 | 71.5026774 |
| 16:16:52 | 78.2189819 | 70.401158 | 70.1396628 | 76.8049643 | 71.5026774 |
| 16:16:53 | 78.2189819 | 70.401158 | 70.1396628 | 76.8049643 | 72.5026774 |
| 16:16:54 | 78.2189819 | 70.401158 | 70.1396628 | 76.8049643 | 72.5026774 |
| 16:16:55 | 78.2189819 | 70.401158 | 70.1396628 | 78.8049643 | 72.5026774 |
| 16:16:56 | 78.2189819 | 70.401158 | 71.1396628 | 78.8049643 | 73.5026774 |
| 16:16:57 | 78.2189819 | 71.401158 | 72.1396628 | 78.8049643 | 73.5026774 |
| 16:16:58 | 78.2189819 | 71.401158 | 72.1396628 | 78.8049643 | 74.5026774 |
| 16:16:59 | 78.2189819 | 71.401158 | 74.1396628 | 80.8049643 | 74.5026774 |
| 16:17:00 | 77.2189819 | 71.401158 | 74.1396628 | 81.8049643 | 74.5026774 |
| 16:17:01 | 76.2189819 | 74.401158 | 75.1396628 | 81.8049643 | 74.5026774 |
| 16:17:02 | 75.2189819 | 74.401158 | 74.1396628 | 81.8049643 | 74.5026774 |

|          |            |           |            |            |            |
|----------|------------|-----------|------------|------------|------------|
| 16:17:03 | 75.2189819 | 77.401158 | 74.1396628 | 81.8049643 | 72.5026774 |
| 16:17:04 | 75.2189819 | 77.401158 | 74.1396628 | 81.8049643 | 72.5026774 |
| 16:17:05 | 75.2189819 | 77.401158 | 74.1396628 | 81.8049643 | 72.5026774 |
| 16:17:06 | 75.2189819 | 77.401158 | 74.1396628 | 77.8049643 | 73.5026774 |
| 16:17:07 | 75.2189819 | 77.401158 | 74.1396628 | 74.8049643 | 74.5026774 |
| 16:17:08 | 75.2189819 | 77.401158 | 75.1396628 | 74.8049643 | 74.5026774 |
| 16:17:09 | 76.2189819 | 76.401158 | 75.1396628 | 74.8049643 | 74.5026774 |
| 16:17:10 | 76.2189819 | 76.401158 | 75.1396628 | 73.8049643 | 74.5026774 |
| 16:17:11 | 75.2189819 | 76.401158 | 75.1396628 | 73.8049643 | 74.5026774 |
| 16:17:12 | 74.2189819 | 76.401158 | 75.1396628 | 73.8049643 | 74.5026774 |
| 16:17:13 | 74.2189819 | 76.401158 | 75.1396628 | 73.8049643 | 74.5026774 |
| 16:17:14 | 73.2189819 | 79.401158 | 75.1396628 | 73.8049643 | 74.5026774 |
| 16:17:15 | 73.2189819 | 80.401158 | 71.1396628 | 74.8049643 | 74.5026774 |
| 16:17:16 | 73.2189819 | 80.401158 | 69.1396628 | 74.8049643 | 73.5026774 |
| 16:17:17 | 73.2189819 | 80.401158 | 68.1396628 | 75.8049643 | 73.5026774 |
| 16:17:18 | 72.2189819 | 80.401158 | 67.1396628 | 75.8049643 | 77.5026774 |
| 16:17:19 | 72.2189819 | 80.401158 | 67.1396628 | 74.8049643 | 77.5026774 |
| 16:17:20 | 72.2189819 | 82.401158 | 67.1396628 | 74.8049643 | 77.5026774 |
| 16:17:21 | 72.2189819 | 81.401158 | 67.1396628 | 73.8049643 | 74.5026774 |
| 16:17:22 | 73.2189819 | 81.401158 | 67.1396628 | 73.8049643 | 71.5026774 |
| 16:17:23 | 72.2189819 | 79.401158 | 66.1396628 | 70.8049643 | 71.5026774 |
| 16:17:24 | 72.2189819 | 79.401158 | 66.1396628 | 70.8049643 | 71.5026774 |
| 16:17:25 | 72.2189819 | 79.401158 | 66.1396628 | 70.8049643 | 67.5026774 |
| 16:17:26 | 72.2189819 | 79.401158 | 66.1396628 | 70.8049643 | 64.5026774 |
| 16:17:27 | 73.2189819 | 79.401158 | 67.1396628 | 70.8049643 | 63.5026774 |
| 16:17:28 | 73.2189819 | 79.401158 | 67.1396628 | 72.8049643 | 63.5026774 |
| 16:17:29 | 72.2189819 | 79.401158 | 66.1396628 | 72.8049643 | 64.5026774 |
| 16:17:30 | 72.2189819 | 79.401158 | 66.1396628 | 72.8049643 | 64.5026774 |
| 16:17:31 | 72.2189819 | 79.401158 | 67.1396628 | 72.8049643 | 65.5026774 |
| 16:17:32 | 71.2189819 | 78.401158 | 69.1396628 | 71.8049643 | 65.5026774 |
| 16:17:33 | 71.2189819 | 78.401158 | 70.1396628 | 71.8049643 | 65.5026774 |
| 16:17:34 | 72.2189819 | 78.401158 | 70.1396628 | 72.8049643 | 65.5026774 |
| 16:17:35 | 72.2189819 | 78.401158 | 70.1396628 | 72.8049643 | 62.5026774 |
| 16:17:36 | 72.2189819 | 81.401158 | 69.1396628 | 72.8049643 | 61.5026774 |
| 16:17:37 | 73.2189819 | 81.401158 | 68.1396628 | 73.8049643 | 62.5026774 |
| 16:17:38 | 73.2189819 | 81.401158 | 67.1396628 | 73.8049643 | 64.5026774 |
| 16:17:39 | 73.2189819 | 80.401158 | 67.1396628 | 74.8049643 | 64.5026774 |
| 16:17:40 | 73.2189819 | 71.401158 | 68.1396628 | 74.8049643 | 66.5026774 |
| 16:17:41 | 73.2189819 | 67.401158 | 70.1396628 | 75.8049643 | 67.5026774 |
| 16:17:42 | 73.2189819 | 67.401158 | 71.1396628 | 75.8049643 | 66.5026774 |
| 16:17:43 | 73.2189819 | 67.401158 | 71.1396628 | 73.8049643 | 65.5026774 |
| 16:17:44 | 76.2189819 | 71.401158 | 71.1396628 | 72.8049643 | 64.5026774 |
| 16:17:45 | 77.2189819 | 71.401158 | 68.1396628 | 71.8049643 | 65.5026774 |
| 16:17:46 | 81.2189819 | 70.401158 | 67.1396628 | 72.8049643 | 66.5026774 |
| 16:17:47 | 81.2189819 | 69.401158 | 67.1396628 | 73.8049643 | 67.5026774 |

|          |            |           |            |            |            |
|----------|------------|-----------|------------|------------|------------|
| 16:17:48 | 85.2189819 | 69.401158 | 67.1396628 | 74.8049643 | 67.5026774 |
| 16:17:49 | 87.2189819 | 69.401158 | 68.1396628 | 74.8049643 | 68.5026774 |
| 16:17:50 | 73.1       | 69.401158 | 69.1396628 | 74.8049643 | 67.5026774 |
| 16:17:51 | 73.7       | 70.401158 | 70.1396628 | 74.8049643 | 67.5026774 |
| 16:17:52 | 90.2189819 | 72.401158 | 70.1396628 | 74.8049643 | 67.5026774 |
| 16:17:53 | 89.2189819 | 72.401158 | 71.1396628 | 75.8049643 | 66.5026774 |
| 16:17:54 | 87.2189819 | 73.401158 | 72.1396628 | 78.8049643 | 67.5026774 |
| 16:17:55 | 82.2189819 | 77.401158 | 72.1396628 | 79.8049643 | 67.5026774 |
| 16:17:56 | 81.2189819 | 78.401158 | 72.1396628 | 80.8049643 | 68.5026774 |
| 16:17:57 | 81.2189819 | 78.401158 | 72.1396628 | 80.8049643 | 68.5026774 |
| 16:17:58 | 81.2189819 | 78.401158 | 72.1396628 | 80.8049643 | 69.5026774 |
| 16:17:59 | 78.2189819 | 78.401158 | 72.1396628 | 78.8049643 | 69.5026774 |
| 16:18:00 | 77.2189819 | 77.401158 | 72.1396628 | 78.8049643 | 70.5026774 |
| 16:18:01 | 77.2189819 | 77.401158 | 72.1396628 | 75.8049643 | 70.5026774 |
| 16:18:02 | 77.2189819 | 77.401158 | 72.1396628 | 72.8049643 | 71.5026774 |
| 16:18:03 | 78.2189819 | 77.401158 | 72.1396628 | 72.8049643 | 71.5026774 |
| 16:18:04 | 78.2189819 | 77.401158 | 72.1396628 | 72.8049643 | 72.5026774 |
| 16:18:05 | 78.2189819 | 77.401158 | 72.1396628 | 72.8049643 | 72.5026774 |
| 16:18:06 | 77.2189819 | 77.401158 | 72.1396628 | 70.8049643 | 71.5026774 |
| 16:18:07 | 77.2189819 | 78.401158 | 72.1396628 | 70.8049643 | 69.5026774 |
| 16:18:08 | 75.2189819 | 78.401158 | 72.1396628 | 70.8049643 | 67.5026774 |
| 16:18:09 | 75.2189819 | 78.401158 | 70.1396628 | 69.8049643 | 67.5026774 |
| 16:18:10 | 75.2189819 | 78.401158 | 70.1396628 | 69.8049643 | 67.5026774 |
| 16:18:11 | 74.2189819 | 78.401158 | 70.1396628 | 69.8049643 | 66.5026774 |
| 16:18:12 | 74.2189819 | 79.401158 | 70.1396628 | 71.8049643 | 67.5026774 |
| 16:18:13 | 74.2189819 | 79.401158 | 70.1396628 | 71.8049643 | 68.5026774 |
| 16:18:14 | 73.2189819 | 79.401158 | 70.1396628 | 71.8049643 | 68.5026774 |
| 16:18:15 | 73.2189819 | 80.401158 | 69.1396628 | 73.8049643 | 69.5026774 |
| 16:18:16 | 73.2189819 | 80.401158 | 68.1396628 | 73.8049643 | 69.5026774 |
| 16:18:17 | 74.2189819 | 80.401158 | 68.1396628 | 74.8049643 | 69.5026774 |
| 16:18:18 | 74.2189819 | 80.401158 | 68.1396628 | 74.8049643 | 69.5026774 |
| 16:18:19 | 77.2189819 | 81.401158 | 67.1396628 | 74.8049643 | 72.5026774 |
| 16:18:20 | 77.2189819 | 81.401158 | 65.1396628 | 74.8049643 | 73.5026774 |
| 16:18:21 | 78.2189819 | 81.401158 | 65.1396628 | 74.8049643 | 70.5026774 |
| 16:18:22 | 78.2189819 | 81.401158 | 64.1396628 | 72.8049643 | 68.5026774 |
| 16:18:23 | 78.2189819 | 81.401158 | 62.1396628 | 72.8049643 | 67.5026774 |
| 16:18:24 | 79.2189819 | 81.401158 | 62.1396628 | 73.8049643 | 67.5026774 |
| 16:18:25 | 79.2189819 | 81.401158 | 60.1396628 | 73.8049643 | 65.5026774 |
| 16:18:26 | 80.2189819 | 81.401158 | 60.1396628 | 73.8049643 | 64.5026774 |
| 16:18:27 | 81.2189819 | 82.401158 | 60.1396628 | 73.8049643 | 64.5026774 |
| 16:18:28 | 81.2189819 | 82.401158 | 60.1396628 | 70.8049643 | 64.5026774 |
| 16:18:29 | 81.2189819 | 83.401158 | 60.1396628 | 70.8049643 | 64.5026774 |
| 16:18:30 | 78.2189819 | 84.401158 | 60.1396628 | 67.8049643 | 65.5026774 |
| 16:18:31 | 78.2189819 | 84.401158 | 59.1396628 | 66.8049643 | 65.5026774 |
| 16:18:32 | 76.2189819 | 84.401158 | 58.1396628 | 65.8049643 | 65.5026774 |



|          |            |           |            |            |            |
|----------|------------|-----------|------------|------------|------------|
| 16:18:33 | 76.2189819 | 82.401158 | 58.1396628 | 65.8049643 | 65.5026774 |
| 16:18:34 | 76.2189819 | 82.401158 | 60.1396628 | 65.8049643 | 65.5026774 |
| 16:18:35 | 76.2189819 | 81.401158 | 60.1396628 | 65.8049643 | 67.5026774 |
| 16:18:36 | 76.2189819 | 83.401158 | 71.1396628 | 64.8049643 | 68.5026774 |
| 16:18:37 | 74.2189819 | 83.401158 | 69.1396628 | 64.8049643 | 68.5026774 |
| 16:18:38 | 72.2189819 | 83.401158 | 67.1396628 | 64.8049643 | 67.5026774 |
| 16:18:39 | 72.2189819 | 83.401158 | 66.1396628 | 64.8049643 | 67.5026774 |
| 16:18:40 | 72.2189819 | 83.401158 | 65.1396628 | 65.8049643 | 67.5026774 |
| 16:18:41 | 72.2189819 | 83.401158 | 65.1396628 | 66.8049643 | 67.5026774 |
| 16:18:42 | 73.2189819 | 83.401158 | 64.1396628 | 68.8049643 | 67.5026774 |
| 16:18:43 | 73.2189819 | 82.401158 | 65.1396628 | 68.8049643 | 68.5026774 |
| 16:18:44 | 73.2189819 | 82.401158 | 65.1396628 | 70.8049643 | 68.5026774 |
| 16:18:45 | 73.2189819 | 82.401158 | 66.1396628 | 71.8049643 | 68.5026774 |
| 16:18:46 | 74.2189819 | 82.401158 | 66.1396628 | 71.8049643 | 69.5026774 |
| 16:18:47 | 74.2189819 | 82.401158 | 71.1396628 | 71.8049643 | 69.5026774 |
| 16:18:48 | 77.2189819 | 81.401158 | 74.1396628 | 71.8049643 | 69.5026774 |
| 16:18:49 | 77.2189819 | 80.401158 | 74.1396628 | 71.8049643 | 69.5026774 |
| 16:18:50 | 72.2189819 | 78.401158 | 75.1396628 | 72.8049643 | 69.5026774 |
| 16:18:51 | 71.2189819 | 77.401158 | 75.1396628 | 72.8049643 | 69.5026774 |
| 16:18:52 | 70.2189819 | 74.401158 | 75.1396628 | 72.8049643 | 69.5026774 |
| 16:18:53 | 70.2189819 | 74.401158 | 75.1396628 | 72.8049643 | 68.5026774 |
| 16:18:54 | 70.2189819 | 73.401158 | 70.1396628 | 72.8049643 | 68.5026774 |
| 16:18:55 | 70.2189819 | 72.401158 | 68.1396628 | 72.8049643 | 69.5026774 |
| 16:18:56 | 71.2189819 | 70.401158 | 68.1396628 | 72.8049643 | 70.5026774 |
| 16:18:57 | 72.2189819 | 68.401158 | 67.1396628 | 72.8049643 | 70.5026774 |
| 16:18:58 | 72.2189819 | 67.401158 | 67.1396628 | 72.8049643 | 70.5026774 |
| 16:18:59 | 73.2189819 | 65.401158 | 74.1396628 | 74.8049643 | 71.5026774 |
| 16:19:00 | 73.2189819 | 65.401158 | 71.1396628 | 77.8049643 | 71.5026774 |
| 16:19:01 | 72.2189819 | 66.401158 | 70.1396628 | 77.8049643 | 71.5026774 |
| 16:19:02 | 72.2189819 | 67.401158 | 70.1396628 | 78.8049643 | 71.5026774 |
| 16:19:03 | 70.2189819 | 67.401158 | 69.1396628 | 78.8049643 | 71.5026774 |
| 16:19:04 | 71.2189819 | 68.401158 | 69.1396628 | 78.8049643 | 71.5026774 |
| 16:19:05 | 71.2189819 | 69.401158 | 69.1396628 | 78.8049643 | 71.5026774 |
| 16:19:06 | 71.2189819 | 69.401158 | 69.1396628 | 77.8049643 | 71.5026774 |
| 16:19:07 | 72.2189819 | 70.401158 | 70.1396628 | 73.8049643 | 71.5026774 |
| 16:19:08 | 72.2189819 | 70.401158 | 73.1396628 | 73.8049643 | 71.5026774 |
| 16:19:09 | 73.2189819 | 72.401158 | 73.1396628 | 72.8049643 | 71.5026774 |
| 16:19:10 | 73.2189819 | 75.401158 | 74.1396628 | 72.8049643 | 71.5026774 |
| 16:19:11 | 73.2189819 | 75.401158 | 74.1396628 | 72.8049643 | 72.5026774 |
| 16:19:12 | 73.2189819 | 75.401158 | 74.1396628 | 72.8049643 | 72.5026774 |
| 16:19:13 | 75.2189819 | 75.401158 | 71.1396628 | 72.8049643 | 72.5026774 |
| 16:19:14 | 76.2189819 | 75.401158 | 70.1396628 | 72.8049643 | 72.5026774 |
| 16:19:15 | 77.2189819 | 75.401158 | 70.1396628 | 72.8049643 | 71.5026774 |
| 16:19:16 | 77.2189819 | 76.401158 | 71.1396628 | 72.8049643 | 71.5026774 |
| 16:19:17 | 78.2189819 | 76.401158 | 71.1396628 | 72.8049643 | 71.5026774 |

|          |            |           |            |            |            |
|----------|------------|-----------|------------|------------|------------|
| 16:19:18 | 78.2189819 | 75.401158 | 71.1396628 | 72.8049643 | 71.5026774 |
| 16:19:19 | 78.2189819 | 66.401158 | 71.1396628 | 72.8049643 | 71.5026774 |
| 16:19:20 | 77.2189819 | 66.401158 | 70.1396628 | 72.8049643 | 72.5026774 |
| 16:19:21 | 77.2189819 | 64.401158 | 70.1396628 | 72.8049643 | 73.5026774 |
| 16:19:22 | 77.2189819 | 64.401158 | 72.1396628 | 73.8049643 | 74.5026774 |
| 16:19:23 | 77.2189819 | 64.401158 | 72.1396628 | 73.8049643 | 75.5026774 |
| 16:19:24 | 76.2189819 | 66.401158 | 72.1396628 | 73.8049643 | 76.5026774 |
| 16:19:25 | 75.2189819 | 72.401158 | 71.1396628 | 73.8049643 | 76.5026774 |
| 16:19:26 | 74.2189819 | 80.401158 | 71.1396628 | 73.8049643 | 76.5026774 |
| 16:19:27 | 74.2189819 | 80.401158 | 71.1396628 | 74.8049643 | 73.5026774 |
| 16:19:28 | 73.2189819 | 82.401158 | 72.1396628 | 74.8049643 | 73.5026774 |
| 16:19:29 | 73.2189819 | 82.401158 | 72.1396628 | 75.8049643 | 72.5026774 |
| 16:19:30 | 74.2189819 | 82.401158 | 72.1396628 | 77.8049643 | 72.5026774 |
| 16:19:31 | 74.2189819 | 81.401158 | 72.1396628 | 82.8049643 | 73.5026774 |
| 16:19:32 | 75.2189819 | 81.401158 | 73.1396628 | 84.8049643 | 73.5026774 |
| 16:19:33 | 76.2189819 | 82.401158 | 73.1396628 | 85.8049643 | 75.5026774 |
| 16:19:34 | 78.2189819 | 82.401158 | 73.1396628 | 85.8049643 | 75.5026774 |
| 16:19:35 | 83.2189819 | 82.401158 | 74.1396628 | 86.8049643 | 76.5026774 |
| 16:19:36 | 83.2189819 | 82.401158 | 74.1396628 | 85.8049643 | 77.5026774 |
| 16:19:37 | 85.2189819 | 82.401158 | 74.1396628 | 85.8049643 | 79.5026774 |
| 16:19:38 | 86.2189819 | 82.401158 | 74.1396628 | 85.8049643 | 79.5026774 |
| 16:19:39 | 90.2189819 | 77.401158 | 75.1396628 | 85.8049643 | 79.5026774 |
| 16:19:40 | 89.2189819 | 72.401158 | 75.1396628 | 83.8049643 | 79.5026774 |
| 16:19:41 | 89.2189819 | 72.401158 | 75.1396628 | 83.8049643 | 79.5026774 |
| 16:19:42 | 88.2189819 | 70.401158 | 76.1396628 | 80.8049643 | 77.5026774 |
| 16:19:43 | 88.2189819 | 70.401158 | 76.1396628 | 76.8049643 | 75.5026774 |
| 16:19:44 | 88.2189819 | 71.401158 | 76.1396628 | 75.8049643 | 75.5026774 |
| 16:19:45 | 87.2189819 | 71.401158 | 76.1396628 | 73.8049643 | 74.5026774 |
| 16:19:46 | 82.2189819 | 71.401158 | 76.1396628 | 73.8049643 | 74.5026774 |
| 16:19:47 | 81.2189819 | 71.401158 | 76.1396628 | 73.8049643 | 74.5026774 |
| 16:19:48 | 81.2189819 | 69.401158 | 76.1396628 | 71.8049643 | 74.5026774 |
| 16:19:49 | 81.2189819 | 65.401158 | 76.1396628 | 69.8049643 | 74.5026774 |
| 16:19:50 | 79.2189819 | 64.401158 | 76.1396628 | 69.8049643 | 74.5026774 |
| 16:19:51 | 78.2189819 | 65.401158 | 76.1396628 | 69.8049643 | 74.5026774 |
| 16:19:52 | 77.2189819 | 65.401158 | 76.1396628 | 69.8049643 | 76.5026774 |
| 16:19:53 | 77.2189819 | 66.401158 | 76.1396628 | 69.8049643 | 75.5026774 |
| 16:19:54 | 77.2189819 | 70.401158 | 77.1396628 | 70.8049643 | 75.5026774 |
| 16:19:55 | 77.2189819 | 70.401158 | 77.1396628 | 70.8049643 | 74.5026774 |
| 16:19:56 | 78.2189819 | 71.401158 | 77.1396628 | 72.8049643 | 74.5026774 |
| 16:19:57 | 79.2189819 | 72.401158 | 77.1396628 | 72.8049643 | 74.5026774 |
| 16:19:58 | 79.2189819 | 72.401158 | 77.1396628 | 73.8049643 | 74.5026774 |
| 16:19:59 | 79.2189819 | 75.401158 | 76.1396628 | 73.8049643 | 73.5026774 |
| 16:20:00 | 78.2189819 | 75.401158 | 75.1396628 | 73.8049643 | 73.5026774 |
| 16:20:01 | 77.2189819 | 72.401158 | 74.1396628 | 73.8049643 | 74.5026774 |
| 16:20:02 | 77.2189819 | 72.401158 | 75.1396628 | 73.8049643 | 74.5026774 |

|          |            |           |            |            |            |
|----------|------------|-----------|------------|------------|------------|
| 16:20:03 | 76.2189819 | 71.401158 | 75.1396628 | 75.8049643 | 74.5026774 |
| 16:20:04 | 75.2189819 | 71.401158 | 75.1396628 | 75.8049643 | 74.5026774 |
| 16:20:05 | 75.2189819 | 71.401158 | 76.1396628 | 75.8049643 | 73.5026774 |
| 16:20:06 | 75.2189819 | 71.401158 | 76.1396628 | 75.8049643 | 73.5026774 |
| 16:20:07 | 75.2189819 | 74.401158 | 75.1396628 | 78.8049643 | 73.5026774 |
| 16:20:08 | 75.2189819 | 75.401158 | 74.1396628 | 78.8049643 | 72.5026774 |
| 16:20:09 | 75.2189819 | 75.401158 | 74.1396628 | 79.8049643 | 72.5026774 |
| 16:20:10 | 75.2189819 | 75.401158 | 74.1396628 | 79.8049643 | 72.5026774 |
| 16:20:11 | 75.2189819 | 75.401158 | 75.1396628 | 80.8049643 | 72.5026774 |
| 16:20:12 | 73.2189819 | 71.401158 | 76.1396628 | 80.8049643 | 72.5026774 |
| 16:20:13 | 73.2189819 | 69.401158 | 76.1396628 | 80.8049643 | 71.5026774 |
| 16:20:14 | 73.2189819 | 69.401158 | 76.1396628 | 78.8049643 | 71.5026774 |
| 16:20:15 | 72.2189819 | 69.401158 | 77.1396628 | 78.8049643 | 71.5026774 |
| 16:20:16 | 72.2189819 | 70.401158 | 77.1396628 | 78.8049643 | 72.5026774 |
| 16:20:17 | 72.2189819 | 70.401158 | 77.1396628 | 77.8049643 | 72.5026774 |
| 16:20:18 | 72.2189819 | 70.401158 | 76.1396628 | 76.8049643 | 72.5026774 |
| 16:20:19 | 72.2189819 | 70.401158 | 76.1396628 | 74.8049643 | 72.5026774 |
| 16:20:20 | 72.2189819 | 70.401158 | 75.1396628 | 74.8049643 | 71.5026774 |
| 16:20:21 | 72.2189819 | 73.401158 | 73.1396628 | 74.8049643 | 71.5026774 |
| 16:20:22 | 72.2189819 | 73.401158 | 72.1396628 | 71.8049643 | 71.5026774 |
| 16:20:23 | 72.2189819 | 72.401158 | 73.1396628 | 71.8049643 | 71.5026774 |
| 16:20:24 | 72.2189819 | 72.401158 | 73.1396628 | 71.8049643 | 71.5026774 |
| 16:20:25 | 72.2189819 | 73.401158 | 73.1396628 | 70.8049643 | 70.5026774 |
| 16:20:26 | 73.2189819 | 73.401158 | 74.1396628 | 70.8049643 | 70.5026774 |
| 16:20:27 | 74.2189819 | 73.401158 | 74.1396628 | 70.8049643 | 70.5026774 |
| 16:20:28 | 76.2189819 | 74.401158 | 74.1396628 | 70.8049643 | 71.5026774 |
| 16:20:29 | 77.2189819 | 74.401158 | 71.1396628 | 69.8049643 | 70.5026774 |
| 16:20:30 | 77.2189819 | 74.401158 | 70.1396628 | 69.8049643 | 70.5026774 |
| 16:20:31 | 77.2189819 | 74.401158 | 70.1396628 | 69.8049643 | 70.5026774 |
| 16:20:32 | 75.2189819 | 74.401158 | 70.1396628 | 70.8049643 | 70.5026774 |
| 16:20:33 | 75.2189819 | 74.401158 | 70.1396628 | 70.8049643 | 70.5026774 |
| 16:20:34 | 75.2189819 | 74.401158 | 70.1396628 | 71.8049643 | 71.5026774 |
| 16:20:35 | 75.2189819 | 74.401158 | 71.1396628 | 74.8049643 | 71.5026774 |
| 16:20:36 | 75.2189819 | 75.401158 | 72.1396628 | 75.8049643 | 71.5026774 |
| 16:20:37 | 75.2189819 | 75.401158 | 73.1396628 | 75.8049643 | 71.5026774 |
| 16:20:38 | 74.2189819 | 75.401158 | 74.1396628 | 76.8049643 | 71.5026774 |
| 16:20:39 | 74.2189819 | 76.401158 | 72.1396628 | 76.8049643 | 71.5026774 |
| 16:20:40 | 74.2189819 | 84.401158 | 72.1396628 | 76.8049643 | 71.5026774 |
| 16:20:41 | 74.2189819 | 86.401158 | 72.1396628 | 76.8049643 | 71.5026774 |
| 16:20:42 | 74.2189819 | 86.401158 | 72.1396628 | 76.8049643 | 71.5026774 |
| 16:20:43 | 74.2189819 | 88.401158 | 72.1396628 | 76.8049643 | 71.5026774 |
| 16:20:44 | 73.2189819 | 83.401158 | 71.1396628 | 78.8049643 | 71.5026774 |
| 16:20:45 | 72.2189819 | 81.401158 | 69.1396628 | 78.8049643 | 71.5026774 |
| 16:20:46 | 72.2189819 | 81.401158 | 69.1396628 | 78.8049643 | 71.5026774 |
| 16:20:47 | 72.2189819 | 81.401158 | 68.1396628 | 78.8049643 | 71.5026774 |

|          |            |           |            |            |            |
|----------|------------|-----------|------------|------------|------------|
| 16:20:48 | 73.2189819 | 74.401158 | 66.1396628 | 78.8049643 | 70.5026774 |
| 16:20:49 | 73.2189819 | 73.401158 | 66.1396628 | 78.8049643 | 70.5026774 |
| 16:20:50 | 73.2189819 | 73.401158 | 66.1396628 | 78.8049643 | 68.5026774 |
| 16:20:51 | 73.2189819 | 73.401158 | 67.1396628 | 78.8049643 | 67.5026774 |
| 16:20:52 | 73.2189819 | 84.401158 | 67.1396628 | 74.8049643 | 66.5026774 |
| 16:20:53 | 72.2189819 | 74.1      | 69.1396628 | 74.8049643 | 63.5026774 |
| 16:20:54 | 72.2189819 | 73.8      | 69.1396628 | 74.8049643 | 62.5026774 |
| 16:20:55 | 72.2189819 | 87.401158 | 69.1396628 | 74.8049643 | 61.5026774 |
| 16:20:56 | 75.2189819 | 73.1      | 69.1396628 | 74.8049643 | 59.5026774 |
| 16:20:57 | 77.2189819 | 86.401158 | 69.1396628 | 74.8049643 | 59.5026774 |
| 16:20:58 | 77.2189819 | 82.401158 | 70.1396628 | 70.8049643 | 58.5026774 |
| 16:20:59 | 76.2189819 | 79.401158 | 70.1396628 | 70.8049643 | 58.5026774 |
| 16:21:00 | 76.2189819 | 79.401158 | 70.1396628 | 70.8049643 | 58.5026774 |
| 16:21:01 | 76.2189819 | 77.401158 | 70.1396628 | 71.8049643 | 57.5026774 |
| 16:21:02 | 75.2189819 | 75.401158 | 69.1396628 | 71.8049643 | 60.5026774 |
| 16:21:03 | 75.2189819 | 75.401158 | 69.1396628 | 71.8049643 | 62.5026774 |
| 16:21:04 | 75.2189819 | 76.401158 | 69.1396628 | 71.8049643 | 62.5026774 |
| 16:21:05 | 75.2189819 | 76.401158 | 68.1396628 | 71.8049643 | 64.5026774 |
| 16:21:06 | 75.2189819 | 76.401158 | 65.1396628 | 71.8049643 | 65.5026774 |
| 16:21:07 | 74.2189819 | 76.401158 | 65.1396628 | 71.8049643 | 67.5026774 |
| 16:21:08 | 73.2189819 | 76.401158 | 64.1396628 | 71.8049643 | 73.5026774 |
| 16:21:09 | 72.2189819 | 76.401158 | 64.1396628 | 72.8049643 | 73.5026774 |
| 16:21:10 | 72.2189819 | 75.401158 | 64.1396628 | 72.8049643 | 75.5026774 |
| 16:21:11 | 71.2189819 | 75.401158 | 65.1396628 | 72.8049643 | 73.5026774 |
| 16:21:12 | 71.2189819 | 75.401158 | 65.1396628 | 72.8049643 | 73.5026774 |
| 16:21:13 | 71.2189819 | 75.401158 | 65.1396628 | 74.8049643 | 73.5026774 |
| 16:21:14 | 71.2189819 | 74.401158 | 64.1396628 | 76.8049643 | 73.5026774 |
| 16:21:15 | 71.2189819 | 74.401158 | 64.1396628 | 76.8049643 | 73.5026774 |
| 16:21:16 | 70.2189819 | 74.401158 | 66.1396628 | 76.8049643 | 73.5026774 |
| 16:21:17 | 71.2189819 | 74.401158 | 66.1396628 | 76.8049643 | 74.5026774 |
| 16:21:18 | 71.2189819 | 74.401158 | 66.1396628 | 76.8049643 | 75.5026774 |
| 16:21:19 | 71.2189819 | 75.401158 | 66.1396628 | 76.8049643 | 75.5026774 |
| 16:21:20 | 71.2189819 | 75.401158 | 66.1396628 | 77.8049643 | 75.5026774 |
| 16:21:21 | 71.2189819 | 75.401158 | 66.1396628 | 77.8049643 | 76.5026774 |
| 16:21:22 | 71.2189819 | 77.401158 | 66.1396628 | 77.8049643 | 76.5026774 |
| 16:21:23 | 71.2189819 | 77.401158 | 66.1396628 | 77.8049643 | 74.5026774 |
| 16:21:24 | 71.2189819 | 75.401158 | 67.1396628 | 77.8049643 | 69.5026774 |
| 16:21:25 | 71.2189819 | 73.401158 | 67.1396628 | 77.8049643 | 67.5026774 |
| 16:21:26 | 72.2189819 | 73.401158 | 68.1396628 | 77.8049643 | 66.5026774 |
| 16:21:27 | 72.2189819 | 73.401158 | 68.1396628 | 78.8049643 | 66.5026774 |
| 16:21:28 | 74.2189819 | 72.401158 | 69.1396628 | 78.8049643 | 65.5026774 |
| 16:21:29 | 74.2189819 | 72.401158 | 81.1396628 | 78.8049643 | 65.5026774 |
| 16:21:30 | 73.2189819 | 72.401158 | 81.1396628 | 78.8049643 | 65.5026774 |
| 16:21:31 | 73.2189819 | 72.401158 | 83.1396628 | 78.8049643 | 66.5026774 |
| 16:21:32 | 73.2189819 | 72.401158 | 84.1396628 | 79.8049643 | 67.5026774 |

|          |            |           |            |            |            |
|----------|------------|-----------|------------|------------|------------|
| 16:21:33 | 72.2189819 | 70.401158 | 85.1396628 | 79.8049643 | 69.5026774 |
| 16:21:34 | 72.2189819 | 70.401158 | 84.1396628 | 81.8049643 | 69.5026774 |
| 16:21:35 | 71.2189819 | 68.401158 | 83.1396628 | 81.8049643 | 69.5026774 |
| 16:21:36 | 70.2189819 | 68.401158 | 82.1396628 | 81.8049643 | 70.5026774 |
| 16:21:37 | 70.2189819 | 66.401158 | 81.1396628 | 81.8049643 | 70.5026774 |
| 16:21:38 | 70.2189819 | 67.401158 | 80.1396628 | 81.8049643 | 71.5026774 |
| 16:21:39 | 70.2189819 | 69.401158 | 78.1396628 | 81.8049643 | 71.5026774 |
| 16:21:40 | 69.2189819 | 73.401158 | 77.1396628 | 81.8049643 | 70.5026774 |
| 16:21:41 | 69.2189819 | 73.401158 | 75.1396628 | 81.8049643 | 72.5026774 |
| 16:21:42 | 68.2189819 | 75.401158 | 74.1396628 | 82.8049643 | 72.5026774 |
| 16:21:43 | 68.2189819 | 76.401158 | 74.1396628 | 82.8049643 | 72.5026774 |
| 16:21:44 | 68.2189819 | 76.401158 | 74.1396628 | 82.8049643 | 73.5026774 |
| 16:21:45 | 69.2189819 | 79.401158 | 74.1396628 | 83.8049643 | 73.5026774 |
| 16:21:46 | 69.2189819 | 80.401158 | 75.1396628 | 82.8049643 | 73.5026774 |
| 16:21:47 | 70.2189819 | 80.401158 | 76.1396628 | 82.8049643 | 73.5026774 |
| 16:21:48 | 70.2189819 | 82.401158 | 76.1396628 | 82.8049643 | 73.5026774 |
| 16:21:49 | 69.2189819 | 82.401158 | 76.1396628 | 83.8049643 | 73.5026774 |
| 16:21:50 | 68.2189819 | 82.401158 | 76.1396628 | 83.8049643 | 73.5026774 |
| 16:21:51 | 67.2189819 | 83.401158 | 76.1396628 | 83.8049643 | 72.5026774 |
| 16:21:52 | 67.2189819 | 83.401158 | 76.1396628 | 83.8049643 | 72.5026774 |
| 16:21:53 | 68.2189819 | 83.401158 | 76.1396628 | 84.8049643 | 72.5026774 |
| 16:21:54 | 68.2189819 | 83.401158 | 76.1396628 | 84.8049643 | 72.5026774 |
| 16:21:55 | 68.2189819 | 84.401158 | 76.1396628 | 82.8049643 | 72.5026774 |
| 16:21:56 | 70.2189819 | 84.401158 | 75.1396628 | 80.8049643 | 72.5026774 |
| 16:21:57 | 70.2189819 | 84.401158 | 76.1396628 | 80.8049643 | 71.5026774 |
| 16:21:58 | 70.2189819 | 84.401158 | 78.1396628 | 80.8049643 | 70.5026774 |
| 16:21:59 | 70.2189819 | 84.401158 | 78.1396628 | 80.8049643 | 70.5026774 |
| 16:22:00 | 70.2189819 | 84.401158 | 79.1396628 | 80.8049643 | 70.5026774 |
| 16:22:01 | 70.2189819 | 87.401158 | 80.1396628 | 80.8049643 | 69.5026774 |
| 16:22:02 | 71.2189819 | 90.401158 | 78.1396628 | 82.8049643 | 69.5026774 |
| 16:22:03 | 72.2189819 | 90.401158 | 78.1396628 | 83.8049643 | 69.5026774 |
| 16:22:04 | 71.2189819 | 93.401158 | 78.1396628 | 83.8049643 | 69.5026774 |
| 16:22:05 | 71.2189819 | 87.401158 | 77.1396628 | 80.8049643 | 68.5026774 |
| 16:22:06 | 71.2189819 | 83.401158 | 77.1396628 | 79.8049643 | 68.5026774 |
| 16:22:07 | 71.2189819 | 82.401158 | 76.1396628 | 78.8049643 | 69.5026774 |
| 16:22:08 | 71.2189819 | 79.401158 | 76.1396628 | 77.8049643 | 71.5026774 |
| 16:22:09 | 71.2189819 | 76.401158 | 76.1396628 | 77.8049643 | 71.5026774 |
| 16:22:10 | 71.2189819 | 73.401158 | 76.1396628 | 77.8049643 | 71.5026774 |
| 16:22:11 | 72.2189819 | 73.401158 | 76.1396628 | 77.8049643 | 73.5026774 |
| 16:22:12 | 73.2189819 | 70.401158 | 77.1396628 | 77.8049643 | 74.5026774 |
| 16:22:13 | 73.2189819 | 69.401158 | 76.1396628 | 77.8049643 | 75.5026774 |
| 16:22:14 | 75.2189819 | 69.401158 | 76.1396628 | 76.8049643 | 75.5026774 |
| 16:22:15 | 75.2189819 | 69.401158 | 75.1396628 | 76.8049643 | 75.5026774 |
| 16:22:16 | 76.2189819 | 69.401158 | 75.1396628 | 75.8049643 | 74.5026774 |
| 16:22:17 | 76.2189819 | 69.401158 | 75.1396628 | 75.8049643 | 73.5026774 |

|          |            |           |            |            |            |
|----------|------------|-----------|------------|------------|------------|
| 16:22:18 | 76.2189819 | 71.401158 | 76.1396628 | 75.8049643 | 72.5026774 |
| 16:22:19 | 76.2189819 | 71.401158 | 77.1396628 | 75.8049643 | 72.5026774 |
| 16:22:20 | 76.2189819 | 71.401158 | 78.1396628 | 75.8049643 | 72.5026774 |
| 16:22:21 | 76.2189819 | 71.401158 | 78.1396628 | 77.8049643 | 73.5026774 |
| 16:22:22 | 75.2189819 | 70.401158 | 78.1396628 | 77.8049643 | 73.5026774 |
| 16:22:23 | 76.2189819 | 70.401158 | 78.1396628 | 78.8049643 | 73.5026774 |
| 16:22:24 | 76.2189819 | 70.401158 | 76.1396628 | 80.8049643 | 73.5026774 |
| 16:22:25 | 76.2189819 | 71.401158 | 72.1396628 | 82.8049643 | 74.5026774 |
| 16:22:26 | 76.2189819 | 72.401158 | 72.1396628 | 84.8049643 | 74.5026774 |
| 16:22:27 | 76.2189819 | 72.401158 | 72.1396628 | 86.8049643 | 74.5026774 |
| 16:22:28 | 72.2189819 | 71.401158 | 73.1396628 | 86.8049643 | 74.5026774 |
| 16:22:29 | 70.2189819 | 71.401158 | 73.1396628 | 89.8049643 | 75.5026774 |
| 16:22:30 | 69.2189819 | 71.401158 | 73.1396628 | 90.8049643 | 76.5026774 |
| 16:22:31 | 69.2189819 | 71.401158 | 73.1396628 | 90.8049643 | 76.5026774 |
| 16:22:32 | 70.2189819 | 71.401158 | 71.1396628 | 89.8049643 | 76.5026774 |
| 16:22:33 | 71.2189819 | 70.401158 | 71.1396628 | 86.8049643 | 76.5026774 |
| 16:22:34 | 71.2189819 | 70.401158 | 71.1396628 | 83.8049643 | 76.5026774 |
| 16:22:35 | 72.2189819 | 70.401158 | 72.1396628 | 83.8049643 | 77.5026774 |
| 16:22:36 | 73.2189819 | 72.401158 | 74.1396628 | 82.8049643 | 78.5026774 |
| 16:22:37 | 74.2189819 | 74.401158 | 74.1396628 | 81.8049643 | 78.5026774 |
| 16:22:38 | 74.2189819 | 74.401158 | 74.1396628 | 81.8049643 | 78.5026774 |
| 16:22:39 | 74.2189819 | 76.401158 | 74.1396628 | 80.8049643 | 78.5026774 |
| 16:22:40 | 74.2189819 | 76.401158 | 74.1396628 | 79.8049643 | 79.5026774 |
| 16:22:41 | 74.2189819 | 76.401158 | 74.1396628 | 77.8049643 | 79.5026774 |
| 16:22:42 | 74.2189819 | 76.401158 | 74.1396628 | 77.8049643 | 79.5026774 |
| 16:22:43 | 74.2189819 | 76.401158 | 74.1396628 | 76.8049643 | 82.5026774 |
| 16:22:44 | 74.2189819 | 76.401158 | 74.1396628 | 76.8049643 | 82.5026774 |
| 16:22:45 | 74.2189819 | 76.401158 | 76.1396628 | 76.8049643 | 83.5026774 |
| 16:22:46 | 73.2189819 | 76.401158 | 76.1396628 | 74.8049643 | 83.5026774 |
| 16:22:47 | 72.2189819 | 76.401158 | 76.1396628 | 73.8049643 | 83.5026774 |
| 16:22:48 | 72.2189819 | 76.401158 | 76.1396628 | 73.8049643 | 83.5026774 |
| 16:22:49 | 72.2189819 | 76.401158 | 70.1396628 | 72.8049643 | 83.5026774 |
| 16:22:50 | 72.2189819 | 76.401158 | 70.1396628 | 72.8049643 | 83.5026774 |
| 16:22:51 | 72.2189819 | 76.401158 | 67.1396628 | 75.8049643 | 83.5026774 |
| 16:22:52 | 76.2189819 | 76.401158 | 67.1396628 | 74.8049643 | 83.5026774 |
| 16:22:53 | 78.2189819 | 76.401158 | 68.1396628 | 73.8049643 | 84.5026774 |
| 16:22:54 | 78.2189819 | 76.401158 | 73.1396628 | 72.8049643 | 84.5026774 |
| 16:22:55 | 78.2189819 | 76.401158 | 75.1396628 | 72.8049643 | 85.5026774 |
| 16:22:56 | 78.2189819 | 75.401158 | 75.1396628 | 70.8049643 | 85.5026774 |
| 16:22:57 | 81.2189819 | 75.401158 | 75.1396628 | 70.8049643 | 85.5026774 |
| 16:22:58 | 83.2189819 | 75.401158 | 74.1396628 | 70.8049643 | 86.5026774 |
| 16:22:59 | 83.2189819 | 75.401158 | 74.1396628 | 70.8049643 | 86.5026774 |
| 16:23:00 | 79.2189819 | 75.401158 | 71.1396628 | 70.8049643 | 86.5026774 |
| 16:23:01 | 79.2189819 | 75.401158 | 71.1396628 | 70.8049643 | 86.5026774 |
| 16:23:02 | 78.2189819 | 75.401158 | 70.1396628 | 70.8049643 | 86.5026774 |

|          |            |           |            |            |            |
|----------|------------|-----------|------------|------------|------------|
| 16:23:03 | 77.2189819 | 75.401158 | 71.1396628 | 70.8049643 | 86.5026774 |
| 16:23:04 | 77.2189819 | 75.401158 | 70.1396628 | 70.8049643 | 85.5026774 |
| 16:23:05 | 77.2189819 | 75.401158 | 70.1396628 | 70.8049643 | 85.5026774 |
| 16:23:06 | 77.2189819 | 75.401158 | 67.1396628 | 71.8049643 | 85.5026774 |
| 16:23:07 | 77.2189819 | 75.401158 | 67.1396628 | 71.8049643 | 86.5026774 |
| 16:23:08 | 77.2189819 | 75.401158 | 68.1396628 | 71.8049643 | 86.5026774 |
| 16:23:09 | 76.2189819 | 74.401158 | 70.1396628 | 71.8049643 | 87.5026774 |
| 16:23:10 | 76.2189819 | 74.401158 | 72.1396628 | 72.8049643 | 85.5026774 |
| 16:23:11 | 76.2189819 | 75.401158 | 74.1396628 | 72.8049643 | 85.5026774 |
| 16:23:12 | 75.2189819 | 75.401158 | 75.1396628 | 72.8049643 | 85.5026774 |
| 16:23:13 | 75.2189819 | 75.401158 | 75.1396628 | 72.8049643 | 82.5026774 |
| 16:23:14 | 74.2189819 | 76.401158 | 74.1396628 | 73.8049643 | 80.5026774 |
| 16:23:15 | 73.2189819 | 76.401158 | 72.1396628 | 74.8049643 | 80.5026774 |
| 16:23:16 | 73.2189819 | 76.401158 | 72.1396628 | 74.8049643 | 79.5026774 |
| 16:23:17 | 73.2189819 | 75.401158 | 73.1396628 | 73.8049643 | 78.5026774 |
| 16:23:18 | 72.2189819 | 73.401158 | 74.1396628 | 73.8049643 | 78.5026774 |
| 16:23:19 | 71.2189819 | 66.401158 | 74.1396628 | 73.8049643 | 77.5026774 |
| 16:23:20 | 69.2189819 | 65.401158 | 73.1396628 | 73.8049643 | 77.5026774 |
| 16:23:21 | 69.2189819 | 65.401158 | 73.1396628 | 73.8049643 | 75.5026774 |
| 16:23:22 | 68.2189819 | 69.401158 | 69.1396628 | 70.8049643 | 74.5026774 |
| 16:23:23 | 68.2189819 | 71.401158 | 67.1396628 | 69.8049643 | 72.5026774 |
| 16:23:24 | 68.2189819 | 71.401158 | 65.1396628 | 70.8049643 | 72.5026774 |
| 16:23:25 | 68.2189819 | 72.401158 | 65.1396628 | 70.8049643 | 72.5026774 |
| 16:23:26 | 68.2189819 | 72.401158 | 66.1396628 | 70.8049643 | 72.5026774 |
| 16:23:27 | 69.2189819 | 70.401158 | 68.1396628 | 71.8049643 | 71.5026774 |
| 16:23:28 | 69.2189819 | 69.401158 | 70.1396628 | 71.8049643 | 71.5026774 |
| 16:23:29 | 70.2189819 | 68.401158 | 71.1396628 | 72.8049643 | 67.5026774 |
| 16:23:30 | 70.2189819 | 68.401158 | 72.1396628 | 72.8049643 | 65.5026774 |
| 16:23:31 | 70.2189819 | 68.401158 | 71.1396628 | 71.8049643 | 64.5026774 |
| 16:23:32 | 69.2189819 | 76.401158 | 69.1396628 | 71.8049643 | 64.5026774 |
| 16:23:33 | 69.2189819 | 76.401158 | 69.1396628 | 71.8049643 | 64.5026774 |
| 16:23:34 | 68.2189819 | 76.401158 | 68.1396628 | 71.8049643 | 63.5026774 |
| 16:23:35 | 68.2189819 | 76.401158 | 67.1396628 | 72.8049643 | 63.5026774 |
| 16:23:36 | 69.2189819 | 76.401158 | 66.1396628 | 72.8049643 | 63.5026774 |
| 16:23:37 | 69.2189819 | 76.401158 | 66.1396628 | 72.8049643 | 63.5026774 |
| 16:23:38 | 74.2189819 | 76.401158 | 66.1396628 | 72.8049643 | 63.5026774 |
| 16:23:39 | 77.2189819 | 76.401158 | 67.1396628 | 72.8049643 | 64.5026774 |
| 16:23:40 | 78.2189819 | 77.401158 | 67.1396628 | 72.8049643 | 65.5026774 |
| 16:23:41 | 78.2189819 | 78.401158 | 67.1396628 | 72.8049643 | 66.5026774 |
| 16:23:42 | 78.2189819 | 78.401158 | 67.1396628 | 72.8049643 | 66.5026774 |
| 16:23:43 | 78.2189819 | 81.401158 | 74.1396628 | 71.8049643 | 66.5026774 |
| 16:23:44 | 73.2189819 | 82.401158 | 77.1396628 | 73.8049643 | 66.5026774 |
| 16:23:45 | 72.2189819 | 82.401158 | 80.1396628 | 74.8049643 | 66.5026774 |
| 16:23:46 | 71.2189819 | 83.401158 | 80.1396628 | 74.8049643 | 71.5026774 |
| 16:23:47 | 70.2189819 | 83.401158 | 81.1396628 | 74.8049643 | 71.5026774 |

|          |            |           |            |            |            |
|----------|------------|-----------|------------|------------|------------|
| 16:23:48 | 69.2189819 | 83.401158 | 81.1396628 | 74.8049643 | 71.5026774 |
| 16:23:49 | 69.2189819 | 83.401158 | 82.1396628 | 74.8049643 | 71.5026774 |
| 16:23:50 | 68.2189819 | 74.401158 | 83.1396628 | 74.8049643 | 71.5026774 |
| 16:23:51 | 68.2189819 | 74.401158 | 83.1396628 | 73.8049643 | 71.5026774 |
| 16:23:52 | 68.2189819 | 74.401158 | 81.1396628 | 73.8049643 | 71.5026774 |
| 16:23:53 | 69.2189819 | 74.401158 | 81.1396628 | 73.8049643 | 71.5026774 |
| 16:23:54 | 70.2189819 | 74.401158 | 75.1396628 | 73.8049643 | 72.5026774 |
| 16:23:55 | 70.2189819 | 74.401158 | 75.1396628 | 73.8049643 | 72.5026774 |
| 16:23:56 | 70.2189819 | 75.401158 | 76.1396628 | 74.8049643 | 72.5026774 |
| 16:23:57 | 71.2189819 | 75.401158 | 78.1396628 | 80.8049643 | 72.5026774 |
| 16:23:58 | 72.2189819 | 76.401158 | 80.1396628 | 82.8049643 | 72.5026774 |
| 16:23:59 | 72.2189819 | 76.401158 | 80.1396628 | 82.8049643 | 73.5026774 |
| 16:24:00 | 72.2189819 | 76.401158 | 80.1396628 | 82.8049643 | 73.5026774 |
| 16:24:01 | 72.2189819 | 78.401158 | 80.1396628 | 85.8049643 | 74.5026774 |
| 16:24:02 | 74.2189819 | 78.401158 | 79.1396628 | 86.8049643 | 74.5026774 |
| 16:24:03 | 74.2189819 | 78.401158 | 78.1396628 | 86.8049643 | 74.5026774 |
| 16:24:04 | 75.2189819 | 78.401158 | 77.1396628 | 87.8049643 | 74.5026774 |
| 16:24:05 | 75.2189819 | 79.401158 | 77.1396628 | 88.8049643 | 74.5026774 |
| 16:24:06 | 77.2189819 | 80.401158 | 76.1396628 | 88.8049643 | 74.5026774 |
| 16:24:07 | 77.2189819 | 80.401158 | 76.1396628 | 87.8049643 | 74.5026774 |
| 16:24:08 | 79.2189819 | 80.401158 | 77.1396628 | 82.8049643 | 74.5026774 |
| 16:24:09 | 79.2189819 | 80.401158 | 79.1396628 | 82.8049643 | 72.5026774 |
| 16:24:10 | 80.2189819 | 80.401158 | 79.1396628 | 80.8049643 | 72.5026774 |
| 16:24:11 | 80.2189819 | 80.401158 | 80.1396628 | 80.8049643 | 72.5026774 |
| 16:24:12 | 80.2189819 | 80.401158 | 80.1396628 | 80.8049643 | 72.5026774 |
| 16:24:13 | 80.2189819 | 80.401158 | 80.1396628 | 80.8049643 | 72.5026774 |
| 16:24:14 | 80.2189819 | 80.401158 | 81.1396628 | 80.8049643 | 72.5026774 |
| 16:24:15 | 80.2189819 | 80.401158 | 81.1396628 | 80.8049643 | 72.5026774 |
| 16:24:16 | 82.2189819 | 80.401158 | 81.1396628 | 80.8049643 | 72.5026774 |
| 16:24:17 | 82.2189819 | 80.401158 | 80.1396628 | 80.8049643 | 73.5026774 |
| 16:24:18 | 82.2189819 | 80.401158 | 81.1396628 | 80.8049643 | 73.5026774 |
| 16:24:19 | 82.2189819 | 81.401158 | 82.1396628 | 79.8049643 | 73.5026774 |
| 16:24:20 | 82.2189819 | 82.401158 | 82.1396628 | 77.8049643 | 73.5026774 |
| 16:24:21 | 83.2189819 | 82.401158 | 82.1396628 | 77.8049643 | 72.5026774 |
| 16:24:22 | 82.2189819 | 86.401158 | 82.1396628 | 77.8049643 | 69.5026774 |
| 16:24:23 | 81.2189819 | 86.401158 | 83.1396628 | 77.8049643 | 67.5026774 |
| 16:24:24 | 79.2189819 | 86.401158 | 82.1396628 | 77.8049643 | 67.5026774 |
| 16:24:25 | 78.2189819 | 86.401158 | 79.1396628 | 77.8049643 | 66.5026774 |
| 16:24:26 | 78.2189819 | 86.401158 | 76.1396628 | 78.8049643 | 66.5026774 |
| 16:24:27 | 78.2189819 | 86.401158 | 76.1396628 | 78.8049643 | 66.5026774 |
| 16:24:28 | 79.2189819 | 89.401158 | 76.1396628 | 78.8049643 | 68.5026774 |
| 16:24:29 | 80.2189819 | 91.401158 | 75.1396628 | 78.8049643 | 68.5026774 |
| 16:24:30 | 80.2189819 | 75.9      | 75.1396628 | 75.8049643 | 68.5026774 |
| 16:24:31 | 78.2189819 | 75.8      | 75.1396628 | 74.8049643 | 69.5026774 |
| 16:24:32 | 75.2189819 | 75.7      | 75.1396628 | 73.8049643 | 69.5026774 |



|          |            |           |            |            |            |
|----------|------------|-----------|------------|------------|------------|
| 16:24:33 | 74.2189819 | 91.401158 | 77.1396628 | 73.8049643 | 70.5026774 |
| 16:24:34 | 74.2189819 | 91.401158 | 77.1396628 | 73.8049643 | 70.5026774 |
| 16:24:35 | 74.2189819 | 76.9      | 77.1396628 | 73.8049643 | 72.5026774 |
| 16:24:36 | 74.2189819 | 92.401158 | 77.1396628 | 73.8049643 | 72.5026774 |
| 16:24:37 | 74.2189819 | 77.1      | 75.1396628 | 73.8049643 | 73.5026774 |
| 16:24:38 | 74.2189819 | 92.401158 | 73.1396628 | 73.8049643 | 74.5026774 |
| 16:24:39 | 74.2189819 | 77.1      | 73.1396628 | 72.8049643 | 74.5026774 |
| 16:24:40 | 74.2189819 | 76.7      | 70.1396628 | 72.8049643 | 75.5026774 |
| 16:24:41 | 74.2189819 | 77.1      | 70.1396628 | 72.8049643 | 74.5026774 |
| 16:24:42 | 73.2189819 | 76.8      | 71.1396628 | 73.8049643 | 69.5026774 |
| 16:24:43 | 73.2189819 | 76.9      | 73.1396628 | 73.8049643 | 68.5026774 |
| 16:24:44 | 73.2189819 | 77.2      | 73.1396628 | 73.8049643 | 68.5026774 |
| 16:24:45 | 73.2189819 | 77.6      | 73.1396628 | 73.8049643 | 67.5026774 |
| 16:24:46 | 73.2189819 | 76.8      | 72.1396628 | 71.8049643 | 66.5026774 |
| 16:24:47 | 73.2189819 | 77        | 71.1396628 | 67.8049643 | 67.5026774 |
| 16:24:48 | 74.2189819 | 76.8      | 67.1396628 | 67.8049643 | 67.5026774 |
| 16:24:49 | 74.2189819 | 76.6      | 64.1396628 | 67.8049643 | 68.5026774 |
| 16:24:50 | 73.2189819 | 76.3      | 64.1396628 | 66.8049643 | 68.5026774 |
| 16:24:51 | 73.2189819 | 76.4      | 63.1396628 | 66.8049643 | 67.5026774 |
| 16:24:52 | 73.2189819 | 76.2      | 64.1396628 | 66.8049643 | 67.5026774 |
| 16:24:53 | 73.2189819 | 76.5      | 66.1396628 | 67.8049643 | 66.5026774 |
| 16:24:54 | 73.2189819 | 77.1      | 67.1396628 | 74.8049643 | 65.5026774 |
| 16:24:55 | 73.2189819 | 77.1      | 67.1396628 | 75.8049643 | 66.5026774 |
| 16:24:56 | 73.2189819 | 77.1      | 67.1396628 | 76.8049643 | 66.5026774 |
| 16:24:57 | 73.2189819 | 77.1      | 66.1396628 | 76.8049643 | 66.5026774 |
| 16:24:58 | 73.2189819 | 76.8      | 64.1396628 | 76.8049643 | 66.5026774 |
| 16:24:59 | 73.2189819 | 76.5      | 62.1396628 | 77.8049643 | 67.5026774 |
| 16:25:00 | 73.2189819 | 76.6      | 62.1396628 | 77.8049643 | 68.5026774 |
| 16:25:01 | 73.2189819 | 76.7      | 60.1396628 | 77.8049643 | 69.5026774 |
| 16:25:02 | 73.2189819 | 77.2      | 61.1396628 | 77.8049643 | 69.5026774 |
| 16:25:03 | 74.2189819 | 77.2      | 62.1396628 | 77.8049643 | 71.5026774 |
| 16:25:04 | 73.2189819 | 77.8      | 67.1396628 | 77.8049643 | 72.5026774 |
| 16:25:05 | 73.2189819 | 77.5      | 67.1396628 | 77.8049643 | 72.5026774 |
| 16:25:06 | 73.2189819 | 78.2      | 71.1396628 | 76.8049643 | 74.5026774 |
| 16:25:07 | 74.2189819 | 78.7      | 73.1396628 | 74.8049643 | 76.5026774 |
| 16:25:08 | 74.2189819 | 78.7      | 73.1396628 | 73.8049643 | 76.5026774 |
| 16:25:09 | 76.2189819 | 78.8      | 73.1396628 | 73.8049643 | 76.5026774 |
| 16:25:10 | 76.2189819 | 79        | 73.1396628 | 72.8049643 | 77.5026774 |
| 16:25:11 | 76.2189819 | 78.3      | 73.1396628 | 71.8049643 | 78.5026774 |
| 16:25:12 | 76.2189819 | 77.2      | 72.1396628 | 66.8049643 | 78.5026774 |
| 16:25:13 | 76.2189819 | 76.8      | 72.1396628 | 66.8049643 | 78.5026774 |
| 16:25:14 | 78.2189819 | 76.7      | 72.1396628 | 66.8049643 | 78.5026774 |
| 16:25:15 | 78.2189819 | 76.4      | 72.1396628 | 67.8049643 | 74.5026774 |
| 16:25:16 | 79.2189819 | 76.5      | 73.1396628 | 67.8049643 | 73.5026774 |
| 16:25:17 | 79.2189819 | 76.5      | 74.1396628 | 67.8049643 | 73.5026774 |

|          |            |           |            |            |            |
|----------|------------|-----------|------------|------------|------------|
| 16:25:18 | 78.2189819 | 76.9      | 76.1396628 | 67.8049643 | 73.5026774 |
| 16:25:19 | 78.2189819 | 85.401158 | 77.1396628 | 67.8049643 | 73.5026774 |
| 16:25:20 | 75.2189819 | 65.401158 | 77.1396628 | 67.8049643 | 72.5026774 |
| 16:25:21 | 74.2189819 | 64.401158 | 76.1396628 | 69.8049643 | 72.5026774 |
| 16:25:22 | 72.2189819 | 64.401158 | 75.1396628 | 71.8049643 | 72.5026774 |
| 16:25:23 | 69.2189819 | 65.401158 | 74.1396628 | 72.8049643 | 72.5026774 |
| 16:25:24 | 68.2189819 | 65.401158 | 74.1396628 | 72.8049643 | 72.5026774 |
| 16:25:25 | 68.2189819 | 65.401158 | 74.1396628 | 72.8049643 | 71.5026774 |
| 16:25:26 | 69.2189819 | 63.401158 | 75.1396628 | 73.8049643 | 71.5026774 |
| 16:25:27 | 68.2189819 | 62.401158 | 76.1396628 | 73.8049643 | 72.5026774 |
| 16:25:28 | 68.2189819 | 62.401158 | 76.1396628 | 75.8049643 | 72.5026774 |
| 16:25:29 | 69.2189819 | 61.401158 | 77.1396628 | 76.8049643 | 72.5026774 |
| 16:25:30 | 69.2189819 | 61.401158 | 77.1396628 | 76.8049643 | 72.5026774 |
| 16:25:31 | 71.2189819 | 61.401158 | 79.1396628 | 76.8049643 | 72.5026774 |
| 16:25:32 | 71.2189819 | 61.401158 | 79.1396628 | 76.8049643 | 71.5026774 |
| 16:25:33 | 71.2189819 | 61.401158 | 79.1396628 | 77.8049643 | 71.5026774 |
| 16:25:34 | 70.2189819 | 62.401158 | 79.1396628 | 77.8049643 | 71.5026774 |
| 16:25:35 | 70.2189819 | 63.401158 | 79.1396628 | 77.8049643 | 71.5026774 |
| 16:25:36 | 70.2189819 | 63.401158 | 79.1396628 | 77.8049643 | 71.5026774 |
| 16:25:37 | 70.2189819 | 63.401158 | 79.1396628 | 78.8049643 | 73.5026774 |
| 16:25:38 | 70.2189819 | 63.401158 | 79.1396628 | 77.8049643 | 73.5026774 |
| 16:25:39 | 70.2189819 | 63.401158 | 76.1396628 | 76.8049643 | 73.5026774 |
| 16:25:40 | 70.2189819 | 63.401158 | 75.1396628 | 74.8049643 | 73.5026774 |
| 16:25:41 | 70.2189819 | 63.401158 | 74.1396628 | 73.8049643 | 73.5026774 |
| 16:25:42 | 70.2189819 | 66.401158 | 75.1396628 | 73.8049643 | 74.5026774 |
| 16:25:43 | 70.2189819 | 69.401158 | 74.1396628 | 73.8049643 | 74.5026774 |
| 16:25:44 | 70.2189819 | 70.401158 | 74.1396628 | 70.8049643 | 74.5026774 |
| 16:25:45 | 70.2189819 | 70.401158 | 74.1396628 | 69.8049643 | 75.5026774 |
| 16:25:46 | 70.2189819 | 71.401158 | 74.1396628 | 69.8049643 | 76.5026774 |
| 16:25:47 | 70.2189819 | 70.401158 | 73.1396628 | 63.8049643 | 76.5026774 |
| 16:25:48 | 70.2189819 | 69.401158 | 73.1396628 | 63.8049643 | 76.5026774 |
| 16:25:49 | 70.2189819 | 69.401158 | 72.1396628 | 63.8049643 | 76.5026774 |
| 16:25:50 | 71.2189819 | 69.401158 | 69.1396628 | 63.8049643 | 77.5026774 |
| 16:25:51 | 71.2189819 | 69.401158 | 69.1396628 | 63.8049643 | 77.5026774 |
| 16:25:52 | 71.2189819 | 70.401158 | 67.1396628 | 64.8049643 | 77.5026774 |
| 16:25:53 | 74.2189819 | 70.401158 | 66.1396628 | 65.8049643 | 77.5026774 |
| 16:25:54 | 74.2189819 | 71.401158 | 67.1396628 | 65.8049643 | 76.5026774 |
| 16:25:55 | 73.2189819 | 72.401158 | 67.1396628 | 67.8049643 | 74.5026774 |
| 16:25:56 | 73.2189819 | 72.401158 | 68.1396628 | 67.8049643 | 74.5026774 |
| 16:25:57 | 72.2189819 | 70.401158 | 68.1396628 | 68.8049643 | 72.5026774 |
| 16:25:58 | 72.2189819 | 70.401158 | 70.1396628 | 68.8049643 | 71.5026774 |
| 16:25:59 | 72.2189819 | 70.401158 | 70.1396628 | 68.8049643 | 69.5026774 |
| 16:26:00 | 72.2189819 | 70.401158 | 70.1396628 | 68.8049643 | 69.5026774 |
| 16:26:01 | 72.2189819 | 70.401158 | 71.1396628 | 68.8049643 | 71.5026774 |
| 16:26:02 | 72.2189819 | 70.401158 | 71.1396628 | 68.8049643 | 72.5026774 |

|          |            |           |            |            |            |
|----------|------------|-----------|------------|------------|------------|
| 16:26:03 | 72.2189819 | 70.401158 | 72.1396628 | 68.8049643 | 73.5026774 |
| 16:26:04 | 71.2189819 | 72.401158 | 73.1396628 | 68.8049643 | 72.5026774 |
| 16:26:05 | 71.2189819 | 72.401158 | 73.1396628 | 69.8049643 | 71.5026774 |
| 16:26:06 | 71.2189819 | 72.401158 | 72.1396628 | 69.8049643 | 71.5026774 |
| 16:26:07 | 71.2189819 | 71.401158 | 72.1396628 | 69.8049643 | 67.5026774 |
| 16:26:08 | 71.2189819 | 72.401158 | 72.1396628 | 68.8049643 | 67.5026774 |
| 16:26:09 | 70.2189819 | 72.401158 | 72.1396628 | 68.8049643 | 67.5026774 |
| 16:26:10 | 69.2189819 | 72.401158 | 71.1396628 | 68.8049643 | 68.5026774 |
| 16:26:11 | 70.2189819 | 72.401158 | 70.1396628 | 69.8049643 | 69.5026774 |
| 16:26:12 | 70.2189819 | 72.401158 | 69.1396628 | 69.8049643 | 70.5026774 |
| 16:26:13 | 70.2189819 | 71.401158 | 69.1396628 | 69.8049643 | 70.5026774 |
| 16:26:14 | 71.2189819 | 69.401158 | 69.1396628 | 70.8049643 | 71.5026774 |
| 16:26:15 | 71.2189819 | 69.401158 | 71.1396628 | 70.8049643 | 71.5026774 |
| 16:26:16 | 72.2189819 | 69.401158 | 73.1396628 | 71.8049643 | 71.5026774 |
| 16:26:17 | 73.2189819 | 69.401158 | 75.1396628 | 74.8049643 | 71.5026774 |
| 16:26:18 | 74.2189819 | 71.401158 | 75.1396628 | 75.8049643 | 70.5026774 |
| 16:26:19 | 74.2189819 | 73.401158 | 76.1396628 | 75.8049643 | 71.5026774 |
| 16:26:20 | 74.2189819 | 73.401158 | 76.1396628 | 75.8049643 | 71.5026774 |
| 16:26:21 | 74.2189819 | 74.401158 | 76.1396628 | 75.8049643 | 72.5026774 |
| 16:26:22 | 74.2189819 | 74.401158 | 76.1396628 | 75.8049643 | 73.5026774 |
| 16:26:23 | 75.2189819 | 75.401158 | 76.1396628 | 75.8049643 | 73.5026774 |
| 16:26:24 | 75.2189819 | 75.401158 | 76.1396628 | 75.8049643 | 73.5026774 |
| 16:26:25 | 72.2189819 | 75.401158 | 86.1396628 | 75.8049643 | 74.5026774 |
| 16:26:26 | 72.2189819 | 75.401158 | 88.1396628 | 74.8049643 | 74.5026774 |
| 16:26:27 | 72.2189819 | 74.401158 | 88.1396628 | 74.8049643 | 75.5026774 |
| 16:26:28 | 72.2189819 | 75.401158 | 88.1396628 | 73.8049643 | 75.5026774 |
| 16:26:29 | 72.2189819 | 75.401158 | 88.1396628 | 73.8049643 | 75.5026774 |
| 16:26:30 | 73.2189819 | 75.401158 | 88.1396628 | 72.8049643 | 74.5026774 |
| 16:26:31 | 73.2189819 | 76.401158 | 85.1396628 | 73.8049643 | 74.5026774 |
| 16:26:32 | 73.2189819 | 81.401158 | 83.1396628 | 73.8049643 | 74.5026774 |
| 16:26:33 | 74.2189819 | 85.401158 | 82.1396628 | 73.8049643 | 74.5026774 |
| 16:26:34 | 74.2189819 | 87.401158 | 82.1396628 | 73.8049643 | 75.5026774 |
| 16:26:35 | 74.2189819 | 86.401158 | 81.1396628 | 73.8049643 | 74.5026774 |
| 16:26:36 | 74.2189819 | 84.401158 | 81.1396628 | 73.8049643 | 74.5026774 |
| 16:26:37 | 74.2189819 | 82.401158 | 81.1396628 | 73.8049643 | 73.5026774 |
| 16:26:38 | 73.2189819 | 79.401158 | 80.1396628 | 73.8049643 | 72.5026774 |
| 16:26:39 | 71.2189819 | 76.401158 | 78.1396628 | 73.8049643 | 72.5026774 |
| 16:26:40 | 70.2189819 | 76.401158 | 78.1396628 | 73.8049643 | 71.5026774 |
| 16:26:41 | 70.2189819 | 74.401158 | 78.1396628 | 73.8049643 | 71.5026774 |
| 16:26:42 | 71.2189819 | 73.401158 | 77.1396628 | 72.8049643 | 71.5026774 |
| 16:26:43 | 69.2189819 | 73.401158 | 76.1396628 | 72.8049643 | 72.5026774 |
| 16:26:44 | 69.2189819 | 68.401158 | 76.1396628 | 72.8049643 | 71.5026774 |
| 16:26:45 | 69.2189819 | 65.401158 | 76.1396628 | 72.8049643 | 71.5026774 |
| 16:26:46 | 70.2189819 | 65.401158 | 76.1396628 | 73.8049643 | 70.5026774 |
| 16:26:47 | 70.2189819 | 64.401158 | 76.1396628 | 74.8049643 | 70.5026774 |

|          |            |           |            |            |            |
|----------|------------|-----------|------------|------------|------------|
| 16:26:48 | 70.2189819 | 63.401158 | 76.1396628 | 74.8049643 | 70.5026774 |
| 16:26:49 | 69.2189819 | 63.401158 | 76.1396628 | 74.8049643 | 70.5026774 |
| 16:26:50 | 69.2189819 | 64.401158 | 75.1396628 | 74.8049643 | 70.5026774 |
| 16:26:51 | 69.2189819 | 64.401158 | 75.1396628 | 74.8049643 | 70.5026774 |
| 16:26:52 | 69.2189819 | 65.401158 | 75.1396628 | 74.8049643 | 69.5026774 |
| 16:26:53 | 69.2189819 | 67.401158 | 75.1396628 | 74.8049643 | 69.5026774 |
| 16:26:54 | 69.2189819 | 69.401158 | 75.1396628 | 74.8049643 | 69.5026774 |
| 16:26:55 | 69.2189819 | 69.401158 | 75.1396628 | 74.8049643 | 69.5026774 |
| 16:26:56 | 69.2189819 | 71.401158 | 74.1396628 | 74.8049643 | 69.5026774 |
| 16:26:57 | 69.2189819 | 72.401158 | 74.1396628 | 74.8049643 | 69.5026774 |
| 16:26:58 | 70.2189819 | 72.401158 | 75.1396628 | 75.8049643 | 69.5026774 |
| 16:26:59 | 70.2189819 | 72.401158 | 75.1396628 | 75.8049643 | 69.5026774 |
| 16:27:00 | 70.2189819 | 72.401158 | 75.1396628 | 75.8049643 | 68.5026774 |
| 16:27:01 | 70.2189819 | 72.401158 | 75.1396628 | 76.8049643 | 67.5026774 |
| 16:27:02 | 70.2189819 | 72.401158 | 75.1396628 | 76.8049643 | 67.5026774 |
| 16:27:03 | 71.2189819 | 73.401158 | 76.1396628 | 77.8049643 | 68.5026774 |
| 16:27:04 | 72.2189819 | 73.401158 | 76.1396628 | 76.8049643 | 68.5026774 |
| 16:27:05 | 76.2189819 | 73.401158 | 78.1396628 | 77.8049643 | 68.5026774 |
| 16:27:06 | 75.2189819 | 73.401158 | 79.1396628 | 77.8049643 | 67.5026774 |
| 16:27:07 | 74.2189819 | 74.401158 | 79.1396628 | 77.8049643 | 69.5026774 |
| 16:27:08 | 75.2189819 | 74.401158 | 78.1396628 | 77.8049643 | 69.5026774 |
| 16:27:09 | 75.2189819 | 74.401158 | 77.1396628 | 77.8049643 | 72.5026774 |
| 16:27:10 | 74.2189819 | 74.401158 | 76.1396628 | 77.8049643 | 72.5026774 |
| 16:27:11 | 73.2189819 | 74.401158 | 75.1396628 | 77.8049643 | 72.5026774 |
| 16:27:12 | 73.2189819 | 75.401158 | 75.1396628 | 77.8049643 | 71.5026774 |
| 16:27:13 | 73.2189819 | 77.401158 | 76.1396628 | 76.8049643 | 70.5026774 |
| 16:27:14 | 73.2189819 | 77.401158 | 77.1396628 | 75.8049643 | 70.5026774 |
| 16:27:15 | 73.2189819 | 77.401158 | 77.1396628 | 73.8049643 | 70.5026774 |
| 16:27:16 | 73.2189819 | 77.401158 | 77.1396628 | 73.8049643 | 69.5026774 |
| 16:27:17 | 73.2189819 | 75.401158 | 77.1396628 | 73.8049643 | 67.5026774 |
| 16:27:18 | 73.2189819 | 75.401158 | 77.1396628 | 73.8049643 | 67.5026774 |
| 16:27:19 | 72.2189819 | 75.401158 | 78.1396628 | 71.8049643 | 66.5026774 |
| 16:27:20 | 72.2189819 | 75.401158 | 77.1396628 | 71.8049643 | 66.5026774 |
| 16:27:21 | 72.2189819 | 75.401158 | 77.1396628 | 71.8049643 | 66.5026774 |
| 16:27:22 | 72.2189819 | 76.401158 | 75.1396628 | 71.8049643 | 66.5026774 |
| 16:27:23 | 73.2189819 | 78.401158 | 73.1396628 | 71.8049643 | 66.5026774 |
| 16:27:24 | 73.2189819 | 79.401158 | 72.1396628 | 70.8049643 | 66.5026774 |
| 16:27:25 | 73.2189819 | 79.401158 | 71.1396628 | 69.8049643 | 67.5026774 |
| 16:27:26 | 74.2189819 | 80.401158 | 71.1396628 | 68.8049643 | 67.5026774 |
| 16:27:27 | 74.2189819 | 81.401158 | 72.1396628 | 67.8049643 | 67.5026774 |
| 16:27:28 | 74.2189819 | 81.401158 | 72.1396628 | 67.8049643 | 67.5026774 |
| 16:27:29 | 74.2189819 | 81.401158 | 73.1396628 | 66.8049643 | 67.5026774 |
| 16:27:30 | 75.2189819 | 82.401158 | 73.1396628 | 66.8049643 | 67.5026774 |
| 16:27:31 | 75.2189819 | 82.401158 | 74.1396628 | 65.8049643 | 67.5026774 |
| 16:27:32 | 74.2189819 | 82.401158 | 75.1396628 | 65.8049643 | 67.5026774 |

|          |            |           |            |            |            |
|----------|------------|-----------|------------|------------|------------|
| 16:27:33 | 74.2189819 | 82.401158 | 74.1396628 | 65.8049643 | 67.5026774 |
| 16:27:34 | 74.2189819 | 82.401158 | 74.1396628 | 68.8049643 | 70.5026774 |
| 16:27:35 | 74.2189819 | 83.401158 | 74.1396628 | 68.8049643 | 74.5026774 |
| 16:27:36 | 74.2189819 | 83.401158 | 74.1396628 | 68.8049643 | 77.5026774 |
| 16:27:37 | 74.2189819 | 83.401158 | 74.1396628 | 68.8049643 | 77.5026774 |
| 16:27:38 | 75.2189819 | 82.401158 | 74.1396628 | 69.8049643 | 78.5026774 |
| 16:27:39 | 75.2189819 | 81.401158 | 75.1396628 | 69.8049643 | 76.5026774 |
| 16:27:40 | 75.2189819 | 81.401158 | 75.1396628 | 69.8049643 | 74.5026774 |
| 16:27:41 | 74.2189819 | 80.401158 | 74.1396628 | 72.8049643 | 73.5026774 |
| 16:27:42 | 74.2189819 | 80.401158 | 74.1396628 | 75.8049643 | 73.5026774 |
| 16:27:43 | 74.2189819 | 77.401158 | 74.1396628 | 75.8049643 | 71.5026774 |
| 16:27:44 | 74.2189819 | 76.401158 | 74.1396628 | 75.8049643 | 71.5026774 |
| 16:27:45 | 74.2189819 | 70.401158 | 74.1396628 | 74.8049643 | 71.5026774 |
| 16:27:46 | 74.2189819 | 70.401158 | 77.1396628 | 74.8049643 | 71.5026774 |
| 16:27:47 | 76.2189819 | 70.401158 | 78.1396628 | 74.8049643 | 71.5026774 |
| 16:27:48 | 75.2189819 | 70.401158 | 77.1396628 | 74.8049643 | 71.5026774 |
| 16:27:49 | 75.2189819 | 70.401158 | 77.1396628 | 74.8049643 | 70.5026774 |
| 16:27:50 | 74.2189819 | 63.401158 | 77.1396628 | 73.8049643 | 70.5026774 |
| 16:27:51 | 74.2189819 | 63.401158 | 78.1396628 | 72.8049643 | 70.5026774 |
| 16:27:52 | 74.2189819 | 59.401158 | 79.1396628 | 71.8049643 | 70.5026774 |
| 16:27:53 | 74.2189819 | 60.401158 | 80.1396628 | 71.8049643 | 70.5026774 |
| 16:27:54 | 74.2189819 | 60.401158 | 80.1396628 | 71.8049643 | 70.5026774 |
| 16:27:55 | 73.2189819 | 62.401158 | 80.1396628 | 71.8049643 | 70.5026774 |
| 16:27:56 | 72.2189819 | 64.401158 | 81.1396628 | 72.8049643 | 70.5026774 |
| 16:27:57 | 73.2189819 | 65.401158 | 82.1396628 | 72.8049643 | 70.5026774 |
| 16:27:58 | 73.2189819 | 65.401158 | 82.1396628 | 72.8049643 | 70.5026774 |
| 16:27:59 | 73.2189819 | 66.401158 | 82.1396628 | 72.8049643 | 71.5026774 |
| 16:28:00 | 73.2189819 | 66.401158 | 81.1396628 | 72.8049643 | 72.5026774 |
| 16:28:01 | 73.2189819 | 67.401158 | 81.1396628 | 72.8049643 | 72.5026774 |
| 16:28:02 | 73.2189819 | 67.401158 | 79.1396628 | 72.8049643 | 72.5026774 |
| 16:28:03 | 73.2189819 | 67.401158 | 79.1396628 | 72.8049643 | 72.5026774 |
| 16:28:04 | 74.2189819 | 68.401158 | 79.1396628 | 73.8049643 | 72.5026774 |
| 16:28:05 | 75.2189819 | 68.401158 | 79.1396628 | 73.8049643 | 72.5026774 |
| 16:28:06 | 74.2189819 | 68.401158 | 79.1396628 | 74.8049643 | 72.5026774 |
| 16:28:07 | 74.2189819 | 68.401158 | 79.1396628 | 74.8049643 | 72.5026774 |
| 16:28:08 | 75.2189819 | 68.401158 | 79.1396628 | 74.8049643 | 72.5026774 |
| 16:28:09 | 75.2189819 | 68.401158 | 79.1396628 | 76.8049643 | 73.5026774 |
| 16:28:10 | 75.2189819 | 68.401158 | 78.1396628 | 77.8049643 | 73.5026774 |
| 16:28:11 | 75.2189819 | 73.401158 | 77.1396628 | 77.8049643 | 73.5026774 |
| 16:28:12 | 75.2189819 | 73.401158 | 77.1396628 | 77.8049643 | 73.5026774 |
| 16:28:13 | 75.2189819 | 73.401158 | 76.1396628 | 78.8049643 | 73.5026774 |
| 16:28:14 | 75.2189819 | 67.401158 | 76.1396628 | 78.8049643 | 75.5026774 |
| 16:28:15 | 75.2189819 | 65.401158 | 76.1396628 | 77.8049643 | 73.5026774 |
| 16:28:16 | 75.2189819 | 64.401158 | 75.1396628 | 77.8049643 | 73.5026774 |
| 16:28:17 | 76.2189819 | 66.401158 | 76.1396628 | 81.8049643 | 72.5026774 |

|          |            |           |            |            |            |
|----------|------------|-----------|------------|------------|------------|
| 16:28:18 | 76.2189819 | 67.401158 | 76.1396628 | 80.8049643 | 71.5026774 |
| 16:28:19 | 76.2189819 | 67.401158 | 76.1396628 | 80.8049643 | 70.5026774 |
| 16:28:20 | 76.2189819 | 72.401158 | 77.1396628 | 76.8049643 | 70.5026774 |
| 16:28:21 | 76.2189819 | 73.401158 | 77.1396628 | 76.8049643 | 70.5026774 |
| 16:28:22 | 76.2189819 | 73.401158 | 77.1396628 | 76.8049643 | 70.5026774 |
| 16:28:23 | 75.2189819 | 73.401158 | 78.1396628 | 75.8049643 | 70.5026774 |
| 16:28:24 | 75.2189819 | 71.401158 | 78.1396628 | 75.8049643 | 70.5026774 |
| 16:28:25 | 76.2189819 | 71.401158 | 79.1396628 | 75.8049643 | 73.5026774 |
| 16:28:26 | 75.2189819 | 69.401158 | 79.1396628 | 74.8049643 | 73.5026774 |
| 16:28:27 | 75.2189819 | 69.401158 | 79.1396628 | 74.8049643 | 74.5026774 |
| 16:28:28 | 77.2189819 | 69.401158 | 79.1396628 | 74.8049643 | 73.5026774 |
| 16:28:29 | 77.2189819 | 70.401158 | 79.1396628 | 74.8049643 | 71.5026774 |
| 16:28:30 | 77.2189819 | 70.401158 | 79.1396628 | 74.8049643 | 71.5026774 |
| 16:28:31 | 81.2189819 | 71.401158 | 82.1396628 | 74.8049643 | 71.5026774 |
| 16:28:32 | 83.2189819 | 72.401158 | 88.1396628 | 74.8049643 | 71.5026774 |
| 16:28:33 | 84.2189819 | 72.401158 | 88.1396628 | 76.8049643 | 72.5026774 |
| 16:28:34 | 84.2189819 | 72.401158 | 91.1396628 | 76.8049643 | 72.5026774 |
| 16:28:35 | 86.2189819 | 72.401158 | 78.2       | 76.8049643 | 72.5026774 |
| 16:28:36 | 87.2189819 | 71.401158 | 78.4       | 76.8049643 | 72.5026774 |
| 16:28:37 | 90.2189819 | 71.401158 | 95.1396628 | 80.8049643 | 72.5026774 |
| 16:28:38 | 91.2189819 | 71.401158 | 94.1396628 | 80.8049643 | 71.5026774 |
| 16:28:39 | 92.2189819 | 71.401158 | 92.1396628 | 80.8049643 | 71.5026774 |
| 16:28:40 | 92.2189819 | 72.401158 | 92.1396628 | 80.8049643 | 71.5026774 |
| 16:28:41 | 95.2189819 | 72.401158 | 92.1396628 | 81.8049643 | 71.5026774 |
| 16:28:42 | 80.6       | 72.401158 | 92.1396628 | 81.8049643 | 71.5026774 |
| 16:28:43 | 80.8       | 72.401158 | 92.1396628 | 82.8049643 | 71.5026774 |
| 16:28:44 | 86.2189819 | 73.401158 | 92.1396628 | 82.8049643 | 71.5026774 |
| 16:28:45 | 80.2189819 | 73.401158 | 85.1396628 | 82.8049643 | 71.5026774 |
| 16:28:46 | 77.2189819 | 74.401158 | 81.1396628 | 82.8049643 | 71.5026774 |
| 16:28:47 | 76.2189819 | 74.401158 | 81.1396628 | 82.8049643 | 74.5026774 |
| 16:28:48 | 75.2189819 | 74.401158 | 81.1396628 | 82.8049643 | 74.5026774 |
| 16:28:49 | 75.2189819 | 74.401158 | 81.1396628 | 78.8049643 | 74.5026774 |
| 16:28:50 | 75.2189819 | 74.401158 | 81.1396628 | 77.8049643 | 74.5026774 |
| 16:28:51 | 75.2189819 | 73.401158 | 81.1396628 | 73.8049643 | 72.5026774 |
| 16:28:52 | 75.2189819 | 72.401158 | 82.1396628 | 73.8049643 | 72.5026774 |
| 16:28:53 | 74.2189819 | 72.401158 | 82.1396628 | 71.8049643 | 71.5026774 |
| 16:28:54 | 74.2189819 | 72.401158 | 82.1396628 | 72.8049643 | 71.5026774 |
| 16:28:55 | 73.2189819 | 72.401158 | 82.1396628 | 72.8049643 | 71.5026774 |
| 16:28:56 | 73.2189819 | 72.401158 | 80.1396628 | 74.8049643 | 71.5026774 |
| 16:28:57 | 73.2189819 | 72.401158 | 80.1396628 | 76.8049643 | 70.5026774 |
| 16:28:58 | 72.2189819 | 72.401158 | 79.1396628 | 76.8049643 | 70.5026774 |
| 16:28:59 | 72.2189819 | 72.401158 | 80.1396628 | 76.8049643 | 70.5026774 |
| 16:29:00 | 72.2189819 | 78.401158 | 79.1396628 | 76.8049643 | 69.5026774 |
| 16:29:01 | 72.2189819 | 80.401158 | 75.1396628 | 76.8049643 | 69.5026774 |
| 16:29:02 | 72.2189819 | 80.401158 | 74.1396628 | 76.8049643 | 69.5026774 |

|          |            |           |            |            |            |
|----------|------------|-----------|------------|------------|------------|
| 16:29:03 | 72.2189819 | 80.401158 | 73.1396628 | 76.8049643 | 70.5026774 |
| 16:29:04 | 72.2189819 | 80.401158 | 73.1396628 | 76.8049643 | 70.5026774 |
| 16:29:05 | 73.2189819 | 80.401158 | 73.1396628 | 76.8049643 | 70.5026774 |
| 16:29:06 | 73.2189819 | 80.401158 | 73.1396628 | 76.8049643 | 70.5026774 |
| 16:29:07 | 75.2189819 | 80.401158 | 73.1396628 | 76.8049643 | 70.5026774 |
| 16:29:08 | 74.2189819 | 80.401158 | 71.1396628 | 74.8049643 | 71.5026774 |
| 16:29:09 | 73.2189819 | 81.401158 | 71.1396628 | 72.8049643 | 71.5026774 |
| 16:29:10 | 72.2189819 | 81.401158 | 71.1396628 | 72.8049643 | 71.5026774 |
| 16:29:11 | 72.2189819 | 81.401158 | 71.1396628 | 72.8049643 | 72.5026774 |
| 16:29:12 | 72.2189819 | 81.401158 | 71.1396628 | 72.8049643 | 72.5026774 |
| 16:29:13 | 73.2189819 | 81.401158 | 70.1396628 | 71.8049643 | 73.5026774 |
| 16:29:14 | 73.2189819 | 81.401158 | 69.1396628 | 71.8049643 | 73.5026774 |
| 16:29:15 | 73.2189819 | 81.401158 | 69.1396628 | 71.8049643 | 73.5026774 |
| 16:29:16 | 73.2189819 | 82.401158 | 69.1396628 | 70.8049643 | 73.5026774 |
| 16:29:17 | 73.2189819 | 84.401158 | 69.1396628 | 70.8049643 | 73.5026774 |
| 16:29:18 | 74.2189819 | 85.401158 | 68.1396628 | 68.8049643 | 74.5026774 |
| 16:29:19 | 74.2189819 | 85.401158 | 68.1396628 | 66.8049643 | 73.5026774 |
| 16:29:20 | 74.2189819 | 85.401158 | 69.1396628 | 66.8049643 | 72.5026774 |
| 16:29:21 | 74.2189819 | 86.401158 | 69.1396628 | 66.8049643 | 72.5026774 |
| 16:29:22 | 74.2189819 | 86.401158 | 71.1396628 | 66.8049643 | 70.5026774 |
| 16:29:23 | 74.2189819 | 86.401158 | 71.1396628 | 66.8049643 | 70.5026774 |
| 16:29:24 | 74.2189819 | 87.401158 | 71.1396628 | 66.8049643 | 69.5026774 |
| 16:29:25 | 74.2189819 | 86.401158 | 70.1396628 | 66.8049643 | 68.5026774 |
| 16:29:26 | 73.2189819 | 85.401158 | 70.1396628 | 67.8049643 | 66.5026774 |
| 16:29:27 | 73.2189819 | 85.401158 | 69.1396628 | 69.8049643 | 66.5026774 |
| 16:29:28 | 73.2189819 | 85.401158 | 69.1396628 | 71.8049643 | 66.5026774 |
| 16:29:29 | 73.2189819 | 85.401158 | 69.1396628 | 71.8049643 | 66.5026774 |
| 16:29:30 | 71.2189819 | 85.401158 | 73.1396628 | 72.8049643 | 66.5026774 |
| 16:29:31 | 71.2189819 | 68.401158 | 73.1396628 | 72.8049643 | 66.5026774 |
| 16:29:32 | 71.2189819 | 67.401158 | 73.1396628 | 72.8049643 | 66.5026774 |
| 16:29:33 | 71.2189819 | 67.401158 | 70.1396628 | 72.8049643 | 66.5026774 |
| 16:29:34 | 71.2189819 | 69.401158 | 70.1396628 | 72.8049643 | 65.5026774 |
| 16:29:35 | 71.2189819 | 71.401158 | 70.1396628 | 71.8049643 | 64.5026774 |
| 16:29:36 | 71.2189819 | 71.401158 | 72.1396628 | 71.8049643 | 65.5026774 |
| 16:29:37 | 71.2189819 | 71.401158 | 73.1396628 | 74.8049643 | 65.5026774 |
| 16:29:38 | 70.2189819 | 71.401158 | 73.1396628 | 74.8049643 | 65.5026774 |
| 16:29:39 | 69.2189819 | 72.401158 | 75.1396628 | 74.8049643 | 65.5026774 |
| 16:29:40 | 69.2189819 | 72.401158 | 76.1396628 | 74.8049643 | 66.5026774 |
| 16:29:41 | 68.2189819 | 72.401158 | 77.1396628 | 74.8049643 | 66.5026774 |
| 16:29:42 | 68.2189819 | 72.401158 | 77.1396628 | 75.8049643 | 66.5026774 |
| 16:29:43 | 69.2189819 | 72.401158 | 77.1396628 | 76.8049643 | 70.5026774 |
| 16:29:44 | 69.2189819 | 72.401158 | 77.1396628 | 76.8049643 | 70.5026774 |
| 16:29:45 | 71.2189819 | 74.401158 | 77.1396628 | 76.8049643 | 71.5026774 |
| 16:29:46 | 71.2189819 | 74.401158 | 80.1396628 | 76.8049643 | 71.5026774 |
| 16:29:47 | 71.2189819 | 74.401158 | 81.1396628 | 75.8049643 | 72.5026774 |

|          |            |           |            |            |            |
|----------|------------|-----------|------------|------------|------------|
| 16:29:48 | 72.2189819 | 74.401158 | 81.1396628 | 76.8049643 | 73.5026774 |
| 16:29:49 | 72.2189819 | 75.401158 | 81.1396628 | 76.8049643 | 73.5026774 |
| 16:29:50 | 72.2189819 | 76.401158 | 81.1396628 | 77.8049643 | 73.5026774 |
| 16:29:51 | 71.2189819 | 77.401158 | 81.1396628 | 78.8049643 | 72.5026774 |
| 16:29:52 | 71.2189819 | 77.401158 | 77.1396628 | 78.8049643 | 72.5026774 |
| 16:29:53 | 71.2189819 | 77.401158 | 75.1396628 | 78.8049643 | 72.5026774 |
| 16:29:54 | 72.2189819 | 78.401158 | 75.1396628 | 78.8049643 | 71.5026774 |
| 16:29:55 | 72.2189819 | 79.401158 | 76.1396628 | 78.8049643 | 71.5026774 |
| 16:29:56 | 72.2189819 | 79.401158 | 77.1396628 | 78.8049643 | 72.5026774 |
| 16:29:57 | 72.2189819 | 79.401158 | 77.1396628 | 78.8049643 | 72.5026774 |
| 16:29:58 | 72.2189819 | 77.401158 | 79.1396628 | 78.8049643 | 72.5026774 |
| 16:29:59 | 72.2189819 | 76.401158 | 79.1396628 | 78.8049643 | 72.5026774 |
| 16:30:00 | 72.2189819 | 76.401158 | 79.1396628 | 78.8049643 | 72.5026774 |
| 16:30:01 | 71.2189819 | 74.401158 | 78.1396628 | 75.8049643 | 74.5026774 |
| 16:30:02 | 71.2189819 | 74.401158 | 77.1396628 | 74.8049643 | 74.5026774 |
| 16:30:03 | 70.2189819 | 74.401158 | 77.1396628 | 72.8049643 | 75.5026774 |
| 16:30:04 | 70.2189819 | 73.401158 | 77.1396628 | 70.8049643 | 75.5026774 |
| 16:30:05 | 69.2189819 | 74.401158 | 77.1396628 | 70.8049643 | 74.5026774 |
| 16:30:06 | 69.2189819 | 75.401158 | 78.1396628 | 71.8049643 | 73.5026774 |
| 16:30:07 | 69.2189819 | 75.401158 | 78.1396628 | 71.8049643 | 73.5026774 |
| 16:30:08 | 70.2189819 | 76.401158 | 78.1396628 | 71.8049643 | 73.5026774 |
| 16:30:09 | 71.2189819 | 76.401158 | 77.1396628 | 72.8049643 | 72.5026774 |
| 16:30:10 | 71.2189819 | 77.401158 | 77.1396628 | 72.8049643 | 72.5026774 |
| 16:30:11 | 72.2189819 | 77.401158 | 75.1396628 | 72.8049643 | 72.5026774 |
| 16:30:12 | 72.2189819 | 80.401158 | 75.1396628 | 72.8049643 | 72.5026774 |
| 16:30:13 | 72.2189819 | 80.401158 | 75.1396628 | 72.8049643 | 71.5026774 |
| 16:30:14 | 72.2189819 | 80.401158 | 76.1396628 | 72.8049643 | 71.5026774 |
| 16:30:15 | 72.2189819 | 80.401158 | 77.1396628 | 73.8049643 | 71.5026774 |
| 16:30:16 | 71.2189819 | 80.401158 | 77.1396628 | 73.8049643 | 72.5026774 |
| 16:30:17 | 71.2189819 | 80.401158 | 79.1396628 | 73.8049643 | 72.5026774 |
| 16:30:18 | 70.2189819 | 80.401158 | 79.1396628 | 73.8049643 | 72.5026774 |
| 16:30:19 | 69.2189819 | 78.401158 | 80.1396628 | 73.8049643 | 72.5026774 |
| 16:30:20 | 68.2189819 | 78.401158 | 80.1396628 | 74.8049643 | 73.5026774 |
| 16:30:21 | 68.2189819 | 76.401158 | 80.1396628 | 71.8049643 | 73.5026774 |
| 16:30:22 | 68.2189819 | 77.401158 | 80.1396628 | 71.8049643 | 72.5026774 |
| 16:30:23 | 67.2189819 | 77.401158 | 81.1396628 | 71.8049643 | 72.5026774 |
| 16:30:24 | 67.2189819 | 79.401158 | 81.1396628 | 70.8049643 | 72.5026774 |
| 16:30:25 | 67.2189819 | 85.401158 | 82.1396628 | 69.8049643 | 70.5026774 |
| 16:30:26 | 67.2189819 | 85.401158 | 83.1396628 | 69.8049643 | 70.5026774 |
| 16:30:27 | 67.2189819 | 85.401158 | 84.1396628 | 68.8049643 | 70.5026774 |
| 16:30:28 | 67.2189819 | 85.401158 | 85.1396628 | 67.8049643 | 70.5026774 |
| 16:30:29 | 67.2189819 | 86.401158 | 85.1396628 | 66.8049643 | 65.5026774 |
| 16:30:30 | 68.2189819 | 88.401158 | 86.1396628 | 66.8049643 | 65.5026774 |
| 16:30:31 | 68.2189819 | 88.401158 | 86.1396628 | 66.8049643 | 65.5026774 |
| 16:30:32 | 67.2189819 | 88.401158 | 75         | 66.8049643 | 65.5026774 |



|          |            |           |            |            |            |
|----------|------------|-----------|------------|------------|------------|
| 16:30:33 | 67.2189819 | 88.401158 | 74.6       | 66.8049643 | 64.5026774 |
| 16:30:34 | 67.2189819 | 89.401158 | 74.6       | 66.8049643 | 63.5026774 |
| 16:30:35 | 67.2189819 | 74.1      | 74.1       | 66.8049643 | 63.5026774 |
| 16:30:36 | 67.2189819 | 87.401158 | 85.1396628 | 64.8049643 | 62.5026774 |
| 16:30:37 | 67.2189819 | 85.401158 | 80.1396628 | 64.8049643 | 62.5026774 |
| 16:30:38 | 67.2189819 | 85.401158 | 78.1396628 | 64.8049643 | 62.5026774 |
| 16:30:39 | 67.2189819 | 84.401158 | 76.1396628 | 64.8049643 | 62.5026774 |
| 16:30:40 | 67.2189819 | 84.401158 | 75.1396628 | 64.8049643 | 62.5026774 |
| 16:30:41 | 66.2189819 | 83.401158 | 74.1396628 | 64.8049643 | 64.5026774 |
| 16:30:42 | 65.2189819 | 82.401158 | 75.1396628 | 65.8049643 | 65.5026774 |
| 16:30:43 | 66.2189819 | 85.401158 | 75.1396628 | 65.8049643 | 65.5026774 |
| 16:30:44 | 67.2189819 | 85.401158 | 75.1396628 | 66.8049643 | 65.5026774 |
| 16:30:45 | 67.2189819 | 85.401158 | 75.1396628 | 66.8049643 | 65.5026774 |
| 16:30:46 | 67.2189819 | 85.401158 | 75.1396628 | 68.8049643 | 65.5026774 |
| 16:30:47 | 67.2189819 | 85.401158 | 75.1396628 | 68.8049643 | 65.5026774 |
| 16:30:48 | 67.2189819 | 70.9      | 75.1396628 | 69.8049643 | 66.5026774 |
| 16:30:49 | 68.2189819 | 86.401158 | 78.1396628 | 69.8049643 | 66.5026774 |
| 16:30:50 | 67.2189819 | 86.401158 | 79.1396628 | 69.8049643 | 67.5026774 |
| 16:30:51 | 67.2189819 | 86.401158 | 80.1396628 | 69.8049643 | 67.5026774 |
| 16:30:52 | 67.2189819 | 86.401158 | 80.1396628 | 68.8049643 | 71.5026774 |
| 16:30:53 | 67.2189819 | 86.401158 | 82.1396628 | 68.8049643 | 71.5026774 |
| 16:30:54 | 67.2189819 | 86.401158 | 82.1396628 | 68.8049643 | 71.5026774 |
| 16:30:55 | 66.2189819 | 86.401158 | 83.1396628 | 65.8049643 | 68.5026774 |
| 16:30:56 | 66.2189819 | 71        | 82.1396628 | 64.8049643 | 68.5026774 |
| 16:30:57 | 66.2189819 | 70.7      | 80.1396628 | 64.8049643 | 68.5026774 |
| 16:30:58 | 66.2189819 | 85.401158 | 78.1396628 | 63.8049643 | 67.5026774 |
| 16:30:59 | 66.2189819 | 85.401158 | 77.1396628 | 62.8049643 | 67.5026774 |
| 16:31:00 | 66.2189819 | 85.401158 | 77.1396628 | 62.8049643 | 67.5026774 |
| 16:31:01 | 65.2189819 | 71        | 77.1396628 | 62.8049643 | 67.5026774 |
| 16:31:02 | 65.2189819 | 71        | 78.1396628 | 62.8049643 | 66.5026774 |
| 16:31:03 | 66.2189819 | 71.3      | 79.1396628 | 63.8049643 | 66.5026774 |
| 16:31:04 | 66.2189819 | 71.6      | 79.1396628 | 63.8049643 | 66.5026774 |
| 16:31:05 | 66.2189819 | 71.9      | 80.1396628 | 63.8049643 | 65.5026774 |
| 16:31:06 | 67.2189819 | 71.9      | 81.1396628 | 63.8049643 | 65.5026774 |
| 16:31:07 | 68.2189819 | 72.2      | 80.1396628 | 63.8049643 | 65.5026774 |
| 16:31:08 | 68.2189819 | 72.5      | 79.1396628 | 63.8049643 | 65.5026774 |
| 16:31:09 | 68.2189819 | 87.401158 | 78.1396628 | 63.8049643 | 66.5026774 |
| 16:31:10 | 68.2189819 | 86.401158 | 77.1396628 | 63.8049643 | 66.5026774 |
| 16:31:11 | 68.2189819 | 86.401158 | 77.1396628 | 67.8049643 | 66.5026774 |
| 16:31:12 | 68.2189819 | 86.401158 | 77.1396628 | 67.8049643 | 67.5026774 |
| 16:31:13 | 69.2189819 | 86.401158 | 75.1396628 | 67.8049643 | 69.5026774 |
| 16:31:14 | 69.2189819 | 86.401158 | 75.1396628 | 71.8049643 | 69.5026774 |
| 16:31:15 | 68.2189819 | 86.401158 | 74.1396628 | 71.8049643 | 69.5026774 |
| 16:31:16 | 67.2189819 | 86.401158 | 75.1396628 | 71.8049643 | 70.5026774 |
| 16:31:17 | 67.2189819 | 85.401158 | 75.1396628 | 71.8049643 | 69.5026774 |

|          |            |           |            |            |            |
|----------|------------|-----------|------------|------------|------------|
| 16:31:18 | 66.2189819 | 85.401158 | 75.1396628 | 71.8049643 | 69.5026774 |
| 16:31:19 | 66.2189819 | 85.401158 | 76.1396628 | 70.8049643 | 70.5026774 |
| 16:31:20 | 66.2189819 | 88.401158 | 77.1396628 | 70.8049643 | 69.5026774 |
| 16:31:21 | 66.2189819 | 75.5      | 75.1396628 | 70.8049643 | 69.5026774 |
| 16:31:22 | 67.2189819 | 76.2      | 75.1396628 | 70.8049643 | 70.5026774 |
| 16:31:23 | 68.2189819 | 76.4      | 75.1396628 | 71.8049643 | 70.5026774 |
| 16:31:24 | 68.2189819 | 76.1      | 75.1396628 | 71.8049643 | 71.5026774 |
| 16:31:25 | 69.2189819 | 76.3      | 74.1396628 | 71.8049643 | 72.5026774 |
| 16:31:26 | 69.2189819 | 76.2      | 74.1396628 | 71.8049643 | 71.5026774 |
| 16:31:27 | 68.2189819 | 76.1      | 74.1396628 | 70.8049643 | 71.5026774 |
| 16:31:28 | 67.2189819 | 75.8      | 73.1396628 | 70.8049643 | 71.5026774 |
| 16:31:29 | 66.2189819 | 75.8      | 73.1396628 | 70.8049643 | 70.5026774 |
| 16:31:30 | 66.2189819 | 75.8      | 73.1396628 | 70.8049643 | 68.5026774 |
| 16:31:31 | 66.2189819 | 75.9      | 73.1396628 | 71.8049643 | 68.5026774 |
| 16:31:32 | 66.2189819 | 75.7      | 74.1396628 | 72.8049643 | 67.5026774 |
| 16:31:33 | 67.2189819 | 75.4      | 76.1396628 | 72.8049643 | 68.5026774 |
| 16:31:34 | 67.2189819 | 75.6      | 76.1396628 | 72.8049643 | 68.5026774 |
| 16:31:35 | 67.2189819 | 75.4      | 75.1396628 | 71.8049643 | 68.5026774 |
| 16:31:36 | 67.2189819 | 75.2      | 74.1396628 | 69.8049643 | 69.5026774 |
| 16:31:37 | 68.2189819 | 75        | 72.1396628 | 69.8049643 | 69.5026774 |
| 16:31:38 | 68.2189819 | 74.7      | 69.1396628 | 68.8049643 | 69.5026774 |
| 16:31:39 | 68.2189819 | 84.401158 | 68.1396628 | 66.8049643 | 69.5026774 |
| 16:31:40 | 68.2189819 | 79.401158 | 66.1396628 | 66.8049643 | 69.5026774 |
| 16:31:41 | 67.2189819 | 77.401158 | 66.1396628 | 66.8049643 | 69.5026774 |
| 16:31:42 | 67.2189819 | 73.401158 | 66.1396628 | 66.8049643 | 69.5026774 |
| 16:31:43 | 67.2189819 | 70.401158 | 68.1396628 | 66.8049643 | 70.5026774 |
| 16:31:44 | 67.2189819 | 68.401158 | 68.1396628 | 67.8049643 | 71.5026774 |
| 16:31:45 | 68.2189819 | 68.401158 | 68.1396628 | 70.8049643 | 71.5026774 |
| 16:31:46 | 68.2189819 | 68.401158 | 65.1396628 | 70.8049643 | 71.5026774 |
| 16:31:47 | 69.2189819 | 67.401158 | 64.1396628 | 71.8049643 | 71.5026774 |
| 16:31:48 | 69.2189819 | 67.401158 | 64.1396628 | 71.8049643 | 71.5026774 |
| 16:31:49 | 70.2189819 | 65.401158 | 61.1396628 | 74.8049643 | 71.5026774 |
| 16:31:50 | 70.2189819 | 64.401158 | 61.1396628 | 73.8049643 | 73.5026774 |
| 16:31:51 | 70.2189819 | 63.401158 | 61.1396628 | 73.8049643 | 74.5026774 |
| 16:31:52 | 69.2189819 | 63.401158 | 61.1396628 | 72.8049643 | 75.5026774 |
| 16:31:53 | 70.2189819 | 63.401158 | 61.1396628 | 73.8049643 | 75.5026774 |
| 16:31:54 | 70.2189819 | 66.401158 | 62.1396628 | 74.8049643 | 76.5026774 |
| 16:31:55 | 70.2189819 | 66.401158 | 62.1396628 | 75.8049643 | 79.5026774 |
| 16:31:56 | 70.2189819 | 68.401158 | 62.1396628 | 76.8049643 | 79.5026774 |
| 16:31:57 | 70.2189819 | 71.401158 | 64.1396628 | 76.8049643 | 79.5026774 |
| 16:31:58 | 73.2189819 | 71.401158 | 64.1396628 | 75.8049643 | 79.5026774 |
| 16:31:59 | 73.2189819 | 71.401158 | 62.1396628 | 74.8049643 | 79.5026774 |
| 16:32:00 | 72.2189819 | 71.401158 | 62.1396628 | 70.8049643 | 79.5026774 |
| 16:32:01 | 72.2189819 | 65.401158 | 60.1396628 | 69.8049643 | 79.5026774 |
| 16:32:02 | 72.2189819 | 65.401158 | 59.1396628 | 69.8049643 | 79.5026774 |

|          |            |           |            |            |            |
|----------|------------|-----------|------------|------------|------------|
| 16:32:03 | 72.2189819 | 64.401158 | 59.1396628 | 69.8049643 | 79.5026774 |
| 16:32:04 | 72.2189819 | 65.401158 | 59.1396628 | 69.8049643 | 76.5026774 |
| 16:32:05 | 72.2189819 | 67.401158 | 60.1396628 | 71.8049643 | 76.5026774 |
| 16:32:06 | 72.2189819 | 68.401158 | 60.1396628 | 71.8049643 | 76.5026774 |
| 16:32:07 | 72.2189819 | 68.401158 | 60.1396628 | 71.8049643 | 76.5026774 |
| 16:32:08 | 72.2189819 | 67.401158 | 61.1396628 | 71.8049643 | 76.5026774 |
| 16:32:09 | 72.2189819 | 65.401158 | 61.1396628 | 68.8049643 | 76.5026774 |
| 16:32:10 | 73.2189819 | 65.401158 | 61.1396628 | 67.8049643 | 76.5026774 |
| 16:32:11 | 73.2189819 | 65.401158 | 62.1396628 | 67.8049643 | 72.5026774 |
| 16:32:12 | 72.2189819 | 65.401158 | 62.1396628 | 67.8049643 | 70.5026774 |
| 16:32:13 | 71.2189819 | 67.401158 | 62.1396628 | 68.8049643 | 69.5026774 |
| 16:32:14 | 70.2189819 | 67.401158 | 62.1396628 | 68.8049643 | 69.5026774 |
| 16:32:15 | 69.2189819 | 67.401158 | 64.1396628 | 68.8049643 | 68.5026774 |
| 16:32:16 | 69.2189819 | 68.401158 | 64.1396628 | 68.8049643 | 68.5026774 |
| 16:32:17 | 68.2189819 | 69.401158 | 67.1396628 | 68.8049643 | 69.5026774 |
| 16:32:18 | 68.2189819 | 71.401158 | 67.1396628 | 69.8049643 | 67.5026774 |
| 16:32:19 | 68.2189819 | 73.401158 | 66.1396628 | 64.8049643 | 66.5026774 |
| 16:32:20 | 69.2189819 | 73.401158 | 66.1396628 | 64.8049643 | 66.5026774 |
| 16:32:21 | 68.2189819 | 74.401158 | 67.1396628 | 64.8049643 | 66.5026774 |
| 16:32:22 | 68.2189819 | 74.401158 | 68.1396628 | 66.8049643 | 66.5026774 |
| 16:32:23 | 67.2189819 | 73.401158 | 68.1396628 | 70.8049643 | 66.5026774 |
| 16:32:24 | 67.2189819 | 73.401158 | 67.1396628 | 70.8049643 | 66.5026774 |
| 16:32:25 | 67.2189819 | 73.401158 | 67.1396628 | 73.8049643 | 66.5026774 |
| 16:32:26 | 67.2189819 | 74.401158 | 64.1396628 | 73.8049643 | 66.5026774 |
| 16:32:27 | 67.2189819 | 75.401158 | 63.1396628 | 73.8049643 | 66.5026774 |
| 16:32:28 | 67.2189819 | 78.401158 | 64.1396628 | 73.8049643 | 66.5026774 |
| 16:32:29 | 67.2189819 | 78.401158 | 63.1396628 | 73.8049643 | 66.5026774 |
| 16:32:30 | 66.2189819 | 79.401158 | 63.1396628 | 73.8049643 | 65.5026774 |
| 16:32:31 | 66.2189819 | 79.401158 | 64.1396628 | 73.8049643 | 65.5026774 |
| 16:32:32 | 66.2189819 | 79.401158 | 65.1396628 | 73.8049643 | 65.5026774 |
| 16:32:33 | 66.2189819 | 72.401158 | 65.1396628 | 73.8049643 | 65.5026774 |
| 16:32:34 | 66.2189819 | 72.401158 | 65.1396628 | 73.8049643 | 63.5026774 |
| 16:32:35 | 67.2189819 | 70.401158 | 65.1396628 | 74.8049643 | 63.5026774 |
| 16:32:36 | 69.2189819 | 70.401158 | 65.1396628 | 76.8049643 | 63.5026774 |
| 16:32:37 | 71.2189819 | 70.401158 | 65.1396628 | 76.8049643 | 63.5026774 |
| 16:32:38 | 71.2189819 | 70.401158 | 65.1396628 | 74.8049643 | 64.5026774 |
| 16:32:39 | 71.2189819 | 70.401158 | 65.1396628 | 74.8049643 | 67.5026774 |
| 16:32:40 | 70.2189819 | 69.401158 | 65.1396628 | 73.8049643 | 68.5026774 |
| 16:32:41 | 70.2189819 | 68.401158 | 64.1396628 | 73.8049643 | 68.5026774 |
| 16:32:42 | 70.2189819 | 68.401158 | 64.1396628 | 73.8049643 | 68.5026774 |
| 16:32:43 | 72.2189819 | 66.401158 | 66.1396628 | 73.8049643 | 68.5026774 |
| 16:32:44 | 73.2189819 | 67.401158 | 66.1396628 | 72.8049643 | 68.5026774 |
| 16:32:45 | 74.2189819 | 67.401158 | 68.1396628 | 72.8049643 | 67.5026774 |
| 16:32:46 | 74.2189819 | 68.401158 | 70.1396628 | 72.8049643 | 66.5026774 |
| 16:32:47 | 74.2189819 | 69.401158 | 70.1396628 | 72.8049643 | 66.5026774 |

|          |            |           |            |            |            |
|----------|------------|-----------|------------|------------|------------|
| 16:32:48 | 74.2189819 | 69.401158 | 70.1396628 | 74.8049643 | 66.5026774 |
| 16:32:49 | 73.2189819 | 69.401158 | 69.1396628 | 74.8049643 | 66.5026774 |
| 16:32:50 | 73.2189819 | 68.401158 | 69.1396628 | 74.8049643 | 66.5026774 |
| 16:32:51 | 73.2189819 | 67.401158 | 68.1396628 | 74.8049643 | 63.5026774 |
| 16:32:52 | 75.2189819 | 66.401158 | 68.1396628 | 73.8049643 | 62.5026774 |
| 16:32:53 | 75.2189819 | 66.401158 | 68.1396628 | 72.8049643 | 64.5026774 |
| 16:32:54 | 75.2189819 | 67.401158 | 68.1396628 | 72.8049643 | 66.5026774 |
| 16:32:55 | 75.2189819 | 70.401158 | 68.1396628 | 72.8049643 | 66.5026774 |
| 16:32:56 | 75.2189819 | 71.401158 | 67.1396628 | 71.8049643 | 66.5026774 |
| 16:32:57 | 75.2189819 | 71.401158 | 67.1396628 | 70.8049643 | 70.5026774 |
| 16:32:58 | 74.2189819 | 72.401158 | 67.1396628 | 70.8049643 | 70.5026774 |
| 16:32:59 | 74.2189819 | 72.401158 | 69.1396628 | 70.8049643 | 70.5026774 |
| 16:33:00 | 74.2189819 | 72.401158 | 69.1396628 | 69.8049643 | 71.5026774 |
| 16:33:01 | 74.2189819 | 72.401158 | 69.1396628 | 69.8049643 | 71.5026774 |
| 16:33:02 | 76.2189819 | 72.401158 | 66.1396628 | 71.8049643 | 72.5026774 |
| 16:33:03 | 77.2189819 | 71.401158 | 66.1396628 | 73.8049643 | 72.5026774 |
| 16:33:04 | 76.2189819 | 71.401158 | 64.1396628 | 73.8049643 | 72.5026774 |
| 16:33:05 | 76.2189819 | 71.401158 | 60.1396628 | 73.8049643 | 72.5026774 |
| 16:33:06 | 76.2189819 | 73.401158 | 60.1396628 | 73.8049643 | 72.5026774 |
| 16:33:07 | 75.2189819 | 73.401158 | 61.1396628 | 73.8049643 | 72.5026774 |
| 16:33:08 | 73.2189819 | 73.401158 | 62.1396628 | 74.8049643 | 71.5026774 |
| 16:33:09 | 70.2189819 | 76.401158 | 64.1396628 | 74.8049643 | 71.5026774 |
| 16:33:10 | 70.2189819 | 76.401158 | 65.1396628 | 74.8049643 | 69.5026774 |
| 16:33:11 | 68.2189819 | 76.401158 | 65.1396628 | 73.8049643 | 68.5026774 |
| 16:33:12 | 68.2189819 | 76.401158 | 65.1396628 | 73.8049643 | 68.5026774 |
| 16:33:13 | 67.2189819 | 78.401158 | 66.1396628 | 73.8049643 | 68.5026774 |
| 16:33:14 | 66.2189819 | 79.401158 | 67.1396628 | 73.8049643 | 68.5026774 |
| 16:33:15 | 66.2189819 | 79.401158 | 69.1396628 | 72.8049643 | 69.5026774 |
| 16:33:16 | 67.2189819 | 80.401158 | 72.1396628 | 74.8049643 | 69.5026774 |
| 16:33:17 | 67.2189819 | 81.401158 | 75.1396628 | 76.8049643 | 70.5026774 |
| 16:33:18 | 68.2189819 | 81.401158 | 77.1396628 | 76.8049643 | 71.5026774 |
| 16:33:19 | 68.2189819 | 82.401158 | 77.1396628 | 78.8049643 | 71.5026774 |
| 16:33:20 | 69.2189819 | 82.401158 | 77.1396628 | 78.8049643 | 71.5026774 |
| 16:33:21 | 69.2189819 | 69.401158 | 77.1396628 | 81.8049643 | 71.5026774 |
| 16:33:22 | 70.2189819 | 66.401158 | 76.1396628 | 82.8049643 | 71.5026774 |
| 16:33:23 | 70.2189819 | 66.401158 | 76.1396628 | 82.8049643 | 71.5026774 |
| 16:33:24 | 71.2189819 | 68.401158 | 75.1396628 | 82.8049643 | 71.5026774 |
| 16:33:25 | 72.2189819 | 69.401158 | 75.1396628 | 83.8049643 | 71.5026774 |
| 16:33:26 | 72.2189819 | 69.401158 | 76.1396628 | 82.8049643 | 71.5026774 |
| 16:33:27 | 72.2189819 | 70.401158 | 76.1396628 | 81.8049643 | 71.5026774 |
| 16:33:28 | 71.2189819 | 70.401158 | 76.1396628 | 80.8049643 | 72.5026774 |
| 16:33:29 | 70.2189819 | 70.401158 | 76.1396628 | 80.8049643 | 72.5026774 |
| 16:33:30 | 69.2189819 | 70.401158 | 69.1396628 | 79.8049643 | 72.5026774 |
| 16:33:31 | 69.2189819 | 70.401158 | 67.1396628 | 77.8049643 | 72.5026774 |
| 16:33:32 | 69.2189819 | 71.401158 | 67.1396628 | 77.8049643 | 72.5026774 |

|          |            |           |            |            |            |
|----------|------------|-----------|------------|------------|------------|
| 16:33:33 | 69.2189819 | 71.401158 | 67.1396628 | 77.8049643 | 71.5026774 |
| 16:33:34 | 68.2189819 | 71.401158 | 66.1396628 | 75.8049643 | 71.5026774 |
| 16:33:35 | 67.2189819 | 71.401158 | 66.1396628 | 75.8049643 | 71.5026774 |
| 16:33:36 | 67.2189819 | 71.401158 | 66.1396628 | 75.8049643 | 71.5026774 |
| 16:33:37 | 68.2189819 | 72.401158 | 66.1396628 | 75.8049643 | 66.5026774 |
| 16:33:38 | 68.2189819 | 72.401158 | 63.1396628 | 75.8049643 | 64.5026774 |
| 16:33:39 | 69.2189819 | 73.401158 | 60.1396628 | 76.8049643 | 64.5026774 |
| 16:33:40 | 69.2189819 | 75.401158 | 60.1396628 | 76.8049643 | 63.5026774 |
| 16:33:41 | 68.2189819 | 78.401158 | 60.1396628 | 78.8049643 | 63.5026774 |
| 16:33:42 | 67.2189819 | 78.401158 | 59.1396628 | 78.8049643 | 61.5026774 |
| 16:33:43 | 67.2189819 | 79.401158 | 59.1396628 | 78.8049643 | 59.5026774 |
| 16:33:44 | 67.2189819 | 78.401158 | 61.1396628 | 78.8049643 | 57.5026774 |
| 16:33:45 | 68.2189819 | 77.401158 | 67.1396628 | 77.8049643 | 57.5026774 |
| 16:33:46 | 67.2189819 | 77.401158 | 69.1396628 | 77.8049643 | 53.5026774 |
| 16:33:47 | 67.2189819 | 77.401158 | 68.1396628 | 77.8049643 | 53.5026774 |
| 16:33:48 | 68.2189819 | 77.401158 | 65.1396628 | 76.8049643 | 52.5026774 |
| 16:33:49 | 69.2189819 | 77.401158 | 64.1396628 | 77.8049643 | 52.5026774 |
| 16:33:50 | 69.2189819 | 77.401158 | 62.1396628 | 77.8049643 | 52.5026774 |
| 16:33:51 | 68.2189819 | 77.401158 | 61.1396628 | 77.8049643 | 52.5026774 |
| 16:33:52 | 68.2189819 | 76.401158 | 61.1396628 | 77.8049643 | 54.5026774 |
| 16:33:53 | 67.2189819 | 75.401158 | 61.1396628 | 77.8049643 | 54.5026774 |
| 16:33:54 | 67.2189819 | 75.401158 | 61.1396628 | 77.8049643 | 60.5026774 |
| 16:33:55 | 66.2189819 | 75.401158 | 61.1396628 | 77.8049643 | 64.5026774 |
| 16:33:56 | 66.2189819 | 75.401158 | 63.1396628 | 74.8049643 | 64.5026774 |
| 16:33:57 | 66.2189819 | 75.401158 | 67.1396628 | 72.8049643 | 67.5026774 |
| 16:33:58 | 67.2189819 | 75.401158 | 67.1396628 | 72.8049643 | 67.5026774 |
| 16:33:59 | 70.2189819 | 76.401158 | 67.1396628 | 71.8049643 | 65.5026774 |
| 16:34:00 | 71.2189819 | 76.401158 | 67.1396628 | 71.8049643 | 65.5026774 |
| 16:34:01 | 71.2189819 | 77.401158 | 67.1396628 | 71.8049643 | 65.5026774 |
| 16:34:02 | 71.2189819 | 78.401158 | 67.1396628 | 71.8049643 | 65.5026774 |
| 16:34:03 | 71.2189819 | 78.401158 | 67.1396628 | 71.8049643 | 65.5026774 |
| 16:34:04 | 71.2189819 | 79.401158 | 66.1396628 | 71.8049643 | 65.5026774 |
| 16:34:05 | 71.2189819 | 79.401158 | 66.1396628 | 71.8049643 | 67.5026774 |
| 16:34:06 | 72.2189819 | 79.401158 | 66.1396628 | 71.8049643 | 68.5026774 |
| 16:34:07 | 72.2189819 | 79.401158 | 66.1396628 | 72.8049643 | 68.5026774 |
| 16:34:08 | 73.2189819 | 79.401158 | 66.1396628 | 72.8049643 | 69.5026774 |
| 16:34:09 | 73.2189819 | 79.401158 | 65.1396628 | 72.8049643 | 68.5026774 |
| 16:34:10 | 73.2189819 | 78.401158 | 65.1396628 | 72.8049643 | 68.5026774 |
| 16:34:11 | 73.2189819 | 79.401158 | 64.1396628 | 72.8049643 | 68.5026774 |
| 16:34:12 | 73.2189819 | 79.401158 | 63.1396628 | 71.8049643 | 69.5026774 |
| 16:34:13 | 73.2189819 | 80.401158 | 63.1396628 | 71.8049643 | 69.5026774 |
| 16:34:14 | 72.2189819 | 84.401158 | 63.1396628 | 71.8049643 | 70.5026774 |
| 16:34:15 | 71.2189819 | 85.401158 | 63.1396628 | 72.8049643 | 70.5026774 |
| 16:34:16 | 71.2189819 | 87.401158 | 62.1396628 | 73.8049643 | 69.5026774 |
| 16:34:17 | 71.2189819 | 88.401158 | 62.1396628 | 76.8049643 | 69.5026774 |

|          |            |           |            |            |            |
|----------|------------|-----------|------------|------------|------------|
| 16:34:18 | 71.2189819 | 88.401158 | 62.1396628 | 77.8049643 | 69.5026774 |
| 16:34:19 | 71.2189819 | 87.401158 | 62.1396628 | 77.8049643 | 69.5026774 |
| 16:34:20 | 70.2189819 | 74.9      | 62.1396628 | 78.8049643 | 71.5026774 |
| 16:34:21 | 70.2189819 | 77.3      | 62.1396628 | 79.8049643 | 72.5026774 |
| 16:34:22 | 70.2189819 | 88.401158 | 62.1396628 | 80.8049643 | 72.5026774 |
| 16:34:23 | 70.2189819 | 88.401158 | 62.1396628 | 81.8049643 | 74.5026774 |
| 16:34:24 | 70.2189819 | 83.401158 | 62.1396628 | 81.8049643 | 73.5026774 |
| 16:34:25 | 70.2189819 | 83.401158 | 63.1396628 | 82.8049643 | 73.5026774 |
| 16:34:26 | 70.2189819 | 84.401158 | 63.1396628 | 83.8049643 | 73.5026774 |
| 16:34:27 | 70.2189819 | 85.401158 | 65.1396628 | 83.8049643 | 72.5026774 |
| 16:34:28 | 70.2189819 | 85.401158 | 66.1396628 | 83.8049643 | 72.5026774 |
| 16:34:29 | 69.2189819 | 85.401158 | 66.1396628 | 83.8049643 | 72.5026774 |
| 16:34:30 | 69.2189819 | 85.401158 | 66.1396628 | 83.8049643 | 72.5026774 |
| 16:34:31 | 67.2189819 | 85.401158 | 66.1396628 | 80.8049643 | 72.5026774 |
| 16:34:32 | 67.2189819 | 78.401158 | 66.1396628 | 80.8049643 | 72.5026774 |
| 16:34:33 | 68.2189819 | 78.401158 | 67.1396628 | 76.8049643 | 72.5026774 |
| 16:34:34 | 68.2189819 | 78.401158 | 67.1396628 | 73.8049643 | 73.5026774 |
| 16:34:35 | 68.2189819 | 78.401158 | 66.1396628 | 72.8049643 | 73.5026774 |
| 16:34:36 | 67.2189819 | 77.401158 | 66.1396628 | 72.8049643 | 73.5026774 |
| 16:34:37 | 67.2189819 | 76.401158 | 67.1396628 | 74.8049643 | 70.5026774 |
| 16:34:38 | 66.2189819 | 76.401158 | 67.1396628 | 75.8049643 | 70.5026774 |
| 16:34:39 | 64.2189819 | 69.401158 | 67.1396628 | 75.8049643 | 70.5026774 |
| 16:34:40 | 64.2189819 | 68.401158 | 67.1396628 | 75.8049643 | 70.5026774 |
| 16:34:41 | 64.2189819 | 67.401158 | 67.1396628 | 75.8049643 | 70.5026774 |
| 16:34:42 | 66.2189819 | 67.401158 | 67.1396628 | 75.8049643 | 70.5026774 |
| 16:34:43 | 69.2189819 | 73.401158 | 64.1396628 | 75.8049643 | 70.5026774 |
| 16:34:44 | 70.2189819 | 74.401158 | 64.1396628 | 75.8049643 | 70.5026774 |
| 16:34:45 | 71.2189819 | 75.401158 | 64.1396628 | 75.8049643 | 70.5026774 |
| 16:34:46 | 71.2189819 | 75.401158 | 67.1396628 | 73.8049643 | 65.5026774 |
| 16:34:47 | 72.2189819 | 75.401158 | 69.1396628 | 73.8049643 | 65.5026774 |
| 16:34:48 | 72.2189819 | 78.401158 | 69.1396628 | 74.8049643 | 65.5026774 |
| 16:34:49 | 72.2189819 | 79.401158 | 65.1396628 | 74.8049643 | 65.5026774 |
| 16:34:50 | 72.2189819 | 80.401158 | 64.1396628 | 75.8049643 | 66.5026774 |
| 16:34:51 | 72.2189819 | 80.401158 | 64.1396628 | 75.8049643 | 66.5026774 |
| 16:34:52 | 73.2189819 | 80.401158 | 65.1396628 | 75.8049643 | 67.5026774 |
| 16:34:53 | 73.2189819 | 80.401158 | 65.1396628 | 75.8049643 | 67.5026774 |
| 16:34:54 | 72.2189819 | 80.401158 | 66.1396628 | 75.8049643 | 67.5026774 |
| 16:34:55 | 71.2189819 | 79.401158 | 68.1396628 | 75.8049643 | 67.5026774 |
| 16:34:56 | 70.2189819 | 79.401158 | 68.1396628 | 73.8049643 | 68.5026774 |
| 16:34:57 | 69.2189819 | 80.401158 | 67.1396628 | 73.8049643 | 69.5026774 |
| 16:34:58 | 69.2189819 | 82.401158 | 67.1396628 | 73.8049643 | 69.5026774 |
| 16:34:59 | 69.2189819 | 82.401158 | 66.1396628 | 72.8049643 | 70.5026774 |
| 16:35:00 | 69.2189819 | 83.401158 | 66.1396628 | 72.8049643 | 71.5026774 |
| 16:35:01 | 70.2189819 | 83.401158 | 65.1396628 | 66.8049643 | 73.5026774 |
| 16:35:02 | 70.2189819 | 83.401158 | 65.1396628 | 66.8049643 | 73.5026774 |

|          |            |           |            |            |            |
|----------|------------|-----------|------------|------------|------------|
| 16:35:03 | 70.2189819 | 75.8      | 65.1396628 | 65.8049643 | 73.5026774 |
| 16:35:04 | 70.2189819 | 77.9      | 65.1396628 | 76.8049643 | 74.5026774 |
| 16:35:05 | 72.2189819 | 78.4      | 64.1396628 | 76.8049643 | 75.5026774 |
| 16:35:06 | 73.2189819 | 80.4      | 64.1396628 | 79.8049643 | 75.5026774 |
| 16:35:07 | 73.2189819 | 81        | 63.1396628 | 80.8049643 | 75.5026774 |
| 16:35:08 | 72.2189819 | 81.3      | 62.1396628 | 84.8049643 | 75.5026774 |
| 16:35:09 | 72.2189819 | 81.1      | 62.1396628 | 84.8049643 | 74.5026774 |
| 16:35:10 | 71.2189819 | 81.2      | 64.1396628 | 84.8049643 | 74.5026774 |
| 16:35:11 | 70.2189819 | 81.2      | 64.1396628 | 85.8049643 | 74.5026774 |
| 16:35:12 | 69.2189819 | 80.3      | 65.1396628 | 85.8049643 | 73.5026774 |
| 16:35:13 | 69.2189819 | 80.4      | 68.1396628 | 85.8049643 | 73.5026774 |
| 16:35:14 | 69.2189819 | 79.7      | 68.1396628 | 85.8049643 | 75.5026774 |
| 16:35:15 | 70.2189819 | 79.9      | 68.1396628 | 85.8049643 | 75.5026774 |
| 16:35:16 | 70.2189819 | 80.3      | 68.1396628 | 85.8049643 | 77.5026774 |
| 16:35:17 | 70.2189819 | 80.3      | 66.1396628 | 86.8049643 | 77.5026774 |
| 16:35:18 | 71.2189819 | 80.6      | 66.1396628 | 78.8049643 | 78.5026774 |
| 16:35:19 | 72.2189819 | 80.7      | 66.1396628 | 78.8049643 | 77.5026774 |
| 16:35:20 | 71.2189819 | 77.2      | 66.1396628 | 76.8049643 | 77.5026774 |
| 16:35:21 | 71.2189819 | 83.401158 | 67.1396628 | 76.8049643 | 77.5026774 |
| 16:35:22 | 71.2189819 | 75.401158 | 68.1396628 | 74.8049643 | 71.5026774 |
| 16:35:23 | 71.2189819 | 71.401158 | 69.1396628 | 74.8049643 | 71.5026774 |
| 16:35:24 | 71.2189819 | 71.401158 | 69.1396628 | 74.8049643 | 71.5026774 |
| 16:35:25 | 71.2189819 | 70.401158 | 69.1396628 | 74.8049643 | 72.5026774 |
| 16:35:26 | 71.2189819 | 70.401158 | 69.1396628 | 74.8049643 | 72.5026774 |
| 16:35:27 | 71.2189819 | 70.401158 | 66.1396628 | 72.8049643 | 72.5026774 |
| 16:35:28 | 70.2189819 | 70.401158 | 66.1396628 | 69.8049643 | 72.5026774 |
| 16:35:29 | 69.2189819 | 70.401158 | 65.1396628 | 68.8049643 | 72.5026774 |
| 16:35:30 | 69.2189819 | 70.401158 | 66.1396628 | 68.8049643 | 73.5026774 |
| 16:35:31 | 69.2189819 | 70.401158 | 67.1396628 | 67.8049643 | 74.5026774 |
| 16:35:32 | 69.2189819 | 75.401158 | 68.1396628 | 67.8049643 | 75.5026774 |
| 16:35:33 | 69.2189819 | 76.401158 | 69.1396628 | 66.8049643 | 75.5026774 |
| 16:35:34 | 69.2189819 | 76.401158 | 69.1396628 | 66.8049643 | 76.5026774 |
| 16:35:35 | 69.2189819 | 73.401158 | 68.1396628 | 66.8049643 | 76.5026774 |
| 16:35:36 | 69.2189819 | 72.401158 | 67.1396628 | 66.8049643 | 76.5026774 |
| 16:35:37 | 69.2189819 | 71.401158 | 67.1396628 | 66.8049643 | 76.5026774 |
| 16:35:38 | 69.2189819 | 71.401158 | 67.1396628 | 66.8049643 | 76.5026774 |
| 16:35:39 | 68.2189819 | 71.401158 | 67.1396628 | 66.8049643 | 76.5026774 |
| 16:35:40 | 68.2189819 | 71.401158 | 69.1396628 | 66.8049643 | 77.5026774 |
| 16:35:41 | 68.2189819 | 71.401158 | 69.1396628 | 66.8049643 | 78.5026774 |
| 16:35:42 | 68.2189819 | 71.401158 | 69.1396628 | 70.8049643 | 78.5026774 |
| 16:35:43 | 68.2189819 | 71.401158 | 69.1396628 | 72.8049643 | 78.5026774 |
| 16:35:44 | 68.2189819 | 71.401158 | 70.1396628 | 72.8049643 | 77.5026774 |
| 16:35:45 | 68.2189819 | 71.401158 | 71.1396628 | 74.8049643 | 77.5026774 |
| 16:35:46 | 68.2189819 | 71.401158 | 71.1396628 | 75.8049643 | 77.5026774 |
| 16:35:47 | 68.2189819 | 71.401158 | 71.1396628 | 75.8049643 | 74.5026774 |

|          |            |           |            |            |            |
|----------|------------|-----------|------------|------------|------------|
| 16:35:48 | 68.2189819 | 71.401158 | 71.1396628 | 76.8049643 | 73.5026774 |
| 16:35:49 | 69.2189819 | 72.401158 | 71.1396628 | 76.8049643 | 73.5026774 |
| 16:35:50 | 69.2189819 | 72.401158 | 71.1396628 | 76.8049643 | 72.5026774 |
| 16:35:51 | 69.2189819 | 74.401158 | 71.1396628 | 74.8049643 | 72.5026774 |
| 16:35:52 | 71.2189819 | 74.401158 | 71.1396628 | 72.8049643 | 71.5026774 |
| 16:35:53 | 73.2189819 | 73.401158 | 71.1396628 | 72.8049643 | 69.5026774 |
| 16:35:54 | 75.2189819 | 73.401158 | 71.1396628 | 71.8049643 | 69.5026774 |
| 16:35:55 | 76.2189819 | 71.401158 | 71.1396628 | 71.8049643 | 67.5026774 |
| 16:35:56 | 76.2189819 | 71.401158 | 74.1396628 | 71.8049643 | 66.5026774 |
| 16:35:57 | 75.2189819 | 71.401158 | 73.1396628 | 71.8049643 | 66.5026774 |
| 16:35:58 | 74.2189819 | 71.401158 | 73.1396628 | 71.8049643 | 66.5026774 |
| 16:35:59 | 74.2189819 | 70.401158 | 73.1396628 | 71.8049643 | 65.5026774 |
| 16:36:00 | 74.2189819 | 70.401158 | 73.1396628 | 71.8049643 | 66.5026774 |
| 16:36:01 | 73.2189819 | 70.401158 | 73.1396628 | 71.8049643 | 66.5026774 |
| 16:36:02 | 73.2189819 | 69.401158 | 75.1396628 | 71.8049643 | 65.5026774 |
| 16:36:03 | 73.2189819 | 70.401158 | 76.1396628 | 70.8049643 | 65.5026774 |
| 16:36:04 | 74.2189819 | 70.401158 | 76.1396628 | 69.8049643 | 65.5026774 |
| 16:36:05 | 74.2189819 | 70.401158 | 75.1396628 | 69.8049643 | 65.5026774 |
| 16:36:06 | 74.2189819 | 70.401158 | 75.1396628 | 68.8049643 | 65.5026774 |
| 16:36:07 | 73.2189819 | 68.401158 | 75.1396628 | 67.8049643 | 65.5026774 |
| 16:36:08 | 73.2189819 | 67.401158 | 74.1396628 | 67.8049643 | 65.5026774 |
| 16:36:09 | 72.2189819 | 68.401158 | 74.1396628 | 66.8049643 | 65.5026774 |
| 16:36:10 | 71.2189819 | 68.401158 | 74.1396628 | 66.8049643 | 66.5026774 |
| 16:36:11 | 70.2189819 | 68.401158 | 72.1396628 | 66.8049643 | 66.5026774 |
| 16:36:12 | 70.2189819 | 68.401158 | 72.1396628 | 65.8049643 | 66.5026774 |
| 16:36:13 | 70.2189819 | 68.401158 | 72.1396628 | 65.8049643 | 66.5026774 |
| 16:36:14 | 70.2189819 | 69.401158 | 74.1396628 | 65.8049643 | 68.5026774 |
| 16:36:15 | 70.2189819 | 69.401158 | 74.1396628 | 65.8049643 | 69.5026774 |
| 16:36:16 | 69.2189819 | 69.401158 | 74.1396628 | 65.8049643 | 69.5026774 |
| 16:36:17 | 70.2189819 | 69.401158 | 74.1396628 | 65.8049643 | 69.5026774 |
| 16:36:18 | 70.2189819 | 69.401158 | 74.1396628 | 65.8049643 | 69.5026774 |
| 16:36:19 | 68.2189819 | 70.401158 | 86.1396628 | 65.8049643 | 70.5026774 |
| 16:36:20 | 68.2189819 | 70.401158 | 86.1396628 | 66.8049643 | 70.5026774 |
| 16:36:21 | 69.2189819 | 70.401158 | 86.1396628 | 66.8049643 | 70.5026774 |
| 16:36:22 | 70.2189819 | 72.401158 | 86.1396628 | 66.8049643 | 69.5026774 |
| 16:36:23 | 70.2189819 | 72.401158 | 86.1396628 | 66.8049643 | 69.5026774 |
| 16:36:24 | 70.2189819 | 72.401158 | 86.1396628 | 66.8049643 | 69.5026774 |
| 16:36:25 | 71.2189819 | 72.401158 | 86.1396628 | 66.8049643 | 69.5026774 |
| 16:36:26 | 72.2189819 | 72.401158 | 86.1396628 | 69.8049643 | 70.5026774 |
| 16:36:27 | 73.2189819 | 73.401158 | 87.1396628 | 72.8049643 | 70.5026774 |
| 16:36:28 | 73.2189819 | 75.401158 | 87.1396628 | 72.8049643 | 73.5026774 |
| 16:36:29 | 71.2189819 | 75.401158 | 85.1396628 | 72.8049643 | 74.5026774 |
| 16:36:30 | 69.2189819 | 78.401158 | 83.1396628 | 72.8049643 | 74.5026774 |
| 16:36:31 | 69.2189819 | 79.401158 | 83.1396628 | 71.8049643 | 74.5026774 |
| 16:36:32 | 69.2189819 | 80.401158 | 79.1396628 | 71.8049643 | 74.5026774 |



|          |            |           |            |            |            |
|----------|------------|-----------|------------|------------|------------|
| 16:36:33 | 69.2189819 | 80.401158 | 79.1396628 | 75.8049643 | 73.5026774 |
| 16:36:34 | 69.2189819 | 80.401158 | 79.1396628 | 74.8049643 | 73.5026774 |
| 16:36:35 | 70.2189819 | 78.401158 | 80.1396628 | 74.8049643 | 72.5026774 |
| 16:36:36 | 70.2189819 | 73.401158 | 81.1396628 | 74.8049643 | 72.5026774 |
| 16:36:37 | 70.2189819 | 73.401158 | 81.1396628 | 73.8049643 | 71.5026774 |
| 16:36:38 | 70.2189819 | 73.401158 | 81.1396628 | 71.8049643 | 71.5026774 |
| 16:36:39 | 70.2189819 | 73.401158 | 81.1396628 | 71.8049643 | 76.5026774 |
| 16:36:40 | 71.2189819 | 73.401158 | 81.1396628 | 71.8049643 | 76.5026774 |
| 16:36:41 | 72.2189819 | 72.401158 | 81.1396628 | 71.8049643 | 77.5026774 |
| 16:36:42 | 72.2189819 | 67.401158 | 82.1396628 | 71.8049643 | 77.5026774 |
| 16:36:43 | 71.2189819 | 65.401158 | 82.1396628 | 71.8049643 | 77.5026774 |
| 16:36:44 | 71.2189819 | 64.401158 | 81.1396628 | 70.8049643 | 71.5026774 |
| 16:36:45 | 71.2189819 | 64.401158 | 81.1396628 | 70.8049643 | 68.5026774 |
| 16:36:46 | 70.2189819 | 64.401158 | 81.1396628 | 71.8049643 | 69.5026774 |
| 16:36:47 | 69.2189819 | 64.401158 | 79.1396628 | 71.8049643 | 71.5026774 |
| 16:36:48 | 70.2189819 | 64.401158 | 78.1396628 | 69.8049643 | 72.5026774 |
| 16:36:49 | 70.2189819 | 64.401158 | 77.1396628 | 69.8049643 | 73.5026774 |
| 16:36:50 | 69.2189819 | 64.401158 | 76.1396628 | 70.8049643 | 73.5026774 |
| 16:36:51 | 69.2189819 | 65.401158 | 76.1396628 | 72.8049643 | 73.5026774 |
| 16:36:52 | 69.2189819 | 65.401158 | 76.1396628 | 72.8049643 | 71.5026774 |
| 16:36:53 | 70.2189819 | 65.401158 | 76.1396628 | 72.8049643 | 70.5026774 |
| 16:36:54 | 70.2189819 | 66.401158 | 75.1396628 | 72.8049643 | 68.5026774 |
| 16:36:55 | 70.2189819 | 66.401158 | 75.1396628 | 73.8049643 | 68.5026774 |
| 16:36:56 | 70.2189819 | 66.401158 | 75.1396628 | 75.8049643 | 65.5026774 |
| 16:36:57 | 70.2189819 | 66.401158 | 75.1396628 | 76.8049643 | 64.5026774 |
| 16:36:58 | 70.2189819 | 65.401158 | 76.1396628 | 76.8049643 | 64.5026774 |
| 16:36:59 | 70.2189819 | 65.401158 | 78.1396628 | 73.8049643 | 65.5026774 |
| 16:37:00 | 71.2189819 | 64.401158 | 77.1396628 | 70.8049643 | 65.5026774 |
| 16:37:01 | 75.2189819 | 61.401158 | 77.1396628 | 70.8049643 | 66.5026774 |
| 16:37:02 | 75.2189819 | 61.401158 | 72.1396628 | 69.8049643 | 66.5026774 |
| 16:37:03 | 78.2189819 | 61.401158 | 69.1396628 | 67.8049643 | 67.5026774 |
| 16:37:04 | 78.2189819 | 61.401158 | 68.1396628 | 66.8049643 | 67.5026774 |
| 16:37:05 | 73.2189819 | 62.401158 | 68.1396628 | 68.8049643 | 64.5026774 |
| 16:37:06 | 72.2189819 | 64.401158 | 69.1396628 | 68.8049643 | 63.5026774 |
| 16:37:07 | 71.2189819 | 66.401158 | 72.1396628 | 68.8049643 | 63.5026774 |
| 16:37:08 | 71.2189819 | 66.401158 | 74.1396628 | 66.8049643 | 62.5026774 |
| 16:37:09 | 71.2189819 | 68.401158 | 75.1396628 | 67.8049643 | 62.5026774 |
| 16:37:10 | 71.2189819 | 68.401158 | 75.1396628 | 67.8049643 | 62.5026774 |
| 16:37:11 | 71.2189819 | 68.401158 | 77.1396628 | 68.8049643 | 62.5026774 |
| 16:37:12 | 71.2189819 | 68.401158 | 77.1396628 | 68.8049643 | 62.5026774 |
| 16:37:13 | 69.2189819 | 70.401158 | 76.1396628 | 69.8049643 | 63.5026774 |
| 16:37:14 | 69.2189819 | 70.401158 | 76.1396628 | 69.8049643 | 63.5026774 |
| 16:37:15 | 69.2189819 | 70.401158 | 76.1396628 | 68.8049643 | 63.5026774 |
| 16:37:16 | 69.2189819 | 70.401158 | 76.1396628 | 68.8049643 | 63.5026774 |
| 16:37:17 | 68.2189819 | 70.401158 | 77.1396628 | 66.8049643 | 65.5026774 |

|          |            |           |            |            |            |
|----------|------------|-----------|------------|------------|------------|
| 16:37:18 | 67.2189819 | 70.401158 | 78.1396628 | 66.8049643 | 65.5026774 |
| 16:37:19 | 67.2189819 | 71.401158 | 78.1396628 | 66.8049643 | 65.5026774 |
| 16:37:20 | 67.2189819 | 71.401158 | 78.1396628 | 66.8049643 | 65.5026774 |
| 16:37:21 | 67.2189819 | 73.401158 | 78.1396628 | 66.8049643 | 65.5026774 |
| 16:37:22 | 67.2189819 | 73.401158 | 78.1396628 | 68.8049643 | 65.5026774 |
| 16:37:23 | 67.2189819 | 72.401158 | 78.1396628 | 69.8049643 | 65.5026774 |
| 16:37:24 | 67.2189819 | 72.401158 | 78.1396628 | 69.8049643 | 66.5026774 |
| 16:37:25 | 67.2189819 | 71.401158 | 78.1396628 | 70.8049643 | 66.5026774 |
| 16:37:26 | 67.2189819 | 71.401158 | 78.1396628 | 71.8049643 | 66.5026774 |
| 16:37:27 | 67.2189819 | 69.401158 | 79.1396628 | 71.8049643 | 66.5026774 |
| 16:37:28 | 68.2189819 | 69.401158 | 79.1396628 | 71.8049643 | 67.5026774 |
| 16:37:29 | 69.2189819 | 69.401158 | 77.1396628 | 74.8049643 | 67.5026774 |
| 16:37:30 | 70.2189819 | 69.401158 | 76.1396628 | 74.8049643 | 68.5026774 |
| 16:37:31 | 70.2189819 | 71.401158 | 76.1396628 | 76.8049643 | 69.5026774 |
| 16:37:32 | 72.2189819 | 71.401158 | 75.1396628 | 76.8049643 | 69.5026774 |
| 16:37:33 | 71.2189819 | 70.401158 | 75.1396628 | 77.8049643 | 70.5026774 |
| 16:37:34 | 72.2189819 | 64.401158 | 72.1396628 | 77.8049643 | 70.5026774 |
| 16:37:35 | 72.2189819 | 64.401158 | 72.1396628 | 76.8049643 | 69.5026774 |
| 16:37:36 | 73.2189819 | 64.401158 | 72.1396628 | 76.8049643 | 68.5026774 |
| 16:37:37 | 74.2189819 | 58.401158 | 71.1396628 | 76.8049643 | 66.5026774 |
| 16:37:38 | 74.2189819 | 58.401158 | 68.1396628 | 73.8049643 | 66.5026774 |
| 16:37:39 | 73.2189819 | 58.401158 | 67.1396628 | 72.8049643 | 67.5026774 |
| 16:37:40 | 73.2189819 | 58.401158 | 67.1396628 | 71.8049643 | 68.5026774 |
| 16:37:41 | 72.2189819 | 58.401158 | 67.1396628 | 71.8049643 | 69.5026774 |
| 16:37:42 | 72.2189819 | 58.401158 | 67.1396628 | 70.8049643 | 72.5026774 |
| 16:37:43 | 73.2189819 | 58.401158 | 69.1396628 | 71.8049643 | 72.5026774 |
| 16:37:44 | 72.2189819 | 57.401158 | 70.1396628 | 72.8049643 | 72.5026774 |
| 16:37:45 | 72.2189819 | 57.401158 | 71.1396628 | 72.8049643 | 72.5026774 |
| 16:37:46 | 72.2189819 | 57.401158 | 71.1396628 | 72.8049643 | 72.5026774 |
| 16:37:47 | 73.2189819 | 56.401158 | 73.1396628 | 70.8049643 | 73.5026774 |
| 16:37:48 | 72.2189819 | 56.401158 | 73.1396628 | 70.8049643 | 73.5026774 |
| 16:37:49 | 72.2189819 | 54.401158 | 72.1396628 | 68.8049643 | 74.5026774 |
| 16:37:50 | 72.2189819 | 54.401158 | 70.1396628 | 67.8049643 | 77.5026774 |
| 16:37:51 | 73.2189819 | 54.401158 | 70.1396628 | 67.8049643 | 77.5026774 |
| 16:37:52 | 73.2189819 | 53.401158 | 70.1396628 | 69.8049643 | 77.5026774 |
| 16:37:53 | 73.2189819 | 53.401158 | 69.1396628 | 71.8049643 | 77.5026774 |
| 16:37:54 | 73.2189819 | 53.401158 | 71.1396628 | 71.8049643 | 66.5026774 |
| 16:37:55 | 73.2189819 | 54.401158 | 72.1396628 | 73.8049643 | 64.5026774 |
| 16:37:56 | 73.2189819 | 54.401158 | 72.1396628 | 73.8049643 | 64.5026774 |
| 16:37:57 | 73.2189819 | 54.401158 | 74.1396628 | 71.8049643 | 64.5026774 |
| 16:37:58 | 72.2189819 | 54.401158 | 73.1396628 | 70.8049643 | 64.5026774 |
| 16:37:59 | 72.2189819 | 54.401158 | 72.1396628 | 68.8049643 | 64.5026774 |
| 16:38:00 | 73.2189819 | 54.401158 | 68.1396628 | 68.8049643 | 64.5026774 |
| 16:38:01 | 73.2189819 | 71.401158 | 68.1396628 | 65.8049643 | 64.5026774 |
| 16:38:02 | 73.2189819 | 77.401158 | 65.1396628 | 63.8049643 | 64.5026774 |

|          |            |           |            |            |            |
|----------|------------|-----------|------------|------------|------------|
| 16:38:03 | 73.2189819 | 77.401158 | 64.1396628 | 63.8049643 | 63.5026774 |
| 16:38:04 | 73.2189819 | 77.401158 | 64.1396628 | 62.8049643 | 63.5026774 |
| 16:38:05 | 73.2189819 | 76.401158 | 64.1396628 | 62.8049643 | 63.5026774 |
| 16:38:06 | 73.2189819 | 76.401158 | 64.1396628 | 62.8049643 | 63.5026774 |
| 16:38:07 | 72.2189819 | 73.401158 | 65.1396628 | 62.8049643 | 64.5026774 |
| 16:38:08 | 72.2189819 | 73.401158 | 68.1396628 | 62.8049643 | 65.5026774 |
| 16:38:09 | 72.2189819 | 73.401158 | 70.1396628 | 64.8049643 | 67.5026774 |
| 16:38:10 | 72.2189819 | 72.401158 | 72.1396628 | 65.8049643 | 67.5026774 |
| 16:38:11 | 73.2189819 | 71.401158 | 74.1396628 | 65.8049643 | 67.5026774 |
| 16:38:12 | 73.2189819 | 70.401158 | 75.1396628 | 65.8049643 | 67.5026774 |
| 16:38:13 | 73.2189819 | 70.401158 | 77.1396628 | 65.8049643 | 68.5026774 |
| 16:38:14 | 73.2189819 | 69.401158 | 78.1396628 | 65.8049643 | 68.5026774 |
| 16:38:15 | 72.2189819 | 67.401158 | 77.1396628 | 65.8049643 | 68.5026774 |
| 16:38:16 | 71.2189819 | 67.401158 | 76.1396628 | 66.8049643 | 69.5026774 |
| 16:38:17 | 70.2189819 | 67.401158 | 76.1396628 | 67.8049643 | 70.5026774 |
| 16:38:18 | 69.2189819 | 67.401158 | 71.1396628 | 67.8049643 | 70.5026774 |
| 16:38:19 | 69.2189819 | 68.401158 | 69.1396628 | 69.8049643 | 70.5026774 |
| 16:38:20 | 70.2189819 | 68.401158 | 68.1396628 | 69.8049643 | 70.5026774 |
| 16:38:21 | 70.2189819 | 70.401158 | 68.1396628 | 69.8049643 | 69.5026774 |
| 16:38:22 | 70.2189819 | 70.401158 | 68.1396628 | 69.8049643 | 69.5026774 |
| 16:38:23 | 70.2189819 | 70.401158 | 68.1396628 | 68.8049643 | 70.5026774 |
| 16:38:24 | 70.2189819 | 70.401158 | 68.1396628 | 68.8049643 | 72.5026774 |
| 16:38:25 | 70.2189819 | 70.401158 | 67.1396628 | 67.8049643 | 73.5026774 |
| 16:38:26 | 70.2189819 | 71.401158 | 66.1396628 | 66.8049643 | 74.5026774 |
| 16:38:27 | 70.2189819 | 75.401158 | 66.1396628 | 66.8049643 | 74.5026774 |
| 16:38:28 | 70.2189819 | 75.401158 | 65.1396628 | 66.8049643 | 74.5026774 |
| 16:38:29 | 71.2189819 | 76.401158 | 65.1396628 | 65.8049643 | 72.5026774 |
| 16:38:30 | 71.2189819 | 76.401158 | 67.1396628 | 65.8049643 | 71.5026774 |
| 16:38:31 | 71.2189819 | 77.401158 | 67.1396628 | 65.8049643 | 71.5026774 |
| 16:38:32 | 71.2189819 | 77.401158 | 69.1396628 | 65.8049643 | 71.5026774 |
| 16:38:33 | 70.2189819 | 77.401158 | 71.1396628 | 68.8049643 | 71.5026774 |
| 16:38:34 | 70.2189819 | 79.401158 | 72.1396628 | 68.8049643 | 71.5026774 |
| 16:38:35 | 70.2189819 | 79.401158 | 73.1396628 | 69.8049643 | 71.5026774 |
| 16:38:36 | 71.2189819 | 80.401158 | 74.1396628 | 69.8049643 | 71.5026774 |
| 16:38:37 | 73.2189819 | 80.401158 | 75.1396628 | 69.8049643 | 71.5026774 |
| 16:38:38 | 73.2189819 | 81.401158 | 74.1396628 | 68.8049643 | 72.5026774 |
| 16:38:39 | 72.2189819 | 81.401158 | 73.1396628 | 68.8049643 | 72.5026774 |
| 16:38:40 | 72.2189819 | 81.401158 | 73.1396628 | 68.8049643 | 72.5026774 |
| 16:38:41 | 72.2189819 | 78.401158 | 71.1396628 | 68.8049643 | 72.5026774 |
| 16:38:42 | 72.2189819 | 78.401158 | 70.1396628 | 68.8049643 | 72.5026774 |
| 16:38:43 | 72.2189819 | 78.401158 | 70.1396628 | 68.8049643 | 71.5026774 |
| 16:38:44 | 72.2189819 | 77.401158 | 71.1396628 | 67.8049643 | 71.5026774 |
| 16:38:45 | 71.2189819 | 77.401158 | 73.1396628 | 67.8049643 | 73.5026774 |
| 16:38:46 | 70.2189819 | 77.401158 | 74.1396628 | 66.8049643 | 73.5026774 |
| 16:38:47 | 72.2189819 | 77.401158 | 74.1396628 | 68.8049643 | 74.5026774 |

|          |            |           |            |            |            |
|----------|------------|-----------|------------|------------|------------|
| 16:38:48 | 72.2189819 | 78.401158 | 74.1396628 | 68.8049643 | 74.5026774 |
| 16:38:49 | 73.2189819 | 83.401158 | 74.1396628 | 68.8049643 | 75.5026774 |
| 16:38:50 | 73.2189819 | 84.401158 | 74.1396628 | 68.8049643 | 75.5026774 |
| 16:38:51 | 73.2189819 | 84.401158 | 74.1396628 | 68.8049643 | 75.5026774 |
| 16:38:52 | 73.2189819 | 83.401158 | 73.1396628 | 68.8049643 | 73.5026774 |
| 16:38:53 | 73.2189819 | 78.401158 | 73.1396628 | 68.8049643 | 73.5026774 |
| 16:38:54 | 73.2189819 | 69.401158 | 73.1396628 | 68.8049643 | 73.5026774 |
| 16:38:55 | 73.2189819 | 69.401158 | 71.1396628 | 68.8049643 | 73.5026774 |
| 16:38:56 | 73.2189819 | 69.401158 | 73.1396628 | 68.8049643 | 72.5026774 |
| 16:38:57 | 72.2189819 | 69.401158 | 74.1396628 | 68.8049643 | 71.5026774 |
| 16:38:58 | 71.2189819 | 70.401158 | 74.1396628 | 66.8049643 | 70.5026774 |
| 16:38:59 | 71.2189819 | 69.401158 | 74.1396628 | 66.8049643 | 71.5026774 |
| 16:39:00 | 71.2189819 | 69.401158 | 74.1396628 | 66.8049643 | 71.5026774 |
| 16:39:01 | 73.2189819 | 69.401158 | 71.1396628 | 66.8049643 | 71.5026774 |
| 16:39:02 | 76.2189819 | 68.401158 | 71.1396628 | 69.8049643 | 71.5026774 |
| 16:39:03 | 80.2189819 | 68.401158 | 71.1396628 | 69.8049643 | 71.5026774 |
| 16:39:04 | 82.2189819 | 67.401158 | 71.1396628 | 69.8049643 | 71.5026774 |
| 16:39:05 | 82.2189819 | 67.401158 | 69.1396628 | 69.8049643 | 71.5026774 |
| 16:39:06 | 80.2189819 | 67.401158 | 70.1396628 | 69.8049643 | 71.5026774 |
| 16:39:07 | 77.2189819 | 66.401158 | 70.1396628 | 67.8049643 | 69.5026774 |
| 16:39:08 | 75.2189819 | 66.401158 | 67.1396628 | 67.8049643 | 69.5026774 |
| 16:39:09 | 75.2189819 | 66.401158 | 66.1396628 | 66.8049643 | 68.5026774 |
| 16:39:10 | 75.2189819 | 66.401158 | 67.1396628 | 66.8049643 | 68.5026774 |
| 16:39:11 | 75.2189819 | 66.401158 | 67.1396628 | 66.8049643 | 68.5026774 |
| 16:39:12 | 74.2189819 | 67.401158 | 67.1396628 | 67.8049643 | 68.5026774 |
| 16:39:13 | 72.2189819 | 67.401158 | 66.1396628 | 67.8049643 | 68.5026774 |
| 16:39:14 | 72.2189819 | 67.401158 | 67.1396628 | 67.8049643 | 69.5026774 |
| 16:39:15 | 70.2189819 | 67.401158 | 67.1396628 | 67.8049643 | 70.5026774 |
| 16:39:16 | 69.2189819 | 68.401158 | 67.1396628 | 66.8049643 | 70.5026774 |
| 16:39:17 | 69.2189819 | 68.401158 | 67.1396628 | 66.8049643 | 67.5026774 |
| 16:39:18 | 68.2189819 | 68.401158 | 65.1396628 | 66.8049643 | 65.5026774 |
| 16:39:19 | 68.2189819 | 68.401158 | 65.1396628 | 66.8049643 | 63.5026774 |
| 16:39:20 | 68.2189819 | 68.401158 | 65.1396628 | 65.8049643 | 62.5026774 |
| 16:39:21 | 68.2189819 | 68.401158 | 65.1396628 | 65.8049643 | 62.5026774 |
| 16:39:22 | 69.2189819 | 71.401158 | 64.1396628 | 65.8049643 | 62.5026774 |
| 16:39:23 | 69.2189819 | 74.401158 | 64.1396628 | 65.8049643 | 63.5026774 |
| 16:39:24 | 71.2189819 | 74.401158 | 64.1396628 | 65.8049643 | 64.5026774 |
| 16:39:25 | 71.2189819 | 75.401158 | 64.1396628 | 65.8049643 | 64.5026774 |
| 16:39:26 | 71.2189819 | 75.401158 | 63.1396628 | 65.8049643 | 64.5026774 |
| 16:39:27 | 71.2189819 | 74.401158 | 63.1396628 | 63.8049643 | 65.5026774 |
| 16:39:28 | 71.2189819 | 74.401158 | 63.1396628 | 63.8049643 | 64.5026774 |
| 16:39:29 | 71.2189819 | 69.401158 | 65.1396628 | 65.8049643 | 64.5026774 |
| 16:39:30 | 70.2189819 | 67.401158 | 66.1396628 | 65.8049643 | 64.5026774 |
| 16:39:31 | 69.2189819 | 67.401158 | 68.1396628 | 65.8049643 | 64.5026774 |
| 16:39:32 | 69.2189819 | 69.401158 | 71.1396628 | 65.8049643 | 64.5026774 |

|          |            |           |            |            |            |
|----------|------------|-----------|------------|------------|------------|
| 16:39:33 | 69.2189819 | 70.401158 | 75.1396628 | 65.8049643 | 65.5026774 |
| 16:39:34 | 69.2189819 | 71.401158 | 77.1396628 | 65.8049643 | 65.5026774 |
| 16:39:35 | 69.2189819 | 71.401158 | 79.1396628 | 65.8049643 | 65.5026774 |
| 16:39:36 | 69.2189819 | 71.401158 | 80.1396628 | 65.8049643 | 65.5026774 |
| 16:39:37 | 70.2189819 | 71.401158 | 81.1396628 | 66.8049643 | 65.5026774 |
| 16:39:38 | 71.2189819 | 75.401158 | 82.1396628 | 66.8049643 | 67.5026774 |
| 16:39:39 | 73.2189819 | 77.401158 | 83.1396628 | 66.8049643 | 67.5026774 |
| 16:39:40 | 72.2189819 | 77.401158 | 83.1396628 | 65.8049643 | 67.5026774 |
| 16:39:41 | 70.2189819 | 77.401158 | 77.1396628 | 65.8049643 | 68.5026774 |
| 16:39:42 | 69.2189819 | 77.401158 | 75.1396628 | 67.8049643 | 70.5026774 |
| 16:39:43 | 69.2189819 | 77.401158 | 74.1396628 | 67.8049643 | 71.5026774 |
| 16:39:44 | 70.2189819 | 80.401158 | 74.1396628 | 67.8049643 | 71.5026774 |
| 16:39:45 | 70.2189819 | 81.401158 | 74.1396628 | 67.8049643 | 71.5026774 |
| 16:39:46 | 70.2189819 | 81.401158 | 72.1396628 | 67.8049643 | 70.5026774 |
| 16:39:47 | 70.2189819 | 81.401158 | 72.1396628 | 67.8049643 | 66.5026774 |
| 16:39:48 | 70.2189819 | 82.401158 | 71.1396628 | 67.8049643 | 63.5026774 |
| 16:39:49 | 70.2189819 | 82.401158 | 72.1396628 | 67.8049643 | 63.5026774 |
| 16:39:50 | 70.2189819 | 83.401158 | 72.1396628 | 67.8049643 | 60.5026774 |
| 16:39:51 | 71.2189819 | 83.401158 | 72.1396628 | 67.8049643 | 60.5026774 |
| 16:39:52 | 71.2189819 | 84.401158 | 72.1396628 | 67.8049643 | 60.5026774 |
| 16:39:53 | 71.2189819 | 84.401158 | 72.1396628 | 70.8049643 | 60.5026774 |
| 16:39:54 | 71.2189819 | 84.401158 | 72.1396628 | 70.8049643 | 60.5026774 |
| 16:39:55 | 69.2189819 | 83.401158 | 72.1396628 | 72.8049643 | 61.5026774 |
| 16:39:56 | 68.2189819 | 83.401158 | 69.1396628 | 73.8049643 | 60.5026774 |
| 16:39:57 | 67.2189819 | 82.401158 | 68.1396628 | 73.8049643 | 60.5026774 |
| 16:39:58 | 67.2189819 | 80.401158 | 69.1396628 | 73.8049643 | 60.5026774 |
| 16:39:59 | 67.2189819 | 80.401158 | 69.1396628 | 74.8049643 | 59.5026774 |
| 16:40:00 | 67.2189819 | 79.401158 | 70.1396628 | 75.8049643 | 59.5026774 |
| 16:40:01 | 66.2189819 | 79.401158 | 71.1396628 | 74.8049643 | 59.5026774 |
| 16:40:02 | 66.2189819 | 79.401158 | 73.1396628 | 74.8049643 | 59.5026774 |
| 16:40:03 | 66.2189819 | 79.401158 | 73.1396628 | 73.8049643 | 59.5026774 |
| 16:40:04 | 67.2189819 | 79.401158 | 72.1396628 | 72.8049643 | 59.5026774 |
| 16:40:05 | 67.2189819 | 79.401158 | 72.1396628 | 72.8049643 | 59.5026774 |
| 16:40:06 | 66.2189819 | 78.401158 | 72.1396628 | 72.8049643 | 63.5026774 |
| 16:40:07 | 66.2189819 | 78.401158 | 72.1396628 | 72.8049643 | 63.5026774 |
| 16:40:08 | 68.2189819 | 78.401158 | 72.1396628 | 72.8049643 | 64.5026774 |
| 16:40:09 | 68.2189819 | 73.401158 | 71.1396628 | 73.8049643 | 64.5026774 |
| 16:40:10 | 68.2189819 | 73.401158 | 70.1396628 | 73.8049643 | 65.5026774 |
| 16:40:11 | 68.2189819 | 73.401158 | 69.1396628 | 73.8049643 | 65.5026774 |
| 16:40:12 | 68.2189819 | 73.401158 | 69.1396628 | 74.8049643 | 66.5026774 |
| 16:40:13 | 69.2189819 | 72.401158 | 69.1396628 | 74.8049643 | 66.5026774 |
| 16:40:14 | 70.2189819 | 74.401158 | 69.1396628 | 74.8049643 | 67.5026774 |
| 16:40:15 | 71.2189819 | 74.401158 | 66.1396628 | 74.8049643 | 67.5026774 |
| 16:40:16 | 71.2189819 | 74.401158 | 71.1396628 | 72.8049643 | 67.5026774 |
| 16:40:17 | 75.2189819 | 74.401158 | 74.1396628 | 72.8049643 | 67.5026774 |

|          |            |           |            |            |            |
|----------|------------|-----------|------------|------------|------------|
| 16:40:18 | 81.2189819 | 74.401158 | 76.1396628 | 70.8049643 | 69.5026774 |
| 16:40:19 | 85.2189819 | 74.401158 | 79.1396628 | 70.8049643 | 69.5026774 |
| 16:40:20 | 85.2189819 | 73.401158 | 81.1396628 | 70.8049643 | 66.5026774 |
| 16:40:21 | 87.2189819 | 73.401158 | 81.1396628 | 70.8049643 | 66.5026774 |
| 16:40:22 | 89.2189819 | 73.401158 | 82.1396628 | 71.8049643 | 66.5026774 |
| 16:40:23 | 87.2189819 | 73.401158 | 82.1396628 | 71.8049643 | 66.5026774 |
| 16:40:24 | 87.2189819 | 73.401158 | 83.1396628 | 71.8049643 | 66.5026774 |
| 16:40:25 | 87.2189819 | 74.401158 | 83.1396628 | 71.8049643 | 67.5026774 |
| 16:40:26 | 83.2189819 | 74.401158 | 82.1396628 | 71.8049643 | 67.5026774 |
| 16:40:27 | 80.2189819 | 74.401158 | 82.1396628 | 71.8049643 | 68.5026774 |
| 16:40:28 | 78.2189819 | 74.401158 | 81.1396628 | 72.8049643 | 76.5026774 |
| 16:40:29 | 77.2189819 | 74.401158 | 89.1396628 | 72.8049643 | 80.5026774 |
| 16:40:30 | 77.2189819 | 74.401158 | 89.1396628 | 72.8049643 | 80.5026774 |
| 16:40:31 | 75.2189819 | 75.401158 | 76.7       | 72.8049643 | 81.5026774 |
| 16:40:32 | 74.2189819 | 73.401158 | 76.3       | 72.8049643 | 81.5026774 |
| 16:40:33 | 74.2189819 | 73.401158 | 75.5       | 72.8049643 | 80.5026774 |
| 16:40:34 | 74.2189819 | 73.401158 | 89.1396628 | 72.8049643 | 70.5026774 |
| 16:40:35 | 74.2189819 | 73.401158 | 85.1396628 | 72.8049643 | 70.5026774 |
| 16:40:36 | 75.2189819 | 74.401158 | 85.1396628 | 69.8049643 | 68.5026774 |
| 16:40:37 | 77.2189819 | 74.401158 | 85.1396628 | 69.8049643 | 67.5026774 |
| 16:40:38 | 78.2189819 | 74.401158 | 85.1396628 | 68.8049643 | 67.5026774 |
| 16:40:39 | 80.2189819 | 75.401158 | 84.1396628 | 68.8049643 | 68.5026774 |
| 16:40:40 | 77.2189819 | 75.401158 | 84.1396628 | 68.8049643 | 68.5026774 |
| 16:40:41 | 73.2189819 | 75.401158 | 84.1396628 | 68.8049643 | 68.5026774 |
| 16:40:42 | 73.2189819 | 77.401158 | 82.1396628 | 69.8049643 | 68.5026774 |
| 16:40:43 | 71.2189819 | 77.401158 | 78.1396628 | 70.8049643 | 67.5026774 |
| 16:40:44 | 69.2189819 | 76.401158 | 76.1396628 | 70.8049643 | 67.5026774 |
| 16:40:45 | 69.2189819 | 75.401158 | 74.1396628 | 70.8049643 | 65.5026774 |
| 16:40:46 | 68.2189819 | 73.401158 | 74.1396628 | 72.8049643 | 65.5026774 |
| 16:40:47 | 68.2189819 | 73.401158 | 75.1396628 | 72.8049643 | 66.5026774 |
| 16:40:48 | 68.2189819 | 73.401158 | 75.1396628 | 72.8049643 | 66.5026774 |
| 16:40:49 | 70.2189819 | 73.401158 | 75.1396628 | 68.8049643 | 66.5026774 |
| 16:40:50 | 70.2189819 | 73.401158 | 76.1396628 | 67.8049643 | 66.5026774 |
| 16:40:51 | 71.2189819 | 72.401158 | 76.1396628 | 68.8049643 | 66.5026774 |
| 16:40:52 | 72.2189819 | 72.401158 | 77.1396628 | 68.8049643 | 65.5026774 |
| 16:40:53 | 72.2189819 | 71.401158 | 77.1396628 | 68.8049643 | 64.5026774 |
| 16:40:54 | 73.2189819 | 72.401158 | 77.1396628 | 69.8049643 | 64.5026774 |
| 16:40:55 | 73.2189819 | 73.401158 | 77.1396628 | 69.8049643 | 66.5026774 |
| 16:40:56 | 73.2189819 | 60.401158 | 77.1396628 | 68.8049643 | 66.5026774 |
| 16:40:57 | 73.2189819 | 60.401158 | 77.1396628 | 68.8049643 | 66.5026774 |
| 16:40:58 | 73.2189819 | 59.401158 | 77.1396628 | 68.8049643 | 68.5026774 |
| 16:40:59 | 73.2189819 | 63.401158 | 79.1396628 | 68.8049643 | 68.5026774 |
| 16:41:00 | 73.2189819 | 63.401158 | 79.1396628 | 69.8049643 | 67.5026774 |
| 16:41:01 | 73.2189819 | 66.401158 | 79.1396628 | 70.8049643 | 67.5026774 |
| 16:41:02 | 73.2189819 | 67.401158 | 85.1396628 | 70.8049643 | 67.5026774 |

|          |            |            |            |            |            |
|----------|------------|------------|------------|------------|------------|
| 16:41:03 | 73.2189819 | 68.401158  | 87.1396628 | 70.8049643 | 67.5026774 |
| 16:41:04 | 75.2189819 | 67.401158  | 86.1396628 | 70.8049643 | 68.5026774 |
| 16:41:05 | 75.2189819 | 67.401158  | 84.1396628 | 70.8049643 | 70.5026774 |
| 16:41:06 | 77.2189819 | 67.401158  | 84.1396628 | 70.8049643 | 70.5026774 |
| 16:41:07 | 77.2189819 | 66.401158  | 82.1396628 | 71.8049643 | 70.5026774 |
| 16:41:08 | 77.2189819 | 66.401158  | 80.1396628 | 72.8049643 | 70.5026774 |
| 16:41:09 | 79.2189819 | 66.401158  | 79.1396628 | 72.8049643 | 70.5026774 |
| 16:41:10 | 81.2189819 | 66.401158  | 79.1396628 | 73.8049643 | 69.5026774 |
| 16:41:11 | 81.2189819 | 66.401158  | 79.1396628 | 73.8049643 | 69.5026774 |
| 16:41:12 | 80.2189819 | 66.401158  | 79.1396628 | 73.8049643 | 69.5026774 |
| 16:41:13 | 78.2189819 | 67.401158  | 79.1396628 | 73.8049643 | 69.5026774 |
| 16:41:14 | 74.2189819 | 68.401158  | 79.1396628 | 67.8049643 | 69.5026774 |
| 16:41:15 | 74.2189819 | 68.401158  | 78.1396628 | 66.8049643 | 70.5026774 |
| 16:41:16 | 73.2189819 | 69.401158  | 78.1396628 | 65.8049643 | 70.5026774 |
| 16:41:17 | 73.2189819 | 73.401158  | 77.1396628 | 64.8049643 | 70.5026774 |
| 16:41:18 | 72.2189819 | 73.401158  | 77.1396628 | 64.8049643 | 68.5026774 |
| 16:41:19 | 71.2189819 | 73.401158  | 76.1396628 | 64.8049643 | 68.5026774 |
| 16:41:20 | 71.2189819 | 73.401158  | 76.1396628 | 64.8049643 | 68.5026774 |
| 16:41:21 | 71.2189819 | 72.401158  | 75.1396628 | 64.8049643 | 68.5026774 |
| 16:41:22 | 70.2189819 | 72.401158  | 75.1396628 | 65.8049643 | 68.5026774 |
| 16:41:23 | 70.2189819 | 72.401158  | 77.1396628 | 66.8049643 | 68.5026774 |
| 16:41:24 | 69.2189819 | 72.401158  | 77.1396628 | 66.8049643 | 68.5026774 |
| 16:41:25 | 68.2189819 | 73.401158  | 77.1396628 | 66.8049643 | 68.5026774 |
| 16:41:26 | 68.2189819 | 73.401158  | 77.1396628 | 66.8049643 | 68.5026774 |
| 16:41:27 | 67.2189819 | 74.401158  | 77.1396628 | 66.8049643 | 68.5026774 |
| 16:41:28 | 67.2189819 | 74.401158  | 77.1396628 | 67.8049643 | 65.5026774 |
| 16:41:29 | 68.2189819 | 75.401158  | 78.1396628 | 66.8049643 | 64.5026774 |
| 16:41:30 | 68.2189819 | 75.401158  | 83.1396628 | 66.8049643 | 64.5026774 |
| 16:41:31 | 68.2189819 | 76.401158  | 84.1396628 | 66.8049643 | 64.5026774 |
| 16:41:32 | 70.2189819 | 76.401158  | 84.1396628 | 65.8049643 | 64.5026774 |
| 16:41:33 | 71.2189819 | 77.401158  | 84.1396628 | 65.8049643 | 64.5026774 |
| 16:41:34 | 71.2189819 | 77.401158  | 84.1396628 | 65.8049643 | 64.5026774 |
| 16:41:35 | 70.2189819 | 80.401158  | 84.1396628 | 65.8049643 | 64.5026774 |
| 16:41:36 | 70.2189819 | 81.401158  | 85.1396628 | 65.8049643 | 64.5026774 |
| 16:41:37 | 70.2189819 | 83.401158  | 85.1396628 | 64.8049643 | 66.5026774 |
| 16:41:38 | 69.2189819 | 85.401158  | 85.1396628 | 65.8049643 | 67.5026774 |
| 16:41:39 | 68.2189819 | 72.9       | 85.1396628 | 65.8049643 | 68.5026774 |
| 16:41:40 | 67.2189819 | 72.6       | 85.1396628 | 65.8049643 | 68.5026774 |
| 16:41:41 | 69.2189819 | 73.5       | 86.1396628 | 65.8049643 | 68.5026774 |
| 16:41:42 | 69.2189819 | 74.9547551 | 86.1396628 | 65.8049643 | 68.5026774 |
| 16:41:43 | 69.2189819 | 74.5       | 87.1396628 | 65.8049643 | 70.5026774 |
| 16:41:44 | 70.2189819 | 74.7       | 88.1396628 | 65.8049643 | 70.5026774 |
| 16:41:45 | 70.2189819 | 74.5       | 88.1396628 | 65.8049643 | 71.5026774 |
| 16:41:46 | 70.2189819 | 74.3       | 87.1396628 | 65.8049643 | 71.5026774 |
| 16:41:47 | 70.2189819 | 74.5       | 87.1396628 | 65.8049643 | 71.5026774 |

|          |            |           |            |            |            |
|----------|------------|-----------|------------|------------|------------|
| 16:41:48 | 70.2189819 | 74.8      | 87.1396628 | 64.8049643 | 72.5026774 |
| 16:41:49 | 70.2189819 | 75        | 87.1396628 | 64.8049643 | 73.5026774 |
| 16:41:50 | 70.2189819 | 75.3      | 87.1396628 | 64.8049643 | 75.5026774 |
| 16:41:51 | 69.2189819 | 75.4      | 87.1396628 | 64.8049643 | 76.5026774 |
| 16:41:52 | 69.2189819 | 75.3      | 88.1396628 | 64.8049643 | 76.5026774 |
| 16:41:53 | 68.2189819 | 75.7      | 88.1396628 | 64.8049643 | 76.5026774 |
| 16:41:54 | 68.2189819 | 75.5      | 86.1396628 | 64.8049643 | 76.5026774 |
| 16:41:55 | 68.2189819 | 75.9      | 85.1396628 | 64.8049643 | 76.5026774 |
| 16:41:56 | 67.2189819 | 76.7      | 84.1396628 | 64.8049643 | 76.5026774 |
| 16:41:57 | 67.2189819 | 76.2      | 82.1396628 | 63.8049643 | 76.5026774 |
| 16:41:58 | 67.2189819 | 89.401158 | 81.1396628 | 62.8049643 | 76.5026774 |
| 16:41:59 | 67.2189819 | 86.401158 | 82.1396628 | 63.8049643 | 76.5026774 |
| 16:42:00 | 68.2189819 | 82.401158 | 82.1396628 | 63.8049643 | 76.5026774 |
| 16:42:01 | 68.2189819 | 82.401158 | 82.1396628 | 63.8049643 | 75.5026774 |
| 16:42:02 | 68.2189819 | 69.401158 | 83.1396628 | 64.8049643 | 74.5026774 |
| 16:42:03 | 69.2189819 | 69.401158 | 83.1396628 | 65.8049643 | 74.5026774 |
| 16:42:04 | 70.2189819 | 69.401158 | 83.1396628 | 65.8049643 | 73.5026774 |
| 16:42:05 | 69.2189819 | 69.401158 | 83.1396628 | 65.8049643 | 73.5026774 |
| 16:42:06 | 68.2189819 | 69.401158 | 81.1396628 | 65.8049643 | 73.5026774 |
| 16:42:07 | 68.2189819 | 69.401158 | 80.1396628 | 65.8049643 | 74.5026774 |
| 16:42:08 | 68.2189819 | 69.401158 | 80.1396628 | 66.8049643 | 74.5026774 |
| 16:42:09 | 67.2189819 | 69.401158 | 81.1396628 | 66.8049643 | 72.5026774 |
| 16:42:10 | 67.2189819 | 66.401158 | 81.1396628 | 66.8049643 | 68.5026774 |
| 16:42:11 | 67.2189819 | 67.401158 | 82.1396628 | 67.8049643 | 66.5026774 |
| 16:42:12 | 68.2189819 | 67.401158 | 84.1396628 | 67.8049643 | 65.5026774 |
| 16:42:13 | 69.2189819 | 68.401158 | 85.1396628 | 67.8049643 | 65.5026774 |
| 16:42:14 | 70.2189819 | 68.401158 | 84.1396628 | 67.8049643 | 64.5026774 |
| 16:42:15 | 71.2189819 | 69.401158 | 82.1396628 | 67.8049643 | 64.5026774 |
| 16:42:16 | 74.2189819 | 69.401158 | 80.1396628 | 63.8049643 | 64.5026774 |
| 16:42:17 | 76.2189819 | 70.401158 | 79.1396628 | 64.8049643 | 64.5026774 |
| 16:42:18 | 76.2189819 | 70.401158 | 79.1396628 | 63.8049643 | 62.5026774 |
| 16:42:19 | 77.2189819 | 70.401158 | 79.1396628 | 63.8049643 | 62.5026774 |
| 16:42:20 | 77.2189819 | 71.401158 | 80.1396628 | 61.8049643 | 62.5026774 |
| 16:42:21 | 77.2189819 | 73.401158 | 81.1396628 | 61.8049643 | 62.5026774 |
| 16:42:22 | 76.2189819 | 75.401158 | 82.1396628 | 60.8049643 | 62.5026774 |
| 16:42:23 | 75.2189819 | 75.401158 | 83.1396628 | 60.8049643 | 63.5026774 |
| 16:42:24 | 74.2189819 | 75.401158 | 83.1396628 | 60.8049643 | 63.5026774 |
| 16:42:25 | 73.2189819 | 74.401158 | 83.1396628 | 60.8049643 | 63.5026774 |
| 16:42:26 | 71.2189819 | 70.401158 | 83.1396628 | 60.8049643 | 64.5026774 |
| 16:42:27 | 70.2189819 | 68.401158 | 83.1396628 | 60.8049643 | 64.5026774 |
| 16:42:28 | 70.2189819 | 67.401158 | 83.1396628 | 60.8049643 | 64.5026774 |
| 16:42:29 | 70.2189819 | 67.401158 | 83.1396628 | 59.8049643 | 65.5026774 |
| 16:42:30 | 70.2189819 | 68.401158 | 83.1396628 | 59.8049643 | 66.5026774 |
| 16:42:31 | 70.2189819 | 68.401158 | 83.1396628 | 59.8049643 | 65.5026774 |
| 16:42:32 | 70.2189819 | 68.401158 | 82.1396628 | 60.8049643 | 63.5026774 |



|          |            |           |            |            |            |
|----------|------------|-----------|------------|------------|------------|
| 16:42:33 | 70.2189819 | 69.401158 | 82.1396628 | 59.8049643 | 64.5026774 |
| 16:42:34 | 70.2189819 | 70.401158 | 84.1396628 | 59.8049643 | 64.5026774 |
| 16:42:35 | 70.2189819 | 70.401158 | 84.1396628 | 59.8049643 | 66.5026774 |
| 16:42:36 | 70.2189819 | 70.401158 | 68.6561259 | 59.8049643 | 66.5026774 |
| 16:42:37 | 71.2189819 | 69.401158 | 85.1396628 | 59.8049643 | 64.5026774 |
| 16:42:38 | 71.2189819 | 67.401158 | 82.1396628 | 60.8049643 | 62.5026774 |
| 16:42:39 | 71.2189819 | 67.401158 | 82.1396628 | 62.8049643 | 62.5026774 |
| 16:42:40 | 71.2189819 | 67.401158 | 82.1396628 | 63.8049643 | 63.5026774 |
| 16:42:41 | 71.2189819 | 67.401158 | 80.1396628 | 63.8049643 | 63.5026774 |
| 16:42:42 | 71.2189819 | 67.401158 | 81.1396628 | 64.8049643 | 64.5026774 |
| 16:42:43 | 71.2189819 | 67.401158 | 82.1396628 | 64.8049643 | 64.5026774 |
| 16:42:44 | 73.2189819 | 67.401158 | 82.1396628 | 64.8049643 | 61.5026774 |
| 16:42:45 | 73.2189819 | 67.401158 | 82.1396628 | 65.8049643 | 61.5026774 |
| 16:42:46 | 73.2189819 | 67.401158 | 82.1396628 | 64.8049643 | 60.5026774 |
| 16:42:47 | 73.2189819 | 65.401158 | 82.1396628 | 64.8049643 | 59.5026774 |
| 16:42:48 | 73.2189819 | 64.401158 | 80.1396628 | 64.8049643 | 61.5026774 |
| 16:42:49 | 73.2189819 | 63.401158 | 80.1396628 | 64.8049643 | 61.5026774 |
| 16:42:50 | 74.2189819 | 63.401158 | 77.1396628 | 64.8049643 | 61.5026774 |
| 16:42:51 | 74.2189819 | 64.401158 | 77.1396628 | 64.8049643 | 64.5026774 |
| 16:42:52 | 74.2189819 | 66.401158 | 77.1396628 | 64.8049643 | 64.5026774 |
| 16:42:53 | 74.2189819 | 68.401158 | 77.1396628 | 63.8049643 | 64.5026774 |
| 16:42:54 | 74.2189819 | 69.401158 | 77.1396628 | 61.8049643 | 64.5026774 |
| 16:42:55 | 74.2189819 | 69.401158 | 77.1396628 | 61.8049643 | 63.5026774 |
| 16:42:56 | 74.2189819 | 70.401158 | 77.1396628 | 61.8049643 | 63.5026774 |
| 16:42:57 | 74.2189819 | 68.401158 | 77.1396628 | 61.8049643 | 63.5026774 |
| 16:42:58 | 74.2189819 | 67.401158 | 77.1396628 | 61.8049643 | 64.5026774 |
| 16:42:59 | 74.2189819 | 67.401158 | 77.1396628 | 61.8049643 | 64.5026774 |
| 16:43:00 | 75.2189819 | 68.401158 | 77.1396628 | 61.8049643 | 67.5026774 |
| 16:43:01 | 74.2189819 | 69.401158 | 77.1396628 | 61.8049643 | 67.5026774 |
| 16:43:02 | 75.2189819 | 70.401158 | 77.1396628 | 61.8049643 | 67.5026774 |
| 16:43:03 | 75.2189819 | 71.401158 | 76.1396628 | 60.8049643 | 68.5026774 |
| 16:43:04 | 85.2189819 | 73.401158 | 77.1396628 | 60.8049643 | 70.5026774 |
| 16:43:05 | 82.2189819 | 73.401158 | 79.1396628 | 63.8049643 | 71.5026774 |
| 16:43:06 | 80.2189819 | 74.401158 | 79.1396628 | 62.8049643 | 71.5026774 |
| 16:43:07 | 78.2189819 | 76.401158 | 79.1396628 | 62.8049643 | 70.5026774 |
| 16:43:08 | 78.2189819 | 76.401158 | 77.1396628 | 62.8049643 | 70.5026774 |
| 16:43:09 | 78.2189819 | 75.401158 | 77.1396628 | 64.8049643 | 71.5026774 |
| 16:43:10 | 77.2189819 | 73.401158 | 77.1396628 | 64.8049643 | 72.5026774 |
| 16:43:11 | 77.2189819 | 73.401158 | 77.1396628 | 64.8049643 | 72.5026774 |
| 16:43:12 | 77.2189819 | 71.401158 | 77.1396628 | 63.8049643 | 73.5026774 |
| 16:43:13 | 77.2189819 | 70.401158 | 77.1396628 | 63.8049643 | 72.5026774 |
| 16:43:14 | 76.2189819 | 71.401158 | 75.1396628 | 63.8049643 | 71.5026774 |
| 16:43:15 | 76.2189819 | 71.401158 | 75.1396628 | 63.8049643 | 70.5026774 |
| 16:43:16 | 74.2189819 | 71.401158 | 74.1396628 | 63.8049643 | 68.5026774 |
| 16:43:17 | 73.2189819 | 72.401158 | 74.1396628 | 63.8049643 | 66.5026774 |

|          |            |           |            |            |            |
|----------|------------|-----------|------------|------------|------------|
| 16:43:18 | 72.2189819 | 72.401158 | 74.1396628 | 63.8049643 | 63.5026774 |
| 16:43:19 | 73.2189819 | 71.401158 | 73.1396628 | 63.8049643 | 63.5026774 |
| 16:43:20 | 73.2189819 | 70.401158 | 71.1396628 | 65.8049643 | 62.5026774 |
| 16:43:21 | 73.2189819 | 70.401158 | 71.1396628 | 65.8049643 | 62.5026774 |
| 16:43:22 | 73.2189819 | 70.401158 | 72.1396628 | 68.8049643 | 61.5026774 |
| 16:43:23 | 73.2189819 | 69.401158 | 73.1396628 | 69.8049643 | 61.5026774 |
| 16:43:24 | 74.2189819 | 68.401158 | 73.1396628 | 69.8049643 | 60.5026774 |
| 16:43:25 | 74.2189819 | 67.401158 | 73.1396628 | 69.8049643 | 58.5026774 |
| 16:43:26 | 74.2189819 | 67.401158 | 73.1396628 | 69.8049643 | 57.5026774 |
| 16:43:27 | 75.2189819 | 67.401158 | 73.1396628 | 69.8049643 | 57.5026774 |
| 16:43:28 | 75.2189819 | 67.401158 | 73.1396628 | 68.8049643 | 56.5026774 |
| 16:43:29 | 75.2189819 | 66.401158 | 75.1396628 | 67.8049643 | 57.5026774 |
| 16:43:30 | 75.2189819 | 66.401158 | 75.1396628 | 67.8049643 | 57.5026774 |
| 16:43:31 | 77.2189819 | 77.401158 | 77.1396628 | 67.8049643 | 59.5026774 |
| 16:43:32 | 76.2189819 | 79.401158 | 77.1396628 | 66.8049643 | 60.5026774 |
| 16:43:33 | 75.2189819 | 79.401158 | 77.1396628 | 65.8049643 | 60.5026774 |
| 16:43:34 | 75.2189819 | 76.401158 | 77.1396628 | 64.8049643 | 61.5026774 |
| 16:43:35 | 75.2189819 | 76.401158 | 76.1396628 | 64.8049643 | 61.5026774 |
| 16:43:36 | 75.2189819 | 76.401158 | 76.1396628 | 66.8049643 | 62.5026774 |
| 16:43:37 | 75.2189819 | 75.401158 | 75.1396628 | 68.8049643 | 62.5026774 |
| 16:43:38 | 75.2189819 | 73.401158 | 74.1396628 | 68.8049643 | 62.5026774 |
| 16:43:39 | 75.2189819 | 73.401158 | 72.1396628 | 68.8049643 | 62.5026774 |
| 16:43:40 | 75.2189819 | 74.401158 | 72.1396628 | 68.8049643 | 62.5026774 |
| 16:43:41 | 75.2189819 | 74.401158 | 72.1396628 | 68.8049643 | 63.5026774 |
| 16:43:42 | 75.2189819 | 73.401158 | 72.1396628 | 68.8049643 | 64.5026774 |
| 16:43:43 | 77.2189819 | 73.401158 | 73.1396628 | 68.8049643 | 64.5026774 |
| 16:43:44 | 77.2189819 | 68.401158 | 70.1396628 | 68.8049643 | 66.5026774 |
| 16:43:45 | 77.2189819 | 65.401158 | 69.1396628 | 68.8049643 | 66.5026774 |
| 16:43:46 | 77.2189819 | 64.401158 | 68.1396628 | 68.8049643 | 66.5026774 |
| 16:43:47 | 77.2189819 | 63.401158 | 68.1396628 | 70.8049643 | 66.5026774 |
| 16:43:48 | 77.2189819 | 63.401158 | 68.1396628 | 70.8049643 | 65.5026774 |
| 16:43:49 | 76.2189819 | 63.401158 | 68.1396628 | 70.8049643 | 66.5026774 |
| 16:43:50 | 76.2189819 | 63.401158 | 67.1396628 | 69.8049643 | 67.5026774 |
| 16:43:51 | 75.2189819 | 65.401158 | 69.1396628 | 69.8049643 | 68.5026774 |
| 16:43:52 | 74.2189819 | 65.401158 | 69.1396628 | 69.8049643 | 67.5026774 |
| 16:43:53 | 74.2189819 | 66.401158 | 69.1396628 | 68.8049643 | 67.5026774 |
| 16:43:54 | 74.2189819 | 66.401158 | 69.1396628 | 68.8049643 | 67.5026774 |
| 16:43:55 | 74.2189819 | 66.401158 | 71.1396628 | 68.8049643 | 67.5026774 |
| 16:43:56 | 74.2189819 | 66.401158 | 71.1396628 | 68.8049643 | 67.5026774 |
| 16:43:57 | 74.2189819 | 66.401158 | 71.1396628 | 68.8049643 | 68.5026774 |
| 16:43:58 | 74.2189819 | 66.401158 | 71.1396628 | 68.8049643 | 69.5026774 |
| 16:43:59 | 74.2189819 | 64.401158 | 71.1396628 | 70.8049643 | 70.5026774 |
| 16:44:00 | 73.2189819 | 62.401158 | 71.1396628 | 70.8049643 | 69.5026774 |
| 16:44:01 | 73.2189819 | 62.401158 | 71.1396628 | 71.8049643 | 65.5026774 |
| 16:44:02 | 73.2189819 | 60.401158 | 73.1396628 | 71.8049643 | 65.5026774 |

|          |            |           |            |            |            |
|----------|------------|-----------|------------|------------|------------|
| 16:44:03 | 72.2189819 | 61.401158 | 73.1396628 | 71.8049643 | 64.5026774 |
| 16:44:04 | 72.2189819 | 61.401158 | 78.1396628 | 69.8049643 | 63.5026774 |
| 16:44:05 | 72.2189819 | 61.401158 | 80.1396628 | 69.8049643 | 63.5026774 |
| 16:44:06 | 72.2189819 | 65.401158 | 80.1396628 | 69.8049643 | 63.5026774 |
| 16:44:07 | 72.2189819 | 65.401158 | 80.1396628 | 68.8049643 | 63.5026774 |
| 16:44:08 | 72.2189819 | 65.401158 | 80.1396628 | 69.8049643 | 64.5026774 |
| 16:44:09 | 72.2189819 | 64.401158 | 81.1396628 | 69.8049643 | 64.5026774 |
| 16:44:10 | 74.2189819 | 64.401158 | 81.1396628 | 69.8049643 | 64.5026774 |
| 16:44:11 | 75.2189819 | 64.401158 | 81.1396628 | 69.8049643 | 64.5026774 |
| 16:44:12 | 75.2189819 | 64.401158 | 82.1396628 | 71.8049643 | 64.5026774 |
| 16:44:13 | 75.2189819 | 64.401158 | 82.1396628 | 70.8049643 | 66.5026774 |
| 16:44:14 | 75.2189819 | 63.401158 | 82.1396628 | 70.8049643 | 66.5026774 |
| 16:44:15 | 75.2189819 | 63.401158 | 81.1396628 | 69.8049643 | 67.5026774 |
| 16:44:16 | 76.2189819 | 64.401158 | 81.1396628 | 69.8049643 | 67.5026774 |
| 16:44:17 | 77.2189819 | 65.401158 | 84.1396628 | 69.8049643 | 67.5026774 |
| 16:44:18 | 79.2189819 | 65.401158 | 84.1396628 | 69.8049643 | 66.5026774 |
| 16:44:19 | 80.2189819 | 66.401158 | 72.1396628 | 69.8049643 | 67.5026774 |
| 16:44:20 | 81.2189819 | 66.401158 | 71.1396628 | 69.8049643 | 67.5026774 |
| 16:44:21 | 81.2189819 | 65.401158 | 71.1396628 | 69.8049643 | 67.5026774 |
| 16:44:22 | 82.2189819 | 63.401158 | 71.1396628 | 68.8049643 | 67.5026774 |
| 16:44:23 | 82.2189819 | 62.401158 | 71.1396628 | 68.8049643 | 67.5026774 |
| 16:44:24 | 82.2189819 | 62.401158 | 71.1396628 | 68.8049643 | 67.5026774 |
| 16:44:25 | 81.2189819 | 62.401158 | 68.1396628 | 68.8049643 | 66.5026774 |
| 16:44:26 | 81.2189819 | 62.401158 | 68.1396628 | 66.8049643 | 66.5026774 |
| 16:44:27 | 81.2189819 | 63.401158 | 68.1396628 | 66.8049643 | 66.5026774 |
| 16:44:28 | 80.2189819 | 63.401158 | 67.1396628 | 66.8049643 | 65.5026774 |
| 16:44:29 | 80.2189819 | 63.401158 | 67.1396628 | 66.8049643 | 64.5026774 |
| 16:44:30 | 80.2189819 | 63.401158 | 67.1396628 | 66.8049643 | 64.5026774 |
| 16:44:31 | 80.2189819 | 61.401158 | 64.1396628 | 66.8049643 | 65.5026774 |
| 16:44:32 | 80.2189819 | 59.401158 | 64.1396628 | 65.8049643 | 65.5026774 |
| 16:44:33 | 78.2189819 | 58.401158 | 64.1396628 | 65.8049643 | 66.5026774 |
| 16:44:34 | 78.2189819 | 58.401158 | 64.1396628 | 64.8049643 | 66.5026774 |
| 16:44:35 | 77.2189819 | 60.401158 | 65.1396628 | 64.8049643 | 66.5026774 |
| 16:44:36 | 77.2189819 | 61.401158 | 65.1396628 | 64.8049643 | 66.5026774 |
| 16:44:37 | 77.2189819 | 63.401158 | 66.1396628 | 64.8049643 | 66.5026774 |
| 16:44:38 | 78.2189819 | 63.401158 | 66.1396628 | 66.8049643 | 64.5026774 |
| 16:44:39 | 80.2189819 | 63.401158 | 65.1396628 | 67.8049643 | 64.5026774 |
| 16:44:40 | 82.2189819 | 63.401158 | 64.1396628 | 67.8049643 | 64.5026774 |
| 16:44:41 | 82.2189819 | 63.401158 | 64.1396628 | 68.8049643 | 63.5026774 |
| 16:44:42 | 84.2189819 | 63.401158 | 62.1396628 | 68.8049643 | 63.5026774 |
| 16:44:43 | 70.5       | 63.401158 | 62.1396628 | 69.8049643 | 63.5026774 |
| 16:44:44 | 71.2       | 64.401158 | 63.1396628 | 69.8049643 | 63.5026774 |
| 16:44:45 | 84.2189819 | 65.401158 | 63.1396628 | 69.8049643 | 63.5026774 |
| 16:44:46 | 80.2189819 | 65.401158 | 62.1396628 | 69.8049643 | 63.5026774 |
| 16:44:47 | 77.2189819 | 65.401158 | 62.1396628 | 69.8049643 | 63.5026774 |

|          |            |           |            |            |            |
|----------|------------|-----------|------------|------------|------------|
| 16:44:48 | 77.2189819 | 65.401158 | 61.1396628 | 69.8049643 | 64.5026774 |
| 16:44:49 | 76.2189819 | 65.401158 | 61.1396628 | 69.8049643 | 64.5026774 |
| 16:44:50 | 76.2189819 | 65.401158 | 61.1396628 | 70.8049643 | 64.5026774 |
| 16:44:51 | 76.2189819 | 67.401158 | 60.1396628 | 71.8049643 | 64.5026774 |
| 16:44:52 | 78.2189819 | 66.401158 | 61.1396628 | 71.8049643 | 62.5026774 |
| 16:44:53 | 79.2189819 | 65.401158 | 60.1396628 | 71.8049643 | 61.5026774 |
| 16:44:54 | 82.2189819 | 65.401158 | 60.1396628 | 72.8049643 | 61.5026774 |
| 16:44:55 | 82.2189819 | 65.401158 | 61.1396628 | 72.8049643 | 61.5026774 |
| 16:44:56 | 79.2189819 | 68.401158 | 65.1396628 | 72.8049643 | 61.5026774 |
| 16:44:57 | 76.2189819 | 70.401158 | 74.1396628 | 73.8049643 | 61.5026774 |
| 16:44:58 | 74.2189819 | 72.401158 | 78.1396628 | 73.8049643 | 62.5026774 |
| 16:44:59 | 72.2189819 | 73.401158 | 79.1396628 | 73.8049643 | 62.5026774 |
| 16:45:00 | 71.2189819 | 73.401158 | 78.1396628 | 73.8049643 | 62.5026774 |
| 16:45:01 | 70.2189819 | 71.401158 | 78.1396628 | 73.8049643 | 62.5026774 |
| 16:45:02 | 70.2189819 | 70.401158 | 77.1396628 | 71.8049643 | 59.5026774 |
| 16:45:03 | 70.2189819 | 69.401158 | 76.1396628 | 71.8049643 | 59.5026774 |
| 16:45:04 | 71.2189819 | 68.401158 | 76.1396628 | 71.8049643 | 60.5026774 |
| 16:45:05 | 71.2189819 | 68.401158 | 76.1396628 | 71.8049643 | 61.5026774 |
| 16:45:06 | 70.2189819 | 67.401158 | 75.1396628 | 70.8049643 | 62.5026774 |
| 16:45:07 | 69.2189819 | 67.401158 | 75.1396628 | 70.8049643 | 63.5026774 |
| 16:45:08 | 69.2189819 | 67.401158 | 75.1396628 | 70.8049643 | 63.5026774 |
| 16:45:09 | 70.2189819 | 65.401158 | 77.1396628 | 70.8049643 | 62.5026774 |
| 16:45:10 | 70.2189819 | 65.401158 | 78.1396628 | 70.8049643 | 62.5026774 |
| 16:45:11 | 70.2189819 | 66.401158 | 78.1396628 | 70.8049643 | 61.5026774 |
| 16:45:12 | 69.2189819 | 66.401158 | 77.1396628 | 70.8049643 | 60.5026774 |
| 16:45:13 | 69.2189819 | 67.401158 | 78.1396628 | 72.8049643 | 60.5026774 |
| 16:45:14 | 69.2189819 | 67.401158 | 80.1396628 | 74.8049643 | 60.5026774 |
| 16:45:15 | 69.2189819 | 66.401158 | 82.1396628 | 75.8049643 | 61.5026774 |
| 16:45:16 | 70.2189819 | 66.401158 | 84.1396628 | 75.8049643 | 61.5026774 |
| 16:45:17 | 71.2189819 | 66.401158 | 85.1396628 | 75.8049643 | 61.5026774 |
| 16:45:18 | 71.2189819 | 66.401158 | 85.1396628 | 75.8049643 | 61.5026774 |
| 16:45:19 | 71.2189819 | 66.401158 | 86.1396628 | 75.8049643 | 61.5026774 |
| 16:45:20 | 72.2189819 | 68.401158 | 86.1396628 | 73.8049643 | 62.5026774 |
| 16:45:21 | 73.2189819 | 69.401158 | 85.1396628 | 73.8049643 | 62.5026774 |
| 16:45:22 | 73.2189819 | 69.401158 | 84.1396628 | 72.8049643 | 62.5026774 |
| 16:45:23 | 74.2189819 | 69.401158 | 84.1396628 | 72.8049643 | 62.5026774 |
| 16:45:24 | 75.2189819 | 69.401158 | 78.1396628 | 72.8049643 | 62.5026774 |
| 16:45:25 | 76.2189819 | 69.401158 | 77.1396628 | 72.8049643 | 62.5026774 |
| 16:45:26 | 76.2189819 | 68.401158 | 77.1396628 | 72.8049643 | 62.5026774 |
| 16:45:27 | 77.2189819 | 68.401158 | 77.1396628 | 74.8049643 | 61.5026774 |
| 16:45:28 | 79.2189819 | 68.401158 | 77.1396628 | 74.8049643 | 61.5026774 |
| 16:45:29 | 83.2189819 | 68.401158 | 77.1396628 | 74.8049643 | 62.5026774 |
| 16:45:30 | 84.2189819 | 69.401158 | 77.1396628 | 73.8049643 | 60.5026774 |
| 16:45:31 | 86.2189819 | 70.401158 | 80.1396628 | 73.8049643 | 60.5026774 |
| 16:45:32 | 89.2189819 | 72.401158 | 84.1396628 | 73.8049643 | 60.5026774 |

|          |            |            |            |            |            |
|----------|------------|------------|------------|------------|------------|
| 16:45:33 | 90.2189819 | 72.401158  | 87.1396628 | 73.8049643 | 57.5026774 |
| 16:45:34 | 90.2189819 | 72.401158  | 88.1396628 | 73.8049643 | 57.5026774 |
| 16:45:35 | 90.2189819 | 72.401158  | 89.1396628 | 73.8049643 | 58.5026774 |
| 16:45:36 | 89.2189819 | 71.401158  | 90.1396628 | 72.8049643 | 59.5026774 |
| 16:45:37 | 89.2189819 | 70.401158  | 89.1396628 | 72.8049643 | 59.5026774 |
| 16:45:38 | 89.2189819 | 69.401158  | 89.1396628 | 70.8049643 | 59.5026774 |
| 16:45:39 | 80.2189819 | 69.401158  | 87.1396628 | 70.8049643 | 59.5026774 |
| 16:45:40 | 78.2189819 | 69.401158  | 86.1396628 | 70.8049643 | 62.5026774 |
| 16:45:41 | 72.2189819 | 69.401158  | 86.1396628 | 70.8049643 | 63.5026774 |
| 16:45:42 | 69.2189819 | 69.401158  | 85.1396628 | 70.8049643 | 63.5026774 |
| 16:45:43 | 69.2189819 | 69.401158  | 83.1396628 | 72.8049643 | 63.5026774 |
| 16:45:44 | 69.2189819 | 69.401158  | 81.1396628 | 74.8049643 | 63.5026774 |
| 16:45:45 | 69.2189819 | 69.401158  | 81.1396628 | 74.8049643 | 63.5026774 |
| 16:45:46 | 68.2189819 | 69.401158  | 79.1396628 | 75.8049643 | 64.5026774 |
| 16:45:47 | 68.2189819 | 70.401158  | 78.1396628 | 73.8049643 | 66.5026774 |
| 16:45:48 | 68.2189819 | 70.401158  | 78.1396628 | 72.8049643 | 70.5026774 |
| 16:45:49 | 69.2189819 | 70.401158  | 76.1396628 | 70.8049643 | 70.5026774 |
| 16:45:50 | 71.2189819 | 71.401158  | 74.1396628 | 70.8049643 | 71.5026774 |
| 16:45:51 | 71.2189819 | 73.401158  | 74.1396628 | 66.8049643 | 71.5026774 |
| 16:45:52 | 71.2189819 | 76.401158  | 72.1396628 | 66.8049643 | 69.5026774 |
| 16:45:53 | 72.2189819 | 81.401158  | 72.1396628 | 66.8049643 | 69.5026774 |
| 16:45:54 | 72.2189819 | 81.401158  | 72.1396628 | 66.8049643 | 69.5026774 |
| 16:45:55 | 71.2189819 | 81.401158  | 72.1396628 | 67.8049643 | 69.5026774 |
| 16:45:56 | 70.2189819 | 81.401158  | 72.1396628 | 67.8049643 | 69.5026774 |
| 16:45:57 | 69.2189819 | 81.401158  | 72.1396628 | 67.8049643 | 68.5026774 |
| 16:45:58 | 68.2189819 | 80.401158  | 72.1396628 | 67.8049643 | 68.5026774 |
| 16:45:59 | 66.2189819 | 80.401158  | 72.1396628 | 67.8049643 | 65.5026774 |
| 16:46:00 | 67.2189819 | 80.401158  | 73.1396628 | 68.8049643 | 66.5026774 |
| 16:46:01 | 67.2189819 | 79.401158  | 73.1396628 | 68.8049643 | 66.5026774 |
| 16:46:02 | 67.2189819 | 79.401158  | 73.1396628 | 68.8049643 | 66.5026774 |
| 16:46:03 | 67.2189819 | 79.401158  | 73.1396628 | 69.8049643 | 66.5026774 |
| 16:46:04 | 67.2189819 | 79.401158  | 73.1396628 | 69.8049643 | 69.5026774 |
| 16:46:05 | 67.2189819 | 79.401158  | 72.1396628 | 69.8049643 | 69.5026774 |
| 16:46:06 | 67.2189819 | 79.401158  | 72.1396628 | 69.8049643 | 67.5026774 |
| 16:46:07 | 67.2189819 | 79.401158  | 73.1396628 | 69.8049643 | 66.5026774 |
| 16:46:08 | 67.2189819 | 78.401158  | 71.1396628 | 69.8049643 | 66.5026774 |
| 16:46:09 | 67.2189819 | 78.401158  | 71.1396628 | 69.8049643 | 66.5026774 |
| 16:46:10 | 68.2189819 | 70.5       | 71.1396628 | 69.8049643 | 66.5026774 |
| 16:46:11 | 67.2189819 | 70.1       | 71.1396628 | 67.8049643 | 66.5026774 |
| 16:46:12 | 67.2189819 | 70.1       | 71.1396628 | 67.8049643 | 66.5026774 |
| 16:46:13 | 67.2189819 | 71.6426255 | 71.1396628 | 67.8049643 | 66.5026774 |
| 16:46:14 | 67.2189819 | 70.6       | 71.1396628 | 67.8049643 | 66.5026774 |
| 16:46:15 | 67.2189819 | 70.4       | 71.1396628 | 66.8049643 | 65.5026774 |
| 16:46:16 | 67.2189819 | 70.5       | 71.1396628 | 66.8049643 | 65.5026774 |
| 16:46:17 | 67.2189819 | 70.7       | 72.1396628 | 67.8049643 | 65.5026774 |

|          |            |           |            |            |            |
|----------|------------|-----------|------------|------------|------------|
| 16:46:18 | 67.2189819 | 70.8      | 72.1396628 | 68.8049643 | 65.5026774 |
| 16:46:19 | 67.2189819 | 70.8      | 71.1396628 | 71.8049643 | 65.5026774 |
| 16:46:20 | 65.2189819 | 70.3      | 71.1396628 | 72.8049643 | 66.5026774 |
| 16:46:21 | 65.2189819 | 70.4      | 70.1396628 | 77.8049643 | 66.5026774 |
| 16:46:22 | 65.2189819 | 70.4      | 70.1396628 | 77.8049643 | 66.5026774 |
| 16:46:23 | 65.2189819 | 84.401158 | 70.1396628 | 78.8049643 | 66.5026774 |
| 16:46:24 | 65.2189819 | 79.401158 | 70.1396628 | 79.8049643 | 65.5026774 |
| 16:46:25 | 65.2189819 | 78.401158 | 69.1396628 | 79.8049643 | 63.5026774 |
| 16:46:26 | 65.2189819 | 76.401158 | 69.1396628 | 81.8049643 | 62.5026774 |
| 16:46:27 | 68.2189819 | 76.401158 | 68.1396628 | 81.8049643 | 62.5026774 |
| 16:46:28 | 70.2189819 | 75.401158 | 68.1396628 | 81.8049643 | 62.5026774 |
| 16:46:29 | 72.2189819 | 76.401158 | 68.1396628 | 81.8049643 | 62.5026774 |
| 16:46:30 | 73.2189819 | 77.401158 | 68.1396628 | 82.8049643 | 65.5026774 |
| 16:46:31 | 74.2189819 | 77.401158 | 69.1396628 | 82.8049643 | 66.5026774 |
| 16:46:32 | 75.2189819 | 78.401158 | 69.1396628 | 82.8049643 | 66.5026774 |
| 16:46:33 | 75.2189819 | 78.401158 | 68.1396628 | 82.8049643 | 66.5026774 |
| 16:46:34 | 75.2189819 | 77.401158 | 68.1396628 | 83.8049643 | 66.5026774 |
| 16:46:35 | 73.2189819 | 76.401158 | 68.1396628 | 83.8049643 | 66.5026774 |
| 16:46:36 | 70.2189819 | 76.401158 | 68.1396628 | 83.8049643 | 67.5026774 |
| 16:46:37 | 68.2189819 | 76.401158 | 68.1396628 | 80.8049643 | 70.5026774 |
| 16:46:38 | 68.2189819 | 77.401158 | 69.1396628 | 79.8049643 | 70.5026774 |
| 16:46:39 | 68.2189819 | 77.401158 | 71.1396628 | 77.8049643 | 69.5026774 |
| 16:46:40 | 68.2189819 | 78.401158 | 73.1396628 | 74.8049643 | 61.5026774 |
| 16:46:41 | 67.2189819 | 78.401158 | 73.1396628 | 74.8049643 | 59.5026774 |
| 16:46:42 | 67.2189819 | 78.401158 | 72.1396628 | 74.8049643 | 59.5026774 |
| 16:46:43 | 67.2189819 | 78.401158 | 71.1396628 | 74.8049643 | 59.5026774 |
| 16:46:44 | 67.2189819 | 78.401158 | 71.1396628 | 74.8049643 | 61.5026774 |
| 16:46:45 | 67.2189819 | 78.401158 | 73.1396628 | 71.8049643 | 62.5026774 |
| 16:46:46 | 67.2189819 | 78.401158 | 75.1396628 | 71.8049643 | 63.5026774 |
| 16:46:47 | 67.2189819 | 78.401158 | 76.1396628 | 71.8049643 | 64.5026774 |
| 16:46:48 | 68.2189819 | 78.401158 | 77.1396628 | 68.8049643 | 65.5026774 |
| 16:46:49 | 69.2189819 | 79.401158 | 78.1396628 | 68.8049643 | 65.5026774 |
| 16:46:50 | 69.2189819 | 80.401158 | 77.1396628 | 68.8049643 | 65.5026774 |
| 16:46:51 | 69.2189819 | 81.401158 | 77.1396628 | 68.8049643 | 65.5026774 |
| 16:46:52 | 68.2189819 | 81.401158 | 77.1396628 | 69.8049643 | 65.5026774 |
| 16:46:53 | 67.2189819 | 81.401158 | 77.1396628 | 69.8049643 | 64.5026774 |
| 16:46:54 | 66.2189819 | 78.401158 | 77.1396628 | 69.8049643 | 64.5026774 |
| 16:46:55 | 66.2189819 | 78.401158 | 77.1396628 | 69.8049643 | 64.5026774 |
| 16:46:56 | 66.2189819 | 78.401158 | 77.1396628 | 68.8049643 | 66.5026774 |
| 16:46:57 | 66.2189819 | 78.401158 | 77.1396628 | 68.8049643 | 68.5026774 |
| 16:46:58 | 66.2189819 | 78.401158 | 78.1396628 | 68.8049643 | 68.5026774 |
| 16:46:59 | 67.2189819 | 78.401158 | 83.1396628 | 68.8049643 | 69.5026774 |
| 16:47:00 | 67.2189819 | 79.401158 | 84.1396628 | 68.8049643 | 69.5026774 |
| 16:47:01 | 67.2189819 | 79.401158 | 84.1396628 | 69.8049643 | 69.5026774 |
| 16:47:02 | 67.2189819 | 79.401158 | 84.1396628 | 69.8049643 | 69.5026774 |

|          |            |           |            |            |            |
|----------|------------|-----------|------------|------------|------------|
| 16:47:03 | 67.2189819 | 84.401158 | 84.1396628 | 70.8049643 | 70.5026774 |
| 16:47:04 | 66.2189819 | 88.401158 | 82.1396628 | 70.8049643 | 70.5026774 |
| 16:47:05 | 66.2189819 | 88.401158 | 74.1396628 | 72.8049643 | 70.5026774 |
| 16:47:06 | 66.2189819 | 88.401158 | 74.1396628 | 72.8049643 | 70.5026774 |
| 16:47:07 | 66.2189819 | 73.8      | 68.1396628 | 74.8049643 | 71.5026774 |
| 16:47:08 | 66.2189819 | 73.8      | 68.1396628 | 74.8049643 | 70.5026774 |
| 16:47:09 | 66.2189819 | 73.5      | 68.1396628 | 73.8049643 | 70.5026774 |
| 16:47:10 | 67.2189819 | 73.6      | 68.1396628 | 70.8049643 | 70.5026774 |
| 16:47:11 | 67.2189819 | 73.6      | 68.1396628 | 70.8049643 | 68.5026774 |
| 16:47:12 | 67.2189819 | 73.4      | 69.1396628 | 68.8049643 | 67.5026774 |
| 16:47:13 | 68.2189819 | 73.3      | 70.1396628 | 67.8049643 | 67.5026774 |
| 16:47:14 | 69.2189819 | 73.6      | 71.1396628 | 68.8049643 | 67.5026774 |
| 16:47:15 | 69.2189819 | 73.5      | 70.1396628 | 70.8049643 | 66.5026774 |
| 16:47:16 | 69.2189819 | 72.9      | 70.1396628 | 70.8049643 | 66.5026774 |
| 16:47:17 | 69.2189819 | 72.5      | 69.1396628 | 70.8049643 | 68.5026774 |
| 16:47:18 | 70.2189819 | 72.6      | 69.1396628 | 70.8049643 | 68.5026774 |
| 16:47:19 | 71.2189819 | 72.9      | 69.1396628 | 70.8049643 | 69.5026774 |
| 16:47:20 | 71.2189819 | 73.2      | 70.1396628 | 70.8049643 | 69.5026774 |
| 16:47:21 | 71.2189819 | 73.5      | 71.1396628 | 70.8049643 | 69.5026774 |
| 16:47:22 | 71.2189819 | 72.8      | 71.1396628 | 69.8049643 | 65.5026774 |
| 16:47:23 | 71.2189819 | 73        | 72.1396628 | 69.8049643 | 65.5026774 |
| 16:47:24 | 71.2189819 | 73        | 73.1396628 | 69.8049643 | 65.5026774 |
| 16:47:25 | 71.2189819 | 73.5      | 74.1396628 | 69.8049643 | 65.5026774 |
| 16:47:26 | 71.2189819 | 73.3      | 74.1396628 | 71.8049643 | 65.5026774 |
| 16:47:27 | 71.2189819 | 72.1      | 74.1396628 | 72.8049643 | 64.5026774 |
| 16:47:28 | 70.2189819 | 71.2      | 73.1396628 | 69.8049643 | 64.5026774 |
| 16:47:29 | 70.2189819 | 70.9      | 73.1396628 | 67.8049643 | 63.5026774 |
| 16:47:30 | 70.2189819 | 70.3      | 71.1396628 | 66.8049643 | 62.5026774 |
| 16:47:31 | 69.2189819 | 81.401158 | 69.1396628 | 65.8049643 | 62.5026774 |
| 16:47:32 | 68.2189819 | 79.401158 | 70.1396628 | 65.8049643 | 61.5026774 |
| 16:47:33 | 68.2189819 | 79.401158 | 70.1396628 | 65.8049643 | 61.5026774 |
| 16:47:34 | 68.2189819 | 80.401158 | 70.1396628 | 65.8049643 | 60.5026774 |
| 16:47:35 | 68.2189819 | 80.401158 | 70.1396628 | 65.8049643 | 60.5026774 |
| 16:47:36 | 68.2189819 | 80.401158 | 70.1396628 | 65.8049643 | 60.5026774 |
| 16:47:37 | 68.2189819 | 79.401158 | 70.1396628 | 65.8049643 | 60.5026774 |
| 16:47:38 | 68.2189819 | 78.401158 | 71.1396628 | 65.8049643 | 60.5026774 |
| 16:47:39 | 68.2189819 | 78.401158 | 70.1396628 | 64.8049643 | 61.5026774 |
| 16:47:40 | 69.2189819 | 78.401158 | 68.1396628 | 65.8049643 | 62.5026774 |
| 16:47:41 | 69.2189819 | 78.401158 | 69.1396628 | 66.8049643 | 62.5026774 |
| 16:47:42 | 73.2189819 | 76.401158 | 70.1396628 | 66.8049643 | 62.5026774 |
| 16:47:43 | 73.2189819 | 65.401158 | 71.1396628 | 66.8049643 | 62.5026774 |
| 16:47:44 | 73.2189819 | 64.401158 | 71.1396628 | 66.8049643 | 64.5026774 |
| 16:47:45 | 72.2189819 | 64.401158 | 75.1396628 | 66.8049643 | 65.5026774 |
| 16:47:46 | 72.2189819 | 64.401158 | 77.1396628 | 66.8049643 | 65.5026774 |
| 16:47:47 | 72.2189819 | 62.401158 | 77.1396628 | 67.8049643 | 67.5026774 |

|          |            |           |            |            |            |
|----------|------------|-----------|------------|------------|------------|
| 16:47:48 | 71.2189819 | 62.401158 | 75.1396628 | 67.8049643 | 68.5026774 |
| 16:47:49 | 70.2189819 | 61.401158 | 75.1396628 | 66.8049643 | 68.5026774 |
| 16:47:50 | 70.2189819 | 60.401158 | 75.1396628 | 66.8049643 | 68.5026774 |
| 16:47:51 | 70.2189819 | 60.401158 | 75.1396628 | 66.8049643 | 70.5026774 |
| 16:47:52 | 70.2189819 | 59.401158 | 76.1396628 | 66.8049643 | 67.5026774 |
| 16:47:53 | 70.2189819 | 63.401158 | 76.1396628 | 66.8049643 | 66.5026774 |
| 16:47:54 | 71.2189819 | 63.401158 | 77.1396628 | 65.8049643 | 66.5026774 |
| 16:47:55 | 71.2189819 | 60.401158 | 77.1396628 | 65.8049643 | 67.5026774 |
| 16:47:56 | 71.2189819 | 60.401158 | 78.1396628 | 65.8049643 | 68.5026774 |
| 16:47:57 | 71.2189819 | 64.401158 | 78.1396628 | 65.8049643 | 68.5026774 |
| 16:47:58 | 72.2189819 | 64.401158 | 77.1396628 | 65.8049643 | 67.5026774 |
| 16:47:59 | 73.2189819 | 71.401158 | 77.1396628 | 66.8049643 | 65.5026774 |
| 16:48:00 | 73.2189819 | 71.401158 | 77.1396628 | 66.8049643 | 65.5026774 |
| 16:48:01 | 73.2189819 | 74.401158 | 76.1396628 | 66.8049643 | 65.5026774 |
| 16:48:02 | 73.2189819 | 74.401158 | 76.1396628 | 64.8049643 | 64.5026774 |
| 16:48:03 | 72.2189819 | 74.401158 | 75.1396628 | 67.8049643 | 65.5026774 |
| 16:48:04 | 70.2189819 | 74.401158 | 75.1396628 | 68.8049643 | 67.5026774 |
| 16:48:05 | 68.2189819 | 74.401158 | 74.1396628 | 68.8049643 | 68.5026774 |
| 16:48:06 | 68.2189819 | 74.401158 | 74.1396628 | 68.8049643 | 68.5026774 |
| 16:48:07 | 67.2189819 | 73.401158 | 74.1396628 | 68.8049643 | 68.5026774 |
| 16:48:08 | 67.2189819 | 70.401158 | 74.1396628 | 69.8049643 | 68.5026774 |
| 16:48:09 | 68.2189819 | 70.401158 | 75.1396628 | 69.8049643 | 68.5026774 |
| 16:48:10 | 69.2189819 | 65.401158 | 75.1396628 | 69.8049643 | 68.5026774 |
| 16:48:11 | 68.2189819 | 63.401158 | 75.1396628 | 69.8049643 | 69.5026774 |
| 16:48:12 | 69.2189819 | 63.401158 | 75.1396628 | 69.8049643 | 72.5026774 |
| 16:48:13 | 70.2189819 | 63.401158 | 74.1396628 | 70.8049643 | 74.5026774 |
| 16:48:14 | 70.2189819 | 63.401158 | 73.1396628 | 70.8049643 | 75.5026774 |
| 16:48:15 | 69.2189819 | 65.401158 | 73.1396628 | 69.8049643 | 76.5026774 |
| 16:48:16 | 69.2189819 | 63.401158 | 74.1396628 | 66.8049643 | 76.5026774 |
| 16:48:17 | 69.2189819 | 62.401158 | 74.1396628 | 65.8049643 | 76.5026774 |
| 16:48:18 | 69.2189819 | 61.401158 | 74.1396628 | 65.8049643 | 75.5026774 |
| 16:48:19 | 68.2189819 | 61.401158 | 75.1396628 | 65.8049643 | 75.5026774 |
| 16:48:20 | 68.2189819 | 61.401158 | 75.1396628 | 65.8049643 | 76.5026774 |
| 16:48:21 | 68.2189819 | 61.401158 | 75.1396628 | 66.8049643 | 77.5026774 |
| 16:48:22 | 67.2189819 | 64.401158 | 74.1396628 | 64.8049643 | 77.5026774 |
| 16:48:23 | 67.2189819 | 64.401158 | 71.1396628 | 63.8049643 | 77.5026774 |
| 16:48:24 | 66.2189819 | 64.401158 | 71.1396628 | 63.8049643 | 77.5026774 |
| 16:48:25 | 67.2189819 | 64.401158 | 71.1396628 | 63.8049643 | 77.5026774 |
| 16:48:26 | 67.2189819 | 65.401158 | 72.1396628 | 63.8049643 | 77.5026774 |
| 16:48:27 | 67.2189819 | 66.401158 | 73.1396628 | 63.8049643 | 77.5026774 |
| 16:48:28 | 67.2189819 | 66.401158 | 75.1396628 | 63.8049643 | 77.5026774 |
| 16:48:29 | 68.2189819 | 67.401158 | 76.1396628 | 63.8049643 | 76.5026774 |
| 16:48:30 | 69.2189819 | 67.401158 | 75.1396628 | 63.8049643 | 76.5026774 |
| 16:48:31 | 69.2189819 | 67.401158 | 75.1396628 | 62.8049643 | 76.5026774 |
| 16:48:32 | 69.2189819 | 67.401158 | 75.1396628 | 62.8049643 | 76.5026774 |



|          |            |           |            |            |            |
|----------|------------|-----------|------------|------------|------------|
| 16:48:33 | 69.2189819 | 66.401158 | 75.1396628 | 62.8049643 | 74.5026774 |
| 16:48:34 | 70.2189819 | 66.401158 | 77.1396628 | 62.8049643 | 74.5026774 |
| 16:48:35 | 69.2189819 | 67.401158 | 77.1396628 | 62.8049643 | 74.5026774 |
| 16:48:36 | 69.2189819 | 68.401158 | 77.1396628 | 62.8049643 | 71.5026774 |
| 16:48:37 | 69.2189819 | 68.401158 | 77.1396628 | 62.8049643 | 71.5026774 |
| 16:48:38 | 68.2189819 | 69.401158 | 73.1396628 | 63.8049643 | 71.5026774 |
| 16:48:39 | 68.2189819 | 70.401158 | 73.1396628 | 64.8049643 | 71.5026774 |
| 16:48:40 | 67.2189819 | 69.401158 | 72.1396628 | 64.8049643 | 71.5026774 |
| 16:48:41 | 67.2189819 | 68.401158 | 71.1396628 | 65.8049643 | 71.5026774 |
| 16:48:42 | 68.2189819 | 68.401158 | 71.1396628 | 66.8049643 | 71.5026774 |
| 16:48:43 | 67.2189819 | 66.401158 | 71.1396628 | 66.8049643 | 71.5026774 |
| 16:48:44 | 67.2189819 | 66.401158 | 71.1396628 | 73.8049643 | 71.5026774 |
| 16:48:45 | 68.2189819 | 67.401158 | 70.1396628 | 73.8049643 | 71.5026774 |
| 16:48:46 | 67.2189819 | 67.401158 | 72.1396628 | 76.8049643 | 71.5026774 |
| 16:48:47 | 67.2189819 | 70.401158 | 72.1396628 | 79.8049643 | 71.5026774 |
| 16:48:48 | 67.2189819 | 71.401158 | 70.1396628 | 79.8049643 | 70.5026774 |
| 16:48:49 | 68.2189819 | 71.401158 | 69.1396628 | 79.8049643 | 70.5026774 |
| 16:48:50 | 68.2189819 | 71.401158 | 69.1396628 | 84.8049643 | 71.5026774 |
| 16:48:51 | 69.2189819 | 67.401158 | 69.1396628 | 84.8049643 | 71.5026774 |
| 16:48:52 | 69.2189819 | 66.401158 | 70.1396628 | 84.8049643 | 71.5026774 |
| 16:48:53 | 70.2189819 | 66.401158 | 72.1396628 | 81.8049643 | 71.5026774 |
| 16:48:54 | 70.2189819 | 66.401158 | 72.1396628 | 81.8049643 | 71.5026774 |
| 16:48:55 | 71.2189819 | 70.401158 | 74.1396628 | 75.8049643 | 72.5026774 |
| 16:48:56 | 70.2189819 | 70.401158 | 73.1396628 | 68.8049643 | 72.5026774 |
| 16:48:57 | 70.2189819 | 74.401158 | 73.1396628 | 68.8049643 | 71.5026774 |
| 16:48:58 | 70.2189819 | 75.401158 | 74.1396628 | 66.8049643 | 69.5026774 |
| 16:48:59 | 69.2189819 | 74.401158 | 73.1396628 | 65.8049643 | 69.5026774 |
| 16:49:00 | 68.2189819 | 73.401158 | 75.1396628 | 65.8049643 | 69.5026774 |
| 16:49:01 | 68.2189819 | 73.401158 | 75.1396628 | 65.8049643 | 69.5026774 |
| 16:49:02 | 69.2189819 | 72.401158 | 75.1396628 | 65.8049643 | 69.5026774 |
| 16:49:03 | 69.2189819 | 73.401158 | 79.1396628 | 65.8049643 | 69.5026774 |
| 16:49:04 | 70.2189819 | 74.401158 | 79.1396628 | 65.8049643 | 69.5026774 |
| 16:49:05 | 70.2189819 | 74.401158 | 79.1396628 | 66.8049643 | 69.5026774 |
| 16:49:06 | 70.2189819 | 77.401158 | 77.1396628 | 66.8049643 | 69.5026774 |
| 16:49:07 | 70.2189819 | 78.401158 | 77.1396628 | 66.8049643 | 70.5026774 |
| 16:49:08 | 70.2189819 | 79.401158 | 76.1396628 | 67.8049643 | 70.5026774 |
| 16:49:09 | 70.2189819 | 79.401158 | 76.1396628 | 67.8049643 | 70.5026774 |
| 16:49:10 | 70.2189819 | 79.401158 | 76.1396628 | 67.8049643 | 70.5026774 |
| 16:49:11 | 68.2189819 | 79.401158 | 76.1396628 | 68.8049643 | 71.5026774 |
| 16:49:12 | 68.2189819 | 80.401158 | 76.1396628 | 68.8049643 | 71.5026774 |
| 16:49:13 | 65.2189819 | 80.401158 | 78.1396628 | 65.8049643 | 71.5026774 |
| 16:49:14 | 65.2189819 | 78.401158 | 79.1396628 | 65.8049643 | 71.5026774 |
| 16:49:15 | 66.2189819 | 75.401158 | 79.1396628 | 65.8049643 | 71.5026774 |
| 16:49:16 | 66.2189819 | 70.401158 | 81.1396628 | 65.8049643 | 70.5026774 |
| 16:49:17 | 66.2189819 | 70.401158 | 81.1396628 | 65.8049643 | 70.5026774 |

|          |            |           |            |            |            |
|----------|------------|-----------|------------|------------|------------|
| 16:49:18 | 66.2189819 | 67.401158 | 80.1396628 | 65.8049643 | 70.5026774 |
| 16:49:19 | 68.2189819 | 66.401158 | 74.1396628 | 65.8049643 | 69.5026774 |
| 16:49:20 | 68.2189819 | 65.401158 | 74.1396628 | 65.8049643 | 69.5026774 |
| 16:49:21 | 68.2189819 | 66.401158 | 74.1396628 | 64.8049643 | 69.5026774 |
| 16:49:22 | 69.2189819 | 66.401158 | 71.1396628 | 64.8049643 | 69.5026774 |
| 16:49:23 | 69.2189819 | 66.401158 | 70.1396628 | 64.8049643 | 71.5026774 |
| 16:49:24 | 69.2189819 | 66.401158 | 68.1396628 | 64.8049643 | 71.5026774 |
| 16:49:25 | 69.2189819 | 68.401158 | 68.1396628 | 64.8049643 | 69.5026774 |
| 16:49:26 | 68.2189819 | 67.401158 | 68.1396628 | 65.8049643 | 69.5026774 |
| 16:49:27 | 68.2189819 | 65.401158 | 68.1396628 | 66.8049643 | 69.5026774 |
| 16:49:28 | 67.2189819 | 64.401158 | 68.1396628 | 64.8049643 | 69.5026774 |
| 16:49:29 | 67.2189819 | 64.401158 | 68.1396628 | 64.8049643 | 68.5026774 |
| 16:49:30 | 67.2189819 | 63.401158 | 68.1396628 | 65.8049643 | 66.5026774 |
| 16:49:31 | 67.2189819 | 63.401158 | 68.1396628 | 65.8049643 | 66.5026774 |
| 16:49:32 | 67.2189819 | 63.401158 | 67.1396628 | 65.8049643 | 67.5026774 |
| 16:49:33 | 67.2189819 | 66.401158 | 67.1396628 | 65.8049643 | 67.5026774 |
| 16:49:34 | 68.2189819 | 67.401158 | 64.1396628 | 65.8049643 | 68.5026774 |
| 16:49:35 | 68.2189819 | 67.401158 | 64.1396628 | 66.8049643 | 67.5026774 |
| 16:49:36 | 69.2189819 | 69.401158 | 64.1396628 | 65.8049643 | 67.5026774 |
| 16:49:37 | 69.2189819 | 69.401158 | 65.1396628 | 65.8049643 | 67.5026774 |
| 16:49:38 | 69.2189819 | 70.401158 | 65.1396628 | 65.8049643 | 66.5026774 |
| 16:49:39 | 69.2189819 | 70.401158 | 63.1396628 | 65.8049643 | 66.5026774 |
| 16:49:40 | 70.2189819 | 69.401158 | 63.1396628 | 63.8049643 | 67.5026774 |
| 16:49:41 | 70.2189819 | 67.401158 | 63.1396628 | 64.8049643 | 67.5026774 |
| 16:49:42 | 70.2189819 | 67.401158 | 63.1396628 | 64.8049643 | 67.5026774 |
| 16:49:43 | 71.2189819 | 66.401158 | 63.1396628 | 63.8049643 | 67.5026774 |
| 16:49:44 | 73.2189819 | 67.401158 | 63.1396628 | 63.8049643 | 68.5026774 |
| 16:49:45 | 73.2189819 | 68.401158 | 63.1396628 | 63.8049643 | 68.5026774 |
| 16:49:46 | 74.2189819 | 70.401158 | 61.1396628 | 63.8049643 | 68.5026774 |
| 16:49:47 | 74.2189819 | 72.401158 | 61.1396628 | 63.8049643 | 68.5026774 |
| 16:49:48 | 74.2189819 | 72.401158 | 61.1396628 | 63.8049643 | 68.5026774 |
| 16:49:49 | 73.2189819 | 76.401158 | 60.1396628 | 67.8049643 | 73.5026774 |
| 16:49:50 | 73.2189819 | 76.401158 | 60.1396628 | 67.8049643 | 74.5026774 |
| 16:49:51 | 72.2189819 | 78.401158 | 61.1396628 | 67.8049643 | 75.5026774 |
| 16:49:52 | 72.2189819 | 80.401158 | 61.1396628 | 69.8049643 | 75.5026774 |
| 16:49:53 | 71.2189819 | 80.401158 | 64.1396628 | 70.8049643 | 74.5026774 |
| 16:49:54 | 71.2189819 | 81.401158 | 66.1396628 | 70.8049643 | 70.5026774 |
| 16:49:55 | 71.2189819 | 81.401158 | 67.1396628 | 72.8049643 | 70.5026774 |
| 16:49:56 | 71.2189819 | 82.401158 | 68.1396628 | 72.8049643 | 70.5026774 |
| 16:49:57 | 71.2189819 | 82.401158 | 68.1396628 | 75.8049643 | 71.5026774 |
| 16:49:58 | 71.2189819 | 83.401158 | 68.1396628 | 75.8049643 | 71.5026774 |
| 16:49:59 | 71.2189819 | 83.401158 | 69.1396628 | 76.8049643 | 73.5026774 |
| 16:50:00 | 71.2189819 | 87.401158 | 69.1396628 | 76.8049643 | 74.5026774 |
| 16:50:01 | 71.2189819 | 89.401158 | 69.1396628 | 78.8049643 | 74.5026774 |
| 16:50:02 | 70.2189819 | 89.401158 | 68.1396628 | 80.8049643 | 74.5026774 |

|          |            |           |            |            |            |
|----------|------------|-----------|------------|------------|------------|
| 16:50:03 | 70.2189819 | 74.6      | 67.1396628 | 80.8049643 | 75.5026774 |
| 16:50:04 | 69.2189819 | 74.4      | 66.1396628 | 82.8049643 | 75.5026774 |
| 16:50:05 | 69.2189819 | 74.7      | 66.1396628 | 84.8049643 | 74.5026774 |
| 16:50:06 | 68.2189819 | 74.7      | 66.1396628 | 84.8049643 | 73.5026774 |
| 16:50:07 | 68.2189819 | 75        | 68.1396628 | 84.8049643 | 73.5026774 |
| 16:50:08 | 68.2189819 | 74.7      | 69.1396628 | 84.8049643 | 73.5026774 |
| 16:50:09 | 68.2189819 | 74.7      | 69.1396628 | 85.8049643 | 73.5026774 |
| 16:50:10 | 69.2189819 | 76.401158 | 70.1396628 | 84.8049643 | 75.5026774 |
| 16:50:11 | 69.2189819 | 69.401158 | 69.1396628 | 84.8049643 | 75.5026774 |
| 16:50:12 | 68.2189819 | 68.401158 | 69.1396628 | 81.8049643 | 75.5026774 |
| 16:50:13 | 68.2189819 | 68.401158 | 69.1396628 | 81.8049643 | 75.5026774 |
| 16:50:14 | 68.2189819 | 68.401158 | 69.1396628 | 81.8049643 | 75.5026774 |
| 16:50:15 | 68.2189819 | 68.401158 | 69.1396628 | 82.8049643 | 75.5026774 |
| 16:50:16 | 67.2189819 | 68.401158 | 68.1396628 | 82.8049643 | 71.5026774 |
| 16:50:17 | 67.2189819 | 68.401158 | 68.1396628 | 82.8049643 | 71.5026774 |
| 16:50:18 | 67.2189819 | 66.401158 | 68.1396628 | 82.8049643 | 71.5026774 |
| 16:50:19 | 68.2189819 | 64.401158 | 68.1396628 | 82.8049643 | 71.5026774 |
| 16:50:20 | 68.2189819 | 64.401158 | 68.1396628 | 80.8049643 | 71.5026774 |
| 16:50:21 | 68.2189819 | 64.401158 | 69.1396628 | 80.8049643 | 71.5026774 |
| 16:50:22 | 68.2189819 | 68.401158 | 69.1396628 | 80.8049643 | 71.5026774 |
| 16:50:23 | 68.2189819 | 68.401158 | 69.1396628 | 74.8049643 | 71.5026774 |
| 16:50:24 | 69.2189819 | 78.401158 | 68.1396628 | 71.8049643 | 73.5026774 |
| 16:50:25 | 70.2189819 | 84.401158 | 68.1396628 | 71.8049643 | 73.5026774 |
| 16:50:26 | 71.2189819 | 87.401158 | 68.1396628 | 69.8049643 | 72.5026774 |
| 16:50:27 | 74.2189819 | 73.3      | 68.1396628 | 70.8049643 | 72.5026774 |
| 16:50:28 | 74.2189819 | 73.1      | 70.1396628 | 69.8049643 | 72.5026774 |
| 16:50:29 | 74.2189819 | 73        | 70.1396628 | 67.8049643 | 72.5026774 |
| 16:50:30 | 74.2189819 | 73.6      | 76.1396628 | 66.8049643 | 73.5026774 |
| 16:50:31 | 75.2189819 | 74.2      | 77.1396628 | 65.8049643 | 75.5026774 |
| 16:50:32 | 77.2189819 | 74.7      | 78.1396628 | 65.8049643 | 75.5026774 |
| 16:50:33 | 77.2189819 | 75.3      | 80.1396628 | 66.8049643 | 79.5026774 |
| 16:50:34 | 77.2189819 | 75        | 80.1396628 | 66.8049643 | 80.5026774 |
| 16:50:35 | 77.2189819 | 77.401158 | 79.1396628 | 66.8049643 | 83.5026774 |
| 16:50:36 | 75.2189819 | 77.401158 | 74.1396628 | 66.8049643 | 83.5026774 |
| 16:50:37 | 74.2189819 | 70.401158 | 72.1396628 | 67.8049643 | 84.5026774 |
| 16:50:38 | 74.2189819 | 70.401158 | 72.1396628 | 67.8049643 | 84.5026774 |
| 16:50:39 | 74.2189819 | 70.401158 | 73.1396628 | 67.8049643 | 83.5026774 |
| 16:50:40 | 74.2189819 | 68.401158 | 75.1396628 | 68.8049643 | 82.5026774 |
| 16:50:41 | 73.2189819 | 67.401158 | 76.1396628 | 69.8049643 | 80.5026774 |
| 16:50:42 | 73.2189819 | 67.401158 | 76.1396628 | 69.8049643 | 80.5026774 |
| 16:50:43 | 74.2189819 | 64.401158 | 77.1396628 | 70.8049643 | 68.5026774 |
| 16:50:44 | 74.2189819 | 62.401158 | 77.1396628 | 72.8049643 | 67.5026774 |
| 16:50:45 | 74.2189819 | 62.401158 | 77.1396628 | 72.8049643 | 67.5026774 |
| 16:50:46 | 74.2189819 | 61.401158 | 76.1396628 | 74.8049643 | 70.5026774 |
| 16:50:47 | 74.2189819 | 61.401158 | 76.1396628 | 75.8049643 | 70.5026774 |

|          |            |           |            |            |            |
|----------|------------|-----------|------------|------------|------------|
| 16:50:48 | 73.2189819 | 62.401158 | 77.1396628 | 75.8049643 | 70.5026774 |
| 16:50:49 | 72.2189819 | 61.401158 | 77.1396628 | 75.8049643 | 69.5026774 |
| 16:50:50 | 70.2189819 | 59.401158 | 78.1396628 | 78.8049643 | 70.5026774 |
| 16:50:51 | 70.2189819 | 59.401158 | 78.1396628 | 80.8049643 | 69.5026774 |
| 16:50:52 | 70.2189819 | 56.401158 | 77.1396628 | 81.8049643 | 69.5026774 |
| 16:50:53 | 70.2189819 | 56.401158 | 76.1396628 | 81.8049643 | 67.5026774 |
| 16:50:54 | 70.2189819 | 56.401158 | 74.1396628 | 80.8049643 | 66.5026774 |
| 16:50:55 | 69.2189819 | 59.401158 | 72.1396628 | 80.8049643 | 66.5026774 |
| 16:50:56 | 70.2189819 | 59.401158 | 71.1396628 | 80.8049643 | 65.5026774 |
| 16:50:57 | 71.2189819 | 60.401158 | 71.1396628 | 80.8049643 | 65.5026774 |
| 16:50:58 | 71.2189819 | 60.401158 | 71.1396628 | 80.8049643 | 65.5026774 |
| 16:50:59 | 71.2189819 | 60.401158 | 72.1396628 | 80.8049643 | 65.5026774 |
| 16:51:00 | 70.2189819 | 60.401158 | 72.1396628 | 80.8049643 | 65.5026774 |
| 16:51:01 | 71.2189819 | 60.401158 | 73.1396628 | 81.8049643 | 64.5026774 |
| 16:51:02 | 71.2189819 | 63.401158 | 73.1396628 | 81.8049643 | 62.5026774 |
| 16:51:03 | 71.2189819 | 64.401158 | 75.1396628 | 81.8049643 | 62.5026774 |
| 16:51:04 | 71.2189819 | 64.401158 | 77.1396628 | 83.8049643 | 60.5026774 |
| 16:51:05 | 71.2189819 | 66.401158 | 79.1396628 | 84.8049643 | 61.5026774 |
| 16:51:06 | 71.2189819 | 67.401158 | 79.1396628 | 84.8049643 | 61.5026774 |
| 16:51:07 | 71.2189819 | 68.401158 | 79.1396628 | 73.2       | 61.5026774 |
| 16:51:08 | 70.2189819 | 68.401158 | 74.1396628 | 72.6       | 61.5026774 |
| 16:51:09 | 70.2189819 | 68.401158 | 73.1396628 | 72.8       | 62.5026774 |
| 16:51:10 | 70.2189819 | 68.401158 | 73.1396628 | 72.3       | 61.5026774 |
| 16:51:11 | 70.2189819 | 69.401158 | 73.1396628 | 72.6       | 61.5026774 |
| 16:51:12 | 70.2189819 | 70.401158 | 74.1396628 | 72.9       | 62.5026774 |
| 16:51:13 | 70.2189819 | 71.401158 | 74.1396628 | 83.8049643 | 63.5026774 |
| 16:51:14 | 69.2189819 | 71.401158 | 75.1396628 | 77.8049643 | 63.5026774 |
| 16:51:15 | 70.2189819 | 70.401158 | 75.1396628 | 77.8049643 | 63.5026774 |
| 16:51:16 | 70.2189819 | 70.401158 | 75.1396628 | 76.8049643 | 66.5026774 |
| 16:51:17 | 70.2189819 | 70.401158 | 75.1396628 | 76.8049643 | 66.5026774 |
| 16:51:18 | 70.2189819 | 70.401158 | 74.1396628 | 73.8049643 | 67.5026774 |
| 16:51:19 | 71.2189819 | 71.401158 | 70.1396628 | 72.8049643 | 66.5026774 |
| 16:51:20 | 71.2189819 | 71.401158 | 70.1396628 | 66.8049643 | 65.5026774 |
| 16:51:21 | 70.2189819 | 70.401158 | 71.1396628 | 66.8049643 | 64.5026774 |
| 16:51:22 | 70.2189819 | 68.401158 | 72.1396628 | 65.8049643 | 64.5026774 |
| 16:51:23 | 70.2189819 | 67.401158 | 72.1396628 | 65.8049643 | 64.5026774 |
| 16:51:24 | 69.2189819 | 66.401158 | 72.1396628 | 65.8049643 | 62.5026774 |
| 16:51:25 | 68.2189819 | 66.401158 | 72.1396628 | 65.8049643 | 59.5026774 |
| 16:51:26 | 68.2189819 | 66.401158 | 72.1396628 | 65.8049643 | 59.5026774 |
| 16:51:27 | 68.2189819 | 67.401158 | 72.1396628 | 64.8049643 | 59.5026774 |
| 16:51:28 | 67.2189819 | 67.401158 | 72.1396628 | 64.8049643 | 59.5026774 |
| 16:51:29 | 67.2189819 | 67.401158 | 72.1396628 | 64.8049643 | 59.5026774 |
| 16:51:30 | 69.2189819 | 69.401158 | 72.1396628 | 64.8049643 | 59.5026774 |
| 16:51:31 | 71.2189819 | 69.401158 | 72.1396628 | 63.8049643 | 58.5026774 |
| 16:51:32 | 72.2189819 | 69.401158 | 68.1396628 | 63.8049643 | 56.5026774 |

|          |            |           |            |            |            |
|----------|------------|-----------|------------|------------|------------|
| 16:51:33 | 72.2189819 | 68.401158 | 67.1396628 | 63.8049643 | 56.5026774 |
| 16:51:34 | 72.2189819 | 67.401158 | 68.1396628 | 63.8049643 | 56.5026774 |
| 16:51:35 | 73.2189819 | 67.401158 | 68.1396628 | 63.8049643 | 56.5026774 |
| 16:51:36 | 73.2189819 | 67.401158 | 68.1396628 | 63.8049643 | 56.5026774 |
| 16:51:37 | 70.2189819 | 68.401158 | 68.1396628 | 61.8049643 | 62.5026774 |
| 16:51:38 | 69.2189819 | 69.401158 | 68.1396628 | 61.8049643 | 61.5026774 |
| 16:51:39 | 68.2189819 | 69.401158 | 68.1396628 | 62.8049643 | 61.5026774 |
| 16:51:40 | 68.2189819 | 69.401158 | 68.1396628 | 62.8049643 | 60.5026774 |
| 16:51:41 | 69.2189819 | 69.401158 | 68.1396628 | 62.8049643 | 60.5026774 |
| 16:51:42 | 69.2189819 | 71.401158 | 68.1396628 | 61.8049643 | 57.5026774 |
| 16:51:43 | 70.2189819 | 71.401158 | 71.1396628 | 59.8049643 | 58.5026774 |
| 16:51:44 | 70.2189819 | 73.401158 | 74.1396628 | 59.8049643 | 58.5026774 |
| 16:51:45 | 69.2189819 | 73.401158 | 75.1396628 | 59.8049643 | 60.5026774 |
| 16:51:46 | 70.2189819 | 73.401158 | 75.1396628 | 59.8049643 | 60.5026774 |
| 16:51:47 | 69.2189819 | 73.401158 | 75.1396628 | 61.8049643 | 60.5026774 |
| 16:51:48 | 69.2189819 | 73.401158 | 74.1396628 | 61.8049643 | 60.5026774 |
| 16:51:49 | 68.2189819 | 74.401158 | 75.1396628 | 60.8049643 | 60.5026774 |
| 16:51:50 | 68.2189819 | 74.401158 | 76.1396628 | 60.8049643 | 60.5026774 |
| 16:51:51 | 69.2189819 | 75.401158 | 76.1396628 | 60.8049643 | 60.5026774 |
| 16:51:52 | 69.2189819 | 75.401158 | 77.1396628 | 60.8049643 | 60.5026774 |
| 16:51:53 | 70.2189819 | 75.401158 | 76.1396628 | 60.8049643 | 60.5026774 |
| 16:51:54 | 70.2189819 | 76.401158 | 74.1396628 | 60.8049643 | 61.5026774 |
| 16:51:55 | 70.2189819 | 78.401158 | 74.1396628 | 60.8049643 | 61.5026774 |
| 16:51:56 | 70.2189819 | 80.401158 | 72.1396628 | 60.8049643 | 61.5026774 |
| 16:51:57 | 70.2189819 | 80.401158 | 72.1396628 | 60.8049643 | 61.5026774 |
| 16:51:58 | 70.2189819 | 80.401158 | 73.1396628 | 60.8049643 | 62.5026774 |
| 16:51:59 | 70.2189819 | 80.401158 | 73.1396628 | 60.8049643 | 63.5026774 |
| 16:52:00 | 70.2189819 | 80.401158 | 73.1396628 | 60.8049643 | 65.5026774 |
| 16:52:01 | 72.2189819 | 80.401158 | 73.1396628 | 62.8049643 | 65.5026774 |
| 16:52:02 | 72.2189819 | 81.401158 | 69.1396628 | 65.8049643 | 69.5026774 |
| 16:52:03 | 72.2189819 | 81.401158 | 69.1396628 | 66.8049643 | 69.5026774 |
| 16:52:04 | 70.2189819 | 80.401158 | 69.1396628 | 67.8049643 | 65.5026774 |
| 16:52:05 | 70.2189819 | 80.401158 | 70.1396628 | 67.8049643 | 65.5026774 |
| 16:52:06 | 71.2189819 | 80.401158 | 70.1396628 | 68.8049643 | 62.5026774 |
| 16:52:07 | 71.2189819 | 81.401158 | 69.1396628 | 68.8049643 | 62.5026774 |

| Person 3   | Person 8   | Person 11  | Person 4  | Person 2   | Activity |
|------------|------------|------------|-----------|------------|----------|
| 56.9685834 | 64.6160148 | 73.8592815 |           |            | BEFORE1  |
| 56.9685834 | 64.6160148 | 73.8592815 |           |            | BEFORE2  |
| 58.9685834 | 64.6160148 | 72.8592815 |           |            | BEFORE3  |
| 58.9685834 | 64.6160148 | 73.8592815 |           | 72.6223778 | BEFORE4  |
| 57.9685834 | 62.6160148 | 73.8592815 |           | 72.6223778 | BEFORE5  |
| 57.9685834 | 62.6160148 | 73.8592815 |           | 72.6223778 | BEFORE6  |
| 58.9685834 | 61.6160148 | 75.8592815 |           | 72.6223778 | BEFORE7  |
| 59.9685834 | 60.6160148 | 79.8592815 |           | 72.6223778 | BEFORE8  |
| 60.9685834 | 60.6160148 | 79.8592815 |           | 71.6223778 | BEFORE9  |
| 60.9685834 | 60.6160148 | 76.8592815 |           | 71.6223778 | BEFORE10 |
| 61.9685834 | 60.6160148 | 75.8592815 |           | 71.6223778 | BEFORE11 |
| 61.9685834 | 60.6160148 | 73.8592815 |           | 71.6223778 | BEFORE12 |
| 62.9685834 | 61.6160148 | 73.8592815 |           | 71.6223778 | BEFORE13 |
| 62.9685834 | 61.6160148 | 73.8592815 |           | 72.6223778 | BEFORE14 |
| 60.9685834 | 61.6160148 | 73.8592815 |           | 72.6223778 | BEFORE15 |
| 60.9685834 | 61.6160148 | 68.8592815 |           | 72.6223778 | BEFORE16 |
| 60.9685834 | 62.6160148 | 61.8592815 |           | 73.6223778 | BEFORE17 |
| 60.9685834 | 64.6160148 | 61.8592815 |           | 74.6223778 | BEFORE18 |
| 60.9685834 | 64.6160148 | 62.8592815 |           | 76.6223778 | BEFORE19 |
| 60.9685834 | 65.6160148 | 62.8592815 |           | 76.6223778 | BEFORE20 |
| 60.9685834 | 65.6160148 | 65.8592815 |           | 76.6223778 | BEFORE21 |
| 60.9685834 | 66.6160148 | 64.8592815 |           | 76.6223778 | BEFORE22 |
| 60.9685834 | 67.6160148 | 64.8592815 |           | 76.6223778 | BEFORE23 |
| 60.9685834 | 67.6160148 | 63.8592815 |           | 76.6223778 | BEFORE24 |
| 66.9685834 | 68.6160148 | 63.8592815 |           | 74.6223778 | BEFORE25 |
| 66.9685834 | 68.6160148 | 62.8592815 |           | 74.6223778 | BEFORE26 |
| 67.9685834 | 68.6160148 | 61.8592815 |           | 74.6223778 | BEFORE27 |
| 67.9685834 | 68.6160148 | 61.8592815 |           | 74.6223778 | BEFORE28 |
| 67.9685834 | 68.6160148 | 61.8592815 |           | 74.6223778 | BEFORE29 |
| 67.9685834 | 68.6160148 | 62.8592815 |           | 74.6223778 | BEFORE30 |
| 67.9685834 | 68.6160148 | 68.8592815 |           | 74.6223778 | BEFORE31 |
| 67.9685834 | 68.6160148 | 68.8592815 | 83.866298 | 75.6223778 | BEFORE32 |
| 67.9685834 | 69.6160148 | 68.8592815 | 83.866298 | 75.6223778 | BEFORE33 |
| 68.9685834 | 69.6160148 | 68.8592815 | 82.866298 | 74.6223778 | BEFORE34 |
| 68.9685834 | 70.6160148 | 68.8592815 | 82.866298 | 74.6223778 | BEFORE35 |
| 70.9685834 | 70.6160148 | 67.8592815 | 81.866298 | 74.6223778 | BEFORE36 |
| 68.9685834 | 70.6160148 | 66.8592815 | 78.866298 | 74.6223778 | BEFORE37 |
| 68.9685834 | 70.6160148 | 66.8592815 | 74.866298 | 74.6223778 | BEFORE38 |
| 66.9685834 | 71.6160148 | 66.8592815 | 74.866298 | 74.6223778 | BEFORE39 |
| 66.9685834 | 72.6160148 | 66.8592815 | 73.866298 | 74.6223778 | BEFORE40 |
| 66.9685834 | 72.6160148 | 67.8592815 | 72.866298 | 75.6223778 | BEFORE41 |
| 66.9685834 | 76.6160148 | 67.8592815 | 72.866298 | 75.6223778 | BEFORE42 |
| 68.9685834 | 81.6160148 | 68.8592815 | 71.866298 | 76.6223778 | BEFORE43 |

|            |            |            |           |            |          |
|------------|------------|------------|-----------|------------|----------|
| 68.9685834 | 80.6160148 | 68.8592815 | 71.866298 | 76.6223778 | BEFORE44 |
| 68.9685834 | 80.6160148 | 69.8592815 | 71.866298 | 75.6223778 | BEFORE45 |
| 68.9685834 | 80.6160148 | 68.8592815 | 70.866298 | 75.6223778 | BEFORE46 |
| 68.9685834 | 78.6160148 | 67.8592815 | 70.866298 | 75.6223778 | BEFORE47 |
| 68.9685834 | 78.6160148 | 67.8592815 | 70.866298 | 75.6223778 | BEFORE48 |
| 67.9685834 | 78.6160148 | 67.8592815 | 69.866298 | 74.6223778 | BEFORE49 |
| 67.9685834 | 77.6160148 | 66.8592815 | 67.866298 | 74.6223778 | BEFORE50 |
| 67.9685834 | 75.6160148 | 66.8592815 | 67.866298 | 74.6223778 | BEFORE51 |
| 67.9685834 | 75.6160148 | 65.8592815 | 67.866298 | 74.6223778 | BEFORE52 |
| 67.9685834 | 74.6160148 | 65.8592815 | 67.866298 | 74.6223778 | BEFORE53 |
| 67.9685834 | 74.6160148 | 69.8592815 | 67.866298 | 72.6223778 | BEFORE54 |
| 67.9685834 | 72.6160148 | 71.8592815 | 67.866298 | 72.6223778 | BEFORE55 |
| 67.9685834 | 72.6160148 | 71.8592815 | 67.866298 | 72.6223778 | BEFORE56 |
| 69.9685834 | 72.6160148 | 67.8592815 | 79.866298 | 72.6223778 | BEFORE57 |
| 69.9685834 | 72.6160148 | 67.8592815 | 79.866298 | 71.6223778 | BEFORE58 |
| 71.9685834 | 72.6160148 | 64.8592815 | 79.866298 | 70.6223778 | BEFORE59 |
| 71.9685834 | 72.6160148 | 63.8592815 | 76.866298 | 70.6223778 | BEFORE60 |
| 70.9685834 | 72.6160148 | 63.8592815 | 70.866298 | 69.6223778 | BEFORE61 |
| 70.9685834 | 69.6160148 | 63.8592815 | 69.866298 | 69.6223778 | BEFORE62 |
| 70.9685834 | 69.6160148 | 63.8592815 | 69.866298 | 70.6223778 | BEFORE63 |
| 71.9685834 | 70.6160148 | 64.8592815 | 70.866298 | 73.6223778 | BEFORE64 |
| 72.9685834 | 70.6160148 | 64.8592815 | 70.866298 | 73.6223778 | BEFORE65 |
| 74.9685834 | 71.6160148 | 64.8592815 | 72.866298 | 75.6223778 | BEFORE66 |
| 75.9685834 | 71.6160148 | 70.8592815 | 74.866298 | 75.6223778 | BEFORE67 |
| 75.9685834 | 70.6160148 | 73.8592815 | 74.866298 | 74.6223778 | BEFORE68 |
| 75.9685834 | 68.6160148 | 73.8592815 | 73.866298 | 73.6223778 | BEFORE69 |
| 75.9685834 | 68.6160148 | 73.8592815 | 72.866298 | 71.6223778 | BEFORE70 |
| 75.9685834 | 65.6160148 | 71.8592815 | 69.866298 | 71.6223778 | BEFORE71 |
| 75.9685834 | 67.6160148 | 67.8592815 | 70.866298 | 71.6223778 | BEFORE72 |
| 75.9685834 | 67.6160148 | 67.8592815 | 70.866298 | 71.6223778 | BEFORE73 |
| 74.9685834 | 66.6160148 | 67.8592815 | 70.866298 | 71.6223778 | BEFORE74 |
| 74.9685834 | 66.6160148 | 68.8592815 | 70.866298 | 71.6223778 | BEFORE75 |
| 73.9685834 | 66.6160148 | 72.8592815 | 70.866298 | 71.6223778 | BEFORE76 |
| 71.9685834 | 66.6160148 | 77.8592815 | 70.866298 | 71.6223778 | BEFORE77 |
| 70.9685834 | 65.6160148 | 77.8592815 | 70.866298 | 70.6223778 | BEFORE78 |
| 70.9685834 | 65.6160148 | 76.8592815 | 70.866298 | 70.6223778 | BEFORE79 |
| 70.9685834 | 65.6160148 | 76.8592815 | 70.866298 | 69.6223778 | BEFORE80 |
| 69.9685834 | 65.6160148 | 73.8592815 | 69.866298 | 71.6223778 | BEFORE81 |
| 70.9685834 | 65.6160148 | 71.8592815 | 69.866298 | 71.6223778 | BEFORE82 |
| 72.9685834 | 65.6160148 | 71.8592815 | 69.866298 | 72.6223778 | BEFORE83 |
| 71.9685834 | 65.6160148 | 71.8592815 | 70.866298 | 71.6223778 | BEFORE84 |
| 71.9685834 | 65.6160148 | 74.8592815 | 70.866298 | 71.6223778 | BEFORE85 |
| 70.9685834 | 65.6160148 | 78.8592815 | 70.866298 | 71.6223778 | BEFORE86 |
| 70.9685834 | 65.6160148 | 78.8592815 | 73.866298 | 70.6223778 | BEFORE87 |
| 70.9685834 | 66.6160148 | 78.8592815 | 73.866298 | 71.6223778 | BEFORE88 |

|            |            |            |           |            |           |
|------------|------------|------------|-----------|------------|-----------|
| 70.9685834 | 66.6160148 | 81.8592815 | 73.866298 | 72.6223778 | BEFORE89  |
| 69.9685834 | 66.6160148 | 82.8592815 | 75.866298 | 72.6223778 | BEFORE90  |
| 69.9685834 | 66.6160148 | 82.8592815 | 75.866298 | 75.6223778 | BEFORE91  |
| 68.9685834 | 66.6160148 | 82.8592815 | 75.866298 | 76.6223778 | BEFORE92  |
| 68.9685834 | 66.6160148 | 81.8592815 | 77.866298 | 76.6223778 | BEFORE93  |
| 68.9685834 | 72.6160148 | 80.8592815 | 77.866298 | 74.6223778 | BEFORE94  |
| 68.9685834 | 72.6160148 | 79.8592815 | 77.866298 | 72.6223778 | BEFORE95  |
| 68.9685834 | 74.6160148 | 76.8592815 | 77.866298 | 72.6223778 | BEFORE96  |
| 68.9685834 | 74.6160148 | 76.8592815 | 77.866298 | 71.6223778 | BEFORE97  |
| 68.9685834 | 74.6160148 | 75.8592815 | 77.866298 | 71.6223778 | BEFORE98  |
| 68.9685834 | 76.6160148 | 76.8592815 | 77.866298 | 71.6223778 | BEFORE99  |
| 67.9685834 | 78.6160148 | 75.8592815 | 77.866298 | 70.6223778 | BEFORE100 |
| 66.9685834 | 77.6160148 | 75.8592815 | 77.866298 | 71.6223778 | BEFORE101 |
| 66.9685834 | 78.6160148 | 75.8592815 | 77.866298 | 71.6223778 | BEFORE102 |
| 65.9685834 | 78.6160148 | 74.8592815 | 87.866298 | 72.6223778 | BEFORE103 |
| 65.9685834 | 78.6160148 | 75.8592815 | 87.866298 | 73.6223778 | BEFORE104 |
| 65.9685834 | 78.6160148 | 76.8592815 | 79.3      | 73.6223778 | BEFORE105 |
| 65.9685834 | 78.6160148 | 76.8592815 | 79.3      | 72.6223778 | BEFORE106 |
| 65.9685834 | 78.6160148 | 76.8592815 | 77.4      | 72.6223778 | BEFORE107 |
| 64.9685834 | 78.6160148 | 77.8592815 | 77        | 72.6223778 | BEFORE108 |
| 65.9685834 | 77.6160148 | 77.8592815 | 76        | 73.6223778 | BEFORE109 |
| 65.9685834 | 77.6160148 | 77.8592815 | 76        | 73.6223778 | BEFORE110 |
| 66.9685834 | 77.6160148 | 77.8592815 | 75.431718 | 73.6223778 | BEFORE111 |
| 66.9685834 | 76.6160148 | 77.8592815 | 75.5      | 73.6223778 | BEFORE112 |
| 66.9685834 | 76.6160148 | 76.8592815 | 80.866298 | 73.6223778 | BEFORE113 |
| 66.9685834 | 76.6160148 | 76.8592815 | 80.866298 | 75.6223778 | BEFORE114 |
| 66.9685834 | 76.6160148 | 75.8592815 | 77.866298 | 75.6223778 | BEFORE115 |
| 65.9685834 | 76.6160148 | 75.8592815 | 76.866298 | 76.6223778 | BEFORE116 |
| 66.9685834 | 76.6160148 | 72.8592815 | 75.866298 | 75.6223778 | BEFORE117 |
| 66.9685834 | 74.6160148 | 72.8592815 | 74.866298 | 75.6223778 | BEFORE118 |
| 66.9685834 | 74.6160148 | 72.8592815 | 74.866298 | 75.6223778 | BEFORE119 |
| 65.9685834 | 74.6160148 | 73.8592815 | 72.866298 | 75.6223778 | BEFORE120 |
| 65.9685834 | 74.6160148 | 68.8592815 | 70.866298 | 75.6223778 | BEFORE121 |
| 65.9685834 | 73.6160148 | 68.8592815 | 69.866298 | 76.6223778 | BEFORE122 |
| 64.9685834 | 73.6160148 | 68.8592815 | 69.866298 | 76.6223778 | BEFORE123 |
| 64.9685834 | 73.6160148 | 67.8592815 | 69.866298 | 76.6223778 | BEFORE124 |
| 64.9685834 | 72.6160148 | 67.8592815 | 68.866298 | 76.6223778 | BEFORE125 |
| 64.9685834 | 72.6160148 | 67.8592815 | 67.866298 | 76.6223778 | BEFORE126 |
| 64.9685834 | 73.6160148 | 67.8592815 | 67.866298 | 77.6223778 | BEFORE127 |
| 64.9685834 | 73.6160148 | 68.8592815 | 67.866298 | 77.6223778 | BEFORE128 |
| 65.9685834 | 78.6160148 | 70.8592815 | 67.866298 | 76.6223778 | BEFORE129 |
| 65.9685834 | 78.6160148 | 71.8592815 | 66.866298 | 76.6223778 | BEFORE130 |
| 66.9685834 | 77.6160148 | 65.8592815 | 64.866298 | 76.6223778 | BEFORE131 |
| 66.9685834 | 78.6160148 | 62.8592815 | 63.866298 | 76.6223778 | BEFORE132 |
| 66.9685834 | 78.6160148 | 62.8592815 | 63.866298 | 76.6223778 | BEFORE133 |



|            |            |            |           |            |           |
|------------|------------|------------|-----------|------------|-----------|
| 66.9685834 | 79.6160148 | 61.8592815 | 62.866298 | 76.6223778 | BEFORE134 |
| 66.9685834 | 79.6160148 | 61.8592815 | 64.866298 | 75.6223778 | BEFORE135 |
| 67.9685834 | 79.6160148 | 62.8592815 | 65.866298 | 74.6223778 | BEFORE136 |
| 67.9685834 | 79.6160148 | 63.8592815 | 66.866298 | 74.6223778 | BEFORE137 |
| 68.9685834 | 79.6160148 | 63.8592815 | 66.866298 | 74.6223778 | BEFORE138 |
| 68.9685834 | 80.6160148 | 65.8592815 | 67.866298 | 74.6223778 | BEFORE139 |
| 69.9685834 | 80.6160148 | 66.8592815 | 68.866298 | 74.6223778 | BEFORE140 |
| 69.9685834 | 80.6160148 | 67.8592815 | 68.866298 | 73.6223778 | BEFORE141 |
| 69.9685834 | 80.6160148 | 68.8592815 | 67.866298 | 74.6223778 | BEFORE142 |
| 70.9685834 | 80.6160148 | 66.8592815 | 67.866298 | 74.6223778 | BEFORE143 |
| 70.9685834 | 80.6160148 | 66.8592815 | 67.866298 | 74.6223778 | BEFORE144 |
| 71.9685834 | 81.6160148 | 66.8592815 | 67.866298 | 72.6223778 | BEFORE145 |
| 71.9685834 | 81.6160148 | 66.8592815 | 70.866298 | 71.6223778 | BEFORE146 |
| 70.9685834 | 81.6160148 | 66.8592815 | 72.866298 | 71.6223778 | BEFORE147 |
| 70.9685834 | 82.6160148 | 67.8592815 | 73.866298 | 69.6223778 | BEFORE148 |
| 70.9685834 | 82.6160148 | 67.8592815 | 73.866298 | 70.6223778 | BEFORE149 |
| 70.9685834 | 80.6160148 | 68.8592815 | 75.866298 | 71.6223778 | BEFORE150 |
| 70.9685834 | 80.6160148 | 68.8592815 | 78.866298 | 72.6223778 | BEFORE151 |
| 70.9685834 | 73.6160148 | 67.8592815 | 79.866298 | 72.6223778 | BEFORE152 |
| 70.9685834 | 71.6160148 | 67.8592815 | 79.866298 | 73.6223778 | BEFORE153 |
| 69.9685834 | 70.6160148 | 67.8592815 | 79.866298 | 73.6223778 | BEFORE154 |
| 69.9685834 | 70.6160148 | 67.8592815 | 79.866298 | 74.6223778 | BEFORE155 |
| 70.9685834 | 70.6160148 | 67.8592815 | 80.866298 | 74.6223778 | BEFORE156 |
| 72.9685834 | 70.6160148 | 67.8592815 | 80.866298 | 74.6223778 | BEFORE157 |
| 73.9685834 | 70.6160148 | 67.8592815 | 79.866298 | 73.6223778 | BEFORE158 |
| 73.9685834 | 66.6160148 | 67.8592815 | 80.866298 | 73.6223778 | BEFORE159 |
| 74.9685834 | 66.6160148 | 67.8592815 | 80.866298 | 76.6223778 | BEFORE160 |
| 74.9685834 | 64.6160148 | 67.8592815 | 80.866298 | 76.6223778 | BEFORE161 |
| 75.9685834 | 64.6160148 | 67.8592815 | 83.866298 | 76.6223778 | BEFORE162 |
| 75.9685834 | 66.6160148 | 67.8592815 | 86.866298 | 75.6223778 | BEFORE163 |
| 75.9685834 | 66.6160148 | 67.8592815 | 86.866298 | 75.6223778 | BEFORE164 |
| 82.9685834 | 68.6160148 | 67.8592815 | 87.866298 | 75.6223778 | BEFORE165 |
| 82.9685834 | 68.6160148 | 69.8592815 | 87.866298 | 75.6223778 | BEFORE166 |
| 76.9685834 | 67.6160148 | 69.8592815 | 73        | 75.6223778 | BEFORE167 |
| 70.9685834 | 64.6160148 | 70.8592815 | 72.1      | 75.6223778 | BEFORE168 |
| 68.9685834 | 63.6160148 | 71.8592815 | 72        | 75.6223778 | BEFORE169 |
| 68.9685834 | 63.6160148 | 69.8592815 | 71.6      | 75.6223778 | BEFORE170 |
| 68.9685834 | 63.6160148 | 69.8592815 | 71.8      | 75.6223778 | BEFORE171 |
| 68.9685834 | 62.6160148 | 69.8592815 | 85.866298 | 75.6223778 | BEFORE172 |
| 68.9685834 | 61.6160148 | 67.8592815 | 83.866298 | 75.6223778 | BEFORE173 |
| 68.9685834 | 61.6160148 | 66.8592815 | 83.866298 | 75.6223778 | BEFORE174 |
| 68.9685834 | 61.6160148 | 64.8592815 | 82.866298 | 74.6223778 | BEFORE175 |
| 68.9685834 | 62.6160148 | 64.8592815 | 82.866298 | 73.6223778 | BEFORE176 |
| 68.9685834 | 62.6160148 | 63.8592815 | 82.866298 | 73.6223778 | BEFORE177 |
| 68.9685834 | 60.6160148 | 64.8592815 | 82.866298 | 73.6223778 | BEFORE178 |

|            |            |            |           |            |           |
|------------|------------|------------|-----------|------------|-----------|
| 68.9685834 | 60.6160148 | 66.8592815 | 84.866298 | 73.6223778 | BEFORE179 |
| 67.9685834 | 60.6160148 | 66.8592815 | 84.866298 | 73.6223778 | BEFORE180 |
| 66.9685834 | 61.6160148 | 69.8592815 | 85.866298 | 73.6223778 | BEFORE181 |
| 65.9685834 | 62.6160148 | 69.8592815 | 83.866298 | 73.6223778 | BEFORE182 |
| 65.9685834 | 64.6160148 | 69.8592815 | 80.866298 | 73.6223778 | BEFORE183 |
| 65.9685834 | 66.6160148 | 69.8592815 | 78.866298 | 73.6223778 | BEFORE184 |
| 65.9685834 | 66.6160148 | 69.8592815 | 77.866298 | 73.6223778 | BEFORE185 |
| 65.9685834 | 66.6160148 | 71.8592815 | 77.866298 | 73.6223778 | BEFORE186 |
| 66.9685834 | 66.6160148 | 71.8592815 | 77.866298 | 72.6223778 | BEFORE187 |
| 67.9685834 | 66.6160148 | 70.8592815 | 77.866298 | 72.6223778 | BEFORE188 |
| 66.9685834 | 67.6160148 | 70.8592815 | 77.866298 | 72.6223778 | BEFORE189 |
| 66.9685834 | 68.6160148 | 71.8592815 | 77.866298 | 72.6223778 | BEFORE190 |
| 66.9685834 | 68.6160148 | 71.8592815 | 77.866298 | 72.6223778 | BEFORE191 |
| 66.9685834 | 68.6160148 | 72.8592815 | 79.866298 | 72.6223778 | BEFORE192 |
| 66.9685834 | 69.6160148 | 72.8592815 | 80.866298 | 72.6223778 | BEFORE193 |
| 66.9685834 | 69.6160148 | 71.8592815 | 80.866298 | 72.6223778 | BEFORE194 |
| 66.9685834 | 69.6160148 | 71.8592815 | 81.866298 | 72.6223778 | BEFORE195 |
| 67.9685834 | 69.6160148 | 71.8592815 | 79.866298 | 72.6223778 | BEFORE196 |
| 67.9685834 | 70.6160148 | 71.8592815 | 78.866298 | 72.6223778 | BEFORE197 |
| 67.9685834 | 70.6160148 | 72.8592815 | 78.866298 | 71.6223778 | BEFORE198 |
| 67.9685834 | 70.6160148 | 74.8592815 | 76.866298 | 71.6223778 | BEFORE199 |
| 66.9685834 | 70.6160148 | 74.8592815 | 75.866298 | 71.6223778 | BEFORE200 |
| 66.9685834 | 70.6160148 | 74.8592815 | 75.866298 | 72.6223778 | BEFORE201 |
| 66.9685834 | 70.6160148 | 74.8592815 | 74.866298 | 73.6223778 | BEFORE202 |
| 66.9685834 | 70.6160148 | 74.8592815 | 73.866298 | 73.6223778 | BEFORE203 |
| 66.9685834 | 70.6160148 | 74.8592815 | 71.866298 | 73.6223778 | BEFORE204 |
| 62.9685834 | 72.6160148 | 77.8592815 | 71.866298 | 72.6223778 | BEFORE205 |
| 62.9685834 | 72.6160148 | 78.8592815 | 70.866298 | 74.6223778 | BEFORE206 |
| 62.9685834 | 79.6160148 | 78.8592815 | 69.866298 | 75.6223778 | BEFORE207 |
| 62.9685834 | 82.6160148 | 78.8592815 | 68.866298 | 75.6223778 | BEFORE208 |
| 79.9685834 | 83.6160148 | 78.8592815 | 69.866298 | 76.6223778 | BEFORE209 |
| 84.9685834 | 84.6160148 | 78.8592815 | 69.866298 | 76.6223778 | BEFORE210 |
| 85.9685834 | 84.6160148 | 78.8592815 | 69.866298 | 77.6223778 | BEFORE211 |
| 85.9685834 | 84.6160148 | 80.8592815 | 69.866298 | 77.6223778 | BEFORE212 |
| 85.9685834 | 82.6160148 | 80.8592815 | 68.866298 | 77.6223778 | BEFORE213 |
| 85.9685834 | 75.6160148 | 81.8592815 | 68.866298 | 75.6223778 | BEFORE214 |
| 85.9685834 | 72.6160148 | 81.8592815 | 67.866298 | 75.6223778 | BEFORE215 |
| 85.9685834 | 71.6160148 | 73.8592815 | 66.866298 | 75.6223778 | BEFORE216 |
| 85.9685834 | 71.6160148 | 73.8592815 | 66.866298 | 75.6223778 | BEFORE217 |
| 85.9685834 | 71.6160148 | 73.8592815 | 66.866298 | 75.6223778 | BEFORE218 |
| 85.9685834 | 72.6160148 | 67.8592815 | 66.866298 | 75.6223778 | BEFORE219 |
| 85.9685834 | 71.6160148 | 66.8592815 | 66.866298 | 75.6223778 | BEFORE220 |
| 84.9685834 | 71.6160148 | 66.8592815 | 65.866298 | 74.6223778 | BEFORE221 |
| 84.9685834 | 69.6160148 | 66.8592815 | 65.866298 | 74.6223778 | BEFORE222 |
| 86.9685834 | 69.6160148 | 65.8592815 | 64.866298 | 73.6223778 | BEFORE223 |

|            |            |            |           |            |           |
|------------|------------|------------|-----------|------------|-----------|
| 86.9685834 | 69.6160148 | 66.8592815 | 64.866298 | 73.6223778 | BEFORE224 |
| 86.9685834 | 68.6160148 | 67.8592815 | 67.866298 | 73.6223778 | BEFORE225 |
| 86.9685834 | 68.6160148 | 68.8592815 | 75.866298 | 73.6223778 | BEFORE226 |
| 86.9685834 | 71.6160148 | 69.8592815 | 75.866298 | 73.6223778 | BEFORE227 |
| 86.9685834 | 71.6160148 | 70.8592815 | 76.866298 | 73.6223778 | BEFORE228 |
| 85.9685834 | 75.6160148 | 70.8592815 | 75.866298 | 72.6223778 | BEFORE229 |
| 75.9685834 | 75.6160148 | 70.8592815 | 75.866298 | 71.6223778 | BEFORE230 |
| 72.9685834 | 76.6160148 | 70.8592815 | 75.866298 | 71.6223778 | BEFORE231 |
| 72.9685834 | 76.6160148 | 69.8592815 | 75.866298 | 71.6223778 | BEFORE232 |
| 69.9685834 | 76.6160148 | 69.8592815 | 75.866298 | 68.6223778 | BEFORE233 |
| 69.9685834 | 76.6160148 | 69.8592815 | 74.866298 | 71.6223778 | BEFORE234 |
| 68.9685834 | 77.6160148 | 69.8592815 | 74.866298 | 77.6223778 | BEFORE235 |
| 68.9685834 | 77.6160148 | 69.8592815 | 73.866298 | 79.6223778 | BEFORE236 |
| 68.9685834 | 77.6160148 | 69.8592815 | 73.866298 | 79.6223778 | BEFORE237 |
| 68.9685834 | 77.6160148 | 69.8592815 | 71.866298 | 80.6223778 | BEFORE238 |
| 68.9685834 | 77.6160148 | 70.8592815 | 70.866298 | 80.6223778 | BEFORE239 |
| 68.9685834 | 77.6160148 | 74.8592815 | 70.866298 | 80.6223778 | BEFORE240 |
| 68.9685834 | 78.6160148 | 79.8592815 | 69.866298 | 80.6223778 | minute1   |
| 67.9685834 | 78.6160148 | 79.8592815 | 69.866298 | 80.6223778 | minute2   |
| 66.9685834 | 78.6160148 | 80.8592815 | 69.866298 | 80.6223778 | minute3   |
| 67.9685834 | 76.6160148 | 80.8592815 | 70.866298 | 80.6223778 | minute4   |
| 67.9685834 | 76.6160148 | 81.8592815 | 71.866298 | 81.6223778 | minute5   |
| 67.9685834 | 75.6160148 | 81.8592815 | 71.866298 | 81.6223778 | minute6   |
| 67.9685834 | 75.6160148 | 81.8592815 | 71.866298 | 81.6223778 | minute7   |
| 67.9685834 | 75.6160148 | 81.8592815 | 71.866298 | 81.6223778 | minute8   |
| 67.9685834 | 75.6160148 | 81.8592815 | 69.866298 | 82.6223778 | minute9   |
| 67.9685834 | 75.6160148 | 78.8592815 | 69.866298 | 82.6223778 | minute10  |
| 67.9685834 | 75.6160148 | 78.8592815 | 69.866298 | 82.6223778 | minute11  |
| 67.9685834 | 74.6160148 | 77.8592815 | 69.866298 | 82.6223778 | minute12  |
| 68.9685834 | 74.6160148 | 76.8592815 | 70.866298 | 80.6223778 | minute13  |
| 68.9685834 | 74.6160148 | 74.8592815 | 69.866298 | 77.6223778 | minute14  |
| 69.9685834 | 74.6160148 | 74.8592815 | 69.866298 | 75.6223778 | minute15  |
| 69.9685834 | 74.6160148 | 73.8592815 | 69.866298 | 75.6223778 | minute16  |
| 69.9685834 | 73.6160148 | 72.8592815 | 69.866298 | 75.6223778 | minute17  |
| 69.9685834 | 73.6160148 | 72.8592815 | 69.866298 | 75.6223778 | minute18  |
| 69.9685834 | 73.6160148 | 71.8592815 | 69.866298 | 75.6223778 | minute19  |
| 71.9685834 | 73.6160148 | 70.8592815 | 69.866298 | 75.6223778 | minute20  |
| 71.9685834 | 72.6160148 | 70.8592815 | 70.866298 | 74.6223778 | minute21  |
| 72.9685834 | 72.6160148 | 70.8592815 | 71.866298 | 75.6223778 | minute22  |
| 72.9685834 | 72.6160148 | 70.8592815 | 68.866298 | 74.6223778 | minute23  |
| 73.9685834 | 73.6160148 | 71.8592815 | 68.866298 | 74.6223778 | minute24  |
| 73.9685834 | 73.6160148 | 71.8592815 | 68.866298 | 74.6223778 | minute25  |
| 73.9685834 | 74.6160148 | 71.8592815 | 66.866298 | 74.6223778 | minute26  |
| 73.9685834 | 74.6160148 | 72.8592815 | 66.866298 | 74.6223778 | minute27  |
| 73.9685834 | 74.6160148 | 72.8592815 | 66.866298 | 74.6223778 | minute28  |

|            |            |            |           |            |          |
|------------|------------|------------|-----------|------------|----------|
| 72.9685834 | 76.6160148 | 72.8592815 | 66.866298 | 74.6223778 | minute29 |
| 73.9685834 | 76.6160148 | 71.8592815 | 65.866298 | 74.6223778 | minute30 |
| 74.9685834 | 76.6160148 | 71.8592815 | 64.866298 | 74.6223778 | minute31 |
| 74.9685834 | 76.6160148 | 71.8592815 | 64.866298 | 74.6223778 | minute32 |
| 74.9685834 | 78.6160148 | 71.8592815 | 64.866298 | 74.6223778 | minute33 |
| 75.9685834 | 78.6160148 | 71.8592815 | 67.866298 | 74.6223778 | minute34 |
| 78.9685834 | 78.6160148 | 72.8592815 | 67.866298 | 74.6223778 | minute35 |
| 80.9685834 | 75.6160148 | 72.8592815 | 67.866298 | 74.6223778 | minute36 |
| 80.9685834 | 75.6160148 | 74.8592815 | 67.866298 | 75.6223778 | minute37 |
| 80.9685834 | 75.6160148 | 75.8592815 | 66.866298 | 76.6223778 | minute38 |
| 76.9685834 | 74.6160148 | 75.8592815 | 65.866298 | 76.6223778 | minute39 |
| 76.9685834 | 73.6160148 | 75.8592815 | 62.866298 | 76.6223778 | minute40 |
| 80.9685834 | 73.6160148 | 76.8592815 | 61.866298 | 77.6223778 | minute41 |
| 80.9685834 | 73.6160148 | 77.8592815 | 61.866298 | 78.6223778 | minute42 |
| 78.9685834 | 73.6160148 | 75.8592815 | 61.866298 | 78.6223778 | minute43 |
| 74.9685834 | 72.6160148 | 74.8592815 | 60.866298 | 78.6223778 | minute44 |
| 73.9685834 | 72.6160148 | 75.8592815 | 60.866298 | 78.6223778 | minute45 |
| 73.9685834 | 70.6160148 | 75.8592815 | 61.866298 | 78.6223778 | minute46 |
| 73.9685834 | 70.6160148 | 74.8592815 | 64.866298 | 76.6223778 | minute47 |
| 72.9685834 | 71.6160148 | 71.8592815 | 64.866298 | 76.6223778 | minute48 |
| 71.9685834 | 71.6160148 | 69.8592815 | 64.866298 | 76.6223778 | minute49 |
| 71.9685834 | 72.6160148 | 69.8592815 | 64.866298 | 77.6223778 | minute50 |
| 70.9685834 | 73.6160148 | 69.8592815 | 64.866298 | 77.6223778 | minute51 |
| 69.9685834 | 73.6160148 | 69.8592815 | 64.866298 | 77.6223778 | minute52 |
| 69.9685834 | 72.6160148 | 69.8592815 | 64.866298 | 79.6223778 | minute53 |
| 69.9685834 | 72.6160148 | 69.8592815 | 69.866298 | 79.6223778 | minute54 |
| 69.9685834 | 72.6160148 | 69.8592815 | 70.866298 | 78.6223778 | minute55 |
| 71.9685834 | 72.6160148 | 69.8592815 | 70.866298 | 76.6223778 | minute56 |
| 75.9685834 | 72.6160148 | 68.8592815 | 68.866298 | 76.6223778 | minute57 |
| 77.9685834 | 72.6160148 | 68.8592815 | 68.866298 | 75.6223778 | minute58 |
| 77.9685834 | 72.6160148 | 68.8592815 | 67.866298 | 75.6223778 | minute59 |
| 77.9685834 | 72.6160148 | 71.8592815 | 67.866298 | 75.6223778 | minute60 |
| 77.9685834 | 72.6160148 | 76.8592815 | 67.866298 | 74.6223778 | Activity |
| 77.9685834 | 72.6160148 | 76.8592815 | 67.866298 | 74.6223778 | Activity |
| 77.9685834 | 74.6160148 | 82.8592815 | 67.866298 | 74.6223778 | Activity |
| 75.9685834 | 74.6160148 | 82.8592815 | 67.866298 | 74.6223778 | Activity |
| 74.9685834 | 74.6160148 | 84.8592815 | 66.866298 | 74.6223778 | Activity |
| 74.9685834 | 72.6160148 | 84.8592815 | 66.866298 | 74.6223778 | Activity |
| 75.9685834 | 72.6160148 | 84.8592815 | 67.866298 | 74.6223778 | Activity |
| 75.9685834 | 72.6160148 | 84.8592815 | 67.866298 | 74.6223778 | Activity |
| 76.9685834 | 72.6160148 | 84.8592815 | 67.866298 | 74.6223778 | Activity |
| 76.9685834 | 72.6160148 | 86.8592815 | 67.866298 | 74.6223778 | Activity |
| 77.9685834 | 73.6160148 | 88.8592815 | 67.866298 | 74.6223778 | Activity |
| 78.9685834 | 73.6160148 | 88.8592815 | 67.866298 | 74.6223778 | Activity |
| 79.9685834 | 73.6160148 | 88.8592815 | 67.866298 | 74.6223778 | Activity |

|            |            |            |           |            |          |
|------------|------------|------------|-----------|------------|----------|
| 80.9685834 | 71.6160148 | 88.8592815 | 67.866298 | 73.6223778 | Activity |
| 80.9685834 | 71.6160148 | 88.8592815 | 68.866298 | 74.6223778 | Activity |
| 80.9685834 | 71.6160148 | 88.8592815 | 68.866298 | 74.6223778 | Activity |
| 80.9685834 | 69.6160148 | 88.8592815 | 69.866298 | 74.6223778 | Activity |
| 80.9685834 | 69.6160148 | 88.8592815 | 71.866298 | 74.6223778 | Activity |
| 81.9685834 | 68.6160148 | 88.8592815 | 84.866298 | 74.6223778 | Activity |
| 82.9685834 | 68.6160148 | 87.8592815 | 84.866298 | 74.6223778 | Activity |
| 82.9685834 | 66.6160148 | 87.8592815 | 89.866298 | 74.6223778 | Activity |
| 82.9685834 | 65.6160148 | 89.8592815 | 89.866298 | 74.6223778 | Activity |
| 77.9685834 | 65.6160148 | 89.8592815 | 89.866298 | 74.6223778 | Activity |
| 76.9685834 | 65.6160148 | 89.8592815 | 85.866298 | 74.6223778 | Activity |
| 75.9685834 | 65.6160148 | 78.9       | 85.866298 | 74.6223778 | Activity |
| 75.9685834 | 65.6160148 | 95.8592815 | 85.866298 | 74.6223778 | Activity |
| 75.9685834 | 64.6160148 | 77.6598327 | 85.866298 | 74.6223778 | Activity |
| 72.9685834 | 64.6160148 | 92.8592815 | 85.866298 | 73.6223778 | Activity |
| 72.9685834 | 64.6160148 | 91.8592815 | 84.866298 | 74.6223778 | Activity |
| 73.9685834 | 65.6160148 | 91.8592815 | 84.866298 | 74.6223778 | Activity |
| 73.9685834 | 65.6160148 | 91.8592815 | 82.866298 | 76.6223778 | Activity |
| 73.9685834 | 65.6160148 | 91.8592815 | 81.866298 | 76.6223778 | Activity |
| 72.9685834 | 65.6160148 | 91.8592815 | 80.866298 | 76.6223778 | Activity |
| 72.9685834 | 65.6160148 | 91.8592815 | 80.866298 | 76.6223778 | Activity |
| 72.9685834 | 65.6160148 | 78.8       | 80.866298 | 78.6223778 | Activity |
| 72.9685834 | 64.6160148 | 92.8592815 | 79.866298 | 78.6223778 | Activity |
| 72.9685834 | 64.6160148 | 92.8592815 | 78.866298 | 76.6223778 | Activity |
| 72.9685834 | 64.6160148 | 89.8592815 | 77.866298 | 76.6223778 | Activity |
| 72.9685834 | 63.6160148 | 88.8592815 | 77.866298 | 76.6223778 | Activity |
| 72.9685834 | 62.6160148 | 88.8592815 | 78.866298 | 76.6223778 | Activity |
| 72.9685834 | 62.6160148 | 88.8592815 | 78.866298 | 77.6223778 | Activity |
| 71.9685834 | 62.6160148 | 88.8592815 | 81.866298 | 78.6223778 | Activity |
| 71.9685834 | 62.6160148 | 88.8592815 | 84.866298 | 78.6223778 | Activity |
| 73.9685834 | 72.6160148 | 90.8592815 | 86.866298 | 78.6223778 | Activity |
| 74.9685834 | 76.6160148 | 89.8592815 | 86.866298 | 79.6223778 | Activity |
| 74.9685834 | 76.6160148 | 89.8592815 | 87.866298 | 79.6223778 | minute1  |
| 74.9685834 | 75.6160148 | 87.8592815 | 88.866298 | 80.6223778 | minute2  |
| 75.9685834 | 73.6160148 | 84.8592815 | 88.866298 | 80.6223778 | minute3  |
| 75.9685834 | 73.6160148 | 83.8592815 | 88.866298 | 80.6223778 | minute4  |
| 77.9685834 | 75.6160148 | 81.8592815 | 88.866298 | 79.6223778 | minute5  |
| 77.9685834 | 75.6160148 | 81.8592815 | 88.866298 | 79.6223778 | minute6  |
| 77.9685834 | 76.6160148 | 83.8592815 | 89.866298 | 80.6223778 | minute7  |
| 78.9685834 | 76.6160148 | 83.8592815 | 90.866298 | 80.6223778 | minute8  |
| 78.9685834 | 75.6160148 | 84.8592815 | 89.866298 | 80.6223778 | minute9  |
| 79.9685834 | 75.6160148 | 84.8592815 | 89.866298 | 80.6223778 | minute10 |
| 79.9685834 | 74.6160148 | 84.8592815 | 90.866298 | 81.6223778 | minute11 |
| 80.9685834 | 74.6160148 | 84.8592815 | 90.866298 | 81.6223778 | minute12 |
| 80.9685834 | 74.6160148 | 85.8592815 | 90.866298 | 82.6223778 | minute13 |

|            |            |            |           |            |          |
|------------|------------|------------|-----------|------------|----------|
| 80.9685834 | 74.6160148 | 88.8592815 | 91.866298 | 82.6223778 | minute14 |
| 79.9685834 | 74.6160148 | 89.8592815 | 92.866298 | 82.6223778 | minute15 |
| 79.9685834 | 74.6160148 | 89.8592815 | 92.866298 | 82.6223778 | minute16 |
| 79.9685834 | 74.6160148 | 89.8592815 | 91.866298 | 83.6223778 | minute17 |
| 79.9685834 | 74.6160148 | 77.8592815 | 91.866298 | 83.6223778 | minute18 |
| 79.9685834 | 74.6160148 | 77.8592815 | 91.866298 | 83.6223778 | minute19 |
| 77.9685834 | 75.6160148 | 73.8592815 | 89.866298 | 83.6223778 | minute20 |
| 75.9685834 | 80.6160148 | 71.8592815 | 89.866298 | 82.6223778 | minute21 |
| 72.9685834 | 80.6160148 | 71.8592815 | 87.866298 | 83.6223778 | minute22 |
| 70.9685834 | 81.6160148 | 69.8592815 | 86.866298 | 83.6223778 | minute23 |
| 69.9685834 | 81.6160148 | 69.8592815 | 86.866298 | 83.6223778 | minute24 |
| 68.9685834 | 81.6160148 | 69.8592815 | 86.866298 | 83.6223778 | minute25 |
| 68.9685834 | 81.6160148 | 72.8592815 | 87.866298 | 83.6223778 | minute26 |
| 68.9685834 | 78.6160148 | 72.8592815 | 87.866298 | 83.6223778 | minute27 |
| 68.9685834 | 78.6160148 | 72.8592815 | 87.866298 | 83.6223778 | minute28 |
| 68.9685834 | 78.6160148 | 72.8592815 | 89.866298 | 83.6223778 | minute29 |
| 67.9685834 | 78.6160148 | 72.8592815 | 90.866298 | 84.6223778 | minute30 |
| 68.9685834 | 78.6160148 | 72.8592815 | 90.866298 | 84.6223778 | minute31 |
| 68.9685834 | 77.6160148 | 73.8592815 | 90.866298 | 84.6223778 | minute32 |
| 69.9685834 | 77.6160148 | 72.8592815 | 90.866298 | 83.6223778 | minute33 |
| 70.9685834 | 77.6160148 | 72.8592815 | 76.5      | 85.6223778 | minute34 |
| 70.9685834 | 77.6160148 | 72.8592815 | 91.866298 | 87.6223778 | minute35 |
| 70.9685834 | 77.6160148 | 72.8592815 | 75.041958 | 87.6223778 | minute36 |
| 70.9685834 | 76.6160148 | 73.8592815 | 76.4      | 87.6223778 | minute37 |
| 69.9685834 | 75.6160148 | 73.8592815 | 76.1      | 89.6223778 | minute38 |
| 70.9685834 | 74.6160148 | 75.8592815 | 76.3      | 88.6223778 | minute39 |
| 70.9685834 | 74.6160148 | 75.8592815 | 75.7      | 87.6223778 | minute40 |
| 70.9685834 | 74.6160148 | 73.8592815 | 75.5      | 82.6223778 | minute41 |
| 71.9685834 | 73.6160148 | 71.8592815 | 74.8      | 82.6223778 | minute42 |
| 71.9685834 | 73.6160148 | 71.8592815 | 74.6      | 82.6223778 | minute43 |
| 70.9685834 | 74.6160148 | 68.8592815 | 77.866298 | 80.6223778 | minute44 |
| 69.9685834 | 75.6160148 | 67.8592815 | 77.866298 | 79.6223778 | minute45 |
| 69.9685834 | 75.6160148 | 67.8592815 | 76.866298 | 78.6223778 | minute46 |
| 68.9685834 | 75.6160148 | 67.8592815 | 76.866298 | 78.6223778 | minute47 |
| 67.9685834 | 75.6160148 | 68.8592815 | 74.866298 | 77.6223778 | minute48 |
| 69.9685834 | 75.6160148 | 68.8592815 | 74.866298 | 76.6223778 | minute49 |
| 72.9685834 | 75.6160148 | 68.8592815 | 72.866298 | 76.6223778 | minute50 |
| 74.9685834 | 76.6160148 | 68.8592815 | 71.866298 | 76.6223778 | minute51 |
| 74.9685834 | 77.6160148 | 69.8592815 | 71.866298 | 76.6223778 | minute52 |
| 74.9685834 | 78.6160148 | 70.8592815 | 71.866298 | 75.6223778 | minute53 |
| 73.9685834 | 79.6160148 | 70.8592815 | 71.866298 | 75.6223778 | minute54 |
| 73.9685834 | 79.6160148 | 70.8592815 | 71.866298 | 75.6223778 | minute55 |
| 72.9685834 | 79.6160148 | 70.8592815 | 73.866298 | 75.6223778 | minute56 |
| 72.9685834 | 79.6160148 | 69.8592815 | 74.866298 | 71.6223778 | minute57 |
| 72.9685834 | 79.6160148 | 69.8592815 | 74.866298 | 69.6223778 | minute58 |

|            |            |            |           |            |          |
|------------|------------|------------|-----------|------------|----------|
| 72.9685834 | 79.6160148 | 69.8592815 | 74.866298 | 69.6223778 | minute59 |
| 72.9685834 | 79.6160148 | 69.8592815 | 74.866298 | 68.6223778 | minute60 |
| 72.9685834 | 79.6160148 | 69.8592815 | 75.866298 | 68.6223778 | AFTER1   |
| 72.9685834 | 76.6160148 | 69.8592815 | 76.866298 | 68.6223778 | AFTER2   |
| 73.9685834 | 76.6160148 | 71.8592815 | 76.866298 | 68.6223778 | AFTER3   |
| 73.9685834 | 76.6160148 | 72.8592815 | 76.866298 | 68.6223778 | AFTER4   |
| 72.9685834 | 76.6160148 | 72.8592815 | 76.866298 | 68.6223778 | AFTER5   |
| 71.9685834 | 78.6160148 | 72.8592815 | 77.866298 | 69.6223778 | AFTER6   |
| 71.9685834 | 78.6160148 | 72.8592815 | 78.866298 | 69.6223778 | AFTER7   |
| 71.9685834 | 78.6160148 | 72.8592815 | 78.866298 | 69.6223778 | AFTER8   |
| 70.9685834 | 78.6160148 | 72.8592815 | 77.866298 | 69.6223778 | AFTER9   |
| 70.9685834 | 77.6160148 | 73.8592815 | 77.866298 | 69.6223778 | AFTER10  |
| 71.9685834 | 76.6160148 | 73.8592815 | 74.866298 | 69.6223778 | AFTER11  |
| 71.9685834 | 76.6160148 | 74.8592815 | 72.866298 | 69.6223778 | AFTER12  |
| 71.9685834 | 72.6160148 | 74.8592815 | 72.866298 | 68.6223778 | AFTER13  |
| 71.9685834 | 71.6160148 | 70.8592815 | 72.866298 | 68.6223778 | AFTER14  |
| 70.9685834 | 71.6160148 | 67.8592815 | 71.866298 | 68.6223778 | AFTER15  |
| 70.9685834 | 70.6160148 | 67.8592815 | 70.866298 | 68.6223778 | AFTER16  |
| 70.9685834 | 70.6160148 | 65.8592815 | 68.866298 | 68.6223778 | AFTER17  |
| 70.9685834 | 71.6160148 | 65.8592815 | 68.866298 | 68.6223778 | AFTER18  |
| 71.9685834 | 71.6160148 | 65.8592815 | 68.866298 | 70.6223778 | AFTER19  |
| 71.9685834 | 72.6160148 | 66.8592815 | 66.866298 | 71.6223778 | AFTER20  |
| 71.9685834 | 72.6160148 | 72.8592815 | 66.866298 | 71.6223778 | AFTER21  |
| 71.9685834 | 74.6160148 | 72.8592815 | 66.866298 | 71.6223778 | AFTER22  |
| 71.9685834 | 74.6160148 | 73.8592815 | 66.866298 | 71.6223778 | AFTER23  |
| 71.9685834 | 74.6160148 | 73.8592815 | 69.866298 | 71.6223778 | AFTER24  |
| 72.9685834 | 74.6160148 | 70.8592815 | 68.866298 | 71.6223778 | AFTER25  |
| 73.9685834 | 74.6160148 | 70.8592815 | 69.866298 | 71.6223778 | AFTER26  |
| 73.9685834 | 74.6160148 | 70.8592815 | 70.866298 | 71.6223778 | AFTER27  |
| 73.9685834 | 74.6160148 | 70.8592815 | 71.866298 | 71.6223778 | AFTER28  |
| 73.9685834 | 74.6160148 | 70.8592815 | 71.866298 | 71.6223778 | AFTER29  |
| 76.9685834 | 74.6160148 | 70.8592815 | 71.866298 | 71.6223778 | AFTER30  |
| 76.9685834 | 74.6160148 | 70.8592815 | 70.866298 | 72.6223778 | AFTER31  |
| 77.9685834 | 74.6160148 | 70.8592815 | 70.866298 | 71.6223778 | AFTER32  |
| 78.9685834 | 74.6160148 | 70.8592815 | 70.866298 | 71.6223778 | AFTER33  |
| 78.9685834 | 76.6160148 | 71.8592815 | 69.866298 | 73.6223778 | AFTER34  |
| 77.9685834 | 75.6160148 | 71.8592815 | 68.866298 | 74.6223778 | AFTER35  |
| 76.9685834 | 75.6160148 | 72.8592815 | 68.866298 | 74.6223778 | AFTER36  |
| 76.9685834 | 75.6160148 | 73.8592815 | 68.866298 | 74.6223778 | AFTER37  |
| 76.9685834 | 75.6160148 | 73.8592815 | 69.866298 | 75.6223778 | AFTER38  |
| 76.9685834 | 76.6160148 | 73.8592815 | 69.866298 | 74.6223778 | AFTER39  |
| 76.9685834 | 76.6160148 | 73.8592815 | 70.866298 | 74.6223778 | AFTER40  |
| 75.9685834 | 77.6160148 | 74.8592815 | 70.866298 | 73.6223778 | AFTER41  |
| 75.9685834 | 77.6160148 | 74.8592815 | 70.866298 | 73.6223778 | AFTER42  |
| 75.9685834 | 77.6160148 | 74.8592815 | 69.866298 | 72.6223778 | AFTER43  |

|            |            |            |           |            |         |
|------------|------------|------------|-----------|------------|---------|
| 73.9685834 | 77.6160148 | 74.8592815 | 67.866298 | 73.6223778 | AFTER44 |
| 73.9685834 | 77.6160148 | 76.8592815 | 67.866298 | 73.6223778 | AFTER45 |
| 72.9685834 | 77.6160148 | 76.8592815 | 67.866298 | 74.6223778 | AFTER46 |
| 72.9685834 | 76.6160148 | 88.8592815 | 67.866298 | 75.6223778 | AFTER47 |
| 72.9685834 | 76.6160148 | 77.1       | 67.866298 | 75.6223778 | AFTER48 |
| 72.9685834 | 76.6160148 | 77.1       | 65.866298 | 76.6223778 | AFTER49 |
| 72.9685834 | 76.6160148 | 77.4       | 65.866298 | 76.6223778 | AFTER50 |
| 72.9685834 | 76.6160148 | 77.4       | 64.866298 | 76.6223778 | AFTER51 |
| 72.9685834 | 76.6160148 | 77.4       | 64.866298 | 75.6223778 | AFTER52 |
| 72.9685834 | 76.6160148 | 85.8592815 | 62.866298 | 75.6223778 | AFTER53 |
| 72.9685834 | 77.6160148 | 76.8592815 | 63.866298 | 75.6223778 | AFTER54 |
| 70.9685834 | 77.6160148 | 76.8592815 | 63.866298 | 75.6223778 | AFTER55 |
| 70.9685834 | 77.6160148 | 71.8592815 | 62.866298 | 74.6223778 | AFTER56 |
| 71.9685834 | 79.6160148 | 68.8592815 | 63.866298 | 75.6223778 | AFTER57 |
| 71.9685834 | 79.6160148 | 67.8592815 | 63.866298 | 75.6223778 | AFTER58 |
| 70.9685834 | 80.6160148 | 67.8592815 | 69.866298 | 75.6223778 | AFTER59 |
| 70.9685834 | 80.6160148 | 66.8592815 | 69.866298 | 75.6223778 | AFTER60 |
| 70.9685834 | 80.6160148 | 65.8592815 | 71.866298 | 75.6223778 | AFTER61 |
| 70.9685834 | 80.6160148 | 65.8592815 | 72.866298 | 74.6223778 | AFTER62 |
| 70.9685834 | 80.6160148 | 65.8592815 | 71.866298 | 74.6223778 | AFTER63 |
| 69.9685834 | 79.6160148 | 65.8592815 | 70.866298 | 73.6223778 | AFTER64 |
| 69.9685834 | 79.6160148 | 61.8592815 | 71.866298 | 73.6223778 | AFTER65 |
| 69.9685834 | 77.6160148 | 61.8592815 | 71.866298 | 73.6223778 | AFTER66 |
| 68.9685834 | 76.6160148 | 61.8592815 | 72.866298 | 73.6223778 | AFTER67 |
| 66.9685834 | 76.6160148 | 62.8592815 | 75.866298 | 73.6223778 | AFTER68 |
| 70.9685834 | 76.6160148 | 59.8592815 | 75.866298 | 72.6223778 | AFTER69 |
| 70.9685834 | 76.6160148 | 60.8592815 | 75.866298 | 72.6223778 | AFTER70 |
| 69.9685834 | 75.6160148 | 61.8592815 | 75.866298 | 73.6223778 | AFTER71 |
| 69.9685834 | 75.6160148 | 63.8592815 | 76.866298 | 72.6223778 | AFTER72 |
| 70.9685834 | 76.6160148 | 63.8592815 | 76.866298 | 72.6223778 | AFTER73 |
| 70.9685834 | 78.6160148 | 66.8592815 | 74.866298 | 72.6223778 | AFTER74 |
| 70.9685834 | 78.6160148 | 66.8592815 | 74.866298 | 72.6223778 | AFTER75 |
| 70.9685834 | 78.6160148 | 66.8592815 | 74.866298 | 75.6223778 | AFTER76 |
| 71.9685834 | 79.6160148 | 67.8592815 | 74.866298 | 74.6223778 | AFTER77 |
| 71.9685834 | 81.6160148 | 67.8592815 | 74.866298 | 74.6223778 | AFTER78 |
| 71.9685834 | 81.6160148 | 67.8592815 | 75.866298 | 74.6223778 | AFTER79 |
| 70.9685834 | 83.6160148 | 69.8592815 | 75.866298 | 74.6223778 | AFTER80 |
| 70.9685834 | 84.6160148 | 71.8592815 | 75.866298 | 74.6223778 | AFTER81 |
| 70.9685834 | 84.6160148 | 71.8592815 | 75.866298 | 74.6223778 | AFTER82 |
| 70.9685834 | 84.6160148 | 71.8592815 | 75.866298 | 74.6223778 | AFTER83 |
| 70.9685834 | 84.6160148 | 71.8592815 | 74.866298 | 74.6223778 | AFTER84 |
| 70.9685834 | 85.6160148 | 70.8592815 | 74.866298 | 74.6223778 | AFTER85 |
| 70.9685834 | 86.6160148 | 70.8592815 | 73.866298 | 74.6223778 | AFTER86 |
| 70.9685834 | 87.6160148 | 70.8592815 | 72.866298 | 73.6223778 | AFTER87 |
| 70.9685834 | 87.6160148 | 69.8592815 | 70.866298 | 72.6223778 | AFTER88 |



|            |            |            |           |            |          |
|------------|------------|------------|-----------|------------|----------|
| 72.9685834 | 87.6160148 | 69.8592815 | 69.866298 | 71.6223778 | AFTER89  |
| 72.9685834 | 87.6160148 | 69.8592815 | 69.866298 | 70.6223778 | AFTER90  |
| 72.9685834 | 85.6160148 | 69.8592815 | 69.866298 | 69.6223778 | AFTER91  |
| 71.9685834 | 85.6160148 | 68.8592815 | 72.866298 | 69.6223778 | AFTER92  |
| 71.9685834 | 85.6160148 | 68.8592815 | 72.866298 | 70.6223778 | AFTER93  |
| 71.9685834 | 84.6160148 | 68.8592815 | 72.866298 | 70.6223778 | AFTER94  |
| 71.9685834 | 84.6160148 | 68.8592815 | 75.866298 | 70.6223778 | AFTER95  |
| 71.9685834 | 83.6160148 | 68.8592815 | 77.866298 | 71.6223778 | AFTER96  |
| 71.9685834 | 81.6160148 | 68.8592815 | 75.866298 | 71.6223778 | AFTER97  |
| 71.9685834 | 79.6160148 | 68.8592815 | 75.866298 | 71.6223778 | AFTER98  |
| 71.9685834 | 78.6160148 | 69.8592815 | 75.866298 | 71.6223778 | AFTER99  |
| 71.9685834 | 77.6160148 | 69.8592815 | 75.866298 | 72.6223778 | AFTER100 |
| 72.9685834 | 77.6160148 | 74.8592815 | 73.866298 | 72.6223778 | AFTER101 |
| 72.9685834 | 75.6160148 | 73.8592815 | 73.866298 | 72.6223778 | AFTER102 |
| 72.9685834 | 75.6160148 | 70.8592815 | 73.866298 | 72.6223778 | AFTER103 |
| 72.9685834 | 74.6160148 | 68.8592815 | 73.866298 | 72.6223778 | AFTER104 |
| 72.9685834 | 74.6160148 | 67.8592815 | 71.866298 | 73.6223778 | AFTER105 |
| 72.9685834 | 74.6160148 | 67.8592815 | 71.866298 | 72.6223778 | AFTER106 |
| 72.9685834 | 74.6160148 | 67.8592815 | 70.866298 | 72.6223778 | AFTER107 |
| 73.9685834 | 74.6160148 | 67.8592815 | 70.866298 | 72.6223778 | AFTER108 |
| 73.9685834 | 75.6160148 | 68.8592815 | 70.866298 | 72.6223778 | AFTER109 |
| 73.9685834 | 75.6160148 | 68.8592815 | 70.866298 | 72.6223778 | AFTER110 |
| 73.9685834 | 80.6160148 | 71.8592815 | 71.866298 | 72.6223778 | AFTER111 |
| 74.9685834 | 80.6160148 | 71.8592815 | 72.866298 | 71.6223778 | AFTER112 |
| 78.9685834 | 80.6160148 | 70.8592815 | 73.866298 | 71.6223778 | AFTER113 |
| 80.9685834 | 82.6160148 | 69.8592815 | 73.866298 | 71.6223778 | AFTER114 |
| 79.9685834 | 82.6160148 | 69.8592815 | 72.866298 | 71.6223778 | AFTER115 |
| 79.9685834 | 82.6160148 | 69.8592815 | 72.866298 | 71.6223778 | AFTER116 |
| 79.9685834 | 82.6160148 | 69.8592815 | 73.866298 | 69.6223778 | AFTER117 |
| 79.9685834 | 82.6160148 | 70.8592815 | 73.866298 | 69.6223778 | AFTER118 |
| 79.9685834 | 81.6160148 | 70.8592815 | 73.866298 | 69.6223778 | AFTER119 |
| 79.9685834 | 80.6160148 | 70.8592815 | 74.866298 | 70.6223778 | AFTER120 |
| 79.9685834 | 80.6160148 | 70.8592815 | 74.866298 | 70.6223778 | AFTER121 |
| 79.9685834 | 80.6160148 | 70.8592815 | 74.866298 | 70.6223778 | AFTER122 |
| 79.9685834 | 80.6160148 | 70.8592815 | 74.866298 | 70.6223778 | AFTER123 |
| 73.9685834 | 80.6160148 | 71.8592815 | 74.866298 | 70.6223778 | AFTER124 |
| 72.9685834 | 80.6160148 | 71.8592815 | 74.866298 | 71.6223778 | AFTER125 |
| 71.9685834 | 80.6160148 | 73.8592815 | 74.866298 | 71.6223778 | AFTER126 |
| 70.9685834 | 80.6160148 | 72.8592815 | 74.866298 | 71.6223778 | AFTER127 |
| 71.9685834 | 80.6160148 | 70.8592815 | 75.866298 | 71.6223778 | AFTER128 |
| 71.9685834 | 80.6160148 | 70.8592815 | 76.866298 | 72.6223778 | AFTER129 |
| 70.9685834 | 79.6160148 | 69.8592815 | 76.866298 | 72.6223778 | AFTER130 |
| 70.9685834 | 79.6160148 | 68.8592815 | 75.866298 | 72.6223778 | AFTER131 |
| 70.9685834 | 79.6160148 | 68.8592815 | 75.866298 | 72.6223778 | AFTER132 |
| 70.9685834 | 72.6160148 | 68.8592815 | 76.866298 | 74.6223778 | AFTER133 |

|            |            |            |           |            |          |
|------------|------------|------------|-----------|------------|----------|
| 70.9685834 | 72.6160148 | 68.8592815 | 76.866298 | 73.6223778 | AFTER134 |
| 70.9685834 | 71.6160148 | 69.8592815 | 77.866298 | 73.6223778 | AFTER135 |
| 70.9685834 | 71.6160148 | 69.8592815 | 77.866298 | 72.6223778 | AFTER136 |
| 70.9685834 | 71.6160148 | 69.8592815 | 77.866298 | 72.6223778 | AFTER137 |
| 70.9685834 | 72.6160148 | 69.8592815 | 79.866298 | 72.6223778 | AFTER138 |
| 69.9685834 | 72.6160148 | 69.8592815 | 79.866298 | 71.6223778 | AFTER139 |
| 68.9685834 | 72.6160148 | 69.8592815 | 79.866298 | 71.6223778 | AFTER140 |
| 68.9685834 | 74.6160148 | 69.8592815 | 80.866298 | 71.6223778 | AFTER141 |
| 68.9685834 | 75.6160148 | 69.8592815 | 80.866298 | 71.6223778 | AFTER142 |
| 68.9685834 | 75.6160148 | 69.8592815 | 78.866298 | 71.6223778 | AFTER143 |
| 69.9685834 | 76.6160148 | 68.8592815 | 72.866298 | 71.6223778 | AFTER144 |
| 69.9685834 | 76.6160148 | 68.8592815 | 71.866298 | 71.6223778 | AFTER145 |
| 68.9685834 | 77.6160148 | 68.8592815 | 72.866298 | 71.6223778 | AFTER146 |
| 68.9685834 | 77.6160148 | 69.8592815 | 72.866298 | 71.6223778 | AFTER147 |
| 68.9685834 | 77.6160148 | 71.8592815 | 72.866298 | 71.6223778 | AFTER148 |
| 68.9685834 | 76.6160148 | 72.8592815 | 71.866298 | 72.6223778 | AFTER149 |
| 67.9685834 | 76.6160148 | 72.8592815 | 71.866298 | 72.6223778 | AFTER150 |
| 67.9685834 | 75.6160148 | 73.8592815 | 71.866298 | 74.6223778 | AFTER151 |
| 67.9685834 | 75.6160148 | 74.8592815 | 71.866298 | 74.6223778 | AFTER152 |
| 66.9685834 | 75.6160148 | 75.8592815 | 71.866298 | 74.6223778 | AFTER153 |
| 67.9685834 | 74.6160148 | 76.8592815 | 70.866298 | 74.6223778 | AFTER154 |
| 68.9685834 | 73.6160148 | 76.8592815 | 70.866298 | 76.6223778 | AFTER155 |
| 68.9685834 | 73.6160148 | 75.8592815 | 71.866298 | 76.6223778 | AFTER156 |
| 68.9685834 | 73.6160148 | 75.8592815 | 72.866298 | 77.6223778 | AFTER157 |
| 68.9685834 | 73.6160148 | 75.8592815 | 72.866298 | 77.6223778 | AFTER158 |
| 69.9685834 | 73.6160148 | 75.8592815 | 72.866298 | 77.6223778 | AFTER159 |
| 69.9685834 | 73.6160148 | 75.8592815 | 74.866298 | 77.6223778 | AFTER160 |
| 71.9685834 | 74.6160148 | 75.8592815 | 73.866298 | 76.6223778 | AFTER161 |
| 71.9685834 | 74.6160148 | 75.8592815 | 73.866298 | 76.6223778 | AFTER162 |
| 71.9685834 | 71.6160148 | 75.8592815 | 72.866298 | 77.6223778 | AFTER163 |
| 71.9685834 | 69.6160148 | 72.8592815 | 72.866298 | 75.6223778 | AFTER164 |
| 71.9685834 | 68.6160148 | 72.8592815 | 71.866298 | 75.6223778 | AFTER165 |
| 71.9685834 | 66.6160148 | 72.8592815 | 72.866298 | 75.6223778 | AFTER166 |
| 71.9685834 | 65.6160148 | 72.8592815 | 72.866298 | 70.6223778 | AFTER167 |
| 70.9685834 | 65.6160148 | 71.8592815 | 72.866298 | 70.6223778 | AFTER168 |
| 68.9685834 | 64.6160148 | 68.8592815 | 71.866298 | 69.6223778 | AFTER169 |
| 67.9685834 | 62.6160148 | 67.8592815 | 71.866298 | 69.6223778 | AFTER170 |
| 67.9685834 | 61.6160148 | 67.8592815 | 71.866298 | 69.6223778 | AFTER171 |
| 67.9685834 | 61.6160148 | 67.8592815 | 71.866298 | 69.6223778 | AFTER172 |
| 67.9685834 | 60.6160148 | 67.8592815 | 71.866298 | 70.6223778 | AFTER173 |
| 67.9685834 | 61.6160148 | 67.8592815 | 72.866298 | 70.6223778 | AFTER174 |
| 68.9685834 | 62.6160148 | 66.8592815 | 73.866298 | 70.6223778 | AFTER175 |
| 68.9685834 | 62.6160148 | 68.8592815 | 73.866298 | 83.6223778 | AFTER176 |
| 67.9685834 | 62.6160148 | 70.8592815 | 73.866298 | 83.6223778 | AFTER177 |
| 67.9685834 | 62.6160148 | 72.8592815 | 73.866298 | 85.6223778 | AFTER178 |

|            |            |            |           |            |          |
|------------|------------|------------|-----------|------------|----------|
| 67.9685834 | 62.6160148 | 72.8592815 | 71.866298 | 94.6223778 | AFTER179 |
| 67.9685834 | 62.6160148 | 73.8592815 | 71.866298 | 94.6223778 | AFTER180 |
| 67.9685834 | 63.6160148 | 72.8592815 | 71.866298 | 94.6223778 | AFTER181 |
| 67.9685834 | 63.6160148 | 68.8592815 | 72.866298 | 106.622378 | AFTER182 |
| 67.9685834 | 65.6160148 | 66.8592815 | 72.866298 | 106.622378 | AFTER183 |
| 67.9685834 | 68.6160148 | 66.8592815 | 73.866298 | 106.622378 | AFTER184 |
| 67.9685834 | 70.6160148 | 64.8592815 | 76.866298 | 107.622378 | AFTER185 |
| 67.9685834 | 70.6160148 | 63.8592815 | 76.866298 | 107.622378 | AFTER186 |
| 70.9685834 | 70.6160148 | 63.8592815 | 76.866298 | 107.622378 | AFTER187 |
| 72.9685834 | 79.6160148 | 63.8592815 | 75.866298 | 108.622378 | AFTER188 |
| 72.9685834 | 79.6160148 | 63.8592815 | 74.866298 | 108.622378 | AFTER189 |
| 72.9685834 | 79.6160148 | 64.8592815 | 74.866298 | 108.622378 | AFTER190 |
| 72.9685834 | 79.6160148 | 64.8592815 | 74.866298 | 108.622378 | AFTER191 |
| 72.9685834 | 80.6160148 | 66.8592815 | 73.866298 | 108.622378 | AFTER192 |
| 73.9685834 | 80.6160148 | 67.8592815 | 73.866298 | 81.6223778 | AFTER193 |
| 73.9685834 | 80.6160148 | 67.8592815 | 72.866298 | 80.6223778 | AFTER194 |
| 73.9685834 | 81.6160148 | 68.8592815 | 72.866298 | 80.6223778 | AFTER195 |
| 73.9685834 | 81.6160148 | 69.8592815 | 72.866298 | 78.6223778 | AFTER196 |
| 73.9685834 | 81.6160148 | 69.8592815 | 73.866298 | 78.6223778 | AFTER197 |
| 73.9685834 | 81.6160148 | 69.8592815 | 73.866298 | 78.6223778 | AFTER198 |
| 73.9685834 | 83.6160148 | 70.8592815 | 73.866298 | 77.6223778 | AFTER199 |
| 74.9685834 | 84.6160148 | 70.8592815 | 75.866298 | 77.6223778 | AFTER200 |
| 74.9685834 | 84.6160148 | 70.8592815 | 77.866298 | 77.6223778 | AFTER201 |
| 73.9685834 | 85.6160148 | 70.8592815 | 77.866298 | 77.6223778 | AFTER202 |
| 70.9685834 | 85.6160148 | 71.8592815 | 77.866298 | 77.6223778 | AFTER203 |
| 70.9685834 | 85.6160148 | 71.8592815 | 77.866298 | 77.6223778 | AFTER204 |
| 70.9685834 | 85.6160148 | 71.8592815 | 77.866298 | 77.6223778 | AFTER205 |
| 70.9685834 | 84.6160148 | 71.8592815 | 77.866298 | 77.6223778 | AFTER206 |
| 70.9685834 | 80.6160148 | 71.8592815 | 77.866298 | 77.6223778 | AFTER207 |
| 70.9685834 | 80.6160148 | 70.8592815 | 77.866298 | 78.6223778 | AFTER208 |
| 70.9685834 | 80.6160148 | 70.8592815 | 76.866298 | 79.6223778 | AFTER209 |
| 70.9685834 | 79.6160148 | 70.8592815 | 76.866298 | 79.6223778 | AFTER210 |
| 69.9685834 | 80.6160148 | 70.8592815 | 76.866298 | 81.6223778 | AFTER211 |
| 70.9685834 | 80.6160148 | 69.8592815 | 75.866298 | 81.6223778 | AFTER212 |
| 70.9685834 | 80.6160148 | 69.8592815 | 74.866298 | 83.6223778 | AFTER213 |
| 71.9685834 | 81.6160148 | 70.8592815 | 74.866298 | 84.6223778 | AFTER214 |
| 72.9685834 | 81.6160148 | 70.8592815 | 74.866298 | 84.6223778 | AFTER215 |
| 73.9685834 | 81.6160148 | 70.8592815 | 75.866298 | 86.6223778 | AFTER216 |
| 74.9685834 | 82.6160148 | 72.8592815 | 74.866298 | 88.6223778 | AFTER217 |
| 74.9685834 | 82.6160148 | 72.8592815 | 74.866298 | 90.6223778 | AFTER218 |
| 74.9685834 | 82.6160148 | 71.8592815 | 75.866298 | 90.6223778 | AFTER219 |
| 73.9685834 | 82.6160148 | 71.8592815 | 75.866298 | 88.6223778 | AFTER220 |
| 73.9685834 | 79.6160148 | 72.8592815 | 74.866298 | 82.6223778 | AFTER221 |
| 73.9685834 | 78.6160148 | 72.8592815 | 74.866298 | 78.6223778 | AFTER222 |
| 73.9685834 | 78.6160148 | 72.8592815 | 74.866298 | 78.6223778 | AFTER223 |

|            |            |            |           |            |          |
|------------|------------|------------|-----------|------------|----------|
| 73.9685834 | 78.6160148 | 72.8592815 | 74.866298 | 78.6223778 | AFTER224 |
| 73.9685834 | 78.6160148 | 73.8592815 | 72.866298 | 78.6223778 | AFTER225 |
| 73.9685834 | 78.6160148 | 73.8592815 | 72.866298 | 77.6223778 | AFTER226 |
| 74.9685834 | 78.6160148 | 73.8592815 | 73.866298 | 77.6223778 | AFTER227 |
| 74.9685834 | 79.6160148 | 73.8592815 | 73.866298 | 77.6223778 | AFTER228 |
| 74.9685834 | 80.6160148 | 73.8592815 | 74.866298 | 76.6223778 | AFTER229 |
| 73.9685834 | 80.6160148 | 73.8592815 | 74.866298 | 75.6223778 | AFTER230 |
| 71.9685834 | 80.6160148 | 73.8592815 | 78.866298 | 74.6223778 | AFTER231 |
| 71.9685834 | 75.6160148 | 74.8592815 | 79.866298 | 74.6223778 | AFTER232 |
| 71.9685834 | 75.6160148 | 74.8592815 | 79.866298 | 74.6223778 | AFTER233 |
| 71.9685834 | 75.6160148 | 74.8592815 | 79.866298 | 74.6223778 | AFTER234 |
| 71.9685834 | 70.6160148 | 73.8592815 | 78.866298 | 74.6223778 | AFTER235 |
| 71.9685834 | 69.6160148 | 72.8592815 | 78.866298 | 74.6223778 | AFTER236 |
| 70.9685834 | 68.6160148 | 72.8592815 | 78.866298 | 76.6223778 | AFTER237 |
| 70.9685834 | 70.6160148 | 72.8592815 | 79.866298 | 76.6223778 | AFTER238 |
| 69.9685834 | 70.6160148 | 72.8592815 | 79.866298 | 75.6223778 | AFTER239 |
| 68.9685834 | 70.6160148 | 75.8592815 | 79.866298 | 69.6223778 | AFTER240 |
| 68.9685834 | 71.6160148 | 75.8592815 | 78.866298 | 69.6223778 |          |
| 67.9685834 | 71.6160148 | 75.8592815 | 76.866298 | 69.6223778 |          |
| 67.9685834 | 71.6160148 | 74.8592815 | 76.866298 | 69.6223778 |          |
| 65.9685834 | 71.6160148 | 74.8592815 | 76.866298 | 69.6223778 |          |
| 65.9685834 | 71.6160148 | 74.8592815 | 76.866298 | 69.6223778 |          |
| 64.9685834 | 73.6160148 | 74.8592815 | 76.866298 | 69.6223778 |          |
| 64.9685834 | 82.6160148 | 73.8592815 | 76.866298 | 69.6223778 |          |
| 63.9685834 | 82.6160148 | 73.8592815 | 75.866298 | 69.6223778 |          |
| 63.9685834 | 82.6160148 | 73.8592815 | 75.866298 | 69.6223778 |          |
| 63.9685834 | 82.6160148 | 73.8592815 | 75.866298 | 69.6223778 |          |
| 63.9685834 | 83.6160148 | 74.8592815 | 75.866298 | 70.6223778 |          |
| 62.9685834 | 83.6160148 | 74.8592815 | 75.866298 | 70.6223778 |          |
| 62.9685834 | 84.6160148 | 74.8592815 | 75.866298 | 70.6223778 |          |
| 60.9685834 | 85.6160148 | 77.8592815 | 76.866298 | 71.6223778 |          |
| 60.9685834 | 86.6160148 | 77.8592815 | 78.866298 | 71.6223778 |          |
| 60.9685834 | 86.6160148 | 79.8592815 | 76.866298 | 71.6223778 |          |
| 68.9685834 | 71.6160148 | 79.8592815 | 74.866298 | 71.6223778 |          |
| 69.9685834 | 67.6160148 | 79.8592815 | 74.866298 | 71.6223778 |          |
| 70.9685834 | 66.6160148 | 79.8592815 | 73.866298 | 72.6223778 |          |
| 70.9685834 | 66.6160148 | 79.8592815 | 72.866298 | 72.6223778 |          |
| 70.9685834 | 66.6160148 | 79.8592815 | 71.866298 | 72.6223778 |          |
| 70.9685834 | 67.6160148 | 79.8592815 | 72.866298 | 72.6223778 |          |
| 70.9685834 | 67.6160148 | 75.8592815 | 72.866298 | 71.6223778 |          |
| 70.9685834 | 67.6160148 | 75.8592815 | 72.866298 | 71.6223778 |          |
| 70.9685834 | 67.6160148 | 75.8592815 | 72.866298 | 71.6223778 |          |
| 69.9685834 | 69.6160148 | 75.8592815 | 72.866298 | 71.6223778 |          |
| 69.9685834 | 69.6160148 | 81.8592815 | 73.866298 | 72.6223778 |          |
| 69.9685834 | 69.6160148 | 83.8592815 | 73.866298 | 72.6223778 |          |

|            |            |            |           |            |
|------------|------------|------------|-----------|------------|
| 70.9685834 | 68.6160148 | 83.8592815 | 73.866298 | 73.6223778 |
| 70.9685834 | 68.6160148 | 77.8592815 | 73.866298 | 73.6223778 |
| 69.9685834 | 68.6160148 | 71.8592815 | 73.866298 | 73.6223778 |
| 69.9685834 | 69.6160148 | 69.8592815 | 73.866298 | 73.6223778 |
| 69.9685834 | 71.6160148 | 69.8592815 | 72.866298 | 74.6223778 |
| 69.9685834 | 71.6160148 | 67.8592815 | 72.866298 | 73.6223778 |
| 70.9685834 | 71.6160148 | 67.8592815 | 72.866298 | 73.6223778 |
| 72.9685834 | 71.6160148 | 68.8592815 | 73.866298 | 73.6223778 |
| 73.9685834 | 70.6160148 | 68.8592815 | 73.866298 | 73.6223778 |
| 73.9685834 | 69.6160148 | 68.8592815 | 73.866298 | 73.6223778 |
| 71.9685834 | 69.6160148 | 68.8592815 | 73.866298 | 73.6223778 |
| 70.9685834 | 68.6160148 | 68.8592815 | 72.866298 | 73.6223778 |
| 69.9685834 | 68.6160148 | 68.8592815 | 72.866298 | 74.6223778 |
| 69.9685834 | 67.6160148 | 67.8592815 | 71.866298 | 74.6223778 |
| 68.9685834 | 67.6160148 | 66.8592815 | 71.866298 | 74.6223778 |
| 68.9685834 | 66.6160148 | 66.8592815 | 70.866298 | 74.6223778 |
| 69.9685834 | 66.6160148 | 66.8592815 | 70.866298 | 74.6223778 |
| 69.9685834 | 65.6160148 | 66.8592815 | 70.866298 | 74.6223778 |
| 69.9685834 | 65.6160148 | 66.8592815 | 71.866298 | 74.6223778 |
| 69.9685834 | 65.6160148 | 67.8592815 | 71.866298 | 75.6223778 |
| 69.9685834 | 65.6160148 | 68.8592815 | 71.866298 | 75.6223778 |
| 68.9685834 | 65.6160148 | 69.8592815 | 71.866298 | 77.6223778 |
| 68.9685834 | 65.6160148 | 69.8592815 | 72.866298 | 77.6223778 |
| 68.9685834 | 64.6160148 | 69.8592815 | 73.866298 | 77.6223778 |
| 68.9685834 | 64.6160148 | 70.8592815 | 73.866298 | 77.6223778 |
| 68.9685834 | 65.6160148 | 71.8592815 | 73.866298 | 76.6223778 |
| 68.9685834 | 67.6160148 | 71.8592815 | 73.866298 | 76.6223778 |
| 71.9685834 | 67.6160148 | 71.8592815 | 73.866298 | 76.6223778 |
| 72.9685834 | 68.6160148 | 71.8592815 | 73.866298 | 76.6223778 |
| 73.9685834 | 68.6160148 | 71.8592815 | 75.866298 | 75.6223778 |
| 73.9685834 | 68.6160148 | 71.8592815 | 75.866298 | 72.6223778 |
| 72.9685834 | 70.6160148 | 69.8592815 | 76.866298 | 72.6223778 |
| 71.9685834 | 70.6160148 | 69.8592815 | 77.866298 | 73.6223778 |
| 70.9685834 | 70.6160148 | 69.8592815 | 77.866298 | 73.6223778 |
| 70.9685834 | 70.6160148 | 69.8592815 | 77.866298 | 72.6223778 |
| 70.9685834 | 70.6160148 | 70.8592815 | 77.866298 | 72.6223778 |
| 70.9685834 | 70.6160148 | 70.8592815 | 77.866298 | 72.6223778 |
| 70.9685834 | 70.6160148 | 70.8592815 | 77.866298 | 72.6223778 |
| 70.9685834 | 72.6160148 | 70.8592815 | 78.866298 | 72.6223778 |
| 70.9685834 | 72.6160148 | 70.8592815 | 78.866298 | 72.6223778 |
| 70.9685834 | 73.6160148 | 71.8592815 | 78.866298 | 71.6223778 |
| 70.9685834 | 75.6160148 | 71.8592815 | 78.866298 | 70.6223778 |
| 70.9685834 | 75.6160148 | 71.8592815 | 80.866298 | 70.6223778 |
| 70.9685834 | 75.6160148 | 70.8592815 | 82.866298 | 70.6223778 |
| 72.9685834 | 75.6160148 | 67.8592815 | 84.866298 | 70.6223778 |

|            |            |            |           |            |
|------------|------------|------------|-----------|------------|
| 73.9685834 | 75.6160148 | 67.8592815 | 85.866298 | 70.6223778 |
| 73.9685834 | 75.6160148 | 67.8592815 | 85.866298 | 71.6223778 |
| 74.9685834 | 71.6160148 | 67.8592815 | 83.866298 | 72.6223778 |
| 74.9685834 | 71.6160148 | 67.8592815 | 82.866298 | 72.6223778 |
| 74.9685834 | 71.6160148 | 66.8592815 | 81.866298 | 72.6223778 |
| 74.9685834 | 71.6160148 | 66.8592815 | 81.866298 | 73.6223778 |
| 74.9685834 | 71.6160148 | 66.8592815 | 78.866298 | 73.6223778 |
| 74.9685834 | 71.6160148 | 66.8592815 | 78.866298 | 72.6223778 |
| 74.9685834 | 71.6160148 | 66.8592815 | 78.866298 | 72.6223778 |
| 74.9685834 | 71.6160148 | 66.8592815 | 79.866298 | 71.6223778 |
| 74.9685834 | 72.6160148 | 66.8592815 | 80.866298 | 71.6223778 |
| 74.9685834 | 73.6160148 | 66.8592815 | 80.866298 | 70.6223778 |
| 74.9685834 | 73.6160148 | 67.8592815 | 80.866298 | 70.6223778 |
| 74.9685834 | 73.6160148 | 67.8592815 | 79.866298 | 70.6223778 |
| 74.9685834 | 73.6160148 | 67.8592815 | 78.866298 | 73.6223778 |
| 73.9685834 | 73.6160148 | 67.8592815 | 79.866298 | 75.6223778 |
| 73.9685834 | 74.6160148 | 67.8592815 | 80.866298 | 75.6223778 |
| 72.9685834 | 76.6160148 | 68.8592815 | 80.866298 | 74.6223778 |
| 71.9685834 | 76.6160148 | 69.8592815 | 80.866298 | 74.6223778 |
| 71.9685834 | 78.6160148 | 69.8592815 | 80.866298 | 74.6223778 |
| 71.9685834 | 78.6160148 | 68.8592815 | 78.866298 | 74.6223778 |
| 68.9685834 | 78.6160148 | 68.8592815 | 76.866298 | 73.6223778 |
| 68.9685834 | 81.6160148 | 69.8592815 | 76.866298 | 73.6223778 |
| 68.9685834 | 81.6160148 | 69.8592815 | 72.866298 | 73.6223778 |
| 68.9685834 | 83.6160148 | 70.8592815 | 70.866298 | 73.6223778 |
| 68.9685834 | 84.6160148 | 72.8592815 | 69.866298 | 73.6223778 |
| 69.9685834 | 86.6160148 | 72.8592815 | 69.866298 | 73.6223778 |
| 69.9685834 | 86.6160148 | 72.8592815 | 69.866298 | 73.6223778 |
| 69.9685834 | 87.6160148 | 72.8592815 | 69.866298 | 73.6223778 |
| 69.9685834 | 86.6160148 | 72.8592815 | 69.866298 | 73.6223778 |
| 68.9685834 | 86.6160148 | 70.8592815 | 69.866298 | 73.6223778 |
| 68.9685834 | 86.6160148 | 70.8592815 | 70.866298 | 73.6223778 |
| 68.9685834 | 85.6160148 | 69.8592815 | 72.866298 | 73.6223778 |
| 68.9685834 | 85.6160148 | 68.8592815 | 74.866298 | 74.6223778 |
| 68.9685834 | 84.6160148 | 68.8592815 | 74.866298 | 82.6223778 |
| 68.9685834 | 84.6160148 | 68.8592815 | 74.866298 | 83.6223778 |
| 68.9685834 | 82.6160148 | 66.8592815 | 74.866298 | 83.6223778 |
| 68.9685834 | 82.6160148 | 66.8592815 | 74.866298 | 84.6223778 |
| 67.9685834 | 83.6160148 | 66.8592815 | 74.866298 | 85.6223778 |
| 67.9685834 | 83.6160148 | 66.8592815 | 74.866298 | 101.622378 |
| 67.9685834 | 83.6160148 | 66.8592815 | 75.866298 | 101.622378 |
| 67.9685834 | 84.6160148 | 66.8592815 | 77.866298 | 101.622378 |
| 67.9685834 | 84.6160148 | 66.8592815 | 77.866298 | 120.622378 |
| 67.9685834 | 84.6160148 | 67.8592815 | 77.866298 | 122.622378 |
| 67.9685834 | 83.6160148 | 67.8592815 | 79.866298 | 122.622378 |

|            |            |            |           |            |
|------------|------------|------------|-----------|------------|
| 66.9685834 | 83.6160148 | 75.8592815 | 80.866298 | 126.622378 |
| 66.9685834 | 83.6160148 | 75.8592815 | 80.866298 | 126.622378 |
| 65.9685834 | 83.6160148 | 75.8592815 | 79.866298 | 126.622378 |
| 64.9685834 | 84.6160148 | 73.8592815 | 79.866298 | 127.622378 |
| 64.9685834 | 84.6160148 | 70.8592815 | 75.866298 | 128.622378 |
| 64.9685834 | 83.6160148 | 68.8592815 | 74.866298 | 128.622378 |
| 64.9685834 | 83.6160148 | 68.8592815 | 74.866298 | 128.622378 |
| 64.9685834 | 81.6160148 | 67.8592815 | 70.866298 | 128.622378 |
| 64.9685834 | 78.6160148 | 67.8592815 | 68.866298 | 122.622378 |
| 66.9685834 | 77.6160148 | 67.8592815 | 67.866298 | 119.622378 |
| 68.9685834 | 77.6160148 | 68.8592815 | 67.866298 | 118.622378 |
| 68.9685834 | 77.6160148 | 69.8592815 | 65.866298 | 116.622378 |
| 67.9685834 | 77.6160148 | 70.8592815 | 65.866298 | 111.622378 |
| 67.9685834 | 77.6160148 | 70.8592815 | 66.866298 | 108.622378 |
| 67.9685834 | 77.6160148 | 72.8592815 | 66.866298 | 108.622378 |
| 67.9685834 | 77.6160148 | 72.8592815 | 67.866298 | 91.6223778 |
| 69.9685834 | 77.6160148 | 71.8592815 | 67.866298 | 78.6223778 |
| 69.9685834 | 76.6160148 | 71.8592815 | 67.866298 | 76.6223778 |
| 69.9685834 | 76.6160148 | 66.8592815 | 66.866298 | 75.6223778 |
| 70.9685834 | 75.6160148 | 64.8592815 | 66.866298 | 74.6223778 |
| 70.9685834 | 75.6160148 | 64.8592815 | 65.866298 | 74.6223778 |
| 70.9685834 | 75.6160148 | 63.8592815 | 65.866298 | 74.6223778 |
| 70.9685834 | 75.6160148 | 64.8592815 | 67.866298 | 74.6223778 |
| 70.9685834 | 75.6160148 | 64.8592815 | 69.866298 | 73.6223778 |
| 69.9685834 | 75.6160148 | 67.8592815 | 69.866298 | 73.6223778 |
| 69.9685834 | 75.6160148 | 69.8592815 | 71.866298 | 73.6223778 |
| 69.9685834 | 75.6160148 | 70.8592815 | 70.866298 | 73.6223778 |
| 69.9685834 | 74.6160148 | 71.8592815 | 70.866298 | 72.6223778 |
| 69.9685834 | 74.6160148 | 71.8592815 | 69.866298 | 72.6223778 |
| 69.9685834 | 74.6160148 | 70.8592815 | 68.866298 | 72.6223778 |
| 69.9685834 | 75.6160148 | 70.8592815 | 68.866298 | 70.6223778 |
| 70.9685834 | 75.6160148 | 70.8592815 | 68.866298 | 69.6223778 |
| 70.9685834 | 77.6160148 | 70.8592815 | 69.866298 | 69.6223778 |
| 70.9685834 | 79.6160148 | 69.8592815 | 69.866298 | 70.6223778 |
| 70.9685834 | 79.6160148 | 68.8592815 | 68.866298 | 71.6223778 |
| 70.9685834 | 79.6160148 | 67.8592815 | 68.866298 | 73.6223778 |
| 70.9685834 | 79.6160148 | 66.8592815 | 68.866298 | 75.6223778 |
| 70.9685834 | 79.6160148 | 66.8592815 | 68.866298 | 75.6223778 |
| 70.9685834 | 78.6160148 | 65.8592815 | 68.866298 | 75.6223778 |
| 68.9685834 | 77.6160148 | 65.8592815 | 68.866298 | 75.6223778 |
| 68.9685834 | 77.6160148 | 65.8592815 | 64.866298 | 74.6223778 |
| 69.9685834 | 77.6160148 | 64.8592815 | 63.866298 | 73.6223778 |
| 70.9685834 | 77.6160148 | 64.8592815 | 62.866298 | 73.6223778 |
| 70.9685834 | 77.6160148 | 64.8592815 | 61.866298 | 73.6223778 |
| 70.9685834 | 77.6160148 | 64.8592815 | 59.866298 | 74.6223778 |

|            |            |            |           |            |
|------------|------------|------------|-----------|------------|
| 70.9685834 | 77.6160148 | 64.8592815 | 59.866298 | 73.6223778 |
| 70.9685834 | 77.6160148 | 65.8592815 | 61.866298 | 73.6223778 |
| 70.9685834 | 77.6160148 | 65.8592815 | 61.866298 | 73.6223778 |
| 70.9685834 | 77.6160148 | 65.8592815 | 61.866298 | 72.6223778 |
| 70.9685834 | 76.6160148 | 65.8592815 | 66.866298 | 72.6223778 |
| 71.9685834 | 75.6160148 | 65.8592815 | 66.866298 | 71.6223778 |
| 71.9685834 | 75.6160148 | 65.8592815 | 65.866298 | 71.6223778 |
| 72.9685834 | 75.6160148 | 66.8592815 | 64.866298 | 71.6223778 |
| 72.9685834 | 75.6160148 | 66.8592815 | 64.866298 | 70.6223778 |
| 72.9685834 | 77.6160148 | 68.8592815 | 64.866298 | 69.6223778 |
| 73.9685834 | 77.6160148 | 69.8592815 | 64.866298 | 70.6223778 |
| 73.9685834 | 78.6160148 | 68.8592815 | 65.866298 | 70.6223778 |
| 73.9685834 | 79.6160148 | 68.8592815 | 66.866298 | 70.6223778 |
| 73.9685834 | 82.6160148 | 67.8592815 | 66.866298 | 70.6223778 |
| 73.9685834 | 83.6160148 | 67.8592815 | 65.866298 | 69.6223778 |
| 73.9685834 | 84.6160148 | 67.8592815 | 66.866298 | 69.6223778 |
| 73.9685834 | 84.6160148 | 67.8592815 | 65.866298 | 69.6223778 |
| 73.9685834 | 81.6160148 | 67.8592815 | 64.866298 | 69.6223778 |
| 73.9685834 | 81.6160148 | 66.8592815 | 64.866298 | 69.6223778 |
| 73.9685834 | 81.6160148 | 66.8592815 | 64.866298 | 68.6223778 |
| 74.9685834 | 80.6160148 | 67.8592815 | 65.866298 | 68.6223778 |
| 74.9685834 | 80.6160148 | 67.8592815 | 66.866298 | 68.6223778 |
| 73.9685834 | 80.6160148 | 67.8592815 | 66.866298 | 69.6223778 |
| 72.9685834 | 80.6160148 | 67.8592815 | 65.866298 | 69.6223778 |
| 72.9685834 | 80.6160148 | 66.8592815 | 65.866298 | 69.6223778 |
| 72.9685834 | 79.6160148 | 65.8592815 | 65.866298 | 69.6223778 |
| 72.9685834 | 79.6160148 | 65.8592815 | 64.866298 | 69.6223778 |
| 72.9685834 | 79.6160148 | 65.8592815 | 64.866298 | 69.6223778 |
| 71.9685834 | 79.6160148 | 65.8592815 | 63.866298 | 69.6223778 |
| 71.9685834 | 78.6160148 | 65.8592815 | 62.866298 | 70.6223778 |
| 71.9685834 | 78.6160148 | 65.8592815 | 61.866298 | 70.6223778 |
| 71.9685834 | 77.6160148 | 65.8592815 | 61.866298 | 69.6223778 |
| 71.9685834 | 76.6160148 | 65.8592815 | 62.866298 | 69.6223778 |
| 66.9685834 | 76.6160148 | 65.8592815 | 62.866298 | 69.6223778 |
| 64.9685834 | 76.6160148 | 65.8592815 | 63.866298 | 70.6223778 |
| 64.9685834 | 76.6160148 | 65.8592815 | 63.866298 | 69.6223778 |
| 63.9685834 | 77.6160148 | 65.8592815 | 67.866298 | 69.6223778 |
| 63.9685834 | 77.6160148 | 65.8592815 | 67.866298 | 69.6223778 |
| 63.9685834 | 77.6160148 | 65.8592815 | 68.866298 | 69.6223778 |
| 64.9685834 | 77.6160148 | 65.8592815 | 68.866298 | 69.6223778 |
| 64.9685834 | 78.6160148 | 65.8592815 | 68.866298 | 69.6223778 |
| 64.9685834 | 78.6160148 | 65.8592815 | 68.866298 | 70.6223778 |
| 64.9685834 | 78.6160148 | 65.8592815 | 68.866298 | 70.6223778 |
| 67.9685834 | 78.6160148 | 65.8592815 | 71.866298 | 70.6223778 |
| 67.9685834 | 78.6160148 | 65.8592815 | 71.866298 | 70.6223778 |



|            |            |            |           |            |
|------------|------------|------------|-----------|------------|
| 67.9685834 | 78.6160148 | 65.8592815 | 71.866298 | 70.6223778 |
| 67.9685834 | 78.6160148 | 65.8592815 | 72.866298 | 70.6223778 |
| 68.9685834 | 78.6160148 | 65.8592815 | 74.866298 | 70.6223778 |
| 70.9685834 | 80.6160148 | 86.8592815 | 74.866298 | 70.6223778 |
| 71.9685834 | 80.6160148 | 90.8592815 | 74.866298 | 70.6223778 |
| 70.9685834 | 80.6160148 | 91.8592815 | 75.866298 | 70.6223778 |
| 70.9685834 | 80.6160148 | 90.8592815 | 77.866298 | 70.6223778 |
| 70.9685834 | 81.6160148 | 90.8592815 | 77.866298 | 72.6223778 |
| 72.9685834 | 82.6160148 | 90.8592815 | 77.866298 | 73.6223778 |
| 73.9685834 | 82.6160148 | 87.8592815 | 78.866298 | 74.6223778 |
| 73.9685834 | 79.6160148 | 87.8592815 | 78.866298 | 73.6223778 |
| 74.9685834 | 79.6160148 | 87.8592815 | 78.866298 | 74.6223778 |
| 74.9685834 | 79.6160148 | 87.8592815 | 78.866298 | 74.6223778 |
| 72.9685834 | 78.6160148 | 82.8592815 | 77.866298 | 74.6223778 |
| 72.9685834 | 78.6160148 | 72.8592815 | 76.866298 | 75.6223778 |
| 71.9685834 | 77.6160148 | 70.8592815 | 73.866298 | 75.6223778 |
| 71.9685834 | 76.6160148 | 70.8592815 | 73.866298 | 75.6223778 |
| 72.9685834 | 75.6160148 | 70.8592815 | 73.866298 | 77.6223778 |
| 72.9685834 | 76.6160148 | 69.8592815 | 73.866298 | 78.6223778 |
| 72.9685834 | 77.6160148 | 68.8592815 | 74.866298 | 78.6223778 |
| 73.9685834 | 77.6160148 | 68.8592815 | 74.866298 | 78.6223778 |
| 74.9685834 | 77.6160148 | 68.8592815 | 74.866298 | 80.6223778 |
| 74.9685834 | 77.6160148 | 68.8592815 | 74.866298 | 80.6223778 |
| 73.9685834 | 78.6160148 | 68.8592815 | 76.866298 | 80.6223778 |
| 73.9685834 | 78.6160148 | 69.8592815 | 76.866298 | 80.6223778 |
| 73.9685834 | 78.6160148 | 69.8592815 | 76.866298 | 79.6223778 |
| 73.9685834 | 78.6160148 | 69.8592815 | 76.866298 | 75.6223778 |
| 72.9685834 | 77.6160148 | 73.8592815 | 76.866298 | 74.6223778 |
| 73.9685834 | 73.6160148 | 74.8592815 | 74.866298 | 74.6223778 |
| 73.9685834 | 73.6160148 | 75.8592815 | 73.866298 | 73.6223778 |
| 73.9685834 | 73.6160148 | 75.8592815 | 73.866298 | 73.6223778 |
| 73.9685834 | 73.6160148 | 76.8592815 | 73.866298 | 73.6223778 |
| 74.9685834 | 73.6160148 | 77.8592815 | 73.866298 | 73.6223778 |
| 74.9685834 | 73.6160148 | 73.8592815 | 73.866298 | 73.6223778 |
| 75.9685834 | 73.6160148 | 71.8592815 | 73.866298 | 73.6223778 |
| 75.9685834 | 74.6160148 | 71.8592815 | 71.866298 | 73.6223778 |
| 75.9685834 | 74.6160148 | 66.8592815 | 68.866298 | 73.6223778 |
| 75.9685834 | 76.6160148 | 64.8592815 | 68.866298 | 72.6223778 |
| 75.9685834 | 76.6160148 | 63.8592815 | 70.866298 | 72.6223778 |
| 76.9685834 | 76.6160148 | 63.8592815 | 70.866298 | 72.6223778 |
| 76.9685834 | 76.6160148 | 63.8592815 | 70.866298 | 72.6223778 |
| 78.9685834 | 75.6160148 | 62.8592815 | 70.866298 | 70.6223778 |
| 78.9685834 | 76.6160148 | 62.8592815 | 71.866298 | 69.6223778 |
| 78.9685834 | 75.6160148 | 62.8592815 | 71.866298 | 69.6223778 |
| 78.9685834 | 75.6160148 | 63.8592815 | 71.866298 | 70.6223778 |

|            |            |            |           |            |
|------------|------------|------------|-----------|------------|
| 77.9685834 | 75.6160148 | 64.8592815 | 71.866298 | 70.6223778 |
| 75.9685834 | 75.6160148 | 64.8592815 | 71.866298 | 70.6223778 |
| 70.9685834 | 75.6160148 | 64.8592815 | 71.866298 | 70.6223778 |
| 68.9685834 | 75.6160148 | 64.8592815 | 71.866298 | 70.6223778 |
| 68.9685834 | 75.6160148 | 64.8592815 | 71.866298 | 70.6223778 |
| 68.9685834 | 75.6160148 | 63.8592815 | 72.866298 | 70.6223778 |
| 68.9685834 | 75.6160148 | 63.8592815 | 72.866298 | 69.6223778 |
| 67.9685834 | 75.6160148 | 62.8592815 | 72.866298 | 68.6223778 |
| 67.9685834 | 75.6160148 | 62.8592815 | 72.866298 | 68.6223778 |
| 67.9685834 | 74.6160148 | 63.8592815 | 72.866298 | 67.6223778 |
| 67.9685834 | 73.6160148 | 63.8592815 | 73.866298 | 67.6223778 |
| 67.9685834 | 73.6160148 | 64.8592815 | 73.866298 | 67.6223778 |
| 68.9685834 | 73.6160148 | 65.8592815 | 72.866298 | 67.6223778 |
| 68.9685834 | 73.6160148 | 65.8592815 | 72.866298 | 68.6223778 |
| 68.9685834 | 73.6160148 | 64.8592815 | 72.866298 | 69.6223778 |
| 68.9685834 | 73.6160148 | 64.8592815 | 72.866298 | 69.6223778 |
| 68.9685834 | 73.6160148 | 65.8592815 | 72.866298 | 71.6223778 |
| 67.9685834 | 73.6160148 | 65.8592815 | 71.866298 | 71.6223778 |
| 67.9685834 | 74.6160148 | 65.8592815 | 71.866298 | 71.6223778 |
| 67.9685834 | 77.6160148 | 64.8592815 | 73.866298 | 71.6223778 |
| 67.9685834 | 78.6160148 | 64.8592815 | 73.866298 | 71.6223778 |
| 67.9685834 | 78.6160148 | 64.8592815 | 73.866298 | 71.6223778 |
| 67.9685834 | 78.6160148 | 64.8592815 | 74.866298 | 71.6223778 |
| 67.9685834 | 79.6160148 | 64.8592815 | 74.866298 | 70.6223778 |
| 67.9685834 | 79.6160148 | 64.8592815 | 74.866298 | 70.6223778 |
| 66.9685834 | 79.6160148 | 64.8592815 | 75.866298 | 70.6223778 |
| 66.9685834 | 79.6160148 | 65.8592815 | 76.866298 | 70.6223778 |
| 66.9685834 | 79.6160148 | 65.8592815 | 79.866298 | 71.6223778 |
| 66.9685834 | 78.6160148 | 65.8592815 | 79.866298 | 70.6223778 |
| 66.9685834 | 78.6160148 | 66.8592815 | 79.866298 | 70.6223778 |
| 66.9685834 | 78.6160148 | 66.8592815 | 77.866298 | 69.6223778 |
| 66.9685834 | 78.6160148 | 67.8592815 | 76.866298 | 69.6223778 |
| 66.9685834 | 78.6160148 | 67.8592815 | 76.866298 | 69.6223778 |
| 65.9685834 | 78.6160148 | 68.8592815 | 76.866298 | 69.6223778 |
| 65.9685834 | 78.6160148 | 68.8592815 | 76.866298 | 69.6223778 |
| 65.9685834 | 75.6160148 | 70.8592815 | 76.866298 | 70.6223778 |
| 65.9685834 | 75.6160148 | 72.8592815 | 76.866298 | 70.6223778 |
| 65.9685834 | 74.6160148 | 72.8592815 | 75.866298 | 70.6223778 |
| 65.9685834 | 75.6160148 | 72.8592815 | 74.866298 | 70.6223778 |
| 65.9685834 | 75.6160148 | 74.8592815 | 74.866298 | 69.6223778 |
| 66.9685834 | 75.6160148 | 74.8592815 | 73.866298 | 69.6223778 |
| 66.9685834 | 76.6160148 | 75.8592815 | 74.866298 | 68.6223778 |
| 66.9685834 | 76.6160148 | 72.8592815 | 74.866298 | 68.6223778 |
| 66.9685834 | 76.6160148 | 72.8592815 | 74.866298 | 68.6223778 |
| 66.9685834 | 77.6160148 | 67.8592815 | 74.866298 | 68.6223778 |

|            |            |            |           |            |
|------------|------------|------------|-----------|------------|
| 66.9685834 | 82.6160148 | 65.8592815 | 74.866298 | 67.6223778 |
| 66.9685834 | 84.6160148 | 64.8592815 | 74.866298 | 67.6223778 |
| 66.9685834 | 86.6160148 | 63.8592815 | 75.866298 | 67.6223778 |
| 66.9685834 | 86.6160148 | 64.8592815 | 77.866298 | 67.6223778 |
| 85.9685834 | 83.6160148 | 64.8592815 | 77.866298 | 67.6223778 |
| 85.9685834 | 81.6160148 | 64.8592815 | 77.866298 | 68.6223778 |
| 85.9685834 | 80.6160148 | 65.8592815 | 77.866298 | 69.6223778 |
| 85.9685834 | 78.6160148 | 67.8592815 | 79.866298 | 69.6223778 |
| 85.9685834 | 78.6160148 | 67.8592815 | 80.866298 | 70.6223778 |
| 85.9685834 | 77.6160148 | 67.8592815 | 81.866298 | 70.6223778 |
| 79.9685834 | 77.6160148 | 67.8592815 | 84.866298 | 70.6223778 |
| 75.9685834 | 76.6160148 | 67.8592815 | 86.866298 | 70.6223778 |
| 73.9685834 | 76.6160148 | 68.8592815 | 86.866298 | 71.6223778 |
| 72.9685834 | 74.6160148 | 67.8592815 | 86.866298 | 71.6223778 |
| 72.9685834 | 74.6160148 | 67.8592815 | 86.866298 | 71.6223778 |
| 73.9685834 | 74.6160148 | 66.8592815 | 86.866298 | 71.6223778 |
| 73.9685834 | 74.6160148 | 66.8592815 | 86.866298 | 71.6223778 |
| 74.9685834 | 74.6160148 | 66.8592815 | 85.866298 | 71.6223778 |
| 73.9685834 | 74.6160148 | 66.8592815 | 84.866298 | 72.6223778 |
| 73.9685834 | 74.6160148 | 66.8592815 | 84.866298 | 73.6223778 |
| 73.9685834 | 74.6160148 | 65.8592815 | 84.866298 | 73.6223778 |
| 72.9685834 | 74.6160148 | 65.8592815 | 84.866298 | 73.6223778 |
| 72.9685834 | 74.6160148 | 65.8592815 | 80.866298 | 77.6223778 |
| 70.9685834 | 74.6160148 | 65.8592815 | 80.866298 | 77.6223778 |
| 70.9685834 | 74.6160148 | 65.8592815 | 75.866298 | 77.6223778 |
| 70.9685834 | 74.6160148 | 66.8592815 | 73.866298 | 71.6223778 |
| 70.9685834 | 74.6160148 | 66.8592815 | 71.866298 | 71.6223778 |
| 70.9685834 | 74.6160148 | 64.8592815 | 71.866298 | 70.6223778 |
| 70.9685834 | 77.6160148 | 64.8592815 | 71.866298 | 69.6223778 |
| 69.9685834 | 77.6160148 | 64.8592815 | 70.866298 | 69.6223778 |
| 69.9685834 | 77.6160148 | 64.8592815 | 70.866298 | 69.6223778 |
| 72.9685834 | 75.6160148 | 64.8592815 | 68.866298 | 69.6223778 |
| 73.9685834 | 75.6160148 | 64.8592815 | 68.866298 | 69.6223778 |
| 74.9685834 | 75.6160148 | 64.8592815 | 68.866298 | 69.6223778 |
| 74.9685834 | 75.6160148 | 65.8592815 | 67.866298 | 72.6223778 |
| 75.9685834 | 76.6160148 | 65.8592815 | 64.866298 | 72.6223778 |
| 77.9685834 | 76.6160148 | 66.8592815 | 64.866298 | 73.6223778 |
| 78.9685834 | 76.6160148 | 66.8592815 | 63.866298 | 74.6223778 |
| 78.9685834 | 76.6160148 | 64.8592815 | 63.866298 | 74.6223778 |
| 80.9685834 | 76.6160148 | 64.8592815 | 63.866298 | 74.6223778 |
| 82.9685834 | 76.6160148 | 63.8592815 | 62.866298 | 74.6223778 |
| 81.9685834 | 75.6160148 | 63.8592815 | 63.866298 | 74.6223778 |
| 78.9685834 | 75.6160148 | 62.8592815 | 68.866298 | 74.6223778 |
| 76.9685834 | 74.6160148 | 62.8592815 | 70.866298 | 74.6223778 |
| 75.9685834 | 72.6160148 | 62.8592815 | 70.866298 | 74.6223778 |

|            |            |            |           |            |
|------------|------------|------------|-----------|------------|
| 73.9685834 | 72.6160148 | 62.8592815 | 69.866298 | 74.6223778 |
| 71.9685834 | 72.6160148 | 63.8592815 | 70.866298 | 74.6223778 |
| 71.9685834 | 72.6160148 | 63.8592815 | 70.866298 | 73.6223778 |
| 71.9685834 | 72.6160148 | 64.8592815 | 70.866298 | 73.6223778 |
| 71.9685834 | 72.6160148 | 64.8592815 | 70.866298 | 74.6223778 |
| 71.9685834 | 72.6160148 | 65.8592815 | 70.866298 | 74.6223778 |
| 73.9685834 | 71.6160148 | 65.8592815 | 70.866298 | 75.6223778 |
| 74.9685834 | 70.6160148 | 65.8592815 | 70.866298 | 75.6223778 |
| 75.9685834 | 69.6160148 | 65.8592815 | 70.866298 | 74.6223778 |
| 72.9685834 | 70.6160148 | 65.8592815 | 70.866298 | 74.6223778 |
| 71.9685834 | 72.6160148 | 65.8592815 | 82.866298 | 74.6223778 |
| 70.9685834 | 72.6160148 | 65.8592815 | 73.6      | 74.6223778 |
| 69.9685834 | 75.6160148 | 65.8592815 | 74.1      | 74.6223778 |
| 69.9685834 | 75.6160148 | 65.8592815 | 74.3      | 74.6223778 |
| 68.9685834 | 75.6160148 | 65.8592815 | 74.7      | 74.6223778 |
| 68.9685834 | 70.6160148 | 65.8592815 | 74.7      | 74.6223778 |
| 68.9685834 | 68.6160148 | 65.8592815 | 82.866298 | 74.6223778 |
| 68.9685834 | 67.6160148 | 65.8592815 | 82.866298 | 74.6223778 |
| 70.9685834 | 67.6160148 | 65.8592815 | 77.866298 | 75.6223778 |
| 70.9685834 | 67.6160148 | 65.8592815 | 72.866298 | 75.6223778 |
| 69.9685834 | 68.6160148 | 64.8592815 | 72.866298 | 75.6223778 |
| 69.9685834 | 70.6160148 | 64.8592815 | 70.866298 | 75.6223778 |
| 69.9685834 | 70.6160148 | 64.8592815 | 70.866298 | 75.6223778 |
| 69.9685834 | 73.6160148 | 64.8592815 | 70.866298 | 75.6223778 |
| 69.9685834 | 73.6160148 | 61.8592815 | 70.866298 | 70.6223778 |
| 69.9685834 | 73.6160148 | 61.8592815 | 70.866298 | 70.6223778 |
| 68.9685834 | 74.6160148 | 62.8592815 | 70.866298 | 70.6223778 |
| 67.9685834 | 75.6160148 | 63.8592815 | 70.866298 | 69.6223778 |
| 67.9685834 | 75.6160148 | 65.8592815 | 70.866298 | 69.6223778 |
| 67.9685834 | 75.6160148 | 65.8592815 | 70.866298 | 68.6223778 |
| 67.9685834 | 75.6160148 | 65.8592815 | 71.866298 | 68.6223778 |
| 66.9685834 | 76.6160148 | 65.8592815 | 71.866298 | 68.6223778 |
| 67.9685834 | 76.6160148 | 67.8592815 | 72.866298 | 68.6223778 |
| 68.9685834 | 76.6160148 | 68.8592815 | 72.866298 | 68.6223778 |
| 68.9685834 | 78.6160148 | 68.8592815 | 73.866298 | 68.6223778 |
| 68.9685834 | 83.6160148 | 71.8592815 | 73.866298 | 68.6223778 |
| 68.9685834 | 84.6160148 | 71.8592815 | 74.866298 | 68.6223778 |
| 69.9685834 | 84.6160148 | 74.8592815 | 76.866298 | 68.6223778 |
| 70.9685834 | 76.6160148 | 73.8592815 | 76.866298 | 69.6223778 |
| 70.9685834 | 76.6160148 | 73.8592815 | 76.866298 | 69.6223778 |
| 70.9685834 | 76.6160148 | 68.8592815 | 77.866298 | 69.6223778 |
| 70.9685834 | 70.6160148 | 67.8592815 | 77.866298 | 69.6223778 |
| 70.9685834 | 70.6160148 | 65.8592815 | 76.866298 | 69.6223778 |
| 71.9685834 | 69.6160148 | 65.8592815 | 76.866298 | 69.6223778 |
| 72.9685834 | 69.6160148 | 65.8592815 | 76.866298 | 69.6223778 |

|            |            |            |           |            |
|------------|------------|------------|-----------|------------|
| 69.9685834 | 69.6160148 | 65.8592815 | 78.866298 | 69.6223778 |
| 69.9685834 | 70.6160148 | 65.8592815 | 78.866298 | 69.6223778 |
| 68.9685834 | 70.6160148 | 69.8592815 | 78.866298 | 69.6223778 |
| 67.9685834 | 70.6160148 | 69.8592815 | 78.866298 | 69.6223778 |
| 66.9685834 | 70.6160148 | 69.8592815 | 75.866298 | 69.6223778 |
| 63.9685834 | 70.6160148 | 71.8592815 | 73.866298 | 69.6223778 |
| 62.9685834 | 70.6160148 | 68.8592815 | 71.866298 | 69.6223778 |
| 61.9685834 | 70.6160148 | 63.8592815 | 71.866298 | 69.6223778 |
| 62.9685834 | 70.6160148 | 63.8592815 | 71.866298 | 70.6223778 |
| 65.9685834 | 70.6160148 | 62.8592815 | 71.866298 | 70.6223778 |
| 67.9685834 | 72.6160148 | 61.8592815 | 72.866298 | 70.6223778 |
| 67.9685834 | 75.6160148 | 62.8592815 | 72.866298 | 70.6223778 |
| 67.9685834 | 76.6160148 | 62.8592815 | 72.866298 | 71.6223778 |
| 67.9685834 | 76.6160148 | 62.8592815 | 72.866298 | 71.6223778 |
| 68.9685834 | 76.6160148 | 62.8592815 | 72.866298 | 71.6223778 |
| 68.9685834 | 77.6160148 | 63.8592815 | 72.866298 | 71.6223778 |
| 68.9685834 | 78.6160148 | 64.8592815 | 72.866298 | 71.6223778 |
| 68.9685834 | 79.6160148 | 64.8592815 | 72.866298 | 71.6223778 |
| 68.9685834 | 79.6160148 | 64.8592815 | 73.866298 | 72.6223778 |
| 69.9685834 | 79.6160148 | 64.8592815 | 73.866298 | 72.6223778 |
| 70.9685834 | 79.6160148 | 64.8592815 | 73.866298 | 73.6223778 |
| 70.9685834 | 79.6160148 | 64.8592815 | 73.866298 | 73.6223778 |
| 70.9685834 | 78.6160148 | 64.8592815 | 73.866298 | 75.6223778 |
| 70.9685834 | 78.6160148 | 64.8592815 | 73.866298 | 76.6223778 |
| 70.9685834 | 77.6160148 | 65.8592815 | 73.866298 | 76.6223778 |
| 70.9685834 | 80.6160148 | 65.8592815 | 73.866298 | 76.6223778 |
| 70.9685834 | 80.6160148 | 65.8592815 | 73.866298 | 77.6223778 |
| 70.9685834 | 80.6160148 | 65.8592815 | 76.866298 | 77.6223778 |
| 70.9685834 | 80.6160148 | 64.8592815 | 79.866298 | 76.6223778 |
| 71.9685834 | 81.6160148 | 64.8592815 | 80.866298 | 76.6223778 |
| 70.9685834 | 83.6160148 | 64.8592815 | 80.866298 | 72.6223778 |
| 70.9685834 | 75         | 64.8592815 | 80.866298 | 70.6223778 |
| 70.9685834 | 75.6       | 64.8592815 | 84.866298 | 70.6223778 |
| 70.9685834 | 76.3       | 64.8592815 | 86.866298 | 70.6223778 |
| 70.9685834 | 76.7       | 65.8592815 | 86.866298 | 70.6223778 |
| 72.9685834 | 77.5       | 68.8592815 | 89.866298 | 70.6223778 |
| 72.9685834 | 77.4       | 67.8592815 | 88.866298 | 70.6223778 |
| 72.9685834 | 89.6160148 | 66.8592815 | 88.866298 | 70.6223778 |
| 72.9685834 | 86.6160148 | 66.8592815 | 88.866298 | 70.6223778 |
| 73.9685834 | 86.6160148 | 66.8592815 | 87.866298 | 71.6223778 |
| 71.9685834 | 86.6160148 | 65.8592815 | 87.866298 | 71.6223778 |
| 69.9685834 | 86.6160148 | 64.8592815 | 87.866298 | 72.6223778 |
| 69.9685834 | 86.6160148 | 64.8592815 | 86.866298 | 73.6223778 |
| 72.9685834 | 85.6160148 | 63.8592815 | 85.866298 | 73.6223778 |
| 77.9685834 | 82.6160148 | 63.8592815 | 85.866298 | 75.6223778 |

|            |            |            |           |            |
|------------|------------|------------|-----------|------------|
| 82.9685834 | 81.6160148 | 64.8592815 | 85.866298 | 75.6223778 |
| 84.9685834 | 81.6160148 | 65.8592815 | 85.866298 | 75.6223778 |
| 84.9685834 | 81.6160148 | 65.8592815 | 85.866298 | 75.6223778 |
| 84.9685834 | 81.6160148 | 65.8592815 | 85.866298 | 77.6223778 |
| 85.9685834 | 82.6160148 | 68.8592815 | 86.866298 | 77.6223778 |
| 85.9685834 | 82.6160148 | 68.8592815 | 86.866298 | 80.6223778 |
| 84.9685834 | 82.6160148 | 68.8592815 | 86.866298 | 80.6223778 |
| 84.9685834 | 82.6160148 | 67.8592815 | 85.866298 | 80.6223778 |
| 84.9685834 | 82.6160148 | 67.8592815 | 79.866298 | 80.6223778 |
| 84.9685834 | 85.6160148 | 67.8592815 | 76.866298 | 75.6223778 |
| 84.9685834 | 86.6160148 | 67.8592815 | 76.866298 | 75.6223778 |
| 84.9685834 | 88.6160148 | 67.8592815 | 76.866298 | 75.6223778 |
| 83.9685834 | 89.6160148 | 67.8592815 | 77.866298 | 74.6223778 |
| 82.9685834 | 89.6160148 | 68.8592815 | 78.866298 | 73.6223778 |
| 82.9685834 | 89.6160148 | 68.8592815 | 77.866298 | 72.6223778 |
| 82.9685834 | 90.6160148 | 68.8592815 | 77.866298 | 72.6223778 |
| 81.9685834 | 90.6160148 | 68.8592815 | 77.866298 | 72.6223778 |
| 79.9685834 | 87.6160148 | 69.8592815 | 79.866298 | 72.6223778 |
| 75.9685834 | 83.6160148 | 69.8592815 | 81.866298 | 73.6223778 |
| 73.9685834 | 83.6160148 | 71.8592815 | 81.866298 | 73.6223778 |
| 72.9685834 | 83.6160148 | 73.8592815 | 81.866298 | 73.6223778 |
| 71.9685834 | 84.6160148 | 73.8592815 | 84.866298 | 73.6223778 |
| 71.9685834 | 85.6160148 | 73.8592815 | 85.866298 | 73.6223778 |
| 72.9685834 | 85.6160148 | 73.8592815 | 85.866298 | 73.6223778 |
| 73.9685834 | 85.6160148 | 73.8592815 | 85.866298 | 73.6223778 |
| 74.9685834 | 85.6160148 | 73.8592815 | 87.866298 | 74.6223778 |
| 74.9685834 | 85.6160148 | 73.8592815 | 87.866298 | 74.6223778 |
| 74.9685834 | 85.6160148 | 73.8592815 | 87.866298 | 74.6223778 |
| 75.9685834 | 85.6160148 | 71.8592815 | 80.866298 | 73.6223778 |
| 75.9685834 | 85.6160148 | 71.8592815 | 79.866298 | 73.6223778 |
| 75.9685834 | 85.6160148 | 71.8592815 | 78.866298 | 73.6223778 |
| 76.9685834 | 85.6160148 | 71.8592815 | 78.866298 | 73.6223778 |
| 76.9685834 | 85.6160148 | 71.8592815 | 78.866298 | 73.6223778 |
| 76.9685834 | 84.6160148 | 71.8592815 | 77.866298 | 73.6223778 |
| 76.9685834 | 82.6160148 | 76.8592815 | 77.866298 | 73.6223778 |
| 77.9685834 | 82.6160148 | 77.8592815 | 78.866298 | 73.6223778 |
| 77.9685834 | 82.6160148 | 77.8592815 | 78.866298 | 74.6223778 |
| 78.9685834 | 81.6160148 | 76.8592815 | 77.866298 | 74.6223778 |
| 79.9685834 | 79.6160148 | 73.8592815 | 77.866298 | 74.6223778 |
| 80.9685834 | 77.6160148 | 73.8592815 | 77.866298 | 74.6223778 |
| 81.9685834 | 75.6160148 | 72.8592815 | 77.866298 | 75.6223778 |
| 85.9685834 | 74.6160148 | 71.8592815 | 77.866298 | 75.6223778 |
| 76.6       | 72.6160148 | 70.8592815 | 77.866298 | 75.6223778 |
| 84.9685834 | 71.6160148 | 69.8592815 | 77.866298 | 75.6223778 |
| 79.9685834 | 69.6160148 | 69.8592815 | 78.866298 | 75.6223778 |

|            |            |            |           |            |
|------------|------------|------------|-----------|------------|
| 74.9685834 | 69.6160148 | 68.8592815 | 79.866298 | 75.6223778 |
| 72.9685834 | 69.6160148 | 68.8592815 | 79.866298 | 74.6223778 |
| 70.9685834 | 69.6160148 | 70.8592815 | 79.866298 | 74.6223778 |
| 70.9685834 | 70.6160148 | 70.8592815 | 80.866298 | 74.6223778 |
| 69.9685834 | 70.6160148 | 71.8592815 | 81.866298 | 73.6223778 |
| 69.9685834 | 71.6160148 | 70.8592815 | 82.866298 | 73.6223778 |
| 69.9685834 | 71.6160148 | 69.8592815 | 82.866298 | 73.6223778 |
| 68.9685834 | 71.6160148 | 69.8592815 | 81.866298 | 72.6223778 |
| 68.9685834 | 70.6160148 | 69.8592815 | 78.866298 | 72.6223778 |
| 68.9685834 | 70.6160148 | 69.8592815 | 77.866298 | 72.6223778 |
| 68.9685834 | 70.6160148 | 69.8592815 | 77.866298 | 71.6223778 |
| 68.9685834 | 70.6160148 | 69.8592815 | 74.866298 | 71.6223778 |
| 68.9685834 | 70.6160148 | 69.8592815 | 74.866298 | 71.6223778 |
| 68.9685834 | 70.6160148 | 69.8592815 | 73.866298 | 71.6223778 |
| 66.9685834 | 71.6160148 | 69.8592815 | 73.866298 | 71.6223778 |
| 66.9685834 | 72.6160148 | 69.8592815 | 73.866298 | 71.6223778 |
| 66.9685834 | 75.6160148 | 69.8592815 | 73.866298 | 70.6223778 |
| 67.9685834 | 75.6160148 | 70.8592815 | 72.866298 | 70.6223778 |
| 67.9685834 | 76.6160148 | 70.8592815 | 72.866298 | 70.6223778 |
| 78.9685834 | 76.6160148 | 71.8592815 | 72.866298 | 70.6223778 |
| 79.9685834 | 75.6160148 | 71.8592815 | 72.866298 | 71.6223778 |
| 79.9685834 | 75.6160148 | 71.8592815 | 72.866298 | 69.6223778 |
| 80.9685834 | 75.6160148 | 71.8592815 | 72.866298 | 69.6223778 |
| 79.9685834 | 75.6160148 | 71.8592815 | 71.866298 | 68.6223778 |
| 79.9685834 | 75.6160148 | 72.8592815 | 71.866298 | 68.6223778 |
| 74.9685834 | 73.6160148 | 72.8592815 | 71.866298 | 68.6223778 |
| 73.9685834 | 73.6160148 | 72.8592815 | 71.866298 | 68.6223778 |
| 73.9685834 | 73.6160148 | 72.8592815 | 71.866298 | 68.6223778 |
| 72.9685834 | 73.6160148 | 74.8592815 | 71.866298 | 69.6223778 |
| 72.9685834 | 73.6160148 | 83.8592815 | 70.866298 | 69.6223778 |
| 72.9685834 | 74.6160148 | 88.8592815 | 70.866298 | 68.6223778 |
| 71.9685834 | 74.6160148 | 88.8592815 | 69.866298 | 68.6223778 |
| 72.9685834 | 80.6160148 | 88.8592815 | 69.866298 | 68.6223778 |
| 72.9685834 | 81.6160148 | 84.8592815 | 67.866298 | 67.6223778 |
| 71.9685834 | 81.6160148 | 82.8592815 | 67.866298 | 68.6223778 |
| 70.9685834 | 81.6160148 | 82.8592815 | 67.866298 | 68.6223778 |
| 70.9685834 | 82.6160148 | 82.8592815 | 67.866298 | 68.6223778 |
| 69.9685834 | 83.6160148 | 80.8592815 | 67.866298 | 68.6223778 |
| 69.9685834 | 84.6160148 | 80.8592815 | 68.866298 | 68.6223778 |
| 69.9685834 | 84.6160148 | 75.8592815 | 68.866298 | 68.6223778 |
| 68.9685834 | 86.6160148 | 75.8592815 | 69.866298 | 68.6223778 |
| 68.9685834 | 86.6160148 | 75.8592815 | 70.866298 | 69.6223778 |
| 68.9685834 | 87.6160148 | 75.8592815 | 70.866298 | 69.6223778 |
| 68.9685834 | 87.6160148 | 75.8592815 | 70.866298 | 70.6223778 |
| 68.9685834 | 87.6160148 | 75.8592815 | 70.866298 | 70.6223778 |

|            |            |            |           |            |
|------------|------------|------------|-----------|------------|
| 68.9685834 | 87.6160148 | 75.8592815 | 71.866298 | 71.6223778 |
| 68.9685834 | 87.6160148 | 75.8592815 | 71.866298 | 71.6223778 |
| 68.9685834 | 87.6160148 | 76.8592815 | 72.866298 | 75.6223778 |
| 66.9685834 | 87.6160148 | 71.8592815 | 72.866298 | 77.6223778 |
| 66.9685834 | 87.6160148 | 66.8592815 | 72.866298 | 80.6223778 |
| 65.9685834 | 87.6160148 | 66.8592815 | 72.866298 | 80.6223778 |
| 64.9685834 | 88.6160148 | 64.8592815 | 74.866298 | 78.6223778 |
| 64.9685834 | 74.4       | 64.8592815 | 73.866298 | 78.6223778 |
| 62.9685834 | 89.6160148 | 67.8592815 | 73.866298 | 78.6223778 |
| 62.9685834 | 89.6160148 | 67.8592815 | 73.866298 | 78.6223778 |
| 61.9685834 | 89.6160148 | 69.8592815 | 73.866298 | 77.6223778 |
| 61.9685834 | 89.6160148 | 70.8592815 | 74.866298 | 77.6223778 |
| 61.9685834 | 89.6160148 | 72.8592815 | 74.866298 | 77.6223778 |
| 62.9685834 | 89.6160148 | 72.8592815 | 74.866298 | 77.6223778 |
| 62.9685834 | 89.6160148 | 72.8592815 | 74.866298 | 75.6223778 |
| 64.9685834 | 89.6160148 | 69.8592815 | 75.866298 | 73.6223778 |
| 77.9685834 | 89.6160148 | 69.8592815 | 75.866298 | 74.6223778 |
| 79.9685834 | 89.6160148 | 68.8592815 | 76.866298 | 74.6223778 |
| 78.9685834 | 90.6160148 | 70.8592815 | 76.866298 | 74.6223778 |
| 78.9685834 | 90.6160148 | 72.8592815 | 76.866298 | 73.6223778 |
| 78.9685834 | 90.6160148 | 73.8592815 | 79.866298 | 73.6223778 |
| 78.9685834 | 90.6160148 | 73.8592815 | 79.866298 | 72.6223778 |
| 78.9685834 | 90.6160148 | 71.8592815 | 82.866298 | 72.6223778 |
| 78.9685834 | 87.6160148 | 72.8592815 | 82.866298 | 71.6223778 |
| 78.9685834 | 87.6160148 | 72.8592815 | 79.866298 | 70.6223778 |
| 78.9685834 | 86.6160148 | 72.8592815 | 78.866298 | 70.6223778 |
| 78.9685834 | 86.6160148 | 72.8592815 | 78.866298 | 70.6223778 |
| 78.9685834 | 89.6160148 | 72.8592815 | 78.866298 | 69.6223778 |
| 77.9685834 | 90.6160148 | 72.8592815 | 76.866298 | 69.6223778 |
| 77.9685834 | 91.6160148 | 73.8592815 | 75.866298 | 69.6223778 |
| 77.9685834 | 92.6160148 | 73.8592815 | 75.866298 | 70.6223778 |
| 77.9685834 | 92.6160148 | 76.8592815 | 76.866298 | 70.6223778 |
| 78.9685834 | 92.6160148 | 77.8592815 | 76.866298 | 70.6223778 |
| 78.9685834 | 92.6160148 | 77.8592815 | 78.866298 | 70.6223778 |
| 79.9685834 | 77.1       | 71.8592815 | 78.866298 | 69.6223778 |
| 80.9685834 | 76.9       | 71.8592815 | 76.866298 | 68.6223778 |
| 80.9685834 | 76.5       | 68.8592815 | 76.866298 | 68.6223778 |
| 80.9685834 | 75.8       | 67.8592815 | 73.866298 | 68.6223778 |
| 78.9685834 | 76         | 67.8592815 | 73.866298 | 68.6223778 |
| 78.9685834 | 76         | 66.8592815 | 73.866298 | 69.6223778 |
| 78.9685834 | 76         | 66.8592815 | 72.866298 | 69.6223778 |
| 80.9685834 | 76.2       | 65.8592815 | 72.866298 | 71.6223778 |
| 81.9685834 | 76.3       | 65.8592815 | 72.866298 | 71.6223778 |
| 80.9685834 | 75.9       | 64.8592815 | 71.866298 | 72.6223778 |
| 77.9685834 | 75.3       | 64.8592815 | 69.866298 | 72.6223778 |



|            |            |            |           |            |
|------------|------------|------------|-----------|------------|
| 73.9685834 | 75         | 63.8592815 | 69.866298 | 72.6223778 |
| 70.9685834 | 74.9       | 63.8592815 | 69.866298 | 72.6223778 |
| 68.9685834 | 75         | 66.8592815 | 69.866298 | 72.6223778 |
| 67.9685834 | 75.3       | 67.8592815 | 69.866298 | 72.6223778 |
| 66.9685834 | 75.1       | 67.8592815 | 70.866298 | 72.6223778 |
| 66.9685834 | 75.1       | 67.8592815 | 70.866298 | 72.6223778 |
| 66.9685834 | 75.1       | 67.8592815 | 70.866298 | 71.6223778 |
| 66.9685834 | 75         | 66.8592815 | 70.866298 | 71.6223778 |
| 66.9685834 | 74.7       | 66.8592815 | 63.866298 | 71.6223778 |
| 66.9685834 | 75.4       | 66.8592815 | 65.866298 | 71.6223778 |
| 66.9685834 | 75         | 66.8592815 | 65.866298 | 72.6223778 |
| 66.9685834 | 76.8       | 76.8592815 | 71.866298 | 72.6223778 |
| 66.9685834 | 77.7       | 80.8592815 | 75.866298 | 72.6223778 |
| 66.9685834 | 78.1       | 80.8592815 | 79.866298 | 72.6223778 |
| 67.9685834 | 77.7       | 82.8592815 | 79.866298 | 72.6223778 |
| 68.9685834 | 77.3       | 83.8592815 | 79.866298 | 71.6223778 |
| 74.9685834 | 91.6160148 | 83.8592815 | 78.866298 | 71.6223778 |
| 77.9685834 | 91.6160148 | 83.8592815 | 77.866298 | 71.6223778 |
| 78.9685834 | 88.6160148 | 83.8592815 | 75.866298 | 71.6223778 |
| 79.9685834 | 89.6160148 | 83.8592815 | 75.866298 | 71.6223778 |
| 78.9685834 | 90.6160148 | 83.8592815 | 75.866298 | 71.6223778 |
| 78.9685834 | 90.6160148 | 83.8592815 | 75.866298 | 71.6223778 |
| 78.9685834 | 90.6160148 | 83.8592815 | 75.866298 | 71.6223778 |
| 78.9685834 | 91.6160148 | 83.8592815 | 75.866298 | 71.6223778 |
| 77.9685834 | 92.6160148 | 86.8592815 | 74.866298 | 74.6223778 |
| 77.9685834 | 92.6160148 | 86.8592815 | 73.866298 | 74.6223778 |
| 77.9685834 | 92.6160148 | 87.8592815 | 73.866298 | 74.6223778 |
| 76.9685834 | 92.6160148 | 86.8592815 | 73.866298 | 73.6223778 |
| 76.9685834 | 92.6160148 | 83.8592815 | 70.866298 | 72.6223778 |
| 75.9685834 | 90.6160148 | 82.8592815 | 70.866298 | 71.6223778 |
| 73.9685834 | 90.6160148 | 80.8592815 | 70.866298 | 70.6223778 |
| 73.9685834 | 74.3601635 | 80.8592815 | 70.866298 | 70.6223778 |
| 77.9685834 | 84.6160148 | 80.8592815 | 69.866298 | 70.6223778 |
| 79.9685834 | 84.6160148 | 77.8592815 | 68.866298 | 70.6223778 |
| 80.9685834 | 84.6160148 | 77.8592815 | 67.866298 | 70.6223778 |
| 81.9685834 | 84.6160148 | 77.8592815 | 67.866298 | 70.6223778 |
| 81.9685834 | 83.6160148 | 77.8592815 | 67.866298 | 69.6223778 |
| 81.9685834 | 81.6160148 | 77.8592815 | 67.866298 | 69.6223778 |
| 81.9685834 | 79.6160148 | 77.8592815 | 67.866298 | 69.6223778 |
| 80.9685834 | 79.6160148 | 77.8592815 | 67.866298 | 68.6223778 |
| 78.9685834 | 81.6160148 | 77.8592815 | 67.866298 | 68.6223778 |
| 75.9685834 | 82.6160148 | 77.8592815 | 67.866298 | 68.6223778 |
| 73.9685834 | 82.6160148 | 76.8592815 | 67.866298 | 68.6223778 |
| 72.9685834 | 82.6160148 | 76.8592815 | 67.866298 | 68.6223778 |
| 71.9685834 | 82.6160148 | 74.8592815 | 67.866298 | 67.6223778 |
| 71.9685834 | 82.6160148 | 74.8592815 | 67.866298 | 67.6223778 |

|            |            |            |           |            |
|------------|------------|------------|-----------|------------|
| 70.9685834 | 82.6160148 | 74.8592815 | 68.866298 | 67.6223778 |
| 69.9685834 | 82.6160148 | 74.8592815 | 69.866298 | 67.6223778 |
| 70.9685834 | 81.6160148 | 74.8592815 | 69.866298 | 67.6223778 |
| 70.9685834 | 80.6160148 | 74.8592815 | 69.866298 | 67.6223778 |
| 71.9685834 | 80.6160148 | 74.8592815 | 69.866298 | 67.6223778 |
| 71.9685834 | 79.6160148 | 74.8592815 | 69.866298 | 67.6223778 |
| 71.9685834 | 79.6160148 | 74.8592815 | 69.866298 | 68.6223778 |
| 71.9685834 | 77.6160148 | 74.8592815 | 69.866298 | 69.6223778 |
| 71.9685834 | 77.6160148 | 74.8592815 | 71.866298 | 70.6223778 |
| 71.9685834 | 77.6160148 | 74.8592815 | 71.866298 | 71.6223778 |
| 71.9685834 | 77.6160148 | 71.8592815 | 76.866298 | 71.6223778 |
| 72.9685834 | 77.6160148 | 72.8592815 | 76.866298 | 71.6223778 |
| 72.9685834 | 78.6160148 | 72.8592815 | 75.866298 | 72.6223778 |
| 72.9685834 | 79.6160148 | 70.8592815 | 75.866298 | 71.6223778 |
| 73.9685834 | 79.6160148 | 70.8592815 | 75.866298 | 71.6223778 |
| 74.9685834 | 79.6160148 | 68.8592815 | 75.866298 | 71.6223778 |
| 74.9685834 | 83.6160148 | 67.8592815 | 76.866298 | 71.6223778 |
| 73.9685834 | 84.6160148 | 67.8592815 | 75.866298 | 71.6223778 |
| 73.9685834 | 84.6160148 | 64.8592815 | 75.866298 | 71.6223778 |
| 72.9685834 | 84.6160148 | 64.8592815 | 75.866298 | 71.6223778 |
| 72.9685834 | 84.6160148 | 64.8592815 | 75.866298 | 71.6223778 |
| 73.9685834 | 84.6160148 | 64.8592815 | 75.866298 | 71.6223778 |
| 77.9685834 | 86.6160148 | 64.8592815 | 74.866298 | 71.6223778 |
| 78.9685834 | 73.6160148 | 65.8592815 | 74.866298 | 71.6223778 |
| 78.9685834 | 73.6160148 | 65.8592815 | 74.866298 | 71.6223778 |
| 76.9685834 | 75.6160148 | 65.8592815 | 73.866298 | 71.6223778 |
| 73.9685834 | 77.6160148 | 67.8592815 | 73.866298 | 71.6223778 |
| 73.9685834 | 79.6160148 | 68.8592815 | 73.866298 | 70.6223778 |
| 73.9685834 | 79.6160148 | 68.8592815 | 73.866298 | 70.6223778 |
| 72.9685834 | 78.6160148 | 68.8592815 | 73.866298 | 69.6223778 |
| 72.9685834 | 76.6160148 | 68.8592815 | 73.866298 | 69.6223778 |
| 72.9685834 | 73.6160148 | 68.8592815 | 73.866298 | 68.6223778 |
| 72.9685834 | 73.6160148 | 69.8592815 | 73.866298 | 68.6223778 |
| 73.9685834 | 72.6160148 | 69.8592815 | 73.866298 | 68.6223778 |
| 71.9685834 | 72.6160148 | 69.8592815 | 73.866298 | 68.6223778 |
| 69.9685834 | 71.6160148 | 70.8592815 | 73.866298 | 69.6223778 |
| 68.9685834 | 70.6160148 | 70.8592815 | 72.866298 | 69.6223778 |
| 67.9685834 | 68.6160148 | 70.8592815 | 72.866298 | 74.6223778 |
| 67.9685834 | 68.6160148 | 71.8592815 | 72.866298 | 74.6223778 |
| 67.9685834 | 68.6160148 | 71.8592815 | 72.866298 | 75.6223778 |
| 67.9685834 | 67.6160148 | 71.8592815 | 72.866298 | 75.6223778 |
| 67.9685834 | 67.6160148 | 73.8592815 | 73.866298 | 76.6223778 |
| 67.9685834 | 67.6160148 | 73.8592815 | 73.866298 | 76.6223778 |
| 67.9685834 | 67.6160148 | 73.8592815 | 72.866298 | 76.6223778 |
| 67.9685834 | 67.6160148 | 74.8592815 | 72.866298 | 76.6223778 |

|            |            |            |           |            |
|------------|------------|------------|-----------|------------|
| 68.9685834 | 68.6160148 | 74.8592815 | 72.866298 | 76.6223778 |
| 71.9685834 | 68.6160148 | 74.8592815 | 72.866298 | 77.6223778 |
| 70.9685834 | 68.6160148 | 73.8592815 | 72.866298 | 77.6223778 |
| 70.9685834 | 72.6160148 | 73.8592815 | 72.866298 | 77.6223778 |
| 70.9685834 | 74.6160148 | 73.8592815 | 73.866298 | 76.6223778 |
| 70.9685834 | 74.6160148 | 72.8592815 | 72.866298 | 76.6223778 |
| 70.9685834 | 74.6160148 | 72.8592815 | 73.866298 | 76.6223778 |
| 70.9685834 | 74.6160148 | 72.8592815 | 73.866298 | 76.6223778 |
| 70.9685834 | 74.6160148 | 72.8592815 | 73.866298 | 76.6223778 |
| 70.9685834 | 74.6160148 | 72.8592815 | 73.866298 | 77.6223778 |
| 70.9685834 | 74.6160148 | 72.8592815 | 72.866298 | 79.6223778 |
| 70.9685834 | 74.6160148 | 72.8592815 | 72.866298 | 78.6223778 |
| 70.9685834 | 74.6160148 | 72.8592815 | 73.866298 | 75.6223778 |
| 70.9685834 | 74.6160148 | 72.8592815 | 73.866298 | 74.6223778 |
| 71.9685834 | 76.6160148 | 72.8592815 | 74.866298 | 75.6223778 |
| 70.9685834 | 77.6160148 | 72.8592815 | 74.866298 | 75.6223778 |
| 70.9685834 | 77.6160148 | 72.8592815 | 75.866298 | 75.6223778 |
| 70.9685834 | 76.6160148 | 70.8592815 | 75.866298 | 75.6223778 |
| 70.9685834 | 77.6160148 | 68.8592815 | 75.866298 | 76.6223778 |
| 69.9685834 | 77.6160148 | 68.8592815 | 75.866298 | 76.6223778 |
| 69.9685834 | 77.6160148 | 68.8592815 | 76.866298 | 77.6223778 |
| 69.9685834 | 77.6160148 | 69.8592815 | 75.866298 | 77.6223778 |
| 68.9685834 | 77.6160148 | 69.8592815 | 74.866298 | 76.6223778 |
| 68.9685834 | 78.6160148 | 69.8592815 | 74.866298 | 76.6223778 |
| 67.9685834 | 79.6160148 | 69.8592815 | 74.866298 | 78.6223778 |
| 67.9685834 | 79.6160148 | 69.8592815 | 74.866298 | 77.6223778 |
| 65.9685834 | 79.6160148 | 69.8592815 | 74.866298 | 77.6223778 |
| 64.9685834 | 79.6160148 | 71.8592815 | 74.866298 | 76.6223778 |
| 64.9685834 | 77.6160148 | 75.8592815 | 74.866298 | 76.6223778 |
| 64.9685834 | 77.6160148 | 76.8592815 | 74.866298 | 76.6223778 |
| 63.9685834 | 79.6160148 | 76.8592815 | 74.866298 | 76.6223778 |
| 63.9685834 | 79.6160148 | 78.8592815 | 73.866298 | 76.6223778 |
| 63.9685834 | 78.6160148 | 84.8592815 | 73.866298 | 76.6223778 |
| 64.9685834 | 78.6160148 | 87.8592815 | 74.866298 | 75.6223778 |
| 65.9685834 | 77.6160148 | 87.8592815 | 74.866298 | 75.6223778 |
| 66.9685834 | 76.6160148 | 88.8592815 | 75.866298 | 73.6223778 |
| 66.9685834 | 76.6160148 | 89.8592815 | 76.866298 | 73.6223778 |
| 66.9685834 | 75.6160148 | 89.8592815 | 76.866298 | 73.6223778 |
| 66.9685834 | 75.6160148 | 88.8592815 | 76.866298 | 73.6223778 |
| 66.9685834 | 76.6160148 | 88.8592815 | 77.866298 | 72.6223778 |
| 67.9685834 | 76.6160148 | 83.8592815 | 78.866298 | 71.6223778 |
| 67.9685834 | 76.6160148 | 82.8592815 | 78.866298 | 71.6223778 |
| 68.9685834 | 76.6160148 | 69.8592815 | 80.866298 | 71.6223778 |
| 69.9685834 | 76.6160148 | 69.8592815 | 80.866298 | 71.6223778 |
| 72.9685834 | 76.6160148 | 65.8592815 | 84.866298 | 71.6223778 |

|            |            |            |           |            |
|------------|------------|------------|-----------|------------|
| 73.9685834 | 76.6160148 | 65.8592815 | 86.866298 | 71.6223778 |
| 74.9685834 | 78.6160148 | 63.8592815 | 86.866298 | 72.6223778 |
| 74.9685834 | 79.6160148 | 62.8592815 | 86.866298 | 73.6223778 |
| 74.9685834 | 79.6160148 | 62.8592815 | 86.866298 | 74.6223778 |
| 74.9685834 | 81.6160148 | 62.8592815 | 87.866298 | 74.6223778 |
| 74.9685834 | 82.6160148 | 62.8592815 | 88.866298 | 74.6223778 |
| 74.9685834 | 83.6160148 | 61.8592815 | 88.866298 | 74.6223778 |
| 73.9685834 | 83.6160148 | 61.8592815 | 88.866298 | 74.6223778 |
| 73.9685834 | 83.6160148 | 61.8592815 | 89.866298 | 73.6223778 |
| 73.9685834 | 83.6160148 | 61.8592815 | 90.866298 | 73.6223778 |
| 73.9685834 | 84.6160148 | 61.8592815 | 90.866298 | 71.6223778 |
| 73.9685834 | 84.6160148 | 62.8592815 | 91.866298 | 69.6223778 |
| 74.9685834 | 85.6160148 | 62.8592815 | 91.866298 | 69.6223778 |
| 74.9685834 | 83.6160148 | 62.8592815 | 91.866298 | 69.6223778 |
| 74.9685834 | 83.6160148 | 64.8592815 | 77        | 67.6223778 |
| 75.9685834 | 81.6160148 | 64.8592815 | 76.8      | 67.6223778 |
| 77.9685834 | 81.6160148 | 64.8592815 | 76.6      | 67.6223778 |
| 77.9685834 | 80.6160148 | 64.8592815 | 76.3      | 66.6223778 |
| 82.9685834 | 79.6160148 | 64.8592815 | 90.866298 | 66.6223778 |
| 83.9685834 | 79.6160148 | 63.8592815 | 87.866298 | 66.6223778 |
| 82.9685834 | 81.6160148 | 63.8592815 | 86.866298 | 66.6223778 |
| 80.9685834 | 81.6160148 | 64.8592815 | 85.866298 | 66.6223778 |
| 77.9685834 | 81.6160148 | 64.8592815 | 85.866298 | 67.6223778 |
| 76.9685834 | 81.6160148 | 64.8592815 | 85.866298 | 68.6223778 |
| 75.9685834 | 81.6160148 | 65.8592815 | 85.866298 | 68.6223778 |
| 75.9685834 | 81.6160148 | 65.8592815 | 84.866298 | 69.6223778 |
| 74.9685834 | 83.6160148 | 65.8592815 | 80.866298 | 69.6223778 |
| 74.9685834 | 83.6160148 | 65.8592815 | 80.866298 | 69.6223778 |
| 73.9685834 | 84.6160148 | 65.8592815 | 81.866298 | 69.6223778 |
| 72.9685834 | 86.6160148 | 67.8592815 | 82.866298 | 70.6223778 |
| 71.9685834 | 86.6160148 | 68.8592815 | 77.866298 | 70.6223778 |
| 71.9685834 | 87.6160148 | 68.8592815 | 77.866298 | 71.6223778 |
| 71.9685834 | 87.6160148 | 68.8592815 | 74.866298 | 71.6223778 |
| 71.9685834 | 87.6160148 | 72.8592815 | 73.866298 | 71.6223778 |
| 71.9685834 | 88.6160148 | 73.8592815 | 73.866298 | 71.6223778 |
| 71.9685834 | 88.6160148 | 73.8592815 | 73.866298 | 71.6223778 |
| 70.9685834 | 88.6160148 | 73.8592815 | 73.866298 | 72.6223778 |
| 70.9685834 | 88.6160148 | 73.8592815 | 73.866298 | 72.6223778 |
| 70.9685834 | 83.6160148 | 70.8592815 | 73.866298 | 74.6223778 |
| 70.9685834 | 82.6160148 | 68.8592815 | 73.866298 | 75.6223778 |
| 70.9685834 | 82.6160148 | 68.8592815 | 73.866298 | 75.6223778 |
| 69.9685834 | 82.6160148 | 67.8592815 | 72.866298 | 75.6223778 |
| 69.9685834 | 82.6160148 | 67.8592815 | 72.866298 | 78.6223778 |
| 69.9685834 | 82.6160148 | 67.8592815 | 72.866298 | 79.6223778 |
| 69.9685834 | 81.6160148 | 67.8592815 | 72.866298 | 79.6223778 |

|            |            |            |           |            |
|------------|------------|------------|-----------|------------|
| 69.9685834 | 81.6160148 | 67.8592815 | 72.866298 | 79.6223778 |
| 68.9685834 | 81.6160148 | 67.8592815 | 72.866298 | 82.6223778 |
| 68.9685834 | 80.6160148 | 67.8592815 | 66.866298 | 82.6223778 |
| 68.9685834 | 80.6160148 | 67.8592815 | 66.866298 | 85.6223778 |
| 68.9685834 | 78.6160148 | 67.8592815 | 66.866298 | 85.6223778 |
| 68.9685834 | 78.6160148 | 67.8592815 | 65.866298 | 85.6223778 |
| 68.9685834 | 78.6160148 | 70.8592815 | 66.866298 | 85.6223778 |
| 68.9685834 | 78.6160148 | 70.8592815 | 66.866298 | 84.6223778 |
| 68.9685834 | 77.6160148 | 70.8592815 | 68.866298 | 84.6223778 |
| 68.9685834 | 77.6160148 | 72.8592815 | 69.866298 | 83.6223778 |
| 67.9685834 | 77.6160148 | 72.8592815 | 67.866298 | 76.6223778 |
| 67.9685834 | 77.6160148 | 73.8592815 | 66.866298 | 74.6223778 |
| 67.9685834 | 77.6160148 | 73.8592815 | 66.866298 | 74.6223778 |
| 69.9685834 | 76.6160148 | 75.8592815 | 66.866298 | 74.6223778 |
| 70.9685834 | 76.6160148 | 75.8592815 | 66.866298 | 73.6223778 |
| 71.9685834 | 74.6160148 | 75.8592815 | 66.866298 | 73.6223778 |
| 71.9685834 | 73.6160148 | 74.8592815 | 67.866298 | 72.6223778 |
| 71.9685834 | 73.6160148 | 74.8592815 | 68.866298 | 71.6223778 |
| 72.9685834 | 73.6160148 | 74.8592815 | 68.866298 | 71.6223778 |
| 74.9685834 | 73.6160148 | 74.8592815 | 69.866298 | 71.6223778 |
| 76.9685834 | 73.6160148 | 74.8592815 | 73.866298 | 71.6223778 |
| 75.9685834 | 73.6160148 | 70.8592815 | 73.866298 | 71.6223778 |
| 74.9685834 | 74.6160148 | 68.8592815 | 73.866298 | 71.6223778 |
| 72.9685834 | 74.6160148 | 67.8592815 | 71.866298 | 71.6223778 |
| 71.9685834 | 74.6160148 | 66.8592815 | 70.866298 | 71.6223778 |
| 71.9685834 | 73.6160148 | 66.8592815 | 70.866298 | 72.6223778 |
| 71.9685834 | 71.6160148 | 65.8592815 | 70.866298 | 72.6223778 |
| 72.9685834 | 70.6160148 | 65.8592815 | 71.866298 | 72.6223778 |
| 73.9685834 | 70.6160148 | 65.8592815 | 71.866298 | 72.6223778 |
| 73.9685834 | 70.6160148 | 65.8592815 | 71.866298 | 72.6223778 |
| 72.9685834 | 70.6160148 | 65.8592815 | 73.866298 | 71.6223778 |
| 71.9685834 | 70.6160148 | 65.8592815 | 73.866298 | 71.6223778 |
| 71.9685834 | 72.6160148 | 68.8592815 | 73.866298 | 70.6223778 |
| 71.9685834 | 72.6160148 | 68.8592815 | 73.866298 | 68.6223778 |
| 71.9685834 | 75.6160148 | 65.8592815 | 73.866298 | 66.6223778 |
| 71.9685834 | 74.6160148 | 65.8592815 | 73.866298 | 66.6223778 |
| 70.9685834 | 73.6160148 | 65.8592815 | 73.866298 | 66.6223778 |
| 69.9685834 | 73.6160148 | 65.8592815 | 75.866298 | 72.6223778 |
| 69.9685834 | 72.6160148 | 61.8592815 | 76.866298 | 72.6223778 |
| 68.9685834 | 73.6160148 | 62.8592815 | 78.866298 | 72.6223778 |
| 68.9685834 | 73.6160148 | 63.8592815 | 75.866298 | 72.6223778 |
| 68.9685834 | 73.6160148 | 64.8592815 | 74.866298 | 73.6223778 |
| 68.9685834 | 73.6160148 | 65.8592815 | 74.866298 | 73.6223778 |
| 68.9685834 | 73.6160148 | 65.8592815 | 73.866298 | 73.6223778 |
| 68.9685834 | 73.6160148 | 65.8592815 | 73.866298 | 73.6223778 |

|            |            |            |            |            |
|------------|------------|------------|------------|------------|
| 68.9685834 | 73.6160148 | 65.8592815 | 73.866298  | 73.6223778 |
| 68.9685834 | 75.6160148 | 66.8592815 | 72.866298  | 73.6223778 |
| 68.9685834 | 75.6160148 | 66.8592815 | 72.866298  | 73.6223778 |
| 68.9685834 | 75.6160148 | 66.8592815 | 74.866298  | 73.6223778 |
| 69.9685834 | 74.6160148 | 67.8592815 | 75.866298  | 73.6223778 |
| 70.9685834 | 74.6160148 | 67.8592815 | 76.866298  | 73.6223778 |
| 72.9685834 | 75.6160148 | 67.8592815 | 76.866298  | 72.6223778 |
| 72.9685834 | 75.6160148 | 67.8592815 | 77.866298  | 72.6223778 |
| 72.9685834 | 75.6160148 | 70.8592815 | 76.866298  | 72.6223778 |
| 73.9685834 | 75.6160148 | 70.8592815 | 76.866298  | 71.6223778 |
| 73.9685834 | 75.6160148 | 70.8592815 | 76.866298  | 71.6223778 |
| 73.9685834 | 76.6160148 | 69.8592815 | 74.866298  | 70.6223778 |
| 70.9685834 | 76.6160148 | 67.8592815 | 74.866298  | 71.6223778 |
| 69.9685834 | 76.6160148 | 67.8592815 | 74.866298  | 71.6223778 |
| 68.9685834 | 76.6160148 | 66.8592815 | 74.866298  | 71.6223778 |
| 68.9685834 | 78.6160148 | 68.8592815 | 74.866298  | 71.6223778 |
| 68.9685834 | 79.6160148 | 69.8592815 | 75.866298  | 72.6223778 |
| 68.9685834 | 80.6160148 | 69.8592815 | 86.866298  | 73.6223778 |
| 68.9685834 | 80.6160148 | 69.8592815 | 75.6       | 73.6223778 |
| 68.9685834 | 80.6160148 | 69.8592815 | 90.866298  | 72.6223778 |
| 68.9685834 | 81.6160148 | 70.8592815 | 76.3       | 72.6223778 |
| 68.9685834 | 81.6160148 | 70.8592815 | 76.6108136 | 72.6223778 |
| 69.9685834 | 79.6160148 | 71.8592815 | 91.866298  | 72.6223778 |
| 69.9685834 | 79.6160148 | 71.8592815 | 82.866298  | 72.6223778 |
| 69.9685834 | 79.6160148 | 72.8592815 | 82.866298  | 73.6223778 |
| 70.9685834 | 79.6160148 | 72.8592815 | 77.866298  | 73.6223778 |
| 71.9685834 | 78.6160148 | 72.8592815 | 74.866298  | 73.6223778 |
| 70.9685834 | 77.6160148 | 72.8592815 | 73.866298  | 73.6223778 |
| 68.9685834 | 76.6160148 | 72.8592815 | 72.866298  | 73.6223778 |
| 69.9685834 | 75.6160148 | 72.8592815 | 71.866298  | 73.6223778 |
| 69.9685834 | 74.6160148 | 72.8592815 | 69.866298  | 73.6223778 |
| 68.9685834 | 73.6160148 | 79.8592815 | 68.866298  | 73.6223778 |
| 66.9685834 | 73.6160148 | 77.8592815 | 67.866298  | 73.6223778 |
| 65.9685834 | 71.6160148 | 71.8592815 | 67.866298  | 71.6223778 |
| 64.9685834 | 71.6160148 | 69.8592815 | 66.866298  | 71.6223778 |
| 63.9685834 | 73.6160148 | 69.8592815 | 66.866298  | 71.6223778 |
| 62.9685834 | 74.6160148 | 65.8592815 | 66.866298  | 71.6223778 |
| 62.9685834 | 74.6160148 | 65.8592815 | 66.866298  | 71.6223778 |
| 62.9685834 | 74.6160148 | 65.8592815 | 67.866298  | 71.6223778 |
| 62.9685834 | 73.6160148 | 65.8592815 | 69.866298  | 71.6223778 |
| 62.9685834 | 71.6160148 | 65.8592815 | 71.866298  | 70.6223778 |
| 62.9685834 | 71.6160148 | 65.8592815 | 71.866298  | 69.6223778 |
| 62.9685834 | 71.6160148 | 65.8592815 | 68.866298  | 69.6223778 |
| 63.9685834 | 71.6160148 | 66.8592815 | 68.866298  | 69.6223778 |
| 63.9685834 | 70.6160148 | 66.8592815 | 68.866298  | 69.6223778 |

|            |            |            |            |            |
|------------|------------|------------|------------|------------|
| 65.9685834 | 73.6160148 | 66.8592815 | 68.866298  | 68.6223778 |
| 65.9685834 | 74.6160148 | 69.8592815 | 69.866298  | 69.6223778 |
| 65.9685834 | 75.6160148 | 67.8592815 | 68.866298  | 69.6223778 |
| 66.9685834 | 75.6160148 | 66.8592815 | 68.866298  | 69.6223778 |
| 66.9685834 | 75.6160148 | 64.8592815 | 68.866298  | 70.6223778 |
| 66.9685834 | 76.6160148 | 64.8592815 | 68.866298  | 70.6223778 |
| 66.9685834 | 76.6160148 | 63.8592815 | 68.866298  | 70.6223778 |
| 66.9685834 | 77.6160148 | 63.8592815 | 68.866298  | 70.6223778 |
| 66.9685834 | 77.6160148 | 63.8592815 | 68.866298  | 70.6223778 |
| 67.9685834 | 77.6160148 | 63.8592815 | 68.866298  | 70.6223778 |
| 67.9685834 | 77.6160148 | 63.8592815 | 68.866298  | 70.6223778 |
| 71.9685834 | 78.6160148 | 64.8592815 | 80.866298  | 70.6223778 |
| 70.9685834 | 78.6160148 | 63.8592815 | 80.866298  | 70.6223778 |
| 70.9685834 | 78.6160148 | 63.8592815 | 81.866298  | 70.6223778 |
| 70.9685834 | 78.6160148 | 63.8592815 | 81.866298  | 70.6223778 |
| 71.9685834 | 79.6160148 | 62.8592815 | 82.866298  | 70.6223778 |
| 71.9685834 | 79.6160148 | 63.8592815 | 85.866298  | 71.6223778 |
| 71.9685834 | 80.6160148 | 63.8592815 | 85.866298  | 72.6223778 |
| 70.9685834 | 80.6160148 | 65.8592815 | 85.866298  | 71.6223778 |
| 70.9685834 | 80.6160148 | 65.8592815 | 85.866298  | 72.6223778 |
| 69.9685834 | 80.6160148 | 65.8592815 | 85.866298  | 72.6223778 |
| 68.9685834 | 81.6160148 | 66.8592815 | 85.866298  | 72.6223778 |
| 68.9685834 | 81.6160148 | 67.8592815 | 85.866298  | 73.6223778 |
| 68.9685834 | 81.6160148 | 67.8592815 | 85.866298  | 73.6223778 |
| 68.9685834 | 81.6160148 | 74.8592815 | 86.866298  | 74.6223778 |
| 68.9685834 | 81.6160148 | 74.8592815 | 90.866298  | 75.6223778 |
| 66.9685834 | 81.6160148 | 75.8592815 | 90.866298  | 75.6223778 |
| 67.9685834 | 81.6160148 | 75.8592815 | 76.6       | 75.6223778 |
| 67.9685834 | 81.6160148 | 73.8592815 | 76.2       | 75.6223778 |
| 68.9685834 | 81.6160148 | 70.8592815 | 75.5       | 74.6223778 |
| 68.9685834 | 81.6160148 | 70.8592815 | 75.7534465 | 74.6223778 |
| 69.9685834 | 81.6160148 | 70.8592815 | 81.866298  | 74.6223778 |
| 69.9685834 | 81.6160148 | 68.8592815 | 76.866298  | 73.6223778 |
| 69.9685834 | 81.6160148 | 66.8592815 | 74.866298  | 72.6223778 |
| 69.9685834 | 82.6160148 | 66.8592815 | 71.866298  | 72.6223778 |
| 69.9685834 | 82.6160148 | 66.8592815 | 70.866298  | 72.6223778 |
| 70.9685834 | 83.6160148 | 66.8592815 | 70.866298  | 72.6223778 |
| 71.9685834 | 83.6160148 | 66.8592815 | 70.866298  | 72.6223778 |
| 71.9685834 | 84.6160148 | 66.8592815 | 69.866298  | 72.6223778 |
| 72.9685834 | 84.6160148 | 66.8592815 | 69.866298  | 72.6223778 |
| 72.9685834 | 86.6160148 | 67.8592815 | 68.866298  | 71.6223778 |
| 72.9685834 | 73.3       | 68.8592815 | 68.866298  | 70.6223778 |
| 73.9685834 | 88.6160148 | 70.8592815 | 69.866298  | 70.6223778 |
| 74.9685834 | 88.6160148 | 70.8592815 | 69.866298  | 69.6223778 |
| 73.9685834 | 74.1       | 71.8592815 | 69.866298  | 69.6223778 |

|            |            |            |           |            |
|------------|------------|------------|-----------|------------|
| 72.9685834 | 74.1       | 72.8592815 | 69.866298 | 69.6223778 |
| 71.9685834 | 74.5       | 72.8592815 | 69.866298 | 69.6223778 |
| 70.9685834 | 75.1       | 72.8592815 | 69.866298 | 69.6223778 |
| 70.9685834 | 75.5       | 72.8592815 | 69.866298 | 69.6223778 |
| 70.9685834 | 75.5       | 71.8592815 | 69.866298 | 69.6223778 |
| 71.9685834 | 75.6       | 70.8592815 | 68.866298 | 69.6223778 |
| 72.9685834 | 75.3       | 70.8592815 | 67.866298 | 69.6223778 |
| 73.9685834 | 75.1       | 72.8592815 | 67.866298 | 69.6223778 |
| 75.9685834 | 89.6160148 | 72.8592815 | 68.866298 | 68.6223778 |
| 77.9685834 | 88.6160148 | 72.8592815 | 68.866298 | 68.6223778 |
| 77.9685834 | 88.6160148 | 72.8592815 | 69.866298 | 68.6223778 |
| 78.9685834 | 88.6160148 | 72.8592815 | 69.866298 | 69.6223778 |
| 78.9685834 | 88.6160148 | 72.8592815 | 68.866298 | 69.6223778 |
| 77.9685834 | 89.6160148 | 72.8592815 | 68.866298 | 69.6223778 |
| 77.9685834 | 75.1       | 72.8592815 | 67.866298 | 69.6223778 |
| 76.9685834 | 74.9       | 73.8592815 | 67.866298 | 70.6223778 |
| 75.9685834 | 74.6       | 73.8592815 | 66.866298 | 70.6223778 |
| 75.9685834 | 86.6160148 | 73.8592815 | 67.866298 | 70.6223778 |
| 74.9685834 | 85.6160148 | 73.8592815 | 68.866298 | 70.6223778 |
| 73.9685834 | 85.6160148 | 73.8592815 | 69.866298 | 70.6223778 |
| 72.9685834 | 84.6160148 | 73.8592815 | 70.866298 | 70.6223778 |
| 72.9685834 | 84.6160148 | 73.8592815 | 70.866298 | 72.6223778 |
| 72.9685834 | 83.6160148 | 72.8592815 | 73.866298 | 73.6223778 |
| 71.9685834 | 83.6160148 | 72.8592815 | 75.866298 | 73.6223778 |
| 72.9685834 | 83.6160148 | 72.8592815 | 76.866298 | 73.6223778 |
| 72.9685834 | 83.6160148 | 79.8592815 | 76.866298 | 72.6223778 |
| 72.9685834 | 83.6160148 | 79.8592815 | 75.866298 | 72.6223778 |
| 72.9685834 | 84.6160148 | 79.8592815 | 75.866298 | 72.6223778 |
| 72.9685834 | 85.6160148 | 80.8592815 | 75.866298 | 72.6223778 |
| 71.9685834 | 81.6160148 | 80.8592815 | 74.866298 | 72.6223778 |
| 71.9685834 | 79.6160148 | 78.8592815 | 73.866298 | 72.6223778 |
| 71.9685834 | 79.6160148 | 77.8592815 | 72.866298 | 73.6223778 |
| 72.9685834 | 79.6160148 | 77.8592815 | 72.866298 | 73.6223778 |
| 73.9685834 | 79.6160148 | 77.8592815 | 72.866298 | 73.6223778 |
| 73.9685834 | 78.6160148 | 70.8592815 | 72.866298 | 71.6223778 |
| 73.9685834 | 78.6160148 | 70.8592815 | 72.866298 | 71.6223778 |
| 74.9685834 | 78.6160148 | 73.8592815 | 73.866298 | 71.6223778 |
| 74.9685834 | 78.6160148 | 73.8592815 | 74.866298 | 71.6223778 |
| 74.9685834 | 77.6160148 | 73.8592815 | 74.866298 | 71.6223778 |
| 74.9685834 | 77.6160148 | 73.8592815 | 74.866298 | 71.6223778 |
| 74.9685834 | 75.6160148 | 73.8592815 | 75.866298 | 71.6223778 |
| 74.9685834 | 75.6160148 | 73.8592815 | 75.866298 | 71.6223778 |
| 74.9685834 | 75.6160148 | 74.8592815 | 75.866298 | 70.6223778 |
| 75.9685834 | 75.6160148 | 74.8592815 | 75.866298 | 69.6223778 |
| 75.9685834 | 74.6160148 | 74.8592815 | 75.866298 | 70.6223778 |



|            |            |            |           |            |
|------------|------------|------------|-----------|------------|
| 75.9685834 | 75.6160148 | 75.8592815 | 75.866298 | 70.6223778 |
| 75.9685834 | 75.6160148 | 75.8592815 | 75.866298 | 69.6223778 |
| 75.9685834 | 75.6160148 | 75.8592815 | 74.866298 | 69.6223778 |
| 75.9685834 | 74.6160148 | 75.8592815 | 78.866298 | 68.6223778 |
| 73.9685834 | 74.6160148 | 80.8592815 | 78.866298 | 68.6223778 |
| 72.9685834 | 73.6160148 | 80.8592815 | 80.866298 | 68.6223778 |
| 71.9685834 | 74.6160148 | 77.8592815 | 80.866298 | 68.6223778 |
| 72.9685834 | 75.6160148 | 77.8592815 | 80.866298 | 69.6223778 |
| 72.9685834 | 75.6160148 | 76.8592815 | 80.866298 | 69.6223778 |
| 73.9685834 | 75.6160148 | 69.8592815 | 83.866298 | 69.6223778 |
| 74.9685834 | 76.6160148 | 65.8592815 | 83.866298 | 69.6223778 |
| 74.9685834 | 76.6160148 | 63.8592815 | 86.866298 | 69.6223778 |
| 74.9685834 | 76.6160148 | 63.8592815 | 86.866298 | 69.6223778 |
| 75.9685834 | 77.6160148 | 62.8592815 | 86.866298 | 69.6223778 |
| 75.9685834 | 77.6160148 | 62.8592815 | 88.866298 | 69.6223778 |
| 75.9685834 | 76.6160148 | 62.8592815 | 88.866298 | 69.6223778 |
| 76.9685834 | 76.6160148 | 62.8592815 | 88.866298 | 70.6223778 |
| 76.9685834 | 76.6160148 | 62.8592815 | 89.866298 | 71.6223778 |
| 76.9685834 | 76.6160148 | 64.8592815 | 89.866298 | 71.6223778 |
| 76.9685834 | 81.6160148 | 70.8592815 | 90.866298 | 71.6223778 |
| 76.9685834 | 79.6160148 | 73.8592815 | 90.866298 | 71.6223778 |
| 77.9685834 | 78.6160148 | 73.8592815 | 90.866298 | 71.6223778 |
| 77.9685834 | 78.6160148 | 75.8592815 | 90.866298 | 71.6223778 |
| 77.9685834 | 78.6160148 | 75.8592815 | 90.866298 | 71.6223778 |
| 76.9685834 | 78.6160148 | 76.8592815 | 84.866298 | 71.6223778 |
| 77.9685834 | 78.6160148 | 76.8592815 | 83.866298 | 72.6223778 |
| 79.9685834 | 78.6160148 | 77.8592815 | 80.866298 | 72.6223778 |
| 79.9685834 | 78.6160148 | 77.8592815 | 80.866298 | 72.6223778 |
| 79.9685834 | 78.6160148 | 78.8592815 | 80.866298 | 72.6223778 |
| 79.9685834 | 78.6160148 | 78.8592815 | 79.866298 | 73.6223778 |
| 79.9685834 | 78.6160148 | 83.8592815 | 80.866298 | 73.6223778 |
| 79.9685834 | 75.6160148 | 86.8592815 | 80.866298 | 72.6223778 |
| 81.9685834 | 75.6160148 | 87.8592815 | 80.866298 | 72.6223778 |
| 82.9685834 | 74.6160148 | 87.8592815 | 80.866298 | 72.6223778 |
| 82.9685834 | 73.6160148 | 88.8592815 | 79.866298 | 72.6223778 |
| 83.9685834 | 72.6160148 | 89.8592815 | 79.866298 | 72.6223778 |
| 83.9685834 | 72.6160148 | 89.8592815 | 78.866298 | 72.6223778 |
| 80.9685834 | 71.6160148 | 76.9       | 79.866298 | 72.6223778 |
| 73.9685834 | 71.6160148 | 76.2       | 79.866298 | 71.6223778 |
| 70.9685834 | 72.6160148 | 76.1       | 79.866298 | 71.6223778 |
| 69.9685834 | 72.6160148 | 75.9       | 80.866298 | 71.6223778 |
| 68.9685834 | 76.6160148 | 76.4       | 80.866298 | 71.6223778 |
| 67.9685834 | 76.6160148 | 76.8       | 80.866298 | 72.6223778 |
| 66.9685834 | 79.6160148 | 77         | 82.866298 | 73.6223778 |
| 65.9685834 | 79.6160148 | 76.8       | 82.866298 | 73.6223778 |

|            |            |            |           |            |
|------------|------------|------------|-----------|------------|
| 65.9685834 | 81.6160148 | 77.3       | 82.866298 | 73.6223778 |
| 65.9685834 | 81.6160148 | 77.3       | 83.866298 | 76.6223778 |
| 65.9685834 | 81.6160148 | 77.3       | 83.866298 | 75.6223778 |
| 65.9685834 | 81.6160148 | 76.9554269 | 83.866298 | 74.6223778 |
| 65.9685834 | 82.6160148 | 77.4661151 | 84.866298 | 74.6223778 |
| 65.9685834 | 82.6160148 | 77.1       | 84.866298 | 71.6223778 |
| 65.9685834 | 82.6160148 | 77.4       | 88.866298 | 71.6223778 |
| 63.9685834 | 83.6160148 | 77.2       | 89.866298 | 71.6223778 |
| 63.9685834 | 83.6160148 | 77.1       | 88.866298 | 70.6223778 |
| 63.9685834 | 83.6160148 | 77.1       | 89.866298 | 69.6223778 |
| 63.9685834 | 83.6160148 | 77.1       | 89.866298 | 69.6223778 |
| 64.9685834 | 82.6160148 | 76.7       | 86.866298 | 69.6223778 |
| 65.9685834 | 80.6160148 | 76.5       | 85.866298 | 69.6223778 |
| 65.9685834 | 80.6160148 | 76.8       | 85.866298 | 69.6223778 |
| 65.9685834 | 77.6160148 | 76.7       | 85.866298 | 69.6223778 |
| 67.9685834 | 76.6160148 | 76.9       | 85.866298 | 69.6223778 |
| 68.9685834 | 76.6160148 | 75.9       | 82.866298 | 70.6223778 |
| 71.9685834 | 76.6160148 | 76.6       | 82.866298 | 70.6223778 |
| 72.9685834 | 75.6160148 | 88.8592815 | 82.866298 | 74.6223778 |
| 72.9685834 | 76.6160148 | 83.8592815 | 81.866298 | 77.6223778 |
| 73.9685834 | 76.6160148 | 75.8592815 | 80.866298 | 77.6223778 |
| 73.9685834 | 76.6160148 | 72.8592815 | 77.866298 | 77.6223778 |
| 71.9685834 | 76.6160148 | 73.8592815 | 77.866298 | 79.6223778 |
| 69.9685834 | 76.6160148 | 76.8592815 | 77.866298 | 80.6223778 |
| 69.9685834 | 76.6160148 | 76.8592815 | 77.866298 | 81.6223778 |
| 69.9685834 | 76.6160148 | 78.8592815 | 77.866298 | 81.6223778 |
| 69.9685834 | 76.6160148 | 80.8592815 | 76.866298 | 81.6223778 |
| 69.9685834 | 75.6160148 | 79.8592815 | 76.866298 | 81.6223778 |
| 69.9685834 | 74.6160148 | 79.8592815 | 74.866298 | 81.6223778 |
| 69.9685834 | 74.6160148 | 75.8592815 | 74.866298 | 81.6223778 |
| 69.9685834 | 74.6160148 | 70.8592815 | 74.866298 | 81.6223778 |
| 68.9685834 | 73.6160148 | 69.8592815 | 74.866298 | 81.6223778 |
| 69.9685834 | 70.6160148 | 69.8592815 | 75.866298 | 81.6223778 |
| 69.9685834 | 67.6160148 | 69.8592815 | 75.866298 | 81.6223778 |
| 70.9685834 | 66.6160148 | 70.8592815 | 75.866298 | 81.6223778 |
| 71.9685834 | 68.6160148 | 70.8592815 | 74.866298 | 80.6223778 |
| 72.9685834 | 73.6160148 | 70.8592815 | 74.866298 | 78.6223778 |
| 72.9685834 | 73.6160148 | 71.8592815 | 73.866298 | 78.6223778 |
| 72.9685834 | 74.6160148 | 73.8592815 | 73.866298 | 76.6223778 |
| 72.9685834 | 75.6160148 | 75.8592815 | 73.866298 | 75.6223778 |
| 72.9685834 | 75.6160148 | 78.8592815 | 73.866298 | 75.6223778 |
| 72.9685834 | 75.6160148 | 78.8592815 | 73.866298 | 74.6223778 |
| 72.9685834 | 75.6160148 | 78.8592815 | 72.866298 | 74.6223778 |
| 71.9685834 | 75.6160148 | 80.8592815 | 72.866298 | 73.6223778 |
| 72.9685834 | 75.6160148 | 80.8592815 | 71.866298 | 73.6223778 |

|            |            |            |           |            |
|------------|------------|------------|-----------|------------|
| 73.9685834 | 75.6160148 | 81.8592815 | 71.866298 | 72.6223778 |
| 73.9685834 | 75.6160148 | 81.8592815 | 70.866298 | 70.6223778 |
| 74.9685834 | 75.6160148 | 81.8592815 | 70.866298 | 70.6223778 |
| 75.9685834 | 74.6160148 | 82.8592815 | 70.866298 | 69.6223778 |
| 75.9685834 | 74.6160148 | 82.8592815 | 70.866298 | 69.6223778 |
| 76.9685834 | 74.6160148 | 82.8592815 | 70.866298 | 69.6223778 |
| 76.9685834 | 74.6160148 | 83.8592815 | 70.866298 | 69.6223778 |
| 77.9685834 | 74.6160148 | 83.8592815 | 75.866298 | 69.6223778 |
| 76.9685834 | 74.6160148 | 86.8592815 | 78.866298 | 69.6223778 |
| 74.9685834 | 73.6160148 | 86.8592815 | 81.866298 | 69.6223778 |
| 73.9685834 | 73.6160148 | 88.8592815 | 83.866298 | 69.6223778 |
| 73.9685834 | 73.6160148 | 89.8592815 | 83.866298 | 70.6223778 |
| 73.9685834 | 73.6160148 | 89.8592815 | 83.866298 | 71.6223778 |
| 73.9685834 | 72.6160148 | 88.8592815 | 87.866298 | 71.6223778 |
| 73.9685834 | 73.6160148 | 88.8592815 | 87.866298 | 72.6223778 |
| 73.9685834 | 73.6160148 | 88.8592815 | 88.866298 | 72.6223778 |
| 73.9685834 | 73.6160148 | 88.8592815 | 88.866298 | 72.6223778 |
| 73.9685834 | 73.6160148 | 88.8592815 | 89.866298 | 72.6223778 |
| 73.9685834 | 75.6160148 | 88.8592815 | 89.866298 | 72.6223778 |
| 73.9685834 | 81.6160148 | 88.8592815 | 90.866298 | 73.6223778 |
| 73.9685834 | 82.6160148 | 87.8592815 | 90.866298 | 73.6223778 |
| 74.9685834 | 83.6160148 | 87.8592815 | 92.866298 | 74.6223778 |
| 75.9685834 | 82.6160148 | 87.8592815 | 92.866298 | 75.6223778 |
| 75.9685834 | 82.6160148 | 87.8592815 | 78.6      | 75.6223778 |
| 75.9685834 | 84.6160148 | 87.8592815 | 79.2      | 75.6223778 |
| 75.9685834 | 84.6160148 | 87.8592815 | 78.9      | 75.6223778 |
| 75.9685834 | 84.6160148 | 87.8592815 | 92.866298 | 73.6223778 |
| 75.9685834 | 83.6160148 | 87.8592815 | 92.866298 | 73.6223778 |
| 75.9685834 | 83.6160148 | 87.8592815 | 91.866298 | 73.6223778 |
| 76.9685834 | 82.6160148 | 87.8592815 | 91.866298 | 73.6223778 |
| 75.9685834 | 79.6160148 | 87.8592815 | 91.866298 | 73.6223778 |
| 76.9685834 | 77.6160148 | 88.8592815 | 91.866298 | 73.6223778 |
| 76.9685834 | 74.6160148 | 87.8592815 | 89.866298 | 74.6223778 |
| 76.9685834 | 72.6160148 | 87.8592815 | 89.866298 | 71.6223778 |
| 76.9685834 | 71.6160148 | 87.8592815 | 89.866298 | 71.6223778 |
| 75.9685834 | 71.6160148 | 87.8592815 | 78.866298 | 70.6223778 |
| 75.9685834 | 71.6160148 | 87.8592815 | 78.866298 | 69.6223778 |
| 75.9685834 | 71.6160148 | 87.8592815 | 78.866298 | 69.6223778 |
| 75.9685834 | 71.6160148 | 86.8592815 | 76.866298 | 69.6223778 |
| 73.9685834 | 71.6160148 | 84.8592815 | 74.866298 | 69.6223778 |
| 72.9685834 | 70.6160148 | 84.8592815 | 74.866298 | 69.6223778 |
| 72.9685834 | 71.6160148 | 84.8592815 | 73.866298 | 69.6223778 |
| 72.9685834 | 71.6160148 | 84.8592815 | 73.866298 | 69.6223778 |
| 73.9685834 | 71.6160148 | 83.8592815 | 73.866298 | 67.6223778 |
| 73.9685834 | 71.6160148 | 82.8592815 | 74.866298 | 67.6223778 |

|            |            |            |           |            |
|------------|------------|------------|-----------|------------|
| 73.9685834 | 71.6160148 | 79.8592815 | 74.866298 | 66.6223778 |
| 74.9685834 | 72.6160148 | 79.8592815 | 74.866298 | 66.6223778 |
| 73.9685834 | 72.6160148 | 76.8592815 | 74.866298 | 66.6223778 |
| 73.9685834 | 70.6160148 | 74.8592815 | 74.866298 | 65.6223778 |
| 73.9685834 | 68.6160148 | 75.8592815 | 74.866298 | 64.6223778 |
| 72.9685834 | 68.6160148 | 78.8592815 | 71.866298 | 64.6223778 |
| 72.9685834 | 66.6160148 | 81.8592815 | 71.866298 | 63.6223778 |
| 71.9685834 | 66.6160148 | 81.8592815 | 71.866298 | 64.6223778 |
| 69.9685834 | 66.6160148 | 81.8592815 | 68.866298 | 65.6223778 |
| 68.9685834 | 67.6160148 | 81.8592815 | 66.866298 | 65.6223778 |
| 67.9685834 | 67.6160148 | 80.8592815 | 63.866298 | 66.6223778 |
| 67.9685834 | 66.6160148 | 81.8592815 | 63.866298 | 67.6223778 |
| 67.9685834 | 66.6160148 | 80.8592815 | 63.866298 | 67.6223778 |
| 67.9685834 | 65.6160148 | 80.8592815 | 63.866298 | 67.6223778 |
| 67.9685834 | 65.6160148 | 76.8592815 | 62.866298 | 71.6223778 |
| 67.9685834 | 65.6160148 | 75.8592815 | 62.866298 | 71.6223778 |
| 67.9685834 | 64.6160148 | 76.8592815 | 61.866298 | 71.6223778 |
| 67.9685834 | 64.6160148 | 77.8592815 | 61.866298 | 72.6223778 |
| 67.9685834 | 64.6160148 | 77.8592815 | 61.866298 | 73.6223778 |
| 68.9685834 | 64.6160148 | 77.8592815 | 61.866298 | 73.6223778 |
| 68.9685834 | 64.6160148 | 77.8592815 | 60.866298 | 73.6223778 |
| 68.9685834 | 64.6160148 | 77.8592815 | 60.866298 | 72.6223778 |
| 68.9685834 | 63.6160148 | 78.8592815 | 60.866298 | 72.6223778 |
| 68.9685834 | 62.6160148 | 78.8592815 | 60.866298 | 70.6223778 |
| 68.9685834 | 61.6160148 | 78.8592815 | 60.866298 | 70.6223778 |
| 68.9685834 | 61.6160148 | 78.8592815 | 60.866298 | 70.6223778 |
| 68.9685834 | 63.6160148 | 78.8592815 | 61.866298 | 70.6223778 |
| 68.9685834 | 64.6160148 | 78.8592815 | 62.866298 | 70.6223778 |
| 69.9685834 | 65.6160148 | 79.8592815 | 63.866298 | 70.6223778 |
| 69.9685834 | 65.6160148 | 79.8592815 | 63.866298 | 69.6223778 |
| 69.9685834 | 64.6160148 | 79.8592815 | 64.866298 | 68.6223778 |
| 72.9685834 | 64.6160148 | 79.8592815 | 64.866298 | 68.6223778 |
| 73.9685834 | 65.6160148 | 79.8592815 | 65.866298 | 67.6223778 |
| 73.9685834 | 64.6160148 | 80.8592815 | 65.866298 | 67.6223778 |
| 73.9685834 | 64.6160148 | 81.8592815 | 67.866298 | 66.6223778 |
| 74.9685834 | 64.6160148 | 81.8592815 | 70.866298 | 66.6223778 |
| 74.9685834 | 64.6160148 | 81.8592815 | 71.866298 | 66.6223778 |
| 75.9685834 | 63.6160148 | 83.8592815 | 71.866298 | 66.6223778 |
| 75.9685834 | 63.6160148 | 83.8592815 | 72.866298 | 66.6223778 |
| 75.9685834 | 63.6160148 | 84.8592815 | 71.866298 | 66.6223778 |
| 75.9685834 | 63.6160148 | 73.7       | 72.866298 | 66.6223778 |
| 75.9685834 | 63.6160148 | 74.1       | 72.866298 | 66.6223778 |
| 75.9685834 | 64.6160148 | 73.9       | 72.866298 | 66.6223778 |
| 75.9685834 | 65.6160148 | 74.2       | 72.866298 | 65.6223778 |
| 75.9685834 | 65.6160148 | 74         | 72.866298 | 66.6223778 |

|            |            |            |           |            |
|------------|------------|------------|-----------|------------|
| 75.9685834 | 66.6160148 | 74         | 72.866298 | 66.6223778 |
| 76.9685834 | 69.6160148 | 74.6       | 72.866298 | 66.6223778 |
| 76.9685834 | 69.6160148 | 74.9       | 72.866298 | 66.6223778 |
| 79.9685834 | 69.6160148 | 83.8592815 | 72.866298 | 66.6223778 |
| 82.9685834 | 70.6160148 | 83.8592815 | 73.866298 | 67.6223778 |
| 84.9685834 | 70.6160148 | 83.8592815 | 74.866298 | 67.6223778 |
| 84.9685834 | 71.6160148 | 78.8592815 | 74.866298 | 68.6223778 |
| 84.9685834 | 71.6160148 | 78.8592815 | 74.866298 | 68.6223778 |
| 84.9685834 | 72.6160148 | 77.8592815 | 73.866298 | 68.6223778 |
| 84.9685834 | 72.6160148 | 77.8592815 | 73.866298 | 68.6223778 |
| 80.9685834 | 72.6160148 | 80.8592815 | 73.866298 | 68.6223778 |
| 79.9685834 | 74.6160148 | 81.8592815 | 73.866298 | 68.6223778 |
| 78.9685834 | 74.6160148 | 81.8592815 | 73.866298 | 68.6223778 |
| 77.9685834 | 74.6160148 | 81.8592815 | 73.866298 | 70.6223778 |
| 76.9685834 | 74.6160148 | 81.8592815 | 76.866298 | 70.6223778 |
| 75.9685834 | 70.6160148 | 81.8592815 | 75.866298 | 70.6223778 |
| 75.9685834 | 70.6160148 | 81.8592815 | 75.866298 | 70.6223778 |
| 75.9685834 | 70.6160148 | 82.8592815 | 75.866298 | 72.6223778 |
| 75.9685834 | 70.6160148 | 82.8592815 | 75.866298 | 73.6223778 |
| 75.9685834 | 70.6160148 | 82.8592815 | 75.866298 | 73.6223778 |
| 75.9685834 | 70.6160148 | 82.8592815 | 75.866298 | 73.6223778 |
| 76.9685834 | 69.6160148 | 81.8592815 | 75.866298 | 74.6223778 |
| 75.9685834 | 68.6160148 | 81.8592815 | 75.866298 | 72.6223778 |
| 74.9685834 | 67.6160148 | 80.8592815 | 75.866298 | 72.6223778 |
| 72.9685834 | 66.6160148 | 80.8592815 | 75.866298 | 69.6223778 |
| 72.9685834 | 66.6160148 | 80.8592815 | 75.866298 | 69.6223778 |
| 72.9685834 | 68.6160148 | 80.8592815 | 75.866298 | 69.6223778 |
| 72.9685834 | 69.6160148 | 80.8592815 | 76.866298 | 68.6223778 |
| 73.9685834 | 68.6160148 | 80.8592815 | 76.866298 | 68.6223778 |
| 73.9685834 | 68.6160148 | 80.8592815 | 76.866298 | 68.6223778 |
| 73.9685834 | 68.6160148 | 80.8592815 | 76.866298 | 67.6223778 |
| 74.9685834 | 68.6160148 | 81.8592815 | 76.866298 | 67.6223778 |
| 74.9685834 | 69.6160148 | 83.8592815 | 81.866298 | 67.6223778 |
| 74.9685834 | 69.6160148 | 72.7       | 81.866298 | 67.6223778 |
| 74.9685834 | 69.6160148 | 72.8       | 83.866298 | 67.6223778 |
| 74.9685834 | 73.6160148 | 78.8592815 | 83.866298 | 67.6223778 |
| 74.9685834 | 74.6160148 | 78.8592815 | 84.866298 | 68.6223778 |
| 74.9685834 | 74.6160148 | 78.8592815 | 85.866298 | 69.6223778 |
| 74.9685834 | 74.6160148 | 77.8592815 | 85.866298 | 68.6223778 |
| 74.9685834 | 73.6160148 | 74.8592815 | 85.866298 | 68.6223778 |
| 74.9685834 | 72.6160148 | 74.8592815 | 85.866298 | 68.6223778 |
| 74.9685834 | 72.6160148 | 73.8592815 | 83.866298 | 69.6223778 |
| 74.9685834 | 70.6160148 | 72.8592815 | 83.866298 | 69.6223778 |
| 73.9685834 | 70.6160148 | 72.8592815 | 83.866298 | 69.6223778 |
| 70.9685834 | 70.6160148 | 73.8592815 | 83.866298 | 69.6223778 |

|            |            |            |           |            |
|------------|------------|------------|-----------|------------|
| 70.9685834 | 70.6160148 | 74.8592815 | 83.866298 | 70.6223778 |
| 69.9685834 | 70.6160148 | 74.8592815 | 83.866298 | 70.6223778 |
| 68.9685834 | 70.6160148 | 78.8592815 | 83.866298 | 70.6223778 |
| 67.9685834 | 70.6160148 | 78.8592815 | 83.866298 | 71.6223778 |
| 65.9685834 | 70.6160148 | 78.8592815 | 83.866298 | 71.6223778 |
| 66.9685834 | 70.6160148 | 79.8592815 | 83.866298 | 72.6223778 |
| 69.9685834 | 70.6160148 | 80.8592815 | 83.866298 | 72.6223778 |
| 68.9685834 | 67.6160148 | 80.8592815 | 83.866298 | 72.6223778 |
| 68.9685834 | 66.6160148 | 80.8592815 | 85.866298 | 71.6223778 |
| 68.9685834 | 66.6160148 | 80.8592815 | 85.866298 | 71.6223778 |
| 68.9685834 | 68.6160148 | 75.8592815 | 71.1      | 71.6223778 |
| 68.9685834 | 69.6160148 | 75.8592815 | 81.866298 | 71.6223778 |
| 69.9685834 | 69.6160148 | 75.8592815 | 74.866298 | 71.6223778 |
| 70.9685834 | 68.6160148 | 74.8592815 | 73.866298 | 71.6223778 |
| 71.9685834 | 67.6160148 | 78.8592815 | 73.866298 | 71.6223778 |
| 71.9685834 | 67.6160148 | 80.8592815 | 73.866298 | 71.6223778 |
| 71.9685834 | 67.6160148 | 80.8592815 | 72.866298 | 71.6223778 |
| 71.9685834 | 67.6160148 | 80.8592815 | 71.866298 | 71.6223778 |
| 73.9685834 | 67.6160148 | 80.8592815 | 71.866298 | 73.6223778 |
| 75.9685834 | 67.6160148 | 79.8592815 | 71.866298 | 73.6223778 |
| 74.9685834 | 67.6160148 | 76.8592815 | 72.866298 | 73.6223778 |
| 74.9685834 | 67.6160148 | 70.8592815 | 71.866298 | 73.6223778 |
| 74.9685834 | 67.6160148 | 68.8592815 | 71.866298 | 73.6223778 |
| 73.9685834 | 67.6160148 | 68.8592815 | 71.866298 | 73.6223778 |
| 70.9685834 | 70.6160148 | 67.8592815 | 71.866298 | 72.6223778 |
| 69.9685834 | 74.6160148 | 67.8592815 | 71.866298 | 72.6223778 |
| 69.9685834 | 74.6160148 | 67.8592815 | 71.866298 | 69.6223778 |
| 68.9685834 | 77.6160148 | 65.8592815 | 71.866298 | 70.6223778 |
| 68.9685834 | 77.6160148 | 65.8592815 | 71.866298 | 70.6223778 |
| 68.9685834 | 77.6160148 | 65.8592815 | 71.866298 | 70.6223778 |
| 68.9685834 | 77.6160148 | 64.8592815 | 72.866298 | 70.6223778 |
| 68.9685834 | 77.6160148 | 64.8592815 | 72.866298 | 70.6223778 |
| 67.9685834 | 77.6160148 | 64.8592815 | 72.866298 | 70.6223778 |
| 67.9685834 | 77.6160148 | 64.8592815 | 73.866298 | 70.6223778 |
| 64.9685834 | 76.6160148 | 65.8592815 | 73.866298 | 70.6223778 |
| 63.9685834 | 76.6160148 | 65.8592815 | 73.866298 | 72.6223778 |
| 63.9685834 | 77.6160148 | 65.8592815 | 73.866298 | 72.6223778 |
| 63.9685834 | 77.6160148 | 65.8592815 | 73.866298 | 73.6223778 |
| 62.9685834 | 77.6160148 | 65.8592815 | 74.866298 | 73.6223778 |
| 62.9685834 | 77.6160148 | 65.8592815 | 74.866298 | 73.6223778 |
| 60.9685834 | 78.6160148 | 65.8592815 | 74.866298 | 73.6223778 |
| 60.9685834 | 78.6160148 | 67.8592815 | 74.866298 | 73.6223778 |
| 59.9685834 | 78.6160148 | 67.8592815 | 74.866298 | 73.6223778 |
| 59.9685834 | 76.6160148 | 77.8592815 | 74.866298 | 73.6223778 |
| 60.9685834 | 75.6160148 | 79.8592815 | 74.866298 | 73.6223778 |

|            |            |            |           |            |
|------------|------------|------------|-----------|------------|
| 60.9685834 | 75.6160148 | 80.8592815 | 74.866298 | 73.6223778 |
| 60.9685834 | 75.6160148 | 80.8592815 | 73.866298 | 73.6223778 |
| 61.9685834 | 75.6160148 | 81.8592815 | 74.866298 | 73.6223778 |
| 62.9685834 | 77.6160148 | 81.8592815 | 75.866298 | 72.6223778 |
| 62.9685834 | 77.6160148 | 83.8592815 | 75.866298 | 71.6223778 |
| 62.9685834 | 78.6160148 | 83.8592815 | 78.866298 | 71.6223778 |
| 62.9685834 | 77.6160148 | 83.8592815 | 78.866298 | 69.6223778 |
| 63.9685834 | 77.6160148 | 82.8592815 | 81.866298 | 68.6223778 |
| 63.9685834 | 76.6160148 | 79.8592815 | 80.866298 | 68.6223778 |
| 64.9685834 | 75.6160148 | 76.8592815 | 80.866298 | 68.6223778 |
| 64.9685834 | 73.6160148 | 76.8592815 | 78.866298 | 68.6223778 |
| 66.9685834 | 74.6160148 | 74.8592815 | 72.866298 | 68.6223778 |
| 67.9685834 | 74.6160148 | 74.8592815 | 72.866298 | 68.6223778 |
| 67.9685834 | 75.6160148 | 74.8592815 | 72.866298 | 68.6223778 |
| 68.9685834 | 75.6160148 | 74.8592815 | 72.866298 | 67.6223778 |
| 69.9685834 | 75.6160148 | 74.8592815 | 72.866298 | 68.6223778 |
| 70.9685834 | 73.6160148 | 73.8592815 | 72.866298 | 67.6223778 |
| 70.9685834 | 73.6160148 | 73.8592815 | 72.866298 | 67.6223778 |
| 73.9685834 | 73.6160148 | 73.8592815 | 72.866298 | 67.6223778 |
| 76.9685834 | 72.6160148 | 73.8592815 | 72.866298 | 67.6223778 |
| 76.9685834 | 72.6160148 | 73.8592815 | 72.866298 | 67.6223778 |
| 77.9685834 | 72.6160148 | 72.8592815 | 72.866298 | 67.6223778 |
| 78.9685834 | 72.6160148 | 72.8592815 | 72.866298 | 68.6223778 |
| 78.9685834 | 71.6160148 | 72.8592815 | 72.866298 | 68.6223778 |
| 78.9685834 | 72.6160148 | 67.8592815 | 72.866298 | 69.6223778 |
| 76.9685834 | 73.6160148 | 67.8592815 | 72.866298 | 70.6223778 |
| 76.9685834 | 73.6160148 | 65.8592815 | 72.866298 | 70.6223778 |
| 76.9685834 | 73.6160148 | 65.8592815 | 73.866298 | 70.6223778 |
| 76.9685834 | 73.6160148 | 65.8592815 | 73.866298 | 70.6223778 |
| 77.9685834 | 73.6160148 | 65.8592815 | 73.866298 | 71.6223778 |
| 77.9685834 | 73.6160148 | 66.8592815 | 73.866298 | 71.6223778 |
| 79.9685834 | 76.6160148 | 66.8592815 | 74.866298 | 72.6223778 |
| 79.9685834 | 76.6160148 | 69.8592815 | 74.866298 | 72.6223778 |
| 79.9685834 | 76.6160148 | 72.8592815 | 73.866298 | 73.6223778 |
| 77.9685834 | 77.6160148 | 73.8592815 | 73.866298 | 73.6223778 |
| 75.9685834 | 79.6160148 | 73.8592815 | 73.866298 | 75.6223778 |
| 74.9685834 | 80.6160148 | 73.8592815 | 73.866298 | 75.6223778 |
| 73.9685834 | 80.6160148 | 74.8592815 | 74.866298 | 77.6223778 |
| 73.9685834 | 78.6160148 | 74.8592815 | 74.866298 | 77.6223778 |
| 72.9685834 | 78.6160148 | 74.8592815 | 75.866298 | 77.6223778 |
| 72.9685834 | 78.6160148 | 75.8592815 | 75.866298 | 77.6223778 |
| 72.9685834 | 78.6160148 | 75.8592815 | 75.866298 | 78.6223778 |
| 72.9685834 | 79.6160148 | 75.8592815 | 77.866298 | 78.6223778 |
| 72.9685834 | 78.6160148 | 75.8592815 | 77.866298 | 78.6223778 |
| 73.9685834 | 78.6160148 | 76.8592815 | 77.866298 | 78.6223778 |

|            |            |            |           |            |
|------------|------------|------------|-----------|------------|
| 73.9685834 | 78.6160148 | 76.8592815 | 75.866298 | 78.6223778 |
| 73.9685834 | 78.6160148 | 76.8592815 | 75.866298 | 78.6223778 |
| 73.9685834 | 78.6160148 | 76.8592815 | 74.866298 | 79.6223778 |
| 73.9685834 | 78.6160148 | 76.8592815 | 74.866298 | 79.6223778 |
| 73.9685834 | 84.6160148 | 76.8592815 | 74.866298 | 79.6223778 |
| 73.9685834 | 85.6160148 | 76.8592815 | 73.866298 | 81.6223778 |
| 74.9685834 | 85.6160148 | 77.8592815 | 72.866298 | 81.6223778 |
| 74.9685834 | 84.6160148 | 77.8592815 | 71.866298 | 81.6223778 |
| 75.9685834 | 84.6160148 | 77.8592815 | 71.866298 | 76.6223778 |
| 72.9685834 | 83.6160148 | 76.8592815 | 71.866298 | 76.6223778 |
| 72.9685834 | 82.6160148 | 76.8592815 | 72.866298 | 75.6223778 |
| 70.9685834 | 81.6160148 | 73.8592815 | 72.866298 | 75.6223778 |
| 70.9685834 | 80.6160148 | 71.8592815 | 73.866298 | 75.6223778 |
| 70.9685834 | 79.6160148 | 71.8592815 | 73.866298 | 76.6223778 |
| 70.9685834 | 81.6160148 | 71.8592815 | 73.866298 | 77.6223778 |
| 71.9685834 | 82.6160148 | 73.8592815 | 72.866298 | 77.6223778 |
| 71.9685834 | 82.6160148 | 73.8592815 | 72.866298 | 77.6223778 |
| 70.9685834 | 83.6160148 | 74.8592815 | 72.866298 | 76.6223778 |
| 70.9685834 | 82.6160148 | 74.8592815 | 75.866298 | 76.6223778 |
| 70.9685834 | 82.6160148 | 74.8592815 | 75.866298 | 75.6223778 |
| 70.9685834 | 82.6160148 | 73.8592815 | 75.866298 | 74.6223778 |
| 70.9685834 | 82.6160148 | 72.8592815 | 75.866298 | 72.6223778 |
| 70.9685834 | 81.6160148 | 72.8592815 | 76.866298 | 72.6223778 |
| 70.9685834 | 81.6160148 | 72.8592815 | 75.866298 | 72.6223778 |
| 70.9685834 | 80.6160148 | 72.8592815 | 74.866298 | 72.6223778 |
| 70.9685834 | 79.6160148 | 72.8592815 | 74.866298 | 72.6223778 |
| 71.9685834 | 78.6160148 | 72.8592815 | 74.866298 | 70.6223778 |
| 71.9685834 | 78.6160148 | 73.8592815 | 75.866298 | 70.6223778 |
| 72.9685834 | 80.6160148 | 70.8592815 | 75.866298 | 71.6223778 |
| 72.9685834 | 80.6160148 | 68.8592815 | 75.866298 | 71.6223778 |
| 71.9685834 | 81.6160148 | 68.8592815 | 75.866298 | 71.6223778 |
| 71.9685834 | 81.6160148 | 66.8592815 | 75.866298 | 71.6223778 |
| 70.9685834 | 81.6160148 | 65.8592815 | 75.866298 | 70.6223778 |
| 70.9685834 | 80.6160148 | 65.8592815 | 75.866298 | 69.6223778 |
| 71.9685834 | 80.6160148 | 65.8592815 | 75.866298 | 69.6223778 |
| 72.9685834 | 77.6160148 | 65.8592815 | 75.866298 | 69.6223778 |
| 72.9685834 | 75.6160148 | 65.8592815 | 75.866298 | 69.6223778 |
| 73.9685834 | 75.6160148 | 64.8592815 | 76.866298 | 69.6223778 |
| 73.9685834 | 75.6160148 | 64.8592815 | 76.866298 | 70.6223778 |
| 73.9685834 | 75.6160148 | 64.8592815 | 78.866298 | 70.6223778 |
| 73.9685834 | 75.6160148 | 64.8592815 | 78.866298 | 70.6223778 |
| 72.9685834 | 77.6160148 | 65.8592815 | 78.866298 | 70.6223778 |
| 73.9685834 | 76.6160148 | 69.8592815 | 77.866298 | 70.6223778 |
| 73.9685834 | 76.6160148 | 69.8592815 | 77.866298 | 70.6223778 |
| 73.9685834 | 76.6160148 | 69.8592815 | 77.866298 | 69.6223778 |



|            |            |            |           |            |
|------------|------------|------------|-----------|------------|
| 74.9685834 | 76.6160148 | 71.8592815 | 77.866298 | 69.6223778 |
| 74.9685834 | 77.6160148 | 75.8592815 | 78.866298 | 68.6223778 |
| 74.9685834 | 77.6160148 | 76.8592815 | 78.866298 | 67.6223778 |
| 76.9685834 | 78.6160148 | 76.8592815 | 78.866298 | 67.6223778 |
| 76.9685834 | 78.6160148 | 76.8592815 | 78.866298 | 69.6223778 |
| 76.9685834 | 77.6160148 | 73.8592815 | 78.866298 | 70.6223778 |
| 75.9685834 | 77.6160148 | 73.8592815 | 78.866298 | 72.6223778 |
| 74.9685834 | 76.6160148 | 74.8592815 | 78.866298 | 72.6223778 |
| 74.9685834 | 76.6160148 | 74.8592815 | 76.866298 | 72.6223778 |
| 74.9685834 | 75.6160148 | 74.8592815 | 75.866298 | 72.6223778 |
| 72.9685834 | 75.6160148 | 74.8592815 | 74.866298 | 72.6223778 |
| 71.9685834 | 73.6160148 | 71.8592815 | 74.866298 | 72.6223778 |
| 71.9685834 | 73.6160148 | 71.8592815 | 74.866298 | 72.6223778 |
| 70.9685834 | 72.6160148 | 73.8592815 | 74.866298 | 72.6223778 |
| 70.9685834 | 72.6160148 | 77.8592815 | 74.866298 | 72.6223778 |
| 70.9685834 | 73.6160148 | 77.8592815 | 74.866298 | 72.6223778 |
| 70.9685834 | 73.6160148 | 77.8592815 | 74.866298 | 70.6223778 |
| 68.9685834 | 73.6160148 | 75.8592815 | 74.866298 | 70.6223778 |
| 68.9685834 | 73.6160148 | 73.8592815 | 74.866298 | 70.6223778 |
| 68.9685834 | 73.6160148 | 73.8592815 | 73.866298 | 70.6223778 |
| 68.9685834 | 73.6160148 | 71.8592815 | 73.866298 | 70.6223778 |
| 68.9685834 | 73.6160148 | 71.8592815 | 73.866298 | 71.6223778 |
| 68.9685834 | 73.6160148 | 65.8592815 | 73.866298 | 71.6223778 |
| 68.9685834 | 74.6160148 | 65.8592815 | 73.866298 | 71.6223778 |
| 68.9685834 | 74.6160148 | 67.8592815 | 73.866298 | 71.6223778 |
| 68.9685834 | 74.6160148 | 68.8592815 | 73.866298 | 72.6223778 |
| 71.9685834 | 74.6160148 | 68.8592815 | 73.866298 | 72.6223778 |
| 72.9685834 | 73.6160148 | 68.8592815 | 73.866298 | 72.6223778 |
| 72.9685834 | 73.6160148 | 68.8592815 | 72.866298 | 72.6223778 |
| 73.9685834 | 74.6160148 | 68.8592815 | 72.866298 | 74.6223778 |
| 76.9685834 | 74.6160148 | 66.8592815 | 72.866298 | 74.6223778 |
| 76.9685834 | 77.6160148 | 65.8592815 | 72.866298 | 74.6223778 |
| 76.9685834 | 77.6160148 | 65.8592815 | 72.866298 | 74.6223778 |
| 77.9685834 | 80.6160148 | 65.8592815 | 72.866298 | 75.6223778 |
| 77.9685834 | 82.6160148 | 65.8592815 | 72.866298 | 75.6223778 |
| 78.9685834 | 83.6160148 | 65.8592815 | 73.866298 | 75.6223778 |
| 79.9685834 | 84.6160148 | 66.8592815 | 74.866298 | 75.6223778 |
| 80.9685834 | 86.6160148 | 66.8592815 | 74.866298 | 75.6223778 |
| 81.9685834 | 86.6160148 | 66.8592815 | 75.866298 | 75.6223778 |
| 81.9685834 | 87.6160148 | 68.8592815 | 76.866298 | 75.6223778 |
| 80.9685834 | 89.6160148 | 68.8592815 | 77.866298 | 75.6223778 |
| 80.9685834 | 89.6160148 | 67.8592815 | 77.866298 | 75.6223778 |
| 81.9685834 | 88.6160148 | 67.8592815 | 77.866298 | 75.6223778 |
| 81.9685834 | 87.6160148 | 66.8592815 | 77.866298 | 75.6223778 |
| 82.9685834 | 87.6160148 | 66.8592815 | 77.866298 | 75.6223778 |

|            |            |            |           |            |
|------------|------------|------------|-----------|------------|
| 82.9685834 | 87.6160148 | 67.8592815 | 76.866298 | 75.6223778 |
| 83.9685834 | 87.6160148 | 67.8592815 | 76.866298 | 75.6223778 |
| 84.9685834 | 87.6160148 | 68.8592815 | 76.866298 | 78.6223778 |
| 84.9685834 | 86.6160148 | 68.8592815 | 76.866298 | 79.6223778 |
| 82.9685834 | 86.6160148 | 73.8592815 | 76.866298 | 79.6223778 |
| 75.9685834 | 86.6160148 | 76.8592815 | 75.866298 | 79.6223778 |
| 72.9685834 | 86.6160148 | 78.8592815 | 75.866298 | 80.6223778 |
| 71.9685834 | 85.6160148 | 78.8592815 | 74.866298 | 80.6223778 |
| 71.9685834 | 85.6160148 | 79.8592815 | 72.866298 | 81.6223778 |
| 70.9685834 | 83.6160148 | 72.8592815 | 72.866298 | 82.6223778 |
| 70.9685834 | 82.6160148 | 72.8592815 | 71.866298 | 83.6223778 |
| 70.9685834 | 80.6160148 | 66.8592815 | 70.866298 | 83.6223778 |
| 70.9685834 | 80.6160148 | 65.8592815 | 72.866298 | 83.6223778 |
| 70.9685834 | 80.6160148 | 65.8592815 | 73.866298 | 83.6223778 |
| 70.9685834 | 80.6160148 | 65.8592815 | 73.866298 | 84.6223778 |
| 70.9685834 | 80.6160148 | 65.8592815 | 73.866298 | 84.6223778 |
| 70.9685834 | 79.6160148 | 66.8592815 | 72.866298 | 85.6223778 |
| 71.9685834 | 78.6160148 | 66.8592815 | 71.866298 | 87.6223778 |
| 73.9685834 | 78.6160148 | 67.8592815 | 71.866298 | 87.6223778 |
| 74.9685834 | 78.6160148 | 67.8592815 | 71.866298 | 88.6223778 |
| 75.9685834 | 77.6160148 | 67.8592815 | 71.866298 | 88.6223778 |
| 75.9685834 | 77.6160148 | 67.8592815 | 71.866298 | 88.6223778 |
| 76.9685834 | 76.6160148 | 76.8592815 | 71.866298 | 88.6223778 |
| 76.9685834 | 76.6160148 | 73.8592815 | 69.866298 | 88.6223778 |
| 76.9685834 | 73.6160148 | 70.8592815 | 69.866298 | 89.6223778 |
| 74.9685834 | 71.6160148 | 66.8592815 | 70.866298 | 85.6223778 |
| 73.9685834 | 71.6160148 | 64.8592815 | 70.866298 | 84.6223778 |
| 73.9685834 | 71.6160148 | 64.8592815 | 70.866298 | 84.6223778 |
| 73.9685834 | 71.6160148 | 65.8592815 | 69.866298 | 84.6223778 |
| 73.9685834 | 71.6160148 | 66.8592815 | 69.866298 | 82.6223778 |
| 73.9685834 | 71.6160148 | 66.8592815 | 69.866298 | 81.6223778 |
| 73.9685834 | 70.6160148 | 66.8592815 | 69.866298 | 81.6223778 |
| 73.9685834 | 70.6160148 | 63.8592815 | 69.866298 | 81.6223778 |
| 73.9685834 | 70.6160148 | 61.8592815 | 69.866298 | 80.6223778 |
| 74.9685834 | 71.6160148 | 61.8592815 | 69.866298 | 79.6223778 |
| 74.9685834 | 71.6160148 | 61.8592815 | 69.866298 | 77.6223778 |
| 74.9685834 | 71.6160148 | 61.8592815 | 69.866298 | 75.6223778 |
| 74.9685834 | 72.6160148 | 62.8592815 | 68.866298 | 74.6223778 |
| 74.9685834 | 72.6160148 | 71.8592815 | 70.866298 | 73.6223778 |
| 77.9685834 | 74.6160148 | 71.8592815 | 69.866298 | 73.6223778 |
| 77.9685834 | 75.6160148 | 77.8592815 | 69.866298 | 72.6223778 |
| 85.9685834 | 75.6160148 | 78.8592815 | 69.866298 | 71.6223778 |
| 86.9685834 | 77.6160148 | 79.8592815 | 69.866298 | 72.6223778 |
| 86.9685834 | 78.6160148 | 79.8592815 | 68.866298 | 72.6223778 |
| 84.9685834 | 78.6160148 | 79.8592815 | 68.866298 | 72.6223778 |

|            |            |            |           |            |
|------------|------------|------------|-----------|------------|
| 77.9685834 | 78.6160148 | 73.8592815 | 68.866298 | 72.6223778 |
| 76.9685834 | 79.6160148 | 70.8592815 | 68.866298 | 73.6223778 |
| 76.9685834 | 81.6160148 | 67.8592815 | 68.866298 | 73.6223778 |
| 73.9685834 | 82.6160148 | 69.8592815 | 69.866298 | 72.6223778 |
| 72.9685834 | 84.6160148 | 70.8592815 | 69.866298 | 71.6223778 |
| 73.9685834 | 85.6160148 | 70.8592815 | 75.866298 | 71.6223778 |
| 73.9685834 | 86.6160148 | 70.8592815 | 75.866298 | 71.6223778 |
| 74.9685834 | 85.6160148 | 71.8592815 | 74.866298 | 69.6223778 |
| 74.9685834 | 85.6160148 | 74.8592815 | 74.866298 | 68.6223778 |
| 74.9685834 | 88.6160148 | 74.8592815 | 74.866298 | 68.6223778 |
| 74.9685834 | 74.2       | 74.8592815 | 74.866298 | 68.6223778 |
| 73.9685834 | 73.9       | 72.8592815 | 75.866298 | 68.6223778 |
| 73.9685834 | 73.5       | 67.8592815 | 75.866298 | 68.6223778 |
| 74.9685834 | 73.6       | 67.8592815 | 76.866298 | 67.6223778 |
| 74.9685834 | 73.6       | 67.8592815 | 76.866298 | 67.6223778 |
| 74.9685834 | 73.5       | 67.8592815 | 76.866298 | 68.6223778 |
| 74.9685834 | 73.8       | 65.8592815 | 77.866298 | 68.6223778 |
| 74.9685834 | 88.6160148 | 65.8592815 | 78.866298 | 73.6223778 |
| 74.9685834 | 85.6160148 | 65.8592815 | 78.866298 | 74.6223778 |
| 74.9685834 | 81.6160148 | 65.8592815 | 79.866298 | 75.6223778 |
| 74.9685834 | 79.6160148 | 65.8592815 | 79.866298 | 75.6223778 |
| 74.9685834 | 78.6160148 | 66.8592815 | 78.866298 | 75.6223778 |
| 73.9685834 | 78.6160148 | 66.8592815 | 78.866298 | 75.6223778 |
| 71.9685834 | 78.6160148 | 66.8592815 | 77.866298 | 72.6223778 |
| 70.9685834 | 78.6160148 | 66.8592815 | 76.866298 | 72.6223778 |
| 69.9685834 | 78.6160148 | 66.8592815 | 74.866298 | 71.6223778 |
| 68.9685834 | 79.6160148 | 67.8592815 | 73.866298 | 71.6223778 |
| 69.9685834 | 81.6160148 | 67.8592815 | 73.866298 | 71.6223778 |
| 69.9685834 | 84.6160148 | 67.8592815 | 73.866298 | 71.6223778 |
| 69.9685834 | 84.6160148 | 67.8592815 | 74.866298 | 71.6223778 |
| 69.9685834 | 84.6160148 | 67.8592815 | 74.866298 | 71.6223778 |
| 68.9685834 | 85.6160148 | 73.8592815 | 74.866298 | 71.6223778 |
| 68.9685834 | 86.6160148 | 73.8592815 | 75.866298 | 71.6223778 |
| 68.9685834 | 87.6160148 | 75.8592815 | 75.866298 | 71.6223778 |
| 70.9685834 | 88.6160148 | 75.8592815 | 75.866298 | 71.6223778 |
| 71.9685834 | 88.6160148 | 75.8592815 | 75.866298 | 71.6223778 |
| 71.9685834 | 86.6160148 | 73.8592815 | 75.866298 | 72.6223778 |
| 70.9685834 | 86.6160148 | 72.8592815 | 75.866298 | 72.6223778 |
| 70.9685834 | 86.6160148 | 71.8592815 | 75.866298 | 72.6223778 |
| 70.9685834 | 85.6160148 | 72.8592815 | 75.866298 | 72.6223778 |
| 71.9685834 | 82.6160148 | 72.8592815 | 75.866298 | 72.6223778 |
| 71.9685834 | 82.6160148 | 72.8592815 | 76.866298 | 73.6223778 |
| 71.9685834 | 77.6160148 | 71.8592815 | 78.866298 | 73.6223778 |
| 71.9685834 | 77.6160148 | 67.8592815 | 78.866298 | 75.6223778 |
| 71.9685834 | 77.6160148 | 66.8592815 | 78.866298 | 75.6223778 |

|            |            |            |           |            |
|------------|------------|------------|-----------|------------|
| 72.9685834 | 76.6160148 | 66.8592815 | 78.866298 | 75.6223778 |
| 72.9685834 | 76.6160148 | 67.8592815 | 79.866298 | 76.6223778 |
| 72.9685834 | 77.6160148 | 67.8592815 | 79.866298 | 76.6223778 |
| 72.9685834 | 78.6160148 | 67.8592815 | 90.866298 | 75.6223778 |
| 72.9685834 | 78.6160148 | 67.8592815 | 76.1      | 75.6223778 |
| 72.9685834 | 78.6160148 | 68.8592815 | 76.2      | 75.6223778 |
| 72.9685834 | 78.6160148 | 68.8592815 | 76.7      | 75.6223778 |
| 72.9685834 | 78.6160148 | 71.8592815 | 77.1      | 75.6223778 |
| 72.9685834 | 78.6160148 | 71.8592815 | 77.2      | 73.6223778 |
| 72.9685834 | 78.6160148 | 79.8592815 | 77.8      | 72.6223778 |
| 72.9685834 | 79.6160148 | 81.8592815 | 77.8      | 73.6223778 |
| 72.9685834 | 79.6160148 | 81.8592815 | 76.9      | 73.6223778 |
| 72.9685834 | 79.6160148 | 81.8592815 | 76.5      | 73.6223778 |
| 72.9685834 | 79.6160148 | 78.8592815 | 76.3      | 72.6223778 |
| 73.9685834 | 79.6160148 | 75.8592815 | 75.9      | 72.6223778 |
| 73.9685834 | 80.6160148 | 72.8592815 | 75.1      | 71.6223778 |
| 75.9685834 | 80.6160148 | 71.8592815 | 75.2      | 68.6223778 |
| 78.9685834 | 81.6160148 | 70.8592815 | 75.6      | 68.6223778 |
| 78.9685834 | 80.6160148 | 70.8592815 | 75.7      | 70.6223778 |
| 80.9685834 | 78.6160148 | 70.8592815 | 75.5      | 70.6223778 |
| 88.9685834 | 76.6160148 | 71.8592815 | 76.2      | 70.6223778 |
| 90.9685834 | 75.6160148 | 71.8592815 | 76        | 70.6223778 |
| 89.9685834 | 74.6160148 | 71.8592815 | 75.9      | 71.6223778 |
| 88.9685834 | 74.6160148 | 72.8592815 | 76        | 71.6223778 |
| 88.9685834 | 74.6160148 | 72.8592815 | 75.7      | 73.6223778 |
| 87.9685834 | 74.6160148 | 73.8592815 | 75.7      | 73.6223778 |
| 86.9685834 | 74.6160148 | 76.8592815 | 75.6      | 74.6223778 |
| 84.9685834 | 74.6160148 | 78.8592815 | 85.866298 | 73.6223778 |
| 84.9685834 | 76.6160148 | 79.8592815 | 85.866298 | 73.6223778 |
| 84.9685834 | 76.6160148 | 81.8592815 | 85.866298 | 73.6223778 |
| 84.9685834 | 77.6160148 | 81.8592815 | 81.866298 | 74.6223778 |
| 85.9685834 | 77.6160148 | 83.8592815 | 82.866298 | 74.6223778 |
| 85.9685834 | 76.6160148 | 84.8592815 | 81.866298 | 76.6223778 |
| 85.9685834 | 76.6160148 | 84.8592815 | 80.866298 | 76.6223778 |
| 84.9685834 | 74.6160148 | 84.8592815 | 80.866298 | 76.6223778 |
| 83.9685834 | 74.6160148 | 84.8592815 | 80.866298 | 77.6223778 |
| 83.9685834 | 74.6160148 | 84.8592815 | 80.866298 | 75.6223778 |
| 77.9685834 | 74.6160148 | 84.8592815 | 80.866298 | 71.6223778 |
| 76.9685834 | 75.6160148 | 84.8592815 | 81.866298 | 68.6223778 |
| 76.9685834 | 75.6160148 | 84.8592815 | 81.866298 | 66.6223778 |
| 76.9685834 | 75.6160148 | 84.8592815 | 81.866298 | 66.6223778 |
| 75.9685834 | 75.6160148 | 83.8592815 | 81.866298 | 63.6223778 |
| 74.9685834 | 76.6160148 | 83.8592815 | 80.866298 | 63.6223778 |
| 74.9685834 | 76.6160148 | 83.8592815 | 80.866298 | 63.6223778 |
| 74.9685834 | 77.6160148 | 82.8592815 | 80.866298 | 63.6223778 |

|            |            |            |           |            |
|------------|------------|------------|-----------|------------|
| 74.9685834 | 76.6160148 | 82.8592815 | 79.866298 | 63.6223778 |
| 74.9685834 | 76.6160148 | 82.8592815 | 79.866298 | 63.6223778 |
| 73.9685834 | 76.6160148 | 82.8592815 | 79.866298 | 64.6223778 |
| 73.9685834 | 77.6160148 | 83.8592815 | 79.866298 | 64.6223778 |
| 73.9685834 | 76.6160148 | 82.8592815 | 79.866298 | 63.6223778 |
| 74.9685834 | 76.6160148 | 83.8592815 | 78.866298 | 63.6223778 |
| 74.9685834 | 76.6160148 | 83.8592815 | 78.866298 | 63.6223778 |
| 72.9685834 | 76.6160148 | 78.8592815 | 79.866298 | 63.6223778 |
| 70.9685834 | 76.6160148 | 78.8592815 | 80.866298 | 64.6223778 |
| 69.9685834 | 77.6160148 | 77.8592815 | 80.866298 | 65.6223778 |
| 67.9685834 | 77.6160148 | 76.8592815 | 79.866298 | 65.6223778 |
| 66.9685834 | 77.6160148 | 74.8592815 | 79.866298 | 65.6223778 |
| 66.9685834 | 77.6160148 | 73.8592815 | 76.866298 | 65.6223778 |
| 66.9685834 | 77.6160148 | 72.8592815 | 76.866298 | 65.6223778 |
| 66.9685834 | 77.6160148 | 65.8592815 | 76.866298 | 65.6223778 |
| 67.9685834 | 77.6160148 | 65.8592815 | 74.866298 | 65.6223778 |
| 67.9685834 | 76.6160148 | 60.8592815 | 73.866298 | 66.6223778 |
| 67.9685834 | 76.6160148 | 58.8592815 | 72.866298 | 66.6223778 |
| 67.9685834 | 74.6160148 | 56.8592815 | 72.866298 | 67.6223778 |
| 67.9685834 | 76.6160148 | 56.8592815 | 71.866298 | 68.6223778 |
| 66.9685834 | 77.6160148 | 56.8592815 | 71.866298 | 68.6223778 |
| 66.9685834 | 78.6160148 | 56.8592815 | 71.866298 | 73.6223778 |
| 66.9685834 | 78.6160148 | 56.8592815 | 71.866298 | 75.6223778 |
| 66.9685834 | 78.6160148 | 57.8592815 | 72.866298 | 75.6223778 |
| 67.9685834 | 78.6160148 | 59.8592815 | 71.866298 | 75.6223778 |
| 67.9685834 | 78.6160148 | 59.8592815 | 71.866298 | 75.6223778 |
| 67.9685834 | 78.6160148 | 60.8592815 | 72.866298 | 76.6223778 |
| 69.9685834 | 78.6160148 | 60.8592815 | 72.866298 | 75.6223778 |
| 70.9685834 | 78.6160148 | 60.8592815 | 73.866298 | 74.6223778 |
| 69.9685834 | 78.6160148 | 59.8592815 | 73.866298 | 73.6223778 |
| 69.9685834 | 78.6160148 | 59.8592815 | 73.866298 | 71.6223778 |
| 69.9685834 | 79.6160148 | 59.8592815 | 68.866298 | 70.6223778 |
| 68.9685834 | 79.6160148 | 60.8592815 | 68.866298 | 69.6223778 |
| 68.9685834 | 79.6160148 | 65.8592815 | 68.866298 | 68.6223778 |
| 68.9685834 | 79.6160148 | 71.8592815 | 68.866298 | 68.6223778 |
| 67.9685834 | 79.6160148 | 71.8592815 | 68.866298 | 67.6223778 |
| 67.9685834 | 81.6160148 | 71.8592815 | 67.866298 | 67.6223778 |
| 67.9685834 | 82.6160148 | 76.8592815 | 67.866298 | 67.6223778 |
| 68.9685834 | 82.6160148 | 76.8592815 | 67.866298 | 67.6223778 |
| 68.9685834 | 82.6160148 | 76.8592815 | 67.866298 | 67.6223778 |
| 68.9685834 | 80.6160148 | 76.8592815 | 65.866298 | 68.6223778 |
| 68.9685834 | 80.6160148 | 76.8592815 | 64.866298 | 67.6223778 |
| 68.9685834 | 78.6160148 | 76.8592815 | 64.866298 | 67.6223778 |
| 67.9685834 | 73.6160148 | 76.8592815 | 64.866298 | 67.6223778 |
| 68.9685834 | 73.6160148 | 76.8592815 | 65.866298 | 67.6223778 |

|            |            |            |           |            |
|------------|------------|------------|-----------|------------|
| 68.9685834 | 72.6160148 | 77.8592815 | 67.866298 | 67.6223778 |
| 68.9685834 | 71.6160148 | 76.8592815 | 67.866298 | 67.6223778 |
| 69.9685834 | 71.6160148 | 76.8592815 | 67.866298 | 67.6223778 |
| 69.9685834 | 71.6160148 | 76.8592815 | 67.866298 | 67.6223778 |
| 72.9685834 | 67.6160148 | 76.8592815 | 66.866298 | 67.6223778 |
| 73.9685834 | 67.6160148 | 68.8592815 | 66.866298 | 67.6223778 |
| 73.9685834 | 66.6160148 | 67.8592815 | 65.866298 | 67.6223778 |
| 74.9685834 | 65.6160148 | 66.8592815 | 65.866298 | 67.6223778 |
| 74.9685834 | 64.6160148 | 65.8592815 | 68.866298 | 67.6223778 |
| 74.9685834 | 64.6160148 | 65.8592815 | 69.866298 | 68.6223778 |
| 74.9685834 | 64.6160148 | 65.8592815 | 69.866298 | 68.6223778 |
| 72.9685834 | 64.6160148 | 65.8592815 | 69.866298 | 68.6223778 |
| 70.9685834 | 64.6160148 | 65.8592815 | 70.866298 | 69.6223778 |
| 70.9685834 | 64.6160148 | 65.8592815 | 70.866298 | 69.6223778 |
| 69.9685834 | 64.6160148 | 66.8592815 | 73.866298 | 69.6223778 |
| 69.9685834 | 64.6160148 | 70.8592815 | 74.866298 | 69.6223778 |
| 69.9685834 | 62.6160148 | 73.8592815 | 74.866298 | 69.6223778 |
| 69.9685834 | 64.6160148 | 73.8592815 | 74.866298 | 69.6223778 |
| 68.9685834 | 67.6160148 | 72.8592815 | 75.866298 | 69.6223778 |
| 69.9685834 | 67.6160148 | 72.8592815 | 74.866298 | 69.6223778 |
| 69.9685834 | 71.6160148 | 72.8592815 | 74.866298 | 69.6223778 |
| 69.9685834 | 74.6160148 | 72.8592815 | 74.866298 | 69.6223778 |
| 69.9685834 | 75.6160148 | 72.8592815 | 74.866298 | 69.6223778 |
| 71.9685834 | 75.6160148 | 71.8592815 | 74.866298 | 69.6223778 |
| 73.9685834 | 75.6160148 | 71.8592815 | 74.866298 | 69.6223778 |
| 74.9685834 | 74.6160148 | 71.8592815 | 74.866298 | 69.6223778 |
| 75.9685834 | 74.6160148 | 72.8592815 | 75.866298 | 69.6223778 |
| 76.9685834 | 73.6160148 | 72.8592815 | 75.866298 | 70.6223778 |
| 76.9685834 | 73.6160148 | 73.8592815 | 75.866298 | 70.6223778 |
| 77.9685834 | 72.6160148 | 73.8592815 | 73.866298 | 70.6223778 |
| 80.9685834 | 72.6160148 | 73.8592815 | 73.866298 | 69.6223778 |
| 82.9685834 | 74.6160148 | 73.8592815 | 73.866298 | 69.6223778 |
| 82.9685834 | 74.6160148 | 73.8592815 | 73.866298 | 70.6223778 |
| 83.9685834 | 74.6160148 | 73.8592815 | 75.866298 | 71.6223778 |
| 83.9685834 | 73.6160148 | 73.8592815 | 75.866298 | 70.6223778 |
| 84.9685834 | 73.6160148 | 71.8592815 | 75.866298 | 70.6223778 |
| 84.9685834 | 73.6160148 | 71.8592815 | 75.866298 | 69.6223778 |
| 85.9685834 | 73.6160148 | 69.8592815 | 72.866298 | 67.6223778 |
| 85.9685834 | 73.6160148 | 69.8592815 | 71.866298 | 66.6223778 |
| 81.9685834 | 73.6160148 | 69.8592815 | 71.866298 | 65.6223778 |
| 81.9685834 | 71.6160148 | 68.8592815 | 71.866298 | 65.6223778 |
| 80.9685834 | 71.6160148 | 68.8592815 | 70.866298 | 64.6223778 |
| 80.9685834 | 71.6160148 | 68.8592815 | 70.866298 | 64.6223778 |
| 80.9685834 | 71.6160148 | 71.8592815 | 66.866298 | 64.6223778 |
| 78.9685834 | 71.6160148 | 69.8592815 | 64.866298 | 64.6223778 |

|            |            |            |           |            |
|------------|------------|------------|-----------|------------|
| 78.9685834 | 73.6160148 | 69.8592815 | 63.866298 | 64.6223778 |
| 78.9685834 | 74.6160148 | 69.8592815 | 63.866298 | 64.6223778 |
| 78.9685834 | 75.6160148 | 68.8592815 | 63.866298 | 65.6223778 |
| 77.9685834 | 75.6160148 | 70.8592815 | 62.866298 | 67.6223778 |
| 76.9685834 | 75.6160148 | 70.8592815 | 63.866298 | 68.6223778 |
| 73.9685834 | 75.6160148 | 72.8592815 | 64.866298 | 68.6223778 |
| 72.9685834 | 76.6160148 | 72.8592815 | 65.866298 | 68.6223778 |
| 70.9685834 | 76.6160148 | 78.8592815 | 65.866298 | 72.6223778 |
| 69.9685834 | 76.6160148 | 83.8592815 | 65.866298 | 73.6223778 |
| 69.9685834 | 76.6160148 | 84.8592815 | 66.866298 | 73.6223778 |
| 69.9685834 | 77.6160148 | 84.8592815 | 66.866298 | 73.6223778 |
| 69.9685834 | 77.6160148 | 84.8592815 | 66.866298 | 73.6223778 |
| 69.9685834 | 77.6160148 | 84.8592815 | 66.866298 | 73.6223778 |
| 69.9685834 | 80.6160148 | 84.8592815 | 67.866298 | 73.6223778 |
| 69.9685834 | 80.6160148 | 83.8592815 | 68.866298 | 71.6223778 |
| 69.9685834 | 79.6160148 | 83.8592815 | 69.866298 | 72.6223778 |
| 69.9685834 | 79.6160148 | 82.8592815 | 69.866298 | 72.6223778 |
| 69.9685834 | 79.6160148 | 81.8592815 | 69.866298 | 72.6223778 |
| 69.9685834 | 79.6160148 | 79.8592815 | 69.866298 | 72.6223778 |
| 69.9685834 | 79.6160148 | 79.8592815 | 69.866298 | 72.6223778 |
| 69.9685834 | 79.6160148 | 77.8592815 | 70.866298 | 72.6223778 |
| 69.9685834 | 79.6160148 | 76.8592815 | 69.866298 | 73.6223778 |
| 70.9685834 | 80.6160148 | 74.8592815 | 70.866298 | 74.6223778 |
| 70.9685834 | 80.6160148 | 74.8592815 | 70.866298 | 75.6223778 |
| 71.9685834 | 80.6160148 | 73.8592815 | 70.866298 | 75.6223778 |
| 71.9685834 | 80.6160148 | 73.8592815 | 70.866298 | 76.6223778 |
| 71.9685834 | 78.6160148 | 70.8592815 | 71.866298 | 72.6223778 |
| 73.9685834 | 78.6160148 | 71.8592815 | 72.866298 | 70.6223778 |
| 77.9685834 | 80.6160148 | 71.8592815 | 72.866298 | 70.6223778 |
| 77.9685834 | 81.6160148 | 72.8592815 | 72.866298 | 69.6223778 |
| 75.9685834 | 83.6160148 | 72.8592815 | 71.866298 | 68.6223778 |
| 75.9685834 | 84.6160148 | 71.8592815 | 72.866298 | 67.6223778 |
| 73.9685834 | 84.6160148 | 71.8592815 | 73.866298 | 65.6223778 |
| 70.9685834 | 84.6160148 | 71.8592815 | 74.866298 | 64.6223778 |
| 70.9685834 | 84.6160148 | 73.8592815 | 74.866298 | 63.6223778 |
| 70.9685834 | 84.6160148 | 73.8592815 | 74.866298 | 63.6223778 |
| 70.9685834 | 84.6160148 | 75.8592815 | 74.866298 | 63.6223778 |
| 70.9685834 | 85.6160148 | 76.8592815 | 75.866298 | 63.6223778 |
| 69.9685834 | 71.4       | 77.8592815 | 75.866298 | 63.6223778 |
| 69.9685834 | 71.1       | 77.8592815 | 74.866298 | 63.6223778 |
| 68.9685834 | 71.1       | 77.8592815 | 74.866298 | 63.6223778 |
| 68.9685834 | 84.6160148 | 79.8592815 | 74.866298 | 65.6223778 |
| 68.9685834 | 81.6160148 | 80.8592815 | 75.866298 | 65.6223778 |
| 68.9685834 | 74.6160148 | 80.8592815 | 75.866298 | 65.6223778 |
| 68.9685834 | 72.6160148 | 80.8592815 | 75.866298 | 65.6223778 |

|            |            |            |           |            |
|------------|------------|------------|-----------|------------|
| 68.9685834 | 71.6160148 | 79.8592815 | 75.866298 | 65.6223778 |
| 68.9685834 | 71.6160148 | 79.8592815 | 75.866298 | 65.6223778 |
| 69.9685834 | 71.6160148 | 81.8592815 | 76.866298 | 65.6223778 |
| 69.9685834 | 70.6160148 | 81.8592815 | 78.866298 | 65.6223778 |
| 69.9685834 | 68.6160148 | 82.8592815 | 78.866298 | 65.6223778 |
| 66.9685834 | 68.6160148 | 82.8592815 | 78.866298 | 65.6223778 |
| 65.9685834 | 68.6160148 | 73.8592815 | 78.866298 | 64.6223778 |
| 65.9685834 | 67.6160148 | 73.8592815 | 78.866298 | 62.6223778 |
| 65.9685834 | 67.6160148 | 71.8592815 | 78.866298 | 62.6223778 |
| 65.9685834 | 68.6160148 | 71.8592815 | 78.866298 | 62.6223778 |
| 67.9685834 | 69.6160148 | 69.8592815 | 85.866298 | 63.6223778 |
| 69.9685834 | 71.6160148 | 69.8592815 | 86.866298 | 63.6223778 |
| 70.9685834 | 71.6160148 | 69.8592815 | 86.866298 | 63.6223778 |
| 70.9685834 | 70.6160148 | 69.8592815 | 85.866298 | 64.6223778 |
| 70.9685834 | 70.6160148 | 72.8592815 | 83.866298 | 67.6223778 |
| 69.9685834 | 70.6160148 | 72.8592815 | 83.866298 | 68.6223778 |
| 68.9685834 | 70.6160148 | 72.8592815 | 83.866298 | 69.6223778 |
| 67.9685834 | 70.6160148 | 72.8592815 | 83.866298 | 69.6223778 |
| 67.9685834 | 70.6160148 | 72.8592815 | 82.866298 | 70.6223778 |
| 67.9685834 | 70.6160148 | 72.8592815 | 82.866298 | 71.6223778 |
| 67.9685834 | 68.6160148 | 72.8592815 | 82.866298 | 71.6223778 |
| 67.9685834 | 68.6160148 | 72.8592815 | 82.866298 | 72.6223778 |
| 67.9685834 | 71.6160148 | 72.8592815 | 82.866298 | 72.6223778 |
| 67.9685834 | 71.6160148 | 72.8592815 | 82.866298 | 71.6223778 |
| 67.9685834 | 71.6160148 | 71.8592815 | 82.866298 | 71.6223778 |
| 66.9685834 | 71.6160148 | 72.8592815 | 82.866298 | 71.6223778 |
| 65.9685834 | 71.6160148 | 75.8592815 | 82.866298 | 71.6223778 |
| 65.9685834 | 71.6160148 | 77.8592815 | 82.866298 | 71.6223778 |
| 65.9685834 | 71.6160148 | 78.8592815 | 84.866298 | 70.6223778 |
| 65.9685834 | 71.6160148 | 77.8592815 | 85.866298 | 69.6223778 |
| 64.9685834 | 75.6160148 | 77.8592815 | 87.866298 | 70.6223778 |
| 64.9685834 | 73.6160148 | 74.8592815 | 72.5      | 70.6223778 |
| 64.9685834 | 70.6160148 | 73.8592815 | 72.5      | 70.6223778 |
| 67.9685834 | 68.6160148 | 72.8592815 | 72.5      | 71.6223778 |
| 68.9685834 | 68.6160148 | 72.8592815 | 73.2      | 71.6223778 |
| 68.9685834 | 68.6160148 | 71.8592815 | 72.6      | 71.6223778 |
| 68.9685834 | 70.6160148 | 72.8592815 | 72.9      | 70.6223778 |
| 68.9685834 | 70.6160148 | 74.8592815 | 73        | 70.6223778 |
| 68.9685834 | 70.6160148 | 77.8592815 | 73.4      | 70.6223778 |
| 68.9685834 | 71.6160148 | 77.8592815 | 73.4      | 69.6223778 |
| 68.9685834 | 70.6160148 | 79.8592815 | 73.7      | 69.6223778 |
| 68.9685834 | 69.6160148 | 79.8592815 | 73.4      | 68.6223778 |
| 67.9685834 | 69.6160148 | 79.8592815 | 73.7      | 68.6223778 |
| 67.9685834 | 68.6160148 | 79.8592815 | 74.3      | 69.6223778 |



|            |            |            |           |            |
|------------|------------|------------|-----------|------------|
| 67.9685834 | 68.6160148 | 79.8592815 | 75.2      | 68.6223778 |
| 67.9685834 | 69.6160148 | 79.8592815 | 76        | 67.6223778 |
| 68.9685834 | 74.6160148 | 78.8592815 | 76.2      | 67.6223778 |
| 68.9685834 | 75.6160148 | 78.8592815 | 76.6      | 66.6223778 |
| 68.9685834 | 74.6160148 | 78.8592815 | 77        | 67.6223778 |
| 70.9685834 | 74.6160148 | 78.8592815 | 77        | 67.6223778 |
| 70.9685834 | 74.6160148 | 78.8592815 | 76.9      | 67.6223778 |
| 68.9685834 | 73.6160148 | 78.8592815 | 76.8      | 67.6223778 |
| 68.9685834 | 73.6160148 | 73.8592815 | 75.5      | 67.6223778 |
| 68.9685834 | 73.6160148 | 72.8592815 | 75.2      | 67.6223778 |
| 68.9685834 | 73.6160148 | 72.8592815 | 86.866298 | 68.6223778 |
| 68.9685834 | 73.6160148 | 71.8592815 | 86.866298 | 68.6223778 |
| 68.9685834 | 73.6160148 | 70.8592815 | 86.866298 | 69.6223778 |
| 68.9685834 | 78.6160148 | 68.8592815 | 82.866298 | 70.6223778 |
| 68.9685834 | 77.6160148 | 68.8592815 | 82.866298 | 70.6223778 |
| 68.9685834 | 77.6160148 | 67.8592815 | 77.866298 | 70.6223778 |
| 68.9685834 | 77.6160148 | 67.8592815 | 76.866298 | 70.6223778 |
| 68.9685834 | 76.6160148 | 67.8592815 | 76.866298 | 70.6223778 |
| 68.9685834 | 74.6160148 | 67.8592815 | 76.866298 | 70.6223778 |
| 70.9685834 | 74.6160148 | 67.8592815 | 76.866298 | 70.6223778 |
| 71.9685834 | 74.6160148 | 67.8592815 | 76.866298 | 70.6223778 |
| 71.9685834 | 74.6160148 | 75.8592815 | 76.866298 | 68.6223778 |
| 74.9685834 | 74.6160148 | 77.8592815 | 75.866298 | 68.6223778 |
| 74.9685834 | 74.6160148 | 78.8592815 | 71.866298 | 68.6223778 |
| 74.9685834 | 74.6160148 | 78.8592815 | 69.866298 | 68.6223778 |
| 74.9685834 | 74.6160148 | 78.8592815 | 68.866298 | 68.6223778 |
| 74.9685834 | 74.6160148 | 78.8592815 | 68.866298 | 68.6223778 |
| 74.9685834 | 75.6160148 | 78.8592815 | 69.866298 | 69.6223778 |
| 74.9685834 | 75.6160148 | 79.8592815 | 69.866298 | 69.6223778 |
| 74.9685834 | 75.6160148 | 80.8592815 | 70.866298 | 69.6223778 |
| 74.9685834 | 75.6160148 | 80.8592815 | 70.866298 | 68.6223778 |
| 74.9685834 | 75.6160148 | 80.8592815 | 72.866298 | 68.6223778 |
| 74.9685834 | 76.6160148 | 80.8592815 | 72.866298 | 69.6223778 |
| 74.9685834 | 76.6160148 | 81.8592815 | 70.866298 | 69.6223778 |
| 72.9685834 | 74.6160148 | 81.8592815 | 68.866298 | 70.6223778 |
| 72.9685834 | 71.6160148 | 81.8592815 | 68.866298 | 70.6223778 |
| 71.9685834 | 71.6160148 | 81.8592815 | 69.866298 | 71.6223778 |
| 71.9685834 | 70.6160148 | 78.8592815 | 69.866298 | 72.6223778 |
| 71.9685834 | 70.6160148 | 78.8592815 | 74.866298 | 73.6223778 |
| 70.9685834 | 70.6160148 | 77.8592815 | 76.866298 | 73.6223778 |
| 70.9685834 | 70.6160148 | 71.8592815 | 77.866298 | 75.6223778 |
| 70.9685834 | 69.6160148 | 71.8592815 | 77.866298 | 75.6223778 |
| 70.9685834 | 69.6160148 | 66.8592815 | 77.866298 | 76.6223778 |
| 70.9685834 | 68.6160148 | 65.8592815 | 77.866298 | 76.6223778 |
| 70.9685834 | 67.6160148 | 64.8592815 | 77.866298 | 75.6223778 |

|            |            |            |           |            |
|------------|------------|------------|-----------|------------|
| 70.9685834 | 68.6160148 | 64.8592815 | 77.866298 | 72.6223778 |
| 70.9685834 | 69.6160148 | 64.8592815 | 78.866298 | 70.6223778 |
| 70.9685834 | 68.6160148 | 65.8592815 | 79.866298 | 69.6223778 |
| 71.9685834 | 68.6160148 | 65.8592815 | 79.866298 | 68.6223778 |
| 71.9685834 | 67.6160148 | 65.8592815 | 78.866298 | 68.6223778 |
| 73.9685834 | 65.6160148 | 66.8592815 | 76.866298 | 68.6223778 |
| 73.9685834 | 64.6160148 | 70.8592815 | 75.866298 | 68.6223778 |
| 73.9685834 | 64.6160148 | 70.8592815 | 75.866298 | 68.6223778 |
| 74.9685834 | 65.6160148 | 72.8592815 | 75.866298 | 69.6223778 |
| 74.9685834 | 66.6160148 | 73.8592815 | 72.866298 | 69.6223778 |
| 76.9685834 | 66.6160148 | 71.8592815 | 69.866298 | 69.6223778 |
| 76.9685834 | 66.6160148 | 71.8592815 | 69.866298 | 69.6223778 |
| 76.9685834 | 65.6160148 | 71.8592815 | 67.866298 | 69.6223778 |
| 77.9685834 | 64.6160148 | 71.8592815 | 67.866298 | 69.6223778 |
| 76.9685834 | 64.6160148 | 72.8592815 | 67.866298 | 69.6223778 |
| 76.9685834 | 63.6160148 | 72.8592815 | 67.866298 | 67.6223778 |
| 74.9685834 | 63.6160148 | 72.8592815 | 66.866298 | 65.6223778 |
| 72.9685834 | 63.6160148 | 72.8592815 | 66.866298 | 65.6223778 |
| 70.9685834 | 63.6160148 | 70.8592815 | 66.866298 | 67.6223778 |
| 69.9685834 | 63.6160148 | 70.8592815 | 66.866298 | 68.6223778 |
| 69.9685834 | 66.6160148 | 70.8592815 | 66.866298 | 69.6223778 |
| 69.9685834 | 67.6160148 | 70.8592815 | 66.866298 | 69.6223778 |
| 70.9685834 | 67.6160148 | 70.8592815 | 65.866298 | 69.6223778 |
| 71.9685834 | 68.6160148 | 70.8592815 | 65.866298 | 70.6223778 |
| 70.9685834 | 68.6160148 | 70.8592815 | 65.866298 | 70.6223778 |
| 70.9685834 | 69.6160148 | 70.8592815 | 65.866298 | 70.6223778 |
| 68.9685834 | 72.6160148 | 69.8592815 | 65.866298 | 70.6223778 |
| 68.9685834 | 73.6160148 | 69.8592815 | 65.866298 | 70.6223778 |
| 68.9685834 | 74.6160148 | 69.8592815 | 68.866298 | 70.6223778 |
| 68.9685834 | 74.6160148 | 69.8592815 | 68.866298 | 70.6223778 |
| 67.9685834 | 74.6160148 | 69.8592815 | 68.866298 | 70.6223778 |
| 68.9685834 | 74.6160148 | 69.8592815 | 70.866298 | 70.6223778 |
| 68.9685834 | 74.6160148 | 69.8592815 | 70.866298 | 70.6223778 |
| 68.9685834 | 75.6160148 | 69.8592815 | 72.866298 | 71.6223778 |
| 68.9685834 | 75.6160148 | 67.8592815 | 72.866298 | 70.6223778 |
| 69.9685834 | 75.6160148 | 66.8592815 | 72.866298 | 69.6223778 |
| 69.9685834 | 74.6160148 | 66.8592815 | 72.866298 | 68.6223778 |
| 69.9685834 | 72.6160148 | 66.8592815 | 72.866298 | 68.6223778 |
| 69.9685834 | 72.6160148 | 66.8592815 | 74.866298 | 68.6223778 |
| 69.9685834 | 72.6160148 | 66.8592815 | 74.866298 | 68.6223778 |
| 69.9685834 | 72.6160148 | 69.8592815 | 75.866298 | 68.6223778 |
| 68.9685834 | 73.6160148 | 69.8592815 | 75.866298 | 69.6223778 |
| 68.9685834 | 73.6160148 | 69.8592815 | 71.866298 | 69.6223778 |
| 69.9685834 | 73.6160148 | 69.8592815 | 67.866298 | 69.6223778 |
| 69.9685834 | 74.6160148 | 69.8592815 | 67.866298 | 71.6223778 |

|            |            |            |           |            |
|------------|------------|------------|-----------|------------|
| 74.9685834 | 74.6160148 | 69.8592815 | 65.866298 | 71.6223778 |
| 82.9685834 | 74.6160148 | 69.8592815 | 63.866298 | 72.6223778 |
| 82.9685834 | 74.6160148 | 70.8592815 | 63.866298 | 68.6223778 |
| 81.9685834 | 79.6160148 | 70.8592815 | 60.866298 | 68.6223778 |
| 81.9685834 | 80.6160148 | 70.8592815 | 56.866298 | 68.6223778 |
| 80.9685834 | 80.6160148 | 70.8592815 | 56.866298 | 70.6223778 |
| 80.9685834 | 80.6160148 | 72.8592815 | 54.866298 | 76.6223778 |
| 80.9685834 | 82.6160148 | 72.8592815 | 54.866298 | 76.6223778 |
| 81.9685834 | 85.6160148 | 79.8592815 | 52.866298 | 80.6223778 |
| 81.9685834 | 85.6160148 | 78.8592815 | 52.866298 | 81.6223778 |
| 77.9685834 | 86.6160148 | 76.8592815 | 52.866298 | 80.6223778 |
| 75.9685834 | 87.6160148 | 72.8592815 | 52.866298 | 80.6223778 |
| 75.9685834 | 74.2       | 72.8592815 | 52.866298 | 79.6223778 |
| 75.9685834 | 74         | 68.8592815 | 56.866298 | 77.6223778 |
| 76.9685834 | 74.1       | 68.8592815 | 69.866298 | 76.6223778 |
| 76.9685834 | 89.6160148 | 69.8592815 | 71.866298 | 75.6223778 |
| 76.9685834 | 89.6160148 | 71.8592815 | 73.866298 | 74.6223778 |
| 75.9685834 | 89.6160148 | 71.8592815 | 75.866298 | 73.6223778 |
| 75.9685834 | 89.6160148 | 71.8592815 | 76.866298 | 72.6223778 |
| 75.9685834 | 74.2       | 68.8592815 | 76.866298 | 72.6223778 |
| 75.9685834 | 88.6160148 | 65.8592815 | 76.866298 | 71.6223778 |
| 75.9685834 | 88.6160148 | 65.8592815 | 78.866298 | 71.6223778 |
| 75.9685834 | 86.6160148 | 65.8592815 | 78.866298 | 71.6223778 |
| 75.9685834 | 86.6160148 | 64.8592815 | 78.866298 | 71.6223778 |
| 75.9685834 | 86.6160148 | 64.8592815 | 78.866298 | 71.6223778 |
| 75.9685834 | 83.6160148 | 63.8592815 | 81.866298 | 71.6223778 |
| 76.9685834 | 82.6160148 | 62.8592815 | 81.866298 | 71.6223778 |
| 76.9685834 | 74.1       | 62.8592815 | 81.866298 | 71.6223778 |
| 75.9685834 | 74         | 63.8592815 | 82.866298 | 72.6223778 |
| 75.9685834 | 74.7       | 63.8592815 | 82.866298 | 73.6223778 |
| 75.9685834 | 74.3       | 63.8592815 | 81.866298 | 72.6223778 |
| 75.9685834 | 74.4       | 63.8592815 | 81.866298 | 72.6223778 |
| 75.9685834 | 74.8       | 63.8592815 | 80.866298 | 72.6223778 |
| 75.9685834 | 74.9       | 62.8592815 | 82.866298 | 72.6223778 |
| 75.9685834 | 74.9       | 62.8592815 | 82.866298 | 72.6223778 |
| 75.9685834 | 84.6160148 | 62.8592815 | 83.866298 | 71.6223778 |
| 75.9685834 | 82.6160148 | 62.8592815 | 83.866298 | 71.6223778 |
| 75.9685834 | 81.6160148 | 62.8592815 | 83.866298 | 70.6223778 |
| 75.9685834 | 81.6160148 | 62.8592815 | 83.866298 | 70.6223778 |
| 75.9685834 | 81.6160148 | 63.8592815 | 83.866298 | 69.6223778 |
| 76.9685834 | 81.6160148 | 64.8592815 | 83.866298 | 69.6223778 |
| 76.9685834 | 80.6160148 | 64.8592815 | 82.866298 | 69.6223778 |
| 81.9685834 | 79.6160148 | 66.8592815 | 82.866298 | 69.6223778 |
| 81.9685834 | 79.6160148 | 66.8592815 | 84.866298 | 69.6223778 |
| 80.9685834 | 79.6160148 | 67.8592815 | 85.866298 | 69.6223778 |

|            |            |            |            |            |
|------------|------------|------------|------------|------------|
| 73.9685834 | 79.6160148 | 67.8592815 | 85.866298  | 69.6223778 |
| 70.9685834 | 77.6160148 | 67.8592815 | 85.866298  | 69.6223778 |
| 69.9685834 | 76.6160148 | 67.8592815 | 85.866298  | 69.6223778 |
| 69.9685834 | 76.6160148 | 67.8592815 | 68.6561259 | 69.6223778 |
| 68.9685834 | 74.6160148 | 67.8592815 | 81.866298  | 69.6223778 |
| 67.9685834 | 73.6160148 | 68.8592815 | 78.866298  | 70.6223778 |
| 67.9685834 | 71.6160148 | 68.8592815 | 77.866298  | 70.6223778 |
| 67.9685834 | 70.6160148 | 68.8592815 | 77.866298  | 69.6223778 |
| 65.9685834 | 70.6160148 | 68.8592815 | 78.866298  | 64.6223778 |
| 62.9685834 | 70.6160148 | 68.8592815 | 80.866298  | 63.6223778 |
| 61.9685834 | 69.6160148 | 68.8592815 | 80.866298  | 63.6223778 |
| 63.9685834 | 67.6160148 | 67.8592815 | 80.866298  | 63.6223778 |
| 64.9685834 | 67.6160148 | 66.8592815 | 80.866298  | 63.6223778 |
| 64.9685834 | 67.6160148 | 66.8592815 | 80.866298  | 63.6223778 |
| 64.9685834 | 67.6160148 | 66.8592815 | 81.866298  | 63.6223778 |
| 64.9685834 | 66.6160148 | 66.8592815 | 81.866298  | 63.6223778 |
| 64.9685834 | 63.6160148 | 68.8592815 | 82.866298  | 63.6223778 |
| 64.9685834 | 61.6160148 | 66.8592815 | 82.866298  | 63.6223778 |
| 64.9685834 | 60.6160148 | 66.8592815 | 82.866298  | 65.6223778 |
| 64.9685834 | 59.6160148 | 66.8592815 | 82.866298  | 66.6223778 |
| 64.9685834 | 59.6160148 | 65.8592815 | 82.866298  | 66.6223778 |
| 64.9685834 | 59.6160148 | 65.8592815 | 81.866298  | 65.6223778 |
| 68.9685834 | 59.6160148 | 65.8592815 | 81.866298  | 64.6223778 |
| 69.9685834 | 72.6160148 | 62.8592815 | 78.866298  | 64.6223778 |
| 69.9685834 | 75.6160148 | 62.8592815 | 77.866298  | 65.6223778 |
| 69.9685834 | 76.6160148 | 62.8592815 | 72.866298  | 65.6223778 |
| 70.9685834 | 76.6160148 | 61.8592815 | 72.866298  | 65.6223778 |
| 70.9685834 | 76.6160148 | 61.8592815 | 72.866298  | 66.6223778 |
| 71.9685834 | 75.6160148 | 61.8592815 | 68.866298  | 68.6223778 |
| 71.9685834 | 75.6160148 | 61.8592815 | 67.866298  | 70.6223778 |
| 71.9685834 | 75.6160148 | 61.8592815 | 67.866298  | 71.6223778 |
| 71.9685834 | 74.6160148 | 62.8592815 | 67.866298  | 71.6223778 |
| 71.9685834 | 74.6160148 | 61.8592815 | 67.866298  | 71.6223778 |
| 71.9685834 | 74.6160148 | 61.8592815 | 67.866298  | 71.6223778 |
| 71.9685834 | 74.6160148 | 61.8592815 | 65.866298  | 71.6223778 |
| 69.9685834 | 74.6160148 | 61.8592815 | 65.866298  | 71.6223778 |
| 69.9685834 | 74.6160148 | 62.8592815 | 65.866298  | 71.6223778 |
| 69.9685834 | 75.6160148 | 62.8592815 | 65.866298  | 71.6223778 |
| 69.9685834 | 75.6160148 | 62.8592815 | 65.866298  | 71.6223778 |
| 69.9685834 | 74.6160148 | 62.8592815 | 65.866298  | 71.6223778 |
| 70.9685834 | 74.6160148 | 63.8592815 | 66.866298  | 73.6223778 |
| 70.9685834 | 74.6160148 | 63.8592815 | 67.866298  | 74.6223778 |
| 71.9685834 | 73.6160148 | 63.8592815 | 69.866298  | 73.6223778 |
| 71.9685834 | 73.6160148 | 63.8592815 | 69.866298  | 72.6223778 |
| 71.9685834 | 72.6160148 | 63.8592815 | 69.866298  | 72.6223778 |

|            |            |            |           |            |
|------------|------------|------------|-----------|------------|
| 71.9685834 | 72.6160148 | 63.8592815 | 66.866298 | 71.6223778 |
| 72.9685834 | 72.6160148 | 63.8592815 | 66.866298 | 71.6223778 |
| 72.9685834 | 72.6160148 | 64.8592815 | 66.866298 | 71.6223778 |
| 72.9685834 | 70.6160148 | 65.8592815 | 66.866298 | 70.6223778 |
| 77.9685834 | 70.6160148 | 69.8592815 | 66.866298 | 70.6223778 |
| 81.9685834 | 68.6160148 | 70.8592815 | 65.866298 | 69.6223778 |
| 71.1       | 68.6160148 | 72.8592815 | 65.866298 | 67.6223778 |
| 70.8       | 67.6160148 | 72.8592815 | 65.866298 | 66.6223778 |
| 72.1       | 72.6160148 | 80.8592815 | 66.866298 | 66.6223778 |
| 72.1       | 72.6160148 | 80.8592815 | 66.866298 | 66.6223778 |
| 81.9685834 | 74.6160148 | 80.8592815 | 65.866298 | 65.6223778 |
| 77.9685834 | 74.6160148 | 77.8592815 | 65.866298 | 65.6223778 |
| 77.9685834 | 74.6160148 | 77.8592815 | 65.866298 | 66.6223778 |
| 73.9685834 | 75.6160148 | 77.8592815 | 64.866298 | 66.6223778 |
| 71.9685834 | 77.6160148 | 62.8592815 | 64.866298 | 66.6223778 |
| 70.9685834 | 77.6160148 | 60.8592815 | 64.866298 | 70.6223778 |
| 70.9685834 | 78.6160148 | 60.8592815 | 63.866298 | 71.6223778 |
| 70.9685834 | 78.6160148 | 59.8592815 | 63.866298 | 72.6223778 |
| 70.9685834 | 77.6160148 | 60.8592815 | 63.866298 | 72.6223778 |
| 70.9685834 | 77.6160148 | 60.8592815 | 63.866298 | 74.6223778 |
| 70.9685834 | 77.6160148 | 62.8592815 | 63.866298 | 74.6223778 |
| 69.9685834 | 78.6160148 | 61.8592815 | 65.866298 | 74.6223778 |
| 68.9685834 | 79.6160148 | 60.8592815 | 65.866298 | 75.6223778 |
| 68.9685834 | 79.6160148 | 60.8592815 | 65.866298 | 78.6223778 |
| 68.9685834 | 79.6160148 | 60.8592815 | 65.866298 | 80.6223778 |
| 68.9685834 | 80.6160148 | 60.8592815 | 66.866298 | 80.6223778 |
| 69.9685834 | 80.6160148 | 60.8592815 | 66.866298 | 84.6223778 |
| 72.9685834 | 80.6160148 | 60.8592815 | 67.866298 | 88.6223778 |
| 72.9685834 | 81.6160148 | 61.8592815 | 67.866298 | 89.6223778 |
| 72.9685834 | 81.6160148 | 61.8592815 | 66.866298 | 89.6223778 |
| 72.9685834 | 81.6160148 | 60.8592815 | 66.866298 | 91.6223778 |
| 73.9685834 | 81.6160148 | 61.8592815 | 66.866298 | 91.6223778 |
| 73.9685834 | 79.6160148 | 61.8592815 | 66.866298 | 89.6223778 |
| 74.9685834 | 78.6160148 | 62.8592815 | 67.866298 | 89.6223778 |
| 74.9685834 | 78.6160148 | 65.8592815 | 67.866298 | 88.6223778 |
| 74.9685834 | 78.6160148 | 65.8592815 | 70.866298 | 76.6223778 |
| 74.9685834 | 78.6160148 | 67.8592815 | 70.866298 | 72.6223778 |
| 74.9685834 | 78.6160148 | 68.8592815 | 70.866298 | 71.6223778 |
| 73.9685834 | 78.6160148 | 71.8592815 | 73.866298 | 71.6223778 |
| 72.9685834 | 78.6160148 | 71.8592815 | 73.866298 | 71.6223778 |
| 72.9685834 | 80.6160148 | 71.8592815 | 74.866298 | 70.6223778 |
| 70.9685834 | 80.6160148 | 71.8592815 | 74.866298 | 70.6223778 |
| 69.9685834 | 81.6160148 | 71.8592815 | 76.866298 | 68.6223778 |
| 69.9685834 | 81.6160148 | 71.8592815 | 77.866298 | 66.6223778 |
| 69.9685834 | 81.6160148 | 71.8592815 | 77.866298 | 65.6223778 |

|            |            |            |           |            |
|------------|------------|------------|-----------|------------|
| 69.9685834 | 82.6160148 | 71.8592815 | 78.866298 | 65.6223778 |
| 69.9685834 | 83.6160148 | 72.8592815 | 78.866298 | 65.6223778 |
| 69.9685834 | 84.6160148 | 72.8592815 | 78.866298 | 65.6223778 |
| 70.9685834 | 85.6160148 | 72.8592815 | 77.866298 | 65.6223778 |
| 70.9685834 | 86.6160148 | 78.8592815 | 77.866298 | 65.6223778 |
| 71.9685834 | 85.6160148 | 82.8592815 | 76.866298 | 65.6223778 |
| 72.9685834 | 85.6160148 | 82.8592815 | 75.866298 | 69.6223778 |
| 73.9685834 | 83.6160148 | 82.8592815 | 75.866298 | 72.6223778 |
| 73.9685834 | 83.6160148 | 82.8592815 | 75.866298 | 73.6223778 |
| 73.9685834 | 83.6160148 | 82.8592815 | 75.866298 | 73.6223778 |
| 73.9685834 | 83.6160148 | 82.8592815 | 75.866298 | 74.6223778 |
| 73.9685834 | 83.6160148 | 83.8592815 | 72.866298 | 74.6223778 |
| 73.9685834 | 85.6160148 | 83.8592815 | 72.866298 | 74.6223778 |
| 73.9685834 | 85.6160148 | 82.8592815 | 70.866298 | 75.6223778 |
| 76.9685834 | 83.6160148 | 82.8592815 | 69.866298 | 75.6223778 |
| 77.9685834 | 81.6160148 | 81.8592815 | 67.866298 | 75.6223778 |
| 77.9685834 | 76.6160148 | 79.8592815 | 67.866298 | 75.6223778 |
| 77.9685834 | 76.6160148 | 78.8592815 | 67.866298 | 75.6223778 |
| 74.9685834 | 76.6160148 | 78.8592815 | 64.866298 | 79.6223778 |
| 69.9685834 | 73.6160148 | 79.8592815 | 64.866298 | 79.6223778 |
| 67.9685834 | 72.6160148 | 70.8592815 | 63.866298 | 79.6223778 |
| 67.9685834 | 72.6160148 | 70.8592815 | 63.866298 | 80.6223778 |
| 67.9685834 | 71.6160148 | 70.8592815 | 64.866298 | 80.6223778 |
| 64.9685834 | 72.6160148 | 68.8592815 | 64.866298 | 81.6223778 |
| 64.9685834 | 73.6160148 | 68.8592815 | 68.866298 | 80.6223778 |
| 64.9685834 | 73.6160148 | 67.8592815 | 68.866298 | 80.6223778 |
| 65.9685834 | 72.6160148 | 66.8592815 | 70.866298 | 79.6223778 |
| 67.9685834 | 72.6160148 | 66.8592815 | 72.866298 | 77.6223778 |
| 68.9685834 | 72.6160148 | 66.8592815 | 72.866298 | 77.6223778 |
| 68.9685834 | 72.6160148 | 65.8592815 | 72.866298 | 76.6223778 |
| 70.9685834 | 72.6160148 | 64.8592815 | 72.866298 | 75.6223778 |
| 70.9685834 | 72.6160148 | 63.8592815 | 71.866298 | 74.6223778 |
| 70.9685834 | 72.6160148 | 61.8592815 | 72.866298 | 74.6223778 |
| 70.9685834 | 73.6160148 | 61.8592815 | 72.866298 | 74.6223778 |
| 70.9685834 | 75.6160148 | 61.8592815 | 72.866298 | 74.6223778 |
| 70.9685834 | 76.6160148 | 61.8592815 | 72.866298 | 75.6223778 |
| 70.9685834 | 76.6160148 | 60.8592815 | 72.866298 | 75.6223778 |
| 69.9685834 | 75.6160148 | 60.8592815 | 72.866298 | 77.6223778 |
| 69.9685834 | 74.6160148 | 61.8592815 | 72.866298 | 76.6223778 |
| 69.9685834 | 74.6160148 | 64.8592815 | 72.866298 | 76.6223778 |
| 69.9685834 | 73.6160148 | 64.8592815 | 72.866298 | 76.6223778 |
| 70.9685834 | 72.6160148 | 66.8592815 | 72.866298 | 76.6223778 |
| 72.9685834 | 72.6160148 | 67.8592815 | 71.866298 | 76.6223778 |
| 73.9685834 | 72.6160148 | 64.8592815 | 68.866298 | 75.6223778 |
| 73.9685834 | 72.6160148 | 61.8592815 | 67.866298 | 75.6223778 |

|            |            |            |           |            |
|------------|------------|------------|-----------|------------|
| 73.9685834 | 72.6160148 | 61.8592815 | 67.866298 | 70.6223778 |
| 72.9685834 | 72.6160148 | 61.8592815 | 67.866298 | 70.6223778 |
| 72.9685834 | 71.6160148 | 63.8592815 | 67.866298 | 69.6223778 |
| 71.9685834 | 71.6160148 | 65.8592815 | 67.866298 | 70.6223778 |
| 70.9685834 | 71.6160148 | 67.8592815 | 67.866298 | 71.6223778 |
| 70.9685834 | 72.6160148 | 69.8592815 | 67.866298 | 71.6223778 |
| 69.9685834 | 72.6160148 | 71.8592815 | 67.866298 | 72.6223778 |
| 69.9685834 | 72.6160148 | 71.8592815 | 67.866298 | 72.6223778 |
| 69.9685834 | 73.6160148 | 71.8592815 | 67.866298 | 72.6223778 |
| 70.9685834 | 74.6160148 | 70.8592815 | 70.866298 | 74.6223778 |
| 71.9685834 | 74.6160148 | 69.8592815 | 70.866298 | 74.6223778 |
| 71.9685834 | 74.6160148 | 69.8592815 | 72.866298 | 74.6223778 |
| 71.9685834 | 73.6160148 | 69.8592815 | 73.866298 | 75.6223778 |
| 71.9685834 | 73.6160148 | 69.8592815 | 74.866298 | 76.6223778 |
| 71.9685834 | 73.6160148 | 69.8592815 | 75.866298 | 76.6223778 |
| 71.9685834 | 73.6160148 | 69.8592815 | 79.866298 | 80.6223778 |
| 71.9685834 | 73.6160148 | 68.8592815 | 79.866298 | 80.6223778 |
| 70.9685834 | 73.6160148 | 68.8592815 | 81.866298 | 80.6223778 |
| 70.9685834 | 72.6160148 | 67.8592815 | 78.866298 | 80.6223778 |
| 70.9685834 | 73.6160148 | 66.8592815 | 75.866298 | 79.6223778 |
| 69.9685834 | 73.6160148 | 64.8592815 | 73.866298 | 79.6223778 |
| 68.9685834 | 73.6160148 | 64.8592815 | 72.866298 | 79.6223778 |
| 68.9685834 | 73.6160148 | 62.8592815 | 71.866298 | 78.6223778 |
| 68.9685834 | 73.6160148 | 62.8592815 | 72.866298 | 78.6223778 |
| 68.9685834 | 75.6160148 | 62.8592815 | 72.866298 | 78.6223778 |
| 68.9685834 | 75.6160148 | 63.8592815 | 73.866298 | 78.6223778 |
| 69.9685834 | 73.6160148 | 63.8592815 | 74.866298 | 78.6223778 |
| 69.9685834 | 72.6160148 | 63.8592815 | 75.866298 | 77.6223778 |
| 69.9685834 | 72.6160148 | 63.8592815 | 75.866298 | 77.6223778 |
| 67.9685834 | 72.6160148 | 63.8592815 | 74.866298 | 76.6223778 |
| 67.9685834 | 72.6160148 | 63.8592815 | 74.866298 | 76.6223778 |
| 67.9685834 | 72.6160148 | 63.8592815 | 74.866298 | 76.6223778 |
| 67.9685834 | 72.6160148 | 63.8592815 | 70.866298 | 75.6223778 |
| 67.9685834 | 74.6160148 | 63.8592815 | 70.866298 | 75.6223778 |
| 67.9685834 | 74.6160148 | 63.8592815 | 70.866298 | 75.6223778 |
| 67.9685834 | 74.6160148 | 64.8592815 | 70.866298 | 75.6223778 |
| 67.9685834 | 74.6160148 | 64.8592815 | 71.866298 | 75.6223778 |
| 67.9685834 | 75.6160148 | 65.8592815 | 72.866298 | 75.6223778 |
| 66.9685834 | 75.6160148 | 66.8592815 | 75.866298 | 71.6223778 |
| 66.9685834 | 74.6160148 | 66.8592815 | 78.866298 | 71.6223778 |
| 66.9685834 | 74.6160148 | 66.8592815 | 78.866298 | 71.6223778 |
| 65.9685834 | 74.6160148 | 70.8592815 | 79.866298 | 71.6223778 |
| 64.9685834 | 76.6160148 | 72.8592815 | 83.866298 | 70.6223778 |
| 64.9685834 | 76.6160148 | 72.8592815 | 83.866298 | 70.6223778 |
| 64.9685834 | 77.6160148 | 72.8592815 | 85.866298 | 70.6223778 |

|            |            |            |           |            |
|------------|------------|------------|-----------|------------|
| 64.9685834 | 77.6160148 | 74.8592815 | 86.866298 | 69.6223778 |
| 64.9685834 | 77.6160148 | 75.8592815 | 86.866298 | 70.6223778 |
| 64.9685834 | 77.6160148 | 81.8592815 | 88.866298 | 70.6223778 |
| 64.9685834 | 77.6160148 | 85.8592815 | 88.866298 | 70.6223778 |
| 64.9685834 | 77.6160148 | 85.8592815 | 88.866298 | 69.6223778 |
| 64.9685834 | 77.6160148 | 85.8592815 | 91.866298 | 69.6223778 |
| 64.9685834 | 77.6160148 | 85.8592815 | 76.4      | 69.6223778 |
| 65.9685834 | 77.6160148 | 74.8592815 | 75.4      | 68.6223778 |
| 66.9685834 | 77.6160148 | 72.8592815 | 74.9      | 68.6223778 |
| 70.9685834 | 77.6160148 | 72.8592815 | 75        | 69.6223778 |
| 69.9685834 | 79.6160148 | 67.8592815 | 74.7      | 68.6223778 |
| 69.9685834 | 78.6160148 | 63.8592815 | 74        | 68.6223778 |
| 68.9685834 | 78.6160148 | 63.8592815 | 73.3      | 68.6223778 |
| 68.9685834 | 77.6160148 | 65.8592815 | 86.866298 | 68.6223778 |
| 68.9685834 | 77.6160148 | 65.8592815 | 86.866298 | 68.6223778 |
| 68.9685834 | 77.6160148 | 65.8592815 | 84.866298 | 68.6223778 |
| 67.9685834 | 77.6160148 | 65.8592815 | 83.866298 | 67.6223778 |
| 67.9685834 | 77.6160148 | 65.8592815 | 80.866298 | 67.6223778 |
| 67.9685834 | 78.6160148 | 67.8592815 | 76.866298 | 66.6223778 |
| 66.9685834 | 79.6160148 | 67.8592815 | 73.866298 | 66.6223778 |
| 64.9685834 | 79.6160148 | 68.8592815 | 73.866298 | 64.6223778 |
| 64.9685834 | 79.6160148 | 68.8592815 | 73.866298 | 66.6223778 |
| 64.9685834 | 78.6160148 | 69.8592815 | 71.866298 | 67.6223778 |
| 63.9685834 | 77.6160148 | 70.8592815 | 69.866298 | 68.6223778 |
| 63.9685834 | 77.6160148 | 73.8592815 | 69.866298 | 70.6223778 |
| 63.9685834 | 76.6160148 | 73.8592815 | 68.866298 | 71.6223778 |
| 63.9685834 | 75.6160148 | 72.8592815 | 69.866298 | 71.6223778 |
| 63.9685834 | 74.6160148 | 72.8592815 | 69.866298 | 70.6223778 |
| 63.9685834 | 74.6160148 | 71.8592815 | 68.866298 | 70.6223778 |
| 63.9685834 | 74.6160148 | 68.8592815 | 68.866298 | 69.6223778 |
| 63.9685834 | 71.6160148 | 67.8592815 | 66.866298 | 69.6223778 |
| 63.9685834 | 71.6160148 | 67.8592815 | 66.866298 | 69.6223778 |
| 62.9685834 | 69.6160148 | 68.8592815 | 66.866298 | 69.6223778 |
| 63.9685834 | 68.6160148 | 69.8592815 | 65.866298 | 69.6223778 |
| 63.9685834 | 69.6160148 | 68.8592815 | 66.866298 | 69.6223778 |
| 63.9685834 | 70.6160148 | 67.8592815 | 66.866298 | 69.6223778 |
| 64.9685834 | 70.6160148 | 67.8592815 | 67.866298 | 69.6223778 |
| 64.9685834 | 66.6160148 | 67.8592815 | 70.866298 | 69.6223778 |
| 63.9685834 | 66.6160148 | 66.8592815 | 70.866298 | 70.6223778 |
| 63.9685834 | 66.6160148 | 66.8592815 | 70.866298 | 70.6223778 |
| 63.9685834 | 66.6160148 | 66.8592815 | 74.866298 | 70.6223778 |
| 63.9685834 | 66.6160148 | 65.8592815 | 75.866298 | 70.6223778 |
| 63.9685834 | 66.6160148 | 65.8592815 | 75.866298 | 70.6223778 |
| 64.9685834 | 67.6160148 | 65.8592815 | 75.866298 | 70.6223778 |
| 65.9685834 | 68.6160148 | 64.8592815 | 75.866298 | 70.6223778 |



|            |            |            |           |            |
|------------|------------|------------|-----------|------------|
| 65.9685834 | 68.6160148 | 64.8592815 | 75.866298 | 70.6223778 |
| 65.9685834 | 66.6160148 | 63.8592815 | 75.866298 | 70.6223778 |
| 65.9685834 | 64.6160148 | 63.8592815 | 72.866298 | 71.6223778 |
| 65.9685834 | 63.6160148 | 63.8592815 | 70.866298 | 72.6223778 |
| 65.9685834 | 63.6160148 | 63.8592815 | 70.866298 | 73.6223778 |
| 64.9685834 | 63.6160148 | 63.8592815 | 70.866298 | 73.6223778 |
| 63.9685834 | 64.6160148 | 63.8592815 | 67.866298 | 73.6223778 |
| 63.9685834 | 65.6160148 | 63.8592815 | 66.866298 | 73.6223778 |
| 64.9685834 | 65.6160148 | 63.8592815 | 63.866298 | 73.6223778 |
| 65.9685834 | 65.6160148 | 68.8592815 | 63.866298 | 72.6223778 |
| 66.9685834 | 67.6160148 | 68.8592815 | 62.866298 | 72.6223778 |
| 71.9685834 | 71.6160148 | 68.8592815 | 60.866298 | 71.6223778 |
| 71.9685834 | 72.6160148 | 68.8592815 | 60.866298 | 70.6223778 |
| 71.9685834 | 72.6160148 | 68.8592815 | 60.866298 | 69.6223778 |
| 71.9685834 | 73.6160148 | 70.8592815 | 67.866298 | 69.6223778 |
| 71.9685834 | 73.6160148 | 71.8592815 | 67.866298 | 69.6223778 |
| 70.9685834 | 73.6160148 | 71.8592815 | 69.866298 | 70.6223778 |
| 70.9685834 | 73.6160148 | 73.8592815 | 70.866298 | 70.6223778 |
| 70.9685834 | 73.6160148 | 73.8592815 | 69.866298 | 67.6223778 |
| 70.9685834 | 72.6160148 | 73.8592815 | 69.866298 | 67.6223778 |
| 70.9685834 | 72.6160148 | 73.8592815 | 69.866298 | 65.6223778 |
| 70.9685834 | 72.6160148 | 73.8592815 | 68.866298 | 65.6223778 |
| 70.9685834 | 69.6160148 | 74.8592815 | 67.866298 | 65.6223778 |
| 70.9685834 | 69.6160148 | 75.8592815 | 67.866298 | 65.6223778 |
| 69.9685834 | 68.6160148 | 75.8592815 | 67.866298 | 66.6223778 |
| 69.9685834 | 67.6160148 | 75.8592815 | 67.866298 | 66.6223778 |
| 68.9685834 | 67.6160148 | 76.8592815 | 67.866298 | 66.6223778 |
| 68.9685834 | 67.6160148 | 76.8592815 | 66.866298 | 66.6223778 |
| 68.9685834 | 67.6160148 | 76.8592815 | 66.866298 | 66.6223778 |
| 68.9685834 | 67.6160148 | 76.8592815 | 66.866298 | 66.6223778 |
| 68.9685834 | 67.6160148 | 76.8592815 | 68.866298 | 66.6223778 |
| 68.9685834 | 67.6160148 | 76.8592815 | 69.866298 | 67.6223778 |
| 68.9685834 | 67.6160148 | 76.8592815 | 69.866298 | 67.6223778 |
| 69.9685834 | 66.6160148 | 76.8592815 | 69.866298 | 66.6223778 |
| 73.9685834 | 75.6160148 | 76.8592815 | 69.866298 | 66.6223778 |
| 73.9685834 | 76.6160148 | 74.1       | 69.866298 | 66.6223778 |
| 77.9685834 | 77.6160148 | 74.2       | 68.866298 | 67.6223778 |
| 77.9685834 | 77.6160148 | 74.3       | 68.866298 | 67.6223778 |
| 77.9685834 | 77.6160148 | 74.4       | 67.866298 | 67.6223778 |
| 78.9685834 | 76.6160148 | 74.5       | 67.866298 | 67.6223778 |
| 78.9685834 | 74.6160148 | 74.4       | 67.866298 | 67.6223778 |
| 78.9685834 | 74.6160148 | 75.2       | 67.866298 | 67.6223778 |
| 78.9685834 | 74.6160148 | 89.8592815 | 67.866298 | 68.6223778 |
| 78.9685834 | 73.6160148 | 89.8592815 | 67.866298 | 69.6223778 |
| 79.9685834 | 73.6160148 | 88.8592815 | 69.866298 | 69.6223778 |

|            |            |            |           |            |
|------------|------------|------------|-----------|------------|
| 75.9685834 | 71.6160148 | 85.8592815 | 69.866298 | 69.6223778 |
| 75.9685834 | 71.6160148 | 79.8592815 | 71.866298 | 69.6223778 |
| 75.9685834 | 70.6160148 | 79.8592815 | 74.866298 | 67.6223778 |
| 75.9685834 | 70.6160148 | 79.8592815 | 74.866298 | 67.6223778 |
| 73.9685834 | 68.6160148 | 75.8592815 | 76.866298 | 67.6223778 |
| 73.9685834 | 67.6160148 | 74.8592815 | 79.866298 | 67.6223778 |
| 72.9685834 | 66.6160148 | 73.8592815 | 79.866298 | 67.6223778 |
| 71.9685834 | 66.6160148 | 73.8592815 | 79.866298 | 67.6223778 |
| 71.9685834 | 67.6160148 | 72.8592815 | 81.866298 | 67.6223778 |
| 69.9685834 | 68.6160148 | 71.8592815 | 83.866298 | 67.6223778 |
| 69.9685834 | 68.6160148 | 70.8592815 | 80.866298 | 67.6223778 |
| 69.9685834 | 68.6160148 | 70.8592815 | 80.866298 | 67.6223778 |
| 69.9685834 | 68.6160148 | 70.8592815 | 79.866298 | 67.6223778 |
| 69.9685834 | 68.6160148 | 69.8592815 | 74.866298 | 67.6223778 |
| 69.9685834 | 68.6160148 | 66.8592815 | 72.866298 | 67.6223778 |
| 70.9685834 | 68.6160148 | 66.8592815 | 71.866298 | 67.6223778 |
| 71.9685834 | 68.6160148 | 66.8592815 | 71.866298 | 67.6223778 |
| 71.9685834 | 68.6160148 | 65.8592815 | 71.866298 | 67.6223778 |
| 72.9685834 | 68.6160148 | 65.8592815 | 70.866298 | 69.6223778 |
| 72.9685834 | 68.6160148 | 65.8592815 | 69.866298 | 70.6223778 |
| 72.9685834 | 68.6160148 | 66.8592815 | 68.866298 | 69.6223778 |
| 72.9685834 | 68.6160148 | 67.8592815 | 68.866298 | 70.6223778 |
| 72.9685834 | 68.6160148 | 71.8592815 | 68.866298 | 70.6223778 |
| 73.9685834 | 69.6160148 | 71.8592815 | 68.866298 | 70.6223778 |
| 71.9685834 | 69.6160148 | 70.8592815 | 67.866298 | 68.6223778 |
| 71.9685834 | 68.6160148 | 70.8592815 | 65.866298 | 68.6223778 |
| 71.9685834 | 68.6160148 | 71.8592815 | 64.866298 | 67.6223778 |
| 71.9685834 | 68.6160148 | 71.8592815 | 63.866298 | 67.6223778 |
| 71.9685834 | 69.6160148 | 71.8592815 | 63.866298 | 67.6223778 |
| 71.9685834 | 70.6160148 | 72.8592815 | 63.866298 | 66.6223778 |
| 71.9685834 | 70.6160148 | 72.8592815 | 64.866298 | 66.6223778 |
| 71.9685834 | 70.6160148 | 72.8592815 | 64.866298 | 66.6223778 |
| 70.9685834 | 70.6160148 | 72.8592815 | 64.866298 | 67.6223778 |
| 70.9685834 | 70.6160148 | 72.8592815 | 64.866298 | 67.6223778 |
| 69.9685834 | 70.6160148 | 71.8592815 | 64.866298 | 67.6223778 |
| 69.9685834 | 70.6160148 | 69.8592815 | 74.866298 | 67.6223778 |
| 69.9685834 | 70.6160148 | 68.8592815 | 77.866298 | 67.6223778 |
| 69.9685834 | 70.6160148 | 68.8592815 | 77.866298 | 67.6223778 |
| 70.9685834 | 70.6160148 | 68.8592815 | 79.866298 | 67.6223778 |
| 70.9685834 | 70.6160148 | 68.8592815 | 79.866298 | 66.6223778 |
| 69.9685834 | 70.6160148 | 68.8592815 | 79.866298 | 66.6223778 |
| 70.9685834 | 70.6160148 | 68.8592815 | 79.866298 | 66.6223778 |
| 72.9685834 | 69.6160148 | 68.8592815 | 79.866298 | 66.6223778 |
| 73.9685834 | 69.6160148 | 68.8592815 | 77.866298 | 66.6223778 |
| 74.9685834 | 70.6160148 | 68.8592815 | 76.866298 | 66.6223778 |

|            |            |            |           |            |
|------------|------------|------------|-----------|------------|
| 74.9685834 | 70.6160148 | 68.8592815 | 76.866298 | 66.6223778 |
| 74.9685834 | 71.6160148 | 68.8592815 | 75.866298 | 66.6223778 |
| 74.9685834 | 71.6160148 | 69.8592815 | 75.866298 | 66.6223778 |
| 74.9685834 | 71.6160148 | 69.8592815 | 73.866298 | 66.6223778 |
| 74.9685834 | 71.6160148 | 70.8592815 | 73.866298 | 66.6223778 |
| 73.9685834 | 72.6160148 | 70.8592815 | 72.866298 | 66.6223778 |
| 70.9685834 | 72.6160148 | 71.8592815 | 72.866298 | 66.6223778 |
| 68.9685834 | 72.6160148 | 71.8592815 | 72.866298 | 66.6223778 |
| 68.9685834 | 73.6160148 | 68.8592815 | 73.866298 | 66.6223778 |
| 68.9685834 | 73.6160148 | 67.8592815 | 73.866298 | 68.6223778 |
| 67.9685834 | 72.6160148 | 67.8592815 | 74.866298 | 68.6223778 |
| 67.9685834 | 71.6160148 | 67.8592815 | 73.866298 | 68.6223778 |
| 67.9685834 | 71.6160148 | 67.8592815 | 73.866298 | 68.6223778 |
| 67.9685834 | 68.6160148 | 69.8592815 | 73.866298 | 68.6223778 |
| 67.9685834 | 68.6160148 | 69.8592815 | 70.866298 | 68.6223778 |
| 67.9685834 | 68.6160148 | 70.8592815 | 68.866298 | 68.6223778 |
| 67.9685834 | 68.6160148 | 70.8592815 | 68.866298 | 68.6223778 |
| 68.9685834 | 68.6160148 | 70.8592815 | 67.866298 | 69.6223778 |
| 68.9685834 | 68.6160148 | 70.8592815 | 67.866298 | 70.6223778 |
| 68.9685834 | 68.6160148 | 70.8592815 | 67.866298 | 70.6223778 |
| 68.9685834 | 68.6160148 | 70.8592815 | 67.866298 | 69.6223778 |
| 69.9685834 | 69.6160148 | 70.8592815 | 67.866298 | 69.6223778 |
| 69.9685834 | 69.6160148 | 71.8592815 | 68.866298 | 69.6223778 |
| 69.9685834 | 68.6160148 | 72.8592815 | 68.866298 | 70.6223778 |
| 70.9685834 | 68.6160148 | 74.8592815 | 69.866298 | 70.6223778 |
| 70.9685834 | 68.6160148 | 74.8592815 | 69.866298 | 70.6223778 |
| 69.9685834 | 68.6160148 | 75.8592815 | 69.866298 | 70.6223778 |
| 69.9685834 | 69.6160148 | 78.8592815 | 69.866298 | 69.6223778 |
| 69.9685834 | 71.6160148 | 79.8592815 | 69.866298 | 69.6223778 |
| 69.9685834 | 72.6160148 | 79.8592815 | 69.866298 | 69.6223778 |
| 69.9685834 | 75.6160148 | 79.8592815 | 69.866298 | 71.6223778 |
| 68.9685834 | 75.6160148 | 77.8592815 | 69.866298 | 73.6223778 |
| 68.9685834 | 76.6160148 | 73.8592815 | 70.866298 | 74.6223778 |
| 69.9685834 | 78.6160148 | 71.8592815 | 71.866298 | 76.6223778 |
| 69.9685834 | 78.6160148 | 71.8592815 | 71.866298 | 77.6223778 |
| 70.9685834 | 81.6160148 | 63.8592815 | 70.866298 | 77.6223778 |
| 71.9685834 | 82.6160148 | 61.8592815 | 70.866298 | 77.6223778 |
| 72.9685834 | 83.6160148 | 61.8592815 | 70.866298 | 76.6223778 |
| 72.9685834 | 84.6160148 | 61.8592815 | 70.866298 | 75.6223778 |
| 73.9685834 | 85.6160148 | 63.8592815 | 70.866298 | 74.6223778 |
| 73.9685834 | 86.6160148 | 63.8592815 | 70.866298 | 73.6223778 |
| 73.9685834 | 72.2       | 63.8592815 | 70.866298 | 73.6223778 |
| 72.9685834 | 72.5       | 65.8592815 | 71.866298 | 72.6223778 |
| 73.9685834 | 72.5       | 65.8592815 | 71.866298 | 72.6223778 |
| 73.9685834 | 72.4       | 65.8592815 | 70.866298 | 72.6223778 |

|            |            |            |            |            |            |
|------------|------------|------------|------------|------------|------------|
| 72.9685834 | 72         | 65.8592815 | 70.866298  | 72.6223778 |            |
| 72.9685834 | 72.2       | 65.8592815 | 68.866298  | 72.6223778 |            |
| 73.9685834 | 72.2       | 65.8592815 | 68.866298  | 73.6223778 |            |
| 72.9685834 | 72         | 67.8592815 | 68.866298  | 74.6223778 |            |
| 72.9685834 | 85.6160148 | 67.8592815 | 67.866298  | 73.6223778 |            |
| 72.9685834 | 84.6160148 | 67.8592815 | 67.866298  | 71.6223778 |            |
| 72.9685834 | 81.6160148 | 67.8592815 | 68.866298  | 70.6223778 |            |
| 70.9685834 | 81.6160148 | 67.8592815 | 68.866298  | 68.6223778 |            |
| 70.9685834 | 81.6160148 | 67.8592815 | 70.866298  | 67.6223778 |            |
| 70.9685834 | 81.6160148 | 67.8592815 | 71.866298  | 67.6223778 |            |
| 70.9685834 | 81.6160148 | 67.8592815 | 71.866298  | 67.6223778 |            |
| 69.9685834 | 83.6160148 | 67.8592815 | 71.866298  | 67.6223778 |            |
| 69.9685834 | 85.6160148 | 67.8592815 | 74.866298  | 67.6223778 |            |
| 69.9685834 | 87.6160148 | 67.8592815 | 76.866298  | 67.6223778 |            |
| 70.9685834 | 87.6160148 | 70.8592815 | 77.866298  | 68.6223778 |            |
| 72.9685834 | 87.6160148 | 70.8592815 | 77.866298  | 68.6223778 |            |
| 72.9685834 | 87.6160148 | 70.8592815 | 77.866298  | 68.6223778 |            |
| 73.9685834 | 87.6160148 | 69.8592815 | 77.866298  | 68.6223778 |            |
| 73.9685834 | 88.6160148 | 68.8592815 | 77.866298  | 68.6223778 |            |
| 73.9685834 | 88.6160148 | 68.8592815 | 77.866298  | 68.6223778 |            |
| 73.9685834 | 85.6160148 | 68.8592815 | 73.866298  | 68.6223778 |            |
| 73.9685834 | 85.6160148 | 68.8592815 | 73.866298  | 68.6223778 |            |
| 73.9685834 | 76.6160148 | 68.8592815 | 73.866298  | 68.6223778 |            |
| 74.9685834 | 73.6160148 | 69.8592815 | 73.866298  | 68.6223778 |            |
| 82.9685834 | 73.6160148 | 68.8592815 | 73.866298  | 68.6223778 |            |
| 82.9685834 | 73.6160148 | 68.8592815 | 73.866298  | 70.6223778 |            |
| 82.9685834 | 72.6160148 | 68.8592815 | 72.866298  | 70.6223778 |            |
|            | 72.6       | 72.6160148 | 68.8592815 | 71.866298  | 70.6223778 |
|            | 73.2       | 76.6160148 | 68.8592815 | 71.866298  | 70.6223778 |
|            | 73.3       | 75.6160148 | 69.8592815 | 71.866298  | 70.6223778 |
|            | 73.6       | 74.6160148 | 70.8592815 | 71.866298  | 71.6223778 |
| 87.9685834 | 73.6160148 | 70.8592815 | 71.866298  | 71.6223778 |            |
| 84.9685834 | 73.6160148 | 71.8592815 | 71.866298  | 77.6223778 |            |
| 81.9685834 | 74.6160148 | 72.8592815 | 72.866298  | 78.6223778 |            |
| 78.9685834 | 75.6160148 | 74.8592815 | 72.866298  | 80.6223778 |            |
| 76.9685834 | 76.6160148 | 74.8592815 | 71.866298  | 83.6223778 |            |
| 75.9685834 | 76.6160148 | 74.8592815 | 71.866298  | 86.6223778 |            |
| 75.9685834 | 75.6160148 | 74.8592815 | 69.866298  | 88.6223778 |            |
| 75.9685834 | 72.6160148 | 74.8592815 | 68.866298  | 88.6223778 |            |
| 74.9685834 | 71.6160148 | 73.8592815 | 68.866298  | 89.6223778 |            |
| 72.9685834 | 72.6160148 | 72.8592815 | 69.866298  | 89.6223778 |            |
| 70.9685834 | 73.6160148 | 72.8592815 | 69.866298  | 90.6223778 |            |
| 68.9685834 | 74.6160148 | 71.8592815 | 70.866298  | 90.6223778 |            |
| 66.9685834 | 74.6160148 | 71.8592815 | 69.866298  | 91.6223778 |            |
| 64.9685834 | 74.6160148 | 71.8592815 | 68.866298  | 91.6223778 |            |

|            |            |            |           |            |
|------------|------------|------------|-----------|------------|
| 64.9685834 | 74.6160148 | 71.8592815 | 68.866298 | 91.6223778 |
| 63.9685834 | 74.6160148 | 71.8592815 | 67.866298 | 91.6223778 |
| 63.9685834 | 73.6160148 | 71.8592815 | 67.866298 | 91.6223778 |
| 63.9685834 | 72.6160148 | 71.8592815 | 68.866298 | 90.6223778 |
| 62.9685834 | 72.6160148 | 71.8592815 | 68.866298 | 90.6223778 |
| 62.9685834 | 71.6160148 | 71.8592815 | 68.866298 | 90.6223778 |
| 62.9685834 | 70.6160148 | 71.8592815 | 68.866298 | 89.6223778 |
| 62.9685834 | 71.6160148 | 72.8592815 | 68.866298 | 87.6223778 |
| 63.9685834 | 71.6160148 | 72.8592815 | 67.866298 | 82.6223778 |
| 64.9685834 | 71.6160148 | 72.8592815 | 68.866298 | 79.6223778 |
| 65.9685834 | 71.6160148 | 73.8592815 | 68.866298 | 78.6223778 |
| 65.9685834 | 70.6160148 | 72.8592815 | 69.866298 | 78.6223778 |
| 65.9685834 | 69.6160148 | 72.8592815 | 69.866298 | 78.6223778 |
| 66.9685834 | 69.6160148 | 72.8592815 | 71.866298 | 78.6223778 |
| 66.9685834 | 70.6160148 | 72.8592815 | 71.866298 | 77.6223778 |
| 73.9685834 | 70.6160148 | 72.8592815 | 71.866298 | 77.6223778 |
| 77.9685834 | 70.6160148 | 72.8592815 | 71.866298 | 78.6223778 |
| 77.9685834 | 71.6160148 | 74.8592815 | 71.866298 | 78.6223778 |
| 77.9685834 | 72.6160148 | 74.8592815 | 71.866298 | 78.6223778 |
| 75.9685834 | 72.6160148 | 75.8592815 | 71.866298 | 78.6223778 |
| 75.9685834 | 70.6160148 | 76.8592815 | 71.866298 | 78.6223778 |
| 74.9685834 | 69.6160148 | 75.8592815 | 71.866298 | 79.6223778 |
| 72.9685834 | 69.6160148 | 75.8592815 | 71.866298 | 79.6223778 |
| 71.9685834 | 69.6160148 | 73.8592815 | 72.866298 | 78.6223778 |
| 70.9685834 | 70.6160148 | 73.8592815 | 72.866298 | 77.6223778 |
| 69.9685834 | 71.6160148 | 73.8592815 | 73.866298 | 75.6223778 |
| 69.9685834 | 71.6160148 | 73.8592815 | 73.866298 | 72.6223778 |
| 68.9685834 | 71.6160148 | 72.8592815 | 74.866298 | 71.6223778 |
| 68.9685834 | 71.6160148 | 73.8592815 | 74.866298 | 69.6223778 |
| 69.9685834 | 71.6160148 | 77.8592815 | 73.866298 | 68.6223778 |
| 69.9685834 | 71.6160148 | 77.8592815 | 73.866298 | 68.6223778 |
| 72.9685834 | 83.6160148 | 77.8592815 | 73.866298 | 68.6223778 |
| 72.9685834 | 87.6160148 | 80.8592815 | 73.866298 | 67.6223778 |
| 72.9685834 | 74         | 80.8592815 | 72.866298 | 67.6223778 |
| 72.9685834 | 88.6160148 | 73.8592815 | 72.866298 | 68.6223778 |
| 71.9685834 | 88.6160148 | 72.8592815 | 72.866298 | 68.6223778 |
| 70.9685834 | 86.6160148 | 72.8592815 | 72.866298 | 68.6223778 |
| 70.9685834 | 85.6160148 | 73.8592815 | 69.866298 | 68.6223778 |
| 69.9685834 | 82.6160148 | 73.8592815 | 69.866298 | 68.6223778 |
| 69.9685834 | 79.6160148 | 74.8592815 | 69.866298 | 68.6223778 |
| 69.9685834 | 79.6160148 | 72.8592815 | 69.866298 | 68.6223778 |
| 69.9685834 | 74.6160148 | 71.8592815 | 71.866298 | 68.6223778 |
| 69.9685834 | 72.6160148 | 71.8592815 | 76.866298 | 67.6223778 |
| 69.9685834 | 71.6160148 | 71.8592815 | 79.866298 | 67.6223778 |
| 69.9685834 | 70.6160148 | 71.8592815 | 79.866298 | 67.6223778 |

|            |            |            |           |            |
|------------|------------|------------|-----------|------------|
| 69.9685834 | 70.6160148 | 71.8592815 | 80.866298 | 67.6223778 |
| 69.9685834 | 70.6160148 | 71.8592815 | 76.866298 | 67.6223778 |
| 68.9685834 | 70.6160148 | 71.8592815 | 74.866298 | 67.6223778 |
| 68.9685834 | 72.6160148 | 71.8592815 | 73.866298 | 69.6223778 |
| 68.9685834 | 72.6160148 | 71.8592815 | 73.866298 | 70.6223778 |
| 68.9685834 | 72.6160148 | 71.8592815 | 73.866298 | 71.6223778 |
| 68.9685834 | 72.6160148 | 71.8592815 | 73.866298 | 71.6223778 |
| 68.9685834 | 72.6160148 | 71.8592815 | 73.866298 | 72.6223778 |
| 68.9685834 | 72.6160148 | 72.8592815 | 73.866298 | 72.6223778 |
| 70.9685834 | 72.6160148 | 72.8592815 | 72.866298 | 72.6223778 |
| 69.9685834 | 72.6160148 | 72.8592815 | 71.866298 | 72.6223778 |
| 69.9685834 | 72.6160148 | 71.8592815 | 70.866298 | 72.6223778 |
| 69.9685834 | 71.6160148 | 72.8592815 | 70.866298 | 71.6223778 |
| 68.9685834 | 71.6160148 | 72.8592815 | 69.866298 | 71.6223778 |
| 67.9685834 | 70.6160148 | 73.8592815 | 69.866298 | 70.6223778 |
| 66.9685834 | 70.6160148 | 73.8592815 | 69.866298 | 69.6223778 |
| 65.9685834 | 70.6160148 | 73.8592815 | 69.866298 | 69.6223778 |
| 65.9685834 | 70.6160148 | 76.8592815 | 69.866298 | 69.6223778 |
| 63.9685834 | 70.6160148 | 76.8592815 | 69.866298 | 69.6223778 |
| 63.9685834 | 70.6160148 | 82.8592815 | 67.866298 | 68.6223778 |
| 63.9685834 | 70.6160148 | 83.8592815 | 66.866298 | 68.6223778 |
| 63.9685834 | 69.6160148 | 84.8592815 | 66.866298 | 67.6223778 |
| 63.9685834 | 69.6160148 | 84.8592815 | 65.866298 | 67.6223778 |
| 63.9685834 | 69.6160148 | 85.8592815 | 66.866298 | 67.6223778 |
| 63.9685834 | 69.6160148 | 85.8592815 | 67.866298 | 67.6223778 |
| 63.9685834 | 70.6160148 | 81.8592815 | 67.866298 | 67.6223778 |
| 63.9685834 | 70.6160148 | 81.8592815 | 67.866298 | 67.6223778 |
| 63.9685834 | 70.6160148 | 81.8592815 | 67.866298 | 68.6223778 |
| 64.9685834 | 70.6160148 | 81.8592815 | 67.866298 | 68.6223778 |
| 64.9685834 | 70.6160148 | 81.8592815 | 67.866298 | 68.6223778 |
| 64.9685834 | 70.6160148 | 80.8592815 | 67.866298 | 68.6223778 |
| 64.9685834 | 70.6160148 | 80.8592815 | 69.866298 | 68.6223778 |
| 64.9685834 | 69.6160148 | 80.8592815 | 69.866298 | 68.6223778 |
| 63.9685834 | 70.6160148 | 80.8592815 | 69.866298 | 68.6223778 |
| 63.9685834 | 70.6160148 | 82.8592815 | 69.866298 | 68.6223778 |
| 63.9685834 | 70.6160148 | 83.8592815 | 69.866298 | 68.6223778 |
| 64.9685834 | 70.6160148 | 84.8592815 | 69.866298 | 68.6223778 |
| 64.9685834 | 70.6160148 | 84.8592815 | 69.866298 | 69.6223778 |
| 65.9685834 | 70.6160148 | 85.8592815 | 69.866298 | 69.6223778 |
| 65.9685834 | 70.6160148 | 85.8592815 | 69.866298 | 69.6223778 |
| 65.9685834 | 70.6160148 | 71.6       | 66.866298 | 69.6223778 |
| 64.9685834 | 71.6160148 | 71.6       | 66.866298 | 70.6223778 |
| 64.9685834 | 71.6160148 | 71.6       | 66.866298 | 70.6223778 |
| 64.9685834 | 69.6160148 | 85.8592815 | 66.866298 | 71.6223778 |
| 64.9685834 | 67.6160148 | 85.8592815 | 67.866298 | 71.6223778 |

|            |            |            |           |            |
|------------|------------|------------|-----------|------------|
| 64.9685834 | 66.6160148 | 85.8592815 | 67.866298 | 72.6223778 |
| 65.9685834 | 66.6160148 | 85.8592815 | 68.866298 | 72.6223778 |
| 67.9685834 | 66.6160148 | 84.8592815 | 68.866298 | 72.6223778 |
| 68.9685834 | 66.6160148 | 83.8592815 | 68.866298 | 73.6223778 |
| 68.9685834 | 66.6160148 | 83.8592815 | 68.866298 | 76.6223778 |
| 68.9685834 | 66.6160148 | 73.8592815 | 68.866298 | 76.6223778 |
| 69.9685834 | 66.6160148 | 72.8592815 | 68.866298 | 76.6223778 |
| 72.9685834 | 66.6160148 | 72.8592815 | 69.866298 | 76.6223778 |
| 72.9685834 | 66.6160148 | 72.8592815 | 69.866298 | 82.6223778 |
| 71.9685834 | 66.6160148 | 72.8592815 | 69.866298 | 82.6223778 |
| 70.9685834 | 67.6160148 | 72.8592815 | 69.866298 | 82.6223778 |
| 69.9685834 | 68.6160148 | 72.8592815 | 69.866298 | 82.6223778 |
| 69.9685834 | 68.6160148 | 73.8592815 | 69.866298 | 82.6223778 |
| 68.9685834 | 68.6160148 | 74.8592815 | 70.866298 | 82.6223778 |
| 68.9685834 | 68.6160148 | 75.8592815 | 69.866298 | 82.6223778 |
| 68.9685834 | 68.6160148 | 75.8592815 | 69.866298 | 82.6223778 |
| 67.9685834 | 68.6160148 | 75.8592815 | 69.866298 | 82.6223778 |
| 66.9685834 | 68.6160148 | 75.8592815 | 69.866298 | 82.6223778 |
| 66.9685834 | 68.6160148 | 76.8592815 | 69.866298 | 81.6223778 |
| 66.9685834 | 68.6160148 | 76.8592815 | 69.866298 | 81.6223778 |
| 66.9685834 | 68.6160148 | 76.8592815 | 70.866298 | 80.6223778 |
| 67.9685834 | 69.6160148 | 76.8592815 | 70.866298 | 77.6223778 |
| 67.9685834 | 68.6160148 | 76.8592815 | 69.866298 | 76.6223778 |
| 68.9685834 | 69.6160148 | 75.8592815 | 70.866298 | 74.6223778 |
| 69.9685834 | 71.6160148 | 75.8592815 | 70.866298 | 74.6223778 |
| 68.9685834 | 71.6160148 | 71.8592815 | 70.866298 | 72.6223778 |
| 68.9685834 | 69.6160148 | 71.8592815 | 68.866298 | 71.6223778 |
| 67.9685834 | 68.6160148 | 70.8592815 | 68.866298 | 70.6223778 |
| 66.9685834 | 67.6160148 | 70.8592815 | 67.866298 | 70.6223778 |
| 66.9685834 | 67.6160148 | 70.8592815 | 67.866298 | 70.6223778 |
| 65.9685834 | 67.6160148 | 69.8592815 | 67.866298 | 70.6223778 |
| 65.9685834 | 67.6160148 | 69.8592815 | 70.866298 | 70.6223778 |
| 65.9685834 | 67.6160148 | 68.8592815 | 70.866298 | 70.6223778 |
| 66.9685834 | 67.6160148 | 68.8592815 | 75.866298 | 70.6223778 |
| 66.9685834 | 66.6160148 | 68.8592815 | 79.866298 | 70.6223778 |
| 66.9685834 | 66.6160148 | 67.8592815 | 79.866298 | 70.6223778 |
| 66.9685834 | 66.6160148 | 67.8592815 | 77.866298 | 72.6223778 |
| 66.9685834 | 67.6160148 | 66.8592815 | 77.866298 | 73.6223778 |
| 66.9685834 | 67.6160148 | 66.8592815 | 74.866298 | 73.6223778 |
| 66.9685834 | 67.6160148 | 66.8592815 | 69.866298 | 72.6223778 |
| 66.9685834 | 67.6160148 | 66.8592815 | 68.866298 | 70.6223778 |
| 66.9685834 | 67.6160148 | 66.8592815 | 68.866298 | 70.6223778 |
| 66.9685834 | 67.6160148 | 66.8592815 | 68.866298 | 69.6223778 |
| 67.9685834 | 67.6160148 | 66.8592815 | 67.866298 | 68.6223778 |
| 67.9685834 | 66.6160148 | 66.8592815 | 67.866298 | 68.6223778 |

|            |            |            |           |            |
|------------|------------|------------|-----------|------------|
| 69.9685834 | 66.6160148 | 66.8592815 | 67.866298 | 67.6223778 |
| 69.9685834 | 66.6160148 | 70.8592815 | 67.866298 | 67.6223778 |
| 69.9685834 | 66.6160148 | 70.8592815 | 67.866298 | 67.6223778 |
| 69.9685834 | 66.6160148 | 70.8592815 | 67.866298 | 67.6223778 |
| 69.9685834 | 62.6160148 | 74.8592815 | 65.866298 | 67.6223778 |
| 67.9685834 | 61.6160148 | 74.8592815 | 65.866298 | 67.6223778 |
| 67.9685834 | 61.6160148 | 74.8592815 | 64.866298 | 67.6223778 |
| 66.9685834 | 61.6160148 | 75.8592815 | 63.866298 | 66.6223778 |
| 67.9685834 | 61.6160148 | 76.8592815 | 62.866298 | 66.6223778 |
| 67.9685834 | 60.6160148 | 76.8592815 | 62.866298 | 66.6223778 |
| 67.9685834 | 60.6160148 | 80.8592815 | 62.866298 | 66.6223778 |
| 67.9685834 | 60.6160148 | 67.9       | 62.866298 | 67.6223778 |
| 67.9685834 | 61.6160148 | 68.4       | 62.866298 | 67.6223778 |
| 67.9685834 | 61.6160148 | 68.6       | 60.866298 | 68.6223778 |
| 67.9685834 | 61.6160148 | 69         | 60.866298 | 69.6223778 |
| 67.9685834 | 61.6160148 | 69         | 59.866298 | 70.6223778 |
| 68.9685834 | 62.6160148 | 69.2       | 59.866298 | 71.6223778 |
| 68.9685834 | 63.6160148 | 69.9       | 59.866298 | 71.6223778 |
| 68.9685834 | 64.6160148 | 70.5       | 59.866298 | 76.6223778 |
| 68.9685834 | 65.6160148 | 71.7       | 67.866298 | 78.6223778 |
| 68.9685834 | 66.6160148 | 72.3       | 73.866298 | 80.6223778 |
| 69.9685834 | 69.6160148 | 73.8592815 | 77.866298 | 81.6223778 |
| 69.9685834 | 70.6160148 | 73.8592815 | 77.866298 | 81.6223778 |
| 70.9685834 | 71.6160148 | 66.8592815 | 77.866298 | 81.6223778 |
| 72.9685834 | 72.6160148 | 65.8592815 | 76.866298 | 81.6223778 |
| 73.9685834 | 72.6160148 | 65.8592815 | 76.866298 | 81.6223778 |
| 72.9685834 | 76.6160148 | 65.8592815 | 75.866298 | 81.6223778 |
| 71.9685834 | 77.6160148 | 64.8592815 | 75.866298 | 81.6223778 |
| 71.9685834 | 78.6160148 | 65.8592815 | 74.866298 | 81.6223778 |
| 71.9685834 | 79.6160148 | 65.8592815 | 73.866298 | 80.6223778 |
| 71.9685834 | 82.6160148 | 67.8592815 | 73.866298 | 77.6223778 |
| 71.9685834 | 83.6160148 | 67.8592815 | 73.866298 | 77.6223778 |
| 71.9685834 | 87.6160148 | 68.8592815 | 73.866298 | 76.6223778 |
| 71.9685834 | 73.2       | 68.8592815 | 72.866298 | 75.6223778 |
| 71.9685834 | 73.3       | 69.8592815 | 72.866298 | 74.6223778 |



Behavior

|            |    |            |
|------------|----|------------|
| 72.0639155 | 63 | 73.0461838 |
| 72.0639155 | 63 | 73.0522605 |
| 72.1889155 | 63 | 73.0405517 |
| 72.3139155 | 63 | 73.024062  |
| 71.6889155 | 63 | 73.0162673 |
| 71.5639155 | 63 | 72.9982651 |
| 71.8139155 | 63 | 72.9799283 |
| 72.5639155 | 63 | 72.9632648 |
| 72.8139155 | 63 | 72.9185543 |
| 72.6889155 | 63 | 72.8829468 |
| 73.0639155 | 63 | 72.8459003 |
| 71.4045166 | 63 | 72.8072473 |
| 73.6889155 | 63 | 72.7773962 |
| 73.8139155 | 63 | 72.7520631 |
| 71.8767389 | 63 | 72.7482845 |
| 71.48785   | 63 | 72.7600682 |
| 70.5434055 | 63 | 72.7762026 |
| 70.7239611 | 63 | 72.7921696 |
| 70.86285   | 63 | 72.8123201 |
| 71.1545166 | 63 | 72.8271157 |
| 71.5711833 | 63 | 72.835218  |
| 71.2934055 | 63 | 72.8528584 |
| 71.4461833 | 63 | 72.862634  |
| 71.1406277 | 63 | 72.8559184 |
| 71.9739611 | 63 | 72.8701197 |
| 71.5434055 | 63 | 72.8975406 |
| 71.2656277 | 63 | 72.9342319 |
| 70.8350722 | 63 | 72.9686809 |
| 71.11285   | 63 | 73.0152115 |
| 71.3350722 | 63 | 73.0469082 |
| 72.5639155 | 63 | 73.0777681 |
| 73.8197358 | 63 | 73.1042773 |
| 74.041958  | 63 | 73.1725877 |
| 74.1530691 | 63 | 73.1879935 |
| 74.3752914 | 63 | 73.1976888 |
| 74.7086247 | 63 | 73.2009627 |
| 74.041958  | 63 | 73.1954933 |
| 73.7086247 | 63 | 73.1943746 |
| 73.8197358 | 63 | 73.1934441 |
| 73.9308469 | 63 | 73.1736013 |
| 73.9308469 | 63 | 73.1740061 |
| 74.041958  | 63 | 73.1785943 |
| 74.5975136 | 63 | 73.1890392 |

|            |    |            |
|------------|----|------------|
| 74.2641802 | 63 | 73.2048389 |
| 74.1530691 | 63 | 73.2244874 |
| 74.041958  | 63 | 73.2493232 |
| 73.8197358 | 63 | 73.2843666 |
| 74.041958  | 63 | 73.3396576 |
| 73.9308469 | 63 | 73.3932752 |
| 71.8529405 | 63 | 73.4405341 |
| 71.608496  | 63 | 73.4834423 |
| 71.3640516 | 63 | 73.5318725 |
| 70.7307182 | 63 | 73.5864941 |
| 71.5862738 | 63 | 73.6611086 |
| 71.5862738 | 63 | 73.7082001 |
| 73.3752914 | 63 | 73.7631564 |
| 74.041958  | 63 | 73.8374362 |
| 74.1530691 | 63 | 73.9217561 |
| 74.2641802 | 63 | 74.0147775 |
| 74.4864025 | 63 | 74.1029461 |
| 74.041958  | 63 | 74.1921188 |
| 73.4864025 | 63 | 74.2898256 |
| 74.1530691 | 63 | 74.3798349 |
| 74.3752914 | 63 | 74.463062  |
| 73.0065156 | 63 | 74.5417711 |
| 74.6176267 | 63 | 74.596183  |
| 76.3398489 | 63 | 74.6333258 |
| 76.9842934 | 63 | 74.6609304 |
| 76.6731823 | 63 | 74.6918818 |
| 76.55096   | 63 | 74.7285985 |
| 76.8197358 | 63 | 74.7633986 |
| 76.3752914 | 63 | 74.7986891 |
| 76.2641802 | 63 | 74.8231903 |
| 75.7086247 | 63 | 74.8205129 |
| 74.041958  | 63 | 74.8124808 |
| 73.7086247 | 63 | 74.7977552 |
| 73.5975136 | 63 | 74.7776749 |
| 73.1530691 | 63 | 74.7562559 |
| 73.2641802 | 63 | 74.7482237 |
| 73.2641802 | 63 | 74.7190149 |
| 73.041958  | 63 | 74.6843175 |
| 72.5975136 | 63 | 74.6528329 |
| 72.8197358 | 63 | 74.6200097 |
| 72.9308469 | 63 | 74.5833042 |
| 73.3752914 | 63 | 74.5373618 |
| 73.8197358 | 63 | 74.4998531 |
| 74.3752914 | 63 | 74.4651557 |
| 74.5975136 | 63 | 74.4453177 |

|            |    |            |
|------------|----|------------|
| 76.1530691 | 63 | 74.4265506 |
| 76.2641802 | 63 | 74.3933258 |
| 76.4864025 | 63 | 74.356888  |
| 76.3752914 | 63 | 74.3453515 |
| 76.7086247 | 63 | 74.3334133 |
| 77.5975136 | 63 | 74.3262944 |
| 77.5975136 | 63 | 74.3528019 |
| 77.5975136 | 63 | 74.3690016 |
| 78.3752914 | 63 | 74.3892173 |
| 78.041958  | 63 | 74.3892173 |
| 78.4864025 | 63 | 74.3798465 |
| 78.2641802 | 63 | 74.3731531 |
| 78.041958  | 63 | 74.3677983 |
| 78.2641802 | 63 | 74.3584275 |
| 79.2641802 | 63 | 74.369137  |
| 79.041958  | 63 | 74.3892173 |
| 78.2012582 | 63 | 74.4039429 |
| 77.979036  | 63 | 74.4133137 |
| 75.6568138 | 63 | 74.4418532 |
| 75.0568138 | 63 | 74.4509817 |
| 73.8345916 | 63 | 74.4406992 |
| 73.8345916 | 63 | 74.4213136 |
| 73.8825603 | 63 | 74.3936282 |
| 74.0012582 | 63 | 74.364738  |
| 74.2641802 | 63 | 74.3245773 |
| 74.5975136 | 63 | 74.2844167 |
| 73.5975136 | 63 | 74.2482721 |
| 73.3752914 | 63 | 74.218821  |
| 72.9308469 | 63 | 74.2107888 |
| 72.7086247 | 63 | 74.2000793 |
| 72.9308469 | 63 | 74.1826764 |
| 73.3752914 | 63 | 74.1666121 |
| 71.2842934 | 63 | 74.1478705 |
| 70.9398489 | 63 | 74.1318062 |
| 71.3176267 | 63 | 74.1184193 |
| 71.2065156 | 63 | 74.1277902 |
| 70.9954045 | 63 | 74.1331449 |
| 70.7842934 | 63 | 74.1078888 |
| 71.15096   | 63 | 74.064025  |
| 71.2731823 | 63 | 74.0133338 |
| 72.3954045 | 63 | 73.950059  |
| 72.2620711 | 63 | 73.8870519 |
| 71.2842934 | 63 | 73.8227949 |
| 70.9065156 | 63 | 73.7518444 |
| 70.8954045 | 63 | 73.6795552 |

|            |    |            |
|------------|----|------------|
| 70.6176267 | 63 | 73.6086048 |
| 70.7731823 | 63 | 73.538993  |
| 72.9308469 | 63 | 73.4533169 |
| 72.9308469 | 63 | 73.371657  |
| 73.2641802 | 63 | 73.2940131 |
| 73.3752914 | 63 | 73.2096757 |
| 73.2641802 | 63 | 73.1209141 |
| 73.5975136 | 63 | 73.02238   |
| 73.8197358 | 63 | 72.9265233 |
| 73.7086247 | 63 | 72.8333439 |
| 74.9308469 | 63 | 72.7333373 |
| 75.1530691 | 63 | 72.6182034 |
| 75.3752914 | 63 | 72.5131098 |
| 75.1530691 | 63 | 72.4198853 |
| 75.3752914 | 63 | 72.3322834 |
| 75.3752914 | 63 | 72.2962209 |
| 75.4864025 | 63 | 72.2747501 |
| 75.3752914 | 63 | 72.2906354 |
| 74.3752914 | 63 | 72.3118754 |
| 74.1530691 | 63 | 72.2998669 |
| 73.4864025 | 63 | 72.2879008 |
| 73.041958  | 63 | 72.2879008 |
| 73.2641802 | 63 | 72.2745139 |
| 73.2641802 | 63 | 72.2771913 |
| 73.3752914 | 63 | 72.2812074 |
| 72.8197358 | 63 | 72.2945942 |
| 72.1530691 | 63 | 72.3133359 |
| 71.8197358 | 63 | 72.3307388 |
| 71.7086247 | 63 | 72.3374323 |
| 71.9308469 | 63 | 72.3706571 |
| 71.9308469 | 63 | 72.3999998 |
| 73.3752914 | 63 | 72.4207749 |
| 73.2641802 | 63 | 72.4535982 |
| 70.8345916 | 63 | 72.4903036 |
| 69.7345916 | 63 | 72.5549877 |
| 69.6123694 | 63 | 72.6206088 |
| 69.1234805 | 63 | 72.686096  |
| 69.3679249 | 63 | 72.7407399 |
| 70.8197358 | 63 | 72.8036837 |
| 70.3752914 | 63 | 72.8757305 |
| 70.4864025 | 63 | 72.9496515 |
| 70.4864025 | 63 | 73.0116582 |
| 70.9308469 | 63 | 73.0823663 |
| 70.4864025 | 63 | 73.1512003 |
| 70.8197358 | 63 | 73.1940383 |

|            |    |            |
|------------|----|------------|
| 71.1530691 | 63 | 73.2090234 |
| 71.3752914 | 63 | 73.2074088 |
| 70.6747398 | 63 | 73.2009749 |
| 70.3080731 | 63 | 73.1966829 |
| 70.3080731 | 63 | 73.2069893 |
| 70.3080731 | 63 | 73.2202407 |
| 69.9636287 | 63 | 73.2170197 |
| 69.7080731 | 63 | 73.2038923 |
| 70.3191842 | 63 | 73.2101826 |
| 70.4636287 | 63 | 73.2262469 |
| 70.7080731 | 63 | 73.2289242 |
| 72.6636287 | 63 | 73.2168761 |
| 73.2747398 | 63 | 73.2034892 |
| 75.1530691 | 63 | 73.1874249 |
| 75.5975136 | 63 | 73.1673446 |
| 72.8858509 | 63 | 73.1593125 |
| 73.0080731 | 63 | 73.1499416 |
| 74.2641802 | 63 | 73.1419095 |
| 73.4864025 | 63 | 73.1352161 |
| 73.8197358 | 63 | 73.127184  |
| 73.7086247 | 63 | 73.1285226 |
| 74.041958  | 63 | 73.1338774 |
| 74.2641802 | 63 | 73.1472643 |
| 74.3752914 | 63 | 73.1566335 |
| 73.9308469 | 63 | 73.1701527 |
| 74.041958  | 63 | 73.190767  |
| 73.3752914 | 63 | 73.2137909 |
| 73.041958  | 63 | 73.2368148 |
| 73.9308469 | 63 | 73.2479243 |
| 74.041958  | 63 | 73.2532775 |
| 76.1530691 | 63 | 73.2834852 |
| 76.5975136 | 63 | 73.3249379 |
| 76.7086247 | 63 | 73.3633115 |
| 76.9308469 | 63 | 73.4118593 |
| 77.4864025 | 63 | 73.4533119 |
| 77.2641802 | 63 | 73.4816906 |
| 77.041958  | 63 | 73.5135498 |
| 76.041958  | 63 | 73.5407236 |
| 76.4864025 | 63 | 73.5678974 |
| 76.4864025 | 63 | 73.604042  |
| 76.4864025 | 63 | 73.642864  |
| 74.1746111 | 63 | 73.6776698 |
| 73.1301667 | 63 | 73.7084597 |
| 72.8412778 | 63 | 73.72854   |
| 72.9079444 | 63 | 73.7637541 |

|            |    |            |
|------------|----|------------|
| 74.4529405 | 63 | 73.8020473 |
| 74.9196071 | 63 | 73.8430178 |
| 73.4412778 | 63 | 73.8880043 |
| 73.8412778 | 63 | 73.9384795 |
| 75.6751627 | 63 | 73.9920337 |
| 76.7086247 | 63 | 74.0368864 |
| 75.3752914 | 63 | 74.0933857 |
| 74.3752914 | 63 | 74.1469398 |
| 74.2641802 | 63 | 74.19032   |
| 74.1530691 | 63 | 74.2231229 |
| 73.7086247 | 63 | 74.2406582 |
| 73.7086247 | 63 | 74.2505629 |
| 73.3752914 | 63 | 74.2966189 |
| 72.8197358 | 63 | 74.3426749 |
| 72.4864025 | 63 | 74.366502  |
| 72.5975136 | 63 | 74.3942112 |
| 73.3752914 | 63 | 74.4245979 |
| 73.8197358 | 63 | 74.456591  |
| 73.9308469 | 63 | 74.4690393 |
| 72.9307182 | 63 | 74.4622104 |
| 72.9418294 | 63 | 74.4509639 |
| 73.4196071 | 63 | 74.4418592 |
| 73.8418294 | 63 | 74.4371723 |
| 73.8418294 | 63 | 74.4335563 |
| 74.2973849 | 63 | 74.4308774 |
| 73.708496  | 63 | 74.4158825 |
| 73.3418294 | 63 | 74.3995489 |
| 73.1751627 | 63 | 74.3545675 |
| 72.7973849 | 63 | 74.3011523 |
| 73.1529405 | 63 | 74.2717011 |
| 72.808496  | 63 | 74.2288631 |
| 73.1751627 | 63 | 74.1793317 |
| 73.0196071 | 63 | 74.1324776 |
| 72.7418294 | 63 | 74.0883009 |
| 72.7418294 | 63 | 74.0427855 |
| 73.9308469 | 63 | 73.9771898 |
| 73.7086247 | 63 | 73.9156101 |
| 73.7086247 | 63 | 73.8553691 |
| 73.7086247 | 63 | 73.8350293 |
| 73.041958  | 63 | 73.8272731 |
| 73.5975136 | 63 | 73.8243362 |
| 73.4864025 | 63 | 73.8179187 |
| 73.7086247 | 63 | 73.7955641 |
| 74.041958  | 63 | 73.7716032 |
| 74.1530691 | 63 | 73.780179  |

|            |    |            |
|------------|----|------------|
| 74.1530691 | 63 | 73.7906289 |
| 74.041958  | 63 | 73.787016  |
| 75.1530691 | 63 | 73.7722904 |
| 75.1530691 | 63 | 73.7749678 |
| 76.2641802 | 63 | 73.7883547 |
| 75.9973849 | 63 | 73.808435  |
| 76.608496  | 63 | 73.829854  |
| 76.4196071 | 63 | 73.8593052 |
| 76.708496  | 63 | 73.8927724 |
| 76.8307182 | 63 | 73.9463199 |
| 76.2418294 | 63 | 74.0119156 |
| 75.7862738 | 63 | 74.0908982 |
| 76.3418294 | 63 | 74.1752356 |
| 76.3640516 | 63 | 74.2408313 |
| 75.0751627 | 63 | 74.3024109 |
| 73.6973849 | 63 | 74.3453034 |
| 73.4418294 | 63 | 74.4229489 |
| 73.1751627 | 63 | 74.472081  |
| 73.6529405 | 63 | 74.5331268 |
| 73.0751627 | 63 | 74.5890855 |
| 72.8196071 | 63 | 74.6517376 |
| 72.6862738 | 63 | 74.7062238 |
| 72.6862738 | 63 | 74.7664663 |
| 72.4196071 | 63 | 74.8271104 |
| 72.1640516 | 63 | 74.89244   |
| 74.2641802 | 63 | 74.9435    |
| 73.3752914 | 63 | 75.0117747 |
| 73.3752914 | 63 | 75.0855379 |
| 73.3752914 | 63 | 75.1522062 |
| 73.3752914 | 63 | 75.2180712 |
| 72.2641802 | 63 | 75.2872829 |
| 71.041958  | 63 | 75.3578333 |
| 71.3752914 | 73 | 75.419413  |
| 71.4864025 | 73 | 75.4903634 |
| 72.4864025 | 73 | 75.5747008 |
| 72.4864025 | 73 | 75.6643929 |
| 72.5975136 | 73 | 75.758101  |
| 72.3752914 | 73 | 75.8344063 |
| 72.5975136 | 73 | 75.9066954 |
| 72.9308469 | 73 | 75.9736298 |
| 74.1530691 | 73 | 76.0378868 |
| 74.7086247 | 73 | 76.1021439 |
| 75.3752914 | 73 | 76.1757717 |
| 75.4864025 | 73 | 76.256093  |
| 75.5975136 | 73 | 76.3176727 |

|            |    |            |
|------------|----|------------|
| 75.4864025 | 73 | 76.3712202 |
| 75.9308469 | 73 | 76.4140582 |
| 75.9308469 | 73 | 76.462788  |
| 76.1530691 | 73 | 76.5068324 |
| 76.4864025 | 73 | 76.5571686 |
| 77.8197358 | 73 | 76.609379  |
| 78.2641802 | 73 | 76.6587781 |
| 79.041958  | 73 | 76.7059015 |
| 79.5975136 | 73 | 76.730401  |
| 78.8197358 | 73 | 76.7455298 |
| 78.9308469 | 73 | 76.7456652 |
| 77.4909267 | 73 | 76.7546359 |
| 79.3752914 | 73 | 76.7681582 |
| 77.019797  | 73 | 76.7794048 |
| 78.4864025 | 73 | 76.7898481 |
| 78.4864025 | 73 | 76.7865029 |
| 79.041958  | 73 | 76.7954737 |
| 78.8197358 | 73 | 76.8048461 |
| 78.7086247 | 73 | 76.8185022 |
| 78.3752914 | 73 | 76.8415292 |
| 78.5975136 | 73 | 76.8691077 |
| 77.0353712 | 73 | 76.90512   |
| 78.8197358 | 73 | 76.9158295 |
| 78.9308469 | 73 | 76.9372485 |
| 78.7086247 | 73 | 76.9394355 |
| 78.4864025 | 73 | 76.9621932 |
| 78.4864025 | 73 | 76.959751  |
| 78.5975136 | 73 | 76.971175  |
| 79.041958  | 73 | 76.9942455 |
| 79.5975136 | 73 | 77.0162451 |
| 80.7086247 | 73 | 77.0334254 |
| 81.1530691 | 73 | 77.0356125 |
| 80.8197358 | 71 | 77.0274916 |
| 79.9308469 | 71 | 77.0177643 |
| 79.4864025 | 71 | 77.0124095 |
| 79.2641802 | 71 | 77.0003613 |
| 79.3752914 | 71 | 76.9829584 |
| 79.4864025 | 71 | 76.9468138 |
| 80.2641802 | 71 | 76.9039758 |
| 80.7086247 | 71 | 76.8571217 |
| 80.2641802 | 71 | 76.8089289 |
| 79.5975136 | 71 | 76.7620748 |
| 79.8197358 | 71 | 76.7192368 |
| 80.041958  | 71 | 76.6697054 |
| 80.2641802 | 71 | 76.62419   |



|            |    |            |
|------------|----|------------|
| 80.5975136 | 71 | 76.5800133 |
| 81.041958  | 71 | 76.5304818 |
| 80.9308469 | 71 | 76.4648861 |
| 80.1530691 | 71 | 76.3939356 |
| 77.8197358 | 71 | 76.3082596 |
| 77.5975136 | 71 | 76.2199062 |
| 76.3752914 | 71 | 76.1422623 |
| 75.8197358 | 71 | 76.0606023 |
| 74.8197358 | 71 | 76.0016455 |
| 74.3752914 | 71 | 75.9213242 |
| 74.041958  | 71 | 75.8640276 |
| 73.3752914 | 71 | 75.7917385 |
| 73.8197358 | 71 | 75.7181106 |
| 73.5975136 | 71 | 75.6364507 |
| 73.8197358 | 71 | 75.553452  |
| 74.5975136 | 71 | 75.4731307 |
| 74.7086247 | 71 | 75.3941481 |
| 75.1530691 | 71 | 75.3111495 |
| 75.1530691 | 71 | 75.2469718 |
| 75.1530691 | 71 | 75.1612957 |
| 73.5568138 | 71 | 75.0649102 |
| 75.2641802 | 71 | 74.9778955 |
| 73.1725869 | 71 | 74.8895421 |
| 73.2123694 | 71 | 74.8011887 |
| 72.9568138 | 71 | 74.7141739 |
| 73.2012582 | 71 | 74.6258205 |
| 72.9123694 | 71 | 74.5388058 |
| 72.6679249 | 71 | 74.4424202 |
| 71.8123694 | 71 | 74.3460347 |
| 71.7901471 | 71 | 74.2603587 |
| 71.9308469 | 71 | 74.1840534 |
| 71.5975136 | 71 | 74.1184577 |
| 71.4864025 | 71 | 74.0568781 |
| 71.1530691 | 71 | 73.9993145 |
| 71.1530691 | 71 | 73.9404122 |
| 71.4864025 | 71 | 73.8801712 |
| 71.4864025 | 71 | 73.8172529 |
| 71.7086247 | 71 | 73.7556733 |
| 71.9308469 | 71 | 73.7208674 |
| 71.8197358 | 71 | 73.6874002 |
| 72.1530691 | 71 | 73.6260867 |
| 72.4864025 | 71 | 73.5635684 |
| 72.3752914 | 71 | 73.5002469 |
| 72.3752914 | 71 | 73.4326416 |
| 72.3752914 | 71 | 73.3857875 |

|            |    |            |
|------------|----|------------|
| 71.9308469 | 71 | 73.3509816 |
| 72.2641802 | 71 | 73.3442882 |
| 72.3752914 | 71 | 73.3375948 |
| 72.1530691 | 71 | 73.3429495 |
| 72.5975136 | 71 | 73.3483043 |
| 72.7086247 | 71 | 73.3616912 |
| 72.2641802 | 71 | 73.375078  |
| 72.4864025 | 71 | 73.4072065 |
| 72.3752914 | 71 | 73.4316252 |
| 72.2641802 | 71 | 73.4506891 |
| 71.9308469 | 71 | 73.4741706 |
| 72.041958  | 71 | 73.4976522 |
| 71.8197358 | 63 | 73.5117629 |
| 71.7086247 | 63 | 73.5345206 |
| 71.7086247 | 63 | 73.541214  |
| 71.7086247 | 63 | 73.5479075 |
| 70.9308469 | 63 | 73.5479075 |
| 71.4864025 | 63 | 73.5698168 |
| 71.1530691 | 63 | 73.5698168 |
| 71.1530691 | 63 | 73.5910007 |
| 71.3752914 | 63 | 73.6090279 |
| 71.7086247 | 63 | 73.6247793 |
| 72.3752914 | 63 | 73.6362469 |
| 72.7086247 | 63 | 73.6418242 |
| 73.1530691 | 63 | 73.6463307 |
| 73.7086247 | 63 | 73.6477581 |
| 73.5975136 | 63 | 73.6494533 |
| 74.041958  | 63 | 73.6454372 |
| 74.1530691 | 63 | 73.650792  |
| 74.5975136 | 63 | 73.6628402 |
| 74.5975136 | 63 | 73.6802431 |
| 75.2641802 | 63 | 73.7030008 |
| 75.4864025 | 63 | 73.7257585 |
| 75.1530691 | 63 | 73.7458388 |
| 76.7086247 | 63 | 73.757887  |
| 77.041958  | 63 | 73.7592257 |
| 74.9529405 | 63 | 73.7565483 |
| 75.0751627 | 63 | 73.7552096 |
| 75.3418294 | 63 | 73.753871  |
| 75.4307182 | 63 | 73.7605644 |
| 77.041958  | 63 | 73.77529   |
| 77.2641802 | 63 | 73.7940316 |
| 77.2641802 | 63 | 73.8208054 |
| 77.041958  | 63 | 73.8435631 |
| 76.8197358 | 63 | 73.8676594 |

|            |    |            |
|------------|----|------------|
| 76.2641802 | 63 | 73.8984493 |
| 75.9308469 | 63 | 73.9265617 |
| 75.4864025 | 63 | 73.9546742 |
| 76.7086247 | 63 | 73.9827866 |
| 75.4020379 | 63 | 74.0082217 |
| 75.4020379 | 63 | 74.0363341 |
| 75.5464823 | 63 | 74.0657853 |
| 75.7687045 | 63 | 74.1019299 |
| 75.7687045 | 63 | 74.1353971 |
| 76.5975136 | 63 | 74.1728803 |
| 75.7086247 | 63 | 74.2183957 |
| 75.7086247 | 63 | 74.2719432 |
| 75.1530691 | 63 | 74.3187973 |
| 75.3752914 | 63 | 74.3723449 |
| 75.2641802 | 63 | 74.4205376 |
| 74.9308469 | 63 | 74.4727465 |
| 74.7086247 | 63 | 74.5329874 |
| 74.2641802 | 63 | 74.5878736 |
| 74.1530691 | 63 | 74.633389  |
| 73.3752914 | 63 | 74.6668562 |
| 73.041958  | 63 | 74.6922913 |
| 71.9308469 | 63 | 74.7110329 |
| 71.9308469 | 63 | 74.7217424 |
| 71.5975136 | 63 | 74.7217424 |
| 72.041958  | 63 | 74.7190651 |
| 72.4864025 | 63 | 74.7123716 |
| 72.5975136 | 63 | 74.7096943 |
| 73.041958  | 63 | 74.7217424 |
| 73.3752914 | 63 | 74.732452  |
| 73.1530691 | 63 | 74.7404841 |
| 72.7086247 | 63 | 74.7498549 |
| 72.041958  | 63 | 74.7351293 |
| 71.5975136 | 63 | 74.7163877 |
| 72.041958  | 63 | 74.7254923 |
| 72.3752914 | 63 | 74.730447  |
| 72.9308469 | 63 | 74.7321889 |
| 73.5975136 | 63 | 74.7328598 |
| 73.9308469 | 63 | 74.7167955 |
| 74.1530691 | 63 | 74.6980539 |
| 74.1530691 | 63 | 74.6726188 |
| 74.3752914 | 63 | 74.6471837 |
| 74.7086247 | 63 | 74.6284421 |
| 74.9308469 | 63 | 74.6137165 |
| 75.041958  | 63 | 74.603007  |
| 74.5975136 | 63 | 74.603007  |

|            |    |            |
|------------|----|------------|
| 74.5975136 | 63 | 74.5842654 |
| 74.7086247 | 63 | 74.575911  |
| 74.7086247 | 63 | 74.5648793 |
| 74.9308469 | 63 | 74.5454138 |
| 74.8197358 | 63 | 74.5232709 |
| 74.9308469 | 63 | 74.5104989 |
| 75.4864025 | 63 | 74.4877412 |
| 76.1530691 | 63 | 74.475693  |
| 75.5975136 | 63 | 74.4529353 |
| 75.3752914 | 63 | 74.4288389 |
| 75.4864025 | 63 | 74.3993877 |
| 75.4864025 | 63 | 74.3699366 |
| 76.1530691 | 63 | 74.3431628 |
| 75.9308469 | 63 | 74.3177278 |
| 75.4864025 | 63 | 74.2963088 |
| 75.1530691 | 63 | 74.2789058 |
| 74.8197358 | 63 | 74.2708737 |
| 74.7086247 | 63 | 74.2748898 |
| 74.5975136 | 63 | 74.2963088 |
| 73.5975136 | 63 | 74.3177278 |
| 73.8197358 | 63 | 74.3431628 |
| 73.5975136 | 63 | 74.3605658 |
| 74.3752914 | 63 | 74.3752914 |
| 75.5975136 | 63 | 74.3900169 |
| 76.1530691 | 63 | 74.4020651 |
| 76.1530691 | 63 | 74.4074199 |
| 75.9308469 | 63 | 74.4181294 |
| 75.4864025 | 63 | 74.436871  |
| 75.4864025 | 63 | 74.4636448 |
| 75.7086247 | 63 | 74.4944346 |
| 75.4864025 | 63 | 74.5238857 |
| 75.4864025 | 63 | 74.5506595 |
| 75.4864025 | 63 | 74.5694011 |
| 75.7086247 | 63 | 74.5720785 |
| 75.7086247 | 63 | 74.5573529 |
| 75.1530691 | 63 | 74.5372726 |
| 74.9308469 | 63 | 74.5225471 |
| 75.2641802 | 63 | 74.5038054 |
| 75.041958  | 63 | 74.4770317 |
| 75.041958  | 63 | 74.4395484 |
| 75.4864025 | 63 | 74.3967104 |
| 75.1530691 | 63 | 74.3592271 |
| 74.7086247 | 63 | 74.3230825 |
| 74.4864025 | 63 | 74.2815832 |
| 73.9308469 | 63 | 74.2360678 |

|            |    |            |
|------------|----|------------|
| 73.9308469 | 63 | 74.1959072 |
| 74.7086247 | 63 | 74.166456  |
| 74.7086247 | 63 | 74.1410209 |
| 74.7086247 | 63 | 74.1249567 |
| 73.8197358 | 63 | 74.0928282 |
| 73.1530691 | 63 | 74.0620383 |
| 72.9308469 | 63 | 74.0325872 |
| 72.8197358 | 63 | 73.9951039 |
| 72.7086247 | 63 | 73.9549433 |
| 72.5975136 | 63 | 73.9107666 |
| 72.4864025 | 63 | 73.8719446 |
| 72.7086247 | 63 | 73.8358001 |
| 72.7086247 | 63 | 73.8076876 |
| 73.3752914 | 63 | 73.7956394 |
| 73.7086247 | 63 | 73.7849299 |
| 73.7086247 | 63 | 73.7742204 |
| 73.7086247 | 63 | 73.7755591 |
| 73.4864025 | 63 | 73.7728817 |
| 73.7086247 | 63 | 73.7768978 |
| 73.8197358 | 63 | 73.7742204 |
| 74.041958  | 63 | 73.7594948 |
| 73.8197358 | 63 | 73.7394145 |
| 74.041958  | 63 | 73.7166568 |
| 74.2641802 | 63 | 73.6965765 |
| 74.2641802 | 63 | 73.685867  |
| 74.1530691 | 63 | 73.6818509 |
| 74.4864025 | 63 | 73.6764962 |
| 74.5975136 | 63 | 73.6764962 |
| 74.4864025 | 63 | 73.6738188 |
| 73.8197358 | 63 | 73.6724801 |
| 72.7086247 | 63 | 73.6698027 |
| 72.4864025 | 63 | 73.6684641 |
| 72.9308469 | 63 | 73.6698027 |
| 72.8197358 | 63 | 73.6738188 |
| 72.4864025 | 63 | 73.6711414 |
| 71.8197358 | 63 | 73.6724801 |
| 71.4864025 | 63 | 73.6724801 |
| 71.4864025 | 63 | 73.6671254 |
| 71.5975136 | 63 | 73.664448  |
| 71.2641802 | 63 | 73.6724801 |
| 70.9308469 | 63 | 73.6778349 |
| 71.5975136 | 63 | 73.6898831 |
| 72.3752914 | 63 | 73.6992539 |
| 72.8197358 | 63 | 73.6965765 |
| 74.1530691 | 63 | 73.6925604 |

|            |    |            |
|------------|----|------------|
| 73.4864025 | 63 | 73.6885444 |
| 73.041958  | 63 | 73.6952378 |
| 72.9308469 | 63 | 73.7086247 |
| 72.3752914 | 63 | 73.724689  |
| 72.1530691 | 63 | 73.7434306 |
| 72.4864025 | 63 | 73.7554788 |
| 72.7086247 | 63 | 73.7702043 |
| 72.4864025 | 63 | 73.7862686 |
| 72.8197358 | 63 | 73.7969781 |
| 73.8197358 | 63 | 73.810365  |
| 73.8197358 | 63 | 73.8130424 |
| 73.7086247 | 63 | 73.8183971 |
| 73.7086247 | 63 | 73.8250906 |
| 73.5975136 | 63 | 73.831784  |
| 73.9308469 | 63 | 73.8411548 |
| 74.1530691 | 63 | 73.831784  |
| 74.3752914 | 63 | 73.8197358 |
| 74.4864025 | 63 | 73.7983168 |
| 74.2641802 | 63 | 73.788946  |
| 74.2641802 | 63 | 73.7768978 |
| 74.5975136 | 63 | 73.7661883 |
| 75.1530691 | 63 | 73.767527  |
| 75.2641802 | 63 | 73.771543  |
| 75.4864025 | 63 | 73.7728817 |
| 75.2641802 | 63 | 73.767527  |
| 75.3752914 | 63 | 73.7635109 |
| 75.4864025 | 63 | 73.7661883 |
| 75.5975136 | 63 | 73.792962  |
| 75.2641802 | 63 | 73.8170584 |
| 75.2641802 | 63 | 73.8344614 |
| 75.041958  | 63 | 73.8558804 |
| 75.1530691 | 63 | 73.8799768 |
| 75.041958  | 63 | 73.9094279 |
| 75.041958  | 63 | 73.9455725 |
| 74.9308469 | 63 | 73.977701  |
| 75.3752914 | 63 | 74.0098295 |
| 74.9308469 | 63 | 74.0446354 |
| 74.9308469 | 63 | 74.0687318 |
| 74.7086247 | 63 | 74.08078   |
| 74.4864025 | 63 | 74.0821187 |
| 74.3752914 | 63 | 74.0740865 |
| 74.3752914 | 63 | 74.0513288 |
| 74.3752914 | 63 | 74.0459741 |
| 74.2641802 | 63 | 74.0406193 |
| 74.2641802 | 63 | 74.0406193 |

|            |    |            |
|------------|----|------------|
| 74.3752914 | 63 | 74.0486515 |
| 73.7086247 | 63 | 74.0526675 |
| 73.8197358 | 63 | 74.0620383 |
| 73.8197358 | 63 | 74.0620383 |
| 73.5975136 | 63 | 74.0606997 |
| 73.8197358 | 63 | 74.0473128 |
| 73.5975136 | 63 | 74.0151843 |
| 74.1530691 | 63 | 73.9870718 |
| 74.2641802 | 63 | 73.9589594 |
| 74.2641802 | 63 | 73.9281695 |
| 74.2641802 | 63 | 73.9000571 |
| 72.9308469 | 63 | 73.8813155 |
| 72.8197358 | 63 | 73.8612351 |
| 72.2641802 | 63 | 73.8371388 |
| 73.041958  | 63 | 73.8090263 |
| 73.041958  | 63 | 73.7822525 |
| 73.3752914 | 63 | 73.7554788 |
| 74.3752914 | 63 | 73.7166568 |
| 74.4864025 | 63 | 73.6684641 |
| 74.5975136 | 63 | 73.6202713 |
| 74.1530691 | 63 | 73.5707398 |
| 74.1530691 | 63 | 73.5238857 |
| 74.041958  | 63 | 73.4823864 |
| 74.9308469 | 63 | 73.4355323 |
| 74.4864025 | 63 | 73.3819848 |
| 74.3752914 | 63 | 73.329776  |
| 74.5975136 | 63 | 73.2671238 |
| 74.4864025 | 63 | 73.2122376 |
| 74.2641802 | 63 | 73.1560127 |
| 74.4864025 | 63 | 73.1064812 |
| 74.1530691 | 63 | 73.0623045 |
| 74.2641802 | 63 | 73.02616   |
| 74.1530691 | 63 | 72.987338  |
| 72.9308469 | 63 | 72.9578869 |
| 72.5975136 | 63 | 72.9284357 |
| 72.4864025 | 63 | 72.9030007 |
| 72.1530691 | 63 | 72.8789043 |
| 72.2641802 | 63 | 72.8601626 |
| 73.041958  | 63 | 72.8481144 |
| 72.5975136 | 63 | 72.8427597 |
| 72.9308469 | 63 | 72.8440984 |
| 73.041958  | 63 | 72.8454371 |
| 72.4864025 | 63 | 72.8494531 |
| 73.2641802 | 63 | 72.8588239 |
| 72.7086247 | 63 | 72.8695335 |

|            |    |            |
|------------|----|------------|
| 72.3752914 | 63 | 72.8762269 |
| 71.7086247 | 63 | 72.884259  |
| 71.1530691 | 63 | 72.8896138 |
| 71.4864025 | 63 | 72.8976459 |
| 71.3752914 | 63 | 72.9030007 |
| 71.1530691 | 63 | 72.9110328 |
| 71.2641802 | 63 | 72.9096941 |
| 72.3752914 | 63 | 72.9043393 |
| 72.4864025 | 63 | 72.9123715 |
| 72.3752914 | 63 | 72.9190649 |
| 72.1530691 | 63 | 72.9244197 |
| 72.041958  | 63 | 72.9163875 |
| 72.041958  | 63 | 72.9083554 |
| 71.3752914 | 63 | 72.8976459 |
| 71.1530691 | 63 | 72.8789043 |
| 71.2641802 | 63 | 72.8655174 |
| 71.3752914 | 63 | 72.8521305 |
| 71.3752914 | 63 | 72.8400823 |
| 71.9308469 | 63 | 72.8280341 |
| 71.5975136 | 63 | 72.8186633 |
| 71.1530691 | 63 | 72.8012604 |
| 70.9308469 | 63 | 72.7905509 |
| 70.0640516 | 63 | 72.777164  |
| 70.4864025 | 63 | 72.7704705 |
| 70.4864025 | 63 | 72.7610997 |
| 70.9308469 | 63 | 72.7477128 |
| 71.3752914 | 63 | 72.7423581 |
| 71.9308469 | 63 | 72.7370033 |
| 72.1530691 | 63 | 72.7370033 |
| 72.4864025 | 63 | 72.7396807 |
| 72.4864025 | 63 | 72.7570837 |
| 72.5975136 | 63 | 72.7744866 |
| 72.4864025 | 63 | 72.7945669 |
| 72.8197358 | 63 | 72.820002  |
| 73.3752914 | 63 | 72.841421  |
| 73.9308469 | 63 | 72.8548079 |
| 74.3752914 | 63 | 72.8762269 |
| 74.3752914 | 63 | 72.8976459 |
| 74.7086247 | 63 | 72.9204036 |
| 74.4864025 | 63 | 72.9538708 |
| 74.7086247 | 63 | 72.9726124 |
| 74.3752914 | 63 | 72.9953701 |
| 74.2641802 | 63 | 73.0221439 |
| 74.2641802 | 63 | 73.0569498 |
| 74.2641802 | 63 | 73.0984491 |



|            |    |            |
|------------|----|------------|
| 74.5975136 | 63 | 73.1426258 |
| 74.9308469 | 63 | 73.1854638 |
| 74.1530691 | 63 | 73.2349953 |
| 73.8197358 | 63 | 73.2831881 |
| 73.5975136 | 63 | 73.3287035 |
| 73.3752914 | 63 | 73.3742189 |
| 72.7086247 | 63 | 73.4183956 |
| 72.3752914 | 63 | 73.4625723 |
| 72.3752914 | 63 | 73.5000555 |
| 72.4864025 | 63 | 73.5348614 |
| 72.8197358 | 63 | 73.5843929 |
| 73.3752914 | 63 | 73.631247  |
| 73.4864025 | 63 | 73.6647142 |
| 73.1530691 | 63 | 73.6968427 |
| 73.1530691 | 63 | 73.7262938 |
| 73.2641802 | 63 | 73.7423581 |
| 73.4864025 | 63 | 73.7624384 |
| 73.5975136 | 63 | 73.7878735 |
| 73.2641802 | 63 | 73.8226794 |
| 74.041958  | 63 | 73.8692673 |
| 73.7086247 | 63 | 73.9094279 |
| 73.1530691 | 63 | 73.9509272 |
| 74.041958  | 63 | 73.9790397 |
| 73.7086247 | 63 | 74.0004587 |
| 74.2641802 | 63 | 74.0218777 |
| 74.3752914 | 63 | 74.041958  |
| 74.3752914 | 63 | 74.0647157 |
| 74.041958  | 63 | 74.0928282 |
| 74.1530691 | 63 | 74.1222793 |
| 74.2641802 | 63 | 74.1557465 |
| 74.041958  | 63 | 74.1825203 |
| 74.1530691 | 63 | 74.1972458 |
| 74.3752914 | 63 | 74.1905524 |
| 74.7086247 | 63 | 74.1758268 |
| 74.9308469 | 63 | 74.1530691 |
| 75.2641802 | 63 | 74.1262954 |
| 74.8197358 | 63 | 74.1048764 |
| 74.5975136 | 63 | 74.0861347 |
| 74.5975136 | 63 | 74.0660544 |
| 74.5975136 | 63 | 74.0486515 |
| 74.5975136 | 63 | 74.0339259 |
| 75.1530691 | 63 | 74.0192003 |
| 74.9308469 | 63 | 73.9951039 |
| 75.2641802 | 63 | 73.9616367 |
| 75.2641802 | 63 | 73.9295082 |

|            |    |            |
|------------|----|------------|
| 76.1530691 | 63 | 73.9000571 |
| 76.2641802 | 63 | 73.870606  |
| 76.041958  | 63 | 73.8411548 |
| 75.8197358 | 63 | 73.8157197 |
| 75.1530691 | 63 | 73.7956394 |
| 74.9308469 | 63 | 73.7795752 |
| 75.4864025 | 63 | 73.7621722 |
| 75.041958  | 63 | 73.7407532 |
| 74.041958  | 63 | 73.7126408 |
| 74.041958  | 63 | 73.6845283 |
| 73.8197358 | 63 | 73.6631093 |
| 73.2641802 | 63 | 73.6497224 |
| 73.2641802 | 63 | 73.6376742 |
| 73.2641802 | 63 | 73.6323195 |
| 73.8197358 | 63 | 73.6336582 |
| 73.9308469 | 63 | 73.6416903 |
| 73.8197358 | 63 | 73.6457064 |
| 73.9308469 | 63 | 73.6604319 |
| 73.2641802 | 63 | 73.6606742 |
| 73.1530691 | 63 | 73.6502071 |
| 73.7086247 | 63 | 73.6453624 |
| 73.8197358 | 63 | 73.627934  |
| 74.3752914 | 63 | 73.6074267 |
| 74.8197358 | 63 | 73.606088  |
| 75.041958  | 63 | 73.606088  |
| 75.2641802 | 63 | 73.6020719 |
| 75.041958  | 63 | 73.5980559 |
| 74.5975136 | 63 | 73.5967172 |
| 73.3752914 | 63 | 73.5913624 |
| 73.1530691 | 63 | 73.5833303 |
| 72.4864025 | 63 | 73.5659274 |
| 72.4864025 | 63 | 73.5525405 |
| 72.7086247 | 63 | 73.5311215 |
| 73.1530691 | 63 | 73.5137185 |
| 72.7086247 | 63 | 73.5016703 |
| 72.8197358 | 63 | 73.4842674 |
| 73.041958  | 63 | 73.4682031 |
| 73.041958  | 63 | 73.4220117 |
| 72.5975136 | 63 | 73.3675205 |
| 72.1530691 | 63 | 73.3127615 |
| 71.4864025 | 63 | 73.2792943 |
| 71.3752914 | 63 | 73.2444884 |
| 71.1530691 | 63 | 73.1976343 |
| 70.9308469 | 63 | 73.1534576 |
| 70.5975136 | 63 | 73.1119583 |

|            |    |            |
|------------|----|------------|
| 70.7086247 | 63 | 73.0731363 |
| 71.041958  | 63 | 73.0423465 |
| 71.041958  | 63 | 73.0222662 |
| 71.041958  | 63 | 72.9995085 |
| 71.041958  | 63 | 72.9847829 |
| 71.1530691 | 63 | 72.9861216 |
| 71.3752914 | 63 | 72.9914764 |
| 72.041958  | 63 | 73.0329757 |
| 72.2641802 | 63 | 73.0905393 |
| 73.041958  | 63 | 73.1481029 |
| 73.7086247 | 63 | 73.2056665 |
| 73.9308469 | 63 | 73.2578753 |
| 74.3752914 | 63 | 73.3074068 |
| 74.9308469 | 63 | 73.3596156 |
| 73.1731823 | 63 | 73.4024536 |
| 73.1731823 | 63 | 73.4533238 |
| 73.3065156 | 63 | 73.5055326 |
| 72.8176267 | 63 | 73.5376611 |
| 72.6731823 | 63 | 73.5564027 |
| 74.2641802 | 63 | 73.5630962 |
| 74.041958  | 63 | 73.5630962 |
| 73.8197358 | 63 | 73.5590801 |
| 73.9308469 | 63 | 73.5523867 |
| 73.9308469 | 63 | 73.5497093 |
| 73.7086247 | 63 | 73.5399353 |
| 73.7086247 | 63 | 73.5522497 |
| 73.2641802 | 63 | 73.5642979 |
| 73.8197358 | 63 | 73.5843782 |
| 73.4864025 | 63 | 73.6044585 |
| 73.3752914 | 63 | 73.6165067 |
| 73.5975136 | 63 | 73.6191841 |
| 73.1530691 | 63 | 73.6312323 |
| 73.2641802 | 63 | 73.6285549 |
| 70.7636287 | 63 | 73.6218615 |
| 70.6302953 | 63 | 73.615168  |
| 70.3858509 | 63 | 73.6205228 |
| 72.4864025 | 63 | 73.6379257 |
| 72.3752914 | 63 | 73.6633608 |
| 72.2641802 | 63 | 73.6901346 |
| 72.5975136 | 63 | 73.7195857 |
| 72.5975136 | 63 | 73.7410047 |
| 72.5975136 | 63 | 73.7691172 |
| 72.5975136 | 63 | 73.799907  |
| 73.2641802 | 63 | 73.8306968 |
| 73.5975136 | 63 | 73.8628253 |

|            |    |            |
|------------|----|------------|
| 73.8197358 | 63 | 73.9003086 |
| 74.1530691 | 63 | 73.9404692 |
| 74.4864025 | 63 | 73.9819686 |
| 77.2641802 | 63 | 74.0194518 |
| 78.041958  | 63 | 74.0502417 |
| 78.041958  | 63 | 74.0756767 |
| 78.041958  | 63 | 74.0850476 |
| 78.1530691 | 63 | 74.0796928 |
| 78.041958  | 63 | 74.0689833 |
| 78.1530691 | 63 | 74.0542577 |
| 77.4864025 | 63 | 74.0328387 |
| 77.4864025 | 63 | 74.0285803 |
| 77.4864025 | 63 | 74.0229833 |
| 76.3752914 | 63 | 74.0144411 |
| 75.3752914 | 63 | 74.0117891 |
| 74.9308469 | 63 | 74.0148935 |
| 74.8197358 | 63 | 73.9974905 |
| 74.7086247 | 63 | 73.9787489 |
| 74.7086247 | 63 | 73.961346  |
| 74.8197358 | 63 | 73.9452817 |
| 73.7862738 | 63 | 73.9292175 |
| 74.3973849 | 63 | 73.9158306 |
| 74.1530691 | 63 | 73.8970889 |
| 74.1530691 | 63 | 73.8863794 |
| 74.1530691 | 63 | 73.8609444 |
| 73.7086247 | 63 | 73.8395254 |
| 73.3752914 | 63 | 73.815429  |
| 73.7086247 | 63 | 73.7859778 |
| 72.5975136 | 63 | 73.7632201 |
| 72.4864025 | 63 | 73.7418011 |
| 72.4864025 | 63 | 73.7518479 |
| 73.041958  | 63 | 73.7675172 |
| 73.5975136 | 63 | 73.7874703 |
| 73.5975136 | 63 | 73.7821156 |
| 73.5975136 | 63 | 73.7767608 |
| 73.5975136 | 63 | 73.7754221 |
| 72.7086247 | 63 | 73.7660513 |
| 72.9308469 | 63 | 73.7580192 |
| 73.2641802 | 63 | 73.7526644 |
| 73.5975136 | 63 | 73.7473097 |
| 73.7086247 | 63 | 73.7366002 |
| 74.1530691 | 63 | 73.7111651 |
| 74.3752914 | 63 | 73.6830527 |
| 74.5975136 | 63 | 73.6536015 |
| 74.4864025 | 63 | 73.6161182 |

|            |    |            |
|------------|----|------------|
| 74.5975136 | 63 | 73.5558773 |
| 74.3752914 | 63 | 73.4795721 |
| 73.8197358 | 63 | 73.4086216 |
| 73.2641802 | 63 | 73.3336551 |
| 73.041958  | 63 | 73.2680593 |
| 73.1530691 | 63 | 73.2104958 |
| 73.1530691 | 63 | 73.1353699 |
| 72.8197358 | 63 | 73.0757729 |
| 72.7086247 | 63 | 73.062386  |
| 72.5975136 | 63 | 73.0463218 |
| 72.5975136 | 63 | 73.0489992 |
| 72.9308469 | 63 | 73.0664021 |
| 72.8197358 | 63 | 73.0931759 |
| 72.4864025 | 63 | 73.1212883 |
| 72.3752914 | 63 | 73.1480621 |
| 72.5975136 | 63 | 73.1641263 |
| 72.5975136 | 63 | 73.1761745 |
| 72.5975136 | 63 | 73.1913032 |
| 72.1530691 | 63 | 73.1963918 |
| 72.3752914 | 63 | 73.2057626 |
| 71.7086247 | 63 | 73.2164721 |
| 71.7086247 | 63 | 73.2271816 |
| 71.3752914 | 63 | 73.2352138 |
| 71.1530691 | 63 | 73.2459233 |
| 71.2641802 | 63 | 73.2459233 |
| 71.4864025 | 63 | 73.2539554 |
| 71.5975136 | 63 | 73.2579715 |
| 71.9308469 | 63 | 73.2566328 |
| 72.041958  | 63 | 73.247262  |
| 72.041958  | 63 | 73.2311977 |
| 71.9308469 | 63 | 73.2111174 |
| 72.1530691 | 63 | 73.1923757 |
| 71.8197358 | 63 | 73.1763115 |
| 71.9308469 | 71 | 73.1709567 |
| 72.1530691 | 71 | 73.1629246 |
| 72.1530691 | 71 | 73.1575699 |
| 72.3752914 | 71 | 73.148199  |
| 71.4864025 | 63 | 73.1361508 |
| 71.4864025 | 63 | 73.1120545 |
| 71.7086247 | 63 | 73.0799259 |
| 71.3752914 | 63 | 73.0518135 |
| 72.2641802 | 63 | 73.019685  |
| 71.7086247 | 63 | 72.9835404 |
| 72.1530691 | 63 | 72.955428  |
| 71.8197358 | 63 | 72.9299929 |

|            |    |            |
|------------|----|------------|
| 72.7086247 | 63 | 72.9112512 |
| 73.2641802 | 63 | 72.8911709 |
| 71.9176267 | 63 | 72.8657359 |
| 72.5398489 | 63 | 72.83093   |
| 76.3752914 | 63 | 72.7934467 |
| 76.1530691 | 63 | 72.7599795 |
| 76.5975136 | 63 | 72.7291897 |
| 76.8197358 | 63 | 72.7171415 |
| 77.1530691 | 63 | 72.6957225 |
| 77.1530691 | 63 | 72.6702874 |
| 76.9308469 | 63 | 72.6488684 |
| 76.041958  | 63 | 72.6287881 |
| 75.8197358 | 63 | 72.6073691 |
| 75.041958  | 63 | 72.58595   |
| 74.8197358 | 63 | 72.5832727 |
| 74.9308469 | 63 | 72.574884  |
| 75.041958  | 63 | 72.5698422 |
| 75.041958  | 63 | 72.5757775 |
| 74.3752914 | 63 | 72.5876031 |
| 74.2641802 | 63 | 72.6034447 |
| 73.7086247 | 63 | 72.6288798 |
| 73.2641802 | 63 | 72.644944  |
| 72.8197358 | 63 | 72.6516375 |
| 72.3752914 | 63 | 72.644944  |
| 72.2641802 | 63 | 72.6315572 |
| 72.2641802 | 63 | 72.6087995 |
| 71.9308469 | 63 | 72.5833644 |
| 72.041958  | 63 | 72.5632841 |
| 72.2641802 | 63 | 72.5338329 |
| 72.2641802 | 63 | 72.5070592 |
| 72.2641802 | 63 | 72.4923336 |
| 72.8197358 | 63 | 72.4762693 |
| 72.8197358 | 63 | 72.4615438 |
| 72.7086247 | 63 | 72.4468182 |
| 72.1530691 | 63 | 72.4401248 |
| 71.7086247 | 63 | 72.4361087 |
| 72.2641802 | 63 | 72.4361087 |
| 71.8197358 | 71 | 72.4414634 |
| 71.5975136 | 71 | 72.4387861 |
| 72.041958  | 71 | 72.4575277 |
| 71.7086247 | 71 | 72.4762693 |
| 71.7086247 | 71 | 72.5124139 |
| 71.3752914 | 71 | 72.5284782 |
| 71.041958  | 71 | 72.537849  |
| 70.2641802 | 71 | 72.5567499 |

|            |    |            |
|------------|----|------------|
| 69.7086247 | 71 | 72.5587833 |
| 69.9308469 | 71 | 72.5105906 |
| 70.041958  | 71 | 72.4677526 |
| 71.5975136 | 71 | 72.4222372 |
| 71.1530691 | 71 | 72.371367  |
| 70.7086247 | 71 | 72.3057713 |
| 70.7086247 | 71 | 72.242853  |
| 70.7086247 | 71 | 72.1799346 |
| 70.8197358 | 71 | 72.1277258 |
| 70.8197358 | 71 | 72.0755169 |
| 72.3752914 | 71 | 72.0273242 |
| 71.4568138 | 71 | 71.9791314 |
| 71.9568138 | 71 | 71.9403094 |
| 72.2012582 | 71 | 71.9001488 |
| 72.6901471 | 71 | 71.8680203 |
| 72.6901471 | 71 | 71.8492787 |
| 73.2641802 | 71 | 71.8372305 |
| 72.5975136 | 71 | 71.8385692 |
| 72.041958  | 71 | 71.851956  |
| 71.041958  | 71 | 71.8800685 |
| 70.8197358 | 71 | 71.9188904 |
| 70.1530691 | 71 | 71.9710993 |
| 69.9308469 | 71 | 72.0246468 |
| 70.2641802 | 71 | 72.0889038 |
| 69.7086247 | 71 | 72.1544995 |
| 69.5975136 | 71 | 72.2174179 |
| 70.7086247 | 71 | 72.268288  |
| 70.8197358 | 71 | 72.3191582 |
| 70.9308469 | 71 | 72.3539641 |
| 71.1530691 | 71 | 72.3847539 |
| 70.9308469 | 71 | 72.4168824 |
| 71.1530691 | 71 | 72.4543657 |
| 71.7086247 | 71 | 72.4931876 |
| 71.8197358 | 71 | 72.5279935 |
| 72.041958  | 71 | 72.5641381 |
| 73.2641802 | 71 | 72.5833938 |
| 73.7086247 | 71 | 72.5994366 |
| 74.8197358 | 71 | 72.6231099 |
| 74.041958  | 71 | 72.6499961 |
| 74.041958  | 71 | 72.6926788 |
| 73.4864025 | 71 | 72.7445985 |
| 72.7086247 | 71 | 72.819565  |
| 72.3752914 | 71 | 72.9025637 |
| 72.5975136 | 71 | 72.9855623 |
| 72.8197358 | 71 | 73.0645449 |

|            |    |            |
|------------|----|------------|
| 72.5975136 | 71 | 73.1221085 |
| 71.7086247 | 71 | 73.1810108 |
| 71.9308469 | 71 | 73.2399131 |
| 71.7086247 | 63 | 73.3028314 |
| 71.7086247 | 63 | 73.3724432 |
| 71.4864025 | 63 | 73.4433937 |
| 71.041958  | 63 | 73.5143441 |
| 70.8197358 | 63 | 73.566553  |
| 71.7086247 | 63 | 73.6445534 |
| 71.7086247 | 63 | 73.715191  |
| 72.3752914 | 63 | 73.7828835 |
| 72.8197358 | 63 | 73.8420084 |
| 73.2641802 | 63 | 73.8957785 |
| 73.8197358 | 63 | 73.9359392 |
| 74.3752914 | 63 | 73.9814546 |
| 75.1530691 | 63 | 74.0336634 |
| 75.5975136 | 63 | 74.0992591 |
| 76.5975136 | 63 | 74.1715483 |
| 76.7086247 | 63 | 74.2491922 |
| 77.2641802 | 63 | 74.3281748 |
| 77.4864025 | 63 | 74.3991252 |
| 77.4864025 | 63 | 74.4714144 |
| 76.4864025 | 63 | 74.5383488 |
| 76.4864025 | 63 | 74.5865416 |
| 75.7086247 | 63 | 74.6347343 |
| 75.3752914 | 63 | 74.6856045 |
| 75.3752914 | 63 | 74.735136  |
| 75.2641802 | 63 | 74.7913609 |
| 74.9308469 | 63 | 74.8475858 |
| 75.1530691 | 63 | 74.906488  |
| 74.8197358 | 63 | 74.9586969 |
| 73.1957342 | 63 | 75.0068896 |
| 73.3735119 | 63 | 75.0296473 |
| 73.6735119 | 63 | 75.0443729 |
| 73.9401786 | 63 | 75.0443729 |
| 74.9179564 | 63 | 75.0577598 |
| 75.3512897 | 63 | 75.0765014 |
| 76.4864025 | 63 | 75.1032752 |
| 76.5975136 | 63 | 75.1447745 |
| 76.8197358 | 63 | 75.1956447 |
| 76.5975136 | 63 | 75.2424987 |
| 76.3752914 | 63 | 75.2947076 |
| 76.041958  | 63 | 75.3469164 |
| 75.5975136 | 63 | 75.4084961 |
| 75.9308469 | 63 | 75.4673983 |



|            |    |            |
|------------|----|------------|
| 76.4864025 | 63 | 75.5249619 |
| 76.7086247 | 63 | 75.5592744 |
| 76.7086247 | 63 | 75.6047898 |
| 76.7086247 | 63 | 75.6462891 |
| 77.9308469 | 63 | 75.6717242 |
| 77.8197358 | 63 | 75.6824337 |
| 77.8197358 | 63 | 75.6904658 |
| 77.5975136 | 63 | 75.6931432 |
| 77.1530691 | 63 | 75.6998366 |
| 76.5975136 | 63 | 75.6860466 |
| 76.3752914 | 63 | 75.6624841 |
| 76.3752914 | 63 | 75.6464199 |
| 76.4864025 | 63 | 75.597824  |
| 76.8197358 | 63 | 75.5630181 |
| 76.5975136 | 63 | 75.5054545 |
| 76.4864025 | 63 | 75.4371814 |
| 76.1530691 | 63 | 75.3622149 |
| 75.7086247 | 63 | 75.2805549 |
| 75.1530691 | 63 | 75.1962175 |
| 74.7086247 | 63 | 75.1279444 |
| 74.8197358 | 63 | 75.0650261 |
| 75.1530691 | 63 | 75.014156  |
| 75.2641802 | 63 | 74.9659632 |
| 75.5975136 | 63 | 74.9351734 |
| 75.8197358 | 63 | 74.911077  |
| 76.5975136 | 63 | 74.8909967 |
| 76.1530691 | 63 | 74.8709163 |
| 76.041958  | 63 | 74.8494973 |
| 75.1530691 | 63 | 74.8489833 |
| 74.9308469 | 63 | 74.8396339 |
| 74.8197358 | 71 | 74.8253314 |
| 75.1530691 | 71 | 74.807816  |
| 75.5975136 | 71 | 74.7811976 |
| 75.7086247 | 71 | 74.7627451 |
| 76.1530691 | 71 | 74.7399874 |
| 76.5975136 | 71 | 74.7145523 |
| 76.4864025 | 71 | 74.6971494 |
| 77.1530691 | 71 | 74.6770691 |
| 76.9308469 | 63 | 74.6583274 |
| 76.8197358 | 63 | 74.6395858 |
| 76.8197358 | 63 | 74.6195055 |
| 76.4864025 | 63 | 74.587377  |
| 74.5565599 | 63 | 74.5525711 |
| 75.2641802 | 63 | 74.5097331 |
| 74.4864025 | 63 | 74.4709111 |

|            |    |            |
|------------|----|------------|
| 72.9308469 | 63 | 74.4494921 |
| 72.5975136 | 63 | 74.4133475 |
| 72.3752914 | 63 | 74.3825577 |
| 72.5975136 | 63 | 74.3557839 |
| 73.3752914 | 63 | 74.3330262 |
| 72.1196071 | 63 | 74.316962  |
| 71.8640516 | 63 | 74.3049138 |
| 73.041958  | 63 | 74.2848335 |
| 71.1196071 | 63 | 74.2540436 |
| 72.7086247 | 63 | 74.2219151 |
| 71.8197358 | 63 | 74.1857705 |
| 71.041958  | 63 | 74.1332725 |
| 71.041958  | 63 | 74.1038214 |
| 70.7086247 | 63 | 74.079725  |
| 70.4864025 | 63 | 74.0636607 |
| 70.8197358 | 63 | 74.058306  |
| 71.2641802 | 63 | 74.0676768 |
| 71.4864025 | 63 | 74.0783863 |
| 71.3752914 | 63 | 74.0877571 |
| 72.8197358 | 63 | 74.0984666 |
| 73.2641802 | 63 | 74.122563  |
| 73.2641802 | 63 | 74.1453207 |
| 73.4864025 | 63 | 74.1600463 |
| 73.041958  | 63 | 74.182804  |
| 73.1530691 | 63 | 74.2149325 |
| 72.5975136 | 63 | 74.2577705 |
| 72.4864025 | 63 | 74.3032859 |
| 72.4864025 | 63 | 74.3461239 |
| 72.7086247 | 63 | 74.3809298 |
| 73.8197358 | 63 | 74.4090423 |
| 74.5975136 | 63 | 74.435816  |
| 74.4864025 | 63 | 74.4625898 |
| 75.3752914 | 63 | 74.4853475 |
| 74.9308469 | 63 | 74.5161373 |
| 74.8197358 | 63 | 74.5429111 |
| 74.4864025 | 63 | 74.5803943 |
| 73.9308469 | 63 | 74.6071681 |
| 73.2641802 | 63 | 74.6299258 |
| 73.5975136 | 63 | 74.6265576 |
| 73.1530691 | 63 | 74.6421568 |
| 73.4864025 | 63 | 74.6406628 |
| 74.9308469 | 63 | 74.6382317 |
| 74.9308469 | 63 | 74.6561487 |
| 75.2641802 | 63 | 74.6767431 |
| 75.5975136 | 63 | 74.6973374 |

|            |    |            |
|------------|----|------------|
| 75.7086247 | 63 | 74.7181995 |
| 75.8197358 | 63 | 74.7298247 |
| 75.5975136 | 63 | 74.7506883 |
| 74.7086247 | 63 | 74.7657956 |
| 73.8197358 | 63 | 74.7622936 |
| 73.8197358 | 63 | 74.7791412 |
| 73.8197358 | 63 | 74.7796552 |
| 72.2401786 | 63 | 74.7952964 |
| 74.041958  | 63 | 74.8173633 |
| 74.1530691 | 63 | 74.8421076 |
| 74.3752914 | 63 | 74.870868  |
| 74.7086247 | 63 | 74.9008331 |
| 75.4864025 | 63 | 74.9210259 |
| 75.7086247 | 63 | 74.9421557 |
| 75.9308469 | 63 | 74.9547179 |
| 76.1530691 | 63 | 74.9951249 |
| 77.5975136 | 63 | 75.0313819 |
| 77.7086247 | 63 | 75.0681744 |
| 77.8197358 | 63 | 75.1057701 |
| 78.041958  | 63 | 75.1388142 |
| 78.7086247 | 63 | 75.1990552 |
| 78.7086247 | 63 | 75.2646509 |
| 78.7086247 | 63 | 75.3382788 |
| 78.3752914 | 63 | 75.4186    |
| 78.041958  | 63 | 75.4989213 |
| 77.9308469 | 63 | 75.5779039 |
| 77.9308469 | 63 | 75.6448383 |
| 78.3752914 | 63 | 75.7024019 |
| 78.4864025 | 63 | 75.7599655 |
| 79.041958  | 63 | 75.8108357 |
| 79.3752914 | 63 | 75.8643832 |
| 80.041958  | 63 | 75.9152533 |
| 79.041958  | 63 | 75.9607687 |
| 78.7086247 | 63 | 76.0049454 |
| 76.2068453 | 63 | 76.0353927 |
| 75.8512897 | 63 | 76.0701986 |
| 75.1401786 | 63 | 76.1076819 |
| 74.284623  | 63 | 76.1411491 |
| 74.4179564 | 63 | 76.1625681 |
| 74.3068453 | 63 | 76.1866645 |
| 74.084623  | 63 | 76.2094222 |
| 74.3290675 | 63 | 76.2295025 |
| 74.3401786 | 63 | 76.2428894 |
| 73.8512897 | 63 | 76.2589537 |
| 73.1179564 | 63 | 76.2776953 |

|            |    |            |
|------------|----|------------|
| 72.7512897 | 63 | 76.3031304 |
| 72.5179564 | 63 | 76.3285654 |
| 72.7512897 | 63 | 76.3499844 |
| 73.1179564 | 63 | 76.3687261 |
| 72.8735119 | 63 | 76.4064985 |
| 73.0957342 | 63 | 76.4198854 |
| 73.0957342 | 63 | 76.4319336 |
| 72.9735119 | 63 | 76.4372883 |
| 72.4957342 | 63 | 76.4413044 |
| 73.0179564 | 63 | 76.4359497 |
| 72.5290675 | 63 | 76.4292562 |
| 74.7290675 | 63 | 76.4185467 |
| 75.8290675 | 63 | 76.4118533 |
| 76.3179564 | 63 | 76.3877569 |
| 76.384623  | 63 | 76.3609831 |
| 76.2290675 | 63 | 76.3328707 |
| 78.041958  | 63 | 76.2994035 |
| 78.5975136 | 63 | 76.2552268 |
| 78.7086247 | 63 | 76.2097114 |
| 79.1530691 | 63 | 76.1601799 |
| 79.1530691 | 63 | 76.1079711 |
| 79.2641802 | 63 | 76.0530849 |
| 79.3752914 | 63 | 75.9928439 |
| 79.3752914 | 63 | 75.9245708 |
| 79.2641802 | 63 | 75.8469269 |
| 79.5975136 | 63 | 75.7679443 |
| 79.3752914 | 63 | 75.6903004 |
| 79.041958  | 63 | 75.5952535 |
| 78.2641802 | 63 | 75.4935132 |
| 77.5975136 | 63 | 75.4038211 |
| 75.7913079 | 63 | 75.3168064 |
| 76.4864025 | 63 | 75.262611  |
| 76.2641802 | 63 | 75.2086833 |
| 76.2641802 | 63 | 75.1673393 |
| 76.7086247 | 63 | 75.1336258 |
| 76.9308469 | 63 | 75.0902737 |
| 77.1530691 | 63 | 75.049599  |
| 77.2641802 | 63 | 75.0116017 |
| 76.8197358 | 63 | 74.9679819 |
| 77.1530691 | 63 | 74.9282443 |
| 77.1530691 | 63 | 74.8970744 |
| 76.8197358 | 63 | 74.8747397 |
| 75.9308469 | 63 | 74.8608388 |
| 75.5975136 | 63 | 74.8497491 |
| 75.3752914 | 63 | 74.8465577 |

|            |    |            |
|------------|----|------------|
| 75.3752914 | 63 | 74.8443034 |
| 75.1530691 | 63 | 74.8490102 |
| 75.1530691 | 63 | 74.8563944 |
| 74.8197358 | 63 | 74.8651174 |
| 75.041958  | 63 | 74.8766515 |
| 75.041958  | 63 | 74.8992968 |
| 75.1530691 | 63 | 74.9009246 |
| 75.041958  | 63 | 74.9124588 |
| 75.5975136 | 63 | 74.8988256 |
| 75.5975136 | 71 | 74.8706007 |
| 75.4864025 | 71 | 74.8324696 |
| 75.4864025 | 71 | 74.7935352 |
| 75.2641802 | 71 | 74.760491  |
| 75.041958  | 71 | 74.717653  |
| 74.9308469 | 71 | 74.674815  |
| 74.5975136 | 71 | 74.631977  |
| 74.041958  | 71 | 74.5851229 |
| 73.4864025 | 71 | 74.5463009 |
| 72.9308469 | 71 | 74.5141724 |
| 72.2641802 | 71 | 74.4793665 |
| 71.9308469 | 71 | 74.447238  |
| 71.9308469 | 71 | 74.4151095 |
| 72.5975136 | 71 | 74.3803036 |
| 71.4864025 | 71 | 74.3454977 |
| 71.5975136 | 71 | 74.3133692 |
| 71.5975136 | 71 | 74.2906115 |
| 71.4864025 | 71 | 74.2718699 |
| 71.7086247 | 71 | 74.2775671 |
| 71.3752914 | 71 | 74.2748898 |
| 71.7086247 | 71 | 74.2748898 |
| 71.4864025 | 71 | 74.2735511 |
| 70.8197358 | 71 | 74.2681963 |
| 70.9308469 | 71 | 74.2655189 |
| 70.9308469 | 71 | 74.2615029 |
| 70.7086247 | 71 | 74.2588255 |
| 71.041958  | 71 | 74.2641802 |
| 71.2641802 | 71 | 74.2708737 |
| 71.2641802 | 71 | 74.2842606 |
| 71.5975136 | 71 | 74.3016635 |
| 71.5975136 | 71 | 74.329776  |
| 72.4864025 | 71 | 74.3605658 |
| 72.9308469 | 71 | 74.3860009 |
| 73.2641802 | 71 | 74.4074199 |
| 73.7086247 | 71 | 74.4341936 |
| 73.8197358 | 71 | 74.4649835 |

|            |    |            |
|------------|----|------------|
| 73.9308469 | 71 | 74.501128  |
| 74.3752914 | 71 | 74.4964411 |
| 73.1530691 | 71 | 74.4902816 |
| 73.4864025 | 71 | 74.4813108 |
| 73.5975136 | 71 | 74.5013911 |
| 73.4864025 | 71 | 74.5161167 |
| 73.1530691 | 71 | 74.5141071 |
| 73.1530691 | 71 | 74.5341874 |
| 73.4864025 | 71 | 74.5364617 |
| 74.4864025 | 71 | 74.5632354 |
| 75.041958  | 71 | 74.5708644 |
| 75.1530691 | 71 | 74.5752805 |
| 75.2641802 | 71 | 74.5842482 |
| 75.9308469 | 71 | 74.5954916 |
| 76.5975136 | 71 | 74.6162397 |
| 76.4864025 | 71 | 74.6467603 |
| 76.7086247 | 71 | 74.6871871 |
| 76.5975136 | 71 | 74.7225269 |
| 76.7086247 | 71 | 74.7355557 |
| 76.4864025 | 71 | 74.7346622 |
| 76.3752914 | 71 | 74.7466201 |
| 76.3752914 | 71 | 74.75242   |
| 76.041958  | 71 | 74.7805309 |
| 76.2641802 | 71 | 74.8070354 |
| 76.2641802 | 71 | 74.8339415 |
| 76.2641802 | 71 | 74.8723603 |
| 76.1530691 | 71 | 74.9054243 |
| 76.2641802 | 71 | 74.9411658 |
| 76.7086247 | 71 | 74.9836006 |
| 76.8197358 | 71 | 75.0202791 |
| 77.041958  | 71 | 75.05254   |
| 77.2641802 | 71 | 75.0889507 |
| 77.7086247 | 71 | 75.1214793 |
| 78.2641802 | 71 | 75.1586933 |
| 78.2641802 | 71 | 75.1945686 |
| 78.2641802 | 71 | 75.2352631 |
| 78.1530691 | 71 | 75.27154   |
| 77.4864025 | 71 | 75.308754  |
| 77.1530691 | 71 | 75.347976  |
| 77.3752914 | 71 | 75.3818433 |
| 77.7086247 | 71 | 75.4118283 |
| 77.8197358 | 71 | 75.4407424 |
| 74.6529405 | 71 | 75.4566713 |
| 74.5307182 | 71 | 75.4537246 |
| 74.408496  | 71 | 75.464968  |

|            |    |            |
|------------|----|------------|
| 76.7086247 | 71 | 75.4707229 |
| 76.8197358 | 71 | 75.4707213 |
| 75.4307182 | 71 | 75.473531  |
| 77.1530691 | 71 | 75.4803568 |
| 75.6751627 | 71 | 75.4890567 |
| 77.4864025 | 63 | 75.5051209 |
| 75.6751627 | 63 | 75.4676377 |
| 75.2973849 | 63 | 75.4221223 |
| 75.3418294 | 63 | 75.3712521 |
| 74.9751627 | 63 | 75.3150272 |
| 75.208496  | 63 | 75.2547863 |
| 75.4640516 | 63 | 75.1851745 |
| 75.6196071 | 63 | 75.1195788 |
| 74.8640516 | 63 | 75.0553217 |
| 73.0122407 | 63 | 74.9910647 |
| 72.5233518 | 63 | 74.9281464 |
| 72.4789074 | 63 | 74.8679054 |
| 72.0789074 | 63 | 74.818374  |
| 73.9307182 | 63 | 74.7688425 |
| 73.6862738 | 63 | 74.7233271 |
| 73.9418294 | 63 | 74.6737956 |
| 74.5640516 | 63 | 74.6269416 |
| 74.4529405 | 63 | 74.5814262 |
| 74.4529405 | 63 | 74.5452816 |
| 74.3418294 | 63 | 74.5144918 |
| 73.9751627 | 63 | 74.466299  |
| 73.608496  | 63 | 74.4100741 |
| 73.7307182 | 63 | 74.341801  |
| 73.7418294 | 63 | 74.2735279 |
| 74.3529405 | 63 | 74.2012387 |
| 74.2418294 | 63 | 74.1155627 |
| 74.9751627 | 63 | 74.0312254 |
| 74.608496  | 63 | 73.9509041 |
| 75.5751627 | 63 | 73.861212  |
| 76.1862738 | 63 | 73.779552  |
| 76.0751627 | 63 | 73.6992307 |
| 76.1973849 | 63 | 73.6215868 |
| 76.2196071 | 63 | 73.5399268 |
| 75.2529405 | 63 | 73.4569282 |
| 74.1307182 | 63 | 73.414761  |
| 74.0862738 | 63 | 73.3727278 |
| 73.9640516 | 63 | 73.3335058 |
| 73.5973849 | 63 | 73.2625553 |
| 73.7196071 | 63 | 73.1889275 |
| 73.7196071 | 63 | 73.1306961 |

|            |    |            |
|------------|----|------------|
| 73.8751627 | 63 | 73.0490361 |
| 74.8197358 | 63 | 72.9865209 |
| 71.3752914 | 63 | 72.904861  |
| 71.2641802 | 63 | 72.8463618 |
| 70.9308469 | 63 | 72.7950916 |
| 70.5975136 | 63 | 72.747302  |
| 70.9308469 | 63 | 72.7039301 |
| 70.8197358 | 63 | 72.6590856 |
| 71.041958  | 63 | 72.607146  |
| 71.3752914 | 63 | 72.5560097 |
| 71.2641802 | 63 | 72.5166538 |
| 71.4864025 | 63 | 72.4996089 |
| 71.4864025 | 63 | 72.493809  |
| 72.2641802 | 63 | 72.4898832 |
| 72.2641802 | 63 | 72.489438  |
| 72.2641802 | 63 | 72.4653432 |
| 72.1530691 | 63 | 72.4401774 |
| 72.3752914 | 63 | 72.4159487 |
| 72.4864025 | 63 | 72.3895781 |
| 73.1530691 | 63 | 72.373917  |
| 73.7086247 | 63 | 72.3676267 |
| 72.7086247 | 63 | 72.3787394 |
| 72.1530691 | 63 | 72.381865  |
| 71.3752914 | 63 | 72.4111839 |
| 71.5975136 | 63 | 72.4248851 |
| 71.7086247 | 63 | 72.4388686 |
| 71.1530691 | 63 | 72.4766212 |
| 71.2641802 | 63 | 72.5050029 |
| 71.5975136 | 63 | 72.525888  |
| 70.7086247 | 63 | 72.545836  |
| 70.7086247 | 63 | 72.5501214 |
| 70.4864025 | 63 | 72.5416892 |
| 70.9308469 | 63 | 72.5279023 |
| 70.9308469 | 63 | 72.5153201 |
| 70.9308469 | 63 | 72.503809  |
| 71.1530691 | 63 | 72.5133152 |
| 71.041958  | 63 | 72.5256327 |
| 71.1530691 | 63 | 72.5237601 |
| 70.8197358 | 63 | 72.5139892 |
| 70.7086247 | 63 | 72.5019426 |
| 70.5975136 | 63 | 72.4736978 |
| 70.3752914 | 63 | 72.4427756 |
| 70.4864025 | 63 | 72.4086407 |
| 70.7086247 | 63 | 72.3617866 |
| 70.8197358 | 63 | 72.3537544 |



|            |    |            |
|------------|----|------------|
| 71.041958  | 63 | 72.3390289 |
| 71.3752914 | 63 | 72.3202872 |
| 71.3752914 | 63 | 72.3095777 |
| 71.4864025 | 63 | 72.2935135 |
| 71.1530691 | 63 | 72.2841427 |
| 71.3752914 | 63 | 72.2774492 |
| 71.5975136 | 63 | 72.2640623 |
| 71.5975136 | 63 | 72.2520141 |
| 72.041958  | 63 | 72.2346112 |
| 72.1530691 | 63 | 72.2212243 |
| 72.041958  | 63 | 72.1998053 |
| 71.9308469 | 63 | 72.179725  |
| 71.5975136 | 63 | 72.1609834 |
| 71.9308469 | 63 | 72.1462578 |
| 72.3752914 | 63 | 72.1328709 |
| 73.1530691 | 63 | 72.1422417 |
| 73.9308469 | 63 | 72.1395643 |
| 75.2641802 | 63 | 72.1315322 |
| 74.2345916 | 63 | 72.1355483 |
| 76.041958  | 63 | 72.1556286 |
| 74.8679249 | 63 | 72.1904345 |
| 74.9024598 | 63 | 72.2332725 |
| 77.4864025 | 63 | 72.2747718 |
| 76.5975136 | 63 | 72.325642  |
| 76.7086247 | 63 | 72.3738348 |
| 76.2641802 | 63 | 72.4220275 |
| 75.9308469 | 63 | 72.4795911 |
| 75.4864025 | 63 | 72.5344773 |
| 74.9308469 | 63 | 72.6027504 |
| 75.1530691 | 63 | 72.6723622 |
| 75.2641802 | 63 | 72.7406353 |
| 76.041958  | 63 | 72.7884716 |
| 75.1530691 | 63 | 72.8290789 |
| 73.9308469 | 63 | 72.8620558 |
| 73.1530691 | 63 | 72.8940332 |
| 72.5975136 | 63 | 72.9355326 |
| 71.3752914 | 63 | 72.9676611 |
| 71.1530691 | 63 | 72.9957735 |
| 71.041958  | 63 | 73.0225473 |
| 70.9308469 | 63 | 73.0479824 |
| 70.7086247 | 63 | 73.0720787 |
| 70.041958  | 63 | 73.0948364 |
| 69.3752914 | 63 | 73.1162554 |
| 69.7086247 | 63 | 73.1363358 |
| 69.5975136 | 63 | 73.1590935 |

|            |    |            |
|------------|----|------------|
| 70.041958  | 63 | 73.1640252 |
| 70.4864025 | 63 | 73.2015084 |
| 70.2641802 | 63 | 73.237653  |
| 70.2641802 | 63 | 73.2516878 |
| 70.041958  | 63 | 73.2643839 |
| 70.3752914 | 63 | 73.2789542 |
| 70.4864025 | 63 | 73.2983437 |
| 70.5975136 | 63 | 73.3236235 |
| 70.7086247 | 63 | 73.3489032 |
| 70.9308469 | 63 | 73.3796716 |
| 71.2641802 | 63 | 73.403345  |
| 73.2641802 | 63 | 73.4227345 |
| 72.9308469 | 63 | 73.454863  |
| 73.041958  | 63 | 73.4829755 |
| 73.041958  | 63 | 73.4896689 |
| 73.8197358 | 63 | 73.508767  |
| 74.2641802 | 63 | 73.4953801 |
| 75.1530691 | 63 | 73.5001543 |
| 75.1530691 | 63 | 73.4877573 |
| 75.3752914 | 63 | 73.4412834 |
| 75.2641802 | 63 | 73.4011013 |
| 75.5975136 | 63 | 73.3649568 |
| 75.4864025 | 63 | 73.3328283 |
| 75.2641802 | 63 | 73.2993611 |
| 76.1530691 | 63 | 73.2725873 |
| 76.7086247 | 63 | 73.252507  |
| 76.5975136 | 63 | 73.2324267 |
| 74.9012582 | 63 | 73.2163624 |
| 74.5234805 | 63 | 73.1976208 |
| 73.779036  | 63 | 73.1989594 |
| 73.8071967 | 63 | 73.2163624 |
| 74.2641802 | 63 | 73.2444748 |
| 73.3752914 | 63 | 73.2832968 |
| 72.9308469 | 63 | 73.3261348 |
| 72.5975136 | 63 | 73.3649568 |
| 72.5975136 | 63 | 73.4064561 |
| 72.7086247 | 63 | 73.4519715 |
| 72.7086247 | 63 | 73.501503  |
| 72.8197358 | 63 | 73.548357  |
| 73.041958  | 63 | 73.6045819 |
| 73.2641802 | 63 | 73.6675003 |
| 71.8957342 | 63 | 73.733096  |
| 74.2641802 | 63 | 73.797353  |
| 74.3752914 | 63 | 73.8562553 |
| 72.7624008 | 63 | 73.9164963 |

|            |    |            |
|------------|----|------------|
| 72.6512897 | 63 | 73.9713825 |
| 73.2512897 | 63 | 74.0235913 |
| 73.7624008 | 63 | 74.0704454 |
| 74.1401786 | 63 | 74.1239929 |
| 74.0290675 | 63 | 74.1775404 |
| 74.1512897 | 63 | 74.2284106 |
| 73.8957342 | 63 | 74.277942  |
| 73.984623  | 63 | 74.3288122 |
| 75.8197358 | 63 | 74.359602  |
| 76.2641802 | 63 | 74.3930692 |
| 75.8197358 | 63 | 74.4185043 |
| 75.8197358 | 63 | 74.4533102 |
| 74.9308469 | 63 | 74.4720518 |
| 75.2641802 | 63 | 74.4827613 |
| 73.8735119 | 63 | 74.4814226 |
| 73.6290675 | 63 | 74.4800839 |
| 73.2624008 | 63 | 74.4760679 |
| 73.7086247 | 63 | 74.4854387 |
| 73.5975136 | 63 | 74.505519  |
| 73.1530691 | 63 | 74.5309541 |
| 73.2641802 | 63 | 74.5644213 |
| 73.2641802 | 63 | 74.5738729 |
| 73.4864025 | 63 | 74.5795761 |
| 73.9308469 | 63 | 74.6344624 |
| 74.4864025 | 63 | 74.7097854 |
| 75.2641802 | 63 | 74.7883213 |
| 75.3752914 | 63 | 74.8798424 |
| 75.4864025 | 63 | 74.976379  |
| 75.8197358 | 63 | 75.0398074 |
| 74.9308469 | 63 | 75.1155518 |
| 74.3752914 | 63 | 75.2052439 |
| 74.4864025 | 63 | 75.2815491 |
| 74.7086247 | 63 | 75.3511609 |
| 74.8197358 | 63 | 75.4207726 |
| 73.9308469 | 63 | 75.4970779 |
| 74.041958  | 63 | 75.5666896 |
| 74.9308469 | 63 | 75.6363014 |
| 75.041958  | 63 | 75.693865  |
| 75.3752914 | 63 | 75.7665772 |
| 75.3752914 | 63 | 75.8067379 |
| 75.2641802 | 63 | 75.8455598 |
| 74.8197358 | 63 | 75.881111  |
| 74.3752914 | 63 | 75.907693  |
| 74.2641802 | 63 | 75.9255735 |
| 74.9308469 | 63 | 75.9343509 |

|            |    |            |
|------------|----|------------|
| 75.041958  | 63 | 75.9446009 |
| 74.9308469 | 63 | 75.9607411 |
| 75.041958  | 63 | 75.9783538 |
| 75.4864025 | 63 | 75.9961005 |
| 75.8197358 | 63 | 76.0161229 |
| 75.7086247 | 63 | 76.0153742 |
| 75.1530691 | 63 | 76.0106094 |
| 75.9308469 | 63 | 76.0107381 |
| 75.3752914 | 63 | 76.0169052 |
| 75.1530691 | 63 | 76.027937  |
| 75.041958  | 63 | 76.0380316 |
| 75.041958  | 63 | 76.0632749 |
| 75.041958  | 63 | 76.0913294 |
| 76.041958  | 63 | 76.1251403 |
| 77.2641802 | 63 | 76.153575  |
| 77.5975136 | 63 | 76.1774582 |
| 78.041958  | 63 | 76.203751  |
| 76.9375511 | 63 | 76.2291067 |
| 77.1819955 | 63 | 76.2529899 |
| 81.1530691 | 63 | 76.2758021 |
| 81.1530691 | 63 | 76.2852274 |
| 81.041958  | 63 | 76.2929124 |
| 81.3752914 | 63 | 76.3089767 |
| 81.8197358 | 63 | 76.3170088 |
| 79.5287378 | 63 | 76.3129927 |
| 79.6620711 | 63 | 76.2969285 |
| 80.3752914 | 63 | 76.286219  |
| 78.9308469 | 63 | 76.2795255 |
| 78.3752914 | 63 | 76.2728321 |
| 78.4864025 | 63 | 76.268816  |
| 79.041958  | 63 | 76.2648    |
| 78.5975136 | 63 | 76.2728321 |
| 78.8197358 | 63 | 76.2527518 |
| 78.041958  | 63 | 76.2152685 |
| 77.9308469 | 63 | 76.1657371 |
| 77.5975136 | 63 | 76.1095122 |
| 77.5975136 | 63 | 76.0519486 |
| 75.713149  | 63 | 75.9957237 |
| 74.8575934 | 63 | 75.951547  |
| 74.7353712 | 63 | 75.9140637 |
| 74.4909267 | 63 | 75.8886286 |
| 74.9909267 | 63 | 75.8578388 |
| 75.3687045 | 63 | 75.8297263 |
| 75.613149  | 63 | 75.8083073 |
| 75.3687045 | 63 | 75.7975978 |

|            |    |            |
|------------|----|------------|
| 75.6464823 | 63 | 75.7815336 |
| 75.7575934 | 63 | 75.766808  |
| 75.8687045 | 63 | 75.7587759 |
| 75.8304186 | 63 | 75.7587759 |
| 76.3316062 | 63 | 75.7560985 |
| 75.8464823 | 63 | 75.7601146 |
| 76.1020379 | 63 | 75.7708241 |
| 75.9687045 | 63 | 75.784211  |
| 75.9575934 | 63 | 75.7922431 |
| 76.0687045 | 63 | 75.7989365 |
| 76.0687045 | 63 | 75.7962591 |
| 75.5798156 | 63 | 75.7895657 |
| 75.3353712 | 63 | 75.788227  |
| 75.3687045 | 63 | 75.7815336 |
| 75.2464823 | 63 | 75.7921623 |
| 75.3798156 | 63 | 75.7998459 |
| 74.713149  | 63 | 75.7596853 |
| 75.1242601 | 63 | 75.7155086 |
| 76.5975136 | 63 | 75.6713319 |
| 76.041958  | 63 | 75.6218004 |
| 75.1530691 | 63 | 75.5628981 |
| 74.4864025 | 63 | 75.5315982 |
| 74.041958  | 63 | 75.5040467 |
| 73.8197358 | 63 | 75.4772729 |
| 73.9308469 | 63 | 75.4705795 |
| 74.3752914 | 63 | 75.4759342 |
| 74.4864025 | 63 | 75.481289  |
| 74.5975136 | 63 | 75.4595135 |
| 72.3752914 | 63 | 75.4505894 |
| 71.8197358 | 63 | 75.4372476 |
| 70.9308469 | 63 | 75.4533119 |
| 70.7086247 | 63 | 75.4720535 |
| 70.5975136 | 63 | 75.4934725 |
| 70.5975136 | 63 | 75.5175689 |
| 71.1530691 | 63 | 75.557675  |
| 71.2641802 | 63 | 75.6054117 |
| 72.1530691 | 63 | 75.6479275 |
| 72.3752914 | 63 | 75.6840175 |
| 72.7086247 | 63 | 75.7127448 |
| 73.1530691 | 63 | 75.7208563 |
| 74.1530691 | 63 | 75.7273614 |
| 74.1530691 | 63 | 75.7421663 |
| 74.5975136 | 63 | 75.7509471 |
| 75.041958  | 63 | 75.7503571 |
| 75.1530691 | 63 | 75.7457511 |

|            |    |            |
|------------|----|------------|
| 75.7086247 | 63 | 75.7349129 |
| 75.7086247 | 63 | 75.723391  |
| 76.041958  | 63 | 75.717714  |
| 76.1530691 | 63 | 75.6927068 |
| 75.7086247 | 63 | 75.6634158 |
| 75.5975136 | 63 | 75.6369361 |
| 75.8197358 | 63 | 75.58261   |
| 76.7086247 | 63 | 75.551498  |
| 77.4864025 | 63 | 75.5155666 |
| 77.4864025 | 63 | 75.4785643 |
| 77.8197358 | 63 | 75.438483  |
| 77.8197358 | 63 | 75.3971969 |
| 77.8197358 | 63 | 75.3462723 |
| 77.4864025 | 63 | 75.302041  |
| 77.3752914 | 63 | 75.251518  |
| 77.2641802 | 63 | 75.1859223 |
| 76.9308469 | 63 | 75.1256813 |
| 76.9308469 | 63 | 75.0774885 |
| 77.3752914 | 63 | 75.0306345 |
| 78.1530691 | 63 | 74.9710613 |
| 78.3752914 | 63 | 74.9389328 |
| 78.8197358 | 63 | 74.908143  |
| 78.9308469 | 63 | 74.8733371 |
| 77.2345916 | 63 | 74.8425472 |
| 77.8568138 | 63 | 74.8117574 |
| 77.7123694 | 63 | 74.8077413 |
| 79.3752914 | 63 | 74.8023866 |
| 79.4864025 | 63 | 74.7831079 |
| 79.3752914 | 71 | 74.762089  |
| 79.5975136 | 71 | 74.7567342 |
| 79.041958  | 71 | 74.7527182 |
| 78.8197358 | 71 | 74.744686  |
| 78.2641802 | 71 | 74.7200526 |
| 77.4864025 | 71 | 74.6847097 |
| 77.3752914 | 71 | 74.6511071 |
| 76.041958  | 71 | 74.6179061 |
| 76.1530691 | 71 | 74.583768  |
| 76.5975136 | 71 | 74.5402591 |
| 76.3752914 | 71 | 74.5011678 |
| 75.7086247 | 71 | 74.4611395 |
| 75.4864025 | 71 | 74.4370431 |
| 74.9308469 | 71 | 74.411608  |
| 75.3752914 | 71 | 74.386173  |
| 75.3752914 | 71 | 74.3620766 |
| 74.0264399 | 71 | 74.3217027 |

|            |    |            |
|------------|----|------------|
| 73.5375511 | 71 | 74.2858804 |
| 73.7597733 | 71 | 74.2538064 |
| 71.5596446 | 71 | 74.22615   |
| 73.4864025 | 71 | 74.1928712 |
| 72.5975136 | 71 | 74.1488829 |
| 72.2641802 | 71 | 74.1030204 |
| 72.041958  | 71 | 74.0615756 |
| 71.8197358 | 71 | 74.0121764 |
| 71.1530691 | 71 | 73.9730852 |
| 71.041958  | 71 | 73.9409551 |
| 70.9308469 | 71 | 73.9084235 |
| 71.1530691 | 71 | 73.8788369 |
| 71.041958  | 71 | 73.8477778 |
| 71.1530691 | 71 | 73.8179235 |
| 70.5975136 | 71 | 73.7836515 |
| 69.0973849 | 71 | 73.7440248 |
| 71.1530691 | 71 | 73.6910112 |
| 71.3752914 | 71 | 73.6354541 |
| 71.4864025 | 71 | 73.5782906 |
| 71.9308469 | 71 | 73.5167094 |
| 72.041958  | 71 | 73.4758327 |
| 72.041958  | 71 | 73.425853  |
| 71.3752914 | 71 | 73.3746684 |
| 69.3307182 | 71 | 73.3018422 |
| 68.9640516 | 71 | 73.221921  |
| 70.1530691 | 71 | 73.1509706 |
| 70.2641802 | 71 | 73.0652945 |
| 70.4864025 | 71 | 72.9782798 |
| 69.2196071 | 71 | 72.8845716 |
| 69.2196071 | 71 | 72.7975569 |
| 69.5862738 | 71 | 72.7225904 |
| 69.9529405 | 71 | 72.6569946 |
| 70.3196071 | 71 | 72.6034471 |
| 70.5418294 | 71 | 72.5485609 |
| 70.908496  | 71 | 72.4883199 |
| 71.2751627 | 71 | 72.4320951 |
| 73.041958  | 71 | 72.3946118 |
| 73.041958  | 71 | 72.3448671 |
| 73.5975136 | 71 | 72.3032884 |
| 73.7086247 | 71 | 72.2724986 |
| 72.6909267 | 71 | 72.2524183 |
| 73.1798156 | 71 | 72.2552826 |
| 73.0464823 | 71 | 72.2667145 |
| 73.3020379 | 71 | 72.2768078 |
| 73.0575934 | 71 | 72.3147473 |

|            |    |            |
|------------|----|------------|
| 73.0575934 | 71 | 72.3214408 |
| 73.6798156 | 71 | 72.3281342 |
| 74.0464823 | 71 | 72.3254568 |
| 73.7196071 | 71 | 72.3214408 |
| 74.5751627 | 71 | 72.3201021 |
| 75.1529405 | 71 | 72.3227794 |
| 74.7862738 | 71 | 72.337505  |
| 74.9196071 | 71 | 72.3535693 |
| 74.6862738 | 71 | 72.3642788 |
| 74.4529405 | 71 | 72.3790043 |
| 74.0862738 | 71 | 72.3910525 |
| 74.0862738 | 71 | 72.4044394 |
| 73.7529405 | 71 | 72.4332228 |
| 73.7640516 | 71 | 72.4332228 |
| 74.0751627 | 71 | 72.4081005 |
| 73.8196071 | 71 | 72.3960524 |
| 73.8418294 | 63 | 72.3706173 |
| 73.708496  | 63 | 72.3425048 |
| 73.4640516 | 63 | 72.3251019 |
| 73.3307182 | 63 | 72.3197471 |
| 72.8529405 | 63 | 72.3309937 |
| 73.4864025 | 63 | 72.3466579 |
| 72.4864025 | 63 | 72.3520126 |
| 71.8197358 | 63 | 72.3613834 |
| 71.041958  | 63 | 72.3667382 |
| 71.041958  | 63 | 72.376646  |
| 71.2641802 | 63 | 72.3878926 |
| 71.9308469 | 63 | 72.3907054 |
| 71.5975136 | 63 | 72.3877618 |
| 71.5975136 | 63 | 72.3897714 |
| 71.5975136 | 63 | 72.3877649 |
| 71.7086247 | 63 | 72.380002  |
| 72.5975136 | 63 | 72.3691602 |
| 71.3575934 | 63 | 72.3383704 |
| 71.4798156 | 63 | 72.2982098 |
| 72.8197358 | 63 | 72.2486783 |
| 73.7086247 | 63 | 72.1964695 |
| 74.2641802 | 63 | 72.1632155 |
| 74.4864025 | 63 | 72.1227326 |
| 74.5975136 | 63 | 72.0811788 |
| 74.7086247 | 63 | 72.0419007 |
| 74.041958  | 63 | 72.0028904 |
| 73.1530691 | 63 | 71.9612026 |
| 72.041958  | 63 | 71.9120183 |
| 71.7086247 | 63 | 71.8597549 |



|            |    |            |
|------------|----|------------|
| 71.7086247 | 63 | 71.8154459 |
| 71.3752914 | 63 | 71.7621677 |
| 72.2641802 | 63 | 71.7153151 |
| 72.2641802 | 63 | 71.6768963 |
| 72.041958  | 63 | 71.6408872 |
| 72.2641802 | 63 | 71.6036732 |
| 72.1530691 | 63 | 71.5719479 |
| 71.7086247 | 63 | 71.5433015 |
| 71.4864025 | 63 | 71.5159938 |
| 71.1530691 | 63 | 71.4993956 |
| 69.2901471 | 63 | 71.4853409 |
| 70.4864025 | 63 | 71.4755701 |
| 69.8197358 | 63 | 71.460846  |
| 69.7086247 | 63 | 71.4458543 |
| 70.5975136 | 63 | 71.4271142 |
| 70.9308469 | 63 | 71.4073032 |
| 70.2641802 | 63 | 71.3904373 |
| 70.2641802 | 63 | 71.3806664 |
| 70.5975136 | 63 | 71.3672795 |
| 71.041958  | 63 | 71.3699569 |
| 70.9308469 | 63 | 71.3739729 |
| 70.041958  | 63 | 71.3820051 |
| 70.1530691 | 63 | 71.3967306 |
| 69.8197358 | 63 | 71.4114562 |
| 69.7086247 | 63 | 71.416811  |
| 70.4864025 | 63 | 71.4288592 |
| 70.3752914 | 63 | 71.4409073 |
| 70.2641802 | 63 | 71.4462621 |
| 70.3752914 | 63 | 71.4449234 |
| 70.4864025 | 63 | 71.4342139 |
| 69.7086247 | 63 | 71.4371045 |
| 69.4864025 | 63 | 71.4425386 |
| 69.3752914 | 63 | 71.4411999 |
| 69.9308469 | 63 | 71.4398612 |
| 69.8197358 | 63 | 71.4385226 |
| 69.5975136 | 63 | 71.4465547 |
| 70.041958  | 63 | 71.4586029 |
| 69.8197358 | 63 | 71.4586029 |
| 69.5975136 | 63 | 71.4639576 |
| 69.5975136 | 63 | 71.4800219 |
| 69.7086247 | 63 | 71.5121504 |
| 70.041958  | 63 | 71.5536497 |
| 70.1530691 | 63 | 71.5924717 |
| 71.2641802 | 63 | 71.6353097 |
| 71.5975136 | 63 | 71.6674382 |

|            |    |            |
|------------|----|------------|
| 71.9308469 | 63 | 71.698228  |
| 71.5975136 | 63 | 71.7236631 |
| 71.8197358 | 63 | 71.7397274 |
| 71.7086247 | 63 | 71.7611464 |
| 71.8197358 | 63 | 71.7839041 |
| 72.3752914 | 63 | 71.8039844 |
| 72.5975136 | 63 | 71.8254034 |
| 73.2641802 | 63 | 71.8692673 |
| 72.5975136 | 63 | 71.9027345 |
| 72.5975136 | 63 | 71.9375404 |
| 72.1530691 | 63 | 71.9750236 |
| 71.8197358 | 63 | 72.0004587 |
| 71.9308469 | 63 | 72.0285711 |
| 72.041958  | 63 | 72.0526675 |
| 72.3752914 | 63 | 72.0754252 |
| 72.7086247 | 63 | 72.084796  |
| 72.1530691 | 63 | 72.0928282 |
| 71.7086247 | 63 | 72.0968442 |
| 72.2641802 | 63 | 72.1129085 |
| 72.4864025 | 63 | 72.1262954 |
| 72.3752914 | 63 | 72.145037  |
| 72.5975136 | 63 | 72.1637786 |
| 72.5975136 | 63 | 72.1731495 |
| 72.041958  | 63 | 72.1851977 |
| 71.5975136 | 63 | 72.1945685 |
| 71.7086247 | 63 | 72.209294  |
| 71.5975136 | 63 | 72.226697  |
| 71.9308469 | 63 | 72.2507934 |
| 72.7086247 | 63 | 72.2815832 |
| 73.5975136 | 63 | 72.3137117 |
| 74.1530691 | 63 | 72.3404855 |
| 75.1530691 | 63 | 72.372614  |
| 75.5975136 | 63 | 72.4087586 |
| 74.7086247 | 63 | 72.4382097 |
| 74.4864025 | 63 | 72.4703382 |
| 74.4864025 | 63 | 72.5024667 |
| 74.7086247 | 63 | 72.5345952 |
| 75.1530691 | 63 | 72.5667238 |
| 74.9308469 | 63 | 72.5975136 |
| 74.9308469 | 63 | 72.6269647 |
| 74.9308469 | 63 | 72.6376742 |
| 74.8197358 | 63 | 72.6443677 |
| 74.1530691 | 63 | 72.647045  |
| 73.5975136 | 63 | 72.6550772 |
| 73.9308469 | 63 | 72.6617706 |

|            |    |            |
|------------|----|------------|
| 73.5975136 | 63 | 72.6778349 |
| 73.1530691 | 63 | 72.6979152 |
| 72.9308469 | 63 | 72.7126408 |
| 72.9308469 | 63 | 72.7300437 |
| 73.2641802 | 63 | 72.7447693 |
| 72.7086247 | 63 | 72.7742204 |
| 72.8197358 | 63 | 72.7909525 |
| 72.7086247 | 63 | 72.8229456 |
| 73.2641802 | 63 | 72.8751544 |
| 72.2641802 | 63 | 72.9246859 |
| 72.1530691 | 63 | 72.9635078 |
| 71.3752914 | 63 | 72.9996524 |
| 71.7086247 | 63 | 73.0317809 |
| 71.2641802 | 63 | 73.0706029 |
| 71.3752914 | 63 | 73.1121022 |
| 71.2641802 | 63 | 73.1375373 |
| 71.3752914 | 63 | 73.160295  |
| 71.2641802 | 63 | 73.1776979 |
| 71.2641802 | 63 | 73.1884074 |
| 71.3752914 | 63 | 73.1977782 |
| 71.041958  | 63 | 73.2111651 |
| 71.5975136 | 63 | 73.2218746 |
| 71.9308469 | 63 | 73.2258907 |
| 71.7086247 | 63 | 73.228568  |
| 72.041958  | 63 | 73.224552  |
| 72.041958  | 63 | 73.1991169 |
| 72.1530691 | 63 | 73.1536015 |
| 72.4864025 | 63 | 73.1013927 |
| 72.5975136 | 63 | 73.0424904 |
| 72.4864025 | 63 | 72.9876042 |
| 72.4864025 | 63 | 72.9501209 |
| 72.2641802 | 63 | 72.9179924 |
| 72.2641802 | 63 | 72.8791705 |
| 72.3752914 | 63 | 72.8443646 |
| 72.5975136 | 63 | 72.8108974 |
| 72.5975136 | 63 | 72.7787688 |
| 72.1530691 | 63 | 72.7493177 |
| 72.1530691 | 63 | 72.7252213 |
| 72.1530691 | 63 | 72.7091571 |
| 72.2641802 | 63 | 72.705141  |
| 72.3752914 | 63 | 72.7131731 |
| 73.041958  | 63 | 72.7212053 |
| 73.4864025 | 63 | 72.7332535 |
| 73.5975136 | 63 | 72.7560112 |
| 74.041958  | 63 | 72.786801  |

|            |    |            |
|------------|----|------------|
| 74.4864025 | 63 | 72.8149134 |
| 75.041958  | 63 | 72.8416872 |
| 73.9862738 | 63 | 72.8671223 |
| 74.808496  | 63 | 72.8925573 |
| 76.1530691 | 63 | 72.9078168 |
| 76.041958  | 63 | 72.9365971 |
| 75.2641802 | 63 | 72.9834496 |
| 75.3752914 | 63 | 73.0383343 |
| 75.3752914 | 63 | 73.107409  |
| 75.3752914 | 63 | 73.1688533 |
| 75.1530691 | 63 | 73.2327071 |
| 74.3752914 | 63 | 73.2926788 |
| 74.3752914 | 63 | 73.3526505 |
| 73.8197358 | 63 | 73.3953531 |
| 73.4864025 | 63 | 73.4408669 |
| 73.3752914 | 63 | 73.4760729 |
| 73.1530691 | 63 | 73.5128852 |
| 72.4864025 | 63 | 73.5582652 |
| 72.041958  | 63 | 73.5956131 |
| 71.8197358 | 63 | 73.6213143 |
| 71.5975136 | 63 | 73.6484881 |
| 70.5975136 | 63 | 73.6616057 |
| 69.8197358 | 63 | 73.6883795 |
| 69.8197358 | 63 | 73.6950729 |
| 70.2641802 | 63 | 73.6937343 |
| 71.041958  | 63 | 73.6910569 |
| 71.5975136 | 63 | 73.7017664 |
| 71.8197358 | 63 | 73.7057824 |
| 71.2641802 | 63 | 73.6977503 |
| 71.8197358 | 63 | 73.6749926 |
| 72.3752914 | 63 | 73.6428641 |
| 72.2641802 | 63 | 73.6107356 |
| 72.4864025 | 63 | 73.5799458 |
| 72.9308469 | 63 | 73.5652202 |
| 73.4864025 | 63 | 73.5518333 |
| 73.8197358 | 63 | 73.5384464 |
| 74.2641802 | 63 | 73.51435   |
| 74.5975136 | 63 | 73.4835602 |
| 74.5975136 | 63 | 73.446077  |
| 75.041958  | 63 | 73.4032389 |
| 75.4864025 | 63 | 73.3577235 |
| 75.2641802 | 63 | 73.3122081 |
| 75.4864025 | 63 | 73.2774023 |
| 74.8197358 | 63 | 73.2466124 |
| 74.9308469 | 63 | 73.2405899 |

|            |    |            |
|------------|----|------------|
| 73.9751627 | 63 | 73.2367092 |
| 75.6529405 | 63 | 73.2259997 |
| 76.1529405 | 63 | 73.2179676 |
| 76.708496  | 63 | 73.2126129 |
| 77.108496  | 63 | 73.1885165 |
| 76.808496  | 63 | 73.1630814 |
| 76.5640516 | 63 | 73.1349689 |
| 76.3529405 | 63 | 73.1108726 |
| 76.2418294 | 63 | 73.0974857 |
| 74.9196071 | 63 | 73.0934696 |
| 75.0418294 | 63 | 73.0988244 |
| 74.1862738 | 63 | 73.1041791 |
| 74.4307182 | 63 | 73.117566  |
| 74.808496  | 63 | 73.1349689 |
| 74.6973849 | 63 | 73.1397668 |
| 74.0640516 | 63 | 73.144163  |
| 73.9640516 | 63 | 73.1453464 |
| 73.1307182 | 63 | 73.1506797 |
| 74.2641802 | 63 | 73.1680612 |
| 72.7086247 | 63 | 73.1960184 |
| 72.3752914 | 63 | 73.2230384 |
| 72.3752914 | 63 | 73.2645377 |
| 73.3752914 | 63 | 73.2913115 |
| 72.8197358 | 63 | 73.302021  |
| 71.5975136 | 63 | 73.3046984 |
| 70.3752914 | 63 | 73.3113918 |
| 69.7086247 | 63 | 73.3100531 |
| 69.9308469 | 63 | 73.2939889 |
| 70.041958  | 63 | 73.2752473 |
| 70.9308469 | 63 | 73.2498122 |
| 71.041958  | 63 | 73.2257158 |
| 71.041958  | 63 | 73.2002807 |
| 70.2641802 | 63 | 73.173507  |
| 69.8197358 | 63 | 73.1440558 |
| 69.9308469 | 63 | 73.1105886 |
| 69.9308469 | 63 | 73.1012178 |
| 69.8197358 | 63 | 73.0905083 |
| 70.2641802 | 63 | 73.0797988 |
| 71.5975136 | 63 | 73.0784601 |
| 72.4864025 | 63 | 73.0757827 |
| 73.4864025 | 63 | 73.0757827 |
| 74.4864025 | 63 | 73.0731054 |
| 75.2641802 | 63 | 73.087297  |
| 75.3752914 | 63 | 73.0893066 |
| 74.8197358 | 63 | 73.0893081 |

|            |    |            |
|------------|----|------------|
| 73.3752914 | 63 | 73.0799389 |
| 73.2641802 | 63 | 73.0590569 |
| 73.041958  | 63 | 73.0364346 |
| 73.1530691 | 63 | 73.0114027 |
| 73.2641802 | 63 | 72.9929303 |
| 74.041958  | 63 | 72.9771354 |
| 74.2641802 | 63 | 72.9772708 |
| 73.9308469 | 63 | 72.9866432 |
| 74.4864025 | 63 | 72.9838786 |
| 74.5975136 | 63 | 72.9769641 |
| 72.884623  | 63 | 72.9728608 |
| 72.4068453 | 63 | 72.9759864 |
| 71.9179564 | 63 | 72.9882152 |
| 72.0401786 | 63 | 73.0078067 |
| 72.0401786 | 63 | 73.0374384 |
| 72.1401786 | 63 | 73.0401609 |
| 72.0624008 | 63 | 73.0570734 |
| 73.7086247 | 63 | 73.075057  |
| 73.2641802 | 63 | 73.088489  |
| 72.4864025 | 63 | 73.0847858 |
| 72.041958  | 63 | 73.0892486 |
| 71.8197358 | 63 | 73.1116498 |
| 71.7086247 | 63 | 73.1515878 |
| 71.041958  | 63 | 73.1966128 |
| 70.7086247 | 63 | 73.2492684 |
| 70.3752914 | 63 | 73.2989788 |
| 70.9308469 | 63 | 73.3365072 |
| 71.3752914 | 63 | 73.3714921 |
| 71.5975136 | 63 | 73.4060753 |
| 71.8197358 | 63 | 73.4500294 |
| 71.8197358 | 63 | 73.5018818 |
| 73.8197358 | 63 | 73.5607841 |
| 74.1530691 | 63 | 73.6263798 |
| 74.5975136 | 63 | 73.6879594 |
| 75.1530691 | 63 | 73.7388296 |
| 75.2641802 | 63 | 73.7763128 |
| 74.8197358 | 63 | 73.7950545 |
| 74.7086247 | 63 | 73.8017479 |
| 75.1530691 | 63 | 73.7977318 |
| 75.8197358 | 63 | 73.7816676 |
| 76.1530691 | 63 | 73.7696194 |
| 75.9308469 | 63 | 73.7562325 |
| 75.3752914 | 63 | 73.7656033 |
| 74.9308469 | 63 | 73.7763128 |
| 74.4864025 | 63 | 73.7910384 |

|            |    |            |
|------------|----|------------|
| 74.8197358 | 63 | 73.8017479 |
| 74.9308469 | 63 | 73.8084413 |
| 74.9308469 | 63 | 73.805764  |
| 75.8197358 | 63 | 73.8004092 |
| 73.9568138 | 63 | 73.7963932 |
| 73.8568138 | 63 | 73.7870223 |
| 74.4679249 | 63 | 73.7749741 |
| 74.9568138 | 63 | 73.7889179 |
| 75.079036  | 63 | 73.8086181 |
| 75.5901471 | 63 | 73.8355472 |
| 75.5901471 | 63 | 73.8623424 |
| 74.4901471 | 63 | 73.8811054 |
| 74.1123694 | 63 | 73.8986637 |
| 73.8679249 | 63 | 73.9144816 |
| 73.4901471 | 63 | 73.9077882 |
| 73.0679249 | 63 | 73.9051108 |
| 73.1901471 | 63 | 73.9077882 |
| 73.4568138 | 63 | 73.9211751 |
| 73.6901471 | 63 | 73.9292072 |
| 73.4457027 | 63 | 73.9372393 |
| 74.3012582 | 63 | 73.9332233 |
| 74.1679249 | 63 | 73.9265298 |
| 74.0457027 | 63 | 73.9184977 |
| 73.9457027 | 63 | 73.8944013 |
| 73.9123694 | 63 | 73.8569181 |
| 73.9123694 | 63 | 73.8154187 |
| 74.1234805 | 63 | 73.771242  |
| 74.8197358 | 63 | 73.7297427 |
| 75.3752914 | 63 | 73.6695017 |
| 74.9308469 | 63 | 73.6105995 |
| 74.4864025 | 63 | 73.5490198 |
| 74.7086247 | 63 | 73.4847628 |
| 74.041958  | 63 | 73.4218444 |
| 74.041958  | 63 | 73.3629422 |
| 74.1530691 | 63 | 73.3040399 |
| 73.9308469 | 63 | 73.2290733 |
| 74.3752914 | 63 | 73.1460747 |
| 73.7086247 | 63 | 73.0670921 |
| 74.1530691 | 69 | 73.0001577 |
| 74.1530691 | 69 | 72.9399167 |
| 74.2641802 | 69 | 72.874321  |
| 74.041958  | 69 | 72.8247895 |
| 73.8197358 | 69 | 72.7725807 |
| 73.8197358 | 69 | 72.7190332 |
| 73.8197358 | 69 | 72.6561148 |

|            |    |            |
|------------|----|------------|
| 73.5975136 | 69 | 72.5771323 |
| 73.7086247 | 69 | 72.5139011 |
| 73.5975136 | 69 | 72.4625842 |
| 74.041958  | 69 | 72.4079206 |
| 74.041958  | 69 | 72.3473668 |
| 74.1530691 | 69 | 72.2813243 |
| 74.2641802 | 69 | 72.2091239 |
| 73.5975136 | 69 | 72.1369235 |
| 73.5975136 | 69 | 72.0726214 |
| 73.3752914 | 69 | 72.0088547 |
| 73.1530691 | 69 | 71.9520492 |
| 73.041958  | 69 | 71.901134  |
| 72.7086247 | 69 | 71.8593218 |
| 73.1530691 | 69 | 71.8173757 |
| 72.4864025 | 69 | 71.7762329 |
| 72.3752914 | 69 | 71.7296014 |
| 70.7086247 | 69 | 71.6792216 |
| 70.1530691 | 69 | 71.6185339 |
| 69.7086247 | 69 | 71.5648074 |
| 68.9308469 | 69 | 71.5112148 |
| 68.2641802 | 69 | 71.4615044 |
| 68.1530691 | 69 | 71.4148729 |
| 68.1530691 | 69 | 71.3722575 |
| 68.3752914 | 69 | 71.3270986 |
| 68.8197358 | 69 | 71.2789058 |
| 69.2641802 | 69 | 71.230713  |
| 69.4864025 | 69 | 71.187875  |
| 69.8197358 | 69 | 71.1517305 |
| 70.041958  | 69 | 71.1209406 |
| 69.9308469 | 69 | 71.0968442 |
| 69.8197358 | 69 | 71.0754252 |
| 68.9308469 | 69 | 71.0540062 |
| 68.9308469 | 69 | 71.037942  |
| 69.5975136 | 69 | 71.016523  |
| 70.3752914 | 69 | 71.0125069 |
| 70.3752914 | 69 | 71.0125069 |
| 69.4864025 | 69 | 71.0151843 |
| 70.3752914 | 69 | 71.0245551 |
| 70.4864025 | 69 | 71.0392807 |
| 70.4864025 | 69 | 71.0553449 |
| 69.7086247 | 69 | 71.0687318 |
| 69.2641802 | 69 | 71.0767639 |
| 68.7086247 | 69 | 71.0794413 |
| 69.5975136 | 69 | 71.0740865 |
| 69.9308469 | 69 | 71.0647157 |



|            |    |            |
|------------|----|------------|
| 69.9308469 | 69 | 71.0459741 |
| 69.5975136 | 69 | 71.0312485 |
| 69.5975136 | 69 | 71.0125069 |
| 69.5975136 | 69 | 70.9910879 |
| 69.1530691 | 69 | 70.9803784 |
| 68.8197358 | 69 | 70.9803784 |
| 69.1530691 | 69 | 70.9843944 |
| 69.2641802 | 69 | 70.9910879 |
| 69.5975136 | 69 | 70.9937653 |
| 69.7086247 | 69 | 70.9937653 |
| 70.041958  | 69 | 70.977701  |
| 69.8197358 | 69 | 70.9723462 |
| 69.2641802 | 69 | 70.9750236 |
| 69.2641802 | 69 | 70.99912   |
| 69.7086247 | 69 | 71.0272325 |
| 69.5975136 | 69 | 71.0606997 |
| 69.8197358 | 69 | 71.1035377 |
| 70.041958  | 69 | 71.1584239 |
| 70.3752914 | 69 | 71.2213422 |
| 70.3752914 | 69 | 71.2896153 |
| 70.8197358 | 69 | 71.355211  |
| 71.3752914 | 69 | 71.4114359 |
| 71.3752914 | 69 | 71.45829   |
| 71.4864025 | 69 | 71.4917572 |
| 72.1530691 | 69 | 71.5131762 |
| 72.041958  | 69 | 71.5252244 |
| 72.2641802 | 69 | 71.5412887 |
| 72.3752914 | 69 | 71.5586916 |
| 72.5975136 | 69 | 71.5881428 |
| 72.5975136 | 69 | 71.6135778 |
| 73.3752914 | 69 | 71.6283034 |
| 74.1530691 | 69 | 71.6376742 |
| 74.3752914 | 69 | 71.6537385 |
| 75.041958  | 69 | 71.6791736 |
| 75.2641802 | 69 | 71.685867  |
| 75.1530691 | 69 | 71.6898831 |
| 74.9308469 | 69 | 71.6898831 |
| 74.4864025 | 69 | 71.6965765 |
| 73.8197358 | 69 | 71.7153181 |
| 73.2641802 | 69 | 71.746108  |
| 72.8197358 | 69 | 71.7728817 |
| 72.4864025 | 69 | 71.8009942 |
| 72.8197358 | 69 | 71.8087371 |
| 72.5975136 | 69 | 71.8160785 |
| 72.4864025 | 69 | 71.8207424 |

|            |    |            |
|------------|----|------------|
| 72.7086247 | 69 | 71.8448388 |
| 73.5975136 | 63 | 71.8702739 |
| 73.7086247 | 63 | 71.8916929 |
| 73.7086247 | 63 | 71.9131119 |
| 73.2641802 | 63 | 71.938547  |
| 72.7086247 | 63 | 71.9639821 |
| 71.8197358 | 63 | 71.9961106 |
| 72.041958  | 63 | 72.0269004 |
| 72.5975136 | 63 | 72.063045  |
| 72.7086247 | 63 | 72.1125764 |
| 72.4864025 | 63 | 72.1554145 |
| 72.4864025 | 63 | 72.1888817 |
| 72.4864025 | 63 | 72.2116394 |
| 72.8197358 | 63 | 72.2343971 |
| 73.3752914 | 63 | 72.2651869 |
| 73.8197358 | 63 | 72.3040088 |
| 73.8197358 | 63 | 72.3455082 |
| 73.4864025 | 63 | 72.3749593 |
| 73.1530691 | 63 | 72.3937009 |
| 72.2641802 | 63 | 72.4070878 |
| 71.5975136 | 63 | 72.419136  |
| 71.041958  | 63 | 72.419136  |
| 71.2641802 | 63 | 72.4204747 |
| 71.2641802 | 63 | 72.4204747 |
| 71.3752914 | 63 | 72.4204747 |
| 71.041958  | 63 | 72.4177973 |
| 70.8197358 | 63 | 72.419136  |
| 71.1530691 | 63 | 72.4057491 |
| 71.7086247 | 63 | 72.3789754 |
| 71.5975136 | 63 | 72.3468469 |
| 70.9308469 | 63 | 72.3066862 |
| 70.8197358 | 63 | 72.2678643 |
| 70.4864025 | 63 | 72.2317197 |
| 70.2641802 | 63 | 72.2049459 |
| 70.8197358 | 63 | 72.1821882 |
| 71.2641802 | 63 | 72.1728174 |
| 71.8197358 | 63 | 72.1428759 |
| 72.2641802 | 63 | 72.1156118 |
| 70.5735119 | 63 | 72.0923637 |
| 70.2068453 | 63 | 72.0713914 |
| 69.984623  | 63 | 72.0442612 |
| 71.5975136 | 63 | 72.0228873 |
| 71.2641802 | 63 | 72.0003086 |
| 70.5975136 | 63 | 71.9742493 |
| 70.9308469 | 63 | 71.94819   |

|            |    |            |
|------------|----|------------|
| 71.3752914 | 63 | 71.9292257 |
| 71.7086247 | 63 | 71.9111986 |
| 72.3752914 | 63 | 71.9029438 |
| 72.5975136 | 63 | 71.9142339 |
| 72.8197358 | 63 | 71.934761  |
| 73.3752914 | 63 | 71.960375  |
| 72.8197358 | 63 | 71.9889342 |
| 72.4864025 | 63 | 72.0247223 |
| 71.4864025 | 63 | 72.0650619 |
| 71.7086247 | 63 | 72.1054015 |
| 72.5975136 | 63 | 72.1429299 |
| 73.5975136 | 63 | 72.1722923 |
| 73.8197358 | 63 | 72.1811728 |
| 73.2641802 | 63 | 72.1856355 |
| 72.9308469 | 63 | 72.2177641 |
| 72.4864025 | 63 | 72.2672955 |
| 72.4864025 | 63 | 72.3261978 |
| 72.1530691 | 63 | 72.3751407 |
| 72.1530691 | 63 | 72.4248868 |
| 72.2641802 | 63 | 72.4615137 |
| 72.3752914 | 71 | 72.5016744 |
| 72.3752914 | 71 | 72.5338029 |
| 72.7086247 | 71 | 72.563254  |
| 72.2641802 | 71 | 72.5993986 |
| 71.9308469 | 71 | 72.6328658 |
| 71.7086247 | 71 | 72.6743651 |
| 71.7086247 | 71 | 72.7185418 |
| 72.041958  | 71 | 72.7613799 |
| 72.1530691 | 71 | 72.8042179 |
| 72.7086247 | 71 | 72.8417012 |
| 72.5975136 | 63 | 72.8751684 |
| 73.041958  | 63 | 72.897926  |
| 70.779036  | 63 | 72.915329  |
| 70.5568138 | 63 | 72.9313933 |
| 70.5568138 | 63 | 72.9421028 |
| 71.079036  | 63 | 72.9731818 |
| 70.3457027 | 63 | 73.0100171 |
| 70.7123694 | 63 | 73.0495299 |
| 70.8345916 | 63 | 73.0629167 |
| 71.4345916 | 63 | 73.0736262 |
| 71.5457027 | 63 | 73.0963839 |
| 72.1345916 | 63 | 73.1137869 |
| 71.7679249 | 63 | 73.1137869 |
| 72.0234805 | 63 | 73.1097708 |
| 72.7568138 | 63 | 73.0923679 |

|            |    |            |
|------------|----|------------|
| 73.7457027 | 63 | 73.078981  |
| 74.7234805 | 63 | 73.0562233 |
| 75.079036  | 63 | 73.0294495 |
| 75.4568138 | 63 | 73.0160627 |
| 75.8345916 | 63 | 73.0120466 |
| 75.8345916 | 63 | 73.0240948 |
| 75.9345916 | 63 | 73.0348043 |
| 75.8123694 | 63 | 73.0388204 |
| 74.5568138 | 63 | 73.0254335 |
| 74.1901471 | 63 | 73.0066918 |
| 76.1530691 | 63 | 72.9986597 |
| 77.2641802 | 63 | 72.997321  |
| 77.1530691 | 63 | 73.0066918 |
| 75.6597733 | 63 | 73.0133853 |
| 75.1708844 | 63 | 73.01874   |
| 74.3042177 | 63 | 73.0120466 |
| 74.5975136 | 63 | 72.9986597 |
| 74.041958  | 63 | 72.9825955 |
| 73.4864025 | 63 | 72.9692086 |
| 73.8197358 | 63 | 72.9464509 |
| 73.9308469 | 63 | 72.9223545 |
| 75.1530691 | 63 | 72.8995968 |
| 75.2641802 | 63 | 72.8714843 |
| 74.4864025 | 63 | 72.8420332 |
| 74.3752914 | 63 | 72.8165981 |
| 73.5975136 | 63 | 72.7898244 |
| 73.041958  | 63 | 72.7563572 |
| 72.7086247 | 63 | 72.726906  |
| 72.7086247 | 63 | 72.6907615 |
| 73.1530691 | 63 | 72.6805423 |
| 73.1530691 | 63 | 72.6743392 |
| 73.1530691 | 63 | 72.6761683 |
| 73.2641802 | 63 | 72.6797376 |
| 73.2641802 | 63 | 72.693481  |
| 72.7086247 | 63 | 72.7041454 |
| 72.1530691 | 63 | 72.7173533 |
| 72.4864025 | 63 | 72.7260096 |
| 72.3752914 | 63 | 72.7400207 |
| 71.3752914 | 71 | 72.7482755 |
| 71.3752914 | 71 | 72.764964  |
| 70.9308469 | 71 | 72.7604996 |
| 71.4864025 | 71 | 72.7427823 |
| 70.9308469 | 71 | 72.7210489 |
| 71.1530691 | 71 | 72.6894825 |
| 71.7086247 | 71 | 72.6623943 |

|            |    |            |
|------------|----|------------|
| 72.1530691 | 71 | 72.6336997 |
| 72.4864025 | 71 | 72.5961698 |
| 72.5975136 | 71 | 72.5530173 |
| 72.9308469 | 71 | 72.5102665 |
| 72.4864025 | 71 | 72.4734059 |
| 72.2641802 | 71 | 72.4613111 |
| 72.5975136 | 71 | 72.4580516 |
| 72.8197358 | 71 | 72.4326149 |
| 73.2641802 | 71 | 72.3909802 |
| 73.041958  | 71 | 72.3485422 |
| 72.5975136 | 71 | 72.3211507 |
| 71.5975136 | 71 | 72.3015235 |
| 71.1530691 | 71 | 72.3027799 |
| 71.041958  | 71 | 72.2944784 |
| 71.2641802 | 71 | 72.3011719 |
| 70.8197358 | 71 | 72.3065266 |
| 70.2641802 | 71 | 72.2858894 |
| 70.041958  | 71 | 72.2623071 |
| 69.3752914 | 71 | 72.2268104 |
| 69.2641802 | 71 | 72.2174396 |
| 69.9308469 | 63 | 72.2227943 |
| 69.9308469 | 63 | 72.2294878 |
| 69.9308469 | 63 | 72.2428746 |
| 70.1530691 | 63 | 72.2383017 |
| 70.041958  | 63 | 72.2543659 |
| 69.9308469 | 63 | 72.2704302 |
| 70.041958  | 63 | 72.2690915 |
| 70.7086247 | 63 | 72.2677528 |
| 71.3752914 | 63 | 72.2690915 |
| 71.4864025 | 63 | 72.2717689 |
| 71.5975136 | 63 | 72.2717689 |
| 71.9308469 | 63 | 72.267062  |
| 72.1530691 | 63 | 72.2662374 |
| 72.7086247 | 63 | 72.2663498 |
| 72.8197358 | 63 | 72.2619107 |
| 73.1530691 | 63 | 72.2709923 |
| 71.6529405 | 63 | 72.2792708 |
| 71.2862738 | 63 | 72.2983926 |
| 71.9418294 | 63 | 72.3121596 |
| 72.1034688 | 63 | 72.3483042 |
| 72.8307182 | 63 | 72.3777553 |
| 73.0751627 | 63 | 72.3964969 |
| 72.7196071 | 63 | 72.4031904 |
| 72.2529405 | 63 | 72.4031904 |
| 72.3862738 | 63 | 72.4031904 |

|            |    |            |
|------------|----|------------|
| 72.7529405 | 63 | 72.3964969 |
| 73.5529405 | 63 | 72.4058678 |
| 73.9196071 | 63 | 72.4192546 |
| 74.0418294 | 63 | 72.4272868 |
| 73.808496  | 63 | 72.4246094 |
| 73.6307182 | 63 | 72.4138999 |
| 73.3862738 | 63 | 72.4058678 |
| 73.5418294 | 63 | 72.3594237 |
| 74.408496  | 63 | 72.358085  |
| 73.908496  | 63 | 72.3487142 |
| 74.5975136 | 63 | 72.3393434 |
| 73.9308469 | 63 | 72.3286339 |
| 72.1068453 | 63 | 72.3192631 |
| 71.9735119 | 63 | 72.3192631 |
| 72.2068453 | 63 | 72.3206018 |
| 74.4864025 | 63 | 72.3272952 |
| 74.9308469 | 63 | 72.3366666 |
| 74.9308469 | 63 | 72.3353273 |
| 74.7086247 | 63 | 72.3313113 |
| 72.6624008 | 63 | 72.3246178 |
| 74.041958  | 63 | 72.3139083 |
| 74.041958  | 63 | 72.2965054 |
| 73.041958  | 63 | 72.2844572 |
| 73.041958  | 63 | 72.272409  |
| 73.2641802 | 63 | 72.2523287 |
| 73.4864025 | 63 | 72.2215388 |
| 73.2641802 | 63 | 72.1934264 |
| 72.3179564 | 63 | 72.1760234 |
| 72.084623  | 63 | 72.1546044 |
| 72.4957342 | 63 | 72.1251533 |
| 72.0068453 | 63 | 72.0890087 |
| 72.1290675 | 63 | 72.0582189 |
| 72.0624008 | 63 | 72.0180582 |
| 72.5179564 | 63 | 71.9973101 |
| 72.6290675 | 63 | 71.9809797 |
| 73.9308469 | 63 | 71.9768313 |
| 73.5975136 | 63 | 71.9734128 |
| 73.2641802 | 63 | 71.9585549 |
| 72.7086247 | 63 | 71.9367359 |
| 72.4864025 | 63 | 71.9138459 |
| 72.5975136 | 63 | 71.9005944 |
| 72.3752914 | 63 | 71.8843978 |
| 73.2641802 | 63 | 71.8637836 |
| 73.3752914 | 63 | 71.8295147 |
| 73.2641802 | 63 | 71.7921669 |

|            |    |            |
|------------|----|------------|
| 72.5975136 | 63 | 71.7506691 |
| 72.3752914 | 63 | 71.7133212 |
| 72.3752914 | 63 | 71.6714219 |
| 68.742657  | 63 | 71.6284515 |
| 71.4864025 | 63 | 71.5742362 |
| 70.3752914 | 63 | 71.5095791 |
| 70.2641802 | 63 | 71.4496074 |
| 70.3752914 | 63 | 71.3799957 |
| 70.041958  | 63 | 71.3344803 |
| 70.2641802 | 63 | 71.3149569 |
| 70.1530691 | 63 | 71.2838289 |
| 69.9308469 | 63 | 71.2441334 |
| 70.041958  | 63 | 71.1961165 |
| 69.8197358 | 63 | 71.1440836 |
| 69.5975136 | 63 | 71.103923  |
| 69.3752914 | 63 | 71.0584076 |
| 69.2641802 | 63 | 71.0375455 |
| 68.5975136 | 63 | 71.0174652 |
| 68.9308469 | 63 | 70.9786432 |
| 69.041958  | 63 | 70.945176  |
| 69.041958  | 63 | 70.9076928 |
| 68.8197358 | 63 | 70.8648547 |
| 69.1530691 | 63 | 70.8233554 |
| 70.1530691 | 63 | 70.7845334 |
| 70.1530691 | 63 | 70.7557731 |
| 69.7086247 | 63 | 70.7284853 |
| 69.7086247 | 63 | 70.6962444 |
| 70.2641802 | 63 | 70.6712323 |
| 69.8197358 | 63 | 70.6447477 |
| 69.9308469 | 63 | 70.6257598 |
| 69.9308469 | 63 | 70.5945898 |
| 71.5975136 | 63 | 70.5620811 |
| 71.8197358 | 63 | 70.5138884 |
| 71.5975136 | 63 | 70.4697117 |
| 71.2641802 | 63 | 70.4268736 |
| 70.8197358 | 63 | 70.3934064 |
| 71.1530691 | 63 | 70.3586005 |
| 71.041958  | 63 | 70.3304881 |
| 71.041958  | 63 | 70.3063917 |
| 70.7086247 | 63 | 70.2756019 |
| 70.8197358 | 63 | 70.2461507 |
| 70.5975136 | 63 | 70.2220544 |
| 70.7086247 | 63 | 70.2126835 |
| 70.1530691 | 63 | 70.2059901 |
| 69.8197358 | 63 | 70.2046514 |

|            |    |            |
|------------|----|------------|
| 69.041958  | 63 | 70.2457407 |
| 69.041958  | 63 | 70.2510955 |
| 68.9308469 | 63 | 70.2671597 |
| 68.8197358 | 63 | 70.2845627 |
| 70.1530691 | 63 | 70.3019656 |
| 70.4864025 | 63 | 70.3287394 |
| 69.3898932 | 63 | 70.3568518 |
| 68.9121154 | 63 | 70.3929964 |
| 70.5010043 | 63 | 70.4398505 |
| 70.6121154 | 63 | 70.4920593 |
| 71.5975136 | 63 | 70.5469455 |
| 70.9308469 | 63 | 70.6058478 |
| 70.9308469 | 63 | 70.6687661 |
| 72.3752914 | 63 | 70.7370392 |
| 70.8197358 | 63 | 70.8146831 |
| 70.2641802 | 63 | 70.8842949 |
| 69.9308469 | 63 | 70.9539067 |
| 69.7086247 | 63 | 71.0221798 |
| 70.041958  | 63 | 71.0998237 |
| 70.041958  | 63 | 71.1694355 |
| 69.9308469 | 63 | 71.2055801 |
| 69.8197358 | 63 | 71.240386  |
| 69.8197358 | 63 | 71.2711758 |
| 69.9308469 | 63 | 71.2899174 |
| 69.9308469 | 63 | 71.283224  |
| 70.4864025 | 63 | 71.2818853 |
| 69.9308469 | 63 | 71.2725145 |
| 69.9308469 | 63 | 71.2551115 |
| 69.9308469 | 63 | 71.2256604 |
| 69.9308469 | 63 | 71.1881771 |
| 69.7086247 | 63 | 71.1533712 |
| 69.9308469 | 63 | 71.1279362 |
| 69.5975136 | 63 | 71.1038398 |
| 70.2641802 | 63 | 71.0703726 |
| 70.3752914 | 63 | 71.0369054 |
| 70.7086247 | 63 | 70.9994221 |
| 70.9308469 | 63 | 70.9672936 |
| 71.2641802 | 63 | 70.9365038 |
| 71.8197358 | 63 | 70.9150848 |
| 71.8197358 | 63 | 70.8950044 |
| 72.2641802 | 63 | 70.8829562 |
| 72.1530691 | 63 | 70.8735854 |
| 71.9308469 | 63 | 70.8735854 |
| 71.7086247 | 63 | 70.8776015 |
| 71.7086247 | 63 | 70.8645908 |



|            |    |            |
|------------|----|------------|
| 71.8197358 | 63 | 70.8592106 |
| 72.2641802 | 63 | 70.8592106 |
| 72.5975136 | 63 | 70.8418077 |
| 73.1530691 | 63 | 70.8282449 |
| 73.8197358 | 63 | 70.8204384 |
| 74.3752914 | 63 | 70.7908114 |
| 74.3752914 | 63 | 70.762523  |
| 74.4864025 | 63 | 70.7263784 |
| 74.5975136 | 63 | 70.6996047 |
| 74.9308469 | 63 | 70.6741696 |
| 75.041958  | 63 | 70.638025  |
| 74.7086247 | 63 | 70.6219608 |
| 74.8197358 | 63 | 70.6192834 |
| 74.7086247 | 63 | 70.638025  |
| 75.2641802 | 63 | 70.6661375 |
| 74.9308469 | 63 | 70.6929112 |
| 73.1530691 | 63 | 70.7170076 |
| 73.041958  | 63 | 70.7397653 |
| 72.2641802 | 63 | 70.7558296 |
| 71.2641802 | 63 | 70.7745712 |
| 69.7086247 | 63 | 70.7919741 |
| 69.7086247 | 63 | 70.8120545 |
| 69.1530691 | 63 | 70.8147318 |
| 68.4864025 | 63 | 70.8200866 |
| 69.1530691 | 63 | 70.8187479 |
| 68.7086247 | 63 | 70.8147318 |
| 68.7086247 | 63 | 70.8080384 |
| 69.1530691 | 63 | 70.805361  |
| 68.8197358 | 63 | 70.7986676 |
| 68.3752914 | 63 | 70.8040223 |
| 68.2641802 | 63 | 70.8066997 |
| 67.9308469 | 63 | 70.8120545 |
| 68.041958  | 63 | 70.8174092 |
| 68.2641802 | 63 | 70.8187479 |
| 68.8197358 | 63 | 70.8160705 |
| 69.041958  | 63 | 70.8080384 |
| 69.1530691 | 63 | 70.7973289 |
| 69.041958  | 63 | 70.7852807 |
| 69.041958  | 63 | 70.7718938 |
| 69.3752914 | 63 | 70.7638617 |
| 67.85096   | 63 | 70.7531522 |
| 68.3731823 | 63 | 70.7464587 |
| 70.1530691 | 63 | 70.741104  |
| 69.041958  | 63 | 70.7357492 |
| 68.2641802 | 63 | 70.7290558 |

|            |    |            |
|------------|----|------------|
| 68.2641802 | 63 | 70.7277171 |
| 68.041958  | 63 | 70.7263784 |
| 68.2641802 | 63 | 70.7263784 |
| 68.5975136 | 63 | 70.7424427 |
| 68.7086247 | 63 | 70.762523  |
| 68.8197358 | 63 | 70.783942  |
| 69.3752914 | 63 | 70.8147318 |
| 69.4864025 | 63 | 70.848199  |
| 70.041958  | 63 | 70.8830049 |
| 71.4864025 | 63 | 70.9164721 |
| 72.041958  | 63 | 70.9158479 |
| 72.2641802 | 63 | 70.8938047 |
| 72.041958  | 63 | 70.867076  |
| 71.8197358 | 63 | 70.8619003 |
| 71.1530691 | 63 | 70.8523068 |
| 71.3752914 | 63 | 70.8444537 |
| 71.3752914 | 63 | 70.846373  |
| 71.5975136 | 63 | 70.8851949 |
| 70.7086247 | 63 | 70.9240169 |
| 70.3752914 | 63 | 70.9708709 |
| 69.8197358 | 63 | 71.0190637 |
| 69.5975136 | 63 | 71.0578857 |
| 69.3752914 | 63 | 71.0980463 |
| 69.4864025 | 63 | 71.1328522 |
| 69.3752914 | 63 | 71.1689968 |
| 70.041958  | 63 | 71.2091574 |
| 70.4864025 | 63 | 71.2519954 |
| 70.8197358 | 63 | 71.2908174 |
| 71.1530691 | 63 | 71.3349941 |
| 71.041958  | 63 | 71.3724774 |
| 71.041958  | 63 | 71.3992511 |
| 71.1530691 | 63 | 71.4233475 |
| 70.9308469 | 63 | 71.4407505 |
| 71.2641802 | 63 | 71.4527987 |
| 71.041958  | 63 | 71.4594921 |
| 71.2641802 | 63 | 71.4702016 |
| 70.8197358 | 63 | 71.472879  |
| 71.1530691 | 63 | 71.4912444 |
| 71.3752914 | 63 | 71.5046567 |
| 71.8197358 | 63 | 71.4926085 |
| 72.041958  | 63 | 71.4966246 |
| 73.041958  | 63 | 71.4994343 |
| 73.7086247 | 63 | 71.4950151 |
| 74.3752914 | 63 | 71.4932732 |
| 75.7086247 | 63 | 71.4962738 |

|            |    |            |
|------------|----|------------|
| 76.1530691 | 63 | 71.4938626 |
| 76.3752914 | 63 | 71.4871677 |
| 77.4864025 | 63 | 71.4819452 |
| 77.8197358 | 63 | 71.4743131 |
| 77.5975136 | 63 | 71.4668149 |
| 77.5975136 | 63 | 71.4512846 |
| 74.6568138 | 63 | 71.4109886 |
| 73.4345916 | 63 | 71.3654716 |
| 72.7123694 | 63 | 71.3172773 |
| 72.7234805 | 63 | 71.2905035 |
| 72.2457027 | 63 | 71.2556976 |
| 71.6123694 | 63 | 71.2235691 |
| 71.4234805 | 63 | 71.1847472 |
| 72.9308469 | 63 | 71.1566347 |
| 72.9308469 | 63 | 71.129861  |
| 73.041958  | 63 | 71.1271836 |
| 72.4864025 | 63 | 71.1378931 |
| 72.3752914 | 63 | 71.1593121 |
| 72.041958  | 63 | 71.1994727 |
| 71.5975136 | 63 | 71.2423108 |
| 72.1530691 | 63 | 71.2851488 |
| 72.1530691 | 63 | 71.3293255 |
| 71.9308469 | 63 | 71.361454  |
| 71.4864025 | 63 | 71.3842117 |
| 71.5975136 | 63 | 71.404292  |
| 71.1530691 | 63 | 71.4176789 |
| 70.4864025 | 63 | 71.4176789 |
| 70.8197358 | 63 | 71.4150015 |
| 70.4864025 | 63 | 71.4069694 |
| 70.1530691 | 63 | 71.3989373 |
| 69.5975136 | 63 | 71.3895664 |
| 69.9308469 | 63 | 71.3815343 |
| 69.5975136 | 63 | 71.3748409 |
| 69.3752914 | 63 | 71.3761796 |
| 69.4864025 | 63 | 71.3761796 |
| 69.1530691 | 63 | 71.3788569 |
| 69.3752914 | 63 | 71.3761796 |
| 68.4973849 | 63 | 71.3721635 |
| 67.8973849 | 63 | 71.3735022 |
| 67.8973849 | 63 | 71.3617762 |
| 68.5132322 | 63 | 71.342152  |
| 68.3973849 | 63 | 71.3065974 |
| 68.1529405 | 63 | 71.265822  |
| 68.3862738 | 63 | 71.2251804 |
| 68.7418294 | 63 | 71.1696793 |

|            |    |            |
|------------|----|------------|
| 68.8640516 | 63 | 71.120604  |
| 68.7529405 | 63 | 71.0965076 |
| 68.1418294 | 63 | 71.0724112 |
| 68.2640516 | 63 | 71.0864223 |
| 68.2640516 | 63 | 71.1124816 |
| 69.8197358 | 63 | 71.1432263 |
| 68.9308469 | 63 | 71.1684824 |
| 68.4864025 | 63 | 71.1994948 |
| 68.1530691 | 63 | 71.2065432 |
| 69.041958  | 63 | 71.2158674 |
| 69.3752914 | 63 | 71.2012741 |
| 70.4864025 | 63 | 71.1827987 |
| 71.2641802 | 63 | 71.1629845 |
| 71.5975136 | 63 | 71.1469187 |
| 72.9308469 | 63 | 71.1280417 |
| 72.9308469 | 63 | 71.1175984 |
| 73.041958  | 63 | 71.1110372 |
| 73.041958  | 63 | 71.0889473 |
| 72.7086247 | 63 | 71.0609672 |
| 72.3752914 | 63 | 71.037137  |
| 72.4864025 | 63 | 71.0230792 |
| 72.2641802 | 63 | 71.0080844 |
| 71.041958  | 63 | 71.0001846 |
| 70.8197358 | 63 | 70.9913477 |
| 70.4864025 | 63 | 70.9801012 |
| 70.2641802 | 63 | 70.9755481 |
| 70.4864025 | 63 | 70.9823738 |
| 70.3752914 | 63 | 71.00098   |
| 70.7086247 | 63 | 71.008609  |
| 70.9308469 | 63 | 71.0083397 |
| 71.1530691 | 63 | 71.0063301 |
| 71.5975136 | 63 | 70.9954852 |
| 71.5975136 | 63 | 70.9995013 |
| 71.7086247 | 63 | 70.9995013 |
| 73.1530691 | 63 | 71.0114172 |
| 72.7353712 | 63 | 71.0305619 |
| 72.7464823 | 63 | 71.048368  |
| 72.7575934 | 63 | 71.0587543 |
| 72.7687045 | 63 | 71.0665202 |
| 73.0020379 | 63 | 71.0879408 |
| 72.8798156 | 63 | 71.1078888 |
| 73.7464823 | 63 | 71.1248917 |
| 75.5975136 | 63 | 71.1471155 |
| 75.5975136 | 63 | 71.174694  |
| 75.8197358 | 63 | 71.1949097 |

|            |    |            |
|------------|----|------------|
| 75.5975136 | 63 | 71.2163303 |
| 75.2641802 | 63 | 71.2444443 |
| 74.8197358 | 63 | 71.2551538 |
| 74.8197358 | 63 | 71.2792502 |
| 72.1973849 | 63 | 71.3060239 |
| 72.1973849 | 63 | 71.3327977 |
| 71.7196071 | 63 | 71.348862  |
| 71.3973849 | 63 | 71.3609102 |
| 71.3973849 | 63 | 71.3568941 |
| 71.1529405 | 63 | 71.3461846 |
| 70.808496  | 63 | 71.3301203 |
| 71.1751627 | 63 | 71.2926371 |
| 71.0529405 | 63 | 71.2564925 |
| 70.3196071 | 63 | 71.2230253 |
| 69.8307182 | 63 | 71.1868807 |
| 69.9529405 | 63 | 71.1614456 |
| 70.3196071 | 63 | 71.1400266 |
| 70.3529405 | 63 | 71.1186076 |
| 70.4973849 | 63 | 71.0918338 |
| 69.7529405 | 63 | 71.0811243 |
| 69.8862738 | 63 | 71.0744309 |
| 70.108496  | 63 | 71.0690761 |
| 70.7196071 | 63 | 71.0663988 |
| 71.1418294 | 63 | 71.0583666 |
| 70.5640516 | 63 | 71.0489958 |
| 69.5751627 | 63 | 71.0409637 |
| 69.208496  | 63 | 71.0275768 |
| 68.5862738 | 63 | 71.0088352 |
| 69.4864025 | 63 | 70.9954483 |
| 69.3752914 | 63 | 70.9860775 |
| 69.4864025 | 63 | 70.975368  |
| 69.4864025 | 63 | 70.953949  |
| 69.3752914 | 63 | 70.9362238 |
| 69.3752914 | 63 | 70.917026  |
| 69.041958  | 63 | 70.8990331 |
| 69.9308469 | 63 | 70.8768902 |
| 70.041958  | 63 | 70.8505974 |
| 70.1530691 | 63 | 70.831132  |
| 70.7086247 | 63 | 70.799886  |
| 71.041958  | 63 | 70.7342903 |
| 69.8197358 | 63 | 70.6673559 |
| 70.041958  | 63 | 70.6017602 |
| 70.5975136 | 63 | 70.5428579 |
| 70.7086247 | 63 | 70.4960038 |
| 70.9308469 | 63 | 70.4585206 |

|            |    |            |
|------------|----|------------|
| 70.7086247 | 63 | 70.4044161 |
| 70.3752914 | 63 | 70.3849853 |
| 70.3752914 | 63 | 70.3655544 |
| 70.3752914 | 63 | 70.3504073 |
| 70.1530691 | 63 | 70.3332522 |
| 70.3752914 | 63 | 70.3177036 |
| 70.2641802 | 63 | 70.3064387 |
| 69.8197358 | 63 | 70.2977173 |
| 69.9308469 | 63 | 70.3014672 |
| 70.2641802 | 63 | 70.3013349 |
| 70.041958  | 63 | 70.3100379 |
| 70.5975136 | 63 | 70.3179377 |
| 70.5975136 | 63 | 70.3257037 |
| 70.7086247 | 63 | 70.333068  |
| 70.041958  | 63 | 70.3360147 |
| 70.1530691 | 63 | 70.3479305 |
| 70.2641802 | 63 | 70.3768477 |
| 70.041958  | 63 | 70.414868  |
| 70.041958  | 63 | 70.4649365 |
| 69.8197358 | 63 | 70.5076422 |
| 69.5975136 | 63 | 70.5452609 |
| 70.041958  | 63 | 70.5978729 |
| 69.8197358 | 63 | 70.6583831 |
| 69.5975136 | 63 | 70.7233111 |
| 70.4864025 | 63 | 70.7863648 |
| 70.8197358 | 63 | 70.8385737 |
| 70.8197358 | 63 | 70.8827504 |
| 71.3752914 | 63 | 70.9122015 |
| 71.2641802 | 63 | 70.9550395 |
| 71.1530691 | 71 | 70.9965389 |
| 71.2641802 | 71 | 71.0300061 |
| 70.9308469 | 71 | 71.0522703 |
| 70.8197358 | 71 | 71.0699831 |
| 71.2641802 | 71 | 71.086491  |
| 71.1530691 | 71 | 71.1087553 |
| 70.1530691 | 71 | 71.1448999 |
| 70.041958  | 71 | 71.1756897 |
| 70.3752914 | 71 | 71.2225438 |
| 70.7086247 | 71 | 71.2693979 |
| 71.3752914 | 71 | 71.3082198 |
| 71.7086247 | 71 | 71.3443644 |
| 70.3290675 | 71 | 71.3738155 |
| 70.584623  | 71 | 71.4005893 |
| 70.584623  | 71 | 71.4287017 |
| 70.4624008 | 71 | 71.4501207 |

|            |    |            |
|------------|----|------------|
| 69.9735119 | 71 | 71.4688624 |
| 70.1068453 | 71 | 71.4862653 |
| 70.2179564 | 71 | 71.4916201 |
| 70.084623  | 71 | 71.4942974 |
| 71.4864025 | 71 | 71.4969748 |
| 71.041958  | 71 | 71.487604  |
| 71.041958  | 71 | 71.4715398 |
| 70.4864025 | 71 | 71.4581529 |
| 70.5975136 | 71 | 71.4340565 |
| 70.9308469 | 71 | 71.4099601 |
| 70.5975136 | 71 | 71.380509  |
| 71.4864025 | 63 | 71.3617673 |
| 72.1530691 | 63 | 71.3403483 |
| 73.041958  | 63 | 71.3189293 |
| 74.2641802 | 63 | 71.2975103 |
| 74.2641802 | 63 | 71.2734139 |
| 74.2641802 | 63 | 71.2479788 |
| 74.9308469 | 63 | 71.2292372 |
| 74.5975136 | 63 | 71.2064795 |
| 74.5975136 | 63 | 71.1997861 |
| 73.8197358 | 63 | 71.2011248 |
| 73.8197358 | 63 | 71.19577   |
| 73.041958  | 63 | 71.1904153 |
| 71.9308469 | 63 | 71.1850605 |
| 73.041958  | 63 | 71.1716736 |
| 72.8197358 | 63 | 71.152932  |
| 72.1530691 | 63 | 71.131513  |
| 70.8898932 | 63 | 71.1047392 |
| 71.4010043 | 63 | 71.0819815 |
| 71.4121154 | 63 | 71.0605625 |
| 72.0010043 | 63 | 71.0391435 |
| 73.7086247 | 63 | 71.0190632 |
| 73.5975136 | 63 | 71.0137084 |
| 73.7086247 | 63 | 71.0177245 |
| 73.9308469 | 63 | 71.0177245 |
| 73.8197358 | 63 | 71.0485143 |
| 73.7086247 | 75 | 71.0819815 |
| 73.3752914 | 75 | 71.0958824 |
| 72.9308469 | 75 | 71.1419547 |
| 72.7086247 | 75 | 71.1849481 |
| 72.1530691 | 75 | 71.2225866 |
| 71.9308469 | 75 | 71.2616978 |
| 71.5975136 | 75 | 71.3040218 |
| 70.8197358 | 75 | 71.3474167 |
| 70.4864025 | 75 | 71.3881342 |

|            |    |            |
|------------|----|------------|
| 70.041958  | 75 | 71.4304582 |
| 69.1530691 | 75 | 71.4666028 |
| 68.9308469 | 75 | 71.5161343 |
| 68.9308469 | 63 | 71.564327  |
| 68.5975136 | 63 | 71.6007378 |
| 68.5975136 | 63 | 71.6301874 |
| 68.2641802 | 63 | 71.6533451 |
| 68.4864025 | 63 | 71.6791803 |
| 68.3752914 | 63 | 71.6973849 |
| 68.4864025 | 63 | 71.7084944 |
| 68.2641802 | 63 | 71.7102332 |
| 68.041958  | 63 | 71.7035397 |
| 67.7086247 | 63 | 71.6874755 |
| 68.041958  | 63 | 71.6660565 |
| 68.1530691 | 63 | 71.633928  |
| 69.2641802 | 63 | 71.6031381 |
| 69.7086247 | 63 | 71.573687  |
| 70.041958  | 63 | 71.5428972 |
| 70.3752914 | 63 | 71.5107687 |
| 70.3752914 | 63 | 71.4839949 |
| 70.2641802 | 63 | 71.4679306 |
| 69.7086247 | 63 | 71.4398182 |
| 69.3752914 | 63 | 71.4130444 |
| 69.041958  | 63 | 71.4050123 |
| 69.041958  | 63 | 71.404167  |
| 69.041958  | 63 | 71.409212  |
| 69.4864025 | 63 | 71.4221552 |
| 69.4864025 | 63 | 71.4320194 |
| 69.7086247 | 63 | 71.4091263 |
| 70.3752914 | 63 | 71.3846268 |
| 70.3752914 | 63 | 71.3559773 |
| 73.2641802 | 63 | 71.3334858 |
| 74.1530691 | 63 | 71.3184909 |
| 72.8624008 | 63 | 71.3095202 |
| 74.1530691 | 63 | 71.3134008 |
| 74.1530691 | 63 | 71.3262507 |
| 73.7086247 | 63 | 71.346331  |
| 73.7086247 | 63 | 71.363734  |
| 73.4864025 | 63 | 71.3757821 |
| 73.7086247 | 63 | 71.3931851 |
| 73.5975136 | 63 | 71.4226362 |
| 73.5975136 | 63 | 71.4561034 |
| 74.4864025 | 63 | 71.4949254 |
| 75.1530691 | 63 | 71.5444568 |
| 75.041958  | 63 | 71.5574966 |



|            |    |            |
|------------|----|------------|
| 73.508496  | 63 | 71.5691977 |
| 73.0418294 | 63 | 71.5849149 |
| 72.8529405 | 63 | 71.6210595 |
| 72.7418294 | 63 | 71.6612201 |
| 72.9973849 | 63 | 71.6987034 |
| 73.0751627 | 63 | 71.7361866 |
| 73.1862738 | 63 | 71.7750086 |
| 73.7086247 | 63 | 71.8178466 |
| 72.9308469 | 63 | 71.8593459 |
| 72.4864025 | 63 | 71.8874584 |
| 72.2641802 | 63 | 71.9062    |
| 72.041958  | 63 | 71.9289577 |
| 72.1530691 | 63 | 71.9369898 |
| 71.2641802 | 63 | 71.9410059 |
| 71.1530691 | 63 | 71.9410059 |
| 70.8197358 | 63 | 71.9383285 |
| 70.5975136 | 63 | 71.9356512 |
| 70.7086247 | 63 | 71.9383285 |
| 70.5975136 | 63 | 71.949038  |
| 71.4864025 | 63 | 71.9677797 |
| 70.8197358 | 63 | 71.9918761 |
| 71.8197358 | 63 | 72.0226659 |
| 72.4864025 | 63 | 72.0561331 |
| 72.8197358 | 63 | 72.0700488 |
| 71.808496  | 63 | 72.0764679 |
| 71.5640516 | 63 | 72.0831547 |
| 71.3307182 | 63 | 72.0771239 |
| 72.0640516 | 63 | 72.0755108 |
| 72.5751627 | 63 | 72.0475256 |
| 72.9640516 | 63 | 72.0194132 |
| 73.6973849 | 63 | 71.9934641 |
| 73.9973849 | 63 | 71.9479487 |
| 74.3752914 | 63 | 71.9010946 |
| 73.5975136 | 63 | 71.8595952 |
| 72.9308469 | 63 | 71.8114025 |
| 73.041958  | 63 | 71.7645484 |
| 73.2641802 | 63 | 71.7043074 |
| 73.2641802 | 63 | 71.6507599 |
| 73.2641802 | 63 | 71.5985511 |
| 73.2641802 | 63 | 71.5329553 |
| 70.013149  | 63 | 71.4512954 |
| 69.9020379 | 63 | 71.3656193 |
| 69.9020379 | 63 | 71.2944027 |
| 71.5975136 | 63 | 71.2221151 |
| 71.5975136 | 63 | 71.1494259 |

|            |    |            |
|------------|----|------------|
| 71.5975136 | 63 | 71.0780753 |
| 71.4864025 | 63 | 71.0090006 |
| 71.7086247 | 63 | 70.9389887 |
| 71.8197358 | 63 | 70.8596061 |
| 71.4864025 | 63 | 70.7739301 |
| 70.041958  | 63 | 70.7029796 |
| 69.5975136 | 63 | 70.6387226 |
| 70.041958  | 63 | 70.5771429 |
| 69.9308469 | 63 | 70.5182406 |
| 70.041958  | 63 | 70.4526449 |
| 70.041958  | 63 | 70.39642   |
| 70.1530691 | 63 | 70.3388564 |
| 70.1530691 | 63 | 70.2879863 |
| 70.4864025 | 63 | 70.2357774 |
| 70.5975136 | 63 | 70.1916007 |
| 70.9308469 | 63 | 70.1381077 |
| 71.041958  | 63 | 70.0785906 |
| 71.5975136 | 63 | 70.0260347 |
| 71.8197358 | 63 | 69.9633047 |
| 70.6414064 | 63 | 69.8898653 |
| 70.0191842 | 63 | 69.8153548 |
| 70.2636287 | 63 | 69.7566425 |
| 69.8747398 | 63 | 69.7056945 |
| 70.2414064 | 63 | 69.6725511 |
| 70.9414064 | 63 | 69.6407464 |
| 71.8197358 | 63 | 69.6155806 |
| 70.7086247 | 63 | 69.5897455 |
| 70.3752914 | 63 | 69.5483816 |
| 70.2641802 | 63 | 69.5047419 |
| 70.2641802 | 71 | 69.4605652 |
| 69.7086247 | 71 | 69.4297754 |
| 69.5975136 | 71 | 69.4083564 |
| 68.7086247 | 71 | 69.3922921 |
| 69.1530691 | 71 | 69.3789052 |
| 69.2641802 | 71 | 69.3735505 |
| 69.041958  | 71 | 69.3615023 |
| 68.3752914 | 71 | 69.3574862 |
| 67.9308469 | 71 | 69.3706633 |
| 67.5975136 | 71 | 69.3866516 |
| 67.041958  | 71 | 69.4027738 |
| 66.8197358 | 71 | 69.395925  |
| 66.8197358 | 71 | 69.3882731 |
| 67.2641802 | 63 | 69.3824953 |
| 67.2641802 | 63 | 69.3797964 |
| 66.5975136 | 63 | 69.3791057 |

|            |    |            |
|------------|----|------------|
| 66.5975136 | 63 | 69.3892582 |
| 67.041958  | 63 | 69.4079784 |
| 67.1530691 | 63 | 69.4478499 |
| 67.1530691 | 63 | 69.5063291 |
| 67.1530691 | 63 | 69.5595875 |
| 66.7086247 | 63 | 69.6168619 |
| 66.5975136 | 63 | 69.6699864 |
| 66.3752914 | 63 | 69.7247173 |
| 66.5975136 | 63 | 69.7916517 |
| 66.2641802 | 63 | 69.8599248 |
| 67.041958  | 63 | 69.9228431 |
| 66.1575934 | 63 | 69.9897775 |
| 66.5464823 | 63 | 70.0486798 |
| 66.4575934 | 63 | 70.1102594 |
| 66.613149  | 63 | 70.1624683 |
| 66.3909267 | 63 | 70.2133384 |
| 66.6353712 | 63 | 70.2784053 |
| 66.9353712 | 63 | 70.3536462 |
| 67.3353712 | 63 | 70.3933905 |
| 68.5798156 | 63 | 70.4331347 |
| 69.4242601 | 63 | 70.4856179 |
| 70.4864025 | 63 | 70.5296674 |
| 70.8197358 | 63 | 70.5644733 |
| 70.2641802 | 63 | 70.6099887 |
| 70.3752914 | 63 | 70.6595202 |
| 70.7086247 | 63 | 70.7130677 |
| 71.041958  | 63 | 70.7666152 |
| 71.1530691 | 63 | 70.8295336 |
| 71.7086247 | 63 | 70.8924519 |
| 72.1530691 | 63 | 70.9660797 |
| 72.8197358 | 63 | 71.0397076 |
| 72.2641802 | 63 | 71.1160128 |
| 72.9308469 | 63 | 71.2043662 |
| 71.1068453 | 63 | 71.2980744 |
| 71.2290675 | 60 | 71.398476  |

| Person 7 | Person 1 | Person 3 | Person 11 | Person 4 |
|----------|----------|----------|-----------|----------|
|----------|----------|----------|-----------|----------|

|          |            |            |  |  |
|----------|------------|------------|--|--|
| 16:00:34 | 64.3324586 | 69.7372035 |  |  |
| 16:00:35 | 64.3324586 | 69.7372035 |  |  |
| 16:00:36 | 64.3324586 | 69.7372035 |  |  |
| 16:00:37 | 68.3324586 | 68.7372035 |  |  |
| 16:00:38 | 68.3324586 | 68.7372035 |  |  |
| 16:00:39 | 68.3324586 | 69.7372035 |  |  |
| 16:00:40 | 69.3324586 | 68.7372035 |  |  |
| 16:00:41 | 71.3324586 | 68.7372035 |  |  |
| 16:00:42 | 71.3324586 | 68.7372035 |  |  |
| 16:00:43 | 71.3324586 | 69.7372035 |  |  |
| 16:00:44 | 71.3324586 | 68.7372035 |  |  |
| 16:00:45 | 71.3324586 | 68.7372035 |  |  |
| 16:00:46 | 71.3324586 | 69.7372035 |  |  |
| 16:00:47 | 71.3324586 | 69.7372035 |  |  |
| 16:00:48 | 72.3324586 | 69.7372035 |  |  |
| 16:00:49 | 73.3324586 | 69.7372035 |  |  |
| 16:00:50 | 73.3324586 | 68.7372035 |  |  |
| 16:00:51 | 73.3324586 | 68.7372035 |  |  |
| 16:00:52 | 73.3324586 | 68.7372035 |  |  |
| 16:00:53 | 74.3324586 | 68.7372035 |  |  |
| 16:00:54 | 74.3324586 | 70.7372035 |  |  |
| 16:00:55 | 74.3324586 | 74.7372035 |  |  |
| 16:00:56 | 74.3324586 | 75.7372035 |  |  |
| 16:00:57 | 74.3324586 | 75.7372035 |  |  |
| 16:00:58 | 73.3324586 | 72.7372035 |  |  |
| 16:00:59 | 73.3324586 | 70.7372035 |  |  |
| 16:01:00 | 73.3324586 | 70.7372035 |  |  |
| 16:01:01 | 73.3324586 | 68.7372035 |  |  |
| 16:01:02 | 73.3324586 | 67.7372035 |  |  |
| 16:01:03 | 73.3324586 | 67.7372035 |  |  |
| 16:01:04 | 73.3324586 | 67.7372035 |  |  |
| 16:01:05 | 73.3324586 | 67.7372035 |  |  |
| 16:01:06 | 73.3324586 | 67.7372035 |  |  |
| 16:01:07 | 71.3324586 | 68.7372035 |  |  |
| 16:01:08 | 70.3324586 | 67.7372035 |  |  |
| 16:01:09 | 69.3324586 | 66.7372035 |  |  |
| 16:01:10 | 69.3324586 | 66.7372035 |  |  |
| 16:01:11 | 69.3324586 | 65.7372035 |  |  |
| 16:01:12 | 69.3324586 | 65.7372035 |  |  |
| 16:01:13 | 69.3324586 | 65.7372035 |  |  |
| 16:01:14 | 68.3324586 | 65.7372035 |  |  |
| 16:01:15 | 69.3324586 | 65.7372035 |  |  |
| 16:01:16 | 69.3324586 | 65.7372035 |  |  |

|          |            |            |
|----------|------------|------------|
| 16:01:17 | 69.3324586 | 65.7372035 |
| 16:01:18 | 69.3324586 | 65.7372035 |
| 16:01:19 | 69.3324586 | 66.7372035 |
| 16:01:20 | 68.3324586 | 66.7372035 |
| 16:01:21 | 68.3324586 | 66.7372035 |
| 16:01:22 | 68.3324586 | 65.7372035 |
| 16:01:23 | 68.3324586 | 65.7372035 |
| 16:01:24 | 68.3324586 | 65.7372035 |
| 16:01:25 | 68.3324586 | 65.7372035 |
| 16:01:26 | 68.3324586 | 65.7372035 |
| 16:01:27 | 66.3324586 | 65.7372035 |
| 16:01:28 | 66.3324586 | 65.7372035 |
| 16:01:29 | 66.3324586 | 65.7372035 |
| 16:01:30 | 66.3324586 | 65.7372035 |
| 16:01:31 | 66.3324586 | 65.7372035 |
| 16:01:32 | 66.3324586 | 65.7372035 |
| 16:01:33 | 67.3324586 | 64.7372035 |
| 16:01:34 | 67.3324586 | 64.7372035 |
| 16:01:35 | 67.3324586 | 64.7372035 |
| 16:01:36 | 67.3324586 | 64.7372035 |
| 16:01:37 | 67.3324586 | 63.7372035 |
| 16:01:38 | 67.3324586 | 63.7372035 |
| 16:01:39 | 69.3324586 | 63.7372035 |
| 16:01:40 | 69.3324586 | 63.7372035 |
| 16:01:41 | 69.3324586 | 63.7372035 |
| 16:01:42 | 70.3324586 | 62.7372035 |
| 16:01:43 | 70.3324586 | 62.7372035 |
| 16:01:44 | 71.3324586 | 62.7372035 |
| 16:01:45 | 72.3324586 | 62.7372035 |
| 16:01:46 | 72.3324586 | 65.7372035 |
| 16:01:47 | 72.3324586 | 66.7372035 |
| 16:01:48 | 72.3324586 | 67.7372035 |
| 16:01:49 | 72.3324586 | 68.7372035 |
| 16:01:50 | 70.3324586 | 68.7372035 |
| 16:01:51 | 68.3324586 | 68.7372035 |
| 16:01:52 | 68.3324586 | 69.7372035 |
| 16:01:53 | 67.3324586 | 69.7372035 |
| 16:01:54 | 67.3324586 | 68.7372035 |
| 16:01:55 | 68.3324586 | 68.7372035 |
| 16:01:56 | 69.3324586 | 69.7372035 |
| 16:01:57 | 69.3324586 | 70.7372035 |
| 16:01:58 | 69.3324586 | 70.7372035 |
| 16:01:59 | 69.3324586 | 69.7372035 |
| 16:02:00 | 70.3324586 | 69.7372035 |
| 16:02:01 | 70.3324586 | 69.7372035 |

|          |            |            |            |            |
|----------|------------|------------|------------|------------|
| 16:02:02 | 72.3324586 | 67.7372035 |            |            |
| 16:02:03 | 72.3324586 | 66.7372035 |            |            |
| 16:02:04 | 72.3324586 | 66.7372035 |            |            |
| 16:02:05 | 72.3324586 | 66.7372035 |            |            |
| 16:02:06 | 72.3324586 | 66.7372035 |            |            |
| 16:02:07 | 72.3324586 | 66.7372035 |            |            |
| 16:02:08 | 72.3324586 | 65.7372035 |            |            |
| 16:02:09 | 73.3324586 | 65.7372035 |            |            |
| 16:02:10 | 72.3324586 | 65.7372035 |            |            |
| 16:02:11 | 72.3324586 | 66.7372035 |            |            |
| 16:02:12 | 71.3324586 | 66.7372035 |            |            |
| 16:02:13 | 69.3324586 | 66.7372035 |            |            |
| 16:02:14 | 67.3324586 | 66.7372035 |            |            |
| 16:02:15 | 66.3324586 | 66.7372035 |            |            |
| 16:02:16 | 66.3324586 | 65.7372035 |            |            |
| 16:02:17 | 65.3324586 | 65.7372035 |            |            |
| 16:02:18 | 65.3324586 | 64.7372035 |            |            |
| 16:02:19 | 65.3324586 | 63.7372035 |            |            |
| 16:02:20 | 65.3324586 | 63.7372035 |            |            |
| 16:02:21 | 65.3324586 | 63.7372035 |            |            |
| 16:02:22 | 64.3324586 | 63.7372035 |            |            |
| 16:02:23 | 63.3324586 | 63.7372035 |            |            |
| 16:02:24 | 63.3324586 | 63.7372035 |            |            |
| 16:02:25 | 63.3324586 | 63.7372035 |            |            |
| 16:02:26 | 63.3324586 | 63.7372035 |            |            |
| 16:02:27 | 62.3324586 | 63.7372035 | 67.9524294 |            |
| 16:02:28 | 59.3324586 | 64.7372035 | 70.9524294 |            |
| 16:02:29 | 58.3324586 | 64.7372035 | 67.9524294 |            |
| 16:02:30 | 58.3324586 | 64.7372035 | 69.9524294 |            |
| 16:02:31 | 56.3324586 | 64.7372035 | 70.9524294 |            |
| 16:02:32 | 56.3324586 | 64.7372035 | 70.9524294 |            |
| 16:02:33 | 53.3324586 | 65.7372035 | 70.9524294 |            |
| 16:02:34 | 48.3324586 | 65.7372035 | 70.9524294 |            |
| 16:02:35 | 47.3324586 | 65.7372035 | 69.9524294 |            |
| 16:02:36 | 47.3324586 | 67.7372035 | 65.0726647 | 68.9524294 |
| 16:02:37 | 45.3324586 | 69.7372035 | 65.0726647 | 68.9524294 |
| 16:02:38 | 45.3324586 | 71.7372035 | 65.0726647 | 65.9524294 |
| 16:02:39 | 44.3324586 | 71.7372035 | 64.5726647 | 65.9524294 |
| 16:02:40 | 44.3324586 | 71.7372035 | 64.5726647 | 65.9524294 |
| 16:02:41 | 42.3324586 | 73.7372035 | 64.5726647 | 65.9524294 |
| 16:02:42 | 42.3324586 | 74.7372035 | 64.8226647 | 65.9524294 |
| 16:02:43 | 42.3324586 | 74.7372035 | 75.2685674 | 66.9524294 |
| 16:02:44 | 42.3324586 | 75.7372035 | 75.2685674 | 67.9524294 |
| 16:02:45 | 42.3324586 | 75.7372035 | 75.2685674 | 67.9524294 |
| 16:02:46 | 42.3324586 | 75.7372035 | 76.2685674 | 67.9524294 |

|          |            |            |            |            |
|----------|------------|------------|------------|------------|
| 16:02:47 | 42.3324586 | 76.7372035 | 76.2685674 | 70.9524294 |
| 16:02:48 | 42.3324586 | 74.7372035 | 75.2685674 | 73.9524294 |
| 16:02:49 | 43.3324586 | 74.7372035 | 75.2685674 | 75.9524294 |
| 16:02:50 | 43.3324586 | 70.7372035 | 75.2685674 | 75.9524294 |
| 16:02:51 | 44.3324586 | 70.7372035 | 73.2685674 | 71.9524294 |
| 16:02:52 | 44.3324586 | 69.7372035 | 73.2685674 | 71.9524294 |
| 16:02:53 | 48.3324586 | 69.7372035 | 73.2685674 | 69.9524294 |
| 16:02:54 | 48.3324586 | 69.7372035 | 73.2685674 | 69.9524294 |
| 16:02:55 | 50.3324586 | 69.7372035 | 72.2685674 | 69.9524294 |
| 16:02:56 | 50.3324586 | 69.7372035 | 72.2685674 | 70.9524294 |
| 16:02:57 | 54.3324586 | 67.7372035 | 72.2685674 | 70.9524294 |
| 16:02:58 | 56.3324586 | 67.7372035 | 70.2685674 | 70.9524294 |
| 16:02:59 | 56.3324586 | 67.7372035 | 69.2685674 | 70.9524294 |
| 16:03:00 | 56.3324586 | 67.7372035 | 69.2685674 | 70.9524294 |
| 16:03:01 | 57.3324586 | 66.7372035 | 69.2685674 | 70.9524294 |
| 16:03:02 | 59.3324586 | 66.7372035 | 68.2685674 | 74.9524294 |
| 16:03:03 | 59.3324586 | 66.7372035 | 68.2685674 | 74.9524294 |
| 16:03:04 | 59.3324586 | 66.7372035 | 68.2685674 | 74.9524294 |
| 16:03:05 | 59.3324586 | 65.7372035 | 68.2685674 | 75.9524294 |
| 16:03:06 | 58.3324586 | 65.7372035 | 69.2685674 | 75.9524294 |
| 16:03:07 | 58.3324586 | 65.7372035 | 70.2685674 | 77.9524294 |
| 16:03:08 | 58.3324586 | 65.7372035 | 70.2685674 | 78.9524294 |
| 16:03:09 | 62.3324586 | 66.7372035 | 70.2685674 | 78.9524294 |
| 16:03:10 | 68.3324586 | 66.7372035 | 71.2685674 | 78.9524294 |
| 16:03:11 | 68.3324586 | 64.7372035 | 71.2685674 | 77.9524294 |
| 16:03:12 | 68.3324586 | 64.7372035 | 71.2685674 | 77.9524294 |
| 16:03:13 | 68.3324586 | 64.7372035 | 74.2685674 | 76.9524294 |
| 16:03:14 | 67.3324586 | 64.7372035 | 75.2685674 | 74.9524294 |
| 16:03:15 | 67.3324586 | 65.7372035 | 74.2685674 | 74.9524294 |
| 16:03:16 | 67.3324586 | 65.7372035 | 72.2685674 | 73.9524294 |
| 16:03:17 | 66.3324586 | 65.7372035 | 72.2685674 | 71.9524294 |
| 16:03:18 | 65.3324586 | 65.7372035 | 70.2685674 | 71.9524294 |
| 16:03:19 | 65.3324586 | 65.7372035 | 70.2685674 | 71.9524294 |
| 16:03:20 | 63.3324586 | 65.7372035 | 70.2685674 | 71.9524294 |
| 16:03:21 | 63.3324586 | 65.7372035 | 70.2685674 | 71.9524294 |
| 16:03:22 | 63.3324586 | 65.7372035 | 70.2685674 | 71.9524294 |
| 16:03:23 | 64.3324586 | 64.7372035 | 70.2685674 | 71.9524294 |
| 16:03:24 | 64.3324586 | 64.7372035 | 70.2685674 | 74.9524294 |
| 16:03:25 | 64.3324586 | 64.7372035 | 71.2685674 | 75.9524294 |
| 16:03:26 | 62.3324586 | 64.7372035 | 70.2685674 | 75.9524294 |
| 16:03:27 | 62.3324586 | 64.7372035 | 70.2685674 | 75.9524294 |
| 16:03:28 | 62.3324586 | 64.7372035 | 69.2685674 | 75.9524294 |
| 16:03:29 | 62.3324586 | 64.7372035 | 69.2685674 | 75.9524294 |
| 16:03:30 | 62.3324586 | 64.7372035 | 68.2685674 | 75.9524294 |
| 16:03:31 | 62.3324586 | 64.7372035 | 65.2685674 | 74.9524294 |

|          |            |            |            |            |
|----------|------------|------------|------------|------------|
| 16:03:32 | 62.3324586 | 64.7372035 | 65.2685674 | 75.9524294 |
| 16:03:33 | 62.3324586 | 65.7372035 | 65.2685674 | 75.9524294 |
| 16:03:34 | 63.3324586 | 65.7372035 | 65.2685674 | 74.9524294 |
| 16:03:35 | 63.3324586 | 65.7372035 | 65.2685674 | 74.9524294 |
| 16:03:36 | 63.3324586 | 65.7372035 | 66.2685674 | 76.9524294 |
| 16:03:37 | 62.3324586 | 65.7372035 | 67.2685674 | 76.9524294 |
| 16:03:38 | 62.3324586 | 65.7372035 | 69.2685674 | 77.9524294 |
| 16:03:39 | 61.3324586 | 65.7372035 | 70.2685674 | 78.9524294 |
| 16:03:40 | 61.3324586 | 65.7372035 | 70.2685674 | 78.9524294 |
| 16:03:41 | 61.3324586 | 66.7372035 | 73.2685674 | 75.9524294 |
| 16:03:42 | 60.3324586 | 66.7372035 | 73.2685674 | 75.9524294 |
| 16:03:43 | 60.3324586 | 66.7372035 | 73.2685674 | 73.9524294 |
| 16:03:44 | 59.3324586 | 65.7372035 | 74.2685674 | 73.9524294 |
| 16:03:45 | 59.3324586 | 65.7372035 | 75.2685674 | 72.9524294 |
| 16:03:46 | 59.3324586 | 65.7372035 | 75.2685674 | 72.9524294 |
| 16:03:47 | 59.3324586 | 65.7372035 | 75.2685674 | 72.9524294 |
| 16:03:48 | 60.3324586 | 65.7372035 | 78.2685674 | 72.9524294 |
| 16:03:49 | 61.3324586 | 64.7372035 | 78.2685674 | 72.9524294 |
| 16:03:50 | 62.3324586 | 66.7372035 | 81.2685674 | 72.9524294 |
| 16:03:51 | 62.3324586 | 66.7372035 | 80.2685674 | 72.9524294 |
| 16:03:52 | 63.3324586 | 66.7372035 | 79.2685674 | 72.9524294 |
| 16:03:53 | 63.3324586 | 67.7372035 | 77.2685674 | 72.9524294 |
| 16:03:54 | 63.3324586 | 67.7372035 | 77.2685674 | 72.9524294 |
| 16:03:55 | 65.3324586 | 67.7372035 | 65.3324586 | 72.9524294 |
| 16:03:56 | 68.3324586 | 66.7372035 | 73.2685674 | 73.9524294 |
| 16:03:57 | 70.3324586 | 66.7372035 | 72.2685674 | 74.9524294 |
| 16:03:58 | 70.3324586 | 65.7372035 | 71.2685674 | 73.9524294 |
| 16:03:59 | 70.3324586 | 65.7372035 | 71.2685674 | 73.9524294 |
| 16:04:00 | 73.3324586 | 65.7372035 | 71.2685674 | 74.9524294 |
| 16:04:01 | 73.3324586 | 65.7372035 | 71.2685674 | 74.9524294 |
| 16:04:02 | 73.3324586 | 65.7372035 | 70.2685674 | 75.9524294 |
| 16:04:03 | 75.3324586 | 66.7372035 | 70.2685674 | 75.9524294 |
| 16:04:04 | 73.3324586 | 66.7372035 | 70.2685674 | 75.9524294 |
| 16:04:05 | 73.3324586 | 65.7372035 | 71.2685674 | 75.9524294 |
| 16:04:06 | 69.3324586 | 65.7372035 | 71.2685674 | 76.9524294 |
| 16:04:07 | 68.3324586 | 65.7372035 | 71.2685674 | 78.9524294 |
| 16:04:08 | 68.3324586 | 65.7372035 | 70.2685674 | 78.9524294 |
| 16:04:09 | 68.3324586 | 66.7372035 | 70.2685674 | 78.9524294 |
| 16:04:10 | 68.3324586 | 66.7372035 | 70.2685674 | 78.9524294 |
| 16:04:11 | 68.3324586 | 66.7372035 | 71.2685674 | 77.9524294 |
| 16:04:12 | 66.3324586 | 66.7372035 | 71.2685674 | 77.9524294 |
| 16:04:13 | 66.3324586 | 66.7372035 | 72.2685674 | 77.9524294 |
| 16:04:14 | 66.3324586 | 67.7372035 | 72.2685674 | 77.9524294 |
| 16:04:15 | 66.3324586 | 67.7372035 | 72.2685674 | 78.9524294 |
| 16:04:16 | 66.3324586 | 67.7372035 | 72.2685674 | 78.9524294 |



|          |            |            |            |            |            |
|----------|------------|------------|------------|------------|------------|
| 16:04:17 | 66.3324586 | 67.7372035 | 71.2685674 | 78.9524294 |            |
| 16:04:18 | 66.3324586 | 66.7372035 | 73.2685674 | 73.9524294 |            |
| 16:04:19 | 66.3324586 | 68.7372035 | 73.2685674 | 71.9524294 |            |
| 16:04:20 | 66.3324586 | 68.7372035 | 73.2685674 | 71.9524294 |            |
| 16:04:21 | 66.3324586 | 68.7372035 | 73.2685674 | 65.9524294 |            |
| 16:04:22 | 66.3324586 | 68.7372035 | 72.2685674 | 64.9524294 |            |
| 16:04:23 | 66.3324586 | 68.7372035 | 72.2685674 | 64.9524294 | 70.7487099 |
| 16:04:24 | 65.3324586 | 69.7372035 | 71.2685674 | 64.9524294 | 70.7487099 |
| 16:04:25 | 64.3324586 | 68.7372035 | 71.2685674 | 64.9524294 | 70.7487099 |
| 16:04:26 | 64.3324586 | 68.7372035 | 71.2685674 | 64.9524294 | 71.7487099 |
| 16:04:27 | 64.3324586 | 67.7372035 | 71.2685674 | 65.9524294 | 71.7487099 |
| 16:04:28 | 63.3324586 | 68.7372035 | 71.2685674 | 67.9524294 | 71.7487099 |
| 16:04:29 | 64.3324586 | 67.7372035 | 71.2685674 | 67.9524294 | 72.7487099 |
| 16:04:30 | 65.3324586 | 66.7372035 | 71.2685674 | 70.9524294 | 72.7487099 |
| 16:04:31 | 68.3324586 | 66.7372035 | 73.2685674 | 71.9524294 | 72.7487099 |
| 16:04:32 | 68.3324586 | 66.7372035 | 73.2685674 | 71.9524294 | 72.7487099 |
| 16:04:33 | 70.3324586 | 67.7372035 | 75.2685674 | 62.9524294 | 75.7487099 |
| 16:04:34 | 71.3324586 | 67.7372035 | 75.2685674 | 60.9524294 | 75.7487099 |
| 16:04:35 | 71.3324586 | 66.7372035 | 75.2685674 | 59.9524294 | 80.7487099 |
| 16:04:36 | 71.3324586 | 66.7372035 | 75.2685674 | 58.9524294 | 80.7487099 |
| 16:04:37 | 71.3324586 | 66.7372035 | 74.2685674 | 58.9524294 | 70.6078737 |
| 16:04:38 | 71.3324586 | 66.7372035 | 73.2685674 | 57.9524294 | 70.2078737 |
| 16:04:39 | 70.3324586 | 66.7372035 | 73.2685674 | 58.9524294 | 70.2078737 |
| 16:04:40 | 70.3324586 | 66.7372035 | 74.2685674 | 58.9524294 | 70.4078737 |
| 16:04:41 | 70.3324586 | 66.7372035 | 75.2685674 | 61.9524294 | 80.7487099 |
| 16:04:42 | 70.3324586 | 66.7372035 | 75.2685674 | 61.9524294 | 77.7487099 |
| 16:04:43 | 69.3324586 | 65.7372035 | 75.2685674 | 61.9524294 | 75.7487099 |
| 16:04:44 | 69.3324586 | 65.7372035 | 75.2685674 | 60.9524294 | 73.7487099 |
| 16:04:45 | 69.3324586 | 65.7372035 | 74.2685674 | 60.9524294 | 73.7487099 |
| 16:04:46 | 67.3324586 | 65.7372035 | 74.2685674 | 61.9524294 | 73.7487099 |
| 16:04:47 | 67.3324586 | 65.7372035 | 71.2685674 | 61.9524294 | 73.7487099 |
| 16:04:48 | 67.3324586 | 65.7372035 | 71.2685674 | 61.9524294 | 73.7487099 |
| 16:04:49 | 67.3324586 | 66.7372035 | 70.2685674 | 62.9524294 | 70.7487099 |
| 16:04:50 | 64.3324586 | 69.7372035 | 70.2685674 | 62.9524294 | 70.7487099 |
| 16:04:51 | 64.3324586 | 70.7372035 | 70.2685674 | 64.9524294 | 70.7487099 |
| 16:04:52 | 64.3324586 | 71.7372035 | 71.2685674 | 64.9524294 | 72.7487099 |
| 16:04:53 | 67.3324586 | 71.7372035 | 71.2685674 | 64.9524294 | 73.7487099 |
| 16:04:54 | 67.3324586 | 70.7372035 | 72.2685674 | 63.9524294 | 74.7487099 |
| 16:04:55 | 70.3324586 | 70.7372035 | 71.2685674 | 63.9524294 | 74.7487099 |
| 16:04:56 | 70.3324586 | 69.7372035 | 70.2685674 | 63.9524294 | 74.7487099 |
| 16:04:57 | 70.3324586 | 69.7372035 | 70.2685674 | 63.9524294 | 74.7487099 |
| 16:04:58 | 70.3324586 | 68.7372035 | 68.2685674 | 63.9524294 | 74.7487099 |
| 16:04:59 | 70.3324586 | 66.7372035 | 68.2685674 | 63.9524294 | 73.7487099 |
| 16:05:00 | 70.3324586 | 65.7372035 | 68.2685674 | 63.9524294 | 73.7487099 |
| 16:05:01 | 70.3324586 | 65.7372035 | 68.2685674 | 64.9524294 | 72.7487099 |

|          |            |            |            |            |            |
|----------|------------|------------|------------|------------|------------|
| 16:05:02 | 70.3324586 | 65.7372035 | 68.2685674 | 67.9524294 | 72.7487099 |
| 16:05:03 | 70.3324586 | 65.7372035 | 71.2685674 | 67.9524294 | 73.7487099 |
| 16:05:04 | 70.3324586 | 65.7372035 | 72.2685674 | 67.9524294 | 74.7487099 |
| 16:05:05 | 70.3324586 | 65.7372035 | 74.2685674 | 68.9524294 | 76.7487099 |
| 16:05:06 | 70.3324586 | 65.7372035 | 74.2685674 | 69.9524294 | 76.7487099 |
| 16:05:07 | 70.3324586 | 64.7372035 | 80.2685674 | 69.9524294 | 77.7487099 |
| 16:05:08 | 70.3324586 | 64.7372035 | 81.2685674 | 69.9524294 | 77.7487099 |
| 16:05:09 | 70.3324586 | 64.7372035 | 80.2685674 | 69.9524294 | 76.7487099 |
| 16:05:10 | 70.3324586 | 64.7372035 | 80.2685674 | 69.9524294 | 75.7487099 |
| 16:05:11 | 71.3324586 | 64.7372035 | 79.2685674 | 70.9524294 | 75.7487099 |
| 16:05:12 | 71.3324586 | 65.7372035 | 79.2685674 | 70.9524294 | 75.7487099 |
| 16:05:13 | 71.3324586 | 65.7372035 | 78.2685674 | 70.9524294 | 74.7487099 |
| 16:05:14 | 71.3324586 | 64.7372035 | 76.2685674 | 69.9524294 | 74.7487099 |
| 16:05:15 | 73.3324586 | 64.7372035 | 73.2685674 | 69.9524294 | 74.7487099 |
| 16:05:16 | 72.3324586 | 64.7372035 | 73.2685674 | 69.9524294 | 75.7487099 |
| 16:05:17 | 72.3324586 | 66.7372035 | 70.2685674 | 69.9524294 | 74.7487099 |
| 16:05:18 | 70.3324586 | 66.7372035 | 70.2685674 | 69.9524294 | 74.7487099 |
| 16:05:19 | 70.3324586 | 66.7372035 | 69.2685674 | 69.9524294 | 73.7487099 |
| 16:05:20 | 70.3324586 | 66.7372035 | 69.2685674 | 69.9524294 | 72.7487099 |
| 16:05:21 | 70.3324586 | 67.7372035 | 69.2685674 | 69.9524294 | 72.7487099 |
| 16:05:22 | 70.3324586 | 66.7372035 | 69.2685674 | 68.9524294 | 72.7487099 |
| 16:05:23 | 70.3324586 | 66.7372035 | 69.2685674 | 71.9524294 | 73.7487099 |
| 16:05:24 | 69.3324586 | 66.7372035 | 67.2685674 | 72.9524294 | 73.7487099 |
| 16:05:25 | 69.3324586 | 66.7372035 | 65.2685674 | 72.9524294 | 73.7487099 |
| 16:05:26 | 69.3324586 | 65.7372035 | 65.2685674 | 72.9524294 | 74.7487099 |
| 16:05:27 | 71.3324586 | 65.7372035 | 76.2685674 | 72.9524294 | 74.7487099 |
| 16:05:28 | 71.3324586 | 65.7372035 | 77.2685674 | 72.9524294 | 74.7487099 |
| 16:05:29 | 71.3324586 | 65.7372035 | 77.2685674 | 71.9524294 | 75.7487099 |
| 16:05:30 | 75.3324586 | 65.7372035 | 76.2685674 | 71.9524294 | 75.7487099 |
| 16:05:31 | 75.3324586 | 65.7372035 | 76.2685674 | 71.9524294 | 75.7487099 |
| 16:05:32 | 79.3324586 | 66.7372035 | 76.2685674 | 71.9524294 | 75.7487099 |
| 16:05:33 | 79.3324586 | 67.7372035 | 76.2685674 | 73.9524294 | 75.7487099 |
| 16:05:34 | 77.3324586 | 66.7372035 | 76.2685674 | 74.9524294 | 75.7487099 |
| 16:05:35 | 75.3324586 | 66.7372035 | 76.2685674 | 74.9524294 | 75.7487099 |
| 16:05:36 | 75.3324586 | 66.7372035 | 76.2685674 | 74.9524294 | 76.7487099 |
| 16:05:37 | 73.3324586 | 66.7372035 | 75.2685674 | 74.9524294 | 76.7487099 |
| 16:05:38 | 73.3324586 | 67.7372035 | 74.2685674 | 69.9524294 | 76.7487099 |
| 16:05:39 | 73.3324586 | 67.7372035 | 73.2685674 | 67.9524294 | 77.7487099 |
| 16:05:40 | 73.3324586 | 67.7372035 | 71.2685674 | 67.9524294 | 78.7487099 |
| 16:05:41 | 72.3324586 | 69.7372035 | 70.2685674 | 66.9524294 | 78.7487099 |
| 16:05:42 | 72.3324586 | 69.7372035 | 70.2685674 | 66.9524294 | 78.7487099 |
| 16:05:43 | 70.3324586 | 69.7372035 | 70.2685674 | 64.9524294 | 78.7487099 |
| 16:05:44 | 69.3324586 | 73.7372035 | 70.2685674 | 64.9524294 | 79.7487099 |
| 16:05:45 | 69.3324586 | 72.7372035 | 70.2685674 | 64.9524294 | 79.7487099 |
| 16:05:46 | 69.3324586 | 72.7372035 | 70.2685674 | 64.9524294 | 79.7487099 |

|          |            |            |            |            |            |
|----------|------------|------------|------------|------------|------------|
| 16:05:47 | 68.3324586 | 71.7372035 | 71.2685674 | 64.9524294 | 79.7487099 |
| 16:05:48 | 68.3324586 | 71.7372035 | 71.2685674 | 64.9524294 | 79.7487099 |
| 16:05:49 | 68.3324586 | 71.7372035 | 70.2685674 | 63.9524294 | 79.7487099 |
| 16:05:50 | 68.3324586 | 70.7372035 | 70.2685674 | 62.9524294 | 79.7487099 |
| 16:05:51 | 68.3324586 | 70.7372035 | 70.2685674 | 62.9524294 | 79.7487099 |
| 16:05:52 | 67.3324586 | 71.7372035 | 70.2685674 | 63.9524294 | 81.7487099 |
| 16:05:53 | 67.3324586 | 71.7372035 | 71.2685674 | 63.9524294 | 71.4078737 |
| 16:05:54 | 66.3324586 | 71.7372035 | 72.2685674 | 63.9524294 | 72.6078737 |
| 16:05:55 | 65.3324586 | 72.7372035 | 72.2685674 | 63.9524294 | 72.6078737 |
| 16:05:56 | 65.3324586 | 72.7372035 | 73.2685674 | 64.9524294 | 73.0078737 |
| 16:05:57 | 66.3324586 | 73.7372035 | 72.2685674 | 64.9524294 | 73.2078737 |
| 16:05:58 | 66.3324586 | 73.7372035 | 72.2685674 | 63.9524294 | 73.0078737 |
| 16:05:59 | 67.3324586 | 73.7372035 | 70.2685674 | 62.9524294 | 72.8078737 |
| 16:06:00 | 67.3324586 | 75.7372035 | 70.2685674 | 62.9524294 | 73.2078737 |
| 16:06:01 | 66.3324586 | 75.7372035 | 70.2685674 | 63.9524294 | 73.2078737 |
| 16:06:02 | 65.3324586 | 74.7372035 | 70.2685674 | 63.9524294 | 72.8078737 |
| 16:06:03 | 64.3324586 | 74.7372035 | 70.2685674 | 63.9524294 | 71.6326248 |
| 16:06:04 | 64.3324586 | 74.7372035 | 70.2685674 | 62.9524294 | 71.4659581 |
| 16:06:05 | 63.3324586 | 74.7372035 | 70.2685674 | 61.9524294 | 70.7992914 |
| 16:06:06 | 62.3324586 | 75.7372035 | 71.2685674 | 61.9524294 | 70.6326248 |
| 16:06:07 | 62.3324586 | 76.7372035 | 71.2685674 | 61.9524294 | 70.4659581 |
| 16:06:08 | 62.3324586 | 76.7372035 | 71.2685674 | 61.9524294 | 70.4659581 |
| 16:06:09 | 64.3324586 | 76.7372035 | 71.2685674 | 61.9524294 | 70.7992914 |
| 16:06:10 | 65.3324586 | 75.7372035 | 71.2685674 | 61.9524294 | 79.7487099 |
| 16:06:11 | 67.3324586 | 74.7372035 | 71.2685674 | 61.9524294 | 77.7487099 |
| 16:06:12 | 67.3324586 | 74.7372035 | 72.2685674 | 61.9524294 | 77.7487099 |
| 16:06:13 | 68.3324586 | 72.7372035 | 72.2685674 | 62.9524294 | 77.7487099 |
| 16:06:14 | 68.3324586 | 72.7372035 | 73.2685674 | 62.9524294 | 80.7487099 |
| 16:06:15 | 69.3324586 | 70.7372035 | 73.2685674 | 62.9524294 | 80.7487099 |
| 16:06:16 | 69.3324586 | 70.7372035 | 73.2685674 | 62.9524294 | 82.7487099 |
| 16:06:17 | 69.3324586 | 70.7372035 | 71.2685674 | 62.9524294 | 82.7487099 |
| 16:06:18 | 69.3324586 | 70.7372035 | 70.2685674 | 63.9524294 | 82.7487099 |
| 16:06:19 | 69.3324586 | 70.7372035 | 70.2685674 | 63.9524294 | 71.9659581 |
| 16:06:20 | 69.3324586 | 70.7372035 | 70.2685674 | 64.9524294 | 72.4659581 |
| 16:06:21 | 69.3324586 | 70.7372035 | 70.2685674 | 65.9524294 | 73.2992914 |
| 16:06:22 | 69.3324586 | 71.7372035 | 70.2685674 | 65.9524294 | 73.7992914 |
| 16:06:23 | 69.3324586 | 71.7372035 | 70.2685674 | 66.9524294 | 73.9659581 |
| 16:06:24 | 70.3324586 | 71.7372035 | 70.2685674 | 77.9524294 | 86.7487099 |
| 16:06:25 | 70.3324586 | 70.7372035 | 70.2685674 | 77.9524294 | 82.7487099 |
| 16:06:26 | 69.3324586 | 70.7372035 | 71.2685674 | 80.9524294 | 82.7487099 |
| 16:06:27 | 69.3324586 | 70.7372035 | 71.2685674 | 80.9524294 | 81.7487099 |
| 16:06:28 | 69.3324586 | 69.7372035 | 71.2685674 | 80.9524294 | 80.7487099 |
| 16:06:29 | 69.3324586 | 69.7372035 | 70.2685674 | 79.9524294 | 78.7487099 |
| 16:06:30 | 70.3324586 | 68.7372035 | 70.2685674 | 78.9524294 | 77.7487099 |
| 16:06:31 | 71.3324586 | 67.7372035 | 70.2685674 | 78.9524294 | 77.7487099 |

|          |            |            |            |            |            |
|----------|------------|------------|------------|------------|------------|
| 16:06:32 | 71.3324586 | 67.7372035 | 72.2685674 | 77.9524294 | 76.7487099 |
| 16:06:33 | 70.3324586 | 67.7372035 | 72.2685674 | 77.9524294 | 76.7487099 |
| 16:06:34 | 69.3324586 | 67.7372035 | 72.2685674 | 77.9524294 | 75.7487099 |
| 16:06:35 | 69.3324586 | 67.7372035 | 72.2685674 | 76.9524294 | 75.7487099 |
| 16:06:36 | 69.3324586 | 67.7372035 | 72.2685674 | 76.9524294 | 75.7487099 |
| 16:06:37 | 69.3324586 | 66.7372035 | 72.2685674 | 76.9524294 | 76.7487099 |
| 16:06:38 | 69.3324586 | 66.7372035 | 71.2685674 | 76.9524294 | 74.7487099 |
| 16:06:39 | 70.3324586 | 66.7372035 | 71.2685674 | 76.9524294 | 72.7487099 |
| 16:06:40 | 70.3324586 | 66.7372035 | 71.2685674 | 76.9524294 | 72.7487099 |
| 16:06:41 | 71.3324586 | 67.7372035 | 71.2685674 | 76.9524294 | 72.7487099 |
| 16:06:42 | 71.3324586 | 67.7372035 | 71.2685674 | 75.9524294 | 72.7487099 |
| 16:06:43 | 71.3324586 | 66.7372035 | 71.2685674 | 74.9524294 | 72.7487099 |
| 16:06:44 | 71.3324586 | 66.7372035 | 70.2685674 | 74.9524294 | 72.7487099 |
| 16:06:45 | 71.3324586 | 67.7372035 | 70.2685674 | 74.9524294 | 72.7487099 |
| 16:06:46 | 71.3324586 | 68.7372035 | 69.2685674 | 67.9524294 | 73.7487099 |
| 16:06:47 | 71.3324586 | 68.7372035 | 69.2685674 | 67.9524294 | 78.7487099 |
| 16:06:48 | 71.3324586 | 67.7372035 | 69.2685674 | 66.9524294 | 82.7487099 |
| 16:06:49 | 71.3324586 | 68.7372035 | 69.2685674 | 66.9524294 | 82.7487099 |
| 16:06:50 | 71.3324586 | 69.7372035 | 73.2685674 | 67.9524294 | 82.7487099 |
| 16:06:51 | 71.3324586 | 69.7372035 | 75.2685674 | 67.9524294 | 83.7487099 |
| 16:06:52 | 71.3324586 | 70.7372035 | 76.2685674 | 67.9524294 | 83.7487099 |
| 16:06:53 | 71.3324586 | 71.7372035 | 76.2685674 | 67.9524294 | 84.7487099 |
| 16:06:54 | 71.3324586 | 71.7372035 | 74.2685674 | 67.9524294 | 84.7487099 |
| 16:06:55 | 72.3324586 | 70.7372035 | 73.2685674 | 68.9524294 | 84.7487099 |
| 16:06:56 | 72.3324586 | 70.7372035 | 73.2685674 | 69.9524294 | 74.5553543 |
| 16:06:57 | 72.3324586 | 71.7372035 | 72.2685674 | 69.9524294 | 74.26964   |
| 16:06:58 | 73.3324586 | 71.7372035 | 73.2685674 | 70.9524294 | 74.8410686 |
| 16:06:59 | 72.3324586 | 71.7372035 | 73.2685674 | 70.9524294 | 74.9839257 |
| 16:07:00 | 72.3324586 | 71.7372035 | 73.2685674 | 70.9524294 | 75.26964   |
| 16:07:01 | 71.3324586 | 70.7372035 | 73.2685674 | 70.9524294 | 74.8410686 |
| 16:07:02 | 70.3324586 | 71.7372035 | 73.2685674 | 70.9524294 | 74.6982114 |
| 16:07:03 | 71.3324586 | 71.7372035 | 73.2685674 | 73.9524294 | 83.7487099 |
| 16:07:04 | 71.3324586 | 71.7372035 | 73.2685674 | 73.9524294 | 83.7487099 |
| 16:07:05 | 71.3324586 | 72.7372035 | 73.2685674 | 73.9524294 | 81.7487099 |
| 16:07:06 | 70.3324586 | 72.7372035 | 73.2685674 | 74.9524294 | 80.7487099 |
| 16:07:07 | 70.3324586 | 71.7372035 | 73.2685674 | 74.9524294 | 80.7487099 |
| 16:07:08 | 70.3324586 | 70.7372035 | 73.2685674 | 75.9524294 | 80.7487099 |
| 16:07:09 | 70.3324586 | 70.7372035 | 74.2685674 | 75.9524294 | 80.7487099 |
| 16:07:10 | 69.3324586 | 69.7372035 | 74.2685674 | 75.9524294 | 79.7487099 |
| 16:07:11 | 69.3324586 | 69.7372035 | 74.2685674 | 75.9524294 | 76.7487099 |
| 16:07:12 | 69.3324586 | 69.7372035 | 75.2685674 | 74.9524294 | 76.7487099 |
| 16:07:13 | 69.3324586 | 69.7372035 | 75.2685674 | 72.9524294 | 75.7487099 |
| 16:07:14 | 69.3324586 | 70.7372035 | 75.2685674 | 72.9524294 | 74.7487099 |
| 16:07:15 | 69.3324586 | 70.7372035 | 75.2685674 | 72.9524294 | 73.7487099 |
| 16:07:16 | 69.3324586 | 70.7372035 | 75.2685674 | 73.9524294 | 73.7487099 |

|          |            |            |            |            |            |
|----------|------------|------------|------------|------------|------------|
| 16:07:17 | 68.3324586 | 71.7372035 | 75.2685674 | 73.9524294 | 73.7487099 |
| 16:07:18 | 67.3324586 | 71.7372035 | 71.2685674 | 73.9524294 | 73.7487099 |
| 16:07:19 | 67.3324586 | 71.7372035 | 71.2685674 | 73.9524294 | 73.7487099 |
| 16:07:20 | 67.3324586 | 71.7372035 | 71.2685674 | 73.9524294 | 73.7487099 |
| 16:07:21 | 68.3324586 | 71.7372035 | 71.2685674 | 73.9524294 | 70.7487099 |
| 16:07:22 | 68.3324586 | 72.7372035 | 70.2685674 | 74.9524294 | 70.7487099 |
| 16:07:23 | 68.3324586 | 72.7372035 | 70.2685674 | 74.9524294 | 70.7487099 |
| 16:07:24 | 68.3324586 | 72.7372035 | 70.2685674 | 75.9524294 | 70.7487099 |
| 16:07:25 | 67.3324586 | 71.7372035 | 70.2685674 | 75.9524294 | 70.7487099 |
| 16:07:26 | 67.3324586 | 70.7372035 | 70.2685674 | 75.9524294 | 72.7487099 |
| 16:07:27 | 67.3324586 | 69.7372035 | 70.2685674 | 75.9524294 | 72.7487099 |
| 16:07:28 | 67.3324586 | 68.7372035 | 73.2685674 | 75.9524294 | 73.7487099 |
| 16:07:29 | 67.3324586 | 67.7372035 | 75.2685674 | 76.9524294 | 73.7487099 |
| 16:07:30 | 67.3324586 | 67.7372035 | 75.2685674 | 76.9524294 | 73.7487099 |
| 16:07:31 | 67.3324586 | 67.7372035 | 76.2685674 | 76.9524294 | 73.7487099 |
| 16:07:32 | 68.3324586 | 67.7372035 | 74.2685674 | 77.9524294 | 73.7487099 |
| 16:07:33 | 68.3324586 | 67.7372035 | 70.2685674 | 77.9524294 | 73.7487099 |
| 16:07:34 | 68.3324586 | 67.7372035 | 69.2685674 | 77.9524294 | 74.7487099 |
| 16:07:35 | 68.3324586 | 67.7372035 | 68.2685674 | 78.9524294 | 74.7487099 |
| 16:07:36 | 68.3324586 | 68.7372035 | 68.2685674 | 74.9524294 | 74.7487099 |
| 16:07:37 | 70.3324586 | 68.7372035 | 68.2685674 | 72.9524294 | 75.7487099 |
| 16:07:38 | 70.3324586 | 67.7372035 | 69.2685674 | 71.9524294 | 75.7487099 |
| 16:07:39 | 70.3324586 | 67.7372035 | 70.2685674 | 70.9524294 | 75.7487099 |
| 16:07:40 | 70.3324586 | 67.7372035 | 70.2685674 | 70.9524294 | 76.7487099 |
| 16:07:41 | 70.3324586 | 66.7372035 | 71.2685674 | 70.9524294 | 76.7487099 |
| 16:07:42 | 71.3324586 | 66.7372035 | 71.2685674 | 70.9524294 | 76.7487099 |
| 16:07:43 | 71.3324586 | 66.7372035 | 69.2685674 | 70.9524294 | 76.7487099 |
| 16:07:44 | 68.3324586 | 66.7372035 | 68.2685674 | 70.9524294 | 77.7487099 |
| 16:07:45 | 68.3324586 | 66.7372035 | 67.2685674 | 70.9524294 | 77.7487099 |
| 16:07:46 | 68.3324586 | 66.7372035 | 67.2685674 | 70.9524294 | 78.7487099 |
| 16:07:47 | 68.3324586 | 66.7372035 | 67.2685674 | 71.9524294 | 78.7487099 |
| 16:07:48 | 68.3324586 | 72.7372035 | 66.2685674 | 71.9524294 | 78.7487099 |
| 16:07:49 | 68.3324586 | 72.7372035 | 66.2685674 | 70.9524294 | 78.7487099 |
| 16:07:50 | 68.3324586 | 72.7372035 | 67.2685674 | 70.9524294 | 78.7487099 |
| 16:07:51 | 68.3324586 | 70.7372035 | 68.2685674 | 70.9524294 | 78.7487099 |
| 16:07:52 | 68.3324586 | 67.7372035 | 69.2685674 | 69.9524294 | 78.7487099 |
| 16:07:53 | 68.3324586 | 67.7372035 | 69.2685674 | 69.9524294 | 78.7487099 |
| 16:07:54 | 68.3324586 | 67.7372035 | 69.2685674 | 69.9524294 | 78.7487099 |
| 16:07:55 | 68.3324586 | 66.7372035 | 69.2685674 | 69.9524294 | 78.7487099 |
| 16:07:56 | 68.3324586 | 65.7372035 | 68.2685674 | 69.9524294 | 79.7487099 |
| 16:07:57 | 69.3324586 | 64.7372035 | 68.2685674 | 69.9524294 | 80.7487099 |
| 16:07:58 | 71.3324586 | 64.7372035 | 66.2685674 | 69.9524294 | 70.5       |
| 16:07:59 | 71.3324586 | 64.7372035 | 65.2685674 | 69.9524294 | 70.375     |
| 16:08:00 | 72.3324586 | 64.7372035 | 64.2685674 | 69.9524294 | 70.875     |
| 16:08:01 | 75.3324586 | 65.7372035 | 69.2685674 | 69.9524294 | 72         |

|          |            |            |            |            |            |
|----------|------------|------------|------------|------------|------------|
| 16:08:02 | 75.3324586 | 65.7372035 | 69.2685674 | 69.9524294 | 72         |
| 16:08:03 | 75.3324586 | 65.7372035 | 75.2685674 | 69.9524294 | 72.625     |
| 16:08:04 | 78.3324586 | 65.7372035 | 76.2685674 | 69.9524294 | 72.875     |
| 16:08:05 | 79.3324586 | 64.7372035 | 75.2685674 | 67.9524294 | 73         |
| 16:08:06 | 79.3324586 | 64.7372035 | 75.2685674 | 67.9524294 | 82.7487099 |
| 16:08:07 | 78.3324586 | 64.7372035 | 74.2685674 | 67.9524294 | 77.7487099 |
| 16:08:08 | 75.3324586 | 64.7372035 | 71.2685674 | 68.9524294 | 76.7487099 |
| 16:08:09 | 73.3324586 | 64.7372035 | 70.2685674 | 69.9524294 | 76.7487099 |
| 16:08:10 | 71.3324586 | 64.7372035 | 70.2685674 | 69.9524294 | 76.7487099 |
| 16:08:11 | 70.3324586 | 64.7372035 | 70.2685674 | 70.9524294 | 79.7487099 |
| 16:08:12 | 70.3324586 | 64.7372035 | 70.2685674 | 72.9524294 | 82.7487099 |
| 16:08:13 | 69.3324586 | 64.7372035 | 70.2685674 | 72.9524294 | 72         |
| 16:08:14 | 68.3324586 | 66.7372035 | 70.2685674 | 72.9524294 | 72.625     |
| 16:08:15 | 68.3324586 | 66.7372035 | 72.2685674 | 73.9524294 | 73.125     |
| 16:08:16 | 68.3324586 | 66.7372035 | 74.2685674 | 73.9524294 | 73.375     |
| 16:08:17 | 68.3324586 | 65.7372035 | 75.2685674 | 73.9524294 | 73.375     |
| 16:08:18 | 69.3324586 | 65.7372035 | 75.2685674 | 75.9524294 | 73.75      |
| 16:08:19 | 69.3324586 | 65.7372035 | 76.2685674 | 75.9524294 | 73.875     |
| 16:08:20 | 69.3324586 | 65.7372035 | 75.2685674 | 74.9524294 | 74.25      |
| 16:08:21 | 68.3324586 | 65.7372035 | 74.2685674 | 74.9524294 | 80.7487099 |
| 16:08:22 | 68.3324586 | 65.7372035 | 74.2685674 | 71.9524294 | 78.7487099 |
| 16:08:23 | 68.3324586 | 65.7372035 | 74.2685674 | 66.9524294 | 78.7487099 |
| 16:08:24 | 68.3324586 | 65.7372035 | 74.2685674 | 66.9524294 | 78.7487099 |
| 16:08:25 | 69.3324586 | 65.7372035 | 72.2685674 | 62.9524294 | 75.7487099 |
| 16:08:26 | 69.3324586 | 65.7372035 | 72.2685674 | 62.9524294 | 75.7487099 |
| 16:08:27 | 69.3324586 | 65.7372035 | 72.2685674 | 61.9524294 | 75.7487099 |
| 16:08:28 | 68.3324586 | 65.7372035 | 72.2685674 | 61.9524294 | 75.7487099 |
| 16:08:29 | 68.3324586 | 65.7372035 | 72.2685674 | 61.9524294 | 75.7487099 |
| 16:08:30 | 68.3324586 | 65.7372035 | 72.2685674 | 61.9524294 | 75.7487099 |
| 16:08:31 | 68.3324586 | 65.7372035 | 72.2685674 | 61.9524294 | 75.7487099 |
| 16:08:32 | 67.3324586 | 65.7372035 | 73.2685674 | 61.9524294 | 73.7487099 |
| 16:08:33 | 67.3324586 | 69.7372035 | 74.2685674 | 61.9524294 | 73.7487099 |
| 16:08:34 | 71.3324586 | 69.7372035 | 75.2685674 | 61.9524294 | 74.7487099 |
| 16:08:35 | 71.3324586 | 70.7372035 | 76.2685674 | 63.9524294 | 74.7487099 |
| 16:08:36 | 73.3324586 | 70.7372035 | 73.2685674 | 63.9524294 | 73.7487099 |
| 16:08:37 | 73.3324586 | 71.7372035 | 69.2685674 | 63.9524294 | 74.7487099 |
| 16:08:38 | 74.3324586 | 71.7372035 | 67.2685674 | 65.9524294 | 75.7487099 |
| 16:08:39 | 74.3324586 | 71.7372035 | 68.2685674 | 65.9524294 | 74.7487099 |
| 16:08:40 | 71.3324586 | 70.7372035 | 67.2685674 | 66.9524294 | 74.7487099 |
| 16:08:41 | 70.3324586 | 71.7372035 | 67.2685674 | 66.9524294 | 74.7487099 |
| 16:08:42 | 70.3324586 | 71.7372035 | 68.2685674 | 67.9524294 | 74.7487099 |
| 16:08:43 | 70.3324586 | 71.7372035 | 69.2685674 | 67.9524294 | 74.7487099 |
| 16:08:44 | 69.3324586 | 70.7372035 | 69.2685674 | 70.9524294 | 74.7487099 |
| 16:08:45 | 69.3324586 | 70.7372035 | 69.2685674 | 71.9524294 | 74.7487099 |
| 16:08:46 | 69.3324586 | 69.7372035 | 69.2685674 | 71.9524294 | 73.7487099 |

|          |            |            |            |            |            |
|----------|------------|------------|------------|------------|------------|
| 16:08:47 | 69.3324586 | 69.7372035 | 69.2685674 | 71.9524294 | 73.7487099 |
| 16:08:48 | 69.3324586 | 69.7372035 | 67.2685674 | 71.9524294 | 73.7487099 |
| 16:08:49 | 69.3324586 | 69.7372035 | 66.2685674 | 65.9524294 | 73.7487099 |
| 16:08:50 | 69.3324586 | 69.7372035 | 66.2685674 | 64.9524294 | 73.7487099 |
| 16:08:51 | 69.3324586 | 69.7372035 | 67.2685674 | 64.9524294 | 73.7487099 |
| 16:08:52 | 70.3324586 | 69.7372035 | 67.2685674 | 64.9524294 | 73.7487099 |
| 16:08:53 | 70.3324586 | 70.7372035 | 67.2685674 | 63.9524294 | 73.7487099 |
| 16:08:54 | 70.3324586 | 70.7372035 | 68.2685674 | 62.9524294 | 73.7487099 |
| 16:08:55 | 70.3324586 | 71.7372035 | 68.2685674 | 62.9524294 | 71.7487099 |
| 16:08:56 | 70.3324586 | 71.7372035 | 69.2685674 | 62.9524294 | 71.7487099 |
| 16:08:57 | 72.3324586 | 70.7372035 | 69.2685674 | 63.9524294 | 68.7487099 |
| 16:08:58 | 72.3324586 | 70.7372035 | 69.2685674 | 64.9524294 | 68.7487099 |
| 16:08:59 | 72.3324586 | 71.7372035 | 69.2685674 | 65.9524294 | 70.7487099 |
| 16:09:00 | 69.3324586 | 71.7372035 | 71.2685674 | 65.9524294 | 71.7487099 |
| 16:09:01 | 68.3324586 | 71.7372035 | 71.2685674 | 69.9524294 | 72.7487099 |
| 16:09:02 | 68.3324586 | 71.7372035 | 74.2685674 | 72.9524294 | 72.7487099 |
| 16:09:03 | 68.3324586 | 71.7372035 | 74.2685674 | 74.9524294 | 71.7487099 |
| 16:09:04 | 67.3324586 | 72.7372035 | 75.2685674 | 73.9524294 | 70.7487099 |
| 16:09:05 | 68.3324586 | 72.7372035 | 75.2685674 | 73.9524294 | 69.7487099 |
| 16:09:06 | 68.3324586 | 72.7372035 | 75.2685674 | 72.9524294 | 69.7487099 |
| 16:09:07 | 68.3324586 | 73.7372035 | 77.2685674 | 71.9524294 | 69.7487099 |
| 16:09:08 | 68.3324586 | 73.7372035 | 77.2685674 | 69.9524294 | 69.7487099 |
| 16:09:09 | 68.3324586 | 72.7372035 | 76.2685674 | 68.9524294 | 69.7487099 |
| 16:09:10 | 68.3324586 | 71.7372035 | 77.2685674 | 68.9524294 | 71.7487099 |
| 16:09:11 | 68.3324586 | 71.7372035 | 77.2685674 | 67.9524294 | 73.7487099 |
| 16:09:12 | 68.3324586 | 70.7372035 | 74.2685674 | 67.9524294 | 73.7487099 |
| 16:09:13 | 70.3324586 | 69.7372035 | 73.2685674 | 68.9524294 | 73.7487099 |
| 16:09:14 | 70.3324586 | 69.7372035 | 73.2685674 | 68.9524294 | 73.7487099 |
| 16:09:15 | 70.3324586 | 69.7372035 | 72.2685674 | 66.9524294 | 72.7487099 |
| 16:09:16 | 70.3324586 | 69.7372035 | 71.2685674 | 65.9524294 | 72.7487099 |
| 16:09:17 | 71.3324586 | 69.7372035 | 70.2685674 | 65.9524294 | 72.7487099 |
| 16:09:18 | 71.3324586 | 69.7372035 | 70.2685674 | 65.9524294 | 72.7487099 |
| 16:09:19 | 71.3324586 | 69.7372035 | 70.2685674 | 64.9524294 | 71.7487099 |
| 16:09:20 | 70.3324586 | 69.7372035 | 71.2685674 | 64.9524294 | 72.7487099 |
| 16:09:21 | 70.3324586 | 70.7372035 | 72.2685674 | 63.9524294 | 73.7487099 |
| 16:09:22 | 70.3324586 | 70.7372035 | 72.2685674 | 63.9524294 | 74.7487099 |
| 16:09:23 | 70.3324586 | 70.7372035 | 72.2685674 | 63.9524294 | 75.7487099 |
| 16:09:24 | 70.3324586 | 68.7372035 | 72.2685674 | 61.9524294 | 75.7487099 |
| 16:09:25 | 70.3324586 | 69.7372035 | 70.2685674 | 61.9524294 | 75.7487099 |
| 16:09:26 | 70.3324586 | 69.7372035 | 69.2685674 | 60.9524294 | 75.7487099 |
| 16:09:27 | 70.3324586 | 69.7372035 | 69.2685674 | 60.9524294 | 75.7487099 |
| 16:09:28 | 71.3324586 | 69.7372035 | 68.2685674 | 60.9524294 | 75.7487099 |
| 16:09:29 | 73.3324586 | 69.7372035 | 68.2685674 | 61.9524294 | 75.7487099 |
| 16:09:30 | 73.3324586 | 69.7372035 | 69.2685674 | 61.9524294 | 75.7487099 |
| 16:09:31 | 75.3324586 | 68.7372035 | 70.2685674 | 61.9524294 | 76.7487099 |

|          |            |            |            |            |            |
|----------|------------|------------|------------|------------|------------|
| 16:09:32 | 75.3324586 | 67.7372035 | 70.2685674 | 61.9524294 | 76.7487099 |
| 16:09:33 | 75.3324586 | 68.7372035 | 71.2685674 | 61.9524294 | 77.7487099 |
| 16:09:34 | 75.3324586 | 68.7372035 | 71.2685674 | 61.9524294 | 77.7487099 |
| 16:09:35 | 75.3324586 | 67.7372035 | 71.2685674 | 61.9524294 | 76.7487099 |
| 16:09:36 | 76.3324586 | 68.7372035 | 71.2685674 | 61.9524294 | 76.7487099 |
| 16:09:37 | 77.3324586 | 68.7372035 | 71.2685674 | 62.9524294 | 77.7487099 |
| 16:09:38 | 78.3324586 | 68.7372035 | 71.2685674 | 62.9524294 | 76.7487099 |
| 16:09:39 | 78.3324586 | 68.7372035 | 71.2685674 | 62.9524294 | 76.7487099 |
| 16:09:40 | 78.3324586 | 67.7372035 | 71.2685674 | 61.9524294 | 76.7487099 |
| 16:09:41 | 80.3324586 | 67.7372035 | 71.2685674 | 62.9524294 | 75.7487099 |
| 16:09:42 | 80.3324586 | 67.7372035 | 71.2685674 | 62.9524294 | 74.7487099 |
| 16:09:43 | 80.3324586 | 68.7372035 | 71.2685674 | 62.9524294 | 73.7487099 |
| 16:09:44 | 80.3324586 | 67.7372035 | 70.2685674 | 63.9524294 | 71.7487099 |
| 16:09:45 | 80.3324586 | 67.7372035 | 70.2685674 | 62.9524294 | 71.7487099 |
| 16:09:46 | 76.3324586 | 68.7372035 | 70.2685674 | 62.9524294 | 70.7487099 |
| 16:09:47 | 76.3324586 | 68.7372035 | 72.2685674 | 62.9524294 | 71.7487099 |
| 16:09:48 | 74.3324586 | 68.7372035 | 73.2685674 | 64.9524294 | 71.7487099 |
| 16:09:49 | 74.3324586 | 68.7372035 | 73.2685674 | 65.9524294 | 71.7487099 |
| 16:09:50 | 74.3324586 | 68.7372035 | 73.2685674 | 65.9524294 | 72.7487099 |
| 16:09:51 | 72.3324586 | 68.7372035 | 73.2685674 | 65.9524294 | 72.7487099 |
| 16:09:52 | 72.3324586 | 67.7372035 | 73.2685674 | 64.9524294 | 72.7487099 |
| 16:09:53 | 71.3324586 | 66.7372035 | 73.2685674 | 63.9524294 | 71.7487099 |
| 16:09:54 | 71.3324586 | 66.7372035 | 80.2685674 | 62.9524294 | 70.7487099 |
| 16:09:55 | 71.3324586 | 66.7372035 | 80.2685674 | 62.9524294 | 69.7487099 |
| 16:09:56 | 71.3324586 | 66.7372035 | 80.2685674 | 61.9524294 | 69.7487099 |
| 16:09:57 | 71.3324586 | 66.7372035 | 79.2685674 | 61.9524294 | 70.7487099 |
| 16:09:58 | 70.3324586 | 66.7372035 | 78.2685674 | 60.9524294 | 70.7487099 |
| 16:09:59 | 69.3324586 | 66.7372035 | 75.2685674 | 60.9524294 | 74.7487099 |
| 16:10:00 | 66.3324586 | 65.7372035 | 74.2685674 | 59.9524294 | 74.7487099 |
| 16:10:01 | 66.3324586 | 66.7372035 | 72.2685674 | 59.9524294 | 74.7487099 |
| 16:10:02 | 66.3324586 | 67.7372035 | 72.2685674 | 60.9524294 | 75.7487099 |
| 16:10:03 | 66.3324586 | 67.7372035 | 71.2685674 | 60.9524294 | 75.7487099 |
| 16:10:04 | 67.3324586 | 67.7372035 | 69.2685674 | 60.9524294 | 76.7487099 |
| 16:10:05 | 67.3324586 | 68.7372035 | 68.2685674 | 60.9524294 | 76.7487099 |
| 16:10:06 | 70.3324586 | 68.7372035 | 67.2685674 | 60.9524294 | 75.7487099 |
| 16:10:07 | 71.3324586 | 68.7372035 | 67.2685674 | 60.9524294 | 74.7487099 |
| 16:10:08 | 71.3324586 | 67.7372035 | 68.2685674 | 60.9524294 | 74.7487099 |
| 16:10:09 | 69.3324586 | 67.7372035 | 69.2685674 | 60.9524294 | 74.7487099 |
| 16:10:10 | 67.3324586 | 67.7372035 | 69.2685674 | 60.9524294 | 75.7487099 |
| 16:10:11 | 65.3324586 | 67.7372035 | 70.2685674 | 60.9524294 | 75.7487099 |
| 16:10:12 | 65.3324586 | 67.7372035 | 70.2685674 | 60.9524294 | 75.7487099 |
| 16:10:13 | 65.3324586 | 67.7372035 | 72.2685674 | 60.9524294 | 75.7487099 |
| 16:10:14 | 65.3324586 | 66.7372035 | 72.2685674 | 61.9524294 | 75.7487099 |
| 16:10:15 | 65.3324586 | 66.7372035 | 74.2685674 | 61.9524294 | 75.7487099 |
| 16:10:16 | 64.3324586 | 66.7372035 | 74.2685674 | 61.9524294 | 74.7487099 |



|          |            |            |            |            |            |
|----------|------------|------------|------------|------------|------------|
| 16:10:17 | 65.3324586 | 66.7372035 | 74.2685674 | 62.9524294 | 72.7487099 |
| 16:10:18 | 70.3324586 | 66.7372035 | 75.2685674 | 63.9524294 | 72.7487099 |
| 16:10:19 | 70.3324586 | 66.7372035 | 75.2685674 | 65.9524294 | 72.7487099 |
| 16:10:20 | 70.3324586 | 65.7372035 | 74.2685674 | 65.9524294 | 71.7487099 |
| 16:10:21 | 70.3324586 | 65.7372035 | 74.2685674 | 66.9524294 | 71.7487099 |
| 16:10:22 | 68.3324586 | 65.7372035 | 73.2685674 | 66.9524294 | 71.7487099 |
| 16:10:23 | 68.3324586 | 66.7372035 | 72.2685674 | 66.9524294 | 70.7487099 |
| 16:10:24 | 67.3324586 | 66.7372035 | 70.2685674 | 66.9524294 | 70.7487099 |
| 16:10:25 | 67.3324586 | 66.7372035 | 67.2685674 | 71.9524294 | 70.7487099 |
| 16:10:26 | 68.3324586 | 66.7372035 | 67.2685674 | 71.9524294 | 70.7487099 |
| 16:10:27 | 68.3324586 | 67.7372035 | 63.2685674 | 71.9524294 | 70.7487099 |
| 16:10:28 | 68.3324586 | 67.7372035 | 62.2685674 | 72.9524294 | 72.7487099 |
| 16:10:29 | 69.3324586 | 67.7372035 | 62.2685674 | 72.9524294 | 73.7487099 |
| 16:10:30 | 70.3324586 | 67.7372035 | 62.2685674 | 72.9524294 | 73.7487099 |
| 16:10:31 | 71.3324586 | 66.7372035 | 63.2685674 | 73.9524294 | 73.7487099 |
| 16:10:32 | 71.3324586 | 65.7372035 | 63.2685674 | 72.9524294 | 73.7487099 |
| 16:10:33 | 72.3324586 | 65.7372035 | 63.2685674 | 72.9524294 | 74.7487099 |
| 16:10:34 | 71.3324586 | 64.7372035 | 63.2685674 | 72.9524294 | 74.7487099 |
| 16:10:35 | 70.3324586 | 63.7372035 | 63.2685674 | 72.9524294 | 74.7487099 |
| 16:10:36 | 69.3324586 | 63.7372035 | 64.2685674 | 73.9524294 | 74.7487099 |
| 16:10:37 | 68.3324586 | 64.7372035 | 65.2685674 | 77.9524294 | 74.7487099 |
| 16:10:38 | 68.3324586 | 65.7372035 | 66.2685674 | 76.9524294 | 74.7487099 |
| 16:10:39 | 68.3324586 | 67.7372035 | 67.2685674 | 76.9524294 | 76.7487099 |
| 16:10:40 | 68.3324586 | 68.7372035 | 68.2685674 | 73.9524294 | 76.7487099 |
| 16:10:41 | 68.3324586 | 68.7372035 | 68.2685674 | 70.9524294 | 77.7487099 |
| 16:10:42 | 69.3324586 | 68.7372035 | 69.2685674 | 68.9524294 | 77.7487099 |
| 16:10:43 | 69.3324586 | 69.7372035 | 71.2685674 | 68.9524294 | 77.7487099 |
| 16:10:44 | 69.3324586 | 70.7372035 | 71.2685674 | 67.9524294 | 76.7487099 |
| 16:10:45 | 69.3324586 | 70.7372035 | 72.2685674 | 65.9524294 | 76.7487099 |
| 16:10:46 | 68.3324586 | 69.7372035 | 72.2685674 | 65.9524294 | 76.7487099 |
| 16:10:47 | 68.3324586 | 69.7372035 | 75.2685674 | 65.9524294 | 76.7487099 |
| 16:10:48 | 68.3324586 | 69.7372035 | 76.2685674 | 65.9524294 | 76.7487099 |
| 16:10:49 | 67.3324586 | 69.7372035 | 77.2685674 | 65.9524294 | 76.7487099 |
| 16:10:50 | 66.3324586 | 69.7372035 | 77.2685674 | 65.9524294 | 77.7487099 |
| 16:10:51 | 66.3324586 | 69.7372035 | 77.2685674 | 66.9524294 | 77.7487099 |
| 16:10:52 | 66.3324586 | 69.7372035 | 78.2685674 | 66.9524294 | 80.7487099 |
| 16:10:53 | 66.3324586 | 69.7372035 | 78.2685674 | 66.9524294 | 81.7487099 |
| 16:10:54 | 67.3324586 | 67.7372035 | 79.2685674 | 67.9524294 | 81.7487099 |
| 16:10:55 | 68.3324586 | 67.7372035 | 79.2685674 | 67.9524294 | 81.7487099 |
| 16:10:56 | 68.3324586 | 67.7372035 | 82.2685674 | 67.9524294 | 81.7487099 |
| 16:10:57 | 69.3324586 | 67.7372035 | 83.2685674 | 67.9524294 | 81.7487099 |
| 16:10:58 | 69.3324586 | 67.7372035 | 82.2685674 | 67.9524294 | 79.7487099 |
| 16:10:59 | 69.3324586 | 68.7372035 | 79.2685674 | 68.9524294 | 78.7487099 |
| 16:11:00 | 69.3324586 | 68.7372035 | 75.2685674 | 68.9524294 | 74.7487099 |
| 16:11:01 | 69.3324586 | 69.7372035 | 75.2685674 | 69.9524294 | 71.7487099 |

|          |            |            |            |            |            |
|----------|------------|------------|------------|------------|------------|
| 16:11:02 | 69.3324586 | 68.7372035 | 71.2685674 | 67.9524294 | 70.7487099 |
| 16:11:03 | 69.3324586 | 67.7372035 | 70.2685674 | 66.9524294 | 70.7487099 |
| 16:11:04 | 69.3324586 | 67.7372035 | 69.2685674 | 65.9524294 | 70.7487099 |
| 16:11:05 | 69.3324586 | 68.7372035 | 69.2685674 | 64.9524294 | 70.7487099 |
| 16:11:06 | 69.3324586 | 68.7372035 | 69.2685674 | 64.9524294 | 70.7487099 |
| 16:11:07 | 70.3324586 | 67.7372035 | 69.2685674 | 63.9524294 | 70.7487099 |
| 16:11:08 | 71.3324586 | 67.7372035 | 68.2685674 | 62.9524294 | 70.7487099 |
| 16:11:09 | 71.3324586 | 67.7372035 | 69.2685674 | 62.9524294 | 70.7487099 |
| 16:11:10 | 72.3324586 | 67.7372035 | 68.2685674 | 62.9524294 | 70.7487099 |
| 16:11:11 | 72.3324586 | 66.7372035 | 68.2685674 | 61.9524294 | 70.7487099 |
| 16:11:12 | 72.3324586 | 65.7372035 | 68.2685674 | 60.9524294 | 70.7487099 |
| 16:11:13 | 72.3324586 | 65.7372035 | 67.2685674 | 60.9524294 | 69.7487099 |
| 16:11:14 | 72.3324586 | 65.7372035 | 66.2685674 | 61.9524294 | 69.7487099 |
| 16:11:15 | 69.3324586 | 64.7372035 | 65.2685674 | 61.9524294 | 68.7487099 |
| 16:11:16 | 68.3324586 | 64.7372035 | 64.2685674 | 62.9524294 | 68.7487099 |
| 16:11:17 | 67.3324586 | 64.7372035 | 64.2685674 | 62.9524294 | 68.7487099 |
| 16:11:18 | 67.3324586 | 64.7372035 | 64.2685674 | 62.9524294 | 69.7487099 |
| 16:11:19 | 67.3324586 | 64.7372035 | 65.2685674 | 61.9524294 | 69.7487099 |
| 16:11:20 | 67.3324586 | 64.7372035 | 65.2685674 | 61.9524294 | 69.7487099 |
| 16:11:21 | 67.3324586 | 65.7372035 | 66.2685674 | 62.9524294 | 71.7487099 |
| 16:11:22 | 67.3324586 | 65.7372035 | 66.2685674 | 62.9524294 | 71.7487099 |
| 16:11:23 | 67.3324586 | 65.7372035 | 66.2685674 | 62.9524294 | 71.7487099 |
| 16:11:24 | 67.3324586 | 66.7372035 | 66.2685674 | 63.9524294 | 71.7487099 |
| 16:11:25 | 67.3324586 | 67.7372035 | 66.2685674 | 63.9524294 | 71.7487099 |
| 16:11:26 | 67.3324586 | 66.7372035 | 67.2685674 | 61.9524294 | 71.7487099 |
| 16:11:27 | 63.3324586 | 66.7372035 | 66.2685674 | 60.9524294 | 71.7487099 |
| 16:11:28 | 62.3324586 | 66.7372035 | 66.2685674 | 60.9524294 | 71.7487099 |
| 16:11:29 | 62.3324586 | 66.7372035 | 66.2685674 | 61.9524294 | 71.7487099 |
| 16:11:30 | 62.3324586 | 65.7372035 | 66.2685674 | 62.9524294 | 70.7487099 |
| 16:11:31 | 62.3324586 | 65.7372035 | 66.2685674 | 62.9524294 | 70.7487099 |
| 16:11:32 | 62.3324586 | 66.7372035 | 66.2685674 | 62.9524294 | 70.7487099 |
| 16:11:33 | 62.3324586 | 66.7372035 | 67.2685674 | 63.9524294 | 70.7487099 |
| 16:11:34 | 64.3324586 | 66.7372035 | 68.2685674 | 63.9524294 | 70.7487099 |
| 16:11:35 | 66.3324586 | 67.7372035 | 67.2685674 | 63.9524294 | 70.7487099 |
| 16:11:36 | 66.3324586 | 67.7372035 | 67.2685674 | 62.9524294 | 64.7487099 |
| 16:11:37 | 66.3324586 | 67.7372035 | 67.2685674 | 61.9524294 | 63.7487099 |
| 16:11:38 | 66.3324586 | 67.7372035 | 67.2685674 | 60.9524294 | 63.7487099 |
| 16:11:39 | 66.3324586 | 67.7372035 | 67.2685674 | 60.9524294 | 62.7487099 |
| 16:11:40 | 67.3324586 | 68.7372035 | 67.2685674 | 60.9524294 | 62.7487099 |
| 16:11:41 | 67.3324586 | 68.7372035 | 68.2685674 | 60.9524294 | 62.7487099 |
| 16:11:42 | 66.3324586 | 67.7372035 | 69.2685674 | 61.9524294 | 62.7487099 |
| 16:11:43 | 66.3324586 | 68.7372035 | 70.2685674 | 61.9524294 | 60.7487099 |
| 16:11:44 | 65.3324586 | 68.7372035 | 70.2685674 | 61.9524294 | 60.7487099 |
| 16:11:45 | 63.3324586 | 69.7372035 | 74.2685674 | 61.9524294 | 60.7487099 |
| 16:11:46 | 63.3324586 | 68.7372035 | 74.2685674 | 61.9524294 | 60.7487099 |

|          |            |            |            |            |            |
|----------|------------|------------|------------|------------|------------|
| 16:11:47 | 63.3324586 | 68.7372035 | 74.2685674 | 62.9524294 | 60.7487099 |
| 16:11:48 | 62.3324586 | 68.7372035 | 74.2685674 | 63.9524294 | 60.7487099 |
| 16:11:49 | 64.3324586 | 69.7372035 | 73.2685674 | 64.9524294 | 56.7487099 |
| 16:11:50 | 65.3324586 | 68.7372035 | 73.2685674 | 64.9524294 | 53.7487099 |
| 16:11:51 | 65.3324586 | 68.7372035 | 73.2685674 | 64.9524294 | 51.7487099 |
| 16:11:52 | 65.3324586 | 68.7372035 | 72.2685674 | 64.9524294 | 51.7487099 |
| 16:11:53 | 65.3324586 | 69.7372035 | 72.2685674 | 65.9524294 | 51.7487099 |
| 16:11:54 | 66.3324586 | 69.7372035 | 72.2685674 | 68.9524294 | 51.7487099 |
| 16:11:55 | 66.3324586 | 69.7372035 | 73.2685674 | 68.9524294 | 52.7487099 |
| 16:11:56 | 66.3324586 | 69.7372035 | 75.2685674 | 68.9524294 | 52.7487099 |
| 16:11:57 | 68.3324586 | 69.7372035 | 73.2685674 | 71.9524294 | 52.7487099 |
| 16:11:58 | 68.3324586 | 70.7372035 | 73.2685674 | 75.9524294 | 53.7487099 |
| 16:11:59 | 68.3324586 | 70.7372035 | 70.2685674 | 75.9524294 | 53.7487099 |
| 16:12:00 | 68.3324586 | 70.7372035 | 70.2685674 | 75.9524294 | 53.7487099 |
| 16:12:01 | 68.3324586 | 70.7372035 | 68.2685674 | 73.9524294 | 53.7487099 |
| 16:12:02 | 69.3324586 | 69.7372035 | 67.2685674 | 71.9524294 | 69.7487099 |
| 16:12:03 | 69.3324586 | 69.7372035 | 67.2685674 | 70.9524294 | 72.7487099 |
| 16:12:04 | 70.3324586 | 69.7372035 | 67.2685674 | 70.9524294 | 74.7487099 |
| 16:12:05 | 70.3324586 | 69.7372035 | 67.2685674 | 70.9524294 | 73.7487099 |
| 16:12:06 | 69.3324586 | 69.7372035 | 67.2685674 | 68.9524294 | 73.7487099 |
| 16:12:07 | 69.3324586 | 70.7372035 | 67.2685674 | 63.9524294 | 73.7487099 |
| 16:12:08 | 69.3324586 | 70.7372035 | 68.2685674 | 62.9524294 | 73.7487099 |
| 16:12:09 | 68.3324586 | 70.7372035 | 68.2685674 | 62.9524294 | 73.7487099 |
| 16:12:10 | 68.3324586 | 70.7372035 | 68.2685674 | 62.9524294 | 74.7487099 |
| 16:12:11 | 70.3324586 | 70.7372035 | 70.2685674 | 63.9524294 | 74.7487099 |
| 16:12:12 | 71.3324586 | 70.7372035 | 70.2685674 | 63.9524294 | 74.7487099 |
| 16:12:13 | 71.3324586 | 70.7372035 | 71.2685674 | 62.9524294 | 74.7487099 |
| 16:12:14 | 71.3324586 | 70.7372035 | 71.2685674 | 60.9524294 | 74.7487099 |
| 16:12:15 | 71.3324586 | 70.7372035 | 71.2685674 | 60.9524294 | 73.7487099 |
| 16:12:16 | 71.3324586 | 70.7372035 | 71.2685674 | 60.9524294 | 73.7487099 |
| 16:12:17 | 70.3324586 | 70.7372035 | 72.2685674 | 60.9524294 | 73.7487099 |
| 16:12:18 | 70.3324586 | 69.7372035 | 72.2685674 | 60.9524294 | 72.7487099 |
| 16:12:19 | 69.3324586 | 69.7372035 | 72.2685674 | 60.9524294 | 72.7487099 |
| 16:12:20 | 68.3324586 | 68.7372035 | 72.2685674 | 61.9524294 | 71.7487099 |
| 16:12:21 | 68.3324586 | 68.7372035 | 72.2685674 | 63.9524294 | 69.7487099 |
| 16:12:22 | 68.3324586 | 69.7372035 | 72.2685674 | 63.9524294 | 69.7487099 |
| 16:12:23 | 68.3324586 | 69.7372035 | 72.2685674 | 63.9524294 | 67.7487099 |
| 16:12:24 | 68.3324586 | 69.7372035 | 72.2685674 | 65.9524294 | 68.7487099 |
| 16:12:25 | 69.3324586 | 69.7372035 | 72.2685674 | 65.9524294 | 68.7487099 |
| 16:12:26 | 69.3324586 | 69.7372035 | 73.2685674 | 65.9524294 | 68.7487099 |
| 16:12:27 | 69.3324586 | 68.7372035 | 73.2685674 | 65.9524294 | 68.7487099 |
| 16:12:28 | 71.3324586 | 69.7372035 | 72.2685674 | 65.9524294 | 68.7487099 |
| 16:12:29 | 71.3324586 | 69.7372035 | 70.2685674 | 64.9524294 | 70.7487099 |
| 16:12:30 | 71.3324586 | 70.7372035 | 70.2685674 | 64.9524294 | 70.7487099 |
| 16:12:31 | 71.3324586 | 73.7372035 | 67.2685674 | 64.9524294 | 71.7487099 |

|          |            |            |            |            |            |
|----------|------------|------------|------------|------------|------------|
| 16:12:32 | 70.3324586 | 75.7372035 | 66.2685674 | 63.9524294 | 73.7487099 |
| 16:12:33 | 69.3324586 | 75.7372035 | 66.2685674 | 62.9524294 | 73.7487099 |
| 16:12:34 | 69.3324586 | 75.7372035 | 66.2685674 | 61.9524294 | 73.7487099 |
| 16:12:35 | 69.3324586 | 73.7372035 | 67.2685674 | 61.9524294 | 66.7487099 |
| 16:12:36 | 68.3324586 | 71.7372035 | 67.2685674 | 61.9524294 | 63.7487099 |
| 16:12:37 | 68.3324586 | 71.7372035 | 67.2685674 | 59.9524294 | 63.7487099 |
| 16:12:38 | 68.3324586 | 71.7372035 | 66.2685674 | 59.9524294 | 63.7487099 |
| 16:12:39 | 69.3324586 | 71.7372035 | 66.2685674 | 59.9524294 | 63.7487099 |
| 16:12:40 | 69.3324586 | 71.7372035 | 66.2685674 | 59.9524294 | 64.7487099 |
| 16:12:41 | 71.3324586 | 71.7372035 | 67.2685674 | 59.9524294 | 62.7487099 |
| 16:12:42 | 73.3324586 | 71.7372035 | 67.2685674 | 58.9524294 | 62.7487099 |
| 16:12:43 | 73.3324586 | 71.7372035 | 67.2685674 | 58.9524294 | 62.7487099 |
| 16:12:44 | 73.3324586 | 71.7372035 | 67.2685674 | 59.9524294 | 62.7487099 |
| 16:12:45 | 73.3324586 | 72.7372035 | 67.2685674 | 59.9524294 | 62.7487099 |
| 16:12:46 | 73.3324586 | 72.7372035 | 73.2685674 | 59.9524294 | 62.7487099 |
| 16:12:47 | 70.3324586 | 72.7372035 | 73.2685674 | 59.9524294 | 63.7487099 |
| 16:12:48 | 67.3324586 | 72.7372035 | 70.2685674 | 60.9524294 | 63.7487099 |
| 16:12:49 | 67.3324586 | 71.7372035 | 69.2685674 | 61.9524294 | 63.7487099 |
| 16:12:50 | 65.3324586 | 71.7372035 | 68.2685674 | 62.9524294 | 64.7487099 |
| 16:12:51 | 64.3324586 | 71.7372035 | 68.2685674 | 62.9524294 | 65.7487099 |
| 16:12:52 | 63.3324586 | 71.7372035 | 67.2685674 | 62.9524294 | 65.7487099 |
| 16:12:53 | 64.3324586 | 71.7372035 | 67.2685674 | 62.9524294 | 65.7487099 |
| 16:12:54 | 64.3324586 | 71.7372035 | 67.2685674 | 62.9524294 | 65.7487099 |
| 16:12:55 | 64.3324586 | 71.7372035 | 66.2685674 | 63.9524294 | 66.7487099 |
| 16:12:56 | 67.3324586 | 72.7372035 | 66.2685674 | 64.9524294 | 66.7487099 |
| 16:12:57 | 69.3324586 | 72.7372035 | 66.2685674 | 65.9524294 | 66.7487099 |
| 16:12:58 | 69.3324586 | 72.7372035 | 66.2685674 | 64.9524294 | 63.7487099 |
| 16:12:59 | 73.3324586 | 72.7372035 | 66.2685674 | 64.9524294 | 62.7487099 |
| 16:13:00 | 73.3324586 | 72.7372035 | 66.2685674 | 64.9524294 | 62.7487099 |
| 16:13:01 | 73.3324586 | 71.7372035 | 66.2685674 | 64.9524294 | 64.7487099 |
| 16:13:02 | 70.3324586 | 70.7372035 | 67.2685674 | 64.9524294 | 65.7487099 |
| 16:13:03 | 70.3324586 | 70.7372035 | 67.2685674 | 64.9524294 | 66.7487099 |
| 16:13:04 | 69.3324586 | 70.7372035 | 67.2685674 | 65.9524294 | 67.7487099 |
| 16:13:05 | 67.3324586 | 70.7372035 | 67.2685674 | 65.9524294 | 67.7487099 |
| 16:13:06 | 67.3324586 | 70.7372035 | 65.2685674 | 65.9524294 | 68.7487099 |
| 16:13:07 | 67.3324586 | 71.7372035 | 65.2685674 | 64.9524294 | 68.7487099 |
| 16:13:08 | 67.3324586 | 71.7372035 | 63.2685674 | 64.9524294 | 67.7487099 |
| 16:13:09 | 67.3324586 | 70.7372035 | 63.2685674 | 63.9524294 | 67.7487099 |
| 16:13:10 | 67.3324586 | 70.7372035 | 63.2685674 | 60.9524294 | 68.7487099 |
| 16:13:11 | 67.3324586 | 68.7372035 | 63.2685674 | 60.9524294 | 68.7487099 |
| 16:13:12 | 66.3324586 | 68.7372035 | 63.2685674 | 59.9524294 | 68.7487099 |
| 16:13:13 | 66.3324586 | 69.7372035 | 63.2685674 | 60.9524294 | 68.7487099 |
| 16:13:14 | 66.3324586 | 70.7372035 | 64.2685674 | 62.9524294 | 69.7487099 |
| 16:13:15 | 66.3324586 | 70.7372035 | 64.2685674 | 62.9524294 | 69.7487099 |
| 16:13:16 | 66.3324586 | 71.7372035 | 64.2685674 | 63.9524294 | 69.7487099 |

|          |            |            |            |            |            |
|----------|------------|------------|------------|------------|------------|
| 16:13:17 | 66.3324586 | 73.7372035 | 67.2685674 | 63.9524294 | 72.7487099 |
| 16:13:18 | 65.3324586 | 73.7372035 | 67.2685674 | 63.9524294 | 72.7487099 |
| 16:13:19 | 66.3324586 | 73.7372035 | 67.2685674 | 64.9524294 | 72.7487099 |
| 16:13:20 | 66.3324586 | 72.7372035 | 68.2685674 | 64.9524294 | 71.7487099 |
| 16:13:21 | 68.3324586 | 70.7372035 | 68.2685674 | 63.9524294 | 69.7487099 |
| 16:13:22 | 68.3324586 | 70.7372035 | 68.2685674 | 63.9524294 | 68.7487099 |
| 16:13:23 | 70.3324586 | 69.7372035 | 68.2685674 | 63.9524294 | 68.7487099 |
| 16:13:24 | 72.3324586 | 68.7372035 | 68.2685674 | 63.9524294 | 67.7487099 |
| 16:13:25 | 73.3324586 | 69.7372035 | 68.2685674 | 63.9524294 | 67.7487099 |
| 16:13:26 | 73.3324586 | 69.7372035 | 69.2685674 | 62.9524294 | 64.7487099 |
| 16:13:27 | 72.3324586 | 69.7372035 | 77.2685674 | 62.9524294 | 64.7487099 |
| 16:13:28 | 70.3324586 | 69.7372035 | 75.2685674 | 61.9524294 | 63.7487099 |
| 16:13:29 | 70.3324586 | 68.7372035 | 68.2685674 | 61.9524294 | 62.7487099 |
| 16:13:30 | 70.3324586 | 68.7372035 | 68.2685674 | 61.9524294 | 61.7487099 |
| 16:13:31 | 70.3324586 | 68.7372035 | 68.2685674 | 62.9524294 | 62.7487099 |
| 16:13:32 | 70.3324586 | 68.7372035 | 63.2685674 | 63.9524294 | 62.7487099 |
| 16:13:33 | 70.3324586 | 68.7372035 | 62.2685674 | 62.9524294 | 62.7487099 |
| 16:13:34 | 70.3324586 | 67.7372035 | 63.2685674 | 62.9524294 | 62.7487099 |
| 16:13:35 | 70.3324586 | 67.7372035 | 63.2685674 | 62.9524294 | 60.7487099 |
| 16:13:36 | 70.3324586 | 67.7372035 | 64.2685674 | 62.9524294 | 60.7487099 |
| 16:13:37 | 66.3324586 | 67.7372035 | 65.2685674 | 62.9524294 | 60.7487099 |
| 16:13:38 | 66.3324586 | 67.7372035 | 65.2685674 | 61.9524294 | 61.7487099 |
| 16:13:39 | 65.3324586 | 67.7372035 | 66.2685674 | 61.9524294 | 63.7487099 |
| 16:13:40 | 65.3324586 | 67.7372035 | 66.2685674 | 60.9524294 | 63.7487099 |
| 16:13:41 | 66.3324586 | 67.7372035 | 67.2685674 | 61.9524294 | 64.7487099 |
| 16:13:42 | 65.3324586 | 67.7372035 | 67.2685674 | 61.9524294 | 64.7487099 |
| 16:13:43 | 65.3324586 | 69.7372035 | 67.2685674 | 62.9524294 | 64.7487099 |
| 16:13:44 | 64.3324586 | 71.7372035 | 68.2685674 | 62.9524294 | 65.7487099 |
| 16:13:45 | 64.3324586 | 73.7372035 | 69.2685674 | 62.9524294 | 65.7487099 |
| 16:13:46 | 64.3324586 | 73.7372035 | 69.2685674 | 63.9524294 | 65.7487099 |
| 16:13:47 | 64.3324586 | 72.7372035 | 68.2685674 | 63.9524294 | 68.7487099 |
| 16:13:48 | 64.3324586 | 72.7372035 | 68.2685674 | 63.9524294 | 68.7487099 |
| 16:13:49 | 67.3324586 | 72.7372035 | 67.2685674 | 61.9524294 | 70.7487099 |
| 16:13:50 | 67.3324586 | 74.7372035 | 66.2685674 | 61.9524294 | 70.7487099 |
| 16:13:51 | 67.3324586 | 74.7372035 | 66.2685674 | 62.9524294 | 70.7487099 |
| 16:13:52 | 67.3324586 | 74.7372035 | 66.2685674 | 63.9524294 | 70.7487099 |
| 16:13:53 | 67.3324586 | 72.7372035 | 66.2685674 | 64.9524294 | 69.7487099 |
| 16:13:54 | 67.3324586 | 72.7372035 | 66.2685674 | 64.9524294 | 69.7487099 |
| 16:13:55 | 66.3324586 | 72.7372035 | 65.2685674 | 65.9524294 | 69.7487099 |
| 16:13:56 | 66.3324586 | 72.7372035 | 64.2685674 | 65.9524294 | 65.7487099 |
| 16:13:57 | 66.3324586 | 71.7372035 | 64.2685674 | 66.9524294 | 65.7487099 |
| 16:13:58 | 66.3324586 | 71.7372035 | 64.2685674 | 66.9524294 | 60.7487099 |
| 16:13:59 | 66.3324586 | 71.7372035 | 64.2685674 | 66.9524294 | 60.7487099 |
| 16:14:00 | 66.3324586 | 71.7372035 | 64.2685674 | 66.9524294 | 60.7487099 |
| 16:14:01 | 64.3324586 | 70.7372035 | 64.2685674 | 66.9524294 | 61.7487099 |

|          |            |            |            |            |            |
|----------|------------|------------|------------|------------|------------|
| 16:14:02 | 65.3324586 | 70.7372035 | 64.2685674 | 64.9524294 | 62.7487099 |
| 16:14:03 | 65.3324586 | 69.7372035 | 64.2685674 | 64.9524294 | 64.7487099 |
| 16:14:04 | 66.3324586 | 70.7372035 | 63.2685674 | 64.9524294 | 64.7487099 |
| 16:14:05 | 66.3324586 | 70.7372035 | 63.2685674 | 64.9524294 | 65.7487099 |
| 16:14:06 | 66.3324586 | 71.7372035 | 63.2685674 | 65.9524294 | 65.7487099 |
| 16:14:07 | 67.3324586 | 70.7372035 | 63.2685674 | 65.9524294 | 65.7487099 |
| 16:14:08 | 67.3324586 | 70.7372035 | 63.2685674 | 65.9524294 | 65.7487099 |
| 16:14:09 | 70.3324586 | 70.7372035 | 63.2685674 | 65.9524294 | 66.7487099 |
| 16:14:10 | 72.3324586 | 69.7372035 | 63.2685674 | 63.9524294 | 66.7487099 |
| 16:14:11 | 72.3324586 | 68.7372035 | 63.2685674 | 62.9524294 | 67.7487099 |
| 16:14:12 | 72.3324586 | 68.7372035 | 63.2685674 | 62.9524294 | 69.7487099 |
| 16:14:13 | 74.3324586 | 67.7372035 | 63.2685674 | 62.9524294 | 69.7487099 |
| 16:14:14 | 74.3324586 | 66.7372035 | 65.2685674 | 64.9524294 | 72.7487099 |
| 16:14:15 | 75.3324586 | 66.7372035 | 65.2685674 | 65.9524294 | 72.7487099 |
| 16:14:16 | 75.3324586 | 67.7372035 | 62.2685674 | 65.9524294 | 72.7487099 |
| 16:14:17 | 73.3324586 | 66.7372035 | 62.2685674 | 65.9524294 | 73.7487099 |
| 16:14:18 | 72.3324586 | 66.7372035 | 62.2685674 | 63.9524294 | 73.7487099 |
| 16:14:19 | 72.3324586 | 66.7372035 | 62.2685674 | 62.9524294 | 73.7487099 |
| 16:14:20 | 70.3324586 | 66.7372035 | 65.2685674 | 61.9524294 | 75.7487099 |
| 16:14:21 | 70.3324586 | 67.7372035 | 66.2685674 | 60.9524294 | 74.7487099 |
| 16:14:22 | 68.3324586 | 67.7372035 | 66.2685674 | 59.9524294 | 74.7487099 |
| 16:14:23 | 68.3324586 | 67.7372035 | 66.2685674 | 58.9524294 | 74.7487099 |
| 16:14:24 | 66.3324586 | 67.7372035 | 66.2685674 | 58.9524294 | 71.7487099 |
| 16:14:25 | 66.3324586 | 67.7372035 | 66.2685674 | 58.9524294 | 71.7487099 |
| 16:14:26 | 66.3324586 | 67.7372035 | 67.2685674 | 58.9524294 | 68.7487099 |
| 16:14:27 | 66.3324586 | 67.7372035 | 67.2685674 | 58.9524294 | 68.7487099 |
| 16:14:28 | 65.3324586 | 67.7372035 | 65.2685674 | 58.9524294 | 68.7487099 |
| 16:14:29 | 65.3324586 | 67.7372035 | 65.2685674 | 58.9524294 | 69.7487099 |
| 16:14:30 | 65.3324586 | 67.7372035 | 64.2685674 | 58.9524294 | 69.7487099 |
| 16:14:31 | 65.3324586 | 68.7372035 | 65.2685674 | 58.9524294 | 69.7487099 |
| 16:14:32 | 64.3324586 | 68.7372035 | 66.2685674 | 59.9524294 | 68.7487099 |
| 16:14:33 | 64.3324586 | 69.7372035 | 67.2685674 | 59.9524294 | 68.7487099 |
| 16:14:34 | 64.3324586 | 70.7372035 | 67.2685674 | 59.9524294 | 67.7487099 |
| 16:14:35 | 64.3324586 | 70.7372035 | 68.2685674 | 59.9524294 | 68.7487099 |
| 16:14:36 | 65.3324586 | 71.7372035 | 68.2685674 | 59.9524294 | 67.7487099 |
| 16:14:37 | 65.3324586 | 71.7372035 | 69.2685674 | 62.9524294 | 67.7487099 |
| 16:14:38 | 65.3324586 | 71.7372035 | 69.2685674 | 62.9524294 | 65.7487099 |
| 16:14:39 | 65.3324586 | 71.7372035 | 69.2685674 | 72.9524294 | 65.7487099 |
| 16:14:40 | 66.3324586 | 71.7372035 | 70.2685674 | 75.9524294 | 67.7487099 |
| 16:14:41 | 66.3324586 | 71.7372035 | 70.2685674 | 75.9524294 | 67.7487099 |
| 16:14:42 | 66.3324586 | 71.7372035 | 70.2685674 | 75.9524294 | 67.7487099 |
| 16:14:43 | 70.3324586 | 71.7372035 | 70.2685674 | 80.9524294 | 70.7487099 |
| 16:14:44 | 70.3324586 | 71.7372035 | 71.2685674 | 81.9524294 | 72.7487099 |
| 16:14:45 | 70.3324586 | 71.7372035 | 72.2685674 | 82.9524294 | 73.7487099 |
| 16:14:46 | 69.3324586 | 70.7372035 | 72.2685674 | 80.9524294 | 74.7487099 |

|          |            |            |            |            |            |
|----------|------------|------------|------------|------------|------------|
| 16:14:47 | 69.3324586 | 71.7372035 | 72.2685674 | 80.9524294 | 74.7487099 |
| 16:14:48 | 69.3324586 | 71.7372035 | 72.2685674 | 80.9524294 | 79.7487099 |
| 16:14:49 | 70.3324586 | 70.7372035 | 72.2685674 | 79.9524294 | 80.7487099 |
| 16:14:50 | 70.3324586 | 70.7372035 | 75.2685674 | 79.9524294 | 80.7487099 |
| 16:14:51 | 69.3324586 | 70.7372035 | 76.2685674 | 79.9524294 | 80.7487099 |
| 16:14:52 | 69.3324586 | 71.7372035 | 76.2685674 | 73.9524294 | 83.7487099 |
| 16:14:53 | 69.3324586 | 70.7372035 | 76.2685674 | 72.9524294 | 78.7487099 |
| 16:14:54 | 68.3324586 | 70.7372035 | 75.2685674 | 72.9524294 | 75.7487099 |
| 16:14:55 | 69.3324586 | 71.7372035 | 75.2685674 | 71.9524294 | 74.7487099 |
| 16:14:56 | 69.3324586 | 71.7372035 | 75.2685674 | 71.9524294 | 74.7487099 |
| 16:14:57 | 69.3324586 | 70.7372035 | 75.2685674 | 71.9524294 | 73.7487099 |
| 16:14:58 | 69.3324586 | 70.7372035 | 72.2685674 | 70.9524294 | 71.7487099 |
| 16:14:59 | 69.3324586 | 70.7372035 | 71.2685674 | 70.9524294 | 71.7487099 |
| 16:15:00 | 69.3324586 | 70.7372035 | 69.2685674 | 70.9524294 | 71.7487099 |
| 16:15:01 | 70.3324586 | 69.7372035 | 67.2685674 | 70.9524294 | 69.7487099 |
| 16:15:02 | 69.3324586 | 69.7372035 | 67.2685674 | 70.9524294 | 67.7487099 |
| 16:15:03 | 68.3324586 | 69.7372035 | 66.2685674 | 71.9524294 | 66.7487099 |
| 16:15:04 | 68.3324586 | 69.7372035 | 66.2685674 | 71.9524294 | 66.7487099 |
| 16:15:05 | 67.3324586 | 70.7372035 | 66.2685674 | 71.9524294 | 65.7487099 |
| 16:15:06 | 66.3324586 | 70.7372035 | 66.2685674 | 68.9524294 | 66.7487099 |
| 16:15:07 | 67.3324586 | 69.7372035 | 67.2685674 | 67.9524294 | 66.7487099 |
| 16:15:08 | 68.3324586 | 69.7372035 | 67.2685674 | 68.9524294 | 67.7487099 |
| 16:15:09 | 69.3324586 | 69.7372035 | 67.2685674 | 69.9524294 | 67.7487099 |
| 16:15:10 | 69.3324586 | 69.7372035 | 68.2685674 | 70.9524294 | 67.7487099 |
| 16:15:11 | 70.3324586 | 69.7372035 | 66.2685674 | 72.9524294 | 67.7487099 |
| 16:15:12 | 70.3324586 | 69.7372035 | 65.2685674 | 72.9524294 | 67.7487099 |
| 16:15:13 | 70.3324586 | 69.7372035 | 65.2685674 | 72.9524294 | 67.7487099 |
| 16:15:14 | 70.3324586 | 69.7372035 | 65.2685674 | 72.9524294 | 67.7487099 |
| 16:15:15 | 70.3324586 | 69.7372035 | 64.2685674 | 72.9524294 | 67.7487099 |
| 16:15:16 | 70.3324586 | 69.7372035 | 65.2685674 | 72.9524294 | 67.7487099 |
| 16:15:17 | 70.3324586 | 69.7372035 | 66.2685674 | 72.9524294 | 66.7487099 |
| 16:15:18 | 70.3324586 | 70.7372035 | 67.2685674 | 71.9524294 | 66.7487099 |
| 16:15:19 | 70.3324586 | 71.7372035 | 68.2685674 | 71.9524294 | 65.7487099 |
| 16:15:20 | 70.3324586 | 71.7372035 | 68.2685674 | 71.9524294 | 65.7487099 |
| 16:15:21 | 70.3324586 | 70.7372035 | 70.2685674 | 71.9524294 | 65.7487099 |
| 16:15:22 | 69.3324586 | 70.7372035 | 70.2685674 | 71.9524294 | 65.7487099 |
| 16:15:23 | 68.3324586 | 70.7372035 | 69.2685674 | 71.9524294 | 66.7487099 |
| 16:15:24 | 68.3324586 | 69.7372035 | 68.2685674 | 72.9524294 | 66.7487099 |
| 16:15:25 | 69.3324586 | 69.7372035 | 68.2685674 | 72.9524294 | 69.7487099 |
| 16:15:26 | 69.3324586 | 69.7372035 | 67.2685674 | 72.9524294 | 69.7487099 |
| 16:15:27 | 69.3324586 | 69.7372035 | 67.2685674 | 72.9524294 | 70.7487099 |
| 16:15:28 | 69.3324586 | 68.7372035 | 67.2685674 | 72.9524294 | 70.7487099 |
| 16:15:29 | 69.3324586 | 68.7372035 | 67.2685674 | 72.9524294 | 69.7487099 |
| 16:15:30 | 69.3324586 | 68.7372035 | 68.2685674 | 72.9524294 | 69.7487099 |
| 16:15:31 | 69.3324586 | 68.7372035 | 68.2685674 | 65.9524294 | 69.7487099 |

|          |            |            |            |            |            |
|----------|------------|------------|------------|------------|------------|
| 16:15:32 | 69.3324586 | 67.7372035 | 68.2685674 | 65.9524294 | 70.7487099 |
| 16:15:33 | 69.3324586 | 67.7372035 | 68.2685674 | 65.9524294 | 70.7487099 |
| 16:15:34 | 70.3324586 | 68.7372035 | 68.2685674 | 64.9524294 | 70.7487099 |
| 16:15:35 | 70.3324586 | 70.7372035 | 68.2685674 | 64.9524294 | 71.7487099 |
| 16:15:36 | 70.3324586 | 70.7372035 | 68.2685674 | 64.9524294 | 71.7487099 |
| 16:15:37 | 75.3324586 | 70.7372035 | 66.2685674 | 61.9524294 | 74.7487099 |
| 16:15:38 | 76.3324586 | 70.7372035 | 66.2685674 | 61.9524294 | 73.7487099 |
| 16:15:39 | 77.3324586 | 69.7372035 | 65.2685674 | 61.9524294 | 71.7487099 |
| 16:15:40 | 78.3324586 | 68.7372035 | 65.2685674 | 61.9524294 | 71.7487099 |
| 16:15:41 | 80.3324586 | 67.7372035 | 64.2685674 | 62.9524294 | 66.7487099 |
| 16:15:42 | 80.3324586 | 67.7372035 | 63.2685674 | 62.9524294 | 66.7487099 |
| 16:15:43 | 70.25      | 66.7372035 | 64.2685674 | 62.9524294 | 66.7487099 |
| 16:15:44 | 81.3324586 | 66.7372035 | 64.2685674 | 62.9524294 | 66.7487099 |
| 16:15:45 | 81.3324586 | 66.7372035 | 65.2685674 | 63.9524294 | 65.7487099 |
| 16:15:46 | 79.3324586 | 66.7372035 | 65.2685674 | 63.9524294 | 65.7487099 |
| 16:15:47 | 74.3324586 | 66.7372035 | 66.2685674 | 64.9524294 | 65.7487099 |
| 16:15:48 | 74.3324586 | 66.7372035 | 68.2685674 | 65.9524294 | 66.7487099 |
| 16:15:49 | 74.3324586 | 66.7372035 | 68.2685674 | 65.9524294 | 66.7487099 |
| 16:15:50 | 74.3324586 | 65.7372035 | 68.2685674 | 64.9524294 | 66.7487099 |
| 16:15:51 | 66.3324586 | 65.7372035 | 65.2685674 | 64.9524294 | 66.7487099 |
| 16:15:52 | 65.3324586 | 66.7372035 | 63.2685674 | 64.9524294 | 66.7487099 |
| 16:15:53 | 66.3324586 | 66.7372035 | 62.2685674 | 64.9524294 | 66.7487099 |
| 16:15:54 | 67.3324586 | 66.7372035 | 62.2685674 | 64.9524294 | 66.7487099 |
| 16:15:55 | 68.3324586 | 66.7372035 | 62.2685674 | 64.9524294 | 67.7487099 |
| 16:15:56 | 70.3324586 | 66.7372035 | 62.2685674 | 65.9524294 | 67.7487099 |
| 16:15:57 | 72.3324586 | 66.7372035 | 62.2685674 | 65.9524294 | 67.7487099 |
| 16:15:58 | 72.3324586 | 66.7372035 | 64.2685674 | 66.9524294 | 67.7487099 |
| 16:15:59 | 73.3324586 | 65.7372035 | 64.2685674 | 66.9524294 | 68.7487099 |
| 16:16:00 | 73.3324586 | 66.7372035 | 65.2685674 | 66.9524294 | 68.7487099 |
| 16:16:01 | 77.3324586 | 66.7372035 | 65.2685674 | 69.9524294 | 69.7487099 |
| 16:16:02 | 74.3324586 | 66.7372035 | 65.2685674 | 69.9524294 | 69.7487099 |
| 16:16:03 | 74.3324586 | 66.7372035 | 65.2685674 | 69.9524294 | 69.7487099 |
| 16:16:04 | 73.3324586 | 67.7372035 | 65.2685674 | 71.9524294 | 69.7487099 |
| 16:16:05 | 73.3324586 | 67.7372035 | 66.2685674 | 70.9524294 | 69.7487099 |
| 16:16:06 | 73.3324586 | 66.7372035 | 66.2685674 | 69.9524294 | 68.7487099 |
| 16:16:07 | 73.3324586 | 66.7372035 | 66.2685674 | 69.9524294 | 68.7487099 |
| 16:16:08 | 73.3324586 | 66.7372035 | 66.2685674 | 69.9524294 | 68.7487099 |
| 16:16:09 | 74.3324586 | 66.7372035 | 67.2685674 | 70.9524294 | 67.7487099 |
| 16:16:10 | 75.3324586 | 65.7372035 | 67.2685674 | 70.9524294 | 67.7487099 |
| 16:16:11 | 75.3324586 | 65.7372035 | 67.2685674 | 70.9524294 | 67.7487099 |
| 16:16:12 | 74.3324586 | 65.7372035 | 67.2685674 | 70.9524294 | 67.7487099 |
| 16:16:13 | 72.3324586 | 65.7372035 | 67.2685674 | 70.9524294 | 67.7487099 |
| 16:16:14 | 72.3324586 | 65.7372035 | 67.2685674 | 70.9524294 | 67.7487099 |
| 16:16:15 | 71.3324586 | 65.7372035 | 67.2685674 | 69.9524294 | 67.7487099 |
| 16:16:16 | 71.3324586 | 65.7372035 | 67.2685674 | 69.9524294 | 67.7487099 |



|          |            |            |            |            |            |
|----------|------------|------------|------------|------------|------------|
| 16:16:17 | 67.3324586 | 65.7372035 | 66.2685674 | 66.9524294 | 67.7487099 |
| 16:16:18 | 67.3324586 | 65.7372035 | 66.2685674 | 65.9524294 | 67.7487099 |
| 16:16:19 | 67.3324586 | 65.7372035 | 66.2685674 | 65.9524294 | 67.7487099 |
| 16:16:20 | 68.3324586 | 65.7372035 | 66.2685674 | 65.9524294 | 67.7487099 |
| 16:16:21 | 68.3324586 | 65.7372035 | 65.2685674 | 65.9524294 | 68.7487099 |
| 16:16:22 | 68.3324586 | 65.7372035 | 65.2685674 | 65.9524294 | 68.7487099 |
| 16:16:23 | 68.3324586 | 65.7372035 | 65.2685674 | 65.9524294 | 68.7487099 |
| 16:16:24 | 68.3324586 | 65.7372035 | 65.2685674 | 65.9524294 | 68.7487099 |
| 16:16:25 | 67.3324586 | 65.7372035 | 67.2685674 | 65.9524294 | 72.25      |
| 16:16:26 | 67.3324586 | 65.7372035 | 68.2685674 | 62.9524294 | 72         |
| 16:16:27 | 67.3324586 | 66.7372035 | 70.2685674 | 61.9524294 | 72.125     |
| 16:16:28 | 67.3324586 | 70.7372035 | 71.2685674 | 61.9524294 | 72.125     |
| 16:16:29 | 66.3324586 | 70.7372035 | 70.2685674 | 61.9524294 | 71.75      |
| 16:16:30 | 66.3324586 | 70.7372035 | 70.2685674 | 61.9524294 | 73.2151984 |
| 16:16:31 | 66.3324586 | 71.7372035 | 70.2685674 | 60.9524294 | 68.3304538 |
| 16:16:32 | 66.3324586 | 70.7372035 | 69.2685674 | 61.9524294 | 70.375     |
| 16:16:33 | 65.3324586 | 69.7372035 | 68.2685674 | 61.9524294 | 70         |
| 16:16:34 | 65.3324586 | 69.7372035 | 67.2685674 | 61.9524294 | 80.7487099 |
| 16:16:35 | 66.3324586 | 69.7372035 | 67.2685674 | 60.9524294 | 78.7487099 |
| 16:16:36 | 66.3324586 | 69.7372035 | 67.2685674 | 60.9524294 | 78.7487099 |
| 16:16:37 | 66.3324586 | 68.7372035 | 67.2685674 | 61.9524294 | 76.7487099 |
| 16:16:38 | 67.3324586 | 68.7372035 | 67.2685674 | 61.9524294 | 75.7487099 |
| 16:16:39 | 68.3324586 | 68.7372035 | 67.2685674 | 62.9524294 | 75.7487099 |
| 16:16:40 | 68.3324586 | 68.7372035 | 67.2685674 | 62.9524294 | 75.7487099 |
| 16:16:41 | 67.3324586 | 67.7372035 | 67.2685674 | 62.9524294 | 75.7487099 |
| 16:16:42 | 66.3324586 | 67.7372035 | 68.2685674 | 62.9524294 | 75.7487099 |
| 16:16:43 | 66.3324586 | 66.7372035 | 68.2685674 | 62.9524294 | 74.7487099 |
| 16:16:44 | 66.3324586 | 66.7372035 | 67.2685674 | 62.9524294 | 74.7487099 |
| 16:16:45 | 66.3324586 | 67.7372035 | 67.2685674 | 62.9524294 | 73.7487099 |
| 16:16:46 | 67.3324586 | 68.7372035 | 67.2685674 | 62.9524294 | 72.7487099 |
| 16:16:47 | 67.3324586 | 68.7372035 | 67.2685674 | 62.9524294 | 72.7487099 |
| 16:16:48 | 67.3324586 | 68.7372035 | 67.2685674 | 62.9524294 | 72.7487099 |
| 16:16:49 | 68.3324586 | 68.7372035 | 67.2685674 | 62.9524294 | 71.7487099 |
| 16:16:50 | 68.3324586 | 68.7372035 | 66.2685674 | 62.9524294 | 70.7487099 |
| 16:16:51 | 68.3324586 | 67.7372035 | 66.2685674 | 61.9524294 | 71.7487099 |
| 16:16:52 | 68.3324586 | 67.7372035 | 67.2685674 | 61.9524294 | 72.7487099 |
| 16:16:53 | 68.3324586 | 66.7372035 | 67.2685674 | 61.9524294 | 72.7487099 |
| 16:16:54 | 68.3324586 | 66.7372035 | 73.2685674 | 61.9524294 | 71.7487099 |
| 16:16:55 | 68.3324586 | 67.7372035 | 73.2685674 | 61.9524294 | 72.7487099 |
| 16:16:56 | 69.3324586 | 67.7372035 | 74.2685674 | 60.9524294 | 71.7487099 |
| 16:16:57 | 70.3324586 | 67.7372035 | 74.2685674 | 60.9524294 | 72.7487099 |
| 16:16:58 | 70.3324586 | 67.7372035 | 74.2685674 | 60.9524294 | 72.7487099 |
| 16:16:59 | 71.3324586 | 67.7372035 | 74.2685674 | 61.9524294 | 71.7487099 |
| 16:17:00 | 72.3324586 | 68.7372035 | 74.2685674 | 61.9524294 | 71.7487099 |
| 16:17:01 | 72.3324586 | 68.7372035 | 75.2685674 | 61.9524294 | 70.7487099 |

|          |            |            |            |            |            |
|----------|------------|------------|------------|------------|------------|
| 16:17:02 | 72.3324586 | 69.7372035 | 75.2685674 | 62.9524294 | 68.7487099 |
| 16:17:03 | 71.3324586 | 69.7372035 | 75.2685674 | 64.9524294 | 68.7487099 |
| 16:17:04 | 70.3324586 | 70.7372035 | 74.2685674 | 64.9524294 | 66.7487099 |
| 16:17:05 | 70.3324586 | 69.7372035 | 72.2685674 | 64.9524294 | 66.7487099 |
| 16:17:06 | 69.3324586 | 67.7372035 | 71.2685674 | 64.9524294 | 67.7487099 |
| 16:17:07 | 70.3324586 | 67.7372035 | 71.2685674 | 65.9524294 | 67.7487099 |
| 16:17:08 | 71.3324586 | 67.7372035 | 71.2685674 | 65.9524294 | 68.7487099 |
| 16:17:09 | 70.3324586 | 65.7372035 | 71.2685674 | 65.9524294 | 67.7487099 |
| 16:17:10 | 70.3324586 | 65.7372035 | 72.2685674 | 65.9524294 | 67.7487099 |
| 16:17:11 | 70.3324586 | 65.7372035 | 72.2685674 | 65.9524294 | 66.7487099 |
| 16:17:12 | 70.3324586 | 65.7372035 | 72.2685674 | 65.9524294 | 66.7487099 |
| 16:17:13 | 70.3324586 | 64.7372035 | 72.2685674 | 65.9524294 | 66.7487099 |
| 16:17:14 | 70.3324586 | 64.7372035 | 72.2685674 | 64.9524294 | 67.7487099 |
| 16:17:15 | 70.3324586 | 64.7372035 | 71.2685674 | 63.9524294 | 67.7487099 |
| 16:17:16 | 71.3324586 | 65.7372035 | 71.2685674 | 63.9524294 | 68.7487099 |
| 16:17:17 | 71.3324586 | 65.7372035 | 70.2685674 | 61.9524294 | 68.7487099 |
| 16:17:18 | 71.3324586 | 65.7372035 | 70.2685674 | 61.9524294 | 67.7487099 |
| 16:17:19 | 72.3324586 | 65.7372035 | 70.2685674 | 61.9524294 | 67.7487099 |
| 16:17:20 | 72.3324586 | 66.7372035 | 69.2685674 | 61.9524294 | 66.7487099 |
| 16:17:21 | 72.3324586 | 67.7372035 | 69.2685674 | 61.9524294 | 65.7487099 |
| 16:17:22 | 72.3324586 | 69.7372035 | 69.2685674 | 61.9524294 | 64.7487099 |
| 16:17:23 | 74.3324586 | 70.7372035 | 69.2685674 | 61.9524294 | 64.7487099 |
| 16:17:24 | 74.3324586 | 70.7372035 | 69.2685674 | 61.9524294 | 64.7487099 |
| 16:17:25 | 74.3324586 | 75.7372035 | 69.2685674 | 62.9524294 | 64.7487099 |
| 16:17:26 | 76.3324586 | 77.7372035 | 67.2685674 | 61.9524294 | 66.7487099 |
| 16:17:27 | 76.3324586 | 79.7372035 | 67.2685674 | 61.9524294 | 66.7487099 |
| 16:17:28 | 78.3324586 | 79.7372035 | 67.2685674 | 61.9524294 | 66.7487099 |
| 16:17:29 | 79.3324586 | 79.7372035 | 67.2685674 | 60.9524294 | 64.7487099 |
| 16:17:30 | 79.3324586 | 79.7372035 | 66.2685674 | 60.9524294 | 64.7487099 |
| 16:17:31 | 77.3324586 | 79.7372035 | 66.2685674 | 60.9524294 | 65.7487099 |
| 16:17:32 | 72.3324586 | 79.7372035 | 67.2685674 | 60.9524294 | 67.7487099 |
| 16:17:33 | 72.3324586 | 79.7372035 | 67.2685674 | 60.9524294 | 67.7487099 |
| 16:17:34 | 71.3324586 | 79.7372035 | 68.2685674 | 60.9524294 | 69.7487099 |
| 16:17:35 | 71.3324586 | 79.7372035 | 68.2685674 | 60.9524294 | 70.7487099 |
| 16:17:36 | 71.3324586 | 78.7372035 | 68.2685674 | 60.9524294 | 70.7487099 |
| 16:17:37 | 71.3324586 | 78.7372035 | 68.2685674 | 60.9524294 | 70.7487099 |
| 16:17:38 | 68.3324586 | 77.7372035 | 68.2685674 | 60.9524294 | 71.7487099 |
| 16:17:39 | 68.3324586 | 77.7372035 | 68.2685674 | 60.9524294 | 70.7487099 |
| 16:17:40 | 68.3324586 | 77.7372035 | 68.2685674 | 60.9524294 | 70.7487099 |
| 16:17:41 | 70.3324586 | 77.7372035 | 67.2685674 | 60.9524294 | 71.7487099 |
| 16:17:42 | 70.3324586 | 76.7372035 | 67.2685674 | 61.9524294 | 74.7487099 |
| 16:17:43 | 71.3324586 | 76.7372035 | 67.2685674 | 62.9524294 | 76.7487099 |
| 16:17:44 | 74.3324586 | 76.7372035 | 74.2685674 | 62.9524294 | 76.7487099 |
| 16:17:45 | 74.3324586 | 76.7372035 | 76.2685674 | 62.9524294 | 77.7487099 |
| 16:17:46 | 74.3324586 | 75.7372035 | 76.2685674 | 63.9524294 | 77.7487099 |

|          |            |            |            |            |            |
|----------|------------|------------|------------|------------|------------|
| 16:17:47 | 74.3324586 | 73.7372035 | 74.2685674 | 63.9524294 | 78.7487099 |
| 16:17:48 | 75.3324586 | 73.7372035 | 73.2685674 | 61.9524294 | 78.7487099 |
| 16:17:49 | 76.3324586 | 73.7372035 | 72.2685674 | 60.9524294 | 78.7487099 |
| 16:17:50 | 76.3324586 | 73.7372035 | 71.2685674 | 59.9524294 | 78.7487099 |
| 16:17:51 | 77.3324586 | 73.7372035 | 69.2685674 | 59.9524294 | 76.7487099 |
| 16:17:52 | 78.3324586 | 74.7372035 | 68.2685674 | 59.9524294 | 74.7487099 |
| 16:17:53 | 79.3324586 | 74.7372035 | 67.2685674 | 58.9524294 | 74.7487099 |
| 16:17:54 | 79.3324586 | 74.7372035 | 68.2685674 | 58.9524294 | 74.7487099 |
| 16:17:55 | 79.3324586 | 75.7372035 | 68.2685674 | 59.9524294 | 74.7487099 |
| 16:17:56 | 76.3324586 | 76.7372035 | 68.2685674 | 59.9524294 | 73.7487099 |
| 16:17:57 | 71.3324586 | 77.7372035 | 69.2685674 | 58.9524294 | 73.7487099 |
| 16:17:58 | 68.3324586 | 78.7372035 | 69.2685674 | 58.9524294 | 72.7487099 |
| 16:17:59 | 68.3324586 | 78.7372035 | 68.2685674 | 59.9524294 | 72.7487099 |
| 16:18:00 | 68.3324586 | 78.7372035 | 67.2685674 | 60.9524294 | 72.7487099 |
| 16:18:01 | 68.3324586 | 79.7372035 | 66.2685674 | 61.9524294 | 71.7487099 |
| 16:18:02 | 69.3324586 | 79.7372035 | 66.2685674 | 61.9524294 | 71.7487099 |
| 16:18:03 | 69.3324586 | 80.7372035 | 64.2685674 | 61.9524294 | 71.7487099 |
| 16:18:04 | 69.3324586 | 69.625     | 63.2685674 | 61.9524294 | 71.7487099 |
| 16:18:05 | 70.3324586 | 70.25      | 62.2685674 | 61.9524294 | 71.7487099 |
| 16:18:06 | 70.3324586 | 69.875     | 62.2685674 | 61.9524294 | 72.7487099 |
| 16:18:07 | 70.3324586 | 70         | 62.2685674 | 61.9524294 | 72.7487099 |
| 16:18:08 | 70.3324586 | 70.375     | 62.2685674 | 61.9524294 | 72.7487099 |
| 16:18:09 | 70.3324586 | 81.7372035 | 63.2685674 | 62.9524294 | 72.7487099 |
| 16:18:10 | 70.3324586 | 81.7372035 | 63.2685674 | 62.9524294 | 72.7487099 |
| 16:18:11 | 72.3324586 | 81.7372035 | 67.2685674 | 63.9524294 | 72.7487099 |
| 16:18:12 | 73.3324586 | 81.7372035 | 68.2685674 | 65.9524294 | 72.7487099 |
| 16:18:13 | 73.3324586 | 81.7372035 | 70.2685674 | 67.9524294 | 72.7487099 |
| 16:18:14 | 73.3324586 | 81.7372035 | 71.2685674 | 67.9524294 | 72.7487099 |
| 16:18:15 | 73.3324586 | 79.7372035 | 71.2685674 | 68.9524294 | 72.7487099 |
| 16:18:16 | 76.3324586 | 71.5       | 71.2685674 | 68.9524294 | 73.7487099 |
| 16:18:17 | 76.3324586 | 72.625     | 72.2685674 | 72.9524294 | 73.7487099 |
| 16:18:18 | 76.3324586 | 72.8410686 | 72.2685674 | 72.9524294 | 73.7487099 |
| 16:18:19 | 77.3324586 | 72.8919457 | 72.2685674 | 72.9524294 | 74.7487099 |
| 16:18:20 | 77.3324586 | 72.25      | 68.2685674 | 72.9524294 | 74.7487099 |
| 16:18:21 | 74.3324586 | 71.125     | 65.2685674 | 72.9524294 | 73.7487099 |
| 16:18:22 | 70.3324586 | 70.375     | 64.2685674 | 72.9524294 | 73.7487099 |
| 16:18:23 | 69.3324586 | 70.375     | 64.2685674 | 73.9524294 | 72.7487099 |
| 16:18:24 | 69.3324586 | 69.875     | 64.2685674 | 73.9524294 | 72.7487099 |
| 16:18:25 | 69.3324586 | 79.7372035 | 65.2685674 | 73.9524294 | 71.7487099 |
| 16:18:26 | 69.3324586 | 77.7372035 | 66.2685674 | 71.9524294 | 71.7487099 |
| 16:18:27 | 69.3324586 | 73.7372035 | 67.2685674 | 70.9524294 | 71.7487099 |
| 16:18:28 | 67.3324586 | 70.7372035 | 67.2685674 | 70.9524294 | 71.7487099 |
| 16:18:29 | 67.3324586 | 68.7372035 | 67.2685674 | 70.9524294 | 71.7487099 |
| 16:18:30 | 66.3324586 | 68.7372035 | 66.2685674 | 68.9524294 | 72.7487099 |
| 16:18:31 | 65.3324586 | 66.7372035 | 66.2685674 | 68.9524294 | 72.7487099 |

|          |            |            |            |            |            |
|----------|------------|------------|------------|------------|------------|
| 16:18:32 | 65.3324586 | 66.7372035 | 65.2685674 | 68.9524294 | 73.7487099 |
| 16:18:33 | 64.3324586 | 65.7372035 | 65.2685674 | 66.9524294 | 73.7487099 |
| 16:18:34 | 64.3324586 | 65.7372035 | 65.2685674 | 66.9524294 | 73.7487099 |
| 16:18:35 | 65.3324586 | 65.7372035 | 65.2685674 | 64.9524294 | 73.7487099 |
| 16:18:36 | 65.3324586 | 65.7372035 | 67.2685674 | 64.9524294 | 73.7487099 |
| 16:18:37 | 65.3324586 | 65.7372035 | 67.2685674 | 64.9524294 | 73.7487099 |
| 16:18:38 | 67.3324586 | 66.7372035 | 68.2685674 | 64.9524294 | 73.7487099 |
| 16:18:39 | 71.3324586 | 65.7372035 | 67.2685674 | 64.9524294 | 73.7487099 |
| 16:18:40 | 71.3324586 | 65.7372035 | 66.2685674 | 64.9524294 | 73.7487099 |
| 16:18:41 | 68.3324586 | 65.7372035 | 65.2685674 | 64.9524294 | 73.7487099 |
| 16:18:42 | 67.3324586 | 64.7372035 | 65.2685674 | 65.9524294 | 74.7487099 |
| 16:18:43 | 66.3324586 | 64.7372035 | 66.2685674 | 66.9524294 | 74.7487099 |
| 16:18:44 | 66.3324586 | 65.7372035 | 66.2685674 | 66.9524294 | 74.7487099 |
| 16:18:45 | 67.3324586 | 65.7372035 | 66.2685674 | 66.9524294 | 74.7487099 |
| 16:18:46 | 67.3324586 | 65.7372035 | 66.2685674 | 63.9524294 | 74.7487099 |
| 16:18:47 | 67.3324586 | 64.7372035 | 66.2685674 | 62.9524294 | 74.7487099 |
| 16:18:48 | 67.3324586 | 64.7372035 | 66.2685674 | 60.9524294 | 74.7487099 |
| 16:18:49 | 67.3324586 | 64.7372035 | 66.2685674 | 61.9524294 | 72.7487099 |
| 16:18:50 | 68.3324586 | 64.7372035 | 68.2685674 | 61.9524294 | 71.7487099 |
| 16:18:51 | 69.3324586 | 65.7372035 | 68.2685674 | 61.9524294 | 72.7487099 |
| 16:18:52 | 70.3324586 | 65.7372035 | 68.2685674 | 62.9524294 | 72.7487099 |
| 16:18:53 | 71.3324586 | 67.7372035 | 68.2685674 | 62.9524294 | 72.7487099 |
| 16:18:54 | 71.3324586 | 66.7372035 | 69.2685674 | 62.9524294 | 72.7487099 |
| 16:18:55 | 71.3324586 | 66.7372035 | 69.2685674 | 62.9524294 | 72.7487099 |
| 16:18:56 | 72.3324586 | 66.7372035 | 73.2685674 | 62.9524294 | 73.7487099 |
| 16:18:57 | 72.3324586 | 70.7372035 | 73.2685674 | 62.9524294 | 69.7487099 |
| 16:18:58 | 72.3324586 | 71.7372035 | 75.2685674 | 62.9524294 | 69.7487099 |
| 16:18:59 | 72.3324586 | 71.7372035 | 76.2685674 | 63.9524294 | 69.7487099 |
| 16:19:00 | 72.3324586 | 67.7372035 | 76.2685674 | 63.9524294 | 72.7487099 |
| 16:19:01 | 72.3324586 | 66.7372035 | 76.2685674 | 65.9524294 | 75.7487099 |
| 16:19:02 | 71.3324586 | 66.7372035 | 76.2685674 | 68.9524294 | 74.7487099 |
| 16:19:03 | 71.3324586 | 66.7372035 | 74.2685674 | 68.9524294 | 74.7487099 |
| 16:19:04 | 71.3324586 | 66.7372035 | 73.2685674 | 68.9524294 | 74.7487099 |
| 16:19:05 | 71.3324586 | 65.7372035 | 71.2685674 | 66.9524294 | 74.7487099 |
| 16:19:06 | 70.3324586 | 65.7372035 | 70.2685674 | 65.9524294 | 74.7487099 |
| 16:19:07 | 70.3324586 | 65.7372035 | 70.2685674 | 65.9524294 | 74.7487099 |
| 16:19:08 | 71.3324586 | 65.7372035 | 70.2685674 | 64.9524294 | 74.7487099 |
| 16:19:09 | 71.3324586 | 65.7372035 | 70.2685674 | 64.9524294 | 74.7487099 |
| 16:19:10 | 71.3324586 | 65.7372035 | 70.2685674 | 65.9524294 | 73.7487099 |
| 16:19:11 | 71.3324586 | 66.7372035 | 70.2685674 | 64.9524294 | 72.7487099 |
| 16:19:12 | 71.3324586 | 66.7372035 | 70.2685674 | 64.9524294 | 72.7487099 |
| 16:19:13 | 73.3324586 | 67.7372035 | 69.2685674 | 64.9524294 | 73.7487099 |
| 16:19:14 | 73.3324586 | 67.7372035 | 69.2685674 | 64.9524294 | 73.7487099 |
| 16:19:15 | 73.3324586 | 68.7372035 | 69.2685674 | 67.9524294 | 73.7487099 |
| 16:19:16 | 73.3324586 | 68.7372035 | 70.2685674 | 69.9524294 | 72.7487099 |

|          |            |            |            |            |            |
|----------|------------|------------|------------|------------|------------|
| 16:19:17 | 73.3324586 | 68.7372035 | 70.2685674 | 68.9524294 | 68.7487099 |
| 16:19:18 | 73.3324586 | 68.7372035 | 70.2685674 | 66.9524294 | 68.7487099 |
| 16:19:19 | 73.3324586 | 68.7372035 | 71.2685674 | 66.9524294 | 68.7487099 |
| 16:19:20 | 75.3324586 | 68.7372035 | 71.2685674 | 66.9524294 | 69.7487099 |
| 16:19:21 | 75.3324586 | 68.7372035 | 72.2685674 | 66.9524294 | 72.7487099 |
| 16:19:22 | 76.3324586 | 68.7372035 | 72.2685674 | 66.9524294 | 74.7487099 |
| 16:19:23 | 77.3324586 | 69.7372035 | 73.2685674 | 65.9524294 | 75.7487099 |
| 16:19:24 | 77.3324586 | 70.7372035 | 73.2685674 | 65.9524294 | 73.7487099 |
| 16:19:25 | 78.3324586 | 70.7372035 | 76.2685674 | 64.9524294 | 73.7487099 |
| 16:19:26 | 79.3324586 | 70.7372035 | 77.2685674 | 64.9524294 | 70.7487099 |
| 16:19:27 | 80.3324586 | 70.7372035 | 77.2685674 | 66.9524294 | 70.7487099 |
| 16:19:28 | 80.3324586 | 70.7372035 | 77.2685674 | 67.9524294 | 71.7487099 |
| 16:19:29 | 79.3324586 | 70.7372035 | 77.2685674 | 67.9524294 | 71.7487099 |
| 16:19:30 | 69.3324586 | 70.7372035 | 77.2685674 | 67.9524294 | 72.7487099 |
| 16:19:31 | 66.3324586 | 67.7372035 | 77.2685674 | 67.9524294 | 73.7487099 |
| 16:19:32 | 65.3324586 | 67.7372035 | 77.2685674 | 67.9524294 | 73.7487099 |
| 16:19:33 | 65.3324586 | 67.7372035 | 76.2685674 | 68.9524294 | 73.7487099 |
| 16:19:34 | 65.3324586 | 66.7372035 | 76.2685674 | 68.9524294 | 74.7487099 |
| 16:19:35 | 65.3324586 | 65.7372035 | 75.2685674 | 69.9524294 | 73.7487099 |
| 16:19:36 | 66.3324586 | 65.7372035 | 72.2685674 | 69.9524294 | 72.7487099 |
| 16:19:37 | 66.3324586 | 65.7372035 | 72.2685674 | 68.9524294 | 72.7487099 |
| 16:19:38 | 67.3324586 | 65.7372035 | 72.2685674 | 68.9524294 | 73.7487099 |
| 16:19:39 | 67.3324586 | 65.7372035 | 72.2685674 | 67.9524294 | 73.7487099 |
| 16:19:40 | 70.3324586 | 65.7372035 | 71.2685674 | 67.9524294 | 71.7487099 |
| 16:19:41 | 74.3324586 | 65.7372035 | 71.2685674 | 67.9524294 | 68.7487099 |
| 16:19:42 | 74.3324586 | 66.7372035 | 71.2685674 | 67.9524294 | 67.7487099 |
| 16:19:43 | 82.3324586 | 65.7372035 | 71.2685674 | 69.9524294 | 68.7487099 |
| 16:19:44 | 73.125     | 65.7372035 | 73.2685674 | 69.9524294 | 69.7487099 |
| 16:19:45 | 73.25      | 65.7372035 | 73.2685674 | 69.9524294 | 69.7487099 |
| 16:19:46 | 73.875     | 66.7372035 | 73.2685674 | 76.9524294 | 69.7487099 |
| 16:19:47 | 74.375     | 66.7372035 | 73.2685674 | 80.9524294 | 69.7487099 |
| 16:19:48 | 74.5       | 66.7372035 | 73.2685674 | 81.9524294 | 69.7487099 |
| 16:19:49 | 75.625     | 66.7372035 | 74.2685674 | 82.9524294 | 69.7487099 |
| 16:19:50 | 76         | 66.7372035 | 74.2685674 | 82.9524294 | 69.7487099 |
| 16:19:51 | 75.125     | 66.7372035 | 74.2685674 | 82.9524294 | 69.7487099 |
| 16:19:52 | 74.125     | 66.7372035 | 74.2685674 | 82.9524294 | 69.7487099 |
| 16:19:53 | 74.625     | 67.7372035 | 76.2685674 | 82.9524294 | 69.7487099 |
| 16:19:54 | 82.3324586 | 67.7372035 | 76.2685674 | 82.9524294 | 69.7487099 |
| 16:19:55 | 79.3324586 | 68.7372035 | 76.2685674 | 82.9524294 | 69.7487099 |
| 16:19:56 | 77.3324586 | 69.7372035 | 75.2685674 | 83.9524294 | 70.7487099 |
| 16:19:57 | 77.3324586 | 69.7372035 | 75.2685674 | 83.9524294 | 70.7487099 |
| 16:19:58 | 75.3324586 | 70.7372035 | 73.2685674 | 84.9524294 | 70.7487099 |
| 16:19:59 | 73.3324586 | 69.7372035 | 72.2685674 | 84.9524294 | 70.7487099 |
| 16:20:00 | 73.3324586 | 67.7372035 | 72.2685674 | 73.75      | 69.7487099 |
| 16:20:01 | 73.3324586 | 67.7372035 | 73.2685674 | 75.9524294 | 69.7487099 |

|          |            |            |            |            |            |
|----------|------------|------------|------------|------------|------------|
| 16:20:02 | 73.3324586 | 66.7372035 | 73.2685674 | 73.9524294 | 68.7487099 |
| 16:20:03 | 76.3324586 | 67.7372035 | 74.2685674 | 73.9524294 | 67.7487099 |
| 16:20:04 | 78.3324586 | 67.7372035 | 75.2685674 | 71.9524294 | 67.7487099 |
| 16:20:05 | 78.3324586 | 66.7372035 | 76.2685674 | 71.9524294 | 67.7487099 |
| 16:20:06 | 78.3324586 | 66.7372035 | 76.2685674 | 71.9524294 | 67.7487099 |
| 16:20:07 | 81.3324586 | 66.7372035 | 76.2685674 | 65.9524294 | 67.7487099 |
| 16:20:08 | 78.3324586 | 66.7372035 | 77.2685674 | 64.9524294 | 67.7487099 |
| 16:20:09 | 76.3324586 | 66.7372035 | 78.2685674 | 64.9524294 | 67.7487099 |
| 16:20:10 | 73.3324586 | 67.7372035 | 78.2685674 | 64.9524294 | 66.7487099 |
| 16:20:11 | 73.3324586 | 68.7372035 | 78.2685674 | 64.9524294 | 65.7487099 |
| 16:20:12 | 68.3324586 | 71.7372035 | 78.2685674 | 66.9524294 | 64.7487099 |
| 16:20:13 | 68.3324586 | 72.7372035 | 78.2685674 | 67.9524294 | 63.7487099 |
| 16:20:14 | 68.3324586 | 72.7372035 | 77.2685674 | 66.9524294 | 63.7487099 |
| 16:20:15 | 68.3324586 | 72.7372035 | 77.2685674 | 66.9524294 | 62.7487099 |
| 16:20:16 | 67.3324586 | 69.7372035 | 76.2685674 | 65.9524294 | 60.7487099 |
| 16:20:17 | 67.3324586 | 68.7372035 | 76.2685674 | 65.9524294 | 57.7487099 |
| 16:20:18 | 68.3324586 | 67.7372035 | 76.2685674 | 64.9524294 | 57.7487099 |
| 16:20:19 | 68.3324586 | 67.7372035 | 77.2685674 | 63.9524294 | 57.7487099 |
| 16:20:20 | 68.3324586 | 67.7372035 | 79.2685674 | 64.9524294 | 57.7487099 |
| 16:20:21 | 70.3324586 | 67.7372035 | 80.2685674 | 64.9524294 | 57.7487099 |
| 16:20:22 | 72.3324586 | 67.7372035 | 80.2685674 | 65.9524294 | 58.7487099 |
| 16:20:23 | 72.3324586 | 66.7372035 | 78.2685674 | 65.9524294 | 58.7487099 |
| 16:20:24 | 77.3324586 | 66.7372035 | 76.2685674 | 65.9524294 | 58.7487099 |
| 16:20:25 | 78.3324586 | 66.7372035 | 76.2685674 | 66.9524294 | 58.7487099 |
| 16:20:26 | 81.3324586 | 65.7372035 | 74.2685674 | 66.9524294 | 58.7487099 |
| 16:20:27 | 70.875     | 65.7372035 | 73.2685674 | 66.9524294 | 58.7487099 |
| 16:20:28 | 82.3324586 | 65.7372035 | 72.2685674 | 66.9524294 | 58.7487099 |
| 16:20:29 | 71.375     | 66.7372035 | 71.2685674 | 65.9524294 | 57.7487099 |
| 16:20:30 | 71.125     | 67.7372035 | 72.2685674 | 65.9524294 | 57.7487099 |
| 16:20:31 | 71         | 68.7372035 | 73.2685674 | 63.9524294 | 61.7487099 |
| 16:20:32 | 72.125     | 69.7372035 | 73.2685674 | 64.9524294 | 68.7487099 |
| 16:20:33 | 81.3324586 | 68.7372035 | 73.2685674 | 65.9524294 | 68.7487099 |
| 16:20:34 | 80.3324586 | 68.7372035 | 72.2685674 | 65.9524294 | 69.7487099 |
| 16:20:35 | 79.3324586 | 67.7372035 | 71.2685674 | 65.9524294 | 68.7487099 |
| 16:20:36 | 79.3324586 | 67.7372035 | 71.2685674 | 65.9524294 | 68.7487099 |
| 16:20:37 | 79.3324586 | 67.7372035 | 70.2685674 | 65.9524294 | 68.7487099 |
| 16:20:38 | 78.3324586 | 67.7372035 | 70.2685674 | 64.9524294 | 67.7487099 |
| 16:20:39 | 78.3324586 | 67.7372035 | 69.2685674 | 64.9524294 | 67.7487099 |
| 16:20:40 | 78.3324586 | 68.7372035 | 69.2685674 | 64.9524294 | 67.7487099 |
| 16:20:41 | 77.3324586 | 68.7372035 | 69.2685674 | 64.9524294 | 67.7487099 |
| 16:20:42 | 77.3324586 | 69.7372035 | 69.2685674 | 65.9524294 | 69.7487099 |
| 16:20:43 | 77.3324586 | 69.7372035 | 69.2685674 | 65.9524294 | 70.7487099 |
| 16:20:44 | 79.3324586 | 68.7372035 | 70.2685674 | 65.9524294 | 75.7487099 |
| 16:20:45 | 79.3324586 | 68.7372035 | 69.2685674 | 65.9524294 | 75.7487099 |
| 16:20:46 | 79.3324586 | 68.7372035 | 69.2685674 | 67.9524294 | 75.7487099 |

|          |            |            |            |            |            |
|----------|------------|------------|------------|------------|------------|
| 16:20:47 | 79.3324586 | 67.7372035 | 69.2685674 | 67.9524294 | 75.7487099 |
| 16:20:48 | 79.3324586 | 67.7372035 | 70.2685674 | 67.9524294 | 75.7487099 |
| 16:20:49 | 73.3324586 | 67.7372035 | 70.2685674 | 66.9524294 | 75.7487099 |
| 16:20:50 | 73.3324586 | 68.7372035 | 70.2685674 | 66.9524294 | 75.7487099 |
| 16:20:51 | 71.3324586 | 71.7372035 | 70.2685674 | 66.9524294 | 75.7487099 |
| 16:20:52 | 70.3324586 | 72.7372035 | 70.2685674 | 66.9524294 | 69.7487099 |
| 16:20:53 | 69.3324586 | 73.7372035 | 72.2685674 | 66.9524294 | 68.7487099 |
| 16:20:54 | 70.3324586 | 73.7372035 | 72.2685674 | 65.9524294 | 68.7487099 |
| 16:20:55 | 70.3324586 | 75.7372035 | 71.2685674 | 66.9524294 | 68.7487099 |
| 16:20:56 | 70.3324586 | 75.7372035 | 72.2685674 | 67.9524294 | 68.7487099 |
| 16:20:57 | 70.3324586 | 75.7372035 | 72.2685674 | 68.9524294 | 68.7487099 |
| 16:20:58 | 70.3324586 | 76.7372035 | 72.2685674 | 69.9524294 | 69.7487099 |
| 16:20:59 | 70.3324586 | 76.7372035 | 72.2685674 | 69.9524294 | 69.7487099 |
| 16:21:00 | 70.3324586 | 76.7372035 | 72.2685674 | 69.9524294 | 69.7487099 |
| 16:21:01 | 70.3324586 | 76.7372035 | 72.2685674 | 69.9524294 | 69.7487099 |
| 16:21:02 | 70.3324586 | 73.7372035 | 72.2685674 | 69.9524294 | 69.7487099 |
| 16:21:03 | 68.3324586 | 72.7372035 | 73.2685674 | 69.9524294 | 70.7487099 |
| 16:21:04 | 68.3324586 | 72.7372035 | 74.2685674 | 71.9524294 | 70.7487099 |
| 16:21:05 | 69.3324586 | 71.7372035 | 74.2685674 | 72.9524294 | 70.7487099 |
| 16:21:06 | 70.3324586 | 71.7372035 | 74.2685674 | 74.9524294 | 70.7487099 |
| 16:21:07 | 70.3324586 | 71.7372035 | 75.2685674 | 74.9524294 | 72.7487099 |
| 16:21:08 | 71.3324586 | 71.7372035 | 75.2685674 | 77.9524294 | 72.7487099 |
| 16:21:09 | 71.3324586 | 70.7372035 | 75.2685674 | 77.9524294 | 72.7487099 |
| 16:21:10 | 71.3324586 | 70.7372035 | 75.2685674 | 77.9524294 | 72.7487099 |
| 16:21:11 | 71.3324586 | 70.7372035 | 73.2685674 | 76.9524294 | 71.7487099 |
| 16:21:12 | 71.3324586 | 70.7372035 | 72.2685674 | 76.9524294 | 71.7487099 |
| 16:21:13 | 71.3324586 | 70.7372035 | 72.2685674 | 77.9524294 | 72.7487099 |
| 16:21:14 | 71.3324586 | 70.7372035 | 71.2685674 | 77.9524294 | 68.7487099 |
| 16:21:15 | 71.3324586 | 69.7372035 | 72.2685674 | 77.9524294 | 68.7487099 |
| 16:21:16 | 70.3324586 | 69.7372035 | 72.2685674 | 77.9524294 | 66.7487099 |
| 16:21:17 | 70.3324586 | 69.7372035 | 72.2685674 | 77.9524294 | 66.7487099 |
| 16:21:18 | 70.3324586 | 70.7372035 | 72.2685674 | 77.9524294 | 66.7487099 |
| 16:21:19 | 70.3324586 | 70.7372035 | 72.2685674 | 77.9524294 | 66.7487099 |
| 16:21:20 | 71.3324586 | 70.7372035 | 70.2685674 | 78.9524294 | 66.7487099 |
| 16:21:21 | 71.3324586 | 70.7372035 | 69.2685674 | 78.9524294 | 65.7487099 |
| 16:21:22 | 71.3324586 | 70.7372035 | 69.2685674 | 78.9524294 | 65.7487099 |
| 16:21:23 | 74.3324586 | 70.7372035 | 69.2685674 | 79.9524294 | 64.7487099 |
| 16:21:24 | 75.3324586 | 70.7372035 | 69.2685674 | 80.9524294 | 64.7487099 |
| 16:21:25 | 75.3324586 | 70.7372035 | 69.2685674 | 80.9524294 | 64.7487099 |
| 16:21:26 | 77.3324586 | 71.7372035 | 69.2685674 | 80.9524294 | 64.7487099 |
| 16:21:27 | 78.3324586 | 71.7372035 | 69.2685674 | 81.9524294 | 64.7487099 |
| 16:21:28 | 78.3324586 | 71.7372035 | 69.2685674 | 81.9524294 | 64.7487099 |
| 16:21:29 | 79.3324586 | 71.7372035 | 69.2685674 | 82.9524294 | 64.7487099 |
| 16:21:30 | 79.3324586 | 71.7372035 | 69.2685674 | 83.9524294 | 63.7487099 |
| 16:21:31 | 79.3324586 | 70.7372035 | 69.2685674 | 72.875     | 60.7487099 |

|          |            |            |            |            |            |
|----------|------------|------------|------------|------------|------------|
| 16:21:32 | 80.3324586 | 70.7372035 | 69.2685674 | 73         | 60.7487099 |
| 16:21:33 | 79.3324586 | 70.7372035 | 69.2685674 | 72.875     | 59.7487099 |
| 16:21:34 | 79.3324586 | 70.7372035 | 72.2685674 | 73.375     | 59.7487099 |
| 16:21:35 | 79.3324586 | 71.7372035 | 73.2685674 | 73.5       | 59.7487099 |
| 16:21:36 | 78.3324586 | 71.7372035 | 72.2685674 | 73.125     | 59.7487099 |
| 16:21:37 | 75.3324586 | 71.7372035 | 70.2685674 | 72.625     | 62.7487099 |
| 16:21:38 | 75.3324586 | 71.7372035 | 69.2685674 | 72.5       | 62.7487099 |
| 16:21:39 | 74.3324586 | 70.7372035 | 69.2685674 | 72.75      | 64.7487099 |
| 16:21:40 | 72.3324586 | 70.7372035 | 70.2685674 | 72.5       | 63.7487099 |
| 16:21:41 | 72.3324586 | 71.7372035 | 71.2685674 | 83.9524294 | 63.7487099 |
| 16:21:42 | 72.3324586 | 71.7372035 | 72.2685674 | 82.9524294 | 63.7487099 |
| 16:21:43 | 71.3324586 | 72.7372035 | 72.2685674 | 81.9524294 | 63.7487099 |
| 16:21:44 | 71.3324586 | 72.7372035 | 72.2685674 | 80.9524294 | 63.7487099 |
| 16:21:45 | 71.3324586 | 72.7372035 | 72.2685674 | 80.9524294 | 63.7487099 |
| 16:21:46 | 71.3324586 | 71.7372035 | 72.2685674 | 80.9524294 | 63.7487099 |
| 16:21:47 | 71.3324586 | 69.7372035 | 72.2685674 | 78.9524294 | 63.7487099 |
| 16:21:48 | 71.3324586 | 68.7372035 | 78.2685674 | 78.9524294 | 63.7487099 |
| 16:21:49 | 71.3324586 | 68.7372035 | 79.2685674 | 77.9524294 | 63.7487099 |
| 16:21:50 | 71.3324586 | 67.7372035 | 79.2685674 | 77.9524294 | 63.7487099 |
| 16:21:51 | 71.3324586 | 67.7372035 | 80.2685674 | 77.9524294 | 64.7487099 |
| 16:21:52 | 73.3324586 | 69.7372035 | 80.2685674 | 77.9524294 | 64.7487099 |
| 16:21:53 | 73.3324586 | 70.7372035 | 80.2685674 | 77.9524294 | 64.7487099 |
| 16:21:54 | 73.3324586 | 70.7372035 | 80.2685674 | 77.9524294 | 64.7487099 |
| 16:21:55 | 75.3324586 | 70.7372035 | 81.2685674 | 76.9524294 | 62.7487099 |
| 16:21:56 | 75.3324586 | 72.7372035 | 79.2685674 | 76.9524294 | 61.7487099 |
| 16:21:57 | 77.3324586 | 72.7372035 | 79.2685674 | 71.9524294 | 61.7487099 |
| 16:21:58 | 78.3324586 | 72.7372035 | 74.2685674 | 71.9524294 | 62.7487099 |
| 16:21:59 | 77.3324586 | 71.7372035 | 72.2685674 | 71.9524294 | 62.7487099 |
| 16:22:00 | 74.3324586 | 71.7372035 | 70.2685674 | 71.9524294 | 63.7487099 |
| 16:22:01 | 72.3324586 | 71.7372035 | 70.2685674 | 71.9524294 | 63.7487099 |
| 16:22:02 | 71.3324586 | 71.7372035 | 70.2685674 | 72.9524294 | 64.7487099 |
| 16:22:03 | 71.3324586 | 71.7372035 | 70.2685674 | 72.9524294 | 65.7487099 |
| 16:22:04 | 71.3324586 | 70.7372035 | 70.2685674 | 72.9524294 | 66.7487099 |
| 16:22:05 | 72.3324586 | 70.7372035 | 70.2685674 | 72.9524294 | 67.7487099 |
| 16:22:06 | 73.3324586 | 70.7372035 | 70.2685674 | 72.9524294 | 67.7487099 |
| 16:22:07 | 74.3324586 | 70.7372035 | 71.2685674 | 73.9524294 | 67.7487099 |
| 16:22:08 | 74.3324586 | 70.7372035 | 72.2685674 | 73.9524294 | 67.7487099 |
| 16:22:09 | 74.3324586 | 70.7372035 | 73.2685674 | 72.9524294 | 66.7487099 |
| 16:22:10 | 74.3324586 | 70.7372035 | 75.2685674 | 71.9524294 | 65.7487099 |
| 16:22:11 | 75.3324586 | 70.7372035 | 78.2685674 | 71.9524294 | 65.7487099 |
| 16:22:12 | 75.3324586 | 69.7372035 | 79.2685674 | 70.9524294 | 65.7487099 |
| 16:22:13 | 75.3324586 | 70.7372035 | 79.2685674 | 70.9524294 | 63.7487099 |
| 16:22:14 | 75.3324586 | 70.7372035 | 79.2685674 | 70.9524294 | 62.7487099 |
| 16:22:15 | 75.3324586 | 70.7372035 | 79.2685674 | 70.9524294 | 62.7487099 |
| 16:22:16 | 77.3324586 | 70.7372035 | 79.2685674 | 70.9524294 | 61.7487099 |



|          |            |            |            |            |            |
|----------|------------|------------|------------|------------|------------|
| 16:22:17 | 77.3324586 | 70.7372035 | 78.2685674 | 70.9524294 | 61.7487099 |
| 16:22:18 | 77.3324586 | 71.7372035 | 76.2685674 | 70.9524294 | 61.7487099 |
| 16:22:19 | 77.3324586 | 71.7372035 | 75.2685674 | 71.9524294 | 62.7487099 |
| 16:22:20 | 77.3324586 | 71.7372035 | 73.2685674 | 72.9524294 | 62.7487099 |
| 16:22:21 | 78.3324586 | 70.7372035 | 72.2685674 | 72.9524294 | 63.7487099 |
| 16:22:22 | 78.3324586 | 70.7372035 | 72.2685674 | 70.9524294 | 63.7487099 |
| 16:22:23 | 79.3324586 | 71.7372035 | 74.2685674 | 69.9524294 | 63.7487099 |
| 16:22:24 | 79.3324586 | 71.7372035 | 74.2685674 | 69.9524294 | 63.7487099 |
| 16:22:25 | 79.3324586 | 70.7372035 | 75.2685674 | 71.9524294 | 63.7487099 |
| 16:22:26 | 76.3324586 | 70.7372035 | 75.2685674 | 74.9524294 | 63.7487099 |
| 16:22:27 | 74.3324586 | 70.7372035 | 75.2685674 | 74.9524294 | 63.7487099 |
| 16:22:28 | 72.3324586 | 70.7372035 | 75.2685674 | 77.9524294 | 64.7487099 |
| 16:22:29 | 71.3324586 | 70.7372035 | 74.2685674 | 77.9524294 | 64.7487099 |
| 16:22:30 | 71.3324586 | 71.7372035 | 73.2685674 | 77.9524294 | 65.7487099 |
| 16:22:31 | 70.3324586 | 72.7372035 | 71.2685674 | 78.9524294 | 66.7487099 |
| 16:22:32 | 70.3324586 | 72.7372035 | 71.2685674 | 78.9524294 | 66.7487099 |
| 16:22:33 | 70.3324586 | 72.7372035 | 71.2685674 | 78.9524294 | 66.7487099 |
| 16:22:34 | 70.3324586 | 75.7372035 | 71.2685674 | 81.9524294 | 67.7487099 |
| 16:22:35 | 70.3324586 | 75.7372035 | 71.2685674 | 82.9524294 | 67.7487099 |
| 16:22:36 | 69.3324586 | 73.7372035 | 71.2685674 | 72.875     | 67.7487099 |
| 16:22:37 | 69.3324586 | 73.7372035 | 71.2685674 | 72.75      | 67.7487099 |
| 16:22:38 | 69.3324586 | 72.7372035 | 71.2685674 | 72.875     | 67.7487099 |
| 16:22:39 | 69.3324586 | 71.7372035 | 71.2685674 | 72.625     | 66.7487099 |
| 16:22:40 | 69.3324586 | 70.7372035 | 71.2685674 | 72.375     | 64.7487099 |
| 16:22:41 | 69.3324586 | 70.7372035 | 72.2685674 | 72.5       | 64.7487099 |
| 16:22:42 | 69.3324586 | 69.7372035 | 72.2685674 | 72.5       | 61.7487099 |
| 16:22:43 | 69.3324586 | 68.7372035 | 72.2685674 | 71.5       | 62.7487099 |
| 16:22:44 | 69.3324586 | 68.7372035 | 76.2685674 | 79.9524294 | 62.7487099 |
| 16:22:45 | 70.3324586 | 69.7372035 | 79.2685674 | 76.9524294 | 62.7487099 |
| 16:22:46 | 71.3324586 | 69.7372035 | 82.2685674 | 76.9524294 | 64.7487099 |
| 16:22:47 | 71.3324586 | 68.7372035 | 82.2685674 | 70.9524294 | 64.7487099 |
| 16:22:48 | 71.3324586 | 68.7372035 | 82.2685674 | 70.9524294 | 64.7487099 |
| 16:22:49 | 73.3324586 | 68.7372035 | 83.2685674 | 70.9524294 | 65.7487099 |
| 16:22:50 | 73.3324586 | 67.7372035 | 71.75      | 65.9524294 | 65.7487099 |
| 16:22:51 | 73.3324586 | 66.7372035 | 82.2685674 | 66.9524294 | 65.7487099 |
| 16:22:52 | 72.3324586 | 66.7372035 | 82.2685674 | 67.9524294 | 65.7487099 |
| 16:22:53 | 72.3324586 | 66.7372035 | 81.2685674 | 68.9524294 | 65.7487099 |
| 16:22:54 | 71.3324586 | 66.7372035 | 80.2685674 | 70.9524294 | 65.7487099 |
| 16:22:55 | 72.3324586 | 66.7372035 | 80.2685674 | 73.9524294 | 66.7487099 |
| 16:22:56 | 72.3324586 | 66.7372035 | 78.2685674 | 76.9524294 | 66.7487099 |
| 16:22:57 | 72.3324586 | 66.7372035 | 72.2685674 | 76.9524294 | 69.7487099 |
| 16:22:58 | 73.3324586 | 65.7372035 | 71.2685674 | 77.9524294 | 69.7487099 |
| 16:22:59 | 76.3324586 | 65.7372035 | 71.2685674 | 76.9524294 | 69.7487099 |
| 16:23:00 | 77.3324586 | 65.7372035 | 72.2685674 | 73.9524294 | 70.7487099 |
| 16:23:01 | 77.3324586 | 65.7372035 | 71.2685674 | 73.9524294 | 71.7487099 |

|          |            |            |            |            |            |
|----------|------------|------------|------------|------------|------------|
| 16:23:02 | 77.3324586 | 64.7372035 | 71.2685674 | 71.9524294 | 72.7487099 |
| 16:23:03 | 79.3324586 | 64.7372035 | 71.2685674 | 69.9524294 | 72.7487099 |
| 16:23:04 | 79.3324586 | 65.7372035 | 72.2685674 | 69.9524294 | 73.25      |
| 16:23:05 | 79.3324586 | 65.7372035 | 71.2685674 | 69.9524294 | 73.125     |
| 16:23:06 | 78.3324586 | 65.7372035 | 70.2685674 | 69.9524294 | 72.875     |
| 16:23:07 | 78.3324586 | 66.7372035 | 70.2685674 | 70.9524294 | 73         |
| 16:23:08 | 78.3324586 | 66.7372035 | 69.2685674 | 70.9524294 | 72.25      |
| 16:23:09 | 78.3324586 | 65.7372035 | 69.2685674 | 69.9524294 | 72.375     |
| 16:23:10 | 77.3324586 | 65.7372035 | 69.2685674 | 67.9524294 | 81.7487099 |
| 16:23:11 | 76.3324586 | 66.7372035 | 69.2685674 | 68.9524294 | 79.7487099 |
| 16:23:12 | 76.3324586 | 66.7372035 | 71.2685674 | 68.9524294 | 79.7487099 |
| 16:23:13 | 75.3324586 | 66.7372035 | 71.2685674 | 68.9524294 | 79.7487099 |
| 16:23:14 | 74.3324586 | 66.7372035 | 71.2685674 | 68.9524294 | 78.7487099 |
| 16:23:15 | 73.3324586 | 66.7372035 | 71.2685674 | 68.9524294 | 78.7487099 |
| 16:23:16 | 73.3324586 | 66.7372035 | 72.2685674 | 68.9524294 | 78.7487099 |
| 16:23:17 | 73.3324586 | 66.7372035 | 73.2685674 | 68.9524294 | 78.7487099 |
| 16:23:18 | 73.3324586 | 66.7372035 | 73.2685674 | 68.9524294 | 74.7487099 |
| 16:23:19 | 72.3324586 | 67.7372035 | 73.2685674 | 68.9524294 | 68.7487099 |
| 16:23:20 | 72.3324586 | 67.7372035 | 74.2685674 | 68.9524294 | 67.7487099 |
| 16:23:21 | 71.3324586 | 68.7372035 | 74.2685674 | 69.9524294 | 65.7487099 |
| 16:23:22 | 70.3324586 | 68.7372035 | 73.2685674 | 71.9524294 | 65.7487099 |
| 16:23:23 | 70.3324586 | 69.7372035 | 73.2685674 | 71.9524294 | 63.7487099 |
| 16:23:24 | 69.3324586 | 68.7372035 | 73.2685674 | 71.9524294 | 62.7487099 |
| 16:23:25 | 68.3324586 | 68.7372035 | 74.2685674 | 71.9524294 | 61.7487099 |
| 16:23:26 | 68.3324586 | 67.7372035 | 74.2685674 | 71.9524294 | 63.7487099 |
| 16:23:27 | 68.3324586 | 67.7372035 | 74.2685674 | 72.9524294 | 64.7487099 |
| 16:23:28 | 68.3324586 | 67.7372035 | 74.2685674 | 72.9524294 | 64.7487099 |
| 16:23:29 | 68.3324586 | 67.7372035 | 74.2685674 | 72.9524294 | 64.7487099 |
| 16:23:30 | 68.3324586 | 68.7372035 | 74.2685674 | 72.9524294 | 64.7487099 |
| 16:23:31 | 69.3324586 | 68.7372035 | 74.2685674 | 72.9524294 | 64.7487099 |
| 16:23:32 | 69.3324586 | 68.7372035 | 75.2685674 | 77.9524294 | 64.7487099 |
| 16:23:33 | 69.3324586 | 68.7372035 | 73.2685674 | 77.9524294 | 64.7487099 |
| 16:23:34 | 70.3324586 | 68.7372035 | 72.2685674 | 77.9524294 | 64.7487099 |
| 16:23:35 | 69.3324586 | 68.7372035 | 71.2685674 | 77.9524294 | 64.7487099 |
| 16:23:36 | 69.3324586 | 68.7372035 | 71.2685674 | 72.9524294 | 63.7487099 |
| 16:23:37 | 69.3324586 | 68.7372035 | 70.2685674 | 69.9524294 | 63.7487099 |
| 16:23:38 | 69.3324586 | 69.7372035 | 70.2685674 | 68.9524294 | 63.7487099 |
| 16:23:39 | 68.3324586 | 69.7372035 | 69.2685674 | 68.9524294 | 63.7487099 |
| 16:23:40 | 68.3324586 | 69.7372035 | 69.2685674 | 68.9524294 | 63.7487099 |
| 16:23:41 | 67.3324586 | 70.7372035 | 68.2685674 | 68.9524294 | 64.7487099 |
| 16:23:42 | 67.3324586 | 70.7372035 | 68.2685674 | 68.9524294 | 64.7487099 |
| 16:23:43 | 67.3324586 | 71.7372035 | 68.2685674 | 68.9524294 | 64.7487099 |
| 16:23:44 | 67.3324586 | 71.7372035 | 67.2685674 | 68.9524294 | 64.7487099 |
| 16:23:45 | 67.3324586 | 71.7372035 | 67.2685674 | 68.9524294 | 64.7487099 |
| 16:23:46 | 67.3324586 | 71.7372035 | 68.2685674 | 69.9524294 | 64.7487099 |

|          |            |            |            |            |            |
|----------|------------|------------|------------|------------|------------|
| 16:23:47 | 67.3324586 | 71.7372035 | 69.2685674 | 69.9524294 | 74.7487099 |
| 16:23:48 | 67.3324586 | 71.7372035 | 69.2685674 | 69.9524294 | 75.7487099 |
| 16:23:49 | 70.3324586 | 71.7372035 | 68.2685674 | 67.9524294 | 76.7487099 |
| 16:23:50 | 69.3324586 | 71.7372035 | 68.2685674 | 67.9524294 | 77.7487099 |
| 16:23:51 | 69.3324586 | 70.7372035 | 67.2685674 | 66.9524294 | 77.7487099 |
| 16:23:52 | 68.3324586 | 71.7372035 | 66.2685674 | 66.9524294 | 77.7487099 |
| 16:23:53 | 68.3324586 | 71.7372035 | 65.2685674 | 66.9524294 | 79.7487099 |
| 16:23:54 | 69.3324586 | 71.7372035 | 66.2685674 | 66.9524294 | 79.7487099 |
| 16:23:55 | 69.3324586 | 71.7372035 | 66.2685674 | 67.9524294 | 79.7487099 |
| 16:23:56 | 70.3324586 | 71.7372035 | 66.2685674 | 67.9524294 | 76.7487099 |
| 16:23:57 | 70.3324586 | 70.7372035 | 67.2685674 | 68.9524294 | 76.7487099 |
| 16:23:58 | 71.3324586 | 70.7372035 | 68.2685674 | 69.9524294 | 75.7487099 |
| 16:23:59 | 71.3324586 | 70.7372035 | 68.2685674 | 70.9524294 | 75.7487099 |
| 16:24:00 | 71.3324586 | 71.7372035 | 68.2685674 | 71.9524294 | 74.7487099 |
| 16:24:01 | 71.3324586 | 71.7372035 | 68.2685674 | 71.9524294 | 71.7487099 |
| 16:24:02 | 70.3324586 | 71.7372035 | 70.2685674 | 72.9524294 | 70.7487099 |
| 16:24:03 | 69.3324586 | 71.7372035 | 72.2685674 | 72.9524294 | 70.7487099 |
| 16:24:04 | 69.3324586 | 71.7372035 | 72.2685674 | 73.9524294 | 69.7487099 |
| 16:24:05 | 67.3324586 | 71.7372035 | 73.2685674 | 73.9524294 | 70.7487099 |
| 16:24:06 | 67.3324586 | 71.7372035 | 74.2685674 | 73.9524294 | 70.7487099 |
| 16:24:07 | 67.3324586 | 71.7372035 | 74.2685674 | 71.9524294 | 70.7487099 |
| 16:24:08 | 68.3324586 | 70.7372035 | 75.2685674 | 70.9524294 | 70.7487099 |
| 16:24:09 | 69.3324586 | 70.7372035 | 75.2685674 | 70.9524294 | 69.7487099 |
| 16:24:10 | 69.3324586 | 70.7372035 | 75.2685674 | 70.9524294 | 65.7487099 |
| 16:24:11 | 70.3324586 | 71.7372035 | 75.2685674 | 70.9524294 | 65.7487099 |
| 16:24:12 | 71.3324586 | 70.7372035 | 75.2685674 | 71.9524294 | 65.7487099 |
| 16:24:13 | 71.3324586 | 69.7372035 | 75.2685674 | 71.9524294 | 65.7487099 |
| 16:24:14 | 71.3324586 | 69.7372035 | 73.2685674 | 72.9524294 | 66.7487099 |
| 16:24:15 | 69.3324586 | 68.7372035 | 71.2685674 | 71.9524294 | 66.7487099 |
| 16:24:16 | 68.3324586 | 68.7372035 | 71.2685674 | 71.9524294 | 66.7487099 |
| 16:24:17 | 67.3324586 | 68.7372035 | 67.2685674 | 68.9524294 | 66.7487099 |
| 16:24:18 | 67.3324586 | 68.7372035 | 65.2685674 | 66.9524294 | 66.7487099 |
| 16:24:19 | 67.3324586 | 69.7372035 | 64.2685674 | 66.9524294 | 66.7487099 |
| 16:24:20 | 67.3324586 | 68.7372035 | 64.2685674 | 66.9524294 | 66.7487099 |
| 16:24:21 | 67.3324586 | 67.7372035 | 63.2685674 | 65.9524294 | 67.7487099 |
| 16:24:22 | 68.3324586 | 67.7372035 | 63.2685674 | 67.9524294 | 67.7487099 |
| 16:24:23 | 68.3324586 | 67.7372035 | 62.2685674 | 67.9524294 | 70.7487099 |
| 16:24:24 | 67.3324586 | 67.7372035 | 62.2685674 | 70.9524294 | 71.7487099 |
| 16:24:25 | 67.3324586 | 67.7372035 | 62.2685674 | 74.9524294 | 68.7487099 |
| 16:24:26 | 67.3324586 | 68.7372035 | 62.2685674 | 76.9524294 | 67.7487099 |
| 16:24:27 | 68.3324586 | 67.7372035 | 62.2685674 | 76.9524294 | 67.7487099 |
| 16:24:28 | 66.3324586 | 67.7372035 | 63.2685674 | 76.9524294 | 65.7487099 |
| 16:24:29 | 65.3324586 | 67.7372035 | 64.2685674 | 76.9524294 | 65.7487099 |
| 16:24:30 | 65.3324586 | 67.7372035 | 64.2685674 | 75.9524294 | 65.7487099 |
| 16:24:31 | 66.3324586 | 66.7372035 | 64.2685674 | 74.9524294 | 65.7487099 |

|          |            |            |            |            |            |
|----------|------------|------------|------------|------------|------------|
| 16:24:32 | 66.3324586 | 66.7372035 | 64.2685674 | 74.9524294 | 64.7487099 |
| 16:24:33 | 66.3324586 | 67.7372035 | 64.2685674 | 74.9524294 | 64.7487099 |
| 16:24:34 | 68.3324586 | 67.7372035 | 64.2685674 | 74.9524294 | 63.7487099 |
| 16:24:35 | 68.3324586 | 67.7372035 | 65.2685674 | 73.9524294 | 63.7487099 |
| 16:24:36 | 68.3324586 | 67.7372035 | 65.2685674 | 73.9524294 | 63.7487099 |
| 16:24:37 | 68.3324586 | 67.7372035 | 68.2685674 | 72.9524294 | 62.7487099 |
| 16:24:38 | 68.3324586 | 67.7372035 | 68.2685674 | 72.9524294 | 62.7487099 |
| 16:24:39 | 68.3324586 | 66.7372035 | 71.2685674 | 79.9524294 | 63.7487099 |
| 16:24:40 | 68.3324586 | 66.7372035 | 71.2685674 | 69.125     | 63.7487099 |
| 16:24:41 | 68.3324586 | 65.7372035 | 70.2685674 | 68.625     | 63.7487099 |
| 16:24:42 | 68.3324586 | 65.7372035 | 69.2685674 | 70.9524294 | 63.7487099 |
| 16:24:43 | 68.3324586 | 64.7372035 | 68.2685674 | 70.9524294 | 63.7487099 |
| 16:24:44 | 67.3324586 | 64.7372035 | 68.2685674 | 67.9524294 | 63.7487099 |
| 16:24:45 | 66.3324586 | 64.7372035 | 68.2685674 | 64.9524294 | 66.7487099 |
| 16:24:46 | 65.3324586 | 64.7372035 | 68.2685674 | 63.9524294 | 66.7487099 |
| 16:24:47 | 65.3324586 | 64.7372035 | 68.2685674 | 62.9524294 | 70.7487099 |
| 16:24:48 | 65.3324586 | 65.7372035 | 68.2685674 | 62.9524294 | 73.7487099 |
| 16:24:49 | 65.3324586 | 66.7372035 | 68.2685674 | 62.9524294 | 75.7487099 |
| 16:24:50 | 65.3324586 | 68.7372035 | 68.2685674 | 61.9524294 | 76.7487099 |
| 16:24:51 | 66.3324586 | 69.7372035 | 67.2685674 | 61.9524294 | 76.7487099 |
| 16:24:52 | 66.3324586 | 69.7372035 | 66.2685674 | 61.9524294 | 76.7487099 |
| 16:24:53 | 67.3324586 | 69.7372035 | 66.2685674 | 61.9524294 | 76.7487099 |
| 16:24:54 | 67.3324586 | 69.7372035 | 66.2685674 | 62.9524294 | 76.7487099 |
| 16:24:55 | 68.3324586 | 69.7372035 | 66.2685674 | 63.9524294 | 76.7487099 |
| 16:24:56 | 69.3324586 | 69.7372035 | 67.2685674 | 63.9524294 | 76.7487099 |
| 16:24:57 | 70.3324586 | 71.7372035 | 66.2685674 | 65.9524294 | 76.7487099 |
| 16:24:58 | 69.3324586 | 71.7372035 | 66.2685674 | 66.9524294 | 76.7487099 |
| 16:24:59 | 69.3324586 | 71.7372035 | 66.2685674 | 68.9524294 | 76.7487099 |
| 16:25:00 | 70.3324586 | 71.7372035 | 66.2685674 | 68.9524294 | 77.7487099 |
| 16:25:01 | 70.3324586 | 72.7372035 | 66.2685674 | 68.9524294 | 77.7487099 |
| 16:25:02 | 70.3324586 | 72.7372035 | 67.2685674 | 68.9524294 | 77.7487099 |
| 16:25:03 | 70.3324586 | 72.7372035 | 67.2685674 | 70.9524294 | 77.7487099 |
| 16:25:04 | 69.3324586 | 72.7372035 | 67.2685674 | 71.9524294 | 77.7487099 |
| 16:25:05 | 69.3324586 | 72.7372035 | 67.2685674 | 71.9524294 | 76.7487099 |
| 16:25:06 | 69.3324586 | 73.7372035 | 67.2685674 | 72.9524294 | 76.7487099 |
| 16:25:07 | 69.3324586 | 73.7372035 | 70.2685674 | 72.9524294 | 76.7487099 |
| 16:25:08 | 69.3324586 | 72.7372035 | 70.2685674 | 72.9524294 | 76.7487099 |
| 16:25:09 | 68.3324586 | 72.7372035 | 69.2685674 | 71.9524294 | 76.7487099 |
| 16:25:10 | 68.3324586 | 72.7372035 | 69.2685674 | 71.9524294 | 76.7487099 |
| 16:25:11 | 68.3324586 | 70.7372035 | 69.2685674 | 71.9524294 | 77.7487099 |
| 16:25:12 | 68.3324586 | 69.7372035 | 69.2685674 | 72.9524294 | 70.7487099 |
| 16:25:13 | 68.3324586 | 69.7372035 | 69.2685674 | 72.9524294 | 69.7487099 |
| 16:25:14 | 68.3324586 | 68.7372035 | 69.2685674 | 72.9524294 | 69.7487099 |
| 16:25:15 | 68.3324586 | 69.7372035 | 69.2685674 | 72.9524294 | 68.7487099 |
| 16:25:16 | 68.3324586 | 69.7372035 | 69.2685674 | 72.9524294 | 67.7487099 |

|          |            |            |            |            |            |
|----------|------------|------------|------------|------------|------------|
| 16:25:17 | 70.3324586 | 69.7372035 | 69.2685674 | 65.9524294 | 67.7487099 |
| 16:25:18 | 70.3324586 | 70.7372035 | 69.2685674 | 65.9524294 | 70.7487099 |
| 16:25:19 | 70.3324586 | 70.7372035 | 69.2685674 | 62.9524294 | 70.7487099 |
| 16:25:20 | 70.3324586 | 70.7372035 | 69.2685674 | 60.9524294 | 70.7487099 |
| 16:25:21 | 70.3324586 | 70.7372035 | 69.2685674 | 60.9524294 | 70.7487099 |
| 16:25:22 | 71.3324586 | 69.7372035 | 69.2685674 | 60.9524294 | 69.7487099 |
| 16:25:23 | 71.3324586 | 69.7372035 | 73.2685674 | 60.9524294 | 69.7487099 |
| 16:25:24 | 71.3324586 | 69.7372035 | 73.2685674 | 61.9524294 | 68.7487099 |
| 16:25:25 | 71.3324586 | 69.7372035 | 72.2685674 | 62.9524294 | 68.7487099 |
| 16:25:26 | 72.3324586 | 69.7372035 | 71.2685674 | 62.9524294 | 68.7487099 |
| 16:25:27 | 73.3324586 | 69.7372035 | 70.2685674 | 62.9524294 | 68.7487099 |
| 16:25:28 | 73.3324586 | 69.7372035 | 69.2685674 | 63.9524294 | 68.7487099 |
| 16:25:29 | 73.3324586 | 69.7372035 | 69.2685674 | 63.9524294 | 68.7487099 |
| 16:25:30 | 73.3324586 | 69.7372035 | 69.2685674 | 63.9524294 | 68.7487099 |
| 16:25:31 | 75.3324586 | 68.7372035 | 69.2685674 | 67.9524294 | 68.7487099 |
| 16:25:32 | 74.3324586 | 69.7372035 | 69.2685674 | 68.9524294 | 68.7487099 |
| 16:25:33 | 73.3324586 | 69.7372035 | 69.2685674 | 68.9524294 | 68.7487099 |
| 16:25:34 | 73.3324586 | 69.7372035 | 69.2685674 | 70.9524294 | 68.7487099 |
| 16:25:35 | 73.3324586 | 69.7372035 | 69.2685674 | 72.9524294 | 68.7487099 |
| 16:25:36 | 73.3324586 | 69.7372035 | 69.2685674 | 72.9524294 | 67.7487099 |
| 16:25:37 | 73.3324586 | 69.7372035 | 69.2685674 | 72.9524294 | 67.7487099 |
| 16:25:38 | 73.3324586 | 69.7372035 | 69.2685674 | 74.9524294 | 67.7487099 |
| 16:25:39 | 75.3324586 | 69.7372035 | 69.2685674 | 75.9524294 | 67.7487099 |
| 16:25:40 | 75.3324586 | 69.7372035 | 70.2685674 | 75.9524294 | 70.7487099 |
| 16:25:41 | 75.3324586 | 70.7372035 | 69.2685674 | 77.9524294 | 70.7487099 |
| 16:25:42 | 77.3324586 | 70.7372035 | 69.2685674 | 77.9524294 | 75.7487099 |
| 16:25:43 | 77.3324586 | 70.7372035 | 69.2685674 | 77.9524294 | 78.7487099 |
| 16:25:44 | 72.3324586 | 69.7372035 | 69.2685674 | 77.9524294 | 78.7487099 |
| 16:25:45 | 70.3324586 | 70.7372035 | 69.2685674 | 75.9524294 | 78.7487099 |
| 16:25:46 | 70.3324586 | 70.7372035 | 68.2685674 | 73.9524294 | 78.7487099 |
| 16:25:47 | 70.3324586 | 69.7372035 | 68.2685674 | 72.9524294 | 78.7487099 |
| 16:25:48 | 70.3324586 | 69.7372035 | 68.2685674 | 71.9524294 | 78.7487099 |
| 16:25:49 | 70.3324586 | 70.7372035 | 68.2685674 | 70.9524294 | 78.7487099 |
| 16:25:50 | 74.3324586 | 69.7372035 | 69.2685674 | 70.9524294 | 78.7487099 |
| 16:25:51 | 75.3324586 | 69.7372035 | 69.2685674 | 69.9524294 | 76.7487099 |
| 16:25:52 | 75.3324586 | 69.7372035 | 69.2685674 | 69.9524294 | 71.7487099 |
| 16:25:53 | 75.3324586 | 69.7372035 | 69.2685674 | 69.9524294 | 66.7487099 |
| 16:25:54 | 75.3324586 | 69.7372035 | 69.2685674 | 69.9524294 | 66.7487099 |
| 16:25:55 | 75.3324586 | 69.7372035 | 69.2685674 | 68.9524294 | 65.7487099 |
| 16:25:56 | 72.3324586 | 69.7372035 | 69.2685674 | 68.9524294 | 62.7487099 |
| 16:25:57 | 71.3324586 | 69.7372035 | 69.2685674 | 68.9524294 | 60.7487099 |
| 16:25:58 | 70.3324586 | 69.7372035 | 69.2685674 | 68.9524294 | 60.7487099 |
| 16:25:59 | 69.3324586 | 68.7372035 | 69.2685674 | 69.9524294 | 60.7487099 |
| 16:26:00 | 69.3324586 | 67.7372035 | 69.2685674 | 69.9524294 | 59.7487099 |
| 16:26:01 | 69.3324586 | 66.7372035 | 71.2685674 | 69.9524294 | 59.7487099 |

|          |            |            |            |            |            |
|----------|------------|------------|------------|------------|------------|
| 16:26:02 | 69.3324586 | 66.7372035 | 74.2685674 | 69.9524294 | 59.7487099 |
| 16:26:03 | 68.3324586 | 66.7372035 | 75.2685674 | 69.9524294 | 59.7487099 |
| 16:26:04 | 68.3324586 | 65.7372035 | 74.2685674 | 69.9524294 | 60.7487099 |
| 16:26:05 | 69.3324586 | 66.7372035 | 73.2685674 | 69.9524294 | 63.7487099 |
| 16:26:06 | 70.3324586 | 66.7372035 | 73.2685674 | 69.9524294 | 64.7487099 |
| 16:26:07 | 70.3324586 | 66.7372035 | 71.2685674 | 68.9524294 | 64.7487099 |
| 16:26:08 | 70.3324586 | 66.7372035 | 71.2685674 | 68.9524294 | 64.7487099 |
| 16:26:09 | 70.3324586 | 66.7372035 | 71.2685674 | 70.9524294 | 64.7487099 |
| 16:26:10 | 70.3324586 | 66.7372035 | 71.2685674 | 70.9524294 | 64.7487099 |
| 16:26:11 | 70.3324586 | 66.7372035 | 71.2685674 | 70.9524294 | 65.7487099 |
| 16:26:12 | 69.3324586 | 66.7372035 | 70.2685674 | 72.9524294 | 65.7487099 |
| 16:26:13 | 69.3324586 | 67.7372035 | 71.2685674 | 72.9524294 | 65.7487099 |
| 16:26:14 | 69.3324586 | 67.7372035 | 70.2685674 | 72.9524294 | 65.7487099 |
| 16:26:15 | 69.3324586 | 66.7372035 | 70.2685674 | 72.9524294 | 64.7487099 |
| 16:26:16 | 69.3324586 | 66.7372035 | 69.2685674 | 72.9524294 | 64.7487099 |
| 16:26:17 | 69.3324586 | 66.7372035 | 69.2685674 | 74.9524294 | 64.7487099 |
| 16:26:18 | 69.3324586 | 66.7372035 | 68.2685674 | 75.9524294 | 63.7487099 |
| 16:26:19 | 68.3324586 | 65.7372035 | 67.2685674 | 74.9524294 | 63.7487099 |
| 16:26:20 | 68.3324586 | 66.7372035 | 67.2685674 | 71.9524294 | 63.7487099 |
| 16:26:21 | 68.3324586 | 66.7372035 | 67.2685674 | 71.9524294 | 65.7487099 |
| 16:26:22 | 68.3324586 | 65.7372035 | 67.2685674 | 71.9524294 | 65.7487099 |
| 16:26:23 | 68.3324586 | 66.7372035 | 68.2685674 | 70.9524294 | 65.7487099 |
| 16:26:24 | 68.3324586 | 66.7372035 | 68.2685674 | 70.9524294 | 65.7487099 |
| 16:26:25 | 69.3324586 | 67.7372035 | 69.2685674 | 70.9524294 | 66.7487099 |
| 16:26:26 | 69.3324586 | 67.7372035 | 69.2685674 | 70.9524294 | 66.7487099 |
| 16:26:27 | 71.3324586 | 67.7372035 | 69.2685674 | 71.9524294 | 66.7487099 |
| 16:26:28 | 73.3324586 | 66.7372035 | 69.2685674 | 71.9524294 | 67.7487099 |
| 16:26:29 | 73.3324586 | 66.7372035 | 69.2685674 | 71.9524294 | 67.7487099 |
| 16:26:30 | 73.3324586 | 66.7372035 | 69.2685674 | 72.9524294 | 67.7487099 |
| 16:26:31 | 73.3324586 | 66.7372035 | 69.2685674 | 73.9524294 | 67.7487099 |
| 16:26:32 | 74.3324586 | 66.7372035 | 69.2685674 | 75.9524294 | 67.7487099 |
| 16:26:33 | 74.3324586 | 66.7372035 | 68.2685674 | 78.9524294 | 66.7487099 |
| 16:26:34 | 75.3324586 | 65.7372035 | 68.2685674 | 78.9524294 | 66.7487099 |
| 16:26:35 | 75.3324586 | 65.7372035 | 68.2685674 | 78.9524294 | 66.7487099 |
| 16:26:36 | 75.3324586 | 65.7372035 | 68.2685674 | 78.9524294 | 68.7487099 |
| 16:26:37 | 72.3324586 | 65.7372035 | 68.2685674 | 79.9524294 | 68.7487099 |
| 16:26:38 | 70.3324586 | 65.7372035 | 68.2685674 | 79.9524294 | 67.7487099 |
| 16:26:39 | 69.3324586 | 65.7372035 | 70.2685674 | 79.9524294 | 67.7487099 |
| 16:26:40 | 69.3324586 | 65.7372035 | 72.2685674 | 79.9524294 | 66.7487099 |
| 16:26:41 | 69.3324586 | 65.7372035 | 72.2685674 | 79.9524294 | 65.7487099 |
| 16:26:42 | 69.3324586 | 65.7372035 | 71.2685674 | 79.9524294 | 67.7487099 |
| 16:26:43 | 69.3324586 | 65.7372035 | 69.2685674 | 79.9524294 | 67.7487099 |
| 16:26:44 | 69.3324586 | 64.7372035 | 69.2685674 | 79.9524294 | 68.7487099 |
| 16:26:45 | 69.3324586 | 65.7372035 | 68.2685674 | 78.9524294 | 68.7487099 |
| 16:26:46 | 69.3324586 | 67.7372035 | 68.2685674 | 78.9524294 | 67.7487099 |

|          |            |            |            |            |            |
|----------|------------|------------|------------|------------|------------|
| 16:26:47 | 69.3324586 | 67.7372035 | 68.2685674 | 79.9524294 | 67.7487099 |
| 16:26:48 | 70.3324586 | 67.7372035 | 68.2685674 | 79.9524294 | 67.7487099 |
| 16:26:49 | 70.3324586 | 67.7372035 | 68.2685674 | 79.9524294 | 67.7487099 |
| 16:26:50 | 71.3324586 | 67.7372035 | 68.2685674 | 79.9524294 | 67.7487099 |
| 16:26:51 | 71.3324586 | 69.7372035 | 67.2685674 | 77.9524294 | 67.7487099 |
| 16:26:52 | 72.3324586 | 69.7372035 | 66.2685674 | 77.9524294 | 67.7487099 |
| 16:26:53 | 72.3324586 | 69.7372035 | 66.2685674 | 76.9524294 | 68.7487099 |
| 16:26:54 | 72.3324586 | 69.7372035 | 66.2685674 | 76.9524294 | 68.7487099 |
| 16:26:55 | 73.3324586 | 70.7372035 | 66.2685674 | 73.9524294 | 68.7487099 |
| 16:26:56 | 73.3324586 | 70.7372035 | 66.2685674 | 73.9524294 | 71.7487099 |
| 16:26:57 | 73.3324586 | 69.7372035 | 65.2685674 | 71.9524294 | 71.7487099 |
| 16:26:58 | 73.3324586 | 70.7372035 | 66.2685674 | 71.9524294 | 72.7487099 |
| 16:26:59 | 74.3324586 | 70.7372035 | 66.2685674 | 71.9524294 | 69.7487099 |
| 16:27:00 | 74.3324586 | 70.7372035 | 67.2685674 | 71.9524294 | 68.7487099 |
| 16:27:01 | 74.3324586 | 71.7372035 | 67.2685674 | 71.9524294 | 68.7487099 |
| 16:27:02 | 74.3324586 | 70.7372035 | 67.2685674 | 71.9524294 | 68.7487099 |
| 16:27:03 | 71.3324586 | 70.7372035 | 68.2685674 | 71.9524294 | 67.7487099 |
| 16:27:04 | 71.3324586 | 69.7372035 | 68.2685674 | 71.9524294 | 65.7487099 |
| 16:27:05 | 71.3324586 | 68.7372035 | 68.2685674 | 73.9524294 | 65.7487099 |
| 16:27:06 | 71.3324586 | 68.7372035 | 69.2685674 | 73.9524294 | 65.7487099 |
| 16:27:07 | 71.3324586 | 68.7372035 | 69.2685674 | 73.9524294 | 66.7487099 |
| 16:27:08 | 72.3324586 | 68.7372035 | 69.2685674 | 74.9524294 | 67.7487099 |
| 16:27:09 | 72.3324586 | 69.7372035 | 70.2685674 | 74.9524294 | 67.7487099 |
| 16:27:10 | 71.3324586 | 69.7372035 | 70.2685674 | 74.9524294 | 67.7487099 |
| 16:27:11 | 70.3324586 | 69.7372035 | 70.2685674 | 75.9524294 | 67.7487099 |
| 16:27:12 | 70.3324586 | 69.7372035 | 70.2685674 | 74.9524294 | 66.7487099 |
| 16:27:13 | 70.3324586 | 68.7372035 | 70.2685674 | 74.9524294 | 66.7487099 |
| 16:27:14 | 70.3324586 | 68.7372035 | 70.2685674 | 75.9524294 | 66.7487099 |
| 16:27:15 | 70.3324586 | 68.7372035 | 70.2685674 | 75.9524294 | 67.7487099 |
| 16:27:16 | 70.3324586 | 68.7372035 | 71.2685674 | 75.9524294 | 67.7487099 |
| 16:27:17 | 70.3324586 | 68.7372035 | 74.2685674 | 76.9524294 | 67.7487099 |
| 16:27:18 | 70.3324586 | 68.7372035 | 74.2685674 | 76.9524294 | 67.7487099 |
| 16:27:19 | 70.3324586 | 69.7372035 | 75.2685674 | 76.9524294 | 67.7487099 |
| 16:27:20 | 76.3324586 | 69.7372035 | 74.2685674 | 76.9524294 | 67.7487099 |
| 16:27:21 | 78.3324586 | 69.7372035 | 73.2685674 | 75.9524294 | 67.7487099 |
| 16:27:22 | 78.3324586 | 69.7372035 | 73.2685674 | 74.9524294 | 67.7487099 |
| 16:27:23 | 78.3324586 | 71.7372035 | 73.2685674 | 70.9524294 | 68.7487099 |
| 16:27:24 | 78.3324586 | 71.7372035 | 72.2685674 | 68.9524294 | 68.7487099 |
| 16:27:25 | 78.3324586 | 71.7372035 | 71.2685674 | 67.9524294 | 68.7487099 |
| 16:27:26 | 75.3324586 | 71.7372035 | 72.2685674 | 66.9524294 | 69.7487099 |
| 16:27:27 | 75.3324586 | 72.7372035 | 73.2685674 | 65.9524294 | 69.7487099 |
| 16:27:28 | 73.3324586 | 72.7372035 | 74.2685674 | 65.9524294 | 70.7487099 |
| 16:27:29 | 73.3324586 | 73.7372035 | 75.2685674 | 64.9524294 | 73.7487099 |
| 16:27:30 | 73.3324586 | 74.7372035 | 74.2685674 | 65.9524294 | 73.7487099 |
| 16:27:31 | 73.3324586 | 71.7372035 | 73.2685674 | 65.9524294 | 73.7487099 |

|          |            |            |            |            |            |
|----------|------------|------------|------------|------------|------------|
| 16:27:32 | 73.3324586 | 70.7372035 | 72.2685674 | 65.9524294 | 76.7487099 |
| 16:27:33 | 73.3324586 | 69.7372035 | 71.2685674 | 65.9524294 | 79.7487099 |
| 16:27:34 | 72.3324586 | 69.7372035 | 71.2685674 | 66.9524294 | 79.7487099 |
| 16:27:35 | 69.3324586 | 69.7372035 | 71.2685674 | 66.9524294 | 79.7487099 |
| 16:27:36 | 69.3324586 | 69.7372035 | 71.2685674 | 67.9524294 | 79.7487099 |
| 16:27:37 | 68.3324586 | 71.7372035 | 71.2685674 | 67.9524294 | 79.7487099 |
| 16:27:38 | 68.3324586 | 73.7372035 | 71.2685674 | 67.9524294 | 79.7487099 |
| 16:27:39 | 68.3324586 | 73.7372035 | 72.2685674 | 68.9524294 | 79.7487099 |
| 16:27:40 | 66.3324586 | 72.7372035 | 73.2685674 | 68.9524294 | 83.7487099 |
| 16:27:41 | 65.3324586 | 71.7372035 | 72.2685674 | 68.9524294 | 83.7487099 |
| 16:27:42 | 65.3324586 | 70.7372035 | 72.2685674 | 68.9524294 | 83.7487099 |
| 16:27:43 | 65.3324586 | 66.7372035 | 71.2685674 | 69.9524294 | 72.25      |
| 16:27:44 | 65.3324586 | 65.7372035 | 71.2685674 | 69.9524294 | 72         |
| 16:27:45 | 67.3324586 | 65.7372035 | 71.2685674 | 69.9524294 | 72         |
| 16:27:46 | 67.3324586 | 68.7372035 | 71.2685674 | 69.9524294 | 72.25      |
| 16:27:47 | 68.3324586 | 68.7372035 | 71.2685674 | 69.9524294 | 72.25      |
| 16:27:48 | 68.3324586 | 71.7372035 | 72.2685674 | 69.9524294 | 72.5       |
| 16:27:49 | 68.3324586 | 71.7372035 | 72.2685674 | 69.9524294 | 72.375     |
| 16:27:50 | 68.3324586 | 72.7372035 | 72.2685674 | 69.9524294 | 81.7487099 |
| 16:27:51 | 68.3324586 | 73.7372035 | 71.2685674 | 69.9524294 | 72.7487099 |
| 16:27:52 | 68.3324586 | 73.7372035 | 70.2685674 | 68.9524294 | 68.7487099 |
| 16:27:53 | 68.3324586 | 73.7372035 | 70.2685674 | 68.9524294 | 68.7487099 |
| 16:27:54 | 68.3324586 | 73.7372035 | 70.2685674 | 68.9524294 | 68.7487099 |
| 16:27:55 | 68.3324586 | 73.7372035 | 70.2685674 | 68.9524294 | 68.7487099 |
| 16:27:56 | 68.3324586 | 73.7372035 | 70.2685674 | 67.9524294 | 68.7487099 |
| 16:27:57 | 68.3324586 | 73.7372035 | 70.2685674 | 68.9524294 | 68.7487099 |
| 16:27:58 | 68.3324586 | 73.7372035 | 71.2685674 | 77.9524294 | 68.7487099 |
| 16:27:59 | 68.3324586 | 73.7372035 | 71.2685674 | 79.9524294 | 68.7487099 |
| 16:28:00 | 68.3324586 | 73.7372035 | 71.2685674 | 79.9524294 | 67.7487099 |
| 16:28:01 | 70.3324586 | 74.7372035 | 73.2685674 | 79.9524294 | 65.7487099 |
| 16:28:02 | 71.3324586 | 74.7372035 | 74.2685674 | 78.9524294 | 65.7487099 |
| 16:28:03 | 72.3324586 | 72.7372035 | 72.2685674 | 72.9524294 | 65.7487099 |
| 16:28:04 | 72.3324586 | 72.7372035 | 71.2685674 | 70.9524294 | 73.7487099 |
| 16:28:05 | 72.3324586 | 72.7372035 | 70.2685674 | 70.9524294 | 79.7487099 |
| 16:28:06 | 71.3324586 | 71.7372035 | 70.2685674 | 68.9524294 | 82.7487099 |
| 16:28:07 | 70.3324586 | 71.7372035 | 70.2685674 | 67.9524294 | 83.7487099 |
| 16:28:08 | 70.3324586 | 72.7372035 | 70.2685674 | 66.9524294 | 83.7487099 |
| 16:28:09 | 70.3324586 | 70.7372035 | 71.2685674 | 66.9524294 | 72.75      |
| 16:28:10 | 69.3324586 | 70.7372035 | 74.2685674 | 65.9524294 | 73         |
| 16:28:11 | 70.3324586 | 70.7372035 | 74.2685674 | 65.9524294 | 73.25      |
| 16:28:12 | 70.3324586 | 70.7372035 | 74.2685674 | 65.9524294 | 74.2925101 |
| 16:28:13 | 71.3324586 | 70.7372035 | 72.2685674 | 66.9524294 | 73.875     |
| 16:28:14 | 71.3324586 | 70.7372035 | 71.2685674 | 66.9524294 | 73.875     |
| 16:28:15 | 71.3324586 | 70.7372035 | 70.2685674 | 65.9524294 | 72.75      |
| 16:28:16 | 71.3324586 | 70.7372035 | 70.2685674 | 64.9524294 | 82.7487099 |



|          |            |            |            |            |            |
|----------|------------|------------|------------|------------|------------|
| 16:28:17 | 71.3324586 | 70.7372035 | 70.2685674 | 64.9524294 | 77.7487099 |
| 16:28:18 | 71.3324586 | 69.7372035 | 69.2685674 | 64.9524294 | 72.7487099 |
| 16:28:19 | 72.3324586 | 69.7372035 | 69.2685674 | 64.9524294 | 72.7487099 |
| 16:28:20 | 70.3324586 | 69.7372035 | 70.2685674 | 64.9524294 | 69.7487099 |
| 16:28:21 | 69.3324586 | 69.7372035 | 71.2685674 | 64.9524294 | 68.7487099 |
| 16:28:22 | 69.3324586 | 70.7372035 | 72.2685674 | 64.9524294 | 68.7487099 |
| 16:28:23 | 70.3324586 | 70.7372035 | 72.2685674 | 64.9524294 | 68.7487099 |
| 16:28:24 | 71.3324586 | 71.7372035 | 72.2685674 | 67.9524294 | 68.7487099 |
| 16:28:25 | 77.3324586 | 72.7372035 | 72.2685674 | 68.9524294 | 68.7487099 |
| 16:28:26 | 79.3324586 | 74.7372035 | 72.2685674 | 68.9524294 | 68.7487099 |
| 16:28:27 | 79.3324586 | 74.7372035 | 71.2685674 | 68.9524294 | 67.7487099 |
| 16:28:28 | 79.3324586 | 75.7372035 | 70.2685674 | 71.9524294 | 67.7487099 |
| 16:28:29 | 76.3324586 | 73.7372035 | 70.2685674 | 72.9524294 | 67.7487099 |
| 16:28:30 | 74.3324586 | 71.7372035 | 70.2685674 | 72.9524294 | 67.7487099 |
| 16:28:31 | 73.3324586 | 71.7372035 | 70.2685674 | 73.9524294 | 66.7487099 |
| 16:28:32 | 73.3324586 | 71.7372035 | 70.2685674 | 73.9524294 | 66.7487099 |
| 16:28:33 | 72.3324586 | 70.7372035 | 70.2685674 | 73.9524294 | 66.7487099 |
| 16:28:34 | 72.3324586 | 69.7372035 | 70.2685674 | 74.9524294 | 66.7487099 |
| 16:28:35 | 73.3324586 | 68.7372035 | 70.2685674 | 75.9524294 | 69.7487099 |
| 16:28:36 | 73.3324586 | 67.7372035 | 71.2685674 | 76.9524294 | 71.7487099 |
| 16:28:37 | 74.3324586 | 67.7372035 | 70.2685674 | 76.9524294 | 71.7487099 |
| 16:28:38 | 74.3324586 | 66.7372035 | 69.2685674 | 76.9524294 | 71.7487099 |
| 16:28:39 | 76.3324586 | 67.7372035 | 69.2685674 | 73.9524294 | 72.7487099 |
| 16:28:40 | 77.3324586 | 68.7372035 | 69.2685674 | 72.9524294 | 72.7487099 |
| 16:28:41 | 77.3324586 | 68.7372035 | 69.2685674 | 73.9524294 | 73.7487099 |
| 16:28:42 | 77.3324586 | 67.7372035 | 69.2685674 | 73.9524294 | 74.7487099 |
| 16:28:43 | 77.3324586 | 67.7372035 | 69.2685674 | 74.9524294 | 74.7487099 |
| 16:28:44 | 77.3324586 | 68.7372035 | 69.2685674 | 75.9524294 | 74.7487099 |
| 16:28:45 | 70.3324586 | 67.7372035 | 69.2685674 | 75.9524294 | 72.7487099 |
| 16:28:46 | 66.3324586 | 66.7372035 | 70.2685674 | 72.9524294 | 72.7487099 |
| 16:28:47 | 66.3324586 | 66.7372035 | 70.2685674 | 72.9524294 | 72.7487099 |
| 16:28:48 | 66.3324586 | 66.7372035 | 70.2685674 | 72.9524294 | 72.7487099 |
| 16:28:49 | 71.3324586 | 67.7372035 | 70.2685674 | 66.9524294 | 72.7487099 |
| 16:28:50 | 72.3324586 | 66.7372035 | 71.2685674 | 64.9524294 | 73.7487099 |
| 16:28:51 | 73.3324586 | 66.7372035 | 71.2685674 | 64.9524294 | 73.7487099 |
| 16:28:52 | 73.3324586 | 66.7372035 | 71.2685674 | 62.9524294 | 72.7487099 |
| 16:28:53 | 72.3324586 | 68.7372035 | 70.2685674 | 62.9524294 | 72.7487099 |
| 16:28:54 | 72.3324586 | 68.7372035 | 70.2685674 | 61.9524294 | 70.7487099 |
| 16:28:55 | 72.3324586 | 69.7372035 | 71.2685674 | 61.9524294 | 69.7487099 |
| 16:28:56 | 72.3324586 | 70.7372035 | 70.2685674 | 61.9524294 | 67.7487099 |
| 16:28:57 | 70.3324586 | 70.7372035 | 70.2685674 | 61.9524294 | 66.7487099 |
| 16:28:58 | 66.3324586 | 69.7372035 | 69.2685674 | 61.9524294 | 68.7487099 |
| 16:28:59 | 65.3324586 | 69.7372035 | 68.2685674 | 61.9524294 | 68.7487099 |
| 16:29:00 | 65.3324586 | 69.7372035 | 68.2685674 | 61.9524294 | 69.7487099 |
| 16:29:01 | 65.3324586 | 69.7372035 | 68.2685674 | 61.9524294 | 69.7487099 |

|          |            |            |            |            |            |
|----------|------------|------------|------------|------------|------------|
| 16:29:02 | 65.3324586 | 69.7372035 | 68.2685674 | 61.9524294 | 68.7487099 |
| 16:29:03 | 65.3324586 | 69.7372035 | 68.2685674 | 62.9524294 | 68.7487099 |
| 16:29:04 | 68.3324586 | 69.7372035 | 68.2685674 | 62.9524294 | 68.7487099 |
| 16:29:05 | 69.3324586 | 66.7372035 | 68.2685674 | 67.9524294 | 68.7487099 |
| 16:29:06 | 69.3324586 | 66.7372035 | 68.2685674 | 67.9524294 | 68.7487099 |
| 16:29:07 | 76.3324586 | 66.7372035 | 70.2685674 | 68.9524294 | 67.7487099 |
| 16:29:08 | 77.3324586 | 66.7372035 | 71.2685674 | 68.9524294 | 67.7487099 |
| 16:29:09 | 79.3324586 | 66.7372035 | 71.2685674 | 68.9524294 | 67.7487099 |
| 16:29:10 | 80.3324586 | 67.7372035 | 71.2685674 | 67.9524294 | 67.7487099 |
| 16:29:11 | 80.3324586 | 67.7372035 | 71.2685674 | 68.9524294 | 66.7487099 |
| 16:29:12 | 70         | 67.7372035 | 71.2685674 | 69.9524294 | 66.7487099 |
| 16:29:13 | 70.25      | 67.7372035 | 71.2685674 | 70.9524294 | 66.7487099 |
| 16:29:14 | 81.3324586 | 67.7372035 | 71.2685674 | 72.9524294 | 67.7487099 |
| 16:29:15 | 81.3324586 | 67.7372035 | 71.2685674 | 73.9524294 | 67.7487099 |
| 16:29:16 | 71.625     | 67.7372035 | 71.2685674 | 73.9524294 | 68.7487099 |
| 16:29:17 | 71.75      | 66.7372035 | 71.2685674 | 74.9524294 | 68.7487099 |
| 16:29:18 | 72.125     | 67.7372035 | 70.2685674 | 75.9524294 | 68.7487099 |
| 16:29:19 | 72.75      | 67.7372035 | 71.2685674 | 75.9524294 | 68.7487099 |
| 16:29:20 | 72.5       | 66.7372035 | 71.2685674 | 74.9524294 | 69.7487099 |
| 16:29:21 | 81.3324586 | 66.7372035 | 71.2685674 | 72.9524294 | 70.7487099 |
| 16:29:22 | 81.3324586 | 65.7372035 | 71.2685674 | 72.9524294 | 70.7487099 |
| 16:29:23 | 80.3324586 | 66.7372035 | 72.2685674 | 70.9524294 | 70.7487099 |
| 16:29:24 | 79.3324586 | 66.7372035 | 72.2685674 | 69.9524294 | 71.7487099 |
| 16:29:25 | 79.3324586 | 66.7372035 | 72.2685674 | 68.9524294 | 71.7487099 |
| 16:29:26 | 79.3324586 | 65.7372035 | 74.2685674 | 68.9524294 | 71.7487099 |
| 16:29:27 | 79.3324586 | 65.7372035 | 75.2685674 | 68.9524294 | 71.7487099 |
| 16:29:28 | 79.3324586 | 65.7372035 | 75.2685674 | 67.9524294 | 72.7487099 |
| 16:29:29 | 81.3324586 | 66.7372035 | 75.2685674 | 67.9524294 | 72.7487099 |
| 16:29:30 | 73         | 66.7372035 | 75.2685674 | 67.9524294 | 72.7487099 |
| 16:29:31 | 73.125     | 66.7372035 | 75.2685674 | 67.9524294 | 72.7487099 |
| 16:29:32 | 73.125     | 66.7372035 | 75.2685674 | 67.9524294 | 72.7487099 |
| 16:29:33 | 72.75      | 65.7372035 | 73.2685674 | 67.9524294 | 71.7487099 |
| 16:29:34 | 72.625     | 65.7372035 | 73.2685674 | 67.9524294 | 71.7487099 |
| 16:29:35 | 73.125     | 65.7372035 | 73.2685674 | 68.9524294 | 70.7487099 |
| 16:29:36 | 73.25      | 65.7372035 | 73.2685674 | 68.9524294 | 70.7487099 |
| 16:29:37 | 73.625     | 65.7372035 | 73.2685674 | 72.9524294 | 71.7487099 |
| 16:29:38 | 74.375     | 65.7372035 | 73.2685674 | 74.9524294 | 71.7487099 |
| 16:29:39 | 74.75      | 65.7372035 | 73.2685674 | 75.9524294 | 72.7487099 |
| 16:29:40 | 75.125     | 66.7372035 | 72.2685674 | 74.9524294 | 73.7487099 |
| 16:29:41 | 74.75      | 66.7372035 | 72.2685674 | 74.9524294 | 73.7487099 |
| 16:29:42 | 81.3324586 | 66.7372035 | 72.2685674 | 72.9524294 | 73.7487099 |
| 16:29:43 | 75.3324586 | 66.7372035 | 72.2685674 | 70.9524294 | 73.7487099 |
| 16:29:44 | 72.3324586 | 66.7372035 | 72.2685674 | 70.9524294 | 73.7487099 |
| 16:29:45 | 72.3324586 | 65.7372035 | 74.2685674 | 70.9524294 | 73.7487099 |
| 16:29:46 | 72.3324586 | 65.7372035 | 75.2685674 | 70.9524294 | 74.7487099 |

|          |            |            |            |            |            |
|----------|------------|------------|------------|------------|------------|
| 16:29:47 | 72.3324586 | 65.7372035 | 74.2685674 | 70.9524294 | 74.7487099 |
| 16:29:48 | 72.3324586 | 65.7372035 | 73.2685674 | 70.9524294 | 74.7487099 |
| 16:29:49 | 72.3324586 | 65.7372035 | 72.2685674 | 71.9524294 | 74.7487099 |
| 16:29:50 | 71.3324586 | 65.7372035 | 72.2685674 | 71.9524294 | 73.7487099 |
| 16:29:51 | 70.3324586 | 65.7372035 | 73.2685674 | 71.9524294 | 72.7487099 |
| 16:29:52 | 70.3324586 | 65.7372035 | 73.2685674 | 71.9524294 | 72.7487099 |
| 16:29:53 | 70.3324586 | 65.7372035 | 74.2685674 | 71.9524294 | 71.7487099 |
| 16:29:54 | 69.3324586 | 65.7372035 | 74.2685674 | 71.9524294 | 71.7487099 |
| 16:29:55 | 68.3324586 | 65.7372035 | 73.2685674 | 71.9524294 | 71.7487099 |
| 16:29:56 | 68.3324586 | 66.7372035 | 72.2685674 | 71.9524294 | 71.7487099 |
| 16:29:57 | 68.3324586 | 65.7372035 | 72.2685674 | 71.9524294 | 72.7487099 |
| 16:29:58 | 69.3324586 | 66.7372035 | 71.2685674 | 72.9524294 | 72.7487099 |
| 16:29:59 | 69.3324586 | 66.7372035 | 69.2685674 | 71.9524294 | 72.7487099 |
| 16:30:00 | 69.3324586 | 66.7372035 | 69.2685674 | 71.9524294 | 72.7487099 |
| 16:30:01 | 71.3324586 | 65.7372035 | 69.2685674 | 70.9524294 | 74.7487099 |
| 16:30:02 | 72.3324586 | 66.7372035 | 69.2685674 | 70.9524294 | 75.7487099 |
| 16:30:03 | 74.3324586 | 66.7372035 | 68.2685674 | 70.9524294 | 75.7487099 |
| 16:30:04 | 74.3324586 | 65.7372035 | 67.2685674 | 70.9524294 | 75.7487099 |
| 16:30:05 | 74.3324586 | 65.7372035 | 67.2685674 | 70.9524294 | 75.7487099 |
| 16:30:06 | 75.3324586 | 65.7372035 | 67.2685674 | 70.9524294 | 74.7487099 |
| 16:30:07 | 74.3324586 | 65.7372035 | 66.2685674 | 71.9524294 | 76.7487099 |
| 16:30:08 | 74.3324586 | 65.7372035 | 66.2685674 | 71.9524294 | 76.7487099 |
| 16:30:09 | 74.3324586 | 65.7372035 | 68.2685674 | 71.9524294 | 77.7487099 |
| 16:30:10 | 71.3324586 | 65.7372035 | 69.2685674 | 72.9524294 | 76.7487099 |
| 16:30:11 | 71.3324586 | 67.7372035 | 71.2685674 | 72.9524294 | 76.7487099 |
| 16:30:12 | 72.3324586 | 68.7372035 | 71.2685674 | 72.9524294 | 76.7487099 |
| 16:30:13 | 74.3324586 | 69.7372035 | 71.2685674 | 72.9524294 | 76.7487099 |
| 16:30:14 | 73.3324586 | 69.7372035 | 71.2685674 | 72.9524294 | 76.7487099 |
| 16:30:15 | 73.3324586 | 69.7372035 | 71.2685674 | 72.9524294 | 77.7487099 |
| 16:30:16 | 71.3324586 | 70.7372035 | 72.2685674 | 73.9524294 | 78.7487099 |
| 16:30:17 | 71.3324586 | 70.7372035 | 72.2685674 | 73.9524294 | 81.7487099 |
| 16:30:18 | 71.3324586 | 71.7372035 | 73.2685674 | 73.9524294 | 83.7487099 |
| 16:30:19 | 71.3324586 | 70.7372035 | 73.2685674 | 73.9524294 | 83.7487099 |
| 16:30:20 | 73.3324586 | 70.7372035 | 72.2685674 | 71.9524294 | 84.7487099 |
| 16:30:21 | 73.3324586 | 70.7372035 | 71.2685674 | 72.9524294 | 74.375     |
| 16:30:22 | 75.3324586 | 70.7372035 | 71.2685674 | 73.9524294 | 74.875     |
| 16:30:23 | 76.3324586 | 69.7372035 | 71.2685674 | 73.9524294 | 75.875     |
| 16:30:24 | 75.3324586 | 69.7372035 | 70.2685674 | 73.9524294 | 75.7487099 |
| 16:30:25 | 75.3324586 | 69.7372035 | 71.2685674 | 73.9524294 | 74.7487099 |
| 16:30:26 | 76.3324586 | 70.7372035 | 72.2685674 | 73.9524294 | 74.7487099 |
| 16:30:27 | 78.3324586 | 70.7372035 | 72.2685674 | 73.9524294 | 74.7487099 |
| 16:30:28 | 78.3324586 | 70.7372035 | 72.2685674 | 73.9524294 | 73.7487099 |
| 16:30:29 | 79.3324586 | 72.7372035 | 71.2685674 | 73.9524294 | 70.7487099 |
| 16:30:30 | 78.3324586 | 74.7372035 | 71.2685674 | 72.9524294 | 70.7487099 |
| 16:30:31 | 78.3324586 | 76.7372035 | 69.2685674 | 71.9524294 | 65.7487099 |

|          |            |            |            |            |            |
|----------|------------|------------|------------|------------|------------|
| 16:30:32 | 74.3324586 | 76.7372035 | 70.2685674 | 70.9524294 | 64.7487099 |
| 16:30:33 | 74.3324586 | 77.7372035 | 72.2685674 | 70.9524294 | 64.7487099 |
| 16:30:34 | 72.3324586 | 76.7372035 | 73.2685674 | 69.9524294 | 64.7487099 |
| 16:30:35 | 71.3324586 | 75.7372035 | 73.2685674 | 67.9524294 | 65.7487099 |
| 16:30:36 | 71.3324586 | 74.7372035 | 72.2685674 | 67.9524294 | 67.7487099 |
| 16:30:37 | 71.3324586 | 74.7372035 | 71.2685674 | 65.9524294 | 67.7487099 |
| 16:30:38 | 69.3324586 | 74.7372035 | 69.2685674 | 65.9524294 | 68.7487099 |
| 16:30:39 | 69.3324586 | 72.7372035 | 68.2685674 | 65.9524294 | 68.7487099 |
| 16:30:40 | 71.3324586 | 70.7372035 | 68.2685674 | 64.9524294 | 68.7487099 |
| 16:30:41 | 72.3324586 | 68.7372035 | 68.2685674 | 64.9524294 | 70.7487099 |
| 16:30:42 | 72.3324586 | 68.7372035 | 69.2685674 | 64.9524294 | 71.7487099 |
| 16:30:43 | 74.3324586 | 68.7372035 | 68.2685674 | 64.9524294 | 70.7487099 |
| 16:30:44 | 74.3324586 | 67.7372035 | 67.2685674 | 64.9524294 | 70.7487099 |
| 16:30:45 | 73.3324586 | 68.7372035 | 68.2685674 | 64.9524294 | 69.7487099 |
| 16:30:46 | 71.3324586 | 68.7372035 | 68.2685674 | 65.9524294 | 68.7487099 |
| 16:30:47 | 71.3324586 | 69.7372035 | 68.2685674 | 66.9524294 | 68.7487099 |
| 16:30:48 | 71.3324586 | 69.7372035 | 68.2685674 | 66.9524294 | 68.7487099 |
| 16:30:49 | 70.3324586 | 69.7372035 | 68.2685674 | 67.9524294 | 68.7487099 |
| 16:30:50 | 70.3324586 | 69.7372035 | 69.2685674 | 70.9524294 | 64.7487099 |
| 16:30:51 | 70.3324586 | 69.7372035 | 69.2685674 | 70.9524294 | 64.7487099 |
| 16:30:52 | 70.3324586 | 70.7372035 | 69.2685674 | 70.9524294 | 64.7487099 |
| 16:30:53 | 70.3324586 | 71.7372035 | 68.2685674 | 70.9524294 | 64.7487099 |
| 16:30:54 | 70.3324586 | 71.7372035 | 68.2685674 | 70.9524294 | 64.7487099 |
| 16:30:55 | 70.3324586 | 66.7372035 | 67.2685674 | 70.9524294 | 66.7487099 |
| 16:30:56 | 70.3324586 | 66.7372035 | 66.2685674 | 68.9524294 | 68.7487099 |
| 16:30:57 | 71.3324586 | 66.7372035 | 65.2685674 | 67.9524294 | 68.7487099 |
| 16:30:58 | 71.3324586 | 66.7372035 | 65.2685674 | 67.9524294 | 70.7487099 |
| 16:30:59 | 71.3324586 | 66.7372035 | 65.2685674 | 66.9524294 | 70.7487099 |
| 16:31:00 | 71.3324586 | 69.7372035 | 65.2685674 | 65.9524294 | 71.7487099 |
| 16:31:01 | 71.3324586 | 69.7372035 | 65.2685674 | 65.9524294 | 71.7487099 |
| 16:31:02 | 72.3324586 | 69.7372035 | 66.2685674 | 64.9524294 | 72.7487099 |
| 16:31:03 | 75.3324586 | 69.7372035 | 66.2685674 | 64.9524294 | 73.7487099 |
| 16:31:04 | 75.3324586 | 68.7372035 | 71.2685674 | 64.9524294 | 75.7487099 |
| 16:31:05 | 78.3324586 | 67.7372035 | 70.2685674 | 65.9524294 | 75.7487099 |
| 16:31:06 | 76.3324586 | 67.7372035 | 67.2685674 | 65.9524294 | 75.7487099 |
| 16:31:07 | 73.3324586 | 67.7372035 | 65.2685674 | 66.9524294 | 75.7487099 |
| 16:31:08 | 71.3324586 | 66.7372035 | 64.2685674 | 68.9524294 | 75.7487099 |
| 16:31:09 | 71.3324586 | 66.7372035 | 63.2685674 | 69.9524294 | 74.7487099 |
| 16:31:10 | 70.3324586 | 66.7372035 | 64.2685674 | 70.9524294 | 77.7487099 |
| 16:31:11 | 70.3324586 | 65.7372035 | 65.2685674 | 69.9524294 | 78.7487099 |
| 16:31:12 | 71.3324586 | 66.7372035 | 66.2685674 | 66.9524294 | 79.7487099 |
| 16:31:13 | 73.3324586 | 66.7372035 | 66.2685674 | 65.9524294 | 81.7487099 |
| 16:31:14 | 74.3324586 | 66.7372035 | 66.2685674 | 65.9524294 | 79.7487099 |
| 16:31:15 | 74.3324586 | 66.7372035 | 66.2685674 | 64.9524294 | 78.7487099 |
| 16:31:16 | 74.3324586 | 66.7372035 | 65.2685674 | 64.9524294 | 78.7487099 |

|          |            |            |            |            |            |
|----------|------------|------------|------------|------------|------------|
| 16:31:17 | 74.3324586 | 67.7372035 | 65.2685674 | 64.9524294 | 76.7487099 |
| 16:31:18 | 72.3324586 | 67.7372035 | 64.2685674 | 65.9524294 | 74.7487099 |
| 16:31:19 | 72.3324586 | 68.7372035 | 64.2685674 | 66.9524294 | 73.7487099 |
| 16:31:20 | 71.3324586 | 73.7372035 | 64.2685674 | 66.9524294 | 72.7487099 |
| 16:31:21 | 70.3324586 | 73.7372035 | 65.2685674 | 68.9524294 | 72.7487099 |
| 16:31:22 | 70.3324586 | 76.7372035 | 66.2685674 | 71.9524294 | 72.7487099 |
| 16:31:23 | 70.3324586 | 78.7372035 | 66.2685674 | 71.9524294 | 72.7487099 |
| 16:31:24 | 70.3324586 | 78.7372035 | 66.2685674 | 71.9524294 | 71.7487099 |
| 16:31:25 | 70.3324586 | 80.7372035 | 66.2685674 | 70.9524294 | 70.7487099 |
| 16:31:26 | 70.3324586 | 69.75      | 65.2685674 | 68.9524294 | 70.7487099 |
| 16:31:27 | 71.3324586 | 69.75      | 65.2685674 | 67.9524294 | 70.7487099 |
| 16:31:28 | 71.3324586 | 69.25      | 65.2685674 | 67.9524294 | 69.7487099 |
| 16:31:29 | 71.3324586 | 69.125     | 65.2685674 | 67.9524294 | 68.7487099 |
| 16:31:30 | 71.3324586 | 79.7372035 | 65.2685674 | 67.9524294 | 68.7487099 |
| 16:31:31 | 71.3324586 | 78.7372035 | 66.2685674 | 67.9524294 | 68.7487099 |
| 16:31:32 | 71.3324586 | 78.7372035 | 66.2685674 | 68.9524294 | 67.7487099 |
| 16:31:33 | 71.3324586 | 79.7372035 | 66.2685674 | 68.9524294 | 67.7487099 |
| 16:31:34 | 71.3324586 | 79.7372035 | 66.2685674 | 69.9524294 | 68.7487099 |
| 16:31:35 | 75.3324586 | 79.7372035 | 66.2685674 | 69.9524294 | 68.7487099 |
| 16:31:36 | 77.3324586 | 79.7372035 | 66.2685674 | 70.9524294 | 68.7487099 |
| 16:31:37 | 76.3324586 | 79.7372035 | 67.2685674 | 71.9524294 | 68.7487099 |
| 16:31:38 | 76.3324586 | 79.7372035 | 68.2685674 | 71.9524294 | 68.7487099 |
| 16:31:39 | 75.3324586 | 80.7372035 | 69.2685674 | 71.9524294 | 70.7487099 |
| 16:31:40 | 75.3324586 | 80.7372035 | 70.2685674 | 71.9524294 | 72.7487099 |
| 16:31:41 | 75.3324586 | 77.7372035 | 70.2685674 | 72.9524294 | 72.7487099 |
| 16:31:42 | 73.3324586 | 72.7372035 | 70.2685674 | 72.9524294 | 74.7487099 |
| 16:31:43 | 72.3324586 | 69.7372035 | 70.2685674 | 72.9524294 | 72.7487099 |
| 16:31:44 | 72.3324586 | 67.7372035 | 70.2685674 | 72.9524294 | 71.7487099 |
| 16:31:45 | 70.3324586 | 66.7372035 | 70.2685674 | 72.9524294 | 71.7487099 |
| 16:31:46 | 70.3324586 | 66.7372035 | 71.2685674 | 72.9524294 | 71.7487099 |
| 16:31:47 | 70.3324586 | 66.7372035 | 71.2685674 | 72.9524294 | 71.7487099 |
| 16:31:48 | 70.3324586 | 66.7372035 | 71.2685674 | 72.9524294 | 71.7487099 |
| 16:31:49 | 71.3324586 | 66.7372035 | 75.2685674 | 72.9524294 | 71.7487099 |
| 16:31:50 | 71.3324586 | 66.7372035 | 76.2685674 | 75.9524294 | 71.7487099 |
| 16:31:51 | 71.3324586 | 65.7372035 | 77.2685674 | 75.9524294 | 71.7487099 |
| 16:31:52 | 73.3324586 | 65.7372035 | 77.2685674 | 75.9524294 | 70.7487099 |
| 16:31:53 | 73.3324586 | 65.7372035 | 76.2685674 | 78.9524294 | 68.7487099 |
| 16:31:54 | 72.3324586 | 65.7372035 | 75.2685674 | 79.9524294 | 68.7487099 |
| 16:31:55 | 72.3324586 | 66.7372035 | 70.2685674 | 80.9524294 | 69.7487099 |
| 16:31:56 | 72.3324586 | 66.7372035 | 66.2685674 | 69.625     | 69.7487099 |
| 16:31:57 | 72.3324586 | 66.7372035 | 64.2685674 | 69.25      | 69.7487099 |
| 16:31:58 | 73.3324586 | 65.7372035 | 64.2685674 | 69.375     | 68.7487099 |
| 16:31:59 | 71.3324586 | 66.7372035 | 62.2685674 | 69.125     | 67.7487099 |
| 16:32:00 | 71.3324586 | 66.7372035 | 62.2685674 | 69.125     | 66.7487099 |
| 16:32:01 | 68.3324586 | 65.7372035 | 62.2685674 | 68.5       | 65.7487099 |

|          |            |            |            |            |            |
|----------|------------|------------|------------|------------|------------|
| 16:32:02 | 67.3324586 | 65.7372035 | 61.2685674 | 68.125     | 65.7487099 |
| 16:32:03 | 67.3324586 | 64.7372035 | 62.2685674 | 67.875     | 64.7487099 |
| 16:32:04 | 66.3324586 | 64.7372035 | 62.2685674 | 67.75      | 64.7487099 |
| 16:32:05 | 66.3324586 | 64.7372035 | 62.2685674 | 67.875     | 66.7487099 |
| 16:32:06 | 66.3324586 | 65.7372035 | 62.2685674 | 68         | 66.7487099 |
| 16:32:07 | 66.3324586 | 67.7372035 | 62.2685674 | 68.25      | 66.7487099 |
| 16:32:08 | 67.3324586 | 67.7372035 | 62.2685674 | 67.875     | 67.7487099 |
| 16:32:09 | 68.3324586 | 67.7372035 | 62.2685674 | 67.75      | 68.7487099 |
| 16:32:10 | 70.3324586 | 66.7372035 | 62.2685674 | 77.9524294 | 68.7487099 |
| 16:32:11 | 72.3324586 | 65.7372035 | 62.2685674 | 77.9524294 | 68.7487099 |
| 16:32:12 | 72.3324586 | 65.7372035 | 62.2685674 | 76.9524294 | 68.7487099 |
| 16:32:13 | 72.3324586 | 65.7372035 | 63.2685674 | 76.9524294 | 68.7487099 |
| 16:32:14 | 72.3324586 | 65.7372035 | 63.2685674 | 74.9524294 | 68.7487099 |
| 16:32:15 | 72.3324586 | 65.7372035 | 63.2685674 | 74.9524294 | 67.7487099 |
| 16:32:16 | 72.3324586 | 65.7372035 | 64.2685674 | 74.9524294 | 68.7487099 |
| 16:32:17 | 72.3324586 | 66.7372035 | 64.2685674 | 75.9524294 | 69.7487099 |
| 16:32:18 | 73.3324586 | 67.7372035 | 63.2685674 | 75.9524294 | 70.7487099 |
| 16:32:19 | 73.3324586 | 67.7372035 | 63.2685674 | 69.375     | 70.7487099 |
| 16:32:20 | 74.3324586 | 67.7372035 | 63.2685674 | 69.625     | 70.7487099 |
| 16:32:21 | 74.3324586 | 67.7372035 | 63.2685674 | 69.625     | 70.7487099 |
| 16:32:22 | 74.3324586 | 67.7372035 | 63.2685674 | 70         | 70.7487099 |
| 16:32:23 | 75.3324586 | 68.7372035 | 64.2685674 | 70.375     | 70.7487099 |
| 16:32:24 | 75.3324586 | 68.7372035 | 64.2685674 | 70.25      | 69.7487099 |
| 16:32:25 | 75.3324586 | 68.7372035 | 65.2685674 | 70.5       | 69.7487099 |
| 16:32:26 | 71.3324586 | 67.7372035 | 66.2685674 | 70         | 69.7487099 |
| 16:32:27 | 71.3324586 | 67.7372035 | 66.2685674 | 70.375     | 69.7487099 |
| 16:32:28 | 70.3324586 | 67.7372035 | 66.2685674 | 70.625     | 69.7487099 |
| 16:32:29 | 70.3324586 | 67.7372035 | 65.2685674 | 70.625     | 68.7487099 |
| 16:32:30 | 70.3324586 | 67.7372035 | 65.2685674 | 71         | 69.7487099 |
| 16:32:31 | 70.3324586 | 67.7372035 | 65.2685674 | 71         | 69.7487099 |
| 16:32:32 | 70.3324586 | 67.7372035 | 65.2685674 | 71.25      | 69.7487099 |
| 16:32:33 | 70.3324586 | 67.7372035 | 65.2685674 | 71.5       | 70.7487099 |
| 16:32:34 | 71.3324586 | 68.7372035 | 66.2685674 | 81.9524294 | 71.7487099 |
| 16:32:35 | 71.3324586 | 69.7372035 | 67.2685674 | 81.9524294 | 73.7487099 |
| 16:32:36 | 71.3324586 | 71.7372035 | 67.2685674 | 76.9524294 | 73.7487099 |
| 16:32:37 | 67.3324586 | 70.7372035 | 66.2685674 | 77.9524294 | 75.7487099 |
| 16:32:38 | 65.3324586 | 69.7372035 | 65.2685674 | 78.9524294 | 76.7487099 |
| 16:32:39 | 65.3324586 | 69.7372035 | 64.2685674 | 79.9524294 | 76.7487099 |
| 16:32:40 | 67.3324586 | 69.7372035 | 64.2685674 | 79.9524294 | 76.7487099 |
| 16:32:41 | 67.3324586 | 69.7372035 | 64.2685674 | 80.9524294 | 76.7487099 |
| 16:32:42 | 67.3324586 | 69.7372035 | 64.2685674 | 80.9524294 | 76.7487099 |
| 16:32:43 | 68.3324586 | 69.7372035 | 64.2685674 | 80.9524294 | 76.7487099 |
| 16:32:44 | 68.3324586 | 70.7372035 | 64.2685674 | 80.9524294 | 74.7487099 |
| 16:32:45 | 68.3324586 | 70.7372035 | 64.2685674 | 80.9524294 | 70.7487099 |
| 16:32:46 | 68.3324586 | 71.7372035 | 64.2685674 | 81.9524294 | 69.7487099 |

|          |            |            |            |            |            |
|----------|------------|------------|------------|------------|------------|
| 16:32:47 | 68.3324586 | 71.7372035 | 64.2685674 | 81.9524294 | 69.7487099 |
| 16:32:48 | 68.3324586 | 72.7372035 | 64.2685674 | 81.9524294 | 68.7487099 |
| 16:32:49 | 68.3324586 | 72.7372035 | 64.2685674 | 81.9524294 | 68.7487099 |
| 16:32:50 | 68.3324586 | 73.7372035 | 64.2685674 | 81.9524294 | 71.7487099 |
| 16:32:51 | 68.3324586 | 72.7372035 | 64.2685674 | 79.9524294 | 73.7487099 |
| 16:32:52 | 68.3324586 | 72.7372035 | 64.2685674 | 70.9524294 | 73.7487099 |
| 16:32:53 | 68.3324586 | 71.7372035 | 64.2685674 | 70.9524294 | 75.7487099 |
| 16:32:54 | 68.3324586 | 70.7372035 | 65.2685674 | 70.9524294 | 75.7487099 |
| 16:32:55 | 68.3324586 | 70.7372035 | 65.2685674 | 69.9524294 | 75.7487099 |
| 16:32:56 | 69.3324586 | 70.7372035 | 66.2685674 | 69.9524294 | 75.7487099 |
| 16:32:57 | 69.3324586 | 69.7372035 | 66.2685674 | 70.9524294 | 74.7487099 |
| 16:32:58 | 69.3324586 | 69.7372035 | 67.2685674 | 70.9524294 | 77.7487099 |
| 16:32:59 | 69.3324586 | 69.7372035 | 67.2685674 | 71.9524294 | 77.7487099 |
| 16:33:00 | 68.3324586 | 69.7372035 | 67.2685674 | 72.9524294 | 78.7487099 |
| 16:33:01 | 68.3324586 | 69.7372035 | 67.2685674 | 72.9524294 | 70.625     |
| 16:33:02 | 68.3324586 | 69.7372035 | 67.2685674 | 72.9524294 | 71.5       |
| 16:33:03 | 68.3324586 | 69.7372035 | 67.2685674 | 72.9524294 | 71.375     |
| 16:33:04 | 69.3324586 | 70.7372035 | 67.2685674 | 72.9524294 | 71.5       |
| 16:33:05 | 69.3324586 | 70.7372035 | 66.2685674 | 72.9524294 | 71.25      |
| 16:33:06 | 70.3324586 | 70.7372035 | 66.2685674 | 74.9524294 | 71.25      |
| 16:33:07 | 71.3324586 | 70.7372035 | 66.2685674 | 74.9524294 | 70.75      |
| 16:33:08 | 71.3324586 | 70.7372035 | 66.2685674 | 75.9524294 | 70.5       |
| 16:33:09 | 71.3324586 | 70.7372035 | 65.2685674 | 75.9524294 | 70         |
| 16:33:10 | 72.3324586 | 70.7372035 | 65.2685674 | 77.9524294 | 70.25      |
| 16:33:11 | 73.3324586 | 70.7372035 | 65.2685674 | 77.9524294 | 80.7487099 |
| 16:33:12 | 74.3324586 | 70.7372035 | 65.2685674 | 80.9524294 | 80.7487099 |
| 16:33:13 | 72.3324586 | 69.7372035 | 65.2685674 | 70.625     | 80.7487099 |
| 16:33:14 | 71.3324586 | 69.7372035 | 69.2685674 | 71.25      | 80.7487099 |
| 16:33:15 | 71.3324586 | 69.7372035 | 72.2685674 | 71.375     | 80.7487099 |
| 16:33:16 | 71.3324586 | 68.7372035 | 72.2685674 | 70.875     | 79.7487099 |
| 16:33:17 | 71.3324586 | 68.7372035 | 74.2685674 | 70.375     | 78.7487099 |
| 16:33:18 | 72.3324586 | 68.7372035 | 75.2685674 | 75.9524294 | 77.7487099 |
| 16:33:19 | 72.3324586 | 68.7372035 | 75.2685674 | 71.9524294 | 77.7487099 |
| 16:33:20 | 72.3324586 | 69.7372035 | 76.2685674 | 71.9524294 | 77.7487099 |
| 16:33:21 | 72.3324586 | 69.7372035 | 76.2685674 | 71.9524294 | 77.7487099 |
| 16:33:22 | 72.3324586 | 68.7372035 | 76.2685674 | 72.9524294 | 77.7487099 |
| 16:33:23 | 74.3324586 | 68.7372035 | 75.2685674 | 72.9524294 | 77.7487099 |
| 16:33:24 | 73.3324586 | 68.7372035 | 74.2685674 | 73.9524294 | 78.7487099 |
| 16:33:25 | 71.3324586 | 67.7372035 | 74.2685674 | 73.9524294 | 78.7487099 |
| 16:33:26 | 70.3324586 | 67.7372035 | 73.2685674 | 73.9524294 | 78.7487099 |
| 16:33:27 | 69.3324586 | 67.7372035 | 72.2685674 | 73.9524294 | 75.7487099 |
| 16:33:28 | 69.3324586 | 67.7372035 | 70.2685674 | 73.9524294 | 69.7487099 |
| 16:33:29 | 70.3324586 | 67.7372035 | 69.2685674 | 73.9524294 | 68.7487099 |
| 16:33:30 | 70.3324586 | 67.7372035 | 69.2685674 | 73.9524294 | 68.7487099 |
| 16:33:31 | 70.3324586 | 67.7372035 | 68.2685674 | 71.9524294 | 67.7487099 |

|          |            |            |            |            |            |
|----------|------------|------------|------------|------------|------------|
| 16:33:32 | 70.3324586 | 67.7372035 | 68.2685674 | 69.9524294 | 67.7487099 |
| 16:33:33 | 70.3324586 | 68.7372035 | 68.2685674 | 68.9524294 | 67.7487099 |
| 16:33:34 | 69.3324586 | 67.7372035 | 69.2685674 | 68.9524294 | 67.7487099 |
| 16:33:35 | 68.3324586 | 68.7372035 | 68.2685674 | 67.9524294 | 67.7487099 |
| 16:33:36 | 68.3324586 | 68.7372035 | 68.2685674 | 67.9524294 | 67.7487099 |
| 16:33:37 | 67.3324586 | 68.7372035 | 66.2685674 | 67.9524294 | 69.7487099 |
| 16:33:38 | 67.3324586 | 68.7372035 | 64.2685674 | 65.9524294 | 66.7487099 |
| 16:33:39 | 67.3324586 | 69.7372035 | 63.2685674 | 65.9524294 | 65.7487099 |
| 16:33:40 | 67.3324586 | 70.7372035 | 63.2685674 | 65.9524294 | 65.7487099 |
| 16:33:41 | 67.3324586 | 70.7372035 | 64.2685674 | 64.9524294 | 69.7487099 |
| 16:33:42 | 68.3324586 | 69.7372035 | 65.2685674 | 64.9524294 | 72.7487099 |
| 16:33:43 | 69.3324586 | 70.7372035 | 67.2685674 | 65.9524294 | 73.7487099 |
| 16:33:44 | 68.3324586 | 70.7372035 | 69.2685674 | 65.9524294 | 73.7487099 |
| 16:33:45 | 68.3324586 | 70.7372035 | 70.2685674 | 66.9524294 | 73.7487099 |
| 16:33:46 | 66.3324586 | 71.7372035 | 71.2685674 | 66.9524294 | 73.7487099 |
| 16:33:47 | 65.3324586 | 72.7372035 | 72.2685674 | 66.9524294 | 71.7487099 |
| 16:33:48 | 65.3324586 | 73.7372035 | 72.2685674 | 66.9524294 | 71.7487099 |
| 16:33:49 | 65.3324586 | 73.7372035 | 72.2685674 | 65.9524294 | 71.7487099 |
| 16:33:50 | 66.3324586 | 74.7372035 | 72.2685674 | 64.9524294 | 70.7487099 |
| 16:33:51 | 66.3324586 | 74.7372035 | 71.2685674 | 64.9524294 | 70.7487099 |
| 16:33:52 | 66.3324586 | 74.7372035 | 71.2685674 | 64.9524294 | 70.7487099 |
| 16:33:53 | 66.3324586 | 74.7372035 | 70.2685674 | 65.9524294 | 68.7487099 |
| 16:33:54 | 66.3324586 | 74.7372035 | 70.2685674 | 65.9524294 | 66.7487099 |
| 16:33:55 | 66.3324586 | 74.7372035 | 69.2685674 | 66.9524294 | 66.7487099 |
| 16:33:56 | 66.3324586 | 75.7372035 | 69.2685674 | 61.9524294 | 66.7487099 |
| 16:33:57 | 66.3324586 | 75.7372035 | 69.2685674 | 61.9524294 | 67.7487099 |
| 16:33:58 | 66.3324586 | 75.7372035 | 69.2685674 | 60.9524294 | 67.7487099 |
| 16:33:59 | 66.3324586 | 75.7372035 | 69.2685674 | 60.9524294 | 73.7487099 |
| 16:34:00 | 69.3324586 | 73.7372035 | 69.2685674 | 60.9524294 | 75.7487099 |
| 16:34:01 | 69.3324586 | 73.7372035 | 69.2685674 | 62.9524294 | 75.7487099 |
| 16:34:02 | 69.3324586 | 73.7372035 | 69.2685674 | 63.9524294 | 75.7487099 |
| 16:34:03 | 69.3324586 | 74.7372035 | 75.2685674 | 63.9524294 | 75.7487099 |
| 16:34:04 | 69.3324586 | 73.7372035 | 78.2685674 | 63.9524294 | 75.7487099 |
| 16:34:05 | 69.3324586 | 73.7372035 | 80.2685674 | 64.9524294 | 75.7487099 |
| 16:34:06 | 70.3324586 | 72.7372035 | 82.2685674 | 64.9524294 | 77.7487099 |
| 16:34:07 | 72.3324586 | 71.7372035 | 83.2685674 | 64.9524294 | 77.7487099 |
| 16:34:08 | 74.3324586 | 71.7372035 | 74         | 64.9524294 | 77.7487099 |
| 16:34:09 | 75.3324586 | 71.7372035 | 85.2685674 | 69.9524294 | 78.7487099 |
| 16:34:10 | 74.3324586 | 71.7372035 | 84.2685674 | 69.9524294 | 78.7487099 |
| 16:34:11 | 74.3324586 | 71.7372035 | 81.2685674 | 79.9524294 | 78.7487099 |
| 16:34:12 | 71.3324586 | 71.7372035 | 79.2685674 | 76.9524294 | 81.7487099 |
| 16:34:13 | 70.3324586 | 71.7372035 | 76.2685674 | 74.9524294 | 73         |
| 16:34:14 | 69.3324586 | 71.7372035 | 76.2685674 | 74.9524294 | 72.875     |
| 16:34:15 | 68.3324586 | 71.7372035 | 75.2685674 | 70.9524294 | 71.625     |
| 16:34:16 | 68.3324586 | 71.7372035 | 75.2685674 | 67.9524294 | 70.375     |



|          |            |            |            |            |            |
|----------|------------|------------|------------|------------|------------|
| 16:34:17 | 68.3324586 | 72.7372035 | 75.2685674 | 66.9524294 | 71.5       |
| 16:34:18 | 69.3324586 | 74.7372035 | 74.2685674 | 66.9524294 | 72         |
| 16:34:19 | 71.3324586 | 74.7372035 | 73.2685674 | 68.9524294 | 72.375     |
| 16:34:20 | 73.3324586 | 74.7372035 | 73.2685674 | 69.9524294 | 83.7487099 |
| 16:34:21 | 73.3324586 | 74.7372035 | 73.2685674 | 70.9524294 | 83.7487099 |
| 16:34:22 | 71.3324586 | 73.7372035 | 72.2685674 | 72.9524294 | 82.7487099 |
| 16:34:23 | 70.3324586 | 73.7372035 | 71.2685674 | 72.9524294 | 82.7487099 |
| 16:34:24 | 69.3324586 | 73.7372035 | 71.2685674 | 72.9524294 | 81.7487099 |
| 16:34:25 | 68.3324586 | 74.7372035 | 70.2685674 | 72.9524294 | 79.7487099 |
| 16:34:26 | 68.3324586 | 72.7372035 | 69.2685674 | 72.9524294 | 78.7487099 |
| 16:34:27 | 68.3324586 | 71.7372035 | 68.2685674 | 73.9524294 | 78.7487099 |
| 16:34:28 | 68.3324586 | 70.7372035 | 67.2685674 | 73.9524294 | 76.7487099 |
| 16:34:29 | 68.3324586 | 70.7372035 | 65.2685674 | 75.9524294 | 73.7487099 |
| 16:34:30 | 68.3324586 | 70.7372035 | 65.2685674 | 75.9524294 | 73.7487099 |
| 16:34:31 | 68.3324586 | 70.7372035 | 64.2685674 | 76.9524294 | 72.7487099 |
| 16:34:32 | 68.3324586 | 69.7372035 | 63.2685674 | 76.9524294 | 72.7487099 |
| 16:34:33 | 68.3324586 | 68.7372035 | 62.2685674 | 77.9524294 | 71.7487099 |
| 16:34:34 | 67.3324586 | 67.7372035 | 62.2685674 | 78.9524294 | 66.7487099 |
| 16:34:35 | 66.3324586 | 66.7372035 | 62.2685674 | 67.75      | 64.7487099 |
| 16:34:36 | 66.3324586 | 67.7372035 | 62.2685674 | 67.625     | 64.7487099 |
| 16:34:37 | 65.3324586 | 67.7372035 | 62.2685674 | 67.25      | 64.7487099 |
| 16:34:38 | 65.3324586 | 67.7372035 | 62.2685674 | 67.375     | 64.7487099 |
| 16:34:39 | 65.3324586 | 66.7372035 | 62.2685674 | 77.9524294 | 64.7487099 |
| 16:34:40 | 65.3324586 | 66.7372035 | 62.2685674 | 77.9524294 | 64.7487099 |
| 16:34:41 | 65.3324586 | 66.7372035 | 62.2685674 | 77.9524294 | 64.7487099 |
| 16:34:42 | 65.3324586 | 66.7372035 | 62.2685674 | 77.9524294 | 64.7487099 |
| 16:34:43 | 65.3324586 | 66.7372035 | 62.2685674 | 77.9524294 | 65.7487099 |
| 16:34:44 | 64.3324586 | 65.7372035 | 63.2685674 | 77.9524294 | 65.7487099 |
| 16:34:45 | 65.3324586 | 65.7372035 | 64.2685674 | 77.9524294 | 65.7487099 |
| 16:34:46 | 65.3324586 | 64.7372035 | 65.2685674 | 77.9524294 | 65.7487099 |
| 16:34:47 | 67.3324586 | 64.7372035 | 66.2685674 | 77.9524294 | 65.7487099 |
| 16:34:48 | 68.3324586 | 64.7372035 | 67.2685674 | 77.9524294 | 64.7487099 |
| 16:34:49 | 68.3324586 | 62.7372035 | 67.2685674 | 77.9524294 | 64.7487099 |
| 16:34:50 | 68.3324586 | 63.7372035 | 66.2685674 | 67.875     | 64.7487099 |
| 16:34:51 | 68.3324586 | 64.7372035 | 65.2685674 | 68         | 64.7487099 |
| 16:34:52 | 68.3324586 | 66.7372035 | 65.2685674 | 68.5       | 64.7487099 |
| 16:34:53 | 68.3324586 | 67.7372035 | 66.2685674 | 69.125     | 64.7487099 |
| 16:34:54 | 68.3324586 | 67.7372035 | 67.2685674 | 78.9524294 | 66.7487099 |
| 16:34:55 | 68.3324586 | 68.7372035 | 67.2685674 | 77.9524294 | 66.7487099 |
| 16:34:56 | 70.3324586 | 68.7372035 | 68.2685674 | 75.9524294 | 66.7487099 |
| 16:34:57 | 70.3324586 | 67.7372035 | 68.2685674 | 75.9524294 | 65.7487099 |
| 16:34:58 | 72.3324586 | 67.7372035 | 68.2685674 | 75.9524294 | 65.7487099 |
| 16:34:59 | 75.3324586 | 67.7372035 | 69.2685674 | 75.9524294 | 65.7487099 |
| 16:35:00 | 75.3324586 | 67.7372035 | 69.2685674 | 75.9524294 | 65.7487099 |
| 16:35:01 | 75.3324586 | 67.7372035 | 69.2685674 | 75.9524294 | 65.7487099 |

|          |            |            |            |            |            |
|----------|------------|------------|------------|------------|------------|
| 16:35:02 | 74.3324586 | 66.7372035 | 66.2685674 | 76.9524294 | 65.7487099 |
| 16:35:03 | 72.3324586 | 67.7372035 | 65.2685674 | 77.9524294 | 67.7487099 |
| 16:35:04 | 72.3324586 | 67.7372035 | 65.2685674 | 78.9524294 | 67.7487099 |
| 16:35:05 | 72.3324586 | 68.7372035 | 65.2685674 | 78.9524294 | 67.7487099 |
| 16:35:06 | 72.3324586 | 67.7372035 | 65.2685674 | 78.9524294 | 67.7487099 |
| 16:35:07 | 72.3324586 | 67.7372035 | 66.2685674 | 80.9524294 | 67.7487099 |
| 16:35:08 | 71.3324586 | 67.7372035 | 66.2685674 | 80.9524294 | 67.7487099 |
| 16:35:09 | 71.3324586 | 67.7372035 | 67.2685674 | 80.9524294 | 68.7487099 |
| 16:35:10 | 71.3324586 | 67.7372035 | 68.2685674 | 70.875     | 68.7487099 |
| 16:35:11 | 71.3324586 | 67.7372035 | 69.2685674 | 71         | 67.7487099 |
| 16:35:12 | 71.3324586 | 67.7372035 | 70.2685674 | 71.375     | 66.7487099 |
| 16:35:13 | 71.3324586 | 67.7372035 | 70.2685674 | 72.375     | 66.7487099 |
| 16:35:14 | 71.3324586 | 67.7372035 | 70.2685674 | 72.25      | 68.7487099 |
| 16:35:15 | 72.3324586 | 67.7372035 | 70.2685674 | 72.25      | 68.7487099 |
| 16:35:16 | 72.3324586 | 68.7372035 | 70.2685674 | 72         | 68.7487099 |
| 16:35:17 | 75.3324586 | 67.7372035 | 70.2685674 | 82.9524294 | 69.7487099 |
| 16:35:18 | 75.3324586 | 67.7372035 | 70.2685674 | 82.9524294 | 69.7487099 |
| 16:35:19 | 76.3324586 | 66.7372035 | 70.2685674 | 77.9524294 | 69.7487099 |
| 16:35:20 | 75.3324586 | 67.7372035 | 70.2685674 | 76.9524294 | 70.7487099 |
| 16:35:21 | 74.3324586 | 67.7372035 | 70.2685674 | 75.9524294 | 69.7487099 |
| 16:35:22 | 72.3324586 | 67.7372035 | 74.2685674 | 75.9524294 | 68.7487099 |
| 16:35:23 | 71.3324586 | 67.7372035 | 76.2685674 | 75.9524294 | 68.7487099 |
| 16:35:24 | 71.3324586 | 67.7372035 | 76.2685674 | 75.9524294 | 68.7487099 |
| 16:35:25 | 74.3324586 | 67.7372035 | 76.2685674 | 70.9524294 | 66.7487099 |
| 16:35:26 | 74.3324586 | 66.7372035 | 74.2685674 | 70.9524294 | 68.7487099 |
| 16:35:27 | 76.3324586 | 66.7372035 | 73.2685674 | 69.9524294 | 69.7487099 |
| 16:35:28 | 76.3324586 | 67.7372035 | 72.2685674 | 69.9524294 | 69.7487099 |
| 16:35:29 | 74.3324586 | 67.7372035 | 72.2685674 | 69.9524294 | 70.7487099 |
| 16:35:30 | 71.3324586 | 69.7372035 | 72.2685674 | 69.9524294 | 71.7487099 |
| 16:35:31 | 71.3324586 | 71.7372035 | 73.2685674 | 68.9524294 | 71.7487099 |
| 16:35:32 | 71.3324586 | 73.7372035 | 73.2685674 | 67.9524294 | 71.7487099 |
| 16:35:33 | 68.3324586 | 73.7372035 | 73.2685674 | 66.9524294 | 70.7487099 |
| 16:35:34 | 68.3324586 | 73.7372035 | 73.2685674 | 66.9524294 | 71.7487099 |
| 16:35:35 | 70.3324586 | 72.7372035 | 74.2685674 | 66.9524294 | 73.7487099 |
| 16:35:36 | 70.3324586 | 70.7372035 | 76.2685674 | 66.9524294 | 74.7487099 |
| 16:35:37 | 70.3324586 | 69.7372035 | 77.2685674 | 66.9524294 | 74.7487099 |
| 16:35:38 | 73.3324586 | 69.7372035 | 77.2685674 | 66.9524294 | 74.7487099 |
| 16:35:39 | 73.3324586 | 69.7372035 | 76.2685674 | 65.9524294 | 76.7487099 |
| 16:35:40 | 74.3324586 | 69.7372035 | 76.2685674 | 65.9524294 | 78.7487099 |
| 16:35:41 | 73.3324586 | 69.7372035 | 77.2685674 | 64.9524294 | 78.7487099 |
| 16:35:42 | 72.3324586 | 70.7372035 | 78.2685674 | 73.9524294 | 78.7487099 |
| 16:35:43 | 72.3324586 | 70.7372035 | 80.2685674 | 77.9524294 | 79.7487099 |
| 16:35:44 | 72.3324586 | 70.7372035 | 81.2685674 | 78.9524294 | 80.7487099 |
| 16:35:45 | 69.3324586 | 69.7372035 | 81.2685674 | 79.9524294 | 80.7487099 |
| 16:35:46 | 69.3324586 | 70.7372035 | 81.2685674 | 79.9524294 | 80.7487099 |

|          |            |            |            |            |            |
|----------|------------|------------|------------|------------|------------|
| 16:35:47 | 69.3324586 | 70.7372035 | 78.2685674 | 83.9524294 | 76.7487099 |
| 16:35:48 | 69.3324586 | 70.7372035 | 75.2685674 | 73.625     | 74.7487099 |
| 16:35:49 | 70.3324586 | 70.7372035 | 75.2685674 | 73.875     | 73.7487099 |
| 16:35:50 | 70.3324586 | 71.7372035 | 74.2685674 | 73.75      | 73.7487099 |
| 16:35:51 | 70.3324586 | 71.7372035 | 72.2685674 | 73.5       | 73.7487099 |
| 16:35:52 | 70.3324586 | 71.7372035 | 71.2685674 | 73.25      | 72.7487099 |
| 16:35:53 | 70.3324586 | 71.7372035 | 70.2685674 | 73.25      | 70.7487099 |
| 16:35:54 | 69.3324586 | 71.7372035 | 69.2685674 | 72.75      | 69.7487099 |
| 16:35:55 | 69.3324586 | 72.7372035 | 68.2685674 | 76.9524294 | 69.7487099 |
| 16:35:56 | 68.3324586 | 73.7372035 | 67.2685674 | 69.9524294 | 69.7487099 |
| 16:35:57 | 69.3324586 | 74.7372035 | 66.2685674 | 65.9524294 | 71.7487099 |
| 16:35:58 | 70.3324586 | 75.7372035 | 66.2685674 | 62.9524294 | 72.7487099 |
| 16:35:59 | 71.3324586 | 75.7372035 | 65.2685674 | 61.9524294 | 71.7487099 |
| 16:36:00 | 71.3324586 | 74.7372035 | 65.2685674 | 60.9524294 | 71.7487099 |
| 16:36:01 | 70.3324586 | 73.7372035 | 64.2685674 | 59.9524294 | 70.7487099 |
| 16:36:02 | 70.3324586 | 72.7372035 | 64.2685674 | 59.9524294 | 70.7487099 |
| 16:36:03 | 69.3324586 | 72.7372035 | 65.2685674 | 59.9524294 | 69.7487099 |
| 16:36:04 | 69.3324586 | 71.7372035 | 68.2685674 | 60.9524294 | 69.7487099 |
| 16:36:05 | 68.3324586 | 71.7372035 | 70.2685674 | 60.9524294 | 68.7487099 |
| 16:36:06 | 68.3324586 | 71.7372035 | 72.2685674 | 59.9524294 | 71.7487099 |
| 16:36:07 | 68.3324586 | 71.7372035 | 73.2685674 | 60.9524294 | 72.7487099 |
| 16:36:08 | 67.3324586 | 71.7372035 | 73.2685674 | 60.9524294 | 73.7487099 |
| 16:36:09 | 67.3324586 | 72.7372035 | 72.2685674 | 60.9524294 | 73.7487099 |
| 16:36:10 | 67.3324586 | 72.7372035 | 72.2685674 | 62.9524294 | 73.7487099 |
| 16:36:11 | 68.3324586 | 73.7372035 | 72.2685674 | 62.9524294 | 73.7487099 |
| 16:36:12 | 68.3324586 | 73.7372035 | 71.2685674 | 61.9524294 | 73.7487099 |
| 16:36:13 | 68.3324586 | 72.7372035 | 70.2685674 | 58.9524294 | 73.7487099 |
| 16:36:14 | 71.3324586 | 72.7372035 | 70.2685674 | 58.9524294 | 73.7487099 |
| 16:36:15 | 71.3324586 | 71.7372035 | 70.2685674 | 58.9524294 | 71.7487099 |
| 16:36:16 | 72.3324586 | 71.7372035 | 71.2685674 | 57.9524294 | 70.7487099 |
| 16:36:17 | 72.3324586 | 71.7372035 | 73.2685674 | 56.9524294 | 66.7487099 |
| 16:36:18 | 72.3324586 | 71.7372035 | 73.2685674 | 56.9524294 | 66.7487099 |
| 16:36:19 | 69.3324586 | 73.7372035 | 73.2685674 | 57.9524294 | 66.7487099 |
| 16:36:20 | 69.3324586 | 73.7372035 | 73.2685674 | 61.9524294 | 65.7487099 |
| 16:36:21 | 69.3324586 | 73.7372035 | 72.2685674 | 61.9524294 | 66.7487099 |
| 16:36:22 | 67.3324586 | 74.7372035 | 70.2685674 | 63.9524294 | 66.7487099 |
| 16:36:23 | 67.3324586 | 76.7372035 | 69.2685674 | 64.9524294 | 65.7487099 |
| 16:36:24 | 67.3324586 | 73.7372035 | 69.2685674 | 64.9524294 | 65.7487099 |
| 16:36:25 | 66.3324586 | 73.7372035 | 69.2685674 | 64.9524294 | 64.7487099 |
| 16:36:26 | 65.3324586 | 72.7372035 | 69.2685674 | 64.9524294 | 64.7487099 |
| 16:36:27 | 64.3324586 | 72.7372035 | 68.2685674 | 62.9524294 | 67.7487099 |
| 16:36:28 | 64.3324586 | 72.7372035 | 71.2685674 | 62.9524294 | 73.7487099 |
| 16:36:29 | 64.3324586 | 72.7372035 | 71.2685674 | 62.9524294 | 75.7487099 |
| 16:36:30 | 64.3324586 | 72.7372035 | 70.2685674 | 63.9524294 | 75.7487099 |
| 16:36:31 | 65.3324586 | 71.7372035 | 70.2685674 | 63.9524294 | 76.7487099 |

|          |            |            |            |            |            |
|----------|------------|------------|------------|------------|------------|
| 16:36:32 | 65.3324586 | 71.7372035 | 66.2685674 | 63.9524294 | 75.7487099 |
| 16:36:33 | 65.3324586 | 70.7372035 | 65.2685674 | 62.9524294 | 73.7487099 |
| 16:36:34 | 66.3324586 | 70.7372035 | 64.2685674 | 62.9524294 | 73.7487099 |
| 16:36:35 | 66.3324586 | 70.7372035 | 64.2685674 | 61.9524294 | 73.7487099 |
| 16:36:36 | 66.3324586 | 70.7372035 | 65.2685674 | 60.9524294 | 73.7487099 |
| 16:36:37 | 66.3324586 | 70.7372035 | 65.2685674 | 59.9524294 | 73.7487099 |
| 16:36:38 | 66.3324586 | 70.7372035 | 65.2685674 | 59.9524294 | 73.7487099 |
| 16:36:39 | 65.3324586 | 70.7372035 | 65.2685674 | 59.9524294 | 73.7487099 |
| 16:36:40 | 65.3324586 | 71.7372035 | 65.2685674 | 60.9524294 | 72.7487099 |
| 16:36:41 | 65.3324586 | 72.7372035 | 65.2685674 | 62.9524294 | 72.7487099 |
| 16:36:42 | 66.3324586 | 72.7372035 | 65.2685674 | 62.9524294 | 66.7487099 |
| 16:36:43 | 67.3324586 | 72.7372035 | 65.2685674 | 62.9524294 | 67.7487099 |
| 16:36:44 | 68.3324586 | 72.7372035 | 65.2685674 | 62.9524294 | 69.7487099 |
| 16:36:45 | 68.3324586 | 72.7372035 | 65.2685674 | 62.9524294 | 69.7487099 |
| 16:36:46 | 68.3324586 | 74.7372035 | 65.2685674 | 63.9524294 | 70.7487099 |
| 16:36:47 | 68.3324586 | 75.7372035 | 66.2685674 | 63.9524294 | 70.7487099 |
| 16:36:48 | 68.3324586 | 78.7372035 | 66.2685674 | 63.9524294 | 70.7487099 |
| 16:36:49 | 68.3324586 | 78.7372035 | 71.2685674 | 63.9524294 | 71.7487099 |
| 16:36:50 | 67.3324586 | 79.7372035 | 78.2685674 | 63.9524294 | 71.7487099 |
| 16:36:51 | 67.3324586 | 77.7372035 | 81.2685674 | 63.9524294 | 71.7487099 |
| 16:36:52 | 66.3324586 | 76.7372035 | 81.2685674 | 63.9524294 | 72.7487099 |
| 16:36:53 | 66.3324586 | 74.7372035 | 72         | 64.9524294 | 73.7487099 |
| 16:36:54 | 66.3324586 | 72.7372035 | 72.25      | 68.9524294 | 73.7487099 |
| 16:36:55 | 67.3324586 | 72.7372035 | 72.375     | 69.9524294 | 75.7487099 |
| 16:36:56 | 67.3324586 | 71.7372035 | 72.375     | 69.9524294 | 76.7487099 |
| 16:36:57 | 67.3324586 | 71.7372035 | 72.625     | 69.9524294 | 76.7487099 |
| 16:36:58 | 67.3324586 | 71.7372035 | 72.625     | 71.9524294 | 75.7487099 |
| 16:36:59 | 67.3324586 | 71.7372035 | 72.125     | 71.9524294 | 74.7487099 |
| 16:37:00 | 67.3324586 | 71.7372035 | 71.625     | 71.9524294 | 74.7487099 |
| 16:37:01 | 66.3324586 | 71.7372035 | 81.2685674 | 71.9524294 | 74.7487099 |
| 16:37:02 | 66.3324586 | 72.7372035 | 79.2685674 | 71.9524294 | 74.7487099 |
| 16:37:03 | 65.3324586 | 72.7372035 | 78.2685674 | 71.9524294 | 74.7487099 |
| 16:37:04 | 65.3324586 | 69.7372035 | 76.2685674 | 71.9524294 | 74.7487099 |
| 16:37:05 | 65.3324586 | 68.7372035 | 76.2685674 | 73.9524294 | 75.7487099 |
| 16:37:06 | 66.3324586 | 68.7372035 | 76.2685674 | 73.9524294 | 75.7487099 |
| 16:37:07 | 66.3324586 | 67.7372035 | 77.2685674 | 73.9524294 | 77.7487099 |
| 16:37:08 | 66.3324586 | 67.7372035 | 78.2685674 | 74.9524294 | 81.7487099 |
| 16:37:09 | 66.3324586 | 67.7372035 | 79.2685674 | 73.9524294 | 77.7487099 |
| 16:37:10 | 66.3324586 | 67.7372035 | 78.2685674 | 73.9524294 | 76.7487099 |
| 16:37:11 | 66.3324586 | 67.7372035 | 78.2685674 | 73.9524294 | 75.7487099 |
| 16:37:12 | 66.3324586 | 67.7372035 | 78.2685674 | 73.9524294 | 75.7487099 |
| 16:37:13 | 65.3324586 | 71.7372035 | 79.2685674 | 74.9524294 | 75.7487099 |
| 16:37:14 | 65.3324586 | 74.7372035 | 79.2685674 | 74.9524294 | 71.7487099 |
| 16:37:15 | 66.3324586 | 74.7372035 | 79.2685674 | 74.9524294 | 70.7487099 |
| 16:37:16 | 66.3324586 | 75.7372035 | 79.2685674 | 74.9524294 | 70.7487099 |

|          |            |            |            |            |            |
|----------|------------|------------|------------|------------|------------|
| 16:37:17 | 66.3324586 | 74.7372035 | 81.2685674 | 74.9524294 | 68.7487099 |
| 16:37:18 | 67.3324586 | 73.7372035 | 82.2685674 | 74.9524294 | 69.7487099 |
| 16:37:19 | 67.3324586 | 73.7372035 | 82.2685674 | 75.9524294 | 69.7487099 |
| 16:37:20 | 68.3324586 | 71.7372035 | 82.2685674 | 76.9524294 | 70.7487099 |
| 16:37:21 | 68.3324586 | 71.7372035 | 82.2685674 | 75.9524294 | 70.7487099 |
| 16:37:22 | 70.3324586 | 71.7372035 | 82.2685674 | 73.9524294 | 69.7487099 |
| 16:37:23 | 70.3324586 | 70.7372035 | 72         | 73.9524294 | 68.7487099 |
| 16:37:24 | 71.3324586 | 70.7372035 | 80.2685674 | 71.9524294 | 68.7487099 |
| 16:37:25 | 74.3324586 | 70.7372035 | 79.2685674 | 71.9524294 | 66.7487099 |
| 16:37:26 | 77.3324586 | 70.7372035 | 78.2685674 | 71.9524294 | 67.7487099 |
| 16:37:27 | 81.3324586 | 71.7372035 | 79.2685674 | 71.9524294 | 68.7487099 |
| 16:37:28 | 83.3324586 | 71.7372035 | 79.2685674 | 71.9524294 | 68.7487099 |
| 16:37:29 | 83.3324586 | 71.7372035 | 79.2685674 | 70.9524294 | 71.7487099 |
| 16:37:30 | 73.125     | 71.7372035 | 79.2685674 | 70.9524294 | 71.7487099 |
| 16:37:31 | 78.3324586 | 72.7372035 | 79.2685674 | 65.9524294 | 72.7487099 |
| 16:37:32 | 71.3324586 | 72.7372035 | 79.2685674 | 63.9524294 | 72.7487099 |
| 16:37:33 | 71.3324586 | 72.7372035 | 79.2685674 | 63.9524294 | 72.7487099 |
| 16:37:34 | 68.3324586 | 71.7372035 | 78.2685674 | 62.9524294 | 72.7487099 |
| 16:37:35 | 67.3324586 | 71.7372035 | 78.2685674 | 63.9524294 | 72.7487099 |
| 16:37:36 | 66.3324586 | 71.7372035 | 78.2685674 | 63.9524294 | 72.7487099 |
| 16:37:37 | 66.3324586 | 72.7372035 | 75.2685674 | 63.9524294 | 71.7487099 |
| 16:37:38 | 67.3324586 | 72.7372035 | 75.2685674 | 64.9524294 | 69.7487099 |
| 16:37:39 | 67.3324586 | 72.7372035 | 76.2685674 | 66.9524294 | 69.7487099 |
| 16:37:40 | 67.3324586 | 74.7372035 | 76.2685674 | 68.9524294 | 68.7487099 |
| 16:37:41 | 67.3324586 | 74.7372035 | 76.2685674 | 71.9524294 | 67.7487099 |
| 16:37:42 | 67.3324586 | 72.7372035 | 76.2685674 | 73.9524294 | 66.7487099 |
| 16:37:43 | 67.3324586 | 71.7372035 | 75.2685674 | 73.9524294 | 66.7487099 |
| 16:37:44 | 71.3324586 | 71.7372035 | 74.2685674 | 74.9524294 | 66.7487099 |
| 16:37:45 | 72.3324586 | 71.7372035 | 72.2685674 | 73.9524294 | 66.7487099 |
| 16:37:46 | 72.3324586 | 71.7372035 | 72.2685674 | 73.9524294 | 66.7487099 |
| 16:37:47 | 71.3324586 | 71.7372035 | 72.2685674 | 73.9524294 | 66.7487099 |
| 16:37:48 | 71.3324586 | 71.7372035 | 72.2685674 | 73.9524294 | 64.7487099 |
| 16:37:49 | 71.3324586 | 71.7372035 | 70.2685674 | 73.9524294 | 64.7487099 |
| 16:37:50 | 71.3324586 | 71.7372035 | 69.2685674 | 72.9524294 | 63.7487099 |
| 16:37:51 | 71.3324586 | 72.7372035 | 69.2685674 | 72.9524294 | 62.7487099 |
| 16:37:52 | 70.3324586 | 72.7372035 | 68.2685674 | 73.9524294 | 62.7487099 |
| 16:37:53 | 70.3324586 | 72.7372035 | 67.2685674 | 72.9524294 | 63.7487099 |
| 16:37:54 | 70.3324586 | 74.7372035 | 67.2685674 | 72.9524294 | 63.7487099 |
| 16:37:55 | 69.3324586 | 73.7372035 | 67.2685674 | 72.9524294 | 64.7487099 |
| 16:37:56 | 69.3324586 | 72.7372035 | 67.2685674 | 72.9524294 | 66.7487099 |
| 16:37:57 | 69.3324586 | 71.7372035 | 67.2685674 | 72.9524294 | 67.7487099 |
| 16:37:58 | 68.3324586 | 69.7372035 | 67.2685674 | 73.9524294 | 68.7487099 |
| 16:37:59 | 69.3324586 | 69.7372035 | 67.2685674 | 73.9524294 | 69.7487099 |
| 16:38:00 | 72.3324586 | 69.7372035 | 65.2685674 | 76.9524294 | 71.7487099 |
| 16:38:01 | 72.3324586 | 69.7372035 | 64.2685674 | 70.25      | 71.7487099 |

|          |            |            |            |            |            |
|----------|------------|------------|------------|------------|------------|
| 16:38:02 | 78.3324586 | 69.7372035 | 63.2685674 | 71.5       | 71.7487099 |
| 16:38:03 | 72.375     | 69.7372035 | 63.2685674 | 72.375     | 70.7487099 |
| 16:38:04 | 73.875     | 69.7372035 | 63.2685674 | 73.875     | 70.7487099 |
| 16:38:05 | 75.625     | 67.7372035 | 64.2685674 | 75.625     | 69.7487099 |
| 16:38:06 | 75.625     | 67.7372035 | 64.2685674 | 75.625     | 69.7487099 |
| 16:38:07 | 76.375     | 67.7372035 | 66.2685674 | 76.375     | 68.7487099 |
| 16:38:08 | 76.25      | 67.7372035 | 66.2685674 | 76.25      | 69.7487099 |
| 16:38:09 | 75.125     | 67.7372035 | 67.2685674 | 75.125     | 69.7487099 |
| 16:38:10 | 75.25      | 68.7372035 | 68.2685674 | 75.25      | 69.7487099 |
| 16:38:11 | 75.5       | 70.7372035 | 68.2685674 | 75.5       | 68.7487099 |
| 16:38:12 | 75.5       | 70.7372035 | 68.2685674 | 75.5       | 68.7487099 |
| 16:38:13 | 75         | 70.7372035 | 68.2685674 | 85.9524294 | 65.7487099 |
| 16:38:14 | 75.375     | 70.7372035 | 68.2685674 | 85.9524294 | 65.7487099 |
| 16:38:15 | 75.25      | 70.7372035 | 68.2685674 | 81.9524294 | 66.7487099 |
| 16:38:16 | 74.875     | 67.7372035 | 68.2685674 | 78.9524294 | 66.7487099 |
| 16:38:17 | 74.875     | 66.7372035 | 68.2685674 | 77.9524294 | 66.7487099 |
| 16:38:18 | 73.875     | 67.7372035 | 69.2685674 | 75.9524294 | 66.7487099 |
| 16:38:19 | 71.875     | 67.7372035 | 73.2685674 | 70.9524294 | 66.7487099 |
| 16:38:20 | 79.3324586 | 67.7372035 | 75.2685674 | 66.9524294 | 67.7487099 |
| 16:38:21 | 79.3324586 | 67.7372035 | 75.2685674 | 65.9524294 | 67.7487099 |
| 16:38:22 | 70.3324586 | 67.7372035 | 76.2685674 | 64.9524294 | 69.7487099 |
| 16:38:23 | 68.3324586 | 67.7372035 | 78.2685674 | 64.9524294 | 69.7487099 |
| 16:38:24 | 68.3324586 | 68.7372035 | 79.2685674 | 64.9524294 | 71.7487099 |
| 16:38:25 | 68.3324586 | 68.7372035 | 80.2685674 | 64.9524294 | 71.7487099 |
| 16:38:26 | 65.3324586 | 67.7372035 | 69.875     | 64.9524294 | 71.7487099 |
| 16:38:27 | 65.3324586 | 68.7372035 | 70.125     | 65.9524294 | 70.7487099 |
| 16:38:28 | 65.3324586 | 67.7372035 | 80.2685674 | 65.9524294 | 69.7487099 |
| 16:38:29 | 65.3324586 | 67.7372035 | 77.2685674 | 65.9524294 | 68.7487099 |
| 16:38:30 | 65.3324586 | 66.7372035 | 72.2685674 | 65.9524294 | 66.7487099 |
| 16:38:31 | 65.3324586 | 67.7372035 | 69.2685674 | 71.9524294 | 65.7487099 |
| 16:38:32 | 65.3324586 | 67.7372035 | 69.2685674 | 71.9524294 | 65.7487099 |
| 16:38:33 | 65.3324586 | 67.7372035 | 69.2685674 | 71.9524294 | 64.7487099 |
| 16:38:34 | 64.3324586 | 67.7372035 | 73.2685674 | 71.9524294 | 64.7487099 |
| 16:38:35 | 64.3324586 | 67.7372035 | 74.2685674 | 71.9524294 | 63.7487099 |
| 16:38:36 | 64.3324586 | 67.7372035 | 75.2685674 | 71.9524294 | 63.7487099 |
| 16:38:37 | 63.3324586 | 67.7372035 | 74.2685674 | 71.9524294 | 63.7487099 |
| 16:38:38 | 63.3324586 | 66.7372035 | 72.2685674 | 71.9524294 | 64.7487099 |
| 16:38:39 | 63.3324586 | 66.7372035 | 71.2685674 | 72.9524294 | 65.7487099 |
| 16:38:40 | 63.3324586 | 65.7372035 | 69.2685674 | 71.9524294 | 65.7487099 |
| 16:38:41 | 63.3324586 | 66.7372035 | 68.2685674 | 71.9524294 | 64.7487099 |
| 16:38:42 | 63.3324586 | 66.7372035 | 67.2685674 | 72.9524294 | 64.7487099 |
| 16:38:43 | 63.3324586 | 66.7372035 | 66.2685674 | 72.9524294 | 64.7487099 |
| 16:38:44 | 64.3324586 | 66.7372035 | 66.2685674 | 72.9524294 | 62.7487099 |
| 16:38:45 | 65.3324586 | 66.7372035 | 66.2685674 | 72.9524294 | 62.7487099 |
| 16:38:46 | 65.3324586 | 66.7372035 | 66.2685674 | 72.9524294 | 63.7487099 |

|          |            |            |            |            |            |
|----------|------------|------------|------------|------------|------------|
| 16:38:47 | 65.3324586 | 66.7372035 | 66.2685674 | 72.9524294 | 64.7487099 |
| 16:38:48 | 67.3324586 | 66.7372035 | 67.2685674 | 72.9524294 | 65.7487099 |
| 16:38:49 | 67.3324586 | 68.7372035 | 68.2685674 | 72.9524294 | 64.7487099 |
| 16:38:50 | 70.3324586 | 69.7372035 | 69.2685674 | 72.9524294 | 64.7487099 |
| 16:38:51 | 71.3324586 | 68.7372035 | 69.2685674 | 72.9524294 | 64.7487099 |
| 16:38:52 | 71.3324586 | 68.7372035 | 69.2685674 | 72.9524294 | 63.7487099 |
| 16:38:53 | 71.3324586 | 68.7372035 | 69.2685674 | 72.9524294 | 63.7487099 |
| 16:38:54 | 71.3324586 | 69.7372035 | 68.2685674 | 73.9524294 | 63.7487099 |
| 16:38:55 | 72.3324586 | 69.7372035 | 68.2685674 | 74.9524294 | 63.7487099 |
| 16:38:56 | 72.3324586 | 69.7372035 | 68.2685674 | 74.9524294 | 62.7487099 |
| 16:38:57 | 72.3324586 | 69.7372035 | 69.2685674 | 77.9524294 | 62.7487099 |
| 16:38:58 | 72.3324586 | 69.7372035 | 69.2685674 | 78.9524294 | 60.7487099 |
| 16:38:59 | 72.3324586 | 69.7372035 | 70.2685674 | 78.9524294 | 58.7487099 |
| 16:39:00 | 72.3324586 | 69.7372035 | 70.2685674 | 78.9524294 | 58.7487099 |
| 16:39:01 | 68.3324586 | 70.7372035 | 69.2685674 | 78.9524294 | 57.7487099 |
| 16:39:02 | 67.3324586 | 70.7372035 | 69.2685674 | 76.9524294 | 57.7487099 |
| 16:39:03 | 66.3324586 | 70.7372035 | 69.2685674 | 73.9524294 | 57.7487099 |
| 16:39:04 | 66.3324586 | 70.7372035 | 69.2685674 | 71.9524294 | 57.7487099 |
| 16:39:05 | 64.3324586 | 69.7372035 | 68.2685674 | 71.9524294 | 58.7487099 |
| 16:39:06 | 64.3324586 | 69.7372035 | 68.2685674 | 67.9524294 | 59.7487099 |
| 16:39:07 | 65.3324586 | 69.7372035 | 68.2685674 | 66.9524294 | 65.7487099 |
| 16:39:08 | 65.3324586 | 69.7372035 | 68.2685674 | 67.9524294 | 65.7487099 |
| 16:39:09 | 65.3324586 | 69.7372035 | 69.2685674 | 68.9524294 | 66.7487099 |
| 16:39:10 | 65.3324586 | 69.7372035 | 69.2685674 | 68.9524294 | 66.7487099 |
| 16:39:11 | 65.3324586 | 69.7372035 | 70.2685674 | 68.9524294 | 66.7487099 |
| 16:39:12 | 66.3324586 | 70.7372035 | 70.2685674 | 68.9524294 | 65.7487099 |
| 16:39:13 | 66.3324586 | 70.7372035 | 71.2685674 | 70.9524294 | 65.7487099 |
| 16:39:14 | 67.3324586 | 70.7372035 | 71.2685674 | 70.9524294 | 64.7487099 |
| 16:39:15 | 66.3324586 | 70.7372035 | 71.2685674 | 72.9524294 | 64.7487099 |
| 16:39:16 | 65.3324586 | 70.7372035 | 71.2685674 | 72.9524294 | 61.7487099 |
| 16:39:17 | 65.3324586 | 70.7372035 | 71.2685674 | 71.9524294 | 59.7487099 |
| 16:39:18 | 65.3324586 | 69.7372035 | 71.2685674 | 70.9524294 | 59.7487099 |
| 16:39:19 | 66.3324586 | 69.7372035 | 72.2685674 | 70.9524294 | 58.7487099 |
| 16:39:20 | 67.3324586 | 69.7372035 | 72.2685674 | 67.9524294 | 56.7487099 |
| 16:39:21 | 67.3324586 | 70.7372035 | 73.2685674 | 67.9524294 | 59.7487099 |
| 16:39:22 | 68.3324586 | 71.7372035 | 73.2685674 | 67.9524294 | 59.7487099 |
| 16:39:23 | 68.3324586 | 71.7372035 | 73.2685674 | 67.9524294 | 62.7487099 |
| 16:39:24 | 68.3324586 | 71.7372035 | 73.2685674 | 67.9524294 | 64.7487099 |
| 16:39:25 | 68.3324586 | 71.7372035 | 73.2685674 | 67.9524294 | 65.7487099 |
| 16:39:26 | 68.3324586 | 70.7372035 | 73.2685674 | 67.9524294 | 65.7487099 |
| 16:39:27 | 68.3324586 | 70.7372035 | 72.2685674 | 67.9524294 | 66.7487099 |
| 16:39:28 | 68.3324586 | 70.7372035 | 72.2685674 | 67.9524294 | 65.7487099 |
| 16:39:29 | 68.3324586 | 70.7372035 | 72.2685674 | 67.9524294 | 64.7487099 |
| 16:39:30 | 68.3324586 | 71.7372035 | 72.2685674 | 72.9524294 | 60.7487099 |
| 16:39:31 | 68.3324586 | 71.7372035 | 72.2685674 | 72.9524294 | 60.7487099 |

|          |            |            |            |            |            |
|----------|------------|------------|------------|------------|------------|
| 16:39:32 | 69.3324586 | 72.7372035 | 71.2685674 | 71.9524294 | 59.7487099 |
| 16:39:33 | 70.3324586 | 72.7372035 | 71.2685674 | 70.9524294 | 59.7487099 |
| 16:39:34 | 70.3324586 | 72.7372035 | 70.2685674 | 70.9524294 | 56.7487099 |
| 16:39:35 | 70.3324586 | 72.7372035 | 70.2685674 | 72.9524294 | 57.7487099 |
| 16:39:36 | 71.3324586 | 72.7372035 | 69.2685674 | 73.9524294 | 57.7487099 |
| 16:39:37 | 75.3324586 | 72.7372035 | 70.2685674 | 75.9524294 | 58.7487099 |
| 16:39:38 | 75.3324586 | 72.7372035 | 70.2685674 | 76.9524294 | 59.7487099 |
| 16:39:39 | 75.3324586 | 72.7372035 | 71.2685674 | 78.9524294 | 60.7487099 |
| 16:39:40 | 75.3324586 | 72.7372035 | 71.2685674 | 78.9524294 | 60.7487099 |
| 16:39:41 | 71.3324586 | 72.7372035 | 71.2685674 | 80.9524294 | 59.7487099 |
| 16:39:42 | 71.3324586 | 72.7372035 | 71.2685674 | 70.75      | 59.7487099 |
| 16:39:43 | 71.3324586 | 72.7372035 | 70.2685674 | 70.75      | 59.7487099 |
| 16:39:44 | 70.3324586 | 72.7372035 | 70.2685674 | 70.625     | 59.7487099 |
| 16:39:45 | 68.3324586 | 72.7372035 | 70.2685674 | 79.9524294 | 59.7487099 |
| 16:39:46 | 67.3324586 | 72.7372035 | 70.2685674 | 73.9524294 | 59.7487099 |
| 16:39:47 | 66.3324586 | 72.7372035 | 70.2685674 | 73.9524294 | 61.7487099 |
| 16:39:48 | 65.3324586 | 71.7372035 | 70.2685674 | 73.9524294 | 63.7487099 |
| 16:39:49 | 64.3324586 | 73.7372035 | 70.2685674 | 72.9524294 | 63.7487099 |
| 16:39:50 | 64.3324586 | 74.7372035 | 70.2685674 | 72.9524294 | 64.7487099 |
| 16:39:51 | 64.3324586 | 73.7372035 | 70.2685674 | 72.9524294 | 64.7487099 |
| 16:39:52 | 64.3324586 | 73.7372035 | 73.2685674 | 71.9524294 | 64.7487099 |
| 16:39:53 | 64.3324586 | 73.7372035 | 73.2685674 | 70.9524294 | 64.7487099 |
| 16:39:54 | 64.3324586 | 73.7372035 | 73.2685674 | 70.9524294 | 64.7487099 |
| 16:39:55 | 64.3324586 | 73.7372035 | 74.2685674 | 73.9524294 | 64.7487099 |
| 16:39:56 | 65.3324586 | 73.7372035 | 74.2685674 | 73.9524294 | 63.7487099 |
| 16:39:57 | 65.3324586 | 73.7372035 | 77.2685674 | 74.9524294 | 64.7487099 |
| 16:39:58 | 66.3324586 | 73.7372035 | 78.2685674 | 73.9524294 | 64.7487099 |
| 16:39:59 | 67.3324586 | 73.7372035 | 78.2685674 | 73.9524294 | 64.7487099 |
| 16:40:00 | 67.3324586 | 72.7372035 | 76.2685674 | 69.9524294 | 64.7487099 |
| 16:40:01 | 68.3324586 | 72.7372035 | 75.2685674 | 69.9524294 | 64.7487099 |
| 16:40:02 | 68.3324586 | 71.7372035 | 75.2685674 | 68.9524294 | 64.7487099 |
| 16:40:03 | 71.3324586 | 72.7372035 | 75.2685674 | 68.9524294 | 65.7487099 |
| 16:40:04 | 72.3324586 | 72.7372035 | 75.2685674 | 67.9524294 | 65.7487099 |
| 16:40:05 | 72.3324586 | 71.7372035 | 75.2685674 | 67.9524294 | 66.7487099 |
| 16:40:06 | 72.3324586 | 72.7372035 | 70.2685674 | 67.9524294 | 67.7487099 |
| 16:40:07 | 70.3324586 | 72.7372035 | 67.2685674 | 67.9524294 | 67.7487099 |
| 16:40:08 | 70.3324586 | 72.7372035 | 67.2685674 | 67.9524294 | 67.7487099 |
| 16:40:09 | 70.3324586 | 71.7372035 | 65.2685674 | 67.9524294 | 67.7487099 |
| 16:40:10 | 69.3324586 | 71.7372035 | 66.2685674 | 67.9524294 | 67.7487099 |
| 16:40:11 | 69.3324586 | 71.7372035 | 66.2685674 | 67.9524294 | 67.7487099 |
| 16:40:12 | 69.3324586 | 71.7372035 | 67.2685674 | 67.9524294 | 69.7487099 |
| 16:40:13 | 69.3324586 | 72.7372035 | 67.2685674 | 67.9524294 | 69.7487099 |
| 16:40:14 | 69.3324586 | 72.7372035 | 67.2685674 | 67.9524294 | 69.7487099 |
| 16:40:15 | 70.3324586 | 72.7372035 | 65.2685674 | 70.9524294 | 68.7487099 |
| 16:40:16 | 69.3324586 | 72.7372035 | 64.2685674 | 70.9524294 | 62.7487099 |



|          |            |            |            |            |            |
|----------|------------|------------|------------|------------|------------|
| 16:40:17 | 69.3324586 | 72.7372035 | 62.2685674 | 71.9524294 | 62.7487099 |
| 16:40:18 | 69.3324586 | 72.7372035 | 62.2685674 | 71.9524294 | 62.7487099 |
| 16:40:19 | 69.3324586 | 72.7372035 | 62.2685674 | 72.9524294 | 61.7487099 |
| 16:40:20 | 69.3324586 | 72.7372035 | 64.2685674 | 72.9524294 | 60.7487099 |
| 16:40:21 | 68.3324586 | 71.7372035 | 65.2685674 | 72.9524294 | 60.7487099 |
| 16:40:22 | 68.3324586 | 72.7372035 | 65.2685674 | 72.9524294 | 60.7487099 |
| 16:40:23 | 69.3324586 | 72.7372035 | 65.2685674 | 72.9524294 | 60.7487099 |
| 16:40:24 | 70.3324586 | 72.7372035 | 65.2685674 | 72.9524294 | 60.7487099 |
| 16:40:25 | 70.3324586 | 72.7372035 | 65.2685674 | 72.9524294 | 61.7487099 |
| 16:40:26 | 70.3324586 | 72.7372035 | 64.2685674 | 72.9524294 | 61.7487099 |
| 16:40:27 | 70.3324586 | 73.7372035 | 63.2685674 | 71.9524294 | 61.7487099 |
| 16:40:28 | 70.3324586 | 73.7372035 | 61.2685674 | 71.9524294 | 62.7487099 |
| 16:40:29 | 64.3324586 | 73.7372035 | 61.2685674 | 71.9524294 | 63.7487099 |
| 16:40:30 | 64.3324586 | 74.7372035 | 60.2685674 | 71.9524294 | 63.7487099 |
| 16:40:31 | 64.3324586 | 74.7372035 | 60.2685674 | 72.9524294 | 63.7487099 |
| 16:40:32 | 63.3324586 | 71.7372035 | 60.2685674 | 72.9524294 | 64.7487099 |
| 16:40:33 | 63.3324586 | 71.7372035 | 60.2685674 | 70.9524294 | 63.7487099 |
| 16:40:34 | 63.3324586 | 71.7372035 | 60.2685674 | 70.9524294 | 63.7487099 |
| 16:40:35 | 63.3324586 | 72.7372035 | 61.2685674 | 70.9524294 | 63.7487099 |
| 16:40:36 | 63.3324586 | 73.7372035 | 61.2685674 | 69.9524294 | 62.7487099 |
| 16:40:37 | 64.3324586 | 73.7372035 | 61.2685674 | 68.9524294 | 62.7487099 |
| 16:40:38 | 64.3324586 | 73.7372035 | 61.2685674 | 68.9524294 | 62.7487099 |
| 16:40:39 | 63.3324586 | 73.7372035 | 61.2685674 | 68.9524294 | 62.7487099 |
| 16:40:40 | 63.3324586 | 72.7372035 | 61.2685674 | 68.9524294 | 62.7487099 |
| 16:40:41 | 63.3324586 | 72.7372035 | 63.2685674 | 68.9524294 | 62.7487099 |
| 16:40:42 | 63.3324586 | 71.7372035 | 65.2685674 | 67.9524294 | 60.7487099 |
| 16:40:43 | 63.3324586 | 70.7372035 | 66.2685674 | 67.9524294 | 59.7487099 |
| 16:40:44 | 64.3324586 | 70.7372035 | 67.2685674 | 67.9524294 | 59.7487099 |
| 16:40:45 | 65.3324586 | 70.7372035 | 67.2685674 | 67.9524294 | 59.7487099 |
| 16:40:46 | 67.3324586 | 70.7372035 | 67.2685674 | 67.9524294 | 59.7487099 |
| 16:40:47 | 67.3324586 | 70.7372035 | 67.2685674 | 66.9524294 | 59.7487099 |
| 16:40:48 | 67.3324586 | 70.7372035 | 67.2685674 | 66.9524294 | 59.7487099 |
| 16:40:49 | 67.3324586 | 72.7372035 | 68.2685674 | 65.9524294 | 58.7487099 |
| 16:40:50 | 67.3324586 | 73.7372035 | 69.2685674 | 65.9524294 | 59.7487099 |
| 16:40:51 | 67.3324586 | 72.7372035 | 69.2685674 | 66.9524294 | 60.7487099 |
| 16:40:52 | 67.3324586 | 72.7372035 | 69.2685674 | 66.9524294 | 60.7487099 |
| 16:40:53 | 69.3324586 | 72.7372035 | 69.2685674 | 66.9524294 | 60.7487099 |
| 16:40:54 | 69.3324586 | 71.7372035 | 69.2685674 | 67.9524294 | 59.7487099 |
| 16:40:55 | 69.3324586 | 71.7372035 | 67.2685674 | 69.9524294 | 61.7487099 |
| 16:40:56 | 69.3324586 | 71.7372035 | 66.2685674 | 69.9524294 | 61.7487099 |
| 16:40:57 | 68.3324586 | 71.7372035 | 65.2685674 | 70.9524294 | 62.7487099 |
| 16:40:58 | 68.3324586 | 71.7372035 | 65.2685674 | 71.9524294 | 62.7487099 |
| 16:40:59 | 67.3324586 | 71.7372035 | 66.2685674 | 71.9524294 | 62.7487099 |
| 16:41:00 | 66.3324586 | 71.7372035 | 67.2685674 | 74.9524294 | 60.7487099 |
| 16:41:01 | 66.3324586 | 71.7372035 | 68.2685674 | 75.9524294 | 58.7487099 |

|          |            |            |            |            |            |
|----------|------------|------------|------------|------------|------------|
| 16:41:02 | 64.3324586 | 72.7372035 | 69.2685674 | 75.9524294 | 58.7487099 |
| 16:41:03 | 63.3324586 | 72.7372035 | 70.2685674 | 75.9524294 | 59.7487099 |
| 16:41:04 | 63.3324586 | 72.7372035 | 70.2685674 | 75.9524294 | 59.7487099 |
| 16:41:05 | 64.3324586 | 72.7372035 | 69.2685674 | 76.9524294 | 63.7487099 |
| 16:41:06 | 64.3324586 | 71.7372035 | 68.2685674 | 78.9524294 | 63.7487099 |
| 16:41:07 | 64.3324586 | 71.7372035 | 68.2685674 | 78.9524294 | 63.7487099 |
| 16:41:08 | 64.3324586 | 71.7372035 | 68.2685674 | 78.9524294 | 63.7487099 |
| 16:41:09 | 64.3324586 | 72.7372035 | 67.2685674 | 78.9524294 | 66.7487099 |
| 16:41:10 | 67.3324586 | 72.7372035 | 67.2685674 | 81.9524294 | 69.7487099 |
| 16:41:11 | 67.3324586 | 75.7372035 | 68.2685674 | 81.9524294 | 78.7487099 |
| 16:41:12 | 67.3324586 | 75.7372035 | 70.2685674 | 81.9524294 | 80.7487099 |
| 16:41:13 | 67.3324586 | 74.7372035 | 72.2685674 | 65.9524294 | 80.7487099 |
| 16:41:14 | 68.3324586 | 74.7372035 | 73.2685674 | 65.9524294 | 73.625     |
| 16:41:15 | 68.3324586 | 74.7372035 | 72.2685674 | 62.9524294 | 73.625     |
| 16:41:16 | 68.3324586 | 74.7372035 | 71.2685674 | 59.9524294 | 73         |
| 16:41:17 | 68.3324586 | 72.7372035 | 69.2685674 | 58.9524294 | 72.375     |
| 16:41:18 | 70.3324586 | 71.7372035 | 68.2685674 | 58.9524294 | 72.625     |
| 16:41:19 | 71.3324586 | 70.7372035 | 66.2685674 | 58.9524294 | 71.625     |
| 16:41:20 | 71.3324586 | 70.7372035 | 65.2685674 | 57.9524294 | 71.5       |
| 16:41:21 | 72.3324586 | 70.7372035 | 64.2685674 | 57.9524294 | 67.7487099 |
| 16:41:22 | 74.3324586 | 70.7372035 | 64.2685674 | 57.9524294 | 67.7487099 |
| 16:41:23 | 74.3324586 | 70.7372035 | 64.2685674 | 57.9524294 | 64.7487099 |
| 16:41:24 | 74.3324586 | 70.7372035 | 64.2685674 | 57.9524294 | 64.7487099 |
| 16:41:25 | 72.3324586 | 70.7372035 | 64.2685674 | 57.9524294 | 64.7487099 |
| 16:41:26 | 72.3324586 | 68.7372035 | 64.2685674 | 57.9524294 | 64.7487099 |
| 16:41:27 | 67.3324586 | 68.7372035 | 65.2685674 | 58.9524294 | 64.7487099 |
| 16:41:28 | 67.3324586 | 68.7372035 | 66.2685674 | 58.9524294 | 64.7487099 |
| 16:41:29 | 67.3324586 | 69.7372035 | 66.2685674 | 58.9524294 | 64.7487099 |
| 16:41:30 | 67.3324586 | 69.7372035 | 65.2685674 | 58.9524294 | 63.7487099 |
| 16:41:31 | 67.3324586 | 69.7372035 | 65.2685674 | 58.9524294 | 60.7487099 |
| 16:41:32 | 73.3324586 | 69.7372035 | 65.2685674 | 61.9524294 | 60.7487099 |
| 16:41:33 | 73.3324586 | 69.7372035 | 65.2685674 | 64.9524294 | 60.7487099 |
| 16:41:34 | 73.3324586 | 69.7372035 | 66.2685674 | 64.9524294 | 59.7487099 |
| 16:41:35 | 73.3324586 | 69.7372035 | 67.2685674 | 65.9524294 | 59.7487099 |
| 16:41:36 | 74.3324586 | 69.7372035 | 67.2685674 | 66.9524294 | 59.7487099 |
| 16:41:37 | 75.3324586 | 69.7372035 | 66.2685674 | 67.9524294 | 62.7487099 |
| 16:41:38 | 75.3324586 | 70.7372035 | 66.2685674 | 67.9524294 | 63.7487099 |
| 16:41:39 | 75.3324586 | 69.7372035 | 67.2685674 | 67.9524294 | 63.7487099 |
| 16:41:40 | 75.3324586 | 70.7372035 | 67.2685674 | 67.9524294 | 63.7487099 |
| 16:41:41 | 74.3324586 | 70.7372035 | 67.2685674 | 68.9524294 | 63.7487099 |
| 16:41:42 | 74.3324586 | 70.7372035 | 67.2685674 | 68.9524294 | 63.7487099 |
| 16:41:43 | 73.3324586 | 70.7372035 | 67.2685674 | 68.9524294 | 63.7487099 |
| 16:41:44 | 73.3324586 | 70.7372035 | 67.2685674 | 68.9524294 | 65.7487099 |
| 16:41:45 | 76.3324586 | 70.7372035 | 67.2685674 | 68.9524294 | 66.7487099 |
| 16:41:46 | 78.3324586 | 69.7372035 | 68.2685674 | 68.9524294 | 66.7487099 |

|          |            |            |            |            |            |
|----------|------------|------------|------------|------------|------------|
| 16:41:47 | 75.3324586 | 67.7372035 | 73.2685674 | 68.9524294 | 66.7487099 |
| 16:41:48 | 73.3324586 | 66.7372035 | 73.2685674 | 68.9524294 | 66.7487099 |
| 16:41:49 | 72.3324586 | 66.7372035 | 74.2685674 | 69.9524294 | 66.7487099 |
| 16:41:50 | 72.3324586 | 66.7372035 | 76.2685674 | 70.9524294 | 66.7487099 |
| 16:41:51 | 71.3324586 | 66.7372035 | 78.2685674 | 70.9524294 | 66.7487099 |
| 16:41:52 | 70.3324586 | 66.7372035 | 78.2685674 | 70.9524294 | 66.7487099 |
| 16:41:53 | 70.3324586 | 67.7372035 | 78.2685674 | 70.9524294 | 66.7487099 |
| 16:41:54 | 69.3324586 | 67.7372035 | 80.2685674 | 70.9524294 | 68.7487099 |
| 16:41:55 | 69.3324586 | 67.7372035 | 81.2685674 | 70.9524294 | 68.7487099 |
| 16:41:56 | 69.3324586 | 67.7372035 | 81.2685674 | 70.9524294 | 68.7487099 |
| 16:41:57 | 67.3324586 | 67.7372035 | 81.2685674 | 70.9524294 | 68.7487099 |
| 16:41:58 | 67.3324586 | 68.7372035 | 81.2685674 | 70.9524294 | 68.7487099 |
| 16:41:59 | 66.3324586 | 67.7372035 | 81.2685674 | 70.9524294 | 68.7487099 |
| 16:42:00 | 66.3324586 | 67.7372035 | 80.2685674 | 70.9524294 | 68.7487099 |
| 16:42:01 | 64.3324586 | 67.7372035 | 78.2685674 | 71.9524294 | 68.7487099 |
| 16:42:02 | 64.3324586 | 67.7372035 | 76.2685674 | 71.9524294 | 68.7487099 |
| 16:42:03 | 63.3324586 | 67.7372035 | 76.2685674 | 70.9524294 | 67.7487099 |
| 16:42:04 | 63.3324586 | 67.7372035 | 75.2685674 | 70.9524294 | 66.7487099 |
| 16:42:05 | 63.3324586 | 69.7372035 | 71.2685674 | 69.9524294 | 66.7487099 |
| 16:42:06 | 64.3324586 | 70.7372035 | 70.2685674 | 68.9524294 | 66.7487099 |
| 16:42:07 | 64.3324586 | 70.7372035 | 69.2685674 | 68.9524294 | 66.7487099 |
| 16:42:08 | 64.3324586 | 70.7372035 | 68.2685674 | 68.9524294 | 66.7487099 |
| 16:42:09 | 65.3324586 | 71.7372035 | 68.2685674 | 66.9524294 | 69.7487099 |
| 16:42:10 | 65.3324586 | 71.7372035 | 68.2685674 | 69.9524294 | 69.7487099 |
| 16:42:11 | 65.3324586 | 70.7372035 | 69.2685674 | 69.9524294 | 70.7487099 |
| 16:42:12 | 65.3324586 | 69.7372035 | 69.2685674 | 69.9524294 | 71.7487099 |
| 16:42:13 | 65.3324586 | 69.7372035 | 73.2685674 | 67.9524294 | 71.7487099 |
| 16:42:14 | 65.3324586 | 68.7372035 | 74.2685674 | 66.9524294 | 71.7487099 |
| 16:42:15 | 65.3324586 | 68.7372035 | 74.2685674 | 65.9524294 | 76.7487099 |
| 16:42:16 | 65.3324586 | 68.7372035 | 73.2685674 | 64.9524294 | 76.7487099 |
| 16:42:17 | 65.3324586 | 68.7372035 | 73.2685674 | 63.9524294 | 76.7487099 |
| 16:42:18 | 65.3324586 | 68.7372035 | 72.2685674 | 63.9524294 | 74.7487099 |
| 16:42:19 | 70.3324586 | 69.7372035 | 71.2685674 | 63.9524294 | 74.7487099 |
| 16:42:20 | 70.3324586 | 69.7372035 | 70.2685674 | 64.9524294 | 74.7487099 |
| 16:42:21 | 70.3324586 | 69.7372035 | 70.2685674 | 66.9524294 | 74.7487099 |
| 16:42:22 | 69.3324586 | 69.7372035 | 69.2685674 | 66.9524294 | 74.7487099 |
| 16:42:23 | 69.3324586 | 69.7372035 | 69.2685674 | 66.9524294 | 72.7487099 |
| 16:42:24 | 69.3324586 | 69.7372035 | 69.2685674 | 61.9524294 | 72.7487099 |
| 16:42:25 | 69.3324586 | 69.7372035 | 69.2685674 | 59.9524294 | 71.7487099 |
| 16:42:26 | 69.3324586 | 70.7372035 | 68.2685674 | 58.9524294 | 71.7487099 |
| 16:42:27 | 69.3324586 | 69.7372035 | 68.2685674 | 59.9524294 | 71.7487099 |
| 16:42:28 | 70.3324586 | 68.7372035 | 67.2685674 | 59.9524294 | 71.7487099 |
| 16:42:29 | 70.3324586 | 68.7372035 | 66.2685674 | 63.9524294 | 71.7487099 |
| 16:42:30 | 70.3324586 | 67.7372035 | 66.2685674 | 63.9524294 | 71.7487099 |
| 16:42:31 | 70.3324586 | 67.7372035 | 75.2685674 | 69.9524294 | 72.7487099 |

|          |            |            |            |            |            |
|----------|------------|------------|------------|------------|------------|
| 16:42:32 | 70.3324586 | 68.7372035 | 78.2685674 | 70.9524294 | 72.7487099 |
| 16:42:33 | 70.3324586 | 69.7372035 | 79.2685674 | 70.9524294 | 72.7487099 |
| 16:42:34 | 70.3324586 | 69.7372035 | 77.2685674 | 69.9524294 | 72.7487099 |
| 16:42:35 | 70.3324586 | 69.7372035 | 73.2685674 | 69.9524294 | 72.7487099 |
| 16:42:36 | 70.3324586 | 69.7372035 | 73.2685674 | 69.9524294 | 72.7487099 |
| 16:42:37 | 69.3324586 | 70.7372035 | 70.2685674 | 59.9524294 | 72.7487099 |
| 16:42:38 | 69.3324586 | 70.7372035 | 69.2685674 | 58.9524294 | 69.7487099 |
| 16:42:39 | 69.3324586 | 70.7372035 | 68.2685674 | 58.9524294 | 68.7487099 |
| 16:42:40 | 71.3324586 | 70.7372035 | 67.2685674 | 58.9524294 | 67.7487099 |
| 16:42:41 | 71.3324586 | 70.7372035 | 67.2685674 | 58.9524294 | 67.7487099 |
| 16:42:42 | 73.3324586 | 70.7372035 | 67.2685674 | 58.9524294 | 67.7487099 |
| 16:42:43 | 72.3324586 | 70.7372035 | 67.2685674 | 59.9524294 | 67.7487099 |
| 16:42:44 | 70.3324586 | 70.7372035 | 68.2685674 | 62.9524294 | 67.7487099 |
| 16:42:45 | 70.3324586 | 71.7372035 | 68.2685674 | 63.9524294 | 68.7487099 |
| 16:42:46 | 70.3324586 | 71.7372035 | 68.2685674 | 63.9524294 | 69.7487099 |
| 16:42:47 | 70.3324586 | 71.7372035 | 69.2685674 | 64.9524294 | 69.7487099 |
| 16:42:48 | 69.3324586 | 71.7372035 | 69.2685674 | 64.9524294 | 69.7487099 |
| 16:42:49 | 69.3324586 | 70.7372035 | 70.2685674 | 64.9524294 | 69.7487099 |
| 16:42:50 | 69.3324586 | 70.7372035 | 70.2685674 | 66.9524294 | 70.7487099 |
| 16:42:51 | 69.3324586 | 70.7372035 | 71.2685674 | 65.9524294 | 71.7487099 |
| 16:42:52 | 69.3324586 | 70.7372035 | 72.2685674 | 68.9524294 | 71.7487099 |
| 16:42:53 | 69.3324586 | 70.7372035 | 72.2685674 | 68.9524294 | 70.7487099 |
| 16:42:54 | 69.3324586 | 69.7372035 | 74.2685674 | 68.9524294 | 69.7487099 |
| 16:42:55 | 68.3324586 | 69.7372035 | 74.2685674 | 69.9524294 | 69.7487099 |
| 16:42:56 | 68.3324586 | 69.7372035 | 75.2685674 | 69.9524294 | 69.7487099 |
| 16:42:57 | 68.3324586 | 69.7372035 | 76.2685674 | 69.9524294 | 69.7487099 |
| 16:42:58 | 69.3324586 | 70.7372035 | 76.2685674 | 69.9524294 | 69.7487099 |
| 16:42:59 | 69.3324586 | 69.7372035 | 78.2685674 | 69.9524294 | 69.7487099 |
| 16:43:00 | 69.3324586 | 69.7372035 | 78.2685674 | 70.9524294 | 68.7487099 |
| 16:43:01 | 70.3324586 | 68.7372035 | 78.2685674 | 72.9524294 | 68.7487099 |
| 16:43:02 | 71.3324586 | 69.7372035 | 76.2685674 | 73.9524294 | 67.7487099 |
| 16:43:03 | 71.3324586 | 69.7372035 | 76.2685674 | 73.9524294 | 66.7487099 |
| 16:43:04 | 72.3324586 | 69.7372035 | 75.2685674 | 74.9524294 | 66.7487099 |
| 16:43:05 | 72.3324586 | 69.7372035 | 75.2685674 | 74.9524294 | 65.7487099 |
| 16:43:06 | 72.3324586 | 69.7372035 | 73.2685674 | 76.9524294 | 63.7487099 |
| 16:43:07 | 72.3324586 | 69.7372035 | 67.2685674 | 76.9524294 | 63.7487099 |
| 16:43:08 | 72.3324586 | 69.7372035 | 64.2685674 | 76.9524294 | 62.7487099 |
| 16:43:09 | 71.3324586 | 67.7372035 | 64.2685674 | 77.9524294 | 62.7487099 |
| 16:43:10 | 71.3324586 | 68.7372035 | 64.2685674 | 68.9524294 | 61.7487099 |
| 16:43:11 | 70.3324586 | 68.7372035 | 64.2685674 | 67.9524294 | 60.7487099 |
| 16:43:12 | 69.3324586 | 67.7372035 | 64.2685674 | 65.9524294 | 60.7487099 |
| 16:43:13 | 69.3324586 | 66.7372035 | 64.2685674 | 65.9524294 | 60.7487099 |
| 16:43:14 | 69.3324586 | 66.7372035 | 63.2685674 | 65.9524294 | 59.7487099 |
| 16:43:15 | 68.3324586 | 66.7372035 | 62.2685674 | 64.9524294 | 64.7487099 |
| 16:43:16 | 67.3324586 | 66.7372035 | 61.2685674 | 60.9524294 | 64.7487099 |

|          |            |            |            |            |            |
|----------|------------|------------|------------|------------|------------|
| 16:43:17 | 67.3324586 | 66.7372035 | 62.2685674 | 60.9524294 | 69.7487099 |
| 16:43:18 | 67.3324586 | 65.7372035 | 62.2685674 | 62.9524294 | 69.7487099 |
| 16:43:19 | 68.3324586 | 65.7372035 | 61.2685674 | 62.9524294 | 69.7487099 |
| 16:43:20 | 70.3324586 | 65.7372035 | 61.2685674 | 63.9524294 | 69.7487099 |
| 16:43:21 | 71.3324586 | 65.7372035 | 61.2685674 | 63.9524294 | 69.7487099 |
| 16:43:22 | 71.3324586 | 65.7372035 | 61.2685674 | 64.9524294 | 69.7487099 |
| 16:43:23 | 71.3324586 | 65.7372035 | 61.2685674 | 64.9524294 | 70.7487099 |
| 16:43:24 | 71.3324586 | 66.7372035 | 61.2685674 | 64.9524294 | 70.7487099 |
| 16:43:25 | 72.3324586 | 66.7372035 | 61.2685674 | 64.9524294 | 70.7487099 |
| 16:43:26 | 73.3324586 | 67.7372035 | 61.2685674 | 64.9524294 | 70.7487099 |
| 16:43:27 | 74.3324586 | 68.7372035 | 61.2685674 | 64.9524294 | 71.7487099 |
| 16:43:28 | 74.3324586 | 70.7372035 | 61.2685674 | 64.9524294 | 72.7487099 |
| 16:43:29 | 74.3324586 | 70.7372035 | 61.2685674 | 64.9524294 | 72.7487099 |
| 16:43:30 | 74.3324586 | 70.7372035 | 61.2685674 | 64.9524294 | 72.7487099 |
| 16:43:31 | 75.3324586 | 71.7372035 | 65.2685674 | 64.9524294 | 72.7487099 |
| 16:43:32 | 75.3324586 | 71.7372035 | 65.2685674 | 64.9524294 | 73.7487099 |
| 16:43:33 | 76.3324586 | 71.7372035 | 66.2685674 | 65.9524294 | 74.7487099 |
| 16:43:34 | 76.3324586 | 71.7372035 | 66.2685674 | 71.9524294 | 74.7487099 |
| 16:43:35 | 76.3324586 | 71.7372035 | 69.2685674 | 71.9524294 | 74.7487099 |
| 16:43:36 | 76.3324586 | 71.7372035 | 72.2685674 | 75.9524294 | 74.7487099 |
| 16:43:37 | 75.3324586 | 71.7372035 | 73.2685674 | 77.9524294 | 74.7487099 |
| 16:43:38 | 75.3324586 | 72.7372035 | 74.2685674 | 78.9524294 | 74.7487099 |
| 16:43:39 | 75.3324586 | 72.7372035 | 74.2685674 | 78.9524294 | 74.7487099 |
| 16:43:40 | 70.3324586 | 72.7372035 | 75.2685674 | 78.9524294 | 74.7487099 |
| 16:43:41 | 67.3324586 | 72.7372035 | 76.2685674 | 78.9524294 | 75.7487099 |
| 16:43:42 | 68.3324586 | 71.7372035 | 76.2685674 | 75.9524294 | 75.7487099 |
| 16:43:43 | 68.3324586 | 72.7372035 | 77.2685674 | 67.9524294 | 77.7487099 |
| 16:43:44 | 69.3324586 | 72.7372035 | 77.2685674 | 67.9524294 | 77.7487099 |
| 16:43:45 | 69.3324586 | 71.7372035 | 71.2685674 | 67.9524294 | 77.7487099 |
| 16:43:46 | 69.3324586 | 71.7372035 | 67.2685674 | 67.9524294 | 77.7487099 |
| 16:43:47 | 69.3324586 | 71.7372035 | 65.2685674 | 67.9524294 | 78.7487099 |
| 16:43:48 | 69.3324586 | 72.7372035 | 64.2685674 | 67.9524294 | 78.7487099 |
| 16:43:49 | 71.3324586 | 72.7372035 | 64.2685674 | 67.9524294 | 78.7487099 |
| 16:43:50 | 80.3324586 | 72.7372035 | 63.2685674 | 67.9524294 | 78.7487099 |
| 16:43:51 | 81.3324586 | 72.7372035 | 63.2685674 | 68.9524294 | 79.7487099 |
| 16:43:52 | 81.3324586 | 72.7372035 | 63.2685674 | 68.9524294 | 77.7487099 |
| 16:43:53 | 71.75      | 72.7372035 | 63.2685674 | 68.9524294 | 77.7487099 |
| 16:43:54 | 71.375     | 73.7372035 | 63.2685674 | 68.9524294 | 74.7487099 |
| 16:43:55 | 71         | 73.7372035 | 63.2685674 | 68.9524294 | 71.7487099 |
| 16:43:56 | 71         | 77.7372035 | 64.2685674 | 68.9524294 | 68.7487099 |
| 16:43:57 | 71.625     | 79.7372035 | 65.2685674 | 68.9524294 | 69.7487099 |
| 16:43:58 | 72.375     | 82.7372035 | 65.2685674 | 68.9524294 | 69.7487099 |
| 16:43:59 | 72.125     | 72.125     | 65.2685674 | 68.9524294 | 65.7487099 |
| 16:44:00 | 72         | 72         | 64.2685674 | 69.9524294 | 65.7487099 |
| 16:44:01 | 72.375     | 72.375     | 64.2685674 | 69.9524294 | 65.7487099 |

|          |            |            |            |            |            |
|----------|------------|------------|------------|------------|------------|
| 16:44:02 | 81.3324586 | 70.5       | 64.2685674 | 64.9524294 | 65.7487099 |
| 16:44:03 | 77.3324586 | 69.875     | 65.2685674 | 64.9524294 | 64.7487099 |
| 16:44:04 | 73.3324586 | 79.7372035 | 66.2685674 | 64.9524294 | 63.7487099 |
| 16:44:05 | 70.3324586 | 77.7372035 | 67.2685674 | 63.9524294 | 63.7487099 |
| 16:44:06 | 70.3324586 | 77.7372035 | 67.2685674 | 63.9524294 | 65.7487099 |
| 16:44:07 | 67.3324586 | 76.7372035 | 68.2685674 | 62.9524294 | 65.7487099 |
| 16:44:08 | 66.3324586 | 76.7372035 | 68.2685674 | 62.9524294 | 66.7487099 |
| 16:44:09 | 65.3324586 | 76.7372035 | 68.2685674 | 61.9524294 | 66.7487099 |
| 16:44:10 | 65.3324586 | 76.7372035 | 68.2685674 | 61.9524294 | 67.7487099 |
| 16:44:11 | 65.3324586 | 76.7372035 | 69.2685674 | 58.9524294 | 67.7487099 |
| 16:44:12 | 65.3324586 | 76.7372035 | 69.2685674 | 58.9524294 | 67.7487099 |
| 16:44:13 | 65.3324586 | 73.7372035 | 69.2685674 | 58.9524294 | 67.7487099 |
| 16:44:14 | 66.3324586 | 71.7372035 | 69.2685674 | 56.9524294 | 67.7487099 |
| 16:44:15 | 68.3324586 | 71.7372035 | 69.2685674 | 56.9524294 | 68.7487099 |
| 16:44:16 | 69.3324586 | 72.7372035 | 69.2685674 | 56.9524294 | 68.7487099 |
| 16:44:17 | 69.3324586 | 72.7372035 | 69.2685674 | 58.9524294 | 69.7487099 |
| 16:44:18 | 69.3324586 | 76.7372035 | 70.2685674 | 59.9524294 | 72.7487099 |
| 16:44:19 | 69.3324586 | 78.7372035 | 70.2685674 | 59.9524294 | 72.7487099 |
| 16:44:20 | 70.3324586 | 78.7372035 | 70.2685674 | 63.9524294 | 75.7487099 |
| 16:44:21 | 70.3324586 | 78.7372035 | 70.2685674 | 64.9524294 | 74.7487099 |
| 16:44:22 | 69.3324586 | 78.7372035 | 70.2685674 | 64.9524294 | 74.7487099 |
| 16:44:23 | 69.3324586 | 78.7372035 | 70.2685674 | 67.9524294 | 72.7487099 |
| 16:44:24 | 69.3324586 | 78.7372035 | 70.2685674 | 67.9524294 | 72.7487099 |
| 16:44:25 | 67.3324586 | 70.25      | 70.2685674 | 67.9524294 | 72.7487099 |
| 16:44:26 | 67.3324586 | 76.7372035 | 71.2685674 | 64.9524294 | 72.7487099 |
| 16:44:27 | 67.3324586 | 74.7372035 | 71.2685674 | 63.9524294 | 72.7487099 |
| 16:44:28 | 67.3324586 | 74.7372035 | 71.2685674 | 62.9524294 | 72.7487099 |
| 16:44:29 | 67.3324586 | 72.7372035 | 72.2685674 | 62.9524294 | 72.7487099 |
| 16:44:30 | 67.3324586 | 72.7372035 | 72.2685674 | 60.9524294 | 71.7487099 |
| 16:44:31 | 67.3324586 | 72.7372035 | 72.2685674 | 59.9524294 | 69.7487099 |
| 16:44:32 | 67.3324586 | 72.7372035 | 72.2685674 | 58.9524294 | 69.7487099 |
| 16:44:33 | 67.3324586 | 71.7372035 | 71.2685674 | 58.9524294 | 61.7487099 |
| 16:44:34 | 67.3324586 | 67.7372035 | 70.2685674 | 58.9524294 | 58.7487099 |
| 16:44:35 | 67.3324586 | 66.7372035 | 70.2685674 | 58.9524294 | 57.7487099 |
| 16:44:36 | 67.3324586 | 66.7372035 | 71.2685674 | 58.9524294 | 57.7487099 |
| 16:44:37 | 67.3324586 | 66.7372035 | 71.2685674 | 58.9524294 | 56.7487099 |
| 16:44:38 | 67.3324586 | 66.7372035 | 71.2685674 | 58.9524294 | 56.7487099 |
| 16:44:39 | 67.3324586 | 66.7372035 | 71.2685674 | 58.9524294 | 57.7487099 |
| 16:44:40 | 67.3324586 | 66.7372035 | 71.2685674 | 62.9524294 | 59.7487099 |
| 16:44:41 | 68.3324586 | 66.7372035 | 71.2685674 | 65.9524294 | 60.7487099 |
| 16:44:42 | 71.3324586 | 66.7372035 | 71.2685674 | 66.9524294 | 60.7487099 |
| 16:44:43 | 71.3324586 | 68.7372035 | 71.2685674 | 66.9524294 | 62.7487099 |
| 16:44:44 | 71.3324586 | 69.7372035 | 71.2685674 | 65.9524294 | 63.7487099 |
| 16:44:45 | 71.3324586 | 66.7372035 | 71.2685674 | 65.9524294 | 64.7487099 |
| 16:44:46 | 71.3324586 | 66.7372035 | 71.2685674 | 65.9524294 | 64.7487099 |

|          |            |            |            |            |            |
|----------|------------|------------|------------|------------|------------|
| 16:44:47 | 71.3324586 | 66.7372035 | 71.2685674 | 65.9524294 | 65.7487099 |
| 16:44:48 | 70.3324586 | 66.7372035 | 71.2685674 | 65.9524294 | 68.7487099 |
| 16:44:49 | 69.3324586 | 66.7372035 | 72.2685674 | 65.9524294 | 68.7487099 |
| 16:44:50 | 68.3324586 | 66.7372035 | 73.2685674 | 64.9524294 | 68.7487099 |
| 16:44:51 | 67.3324586 | 66.7372035 | 73.2685674 | 64.9524294 | 67.7487099 |
| 16:44:52 | 67.3324586 | 67.7372035 | 74.2685674 | 64.9524294 | 67.7487099 |
| 16:44:53 | 66.3324586 | 67.7372035 | 76.2685674 | 64.9524294 | 66.7487099 |
| 16:44:54 | 66.3324586 | 66.7372035 | 77.2685674 | 64.9524294 | 66.7487099 |
| 16:44:55 | 66.3324586 | 66.7372035 | 77.2685674 | 64.9524294 | 67.7487099 |
| 16:44:56 | 66.3324586 | 67.7372035 | 77.2685674 | 64.9524294 | 68.7487099 |
| 16:44:57 | 65.3324586 | 67.7372035 | 77.2685674 | 64.9524294 | 68.7487099 |
| 16:44:58 | 65.3324586 | 67.7372035 | 76.2685674 | 62.9524294 | 68.7487099 |
| 16:44:59 | 65.3324586 | 69.7372035 | 76.2685674 | 61.9524294 | 67.7487099 |
| 16:45:00 | 65.3324586 | 69.7372035 | 76.2685674 | 61.9524294 | 66.7487099 |
| 16:45:01 | 66.3324586 | 69.7372035 | 75.2685674 | 59.9524294 | 66.7487099 |
| 16:45:02 | 66.3324586 | 68.7372035 | 75.2685674 | 58.9524294 | 66.7487099 |
| 16:45:03 | 66.3324586 | 67.7372035 | 74.2685674 | 58.9524294 | 65.7487099 |
| 16:45:04 | 67.3324586 | 67.7372035 | 73.2685674 | 58.9524294 | 63.7487099 |
| 16:45:05 | 67.3324586 | 68.7372035 | 74.2685674 | 58.9524294 | 62.7487099 |
| 16:45:06 | 65.3324586 | 68.7372035 | 74.2685674 | 58.9524294 | 61.7487099 |
| 16:45:07 | 64.3324586 | 68.7372035 | 74.2685674 | 58.9524294 | 61.7487099 |
| 16:45:08 | 64.3324586 | 68.7372035 | 74.2685674 | 58.9524294 | 61.7487099 |
| 16:45:09 | 63.3324586 | 66.7372035 | 73.2685674 | 58.9524294 | 60.7487099 |
| 16:45:10 | 63.3324586 | 65.7372035 | 72.2685674 | 58.9524294 | 60.7487099 |
| 16:45:11 | 64.3324586 | 66.7372035 | 72.2685674 | 58.9524294 | 60.7487099 |
| 16:45:12 | 64.3324586 | 66.7372035 | 70.2685674 | 58.9524294 | 60.7487099 |
| 16:45:13 | 64.3324586 | 66.7372035 | 70.2685674 | 58.9524294 | 60.7487099 |
| 16:45:14 | 65.3324586 | 65.7372035 | 69.2685674 | 60.9524294 | 60.7487099 |
| 16:45:15 | 65.3324586 | 66.7372035 | 68.2685674 | 60.9524294 | 60.7487099 |
| 16:45:16 | 65.3324586 | 66.7372035 | 68.2685674 | 60.9524294 | 59.7487099 |
| 16:45:17 | 65.3324586 | 66.7372035 | 68.2685674 | 64.9524294 | 59.7487099 |
| 16:45:18 | 65.3324586 | 66.7372035 | 68.2685674 | 64.9524294 | 59.7487099 |
| 16:45:19 | 65.3324586 | 66.7372035 | 67.2685674 | 67.9524294 | 59.7487099 |
| 16:45:20 | 65.3324586 | 66.7372035 | 67.2685674 | 67.9524294 | 60.7487099 |
| 16:45:21 | 64.3324586 | 66.7372035 | 67.2685674 | 69.9524294 | 61.7487099 |
| 16:45:22 | 63.3324586 | 67.7372035 | 67.2685674 | 69.9524294 | 61.7487099 |
| 16:45:23 | 63.3324586 | 69.7372035 | 67.2685674 | 67.9524294 | 61.7487099 |
| 16:45:24 | 63.3324586 | 69.7372035 | 66.2685674 | 64.9524294 | 61.7487099 |
| 16:45:25 | 63.3324586 | 69.7372035 | 66.2685674 | 64.9524294 | 61.7487099 |
| 16:45:26 | 63.3324586 | 70.7372035 | 66.2685674 | 64.9524294 | 61.7487099 |
| 16:45:27 | 63.3324586 | 71.7372035 | 66.2685674 | 64.9524294 | 61.7487099 |
| 16:45:28 | 63.3324586 | 71.7372035 | 67.2685674 | 63.9524294 | 61.7487099 |
| 16:45:29 | 64.3324586 | 71.7372035 | 67.2685674 | 63.9524294 | 61.7487099 |
| 16:45:30 | 67.3324586 | 71.7372035 | 66.2685674 | 63.9524294 | 63.7487099 |
| 16:45:31 | 67.3324586 | 69.7372035 | 67.2685674 | 63.9524294 | 63.7487099 |

|          |            |            |            |            |            |
|----------|------------|------------|------------|------------|------------|
| 16:45:32 | 67.3324586 | 67.7372035 | 67.2685674 | 63.9524294 | 62.7487099 |
| 16:45:33 | 66.3324586 | 68.7372035 | 68.2685674 | 63.9524294 | 61.7487099 |
| 16:45:34 | 66.3324586 | 68.7372035 | 68.2685674 | 63.9524294 | 60.7487099 |
| 16:45:35 | 66.3324586 | 68.7372035 | 69.2685674 | 63.9524294 | 60.7487099 |
| 16:45:36 | 66.3324586 | 68.7372035 | 69.2685674 | 63.9524294 | 60.7487099 |
| 16:45:37 | 66.3324586 | 67.7372035 | 69.2685674 | 63.9524294 | 61.7487099 |
| 16:45:38 | 66.3324586 | 67.7372035 | 69.2685674 | 64.9524294 | 62.7487099 |
| 16:45:39 | 66.3324586 | 67.7372035 | 69.2685674 | 64.9524294 | 62.7487099 |
| 16:45:40 | 68.3324586 | 67.7372035 | 69.2685674 | 64.9524294 | 62.7487099 |
| 16:45:41 | 73.3324586 | 68.7372035 | 69.2685674 | 64.9524294 | 62.7487099 |
| 16:45:42 | 73.3324586 | 68.7372035 | 69.2685674 | 65.9524294 | 62.7487099 |
| 16:45:43 | 73.3324586 | 68.7372035 | 69.2685674 | 65.9524294 | 62.7487099 |
| 16:45:44 | 73.3324586 | 68.7372035 | 69.2685674 | 64.9524294 | 62.7487099 |
| 16:45:45 | 74.3324586 | 67.7372035 | 69.2685674 | 64.9524294 | 63.7487099 |
| 16:45:46 | 74.3324586 | 67.7372035 | 69.2685674 | 65.9524294 | 63.7487099 |
| 16:45:47 | 69.3324586 | 67.7372035 | 72.2685674 | 66.9524294 | 64.7487099 |
| 16:45:48 | 66.3324586 | 67.7372035 | 73.2685674 | 66.9524294 | 65.7487099 |
| 16:45:49 | 64.3324586 | 68.7372035 | 73.2685674 | 65.9524294 | 65.7487099 |
| 16:45:50 | 64.3324586 | 68.7372035 | 74.2685674 | 62.9524294 | 65.7487099 |
| 16:45:51 | 64.3324586 | 67.7372035 | 76.2685674 | 61.9524294 | 65.7487099 |
| 16:45:52 | 64.3324586 | 67.7372035 | 76.2685674 | 61.9524294 | 65.7487099 |
| 16:45:53 | 63.3324586 | 68.7372035 | 77.2685674 | 61.9524294 | 66.7487099 |
| 16:45:54 | 63.3324586 | 68.7372035 | 77.2685674 | 62.9524294 | 67.7487099 |
| 16:45:55 | 60.3324586 | 68.7372035 | 77.2685674 | 62.9524294 | 67.7487099 |
| 16:45:56 | 59.3324586 | 68.7372035 | 77.2685674 | 62.9524294 | 66.7487099 |
| 16:45:57 | 60.3324586 | 68.7372035 | 76.2685674 | 63.9524294 | 66.7487099 |
| 16:45:58 | 60.3324586 | 68.7372035 | 75.2685674 | 63.9524294 | 66.7487099 |
| 16:45:59 | 62.3324586 | 68.7372035 | 75.2685674 | 63.9524294 | 66.7487099 |
| 16:46:00 | 64.3324586 | 68.7372035 | 75.2685674 | 64.9524294 | 66.7487099 |
| 16:46:01 | 65.3324586 | 68.7372035 | 75.2685674 | 66.9524294 | 66.7487099 |
| 16:46:02 | 67.3324586 | 68.7372035 | 73.2685674 | 68.9524294 | 66.7487099 |
| 16:46:03 | 71.3324586 | 69.7372035 | 73.2685674 | 68.9524294 | 66.7487099 |
| 16:46:04 | 71.3324586 | 70.7372035 | 73.2685674 | 68.9524294 | 67.7487099 |
| 16:46:05 | 72.3324586 | 69.7372035 | 73.2685674 | 69.9524294 | 67.7487099 |
| 16:46:06 | 72.3324586 | 68.7372035 | 73.2685674 | 69.9524294 | 67.7487099 |
| 16:46:07 | 72.3324586 | 68.7372035 | 75.2685674 | 69.9524294 | 67.7487099 |
| 16:46:08 | 72.3324586 | 68.7372035 | 77.2685674 | 69.9524294 | 66.7487099 |
| 16:46:09 | 73.3324586 | 68.7372035 | 78.2685674 | 69.9524294 | 68.7487099 |
| 16:46:10 | 73.3324586 | 68.7372035 | 77.2685674 | 70.9524294 | 68.7487099 |
| 16:46:11 | 73.3324586 | 69.7372035 | 77.2685674 | 70.9524294 | 68.7487099 |
| 16:46:12 | 73.3324586 | 69.7372035 | 77.2685674 | 70.9524294 | 68.7487099 |
| 16:46:13 | 73.3324586 | 68.7372035 | 77.2685674 | 70.9524294 | 69.7487099 |
| 16:46:14 | 73.3324586 | 68.7372035 | 77.2685674 | 72.9524294 | 70.7487099 |
| 16:46:15 | 73.3324586 | 68.7372035 | 77.2685674 | 78.9524294 | 70.7487099 |
| 16:46:16 | 73.3324586 | 68.7372035 | 79.2685674 | 78.9524294 | 70.7487099 |



|          |            |            |            |            |            |
|----------|------------|------------|------------|------------|------------|
| 16:46:17 | 72.3324586 | 68.7372035 | 78.2685674 | 78.9524294 | 69.7487099 |
| 16:46:18 | 72.3324586 | 68.7372035 | 75.2685674 | 78.9524294 | 69.7487099 |
| 16:46:19 | 72.3324586 | 68.7372035 | 72.2685674 | 77.9524294 | 69.7487099 |
| 16:46:20 | 71.3324586 | 70.7372035 | 70.2685674 | 76.9524294 | 69.7487099 |
| 16:46:21 | 70.3324586 | 70.7372035 | 67.2685674 | 76.9524294 | 69.7487099 |
| 16:46:22 | 69.3324586 | 69.7372035 | 65.2685674 | 76.9524294 | 69.7487099 |
| 16:46:23 | 68.3324586 | 69.7372035 | 64.2685674 | 76.9524294 | 69.7487099 |
| 16:46:24 | 68.3324586 | 70.7372035 | 64.2685674 | 74.9524294 | 66.7487099 |
| 16:46:25 | 68.3324586 | 70.7372035 | 64.2685674 | 72.9524294 | 66.7487099 |
| 16:46:26 | 68.3324586 | 70.7372035 | 65.2685674 | 71.9524294 | 66.7487099 |
| 16:46:27 | 68.3324586 | 71.7372035 | 65.2685674 | 71.9524294 | 66.7487099 |
| 16:46:28 | 68.3324586 | 71.7372035 | 66.2685674 | 72.9524294 | 66.7487099 |
| 16:46:29 | 68.3324586 | 71.7372035 | 66.2685674 | 72.9524294 | 66.7487099 |
| 16:46:30 | 68.3324586 | 71.7372035 | 66.2685674 | 72.9524294 | 66.7487099 |
| 16:46:31 | 68.3324586 | 72.7372035 | 66.2685674 | 72.9524294 | 65.7487099 |
| 16:46:32 | 68.3324586 | 73.7372035 | 66.2685674 | 73.9524294 | 65.7487099 |
| 16:46:33 | 64.3324586 | 72.7372035 | 67.2685674 | 73.9524294 | 65.7487099 |
| 16:46:34 | 62.3324586 | 72.7372035 | 67.2685674 | 73.9524294 | 65.7487099 |
| 16:46:35 | 62.3324586 | 72.7372035 | 67.2685674 | 73.9524294 | 65.7487099 |
| 16:46:36 | 62.3324586 | 72.7372035 | 66.2685674 | 73.9524294 | 65.7487099 |
| 16:46:37 | 63.3324586 | 72.7372035 | 66.2685674 | 73.9524294 | 65.7487099 |
| 16:46:38 | 63.3324586 | 72.7372035 | 66.2685674 | 73.9524294 | 65.7487099 |
| 16:46:39 | 63.3324586 | 73.7372035 | 66.2685674 | 72.9524294 | 64.7487099 |
| 16:46:40 | 63.3324586 | 70.25      | 66.2685674 | 72.9524294 | 61.7487099 |
| 16:46:41 | 63.3324586 | 70.125     | 66.2685674 | 68.9524294 | 61.7487099 |
| 16:46:42 | 63.3324586 | 70.375     | 68.2685674 | 68.9524294 | 61.7487099 |
| 16:46:43 | 67.3324586 | 69.625     | 67.2685674 | 66.9524294 | 61.7487099 |
| 16:46:44 | 68.3324586 | 69.125     | 67.2685674 | 66.9524294 | 61.7487099 |
| 16:46:45 | 68.3324586 | 68.25      | 66.2685674 | 66.9524294 | 61.7487099 |
| 16:46:46 | 68.3324586 | 70.7372035 | 66.2685674 | 69.9524294 | 61.7487099 |
| 16:46:47 | 67.3324586 | 70.7372035 | 66.2685674 | 73.9524294 | 61.7487099 |
| 16:46:48 | 67.3324586 | 69.7372035 | 66.2685674 | 75.9524294 | 62.7487099 |
| 16:46:49 | 64.3324586 | 70.7372035 | 66.2685674 | 75.9524294 | 62.7487099 |
| 16:46:50 | 64.3324586 | 70.7372035 | 66.2685674 | 75.9524294 | 66.7487099 |
| 16:46:51 | 64.3324586 | 69.7372035 | 66.2685674 | 75.9524294 | 69.7487099 |
| 16:46:52 | 63.3324586 | 69.7372035 | 66.2685674 | 75.9524294 | 69.7487099 |
| 16:46:53 | 65.3324586 | 68.7372035 | 66.2685674 | 75.9524294 | 70.7487099 |
| 16:46:54 | 65.3324586 | 67.7372035 | 67.2685674 | 75.9524294 | 71.7487099 |
| 16:46:55 | 66.3324586 | 66.7372035 | 67.2685674 | 70.9524294 | 68.7487099 |
| 16:46:56 | 66.3324586 | 65.7372035 | 67.2685674 | 70.9524294 | 68.7487099 |
| 16:46:57 | 69.3324586 | 65.7372035 | 69.2685674 | 69.9524294 | 64.7487099 |
| 16:46:58 | 69.3324586 | 65.7372035 | 69.2685674 | 69.9524294 | 60.7487099 |
| 16:46:59 | 69.3324586 | 64.7372035 | 69.2685674 | 67.9524294 | 60.7487099 |
| 16:47:00 | 69.3324586 | 64.7372035 | 69.2685674 | 67.9524294 | 60.7487099 |
| 16:47:01 | 69.3324586 | 65.7372035 | 69.2685674 | 66.9524294 | 59.7487099 |

|          |            |            |            |            |            |
|----------|------------|------------|------------|------------|------------|
| 16:47:02 | 68.3324586 | 66.7372035 | 68.2685674 | 66.9524294 | 59.7487099 |
| 16:47:03 | 68.3324586 | 66.7372035 | 68.2685674 | 65.9524294 | 59.7487099 |
| 16:47:04 | 68.3324586 | 66.7372035 | 68.2685674 | 66.9524294 | 59.7487099 |
| 16:47:05 | 68.3324586 | 66.7372035 | 68.2685674 | 70.9524294 | 58.7487099 |
| 16:47:06 | 68.3324586 | 66.7372035 | 68.2685674 | 70.9524294 | 58.7487099 |
| 16:47:07 | 68.3324586 | 66.7372035 | 67.2685674 | 74.9524294 | 58.7487099 |
| 16:47:08 | 67.3324586 | 66.7372035 | 66.2685674 | 74.9524294 | 58.7487099 |
| 16:47:09 | 67.3324586 | 65.7372035 | 65.2685674 | 73.9524294 | 58.7487099 |
| 16:47:10 | 67.3324586 | 66.7372035 | 65.2685674 | 73.9524294 | 57.7487099 |
| 16:47:11 | 65.3324586 | 66.7372035 | 65.2685674 | 73.9524294 | 58.7487099 |
| 16:47:12 | 65.3324586 | 67.7372035 | 65.2685674 | 73.9524294 | 58.7487099 |
| 16:47:13 | 65.3324586 | 66.7372035 | 66.2685674 | 68.9524294 | 58.7487099 |
| 16:47:14 | 64.3324586 | 66.7372035 | 67.2685674 | 66.9524294 | 58.7487099 |
| 16:47:15 | 64.3324586 | 66.7372035 | 66.2685674 | 66.9524294 | 57.7487099 |
| 16:47:16 | 64.3324586 | 66.7372035 | 65.2685674 | 65.9524294 | 57.7487099 |
| 16:47:17 | 64.3324586 | 66.7372035 | 65.2685674 | 65.9524294 | 57.7487099 |
| 16:47:18 | 64.3324586 | 66.7372035 | 65.2685674 | 65.9524294 | 57.7487099 |
| 16:47:19 | 64.3324586 | 66.7372035 | 65.2685674 | 65.9524294 | 58.7487099 |
| 16:47:20 | 65.3324586 | 66.7372035 | 65.2685674 | 65.9524294 | 60.7487099 |
| 16:47:21 | 65.3324586 | 67.7372035 | 65.2685674 | 65.9524294 | 59.7487099 |
| 16:47:22 | 66.3324586 | 72.7372035 | 64.2685674 | 65.9524294 | 59.7487099 |
| 16:47:23 | 66.3324586 | 67         | 65.2685674 | 64.9524294 | 59.7487099 |
| 16:47:24 | 66.3324586 | 67.125     | 64.2685674 | 63.9524294 | 58.7487099 |
| 16:47:25 | 67.3324586 | 67.125     | 64.2685674 | 63.9524294 | 58.7487099 |
| 16:47:26 | 67.3324586 | 66.75      | 63.2685674 | 63.9524294 | 58.7487099 |
| 16:47:27 | 67.3324586 | 66.75      | 63.2685674 | 63.9524294 | 58.7487099 |
| 16:47:28 | 67.3324586 | 67.5       | 64.2685674 | 63.9524294 | 62.7487099 |
| 16:47:29 | 67.3324586 | 68         | 66.2685674 | 63.9524294 | 62.7487099 |
| 16:47:30 | 67.3324586 | 68.25      | 67.2685674 | 63.9524294 | 62.7487099 |
| 16:47:31 | 67.3324586 | 68.125     | 68.2685674 | 63.9524294 | 62.7487099 |
| 16:47:32 | 67.3324586 | 78.7372035 | 69.2685674 | 63.9524294 | 62.7487099 |
| 16:47:33 | 67.3324586 | 73.7372035 | 69.2685674 | 62.9524294 | 62.7487099 |
| 16:47:34 | 67.3324586 | 72.7372035 | 68.2685674 | 62.9524294 | 61.7487099 |
| 16:47:35 | 67.3324586 | 71.7372035 | 68.2685674 | 64.9524294 | 62.7487099 |
| 16:47:36 | 67.3324586 | 71.7372035 | 68.2685674 | 64.9524294 | 62.7487099 |
| 16:47:37 | 67.3324586 | 71.7372035 | 67.2685674 | 66.9524294 | 62.7487099 |
| 16:47:38 | 67.3324586 | 71.7372035 | 67.2685674 | 66.9524294 | 62.7487099 |
| 16:47:39 | 68.3324586 | 71.7372035 | 67.2685674 | 66.9524294 | 62.7487099 |
| 16:47:40 | 68.3324586 | 71.7372035 | 67.2685674 | 66.9524294 | 64.7487099 |
| 16:47:41 | 68.3324586 | 71.7372035 | 67.2685674 | 65.9524294 | 64.7487099 |
| 16:47:42 | 68.3324586 | 68.7372035 | 67.2685674 | 65.9524294 | 64.7487099 |
| 16:47:43 | 65.3324586 | 67.7372035 | 67.2685674 | 64.9524294 | 64.7487099 |
| 16:47:44 | 64.3324586 | 67.7372035 | 68.2685674 | 63.9524294 | 64.7487099 |
| 16:47:45 | 63.3324586 | 67.7372035 | 68.2685674 | 63.9524294 | 63.7487099 |
| 16:47:46 | 64.3324586 | 66.7372035 | 68.2685674 | 63.9524294 | 63.7487099 |

|          |            |            |            |            |            |
|----------|------------|------------|------------|------------|------------|
| 16:47:47 | 64.3324586 | 66.7372035 | 68.2685674 | 63.9524294 | 62.7487099 |
| 16:47:48 | 64.3324586 | 66.7372035 | 67.2685674 | 62.9524294 | 62.7487099 |
| 16:47:49 | 63.3324586 | 66.7372035 | 67.2685674 | 62.9524294 | 62.7487099 |
| 16:47:50 | 64.3324586 | 66.7372035 | 67.2685674 | 62.9524294 | 62.7487099 |
| 16:47:51 | 65.3324586 | 66.7372035 | 67.2685674 | 62.9524294 | 61.7487099 |
| 16:47:52 | 65.3324586 | 65.7372035 | 67.2685674 | 62.9524294 | 61.7487099 |
| 16:47:53 | 65.3324586 | 65.7372035 | 67.2685674 | 62.9524294 | 61.7487099 |
| 16:47:54 | 65.3324586 | 66.7372035 | 66.2685674 | 62.9524294 | 58.7487099 |
| 16:47:55 | 65.3324586 | 66.7372035 | 66.2685674 | 63.9524294 | 58.7487099 |
| 16:47:56 | 65.3324586 | 66.7372035 | 66.2685674 | 64.9524294 | 64.7487099 |
| 16:47:57 | 65.3324586 | 65.7372035 | 66.2685674 | 63.9524294 | 64.7487099 |
| 16:47:58 | 66.3324586 | 65.7372035 | 66.2685674 | 64.9524294 | 64.7487099 |
| 16:47:59 | 66.3324586 | 66.7372035 | 67.2685674 | 64.9524294 | 65.7487099 |
| 16:48:00 | 66.3324586 | 66.7372035 | 67.2685674 | 64.9524294 | 65.7487099 |
| 16:48:01 | 66.3324586 | 66.7372035 | 68.2685674 | 67.9524294 | 66.7487099 |
| 16:48:02 | 66.3324586 | 66.7372035 | 68.2685674 | 65.9524294 | 66.7487099 |
| 16:48:03 | 66.3324586 | 66.7372035 | 67.2685674 | 65.9524294 | 66.7487099 |
| 16:48:04 | 64.3324586 | 66.7372035 | 66.2685674 | 65.9524294 | 66.7487099 |
| 16:48:05 | 64.3324586 | 65.7372035 | 63.2685674 | 64.9524294 | 66.7487099 |
| 16:48:06 | 63.3324586 | 65.7372035 | 63.2685674 | 63.9524294 | 66.7487099 |
| 16:48:07 | 63.3324586 | 64.7372035 | 61.2685674 | 63.9524294 | 66.7487099 |
| 16:48:08 | 63.3324586 | 63.7372035 | 61.2685674 | 63.9524294 | 66.7487099 |
| 16:48:09 | 63.3324586 | 63.7372035 | 61.2685674 | 63.9524294 | 65.7487099 |
| 16:48:10 | 63.3324586 | 63.7372035 | 62.2685674 | 65.9524294 | 65.7487099 |
| 16:48:11 | 64.3324586 | 63.7372035 | 62.2685674 | 67.9524294 | 64.7487099 |
| 16:48:12 | 64.3324586 | 63.7372035 | 62.2685674 | 66.9524294 | 64.7487099 |
| 16:48:13 | 67.3324586 | 63.7372035 | 63.2685674 | 64.9524294 | 64.7487099 |
| 16:48:14 | 67.3324586 | 64.7372035 | 63.2685674 | 62.9524294 | 64.7487099 |
| 16:48:15 | 67.3324586 | 64.7372035 | 63.2685674 | 62.9524294 | 65.7487099 |
| 16:48:16 | 67.3324586 | 64.7372035 | 63.2685674 | 62.9524294 | 66.7487099 |
| 16:48:17 | 67.3324586 | 64.7372035 | 63.2685674 | 62.9524294 | 66.7487099 |
| 16:48:18 | 67.3324586 | 64.7372035 | 63.2685674 | 62.9524294 | 66.7487099 |
| 16:48:19 | 67.3324586 | 64.7372035 | 64.2685674 | 64.9524294 | 66.7487099 |
| 16:48:20 | 67.3324586 | 64.7372035 | 64.2685674 | 65.9524294 | 67.7487099 |
| 16:48:21 | 65.3324586 | 63.7372035 | 65.2685674 | 66.9524294 | 67.7487099 |
| 16:48:22 | 64.3324586 | 63.7372035 | 66.2685674 | 67.9524294 | 68.7487099 |
| 16:48:23 | 64.3324586 | 64.7372035 | 66.2685674 | 67.9524294 | 70.7487099 |
| 16:48:24 | 64.3324586 | 65.7372035 | 66.2685674 | 67.9524294 | 70.7487099 |
| 16:48:25 | 64.3324586 | 65.7372035 | 66.2685674 | 64.9524294 | 73.7487099 |
| 16:48:26 | 64.3324586 | 65.7372035 | 65.2685674 | 63.9524294 | 74.7487099 |
| 16:48:27 | 64.3324586 | 65.7372035 | 65.2685674 | 63.9524294 | 75.7487099 |
| 16:48:28 | 64.3324586 | 65.7372035 | 65.2685674 | 63.9524294 | 75.7487099 |
| 16:48:29 | 64.3324586 | 64.7372035 | 64.2685674 | 63.9524294 | 76.7487099 |
| 16:48:30 | 64.3324586 | 64.7372035 | 64.2685674 | 63.9524294 | 75.7487099 |
| 16:48:31 | 64.3324586 | 63.7372035 | 63.2685674 | 63.9524294 | 72.7487099 |

|          |            |            |            |            |            |
|----------|------------|------------|------------|------------|------------|
| 16:48:32 | 65.3324586 | 64.7372035 | 64.2685674 | 63.9524294 | 65.7487099 |
| 16:48:33 | 67.3324586 | 64.7372035 | 64.2685674 | 62.9524294 | 65.7487099 |
| 16:48:34 | 67.3324586 | 64.7372035 | 65.2685674 | 62.9524294 | 64.7487099 |
| 16:48:35 | 67.3324586 | 64.7372035 | 66.2685674 | 62.9524294 | 64.7487099 |
| 16:48:36 | 67.3324586 | 64.7372035 | 66.2685674 | 62.9524294 | 64.7487099 |
| 16:48:37 | 68.3324586 | 64.7372035 | 66.2685674 | 63.9524294 | 65.7487099 |
| 16:48:38 | 68.3324586 | 64.7372035 | 66.2685674 | 64.9524294 | 65.7487099 |
| 16:48:39 | 69.3324586 | 64.7372035 | 66.2685674 | 65.9524294 | 66.7487099 |
| 16:48:40 | 69.3324586 | 64.7372035 | 66.2685674 | 65.9524294 | 66.7487099 |
| 16:48:41 | 72.3324586 | 63.7372035 | 66.2685674 | 65.9524294 | 67.7487099 |
| 16:48:42 | 71.3324586 | 63.7372035 | 66.2685674 | 67.9524294 | 68.7487099 |
| 16:48:43 | 71.3324586 | 63.7372035 | 66.2685674 | 67.9524294 | 68.7487099 |
| 16:48:44 | 71.3324586 | 64.7372035 | 67.2685674 | 67.9524294 | 68.7487099 |
| 16:48:45 | 71.3324586 | 64.7372035 | 68.2685674 | 67.9524294 | 68.7487099 |
| 16:48:46 | 71.3324586 | 64.7372035 | 68.2685674 | 68.9524294 | 68.7487099 |
| 16:48:47 | 71.3324586 | 64.7372035 | 67.2685674 | 69.9524294 | 68.7487099 |
| 16:48:48 | 71.3324586 | 64.7372035 | 67.2685674 | 69.9524294 | 68.7487099 |
| 16:48:49 | 71.3324586 | 64.7372035 | 67.2685674 | 72.9524294 | 68.7487099 |
| 16:48:50 | 71.3324586 | 63.7372035 | 67.2685674 | 73.9524294 | 68.7487099 |
| 16:48:51 | 69.3324586 | 63.7372035 | 66.2685674 | 73.9524294 | 65.7487099 |
| 16:48:52 | 69.3324586 | 64.7372035 | 67.2685674 | 74.9524294 | 65.7487099 |
| 16:48:53 | 69.3324586 | 65.7372035 | 67.2685674 | 75.9524294 | 63.7487099 |
| 16:48:54 | 69.3324586 | 65.7372035 | 67.2685674 | 75.9524294 | 63.7487099 |
| 16:48:55 | 69.3324586 | 65.7372035 | 65.2685674 | 75.9524294 | 63.7487099 |
| 16:48:56 | 69.3324586 | 65.7372035 | 65.2685674 | 75.9524294 | 63.7487099 |
| 16:48:57 | 69.3324586 | 65.7372035 | 65.2685674 | 75.9524294 | 62.7487099 |
| 16:48:58 | 68.3324586 | 65.7372035 | 66.2685674 | 75.9524294 | 62.7487099 |
| 16:48:59 | 68.3324586 | 64.7372035 | 66.2685674 | 75.9524294 | 63.7487099 |
| 16:49:00 | 68.3324586 | 65.7372035 | 66.2685674 | 75.9524294 | 63.7487099 |
| 16:49:01 | 68.3324586 | 65.7372035 | 66.2685674 | 75.9524294 | 63.7487099 |
| 16:49:02 | 68.3324586 | 65.7372035 | 67.2685674 | 75.9524294 | 63.7487099 |
| 16:49:03 | 69.3324586 | 65.7372035 | 69.2685674 | 76.9524294 | 63.7487099 |
| 16:49:04 | 69.3324586 | 67.7372035 | 71.2685674 | 76.9524294 | 63.7487099 |
| 16:49:05 | 69.3324586 | 67.7372035 | 77.2685674 | 75.9524294 | 63.7487099 |
| 16:49:06 | 68.3324586 | 69.7372035 | 77.2685674 | 75.9524294 | 65.7487099 |
| 16:49:07 | 68.3324586 | 69.7372035 | 79.2685674 | 75.9524294 | 65.7487099 |
| 16:49:08 | 68.3324586 | 69.7372035 | 79.2685674 | 75.9524294 | 65.7487099 |
| 16:49:09 | 68.3324586 | 69.7372035 | 79.2685674 | 76.9524294 | 65.7487099 |
| 16:49:10 | 69.3324586 | 69.7372035 | 79.2685674 | 75.9524294 | 65.7487099 |
| 16:49:11 | 70.3324586 | 70.7372035 | 78.2685674 | 73.9524294 | 65.7487099 |
| 16:49:12 | 70.3324586 | 71.7372035 | 76.2685674 | 73.9524294 | 65.7487099 |
| 16:49:13 | 70.3324586 | 71.7372035 | 75.2685674 | 65.9524294 | 65.7487099 |
| 16:49:14 | 69.3324586 | 71.7372035 | 74.2685674 | 64.9524294 | 65.7487099 |
| 16:49:15 | 69.3324586 | 71.7372035 | 74.2685674 | 64.9524294 | 65.7487099 |
| 16:49:16 | 66.3324586 | 72.7372035 | 74.2685674 | 64.9524294 | 66.7487099 |

|          |            |            |            |            |            |
|----------|------------|------------|------------|------------|------------|
| 16:49:17 | 66.3324586 | 72.7372035 | 74.2685674 | 65.9524294 | 67.7487099 |
| 16:49:18 | 68.3324586 | 72.7372035 | 72.2685674 | 65.9524294 | 67.7487099 |
| 16:49:19 | 68.3324586 | 72.7372035 | 69.2685674 | 65.9524294 | 67.7487099 |
| 16:49:20 | 67.3324586 | 69.7372035 | 67.2685674 | 65.9524294 | 67.7487099 |
| 16:49:21 | 67.3324586 | 68.7372035 | 66.2685674 | 65.9524294 | 67.7487099 |
| 16:49:22 | 66.3324586 | 68.7372035 | 65.2685674 | 65.9524294 | 67.7487099 |
| 16:49:23 | 64.3324586 | 68.7372035 | 65.2685674 | 65.9524294 | 69.7487099 |
| 16:49:24 | 64.3324586 | 68.7372035 | 65.2685674 | 68.9524294 | 67.7487099 |
| 16:49:25 | 64.3324586 | 68.7372035 | 65.2685674 | 70.9524294 | 66.7487099 |
| 16:49:26 | 64.3324586 | 68.7372035 | 66.2685674 | 70.9524294 | 66.7487099 |
| 16:49:27 | 64.3324586 | 68.7372035 | 68.2685674 | 66.9524294 | 66.7487099 |
| 16:49:28 | 64.3324586 | 68.7372035 | 69.2685674 | 66.9524294 | 66.7487099 |
| 16:49:29 | 64.3324586 | 67.7372035 | 69.2685674 | 66.9524294 | 66.7487099 |
| 16:49:30 | 64.3324586 | 67.7372035 | 68.2685674 | 71.9524294 | 66.7487099 |
| 16:49:31 | 64.3324586 | 67.7372035 | 67.2685674 | 76.9524294 | 66.7487099 |
| 16:49:32 | 66.3324586 | 67.7372035 | 66.2685674 | 78.9524294 | 68.7487099 |
| 16:49:33 | 66.3324586 | 68.7372035 | 66.2685674 | 78.9524294 | 69.7487099 |
| 16:49:34 | 67.3324586 | 69.7372035 | 66.2685674 | 78.9524294 | 70.7487099 |
| 16:49:35 | 67.3324586 | 69.7372035 | 66.2685674 | 78.9524294 | 70.7487099 |
| 16:49:36 | 67.3324586 | 69.7372035 | 66.2685674 | 78.9524294 | 70.7487099 |
| 16:49:37 | 65.3324586 | 69.7372035 | 66.2685674 | 78.9524294 | 70.7487099 |
| 16:49:38 | 65.3324586 | 69.7372035 | 66.2685674 | 80.9524294 | 70.7487099 |
| 16:49:39 | 66.3324586 | 70.7372035 | 67.2685674 | 80.9524294 | 70.7487099 |
| 16:49:40 | 66.3324586 | 70.7372035 | 67.2685674 | 82.9524294 | 71.7487099 |
| 16:49:41 | 66.3324586 | 71.7372035 | 67.2685674 | 82.9524294 | 71.7487099 |
| 16:49:42 | 66.3324586 | 72.7372035 | 67.2685674 | 82.9524294 | 71.7487099 |
| 16:49:43 | 67.3324586 | 72.7372035 | 67.2685674 | 82.9524294 | 71.7487099 |
| 16:49:44 | 67.3324586 | 72.7372035 | 68.2685674 | 82.9524294 | 71.7487099 |
| 16:49:45 | 68.3324586 | 72.7372035 | 68.2685674 | 72         | 71.7487099 |
| 16:49:46 | 69.3324586 | 72.7372035 | 69.2685674 | 71.125     | 71.7487099 |
| 16:49:47 | 69.3324586 | 72.7372035 | 68.2685674 | 70.25      | 72.7487099 |
| 16:49:48 | 69.3324586 | 72.7372035 | 68.2685674 | 67.5517279 | 72.7487099 |
| 16:49:49 | 69.3324586 | 73.7372035 | 69.2685674 | 69.9839257 | 72.7487099 |
| 16:49:50 | 67.3324586 | 72.7372035 | 69.2685674 | 68.5       | 71.7487099 |
| 16:49:51 | 67.3324586 | 72.7372035 | 69.2685674 | 68.375     | 71.7487099 |
| 16:49:52 | 66.3324586 | 71.7372035 | 69.2685674 | 68.25      | 72.7487099 |
| 16:49:53 | 66.3324586 | 69.7372035 | 70.2685674 | 68.125     | 72.7487099 |
| 16:49:54 | 66.3324586 | 69.7372035 | 70.2685674 | 68.375     | 73.7487099 |
| 16:49:55 | 66.3324586 | 69.7372035 | 72.2685674 | 68.375     | 74.7487099 |
| 16:49:56 | 66.3324586 | 69.7372035 | 73.2685674 | 67.875     | 75.7487099 |
| 16:49:57 | 66.3324586 | 69.7372035 | 74.2685674 | 68         | 75.7487099 |
| 16:49:58 | 66.3324586 | 69.7372035 | 74.2685674 | 68.25      | 75.7487099 |
| 16:49:59 | 66.3324586 | 69.7372035 | 73.2685674 | 68.25      | 76.7487099 |
| 16:50:00 | 67.3324586 | 71.7372035 | 73.2685674 | 69.625     | 76.7487099 |
| 16:50:01 | 67.3324586 | 71.7372035 | 72.2685674 | 69.875     | 77.7487099 |

|          |            |            |            |            |            |
|----------|------------|------------|------------|------------|------------|
| 16:50:02 | 67.3324586 | 71.7372035 | 71.2685674 | 69.875     | 77.7487099 |
| 16:50:03 | 68.3324586 | 72.7372035 | 70.2685674 | 70         | 77.7487099 |
| 16:50:04 | 68.3324586 | 73.7372035 | 70.2685674 | 71.625     | 77.7487099 |
| 16:50:05 | 68.3324586 | 73.7372035 | 70.2685674 | 71.875     | 78.7487099 |
| 16:50:06 | 68.3324586 | 74.7372035 | 70.2685674 | 72.25      | 78.7487099 |
| 16:50:07 | 69.3324586 | 75.7372035 | 69.2685674 | 72.625     | 78.7487099 |
| 16:50:08 | 69.3324586 | 76.7372035 | 69.2685674 | 72.875     | 79.7487099 |
| 16:50:09 | 69.3324586 | 76.7372035 | 69.2685674 | 73.25      | 80.7487099 |
| 16:50:10 | 69.3324586 | 80.7372035 | 69.2685674 | 82.9524294 | 80.7487099 |
| 16:50:11 | 69.3324586 | 80.7372035 | 69.2685674 | 82.9524294 | 79.7487099 |
| 16:50:12 | 69.3324586 | 82.7372035 | 69.2685674 | 82.9524294 | 79.7487099 |
| 16:50:13 | 71.3324586 | 82.7372035 | 69.2685674 | 82.9524294 | 77.7487099 |
| 16:50:14 | 74.3324586 | 83.7372035 | 71.2685674 | 83.9524294 | 77.7487099 |
| 16:50:15 | 77.3324586 | 83.7372035 | 71.2685674 | 82.9524294 | 67.7487099 |
| 16:50:16 | 77.3324586 | 72.25      | 70.2685674 | 81.9524294 | 63.7487099 |
| 16:50:17 | 78.3324586 | 72         | 70.2685674 | 77.9524294 | 63.7487099 |
| 16:50:18 | 78.3324586 | 71.625     | 70.2685674 | 75.9524294 | 61.7487099 |
| 16:50:19 | 78.3324586 | 71.375     | 70.2685674 | 74.9524294 | 60.7487099 |
| 16:50:20 | 76.3324586 | 71.125     | 69.2685674 | 73.9524294 | 60.7487099 |
| 16:50:21 | 76.3324586 | 77.7372035 | 69.2685674 | 73.9524294 | 58.7487099 |
| 16:50:22 | 72.3324586 | 77.7372035 | 70.2685674 | 73.9524294 | 58.7487099 |
| 16:50:23 | 69.3324586 | 77.7372035 | 70.2685674 | 73.9524294 | 58.7487099 |
| 16:50:24 | 67.3324586 | 77.7372035 | 69.2685674 | 73.9524294 | 56.7487099 |
| 16:50:25 | 67.3324586 | 76.7372035 | 65.2685674 | 73.9524294 | 56.7487099 |
| 16:50:26 | 67.3324586 | 77.7372035 | 63.2685674 | 73.9524294 | 56.7487099 |
| 16:50:27 | 68.3324586 | 68.25      | 62.2685674 | 73.9524294 | 56.7487099 |
| 16:50:28 | 68.3324586 | 68.375     | 62.2685674 | 74.9524294 | 57.7487099 |
| 16:50:29 | 68.3324586 | 68.125     | 61.2685674 | 74.9524294 | 57.7487099 |
| 16:50:30 | 68.3324586 | 68         | 61.2685674 | 75.9524294 | 57.7487099 |
| 16:50:31 | 68.3324586 | 68.25      | 61.2685674 | 76.9524294 | 58.7487099 |
| 16:50:32 | 68.3324586 | 68         | 61.2685674 | 76.9524294 | 58.7487099 |
| 16:50:33 | 68.3324586 | 66.75      | 61.2685674 | 76.9524294 | 63.7487099 |
| 16:50:34 | 71.3324586 | 66.625     | 61.2685674 | 75.9524294 | 63.7487099 |
| 16:50:35 | 72.3324586 | 75.7372035 | 60.2685674 | 75.9524294 | 65.7487099 |
| 16:50:36 | 76.3324586 | 72.7372035 | 59.2685674 | 75.9524294 | 66.7487099 |
| 16:50:37 | 77.3324586 | 71.7372035 | 59.2685674 | 75.9524294 | 66.7487099 |
| 16:50:38 | 77.3324586 | 70.7372035 | 59.2685674 | 74.9524294 | 67.7487099 |
| 16:50:39 | 77.3324586 | 68.7372035 | 59.2685674 | 74.9524294 | 67.7487099 |
| 16:50:40 | 77.3324586 | 68.7372035 | 58.2685674 | 77.9524294 | 67.7487099 |
| 16:50:41 | 68.25      | 67.7372035 | 60.2685674 | 77.9524294 | 67.7487099 |
| 16:50:42 | 68.3216129 | 67.7372035 | 60.2685674 | 77.9524294 | 67.7487099 |
| 16:50:43 | 68.7210815 | 65.7372035 | 67.2685674 | 77.9524294 | 70.7487099 |
| 16:50:44 | 71         | 66.7372035 | 68.2685674 | 71         | 70.7487099 |
| 16:50:45 | 71.25      | 66.7372035 | 69.2685674 | 71.25      | 70.7487099 |
| 16:50:46 | 72         | 66.7372035 | 71.2685674 | 72         | 70.7487099 |

|          |            |            |            |            |            |
|----------|------------|------------|------------|------------|------------|
| 16:50:47 | 73.875     | 65.7372035 | 73.2685674 | 84.9524294 | 70.7487099 |
| 16:50:48 | 74.25      | 65.7372035 | 73.2685674 | 74.25      | 70.7487099 |
| 16:50:49 | 74.5       | 65.7372035 | 73.2685674 | 74.5       | 70.7487099 |
| 16:50:50 | 74         | 65.7372035 | 69.2685674 | 74         | 70.7487099 |
| 16:50:51 | 73.5       | 65.7372035 | 67.2685674 | 73.5       | 70.7487099 |
| 16:50:52 | 72.875     | 65.7372035 | 66.2685674 | 72.875     | 70.7487099 |
| 16:50:53 | 72.375     | 65.7372035 | 67.2685674 | 72.375     | 70.7487099 |
| 16:50:54 | 80.3324586 | 65.7372035 | 68.2685674 | 71.625     | 70.7487099 |
| 16:50:55 | 79.3324586 | 65.7372035 | 70.2685674 | 71.625     | 70.7487099 |
| 16:50:56 | 78.3324586 | 65.7372035 | 72.2685674 | 70.625     | 68.7487099 |
| 16:50:57 | 78.3324586 | 65.7372035 | 72.2685674 | 70.625     | 68.7487099 |
| 16:50:58 | 76.3324586 | 66.7372035 | 72.2685674 | 80.9524294 | 68.7487099 |
| 16:50:59 | 76.3324586 | 66.7372035 | 72.2685674 | 80.9524294 | 68.7487099 |
| 16:51:00 | 74.3324586 | 67.7372035 | 72.2685674 | 80.9524294 | 70.7487099 |
| 16:51:01 | 74.3324586 | 68.7372035 | 72.2685674 | 80.9524294 | 71.7487099 |
| 16:51:02 | 72.3324586 | 70.7372035 | 70.2685674 | 80.9524294 | 71.7487099 |
| 16:51:03 | 72.3324586 | 70.7372035 | 69.2685674 | 80.9524294 | 71.7487099 |
| 16:51:04 | 70.3324586 | 71.7372035 | 67.2685674 | 79.9524294 | 71.7487099 |
| 16:51:05 | 69.3324586 | 69.7372035 | 66.2685674 | 74.9524294 | 71.7487099 |
| 16:51:06 | 69.3324586 | 69.7372035 | 65.2685674 | 74.9524294 | 71.7487099 |
| 16:51:07 | 66.3324586 | 69.7372035 | 65.2685674 | 70.9524294 | 70.7487099 |
| 16:51:08 | 65.3324586 | 69.7372035 | 65.2685674 | 62.9524294 | 71.7487099 |
| 16:51:09 | 63.3324586 | 68.7372035 | 66.2685674 | 62.9524294 | 71.7487099 |
| 16:51:10 | 62.3324586 | 68.7372035 | 69.2685674 | 62.9524294 | 68.7487099 |
| 16:51:11 | 56.3324586 | 68.7372035 | 70.2685674 | 63.9524294 | 67.7487099 |
| 16:51:12 | 52.3324586 | 68.7372035 | 71.2685674 | 63.9524294 | 66.7487099 |
| 16:51:13 | 49.3324586 | 66.7372035 | 70.2685674 | 63.9524294 | 66.7487099 |
| 16:51:14 | 48.3324586 | 65.7372035 | 69.2685674 | 64.9524294 | 65.7487099 |
| 16:51:15 | 47.3324586 | 63.7372035 | 69.2685674 | 64.9524294 | 65.7487099 |
| 16:51:16 | 47.3324586 | 63.7372035 | 71.2685674 | 65.9524294 | 63.7487099 |
| 16:51:17 | 46.3324586 | 63.7372035 | 72.2685674 | 66.9524294 | 61.7487099 |
| 16:51:18 | 46.3324586 | 64.7372035 | 71.2685674 | 66.9524294 | 60.7487099 |
| 16:51:19 | 47.3324586 | 64.7372035 | 71.2685674 | 65.9524294 | 60.7487099 |
| 16:51:20 | 47.3324586 | 64.7372035 | 70.2685674 | 65.9524294 | 59.7487099 |
| 16:51:21 | 48.3324586 | 66.7372035 | 68.2685674 | 65.9524294 | 58.7487099 |
| 16:51:22 | 49.3324586 | 65.7372035 | 68.2685674 | 64.9524294 | 58.7487099 |
| 16:51:23 | 52.3324586 | 65.7372035 | 68.2685674 | 64.9524294 | 58.7487099 |
| 16:51:24 | 59.3324586 | 65.7372035 | 67.2685674 | 64.9524294 | 58.7487099 |
| 16:51:25 | 59.3324586 | 66.7372035 | 65.2685674 | 64.9524294 | 56.7487099 |
| 16:51:26 | 61.3324586 | 66.7372035 | 64.2685674 | 65.9524294 | 56.7487099 |
| 16:51:27 | 61.3324586 | 66.7372035 | 63.2685674 | 66.9524294 | 56.7487099 |
| 16:51:28 | 62.3324586 | 66.7372035 | 63.2685674 | 66.9524294 | 56.7487099 |
| 16:51:29 | 66.3324586 | 65.7372035 | 63.2685674 | 66.9524294 | 56.7487099 |
| 16:51:30 | 67.3324586 | 65.7372035 | 63.2685674 | 67.9524294 | 56.7487099 |
| 16:51:31 | 67.3324586 | 66.7372035 | 62.2685674 | 69.9524294 | 57.7487099 |

|          |            |            |            |            |            |
|----------|------------|------------|------------|------------|------------|
| 16:51:32 | 67.3324586 | 66.7372035 | 62.2685674 | 75.9524294 | 56.7487099 |
| 16:51:33 | 66.3324586 | 66.7372035 | 61.2685674 | 75.9524294 | 56.7487099 |
| 16:51:34 | 66.3324586 | 66.7372035 | 55.2685674 | 73.9524294 | 56.7487099 |
| 16:51:35 | 66.3324586 | 68.7372035 | 53.2685674 | 73.9524294 | 56.7487099 |
| 16:51:36 | 66.3324586 | 68.7372035 | 53.2685674 | 73.9524294 | 56.7487099 |
| 16:51:37 | 67.3324586 | 68.7372035 | 52.2685674 | 72.9524294 | 56.7487099 |
| 16:51:38 | 67.3324586 | 68.7372035 | 52.2685674 | 72.9524294 | 56.7487099 |
| 16:51:39 | 69.3324586 | 68.7372035 | 61.2685674 | 72.9524294 | 56.7487099 |
| 16:51:40 | 69.3324586 | 65.7372035 | 63.2685674 | 72.9524294 | 56.7487099 |
| 16:51:41 | 69.3324586 | 64.7372035 | 64.2685674 | 72.9524294 | 56.7487099 |
| 16:51:42 | 69.3324586 | 63.7372035 | 64.2685674 | 74.9524294 | 57.7487099 |
| 16:51:43 | 69.3324586 | 63.7372035 | 64.2685674 | 76.9524294 | 57.7487099 |
| 16:51:44 | 69.3324586 | 63.7372035 | 64.2685674 | 76.9524294 | 57.7487099 |
| 16:51:45 | 69.3324586 | 63.7372035 | 65.2685674 | 76.9524294 | 57.7487099 |
| 16:51:46 | 69.3324586 | 63.7372035 | 65.2685674 | 76.9524294 | 57.7487099 |
| 16:51:47 | 69.3324586 | 64.7372035 | 65.2685674 | 76.9524294 | 56.7487099 |
| 16:51:48 | 70.3324586 | 64.7372035 | 66.2685674 | 76.9524294 | 55.7487099 |
| 16:51:49 | 70.3324586 | 64.7372035 | 66.2685674 | 66         | 55.7487099 |
| 16:51:50 | 69.3324586 | 64.7372035 | 66.2685674 | 76.9524294 | 55.7487099 |
| 16:51:51 | 68.3324586 | 64.7372035 | 66.2685674 | 76.9524294 | 57.7487099 |
| 16:51:52 | 68.3324586 | 63.7372035 | 77.2685674 | 76.9524294 | 57.7487099 |
| 16:51:53 | 68.3324586 | 63.7372035 | 68.75      | 76.9524294 | 58.7487099 |
| 16:51:54 | 69.3324586 | 64.7372035 | 68.875     | 76.9524294 | 58.7487099 |
| 16:51:55 | 69.3324586 | 64.7372035 | 79.2685674 | 76.9524294 | 57.7487099 |
| 16:51:56 | 70.3324586 | 64.7372035 | 76.2685674 | 77.9524294 | 57.7487099 |
| 16:51:57 | 70.3324586 | 64.7372035 | 74.2685674 | 74.9524294 | 58.7487099 |
| 16:51:58 | 70.3324586 | 64.7372035 | 72.2685674 | 74.9524294 | 59.7487099 |
| 16:51:59 | 70.3324586 | 64.7372035 | 71.2685674 | 73.9524294 | 59.7487099 |
| 16:52:00 | 70.3324586 | 64.7372035 | 70.2685674 | 66.9524294 | 59.7487099 |
| 16:52:01 | 70.3324586 | 64.7372035 | 69.2685674 | 66.9524294 | 59.7487099 |
| 16:52:02 | 70.3324586 | 64.7372035 | 69.2685674 | 65.9524294 | 60.7487099 |
| 16:52:03 | 71.3324586 | 64.7372035 | 68.2685674 | 62.9524294 | 62.7487099 |
| 16:52:04 | 71.3324586 | 64.7372035 | 68.2685674 | 62.9524294 | 62.7487099 |
| 16:52:05 | 75.3324586 | 64.7372035 | 68.2685674 | 63.9524294 | 63.7487099 |
| 16:52:06 | 74.3324586 | 64.7372035 | 68.2685674 | 65.9524294 | 63.7487099 |
| 16:52:07 | 74.3324586 | 64.7372035 | 68.2685674 | 66.9524294 | 63.7487099 |
| 16:52:08 | 74.3324586 | 64.7372035 | 68.2685674 | 66.9524294 | 63.7487099 |
| 16:52:09 | 74.3324586 | 65.7372035 | 68.2685674 | 66.9524294 | 64.7487099 |
| 16:52:10 | 65.3324586 | 65.7372035 | 68.2685674 | 66.9524294 | 64.7487099 |
| 16:52:11 | 63.3324586 | 65.7372035 | 67.2685674 | 67.9524294 | 65.7487099 |
| 16:52:12 | 61.3324586 | 66.7372035 | 66.2685674 | 67.9524294 | 67.7487099 |
| 16:52:13 | 59.3324586 | 66.7372035 | 66.2685674 | 67.9524294 | 68.7487099 |
| 16:52:14 | 59.3324586 | 66.7372035 | 66.2685674 | 67.9524294 | 68.7487099 |
| 16:52:15 | 55.3324586 | 66.7372035 | 67.2685674 | 66.9524294 | 68.7487099 |
| 16:52:16 | 53.3324586 | 66.7372035 | 67.2685674 | 66.9524294 | 67.7487099 |



|          |            |            |            |            |            |
|----------|------------|------------|------------|------------|------------|
| 16:52:17 | 52.3324586 | 65.7372035 | 68.2685674 | 66.9524294 | 67.7487099 |
| 16:52:18 | 50.3324586 | 65.7372035 | 68.2685674 | 66.9524294 | 67.7487099 |
| 16:52:19 | 50.3324586 | 66.7372035 | 68.2685674 | 66.9524294 | 67.7487099 |
| 16:52:20 | 50.3324586 | 66.7372035 | 69.2685674 | 66.9524294 | 67.7487099 |
| 16:52:21 | 52.3324586 | 66.7372035 | 70.2685674 | 68.9524294 | 68.7487099 |
| 16:52:22 | 52.3324586 | 66.7372035 | 70.2685674 | 70.9524294 | 68.7487099 |
| 16:52:23 | 51.3324586 | 65.7372035 | 69.2685674 | 71.9524294 | 70.7487099 |
| 16:52:24 | 51.3324586 | 65.7372035 | 67.2685674 | 71.9524294 | 70.7487099 |
| 16:52:25 | 51.3324586 | 65.7372035 | 65.2685674 | 76.9524294 | 74.7487099 |
| 16:52:26 | 51.3324586 | 65.7372035 | 64.2685674 | 65.75      | 65.75      |
| 16:52:27 | 52.3324586 | 64.7372035 | 64.2685674 | 71.9524294 | 65.25      |
| 16:52:28 | 57.3324586 | 63.7372035 | 64.2685674 | 68.9524294 | 65.75      |
| 16:52:29 | 63.3324586 | 62.7372035 | 63.2685674 | 64.9524294 | 66.5       |
| 16:52:30 | 63.3324586 | 62.7372035 | 63.2685674 | 64.9524294 | 66.5       |
| 16:52:31 | 66.3324586 | 62.7372035 | 63.2685674 | 60.9524294 | 63.3216129 |
| 16:52:32 | 66.3324586 | 62.7372035 | 63.2685674 | 60.9524294 | 66.5       |
| 16:52:33 | 66.3324586 | 61.7372035 | 63.2685674 | 60.9524294 | 66.75      |
| 16:52:34 | 66.3324586 | 61.7372035 | 63.2685674 | 60.9524294 | 66.75      |
| 16:52:35 | 67.3324586 | 65.7372035 | 65.2685674 | 60.9524294 | 67.5       |
| 16:52:36 | 67.3324586 | 66.7372035 | 67.2685674 | 60.9524294 | 67.5       |
| 16:52:37 | 67.3324586 | 66.7372035 | 68.2685674 | 61.9524294 | 67.75      |
| 16:52:38 | 66.3324586 | 65.7372035 | 68.2685674 | 61.9524294 | 67.375     |
| 16:52:39 | 66.3324586 | 65.7372035 | 68.2685674 | 64.9524294 | 67.625     |
| 16:52:40 | 66.3324586 | 64.7372035 | 68.2685674 | 65.9524294 | 67.875     |
| 16:52:41 | 66.3324586 | 64.7372035 | 68.2685674 | 65.9524294 | 67.75      |
| 16:52:42 | 66.3324586 | 64.7372035 | 68.2685674 | 65.9524294 | 67.75      |
| 16:52:43 | 66.3324586 | 64.7372035 | 68.2685674 | 65.9524294 | 68         |
| 16:52:44 | 66.3324586 | 65.7372035 | 71.2685674 | 63.9524294 | 68.125     |
| 16:52:45 | 66.3324586 | 65.7372035 | 73.2685674 | 63.9524294 | 68.875     |
| 16:52:46 | 65.3324586 | 65.7372035 | 73.2685674 | 63.9524294 | 68.875     |
| 16:52:47 | 65.3324586 | 65.7372035 | 74.2685674 | 63.9524294 | 69.375     |
| 16:52:48 | 64.3324586 | 65.7372035 | 74.2685674 | 65.9524294 | 69.5       |
| 16:52:49 | 64.3324586 | 66.7372035 | 73.2685674 | 66.9524294 | 70         |
| 16:52:50 | 64.3324586 | 66.7372035 | 72.2685674 | 66.9524294 | 69.875     |
| 16:52:51 | 65.3324586 | 67.7372035 | 70.2685674 | 66.9524294 | 70         |
| 16:52:52 | 64.3324586 | 68.7372035 | 66.2685674 | 66.9524294 | 69.625     |
| 16:52:53 | 62.3324586 | 69.7372035 | 64.2685674 | 66.9524294 | 69.375     |
| 16:52:54 | 62.3324586 | 69.7372035 | 64.2685674 | 66.9524294 | 80.7487099 |
| 16:52:55 | 62.3324586 | 69.7372035 | 64.2685674 | 66.9524294 | 79.7487099 |
| 16:52:56 | 61.3324586 | 69.7372035 | 66.2685674 | 66.9524294 | 77.7487099 |
| 16:52:57 | 61.3324586 | 69.7372035 | 66.2685674 | 67.9524294 | 74.7487099 |
| 16:52:58 | 61.3324586 | 69.7372035 | 65.2685674 | 67.9524294 | 74.7487099 |
| 16:52:59 | 61.3324586 | 69.7372035 | 65.2685674 | 68.9524294 | 73.7487099 |
| 16:53:00 | 62.3324586 | 69.7372035 | 64.2685674 | 68.9524294 | 73.7487099 |
| 16:53:01 | 62.3324586 | 70.7372035 | 63.2685674 | 68.9524294 | 73.7487099 |

|          |            |            |            |            |            |
|----------|------------|------------|------------|------------|------------|
| 16:53:02 | 63.3324586 | 70.7372035 | 63.2685674 | 68.9524294 | 74.7487099 |
| 16:53:03 | 63.3324586 | 71.7372035 | 63.2685674 | 69.9524294 | 75.7487099 |
| 16:53:04 | 63.3324586 | 71.7372035 | 63.2685674 | 69.9524294 | 75.7487099 |
| 16:53:05 | 63.3324586 | 71.7372035 | 63.2685674 | 69.9524294 | 76.7487099 |
| 16:53:06 | 63.3324586 | 70.7372035 | 63.2685674 | 70.9524294 | 77.7487099 |
| 16:53:07 | 62.3324586 | 70.7372035 | 63.2685674 | 70.9524294 | 78.7487099 |
| 16:53:08 | 62.3324586 | 70.7372035 | 63.2685674 | 68.9524294 | 78.7487099 |
| 16:53:09 | 62.3324586 | 71.7372035 | 63.2685674 | 65.9524294 | 78.7487099 |
| 16:53:10 | 62.3324586 | 71.7372035 | 63.2685674 | 65.9524294 | 78.7487099 |
| 16:53:11 | 62.3324586 | 69.7372035 | 63.2685674 | 65.9524294 | 78.7487099 |
| 16:53:12 | 63.3324586 | 70.7372035 | 63.2685674 | 64.9524294 | 73.7487099 |
| 16:53:13 | 64.3324586 | 70.7372035 | 63.2685674 | 64.9524294 | 69.7487099 |
| 16:53:14 | 64.3324586 | 69.7372035 | 63.2685674 | 64.9524294 | 69.7487099 |
| 16:53:15 | 65.3324586 | 69.7372035 | 63.2685674 | 65.9524294 | 67.7487099 |
| 16:53:16 | 65.3324586 | 69.7372035 | 63.2685674 | 66.9524294 | 65.7487099 |
| 16:53:17 | 65.3324586 | 69.7372035 | 65.2685674 | 66.9524294 | 60.7487099 |
| 16:53:18 | 66.3324586 | 69.7372035 | 65.2685674 | 66.9524294 | 60.7487099 |
| 16:53:19 | 66.3324586 | 69.7372035 | 65.2685674 | 67.9524294 | 59.7487099 |
| 16:53:20 | 66.3324586 | 69.7372035 | 67.2685674 | 67.9524294 | 58.7487099 |
| 16:53:21 | 65.3324586 | 69.7372035 | 67.2685674 | 67.9524294 | 58.7487099 |
| 16:53:22 | 65.3324586 | 70.7372035 | 67.2685674 | 67.9524294 | 59.7487099 |
| 16:53:23 | 66.3324586 | 77.7372035 | 65.2685674 | 68.9524294 | 59.7487099 |
| 16:53:24 | 66.3324586 | 77.7372035 | 65.2685674 | 68.9524294 | 59.7487099 |
| 16:53:25 | 66.3324586 | 69.75      | 64.2685674 | 70.9524294 | 61.7487099 |
| 16:53:26 | 66.3324586 | 70.125     | 64.2685674 | 70.9524294 | 61.7487099 |
| 16:53:27 | 66.3324586 | 70.625     | 64.2685674 | 70.9524294 | 61.7487099 |
| 16:53:28 | 67.3324586 | 71.25      | 64.2685674 | 70.9524294 | 60.7487099 |
| 16:53:29 | 68.3324586 | 72.125     | 65.2685674 | 70.9524294 | 60.7487099 |
| 16:53:30 | 68.3324586 | 72.5       | 67.2685674 | 70.9524294 | 61.7487099 |
| 16:53:31 | 69.3324586 | 72.25      | 67.2685674 | 70.9524294 | 61.7487099 |
| 16:53:32 | 69.3324586 | 71.25      | 69.2685674 | 70.9524294 | 61.7487099 |
| 16:53:33 | 69.3324586 | 70.25      | 69.2685674 | 70.9524294 | 61.7487099 |
| 16:53:34 | 69.3324586 | 69.875     | 69.2685674 | 69.9524294 | 61.7487099 |
| 16:53:35 | 69.3324586 | 69.375     | 69.2685674 | 69.9524294 | 60.7487099 |
| 16:53:36 | 69.3324586 | 69.25      | 69.2685674 | 69.9524294 | 60.7487099 |
| 16:53:37 | 69.3324586 | 69.5       | 69.2685674 | 70.9524294 | 60.7487099 |
| 16:53:38 | 69.3324586 | 70         | 69.2685674 | 71.9524294 | 62.7487099 |
| 16:53:39 | 69.3324586 | 70.25      | 69.2685674 | 71.9524294 | 62.7487099 |
| 16:53:40 | 70.3324586 | 70.75      | 69.2685674 | 71.9524294 | 63.7487099 |
| 16:53:41 | 70.3324586 | 71         | 69.2685674 | 70.9524294 | 63.7487099 |
| 16:53:42 | 70.3324586 | 71.125     | 69.2685674 | 69.9524294 | 63.7487099 |
| 16:53:43 | 77.3324586 | 73.375     | 69.2685674 | 68.9524294 | 63.7487099 |
| 16:53:44 | 77.3324586 | 73.875     | 67.2685674 | 68.9524294 | 63.7487099 |
| 16:53:45 | 77.3324586 | 73.75      | 65.2685674 | 68.9524294 | 63.7487099 |
| 16:53:46 | 72.3324586 | 73.125     | 64.2685674 | 68.9524294 | 63.7487099 |

|          |            |            |            |            |            |
|----------|------------|------------|------------|------------|------------|
| 16:53:47 | 72.3324586 | 71.375     | 63.2685674 | 68.9524294 | 64.7487099 |
| 16:53:48 | 73.3324586 | 69.875     | 64.2685674 | 68.9524294 | 61.7487099 |
| 16:53:49 | 73.3324586 | 69.625     | 64.2685674 | 68.9524294 | 61.7487099 |
| 16:53:50 | 73.3324586 | 69.25      | 64.2685674 | 69.9524294 | 59.7487099 |
| 16:53:51 | 72.3324586 | 68.75      | 66.2685674 | 69.9524294 | 59.7487099 |
| 16:53:52 | 71.3324586 | 68.5       | 69.2685674 | 68.9524294 | 59.7487099 |
| 16:53:53 | 71.3324586 | 69         | 71.2685674 | 68.9524294 | 59.7487099 |
| 16:53:54 | 72.3324586 | 69         | 70.2685674 | 66.9524294 | 59.7487099 |
| 16:53:55 | 71.3324586 | 79.7372035 | 70.2685674 | 65.9524294 | 58.7487099 |
| 16:53:56 | 71.3324586 | 77.7372035 | 70.2685674 | 65.9524294 | 58.7487099 |
| 16:53:57 | 69.3324586 | 75.7372035 | 70.2685674 | 65.9524294 | 60.7487099 |
| 16:53:58 | 69.3324586 | 74.7372035 | 70.2685674 | 65.9524294 | 64.7487099 |
| 16:53:59 | 64.3324586 | 73.7372035 | 70.2685674 | 65.9524294 | 65.7487099 |
| 16:54:00 | 61.3324586 | 73.7372035 | 71.2685674 | 65.9524294 | 66.7487099 |
| 16:54:01 | 57.3324586 | 73.7372035 | 70.2685674 | 65.9524294 | 66.7487099 |
| 16:54:02 | 57.3324586 | 72.7372035 | 70.2685674 | 65.9524294 | 66.7487099 |
| 16:54:03 | 55.3324586 | 71.7372035 | 70.2685674 | 67.9524294 | 66.7487099 |
| 16:54:04 | 54.3324586 | 71.7372035 | 70.2685674 | 69.9524294 | 67.7487099 |
| 16:54:05 | 56.3324586 | 72.7372035 | 69.2685674 | 70.9524294 | 67.7487099 |
| 16:54:06 | 61.3324586 | 72.7372035 | 69.2685674 | 71.9524294 | 68.7487099 |
| 16:54:07 | 61.3324586 | 72.7372035 | 68.2685674 | 73.9524294 | 68.7487099 |
| 16:54:08 | 70.3324586 | 72.7372035 | 67.2685674 | 73.9524294 | 68.7487099 |
| 16:54:09 | 71.3324586 | 72.7372035 | 64.2685674 | 74.9524294 | 70.7487099 |
| 16:54:10 | 71.3324586 | 73.7372035 | 62.2685674 | 72.9524294 | 70.7487099 |
| 16:54:11 | 72.3324586 | 73.7372035 | 61.2685674 | 72.9524294 | 70.7487099 |
| 16:54:12 | 76.3324586 | 71.7372035 | 61.2685674 | 72.9524294 | 68.7487099 |
| 16:54:13 | 77.3324586 | 71.7372035 | 61.2685674 | 71.9524294 | 68.7487099 |
| 16:54:14 | 77.3324586 | 70.7372035 | 62.2685674 | 71.9524294 | 68.7487099 |
| 16:54:15 | 77.3324586 | 69.7372035 | 62.2685674 | 71.9524294 | 66.7487099 |
| 16:54:16 | 77.3324586 | 69.7372035 | 62.2685674 | 72.9524294 | 66.7487099 |
| 16:54:17 | 78.3324586 | 71.7372035 | 63.2685674 | 72.9524294 | 66.7487099 |
| 16:54:18 | 78.3324586 | 71.7372035 | 63.2685674 | 72.9524294 | 66.7487099 |
| 16:54:19 | 77.3324586 | 72.7372035 | 63.2685674 | 72.9524294 | 63.7487099 |
| 16:54:20 | 76.3324586 | 71.7372035 | 64.2685674 | 72.9524294 | 63.7487099 |
| 16:54:21 | 75.3324586 | 70.7372035 | 64.2685674 | 72.9524294 | 63.7487099 |
| 16:54:22 | 73.3324586 | 70.7372035 | 64.2685674 | 72.9524294 | 63.7487099 |
| 16:54:23 | 73.3324586 | 70.7372035 | 64.2685674 | 72.9524294 | 63.7487099 |
| 16:54:24 | 73.3324586 | 70.7372035 | 64.2685674 | 72.9524294 | 63.7487099 |
| 16:54:25 | 71.3324586 | 69.7372035 | 64.2685674 | 71.9524294 | 64.7487099 |
| 16:54:26 | 70.3324586 | 69.7372035 | 64.2685674 | 71.9524294 | 65.7487099 |
| 16:54:27 | 68.3324586 | 68.7372035 | 64.2685674 | 69.9524294 | 65.7487099 |
| 16:54:28 | 68.3324586 | 68.7372035 | 63.2685674 | 66.9524294 | 65.7487099 |
| 16:54:29 | 68.3324586 | 69.7372035 | 63.2685674 | 66.9524294 | 66.7487099 |
| 16:54:30 | 68.3324586 | 69.7372035 | 63.2685674 | 65.9524294 | 66.7487099 |
| 16:54:31 | 69.3324586 | 69.7372035 | 63.2685674 | 64.9524294 | 66.7487099 |

|          |            |            |            |            |            |
|----------|------------|------------|------------|------------|------------|
| 16:54:32 | 69.3324586 | 68.7372035 | 63.2685674 | 64.9524294 | 66.7487099 |
| 16:54:33 | 69.3324586 | 68.7372035 | 64.2685674 | 64.9524294 | 66.7487099 |
| 16:54:34 | 69.3324586 | 68.7372035 | 64.2685674 | 64.9524294 | 66.7487099 |
| 16:54:35 | 69.3324586 | 68.7372035 | 64.2685674 | 64.9524294 | 67.7487099 |
| 16:54:36 | 68.3324586 | 67.7372035 | 64.2685674 | 64.9524294 | 67.7487099 |
| 16:54:37 | 66.3324586 | 67.7372035 | 63.2685674 | 64.9524294 | 69.7487099 |
| 16:54:38 | 66.3324586 | 67.7372035 | 63.2685674 | 64.9524294 | 70.7487099 |
| 16:54:39 | 65.3324586 | 66.7372035 | 63.2685674 | 64.9524294 | 70.7487099 |
| 16:54:40 | 64.3324586 | 67.7372035 | 63.2685674 | 64.9524294 | 70.7487099 |
| 16:54:41 | 63.3324586 | 67.7372035 | 64.2685674 | 64.9524294 | 70.7487099 |
| 16:54:42 | 63.3324586 | 67.7372035 | 65.2685674 | 64.9524294 | 69.7487099 |
| 16:54:43 | 63.3324586 | 66.7372035 | 65.2685674 | 64.9524294 | 68.7487099 |
| 16:54:44 | 63.3324586 | 66.7372035 | 64.2685674 | 64.9524294 | 67.7487099 |
| 16:54:45 | 63.3324586 | 66.7372035 | 64.2685674 | 64.9524294 | 67.7487099 |
| 16:54:46 | 63.3324586 | 65.7372035 | 64.2685674 | 64.9524294 | 66.7487099 |
| 16:54:47 | 63.3324586 | 65.7372035 | 64.2685674 | 64.9524294 | 66.7487099 |
| 16:54:48 | 63.3324586 | 65.7372035 | 64.2685674 | 64.9524294 | 66.7487099 |
| 16:54:49 | 63.3324586 | 65.7372035 | 64.2685674 | 64.9524294 | 66.7487099 |
| 16:54:50 | 63.3324586 | 65.7372035 | 64.2685674 | 64.9524294 | 67.7487099 |
| 16:54:51 | 63.3324586 | 65.7372035 | 65.2685674 | 64.9524294 | 67.7487099 |
| 16:54:52 | 62.3324586 | 65.7372035 | 64.2685674 | 64.9524294 | 68.7487099 |
| 16:54:53 | 62.3324586 | 65.7372035 | 64.2685674 | 64.9524294 | 69.7487099 |
| 16:54:54 | 62.3324586 | 65.7372035 | 65.2685674 | 64.9524294 | 69.7487099 |
| 16:54:55 | 62.3324586 | 65.7372035 | 64.2685674 |            | 69.7487099 |
| 16:54:56 | 62.3324586 | 66.7372035 | 62.2685674 |            | 70.7487099 |
| 16:54:57 | 63.3324586 | 66.7372035 | 62.2685674 |            | 71.7487099 |
| 16:54:58 | 63.3324586 | 66.7372035 | 62.2685674 |            | 71.7487099 |
| 16:54:59 | 63.3324586 | 66.7372035 | 62.2685674 |            | 71.7487099 |
| 16:55:00 | 65.3324586 | 66.7372035 | 62.2685674 |            | 69.7487099 |
| 16:55:01 | 65.3324586 | 66.7372035 | 62.2685674 |            | 68.7487099 |
| 16:55:02 | 65.3324586 | 67.7372035 | 63.2685674 |            | 68.7487099 |
| 16:55:03 | 66.3324586 | 67.7372035 | 63.2685674 |            | 68.7487099 |
| 16:55:04 | 66.3324586 | 68.7372035 | 63.2685674 |            | 68.7487099 |
| 16:55:05 | 67.3324586 | 68.7372035 | 62.2685674 |            | 67.7487099 |
| 16:55:06 | 67.3324586 | 68.7372035 | 63.2685674 |            | 67.7487099 |
| 16:55:07 | 66.3324586 | 68.7372035 | 62.2685674 |            | 67.7487099 |
| 16:55:08 | 66.3324586 | 69.7372035 | 62.2685674 |            | 67.7487099 |
| 16:55:09 | 67.3324586 | 69.7372035 | 62.2685674 |            | 67.7487099 |
| 16:55:10 | 67.3324586 | 70.7372035 | 62.2685674 |            | 68.7487099 |
| 16:55:11 | 68.3324586 | 71.7372035 | 64.2685674 |            | 72.7487099 |
| 16:55:12 | 68.3324586 | 71.7372035 | 64.2685674 |            | 72.7487099 |
| 16:55:13 | 67.3324586 | 71.7372035 | 64.2685674 |            | 73.7487099 |
| 16:55:14 | 66.3324586 | 71.7372035 | 64.2685674 |            | 71.7487099 |
| 16:55:15 | 66.3324586 | 71.7372035 | 65.2685674 |            | 71.7487099 |
| 16:55:16 | 66.3324586 | 71.7372035 | 64.2685674 |            | 70.7487099 |

|          |            |            |            |            |
|----------|------------|------------|------------|------------|
| 16:55:17 | 66.3324586 | 71.7372035 | 62.2685674 | 70.7487099 |
| 16:55:18 | 66.3324586 | 72.7372035 | 61.2685674 | 70.7487099 |
| 16:55:19 | 65.3324586 | 72.7372035 | 62.2685674 | 68.7487099 |
| 16:55:20 | 65.3324586 | 71.7372035 | 62.2685674 | 65.7487099 |
| 16:55:21 | 65.3324586 | 71.7372035 | 62.2685674 | 65.7487099 |
| 16:55:22 | 65.3324586 | 71.7372035 | 62.2685674 | 63.7487099 |
| 16:55:23 | 65.3324586 | 69.7372035 | 62.2685674 | 63.7487099 |
| 16:55:24 | 65.3324586 | 69.7372035 | 62.2685674 | 63.7487099 |
| 16:55:25 | 64.3324586 | 69.7372035 | 63.2685674 | 64.7487099 |
| 16:55:26 | 64.3324586 | 69.7372035 | 70.2685674 | 64.7487099 |
| 16:55:27 | 64.3324586 | 69.7372035 | 73.2685674 | 63.7487099 |
| 16:55:28 | 64.3324586 | 69.7372035 | 74.2685674 | 63.7487099 |
| 16:55:29 | 64.3324586 | 70.7372035 | 73.2685674 | 63.7487099 |
| 16:55:30 | 64.3324586 | 71.7372035 | 73.2685674 | 64.7487099 |
| 16:55:31 | 65.3324586 | 72.7372035 | 73.2685674 | 64.7487099 |
| 16:55:32 | 67.3324586 | 74.7372035 | 72.2685674 | 63.7487099 |
| 16:55:33 | 67.3324586 | 74.7372035 | 70.2685674 | 62.7487099 |
| 16:55:34 | 66.3324586 | 75.7372035 | 67.2685674 | 61.7487099 |
| 16:55:35 | 66.3324586 | 75.7372035 | 66.2685674 | 61.7487099 |
| 16:55:36 | 67.3324586 | 76.7372035 | 65.2685674 | 61.7487099 |
| 16:55:37 | 66.3324586 | 76.7372035 | 64.2685674 | 61.7487099 |
| 16:55:38 | 65.3324586 | 76.7372035 | 63.2685674 | 61.7487099 |
| 16:55:39 | 65.3324586 | 76.7372035 | 63.2685674 | 62.7487099 |
| 16:55:40 | 65.3324586 | 69.7372035 | 63.2685674 | 62.7487099 |
| 16:55:41 | 64.3324586 | 68.7372035 | 63.2685674 | 62.7487099 |
| 16:55:42 | 65.3324586 | 67.7372035 | 63.2685674 | 64.7487099 |
| 16:55:43 | 65.3324586 | 67.7372035 | 62.2685674 | 66.7487099 |
| 16:55:44 | 66.3324586 | 67.7372035 | 61.2685674 | 66.7487099 |
| 16:55:45 | 67.3324586 | 68.7372035 | 61.2685674 | 66.7487099 |
| 16:55:46 | 67.3324586 | 67.7372035 | 62.2685674 | 66.7487099 |
| 16:55:47 | 66.3324586 | 67.7372035 | 62.2685674 | 67.7487099 |
| 16:55:48 | 66.3324586 | 68.7372035 | 63.2685674 | 67.7487099 |
| 16:55:49 | 65.3324586 | 68.7372035 | 64.2685674 | 66.7487099 |
| 16:55:50 | 65.3324586 | 68.7372035 | 66.2685674 | 66.7487099 |
| 16:55:51 | 65.3324586 | 68.7372035 | 65.2685674 | 66.7487099 |
| 16:55:52 | 65.3324586 | 68.7372035 | 65.2685674 | 66.7487099 |
| 16:55:53 | 67.3324586 | 68.7372035 | 65.2685674 | 66.7487099 |
| 16:55:54 | 67.3324586 | 68.7372035 | 65.2685674 | 67.7487099 |
| 16:55:55 | 67.3324586 | 68.7372035 | 65.2685674 | 67.7487099 |
| 16:55:56 | 67.3324586 | 67.7372035 | 65.2685674 | 67.7487099 |
| 16:55:57 | 66.3324586 | 66.7372035 | 65.2685674 | 68.7487099 |
| 16:55:58 | 67.3324586 | 67.7372035 | 66.2685674 | 68.7487099 |
| 16:55:59 | 67.3324586 | 67.7372035 | 66.2685674 | 68.7487099 |
| 16:56:00 | 67.3324586 | 67.7372035 | 66.2685674 | 66.7487099 |
| 16:56:01 | 68.3324586 | 66.7372035 | 71.2685674 | 66.7487099 |

|          |            |            |            |            |
|----------|------------|------------|------------|------------|
| 16:56:02 | 71.3324586 | 66.7372035 | 73.2685674 | 66.7487099 |
| 16:56:03 | 71.3324586 | 66.7372035 | 73.2685674 | 66.7487099 |
| 16:56:04 | 71.3324586 | 66.7372035 | 73.2685674 | 66.7487099 |
| 16:56:05 | 71.3324586 | 66.7372035 | 73.2685674 | 66.7487099 |
| 16:56:06 | 71.3324586 | 66.7372035 | 73.2685674 | 66.7487099 |
| 16:56:07 | 70.3324586 | 66.7372035 | 73.2685674 | 65.7487099 |
| 16:56:08 | 69.3324586 | 66.7372035 | 73.2685674 | 65.7487099 |
| 16:56:09 | 69.3324586 | 66.7372035 | 72.2685674 | 65.7487099 |
| 16:56:10 | 69.3324586 | 67.7372035 | 72.2685674 | 65.7487099 |
| 16:56:11 | 69.3324586 | 67.7372035 | 72.2685674 | 64.7487099 |
| 16:56:12 | 69.3324586 | 67.7372035 | 71.2685674 | 63.7487099 |
| 16:56:13 | 69.3324586 | 67.7372035 | 71.2685674 | 63.7487099 |
| 16:56:14 | 69.3324586 | 67.7372035 | 72.2685674 | 63.7487099 |
| 16:56:15 | 69.3324586 | 67.7372035 | 72.2685674 | 63.7487099 |
| 16:56:16 | 69.3324586 | 67.7372035 | 72.2685674 | 64.7487099 |
| 16:56:17 | 69.3324586 | 68.7372035 | 72.2685674 | 65.7487099 |
| 16:56:18 | 69.3324586 | 68.7372035 | 72.2685674 | 65.7487099 |
| 16:56:19 | 70.3324586 | 68.7372035 | 74.2685674 | 68.7487099 |
| 16:56:20 | 70.3324586 | 68.7372035 | 75.2685674 | 69.7487099 |
| 16:56:21 | 70.3324586 | 69.7372035 | 75.2685674 | 70.7487099 |
| 16:56:22 | 70.3324586 | 69.7372035 | 75.2685674 | 70.7487099 |
| 16:56:23 | 70.3324586 | 69.7372035 | 75.2685674 | 70.7487099 |
| 16:56:24 | 71.3324586 | 69.7372035 | 77.2685674 | 71.7487099 |
| 16:56:25 | 73.3324586 | 70.7372035 | 77.2685674 | 71.7487099 |
| 16:56:26 | 73.3324586 | 70.7372035 | 77.2685674 | 71.7487099 |
| 16:56:27 | 73.3324586 | 70.7372035 | 77.2685674 | 71.7487099 |
| 16:56:28 | 75.3324586 | 76.7372035 | 77.2685674 | 71.7487099 |
| 16:56:29 | 75.3324586 | 76.7372035 | 77.2685674 | 71.7487099 |

Person 8    Person 2    Person 13

Activities    average of all behavior

|           |    |
|-----------|----|
| 67.034831 | 63 |
| 67.034831 | 63 |
| 67.034831 | 63 |
| 68.534831 | 63 |
| 68.534831 | 63 |
| 69.034831 | 63 |
| 69.034831 | 63 |
| 70.034831 | 63 |
| 70.034831 | 63 |
| 70.534831 | 63 |
| 70.034831 | 63 |
| 70.034831 | 63 |
| 70.534831 | 63 |
| 70.534831 | 63 |
| 71.034831 | 63 |
| 71.534831 | 63 |
| 71.034831 | 63 |
| 71.034831 | 63 |
| 71.034831 | 63 |
| 71.534831 | 63 |
| 72.534831 | 63 |
| 74.534831 | 63 |
| 75.034831 | 63 |
| 75.034831 | 63 |
| 73.034831 | 63 |
| 72.034831 | 63 |
| 72.034831 | 63 |
| 71.034831 | 63 |
| 70.534831 | 63 |
| 70.534831 | 63 |
| 70.534831 | 63 |
| 70.534831 | 63 |
| 70.534831 | 63 |
| 70.034831 | 63 |
| 69.034831 | 63 |
| 68.034831 | 63 |
| 68.034831 | 63 |
| 67.534831 | 63 |
| 67.534831 | 63 |
| 67.534831 | 63 |
| 67.034831 | 63 |
| 67.534831 | 63 |
| 67.534831 | 63 |





|            |    |
|------------|----|
| 70.034831  | 63 |
| 69.534831  | 63 |
| 69.534831  | 63 |
| 69.534831  | 63 |
| 69.534831  | 63 |
| 69.534831  | 63 |
| 69.034831  | 63 |
| 69.534831  | 63 |
| 69.034831  | 63 |
| 69.534831  | 63 |
| 69.034831  | 63 |
| 68.034831  | 63 |
| 67.034831  | 63 |
| 66.534831  | 63 |
| 66.034831  | 63 |
| 65.534831  | 63 |
| 65.034831  | 63 |
| 64.534831  | 63 |
| 64.534831  | 63 |
| 64.534831  | 63 |
| 64.034831  | 63 |
| 63.534831  | 63 |
| 63.534831  | 63 |
| 63.534831  | 63 |
| 63.534831  | 63 |
| 64.6740305 | 63 |
| 65.0073638 | 63 |
| 63.6740305 | 63 |
| 64.3406971 | 63 |
| 64.0073638 | 63 |
| 64.0073638 | 63 |
| 63.3406971 | 63 |
| 61.6740305 | 63 |
| 61.0073638 | 63 |
| 62.273689  | 63 |
| 62.273689  | 63 |
| 62.023689  | 63 |
| 61.648689  | 63 |
| 61.648689  | 63 |
| 61.648689  | 63 |
| 61.961189  | 63 |
| 64.8226647 | 63 |
| 65.3226647 | 63 |
| 65.3226647 | 63 |
| 65.5726647 | 63 |

|            |    |
|------------|----|
| 66.5726647 | 63 |
| 66.5726647 | 63 |
| 67.3226647 | 63 |
| 66.3226647 | 63 |
| 65.0726647 | 63 |
| 64.8226647 | 63 |
| 65.3226647 | 63 |
| 65.3226647 | 63 |
| 65.5726647 | 63 |
| 65.8226647 | 63 |
| 66.3226647 | 63 |
| 66.3226647 | 63 |
| 66.0726647 | 63 |
| 66.0726647 | 63 |
| 66.0726647 | 63 |
| 67.3226647 | 63 |
| 67.3226647 | 63 |
| 67.3226647 | 63 |
| 67.3226647 | 63 |
| 67.3226647 | 63 |
| 68.0726647 | 63 |
| 68.3226647 | 63 |
| 69.5726647 | 63 |
| 71.3226647 | 63 |
| 70.5726647 | 63 |
| 70.5726647 | 63 |
| 71.0726647 | 63 |
| 70.5726647 | 63 |
| 70.5726647 | 63 |
| 69.8226647 | 63 |
| 69.0726647 | 63 |
| 68.3226647 | 63 |
| 68.3226647 | 63 |
| 67.8226647 | 63 |
| 67.8226647 | 63 |
| 67.8226647 | 63 |
| 67.8226647 | 63 |
| 68.5726647 | 63 |
| 69.0726647 | 63 |
| 68.3226647 | 63 |
| 68.3226647 | 63 |
| 68.0726647 | 63 |
| 68.0726647 | 63 |
| 67.8226647 | 63 |
| 66.8226647 | 63 |

|            |    |
|------------|----|
| 67.0726647 | 63 |
| 67.3226647 | 63 |
| 67.3226647 | 63 |
| 67.3226647 | 63 |
| 68.0726647 | 63 |
| 68.0726647 | 63 |
| 68.8226647 | 63 |
| 69.0726647 | 63 |
| 69.0726647 | 63 |
| 69.3226647 | 63 |
| 69.0726647 | 63 |
| 68.5726647 | 63 |
| 68.3226647 | 63 |
| 68.3226647 | 63 |
| 68.3226647 | 63 |
| 68.3226647 | 63 |
| 69.3226647 | 63 |
| 69.3226647 | 63 |
| 70.8226647 | 63 |
| 70.5726647 | 63 |
| 70.5726647 | 63 |
| 70.3226647 | 63 |
| 70.3226647 | 63 |
| 67.8386375 | 63 |
| 70.5726647 | 63 |
| 71.0726647 | 63 |
| 70.3226647 | 63 |
| 70.3226647 | 63 |
| 71.3226647 | 63 |
| 71.3226647 | 63 |
| 71.3226647 | 63 |
| 72.0726647 | 63 |
| 71.5726647 | 63 |
| 71.5726647 | 63 |
| 70.8226647 | 63 |
| 71.0726647 | 63 |
| 70.8226647 | 63 |
| 71.0726647 | 63 |
| 71.0726647 | 63 |
| 71.0726647 | 63 |
| 70.5726647 | 63 |
| 70.8226647 | 63 |
| 71.0726647 | 63 |
| 71.3226647 | 63 |
| 71.3226647 | 63 |

|            |    |
|------------|----|
| 71.0726647 | 63 |
| 70.0726647 | 63 |
| 70.0726647 | 63 |
| 70.0726647 | 69 |
| 68.5726647 | 69 |
| 68.0726647 | 69 |
| 68.6078737 | 69 |
| 68.4078737 | 69 |
| 68.0078737 | 69 |
| 68.2078737 | 69 |
| 68.2078737 | 69 |
| 68.6078737 | 69 |
| 68.8078737 | 69 |
| 69.4078737 | 69 |
| 70.6078737 | 69 |
| 70.6078737 | 69 |
| 70.4078737 | 69 |
| 70.2078737 | 69 |
| 70.8078737 | 69 |
| 70.6078737 | 69 |
| 68.3797065 | 69 |
| 67.8997065 | 69 |
| 67.8997065 | 69 |
| 68.1397065 | 69 |
| 71.0078737 | 69 |
| 70.4078737 | 69 |
| 69.6078737 | 69 |
| 69.0078737 | 69 |
| 68.8078737 | 69 |
| 68.6078737 | 69 |
| 68.0078737 | 69 |
| 68.0078737 | 69 |
| 67.6078737 | 69 |
| 67.6078737 | 69 |
| 68.2078737 | 69 |
| 69.0078737 | 69 |
| 69.8078737 | 69 |
| 69.8078737 | 69 |
| 70.2078737 | 69 |
| 69.8078737 | 69 |
| 69.8078737 | 69 |
| 69.2078737 | 69 |
| 68.6078737 | 69 |
| 68.4078737 | 69 |
| 68.4078737 | 69 |

|            |    |
|------------|----|
| 69.0078737 | 69 |
| 69.8078737 | 69 |
| 70.2078737 | 69 |
| 71.2078737 | 69 |
| 71.4078737 | 69 |
| 72.6078737 | 69 |
| 72.8078737 | 69 |
| 72.4078737 | 69 |
| 72.2078737 | 63 |
| 72.4078737 | 63 |
| 72.6078737 | 63 |
| 72.2078737 | 63 |
| 71.4078737 | 63 |
| 71.2078737 | 63 |
| 71.2078737 | 63 |
| 70.8078737 | 63 |
| 70.4078737 | 63 |
| 70.0078737 | 63 |
| 69.8078737 | 63 |
| 70.0078737 | 71 |
| 69.6078737 | 71 |
| 70.4078737 | 71 |
| 70.0078737 | 71 |
| 69.6078737 | 71 |
| 69.6078737 | 71 |
| 72.2078737 | 71 |
| 72.4078737 | 71 |
| 72.4078737 | 71 |
| 73.0078737 | 71 |
| 73.0078737 | 71 |
| 74.0078737 | 71 |
| 74.6078737 | 71 |
| 74.2078737 | 71 |
| 73.8078737 | 71 |
| 74.0078737 | 71 |
| 73.4078737 | 63 |
| 72.4078737 | 63 |
| 72.0078737 | 63 |
| 71.8078737 | 63 |
| 71.6078737 | 63 |
| 71.6078737 | 63 |
| 70.8078737 | 63 |
| 71.6078737 | 63 |
| 71.4078737 | 63 |
| 71.4078737 | 63 |

|            |          |            |    |
|------------|----------|------------|----|
|            |          | 71.2078737 | 63 |
|            |          | 71.2078737 | 63 |
|            |          | 70.8078737 | 63 |
|            |          | 70.4078737 | 63 |
|            |          | 70.4078737 | 63 |
|            |          | 71.0078737 | 63 |
|            |          | 69.1397065 | 63 |
|            |          | 69.3797065 | 63 |
|            |          | 69.3797065 | 63 |
|            |          | 69.8597065 | 63 |
|            |          | 70.0997065 | 63 |
|            |          | 69.8597065 | 63 |
|            |          | 69.4197065 | 63 |
|            |          | 69.8997065 | 63 |
|            |          | 69.8997065 | 63 |
|            |          | 69.4197065 | 63 |
|            |          | 68.6132773 | 63 |
|            |          | 68.4188328 | 63 |
|            |          | 67.641055  | 63 |
|            |          | 67.7799439 | 63 |
|            |          | 67.9188328 | 63 |
|            |          | 67.9188328 | 63 |
|            |          | 68.4743884 | 63 |
|            |          | 69.9659581 | 63 |
|            |          | 69.7992914 | 63 |
|            |          | 70.7992914 | 63 |
|            |          | 71.1326248 | 63 |
|            |          | 71.9659581 | 63 |
|            |          | 71.7992914 | 63 |
|            |          | 72.1326248 | 63 |
|            |          | 71.7992914 | 63 |
|            |          | 71.7992914 | 63 |
|            |          | 70.0021661 | 63 |
|            |          | 70.2521661 | 63 |
|            |          | 71.2243884 | 63 |
|            |          | 71.4743884 | 63 |
|            |          | 71.6688328 | 63 |
|            |          | 75.9659581 | 63 |
|            |          | 75.1326248 | 63 |
|            |          | 75.6326248 | 63 |
|            |          | 75.4659581 | 63 |
|            |          | 75.4124971 | 63 |
|            |          | 74.8410686 | 63 |
|            |          | 74.6982114 | 63 |
|            |          | 74.6982114 | 63 |
|            | 66.75638 |            |    |
|            | 66.75638 |            |    |
|            | 64.75638 |            |    |
|            | 64.75638 |            |    |
|            | 64.75638 |            |    |
|            | 64.75638 |            |    |
|            | 65.75638 |            |    |
|            | 65.75638 |            |    |
|            | 65.75638 |            |    |
|            | 70.75638 |            |    |
|            | 72.75638 |            |    |
|            | 73.75638 |            |    |
|            | 73.75638 |            |    |
|            | 73.75638 |            |    |
|            | 73.75638 |            |    |
|            | 73.75638 |            |    |
|            | 73.75638 |            |    |
|            | 73.75638 |            |    |
|            | 73.75638 |            |    |
|            | 77.75638 |            |    |
|            | 77.75638 |            |    |
|            | 77.75638 |            |    |
|            | 78.75638 |            |    |
|            | 78.75638 |            |    |
|            | 78.75638 |            |    |
|            | 78.75638 |            |    |
| 77.0917313 | 78.75638 |            |    |
| 77.0917313 | 78.75638 |            |    |
| 78.0917313 | 78.75638 |            |    |
| 78.0917313 | 78.75638 |            |    |

|            |          |            |            |    |
|------------|----------|------------|------------|----|
| 78.0917313 | 78.75638 |            | 74.6982114 | 63 |
| 78.0917313 | 79.75638 |            | 74.6982114 | 63 |
| 78.0917313 | 78.75638 |            | 74.26964   | 63 |
| 77.0917313 | 78.75638 |            | 73.9839257 | 63 |
| 77.0917313 | 78.75638 |            | 73.9839257 | 63 |
| 74.0917313 | 77.75638 |            | 73.4124971 | 63 |
| 74.0917313 | 77.75638 |            | 72.9839257 | 63 |
| 74.0917313 | 77.75638 |            | 72.8410686 | 63 |
| 73.0917313 | 78.75638 |            | 72.8410686 | 63 |
| 70.0917313 | 78.75638 |            | 72.6982114 | 63 |
| 70.0917313 | 78.75638 |            | 72.5553543 | 63 |
| 70.0917313 | 77.75638 |            | 72.1267828 | 63 |
| 68.0917313 | 77.75638 |            | 71.6982114 | 63 |
| 68.0917313 | 77.75638 |            | 71.8410686 | 63 |
| 68.0917313 | 77.75638 |            | 70.9839257 | 63 |
| 68.0917313 | 77.75638 |            | 71.6982114 | 63 |
| 68.0917313 | 77.75638 |            | 71.9839257 | 63 |
| 69.0917313 | 77.75638 |            | 72.26964   | 63 |
| 69.0917313 | 77.75638 |            | 73.1267828 | 63 |
| 69.0917313 | 79.75638 |            | 73.8410686 | 63 |
| 70.0917313 | 79.75638 |            | 74.26964   | 63 |
| 75.0917313 | 79.75638 |            | 75.26964   | 63 |
| 75.0917313 | 80.75638 |            | 75.1267828 | 63 |
| 72.0917313 | 80.75638 |            | 74.6982114 | 63 |
| 68.0917313 | 80.75638 |            | 72.8134463 | 63 |
| 64.0917313 | 80.75638 |            | 72.2012014 | 63 |
| 64.0917313 | 80.75638 |            | 72.7114055 | 63 |
| 64.0917313 | 81.75638 |            | 72.7318137 | 63 |
| 64.0917313 | 81.75638 |            | 72.77263   | 63 |
| 64.0917313 | 81.75638 |            | 72.4256912 | 63 |
| 64.0917313 | 82.75638 |            | 72.5481402 | 63 |
| 63.0917313 | 83.75638 |            | 74.4124971 | 63 |
| 63.0917313 | 84.75638 |            | 74.5553543 | 63 |
| 63.0917313 | 84.75638 |            | 74.4124971 | 63 |
| 63.0917313 | 84.75638 |            | 74.26964   | 63 |
| 63.0917313 | 74.26964 |            | 72.6286771 | 63 |
| 63.0917313 | 73.75    | 70.1125201 | 72.2492025 | 63 |
| 63.0917313 | 73.875   | 70.1125201 | 72.3898275 | 63 |
| 61.0917313 | 73.625   | 73.1125201 | 72.1085775 | 63 |
| 61.0917313 | 73.125   | 73.1125201 | 71.6710775 | 63 |
| 61.0917313 | 83.75638 | 73.1125201 | 73         | 63 |
| 61.0917313 | 81.75638 | 72.1125201 | 72.25      | 63 |
| 61.0917313 | 81.75638 | 71.1125201 | 72.125     | 63 |
| 61.0917313 | 81.75638 | 71.1125201 | 72         | 63 |
| 60.0917313 | 81.75638 | 71.1125201 | 72         | 63 |

|            |          |            |            |    |
|------------|----------|------------|------------|----|
| 60.0917313 | 78.75638 | 70.1125201 | 71.5       | 63 |
| 60.0917313 | 78.75638 | 71.1125201 | 71         | 63 |
| 62.0917313 | 77.75638 | 72.1125201 | 71.25      | 63 |
| 62.0917313 | 77.75638 | 72.1125201 | 71.25      | 63 |
| 62.0917313 | 77.75638 | 73.1125201 | 71.125     | 63 |
| 64.0917313 | 77.75638 | 73.1125201 | 71.5       | 63 |
| 64.0917313 | 75.75638 | 73.1125201 | 71.25      | 63 |
| 64.0917313 | 76.75638 | 74.1125201 | 71.625     | 63 |
| 69.0917313 | 76.75638 | 75.1125201 | 72.125     | 63 |
| 70.0917313 | 76.75638 | 75.1125201 | 72.375     | 63 |
| 70.0917313 | 76.75638 | 75.1125201 | 72.25      | 63 |
| 71.0917313 | 76.75638 | 70.1125201 | 72.125     | 63 |
| 69.0917313 | 76.75638 | 67.1125201 | 71.75      | 69 |
| 69.0917313 | 76.75638 | 67.1125201 | 71.75      | 69 |
| 69.0917313 | 76.75638 | 67.1125201 | 71.875     | 69 |
| 66.0917313 | 76.75638 | 68.1125201 | 71.625     | 69 |
| 66.0917313 | 76.75638 | 69.1125201 | 71.25      | 69 |
| 66.0917313 | 72.75638 | 70.1125201 | 70.875     | 69 |
| 66.0917313 | 68.75638 | 69.1125201 | 70.25      | 69 |
| 66.0917313 | 68.75638 | 68.1125201 | 69.75      | 69 |
| 66.0917313 | 67.75638 | 65.1125201 | 69.375     | 69 |
| 66.0917313 | 66.75638 | 65.1125201 | 69.125     | 69 |
| 68.0917313 | 66.75638 | 65.1125201 | 69.375     | 69 |
| 68.0917313 | 66.75638 | 64.1125201 | 69.375     | 69 |
| 68.0917313 | 66.75638 | 66.1125201 | 69.625     | 69 |
| 68.0917313 | 66.75638 | 66.1125201 | 69.75      | 69 |
| 70.0917313 | 65.75638 | 66.1125201 | 69.625     | 69 |
| 70.0917313 | 65.75638 | 66.1125201 | 69.25      | 69 |
| 70.0917313 | 66.75638 | 71.1125201 | 69.875     | 69 |
| 70.0917313 | 67.75638 | 70.1125201 | 70         | 69 |
| 74.0917313 | 67.75638 | 70.1125201 | 70.625     | 69 |
| 74.0917313 | 68.75638 | 70.1125201 | 71.375     | 69 |
| 72.0917313 | 68.75638 | 69.1125201 | 70.875     | 69 |
| 72.0917313 | 68.75638 | 69.1125201 | 71         | 69 |
| 72.0917313 | 68.75638 | 69.1125201 | 70.875     | 69 |
| 71.0917313 | 68.75638 | 70.1125201 | 70.5       | 69 |
| 70.0917313 | 68.75638 | 69.1125201 | 70.25      | 69 |
| 70.0917313 | 71.75638 | 69.1125201 | 70.625     | 69 |
| 69.0917313 | 71.75638 | 69.1125201 | 70.375     | 69 |
| 67.0917313 | 73.75638 | 69.1125201 | 70.25      | 69 |
| 66.0917313 | 73.75638 | 69.1125201 | 70.25      | 69 |
| 66.0917313 | 73.75638 | 70.1125201 | 69.0939113 | 69 |
| 66.0917313 | 73.75638 | 70.1125201 | 68.9532863 | 69 |
| 66.0917313 | 73.75638 | 70.1125201 | 69.0157863 | 69 |
| 66.0917313 | 73.75638 | 68.1125201 | 70.0314113 | 69 |



|            |          |            |            |    |
|------------|----------|------------|------------|----|
| 66.0917313 | 73.75638 | 68.1125201 | 70.0314113 | 69 |
| 66.0917313 | 72.75638 | 68.1125201 | 70.7345363 | 69 |
| 66.0917313 | 72.75638 | 68.1125201 | 71.2657863 | 69 |
| 70.0917313 | 71.75638 | 69.1125201 | 71.4064113 | 69 |
| 70.0917313 | 71.75638 | 69.1125201 | 72.625     | 69 |
| 70.0917313 | 71.75638 | 71.1125201 | 72         | 69 |
| 70.0917313 | 71.75638 | 72.1125201 | 71.375     | 69 |
| 68.0917313 | 70.75638 | 74.1125201 | 71         | 69 |
| 67.0917313 | 70.75638 | 75.1125201 | 70.75      | 69 |
| 67.0917313 | 70.75638 | 75.1125201 | 71.125     | 69 |
| 67.0917313 | 70.75638 | 75.1125201 | 71.75      | 69 |
| 68.0917313 | 71.75638 | 74.1125201 | 70.4064113 | 69 |
| 68.0917313 | 72.75638 | 74.1125201 | 70.7345363 | 69 |
| 68.0917313 | 73.75638 | 74.1125201 | 71.2970363 | 69 |
| 68.0917313 | 73.75638 | 74.1125201 | 71.5782863 | 69 |
| 68.0917313 | 73.75638 | 74.1125201 | 71.5782863 | 69 |
| 68.0917313 | 74.75638 | 73.1125201 | 72.0001613 | 69 |
| 68.0917313 | 74.75638 | 74.1125201 | 72.2657863 | 69 |
| 68.0917313 | 80.75638 | 74.1125201 | 72.8126613 | 69 |
| 68.0917313 | 82.75638 | 75.1125201 | 73.75      | 69 |
| 68.0917313 | 82.75638 | 74.1125201 | 73         | 69 |
| 70.0917313 | 82.75638 | 72.1125201 | 72.375     | 69 |
| 70.0917313 | 82.75638 | 72.1125201 | 72.375     | 69 |
| 72.0917313 | 81.75638 | 69.1125201 | 71.125     | 69 |
| 73.0917313 | 81.75638 | 68.1125201 | 71.125     | 69 |
| 73.0917313 | 81.75638 | 67.1125201 | 70.875     | 69 |
| 75.0917313 | 81.75638 | 67.1125201 | 71         | 69 |
| 75.0917313 | 81.75638 | 68.1125201 | 71.125     | 69 |
| 75.0917313 | 76.75638 | 70.1125201 | 70.75      | 69 |
| 75.0917313 | 74.75638 | 72.1125201 | 70.75      | 69 |
| 75.0917313 | 74.75638 | 74.1125201 | 70.75      | 69 |
| 75.0917313 | 74.75638 | 75.1125201 | 71.5       | 69 |
| 74.0917313 | 75.75638 | 75.1125201 | 72.25      | 63 |
| 72.0917313 | 76.75638 | 74.1125201 | 72.5       | 63 |
| 63.0917313 | 77.75638 | 74.1125201 | 71.25      | 63 |
| 58.0917313 | 77.75638 | 70.1125201 | 69.875     | 63 |
| 58.0917313 | 77.75638 | 70.1125201 | 70.125     | 63 |
| 57.0917313 | 77.75638 | 70.1125201 | 70         | 63 |
| 57.0917313 | 77.75638 | 71.1125201 | 69.625     | 63 |
| 57.0917313 | 76.75638 | 72.1125201 | 69.625     | 63 |
| 56.0917313 | 77.75638 | 72.1125201 | 69.875     | 63 |
| 55.0917313 | 77.75638 | 73.1125201 | 70         | 63 |
| 53.0917313 | 77.75638 | 74.1125201 | 70         | 63 |
| 53.0917313 | 77.75638 | 75.1125201 | 70.25      | 63 |
| 50.0917313 | 78.75638 | 75.1125201 | 69.75      | 63 |

|            |          |            |          |    |
|------------|----------|------------|----------|----|
| 53.0917313 | 78.75638 | 75.1125201 | 70.125   | 63 |
| 58.0917313 | 77.75638 | 75.1125201 | 70.375   | 63 |
| 59.0917313 | 76.75638 | 75.1125201 | 69.5     | 63 |
| 60.0917313 | 77.75638 | 75.1125201 | 69.625   | 63 |
| 63.0917313 | 77.75638 | 75.1125201 | 70.125   | 63 |
| 65.0917313 | 77.75638 | 75.1125201 | 70.5     | 63 |
| 65.0917313 | 78.75638 | 74.1125201 | 70.5     | 63 |
| 65.0917313 | 79.75638 | 73.1125201 | 70.5     | 63 |
| 64.0917313 | 79.75638 | 73.1125201 | 70.25    | 63 |
| 63.0917313 | 79.75638 | 73.1125201 | 70.25    | 63 |
| 63.0917313 | 79.75638 | 73.1125201 | 70.125   | 63 |
| 62.0917313 | 79.75638 | 73.1125201 | 70.125   | 63 |
| 62.0917313 | 79.75638 | 73.1125201 | 70.625   | 63 |
| 62.0917313 | 79.75638 | 73.1125201 | 70.625   | 63 |
| 62.0917313 | 79.75638 | 73.1125201 | 71.125   | 63 |
| 63.0917313 | 79.75638 | 73.1125201 | 72       | 63 |
| 63.0917313 | 79.75638 | 73.1125201 | 72.125   | 63 |
| 63.0917313 | 79.75638 | 73.1125201 | 72       | 63 |
| 63.0917313 | 79.75638 | 73.1125201 | 72       | 63 |
| 64.0917313 | 78.75638 | 74.1125201 | 72       | 63 |
| 66.0917313 | 77.75638 | 75.1125201 | 72.5     | 63 |
| 72.0917313 | 77.75638 | 75.1125201 | 73       | 63 |
| 72.0917313 | 77.75638 | 75.1125201 | 72.625   | 63 |
| 72.0917313 | 77.75638 | 76.1125201 | 73       | 63 |
| 72.0917313 | 77.75638 | 77.1125201 | 73.25    | 63 |
| 72.0917313 | 77.75638 | 79.1125201 | 73       | 63 |
| 72.0917313 | 78.75638 | 80.1125201 | 73.375   | 63 |
| 70.0917313 | 78.75638 | 82.1125201 | 73.375   | 63 |
| 68.0917313 | 78.75638 | 83.1125201 | 72.75    | 63 |
| 66.0917313 | 78.75638 | 83.1125201 | 72.25    | 63 |
| 66.0917313 | 78.75638 | 82.1125201 | 72.125   | 63 |
| 66.0917313 | 78.75638 | 82.1125201 | 72.125   | 63 |
| 66.0917313 | 78.75638 | 82.1125201 | 71.875   | 63 |
| 66.0917313 | 78.75638 | 81.1125201 | 71.875   | 63 |
| 66.0917313 | 75.75638 | 81.1125201 | 71.75    | 63 |
| 66.0917313 | 74.75638 | 79.1125201 | 71.5     | 63 |
| 66.0917313 | 74.75638 | 79.1125201 | 71.625   | 63 |
| 66.0917313 | 74.75638 | 79.1125201 | 71.125   | 63 |
| 66.0917313 | 74.75638 | 80.1125201 | 71.125   | 63 |
| 66.0917313 | 78.75638 | 80.1125201 | 71.375   | 63 |
| 66.0917313 | 77.75638 | 81.1125201 | 71.375   | 63 |
| 65.0917313 | 77.75638 | 82.1125201 | 71.375   | 63 |
| 64.0917313 | 77.75638 | 82.1125201 | 71.625   | 63 |
| 64.0917313 | 69.75638 | 70.875     | 69.34531 | 63 |
| 63.0917313 | 67.75638 | 70.875     | 69.34531 | 63 |

|            |          |            |           |    |
|------------|----------|------------|-----------|----|
| 63.0917313 | 67.75638 | 70.875     | 69.22031  | 63 |
| 62.0917313 | 65.75638 | 71         | 69.235935 | 63 |
| 62.0917313 | 66.75638 | 71.125     | 69.37656  | 63 |
| 61.0917313 | 69.75638 | 71.125     | 69.37656  | 63 |
| 61.0917313 | 70.75638 | 71.25      | 69.767185 | 63 |
| 61.0917313 | 70.75638 | 81.1125201 | 71.375    | 63 |
| 61.0917313 | 76.75638 | 78.1125201 | 71.75     | 63 |
| 62.0917313 | 76.75638 | 74.1125201 | 71.375    | 63 |
| 69.0917313 | 77.75638 | 74.1125201 | 72.125    | 63 |
| 69.0917313 | 77.75638 | 73.1125201 | 72.25     | 63 |
| 67.0917313 | 77.75638 | 73.1125201 | 71.875    | 63 |
| 67.0917313 | 77.75638 | 73.1125201 | 71.875    | 63 |
| 66.0917313 | 78.75638 | 75.1125201 | 71.75     | 63 |
| 66.0917313 | 78.75638 | 75.1125201 | 71.625    | 63 |
| 67.0917313 | 76.75638 | 75.1125201 | 71        | 63 |
| 67.0917313 | 75.75638 | 74.1125201 | 71.125    | 63 |
| 68.0917313 | 75.75638 | 74.1125201 | 71.375    | 63 |
| 68.0917313 | 75.75638 | 75.1125201 | 71.625    | 63 |
| 68.0917313 | 73.75638 | 76.1125201 | 71.625    | 63 |
| 67.0917313 | 73.75638 | 76.1125201 | 71.25     | 63 |
| 66.0917313 | 73.75638 | 78.1125201 | 71.125    | 63 |
| 67.0917313 | 73.75638 | 79.1125201 | 70.875    | 63 |
| 67.0917313 | 74.75638 | 81.1125201 | 71.875    | 63 |
| 67.0917313 | 74.75638 | 72         | 70.610935 | 63 |
| 68.0917313 | 73.75638 | 71.875     | 70.47031  | 63 |
| 69.0917313 | 73.75638 | 72.125     | 70.62656  | 63 |
| 69.0917313 | 72.75638 | 71.625     | 70.06406  | 63 |
| 68.0917313 | 72.75638 | 71.375     | 69.90781  | 63 |
| 69.0917313 | 72.75638 | 70.625     | 69.18906  | 63 |
| 67.0917313 | 72.75638 | 70.25      | 68.767185 | 63 |
| 67.0917313 | 73.75638 | 81.1125201 | 70.625    | 63 |
| 67.0917313 | 73.75638 | 80.1125201 | 70.375    | 63 |
| 67.0917313 | 73.75638 | 80.1125201 | 70.375    | 63 |
| 66.0917313 | 74.75638 | 80.1125201 | 70.375    | 63 |
| 67.0917313 | 77.75638 | 80.1125201 | 71        | 63 |
| 68.0917313 | 77.75638 | 78.1125201 | 70.875    | 63 |
| 68.0917313 | 78.75638 | 78.1125201 | 71        | 63 |
| 68.0917313 | 78.75638 | 75.1125201 | 70.5      | 63 |
| 68.0917313 | 78.75638 | 74.1125201 | 70.25     | 63 |
| 68.0917313 | 78.75638 | 74.1125201 | 70.125    | 63 |
| 68.0917313 | 78.75638 | 74.1125201 | 70.125    | 63 |
| 68.0917313 | 78.75638 | 74.1125201 | 70.375    | 63 |
| 68.0917313 | 76.75638 | 74.1125201 | 70.125    | 63 |
| 69.0917313 | 74.75638 | 74.1125201 | 70.25     | 63 |
| 77.0917313 | 74.75638 | 76.1125201 | 71.25     | 63 |

|            |          |            |        |    |
|------------|----------|------------|--------|----|
| 77.0917313 | 69.75638 | 76.1125201 | 70.625 | 63 |
| 78.0917313 | 65.75638 | 79.1125201 | 71.5   | 63 |
| 77.0917313 | 65.75638 | 79.1125201 | 71.625 | 63 |
| 76.0917313 | 67.75638 | 82.1125201 | 71.75  | 63 |
| 76.0917313 | 67.75638 | 82.1125201 | 71.875 | 63 |
| 76.0917313 | 69.75638 | 82.1125201 | 71.75  | 63 |
| 76.0917313 | 71.75638 | 82.1125201 | 71.875 | 63 |
| 77.0917313 | 71.75638 | 71.1125201 | 70.25  | 63 |
| 78.0917313 | 71.75638 | 69.1125201 | 70.375 | 63 |
| 78.0917313 | 71.75638 | 69.1125201 | 70.5   | 63 |
| 78.0917313 | 71.75638 | 70.1125201 | 70.25  | 63 |
| 78.0917313 | 71.75638 | 71.1125201 | 70.625 | 63 |
| 78.0917313 | 72.75638 | 71.1125201 | 71     | 63 |
| 79.0917313 | 72.75638 | 72.1125201 | 71.375 | 63 |
| 79.0917313 | 73.75638 | 73.1125201 | 71.875 | 63 |
| 79.0917313 | 74.75638 | 72.1125201 | 71.625 | 63 |
| 79.0917313 | 74.75638 | 72.1125201 | 71.875 | 63 |
| 79.0917313 | 74.75638 | 69.1125201 | 71.25  | 63 |
| 79.0917313 | 74.75638 | 68.1125201 | 70.875 | 63 |
| 79.0917313 | 73.75638 | 68.1125201 | 70.875 | 63 |
| 79.0917313 | 73.75638 | 68.1125201 | 71.5   | 63 |
| 81.0917313 | 73.75638 | 68.1125201 | 71.875 | 63 |
| 81.0917313 | 73.75638 | 68.1125201 | 72.5   | 69 |
| 81.0917313 | 75.75638 | 69.1125201 | 72.75  | 69 |
| 80.0917313 | 74.75638 | 70.1125201 | 72.375 | 69 |
| 80.0917313 | 73.75638 | 71.1125201 | 72.375 | 69 |
| 67.0917313 | 73.75638 | 71.1125201 | 71.125 | 69 |
| 67.0917313 | 73.75638 | 73.1125201 | 71.25  | 69 |
| 65.0917313 | 74.75638 | 73.1125201 | 71     | 69 |
| 65.0917313 | 74.75638 | 73.1125201 | 70.75  | 69 |
| 67.0917313 | 75.75638 | 72.1125201 | 71.375 | 69 |
| 67.0917313 | 75.75638 | 72.1125201 | 71.5   | 69 |
| 67.0917313 | 75.75638 | 72.1125201 | 71.5   | 69 |
| 68.0917313 | 76.75638 | 74.1125201 | 72     | 69 |
| 68.0917313 | 77.75638 | 74.1125201 | 72.25  | 69 |
| 69.0917313 | 77.75638 | 75.1125201 | 73     | 69 |
| 69.0917313 | 77.75638 | 77.1125201 | 73.375 | 69 |
| 69.0917313 | 77.75638 | 77.1125201 | 73.5   | 69 |
| 69.0917313 | 77.75638 | 78.1125201 | 73.75  | 69 |
| 69.0917313 | 78.75638 | 78.1125201 | 74.25  | 69 |
| 68.0917313 | 79.75638 | 78.1125201 | 74.5   | 69 |
| 68.0917313 | 80.75638 | 75.1125201 | 73.875 | 69 |
| 68.0917313 | 80.75638 | 74.1125201 | 73.5   | 69 |
| 66.0917313 | 81.75638 | 72.1125201 | 72.125 | 69 |
| 65.0917313 | 80.75638 | 72.1125201 | 71.75  | 69 |

|            |          |            |            |    |
|------------|----------|------------|------------|----|
| 65.0917313 | 78.75638 | 72.1125201 | 70.5       | 69 |
| 64.0917313 | 77.75638 | 72.1125201 | 69.875     | 69 |
| 64.0917313 | 76.75638 | 73.1125201 | 69.625     | 69 |
| 64.0917313 | 76.75638 | 72.1125201 | 69.5       | 69 |
| 64.0917313 | 76.75638 | 72.1125201 | 69.5       | 69 |
| 64.0917313 | 77.75638 | 71.1125201 | 69.375     | 69 |
| 63.0917313 | 77.75638 | 69.1125201 | 68.875     | 69 |
| 62.0917313 | 77.75638 | 69.1125201 | 68.875     | 69 |
| 62.0917313 | 76.75638 | 69.1125201 | 68.75      | 69 |
| 62.0917313 | 76.75638 | 74.1125201 | 69.125     | 69 |
| 60.0917313 | 76.75638 | 77.1125201 | 69         | 69 |
| 60.0917313 | 75.75638 | 79.1125201 | 68.875     | 69 |
| 60.0917313 | 75.75638 | 79.1125201 | 68.875     | 69 |
| 60.0917313 | 75.75638 | 78.1125201 | 68         | 69 |
| 61.0917313 | 76.75638 | 71.1125201 | 67.25      | 69 |
| 62.0917313 | 76.75638 | 71.1125201 | 67.25      | 69 |
| 62.0917313 | 66.875   | 64.1125201 | 65.2648275 | 69 |
| 62.0917313 | 66.625   | 61.1125201 | 64.8585775 | 69 |
| 62.0917313 | 66.375   | 59.1125201 | 64.5773275 | 69 |
| 62.0917313 | 66.875   | 58.1125201 | 65.1398275 | 69 |
| 62.0917313 | 67       | 59.1125201 | 65.2804525 | 69 |
| 62.0917313 | 67.125   | 60.1125201 | 65.4210775 | 69 |
| 62.0917313 | 67.5     | 60.1125201 | 65.7179525 | 69 |
| 63.0917313 | 67.75    | 60.1125201 | 65.9992025 | 69 |
| 69.0917313 | 68.5     | 60.1125201 | 66.5929525 | 69 |
| 74.0917313 | 68.25    | 58.1125201 | 66.1867025 | 69 |
| 74.0917313 | 68.375   | 60.1125201 | 66.3273275 | 69 |
| 71.0917313 | 68.125   | 61.1125201 | 66.1710775 | 69 |
| 68.0917313 | 67.5     | 61.1125201 | 65.5929525 | 69 |
| 68.0917313 | 67.5     | 61.1125201 | 65.5929525 | 69 |
| 67.0917313 | 67.25    | 60.1125201 | 65.4367025 | 69 |
| 65.0917313 | 67.125   | 60.1125201 | 65.4210775 | 69 |
| 65.0917313 | 67.625   | 61.1125201 | 65.9835775 | 69 |
| 64.0917313 | 67.875   | 62.1125201 | 66.2648275 | 69 |
| 64.0917313 | 67       | 62.1125201 | 65.2804525 | 69 |
| 64.0917313 | 66.625   | 62.1125201 | 64.9835775 | 69 |
| 64.0917313 | 66.875   | 65.1125201 | 65.2648275 | 69 |
| 63.0917313 | 66.75    | 66.1125201 | 65.1242025 | 69 |
| 63.0917313 | 77.75638 | 66.1125201 | 66.75      | 69 |
| 62.0917313 | 77.75638 | 68.1125201 | 67         | 69 |
| 61.0917313 | 77.75638 | 68.1125201 | 66.875     | 69 |
| 62.0917313 | 76.75638 | 68.1125201 | 66.875     | 69 |
| 62.0917313 | 76.75638 | 67.1125201 | 66.625     | 69 |
| 62.0917313 | 76.75638 | 68.1125201 | 67.125     | 69 |
| 63.0917313 | 76.75638 | 68.1125201 | 67.125     | 69 |

|            |          |            |            |    |
|------------|----------|------------|------------|----|
| 66.0917313 | 77.75638 | 68.1125201 | 67.75      | 69 |
| 66.0917313 | 75.75638 | 68.1125201 | 67.5       | 69 |
| 66.0917313 | 74.75638 | 68.1125201 | 67.25      | 69 |
| 66.0917313 | 74.75638 | 70.1125201 | 67.125     | 69 |
| 66.0917313 | 73.75638 | 70.1125201 | 66.75      | 69 |
| 68.0917313 | 73.75638 | 70.1125201 | 66.875     | 69 |
| 68.0917313 | 73.75638 | 69.1125201 | 67         | 69 |
| 66.0917313 | 74.75638 | 68.1125201 | 67.25      | 69 |
| 66.0917313 | 74.75638 | 65.1125201 | 67.125     | 69 |
| 66.0917313 | 74.75638 | 65.1125201 | 67.375     | 69 |
| 66.0917313 | 74.75638 | 66.1125201 | 67.875     | 69 |
| 68.0917313 | 73.75638 | 66.1125201 | 68.75      | 69 |
| 68.0917313 | 73.75638 | 65.1125201 | 68.25      | 69 |
| 68.0917313 | 73.75638 | 65.1125201 | 68.25      | 69 |
| 66.0917313 | 73.75638 | 65.1125201 | 67.5       | 69 |
| 66.0917313 | 77.75638 | 65.1125201 | 69.625     | 69 |
| 66.0917313 | 79.75638 | 65.1125201 | 70.125     | 69 |
| 66.0917313 | 79.75638 | 65.1125201 | 70.5       | 69 |
| 66.0917313 | 80.75638 | 65.1125201 | 70.5       | 69 |
| 66.0917313 | 80.75638 | 65.1125201 | 70.125     | 69 |
| 65.0917313 | 78.75638 | 65.1125201 | 69.25      | 69 |
| 65.0917313 | 77.75638 | 69.1125201 | 69.625     | 69 |
| 65.0917313 | 76.75638 | 69.1125201 | 69.375     | 69 |
| 65.0917313 | 77.75638 | 69.1125201 | 69.625     | 69 |
| 65.0917313 | 78.75638 | 70.1125201 | 70.5       | 69 |
| 65.0917313 | 78.75638 | 70.1125201 | 70.625     | 69 |
| 65.0917313 | 78.75638 | 70.1125201 | 70.625     | 69 |
| 65.0917313 | 80.75638 | 71.1125201 | 70.75      | 63 |
| 65.0917313 | 81.75638 | 71.1125201 | 70.75      | 63 |
| 67.0917313 | 71.125   | 71.1125201 | 69.6710775 | 63 |
| 68.0917313 | 71.375   | 72.1125201 | 69.9523275 | 63 |
| 68.0917313 | 71.125   | 72.1125201 | 69.6710775 | 63 |
| 66.0917313 | 70.625   | 72.1125201 | 69.2335775 | 63 |
| 65.0917313 | 80.75638 | 72.1125201 | 70.125     | 63 |
| 65.0917313 | 80.75638 | 73.1125201 | 70.25      | 63 |
| 64.0917313 | 72.75638 | 72.1125201 | 69.125     | 63 |
| 64.0917313 | 72.75638 | 72.1125201 | 68.875     | 63 |
| 64.0917313 | 71.75638 | 71.1125201 | 69         | 63 |
| 65.0917313 | 71.75638 | 71.1125201 | 69.25      | 63 |
| 65.0917313 | 71.75638 | 71.1125201 | 69.375     | 63 |
| 64.0917313 | 74.75638 | 71.1125201 | 69.5       | 63 |
| 64.0917313 | 75.75638 | 71.1125201 | 69.875     | 63 |
| 64.0917313 | 76.75638 | 70.1125201 | 69.75      | 63 |
| 64.0917313 | 76.75638 | 69.1125201 | 69.75      | 63 |
| 64.0917313 | 74.75638 | 69.1125201 | 69.625     | 63 |

|            |          |            |        |    |
|------------|----------|------------|--------|----|
| 64.0917313 | 74.75638 | 69.1125201 | 69.75  | 63 |
| 66.0917313 | 73.75638 | 71.1125201 | 69.875 | 63 |
| 68.0917313 | 72.75638 | 71.1125201 | 69.875 | 63 |
| 68.0917313 | 72.75638 | 71.1125201 | 68.875 | 63 |
| 68.0917313 | 73.75638 | 71.1125201 | 68.25  | 63 |
| 68.0917313 | 72.75638 | 71.1125201 | 67.875 | 63 |
| 69.0917313 | 72.75638 | 71.1125201 | 67.875 | 63 |
| 70.0917313 | 72.75638 | 67.1125201 | 67.625 | 63 |
| 70.0917313 | 71.75638 | 67.1125201 | 67.625 | 63 |
| 69.0917313 | 71.75638 | 66.1125201 | 67.5   | 63 |
| 68.0917313 | 71.75638 | 65.1125201 | 67.375 | 63 |
| 67.0917313 | 72.75638 | 65.1125201 | 67.375 | 63 |
| 67.0917313 | 72.75638 | 66.1125201 | 67.625 | 63 |
| 65.0917313 | 73.75638 | 66.1125201 | 67.625 | 63 |
| 65.0917313 | 74.75638 | 66.1125201 | 68.5   | 63 |
| 66.0917313 | 74.75638 | 70.1125201 | 68.875 | 63 |
| 68.0917313 | 74.75638 | 73.1125201 | 68.875 | 63 |
| 68.0917313 | 74.75638 | 74.1125201 | 68.875 | 63 |
| 69.0917313 | 73.75638 | 75.1125201 | 68.875 | 63 |
| 69.0917313 | 73.75638 | 75.1125201 | 68.875 | 63 |
| 68.0917313 | 75.75638 | 74.1125201 | 68.625 | 63 |
| 67.0917313 | 76.75638 | 74.1125201 | 68.75  | 63 |
| 67.0917313 | 76.75638 | 74.1125201 | 68.75  | 63 |
| 67.0917313 | 78.75638 | 72.1125201 | 68.875 | 63 |
| 67.0917313 | 78.75638 | 72.1125201 | 69.5   | 63 |
| 67.0917313 | 80.75638 | 72.1125201 | 70.125 | 63 |
| 68.0917313 | 80.75638 | 72.1125201 | 69.75  | 63 |
| 70.0917313 | 80.75638 | 72.1125201 | 70.375 | 63 |
| 71.0917313 | 80.75638 | 72.1125201 | 70.5   | 63 |
| 72.0917313 | 80.75638 | 71.1125201 | 70.625 | 63 |
| 72.0917313 | 80.75638 | 71.1125201 | 70.375 | 63 |
| 72.0917313 | 80.75638 | 71.1125201 | 70.5   | 63 |
| 72.0917313 | 79.75638 | 70.1125201 | 70.375 | 63 |
| 72.0917313 | 79.75638 | 71.1125201 | 70.25  | 63 |
| 72.0917313 | 79.75638 | 71.1125201 | 70.125 | 63 |
| 72.0917313 | 79.75638 | 72.1125201 | 70.25  | 63 |
| 74.0917313 | 78.75638 | 72.1125201 | 70     | 63 |
| 74.0917313 | 77.75638 | 73.1125201 | 69.75  | 63 |
| 75.0917313 | 76.75638 | 74.1125201 | 69.625 | 63 |
| 76.0917313 | 75.75638 | 74.1125201 | 69.375 | 63 |
| 76.0917313 | 75.75638 | 74.1125201 | 69.125 | 63 |
| 75.0917313 | 75.75638 | 74.1125201 | 69.25  | 63 |
| 74.0917313 | 75.75638 | 74.1125201 | 69.75  | 63 |
| 72.0917313 | 75.75638 | 74.1125201 | 69.5   | 63 |
| 72.0917313 | 76.75638 | 74.1125201 | 69.875 | 63 |

|            |          |            |            |    |
|------------|----------|------------|------------|----|
| 72.0917313 | 76.75638 | 74.1125201 | 70.875     | 63 |
| 72.0917313 | 77.75638 | 73.1125201 | 70.75      | 63 |
| 72.0917313 | 77.75638 | 73.1125201 | 71         | 63 |
| 72.0917313 | 77.75638 | 73.1125201 | 70.875     | 63 |
| 72.0917313 | 78.75638 | 73.1125201 | 70.625     | 63 |
| 73.0917313 | 78.75638 | 72.1125201 | 70.5       | 63 |
| 74.0917313 | 78.75638 | 72.1125201 | 70.75      | 63 |
| 74.0917313 | 79.75638 | 72.1125201 | 70.875     | 63 |
| 76.0917313 | 79.75638 | 72.1125201 | 71.375     | 63 |
| 77.0917313 | 80.75638 | 72.1125201 | 71.25      | 63 |
| 78.0917313 | 81.75638 | 72.1125201 | 72.375     | 63 |
| 78.0917313 | 81.75638 | 72.1125201 | 71.625     | 63 |
| 79.0917313 | 70.5     | 70.1125201 | 68.9679525 | 63 |
| 79.0917313 | 70.25    | 69.1125201 | 68.6867025 | 63 |
| 79.0917313 | 70.125   | 66.1125201 | 68.5460775 | 63 |
| 79.0917313 | 69.625   | 66.1125201 | 67.9835775 | 63 |
| 80.0917313 | 69.375   | 64.1125201 | 67.5773275 | 63 |
| 80.0917313 | 69.375   | 64.1125201 | 67.5773275 | 69 |
| 69.375     | 69.375   | 63.1125201 | 65.8627361 | 69 |
| 69.5       | 69.5     | 62.1125201 | 65.8939861 | 69 |
| 69         | 69       | 61.1125201 | 65.2689861 | 69 |
| 68.75      | 68.75    | 61.1125201 | 65.2064861 | 69 |
| 68.5       | 68.5     | 61.1125201 | 65.3939861 | 69 |
| 67.875     | 76.75638 | 61.1125201 | 66.2229086 | 69 |
| 79.0917313 | 75.75638 | 65.1125201 | 68.5       | 69 |
| 78.0917313 | 75.75638 | 65.1125201 | 68.25      | 69 |
| 76.0917313 | 75.75638 | 66.1125201 | 68.5       | 69 |
| 74.0917313 | 76.75638 | 65.1125201 | 68.625     | 69 |
| 74.0917313 | 78.75638 | 64.1125201 | 69.125     | 69 |
| 70.0917313 | 78.75638 | 64.1125201 | 68.75      | 69 |
| 70.0917313 | 78.75638 | 64.1125201 | 68.875     | 69 |
| 70.0917313 | 78.75638 | 64.1125201 | 68.875     | 69 |
| 70.0917313 | 78.75638 | 67.1125201 | 69.5       | 69 |
| 71.0917313 | 78.75638 | 67.1125201 | 69.75      | 69 |
| 71.0917313 | 78.75638 | 69.1125201 | 70.125     | 69 |
| 71.0917313 | 78.75638 | 69.1125201 | 70.25      | 69 |
| 71.0917313 | 76.75638 | 69.1125201 | 69.75      | 69 |
| 71.0917313 | 76.75638 | 69.1125201 | 69.75      | 69 |
| 72.0917313 | 76.75638 | 69.1125201 | 69.75      | 69 |
| 68.0917313 | 75.75638 | 69.1125201 | 68.5       | 69 |
| 68.0917313 | 74.75638 | 70.1125201 | 68.5       | 69 |
| 63.0917313 | 74.75638 | 69.1125201 | 67.125     | 69 |
| 62.0917313 | 74.75638 | 69.1125201 | 67         | 69 |
| 62.0917313 | 75.75638 | 67.1125201 | 66.875     | 69 |
| 61.0917313 | 76.75638 | 67.1125201 | 66.625     | 69 |



|            |          |            |        |    |
|------------|----------|------------|--------|----|
| 61.0917313 | 76.75638 | 67.1125201 | 66.625 | 69 |
| 61.0917313 | 75.75638 | 67.1125201 | 66.625 | 69 |
| 61.0917313 | 70.75638 | 67.1125201 | 66.125 | 69 |
| 61.0917313 | 69.75638 | 68.1125201 | 66.25  | 69 |
| 61.0917313 | 69.75638 | 68.1125201 | 66.5   | 69 |
| 61.0917313 | 69.75638 | 71.1125201 | 66.875 | 69 |
| 61.0917313 | 69.75638 | 74.1125201 | 67.25  | 69 |
| 61.0917313 | 69.75638 | 75.1125201 | 67.875 | 69 |
| 60.0917313 | 69.75638 | 77.1125201 | 67.875 | 69 |
| 59.0917313 | 68.75638 | 77.1125201 | 67.5   | 69 |
| 60.0917313 | 68.75638 | 77.1125201 | 67.875 | 69 |
| 62.0917313 | 67.75638 | 77.1125201 | 68.125 | 63 |
| 63.0917313 | 64.75638 | 76.1125201 | 68.5   | 63 |
| 65.0917313 | 64.75638 | 73.1125201 | 68.625 | 63 |
| 65.0917313 | 60.75638 | 73.1125201 | 67.875 | 63 |
| 66.0917313 | 59.75638 | 71.1125201 | 67.375 | 63 |
| 66.0917313 | 59.75638 | 71.1125201 | 67     | 63 |
| 67.0917313 | 62.75638 | 71.1125201 | 67.375 | 63 |
| 67.0917313 | 62.75638 | 70.1125201 | 67.5   | 63 |
| 68.0917313 | 63.75638 | 70.1125201 | 67.75  | 63 |
| 68.0917313 | 65.75638 | 70.1125201 | 67.625 | 63 |
| 68.0917313 | 65.75638 | 70.1125201 | 67.5   | 63 |
| 69.0917313 | 65.75638 | 68.1125201 | 66.75  | 63 |
| 68.0917313 | 65.75638 | 67.1125201 | 66.5   | 63 |
| 68.0917313 | 66.75638 | 66.1125201 | 66.25  | 63 |
| 68.0917313 | 67.75638 | 66.1125201 | 66.375 | 63 |
| 68.0917313 | 67.75638 | 66.1125201 | 66     | 63 |
| 68.0917313 | 67.75638 | 66.1125201 | 66.125 | 63 |
| 70.0917313 | 68.75638 | 67.1125201 | 66.5   | 63 |
| 71.0917313 | 69.75638 | 68.1125201 | 67.125 | 63 |
| 71.0917313 | 69.75638 | 67.1125201 | 67     | 63 |
| 71.0917313 | 69.75638 | 67.1125201 | 67.25  | 63 |
| 71.0917313 | 69.75638 | 67.1125201 | 67.25  | 63 |
| 73.0917313 | 69.75638 | 66.1125201 | 67.625 | 63 |
| 72.0917313 | 69.75638 | 66.1125201 | 67.625 | 63 |
| 72.0917313 | 69.75638 | 66.1125201 | 68.125 | 63 |
| 69.0917313 | 70.75638 | 68.1125201 | 67.875 | 63 |
| 66.0917313 | 70.75638 | 68.1125201 | 68.75  | 63 |
| 66.0917313 | 71.75638 | 68.1125201 | 69.75  | 63 |
| 67.0917313 | 71.75638 | 68.1125201 | 69.875 | 63 |
| 67.0917313 | 71.75638 | 68.1125201 | 69.875 | 63 |
| 68.0917313 | 72.75638 | 69.1125201 | 71.75  | 63 |
| 68.0917313 | 73.75638 | 70.1125201 | 72.5   | 63 |
| 67.0917313 | 75.75638 | 69.1125201 | 72.875 | 63 |
| 67.0917313 | 75.75638 | 68.1125201 | 72.375 | 63 |

|            |          |            |            |    |
|------------|----------|------------|------------|----|
| 67.0917313 | 76.75638 | 68.1125201 | 72.625     | 63 |
| 67.0917313 | 75.75638 | 67.1125201 | 73         | 63 |
| 66.0917313 | 74.75638 | 66.1125201 | 72.625     | 63 |
| 66.0917313 | 73.75638 | 67.1125201 | 73         | 63 |
| 66.0917313 | 73.75638 | 67.1125201 | 73         | 63 |
| 66.0917313 | 73.75638 | 67.1125201 | 72.75      | 63 |
| 66.0917313 | 73.75638 | 67.1125201 | 71.875     | 63 |
| 66.0917313 | 73.75638 | 68.1125201 | 71.375     | 63 |
| 65.0917313 | 76.75638 | 68.1125201 | 71.625     | 63 |
| 66.0917313 | 76.75638 | 69.1125201 | 71.875     | 63 |
| 68.0917313 | 76.75638 | 69.1125201 | 71.875     | 63 |
| 68.0917313 | 75.75638 | 69.1125201 | 71         | 63 |
| 69.0917313 | 75.75638 | 69.1125201 | 71         | 63 |
| 70.0917313 | 74.75638 | 67.1125201 | 70.5       | 63 |
| 80.0917313 | 71.75638 | 66.1125201 | 70.75      | 63 |
| 81.0917313 | 68.75638 | 66.1125201 | 70.125     | 63 |
| 69.75      | 67.75638 | 66.1125201 | 68.3322836 | 63 |
| 81.0917313 | 69.75638 | 67.1125201 | 70.125     | 63 |
| 81.0917313 | 70.75638 | 67.1125201 | 70.125     | 63 |
| 80.0917313 | 72.75638 | 67.1125201 | 69.875     | 63 |
| 79.0917313 | 71.75638 | 67.1125201 | 69.625     | 63 |
| 74.0917313 | 71.75638 | 67.1125201 | 69.375     | 63 |
| 74.0917313 | 70.75638 | 67.1125201 | 69.5       | 63 |
| 72.0917313 | 69.75638 | 66.1125201 | 69.25      | 63 |
| 72.0917313 | 70.75638 | 66.1125201 | 69.5       | 63 |
| 72.0917313 | 70.75638 | 66.1125201 | 69.375     | 63 |
| 72.0917313 | 71.75638 | 66.1125201 | 69.5       | 63 |
| 73.0917313 | 71.75638 | 66.1125201 | 69.625     | 63 |
| 73.0917313 | 72.75638 | 65.1125201 | 69.5       | 63 |
| 74.0917313 | 72.75638 | 65.1125201 | 69.75      | 63 |
| 74.0917313 | 74.75638 | 67.1125201 | 70.25      | 63 |
| 71.0917313 | 74.75638 | 68.1125201 | 70.125     | 63 |
| 70.0917313 | 72.75638 | 68.1125201 | 69.875     | 63 |
| 70.0917313 | 70.75638 | 68.1125201 | 69.625     | 63 |
| 70.0917313 | 70.75638 | 68.1125201 | 69.75      | 63 |
| 70.0917313 | 69.75638 | 69.1125201 | 69.625     | 63 |
| 71.0917313 | 68.75638 | 69.1125201 | 69.5       | 63 |
| 71.0917313 | 70.75638 | 69.1125201 | 69.625     | 63 |
| 69.0917313 | 71.75638 | 69.1125201 | 70         | 63 |
| 69.0917313 | 72.75638 | 69.1125201 | 70         | 63 |
| 70.0917313 | 72.75638 | 69.1125201 | 70.25      | 63 |
| 70.0917313 | 72.75638 | 70.1125201 | 70.25      | 63 |
| 70.0917313 | 72.75638 | 69.1125201 | 70         | 63 |
| 70.0917313 | 72.75638 | 70.1125201 | 70.25      | 63 |
| 71.0917313 | 70.75638 | 70.1125201 | 69.25      | 63 |

|            |          |            |            |    |
|------------|----------|------------|------------|----|
| 72.0917313 | 70.75638 | 70.1125201 | 69.375     | 63 |
| 72.0917313 | 70.75638 | 71.1125201 | 69.5       | 63 |
| 74.0917313 | 71.75638 | 71.1125201 | 70         | 63 |
| 74.0917313 | 72.75638 | 72.1125201 | 70.625     | 63 |
| 74.0917313 | 72.75638 | 72.1125201 | 70.625     | 63 |
| 74.0917313 | 73.75638 | 73.1125201 | 71.25      | 63 |
| 74.0917313 | 73.75638 | 73.1125201 | 71.25      | 63 |
| 74.0917313 | 73.75638 | 71.1125201 | 70.625     | 63 |
| 74.0917313 | 73.75638 | 72.1125201 | 70.75      | 63 |
| 74.0917313 | 72.75638 | 72.1125201 | 70.125     | 63 |
| 74.0917313 | 72.75638 | 72.1125201 | 70         | 63 |
| 74.0917313 | 72.75638 | 73.1125201 | 68.8646927 | 63 |
| 74.0917313 | 72.75638 | 74.1125201 | 70.375     | 63 |
| 74.0917313 | 72.75638 | 74.1125201 | 70.5       | 63 |
| 74.0917313 | 76.75638 | 75.1125201 | 70.875     | 63 |
| 72.0917313 | 76.75638 | 75.1125201 | 70.25      | 63 |
| 72.0917313 | 76.75638 | 75.1125201 | 70.75      | 63 |
| 72.0917313 | 76.75638 | 70.1125201 | 70.125     | 63 |
| 72.0917313 | 76.75638 | 69.1125201 | 69.75      | 63 |
| 73.0917313 | 76.75638 | 66.1125201 | 68.125     | 63 |
| 72.0917313 | 76.75638 | 66.1125201 | 67.75      | 63 |
| 72.0917313 | 76.75638 | 62.1125201 | 67.25      | 63 |
| 72.0917313 | 76.75638 | 61.1125201 | 67.25      | 63 |
| 72.0917313 | 76.75638 | 61.1125201 | 67.5       | 63 |
| 72.0917313 | 63.75638 | 60.1125201 | 66.125     | 63 |
| 71.0917313 | 62.75638 | 62.1125201 | 66.375     | 63 |
| 71.0917313 | 62.75638 | 62.1125201 | 66.75      | 63 |
| 71.0917313 | 63.75638 | 61.1125201 | 66.875     | 63 |
| 71.0917313 | 63.75638 | 61.1125201 | 67.125     | 63 |
| 71.0917313 | 63.75638 | 63.1125201 | 68.375     | 63 |
| 72.0917313 | 65.75638 | 62.1125201 | 68.25      | 63 |
| 72.0917313 | 65.75638 | 61.1125201 | 68.125     | 63 |
| 72.0917313 | 67.75638 | 61.1125201 | 68.625     | 63 |
| 72.0917313 | 70.75638 | 61.1125201 | 69         | 63 |
| 72.0917313 | 70.75638 | 62.1125201 | 68.75      | 63 |
| 72.0917313 | 70.75638 | 63.1125201 | 68.875     | 63 |
| 72.0917313 | 71.75638 | 63.1125201 | 69         | 63 |
| 72.0917313 | 71.75638 | 64.1125201 | 69.375     | 63 |
| 72.0917313 | 76.75638 | 64.1125201 | 70         | 63 |
| 71.0917313 | 77.75638 | 65.1125201 | 70.125     | 63 |
| 72.0917313 | 77.75638 | 65.1125201 | 70.125     | 63 |
| 72.0917313 | 77.75638 | 70.1125201 | 70.5       | 63 |
| 73.0917313 | 77.75638 | 71.1125201 | 70.75      | 63 |
| 73.0917313 | 76.75638 | 73.1125201 | 70.625     | 63 |
| 73.0917313 | 72.75638 | 73.1125201 | 70.125     | 63 |

|            |          |            |            |    |
|------------|----------|------------|------------|----|
| 73.0917313 | 72.75638 | 77.1125201 | 69.625     | 63 |
| 74.0917313 | 71.75638 | 77.1125201 | 69.5       | 63 |
| 74.0917313 | 71.75638 | 77.1125201 | 69.5       | 63 |
| 71.0917313 | 71.75638 | 75.1125201 | 69         | 63 |
| 71.0917313 | 72.75638 | 75.1125201 | 69.125     | 63 |
| 70.0917313 | 74.75638 | 75.1125201 | 69.25      | 63 |
| 69.0917313 | 76.75638 | 74.1125201 | 69.25      | 63 |
| 69.0917313 | 76.75638 | 73.1125201 | 69.125     | 63 |
| 67.0917313 | 76.75638 | 73.1125201 | 69.4376613 | 63 |
| 67.0917313 | 74.75638 | 73.1125201 | 68.9064113 | 63 |
| 67.0917313 | 73.75638 | 73.1125201 | 69.0470363 | 63 |
| 67.0917313 | 72.75638 | 73.1125201 | 69.5470363 | 63 |
| 67.0917313 | 72.75638 | 73.1125201 | 69.2501613 | 63 |
| 67.0917313 | 72.75638 | 73.1125201 | 69.4333111 | 63 |
| 67.0917313 | 72.75638 | 71.1125201 | 68.572718  | 63 |
| 68.0917313 | 72.75638 | 71.1125201 | 68.8282863 | 63 |
| 68.0917313 | 76.75638 | 68.1125201 | 68.5314113 | 63 |
| 68.0917313 | 77.75638 | 68.1125201 | 69.875     | 63 |
| 68.0917313 | 77.75638 | 68.1125201 | 69.625     | 63 |
| 68.0917313 | 76.75638 | 67.1125201 | 69.375     | 63 |
| 68.0917313 | 74.75638 | 67.1125201 | 68.875     | 63 |
| 67.0917313 | 71.75638 | 67.1125201 | 68.375     | 63 |
| 67.0917313 | 71.75638 | 67.1125201 | 68.625     | 63 |
| 67.0917313 | 70.75638 | 67.1125201 | 68.5       | 63 |
| 67.0917313 | 71.75638 | 68.1125201 | 68.5       | 63 |
| 67.0917313 | 71.75638 | 67.1125201 | 68.375     | 63 |
| 68.0917313 | 71.75638 | 67.1125201 | 68.25      | 63 |
| 68.0917313 | 72.75638 | 67.1125201 | 68.25      | 63 |
| 66.0917313 | 75.75638 | 67.1125201 | 68.375     | 63 |
| 66.0917313 | 78.75638 | 67.1125201 | 68.875     | 63 |
| 67.0917313 | 78.75638 | 68.1125201 | 69.125     | 63 |
| 67.0917313 | 79.75638 | 68.1125201 | 69.25      | 63 |
| 66.0917313 | 78.75638 | 67.1125201 | 68.875     | 63 |
| 65.0917313 | 77.75638 | 67.1125201 | 68.375     | 63 |
| 65.0917313 | 77.75638 | 67.1125201 | 68.25      | 63 |
| 64.0917313 | 77.75638 | 68.1125201 | 68.5       | 63 |
| 65.0917313 | 76.75638 | 68.1125201 | 68.375     | 63 |
| 65.0917313 | 76.75638 | 70.1125201 | 69.25      | 63 |
| 69.0917313 | 76.75638 | 70.1125201 | 70         | 63 |
| 69.0917313 | 75.75638 | 70.1125201 | 69.875     | 63 |
| 68.0917313 | 73.75638 | 70.1125201 | 69.75      | 63 |
| 69.0917313 | 73.75638 | 73.1125201 | 70.25      | 63 |
| 69.0917313 | 73.75638 | 74.1125201 | 70.5       | 63 |
| 69.0917313 | 72.75638 | 74.1125201 | 70.625     | 63 |
| 67.0917313 | 72.75638 | 74.1125201 | 70.375     | 63 |

|            |            |            |            |    |
|------------|------------|------------|------------|----|
| 66.0917313 | 72.75638   | 74.1125201 | 70.25      | 63 |
| 66.0917313 | 73.75638   | 74.1125201 | 70.5       | 63 |
| 65.0917313 | 73.75638   | 73.1125201 | 69.875     | 63 |
| 64.0917313 | 73.75638   | 72.1125201 | 69.25      | 63 |
| 63.0917313 | 73.75638   | 73.1125201 | 68.875     | 63 |
| 63.0917313 | 73.75638   | 72.1125201 | 69         | 63 |
| 63.0917313 | 73.75638   | 72.1125201 | 69.25      | 63 |
| 63.0917313 | 73.75638   | 72.1125201 | 68.75      | 63 |
| 63.0917313 | 74.75638   | 74.1125201 | 69.25      | 63 |
| 63.0917313 | 75.75638   | 74.1125201 | 69.25      | 63 |
| 63.0917313 | 75.75638   | 75.1125201 | 69.375     | 63 |
| 63.0917313 | 75.75638   | 74.1125201 | 69.125     | 63 |
| 63.0917313 | 75.75638   | 74.1125201 | 69.125     | 63 |
| 63.0917313 | 75.75638   | 73.1125201 | 68.75      | 63 |
| 62.0917313 | 75.75638   | 73.1125201 | 69         | 63 |
| 62.0917313 | 75.75638   | 71.1125201 | 68.375     | 63 |
| 62.0917313 | 76.75638   | 70.1125201 | 68.25      | 63 |
| 61.0917313 | 78.75638   | 68.1125201 | 68.25      | 63 |
| 61.0917313 | 68.125     | 67.1125201 | 66.6710775 | 63 |
| 61.0917313 | 68.125     | 67.1125201 | 66.6710775 | 63 |
| 63.0917313 | 68.625     | 68.1125201 | 67.2335775 | 63 |
| 63.0917313 | 69.125     | 68.1125201 | 67.6710775 | 63 |
| 63.0917313 | 69.1044904 | 68.1125201 | 67.6685138 | 63 |
| 61.0917313 | 68.8096488 | 67.1125201 | 68.0066586 | 63 |
| 61.0917313 | 79.75638   | 67.1125201 | 69.75      | 63 |
| 59.0917313 | 79.75638   | 67.1125201 | 69.75      | 63 |
| 59.0917313 | 79.75638   | 67.1125201 | 70         | 63 |
| 59.0917313 | 80.75638   | 67.1125201 | 69.875     | 63 |
| 59.0917313 | 69.625     | 66.1125201 | 68.2335775 | 63 |
| 60.0917313 | 76.75638   | 66.1125201 | 69.125     | 63 |
| 60.0917313 | 74.75638   | 67.1125201 | 68.75      | 63 |
| 61.0917313 | 73.75638   | 68.1125201 | 68.875     | 63 |
| 61.0917313 | 73.75638   | 68.1125201 | 69.125     | 63 |
| 61.0917313 | 72.75638   | 69.1125201 | 69.25      | 63 |
| 61.0917313 | 72.75638   | 71.1125201 | 69.375     | 63 |
| 61.0917313 | 71.75638   | 74.1125201 | 69.625     | 63 |
| 62.0917313 | 70.75638   | 76.1125201 | 69.5       | 63 |
| 63.0917313 | 70.75638   | 76.1125201 | 69.5       | 63 |
| 63.0917313 | 68.75638   | 80.1125201 | 69.75      | 63 |
| 64.0917313 | 68.75638   | 80.1125201 | 70.125     | 63 |
| 64.0917313 | 68.75638   | 78.1125201 | 70.25      | 63 |
| 64.0917313 | 68.75638   | 78.1125201 | 70.75      | 63 |
| 64.0917313 | 71.75638   | 80.1125201 | 72.625     | 63 |
| 65.0917313 | 72.75638   | 82.1125201 | 73.5       | 63 |
| 65.0917313 | 73.75638   | 82.1125201 | 73.625     | 63 |

|            |          |            |            |    |
|------------|----------|------------|------------|----|
| 65.0917313 | 73.75638 | 83.1125201 | 73.375     | 63 |
| 65.0917313 | 74.75638 | 83.1125201 | 73.25      | 63 |
| 66.0917313 | 75.75638 | 83.1125201 | 73.375     | 63 |
| 66.0917313 | 72.75638 | 77.1125201 | 72         | 63 |
| 67.0917313 | 70.75638 | 75.1125201 | 71.25      | 63 |
| 67.0917313 | 69.75638 | 75.1125201 | 71         | 63 |
| 67.0917313 | 69.75638 | 72.1125201 | 70.5       | 63 |
| 67.0917313 | 70.75638 | 72.1125201 | 70.75      | 63 |
| 67.0917313 | 72.75638 | 72.1125201 | 71.25      | 63 |
| 67.0917313 | 73.75638 | 72.1125201 | 71         | 63 |
| 67.0917313 | 73.75638 | 74.1125201 | 70.75      | 63 |
| 67.0917313 | 73.75638 | 76.1125201 | 70.625     | 63 |
| 67.0917313 | 73.75638 | 76.1125201 | 70.625     | 63 |
| 67.0917313 | 73.75638 | 76.1125201 | 70.625     | 63 |
| 67.0917313 | 73.75638 | 76.1125201 | 70.625     | 63 |
| 67.0917313 | 74.75638 | 71.1125201 | 70.25      | 63 |
| 67.0917313 | 74.75638 | 70.1125201 | 70         | 63 |
| 67.0917313 | 74.75638 | 68.1125201 | 68.2359746 | 63 |
| 67.0917313 | 78.75638 | 68.1125201 | 68.8140996 | 63 |
| 67.0917313 | 80.75638 | 62.1125201 | 68.3922246 | 63 |
| 68.0917313 | 80.75638 | 62.1125201 | 68.5328496 | 63 |
| 68.0917313 | 80.75638 | 65.1125201 | 68.9547246 | 63 |
| 68.0917313 | 80.75638 | 68.1125201 | 71         | 63 |
| 68.0917313 | 80.75638 | 68.1125201 | 71         | 63 |
| 67.0917313 | 79.75638 | 71.1125201 | 72         | 63 |
| 61.0917313 | 74.75638 | 71.1125201 | 71.125     | 63 |
| 58.0917313 | 71.75638 | 71.1125201 | 70.875     | 63 |
| 57.0917313 | 71.75638 | 72.1125201 | 71         | 63 |
| 57.0917313 | 70.75638 | 71.1125201 | 70.625     | 63 |
| 57.0917313 | 70.75638 | 71.1125201 | 70.0953496 | 63 |
| 57.0917313 | 71.75638 | 71.1125201 | 70.9859746 | 63 |
| 57.0917313 | 71.75638 | 71.1125201 | 71.0129831 | 63 |
| 57.0917313 | 71.75638 | 69.1125201 | 71.0193428 | 63 |
| 57.0917313 | 71.75638 | 69.1125201 | 70.4390996 | 63 |
| 58.0917313 | 71.75638 | 66.1125201 | 69.1734746 | 63 |
| 58.0917313 | 70.75638 | 66.1125201 | 68.3297246 | 63 |
| 58.0917313 | 70.75638 | 68.1125201 | 68.4547246 | 63 |
| 58.0917313 | 70.75638 | 68.1125201 | 68.3922246 | 63 |
| 58.0917313 | 70.75638 | 68.1125201 | 69.625     | 63 |
| 58.0917313 | 69.75638 | 68.1125201 | 69.125     | 63 |
| 60.0917313 | 70.75638 | 69.1125201 | 69.125     | 63 |
| 60.0917313 | 70.75638 | 69.1125201 | 68.5       | 63 |
| 63.0917313 | 70.75638 | 69.1125201 | 68.625     | 63 |
| 63.0917313 | 70.75638 | 69.1125201 | 68.25      | 63 |
| 66.0917313 | 71.75638 | 70.1125201 | 68.5       | 63 |

|            |          |            |            |    |
|------------|----------|------------|------------|----|
| 67.0917313 | 71.75638 | 70.1125201 | 68.625     | 63 |
| 67.0917313 | 70.75638 | 70.1125201 | 68         | 71 |
| 67.0917313 | 70.75638 | 70.1125201 | 68         | 71 |
| 67.0917313 | 68.75638 | 70.1125201 | 67.625     | 71 |
| 66.0917313 | 68.75638 | 70.1125201 | 67.75      | 63 |
| 67.0917313 | 68.75638 | 70.1125201 | 67.875     | 63 |
| 68.0917313 | 68.75638 | 69.1125201 | 68.375     | 63 |
| 68.0917313 | 68.75638 | 69.1125201 | 68.625     | 63 |
| 69.0917313 | 68.75638 | 69.1125201 | 68.625     | 63 |
| 69.0917313 | 68.75638 | 68.1125201 | 68         | 63 |
| 69.0917313 | 68.75638 | 68.1125201 | 68         | 63 |
| 68.0917313 | 70.75638 | 68.1125201 | 68.25      | 63 |
| 68.0917313 | 70.75638 | 69.1125201 | 68.5       | 63 |
| 68.0917313 | 71.75638 | 69.1125201 | 68.75      | 63 |
| 68.0917313 | 71.75638 | 69.1125201 | 68.375     | 63 |
| 68.0917313 | 71.75638 | 68.1125201 | 68         | 63 |
| 68.0917313 | 71.75638 | 68.1125201 | 67.75      | 63 |
| 68.0917313 | 71.75638 | 67.1125201 | 67.5       | 63 |
| 68.0917313 | 73.75638 | 67.1125201 | 68         | 63 |
| 67.0917313 | 74.75638 | 67.1125201 | 68.375     | 63 |
| 67.0917313 | 76.75638 | 67.1125201 | 68.875     | 63 |
| 67.0917313 | 77.75638 | 67.1125201 | 69.375     | 63 |
| 68.0917313 | 77.75638 | 66.1125201 | 69.375     | 63 |
| 69.0917313 | 75.75638 | 65.1125201 | 69.125     | 63 |
| 69.0917313 | 73.75638 | 65.1125201 | 69.625     | 63 |
| 73.0917313 | 72.75638 | 65.1125201 | 70         | 63 |
| 74.0917313 | 71.75638 | 65.1125201 | 70.375     | 63 |
| 72.0917313 | 72.75638 | 65.1125201 | 70.5       | 63 |
| 67.0917313 | 72.75638 | 65.1125201 | 69.75      | 63 |
| 62.0917313 | 73.75638 | 65.1125201 | 69.75      | 63 |
| 60.0917313 | 73.75638 | 65.1125201 | 69.625     | 63 |
| 59.0917313 | 74.75638 | 63.1125201 | 69.125     | 63 |
| 59.0917313 | 75.75638 | 64.1125201 | 69.25      | 63 |
| 58.0917313 | 75.75638 | 64.1125201 | 68.5       | 63 |
| 57.0917313 | 75.75638 | 63.1125201 | 67.875     | 63 |
| 57.0917313 | 75.75638 | 63.1125201 | 67.875     | 63 |
| 59.0917313 | 75.75638 | 64.1125201 | 68.25      | 63 |
| 59.0917313 | 76.75638 | 64.1125201 | 68.375     | 63 |
| 59.0917313 | 76.75638 | 68.1125201 | 68.875     | 63 |
| 59.0917313 | 77.75638 | 69.1125201 | 69         | 63 |
| 59.0917313 | 77.75638 | 69.1125201 | 69         | 63 |
| 60.0917313 | 78.75638 | 74.1125201 | 70.25      | 63 |
| 59.0917313 | 80.75638 | 74.1125201 | 70.375     | 63 |
| 59.0917313 | 82.75638 | 79.1125201 | 71.75      | 63 |
| 64.0917313 | 73.25    | 82.1125201 | 71.8117025 | 63 |

|            |          |            |            |    |
|------------|----------|------------|------------|----|
| 65.0917313 | 73       | 82.1125201 | 71.2804525 | 63 |
| 64.0917313 | 72.125   | 78.1125201 | 70.2960775 | 63 |
| 64.0917313 | 72.25    | 78.1125201 | 70.4367025 | 63 |
| 64.0917313 | 72.25    | 75.1125201 | 70.4367025 | 63 |
| 63.0917313 | 72.25    | 72.1125201 | 70.4367025 | 63 |
| 64.0917313 | 72.125   | 67.1125201 | 70.2960775 | 63 |
| 65.0917313 | 72.625   | 67.1125201 | 70.8585775 | 63 |
| 66.0917313 | 72.5     | 66.1125201 | 70.7179525 | 63 |
| 66.0917313 | 72.875   | 66.1125201 | 71.1398275 | 63 |
| 66.0917313 | 82.75638 | 66.1125201 | 72.25      | 63 |
| 67.0917313 | 73.75638 | 68.1125201 | 71.875     | 63 |
| 68.0917313 | 72.75638 | 68.1125201 | 72.125     | 63 |
| 68.0917313 | 72.75638 | 69.1125201 | 72.125     | 63 |
| 68.0917313 | 73.75638 | 69.1125201 | 71.125     | 63 |
| 68.0917313 | 74.75638 | 70.1125201 | 70.75      | 63 |
| 68.0917313 | 74.75638 | 69.1125201 | 70.5       | 63 |
| 66.0917313 | 74.75638 | 69.1125201 | 70.25      | 63 |
| 66.0917313 | 74.75638 | 69.1125201 | 70.25      | 63 |
| 67.0917313 | 73.75638 | 69.1125201 | 70         | 63 |
| 67.0917313 | 73.75638 | 70.1125201 | 69.75      | 63 |
| 68.0917313 | 73.75638 | 71.1125201 | 69.875     | 63 |
| 68.0917313 | 73.75638 | 71.1125201 | 70.125     | 63 |
| 67.0917313 | 73.75638 | 73.1125201 | 70.125     | 63 |
| 67.0917313 | 73.75638 | 72.1125201 | 70         | 63 |
| 67.0917313 | 73.75638 | 72.1125201 | 70.125     | 63 |
| 68.0917313 | 73.75638 | 72.1125201 | 70.25      | 63 |
| 69.0917313 | 72.75638 | 72.1125201 | 71.5       | 63 |
| 70.0917313 | 72.75638 | 73.1125201 | 70.9740677 | 63 |
| 71.0917313 | 69.75638 | 73.1125201 | 70.7396927 | 63 |
| 71.0917313 | 67.75638 | 72.1125201 | 71.4428177 | 63 |
| 71.0917313 | 67.75638 | 71.1125201 | 71.8803177 | 63 |
| 71.0917313 | 67.75638 | 71.1125201 | 72.0209427 | 63 |
| 71.0917313 | 68.75638 | 71.1125201 | 72.5365677 | 63 |
| 71.0917313 | 68.75638 | 72.1125201 | 72.7084427 | 63 |
| 71.0917313 | 68.75638 | 72.1125201 | 72.5990677 | 63 |
| 71.0917313 | 68.75638 | 72.1125201 | 72.4740677 | 63 |
| 72.0917313 | 68.75638 | 72.1125201 | 73.0365677 | 63 |
| 80.0917313 | 68.75638 | 72.1125201 | 75         | 63 |
| 80.0917313 | 68.75638 | 72.1125201 | 74.75      | 63 |
| 80.0917313 | 71.75638 | 72.1125201 | 75.125     | 63 |
| 81.0917313 | 72.75638 | 72.1125201 | 75.375     | 63 |
| 81.0917313 | 73.75638 | 72.1125201 | 75.25      | 63 |
| 81.0917313 | 73.75638 | 70.1125201 | 74.5       | 63 |
| 81.0917313 | 73.75638 | 67.1125201 | 72.3496963 | 63 |
| 80.0917313 | 73.75638 | 67.1125201 | 72.625     | 63 |



|            |          |            |            |    |
|------------|----------|------------|------------|----|
| 79.0917313 | 72.75638 | 68.1125201 | 72         | 63 |
| 79.0917313 | 71.75638 | 69.1125201 | 72.5       | 63 |
| 78.0917313 | 70.75638 | 69.1125201 | 72.375     | 63 |
| 77.0917313 | 70.75638 | 69.1125201 | 72.25      | 63 |
| 77.0917313 | 70.75638 | 69.1125201 | 72.25      | 63 |
| 76.0917313 | 70.75638 | 69.1125201 | 71.75      | 63 |
| 75.0917313 | 71.75638 | 68.1125201 | 71.25      | 63 |
| 75.0917313 | 72.75638 | 68.1125201 | 71.25      | 63 |
| 75.0917313 | 74.75638 | 67.1125201 | 71         | 63 |
| 75.0917313 | 74.75638 | 67.1125201 | 71         | 63 |
| 75.0917313 | 73.75638 | 67.1125201 | 70.75      | 63 |
| 73.0917313 | 73.75638 | 68.1125201 | 70.75      | 63 |
| 73.0917313 | 73.75638 | 68.1125201 | 70.5       | 63 |
| 73.0917313 | 71.75638 | 69.1125201 | 70.25      | 63 |
| 73.0917313 | 71.75638 | 69.1125201 | 69.25      | 63 |
| 73.0917313 | 71.75638 | 70.1125201 | 68.875     | 63 |
| 73.0917313 | 71.75638 | 69.1125201 | 68.625     | 63 |
| 73.0917313 | 72.75638 | 69.1125201 | 68.75      | 63 |
| 72.0917313 | 74.75638 | 69.1125201 | 69.25      | 63 |
| 75.0917313 | 73.75638 | 70.1125201 | 70         | 63 |
| 76.0917313 | 73.75638 | 70.1125201 | 70.625     | 63 |
| 76.0917313 | 72.75638 | 70.1125201 | 70.125     | 63 |
| 77.0917313 | 70.75638 | 70.1125201 | 70.375     | 63 |
| 77.0917313 | 70.75638 | 71.1125201 | 70.75      | 63 |
| 77.0917313 | 70.75638 | 71.1125201 | 70.75      | 63 |
| 77.0917313 | 70.75638 | 72.1125201 | 69.4428177 | 63 |
| 78.0917313 | 71.75638 | 75.1125201 | 71.375     | 63 |
| 78.0917313 | 70.75638 | 74.1125201 | 69.5053177 | 63 |
| 75.0917313 | 70.75638 | 72.1125201 | 69.0990677 | 63 |
| 72.0917313 | 70.75638 | 72.1125201 | 69.2084427 | 63 |
| 72.0917313 | 71.75638 | 71.1125201 | 70.4740677 | 63 |
| 70.0917313 | 72.75638 | 69.1125201 | 71.25      | 63 |
| 70.0917313 | 74.75638 | 69.1125201 | 71.375     | 71 |
| 70.0917313 | 74.75638 | 67.1125201 | 70.625     | 71 |
| 70.0917313 | 74.75638 | 66.1125201 | 70.5       | 71 |
| 70.0917313 | 74.75638 | 66.1125201 | 70.375     | 71 |
| 70.0917313 | 75.75638 | 66.1125201 | 70.125     | 63 |
| 71.0917313 | 76.75638 | 66.1125201 | 70.25      | 63 |
| 70.0917313 | 77.75638 | 65.1125201 | 70.25      | 63 |
| 69.0917313 | 77.75638 | 65.1125201 | 70         | 63 |
| 69.0917313 | 76.75638 | 65.1125201 | 70.375     | 63 |
| 68.0917313 | 75.75638 | 65.1125201 | 70.25      | 63 |
| 68.0917313 | 75.75638 | 68.1125201 | 71.5       | 63 |
| 68.0917313 | 75.75638 | 72.1125201 | 71.875     | 63 |
| 68.0917313 | 74.75638 | 72.1125201 | 72         | 63 |

|            |          |            |            |    |
|------------|----------|------------|------------|----|
| 70.0917313 | 74.75638 | 74.1125201 | 72.375     | 69 |
| 74.0917313 | 74.75638 | 74.1125201 | 73         | 69 |
| 75.0917313 | 75.75638 | 74.1125201 | 72.375     | 69 |
| 75.0917313 | 75.75638 | 73.1125201 | 72.375     | 69 |
| 75.0917313 | 75.75638 | 72.1125201 | 72.375     | 69 |
| 75.0917313 | 75.75638 | 70.1125201 | 71.375     | 69 |
| 76.0917313 | 76.75638 | 70.1125201 | 71.75      | 69 |
| 76.0917313 | 77.75638 | 68.1125201 | 71.625     | 69 |
| 76.0917313 | 77.75638 | 68.1125201 | 71.875     | 69 |
| 76.0917313 | 78.75638 | 67.1125201 | 72.125     | 69 |
| 76.0917313 | 78.75638 | 67.1125201 | 72.25      | 69 |
| 77.0917313 | 77.75638 | 67.1125201 | 72.625     | 69 |
| 77.0917313 | 75.75638 | 67.1125201 | 72.375     | 69 |
| 77.0917313 | 75.75638 | 67.1125201 | 72.375     | 69 |
| 76.0917313 | 75.75638 | 68.1125201 | 72.375     | 69 |
| 76.0917313 | 76.75638 | 68.1125201 | 72.125     | 69 |
| 75.0917313 | 79.75638 | 68.1125201 | 72.25      | 69 |
| 75.0917313 | 79.75638 | 67.1125201 | 72.5       | 69 |
| 77.0917313 | 79.75638 | 67.1125201 | 72.875     | 69 |
| 77.0917313 | 79.75638 | 66.1125201 | 73.125     | 69 |
| 79.0917313 | 76.75638 | 64.1125201 | 73.125     | 69 |
| 79.0917313 | 72.75638 | 64.1125201 | 73.125     | 69 |
| 80.0917313 | 67.75638 | 63.1125201 | 72.375     | 69 |
| 80.0917313 | 67.75638 | 63.1125201 | 72.375     | 69 |
| 80.0917313 | 67.75638 | 63.1125201 | 71.875     | 69 |
| 82.0917313 | 69.75638 | 64.1125201 | 72.375     | 69 |
| 82.0917313 | 70.75638 | 65.1125201 | 72.875     | 69 |
| 82.0917313 | 70.75638 | 64.1125201 | 72.125     | 69 |
| 81.0917313 | 69.75638 | 64.1125201 | 71.875     | 69 |
| 81.0917313 | 69.75638 | 64.1125201 | 71.5       | 69 |
| 80.0917313 | 69.75638 | 64.1125201 | 71.375     | 69 |
| 80.0917313 | 69.75638 | 64.1125201 | 71.5       | 69 |
| 80.0917313 | 71.75638 | 64.1125201 | 71.75      | 69 |
| 79.0917313 | 71.75638 | 65.1125201 | 71.75      | 69 |
| 76.0917313 | 72.75638 | 65.1125201 | 71.25      | 69 |
| 76.0917313 | 73.75638 | 65.1125201 | 71.375     | 69 |
| 70.0917313 | 72.75638 | 65.1125201 | 70.875     | 69 |
| 68.0917313 | 72.75638 | 65.1125201 | 70.875     | 69 |
| 68.0917313 | 72.75638 | 65.1125201 | 70.875     | 69 |
| 68.0917313 | 72.75638 | 66.1125201 | 71.375     | 69 |
| 68.0917313 | 72.75638 | 67.1125201 | 71.75      | 69 |
| 68.0917313 | 72.75638 | 70.1125201 | 72.125     | 69 |
| 69.0917313 | 73.75638 | 72.1125201 | 72.875     | 69 |
| 69.0917313 | 75.75638 | 72.1125201 | 73.125     | 69 |
| 68.0917313 | 75.75638 | 74.1125201 | 71.3653213 | 69 |

|            |          |            |            |    |
|------------|----------|------------|------------|----|
| 67.0917313 | 76.75638 | 73.1125201 | 71.3809463 | 69 |
| 67.0917313 | 76.75638 | 74.1125201 | 71.2403213 | 69 |
| 67.0917313 | 76.75638 | 74.1125201 | 71.6778213 | 69 |
| 67.0917313 | 76.75638 | 74.1125201 | 71.9434463 | 69 |
| 68.0917313 | 76.75638 | 73.1125201 | 71.6465713 | 69 |
| 68.0917313 | 75.75638 | 72.1125201 | 71.0840713 | 69 |
| 68.0917313 | 76.75638 | 72.1125201 | 71.0684463 | 69 |
| 68.0917313 | 78.75638 | 72.1125201 | 71.3496963 | 69 |
| 68.0917313 | 78.75638 | 72.1125201 | 71.0684463 | 69 |
| 68.0917313 | 79.75638 | 72.1125201 | 72.875     | 69 |
| 68.0917313 | 79.75638 | 72.1125201 | 72.875     | 69 |
| 67.0917313 | 79.75638 | 71.1125201 | 72.5       | 69 |
| 66.0917313 | 79.75638 | 71.1125201 | 72.25      | 69 |
| 66.0917313 | 79.75638 | 69.1125201 | 72         | 69 |
| 66.0917313 | 77.75638 | 68.1125201 | 71.5       | 69 |
| 65.0917313 | 76.75638 | 67.1125201 | 70.625     | 69 |
| 65.0917313 | 75.75638 | 67.1125201 | 71.125     | 69 |
| 66.0917313 | 75.75638 | 67.1125201 | 71.25      | 69 |
| 66.0917313 | 77.75638 | 66.1125201 | 71.25      | 69 |
| 67.0917313 | 78.75638 | 67.1125201 | 71.875     | 69 |
| 67.0917313 | 78.75638 | 67.1125201 | 72.375     | 69 |
| 68.0917313 | 79.75638 | 67.1125201 | 72.75      | 69 |
| 68.0917313 | 79.75638 | 67.1125201 | 72.75      | 69 |
| 64.0917313 | 79.75638 | 69.1125201 | 72.5       | 69 |
| 64.0917313 | 79.75638 | 69.1125201 | 72.375     | 69 |
| 63.0917313 | 78.75638 | 70.1125201 | 71.875     | 69 |
| 63.0917313 | 78.75638 | 70.1125201 | 71.5       | 69 |
| 63.0917313 | 78.75638 | 70.1125201 | 71         | 69 |
| 66.0917313 | 77.75638 | 70.1125201 | 70.75      | 69 |
| 67.0917313 | 76.75638 | 70.1125201 | 70.5       | 69 |
| 67.0917313 | 76.75638 | 70.1125201 | 70.625     | 69 |
| 66.0917313 | 79.75638 | 70.1125201 | 71         | 69 |
| 65.0917313 | 79.75638 | 70.1125201 | 70.875     | 69 |
| 65.0917313 | 79.75638 | 69.1125201 | 71         | 69 |
| 65.0917313 | 79.75638 | 68.1125201 | 71         | 69 |
| 64.0917313 | 77.75638 | 68.1125201 | 71         | 69 |
| 65.0917313 | 72.75638 | 68.1125201 | 70.625     | 69 |
| 65.0917313 | 72.75638 | 68.1125201 | 70.5       | 69 |
| 65.0917313 | 70.75638 | 69.1125201 | 70.375     | 69 |
| 66.0917313 | 70.75638 | 69.1125201 | 71         | 69 |
| 66.0917313 | 70.75638 | 69.1125201 | 70.875     | 69 |
| 66.0917313 | 70.75638 | 70.1125201 | 70.875     | 69 |
| 66.0917313 | 70.75638 | 70.1125201 | 70.75      | 69 |
| 66.0917313 | 70.75638 | 70.1125201 | 70.75      | 69 |
| 67.0917313 | 69.75638 | 70.1125201 | 70.875     | 69 |

|            |          |            |            |    |
|------------|----------|------------|------------|----|
| 70.0917313 | 67.75638 | 69.1125201 | 70.75      | 69 |
| 70.0917313 | 67.75638 | 69.1125201 | 70.625     | 69 |
| 70.0917313 | 67.75638 | 69.1125201 | 70.75      | 69 |
| 70.0917313 | 67.75638 | 69.1125201 | 70.625     | 69 |
| 70.0917313 | 68.75638 | 69.1125201 | 70.75      | 69 |
| 69.0917313 | 68.75638 | 70.1125201 | 70.5       | 69 |
| 69.0917313 | 68.75638 | 71.1125201 | 71         | 69 |
| 70.0917313 | 69.75638 | 72.1125201 | 71.375     | 69 |
| 69.0917313 | 69.75638 | 72.1125201 | 71.5       | 69 |
| 69.0917313 | 70.75638 | 75.1125201 | 72         | 69 |
| 69.0917313 | 70.75638 | 77.1125201 | 72         | 69 |
| 69.0917313 | 70.75638 | 77.1125201 | 72.25      | 69 |
| 69.0917313 | 70.75638 | 77.1125201 | 72         | 69 |
| 68.0917313 | 72.75638 | 77.1125201 | 72.25      | 69 |
| 68.0917313 | 72.75638 | 77.1125201 | 72.25      | 69 |
| 69.0917313 | 73.75638 | 77.1125201 | 72.5       | 69 |
| 69.0917313 | 73.75638 | 77.1125201 | 72.5       | 69 |
| 70.0917313 | 74.75638 | 77.1125201 | 73.625     | 69 |
| 70.0917313 | 74.75638 | 75.1125201 | 73.5       | 69 |
| 70.0917313 | 74.75638 | 71.1125201 | 71.3653213 | 69 |
| 70.0917313 | 74.75638 | 70.1125201 | 71.2246963 | 69 |
| 70.0917313 | 74.75638 | 70.1125201 | 71.1153213 | 69 |
| 70.0917313 | 74.75638 | 70.1125201 | 70.8340713 | 69 |
| 71.0917313 | 74.75638 | 70.1125201 | 70.5528213 | 69 |
| 71.0917313 | 74.75638 | 70.1125201 | 70.6934463 | 69 |
| 71.0917313 | 74.75638 | 70.1125201 | 70.1934463 | 69 |
| 71.0917313 | 74.75638 | 70.1125201 | 70.0684463 | 69 |
| 72.0917313 | 75.75638 | 70.1125201 | 71.875     | 69 |
| 73.0917313 | 78.75638 | 70.1125201 | 72.625     | 69 |
| 73.0917313 | 78.75638 | 70.1125201 | 73.375     | 69 |
| 73.0917313 | 77.75638 | 70.1125201 | 72.375     | 69 |
| 73.0917313 | 77.75638 | 70.1125201 | 72.375     | 69 |
| 71.0917313 | 77.75638 | 69.1125201 | 72.5       | 69 |
| 71.0917313 | 77.75638 | 69.1125201 | 70.3101791 | 69 |
| 71.0917313 | 75.75638 | 69.1125201 | 71.375     | 69 |
| 71.0917313 | 75.75638 | 68.1125201 | 71.25      | 69 |
| 71.0917313 | 75.75638 | 68.1125201 | 71.25      | 69 |
| 71.0917313 | 76.75638 | 70.1125201 | 71.625     | 69 |
| 71.0917313 | 76.75638 | 71.1125201 | 72.375     | 69 |
| 71.0917313 | 76.75638 | 72.1125201 | 72.625     | 69 |
| 71.0917313 | 77.75638 | 75.1125201 | 72.75      | 69 |
| 72.0917313 | 77.75638 | 75.1125201 | 72.875     | 69 |
| 72.0917313 | 77.75638 | 75.1125201 | 73.125     | 69 |
| 71.0917313 | 76.75638 | 75.1125201 | 72.875     | 69 |
| 64.0917313 | 76.75638 | 77.1125201 | 72.25      | 69 |

|            |          |            |            |    |
|------------|----------|------------|------------|----|
| 64.0917313 | 76.75638 | 77.1125201 | 72         | 69 |
| 64.0917313 | 74.75638 | 75.1125201 | 71.5       | 69 |
| 64.0917313 | 74.75638 | 74.1125201 | 71.6876613 | 69 |
| 64.0917313 | 74.75638 | 73.1125201 | 71.4220363 | 69 |
| 64.0917313 | 74.75638 | 73.1125201 | 71.1407863 | 69 |
| 64.0917313 | 74.75638 | 71.1125201 | 71.1564113 | 69 |
| 64.0917313 | 72.75638 | 70.1125201 | 70.5626613 | 69 |
| 68.0917313 | 71.75638 | 70.1125201 | 70.7032863 | 69 |
| 68.0917313 | 71.75638 | 70.1125201 | 71.5       | 69 |
| 70.0917313 | 70.75638 | 69.1125201 | 71.375     | 69 |
| 71.0917313 | 69.75638 | 69.1125201 | 71.625     | 69 |
| 71.0917313 | 68.75638 | 69.1125201 | 71.375     | 69 |
| 72.0917313 | 68.75638 | 69.1125201 | 71.25      | 69 |
| 74.0917313 | 68.75638 | 69.1125201 | 71.375     | 69 |
| 74.0917313 | 68.75638 | 69.1125201 | 71.5       | 69 |
| 74.0917313 | 69.75638 | 69.1125201 | 71.75      | 63 |
| 73.0917313 | 69.75638 | 69.1125201 | 71.125     | 63 |
| 71.0917313 | 68.75638 | 67.1125201 | 69.75      | 63 |
| 69.0917313 | 68.75638 | 69.1125201 | 69.75      | 63 |
| 68.0917313 | 68.75638 | 70.1125201 | 69.625     | 63 |
| 67.0917313 | 68.75638 | 70.1125201 | 69.5       | 63 |
| 67.0917313 | 68.75638 | 70.1125201 | 69.375     | 63 |
| 68.0917313 | 68.75638 | 69.1125201 | 69         | 63 |
| 68.0917313 | 68.75638 | 69.1125201 | 68.875     | 63 |
| 67.0917313 | 68.75638 | 69.1125201 | 68.875     | 63 |
| 66.0917313 | 68.75638 | 69.1125201 | 69         | 63 |
| 65.0917313 | 66.75638 | 69.1125201 | 68.625     | 63 |
| 65.0917313 | 66.75638 | 70.1125201 | 68.75      | 63 |
| 66.0917313 | 65.75638 | 70.1125201 | 68.875     | 63 |
| 66.0917313 | 65.75638 | 70.1125201 | 69         | 63 |
| 67.0917313 | 65.75638 | 68.1125201 | 69.625     | 63 |
| 67.0917313 | 65.75638 | 68.1125201 | 69.375     | 63 |
| 67.0917313 | 66.75638 | 68.1125201 | 69.5       | 63 |
| 67.0917313 | 67.75638 | 66.1125201 | 69.125     | 63 |
| 67.0917313 | 67.75638 | 66.1125201 | 68.375     | 63 |
| 67.0917313 | 67.75638 | 67.1125201 | 68         | 63 |
| 67.0917313 | 68.75638 | 67.1125201 | 68.125     | 63 |
| 67.0917313 | 69.75638 | 67.1125201 | 68         | 63 |
| 67.0917313 | 70.75638 | 67.1125201 | 68.125     | 63 |
| 67.0917313 | 71.75638 | 67.1125201 | 68.25      | 63 |
| 67.0917313 | 71.75638 | 67.1125201 | 68.25      | 63 |
| 65.0917313 | 74.75638 | 67.1125201 | 68.5       | 63 |
| 65.0917313 | 74.75638 | 67.1125201 | 68.375     | 63 |
| 65.0917313 | 74.75638 | 67.1125201 | 68.375     | 63 |
| 65.0917313 | 77.75638 | 67.1125201 | 69         | 63 |

|            |          |            |           |    |
|------------|----------|------------|-----------|----|
| 65.0917313 | 77.75638 | 67.1125201 | 70.375    | 63 |
| 65.0917313 | 77.75638 | 69.1125201 | 70.75     | 63 |
| 67.0917313 | 77.75638 | 70.1125201 | 71.25     | 63 |
| 67.0917313 | 77.75638 | 69.1125201 | 71.125    | 63 |
| 67.0917313 | 77.75638 | 69.1125201 | 70.75     | 63 |
| 69.0917313 | 77.75638 | 69.1125201 | 70.875    | 63 |
| 69.0917313 | 77.75638 | 68.1125201 | 70.875    | 63 |
| 69.0917313 | 77.75638 | 66.1125201 | 70.875    | 63 |
| 69.0917313 | 77.75638 | 66.1125201 | 71        | 63 |
| 69.0917313 | 77.75638 | 64.1125201 | 70.5      | 63 |
| 67.0917313 | 77.75638 | 63.1125201 | 70.25     | 63 |
| 65.0917313 | 77.75638 | 63.1125201 | 70.25     | 63 |
| 64.0917313 | 78.75638 | 64.1125201 | 70.5      | 63 |
| 64.0917313 | 78.75638 | 64.1125201 | 70.625    | 63 |
| 64.0917313 | 79.75638 | 66.1125201 | 70.625    | 63 |
| 65.0917313 | 78.75638 | 67.1125201 | 70.875    | 63 |
| 65.0917313 | 78.75638 | 68.1125201 | 71.125    | 63 |
| 65.0917313 | 78.75638 | 67.1125201 | 71        | 63 |
| 64.0917313 | 76.75638 | 67.1125201 | 70.625    | 63 |
| 64.0917313 | 76.75638 | 67.1125201 | 70.75     | 63 |
| 64.0917313 | 78.75638 | 66.1125201 | 70.625    | 63 |
| 64.0917313 | 78.75638 | 66.1125201 | 70.625    | 63 |
| 64.0917313 | 79.75638 | 67.1125201 | 70.875    | 63 |
| 64.0917313 | 79.75638 | 67.1125201 | 70.375    | 63 |
| 64.0917313 | 70.75638 | 67.1125201 | 69.5      | 63 |
| 64.0917313 | 65.75638 | 67.1125201 | 69        | 63 |
| 65.0917313 | 62.75638 | 68.1125201 | 68.75     | 63 |
| 65.0917313 | 61.75638 | 67.1125201 | 68.5      | 63 |
| 64.0917313 | 61.75638 | 66.1125201 | 67.5      | 63 |
| 64.0917313 | 60.75638 | 66.1125201 | 67.25     | 63 |
| 64.0917313 | 60.75638 | 66.1125201 | 66.25     | 63 |
| 65.0917313 | 60.75638 | 66.1125201 | 65.875    | 63 |
| 65.0917313 | 60.75638 | 68.1125201 | 66.125    | 63 |
| 66.0917313 | 65.75638 | 69.1125201 | 66.875    | 63 |
| 66.0917313 | 66.75638 | 69.1125201 | 66.75     | 63 |
| 67.0917313 | 66.75638 | 70.1125201 | 67.375    | 63 |
| 67.0917313 | 66.75638 | 71.1125201 | 67.75     | 63 |
| 67.0917313 | 62.75638 | 72.1125201 | 67.75     | 63 |
| 67.0917313 | 61.75638 | 73.1125201 | 67.875    | 63 |
| 65.0917313 | 61.75638 | 76.1125201 | 68.25     | 63 |
| 63.0917313 | 62.75638 | 79.1125201 | 68.5      | 63 |
| 63.0917313 | 63.75638 | 79.1125201 | 68.25     | 63 |
| 63.0917313 | 65.75638 | 68.75      | 67.204685 | 63 |
| 63.0917313 | 67.75638 | 68.875     | 67.34531  | 63 |
| 63.0917313 | 67.75638 | 68.75      | 67.204685 | 63 |

|            |          |            |            |    |
|------------|----------|------------|------------|----|
| 62.0917313 | 67.75638 | 68.375     | 66.90781   | 63 |
| 62.0917313 | 67.75638 | 76.1125201 | 68         | 63 |
| 62.0917313 | 67.75638 | 72.1125201 | 67.625     | 63 |
| 62.0917313 | 66.75638 | 72.1125201 | 67.5       | 63 |
| 62.0917313 | 66.75638 | 72.1125201 | 67.5       | 63 |
| 62.0917313 | 66.75638 | 70.1125201 | 67.375     | 63 |
| 64.0917313 | 68.75638 | 70.1125201 | 67.875     | 63 |
| 64.0917313 | 69.75638 | 70.1125201 | 69.25      | 63 |
| 63.0917313 | 70.75638 | 68.1125201 | 67.6465713 | 63 |
| 62.0917313 | 70.75638 | 67.1125201 | 67.0840713 | 63 |
| 62.0917313 | 70.75638 | 67.1125201 | 67.25      | 63 |
| 61.0917313 | 70.75638 | 67.1125201 | 66.875     | 63 |
| 61.0917313 | 69.75638 | 66.1125201 | 66.125     | 63 |
| 62.0917313 | 71.75638 | 66.1125201 | 66.375     | 63 |
| 62.0917313 | 72.75638 | 66.1125201 | 66.25      | 63 |
| 62.0917313 | 73.75638 | 66.1125201 | 66.75      | 63 |
| 63.0917313 | 73.75638 | 66.1125201 | 67.375     | 63 |
| 63.0917313 | 73.75638 | 67.1125201 | 67.875     | 63 |
| 63.0917313 | 75.75638 | 67.1125201 | 68.375     | 63 |
| 63.0917313 | 75.75638 | 72.1125201 | 69.125     | 63 |
| 63.0917313 | 75.75638 | 73.1125201 | 69.125     | 63 |
| 63.0917313 | 75.75638 | 75.1125201 | 69.5       | 63 |
| 63.0917313 | 75.75638 | 75.1125201 | 69.625     | 63 |
| 63.0917313 | 75.75638 | 76.1125201 | 70         | 63 |
| 63.0917313 | 74.75638 | 75.1125201 | 70         | 63 |
| 76.0917313 | 73.75638 | 75.1125201 | 72         | 63 |
| 80.0917313 | 72.75638 | 73.1125201 | 72.125     | 63 |
| 80.0917313 | 72.75638 | 73.1125201 | 72.375     | 63 |
| 79.0917313 | 70.75638 | 73.1125201 | 72.25      | 63 |
| 76.0917313 | 68.75638 | 73.1125201 | 71.75      | 63 |
| 74.0917313 | 67.75638 | 72.1125201 | 71.375     | 63 |
| 73.0917313 | 67.75638 | 72.1125201 | 71.5       | 63 |
| 72.0917313 | 66.75638 | 72.1125201 | 71.25      | 63 |
| 71.0917313 | 66.75638 | 71.1125201 | 70.875     | 63 |
| 71.0917313 | 66.75638 | 71.1125201 | 71.125     | 63 |
| 73.0917313 | 66.75638 | 71.1125201 | 71.75      | 63 |
| 74.0917313 | 65.75638 | 71.1125201 | 71.625     | 63 |
| 74.0917313 | 65.75638 | 71.1125201 | 71.25      | 63 |
| 74.0917313 | 65.75638 | 69.1125201 | 71         | 63 |
| 74.0917313 | 66.75638 | 68.1125201 | 70.875     | 63 |
| 74.0917313 | 66.75638 | 66.1125201 | 69.75      | 63 |
| 74.0917313 | 67.75638 | 66.1125201 | 69.75      | 63 |
| 74.0917313 | 67.75638 | 66.1125201 | 69.625     | 63 |
| 74.0917313 | 68.75638 | 66.1125201 | 69.75      | 63 |
| 74.0917313 | 68.75638 | 69.1125201 | 70         | 63 |

|            |          |            |        |    |
|------------|----------|------------|--------|----|
| 74.0917313 | 70.75638 | 70.1125201 | 69.75  | 63 |
| 74.0917313 | 70.75638 | 70.1125201 | 70.25  | 63 |
| 73.0917313 | 70.75638 | 70.1125201 | 69.75  | 63 |
| 73.0917313 | 68.75638 | 71.1125201 | 69.375 | 63 |
| 75.0917313 | 68.75638 | 71.1125201 | 69.625 | 63 |
| 75.0917313 | 67.75638 | 72.1125201 | 69.5   | 63 |
| 75.0917313 | 66.75638 | 73.1125201 | 70     | 63 |
| 75.0917313 | 66.75638 | 71.1125201 | 69.75  | 63 |
| 75.0917313 | 68.75638 | 71.1125201 | 70     | 63 |
| 75.0917313 | 69.75638 | 70.1125201 | 70     | 63 |
| 75.0917313 | 70.75638 | 70.1125201 | 70.125 | 63 |
| 75.0917313 | 70.75638 | 69.1125201 | 70     | 63 |
| 73.0917313 | 69.75638 | 70.1125201 | 69.75  | 63 |
| 73.0917313 | 69.75638 | 70.1125201 | 69.75  | 63 |
| 72.0917313 | 65.75638 | 70.1125201 | 69.75  | 63 |
| 71.0917313 | 65.75638 | 70.1125201 | 69.75  | 63 |
| 71.0917313 | 63.75638 | 70.1125201 | 69.375 | 63 |
| 71.0917313 | 63.75638 | 69.1125201 | 69.5   | 63 |
| 71.0917313 | 63.75638 | 69.1125201 | 69.75  | 63 |
| 71.0917313 | 63.75638 | 69.1125201 | 69.625 | 63 |
| 71.0917313 | 64.75638 | 67.1125201 | 69.5   | 63 |
| 71.0917313 | 64.75638 | 67.1125201 | 69.75  | 63 |
| 71.0917313 | 65.75638 | 67.1125201 | 70.25  | 63 |
| 71.0917313 | 65.75638 | 67.1125201 | 70.75  | 63 |
| 71.0917313 | 65.75638 | 68.1125201 | 71.125 | 63 |
| 70.0917313 | 65.75638 | 69.1125201 | 72     | 63 |
| 70.0917313 | 65.75638 | 69.1125201 | 72.375 | 63 |
| 70.0917313 | 64.75638 | 69.1125201 | 71.5   | 63 |
| 70.0917313 | 64.75638 | 69.1125201 | 71.125 | 63 |
| 70.0917313 | 65.75638 | 71.1125201 | 71.125 | 63 |
| 70.0917313 | 65.75638 | 73.1125201 | 71.125 | 63 |
| 70.0917313 | 65.75638 | 73.1125201 | 71     | 63 |
| 70.0917313 | 66.75638 | 76.1125201 | 71.5   | 63 |
| 72.0917313 | 66.75638 | 78.1125201 | 72.5   | 63 |
| 69.0917313 | 66.75638 | 78.1125201 | 71.875 | 63 |
| 69.0917313 | 69.75638 | 78.1125201 | 71.625 | 63 |
| 69.0917313 | 69.75638 | 77.1125201 | 70.875 | 63 |
| 69.0917313 | 69.75638 | 76.1125201 | 70.75  | 63 |
| 69.0917313 | 70.75638 | 77.1125201 | 70.75  | 63 |
| 69.0917313 | 71.75638 | 77.1125201 | 70.125 | 63 |
| 71.0917313 | 72.75638 | 77.1125201 | 70.125 | 63 |
| 72.0917313 | 73.75638 | 78.1125201 | 70.375 | 63 |
| 72.0917313 | 73.75638 | 78.1125201 | 70.25  | 63 |
| 72.0917313 | 74.75638 | 78.1125201 | 70.125 | 63 |
| 72.0917313 | 75.75638 | 75.1125201 | 70     | 63 |



|            |          |            |        |    |
|------------|----------|------------|--------|----|
| 73.0917313 | 75.75638 | 73.1125201 | 70.25  | 63 |
| 73.0917313 | 74.75638 | 73.1125201 | 70.125 | 63 |
| 73.0917313 | 74.75638 | 71.1125201 | 69.75  | 63 |
| 72.0917313 | 74.75638 | 69.1125201 | 69.875 | 63 |
| 72.0917313 | 73.75638 | 69.1125201 | 70     | 63 |
| 72.0917313 | 72.75638 | 70.1125201 | 69.625 | 63 |
| 72.0917313 | 72.75638 | 70.1125201 | 69.625 | 63 |
| 71.0917313 | 72.75638 | 70.1125201 | 69.75  | 63 |
| 71.0917313 | 73.75638 | 70.1125201 | 69.875 | 63 |
| 70.0917313 | 73.75638 | 70.1125201 | 69.875 | 63 |
| 68.0917313 | 72.75638 | 70.1125201 | 69.5   | 63 |
| 66.0917313 | 71.75638 | 70.1125201 | 69.375 | 63 |
| 66.0917313 | 71.75638 | 69.1125201 | 69.125 | 63 |
| 66.0917313 | 71.75638 | 69.1125201 | 68.875 | 63 |
| 67.0917313 | 71.75638 | 68.1125201 | 68.75  | 63 |
| 69.0917313 | 71.75638 | 69.1125201 | 69.375 | 63 |
| 70.0917313 | 72.75638 | 70.1125201 | 69.625 | 63 |
| 69.0917313 | 72.75638 | 70.1125201 | 69     | 63 |
| 69.0917313 | 72.75638 | 69.1125201 | 68.625 | 63 |
| 69.0917313 | 72.75638 | 68.1125201 | 68.75  | 63 |
| 69.0917313 | 72.75638 | 68.1125201 | 68.625 | 63 |
| 70.0917313 | 71.75638 | 68.1125201 | 68.75  | 63 |
| 70.0917313 | 71.75638 | 68.1125201 | 68.75  | 63 |
| 69.0917313 | 71.75638 | 68.1125201 | 69.125 | 63 |
| 69.0917313 | 71.75638 | 67.1125201 | 69     | 63 |
| 69.0917313 | 72.75638 | 66.1125201 | 69.375 | 63 |
| 69.0917313 | 74.75638 | 66.1125201 | 69.875 | 63 |
| 69.0917313 | 75.75638 | 66.1125201 | 70     | 63 |
| 69.0917313 | 75.75638 | 65.1125201 | 70     | 63 |
| 70.0917313 | 75.75638 | 65.1125201 | 70.25  | 63 |
| 70.0917313 | 74.75638 | 66.1125201 | 70.625 | 63 |
| 70.0917313 | 74.75638 | 67.1125201 | 70.875 | 63 |
| 70.0917313 | 73.75638 | 67.1125201 | 70.75  | 63 |
| 69.0917313 | 73.75638 | 67.1125201 | 70.625 | 63 |
| 68.0917313 | 74.75638 | 68.1125201 | 71     | 63 |
| 68.0917313 | 74.75638 | 67.1125201 | 70.625 | 63 |
| 67.0917313 | 75.75638 | 67.1125201 | 70.25  | 63 |
| 67.0917313 | 77.75638 | 66.1125201 | 70.5   | 63 |
| 70.0917313 | 77.75638 | 67.1125201 | 71.125 | 63 |
| 69.0917313 | 77.75638 | 68.1125201 | 71     | 63 |
| 69.0917313 | 77.75638 | 68.1125201 | 71.125 | 63 |
| 69.0917313 | 76.75638 | 68.1125201 | 70.75  | 63 |
| 69.0917313 | 73.75638 | 68.1125201 | 70.375 | 63 |
| 69.0917313 | 69.75638 | 68.1125201 | 69.75  | 63 |
| 69.0917313 | 68.75638 | 68.1125201 | 69.75  | 63 |

|            |          |            |        |    |
|------------|----------|------------|--------|----|
| 69.0917313 | 68.75638 | 69.1125201 | 70     | 63 |
| 69.0917313 | 68.75638 | 69.1125201 | 70.125 | 63 |
| 69.0917313 | 69.75638 | 69.1125201 | 70.25  | 63 |
| 69.0917313 | 69.75638 | 72.1125201 | 70.75  | 63 |
| 68.0917313 | 69.75638 | 72.1125201 | 70.5   | 63 |
| 65.0917313 | 69.75638 | 74.1125201 | 70.375 | 63 |
| 65.0917313 | 69.75638 | 75.1125201 | 70.5   | 63 |
| 64.0917313 | 69.75638 | 76.1125201 | 70.5   | 63 |
| 65.0917313 | 69.75638 | 76.1125201 | 70.5   | 63 |
| 65.0917313 | 69.75638 | 76.1125201 | 70.875 | 63 |
| 66.0917313 | 72.75638 | 77.1125201 | 71     | 63 |
| 66.0917313 | 76.75638 | 77.1125201 | 71.875 | 63 |
| 66.0917313 | 77.75638 | 76.1125201 | 71.625 | 63 |
| 66.0917313 | 78.75638 | 76.1125201 | 71.75  | 63 |
| 66.0917313 | 80.75638 | 75.1125201 | 72     | 63 |
| 67.0917313 | 81.75638 | 73.1125201 | 71.875 | 63 |
| 67.0917313 | 80.75638 | 72.1125201 | 71.25  | 63 |
| 67.0917313 | 80.75638 | 72.1125201 | 70.875 | 63 |
| 67.0917313 | 79.75638 | 72.1125201 | 70.875 | 63 |
| 68.0917313 | 77.75638 | 71.1125201 | 70.75  | 63 |
| 68.0917313 | 76.75638 | 70.1125201 | 70.625 | 63 |
| 68.0917313 | 76.75638 | 70.1125201 | 71     | 63 |
| 68.0917313 | 75.75638 | 69.1125201 | 71     | 63 |
| 68.0917313 | 75.75638 | 68.1125201 | 70.75  | 63 |
| 68.0917313 | 75.75638 | 67.1125201 | 70.625 | 63 |
| 68.0917313 | 73.75638 | 66.1125201 | 70     | 63 |
| 68.0917313 | 72.75638 | 66.1125201 | 69.75  | 63 |
| 68.0917313 | 70.75638 | 65.1125201 | 69.5   | 63 |
| 68.0917313 | 69.75638 | 66.1125201 | 69.625 | 63 |
| 69.0917313 | 69.75638 | 67.1125201 | 70     | 63 |
| 69.0917313 | 69.75638 | 67.1125201 | 70.5   | 63 |
| 69.0917313 | 69.75638 | 67.1125201 | 70.5   | 63 |
| 70.0917313 | 72.75638 | 68.1125201 | 71.375 | 63 |
| 70.0917313 | 72.75638 | 68.1125201 | 72     | 63 |
| 71.0917313 | 72.75638 | 69.1125201 | 72.25  | 63 |
| 71.0917313 | 72.75638 | 70.1125201 | 72.25  | 63 |
| 71.0917313 | 71.75638 | 70.1125201 | 72     | 63 |
| 71.0917313 | 71.75638 | 70.1125201 | 71.625 | 63 |
| 71.0917313 | 70.75638 | 70.1125201 | 71.25  | 63 |
| 71.0917313 | 68.75638 | 69.1125201 | 70.625 | 63 |
| 71.0917313 | 67.75638 | 70.1125201 | 70.75  | 63 |
| 70.0917313 | 67.75638 | 70.1125201 | 70.625 | 63 |
| 70.0917313 | 67.75638 | 70.1125201 | 71.125 | 63 |
| 70.0917313 | 67.75638 | 71.1125201 | 71.375 | 63 |
| 70.0917313 | 67.75638 | 72.1125201 | 71     | 63 |

|            |          |            |            |    |
|------------|----------|------------|------------|----|
| 70.0917313 | 66.75638 | 72.1125201 | 71         | 63 |
| 70.0917313 | 65.75638 | 72.1125201 | 71         | 63 |
| 70.0917313 | 65.75638 | 73.1125201 | 71.125     | 63 |
| 72.0917313 | 65.75638 | 74.1125201 | 71.125     | 63 |
| 72.0917313 | 65.75638 | 75.1125201 | 71.375     | 63 |
| 72.0917313 | 65.75638 | 75.1125201 | 71.5       | 63 |
| 74.0917313 | 68.75638 | 75.1125201 | 72.375     | 63 |
| 74.0917313 | 73.75638 | 75.1125201 | 73.25      | 63 |
| 72.0917313 | 74.75638 | 75.1125201 | 73.375     | 63 |
| 71.0917313 | 74.75638 | 75.1125201 | 72.875     | 63 |
| 70.0917313 | 75.75638 | 75.1125201 | 72.75      | 63 |
| 70.0917313 | 75.75638 | 75.1125201 | 70.8126613 | 63 |
| 70.0917313 | 74.75638 | 75.1125201 | 70.5314113 | 63 |
| 69.0917313 | 73.75638 | 75.1125201 | 70.5314113 | 63 |
| 69.0917313 | 72.75638 | 74.1125201 | 70.6876613 | 63 |
| 69.0917313 | 71.75638 | 74.1125201 | 70.6876613 | 63 |
| 68.0917313 | 71.75638 | 74.1125201 | 71.0939113 | 63 |
| 68.0917313 | 71.75638 | 73.1125201 | 70.9532863 | 63 |
| 68.0917313 | 71.75638 | 73.1125201 | 72.25      | 63 |
| 71.0917313 | 72.75638 | 71.1125201 | 71.375     | 63 |
| 75.0917313 | 72.75638 | 71.1125201 | 71.125     | 63 |
| 75.0917313 | 73.75638 | 70.1125201 | 71.125     | 63 |
| 74.0917313 | 73.75638 | 70.1125201 | 71         | 63 |
| 73.0917313 | 73.75638 | 70.1125201 | 70.875     | 63 |
| 71.0917313 | 73.75638 | 70.1125201 | 70.5       | 63 |
| 70.0917313 | 73.75638 | 70.1125201 | 70.5       | 63 |
| 70.0917313 | 74.75638 | 68.1125201 | 71.625     | 63 |
| 70.0917313 | 74.75638 | 67.1125201 | 71.75      | 69 |
| 70.0917313 | 74.75638 | 66.1125201 | 71.5       | 69 |
| 70.0917313 | 74.75638 | 67.1125201 | 72         | 69 |
| 68.0917313 | 74.75638 | 70.1125201 | 72.25      | 69 |
| 74.0917313 | 75.75638 | 70.1125201 | 72         | 69 |
| 75.0917313 | 75.75638 | 72.1125201 | 73         | 69 |
| 75.0917313 | 76.75638 | 72.1125201 | 73.75      | 69 |
| 75.0917313 | 77.75638 | 71.1125201 | 73.625     | 69 |
| 73.0917313 | 76.75638 | 71.1125201 | 73.125     | 69 |
| 71.0917313 | 76.75638 | 72.1125201 | 73         | 69 |
| 70.0917313 | 72.75638 | 73.1125201 | 71.0001613 | 69 |
| 70.0917313 | 72.75638 | 74.1125201 | 71.2814113 | 69 |
| 71.0917313 | 70.75638 | 76.1125201 | 71.5626613 | 69 |
| 71.0917313 | 70.75638 | 76.1125201 | 71.692975  | 69 |
| 72.0917313 | 73.75638 | 77.1125201 | 72.2657863 | 63 |
| 72.0917313 | 75.75638 | 77.1125201 | 72.3907863 | 63 |
| 67.0917313 | 76.75638 | 74.1125201 | 71.1251613 | 63 |
| 65.0917313 | 76.75638 | 72.1125201 | 71.75      | 63 |

|            |          |            |        |    |
|------------|----------|------------|--------|----|
| 65.0917313 | 76.75638 | 72.1125201 | 71.125 | 63 |
| 65.0917313 | 75.75638 | 74.1125201 | 70.375 | 63 |
| 65.0917313 | 67.75638 | 75.1125201 | 69.625 | 63 |
| 65.0917313 | 60.75638 | 76.1125201 | 68.375 | 63 |
| 65.0917313 | 59.75638 | 76.1125201 | 68.125 | 63 |
| 65.0917313 | 59.75638 | 76.1125201 | 68.375 | 63 |
| 64.0917313 | 59.75638 | 75.1125201 | 68.25  | 63 |
| 64.0917313 | 63.75638 | 74.1125201 | 69.25  | 63 |
| 64.0917313 | 65.75638 | 73.1125201 | 70.375 | 63 |
| 62.0917313 | 65.75638 | 72.1125201 | 70.5   | 63 |
| 62.0917313 | 65.75638 | 72.1125201 | 70.25  | 63 |
| 67.0917313 | 66.75638 | 72.1125201 | 71.375 | 63 |
| 68.0917313 | 66.75638 | 73.1125201 | 71.125 | 63 |
| 68.0917313 | 67.75638 | 73.1125201 | 70.75  | 63 |
| 68.0917313 | 67.75638 | 73.1125201 | 70.625 | 63 |
| 68.0917313 | 67.75638 | 72.1125201 | 70.5   | 63 |
| 68.0917313 | 68.75638 | 72.1125201 | 70.375 | 63 |
| 68.0917313 | 68.75638 | 72.1125201 | 70.375 | 63 |
| 68.0917313 | 68.75638 | 72.1125201 | 70.875 | 63 |
| 68.0917313 | 68.75638 | 73.1125201 | 71.375 | 63 |
| 69.0917313 | 69.75638 | 73.1125201 | 71.625 | 63 |
| 69.0917313 | 69.75638 | 73.1125201 | 71.375 | 63 |
| 67.0917313 | 76.75638 | 73.1125201 | 72.125 | 63 |
| 67.0917313 | 76.75638 | 73.1125201 | 72.25  | 63 |
| 67.0917313 | 77.75638 | 73.1125201 | 72.625 | 63 |
| 66.0917313 | 77.75638 | 73.1125201 | 72.5   | 63 |
| 66.0917313 | 78.75638 | 73.1125201 | 72.75  | 63 |
| 66.0917313 | 78.75638 | 74.1125201 | 73.125 | 63 |
| 66.0917313 | 78.75638 | 74.1125201 | 71.875 | 63 |
| 66.0917313 | 78.75638 | 76.1125201 | 71.25  | 63 |
| 66.0917313 | 78.75638 | 76.1125201 | 71.25  | 63 |
| 65.0917313 | 78.75638 | 75.1125201 | 71     | 63 |
| 63.0917313 | 78.75638 | 75.1125201 | 70.75  | 63 |
| 63.0917313 | 78.75638 | 70.1125201 | 70.125 | 63 |
| 68.0917313 | 79.75638 | 69.1125201 | 70.875 | 63 |
| 68.0917313 | 79.75638 | 69.1125201 | 70.5   | 63 |
| 69.0917313 | 79.75638 | 69.1125201 | 70.625 | 63 |
| 69.0917313 | 78.75638 | 69.1125201 | 70.125 | 63 |
| 70.0917313 | 77.75638 | 69.1125201 | 70.25  | 63 |
| 70.0917313 | 77.75638 | 69.1125201 | 70     | 63 |
| 70.0917313 | 77.75638 | 68.1125201 | 69.5   | 63 |
| 70.0917313 | 77.75638 | 68.1125201 | 69     | 63 |
| 70.0917313 | 77.75638 | 69.1125201 | 68.875 | 63 |
| 70.0917313 | 77.75638 | 70.1125201 | 69.125 | 63 |
| 71.0917313 | 77.75638 | 71.1125201 | 69.375 | 63 |

|            |          |            |            |    |
|------------|----------|------------|------------|----|
| 71.0917313 | 77.75638 | 71.1125201 | 69.25      | 63 |
| 70.0917313 | 75.75638 | 71.1125201 | 69         | 63 |
| 70.0917313 | 74.75638 | 71.1125201 | 69.25      | 63 |
| 70.0917313 | 70.75638 | 69.1125201 | 68.875     | 63 |
| 70.0917313 | 70.75638 | 69.1125201 | 68.875     | 63 |
| 69.0917313 | 70.75638 | 66.1125201 | 69.5       | 63 |
| 69.0917313 | 71.75638 | 65.1125201 | 69.75      | 63 |
| 69.0917313 | 71.75638 | 65.1125201 | 70         | 63 |
| 69.0917313 | 71.75638 | 66.1125201 | 70.25      | 63 |
| 68.0917313 | 69.75638 | 66.1125201 | 69.875     | 63 |
| 66.0917313 | 69.75638 | 67.1125201 | 68.5834427 | 69 |
| 66.0917313 | 70.75638 | 67.1125201 | 68.8646927 | 69 |
| 66.0917313 | 70.75638 | 67.1125201 | 70.625     | 69 |
| 70.0917313 | 70.75638 | 66.1125201 | 71.125     | 69 |
| 70.0917313 | 70.75638 | 66.1125201 | 70.0365677 | 69 |
| 70.0917313 | 71.75638 | 66.1125201 | 70.1771927 | 69 |
| 70.0917313 | 72.75638 | 65.1125201 | 70.3490677 | 69 |
| 71.0917313 | 74.75638 | 66.1125201 | 71.0521927 | 69 |
| 70.0917313 | 74.75638 | 66.1125201 | 70.7709427 | 69 |
| 70.0917313 | 75.75638 | 66.1125201 | 71.875     | 69 |
| 69.0917313 | 75.75638 | 67.1125201 | 71.75      | 69 |
| 69.0917313 | 74.75638 | 67.1125201 | 71.5       | 69 |
| 69.0917313 | 74.75638 | 67.1125201 | 71.375     | 69 |
| 69.0917313 | 74.75638 | 67.1125201 | 71.25      | 69 |
| 69.0917313 | 74.75638 | 66.1125201 | 71.25      | 69 |
| 70.0917313 | 74.75638 | 66.1125201 | 71.5       | 69 |
| 72.0917313 | 76.75638 | 66.1125201 | 72         | 69 |
| 72.0917313 | 76.75638 | 67.1125201 | 72.5       | 69 |
| 73.0917313 | 77.75638 | 66.1125201 | 71.5834427 | 69 |
| 74.0917313 | 77.75638 | 66.1125201 | 71.7240677 | 69 |
| 73.0917313 | 76.75638 | 67.1125201 | 71.5990677 | 69 |
| 73.0917313 | 76.75638 | 67.1125201 | 71.0521927 | 69 |
| 73.0917313 | 72.75638 | 67.1125201 | 70.5365677 | 69 |
| 73.0917313 | 72.75638 | 67.1125201 | 70.5990677 | 69 |
| 73.0917313 | 72.75638 | 67.1125201 | 70.6146927 | 69 |
| 73.0917313 | 72.75638 | 65.1125201 | 71.0365677 | 69 |
| 73.0917313 | 75.75638 | 65.1125201 | 71.7553177 | 69 |
| 73.0917313 | 75.75638 | 65.1125201 | 72.0521927 | 69 |
| 75.0917313 | 75.75638 | 66.1125201 | 72.4740677 | 69 |
| 76.0917313 | 72.75638 | 66.1125201 | 72.1771927 | 69 |
| 74.0917313 | 70.75638 | 67.1125201 | 72.375     | 69 |
| 74.0917313 | 69.75638 | 67.1125201 | 71.25      | 69 |
| 73.0917313 | 68.75638 | 68.1125201 | 70.75      | 69 |
| 73.0917313 | 68.75638 | 68.1125201 | 70.875     | 69 |
| 73.0917313 | 68.75638 | 67.1125201 | 71         | 69 |

|            |          |            |            |    |
|------------|----------|------------|------------|----|
| 73.0917313 | 68.75638 | 67.1125201 | 70.875     | 69 |
| 73.0917313 | 67.75638 | 67.1125201 | 70.625     | 69 |
| 73.0917313 | 65.75638 | 67.1125201 | 70.375     | 69 |
| 71.0917313 | 62.75638 | 66.1125201 | 69.375     | 69 |
| 71.0917313 | 62.75638 | 65.1125201 | 69.125     | 69 |
| 68.0917313 | 61.75638 | 66.1125201 | 68.75      | 69 |
| 67.0917313 | 61.75638 | 66.1125201 | 68.625     | 69 |
| 67.0917313 | 60.75638 | 68.1125201 | 68.625     | 69 |
| 68.0917313 | 61.75638 | 68.1125201 | 68.625     | 69 |
| 69.0917313 | 61.75638 | 69.1125201 | 68.875     | 69 |
| 69.0917313 | 64.75638 | 69.1125201 | 69.25      | 63 |
| 71.0917313 | 65.75638 | 68.1125201 | 69.75      | 63 |
| 72.0917313 | 65.75638 | 68.1125201 | 69.5       | 63 |
| 72.0917313 | 65.75638 | 68.1125201 | 69.5       | 63 |
| 73.0917313 | 66.75638 | 67.1125201 | 69.875     | 63 |
| 73.0917313 | 66.75638 | 67.1125201 | 70.25      | 63 |
| 72.0917313 | 66.75638 | 67.1125201 | 70.25      | 63 |
| 72.0917313 | 66.75638 | 67.1125201 | 70         | 63 |
| 72.0917313 | 66.75638 | 67.1125201 | 70         | 63 |
| 72.0917313 | 66.75638 | 67.1125201 | 70         | 63 |
| 72.0917313 | 67.75638 | 68.1125201 | 70.375     | 63 |
| 72.0917313 | 66.75638 | 68.1125201 | 70.25      | 63 |
| 72.0917313 | 67.75638 | 68.1125201 | 70.75      | 63 |
| 72.0917313 | 67.75638 | 68.1125201 | 70.5       | 63 |
| 72.0917313 | 68.75638 | 69.1125201 | 71.25      | 63 |
| 73.0917313 | 68.75638 | 69.1125201 | 71.625     | 63 |
| 73.0917313 | 68.75638 | 69.1125201 | 72         | 63 |
| 73.0917313 | 68.75638 | 70.1125201 | 72         | 63 |
| 73.0917313 | 68.75638 | 73.1125201 | 72.5       | 63 |
| 73.0917313 | 68.75638 | 75.1125201 | 73         | 63 |
| 73.0917313 | 69.75638 | 77.1125201 | 73.75      | 63 |
| 74.0917313 | 69.75638 | 77.1125201 | 74.375     | 63 |
| 74.0917313 | 69.75638 | 75.1125201 | 74         | 63 |
| 74.0917313 | 69.75638 | 75.1125201 | 74         | 63 |
| 74.0917313 | 70.75638 | 75.1125201 | 72.8282863 | 63 |
| 74.0917313 | 70.75638 | 76.1125201 | 73.3907863 | 63 |
| 75.0917313 | 73.75638 | 76.1125201 | 74.0157863 | 63 |
| 78.0917313 | 73.75638 | 76.1125201 | 74.125     | 63 |
| 78.0917313 | 73.75638 | 75.1125201 | 74         | 63 |
| 75.0917313 | 69.75638 | 74.1125201 | 73.375     | 63 |
| 75.0917313 | 64.75638 | 74.1125201 | 73         | 63 |
| 72.0917313 | 61.75638 | 74.1125201 | 72.125     | 63 |
| 71.0917313 | 59.75638 | 74.1125201 | 71.625     | 63 |
| 71.0917313 | 59.75638 | 74.1125201 | 71.625     | 63 |
| 72.0917313 | 58.75638 | 74.1125201 | 70.875     | 63 |

|            |          |            |           |    |
|------------|----------|------------|-----------|----|
| 72.0917313 | 58.75638 | 75.1125201 | 70.375    | 63 |
| 72.0917313 | 58.75638 | 74.1125201 | 70.625    | 63 |
| 72.0917313 | 58.75638 | 74.1125201 | 70.25     | 63 |
| 71.0917313 | 58.75638 | 74.1125201 | 69.75     | 63 |
| 71.0917313 | 58.75638 | 73.1125201 | 69.625    | 63 |
| 71.0917313 | 60.75638 | 73.1125201 | 69.5      | 63 |
| 71.0917313 | 60.75638 | 72.1125201 | 69        | 63 |
| 71.0917313 | 61.75638 | 72.1125201 | 68.75     | 63 |
| 71.0917313 | 62.75638 | 74.1125201 | 69        | 63 |
| 71.0917313 | 62.75638 | 74.1125201 | 69.125    | 63 |
| 72.0917313 | 62.75638 | 76.1125201 | 69.75     | 63 |
| 73.0917313 | 63.75638 | 76.1125201 | 70        | 63 |
| 73.0917313 | 67.75638 | 80.1125201 | 70.75     | 63 |
| 73.0917313 | 67.75638 | 71         | 69.610935 | 63 |
| 73.0917313 | 67.75638 | 70.75      | 69.329685 | 63 |
| 73.0917313 | 67.75638 | 71         | 69.610935 | 63 |
| 74.0917313 | 67.75638 | 82.1125201 | 71.125    | 63 |
| 79.0917313 | 68.75638 | 82.1125201 | 71.875    | 63 |
| 80.0917313 | 68.75638 | 75.1125201 | 71.125    | 63 |
| 80.0917313 | 67.75638 | 75.1125201 | 71        | 63 |
| 80.0917313 | 65.75638 | 66.1125201 | 69.75     | 63 |
| 80.0917313 | 64.75638 | 64.1125201 | 69.375    | 63 |
| 80.0917313 | 64.75638 | 64.1125201 | 69.375    | 63 |
| 79.0917313 | 65.75638 | 65.1125201 | 69        | 69 |
| 78.0917313 | 65.75638 | 67.1125201 | 69        | 69 |
| 76.0917313 | 65.75638 | 67.1125201 | 68.625    | 69 |
| 76.0917313 | 70.75638 | 69.1125201 | 69.75     | 69 |
| 76.0917313 | 74.75638 | 70.1125201 | 70.25     | 69 |
| 76.0917313 | 75.75638 | 72.1125201 | 71        | 69 |
| 75.0917313 | 76.75638 | 72.1125201 | 71        | 69 |
| 75.0917313 | 77.75638 | 73.1125201 | 71.5      | 69 |
| 74.0917313 | 77.75638 | 71.1125201 | 71.625    | 69 |
| 74.0917313 | 77.75638 | 71.1125201 | 72.375    | 69 |
| 73.0917313 | 79.75638 | 69.1125201 | 72.5      | 69 |
| 74.0917313 | 79.75638 | 68.1125201 | 71.875    | 69 |
| 74.0917313 | 79.75638 | 64.1125201 | 70.875    | 69 |
| 74.0917313 | 79.75638 | 63.1125201 | 70.5      | 69 |
| 74.0917313 | 79.75638 | 63.1125201 | 70.375    | 69 |
| 73.0917313 | 80.75638 | 64.1125201 | 71        | 69 |
| 73.0917313 | 79.75638 | 65.1125201 | 71        | 69 |
| 73.0917313 | 79.75638 | 65.1125201 | 71.125    | 69 |
| 73.0917313 | 80.75638 | 66.1125201 | 71.75     | 69 |
| 74.0917313 | 80.75638 | 66.1125201 | 71.75     | 69 |
| 75.0917313 | 80.75638 | 67.1125201 | 71.75     | 69 |
| 75.0917313 | 79.75638 | 67.1125201 | 71.5      | 69 |

|            |          |            |            |    |
|------------|----------|------------|------------|----|
| 75.0917313 | 78.75638 | 67.1125201 | 71.25      | 69 |
| 76.0917313 | 78.75638 | 66.1125201 | 70.75      | 69 |
| 76.0917313 | 78.75638 | 66.1125201 | 70.875     | 69 |
| 73.0917313 | 77.75638 | 66.1125201 | 70.75      | 69 |
| 71.0917313 | 76.75638 | 66.1125201 | 70.625     | 69 |
| 70.0917313 | 75.75638 | 65.1125201 | 71.125     | 69 |
| 70.0917313 | 74.75638 | 64.1125201 | 71.125     | 69 |
| 70.0917313 | 74.75638 | 64.1125201 | 71         | 69 |
| 70.0917313 | 68.75638 | 64.1125201 | 70.25      | 69 |
| 69.0917313 | 65.75638 | 64.1125201 | 68.0015996 | 69 |
| 69.0917313 | 64.75638 | 64.1125201 | 67.8765996 | 69 |
| 69.0917313 | 63.75638 | 64.1125201 | 67.5640996 | 69 |
| 69.0917313 | 64.75638 | 64.1125201 | 67.5484746 | 69 |
| 70.0917313 | 64.75638 | 64.1125201 | 69         | 69 |
| 70.0917313 | 64.75638 | 64.1125201 | 69         | 69 |
| 70.0917313 | 62.75638 | 64.1125201 | 68.75      | 69 |
| 72.0917313 | 61.75638 | 65.1125201 | 69.125     | 69 |
| 70.875     | 61.75638 | 67.1125201 | 69.4729086 | 69 |
| 71.875     | 61.75638 | 67.1125201 | 70.0979086 | 69 |
| 72.625     | 64.75638 | 66.1125201 | 70.8166586 | 69 |
| 73         | 67.75638 | 65.1125201 | 71.2385336 | 69 |
| 73.25      | 69.75638 | 65.1125201 | 71.6447836 | 69 |
| 76.0917313 | 69.75638 | 66.1125201 | 72.5       | 69 |
| 74.0917313 | 70.75638 | 66.1125201 | 72.75      | 69 |
| 70.0917313 | 71.75638 | 66.1125201 | 72.125     | 69 |
| 70.0917313 | 70.75638 | 69.1125201 | 71.75      | 69 |
| 70.0917313 | 69.75638 | 69.1125201 | 70.875     | 69 |
| 66.0917313 | 68.75638 | 69.1125201 | 69.875     | 69 |
| 65.0917313 | 69.75638 | 68.1125201 | 69.375     | 69 |
| 64.0917313 | 69.75638 | 68.1125201 | 69.375     | 69 |
| 63.0917313 | 70.75638 | 68.1125201 | 69.375     | 69 |
| 63.0917313 | 70.75638 | 68.1125201 | 69.375     | 69 |
| 63.0917313 | 71.75638 | 65.1125201 | 69.75      | 69 |
| 62.0917313 | 70.75638 | 65.1125201 | 70         | 69 |
| 62.0917313 | 70.75638 | 66.1125201 | 70.125     | 69 |
| 62.0917313 | 68.75638 | 67.1125201 | 70.125     | 69 |
| 62.0917313 | 67.75638 | 67.1125201 | 70         | 69 |
| 62.0917313 | 67.75638 | 68.1125201 | 70         | 69 |
| 65.0917313 | 66.75638 | 69.1125201 | 70.125     | 69 |
| 65.0917313 | 66.75638 | 69.1125201 | 68.2090713 | 69 |
| 65.0917313 | 67.75638 | 67.1125201 | 67.7871963 | 69 |
| 65.0917313 | 69.75638 | 67.1125201 | 67.9278213 | 69 |
| 66.0917313 | 69.75638 | 68.1125201 | 67.6465713 | 69 |
| 65.0917313 | 71.75638 | 68.1125201 | 67.6465713 | 69 |
| 65.0917313 | 70.75638 | 69.1125201 | 66.9434463 | 69 |



|            |          |            |            |    |
|------------|----------|------------|------------|----|
| 65.0917313 | 68.75638 | 69.1125201 | 66.3965713 | 69 |
| 64.0917313 | 68.75638 | 69.1125201 | 66.1153213 | 69 |
| 65.0917313 | 64.75638 | 70.1125201 | 65.7246963 | 69 |
| 65.0917313 | 63.75638 | 70.1125201 | 65.8653213 | 69 |
| 65.0917313 | 62.75638 | 71.1125201 | 66.0059463 | 69 |
| 65.0917313 | 62.75638 | 71.1125201 | 66.2871963 | 69 |
| 65.0917313 | 61.75638 | 71.1125201 | 66.3653213 | 69 |
| 64.0917313 | 60.75638 | 70.1125201 | 66.2246963 | 69 |
| 63.0917313 | 60.75638 | 70.1125201 | 67.5       | 69 |
| 63.0917313 | 60.75638 | 71.1125201 | 67.75      | 69 |
| 64.0917313 | 62.75638 | 71.1125201 | 68         | 69 |
| 66.0917313 | 63.75638 | 71.1125201 | 68.5       | 69 |
| 68.0917313 | 65.75638 | 71.1125201 | 68.75      | 69 |
| 69.0917313 | 65.75638 | 71.1125201 | 68.75      | 69 |
| 70.0917313 | 65.75638 | 70.1125201 | 69         | 69 |
| 69.0917313 | 65.75638 | 70.1125201 | 69.25      | 69 |
| 69.0917313 | 65.75638 | 70.1125201 | 69.5       | 69 |
| 63.0917313 | 65.75638 | 70.1125201 | 67.9278213 | 69 |
| 63.0917313 | 65.75638 | 70.1125201 | 68.0840713 | 69 |
| 63.0917313 | 65.75638 | 70.1125201 | 68.0840713 | 63 |
| 63.0917313 | 68.75638 | 70.1125201 | 68.5059463 | 63 |
| 62.0917313 | 69.75638 | 70.1125201 | 68.9278213 | 63 |
| 61.0917313 | 70.75638 | 70.1125201 | 68.7871963 | 63 |
| 61.0917313 | 70.75638 | 70.1125201 | 68.9434463 | 63 |
| 62.0917313 | 69.75638 | 70.1125201 | 68.3809463 | 63 |
| 62.0917313 | 68.75638 | 71.1125201 | 68.4278213 | 63 |
| 65.0917313 | 67.75638 | 71.1125201 | 68.5840713 | 63 |
| 66.0917313 | 67.75638 | 71.1125201 | 68.4590713 | 63 |
| 66.0917313 | 67.75638 | 71.1125201 | 68.6309463 | 63 |
| 66.0917313 | 67.75638 | 71.1125201 | 68.6309463 | 63 |
| 66.0917313 | 67.75638 | 71.1125201 | 68.6621963 | 63 |
| 68.0917313 | 69.75638 | 70.1125201 | 69.1934463 | 63 |
| 68.0917313 | 69.75638 | 69.1125201 | 70.875     | 63 |
| 67.0917313 | 69.75638 | 68.1125201 | 71.125     | 63 |
| 66.0917313 | 69.75638 | 68.1125201 | 70.625     | 63 |
| 65.0917313 | 68.75638 | 67.1125201 | 69.875     | 63 |
| 65.0917313 | 65.75638 | 68.1125201 | 69.375     | 63 |
| 66.0917313 | 64.75638 | 68.1125201 | 69.375     | 63 |
| 67.0917313 | 64.75638 | 68.1125201 | 69.75      | 63 |
| 67.0917313 | 66.75638 | 68.1125201 | 70.125     | 63 |
| 67.0917313 | 66.75638 | 68.1125201 | 70.125     | 63 |
| 67.0917313 | 68.75638 | 72.1125201 | 71         | 63 |
| 67.0917313 | 67.75638 | 72.1125201 | 70.75      | 63 |
| 67.0917313 | 66.75638 | 74.1125201 | 70.375     | 63 |
| 68.0917313 | 66.75638 | 76.1125201 | 70.875     | 63 |

|            |          |            |            |    |
|------------|----------|------------|------------|----|
| 68.0917313 | 66.75638 | 78.1125201 | 71.125     | 63 |
| 69.0917313 | 65.75638 | 78.1125201 | 71.125     | 63 |
| 69.0917313 | 66.75638 | 78.1125201 | 71.25      | 63 |
| 69.0917313 | 67.75638 | 77.1125201 | 71.75      | 63 |
| 69.0917313 | 67.75638 | 76.1125201 | 71.5       | 63 |
| 69.0917313 | 69.75638 | 74.1125201 | 70.375     | 63 |
| 69.0917313 | 70.75638 | 74.1125201 | 70.625     | 63 |
| 69.0917313 | 71.75638 | 74.1125201 | 70.75      | 63 |
| 68.0917313 | 70.75638 | 74.1125201 | 70.375     | 63 |
| 69.0917313 | 68.75638 | 74.1125201 | 70.5       | 63 |
| 70.0917313 | 67.75638 | 73.1125201 | 70.25      | 63 |
| 69.0917313 | 67.75638 | 72.1125201 | 70.5       | 63 |
| 69.0917313 | 67.75638 | 70.1125201 | 70.375     | 63 |
| 70.0917313 | 66.75638 | 68.1125201 | 70.25      | 63 |
| 70.0917313 | 66.75638 | 68.1125201 | 69.2345363 | 63 |
| 68.0917313 | 73.75638 | 68.1125201 | 69.9689113 | 63 |
| 66.0917313 | 74.75638 | 68.1125201 | 69.8282863 | 63 |
| 64.0917313 | 74.75638 | 69.1125201 | 69.9689113 | 63 |
| 63.0917313 | 74.75638 | 69.1125201 | 69.6876613 | 63 |
| 62.0917313 | 74.75638 | 68.1125201 | 69.8126613 | 63 |
| 62.0917313 | 69.75638 | 68.1125201 | 69.2501613 | 63 |
| 63.0917313 | 65.75638 | 69.1125201 | 69.0939113 | 63 |
| 63.0917313 | 64.75638 | 67.1125201 | 68.5314113 | 63 |
| 63.0917313 | 64.75638 | 66.1125201 | 68.8126613 | 63 |
| 62.0917313 | 64.75638 | 66.1125201 | 70.125     | 63 |
| 62.0917313 | 66.75638 | 65.1125201 | 70.75      | 63 |
| 62.0917313 | 67.75638 | 64.1125201 | 69.0840713 | 63 |
| 62.0917313 | 67.75638 | 64.1125201 | 69.5371963 | 63 |
| 62.0917313 | 66.75638 | 63.1125201 | 69.6778213 | 63 |
| 62.0917313 | 63.75638 | 64.1125201 | 69.1153213 | 63 |
| 62.0917313 | 61.75638 | 64.1125201 | 68.9278213 | 63 |
| 62.0917313 | 60.75638 | 64.1125201 | 69.625     | 63 |
| 62.0917313 | 59.75638 | 65.1125201 | 69.125     | 63 |
| 62.0917313 | 59.75638 | 65.1125201 | 69.375     | 63 |
| 62.0917313 | 58.75638 | 65.1125201 | 69.25      | 63 |
| 62.0917313 | 58.75638 | 65.1125201 | 69.25      | 71 |
| 68.0917313 | 57.75638 | 65.1125201 | 70         | 71 |
| 67.0917313 | 57.75638 | 65.1125201 | 69.875     | 71 |
| 66.0917313 | 57.75638 | 65.1125201 | 69.375     | 71 |
| 65.0917313 | 57.75638 | 65.1125201 | 69         | 71 |
| 65.0917313 | 57.75638 | 65.1125201 | 68.375     | 71 |
| 66.0917313 | 57.75638 | 65.1125201 | 67.5       | 63 |
| 65.0917313 | 57.75638 | 65.1125201 | 67.25      | 63 |
| 65.0917313 | 58.75638 | 66.1125201 | 67.5       | 63 |
| 64.0917313 | 57.75638 | 66.1125201 | 66.75      | 63 |

|            |          |            |            |    |
|------------|----------|------------|------------|----|
| 64.0917313 | 58.75638 | 66.1125201 | 66.625     | 63 |
| 64.0917313 | 58.75638 | 66.1125201 | 66.625     | 63 |
| 64.0917313 | 58.75638 | 66.1125201 | 66.5       | 63 |
| 64.0917313 | 58.75638 | 65.1125201 | 66.125     | 63 |
| 64.0917313 | 58.75638 | 65.1125201 | 66.125     | 63 |
| 65.0917313 | 59.75638 | 65.1125201 | 66.25      | 63 |
| 65.0917313 | 60.75638 | 64.1125201 | 65.375     | 63 |
| 67.0917313 | 61.75638 | 64.1125201 | 65.625     | 63 |
| 67.0917313 | 62.75638 | 63.1125201 | 65.75      | 63 |
| 67.0917313 | 63.75638 | 63.1125201 | 66.375     | 63 |
| 68.0917313 | 63.75638 | 63.1125201 | 67         | 63 |
| 68.0917313 | 63.75638 | 64.1125201 | 67.875     | 63 |
| 68.0917313 | 68.75638 | 65.1125201 | 68.75      | 63 |
| 68.0917313 | 69.75638 | 67.1125201 | 69.375     | 63 |
| 69.0917313 | 69.75638 | 68.1125201 | 69.625     | 63 |
| 69.0917313 | 68.75638 | 67.1125201 | 69.25      | 63 |
| 69.0917313 | 67.75638 | 66.1125201 | 69.125     | 63 |
| 71.0917313 | 67.75638 | 66.1125201 | 69.25      | 63 |
| 71.0917313 | 67.75638 | 66.1125201 | 69.25      | 63 |
| 71.0917313 | 67.75638 | 68.1125201 | 69.375     | 63 |
| 71.0917313 | 68.75638 | 68.1125201 | 69.5       | 63 |
| 71.0917313 | 68.75638 | 68.1125201 | 69.25      | 63 |
| 71.0917313 | 67.75638 | 68.1125201 | 68.875     | 63 |
| 71.0917313 | 67.75638 | 66.1125201 | 68.625     | 63 |
| 71.0917313 | 67.75638 | 66.1125201 | 68.125     | 63 |
| 71.0917313 | 66.75638 | 67.1125201 | 68.25      | 63 |
| 73.0917313 | 66.75638 | 67.1125201 | 68.375     | 63 |
| 73.0917313 | 65.75638 | 68.1125201 | 69.125     | 63 |
| 74.0917313 | 65.75638 | 67.1125201 | 69.5       | 63 |
| 75.0917313 | 65.75638 | 66.1125201 | 69.75      | 63 |
| 75.0917313 | 65.75638 | 66.1125201 | 69.875     | 63 |
| 75.0917313 | 65.75638 | 65.1125201 | 70.625     | 63 |
| 78.0917313 | 66.75638 | 65.1125201 | 71.375     | 63 |
| 77.0917313 | 68.75638 | 65.1125201 | 71.875     | 63 |
| 77.0917313 | 74.75638 | 65.1125201 | 73.125     | 63 |
| 77.0917313 | 74.75638 | 65.1125201 | 73.375     | 63 |
| 77.0917313 | 75.75638 | 65.1125201 | 72.5914291 | 63 |
| 77.0917313 | 77.75638 | 65.1125201 | 75.125     | 63 |
| 76.0917313 | 78.75638 | 65.1125201 | 74.875     | 63 |
| 76.0917313 | 78.75638 | 65.1125201 | 75.75      | 63 |
| 67.0917313 | 77.75638 | 65.1125201 | 73.875     | 63 |
| 66.0917313 | 75.75638 | 64.1125201 | 71.5314113 | 63 |
| 65.0917313 | 75.75638 | 64.1125201 | 71.2657863 | 63 |
| 65.0917313 | 71.75638 | 64.1125201 | 69.8595363 | 63 |
| 64.0917313 | 65.75638 | 64.1125201 | 68.4532863 | 63 |

|            |          |            |            |    |
|------------|----------|------------|------------|----|
| 64.0917313 | 65.75638 | 73.1125201 | 69.7189113 | 63 |
| 64.0917313 | 64.75638 | 77.1125201 | 70.4064113 | 63 |
| 65.0917313 | 63.75638 | 77.1125201 | 70.8282863 | 63 |
| 65.0917313 | 66.75638 | 77.1125201 | 73         | 63 |
| 68.0917313 | 66.75638 | 76.1125201 | 73.375     | 63 |
| 68.0917313 | 69.75638 | 73.1125201 | 73         | 63 |
| 68.0917313 | 71.75638 | 73.1125201 | 73         | 63 |
| 68.0917313 | 71.75638 | 74.1125201 | 72.875     | 63 |
| 68.0917313 | 72.75638 | 76.1125201 | 72.875     | 63 |
| 68.0917313 | 70.75638 | 76.1125201 | 72.125     | 63 |
| 68.0917313 | 70.75638 | 79.1125201 | 72.375     | 63 |
| 68.0917313 | 68.75638 | 72.375     | 70.78281   | 63 |
| 68.0917313 | 65.75638 | 71.625     | 69.93906   | 63 |
| 68.0917313 | 65.75638 | 69.6982114 | 69.6982114 | 69 |
| 68.0917313 | 64.75638 | 72.1550563 | 69.755317  | 69 |
| 68.0917313 | 65.75638 | 77.1125201 | 70.25      | 69 |
| 68.0917313 | 66.75638 | 71.1125201 | 69.375     | 69 |
| 68.0917313 | 66.75638 | 67.1125201 | 68.125     | 69 |
| 68.0917313 | 66.75638 | 67.1125201 | 66.2246963 | 69 |
| 68.0917313 | 66.75638 | 65.1125201 | 66.0840713 | 69 |
| 67.0917313 | 66.75638 | 64.1125201 | 65.6621963 | 69 |
| 67.0917313 | 68.75638 | 64.1125201 | 65.9278213 | 69 |
| 67.0917313 | 68.75638 | 65.1125201 | 67.25      | 69 |
| 69.0917313 | 68.75638 | 69.1125201 | 68         | 69 |
| 69.0917313 | 68.75638 | 69.1125201 | 68         | 69 |
| 70.0917313 | 67.75638 | 71.1125201 | 68.25      | 69 |
| 68.0917313 | 66.75638 | 70.1125201 | 67.875     | 69 |
| 67.0917313 | 66.75638 | 70.1125201 | 67.625     | 69 |
| 67.0917313 | 65.75638 | 70.1125201 | 67.75      | 69 |
| 67.0917313 | 65.75638 | 70.1125201 | 67.75      | 69 |
| 67.0917313 | 65.75638 | 70.1125201 | 68.125     | 69 |
| 67.0917313 | 65.75638 | 69.1125201 | 68.125     | 69 |
| 67.0917313 | 65.75638 | 69.1125201 | 67.875     | 69 |
| 67.0917313 | 65.75638 | 66.1125201 | 66.2403213 | 69 |
| 68.0917313 | 65.75638 | 66.1125201 | 66.3809463 | 69 |
| 69.0917313 | 65.75638 | 67.1125201 | 66.9434463 | 69 |
| 70.0917313 | 65.75638 | 69.1125201 | 67.6465713 | 69 |
| 70.0917313 | 66.75638 | 70.1125201 | 69.5       | 69 |
| 70.0917313 | 66.75638 | 70.1125201 | 69.5       | 69 |
| 72.0917313 | 66.75638 | 70.1125201 | 69.875     | 69 |
| 72.0917313 | 65.75638 | 69.1125201 | 69.375     | 69 |
| 70.0917313 | 65.75638 | 68.1125201 | 69.25      | 69 |
| 69.0917313 | 65.75638 | 67.1125201 | 69.5       | 69 |
| 69.0917313 | 65.75638 | 67.1125201 | 69.5       | 69 |
| 69.0917313 | 65.75638 | 66.1125201 | 69.375     | 69 |

|            |          |            |            |    |
|------------|----------|------------|------------|----|
| 69.0917313 | 65.75638 | 66.1125201 | 68.875     | 69 |
| 68.0917313 | 65.75638 | 65.1125201 | 68.75      | 69 |
| 68.0917313 | 65.75638 | 65.1125201 | 68.875     | 69 |
| 68.0917313 | 69.75638 | 65.1125201 | 69.5       | 69 |
| 68.0917313 | 69.75638 | 66.1125201 | 69.5       | 69 |
| 68.0917313 | 69.75638 | 67.1125201 | 70         | 69 |
| 69.0917313 | 69.75638 | 68.1125201 | 70.125     | 69 |
| 68.0917313 | 69.75638 | 68.1125201 | 70.25      | 69 |
| 68.0917313 | 69.75638 | 68.1125201 | 69.1153213 | 69 |
| 68.0917313 | 70.75638 | 68.1125201 | 69.2559463 | 69 |
| 69.0917313 | 71.75638 | 69.1125201 | 69.6778213 | 69 |
| 70.0917313 | 71.75638 | 69.1125201 | 69.9278213 | 69 |
| 71.0917313 | 71.75638 | 69.1125201 | 70.2871963 | 69 |
| 72.0917313 | 71.75638 | 68.1125201 | 70.4121963 | 69 |
| 73.0917313 | 69.75638 | 68.1125201 | 70.3809463 | 69 |
| 73.0917313 | 68.75638 | 68.1125201 | 72         | 69 |
| 74.0917313 | 67.75638 | 67.1125201 | 71.875     | 69 |
| 74.0917313 | 67.75638 | 67.1125201 | 71.25      | 69 |
| 74.0917313 | 67.75638 | 67.1125201 | 71.25      | 63 |
| 74.0917313 | 67.75638 | 67.1125201 | 70.875     | 63 |
| 74.0917313 | 67.75638 | 67.1125201 | 71         | 63 |
| 75.0917313 | 67.75638 | 68.1125201 | 71.375     | 63 |
| 75.0917313 | 67.75638 | 68.1125201 | 71.375     | 63 |
| 78.0917313 | 70.75638 | 66.1125201 | 71.375     | 63 |
| 78.0917313 | 70.75638 | 66.1125201 | 71.25      | 63 |
| 80.0917313 | 71.75638 | 65.1125201 | 71.625     | 63 |
| 80.0917313 | 71.75638 | 65.1125201 | 71.625     | 63 |
| 79.0917313 | 71.75638 | 66.1125201 | 71.5       | 63 |
| 77.0917313 | 72.75638 | 66.1125201 | 71.375     | 63 |
| 76.0917313 | 72.75638 | 66.1125201 | 71.5       | 63 |
| 76.0917313 | 72.75638 | 66.1125201 | 71.625     | 63 |
| 75.0917313 | 70.75638 | 67.1125201 | 70.75      | 63 |
| 73.0917313 | 70.75638 | 66.1125201 | 70.5       | 63 |
| 70.0917313 | 70.75638 | 66.1125201 | 70.625     | 63 |
| 68.0917313 | 69.75638 | 66.1125201 | 70.375     | 63 |
| 68.0917313 | 69.75638 | 66.1125201 | 70.375     | 63 |
| 67.0917313 | 70.75638 | 68.1125201 | 71         | 63 |
| 67.0917313 | 70.75638 | 68.1125201 | 71         | 63 |
| 66.0917313 | 70.75638 | 68.1125201 | 71.25      | 63 |
| 66.0917313 | 70.75638 | 68.1125201 | 71.125     | 63 |
| 66.0917313 | 69.75638 | 75.1125201 | 73.125     | 63 |
| 66.0917313 | 69.75638 | 77.1125201 | 74.25      | 63 |
| 67.0917313 | 69.75638 | 78.1125201 | 74.875     | 63 |
| 71.0917313 | 69.75638 | 78.1125201 | 75         | 63 |
| 71.0917313 | 69.75638 | 78.1125201 | 75.125     | 63 |

|            |          |            |            |    |
|------------|----------|------------|------------|----|
| 71.0917313 | 68.75638 | 75.1125201 | 74.25      | 63 |
| 71.0917313 | 68.75638 | 74.1125201 | 72.2090713 | 63 |
| 71.0917313 | 67.75638 | 74.1125201 | 72.1153213 | 63 |
| 71.0917313 | 67.75638 | 72.1125201 | 71.8496963 | 63 |
| 72.0917313 | 66.75638 | 72.1125201 | 71.5684463 | 63 |
| 73.0917313 | 66.75638 | 71.1125201 | 71.2871963 | 63 |
| 74.0917313 | 66.75638 | 71.1125201 | 71.0371963 | 63 |
| 74.0917313 | 67.75638 | 70.1125201 | 70.5996963 | 63 |
| 74.0917313 | 67.75638 | 69.1125201 | 71         | 63 |
| 75.0917313 | 67.75638 | 69.1125201 | 70.125     | 63 |
| 75.0917313 | 65.75638 | 67.1125201 | 69.5       | 63 |
| 75.0917313 | 63.75638 | 66.1125201 | 69.125     | 63 |
| 75.0917313 | 63.75638 | 66.1125201 | 68.875     | 63 |
| 76.0917313 | 60.75638 | 65.1125201 | 68.25      | 63 |
| 74.0917313 | 59.75638 | 65.1125201 | 67.25      | 63 |
| 74.0917313 | 59.75638 | 65.1125201 | 67.125     | 63 |
| 74.0917313 | 58.75638 | 65.1125201 | 66.875     | 63 |
| 74.0917313 | 59.75638 | 65.1125201 | 67.375     | 63 |
| 74.0917313 | 59.75638 | 65.1125201 | 67.375     | 63 |
| 75.0917313 | 58.75638 | 65.1125201 | 67.875     | 63 |
| 77.0917313 | 58.75638 | 64.1125201 | 68.375     | 63 |
| 77.0917313 | 58.75638 | 64.1125201 | 68.375     | 63 |
| 77.0917313 | 57.75638 | 64.1125201 | 68.25      | 63 |
| 74.0917313 | 57.75638 | 68.1125201 | 68.625     | 63 |
| 70.0917313 | 57.75638 | 69.1125201 | 68.5       | 63 |
| 70.0917313 | 58.75638 | 71.1125201 | 68.625     | 63 |
| 70.0917313 | 59.75638 | 76.1125201 | 68.75      | 63 |
| 71.0917313 | 59.75638 | 76.1125201 | 69.25      | 63 |
| 72.0917313 | 61.75638 | 76.1125201 | 69.25      | 63 |
| 71.0917313 | 62.75638 | 76.1125201 | 69.25      | 63 |
| 71.0917313 | 62.75638 | 75.1125201 | 68.75      | 63 |
| 71.0917313 | 62.75638 | 75.1125201 | 68.75      | 63 |
| 72.0917313 | 62.75638 | 73.1125201 | 68.625     | 63 |
| 73.0917313 | 62.75638 | 72.1125201 | 69         | 63 |
| 73.0917313 | 62.75638 | 72.1125201 | 69         | 63 |
| 72.0917313 | 63.75638 | 72.1125201 | 68.875     | 63 |
| 70.0917313 | 63.75638 | 72.1125201 | 68.75      | 63 |
| 70.0917313 | 63.75638 | 73.1125201 | 68.5       | 63 |
| 71.0917313 | 63.75638 | 73.1125201 | 68.375     | 63 |
| 71.0917313 | 63.75638 | 72.1125201 | 68         | 63 |
| 72.0917313 | 69.75638 | 71.1125201 | 68.625     | 63 |
| 73.0917313 | 70.75638 | 71.1125201 | 70         | 63 |
| 73.0917313 | 70.75638 | 71.1125201 | 70.25      | 63 |
| 73.0917313 | 70.75638 | 71.1125201 | 70.25      | 63 |
| 72.0917313 | 71.75638 | 71.1125201 | 70.375     | 63 |

|            |          |            |            |    |
|------------|----------|------------|------------|----|
| 72.0917313 | 71.75638 | 71.1125201 | 69.75      | 63 |
| 73.0917313 | 73.75638 | 71.1125201 | 69.5       | 63 |
| 74.0917313 | 74.75638 | 71.1125201 | 69.75      | 63 |
| 74.0917313 | 75.75638 | 70.1125201 | 69.625     | 63 |
| 74.0917313 | 75.75638 | 70.1125201 | 69.625     | 63 |
| 75.0917313 | 75.75638 | 70.1125201 | 69.625     | 63 |
| 74.0917313 | 76.75638 | 71.1125201 | 69.75      | 63 |
| 73.0917313 | 77.75638 | 71.1125201 | 69.625     | 63 |
| 73.0917313 | 78.75638 | 71.1125201 | 69.875     | 63 |
| 72.0917313 | 78.75638 | 71.1125201 | 70.125     | 63 |
| 72.0917313 | 78.75638 | 72.1125201 | 69.625     | 63 |
| 73.0917313 | 77.75638 | 73.1125201 | 70         | 63 |
| 74.0917313 | 75.75638 | 73.1125201 | 70.25      | 63 |
| 74.0917313 | 74.75638 | 73.1125201 | 70.125     | 63 |
| 74.0917313 | 73.75638 | 69.1125201 | 70         | 63 |
| 72.0917313 | 73.75638 | 69.1125201 | 70         | 63 |
| 71.0917313 | 72.75638 | 68.1125201 | 70         | 63 |
| 70.0917313 | 72.75638 | 68.1125201 | 70.625     | 63 |
| 70.0917313 | 71.75638 | 69.1125201 | 71.5       | 63 |
| 69.0917313 | 71.75638 | 70.1125201 | 71.625     | 63 |
| 70.0917313 | 71.75638 | 71.1125201 | 71.75      | 63 |
| 70.0917313 | 70.75638 | 71.1125201 | 70.4664291 | 63 |
| 70.0917313 | 70.75638 | 71.1125201 | 70.7476791 | 63 |
| 70.0917313 | 70.75638 | 68.1125201 | 70.8883041 | 63 |
| 70.0917313 | 70.75638 | 67.1125201 | 70.7633041 | 63 |
| 70.0917313 | 70.75638 | 67.1125201 | 70.7945541 | 63 |
| 69.0917313 | 69.75638 | 67.1125201 | 70.6695541 | 63 |
| 69.0917313 | 67.75638 | 67.1125201 | 70.2320541 | 63 |
| 69.0917313 | 66.75638 | 66.1125201 | 69.9195541 | 63 |
| 69.0917313 | 66.75638 | 66.1125201 | 71         | 63 |
| 70.0917313 | 66.75638 | 65.1125201 | 70.875     | 63 |
| 70.0917313 | 66.75638 | 64.1125201 | 70.5       | 63 |
| 70.0917313 | 66.75638 | 65.1125201 | 70         | 63 |
| 71.0917313 | 66.75638 | 65.1125201 | 70.375     | 63 |
| 72.0917313 | 66.75638 | 64.1125201 | 70.5       | 63 |
| 72.0917313 | 67.75638 | 65.1125201 | 71         | 63 |
| 75.0917313 | 67.75638 | 66.1125201 | 72.25      | 63 |
| 75.0917313 | 67.75638 | 66.1125201 | 71.75      | 63 |
| 75.0917313 | 68.75638 | 66.1125201 | 71.625     | 63 |
| 76.0917313 | 68.75638 | 67.1125201 | 71.75      | 63 |
| 76.0917313 | 68.75638 | 67.1125201 | 71.75      | 63 |
| 76.0917313 | 68.75638 | 67.1125201 | 72.375     | 63 |
| 76.0917313 | 68.75638 | 68.1125201 | 72.375     | 63 |
| 77.0917313 | 71.75638 | 67.1125201 | 72.75      | 63 |
| 77.0917313 | 71.75638 | 67.1125201 | 72.875     | 63 |

|            |          |            |            |    |
|------------|----------|------------|------------|----|
| 73.0917313 | 72.75638 | 67.1125201 | 72.375     | 63 |
| 72.0917313 | 72.75638 | 67.1125201 | 72.5       | 63 |
| 72.0917313 | 73.75638 | 67.1125201 | 72.75      | 63 |
| 67.0917313 | 73.75638 | 67.1125201 | 72.25      | 63 |
| 67.0917313 | 74.75638 | 66.1125201 | 72.125     | 63 |
| 67.0917313 | 75.75638 | 66.1125201 | 72.125     | 63 |
| 66.0917313 | 76.75638 | 66.1125201 | 70.5914291 | 63 |
| 66.0917313 | 76.75638 | 67.1125201 | 71.625     | 63 |
| 66.0917313 | 75.75638 | 67.1125201 | 71.5       | 63 |
| 68.0917313 | 75.75638 | 67.1125201 | 72.125     | 63 |
| 68.0917313 | 69.75638 | 69.1125201 | 72.5       | 63 |
| 71.0917313 | 66.75638 | 70.1125201 | 72.875     | 63 |
| 71.0917313 | 66.75638 | 70.1125201 | 73.125     | 63 |
| 71.0917313 | 64.75638 | 69.1125201 | 71.4740677 | 63 |
| 71.0917313 | 64.75638 | 69.1125201 | 71.75      | 63 |
| 71.0917313 | 63.75638 | 67.1125201 | 70.25      | 63 |
| 71.0917313 | 63.75638 | 66.1125201 | 70.125     | 63 |
| 71.0917313 | 63.75638 | 66.1125201 | 69.375     | 63 |
| 70.0917313 | 64.75638 | 66.1125201 | 69.375     | 63 |
| 69.0917313 | 66.75638 | 67.1125201 | 69.5       | 63 |
| 69.0917313 | 66.75638 | 68.1125201 | 69.25      | 63 |
| 69.0917313 | 66.75638 | 68.1125201 | 69.25      | 63 |
| 69.0917313 | 66.75638 | 69.1125201 | 69.75      | 63 |
| 69.0917313 | 67.75638 | 68.1125201 | 70.125     | 63 |
| 69.0917313 | 67.75638 | 68.1125201 | 70.375     | 63 |
| 69.0917313 | 68.75638 | 67.1125201 | 70.25      | 63 |
| 69.0917313 | 69.75638 | 66.1125201 | 70         | 63 |
| 68.0917313 | 70.75638 | 64.1125201 | 70.25      | 63 |
| 67.0917313 | 70.75638 | 64.1125201 | 69.875     | 63 |
| 67.0917313 | 69.75638 | 64.1125201 | 69.75      | 63 |
| 67.0917313 | 68.75638 | 67.1125201 | 69.875     | 63 |
| 71.0917313 | 66.75638 | 67.1125201 | 69.875     | 63 |
| 71.0917313 | 66.75638 | 65.1125201 | 69.375     | 63 |
| 71.0917313 | 65.75638 | 64.1125201 | 68.75      | 63 |
| 71.0917313 | 65.75638 | 64.1125201 | 68.75      | 63 |
| 71.0917313 | 65.75638 | 65.1125201 | 68.75      | 63 |
| 72.0917313 | 64.75638 | 68.1125201 | 69         | 63 |
| 72.0917313 | 60.75638 | 71.1125201 | 69.125     | 63 |
| 72.0917313 | 60.75638 | 71.1125201 | 69         | 63 |
| 71.0917313 | 57.75638 | 73.1125201 | 68.875     | 63 |
| 69.0917313 | 57.75638 | 73.1125201 | 68.625     | 63 |
| 65.0917313 | 57.75638 | 73.1125201 | 68         | 63 |
| 64.0917313 | 58.75638 | 74.1125201 | 68.375     | 63 |
| 64.0917313 | 59.75638 | 74.1125201 | 69.25      | 63 |
| 63.0917313 | 63.75638 | 72.1125201 | 68.4121963 | 63 |



|            |          |            |            |    |
|------------|----------|------------|------------|----|
| 63.0917313 | 65.75638 | 71.1125201 | 69.3184463 | 63 |
| 60.0917313 | 66.75638 | 71.1125201 | 68.308139  | 63 |
| 60.0917313 | 67.75638 | 71.1125201 | 68.808139  | 63 |
| 60.0917313 | 68.75638 | 73.1125201 | 69.370639  | 63 |
| 60.0917313 | 68.75638 | 73.1125201 | 69.370639  | 63 |
| 59.0917313 | 67.75638 | 73.1125201 | 69.433139  | 63 |
| 57.0917313 | 67.75638 | 73.1125201 | 69.276889  | 63 |
| 57.0917313 | 64.75638 | 73.1125201 | 68.745639  | 63 |
| 58.0917313 | 63.75638 | 73.1125201 | 69.026889  | 63 |
| 59.0917313 | 63.75638 | 74.1125201 | 69.464389  | 63 |
| 60.0917313 | 60.75638 | 77.1125201 | 69.589389  | 63 |
| 61.0917313 | 59.75638 | 77.1125201 | 70.4584427 | 63 |
| 61.0917313 | 59.75638 | 78.1125201 | 70.6303177 | 63 |
| 61.0917313 | 60.75638 | 78.1125201 | 70.3646927 | 63 |
| 62.0917313 | 61.75638 | 78.1125201 | 69.8178177 | 63 |
| 64.0917313 | 61.75638 | 78.1125201 | 69.8178177 | 63 |
| 65.0917313 | 61.75638 | 79.1125201 | 69.9428177 | 63 |
| 69.0917313 | 61.75638 | 79.1125201 | 70.0678177 | 63 |
| 69.0917313 | 62.75638 | 79.1125201 | 71         | 63 |
| 69.0917313 | 63.75638 | 78.1125201 | 70.875     | 63 |
| 69.0917313 | 63.75638 | 78.1125201 | 70         | 63 |
| 69.0917313 | 63.75638 | 76.1125201 | 69.75      | 63 |
| 69.0917313 | 64.75638 | 76.1125201 | 70.375     | 63 |
| 69.0917313 | 64.75638 | 76.1125201 | 70.5       | 63 |
| 68.0917313 | 63.75638 | 76.1125201 | 68.4508041 | 63 |
| 69.0917313 | 63.75638 | 76.1125201 | 68.7320541 | 63 |
| 69.0917313 | 63.75638 | 76.1125201 | 69.75      | 63 |
| 69.0917313 | 64.75638 | 74.1125201 | 69.125     | 63 |
| 69.0917313 | 64.75638 | 74.1125201 | 68.125     | 63 |
| 69.0917313 | 64.75638 | 75.1125201 | 68.625     | 63 |
| 69.0917313 | 64.75638 | 76.1125201 | 68.75      | 63 |
| 69.0917313 | 64.75638 | 76.1125201 | 68.625     | 63 |
| 68.0917313 | 65.75638 | 76.1125201 | 69         | 63 |
| 68.0917313 | 65.75638 | 74.1125201 | 68.75      | 63 |
| 67.0917313 | 65.75638 | 75.1125201 | 68.875     | 63 |
| 65.0917313 | 74.75638 | 75.1125201 | 69.5       | 63 |
| 65.0917313 | 75.75638 | 75.1125201 | 69.375     | 63 |
| 65.0917313 | 75.75638 | 72.1125201 | 69.125     | 63 |
| 65.0917313 | 75.75638 | 72.1125201 | 68.625     | 63 |
| 65.0917313 | 74.75638 | 73.1125201 | 68.5       | 63 |
| 65.0917313 | 73.75638 | 73.1125201 | 68.375     | 63 |
| 65.0917313 | 69.75638 | 73.1125201 | 67.75      | 63 |
| 65.0917313 | 68.75638 | 73.1125201 | 67.5       | 63 |
| 65.0917313 | 67.75638 | 72.1125201 | 67.375     | 63 |
| 74.0917313 | 67.75638 | 72.1125201 | 68.625     | 63 |

|            |          |            |            |    |
|------------|----------|------------|------------|----|
| 74.0917313 | 67.75638 | 70.1125201 | 68.5       | 63 |
| 73.0917313 | 66.75638 | 69.1125201 | 68.625     | 69 |
| 73.0917313 | 66.75638 | 69.1125201 | 68.875     | 69 |
| 74.0917313 | 66.75638 | 67.1125201 | 69.375     | 69 |
| 75.0917313 | 66.75638 | 67.1125201 | 69.5       | 69 |
| 75.0917313 | 66.75638 | 67.1125201 | 69.375     | 69 |
| 75.0917313 | 66.75638 | 67.1125201 | 69.375     | 69 |
| 74.0917313 | 66.75638 | 68.1125201 | 69.5       | 69 |
| 73.0917313 | 67.75638 | 69.1125201 | 69.875     | 69 |
| 73.0917313 | 68.75638 | 69.1125201 | 69.875     | 69 |
| 73.0917313 | 68.75638 | 70.1125201 | 70.5       | 69 |
| 72.0917313 | 69.75638 | 69.1125201 | 70.25      | 69 |
| 72.0917313 | 69.75638 | 70.1125201 | 70.25      | 69 |
| 72.0917313 | 69.75638 | 70.1125201 | 70.25      | 69 |
| 72.0917313 | 68.75638 | 68.1125201 | 69.25      | 69 |
| 76.0917313 | 67.75638 | 68.1125201 | 69.25      | 69 |
| 77.0917313 | 66.75638 | 68.1125201 | 68.75      | 69 |
| 79.0917313 | 65.75638 | 69.1125201 | 68.75      | 69 |
| 68.5       | 65.75638 | 69.1125201 | 67.0510336 | 69 |
| 68.125     | 64.75638 | 69.1125201 | 66.5041586 | 69 |
| 69         | 64.75638 | 69.1125201 | 67.3635336 | 69 |
| 69.375     | 65.75638 | 70.1125201 | 67.7854086 | 69 |
| 70.125     | 65.75638 | 71.1125201 | 68.3791586 | 63 |
| 70.25      | 66.75638 | 71.1125201 | 68.5197836 | 63 |
| 70.25      | 65.75638 | 71.1125201 | 68.5197836 | 63 |
| 70.25      | 65.75638 | 70.1125201 | 68.5197836 | 63 |
| 70.75      | 66.75638 | 70.1125201 | 69.0822836 | 63 |
| 70.625     | 66.75638 | 69.1125201 | 68.9416586 | 63 |
| 71         | 67.75638 | 70.1125201 | 69.3635336 | 63 |
| 70.625     | 67.75638 | 70.1125201 | 68.8166586 | 63 |
| 70.375     | 68.75638 | 70.1125201 | 68.5354086 | 63 |
| 69.75      | 68.75638 | 71.1125201 | 68.3322836 | 63 |
| 78.0917313 | 69.75638 | 71.1125201 | 69.625     | 63 |
| 78.0917313 | 69.75638 | 71.1125201 | 69.125     | 63 |
| 78.0917313 | 69.75638 | 71.1125201 | 69.75      | 63 |
| 78.0917313 | 69.75638 | 68.1125201 | 69.625     | 63 |
| 77.0917313 | 68.75638 | 66.1125201 | 69.5       | 63 |
| 76.0917313 | 68.75638 | 65.1125201 | 69.5       | 63 |
| 75.0917313 | 68.75638 | 65.1125201 | 69.5       | 63 |
| 75.0917313 | 68.75638 | 65.1125201 | 69.375     | 63 |
| 75.0917313 | 67.75638 | 65.1125201 | 69.25      | 63 |
| 75.0917313 | 65.75638 | 67.1125201 | 69.125     | 63 |
| 75.0917313 | 65.75638 | 67.1125201 | 69         | 63 |
| 75.0917313 | 65.75638 | 66.1125201 | 69.125     | 63 |
| 75.0917313 | 65.75638 | 66.1125201 | 69.125     | 63 |

|            |          |            |            |    |
|------------|----------|------------|------------|----|
| 75.0917313 | 66.75638 | 65.1125201 | 69         | 63 |
| 75.0917313 | 66.75638 | 65.1125201 | 69         | 63 |
| 77.0917313 | 67.75638 | 65.1125201 | 68.875     | 63 |
| 69.75      | 67.75638 | 65.1125201 | 68.3322836 | 63 |
| 77.0917313 | 67.75638 | 66.1125201 | 69.5       | 63 |
| 76.0917313 | 67.75638 | 66.1125201 | 70.375     | 63 |
| 75.0917313 | 67.75638 | 66.1125201 | 70.5       | 63 |
| 73.0917313 | 68.75638 | 65.1125201 | 70.75      | 63 |
| 71.0917313 | 70.75638 | 65.1125201 | 70.75      | 63 |
| 71.0917313 | 71.75638 | 65.1125201 | 70.5       | 63 |
| 71.0917313 | 71.75638 | 65.1125201 | 69.2246963 | 63 |
| 71.0917313 | 72.75638 | 65.1125201 | 69.2246963 | 63 |
| 71.0917313 | 72.75638 | 65.1125201 | 69.0840713 | 63 |
| 71.0917313 | 72.75638 | 65.1125201 | 70         | 63 |
| 71.0917313 | 72.75638 | 66.1125201 | 69.25      | 63 |
| 72.0917313 | 72.75638 | 67.1125201 | 69.625     | 63 |
| 72.0917313 | 72.75638 | 67.1125201 | 69.625     | 63 |
| 72.0917313 | 71.75638 | 69.1125201 | 69.75      | 63 |
| 71.0917313 | 71.75638 | 69.1125201 | 69.875     | 63 |
| 71.0917313 | 71.75638 | 69.1125201 | 69.75      | 63 |
| 71.0917313 | 71.75638 | 69.1125201 | 70         | 63 |
| 71.0917313 | 72.75638 | 68.1125201 | 69.875     | 63 |
| 71.0917313 | 72.75638 | 68.1125201 | 69.875     | 63 |
| 73.0917313 | 72.75638 | 64.1125201 | 70.125     | 63 |
| 74.0917313 | 72.75638 | 64.1125201 | 70.25      | 63 |
| 74.0917313 | 72.75638 | 62.1125201 | 70.625     | 63 |
| 72.0917313 | 72.75638 | 63.1125201 | 70.625     | 63 |
| 73.0917313 | 72.75638 | 63.1125201 | 70.875     | 63 |
| 73.0917313 | 73.75638 | 64.1125201 | 70.25      | 63 |
| 73.0917313 | 73.75638 | 69.1125201 | 70.875     | 63 |
| 73.0917313 | 74.75638 | 70.1125201 | 70.875     | 63 |
| 73.0917313 | 74.75638 | 70.1125201 | 71.5       | 63 |
| 74.0917313 | 73.75638 | 71.1125201 | 71.625     | 63 |
| 75.0917313 | 73.75638 | 71.1125201 | 71.75      | 63 |
| 75.0917313 | 73.75638 | 73.1125201 | 71.625     | 63 |
| 75.0917313 | 73.75638 | 73.1125201 | 71         | 63 |
| 75.0917313 | 73.75638 | 74.1125201 | 71.125     | 63 |
| 76.0917313 | 74.75638 | 76.1125201 | 71.25      | 63 |
| 76.0917313 | 74.75638 | 76.1125201 | 71.25      | 63 |
| 76.0917313 | 74.75638 | 75.1125201 | 71.125     | 63 |
| 74.0917313 | 73.75638 | 75.1125201 | 71.125     | 63 |
| 74.0917313 | 73.75638 | 74.1125201 | 71.125     | 63 |
| 74.0917313 | 74.75638 | 73.1125201 | 71.125     | 63 |
| 74.0917313 | 75.75638 | 73.1125201 | 71.375     | 63 |
| 74.0917313 | 76.75638 | 71.1125201 | 70.25      | 63 |

|            |          |            |           |    |
|------------|----------|------------|-----------|----|
| 74.0917313 | 76.75638 | 70.1125201 | 70        | 63 |
| 74.0917313 | 76.75638 | 70.1125201 | 70        | 63 |
| 74.0917313 | 76.75638 | 70.1125201 | 70        | 63 |
| 74.0917313 | 76.75638 | 68.1125201 | 69.875    | 63 |
| 74.0917313 | 74.75638 | 69.1125201 | 69.625    | 63 |
| 74.0917313 | 67.75638 | 69.1125201 | 68.875    | 63 |
| 74.0917313 | 62.75638 | 69.1125201 | 68.375    | 63 |
| 75.0917313 | 60.75638 | 68.1125201 | 68.25     | 63 |
| 75.0917313 | 58.75638 | 68.1125201 | 68.125    | 63 |
| 76.0917313 | 58.75638 | 68.1125201 | 68.125    | 63 |
| 76.0917313 | 58.75638 | 66.1125201 | 67.75     | 63 |
| 75.0917313 | 58.75638 | 66.1125201 | 67.5      | 63 |
| 75.0917313 | 58.75638 | 66.1125201 | 66.875    | 63 |
| 74.0917313 | 58.75638 | 65.1125201 | 66.625    | 63 |
| 73.0917313 | 59.75638 | 65.1125201 | 66.75     | 63 |
| 74.0917313 | 62.75638 | 66.1125201 | 67        | 63 |
| 74.0917313 | 62.75638 | 66.1125201 | 66.625    | 63 |
| 75.0917313 | 64.75638 | 67.1125201 | 67.125    | 63 |
| 75.0917313 | 64.75638 | 67.1125201 | 67.375    | 63 |
| 75.0917313 | 66.75638 | 67.1125201 | 67.5      | 63 |
| 72.0917313 | 67.75638 | 67.1125201 | 67.25     | 63 |
| 72.0917313 | 68.75638 | 67.1125201 | 67.375    | 63 |
| 71.0917313 | 68.75638 | 67.1125201 | 67.125    | 63 |
| 71.0917313 | 68.75638 | 68.1125201 | 67.125    | 63 |
| 72.0917313 | 68.75638 | 69.1125201 | 67.625    | 63 |
| 73.0917313 | 68.75638 | 69.1125201 | 67.5      | 63 |
| 72.0917313 | 67.75638 | 69.1125201 | 67.125    | 63 |
| 72.0917313 | 67.75638 | 69.1125201 | 67.375    | 63 |
| 72.0917313 | 66.75638 | 69.1125201 | 67.375    | 63 |
| 72.0917313 | 66.75638 | 70.1125201 | 67.75     | 63 |
| 73.0917313 | 66.75638 | 71.1125201 | 67.875    | 63 |
| 73.0917313 | 66.75638 | 71.1125201 | 67.875    | 63 |
| 72.0917313 | 66.75638 | 75.1125201 | 68.375    | 63 |
| 72.0917313 | 65.75638 | 75.1125201 | 68.625    | 63 |
| 72.0917313 | 64.75638 | 75.1125201 | 68.625    | 63 |
| 72.0917313 | 64.75638 | 74.1125201 | 68.5      | 63 |
| 72.0917313 | 65.75638 | 75.1125201 | 69        | 63 |
| 72.0917313 | 65.75638 | 76.1125201 | 69        | 63 |
| 71.0917313 | 69.75638 | 77.1125201 | 69.75     | 63 |
| 71.0917313 | 69.75638 | 77.1125201 | 69.625    | 63 |
| 71.0917313 | 69.75638 | 78.1125201 | 69.75     | 63 |
| 71.0917313 | 70.75638 | 80.1125201 | 70.25     | 63 |
| 70.0917313 | 69.75638 | 70.25      | 68.767185 | 63 |
| 70.0917313 | 68.75638 | 70.5       | 68.798435 | 63 |
| 69.0917313 | 67.75638 | 70.25      | 68.517185 | 63 |

|            |          |            |            |    |
|------------|----------|------------|------------|----|
| 68.0917313 | 67.75638 | 70.125     | 68.37656   | 63 |
| 67.0917313 | 67.75638 | 70.125     | 68.37656   | 63 |
| 65.0917313 | 67.75638 | 69.875     | 68.09531   | 63 |
| 65.0917313 | 68.75638 | 70.625     | 68.93906   | 63 |
| 66.0917313 | 69.75638 | 70.875     | 69.22031   | 63 |
| 67.0917313 | 69.75638 | 70.875     | 69.34531   | 63 |
| 69.0917313 | 69.75638 | 71.125     | 69.62656   | 63 |
| 70.0917313 | 70.75638 | 82.1125201 | 71.625     | 63 |
| 70.0917313 | 70.75638 | 82.1125201 | 72.75      | 63 |
| 70.0917313 | 70.75638 | 81.1125201 | 74.25      | 63 |
| 71.0917313 | 71.75638 | 79.1125201 | 74.75      | 63 |
| 71.0917313 | 70.75638 | 79.1125201 | 72.75      | 63 |
| 71.0917313 | 69.75638 | 78.1125201 | 71.8595363 | 63 |
| 73.0917313 | 69.75638 | 78.1125201 | 71.6095363 | 63 |
| 73.0917313 | 68.75638 | 78.1125201 | 70.9064113 | 63 |
| 73.0917313 | 66.75638 | 78.1125201 | 69.9532863 | 63 |
| 75.0917313 | 64.75638 | 78.1125201 | 69.9845363 | 63 |
| 72.0917313 | 64.75638 | 75.1125201 | 68.8595363 | 63 |
| 72.0917313 | 65.75638 | 75.1125201 | 68.7189113 | 69 |
| 71.0917313 | 67.75638 | 75.1125201 | 68.375     | 69 |
| 71.0917313 | 68.75638 | 74.1125201 | 68.625     | 69 |
| 73.0917313 | 68.75638 | 73.1125201 | 68.375     | 69 |
| 73.0917313 | 69.75638 | 73.1125201 | 68.5       | 69 |
| 74.0917313 | 70.75638 | 73.1125201 | 68.5       | 69 |
| 75.0917313 | 70.75638 | 74.1125201 | 68.5       | 69 |
| 76.0917313 | 70.75638 | 75.1125201 | 68.375     | 69 |
| 77.0917313 | 69.75638 | 76.1125201 | 68.625     | 69 |
| 78.0917313 | 66.75638 | 78.1125201 | 68.75      | 69 |
| 77.0917313 | 63.75638 | 78.1125201 | 68         | 69 |
| 77.0917313 | 62.75638 | 78.1125201 | 67.5       | 69 |
| 75.0917313 | 62.75638 | 79.1125201 | 68.5       | 69 |
| 75.0917313 | 71.75638 | 77.1125201 | 69.75      | 69 |
| 75.0917313 | 75.75638 | 74.1125201 | 69.875     | 69 |
| 75.0917313 | 75.75638 | 72.1125201 | 69.875     | 69 |
| 74.0917313 | 77.75638 | 72.1125201 | 70.25      | 69 |
| 75.0917313 | 78.75638 | 72.1125201 | 71         | 69 |
| 76.0917313 | 77.75638 | 71.1125201 | 71.125     | 69 |
| 77.0917313 | 72.75638 | 72.1125201 | 70.75      | 69 |
| 77.0917313 | 69.75638 | 72.1125201 | 70.5       | 69 |
| 77.0917313 | 68.75638 | 72.1125201 | 70.375     | 69 |
| 77.0917313 | 68.75638 | 72.1125201 | 70.375     | 69 |
| 77.0917313 | 68.75638 | 72.1125201 | 70.25      | 69 |
| 77.0917313 | 67.75638 | 71.1125201 | 70.25      | 69 |
| 77.0917313 | 67.75638 | 69.1125201 | 70.5       | 69 |
| 78.0917313 | 67.75638 | 68.1125201 | 70.75      | 69 |

|            |          |            |            |    |
|------------|----------|------------|------------|----|
| 80.0917313 | 65.75638 | 67.1125201 | 70.625     | 69 |
| 70         | 62.75638 | 67.1125201 | 68.6135336 | 63 |
| 70         | 60.75638 | 67.1125201 | 68.4885336 | 63 |
| 70.25      | 59.75638 | 67.1125201 | 68.7697836 | 63 |
| 70.375     | 59.75638 | 67.1125201 | 68.9104086 | 63 |
| 70.25      | 60.75638 | 66.1125201 | 68.7697836 | 63 |
| 70.375     | 60.75638 | 66.1125201 | 68.9104086 | 63 |
| 80.0917313 | 63.75638 | 66.1125201 | 70.875     | 63 |
| 80.0917313 | 68.75638 | 66.1125201 | 71.625     | 63 |
| 77.0917313 | 72.75638 | 67.1125201 | 71.875     | 63 |
| 77.0917313 | 74.75638 | 68.1125201 | 72         | 63 |
| 77.0917313 | 75.75638 | 68.1125201 | 72.25      | 63 |
| 79.0917313 | 75.75638 | 68.1125201 | 72.25      | 63 |
| 79.0917313 | 74.75638 | 68.1125201 | 72         | 63 |
| 79.0917313 | 73.75638 | 71.1125201 | 71.875     | 63 |
| 77.0917313 | 73.75638 | 71.1125201 | 71.375     | 63 |
| 75.0917313 | 73.75638 | 71.1125201 | 70.75      | 63 |
| 75.0917313 | 73.75638 | 71.1125201 | 70.5       | 63 |
| 73.0917313 | 73.75638 | 71.1125201 | 69.875     | 63 |
| 72.0917313 | 73.75638 | 71.1125201 | 69.75      | 63 |
| 72.0917313 | 73.75638 | 71.1125201 | 69.625     | 63 |
| 72.0917313 | 73.75638 | 71.1125201 | 69.5       | 63 |
| 72.0917313 | 73.75638 | 71.1125201 | 69.875     | 63 |
| 72.0917313 | 73.75638 | 70.1125201 | 70.125     | 63 |
| 72.0917313 | 73.75638 | 70.1125201 | 70.25      | 63 |
| 73.0917313 | 73.75638 | 70.1125201 | 70.375     | 63 |
| 74.0917313 | 74.75638 | 70.1125201 | 70.875     | 63 |
| 73.0917313 | 74.75638 | 71.1125201 | 70.75      | 63 |
| 73.0917313 | 74.75638 | 71.1125201 | 71.25      | 63 |
| 72.0917313 | 74.75638 | 70.1125201 | 70.75      | 63 |
| 73.0917313 | 76.75638 | 70.1125201 | 71         | 63 |
| 73.0917313 | 76.75638 | 69.1125201 | 70.5       | 63 |
| 74.0917313 | 73.75638 | 68.1125201 | 70.75      | 63 |
| 75.0917313 | 65.75638 | 67.1125201 | 69.75      | 63 |
| 76.0917313 | 59.75638 | 67.1125201 | 69.375     | 63 |
| 76.0917313 | 56.75638 | 67.1125201 | 68.75      | 63 |
| 76.0917313 | 54.75638 | 67.1125201 | 68.25      | 63 |
| 75.0917313 | 53.75638 | 66.1125201 | 67.25      | 63 |
| 76.0917313 | 52.75638 | 66.1125201 | 66.875     | 63 |
| 75.0917313 | 52.75638 | 66.1125201 | 66.625     | 63 |
| 76.0917313 | 53.75638 | 65.1125201 | 66.75      | 63 |
| 76.0917313 | 54.75638 | 65.1125201 | 66.75      | 63 |
| 77.0917313 | 55.75638 | 65.1125201 | 67.375     | 63 |
| 77.0917313 | 57.75638 | 64.1125201 | 67.375     | 63 |
| 77.0917313 | 59.75638 | 63.1125201 | 69.5       | 63 |

|            |          |            |             |            |    |
|------------|----------|------------|-------------|------------|----|
| 77.0917313 | 62.75638 | 63.1125201 |             | 70.5       | 63 |
| 77.0917313 | 62.75638 | 63.1125201 |             | 70.75      | 63 |
| 77.0917313 | 63.75638 | 62.1125201 |             | 70.375     | 63 |
| 77.0917313 | 63.75638 | 62.1125201 |             | 69.875     | 63 |
| 77.0917313 | 63.75638 | 62.1125201 |             | 69.875     | 63 |
| 77.0917313 | 63.75638 | 62.1125201 |             | 68.25      | 63 |
| 76.0917313 | 62.75638 | 63.1125201 |             | 67.5       | 63 |
| 78.0917313 | 62.75638 | 63.1125201 |             | 67.5       | 63 |
| 78.0917313 | 62.75638 | 63.1125201 |             | 67.5       | 63 |
| 78.0917313 | 63.75638 | 61.1125201 |             | 67.375     | 63 |
| 77.0917313 | 63.75638 | 60.1125201 |             | 67.375     | 63 |
| 68         | 63.75638 | 61.1125201 |             | 66.3635336 | 63 |
| 68.5       | 64.75638 | 61.1125201 |             | 66.8010336 | 63 |
| 68.75      | 64.75638 | 60.1125201 | 101614.16.9 | 67.0822836 | 63 |
| 68.875     | 64.75638 | 60.1125201 | Before 1    | 67.2229086 | 63 |
| 69.5       | 65.75638 | 62.1125201 | Before 2    | 67.9260336 | 63 |
| 69.5       | 66.75638 | 62.1125201 | Before 3    | 67.9260336 | 63 |
| 70.25      | 71.75638 | 62.1125201 | Before 4    | 68.6447836 | 63 |
| 70.875     | 73.75638 | 62.1125201 | Before 5    | 69.3479086 | 63 |
| 71         | 73.75638 | 62.1125201 | Before 6    | 69.4885336 | 63 |
| 71.75      | 73.75638 | 63.1125201 | Before 7    | 70.2072836 | 63 |
| 71.75      | 74.75638 | 63.1125201 | Before 8    | 70.2072836 | 63 |
| 81.0917313 | 74.75638 | 63.1125201 | Before 9    | 71.375     | 63 |
| 79.0917313 | 65.75638 | 63.1125201 | Before 10   | 70         | 63 |
| 77.0917313 | 65.75638 | 63.1125201 | Before 11   | 69.875     | 63 |
| 75.0917313 | 62.75638 | 60.1125201 | Before 12   | 69         | 63 |
| 74.0917313 | 62.75638 | 59.1125201 | Before 13   | 69         | 63 |
| 74.0917313 | 60.75638 | 60.1125201 | Before 14   | 69         | 63 |
| 75.0917313 | 60.75638 | 60.1125201 | Before 15   | 69.125     | 63 |
| 77.0917313 | 60.75638 | 60.1125201 | Before 16   | 69.625     | 63 |
| 77.0917313 | 61.75638 | 60.1125201 | Before 17   | 69.75      | 63 |
| 77.0917313 | 61.75638 | 63.1125201 | Before 18   | 70         | 63 |
| 74.0917313 | 61.75638 | 63.1125201 | Before 19   | 69.75      | 63 |
| 72.0917313 | 61.75638 | 63.1125201 | Before 20   | 69.375     | 63 |
| 71.0917313 | 62.75638 | 64.1125201 | Before 21   | 69.25      | 63 |
| 70.0917313 | 62.75638 | 63.1125201 | Before 22   | 68.25      | 63 |
| 70.0917313 | 62.75638 | 63.1125201 | Before 23   | 67.75      | 63 |
| 70.0917313 | 62.75638 | 63.1125201 | Before 24   | 67.5       | 63 |
| 70.0917313 | 62.75638 | 64.1125201 | Before 25   | 66.5       | 63 |
| 70.0917313 | 62.75638 | 64.1125201 | Before 26   | 66.125     | 63 |
| 70.0917313 | 62.75638 | 65.1125201 | Before 27   | 65.75      | 63 |
| 69.0917313 | 62.75638 | 67.1125201 | Before 28   | 65.75      | 63 |
| 69.0917313 | 63.75638 | 68.1125201 | Before 29   | 65.75      | 63 |
| 71.0917313 | 63.75638 | 69.1125201 | Before 30   | 66.375     | 63 |
| 72.0917313 | 62.75638 | 71.1125201 | Before 31   | 65.875     | 63 |

|            |          |            |           |            |    |
|------------|----------|------------|-----------|------------|----|
| 73.0917313 | 62.75638 | 71.1125201 | Before 32 | 66.75      | 63 |
| 72.0917313 | 61.75638 | 72.1125201 | Before 33 | 66.75      | 63 |
| 70.0917313 | 60.75638 | 72.1125201 | Before 34 | 66.375     | 63 |
| 69.0917313 | 60.75638 | 72.1125201 | Before 35 | 66.625     | 63 |
| 69.0917313 | 59.75638 | 72.1125201 | Before 36 | 66.625     | 63 |
| 69.0917313 | 59.75638 | 71.1125201 | Before 37 | 66.625     | 63 |
| 68.0917313 | 60.75638 | 70.1125201 | Before 38 | 66.625     | 63 |
| 68.0917313 | 60.75638 | 70.1125201 | Before 39 | 66.75      | 63 |
| 68.0917313 | 60.75638 | 71.1125201 | Before 40 | 67         | 63 |
| 68.0917313 | 60.75638 | 71.1125201 | Before 41 | 67.25      | 63 |
| 68.0917313 | 60.75638 | 70.1125201 | Before 42 | 67.5       | 63 |
| 68.0917313 | 60.75638 | 70.1125201 | Before 43 | 67.875     | 63 |
| 68.0917313 | 60.75638 | 70.1125201 | Before 44 | 67.875     | 63 |
| 68.0917313 | 60.75638 | 70.1125201 | Before 45 | 67.875     | 63 |
| 68.0917313 | 63.75638 | 69.1125201 | Before 46 | 68.875     | 63 |
| 67.0917313 | 64.75638 | 68.1125201 | Before 47 | 68.875     | 63 |
| 67.0917313 | 64.75638 | 68.1125201 | Before 48 | 69.375     | 63 |
| 67.0917313 | 64.75638 | 68.1125201 | Before 49 | 70.125     | 63 |
| 67.0917313 | 64.75638 | 67.1125201 | Before 50 | 70.375     | 63 |
| 72.0917313 | 64.75638 | 66.1125201 | Before 51 | 71.75      | 63 |
| 72.0917313 | 64.75638 | 65.1125201 | Before 52 | 71.875     | 63 |
| 76.0917313 | 64.75638 | 65.1125201 | Before 53 | 72.75      | 63 |
| 76.0917313 | 64.75638 | 65.1125201 | Before 54 | 72.75      | 63 |
| 76.0917313 | 64.75638 | 65.1125201 | Before 55 | 72.25      | 63 |
| 75.0917313 | 64.75638 | 65.1125201 | Before 56 | 72         | 63 |
| 74.0917313 | 65.75638 | 65.1125201 | Before 57 | 71.625     | 63 |
| 74.0917313 | 64.75638 | 64.1125201 | Before 58 | 70.875     | 63 |
| 74.0917313 | 64.75638 | 64.1125201 | Before 59 | 71         | 63 |
| 76.0917313 | 64.75638 | 63.1125201 | Before 60 | 70.25      | 63 |
| 76.0917313 | 64.75638 | 64.1125201 | Before 61 | 69.875     | 63 |
| 77.0917313 | 65.75638 | 63.1125201 | Before 62 | 69.875     | 63 |
| 76.0917313 | 65.75638 | 63.1125201 | Before 63 | 69.75      | 63 |
| 76.0917313 | 65.75638 | 64.1125201 | Before 64 | 70.125     | 63 |
| 76.0917313 | 64.75638 | 65.1125201 | Before 65 | 71.125     | 63 |
| 76.0917313 | 65.75638 | 66.1125201 | Before 66 | 71.75      | 63 |
| 76.0917313 | 65.75638 | 66.1125201 | Before 67 | 71.5       | 63 |
| 76.0917313 | 64.75638 | 67.1125201 | Before 68 | 70.3021927 | 63 |
| 76.0917313 | 64.75638 | 66.1125201 | Before 69 | 69.8803177 | 63 |
| 76.0917313 | 64.75638 | 66.1125201 | Before 70 | 69.4584427 | 63 |
| 75.0917313 | 64.75638 | 65.1125201 | Before 71 | 69.4584427 | 63 |
| 75.0917313 | 64.75638 | 65.1125201 | Before 72 | 70.0365677 | 63 |
| 74.0917313 | 64.75638 | 65.1125201 | Before 73 | 70.3803177 | 63 |
| 74.0917313 | 65.75638 | 65.1125201 | Before 74 | 68.6475422 | 63 |
| 74.0917313 | 65.75638 | 65.1125201 | Before 75 | 68.6162922 | 63 |
| 73.0917313 | 66.75638 | 68.1125201 | Before 76 | 69.0850422 | 63 |



|            |          |            |            |            |    |
|------------|----------|------------|------------|------------|----|
| 72.0917313 | 65.75638 | 67.1125201 | Before 77  | 68.9703496 | 63 |
| 72.0917313 | 65.75638 | 67.1125201 | Before 78  | 68.3922246 | 63 |
| 72.0917313 | 63.75638 | 68.1125201 | Before 79  | 69         | 63 |
| 72.0917313 | 63.75638 | 67.1125201 | Before 80  | 68.25      | 63 |
| 72.0917313 | 64.75638 | 67.1125201 | Before 81  | 68.625     | 63 |
| 72.0917313 | 65.75638 | 67.1125201 | Before 82  | 68.25      | 63 |
| 72.0917313 | 65.75638 | 67.1125201 | Before 83  | 68.25      | 63 |
| 72.0917313 | 66.75638 | 67.1125201 | Before 84  | 68.125     | 63 |
| 73.0917313 | 66.75638 | 66.1125201 | Before 85  | 68.25      | 63 |
| 75.0917313 | 66.75638 | 66.1125201 | Before 86  | 68.25      | 63 |
| 77.0917313 | 66.75638 | 66.1125201 | Before 87  | 68.5       | 63 |
| 79.0917313 | 65.75638 | 66.1125201 | Before 88  | 68.25      | 63 |
| 68         | 66.75638 | 66.1125201 | Before 89  | 66.6135336 | 63 |
| 79.0917313 | 67.75638 | 66.1125201 | Before 90  | 68.5       | 63 |
| 79.0917313 | 68.75638 | 65.1125201 | Before 91  | 68.75      | 63 |
| 75.0917313 | 69.75638 | 65.1125201 | Before 92  | 68.75      | 63 |
| 72.0917313 | 69.75638 | 65.1125201 | Before 93  | 69.5       | 63 |
| 70.0917313 | 69.75638 | 66.1125201 | Before 94  | 69.625     | 63 |
| 68.0917313 | 68.75638 | 66.1125201 | Before 95  | 70.25      | 63 |
| 68.0917313 | 67.75638 | 66.1125201 | Before 96  | 70.125     | 63 |
| 69.0917313 | 67.75638 | 64.1125201 | Before 97  | 69.875     | 63 |
| 70.0917313 | 66.75638 | 64.1125201 | Before 98  | 70         | 63 |
| 70.0917313 | 66.75638 | 64.1125201 | Before 99  | 70         | 63 |
| 70.0917313 | 69.75638 | 62.1125201 | Before 100 | 68.8140996 | 63 |
| 70.0917313 | 70.75638 | 61.1125201 | Before 101 | 69.375     | 63 |
| 70.0917313 | 70.75638 | 61.1125201 | Before 102 | 69         | 63 |
| 69.0917313 | 69.75638 | 63.1125201 | Before 103 | 68.875     | 63 |
| 69.0917313 | 67.75638 | 63.1125201 | Before 104 | 68.5       | 63 |
| 69.0917313 | 66.75638 | 63.1125201 | Before 105 | 68         | 63 |
| 70.0917313 | 66.75638 | 64.1125201 | Before 106 | 67.875     | 63 |
| 70.0917313 | 66.75638 | 64.1125201 | Before 107 | 67.75      | 63 |
| 71.0917313 | 66.75638 | 65.1125201 | Before 108 | 66.75      | 63 |
| 70.0917313 | 66.75638 | 65.1125201 | Before 109 | 65.625     | 63 |
| 69.0917313 | 67.75638 | 65.1125201 | Before 110 | 65.375     | 63 |
| 69.0917313 | 67.75638 | 65.1125201 | Before 111 | 65.5       | 63 |
| 69.0917313 | 67.75638 | 65.1125201 | Before 112 | 65.375     | 63 |
| 69.0917313 | 67.75638 | 66.1125201 | Before 113 | 65.5       | 63 |
| 69.0917313 | 66.75638 | 66.1125201 | Before 114 | 65.5       | 63 |
| 69.0917313 | 65.75638 | 67.1125201 | Before 115 | 66.25      | 63 |
| 69.0917313 | 65.75638 | 66.1125201 | Before 116 | 66.75      | 63 |
| 70.0917313 | 69.75638 | 66.1125201 | Before 117 | 67.875     | 63 |
| 70.0917313 | 71.75638 | 66.1125201 | Before 118 | 68.625     | 63 |
| 71.0917313 | 71.75638 | 66.1125201 | Before 119 | 68.875     | 63 |
| 71.0917313 | 70.75638 | 66.1125201 | Before 120 | 68.5       | 63 |
| 73.0917313 | 70.75638 | 66.1125201 | Before 121 | 68.75      | 63 |

|            |          |            |            |            |    |
|------------|----------|------------|------------|------------|----|
| 73.0917313 | 70.75638 | 66.1125201 | Before 122 | 68.875     | 63 |
| 74.0917313 | 69.75638 | 68.1125201 | Before 123 | 69.375     | 63 |
| 76.0917313 | 69.75638 | 68.1125201 | Before 124 | 69.625     | 63 |
| 78.0917313 | 69.75638 | 70.1125201 | Before 125 | 70         | 63 |
| 77.0917313 | 69.75638 | 70.1125201 | Before 126 | 69.625     | 63 |
| 75.0917313 | 69.75638 | 69.1125201 | Before 127 | 69.5       | 63 |
| 73.0917313 | 69.75638 | 67.1125201 | Before 128 | 69         | 63 |
| 70.0917313 | 69.75638 | 66.1125201 | Before 129 | 68.5       | 63 |
| 69.0917313 | 69.75638 | 67.1125201 | Before 130 | 68.625     | 63 |
| 69.0917313 | 69.75638 | 69.1125201 | Before 131 | 69.125     | 63 |
| 69.0917313 | 79.75638 | 69.1125201 | Before 132 | 70.25      | 63 |
| 67.0917313 | 79.75638 | 69.1125201 | Before 133 | 69.625     | 63 |
| 66.0917313 | 80.75638 | 71.1125201 | Before 134 | 69.875     | 63 |
| 66.0917313 | 80.75638 | 71.1125201 | Before 135 | 69.75      | 63 |
| 66.0917313 | 79.75638 | 69.1125201 | Before 136 | 69.125     | 63 |
| 66.0917313 | 79.75638 | 69.1125201 | Before 137 | 68.875     | 63 |
| 67.0917313 | 68.625   | 69.1125201 | Before 138 | 67.2335775 | 63 |
| 67.0917313 | 71.75638 | 69.1125201 | Before 139 | 67.375     | 63 |
| 67.0917313 | 66.75638 | 69.1125201 | Before 140 | 66.875     | 63 |
| 67.0917313 | 63.75638 | 69.1125201 | Before 141 | 66.125     | 63 |
| 67.0917313 | 60.75638 | 69.1125201 | Before 142 | 65.625     | 63 |
| 67.0917313 | 59.75638 | 69.1125201 | Before 143 | 65.5       | 63 |
| 67.0917313 | 59.75638 | 69.1125201 | Before 144 | 64.875     | 63 |
| 68.0917313 | 59.75638 | 66.1125201 | Before 145 | 64.375     | 63 |
| 68.0917313 | 58.75638 | 66.1125201 | Before 146 | 64.5       | 63 |
| 68.0917313 | 58.75638 | 66.1125201 | Before 147 | 64.25      | 63 |
| 68.0917313 | 59.75638 | 66.1125201 | Before 148 | 64.375     | 63 |
| 68.0917313 | 59.75638 | 66.1125201 | Before 149 | 64.5       | 63 |
| 68.0917313 | 60.75638 | 66.1125201 | Before 150 | 64.625     | 63 |
| 71.0917313 | 63.75638 | 66.1125201 | Before 151 | 65.25      | 63 |
| 71.0917313 | 62.75638 | 67.1125201 | Before 152 | 65.75      | 63 |
| 71.0917313 | 62.75638 | 67.1125201 | Before 153 | 65.75      | 63 |
| 68.0917313 | 61.75638 | 55.1125201 | Before 154 | 64         | 63 |
| 68.0917313 | 60.75638 | 55.1125201 | Before 155 | 64         | 63 |
| 68.0917313 | 60.75638 | 55.1125201 | Before 156 | 64.25      | 63 |
| 67.0917313 | 60.75638 | 56.1125201 | Before 157 | 64.25      | 63 |
| 67.0917313 | 60.75638 | 56.1125201 | Before 158 | 64.25      | 63 |
| 68.0917313 | 60.75638 | 56.1125201 | Before 159 | 63.875     | 63 |
| 68.0917313 | 60.75638 | 63.1125201 | Before 160 | 64.75      | 63 |
| 68.0917313 | 60.75638 | 63.1125201 | Before 161 | 64.875     | 63 |
| 68.0917313 | 60.75638 | 64.1125201 | Before 162 | 65.125     | 63 |
| 68.0917313 | 60.75638 | 65.1125201 | Before 163 | 65.25      | 63 |
| 68.0917313 | 60.75638 | 65.1125201 | Before 164 | 65.375     | 63 |
| 68.0917313 | 60.75638 | 66.1125201 | Before 165 | 66         | 63 |
| 70.0917313 | 59.75638 | 66.1125201 | Before 166 | 66         | 63 |

|            |          |            |            |        |    |
|------------|----------|------------|------------|--------|----|
| 71.0917313 | 59.75638 | 66.1125201 | Before 167 | 65.75  | 63 |
| 72.0917313 | 62.75638 | 66.1125201 | Before 168 | 66.25  | 63 |
| 72.0917313 | 64.75638 | 66.1125201 | Before 169 | 66.375 | 63 |
| 72.0917313 | 65.75638 | 66.1125201 | Before 170 | 66.625 | 63 |
| 72.0917313 | 65.75638 | 67.1125201 | Before 171 | 66.75  | 63 |
| 72.0917313 | 65.75638 | 67.1125201 | Before 172 | 66.75  | 63 |
| 74.0917313 | 65.75638 | 67.1125201 | Before 173 | 67.25  | 63 |
| 74.0917313 | 65.75638 | 67.1125201 | Before 174 | 67.25  | 63 |
| 74.0917313 | 65.75638 | 69.1125201 | Before 175 | 67.75  | 63 |
| 74.0917313 | 66.75638 | 70.1125201 | Before 176 | 68.75  | 63 |
| 73.0917313 | 69.75638 | 70.1125201 | Before 177 | 69.125 | 63 |
| 74.0917313 | 70.75638 | 71.1125201 | Before 178 | 69.5   | 63 |
| 72.0917313 | 74.75638 | 70.1125201 | Before 179 | 69.5   | 63 |
| 71.0917313 | 75.75638 | 70.1125201 | Before 180 | 69.625 | 63 |
| 70.0917313 | 75.75638 | 71.1125201 | Before 181 | 69.75  | 63 |
| 69.0917313 | 73.75638 | 70.1125201 | Before 182 | 69.25  | 63 |
| 69.0917313 | 68.75638 | 70.1125201 | Before 183 | 68.5   | 63 |
| 69.0917313 | 65.75638 | 69.1125201 | Before 184 | 67.75  | 63 |
| 69.0917313 | 64.75638 | 69.1125201 | Before 185 | 67.375 | 63 |
| 69.0917313 | 65.75638 | 69.1125201 | Before 186 | 67.5   | 63 |
| 71.0917313 | 68.75638 | 71.1125201 | Before 187 | 68.375 | 63 |
| 71.0917313 | 69.75638 | 71.1125201 | Before 188 | 68.75  | 63 |
| 71.0917313 | 69.75638 | 71.1125201 | Before 189 | 69     | 63 |
| 71.0917313 | 70.75638 | 71.1125201 | Before 190 | 68.75  | 63 |
| 71.0917313 | 70.75638 | 70.1125201 | Before 191 | 68.375 | 63 |
| 72.0917313 | 69.75638 | 70.1125201 | Before 192 | 68.5   | 63 |
| 72.0917313 | 63.75638 | 70.1125201 | Before 193 | 67.625 | 63 |
| 72.0917313 | 61.75638 | 71.1125201 | Before 194 | 67.75  | 63 |
| 72.0917313 | 60.75638 | 71.1125201 | Before 195 | 68     | 63 |
| 72.0917313 | 59.75638 | 71.1125201 | Before 196 | 68.25  | 63 |
| 73.0917313 | 59.75638 | 71.1125201 | Before 197 | 68.625 | 63 |
| 76.0917313 | 59.75638 | 72.1125201 | Before 198 | 69.75  | 63 |
| 78.0917313 | 59.75638 | 72.1125201 | Before 199 | 70.25  | 63 |
| 77.0917313 | 58.75638 | 72.1125201 | Before 200 | 70.125 | 63 |
| 76.0917313 | 58.75638 | 73.1125201 | Before 201 | 70     | 63 |
| 76.0917313 | 58.75638 | 77.1125201 | Before 202 | 70.75  | 63 |
| 76.0917313 | 58.75638 | 78.1125201 | Before 203 | 71     | 63 |
| 75.0917313 | 57.75638 | 77.1125201 | Before 204 | 71.125 | 63 |
| 75.0917313 | 56.75638 | 77.1125201 | Before 205 | 71     | 63 |
| 74.0917313 | 55.75638 | 77.1125201 | Before 206 | 70.875 | 63 |
| 74.0917313 | 55.75638 | 77.1125201 | Before 207 | 70.875 | 63 |
| 74.0917313 | 55.75638 | 80.1125201 | Before 208 | 71.25  | 63 |
| 74.0917313 | 56.75638 | 81.1125201 | Before 209 | 71.875 | 63 |
| 74.0917313 | 57.75638 | 83.1125201 | Before 210 | 73     | 63 |
| 74.0917313 | 57.75638 | 84.1125201 | Before 211 | 73.375 | 63 |

|            |          |            |            |            |    |
|------------|----------|------------|------------|------------|----|
| 74.0917313 | 57.75638 | 73         | Before 212 | 71.610935  | 63 |
| 74.0917313 | 57.75638 | 72.625     | Before 213 | 71.18906   | 63 |
| 74.0917313 | 57.75638 | 72.25      | Before 214 | 70.642185  | 63 |
| 74.0917313 | 57.75638 | 72         | Before 215 | 70.360935  | 63 |
| 73.0917313 | 57.75638 | 71.375     | Before 216 | 69.65781   | 63 |
| 72.0917313 | 57.75638 | 70.75      | Before 217 | 68.954685  | 63 |
| 72.0917313 | 57.75638 | 76.1125201 | Before 218 | 69.375     | 63 |
| 72.0917313 | 57.75638 | 68.1125201 | Before 219 | 67.875     | 63 |
| 72.0917313 | 58.75638 | 68.1125201 | Before 220 | 67.75      | 63 |
| 72.0917313 | 58.75638 | 69.1125201 | Before 221 | 67.875     | 63 |
| 72.0917313 | 58.75638 | 70.1125201 | Before 222 | 68.125     | 69 |
| 72.0917313 | 58.75638 | 70.1125201 | Before 223 | 68.375     | 69 |
| 72.0917313 | 58.75638 | 71.1125201 | Before 224 | 68.5       | 69 |
| 72.0917313 | 58.75638 | 73.1125201 | Before 225 | 68.75      | 69 |
| 72.0917313 | 57.75638 | 73.1125201 | Before 226 | 68.625     | 69 |
| 71.0917313 | 57.75638 | 73.1125201 | Before 227 | 68.75      | 69 |
| 71.0917313 | 60.75638 | 73.1125201 | Before 228 | 68.625     | 69 |
| 69.0917313 | 74.75638 | 73.1125201 | Before 229 | 69.875     | 69 |
| 66.0917313 | 76.75638 | 75.1125201 | Before 230 | 70         | 69 |
| 65.0917313 | 76.75638 | 73.1125201 | Before 231 | 69.5       | 69 |
| 65.0917313 | 78.75638 | 72.1125201 | Before 232 | 69.75      | 69 |
| 65.0917313 | 79.75638 | 71.1125201 | Before 233 | 69.75      | 69 |
| 65.0917313 | 78.75638 | 71.1125201 | Before 234 | 69.5       | 69 |
| 66.0917313 | 78.75638 | 71.1125201 | Before 235 | 68.8140996 | 69 |
| 68.0917313 | 77.75638 | 70.1125201 | Before 236 | 68.2984746 | 69 |
| 69.0917313 | 75.75638 | 70.1125201 | Before 237 | 68.4547246 | 69 |
| 69.0917313 | 72.75638 | 68.1125201 | Before 238 | 67.8609746 | 69 |
| 69.0917313 | 69.75638 | 66.1125201 | Before 239 | 67.2984746 | 69 |
| 69.0917313 | 67.75638 | 66.1125201 | Before 240 | 66.8140996 | 69 |
| 69.0917313 | 67.75638 | 66.1125201 | minute 1   | 67.5       | 69 |
| 69.0917313 | 64.75638 | 66.1125201 | minute 2   | 67.5       | 69 |
| 70.0917313 | 64.75638 | 66.1125201 | minute 3   | 67.875     | 69 |
| 70.0917313 | 64.75638 | 68.1125201 | minute 4   | 67.875     | 69 |
| 70.0917313 | 64.75638 | 67.1125201 | minute 5   | 68.25      | 69 |
| 70.0917313 | 64.75638 | 67.1125201 | minute 6   | 68.5       | 69 |
| 70.0917313 | 65.75638 | 67.1125201 | minute 7   | 68.5       | 69 |
| 70.0917313 | 67.75638 | 66.1125201 | minute 8   | 68.875     | 69 |
| 70.0917313 | 69.75638 | 66.1125201 | minute 9   | 69.25      | 69 |
| 71.0917313 | 69.75638 | 62.1125201 | minute 10  | 67.875     | 69 |
| 72.0917313 | 69.75638 | 62.1125201 | minute 11  | 67.875     | 69 |
| 72.0917313 | 68.75638 | 62.1125201 | minute 12  | 67.75      | 69 |
| 72.0917313 | 68.75638 | 62.1125201 | minute 13  | 67.25      | 69 |
| 72.0917313 | 68.75638 | 62.1125201 | minute 14  | 66.875     | 69 |
| 72.0917313 | 68.75638 | 62.1125201 | minute 15  | 66.875     | 69 |
| 72.0917313 | 68.75638 | 63.1125201 | minute 16  | 66.875     | 69 |

|            |          |            |           |            |    |
|------------|----------|------------|-----------|------------|----|
| 73.0917313 | 63.75638 | 63.1125201 | minute 17 | 66.25      | 69 |
| 74.0917313 | 61.75638 | 63.1125201 | minute 18 | 66         | 69 |
| 66.625     | 60.75638 | 63.1125201 | minute 19 | 65.0666586 | 69 |
| 66.875     | 60.75638 | 60.1125201 | minute 20 | 65.0979086 | 71 |
| 66.6667916 | 60.75638 | 60.1125201 | minute 21 | 65.0718825 | 71 |
| 67.7518281 | 60.75638 | 62.1125201 | minute 22 | 65.8325121 | 71 |
| 67.375     | 60.75638 | 62.1125201 | minute 23 | 65.5354086 | 71 |
| 67         | 60.75638 | 62.1125201 | minute 24 | 65.1135336 | 71 |
| 67         | 60.75638 | 62.1125201 | minute 25 | 65.1135336 | 71 |
| 67         | 60.75638 | 63.1125201 | minute 26 | 65.1135336 | 71 |
| 67.75      | 61.75638 | 67.1125201 | minute 27 | 65.9572836 | 71 |
| 67.125     | 60.75638 | 69.1125201 | minute 28 | 65.3791586 | 71 |
| 66.875     | 60.75638 | 69.1125201 | minute 29 | 65.0979086 | 71 |
| 66.125     | 59.75638 | 67.1125201 | minute 30 | 64.3791586 | 71 |
| 65.25      | 58.75638 | 65.1125201 | minute 31 | 63.6447836 | 71 |
| 64.875     | 58.75638 | 63.1125201 | minute 32 | 63.3479086 | 71 |
| 64.75      | 58.75638 | 63.1125201 | minute 33 | 63.3322836 | 71 |
| 76.0917313 | 60.75638 | 63.1125201 | minute 34 | 65.125     | 71 |
| 73.0917313 | 61.75638 | 64.1125201 | minute 35 | 65.375     | 71 |
| 70.0917313 | 62.75638 | 66.1125201 | minute 36 | 65.375     | 71 |
| 68.0917313 | 63.75638 | 70.1125201 | minute 37 | 66.375     | 71 |
| 67.0917313 | 62.75638 | 70.1125201 | minute 38 | 65.4078496 | 71 |
| 67.0917313 | 61.75638 | 71.1125201 | minute 39 | 65.0484746 | 71 |
| 67.0917313 | 59.75638 | 71.1125201 | minute 40 | 64.9234746 | 71 |
| 67.0917313 | 58.75638 | 71.1125201 | minute 41 | 64.6265996 | 71 |
| 68.0917313 | 58.75638 | 71.1125201 | minute 42 | 64.7515996 | 71 |
| 69.0917313 | 58.75638 | 71.1125201 | minute 43 | 65.5953496 | 63 |
| 69.0917313 | 60.75638 | 71.1125201 | minute 44 | 66.1578496 | 63 |
| 69.0917313 | 61.75638 | 71.1125201 | minute 45 | 66.4390996 | 63 |
| 70.0917313 | 61.75638 | 69.1125201 | minute 46 | 66.4234746 | 63 |
| 70.0917313 | 61.75638 | 69.1125201 | minute 47 | 67.875     | 63 |
| 70.0917313 | 61.75638 | 69.1125201 | minute 48 | 67.125     | 63 |
| 70.0917313 | 61.75638 | 68.1125201 | minute 49 | 66.625     | 63 |
| 69.0917313 | 60.75638 | 66.1125201 | minute 50 | 66.375     | 63 |
| 70.0917313 | 60.75638 | 65.1125201 | minute 51 | 66.375     | 63 |
| 69.0917313 | 60.75638 | 64.1125201 | minute 52 | 66.25      | 63 |
| 69.0917313 | 59.75638 | 65.1125201 | minute 53 | 66.25      | 63 |
| 69.0917313 | 59.75638 | 64.1125201 | minute 54 | 66.25      | 63 |
| 68.0917313 | 59.75638 | 63.1125201 | minute 55 | 66.25      | 63 |
| 69.0917313 | 59.75638 | 63.1125201 | minute 56 | 66.25      | 63 |
| 69.0917313 | 59.75638 | 64.1125201 | minute 57 | 66         | 63 |
| 69.0917313 | 59.75638 | 64.1125201 | minute 58 | 65.375     | 63 |
| 70.0917313 | 59.75638 | 64.1125201 | minute 59 | 65.375     | 63 |
| 70.0917313 | 59.75638 | 65.1125201 | minute 60 | 65.25      | 63 |
| 72.0917313 | 59.75638 | 65.1125201 | Activity  | 65.5       | 73 |

|            |          |            |          |        |    |
|------------|----------|------------|----------|--------|----|
| 72.0917313 | 59.75638 | 62.1125201 | Activity | 65     | 73 |
| 73.0917313 | 59.75638 | 62.1125201 | Activity | 64.875 | 73 |
| 73.0917313 | 60.75638 | 61.1125201 | Activity | 64.75  | 73 |
| 73.0917313 | 61.75638 | 61.1125201 | Activity | 65     | 73 |
| 72.0917313 | 61.75638 | 62.1125201 | Activity | 65     | 73 |
| 72.0917313 | 61.75638 | 63.1125201 | Activity | 65     | 73 |
| 73.0917313 | 60.75638 | 64.1125201 | Activity | 65.125 | 73 |
| 74.0917313 | 60.75638 | 63.1125201 | Activity | 64.75  | 73 |
| 75.0917313 | 60.75638 | 63.1125201 | Activity | 65     | 73 |
| 75.0917313 | 60.75638 | 63.1125201 | Activity | 65.875 | 73 |
| 75.0917313 | 61.75638 | 64.1125201 | Activity | 65.875 | 73 |
| 75.0917313 | 63.75638 | 65.1125201 | Activity | 66.5   | 73 |
| 75.0917313 | 64.75638 | 66.1125201 | Activity | 67.125 | 73 |
| 75.0917313 | 64.75638 | 66.1125201 | Activity | 67.125 | 73 |
| 72.0917313 | 67.75638 | 66.1125201 | Activity | 67.75  | 73 |
| 71.0917313 | 67.75638 | 65.1125201 | Activity | 67.25  | 73 |
| 70.0917313 | 67.75638 | 65.1125201 | Activity | 67     | 73 |
| 70.0917313 | 67.75638 | 65.1125201 | Activity | 66.625 | 73 |
| 70.0917313 | 66.75638 | 65.1125201 | Activity | 65.875 | 73 |
| 70.0917313 | 66.75638 | 67.1125201 | Activity | 65.875 | 73 |
| 70.0917313 | 66.75638 | 69.1125201 | Activity | 65.75  | 73 |
| 70.0917313 | 66.75638 | 70.1125201 | Activity | 65.75  | 73 |
| 70.0917313 | 65.75638 | 71.1125201 | Activity | 65.625 | 73 |
| 70.0917313 | 65.75638 | 71.1125201 | Activity | 66     | 73 |
| 70.0917313 | 65.75638 | 72.1125201 | Activity | 66.375 | 73 |
| 70.0917313 | 65.75638 | 72.1125201 | Activity | 66.25  | 73 |
| 70.0917313 | 65.75638 | 67.1125201 | Activity | 65.875 | 73 |
| 71.0917313 | 65.75638 | 67.1125201 | Activity | 65.875 | 73 |
| 71.0917313 | 63.75638 | 67.1125201 | Activity | 65.75  | 73 |
| 73.0917313 | 62.75638 | 67.1125201 | Activity | 66     | 73 |
| 73.0917313 | 61.75638 | 69.1125201 | Activity | 66.125 | 73 |
| 74.0917313 | 61.75638 | 69.1125201 | Activity | 66.25  | 73 |
| 75.0917313 | 62.75638 | 69.1125201 | Activity | 66.875 | 73 |
| 76.0917313 | 62.75638 | 70.1125201 | Activity | 67.375 | 73 |
| 73.0917313 | 62.75638 | 71.1125201 | Activity | 67     | 73 |
| 72.0917313 | 62.75638 | 73.1125201 | Activity | 67.375 | 73 |
| 73.0917313 | 62.75638 | 73.1125201 | Activity | 67.875 | 73 |
| 73.0917313 | 62.75638 | 74.1125201 | Activity | 68.125 | 73 |
| 74.0917313 | 62.75638 | 74.1125201 | Activity | 68.25  | 73 |
| 74.0917313 | 62.75638 | 76.1125201 | Activity | 68.375 | 73 |
| 73.0917313 | 62.75638 | 74.1125201 | Activity | 68.125 | 73 |
| 73.0917313 | 63.75638 | 73.1125201 | Activity | 68.125 | 73 |
| 73.0917313 | 66.75638 | 73.1125201 | Activity | 68.375 | 73 |
| 72.0917313 | 68.75638 | 73.1125201 | Activity | 68.375 | 73 |
| 71.0917313 | 69.75638 | 69.1125201 | Activity | 67.25  | 73 |

|            |          |            |          |            |    |
|------------|----------|------------|----------|------------|----|
| 71.0917313 | 70.75638 | 69.1125201 | Activity | 66.875     | 73 |
| 69.0917313 | 70.75638 | 69.1125201 | Activity | 66.75      | 73 |
| 69.0917313 | 70.75638 | 69.1125201 | minute1  | 66.75      | 71 |
| 69.0917313 | 69.75638 | 69.1125201 | minute2  | 66.75      | 71 |
| 68.0917313 | 69.75638 | 69.1125201 | minute3  | 66.625     | 71 |
| 68.0917313 | 68.75638 | 70.1125201 | minute4  | 67         | 71 |
| 68.0917313 | 67.75638 | 74.1125201 | minute5  | 67.5       | 71 |
| 68.0917313 | 66.75638 | 74.1125201 | minute6  | 67.75      | 71 |
| 67.0917313 | 66.75638 | 74.1125201 | minute7  | 67.625     | 71 |
| 66.0917313 | 67.75638 | 74.1125201 | minute8  | 68         | 71 |
| 65.0917313 | 68.75638 | 74.1125201 | minute9  | 68.25      | 71 |
| 62.0917313 | 68.75638 | 77.1125201 | minute10 | 68.25      | 71 |
| 64.0917313 | 68.75638 | 77.1125201 | minute11 | 68.75      | 71 |
| 66.0917313 | 68.75638 | 75.1125201 | minute12 | 68.875     | 71 |
| 66.0917313 | 68.75638 | 74.1125201 | minute13 | 68.875     | 71 |
| 66.0917313 | 69.75638 | 74.1125201 | minute14 | 69         | 71 |
| 66.0917313 | 69.75638 | 73.1125201 | minute15 | 68.875     | 71 |
| 65.0917313 | 68.75638 | 72.1125201 | minute16 | 68.875     | 71 |
| 65.0917313 | 68.75638 | 72.1125201 | minute17 | 68.875     | 71 |
| 65.0917313 | 68.75638 | 73.1125201 | minute18 | 68.25      | 71 |
| 65.0917313 | 69.75638 | 73.1125201 | minute19 | 68.75      | 71 |
| 64.0917313 | 68.75638 | 73.1125201 | minute20 | 68.5       | 71 |
| 64.0917313 | 68.75638 | 73.1125201 | minute21 | 68.5       | 71 |
| 71.0917313 | 65.75638 | 69.1125201 | minute22 | 68.25      | 71 |
| 73.0917313 | 64.75638 | 69.1125201 | minute23 | 68.375     | 71 |
| 74.0917313 | 64.75638 | 67.1125201 | minute24 | 68.125     | 71 |
| 75.0917313 | 64.75638 | 68.1125201 | minute25 | 68.375     | 71 |
| 75.0917313 | 64.75638 | 70.1125201 | minute26 | 68.625     | 71 |
| 75.0917313 | 64.75638 | 71.1125201 | minute27 | 68.875     | 71 |
| 75.0917313 | 63.75638 | 71.1125201 | minute28 | 68.75      | 71 |
| 75.0917313 | 62.75638 | 71.1125201 | minute29 | 68.75      | 71 |
| 75.0917313 | 61.75638 | 71.1125201 | minute30 | 69.125     | 71 |
| 75.0917313 | 60.75638 | 71.1125201 | minute31 | 69.5       | 71 |
| 75.0917313 | 60.75638 | 69.1125201 | minute32 | 69.875     | 71 |
| 76.0917313 | 61.75638 | 66.1125201 | minute33 | 70.125     | 71 |
| 76.0917313 | 61.75638 | 63.1125201 | minute34 | 70         | 71 |
| 76.0917313 | 61.75638 | 62.1125201 | minute35 | 69.875     | 71 |
| 77.0917313 | 61.75638 | 62.1125201 | minute36 | 70.125     | 71 |
| 80.0917313 | 61.75638 | 62.1125201 | minute37 | 70.5       | 71 |
| 71.375     | 62.75638 | 63.1125201 | minute38 | 69.5354086 | 71 |
| 71.5       | 62.75638 | 64.1125201 | minute39 | 69.5510336 | 71 |
| 70.375     | 62.75638 | 64.1125201 | minute40 | 68.2854086 | 71 |
| 70.125     | 62.75638 | 65.1125201 | minute41 | 68.0041586 | 71 |
| 70         | 62.75638 | 64.1125201 | minute42 | 67.8635336 | 71 |
| 69.875     | 63.75638 | 62.1125201 | minute43 | 67.5979086 | 71 |

|            |          |            |          |            |    |
|------------|----------|------------|----------|------------|----|
| 70.125     | 63.75638 | 62.1125201 | minute44 | 67.8791586 | 71 |
| 70.125     | 63.75638 | 62.1125201 | minute45 | 67.8791586 | 71 |
| 69.75      | 63.75638 | 63.1125201 | minute46 | 67.5822836 | 71 |
| 69.125     | 63.75638 | 65.1125201 | minute47 | 67.0041586 | 71 |
| 69.125     | 68.75638 | 65.1125201 | minute48 | 67.3791586 | 71 |
| 68.875     | 69.75638 | 65.1125201 | minute49 | 67.2229086 | 71 |
| 68.625     | 69.75638 | 63.1125201 | minute50 | 66.9416586 | 71 |
| 68.875     | 71.75638 | 63.1125201 | minute51 | 67.3479086 | 71 |
| 69.125     | 73.75638 | 62.1125201 | minute52 | 67.6291586 | 71 |
| 69.25      | 73.75638 | 62.1125201 | minute53 | 67.7697836 | 71 |
| 68.875     | 73.75638 | 62.1125201 | minute54 | 67.4729086 | 71 |
| 69.375     | 73.75638 | 63.1125201 | minute55 | 67.7854086 | 71 |
| 69.5       | 73.75638 | 65.1125201 | minute56 | 67.9260336 | 71 |
| 69.75      | 68.75638 | 68.1125201 | minute57 | 68.2072836 | 71 |
| 70.375     | 68.75638 | 69.1125201 | minute58 | 68.9104086 | 71 |
| 82.0917313 | 68.75638 | 70.1125201 | minute59 | 71.125     | 71 |
| 82.0917313 | 68.75638 | 70.1125201 | minute60 | 71.375     | 71 |
| 81.0917313 | 68.75638 | 70.1125201 | After1   | 71.625     | 71 |
| 81.0917313 | 68.75638 | 69.1125201 | After2   | 71.5       | 71 |
| 81.0917313 | 69.75638 | 69.1125201 | After3   | 71.625     | 71 |
| 82.0917313 | 71.75638 | 70.1125201 | After4   | 71.875     | 71 |
| 82.0917313 | 71.75638 | 70.1125201 | After5   | 72.125     | 71 |
| 82.0917313 | 76.75638 | 70.1125201 | After6   | 73.125     | 71 |
| 82.0917313 | 78.75638 | 69.1125201 | After7   | 73.625     | 71 |
| 82.0917313 | 78.75638 | 68.1125201 | After8   | 73.625     | 71 |
| 82.0917313 | 76.75638 | 67.1125201 | After9   | 73.375     | 71 |
| 82.0917313 | 70.75638 | 67.1125201 | After10  | 72.75      | 71 |
| 82.0917313 | 67.75638 | 66.1125201 | After11  | 72.375     | 71 |
| 79.0917313 | 65.75638 | 66.1125201 | After12  | 70.5059463 | 71 |
| 72.0917313 | 63.75638 | 66.1125201 | After13  | 69.5215713 | 71 |
| 67.0917313 | 61.75638 | 66.1125201 | After14  | 68.5371963 | 71 |
| 67.0917313 | 61.75638 | 66.1125201 | After15  | 68.1999123 | 71 |
| 61.0917313 | 59.75638 | 66.1125201 | After16  | 67.753937  | 71 |
| 60.0917313 | 59.75638 | 64.1125201 | After17  | 66.6934463 | 71 |
| 59.0917313 | 59.75638 | 64.1125201 | After18  | 66.5528213 | 71 |
| 59.0917313 | 59.75638 | 63.1125201 | After19  | 66.2871963 | 71 |
| 59.0917313 | 59.75638 | 63.1125201 | After20  | 66.1465713 | 71 |
| 59.0917313 | 59.75638 | 63.1125201 | After21  | 66.3028213 | 71 |
| 59.0917313 | 59.75638 | 60.1125201 | After22  | 66.3028213 | 71 |
| 59.0917313 | 59.75638 | 55.1125201 | After23  | 65.8653213 | 71 |
| 59.0917313 | 59.75638 | 55.1125201 | After24  | 66.0059463 | 71 |
| 59.0917313 | 59.75638 | 56.1125201 | After25  | 66.1621963 | 71 |
| 60.0917313 | 58.75638 | 56.1125201 | After26  | 66.1621963 | 71 |
| 61.0917313 | 57.75638 | 64.1125201 | After27  | 67.7090713 | 71 |
| 61.0917313 | 57.75638 | 66.1125201 | After28  | 67.9903213 | 71 |



|            |          |            |         |            |    |
|------------|----------|------------|---------|------------|----|
| 61.0917313 | 57.75638 | 67.1125201 | After29 | 67.9903213 | 71 |
| 61.0917313 | 57.75638 | 67.1125201 | After30 | 68.1309463 | 71 |
| 61.0917313 | 69.75638 | 65.1125201 | After31 | 69.7090713 | 71 |
| 63.0917313 | 69.75638 | 64.1125201 | After32 | 69.9903213 | 71 |
| 63.0917313 | 70.75638 | 65.1125201 | After33 | 70.4121963 | 71 |
| 66.0917313 | 69.75638 | 65.1125201 | After34 | 70.8340713 | 71 |
| 66.0917313 | 69.75638 | 65.1125201 | After35 | 71.1153213 | 71 |
| 67.0917313 | 69.75638 | 67.1125201 | After36 | 71.6621963 | 71 |
| 69.0917313 | 69.75638 | 66.1125201 | After37 | 73.5       | 71 |
| 69.0917313 | 69.75638 | 66.1125201 | After38 | 73.375     | 71 |
| 70.0917313 | 69.75638 | 65.1125201 | After39 | 73.625     | 71 |
| 70.0917313 | 70.75638 | 65.1125201 | After40 | 73.75      | 71 |
| 70.0917313 | 70.75638 | 63.1125201 | After41 | 74.375     | 71 |
| 70.0917313 | 67.75638 | 63.1125201 | After42 | 73         | 71 |
| 71.0917313 | 67.75638 | 62.1125201 | After43 | 70.8140996 | 71 |
| 71.0917313 | 67.75638 | 63.1125201 | After44 | 70.5328496 | 71 |
| 72.0917313 | 67.75638 | 64.1125201 | After45 | 70.2359746 | 71 |
| 72.0917313 | 67.75638 | 64.1125201 | After46 | 69.9547246 | 71 |
| 74.0917313 | 67.75638 | 64.1125201 | After47 | 69.6734746 | 71 |
| 74.0917313 | 66.75638 | 64.1125201 | After48 | 70.125     | 71 |
| 76.0917313 | 66.75638 | 64.1125201 | After49 | 70         | 71 |
| 76.0917313 | 66.75638 | 64.1125201 | After50 | 69.625     | 71 |
| 76.0917313 | 65.75638 | 66.1125201 | After51 | 69.125     | 71 |
| 76.0917313 | 65.75638 | 68.1125201 | After52 | 68.75      | 71 |
| 77.0917313 | 62.75638 | 68.1125201 | After53 | 68.375     | 71 |
| 77.0917313 | 62.75638 | 65.1125201 | After54 | 66.8140996 | 71 |
| 77.0917313 | 62.75638 | 64.1125201 | After55 | 66.9547246 | 71 |
| 78.0917313 | 60.75638 | 64.1125201 | After56 | 66.6734746 | 71 |
| 78.0917313 | 59.75638 | 62.1125201 | After57 | 66.4078496 | 71 |
| 78.0917313 | 59.75638 | 62.1125201 | After58 | 66.6890996 | 71 |
| 78.0917313 | 58.75638 | 62.1125201 | After59 | 66.5328496 | 71 |
| 65.0917313 | 57.75638 | 62.1125201 | After60 | 65.2515996 | 71 |
| 62.0917313 | 57.75638 | 62.1125201 | After61 | 65.1109746 | 71 |
| 60.0917313 | 57.75638 | 62.1125201 | After62 | 66.25      | 71 |
| 60.0917313 | 58.75638 | 63.1125201 | After63 | 66.625     | 71 |
| 61.0917313 | 58.75638 | 66.1125201 | After64 | 67.125     | 71 |
| 61.0917313 | 58.75638 | 66.1125201 | After65 | 67         | 71 |
| 61.0917313 | 58.75638 | 67.1125201 | After66 | 66.875     | 71 |
| 62.0917313 | 58.75638 | 67.1125201 | After67 | 67.25      | 71 |
| 62.0917313 | 61.75638 | 67.1125201 | After68 | 66.6146927 | 71 |
| 62.0917313 | 61.75638 | 67.1125201 | After69 | 66.6236443 | 71 |
| 62.0917313 | 62.75638 | 67.1125201 | After70 | 67.7985779 | 71 |
| 62.0917313 | 63.75638 | 67.1125201 | After71 | 67.589389  | 71 |
| 62.0917313 | 63.75638 | 67.1125201 | After72 | 67.776889  | 71 |
| 63.0917313 | 64.75638 | 67.1125201 | After73 | 68.464389  | 71 |

|            |          |            |          |            |    |
|------------|----------|------------|----------|------------|----|
| 63.0917313 | 68.75638 | 77.1125201 | After74  | 72.1928177 | 71 |
| 64.0917313 | 69.75638 | 77.1125201 | After75  | 71.151889  | 71 |
| 65.0917313 | 69.75638 | 76.1125201 | After76  | 71.214389  | 71 |
| 65.0917313 | 69.75638 | 75.1125201 | After77  | 70.464389  | 71 |
| 65.0917313 | 69.75638 | 73.1125201 | After78  | 69.839389  | 71 |
| 65.0917313 | 68.75638 | 71.1125201 | After79  | 69.183139  | 71 |
| 65.0917313 | 67.75638 | 70.1125201 | After80  | 68.933139  | 71 |
| 65.0917313 | 66.75638 | 71.1125201 | After81  | 69.9590713 | 71 |
| 64.0917313 | 66.75638 | 71.1125201 | After82  | 69.9590713 | 71 |
| 64.0917313 | 63.75638 | 70.1125201 | After83  | 69.2090713 | 71 |
| 67.0917313 | 62.75638 | 68.1125201 | After84  | 69.2090713 | 63 |
| 68.0917313 | 62.75638 | 67.1125201 | After85  | 70.375     | 63 |
| 71.0917313 | 62.75638 | 67.1125201 | After86  | 70.75      | 63 |
| 72.0917313 | 63.75638 | 67.1125201 | After87  | 71.125     | 63 |
| 73.0917313 | 62.75638 | 67.1125201 | After88  | 71.375     | 63 |
| 75.0917313 | 62.75638 | 65.1125201 | After89  | 71.125     | 63 |
| 75.0917313 | 63.75638 | 65.1125201 | After90  | 71.125     | 63 |
| 75.0917313 | 62.75638 | 64.1125201 | After91  | 70.375     | 63 |
| 74.0917313 | 62.75638 | 65.1125201 | After92  | 69.25      | 63 |
| 71.0917313 | 62.75638 | 66.1125201 | After93  | 68.875     | 63 |
| 69.0917313 | 62.75638 | 66.1125201 | After94  | 67.625     | 63 |
| 69.0917313 | 62.75638 | 65.1125201 | After95  | 66.5       | 63 |
| 70.0917313 | 61.75638 | 65.1125201 | After96  | 66.25      | 63 |
| 71.0917313 | 61.75638 | 65.1125201 | After97  | 66.25      | 63 |
| 71.0917313 | 61.75638 | 64.1125201 | After98  | 65.5       | 63 |
| 71.0917313 | 61.75638 | 64.1125201 | After99  | 65         | 63 |
| 71.0917313 | 61.75638 | 63.1125201 | After100 | 64.125     | 63 |
| 71.0917313 | 61.75638 | 63.1125201 | After101 | 63.75      | 63 |
| 70.0917313 | 61.75638 | 63.1125201 | After102 | 63.25      | 63 |
| 70.0917313 | 62.75638 | 63.1125201 | After103 | 63.5       | 63 |
| 69.0917313 | 62.75638 | 63.1125201 | After104 | 63.25      | 63 |
| 69.0917313 | 63.75638 | 63.1125201 | After105 | 63.25      | 63 |
| 69.0917313 | 63.75638 | 64.1125201 | After106 | 63.375     | 63 |
| 68.0917313 | 65.75638 | 63.1125201 | After107 | 63.125     | 63 |
| 71.0917313 | 65.75638 | 63.1125201 | After108 | 63.5       | 63 |
| 71.0917313 | 66.75638 | 61.1125201 | After109 | 63.25      | 63 |
| 71.0917313 | 65.75638 | 61.1125201 | After110 | 63.5       | 63 |
| 71.0917313 | 65.75638 | 61.1125201 | After111 | 64.25      | 63 |
| 71.0917313 | 65.75638 | 62.1125201 | After112 | 64         | 63 |
| 71.0917313 | 65.75638 | 62.1125201 | After113 | 64.25      | 63 |
| 71.0917313 | 65.75638 | 63.1125201 | After114 | 64.375     | 63 |
| 71.0917313 | 65.75638 | 65.1125201 | After115 | 64.75      | 63 |
| 71.0917313 | 65.75638 | 65.1125201 | After116 | 65.125     | 63 |
| 70.0917313 | 65.75638 | 66.1125201 | After117 | 65.375     | 63 |
| 70.0917313 | 66.75638 | 66.1125201 | After118 | 65.875     | 63 |

|            |          |            |          |            |    |
|------------|----------|------------|----------|------------|----|
| 69.0917313 | 67.75638 | 66.1125201 | After119 | 66.5       | 63 |
| 69.0917313 | 69.75638 | 67.1125201 | After120 | 66.625     | 63 |
| 69.0917313 | 69.75638 | 67.1125201 | After121 | 65.625     | 63 |
| 69.0917313 | 70.75638 | 67.1125201 | After122 | 65.75      | 63 |
| 69.0917313 | 70.75638 | 67.1125201 | After123 | 65.75      | 63 |
| 69.0917313 | 70.75638 | 67.1125201 | After124 | 65.625     | 63 |
| 69.0917313 | 69.75638 | 66.1125201 | After125 | 65.375     | 63 |
| 69.0917313 | 68.75638 | 66.1125201 | After126 | 66.625     | 63 |
| 70.0917313 | 66.75638 | 66.1125201 | After127 | 66.375     | 63 |
| 71.0917313 | 66.75638 | 66.1125201 | After128 | 66.5       | 63 |
| 71.0917313 | 66.75638 | 66.1125201 | After129 | 66.75      | 63 |
| 71.0917313 | 65.75638 | 65.1125201 | After130 | 66.75      | 63 |
| 71.0917313 | 65.75638 | 65.1125201 | After131 | 66.75      | 63 |
| 71.0917313 | 65.75638 | 65.1125201 | After132 | 66.875     | 63 |
| 71.0917313 | 65.75638 | 61.1125201 | After133 | 66.375     | 63 |
| 71.0917313 | 64.75638 | 59.1125201 | After134 | 66         | 63 |
| 71.0917313 | 64.75638 | 59.1125201 | After135 | 66.125     | 63 |
| 71.0917313 | 63.75638 | 58.1125201 | After136 | 64.5059463 | 63 |
| 72.0917313 | 63.75638 | 59.1125201 | After137 | 66         | 63 |
| 72.0917313 | 63.75638 | 59.1125201 | After138 | 66.125     | 63 |
| 72.0917313 | 62.75638 | 62.1125201 | After139 | 67.625     | 63 |
| 73.0917313 | 63.75638 | 63.1125201 | After140 | 67.0601791 | 63 |
| 72.0917313 | 63.75638 | 63.1125201 | After141 | 67.2008041 | 63 |
| 72.0917313 | 63.75638 | 65.1125201 | After142 | 68.625     | 63 |
| 73.0917313 | 64.75638 | 64.1125201 | After143 | 68.625     | 63 |
| 73.0917313 | 64.75638 | 64.1125201 | After144 | 68.125     | 63 |
| 73.0917313 | 64.75638 | 64.1125201 | After145 | 68         | 63 |
| 73.0917313 | 63.75638 | 64.1125201 | After146 | 67.625     | 63 |
| 73.0917313 | 63.75638 | 64.1125201 | After147 | 66.625     | 63 |
| 73.0917313 | 63.75638 | 64.1125201 | After148 | 66.5       | 63 |
| 73.0917313 | 63.75638 | 64.1125201 | After149 | 66.5       | 63 |
| 73.0917313 | 63.75638 | 64.1125201 | After150 | 66.375     | 63 |
| 70.0917313 | 64.75638 | 62.1125201 | After151 | 65.875     | 63 |
| 69.0917313 | 64.75638 | 63.1125201 | After152 | 66.625     | 63 |
| 69.0917313 | 64.75638 | 63.1125201 | After153 | 66.75      | 63 |
| 69.0917313 | 64.75638 | 64.1125201 | After154 | 67         | 63 |
| 69.0917313 | 64.75638 | 65.1125201 | After155 | 67.125     | 63 |
| 69.0917313 | 65.75638 | 65.1125201 | After156 | 67.5       | 63 |
| 67.0917313 | 65.75638 | 65.1125201 | After157 | 66.125     | 63 |
| 66.0917313 | 65.75638 | 64.1125201 | After158 | 65.75      | 63 |
| 65.0917313 | 65.75638 | 64.1125201 | After159 | 65.625     | 63 |
| 64.0917313 | 65.75638 | 64.1125201 | After160 | 65.375     | 63 |
| 63.0917313 | 65.75638 | 64.1125201 | After161 | 65.25      | 63 |
| 62.0917313 | 64.75638 | 64.1125201 | After162 | 64.5       | 63 |
| 62.0917313 | 64.75638 | 64.1125201 | After163 | 64.125     | 63 |

|            |          |            |          |            |    |
|------------|----------|------------|----------|------------|----|
| 63.0917313 | 63.75638 | 64.1125201 | After164 | 64         | 63 |
| 63.0917313 | 63.75638 | 65.1125201 | After165 | 63.875     | 63 |
| 63.0917313 | 63.75638 | 65.1125201 | After166 | 64         | 63 |
| 63.0917313 | 64.75638 | 65.1125201 | After167 | 64.25      | 63 |
| 62.0917313 | 64.75638 | 66.1125201 | After168 | 65         | 63 |
| 62.0917313 | 64.75638 | 66.1125201 | After169 | 65.25      | 63 |
| 63.0917313 | 63.75638 | 66.1125201 | After170 | 65.25      | 63 |
| 63.0917313 | 63.75638 | 66.1125201 | After171 | 65         | 63 |
| 62.0917313 | 63.75638 | 67.1125201 | After172 | 65.875     | 63 |
| 60.0917313 | 62.75638 | 67.1125201 | After173 | 62.8498576 | 63 |
| 60.0917313 | 62.75638 | 68.1125201 | After174 | 63.6876613 | 63 |
| 60.0917313 | 63.75638 | 68.1125201 | After175 | 64.0001613 | 63 |
| 59.0917313 | 64.75638 | 68.1125201 | After176 | 64.0939113 | 63 |
| 59.0917313 | 64.75638 | 68.1125201 | After177 | 64.0939113 | 63 |
| 59.0917313 | 64.75638 | 66.1125201 | After178 | 63.3216129 | 63 |
| 59.0917313 | 64.75638 | 66.1125201 | After179 | 63.7189113 | 63 |
| 60.0917313 | 64.75638 | 67.1125201 | After180 | 63.8751613 | 63 |
| 60.0917313 | 64.75638 | 67.1125201 | After181 | 63.8751613 | 63 |
| 61.0917313 | 62.75638 | 68.1125201 | After182 | 64.8439113 | 63 |
| 61.0917313 | 62.75638 | 68.1125201 | After183 | 65.2189113 | 63 |
| 61.0917313 | 62.75638 | 68.1125201 | After184 | 65.5001613 | 63 |
| 61.0917313 | 62.75638 | 67.1125201 | After185 | 65.0782863 | 63 |
| 62.0917313 | 62.75638 | 67.1125201 | After186 | 65.6095363 | 63 |
| 62.0917313 | 62.75638 | 68.1125201 | After187 | 65.7657863 | 63 |
| 62.0917313 | 62.75638 | 68.1125201 | After188 | 65.7501613 | 63 |
| 62.0917313 | 62.75638 | 68.1125201 | After189 | 65.7501613 | 63 |
| 63.0917313 | 62.75638 | 70.1125201 | After190 | 66.1564113 | 63 |
| 63.0917313 | 62.75638 | 70.1125201 | After191 | 66.4220363 | 63 |
| 66.0917313 | 62.75638 | 71.1125201 | After192 | 67.2657863 | 63 |
| 66.0917313 | 62.75638 | 72.1125201 | After193 | 67.2657863 | 63 |
| 66.0917313 | 63.75638 | 74.1125201 | After194 | 67.8282863 | 63 |
| 66.0917313 | 63.75638 | 74.1125201 | After195 | 67.9689113 | 63 |
| 68.0917313 | 63.75638 | 75.1125201 | After196 | 68.5314113 | 63 |
| 68.0917313 | 63.75638 | 75.1125201 | After197 | 68.3907863 | 63 |
| 69.0917313 | 63.75638 | 75.1125201 | After198 | 68.5314113 | 63 |
| 70.0917313 | 63.75638 | 75.1125201 | After199 | 68.1095363 | 63 |
| 71.0917313 | 64.75638 | 75.1125201 | After200 | 67.9532863 | 63 |
| 72.0917313 | 68.75638 | 76.1125201 | After201 | 70.125     | 63 |
| 73.0917313 | 69.75638 | 80.1125201 | After202 | 70.75      | 63 |
| 74.0917313 | 69.75638 | 71         | After203 | 69.610935  | 63 |
| 75.0917313 | 70.75638 | 71         | After204 | 69.610935  | 63 |
| 75.0917313 | 71.75638 | 71.125     | After205 | 69.62656   | 63 |
| 80.0917313 | 71.75638 | 81.1125201 | After206 | 71.5       | 63 |
| 81.0917313 | 71.75638 | 81.1125201 | After207 | 71.625     | 63 |
| 82.0917313 | 71.75638 | 81.1125201 | After208 | 71.75      | 63 |

|            |          |            |          |            |    |
|------------|----------|------------|----------|------------|----|
| 82.0917313 | 71.75638 | 77.1125201 | After209 | 71.5       | 63 |
| 82.0917313 | 71.75638 | 77.1125201 | After210 | 71.875     | 63 |
| 80.0917313 | 71.75638 | 75.1125201 | After211 | 71.375     | 63 |
| 79.0917313 | 71.75638 | 74.1125201 | After212 | 71.25      | 63 |
| 78.0917313 | 71.75638 | 73.1125201 | After213 | 71.125     | 63 |
| 78.0917313 | 72.75638 | 70.1125201 | After214 | 70.875     | 63 |
| 78.0917313 | 73.75638 | 70.1125201 | After215 | 70.75      | 63 |
| 78.0917313 | 74.75638 | 70.1125201 | After216 | 70.625     | 63 |
| 78.0917313 | 74.75638 | 68.1125201 | After217 | 70.375     | 63 |
| 78.0917313 | 74.75638 | 68.1125201 | After218 | 70.125     | 63 |
| 76.0917313 | 74.75638 | 68.1125201 | After219 | 69.375     | 63 |
| 76.0917313 | 74.75638 | 68.1125201 | After220 | 69         | 63 |
| 76.0917313 | 74.75638 | 67.1125201 | After221 | 68.75      | 63 |
| 76.0917313 | 74.75638 | 68.1125201 | After222 | 68.875     | 63 |
| 75.0917313 | 73.75638 | 69.1125201 | After223 | 68.625     | 63 |
| 75.0917313 | 73.75638 | 69.1125201 | After224 | 68.25      | 63 |
| 75.0917313 | 73.75638 | 70.1125201 | After225 | 68.5       | 71 |
| 75.0917313 | 73.75638 | 70.1125201 | After226 | 68.5       | 71 |
| 74.0917313 | 72.75638 | 72.1125201 | After227 | 68.625     | 71 |
| 73.0917313 | 71.75638 | 72.1125201 | After228 | 68.25      | 71 |
| 73.0917313 | 71.75638 | 70.1125201 | After229 | 68.25      | 71 |
| 73.0917313 | 71.75638 | 70.1125201 | After230 | 69.125     | 71 |
| 73.0917313 | 71.75638 | 70.1125201 | After231 | 69.125     | 71 |
| 74.0917313 | 72.75638 | 66.1125201 | After232 | 68.2515996 | 71 |
| 74.0917313 | 72.75638 | 66.1125201 | After233 | 68.2984746 | 71 |
| 75.0917313 | 72.75638 | 69.1125201 | After234 | 68.8609746 | 71 |
| 75.0917313 | 72.75638 | 69.1125201 | After235 | 68.9390996 | 71 |
| 75.0917313 | 72.75638 | 70.1125201 | After236 | 69.4234746 | 71 |
| 74.0917313 | 72.75638 | 70.1125201 | After237 | 69.7203496 | 71 |
| 74.0917313 | 71.75638 | 70.1125201 | After238 | 69.6890996 | 71 |
| 74.0917313 | 63.75638 | 70.1125201 | After239 | 68.8140996 | 71 |
| 69.0917313 | 63.75638 | 70.1125201 | After240 | 68.0640996 | 71 |
| 69.0917313 | 63.75638 | 69.1125201 |          | 67.7672246 | 71 |
| 69.0917313 | 63.75638 | 66.1125201 |          | 67.2047246 | 71 |
| 69.0917313 | 62.75638 | 66.1125201 |          | 67.0640996 | 71 |
| 69.0917313 | 62.75638 | 66.1125201 |          | 67.2203496 | 71 |
| 68.0917313 | 63.75638 | 67.1125201 |          | 67.7828496 | 71 |
| 70.0917313 | 63.75638 | 67.1125201 |          | 68.0640996 | 71 |
| 71.0917313 | 63.75638 | 67.1125201 |          | 68.5015996 | 71 |
| 72.0917313 | 63.75638 | 67.1125201 |          | 68.5328496 | 71 |
| 72.0917313 | 62.75638 | 67.1125201 |          | 68.2984746 | 71 |
| 78.0917313 | 62.75638 | 68.1125201 |          | 70.2047246 | 71 |
| 78.0917313 | 62.75638 | 69.1125201 |          | 70.1422246 | 71 |
| 77.0917313 | 62.75638 | 70.1125201 |          | 69.8765996 | 71 |
| 77.0917313 | 63.75638 | 71.1125201 |          | 69.2984746 | 71 |

|            |          |            |            |    |
|------------|----------|------------|------------|----|
| 76.0917313 | 63.75638 | 71.1125201 | 68.9547246 | 71 |
| 74.0917313 | 61.75638 | 71.1125201 | 68.1422246 | 71 |
| 73.0917313 | 59.75638 | 72.1125201 | 67.8609746 | 71 |
| 71.0917313 | 58.75638 | 73.1125201 | 67.4390996 | 71 |
| 70.0917313 | 56.75638 | 73.1125201 | 67.1265996 | 71 |
| 69.0917313 | 56.75638 | 73.1125201 | 67.0953496 | 71 |
| 69.0917313 | 56.75638 | 73.1125201 | 67.4078496 | 71 |
| 70.0917313 | 56.75638 | 74.1125201 | 67.4078496 | 71 |
| 72.0917313 | 56.75638 | 75.1125201 | 68.75      | 71 |
| 73.0917313 | 57.75638 | 77.1125201 | 69         | 71 |
| 73.0917313 | 58.75638 | 78.1125201 | 69         | 71 |
| 70.0917313 | 59.75638 | 78.1125201 | 69.125     | 71 |
| 68.0917313 | 59.75638 | 76.1125201 | 68         | 71 |
| 66.0917313 | 59.75638 | 71.1125201 | 67         | 71 |
| 66.0917313 | 59.75638 | 71.1125201 | 66.375     | 71 |
| 67.0917313 | 59.75638 | 69.1125201 | 66.125     | 71 |
| 68.0917313 | 58.75638 | 68.1125201 | 65.875     | 71 |
| 69.0917313 | 58.75638 | 68.1125201 | 66.25      | 71 |
| 70.0917313 | 58.75638 | 68.1125201 | 66.75      | 71 |
| 70.0917313 | 58.75638 | 68.1125201 | 67.625     | 71 |
| 70.0917313 | 59.75638 | 69.1125201 | 68         | 71 |
| 70.0917313 | 59.75638 | 69.1125201 | 69         | 71 |
| 71.0917313 | 59.75638 | 69.1125201 | 69.25      | 71 |
| 72.0917313 | 59.75638 | 69.1125201 | 69         | 71 |
| 72.0917313 | 59.75638 | 69.1125201 | 69         | 71 |
| 72.0917313 | 60.75638 | 69.1125201 | 69.125     | 71 |
| 71.0917313 | 60.75638 | 71.1125201 | 69.25      | 71 |
| 71.0917313 | 59.75638 | 72.1125201 | 69.25      | 71 |
| 71.0917313 | 60.75638 | 72.1125201 | 69         | 71 |
| 71.0917313 | 60.75638 | 72.1125201 | 69.125     | 71 |
| 71.0917313 | 60.75638 | 72.1125201 | 69.625     | 71 |
| 71.0917313 | 60.75638 | 72.1125201 | 69.625     | 71 |
| 71.0917313 | 60.75638 | 75.1125201 | 69.625     | 71 |
| 72.0917313 | 62.75638 | 75.1125201 | 69.875     | 71 |
| 72.0917313 | 62.75638 | 78.1125201 | 70         | 71 |
| 72.0917313 | 61.75638 | 77.1125201 | 69.5       | 71 |
| 72.0917313 | 61.75638 | 73.1125201 | 69         | 71 |
| 72.0917313 | 61.75638 | 72.1125201 | 68.875     | 71 |
| 72.0917313 | 61.75638 | 72.1125201 | 68.5       | 71 |
| 72.0917313 | 60.75638 | 71.1125201 | 68.25      | 71 |
| 72.0917313 | 60.75638 | 70.1125201 | 67.5       | 71 |
| 72.0917313 | 60.75638 | 70.1125201 | 67         | 71 |
| 72.0917313 | 60.75638 | 69.1125201 | 67.125     | 71 |
| 72.0917313 | 59.75638 | 69.1125201 | 66.875     | 71 |
| 71.0917313 | 59.75638 | 69.1125201 | 66.75      | 71 |

|            |          |            |            |    |
|------------|----------|------------|------------|----|
| 71.0917313 | 59.75638 | 69.1125201 | 66.625     | 71 |
| 72.0917313 | 59.75638 | 69.1125201 | 66.875     | 71 |
| 73.0917313 | 59.75638 | 69.1125201 | 67         | 71 |
| 73.0917313 | 59.75638 | 68.1125201 | 67         | 71 |
| 76.0917313 | 59.75638 | 68.1125201 | 67.125     | 71 |
| 76.0917313 | 59.75638 | 67.1125201 | 66.875     | 71 |
| 76.0917313 | 59.75638 | 68.1125201 | 67.125     | 71 |
| 76.0917313 | 58.75638 | 71.1125201 | 67.125     | 71 |
| 76.0917313 | 58.75638 | 71.1125201 | 67.125     | 71 |
| 76.0917313 | 60.75638 | 73.1125201 | 67.625     | 71 |
| 76.0917313 | 61.75638 | 75.1125201 | 68         | 71 |
| 76.0917313 | 62.75638 | 75.1125201 | 67.875     |    |
| 76.0917313 | 63.75638 | 73.1125201 | 67.5       |    |
| 76.0917313 | 63.75638 | 73.1125201 | 67.5       |    |
| 76.0917313 | 63.75638 | 73.1125201 | 67.25      |    |
| 76.0917313 | 64.75638 | 73.1125201 | 67.375     |    |
| 77.0917313 | 64.75638 | 73.1125201 | 67.5       |    |
| 76.0917313 | 65.75638 | 72.1125201 | 67.375     |    |
| 69.0917313 | 65.75638 | 72.1125201 | 66.625     |    |
| 67.0917313 | 65.75638 | 72.1125201 | 66.5       |    |
| 67.0917313 | 65.75638 | 72.1125201 | 66.375     |    |
| 67.0917313 | 65.75638 | 70.1125201 | 66.25      |    |
| 67.0917313 | 66.75638 | 69.1125201 | 66.375     |    |
| 67.0917313 | 68.75638 | 69.1125201 | 66.7210815 |    |
| 67.0917313 | 70.75638 | 71.1125201 | 67.2925101 |    |
| 67.0917313 | 70.75638 | 72.1125201 | 67.7210815 |    |
| 67.0917313 | 70.75638 | 72.1125201 | 67.7210815 |    |
| 67.0917313 | 70.75638 | 72.1125201 | 67.7210815 |    |
| 67.0917313 | 70.75638 | 72.1125201 | 67.7210815 |    |
| 67.0917313 | 70.75638 | 71.1125201 | 67.4353672 |    |
| 68.0917313 | 71.75638 | 71.1125201 | 68.0067958 |    |
| 68.0917313 | 71.75638 | 71.1125201 | 68.1496529 |    |
| 68.0917313 | 71.75638 | 71.1125201 | 68.2925101 |    |
| 67.0917313 | 71.75638 | 71.1125201 | 68.0067958 |    |
| 67.0917313 | 69.75638 | 71.1125201 | 67.8639387 |    |
| 67.0917313 | 67.75638 | 71.1125201 | 67.2925101 |    |
| 68.0917313 | 65.75638 | 71.1125201 | 67.2925101 |    |
| 68.0917313 | 63.75638 | 70.1125201 | 67.0067958 |    |
| 68.0917313 | 62.75638 | 68.1125201 | 66.8639387 |    |
| 69.0917313 | 63.75638 | 68.1125201 | 68.2925101 |    |
| 69.0917313 | 63.75638 | 68.1125201 | 68.2925101 |    |
| 70.0917313 | 62.75638 | 62.1125201 | 67.4353672 |    |
| 73.0917313 | 62.75638 | 61.1125201 | 67.2925101 |    |
| 73.0917313 | 61.75638 | 61.1125201 | 67.2925101 |    |
| 73.0917313 | 59.75638 | 61.1125201 | 66.7210815 |    |

|            |          |            |            |
|------------|----------|------------|------------|
| 73.0917313 | 59.75638 | 61.1125201 | 66.4353672 |
| 73.0917313 | 59.75638 | 62.1125201 | 66.5782244 |
| 71.0917313 | 59.75638 | 62.1125201 | 66.0067958 |
| 70.0917313 | 59.75638 | 62.1125201 | 65.2925101 |
| 69.0917313 | 59.75638 | 69.1125201 | 66.1496529 |
| 69.0917313 | 59.75638 | 69.1125201 | 65.8639387 |
| 68.0917313 | 60.75638 | 70.1125201 | 65.7210815 |
| 68.0917313 | 63.75638 | 70.1125201 | 66.1496529 |
| 68.0917313 | 65.75638 | 71.1125201 | 66.7210815 |
| 69.0917313 | 66.75638 | 71.1125201 | 68.0067958 |
| 69.0917313 | 67.75638 | 71.1125201 | 68.4353672 |
| 73.0917313 | 69.75638 | 72.1125201 | 69.5782244 |
| 72.0917313 | 70.75638 | 72.1125201 | 69.5782244 |
| 71.0917313 | 71.75638 | 70.1125201 | 69.5782244 |
| 70.0917313 | 72.75638 | 70.1125201 | 69.8639387 |
| 69.0917313 | 72.75638 | 69.1125201 | 69.8639387 |
| 69.0917313 | 72.75638 | 69.1125201 | 69.4353672 |
| 70.0917313 | 71.75638 | 69.1125201 | 68.8639387 |
| 72.0917313 | 69.75638 | 71.1125201 | 69.0067958 |
| 73.0917313 | 66.75638 | 72.1125201 | 69.0067958 |
| 73.0917313 | 63.75638 | 72.1125201 | 68.2925101 |
| 73.0917313 | 62.75638 | 72.1125201 | 67.8639387 |
| 73.0917313 | 61.75638 | 73.1125201 | 68.0067958 |
| 73.0917313 | 61.75638 | 73.1125201 | 67.0067958 |
| 73.0917313 | 61.75638 | 73.1125201 | 66.7210815 |
| 72.0917313 | 62.75638 | 73.1125201 | 67.0067958 |
| 72.0917313 | 62.75638 | 73.1125201 | 67.1496529 |
| 72.0917313 | 62.75638 | 73.1125201 | 67.1496529 |
| 72.0917313 | 62.75638 | 73.1125201 | 67.4353672 |
| 71.0917313 | 62.75638 | 72.1125201 | 67.1496529 |
| 69.0917313 | 61.75638 | 72.1125201 | 66.7210815 |
| 69.0917313 | 60.75638 | 73.1125201 | 67.0067958 |
| 68.0917313 | 60.75638 | 73.1125201 | 66.7210815 |
| 67.0917313 | 60.75638 | 73.1125201 | 66.8639387 |
| 67.0917313 | 60.75638 | 73.1125201 | 66.7210815 |
| 66.0917313 | 61.75638 | 75.1125201 | 67.0067958 |
| 66.0917313 | 61.75638 | 75.1125201 | 67.2925101 |
| 66.0917313 | 61.75638 | 76.1125201 | 67.5782244 |
| 66.0917313 | 61.75638 | 76.1125201 | 67.5782244 |
| 66.0917313 | 63.75638 | 76.1125201 | 67.7210815 |
| 66.0917313 | 63.75638 | 76.1125201 | 67.5782244 |
| 67.0917313 | 63.75638 | 76.1125201 | 68.1496529 |
| 64.0917313 | 64.75638 | 76.1125201 | 67.8639387 |
| 61.0917313 | 65.75638 | 76.1125201 | 67.2925101 |
| 61.0917313 | 65.75638 | 77.1125201 | 68.1496529 |



|            |          |            |            |
|------------|----------|------------|------------|
| 63.0917313 | 65.75638 | 77.1125201 | 69.1496529 |
| 66.0917313 | 65.75638 | 77.1125201 | 69.5782244 |
| 66.0917313 | 65.75638 | 77.1125201 | 69.5782244 |
| 70.0917313 | 65.75638 | 76.1125201 | 70.0067958 |
| 70.0917313 | 65.75638 | 76.1125201 | 70.0067958 |
| 67.0917313 | 63.75638 | 72.1125201 | 68.4353672 |
| 65.0917313 | 63.75638 | 72.1125201 | 68.0067958 |
| 65.0917313 | 60.75638 | 72.1125201 | 67.4353672 |
| 66.0917313 | 60.75638 | 72.1125201 | 67.7210815 |
| 67.0917313 | 60.75638 | 73.1125201 | 67.8639387 |
| 67.0917313 | 62.75638 | 73.1125201 | 67.8639387 |
| 67.0917313 | 62.75638 | 73.1125201 | 67.8639387 |
| 67.0917313 | 62.75638 | 73.1125201 | 68.0067958 |
| 67.0917313 | 62.75638 | 74.1125201 | 68.1496529 |
| 67.0917313 | 62.75638 | 74.1125201 | 68.2925101 |
| 67.0917313 | 61.75638 | 74.1125201 | 68.4353672 |
| 67.0917313 | 61.75638 | 76.1125201 | 68.7210815 |
| 67.0917313 | 60.75638 | 76.1125201 | 69.4353672 |
| 67.0917313 | 59.75638 | 76.1125201 | 69.5782244 |
| 67.0917313 | 59.75638 | 76.1125201 | 69.8639387 |
| 67.0917313 | 59.75638 | 77.1125201 | 70.0067958 |
| 66.0917313 | 59.75638 | 77.1125201 | 69.8639387 |
| 66.0917313 | 59.75638 | 78.1125201 | 70.5782244 |
| 66.0917313 | 56.75638 | 78.1125201 | 70.5782244 |
| 65.0917313 | 56.75638 | 78.1125201 | 70.4353672 |
| 65.0917313 | 56.75638 | 81.1125201 | 70.8639387 |
| 65.0917313 | 53.75638 | 82.1125201 | 71.7210815 |
| 65.0917313 | 53.75638 | 82.1125201 | 71.7210815 |
|            |          |            | 69.7643311 |

moving average

69.4841064  
69.5130919  
69.534831  
69.5565702  
69.5783093  
69.6072948  
69.6217875  
69.6435267  
69.6652658  
69.6797586  
69.6797586  
69.6797586  
69.6652658  
69.6507731  
69.6362803  
69.6217875  
69.6072948  
69.592802  
69.5638165  
69.5203383  
69.4623673  
69.4043962  
69.3319325  
69.2377296  
69.1362803  
69.034831  
68.9478745  
68.8826571  
68.8246861  
68.802947  
68.7812078  
68.7739615  
68.7667151  
68.7594687  
68.7522223  
68.744976  
68.744976  
68.7522223  
68.7594687  
68.7739615  
68.7884542  
68.8101933  
68.802947

68.7812078  
68.7594687  
68.7377296  
68.7087441  
68.6797586  
68.6652658  
68.6507731  
68.6290339  
68.6072948  
68.592802  
68.5783093  
68.5565702  
68.5130919  
68.4406281  
68.360918  
68.2812078  
68.2304832  
68.1870049  
68.1507731  
68.1217875  
68.1072948  
68.0855557  
68.0493238  
67.9985991  
67.9406281  
67.8826571  
67.8319325  
67.7884542  
67.7377296  
67.6942513  
67.6507731  
67.6000484  
67.5493238  
67.4913528  
67.4333818  
67.3754107  
67.3339499  
67.2900735  
67.2341199  
67.1878281  
67.1439518  
67.1000754  
67.0465373  
66.9688445  
66.8814899

66.8269806  
66.7724713  
66.7143388  
66.6507715  
66.5872042  
66.523637  
66.4645987  
66.447031  
66.4367098  
66.4263885  
66.4269369  
66.4419779  
66.4425262  
66.4539441  
66.4508692  
66.4296784  
66.4048644  
66.3800504  
66.34799  
66.2978137  
66.2440142  
66.1902147  
66.1291688  
66.0789925  
66.0433089  
66.000379  
65.9828113  
65.9724901  
65.9549225  
65.9228621  
65.8835553  
65.8551181  
65.8375505  
65.8308524  
65.8495167  
65.8573114  
65.8723524  
65.8946399  
65.909681  
65.924722  
65.9288935  
65.9294418  
65.9118742  
65.901553  
65.876739

65.8591713  
65.8560965  
65.8675143  
65.8970482  
65.9410747  
65.9814781  
66.0291279  
66.0804008  
66.1316738  
66.1793236  
66.2197269  
66.2709999  
66.325896  
66.3807922  
66.4356883  
66.4849439  
66.5293685  
66.6039864  
66.6725657  
66.7459758  
66.8230092  
66.9060812  
67.0060614  
67.1120802  
67.1997465  
67.2874128  
67.3787023  
67.4899194  
67.6011364  
67.7340926  
67.8588966  
67.9422299  
68.0146937  
68.0871575  
68.1199976  
68.1779687  
68.243186  
68.2866643  
68.3446353  
68.435215  
68.5294179  
68.6163745  
68.7142005  
68.8011571  
68.8844904

68.9497078  
69.0185484  
69.0873889  
69.1598527  
69.2323165  
69.2866643  
69.3337658  
69.3844904  
69.4388382  
69.4968092  
69.5439107  
69.5837658  
69.5910121  
69.5728962  
69.5656498  
69.5366643  
69.493186  
69.4647108  
69.433337  
69.4070357  
69.3945025  
69.3928389  
69.3969723  
69.4112507  
69.4342248  
69.4745901  
69.5149555  
69.5415527  
69.558005  
69.5940225  
69.6271415  
69.6315914  
69.6290847  
69.6302013  
69.6492889  
69.7063209  
69.751034  
69.784153  
69.8085763  
69.8192315  
69.8269882  
69.8151796  
69.7997479  
69.778519  
69.753667

69.7411338  
69.7474412  
69.7689659  
69.7904907  
69.8178126  
69.8393373  
69.8463693  
69.8447057  
69.8126073  
69.7812335  
69.7498597  
69.7308048  
69.723344  
69.7576808  
69.7668867  
69.7717448  
69.8048638  
69.8408813  
69.856609  
69.8694381  
69.8851658  
69.8929224  
69.9021284  
69.8997401  
69.9053228  
69.9072824  
69.907068  
69.8974334  
69.8820016  
69.8636713  
69.8554859  
69.8378803  
69.8282456  
69.8091907  
69.7843386  
69.7631098  
69.7940548  
69.8278984  
69.861742  
69.9260204  
69.9975452  
70.0758061  
70.1656611  
70.2555162  
70.3366756

70.4207336  
70.4902988  
70.5424727  
70.5801539  
70.5975452  
70.612038  
70.6294293  
70.6381249  
70.6497191  
70.6613133  
70.7051998  
70.7531443  
70.8010887  
70.8397578  
70.8310621  
70.8310621  
70.851352  
70.8532626  
70.86155  
70.872736  
70.8995742  
70.9298906  
70.9625259  
70.9887843  
71.0133036  
71.0262287  
71.0206031  
71.0032901  
70.977362  
70.9459588  
70.9165685  
70.8978868  
70.8879007  
70.8888647  
70.9114456  
70.9229154  
70.9372838  
70.950686  
70.9616727  
70.9673454  
70.9604578  
70.9458406  
70.9370206  
70.9050538  
70.8738117



70.8537612  
70.843131  
70.846913  
70.9158707  
70.9727512  
71.0426751  
71.1159807  
71.1943085  
71.2672534  
71.3352293  
71.4090023  
71.4711811  
71.539157  
71.6067189  
71.6701399  
71.6958798  
71.7104395  
71.7187881  
71.7163707  
71.7139532  
71.6949726  
71.6652259  
71.6350652  
71.6044904  
71.5730874  
71.5379577  
71.5276727  
71.5273257  
71.5340179  
71.5560311  
71.5883963  
71.6385668  
71.6916359  
71.7455331  
71.7932191  
71.8164883  
71.8308844  
71.8584718  
71.8921521  
71.9264239  
71.946972  
71.9963696  
72.0693086  
72.144318  
72.2103004

72.2707342  
72.3108643  
72.3518714  
72.3879602  
72.4199728  
72.4526013  
72.516177  
72.5717012  
72.6366859  
72.6978461  
72.7569935  
72.8088945  
72.8454975  
72.8641068  
72.8851316  
72.889852  
72.8951763  
72.8848001  
72.8822741  
72.8821636  
72.8905072  
72.8970392  
72.9278049  
72.9495127  
72.9571302  
72.9629362  
72.9623009  
72.8939537  
72.832249  
72.75424  
72.6714  
72.5839  
72.5010585  
72.4239105  
72.3467625  
72.2732377  
72.2015245  
72.1342108  
72.0656032  
72.0060536  
71.9565971  
71.9224098  
71.9011624  
71.8726686  
71.8480569

71.8237039  
71.8001274  
71.7791388  
71.7615146  
71.7526896  
71.731701  
71.7065717  
71.6605466  
71.6000612  
71.5301295  
71.4687059  
71.3927896  
71.3291338  
71.2793885  
71.2589967  
71.2651387  
71.2548285  
71.2351645  
71.2094742  
71.1851889  
71.1645636  
71.1259767  
71.0658471  
71.0125433  
70.9694621  
70.9542391  
70.9445156  
70.9388683  
70.9411467  
70.9576914  
70.9685609  
70.9794305  
70.9830537  
70.9884885  
70.9758073  
70.9703725  
70.9685609  
70.9649378  
70.9631262  
70.9576914  
70.9468218  
70.9395754  
70.9377638  
70.9395754  
70.941387

70.9268943  
70.8942856  
70.8707349  
70.8453725  
70.8127638  
70.7837783  
70.7638508  
70.7511696  
70.7475465  
70.7547928  
70.7602276  
70.7747204  
70.7892131  
70.7910247  
70.7910247  
70.7964595  
70.8091407  
70.8272566  
70.8363146  
70.8399378  
70.834503  
70.816387  
70.8055175  
70.8000827  
70.7964595  
70.8055175  
70.8308798  
70.8526189  
70.8761696  
70.901532  
70.9268943  
70.9762579  
71.0349059  
71.0872134  
71.1302364  
71.1768826  
71.2097154  
71.2402837  
71.268814  
71.2706256  
71.2742488  
71.2851183  
71.3014227  
71.317727  
71.3285966

71.3285966  
71.3444457  
71.357351  
71.3548577  
71.3482883  
71.3453422  
71.3362818  
71.3233719  
71.3061594  
71.2423233  
71.1893568  
71.1436367  
71.098143  
71.0728033  
71.0474636  
71.0314083  
71.036843  
71.045901  
71.054959  
71.0748865  
71.0966257  
71.1020604  
71.0966257  
71.0857561  
71.0911909  
71.1074952  
71.121988  
71.1419155  
71.170901  
71.1998865  
71.2198141  
71.2361184  
71.2487996  
71.2723503  
71.2848276  
71.2898321  
71.2934779  
71.3016527  
71.3057514  
71.292187  
71.2670738  
71.2688854  
71.2670738  
71.2688854  
71.270697

71.2833781  
71.2942477  
71.2996825  
71.2978709  
71.2851897  
71.2580158  
71.2290303  
71.2054796  
71.1783057  
71.1529433  
71.1348274  
71.1004071  
71.0841028  
71.0641752  
71.0424361  
71.0261317  
71.002581  
70.9808419  
70.94461  
70.9174361  
70.8938854  
70.8667114  
70.8485955  
70.8359143  
70.8304796  
70.8359143  
70.8359143  
70.8467839  
70.8485955  
70.8413491  
70.8341028  
70.8359143  
70.8395375  
70.8852577  
70.934601  
70.9803212  
71.0258149  
71.0511546  
71.0783059  
71.0961728  
71.0871148  
71.08168  
71.0834916  
71.0744336  
71.0708104

71.0762452  
71.0925496  
71.1161003  
71.1432742  
71.1831293  
71.2284191  
71.273709  
71.3063177  
71.3334916  
71.3461728  
71.3552307  
71.3497959  
71.3208104  
71.3065215  
71.2924591  
71.2761321  
71.2661457  
71.2511775  
71.2466259  
71.2463768  
71.2246377  
71.2047101  
71.182971  
71.1612319  
71.1177536  
71.0652174  
71.0108696  
70.9349975  
70.8568609  
70.7764599  
70.704211  
70.630377  
70.5622042  
70.4965224  
70.4204238  
70.3619884  
70.2849841  
70.2082062  
70.1273522  
70.0363081  
69.9470755  
69.8537668  
69.7837825  
69.7201387  
69.6587593

69.5867369  
69.5049772  
69.4218587  
69.3312675  
69.2569921  
69.1899631  
69.1174993  
69.0540936  
68.9924993  
68.9381515  
68.8747457  
68.8149631  
68.7424993  
68.6627892  
68.5867022  
68.5051805  
68.4435863  
68.3819921  
68.3276443  
68.275108  
68.217137  
68.1646008  
68.1247457  
68.0703979  
68.0124269  
67.9327167  
67.8783689  
67.8294559  
67.7823544  
67.7280066  
67.6646008  
67.5975718  
67.5414124  
67.5015573  
67.4707602  
67.4707602  
67.4816298  
67.4961225  
67.5142385  
67.5323544  
67.5366454  
67.5522588  
67.5637962  
67.5708046  
67.5852973



67.6034133  
67.6070365  
67.6070365  
67.6215292  
67.6505147  
67.6813118  
67.7426911  
67.8153929  
67.8903592  
67.9571733  
68.0201377  
68.0828757  
68.1431228  
68.1992938  
68.2323669  
68.2622698  
68.2846998  
68.3093943  
68.3388443  
68.3682943  
68.3981971  
68.4265149  
68.4466804  
68.466393  
68.500372  
68.5513346  
68.603656  
68.6580154  
68.6888125  
68.7159864  
68.7449719  
68.7703342  
68.8011313  
68.824682  
68.8500443  
68.8754067  
68.9134501  
68.949682  
68.9967835  
69.0511313  
69.1054791  
69.1543922  
69.2014936  
69.2485951  
69.2902617

69.3228704  
69.3446096  
69.3699719  
69.391711  
69.4225081  
69.4188849  
69.4043922  
69.3862762  
69.3754067  
69.3663487  
69.3754067  
69.3935226  
69.4134501  
69.4333777  
69.4388125  
69.4388125  
69.4370009  
69.4370009  
69.4388125  
69.463507  
69.4823138  
69.5215011  
69.5561594  
69.5393906  
69.5167341  
69.5083439  
69.4954248  
69.4748063  
69.4505647  
69.3996623  
69.3474013  
69.2806474  
69.2147994  
69.1516688  
69.1023631  
69.0842472  
69.0606964  
69.0407689  
69.0371457  
69.0498269  
69.062508  
69.0770008  
69.0951167  
69.1222906  
69.1548993

69.1947544  
69.2364211  
69.2672182  
69.2980153  
69.3161312  
69.3106964  
69.3052617  
69.2798993  
69.2527254  
69.2237399  
69.1947544  
69.1639573  
69.1331602  
69.0933051  
69.0462037  
68.9936675  
68.9520008  
68.9067109  
68.8686675  
68.8288124  
68.7871457  
68.7491022  
68.7164935  
68.6911312  
68.6693921  
68.6349718  
68.5969283  
68.5570732  
68.5244646  
68.4972906  
68.4773631  
68.4538124  
68.4212037  
68.3813486  
68.3324356  
68.2654066  
68.2020008  
68.129537  
68.0606964  
68.0009138  
67.9520008  
67.897653  
67.8451167  
67.7853341  
67.7327979

67.6639573  
67.6132327  
67.5973928  
67.5983101  
67.6157583  
67.6431702  
67.6764698  
67.7369433  
67.8331356  
67.9343097  
68.0372954  
68.1448101  
68.2550422  
68.3478261  
68.4130435  
68.4818841  
68.5434783  
68.5905797  
68.6231884  
68.6648551  
68.7083333  
68.7518116  
68.7735507  
68.7916667  
68.7971014  
68.8043478  
68.8097826  
68.789236  
68.7946708  
68.8182215  
68.838149  
68.8743809  
68.9088012  
68.9468447  
68.9848882  
69.0265548  
69.0664099  
69.115323  
69.164236  
69.2077143  
69.2493809  
69.2928592  
69.3254679  
69.3544534  
69.3852505

69.4124244  
69.4341635  
69.4486563  
69.463149  
69.4939461  
69.5319896  
69.5790911  
69.6207577  
69.6569896  
69.6932215  
69.7167722  
69.7439461  
69.7838012  
69.8345258  
69.8979316  
69.9595258  
70.0356128  
70.1098882  
70.1696708  
70.222207  
70.2674969  
70.3073519  
70.3307533  
70.3706084  
70.412275  
70.4521301  
70.4865504  
70.5155359  
70.5209707  
70.5191591  
70.4937968  
70.4358257  
70.3597388  
70.278217  
70.2075649  
70.113362  
70.0173475  
69.9322026  
69.8434344  
69.7582895  
69.6948837  
69.6423475  
69.595246  
69.5517678  
69.5101011

69.4648113  
69.4340141  
69.4050286  
69.3887243  
69.3778547  
69.3778547  
69.4038361  
69.4092709  
69.4183289  
69.4291984  
69.4364448  
69.440068  
69.440068  
69.4436912  
69.4364448  
69.4328216  
69.4291984  
69.4237637  
69.4183289  
69.4138022  
69.3943299  
69.3787073  
69.3739542  
69.3685217  
69.363932  
69.3486816  
69.3389466  
69.3230975  
69.3212859  
69.3158511  
69.3031699  
69.2832424  
69.2596917  
69.236141  
69.2252714  
69.2125902  
69.1962859  
69.1709236  
69.1365033  
69.1038946  
69.0694743  
69.0386772  
69.0187496  
68.9915757  
68.9662134

68.9408511  
68.9355657  
68.9065802  
68.8884642  
68.8757831  
68.8703483  
68.8558555  
68.8576671  
68.8685367  
68.9047686  
68.9428121  
68.9862903  
69.0333918  
69.0678121  
69.1131019  
69.1493338  
69.1819425  
69.2163628  
69.2399135  
69.2525947  
69.2670874  
69.2852034  
69.2924498  
69.2942613  
69.2942613  
69.2960729  
69.287015  
69.2707106  
69.2453483  
69.1952915  
69.1452346  
69.0978952  
69.0532731  
69.0104255  
68.9797249  
68.9815365  
68.9851596  
68.992406  
69.0050872  
68.992168  
68.9903564  
68.98311  
68.9794869  
68.9749555  
68.9799351

68.9846882  
68.9858181  
68.9894389  
68.9904054  
69.0074675  
69.0262605  
69.0511675  
69.0638487  
69.107327  
69.1671096  
69.2359501  
69.3084139  
69.3754429  
69.4460951  
69.4968197  
69.5384864  
69.5783414  
69.6109501  
69.6453704  
69.6797907  
69.7069646  
69.7287038  
69.7540661  
69.7866748  
69.8210951  
69.8518922  
69.8790661  
69.8899357  
69.8643701  
69.8489947  
69.8293168  
69.8044306  
69.7820353  
69.78747  
69.796528  
69.8218903  
69.8309483  
69.8454411  
69.8708034  
69.8961657  
69.9120403  
69.9371994  
69.9699962  
69.9956389  
70.0128722



70.0099515  
69.9984258  
69.9887117  
69.9835265  
69.9925845  
70.0034541  
70.0161352  
70.0197584  
70.0480761  
70.0709591  
70.089313  
70.103138  
70.1079421  
70.1078456  
70.0770485  
70.048063  
70.0172659  
69.9955268  
70.0011996  
69.9939532  
69.9830836  
69.9704025  
69.9577213  
69.9468517  
69.9377938  
69.9196778  
69.8979387  
69.8725764  
69.8399677  
69.8091706  
69.7819967  
69.7548228  
69.7077213  
69.6479387  
69.5827213  
69.5283735  
69.481272  
69.4377938  
69.4160546  
69.3943155  
69.3761996  
69.3635184  
69.3399677  
69.3109822  
69.2747503

69.2330836  
69.1932286  
69.1588083  
69.1261996  
69.1008373  
69.0827213  
69.0682286  
69.0974173  
69.1200391  
69.1687025  
69.2162221  
69.2499283  
69.2397265  
69.2315628  
69.2089063  
69.198931  
69.1905408  
69.1884912  
69.1898383  
69.2049757  
69.2232949  
69.2357879  
69.2518119  
69.2762453  
69.3045282  
69.3396047  
69.3692464  
69.3961707  
69.4052286  
69.4179098  
69.4269678  
69.4468953  
69.4686344  
69.4958083  
69.5175475  
69.5392866  
69.5718953  
69.6226199  
69.6711571  
69.714486  
69.7661935  
69.8169952  
69.8662118  
69.9229012  
69.9911395

70.0577926  
70.119011  
70.1847584  
70.2753381  
70.3677294  
70.4709902  
70.5814975  
70.6938163  
70.7880192  
70.8456235  
70.8999714  
70.9380148  
70.9833047  
71.0304061  
71.0684496  
71.1010583  
71.1209858  
71.1318554  
71.1535945  
71.1717105  
71.191638  
71.2151887  
71.2369279  
71.2659134  
71.3003337  
71.3202612  
71.3293192  
71.3329424  
71.3311308  
71.334754  
71.3492467  
71.3546815  
71.3510583  
71.3311308  
71.3157438  
71.3080561  
71.29569  
71.3092885  
71.2957902  
71.2764041  
71.2606413  
71.2550687  
71.2627796  
71.2661878  
71.2426371

71.2227096  
71.1973473  
71.1683618  
71.1556806  
71.1484342  
71.1411878  
71.1429994  
71.1429994  
71.1647386  
71.1955357  
71.2263328  
71.2589415  
71.3006081  
71.3350284  
71.3676371  
71.3984342  
71.3966226  
71.407868  
71.4206986  
71.4269621  
71.4305082  
71.4338279  
71.4351095  
71.430277  
71.4270296  
71.4255939  
71.4123827  
71.3725277  
71.339919  
71.3073103  
71.2747016  
71.2439045  
71.223977  
71.2243437  
71.2207205  
71.2189089  
71.2170973  
71.2243437  
71.2225321  
71.2170973  
71.2134741  
71.2152857  
71.2189089  
71.2297785  
71.240648

71.2478944  
71.2569524  
71.2623872  
71.2714451  
71.2949958  
71.3312277  
71.3765176  
71.4254306  
71.4779669  
71.5232567  
71.533986  
71.5521881  
71.564729  
71.5781757  
71.595472  
71.6274105  
71.6231941  
71.6458482  
71.678466  
71.7054226  
71.7402187  
71.7637694  
71.7800737  
71.8036245  
71.8253636  
71.8416679  
71.8489143  
71.8615955  
71.8760882  
71.8942042  
71.9159433  
71.9467404  
71.9648564  
71.9775375  
71.9847839  
71.9847839  
71.9684795  
71.9557984  
71.9358708  
71.9123201  
71.899639  
71.8833346  
71.8742766  
71.8597839  
71.8434795

71.8253636  
71.8018129  
71.7764506  
71.7492766  
71.7202911  
71.7039868  
71.6840593  
71.6605085  
71.6297114  
71.5952911  
71.5626824  
71.5282621  
71.5028998  
71.4793491  
71.4612332  
71.4376824  
71.4032621  
71.3869578  
71.3797114  
71.3797114  
71.3887694  
71.3960158  
71.4032621  
71.4068853  
71.4213781  
71.4340593  
71.45761  
71.4811607  
71.5210158  
71.5518129  
71.5462378  
71.5331899  
71.5076874  
71.4744855  
71.4627101  
71.4527464  
71.4375743  
71.41425  
71.413258  
71.4274381  
71.46064  
71.4795756  
71.494435  
71.5151822  
71.4780109

71.4562717  
71.4381558  
71.423663  
71.4182283  
71.4309094  
71.4598949  
71.4834456  
71.5069964  
71.5341703  
71.548663  
71.5468514  
71.5359819  
71.5178659  
71.5060929  
71.4922818  
71.4816411  
71.4766615  
71.4703233  
71.4696463  
71.484139  
71.4950086  
71.5040666  
71.5113129  
71.5149361  
71.5203709  
71.5276173  
71.5439216  
71.5529796  
71.5439216  
71.5258057  
71.5076897  
71.4877622  
71.4678347  
71.4424724  
71.4134868  
71.3863129  
71.3627622  
71.3319651  
71.3047912  
71.2776173  
71.2558781  
71.2359506  
71.2069651  
71.1779796  
71.1363129

71.0837767  
71.0221825  
70.9660231  
70.9044289  
70.8446463  
70.7830521  
70.7214579  
70.6471825  
70.5729071  
70.5295691  
70.4973272  
70.4865979  
70.4853794  
70.4954835  
70.5017379  
70.5098039  
70.5214931  
70.5070003  
70.481638  
70.4472177  
70.4200438  
70.3892467  
70.356638  
70.359389  
70.3485195  
70.3394615  
70.3340267  
70.3267803  
70.3068528  
70.2778673  
70.2488818  
70.2162731  
70.1800412  
70.1510557  
70.1238818  
70.0876499  
70.051418  
70.0088432  
69.9664949  
69.9137298  
69.8571152  
69.7946128  
69.7246377  
69.6467391  
69.5815217



69.5108696  
69.4528986  
69.4021739  
69.3496377  
69.2971014  
69.2463768  
69.2083333  
69.1865942  
69.1497056  
69.1166666  
69.0834012  
69.0476448  
69.033152  
69.0150361  
68.9951086  
68.9733694  
68.9552535  
68.9425723  
68.9480071  
68.9283922  
68.8915671  
68.86077  
68.8227266  
68.7792483  
68.7502628  
68.7249005  
68.7049729  
68.695915  
68.6922918  
68.6941034  
68.7067845  
68.7158425  
68.7321468  
68.7502628  
68.7647555  
68.7593208  
68.7774367  
68.7901179  
68.8082338  
68.8299729  
68.8426541  
68.8499005  
68.8589584  
68.8625816  
68.8680164

68.8806976  
68.9024367  
68.9187411  
68.927799  
68.9332338  
68.9332338  
68.9133063  
68.8951903  
68.8806976  
68.8662048  
68.8571468  
68.8444657  
68.8354077  
68.8263497  
68.8245382  
68.8335961  
68.8444657  
68.8662048  
68.8988135  
68.9386686  
68.9930164  
69.0546106  
69.11077  
69.1524367  
69.195915  
69.2303353  
69.2593208  
69.2828715  
69.3064222  
69.3281613  
69.3444657  
69.3625816  
69.3994703  
69.4415672  
69.4929486  
69.5540673  
69.6120383  
69.6808789  
69.7388499  
69.7913861  
69.845734  
69.8928354  
69.9181977  
69.9740445  
70.0525362

70.1195652  
70.1884058  
70.2572464  
70.3206522  
70.3858696  
70.4347826  
70.4746377  
70.5108696  
70.5380435  
70.5525362  
70.5652174  
70.576087  
70.5833333  
70.5797101  
70.5778986  
70.548913  
70.5126812  
70.4728261  
70.4365942  
70.4094203  
70.3876812  
70.3586957  
70.3315217  
70.3061594  
70.2735507  
70.2300725  
70.1974638  
70.173913  
70.1449275  
70.1123188  
70.0978261  
70.0815217  
70.0688406  
70.0543478  
70.0416667  
70.0307971  
70.0181159  
70.0199275  
70.0289855  
70.0344203  
70.0452899  
70.0543478  
70.0706522  
70.0815217  
70.0905797

70.1032609  
70.1123188  
70.1195652  
70.1304348  
70.1503623  
70.1684783  
70.1938406  
70.2119565  
70.2210145  
70.2228261  
70.2264493  
70.2300725  
70.2282609  
70.2210145  
70.2155797  
70.1938406  
70.1648551  
70.1503623  
70.1413043  
70.1322464  
70.1286232  
70.1286232  
70.134058  
70.1213768  
70.1195652  
70.125  
70.1394928  
70.1467391  
70.1485507  
70.1594203  
70.1684783  
70.1721014  
70.182971  
70.1956522  
70.2065217  
70.2119565  
70.2101449  
70.2101449  
70.2047101  
70.1992754  
70.2047101  
70.2173913  
70.2282609  
70.25  
70.2807971

70.3206522  
70.3623188  
70.4039855  
70.4438406  
70.4800725  
70.4981884  
70.5144928  
70.5380435  
70.5742754  
70.6123188  
70.6467391  
70.6793478  
70.7119565  
70.740942  
70.7717391  
70.8007246  
70.8242754  
70.8586957  
70.9057971  
70.951087  
70.9836957  
71.0108696  
71.0117777  
71.0104213  
71.0036302  
71.0045383  
71.0108813  
71.0194887  
71.0170001  
71.035116  
71.0387392  
71.044174  
71.0550435  
71.0731595  
71.0894638  
71.0967102  
71.102145  
71.1220725  
71.1365653  
71.151058  
71.1746088  
71.1999711  
71.2217102  
71.2579421  
71.2996088

71.3376522  
71.3557682  
71.3756957  
71.3648285  
71.3544142  
71.3498875  
71.3563074  
71.3764638  
71.3984317  
71.4038688  
71.4201731  
71.4219847  
71.4129268  
71.3966224  
71.3640137  
71.3368398  
71.3169123  
71.2987963  
71.2933615  
71.2987963  
71.2987963  
71.2951731  
71.2951731  
71.282492  
71.2607528  
71.2372021  
71.215463  
71.1973471  
71.1846659  
71.1882891  
71.1973471  
71.2118398  
71.215463  
71.2263326  
71.2444485  
71.2679992  
71.2897384  
71.3132891  
71.3422746  
71.349521  
71.3458978  
71.3295934  
71.2969847  
71.2589413  
71.2190862

71.1919123  
71.1873809  
71.1887373  
71.1828473  
71.1765044  
71.1665383  
71.1434381  
71.1151296  
71.0662166  
71.0336079  
71.0082455  
70.9810716  
70.9520861  
70.9285354  
70.9049847  
70.881434  
70.8506368  
70.8216513  
70.7999122  
70.7745499  
70.7401296  
70.6906143  
70.6306823  
70.5853924  
70.5491606  
70.5044007  
70.4634904  
70.4540543  
70.4507323  
70.4392581  
70.4418961  
70.434421  
70.421511  
70.4251319  
70.4178855  
70.4196971  
70.4360014  
70.4704217  
70.5302043  
70.5803267  
70.6288639  
70.6774011  
70.7035198  
70.7058614  
70.7072972

70.7125826  
70.7076778  
70.7168128  
70.7356852  
70.7624832  
70.7867904  
70.8157759  
70.828457  
70.8266454  
70.8193991  
70.8103411  
70.8030947  
70.7813556  
70.7541817  
70.7070802  
70.6581672  
70.6001962  
70.5349788  
70.4878773  
70.4498339  
70.4154136  
70.3900512  
70.3755585  
70.3665005  
70.346573  
70.337515  
70.3320802  
70.3338918  
70.3302686  
70.3302686  
70.337515  
70.3574425  
70.3773701  
70.4009208  
70.4172252  
70.4462107  
70.4842541  
70.5241092  
70.5693991  
70.6219353  
70.6726599  
70.730631  
70.7940368  
70.8483846  
70.9081672



70.9696867  
71.0352822  
71.084424  
71.1279023  
71.1853434  
71.2316884  
71.2701077  
71.2856556  
71.2980333  
71.2944101  
71.2817289  
71.2654246  
71.254555  
71.2400623  
71.2183231  
71.1911492  
71.1549173  
71.1041927  
71.0631283  
71.0236491  
70.987793  
70.9689207  
70.9611443  
70.9633317  
70.9487845  
70.9240471  
70.8929691  
70.8795315  
70.8708494  
70.8556002  
70.8356727  
70.8139335  
70.794006  
70.7722669  
70.7432814  
70.7161074  
70.6871219  
70.678064  
70.6907451  
70.717919  
70.7505277  
70.7921944  
70.8356727  
70.8900205  
70.9425567

70.9806002  
70.9969045  
71.0113973  
71.0240785  
71.0403828  
71.0512524  
71.0639335  
71.0892959  
71.1146582  
71.1400205  
71.1563248  
71.1708176  
71.1708176  
71.1762524  
71.169006  
71.1545132  
71.1418321  
71.1291509  
71.1074118  
71.0675567  
70.9842466  
70.8900669  
70.7967929  
70.7032926  
70.6478102  
70.5841756  
70.5078598  
70.4353961  
70.369786  
70.322292  
70.2906493  
70.277802  
70.2780887  
70.2907699  
70.3179438  
70.3433061  
70.3596105  
70.3686684  
70.37048  
70.3668568  
70.3650452  
70.37048  
70.379538  
70.3904076  
70.4030887

70.4085235  
70.4103351  
70.3994655  
70.4051041  
70.4166305  
70.3963136  
70.3479396  
70.2907341  
70.2403221  
70.1917217  
70.151047  
70.1078814  
70.0606397  
70.0131715  
69.9677414  
69.9297841  
69.8795985  
69.8232988  
69.7540915  
69.7033669  
69.6490191  
69.5964828  
69.5403234  
69.4859756  
69.4406857  
69.4135118  
69.3953959  
69.3827147  
69.3381904  
69.2959305  
69.2518591  
69.2048438  
69.1639427  
69.1210035  
69.083952  
69.0423715  
69.0087168  
68.9755149  
68.942313  
68.9134137  
68.877268  
68.8415752  
68.8153933  
68.8244512  
68.8697179

68.9095498  
68.9430411  
68.9695125  
68.9749473  
68.9858168  
69.0057444  
69.0202371  
69.0423689  
69.0518195  
69.0454186  
69.04015  
69.0326169  
69.0126894  
68.9909503  
68.9855155  
68.9818923  
68.9746459  
68.9855155  
69.005443  
69.0199358  
69.0362401  
69.0489213  
69.0597908  
69.0652256  
69.0670372  
69.054132  
69.0536814  
69.0511928  
69.0489306  
69.0703595  
69.099714  
69.1188784  
69.1398543  
69.1526781  
69.1797682  
69.2338034  
69.3009726  
69.3496592  
69.4028748  
69.4560904  
69.4970777  
69.5342154  
69.5834951  
69.6070459  
69.6305966

69.6487125  
69.6595821  
69.677698  
69.6940024  
69.6994372  
69.695814  
69.6795096  
69.6733093  
69.6612213  
69.6527565  
69.627308  
69.5939338  
69.5625976  
69.5271854  
69.4944905  
69.4611163  
69.4272891  
69.3825925  
69.339028  
69.2972752  
69.2641274  
69.2323383  
69.1888601  
69.1544398  
69.1363238  
69.1327006  
69.130889  
69.1272659  
69.1200195  
69.1073383  
69.0964688  
69.0747296  
69.0529905  
69.0312514  
68.9986427  
68.9551644  
68.9134977  
68.8718311  
68.8337876  
68.8048021  
68.7957441  
68.7848746  
68.783063  
68.7975557  
68.8174833

68.8591499  
68.9008166  
68.9329387  
69.0035909  
69.0853368  
69.1691207  
69.2277687  
69.2504136  
69.273285  
69.2739643  
69.2624154  
69.2714734  
69.2986473  
69.3278593  
69.3695259  
69.4075694  
69.464322  
69.5145076  
69.5608435  
69.6153316  
69.6616675  
69.7015226  
69.7255488  
69.7337236  
69.7402194  
69.7475428  
69.751166  
69.7439197  
69.7258037  
69.6855819  
69.6523801  
69.6257452  
69.6065832  
69.60296  
69.621076  
69.6410035  
69.6645542  
69.6844818  
69.7062209  
69.7297716  
69.7515107  
69.7913658  
69.8275977  
69.8583948  
69.8564429

69.8474712  
69.8339704  
69.8179787  
69.8197902  
69.8179787  
69.8270366  
69.8306598  
69.8306598  
69.834283  
69.8360946  
69.834283  
69.8288482  
69.8270366  
69.8306598  
69.8505873  
69.8687033  
69.892254  
69.9067468  
69.9176163  
69.9084181  
69.8994463  
69.8857191  
69.8647455  
69.8417338  
69.8024178  
69.7590257  
69.7504543  
69.7033529  
69.6508166  
69.5855992  
69.542121  
69.5344194  
69.5360022  
69.5579654  
69.6003091  
69.6224988  
69.6401595  
69.6517061  
69.6299669  
69.6009814  
69.5792423  
69.5593148  
69.5285177  
69.4940974  
69.4723582

69.4433727  
69.4374624  
69.4528384  
69.4717049  
69.493367  
69.5060481  
69.5603959  
69.6491641  
69.7745308  
69.9037471  
70.0408892  
70.1615005  
70.2333711  
70.2930134  
70.3488061  
70.3968996  
70.4463517  
70.4958038  
70.5371038  
70.5842052  
70.6131907  
70.6331182  
70.6512342  
70.6894179  
70.7165057  
70.7209485  
70.7133895  
70.675346  
70.6445489  
70.608317  
70.5865779  
70.5738967  
70.5575924  
70.5394764  
70.5286069  
70.5231721  
70.5213605  
70.5195489  
70.5159257  
70.5123025  
70.501433  
70.4815054  
70.4597663  
70.4526602  
70.4489508



70.4391273  
70.423869  
70.4015908  
70.3738778  
70.3448061  
70.2868351  
70.2397337  
70.2216177  
70.207125  
70.198067  
70.189009  
70.1654583  
70.1382844  
70.1147337  
70.091183  
70.0621975  
70.0332119  
70.0078496  
69.9824873  
69.9589366  
69.9371975  
69.9208931  
69.9136467  
69.9082119  
69.9045888  
69.899154  
69.8846612  
69.8701685  
69.8611105  
69.8665453  
69.8448061  
69.8085743  
69.7446819  
69.6830541  
69.6216527  
69.5711209  
69.5506206  
69.5296675  
69.5062234  
69.4823264  
69.4781641  
69.4758135  
69.4743686  
69.4598758  
69.463499

69.4779918  
69.5051657  
69.5540787  
69.6048034  
69.6682092  
69.7352382  
69.8058903  
69.8783541  
69.9508179  
70.02147  
70.0866874  
70.1446584  
70.2062526  
70.2660353  
70.3203831  
70.3711077  
70.4200208  
70.4394618  
70.4738821  
70.5064907  
70.5554038  
70.6097516  
70.6713458  
70.7311284  
70.7669845  
70.8086512  
70.8303903  
70.853941  
70.8684338  
70.8883613  
70.9010425  
70.8901729  
70.8756801  
70.8684338  
70.8648106  
70.8738685  
70.8847381  
70.8883613  
70.8974193  
70.9010425  
70.902854  
70.9046656  
70.9082888  
70.9010425  
70.8811149

70.8684338  
70.8503178  
70.8322019  
70.8177091  
70.8032164  
70.786912  
70.7669845  
70.728941  
70.6836512  
70.6492309  
70.6008569  
70.5842195  
70.5488638  
70.5187165  
70.4985329  
70.4778965  
70.4599774  
70.4461345  
70.4291212  
70.4005254  
70.3800817  
70.3668845  
70.3735286  
70.3772288  
70.3752679  
70.3581348  
70.3228858  
70.2966947  
70.2741269  
70.2632573  
70.2505761  
70.2161558  
70.1781124  
70.1436921  
70.1092718  
70.0523994  
69.9977915  
69.9543132  
69.9090234  
69.8510523  
69.8003277  
69.7736403  
69.7301621  
69.6939302  
69.6450171

69.5924809  
69.5435679  
69.48922  
69.4551756  
69.4098857  
69.3845234  
69.3591611  
69.3356104  
69.3084364  
69.2776393  
69.2685814  
69.2577118  
69.2414075  
69.2232915  
69.2087988  
69.1979292  
69.1888712  
69.1761901  
69.1707553  
69.1725669  
69.1725669  
69.1816248  
69.194306  
69.2160451  
69.2377843  
69.2450306  
69.2486538  
69.2432191  
69.2395959  
69.2131616  
69.1824247  
69.1732006  
69.1646558  
69.1520349  
69.1535941  
69.1420193  
69.1450866  
69.1490597  
69.1428426  
69.1427396  
69.1338051  
69.1230591  
69.1170684  
69.1257367  
69.120818

69.1231457  
69.1110668  
69.0946854  
69.0821536  
69.0775476  
69.0711299  
69.0610891  
69.047425  
69.0184395  
68.9930772  
68.9803961  
68.9695265  
68.949599  
68.9260482  
68.9243305  
68.9354602  
68.9445182  
68.9644457  
69.0024892  
69.0332863  
69.0586486  
69.0673399  
69.0705963  
69.0754379  
69.0917423  
69.0881191  
69.0917423  
69.0989887  
69.115293  
69.1352205  
69.1551481  
69.1877568  
69.2221771  
69.258409  
69.2801481  
69.3055104  
69.3344959  
69.3598582  
69.3815974  
69.3924669  
69.4142061  
69.4359452  
69.4649307  
69.490293  
69.5174669

69.5337713  
69.5446408  
69.557322  
69.5718148  
69.6008003  
69.6279742  
69.6623945  
69.6968148  
69.7558577  
69.8264496  
69.8682825  
69.900378  
69.9238685  
69.9453209  
69.9649617  
69.9809793  
69.9779752  
69.9697628  
69.9536246  
69.9436006  
69.9376526  
69.9292137  
69.8984166  
69.8658079  
69.8205181  
69.7788514  
69.7426195  
69.7009529  
69.6665326  
69.6375471  
69.6121847  
69.5850108  
69.5614601  
69.5324746  
69.5034891  
69.4835616  
69.4618224  
69.4364601  
69.4225864  
69.3917893  
69.3537459  
69.3157024  
69.2740357  
69.2396154  
69.2124415

69.2037503  
69.1932474  
69.192029  
69.1775362  
69.1847826  
69.1847826  
69.1865942  
69.1938406  
69.1777853  
69.1639945  
69.1425044  
69.1207879  
69.0990714  
69.0696556  
69.0506564  
69.0302986  
69.0117524  
68.9936591  
69.0135866  
69.0407605  
69.0896735  
69.136775  
69.1530793  
69.1546668  
69.1544427  
69.1530864  
69.136105  
69.1177649  
69.0831205  
69.0482497  
69.0083946  
68.9721627  
68.9323077  
68.890641  
68.8652787  
68.8435395  
68.8199888  
68.8000613  
68.7837569  
68.7602062  
68.7402787  
68.7420903  
68.7638294  
68.7891917  
68.814554

68.8507859  
68.9015106  
68.9631048  
69.0228874  
69.0772352  
69.1261482  
69.1804961  
69.2257859  
69.2674526  
69.3109309  
69.3616555  
69.4087569  
69.4303299  
69.4500912  
69.4666823  
69.487123  
69.5109605  
69.5332128  
69.5839374  
69.6400968  
69.6980678  
69.7578504  
69.8140099  
69.8665461  
69.9154591  
69.9643722  
69.9987925  
70.0241548  
70.0350244  
70.0386475  
70.0386475  
70.0295896  
70.0402101  
70.0558125  
70.0791141  
70.1062654  
70.1352283  
70.1755137  
70.2017592  
70.231175  
70.2515328  
70.2714378  
70.2551334  
70.2261479  
70.1609305



70.083032  
70.0250609  
69.9727488  
69.9095671  
69.8511409  
69.8029049  
69.7560275  
69.7254545  
69.7059776  
69.6914848  
69.704166  
69.7349631  
69.7675718  
69.7947457  
69.8146732  
69.8364123  
69.8309776  
69.8128616  
69.8056152  
69.8056152  
69.7893109  
69.7548906  
69.7039998  
69.6594495  
69.6135406  
69.5588002  
69.5124383  
69.4715113  
69.4446241  
69.4297387  
69.4168914  
69.4162723  
69.4156532  
69.4283344  
69.4174648  
69.4065952  
69.4121962  
69.4196088  
69.4229452  
69.4260552  
69.4384497  
69.4506177  
69.4379365  
69.4107626  
69.3745307

69.3346756  
69.2767046  
69.2114872  
69.1462698  
69.0683713  
68.9922843  
68.9198206  
68.85098  
68.7911974  
68.7422843  
68.6879365  
68.6480814  
68.6027916  
68.5484438  
68.4959075  
68.4415597  
68.3799655  
68.3201829  
68.2549655  
68.2006177  
68.1462698  
68.1027916  
68.0611249  
68.033951  
68.0122119  
68.0140235  
68.0230814  
68.0538785  
68.10098  
68.1553278  
68.2277916  
68.3020669  
68.3799655  
68.4578641  
68.4977191  
68.5194583  
68.5321394  
68.5393858  
68.5556901  
68.5611249  
68.5846756  
68.6190959  
68.6517046  
68.6897481  
68.7440959

68.8075017  
68.8819433  
68.9326847  
68.9732359  
69.005635  
69.0278438  
69.0584313  
69.0835839  
69.0734337  
69.0607925  
69.0445281  
69.0266016  
68.9833729  
68.9688802  
68.9453294  
68.9398947  
68.9290251  
68.9181555  
68.9036628  
68.8837352  
68.8619961  
68.840257  
68.8185179  
68.7784966  
68.767627  
68.7748734  
68.7893662  
68.8183517  
68.8636415  
68.9234241  
68.9868299  
69.0466125  
69.1082067  
69.160743  
69.2033386  
69.2413821  
69.2739908  
69.3102227  
69.3373966  
69.3573241  
69.3754401  
69.3917444  
69.3917444  
69.3718169  
69.344643

69.3156575  
69.2794256  
69.2450053  
69.210585  
69.1725415  
69.1417444  
69.1200053  
69.0982662  
69.076527  
69.0294256  
68.9841357  
68.9279763  
68.8790633  
68.8410198  
68.8120343  
68.7830488  
68.7631212  
68.7341357  
68.7087734  
68.6906575  
68.6797879  
68.6870343  
68.6797879  
68.661672  
68.6326865  
68.5982662  
68.5775822  
68.5392237  
68.5090288  
68.4715876  
68.4148982  
68.3459806  
68.300364  
68.2461424  
68.1778809  
68.1130933  
68.053061  
67.986032  
67.9316842  
67.8737132  
67.8302349  
67.7940031  
67.7595828  
67.6979886  
67.6363944

67.5748002  
67.5168291  
67.482575  
67.415546  
67.357575  
67.3014156  
67.2380098  
67.174604  
67.1039518  
67.0441692  
66.9880098  
66.9264156  
66.8720678  
66.8367185  
66.7968634  
66.7642547  
66.7334576  
66.7153417  
66.7044721  
66.7026605  
66.7171533  
66.7515736  
66.807733  
66.8675156  
66.9272982  
66.990704  
67.0450518  
67.0885301  
67.1102692  
67.1193272  
67.1138924  
67.1102692  
67.1084576  
67.115704  
67.115704  
67.1084576  
67.0957765  
67.066791  
67.0341823  
67.0106316  
66.9925156  
66.9870808  
67.0051968  
67.0287475  
67.0432403

67.0396171  
67.0559214  
67.0722258  
67.0921533  
67.1193272  
67.1483127  
67.201087  
67.2572464  
67.3297101  
67.4293478  
67.5416667  
67.6302309  
67.7217391  
67.8125678  
67.8975089  
67.975883  
68.0422552  
68.1129074  
68.1600088  
68.1962407  
68.2270378  
68.2614581  
68.3248639  
68.3900813  
68.4552987  
68.5187045  
68.5839219  
68.6527625  
68.7270378  
68.8013132  
68.864719  
68.9299364  
68.9933422  
69.0440668  
69.0848509  
69.1217853  
69.1537378  
69.1752737  
69.1850342  
69.1859632  
69.1968327  
69.2004559  
69.2095139  
69.2113255  
69.2040791

69.1950211  
69.1805284  
69.1714704  
69.1660356  
69.1388617  
69.1189342  
69.1080646  
69.1008182  
69.0935718  
69.0845139  
69.0627747  
69.0265429  
68.9830646  
68.9296828  
68.8821888  
68.8325059  
68.8065278  
68.7744323  
68.7325994  
68.6871434  
68.6362526  
68.5812857  
68.5106938  
68.4378374  
68.3563759  
68.2534018  
68.1425019  
68.029564  
67.944419  
67.8647089  
67.7849987  
67.7143466  
67.6206198  
67.5053803  
67.3828944  
67.2816721  
67.1883756  
67.1152331  
67.0543188  
67.0076708  
66.9709866  
66.9492475  
66.9383779  
66.9220735  
66.9003344

66.8749721  
66.844175  
66.8115663  
66.7753344  
66.7409141  
66.7046822  
66.6666388  
66.6014214  
66.5343924  
66.4727982  
66.411204  
66.3423634  
66.2753344  
66.2164344  
66.1686304  
66.118562  
66.0770986  
66.0455989  
66.0156845  
65.9794526  
65.9559018  
65.9269163  
65.9069888  
65.8906845  
65.8707569  
65.8598874  
65.8363366  
65.8037279  
65.785612  
65.7566265  
65.7294526  
65.7077134  
65.6914091  
65.6732932  
65.660612  
65.6624236  
65.6660468  
65.6777619  
65.6890241  
65.6988519  
65.7012792  
65.709824  
65.7262945  
65.751823  
65.7845979



65.7997097  
65.828635  
65.8688827  
65.9231702  
65.9899125  
66.0627689  
66.1322286  
66.1757068  
66.2191851  
66.2626633  
66.2753445  
66.2966076  
66.3212673  
66.3477387  
66.3785126  
66.4056634  
66.4260206  
66.4454721  
66.4644706  
66.4818841  
66.4836957  
66.5  
66.5235507  
66.557971  
66.5942029  
66.6322464  
66.6721014  
66.7101449  
66.7481884  
66.7862319  
66.8188406  
66.8677536  
66.9130435  
66.9601449  
67  
67.048913  
67.0960145  
67.1485507  
67.201087  
67.2572464  
67.3115942  
67.3641304  
67.4275362  
67.4927536  
67.5507246

67.6123188  
67.6630435  
67.7028986  
67.7463768  
67.7862319  
67.8193537  
67.8563252  
67.8803891  
67.9112465  
67.9400658  
67.9668471  
67.9977045  
68.0303735  
68.0533051  
68.0624233  
68.078788  
68.0983229  
68.1137817  
68.1369398  
68.1605508  
68.1843882  
68.2021115  
68.2153059  
68.2232919  
68.2407887  
68.263041  
68.3101425  
68.3572439  
68.406157  
68.4514468  
68.5021715  
68.5565193  
68.6108671  
68.6797077  
68.772099  
68.8699251  
68.9659396  
69.0528961  
69.1344178  
69.1906634  
69.2272079  
69.2422398  
69.2487602  
69.2506289  
69.2316933

69.2070965  
69.1786501  
69.1409193  
69.1036413  
69.0663634  
69.0209332  
68.9793527  
68.9400367  
68.9007208  
68.8928812  
68.8818714  
68.8744847  
68.8691361  
68.8902821  
68.9136925  
68.9468403  
68.982479  
69.0185706  
69.0589648  
69.1278054  
69.1948344  
69.2600517  
69.3216459  
69.3868633  
69.42853  
69.4403285  
69.4498626  
69.4514709  
69.4435684  
69.4455693  
69.4538877  
69.4787368  
69.5022273  
69.5205094  
69.5372064  
69.5443925  
69.5289569  
69.5198618  
69.5150693  
69.5009923  
69.493256  
69.4873312  
69.4569499  
69.4204545  
69.3984287

69.3861401  
69.376569  
69.3631482  
69.3438398  
69.3197759  
69.2544091  
69.1855489  
69.1300935  
69.0734179  
69.0176482  
68.9682191  
68.9692019  
68.9406061  
68.9056697  
68.8598638  
68.808623  
68.7569294  
68.7070474  
68.6991216  
68.7054622  
68.7151995  
68.729825  
68.7678114  
68.8266021  
68.8928655  
68.9666018  
69.038753  
69.1086396  
69.1676567  
69.21671  
69.2582905  
69.2794905  
69.2843863  
69.2632403  
69.2380182  
69.2019266  
69.1565506  
69.075622  
68.9851826  
68.8813826  
68.7750918  
68.6611016  
68.5391857  
68.3924466  
68.2438958

68.0971567  
67.9449828  
67.7873741  
67.6605625  
67.5618074  
67.4707517  
67.38581  
67.3103792  
67.2444593  
67.1756187  
67.1158361  
67.0705462  
67.0343144  
66.9890245  
66.950981  
66.9355593  
66.9162879  
66.8974694  
66.9006166  
66.8960644  
66.8955883  
66.9173043  
66.9410582  
66.9483046  
66.9519278  
66.9410582  
66.9265655  
66.9156959  
66.875927  
66.8670184  
66.8597917  
66.8572761  
66.8496064  
66.8412573  
66.843585  
66.7918775  
66.7480096  
66.7014242  
66.6602736  
66.6136883  
66.5748022  
66.5395393  
66.4875963  
66.4284068  
66.3909565

66.3553178  
66.3064048  
66.2538685  
66.2013323  
66.1252454  
66.0473468  
65.9676367  
65.8951729  
65.8372019  
65.7737961  
65.7230714  
65.6868396  
65.6524193  
65.6198106  
65.6016946  
65.6016946  
65.617999  
65.6397381  
65.6651004  
65.6995207  
65.6937216  
65.7000645  
65.7091248  
65.723167  
65.7317744  
65.7328122  
65.7359849  
65.7305524  
65.7287432  
65.7373506  
65.7495812  
65.7604531  
65.7597761  
65.7631751  
65.7615923  
65.7507251  
65.7380463  
65.7457479  
65.7554876  
65.7774555  
65.801235  
65.8367899  
65.8562668  
65.8875192  
65.9149219

65.9407394  
65.9604428  
65.9778818  
66.0249832  
66.088389  
66.1407214  
66.1912422  
66.265454  
66.3451642  
66.4248743  
66.4846569  
66.5490021  
66.6167441  
66.6565992  
66.6946427  
66.7381209  
66.7797876  
66.8250774  
66.8830485  
66.9392079  
66.9917441  
67.0352224  
67.0805122  
67.1113093  
67.1421064  
67.1656572  
67.1819615  
67.1964543  
67.2308745  
67.2725412  
67.3105847  
67.3522514  
67.4084108  
67.4754398  
67.5352455  
67.5975423  
67.6698028  
67.7413839  
67.8163618  
67.8847727  
67.9491075  
68.0007611  
68.0451683  
68.0725919  
68.1357059

68.1846398  
68.2313092  
68.284772  
68.342311  
68.4173833  
68.4871505  
68.5512565  
68.6429893  
68.7197764  
68.7872792  
68.8423272  
68.8985074  
68.9352131  
68.9655781  
68.9900555  
69.0100039  
69.0236117  
69.0378988  
69.0399577  
69.0614681  
69.0784494  
69.0933927  
69.1019955  
69.0963319  
69.0741375  
69.0489993  
69.0225024  
68.9609082  
68.8956908  
68.854228  
68.8254463  
68.801873  
68.7656411  
68.7312208  
68.6913658  
68.6551339  
68.6152788  
68.5844817  
68.5554962  
68.5246991  
68.4993368  
68.4830324  
68.4685397  
68.4576701  
68.4540469



68.4631049  
68.4703513  
68.4739744  
68.4739744  
68.4721629  
68.4721629  
68.4576701  
68.435931  
68.4141918  
68.3942643  
68.3725252  
68.3362933  
68.3036846  
68.2855455  
68.266727  
68.2415679  
68.2116535  
68.1783422  
68.1407285  
68.1035676  
68.0863343  
68.0854053  
68.0869673  
68.0912466  
68.097564  
68.0979937  
68.0920829  
68.0839075  
68.06758  
68.03993  
68.0138651  
67.9583619  
67.9019528  
67.851205  
67.8138515  
67.7897614  
67.7836579  
67.7816305  
67.7857172  
67.7943328  
67.7992606  
67.807941  
67.8186918  
67.8120615  
67.7976672

67.7812026  
67.7546448  
67.7443913  
67.7444898  
67.7515758  
67.782989  
67.8180254  
67.8352046  
67.8430671  
67.8382484  
67.8197134  
67.7825448  
67.7438234  
67.7004436  
67.6467119  
67.6035909  
67.5545176  
67.5033738  
67.4620644  
67.427225  
67.4037728  
67.3865317  
67.3858538  
67.3815527  
67.37544  
67.3807145  
67.3932354  
67.4013566  
67.4066311  
67.4175992  
67.4394368  
67.4581688  
67.4688781  
67.4852809  
67.4890026  
67.4903951  
67.4923052  
67.494474  
67.4966429  
67.501141  
67.5051215  
67.4992676  
67.4975545  
67.4917006  
67.4806707

67.4621357  
67.449553  
67.4465459  
67.4476796  
67.4524365  
67.4574521  
67.4585858  
67.4698127  
67.4877683  
67.499254  
67.5249736  
67.5669975  
67.6134211  
67.6548289  
67.6941664  
67.7272927  
67.7376447  
67.7417855  
67.7376447  
67.7417855  
67.7397151  
67.7355743  
67.7293631  
67.7293631  
67.7335039  
67.7479966  
67.7645598  
67.7894045  
67.8266716  
67.8453051  
67.8680794  
67.9053465  
67.9426136  
67.9902327  
68.0461333  
68.1041043  
68.1662161  
68.2490318  
68.3421995  
68.3744429  
68.4266351  
68.4670165  
68.502128  
68.5295288  
68.5376965

68.5393207  
68.5225642  
68.5052583  
68.4873755  
68.464044  
68.4399078  
68.4224436  
68.4145598  
68.4037919  
68.3926251  
68.3945141  
68.4047175  
68.4125199  
68.4406343  
68.4757273  
68.50633  
68.5351955  
68.565316  
68.5904259  
68.6231708  
68.6674054  
68.7069437  
68.7553794  
68.8026654  
68.8560394  
68.9047037  
68.9482765  
68.9863335

| Time     | Person 15  | Person 3   | Person 1   | Person 13 | Person 4 |
|----------|------------|------------|------------|-----------|----------|
| 16:01:42 | 75.6408647 | 70.1179467 | 80.2705783 |           |          |
| 16:01:43 | 72.6408647 | 70.1179467 | 84.2705783 |           |          |
| 16:01:44 | 72.6408647 | 69.1179467 | 87.2705783 |           |          |
| 16:01:45 | 68.6408647 | 69.1179467 | 85.2705783 |           |          |
| 16:01:46 | 68.6408647 | 68.1179467 | 85.2705783 |           |          |
| 16:01:47 | 68.6408647 | 68.1179467 | 80.2705783 |           |          |
| 16:01:48 | 69.6408647 | 70.1179467 | 72.2705783 |           |          |
| 16:01:49 | 69.6408647 | 70.1179467 | 69.2705783 |           |          |
| 16:01:50 | 71.6408647 | 70.1179467 | 69.2705783 |           |          |
| 16:01:51 | 71.6408647 | 69.1179467 | 69.2705783 |           |          |
| 16:01:52 | 71.6408647 | 69.1179467 | 69.2705783 |           |          |
| 16:01:53 | 70.6408647 | 69.1179467 | 69.2705783 |           |          |
| 16:01:54 | 70.6408647 | 68.1179467 | 68.2705783 |           |          |
| 16:01:55 | 71.6408647 | 68.1179467 | 67.2705783 |           |          |
| 16:01:56 | 71.6408647 | 67.1179467 | 66.2705783 |           |          |
| 16:01:57 | 72.6408647 | 67.1179467 | 66.2705783 |           |          |
| 16:01:58 | 73.6408647 | 68.1179467 | 66.2705783 |           |          |
| 16:01:59 | 73.6408647 | 68.1179467 | 66.2705783 |           |          |
| 16:02:00 | 72.6408647 | 68.1179467 | 66.2705783 |           |          |
| 16:02:01 | 72.6408647 | 68.1179467 | 66.2705783 |           |          |
| 16:02:02 | 71.6408647 | 68.1179467 | 66.2705783 |           |          |
| 16:02:03 | 71.6408647 | 70.1179467 | 66.2705783 |           |          |
| 16:02:04 | 71.6408647 | 72.1179467 | 67.2705783 |           |          |
| 16:02:05 | 71.6408647 | 72.1179467 | 67.2705783 |           |          |
| 16:02:06 | 71.6408647 | 73.1179467 | 69.2705783 |           |          |
| 16:02:07 | 71.6408647 | 73.1179467 | 69.2705783 |           |          |
| 16:02:08 | 71.6408647 | 73.1179467 | 70.2705783 |           |          |
| 16:02:09 | 71.6408647 | 72.1179467 | 69.2705783 |           |          |
| 16:02:10 | 72.6408647 | 72.1179467 | 69.2705783 |           |          |
| 16:02:11 | 72.6408647 | 71.1179467 | 68.2705783 |           |          |
| 16:02:12 | 72.6408647 | 71.1179467 | 67.2705783 |           |          |
| 16:02:13 | 72.6408647 | 72.1179467 | 67.2705783 |           |          |
| 16:02:14 | 72.6408647 | 72.1179467 | 67.2705783 |           |          |
| 16:02:15 | 72.6408647 | 72.1179467 | 68.2705783 |           |          |
| 16:02:16 | 72.6408647 | 72.1179467 | 68.2705783 |           |          |
| 16:02:17 | 72.6408647 | 73.1179467 | 68.2705783 |           |          |
| 16:02:18 | 72.6408647 | 73.1179467 | 70.2705783 |           |          |
| 16:02:19 | 72.6408647 | 73.1179467 | 70.2705783 |           |          |
| 16:02:20 | 72.6408647 | 73.1179467 | 70.2705783 |           |          |
| 16:02:21 | 72.6408647 | 73.1179467 | 70.2705783 |           |          |
| 16:02:22 | 73.6408647 | 73.1179467 | 69.2705783 |           |          |
| 16:02:23 | 73.6408647 | 76.1179467 | 69.2705783 |           |          |

|          |            |            |            |            |            |
|----------|------------|------------|------------|------------|------------|
| 16:02:24 | 72.6408647 | 76.1179467 | 68.2705783 |            |            |
| 16:02:25 | 72.6408647 | 76.1179467 | 67.2705783 | 70.6228432 |            |
| 16:02:26 | 71.6408647 | 75.1179467 | 66.2705783 | 68.6228432 |            |
| 16:02:27 | 71.6408647 | 75.1179467 | 66.2705783 | 68.6228432 |            |
| 16:02:28 | 71.6408647 | 74.1179467 | 66.2705783 | 68.6228432 |            |
| 16:02:29 | 74.6408647 | 74.1179467 | 65.2705783 | 68.6228432 |            |
| 16:02:30 | 76.6408647 | 74.1179467 | 65.2705783 | 68.6228432 |            |
| 16:02:31 | 77.6408647 | 79.1179467 | 65.2705783 | 67.6228432 |            |
| 16:02:32 | 78.6408647 | 79.1179467 | 65.2705783 | 67.6228432 |            |
| 16:02:33 | 78.6408647 | 78.1179467 | 65.2705783 | 67.6228432 |            |
| 16:02:34 | 75.6408647 | 74.1179467 | 65.2705783 | 67.6228432 |            |
| 16:02:35 | 75.6408647 | 69.1179467 | 65.2705783 | 67.6228432 |            |
| 16:02:36 | 72.6408647 | 68.1179467 | 65.2705783 | 67.6228432 |            |
| 16:02:37 | 72.6408647 | 68.1179467 | 65.2705783 | 67.6228432 |            |
| 16:02:38 | 72.6408647 | 68.1179467 | 65.2705783 | 67.6228432 |            |
| 16:02:39 | 72.6408647 | 68.1179467 | 65.2705783 | 67.6228432 |            |
| 16:02:40 | 72.6408647 | 70.1179467 | 65.2705783 | 67.6228432 |            |
| 16:02:41 | 72.6408647 | 71.1179467 | 65.2705783 | 67.6228432 |            |
| 16:02:42 | 70.6408647 | 71.1179467 | 64.2705783 | 67.6228432 |            |
| 16:02:43 | 70.6408647 | 73.1179467 | 64.2705783 | 68.6228432 |            |
| 16:02:44 | 70.6408647 | 73.1179467 | 64.2705783 | 67.6228432 |            |
| 16:02:45 | 70.6408647 | 73.1179467 | 64.2705783 | 63.6228432 |            |
| 16:02:46 | 70.6408647 | 73.1179467 | 64.2705783 | 62.6228432 |            |
| 16:02:47 | 73.6408647 | 73.1179467 | 64.2705783 | 62.6228432 |            |
| 16:02:48 | 73.6408647 | 74.1179467 | 64.2705783 | 61.6228432 |            |
| 16:02:49 | 80.6408647 | 74.1179467 | 64.2705783 | 60.6228432 |            |
| 16:02:50 | 81.6408647 | 74.1179467 | 64.2705783 | 62.6228432 |            |
| 16:02:51 | 83.6408647 | 75.1179467 | 64.2705783 | 63.6228432 |            |
| 16:02:52 | 82.6408647 | 75.1179467 | 64.2705783 | 60.6228432 |            |
| 16:02:53 | 82.6408647 | 75.1179467 | 64.2705783 | 60.6228432 |            |
| 16:02:54 | 79.6408647 | 75.1179467 | 64.2705783 | 58.6228432 |            |
| 16:02:55 | 78.6408647 | 75.1179467 | 64.2705783 | 58.6228432 |            |
| 16:02:56 | 79.6408647 | 76.1179467 | 64.2705783 | 60.6228432 |            |
| 16:02:57 | 79.6408647 | 74.1179467 | 65.2705783 | 62.6228432 |            |
| 16:02:58 | 79.6408647 | 69.1179467 | 66.2705783 | 62.6228432 |            |
| 16:02:59 | 79.6408647 | 69.1179467 | 66.2705783 | 62.6228432 |            |
| 16:03:00 | 78.6408647 | 69.1179467 | 66.2705783 | 64.6228432 |            |
| 16:03:01 | 77.6408647 | 69.1179467 | 65.2705783 | 64.6228432 |            |
| 16:03:02 | 75.6408647 | 69.1179467 | 65.2705783 | 62.6228432 |            |
| 16:03:03 | 75.6408647 | 68.1179467 | 64.2705783 | 64.6228432 |            |
| 16:03:04 | 75.6408647 | 68.1179467 | 64.2705783 | 64.6228432 |            |
| 16:03:05 | 75.6408647 | 68.1179467 | 65.2705783 | 65.6228432 | 79.3935956 |
| 16:03:06 | 73.6408647 | 68.1179467 | 66.2705783 | 66.6228432 | 79.3935956 |
| 16:03:07 | 73.6408647 | 68.1179467 | 66.2705783 | 66.6228432 | 79.3935956 |
| 16:03:08 | 73.6408647 | 67.1179467 | 66.2705783 | 66.6228432 | 78.3935956 |

|          |            |            |            |            |            |
|----------|------------|------------|------------|------------|------------|
| 16:03:09 | 72.6408647 | 66.1179467 | 65.2705783 | 66.6228432 | 75.3935956 |
| 16:03:10 | 72.6408647 | 66.1179467 | 66.2705783 | 67.6228432 | 75.3935956 |
| 16:03:11 | 72.6408647 | 65.1179467 | 66.2705783 | 67.6228432 | 75.3935956 |
| 16:03:12 | 72.6408647 | 65.1179467 | 66.2705783 | 67.6228432 | 68.3935956 |
| 16:03:13 | 72.6408647 | 65.1179467 | 66.2705783 | 68.6228432 | 66.3935956 |
| 16:03:14 | 72.6408647 | 64.1179467 | 66.2705783 | 68.6228432 | 66.3935956 |
| 16:03:15 | 72.6408647 | 63.1179467 | 66.2705783 | 68.6228432 | 63.3935956 |
| 16:03:16 | 72.6408647 | 61.1179467 | 66.2705783 | 68.6228432 | 64.3935956 |
| 16:03:17 | 72.6408647 | 61.1179467 | 66.2705783 | 68.6228432 | 65.3935956 |
| 16:03:18 | 71.6408647 | 59.1179467 | 66.2705783 | 67.6228432 | 65.3935956 |
| 16:03:19 | 71.6408647 | 58.1179467 | 67.2705783 | 67.6228432 | 66.3935956 |
| 16:03:20 | 71.6408647 | 58.1179467 | 66.2705783 | 66.6228432 | 67.3935956 |
| 16:03:21 | 71.6408647 | 58.1179467 | 66.2705783 | 66.6228432 | 67.3935956 |
| 16:03:22 | 71.6408647 | 62.1179467 | 65.2705783 | 67.6228432 | 67.3935956 |
| 16:03:23 | 71.6408647 | 63.1179467 | 65.2705783 | 68.6228432 | 67.3935956 |
| 16:03:24 | 71.6408647 | 64.1179467 | 65.2705783 | 68.6228432 | 67.3935956 |
| 16:03:25 | 71.6408647 | 64.1179467 | 64.2705783 | 68.6228432 | 66.3935956 |
| 16:03:26 | 71.6408647 | 64.1179467 | 64.2705783 | 73.6228432 | 66.3935956 |
| 16:03:27 | 71.6408647 | 65.1179467 | 64.2705783 | 73.6228432 | 66.3935956 |
| 16:03:28 | 71.6408647 | 65.1179467 | 64.2705783 | 75.6228432 | 66.3935956 |
| 16:03:29 | 71.6408647 | 67.1179467 | 64.2705783 | 77.6228432 | 66.3935956 |
| 16:03:30 | 71.6408647 | 67.1179467 | 64.2705783 | 77.6228432 | 66.3935956 |
| 16:03:31 | 71.6408647 | 67.1179467 | 64.2705783 | 77.6228432 | 66.3935956 |
| 16:03:32 | 71.6408647 | 68.1179467 | 64.2705783 | 78.6228432 | 67.3935956 |
| 16:03:33 | 71.6408647 | 69.1179467 | 64.2705783 | 78.6228432 | 68.3935956 |
| 16:03:34 | 71.6408647 | 69.1179467 | 64.2705783 | 77.6228432 | 68.3935956 |
| 16:03:35 | 71.6408647 | 71.1179467 | 65.2705783 | 77.6228432 | 69.3935956 |
| 16:03:36 | 71.6408647 | 71.1179467 | 65.2705783 | 76.6228432 | 69.3935956 |
| 16:03:37 | 71.6408647 | 71.1179467 | 65.2705783 | 74.6228432 | 69.3935956 |
| 16:03:38 | 71.6408647 | 70.1179467 | 65.2705783 | 74.6228432 | 69.3935956 |
| 16:03:39 | 71.6408647 | 70.1179467 | 65.2705783 | 72.6228432 | 70.3935956 |
| 16:03:40 | 71.6408647 | 70.1179467 | 65.2705783 | 70.6228432 | 70.3935956 |
| 16:03:41 | 71.6408647 | 70.1179467 | 65.2705783 | 67.6228432 | 73.3935956 |
| 16:03:42 | 71.6408647 | 70.1179467 | 65.2705783 | 67.6228432 | 73.3935956 |
| 16:03:43 | 71.6408647 | 70.1179467 | 65.2705783 | 67.6228432 | 73.3935956 |
| 16:03:44 | 71.6408647 | 70.1179467 | 65.2705783 | 66.6228432 | 72.3935956 |
| 16:03:45 | 71.6408647 | 70.1179467 | 65.2705783 | 61.6228432 | 71.3935956 |
| 16:03:46 | 71.6408647 | 69.1179467 | 64.2705783 | 61.6228432 | 71.3935956 |
| 16:03:47 | 71.6408647 | 69.1179467 | 65.2705783 | 61.6228432 | 71.3935956 |
| 16:03:48 | 71.6408647 | 69.1179467 | 65.2705783 | 61.6228432 | 76.3935956 |
| 16:03:49 | 71.6408647 | 69.1179467 | 65.2705783 | 62.6228432 | 78.3935956 |
| 16:03:50 | 70.6408647 | 69.1179467 | 65.2705783 | 62.6228432 | 79.3935956 |
| 16:03:51 | 70.6408647 | 69.1179467 | 66.2705783 | 62.6228432 | 80.3935956 |
| 16:03:52 | 70.6408647 | 69.1179467 | 66.2705783 | 62.6228432 | 80.3935956 |
| 16:03:53 | 70.6408647 | 69.1179467 | 66.2705783 | 62.6228432 | 80.3935956 |

|          |            |            |            |            |            |
|----------|------------|------------|------------|------------|------------|
| 16:03:54 | 71.6408647 | 69.1179467 | 66.2705783 | 62.6228432 | 82.3935956 |
| 16:03:55 | 71.6408647 | 68.1179467 | 66.2705783 | 63.6228432 | 81.3935956 |
| 16:03:56 | 74.6408647 | 68.1179467 | 66.2705783 | 63.6228432 | 81.3935956 |
| 16:03:57 | 74.6408647 | 68.1179467 | 65.2705783 | 64.6228432 | 81.3935956 |
| 16:03:58 | 74.6408647 | 67.1179467 | 65.2705783 | 68.6228432 | 81.3935956 |
| 16:03:59 | 72.6408647 | 67.1179467 | 65.2705783 | 68.6228432 | 81.3935956 |
| 16:04:00 | 68.6408647 | 66.1179467 | 65.2705783 | 70.6228432 | 80.3935956 |
| 16:04:01 | 67.6408647 | 66.1179467 | 64.2705783 | 72.6228432 | 80.3935956 |
| 16:04:02 | 66.6408647 | 66.1179467 | 65.2705783 | 72.6228432 | 80.3935956 |
| 16:04:03 | 66.6408647 | 67.1179467 | 65.2705783 | 72.6228432 | 80.3935956 |
| 16:04:04 | 66.6408647 | 67.1179467 | 65.2705783 | 71.6228432 | 80.3935956 |
| 16:04:05 | 67.6408647 | 67.1179467 | 66.2705783 | 71.6228432 | 79.3935956 |
| 16:04:06 | 68.6408647 | 65.1179467 | 66.2705783 | 71.6228432 | 78.3935956 |
| 16:04:07 | 68.6408647 | 64.1179467 | 66.2705783 | 71.6228432 | 77.3935956 |
| 16:04:08 | 70.6408647 | 64.1179467 | 66.2705783 | 71.6228432 | 77.3935956 |
| 16:04:09 | 70.6408647 | 64.1179467 | 66.2705783 | 70.6228432 | 76.3935956 |
| 16:04:10 | 72.6408647 | 64.1179467 | 65.2705783 | 70.6228432 | 76.3935956 |
| 16:04:11 | 74.6408647 | 65.1179467 | 66.2705783 | 71.6228432 | 76.3935956 |
| 16:04:12 | 75.6408647 | 65.1179467 | 66.2705783 | 71.6228432 | 72.3935956 |
| 16:04:13 | 76.6408647 | 66.1179467 | 66.2705783 | 71.6228432 | 73.3935956 |
| 16:04:14 | 76.6408647 | 68.1179467 | 65.2705783 | 71.6228432 | 73.3935956 |
| 16:04:15 | 71.6408647 | 69.1179467 | 65.2705783 | 72.6228432 | 73.3935956 |
| 16:04:16 | 69.6408647 | 69.1179467 | 65.2705783 | 72.6228432 | 72.3935956 |
| 16:04:17 | 69.6408647 | 69.1179467 | 65.2705783 | 72.6228432 | 72.3935956 |
| 16:04:18 | 68.6408647 | 69.1179467 | 64.2705783 | 72.6228432 | 72.3935956 |
| 16:04:19 | 68.6408647 | 70.1179467 | 64.2705783 | 73.6228432 | 68.3935956 |
| 16:04:20 | 69.6408647 | 70.1179467 | 65.2705783 | 73.6228432 | 66.3935956 |
| 16:04:21 | 70.6408647 | 70.1179467 | 65.2705783 | 73.6228432 | 66.3935956 |
| 16:04:22 | 71.6408647 | 72.1179467 | 65.2705783 | 73.6228432 | 66.3935956 |
| 16:04:23 | 71.6408647 | 73.1179467 | 64.2705783 | 74.6228432 | 67.3935956 |
| 16:04:24 | 72.6408647 | 73.1179467 | 64.2705783 | 74.6228432 | 69.3935956 |
| 16:04:25 | 72.6408647 | 73.1179467 | 65.2705783 | 74.6228432 | 71.3935956 |
| 16:04:26 | 72.6408647 | 73.1179467 | 64.2705783 | 74.6228432 | 71.3935956 |
| 16:04:27 | 72.6408647 | 73.1179467 | 64.2705783 | 73.6228432 | 72.3935956 |
| 16:04:28 | 72.6408647 | 73.1179467 | 64.2705783 | 73.6228432 | 72.3935956 |
| 16:04:29 | 72.6408647 | 74.1179467 | 64.2705783 | 73.6228432 | 72.3935956 |
| 16:04:30 | 72.6408647 | 75.1179467 | 64.2705783 | 72.6228432 | 73.3935956 |
| 16:04:31 | 72.6408647 | 75.1179467 | 65.2705783 | 72.6228432 | 74.3935956 |
| 16:04:32 | 72.6408647 | 75.1179467 | 65.2705783 | 72.6228432 | 74.3935956 |
| 16:04:33 | 71.6408647 | 75.1179467 | 65.2705783 | 71.6228432 | 76.3935956 |
| 16:04:34 | 69.6408647 | 75.1179467 | 67.2705783 | 69.6228432 | 76.3935956 |
| 16:04:35 | 66.6408647 | 74.1179467 | 69.2705783 | 69.6228432 | 76.3935956 |
| 16:04:36 | 64.6408647 | 72.1179467 | 69.2705783 | 68.6228432 | 76.3935956 |
| 16:04:37 | 64.6408647 | 70.1179467 | 70.2705783 | 68.6228432 | 72.3935956 |
| 16:04:38 | 62.6408647 | 68.1179467 | 70.2705783 | 68.6228432 | 72.3935956 |



|          |            |            |            |            |            |
|----------|------------|------------|------------|------------|------------|
| 16:04:39 | 61.6408647 | 68.1179467 | 70.2705783 | 69.6228432 | 72.3935956 |
| 16:04:40 | 61.6408647 | 68.1179467 | 69.2705783 | 69.6228432 | 72.3935956 |
| 16:04:41 | 62.6408647 | 68.1179467 | 69.2705783 | 69.6228432 | 71.3935956 |
| 16:04:42 | 62.6408647 | 68.1179467 | 68.2705783 | 69.6228432 | 71.3935956 |
| 16:04:43 | 63.6408647 | 68.1179467 | 68.2705783 | 71.6228432 | 70.3935956 |
| 16:04:44 | 66.6408647 | 68.1179467 | 67.2705783 | 72.6228432 | 70.3935956 |
| 16:04:45 | 66.6408647 | 67.1179467 | 67.2705783 | 70.6228432 | 70.3935956 |
| 16:04:46 | 67.6408647 | 67.1179467 | 67.2705783 | 70.6228432 | 70.3935956 |
| 16:04:47 | 67.6408647 | 67.1179467 | 67.2705783 | 70.6228432 | 70.3935956 |
| 16:04:48 | 68.6408647 | 66.1179467 | 69.2705783 | 70.6228432 | 71.3935956 |
| 16:04:49 | 69.6408647 | 66.1179467 | 69.2705783 | 71.6228432 | 71.3935956 |
| 16:04:50 | 70.6408647 | 66.1179467 | 69.2705783 | 71.6228432 | 79.3935956 |
| 16:04:51 | 71.6408647 | 66.1179467 | 70.2705783 | 70.6228432 | 78.3935956 |
| 16:04:52 | 73.6408647 | 66.1179467 | 69.2705783 | 69.6228432 | 78.3935956 |
| 16:04:53 | 73.6408647 | 65.1179467 | 69.2705783 | 69.6228432 | 77.3935956 |
| 16:04:54 | 73.6408647 | 64.1179467 | 68.2705783 | 69.6228432 | 74.3935956 |
| 16:04:55 | 73.6408647 | 63.1179467 | 68.2705783 | 69.6228432 | 73.3935956 |
| 16:04:56 | 76.6408647 | 61.1179467 | 68.2705783 | 68.6228432 | 73.3935956 |
| 16:04:57 | 76.6408647 | 61.1179467 | 68.2705783 | 68.6228432 | 72.3935956 |
| 16:04:58 | 76.6408647 | 60.1179467 | 67.2705783 | 68.6228432 | 69.3935956 |
| 16:04:59 | 74.6408647 | 58.1179467 | 67.2705783 | 68.6228432 | 69.3935956 |
| 16:05:00 | 76.6408647 | 59.1179467 | 67.2705783 | 68.6228432 | 68.3935956 |
| 16:05:01 | 78.6408647 | 59.1179467 | 67.2705783 | 67.6228432 | 67.3935956 |
| 16:05:02 | 70.7064728 | 61.1179467 | 67.2705783 | 68.6228432 | 65.3935956 |
| 16:05:03 | 71.3731395 | 63.1179467 | 67.2705783 | 68.6228432 | 65.3935956 |
| 16:05:04 | 72.1509173 | 64.1179467 | 67.2705783 | 68.6228432 | 65.3935956 |
| 16:05:05 | 72.7064728 | 65.1179467 | 67.2705783 | 68.6228432 | 65.3935956 |
| 16:05:06 | 72.817584  | 65.1179467 | 66.2705783 | 68.6228432 | 65.3935956 |
| 16:05:07 | 72.9286951 | 65.1179467 | 66.2705783 | 68.6228432 | 65.3935956 |
| 16:05:08 | 72.9286951 | 65.1179467 | 66.2705783 | 68.6228432 | 65.3935956 |
| 16:05:09 | 73.2620284 | 65.1179467 | 66.2705783 | 69.6228432 | 65.3935956 |
| 16:05:10 | 73.7064728 | 68.1179467 | 66.2705783 | 70.6228432 | 65.3935956 |
| 16:05:11 | 73.5953617 | 68.1179467 | 66.2705783 | 70.6228432 | 65.3935956 |
| 16:05:12 | 72.4842506 | 68.1179467 | 66.2705783 | 71.6228432 | 64.3935956 |
| 16:05:13 | 72.5953617 | 68.1179467 | 67.2705783 | 73.6228432 | 61.3935956 |
| 16:05:14 | 72.1509173 | 66.1179467 | 67.2705783 | 75.6228432 | 61.3935956 |
| 16:05:15 | 85.6408647 | 66.1179467 | 67.2705783 | 77.6228432 | 61.3935956 |
| 16:05:16 | 83.6408647 | 66.1179467 | 66.2705783 | 77.6228432 | 61.3935956 |
| 16:05:17 | 82.6408647 | 66.1179467 | 65.2705783 | 78.6228432 | 61.3935956 |
| 16:05:18 | 82.6408647 | 61.1179467 | 65.2705783 | 75.6228432 | 62.3935956 |
| 16:05:19 | 80.6408647 | 61.1179467 | 65.2705783 | 73.6228432 | 62.3935956 |
| 16:05:20 | 79.6408647 | 61.1179467 | 65.2705783 | 71.6228432 | 62.3935956 |
| 16:05:21 | 75.6408647 | 61.1179467 | 65.2705783 | 69.6228432 | 61.3935956 |
| 16:05:22 | 74.6408647 | 61.1179467 | 65.2705783 | 69.6228432 | 62.3935956 |
| 16:05:23 | 70.6408647 | 61.1179467 | 65.2705783 | 68.6228432 | 65.3935956 |

|          |            |            |            |            |            |
|----------|------------|------------|------------|------------|------------|
| 16:05:24 | 70.6408647 | 61.1179467 | 65.2705783 | 68.6228432 | 66.3935956 |
| 16:05:25 | 70.6408647 | 61.1179467 | 65.2705783 | 68.6228432 | 66.3935956 |
| 16:05:26 | 70.6408647 | 61.1179467 | 65.2705783 | 68.6228432 | 67.3935956 |
| 16:05:27 | 69.6408647 | 63.1179467 | 64.2705783 | 69.6228432 | 69.3935956 |
| 16:05:28 | 69.6408647 | 64.1179467 | 64.2705783 | 69.6228432 | 72.3935956 |
| 16:05:29 | 69.6408647 | 64.1179467 | 64.2705783 | 69.6228432 | 72.3935956 |
| 16:05:30 | 68.6408647 | 64.1179467 | 65.2705783 | 69.6228432 | 74.3935956 |
| 16:05:31 | 68.6408647 | 64.1179467 | 65.2705783 | 69.6228432 | 74.3935956 |
| 16:05:32 | 68.6408647 | 64.1179467 | 65.2705783 | 72.6228432 | 74.3935956 |
| 16:05:33 | 68.6408647 | 64.1179467 | 64.2705783 | 72.6228432 | 80.3935956 |
| 16:05:34 | 68.6408647 | 64.1179467 | 64.2705783 | 72.6228432 | 80.3935956 |
| 16:05:35 | 68.6408647 | 64.1179467 | 65.2705783 | 72.6228432 | 82.3935956 |
| 16:05:36 | 66.6408647 | 64.1179467 | 65.2705783 | 72.6228432 | 71.3731395 |
| 16:05:37 | 66.6408647 | 64.1179467 | 64.2705783 | 74.6228432 | 71.4842506 |
| 16:05:38 | 66.6408647 | 65.1179467 | 64.2705783 | 76.6228432 | 72.3731395 |
| 16:05:39 | 66.6408647 | 65.1179467 | 64.2705783 | 77.6228432 | 72.817584  |
| 16:05:40 | 65.6408647 | 65.1179467 | 64.2705783 | 77.6228432 | 81.3935956 |
| 16:05:41 | 65.6408647 | 65.1179467 | 64.2705783 | 77.6228432 | 81.3935956 |
| 16:05:42 | 66.6408647 | 61.1179467 | 64.2705783 | 78.6228432 | 76.3935956 |
| 16:05:43 | 66.6408647 | 61.1179467 | 64.2705783 | 78.6228432 | 76.3935956 |
| 16:05:44 | 66.6408647 | 61.1179467 | 65.2705783 | 78.6228432 | 76.3935956 |
| 16:05:45 | 66.6408647 | 61.1179467 | 65.2705783 | 78.6228432 | 76.3935956 |
| 16:05:46 | 67.6408647 | 63.1179467 | 65.2705783 | 78.6228432 | 75.3935956 |
| 16:05:47 | 67.6408647 | 67.1179467 | 65.2705783 | 79.6228432 | 75.3935956 |
| 16:05:48 | 67.6408647 | 67.1179467 | 65.2705783 | 80.6228432 | 73.3935956 |
| 16:05:49 | 67.6408647 | 68.1179467 | 65.2705783 | 79.6228432 | 68.3935956 |
| 16:05:50 | 68.6408647 | 63.1179467 | 65.2705783 | 73.6228432 | 65.3935956 |
| 16:05:51 | 70.6408647 | 63.1179467 | 65.2705783 | 70.6228432 | 66.3935956 |
| 16:05:52 | 70.6408647 | 62.1179467 | 66.2705783 | 68.6228432 | 66.3935956 |
| 16:05:53 | 70.6408647 | 63.1179467 | 66.2705783 | 67.6228432 | 67.3935956 |
| 16:05:54 | 71.6408647 | 62.1179467 | 66.2705783 | 67.6228432 | 66.3935956 |
| 16:05:55 | 70.6408647 | 62.1179467 | 66.2705783 | 68.6228432 | 65.3935956 |
| 16:05:56 | 68.6408647 | 63.1179467 | 67.2705783 | 67.6228432 | 65.3935956 |
| 16:05:57 | 67.6408647 | 63.1179467 | 67.2705783 | 67.6228432 | 65.3935956 |
| 16:05:58 | 67.6408647 | 63.1179467 | 67.2705783 | 67.6228432 | 65.3935956 |
| 16:05:59 | 66.6408647 | 64.1179467 | 69.2705783 | 67.6228432 | 65.3935956 |
| 16:06:00 | 65.6408647 | 64.1179467 | 69.2705783 | 67.6228432 | 64.3935956 |
| 16:06:01 | 65.6408647 | 64.1179467 | 69.2705783 | 67.6228432 | 64.3935956 |
| 16:06:02 | 65.6408647 | 63.1179467 | 69.2705783 | 67.6228432 | 64.3935956 |
| 16:06:03 | 66.6408647 | 63.1179467 | 69.2705783 | 67.6228432 | 64.3935956 |
| 16:06:04 | 66.6408647 | 63.1179467 | 69.2705783 | 66.6228432 | 63.3935956 |
| 16:06:05 | 66.6408647 | 66.1179467 | 68.2705783 | 65.6228432 | 64.3935956 |
| 16:06:06 | 66.6408647 | 66.1179467 | 68.2705783 | 65.6228432 | 69.3935956 |
| 16:06:07 | 66.6408647 | 69.1179467 | 67.2705783 | 66.6228432 | 69.3935956 |
| 16:06:08 | 67.6408647 | 69.1179467 | 68.2705783 | 65.6228432 | 70.3935956 |

|          |            |            |            |            |            |
|----------|------------|------------|------------|------------|------------|
| 16:06:09 | 67.6408647 | 68.1179467 | 69.2705783 | 63.6228432 | 70.3935956 |
| 16:06:10 | 68.6408647 | 68.1179467 | 69.2705783 | 64.6228432 | 71.3935956 |
| 16:06:11 | 68.6408647 | 67.1179467 | 69.2705783 | 64.6228432 | 71.3935956 |
| 16:06:12 | 68.6408647 | 66.1179467 | 70.2705783 | 64.6228432 | 74.3935956 |
| 16:06:13 | 68.6408647 | 66.1179467 | 70.2705783 | 65.6228432 | 75.3935956 |
| 16:06:14 | 70.6408647 | 66.1179467 | 70.2705783 | 66.6228432 | 74.3935956 |
| 16:06:15 | 70.6408647 | 67.1179467 | 70.2705783 | 66.6228432 | 74.3935956 |
| 16:06:16 | 70.6408647 | 68.1179467 | 70.2705783 | 66.6228432 | 74.3935956 |
| 16:06:17 | 70.6408647 | 68.1179467 | 69.2705783 | 66.6228432 | 74.3935956 |
| 16:06:18 | 70.6408647 | 68.1179467 | 69.2705783 | 66.6228432 | 73.3935956 |
| 16:06:19 | 70.6408647 | 67.1179467 | 69.2705783 | 66.6228432 | 72.3935956 |
| 16:06:20 | 71.6408647 | 66.1179467 | 67.2705783 | 67.6228432 | 72.3935956 |
| 16:06:21 | 71.6408647 | 65.1179467 | 67.2705783 | 69.6228432 | 71.3935956 |
| 16:06:22 | 71.6408647 | 65.1179467 | 67.2705783 | 69.6228432 | 69.3935956 |
| 16:06:23 | 71.6408647 | 66.1179467 | 67.2705783 | 72.6228432 | 68.3935956 |
| 16:06:24 | 71.6408647 | 66.1179467 | 67.2705783 | 72.6228432 | 68.3935956 |
| 16:06:25 | 73.6408647 | 66.1179467 | 67.2705783 | 72.6228432 | 66.3935956 |
| 16:06:26 | 75.6408647 | 65.1179467 | 66.2705783 | 66.6228432 | 65.3935956 |
| 16:06:27 | 73.6408647 | 64.1179467 | 66.2705783 | 64.6228432 | 65.3935956 |
| 16:06:28 | 73.6408647 | 62.1179467 | 66.2705783 | 63.6228432 | 63.3935956 |
| 16:06:29 | 70.6408647 | 61.1179467 | 66.2705783 | 63.6228432 | 60.3935956 |
| 16:06:30 | 70.6408647 | 61.1179467 | 66.2705783 | 61.6228432 | 56.3935956 |
| 16:06:31 | 69.6408647 | 61.1179467 | 66.2705783 | 61.6228432 | 56.3935956 |
| 16:06:32 | 69.6408647 | 62.1179467 | 67.2705783 | 62.6228432 | 57.3935956 |
| 16:06:33 | 68.6408647 | 62.1179467 | 67.2705783 | 63.6228432 | 57.3935956 |
| 16:06:34 | 68.6408647 | 61.1179467 | 67.2705783 | 63.6228432 | 61.3935956 |
| 16:06:35 | 68.6408647 | 61.1179467 | 67.2705783 | 63.6228432 | 61.3935956 |
| 16:06:36 | 69.6408647 | 62.1179467 | 67.2705783 | 67.6228432 | 70.3935956 |
| 16:06:37 | 70.6408647 | 63.1179467 | 68.2705783 | 66.6228432 | 69.3935956 |
| 16:06:38 | 70.6408647 | 64.1179467 | 67.2705783 | 66.6228432 | 69.3935956 |
| 16:06:39 | 70.6408647 | 64.1179467 | 68.2705783 | 66.6228432 | 68.3935956 |
| 16:06:40 | 70.6408647 | 63.1179467 | 68.2705783 | 66.6228432 | 67.3935956 |
| 16:06:41 | 72.6408647 | 63.1179467 | 68.2705783 | 66.6228432 | 67.3935956 |
| 16:06:42 | 74.6408647 | 63.1179467 | 68.2705783 | 66.6228432 | 66.3935956 |
| 16:06:43 | 75.6408647 | 64.1179467 | 68.2705783 | 66.6228432 | 66.3935956 |
| 16:06:44 | 74.6408647 | 64.1179467 | 68.2705783 | 67.6228432 | 66.3935956 |
| 16:06:45 | 70.6408647 | 64.1179467 | 68.2705783 | 67.6228432 | 65.3935956 |
| 16:06:46 | 68.6408647 | 64.1179467 | 68.2705783 | 67.6228432 | 64.3935956 |
| 16:06:47 | 68.6408647 | 64.1179467 | 67.2705783 | 65.6228432 | 64.3935956 |
| 16:06:48 | 66.6408647 | 64.1179467 | 67.2705783 | 66.6228432 | 64.3935956 |
| 16:06:49 | 65.6408647 | 64.1179467 | 67.2705783 | 68.6228432 | 64.3935956 |
| 16:06:50 | 65.6408647 | 64.1179467 | 67.2705783 | 68.6228432 | 64.3935956 |
| 16:06:51 | 65.6408647 | 64.1179467 | 67.2705783 | 72.6228432 | 64.3935956 |
| 16:06:52 | 65.6408647 | 64.1179467 | 67.2705783 | 75.6228432 | 63.3935956 |
| 16:06:53 | 66.6408647 | 64.1179467 | 66.2705783 | 75.6228432 | 63.3935956 |

|          |            |            |            |            |            |
|----------|------------|------------|------------|------------|------------|
| 16:06:54 | 67.6408647 | 64.1179467 | 66.2705783 | 76.6228432 | 63.3935956 |
| 16:06:55 | 67.6408647 | 64.1179467 | 66.2705783 | 77.6228432 | 61.3935956 |
| 16:06:56 | 67.6408647 | 62.1179467 | 66.2705783 | 77.6228432 | 62.3935956 |
| 16:06:57 | 70.6408647 | 62.1179467 | 66.2705783 | 63.4842506 | 55.3935956 |
| 16:06:58 | 70.6408647 | 63.1179467 | 66.2705783 | 76.6228432 | 53.3935956 |
| 16:06:59 | 70.6408647 | 64.1179467 | 66.2705783 | 73.6228432 | 53.3935956 |
| 16:07:00 | 70.6408647 | 64.1179467 | 67.2705783 | 72.6228432 | 52.3935956 |
| 16:07:01 | 71.6408647 | 71.1179467 | 68.2705783 | 72.6228432 | 52.3935956 |
| 16:07:02 | 71.6408647 | 73.1179467 | 68.2705783 | 71.6228432 | 51.3935956 |
| 16:07:03 | 71.6408647 | 73.1179467 | 67.2705783 | 72.6228432 | 51.3935956 |
| 16:07:04 | 74.6408647 | 73.1179467 | 67.2705783 | 72.6228432 | 51.3935956 |
| 16:07:05 | 74.6408647 | 70.1179467 | 67.2705783 | 72.6228432 | 50.3935956 |
| 16:07:06 | 74.6408647 | 70.1179467 | 67.2705783 | 73.6228432 | 53.3935956 |
| 16:07:07 | 75.6408647 | 65.1179467 | 67.2705783 | 73.6228432 | 53.3935956 |
| 16:07:08 | 75.6408647 | 63.1179467 | 67.2705783 | 73.6228432 | 62.3935956 |
| 16:07:09 | 75.6408647 | 63.1179467 | 67.2705783 | 73.6228432 | 65.3935956 |
| 16:07:10 | 76.6408647 | 63.1179467 | 67.2705783 | 74.6228432 | 71.3935956 |
| 16:07:11 | 76.6408647 | 63.1179467 | 67.2705783 | 74.6228432 | 73.3935956 |
| 16:07:12 | 78.6408647 | 63.1179467 | 67.2705783 | 73.6228432 | 73.3935956 |
| 16:07:13 | 78.6408647 | 64.1179467 | 67.2705783 | 73.6228432 | 76.3935956 |
| 16:07:14 | 79.6408647 | 63.1179467 | 67.2705783 | 73.6228432 | 78.3935956 |
| 16:07:15 | 69.5953617 | 63.1179467 | 67.2705783 | 73.6228432 | 80.3935956 |
| 16:07:16 | 69.9286951 | 62.1179467 | 67.2705783 | 73.6228432 | 80.3935956 |
| 16:07:17 | 69.5953617 | 61.1179467 | 67.2705783 | 73.6228432 | 79.3935956 |
| 16:07:18 | 69.817584  | 61.1179467 | 66.2705783 | 69.6228432 | 79.3935956 |
| 16:07:19 | 69.7064728 | 60.1179467 | 66.2705783 | 69.6228432 | 76.3935956 |
| 16:07:20 | 69.7064728 | 60.1179467 | 66.2705783 | 69.6228432 | 73.3935956 |
| 16:07:21 | 70.1509173 | 60.1179467 | 67.2705783 | 69.6228432 | 73.3935956 |
| 16:07:22 | 70.817584  | 59.1179467 | 67.2705783 | 69.6228432 | 73.3935956 |
| 16:07:23 | 71.4842506 | 60.1179467 | 67.2705783 | 69.6228432 | 72.3935956 |
| 16:07:24 | 71.5953617 | 60.1179467 | 67.2705783 | 69.6228432 | 70.3935956 |
| 16:07:25 | 72.4842506 | 62.1179467 | 67.2705783 | 69.6228432 | 70.3935956 |
| 16:07:26 | 72.9286951 | 63.1179467 | 68.2705783 | 70.6228432 | 70.3935956 |
| 16:07:27 | 73.7064728 | 63.1179467 | 69.2705783 | 73.6228432 | 70.3935956 |
| 16:07:28 | 73.2620284 | 63.1179467 | 69.2705783 | 74.6228432 | 68.3935956 |
| 16:07:29 | 73.2620284 | 63.1179467 | 69.2705783 | 74.6228432 | 68.3935956 |
| 16:07:30 | 83.6408647 | 63.1179467 | 69.2705783 | 74.6228432 | 68.3935956 |
| 16:07:31 | 76.6408647 | 62.1179467 | 70.2705783 | 75.6228432 | 68.3935956 |
| 16:07:32 | 75.6408647 | 61.1179467 | 70.2705783 | 74.6228432 | 69.3935956 |
| 16:07:33 | 75.6408647 | 61.1179467 | 70.2705783 | 74.6228432 | 69.3935956 |
| 16:07:34 | 76.6408647 | 62.1179467 | 70.2705783 | 75.6228432 | 71.3935956 |
| 16:07:35 | 76.6408647 | 62.1179467 | 70.2705783 | 75.6228432 | 71.3935956 |
| 16:07:36 | 76.6408647 | 62.1179467 | 70.2705783 | 74.6228432 | 71.3935956 |
| 16:07:37 | 77.6408647 | 62.1179467 | 70.2705783 | 74.6228432 | 70.3935956 |
| 16:07:38 | 77.6408647 | 61.1179467 | 70.2705783 | 73.6228432 | 68.3935956 |

|          |            |            |            |            |            |
|----------|------------|------------|------------|------------|------------|
| 16:07:39 | 76.6408647 | 61.1179467 | 68.2705783 | 71.6228432 | 66.3935956 |
| 16:07:40 | 74.6408647 | 60.1179467 | 68.2705783 | 66.6228432 | 66.3935956 |
| 16:07:41 | 73.6408647 | 60.1179467 | 68.2705783 | 66.6228432 | 66.3935956 |
| 16:07:42 | 70.6408647 | 60.1179467 | 68.2705783 | 66.6228432 | 66.3935956 |
| 16:07:43 | 68.6408647 | 62.1179467 | 68.2705783 | 66.6228432 | 67.3935956 |
| 16:07:44 | 67.6408647 | 64.1179467 | 70.2705783 | 66.6228432 | 67.3935956 |
| 16:07:45 | 68.6408647 | 67.1179467 | 71.2705783 | 66.6228432 | 67.3935956 |
| 16:07:46 | 68.6408647 | 67.1179467 | 71.2705783 | 69.6228432 | 67.3935956 |
| 16:07:47 | 69.6408647 | 69.1179467 | 70.2705783 | 69.6228432 | 66.3935956 |
| 16:07:48 | 69.6408647 | 69.1179467 | 69.2705783 | 69.6228432 | 66.3935956 |
| 16:07:49 | 70.6408647 | 69.1179467 | 69.2705783 | 69.6228432 | 64.3935956 |
| 16:07:50 | 70.6408647 | 69.1179467 | 69.2705783 | 69.6228432 | 63.3935956 |
| 16:07:51 | 71.6408647 | 69.1179467 | 69.2705783 | 67.6228432 | 62.3935956 |
| 16:07:52 | 71.6408647 | 72.1179467 | 69.2705783 | 67.6228432 | 62.3935956 |
| 16:07:53 | 71.6408647 | 75.1179467 | 68.2705783 | 67.6228432 | 62.3935956 |
| 16:07:54 | 74.6408647 | 76.1179467 | 68.2705783 | 69.6228432 | 61.3935956 |
| 16:07:55 | 76.6408647 | 75.1179467 | 68.2705783 | 70.6228432 | 60.3935956 |
| 16:07:56 | 76.6408647 | 75.1179467 | 67.2705783 | 70.6228432 | 57.3935956 |
| 16:07:57 | 76.6408647 | 70.1179467 | 67.2705783 | 68.6228432 | 57.3935956 |
| 16:07:58 | 76.6408647 | 68.1179467 | 66.2705783 | 62.6228432 | 57.3935956 |
| 16:07:59 | 77.6408647 | 66.1179467 | 66.2705783 | 63.6228432 | 59.3935956 |
| 16:08:00 | 77.6408647 | 65.1179467 | 67.2705783 | 63.6228432 | 60.3935956 |
| 16:08:01 | 76.6408647 | 65.1179467 | 67.2705783 | 64.6228432 | 60.3935956 |
| 16:08:02 | 75.6408647 | 64.1179467 | 67.2705783 | 66.6228432 | 60.3935956 |
| 16:08:03 | 74.6408647 | 64.1179467 | 69.2705783 | 69.6228432 | 63.3935956 |
| 16:08:04 | 73.6408647 | 64.1179467 | 68.2705783 | 70.6228432 | 62.3935956 |
| 16:08:05 | 71.6408647 | 64.1179467 | 68.2705783 | 70.6228432 | 58.3935956 |
| 16:08:06 | 71.6408647 | 64.1179467 | 68.2705783 | 70.6228432 | 58.3935956 |
| 16:08:07 | 71.6408647 | 64.1179467 | 68.2705783 | 70.6228432 | 57.3935956 |
| 16:08:08 | 71.6408647 | 69.1179467 | 67.2705783 | 70.6228432 | 58.3935956 |
| 16:08:09 | 71.6408647 | 75.1179467 | 67.2705783 | 70.6228432 | 60.3935956 |
| 16:08:10 | 70.6408647 | 79.1179467 | 66.2705783 | 70.6228432 | 62.3935956 |
| 16:08:11 | 71.6408647 | 80.1179467 | 66.2705783 | 70.6228432 | 62.3935956 |
| 16:08:12 | 71.6408647 | 80.1179467 | 66.2705783 | 70.6228432 | 64.3935956 |
| 16:08:13 | 71.6408647 | 81.1179467 | 68.2705783 | 70.6228432 | 65.3935956 |
| 16:08:14 | 71.6408647 | 80.1179467 | 68.2705783 | 70.6228432 | 65.3935956 |
| 16:08:15 | 71.6408647 | 78.1179467 | 68.2705783 | 70.6228432 | 65.3935956 |
| 16:08:16 | 71.6408647 | 78.1179467 | 68.2705783 | 71.6228432 | 65.3935956 |
| 16:08:17 | 71.6408647 | 76.1179467 | 68.2705783 | 72.6228432 | 65.3935956 |
| 16:08:18 | 70.6408647 | 76.1179467 | 68.2705783 | 72.6228432 | 67.3935956 |
| 16:08:19 | 71.6408647 | 76.1179467 | 68.2705783 | 69.6228432 | 68.3935956 |
| 16:08:20 | 71.6408647 | 76.1179467 | 68.2705783 | 67.6228432 | 68.3935956 |
| 16:08:21 | 71.6408647 | 79.1179467 | 69.2705783 | 63.6228432 | 68.3935956 |
| 16:08:22 | 71.6408647 | 80.1179467 | 69.2705783 | 63.6228432 | 69.3935956 |
| 16:08:23 | 71.6408647 | 80.1179467 | 69.2705783 | 63.6228432 | 69.3935956 |

|          |            |            |            |            |            |
|----------|------------|------------|------------|------------|------------|
| 16:08:24 | 72.6408647 | 79.1179467 | 67.2705783 | 64.6228432 | 71.3935956 |
| 16:08:25 | 71.6408647 | 78.1179467 | 67.2705783 | 64.6228432 | 71.3935956 |
| 16:08:26 | 67.6408647 | 76.1179467 | 67.2705783 | 64.6228432 | 69.3935956 |
| 16:08:27 | 67.6408647 | 76.1179467 | 67.2705783 | 64.6228432 | 68.3935956 |
| 16:08:28 | 63.6408647 | 73.1179467 | 67.2705783 | 63.6228432 | 65.3935956 |
| 16:08:29 | 63.6408647 | 70.1179467 | 67.2705783 | 61.6228432 | 65.3935956 |
| 16:08:30 | 62.6408647 | 69.1179467 | 67.2705783 | 60.6228432 | 65.3935956 |
| 16:08:31 | 62.6408647 | 68.1179467 | 67.2705783 | 60.6228432 | 65.3935956 |
| 16:08:32 | 63.6408647 | 67.1179467 | 67.2705783 | 60.6228432 | 66.3935956 |
| 16:08:33 | 67.6408647 | 65.1179467 | 68.2705783 | 60.6228432 | 67.3935956 |
| 16:08:34 | 70.6408647 | 65.1179467 | 67.2705783 | 60.6228432 | 67.3935956 |
| 16:08:35 | 70.6408647 | 65.1179467 | 67.2705783 | 61.6228432 | 67.3935956 |
| 16:08:36 | 70.6408647 | 65.1179467 | 68.2705783 | 62.6228432 | 67.3935956 |
| 16:08:37 | 67.6408647 | 65.1179467 | 68.2705783 | 62.6228432 | 70.3935956 |
| 16:08:38 | 67.6408647 | 65.1179467 | 68.2705783 | 62.6228432 | 71.3935956 |
| 16:08:39 | 68.6408647 | 65.1179467 | 68.2705783 | 61.6228432 | 71.3935956 |
| 16:08:40 | 67.6408647 | 65.1179467 | 68.2705783 | 61.6228432 | 72.3935956 |
| 16:08:41 | 67.6408647 | 65.1179467 | 68.2705783 | 61.6228432 | 71.3935956 |
| 16:08:42 | 67.6408647 | 68.1179467 | 68.2705783 | 60.6228432 | 71.3935956 |
| 16:08:43 | 66.6408647 | 68.1179467 | 68.2705783 | 59.6228432 | 71.3935956 |
| 16:08:44 | 66.6408647 | 68.1179467 | 68.2705783 | 59.6228432 | 72.3935956 |
| 16:08:45 | 66.6408647 | 68.1179467 | 67.2705783 | 59.6228432 | 74.3935956 |
| 16:08:46 | 66.6408647 | 67.1179467 | 67.2705783 | 59.6228432 | 74.3935956 |
| 16:08:47 | 66.6408647 | 67.1179467 | 67.2705783 | 58.6228432 | 74.3935956 |
| 16:08:48 | 66.6408647 | 67.1179467 | 67.2705783 | 58.6228432 | 73.3935956 |
| 16:08:49 | 66.6408647 | 66.1179467 | 67.2705783 | 62.6228432 | 73.3935956 |
| 16:08:50 | 67.6408647 | 66.1179467 | 68.2705783 | 62.6228432 | 73.3935956 |
| 16:08:51 | 67.6408647 | 66.1179467 | 67.2705783 | 63.6228432 | 73.3935956 |
| 16:08:52 | 68.6408647 | 67.1179467 | 67.2705783 | 62.6228432 | 73.3935956 |
| 16:08:53 | 69.6408647 | 67.1179467 | 67.2705783 | 62.6228432 | 72.3935956 |
| 16:08:54 | 70.6408647 | 66.1179467 | 67.2705783 | 60.6228432 | 69.3935956 |
| 16:08:55 | 71.6408647 | 66.1179467 | 67.2705783 | 60.6228432 | 69.3935956 |
| 16:08:56 | 71.6408647 | 65.1179467 | 67.2705783 | 64.6228432 | 69.3935956 |
| 16:08:57 | 74.6408647 | 64.1179467 | 67.2705783 | 64.6228432 | 68.3935956 |
| 16:08:58 | 74.6408647 | 64.1179467 | 68.2705783 | 66.6228432 | 68.3935956 |
| 16:08:59 | 75.6408647 | 64.1179467 | 68.2705783 | 66.6228432 | 68.3935956 |
| 16:09:00 | 74.6408647 | 64.1179467 | 67.2705783 | 66.6228432 | 68.3935956 |
| 16:09:01 | 74.6408647 | 64.1179467 | 67.2705783 | 66.6228432 | 68.3935956 |
| 16:09:02 | 73.6408647 | 65.1179467 | 67.2705783 | 66.6228432 | 67.3935956 |
| 16:09:03 | 73.6408647 | 65.1179467 | 67.2705783 | 64.6228432 | 67.3935956 |
| 16:09:04 | 73.6408647 | 65.1179467 | 67.2705783 | 65.6228432 | 67.3935956 |
| 16:09:05 | 72.6408647 | 65.1179467 | 67.2705783 | 65.6228432 | 67.3935956 |
| 16:09:06 | 72.6408647 | 64.1179467 | 67.2705783 | 65.6228432 | 67.3935956 |
| 16:09:07 | 72.6408647 | 64.1179467 | 67.2705783 | 64.6228432 | 73.3935956 |
| 16:09:08 | 72.6408647 | 64.1179467 | 67.2705783 | 64.6228432 | 69.240841  |

|          |            |            |            |            |            |
|----------|------------|------------|------------|------------|------------|
| 16:09:09 | 72.6408647 | 64.1179467 | 67.2705783 | 65.6228432 | 69.640841  |
| 16:09:10 | 72.6408647 | 64.1179467 | 67.2705783 | 65.6228432 | 69.840841  |
| 16:09:11 | 72.6408647 | 65.1179467 | 67.2705783 | 63.6228432 | 70.040841  |
| 16:09:12 | 76.6408647 | 65.1179467 | 67.2705783 | 63.6228432 | 70.840841  |
| 16:09:13 | 77.6408647 | 65.1179467 | 66.2705783 | 62.6228432 | 70.740841  |
| 16:09:14 | 75.6408647 | 65.1179467 | 66.2705783 | 61.6228432 | 70.540841  |
| 16:09:15 | 73.6408647 | 65.1179467 | 66.2705783 | 61.6228432 | 70.040841  |
| 16:09:16 | 71.6408647 | 66.1179467 | 66.2705783 | 62.6228432 | 69.940841  |
| 16:09:17 | 71.6408647 | 66.1179467 | 66.2705783 | 62.6228432 | 69.940841  |
| 16:09:18 | 71.6408647 | 66.1179467 | 66.2705783 | 62.6228432 | 83.3935956 |
| 16:09:19 | 64.6408647 | 68.1179467 | 65.2705783 | 64.6228432 | 82.3935956 |
| 16:09:20 | 64.6408647 | 70.1179467 | 65.2705783 | 65.6228432 | 81.3935956 |
| 16:09:21 | 63.6408647 | 70.1179467 | 65.2705783 | 65.6228432 | 81.3935956 |
| 16:09:22 | 63.6408647 | 70.1179467 | 65.2705783 | 66.6228432 | 80.3935956 |
| 16:09:23 | 63.6408647 | 71.1179467 | 65.2705783 | 66.6228432 | 80.3935956 |
| 16:09:24 | 65.6408647 | 71.1179467 | 64.2705783 | 66.6228432 | 79.3935956 |
| 16:09:25 | 70.6408647 | 71.1179467 | 64.2705783 | 66.6228432 | 79.3935956 |
| 16:09:26 | 72.6408647 | 72.1179467 | 65.2705783 | 67.6228432 | 79.3935956 |
| 16:09:27 | 73.6408647 | 72.1179467 | 65.2705783 | 69.6228432 | 79.3935956 |
| 16:09:28 | 73.6408647 | 73.1179467 | 65.2705783 | 69.6228432 | 79.3935956 |
| 16:09:29 | 72.6408647 | 73.1179467 | 66.2705783 | 69.6228432 | 79.3935956 |
| 16:09:30 | 71.6408647 | 72.1179467 | 67.2705783 | 69.6228432 | 79.3935956 |
| 16:09:31 | 71.6408647 | 69.1179467 | 67.2705783 | 69.6228432 | 78.3935956 |
| 16:09:32 | 71.6408647 | 66.1179467 | 67.2705783 | 70.6228432 | 78.3935956 |
| 16:09:33 | 70.6408647 | 65.1179467 | 67.2705783 | 71.6228432 | 78.3935956 |
| 16:09:34 | 71.6408647 | 64.1179467 | 67.2705783 | 72.6228432 | 78.3935956 |
| 16:09:35 | 71.6408647 | 64.1179467 | 67.2705783 | 72.6228432 | 78.3935956 |
| 16:09:36 | 72.6408647 | 64.1179467 | 67.2705783 | 73.6228432 | 78.3935956 |
| 16:09:37 | 72.6408647 | 65.1179467 | 66.2705783 | 74.6228432 | 78.3935956 |
| 16:09:38 | 72.6408647 | 64.1179467 | 66.2705783 | 75.6228432 | 78.3935956 |
| 16:09:39 | 73.6408647 | 64.1179467 | 66.2705783 | 76.6228432 | 78.3935956 |
| 16:09:40 | 73.6408647 | 64.1179467 | 66.2705783 | 76.6228432 | 79.3935956 |
| 16:09:41 | 75.6408647 | 64.1179467 | 65.2705783 | 76.6228432 | 79.3935956 |
| 16:09:42 | 76.6408647 | 63.1179467 | 65.2705783 | 82.6228432 | 79.3935956 |
| 16:09:43 | 71.6408647 | 62.1179467 | 65.2705783 | 82.6228432 | 69.540841  |
| 16:09:44 | 69.6408647 | 61.1179467 | 65.2705783 | 82.6228432 | 68.940841  |
| 16:09:45 | 69.6408647 | 62.1179467 | 65.2705783 | 69.340841  | 69.340841  |
| 16:09:46 | 68.6408647 | 63.1179467 | 65.2705783 | 69.640841  | 69.640841  |
| 16:09:47 | 71.6408647 | 63.1179467 | 65.2705783 | 70.040841  | 70.040841  |
| 16:09:48 | 73.6408647 | 63.1179467 | 65.2705783 | 70.140841  | 70.140841  |
| 16:09:49 | 73.6408647 | 62.1179467 | 65.2705783 | 70.040841  | 70.040841  |
| 16:09:50 | 74.6408647 | 61.1179467 | 65.2705783 | 69.740841  | 69.740841  |
| 16:09:51 | 73.6408647 | 61.1179467 | 65.2705783 | 69.540841  | 69.540841  |
| 16:09:52 | 68.6408647 | 61.1179467 | 65.2705783 | 69.040841  | 69.040841  |
| 16:09:53 | 67.6408647 | 61.1179467 | 65.2705783 | 68.440841  | 68.440841  |

|          |            |            |            |            |            |
|----------|------------|------------|------------|------------|------------|
| 16:09:54 | 67.6408647 | 61.1179467 | 66.2705783 | 68.740841  | 68.740841  |
| 16:09:55 | 66.6408647 | 65.1179467 | 66.2705783 | 69.140841  | 69.140841  |
| 16:09:56 | 66.6408647 | 67.1179467 | 66.2705783 | 69.440841  | 83.3935956 |
| 16:09:57 | 66.6408647 | 69.1179467 | 66.2705783 | 69.440841  | 80.3935956 |
| 16:09:58 | 66.6408647 | 69.1179467 | 65.2705783 | 69.140841  | 74.3935956 |
| 16:09:59 | 65.6408647 | 68.1179467 | 65.2705783 | 68.840841  | 72.3935956 |
| 16:10:00 | 67.6408647 | 68.1179467 | 65.2705783 | 69.440841  | 72.3935956 |
| 16:10:01 | 68.6408647 | 63.1179467 | 65.2705783 | 69.040841  | 74.3935956 |
| 16:10:02 | 68.6408647 | 62.1179467 | 66.2705783 | 67.840841  | 73.3935956 |
| 16:10:03 | 68.6408647 | 62.1179467 | 66.2705783 | 67.740841  | 72.3935956 |
| 16:10:04 | 68.6408647 | 61.1179467 | 66.2705783 | 67.240841  | 72.3935956 |
| 16:10:05 | 67.6408647 | 60.1179467 | 66.2705783 | 66.940841  | 62.3935956 |
| 16:10:06 | 67.6408647 | 60.1179467 | 66.2705783 | 76.6228432 | 61.3935956 |
| 16:10:07 | 66.6408647 | 60.1179467 | 65.2705783 | 75.6228432 | 61.3935956 |
| 16:10:08 | 67.6408647 | 60.1179467 | 66.2705783 | 75.6228432 | 60.3935956 |
| 16:10:09 | 67.6408647 | 61.1179467 | 66.2705783 | 73.6228432 | 60.3935956 |
| 16:10:10 | 67.6408647 | 61.1179467 | 66.2705783 | 71.6228432 | 60.3935956 |
| 16:10:11 | 67.6408647 | 61.1179467 | 66.2705783 | 71.6228432 | 60.3935956 |
| 16:10:12 | 68.6408647 | 62.1179467 | 66.2705783 | 70.6228432 | 60.3935956 |
| 16:10:13 | 69.6408647 | 63.1179467 | 66.2705783 | 70.6228432 | 60.3935956 |
| 16:10:14 | 69.6408647 | 63.1179467 | 66.2705783 | 69.6228432 | 60.3935956 |
| 16:10:15 | 68.6408647 | 64.1179467 | 66.2705783 | 68.6228432 | 60.3935956 |
| 16:10:16 | 67.6408647 | 64.1179467 | 66.2705783 | 65.6228432 | 60.3935956 |
| 16:10:17 | 67.6408647 | 64.1179467 | 66.2705783 | 64.6228432 | 60.3935956 |
| 16:10:18 | 67.6408647 | 65.1179467 | 66.2705783 | 64.6228432 | 60.3935956 |
| 16:10:19 | 67.6408647 | 67.1179467 | 66.2705783 | 63.6228432 | 61.3935956 |
| 16:10:20 | 67.6408647 | 68.1179467 | 66.2705783 | 63.6228432 | 61.3935956 |
| 16:10:21 | 67.6408647 | 69.1179467 | 66.2705783 | 64.6228432 | 61.3935956 |
| 16:10:22 | 67.6408647 | 69.1179467 | 66.2705783 | 64.6228432 | 62.3935956 |
| 16:10:23 | 67.6408647 | 68.1179467 | 66.2705783 | 64.6228432 | 62.3935956 |
| 16:10:24 | 67.6408647 | 67.1179467 | 66.2705783 | 62.6228432 | 62.3935956 |
| 16:10:25 | 68.6408647 | 66.1179467 | 66.2705783 | 61.6228432 | 60.3935956 |
| 16:10:26 | 69.6408647 | 65.1179467 | 66.2705783 | 61.6228432 | 59.3935956 |
| 16:10:27 | 70.6408647 | 65.1179467 | 66.2705783 | 60.6228432 | 58.3935956 |
| 16:10:28 | 68.6408647 | 65.1179467 | 66.2705783 | 60.6228432 | 56.3935956 |
| 16:10:29 | 68.6408647 | 72.1179467 | 66.2705783 | 60.6228432 | 56.3935956 |
| 16:10:30 | 69.6408647 | 74.1179467 | 66.2705783 | 59.6228432 | 55.3935956 |
| 16:10:31 | 69.6408647 | 75.1179467 | 66.2705783 | 58.6228432 | 54.3935956 |
| 16:10:32 | 70.6408647 | 75.1179467 | 66.2705783 | 58.6228432 | 52.3935956 |
| 16:10:33 | 73.6408647 | 75.1179467 | 66.2705783 | 57.6228432 | 52.3935956 |
| 16:10:34 | 73.6408647 | 74.1179467 | 66.2705783 | 58.6228432 | 50.3935956 |
| 16:10:35 | 73.6408647 | 74.1179467 | 65.2705783 | 58.6228432 | 49.3935956 |
| 16:10:36 | 70.6408647 | 74.1179467 | 65.2705783 | 60.6228432 | 49.3935956 |
| 16:10:37 | 70.6408647 | 74.1179467 | 65.2705783 | 60.6228432 | 49.3935956 |
| 16:10:38 | 70.6408647 | 73.1179467 | 65.2705783 | 60.6228432 | 48.3935956 |



|          |            |            |            |            |            |
|----------|------------|------------|------------|------------|------------|
| 16:10:39 | 71.6408647 | 73.1179467 | 66.2705783 | 57.6228432 | 45.3935956 |
| 16:10:40 | 72.6408647 | 73.1179467 | 66.2705783 | 57.6228432 | 41.3935956 |
| 16:10:41 | 73.6408647 | 73.1179467 | 66.2705783 | 58.6228432 | 41.3935956 |
| 16:10:42 | 75.6408647 | 73.1179467 | 66.2705783 | 57.6228432 | 40.3935956 |
| 16:10:43 | 75.6408647 | 73.1179467 | 66.2705783 | 57.6228432 | 39.3935956 |
| 16:10:44 | 75.6408647 | 73.1179467 | 66.2705783 | 56.6228432 | 40.3935956 |
| 16:10:45 | 74.6408647 | 73.1179467 | 66.2705783 | 56.6228432 | 40.3935956 |
| 16:10:46 | 73.6408647 | 72.1179467 | 66.2705783 | 56.6228432 | 40.3935956 |
| 16:10:47 | 73.6408647 | 73.1179467 | 66.2705783 | 56.6228432 | 40.3935956 |
| 16:10:48 | 73.6408647 | 73.1179467 | 65.2705783 | 59.6228432 | 41.3935956 |
| 16:10:49 | 73.6408647 | 73.1179467 | 65.2705783 | 62.6228432 | 41.3935956 |
| 16:10:50 | 71.6408647 | 73.1179467 | 65.2705783 | 62.6228432 | 41.3935956 |
| 16:10:51 | 70.6408647 | 69.1179467 | 65.2705783 | 64.6228432 | 41.3935956 |
| 16:10:52 | 69.6408647 | 69.1179467 | 65.2705783 | 64.6228432 | 40.3935956 |
| 16:10:53 | 69.6408647 | 68.1179467 | 65.2705783 | 63.6228432 | 39.3935956 |
| 16:10:54 | 69.6408647 | 68.1179467 | 64.2705783 | 63.6228432 | 39.3935956 |
| 16:10:55 | 69.6408647 | 67.1179467 | 64.2705783 | 63.6228432 | 39.3935956 |
| 16:10:56 | 68.6408647 | 62.1179467 | 64.2705783 | 63.6228432 | 38.3935956 |
| 16:10:57 | 68.6408647 | 60.1179467 | 64.2705783 | 66.6228432 | 38.3935956 |
| 16:10:58 | 68.6408647 | 61.1179467 | 65.2705783 | 68.6228432 | 38.3935956 |
| 16:10:59 | 69.6408647 | 62.1179467 | 65.2705783 | 68.6228432 | 38.3935956 |
| 16:11:00 | 69.6408647 | 63.1179467 | 65.2705783 | 68.6228432 | 38.3935956 |
| 16:11:01 | 69.6408647 | 64.1179467 | 65.2705783 | 68.6228432 | 38.3935956 |
| 16:11:02 | 69.6408647 | 64.1179467 | 66.2705783 | 69.6228432 | 41.3935956 |
| 16:11:03 | 69.6408647 | 64.1179467 | 66.2705783 | 69.6228432 | 46.3935956 |
| 16:11:04 | 70.6408647 | 64.1179467 | 66.2705783 | 69.6228432 | 46.3935956 |
| 16:11:05 | 70.6408647 | 64.1179467 | 66.2705783 | 69.6228432 | 46.3935956 |
| 16:11:06 | 70.6408647 | 63.1179467 | 66.2705783 | 68.6228432 | 55.3935956 |
| 16:11:07 | 71.6408647 | 63.1179467 | 66.2705783 | 69.6228432 | 56.3935956 |
| 16:11:08 | 72.6408647 | 62.1179467 | 65.2705783 | 70.6228432 | 58.3935956 |
| 16:11:09 | 73.6408647 | 62.1179467 | 65.2705783 | 69.6228432 | 58.3935956 |
| 16:11:10 | 73.6408647 | 62.1179467 | 65.2705783 | 69.6228432 | 58.3935956 |
| 16:11:11 | 73.6408647 | 62.1179467 | 65.2705783 | 69.6228432 | 58.3935956 |
| 16:11:12 | 71.6408647 | 62.1179467 | 64.2705783 | 69.6228432 | 59.3935956 |
| 16:11:13 | 70.6408647 | 61.1179467 | 64.2705783 | 69.6228432 | 59.3935956 |
| 16:11:14 | 70.6408647 | 60.1179467 | 64.2705783 | 69.6228432 | 60.3935956 |
| 16:11:15 | 70.6408647 | 62.1179467 | 64.2705783 | 69.6228432 | 60.3935956 |
| 16:11:16 | 70.6408647 | 64.1179467 | 64.2705783 | 68.6228432 | 60.3935956 |
| 16:11:17 | 70.6408647 | 66.1179467 | 64.2705783 | 68.6228432 | 60.3935956 |
| 16:11:18 | 69.6408647 | 66.1179467 | 64.2705783 | 68.6228432 | 64.3935956 |
| 16:11:19 | 69.6408647 | 66.1179467 | 64.2705783 | 67.6228432 | 64.3935956 |
| 16:11:20 | 69.6408647 | 65.1179467 | 64.2705783 | 68.6228432 | 64.3935956 |
| 16:11:21 | 69.6408647 | 65.1179467 | 64.2705783 | 68.6228432 | 64.3935956 |
| 16:11:22 | 69.6408647 | 65.1179467 | 64.2705783 | 68.6228432 | 65.3935956 |
| 16:11:23 | 69.6408647 | 65.1179467 | 64.2705783 | 68.6228432 | 67.3935956 |

|          |            |            |            |            |            |
|----------|------------|------------|------------|------------|------------|
| 16:11:24 | 69.6408647 | 65.1179467 | 64.2705783 | 67.6228432 | 67.3935956 |
| 16:11:25 | 69.6408647 | 65.1179467 | 65.2705783 | 67.6228432 | 67.3935956 |
| 16:11:26 | 70.6408647 | 65.1179467 | 65.2705783 | 67.6228432 | 65.3935956 |
| 16:11:27 | 71.6408647 | 65.1179467 | 65.2705783 | 67.6228432 | 65.3935956 |
| 16:11:28 | 71.6408647 | 65.1179467 | 64.2705783 | 67.6228432 | 66.3935956 |
| 16:11:29 | 72.6408647 | 65.1179467 | 65.2705783 | 67.6228432 | 66.3935956 |
| 16:11:30 | 71.6408647 | 65.1179467 | 65.2705783 | 67.6228432 | 66.3935956 |
| 16:11:31 | 71.6408647 | 65.1179467 | 65.2705783 | 66.6228432 | 66.3935956 |
| 16:11:32 | 71.6408647 | 65.1179467 | 65.2705783 | 67.6228432 | 66.3935956 |
| 16:11:33 | 70.6408647 | 65.1179467 | 65.2705783 | 67.6228432 | 67.3935956 |
| 16:11:34 | 70.6408647 | 66.1179467 | 65.2705783 | 67.6228432 | 70.3935956 |
| 16:11:35 | 70.6408647 | 66.1179467 | 65.2705783 | 66.6228432 | 70.3935956 |
| 16:11:36 | 70.6408647 | 66.1179467 | 65.2705783 | 66.6228432 | 71.3935956 |
| 16:11:37 | 71.6408647 | 67.1179467 | 65.2705783 | 66.6228432 | 76.3935956 |
| 16:11:38 | 70.6408647 | 69.1179467 | 65.2705783 | 67.6228432 | 76.3935956 |
| 16:11:39 | 70.6408647 | 68.1179467 | 65.2705783 | 67.6228432 | 79.3935956 |
| 16:11:40 | 69.6408647 | 67.1179467 | 65.2705783 | 67.6228432 | 77.3935956 |
| 16:11:41 | 69.6408647 | 66.1179467 | 65.2705783 | 67.6228432 | 77.3935956 |
| 16:11:42 | 69.6408647 | 66.1179467 | 65.2705783 | 68.6228432 | 76.3935956 |
| 16:11:43 | 68.6408647 | 65.1179467 | 65.2705783 | 68.6228432 | 76.3935956 |
| 16:11:44 | 67.6408647 | 64.1179467 | 65.2705783 | 67.6228432 | 76.3935956 |
| 16:11:45 | 68.6408647 | 64.1179467 | 65.2705783 | 67.6228432 | 76.3935956 |
| 16:11:46 | 69.6408647 | 64.1179467 | 65.2705783 | 67.6228432 | 75.3935956 |
| 16:11:47 | 70.6408647 | 64.1179467 | 65.2705783 | 67.6228432 | 72.3935956 |
| 16:11:48 | 70.6408647 | 64.1179467 | 65.2705783 | 67.6228432 | 72.3935956 |
| 16:11:49 | 70.6408647 | 64.1179467 | 65.2705783 | 67.6228432 | 72.3935956 |
| 16:11:50 | 70.6408647 | 64.1179467 | 65.2705783 | 67.6228432 | 72.3935956 |
| 16:11:51 | 70.6408647 | 64.1179467 | 65.2705783 | 69.6228432 | 71.3935956 |
| 16:11:52 | 69.6408647 | 67.1179467 | 65.2705783 | 70.6228432 | 71.3935956 |
| 16:11:53 | 70.6408647 | 67.1179467 | 65.2705783 | 70.6228432 | 71.3935956 |
| 16:11:54 | 70.6408647 | 67.1179467 | 65.2705783 | 70.6228432 | 69.3935956 |
| 16:11:55 | 69.6408647 | 67.1179467 | 65.2705783 | 71.6228432 | 69.3935956 |
| 16:11:56 | 68.6408647 | 67.1179467 | 65.2705783 | 71.6228432 | 68.3935956 |
| 16:11:57 | 68.6408647 | 68.1179467 | 65.2705783 | 71.6228432 | 66.3935956 |
| 16:11:58 | 67.6408647 | 67.1179467 | 65.2705783 | 70.6228432 | 66.3935956 |
| 16:11:59 | 67.6408647 | 67.1179467 | 65.2705783 | 70.6228432 | 66.3935956 |
| 16:12:00 | 67.6408647 | 66.1179467 | 65.2705783 | 71.6228432 | 67.3935956 |
| 16:12:01 | 65.6408647 | 66.1179467 | 65.2705783 | 71.6228432 | 67.3935956 |
| 16:12:02 | 65.6408647 | 66.1179467 | 65.2705783 | 71.6228432 | 67.3935956 |
| 16:12:03 | 65.6408647 | 64.1179467 | 65.2705783 | 71.6228432 | 67.3935956 |
| 16:12:04 | 66.6408647 | 62.1179467 | 65.2705783 | 71.6228432 | 68.3935956 |
| 16:12:05 | 66.6408647 | 62.1179467 | 65.2705783 | 71.6228432 | 68.3935956 |
| 16:12:06 | 66.6408647 | 62.1179467 | 65.2705783 | 71.6228432 | 68.3935956 |
| 16:12:07 | 68.6408647 | 62.1179467 | 65.2705783 | 70.6228432 | 68.3935956 |
| 16:12:08 | 69.6408647 | 62.1179467 | 65.2705783 | 70.6228432 | 68.3935956 |

|          |            |            |            |            |            |
|----------|------------|------------|------------|------------|------------|
| 16:12:09 | 70.6408647 | 61.1179467 | 65.2705783 | 69.6228432 | 68.3935956 |
| 16:12:10 | 70.6408647 | 60.1179467 | 65.2705783 | 69.6228432 | 69.3935956 |
| 16:12:11 | 70.6408647 | 58.1179467 | 65.2705783 | 69.6228432 | 69.3935956 |
| 16:12:12 | 70.6408647 | 56.1179467 | 65.2705783 | 68.6228432 | 69.3935956 |
| 16:12:13 | 69.6408647 | 55.1179467 | 65.2705783 | 68.6228432 | 69.3935956 |
| 16:12:14 | 69.6408647 | 55.1179467 | 65.2705783 | 68.6228432 | 69.3935956 |
| 16:12:15 | 67.6408647 | 55.1179467 | 65.2705783 | 68.6228432 | 69.3935956 |
| 16:12:16 | 66.6408647 | 55.1179467 | 65.2705783 | 68.6228432 | 66.3935956 |
| 16:12:17 | 72.6408647 | 56.1179467 | 65.2705783 | 68.6228432 | 66.3935956 |
| 16:12:18 | 77.6408647 | 57.1179467 | 66.2705783 | 68.6228432 | 64.3935956 |
| 16:12:19 | 77.6408647 | 57.1179467 | 66.2705783 | 68.6228432 | 63.3935956 |
| 16:12:20 | 65.340841  | 57.1179467 | 66.2705783 | 68.6228432 | 62.3935956 |
| 16:12:21 | 64.940841  | 58.1179467 | 65.2705783 | 66.6228432 | 62.3935956 |
| 16:12:22 | 64.140841  | 59.1179467 | 65.2705783 | 65.6228432 | 62.3935956 |
| 16:12:23 | 64.340841  | 61.1179467 | 65.2705783 | 65.6228432 | 62.3935956 |
| 16:12:24 | 73.6408647 | 61.1179467 | 65.2705783 | 65.6228432 | 61.3935956 |
| 16:12:25 | 70.6408647 | 62.1179467 | 65.2705783 | 65.6228432 | 62.3935956 |
| 16:12:26 | 68.6408647 | 62.1179467 | 65.2705783 | 65.6228432 | 64.3935956 |
| 16:12:27 | 68.6408647 | 62.1179467 | 65.2705783 | 64.6228432 | 64.3935956 |
| 16:12:28 | 69.6408647 | 64.1179467 | 65.2705783 | 65.6228432 | 65.3935956 |
| 16:12:29 | 69.6408647 | 65.1179467 | 66.2705783 | 66.6228432 | 66.3935956 |
| 16:12:30 | 69.6408647 | 66.1179467 | 66.2705783 | 66.6228432 | 67.3935956 |
| 16:12:31 | 70.6408647 | 65.1179467 | 66.2705783 | 69.6228432 | 67.3935956 |
| 16:12:32 | 70.6408647 | 65.1179467 | 66.2705783 | 69.6228432 | 67.3935956 |
| 16:12:33 | 71.6408647 | 65.1179467 | 66.2705783 | 68.6228432 | 68.3935956 |
| 16:12:34 | 73.6408647 | 66.1179467 | 66.2705783 | 68.6228432 | 68.3935956 |
| 16:12:35 | 74.6408647 | 67.1179467 | 66.2705783 | 69.6228432 | 67.3935956 |
| 16:12:36 | 76.6408647 | 67.1179467 | 66.2705783 | 69.6228432 | 69.3935956 |
| 16:12:37 | 76.6408647 | 67.1179467 | 66.2705783 | 69.6228432 | 71.3935956 |
| 16:12:38 | 76.6408647 | 67.1179467 | 66.2705783 | 69.6228432 | 72.3935956 |
| 16:12:39 | 76.6408647 | 67.1179467 | 65.2705783 | 69.6228432 | 73.3935956 |
| 16:12:40 | 76.6408647 | 67.1179467 | 65.2705783 | 69.6228432 | 73.3935956 |
| 16:12:41 | 76.6408647 | 65.1179467 | 65.2705783 | 69.6228432 | 73.3935956 |
| 16:12:42 | 76.6408647 | 64.1179467 | 65.2705783 | 69.6228432 | 73.3935956 |
| 16:12:43 | 76.6408647 | 64.1179467 | 65.2705783 | 69.6228432 | 75.3935956 |
| 16:12:44 | 77.6408647 | 64.1179467 | 65.2705783 | 68.6228432 | 75.3935956 |
| 16:12:45 | 78.6408647 | 64.1179467 | 65.2705783 | 68.6228432 | 75.3935956 |
| 16:12:46 | 78.6408647 | 64.1179467 | 65.2705783 | 69.6228432 | 75.3935956 |
| 16:12:47 | 78.6408647 | 64.1179467 | 65.2705783 | 69.6228432 | 75.3935956 |
| 16:12:48 | 78.6408647 | 64.1179467 | 64.2705783 | 69.6228432 | 74.3935956 |
| 16:12:49 | 78.6408647 | 64.1179467 | 64.2705783 | 70.6228432 | 73.3935956 |
| 16:12:50 | 79.6408647 | 64.1179467 | 64.2705783 | 70.6228432 | 73.3935956 |
| 16:12:51 | 79.6408647 | 64.1179467 | 64.2705783 | 70.6228432 | 74.3935956 |
| 16:12:52 | 67.240841  | 64.1179467 | 64.2705783 | 70.6228432 | 74.3935956 |
| 16:12:53 | 82.6408647 | 64.1179467 | 64.2705783 | 70.6228432 | 74.3935956 |

|          |            |            |            |            |            |
|----------|------------|------------|------------|------------|------------|
| 16:12:54 | 67.2921816 | 62.1179467 | 65.2705783 | 75.6228432 | 73.3935956 |
| 16:12:55 | 67.240841  | 61.1179467 | 65.2705783 | 76.6228432 | 72.3935956 |
| 16:12:56 | 70.6408647 | 61.1179467 | 65.2705783 | 76.6228432 | 72.3935956 |
| 16:12:57 | 70.6408647 | 60.1179467 | 65.2705783 | 75.6228432 | 72.3935956 |
| 16:12:58 | 70.6408647 | 68.1179467 | 65.2705783 | 76.6228432 | 72.3935956 |
| 16:12:59 | 70.6408647 | 69.1179467 | 65.2705783 | 76.6228432 | 73.3935956 |
| 16:13:00 | 69.6408647 | 70.1179467 | 65.2705783 | 77.6228432 | 73.3935956 |
| 16:13:01 | 69.6408647 | 71.1179467 | 65.2705783 | 77.6228432 | 75.3935956 |
| 16:13:02 | 68.6408647 | 71.1179467 | 65.2705783 | 79.6228432 | 76.3935956 |
| 16:13:03 | 68.6408647 | 72.1179467 | 65.2705783 | 79.6228432 | 80.3935956 |
| 16:13:04 | 68.6408647 | 73.1179467 | 65.2705783 | 78.6228432 | 81.3935956 |
| 16:13:05 | 68.6408647 | 73.1179467 | 69.2705783 | 77.6228432 | 81.3935956 |
| 16:13:06 | 68.6408647 | 73.1179467 | 70.2705783 | 72.6228432 | 82.3935956 |
| 16:13:07 | 68.6408647 | 73.1179467 | 70.2705783 | 68.6228432 | 81.3935956 |
| 16:13:08 | 68.6408647 | 74.1179467 | 68.2705783 | 65.6228432 | 82.3935956 |
| 16:13:09 | 69.6408647 | 74.1179467 | 66.2705783 | 65.6228432 | 82.3935956 |
| 16:13:10 | 69.6408647 | 74.1179467 | 66.2705783 | 65.6228432 | 82.3935956 |
| 16:13:11 | 69.6408647 | 74.1179467 | 66.2705783 | 66.6228432 | 82.3935956 |
| 16:13:12 | 68.6408647 | 76.1179467 | 66.2705783 | 66.6228432 | 82.3935956 |
| 16:13:13 | 68.6408647 | 78.1179467 | 66.2705783 | 66.6228432 | 82.3935956 |
| 16:13:14 | 68.6408647 | 79.1179467 | 66.2705783 | 66.6228432 | 79.3935956 |
| 16:13:15 | 68.6408647 | 78.1179467 | 66.2705783 | 65.6228432 | 79.3935956 |
| 16:13:16 | 68.6408647 | 77.1179467 | 67.2705783 | 64.6228432 | 79.3935956 |
| 16:13:17 | 68.6408647 | 77.1179467 | 67.2705783 | 64.6228432 | 79.3935956 |
| 16:13:18 | 68.6408647 | 77.1179467 | 65.2705783 | 62.6228432 | 81.3935956 |
| 16:13:19 | 68.6408647 | 77.1179467 | 65.2705783 | 62.6228432 | 81.3935956 |
| 16:13:20 | 68.6408647 | 78.1179467 | 65.2705783 | 62.6228432 | 82.3935956 |
| 16:13:21 | 67.6408647 | 78.1179467 | 65.2705783 | 63.6228432 | 82.3935956 |
| 16:13:22 | 68.6408647 | 79.1179467 | 65.2705783 | 64.6228432 | 70.140841  |
| 16:13:23 | 68.6408647 | 79.1179467 | 65.2705783 | 66.6228432 | 70.240841  |
| 16:13:24 | 70.6408647 | 80.1179467 | 65.2705783 | 66.6228432 | 69.540841  |
| 16:13:25 | 70.6408647 | 80.1179467 | 64.2705783 | 68.6228432 | 69.240841  |
| 16:13:26 | 71.6408647 | 80.1179467 | 63.2705783 | 69.6228432 | 76.3935956 |
| 16:13:27 | 71.6408647 | 80.1179467 | 63.2705783 | 69.6228432 | 76.3935956 |
| 16:13:28 | 71.6408647 | 80.1179467 | 64.2705783 | 69.6228432 | 72.3935956 |
| 16:13:29 | 72.6408647 | 80.1179467 | 63.2705783 | 69.6228432 | 70.3935956 |
| 16:13:30 | 73.6408647 | 78.1179467 | 63.2705783 | 69.6228432 | 70.3935956 |
| 16:13:31 | 72.6408647 | 78.1179467 | 64.2705783 | 69.6228432 | 71.3935956 |
| 16:13:32 | 71.6408647 | 78.1179467 | 64.2705783 | 68.6228432 | 72.3935956 |
| 16:13:33 | 71.6408647 | 76.1179467 | 64.2705783 | 68.6228432 | 72.3935956 |
| 16:13:34 | 68.6408647 | 76.1179467 | 62.2705783 | 68.6228432 | 72.3935956 |
| 16:13:35 | 68.6408647 | 76.1179467 | 63.2705783 | 69.6228432 | 72.3935956 |
| 16:13:36 | 67.6408647 | 76.1179467 | 63.2705783 | 69.6228432 | 70.3935956 |
| 16:13:37 | 67.6408647 | 76.1179467 | 63.2705783 | 67.6228432 | 70.3935956 |
| 16:13:38 | 67.6408647 | 76.1179467 | 62.2705783 | 66.6228432 | 69.3935956 |

|          |            |            |            |            |            |
|----------|------------|------------|------------|------------|------------|
| 16:13:39 | 67.6408647 | 76.1179467 | 62.2705783 | 65.6228432 | 68.3935956 |
| 16:13:40 | 67.6408647 | 76.1179467 | 62.2705783 | 65.6228432 | 68.3935956 |
| 16:13:41 | 68.6408647 | 75.1179467 | 62.2705783 | 65.6228432 | 68.3935956 |
| 16:13:42 | 68.6408647 | 75.1179467 | 62.2705783 | 65.6228432 | 68.3935956 |
| 16:13:43 | 70.6408647 | 61.1179467 | 62.2705783 | 65.6228432 | 68.3935956 |
| 16:13:44 | 70.6408647 | 61.1179467 | 61.2705783 | 65.6228432 | 70.3935956 |
| 16:13:45 | 70.6408647 | 61.1179467 | 61.2705783 | 65.6228432 | 74.3935956 |
| 16:13:46 | 70.6408647 | 61.1179467 | 63.2705783 | 64.6228432 | 74.3935956 |
| 16:13:47 | 70.6408647 | 61.1179467 | 63.2705783 | 64.6228432 | 74.3935956 |
| 16:13:48 | 74.6408647 | 60.1179467 | 65.2705783 | 63.6228432 | 77.3935956 |
| 16:13:49 | 75.6408647 | 59.1179467 | 65.2705783 | 63.6228432 | 79.3935956 |
| 16:13:50 | 75.6408647 | 59.1179467 | 65.2705783 | 64.6228432 | 79.3935956 |
| 16:13:51 | 75.6408647 | 60.1179467 | 65.2705783 | 65.6228432 | 79.3935956 |
| 16:13:52 | 76.6408647 | 61.1179467 | 65.2705783 | 64.6228432 | 79.3935956 |
| 16:13:53 | 76.6408647 | 61.1179467 | 65.2705783 | 64.6228432 | 79.3935956 |
| 16:13:54 | 77.6408647 | 66.1179467 | 67.2705783 | 63.6228432 | 79.3935956 |
| 16:13:55 | 78.6408647 | 67.1179467 | 68.2705783 | 64.6228432 | 79.3935956 |
| 16:13:56 | 78.6408647 | 67.1179467 | 68.2705783 | 65.6228432 | 79.3935956 |
| 16:13:57 | 80.6408647 | 67.1179467 | 68.2705783 | 65.6228432 | 79.3935956 |
| 16:13:58 | 80.6408647 | 69.1179467 | 67.2705783 | 65.6228432 | 80.3935956 |
| 16:13:59 | 79.6408647 | 69.1179467 | 67.2705783 | 65.6228432 | 80.3935956 |
| 16:14:00 | 79.6408647 | 67.1179467 | 66.2705783 | 67.6228432 | 80.3935956 |
| 16:14:01 | 80.6408647 | 65.1179467 | 66.2705783 | 67.6228432 | 80.3935956 |
| 16:14:02 | 80.6408647 | 65.1179467 | 66.2705783 | 68.6228432 | 80.3935956 |
| 16:14:03 | 74.6408647 | 63.1179467 | 66.2705783 | 69.6228432 | 79.3935956 |
| 16:14:04 | 74.6408647 | 63.1179467 | 66.2705783 | 69.6228432 | 79.3935956 |
| 16:14:05 | 68.6408647 | 63.1179467 | 66.2705783 | 69.6228432 | 76.3935956 |
| 16:14:06 | 67.6408647 | 64.1179467 | 67.2705783 | 70.6228432 | 75.3935956 |
| 16:14:07 | 67.6408647 | 64.1179467 | 67.2705783 | 70.6228432 | 72.3935956 |
| 16:14:08 | 66.6408647 | 63.1179467 | 67.2705783 | 70.6228432 | 68.3935956 |
| 16:14:09 | 67.6408647 | 64.1179467 | 67.2705783 | 69.6228432 | 68.3935956 |
| 16:14:10 | 67.6408647 | 65.1179467 | 67.2705783 | 69.6228432 | 68.3935956 |
| 16:14:11 | 67.6408647 | 65.1179467 | 67.2705783 | 68.6228432 | 67.3935956 |
| 16:14:12 | 67.6408647 | 70.1179467 | 64.2705783 | 68.6228432 | 67.3935956 |
| 16:14:13 | 67.6408647 | 72.1179467 | 64.2705783 | 68.6228432 | 67.3935956 |
| 16:14:14 | 68.6408647 | 72.1179467 | 64.2705783 | 67.6228432 | 67.3935956 |
| 16:14:15 | 67.6408647 | 71.1179467 | 65.2705783 | 67.6228432 | 67.3935956 |
| 16:14:16 | 67.6408647 | 69.1179467 | 66.2705783 | 67.6228432 | 67.3935956 |
| 16:14:17 | 67.6408647 | 66.1179467 | 65.2705783 | 68.6228432 | 67.3935956 |
| 16:14:18 | 68.6408647 | 64.1179467 | 64.2705783 | 68.6228432 | 68.3935956 |
| 16:14:19 | 67.6408647 | 63.1179467 | 64.2705783 | 68.6228432 | 68.3935956 |
| 16:14:20 | 67.6408647 | 62.1179467 | 64.2705783 | 68.6228432 | 68.3935956 |
| 16:14:21 | 66.6408647 | 63.1179467 | 65.2705783 | 69.6228432 | 68.3935956 |
| 16:14:22 | 66.6408647 | 63.1179467 | 66.2705783 | 70.6228432 | 66.3935956 |
| 16:14:23 | 65.6408647 | 64.1179467 | 66.2705783 | 70.6228432 | 66.3935956 |

|          |            |            |            |            |            |
|----------|------------|------------|------------|------------|------------|
| 16:14:24 | 65.6408647 | 64.1179467 | 66.2705783 | 71.6228432 | 66.3935956 |
| 16:14:25 | 65.6408647 | 64.1179467 | 66.2705783 | 71.6228432 | 66.3935956 |
| 16:14:26 | 65.6408647 | 63.1179467 | 66.2705783 | 71.6228432 | 66.3935956 |
| 16:14:27 | 65.6408647 | 62.1179467 | 67.2705783 | 70.6228432 | 65.3935956 |
| 16:14:28 | 67.6408647 | 61.1179467 | 67.2705783 | 69.6228432 | 65.3935956 |
| 16:14:29 | 67.6408647 | 61.1179467 | 67.2705783 | 68.6228432 | 65.3935956 |
| 16:14:30 | 67.6408647 | 61.1179467 | 68.2705783 | 68.6228432 | 65.3935956 |
| 16:14:31 | 67.6408647 | 62.1179467 | 69.2705783 | 68.6228432 | 65.3935956 |
| 16:14:32 | 67.6408647 | 62.1179467 | 69.2705783 | 69.6228432 | 65.3935956 |
| 16:14:33 | 71.6408647 | 62.1179467 | 68.2705783 | 68.6228432 | 66.3935956 |
| 16:14:34 | 73.6408647 | 62.1179467 | 68.2705783 | 66.6228432 | 66.3935956 |
| 16:14:35 | 73.6408647 | 62.1179467 | 68.2705783 | 65.6228432 | 66.3935956 |
| 16:14:36 | 73.6408647 | 62.1179467 | 67.2705783 | 64.6228432 | 67.3935956 |
| 16:14:37 | 73.6408647 | 62.1179467 | 67.2705783 | 64.6228432 | 67.3935956 |
| 16:14:38 | 73.6408647 | 62.1179467 | 67.2705783 | 63.6228432 | 67.3935956 |
| 16:14:39 | 72.6408647 | 65.1179467 | 68.2705783 | 63.6228432 | 67.3935956 |
| 16:14:40 | 71.6408647 | 71.1179467 | 68.2705783 | 63.6228432 | 67.3935956 |
| 16:14:41 | 71.6408647 | 71.1179467 | 68.2705783 | 63.6228432 | 67.3935956 |
| 16:14:42 | 71.6408647 | 74.1179467 | 67.2705783 | 63.6228432 | 67.3935956 |
| 16:14:43 | 70.6408647 | 73.1179467 | 67.2705783 | 62.6228432 | 67.3935956 |
| 16:14:44 | 69.6408647 | 73.1179467 | 68.2705783 | 62.6228432 | 67.3935956 |
| 16:14:45 | 69.6408647 | 73.1179467 | 69.2705783 | 63.6228432 | 68.3935956 |
| 16:14:46 | 69.6408647 | 75.1179467 | 70.2705783 | 64.6228432 | 68.3935956 |
| 16:14:47 | 69.6408647 | 75.1179467 | 69.2705783 | 65.6228432 | 68.3935956 |
| 16:14:48 | 68.6408647 | 79.1179467 | 67.2705783 | 66.6228432 | 67.3935956 |
| 16:14:49 | 67.6408647 | 80.1179467 | 66.2705783 | 66.6228432 | 68.3935956 |
| 16:14:50 | 67.6408647 | 80.1179467 | 66.2705783 | 66.6228432 | 69.3935956 |
| 16:14:51 | 67.6408647 | 80.1179467 | 66.2705783 | 67.6228432 | 69.3935956 |
| 16:14:52 | 67.6408647 | 73.1179467 | 65.2705783 | 68.6228432 | 70.3935956 |
| 16:14:53 | 66.6408647 | 73.1179467 | 65.2705783 | 69.6228432 | 71.3935956 |
| 16:14:54 | 66.6408647 | 73.1179467 | 66.2705783 | 69.6228432 | 75.3935956 |
| 16:14:55 | 66.6408647 | 66.1179467 | 66.2705783 | 69.6228432 | 77.3935956 |
| 16:14:56 | 66.6408647 | 65.1179467 | 66.2705783 | 71.6228432 | 77.3935956 |
| 16:14:57 | 66.6408647 | 65.1179467 | 66.2705783 | 73.6228432 | 80.3935956 |
| 16:14:58 | 65.6408647 | 65.1179467 | 67.2705783 | 75.6228432 | 82.3935956 |
| 16:14:59 | 64.6408647 | 65.1179467 | 67.2705783 | 76.6228432 | 82.3935956 |
| 16:15:00 | 62.6408647 | 65.1179467 | 67.2705783 | 76.6228432 | 84.3935956 |
| 16:15:01 | 62.6408647 | 65.1179467 | 67.2705783 | 76.6228432 | 84.3935956 |
| 16:15:02 | 62.6408647 | 66.1179467 | 67.2705783 | 75.6228432 | 81.3935956 |
| 16:15:03 | 61.6408647 | 66.1179467 | 67.2705783 | 73.6228432 | 79.3935956 |
| 16:15:04 | 61.6408647 | 67.1179467 | 67.2705783 | 71.6228432 | 79.3935956 |
| 16:15:05 | 61.6408647 | 67.1179467 | 67.2705783 | 71.6228432 | 78.3935956 |
| 16:15:06 | 61.6408647 | 68.1179467 | 66.2705783 | 70.6228432 | 76.3935956 |
| 16:15:07 | 61.6408647 | 68.1179467 | 66.2705783 | 69.6228432 | 74.3935956 |
| 16:15:08 | 61.6408647 | 68.1179467 | 66.2705783 | 69.6228432 | 73.3935956 |

|          |            |            |            |            |            |
|----------|------------|------------|------------|------------|------------|
| 16:15:09 | 61.6408647 | 68.1179467 | 66.2705783 | 69.6228432 | 71.3935956 |
| 16:15:10 | 62.6408647 | 69.1179467 | 66.2705783 | 69.6228432 | 71.3935956 |
| 16:15:11 | 62.6408647 | 69.1179467 | 66.2705783 | 69.6228432 | 71.3935956 |
| 16:15:12 | 64.6408647 | 69.1179467 | 66.2705783 | 69.6228432 | 71.3935956 |
| 16:15:13 | 65.6408647 | 70.1179467 | 66.2705783 | 69.6228432 | 70.3935956 |
| 16:15:14 | 65.6408647 | 70.1179467 | 66.2705783 | 68.6228432 | 70.3935956 |
| 16:15:15 | 64.6408647 | 70.1179467 | 66.2705783 | 68.6228432 | 70.3935956 |
| 16:15:16 | 63.6408647 | 73.1179467 | 66.2705783 | 68.6228432 | 69.3935956 |
| 16:15:17 | 63.6408647 | 76.1179467 | 66.2705783 | 67.6228432 | 69.3935956 |
| 16:15:18 | 63.6408647 | 76.1179467 | 66.2705783 | 67.6228432 | 69.3935956 |
| 16:15:19 | 64.6408647 | 79.1179467 | 66.2705783 | 67.6228432 | 66.3935956 |
| 16:15:20 | 65.6408647 | 79.1179467 | 66.2705783 | 66.6228432 | 66.3935956 |
| 16:15:21 | 66.6408647 | 80.1179467 | 66.2705783 | 66.6228432 | 66.3935956 |
| 16:15:22 | 67.6408647 | 80.1179467 | 66.2705783 | 67.6228432 | 66.3935956 |
| 16:15:23 | 67.6408647 | 78.1179467 | 66.2705783 | 67.6228432 | 69.3935956 |
| 16:15:24 | 67.6408647 | 79.1179467 | 66.2705783 | 68.6228432 | 71.3935956 |
| 16:15:25 | 68.6408647 | 81.1179467 | 66.2705783 | 68.6228432 | 72.3935956 |
| 16:15:26 | 68.6408647 | 83.1179467 | 66.2705783 | 68.6228432 | 72.3935956 |
| 16:15:27 | 68.6408647 | 69.3764008 | 66.2705783 | 68.6228432 | 74.3935956 |
| 16:15:28 | 68.6408647 | 69.7097341 | 66.2705783 | 68.6228432 | 75.3935956 |
| 16:15:29 | 69.6408647 | 69.8208452 | 66.2705783 | 68.6228432 | 75.3935956 |
| 16:15:30 | 72.6408647 | 85.1179467 | 76.2705783 | 68.6228432 | 75.3935956 |
| 16:15:31 | 72.6408647 | 83.1179467 | 77.2705783 | 68.6228432 | 76.3935956 |
| 16:15:32 | 72.6408647 | 79.1179467 | 78.2705783 | 68.6228432 | 76.3935956 |
| 16:15:33 | 71.6408647 | 76.1179467 | 78.2705783 | 68.6228432 | 77.3935956 |
| 16:15:34 | 70.6408647 | 75.1179467 | 77.2705783 | 69.6228432 | 77.3935956 |
| 16:15:35 | 70.6408647 | 75.1179467 | 77.2705783 | 69.6228432 | 77.3935956 |
| 16:15:36 | 69.6408647 | 75.1179467 | 74.2705783 | 70.6228432 | 78.3935956 |
| 16:15:37 | 69.6408647 | 72.1179467 | 71.2705783 | 71.6228432 | 78.3935956 |
| 16:15:38 | 69.6408647 | 71.1179467 | 70.2705783 | 71.6228432 | 78.3935956 |
| 16:15:39 | 71.6408647 | 69.1179467 | 67.2705783 | 70.6228432 | 77.3935956 |
| 16:15:40 | 72.6408647 | 67.1179467 | 66.2705783 | 69.6228432 | 77.3935956 |
| 16:15:41 | 73.6408647 | 65.1179467 | 65.2705783 | 68.6228432 | 77.3935956 |
| 16:15:42 | 74.6408647 | 63.1179467 | 65.2705783 | 68.6228432 | 76.3935956 |
| 16:15:43 | 74.6408647 | 63.1179467 | 65.2705783 | 68.6228432 | 75.3935956 |
| 16:15:44 | 74.6408647 | 63.1179467 | 68.2705783 | 69.6228432 | 73.3935956 |
| 16:15:45 | 74.6408647 | 62.1179467 | 68.2705783 | 69.6228432 | 73.3935956 |
| 16:15:46 | 73.6408647 | 62.1179467 | 69.2705783 | 72.6228432 | 73.3935956 |
| 16:15:47 | 73.6408647 | 62.1179467 | 69.2705783 | 72.6228432 | 71.3935956 |
| 16:15:48 | 72.6408647 | 62.1179467 | 69.2705783 | 72.6228432 | 71.3935956 |
| 16:15:49 | 72.6408647 | 62.1179467 | 68.2705783 | 72.6228432 | 71.3935956 |
| 16:15:50 | 72.6408647 | 69.1179467 | 67.2705783 | 73.6228432 | 71.3935956 |
| 16:15:51 | 72.6408647 | 72.1179467 | 66.2705783 | 74.6228432 | 71.3935956 |
| 16:15:52 | 72.6408647 | 72.1179467 | 66.2705783 | 74.6228432 | 70.3935956 |
| 16:15:53 | 72.6408647 | 69.1179467 | 66.2705783 | 75.6228432 | 69.3935956 |

|          |            |            |            |            |            |
|----------|------------|------------|------------|------------|------------|
| 16:15:54 | 72.6408647 | 68.1179467 | 67.2705783 | 78.6228432 | 69.3935956 |
| 16:15:55 | 72.6408647 | 66.1179467 | 67.2705783 | 78.6228432 | 67.3935956 |
| 16:15:56 | 72.6408647 | 65.1179467 | 67.2705783 | 78.6228432 | 67.3935956 |
| 16:15:57 | 72.6408647 | 65.1179467 | 67.2705783 | 78.6228432 | 66.3935956 |
| 16:15:58 | 72.6408647 | 64.1179467 | 67.2705783 | 78.6228432 | 66.3935956 |
| 16:15:59 | 71.6408647 | 65.1179467 | 66.2705783 | 77.6228432 | 65.3935956 |
| 16:16:00 | 71.6408647 | 65.1179467 | 65.2705783 | 75.6228432 | 64.3935956 |
| 16:16:01 | 71.6408647 | 65.1179467 | 65.2705783 | 75.6228432 | 64.3935956 |
| 16:16:02 | 71.6408647 | 64.1179467 | 65.2705783 | 73.6228432 | 63.3935956 |
| 16:16:03 | 72.6408647 | 62.1179467 | 64.2705783 | 70.6228432 | 63.3935956 |
| 16:16:04 | 71.6408647 | 60.1179467 | 64.2705783 | 70.6228432 | 63.3935956 |
| 16:16:05 | 71.6408647 | 59.1179467 | 64.2705783 | 69.6228432 | 63.3935956 |
| 16:16:06 | 71.6408647 | 59.1179467 | 64.2705783 | 69.6228432 | 64.3935956 |
| 16:16:07 | 71.6408647 | 59.1179467 | 64.2705783 | 68.6228432 | 64.3935956 |
| 16:16:08 | 71.6408647 | 59.1179467 | 64.2705783 | 68.6228432 | 64.3935956 |
| 16:16:09 | 68.6408647 | 60.1179467 | 65.2705783 | 68.6228432 | 64.3935956 |
| 16:16:10 | 67.6408647 | 62.1179467 | 65.2705783 | 69.6228432 | 64.3935956 |
| 16:16:11 | 67.6408647 | 65.1179467 | 65.2705783 | 69.6228432 | 64.3935956 |
| 16:16:12 | 67.6408647 | 67.1179467 | 66.2705783 | 69.6228432 | 64.3935956 |
| 16:16:13 | 67.6408647 | 67.1179467 | 67.2705783 | 69.6228432 | 66.3935956 |
| 16:16:14 | 68.6408647 | 67.1179467 | 67.2705783 | 70.6228432 | 69.3935956 |
| 16:16:15 | 71.6408647 | 66.1179467 | 67.2705783 | 70.6228432 | 70.3935956 |
| 16:16:16 | 72.6408647 | 64.1179467 | 69.2705783 | 70.6228432 | 70.3935956 |
| 16:16:17 | 72.6408647 | 63.1179467 | 69.2705783 | 72.6228432 | 69.3935956 |
| 16:16:18 | 72.6408647 | 62.1179467 | 68.2705783 | 72.6228432 | 67.3935956 |
| 16:16:19 | 71.6408647 | 61.1179467 | 68.2705783 | 72.6228432 | 67.3935956 |
| 16:16:20 | 70.6408647 | 61.1179467 | 68.2705783 | 71.6228432 | 67.3935956 |
| 16:16:21 | 69.6408647 | 61.1179467 | 68.2705783 | 71.6228432 | 69.3935956 |
| 16:16:22 | 69.6408647 | 63.1179467 | 68.2705783 | 71.6228432 | 69.3935956 |
| 16:16:23 | 68.6408647 | 63.1179467 | 67.2705783 | 71.6228432 | 71.3935956 |
| 16:16:24 | 67.6408647 | 63.1179467 | 67.2705783 | 71.6228432 | 70.3935956 |
| 16:16:25 | 67.6408647 | 62.1179467 | 67.2705783 | 70.6228432 | 70.3935956 |
| 16:16:26 | 66.6408647 | 62.1179467 | 67.2705783 | 70.6228432 | 69.3935956 |
| 16:16:27 | 67.6408647 | 61.1179467 | 68.2705783 | 70.6228432 | 69.3935956 |
| 16:16:28 | 67.6408647 | 61.1179467 | 71.2705783 | 70.6228432 | 68.3935956 |
| 16:16:29 | 67.6408647 | 61.1179467 | 71.2705783 | 70.6228432 | 68.3935956 |
| 16:16:30 | 67.6408647 | 62.1179467 | 71.2705783 | 70.6228432 | 67.3935956 |
| 16:16:31 | 67.6408647 | 62.1179467 | 72.2705783 | 69.6228432 | 67.3935956 |
| 16:16:32 | 67.6408647 | 64.1179467 | 72.2705783 | 69.6228432 | 69.3935956 |
| 16:16:33 | 67.6408647 | 65.1179467 | 73.2705783 | 69.6228432 | 69.3935956 |
| 16:16:34 | 67.6408647 | 65.1179467 | 73.2705783 | 68.6228432 | 73.3935956 |
| 16:16:35 | 67.6408647 | 67.1179467 | 73.2705783 | 68.6228432 | 74.3935956 |
| 16:16:36 | 68.6408647 | 68.1179467 | 73.2705783 | 67.6228432 | 74.3935956 |
| 16:16:37 | 69.6408647 | 69.1179467 | 74.2705783 | 67.6228432 | 75.3935956 |
| 16:16:38 | 70.6408647 | 68.1179467 | 74.2705783 | 67.6228432 | 75.3935956 |



|          |            |            |            |            |            |
|----------|------------|------------|------------|------------|------------|
| 16:16:39 | 70.6408647 | 66.1179467 | 75.2705783 | 67.6228432 | 75.3935956 |
| 16:16:40 | 70.6408647 | 65.1179467 | 76.2705783 | 67.6228432 | 75.3935956 |
| 16:16:41 | 70.6408647 | 64.1179467 | 76.2705783 | 67.6228432 | 75.3935956 |
| 16:16:42 | 70.6408647 | 63.1179467 | 78.2705783 | 67.6228432 | 75.3935956 |
| 16:16:43 | 70.6408647 | 62.1179467 | 80.2705783 | 67.6228432 | 76.3935956 |
| 16:16:44 | 69.6408647 | 61.1179467 | 81.2705783 | 67.6228432 | 77.3935956 |
| 16:16:45 | 65.6408647 | 61.1179467 | 84.2705783 | 67.6228432 | 78.3935956 |
| 16:16:46 | 64.6408647 | 61.1179467 | 85.2705783 | 67.6228432 | 78.3935956 |
| 16:16:47 | 64.6408647 | 61.1179467 | 77.2705783 | 67.6228432 | 78.3935956 |
| 16:16:48 | 64.6408647 | 60.1179467 | 75.2705783 | 67.6228432 | 78.3935956 |
| 16:16:49 | 63.6408647 | 60.1179467 | 75.2705783 | 67.6228432 | 78.3935956 |
| 16:16:50 | 64.6408647 | 59.1179467 | 74.2705783 | 67.6228432 | 78.3935956 |
| 16:16:51 | 64.6408647 | 59.1179467 | 73.2705783 | 67.6228432 | 78.3935956 |
| 16:16:52 | 64.6408647 | 59.1179467 | 74.2705783 | 67.6228432 | 75.3935956 |
| 16:16:53 | 65.6408647 | 59.1179467 | 73.2705783 | 67.6228432 | 75.3935956 |
| 16:16:54 | 66.6408647 | 59.1179467 | 73.2705783 | 68.6228432 | 75.3935956 |
| 16:16:55 | 66.6408647 | 59.1179467 | 72.2705783 | 70.6228432 | 73.3935956 |
| 16:16:56 | 66.6408647 | 60.1179467 | 70.2705783 | 70.6228432 | 72.3935956 |
| 16:16:57 | 66.6408647 | 61.1179467 | 69.2705783 | 70.6228432 | 71.3935956 |
| 16:16:58 | 66.6408647 | 61.1179467 | 68.2705783 | 71.6228432 | 71.3935956 |
| 16:16:59 | 66.6408647 | 61.1179467 | 68.2705783 | 71.6228432 | 71.3935956 |
| 16:17:00 | 66.6408647 | 61.1179467 | 69.2705783 | 71.6228432 | 71.3935956 |
| 16:17:01 | 66.6408647 | 64.1179467 | 68.2705783 | 70.6228432 | 70.3935956 |
| 16:17:02 | 66.6408647 | 64.1179467 | 67.2705783 | 69.6228432 | 70.3935956 |
| 16:17:03 | 67.6408647 | 66.1179467 | 67.2705783 | 69.6228432 | 69.3935956 |
| 16:17:04 | 70.6408647 | 66.1179467 | 67.2705783 | 69.6228432 | 68.3935956 |
| 16:17:05 | 71.6408647 | 67.1179467 | 67.2705783 | 68.6228432 | 67.3935956 |
| 16:17:06 | 71.6408647 | 69.1179467 | 67.2705783 | 68.6228432 | 67.3935956 |
| 16:17:07 | 71.6408647 | 70.1179467 | 66.2705783 | 68.6228432 | 67.3935956 |
| 16:17:08 | 71.6408647 | 66.1179467 | 66.2705783 | 67.6228432 | 68.3935956 |
| 16:17:09 | 70.6408647 | 65.1179467 | 65.2705783 | 67.6228432 | 68.3935956 |
| 16:17:10 | 70.6408647 | 65.1179467 | 65.2705783 | 68.6228432 | 68.3935956 |
| 16:17:11 | 70.6408647 | 65.1179467 | 65.2705783 | 68.6228432 | 66.3935956 |
| 16:17:12 | 69.6408647 | 65.1179467 | 65.2705783 | 68.6228432 | 66.3935956 |
| 16:17:13 | 69.6408647 | 65.1179467 | 65.2705783 | 68.6228432 | 66.3935956 |
| 16:17:14 | 68.6408647 | 65.1179467 | 65.2705783 | 68.6228432 | 67.3935956 |
| 16:17:15 | 67.6408647 | 65.1179467 | 65.2705783 | 69.6228432 | 67.3935956 |
| 16:17:16 | 66.6408647 | 65.1179467 | 65.2705783 | 69.6228432 | 67.3935956 |
| 16:17:17 | 66.6408647 | 65.1179467 | 65.2705783 | 69.6228432 | 67.3935956 |
| 16:17:18 | 66.6408647 | 65.1179467 | 66.2705783 | 70.6228432 | 67.3935956 |
| 16:17:19 | 66.6408647 | 65.1179467 | 66.2705783 | 71.6228432 | 66.3935956 |
| 16:17:20 | 66.6408647 | 65.1179467 | 66.2705783 | 72.6228432 | 64.3935956 |
| 16:17:21 | 66.6408647 | 66.1179467 | 66.2705783 | 72.6228432 | 64.3935956 |
| 16:17:22 | 66.6408647 | 66.1179467 | 65.2705783 | 71.6228432 | 64.3935956 |
| 16:17:23 | 66.6408647 | 66.1179467 | 65.2705783 | 71.6228432 | 64.3935956 |

|          |            |            |            |            |            |
|----------|------------|------------|------------|------------|------------|
| 16:17:24 | 65.6408647 | 66.1179467 | 65.2705783 | 70.6228432 | 64.3935956 |
| 16:17:25 | 65.6408647 | 66.1179467 | 65.2705783 | 69.6228432 | 64.3935956 |
| 16:17:26 | 65.6408647 | 66.1179467 | 66.2705783 | 68.6228432 | 65.3935956 |
| 16:17:27 | 65.6408647 | 66.1179467 | 67.2705783 | 68.6228432 | 66.3935956 |
| 16:17:28 | 65.6408647 | 67.1179467 | 68.2705783 | 67.6228432 | 66.3935956 |
| 16:17:29 | 65.6408647 | 68.1179467 | 68.2705783 | 67.6228432 | 66.3935956 |
| 16:17:30 | 65.6408647 | 71.1179467 | 69.2705783 | 67.6228432 | 66.3935956 |
| 16:17:31 | 65.6408647 | 73.1179467 | 70.2705783 | 67.6228432 | 66.3935956 |
| 16:17:32 | 65.6408647 | 74.1179467 | 68.2705783 | 66.6228432 | 66.3935956 |
| 16:17:33 | 65.6408647 | 74.1179467 | 67.2705783 | 66.6228432 | 66.3935956 |
| 16:17:34 | 65.6408647 | 73.1179467 | 67.2705783 | 66.6228432 | 65.3935956 |
| 16:17:35 | 65.6408647 | 73.1179467 | 67.2705783 | 66.6228432 | 64.3935956 |
| 16:17:36 | 67.6408647 | 72.1179467 | 66.2705783 | 66.6228432 | 63.3935956 |
| 16:17:37 | 67.6408647 | 71.1179467 | 66.2705783 | 66.6228432 | 64.3935956 |
| 16:17:38 | 64.6408647 | 69.1179467 | 66.2705783 | 66.6228432 | 65.3935956 |
| 16:17:39 | 64.6408647 | 67.1179467 | 66.2705783 | 66.6228432 | 65.3935956 |
| 16:17:40 | 63.6408647 | 65.1179467 | 66.2705783 | 67.6228432 | 66.3935956 |
| 16:17:41 | 63.6408647 | 64.1179467 | 66.2705783 | 67.6228432 | 66.3935956 |
| 16:17:42 | 62.6408647 | 63.1179467 | 66.2705783 | 67.6228432 | 66.3935956 |
| 16:17:43 | 62.6408647 | 63.1179467 | 66.2705783 | 68.6228432 | 65.3935956 |
| 16:17:44 | 63.6408647 | 63.1179467 | 67.2705783 | 68.6228432 | 65.3935956 |
| 16:17:45 | 64.6408647 | 63.1179467 | 67.2705783 | 68.6228432 | 62.3935956 |
| 16:17:46 | 64.6408647 | 65.1179467 | 67.2705783 | 68.6228432 | 62.3935956 |
| 16:17:47 | 64.6408647 | 66.1179467 | 67.2705783 | 68.6228432 | 62.3935956 |
| 16:17:48 | 64.6408647 | 66.1179467 | 67.2705783 | 68.6228432 | 62.3935956 |
| 16:17:49 | 64.6408647 | 66.1179467 | 68.2705783 | 68.6228432 | 62.3935956 |
| 16:17:50 | 64.6408647 | 66.1179467 | 68.2705783 | 68.6228432 | 62.3935956 |
| 16:17:51 | 64.6408647 | 66.1179467 | 68.2705783 | 67.6228432 | 63.3935956 |
| 16:17:52 | 74.6408647 | 67.1179467 | 68.2705783 | 67.6228432 | 63.3935956 |
| 16:17:53 | 74.6408647 | 67.1179467 | 68.2705783 | 67.6228432 | 63.3935956 |
| 16:17:54 | 74.6408647 | 67.1179467 | 68.2705783 | 67.6228432 | 64.3935956 |
| 16:17:55 | 71.6408647 | 67.1179467 | 68.2705783 | 67.6228432 | 64.3935956 |
| 16:17:56 | 70.6408647 | 67.1179467 | 69.2705783 | 67.6228432 | 64.3935956 |
| 16:17:57 | 70.6408647 | 69.1179467 | 72.2705783 | 67.6228432 | 67.3935956 |
| 16:17:58 | 69.6408647 | 70.1179467 | 72.2705783 | 67.6228432 | 67.3935956 |
| 16:17:59 | 69.6408647 | 71.1179467 | 69.2705783 | 68.6228432 | 68.3935956 |
| 16:18:00 | 71.6408647 | 72.1179467 | 68.2705783 | 67.6228432 | 68.3935956 |
| 16:18:01 | 72.6408647 | 72.1179467 | 68.2705783 | 68.6228432 | 68.3935956 |
| 16:18:02 | 72.6408647 | 71.1179467 | 68.2705783 | 68.6228432 | 68.3935956 |
| 16:18:03 | 73.6408647 | 72.1179467 | 68.2705783 | 68.6228432 | 70.3935956 |
| 16:18:04 | 73.6408647 | 72.1179467 | 67.2705783 | 68.6228432 | 71.3935956 |
| 16:18:05 | 73.6408647 | 72.1179467 | 67.2705783 | 69.6228432 | 72.3935956 |
| 16:18:06 | 73.6408647 | 71.1179467 | 67.2705783 | 69.6228432 | 72.3935956 |
| 16:18:07 | 74.6408647 | 70.1179467 | 66.2705783 | 69.6228432 | 73.3935956 |
| 16:18:08 | 74.6408647 | 67.1179467 | 66.2705783 | 69.6228432 | 74.3935956 |

|          |            |            |            |            |            |
|----------|------------|------------|------------|------------|------------|
| 16:18:09 | 75.6408647 | 65.1179467 | 66.2705783 | 68.6228432 | 74.3935956 |
| 16:18:10 | 75.6408647 | 64.1179467 | 66.2705783 | 68.6228432 | 74.3935956 |
| 16:18:11 | 75.6408647 | 64.1179467 | 66.2705783 | 69.6228432 | 74.3935956 |
| 16:18:12 | 75.6408647 | 64.1179467 | 66.2705783 | 69.6228432 | 75.3935956 |
| 16:18:13 | 71.6408647 | 64.1179467 | 66.2705783 | 70.6228432 | 75.3935956 |
| 16:18:14 | 69.6408647 | 64.1179467 | 66.2705783 | 73.6228432 | 74.3935956 |
| 16:18:15 | 69.6408647 | 65.1179467 | 67.2705783 | 74.6228432 | 74.3935956 |
| 16:18:16 | 67.6408647 | 66.1179467 | 67.2705783 | 74.6228432 | 75.3935956 |
| 16:18:17 | 67.6408647 | 66.1179467 | 67.2705783 | 74.6228432 | 75.3935956 |
| 16:18:18 | 67.6408647 | 66.1179467 | 67.2705783 | 73.6228432 | 75.3935956 |
| 16:18:19 | 66.6408647 | 66.1179467 | 67.2705783 | 72.6228432 | 74.3935956 |
| 16:18:20 | 66.6408647 | 66.1179467 | 66.2705783 | 71.6228432 | 74.3935956 |
| 16:18:21 | 65.6408647 | 66.1179467 | 66.2705783 | 72.6228432 | 73.3935956 |
| 16:18:22 | 66.6408647 | 66.1179467 | 66.2705783 | 72.6228432 | 73.3935956 |
| 16:18:23 | 66.6408647 | 67.1179467 | 66.2705783 | 77.6228432 | 73.3935956 |
| 16:18:24 | 66.6408647 | 68.1179467 | 66.2705783 | 77.6228432 | 72.3935956 |
| 16:18:25 | 65.6408647 | 70.1179467 | 66.2705783 | 78.6228432 | 72.3935956 |
| 16:18:26 | 65.6408647 | 70.1179467 | 67.2705783 | 78.6228432 | 72.3935956 |
| 16:18:27 | 66.6408647 | 70.1179467 | 69.2705783 | 68.6228432 | 71.3935956 |
| 16:18:28 | 66.6408647 | 71.1179467 | 69.2705783 | 66.6228432 | 71.3935956 |
| 16:18:29 | 66.6408647 | 72.1179467 | 69.2705783 | 66.6228432 | 71.3935956 |
| 16:18:30 | 65.6408647 | 73.1179467 | 68.2705783 | 67.6228432 | 72.3935956 |
| 16:18:31 | 65.6408647 | 73.1179467 | 68.2705783 | 67.6228432 | 72.3935956 |
| 16:18:32 | 64.6408647 | 73.1179467 | 68.2705783 | 67.6228432 | 73.3935956 |
| 16:18:33 | 64.6408647 | 73.1179467 | 67.2705783 | 68.6228432 | 73.3935956 |
| 16:18:34 | 64.6408647 | 74.1179467 | 67.2705783 | 69.6228432 | 73.3935956 |
| 16:18:35 | 64.6408647 | 74.1179467 | 67.2705783 | 71.6228432 | 71.3935956 |
| 16:18:36 | 63.6408647 | 74.1179467 | 67.2705783 | 71.6228432 | 69.3935956 |
| 16:18:37 | 63.6408647 | 76.1179467 | 67.2705783 | 71.6228432 | 69.3935956 |
| 16:18:38 | 63.6408647 | 79.1179467 | 67.2705783 | 70.6228432 | 69.3935956 |
| 16:18:39 | 64.6408647 | 81.1179467 | 67.2705783 | 70.6228432 | 69.3935956 |
| 16:18:40 | 64.6408647 | 82.1179467 | 67.2705783 | 68.6228432 | 69.3935956 |
| 16:18:41 | 64.6408647 | 81.1179467 | 66.2705783 | 68.6228432 | 68.3935956 |
| 16:18:42 | 64.6408647 | 80.1179467 | 66.2705783 | 65.6228432 | 68.3935956 |
| 16:18:43 | 64.6408647 | 78.1179467 | 66.2705783 | 65.6228432 | 68.3935956 |
| 16:18:44 | 63.6408647 | 77.1179467 | 66.2705783 | 66.6228432 | 67.3935956 |
| 16:18:45 | 64.6408647 | 77.1179467 | 66.2705783 | 69.6228432 | 65.3935956 |
| 16:18:46 | 65.6408647 | 74.1179467 | 65.2705783 | 70.6228432 | 65.3935956 |
| 16:18:47 | 65.6408647 | 73.1179467 | 65.2705783 | 70.6228432 | 65.3935956 |
| 16:18:48 | 66.6408647 | 72.1179467 | 65.2705783 | 74.6228432 | 66.3935956 |
| 16:18:49 | 66.6408647 | 71.1179467 | 65.2705783 | 76.6228432 | 66.3935956 |
| 16:18:50 | 65.6408647 | 71.1179467 | 65.2705783 | 76.6228432 | 66.3935956 |
| 16:18:51 | 65.6408647 | 71.1179467 | 65.2705783 | 76.6228432 | 66.3935956 |
| 16:18:52 | 67.6408647 | 71.1179467 | 65.2705783 | 76.6228432 | 66.3935956 |
| 16:18:53 | 67.6408647 | 72.1179467 | 66.2705783 | 78.6228432 | 66.3935956 |

|          |            |            |            |            |            |
|----------|------------|------------|------------|------------|------------|
| 16:18:54 | 69.6408647 | 72.1179467 | 67.2705783 | 78.6228432 | 66.3935956 |
| 16:18:55 | 71.6408647 | 71.1179467 | 67.2705783 | 78.6228432 | 65.3935956 |
| 16:18:56 | 76.6408647 | 69.1179467 | 68.2705783 | 78.6228432 | 66.3935956 |
| 16:18:57 | 76.6408647 | 68.1179467 | 69.2705783 | 79.6228432 | 67.3935956 |
| 16:18:58 | 77.6408647 | 68.1179467 | 69.2705783 | 79.6228432 | 67.3935956 |
| 16:18:59 | 77.6408647 | 68.1179467 | 69.2705783 | 80.6228432 | 66.3935956 |
| 16:19:00 | 76.6408647 | 68.1179467 | 69.2705783 | 80.6228432 | 65.3935956 |
| 16:19:01 | 75.6408647 | 69.1179467 | 73.2705783 | 80.6228432 | 64.3935956 |
| 16:19:02 | 74.6408647 | 70.1179467 | 73.2705783 | 78.6228432 | 63.3935956 |
| 16:19:03 | 74.6408647 | 71.1179467 | 74.2705783 | 77.6228432 | 63.3935956 |
| 16:19:04 | 73.6408647 | 71.1179467 | 74.2705783 | 78.6228432 | 65.3935956 |
| 16:19:05 | 73.6408647 | 72.1179467 | 74.2705783 | 78.6228432 | 66.3935956 |
| 16:19:06 | 81.6408647 | 71.1179467 | 74.2705783 | 77.6228432 | 66.3935956 |
| 16:19:07 | 81.6408647 | 72.1179467 | 74.2705783 | 78.6228432 | 78.3935956 |
| 16:19:08 | 83.6408647 | 73.1179467 | 74.2705783 | 79.6228432 | 84.3935956 |
| 16:19:09 | 84.6408647 | 75.1179467 | 74.2705783 | 79.6228432 | 87.3935956 |
| 16:19:10 | 83.6408647 | 76.1179467 | 75.2705783 | 79.6228432 | 87.3935956 |
| 16:19:11 | 83.6408647 | 76.1179467 | 75.2705783 | 79.6228432 | 87.3935956 |
| 16:19:12 | 79.6408647 | 76.1179467 | 75.2705783 | 78.6228432 | 90.3935956 |
| 16:19:13 | 78.6408647 | 76.1179467 | 73.2705783 | 78.6228432 | 90.3935956 |
| 16:19:14 | 78.6408647 | 75.1179467 | 73.2705783 | 78.6228432 | 90.3935956 |
| 16:19:15 | 78.6408647 | 74.1179467 | 73.2705783 | 78.6228432 | 90.3935956 |
| 16:19:16 | 77.6408647 | 74.1179467 | 72.2705783 | 78.6228432 | 89.3935956 |
| 16:19:17 | 77.6408647 | 73.1179467 | 71.2705783 | 78.6228432 | 87.3935956 |
| 16:19:18 | 77.6408647 | 71.1179467 | 71.2705783 | 78.6228432 | 86.3935956 |
| 16:19:19 | 77.6408647 | 70.1179467 | 71.2705783 | 78.6228432 | 86.3935956 |
| 16:19:20 | 77.6408647 | 70.1179467 | 70.2705783 | 76.6228432 | 85.3935956 |
| 16:19:21 | 77.6408647 | 70.1179467 | 70.2705783 | 74.6228432 | 83.3935956 |
| 16:19:22 | 78.6408647 | 70.1179467 | 71.2705783 | 71.6228432 | 82.3935956 |
| 16:19:23 | 79.6408647 | 70.1179467 | 71.2705783 | 69.6228432 | 78.3935956 |
| 16:19:24 | 79.6408647 | 71.1179467 | 70.2705783 | 68.6228432 | 78.3935956 |
| 16:19:25 | 79.6408647 | 71.1179467 | 70.2705783 | 68.6228432 | 78.3935956 |
| 16:19:26 | 78.6408647 | 71.1179467 | 71.2705783 | 68.6228432 | 78.3935956 |
| 16:19:27 | 78.6408647 | 71.1179467 | 72.2705783 | 67.6228432 | 78.3935956 |
| 16:19:28 | 78.6408647 | 71.1179467 | 72.2705783 | 68.6228432 | 78.3935956 |
| 16:19:29 | 76.6408647 | 71.1179467 | 73.2705783 | 68.6228432 | 77.3935956 |
| 16:19:30 | 76.6408647 | 71.1179467 | 73.2705783 | 68.6228432 | 78.3935956 |
| 16:19:31 | 75.6408647 | 71.1179467 | 73.2705783 | 71.6228432 | 78.3935956 |
| 16:19:32 | 75.6408647 | 72.1179467 | 73.2705783 | 70.6228432 | 80.3935956 |
| 16:19:33 | 76.6408647 | 77.1179467 | 73.2705783 | 70.6228432 | 80.3935956 |
| 16:19:34 | 77.6408647 | 81.1179467 | 73.2705783 | 69.6228432 | 81.3935956 |
| 16:19:35 | 78.6408647 | 82.1179467 | 73.2705783 | 69.6228432 | 81.3935956 |
| 16:19:36 | 78.6408647 | 82.1179467 | 73.2705783 | 69.6228432 | 80.3935956 |
| 16:19:37 | 79.6408647 | 75.1179467 | 73.2705783 | 67.6228432 | 78.3935956 |
| 16:19:38 | 81.6408647 | 73.1179467 | 73.2705783 | 67.6228432 | 78.3935956 |

|          |            |            |            |            |            |
|----------|------------|------------|------------|------------|------------|
| 16:19:39 | 86.6408647 | 72.1179467 | 73.2705783 | 67.6228432 | 78.3935956 |
| 16:19:40 | 87.6408647 | 72.1179467 | 73.2705783 | 67.6228432 | 78.3935956 |
| 16:19:41 | 87.6408647 | 72.1179467 | 73.2705783 | 67.6228432 | 77.3935956 |
| 16:19:42 | 88.6408647 | 72.1179467 | 75.2705783 | 67.6228432 | 76.3935956 |
| 16:19:43 | 88.6408647 | 70.1179467 | 75.2705783 | 68.6228432 | 72.3935956 |
| 16:19:44 | 88.6408647 | 70.1179467 | 75.2705783 | 68.6228432 | 70.3935956 |
| 16:19:45 | 88.6408647 | 70.1179467 | 76.2705783 | 68.6228432 | 71.3935956 |
| 16:19:46 | 88.6408647 | 70.1179467 | 76.2705783 | 69.6228432 | 71.3935956 |
| 16:19:47 | 81.6408647 | 70.1179467 | 76.2705783 | 68.6228432 | 71.3935956 |
| 16:19:48 | 78.6408647 | 70.1179467 | 76.2705783 | 65.6228432 | 71.3935956 |
| 16:19:49 | 78.6408647 | 70.1179467 | 76.2705783 | 65.6228432 | 71.3935956 |
| 16:19:50 | 78.6408647 | 70.1179467 | 77.2705783 | 62.6228432 | 72.3935956 |
| 16:19:51 | 77.6408647 | 70.1179467 | 76.2705783 | 61.6228432 | 67.3935956 |
| 16:19:52 | 78.6408647 | 69.1179467 | 76.2705783 | 62.6228432 | 67.3935956 |
| 16:19:53 | 78.6408647 | 69.1179467 | 74.2705783 | 63.6228432 | 67.3935956 |
| 16:19:54 | 81.6408647 | 70.1179467 | 72.2705783 | 63.6228432 | 66.3935956 |
| 16:19:55 | 81.6408647 | 70.1179467 | 72.2705783 | 63.6228432 | 65.3935956 |
| 16:19:56 | 85.6408647 | 71.1179467 | 71.2705783 | 63.6228432 | 65.3935956 |
| 16:19:57 | 86.6408647 | 71.1179467 | 71.2705783 | 63.6228432 | 65.3935956 |
| 16:19:58 | 86.6408647 | 71.1179467 | 71.2705783 | 65.6228432 | 65.3935956 |
| 16:19:59 | 85.6408647 | 71.1179467 | 70.2705783 | 70.6228432 | 65.3935956 |
| 16:20:00 | 82.6408647 | 72.1179467 | 70.2705783 | 72.6228432 | 64.3935956 |
| 16:20:01 | 81.6408647 | 74.1179467 | 70.2705783 | 72.6228432 | 64.3935956 |
| 16:20:02 | 81.6408647 | 75.1179467 | 69.2705783 | 73.6228432 | 64.3935956 |
| 16:20:03 | 81.6408647 | 76.1179467 | 70.2705783 | 73.6228432 | 64.3935956 |
| 16:20:04 | 80.6408647 | 76.1179467 | 70.2705783 | 75.6228432 | 65.3935956 |
| 16:20:05 | 80.6408647 | 76.1179467 | 70.2705783 | 75.6228432 | 65.3935956 |
| 16:20:06 | 79.6408647 | 76.1179467 | 71.2705783 | 76.6228432 | 65.3935956 |
| 16:20:07 | 79.6408647 | 77.1179467 | 71.2705783 | 75.6228432 | 68.3935956 |
| 16:20:08 | 79.6408647 | 77.1179467 | 71.2705783 | 72.6228432 | 69.3935956 |
| 16:20:09 | 79.6408647 | 76.1179467 | 70.2705783 | 71.6228432 | 72.3935956 |
| 16:20:10 | 79.6408647 | 74.1179467 | 70.2705783 | 71.6228432 | 72.3935956 |
| 16:20:11 | 79.6408647 | 73.1179467 | 68.2705783 | 70.6228432 | 73.3935956 |
| 16:20:12 | 79.6408647 | 73.1179467 | 68.2705783 | 70.6228432 | 73.3935956 |
| 16:20:13 | 79.6408647 | 73.1179467 | 68.2705783 | 71.6228432 | 72.3935956 |
| 16:20:14 | 78.6408647 | 73.1179467 | 68.2705783 | 72.6228432 | 72.3935956 |
| 16:20:15 | 78.6408647 | 73.1179467 | 67.2705783 | 72.6228432 | 72.3935956 |
| 16:20:16 | 78.6408647 | 73.1179467 | 67.2705783 | 72.6228432 | 71.3935956 |
| 16:20:17 | 78.6408647 | 72.1179467 | 67.2705783 | 73.6228432 | 71.3935956 |
| 16:20:18 | 76.6408647 | 72.1179467 | 68.2705783 | 73.6228432 | 71.3935956 |
| 16:20:19 | 76.6408647 | 72.1179467 | 68.2705783 | 73.6228432 | 72.3935956 |
| 16:20:20 | 75.6408647 | 72.1179467 | 70.2705783 | 73.6228432 | 72.3935956 |
| 16:20:21 | 75.6408647 | 73.1179467 | 71.2705783 | 71.6228432 | 74.3935956 |
| 16:20:22 | 75.6408647 | 73.1179467 | 71.2705783 | 70.6228432 | 75.3935956 |
| 16:20:23 | 75.6408647 | 73.1179467 | 72.2705783 | 70.6228432 | 75.3935956 |

|          |            |            |            |            |            |
|----------|------------|------------|------------|------------|------------|
| 16:20:24 | 75.6408647 | 72.1179467 | 73.2705783 | 68.6228432 | 74.3935956 |
| 16:20:25 | 74.6408647 | 72.1179467 | 73.2705783 | 68.6228432 | 74.3935956 |
| 16:20:26 | 73.6408647 | 67.1179467 | 74.2705783 | 67.6228432 | 74.3935956 |
| 16:20:27 | 73.6408647 | 67.1179467 | 74.2705783 | 67.6228432 | 73.3935956 |
| 16:20:28 | 67.6408647 | 67.1179467 | 75.2705783 | 67.6228432 | 73.3935956 |
| 16:20:29 | 67.6408647 | 67.1179467 | 76.2705783 | 67.6228432 | 73.3935956 |
| 16:20:30 | 66.6408647 | 67.1179467 | 76.2705783 | 67.6228432 | 73.3935956 |
| 16:20:31 | 66.6408647 | 67.1179467 | 74.2705783 | 66.6228432 | 74.3935956 |
| 16:20:32 | 66.6408647 | 68.1179467 | 74.2705783 | 66.6228432 | 74.3935956 |
| 16:20:33 | 66.6408647 | 68.1179467 | 74.2705783 | 66.6228432 | 75.3935956 |
| 16:20:34 | 66.6408647 | 68.1179467 | 74.2705783 | 67.6228432 | 77.3935956 |
| 16:20:35 | 65.6408647 | 67.1179467 | 74.2705783 | 68.6228432 | 78.3935956 |
| 16:20:36 | 65.6408647 | 67.1179467 | 75.2705783 | 67.6228432 | 78.3935956 |
| 16:20:37 | 65.6408647 | 67.1179467 | 76.2705783 | 67.6228432 | 77.3935956 |
| 16:20:38 | 64.6408647 | 66.1179467 | 76.2705783 | 66.6228432 | 77.3935956 |
| 16:20:39 | 64.6408647 | 66.1179467 | 77.2705783 | 64.6228432 | 77.3935956 |
| 16:20:40 | 64.6408647 | 66.1179467 | 78.2705783 | 61.6228432 | 76.3935956 |
| 16:20:41 | 64.6408647 | 66.1179467 | 80.2705783 | 59.6228432 | 76.3935956 |
| 16:20:42 | 64.6408647 | 65.1179467 | 81.2705783 | 59.6228432 | 76.3935956 |
| 16:20:43 | 64.6408647 | 65.1179467 | 82.2705783 | 59.6228432 | 78.3935956 |
| 16:20:44 | 63.6408647 | 65.1179467 | 83.2705783 | 59.6228432 | 78.3935956 |
| 16:20:45 | 63.6408647 | 65.1179467 | 69.7433868 | 59.6228432 | 78.3935956 |
| 16:20:46 | 63.6408647 | 65.1179467 | 69.7433868 | 59.6228432 | 77.3935956 |
| 16:20:47 | 63.6408647 | 64.1179467 | 69.8433868 | 59.6228432 | 77.3935956 |
| 16:20:48 | 63.6408647 | 64.1179467 | 70.2433868 | 60.6228432 | 74.3935956 |
| 16:20:49 | 63.6408647 | 64.1179467 | 71.5433868 | 63.6228432 | 74.3935956 |
| 16:20:50 | 63.6408647 | 62.1179467 | 71.3433868 | 63.6228432 | 72.3935956 |
| 16:20:51 | 63.6408647 | 62.1179467 | 71.2433868 | 66.6228432 | 68.3935956 |
| 16:20:52 | 64.6408647 | 62.1179467 | 72.0433868 | 72.6228432 | 68.3935956 |
| 16:20:53 | 64.6408647 | 62.1179467 | 72.8433868 | 75.6228432 | 69.3935956 |
| 16:20:54 | 65.6408647 | 62.1179467 | 71.9433868 | 77.6228432 | 69.3935956 |
| 16:20:55 | 67.6408647 | 62.1179467 | 71.8433868 | 77.6228432 | 69.3935956 |
| 16:20:56 | 64.6408647 | 62.1179467 | 70.3433868 | 77.6228432 | 70.3935956 |
| 16:20:57 | 62.6408647 | 62.1179467 | 67.8433868 | 67.6228432 | 70.3935956 |
| 16:20:58 | 62.6408647 | 62.1179467 | 66.8433868 | 63.6228432 | 70.3935956 |
| 16:20:59 | 62.6408647 | 62.1179467 | 66.2921816 | 63.6228432 | 70.3935956 |
| 16:21:00 | 62.6408647 | 63.1179467 | 65.8608581 | 62.6228432 | 71.3935956 |
| 16:21:01 | 62.6408647 | 64.1179467 | 65.8433868 | 62.6228432 | 71.3935956 |
| 16:21:02 | 62.6408647 | 64.1179467 | 73.2705783 | 65.6228432 | 71.3935956 |
| 16:21:03 | 62.6408647 | 66.1179467 | 71.2705783 | 65.6228432 | 69.3935956 |
| 16:21:04 | 62.6408647 | 67.1179467 | 69.2705783 | 65.6228432 | 69.3935956 |
| 16:21:05 | 62.6408647 | 68.1179467 | 68.2705783 | 68.6228432 | 69.3935956 |
| 16:21:06 | 62.6408647 | 68.1179467 | 67.2705783 | 68.6228432 | 69.3935956 |
| 16:21:07 | 61.6408647 | 68.1179467 | 67.2705783 | 69.6228432 | 69.3935956 |
| 16:21:08 | 61.6408647 | 65.1179467 | 67.2705783 | 65.6228432 | 65.3935956 |

|          |            |            |            |            |            |
|----------|------------|------------|------------|------------|------------|
| 16:21:09 | 60.6408647 | 63.1179467 | 67.2705783 | 64.6228432 | 65.3935956 |
| 16:21:10 | 60.6408647 | 62.1179467 | 67.2705783 | 64.6228432 | 62.3935956 |
| 16:21:11 | 60.6408647 | 63.1179467 | 67.2705783 | 64.6228432 | 62.3935956 |
| 16:21:12 | 60.6408647 | 66.1179467 | 67.2705783 | 64.6228432 | 61.3935956 |
| 16:21:13 | 60.6408647 | 66.1179467 | 66.2705783 | 64.6228432 | 61.3935956 |
| 16:21:14 | 60.6408647 | 66.1179467 | 66.2705783 | 68.6228432 | 61.3935956 |
| 16:21:15 | 59.6408647 | 66.1179467 | 66.2705783 | 68.6228432 | 62.3935956 |
| 16:21:16 | 59.6408647 | 67.1179467 | 66.2705783 | 71.6228432 | 62.3935956 |
| 16:21:17 | 59.6408647 | 67.1179467 | 66.2705783 | 73.6228432 | 62.3935956 |
| 16:21:18 | 59.6408647 | 68.1179467 | 66.2705783 | 73.6228432 | 63.3935956 |
| 16:21:19 | 59.6408647 | 69.1179467 | 66.2705783 | 71.6228432 | 63.3935956 |
| 16:21:20 | 61.6408647 | 70.1179467 | 66.2705783 | 71.6228432 | 63.3935956 |
| 16:21:21 | 63.6408647 | 72.1179467 | 66.2705783 | 70.6228432 | 63.3935956 |
| 16:21:22 | 64.6408647 | 73.1179467 | 66.2705783 | 70.6228432 | 63.3935956 |
| 16:21:23 | 65.6408647 | 75.1179467 | 66.2705783 | 71.6228432 | 63.3935956 |
| 16:21:24 | 65.6408647 | 75.1179467 | 67.2705783 | 71.6228432 | 64.3935956 |
| 16:21:25 | 66.6408647 | 76.1179467 | 68.2705783 | 72.6228432 | 64.3935956 |
| 16:21:26 | 66.6408647 | 75.1179467 | 68.2705783 | 71.6228432 | 65.3935956 |
| 16:21:27 | 67.6408647 | 73.1179467 | 67.2705783 | 66.6228432 | 67.3935956 |
| 16:21:28 | 67.6408647 | 72.1179467 | 67.2705783 | 66.6228432 | 67.3935956 |
| 16:21:29 | 70.6408647 | 72.1179467 | 67.2705783 | 64.6228432 | 67.3935956 |
| 16:21:30 | 70.6408647 | 66.1179467 | 67.2705783 | 63.6228432 | 69.3935956 |
| 16:21:31 | 71.6408647 | 59.1179467 | 67.2705783 | 63.6228432 | 69.3935956 |
| 16:21:32 | 71.6408647 | 56.1179467 | 67.2705783 | 63.6228432 | 70.3935956 |
| 16:21:33 | 71.6408647 | 54.1179467 | 67.2705783 | 63.6228432 | 72.3935956 |
| 16:21:34 | 71.6408647 | 52.1179467 | 67.2705783 | 63.6228432 | 73.3935956 |
| 16:21:35 | 73.6408647 | 50.1179467 | 67.2705783 | 64.6228432 | 73.3935956 |
| 16:21:36 | 72.6408647 | 50.1179467 | 67.2705783 | 66.6228432 | 73.3935956 |
| 16:21:37 | 72.6408647 | 49.1179467 | 66.2705783 | 66.6228432 | 71.3935956 |
| 16:21:38 | 70.6408647 | 49.1179467 | 66.2705783 | 64.6228432 | 71.3935956 |
| 16:21:39 | 70.6408647 | 50.1179467 | 66.2705783 | 64.6228432 | 71.3935956 |
| 16:21:40 | 69.6408647 | 51.1179467 | 66.2705783 | 64.6228432 | 70.3935956 |
| 16:21:41 | 69.6408647 | 51.1179467 | 66.2705783 | 65.6228432 | 68.3935956 |
| 16:21:42 | 69.6408647 | 51.1179467 | 66.2705783 | 67.6228432 | 68.3935956 |
| 16:21:43 | 66.6408647 | 51.1179467 | 66.2705783 | 67.6228432 | 68.3935956 |
| 16:21:44 | 62.6408647 | 51.1179467 | 66.2705783 | 67.6228432 | 67.3935956 |
| 16:21:45 | 61.6408647 | 50.1179467 | 66.2705783 | 67.6228432 | 67.3935956 |
| 16:21:46 | 60.6408647 | 50.1179467 | 66.2705783 | 67.6228432 | 65.3935956 |
| 16:21:47 | 60.6408647 | 52.1179467 | 66.2705783 | 66.6228432 | 64.3935956 |
| 16:21:48 | 60.6408647 | 58.1179467 | 66.2705783 | 66.6228432 | 64.3935956 |
| 16:21:49 | 60.6408647 | 63.1179467 | 66.2705783 | 66.6228432 | 64.3935956 |
| 16:21:50 | 60.6408647 | 63.1179467 | 66.2705783 | 66.6228432 | 64.3935956 |
| 16:21:51 | 60.6408647 | 65.1179467 | 66.2705783 | 66.6228432 | 62.3935956 |
| 16:21:52 | 61.6408647 | 66.1179467 | 66.2705783 | 67.6228432 | 59.3935956 |
| 16:21:53 | 61.6408647 | 66.1179467 | 66.2705783 | 67.6228432 | 59.3935956 |

|          |            |            |            |            |            |
|----------|------------|------------|------------|------------|------------|
| 16:21:54 | 62.6408647 | 66.1179467 | 66.2705783 | 67.6228432 | 58.3935956 |
| 16:21:55 | 62.6408647 | 67.1179467 | 66.2705783 | 70.6228432 | 58.3935956 |
| 16:21:56 | 62.6408647 | 70.1179467 | 66.2705783 | 74.6228432 | 57.3935956 |
| 16:21:57 | 62.6408647 | 71.1179467 | 66.2705783 | 75.6228432 | 57.3935956 |
| 16:21:58 | 61.6408647 | 72.1179467 | 66.2705783 | 76.6228432 | 57.3935956 |
| 16:21:59 | 60.6408647 | 71.1179467 | 67.2705783 | 76.6228432 | 57.3935956 |
| 16:22:00 | 60.6408647 | 71.1179467 | 67.2705783 | 76.6228432 | 57.3935956 |
| 16:22:01 | 60.6408647 | 71.1179467 | 67.2705783 | 76.6228432 | 58.3935956 |
| 16:22:02 | 60.6408647 | 71.1179467 | 67.2705783 | 76.6228432 | 59.3935956 |
| 16:22:03 | 60.6408647 | 72.1179467 | 67.2705783 | 74.6228432 | 59.3935956 |
| 16:22:04 | 60.6408647 | 72.1179467 | 67.2705783 | 70.6228432 | 59.3935956 |
| 16:22:05 | 61.6408647 | 74.1179467 | 66.2705783 | 67.6228432 | 59.3935956 |
| 16:22:06 | 61.6408647 | 74.1179467 | 67.2705783 | 67.6228432 | 59.3935956 |
| 16:22:07 | 61.6408647 | 73.1179467 | 66.2705783 | 66.6228432 | 57.3935956 |
| 16:22:08 | 61.6408647 | 72.1179467 | 66.2705783 | 66.6228432 | 57.3935956 |
| 16:22:09 | 61.6408647 | 71.1179467 | 66.2705783 | 67.6228432 | 57.3935956 |
| 16:22:10 | 61.6408647 | 70.1179467 | 66.2705783 | 67.6228432 | 56.3935956 |
| 16:22:11 | 61.6408647 | 69.1179467 | 67.2705783 | 68.6228432 | 56.3935956 |
| 16:22:12 | 60.6408647 | 69.1179467 | 67.2705783 | 68.6228432 | 55.3935956 |
| 16:22:13 | 61.6408647 | 70.1179467 | 67.2705783 | 68.6228432 | 55.3935956 |
| 16:22:14 | 61.6408647 | 72.1179467 | 67.2705783 | 68.6228432 | 55.3935956 |
| 16:22:15 | 61.6408647 | 73.1179467 | 67.2705783 | 68.6228432 | 55.3935956 |
| 16:22:16 | 63.6408647 | 73.1179467 | 67.2705783 | 67.6228432 | 59.3935956 |
| 16:22:17 | 63.6408647 | 73.1179467 | 67.2705783 | 67.6228432 | 60.3935956 |
| 16:22:18 | 63.6408647 | 73.1179467 | 67.2705783 | 67.6228432 | 60.3935956 |
| 16:22:19 | 63.6408647 | 73.1179467 | 67.2705783 | 67.6228432 | 62.3935956 |
| 16:22:20 | 63.6408647 | 73.1179467 | 68.2705783 | 67.6228432 | 62.3935956 |
| 16:22:21 | 64.6408647 | 72.1179467 | 68.2705783 | 67.6228432 | 63.3935956 |
| 16:22:22 | 65.6408647 | 72.1179467 | 69.2705783 | 67.6228432 | 63.3935956 |
| 16:22:23 | 64.6408647 | 73.1179467 | 71.2705783 | 67.6228432 | 69.3935956 |
| 16:22:24 | 64.6408647 | 74.1179467 | 71.2705783 | 66.6228432 | 69.3935956 |
| 16:22:25 | 63.6408647 | 75.1179467 | 71.2705783 | 65.6228432 | 71.3935956 |
| 16:22:26 | 63.6408647 | 75.1179467 | 72.2705783 | 65.6228432 | 72.3935956 |
| 16:22:27 | 63.6408647 | 75.1179467 | 76.2705783 | 64.6228432 | 72.3935956 |
| 16:22:28 | 63.6408647 | 75.1179467 | 78.2705783 | 64.6228432 | 72.3935956 |
| 16:22:29 | 63.6408647 | 75.1179467 | 78.2705783 | 65.6228432 | 72.3935956 |
| 16:22:30 | 63.6408647 | 75.1179467 | 78.2705783 | 65.6228432 | 71.3935956 |
| 16:22:31 | 63.6408647 | 73.1179467 | 78.2705783 | 67.6228432 | 70.3935956 |
| 16:22:32 | 63.6408647 | 73.1179467 | 71.2705783 | 68.6228432 | 70.3935956 |
| 16:22:33 | 64.6408647 | 74.1179467 | 70.2705783 | 69.6228432 | 65.3935956 |
| 16:22:34 | 65.6408647 | 75.1179467 | 69.2705783 | 69.6228432 | 65.3935956 |
| 16:22:35 | 65.6408647 | 75.1179467 | 68.2705783 | 69.6228432 | 67.3935956 |
| 16:22:36 | 65.6408647 | 75.1179467 | 68.2705783 | 69.6228432 | 67.3935956 |
| 16:22:37 | 65.6408647 | 73.1179467 | 68.2705783 | 68.6228432 | 67.3935956 |
| 16:22:38 | 66.6408647 | 73.1179467 | 69.2705783 | 68.6228432 | 67.3935956 |



|          |            |            |            |            |            |
|----------|------------|------------|------------|------------|------------|
| 16:22:39 | 66.6408647 | 71.1179467 | 68.2705783 | 68.6228432 | 68.3935956 |
| 16:22:40 | 66.6408647 | 71.1179467 | 68.2705783 | 69.6228432 | 68.3935956 |
| 16:22:41 | 66.6408647 | 70.1179467 | 68.2705783 | 69.6228432 | 68.3935956 |
| 16:22:42 | 68.6408647 | 70.1179467 | 68.2705783 | 70.6228432 | 68.3935956 |
| 16:22:43 | 68.6408647 | 70.1179467 | 69.2705783 | 70.6228432 | 68.3935956 |
| 16:22:44 | 68.6408647 | 70.1179467 | 70.2705783 | 71.6228432 | 68.3935956 |
| 16:22:45 | 68.6408647 | 70.1179467 | 69.2705783 | 72.6228432 | 69.3935956 |
| 16:22:46 | 68.6408647 | 70.1179467 | 69.2705783 | 72.6228432 | 73.3935956 |
| 16:22:47 | 68.6408647 | 70.1179467 | 69.2705783 | 72.6228432 | 73.3935956 |
| 16:22:48 | 67.6408647 | 70.1179467 | 69.2705783 | 72.6228432 | 75.3935956 |
| 16:22:49 | 67.6408647 | 70.1179467 | 69.2705783 | 72.6228432 | 75.3935956 |
| 16:22:50 | 66.6408647 | 70.1179467 | 69.2705783 | 74.6228432 | 75.3935956 |
| 16:22:51 | 66.6408647 | 69.1179467 | 69.2705783 | 74.6228432 | 75.3935956 |
| 16:22:52 | 66.6408647 | 69.1179467 | 69.2705783 | 74.6228432 | 75.3935956 |
| 16:22:53 | 68.6408647 | 70.1179467 | 69.2705783 | 74.6228432 | 75.3935956 |
| 16:22:54 | 69.6408647 | 70.1179467 | 69.2705783 | 74.6228432 | 75.3935956 |
| 16:22:55 | 69.6408647 | 70.1179467 | 69.2705783 | 74.6228432 | 74.3935956 |
| 16:22:56 | 70.6408647 | 70.1179467 | 69.2705783 | 74.6228432 | 74.3935956 |
| 16:22:57 | 70.6408647 | 70.1179467 | 69.2705783 | 74.6228432 | 74.3935956 |
| 16:22:58 | 70.6408647 | 70.1179467 | 69.2705783 | 72.6228432 | 75.3935956 |
| 16:22:59 | 70.6408647 | 71.1179467 | 70.2705783 | 71.6228432 | 75.3935956 |
| 16:23:00 | 70.6408647 | 71.1179467 | 71.2705783 | 71.6228432 | 77.3935956 |
| 16:23:01 | 68.6408647 | 71.1179467 | 71.2705783 | 71.6228432 | 78.3935956 |
| 16:23:02 | 67.6408647 | 70.1179467 | 69.2705783 | 71.6228432 | 78.3935956 |
| 16:23:03 | 67.6408647 | 70.1179467 | 68.2705783 | 71.6228432 | 78.3935956 |
| 16:23:04 | 67.6408647 | 71.1179467 | 67.2705783 | 71.6228432 | 79.3935956 |
| 16:23:05 | 67.6408647 | 71.1179467 | 67.2705783 | 71.6228432 | 79.3935956 |
| 16:23:06 | 67.6408647 | 72.1179467 | 67.2705783 | 71.6228432 | 81.3935956 |
| 16:23:07 | 68.6408647 | 72.1179467 | 67.2705783 | 70.6228432 | 81.3935956 |
| 16:23:08 | 68.6408647 | 74.1179467 | 67.2705783 | 68.6228432 | 81.3935956 |
| 16:23:09 | 68.6408647 | 74.1179467 | 67.2705783 | 67.6228432 | 81.3935956 |
| 16:23:10 | 70.6408647 | 75.1179467 | 68.2705783 | 65.6228432 | 81.3935956 |
| 16:23:11 | 71.6408647 | 76.1179467 | 68.2705783 | 65.6228432 | 80.3935956 |
| 16:23:12 | 71.6408647 | 77.1179467 | 68.2705783 | 64.6228432 | 78.3935956 |
| 16:23:13 | 71.6408647 | 78.1179467 | 68.2705783 | 65.6228432 | 76.3935956 |
| 16:23:14 | 71.6408647 | 77.1179467 | 69.2705783 | 65.6228432 | 76.3935956 |
| 16:23:15 | 71.6408647 | 77.1179467 | 70.2705783 | 65.6228432 | 72.3935956 |
| 16:23:16 | 71.6408647 | 77.1179467 | 70.2705783 | 67.6228432 | 71.3935956 |
| 16:23:17 | 71.6408647 | 75.1179467 | 71.2705783 | 68.6228432 | 72.3935956 |
| 16:23:18 | 71.6408647 | 75.1179467 | 70.2705783 | 68.6228432 | 72.3935956 |
| 16:23:19 | 71.6408647 | 75.1179467 | 69.2705783 | 69.6228432 | 72.3935956 |
| 16:23:20 | 71.6408647 | 75.1179467 | 68.2705783 | 69.6228432 | 73.3935956 |
| 16:23:21 | 71.6408647 | 74.1179467 | 68.2705783 | 68.6228432 | 73.3935956 |
| 16:23:22 | 71.6408647 | 71.1179467 | 68.2705783 | 68.6228432 | 73.3935956 |
| 16:23:23 | 68.6408647 | 71.1179467 | 68.2705783 | 68.6228432 | 73.3935956 |

|          |            |            |            |            |            |
|----------|------------|------------|------------|------------|------------|
| 16:23:24 | 68.6408647 | 69.1179467 | 68.2705783 | 68.6228432 | 73.3935956 |
| 16:23:25 | 67.6408647 | 69.1179467 | 67.2705783 | 68.6228432 | 77.3935956 |
| 16:23:26 | 66.6408647 | 68.1179467 | 68.2705783 | 68.6228432 | 76.3935956 |
| 16:23:27 | 66.6408647 | 69.1179467 | 68.2705783 | 68.6228432 | 76.3935956 |
| 16:23:28 | 66.6408647 | 70.1179467 | 68.2705783 | 68.6228432 | 76.3935956 |
| 16:23:29 | 66.6408647 | 71.1179467 | 68.2705783 | 68.6228432 | 76.3935956 |
| 16:23:30 | 66.6408647 | 71.1179467 | 68.2705783 | 68.6228432 | 74.3935956 |
| 16:23:31 | 66.6408647 | 71.1179467 | 68.2705783 | 68.6228432 | 74.3935956 |
| 16:23:32 | 66.6408647 | 71.1179467 | 68.2705783 | 68.6228432 | 74.3935956 |
| 16:23:33 | 66.6408647 | 71.1179467 | 68.2705783 | 68.6228432 | 74.3935956 |
| 16:23:34 | 67.6408647 | 71.1179467 | 67.2705783 | 67.6228432 | 74.3935956 |
| 16:23:35 | 67.6408647 | 70.1179467 | 67.2705783 | 67.6228432 | 74.3935956 |
| 16:23:36 | 65.6408647 | 69.1179467 | 67.2705783 | 67.6228432 | 72.3935956 |
| 16:23:37 | 65.6408647 | 69.1179467 | 67.2705783 | 66.6228432 | 72.3935956 |
| 16:23:38 | 65.6408647 | 68.1179467 | 68.2705783 | 66.6228432 | 72.3935956 |
| 16:23:39 | 65.6408647 | 69.1179467 | 68.2705783 | 66.6228432 | 72.3935956 |
| 16:23:40 | 65.6408647 | 69.1179467 | 68.2705783 | 66.6228432 | 71.3935956 |
| 16:23:41 | 65.6408647 | 69.1179467 | 68.2705783 | 66.6228432 | 71.3935956 |
| 16:23:42 | 66.6408647 | 71.1179467 | 68.2705783 | 65.6228432 | 74.3935956 |
| 16:23:43 | 66.6408647 | 71.1179467 | 68.2705783 | 65.6228432 | 75.3935956 |
| 16:23:44 | 66.6408647 | 72.1179467 | 68.2705783 | 66.6228432 | 75.3935956 |
| 16:23:45 | 66.6408647 | 72.1179467 | 69.2705783 | 65.6228432 | 75.3935956 |
| 16:23:46 | 65.6408647 | 71.1179467 | 70.2705783 | 66.6228432 | 77.3935956 |
| 16:23:47 | 65.6408647 | 71.1179467 | 70.2705783 | 66.6228432 | 77.3935956 |
| 16:23:48 | 65.6408647 | 71.1179467 | 70.2705783 | 66.6228432 | 77.3935956 |
| 16:23:49 | 65.6408647 | 71.1179467 | 70.2705783 | 66.6228432 | 77.3935956 |
| 16:23:50 | 65.6408647 | 71.1179467 | 69.2705783 | 66.6228432 | 77.3935956 |
| 16:23:51 | 64.6408647 | 71.1179467 | 69.2705783 | 67.6228432 | 76.3935956 |
| 16:23:52 | 64.6408647 | 77.1179467 | 69.2705783 | 68.6228432 | 76.3935956 |
| 16:23:53 | 64.6408647 | 77.1179467 | 68.2705783 | 71.6228432 | 76.3935956 |
| 16:23:54 | 64.6408647 | 78.1179467 | 68.2705783 | 74.6228432 | 76.3935956 |
| 16:23:55 | 66.6408647 | 79.1179467 | 68.2705783 | 76.6228432 | 75.3935956 |
| 16:23:56 | 66.6408647 | 80.1179467 | 68.2705783 | 76.6228432 | 75.3935956 |
| 16:23:57 | 66.6408647 | 80.1179467 | 68.2705783 | 77.6228432 | 76.3935956 |
| 16:23:58 | 67.6408647 | 79.1179467 | 68.2705783 | 78.6228432 | 76.3935956 |
| 16:23:59 | 67.6408647 | 76.1179467 | 67.2705783 | 81.6228432 | 76.3935956 |
| 16:24:00 | 67.6408647 | 76.1179467 | 67.2705783 | 83.6228432 | 79.3935956 |
| 16:24:01 | 69.6408647 | 75.1179467 | 67.2705783 | 84.6228432 | 79.3935956 |
| 16:24:02 | 69.6408647 | 74.1179467 | 66.2705783 | 70.3433868 | 77.3935956 |
| 16:24:03 | 69.6408647 | 74.1179467 | 66.2705783 | 70.0433868 | 74.3935956 |
| 16:24:04 | 69.6408647 | 74.1179467 | 66.2705783 | 77.6228432 | 73.3935956 |
| 16:24:05 | 69.6408647 | 75.1179467 | 66.2705783 | 72.6228432 | 72.3935956 |
| 16:24:06 | 69.6408647 | 76.1179467 | 66.2705783 | 72.6228432 | 72.3935956 |
| 16:24:07 | 69.6408647 | 76.1179467 | 66.2705783 | 69.6228432 | 72.3935956 |
| 16:24:08 | 70.6408647 | 75.1179467 | 67.2705783 | 68.6228432 | 71.3935956 |

|          |            |            |            |            |            |
|----------|------------|------------|------------|------------|------------|
| 16:24:09 | 72.6408647 | 75.1179467 | 67.2705783 | 68.6228432 | 71.3935956 |
| 16:24:10 | 74.6408647 | 74.1179467 | 67.2705783 | 70.6228432 | 68.3935956 |
| 16:24:11 | 83.6408647 | 74.1179467 | 67.2705783 | 72.6228432 | 66.3935956 |
| 16:24:12 | 71.8433868 | 73.1179467 | 68.2705783 | 73.6228432 | 65.3935956 |
| 16:24:13 | 72.3433868 | 73.1179467 | 69.2705783 | 73.6228432 | 65.3935956 |
| 16:24:14 | 72.2433868 | 72.1179467 | 69.2705783 | 73.6228432 | 64.3935956 |
| 16:24:15 | 72.2433868 | 71.1179467 | 69.2705783 | 73.6228432 | 63.3935956 |
| 16:24:16 | 71.3433868 | 69.1179467 | 69.2705783 | 73.6228432 | 61.3935956 |
| 16:24:17 | 83.6408647 | 69.1179467 | 69.2705783 | 73.6228432 | 61.3935956 |
| 16:24:18 | 83.6408647 | 67.1179467 | 68.2705783 | 73.6228432 | 61.3935956 |
| 16:24:19 | 73.6408647 | 66.1179467 | 65.2705783 | 72.6228432 | 60.3935956 |
| 16:24:20 | 68.6408647 | 66.1179467 | 65.2705783 | 72.6228432 | 60.3935956 |
| 16:24:21 | 65.6408647 | 65.1179467 | 65.2705783 | 70.6228432 | 60.3935956 |
| 16:24:22 | 64.6408647 | 65.1179467 | 65.2705783 | 69.6228432 | 60.3935956 |
| 16:24:23 | 64.6408647 | 66.1179467 | 63.2705783 | 69.6228432 | 58.3935956 |
| 16:24:24 | 64.6408647 | 66.1179467 | 62.2705783 | 69.6228432 | 57.3935956 |
| 16:24:25 | 64.6408647 | 66.1179467 | 61.2705783 | 69.6228432 | 56.3935956 |
| 16:24:26 | 64.6408647 | 67.1179467 | 62.2705783 | 69.6228432 | 56.3935956 |
| 16:24:27 | 64.6408647 | 67.1179467 | 64.2705783 | 69.6228432 | 57.3935956 |
| 16:24:28 | 64.6408647 | 67.1179467 | 64.2705783 | 69.6228432 | 58.3935956 |
| 16:24:29 | 64.6408647 | 67.1179467 | 64.2705783 | 68.6228432 | 58.3935956 |
| 16:24:30 | 64.6408647 | 67.1179467 | 63.2705783 | 68.6228432 | 58.3935956 |
| 16:24:31 | 63.6408647 | 67.1179467 | 62.2705783 | 67.6228432 | 57.3935956 |
| 16:24:32 | 63.6408647 | 68.1179467 | 61.2705783 | 65.6228432 | 56.3935956 |
| 16:24:33 | 61.6408647 | 69.1179467 | 61.2705783 | 65.6228432 | 56.3935956 |
| 16:24:34 | 60.6408647 | 69.1179467 | 61.2705783 | 64.6228432 | 56.3935956 |
| 16:24:35 | 60.6408647 | 69.1179467 | 61.2705783 | 64.6228432 | 56.3935956 |
| 16:24:36 | 60.6408647 | 71.1179467 | 63.2705783 | 63.6228432 | 56.3935956 |
| 16:24:37 | 60.6408647 | 72.1179467 | 65.2705783 | 63.6228432 | 59.3935956 |
| 16:24:38 | 60.6408647 | 72.1179467 | 67.2705783 | 64.6228432 | 59.3935956 |
| 16:24:39 | 61.6408647 | 72.1179467 | 69.2705783 | 64.6228432 | 58.3935956 |
| 16:24:40 | 61.6408647 | 73.1179467 | 70.2705783 | 65.6228432 | 58.3935956 |
| 16:24:41 | 59.6408647 | 73.1179467 | 70.2705783 | 64.6228432 | 58.3935956 |
| 16:24:42 | 59.6408647 | 73.1179467 | 71.2705783 | 63.6228432 | 59.3935956 |
| 16:24:43 | 59.6408647 | 73.1179467 | 68.2705783 | 63.6228432 | 59.3935956 |
| 16:24:44 | 59.6408647 | 72.1179467 | 68.2705783 | 63.6228432 | 60.3935956 |
| 16:24:45 | 59.6408647 | 72.1179467 | 68.2705783 | 64.6228432 | 62.3935956 |
| 16:24:46 | 59.6408647 | 72.1179467 | 68.2705783 | 65.6228432 | 64.3935956 |
| 16:24:47 | 59.6408647 | 72.1179467 | 67.2705783 | 66.6228432 | 65.3935956 |
| 16:24:48 | 59.6408647 | 72.1179467 | 67.2705783 | 66.6228432 | 65.3935956 |
| 16:24:49 | 59.6408647 | 72.1179467 | 67.2705783 | 65.6228432 | 65.3935956 |
| 16:24:50 | 61.6408647 | 74.1179467 | 67.2705783 | 65.6228432 | 65.3935956 |
| 16:24:51 | 62.6408647 | 74.1179467 | 67.2705783 | 66.6228432 | 65.3935956 |
| 16:24:52 | 62.6408647 | 74.1179467 | 67.2705783 | 68.6228432 | 64.3935956 |
| 16:24:53 | 63.6408647 | 73.1179467 | 67.2705783 | 68.6228432 | 64.3935956 |

|          |            |            |            |            |            |
|----------|------------|------------|------------|------------|------------|
| 16:24:54 | 64.6408647 | 73.1179467 | 67.2705783 | 69.6228432 | 64.3935956 |
| 16:24:55 | 66.6408647 | 73.1179467 | 67.2705783 | 69.6228432 | 64.3935956 |
| 16:24:56 | 64.6408647 | 73.1179467 | 67.2705783 | 69.6228432 | 65.3935956 |
| 16:24:57 | 64.6408647 | 73.1179467 | 67.2705783 | 69.6228432 | 65.3935956 |
| 16:24:58 | 64.6408647 | 74.1179467 | 67.2705783 | 68.6228432 | 66.3935956 |
| 16:24:59 | 64.6408647 | 74.1179467 | 67.2705783 | 67.6228432 | 66.3935956 |
| 16:25:00 | 64.6408647 | 74.1179467 | 67.2705783 | 66.6228432 | 64.3935956 |
| 16:25:01 | 65.6408647 | 75.1179467 | 67.2705783 | 65.6228432 | 63.3935956 |
| 16:25:02 | 65.6408647 | 75.1179467 | 67.2705783 | 65.6228432 | 63.3935956 |
| 16:25:03 | 65.6408647 | 75.1179467 | 67.2705783 | 65.6228432 | 63.3935956 |
| 16:25:04 | 65.6408647 | 75.1179467 | 67.2705783 | 69.6228432 | 63.3935956 |
| 16:25:05 | 65.6408647 | 75.1179467 | 67.2705783 | 71.6228432 | 63.3935956 |
| 16:25:06 | 65.6408647 | 75.1179467 | 67.2705783 | 72.6228432 | 63.3935956 |
| 16:25:07 | 64.6408647 | 73.1179467 | 67.2705783 | 71.6228432 | 63.3935956 |
| 16:25:08 | 65.6408647 | 71.1179467 | 67.2705783 | 70.6228432 | 63.3935956 |
| 16:25:09 | 64.6408647 | 70.1179467 | 67.2705783 | 71.6228432 | 62.3935956 |
| 16:25:10 | 63.6408647 | 70.1179467 | 67.2705783 | 71.6228432 | 61.3935956 |
| 16:25:11 | 62.6408647 | 71.1179467 | 68.2705783 | 71.6228432 | 63.3935956 |
| 16:25:12 | 61.6408647 | 71.1179467 | 70.2705783 | 71.6228432 | 63.3935956 |
| 16:25:13 | 61.6408647 | 71.1179467 | 71.2705783 | 72.6228432 | 64.3935956 |
| 16:25:14 | 61.6408647 | 71.1179467 | 71.2705783 | 73.6228432 | 65.3935956 |
| 16:25:15 | 60.6408647 | 71.1179467 | 72.2705783 | 73.6228432 | 65.3935956 |
| 16:25:16 | 60.6408647 | 71.1179467 | 73.2705783 | 72.6228432 | 64.3935956 |
| 16:25:17 | 60.6408647 | 71.1179467 | 77.2705783 | 72.6228432 | 64.3935956 |
| 16:25:18 | 60.6408647 | 71.1179467 | 81.2705783 | 68.6228432 | 64.3935956 |
| 16:25:19 | 61.6408647 | 71.1179467 | 77.2705783 | 67.6228432 | 64.3935956 |
| 16:25:20 | 61.6408647 | 71.1179467 | 77.2705783 | 67.6228432 | 65.3935956 |
| 16:25:21 | 61.6408647 | 71.1179467 | 77.2705783 | 68.6228432 | 66.3935956 |
| 16:25:22 | 61.6408647 | 70.1179467 | 77.2705783 | 69.6228432 | 66.3935956 |
| 16:25:23 | 61.6408647 | 70.1179467 | 77.2705783 | 70.6228432 | 67.3935956 |
| 16:25:24 | 61.6408647 | 70.1179467 | 77.2705783 | 70.6228432 | 68.3935956 |
| 16:25:25 | 66.6408647 | 70.1179467 | 76.2705783 | 70.6228432 | 70.3935956 |
| 16:25:26 | 67.6408647 | 70.1179467 | 72.2705783 | 69.6228432 | 70.3935956 |
| 16:25:27 | 66.6408647 | 70.1179467 | 70.2705783 | 67.6228432 | 69.3935956 |
| 16:25:28 | 65.6408647 | 71.1179467 | 70.2705783 | 67.6228432 | 68.3935956 |
| 16:25:29 | 65.6408647 | 71.1179467 | 70.2705783 | 67.6228432 | 68.3935956 |
| 16:25:30 | 64.6408647 | 71.1179467 | 69.2705783 | 65.6228432 | 68.3935956 |
| 16:25:31 | 65.6408647 | 71.1179467 | 69.2705783 | 65.6228432 | 68.3935956 |
| 16:25:32 | 65.6408647 | 71.1179467 | 69.2705783 | 66.6228432 | 68.3935956 |
| 16:25:33 | 65.6408647 | 71.1179467 | 68.2705783 | 66.6228432 | 68.3935956 |
| 16:25:34 | 65.6408647 | 71.1179467 | 68.2705783 | 67.6228432 | 68.3935956 |
| 16:25:35 | 65.6408647 | 71.1179467 | 68.2705783 | 67.6228432 | 67.3935956 |
| 16:25:36 | 66.6408647 | 71.1179467 | 68.2705783 | 67.6228432 | 67.3935956 |
| 16:25:37 | 67.6408647 | 70.1179467 | 67.2705783 | 66.6228432 | 67.3935956 |
| 16:25:38 | 67.6408647 | 70.1179467 | 68.2705783 | 66.6228432 | 67.3935956 |

|          |            |            |            |            |            |
|----------|------------|------------|------------|------------|------------|
| 16:25:39 | 67.6408647 | 70.1179467 | 68.2705783 | 66.6228432 | 64.3935956 |
| 16:25:40 | 67.6408647 | 71.1179467 | 68.2705783 | 66.6228432 | 64.3935956 |
| 16:25:41 | 68.6408647 | 70.1179467 | 67.2705783 | 66.6228432 | 63.3935956 |
| 16:25:42 | 68.6408647 | 69.1179467 | 67.2705783 | 66.6228432 | 63.3935956 |
| 16:25:43 | 68.6408647 | 69.1179467 | 67.2705783 | 66.6228432 | 62.3935956 |
| 16:25:44 | 68.6408647 | 69.1179467 | 67.2705783 | 66.6228432 | 62.3935956 |
| 16:25:45 | 67.6408647 | 69.1179467 | 67.2705783 | 65.6228432 | 62.3935956 |
| 16:25:46 | 65.6408647 | 70.1179467 | 67.2705783 | 65.6228432 | 62.3935956 |
| 16:25:47 | 65.6408647 | 70.1179467 | 67.2705783 | 64.6228432 | 61.3935956 |
| 16:25:48 | 65.6408647 | 70.1179467 | 67.2705783 | 64.6228432 | 60.3935956 |
| 16:25:49 | 64.6408647 | 71.1179467 | 67.2705783 | 64.6228432 | 60.3935956 |
| 16:25:50 | 64.6408647 | 73.1179467 | 67.2705783 | 64.6228432 | 59.3935956 |
| 16:25:51 | 63.6408647 | 73.1179467 | 67.2705783 | 64.6228432 | 59.3935956 |
| 16:25:52 | 63.6408647 | 73.1179467 | 67.2705783 | 64.6228432 | 60.3935956 |
| 16:25:53 | 63.6408647 | 75.1179467 | 67.2705783 | 66.6228432 | 60.3935956 |
| 16:25:54 | 62.6408647 | 75.1179467 | 67.2705783 | 70.6228432 | 60.3935956 |
| 16:25:55 | 62.6408647 | 75.1179467 | 67.2705783 | 70.6228432 | 60.3935956 |
| 16:25:56 | 62.6408647 | 75.1179467 | 66.2705783 | 71.6228432 | 60.3935956 |
| 16:25:57 | 62.6408647 | 75.1179467 | 66.2705783 | 70.6228432 | 60.3935956 |
| 16:25:58 | 62.6408647 | 78.1179467 | 66.2705783 | 69.6228432 | 60.3935956 |
| 16:25:59 | 62.6408647 | 79.1179467 | 66.2705783 | 69.6228432 | 60.3935956 |
| 16:26:00 | 62.6408647 | 78.1179467 | 66.2705783 | 65.6228432 | 60.3935956 |
| 16:26:01 | 62.6408647 | 77.1179467 | 66.2705783 | 65.6228432 | 59.3935956 |
| 16:26:02 | 62.6408647 | 77.1179467 | 66.2705783 | 65.6228432 | 59.3935956 |
| 16:26:03 | 62.6408647 | 77.1179467 | 67.2705783 | 69.6228432 | 60.3935956 |
| 16:26:04 | 64.6408647 | 76.1179467 | 67.2705783 | 72.6228432 | 61.3935956 |
| 16:26:05 | 64.6408647 | 75.1179467 | 67.2705783 | 72.6228432 | 61.3935956 |
| 16:26:06 | 64.6408647 | 74.1179467 | 67.2705783 | 73.6228432 | 62.3935956 |
| 16:26:07 | 64.6408647 | 73.1179467 | 67.2705783 | 72.6228432 | 63.3935956 |
| 16:26:08 | 64.6408647 | 73.1179467 | 68.2705783 | 72.6228432 | 63.3935956 |
| 16:26:09 | 64.6408647 | 73.1179467 | 68.2705783 | 72.6228432 | 65.3935956 |
| 16:26:10 | 64.6408647 | 73.1179467 | 66.2705783 | 72.6228432 | 66.3935956 |
| 16:26:11 | 63.6408647 | 73.1179467 | 65.2705783 | 72.6228432 | 66.3935956 |
| 16:26:12 | 63.6408647 | 71.1179467 | 65.2705783 | 72.6228432 | 66.3935956 |
| 16:26:13 | 63.6408647 | 69.1179467 | 64.2705783 | 72.6228432 | 66.3935956 |
| 16:26:14 | 63.6408647 | 68.1179467 | 64.2705783 | 72.6228432 | 66.3935956 |
| 16:26:15 | 67.6408647 | 67.1179467 | 63.2705783 | 72.6228432 | 66.3935956 |
| 16:26:16 | 70.6408647 | 67.1179467 | 63.2705783 | 73.6228432 | 66.3935956 |
| 16:26:17 | 70.6408647 | 67.1179467 | 63.2705783 | 72.6228432 | 66.3935956 |
| 16:26:18 | 70.6408647 | 67.1179467 | 63.2705783 | 72.6228432 | 66.3935956 |
| 16:26:19 | 69.6408647 | 67.1179467 | 63.2705783 | 72.6228432 | 66.3935956 |
| 16:26:20 | 69.6408647 | 67.1179467 | 63.2705783 | 71.6228432 | 66.3935956 |
| 16:26:21 | 69.6408647 | 67.1179467 | 63.2705783 | 71.6228432 | 66.3935956 |
| 16:26:22 | 69.6408647 | 64.1179467 | 62.2705783 | 71.6228432 | 66.3935956 |
| 16:26:23 | 69.6408647 | 64.1179467 | 62.2705783 | 71.6228432 | 66.3935956 |

|          |            |            |            |            |            |
|----------|------------|------------|------------|------------|------------|
| 16:26:24 | 69.6408647 | 63.1179467 | 63.2705783 | 64.6228432 | 65.3935956 |
| 16:26:25 | 70.6408647 | 63.1179467 | 63.2705783 | 64.6228432 | 64.3935956 |
| 16:26:26 | 71.6408647 | 63.1179467 | 63.2705783 | 63.6228432 | 64.3935956 |
| 16:26:27 | 71.6408647 | 62.1179467 | 63.2705783 | 64.6228432 | 64.3935956 |
| 16:26:28 | 71.6408647 | 62.1179467 | 64.2705783 | 64.6228432 | 62.3935956 |
| 16:26:29 | 71.6408647 | 62.1179467 | 64.2705783 | 63.6228432 | 61.3935956 |
| 16:26:30 | 71.6408647 | 74.1179467 | 64.2705783 | 63.6228432 | 59.3935956 |
| 16:26:31 | 71.6408647 | 74.1179467 | 65.2705783 | 63.6228432 | 59.3935956 |
| 16:26:32 | 71.6408647 | 74.1179467 | 65.2705783 | 64.6228432 | 56.3935956 |
| 16:26:33 | 72.6408647 | 74.1179467 | 65.2705783 | 64.6228432 | 54.3935956 |
| 16:26:34 | 73.6408647 | 74.1179467 | 64.2705783 | 66.6228432 | 54.3935956 |
| 16:26:35 | 74.6408647 | 71.1179467 | 64.2705783 | 66.6228432 | 55.3935956 |
| 16:26:36 | 74.6408647 | 71.1179467 | 65.2705783 | 66.6228432 | 57.3935956 |
| 16:26:37 | 75.6408647 | 69.1179467 | 65.2705783 | 65.6228432 | 57.3935956 |
| 16:26:38 | 76.6408647 | 68.1179467 | 65.2705783 | 65.6228432 | 57.3935956 |
| 16:26:39 | 76.6408647 | 68.1179467 | 65.2705783 | 65.6228432 | 57.3935956 |
| 16:26:40 | 76.6408647 | 68.1179467 | 65.2705783 | 65.6228432 | 56.3935956 |
| 16:26:41 | 76.6408647 | 68.1179467 | 65.2705783 | 66.6228432 | 57.3935956 |
| 16:26:42 | 74.6408647 | 67.1179467 | 65.2705783 | 66.6228432 | 57.3935956 |
| 16:26:43 | 74.6408647 | 67.1179467 | 66.2705783 | 67.6228432 | 57.3935956 |
| 16:26:44 | 68.6408647 | 67.1179467 | 66.2705783 | 67.6228432 | 58.3935956 |
| 16:26:45 | 67.6408647 | 67.1179467 | 66.2705783 | 67.6228432 | 59.3935956 |
| 16:26:46 | 66.6408647 | 67.1179467 | 66.2705783 | 67.6228432 | 59.3935956 |
| 16:26:47 | 67.6408647 | 67.1179467 | 65.2705783 | 67.6228432 | 59.3935956 |
| 16:26:48 | 68.6408647 | 67.1179467 | 65.2705783 | 66.6228432 | 59.3935956 |
| 16:26:49 | 68.6408647 | 67.1179467 | 66.2705783 | 66.6228432 | 59.3935956 |
| 16:26:50 | 68.6408647 | 67.1179467 | 66.2705783 | 66.6228432 | 61.3935956 |
| 16:26:51 | 68.6408647 | 67.1179467 | 66.2705783 | 66.6228432 | 61.3935956 |
| 16:26:52 | 69.6408647 | 72.1179467 | 66.2705783 | 66.6228432 | 60.3935956 |
| 16:26:53 | 69.6408647 | 73.1179467 | 66.2705783 | 66.6228432 | 60.3935956 |
| 16:26:54 | 69.6408647 | 73.1179467 | 66.2705783 | 66.6228432 | 60.3935956 |
| 16:26:55 | 69.6408647 | 73.1179467 | 66.2705783 | 66.6228432 | 59.3935956 |
| 16:26:56 | 69.6408647 | 73.1179467 | 66.2705783 | 66.6228432 | 57.3935956 |
| 16:26:57 | 69.6408647 | 73.1179467 | 66.2705783 | 68.6228432 | 59.3935956 |
| 16:26:58 | 69.6408647 | 74.1179467 | 66.2705783 | 63.6228432 | 63.3935956 |
| 16:26:59 | 68.6408647 | 75.1179467 | 66.2705783 | 62.6228432 | 64.3935956 |
| 16:27:00 | 67.6408647 | 75.1179467 | 66.2705783 | 62.6228432 | 64.3935956 |
| 16:27:01 | 67.6408647 | 75.1179467 | 66.2705783 | 61.6228432 | 63.3935956 |
| 16:27:02 | 68.6408647 | 82.1179467 | 66.2705783 | 61.6228432 | 63.3935956 |
| 16:27:03 | 68.6408647 | 82.1179467 | 66.2705783 | 61.6228432 | 63.3935956 |
| 16:27:04 | 68.6408647 | 82.1179467 | 67.2705783 | 63.6228432 | 64.3935956 |
| 16:27:05 | 68.6408647 | 82.1179467 | 66.2705783 | 63.6228432 | 64.3935956 |
| 16:27:06 | 68.6408647 | 83.1179467 | 66.2705783 | 63.6228432 | 64.3935956 |
| 16:27:07 | 68.6408647 | 83.1179467 | 66.2705783 | 64.6228432 | 64.3935956 |
| 16:27:08 | 66.6408647 | 81.1179467 | 66.2705783 | 64.6228432 | 63.3935956 |

|          |            |            |            |            |            |
|----------|------------|------------|------------|------------|------------|
| 16:27:09 | 65.6408647 | 81.1179467 | 65.2705783 | 65.6228432 | 63.3935956 |
| 16:27:10 | 65.6408647 | 77.1179467 | 65.2705783 | 66.6228432 | 62.3935956 |
| 16:27:11 | 65.6408647 | 75.1179467 | 65.2705783 | 66.6228432 | 62.3935956 |
| 16:27:12 | 64.6408647 | 75.1179467 | 64.2705783 | 65.6228432 | 62.3935956 |
| 16:27:13 | 64.6408647 | 75.1179467 | 64.2705783 | 65.6228432 | 62.3935956 |
| 16:27:14 | 64.6408647 | 71.1179467 | 64.2705783 | 65.6228432 | 62.3935956 |
| 16:27:15 | 64.6408647 | 71.1179467 | 63.2705783 | 65.6228432 | 61.3935956 |
| 16:27:16 | 64.6408647 | 68.1179467 | 63.2705783 | 66.6228432 | 61.3935956 |
| 16:27:17 | 64.6408647 | 68.1179467 | 63.2705783 | 66.6228432 | 61.3935956 |
| 16:27:18 | 63.6408647 | 68.1179467 | 64.2705783 | 69.6228432 | 62.3935956 |
| 16:27:19 | 63.6408647 | 65.1179467 | 64.2705783 | 69.6228432 | 62.3935956 |
| 16:27:20 | 63.6408647 | 64.1179467 | 64.2705783 | 71.6228432 | 62.3935956 |
| 16:27:21 | 62.6408647 | 64.1179467 | 64.2705783 | 72.6228432 | 62.3935956 |
| 16:27:22 | 61.6408647 | 63.1179467 | 64.2705783 | 72.6228432 | 62.3935956 |
| 16:27:23 | 61.6408647 | 63.1179467 | 64.2705783 | 72.6228432 | 61.3935956 |
| 16:27:24 | 61.6408647 | 63.1179467 | 64.2705783 | 70.6228432 | 61.3935956 |
| 16:27:25 | 61.6408647 | 63.1179467 | 64.2705783 | 69.6228432 | 61.3935956 |
| 16:27:26 | 62.6408647 | 63.1179467 | 64.2705783 | 64.6228432 | 61.3935956 |
| 16:27:27 | 62.6408647 | 63.1179467 | 64.2705783 | 63.6228432 | 61.3935956 |
| 16:27:28 | 62.6408647 | 62.1179467 | 64.2705783 | 64.6228432 | 61.3935956 |
| 16:27:29 | 63.6408647 | 62.1179467 | 64.2705783 | 64.6228432 | 62.3935956 |
| 16:27:30 | 63.6408647 | 62.1179467 | 64.2705783 | 64.6228432 | 62.3935956 |
| 16:27:31 | 63.6408647 | 62.1179467 | 64.2705783 | 64.6228432 | 62.3935956 |
| 16:27:32 | 64.6408647 | 62.1179467 | 63.2705783 | 64.6228432 | 62.3935956 |
| 16:27:33 | 64.6408647 | 62.1179467 | 63.2705783 | 65.6228432 | 62.3935956 |
| 16:27:34 | 64.6408647 | 62.1179467 | 63.2705783 | 67.6228432 | 62.3935956 |
| 16:27:35 | 63.6408647 | 62.1179467 | 64.2705783 | 69.6228432 | 62.3935956 |
| 16:27:36 | 63.6408647 | 62.1179467 | 64.2705783 | 69.6228432 | 63.3935956 |
| 16:27:37 | 63.6408647 | 64.1179467 | 64.2705783 | 69.6228432 | 64.3935956 |
| 16:27:38 | 63.6408647 | 64.1179467 | 64.2705783 | 69.6228432 | 70.3935956 |
| 16:27:39 | 63.6408647 | 64.1179467 | 64.2705783 | 69.6228432 | 70.3935956 |
| 16:27:40 | 63.6408647 | 64.1179467 | 64.2705783 | 69.6228432 | 70.3935956 |
| 16:27:41 | 63.6408647 | 65.1179467 | 65.2705783 | 69.6228432 | 73.3935956 |
| 16:27:42 | 63.6408647 | 65.1179467 | 65.2705783 | 69.6228432 | 73.3935956 |
| 16:27:43 | 64.6408647 | 64.1179467 | 64.2705783 | 68.6228432 | 76.3935956 |
| 16:27:44 | 64.6408647 | 63.1179467 | 64.2705783 | 68.6228432 | 79.3935956 |
| 16:27:45 | 63.6408647 | 62.1179467 | 64.2705783 | 67.6228432 | 80.3935956 |
| 16:27:46 | 63.6408647 | 62.1179467 | 64.2705783 | 67.6228432 | 80.3935956 |
| 16:27:47 | 63.6408647 | 62.1179467 | 64.2705783 | 66.6228432 | 80.3935956 |
| 16:27:48 | 63.6408647 | 62.1179467 | 64.2705783 | 65.6228432 | 80.3935956 |
| 16:27:49 | 63.6408647 | 63.1179467 | 64.2705783 | 63.6228432 | 81.3935956 |
| 16:27:50 | 63.6408647 | 63.1179467 | 64.2705783 | 62.6228432 | 81.3935956 |
| 16:27:51 | 64.6408647 | 64.1179467 | 64.2705783 | 62.6228432 | 81.3935956 |
| 16:27:52 | 65.6408647 | 64.1179467 | 64.2705783 | 62.6228432 | 77.3935956 |
| 16:27:53 | 66.6408647 | 64.1179467 | 66.2705783 | 63.6228432 | 74.3935956 |

|          |            |            |            |            |            |
|----------|------------|------------|------------|------------|------------|
| 16:27:54 | 65.6408647 | 64.1179467 | 66.2705783 | 64.6228432 | 74.3935956 |
| 16:27:55 | 65.6408647 | 64.1179467 | 66.2705783 | 64.6228432 | 69.3935956 |
| 16:27:56 | 64.6408647 | 64.1179467 | 67.2705783 | 64.6228432 | 69.3935956 |
| 16:27:57 | 64.6408647 | 64.1179467 | 67.2705783 | 65.6228432 | 69.3935956 |
| 16:27:58 | 64.6408647 | 65.1179467 | 67.2705783 | 65.6228432 | 66.3935956 |
| 16:27:59 | 64.6408647 | 65.1179467 | 67.2705783 | 65.6228432 | 66.3935956 |
| 16:28:00 | 63.6408647 | 65.1179467 | 66.2705783 | 65.6228432 | 66.3935956 |
| 16:28:01 | 62.6408647 | 65.1179467 | 67.2705783 | 65.6228432 | 68.3935956 |
| 16:28:02 | 62.6408647 | 65.1179467 | 67.2705783 | 65.6228432 | 68.3935956 |
| 16:28:03 | 62.6408647 | 65.1179467 | 67.2705783 | 66.6228432 | 68.3935956 |
| 16:28:04 | 61.6408647 | 65.1179467 | 67.2705783 | 68.6228432 | 68.3935956 |
| 16:28:05 | 63.6408647 | 65.1179467 | 67.2705783 | 68.6228432 | 68.3935956 |
| 16:28:06 | 64.6408647 | 66.1179467 | 67.2705783 | 67.6228432 | 68.3935956 |
| 16:28:07 | 64.6408647 | 67.1179467 | 67.2705783 | 66.6228432 | 67.3935956 |
| 16:28:08 | 67.6408647 | 68.1179467 | 67.2705783 | 66.6228432 | 67.3935956 |
| 16:28:09 | 67.6408647 | 67.1179467 | 67.2705783 | 66.6228432 | 67.3935956 |
| 16:28:10 | 69.6408647 | 66.1179467 | 68.2705783 | 66.6228432 | 68.3935956 |
| 16:28:11 | 69.6408647 | 66.1179467 | 68.2705783 | 66.6228432 | 68.3935956 |
| 16:28:12 | 71.6408647 | 65.1179467 | 67.2705783 | 67.6228432 | 68.3935956 |
| 16:28:13 | 71.6408647 | 64.1179467 | 67.2705783 | 67.6228432 | 67.3935956 |
| 16:28:14 | 71.6408647 | 64.1179467 | 66.2705783 | 67.6228432 | 66.3935956 |
| 16:28:15 | 68.6408647 | 64.1179467 | 66.2705783 | 67.6228432 | 64.3935956 |
| 16:28:16 | 67.6408647 | 64.1179467 | 66.2705783 | 65.6228432 | 63.3935956 |
| 16:28:17 | 67.6408647 | 64.1179467 | 66.2705783 | 64.6228432 | 63.3935956 |
| 16:28:18 | 67.6408647 | 64.1179467 | 66.2705783 | 64.6228432 | 62.3935956 |
| 16:28:19 | 67.6408647 | 64.1179467 | 65.2705783 | 62.6228432 | 60.3935956 |
| 16:28:20 | 67.6408647 | 64.1179467 | 65.2705783 | 63.6228432 | 60.3935956 |
| 16:28:21 | 67.6408647 | 64.1179467 | 66.2705783 | 63.6228432 | 58.3935956 |
| 16:28:22 | 68.6408647 | 64.1179467 | 66.2705783 | 66.6228432 | 58.3935956 |
| 16:28:23 | 68.6408647 | 67.1179467 | 66.2705783 | 66.6228432 | 58.3935956 |
| 16:28:24 | 68.6408647 | 67.1179467 | 66.2705783 | 66.6228432 | 58.3935956 |
| 16:28:25 | 68.6408647 | 68.1179467 | 67.2705783 | 65.6228432 | 57.3935956 |
| 16:28:26 | 69.6408647 | 67.1179467 | 67.2705783 | 64.6228432 | 57.3935956 |
| 16:28:27 | 70.6408647 | 67.1179467 | 68.2705783 | 63.6228432 | 56.3935956 |
| 16:28:28 | 70.6408647 | 66.1179467 | 68.2705783 | 63.6228432 | 55.3935956 |
| 16:28:29 | 69.6408647 | 66.1179467 | 68.2705783 | 62.6228432 | 55.3935956 |
| 16:28:30 | 68.6408647 | 65.1179467 | 68.2705783 | 62.6228432 | 54.3935956 |
| 16:28:31 | 67.6408647 | 65.1179467 | 69.2705783 | 63.6228432 | 53.3935956 |
| 16:28:32 | 66.6408647 | 65.1179467 | 69.2705783 | 63.6228432 | 53.3935956 |
| 16:28:33 | 66.6408647 | 65.1179467 | 69.2705783 | 65.6228432 | 52.3935956 |
| 16:28:34 | 65.6408647 | 65.1179467 | 70.2705783 | 66.6228432 | 50.3935956 |
| 16:28:35 | 65.6408647 | 65.1179467 | 70.2705783 | 66.6228432 | 50.3935956 |
| 16:28:36 | 64.6408647 | 65.1179467 | 70.2705783 | 66.6228432 | 50.3935956 |
| 16:28:37 | 64.6408647 | 65.1179467 | 70.2705783 | 67.6228432 | 49.3935956 |
| 16:28:38 | 64.6408647 | 63.1179467 | 70.2705783 | 66.6228432 | 47.3935956 |



|          |            |            |            |            |            |
|----------|------------|------------|------------|------------|------------|
| 16:28:39 | 64.6408647 | 62.1179467 | 70.2705783 | 66.6228432 | 53.3935956 |
| 16:28:40 | 64.6408647 | 62.1179467 | 71.2705783 | 66.6228432 | 60.3935956 |
| 16:28:41 | 64.6408647 | 62.1179467 | 71.2705783 | 66.6228432 | 62.3935956 |
| 16:28:42 | 64.6408647 | 68.1179467 | 69.2705783 | 65.6228432 | 62.3935956 |
| 16:28:43 | 64.6408647 | 75.1179467 | 68.2705783 | 65.6228432 | 63.3935956 |
| 16:28:44 | 64.6408647 | 75.1179467 | 67.2705783 | 63.6228432 | 62.3935956 |
| 16:28:45 | 63.6408647 | 76.1179467 | 67.2705783 | 63.6228432 | 62.3935956 |
| 16:28:46 | 63.6408647 | 76.1179467 | 67.2705783 | 63.6228432 | 62.3935956 |
| 16:28:47 | 63.6408647 | 75.1179467 | 67.2705783 | 62.6228432 | 61.3935956 |
| 16:28:48 | 63.6408647 | 71.1179467 | 66.2705783 | 62.6228432 | 61.3935956 |
| 16:28:49 | 63.6408647 | 70.1179467 | 67.2705783 | 66.6228432 | 61.3935956 |
| 16:28:50 | 63.6408647 | 69.1179467 | 66.2705783 | 70.6228432 | 61.3935956 |
| 16:28:51 | 63.6408647 | 69.1179467 | 66.2705783 | 70.6228432 | 61.3935956 |
| 16:28:52 | 63.6408647 | 69.1179467 | 66.2705783 | 72.6228432 | 61.3935956 |
| 16:28:53 | 63.6408647 | 70.1179467 | 66.2705783 | 73.6228432 | 61.3935956 |
| 16:28:54 | 63.6408647 | 70.1179467 | 66.2705783 | 75.6228432 | 63.3935956 |
| 16:28:55 | 63.6408647 | 70.1179467 | 66.2705783 | 73.6228432 | 63.3935956 |
| 16:28:56 | 63.6408647 | 70.1179467 | 66.2705783 | 73.6228432 | 65.3935956 |
| 16:28:57 | 63.6408647 | 70.1179467 | 66.2705783 | 73.6228432 | 65.3935956 |
| 16:28:58 | 63.6408647 | 68.1179467 | 66.2705783 | 73.6228432 | 66.3935956 |
| 16:28:59 | 62.6408647 | 68.1179467 | 66.2705783 | 72.6228432 | 66.3935956 |
| 16:29:00 | 62.6408647 | 68.1179467 | 66.2705783 | 72.6228432 | 66.3935956 |
| 16:29:01 | 62.6408647 | 68.1179467 | 66.2705783 | 72.6228432 | 67.3935956 |
| 16:29:02 | 62.6408647 | 68.1179467 | 66.2705783 | 72.6228432 | 67.3935956 |
| 16:29:03 | 62.6408647 | 67.1179467 | 66.2705783 | 72.6228432 | 68.3935956 |
| 16:29:04 | 63.6408647 | 67.1179467 | 66.2705783 | 72.6228432 | 67.3935956 |
| 16:29:05 | 63.6408647 | 67.1179467 | 66.2705783 | 72.6228432 | 67.3935956 |
| 16:29:06 | 67.6408647 | 68.1179467 | 66.2705783 | 72.6228432 | 66.3935956 |
| 16:29:07 | 67.6408647 | 68.1179467 | 66.2705783 | 72.6228432 | 66.3935956 |
| 16:29:08 | 68.6408647 | 71.1179467 | 66.2705783 | 72.6228432 | 65.3935956 |
| 16:29:09 | 69.6408647 | 71.1179467 | 66.2705783 | 72.6228432 | 65.3935956 |
| 16:29:10 | 70.6408647 | 71.1179467 | 66.2705783 | 72.6228432 | 65.3935956 |
| 16:29:11 | 71.6408647 | 73.1179467 | 66.2705783 | 73.6228432 | 65.3935956 |
| 16:29:12 | 72.6408647 | 74.1179467 | 66.2705783 | 75.6228432 | 65.3935956 |
| 16:29:13 | 70.6408647 | 75.1179467 | 66.2705783 | 75.6228432 | 64.3935956 |
| 16:29:14 | 70.6408647 | 74.1179467 | 66.2705783 | 75.6228432 | 63.3935956 |
| 16:29:15 | 68.6408647 | 72.1179467 | 66.2705783 | 75.6228432 | 63.3935956 |
| 16:29:16 | 68.6408647 | 72.1179467 | 66.2705783 | 75.6228432 | 61.3935956 |
| 16:29:17 | 70.6408647 | 72.1179467 | 66.2705783 | 76.6228432 | 61.3935956 |
| 16:29:18 | 70.6408647 | 70.1179467 | 66.2705783 | 70.5433868 | 61.3935956 |
| 16:29:19 | 70.6408647 | 70.1179467 | 66.2705783 | 70.2433868 | 61.3935956 |
| 16:29:20 | 70.6408647 | 70.1179467 | 66.2705783 | 70.0433868 | 60.3935956 |
| 16:29:21 | 69.6408647 | 70.1179467 | 66.2705783 | 69.3433868 | 59.3935956 |
| 16:29:22 | 67.6408647 | 70.1179467 | 66.2705783 | 69.0433868 | 58.3935956 |
| 16:29:23 | 66.6408647 | 70.1179467 | 66.2705783 | 68.9433868 | 58.3935956 |

|          |            |            |            |            |            |
|----------|------------|------------|------------|------------|------------|
| 16:29:24 | 66.6408647 | 70.1179467 | 66.2705783 | 68.9433868 | 58.3935956 |
| 16:29:25 | 67.6408647 | 70.1179467 | 66.2705783 | 69.3433868 | 58.3935956 |
| 16:29:26 | 68.6408647 | 71.1179467 | 66.2705783 | 69.1433868 | 58.3935956 |
| 16:29:27 | 69.6408647 | 74.1179467 | 66.2705783 | 73.6228432 | 58.3935956 |
| 16:29:28 | 69.6408647 | 74.1179467 | 66.2705783 | 73.6228432 | 58.3935956 |
| 16:29:29 | 71.6408647 | 75.1179467 | 65.2705783 | 67.6228432 | 58.3935956 |
| 16:29:30 | 72.6408647 | 75.1179467 | 65.2705783 | 62.6228432 | 57.3935956 |
| 16:29:31 | 72.6408647 | 75.1179467 | 65.2705783 | 59.6228432 | 56.3935956 |
| 16:29:32 | 72.6408647 | 75.1179467 | 65.2705783 | 59.6228432 | 56.3935956 |
| 16:29:33 | 70.6408647 | 75.1179467 | 65.2705783 | 60.6228432 | 56.3935956 |
| 16:29:34 | 70.6408647 | 76.1179467 | 65.2705783 | 61.6228432 | 56.3935956 |
| 16:29:35 | 70.6408647 | 76.1179467 | 65.2705783 | 63.6228432 | 56.3935956 |
| 16:29:36 | 70.6408647 | 76.1179467 | 65.2705783 | 64.6228432 | 56.3935956 |
| 16:29:37 | 70.6408647 | 75.1179467 | 65.2705783 | 64.6228432 | 57.3935956 |
| 16:29:38 | 70.6408647 | 74.1179467 | 65.2705783 | 64.6228432 | 58.3935956 |
| 16:29:39 | 70.6408647 | 73.1179467 | 65.2705783 | 64.6228432 | 59.3935956 |
| 16:29:40 | 70.6408647 | 72.1179467 | 65.2705783 | 64.6228432 | 59.3935956 |
| 16:29:41 | 71.6408647 | 72.1179467 | 65.2705783 | 65.6228432 | 59.3935956 |
| 16:29:42 | 73.6408647 | 72.1179467 | 65.2705783 | 65.6228432 | 59.3935956 |
| 16:29:43 | 73.6408647 | 72.1179467 | 65.2705783 | 67.6228432 | 60.3935956 |
| 16:29:44 | 69.6408647 | 71.1179467 | 65.2705783 | 73.6228432 | 59.3935956 |
| 16:29:45 | 68.6408647 | 71.1179467 | 65.2705783 | 76.6228432 | 59.3935956 |
| 16:29:46 | 68.6408647 | 71.1179467 | 65.2705783 | 78.6228432 | 59.3935956 |
| 16:29:47 | 68.6408647 | 71.1179467 | 65.2705783 | 75.6228432 | 59.3935956 |
| 16:29:48 | 68.6408647 | 71.1179467 | 65.2705783 | 72.6228432 | 64.3935956 |
| 16:29:49 | 70.6408647 | 71.1179467 | 65.2705783 | 69.6228432 | 65.3935956 |
| 16:29:50 | 70.6408647 | 72.1179467 | 64.2705783 | 66.6228432 | 65.3935956 |
| 16:29:51 | 70.6408647 | 73.1179467 | 64.2705783 | 65.6228432 | 64.3935956 |
| 16:29:52 | 66.6408647 | 73.1179467 | 64.2705783 | 65.6228432 | 64.3935956 |
| 16:29:53 | 65.6408647 | 73.1179467 | 64.2705783 | 64.6228432 | 68.3935956 |
| 16:29:54 | 64.6408647 | 73.1179467 | 63.2705783 | 64.6228432 | 69.3935956 |
| 16:29:55 | 64.6408647 | 70.1179467 | 63.2705783 | 64.6228432 | 71.3935956 |
| 16:29:56 | 64.6408647 | 66.1179467 | 63.2705783 | 64.6228432 | 72.3935956 |
| 16:29:57 | 64.6408647 | 64.1179467 | 64.2705783 | 64.6228432 | 73.3935956 |
| 16:29:58 | 64.6408647 | 61.1179467 | 64.2705783 | 65.6228432 | 73.3935956 |
| 16:29:59 | 64.6408647 | 61.1179467 | 64.2705783 | 65.6228432 | 73.3935956 |
| 16:30:00 | 67.6408647 | 60.1179467 | 63.2705783 | 63.6228432 | 73.3935956 |
| 16:30:01 | 68.6408647 | 60.1179467 | 64.2705783 | 63.6228432 | 73.3935956 |
| 16:30:02 | 68.6408647 | 58.1179467 | 64.2705783 | 62.6228432 | 73.3935956 |
| 16:30:03 | 70.6408647 | 57.1179467 | 64.2705783 | 62.6228432 | 73.3935956 |
| 16:30:04 | 71.6408647 | 56.1179467 | 64.2705783 | 61.6228432 | 73.3935956 |
| 16:30:05 | 75.6408647 | 56.1179467 | 64.2705783 | 61.6228432 | 73.3935956 |
| 16:30:06 | 77.6408647 | 56.1179467 | 64.2705783 | 60.6228432 | 73.3935956 |
| 16:30:07 | 64.2433868 | 56.1179467 | 64.2705783 | 60.6228432 | 70.3935956 |
| 16:30:08 | 65.1433868 | 65.1179467 | 64.2705783 | 60.6228432 | 69.3935956 |

|          |            |            |            |            |            |
|----------|------------|------------|------------|------------|------------|
| 16:30:09 | 65.2433868 | 66.1179467 | 64.2705783 | 61.6228432 | 69.3935956 |
| 16:30:10 | 65.5433868 | 67.1179467 | 64.2705783 | 62.6228432 | 68.3935956 |
| 16:30:11 | 65.9433868 | 67.1179467 | 64.2705783 | 64.6228432 | 68.3935956 |
| 16:30:12 | 66.0433868 | 67.1179467 | 63.2705783 | 65.6228432 | 68.3935956 |
| 16:30:13 | 66.1433868 | 68.1179467 | 62.2705783 | 64.6228432 | 68.3935956 |
| 16:30:14 | 71.6408647 | 68.1179467 | 62.2705783 | 64.6228432 | 67.3935956 |
| 16:30:15 | 65.6408647 | 68.1179467 | 61.2705783 | 63.6228432 | 67.3935956 |
| 16:30:16 | 64.6408647 | 68.1179467 | 61.2705783 | 62.6228432 | 65.3935956 |
| 16:30:17 | 64.6408647 | 72.1179467 | 61.2705783 | 59.6228432 | 65.3935956 |
| 16:30:18 | 64.6408647 | 65.0433868 | 61.2705783 | 59.6228432 | 65.3935956 |
| 16:30:19 | 64.6408647 | 65.7433868 | 62.2705783 | 58.6228432 | 65.3935956 |
| 16:30:20 | 64.6408647 | 66.0433868 | 63.2705783 | 57.6228432 | 65.3935956 |
| 16:30:21 | 64.6408647 | 66.0433868 | 63.2705783 | 57.6228432 | 65.3935956 |
| 16:30:22 | 64.6408647 | 66.3433868 | 63.2705783 | 57.6228432 | 66.3935956 |
| 16:30:23 | 64.6408647 | 66.4433868 | 64.2705783 | 56.6228432 | 66.3935956 |
| 16:30:24 | 65.6408647 | 66.2433868 | 63.2705783 | 57.6228432 | 66.3935956 |
| 16:30:25 | 65.6408647 | 67.3433868 | 63.2705783 | 62.6228432 | 67.3935956 |
| 16:30:26 | 65.6408647 | 67.6433868 | 64.2705783 | 63.6228432 | 68.3935956 |
| 16:30:27 | 64.6408647 | 79.1179467 | 64.2705783 | 64.6228432 | 68.3935956 |
| 16:30:28 | 64.6408647 | 78.1179467 | 64.2705783 | 66.6228432 | 68.3935956 |
| 16:30:29 | 63.6408647 | 74.1179467 | 64.2705783 | 66.6228432 | 68.3935956 |
| 16:30:30 | 62.6408647 | 74.1179467 | 63.2705783 | 70.6228432 | 68.3935956 |
| 16:30:31 | 62.6408647 | 73.1179467 | 63.2705783 | 71.6228432 | 68.3935956 |
| 16:30:32 | 62.6408647 | 73.1179467 | 63.2705783 | 71.6228432 | 68.3935956 |
| 16:30:33 | 62.6408647 | 73.1179467 | 64.2705783 | 70.6228432 | 68.3935956 |
| 16:30:34 | 62.6408647 | 73.1179467 | 63.2705783 | 68.6228432 | 68.3935956 |
| 16:30:35 | 62.6408647 | 73.1179467 | 64.2705783 | 67.6228432 | 68.3935956 |
| 16:30:36 | 62.6408647 | 73.1179467 | 64.2705783 | 60.6228432 | 68.3935956 |
| 16:30:37 | 61.6408647 | 71.1179467 | 64.2705783 | 60.6228432 | 68.3935956 |
| 16:30:38 | 61.6408647 | 70.1179467 | 64.2705783 | 59.6228432 | 70.3935956 |
| 16:30:39 | 61.6408647 | 68.1179467 | 64.2705783 | 58.6228432 | 71.3935956 |
| 16:30:40 | 61.6408647 | 67.1179467 | 64.2705783 | 59.6228432 | 72.3935956 |
| 16:30:41 | 61.6408647 | 67.1179467 | 64.2705783 | 59.6228432 | 72.3935956 |
| 16:30:42 | 61.6408647 | 66.1179467 | 64.2705783 | 61.6228432 | 72.3935956 |
| 16:30:43 | 61.6408647 | 66.1179467 | 64.2705783 | 61.6228432 | 70.3935956 |
| 16:30:44 | 61.6408647 | 66.1179467 | 64.2705783 | 61.6228432 | 69.3935956 |
| 16:30:45 | 61.6408647 | 66.1179467 | 65.2705783 | 61.6228432 | 65.3935956 |
| 16:30:46 | 61.6408647 | 67.1179467 | 65.2705783 | 61.6228432 | 65.3935956 |
| 16:30:47 | 63.6408647 | 68.1179467 | 65.2705783 | 61.6228432 | 65.3935956 |
| 16:30:48 | 66.6408647 | 68.1179467 | 67.2705783 | 61.6228432 | 65.3935956 |
| 16:30:49 | 66.6408647 | 67.1179467 | 68.2705783 | 61.6228432 | 65.3935956 |
| 16:30:50 | 66.6408647 | 67.1179467 | 69.2705783 | 66.6228432 | 65.3935956 |
| 16:30:51 | 66.6408647 | 67.1179467 | 70.2705783 | 66.6228432 | 65.3935956 |
| 16:30:52 | 67.6408647 | 67.1179467 | 70.2705783 | 67.6228432 | 65.3935956 |
| 16:30:53 | 67.6408647 | 67.1179467 | 70.2705783 | 67.6228432 | 65.3935956 |

|          |            |            |            |            |            |
|----------|------------|------------|------------|------------|------------|
| 16:30:54 | 68.6408647 | 67.1179467 | 68.2705783 | 67.6228432 | 66.3935956 |
| 16:30:55 | 68.6408647 | 67.1179467 | 67.2705783 | 66.6228432 | 66.3935956 |
| 16:30:56 | 66.6408647 | 66.1179467 | 66.2705783 | 66.6228432 | 69.3935956 |
| 16:30:57 | 65.6408647 | 66.1179467 | 65.2705783 | 66.6228432 | 71.3935956 |
| 16:30:58 | 65.6408647 | 65.1179467 | 64.2705783 | 66.6228432 | 71.3935956 |
| 16:30:59 | 64.6408647 | 65.1179467 | 65.2705783 | 66.6228432 | 69.3935956 |
| 16:31:00 | 63.6408647 | 65.1179467 | 64.2705783 | 66.6228432 | 69.3935956 |
| 16:31:01 | 61.6408647 | 65.1179467 | 64.2705783 | 66.6228432 | 68.3935956 |
| 16:31:02 | 61.6408647 | 67.1179467 | 63.2705783 | 66.6228432 | 68.3935956 |
| 16:31:03 | 61.6408647 | 67.1179467 | 63.2705783 | 69.6228432 | 67.3935956 |
| 16:31:04 | 61.6408647 | 69.1179467 | 63.2705783 | 66.6228432 | 67.3935956 |
| 16:31:05 | 64.6408647 | 69.1179467 | 62.2705783 | 64.6228432 | 67.3935956 |
| 16:31:06 | 64.6408647 | 69.1179467 | 62.2705783 | 62.6228432 | 65.3935956 |
| 16:31:07 | 64.6408647 | 68.1179467 | 61.2705783 | 60.6228432 | 65.3935956 |
| 16:31:08 | 64.6408647 | 67.1179467 | 62.2705783 | 59.6228432 | 64.3935956 |
| 16:31:09 | 65.6408647 | 67.1179467 | 62.2705783 | 59.6228432 | 63.3935956 |
| 16:31:10 | 66.6408647 | 67.1179467 | 63.2705783 | 59.6228432 | 62.3935956 |
| 16:31:11 | 66.6408647 | 67.1179467 | 63.2705783 | 59.6228432 | 62.3935956 |
| 16:31:12 | 66.6408647 | 66.1179467 | 62.2705783 | 61.6228432 | 62.3935956 |
| 16:31:13 | 67.6408647 | 65.1179467 | 63.2705783 | 61.6228432 | 62.3935956 |
| 16:31:14 | 67.6408647 | 65.1179467 | 63.2705783 | 60.6228432 | 62.3935956 |
| 16:31:15 | 66.6408647 | 65.1179467 | 63.2705783 | 60.6228432 | 62.3935956 |
| 16:31:16 | 66.6408647 | 65.1179467 | 63.2705783 | 59.6228432 | 61.3935956 |
| 16:31:17 | 66.6408647 | 65.1179467 | 62.2705783 | 58.6228432 | 61.3935956 |
| 16:31:18 | 66.6408647 | 68.1179467 | 62.2705783 | 58.6228432 | 61.3935956 |
| 16:31:19 | 66.6408647 | 67.1179467 | 63.2705783 | 59.6228432 | 55.3935956 |
| 16:31:20 | 65.6408647 | 67.1179467 | 64.2705783 | 59.6228432 | 55.3935956 |
| 16:31:21 | 65.6408647 | 66.1179467 | 64.2705783 | 59.6228432 | 55.3935956 |
| 16:31:22 | 65.6408647 | 65.1179467 | 64.2705783 | 60.6228432 | 56.3935956 |
| 16:31:23 | 65.6408647 | 65.1179467 | 63.2705783 | 60.6228432 | 58.3935956 |
| 16:31:24 | 65.6408647 | 65.1179467 | 65.2705783 | 60.6228432 | 58.3935956 |
| 16:31:25 | 65.6408647 | 66.1179467 | 68.2705783 | 60.6228432 | 64.3935956 |
| 16:31:26 | 64.6408647 | 66.1179467 | 70.2705783 | 60.6228432 | 67.3935956 |
| 16:31:27 | 64.6408647 | 66.1179467 | 72.2705783 | 60.6228432 | 68.3935956 |
| 16:31:28 | 64.6408647 | 65.1179467 | 73.2705783 | 60.6228432 | 68.3935956 |
| 16:31:29 | 64.6408647 | 65.1179467 | 73.2705783 | 61.6228432 | 68.3935956 |
| 16:31:30 | 63.6408647 | 65.1179467 | 74.2705783 | 61.6228432 | 64.3935956 |
| 16:31:31 | 64.6408647 | 65.1179467 | 74.2705783 | 60.6228432 | 61.3935956 |
| 16:31:32 | 64.6408647 | 65.1179467 | 74.2705783 | 60.6228432 | 59.3935956 |
| 16:31:33 | 64.6408647 | 72.1179467 | 74.2705783 | 60.6228432 | 59.3935956 |
| 16:31:34 | 63.6408647 | 74.1179467 | 74.2705783 | 60.6228432 | 59.3935956 |
| 16:31:35 | 63.6408647 | 75.1179467 | 74.2705783 | 61.6228432 | 60.3935956 |
| 16:31:36 | 62.6408647 | 75.1179467 | 74.2705783 | 63.6228432 | 61.3935956 |
| 16:31:37 | 61.6408647 | 73.1179467 | 73.2705783 | 64.6228432 | 61.3935956 |
| 16:31:38 | 61.6408647 | 71.1179467 | 73.2705783 | 64.6228432 | 61.3935956 |

|          |            |            |            |            |            |
|----------|------------|------------|------------|------------|------------|
| 16:31:39 | 61.6408647 | 69.1179467 | 73.2705783 | 62.6228432 | 61.3935956 |
| 16:31:40 | 62.6408647 | 69.1179467 | 73.2705783 | 63.6228432 | 61.3935956 |
| 16:31:41 | 62.6408647 | 68.1179467 | 72.2705783 | 63.6228432 | 59.3935956 |
| 16:31:42 | 67.5433868 | 68.1179467 | 70.2705783 | 63.6228432 | 58.3935956 |
| 16:31:43 | 67.5433868 | 67.1179467 | 69.2705783 | 62.6228432 | 57.3935956 |
| 16:31:44 | 67.8433868 | 67.1179467 | 69.2705783 | 63.6228432 | 57.3935956 |
| 16:31:45 | 67.7433868 | 67.1179467 | 68.2705783 | 63.6228432 | 57.3935956 |
| 16:31:46 | 81.6408647 | 66.1179467 | 68.2705783 | 63.6228432 | 56.3935956 |
| 16:31:47 | 81.6408647 | 66.1179467 | 68.2705783 | 63.6228432 | 56.3935956 |
| 16:31:48 | 80.6408647 | 65.1179467 | 68.2705783 | 63.6228432 | 59.3935956 |
| 16:31:49 | 80.6408647 | 65.1179467 | 68.2705783 | 63.6228432 | 59.3935956 |
| 16:31:50 | 80.6408647 | 64.1179467 | 68.2705783 | 63.6228432 | 62.3935956 |
| 16:31:51 | 80.6408647 | 64.1179467 | 68.2705783 | 63.6228432 | 61.3935956 |
| 16:31:52 | 80.6408647 | 64.1179467 | 68.2705783 | 63.6228432 | 59.3935956 |
| 16:31:53 | 79.6408647 | 63.1179467 | 69.2705783 | 65.6228432 | 59.3935956 |
| 16:31:54 | 79.6408647 | 61.1179467 | 69.2705783 | 66.6228432 | 59.3935956 |
| 16:31:55 | 79.6408647 | 60.1179467 | 69.2705783 | 65.6228432 | 60.3935956 |
| 16:31:56 | 79.6408647 | 60.1179467 | 68.2705783 | 64.6228432 | 60.3935956 |
| 16:31:57 | 79.6408647 | 60.1179467 | 68.2705783 | 64.6228432 | 60.3935956 |
| 16:31:58 | 79.6408647 | 60.1179467 | 69.2705783 | 63.6228432 | 62.3935956 |
| 16:31:59 | 79.6408647 | 59.1179467 | 68.2705783 | 62.6228432 | 62.3935956 |
| 16:32:00 | 79.6408647 | 56.1179467 | 67.2705783 | 62.6228432 | 63.3935956 |
| 16:32:01 | 79.6408647 | 51.1179467 | 67.2705783 | 64.6228432 | 65.3935956 |
| 16:32:02 | 79.6408647 | 51.1179467 | 67.2705783 | 64.6228432 | 65.3935956 |
| 16:32:03 | 81.6408647 | 50.1179467 | 68.2705783 | 64.6228432 | 65.3935956 |
| 16:32:04 | 69.1433868 | 54.1179467 | 67.2705783 | 64.6228432 | 65.3935956 |
| 16:32:05 | 69.0433868 | 56.1179467 | 67.2705783 | 62.6228432 | 64.3935956 |
| 16:32:06 | 81.6408647 | 60.1179467 | 67.2705783 | 62.6228432 | 64.3935956 |
| 16:32:07 | 77.6408647 | 66.1179467 | 66.2705783 | 62.6228432 | 64.3935956 |
| 16:32:08 | 77.6408647 | 71.1179467 | 66.2705783 | 62.6228432 | 63.3935956 |
| 16:32:09 | 77.6408647 | 77.1179467 | 66.2705783 | 62.6228432 | 63.3935956 |
| 16:32:10 | 77.6408647 | 79.1179467 | 65.2705783 | 63.6228432 | 63.3935956 |
| 16:32:11 | 78.6408647 | 79.1179467 | 65.2705783 | 63.6228432 | 64.3935956 |
| 16:32:12 | 78.6408647 | 79.1179467 | 65.2705783 | 63.6228432 | 64.3935956 |
| 16:32:13 | 78.6408647 | 80.1179467 | 65.2705783 | 63.6228432 | 64.3935956 |
| 16:32:14 | 78.6408647 | 80.1179467 | 64.2705783 | 63.6228432 | 64.3935956 |
| 16:32:15 | 78.6408647 | 78.1179467 | 65.2705783 | 63.6228432 | 66.3935956 |
| 16:32:16 | 78.6408647 | 77.1179467 | 67.2705783 | 63.6228432 | 66.3935956 |
| 16:32:17 | 74.6408647 | 76.1179467 | 68.2705783 | 63.6228432 | 66.3935956 |
| 16:32:18 | 73.6408647 | 76.1179467 | 68.2705783 | 63.6228432 | 65.3935956 |
| 16:32:19 | 73.6408647 | 74.1179467 | 68.2705783 | 69.6228432 | 64.3935956 |
| 16:32:20 | 73.6408647 | 74.1179467 | 68.2705783 | 71.6228432 | 64.3935956 |
| 16:32:21 | 72.6408647 | 73.1179467 | 68.2705783 | 73.6228432 | 64.3935956 |
| 16:32:22 | 72.6408647 | 72.1179467 | 69.2705783 | 75.6228432 | 64.3935956 |
| 16:32:23 | 72.6408647 | 72.1179467 | 68.2705783 | 75.6228432 | 63.3935956 |

|          |            |            |            |            |            |
|----------|------------|------------|------------|------------|------------|
| 16:32:24 | 69.6408647 | 72.1179467 | 68.2705783 | 80.6228432 | 63.3935956 |
| 16:32:25 | 68.6408647 | 71.1179467 | 68.2705783 | 82.6228432 | 62.3935956 |
| 16:32:26 | 67.6408647 | 71.1179467 | 69.2705783 | 82.6228432 | 62.3935956 |
| 16:32:27 | 67.6408647 | 71.1179467 | 68.2705783 | 69.7433868 | 61.3935956 |
| 16:32:28 | 67.6408647 | 71.1179467 | 68.2705783 | 69.7433868 | 61.3935956 |
| 16:32:29 | 68.6408647 | 71.1179467 | 67.2705783 | 69.7433868 | 61.3935956 |
| 16:32:30 | 68.6408647 | 70.1179467 | 65.2705783 | 69.5433868 | 61.3935956 |
| 16:32:31 | 69.6408647 | 70.1179467 | 64.2705783 | 83.6228432 | 63.3935956 |
| 16:32:32 | 69.6408647 | 70.1179467 | 64.2705783 | 79.6228432 | 65.3935956 |
| 16:32:33 | 70.6408647 | 70.1179467 | 63.2705783 | 73.6228432 | 65.3935956 |
| 16:32:34 | 69.6408647 | 70.1179467 | 63.2705783 | 71.6228432 | 65.3935956 |
| 16:32:35 | 69.6408647 | 70.1179467 | 62.2705783 | 70.6228432 | 65.3935956 |
| 16:32:36 | 68.6408647 | 70.1179467 | 62.2705783 | 70.6228432 | 65.3935956 |
| 16:32:37 | 68.6408647 | 70.1179467 | 62.2705783 | 69.6228432 | 65.3935956 |
| 16:32:38 | 68.6408647 | 69.1179467 | 61.2705783 | 69.6228432 | 65.3935956 |
| 16:32:39 | 68.6408647 | 68.1179467 | 61.2705783 | 69.6228432 | 65.3935956 |
| 16:32:40 | 68.6408647 | 68.1179467 | 61.2705783 | 71.6228432 | 65.3935956 |
| 16:32:41 | 68.6408647 | 68.1179467 | 61.2705783 | 71.6228432 | 65.3935956 |
| 16:32:42 | 67.6408647 | 68.1179467 | 61.2705783 | 68.6228432 | 65.3935956 |
| 16:32:43 | 65.6408647 | 68.1179467 | 61.2705783 | 66.6228432 | 65.3935956 |
| 16:32:44 | 65.6408647 | 69.1179467 | 61.2705783 | 64.6228432 | 66.3935956 |
| 16:32:45 | 63.6408647 | 76.1179467 | 61.2705783 | 64.6228432 | 66.3935956 |
| 16:32:46 | 63.6408647 | 77.1179467 | 61.2705783 | 63.6228432 | 65.3935956 |
| 16:32:47 | 64.6408647 | 79.1179467 | 61.2705783 | 65.6228432 | 65.3935956 |
| 16:32:48 | 68.6408647 | 80.1179467 | 62.2705783 | 68.6228432 | 64.3935956 |
| 16:32:49 | 68.6408647 | 80.1179467 | 62.2705783 | 70.6228432 | 63.3935956 |
| 16:32:50 | 68.6408647 | 78.1179467 | 61.2705783 | 70.6228432 | 62.3935956 |
| 16:32:51 | 70.6408647 | 78.1179467 | 61.2705783 | 74.6228432 | 62.3935956 |
| 16:32:52 | 69.6408647 | 74.1179467 | 61.2705783 | 75.6228432 | 62.3935956 |
| 16:32:53 | 69.6408647 | 73.1179467 | 61.2705783 | 74.6228432 | 63.3935956 |
| 16:32:54 | 69.6408647 | 73.1179467 | 61.2705783 | 74.6228432 | 63.3935956 |
| 16:32:55 | 70.6408647 | 74.1179467 | 61.2705783 | 73.6228432 | 63.3935956 |
| 16:32:56 | 70.6408647 | 73.1179467 | 61.2705783 | 71.6228432 | 63.3935956 |
| 16:32:57 | 70.6408647 | 73.1179467 | 63.2705783 | 69.6228432 | 63.3935956 |
| 16:32:58 | 71.6408647 | 71.1179467 | 64.2705783 | 67.6228432 | 64.3935956 |
| 16:32:59 | 71.6408647 | 68.1179467 | 63.2705783 | 67.6228432 | 70.3935956 |
| 16:33:00 | 70.6408647 | 65.1179467 | 63.2705783 | 66.6228432 | 70.3935956 |
| 16:33:01 | 70.6408647 | 64.1179467 | 62.2705783 | 65.6228432 | 71.3935956 |
| 16:33:02 | 70.6408647 | 64.1179467 | 62.2705783 | 65.6228432 | 71.3935956 |
| 16:33:03 | 70.6408647 | 63.1179467 | 61.2705783 | 69.6228432 | 71.3935956 |
| 16:33:04 | 69.6408647 | 63.1179467 | 61.2705783 | 69.6228432 | 71.3935956 |
| 16:33:05 | 69.6408647 | 64.1179467 | 61.2705783 | 68.6228432 | 70.3935956 |
| 16:33:06 | 71.6408647 | 64.1179467 | 61.2705783 | 65.6228432 | 69.3935956 |
| 16:33:07 | 71.6408647 | 66.1179467 | 60.2705783 | 63.6228432 | 69.3935956 |
| 16:33:08 | 72.6408647 | 66.1179467 | 60.2705783 | 62.6228432 | 69.3935956 |

|          |            |            |            |            |            |
|----------|------------|------------|------------|------------|------------|
| 16:33:09 | 72.6408647 | 66.1179467 | 60.2705783 | 62.6228432 | 69.3935956 |
| 16:33:10 | 70.6408647 | 68.1179467 | 60.2705783 | 62.6228432 | 69.3935956 |
| 16:33:11 | 70.6408647 | 68.1179467 | 60.2705783 | 64.6228432 | 69.3935956 |
| 16:33:12 | 69.6408647 | 68.1179467 | 60.2705783 | 66.6228432 | 70.3935956 |
| 16:33:13 | 69.6408647 | 68.1179467 | 61.2705783 | 69.6228432 | 71.3935956 |
| 16:33:14 | 69.6408647 | 68.1179467 | 61.2705783 | 70.6228432 | 71.3935956 |
| 16:33:15 | 69.6408647 | 69.1179467 | 61.2705783 | 73.6228432 | 71.3935956 |
| 16:33:16 | 69.6408647 | 69.1179467 | 61.2705783 | 73.6228432 | 71.3935956 |
| 16:33:17 | 69.6408647 | 69.1179467 | 61.2705783 | 76.6228432 | 71.3935956 |
| 16:33:18 | 69.6408647 | 70.1179467 | 61.2705783 | 76.6228432 | 74.3935956 |
| 16:33:19 | 69.6408647 | 70.1179467 | 61.2705783 | 76.6228432 | 74.3935956 |
| 16:33:20 | 69.6408647 | 70.1179467 | 61.2705783 | 76.6228432 | 73.3935956 |
| 16:33:21 | 69.6408647 | 71.1179467 | 61.2705783 | 76.6228432 | 72.3935956 |
| 16:33:22 | 68.6408647 | 71.1179467 | 61.2705783 | 76.6228432 | 71.3935956 |
| 16:33:23 | 68.6408647 | 71.1179467 | 61.2705783 | 71.6228432 | 71.3935956 |
| 16:33:24 | 67.6408647 | 71.1179467 | 61.2705783 | 71.6228432 | 70.3935956 |
| 16:33:25 | 67.6408647 | 72.1179467 | 63.2705783 | 72.6228432 | 68.3935956 |
| 16:33:26 | 67.6408647 | 72.1179467 | 63.2705783 | 73.6228432 | 68.3935956 |
| 16:33:27 | 67.6408647 | 74.1179467 | 63.2705783 | 73.6228432 | 68.3935956 |
| 16:33:28 | 67.6408647 | 73.1179467 | 62.2705783 | 73.6228432 | 68.3935956 |
| 16:33:29 | 68.6408647 | 73.1179467 | 62.2705783 | 73.6228432 | 66.3935956 |
| 16:33:30 | 69.6408647 | 73.1179467 | 62.2705783 | 72.6228432 | 65.3935956 |
| 16:33:31 | 70.6408647 | 72.1179467 | 62.2705783 | 72.6228432 | 65.3935956 |
| 16:33:32 | 71.6408647 | 73.1179467 | 62.2705783 | 69.6228432 | 63.3935956 |
| 16:33:33 | 71.6408647 | 72.1179467 | 62.2705783 | 69.6228432 | 63.3935956 |
| 16:33:34 | 71.6408647 | 72.1179467 | 62.2705783 | 69.6228432 | 63.3935956 |
| 16:33:35 | 71.6408647 | 72.1179467 | 62.2705783 | 69.6228432 | 63.3935956 |
| 16:33:36 | 72.6408647 | 70.1179467 | 62.2705783 | 69.6228432 | 63.3935956 |
| 16:33:37 | 72.6408647 | 70.1179467 | 62.2705783 | 68.6228432 | 63.3935956 |
| 16:33:38 | 71.6408647 | 68.1179467 | 62.2705783 | 68.6228432 | 63.3935956 |
| 16:33:39 | 70.6408647 | 68.1179467 | 62.2705783 | 68.6228432 | 64.3935956 |
| 16:33:40 | 68.6408647 | 68.1179467 | 62.2705783 | 68.6228432 | 64.3935956 |
| 16:33:41 | 66.6408647 | 68.1179467 | 62.2705783 | 68.6228432 | 64.3935956 |
| 16:33:42 | 64.6408647 | 69.1179467 | 62.2705783 | 68.6228432 | 64.3935956 |
| 16:33:43 | 64.6408647 | 69.1179467 | 63.2705783 | 68.6228432 | 64.3935956 |
| 16:33:44 | 63.6408647 | 69.1179467 | 63.2705783 | 68.6228432 | 64.3935956 |
| 16:33:45 | 63.6408647 | 70.1179467 | 62.2705783 | 70.6228432 | 66.3935956 |
| 16:33:46 | 65.6408647 | 70.1179467 | 62.2705783 | 72.6228432 | 66.3935956 |
| 16:33:47 | 65.6408647 | 70.1179467 | 62.2705783 | 72.6228432 | 66.3935956 |
| 16:33:48 | 65.6408647 | 69.1179467 | 63.2705783 | 73.6228432 | 66.3935956 |
| 16:33:49 | 65.6408647 | 69.1179467 | 63.2705783 | 74.6228432 | 67.3935956 |
| 16:33:50 | 66.6408647 | 70.1179467 | 63.2705783 | 74.6228432 | 66.3935956 |
| 16:33:51 | 65.6408647 | 70.1179467 | 64.2705783 | 75.6228432 | 66.3935956 |
| 16:33:52 | 64.6408647 | 70.1179467 | 64.2705783 | 74.6228432 | 65.3935956 |
| 16:33:53 | 64.6408647 | 71.1179467 | 64.2705783 | 74.6228432 | 64.3935956 |

|          |            |            |            |            |            |
|----------|------------|------------|------------|------------|------------|
| 16:33:54 | 64.6408647 | 72.1179467 | 64.2705783 | 75.6228432 | 64.3935956 |
| 16:33:55 | 63.6408647 | 72.1179467 | 63.2705783 | 76.6228432 | 64.3935956 |
| 16:33:56 | 63.6408647 | 72.1179467 | 62.2705783 | 76.6228432 | 63.3935956 |
| 16:33:57 | 63.6408647 | 72.1179467 | 61.2705783 | 74.6228432 | 60.3935956 |
| 16:33:58 | 65.6408647 | 72.1179467 | 61.2705783 | 74.6228432 | 60.3935956 |
| 16:33:59 | 65.6408647 | 71.1179467 | 61.2705783 | 72.6228432 | 60.3935956 |
| 16:34:00 | 68.6408647 | 71.1179467 | 61.2705783 | 73.6228432 | 61.3935956 |
| 16:34:01 | 74.6408647 | 71.1179467 | 61.2705783 | 73.6228432 | 62.3935956 |
| 16:34:02 | 76.6408647 | 72.1179467 | 61.2705783 | 73.6228432 | 62.3935956 |
| 16:34:03 | 76.6408647 | 72.1179467 | 61.2705783 | 73.6228432 | 63.3935956 |
| 16:34:04 | 76.6408647 | 71.1179467 | 61.2705783 | 72.6228432 | 63.3935956 |
| 16:34:05 | 74.6408647 | 70.1179467 | 61.2705783 | 71.6228432 | 63.3935956 |
| 16:34:06 | 74.6408647 | 70.1179467 | 61.2705783 | 70.6228432 | 63.3935956 |
| 16:34:07 | 74.6408647 | 70.1179467 | 61.2705783 | 69.6228432 | 68.3935956 |
| 16:34:08 | 73.6408647 | 69.1179467 | 61.2705783 | 69.6228432 | 68.3935956 |
| 16:34:09 | 71.6408647 | 70.1179467 | 61.2705783 | 69.6228432 | 68.3935956 |
| 16:34:10 | 71.6408647 | 70.1179467 | 62.2705783 | 70.6228432 | 67.3935956 |
| 16:34:11 | 71.6408647 | 70.1179467 | 62.2705783 | 70.6228432 | 67.3935956 |
| 16:34:12 | 71.6408647 | 70.1179467 | 61.2705783 | 69.6228432 | 67.3935956 |
| 16:34:13 | 71.6408647 | 70.1179467 | 61.2705783 | 69.6228432 | 68.3935956 |
| 16:34:14 | 71.6408647 | 70.1179467 | 62.2705783 | 68.6228432 | 68.3935956 |
| 16:34:15 | 70.6408647 | 71.1179467 | 62.2705783 | 68.6228432 | 68.3935956 |
| 16:34:16 | 70.6408647 | 71.1179467 | 62.2705783 | 68.6228432 | 68.3935956 |
| 16:34:17 | 67.6408647 | 70.1179467 | 62.2705783 | 69.6228432 | 68.3935956 |
| 16:34:18 | 67.6408647 | 69.1179467 | 63.2705783 | 69.6228432 | 68.3935956 |
| 16:34:19 | 68.6408647 | 70.1179467 | 63.2705783 | 68.6228432 | 69.3935956 |
| 16:34:20 | 68.6408647 | 70.1179467 | 63.2705783 | 68.6228432 | 70.3935956 |
| 16:34:21 | 68.6408647 | 70.1179467 | 63.2705783 | 68.6228432 | 70.3935956 |
| 16:34:22 | 69.6408647 | 70.1179467 | 63.2705783 | 67.6228432 | 70.3935956 |
| 16:34:23 | 68.6408647 | 71.1179467 | 63.2705783 | 67.6228432 | 69.3935956 |
| 16:34:24 | 68.6408647 | 70.1179467 | 63.2705783 | 67.6228432 | 68.3935956 |
| 16:34:25 | 69.6408647 | 70.1179467 | 63.2705783 | 68.6228432 | 68.3935956 |
| 16:34:26 | 70.6408647 | 70.1179467 | 64.2705783 | 70.6228432 | 68.3935956 |
| 16:34:27 | 70.6408647 | 70.1179467 | 63.2705783 | 70.6228432 | 68.3935956 |
| 16:34:28 | 70.6408647 | 71.1179467 | 63.2705783 | 71.6228432 | 68.3935956 |
| 16:34:29 | 70.6408647 | 71.1179467 | 63.2705783 | 71.6228432 | 68.3935956 |
| 16:34:30 | 67.6408647 | 69.1179467 | 62.2705783 | 71.6228432 | 64.3935956 |
| 16:34:31 | 67.6408647 | 70.1179467 | 62.2705783 | 71.6228432 | 64.3935956 |
| 16:34:32 | 67.6408647 | 72.1179467 | 63.2705783 | 70.6228432 | 64.3935956 |
| 16:34:33 | 64.6408647 | 72.1179467 | 63.2705783 | 70.6228432 | 63.3935956 |
| 16:34:34 | 64.6408647 | 73.1179467 | 64.2705783 | 70.6228432 | 63.3935956 |
| 16:34:35 | 64.6408647 | 73.1179467 | 63.2705783 | 69.6228432 | 63.3935956 |
| 16:34:36 | 64.6408647 | 73.1179467 | 63.2705783 | 69.6228432 | 63.3935956 |
| 16:34:37 | 64.6408647 | 73.1179467 | 62.2705783 | 69.6228432 | 64.3935956 |
| 16:34:38 | 64.6408647 | 73.1179467 | 62.2705783 | 69.6228432 | 62.3935956 |



|          |            |            |            |            |            |
|----------|------------|------------|------------|------------|------------|
| 16:34:39 | 64.6408647 | 73.1179467 | 62.2705783 | 69.6228432 | 62.3935956 |
| 16:34:40 | 64.6408647 | 72.1179467 | 62.2705783 | 69.6228432 | 62.3935956 |
| 16:34:41 | 64.6408647 | 72.1179467 | 63.2705783 | 69.6228432 | 60.3935956 |
| 16:34:42 | 64.6408647 | 71.1179467 | 63.2705783 | 69.6228432 | 60.3935956 |
| 16:34:43 | 64.6408647 | 71.1179467 | 64.2705783 | 69.6228432 | 59.3935956 |
| 16:34:44 | 65.6408647 | 71.1179467 | 64.2705783 | 71.6228432 | 59.3935956 |
| 16:34:45 | 66.6408647 | 71.1179467 | 63.2705783 | 71.6228432 | 59.3935956 |
| 16:34:46 | 67.6408647 | 71.1179467 | 63.2705783 | 71.6228432 | 59.3935956 |
| 16:34:47 | 67.6408647 | 71.1179467 | 63.2705783 | 72.6228432 | 59.3935956 |
| 16:34:48 | 70.6408647 | 71.1179467 | 62.2705783 | 72.6228432 | 59.3935956 |
| 16:34:49 | 70.6408647 | 71.1179467 | 62.2705783 | 72.6228432 | 59.3935956 |
| 16:34:50 | 70.6408647 | 71.1179467 | 62.2705783 | 73.6228432 | 59.3935956 |
| 16:34:51 | 70.6408647 | 71.1179467 | 62.2705783 | 74.6228432 | 59.3935956 |
| 16:34:52 | 70.6408647 | 71.1179467 | 62.2705783 | 74.6228432 | 59.3935956 |
| 16:34:53 | 68.6408647 | 71.1179467 | 62.2705783 | 75.6228432 | 59.3935956 |
| 16:34:54 | 68.6408647 | 71.1179467 | 61.2705783 | 76.6228432 | 59.3935956 |
| 16:34:55 | 69.6408647 | 71.1179467 | 61.2705783 | 76.6228432 | 59.3935956 |
| 16:34:56 | 71.6408647 | 71.1179467 | 61.2705783 | 76.6228432 | 59.3935956 |
| 16:34:57 | 73.6408647 | 70.1179467 | 61.2705783 | 76.6228432 | 59.3935956 |
| 16:34:58 | 73.6408647 | 70.1179467 | 61.2705783 | 77.6228432 | 59.3935956 |
| 16:34:59 | 73.6408647 | 70.1179467 | 61.2705783 | 79.6228432 | 59.3935956 |
| 16:35:00 | 72.6408647 | 70.1179467 | 62.2705783 | 79.6228432 | 59.3935956 |
| 16:35:01 | 71.6408647 | 68.1179467 | 62.2705783 | 69.0433868 | 58.3935956 |
| 16:35:02 | 70.6408647 | 68.1179467 | 62.2705783 | 68.8433868 | 59.3935956 |
| 16:35:03 | 69.6408647 | 69.1179467 | 63.2705783 | 68.9433868 | 60.3935956 |
| 16:35:04 | 68.6408647 | 69.1179467 | 63.2705783 | 68.9433868 | 62.3935956 |
| 16:35:05 | 68.6408647 | 69.1179467 | 62.2705783 | 68.8433868 | 62.3935956 |
| 16:35:06 | 66.6408647 | 70.1179467 | 62.2705783 | 68.6433868 | 63.3935956 |
| 16:35:07 | 66.6408647 | 71.1179467 | 63.2705783 | 69.0433868 | 64.3935956 |
| 16:35:08 | 67.6408647 | 71.1179467 | 63.2705783 | 80.6228432 | 66.3935956 |
| 16:35:09 | 67.6408647 | 71.1179467 | 63.2705783 | 80.6228432 | 66.3935956 |
| 16:35:10 | 68.6408647 | 72.1179467 | 64.2705783 | 74.6228432 | 66.3935956 |
| 16:35:11 | 68.6408647 | 72.1179467 | 64.2705783 | 74.6228432 | 66.3935956 |
| 16:35:12 | 68.6408647 | 72.1179467 | 65.2705783 | 74.6228432 | 67.3935956 |
| 16:35:13 | 68.6408647 | 72.1179467 | 64.2705783 | 74.6228432 | 68.3935956 |
| 16:35:14 | 68.6408647 | 71.1179467 | 64.2705783 | 73.6228432 | 67.3935956 |
| 16:35:15 | 68.6408647 | 72.1179467 | 63.2705783 | 71.6228432 | 67.3935956 |
| 16:35:16 | 69.6408647 | 72.1179467 | 63.2705783 | 71.6228432 | 66.3935956 |
| 16:35:17 | 69.6408647 | 72.1179467 | 63.2705783 | 71.6228432 | 66.3935956 |
| 16:35:18 | 68.6408647 | 72.1179467 | 63.2705783 | 71.6228432 | 66.3935956 |
| 16:35:19 | 68.6408647 | 72.1179467 | 63.2705783 | 71.6228432 | 66.3935956 |
| 16:35:20 | 68.6408647 | 72.1179467 | 63.2705783 | 71.6228432 | 66.3935956 |
| 16:35:21 | 68.6408647 | 73.1179467 | 63.2705783 | 71.6228432 | 66.3935956 |
| 16:35:22 | 68.6408647 | 73.1179467 | 62.2705783 | 71.6228432 | 66.3935956 |
| 16:35:23 | 68.6408647 | 73.1179467 | 62.2705783 | 71.6228432 | 66.3935956 |

|          |            |            |            |            |            |
|----------|------------|------------|------------|------------|------------|
| 16:35:24 | 68.6408647 | 73.1179467 | 62.2705783 | 72.6228432 | 67.3935956 |
| 16:35:25 | 68.6408647 | 73.1179467 | 62.2705783 | 73.6228432 | 65.3935956 |
| 16:35:26 | 68.6408647 | 72.1179467 | 63.2705783 | 73.6228432 | 63.3935956 |
| 16:35:27 | 67.6408647 | 72.1179467 | 64.2705783 | 74.6228432 | 64.3935956 |
| 16:35:28 | 67.6408647 | 72.1179467 | 64.2705783 | 74.6228432 | 65.3935956 |
| 16:35:29 | 68.6408647 | 72.1179467 | 64.2705783 | 75.6228432 | 66.3935956 |
| 16:35:30 | 69.6408647 | 72.1179467 | 64.2705783 | 75.6228432 | 66.3935956 |
| 16:35:31 | 69.6408647 | 72.1179467 | 64.2705783 | 75.6228432 | 66.3935956 |
| 16:35:32 | 69.6408647 | 72.1179467 | 64.2705783 | 75.6228432 | 66.3935956 |
| 16:35:33 | 69.6408647 | 70.1179467 | 63.2705783 | 73.6228432 | 64.3935956 |
| 16:35:34 | 69.6408647 | 70.1179467 | 63.2705783 | 73.6228432 | 64.3935956 |
| 16:35:35 | 71.6408647 | 70.1179467 | 63.2705783 | 73.6228432 | 64.3935956 |
| 16:35:36 | 72.6408647 | 70.1179467 | 62.2705783 | 73.6228432 | 64.3935956 |
| 16:35:37 | 72.6408647 | 70.1179467 | 62.2705783 | 73.6228432 | 64.3935956 |
| 16:35:38 | 72.6408647 | 70.1179467 | 62.2705783 | 74.6228432 | 64.3935956 |
| 16:35:39 | 72.6408647 | 70.1179467 | 62.2705783 | 74.6228432 | 65.3935956 |
| 16:35:40 | 72.6408647 | 71.1179467 | 61.2705783 | 74.6228432 | 66.3935956 |
| 16:35:41 | 72.6408647 | 73.1179467 | 61.2705783 | 74.6228432 | 66.3935956 |
| 16:35:42 | 74.6408647 | 73.1179467 | 62.2705783 | 73.6228432 | 66.3935956 |
| 16:35:43 | 75.6408647 | 74.1179467 | 62.2705783 | 73.6228432 | 67.3935956 |
| 16:35:44 | 76.6408647 | 74.1179467 | 61.2705783 | 72.6228432 | 68.3935956 |
| 16:35:45 | 75.6408647 | 75.1179467 | 61.2705783 | 72.6228432 | 68.3935956 |
| 16:35:46 | 74.6408647 | 75.1179467 | 61.2705783 | 72.6228432 | 68.3935956 |
| 16:35:47 | 73.6408647 | 76.1179467 | 61.2705783 | 73.6228432 | 68.3935956 |
| 16:35:48 | 73.6408647 | 76.1179467 | 62.2705783 | 74.6228432 | 67.3935956 |
| 16:35:49 | 71.6408647 | 75.1179467 | 62.2705783 | 74.6228432 | 67.3935956 |
| 16:35:50 | 71.6408647 | 75.1179467 | 62.2705783 | 74.6228432 | 66.3935956 |
| 16:35:51 | 71.6408647 | 75.1179467 | 62.2705783 | 74.6228432 | 66.3935956 |
| 16:35:52 | 72.6408647 | 74.1179467 | 62.2705783 | 74.6228432 | 66.3935956 |
| 16:35:53 | 73.6408647 | 74.1179467 | 61.2705783 | 74.6228432 | 67.3935956 |
| 16:35:54 | 73.6408647 | 74.1179467 | 61.2705783 | 73.6228432 | 67.3935956 |
| 16:35:55 | 74.6408647 | 74.1179467 | 62.2705783 | 73.6228432 | 67.3935956 |
| 16:35:56 | 74.6408647 | 74.1179467 | 62.2705783 | 72.6228432 | 68.3935956 |
| 16:35:57 | 73.6408647 | 73.1179467 | 62.2705783 | 71.6228432 | 68.3935956 |
| 16:35:58 | 73.6408647 | 72.1179467 | 62.2705783 | 70.6228432 | 68.3935956 |
| 16:35:59 | 72.6408647 | 72.1179467 | 62.2705783 | 69.6228432 | 71.3935956 |
| 16:36:00 | 72.6408647 | 74.1179467 | 62.2705783 | 68.6228432 | 71.3935956 |
| 16:36:01 | 72.6408647 | 74.1179467 | 62.2705783 | 69.6228432 | 71.3935956 |
| 16:36:02 | 72.6408647 | 73.1179467 | 62.2705783 | 71.6228432 | 71.3935956 |
| 16:36:03 | 72.6408647 | 69.1179467 | 62.2705783 | 71.6228432 | 72.3935956 |
| 16:36:04 | 72.6408647 | 67.1179467 | 62.2705783 | 72.6228432 | 71.3935956 |
| 16:36:05 | 72.6408647 | 67.1179467 | 62.2705783 | 72.6228432 | 70.3935956 |
| 16:36:06 | 72.6408647 | 67.1179467 | 63.2705783 | 72.6228432 | 70.3935956 |
| 16:36:07 | 71.6408647 | 67.1179467 | 63.2705783 | 73.6228432 | 67.3935956 |
| 16:36:08 | 71.6408647 | 69.1179467 | 64.2705783 | 73.6228432 | 66.3935956 |

|          |            |            |            |            |            |
|----------|------------|------------|------------|------------|------------|
| 16:36:09 | 70.6408647 | 71.1179467 | 64.2705783 | 73.6228432 | 67.3935956 |
| 16:36:10 | 70.6408647 | 72.1179467 | 64.2705783 | 74.6228432 | 67.3935956 |
| 16:36:11 | 70.6408647 | 72.1179467 | 64.2705783 | 73.6228432 | 67.3935956 |
| 16:36:12 | 70.6408647 | 72.1179467 | 64.2705783 | 69.6228432 | 67.3935956 |
| 16:36:13 | 70.6408647 | 72.1179467 | 64.2705783 | 69.6228432 | 67.3935956 |
| 16:36:14 | 68.6408647 | 72.1179467 | 64.2705783 | 68.6228432 | 67.3935956 |
| 16:36:15 | 67.6408647 | 72.1179467 | 64.2705783 | 69.6228432 | 67.3935956 |
| 16:36:16 | 67.6408647 | 71.1179467 | 64.2705783 | 71.6228432 | 67.3935956 |
| 16:36:17 | 67.6408647 | 71.1179467 | 64.2705783 | 71.6228432 | 67.3935956 |
| 16:36:18 | 67.6408647 | 68.1179467 | 63.2705783 | 72.6228432 | 68.3935956 |
| 16:36:19 | 67.6408647 | 67.1179467 | 63.2705783 | 72.6228432 | 68.3935956 |
| 16:36:20 | 68.6408647 | 67.1179467 | 63.2705783 | 70.6228432 | 68.3935956 |
| 16:36:21 | 69.6408647 | 67.1179467 | 63.2705783 | 64.6228432 | 68.3935956 |
| 16:36:22 | 69.6408647 | 67.1179467 | 64.2705783 | 64.6228432 | 68.3935956 |
| 16:36:23 | 69.6408647 | 66.1179467 | 64.2705783 | 63.6228432 | 68.3935956 |
| 16:36:24 | 70.6408647 | 66.1179467 | 64.2705783 | 63.6228432 | 66.3935956 |
| 16:36:25 | 71.6408647 | 67.1179467 | 64.2705783 | 64.6228432 | 64.3935956 |
| 16:36:26 | 71.6408647 | 66.1179467 | 63.2705783 | 65.6228432 | 64.3935956 |
| 16:36:27 | 73.6408647 | 66.1179467 | 63.2705783 | 66.6228432 | 64.3935956 |
| 16:36:28 | 73.6408647 | 67.1179467 | 63.2705783 | 67.6228432 | 64.3935956 |
| 16:36:29 | 73.6408647 | 66.1179467 | 63.2705783 | 67.6228432 | 64.3935956 |
| 16:36:30 | 74.6408647 | 67.1179467 | 63.2705783 | 67.6228432 | 64.3935956 |
| 16:36:31 | 80.6408647 | 67.1179467 | 63.2705783 | 67.6228432 | 64.3935956 |
| 16:36:32 | 80.6408647 | 67.1179467 | 63.2705783 | 69.6228432 | 64.3935956 |
| 16:36:33 | 68.2433868 | 67.1179467 | 66.2705783 | 69.6228432 | 64.3935956 |
| 16:36:34 | 68.9433868 | 67.1179467 | 66.2705783 | 70.6228432 | 64.3935956 |
| 16:36:35 | 69.6433868 | 67.1179467 | 67.2705783 | 75.6228432 | 64.3935956 |
| 16:36:36 | 69.6433868 | 67.1179467 | 67.2705783 | 76.6228432 | 64.3935956 |
| 16:36:37 | 67.9770004 | 67.1179467 | 67.2705783 | 76.6228432 | 64.3935956 |
| 16:36:38 | 69.9433868 | 67.1179467 | 66.2705783 | 77.6228432 | 64.3935956 |
| 16:36:39 | 69.8433868 | 67.1179467 | 67.2705783 | 77.6228432 | 64.3935956 |
| 16:36:40 | 70.5600303 | 67.1179467 | 67.2705783 | 76.6228432 |            |
| 16:36:41 | 69.5600303 | 67.1179467 | 66.2705783 | 71.6228432 |            |
| 16:36:42 | 80.6408647 | 68.1179467 | 66.2705783 | 71.6228432 |            |
| 16:36:43 | 72.6408647 | 67.1179467 | 66.2705783 | 72.6228432 |            |
| 16:36:44 | 72.6408647 | 68.1179467 | 66.2705783 | 72.6228432 |            |
| 16:36:45 | 67.6408647 | 68.1179467 | 66.2705783 | 72.6228432 |            |
| 16:36:46 | 67.6408647 | 68.1179467 | 66.2705783 | 73.6228432 |            |
| 16:36:47 | 67.6408647 | 68.1179467 | 66.2705783 | 74.6228432 |            |
| 16:36:48 | 67.6408647 | 67.1179467 | 64.2705783 | 73.6228432 |            |
| 16:36:49 | 68.6408647 | 67.1179467 | 64.2705783 | 73.6228432 |            |
| 16:36:50 | 68.6408647 | 67.1179467 | 63.2705783 | 73.6228432 |            |
| 16:36:51 | 68.6408647 | 67.1179467 | 63.2705783 | 72.6228432 |            |
| 16:36:52 | 68.6408647 | 66.1179467 | 63.2705783 | 71.6228432 |            |
| 16:36:53 | 69.6408647 | 67.1179467 | 62.2705783 | 71.6228432 |            |

|          |            |            |            |            |
|----------|------------|------------|------------|------------|
| 16:36:54 | 80.6408647 | 69.1179467 | 62.2705783 | 71.6228432 |
| 16:36:55 | 83.6408647 | 69.1179467 | 62.2705783 | 72.6228432 |
| 16:36:56 | 83.6408647 | 69.1179467 | 63.2705783 | 72.6228432 |
| 16:36:57 | 83.6408647 | 70.1179467 | 64.2705783 | 73.6228432 |
| 16:36:58 | 75.6408647 | 70.1179467 | 64.2705783 | 78.6228432 |
| 16:36:59 | 72.6408647 | 69.1179467 | 64.2705783 | 79.6228432 |
| 16:37:00 | 72.6408647 | 68.1179467 | 64.2705783 | 79.6228432 |
| 16:37:01 | 72.6408647 | 67.1179467 | 63.2705783 | 78.6228432 |
| 16:37:02 | 70.6408647 | 67.1179467 | 62.2705783 | 76.6228432 |
| 16:37:03 | 70.6408647 | 67.1179467 | 62.2705783 | 76.6228432 |
| 16:37:04 | 70.6408647 | 67.1179467 | 62.2705783 | 75.6228432 |
| 16:37:05 | 70.6408647 | 68.1179467 | 62.2705783 | 71.6228432 |
| 16:37:06 | 71.6408647 | 68.1179467 | 62.2705783 | 67.6228432 |
| 16:37:07 | 71.6408647 | 71.1179467 | 62.2705783 | 67.6228432 |
| 16:37:08 | 71.6408647 | 73.1179467 | 62.2705783 | 67.6228432 |
| 16:37:09 | 71.6408647 | 72.1179467 | 62.2705783 | 68.6228432 |
| 16:37:10 | 70.6408647 | 71.1179467 | 62.2705783 | 69.6228432 |
| 16:37:11 | 70.6408647 | 71.1179467 | 62.2705783 | 69.6228432 |
| 16:37:12 | 70.6408647 | 69.1179467 | 62.2705783 | 69.6228432 |
| 16:37:13 | 74.6408647 | 68.1179467 | 62.2705783 | 68.6228432 |
| 16:37:14 | 76.6408647 | 69.1179467 | 62.2705783 | 67.6228432 |
| 16:37:15 | 77.6408647 | 69.1179467 | 62.2705783 | 67.6228432 |
| 16:37:16 | 75.6408647 | 70.1179467 | 62.2705783 | 65.6228432 |
| 16:37:17 | 71.6408647 | 70.1179467 | 62.2705783 | 63.6228432 |
| 16:37:18 | 71.6408647 | 70.1179467 | 62.2705783 | 63.6228432 |
| 16:37:19 | 69.6408647 | 70.1179467 | 62.2705783 | 63.6228432 |
| 16:37:20 | 68.6408647 | 70.1179467 | 62.2705783 | 63.6228432 |
| 16:37:21 | 68.6408647 | 70.1179467 | 62.2705783 | 63.6228432 |
| 16:37:22 | 68.6408647 | 68.1179467 | 62.2705783 | 63.6228432 |
| 16:37:23 | 67.6408647 | 68.1179467 | 62.2705783 | 63.6228432 |
| 16:37:24 | 66.6408647 | 67.1179467 | 62.2705783 | 63.6228432 |
| 16:37:25 | 66.6408647 | 67.1179467 | 62.2705783 | 63.6228432 |
| 16:37:26 | 66.6408647 | 67.1179467 | 62.2705783 | 64.6228432 |
| 16:37:27 | 66.6408647 | 67.1179467 | 62.2705783 | 70.6228432 |
| 16:37:28 | 66.6408647 | 68.1179467 | 63.2705783 | 71.6228432 |
| 16:37:29 | 67.6408647 | 68.1179467 | 64.2705783 | 75.6228432 |
| 16:37:30 | 67.6408647 | 68.1179467 | 64.2705783 | 75.6228432 |
| 16:37:31 | 67.6408647 | 68.1179467 | 64.2705783 | 75.6228432 |
| 16:37:32 | 67.6408647 | 68.1179467 | 64.2705783 | 75.6228432 |
| 16:37:33 | 68.6408647 | 68.1179467 | 63.2705783 | 76.6228432 |
| 16:37:34 | 68.6408647 | 70.1179467 | 62.2705783 | 75.6228432 |
| 16:37:35 | 68.6408647 | 72.1179467 | 62.2705783 | 74.6228432 |
| 16:37:36 | 68.6408647 | 71.1179467 | 62.2705783 | 73.6228432 |
| 16:37:37 | 68.6408647 | 71.1179467 | 62.2705783 | 71.6228432 |
| 16:37:38 | 68.6408647 | 71.1179467 | 61.2705783 | 70.6228432 |

|          |            |            |            |            |
|----------|------------|------------|------------|------------|
| 16:37:39 | 68.6408647 | 71.1179467 | 61.2705783 | 69.6228432 |
| 16:37:40 | 68.6408647 | 71.1179467 | 61.2705783 | 70.6228432 |
| 16:37:41 | 68.6408647 | 72.1179467 | 62.2705783 | 72.6228432 |
| 16:37:42 | 67.6408647 | 73.1179467 | 62.2705783 | 72.6228432 |
| 16:37:43 | 67.6408647 | 73.1179467 | 62.2705783 | 73.6228432 |
| 16:37:44 | 67.6408647 | 73.1179467 | 62.2705783 | 75.6228432 |
| 16:37:45 | 67.6408647 | 74.1179467 | 62.2705783 | 79.6228432 |
| 16:37:46 | 68.6408647 | 74.1179467 | 62.2705783 | 79.6228432 |
| 16:37:47 | 68.6408647 | 74.1179467 | 62.2705783 | 81.6228432 |
| 16:37:48 | 67.6408647 | 75.1179467 | 62.2705783 | 82.6228432 |
| 16:37:49 | 67.6408647 | 75.1179467 | 62.2705783 | 82.6228432 |
| 16:37:50 | 67.6408647 | 75.1179467 | 63.2705783 | 83.6228432 |
| 16:37:51 | 67.6408647 | 77.1179467 | 63.2705783 | 83.6228432 |
| 16:37:52 | 68.6408647 | 77.1179467 | 63.2705783 | 83.6228432 |
| 16:37:53 | 69.6408647 | 77.1179467 | 63.2705783 | 85.6228432 |
| 16:37:54 | 69.6408647 | 77.1179467 | 64.2705783 | 85.6228432 |
| 16:37:55 | 69.6408647 | 80.1179467 | 64.2705783 | 85.6228432 |
| 16:37:56 | 68.6408647 | 79.1179467 | 63.2705783 | 79.6228432 |
| 16:37:57 | 68.6408647 | 79.1179467 | 64.2705783 | 73.6228432 |
| 16:37:58 | 68.6408647 | 78.1179467 | 63.2705783 | 71.6228432 |
| 16:37:59 | 68.6408647 | 78.1179467 | 62.2705783 | 70.6228432 |
| 16:38:00 | 67.6408647 | 78.1179467 | 62.2705783 | 70.6228432 |
| 16:38:01 | 67.6408647 | 78.1179467 | 63.2705783 | 72.6228432 |
| 16:38:02 | 67.6408647 | 78.1179467 | 63.2705783 | 71.6228432 |
| 16:38:03 | 67.6408647 | 78.1179467 | 62.2705783 | 71.6228432 |
| 16:38:04 | 67.6408647 | 79.1179467 | 62.2705783 | 64.6228432 |
| 16:38:05 | 67.6408647 | 79.1179467 | 62.2705783 | 64.6228432 |
| 16:38:06 | 67.6408647 | 79.1179467 | 61.2705783 | 62.6228432 |
| 16:38:07 | 66.6408647 | 80.1179467 | 62.2705783 | 62.6228432 |
| 16:38:08 | 66.6408647 | 81.1179467 | 62.2705783 | 58.6228432 |
| 16:38:09 | 66.6408647 | 69.0044748 | 62.2705783 | 57.6228432 |
| 16:38:10 | 65.6408647 | 69.0044748 | 61.2705783 | 57.6228432 |
| 16:38:11 | 64.6408647 | 69.226697  | 61.2705783 | 58.6228432 |
| 16:38:12 | 64.6408647 | 69.226697  | 61.2705783 | 58.6228432 |
| 16:38:13 | 64.6408647 | 69.3378081 | 61.2705783 | 59.6228432 |
| 16:38:14 | 64.6408647 | 69.3378081 | 61.2705783 | 59.6228432 |
| 16:38:15 | 65.6408647 | 69.4489192 | 61.2705783 | 60.6228432 |
| 16:38:16 | 65.6408647 | 81.1179467 | 61.2705783 | 60.6228432 |
| 16:38:17 | 65.6408647 | 78.1179467 | 61.2705783 | 60.6228432 |
| 16:38:18 | 65.6408647 | 75.1179467 | 61.2705783 | 60.6228432 |
| 16:38:19 | 65.6408647 | 72.1179467 | 61.2705783 | 60.6228432 |
| 16:38:20 | 66.6408647 | 70.1179467 | 61.2705783 | 57.6228432 |
| 16:38:21 | 75.6408647 | 69.1179467 | 61.2705783 | 57.6228432 |
| 16:38:22 | 75.6408647 | 68.1179467 | 61.2705783 | 56.6228432 |
| 16:38:23 | 80.6408647 | 66.1179467 | 61.2705783 | 56.6228432 |

|          |            |            |            |            |
|----------|------------|------------|------------|------------|
| 16:38:24 | 67.6711414 | 66.1179467 | 61.2705783 | 57.6228432 |
| 16:38:25 | 67.7822525 | 65.1179467 | 61.2705783 | 59.6228432 |
| 16:38:26 | 68.0044748 | 65.1179467 | 61.2705783 | 59.6228432 |
| 16:38:27 | 68.4489192 | 65.1179467 | 61.2705783 | 64.6228432 |
| 16:38:28 | 68.1155859 | 64.1179467 | 61.2705783 | 65.6228432 |
| 16:38:29 | 78.6408647 | 63.1179467 | 61.2705783 | 66.6228432 |
| 16:38:30 | 75.6408647 | 63.1179467 | 62.2705783 | 66.6228432 |
| 16:38:31 | 75.6408647 | 63.1179467 | 62.2705783 | 65.6228432 |
| 16:38:32 | 74.6408647 | 63.1179467 | 62.2705783 | 65.6228432 |
| 16:38:33 | 75.6408647 | 63.1179467 | 62.2705783 | 63.6228432 |
| 16:38:34 | 75.6408647 | 63.1179467 | 62.2705783 | 62.6228432 |
| 16:38:35 | 75.6408647 | 63.1179467 | 62.2705783 | 61.6228432 |
| 16:38:36 | 75.6408647 | 63.1179467 | 62.2705783 | 61.6228432 |
| 16:38:37 | 74.6408647 | 63.1179467 | 62.2705783 | 61.6228432 |
| 16:38:38 | 72.6408647 | 62.1179467 | 62.2705783 | 61.6228432 |
| 16:38:39 | 71.6408647 | 62.1179467 | 61.2705783 | 61.6228432 |
| 16:38:40 | 70.6408647 | 62.1179467 | 62.2705783 | 61.6228432 |
| 16:38:41 | 70.6408647 | 62.1179467 | 62.2705783 | 61.6228432 |
| 16:38:42 | 69.6408647 | 63.1179467 | 62.2705783 | 61.6228432 |
| 16:38:43 | 69.6408647 | 63.1179467 | 62.2705783 | 61.6228432 |
| 16:38:44 | 68.6408647 | 65.1179467 | 61.2705783 | 61.6228432 |
| 16:38:45 | 68.6408647 | 65.1179467 | 61.2705783 | 63.6228432 |
| 16:38:46 | 68.6408647 | 66.1179467 | 62.2705783 | 64.6228432 |
| 16:38:47 | 68.6408647 | 66.1179467 | 62.2705783 | 64.6228432 |
| 16:38:48 | 67.6408647 | 68.1179467 | 62.2705783 | 68.6228432 |
| 16:38:49 | 67.6408647 | 68.1179467 | 63.2705783 | 70.6228432 |
| 16:38:50 | 67.6408647 | 70.1179467 | 63.2705783 | 71.6228432 |
| 16:38:51 | 67.6408647 | 71.1179467 | 64.2705783 | 72.6228432 |
| 16:38:52 | 67.6408647 | 71.1179467 | 64.2705783 | 72.6228432 |
| 16:38:53 | 67.6408647 | 71.1179467 | 64.2705783 | 72.6228432 |
| 16:38:54 | 68.6408647 | 71.1179467 | 64.2705783 | 70.6228432 |
| 16:38:55 | 68.6408647 | 71.1179467 | 64.2705783 | 69.6228432 |
| 16:38:56 | 69.6408647 | 71.1179467 | 66.2705783 | 67.6228432 |
| 16:38:57 | 69.6408647 | 69.1179467 | 67.2705783 | 66.6228432 |
| 16:38:58 | 70.6408647 | 68.1179467 | 67.2705783 | 66.6228432 |
| 16:38:59 | 70.6408647 | 68.1179467 | 67.2705783 | 66.6228432 |
| 16:39:00 | 70.6408647 | 68.1179467 | 72.2705783 | 68.6228432 |
| 16:39:01 | 70.6408647 | 67.1179467 | 73.2705783 | 70.6228432 |
| 16:39:02 | 70.6408647 | 67.1179467 | 74.2705783 | 71.6228432 |
| 16:39:03 | 73.6408647 | 67.1179467 | 73.2705783 | 71.6228432 |
| 16:39:04 | 73.6408647 | 66.1179467 | 71.2705783 | 70.6228432 |
| 16:39:05 | 75.6408647 | 66.1179467 | 70.2705783 | 69.6228432 |
| 16:39:06 | 75.6408647 | 67.1179467 | 70.2705783 | 69.6228432 |
| 16:39:07 | 75.6408647 | 68.1179467 | 69.2705783 | 68.6228432 |
| 16:39:08 | 75.6408647 | 68.1179467 | 68.2705783 | 68.6228432 |

|          |            |            |            |            |
|----------|------------|------------|------------|------------|
| 16:39:09 | 75.6408647 | 69.1179467 | 67.2705783 | 69.6228432 |
| 16:39:10 | 75.6408647 | 69.1179467 | 67.2705783 | 69.6228432 |
| 16:39:11 | 76.6408647 | 69.1179467 | 67.2705783 | 69.6228432 |
| 16:39:12 | 77.6408647 | 69.1179467 | 67.2705783 | 69.6228432 |
| 16:39:13 | 77.6408647 | 69.1179467 | 66.2705783 | 69.6228432 |
| 16:39:14 | 79.6408647 | 68.1179467 | 65.2705783 | 69.6228432 |
| 16:39:15 | 79.6408647 | 68.1179467 | 64.2705783 | 68.6228432 |
| 16:39:16 | 79.6408647 | 67.1179467 | 64.2705783 | 68.6228432 |
| 16:39:17 | 78.6408647 | 67.1179467 | 63.2705783 | 68.6228432 |
| 16:39:18 | 78.6408647 | 67.1179467 | 63.2705783 | 66.6228432 |
| 16:39:19 | 78.6408647 | 67.1179467 | 63.2705783 | 65.6228432 |
| 16:39:20 | 78.6408647 | 64.1179467 | 62.2705783 | 64.6228432 |
| 16:39:21 | 78.6408647 | 65.1179467 | 62.2705783 | 63.6228432 |
| 16:39:22 | 78.6408647 | 65.1179467 | 62.2705783 | 62.6228432 |
| 16:39:23 | 78.6408647 | 65.1179467 | 62.2705783 | 62.6228432 |
| 16:39:24 | 78.6408647 | 65.1179467 | 62.2705783 | 62.6228432 |
| 16:39:25 | 78.6408647 | 65.1179467 | 62.2705783 | 60.6228432 |
| 16:39:26 | 71.6408647 | 65.1179467 | 62.2705783 | 61.6228432 |
| 16:39:27 | 71.6408647 | 65.1179467 | 63.2705783 | 62.6228432 |
| 16:39:28 | 71.6408647 | 65.1179467 | 62.2705783 | 62.6228432 |
| 16:39:29 | 71.6408647 | 66.1179467 | 61.2705783 | 62.6228432 |
| 16:39:30 | 71.6408647 | 66.1179467 | 61.2705783 | 63.6228432 |
| 16:39:31 | 71.6408647 | 67.1179467 | 62.2705783 | 64.6228432 |
| 16:39:32 | 72.6408647 | 67.1179467 | 62.2705783 | 65.6228432 |
| 16:39:33 | 73.6408647 | 67.1179467 | 62.2705783 | 68.6228432 |
| 16:39:34 | 73.6408647 | 66.1179467 | 62.2705783 | 69.6228432 |
| 16:39:35 | 76.6408647 | 66.1179467 | 62.2705783 | 69.6228432 |
| 16:39:36 | 76.6408647 | 66.1179467 | 62.2705783 | 69.6228432 |
| 16:39:37 | 76.6408647 | 66.1179467 | 62.2705783 | 68.6228432 |
| 16:39:38 | 76.6408647 | 67.1179467 | 61.2705783 | 67.6228432 |
| 16:39:39 | 76.6408647 | 67.1179467 | 62.2705783 | 68.6228432 |
| 16:39:40 | 76.6408647 | 67.1179467 | 61.2705783 | 68.6228432 |
| 16:39:41 | 76.6408647 | 67.1179467 | 61.2705783 | 68.6228432 |
| 16:39:42 | 77.6408647 | 67.1179467 | 61.2705783 | 68.6228432 |
| 16:39:43 | 77.6408647 | 67.1179467 | 62.2705783 | 68.6228432 |
| 16:39:44 | 78.6408647 | 68.1179467 | 62.2705783 | 67.6228432 |
| 16:39:45 | 78.6408647 | 68.1179467 | 62.2705783 | 66.6228432 |
| 16:39:46 | 79.6408647 | 68.1179467 | 62.2705783 | 66.6228432 |
| 16:39:47 | 78.6408647 | 68.1179467 | 62.2705783 | 65.6228432 |
| 16:39:48 | 76.6408647 | 70.1179467 | 63.2705783 | 65.6228432 |
| 16:39:49 | 76.6408647 | 72.1179467 | 63.2705783 | 65.6228432 |
| 16:39:50 | 76.6408647 | 72.1179467 | 63.2705783 | 65.6228432 |
| 16:39:51 | 78.6408647 | 72.1179467 | 63.2705783 | 65.6228432 |
| 16:39:52 | 79.6408647 | 72.1179467 | 63.2705783 | 68.6228432 |
| 16:39:53 | 79.6408647 | 72.1179467 | 63.2705783 | 68.6228432 |

|          |            |            |            |            |
|----------|------------|------------|------------|------------|
| 16:39:54 | 80.6408647 | 72.1179467 | 63.2705783 | 71.6228432 |
| 16:39:55 | 80.6408647 | 72.1179467 | 63.2705783 | 72.6228432 |
| 16:39:56 | 79.6408647 | 72.1179467 | 63.2705783 | 72.6228432 |
| 16:39:57 | 79.6408647 | 72.1179467 | 62.2705783 | 72.6228432 |
| 16:39:58 | 77.6408647 | 69.1179467 | 62.2705783 | 71.6228432 |
| 16:39:59 | 77.6408647 | 68.1179467 | 62.2705783 | 71.6228432 |
| 16:40:00 | 77.6408647 | 68.1179467 | 63.2705783 | 70.6228432 |
| 16:40:01 | 77.6408647 | 67.1179467 | 62.2705783 | 70.6228432 |
| 16:40:02 | 77.6408647 | 63.1179467 | 61.2705783 | 70.6228432 |
| 16:40:03 | 77.6408647 | 63.1179467 | 61.2705783 | 70.6228432 |
| 16:40:04 | 77.6408647 | 63.1179467 | 64.2705783 | 70.6228432 |
| 16:40:05 | 75.6408647 | 64.1179467 | 64.2705783 | 70.6228432 |
| 16:40:06 | 74.6408647 | 64.1179467 | 64.2705783 | 70.6228432 |
| 16:40:07 | 73.6408647 | 65.1179467 | 64.2705783 | 70.6228432 |
| 16:40:08 | 73.6408647 | 65.1179467 | 64.2705783 | 71.6228432 |
| 16:40:09 | 73.6408647 | 65.1179467 | 66.2705783 | 71.6228432 |
| 16:40:10 | 72.6408647 | 68.1179467 | 66.2705783 | 71.6228432 |
| 16:40:11 | 72.6408647 | 70.1179467 | 66.2705783 | 70.6228432 |
| 16:40:12 | 71.6408647 | 76.1179467 | 65.2705783 | 70.6228432 |
| 16:40:13 | 71.6408647 | 77.1179467 | 65.2705783 | 69.6228432 |
| 16:40:14 | 71.6408647 | 77.1179467 | 64.2705783 | 69.6228432 |
| 16:40:15 | 72.6408647 | 77.1179467 | 63.2705783 | 69.6228432 |
| 16:40:16 | 72.6408647 | 77.1179467 | 63.2705783 | 69.6228432 |
| 16:40:17 | 71.6408647 | 77.1179467 | 63.2705783 | 68.6228432 |
| 16:40:18 | 71.6408647 | 77.1179467 | 63.2705783 | 68.6228432 |
| 16:40:19 | 71.6408647 | 77.1179467 | 63.2705783 | 68.6228432 |
| 16:40:20 | 71.6408647 | 77.1179467 | 64.2705783 | 68.6228432 |
| 16:40:21 | 71.6408647 | 78.1179467 | 65.2705783 | 68.6228432 |
| 16:40:22 | 70.6408647 | 78.1179467 | 65.2705783 | 68.6228432 |
| 16:40:23 | 69.6408647 | 77.1179467 | 66.2705783 | 68.6228432 |
| 16:40:24 | 67.6408647 | 77.1179467 | 66.2705783 | 68.6228432 |
| 16:40:25 | 67.6408647 | 77.1179467 | 66.2705783 | 68.6228432 |
| 16:40:26 | 67.6408647 | 76.1179467 | 67.2705783 | 68.6228432 |
| 16:40:27 | 68.6408647 | 76.1179467 | 68.2705783 | 68.6228432 |
| 16:40:28 | 68.6408647 | 75.1179467 | 68.2705783 | 69.6228432 |
| 16:40:29 | 68.6408647 | 75.1179467 | 68.2705783 | 71.6228432 |
| 16:40:30 | 69.6408647 | 75.1179467 | 68.2705783 | 71.6228432 |
| 16:40:31 | 69.6408647 | 72.1179467 | 68.2705783 | 71.6228432 |
| 16:40:32 | 69.6408647 | 68.1179467 | 68.2705783 | 71.6228432 |
| 16:40:33 | 70.6408647 | 68.1179467 | 68.2705783 | 71.6228432 |
| 16:40:34 | 74.6408647 | 67.1179467 | 68.2705783 | 71.6228432 |
| 16:40:35 | 75.6408647 | 68.1179467 | 69.2705783 | 71.6228432 |
| 16:40:36 | 75.6408647 | 68.1179467 | 71.2705783 | 71.6228432 |
| 16:40:37 | 76.6408647 | 64.1179467 | 72.2705783 | 71.6228432 |
| 16:40:38 | 76.6408647 | 64.1179467 | 74.2705783 | 71.6228432 |



|          |            |            |            |            |            |
|----------|------------|------------|------------|------------|------------|
| 16:40:39 | 76.6408647 | 64.1179467 | 72.2705783 | 70.6228432 |            |
| 16:40:40 | 77.6408647 | 63.1179467 | 71.2705783 | 70.6228432 |            |
| 16:40:41 | 77.6408647 | 62.1179467 | 72.2705783 | 68.6228432 |            |
| 16:40:42 | 79.6408647 | 62.1179467 | 73.2705783 | 67.6228432 |            |
| 16:40:43 | 79.6408647 | 62.1179467 | 75.2705783 | 67.6228432 |            |
| 16:40:44 | 79.6408647 | 64.1179467 | 76.2705783 | 67.6228432 |            |
| 16:40:45 | 79.6408647 | 64.1179467 | 77.2705783 | 67.6228432 |            |
| 16:40:46 | 78.6408647 | 66.1179467 | 79.2705783 | 68.6228432 |            |
| 16:40:47 | 78.6408647 | 66.1179467 | 79.2705783 | 68.6228432 |            |
| 16:40:48 | 77.6408647 | 66.1179467 | 83.2705783 | 68.6228432 |            |
| 16:40:49 | 77.6408647 | 65.1179467 | 70.3433868 | 69.6228432 |            |
| 16:40:50 | 77.6408647 | 65.1179467 | 71.3378081 | 71.6228432 |            |
| 16:40:51 | 78.6408647 | 65.1179467 | 84.2705783 | 72.6228432 |            |
| 16:40:52 | 79.6408647 | 64.1179467 | 84.2705783 | 72.6228432 | 71.3378081 |
| 16:40:53 | 79.6408647 | 64.1179467 | 85.2705783 | 74.6228432 | 71.5600303 |
| 16:40:54 | 78.6408647 | 63.1179467 | 85.2705783 | 75.6228432 | 71.3378081 |
| 16:40:55 | 77.6408647 | 63.1179467 | 70.6711414 | 75.6228432 | 70.6711414 |
| 16:40:56 | 72.6408647 | 65.1179467 | 82.2705783 | 74.6228432 | 70.0044748 |
| 16:40:57 | 72.6408647 | 66.1179467 | 81.2705783 | 72.6228432 | 69.4489192 |
| 16:40:58 | 69.6408647 | 66.1179467 | 74.2705783 | 69.6228432 | 68.0044748 |
| 16:40:59 | 69.6408647 | 67.1179467 | 71.2705783 | 69.6228432 | 68.0044748 |
| 16:41:00 | 69.6408647 | 67.1179467 | 70.2705783 | 68.6228432 | 67.8933636 |
| 16:41:01 | 69.6408647 | 67.1179467 | 70.2705783 | 69.6228432 | 68.0044748 |
| 16:41:02 | 70.6408647 | 65.1179467 | 69.2705783 | 70.6228432 | 67.6711414 |
| 16:41:03 | 69.6408647 | 64.1179467 | 69.2705783 | 70.6228432 | 67.7822525 |
| 16:41:04 | 68.6408647 | 65.1179467 | 69.2705783 | 70.6228432 | 67.5600303 |
| 16:41:05 | 67.6408647 | 65.1179467 | 68.2705783 | 70.6228432 | 67.0044748 |
| 16:41:06 | 66.6408647 | 65.1179467 | 68.2705783 | 70.6228432 | 66.226697  |
| 16:41:07 | 66.6408647 | 65.1179467 | 68.2705783 | 70.6228432 | 66.226697  |
| 16:41:08 | 66.6408647 | 65.1179467 | 68.2705783 | 70.6228432 | 66.1155859 |
| 16:41:09 | 66.6408647 | 65.1179467 | 67.2705783 | 71.6228432 | 66.1155859 |
| 16:41:10 | 66.6408647 | 65.1179467 | 66.2705783 | 71.6228432 | 65.7822525 |
| 16:41:11 | 66.6408647 | 65.1179467 | 67.2705783 | 72.6228432 | 65.7822525 |
| 16:41:12 | 65.6408647 | 65.1179467 | 67.2705783 | 73.6228432 | 65.3378081 |
| 16:41:13 | 65.6408647 | 65.1179467 | 65.2705783 | 74.6228432 | 65.3378081 |
| 16:41:14 | 65.6408647 | 66.1179467 | 64.2705783 | 76.6228432 | 65.1155859 |
| 16:41:15 | 65.6408647 | 67.1179467 | 64.2705783 | 77.6228432 | 65.0044748 |
| 16:41:16 | 65.6408647 | 67.1179467 | 64.2705783 | 78.6228432 | 64.8933636 |
| 16:41:17 | 64.6408647 | 67.1179467 | 64.2705783 | 64.3378081 | 64.3378081 |
| 16:41:18 | 64.6408647 | 67.1179467 | 63.2705783 | 64.1155859 | 64.1155859 |
| 16:41:19 | 64.6408647 | 67.1179467 | 63.2705783 | 64.1155859 | 64.1155859 |
| 16:41:20 | 65.6408647 | 68.1179467 | 63.2705783 | 65.3378081 | 65.3378081 |
| 16:41:21 | 65.6408647 | 68.1179467 | 65.2705783 | 65.7822525 | 65.7822525 |
| 16:41:22 | 66.6408647 | 68.1179467 | 66.2705783 | 66.0044748 | 66.0044748 |
| 16:41:23 | 66.6408647 | 67.1179467 | 66.2705783 | 66.0044748 | 66.0044748 |

|          |            |            |            |            |            |
|----------|------------|------------|------------|------------|------------|
| 16:41:24 | 65.6408647 | 67.1179467 | 66.2705783 | 66.226697  | 66.226697  |
| 16:41:25 | 66.6408647 | 68.1179467 | 65.2705783 | 66.5600303 | 66.5600303 |
| 16:41:26 | 66.6408647 | 68.1179467 | 65.2705783 | 66.3378081 | 66.3378081 |
| 16:41:27 | 67.6408647 | 69.1179467 | 65.2705783 | 67.4489192 | 67.4489192 |
| 16:41:28 | 67.6408647 | 68.1179467 | 64.2705783 | 67.7822525 | 67.7822525 |
| 16:41:29 | 68.6408647 | 68.1179467 | 64.2705783 | 68.1155859 | 68.1155859 |
| 16:41:30 | 68.6408647 | 69.1179467 | 63.2705783 | 68.226697  | 68.226697  |
| 16:41:31 | 68.6408647 | 70.1179467 | 63.2705783 | 68.3378081 | 68.3378081 |
| 16:41:32 | 68.6408647 | 71.1179467 | 63.2705783 | 68.226697  | 68.226697  |
| 16:41:33 | 67.6408647 | 71.1179467 | 63.2705783 | 68.226697  | 68.226697  |
| 16:41:34 | 67.6408647 | 71.1179467 | 64.2705783 | 68.4489192 | 68.4489192 |
| 16:41:35 | 65.6408647 | 70.1179467 | 64.2705783 | 68.226697  | 68.226697  |
| 16:41:36 | 65.6408647 | 70.1179467 | 64.2705783 | 68.3378081 | 68.3378081 |
| 16:41:37 | 63.6408647 | 69.1179467 | 64.2705783 | 68.0044748 | 68.0044748 |
| 16:41:38 | 63.6408647 | 70.1179467 | 64.2705783 | 78.6228432 | 67.0044748 |
| 16:41:39 | 63.6408647 | 70.1179467 | 65.2705783 | 78.6228432 | 67.1155859 |
| 16:41:40 | 63.6408647 | 70.1179467 | 68.2705783 | 78.6228432 | 67.4489192 |
| 16:41:41 | 63.6408647 | 70.1179467 | 68.2705783 | 78.6228432 | 67.4489192 |
| 16:41:42 | 63.6408647 | 71.1179467 | 68.2705783 | 72.6228432 | 68.1107416 |
| 16:41:43 | 63.6408647 | 70.1179467 | 67.2705783 | 72.6228432 | 67.226697  |
| 16:41:44 | 64.6408647 | 71.1179467 | 67.2705783 | 72.6228432 | 67.5600303 |
| 16:41:45 | 65.6408647 | 71.1179467 | 67.2705783 | 71.6228432 | 67.4489192 |
| 16:41:46 | 66.6408647 | 72.1179467 | 67.2705783 | 71.6228432 | 67.6711414 |
| 16:41:47 | 67.6408647 | 72.1179467 | 67.2705783 | 68.6228432 | 67.5600303 |
| 16:41:48 | 67.6408647 | 72.1179467 | 68.2705783 | 68.6228432 | 67.7822525 |
| 16:41:49 | 68.6408647 | 72.1179467 | 68.2705783 | 66.6228432 | 67.6711414 |
| 16:41:50 | 69.6408647 | 79.1179467 | 68.2705783 | 66.6228432 | 68.4489192 |
| 16:41:51 | 70.6408647 | 69.226697  | 68.2705783 | 66.6228432 | 69.226697  |
| 16:41:52 | 70.6408647 | 69.4489192 | 69.2705783 | 66.6228432 | 69.4489192 |
| 16:41:53 | 68.6408647 | 69.3378081 | 69.2705783 | 66.6228432 | 69.3378081 |
| 16:41:54 | 66.6408647 | 69.0044748 | 67.2705783 | 66.6228432 | 69.0044748 |
| 16:41:55 | 66.6408647 | 69.0044748 | 67.2705783 | 66.6228432 | 69.0044748 |
| 16:41:56 | 66.6408647 | 68.7822525 | 66.2705783 | 65.6228432 | 68.7822525 |
| 16:41:57 | 65.6408647 | 68.6711414 | 66.2705783 | 65.6228432 | 68.6711414 |
| 16:41:58 | 65.6408647 | 68.6711414 | 66.2705783 | 65.6228432 | 68.6711414 |
| 16:41:59 | 65.6408647 | 67.7822525 | 66.2705783 | 59.6228432 | 67.7822525 |
| 16:42:00 | 65.6408647 | 81.1179467 | 66.2705783 | 59.6228432 | 67.7822525 |
| 16:42:01 | 65.6408647 | 81.1179467 | 66.2705783 | 59.6228432 | 67.7822525 |
| 16:42:02 | 66.6408647 | 81.1179467 | 65.2705783 | 60.6228432 | 67.6711414 |
| 16:42:03 | 66.6408647 | 81.1179467 | 65.2705783 | 61.6228432 | 67.7822525 |
| 16:42:04 | 67.6408647 | 78.1179467 | 64.2705783 | 63.6228432 | 67.6711414 |
| 16:42:05 | 67.6408647 | 77.1179467 | 66.2705783 | 63.6228432 | 67.7822525 |
| 16:42:06 | 67.6408647 | 76.1179467 | 68.2705783 | 63.6228432 | 68.0044748 |
| 16:42:07 | 68.6408647 | 76.1179467 | 71.2705783 | 62.6228432 | 68.3378081 |
| 16:42:08 | 69.6408647 | 72.1179467 | 71.2705783 | 61.6228432 | 68.1155859 |

|          |            |            |            |            |            |
|----------|------------|------------|------------|------------|------------|
| 16:42:09 | 74.6408647 | 72.1179467 | 72.2705783 | 61.6228432 | 68.5600303 |
| 16:42:10 | 76.6408647 | 72.1179467 | 72.2705783 | 61.6228432 | 69.0044748 |
| 16:42:11 | 76.6408647 | 71.1179467 | 72.2705783 | 62.6228432 | 69.226697  |
| 16:42:12 | 76.6408647 | 70.1179467 | 72.2705783 | 64.6228432 | 68.8933636 |
| 16:42:13 | 76.6408647 | 70.1179467 | 72.2705783 | 64.6228432 | 69.3378081 |
| 16:42:14 | 76.6408647 | 69.1179467 | 72.2705783 | 63.6228432 | 69.0044748 |
| 16:42:15 | 76.6408647 | 69.1179467 | 72.2705783 | 63.6228432 | 68.8933636 |
| 16:42:16 | 73.6408647 | 69.1179467 | 72.2705783 | 63.6228432 | 68.5600303 |
| 16:42:17 | 72.6408647 | 68.1179467 | 71.2705783 | 63.6228432 | 68.226697  |
| 16:42:18 | 72.6408647 | 67.1179467 | 72.2705783 | 63.6228432 | 68.1155859 |
| 16:42:19 | 71.6408647 | 66.1179467 | 72.2705783 | 64.6228432 | 67.8933636 |
| 16:42:20 | 71.6408647 | 66.1179467 | 72.2705783 | 64.6228432 | 67.7822525 |
| 16:42:21 | 71.6408647 | 64.1179467 | 72.2705783 | 64.6228432 | 67.6711414 |
| 16:42:22 | 71.6408647 | 64.1179467 | 72.2705783 | 63.6228432 | 67.5600303 |
| 16:42:23 | 72.6408647 | 63.1179467 | 73.2705783 | 62.6228432 | 67.7822525 |
| 16:42:24 | 72.6408647 | 63.1179467 | 73.2705783 | 61.6228432 | 67.7822525 |
| 16:42:25 | 72.6408647 | 63.1179467 | 74.2705783 | 61.6228432 | 67.8933636 |
| 16:42:26 | 72.6408647 | 64.1179467 | 71.2705783 | 60.6228432 | 67.1155859 |
| 16:42:27 | 71.6408647 | 63.1179467 | 71.2705783 | 62.6228432 | 67.7822525 |
| 16:42:28 | 71.6408647 | 62.1179467 | 71.2705783 | 62.6228432 | 67.5600303 |
| 16:42:29 | 69.6408647 | 62.1179467 | 71.2705783 | 62.6228432 | 67.4489192 |
| 16:42:30 | 69.6408647 | 62.1179467 | 69.2705783 | 61.6228432 | 66.8933636 |
| 16:42:31 | 69.6408647 | 62.1179467 | 68.2705783 | 60.6228432 | 66.6711414 |
| 16:42:32 | 69.6408647 | 63.1179467 | 67.2705783 | 60.6228432 | 66.5600303 |
| 16:42:33 | 69.6408647 | 64.1179467 | 67.2705783 | 58.6228432 | 66.4489192 |
| 16:42:34 | 70.6408647 | 66.1179467 | 67.2705783 | 58.6228432 | 66.5600303 |
| 16:42:35 | 70.6408647 | 66.1179467 | 67.2705783 | 58.6228432 | 66.8342388 |
| 16:42:36 | 71.6408647 | 68.1179467 | 67.2705783 | 58.6228432 | 66.3378081 |
| 16:42:37 | 71.6408647 | 68.1179467 | 67.2705783 | 60.6228432 | 66.6711414 |
| 16:42:38 | 71.6408647 | 68.1179467 | 68.2705783 | 60.6228432 | 66.7822525 |
| 16:42:39 | 71.6408647 | 68.1179467 | 68.2705783 | 60.6228432 | 67.5600303 |
| 16:42:40 | 72.6408647 | 68.1179467 | 68.2705783 | 60.6228432 | 68.226697  |
| 16:42:41 | 72.6408647 | 70.1179467 | 67.2705783 | 62.6228432 | 68.5600303 |
| 16:42:42 | 71.6408647 | 74.1179467 | 67.2705783 | 63.6228432 | 69.0044748 |
| 16:42:43 | 71.6408647 | 74.1179467 | 66.2705783 | 67.6228432 | 68.7822525 |
| 16:42:44 | 71.6408647 | 74.1179467 | 66.2705783 | 69.6228432 | 68.8933636 |
| 16:42:45 | 70.6408647 | 72.1179467 | 67.2705783 | 69.6228432 | 68.4489192 |
| 16:42:46 | 69.6408647 | 71.1179467 | 66.2705783 | 68.6228432 | 67.8933636 |
| 16:42:47 | 69.6408647 | 71.1179467 | 66.2705783 | 68.6228432 | 68.0044748 |
| 16:42:48 | 67.6408647 | 68.1179467 | 66.2705783 | 68.6228432 | 67.1155859 |
| 16:42:49 | 67.6408647 | 68.1179467 | 66.2705783 | 68.6228432 | 67.1155859 |
| 16:42:50 | 65.6408647 | 67.1179467 | 66.2705783 | 68.6228432 | 66.8933636 |
| 16:42:51 | 65.6408647 | 65.1179467 | 66.2705783 | 69.6228432 | 67.0044748 |
| 16:42:52 | 64.6408647 | 65.1179467 | 66.2705783 | 69.6228432 | 67.1155859 |
| 16:42:53 | 64.6408647 | 64.1179467 | 66.2705783 | 69.6228432 | 67.3378081 |

|          |            |            |            |            |            |
|----------|------------|------------|------------|------------|------------|
| 16:42:54 | 66.6408647 | 64.1179467 | 66.2705783 | 69.6228432 | 67.5600303 |
| 16:42:55 | 66.6408647 | 61.1179467 | 67.2705783 | 69.6228432 | 67.226697  |
| 16:42:56 | 66.6408647 | 61.1179467 | 67.2705783 | 66.6228432 | 67.226697  |
| 16:42:57 | 65.6408647 | 60.1179467 | 67.2705783 | 66.6228432 | 67.0044748 |
| 16:42:58 | 65.6408647 | 60.1179467 | 67.2705783 | 65.6228432 | 67.3607416 |
| 16:42:59 | 65.6408647 | 63.1179467 | 67.2705783 | 64.6228432 | 67.1155859 |
| 16:43:00 | 65.6408647 | 65.1179467 | 67.2705783 | 62.6228432 | 66.5600303 |
| 16:43:01 | 65.6408647 | 65.1179467 | 69.2705783 | 61.6228432 | 66.4489192 |
| 16:43:02 | 65.6408647 | 66.1179467 | 71.2705783 | 61.6228432 | 67.3378081 |
| 16:43:03 | 66.6408647 | 67.1179467 | 72.2705783 | 61.6228432 | 67.6711414 |
| 16:43:04 | 66.6408647 | 67.1179467 | 72.2705783 | 60.6228432 | 67.6711414 |
| 16:43:05 | 69.6408647 | 67.1179467 | 72.2705783 | 60.6228432 | 68.226697  |
| 16:43:06 | 69.6408647 | 68.1179467 | 74.2705783 | 57.6228432 | 67.5600303 |
| 16:43:07 | 73.6408647 | 68.1179467 | 74.2705783 | 57.6228432 | 67.7822525 |
| 16:43:08 | 73.6408647 | 68.1179467 | 71.2705783 | 56.6228432 | 66.8933636 |
| 16:43:09 | 76.6408647 | 68.1179467 | 70.2705783 | 56.6228432 | 66.6711414 |
| 16:43:10 | 75.6408647 | 68.1179467 | 70.2705783 | 56.6228432 | 66.226697  |
| 16:43:11 | 74.6408647 | 68.1179467 | 70.2705783 | 56.6228432 | 66.0044748 |
| 16:43:12 | 74.6408647 | 69.1179467 | 70.2705783 | 57.6228432 | 66.226697  |
| 16:43:13 | 74.6408647 | 69.1179467 | 70.2705783 | 55.6228432 | 67.3378081 |
| 16:43:14 | 74.6408647 | 69.1179467 | 70.2705783 | 55.6228432 | 67.7822525 |
| 16:43:15 | 74.6408647 | 69.1179467 | 70.2705783 | 56.6228432 | 68.1155859 |
| 16:43:16 | 74.6408647 | 69.1179467 | 70.2705783 | 57.6228432 | 68.4489192 |
| 16:43:17 | 74.6408647 | 69.1179467 | 70.2705783 | 57.6228432 | 68.226697  |
| 16:43:18 | 74.6408647 | 69.1179467 | 68.2705783 | 59.6228432 | 68.226697  |
| 16:43:19 | 77.6408647 | 69.1179467 | 68.2705783 | 61.6228432 | 68.6711414 |
| 16:43:20 | 77.6408647 | 69.1179467 | 67.2705783 | 62.6228432 | 68.5600303 |
| 16:43:21 | 79.6408647 | 69.1179467 | 66.2705783 | 62.6228432 | 68.5600303 |
| 16:43:22 | 80.6408647 | 69.1179467 | 66.2705783 | 62.6228432 | 68.7822525 |
| 16:43:23 | 80.6408647 | 69.1179467 | 66.2705783 | 62.6228432 | 68.6711414 |
| 16:43:24 | 80.6408647 | 70.1179467 | 66.2705783 | 61.6228432 | 68.4489192 |
| 16:43:25 | 81.6408647 | 70.1179467 | 65.2705783 | 60.6228432 | 68.226697  |
| 16:43:26 | 81.6408647 | 70.1179467 | 65.2705783 | 61.6228432 | 68.226697  |
| 16:43:27 | 81.6408647 | 70.1179467 | 64.2705783 | 61.6228432 | 68.1155859 |
| 16:43:28 | 68.0044748 | 70.1179467 | 64.2705783 | 62.6228432 | 68.0044748 |
| 16:43:29 | 82.6408647 | 70.1179467 | 64.2705783 | 62.6228432 | 69.0334189 |
| 16:43:30 | 68.0044748 | 70.1179467 | 64.2705783 | 64.6228432 | 68.0044748 |
| 16:43:31 | 80.6408647 | 68.1179467 | 64.2705783 | 64.6228432 | 67.5600303 |
| 16:43:32 | 80.6408647 | 68.1179467 | 64.2705783 | 64.6228432 | 67.5600303 |
| 16:43:33 | 75.6408647 | 68.1179467 | 64.2705783 | 64.6228432 | 66.8933636 |
| 16:43:34 | 72.6408647 | 68.1179467 | 64.2705783 | 64.6228432 | 66.7822525 |
| 16:43:35 | 70.6408647 | 68.1179467 | 64.2705783 | 66.6228432 | 66.6711414 |
| 16:43:36 | 68.6408647 | 68.1179467 | 63.2705783 | 67.6228432 | 66.226697  |
| 16:43:37 | 68.6408647 | 67.1179467 | 63.2705783 | 67.6228432 | 66.1155859 |
| 16:43:38 | 68.6408647 | 67.1179467 | 62.2705783 | 68.6228432 | 66.0044748 |

|          |            |            |            |            |            |
|----------|------------|------------|------------|------------|------------|
| 16:43:39 | 64.6408647 | 67.1179467 | 62.2705783 | 69.6228432 | 65.6711414 |
| 16:43:40 | 64.6408647 | 66.1179467 | 63.2705783 | 69.6228432 | 65.7822525 |
| 16:43:41 | 64.6408647 | 66.1179467 | 62.2705783 | 69.6228432 | 65.7822525 |
| 16:43:42 | 64.6408647 | 66.1179467 | 62.2705783 | 68.6228432 | 66.3378081 |
| 16:43:43 | 64.6408647 | 66.1179467 | 62.2705783 | 66.6228432 | 66.0044748 |
| 16:43:44 | 64.6408647 | 66.1179467 | 69.0044748 | 65.6228432 | 69.0044748 |
| 16:43:45 | 64.6408647 | 66.1179467 | 71.6711414 | 65.6228432 | 71.6711414 |
| 16:43:46 | 64.6408647 | 64.1179467 | 71.1155859 | 64.6228432 | 71.1155859 |
| 16:43:47 | 64.6408647 | 64.1179467 | 71.5600303 | 65.6228432 | 71.5600303 |
| 16:43:48 | 63.6408647 | 64.1179467 | 71.6711414 | 65.6228432 | 71.6711414 |
| 16:43:49 | 62.6408647 | 64.1179467 | 71.5600303 | 66.6228432 | 71.5600303 |
| 16:43:50 | 63.6408647 | 64.1179467 | 71.8933636 | 67.6228432 | 71.8933636 |
| 16:43:51 | 63.6408647 | 64.1179467 | 72.1155859 | 69.6228432 | 72.1155859 |
| 16:43:52 | 63.6408647 | 64.1179467 | 72.1155859 | 69.6228432 | 72.1155859 |
| 16:43:53 | 63.6408647 | 64.1179467 | 72.4489192 | 69.6228432 | 72.4489192 |
| 16:43:54 | 63.6408647 | 64.1179467 | 72.226697  | 70.6228432 | 72.226697  |
| 16:43:55 | 63.6408647 | 64.1179467 | 71.3378081 | 69.6228432 | 71.3378081 |
| 16:43:56 | 63.6408647 | 64.1179467 | 71.0044748 | 68.6228432 | 71.0044748 |
| 16:43:57 | 63.6408647 | 65.1179467 | 70.4489192 | 68.6228432 | 70.4489192 |
| 16:43:58 | 63.6408647 | 65.1179467 | 69.8933636 | 68.6228432 | 69.8933636 |
| 16:43:59 | 63.6408647 | 65.1179467 | 68.5600303 | 67.6228432 | 68.5600303 |
| 16:44:00 | 63.6408647 | 63.1179467 | 66.4489192 | 67.6228432 | 66.4489192 |
| 16:44:01 | 63.6408647 | 63.1179467 | 78.2705783 | 67.6228432 | 65.6711414 |
| 16:44:02 | 64.6408647 | 63.1179467 | 74.2705783 | 67.6228432 | 65.0044748 |
| 16:44:03 | 64.6408647 | 62.1179467 | 69.2705783 | 67.6228432 | 64.3378081 |
| 16:44:04 | 64.6408647 | 63.1179467 | 68.2705783 | 66.6228432 | 64.226697  |
| 16:44:05 | 64.6408647 | 64.1179467 | 67.2705783 | 66.6228432 | 64.1155859 |
| 16:44:06 | 64.6408647 | 66.1179467 | 67.2705783 | 66.6228432 | 64.4489192 |
| 16:44:07 | 64.6408647 | 67.1179467 | 67.2705783 | 67.6228432 | 65.1155859 |
| 16:44:08 | 65.6408647 | 68.1179467 | 66.2705783 | 68.6228432 | 65.4489192 |
| 16:44:09 | 65.6408647 | 69.1179467 | 65.2705783 | 68.6228432 | 66.0044748 |
| 16:44:10 | 65.6408647 | 68.1179467 | 64.2705783 | 67.6228432 | 65.8933636 |
| 16:44:11 | 65.6408647 | 67.1179467 | 64.2705783 | 67.6228432 | 65.5600303 |
| 16:44:12 | 65.6408647 | 67.1179467 | 63.2705783 | 68.6228432 | 65.226697  |
| 16:44:13 | 65.6408647 | 67.1179467 | 63.2705783 | 67.6228432 | 65.0044748 |
| 16:44:14 | 65.6408647 | 66.1179467 | 64.2705783 | 68.6228432 | 65.3378081 |
| 16:44:15 | 65.6408647 | 66.1179467 | 64.2705783 | 68.6228432 | 65.3378081 |
| 16:44:16 | 66.6408647 | 65.1179467 | 63.2705783 | 69.6228432 | 65.1155859 |
| 16:44:17 | 66.6408647 | 65.1179467 | 63.2705783 | 69.6228432 | 64.8933636 |
| 16:44:18 | 67.6408647 | 65.1179467 | 63.2705783 | 66.6228432 | 64.1155859 |
| 16:44:19 | 68.6408647 | 65.1179467 | 63.2705783 | 63.6228432 | 64.0044748 |
| 16:44:20 | 68.6408647 | 65.1179467 | 63.2705783 | 62.6228432 | 64.0044748 |
| 16:44:21 | 68.6408647 | 65.1179467 | 62.2705783 | 62.6228432 | 64.226697  |
| 16:44:22 | 68.6408647 | 64.1179467 | 62.2705783 | 62.6228432 | 64.226697  |
| 16:44:23 | 68.6408647 | 64.1179467 | 62.2705783 | 62.6228432 | 64.226697  |

|          |            |            |            |            |            |
|----------|------------|------------|------------|------------|------------|
| 16:44:24 | 68.6408647 | 63.1179467 | 62.2705783 | 62.6228432 | 62.4815955 |
| 16:44:25 | 68.6408647 | 62.1179467 | 62.2705783 | 65.6228432 | 64.226697  |
| 16:44:26 | 64.6408647 | 62.1179467 | 62.2705783 | 65.6228432 | 63.7822525 |
| 16:44:27 | 63.6408647 | 62.1179467 | 62.2705783 | 66.6228432 | 63.5600303 |
| 16:44:28 | 62.6408647 | 61.1179467 | 62.2705783 | 66.6228432 | 63.0044748 |
| 16:44:29 | 62.6408647 | 61.1179467 | 62.2705783 | 66.6228432 | 62.7822525 |
| 16:44:30 | 62.6408647 | 61.1179467 | 63.2705783 | 67.6228432 | 63.0044748 |
| 16:44:31 | 62.6408647 | 60.1179467 | 63.2705783 | 67.6228432 | 63.1155859 |
| 16:44:32 | 62.6408647 | 60.1179467 | 63.2705783 | 67.6228432 | 62.6711414 |
| 16:44:33 | 63.6408647 | 60.1179467 | 64.2705783 | 67.6228432 | 62.5600303 |
| 16:44:34 | 63.6408647 | 60.1179467 | 63.2705783 | 67.6228432 | 62.4489192 |
| 16:44:35 | 63.6408647 | 60.1179467 | 62.2705783 | 65.6228432 | 62.1155859 |
| 16:44:36 | 63.6408647 | 58.1179467 | 62.2705783 | 66.6228432 | 62.1155859 |
| 16:44:37 | 63.6408647 | 58.1179467 | 63.2705783 | 66.6228432 | 62.3378081 |
| 16:44:38 | 64.6408647 | 59.1179467 | 62.2705783 | 67.6228432 | 62.5600303 |
| 16:44:39 | 65.6408647 | 60.1179467 | 62.2705783 | 68.6228432 | 63.4489192 |
| 16:44:40 | 65.6408647 | 61.1179467 | 62.2705783 | 69.6228432 | 63.7822525 |
| 16:44:41 | 66.6408647 | 63.1179467 | 62.2705783 | 70.6228432 | 64.3378081 |
| 16:44:42 | 66.6408647 | 64.1179467 | 62.2705783 | 70.6228432 | 64.5600303 |
| 16:44:43 | 66.6408647 | 66.1179467 | 61.2705783 | 68.6228432 | 64.5600303 |
| 16:44:44 | 66.6408647 | 68.1179467 | 62.2705783 | 66.6228432 | 64.6711414 |
| 16:44:45 | 66.6408647 | 68.1179467 | 63.2705783 | 65.6228432 | 65.1155859 |
| 16:44:46 | 67.6408647 | 67.1179467 | 63.2705783 | 63.6228432 | 64.6711414 |
| 16:44:47 | 67.6408647 | 66.1179467 | 63.2705783 | 63.6228432 | 64.7822525 |
| 16:44:48 | 68.6408647 | 66.1179467 | 62.2705783 | 64.6228432 | 65.226697  |
| 16:44:49 | 68.6408647 | 66.1179467 | 63.2705783 | 64.6228432 | 65.5600303 |
| 16:44:50 | 68.6408647 | 66.1179467 | 63.2705783 | 66.6228432 | 66.1155859 |
| 16:44:51 | 68.6408647 | 66.1179467 | 63.2705783 | 66.6228432 | 66.8933636 |
| 16:44:52 | 68.6408647 | 66.1179467 | 63.2705783 | 67.6228432 | 67.4489192 |
| 16:44:53 | 68.6408647 | 66.1179467 | 62.2705783 | 68.6228432 | 67.4489192 |
| 16:44:54 | 68.6408647 | 66.1179467 | 62.2705783 | 68.6228432 | 67.5600303 |
| 16:44:55 | 68.6408647 | 66.1179467 | 62.2705783 | 68.6228432 | 67.6711414 |
| 16:44:56 | 68.6408647 | 64.1179467 | 62.2705783 | 67.6228432 | 67.1155859 |
| 16:44:57 | 68.6408647 | 64.1179467 | 62.2705783 | 66.6228432 | 67.1155859 |
| 16:44:58 | 68.6408647 | 64.1179467 | 62.2705783 | 65.6228432 | 67.0044748 |
| 16:44:59 | 68.6408647 | 64.1179467 | 62.2705783 | 65.6228432 | 66.7822525 |
| 16:45:00 | 69.6408647 | 65.1179467 | 62.2705783 | 65.6228432 | 66.8933636 |
| 16:45:01 | 70.6408647 | 65.1179467 | 63.2705783 | 66.6228432 | 67.3378081 |
| 16:45:02 | 71.6408647 | 65.1179467 | 63.2705783 | 66.6228432 | 67.1155859 |
| 16:45:03 | 71.6408647 | 65.1179467 | 63.2705783 | 67.6228432 | 67.0044748 |
| 16:45:04 | 72.6408647 | 66.1179467 | 63.2705783 | 67.6228432 | 67.4489192 |
| 16:45:05 | 72.6408647 | 66.1179467 | 63.2705783 | 66.6228432 | 67.1155859 |
| 16:45:06 | 70.6408647 | 66.1179467 | 63.2705783 | 65.6228432 | 66.5600303 |
| 16:45:07 | 70.6408647 | 66.1179467 | 62.2705783 | 65.6228432 | 66.7822525 |
| 16:45:08 | 70.6408647 | 66.1179467 | 62.2705783 | 66.6228432 | 67.1155859 |

|          |            |            |            |            |            |
|----------|------------|------------|------------|------------|------------|
| 16:45:09 | 70.6408647 | 66.1179467 | 62.2705783 | 66.6228432 | 67.226697  |
| 16:45:10 | 70.6408647 | 66.1179467 | 62.2705783 | 67.6228432 | 67.7822525 |
| 16:45:11 | 69.6408647 | 66.1179467 | 62.2705783 | 67.6228432 | 68.1155859 |
| 16:45:12 | 69.6408647 | 67.1179467 | 63.2705783 | 68.6228432 | 68.5600303 |
| 16:45:13 | 69.6408647 | 69.1179467 | 63.2705783 | 68.6228432 | 68.7822525 |
| 16:45:14 | 69.6408647 | 68.1179467 | 63.2705783 | 69.6228432 | 69.0044748 |
| 16:45:15 | 67.6408647 | 66.1179467 | 63.2705783 | 69.6228432 | 69.1155859 |
| 16:45:16 | 67.6408647 | 66.1179467 | 63.2705783 | 68.6228432 | 69.226697  |
| 16:45:17 | 67.6408647 | 66.1179467 | 63.2705783 | 68.6228432 | 69.7357416 |
| 16:45:18 | 65.6408647 | 65.1179467 | 64.2705783 | 68.6228432 | 69.1504382 |
| 16:45:19 | 65.6408647 | 65.1179467 | 65.2705783 | 68.6228432 | 69.3378081 |
| 16:45:20 | 65.6408647 | 65.1179467 | 65.2705783 | 68.6228432 | 69.3378081 |
| 16:45:21 | 66.6408647 | 65.1179467 | 65.2705783 | 68.6228432 | 69.4489192 |
| 16:45:22 | 66.6408647 | 65.1179467 | 65.2705783 | 68.6228432 | 69.1155859 |
| 16:45:23 | 66.6408647 | 66.1179467 | 67.2705783 | 71.6228432 | 69.8933636 |
| 16:45:24 | 66.6408647 | 66.1179467 | 67.2705783 | 71.6228432 | 69.4585601 |
| 16:45:25 | 66.6408647 | 66.1179467 | 67.2705783 | 74.6228432 | 69.4585601 |
| 16:45:26 | 67.6408647 | 65.1179467 | 67.2705783 | 75.6228432 | 69.9585601 |
| 16:45:27 | 67.6408647 | 65.1179467 | 67.2705783 | 75.6228432 | 70.0585601 |
| 16:45:28 | 67.6408647 | 65.1179467 | 67.2705783 | 75.6228432 | 70.1585601 |
| 16:45:29 | 66.6408647 | 65.1179467 | 66.2705783 | 74.6228432 | 69.7585601 |
| 16:45:30 | 66.6408647 | 66.1179467 | 65.2705783 | 74.6228432 | 69.9585601 |
| 16:45:31 | 65.6408647 | 67.1179467 | 65.2705783 | 72.6228432 | 69.7585601 |
| 16:45:32 | 65.6408647 | 68.1179467 | 66.2705783 | 71.6228432 | 69.6585601 |
| 16:45:33 | 65.6408647 | 68.1179467 | 66.2705783 | 70.6228432 | 68.8585601 |
| 16:45:34 | 64.6408647 | 68.1179467 | 66.2705783 | 69.6228432 | 68.6585601 |
| 16:45:35 | 64.6408647 | 67.1179467 | 66.2705783 | 68.6228432 | 68.3585601 |
| 16:45:36 | 64.6408647 | 67.1179467 | 66.2705783 | 68.6228432 | 68.5585601 |
| 16:45:37 | 65.6408647 | 67.1179467 | 66.2705783 | 68.6228432 | 67.9585601 |
| 16:45:38 | 65.6408647 | 67.1179467 | 66.2705783 | 67.6228432 | 67.5585601 |
| 16:45:39 | 65.6408647 | 68.1179467 | 65.2705783 | 67.6228432 | 67.3585601 |
| 16:45:40 | 66.6408647 | 69.1179467 | 65.2705783 | 67.6228432 | 67.3585601 |
| 16:45:41 | 66.6408647 | 70.1179467 | 66.2705783 | 67.6228432 | 68.0585601 |
| 16:45:42 | 67.6408647 | 70.1179467 | 66.2705783 | 67.6228432 | 68.2585601 |
| 16:45:43 | 67.6408647 | 71.1179467 | 66.2705783 | 67.6228432 | 68.2585601 |
| 16:45:44 | 67.6408647 | 72.1179467 | 64.2705783 | 66.6228432 | 68.0585601 |
| 16:45:45 | 69.6408647 | 72.1179467 | 64.2705783 | 66.6228432 | 68.9585601 |
| 16:45:46 | 70.6408647 | 70.1179467 | 64.2705783 | 64.6228432 | 68.8585601 |
| 16:45:47 | 70.6408647 | 69.1179467 | 65.2705783 | 64.6228432 | 69.2585601 |
| 16:45:48 | 70.6408647 | 68.1179467 | 65.2705783 | 64.6228432 | 68.9585601 |
| 16:45:49 | 70.6408647 | 68.1179467 | 65.2705783 | 64.6228432 | 69.6585601 |
| 16:45:50 | 72.6408647 | 68.1179467 | 65.2705783 | 65.6228432 | 70.2585601 |
| 16:45:51 | 72.6408647 | 68.1179467 | 66.2705783 | 65.6228432 | 70.6585601 |
| 16:45:52 | 71.6408647 | 68.1179467 | 66.2705783 | 67.6228432 | 70.6585601 |
| 16:45:53 | 71.6408647 | 68.1179467 | 66.2705783 | 68.6228432 | 70.6585601 |

|          |            |            |            |            |            |
|----------|------------|------------|------------|------------|------------|
| 16:45:54 | 73.6408647 | 68.1179467 | 65.2705783 | 67.6228432 | 70.3585601 |
| 16:45:55 | 73.6408647 | 68.1179467 | 64.2705783 | 67.6228432 | 70.8585601 |
| 16:45:56 | 74.6408647 | 69.1179467 | 64.2705783 | 67.6228432 | 70.4585601 |
| 16:45:57 | 74.6408647 | 68.1179467 | 64.2705783 | 67.6228432 | 70.4585601 |
| 16:45:58 | 75.6408647 | 67.1179467 | 64.2705783 | 69.6228432 | 70.2585601 |
| 16:45:59 | 75.6408647 | 66.1179467 | 64.2705783 | 70.6228432 | 69.7585601 |
| 16:46:00 | 74.6408647 | 66.1179467 | 64.2705783 | 70.6228432 | 68.6585601 |
| 16:46:01 | 73.6408647 | 66.1179467 | 64.2705783 | 70.6228432 | 68.5585601 |
| 16:46:02 | 73.6408647 | 66.1179467 | 64.2705783 | 69.6228432 | 68.5585601 |
| 16:46:03 | 73.6408647 | 66.1179467 | 64.2705783 | 66.6228432 | 68.1585601 |
| 16:46:04 | 73.6408647 | 66.1179467 | 65.2705783 | 65.6228432 | 68.2585601 |
| 16:46:05 | 73.6408647 | 66.1179467 | 66.2705783 | 64.6228432 | 67.6585601 |
| 16:46:06 | 73.6408647 | 66.1179467 | 68.2705783 | 64.6228432 | 67.9585601 |
| 16:46:07 | 73.6408647 | 66.1179467 | 68.2705783 | 63.6228432 | 67.6585601 |
| 16:46:08 | 73.6408647 | 66.1179467 | 68.2705783 | 63.6228432 | 67.3585601 |
| 16:46:09 | 73.6408647 | 66.1179467 | 68.2705783 | 66.6228432 | 67.7585601 |
| 16:46:10 | 73.6408647 | 67.1179467 | 73.2705783 | 68.6228432 | 68.7585601 |
| 16:46:11 | 73.6408647 | 67.1179467 | 73.2705783 | 68.6228432 | 68.6107416 |
| 16:46:12 | 76.6408647 | 69.1179467 | 76.2705783 | 67.6228432 | 67.6912488 |
| 16:46:13 | 77.6408647 | 69.1179467 | 76.2705783 | 66.6228432 | 67.2585601 |
| 16:46:14 | 77.6408647 | 69.1179467 | 75.2705783 | 65.6228432 | 67.2585601 |
| 16:46:15 | 76.6408647 | 69.1179467 | 74.2705783 | 64.6228432 | 67.1585601 |
| 16:46:16 | 69.6408647 | 69.1179467 | 74.2705783 | 63.6228432 | 66.3585601 |
| 16:46:17 | 69.6408647 | 70.1179467 | 74.2705783 | 63.6228432 | 66.4585601 |
| 16:46:18 | 67.6408647 | 73.1179467 | 74.2705783 | 63.6228432 | 66.9585601 |
| 16:46:19 | 65.6408647 | 75.1179467 | 74.2705783 | 63.6228432 | 67.0585601 |
| 16:46:20 | 62.6408647 | 75.1179467 | 75.2705783 | 62.6228432 | 66.7585601 |
| 16:46:21 | 61.6408647 | 77.1179467 | 74.2705783 | 62.6228432 | 66.5585601 |
| 16:46:22 | 61.6408647 | 77.1179467 | 72.2705783 | 62.6228432 | 66.2585601 |
| 16:46:23 | 61.6408647 | 77.1179467 | 71.2705783 | 62.6228432 | 66.7585601 |
| 16:46:24 | 61.6408647 | 77.1179467 | 69.2705783 | 62.6228432 | 67.1585601 |
| 16:46:25 | 61.6408647 | 77.1179467 | 69.2705783 | 62.6228432 | 67.2585601 |
| 16:46:26 | 60.6408647 | 77.1179467 | 68.2705783 | 61.6228432 | 66.9585601 |
| 16:46:27 | 60.6408647 | 77.1179467 | 67.2705783 | 61.6228432 | 66.8585601 |
| 16:46:28 | 60.6408647 | 77.1179467 | 67.2705783 | 61.6228432 | 66.5585601 |
| 16:46:29 | 61.6408647 | 70.1179467 | 64.2705783 | 60.6228432 | 65.5585601 |
| 16:46:30 | 63.6408647 | 70.1179467 | 65.2705783 | 60.6228432 | 65.8585601 |
| 16:46:31 | 63.6408647 | 70.1179467 | 65.2705783 | 60.6228432 | 65.4585601 |
| 16:46:32 | 63.6408647 | 69.1179467 | 66.2705783 | 60.6228432 | 65.6585601 |
| 16:46:33 | 63.6408647 | 68.1179467 | 68.2705783 | 62.6228432 | 66.0585601 |
| 16:46:34 | 63.6408647 | 68.1179467 | 70.2705783 | 63.6228432 | 66.3585601 |
| 16:46:35 | 65.6408647 | 69.1179467 | 76.2705783 | 63.6228432 | 67.5585601 |
| 16:46:36 | 63.6408647 | 69.1179467 | 67.9585601 | 65.6228432 | 67.9585601 |
| 16:46:37 | 63.6408647 | 69.1179467 | 68.0585601 | 65.6228432 | 68.0585601 |
| 16:46:38 | 63.6408647 | 69.1179467 | 68.4585601 | 65.6228432 | 68.4585601 |



|          |            |            |            |            |            |
|----------|------------|------------|------------|------------|------------|
| 16:46:39 | 62.6408647 | 69.1179467 | 68.5585601 | 65.6228432 | 68.5585601 |
| 16:46:40 | 62.6408647 | 70.1179467 | 68.9585601 | 66.6228432 | 68.9585601 |
| 16:46:41 | 62.6408647 | 71.1179467 | 69.1585601 | 66.6228432 | 69.1585601 |
| 16:46:42 | 62.6408647 | 72.1179467 | 69.0585601 | 66.6228432 | 69.0585601 |
| 16:46:43 | 62.6408647 | 72.1179467 | 69.0585601 | 64.6228432 | 69.0585601 |
| 16:46:44 | 61.6408647 | 72.1179467 | 69.8585601 | 64.6228432 | 69.8585601 |
| 16:46:45 | 61.6408647 | 72.1179467 | 69.8585601 | 63.6228432 | 69.8585601 |
| 16:46:46 | 61.6408647 | 72.1179467 | 70.4585601 | 63.6228432 | 70.4585601 |
| 16:46:47 | 62.6408647 | 72.1179467 | 70.1585601 | 63.6228432 | 70.1585601 |
| 16:46:48 | 62.6408647 | 72.1179467 | 69.9585601 | 63.6228432 | 69.9585601 |
| 16:46:49 | 63.6408647 | 72.1179467 | 70.2585601 | 63.6228432 | 70.2585601 |
| 16:46:50 | 63.6408647 | 72.1179467 | 70.1585601 | 62.6228432 | 70.1585601 |
| 16:46:51 | 61.6408647 | 69.1179467 | 69.7585601 | 62.6228432 | 69.7585601 |
| 16:46:52 | 61.6408647 | 68.1179467 | 69.9585601 | 62.6228432 | 69.9585601 |
| 16:46:53 | 61.6408647 | 69.1179467 | 70.2585601 | 62.6228432 | 70.2585601 |
| 16:46:54 | 61.6408647 | 69.1179467 | 70.2585601 | 63.6228432 | 70.2585601 |
| 16:46:55 | 61.6408647 | 69.1179467 | 69.8585601 | 63.6228432 | 69.8585601 |
| 16:46:56 | 61.6408647 | 68.1179467 | 69.2585601 | 63.6228432 | 69.2585601 |
| 16:46:57 | 61.6408647 | 68.1179467 | 68.7585601 | 63.6228432 | 68.7585601 |
| 16:46:58 | 61.6408647 | 68.1179467 | 68.8585601 | 63.6228432 | 68.8585601 |
| 16:46:59 | 61.6408647 | 67.1179467 | 68.7585601 | 63.6228432 | 68.7585601 |
| 16:47:00 | 61.6408647 | 67.1179467 | 67.2705783 | 63.6228432 | 66.0585601 |
| 16:47:01 | 61.6408647 | 67.1179467 | 64.2705783 | 63.6228432 | 65.7585601 |
| 16:47:02 | 62.6408647 | 67.1179467 | 64.2705783 | 67.6228432 | 66.2585601 |
| 16:47:03 | 63.6408647 | 67.1179467 | 63.2705783 | 68.6228432 | 66.7585601 |
| 16:47:04 | 64.6408647 | 68.1179467 | 63.2705783 | 69.6228432 | 67.2585601 |
| 16:47:05 | 64.6408647 | 68.1179467 | 63.2705783 | 69.6228432 | 67.0899499 |
| 16:47:06 | 64.6408647 | 67.1179467 | 65.2705783 | 70.6228432 | 67.9226383 |
| 16:47:07 | 64.6408647 | 68.1179467 | 65.2705783 | 69.6228432 | 68.0585601 |
| 16:47:08 | 64.6408647 | 68.1179467 | 65.2705783 | 69.6228432 | 68.1585601 |
| 16:47:09 | 64.6408647 | 68.1179467 | 65.2705783 | 69.6228432 | 68.4585601 |
| 16:47:10 | 64.6408647 | 69.1179467 | 65.2705783 | 68.6228432 | 68.6585601 |
| 16:47:11 | 64.6408647 | 70.1179467 | 65.2705783 | 68.6228432 | 68.7585601 |
| 16:47:12 | 64.6408647 | 70.1179467 | 66.2705783 | 70.6228432 | 69.3585601 |
| 16:47:13 | 64.6408647 | 69.1179467 | 66.2705783 | 71.6228432 | 69.1585601 |
| 16:47:14 | 66.6408647 | 67.1179467 | 67.2705783 | 72.6228432 | 69.1585601 |
| 16:47:15 | 67.6408647 | 67.1179467 | 68.2705783 | 71.6228432 | 69.4585601 |
| 16:47:16 | 68.6408647 | 63.1179467 | 68.2705783 | 70.6228432 | 69.3812512 |
| 16:47:17 | 72.6408647 | 63.1179467 | 68.2705783 | 70.6228432 | 69.2585601 |
| 16:47:18 | 73.6408647 | 63.1179467 | 67.2705783 | 68.6228432 | 68.8585601 |
| 16:47:19 | 73.6408647 | 63.1179467 | 67.2705783 | 65.6228432 | 68.3585601 |
| 16:47:20 | 74.6408647 | 62.1179467 | 68.2705783 | 64.6228432 | 69.0585601 |
| 16:47:21 | 74.6408647 | 62.1179467 | 69.2705783 | 64.6228432 | 69.1585601 |
| 16:47:22 | 75.6408647 | 67.1179467 | 71.2705783 | 62.6228432 | 70.6585601 |
| 16:47:23 | 77.6408647 | 68.1179467 | 71.2705783 | 61.6228432 | 70.9585601 |

|          |            |            |            |            |            |
|----------|------------|------------|------------|------------|------------|
| 16:47:24 | 78.6408647 | 68.1179467 | 72.2705783 | 63.6228432 | 71.1585601 |
| 16:47:25 | 78.6408647 | 68.1179467 | 74.2705783 | 64.6228432 | 71.4585601 |
| 16:47:26 | 78.6408647 | 68.1179467 | 75.2705783 | 64.6228432 | 70.0585601 |
| 16:47:27 | 77.6408647 | 68.1179467 | 78.2705783 | 64.6228432 | 70.2585601 |
| 16:47:28 | 76.6408647 | 66.1179467 | 81.2705783 | 64.6228432 | 69.1585601 |
| 16:47:29 | 74.6408647 | 67.1179467 | 80.2705783 | 62.6228432 | 68.4585601 |
| 16:47:30 | 73.6408647 | 67.1179467 | 75.2705783 | 62.6228432 | 67.3585601 |
| 16:47:31 | 69.6408647 | 67.1179467 | 70.2705783 | 61.6228432 | 66.2585601 |
| 16:47:32 | 67.6408647 | 67.1179467 | 69.2705783 | 61.6228432 | 65.9585601 |
| 16:47:33 | 67.6408647 | 67.1179467 | 69.2705783 | 61.6228432 | 65.7585601 |
| 16:47:34 | 66.6408647 | 67.1179467 | 71.2705783 | 62.6228432 | 65.8585601 |
| 16:47:35 | 66.6408647 | 68.1179467 | 72.2705783 | 62.6228432 | 65.8585601 |
| 16:47:36 | 65.6408647 | 68.1179467 | 73.2705783 | 63.6228432 | 65.8585601 |
| 16:47:37 | 65.6408647 | 67.1179467 | 73.2705783 | 63.6228432 | 65.9585601 |
| 16:47:38 | 65.6408647 | 67.1179467 | 72.2705783 | 63.6228432 | 65.8585601 |
| 16:47:39 | 66.6408647 | 66.1179467 | 72.2705783 | 62.6228432 | 65.7585601 |
| 16:47:40 | 67.6408647 | 65.1179467 | 72.2705783 | 62.6228432 | 66.0585601 |
| 16:47:41 | 67.6408647 | 65.1179467 | 72.2705783 | 61.6228432 | 66.1585601 |
| 16:47:42 | 68.6408647 | 64.1179467 | 72.2705783 | 61.6228432 | 66.2585601 |
| 16:47:43 | 69.6408647 | 63.1179467 | 74.2705783 | 61.6228432 | 66.5585601 |
| 16:47:44 | 69.6408647 | 62.1179467 | 74.2705783 | 62.6228432 | 67.4585601 |
| 16:47:45 | 69.6408647 | 62.1179467 | 74.2705783 | 62.6228432 | 67.1585601 |
| 16:47:46 | 69.6408647 | 62.1179467 | 75.2705783 | 62.6228432 | 66.7585601 |
| 16:47:47 | 68.6408647 | 60.1179467 | 76.2705783 | 63.6228432 | 66.9585601 |
| 16:47:48 | 68.6408647 | 59.1179467 | 77.2705783 | 63.6228432 | 68.1585601 |
| 16:47:49 | 69.6408647 | 59.1179467 | 77.2705783 | 63.6228432 | 68.1585601 |
| 16:47:50 | 70.6408647 | 59.1179467 | 79.2705783 | 63.6228432 | 68.7585601 |
| 16:47:51 | 73.6408647 | 58.1179467 | 72.2705783 | 63.6228432 | 68.9585601 |
| 16:47:52 | 75.6408647 | 58.1179467 | 68.2705783 | 61.6228432 | 69.2585601 |
| 16:47:53 | 75.6408647 | 60.1179467 | 67.2705783 | 61.6228432 | 69.1585601 |
| 16:47:54 | 75.6408647 | 63.1179467 | 67.2705783 | 62.6228432 | 69.6585601 |
| 16:47:55 | 75.6408647 | 65.1179467 | 66.2705783 | 63.6228432 | 69.9585601 |
| 16:47:56 | 75.6408647 | 65.1179467 | 65.2705783 | 62.6228432 | 69.9585601 |
| 16:47:57 | 72.6408647 | 65.1179467 | 65.2705783 | 61.6228432 | 69.5585601 |
| 16:47:58 | 70.6408647 | 65.1179467 | 66.2705783 | 61.6228432 | 69.3585601 |
| 16:47:59 | 70.6408647 | 65.1179467 | 66.2705783 | 61.6228432 | 69.9890754 |
| 16:48:00 | 69.6408647 | 65.1179467 | 66.2705783 | 61.6228432 | 68.7585601 |
| 16:48:01 | 69.6408647 | 65.1179467 | 66.2705783 | 61.6228432 | 68.8585601 |
| 16:48:02 | 68.6408647 | 65.1179467 | 66.2705783 | 60.6228432 | 68.4585601 |
| 16:48:03 | 68.6408647 | 65.1179467 | 66.2705783 | 61.6228432 | 68.3585601 |
| 16:48:04 | 68.6408647 | 67.1179467 | 66.2705783 | 61.6228432 | 68.6585601 |
| 16:48:05 | 68.6408647 | 67.1179467 | 65.2705783 | 61.6228432 | 68.3585601 |
| 16:48:06 | 68.6408647 | 66.1179467 | 64.2705783 | 61.6228432 | 68.4585601 |
| 16:48:07 | 66.6408647 | 66.1179467 | 64.2705783 | 62.6228432 | 68.3585601 |
| 16:48:08 | 66.6408647 | 66.1179467 | 64.2705783 | 62.6228432 | 68.5585601 |

|          |            |            |            |            |            |
|----------|------------|------------|------------|------------|------------|
| 16:48:09 | 64.6408647 | 69.1179467 | 64.2705783 | 63.6228432 | 69.1585601 |
| 16:48:10 | 64.6408647 | 69.1179467 | 64.2705783 | 62.6228432 | 69.2585601 |
| 16:48:11 | 64.6408647 | 69.1179467 | 65.2705783 | 62.6228432 | 69.0585601 |
| 16:48:12 | 64.6408647 | 69.1179467 | 65.2705783 | 62.6228432 | 68.9585601 |
| 16:48:13 | 64.6408647 | 69.1179467 | 66.2705783 | 63.6228432 | 69.6585601 |
| 16:48:14 | 64.6408647 | 69.1179467 | 65.2705783 | 62.6228432 | 69.7585601 |
| 16:48:15 | 63.6408647 | 69.1179467 | 65.2705783 | 63.6228432 | 70.3585601 |
| 16:48:16 | 63.6408647 | 69.1179467 | 65.2705783 | 63.6228432 | 70.5585601 |
| 16:48:17 | 63.6408647 | 69.1179467 | 66.2705783 | 63.6228432 | 70.8585601 |
| 16:48:18 | 63.6408647 | 69.1179467 | 66.2705783 | 63.6228432 | 70.7585601 |
| 16:48:19 | 63.6408647 | 69.1179467 | 66.2705783 | 63.6228432 | 70.4585601 |
| 16:48:20 | 61.6408647 | 69.1179467 | 66.2705783 | 64.6228432 | 70.4585601 |
| 16:48:21 | 61.6408647 | 71.1179467 | 66.2705783 | 63.6228432 | 70.7585601 |
| 16:48:22 | 61.6408647 | 71.1179467 | 66.2705783 | 63.6228432 | 70.6585601 |
| 16:48:23 | 61.6408647 | 71.1179467 | 66.2705783 | 63.6228432 | 70.7585601 |
| 16:48:24 | 62.6408647 | 71.1179467 | 65.2705783 | 63.6228432 | 70.6585601 |
| 16:48:25 | 62.6408647 | 71.1179467 | 66.2705783 | 62.6228432 | 70.5585601 |
| 16:48:26 | 62.6408647 | 69.1179467 | 66.2705783 | 62.6228432 | 67.9585601 |
| 16:48:27 | 62.6408647 | 68.1179467 | 66.2705783 | 62.6228432 | 67.3585601 |
| 16:48:28 | 62.6408647 | 68.1179467 | 67.2705783 | 63.6228432 | 66.9585601 |
| 16:48:29 | 63.6408647 | 67.1179467 | 66.2705783 | 63.6228432 | 66.7585601 |
| 16:48:30 | 63.6408647 | 67.1179467 | 66.2705783 | 66.6228432 | 66.8585601 |
| 16:48:31 | 63.6408647 | 67.1179467 | 66.2705783 | 66.6228432 | 67.0585601 |
| 16:48:32 | 64.6408647 | 68.1179467 | 66.2705783 | 66.6228432 | 67.2585601 |
| 16:48:33 | 66.6408647 | 69.1179467 | 66.2705783 | 66.6228432 | 67.4585601 |
| 16:48:34 | 68.6408647 | 70.1179467 | 65.2705783 | 68.6228432 | 67.8585601 |
| 16:48:35 | 68.6408647 | 70.1179467 | 64.2705783 | 68.6228432 | 67.4585601 |
| 16:48:36 | 69.6408647 | 69.1179467 | 64.2705783 | 68.6228432 | 67.3585601 |
| 16:48:37 | 69.6408647 | 68.1179467 | 65.2705783 | 68.6228432 | 67.5585601 |
| 16:48:38 | 69.6408647 | 68.1179467 | 66.2705783 | 68.6228432 | 68.2585601 |
| 16:48:39 | 69.6408647 | 68.1179467 | 66.2705783 | 68.6228432 | 68.3585601 |
| 16:48:40 | 69.6408647 | 67.1179467 | 66.2705783 | 65.6228432 | 68.0585601 |
| 16:48:41 | 69.6408647 | 66.1179467 | 66.2705783 | 65.6228432 | 67.7585601 |
| 16:48:42 | 70.6408647 | 66.1179467 | 66.2705783 | 65.6228432 | 67.8585601 |
| 16:48:43 | 70.6408647 | 66.1179467 | 67.2705783 | 65.6228432 | 68.0585601 |
| 16:48:44 | 80.6408647 | 66.1179467 | 67.2705783 | 65.6228432 | 68.9585601 |
| 16:48:45 | 68.9585601 | 66.1179467 | 67.2705783 | 64.6228432 | 68.9585601 |
| 16:48:46 | 69.1585601 | 66.1179467 | 66.2705783 | 64.6228432 | 69.1585601 |
| 16:48:47 | 69.0585601 | 68.1179467 | 65.2705783 | 64.6228432 | 69.0585601 |
| 16:48:48 | 68.2585601 | 68.1179467 | 65.2705783 | 64.6228432 | 68.2585601 |
| 16:48:49 | 68.0585601 | 68.1179467 | 65.2705783 | 63.6228432 | 68.0585601 |
| 16:48:50 | 68.1585601 | 68.1179467 | 65.2705783 | 64.6228432 | 68.1585601 |
| 16:48:51 | 68.2585601 | 69.1179467 | 65.2705783 | 65.6228432 | 68.2585601 |
| 16:48:52 | 68.2585601 | 69.1179467 | 65.2705783 | 65.6228432 | 68.2585601 |
| 16:48:53 | 68.4806014 | 69.1179467 | 65.2705783 | 65.6228432 | 68.4806014 |

|          |            |            |            |            |            |
|----------|------------|------------|------------|------------|------------|
| 16:48:54 | 67.6154822 | 69.1179467 | 63.2705783 | 65.6228432 | 67.6154822 |
| 16:48:55 | 67.6585601 | 69.1179467 | 63.2705783 | 66.6228432 | 67.6585601 |
| 16:48:56 | 67.5585601 | 69.1179467 | 62.2705783 | 68.6228432 | 67.5585601 |
| 16:48:57 | 67.2585601 | 70.1179467 | 62.2705783 | 68.6228432 | 67.2585601 |
| 16:48:58 | 67.6585601 | 70.1179467 | 62.2705783 | 70.6228432 | 67.6585601 |
| 16:48:59 | 67.4585601 | 72.1179467 | 62.2705783 | 71.6228432 | 67.4585601 |
| 16:49:00 | 80.6408647 | 72.1179467 | 63.2705783 | 72.6228432 | 67.3585601 |
| 16:49:01 | 81.6408647 | 73.1179467 | 63.2705783 | 72.6228432 | 68.0585601 |
| 16:49:02 | 81.6408647 | 73.1179467 | 62.2705783 | 72.6228432 | 68.2585601 |
| 16:49:03 | 81.6408647 | 71.1179467 | 63.2705783 | 73.6228432 | 68.3585601 |
| 16:49:04 | 80.6408647 | 69.1179467 | 63.2705783 | 73.6228432 | 68.4585601 |
| 16:49:05 | 80.6408647 | 69.1179467 | 64.2705783 | 73.6228432 | 68.3585601 |
| 16:49:06 | 77.6408647 | 69.1179467 | 64.2705783 | 73.6228432 | 68.4585601 |
| 16:49:07 | 74.6408647 | 69.1179467 | 64.2705783 | 73.6228432 | 67.7585601 |
| 16:49:08 | 73.6408647 | 69.1179467 | 63.2705783 | 72.6228432 | 66.6585601 |
| 16:49:09 | 73.6408647 | 70.1179467 | 63.2705783 | 66.6228432 | 66.6585601 |
| 16:49:10 | 72.6408647 | 71.1179467 | 63.2705783 | 66.6228432 | 66.5585601 |
| 16:49:11 | 66.6408647 | 71.1179467 | 63.2705783 | 66.6228432 | 66.0585601 |
| 16:49:12 | 66.6408647 | 71.1179467 | 64.2705783 | 67.6228432 | 66.6585601 |
| 16:49:13 | 63.6408647 | 72.1179467 | 64.2705783 | 67.6228432 | 66.0585601 |
| 16:49:14 | 61.6408647 | 72.1179467 | 63.2705783 | 67.6228432 | 65.4585601 |
| 16:49:15 | 60.6408647 | 72.1179467 | 63.2705783 | 67.6228432 | 65.5585601 |
| 16:49:16 | 60.6408647 | 72.1179467 | 63.2705783 | 70.6228432 | 65.6585601 |
| 16:49:17 | 60.6408647 | 72.1179467 | 63.2705783 | 74.6228432 | 66.3585601 |
| 16:49:18 | 60.6408647 | 72.1179467 | 64.2705783 | 74.6228432 | 66.4585601 |
| 16:49:19 | 59.6408647 | 72.1179467 | 64.2705783 | 76.6228432 | 66.5585601 |
| 16:49:20 | 59.6408647 | 70.1179467 | 63.2705783 | 76.6228432 | 65.9585601 |
| 16:49:21 | 58.6408647 | 70.1179467 | 63.2705783 | 76.6228432 | 65.8585601 |
| 16:49:22 | 58.6408647 | 69.1179467 | 62.2705783 | 76.6228432 | 65.9585601 |
| 16:49:23 | 58.6408647 | 68.1179467 | 62.2705783 | 75.6228432 | 65.8585601 |
| 16:49:24 | 58.6408647 | 67.1179467 | 62.2705783 | 75.6228432 | 65.7585601 |
| 16:49:25 | 58.6408647 | 67.1179467 | 63.2705783 | 74.6228432 | 66.0585601 |
| 16:49:26 | 58.6408647 | 67.1179467 | 63.2705783 | 74.6228432 | 65.8585601 |
| 16:49:27 | 58.6408647 | 67.1179467 | 63.2705783 | 74.6228432 | 65.9585601 |
| 16:49:28 | 58.6408647 | 68.1179467 | 63.2705783 | 73.6228432 | 65.9585601 |
| 16:49:29 | 58.6408647 | 68.1179467 | 64.2705783 | 72.6228432 | 66.0585601 |
| 16:49:30 | 58.6408647 | 66.1179467 | 64.2705783 | 72.6228432 | 65.6585601 |
| 16:49:31 | 58.6408647 | 66.1179467 | 63.2705783 | 71.6228432 | 65.3585601 |
| 16:49:32 | 58.6408647 | 66.1179467 | 63.2705783 | 70.6228432 | 65.2585601 |
| 16:49:33 | 58.6408647 | 65.1179467 | 63.2705783 | 70.6228432 | 64.8585601 |
| 16:49:34 | 59.6408647 | 66.1179467 | 63.2705783 | 68.6228432 | 65.2585601 |
| 16:49:35 | 60.6408647 | 67.1179467 | 63.2705783 | 68.6228432 | 65.5585601 |
| 16:49:36 | 61.6408647 | 70.1179467 | 63.2705783 | 68.6228432 | 66.3585601 |
| 16:49:37 | 62.6408647 | 70.1179467 | 63.2705783 | 68.6228432 | 66.2585601 |
| 16:49:38 | 62.6408647 | 70.1179467 | 63.2705783 | 68.6228432 | 66.0585601 |

|          |            |            |            |            |            |
|----------|------------|------------|------------|------------|------------|
| 16:49:39 | 62.6408647 | 70.1179467 | 63.2705783 | 68.6228432 | 66.0585601 |
| 16:49:40 | 62.6408647 | 70.1179467 | 62.2705783 | 68.6228432 | 65.6585601 |
| 16:49:41 | 62.6408647 | 68.1179467 | 62.2705783 | 68.6228432 | 65.1585601 |
| 16:49:42 | 63.6408647 | 66.1179467 | 62.2705783 | 68.6228432 | 64.8585601 |
| 16:49:43 | 63.6408647 | 66.1179467 | 62.2705783 | 67.6228432 | 64.7585601 |
| 16:49:44 | 63.6408647 | 66.1179467 | 63.2705783 | 68.6228432 | 65.0585601 |
| 16:49:45 | 63.6408647 | 66.1179467 | 63.2705783 | 68.6228432 | 65.8585601 |
| 16:49:46 | 64.6408647 | 66.1179467 | 63.2705783 | 68.6228432 | 66.9585601 |
| 16:49:47 | 64.6408647 | 66.1179467 | 63.2705783 | 68.6228432 | 66.9271787 |
| 16:49:48 | 64.6408647 | 68.1179467 | 63.2705783 | 65.6228432 | 67.3579155 |
| 16:49:49 | 62.6408647 | 67.1179467 | 63.2705783 | 63.6228432 | 66.4585601 |
| 16:49:50 | 61.6408647 | 63.1179467 | 63.2705783 | 62.6228432 | 65.9585601 |
| 16:49:51 | 61.6408647 | 61.1179467 | 64.2705783 | 62.6228432 | 65.5585601 |
| 16:49:52 | 60.6408647 | 60.1179467 | 64.2705783 | 62.6228432 | 65.2585601 |
| 16:49:53 | 60.6408647 | 59.1179467 | 64.2705783 | 61.6228432 | 65.1585601 |
| 16:49:54 | 60.6408647 | 59.1179467 | 64.2705783 | 62.6228432 | 65.2585601 |
| 16:49:55 | 60.6408647 | 59.1179467 | 63.2705783 | 62.6228432 | 64.7585601 |
| 16:49:56 | 60.6408647 | 59.1179467 | 63.2705783 | 62.6228432 | 64.5585601 |
| 16:49:57 | 60.6408647 | 59.1179467 | 63.2705783 | 62.6228432 | 63.7585601 |
| 16:49:58 | 60.6408647 | 59.1179467 | 62.2705783 | 62.6228432 | 63.7585601 |
| 16:49:59 | 60.6408647 | 59.1179467 | 62.2705783 | 63.6228432 | 63.7585601 |
| 16:50:00 | 60.6408647 | 59.1179467 | 62.2705783 | 67.6228432 | 63.8585601 |
| 16:50:01 | 62.6408647 | 59.1179467 | 63.2705783 | 68.6228432 | 64.4585601 |
| 16:50:02 | 62.6408647 | 60.1179467 | 63.2705783 | 69.6228432 | 64.9585601 |
| 16:50:03 | 62.6408647 | 61.1179467 | 64.2705783 | 68.6228432 | 65.1585601 |
| 16:50:04 | 62.6408647 | 62.1179467 | 64.2705783 | 68.6228432 | 65.6585601 |
| 16:50:05 | 62.6408647 | 63.1179467 | 64.2705783 | 65.6228432 | 65.3585601 |
| 16:50:06 | 62.6408647 | 64.1179467 | 64.2705783 | 65.6228432 | 65.1585601 |
| 16:50:07 | 62.6408647 | 66.1179467 | 64.2705783 | 64.6228432 | 64.8585601 |
| 16:50:08 | 62.6408647 | 67.1179467 | 64.2705783 | 64.6228432 | 64.7585601 |
| 16:50:09 | 61.6408647 | 68.1179467 | 63.2705783 | 63.6228432 | 64.4585601 |
| 16:50:10 | 61.6408647 | 68.1179467 | 63.2705783 | 62.6228432 | 63.8585601 |
| 16:50:11 | 61.6408647 | 66.1179467 | 63.2705783 | 62.6228432 | 63.8585601 |
| 16:50:12 | 61.6408647 | 66.1179467 | 63.2705783 | 61.6228432 | 63.7585601 |
| 16:50:13 | 61.6408647 | 64.1179467 | 63.2705783 | 59.6228432 | 63.7585601 |
| 16:50:14 | 61.6408647 | 62.1179467 | 63.2705783 | 59.6228432 | 63.7585601 |
| 16:50:15 | 61.6408647 | 62.1179467 | 64.2705783 | 59.6228432 | 64.0585601 |
| 16:50:16 | 63.6408647 | 61.1179467 | 64.2705783 | 59.6228432 | 64.0585601 |
| 16:50:17 | 63.6408647 | 61.1179467 | 63.2705783 | 59.6228432 | 63.7585601 |
| 16:50:18 | 63.6408647 | 62.1179467 | 63.2705783 | 59.6228432 | 63.6585601 |
| 16:50:19 | 63.6408647 | 61.1179467 | 63.2705783 | 59.6228432 | 63.3585601 |
| 16:50:20 | 63.6408647 | 61.1179467 | 62.2705783 | 61.6228432 | 63.4585601 |
| 16:50:21 | 63.6408647 | 60.1179467 | 62.2705783 | 61.6228432 | 63.8585601 |
| 16:50:22 | 63.6408647 | 61.1179467 | 62.2705783 | 61.6228432 | 64.0585601 |
| 16:50:23 | 63.6408647 | 61.1179467 | 62.2705783 | 62.6228432 | 64.2585601 |

|          |            |            |            |            |            |
|----------|------------|------------|------------|------------|------------|
| 16:50:24 | 64.6408647 | 61.1179467 | 63.2705783 | 62.6228432 | 64.7585601 |
| 16:50:25 | 64.6408647 | 61.1179467 | 63.2705783 | 62.6228432 | 64.9585601 |
| 16:50:26 | 66.6408647 | 62.1179467 | 62.2705783 | 60.6228432 | 65.1585601 |
| 16:50:27 | 67.6408647 | 62.1179467 | 62.2705783 | 60.6228432 | 66.3585601 |
| 16:50:28 | 68.6408647 | 64.1179467 | 63.2705783 | 60.6228432 | 67.4585601 |
| 16:50:29 | 68.6408647 | 64.1179467 | 63.2705783 | 59.6228432 | 67.9585601 |
| 16:50:30 | 66.6408647 | 63.1179467 | 62.2705783 | 59.6228432 | 67.4585601 |
| 16:50:31 | 66.6408647 | 62.1179467 | 62.2705783 | 59.6228432 | 67.4585601 |
| 16:50:32 | 65.6408647 | 62.1179467 | 63.2705783 | 58.6228432 | 67.3585601 |
| 16:50:33 | 65.6408647 | 63.1179467 | 63.2705783 | 56.6228432 | 67.2585601 |
| 16:50:34 | 66.6408647 | 62.1179467 | 63.2705783 | 54.6228432 | 67.0585601 |
| 16:50:35 | 66.6408647 | 62.1179467 | 63.2705783 | 54.6228432 | 67.5585601 |
| 16:50:36 | 65.6408647 | 62.1179467 | 63.2705783 | 53.6228432 | 67.7585601 |
| 16:50:37 | 65.6408647 | 62.1179467 | 63.2705783 | 54.6228432 | 67.7585601 |
| 16:50:38 | 65.6408647 | 62.1179467 | 63.2705783 | 55.6228432 | 68.5585601 |
| 16:50:39 | 65.6408647 | 64.1179467 | 63.2705783 | 57.6228432 | 69.4585601 |
| 16:50:40 | 64.6408647 | 66.1179467 | 63.2705783 | 57.6228432 | 69.5585601 |
| 16:50:41 | 64.6408647 | 66.1179467 | 63.2705783 | 57.6228432 | 69.5585601 |
| 16:50:42 | 65.6408647 | 66.1179467 | 64.2705783 | 57.6228432 | 69.4585601 |
| 16:50:43 | 65.6408647 | 67.1179467 | 64.2705783 | 57.6228432 | 69.5585601 |
| 16:50:44 | 65.6408647 | 67.1179467 | 64.2705783 | 57.6228432 | 68.7585601 |
| 16:50:45 | 64.6408647 | 67.1179467 | 64.2705783 | 57.6228432 | 68.7585601 |
| 16:50:46 | 65.6408647 | 68.1179467 | 64.2705783 | 57.6228432 | 68.7585601 |
| 16:50:47 | 66.6408647 | 68.1179467 | 64.2705783 | 57.6228432 | 69.1585601 |
| 16:50:48 | 66.6408647 | 68.1179467 | 64.2705783 | 57.6228432 | 69.2585601 |
| 16:50:49 | 66.6408647 | 68.1179467 | 64.2705783 | 58.6228432 | 69.6585601 |
| 16:50:50 | 66.6408647 | 67.1179467 | 64.2705783 | 63.6228432 | 70.3585601 |
| 16:50:51 | 65.6408647 | 67.1179467 | 64.2705783 | 63.6228432 | 70.2585601 |
| 16:50:52 | 65.6408647 | 73.1179467 | 66.2705783 | 65.6228432 | 71.4585601 |
| 16:50:53 | 65.6408647 | 73.1179467 | 67.2705783 | 67.6228432 | 71.8585601 |
| 16:50:54 | 65.6408647 | 72.1179467 | 67.2705783 | 70.6228432 | 72.7585601 |
| 16:50:55 | 65.6408647 | 71.1179467 | 66.2705783 | 70.6228432 | 72.3585601 |
| 16:50:56 | 66.6408647 | 70.1179467 | 66.2705783 | 70.6228432 | 73.1585601 |
| 16:50:57 | 67.6408647 | 70.1179467 | 66.2705783 | 67.6228432 | 73.0585601 |
| 16:50:58 | 67.6408647 | 69.1179467 | 66.2705783 | 65.6228432 | 72.8585601 |
| 16:50:59 | 67.6408647 | 69.1179467 | 66.2705783 | 62.6228432 | 72.5585601 |
| 16:51:00 | 67.6408647 | 65.1179467 | 66.2705783 | 59.6228432 | 71.6585601 |
| 16:51:01 | 67.6408647 | 68.1179467 | 66.2705783 | 57.6228432 | 71.4585601 |
| 16:51:02 | 67.6408647 | 72.1179467 | 66.2705783 | 57.6228432 | 71.3585601 |
| 16:51:03 | 67.6408647 | 73.1179467 | 68.2705783 | 56.6228432 | 71.3585601 |
| 16:51:04 | 67.6408647 | 72.1179467 | 69.2705783 | 55.6228432 | 71.0585601 |
| 16:51:05 | 68.6408647 | 72.1179467 | 71.2705783 | 55.6228432 | 71.1585601 |
| 16:51:06 | 64.6408647 | 70.1179467 | 72.2705783 | 55.6228432 | 71.1585601 |
| 16:51:07 | 62.6408647 | 64.1179467 | 72.2705783 | 55.6228432 | 70.6585601 |
| 16:51:08 | 62.6408647 | 61.1179467 | 70.2705783 | 55.6228432 | 69.9585601 |

|          |            |            |            |            |            |
|----------|------------|------------|------------|------------|------------|
| 16:51:09 | 62.6408647 | 60.1179467 | 67.2705783 | 55.6228432 | 69.4585601 |
| 16:51:10 | 62.6408647 | 59.1179467 | 65.2705783 | 57.6228432 | 68.0585601 |
| 16:51:11 | 62.6408647 | 58.1179467 | 64.2705783 | 57.6228432 | 67.7585601 |
| 16:51:12 | 62.6408647 | 58.1179467 | 64.2705783 | 57.6228432 | 67.2585601 |
| 16:51:13 | 62.6408647 | 58.1179467 | 64.2705783 | 53.6228432 | 66.7585601 |
| 16:51:14 | 62.6408647 | 58.1179467 | 64.2705783 | 56.6228432 | 66.8585601 |
| 16:51:15 | 62.6408647 | 57.1179467 | 61.2705783 | 57.6228432 | 66.5585601 |
| 16:51:16 | 62.6408647 | 57.1179467 | 59.2705783 | 58.6228432 | 66.1585601 |
| 16:51:17 | 62.6408647 | 58.1179467 | 59.2705783 | 59.6228432 | 66.6585601 |
| 16:51:18 | 62.6408647 | 60.1179467 | 59.2705783 | 60.6228432 | 66.8585601 |
| 16:51:19 | 62.6408647 | 61.1179467 | 59.2705783 | 59.6228432 | 66.6585601 |
| 16:51:20 | 62.6408647 | 60.1179467 | 60.2705783 | 59.6228432 | 66.3585601 |
| 16:51:21 | 62.6408647 | 59.1179467 | 60.2705783 | 59.6228432 | 65.3585601 |
| 16:51:22 | 62.6408647 | 58.1179467 | 61.2705783 | 59.6228432 | 64.8585601 |
| 16:51:23 | 62.6408647 | 58.1179467 | 63.2705783 | 59.6228432 | 64.8585601 |
| 16:51:24 | 62.6408647 | 59.1179467 | 66.2705783 | 59.6228432 | 65.2585601 |
| 16:51:25 | 62.6408647 | 60.1179467 | 67.2705783 | 59.6228432 | 65.1585601 |
| 16:51:26 | 63.6408647 | 60.1179467 | 68.2705783 | 60.6228432 | 65.4585601 |
| 16:51:27 | 63.6408647 | 61.1179467 | 68.2705783 | 60.6228432 | 65.5585601 |
| 16:51:28 | 63.6408647 | 61.1179467 | 68.2705783 | 61.6228432 | 65.7585601 |
| 16:51:29 | 67.6408647 | 61.1179467 | 68.2705783 | 62.6228432 | 65.9585601 |
| 16:51:30 | 67.6408647 | 61.1179467 | 68.2705783 | 62.6228432 | 66.4585601 |
| 16:51:31 | 67.6408647 | 61.1179467 | 68.2705783 | 61.6228432 | 66.6585601 |
| 16:51:32 | 67.6408647 | 61.1179467 | 67.2705783 | 61.6228432 | 66.4585601 |
| 16:51:33 | 67.6408647 | 61.1179467 | 67.2705783 | 61.6228432 | 66.7585601 |
| 16:51:34 | 67.6408647 | 62.1179467 | 67.2705783 | 61.6228432 | 66.9585601 |
| 16:51:35 | 67.6408647 | 62.1179467 | 67.2705783 | 61.6228432 | 66.9585601 |
| 16:51:36 | 65.6408647 | 63.1179467 | 65.2705783 | 61.6228432 | 67.5514176 |
| 16:51:37 | 65.6408647 | 63.1179467 | 64.2705783 | 61.6228432 | 66.9585601 |
| 16:51:38 | 65.6408647 | 63.1179467 | 64.2705783 | 61.6228432 | 66.3585601 |
| 16:51:39 | 64.6408647 | 63.1179467 | 64.2705783 | 62.6228432 | 66.2585601 |
| 16:51:40 | 64.6408647 | 63.1179467 | 64.2705783 | 63.6228432 | 66.1585601 |
| 16:51:41 | 64.6408647 | 64.1179467 | 64.2705783 | 63.6228432 | 66.2585601 |
| 16:51:42 | 64.6408647 | 63.1179467 | 64.2705783 | 63.6228432 | 66.3585601 |
| 16:51:43 | 64.6408647 | 63.1179467 | 64.2705783 | 63.6228432 | 66.0585601 |
| 16:51:44 | 64.6408647 | 62.1179467 | 63.2705783 | 64.6228432 | 65.9585601 |
| 16:51:45 | 64.6408647 | 62.1179467 | 63.2705783 | 64.6228432 | 65.8585601 |
| 16:51:46 | 63.6408647 | 62.1179467 | 63.2705783 | 64.6228432 | 65.6585601 |
| 16:51:47 | 62.6408647 | 61.1179467 | 63.2705783 | 64.6228432 | 64.8585601 |
| 16:51:48 | 62.6408647 | 61.1179467 | 64.2705783 | 64.6228432 | 65.3585601 |
| 16:51:49 | 60.6408647 | 60.1179467 | 65.2705783 | 64.6228432 | 65.0585601 |
| 16:51:50 | 59.6408647 | 60.1179467 | 65.2705783 | 63.6228432 | 65.1585601 |
| 16:51:51 | 59.6408647 | 61.1179467 | 64.2705783 | 62.6228432 | 64.9585601 |
| 16:51:52 | 60.6408647 | 61.1179467 | 64.2705783 | 62.6228432 | 64.6585601 |
| 16:51:53 | 61.6408647 | 61.1179467 | 63.2705783 | 62.6228432 | 64.6585601 |

|          |            |            |            |            |            |
|----------|------------|------------|------------|------------|------------|
| 16:51:54 | 62.6408647 | 63.1179467 | 63.2705783 | 62.6228432 | 64.6585601 |
| 16:51:55 | 62.6408647 | 63.1179467 | 63.2705783 | 63.6228432 | 64.0585601 |
| 16:51:56 | 62.6408647 | 64.1179467 | 63.2705783 | 63.6228432 | 64.4585601 |
| 16:51:57 | 63.6408647 | 64.1179467 | 64.2705783 | 64.6228432 | 64.9585601 |
| 16:51:58 | 63.6408647 | 64.1179467 | 64.2705783 | 65.6228432 | 64.9585601 |
| 16:51:59 | 63.6408647 | 64.1179467 | 63.2705783 | 65.6228432 | 65.0585601 |
| 16:52:00 | 64.6408647 | 64.1179467 | 62.2705783 | 66.6228432 | 65.4585601 |
| 16:52:01 | 65.6408647 | 64.1179467 | 62.2705783 | 67.6228432 | 66.1585601 |
| 16:52:02 | 65.6408647 | 63.1179467 | 62.2705783 | 68.6228432 | 66.0585601 |
| 16:52:03 | 63.6408647 | 63.1179467 | 62.2705783 | 67.6228432 | 65.8585601 |
| 16:52:04 | 63.6408647 | 63.1179467 | 63.2705783 | 67.6228432 | 65.8585601 |
| 16:52:05 | 63.6408647 | 63.1179467 | 63.2705783 | 67.6228432 | 65.8585601 |
| 16:52:06 | 62.6408647 | 63.1179467 | 63.2705783 | 67.6228432 | 65.8585601 |
| 16:52:07 | 62.6408647 | 63.1179467 | 66.2705783 | 66.6228432 | 66.0585601 |
| 16:52:08 | 62.6408647 | 64.1179467 | 66.2705783 | 65.6228432 | 66.2585601 |
| 16:52:09 | 62.6408647 | 64.1179467 | 66.2705783 | 65.6228432 | 66.7585601 |
| 16:52:10 | 63.6408647 | 64.1179467 | 66.2705783 | 66.6228432 | 66.9585601 |
| 16:52:11 | 63.6408647 | 64.1179467 | 66.2705783 | 66.6228432 | 67.2585601 |
| 16:52:12 | 63.6408647 | 64.1179467 | 65.2705783 | 66.6228432 | 67.0585601 |
| 16:52:13 | 64.6408647 | 64.1179467 | 65.2705783 | 66.6228432 | 67.4585601 |
| 16:52:14 | 65.6408647 | 65.1179467 | 65.2705783 | 66.6228432 | 67.5585601 |
| 16:52:15 | 65.6408647 | 65.1179467 | 65.2705783 | 66.6228432 | 67.1585601 |
| 16:52:16 | 65.6408647 | 65.1179467 | 66.2705783 | 66.6228432 | 67.8585601 |
| 16:52:17 | 65.6408647 | 65.1179467 | 67.2705783 | 65.6228432 | 66.9585601 |
| 16:52:18 | 65.6408647 | 67.1179467 | 67.2705783 | 66.6228432 | 67.3585601 |
| 16:52:19 | 65.6408647 | 67.1179467 | 66.2705783 | 66.6228432 | 66.6585601 |
| 16:52:20 | 65.6408647 | 68.1179467 | 65.2705783 | 67.6228432 | 66.5585601 |
| 16:52:21 | 65.6408647 | 68.1179467 | 64.2705783 | 68.6228432 | 66.0585601 |
| 16:52:22 | 65.6408647 | 68.1179467 | 64.2705783 | 68.6228432 | 66.0585601 |
| 16:52:23 | 65.6408647 | 68.1179467 | 63.2705783 | 68.6228432 | 65.7585601 |
| 16:52:24 | 65.6408647 | 69.1179467 | 63.2705783 | 65.6228432 | 65.5585601 |
| 16:52:25 | 65.6408647 | 70.1179467 | 63.2705783 | 63.6228432 | 65.3585601 |
| 16:52:26 | 64.6408647 | 71.1179467 | 63.2705783 | 63.6228432 | 65.5585601 |
| 16:52:27 | 64.6408647 | 71.1179467 | 63.2705783 | 62.6228432 | 65.6585601 |
| 16:52:28 | 64.6408647 | 72.1179467 | 63.2705783 | 62.6228432 | 65.5585601 |
| 16:52:29 | 64.6408647 | 72.1179467 | 63.2705783 | 62.6228432 | 65.9628917 |
| 16:52:30 | 65.6408647 | 74.1179467 | 63.2705783 | 64.6228432 | 66.1289984 |
| 16:52:31 | 64.6408647 | 74.1179467 | 63.2705783 | 64.6228432 | 65.8585601 |
| 16:52:32 | 64.6408647 | 74.1179467 | 64.2705783 | 65.6228432 | 65.8585601 |
| 16:52:33 | 64.6408647 | 71.1179467 | 64.2705783 | 65.6228432 | 65.6585601 |
| 16:52:34 | 64.6408647 | 70.1179467 | 64.2705783 | 64.6228432 | 65.9585601 |
| 16:52:35 | 63.6408647 | 68.1179467 | 64.2705783 | 64.6228432 | 65.5585601 |
| 16:52:36 | 63.6408647 | 68.1179467 | 64.2705783 | 64.6228432 | 65.6585601 |
| 16:52:37 | 63.6408647 | 69.1179467 | 64.2705783 | 64.6228432 | 65.6585601 |
| 16:52:38 | 63.6408647 | 69.1179467 | 64.2705783 | 62.6228432 | 65.5585601 |



|          |            |            |            |            |            |
|----------|------------|------------|------------|------------|------------|
| 16:52:39 | 63.6408647 | 71.1179467 | 64.2705783 | 62.6228432 | 66.2585601 |
| 16:52:40 | 64.6408647 | 72.1179467 | 65.2705783 | 62.6228432 | 67.7585601 |
| 16:52:41 | 64.6408647 | 71.1179467 | 66.2705783 | 62.6228432 | 67.9585601 |
| 16:52:42 | 64.6408647 | 72.1179467 | 66.2705783 | 61.6228432 | 68.0585601 |
| 16:52:43 | 64.6408647 | 72.1179467 | 66.2705783 | 61.6228432 | 68.4585601 |
| 16:52:44 | 64.6408647 | 72.1179467 | 64.2705783 | 61.6228432 | 68.9585601 |
| 16:52:45 | 65.6408647 | 73.1179467 | 64.2705783 | 61.6228432 | 69.2585601 |
| 16:52:46 | 65.6408647 | 72.1179467 | 64.2705783 | 61.6228432 | 69.2585601 |
| 16:52:47 | 65.6408647 | 71.1179467 | 64.2705783 | 62.6228432 | 69.3585601 |
| 16:52:48 | 65.6408647 | 69.1179467 | 63.2705783 | 64.6228432 | 69.4585601 |
| 16:52:49 | 65.6408647 | 68.1179467 | 63.2705783 | 65.6228432 | 69.4585601 |
| 16:52:50 | 64.6408647 | 68.1179467 | 64.2705783 | 66.6228432 | 69.8585601 |
| 16:52:51 | 67.6408647 | 68.1179467 | 64.2705783 | 66.6228432 | 70.0585601 |
| 16:52:52 | 69.6408647 | 68.1179467 | 64.2705783 | 66.6228432 | 70.0585601 |
| 16:52:53 | 69.6408647 | 67.1179467 | 63.2705783 | 68.6228432 | 69.4585601 |
| 16:52:54 | 70.6408647 | 63.1179467 | 64.2705783 | 68.6228432 | 69.0585601 |
| 16:52:55 | 70.6408647 | 62.1179467 | 64.2705783 | 68.6228432 | 69.3585601 |
| 16:52:56 | 70.6408647 | 62.1179467 | 63.2705783 | 68.6228432 | 69.2585601 |
| 16:52:57 | 70.6408647 | 61.1179467 | 63.2705783 | 67.6228432 | 69.1585601 |
| 16:52:58 | 70.6408647 | 61.1179467 | 63.2705783 | 67.6228432 | 69.4585601 |
| 16:52:59 | 70.6408647 | 61.1179467 | 63.2705783 | 66.6228432 | 69.7585601 |
| 16:53:00 | 71.6408647 | 61.1179467 | 63.2705783 | 66.6228432 | 69.6585601 |
| 16:53:01 | 71.6408647 | 61.1179467 | 63.2705783 | 67.6228432 | 69.2585601 |
| 16:53:02 | 69.6408647 | 61.1179467 | 62.2705783 | 67.6228432 | 68.8585601 |
| 16:53:03 | 69.6408647 | 61.1179467 | 62.2705783 | 67.6228432 | 68.4585601 |
| 16:53:04 | 69.6408647 | 63.1179467 | 62.2705783 | 66.6228432 | 68.1585601 |
| 16:53:05 | 66.6408647 | 62.1179467 | 62.2705783 | 66.6228432 | 67.0585601 |
| 16:53:06 | 63.6408647 | 60.1179467 | 62.2705783 | 65.6228432 | 66.0585601 |
| 16:53:07 | 63.6408647 | 59.1179467 | 62.2705783 | 63.6228432 | 65.4585601 |
| 16:53:08 | 63.6408647 | 59.1179467 | 63.2705783 | 63.6228432 | 65.4585601 |
| 16:53:09 | 62.6408647 | 59.1179467 | 63.2705783 | 64.6228432 | 65.4585601 |
| 16:53:10 | 62.6408647 | 59.1179467 | 63.2705783 | 65.6228432 | 65.8585601 |
| 16:53:11 | 62.6408647 | 61.1179467 | 63.2705783 | 65.6228432 | 66.2585601 |
| 16:53:12 | 62.6408647 | 61.1179467 | 63.2705783 | 66.6228432 | 66.2585601 |
| 16:53:13 | 63.6408647 | 61.1179467 | 64.2705783 | 66.6228432 | 66.5585601 |
| 16:53:14 | 62.6408647 | 62.1179467 | 64.2705783 | 66.6228432 | 66.8585601 |
| 16:53:15 | 62.6408647 | 64.1179467 | 63.2705783 | 65.6228432 | 66.8585601 |
| 16:53:16 | 61.6408647 | 64.1179467 | 63.2705783 | 65.6228432 | 66.9585601 |
| 16:53:17 | 57.6408647 | 64.1179467 | 64.2705783 | 65.6228432 | 66.4585601 |
| 16:53:18 | 56.6408647 | 65.1179467 | 64.2705783 | 65.6228432 | 66.4585601 |
| 16:53:19 | 57.6408647 | 68.1179467 | 64.2705783 | 65.6228432 | 67.1585601 |
| 16:53:20 | 57.6408647 | 69.1179467 | 63.2705783 | 67.6228432 | 67.2585601 |
| 16:53:21 | 57.6408647 | 69.1179467 | 63.2705783 | 67.6228432 | 67.4585601 |
| 16:53:22 | 59.6408647 | 68.1179467 | 64.2705783 | 67.6228432 | 67.8585601 |
| 16:53:23 | 59.6408647 | 68.1179467 | 64.2705783 | 67.6228432 | 68.3111482 |

|          |            |            |            |            |            |
|----------|------------|------------|------------|------------|------------|
| 16:53:24 | 63.6408647 | 66.1179467 | 64.2705783 | 67.6228432 | 68.4690266 |
| 16:53:25 | 63.6408647 | 66.1179467 | 64.2705783 | 68.6228432 | 68.1585601 |
| 16:53:26 | 63.6408647 | 65.1179467 | 64.2705783 | 68.6228432 | 67.5585601 |
| 16:53:27 | 63.6408647 | 65.1179467 | 64.2705783 | 71.6228432 | 67.9585601 |
| 16:53:28 | 63.6408647 | 64.1179467 | 63.2705783 | 71.6228432 | 67.5585601 |
| 16:53:29 | 63.6408647 | 63.1179467 | 63.2705783 | 72.6228432 | 67.8585601 |
| 16:53:30 | 63.6408647 | 63.1179467 | 62.2705783 | 72.6228432 | 67.7585601 |
| 16:53:31 | 63.6408647 | 62.1179467 | 62.2705783 | 72.6228432 | 67.6585601 |
| 16:53:32 | 63.6408647 | 61.1179467 | 62.2705783 | 72.6228432 | 67.3585601 |
| 16:53:33 | 63.6408647 | 62.1179467 | 62.2705783 | 70.6228432 | 67.4585601 |
| 16:53:34 | 64.6408647 | 62.1179467 | 62.2705783 | 70.6228432 | 67.0585601 |
| 16:53:35 | 63.6408647 | 64.1179467 | 62.2705783 | 67.6228432 | 66.3585601 |
| 16:53:36 | 63.6408647 | 64.1179467 | 63.2705783 | 67.6228432 | 66.6585601 |
| 16:53:37 | 63.6408647 | 64.1179467 | 63.2705783 | 67.6228432 | 66.3585601 |
| 16:53:38 | 63.6408647 | 64.1179467 | 63.2705783 | 65.6228432 | 66.0585601 |
| 16:53:39 | 63.6408647 | 65.1179467 | 63.2705783 | 65.6228432 | 66.2585601 |
| 16:53:40 | 63.6408647 | 66.1179467 | 64.2705783 | 65.6228432 | 66.3585601 |
| 16:53:41 | 64.6408647 | 66.1179467 | 64.2705783 | 64.6228432 | 66.1585601 |
| 16:53:42 | 66.6408647 | 66.1179467 | 64.2705783 | 65.6228432 | 66.4585601 |
| 16:53:43 | 68.6408647 | 67.1179467 | 64.2705783 | 63.6228432 | 66.5585601 |
| 16:53:44 | 67.6408647 | 67.1179467 | 64.2705783 | 62.6228432 | 66.4585601 |
| 16:53:45 | 67.6408647 | 68.1179467 | 64.2705783 | 62.6228432 | 66.6585601 |
| 16:53:46 | 67.6408647 | 67.1179467 | 63.2705783 | 62.6228432 | 66.6585601 |
| 16:53:47 | 67.6408647 | 67.1179467 | 63.2705783 | 60.6228432 | 66.6585601 |
| 16:53:48 | 67.6408647 | 67.1179467 | 63.2705783 | 60.6228432 | 66.6585601 |
| 16:53:49 | 67.6408647 | 69.1179467 | 63.2705783 | 61.6228432 | 66.8585601 |
| 16:53:50 | 69.6408647 | 69.1179467 | 63.2705783 | 61.6228432 | 66.7585601 |
| 16:53:51 | 69.6408647 | 70.1179467 | 63.2705783 | 61.6228432 | 66.7585601 |
| 16:53:52 | 68.6408647 | 71.1179467 | 64.2705783 | 63.6228432 | 66.6585601 |
| 16:53:53 | 68.6408647 | 71.1179467 | 64.2705783 | 63.6228432 | 66.4585601 |
| 16:53:54 | 68.6408647 | 72.1179467 | 64.2705783 | 61.6228432 | 66.2585601 |
| 16:53:55 | 69.6408647 | 72.1179467 | 63.2705783 | 61.6228432 | 66.0585601 |
| 16:53:56 | 70.6408647 | 72.1179467 | 63.2705783 | 61.6228432 | 65.7585601 |
| 16:53:57 | 71.6408647 | 75.1179467 | 63.2705783 | 63.6228432 | 66.2585601 |
| 16:53:58 | 71.6408647 | 75.1179467 | 63.2705783 | 64.6228432 | 66.1585601 |
| 16:53:59 | 71.6408647 | 75.1179467 | 63.2705783 | 66.6228432 | 66.2585601 |
| 16:54:00 | 71.6408647 | 74.1179467 | 63.2705783 | 66.6228432 | 66.2585601 |
| 16:54:01 | 71.6408647 | 73.1179467 | 63.2705783 | 66.6228432 | 66.3585601 |
| 16:54:02 | 71.6408647 | 73.1179467 | 64.2705783 | 66.6228432 | 66.6585601 |
| 16:54:03 | 71.6408647 | 72.1179467 | 64.2705783 | 65.6228432 | 66.4585601 |
| 16:54:04 | 71.6408647 | 72.1179467 | 64.2705783 | 63.6228432 | 66.5585601 |
| 16:54:05 | 71.6408647 | 72.1179467 | 64.2705783 | 63.6228432 | 66.4585601 |
| 16:54:06 | 72.6408647 | 72.1179467 | 67.2705783 | 63.6228432 | 66.9585601 |
| 16:54:07 | 72.6408647 | 72.1179467 | 68.2705783 | 63.6228432 | 67.0585601 |
| 16:54:08 | 72.6408647 | 72.1179467 | 71.2705783 | 63.6228432 | 67.7585601 |

|          |            |            |            |            |            |
|----------|------------|------------|------------|------------|------------|
| 16:54:09 | 71.6408647 | 74.1179467 | 72.2705783 | 65.6228432 | 68.5585601 |
| 16:54:10 | 71.6408647 | 74.1179467 | 72.2705783 | 65.6228432 | 68.5585601 |
| 16:54:11 | 71.6408647 | 74.1179467 | 69.2705783 | 65.6228432 | 68.6585601 |
| 16:54:12 | 72.6408647 | 77.1179467 | 67.2705783 | 64.6228432 | 68.9585601 |
| 16:54:13 | 72.6408647 | 78.1179467 | 66.2705783 | 64.6228432 | 69.1585601 |
| 16:54:14 | 72.6408647 | 77.1179467 | 65.2705783 | 63.6228432 | 68.9585601 |
| 16:54:15 | 73.6408647 | 77.1179467 | 65.2705783 | 64.6228432 | 69.0585601 |
| 16:54:16 | 73.6408647 | 77.1179467 | 65.2705783 | 65.6228432 | 69.2585601 |
| 16:54:17 | 73.6408647 | 77.1179467 | 65.2705783 | 65.6228432 | 69.2585601 |
| 16:54:18 | 73.6408647 | 74.1179467 | 66.2705783 | 65.6228432 | 68.3096504 |
| 16:54:19 | 73.6408647 | 73.1179467 | 66.2705783 | 68.6228432 | 69.8585601 |
| 16:54:20 | 73.6408647 | 73.1179467 | 66.2705783 | 70.6228432 | 69.9585601 |
| 16:54:21 | 73.6408647 | 72.1179467 | 66.2705783 | 70.6228432 | 69.7585601 |
| 16:54:22 | 73.6408647 | 70.1179467 | 66.2705783 | 70.6228432 | 69.7585601 |
| 16:54:23 | 73.6408647 | 68.1179467 | 66.2705783 | 71.6228432 | 69.4585601 |
| 16:54:24 | 73.6408647 | 67.1179467 | 65.2705783 | 71.6228432 | 69.2585601 |
| 16:54:25 | 73.6408647 | 67.1179467 | 65.2705783 | 71.6228432 | 69.9585601 |
| 16:54:26 | 74.6408647 | 67.1179467 | 65.2705783 | 69.6228432 | 69.8585601 |
| 16:54:27 | 74.6408647 | 65.1179467 | 65.2705783 | 68.6228432 | 69.7585601 |
| 16:54:28 | 74.6408647 | 65.1179467 | 65.2705783 | 68.6228432 | 69.7585601 |
| 16:54:29 | 73.6408647 | 65.1179467 | 64.2705783 | 69.6228432 | 69.7585601 |
| 16:54:30 | 73.6408647 | 65.1179467 | 64.2705783 | 69.6228432 | 69.7585601 |
| 16:54:31 | 73.6408647 | 64.1179467 | 65.2705783 | 69.6228432 | 69.9585601 |
| 16:54:32 | 73.6408647 | 64.1179467 | 65.2705783 | 68.6228432 | 70.2585601 |
| 16:54:33 | 73.6408647 | 64.1179467 | 65.2705783 | 68.6228432 | 70.4585601 |
| 16:54:34 | 73.6408647 | 63.1179467 | 64.2705783 | 66.6228432 | 69.9585601 |
| 16:54:35 | 74.6408647 | 62.1179467 | 64.2705783 | 65.6228432 | 70.4585601 |
| 16:54:36 | 75.6408647 | 62.1179467 | 64.2705783 | 63.6228432 | 71.1585601 |
| 16:54:37 | 75.6408647 | 62.1179467 | 65.2705783 | 64.6228432 | 71.4585601 |
| 16:54:38 | 75.6408647 | 63.1179467 | 65.2705783 | 64.6228432 | 72.1585601 |
| 16:54:39 |            |            |            |            |            |

Person 16

Person 5

Person 8

Person 6

Person 2

Person 14

Activity





69.3643621  
69.3643621  
70.3643621  
76.3643621  
76.3643621  
76.3643621  
76.3643621  
77.3643621  
77.3643621  
77.3643621  
78.3643621  
78.3643621  
78.3643621 45.0208031  
81.3643621 46.0208031  
81.3643621 46.0208031  
81.3643621 49.0208031  
81.3643621 51.0208031  
81.3643621 51.0208031  
81.3643621 51.0208031  
81.3643621 51.0208031  
81.3643621 51.0208031  
81.3643621 51.0208031  
81.3643621 51.0208031  
81.3643621 51.0208031  
81.3643621 51.0208031  
80.3643621 74.7729216 52.0208031  
80.3643621 74.7729216 52.0208031  
80.3643621 74.7729216 53.0208031  
81.3643621 74.7729216 56.0208031  
84.3643621 74.7729216 63.0208031  
84.3643621 76.7729216 70.0208031  
84.3643621 78.7729216 70.0208031  
84.3643621 78.7729216 72.0208031  
85.3643621 78.7729216 75.0208031  
85.3643621 78.7729216 75.0208031  
86.3643621 79.7729216 69.0208031  
86.3643621 79.7729216 71.0208031  
86.3643621 82.7729216 73.0208031  
86.3643621 83.7729216 73.0208031  
86.3643621 84.7729216 74.0208031  
86.3643621 84.7729216 75.0208031  
74.7064728 84.7729216 75.0208031  
74.5953617 84.7729216 75.0208031  
74.1509173 84.7729216 76.0208031  
73.7064728 84.7729216 77.0208031  
73.3731395 85.7729216 77.0208031

|            |            |            |
|------------|------------|------------|
| 73.4842506 | 85.7729216 | 77.0208031 |
| 73.5953617 | 73.5953617 | 77.0208031 |
| 74.0398062 | 74.0398062 | 77.0208031 |
| 73.817584  | 73.817584  | 77.0208031 |
| 87.3643621 | 74.1509173 | 76.0208031 |
| 87.3643621 | 74.7064728 | 77.0208031 |
| 86.3643621 | 74.3731395 | 78.0208031 |
| 84.3643621 | 74.3731395 | 79.0208031 |
| 84.3643621 | 72.9486521 | 79.0208031 |
| 81.3643621 | 73.9286951 | 77.0208031 |
| 81.3643621 | 73.5953617 | 74.0208031 |
| 80.3643621 | 86.7729216 | 74.0208031 |
| 80.3643621 | 86.7729216 | 74.0208031 |
| 80.3643621 | 85.7729216 | 74.0208031 |
| 80.3643621 | 85.7729216 | 74.0208031 |
| 80.3643621 | 85.7729216 | 74.0208031 |
| 80.3643621 | 85.7729216 | 74.0208031 |
| 80.3643621 | 85.7729216 | 74.0208031 |
| 80.3643621 | 84.7729216 | 74.0208031 |
| 81.3643621 | 84.7729216 | 74.0208031 |
| 73.3643621 | 83.7729216 | 74.0208031 |
| 67.3643621 | 69.7064728 | 74.0208031 |
| 66.3643621 | 69.7064728 | 74.0208031 |
| 66.3643621 | 83.7729216 | 75.0208031 |
| 66.3643621 | 83.7729216 | 75.0208031 |
| 66.3643621 | 83.7729216 | 75.0208031 |
| 66.3643621 | 83.7729216 | 75.0208031 |
| 66.3643621 | 83.7729216 | 77.0208031 |
| 65.3643621 | 83.7729216 | 78.0208031 |
| 65.3643621 | 83.7729216 | 78.0208031 |
| 64.3643621 | 83.7729216 | 78.0208031 |
| 64.3643621 | 83.7729216 | 80.0208031 |
| 64.3643621 | 83.7729216 | 81.0208031 |
| 63.3643621 | 83.7729216 | 82.0208031 |
| 63.3643621 | 80.7729216 | 80.0208031 |
| 64.3643621 | 80.7729216 | 80.0208031 |
| 64.3643621 | 76.7729216 | 79.0208031 |
| 64.3643621 | 76.7729216 | 79.0208031 |
| 64.3643621 | 76.7729216 | 78.0208031 |
| 65.3643621 | 76.7729216 | 69.0208031 |
| 65.3643621 | 76.7729216 | 63.0208031 |
| 65.3643621 | 76.7729216 | 58.0208031 |
| 69.3643621 | 76.7729216 | 58.0208031 |
| 69.3643621 | 76.7729216 | 55.0208031 |
| 69.3643621 | 76.7729216 | 54.0208031 |
| 73.3643621 | 76.7729216 | 54.0208031 |



|            |            |            |
|------------|------------|------------|
| 73.3643621 | 76.7729216 | 51.0208031 |
| 73.3643621 | 76.7729216 | 51.0208031 |
| 73.3643621 | 77.7729216 | 51.0208031 |
| 74.3643621 | 76.7729216 | 51.0208031 |
| 75.3643621 | 77.7729216 | 50.0208031 |
| 75.3643621 | 77.7729216 | 49.0208031 |
| 77.3643621 | 76.7729216 | 49.0208031 |
| 77.3643621 | 75.7729216 | 49.0208031 |
| 77.3643621 | 75.7729216 | 49.0208031 |
| 79.3643621 | 75.7729216 | 49.0208031 |
| 80.3643621 | 74.7729216 | 49.0208031 |
| 80.3643621 | 74.7729216 | 49.0208031 |
| 81.3643621 | 74.7729216 | 59.0208031 |
| 82.3643621 | 74.7729216 | 59.0208031 |
| 83.3643621 | 74.7729216 | 62.0208031 |
| 84.3643621 | 74.7729216 | 62.0208031 |
| 84.3643621 | 74.7729216 | 62.0208031 |
| 69.4815786 | 74.7729216 | 62.0208031 |
| 86.3643621 | 73.7729216 | 62.0208031 |
| 71.5953617 | 70.7729216 | 63.0208031 |
| 72.3731395 | 70.7729216 | 69.0208031 |
| 71.7064728 | 65.7729216 | 69.0208031 |
| 71.5953617 | 65.7729216 | 69.0208031 |
| 72.1509173 | 65.7729216 | 69.0208031 |
| 86.3643621 | 69.7729216 | 69.0208031 |
| 71.817584  | 69.7729216 | 69.0208031 |
| 70.4842506 | 69.7729216 | 69.0208031 |
| 70.5953617 | 69.7729216 | 69.0208031 |
| 70.4842506 | 69.7729216 | 71.0208031 |
| 84.3643621 | 69.7729216 | 71.0208031 |
| 83.3643621 | 69.7729216 | 71.0208031 |
| 83.3643621 | 69.7729216 | 71.0208031 |
| 83.3643621 | 69.7729216 | 70.0208031 |
| 69.9286951 | 69.7729216 | 70.0208031 |
| 69.817584  | 69.7729216 | 70.0208031 |
| 69.817584  | 69.7729216 | 70.0208031 |
| 69.2620284 | 69.7729216 | 70.0208031 |
| 69.2620284 | 70.7729216 | 70.0208031 |
| 69.0398062 | 70.7729216 | 70.0208031 |
| 83.3643621 | 70.7729216 | 70.0208031 |
| 83.3643621 | 70.7729216 | 70.0208031 |
| 83.3643621 | 70.7729216 | 70.0208031 |
| 77.3643621 | 65.7729216 | 70.0208031 |
| 77.3643621 | 63.7729216 | 69.0208031 |
| 77.3643621 | 63.7729216 | 69.0208031 |

77.3643621 64.7729216 69.0208031  
76.3643621 64.7729216 70.0208031  
75.3643621 64.7729216 69.0208031  
75.3643621 63.7729216 69.0208031  
73.3643621 62.7729216 69.0208031  
72.3643621 62.7729216 68.0208031  
70.3643621 62.7729216 68.0208031  
70.3643621 62.7729216 68.0208031  
68.3643621 62.7729216 68.0208031  
68.3643621 61.7729216 68.0208031  
68.3643621 61.7729216 70.0208031  
68.3643621 61.7729216 69.0208031  
68.3643621 61.7729216 69.0208031  
67.3643621 61.7729216 67.0208031  
67.3643621 62.7729216 66.0208031  
67.3643621 62.7729216 66.0208031  
65.3643621 62.7729216 65.0208031  
64.3643621 63.7729216 64.0208031  
64.3643621 63.7729216 64.0208031  
64.3643621 63.7729216 64.0208031  
61.3643621 63.7729216 65.0208031  
60.3643621 61.7729216 65.0208031  
60.3643621 60.7729216 65.0208031  
60.3643621 60.7729216 65.0208031  
59.3643621 60.7729216 65.0208031  
59.3643621 60.7729216 67.0208031  
59.3643621 60.7729216 67.0208031  
58.3643621 60.7729216 67.0208031  
58.3643621 60.7729216 67.0208031  
58.3643621 60.7729216 67.0208031  
57.3643621 60.7729216 64.0208031  
55.3643621 60.7729216 64.0208031  
55.3643621 60.7729216 64.0208031  
55.3643621 61.7729216 64.0208031  
54.3643621 61.7729216 65.0208031  
54.3643621 61.7729216 73.0208031  
54.3643621 61.7729216 73.0208031  
53.3643621 61.7729216 73.0208031  
52.3643621 61.7729216 72.0208031  
52.3643621 61.7729216 71.0208031  
52.3643621 61.7729216 71.0208031  
52.3643621 62.7729216 69.0208031  
52.3643621 62.7729216 70.0208031  
51.3643621 62.7729216 70.0208031  
51.3643621 62.7729216 70.0208031

50.3643621 61.7729216 69.0208031  
49.3643621 59.7729216 67.0208031  
49.3643621 59.7729216 67.0208031  
49.3643621 57.7729216 66.0208031  
49.3643621 57.7729216 67.0208031  
52.3643621 57.7729216 67.0208031  
54.3643621 57.7729216 67.0208031  
55.3643621 57.7729216 67.0208031  
55.3643621 57.7729216 66.0208031  
55.3643621 58.7729216 65.0208031  
54.3643621 58.7729216 65.0208031  
54.3643621 57.7729216 67.0208031  
54.3643621 57.7729216 67.0208031  
55.3643621 57.7729216 67.0208031  
55.3643621 57.7729216 67.0208031  
56.3643621 57.7729216 68.0208031  
56.3643621 56.7729216 68.0208031  
56.3643621 56.7729216 68.0208031  
56.3643621 56.7729216 65.0208031  
57.3643621 56.7729216 67.0208031  
58.3643621 56.7729216 67.0208031  
58.3643621 56.7729216 67.0208031  
60.3643621 56.7729216 69.0208031  
60.3643621 56.7729216 68.0208031  
60.3643621 62.7729216 68.0208031  
61.3643621 65.7729216 68.0208031  
63.3643621 65.7729216 66.0208031  
63.3643621 65.7729216 66.0208031  
67.3643621 65.7729216 66.0208031  
69.3643621 65.7729216 67.0208031  
69.3643621 65.7729216 68.0208031  
70.3643621 69.7729216 69.0208031  
70.3643621 69.7729216 69.0208031  
70.3643621 72.7729216 69.0208031  
71.3643621 73.7729216 69.0208031  
71.3643621 73.7729216 69.0208031  
71.3643621 74.7729216 69.0208031  
71.3643621 75.7729216 69.0208031  
71.3643621 76.7729216 69.0208031  
70.3643621 76.7729216 69.0208031  
70.3643621 76.7729216 68.0208031  
70.3643621 76.7729216 68.0208031  
70.3643621 76.7729216 65.0208031  
70.3643621 69.7729216 62.0208031  
70.3643621 69.7729216 60.0208031

65.3643621 67.7729216 60.0208031  
64.3643621 67.7729216 62.0208031  
64.3643621 64.7729216 62.0208031  
64.3643621 62.7729216 62.0208031  
62.3643621 60.7729216 62.0208031  
60.3643621 60.7729216 63.0208031  
60.3643621 58.7729216 65.0208031  
59.3643621 58.7729216 67.0208031  
57.3643621 56.7729216 67.0208031  
58.3643621 55.7729216 67.0208031  
58.3643621 52.7729216 69.0208031  
58.3643621 52.7729216 69.0208031  
64.3643621 52.7729216 70.0208031  
65.3643621 52.7729216 74.0208031  
66.3643621 52.7729216 74.0208031  
65.3643621 52.7729216 76.0208031  
65.3643621 52.7729216 78.0208031  
64.3643621 53.7729216 78.0208031  
63.3643621 53.7729216 78.0208031  
63.3643621 53.7729216 78.0208031  
63.3643621 53.7729216 78.0208031  
63.3643621 53.7729216 78.0208031  
63.3643621 53.7729216 78.0208031  
63.3643621 53.7729216 78.0208031  
64.3643621 54.7729216 77.0208031  
64.3643621 54.7729216 77.0208031  
64.3643621 54.7729216 75.0208031  
64.3643621 54.7729216 75.0208031  
63.3643621 53.7729216 75.0208031  
63.3643621 53.7729216 68.1509173  
67.3643621 53.7729216 77.0208031  
67.3643621 53.7729216 74.0208031  
68.3643621 53.7729216 74.0208031  
68.3643621 53.7729216 75.0208031  
68.3643621 52.7729216 75.0208031  
68.3643621 52.7729216 75.0208031  
68.3643621 53.7729216 75.0208031  
68.3643621 53.7729216 75.0208031  
68.3643621 53.7729216 75.0208031  
68.3643621 53.7729216 74.0208031  
68.3643621 53.7729216 69.0208031  
68.3643621 53.7729216 68.0208031  
68.3643621 52.7729216 68.0208031 67.0501546  
68.3643621 51.7729216 69.0208031 67.0501546  
69.3643621 51.7729216 70.0208031 67.0501546  
69.3643621 51.7729216 70.0208031 67.0501546

|            |            |            |            |
|------------|------------|------------|------------|
| 69.3643621 | 54.7729216 | 70.0208031 | 68.0501546 |
| 69.3643621 | 59.7729216 | 70.0208031 | 68.0501546 |
| 68.3643621 | 59.7729216 | 69.0208031 | 68.0501546 |
| 68.3643621 | 60.7729216 | 69.0208031 | 67.0501546 |
| 68.3643621 | 60.7729216 | 70.0208031 | 66.0501546 |
| 68.3643621 | 64.7729216 | 71.0208031 | 66.0501546 |
| 68.3643621 | 66.7729216 | 71.0208031 | 66.0501546 |
| 68.3643621 | 66.7729216 | 70.0208031 | 65.0501546 |
| 68.3643621 | 66.7729216 | 70.0208031 | 65.0501546 |
| 69.3643621 | 65.7729216 | 70.0208031 | 65.0501546 |
| 70.3643621 | 65.7729216 | 70.0208031 | 66.0501546 |
| 70.3643621 | 65.7729216 | 70.0208031 | 69.0501546 |
| 67.3643621 | 66.7729216 | 70.0208031 | 70.0501546 |
| 67.3643621 | 66.7729216 | 70.0208031 | 69.0501546 |
| 66.3643621 | 65.7729216 | 70.0208031 | 69.0501546 |
| 65.3643621 | 65.7729216 | 70.0208031 | 68.0501546 |
| 65.3643621 | 65.7729216 | 70.0208031 | 68.0501546 |
| 63.3643621 | 63.7729216 | 69.0208031 | 68.0501546 |
| 63.3643621 | 63.7729216 | 68.0208031 | 68.0501546 |
| 63.3643621 | 62.7729216 | 68.0208031 | 68.0501546 |
| 63.3643621 | 63.7729216 | 68.0208031 | 68.0501546 |
| 65.3643621 | 63.7729216 | 67.0208031 | 70.0501546 |
| 65.3643621 | 63.7729216 | 67.0208031 | 70.0501546 |
| 66.3643621 | 65.7729216 | 66.0208031 | 71.0501546 |
| 66.3643621 | 65.7729216 | 66.0208031 | 71.0501546 |
| 66.3643621 | 65.7729216 | 66.0208031 | 72.0501546 |
| 66.3643621 | 65.7729216 | 66.0208031 | 72.0501546 |
| 66.3643621 | 66.7729216 | 67.0208031 | 72.0501546 |
| 66.3643621 | 66.7729216 | 68.0208031 | 73.0501546 |
| 65.3643621 | 66.7729216 | 68.0208031 | 73.0501546 |
| 64.3643621 | 66.7729216 | 68.0208031 | 74.0501546 |
| 63.3643621 | 66.7729216 | 71.0208031 | 74.0501546 |
| 64.3643621 | 66.7729216 | 78.0208031 | 74.0501546 |
| 64.3643621 | 66.7729216 | 77.0208031 | 74.0501546 |
| 64.3643621 | 66.7729216 | 77.0208031 | 77.0501546 |
| 65.3643621 | 66.7729216 | 75.0208031 | 77.0501546 |
| 65.3643621 | 68.7729216 | 71.0208031 | 77.0501546 |
| 65.3643621 | 68.7729216 | 71.0208031 | 77.0501546 |
| 65.3643621 | 68.7729216 | 70.0208031 | 77.0501546 |
| 65.3643621 | 70.7729216 | 69.0208031 | 76.0501546 |
| 65.3643621 | 70.7729216 | 68.0208031 | 76.0501546 |
| 64.3643621 | 70.7729216 | 68.0208031 | 76.0501546 |
| 64.3643621 | 72.7729216 | 68.0208031 | 76.0501546 |
| 63.3643621 | 72.7729216 | 68.0208031 | 76.0501546 |
| 64.3643621 | 72.7729216 | 68.0208031 | 76.0501546 |

|            |            |            |            |
|------------|------------|------------|------------|
| 65.3643621 | 72.7729216 | 69.0208031 | 77.0501546 |
| 65.3643621 | 73.7729216 | 70.0208031 | 77.0501546 |
| 66.3643621 | 75.7729216 | 70.0208031 | 77.0501546 |
| 67.3643621 | 75.7729216 | 70.0208031 | 77.0501546 |
| 67.3643621 | 75.7729216 | 70.0208031 | 77.0501546 |
| 67.3643621 | 75.7729216 | 70.0208031 | 77.0501546 |
| 67.3643621 | 75.7729216 | 69.0208031 | 77.0501546 |
| 68.3643621 | 75.7729216 | 69.0208031 | 77.0501546 |
| 68.3643621 | 75.7729216 | 69.0208031 | 77.0501546 |
| 70.3643621 | 75.7729216 | 70.0208031 | 77.0501546 |
| 71.3643621 | 75.7729216 | 70.0208031 | 82.0501546 |
| 70.3643621 | 75.7729216 | 70.0208031 | 82.0501546 |
| 70.3643621 | 73.7729216 | 69.0208031 | 82.0501546 |
| 69.3643621 | 71.7729216 | 69.0208031 | 79.0501546 |
| 69.3643621 | 71.7729216 | 69.0208031 | 79.0501546 |
| 68.3643621 | 70.7729216 | 69.0208031 | 79.0501546 |
| 68.3643621 | 70.7729216 | 68.0208031 | 76.0501546 |
| 68.3643621 | 70.7729216 | 68.0208031 | 79.0501546 |
| 68.3643621 | 70.7729216 | 67.0208031 | 79.0501546 |
| 67.3643621 | 70.7729216 | 67.0208031 | 81.0501546 |
| 66.3643621 | 71.7729216 | 67.0208031 | 83.0501546 |
| 66.3643621 | 71.7729216 | 66.0208031 | 81.0501546 |
| 64.3643621 | 71.7729216 | 67.0208031 | 81.0501546 |
| 63.3643621 | 71.7729216 | 67.0208031 | 81.0501546 |
| 62.3643621 | 69.7729216 | 67.0208031 | 78.0501546 |
| 62.3643621 | 66.7729216 | 67.0208031 | 78.0501546 |
| 62.3643621 | 63.7729216 | 67.0208031 | 78.0501546 |
| 62.3643621 | 63.7729216 | 66.0208031 | 76.0501546 |
| 62.3643621 | 62.7729216 | 65.0208031 | 76.0501546 |
| 62.3643621 | 60.7729216 | 65.0208031 | 76.0501546 |
| 62.3643621 | 60.7729216 | 65.0208031 | 76.0501546 |
| 61.3643621 | 59.7729216 | 65.0208031 | 75.0501546 |
| 60.3643621 | 58.7729216 | 66.0208031 | 76.0501546 |
| 60.3643621 | 58.7729216 | 67.0208031 | 76.0501546 |
| 60.3643621 | 58.7729216 | 67.0208031 | 76.0501546 |
| 60.3643621 | 58.7729216 | 66.0208031 | 76.0501546 |
| 61.3643621 | 58.7729216 | 66.0208031 | 75.0501546 |
| 61.3643621 | 58.7729216 | 66.0208031 | 75.0501546 |
| 61.3643621 | 58.7729216 | 66.0208031 | 75.0501546 |
| 59.3643621 | 57.7729216 | 66.0208031 | 75.0501546 |
| 58.3643621 | 57.7729216 | 66.0208031 | 75.0501546 |
| 58.3643621 | 57.7729216 | 64.0208031 | 75.0501546 |
| 58.3643621 | 57.7729216 | 63.0208031 | 75.0501546 |
| 58.3643621 | 57.7729216 | 62.0208031 | 75.0501546 |
| 58.3643621 | 56.7729216 | 62.0208031 | 75.0501546 |

|            |            |            |            |
|------------|------------|------------|------------|
| 58.3643621 | 57.7729216 | 62.0208031 | 75.0501546 |
| 58.3643621 | 57.7729216 | 62.0208031 | 74.0501546 |
| 58.3643621 | 57.7729216 | 62.0208031 | 74.0501546 |
| 58.3643621 | 57.7729216 | 63.0208031 | 73.0501546 |
| 58.3643621 | 57.7729216 | 63.0208031 | 73.0501546 |
| 58.3643621 | 57.7729216 | 64.0208031 | 73.0501546 |
| 58.3643621 | 58.7729216 | 64.0208031 | 73.0501546 |
| 58.3643621 | 58.7729216 | 63.0208031 | 73.0501546 |
| 57.3643621 | 58.7729216 | 63.0208031 | 73.0501546 |
| 57.3643621 | 61.7729216 | 63.0208031 | 75.0501546 |
| 58.3643621 | 61.7729216 | 63.0208031 | 77.0501546 |
| 64.3643621 | 64.7729216 | 63.0208031 | 77.0501546 |
| 64.3643621 | 65.7729216 | 62.0208031 | 77.0501546 |
| 64.3643621 | 65.7729216 | 61.0208031 | 78.0501546 |
| 64.3643621 | 65.7729216 | 61.0208031 | 78.0501546 |
| 64.3643621 | 65.7729216 | 59.0208031 | 79.0501546 |
| 65.3643621 | 65.7729216 | 59.0208031 | 79.0501546 |
| 65.3643621 | 65.7729216 | 59.0208031 | 63.3319708 |
| 64.3643621 | 65.7729216 | 59.0208031 | 78.0501546 |
| 65.3643621 | 65.7729216 | 60.0208031 | 79.0501546 |
| 65.3643621 | 65.7729216 | 61.0208031 | 79.0501546 |
| 65.3643621 | 65.7729216 | 62.0208031 | 80.0501546 |
| 65.3643621 | 65.7729216 | 62.0208031 | 65.640841  |
| 65.3643621 | 65.7729216 | 62.0208031 | 65.540841  |
| 65.3643621 | 65.7729216 | 61.0208031 | 65.540841  |
| 66.3643621 | 63.7729216 | 61.0208031 | 79.0501546 |
| 66.3643621 | 63.7729216 | 63.0208031 | 79.0501546 |
| 65.3643621 | 63.7729216 | 64.0208031 | 79.0501546 |
| 63.3643621 | 63.7729216 | 66.0208031 | 66.640841  |
| 62.3643621 | 64.7729216 | 66.0208031 | 66.540841  |
| 62.3643621 | 64.7729216 | 66.0208031 | 79.0501546 |
| 57.3643621 | 64.7729216 | 66.0208031 | 79.0501546 |
| 56.3643621 | 64.7729216 | 66.0208031 | 78.0501546 |
| 57.3643621 | 65.7729216 | 66.0208031 | 78.0501546 |
| 57.3643621 | 65.7729216 | 66.0208031 | 78.0501546 |
| 57.3643621 | 65.7729216 | 66.0208031 | 78.0501546 |
| 57.3643621 | 66.7729216 | 66.0208031 | 79.0501546 |
| 57.3643621 | 62.7729216 | 66.0208031 | 65.040841  |
| 57.3643621 | 61.7729216 | 66.0208031 | 64.840841  |
| 57.3643621 | 61.7729216 | 64.0208031 | 65.040841  |
| 57.3643621 | 61.7729216 | 64.0208031 | 64.840841  |
| 55.3643621 | 61.7729216 | 64.0208031 | 64.540841  |
| 55.3643621 | 60.7729216 | 64.0208031 | 64.340841  |
| 55.3643621 | 59.7729216 | 66.0208031 | 64.540841  |
| 55.3643621 | 59.7729216 | 66.0208031 | 64.340841  |

|            |            |            |            |
|------------|------------|------------|------------|
| 55.3643621 | 59.7729216 | 67.0208031 | 63.840841  |
| 55.3643621 | 60.7729216 | 67.0208031 | 63.540841  |
| 55.3643621 | 60.7729216 | 67.0208031 | 63.740841  |
| 55.3643621 | 60.7729216 | 67.0208031 | 63.640841  |
| 56.3643621 | 60.7729216 | 71.0208031 | 63.940841  |
| 58.3643621 | 59.7729216 | 71.0208031 | 63.940841  |
| 58.3643621 | 59.7729216 | 74.0208031 | 64.240841  |
| 61.3643621 | 60.7729216 | 75.0208031 | 77.0501546 |
| 62.3643621 | 60.7729216 | 75.0208031 | 76.0501546 |
| 64.3643621 | 60.7729216 | 75.0208031 | 76.0501546 |
| 63.3643621 | 61.7729216 | 75.0208031 | 76.0501546 |
| 63.3643621 | 63.7729216 | 75.0208031 | 76.0501546 |
| 63.3643621 | 64.7729216 | 75.0208031 | 76.0501546 |
| 63.3643621 | 64.7729216 | 75.0208031 | 77.0501546 |
| 64.3643621 | 65.7729216 | 75.0208031 | 77.0501546 |
| 65.3643621 | 66.7729216 | 73.0208031 | 77.0501546 |
| 66.3643621 | 67.7729216 | 70.0208031 | 77.0501546 |
| 65.3643621 | 67.7729216 | 70.0208031 | 64.040841  |
| 65.3643621 | 68.7729216 | 67.0208031 | 64.040841  |
| 65.3643621 | 69.7729216 | 66.0208031 | 64.540841  |
| 65.3643621 | 69.7729216 | 65.0208031 | 64.640841  |
| 65.3643621 | 69.7729216 | 65.0208031 | 64.740841  |
| 65.3643621 | 69.7729216 | 65.0208031 | 65.040841  |
| 65.3643621 | 68.7729216 | 66.0208031 | 65.740841  |
| 65.3643621 | 68.7729216 | 66.0208031 | 66.140841  |
| 65.3643621 | 68.7729216 | 66.0208031 | 66.240841  |
| 65.3643621 | 68.7729216 | 66.0208031 | 82.0501546 |
| 63.3643621 | 67.7729216 | 66.0208031 | 64.9286951 |
| 65.3643621 | 67.7729216 | 66.0208031 | 67.140841  |
| 65.3643621 | 67.7729216 | 70.0208031 | 81.0501546 |
| 65.3643621 | 65.7729216 | 70.0208031 | 81.0501546 |
| 65.3643621 | 65.7729216 | 74.0208031 | 81.0501546 |
| 62.3643621 | 64.7729216 | 70.0208031 | 80.0501546 |
| 57.3643621 | 65.7729216 | 70.0208031 | 80.0501546 |
| 57.3643621 | 65.7729216 | 70.0208031 | 80.0501546 |
| 56.3643621 | 64.7729216 | 70.0208031 | 80.0501546 |
| 56.3643621 | 64.7729216 | 69.0208031 | 80.0501546 |
| 61.3643621 | 66.7729216 | 69.0208031 | 80.0501546 |
| 61.3643621 | 68.7729216 | 68.0208031 | 78.0501546 |
| 64.3643621 | 68.7729216 | 68.0208031 | 75.0501546 |
| 67.3643621 | 68.7729216 | 68.0208031 | 74.0501546 |
| 67.3643621 | 67.7729216 | 68.0208031 | 74.0501546 |
| 68.3643621 | 67.7729216 | 67.0208031 | 75.0501546 |
| 68.3643621 | 67.7729216 | 67.0208031 | 77.0501546 |
| 69.3643621 | 67.7729216 | 67.0208031 | 77.0501546 |



69.3643621 67.7729216 68.0208031 78.0501546  
69.3643621 67.7729216 68.0208031 78.0501546  
69.3643621 67.7729216 68.0208031 78.0501546  
69.3643621 67.7729216 68.0208031 78.0501546  
69.3643621 67.7729216 68.0208031 79.0501546  
69.3643621 64.7729216 68.0208031 80.0501546  
69.3643621 64.7729216 68.0208031 80.0501546  
69.3643621 64.7729216 68.0208031 79.0501546  
69.3643621 64.7729216 68.0208031 79.0501546  
69.3643621 64.7729216 68.0208031 81.0501546  
70.3643621 64.7729216 68.0208031 81.0501546  
70.3643621 64.7729216 68.0208031 78.0501546  
70.3643621 63.7729216 68.0208031 77.0501546  
69.3643621 62.7729216 68.0208031 77.0501546  
69.3643621 62.7729216 69.0208031 77.0501546  
70.3643621 61.7729216 69.0208031 74.0501546  
70.3643621 60.7729216 70.0208031 74.0501546  
70.3643621 60.7729216 70.0208031 74.0501546  
70.3643621 60.7729216 71.0208031 74.0501546  
69.3643621 60.7729216 71.0208031 74.0501546  
69.3643621 60.7729216 69.0208031 74.0501546  
69.3643621 59.7729216 69.0208031 74.0501546  
69.3643621 59.7729216 70.0208031 79.0501546  
69.3643621 59.7729216 70.0208031 80.0501546  
69.3643621 60.7729216 71.0208031 80.0501546  
69.3643621 60.7729216 71.0208031 80.0501546  
69.3643621 60.7729216 71.0208031 77.0501546  
68.3643621 60.7729216 71.0208031 76.0501546  
68.3643621 60.7729216 71.0208031 76.0501546  
68.3643621 60.7729216 72.0208031 76.0501546  
68.3643621 61.7729216 71.0208031 76.0501546  
68.3643621 61.7729216 71.0208031 76.0501546  
68.3643621 65.7729216 68.0208031 76.0501546  
69.3643621 65.7729216 67.0208031 76.0501546  
70.3643621 67.7729216 67.0208031 76.0501546  
70.3643621 67.7729216 67.0208031 76.0501546  
71.3643621 72.7729216 67.0208031 76.0501546  
71.3643621 72.7729216 67.0208031 76.0501546  
71.3643621 72.7729216 67.0208031 75.0501546  
72.3643621 72.7729216 67.0208031 75.0501546  
72.3643621 69.7729216 67.0208031 75.0501546  
71.3643621 69.7729216 67.0208031 75.0501546  
68.3643621 67.7729216 67.0208031 75.0501546  
68.3643621 67.7729216 63.0208031 75.0501546  
67.3643621 67.7729216 63.0208031 75.0501546

|            |            |            |            |
|------------|------------|------------|------------|
| 69.3643621 | 67.7729216 | 63.0208031 | 75.0501546 |
| 70.3643621 | 67.7729216 | 63.0208031 | 75.0501546 |
| 70.3643621 | 66.7729216 | 62.0208031 | 75.0501546 |
| 71.3643621 | 65.7729216 | 62.0208031 | 76.0501546 |
| 66.3643621 | 65.7729216 | 62.0208031 | 76.0501546 |
| 63.3643621 | 65.7729216 | 62.0208031 | 76.0501546 |
| 63.3643621 | 65.7729216 | 62.0208031 | 76.0501546 |
| 62.3643621 | 65.7729216 | 62.0208031 | 76.0501546 |
| 62.3643621 | 64.7729216 | 65.0208031 | 76.0501546 |
| 61.3643621 | 64.7729216 | 65.0208031 | 73.0501546 |
| 60.3643621 | 64.7729216 | 66.0208031 | 73.0501546 |
| 60.3643621 | 61.7729216 | 64.0208031 | 72.0501546 |
| 60.3643621 | 61.7729216 | 62.0208031 | 72.0501546 |
| 57.3643621 | 59.7729216 | 61.0208031 | 72.0501546 |
| 57.3643621 | 58.7729216 | 61.0208031 | 73.0501546 |
| 57.3643621 | 58.7729216 | 61.0208031 | 72.0501546 |
| 57.3643621 | 58.7729216 | 61.0208031 | 71.0501546 |
| 56.3643621 | 55.7729216 | 61.0208031 | 72.0501546 |
| 54.3643621 | 55.7729216 | 62.0208031 | 72.0501546 |
| 54.3643621 | 55.7729216 | 62.0208031 | 71.0501546 |
| 53.3643621 | 60.7729216 | 62.0208031 | 71.0501546 |
| 53.3643621 | 60.7729216 | 62.0208031 | 71.0501546 |
| 53.3643621 | 60.7729216 | 61.0208031 | 71.0501546 |
| 56.3643621 | 60.7729216 | 62.0208031 | 71.0501546 |
| 57.3643621 | 61.7729216 | 62.0208031 | 71.0501546 |
| 58.3643621 | 61.7729216 | 62.0208031 | 72.0501546 |
| 58.3643621 | 61.7729216 | 62.0208031 | 72.0501546 |
| 58.3643621 | 61.7729216 | 62.0208031 | 72.0501546 |
| 58.3643621 | 61.7729216 | 63.0208031 | 72.0501546 |
| 58.3643621 | 63.7729216 | 63.0208031 | 74.0501546 |
| 60.3643621 | 63.7729216 | 63.0208031 | 74.0501546 |
| 60.3643621 | 63.7729216 | 64.0208031 | 74.0501546 |
| 63.3643621 | 63.7729216 | 64.0208031 | 74.0501546 |
| 63.3643621 | 63.7729216 | 64.0208031 | 73.0501546 |
| 64.3643621 | 63.7729216 | 64.0208031 | 73.0501546 |
| 65.3643621 | 64.7729216 | 64.0208031 | 73.0501546 |
| 65.3643621 | 64.7729216 | 64.0208031 | 72.0501546 |
| 67.3643621 | 63.7729216 | 61.0208031 | 71.0501546 |
| 65.3643621 | 63.7729216 | 59.0208031 | 71.0501546 |
| 65.3643621 | 62.7729216 | 58.0208031 | 71.0501546 |
| 65.3643621 | 61.7729216 | 59.0208031 | 72.0501546 |
| 64.3643621 | 59.7729216 | 59.0208031 | 73.0501546 |
| 61.3643621 | 59.7729216 | 61.0208031 | 73.0501546 |
| 61.3643621 | 59.7729216 | 60.0208031 | 73.0501546 |
| 61.3643621 | 59.7729216 | 60.0208031 | 73.0501546 |

|            |            |            |            |
|------------|------------|------------|------------|
| 57.3643621 | 59.7729216 | 60.0208031 | 73.0501546 |
| 56.3643621 | 59.7729216 | 61.0208031 | 76.0501546 |
| 56.3643621 | 59.7729216 | 61.0208031 | 78.0501546 |
| 56.3643621 | 58.7729216 | 61.0208031 | 78.0501546 |
| 56.3643621 | 57.7729216 | 61.0208031 | 78.0501546 |
| 57.3643621 | 57.7729216 | 66.0208031 | 78.0501546 |
| 57.3643621 | 57.7729216 | 68.0208031 | 77.0501546 |
| 61.3643621 | 56.7729216 | 69.0208031 | 76.0501546 |
| 61.3643621 | 54.7729216 | 69.0208031 | 77.0501546 |
| 64.3643621 | 54.7729216 | 69.0208031 | 77.0501546 |
| 64.3643621 | 54.7729216 | 71.0208031 | 77.0501546 |
| 64.3643621 | 54.7729216 | 73.0208031 | 75.0501546 |
| 62.3643621 | 54.7729216 | 73.0208031 | 75.0501546 |
| 62.3643621 | 54.7729216 | 71.0208031 | 75.0501546 |
| 62.3643621 | 55.7729216 | 72.0208031 | 75.0501546 |
| 62.3643621 | 56.7729216 | 73.0208031 | 75.0501546 |
| 63.3643621 | 59.7729216 | 76.0208031 | 75.0501546 |
| 62.3643621 | 59.7729216 | 80.0208031 | 75.0501546 |
| 62.3643621 | 59.7729216 | 71.140841  | 75.0501546 |
| 59.3643621 | 62.7729216 | 71.240841  | 75.0501546 |
| 58.3643621 | 63.7729216 | 72.340841  | 76.0501546 |
| 58.3643621 | 63.7729216 | 72.240841  | 76.0501546 |
| 58.3643621 | 63.7729216 | 72.340841  | 76.0501546 |
| 58.3643621 | 64.7729216 | 72.440841  | 76.0501546 |
| 58.3643621 | 64.7729216 | 72.240841  | 76.0501546 |
| 56.3643621 | 65.7729216 | 72.040841  | 76.0501546 |
| 56.3643621 | 65.7729216 | 71.940841  | 76.0501546 |
| 55.3643621 | 64.7729216 | 71.640841  | 75.0501546 |
| 55.3643621 | 63.7729216 | 81.0208031 | 75.0501546 |
| 55.3643621 | 63.7729216 | 81.0208031 | 74.0501546 |
| 55.3643621 | 62.7729216 | 71.0208031 | 75.0501546 |
| 55.3643621 | 61.7729216 | 70.0208031 | 75.0501546 |
| 54.3643621 | 61.7729216 | 69.0208031 | 75.0501546 |
| 54.3643621 | 61.7729216 | 68.0208031 | 76.0501546 |
| 53.3643621 | 61.7729216 | 68.0208031 | 76.0501546 |
| 53.3643621 | 63.7729216 | 68.0208031 | 76.0501546 |
| 54.3643621 | 64.7729216 | 68.0208031 | 77.0501546 |
| 54.3643621 | 64.7729216 | 68.0208031 | 77.0501546 |
| 54.3643621 | 64.7729216 | 68.0208031 | 76.0501546 |
| 54.3643621 | 64.7729216 | 68.0208031 | 76.0501546 |
| 55.3643621 | 63.7729216 | 68.0208031 | 76.0501546 |
| 56.3643621 | 63.7729216 | 68.0208031 | 77.0501546 |
| 56.3643621 | 63.7729216 | 67.9319564 | 77.0501546 |
| 58.3643621 | 63.7729216 | 67.9319564 | 77.0501546 |
| 58.3643621 | 63.7729216 | 67.8208452 | 78.0501546 |
| 58.3643621 | 62.7729216 | 67.3764008 | 78.0501546 |

|            |            |            |            |           |
|------------|------------|------------|------------|-----------|
| 59.3643621 | 61.7729216 | 67.2652897 | 78.0501546 |           |
| 59.3643621 | 61.7729216 | 67.4875119 | 78.0501546 |           |
| 59.3643621 | 61.7729216 | 67.3764008 | 77.0501546 |           |
| 57.3643621 | 61.7729216 | 67.2652897 | 77.0501546 |           |
| 55.3643621 | 62.7729216 | 66.3764008 | 77.0501546 |           |
| 55.3643621 | 62.7729216 | 66.598623  | 77.0501546 |           |
| 55.3643621 | 63.7729216 | 67.0430675 | 76.0501546 |           |
| 60.3643621 | 63.7729216 | 67.8208452 | 76.0501546 |           |
| 60.3643621 | 63.7729216 | 66.0284892 | 76.0501546 |           |
| 61.3643621 | 62.7729216 | 68.3764008 | 75.0501546 |           |
| 61.3643621 | 62.7729216 | 68.4875119 | 74.0501546 |           |
| 65.3643621 | 62.7729216 | 69.0430675 | 74.0501546 |           |
| 64.3643621 | 62.7729216 | 69.0430675 | 75.0501546 |           |
| 64.3643621 | 62.7729216 | 68.8208452 | 76.0501546 |           |
| 63.3643621 | 62.7729216 | 68.9319564 | 78.0501546 |           |
| 63.3643621 | 62.7729216 | 69.598623  | 78.0501546 |           |
| 61.3643621 | 62.7729216 | 69.4875119 | 76.0501546 |           |
| 61.3643621 | 62.7729216 | 69.3764008 | 76.0501546 |           |
| 61.3643621 | 62.7729216 | 69.4875119 | 76.0501546 |           |
| 60.3643621 | 62.7729216 | 69.598623  | 76.0501546 |           |
| 60.3643621 | 63.7729216 | 69.598623  | 77.0501546 | Before 1  |
| 60.3643621 | 63.7729216 | 69.4875119 | 77.0501546 | Before 2  |
| 60.3643621 | 63.7729216 | 69.3764008 | 77.0501546 | Before 3  |
| 60.3643621 | 64.7729216 | 69.3764008 | 75.0501546 | Before 4  |
| 60.3643621 | 67.7729216 | 68.7097341 | 74.0501546 | Before 5  |
| 60.3643621 | 67.7729216 | 68.598623  | 72.0501546 | Before 6  |
| 61.3643621 | 67.7729216 | 67.598623  | 70.0501546 | Before 7  |
| 62.3643621 | 67.7729216 | 67.8208452 | 70.0501546 | Before 8  |
| 62.3643621 | 68.7729216 | 67.8208452 | 71.0501546 | Before 9  |
| 62.3643621 | 68.7729216 | 67.2652897 | 71.0501546 | Before 10 |
| 63.3643621 | 71.7729216 | 67.9319564 | 72.0501546 | Before 11 |
| 63.3643621 | 72.7729216 | 68.1541786 | 72.0501546 | Before 12 |
| 63.3643621 | 73.7729216 | 68.2652897 | 74.0501546 | Before 13 |
| 63.3643621 | 77.7729216 | 69.0430675 | 75.0501546 | Before 14 |
| 63.3643621 | 78.7729216 | 69.3764008 | 75.0501546 | Before 15 |
| 65.3643621 | 78.7729216 | 69.598623  | 75.0501546 | Before 16 |
| 64.3643621 | 78.7729216 | 69.3764008 | 75.0501546 | Before 17 |
| 64.3643621 | 80.7729216 | 69.598623  | 75.0501546 | Before 18 |
| 64.3643621 | 69.7097341 | 69.7097341 | 75.0501546 | Before 19 |
| 64.3643621 | 69.9319564 | 69.9319564 | 77.0501546 | Before 20 |
| 64.3643621 | 69.598623  | 69.598623  | 77.0501546 | Before 21 |
| 65.3643621 | 69.3764008 | 69.3764008 | 77.0501546 | Before 22 |
| 64.3643621 | 82.7729216 | 69.0430675 | 78.0501546 | Before 23 |
| 64.3643621 | 82.7729216 | 69.3764008 | 81.0501546 | Before 24 |
| 64.3643621 | 82.7729216 | 69.2652897 | 81.0501546 | Before 25 |

|            |            |            |            |           |
|------------|------------|------------|------------|-----------|
| 66.3643621 | 79.7729216 | 69.3764008 | 82.0501546 | Before 26 |
| 65.3643621 | 79.7729216 | 69.2652897 | 82.0501546 | Before 27 |
| 64.3643621 | 77.7729216 | 69.0430675 | 83.0501546 | Before 28 |
| 64.3643621 | 76.7729216 | 68.8208452 | 68.8208452 | Before 29 |
| 64.3643621 | 76.7729216 | 68.9319564 | 68.9319564 | Before 30 |
| 64.3643621 | 76.7729216 | 68.8208452 | 68.8208452 | Before 31 |
| 64.3643621 | 76.7729216 | 68.9319564 | 82.0501546 | Before 32 |
| 64.3643621 | 76.7729216 | 69.0430675 | 81.0501546 | Before 33 |
| 63.3643621 | 76.7729216 | 68.9319564 | 81.0501546 | Before 34 |
| 65.3643621 | 76.7729216 | 69.3764008 | 80.0501546 | Before 35 |
| 65.3643621 | 76.7729216 | 69.3764008 | 80.0501546 | Before 36 |
| 66.3643621 | 76.7729216 | 69.1541786 | 78.0501546 | Before 37 |
| 66.3643621 | 76.7729216 | 68.9319564 | 78.0501546 | Before 38 |
| 66.3643621 | 76.7729216 | 68.9319564 | 78.0501546 | Before 39 |
| 66.3643621 | 76.7729216 | 68.8208452 | 78.0501546 | Before 40 |
| 66.3643621 | 76.7729216 | 69.0430675 | 78.0501546 | Before 41 |
| 68.3643621 | 76.7729216 | 69.9319564 | 78.0501546 | Before 42 |
| 68.3643621 | 76.7729216 | 69.9319564 | 78.0501546 | Before 43 |
| 68.3643621 | 76.7729216 | 70.0933428 | 79.0501546 | Before 44 |
| 68.3643621 | 76.7729216 | 69.9319564 | 79.0501546 | Before 45 |
| 67.3643621 | 76.7729216 | 69.8208452 | 79.0501546 | Before 46 |
| 66.3643621 | 79.7729216 | 70.2652897 | 79.0501546 | Before 47 |
| 66.3643621 | 78.7729216 | 70.7097341 | 80.0501546 | Before 48 |
| 66.3643621 | 78.7729216 | 70.8208452 | 81.0501546 | Before 49 |
| 67.3643621 | 78.7729216 | 71.0430675 | 81.0501546 | Before 50 |
| 67.3643621 | 77.7729216 | 70.9319564 | 81.0501546 | Before 51 |
| 67.3643621 | 77.7729216 | 71.0430675 | 82.0501546 | Before 52 |
| 67.3643621 | 77.7729216 | 71.1541786 | 82.0501546 | Before 53 |
| 68.3643621 | 72.7729216 | 70.0430675 | 82.0501546 | Before 54 |
| 68.3643621 | 67.7729216 | 69.7097341 | 83.0501546 | Before 55 |
| 69.3643621 | 66.7729216 | 70.2652897 | 83.0501546 | Before 56 |
| 69.3643621 | 66.7729216 | 69.7097341 | 83.0501546 | Before 57 |
| 67.3643621 | 66.7729216 | 69.3764008 | 81.0501546 | Before 58 |
| 68.3643621 | 66.7729216 | 69.8208452 | 79.0501546 | Before 59 |
| 68.3643621 | 67.7729216 | 70.3764008 | 78.0501546 | Before 60 |
| 69.3643621 | 67.7729216 | 70.4875119 | 78.0501546 | Before 61 |
| 69.3643621 | 67.7729216 | 70.4875119 | 78.0501546 | Before 62 |
| 69.3643621 | 68.7729216 | 70.7097341 | 78.0501546 | Before 63 |
| 69.3643621 | 69.7729216 | 70.3764008 | 77.0501546 | Before 64 |
| 66.3643621 | 69.7729216 | 69.4875119 | 77.0501546 | Before 65 |
| 66.3643621 | 69.7729216 | 69.1541786 | 76.0501546 | Before 66 |
| 67.3643621 | 69.7729216 | 69.1541786 | 76.0501546 | Before 67 |
| 67.3643621 | 70.7729216 | 68.7097341 | 75.0501546 | Before 68 |
| 68.3643621 | 71.7729216 | 68.598623  | 75.0501546 | Before 69 |
| 68.3643621 | 73.7729216 | 68.1541786 | 71.0501546 | Before 70 |

|            |            |            |            |            |            |
|------------|------------|------------|------------|------------|------------|
| 69.3643621 | 73.7729216 | 67.9319564 | 70.0501546 | Before 71  |            |
| 69.3643621 | 73.7729216 | 68.0430675 | 69.0501546 | Before 72  |            |
| 69.3643621 | 74.7729216 | 68.1541786 | 69.0501546 | Before 73  |            |
| 67.3643621 | 74.7729216 | 68.3764008 | 71.0501546 | Before 74  |            |
| 68.3643621 | 76.7729216 | 68.9319564 | 71.0501546 | Before 75  |            |
| 67.3643621 | 76.7729216 | 68.7097341 | 71.0501546 | Before 76  |            |
| 68.3643621 | 77.7729216 | 69.0430675 | 72.0501546 | Before 77  |            |
| 68.3643621 | 77.7729216 | 69.0430675 | 71.0501546 | Before 78  |            |
| 68.3643621 | 77.7729216 | 69.1541786 | 70.0501546 | Before 79  |            |
| 68.3643621 | 77.7729216 | 69.1541786 | 70.0501546 | Before 80  |            |
| 68.3643621 | 79.7729216 | 69.4875119 | 70.0501546 | Before 81  |            |
| 70.3643621 | 78.7729216 | 69.598623  | 70.0501546 | Before 82  |            |
| 70.3643621 | 78.7729216 | 69.8208452 | 70.0501546 | Before 83  |            |
| 70.3643621 | 73.7729216 | 69.2652897 | 68.0501546 | Before 84  |            |
| 69.3643621 | 73.7729216 | 69.1541786 | 67.0501546 | Before 85  |            |
| 69.3643621 | 70.7729216 | 69.1541786 | 67.0501546 | Before 86  |            |
| 69.3643621 | 70.7729216 | 69.2652897 | 65.0501546 | Before 87  |            |
| 68.3643621 | 71.7729216 | 69.2652897 | 63.0501546 | Before 88  |            |
| 66.3643621 | 71.7729216 | 69.3764008 | 63.0501546 | Before 89  |            |
| 66.3643621 | 72.7729216 | 69.7097341 | 63.0501546 | Before 90  |            |
| 65.3643621 | 72.7729216 | 69.8208452 | 64.0501546 | Before 91  |            |
| 65.3643621 | 72.7729216 | 71.2652897 | 64.0501546 | Before 92  |            |
| 63.3643621 | 70.7729216 | 70.9319564 | 64.0501546 | Before 93  |            |
| 62.3643621 | 69.7729216 | 70.598623  | 65.0501546 | Before 94  |            |
| 63.3643621 | 69.7729216 | 70.3764008 | 65.0501546 | Before 95  |            |
| 63.3643621 | 69.7729216 | 70.1541786 | 65.0501546 | Before 96  |            |
| 63.3643621 | 69.7729216 | 71.0029056 | 65.0501546 | Before 97  |            |
| 64.3643621 | 69.7729216 | 70.0744307 | 65.0501546 | Before 98  |            |
| 64.3643621 | 69.7729216 | 69.7097341 | 67.0501546 | Before 99  |            |
| 63.3643621 | 68.7729216 | 69.2652897 | 67.0501546 | Before 100 |            |
| 62.3643621 | 68.7729216 | 68.598623  | 67.0501546 | Before 101 |            |
| 62.3643621 | 68.7729216 | 68.2652897 | 67.0501546 | Before 102 |            |
| 62.3643621 | 65.7729216 | 67.598623  | 67.0501546 | Before 103 |            |
| 62.3643621 | 65.7729216 | 68.3433868 | 66.0501546 | 78.0462612 | Before 104 |
| 63.3643621 | 64.7729216 | 67.8433868 | 66.0501546 | 73.0462612 | Before 105 |
| 64.3643621 | 64.7729216 | 68.2433868 | 68.0501546 | 72.0462612 | Before 106 |
| 64.3643621 | 64.7729216 | 68.1433868 | 68.0501546 | 72.0462612 | Before 107 |
| 64.3643621 | 65.7729216 | 68.5433868 | 69.0501546 | 71.0462612 | Before 108 |
| 64.3643621 | 65.7729216 | 67.9433868 | 67.0501546 | 70.0462612 | Before 109 |
| 64.3643621 | 65.7729216 | 67.7433868 | 66.0501546 | 70.0462612 | Before 110 |
| 64.3643621 | 68.7729216 | 67.5433868 | 65.0501546 | 69.0462612 | Before 111 |
| 64.3643621 | 68.7729216 | 68.2433868 | 65.0501546 | 69.0462612 | Before 112 |
| 64.3643621 | 73.7729216 | 69.1433868 | 68.0501546 | 69.0462612 | Before 113 |
| 65.3643621 | 72.7729216 | 68.9433868 | 68.0501546 | 69.0462612 | Before 114 |
| 65.3643621 | 72.7729216 | 68.6433868 | 68.0501546 | 70.0462612 | Before 115 |

|            |            |            |            |            |            |
|------------|------------|------------|------------|------------|------------|
| 65.3643621 | 72.7729216 | 68.9433868 | 68.0501546 | 70.0462612 | Before 116 |
| 64.3643621 | 72.7729216 | 68.3433868 | 67.0501546 | 70.0462612 | Before 117 |
| 64.3643621 | 72.7729216 | 68.0433868 | 65.0501546 | 71.0462612 | Before 118 |
| 64.3643621 | 74.7729216 | 68.1433868 | 65.0501546 | 71.0462612 | Before 119 |
| 64.3643621 | 74.7729216 | 67.8433868 | 63.0501546 | 71.0462612 | Before 120 |
| 63.3643621 | 73.7729216 | 67.3433868 | 62.0501546 | 72.0462612 | Before 121 |
| 63.3643621 | 73.7729216 | 67.6433868 | 65.0501546 | 73.0462612 | Before 122 |
| 65.3643621 | 74.7729216 | 68.1433868 | 67.0501546 | 73.0462612 | Before 123 |
| 67.3643621 | 74.7729216 | 68.0433868 | 67.0501546 | 73.0462612 | Before 124 |
| 67.3643621 | 75.7729216 | 67.9433868 | 69.0501546 | 73.0462612 | Before 125 |
| 68.3643621 | 75.7729216 | 67.9433868 | 71.0501546 | 73.0462612 | Before 126 |
| 68.3643621 | 76.7729216 | 67.8433868 | 70.0501546 | 73.0462612 | Before 127 |
| 68.3643621 | 76.7729216 | 68.0433868 | 70.0501546 | 74.0462612 | Before 128 |
| 68.3643621 | 73.7729216 | 67.6433868 | 70.0501546 | 74.0462612 | Before 129 |
| 68.3643621 | 68.7729216 | 67.1433868 | 69.0501546 | 73.0462612 | Before 130 |
| 68.3643621 | 66.7729216 | 66.9433868 | 69.0501546 | 73.0462612 | Before 131 |
| 69.3643621 | 65.7729216 | 67.2433868 | 68.0501546 | 74.0462612 | Before 132 |
| 70.3643621 | 65.7729216 | 67.7433868 | 68.0501546 | 74.0462612 | Before 133 |
| 70.3643621 | 64.7729216 | 67.9433868 | 68.0501546 | 74.0462612 | Before 134 |
| 70.3643621 | 64.7729216 | 68.2433868 | 68.0501546 | 74.0462612 | Before 135 |
| 71.3643621 | 64.7729216 | 68.8433868 | 68.0501546 | 74.0462612 | Before 136 |
| 71.3643621 | 64.7729216 | 69.4433868 | 68.0501546 | 77.0462612 | Before 137 |
| 71.3643621 | 64.7729216 | 69.5433868 | 67.0501546 | 77.0462612 | Before 138 |
| 71.3643621 | 64.7729216 | 69.8433868 | 67.0501546 | 80.0462612 | Before 139 |
| 71.3643621 | 64.7729216 | 69.3433868 | 67.0501546 | 80.0462612 | Before 140 |
| 72.3643621 | 62.7729216 | 69.1433868 | 67.0501546 | 81.0462612 | Before 141 |
| 72.3643621 | 61.7729216 | 68.9433868 | 67.0501546 | 81.0462612 | Before 142 |
| 72.3643621 | 59.7729216 | 68.8433868 | 67.0501546 | 81.0462612 | Before 143 |
| 75.3643621 | 59.7729216 | 69.3433868 | 66.0501546 | 81.0462612 | Before 144 |
| 75.3643621 | 59.7729216 | 69.5433868 | 67.0501546 | 81.0462612 | Before 145 |
| 75.3643621 | 59.7729216 | 69.7433868 | 71.0501546 | 81.0462612 | Before 146 |
| 76.3643621 | 60.7729216 | 69.8433868 | 71.0501546 | 81.0462612 | Before 147 |
| 76.3643621 | 62.7729216 | 70.0433868 | 71.0501546 | 81.0462612 | Before 148 |
| 76.3643621 | 62.7729216 | 70.2433868 | 71.0501546 | 82.0462612 | Before 149 |
| 76.3643621 | 62.7729216 | 70.5433868 | 72.0501546 | 82.0462612 | Before 150 |
| 76.3643621 | 62.7729216 | 70.2532809 | 72.0501546 | 82.0462612 | Before 151 |
| 80.3643621 | 63.7729216 | 71.201225  | 72.0501546 | 81.0462612 | Before 152 |
| 80.3643621 | 63.7729216 | 71.1433868 | 72.0501546 | 81.0462612 | Before 153 |
| 81.3643621 | 63.7729216 | 71.2433868 | 73.0501546 | 80.0462612 | Before 154 |
| 81.3643621 | 63.7729216 | 71.3433868 | 74.0501546 | 79.0462612 | Before 155 |
| 81.3643621 | 63.7729216 | 71.7433868 | 75.0501546 | 79.0462612 | Before 156 |
| 83.3643621 | 62.7729216 | 71.7433868 | 76.0501546 | 79.0462612 | Before 157 |
| 84.3643621 | 62.7729216 | 71.7433868 | 76.0501546 | 78.0462612 | Before 158 |
| 84.3643621 | 63.7729216 | 72.1433868 | 76.0501546 | 77.0462612 | Before 159 |
| 85.3643621 | 64.7729216 | 72.2433868 | 75.0501546 | 77.0462612 | Before 160 |

|            |            |            |            |            |            |
|------------|------------|------------|------------|------------|------------|
| 85.3643621 | 65.7729216 | 72.1433868 | 74.0501546 | 77.0462612 | Before 161 |
| 85.3643621 | 65.7729216 | 72.0433868 | 74.0501546 | 76.0462612 | Before 162 |
| 85.3643621 | 65.7729216 | 71.8433868 | 74.0501546 | 75.0462612 | Before 163 |
| 85.3643621 | 66.7729216 | 72.2433868 | 74.0501546 | 78.0462612 | Before 164 |
| 85.3643621 | 67.7729216 | 72.5433868 | 74.0501546 | 78.0462612 | Before 165 |
| 86.3643621 | 67.7729216 | 72.6433868 | 74.0501546 | 78.0462612 | Before 166 |
| 86.3643621 | 67.7729216 | 72.6433868 | 74.0501546 | 78.0462612 | Before 167 |
| 72.6433868 | 67.7729216 | 72.6433868 | 74.0501546 | 79.0462612 | Before 168 |
| 71.7433868 | 67.7729216 | 71.7433868 | 74.0501546 | 79.0462612 | Before 169 |
| 71.2433868 | 66.7729216 | 71.2433868 | 74.0501546 | 78.0462612 | Before 170 |
| 71.5433868 | 68.7729216 | 71.5433868 | 74.0501546 | 78.0462612 | Before 171 |
| 71.3433868 | 68.7729216 | 71.3433868 | 74.0501546 | 78.0462612 | Before 172 |
| 71.5433868 | 69.7729216 | 71.5433868 | 75.0501546 | 78.0462612 | Before 173 |
| 71.4433868 | 69.7729216 | 71.4433868 | 75.0501546 | 78.0462612 | Before 174 |
| 71.6433868 | 69.7729216 | 71.6433868 | 75.0501546 | 78.0462612 | Before 175 |
| 71.9433868 | 69.7729216 | 71.9433868 | 76.0501546 | 78.0462612 | Before 176 |
| 71.9433868 | 69.7729216 | 71.9433868 | 77.0501546 | 78.0462612 | Before 177 |
| 71.6433868 | 68.7729216 | 71.6433868 | 77.0501546 | 78.0462612 | Before 178 |
| 85.3643621 | 68.7729216 | 71.4433868 | 77.0501546 | 79.0462612 | Before 179 |
| 85.3643621 | 68.7729216 | 71.4433868 | 77.0501546 | 79.0462612 | Before 180 |
| 71.2433868 | 68.7729216 | 71.2433868 | 77.0501546 | 79.0462612 | Before 181 |
| 84.3643621 | 68.7729216 | 70.9433868 | 76.0501546 | 78.0462612 | Before 182 |
| 84.3643621 | 67.7729216 | 71.0433868 | 76.0501546 | 79.0462612 | Before 183 |
| 84.3643621 | 67.7729216 | 71.2433868 | 77.0501546 | 82.0462612 | Before 184 |
| 83.3643621 | 69.7729216 | 71.6433868 | 77.0501546 | 83.0462612 | Before 185 |
| 81.3643621 | 69.7729216 | 71.7433868 | 77.0501546 | 83.0462612 | Before 186 |
| 76.3643621 | 69.7729216 | 71.4433868 | 77.0501546 | 83.0462612 | Before 187 |
| 74.3643621 | 69.7729216 | 71.4433868 | 78.0501546 | 83.0462612 | Before 188 |
| 74.3643621 | 69.7729216 | 71.5433868 | 79.0501546 | 83.0462612 | Before 189 |
| 73.3643621 | 69.7729216 | 70.8433868 | 78.0501546 | 83.0462612 | Before 190 |
| 73.3643621 | 69.7729216 | 70.4433868 | 77.0501546 | 83.0462612 | Before 191 |
| 73.3643621 | 69.7729216 | 70.5433868 | 77.0501546 | 83.0462612 | Before 192 |
| 72.3643621 | 69.7729216 | 70.1433868 | 77.0501546 | 83.0462612 | Before 193 |
| 70.3643621 | 69.7729216 | 69.7433868 | 76.0501546 | 83.0462612 | Before 194 |
| 69.3643621 | 69.7729216 | 69.2433868 | 72.0501546 | 83.0462612 | Before 195 |
| 69.3643621 | 69.7729216 | 69.0433868 | 70.0501546 | 83.0462612 | Before 196 |
| 69.3643621 | 69.7729216 | 69.1433868 | 70.0501546 | 83.0462612 | Before 197 |
| 69.3643621 | 70.7729216 | 69.1433868 | 70.0501546 | 83.0462612 | Before 198 |
| 69.3643621 | 70.7729216 | 69.3433868 | 70.0501546 | 69.3433868 | Before 199 |
| 70.3643621 | 70.7729216 | 69.2433868 | 70.0501546 | 81.0462612 | Before 200 |
| 70.3643621 | 71.7729216 | 68.7433868 | 70.0501546 | 75.0462612 | Before 201 |
| 70.3643621 | 70.7729216 | 68.4433868 | 70.0501546 | 74.0462612 | Before 202 |
| 69.3643621 | 70.7729216 | 68.5433868 | 71.0501546 | 74.0462612 | Before 203 |
| 69.3643621 | 69.7729216 | 68.2433868 | 71.0501546 | 74.0462612 | Before 204 |
| 69.3643621 | 69.7729216 | 68.6711414 | 71.0501546 | 74.0462612 | Before 205 |



|            |            |            |            |            |            |
|------------|------------|------------|------------|------------|------------|
| 69.3643621 | 69.7729216 | 68.2433868 | 72.0501546 | 74.0462612 | Before 206 |
| 69.3643621 | 72.7729216 | 68.6433868 | 72.0501546 | 76.0462612 | Before 207 |
| 69.3643621 | 72.7729216 | 69.0433868 | 72.0501546 | 77.0462612 | Before 208 |
| 69.3643621 | 69.7729216 | 68.6433868 | 71.0501546 | 77.0462612 | Before 209 |
| 70.3643621 | 69.7729216 | 68.8433868 | 71.0501546 | 77.0462612 | Before 210 |
| 71.3643621 | 68.7729216 | 68.8433868 | 71.0501546 | 77.0462612 | Before 211 |
| 71.3643621 | 68.7729216 | 69.1433868 | 70.0501546 | 78.0462612 | Before 212 |
| 72.3643621 | 66.7729216 | 69.1433868 | 69.0501546 | 78.0462612 | Before 213 |
| 73.3643621 | 67.7729216 | 69.1433868 | 69.0501546 | 79.0462612 | Before 214 |
| 73.3643621 | 68.7729216 | 69.2433868 | 70.0501546 | 79.0462612 | Before 215 |
| 73.3643621 | 68.7729216 | 69.2433868 | 71.0501546 | 80.0462612 | Before 216 |
| 73.3643621 | 69.7729216 | 69.3433868 | 73.0501546 | 80.0462612 | Before 217 |
| 73.3643621 | 69.7729216 | 69.4433868 | 73.0501546 | 82.0462612 | Before 218 |
| 73.3643621 | 69.7729216 | 69.5433868 | 73.0501546 | 83.0462612 | Before 219 |
| 73.3643621 | 67.7729216 | 68.7433868 | 70.0501546 | 68.7433868 | Before 220 |
| 71.3643621 | 66.7729216 | 68.0433868 | 70.0501546 | 81.0462612 | Before 221 |
| 71.3643621 | 66.7729216 | 67.6433868 | 70.0501546 | 78.0462612 | Before 222 |
| 71.3643621 | 66.7729216 | 67.9433868 | 69.0501546 | 78.0462612 | Before 223 |
| 71.3643621 | 66.7729216 | 67.4433868 | 68.0501546 | 75.0462612 | Before 224 |
| 72.3643621 | 67.7729216 | 67.6433868 | 68.0501546 | 75.0462612 | Before 225 |
| 72.3643621 | 67.7729216 | 67.8433868 | 68.0501546 | 75.0462612 | Before 226 |
| 72.3643621 | 68.7729216 | 67.6433868 | 67.0501546 | 76.0462612 | Before 227 |
| 72.3643621 | 68.7729216 | 67.6433868 | 65.0501546 | 76.0462612 | Before 228 |
| 72.3643621 | 68.7729216 | 67.5433868 | 63.0501546 | 76.0462612 | Before 229 |
| 73.3643621 | 69.7729216 | 67.7433868 | 63.0501546 | 76.0462612 | Before 230 |
| 72.3643621 | 69.7729216 | 67.7433868 | 63.0501546 | 76.0462612 | Before 231 |
| 71.3643621 | 71.7729216 | 67.7433868 | 63.0501546 | 75.0462612 | Before 232 |
| 70.3643621 | 72.7729216 | 67.7433868 | 63.0501546 | 75.0462612 | Before 233 |
| 70.3643621 | 72.7729216 | 69.1433868 | 63.0501546 | 75.0462612 | Before 234 |
| 70.3643621 | 74.7729216 | 69.2433868 | 62.0501546 | 74.0462612 | Before 235 |
| 71.3643621 | 74.7729216 | 69.2433868 | 62.0501546 | 73.0462612 | Before 236 |
| 71.3643621 | 74.7729216 | 68.9433868 | 62.0501546 | 73.0462612 | Before 237 |
| 72.3643621 | 74.7729216 | 69.0433868 | 64.0501546 | 73.0462612 | Before 238 |
| 72.3643621 | 74.7729216 | 69.8433868 | 64.0501546 | 73.0462612 | Before 239 |
| 72.3643621 | 73.7729216 | 69.7433868 | 64.0501546 | 74.0462612 | Before 240 |
| 72.3643621 | 71.7729216 | 69.9433868 | 67.0501546 | 75.0462612 | minute1    |
| 69.3643621 | 71.7729216 | 69.9433868 | 68.0501546 | 76.0462612 | minute2    |
| 69.3643621 | 70.7729216 | 70.0433868 | 68.0501546 | 76.0462612 | minute3    |
| 69.3643621 | 70.7729216 | 70.1433868 | 68.0501546 | 78.0462612 | minute4    |
| 68.3643621 | 70.7729216 | 70.4433868 | 68.0501546 | 78.0462612 | minute5    |
| 68.3643621 | 71.7729216 | 70.6433868 | 69.0501546 | 78.0462612 | minute6    |
| 66.3643621 | 72.7729216 | 70.1433868 | 66.0501546 | 77.0462612 | minute7    |
| 66.3643621 | 73.7729216 | 70.0433868 | 66.0501546 | 77.0462612 | minute8    |
| 66.3643621 | 73.7729216 | 69.5433868 | 64.0501546 | 75.0462612 | minute9    |
| 66.3643621 | 73.7729216 | 69.2433868 | 65.0501546 | 74.0462612 | minute10   |

|            |            |            |            |            |          |
|------------|------------|------------|------------|------------|----------|
| 66.3643621 | 73.7729216 | 69.1433868 | 66.0501546 | 74.0462612 | minute11 |
| 66.3643621 | 73.7729216 | 69.2433868 | 70.0501546 | 72.0462612 | minute12 |
| 66.3643621 | 73.7729216 | 69.3433868 | 70.0501546 | 72.0462612 | minute13 |
| 66.3643621 | 73.7729216 | 69.5433868 | 71.0501546 | 72.0462612 | minute14 |
| 65.3643621 | 73.7729216 | 69.3433868 | 72.0501546 | 72.0462612 | minute15 |
| 65.3643621 | 73.7729216 | 69.3433868 | 72.0501546 | 72.0462612 | minute16 |
| 64.3643621 | 72.7729216 | 69.5433868 | 72.0501546 | 72.0462612 | minute17 |
| 65.3643621 | 72.7729216 | 69.6433868 | 72.0501546 | 72.0462612 | minute18 |
| 65.3643621 | 72.7729216 | 69.2956608 | 72.0501546 | 72.0462612 | minute19 |
| 66.3643621 | 70.7729216 | 69.8921525 | 72.0501546 | 73.0462612 | minute20 |
| 66.3643621 | 67.7729216 | 68.9433868 | 72.0501546 | 73.0462612 | minute21 |
| 66.3643621 | 65.7729216 | 68.8433868 | 72.0501546 | 75.0462612 | minute22 |
| 66.3643621 | 65.7729216 | 68.6433868 | 71.0501546 | 75.0462612 | minute23 |
| 66.3643621 | 65.7729216 | 69.0433868 | 73.0501546 | 75.0462612 | minute24 |
| 66.3643621 | 66.7729216 | 69.9433868 | 73.0501546 | 75.0462612 | minute25 |
| 67.3643621 | 66.7729216 | 70.1433868 | 74.0501546 | 75.0462612 | minute26 |
| 67.3643621 | 66.7729216 | 70.3433868 | 74.0501546 | 75.0462612 | minute27 |
| 67.3643621 | 67.7729216 | 70.5433868 | 74.0501546 | 75.0462612 | minute28 |
| 68.3643621 | 67.7729216 | 70.2433868 | 75.0501546 | 75.0462612 | minute29 |
| 68.3643621 | 69.7729216 | 70.3433868 | 76.0501546 | 75.0462612 | minute30 |
| 68.3643621 | 70.7729216 | 70.5433868 | 76.0501546 | 75.0462612 | minute31 |
| 68.3643621 | 71.7729216 | 70.6433868 | 76.0501546 | 75.0462612 | minute32 |
| 68.3643621 | 71.7729216 | 70.6433868 | 76.0501546 | 75.0462612 | minute33 |
| 68.3643621 | 70.7729216 | 70.4433868 | 76.0501546 | 75.0462612 | minute34 |
| 68.3643621 | 71.7729216 | 69.8433868 | 70.0501546 | 74.0462612 | minute35 |
| 70.3643621 | 74.7729216 | 70.4433868 | 69.0501546 | 74.0462612 | minute36 |
| 70.3643621 | 75.7729216 | 70.5433868 | 71.0501546 | 74.0462612 | minute37 |
| 71.3643621 | 75.7729216 | 70.4433868 | 72.0501546 | 74.0462612 | minute38 |
| 71.3643621 | 75.7729216 | 70.7433868 | 72.0501546 | 75.0462612 | minute39 |
| 72.3643621 | 77.7729216 | 71.5433868 | 74.0501546 | 78.0462612 | minute40 |
| 72.3643621 | 78.7729216 | 71.9433868 | 74.0501546 | 78.0462612 | minute41 |
| 72.3643621 | 79.7729216 | 71.8433868 | 74.0501546 | 78.0462612 | minute42 |
| 72.3643621 | 79.7729216 | 71.6433868 | 75.0501546 | 78.0462612 | minute43 |
| 72.3643621 | 79.7729216 | 71.4433868 | 75.0501546 | 80.0462612 | minute44 |
| 72.3643621 | 80.7729216 | 71.5433868 | 76.0501546 | 80.0462612 | minute45 |
| 72.3643621 | 80.7729216 | 71.2433868 | 76.0501546 | 79.0462612 | minute46 |
| 73.3643621 | 80.7729216 | 71.0433868 | 76.0501546 | 75.0462612 | minute47 |
| 74.3643621 | 80.7729216 | 70.7433868 | 76.0501546 | 73.0462612 | minute48 |
| 74.3643621 | 80.7729216 | 70.6433868 | 76.0501546 | 73.0462612 | minute49 |
| 74.3643621 | 80.7729216 | 70.9433868 | 76.0501546 | 72.0462612 | minute50 |
| 74.3643621 | 81.7729216 | 71.0433868 | 76.0501546 | 71.0462612 | minute51 |
| 74.3643621 | 80.7729216 | 70.9433868 | 77.0501546 | 71.0462612 | minute52 |
| 74.3643621 | 79.7729216 | 70.8433868 | 78.0501546 | 70.0462612 | minute53 |
| 74.3643621 | 71.7729216 | 70.3433868 | 78.0501546 | 70.0462612 | minute54 |
| 73.3643621 | 71.7729216 | 70.8433868 | 77.0501546 | 71.0462612 | minute55 |

|            |            |            |            |            |          |
|------------|------------|------------|------------|------------|----------|
| 72.3643621 | 65.7729216 | 70.3433868 | 76.0501546 | 71.0462612 | minute56 |
| 71.3643621 | 65.7729216 | 70.3433868 | 76.0501546 | 71.0462612 | minute57 |
| 71.3643621 | 65.7729216 | 71.1433868 | 78.0501546 | 71.0462612 | minute58 |
| 70.3643621 | 65.7729216 | 71.1433868 | 78.0501546 | 71.0462612 | minute59 |
| 70.3643621 | 65.7729216 | 71.2433868 | 78.0501546 | 71.0462612 | minute60 |
| 70.3643621 | 68.7729216 | 71.4433868 | 78.0501546 | 71.0462612 | Activity |
| 70.3643621 | 68.7729216 | 71.7433868 | 78.0501546 | 76.0462612 | Activity |
| 69.3643621 | 70.7729216 | 72.2433868 | 80.0501546 | 76.0462612 | Activity |
| 68.3643621 | 70.7729216 | 71.9433868 | 80.0501546 | 77.0462612 | Activity |
| 67.3643621 | 70.7729216 | 72.0433868 | 80.0501546 | 77.0462612 | Activity |
| 67.3643621 | 71.7729216 | 72.3433868 | 80.0501546 | 77.0462612 | Activity |
| 67.3643621 | 72.7729216 | 72.7433868 | 80.0501546 | 78.0462612 | Activity |
| 66.3643621 | 72.7729216 | 74.0433868 | 80.0501546 | 86.0462612 | Activity |
| 66.3643621 | 72.7729216 | 75.8433868 | 80.0501546 | 88.0462612 | Activity |
| 66.3643621 | 72.7729216 | 77.0433868 | 80.0501546 | 90.0462612 | Activity |
| 66.3643621 | 72.7729216 | 78.5433868 | 87.0501546 | 92.0462612 | Activity |
| 66.3643621 | 72.7729216 | 78.7433868 | 87.0501546 | 78.7433868 | Activity |
| 66.3643621 | 72.7729216 | 80.2133576 | 87.0501546 | 93.0462612 | Activity |
| 67.3643621 | 76.7729216 | 77.7646286 | 88.0501546 | 77.7646286 | Activity |
| 67.3643621 | 77.7729216 | 78.6433868 | 88.0501546 | 91.0462612 | Activity |
| 68.3643621 | 77.7729216 | 78.2433868 | 88.0501546 | 84.0462612 | Activity |
| 68.3643621 | 79.7729216 | 78.2433868 | 87.0501546 | 84.0462612 | Activity |
| 68.3643621 | 80.7729216 | 77.8433868 | 86.0501546 | 84.0462612 | Activity |
| 68.3643621 | 80.7729216 | 77.2433868 | 86.0501546 | 82.0462612 | Activity |
| 68.3643621 | 81.7729216 | 76.5433868 | 86.0501546 | 79.0462612 | Activity |
| 68.3643621 | 81.7729216 | 76.3433868 | 86.0501546 | 79.0462612 | Activity |
| 67.3643621 | 81.7729216 | 75.7433868 | 86.0501546 | 78.0462612 | Activity |
| 67.3643621 | 81.7729216 | 75.2433868 | 84.0501546 | 78.0462612 | Activity |
| 68.3643621 | 81.7729216 | 75.2433868 | 84.0501546 | 78.0462612 | Activity |
| 69.3643621 | 81.7729216 | 75.0433868 | 84.0501546 | 79.0462612 | Activity |
| 69.3643621 | 82.7729216 | 74.9433868 | 84.0501546 | 79.0462612 | Activity |
| 65.3643621 | 81.7729216 | 74.4433868 | 84.0501546 | 80.0462612 | Activity |
| 62.3643621 | 80.7729216 | 74.2433868 | 86.0501546 | 80.0462612 | Activity |
| 62.3643621 | 80.7729216 | 74.0433868 | 86.0501546 | 80.0462612 | Activity |
| 62.3643621 | 80.7729216 | 74.0433868 | 85.0501546 | 80.0462612 | Activity |
| 65.3643621 | 80.7729216 | 74.2433868 | 85.0501546 | 81.0462612 | Activity |
| 66.3643621 | 80.7729216 | 74.5433868 | 85.0501546 | 82.0462612 | Activity |
| 67.3643621 | 80.7729216 | 74.7433868 | 83.0501546 | 82.0462612 | Activity |
| 67.3643621 | 81.7729216 | 75.2433868 | 83.0501546 | 83.0462612 | Activity |
| 67.3643621 | 81.7729216 | 75.9433868 | 83.0501546 | 84.0462612 | Activity |
| 67.3643621 | 81.7729216 | 76.7433868 | 83.0501546 | 84.0462612 | Activity |
| 67.3643621 | 81.7729216 | 76.9433868 | 83.0501546 | 84.0462612 | Activity |
| 67.3643621 | 81.7729216 | 76.8433868 | 83.0501546 | 84.0462612 | Activity |
| 67.3643621 | 81.7729216 | 75.8433868 | 84.0501546 | 84.0462612 | Activity |
| 67.3643621 | 81.7729216 | 76.3433868 | 89.0501546 | 84.0462612 | Activity |

|            |            |            |            |            |          |
|------------|------------|------------|------------|------------|----------|
| 67.3643621 | 81.7729216 | 76.6433868 | 89.0501546 | 85.0462612 | Activity |
| 68.3643621 | 81.7729216 | 77.1433868 | 91.0501546 | 87.0462612 | Activity |
| 68.3643621 | 81.7729216 | 77.3433868 | 77.3433868 | 87.0462612 | Activity |
| 68.3643621 | 80.7729216 | 77.5433868 | 77.5433868 | 88.0462612 | Activity |
| 70.3643621 | 78.7729216 | 77.1433868 | 77.1433868 | 88.0462612 | Activity |
| 71.3643621 | 75.7729216 | 76.8433868 | 76.8433868 | 90.0462612 | Activity |
| 71.3643621 | 75.7729216 | 76.7433868 | 76.7433868 | 88.0462612 | Activity |
| 71.3643621 | 75.7729216 | 75.9433868 | 75.9433868 | 80.0462612 | Activity |
| 70.3643621 | 75.7729216 | 74.9433868 | 74.9433868 | 78.0462612 | Activity |
| 70.3643621 | 75.7729216 | 74.1433868 | 74.1433868 | 77.0462612 | Activity |
| 69.3643621 | 75.7729216 | 74.0433868 | 74.0433868 | 77.0462612 | Activity |
| 68.3643621 | 74.7729216 | 73.6433868 | 73.6433868 | 77.0462612 | Activity |
| 68.3643621 | 77.7729216 | 73.1433868 | 73.1433868 | 77.0462612 | Activity |
| 68.3643621 | 77.7729216 | 73.2433868 | 73.2433868 | 77.0462612 | Activity |
| 68.3643621 | 78.7729216 | 73.3433868 | 73.3433868 | 77.0462612 | Activity |
| 68.3643621 | 78.7729216 | 73.7433868 | 73.7433868 | 80.0462612 | Activity |
| 68.3643621 | 78.7729216 | 73.6433868 | 73.6433868 | 80.0462612 | Activity |
| 68.3643621 | 78.7729216 | 73.9433868 | 73.9433868 | 80.0462612 | Activity |
| 68.3643621 | 76.7729216 | 73.9433868 | 73.9433868 | 80.0462612 | Activity |
| 66.3643621 | 76.7729216 | 74.0433868 | 74.0433868 | 80.0462612 | Activity |
| 66.3643621 | 76.7729216 | 74.6433868 | 74.6433868 | 81.0462612 | Activity |
| 66.3643621 | 76.7729216 | 74.6433868 | 74.6433868 | 81.0462612 | Activity |
| 66.3643621 | 73.7729216 | 74.3433868 | 74.3433868 | 81.0462612 | Activity |
| 67.3643621 | 63.7729216 | 73.3433868 | 73.3433868 | 81.0462612 | Activity |
| 67.3643621 | 62.7729216 | 73.4433868 | 87.0501546 | 83.0462612 | Activity |
| 67.3643621 | 62.7729216 | 73.4433868 | 86.0501546 | 84.0462612 | Activity |
| 67.3643621 | 62.7729216 | 75.5370731 | 86.0501546 | 84.0462612 | Activity |
| 68.3643621 | 62.7729216 | 73.3652908 | 80.0501546 | 84.0462612 | Activity |
| 68.3643621 | 62.7729216 | 73.1433868 | 80.0501546 | 84.0462612 | Activity |
| 68.3643621 | 62.7729216 | 72.9433868 | 80.0501546 | 84.0462612 | Activity |
| 67.3643621 | 62.7729216 | 72.7433868 | 79.0501546 | 84.0462612 | Activity |
| 67.3643621 | 62.7729216 | 72.5433868 | 79.0501546 | 84.0462612 | Activity |
| 67.3643621 | 62.7729216 | 73.4433868 | 79.0501546 | 73.4433868 | Activity |
| 68.3643621 | 62.7729216 | 73.9433868 | 79.0501546 | 73.9433868 | Activity |
| 68.3643621 | 62.7729216 | 74.0433868 | 79.0501546 | 74.0433868 | Activity |
| 68.3643621 | 65.7729216 | 74.2433868 | 78.0501546 | 74.2433868 | Activity |
| 69.3643621 | 65.7729216 | 74.2433868 | 78.0501546 | 74.2433868 | Activity |
| 69.3643621 | 65.7729216 | 74.1433868 | 78.0501546 | 74.1433868 | Activity |
| 69.3643621 | 65.7729216 | 74.1433868 | 79.0501546 | 74.1433868 | Activity |
| 70.3643621 | 64.7729216 | 74.2433868 | 81.0501546 | 74.2433868 | Activity |
| 70.3643621 | 63.7729216 | 74.3433868 | 82.0501546 | 74.3433868 | Activity |
| 67.3643621 | 63.7729216 | 74.5433868 | 82.0501546 | 74.5433868 | Activity |
| 66.3643621 | 63.7729216 | 74.7433868 | 82.0501546 | 74.7433868 | Activity |
| 66.3643621 | 63.7729216 | 74.7433868 | 82.0501546 | 74.7433868 | Activity |
| 66.3643621 | 63.7729216 | 75.0433868 | 81.0501546 | 75.0433868 | Activity |

|            |            |            |            |            |          |
|------------|------------|------------|------------|------------|----------|
| 67.3643621 | 63.7729216 | 74.8433868 | 81.0501546 | 74.8433868 | Activity |
| 67.3643621 | 62.7729216 | 74.6433868 | 80.0501546 | 74.6433868 | minute1  |
| 67.3643621 | 61.7729216 | 73.9433868 | 80.0501546 | 73.9433868 | minute2  |
| 67.3643621 | 60.7729216 | 73.7433868 | 80.0501546 | 73.7433868 | minute3  |
| 66.3643621 | 60.7729216 | 73.1433868 | 80.0501546 | 73.1433868 | minute4  |
| 66.3643621 | 60.7729216 | 73.1433868 | 80.0501546 | 73.1433868 | minute5  |
| 66.3643621 | 60.7729216 | 73.0433868 | 80.0501546 | 73.0433868 | minute6  |
| 66.3643621 | 62.7729216 | 73.1433868 | 80.0501546 | 73.1433868 | minute7  |
| 64.3643621 | 62.7729216 | 72.9433868 | 79.0501546 | 72.9433868 | minute8  |
| 64.3643621 | 62.7729216 | 72.9433868 | 79.0501546 | 72.9433868 | minute9  |
| 64.3643621 | 62.7729216 | 73.1433868 | 79.0501546 | 73.1433868 | minute10 |
| 64.3643621 | 64.7729216 | 73.4433868 | 85.0501546 | 73.4433868 | minute11 |
| 64.3643621 | 64.7729216 | 73.3433868 | 85.0501546 | 73.3433868 | minute12 |
| 64.3643621 | 65.7729216 | 73.3433868 | 85.0501546 | 73.3433868 | minute13 |
| 64.3643621 | 65.7729216 | 72.9433868 | 85.0501546 | 72.9433868 | minute14 |
| 64.3643621 | 65.7729216 | 71.7433868 | 74.0501546 | 71.7433868 | minute15 |
| 65.3643621 | 68.7729216 | 71.3433868 | 70.0501546 | 71.3433868 | minute16 |
| 65.3643621 | 69.7729216 | 71.3433868 | 69.0501546 | 71.3433868 | minute17 |
| 65.3643621 | 69.7729216 | 70.1433868 | 69.0501546 | 70.1433868 | minute18 |
| 64.3643621 | 68.7729216 | 69.9433868 | 68.0501546 | 69.9433868 | minute19 |
| 65.3643621 | 67.7729216 | 69.5433868 | 68.0501546 | 80.0462612 | minute20 |
| 65.3643621 | 67.7729216 | 69.7433868 | 68.0501546 | 80.0462612 | minute21 |
| 68.3643621 | 67.7729216 | 69.7433868 | 67.0501546 | 79.0462612 | minute22 |
| 69.3643621 | 67.7729216 | 69.8433868 | 67.0501546 | 79.0462612 | minute23 |
| 69.3643621 | 67.7729216 | 70.2433868 | 66.0501546 | 78.0462612 | minute24 |
| 69.3643621 | 67.7729216 | 71.5433868 | 66.0501546 | 77.0462612 | minute25 |
| 68.3643621 | 67.7729216 | 71.3433868 | 65.0501546 | 77.0462612 | minute26 |
| 67.3643621 | 67.7729216 | 71.2433868 | 64.0501546 | 77.0462612 | minute27 |
| 67.3643621 | 66.7729216 | 72.0433868 | 64.0501546 | 77.0462612 | minute28 |
| 67.3643621 | 66.7729216 | 72.8433868 | 64.0501546 | 77.0462612 | minute29 |
| 66.3643621 | 64.7729216 | 71.9433868 | 63.0501546 | 76.0462612 | minute30 |
| 65.3643621 | 62.7729216 | 71.8433868 | 63.0501546 | 76.0462612 | minute31 |
| 65.3643621 | 61.7729216 | 70.3433868 | 64.0501546 | 75.0462612 | minute32 |
| 56.3643621 | 61.7729216 | 67.8433868 | 65.0501546 | 73.0462612 | minute33 |
| 54.3643621 | 59.7729216 | 66.8433868 | 65.0501546 | 73.0462612 | minute34 |
| 54.3643621 | 59.7729216 | 66.2921816 | 65.0501546 | 73.0462612 | minute35 |
| 54.3643621 | 59.7729216 | 65.8608581 | 66.0501546 | 71.0462612 | minute36 |
| 52.3643621 | 61.7729216 | 65.8433868 | 66.0501546 | 71.0462612 | minute37 |
| 51.3643621 | 62.7729216 | 65.2433868 | 66.0501546 | 71.0462612 | minute38 |
| 51.3643621 | 63.7729216 | 65.1433868 | 66.0501546 | 71.0462612 | minute39 |
| 51.3643621 | 63.7729216 | 64.9433868 | 66.0501546 | 71.0462612 | minute40 |
| 51.3643621 | 64.7729216 | 65.3433868 | 66.0501546 | 71.0462612 | minute41 |
| 51.3643621 | 65.7729216 | 65.4433868 | 67.0501546 | 71.0462612 | minute42 |
| 50.3643621 | 65.7729216 | 65.2433868 | 67.0501546 | 71.0462612 | minute43 |
| 52.3643621 | 67.7729216 | 64.6433868 | 68.0501546 | 71.0462612 | minute44 |

|            |            |            |            |            |          |
|------------|------------|------------|------------|------------|----------|
| 60.3643621 | 69.7729216 | 65.2433868 | 68.0501546 | 71.0462612 | minute45 |
| 62.3643621 | 77.7729216 | 65.8433868 | 68.0501546 | 71.0462612 | minute46 |
| 62.3643621 | 66.5433868 | 66.5433868 | 69.0501546 | 71.0462612 | minute47 |
| 64.3643621 | 67.1433868 | 67.1433868 | 68.0501546 | 71.0462612 | minute48 |
| 64.3643621 | 67.0433868 | 67.0433868 | 68.0501546 | 71.0462612 | minute49 |
| 64.3643621 | 67.7433868 | 67.7433868 | 68.0501546 | 71.0462612 | minute50 |
| 65.3643621 | 67.9433868 | 67.9433868 | 68.0501546 | 71.0462612 | minute51 |
| 65.3643621 | 68.2433868 | 68.2433868 | 67.0501546 | 71.0462612 | minute52 |
| 66.3643621 | 68.4433868 | 68.4433868 | 66.0501546 | 71.0462612 | minute53 |
| 67.3643621 | 68.5433868 | 68.5433868 | 66.0501546 | 70.0462612 | minute54 |
| 67.3643621 | 68.3433868 | 68.3433868 | 66.0501546 | 70.0462612 | minute55 |
| 67.3643621 | 68.7433868 | 68.7433868 | 66.0501546 | 71.0462612 | minute56 |
| 67.3643621 | 68.9433868 | 68.9433868 | 66.0501546 | 70.0462612 | minute57 |
| 65.3643621 | 69.0433868 | 69.0433868 | 66.0501546 | 71.0462612 | minute58 |
| 65.3643621 | 69.4433868 | 69.4433868 | 66.0501546 | 71.0462612 | minute59 |
| 65.3643621 | 69.8433868 | 69.8433868 | 66.0501546 | 71.0462612 | minute60 |
| 66.3643621 | 70.5433868 | 70.5433868 | 67.0501546 | 71.0462612 | AFTER1   |
| 66.3643621 | 70.5433868 | 70.5433868 | 68.0501546 | 71.0462612 | AFTER2   |
| 66.3643621 | 70.1433868 | 70.1433868 | 68.0501546 | 72.0462612 | AFTER3   |
| 65.3643621 | 69.9433868 | 69.9433868 | 68.0501546 | 72.0462612 | AFTER4   |
| 65.3643621 | 83.7729216 | 69.7433868 | 68.0501546 | 71.0462612 | AFTER5   |
| 66.3643621 | 82.7729216 | 69.0433868 | 68.0501546 | 71.0462612 | AFTER6   |
| 66.3643621 | 68.5433868 | 68.5433868 | 70.0501546 | 70.0462612 | AFTER7   |
| 66.3643621 | 80.7729216 | 68.0433868 | 70.0501546 | 70.0462612 | AFTER8   |
| 66.3643621 | 78.7729216 | 67.7433868 | 69.0501546 | 70.0462612 | AFTER9   |
| 66.3643621 | 77.7729216 | 67.6433868 | 69.0501546 | 70.0462612 | AFTER10  |
| 65.3643621 | 76.7729216 | 67.5433868 | 68.0501546 | 71.0462612 | AFTER11  |
| 65.3643621 | 76.7729216 | 67.8433868 | 68.0501546 | 71.0462612 | AFTER12  |
| 65.3643621 | 76.7729216 | 67.3433868 | 68.0501546 | 71.0462612 | AFTER13  |
| 65.3643621 | 76.7729216 | 67.1433868 | 70.0501546 | 71.0462612 | AFTER14  |
| 65.3643621 | 81.7729216 | 67.9433868 | 70.0501546 | 73.0462612 | AFTER15  |
| 66.3643621 | 68.3433868 | 68.3433868 | 71.0501546 | 74.0462612 | AFTER16  |
| 66.3643621 | 68.3433868 | 68.3433868 | 71.0501546 | 74.0462612 | AFTER17  |
| 66.3643621 | 68.9433868 | 68.9433868 | 71.0501546 | 76.0462612 | AFTER18  |
| 66.3643621 | 68.6433868 | 68.6433868 | 71.0501546 | 76.0462612 | AFTER19  |
| 67.3643621 | 68.2433868 | 68.2433868 | 72.0501546 | 75.0462612 | AFTER20  |
| 67.3643621 | 68.1433868 | 68.1433868 | 73.0501546 | 75.0462612 | AFTER21  |
| 67.3643621 | 67.8433868 | 67.8433868 | 73.0501546 | 75.0462612 | AFTER22  |
| 68.3643621 | 68.0433868 | 68.0433868 | 74.0501546 | 76.0462612 | AFTER23  |
| 68.3643621 | 68.5433868 | 68.5433868 | 73.0501546 | 76.0462612 | AFTER24  |
| 68.3643621 | 68.9433868 | 68.9433868 | 73.0501546 | 76.0462612 | AFTER25  |
| 68.3643621 | 68.8433868 | 68.8433868 | 73.0501546 | 76.0462612 | AFTER26  |
| 68.3643621 | 68.8433868 | 68.8433868 | 73.0501546 | 76.0462612 | AFTER27  |
| 68.3643621 | 68.6433868 | 68.6433868 | 73.0501546 | 74.0462612 | AFTER28  |
| 68.3643621 | 68.6433868 | 68.6433868 | 73.0501546 | 74.0462612 | AFTER29  |

|            |            |            |            |            |         |
|------------|------------|------------|------------|------------|---------|
| 68.3643621 | 68.6456695 | 68.6456695 | 74.0501546 | 71.0462612 | AFTER30 |
| 70.3643621 | 69.1433868 | 69.1433868 | 74.0501546 | 71.0462612 | AFTER31 |
| 71.3643621 | 69.9433868 | 69.9433868 | 74.0501546 | 71.0462612 | AFTER32 |
| 70.3643621 | 69.9433868 | 69.9433868 | 73.0501546 | 71.0462612 | AFTER33 |
| 70.3643621 | 70.0433868 | 70.0433868 | 73.0501546 | 71.0462612 | AFTER34 |
| 70.3643621 | 69.7433868 | 69.7433868 | 73.0501546 | 71.0462612 | AFTER35 |
| 69.3643621 | 69.6433868 | 69.6433868 | 73.0501546 | 71.0462612 | AFTER36 |
| 70.3643621 | 70.0433868 | 70.0433868 | 73.0501546 | 72.0462612 | AFTER37 |
| 70.3643621 | 70.2433868 | 70.2433868 | 73.0501546 | 72.0462612 | AFTER38 |
| 70.3643621 | 70.2433868 | 70.2433868 | 73.0501546 | 72.0462612 | AFTER39 |
| 69.3643621 | 69.7433868 | 69.7433868 | 73.0501546 | 71.0462612 | AFTER40 |
| 69.3643621 | 69.5433868 | 69.5433868 | 72.0501546 | 71.0462612 | AFTER41 |
| 69.3643621 | 69.4433868 | 69.4433868 | 71.0501546 | 71.0462612 | AFTER42 |
| 69.3643621 | 68.8433868 | 68.8433868 | 70.0501546 | 71.0462612 | AFTER43 |
| 70.3643621 | 68.9433868 | 68.9433868 | 69.0501546 | 71.0462612 | AFTER44 |
| 70.3643621 | 68.8433868 | 68.8433868 | 69.0501546 | 70.0462612 | AFTER45 |
| 70.3643621 | 68.5433868 | 68.5433868 | 69.0501546 | 70.0462612 | AFTER46 |
| 70.3643621 | 68.6433868 | 68.6433868 | 68.0501546 | 70.0462612 | AFTER47 |
| 69.3643621 | 68.3433868 | 68.3433868 | 68.0501546 | 70.0462612 | AFTER48 |
| 69.3643621 | 68.4433868 | 68.4433868 | 68.0501546 | 69.0462612 | AFTER49 |
| 69.3643621 | 68.5433868 | 68.5433868 | 66.0501546 | 69.0462612 | AFTER50 |
| 69.3643621 | 68.5433868 | 68.5433868 | 65.0501546 | 69.0462612 | AFTER51 |
| 69.3643621 | 69.6433868 | 69.6433868 | 65.0501546 | 69.0462612 | AFTER52 |
| 69.3643621 | 70.2433868 | 70.2433868 | 64.0501546 | 68.0462612 | AFTER53 |
| 70.3643621 | 70.2433868 | 70.2433868 | 63.0501546 | 68.0462612 | AFTER54 |
| 69.3643621 | 70.5433868 | 70.5433868 | 62.0501546 | 68.0462612 | AFTER55 |
| 69.3643621 | 70.8433868 | 70.8433868 | 62.0501546 | 68.0462612 | AFTER56 |
| 69.3643621 | 70.9433868 | 70.9433868 | 63.0501546 | 68.0462612 | AFTER57 |
| 69.3643621 | 83.7729216 | 70.5433868 | 63.0501546 | 68.0462612 | AFTER58 |
| 68.3643621 | 80.7729216 | 71.2433868 | 69.0501546 | 68.0462612 | AFTER59 |
| 68.3643621 | 79.7729216 | 70.5433868 | 69.0501546 | 67.0462612 | AFTER60 |
| 67.3643621 | 79.7729216 | 70.3433868 | 70.0501546 | 67.0462612 | AFTER61 |
| 67.3643621 | 79.7729216 | 70.2433868 | 70.0501546 | 66.0462612 | AFTER62 |
| 66.3643621 | 81.7729216 | 70.5433868 | 70.0501546 | 67.0462612 | AFTER63 |
| 66.3643621 | 82.7729216 | 70.7433868 | 71.0501546 | 67.0462612 | AFTER64 |
| 65.3643621 | 81.7729216 | 70.6433868 | 71.0501546 | 67.0462612 | AFTER65 |
| 65.3643621 | 81.7729216 | 70.5433868 | 71.0501546 | 67.0462612 | AFTER66 |
| 65.3643621 | 81.7729216 | 70.5433868 | 72.0501546 | 67.0462612 | AFTER67 |
| 64.3643621 | 81.7729216 | 69.9433868 | 73.0501546 | 67.0462612 | AFTER68 |
| 64.3643621 | 82.7729216 | 69.5433868 | 72.0501546 | 67.0462612 | AFTER69 |
| 64.3643621 | 82.7729216 | 69.6433868 | 72.0501546 | 67.0462612 | AFTER70 |
| 64.3643621 | 82.7729216 | 69.7433868 | 72.0501546 | 67.0462612 | AFTER71 |
| 65.3643621 | 82.7729216 | 69.5433868 | 71.0501546 | 67.0462612 | AFTER72 |
| 65.3643621 | 82.7729216 | 69.2433868 | 72.0501546 | 67.0462612 | AFTER73 |
| 65.3643621 | 82.7729216 | 69.4433868 | 73.0501546 | 67.0462612 | AFTER74 |

|            |            |            |            |            |          |
|------------|------------|------------|------------|------------|----------|
| 66.3643621 | 82.7729216 | 69.3433868 | 73.0501546 | 67.0462612 | AFTER75  |
| 66.3643621 | 82.7729216 | 69.4433868 | 73.0501546 | 67.0462612 | AFTER76  |
| 64.3643621 | 82.7729216 | 69.2433868 | 73.0501546 | 68.0462612 | AFTER77  |
| 64.3643621 | 69.8433868 | 69.8433868 | 74.0501546 | 67.0462612 | AFTER78  |
| 64.3643621 | 70.1433868 | 70.1433868 | 74.0501546 | 67.0462612 | AFTER79  |
| 63.3643621 | 70.2433868 | 70.2433868 | 74.0501546 | 66.0462612 | AFTER80  |
| 63.3643621 | 70.5433868 | 70.5433868 | 74.0501546 | 66.0462612 | AFTER81  |
| 61.3643621 | 70.9433868 | 70.9433868 | 76.0501546 | 66.0462612 | AFTER82  |
| 61.3643621 | 70.8366348 | 70.8366348 | 76.0501546 | 66.0462612 | AFTER83  |
| 61.3643621 | 72.0310587 | 72.0310587 | 76.0501546 | 67.0462612 | AFTER84  |
| 68.3643621 | 71.9433868 | 71.9433868 | 76.0501546 | 69.0462612 | AFTER85  |
| 68.3643621 | 72.1433868 | 72.1433868 | 76.0501546 | 71.0462612 | AFTER86  |
| 68.3643621 | 71.9433868 | 71.9433868 | 76.0501546 | 71.0462612 | AFTER87  |
| 67.3643621 | 85.7729216 | 71.7433868 | 76.0501546 | 71.0462612 | AFTER88  |
| 67.3643621 | 84.7729216 | 72.0433868 | 77.0501546 | 71.0462612 | AFTER89  |
| 67.3643621 | 84.7729216 | 72.1433868 | 77.0501546 | 71.0462612 | AFTER90  |
| 68.3643621 | 83.7729216 | 72.0433868 | 77.0501546 | 71.0462612 | AFTER91  |
| 68.3643621 | 84.7729216 | 72.2433868 | 77.0501546 | 71.0462612 | AFTER92  |
| 68.3643621 | 72.6433868 | 72.6433868 | 77.0501546 | 71.0462612 | AFTER93  |
| 68.3643621 | 73.4433868 | 73.4433868 | 77.0501546 | 72.0462612 | AFTER94  |
| 69.3643621 | 75.2433868 | 75.2433868 | 77.0501546 | 72.0462612 | AFTER95  |
| 69.3643621 | 75.9433868 | 75.9433868 | 77.0501546 | 72.0462612 | AFTER96  |
| 69.3643621 | 76.0433868 | 76.0433868 | 78.0501546 | 72.0462612 | AFTER97  |
| 68.3643621 | 75.0433868 | 75.0433868 | 78.0501546 | 72.0462612 | AFTER98  |
| 65.3643621 | 74.6433868 | 74.6433868 | 78.0501546 | 72.0462612 | AFTER99  |
| 65.3643621 | 73.2433868 | 73.2433868 | 78.0501546 | 71.0462612 | AFTER100 |
| 64.3643621 | 80.7729216 | 71.5433868 | 78.0501546 | 71.0462612 | AFTER101 |
| 64.3643621 | 80.7729216 | 71.7433868 | 78.0501546 | 70.0462612 | AFTER102 |
| 64.3643621 | 79.7729216 | 71.5433868 | 78.0501546 | 70.0462612 | AFTER103 |
| 64.3643621 | 77.7729216 | 71.3433868 | 78.0501546 | 70.0462612 | AFTER104 |
| 64.3643621 | 75.7729216 | 71.0433868 | 78.0501546 | 70.0462612 | AFTER105 |
| 65.3643621 | 72.7729216 | 71.3433868 | 81.0501546 | 70.0462612 | AFTER106 |
| 66.3643621 | 72.7729216 | 71.1433868 | 81.0501546 | 70.0462612 | AFTER107 |
| 66.3643621 | 70.7729216 | 70.8433868 | 82.0501546 | 70.0462612 | AFTER108 |
| 66.3643621 | 69.7729216 | 70.5433868 | 83.0501546 | 71.0462612 | AFTER109 |
| 67.3643621 | 69.7729216 | 70.5433868 | 82.0501546 | 71.0462612 | AFTER110 |
| 67.3643621 | 68.7729216 | 70.0433868 | 82.0501546 | 71.0462612 | AFTER111 |
| 66.3643621 | 68.7729216 | 69.6433868 | 78.0501546 | 71.0462612 | AFTER112 |
| 66.3643621 | 67.7729216 | 69.7433868 | 78.0501546 | 72.0462612 | AFTER113 |
| 66.3643621 | 66.7729216 | 69.4433868 | 76.0501546 | 74.0462612 | AFTER114 |
| 66.3643621 | 65.7729216 | 69.2433868 | 75.0501546 | 74.0462612 | AFTER115 |
| 66.3643621 | 66.7729216 | 68.8433868 | 72.0501546 | 72.0462612 | AFTER116 |
| 65.3643621 | 66.7729216 | 68.2433868 | 67.0501546 | 72.0462612 | AFTER117 |
| 64.3643621 | 66.7729216 | 68.5433868 | 67.0501546 | 72.0462612 | AFTER118 |
| 64.3643621 | 68.7729216 | 68.7433868 | 67.0501546 | 72.0462612 | AFTER119 |



|            |            |            |            |            |          |
|------------|------------|------------|------------|------------|----------|
| 64.3643621 | 69.7729216 | 68.5433868 | 66.0501546 | 72.0462612 | AFTER120 |
| 64.3643621 | 69.7729216 | 68.8433868 | 66.0501546 | 72.0462612 | AFTER121 |
| 62.3643621 | 69.7729216 | 68.1433868 | 63.0501546 | 72.0462612 | AFTER122 |
| 61.3643621 | 69.7729216 | 68.0433868 | 63.0501546 | 71.0462612 | AFTER123 |
| 61.3643621 | 69.7729216 | 67.8433868 | 61.0501546 | 71.0462612 | AFTER124 |
| 61.3643621 | 68.7729216 | 67.8433868 | 61.0501546 | 70.0462612 | AFTER125 |
| 62.3643621 | 67.7729216 | 67.5433868 | 60.0501546 | 70.0462612 | AFTER126 |
| 63.3643621 | 68.7729216 | 67.6433868 | 60.0501546 | 69.0462612 | AFTER127 |
| 63.3643621 | 68.7729216 | 67.6433868 | 60.0501546 | 69.0462612 | AFTER128 |
| 63.3643621 | 69.7729216 | 68.1433868 | 60.0501546 | 74.0462612 | AFTER129 |
| 63.3643621 | 70.7729216 | 68.2433868 | 60.0501546 | 75.0462612 | AFTER130 |
| 63.3643621 | 70.7729216 | 68.1433868 | 59.0501546 | 76.0462612 | AFTER131 |
| 63.3643621 | 70.7729216 | 67.6433868 | 59.0501546 | 76.0462612 | AFTER132 |
| 63.3643621 | 71.7729216 | 67.6433868 | 59.0501546 | 76.0462612 | AFTER133 |
| 63.3643621 | 73.7729216 | 68.0433868 | 60.0501546 | 76.0462612 | AFTER134 |
| 64.3643621 | 73.7729216 | 68.2433868 | 60.0501546 | 76.0462612 | AFTER135 |
| 66.3643621 | 74.7729216 | 68.4433868 | 60.0501546 | 76.0462612 | AFTER136 |
| 66.3643621 | 74.7729216 | 68.6451977 | 60.0501546 | 76.0462612 | AFTER137 |
| 68.3643621 | 75.7729216 | 69.6433868 | 65.0501546 | 75.0462612 | AFTER138 |
| 69.3643621 | 75.7729216 | 69.9433868 | 67.0501546 | 75.0462612 | AFTER139 |
| 68.3643621 | 75.7729216 | 69.8433868 | 67.0501546 | 73.0462612 | AFTER140 |
| 68.3643621 | 73.7729216 | 69.5433868 | 67.0501546 | 72.0462612 | AFTER141 |
| 69.3643621 | 73.7729216 | 70.0433868 | 68.0501546 | 72.0462612 | AFTER142 |
| 70.3643621 | 73.7729216 | 70.3433868 | 68.0501546 | 73.0462612 | AFTER143 |
| 70.3643621 | 73.7729216 | 70.3433868 | 68.0501546 | 73.0462612 | AFTER144 |
| 70.3643621 | 72.7729216 | 70.5433868 | 71.0501546 | 73.0462612 | AFTER145 |
| 70.3643621 | 72.7729216 | 70.6433868 | 71.0501546 | 75.0462612 | AFTER146 |
| 70.3643621 | 69.7729216 | 70.2433868 | 72.0501546 | 75.0462612 | AFTER147 |
| 70.3643621 | 69.7729216 | 70.8433868 | 72.0501546 | 75.0462612 | AFTER148 |
| 71.3643621 | 69.7729216 | 71.0433868 | 73.0501546 | 73.0462612 | AFTER149 |
| 70.3643621 | 68.7729216 | 71.2433868 | 73.0501546 | 73.0462612 | AFTER150 |
| 70.3643621 | 68.7729216 | 71.5433868 | 72.0501546 | 73.0462612 | AFTER151 |
| 70.3643621 | 68.7729216 | 71.3433868 | 72.0501546 | 70.0462612 | AFTER152 |
| 69.3643621 | 68.7729216 | 71.2433868 | 72.0501546 | 69.0462612 | AFTER153 |
| 69.3643621 | 68.7729216 | 71.3433868 | 71.0501546 | 69.0462612 | AFTER154 |
| 68.3643621 | 68.7729216 | 71.1433868 | 71.0501546 | 69.0462612 | AFTER155 |
| 68.3643621 | 68.7729216 | 71.4433868 | 69.0501546 | 69.0462612 | AFTER156 |
| 68.3643621 | 67.7729216 | 71.3433868 | 67.0501546 | 69.0462612 | AFTER157 |
| 68.3643621 | 62.7729216 | 70.3433868 | 66.0501546 | 69.0462612 | AFTER158 |
| 68.3643621 | 61.7729216 | 70.0433868 | 66.0501546 | 69.0462612 | AFTER159 |
| 69.3643621 | 61.7729216 | 69.2433868 | 66.0501546 | 68.0462612 | AFTER160 |
| 69.3643621 | 60.7729216 | 68.5433868 | 65.0501546 | 68.0462612 | AFTER161 |
| 69.3643621 | 59.7729216 | 69.0433868 | 70.0501546 | 68.0462612 | AFTER162 |
| 68.3643621 | 59.7729216 | 69.2433868 | 76.0501546 | 68.0462612 | AFTER163 |
| 69.3643621 | 59.7729216 | 69.1433868 | 76.0501546 | 68.0462612 | AFTER164 |

|            |            |            |            |            |          |
|------------|------------|------------|------------|------------|----------|
| 69.3643621 | 59.7729216 | 69.4433868 | 78.0501546 | 68.0462612 | AFTER165 |
| 68.3643621 | 61.7729216 | 69.6433868 | 78.0501546 | 69.0462612 | AFTER166 |
| 68.3643621 | 61.7729216 | 70.7433868 | 79.0501546 | 69.0462612 | AFTER167 |
| 68.3643621 | 62.7729216 | 71.8433868 | 79.0501546 | 71.0462612 | AFTER168 |
| 67.3643621 | 63.7729216 | 72.3433868 | 79.0501546 | 73.0462612 | AFTER169 |
| 66.3643621 | 64.7729216 | 72.2433868 | 79.0501546 | 73.0462612 | AFTER170 |
| 66.3643621 | 64.7729216 | 72.2433868 | 79.0501546 | 75.0462612 | AFTER171 |
| 66.3643621 | 64.7729216 | 71.3433868 | 78.0501546 | 75.0462612 | AFTER172 |
| 66.3643621 | 64.7729216 | 70.6433868 | 78.0501546 | 75.0462612 | AFTER173 |
| 66.3643621 | 61.7729216 | 69.7433868 | 76.0501546 | 74.0462612 | AFTER174 |
| 66.3643621 | 61.7729216 | 67.8433868 | 74.0501546 | 74.0462612 | AFTER175 |
| 66.3643621 | 60.7729216 | 67.1433868 | 74.0501546 | 74.0462612 | AFTER176 |
| 66.3643621 | 59.7729216 | 66.3433868 | 73.0501546 | 74.0462612 | AFTER177 |
| 66.3643621 | 59.7729216 | 66.1433868 | 73.0501546 | 74.0462612 | AFTER178 |
| 64.3643621 | 59.7729216 | 65.4433868 | 73.0501546 | 73.0462612 | AFTER179 |
| 63.3643621 | 59.7729216 | 65.1433868 | 74.0501546 | 72.0462612 | AFTER180 |
| 63.3643621 | 59.7729216 | 65.0433868 | 75.0501546 | 71.0462612 | AFTER181 |
| 62.3643621 | 59.7729216 | 65.0433868 | 73.0501546 | 71.0462612 | AFTER182 |
| 62.3643621 | 59.7729216 | 65.1433868 | 71.0501546 | 70.0462612 | AFTER183 |
| 62.3643621 | 59.7729216 | 65.5433868 | 71.0501546 | 70.0462612 | AFTER184 |
| 61.3643621 | 59.7729216 | 65.3433868 | 71.0501546 | 70.0462612 | AFTER185 |
| 61.3643621 | 59.7729216 | 65.3433868 | 71.0501546 | 70.0462612 | AFTER186 |
| 61.3643621 | 60.7729216 | 64.9433868 | 71.0501546 | 69.0462612 | AFTER187 |
| 56.3643621 | 60.7729216 | 64.1433868 | 71.0501546 | 69.0462612 | AFTER188 |
| 59.3643621 | 60.7729216 | 64.3433868 | 71.0501546 | 69.0462612 | AFTER189 |
| 62.3643621 | 60.7729216 | 64.8433868 | 73.0501546 | 69.0462612 | AFTER190 |
| 62.3643621 | 60.7729216 | 65.2403656 | 73.0501546 | 69.0462612 | AFTER191 |
| 62.3643621 | 57.7729216 | 64.6991522 | 73.0501546 | 70.0462612 | AFTER192 |
| 62.3643621 | 58.7729216 | 65.8433868 | 74.0501546 | 70.0462612 | AFTER193 |
| 70.3643621 | 58.7729216 | 66.8433868 | 74.0501546 | 70.0462612 | AFTER194 |
| 72.3643621 | 58.7729216 | 67.3433868 | 75.0501546 | 70.0462612 | AFTER195 |
| 72.3643621 | 58.7729216 | 67.5433868 | 74.0501546 | 70.0462612 | AFTER196 |
| 72.3643621 | 58.7729216 | 67.4433868 | 75.0501546 | 71.0462612 | AFTER197 |
| 72.3643621 | 58.7729216 | 67.5433868 | 75.0501546 | 71.0462612 | AFTER198 |
| 73.3643621 | 58.7729216 | 67.7433868 | 75.0501546 | 72.0462612 | AFTER199 |
| 71.3643621 | 58.7729216 | 67.5433868 | 75.0501546 | 72.0462612 | AFTER200 |
| 70.3643621 | 60.7729216 | 67.7433868 | 76.0501546 | 72.0462612 | AFTER201 |
| 70.3643621 | 60.7729216 | 68.0433868 | 76.0501546 | 72.0462612 | AFTER202 |
| 70.3643621 | 60.7729216 | 68.0433868 | 76.0501546 | 73.0462612 | AFTER203 |
| 70.3643621 | 60.7729216 | 67.9433868 | 75.0501546 | 73.0462612 | AFTER204 |
| 70.3643621 | 60.7729216 | 67.5433868 | 73.0501546 | 72.0462612 | AFTER205 |
| 70.3643621 | 60.7729216 | 67.6433868 | 73.0501546 | 72.0462612 | AFTER206 |
| 70.3643621 | 60.7729216 | 67.6433868 | 73.0501546 | 72.0462612 | AFTER207 |
| 70.3643621 | 60.7729216 | 67.5433868 | 73.0501546 | 72.0462612 | AFTER208 |
| 69.3643621 | 61.7729216 | 67.2433868 | 72.0501546 | 72.0462612 | AFTER209 |

|            |            |            |            |            |          |
|------------|------------|------------|------------|------------|----------|
| 69.3643621 | 61.7729216 | 67.2433868 | 72.0501546 | 72.0462612 | AFTER210 |
| 70.3643621 | 62.7729216 | 67.3433868 | 69.0501546 | 73.0462612 | AFTER211 |
| 70.3643621 | 62.7729216 | 67.6433868 | 71.0501546 | 75.0462612 | AFTER212 |
| 70.3643621 | 62.7729216 | 67.3433868 | 72.0501546 | 75.0462612 | AFTER213 |
| 68.3643621 | 63.7729216 | 67.2433868 | 72.0501546 | 74.0462612 | AFTER214 |
| 68.3643621 | 63.7729216 | 67.1433868 | 72.0501546 | 74.0462612 | AFTER215 |
| 68.3643621 | 62.7729216 | 67.4433868 | 73.0501546 | 75.0462612 | AFTER216 |
| 68.3643621 | 62.7729216 | 67.9433868 | 73.0501546 | 78.0462612 | AFTER217 |
| 68.3643621 | 62.7729216 | 68.0433868 | 73.0501546 | 78.0462612 | AFTER218 |
| 67.3643621 | 62.7729216 | 68.5433868 | 74.0501546 | 68.5433868 | AFTER219 |
| 64.3643621 | 62.7729216 | 68.4433868 | 72.0501546 | 68.4433868 | AFTER220 |
| 64.3643621 | 63.7729216 | 68.8433868 | 72.0501546 | 68.8433868 | AFTER221 |
| 64.3643621 | 65.7729216 | 68.8433868 | 69.0501546 | 68.8433868 | AFTER222 |
| 64.3643621 | 66.7729216 | 68.8433868 | 70.0501546 | 68.8433868 | AFTER223 |
| 64.3643621 | 66.7729216 | 68.7433868 | 71.0501546 | 68.7433868 | AFTER224 |
| 64.3643621 | 67.7729216 | 68.0433868 | 72.0501546 | 76.0462612 | AFTER225 |
| 65.3643621 | 67.7729216 | 68.1433868 | 73.0501546 | 76.0462612 | AFTER226 |
| 66.3643621 | 67.7729216 | 68.5433868 | 73.0501546 | 76.0462612 | AFTER227 |
| 66.3643621 | 68.7729216 | 68.7433868 | 73.0501546 | 76.0462612 | AFTER228 |
| 66.3643621 | 69.7729216 | 69.0433868 | 73.0501546 | 75.0462612 | AFTER229 |
| 66.3643621 | 69.7729216 | 69.1433868 | 73.0501546 | 75.0462612 | AFTER230 |
| 66.3643621 | 69.7729216 | 69.1433868 | 74.0501546 | 74.0462612 | AFTER231 |
| 66.3643621 | 69.7729216 | 69.1433868 | 76.0501546 | 73.0462612 | AFTER232 |
| 66.3643621 | 69.7729216 | 69.1433868 | 76.0501546 | 70.0462612 | AFTER233 |
| 66.3643621 | 69.7729216 | 69.1433868 | 76.0501546 | 70.0462612 | AFTER234 |
| 66.3643621 | 69.7729216 | 68.7433868 | 76.0501546 | 70.0462612 | AFTER235 |
| 66.3643621 | 69.7729216 | 68.6433868 | 74.0501546 | 70.0462612 | AFTER236 |
| 66.3643621 | 69.7729216 | 68.5433868 | 72.0501546 | 69.0462612 | AFTER237 |
| 66.3643621 | 69.7729216 | 68.2433868 | 72.0501546 | 66.0462612 | AFTER238 |
| 66.3643621 | 69.7729216 | 68.3433868 | 72.0501546 | 65.0462612 | AFTER239 |
| 66.3643621 | 69.7729216 | 68.3433868 | 72.0501546 | 64.0462612 | AFTER240 |
| 67.3643621 | 69.7729216 | 68.9433868 | 72.0501546 | 64.0462612 |          |
| 66.3643621 | 69.7729216 | 68.4433868 | 72.0501546 | 64.0462612 |          |
| 66.3643621 | 69.7729216 | 67.8433868 | 73.0501546 | 63.0462612 |          |
| 67.3643621 | 70.7729216 | 67.8433868 | 73.0501546 | 63.0462612 |          |
| 67.3643621 | 70.7729216 | 67.5675559 | 73.0501546 | 63.0462612 |          |
| 67.3643621 | 70.7729216 | 68.3643957 | 73.0501546 | 64.0462612 |          |
| 66.3643621 | 70.7729216 | 67.9433868 | 74.0501546 | 64.0462612 |          |
| 65.3643621 | 71.7729216 | 67.9433868 | 72.0501546 | 66.0462612 |          |
| 66.3643621 | 71.7729216 | 68.0433868 | 71.0501546 | 69.0462612 |          |
| 67.3643621 | 71.7729216 | 69.0433868 | 72.0501546 | 76.0462612 |          |
| 68.3643621 | 71.7729216 | 69.4433868 | 72.0501546 | 80.0462612 |          |
| 68.3643621 | 71.7729216 | 69.8433868 | 74.0501546 | 80.0462612 |          |
| 68.3643621 | 71.7729216 | 69.6433868 | 74.0501546 | 80.0462612 |          |
| 68.3643621 | 71.7729216 | 69.8433868 | 75.0501546 | 80.0462612 |          |

|            |            |            |            |            |
|------------|------------|------------|------------|------------|
| 68.3643621 | 71.7729216 | 70.3433868 | 75.0501546 | 82.0462612 |
| 68.3643621 | 70.7729216 | 70.3433868 | 75.0501546 | 82.0462612 |
| 68.3643621 | 70.7729216 | 70.3433868 | 76.0501546 | 81.0462612 |
| 68.3643621 | 68.7729216 | 70.7433868 | 76.0501546 | 81.0462612 |
| 68.3643621 | 65.7729216 | 69.9433868 | 76.0501546 | 77.0462612 |
| 67.3643621 | 65.7729216 | 69.8433868 | 76.0501546 | 77.0462612 |
| 67.3643621 | 65.7729216 | 69.7433868 | 78.0501546 | 75.0462612 |
| 68.3643621 | 65.7729216 | 69.6433868 | 79.0501546 | 72.0462612 |
| 68.3643621 | 65.7729216 | 69.4433868 | 79.0501546 | 70.0462612 |
| 68.3643621 | 64.7729216 | 69.2433868 | 79.0501546 | 70.0462612 |
| 68.3643621 | 64.7729216 | 69.2433868 | 80.0501546 | 69.0462612 |
| 68.3643621 | 64.7729216 | 69.3433868 | 80.0501546 | 69.0462612 |
| 68.3643621 | 64.7729216 | 68.5433868 | 80.0501546 | 69.0462612 |
| 68.3643621 | 64.7729216 | 68.0433868 | 80.0501546 | 69.0462612 |
| 68.3643621 | 64.7729216 | 68.4433868 | 80.0501546 | 69.0462612 |
| 68.3643621 | 64.7729216 | 68.1433868 | 79.0501546 | 69.0462612 |
| 69.3643621 | 65.7729216 | 68.2433868 | 78.0501546 | 70.0462612 |
| 69.3643621 | 65.7729216 | 68.2433868 | 78.0501546 | 70.0462612 |
| 69.3643621 | 65.7729216 | 67.8433868 | 75.0501546 | 70.0462612 |
| 69.3643621 | 65.7729216 | 68.0433868 | 75.0501546 | 70.0462612 |
| 68.3643621 | 65.7729216 | 67.9433868 | 74.0501546 | 70.0462612 |
| 67.3643621 | 65.7729216 | 67.2433868 | 73.0501546 | 70.0462612 |
| 67.3643621 | 66.7729216 | 67.1433868 | 72.0501546 | 70.0462612 |
| 67.3643621 | 66.7729216 | 67.0433868 | 70.0501546 | 70.0462612 |
| 67.3643621 | 66.7729216 | 67.6433868 | 70.0501546 | 70.0462612 |
| 68.3643621 | 66.7729216 | 68.4433868 | 70.0501546 | 70.0462612 |
| 69.3643621 | 66.7729216 | 68.4433868 | 70.0501546 | 70.0462612 |
| 69.3643621 | 66.7729216 | 69.0433868 | 70.0501546 | 74.0462612 |
| 69.3643621 | 66.7729216 | 68.8433868 | 70.0501546 | 73.0462612 |
| 68.3643621 | 66.7729216 | 68.8433868 | 70.0501546 | 72.0462612 |
| 68.3643621 | 67.7729216 | 69.1433868 | 70.0501546 | 72.0462612 |
| 68.3643621 | 68.7729216 | 69.8433868 | 70.0501546 | 72.0462612 |
| 67.3643621 | 68.7729216 | 69.7433868 | 70.0501546 | 72.0462612 |
| 67.3643621 | 68.7729216 | 69.8433868 | 71.0501546 | 72.0462612 |
| 67.3643621 | 68.7729216 | 69.5433868 | 72.0501546 | 71.0462612 |
| 68.3643621 | 68.7729216 | 69.4433868 | 72.0501546 | 71.0462612 |
| 68.3643621 | 67.7729216 | 69.5433868 | 73.0501546 | 71.0462612 |
| 68.3643621 | 67.7729216 | 69.9433868 | 73.0501546 | 71.0462612 |
| 68.3643621 | 67.7729216 | 69.5433868 | 76.0501546 | 71.0462612 |
| 67.3643621 | 68.7729216 | 69.8433868 | 80.0501546 | 71.0462612 |
| 67.3643621 | 68.7729216 | 69.8433868 | 81.0501546 | 71.0462612 |
| 66.3643621 | 70.7729216 | 69.6433868 | 81.0501546 | 70.0462612 |
| 65.3643621 | 70.7729216 | 69.5433868 | 81.0501546 | 69.0462612 |
| 66.3643621 | 70.7729216 | 69.2433868 | 81.0501546 | 68.0462612 |
| 66.3643621 | 70.7729216 | 68.8962701 | 81.0501546 | 68.0462612 |

|            |            |            |            |            |
|------------|------------|------------|------------|------------|
| 66.3643621 | 71.7729216 | 68.2532809 | 82.0501546 | 68.0462612 |
| 66.3643621 | 71.7729216 | 68.8433868 | 82.0501546 | 68.0462612 |
| 66.3643621 | 71.7729216 | 68.9433868 | 82.0501546 | 70.0462612 |
| 67.3643621 | 70.7729216 | 68.7433868 | 82.0501546 | 70.0462612 |
| 67.3643621 | 70.7729216 | 68.3433868 | 79.0501546 | 70.0462612 |
| 67.3643621 | 69.7729216 | 67.4433868 | 77.0501546 | 70.0462612 |
| 68.3643621 | 69.7729216 | 68.4433868 | 77.0501546 | 70.0462612 |
| 68.3643621 | 69.7729216 | 68.4433868 | 77.0501546 | 70.0462612 |
| 68.3643621 | 69.7729216 | 68.0433868 | 77.0501546 | 69.0462612 |
| 68.3643621 | 68.7729216 | 67.9433868 | 78.0501546 | 69.0462612 |
| 68.3643621 | 68.7729216 | 68.2433868 | 78.0501546 | 69.0462612 |
| 68.3643621 | 67.7729216 | 67.9433868 | 78.0501546 | 68.0462612 |
| 69.3643621 | 67.7729216 | 68.3433868 | 78.0501546 | 67.0462612 |
| 69.3643621 | 69.7729216 | 68.6433868 | 78.0501546 | 71.0462612 |
| 68.3643621 | 69.7729216 | 68.7433868 | 79.0501546 | 72.0462612 |
| 68.3643621 | 69.7729216 | 68.8433868 | 80.0501546 | 72.0462612 |
| 69.3643621 | 70.7729216 | 69.0433868 | 80.0501546 | 73.0462612 |
| 69.3643621 | 70.7729216 | 69.3433868 | 81.0501546 | 73.0462612 |
| 69.3643621 | 70.7729216 | 69.0433868 | 81.0501546 | 73.0462612 |
| 69.3643621 | 71.7729216 | 69.5433868 | 83.0501546 | 73.0462612 |
| 69.3643621 | 73.7729216 | 69.3433868 | 69.3433868 | 73.0462612 |
| 69.3643621 | 73.7729216 | 69.3433868 | 69.3433868 | 72.0462612 |
| 68.3643621 | 74.7729216 | 69.3433868 | 69.3433868 | 72.0462612 |
| 68.3643621 | 77.7729216 | 69.6433868 | 69.6433868 | 72.0462612 |
| 68.3643621 | 77.7729216 | 69.6433868 | 69.6433868 | 72.0462612 |
| 66.3643621 | 77.7729216 | 69.5433868 | 69.5433868 | 72.0462612 |
| 66.3643621 | 77.7729216 | 69.6433868 | 69.6433868 | 71.0462612 |
| 66.3643621 | 77.7729216 | 69.7433868 | 69.7433868 | 71.0462612 |
| 66.3643621 | 77.7729216 | 70.3433868 | 70.3433868 | 72.0462612 |
| 69.3643621 | 76.7729216 | 70.8433868 | 70.8433868 | 73.0462612 |
| 69.3643621 | 76.7729216 | 70.7433868 | 70.7433868 | 73.0462612 |
| 69.3643621 | 76.7729216 | 70.6433868 | 70.6433868 | 73.0462612 |
| 69.3643621 | 76.7729216 | 70.5433868 | 70.5433868 | 74.0462612 |
| 69.3643621 | 77.7729216 | 70.7433868 | 70.7433868 | 73.0462612 |
| 69.3643621 | 77.7729216 | 70.3433868 | 83.0501546 | 72.0462612 |
| 68.3643621 | 77.7729216 | 70.1433868 | 83.0501546 | 72.0462612 |
| 67.3643621 | 77.7729216 | 69.6433868 | 78.0501546 | 72.0462612 |
| 67.3643621 | 78.7729216 | 69.2433868 | 76.0501546 | 71.0462612 |
| 67.3643621 | 79.7729216 | 70.1433868 | 76.0501546 | 70.0462612 |
| 67.3643621 | 79.7729216 | 70.1433868 | 76.0501546 | 70.0462612 |
| 67.3643621 | 79.7729216 | 70.5433868 | 76.0501546 | 70.0462612 |
| 66.3643621 | 79.7729216 | 69.8433868 | 76.0501546 | 70.0462612 |
| 66.3643621 | 77.7729216 | 69.7433868 | 76.0501546 | 70.0462612 |
| 67.3643621 | 77.7729216 | 70.3433868 | 76.0501546 | 70.0462612 |
| 67.3643621 | 74.7729216 | 69.5433868 | 76.0501546 | 70.0462612 |

|            |            |            |            |            |
|------------|------------|------------|------------|------------|
| 67.3643621 | 72.7729216 | 69.3433868 | 75.0501546 | 70.0462612 |
| 67.3643621 | 72.7729216 | 69.0433868 | 75.0501546 | 70.0462612 |
| 67.3643621 | 69.7729216 | 68.4433868 | 74.0501546 | 70.0462612 |
| 67.3643621 | 68.7729216 | 68.0433868 | 74.0501546 | 70.0462612 |
| 67.3643621 | 68.7729216 | 67.9433868 | 74.0501546 | 70.0462612 |
| 67.3643621 | 68.7729216 | 67.5433868 | 74.0501546 | 70.0462612 |
| 68.3643621 | 68.7729216 | 67.6433868 | 74.0501546 | 71.0462612 |
| 68.3643621 | 68.7729216 | 67.6433868 | 73.0501546 | 71.0462612 |
| 68.3643621 | 68.7729216 | 67.2652897 | 73.0501546 | 71.0462612 |
| 68.3643621 | 68.7729216 | 67.3561208 | 73.0501546 | 71.0462612 |
| 68.3643621 | 67.7729216 | 67.7433868 | 73.0501546 | 71.0462612 |
| 68.3643621 | 67.7729216 | 67.8433868 | 73.0501546 | 71.0462612 |
| 68.3643621 | 67.7729216 | 67.7433868 | 73.0501546 | 71.0462612 |
| 68.3643621 | 67.7729216 | 67.5433868 | 73.0501546 | 71.0462612 |
| 68.3643621 | 66.7729216 | 67.4433868 | 73.0501546 | 71.0462612 |
| 68.3643621 | 66.7729216 | 66.8433868 | 69.0501546 | 71.0462612 |
| 68.3643621 | 66.7729216 | 66.5433868 | 67.0501546 | 71.0462612 |
| 68.3643621 | 66.7729216 | 66.0433868 | 66.0501546 | 71.0462612 |
| 67.3643621 | 68.7729216 | 65.9433868 | 66.0501546 | 71.0462612 |
| 67.3643621 | 70.7729216 | 66.1433868 | 66.0501546 | 71.0462612 |
| 67.3643621 | 74.7729216 | 66.6433868 | 66.0501546 | 71.0462612 |
| 67.3643621 | 75.7729216 | 66.7433868 | 66.0501546 | 71.0462612 |
| 68.3643621 | 76.7729216 | 66.9433868 | 66.0501546 | 71.0462612 |
| 69.3643621 | 76.7729216 | 67.3433868 | 66.0501546 | 74.0462612 |
| 69.3643621 | 77.7729216 | 67.6433868 | 66.0501546 | 75.0462612 |
| 68.3643621 | 77.7729216 | 67.8433868 | 67.0501546 | 75.0462612 |
| 67.3643621 | 78.7729216 | 68.2433868 | 67.0501546 | 77.0462612 |
| 67.3643621 | 78.7729216 | 68.4433868 | 67.0501546 | 78.0462612 |
| 67.3643621 | 78.7729216 | 68.8433868 | 68.0501546 | 79.0462612 |
| 65.3643621 | 78.7729216 | 69.3433868 | 68.0501546 | 80.0462612 |
| 65.3643621 | 79.7729216 | 69.5433868 | 69.0501546 | 81.0462612 |
| 66.3643621 | 79.7729216 | 69.5433868 | 69.0501546 | 81.0462612 |
| 67.3643621 | 79.7729216 | 70.4433868 | 71.0501546 | 82.0462612 |
| 68.3643621 | 79.7729216 | 70.4433868 | 71.0501546 | 82.0462612 |
| 68.3643621 | 79.7729216 | 70.7433868 | 71.0501546 | 70.7433868 |
| 68.3643621 | 77.7729216 | 70.9433868 | 71.0501546 | 70.9433868 |
| 68.3643621 | 76.7729216 | 70.6433868 | 71.0501546 | 70.6433868 |
| 68.3643621 | 76.7729216 | 70.6433868 | 71.0501546 | 70.6433868 |
| 68.3643621 | 75.7729216 | 70.6433868 | 72.0501546 | 70.6433868 |
| 68.3643621 | 76.7729216 | 70.7433868 | 72.0501546 | 70.7433868 |
| 68.3643621 | 76.7729216 | 70.7433868 | 72.0501546 | 70.7433868 |
| 68.3643621 | 76.7729216 | 70.5433868 | 72.0501546 | 70.5433868 |
| 69.3643621 | 76.7729216 | 70.7433868 | 72.0501546 | 70.7433868 |
| 69.3643621 | 77.7729216 | 70.5433868 | 72.0501546 | 70.5433868 |
| 70.3643621 | 77.7729216 | 70.4433868 | 68.0501546 | 70.4433868 |

|            |            |            |            |            |
|------------|------------|------------|------------|------------|
| 71.3643621 | 77.7729216 | 70.5433868 | 68.0501546 | 70.5433868 |
| 70.3643621 | 77.7729216 | 69.7433868 | 64.0501546 | 69.7433868 |
| 70.3643621 | 76.7729216 | 69.6433868 | 63.0501546 | 69.6433868 |
| 70.3643621 | 76.7729216 | 70.1433868 | 67.0501546 | 70.1433868 |
| 70.3643621 | 76.7729216 | 70.1433868 | 71.0501546 | 70.1433868 |
| 69.3643621 | 76.7729216 | 69.9433868 | 71.0501546 | 69.9433868 |
| 69.3643621 | 76.7729216 | 69.7433868 | 72.0501546 | 82.0462612 |
| 69.3643621 | 76.7729216 | 69.7433868 | 71.0501546 | 81.0462612 |
| 69.3643621 | 76.7729216 | 69.5433868 | 72.0501546 | 78.0462612 |
| 68.3643621 | 76.7729216 | 69.6433868 | 72.0501546 | 79.0462612 |
| 68.3643621 | 75.7729216 | 69.7433868 | 72.0501546 | 79.0462612 |
| 69.3643621 | 75.7729216 | 70.0433868 | 72.0501546 | 80.0462612 |
| 69.3643621 | 75.7729216 | 69.9433868 | 72.0501546 | 78.0462612 |
| 69.3643621 | 75.7729216 | 69.5433868 | 72.0501546 | 77.0462612 |
| 69.3643621 | 75.7729216 | 69.7433868 | 72.0501546 | 77.0462612 |
| 68.3643621 | 73.7729216 | 69.2433868 | 71.0501546 | 77.0462612 |
| 68.3643621 | 73.7729216 | 69.3433868 | 71.0501546 | 77.0462612 |
| 68.3643621 | 73.7729216 | 69.3433868 | 71.0501546 | 77.0462612 |
| 68.3643621 | 73.7729216 | 69.2834189 | 72.0501546 | 77.0462612 |
| 68.3643621 | 72.7729216 | 69.4433868 | 72.0501546 | 78.0462612 |
| 69.3643621 | 71.7729216 | 69.3433868 | 72.0501546 | 78.0462612 |
| 69.3643621 | 70.7729216 | 68.6433868 | 72.0501546 | 77.0462612 |
| 69.3643621 | 69.7729216 | 68.1433868 | 72.0501546 | 77.0462612 |
| 69.3643621 | 69.7729216 | 68.0433868 | 73.0501546 | 76.0462612 |
| 69.3643621 | 69.7729216 | 67.7433868 | 73.0501546 | 75.0462612 |
| 69.3643621 | 69.7729216 | 66.9433868 | 72.0501546 | 74.0462612 |
| 69.3643621 | 69.7729216 | 66.9433868 | 72.0501546 | 74.0462612 |
| 70.3643621 | 69.7729216 | 66.9433868 | 72.0501546 | 74.0462612 |
| 71.3643621 | 69.7729216 | 67.4433868 | 72.0501546 | 74.0462612 |
| 72.3643621 | 69.7729216 | 67.6433868 | 70.0501546 | 74.0462612 |
| 73.3643621 | 69.7729216 | 67.4433868 | 68.0501546 | 73.0462612 |
| 73.3643621 | 69.7729216 | 67.2433868 | 65.0501546 | 73.0462612 |
| 71.3643621 | 70.7729216 | 67.0433868 | 65.0501546 | 73.0462612 |
| 70.3643621 | 70.7729216 | 67.1433868 | 66.0501546 | 73.0462612 |
| 69.3643621 | 71.7729216 | 66.9433868 | 66.0501546 | 73.0462612 |
| 69.3643621 | 71.7729216 | 66.6433868 | 68.0501546 | 71.0462612 |
| 68.3643621 | 71.7729216 | 66.3433868 | 69.0501546 | 71.0462612 |
| 68.3643621 | 71.7729216 | 66.1433868 | 69.0501546 | 71.0462612 |
| 69.3643621 | 71.7729216 | 66.2433868 | 70.0501546 | 71.0462612 |
| 69.3643621 | 71.7729216 | 66.3433868 | 70.0501546 | 71.0462612 |
| 69.3643621 | 71.7729216 | 66.0433868 | 69.0501546 | 71.0462612 |
| 69.3643621 | 71.7729216 | 65.9433868 | 69.0501546 | 71.0462612 |
| 69.3643621 | 71.7729216 | 65.8433868 | 69.0501546 | 71.0462612 |
| 69.3643621 | 71.7729216 | 65.7433868 | 67.0501546 | 72.0462612 |
| 68.3643621 | 71.7729216 | 66.1433868 | 67.0501546 | 72.0462612 |

|            |            |            |            |            |
|------------|------------|------------|------------|------------|
| 68.3643621 | 71.7729216 | 66.6433868 | 67.0501546 | 72.0462612 |
| 68.3643621 | 71.7729216 | 67.8433868 | 68.0501546 | 72.0462612 |
| 66.3643621 | 71.7729216 | 68.1433868 | 70.0501546 | 72.0462612 |
| 66.3643621 | 71.7729216 | 68.3433868 | 70.0501546 | 72.0462612 |
| 65.3643621 | 71.7729216 | 68.9433868 | 71.0501546 | 71.0462612 |
| 65.3643621 | 70.7729216 | 68.2433868 | 71.0501546 | 70.0462612 |
| 66.3643621 | 70.7729216 | 68.2433868 | 71.0501546 | 70.0462612 |
| 66.3643621 | 70.7729216 | 68.0433868 | 71.0501546 | 70.0462612 |
| 66.3643621 | 70.7729216 | 67.6433868 | 72.0501546 | 71.0462612 |
| 66.3643621 | 65.7729216 | 66.6433868 | 72.0501546 | 71.0462612 |
| 66.3643621 | 65.7729216 | 66.9433868 | 72.0501546 | 71.0462612 |
| 64.3643621 | 62.7729216 | 66.5433868 | 73.0501546 | 70.0462612 |
| 63.3643621 | 62.7729216 | 65.8433868 | 68.0501546 | 70.0462612 |
| 64.3643621 | 61.7729216 | 65.4433868 | 65.0501546 | 67.0462612 |
| 64.3643621 | 61.7729216 | 65.7433868 | 65.0501546 | 67.0462612 |
| 65.3643621 | 61.7729216 | 66.1433868 | 64.0501546 | 67.0462612 |
| 65.3643621 | 61.7729216 | 65.8433868 | 63.0501546 | 66.0462612 |
| 66.3643621 | 61.7729216 | 66.4433868 | 65.0501546 | 66.0462612 |
| 66.3643621 | 60.7729216 | 66.5433868 | 67.0501546 | 66.0462612 |
| 66.3643621 | 60.7729216 | 66.3433868 | 67.0501546 | 66.0462612 |
| 64.3643621 | 60.7729216 | 65.7433868 | 66.0501546 | 67.0462612 |
| 63.3643621 | 60.7729216 | 65.5433868 | 65.0501546 | 68.0462612 |
| 62.3643621 | 61.7729216 | 65.6433868 | 65.0501546 | 68.0462612 |
| 61.3643621 | 69.7729216 | 66.4433868 | 65.0501546 | 68.0462612 |
| 61.3643621 | 70.7729216 | 66.5433868 | 65.0501546 | 68.0462612 |
| 62.3643621 | 70.7729216 | 66.7433868 | 66.0501546 | 68.0462612 |
| 62.3643621 | 70.7729216 | 66.7433868 | 66.0501546 | 68.0462612 |
| 65.3643621 | 71.7729216 | 68.5866142 | 71.0501546 | 68.0462612 |
| 65.3643621 | 71.7729216 | 68.2433868 | 73.0501546 | 68.0462612 |
| 65.3643621 | 71.7729216 | 68.8433868 | 75.0501546 | 68.0462612 |
| 65.3643621 | 71.7729216 | 69.1433868 | 75.0501546 | 68.0462612 |
| 65.3643621 | 71.7729216 | 69.4433868 | 75.0501546 | 70.0462612 |
| 68.3643621 | 75.7729216 | 70.6433868 | 75.0501546 | 71.0462612 |
| 68.3643621 | 75.7729216 | 71.3433868 | 77.0501546 | 72.0462612 |
| 68.3643621 | 75.7729216 | 71.3433868 | 78.0501546 | 72.0462612 |
| 68.3643621 | 74.7729216 | 71.0433868 | 78.0501546 | 72.0462612 |
| 68.3643621 | 73.7729216 | 70.3433868 | 77.0501546 | 72.0462612 |
| 67.3643621 | 71.7729216 | 69.9433868 | 78.0501546 | 72.0462612 |
| 67.3643621 | 69.7729216 | 70.2433868 | 78.0501546 | 73.0462612 |
| 66.3643621 | 68.7729216 | 70.5433868 | 78.0501546 | 73.0462612 |
| 65.3643621 | 66.7729216 | 70.2433868 | 77.0501546 | 72.0462612 |
| 66.3643621 | 66.7729216 | 70.0433868 | 76.0501546 | 72.0462612 |
| 66.3643621 | 63.7729216 | 69.3433868 | 76.0501546 | 71.0462612 |
| 66.3643621 | 64.7729216 | 69.0433868 | 75.0501546 | 71.0462612 |
| 66.3643621 | 65.7729216 | 68.9433868 | 75.0501546 | 71.0462612 |



|            |            |            |            |            |
|------------|------------|------------|------------|------------|
| 66.3643621 | 66.7729216 | 68.9433868 | 75.0501546 | 70.0462612 |
| 68.3643621 | 66.7729216 | 69.3433868 | 75.0501546 | 70.0462612 |
| 68.3643621 | 66.7729216 | 69.1433868 | 75.0501546 | 68.0462612 |
| 68.3643621 | 66.7729216 | 68.5433868 | 75.0501546 | 68.0462612 |
| 68.3643621 | 67.7729216 | 68.4433868 | 75.0501546 | 67.0462612 |
| 69.3643621 | 67.7729216 | 68.0433868 | 75.0501546 | 67.0462612 |
| 69.3643621 | 67.7729216 | 67.0433868 | 72.0501546 | 66.0462612 |
| 69.3643621 | 67.7729216 | 66.5433868 | 72.0501546 | 66.0462612 |
| 68.3643621 | 67.7729216 | 66.3433868 | 71.0501546 | 66.0462612 |
| 67.3643621 | 67.7729216 | 65.9433868 | 70.0501546 | 65.0462612 |
| 62.3643621 | 67.7729216 | 65.7433868 | 70.0501546 | 65.0462612 |
| 61.3643621 | 67.7729216 | 65.8433868 | 70.0501546 | 65.0462612 |
| 61.3643621 | 67.7729216 | 65.9433868 | 70.0501546 | 65.0462612 |
| 61.3643621 | 67.7729216 | 65.9433868 | 70.0501546 | 65.0462612 |
| 61.3643621 | 74.7729216 | 66.9433868 | 70.0501546 | 65.0462612 |
| 61.3643621 | 74.7729216 | 66.8433868 | 69.0501546 | 65.0462612 |
| 61.3643621 | 74.7729216 | 66.6433868 | 68.0501546 | 65.0462612 |
| 61.3643621 | 74.7729216 | 67.0433868 | 68.0501546 | 65.0462612 |
| 61.3643621 | 74.7729216 | 67.4433868 | 68.0501546 | 67.0462612 |
| 62.3643621 | 73.7729216 | 67.8433868 | 68.0501546 | 68.0462612 |
| 62.3643621 | 73.7729216 | 67.8433868 | 68.0501546 | 68.0462612 |
| 62.3643621 | 73.7729216 | 67.8433868 | 67.0501546 | 68.0462612 |
| 61.3643621 | 73.7729216 | 67.9433868 | 67.0501546 | 68.0462612 |
| 61.3643621 | 70.7729216 | 67.3433868 | 67.0501546 | 68.0462612 |
| 61.3643621 | 67.7729216 | 67.2433868 | 67.0501546 | 68.0462612 |
| 62.3643621 | 64.7729216 | 66.9433868 | 67.0501546 | 67.0462612 |
| 62.3643621 | 64.7729216 | 66.8433868 | 68.0501546 | 67.0462612 |
| 62.3643621 | 64.7729216 | 66.8433868 | 68.0501546 | 66.0462612 |
| 62.3643621 | 64.7729216 | 66.2433868 | 67.0501546 | 66.0462612 |
| 62.3643621 | 63.7729216 | 66.0433868 | 67.0501546 | 65.0462612 |
| 63.3643621 | 62.7729216 | 65.9433868 | 67.0501546 | 65.0462612 |
| 64.3643621 | 62.7729216 | 65.7433868 | 67.0501546 | 65.0462612 |
| 64.3643621 | 62.7729216 | 65.1433868 | 65.0501546 | 65.0462612 |
| 63.3643621 | 61.7729216 | 64.9433868 | 65.0501546 | 65.0462612 |
| 63.3643621 | 60.7729216 | 64.6433868 | 64.0501546 | 66.0462612 |
| 63.3643621 | 60.7729216 | 64.6433868 | 64.0501546 | 66.0462612 |
| 62.3643621 | 60.7729216 | 64.9383258 | 64.0501546 | 65.0462612 |
| 62.3643621 | 60.7729216 | 64.9433868 | 65.0501546 | 65.0462612 |
| 62.3643621 | 60.7729216 | 64.6433868 | 65.0501546 | 65.0462612 |
| 63.3643621 | 59.7729216 | 64.5433868 | 65.0501546 | 65.0462612 |
| 63.3643621 | 57.7729216 | 64.1433868 | 65.0501546 | 65.0462612 |
| 63.3643621 | 57.7729216 | 64.5433868 | 65.0501546 | 65.0462612 |
| 63.3643621 | 56.7729216 | 64.6433868 | 65.0501546 | 66.0462612 |
| 60.3643621 | 55.7729216 | 64.2433868 | 65.0501546 | 66.0462612 |
| 60.3643621 | 55.7729216 | 65.1433868 | 65.0501546 | 67.0462612 |

|            |            |            |            |            |
|------------|------------|------------|------------|------------|
| 60.3643621 | 53.7729216 | 65.2433868 | 65.0501546 | 67.0462612 |
| 60.3643621 | 53.7729216 | 65.5433868 | 66.0501546 | 68.0462612 |
| 60.3643621 | 53.7729216 | 65.9433868 | 66.0501546 | 69.0462612 |
| 60.3643621 | 54.7729216 | 66.0433868 | 66.0501546 | 69.0462612 |
| 60.3643621 | 55.7729216 | 66.1433868 | 66.0501546 | 70.0462612 |
| 59.3643621 | 56.7729216 | 65.0433868 | 66.0501546 | 70.0462612 |
| 59.3643621 | 56.7729216 | 64.2433868 | 67.0501546 | 69.0462612 |
| 58.3643621 | 56.7729216 | 63.6433868 | 68.0501546 | 68.0462612 |
| 58.3643621 | 57.7729216 | 63.8433868 | 69.0501546 | 67.0462612 |
| 59.3643621 | 59.7729216 | 65.0433868 | 70.0501546 | 67.0462612 |
| 59.3643621 | 59.7729216 | 65.7433868 | 70.0501546 | 67.0462612 |
| 59.3643621 | 59.7729216 | 66.0433868 | 73.0501546 | 67.0462612 |
| 59.3643621 | 60.7729216 | 66.0433868 | 72.0501546 | 67.0462612 |
| 61.3643621 | 60.7729216 | 66.3433868 | 71.0501546 | 67.0462612 |
| 63.3643621 | 60.7729216 | 66.4433868 | 71.0501546 | 67.0462612 |
| 67.3643621 | 60.7729216 | 66.2433868 | 71.0501546 | 65.0462612 |
| 69.3643621 | 60.7729216 | 67.3433868 | 74.0501546 | 65.0462612 |
| 70.3643621 | 60.7729216 | 67.6433868 | 74.0501546 | 65.0462612 |
| 70.3643621 | 60.7729216 | 67.3433868 | 75.0501546 | 65.0462612 |
| 70.3643621 | 61.7729216 | 67.6433868 | 74.0501546 | 66.0462612 |
| 69.3643621 | 61.7729216 | 67.0433868 | 73.0501546 | 67.0462612 |
| 68.3643621 | 61.7729216 | 67.2433868 | 73.0501546 | 67.0462612 |
| 68.3643621 | 62.7729216 | 67.5433868 | 74.0501546 | 67.0462612 |
| 69.3643621 | 62.7729216 | 67.6433868 | 74.0501546 | 67.0462612 |
| 69.3643621 | 62.7729216 | 67.6433868 | 74.0501546 | 67.0462612 |
| 70.3643621 | 61.7729216 | 67.4433868 | 74.0501546 | 68.0462612 |
| 70.3643621 | 61.7729216 | 67.2433868 | 73.0501546 | 68.0462612 |
| 69.3643621 | 61.7729216 | 66.2433868 | 73.0501546 | 68.0462612 |
| 69.3643621 | 61.7729216 | 65.9433868 | 73.0501546 | 68.0462612 |
| 69.3643621 | 61.7729216 | 65.8433868 | 72.0501546 | 68.0462612 |
| 67.3643621 | 61.7729216 | 65.3433868 | 72.0501546 | 67.0462612 |
| 67.3643621 | 61.7729216 | 65.3433868 | 71.0501546 | 67.0462612 |
| 67.3643621 | 61.7729216 | 65.3433868 | 71.0501546 | 67.0462612 |
| 68.3643621 | 60.7729216 | 65.4433868 | 71.0501546 | 67.0462612 |
| 68.3643621 | 61.7729216 | 64.8433868 | 67.0501546 | 67.0462612 |
| 69.3643621 | 62.7729216 | 64.9433868 | 67.0501546 | 67.0462612 |
| 69.3643621 | 62.7729216 | 64.3433868 | 65.0501546 | 66.0462612 |
| 69.3643621 | 62.7729216 | 64.6433868 | 67.0501546 | 66.0462612 |
| 69.3643621 | 62.7729216 | 65.0433868 | 67.0501546 | 66.0462612 |
| 69.3643621 | 62.7729216 | 65.7433868 | 68.0501546 | 67.0462612 |
| 69.3643621 | 62.7729216 | 65.7433868 | 67.0501546 | 68.0462612 |
| 69.3643621 | 62.7729216 | 66.5433868 | 66.0501546 | 69.0462612 |
| 69.3643621 | 63.7729216 | 66.9433868 | 66.0501546 | 71.0462612 |
| 69.3643621 | 62.7729216 | 68.3433868 | 66.0501546 | 71.0462612 |
| 69.3643621 | 62.7729216 | 68.5981904 | 66.0501546 | 71.0462612 |

|            |            |            |            |            |
|------------|------------|------------|------------|------------|
| 67.3643621 | 62.7729216 | 68.6433868 | 66.0501546 | 74.0462612 |
| 67.3643621 | 62.7729216 | 68.4433868 | 66.0501546 | 75.0462612 |
| 67.3643621 | 62.7729216 | 68.3433868 | 67.0501546 | 75.0462612 |
| 67.3643621 | 62.7729216 | 68.2433868 | 67.0501546 | 74.0462612 |
| 67.3643621 | 62.7729216 | 67.5433868 | 67.0501546 | 73.0462612 |
| 67.3643621 | 63.7729216 | 67.1433868 | 67.0501546 | 72.0462612 |
| 67.3643621 | 64.7729216 | 66.8433868 | 68.0501546 | 70.0462612 |
| 66.3643621 | 64.7729216 | 66.5433868 | 69.0501546 | 70.0462612 |
| 63.3643621 | 64.7729216 | 66.3433868 | 69.0501546 | 70.0462612 |
| 63.3643621 | 64.7729216 | 66.5433868 | 69.0501546 | 70.0462612 |
| 63.3643621 | 65.7729216 | 66.4433868 | 69.0501546 | 69.0462612 |
| 63.3643621 | 66.7729216 | 66.4433868 | 68.0501546 | 69.0462612 |
| 63.3643621 | 66.7729216 | 66.2433868 | 68.0501546 | 71.0462612 |
| 63.3643621 | 66.7729216 | 65.6433868 | 67.0501546 | 71.0462612 |
| 63.3643621 | 67.7729216 | 65.5433868 | 67.0501546 | 71.0462612 |
| 62.3643621 | 68.7729216 | 65.5433868 | 66.0501546 | 72.0462612 |
| 62.3643621 | 68.7729216 | 65.6433868 | 66.0501546 | 73.0462612 |
| 62.3643621 | 68.7729216 | 65.7433868 | 66.0501546 | 73.0462612 |
| 62.3643621 | 69.7729216 | 66.0433868 | 65.0501546 | 74.0462612 |
| 62.3643621 | 70.7729216 | 66.3433868 | 65.0501546 | 74.0462612 |
| 62.3643621 | 70.7729216 | 66.4433868 | 65.0501546 | 75.0462612 |
| 62.3643621 | 70.7729216 | 66.6433868 | 65.0501546 | 76.0462612 |
| 62.3643621 | 70.7729216 | 66.7433868 | 66.0501546 | 77.0462612 |
| 62.3643621 | 70.7729216 | 66.5433868 | 66.0501546 | 77.0462612 |
| 62.3643621 | 66.7729216 | 66.5433868 | 66.0501546 | 77.0462612 |
| 61.3643621 | 66.7729216 | 66.0433868 | 67.0501546 | 77.0462612 |
| 61.3643621 | 66.7729216 | 66.1433868 | 67.0501546 | 77.0462612 |
| 62.3643621 | 65.7729216 | 66.3433868 | 67.0501546 | 77.0462612 |
| 63.3643621 | 65.7729216 | 66.5433868 | 67.0501546 | 76.0462612 |
| 65.3643621 | 65.7729216 | 67.1433868 | 71.0501546 | 75.0462612 |
| 65.3643621 | 65.7729216 | 67.2433868 | 71.0501546 | 74.0462612 |
| 65.3643621 | 63.7729216 | 68.2433868 | 72.0501546 | 74.0462612 |
| 65.3643621 | 63.7729216 | 68.4433868 | 70.0501546 | 74.0462612 |
| 66.3643621 | 63.7729216 | 68.7433868 | 69.0501546 | 74.0462612 |
| 66.3643621 | 63.7729216 | 68.8433868 | 69.0501546 | 74.0462612 |
| 66.3643621 | 63.7729216 | 68.8433868 | 69.0501546 | 73.0462612 |
| 66.3643621 | 63.7729216 | 68.0433868 | 65.0501546 | 72.0462612 |
| 66.3643621 | 62.7729216 | 67.0433868 | 65.0501546 | 72.0462612 |
| 67.3643621 | 62.7729216 | 66.8433868 | 64.0501546 | 72.0462612 |
| 68.3643621 | 62.7729216 | 66.8433868 | 63.0501546 | 71.0462612 |
| 67.3643621 | 62.7729216 | 66.6433868 | 62.0501546 | 71.0462612 |
| 67.3643621 | 62.7729216 | 66.9433868 | 62.0501546 | 71.0462612 |
| 67.3643621 | 62.7729216 | 67.0433868 | 61.0501546 | 71.0462612 |
| 68.3643621 | 62.7729216 | 66.6433868 | 59.0501546 | 71.0462612 |
| 68.3643621 | 61.7729216 | 66.3433868 | 59.0501546 | 71.0462612 |

|            |            |            |            |            |
|------------|------------|------------|------------|------------|
| 68.3643621 | 61.7729216 | 65.9433868 | 59.0501546 | 71.0462612 |
| 68.3643621 | 61.7729216 | 65.9433868 | 57.0501546 | 70.0462612 |
| 68.3643621 | 61.7729216 | 65.7433868 | 58.0501546 | 70.0462612 |
| 69.3643621 | 62.7729216 | 67.5433868 | 58.0501546 | 70.0462612 |
| 68.3643621 | 64.7729216 | 67.5433868 | 58.0501546 | 70.0462612 |
| 67.3643621 | 66.7729216 | 67.8433868 | 58.0501546 | 70.0462612 |
| 67.3643621 | 66.7729216 | 67.7433868 | 58.0501546 | 70.0462612 |
| 65.3643621 | 70.7729216 | 68.2433868 | 61.0501546 | 71.0462612 |
| 65.3643621 | 70.7729216 | 68.2433868 | 61.0501546 | 71.0462612 |
| 65.3643621 | 69.7729216 | 68.9171816 | 61.0501546 | 71.0462612 |
| 66.3643621 | 69.7729216 | 68.8433868 | 64.0501546 | 71.0462612 |
| 67.3643621 | 69.7729216 | 69.1433868 | 65.0501546 | 70.0462612 |
| 68.3643621 | 68.7729216 | 69.5433868 | 65.0501546 | 70.0462612 |
| 67.3643621 | 68.7729216 | 69.2433868 | 65.0501546 | 70.0462612 |
| 67.3643621 | 68.7729216 | 69.4433868 | 66.0501546 | 70.0462612 |
| 67.3643621 | 68.7729216 | 69.4433868 | 66.0501546 | 71.0462612 |
| 68.3643621 | 68.7729216 | 69.4433868 | 66.0501546 | 72.0462612 |
| 68.3643621 | 68.7729216 | 69.3433868 | 66.0501546 | 73.0462612 |
| 68.3643621 | 70.7729216 | 69.4433868 | 66.0501546 | 73.0462612 |
| 68.3643621 | 70.7729216 | 68.6433868 | 65.0501546 | 72.0462612 |
| 67.3643621 | 70.7729216 | 68.2433868 | 64.0501546 | 70.0462612 |
| 67.3643621 | 71.7729216 | 68.1433868 | 65.0501546 | 70.0462612 |
| 68.3643621 | 71.7729216 | 68.2433868 | 66.0501546 | 69.0462612 |
| 67.3643621 | 71.7729216 | 68.1433868 | 66.0501546 | 69.0462612 |
| 67.3643621 | 71.7729216 | 68.5433868 | 66.0501546 | 71.0462612 |
| 67.3643621 | 72.7729216 | 69.1433868 | 68.0501546 | 71.0462612 |
| 67.3643621 | 72.7729216 | 69.0433868 | 69.0501546 | 70.0462612 |
| 68.3643621 | 72.7729216 | 69.4433868 | 70.0501546 | 70.0462612 |
| 68.3643621 | 72.7729216 | 69.5433868 | 70.0501546 | 70.0462612 |
| 68.3643621 | 74.7729216 | 69.9433868 | 70.0501546 | 69.0462612 |
| 68.3643621 | 74.7729216 | 70.3433868 | 70.0501546 | 68.0462612 |
| 68.3643621 | 74.7729216 | 70.3433868 | 71.0501546 | 69.0462612 |
| 69.3643621 | 75.7729216 | 70.6433868 | 71.0501546 | 69.0462612 |
| 69.3643621 | 75.7729216 | 70.7433868 | 71.0501546 | 70.0462612 |
| 69.3643621 | 76.7729216 | 70.6433868 | 69.0501546 | 70.0462612 |
| 69.3643621 | 79.7729216 | 70.9433868 | 69.0501546 | 72.0462612 |
| 70.3643621 | 79.7729216 | 71.3433868 | 69.0501546 | 73.0462612 |
| 71.3643621 | 79.7729216 | 71.5433868 | 69.0501546 | 73.0462612 |
| 70.3643621 | 84.7729216 | 71.3433868 | 69.0501546 | 71.0462612 |
| 70.3643621 | 71.1433868 | 71.1433868 | 69.0501546 | 70.0462612 |
| 70.3643621 | 71.2433868 | 71.2433868 | 69.0501546 | 69.0462612 |
| 70.3643621 | 71.5433868 | 71.5433868 | 69.0501546 | 69.0462612 |
| 69.3643621 | 71.3433868 | 71.3433868 | 69.0501546 | 69.0462612 |
| 69.3643621 | 71.2433868 | 71.2433868 | 67.0501546 | 69.0462612 |
| 69.3643621 | 78.7729216 | 70.2433868 | 67.0501546 | 69.0462612 |

|            |            |            |            |            |
|------------|------------|------------|------------|------------|
| 66.3643621 | 72.7729216 | 69.7433868 | 67.0501546 | 71.0462612 |
| 66.3643621 | 71.7729216 | 69.5433868 | 66.0501546 | 74.0462612 |
| 66.3643621 | 71.7729216 | 69.5433868 | 66.0501546 | 74.0462612 |
| 66.3643621 | 71.7729216 | 69.7433868 | 65.0501546 | 76.0462612 |
| 65.3643621 | 70.7729216 | 69.7433868 | 67.0501546 | 76.0462612 |
| 66.3643621 | 70.7729216 | 69.7433868 | 67.0501546 | 76.0462612 |
| 66.3643621 | 70.7729216 | 69.5433868 | 69.0501546 | 76.0462612 |
| 66.3643621 | 67.7729216 | 69.7433868 | 71.0501546 | 76.0462612 |
| 66.3643621 | 66.7729216 | 69.8433868 | 74.0501546 | 76.0462612 |
| 65.3643621 | 65.7729216 | 69.0433868 | 74.0501546 | 76.0462612 |
| 65.3643621 | 65.7729216 | 68.7433868 | 74.0501546 | 76.0462612 |
| 64.3643621 | 65.7729216 | 68.3433868 | 74.0501546 | 75.0462612 |
| 64.3643621 | 63.7729216 | 67.8433868 | 74.0501546 | 73.0462612 |
| 66.3643621 | 62.7729216 | 67.7433868 | 74.0501546 | 72.0462612 |
| 66.3643621 | 62.7729216 | 67.6433868 | 75.0501546 | 72.0462612 |
| 66.3643621 | 62.7729216 | 68.1433868 | 79.0501546 | 72.0462612 |
| 66.3643621 | 64.7729216 | 68.6433868 | 79.0501546 | 72.0462612 |
| 66.3643621 | 64.7729216 | 68.2652897 | 79.0501546 | 72.0462612 |
| 66.3643621 | 64.7729216 | 67.127419  | 79.0501546 | 71.0462612 |
| 67.3643621 | 63.7729216 | 67.8433868 | 80.0501546 | 70.0462612 |
| 68.3643621 | 63.7729216 | 67.9433868 | 80.0501546 | 70.0462612 |
| 72.3643621 | 63.7729216 | 68.9433868 | 80.0501546 | 69.0462612 |
| 74.3643621 | 64.7729216 | 68.7433868 | 80.0501546 | 69.0462612 |
| 76.3643621 | 64.7729216 | 69.5433868 | 82.0501546 | 68.0462612 |
| 76.3643621 | 64.7729216 | 70.3433868 | 82.0501546 | 68.0462612 |
| 77.3643621 | 64.7729216 | 70.6433868 | 83.0501546 | 68.0462612 |
| 77.3643621 | 65.7729216 | 70.1433868 | 83.0501546 | 68.0462612 |
| 77.3643621 | 64.7729216 | 70.6433868 | 84.0501546 | 68.0462612 |
| 75.3643621 | 63.7729216 | 69.8433868 | 69.8433868 | 68.0462612 |
| 70.3643621 | 63.7729216 | 69.2433868 | 69.2433868 | 68.0462612 |
| 69.3643621 | 63.7729216 | 68.7433868 | 80.0501546 | 68.0462612 |
| 69.3643621 | 63.7729216 | 68.9433868 | 80.0501546 | 68.0462612 |
| 69.3643621 | 62.7729216 | 68.6433868 | 80.0501546 | 68.0462612 |
| 69.3643621 | 62.7729216 | 68.2433868 | 76.0501546 | 68.0462612 |
| 70.3643621 | 62.7729216 | 68.7433868 | 77.0501546 | 68.0462612 |
| 70.3643621 | 62.7729216 | 69.0433868 | 76.0501546 | 68.0462612 |
| 70.3643621 | 62.7729216 | 68.4433868 | 75.0501546 | 68.0462612 |
| 70.3643621 | 62.7729216 | 68.0433868 | 75.0501546 | 68.0462612 |
| 68.3643621 | 64.7729216 | 67.9433868 | 75.0501546 | 67.0462612 |
| 68.3643621 | 66.7729216 | 68.2433868 | 75.0501546 | 69.0462612 |
| 65.3643621 | 66.7729216 | 67.7433868 | 75.0501546 | 68.0462612 |
| 64.3643621 | 66.7729216 | 67.5433868 | 75.0501546 | 68.0462612 |
| 64.3643621 | 67.7729216 | 67.5433868 | 75.0501546 | 68.0462612 |
| 64.3643621 | 67.7729216 | 67.3433868 | 75.0501546 | 67.0462612 |
| 65.3643621 | 67.7729216 | 67.5433868 | 75.0501546 | 67.0462612 |

|            |            |            |            |            |
|------------|------------|------------|------------|------------|
| 65.3643621 | 67.7729216 | 67.6433868 | 76.0501546 | 67.0462612 |
| 65.3643621 | 67.7729216 | 67.5433868 | 76.0501546 | 66.0462612 |
| 66.3643621 | 67.7729216 | 67.8433868 | 75.0501546 | 67.0462612 |
| 68.3643621 | 67.7729216 | 68.4433868 | 75.0501546 | 69.0462612 |
| 68.3643621 | 66.7729216 | 68.8433868 | 74.0501546 | 71.0462612 |
| 68.3643621 | 66.7729216 | 69.0433868 | 74.0501546 | 72.0462612 |
| 69.3643621 | 66.7729216 | 69.3433868 | 73.0501546 | 73.0462612 |
| 69.3643621 | 66.7729216 | 69.2433868 | 73.0501546 | 73.0462612 |
| 69.3643621 | 66.7729216 | 69.2433868 | 69.0501546 | 73.0462612 |
| 69.3643621 | 66.7729216 | 69.7433868 | 68.0501546 | 73.0462612 |
| 69.3643621 | 67.7729216 | 69.9433868 | 68.0501546 | 74.0462612 |
| 68.3643621 | 67.7729216 | 69.7433868 | 68.0501546 | 74.0462612 |
| 68.3643621 | 67.7729216 | 69.7433868 | 68.0501546 | 74.0462612 |
| 67.3643621 | 67.7729216 | 69.3433868 | 68.0501546 | 74.0462612 |
| 67.3643621 | 66.7729216 | 68.7433868 | 68.0501546 | 74.0462612 |
| 67.3643621 | 66.7729216 | 68.3433868 | 68.0501546 | 73.0462612 |
| 71.3643621 | 66.7729216 | 68.8433868 | 68.0501546 | 73.0462612 |
| 73.3643621 | 66.7729216 | 69.0433868 | 68.0501546 | 73.0462612 |
| 72.3643621 | 66.7729216 | 69.0433868 | 68.0501546 | 72.0462612 |
| 70.3643621 | 66.7729216 | 68.6433868 | 68.0501546 | 72.0462612 |
| 70.3643621 | 67.7729216 | 68.8433868 | 68.0501546 | 72.0462612 |
| 70.3643621 | 67.7729216 | 68.6433868 | 68.0501546 | 71.0462612 |
| 70.3643621 | 67.7729216 | 68.6433868 | 67.0501546 | 71.0462612 |
| 70.3643621 | 67.7729216 | 68.4433868 | 67.0501546 | 71.0462612 |
| 71.3643621 | 65.7729216 | 68.5433868 | 71.0501546 | 70.0462612 |
| 72.3643621 | 65.7729216 | 68.5433868 | 71.0501546 | 68.0462612 |
| 72.3643621 | 65.7729216 | 68.576349  | 71.0501546 | 68.0462612 |
| 72.3643621 | 67.7729216 | 68.8433868 | 73.0501546 | 67.0462612 |
| 71.3643621 | 67.7729216 | 68.6433868 | 74.0501546 | 66.0462612 |
| 71.3643621 | 67.7729216 | 68.3433868 | 74.0501546 | 66.0462612 |
| 71.3643621 | 67.7729216 | 68.2433868 | 74.0501546 | 65.0462612 |
| 71.3643621 | 67.7729216 | 67.9433868 | 74.0501546 | 64.0462612 |
| 71.3643621 | 68.7729216 | 67.8433868 | 73.0501546 | 64.0462612 |
| 70.3643621 | 68.7729216 | 68.2433868 | 73.0501546 | 66.0462612 |
| 70.3643621 | 68.7729216 | 68.4433868 | 73.0501546 | 66.0462612 |
| 69.3643621 | 68.7729216 | 68.1433868 | 72.0501546 | 66.0462612 |
| 69.3643621 | 68.7729216 | 68.5433868 | 72.0501546 | 66.0462612 |
| 69.3643621 | 68.7729216 | 68.9433868 | 72.0501546 | 66.0462612 |
| 69.3643621 | 69.7729216 | 69.1433868 | 72.0501546 | 67.0462612 |
| 69.3643621 | 68.7729216 | 69.2433868 | 72.0501546 | 68.0462612 |
| 69.3643621 | 68.7729216 | 69.5433868 | 72.0501546 | 69.0462612 |
| 69.3643621 | 69.7729216 | 69.5433868 | 72.0501546 | 69.0462612 |
| 69.3643621 | 69.7729216 | 69.6433868 | 72.0501546 | 69.0462612 |
| 69.3643621 | 69.7729216 | 69.3433868 | 72.0501546 | 69.0462612 |
| 68.3643621 | 69.7729216 | 69.3433868 | 71.0501546 | 69.0462612 |

68.3643621 69.7729216 69.5433868 70.0501546 70.0462612  
68.3643621 69.7729216 69.2433868 70.0501546 70.0462612  
66.3643621 69.7729216 68.7433868 69.0501546 72.0462612  
65.3643621 69.7729216 67.9433868 69.0501546 71.0462612  
64.3643621 69.7729216 67.8433868 69.0501546 70.0462612  
64.3643621 69.7729216 67.5433868 69.0501546 70.0462612  
64.3643621 69.7729216 68.2433868 69.0501546 71.0462612  
64.3643621 66.7729216 68.6433868 69.0501546 71.0462612  
63.3643621 66.7729216 69.3433868 69.0501546 71.0462612  
64.3643621 66.7729216 69.4433868 68.0501546 71.0462612  
65.3643621 66.7729216 69.3433868 68.0501546 71.0462612  
65.3643621 64.7729216 68.8433868 68.0501546 71.0462612  
65.3643621 64.7729216 68.8433868 68.0501546 71.0462612  
62.3643621 63.7729216 68.7433868 68.0501546 70.0462612  
62.3643621 63.7729216 68.5433868 68.0501546 70.0462612  
62.3643621 63.7729216 68.5433868 68.0501546 70.0462612  
62.3643621 63.7729216 68.4433868 68.0501546 69.0462612  
61.3643621 63.7729216 67.4433868 68.0501546 69.0462612  
61.3643621 63.7729216 67.2433868 68.0501546 69.0462612  
60.3643621 63.7729216 67.2433868 69.0501546 69.0462612  
59.3643621 64.7729216 67.2433868 69.0501546 69.0462612  
57.3643621 64.7729216 67.0433868 69.0501546 69.0462612  
56.3643621 64.7729216 66.8433868 69.0501546 69.0462612  
56.3643621 65.7729216 66.9433868 68.0501546 69.0462612  
56.3643621 65.7729216 66.9433868 68.0501546 69.0462612  
56.3643621 67.7729216 67.3433868 67.0501546 70.0462612  
55.3643621 67.7729216 67.6433868 67.0501546 74.0462612  
55.3643621 68.7729216 67.4433868 66.0501546 73.0462612  
55.3643621 69.7729216 67.4433868 66.0501546 72.0462612  
55.3643621 69.7729216 67.4433868 67.0501546 72.0462612  
55.3643621 69.7729216 67.4433868 68.0501546 71.0462612  
54.3643621 69.7729216 67.5433868 68.0501546 70.0462612  
54.3643621 68.7729216 67.7433868 68.0501546 70.0462612  
54.3643621 68.7729216 67.4433868 68.0501546 69.0462612  
54.3643621 69.7729216 67.7433868 68.0501546 69.0462612  
54.3643621 69.7729216 68.7668889 68.0501546 69.0462612  
59.3643621 71.7729216 67.0426349 68.0501546 70.0462612  
59.3643621 72.7729216 67.6433868 71.0501546 70.0462612  
59.3643621 72.7729216 67.8433868 71.0501546 70.0462612  
60.3643621 72.7729216 67.8433868 74.0501546 70.0462612  
61.3643621 74.7729216 68.5433868 76.0501546 70.0462612  
62.3643621 74.7729216 68.6433868 79.0501546 70.0462612  
62.3643621 74.7729216 67.6433868 68.0501546 71.0462612  
62.3643621 74.7729216 67.5433868 68.0501546 70.0462612  
63.3643621 75.7729216 67.3433868 66.0501546 71.0462612

|            |            |            |            |            |
|------------|------------|------------|------------|------------|
| 63.3643621 | 77.7729216 | 67.6433868 | 68.0501546 | 70.0462612 |
| 63.3643621 | 78.7729216 | 67.7433868 | 68.0501546 | 70.0462612 |
| 63.3643621 | 80.7729216 | 67.9433868 | 68.0501546 | 70.0462612 |
| 64.3643621 | 81.7729216 | 68.2433868 | 70.0501546 | 70.0462612 |
| 65.3643621 | 81.7729216 | 68.2433868 | 71.0501546 | 70.0462612 |
| 65.3643621 | 81.7729216 | 68.4433868 | 71.0501546 | 70.0462612 |
| 64.3643621 | 81.7729216 | 68.3433868 | 71.0501546 | 70.0462612 |
| 64.3643621 | 81.7729216 | 68.5433868 | 71.0501546 | 70.0462612 |
| 64.3643621 | 81.7729216 | 68.6433868 | 71.0501546 | 70.0462612 |
| 64.3643621 | 81.7729216 | 69.0433868 | 71.0501546 | 70.0462612 |
| 64.3643621 | 80.7729216 | 69.0433868 | 71.0501546 | 71.0462612 |
| 64.3643621 | 80.7729216 | 69.2433868 | 71.0501546 | 72.0462612 |
| 63.3643621 | 80.7729216 | 69.1433868 | 71.0501546 | 72.0462612 |
| 63.3643621 | 80.7729216 | 69.3433868 | 71.0501546 | 73.0462612 |
| 63.3643621 | 82.7729216 | 69.4433868 | 70.0501546 | 74.0462612 |
| 63.3643621 | 82.7729216 | 69.3433868 | 70.0501546 | 74.0462612 |
| 65.3643621 | 82.7729216 | 69.5433868 | 70.0501546 | 74.0462612 |
| 64.3643621 | 82.7729216 | 69.6433868 | 70.0501546 | 74.0462612 |
| 63.3643621 | 69.6433868 | 69.6433868 | 70.0501546 | 73.0462612 |
| 63.3643621 | 82.7729216 | 69.1433868 | 66.0501546 | 71.0462612 |
| 64.3643621 | 82.7729216 | 69.7433868 | 66.0501546 | 71.0462612 |
| 63.3643621 | 82.7729216 | 69.3433868 | 65.0501546 | 69.0462612 |
| 62.3643621 | 81.7729216 | 69.0433868 | 65.0501546 | 69.0462612 |
| 61.3643621 | 81.7729216 | 68.8433868 | 64.0501546 | 69.0462612 |
| 61.3643621 | 81.7729216 | 68.9433868 | 64.0501546 | 68.0462612 |
| 62.3643621 | 81.7729216 | 68.9433868 | 63.0501546 | 68.0462612 |
| 64.3643621 | 78.7729216 | 68.8433868 | 64.0501546 | 68.0462612 |
| 65.3643621 | 78.7729216 | 68.6433868 | 64.0501546 | 67.0462612 |
| 66.3643621 | 77.7729216 | 69.0433868 | 64.0501546 | 68.0462612 |
| 66.3643621 | 75.7729216 | 68.6433868 | 62.0501546 | 68.0462612 |
| 65.3643621 | 74.7729216 | 68.5433868 | 62.0501546 | 69.0462612 |
| 65.3643621 | 74.7729216 | 68.1433868 | 61.0501546 | 69.0462612 |
| 64.3643621 | 74.7729216 | 67.9433868 | 61.0501546 | 68.0462612 |
| 64.3643621 | 78.7729216 | 68.4433868 | 61.0501546 | 68.0462612 |
| 64.3643621 | 78.7729216 | 68.4433868 | 61.0501546 | 68.0462612 |
| 64.3643621 | 79.7729216 | 68.4433868 | 62.0501546 | 69.0462612 |
| 65.3643621 | 81.7729216 | 68.8433868 | 65.0501546 | 69.0462612 |
| 66.3643621 | 82.7729216 | 69.1433868 | 66.0501546 | 69.0462612 |
| 67.3643621 | 82.7729216 | 69.3433868 | 67.0501546 | 69.0462612 |
| 68.3643621 | 82.7729216 | 69.2433868 | 67.0501546 | 69.0462612 |
| 68.3643621 | 81.7729216 | 69.1433868 | 67.0501546 | 69.0462612 |
| 68.3643621 | 80.7729216 | 69.2433868 | 71.0501546 | 68.0462612 |
| 68.3643621 | 78.7729216 | 69.5433868 | 73.0501546 | 70.0462612 |
| 68.3643621 | 78.7729216 | 69.8433868 | 74.0501546 | 71.0462612 |
| 68.3643621 | 78.7729216 | 69.7712701 | 74.0501546 | 71.0462612 |



|            |            |            |            |            |
|------------|------------|------------|------------|------------|
| 68.3643621 | 77.7729216 | 69.8128802 | 75.0501546 | 71.0462612 |
| 68.3643621 | 77.7729216 | 69.9433868 | 74.0501546 | 71.0462612 |
| 68.3643621 | 77.7729216 | 69.5433868 | 70.0501546 | 72.0462612 |
| 68.3643621 | 76.7729216 | 69.6433868 | 70.0501546 | 72.0462612 |
| 68.3643621 | 75.7729216 | 69.6433868 | 69.0501546 | 72.0462612 |
| 68.3643621 | 75.7729216 | 69.9433868 | 69.0501546 | 72.0462612 |
| 68.3643621 | 74.7729216 | 69.9433868 | 69.0501546 | 72.0462612 |
| 68.3643621 | 74.7729216 | 69.9433868 | 69.0501546 | 71.0462612 |
| 69.3643621 | 74.7729216 | 70.0433868 | 69.0501546 | 71.0462612 |
| 69.3643621 | 73.7729216 | 69.1433868 | 69.0501546 | 70.0462612 |
| 72.3643621 | 73.7729216 | 69.6433868 | 70.0501546 | 69.0462612 |
| 71.3643621 | 74.7729216 | 69.8433868 | 70.0501546 | 69.0462612 |
| 71.3643621 | 74.7729216 | 70.2433868 | 72.0501546 | 69.0462612 |
| 72.3643621 | 73.7729216 | 70.8433868 | 72.0501546 | 71.0462612 |
| 72.3643621 | 73.7729216 | 71.0433868 | 72.0501546 | 71.0462612 |
| 72.3643621 | 73.7729216 | 71.2433868 | 72.0501546 | 72.0462612 |
| 73.3643621 | 73.7729216 | 71.4433868 | 72.0501546 | 72.0462612 |
| 73.3643621 | 73.7729216 | 71.5433868 | 71.0501546 | 72.0462612 |
| 71.3643621 | 73.7729216 | 71.5433868 | 71.0501546 | 72.0462612 |
| 71.3643621 | 71.7729216 | 71.5433868 | 70.0501546 | 72.0462612 |
| 70.3643621 | 71.7729216 | 71.2433868 | 68.0501546 | 72.0462612 |
| 69.3643621 | 72.7729216 | 71.0433868 | 67.0501546 | 72.0462612 |
| 67.3643621 | 72.7729216 | 70.7433868 | 68.0501546 | 71.0462612 |
| 67.3643621 | 72.7729216 | 70.8433868 | 68.0501546 | 71.0462612 |
| 66.3643621 | 72.7729216 | 70.7433868 | 68.0501546 | 71.0462612 |
| 65.3643621 | 72.7729216 | 70.1433868 | 68.0501546 | 70.0462612 |
| 66.3643621 | 72.7729216 | 70.1433868 | 68.0501546 | 70.0462612 |
| 66.3643621 | 73.7729216 | 70.3433868 | 69.0501546 | 70.0462612 |
| 68.3643621 | 73.7729216 | 70.4433868 | 69.0501546 | 70.0462612 |
| 69.3643621 | 73.7729216 | 70.5433868 | 69.0501546 | 70.0462612 |
| 69.3643621 | 72.7729216 | 70.4433868 | 70.0501546 | 70.0462612 |
| 69.3643621 | 72.7729216 | 71.0433868 | 71.0501546 | 72.0462612 |
| 69.3643621 | 72.7729216 | 71.3433868 | 72.0501546 | 72.0462612 |
| 71.3643621 | 72.7729216 | 71.3433868 | 72.0501546 | 73.0462612 |
| 71.3643621 | 72.7729216 | 71.3433868 | 73.0501546 | 74.0462612 |
| 71.3643621 | 72.7729216 | 71.0433868 | 74.0501546 | 74.0462612 |
| 71.3643621 | 72.7729216 | 71.0433868 | 75.0501546 | 73.0462612 |
| 71.3643621 | 71.7729216 | 70.9433868 | 75.0501546 | 72.0462612 |
| 70.3643621 | 69.7729216 | 70.7433868 | 75.0501546 | 72.0462612 |
| 70.3643621 | 69.7729216 | 70.4433868 | 72.0501546 | 75.0462612 |
| 70.3643621 | 69.7729216 | 69.7433868 | 68.0501546 | 74.0462612 |
| 70.3643621 | 69.7729216 | 69.5433868 | 66.0501546 | 75.0462612 |
| 70.3643621 | 67.7729216 | 69.1433868 | 66.0501546 | 75.0462612 |
| 69.3643621 | 67.7729216 | 68.5433868 | 64.0501546 | 75.0462612 |
| 69.3643621 | 68.7729216 | 68.6433868 | 63.0501546 | 75.0462612 |

|            |            |            |            |            |
|------------|------------|------------|------------|------------|
| 68.3643621 | 68.7729216 | 68.7433868 | 63.0501546 | 75.0462612 |
| 68.3643621 | 67.7729216 | 68.6433868 | 64.0501546 | 75.0462612 |
| 68.3643621 | 66.7729216 | 68.4433868 | 64.0501546 | 76.0462612 |
| 65.3643621 | 66.7729216 | 67.5433868 | 63.0501546 | 75.0462612 |
| 65.3643621 | 65.7729216 | 67.4433868 | 63.0501546 | 75.0462612 |
| 65.3643621 | 63.7729216 | 67.1433868 | 63.0501546 | 75.0462612 |
| 65.3643621 | 62.7729216 | 67.1433868 | 62.0501546 | 75.0462612 |
| 65.3643621 | 62.7729216 | 67.4433868 | 62.0501546 | 75.0462612 |
| 65.3643621 | 62.7729216 | 68.0426349 | 62.0501546 | 75.0462612 |
| 65.3643621 | 62.7729216 | 68.1845496 | 62.0501546 | 75.0462612 |
| 64.3643621 | 60.7729216 | 67.2433868 | 62.0501546 | 75.0462612 |
| 64.3643621 | 60.7729216 | 67.0433868 | 62.0501546 | 74.0462612 |
| 63.3643621 | 58.7729216 | 66.2433868 | 62.0501546 | 75.0462612 |
| 62.3643621 | 58.7729216 | 66.2433868 | 62.0501546 | 75.0462612 |
| 62.3643621 | 57.7729216 | 65.7433868 | 62.0501546 | 75.0462612 |
| 62.3643621 | 56.7729216 | 65.6433868 | 63.0501546 | 75.0462612 |
| 62.3643621 | 56.7729216 | 65.7433868 | 63.0501546 | 75.0462612 |
| 63.3643621 | 56.7729216 | 65.6433868 | 63.0501546 | 75.0462612 |
| 63.3643621 | 56.7729216 | 65.9433868 | 63.0501546 | 75.0462612 |
| 64.3643621 | 54.7729216 | 65.9433868 | 63.0501546 | 75.0462612 |
| 64.3643621 | 54.7729216 | 66.0433868 | 63.0501546 | 76.0462612 |
| 66.3643621 | 54.7729216 | 66.5433868 | 64.0501546 | 76.0462612 |
| 66.3643621 | 54.7729216 | 67.1433868 | 65.0501546 | 76.0462612 |
| 67.3643621 | 54.7729216 | 67.4433868 | 67.0501546 | 74.0462612 |
| 67.3643621 | 54.7729216 | 68.2433868 | 67.0501546 | 74.0462612 |
| 69.3643621 | 54.7729216 | 68.9433868 | 71.0501546 | 73.0462612 |
| 69.3643621 | 54.7729216 | 69.6433868 | 72.0501546 | 73.0462612 |
| 69.3643621 | 53.7729216 | 69.6433868 | 72.0501546 | 73.0462612 |
| 68.3643621 | 54.7729216 | 67.9770004 | 73.0501546 | 73.0462612 |
| 69.3643621 | 54.7729216 | 69.9433868 | 73.0501546 | 73.0462612 |
| 71.3643621 | 53.7729216 | 69.8433868 | 71.0501546 | 73.0462612 |
| 72.3643621 | 53.7729216 | 70.5600303 | 72.0501546 | 72.0462612 |
| 72.3643621 | 52.7729216 | 69.5600303 | 71.0501546 | 72.0462612 |
| 72.3643621 | 52.7729216 | 69.4489192 | 73.0501546 | 72.0462612 |
| 72.3643621 | 52.7729216 | 68.4489192 | 73.0501546 | 72.0462612 |
| 71.3643621 | 52.7729216 | 68.4489192 | 73.0501546 | 72.0462612 |
| 70.3643621 | 52.7729216 | 67.8933636 | 74.0501546 | 72.0462612 |
| 70.3643621 | 54.7729216 | 67.8933636 | 75.0501546 | 72.0462612 |
| 69.3643621 | 59.7729216 | 68.4489192 | 76.0501546 | 71.0462612 |
| 69.3643621 | 59.7729216 | 68.1155859 | 77.0501546 | 71.0462612 |
| 69.3643621 | 61.7729216 | 68.3378081 | 77.0501546 | 70.0462612 |
| 69.3643621 | 62.7729216 | 68.6711414 | 79.0501546 | 70.0462612 |
| 69.3643621 | 61.7729216 | 68.4489192 | 80.0501546 | 69.0462612 |
| 69.3643621 | 61.7729216 | 68.4489192 | 80.0501546 | 69.0462612 |
| 69.3643621 | 62.7729216 | 68.4489192 | 78.0501546 | 69.0462612 |

|            |            |            |            |            |
|------------|------------|------------|------------|------------|
| 69.3643621 | 62.7729216 | 69.6711414 | 77.0501546 | 68.0462612 |
| 69.3643621 | 62.7729216 | 70.1155859 | 77.0501546 | 68.0462612 |
| 68.3643621 | 70.7729216 | 71.4489192 | 77.0501546 | 67.0462612 |
| 67.3643621 | 70.7729216 | 71.6711414 | 77.0501546 | 67.0462612 |
| 67.3643621 | 71.7729216 | 70.5600303 | 73.0501546 | 67.0462612 |
| 66.3643621 | 70.7729216 | 70.1155859 | 73.0501546 | 68.0462612 |
| 65.3643621 | 67.7729216 | 69.4489192 | 73.0501546 | 69.0462612 |
| 65.3643621 | 64.7729216 | 68.7822525 | 73.0501546 | 70.0462612 |
| 65.3643621 | 61.7729216 | 67.7822525 | 73.0501546 | 70.0462612 |
| 64.3643621 | 61.7729216 | 67.5600303 | 72.0501546 | 70.0462612 |
| 64.3643621 | 60.7729216 | 67.6711414 | 72.0501546 | 70.0462612 |
| 65.3643621 | 60.7729216 | 67.5600303 | 73.0501546 | 70.0462612 |
| 65.3643621 | 60.7729216 | 67.3378081 | 73.0501546 | 70.0462612 |
| 66.3643621 | 60.7729216 | 68.226697  | 76.0501546 | 70.0462612 |
| 66.3643621 | 61.7729216 | 68.5600303 | 77.0501546 | 70.0462612 |
| 66.3643621 | 61.7729216 | 68.226697  | 76.0501546 | 70.0462612 |
| 66.3643621 | 61.7729216 | 68.1155859 | 76.0501546 | 69.0462612 |
| 66.3643621 | 61.7729216 | 68.3344888 | 76.0501546 | 69.0462612 |
| 66.3643621 | 61.7729216 | 66.3906977 | 76.0501546 | 68.0462612 |
| 66.3643621 | 61.7729216 | 67.7822525 | 74.0501546 | 68.0462612 |
| 65.3643621 | 61.7729216 | 67.8933636 | 74.0501546 | 68.0462612 |
| 65.3643621 | 61.7729216 | 68.1155859 | 75.0501546 | 68.0462612 |
| 64.3643621 | 61.7729216 | 67.6711414 | 75.0501546 | 68.0462612 |
| 66.3643621 | 63.7729216 | 67.3378081 | 74.0501546 | 68.0462612 |
| 66.3643621 | 64.7729216 | 67.5600303 | 74.0501546 | 68.0462612 |
| 66.3643621 | 64.7729216 | 67.3378081 | 75.0501546 | 67.0462612 |
| 67.3643621 | 61.7729216 | 67.0044748 | 75.0501546 | 67.0462612 |
| 69.3643621 | 61.7729216 | 68.1155859 | 75.0501546 | 67.0462612 |
| 70.3643621 | 64.7729216 | 68.6711414 | 76.0501546 | 67.0462612 |
| 71.3643621 | 64.7729216 | 68.6711414 | 76.0501546 | 66.0462612 |
| 71.3643621 | 65.7729216 | 68.4489192 | 76.0501546 | 65.0462612 |
| 71.3643621 | 65.7729216 | 68.5600303 | 76.0501546 | 65.0462612 |
| 72.3643621 | 65.7729216 | 68.4489192 | 75.0501546 | 63.0462612 |
| 76.3643621 | 66.7729216 | 69.8933636 | 75.0501546 | 63.0462612 |
| 76.3643621 | 69.7729216 | 71.1155859 | 75.0501546 | 63.0462612 |
| 80.3643621 | 69.7729216 | 72.1155859 | 75.0501546 | 62.0462612 |
| 80.3643621 | 73.7729216 | 72.6711414 | 75.0501546 | 62.0462612 |
| 81.3643621 | 69.7729216 | 72.6711414 | 76.0501546 | 62.0462612 |
| 82.3643621 | 63.7729216 | 72.4489192 | 76.0501546 | 62.0462612 |
| 77.3643621 | 63.7729216 | 72.226697  | 77.0501546 | 62.0462612 |
| 77.3643621 | 62.7729216 | 72.1155859 | 77.0501546 | 62.0462612 |
| 75.3643621 | 61.7729216 | 72.0044748 | 77.0501546 | 63.0462612 |
| 75.3643621 | 61.7729216 | 71.8933636 | 79.0501546 | 63.0462612 |
| 73.3643621 | 62.7729216 | 71.5600303 | 79.0501546 | 63.0462612 |
| 73.3643621 | 62.7729216 | 71.5600303 | 79.0501546 | 64.0462612 |

|            |            |            |            |            |
|------------|------------|------------|------------|------------|
| 73.3643621 | 63.7729216 | 71.5600303 | 79.0501546 | 64.0462612 |
| 71.3643621 | 63.7729216 | 71.5600303 | 79.0501546 | 65.0462612 |
| 71.3643621 | 62.7729216 | 72.0044748 | 80.0501546 | 65.0462612 |
| 71.3643621 | 62.7729216 | 72.5600303 | 80.0501546 | 69.0462612 |
| 71.3643621 | 63.7729216 | 73.0044748 | 80.0501546 | 71.0462612 |
| 71.3643621 | 65.7729216 | 73.5600303 | 80.0501546 | 72.0462612 |
| 71.3643621 | 67.7729216 | 74.4489192 | 81.0501546 | 73.0462612 |
| 72.3643621 | 67.7729216 | 74.8933636 | 83.0501546 | 73.0462612 |
| 72.3643621 | 65.7729216 | 74.5600303 | 82.0501546 | 72.0462612 |
| 72.3643621 | 65.7729216 | 74.3378081 | 82.0501546 | 72.0462612 |
| 74.3643621 | 66.7729216 | 74.7822525 | 82.0501546 | 73.0462612 |
| 74.3643621 | 67.7729216 | 75.4489192 | 82.0501546 | 75.0462612 |
| 77.3643621 | 65.7729216 | 75.8933636 | 82.0501546 | 76.0462612 |
| 77.3643621 | 65.7729216 | 75.8933636 | 83.0501546 | 76.0462612 |
| 77.3643621 | 62.7729216 | 75.5600303 | 83.0501546 | 76.0462612 |
| 77.3643621 | 58.7729216 | 75.1155859 | 83.0501546 | 75.0462612 |
| 78.3643621 | 58.7729216 | 74.8933636 | 83.0501546 | 75.0462612 |
| 78.3643621 | 57.7729216 | 73.226697  | 83.0501546 | 74.0462612 |
| 78.3643621 | 59.7729216 | 72.3378081 | 83.0501546 | 74.0462612 |
| 78.3643621 | 59.7729216 | 71.8933636 | 83.0501546 | 74.0462612 |
| 78.3643621 | 58.7729216 | 70.8933636 | 83.0501546 | 74.0462612 |
| 78.3643621 | 56.7729216 | 70.3378081 | 82.0501546 | 74.0462612 |
| 77.3643621 | 57.7729216 | 70.226697  | 79.0501546 | 74.0462612 |
| 77.3643621 | 57.7729216 | 69.5600303 | 77.0501546 | 71.0462612 |
| 77.3643621 | 58.7729216 | 69.4489192 | 77.0501546 | 70.0462612 |
| 78.3643621 | 60.7729216 | 69.1155859 | 77.0501546 | 70.0462612 |
| 78.3643621 | 60.7729216 | 68.9992514 | 77.0501546 | 70.0462612 |
| 70.0334189 | 60.7729216 | 70.0334189 | 73.0501546 | 72.0462612 |
| 69.1155859 | 61.7729216 | 69.1155859 | 72.0501546 | 72.0462612 |
| 68.7822525 | 61.7729216 | 68.7822525 | 72.0501546 | 72.0462612 |
| 69.0044748 | 62.7729216 | 69.0044748 | 72.0501546 | 71.0462612 |
| 69.0044748 | 62.7729216 | 69.0044748 | 72.0501546 | 71.0462612 |
| 69.226697  | 62.7729216 | 69.226697  | 72.0501546 | 72.0462612 |
| 69.226697  | 62.7729216 | 69.226697  | 72.0501546 | 72.0462612 |
| 69.3378081 | 62.7729216 | 69.3378081 | 71.0501546 | 72.0462612 |
| 69.3378081 | 62.7729216 | 69.3378081 | 71.0501546 | 71.0462612 |
| 83.3643621 | 62.7729216 | 69.4489192 | 71.0501546 | 71.0462612 |
| 68.8933636 | 62.7729216 | 68.8933636 | 70.0501546 | 71.0462612 |
| 68.226697  | 62.7729216 | 68.226697  | 69.0501546 | 70.0462612 |
| 67.8933636 | 62.7729216 | 67.8933636 | 69.0501546 | 70.0462612 |
| 67.6711414 | 62.7729216 | 67.6711414 | 70.0501546 | 70.0462612 |
| 79.3643621 | 60.7729216 | 66.7822525 | 71.0501546 | 70.0462612 |
| 77.3643621 | 60.7729216 | 67.5600303 | 72.0501546 | 70.0462612 |
| 77.3643621 | 59.7729216 | 67.0044748 | 72.0501546 | 70.0462612 |
| 76.3643621 | 59.7729216 | 67.3378081 | 72.0501546 | 71.0462612 |

|            |            |            |            |            |
|------------|------------|------------|------------|------------|
| 76.3643621 | 59.7729216 | 67.6711414 | 72.0501546 | 72.0462612 |
| 76.3643621 | 59.7729216 | 67.7822525 | 72.0501546 | 72.0462612 |
| 76.3643621 | 60.7729216 | 68.0044748 | 72.0501546 | 72.0462612 |
| 76.3643621 | 59.7729216 | 68.4489192 | 72.0501546 | 73.0462612 |
| 75.3643621 | 59.7729216 | 68.1155859 | 72.0501546 | 72.0462612 |
| 72.3643621 | 59.7729216 | 67.3378081 | 71.0501546 | 72.0462612 |
| 70.3643621 | 59.7729216 | 66.4489192 | 68.0501546 | 71.0462612 |
| 70.3643621 | 57.7729216 | 66.0044748 | 68.0501546 | 69.0462612 |
| 70.3643621 | 57.7729216 | 65.7822525 | 66.0501546 | 69.0462612 |
| 69.3643621 | 56.7729216 | 65.4489192 | 66.0501546 | 69.0462612 |
| 69.3643621 | 56.7729216 | 65.4489192 | 66.0501546 | 69.0462612 |
| 69.3643621 | 56.7729216 | 65.3378081 | 66.0501546 | 69.0462612 |
| 69.3643621 | 56.7729216 | 64.8933636 | 66.0501546 | 68.0462612 |
| 68.3643621 | 56.7729216 | 64.5600303 | 66.0501546 | 68.0462612 |
| 68.3643621 | 58.7729216 | 64.1155859 | 65.0501546 | 66.0462612 |
| 68.3643621 | 58.7729216 | 63.8933636 | 65.0501546 | 66.0462612 |
| 68.3643621 | 59.7729216 | 64.0044748 | 65.0501546 | 66.0462612 |
| 68.3643621 | 59.7729216 | 64.0044748 | 65.0501546 | 66.0462612 |
| 68.3643621 | 59.7729216 | 64.0044748 | 64.0501546 | 67.0462612 |
| 68.3643621 | 59.7729216 | 64.1155859 | 64.0501546 | 68.0462612 |
| 68.3643621 | 59.7729216 | 64.3378081 | 64.0501546 | 69.0462612 |
| 68.3643621 | 59.7729216 | 64.226697  | 62.0501546 | 69.0462612 |
| 68.3643621 | 61.7729216 | 65.0044748 | 62.0501546 | 71.0462612 |
| 68.3643621 | 61.7729216 | 65.0044748 | 62.0501546 | 71.0462612 |
| 69.3643621 | 61.7729216 | 65.6711414 | 62.0501546 | 71.0462612 |
| 72.3643621 | 61.7729216 | 66.5600303 | 63.0501546 | 71.0462612 |
| 72.3643621 | 61.7729216 | 66.7822525 | 63.0501546 | 70.0462612 |
| 72.3643621 | 62.7729216 | 67.8933636 | 67.0501546 | 72.0462612 |
| 72.3643621 | 62.7729216 | 68.1155859 | 68.0501546 | 73.0462612 |
| 72.3643621 | 62.7729216 | 68.1155859 | 68.0501546 | 73.0462612 |
| 72.3643621 | 60.7729216 | 67.7822525 | 68.0501546 | 73.0462612 |
| 72.3643621 | 60.7729216 | 67.6711414 | 68.0501546 | 73.0462612 |
| 72.3643621 | 60.7729216 | 67.8933636 | 69.0501546 | 73.0462612 |
| 72.3643621 | 60.7729216 | 67.7822525 | 70.0501546 | 73.0462612 |
| 75.3643621 | 58.7729216 | 67.8933636 | 70.0501546 | 73.0462612 |
| 75.3643621 | 58.7729216 | 68.0521787 | 70.0501546 | 73.0462612 |
| 75.3643621 | 58.7729216 | 69.2718556 | 71.0501546 | 73.0462612 |
| 80.3643621 | 58.7729216 | 69.5600303 | 71.0501546 | 73.0462612 |
| 83.3643621 | 58.7729216 | 70.1155859 | 71.0501546 | 73.0462612 |
| 70.1155859 | 58.7729216 | 70.1155859 | 72.0501546 | 69.0462612 |
| 84.3643621 | 63.7729216 | 70.6711414 | 77.0501546 | 68.0462612 |
| 79.3643621 | 64.7729216 | 69.8933636 | 77.0501546 | 67.0462612 |
| 75.3643621 | 65.7729216 | 70.0044748 | 80.0501546 | 67.0462612 |
| 66.3643621 | 65.7729216 | 68.8933636 | 80.0501546 | 67.0462612 |
| 65.3643621 | 66.7729216 | 68.4489192 | 76.0501546 | 67.0462612 |

|            |            |            |            |            |
|------------|------------|------------|------------|------------|
| 65.3643621 | 66.7729216 | 68.6711414 | 76.0501546 | 67.0462612 |
| 65.3643621 | 67.7729216 | 68.6711414 | 76.0501546 | 66.0462612 |
| 64.3643621 | 67.7729216 | 68.4489192 | 74.0501546 | 66.0462612 |
| 64.3643621 | 68.7729216 | 68.5600303 | 74.0501546 | 65.0462612 |
| 60.3643621 | 67.7729216 | 67.7822525 | 73.0501546 | 65.0462612 |
| 57.3643621 | 67.7729216 | 67.3378081 | 72.0501546 | 65.0462612 |
| 57.3643621 | 67.7729216 | 67.0044748 | 71.0501546 | 65.0462612 |
| 57.3643621 | 68.7729216 | 66.6711414 | 69.0501546 | 63.0462612 |
| 59.3643621 | 68.7729216 | 66.5600303 | 68.0501546 | 63.0462612 |
| 60.3643621 | 68.7729216 | 66.5600303 | 69.0501546 | 63.0462612 |
| 60.3643621 | 70.7729216 | 66.8933636 | 72.0501546 | 63.0462612 |
| 60.3643621 | 72.7729216 | 66.6711414 | 73.0501546 | 63.0462612 |
| 60.3643621 | 75.7729216 | 67.0044748 | 73.0501546 | 63.0462612 |
| 60.3643621 | 77.7729216 | 67.226697  | 73.0501546 | 64.0462612 |
| 60.3643621 | 78.7729216 | 67.4489192 | 73.0501546 | 64.0462612 |
| 60.3643621 | 78.7729216 | 67.7822525 | 74.0501546 | 65.0462612 |
| 61.3643621 | 78.7729216 | 67.7822525 | 74.0501546 | 65.0462612 |
| 61.3643621 | 78.7729216 | 67.3378081 | 74.0501546 | 65.0462612 |
| 63.3643621 | 80.7729216 | 68.226697  | 75.0501546 | 66.0462612 |
| 62.3643621 | 81.7729216 | 68.226697  | 76.0501546 | 66.0462612 |
| 62.3643621 | 81.7729216 | 68.1155859 | 76.0501546 | 66.0462612 |
| 60.3643621 | 81.7729216 | 68.3378081 | 79.0501546 | 67.0462612 |
| 60.3643621 | 81.7729216 | 69.7822525 | 69.7822525 | 72.0462612 |
| 60.3643621 | 82.7729216 | 70.8933636 | 70.8933636 | 78.0462612 |
| 60.3643621 | 82.7729216 | 71.226697  | 85.0501546 | 78.0462612 |
| 60.3643621 | 82.7729216 | 71.1155859 | 85.0501546 | 78.0462612 |
| 61.3643621 | 82.7729216 | 71.4489192 | 84.0501546 | 78.0462612 |
| 62.3643621 | 80.7729216 | 71.4489192 | 84.0501546 | 78.0462612 |
| 63.3643621 | 77.7729216 | 70.6711414 | 84.0501546 | 74.0462612 |
| 63.3643621 | 72.7729216 | 69.1155859 | 69.1155859 | 66.0462612 |
| 63.3643621 | 71.7729216 | 69.226697  | 69.226697  | 66.0462612 |
| 63.3643621 | 71.7729216 | 68.7822525 | 68.7822525 | 64.0462612 |
| 63.3643621 | 71.7729216 | 68.7822525 | 68.7822525 | 64.0462612 |
| 63.3643621 | 69.7729216 | 68.226697  | 80.0501546 | 64.0462612 |
| 63.3643621 | 64.7729216 | 67.4489192 | 78.0501546 | 64.0462612 |
| 65.3643621 | 64.7729216 | 66.6711414 | 67.0501546 | 64.0462612 |
| 67.3643621 | 64.7729216 | 66.6711414 | 66.0501546 | 64.0462612 |
| 69.3643621 | 62.7729216 | 66.7822525 | 66.0501546 | 64.0462612 |
| 70.3643621 | 62.7729216 | 66.6711414 | 66.0501546 | 64.0462612 |
| 70.3643621 | 61.7729216 | 66.4489192 | 65.0501546 | 63.0462612 |
| 70.3643621 | 62.7729216 | 66.7822525 | 65.0501546 | 63.0462612 |
| 70.3643621 | 64.7729216 | 67.0044748 | 65.0501546 | 63.0462612 |
| 69.3643621 | 64.7729216 | 67.1155859 | 65.0501546 | 64.0462612 |
| 69.3643621 | 65.7729216 | 67.6711414 | 65.0501546 | 64.0462612 |
| 69.3643621 | 65.7729216 | 67.6711414 | 65.0501546 | 64.0462612 |

|            |            |            |            |            |
|------------|------------|------------|------------|------------|
| 70.3643621 | 65.7729216 | 69.2776938 | 65.0501546 | 64.0462612 |
| 69.3643621 | 65.7729216 | 68.6711414 | 67.0501546 | 66.0462612 |
| 69.3643621 | 65.7729216 | 68.7822525 | 68.0501546 | 67.0462612 |
| 70.3643621 | 67.7729216 | 69.0044748 | 68.0501546 | 67.0462612 |
| 70.3643621 | 67.7729216 | 68.4489192 | 68.0501546 | 68.0462612 |
| 70.3643621 | 67.7729216 | 68.4489192 | 68.0501546 | 68.0462612 |
| 70.3643621 | 67.7729216 | 68.4489192 | 68.0501546 | 69.0462612 |
| 69.3643621 | 67.7729216 | 68.0044748 | 67.0501546 | 69.0462612 |
| 69.3643621 | 67.7729216 | 67.4489192 | 67.0501546 | 69.0462612 |
| 69.3643621 | 67.7729216 | 67.3378081 | 67.0501546 | 69.0462612 |
| 69.3643621 | 67.7729216 | 67.7822525 | 67.0501546 | 70.0462612 |
| 69.3643621 | 67.7729216 | 67.7822525 | 67.0501546 | 71.0462612 |
| 69.3643621 | 67.7729216 | 67.7822525 | 68.0501546 | 71.0462612 |
| 70.3643621 | 67.7729216 | 68.1155859 | 69.0501546 | 72.0462612 |
| 70.3643621 | 67.7729216 | 68.1155859 | 69.0501546 | 71.0462612 |
| 68.3643621 | 66.7729216 | 68.0044748 | 69.0501546 | 70.0462612 |
| 66.3643621 | 66.7729216 | 67.8933636 | 69.0501546 | 68.0462612 |
| 66.3643621 | 66.7729216 | 68.0044748 | 69.0501546 | 68.0462612 |
| 66.3643621 | 65.7729216 | 68.3378081 | 69.0501546 | 68.0462612 |
| 66.3643621 | 66.7729216 | 68.226697  | 69.0501546 | 66.0462612 |
| 66.3643621 | 67.7729216 | 68.3378081 | 71.0501546 | 66.0462612 |
| 67.3643621 | 68.7729216 | 68.6711414 | 72.0501546 | 66.0462612 |
| 67.3643621 | 68.7729216 | 68.7822525 | 72.0501546 | 67.0462612 |
| 67.3643621 | 71.7729216 | 69.0044748 | 73.0501546 | 67.0462612 |
| 67.3643621 | 73.7729216 | 69.3378081 | 73.0501546 | 68.0462612 |
| 66.3643621 | 73.7729216 | 69.226697  | 73.0501546 | 68.0462612 |
| 65.3643621 | 73.7729216 | 69.5600303 | 75.0501546 | 69.0462612 |
| 65.3643621 | 73.7729216 | 70.0044748 | 75.0501546 | 70.0462612 |
| 64.3643621 | 73.7729216 | 69.7822525 | 75.0501546 | 69.0462612 |
| 62.3643621 | 73.7729216 | 69.6711414 | 75.0501546 | 69.0462612 |
| 62.3643621 | 71.7729216 | 69.3378081 | 76.0501546 | 69.0462612 |
| 62.3643621 | 69.7729216 | 69.4489192 | 78.0501546 | 70.0462612 |
| 62.3643621 | 69.7729216 | 69.5600303 | 79.0501546 | 70.0462612 |
| 62.3643621 | 69.7729216 | 69.7822525 | 79.0501546 | 70.0462612 |
| 59.3643621 | 68.7729216 | 69.4489192 | 81.0501546 | 69.0462612 |
| 58.3643621 | 68.7729216 | 69.4489192 | 80.0501546 | 69.0462612 |
| 58.3643621 | 68.7729216 | 69.3378081 | 79.0501546 | 69.0462612 |
| 58.3643621 | 68.7729216 | 68.8933636 | 78.0501546 | 69.0462612 |
| 67.3643621 | 67.7729216 | 69.3378081 | 78.0501546 | 69.0462612 |
| 68.3643621 | 67.7729216 | 69.3378081 | 77.0501546 | 69.0462612 |
| 68.3643621 | 68.7729216 | 69.7822525 | 77.0501546 | 69.0462612 |
| 71.3643621 | 69.7729216 | 70.5600303 | 77.0501546 | 69.0462612 |
| 72.3643621 | 69.7729216 | 70.8933636 | 77.0501546 | 69.0462612 |
| 74.3643621 | 70.7729216 | 71.0044748 | 77.0501546 | 69.0462612 |
| 75.3643621 | 69.7729216 | 71.0044748 | 75.0501546 | 69.0462612 |

|            |            |            |            |            |
|------------|------------|------------|------------|------------|
| 75.3643621 | 69.7729216 | 70.4489192 | 73.0501546 | 69.0462612 |
| 72.3643621 | 69.7729216 | 70.0044748 | 73.0501546 | 68.0462612 |
| 71.3643621 | 69.7729216 | 69.3378081 | 72.0501546 | 67.0462612 |
| 69.3643621 | 70.7729216 | 69.4489192 | 72.0501546 | 67.0462612 |
| 67.3643621 | 70.7729216 | 69.4489192 | 72.0501546 | 67.0462612 |
| 66.3643621 | 72.7729216 | 69.7822525 | 72.0501546 | 67.0462612 |
| 66.3643621 | 72.7729216 | 69.8933636 | 72.0501546 | 67.0462612 |
| 65.3643621 | 73.7729216 | 70.1155859 | 72.0501546 | 65.0462612 |
| 65.3643621 | 73.7729216 | 70.1155859 | 72.0501546 | 65.0462612 |
| 64.3643621 | 74.7729216 | 70.8320856 | 71.0501546 | 65.0462612 |
| 64.3643621 | 76.7729216 | 70.3433868 | 71.0501546 | 65.0462612 |
| 64.3643621 | 75.7729216 | 71.3378081 | 71.0501546 | 65.0462612 |
| 64.3643621 | 75.7729216 | 71.3378081 | 71.0501546 | 65.0462612 |
| 64.3643621 | 75.7729216 | 71.3378081 | 70.0501546 | 67.0462612 |
| 64.3643621 | 75.7729216 | 71.5600303 | 70.0501546 | 67.0462612 |
| 64.3643621 | 75.7729216 | 71.3378081 | 69.0501546 | 67.0462612 |
| 63.3643621 | 75.7729216 | 70.6711414 | 66.0501546 | 66.0462612 |
| 63.3643621 | 76.7729216 | 70.0044748 | 66.0501546 | 66.0462612 |
| 63.3643621 | 76.7729216 | 69.4489192 | 63.0501546 | 66.0462612 |
| 63.3643621 | 77.7729216 | 68.0044748 | 62.0501546 | 66.0462612 |
| 64.3643621 | 78.7729216 | 68.0044748 | 62.0501546 | 66.0462612 |
| 64.3643621 | 79.7729216 | 67.8933636 | 62.0501546 | 66.0462612 |
| 65.3643621 | 80.7729216 | 68.0044748 | 61.0501546 | 65.0462612 |
| 65.3643621 | 80.7729216 | 67.6711414 | 60.0501546 | 65.0462612 |
| 66.3643621 | 67.7822525 | 67.7822525 | 59.0501546 | 65.0462612 |
| 65.3643621 | 67.5600303 | 67.5600303 | 59.0501546 | 65.0462612 |
| 65.3643621 | 80.7729216 | 67.0044748 | 59.0501546 | 65.0462612 |
| 64.3643621 | 74.7729216 | 66.226697  | 59.0501546 | 66.0462612 |
| 63.3643621 | 74.7729216 | 66.226697  | 59.0501546 | 67.0462612 |
| 63.3643621 | 74.7729216 | 66.1155859 | 59.0501546 | 66.0462612 |
| 63.3643621 | 73.7729216 | 66.1155859 | 59.0501546 | 66.0462612 |
| 64.3643621 | 71.7729216 | 65.7822525 | 59.0501546 | 65.0462612 |
| 65.3643621 | 71.7729216 | 65.7822525 | 57.0501546 | 64.0462612 |
| 65.3643621 | 71.7729216 | 65.3378081 | 53.0501546 | 64.0462612 |
| 66.3643621 | 71.7729216 | 65.3378081 | 53.0501546 | 64.0462612 |
| 64.3643621 | 71.7729216 | 65.1155859 | 51.0501546 | 64.0462612 |
| 62.3643621 | 70.7729216 | 65.0044748 | 51.0501546 | 64.0462612 |
| 62.3643621 | 69.7729216 | 64.8933636 | 51.0501546 | 63.0462612 |
| 61.3643621 | 67.7729216 | 64.3378081 | 51.0501546 | 63.0462612 |
| 61.3643621 | 65.7729216 | 64.1155859 | 51.0501546 | 63.0462612 |
| 61.3643621 | 65.7729216 | 64.1155859 | 51.0501546 | 63.0462612 |
| 64.3643621 | 64.7729216 | 65.3378081 | 51.0501546 | 63.0462612 |
| 64.3643621 | 61.7729216 | 65.7822525 | 51.0501546 | 63.0462612 |
| 63.3643621 | 61.7729216 | 66.0044748 | 51.0501546 | 63.0462612 |
| 64.3643621 | 59.7729216 | 66.0044748 | 53.0501546 | 63.0462612 |



|            |            |            |            |            |
|------------|------------|------------|------------|------------|
| 66.3643621 | 58.7729216 | 66.226697  | 55.0501546 | 63.0462612 |
| 68.3643621 | 58.7729216 | 66.5600303 | 55.0501546 | 63.0462612 |
| 68.3643621 | 57.7729216 | 66.3378081 | 55.0501546 | 63.0462612 |
| 67.3643621 | 57.7729216 | 67.4489192 | 59.0501546 | 68.0462612 |
| 67.3643621 | 57.7729216 | 67.7822525 | 65.0501546 | 68.0462612 |
| 67.3643621 | 57.7729216 | 68.1155859 | 67.0501546 | 68.0462612 |
| 66.3643621 | 57.7729216 | 68.226697  | 70.0501546 | 68.0462612 |
| 67.3643621 | 57.7729216 | 68.3378081 | 70.0501546 | 68.0462612 |
| 66.3643621 | 57.7729216 | 68.226697  | 71.0501546 | 66.0462612 |
| 66.3643621 | 57.7729216 | 68.226697  | 72.0501546 | 66.0462612 |
| 66.3643621 | 57.7729216 | 68.4489192 | 74.0501546 | 65.0462612 |
| 66.3643621 | 57.7729216 | 68.226697  | 74.0501546 | 65.0462612 |
| 66.3643621 | 58.7729216 | 68.3378081 | 74.0501546 | 65.0462612 |
| 65.3643621 | 58.7729216 | 68.0044748 | 74.0501546 | 66.0462612 |
| 65.3643621 | 59.7729216 | 67.0044748 | 74.0501546 | 66.0462612 |
| 65.3643621 | 60.7729216 | 67.1155859 | 73.0501546 | 66.0462612 |
| 64.3643621 | 61.7729216 | 67.4489192 | 73.0501546 | 66.0462612 |
| 64.3643621 | 61.7729216 | 67.4489192 | 73.0501546 | 66.0462612 |
| 63.3643621 | 65.7729216 | 68.1107416 | 73.0501546 | 67.0462612 |
| 63.3643621 | 65.7729216 | 67.226697  | 74.0501546 | 67.0462612 |
| 64.3643621 | 65.7729216 | 67.5600303 | 74.0501546 | 67.0462612 |
| 64.3643621 | 64.7729216 | 67.4489192 | 74.0501546 | 67.0462612 |
| 64.3643621 | 64.7729216 | 67.6711414 | 74.0501546 | 67.0462612 |
| 64.3643621 | 64.7729216 | 67.5600303 | 75.0501546 | 67.0462612 |
| 63.3643621 | 64.7729216 | 67.7822525 | 76.0501546 | 67.0462612 |
| 63.3643621 | 64.7729216 | 67.6711414 | 76.0501546 | 67.0462612 |
| 62.3643621 | 64.7729216 | 68.4489192 | 76.0501546 | 67.0462612 |
| 62.3643621 | 64.7729216 | 69.226697  | 76.0501546 | 68.0462612 |
| 62.3643621 | 64.7729216 | 69.4489192 | 76.0501546 | 68.0462612 |
| 63.3643621 | 64.7729216 | 69.3378081 | 76.0501546 | 68.0462612 |
| 64.3643621 | 64.7729216 | 69.0044748 | 76.0501546 | 68.0462612 |
| 64.3643621 | 64.7729216 | 69.0044748 | 76.0501546 | 68.0462612 |
| 65.3643621 | 64.7729216 | 68.7822525 | 76.0501546 | 68.0462612 |
| 65.3643621 | 63.7729216 | 68.6711414 | 76.0501546 | 68.0462612 |
| 65.3643621 | 63.7729216 | 68.6711414 | 76.0501546 | 68.0462612 |
| 65.3643621 | 62.7729216 | 67.7822525 | 77.0501546 | 68.0462612 |
| 65.3643621 | 63.7729216 | 67.7822525 | 77.0501546 | 69.0462612 |
| 65.3643621 | 63.7729216 | 67.7822525 | 77.0501546 | 69.0462612 |
| 65.3643621 | 63.7729216 | 67.6711414 | 77.0501546 | 68.0462612 |
| 65.3643621 | 63.7729216 | 67.7822525 | 77.0501546 | 68.0462612 |
| 65.3643621 | 63.7729216 | 67.6711414 | 77.0501546 | 68.0462612 |
| 65.3643621 | 63.7729216 | 67.7822525 | 77.0501546 | 68.0462612 |
| 64.3643621 | 63.7729216 | 68.0044748 | 78.0501546 | 68.0462612 |
| 63.3643621 | 62.7729216 | 68.3378081 | 79.0501546 | 69.0462612 |
| 63.3643621 | 62.7729216 | 68.1155859 | 79.0501546 | 69.0462612 |

|            |            |            |            |            |
|------------|------------|------------|------------|------------|
| 63.3643621 | 61.7729216 | 68.5600303 | 78.0501546 | 69.0462612 |
| 63.3643621 | 61.7729216 | 69.0044748 | 78.0501546 | 71.0462612 |
| 64.3643621 | 62.7729216 | 69.226697  | 78.0501546 | 71.0462612 |
| 64.3643621 | 61.7729216 | 68.8933636 | 78.0501546 | 68.0462612 |
| 65.3643621 | 61.7729216 | 69.3378081 | 77.0501546 | 68.0462612 |
| 64.3643621 | 59.7729216 | 69.0044748 | 78.0501546 | 68.0462612 |
| 64.3643621 | 59.7729216 | 68.8933636 | 79.0501546 | 66.0462612 |
| 65.3643621 | 58.7729216 | 68.5600303 | 79.0501546 | 66.0462612 |
| 65.3643621 | 58.7729216 | 68.226697  | 79.0501546 | 66.0462612 |
| 65.3643621 | 57.7729216 | 68.1155859 | 79.0501546 | 66.0462612 |
| 65.3643621 | 57.7729216 | 67.8933636 | 78.0501546 | 66.0462612 |
| 66.3643621 | 56.7729216 | 67.7822525 | 77.0501546 | 66.0462612 |
| 66.3643621 | 56.7729216 | 67.6711414 | 77.0501546 | 67.0462612 |
| 66.3643621 | 55.7729216 | 67.5600303 | 77.0501546 | 68.0462612 |
| 66.3643621 | 55.7729216 | 67.7822525 | 77.0501546 | 69.0462612 |
| 66.3643621 | 57.7729216 | 67.7822525 | 78.0501546 | 69.0462612 |
| 65.3643621 | 58.7729216 | 67.8933636 | 79.0501546 | 68.0462612 |
| 64.3643621 | 58.7729216 | 67.1155859 | 80.0501546 | 68.0462612 |
| 63.3643621 | 65.7729216 | 67.7822525 | 80.0501546 | 68.0462612 |
| 64.3643621 | 64.7729216 | 67.5600303 | 79.0501546 | 68.0462612 |
| 65.3643621 | 64.7729216 | 67.4489192 | 79.0501546 | 68.0462612 |
| 65.3643621 | 64.7729216 | 66.8933636 | 78.0501546 | 67.0462612 |
| 66.3643621 | 63.7729216 | 66.6711414 | 78.0501546 | 67.0462612 |
| 66.3643621 | 62.7729216 | 66.5600303 | 78.0501546 | 67.0462612 |
| 66.3643621 | 62.7729216 | 66.4489192 | 78.0501546 | 67.0462612 |
| 64.3643621 | 62.7729216 | 66.5600303 | 78.0501546 | 67.0462612 |
| 64.3643621 | 62.7729216 | 66.8342388 | 78.0501546 | 67.0462612 |
| 60.3643621 | 62.7729216 | 66.3378081 | 78.0501546 | 66.0462612 |
| 60.3643621 | 62.7729216 | 66.6711414 | 79.0501546 | 66.0462612 |
| 60.3643621 | 62.7729216 | 66.7822525 | 79.0501546 | 66.0462612 |
| 62.3643621 | 64.7729216 | 67.5600303 | 67.5600303 | 66.0462612 |
| 64.3643621 | 64.7729216 | 68.226697  | 68.226697  | 66.0462612 |
| 65.3643621 | 64.7729216 | 68.5600303 | 68.5600303 | 66.0462612 |
| 66.3643621 | 64.7729216 | 69.0044748 | 69.0044748 | 66.0462612 |
| 67.3643621 | 64.7729216 | 68.7822525 | 76.0501546 | 67.0462612 |
| 67.3643621 | 64.7729216 | 68.8933636 | 72.0501546 | 69.0462612 |
| 69.3643621 | 63.7729216 | 68.4489192 | 69.0501546 | 69.0462612 |
| 68.3643621 | 63.7729216 | 67.8933636 | 69.0501546 | 69.0462612 |
| 68.3643621 | 63.7729216 | 68.0044748 | 68.0501546 | 71.0462612 |
| 66.3643621 | 62.7729216 | 67.1155859 | 68.0501546 | 71.0462612 |
| 66.3643621 | 62.7729216 | 67.1155859 | 68.0501546 | 71.0462612 |
| 67.3643621 | 62.7729216 | 66.8933636 | 68.0501546 | 71.0462612 |
| 67.3643621 | 62.7729216 | 67.0044748 | 67.0501546 | 72.0462612 |
| 67.3643621 | 62.7729216 | 67.1155859 | 68.0501546 | 74.0462612 |
| 67.3643621 | 65.7729216 | 67.3378081 | 68.0501546 | 74.0462612 |

|            |            |            |            |            |
|------------|------------|------------|------------|------------|
| 67.3643621 | 65.7729216 | 67.5600303 | 68.0501546 | 74.0462612 |
| 66.3643621 | 65.7729216 | 67.226697  | 68.0501546 | 75.0462612 |
| 66.3643621 | 65.7729216 | 67.226697  | 67.0501546 | 79.0462612 |
| 67.3643621 | 64.7729216 | 67.0044748 | 67.0501546 | 79.0462612 |
| 68.3643621 | 63.7729216 | 67.3607416 | 67.0501546 | 81.0462612 |
| 68.3643621 | 63.7729216 | 67.1155859 | 67.0501546 | 81.0462612 |
| 68.3643621 | 66.7729216 | 66.5600303 | 60.0501546 | 66.5600303 |
| 68.3643621 | 66.7729216 | 66.4489192 | 59.0501546 | 66.4489192 |
| 73.3643621 | 66.7729216 | 67.3378081 | 59.0501546 | 81.0462612 |
| 75.3643621 | 65.7729216 | 67.6711414 | 59.0501546 | 80.0462612 |
| 76.3643621 | 65.7729216 | 67.6711414 | 59.0501546 | 80.0462612 |
| 77.3643621 | 66.7729216 | 68.226697  | 59.0501546 | 80.0462612 |
| 77.3643621 | 66.7729216 | 67.5600303 | 58.0501546 | 75.0462612 |
| 77.3643621 | 66.7729216 | 67.7822525 | 58.0501546 | 70.0462612 |
| 77.3643621 | 65.7729216 | 66.8933636 | 58.0501546 | 67.0462612 |
| 76.3643621 | 64.7729216 | 66.6711414 | 59.0501546 | 65.0462612 |
| 75.3643621 | 63.7729216 | 66.226697  | 59.0501546 | 64.0462612 |
| 74.3643621 | 63.7729216 | 66.0044748 | 59.0501546 | 64.0462612 |
| 73.3643621 | 63.7729216 | 66.226697  | 59.0501546 | 64.0462612 |
| 78.3643621 | 63.7729216 | 67.3378081 | 63.0501546 | 64.0462612 |
| 78.3643621 | 63.7729216 | 67.7822525 | 67.0501546 | 64.0462612 |
| 78.3643621 | 62.7729216 | 68.1155859 | 69.0501546 | 65.0462612 |
| 78.3643621 | 62.7729216 | 68.4489192 | 70.0501546 | 65.0462612 |
| 78.3643621 | 62.7729216 | 68.226697  | 70.0501546 | 66.0462612 |
| 78.3643621 | 61.7729216 | 68.226697  | 70.0501546 | 67.0462612 |
| 78.3643621 | 60.7729216 | 68.6711414 | 70.0501546 | 67.0462612 |
| 77.3643621 | 59.7729216 | 68.5600303 | 70.0501546 | 68.0462612 |
| 77.3643621 | 59.7729216 | 68.5600303 | 70.0501546 | 68.0462612 |
| 77.3643621 | 59.7729216 | 68.7822525 | 70.0501546 | 69.0462612 |
| 77.3643621 | 59.7729216 | 68.6711414 | 69.0501546 | 69.0462612 |
| 76.3643621 | 59.7729216 | 68.4489192 | 69.0501546 | 69.0462612 |
| 76.3643621 | 59.7729216 | 68.226697  | 68.0501546 | 69.0462612 |
| 76.3643621 | 59.7729216 | 68.226697  | 68.0501546 | 69.0462612 |
| 76.3643621 | 59.7729216 | 68.1155859 | 68.0501546 | 69.0462612 |
| 74.3643621 | 59.7729216 | 68.0044748 | 68.0501546 | 68.0462612 |
| 74.3643621 | 59.7729216 | 69.0334189 | 68.0501546 | 68.0462612 |
| 75.3643621 | 59.7729216 | 68.0044748 | 66.0501546 | 67.0462612 |
| 75.3643621 | 59.7729216 | 67.5600303 | 66.0501546 | 67.0462612 |
| 73.3643621 | 61.7729216 | 67.5600303 | 66.0501546 | 67.0462612 |
| 73.3643621 | 61.7729216 | 66.8933636 | 65.0501546 | 67.0462612 |
| 73.3643621 | 61.7729216 | 66.7822525 | 65.0501546 | 67.0462612 |
| 73.3643621 | 61.7729216 | 66.6711414 | 65.0501546 | 67.0462612 |
| 73.3643621 | 61.7729216 | 66.226697  | 66.0501546 | 66.0462612 |
| 72.3643621 | 61.7729216 | 66.1155859 | 66.0501546 | 67.0462612 |
| 72.3643621 | 61.7729216 | 66.0044748 | 66.0501546 | 66.0462612 |

|            |            |            |            |            |
|------------|------------|------------|------------|------------|
| 72.3643621 | 61.7729216 | 65.6711414 | 66.0501546 | 66.0462612 |
| 73.3643621 | 62.7729216 | 65.7822525 | 65.0501546 | 66.0462612 |
| 72.3643621 | 62.7729216 | 65.7822525 | 65.0501546 | 66.0462612 |
| 72.3643621 | 63.7729216 | 66.3378081 | 69.0501546 | 66.0462612 |
| 72.3643621 | 63.7729216 | 66.0044748 | 68.0501546 | 66.0462612 |
| 72.3643621 | 63.7729216 | 69.0044748 | 65.0501546 | 66.0462612 |
| 71.3643621 | 63.7729216 | 71.6711414 | 65.0501546 | 66.0462612 |
| 68.3643621 | 63.7729216 | 71.1155859 | 64.0501546 | 67.0462612 |
| 68.3643621 | 63.7729216 | 71.5600303 | 63.0501546 | 67.0462612 |
| 68.3643621 | 63.7729216 | 71.6711414 | 63.0501546 | 67.0462612 |
| 67.3643621 | 64.7729216 | 71.5600303 | 61.0501546 | 67.0462612 |
| 67.3643621 | 64.7729216 | 71.8933636 | 61.0501546 | 66.0462612 |
| 66.3643621 | 64.7729216 | 72.1155859 | 61.0501546 | 67.0462612 |
| 66.3643621 | 63.7729216 | 72.1155859 | 60.0501546 | 69.0462612 |
| 66.3643621 | 63.7729216 | 72.4489192 | 60.0501546 | 69.0462612 |
| 66.3643621 | 63.7729216 | 72.226697  | 60.0501546 | 69.0462612 |
| 65.3643621 | 63.7729216 | 71.3378081 | 60.0501546 | 69.0462612 |
| 65.3643621 | 63.7729216 | 71.0044748 | 60.0501546 | 69.0462612 |
| 65.3643621 | 62.7729216 | 70.4489192 | 60.0501546 | 69.0462612 |
| 65.3643621 | 62.7729216 | 69.8933636 | 61.0501546 | 69.0462612 |
| 65.3643621 | 62.7729216 | 68.5600303 | 61.0501546 | 69.0462612 |
| 64.3643621 | 62.7729216 | 66.4489192 | 61.0501546 | 66.0462612 |
| 65.3643621 | 62.7729216 | 65.6711414 | 62.0501546 | 65.0462612 |
| 65.3643621 | 60.7729216 | 65.0044748 | 62.0501546 | 65.0462612 |
| 66.3643621 | 60.7729216 | 64.3378081 | 61.0501546 | 65.0462612 |
| 66.3643621 | 60.7729216 | 64.226697  | 61.0501546 | 65.0462612 |
| 65.3643621 | 60.7729216 | 64.1155859 | 61.0501546 | 65.0462612 |
| 65.3643621 | 59.7729216 | 64.4489192 | 61.0501546 | 65.0462612 |
| 65.3643621 | 60.7729216 | 65.1155859 | 63.0501546 | 65.0462612 |
| 65.3643621 | 60.7729216 | 65.4489192 | 63.0501546 | 65.0462612 |
| 65.3643621 | 60.7729216 | 66.0044748 | 68.0501546 | 65.0462612 |
| 66.3643621 | 60.7729216 | 65.8933636 | 69.0501546 | 65.0462612 |
| 65.3643621 | 61.7729216 | 65.5600303 | 69.0501546 | 64.0462612 |
| 64.3643621 | 61.7729216 | 65.226697  | 68.0501546 | 65.0462612 |
| 64.3643621 | 61.7729216 | 65.0044748 | 68.0501546 | 65.0462612 |
| 64.3643621 | 61.7729216 | 65.3378081 | 68.0501546 | 67.0462612 |
| 64.3643621 | 61.7729216 | 65.3378081 | 68.0501546 | 67.0462612 |
| 62.3643621 | 61.7729216 | 65.1155859 | 68.0501546 | 67.0462612 |
| 62.3643621 | 60.7729216 | 64.8933636 | 68.0501546 | 67.0462612 |
| 60.3643621 | 60.7729216 | 64.1155859 | 65.0501546 | 67.0462612 |
| 61.3643621 | 60.7729216 | 64.0044748 | 65.0501546 | 67.0462612 |
| 61.3643621 | 56.7729216 | 64.0044748 | 65.0501546 | 71.0462612 |
| 63.3643621 | 55.7729216 | 64.226697  | 64.0501546 | 74.0462612 |
| 64.3643621 | 54.7729216 | 64.226697  | 64.0501546 | 75.0462612 |
| 64.3643621 | 54.7729216 | 64.226697  | 64.0501546 | 75.0462612 |

|            |            |            |            |            |
|------------|------------|------------|------------|------------|
| 63.3643621 | 54.7729216 | 62.4815955 | 61.0501546 | 75.0462612 |
| 63.3643621 | 54.7729216 | 64.226697  | 61.0501546 | 75.0462612 |
| 63.3643621 | 54.7729216 | 63.7822525 | 61.0501546 | 75.0462612 |
| 63.3643621 | 54.7729216 | 63.5600303 | 61.0501546 | 74.0462612 |
| 63.3643621 | 54.7729216 | 63.0044748 | 61.0501546 | 72.0462612 |
| 63.3643621 | 54.7729216 | 62.7822525 | 62.0501546 | 69.0462612 |
| 63.3643621 | 54.7729216 | 63.0044748 | 63.0501546 | 68.0462612 |
| 65.3643621 | 55.7729216 | 63.1155859 | 63.0501546 | 68.0462612 |
| 65.3643621 | 55.7729216 | 62.6711414 | 63.0501546 | 67.0462612 |
| 65.3643621 | 55.7729216 | 62.5600303 | 63.0501546 | 67.0462612 |
| 65.3643621 | 55.7729216 | 62.4489192 | 63.0501546 | 67.0462612 |
| 66.3643621 | 55.7729216 | 62.1155859 | 63.0501546 | 67.0462612 |
| 66.3643621 | 55.7729216 | 62.1155859 | 64.0501546 | 67.0462612 |
| 66.3643621 | 55.7729216 | 62.3378081 | 64.0501546 | 67.0462612 |
| 66.3643621 | 55.7729216 | 62.5600303 | 64.0501546 | 67.0462612 |
| 66.3643621 | 56.7729216 | 63.4489192 | 65.0501546 | 70.0462612 |
| 66.3643621 | 56.7729216 | 63.7822525 | 66.0501546 | 70.0462612 |
| 66.3643621 | 58.7729216 | 64.3378081 | 66.0501546 | 69.0462612 |
| 66.3643621 | 58.7729216 | 64.5600303 | 66.0501546 | 69.0462612 |
| 67.3643621 | 58.7729216 | 64.5600303 | 66.0501546 | 69.0462612 |
| 67.3643621 | 58.7729216 | 64.6711414 | 66.0501546 | 69.0462612 |
| 67.3643621 | 58.7729216 | 65.1155859 | 66.0501546 | 73.0462612 |
| 66.3643621 | 57.7729216 | 64.6711414 | 66.0501546 | 74.0462612 |
| 66.3643621 | 57.7729216 | 64.7822525 | 66.0501546 | 74.0462612 |
| 66.3643621 | 57.7729216 | 65.226697  | 67.0501546 | 75.0462612 |
| 65.3643621 | 58.7729216 | 65.5600303 | 68.0501546 | 75.0462612 |
| 65.3643621 | 58.7729216 | 66.1155859 | 69.0501546 | 76.0462612 |
| 65.3643621 | 59.7729216 | 66.8933636 | 72.0501546 | 78.0462612 |
| 65.3643621 | 61.7729216 | 67.4489192 | 73.0501546 | 79.0462612 |
| 64.3643621 | 61.7729216 | 67.4489192 | 73.0501546 | 80.0462612 |
| 64.3643621 | 61.7729216 | 67.5600303 | 73.0501546 | 81.0462612 |
| 64.3643621 | 61.7729216 | 67.6711414 | 75.0501546 | 80.0462612 |
| 63.3643621 | 61.7729216 | 67.1155859 | 75.0501546 | 78.0462612 |
| 64.3643621 | 62.7729216 | 67.1155859 | 75.0501546 | 78.0462612 |
| 64.3643621 | 62.7729216 | 67.0044748 | 76.0501546 | 77.0462612 |
| 64.3643621 | 62.7729216 | 66.7822525 | 75.0501546 | 76.0462612 |
| 64.3643621 | 62.7729216 | 66.8933636 | 75.0501546 | 75.0462612 |
| 66.3643621 | 64.7729216 | 67.3378081 | 72.0501546 | 75.0462612 |
| 66.3643621 | 65.7729216 | 67.1155859 | 70.0501546 | 74.0462612 |
| 66.3643621 | 65.7729216 | 67.0044748 | 70.0501546 | 73.0462612 |
| 67.3643621 | 66.7729216 | 67.4489192 | 70.0501546 | 73.0462612 |
| 67.3643621 | 66.7729216 | 67.1155859 | 70.0501546 | 73.0462612 |
| 67.3643621 | 66.7729216 | 66.5600303 | 71.0501546 | 70.0462612 |
| 68.3643621 | 66.7729216 | 66.7822525 | 72.0501546 | 70.0462612 |
| 69.3643621 | 67.7729216 | 67.1155859 | 72.0501546 | 69.0462612 |

|            |            |            |            |            |            |
|------------|------------|------------|------------|------------|------------|
| 69.3643621 | 67.7729216 | 67.226697  | 73.0501546 | 69.0462612 |            |
| 70.3643621 | 69.7729216 | 67.7822525 | 74.0501546 | 69.0462612 |            |
| 70.3643621 | 69.7729216 | 68.1155859 | 77.0501546 | 69.0462612 |            |
| 69.3643621 | 69.7729216 | 68.5600303 | 78.0501546 | 70.0462612 |            |
| 69.3643621 | 69.7729216 | 68.7822525 | 78.0501546 | 70.0462612 |            |
| 69.3643621 | 69.7729216 | 69.0044748 | 80.0501546 | 70.0462612 |            |
| 70.3643621 | 68.7729216 | 69.1155859 | 80.0501546 | 71.0462612 |            |
| 71.3643621 | 67.7729216 | 69.226697  | 82.0501546 | 71.0462612 |            |
| 71.3643621 | 67.7729216 | 69.7357416 | 82.0501546 | 71.0462612 |            |
| 71.3643621 | 67.7729216 | 69.1504382 | 69.1504382 | 72.0462612 |            |
| 70.3643621 | 67.7729216 | 69.3378081 | 69.3378081 | 73.0462612 |            |
| 70.3643621 | 67.7729216 | 69.3378081 | 69.3378081 | 73.0462612 |            |
| 71.3643621 | 67.7729216 | 69.4489192 | 69.4489192 | 73.0462612 |            |
| 71.3643621 | 67.7729216 | 69.1155859 | 82.0501546 | 73.0462612 |            |
| 72.3643621 | 67.7729216 | 69.8933636 | 81.0501546 | 74.0462612 |            |
| 72.3643621 | 67.7729216 | 69.4585601 | 81.0501546 | 74.0462612 | 66.5453285 |
| 72.3643621 | 67.7729216 | 69.4585601 | 79.0501546 | 74.0462612 | 66.5453285 |
| 72.3643621 | 67.7729216 | 69.9585601 | 79.0501546 | 77.0462612 | 67.5453285 |
| 73.3643621 | 67.7729216 | 70.0585601 | 79.0501546 | 78.0462612 | 65.5453285 |
| 72.3643621 | 67.7729216 | 70.1585601 | 77.0501546 | 81.0462612 | 64.5453285 |
| 72.3643621 | 67.7729216 | 69.7585601 | 76.0501546 | 81.0462612 | 64.5453285 |
| 73.3643621 | 67.7729216 | 69.9585601 | 76.0501546 | 82.0462612 | 63.5453285 |
| 73.3643621 | 67.7729216 | 69.7585601 | 76.0501546 | 82.0462612 | 63.5453285 |
| 71.3643621 | 67.7729216 | 69.6585601 | 75.0501546 | 82.0462612 | 63.5453285 |
| 71.3643621 | 67.7729216 | 68.8585601 | 68.0501546 | 82.0462612 | 63.5453285 |
| 71.3643621 | 67.7729216 | 68.6585601 | 66.0501546 | 82.0462612 | 64.5453285 |
| 71.3643621 | 67.7729216 | 68.3585601 | 66.0501546 | 82.0462612 | 63.5453285 |
| 71.3643621 | 67.7729216 | 68.5585601 | 65.0501546 | 68.5585601 | 63.5453285 |
| 71.3643621 | 67.7729216 | 67.9585601 | 65.0501546 | 78.0462612 | 63.5453285 |
| 71.3643621 | 68.7729216 | 67.5585601 | 65.0501546 | 77.0462612 | 60.5453285 |
| 69.3643621 | 68.7729216 | 67.3585601 | 65.0501546 | 77.0462612 | 60.5453285 |
| 68.3643621 | 68.7729216 | 67.3585601 | 65.0501546 | 76.0462612 | 60.5453285 |
| 69.3643621 | 69.7729216 | 68.0585601 | 65.0501546 | 76.0462612 | 63.5453285 |
| 69.3643621 | 70.7729216 | 68.2585601 | 65.0501546 | 76.0462612 | 63.5453285 |
| 69.3643621 | 70.7729216 | 68.2585601 | 65.0501546 | 75.0462612 | 62.5453285 |
| 69.3643621 | 71.7729216 | 68.0585601 | 65.0501546 | 74.0462612 | 62.5453285 |
| 71.3643621 | 73.7729216 | 68.9585601 | 70.0501546 | 73.0462612 | 62.5453285 |
| 73.3643621 | 73.7729216 | 68.8585601 | 70.0501546 | 73.0462612 | 63.5453285 |
| 73.3643621 | 75.7729216 | 69.2585601 | 72.0501546 | 73.0462612 | 63.5453285 |
| 74.3643621 | 75.7729216 | 68.9585601 | 72.0501546 | 71.0462612 | 63.5453285 |
| 77.3643621 | 75.7729216 | 69.6585601 | 72.0501546 | 71.0462612 | 66.5453285 |
| 78.3643621 | 75.7729216 | 70.2585601 | 72.0501546 | 70.0462612 | 68.5453285 |
| 80.3643621 | 75.7729216 | 70.6585601 | 72.0501546 | 69.0462612 | 70.5453285 |
| 80.3643621 | 74.7729216 | 70.6585601 | 73.0501546 | 67.0462612 | 70.5453285 |
| 79.3643621 | 74.7729216 | 70.6585601 | 73.0501546 | 67.0462612 | 70.5453285 |

|            |            |            |            |            |            |
|------------|------------|------------|------------|------------|------------|
| 76.3643621 | 74.7729216 | 70.3585601 | 73.0501546 | 67.0462612 | 70.5453285 |
| 76.3643621 | 73.7729216 | 70.8585601 | 72.0501546 | 67.0462612 | 78.5453285 |
| 75.3643621 | 68.7729216 | 70.4585601 | 72.0501546 | 67.0462612 | 78.5453285 |
| 75.3643621 | 68.7729216 | 70.4585601 | 71.0501546 | 67.0462612 | 80.5453285 |
| 75.3643621 | 65.7729216 | 70.2585601 | 71.0501546 | 66.0462612 | 80.5453285 |
| 74.3643621 | 64.7729216 | 69.7585601 | 68.0501546 | 66.0462612 | 79.5453285 |
| 74.3643621 | 63.7729216 | 68.6585601 | 67.0501546 | 64.0462612 | 73.5453285 |
| 74.3643621 | 64.7729216 | 68.5585601 | 67.0501546 | 64.0462612 | 72.5453285 |
| 74.3643621 | 64.7729216 | 68.5585601 | 67.0501546 | 64.0462612 | 72.5453285 |
| 73.3643621 | 65.7729216 | 68.1585601 | 66.0501546 | 64.0462612 | 72.5453285 |
| 73.3643621 | 65.7729216 | 68.2585601 | 66.0501546 | 64.0462612 | 73.5453285 |
| 71.3643621 | 63.7729216 | 67.6585601 | 64.0501546 | 64.0462612 | 73.5453285 |
| 70.3643621 | 62.7729216 | 67.9585601 | 63.0501546 | 68.0462612 | 73.5453285 |
| 69.3643621 | 62.7729216 | 67.6585601 | 62.0501546 | 68.0462612 | 73.5453285 |
| 69.3643621 | 60.7729216 | 67.3585601 | 62.0501546 | 68.0462612 | 73.5453285 |
| 68.3643621 | 60.7729216 | 67.7585601 | 66.0501546 | 69.0462612 | 71.5453285 |
| 69.3643621 | 59.7729216 | 68.7585601 | 67.0501546 | 70.0462612 | 71.5453285 |
| 69.3643621 | 59.7729216 | 68.6107416 | 67.0501546 | 70.0462612 | 71.5453285 |
| 69.3643621 | 58.7729216 | 67.6912488 | 64.0501546 | 69.0462612 | 62.5453285 |
| 67.3643621 | 57.7729216 | 67.2585601 | 64.0501546 | 68.0462612 | 60.5453285 |
| 67.3643621 | 58.7729216 | 67.2585601 | 64.0501546 | 68.0462612 | 60.5453285 |
| 66.3643621 | 61.7729216 | 67.1585601 | 64.0501546 | 68.0462612 | 59.5453285 |
| 66.3643621 | 61.7729216 | 66.3585601 | 64.0501546 | 68.0462612 | 59.5453285 |
| 66.3643621 | 61.7729216 | 66.4585601 | 64.0501546 | 68.0462612 | 59.5453285 |
| 67.3643621 | 60.7729216 | 66.9585601 | 64.0501546 | 69.0462612 | 63.5453285 |
| 67.3643621 | 59.7729216 | 67.0585601 | 64.0501546 | 69.0462612 | 65.5453285 |
| 68.3643621 | 59.7729216 | 66.7585601 | 64.0501546 | 69.0462612 | 65.5453285 |
| 67.3643621 | 58.7729216 | 66.5585601 | 66.0501546 | 69.0462612 | 64.5453285 |
| 67.3643621 | 58.7729216 | 66.2585601 | 66.0501546 | 69.0462612 | 63.5453285 |
| 66.3643621 | 59.7729216 | 66.7585601 | 72.0501546 | 69.0462612 | 63.5453285 |
| 65.3643621 | 66.7729216 | 67.1585601 | 72.0501546 | 69.0462612 | 63.5453285 |
| 65.3643621 | 66.7729216 | 67.2585601 | 72.0501546 | 70.0462612 | 63.5453285 |
| 63.3643621 | 66.7729216 | 66.9585601 | 72.0501546 | 70.0462612 | 65.5453285 |
| 63.3643621 | 64.7729216 | 66.8585601 | 72.0501546 | 70.0462612 | 66.5453285 |
| 62.3643621 | 62.7729216 | 66.5585601 | 72.0501546 | 69.0462612 | 67.5453285 |
| 62.3643621 | 62.7729216 | 65.5585601 | 72.0501546 | 69.0462612 | 67.5453285 |
| 62.3643621 | 61.7729216 | 65.8585601 | 72.0501546 | 69.0462612 | 68.5453285 |
| 63.3643621 | 61.7729216 | 65.4585601 | 72.0501546 | 68.0462612 | 65.5453285 |
| 65.3643621 | 61.7729216 | 65.6585601 | 71.0501546 | 68.0462612 | 66.5453285 |
| 67.3643621 | 62.7729216 | 66.0585601 | 69.0501546 | 68.0462612 | 66.5453285 |
| 67.3643621 | 64.7729216 | 66.3585601 | 67.0501546 | 68.0462612 | 66.5453285 |
| 68.3643621 | 64.7729216 | 67.5585601 | 67.0501546 | 68.0462612 | 68.5453285 |
| 68.3643621 | 65.7729216 | 67.9585601 | 63.0501546 | 69.0462612 | 68.5453285 |
| 68.3643621 | 70.7729216 | 68.0585601 | 61.0501546 | 68.0462612 | 67.5453285 |
| 67.3643621 | 71.7729216 | 68.4585601 | 61.0501546 | 68.0462612 | 67.5453285 |

|            |            |            |            |            |            |
|------------|------------|------------|------------|------------|------------|
| 67.3643621 | 71.7729216 | 68.5585601 | 61.0501546 | 68.0462612 | 66.5453285 |
| 67.3643621 | 71.7729216 | 68.9585601 | 61.0501546 | 68.0462612 | 66.5453285 |
| 68.3643621 | 72.7729216 | 69.1585601 | 60.0501546 | 68.0462612 | 65.5453285 |
| 67.3643621 | 72.7729216 | 69.0585601 | 59.0501546 | 67.0462612 | 65.5453285 |
| 67.3643621 | 72.7729216 | 69.0585601 | 59.0501546 | 67.0462612 | 66.5453285 |
| 67.3643621 | 72.7729216 | 69.8585601 | 58.0501546 | 67.0462612 | 75.5453285 |
| 66.3643621 | 74.7729216 | 69.8585601 | 58.0501546 | 67.0462612 | 75.5453285 |
| 66.3643621 | 76.7729216 | 70.4585601 | 59.0501546 | 67.0462612 | 75.5453285 |
| 67.3643621 | 76.7729216 | 70.1585601 | 59.0501546 | 67.0462612 | 70.5453285 |
| 67.3643621 | 76.7729216 | 69.9585601 | 61.0501546 | 68.0462612 | 65.5453285 |
| 67.3643621 | 76.7729216 | 70.2585601 | 61.0501546 | 68.0462612 | 66.5453285 |
| 68.3643621 | 76.7729216 | 70.1585601 | 61.0501546 | 67.0462612 | 66.5453285 |
| 68.3643621 | 76.7729216 | 69.7585601 | 61.0501546 | 67.0462612 | 66.5453285 |
| 68.3643621 | 75.7729216 | 69.9585601 | 62.0501546 | 67.0462612 | 69.5453285 |
| 68.3643621 | 75.7729216 | 70.2585601 | 63.0501546 | 67.0462612 | 69.5453285 |
| 68.3643621 | 75.7729216 | 70.2585601 | 63.0501546 | 68.0462612 | 69.5453285 |
| 68.3643621 | 75.7729216 | 69.8585601 | 63.0501546 | 68.0462612 | 69.5453285 |
| 68.3643621 | 74.7729216 | 69.2585601 | 63.0501546 | 68.0462612 | 65.5453285 |
| 69.3643621 | 73.7729216 | 68.7585601 | 64.0501546 | 69.0462612 | 61.5453285 |
| 69.3643621 | 72.7729216 | 68.8585601 | 64.0501546 | 70.0462612 | 61.5453285 |
| 69.3643621 | 72.7729216 | 68.7585601 | 64.0501546 | 70.0462612 | 61.5453285 |
| 69.3643621 | 70.7729216 | 66.0585601 | 64.0501546 | 70.0462612 | 61.5453285 |
| 69.3643621 | 69.7729216 | 65.7585601 | 64.0501546 | 69.0462612 | 63.5453285 |
| 69.3643621 | 69.7729216 | 66.2585601 | 63.0501546 | 68.0462612 | 64.5453285 |
| 70.3643621 | 69.7729216 | 66.7585601 | 63.0501546 | 68.0462612 | 64.5453285 |
| 70.3643621 | 69.7729216 | 67.2585601 | 63.0501546 | 68.0462612 | 64.5453285 |
| 70.3643621 | 69.7729216 | 67.0899499 | 63.0501546 | 68.0462612 | 64.5453285 |
| 70.3643621 | 69.7729216 | 67.9226383 | 63.0501546 | 68.0462612 | 67.5453285 |
| 70.3643621 | 69.7729216 | 68.0585601 | 63.0501546 | 67.0462612 | 71.5453285 |
| 71.3643621 | 69.7729216 | 68.1585601 | 64.0501546 | 67.0462612 | 71.5453285 |
| 71.3643621 | 69.7729216 | 68.4585601 | 64.0501546 | 67.0462612 | 75.5453285 |
| 71.3643621 | 69.7729216 | 68.6585601 | 65.0501546 | 67.0462612 | 76.5453285 |
| 72.3643621 | 69.7729216 | 68.7585601 | 65.0501546 | 67.0462612 | 76.5453285 |
| 72.3643621 | 70.7729216 | 69.3585601 | 65.0501546 | 69.0462612 | 76.5453285 |
| 71.3643621 | 70.7729216 | 69.1585601 | 65.0501546 | 69.0462612 | 76.5453285 |
| 70.3643621 | 72.7729216 | 69.1585601 | 63.0501546 | 69.0462612 | 76.5453285 |
| 70.3643621 | 73.7729216 | 69.4585601 | 63.0501546 | 69.0462612 | 77.5453285 |
| 70.3643621 | 72.7729216 | 69.3812512 | 63.0501546 | 70.0462612 | 77.5453285 |
| 69.3643621 | 72.7729216 | 69.2585601 | 63.0501546 | 70.0462612 | 77.5453285 |
| 69.3643621 | 72.7729216 | 68.8585601 | 62.0501546 | 69.0462612 | 77.5453285 |
| 69.3643621 | 72.7729216 | 68.3585601 | 60.0501546 | 69.0462612 | 77.5453285 |
| 69.3643621 | 72.7729216 | 69.0585601 | 60.0501546 | 70.0462612 | 69.0585601 |
| 70.3643621 | 72.7729216 | 69.1585601 | 60.0501546 | 69.0462612 | 69.1585601 |
| 70.3643621 | 72.7729216 | 70.6585601 | 60.0501546 | 69.0462612 | 70.6585601 |
| 70.3643621 | 72.7729216 | 70.9585601 | 59.0501546 | 69.0462612 | 70.9585601 |



|            |            |            |            |            |            |
|------------|------------|------------|------------|------------|------------|
| 70.3643621 | 71.7729216 | 71.1585601 | 58.0501546 | 69.0462612 | 71.1585601 |
| 70.3643621 | 71.7729216 | 71.4585601 | 59.0501546 | 69.0462612 | 71.4585601 |
| 71.3643621 | 71.7729216 | 70.0585601 | 59.0501546 | 69.0462612 | 79.5453285 |
| 71.3643621 | 71.7729216 | 70.2585601 | 59.0501546 | 69.0462612 | 79.5453285 |
| 71.3643621 | 71.7729216 | 69.1585601 | 59.0501546 | 69.0462612 | 68.5453285 |
| 72.3643621 | 70.7729216 | 68.4585601 | 59.0501546 | 69.0462612 | 65.5453285 |
| 70.3643621 | 70.7729216 | 67.3585601 | 58.0501546 | 69.0462612 | 58.5453285 |
| 69.3643621 | 70.7729216 | 66.2585601 | 58.0501546 | 69.0462612 | 58.5453285 |
| 69.3643621 | 70.7729216 | 65.9585601 | 58.0501546 | 70.0462612 | 57.5453285 |
| 69.3643621 | 70.7729216 | 65.7585601 | 57.0501546 | 70.0462612 | 56.5453285 |
| 69.3643621 | 70.7729216 | 65.8585601 | 57.0501546 | 69.0462612 | 56.5453285 |
| 69.3643621 | 69.7729216 | 65.8585601 | 56.0501546 | 69.0462612 | 55.5453285 |
| 69.3643621 | 70.7729216 | 65.8585601 | 55.0501546 | 69.0462612 | 54.5453285 |
| 70.3643621 | 70.7729216 | 65.9585601 | 55.0501546 | 69.0462612 | 54.5453285 |
| 71.3643621 | 70.7729216 | 65.8585601 | 54.0501546 | 69.0462612 | 54.5453285 |
| 71.3643621 | 70.7729216 | 65.7585601 | 54.0501546 | 69.0462612 | 54.5453285 |
| 71.3643621 | 73.7729216 | 66.0585601 | 54.0501546 | 69.0462612 | 54.5453285 |
| 71.3643621 | 74.7729216 | 66.1585601 | 54.0501546 | 70.0462612 | 55.5453285 |
| 71.3643621 | 74.7729216 | 66.2585601 | 54.0501546 | 70.0462612 | 57.5453285 |
| 71.3643621 | 74.7729216 | 66.5585601 | 54.0501546 | 70.0462612 | 58.5453285 |
| 71.3643621 | 75.7729216 | 67.4585601 | 60.0501546 | 71.0462612 | 60.5453285 |
| 71.3643621 | 75.7729216 | 67.1585601 | 62.0501546 | 66.0462612 | 60.5453285 |
| 69.3643621 | 75.7729216 | 66.7585601 | 63.0501546 | 65.0462612 | 58.5453285 |
| 68.3643621 | 76.7729216 | 66.9585601 | 65.0501546 | 66.0462612 | 58.5453285 |
| 68.3643621 | 68.1585601 | 68.1585601 | 68.0501546 | 67.0462612 | 57.5453285 |
| 68.3643621 | 68.1585601 | 68.1585601 | 68.0501546 | 67.0462612 | 57.5453285 |
| 66.3643621 | 68.7585601 | 68.7585601 | 68.0501546 | 70.0462612 | 58.5453285 |
| 66.3643621 | 68.9585601 | 68.9585601 | 69.0501546 | 71.0462612 | 58.5453285 |
| 65.3643621 | 69.2585601 | 69.2585601 | 69.0501546 | 71.0462612 | 59.5453285 |
| 64.3643621 | 69.1585601 | 69.1585601 | 69.0501546 | 71.0462612 | 58.5453285 |
| 64.3643621 | 69.6585601 | 69.6585601 | 69.0501546 | 71.0462612 | 58.5453285 |
| 65.3643621 | 69.9585601 | 69.9585601 | 70.0501546 | 71.0462612 | 56.5453285 |
| 65.3643621 | 69.9585601 | 69.9585601 | 72.0501546 | 70.0462612 | 55.5453285 |
| 66.3643621 | 69.5585601 | 69.5585601 | 72.0501546 | 69.0462612 | 55.5453285 |
| 66.3643621 | 69.3585601 | 69.3585601 | 72.0501546 | 69.0462612 | 55.5453285 |
| 66.3643621 | 69.9890754 | 69.9890754 | 72.0501546 | 69.0462612 | 55.5453285 |
| 66.3643621 | 68.7585601 | 68.7585601 | 64.0501546 | 68.0462612 | 54.5453285 |
| 67.3643621 | 68.8585601 | 68.8585601 | 63.0501546 | 69.0462612 | 54.5453285 |
| 66.3643621 | 68.4585601 | 68.4585601 | 63.0501546 | 69.0462612 | 54.5453285 |
| 66.3643621 | 68.3585601 | 68.3585601 | 60.0501546 | 70.0462612 | 54.5453285 |
| 66.3643621 | 68.6585601 | 68.6585601 | 59.0501546 | 72.0462612 | 54.5453285 |
| 66.3643621 | 68.3585601 | 68.3585601 | 59.0501546 | 72.0462612 | 54.5453285 |
| 66.3643621 | 68.4585601 | 68.4585601 | 59.0501546 | 73.0462612 | 56.5453285 |
| 66.3643621 | 68.3585601 | 68.3585601 | 59.0501546 | 73.0462612 | 56.5453285 |
| 66.3643621 | 68.5585601 | 68.5585601 | 59.0501546 | 73.0462612 | 57.5453285 |

|            |            |            |            |            |            |
|------------|------------|------------|------------|------------|------------|
| 66.3643621 | 69.1585601 | 69.1585601 | 59.0501546 | 73.0462612 | 59.5453285 |
| 67.3643621 | 69.2585601 | 69.2585601 | 59.0501546 | 73.0462612 | 59.5453285 |
| 68.3643621 | 69.0585601 | 69.0585601 | 58.0501546 | 73.0462612 | 56.5453285 |
| 68.3643621 | 68.9585601 | 68.9585601 | 57.0501546 | 74.0462612 | 56.5453285 |
| 72.3643621 | 69.6585601 | 69.6585601 | 57.0501546 | 74.0462612 | 56.5453285 |
| 73.3643621 | 69.7585601 | 69.7585601 | 56.0501546 | 74.0462612 | 56.5453285 |
| 72.3643621 | 70.3585601 | 70.3585601 | 55.0501546 | 76.0462612 | 61.5453285 |
| 71.3643621 | 70.5585601 | 70.5585601 | 55.0501546 | 76.0462612 | 64.5453285 |
| 71.3643621 | 70.8585601 | 70.8585601 | 55.0501546 | 76.0462612 | 66.5453285 |
| 70.3643621 | 70.7585601 | 70.7585601 | 56.0501546 | 76.0462612 | 66.5453285 |
| 70.3643621 | 70.4585601 | 70.4585601 | 56.0501546 | 75.0462612 | 66.5453285 |
| 70.3643621 | 70.4585601 | 70.4585601 | 56.0501546 | 75.0462612 | 66.5453285 |
| 70.3643621 | 70.7585601 | 70.7585601 | 56.0501546 | 75.0462612 | 66.5453285 |
| 70.3643621 | 70.6585601 | 70.6585601 | 58.0501546 | 74.0462612 | 64.5453285 |
| 71.3643621 | 70.7585601 | 70.7585601 | 58.0501546 | 71.0462612 | 65.5453285 |
| 70.3643621 | 70.6585601 | 70.6585601 | 58.0501546 | 71.0462612 | 67.5453285 |
| 70.3643621 | 70.5585601 | 70.5585601 | 58.0501546 | 70.0462612 | 68.5453285 |
| 70.3643621 | 74.7729216 | 67.9585601 | 58.0501546 | 70.0462612 | 68.5453285 |
| 69.3643621 | 72.7729216 | 67.3585601 | 57.0501546 | 70.0462612 | 67.5453285 |
| 69.3643621 | 70.7729216 | 66.9585601 | 57.0501546 | 70.0462612 | 66.5453285 |
| 69.3643621 | 70.7729216 | 66.7585601 | 58.0501546 | 70.0462612 | 66.5453285 |
| 70.3643621 | 69.7729216 | 66.8585601 | 58.0501546 | 70.0462612 | 66.5453285 |
| 70.3643621 | 69.7729216 | 67.0585601 | 58.0501546 | 71.0462612 | 67.5453285 |
| 70.3643621 | 69.7729216 | 67.2585601 | 58.0501546 | 71.0462612 | 67.5453285 |
| 70.3643621 | 69.7729216 | 67.4585601 | 57.0501546 | 71.0462612 | 67.5453285 |
| 70.3643621 | 69.7729216 | 67.8585601 | 58.0501546 | 71.0462612 | 66.5453285 |
| 69.3643621 | 70.7729216 | 67.4585601 | 58.0501546 | 71.0462612 | 65.5453285 |
| 69.3643621 | 70.7729216 | 67.3585601 | 58.0501546 | 70.0462612 | 65.5453285 |
| 69.3643621 | 72.7729216 | 67.5585601 | 58.0501546 | 70.0462612 | 66.5453285 |
| 69.3643621 | 77.7729216 | 68.2585601 | 59.0501546 | 68.0462612 | 68.5453285 |
| 69.3643621 | 80.7729216 | 68.3585601 | 59.0501546 | 67.0462612 | 68.5453285 |
| 69.3643621 | 81.7729216 | 68.0585601 | 59.0501546 | 67.0462612 | 69.5453285 |
| 68.3643621 | 81.7729216 | 67.7585601 | 58.0501546 | 67.0462612 | 69.5453285 |
| 68.3643621 | 81.7729216 | 67.8585601 | 58.0501546 | 67.0462612 | 69.5453285 |
| 68.3643621 | 68.0585601 | 68.0585601 | 59.0501546 | 67.0462612 | 69.5453285 |
| 67.3643621 | 82.7729216 | 68.9585601 | 59.0501546 | 67.0462612 | 70.5453285 |
| 67.3643621 | 82.7729216 | 68.9585601 | 57.0501546 | 67.0462612 | 69.5453285 |
| 67.3643621 | 81.7729216 | 69.1585601 | 57.0501546 | 67.0462612 | 69.5453285 |
| 66.3643621 | 76.7729216 | 69.0585601 | 57.0501546 | 67.0462612 | 69.5453285 |
| 66.3643621 | 68.7729216 | 68.2585601 | 58.0501546 | 67.0462612 | 68.5453285 |
| 66.3643621 | 67.7729216 | 68.0585601 | 58.0501546 | 67.0462612 | 68.5453285 |
| 65.3643621 | 67.7729216 | 68.1585601 | 58.0501546 | 67.0462612 | 68.5453285 |
| 65.3643621 | 66.7729216 | 68.2585601 | 60.0501546 | 67.0462612 | 67.5453285 |
| 65.3643621 | 66.7729216 | 68.2585601 | 60.0501546 | 67.0462612 | 68.5453285 |
| 65.3643621 | 66.7729216 | 68.4806014 | 60.0501546 | 67.0462612 | 68.5453285 |

|            |            |            |            |            |            |
|------------|------------|------------|------------|------------|------------|
| 65.3643621 | 64.7729216 | 67.6154822 | 60.0501546 | 67.0462612 | 68.5453285 |
| 65.3643621 | 64.7729216 | 67.6585601 | 60.0501546 | 67.0462612 | 69.5453285 |
| 65.3643621 | 64.7729216 | 67.5585601 | 60.0501546 | 67.0462612 | 69.5453285 |
| 65.3643621 | 63.7729216 | 67.2585601 | 60.0501546 | 66.0462612 | 68.5453285 |
| 67.3643621 | 63.7729216 | 67.6585601 | 60.0501546 | 66.0462612 | 68.5453285 |
| 66.3643621 | 62.7729216 | 67.4585601 | 60.0501546 | 66.0462612 | 68.5453285 |
| 66.3643621 | 62.7729216 | 67.3585601 | 60.0501546 | 65.0462612 | 68.5453285 |
| 65.3643621 | 69.7729216 | 68.0585601 | 59.0501546 | 66.0462612 | 68.5453285 |
| 65.3643621 | 71.7729216 | 68.2585601 | 59.0501546 | 67.0462612 | 68.5453285 |
| 65.3643621 | 71.7729216 | 68.3585601 | 59.0501546 | 67.0462612 | 70.5453285 |
| 66.3643621 | 74.7729216 | 68.4585601 | 59.0501546 | 67.0462612 | 70.5453285 |
| 66.3643621 | 74.7729216 | 68.3585601 | 59.0501546 | 67.0462612 | 68.5453285 |
| 66.3643621 | 74.7729216 | 68.4585601 | 59.0501546 | 72.0462612 | 68.5453285 |
| 65.3643621 | 74.7729216 | 67.7585601 | 59.0501546 | 68.0462612 | 69.5453285 |
| 65.3643621 | 68.7729216 | 66.6585601 | 60.0501546 | 66.0462612 | 69.5453285 |
| 65.3643621 | 66.7729216 | 66.6585601 | 63.0501546 | 65.0462612 | 74.5453285 |
| 64.3643621 | 66.7729216 | 66.5585601 | 63.0501546 | 65.0462612 | 75.5453285 |
| 63.3643621 | 66.7729216 | 66.0585601 | 65.0501546 | 65.0462612 | 75.5453285 |
| 63.3643621 | 66.7729216 | 66.6585601 | 63.0501546 | 65.0462612 | 75.5453285 |
| 63.3643621 | 66.7729216 | 66.0585601 | 63.0501546 | 66.0462612 | 70.5453285 |
| 63.3643621 | 66.7729216 | 65.4585601 | 63.0501546 | 67.0462612 | 66.5453285 |
| 63.3643621 | 66.7729216 | 65.5585601 | 64.0501546 | 67.0462612 | 66.5453285 |
| 64.3643621 | 66.7729216 | 65.6585601 | 64.0501546 | 67.0462612 | 64.5453285 |
| 65.3643621 | 67.7729216 | 66.3585601 | 64.0501546 | 68.0462612 | 63.5453285 |
| 65.3643621 | 67.7729216 | 66.4585601 | 64.0501546 | 68.0462612 | 63.5453285 |
| 66.3643621 | 67.7729216 | 66.5585601 | 63.0501546 | 68.0462612 | 63.5453285 |
| 66.3643621 | 66.7729216 | 65.9585601 | 61.0501546 | 69.0462612 | 62.5453285 |
| 66.3643621 | 67.7729216 | 65.8585601 | 61.0501546 | 69.0462612 | 62.5453285 |
| 67.3643621 | 67.7729216 | 65.9585601 | 61.0501546 | 70.0462612 | 63.5453285 |
| 67.3643621 | 67.7729216 | 65.8585601 | 61.0501546 | 70.0462612 | 64.5453285 |
| 67.3643621 | 67.7729216 | 65.7585601 | 61.0501546 | 70.0462612 | 66.5453285 |
| 67.3643621 | 67.7729216 | 66.0585601 | 63.0501546 | 70.0462612 | 67.5453285 |
| 67.3643621 | 66.7729216 | 65.8585601 | 63.0501546 | 69.0462612 | 67.5453285 |
| 67.3643621 | 66.7729216 | 65.9585601 | 63.0501546 | 69.0462612 | 68.5453285 |
| 67.3643621 | 66.7729216 | 65.9585601 | 64.0501546 | 68.0462612 | 68.5453285 |
| 67.3643621 | 66.7729216 | 66.0585601 | 64.0501546 | 68.0462612 | 68.5453285 |
| 67.3643621 | 67.7729216 | 65.6585601 | 65.0501546 | 67.0462612 | 65.5453285 |
| 67.3643621 | 68.7729216 | 65.3585601 | 65.0501546 | 66.0462612 | 64.5453285 |
| 66.3643621 | 68.7729216 | 65.2585601 | 65.0501546 | 66.0462612 | 64.5453285 |
| 64.3643621 | 66.7729216 | 64.8585601 | 65.0501546 | 66.0462612 | 65.5453285 |
| 64.3643621 | 66.7729216 | 65.2585601 | 69.0501546 | 66.0462612 | 66.5453285 |
| 65.3643621 | 66.7729216 | 65.5585601 | 69.0501546 | 66.0462612 | 66.5453285 |
| 65.3643621 | 66.7729216 | 66.3585601 | 71.0501546 | 66.0462612 | 68.5453285 |
| 65.3643621 | 65.7729216 | 66.2585601 | 71.0501546 | 66.0462612 | 67.5453285 |
| 65.3643621 | 65.7729216 | 66.0585601 | 71.0501546 | 66.0462612 | 66.5453285 |

|            |            |            |            |            |            |
|------------|------------|------------|------------|------------|------------|
| 65.3643621 | 66.7729216 | 66.0585601 | 70.0501546 | 66.0462612 | 66.5453285 |
| 65.3643621 | 66.7729216 | 65.6585601 | 69.0501546 | 67.0462612 | 63.5453285 |
| 65.3643621 | 65.7729216 | 65.1585601 | 68.0501546 | 67.0462612 | 62.5453285 |
| 64.3643621 | 65.7729216 | 64.8585601 | 67.0501546 | 67.0462612 | 62.5453285 |
| 64.3643621 | 65.7729216 | 64.7585601 | 67.0501546 | 67.0462612 | 62.5453285 |
| 63.3643621 | 65.7729216 | 65.0585601 | 67.0501546 | 67.0462612 | 64.5453285 |
| 63.3643621 | 65.7729216 | 65.8585601 | 71.0501546 | 67.0462612 | 65.5453285 |
| 63.3643621 | 68.7729216 | 66.9585601 | 73.0501546 | 71.0462612 | 65.5453285 |
| 63.3643621 | 68.7729216 | 66.9271787 | 73.0501546 | 71.0462612 | 65.5453285 |
| 63.3643621 | 65.7729216 | 67.3579155 | 75.0501546 | 71.0462612 | 68.5453285 |
| 65.3643621 | 65.7729216 | 66.4585601 | 75.0501546 | 70.0462612 | 67.5453285 |
| 65.3643621 | 65.7729216 | 65.9585601 | 77.0501546 | 70.0462612 | 67.5453285 |
| 64.3643621 | 64.7729216 | 65.5585601 | 77.0501546 | 69.0462612 | 67.5453285 |
| 63.3643621 | 65.7729216 | 65.2585601 | 77.0501546 | 68.0462612 | 67.5453285 |
| 63.3643621 | 67.7729216 | 65.1585601 | 75.0501546 | 68.0462612 | 68.5453285 |
| 63.3643621 | 68.7729216 | 65.2585601 | 75.0501546 | 67.0462612 | 68.5453285 |
| 62.3643621 | 68.7729216 | 64.7585601 | 73.0501546 | 66.0462612 | 68.5453285 |
| 61.3643621 | 68.7729216 | 64.5585601 | 71.0501546 | 65.0462612 | 70.5453285 |
| 61.3643621 | 60.7729216 | 63.7585601 | 70.0501546 | 64.0462612 | 72.5453285 |
| 60.3643621 | 61.7729216 | 63.7585601 | 69.0501546 | 64.0462612 | 74.5453285 |
| 58.3643621 | 63.7729216 | 63.7585601 | 69.0501546 | 64.0462612 | 74.5453285 |
| 56.3643621 | 63.7729216 | 63.8585601 | 68.0501546 | 64.0462612 | 74.5453285 |
| 53.3643621 | 69.7729216 | 64.4585601 | 68.0501546 | 64.0462612 | 73.5453285 |
| 53.3643621 | 71.7729216 | 64.9585601 | 68.0501546 | 65.0462612 | 74.5453285 |
| 53.3643621 | 72.7729216 | 65.1585601 | 68.0501546 | 65.0462612 | 74.5453285 |
| 54.3643621 | 71.7729216 | 65.6585601 | 65.0501546 | 69.0462612 | 77.5453285 |
| 56.3643621 | 71.7729216 | 65.3585601 | 62.0501546 | 69.0462612 | 77.5453285 |
| 60.3643621 | 67.7729216 | 65.1585601 | 60.0501546 | 68.0462612 | 77.5453285 |
| 60.3643621 | 65.7729216 | 64.8585601 | 59.0501546 | 67.0462612 | 77.5453285 |
| 62.3643621 | 64.7729216 | 64.7585601 | 58.0501546 | 67.0462612 | 75.5453285 |
| 62.3643621 | 64.7729216 | 64.4585601 | 58.0501546 | 66.0462612 | 75.5453285 |
| 62.3643621 | 64.7729216 | 63.8585601 | 58.0501546 | 66.0462612 | 70.5453285 |
| 65.3643621 | 64.7729216 | 63.8585601 | 57.0501546 | 66.0462612 | 70.5453285 |
| 65.3643621 | 64.7729216 | 63.7585601 | 57.0501546 | 66.0462612 | 70.5453285 |
| 65.3643621 | 64.7729216 | 63.7585601 | 62.0501546 | 66.0462612 | 70.5453285 |
| 65.3643621 | 64.7729216 | 63.7585601 | 64.0501546 | 66.0462612 | 70.5453285 |
| 65.3643621 | 66.7729216 | 64.0585601 | 64.0501546 | 66.0462612 | 70.5453285 |
| 65.3643621 | 67.7729216 | 64.0585601 | 63.0501546 | 66.0462612 | 69.5453285 |
| 65.3643621 | 67.7729216 | 63.7585601 | 63.0501546 | 65.0462612 | 68.5453285 |
| 64.3643621 | 68.7729216 | 63.6585601 | 62.0501546 | 65.0462612 | 67.5453285 |
| 64.3643621 | 68.7729216 | 63.3585601 | 61.0501546 | 65.0462612 | 66.5453285 |
| 64.3643621 | 68.7729216 | 63.4585601 | 61.0501546 | 65.0462612 | 66.5453285 |
| 65.3643621 | 71.7729216 | 63.8585601 | 61.0501546 | 65.0462612 | 66.5453285 |
| 65.3643621 | 74.7729216 | 64.0585601 | 61.0501546 | 65.0462612 | 65.5453285 |
| 66.3643621 | 74.7729216 | 64.2585601 | 61.0501546 | 65.0462612 | 65.5453285 |

|            |            |            |            |            |            |
|------------|------------|------------|------------|------------|------------|
| 69.3643621 | 74.7729216 | 64.7585601 | 61.0501546 | 65.0462612 | 65.5453285 |
| 70.3643621 | 74.7729216 | 64.9585601 | 61.0501546 | 65.0462612 | 66.5453285 |
| 70.3643621 | 76.7729216 | 65.1585601 | 61.0501546 | 65.0462612 | 66.5453285 |
| 70.3643621 | 76.7729216 | 66.3585601 | 67.0501546 | 65.0462612 | 67.5453285 |
| 69.3643621 | 76.7729216 | 67.4585601 | 69.0501546 | 65.0462612 | 68.5453285 |
| 69.3643621 | 79.7729216 | 67.9585601 | 70.0501546 | 68.0462612 | 68.5453285 |
| 68.3643621 | 80.7729216 | 67.4585601 | 71.0501546 | 67.0462612 | 69.5453285 |
| 67.3643621 | 67.4585601 | 67.4585601 | 72.0501546 | 67.0462612 | 69.5453285 |
| 67.3643621 | 67.3585601 | 67.3585601 | 77.0501546 | 64.0462612 | 67.5453285 |
| 66.3643621 | 67.2585601 | 67.2585601 | 77.0501546 | 64.0462612 | 67.5453285 |
| 64.3643621 | 67.0585601 | 67.0585601 | 79.0501546 | 64.0462612 | 67.5453285 |
| 64.3643621 | 67.5585601 | 67.5585601 | 67.5585601 | 63.0462612 | 67.5453285 |
| 64.3643621 | 67.7585601 | 67.7585601 | 67.7585601 | 64.0462612 | 65.5453285 |
| 63.3643621 | 67.7585601 | 67.7585601 | 67.7585601 | 65.0462612 | 64.5453285 |
| 63.3643621 | 68.5585601 | 68.5585601 | 68.5585601 | 65.0462612 | 64.5453285 |
| 63.3643621 | 69.4585601 | 69.4585601 | 69.4585601 | 66.0462612 | 64.5453285 |
| 63.3643621 | 69.5585601 | 69.5585601 | 69.5585601 | 66.0462612 | 64.5453285 |
| 63.3643621 | 69.5585601 | 69.5585601 | 69.5585601 | 66.0462612 | 64.5453285 |
| 61.3643621 | 69.4585601 | 69.4585601 | 69.4585601 | 65.0462612 | 62.5453285 |
| 61.3643621 | 69.5585601 | 69.5585601 | 69.5585601 | 65.0462612 | 61.5453285 |
| 61.3643621 | 68.7585601 | 68.7585601 | 68.7585601 | 65.0462612 | 62.5453285 |
| 60.3643621 | 68.7585601 | 68.7585601 | 68.7585601 | 66.0462612 | 62.5453285 |
| 60.3643621 | 68.7585601 | 68.7585601 | 68.7585601 | 66.0462612 | 63.5453285 |
| 60.3643621 | 69.1585601 | 69.1585601 | 69.1585601 | 66.0462612 | 65.5453285 |
| 59.3643621 | 69.2585601 | 69.2585601 | 69.2585601 | 68.0462612 | 65.5453285 |
| 59.3643621 | 69.6585601 | 69.6585601 | 69.6585601 | 68.0462612 | 67.5453285 |
| 59.3643621 | 70.3585601 | 70.3585601 | 70.3585601 | 69.0462612 | 65.5453285 |
| 60.3643621 | 70.2585601 | 70.2585601 | 70.2585601 | 69.0462612 | 64.5453285 |
| 60.3643621 | 71.4585601 | 71.4585601 | 71.4585601 | 69.0462612 | 64.5453285 |
| 60.3643621 | 71.8585601 | 71.8585601 | 71.8585601 | 68.0462612 | 65.5453285 |
| 61.3643621 | 72.7585601 | 72.7585601 | 72.7585601 | 68.0462612 | 68.5453285 |
| 60.3643621 | 72.3585601 | 72.3585601 | 72.3585601 | 67.0462612 | 68.5453285 |
| 60.3643621 | 73.1585601 | 73.1585601 | 73.1585601 | 67.0462612 | 75.5453285 |
| 61.3643621 | 73.0585601 | 73.0585601 | 73.0585601 | 66.0462612 | 75.5453285 |
| 61.3643621 | 72.8585601 | 72.8585601 | 72.8585601 | 66.0462612 | 74.5453285 |
| 62.3643621 | 72.5585601 | 72.5585601 | 72.5585601 | 66.0462612 | 72.5453285 |
| 62.3643621 | 71.6585601 | 71.6585601 | 71.6585601 | 65.0462612 | 72.5453285 |
| 65.3643621 | 71.4585601 | 71.4585601 | 71.4585601 | 64.0462612 | 67.5453285 |
| 65.3643621 | 71.3585601 | 71.3585601 | 71.3585601 | 64.0462612 | 66.5453285 |
| 65.3643621 | 71.3585601 | 71.3585601 | 71.3585601 | 63.0462612 | 66.5453285 |
| 65.3643621 | 71.0585601 | 71.0585601 | 71.0585601 | 63.0462612 | 69.5453285 |
| 65.3643621 | 71.1585601 | 71.1585601 | 71.1585601 | 63.0462612 | 69.5453285 |
| 68.3643621 | 71.1585601 | 71.1585601 | 71.1585601 | 63.0462612 | 74.5453285 |
| 70.3643621 | 70.6585601 | 70.6585601 | 70.6585601 | 63.0462612 | 74.5453285 |
| 70.3643621 | 69.9585601 | 69.9585601 | 69.9585601 | 63.0462612 | 74.5453285 |

|            |            |            |            |            |            |
|------------|------------|------------|------------|------------|------------|
| 70.3643621 | 69.4585601 | 69.4585601 | 69.4585601 | 63.0462612 | 72.5453285 |
| 70.3643621 | 79.7729216 | 68.0585601 | 68.0585601 | 63.0462612 | 66.5453285 |
| 70.3643621 | 79.7729216 | 67.7585601 | 67.7585601 | 63.0462612 | 66.5453285 |
| 70.3643621 | 79.7729216 | 67.2585601 | 67.2585601 | 63.0462612 | 63.5453285 |
| 71.3643621 | 79.7729216 | 66.7585601 | 66.7585601 | 63.0462612 | 63.5453285 |
| 71.3643621 | 78.7729216 | 66.8585601 | 66.8585601 | 63.0462612 | 63.5453285 |
| 75.3643621 | 78.7729216 | 66.5585601 | 66.5585601 | 63.0462612 | 63.5453285 |
| 75.3643621 | 77.7729216 | 66.1585601 | 66.1585601 | 63.0462612 | 63.5453285 |
| 75.3643621 | 77.7729216 | 66.6585601 | 66.6585601 | 63.0462612 | 64.5453285 |
| 74.3643621 | 76.7729216 | 66.8585601 | 66.8585601 | 63.0462612 | 64.5453285 |
| 72.3643621 | 76.7729216 | 66.6585601 | 66.6585601 | 63.0462612 | 64.5453285 |
| 72.3643621 | 76.7729216 | 66.3585601 | 66.3585601 | 64.0462612 | 60.5453285 |
| 71.3643621 | 76.7729216 | 65.3585601 | 76.0501546 | 65.0462612 | 59.5453285 |
| 70.3643621 | 76.7729216 | 64.8585601 | 74.0501546 | 65.0462612 | 59.5453285 |
| 70.3643621 | 75.7729216 | 64.8585601 | 73.0501546 | 65.0462612 | 59.5453285 |
| 69.3643621 | 75.7729216 | 65.2585601 | 73.0501546 | 65.0462612 | 60.5453285 |
| 69.3643621 | 75.7729216 | 65.1585601 | 69.0501546 | 65.0462612 | 61.5453285 |
| 69.3643621 | 74.7729216 | 65.4585601 | 69.0501546 | 66.0462612 | 61.5453285 |
| 69.3643621 | 74.7729216 | 65.5585601 | 68.0501546 | 66.0462612 | 62.5453285 |
| 69.3643621 | 74.7729216 | 65.7585601 | 68.0501546 | 66.0462612 | 63.5453285 |
| 68.3643621 | 74.7729216 | 65.9585601 | 66.0501546 | 66.0462612 | 63.5453285 |
| 68.3643621 | 74.7729216 | 66.4585601 | 65.0501546 | 66.0462612 | 68.5453285 |
| 67.3643621 | 74.7729216 | 66.6585601 | 66.0501546 | 67.0462612 | 69.5453285 |
| 66.3643621 | 73.7729216 | 66.4585601 | 66.0501546 | 68.0462612 | 69.5453285 |
| 66.3643621 | 71.7729216 | 66.7585601 | 70.0501546 | 69.0462612 | 70.5453285 |
| 65.3643621 | 70.7729216 | 66.9585601 | 71.0501546 | 69.0462612 | 72.5453285 |
| 65.3643621 | 70.7729216 | 66.9585601 | 71.0501546 | 69.0462612 | 72.5453285 |
| 65.3643621 | 68.7729216 | 67.5514176 | 72.0501546 | 71.0462612 | 74.5453285 |
| 64.3643621 | 68.7729216 | 66.9585601 | 72.0501546 | 72.0462612 | 75.5453285 |
| 65.3643621 | 68.7729216 | 66.3585601 | 72.0501546 | 72.0462612 | 68.5453285 |
| 66.3643621 | 67.7729216 | 66.2585601 | 73.0501546 | 72.0462612 | 66.5453285 |
| 66.3643621 | 66.7729216 | 66.1585601 | 73.0501546 | 72.0462612 | 65.5453285 |
| 66.3643621 | 66.7729216 | 66.2585601 | 74.0501546 | 71.0462612 | 65.5453285 |
| 66.3643621 | 67.7729216 | 66.3585601 | 74.0501546 | 71.0462612 | 65.5453285 |
| 65.3643621 | 68.7729216 | 66.0585601 | 74.0501546 | 68.0462612 | 61.5453285 |
| 65.3643621 | 68.7729216 | 65.9585601 | 74.0501546 | 65.0462612 | 61.5453285 |
| 65.3643621 | 70.7729216 | 65.8585601 | 73.0501546 | 64.0462612 | 59.5453285 |
| 65.3643621 | 70.7729216 | 65.6585601 | 73.0501546 | 63.0462612 | 59.5453285 |
| 64.3643621 | 70.7729216 | 64.8585601 | 68.0501546 | 62.0462612 | 60.5453285 |
| 65.3643621 | 70.7729216 | 65.3585601 | 68.0501546 | 62.0462612 | 61.5453285 |
| 65.3643621 | 70.7729216 | 65.0585601 | 68.0501546 | 62.0462612 | 60.5453285 |
| 65.3643621 | 71.7729216 | 65.1585601 | 67.0501546 | 64.0462612 | 60.5453285 |
| 65.3643621 | 71.7729216 | 64.9585601 | 67.0501546 | 65.0462612 | 57.5453285 |
| 64.3643621 | 69.7729216 | 64.6585601 | 67.0501546 | 65.0462612 | 56.5453285 |
| 64.3643621 | 70.7729216 | 64.6585601 | 67.0501546 | 65.0462612 | 55.5453285 |

|            |            |            |            |            |            |
|------------|------------|------------|------------|------------|------------|
| 64.3643621 | 70.7729216 | 64.6585601 | 64.0501546 | 65.0462612 | 55.5453285 |
| 65.3643621 | 70.7729216 | 64.0585601 | 64.0501546 | 65.0462612 | 56.5453285 |
| 68.3643621 | 70.7729216 | 64.4585601 | 64.0501546 | 65.0462612 | 56.5453285 |
| 69.3643621 | 71.7729216 | 64.9585601 | 64.0501546 | 65.0462612 | 57.5453285 |
| 69.3643621 | 71.7729216 | 64.9585601 | 64.0501546 | 65.0462612 | 57.5453285 |
| 68.3643621 | 71.7729216 | 65.0585601 | 65.0501546 | 65.0462612 | 59.5453285 |
| 67.3643621 | 71.7729216 | 65.4585601 | 68.0501546 | 65.0462612 | 60.5453285 |
| 67.3643621 | 72.7729216 | 66.1585601 | 69.0501546 | 66.0462612 | 61.5453285 |
| 65.3643621 | 72.7729216 | 66.0585601 | 70.0501546 | 66.0462612 | 61.5453285 |
| 65.3643621 | 72.7729216 | 65.8585601 | 70.0501546 | 66.0462612 | 62.5453285 |
| 65.3643621 | 72.7729216 | 65.8585601 | 71.0501546 | 65.0462612 | 62.5453285 |
| 64.3643621 | 72.7729216 | 65.8585601 | 71.0501546 | 64.0462612 | 64.5453285 |
| 65.3643621 | 72.7729216 | 65.8585601 | 71.0501546 | 64.0462612 | 64.5453285 |
| 65.3643621 | 72.7729216 | 66.0585601 | 71.0501546 | 64.0462612 | 64.5453285 |
| 66.3643621 | 72.7729216 | 66.2585601 | 71.0501546 | 65.0462612 | 64.5453285 |
| 67.3643621 | 72.7729216 | 66.7585601 | 71.0501546 | 65.0462612 | 68.5453285 |
| 67.3643621 | 71.7729216 | 66.9585601 | 70.0501546 | 65.0462612 | 70.5453285 |
| 67.3643621 | 71.7729216 | 67.2585601 | 70.0501546 | 66.0462612 | 72.5453285 |
| 68.3643621 | 71.7729216 | 67.0585601 | 68.0501546 | 66.0462612 | 72.5453285 |
| 68.3643621 | 71.7729216 | 67.4585601 | 68.0501546 | 66.0462612 | 72.5453285 |
| 68.3643621 | 71.7729216 | 67.5585601 | 67.0501546 | 66.0462612 | 72.5453285 |
| 68.3643621 | 72.7729216 | 67.1585601 | 66.0501546 | 67.0462612 | 67.5453285 |
| 69.3643621 | 72.7729216 | 67.8585601 | 66.0501546 | 68.0462612 | 67.5453285 |
| 69.3643621 | 72.7729216 | 66.9585601 | 66.0501546 | 68.0462612 | 58.5453285 |
| 69.3643621 | 73.7729216 | 67.3585601 | 65.0501546 | 68.0462612 | 59.5453285 |
| 69.3643621 | 73.7729216 | 66.6585601 | 64.0501546 | 67.0462612 | 61.5453285 |
| 68.3643621 | 74.7729216 | 66.5585601 | 64.0501546 | 67.0462612 | 61.5453285 |
| 68.3643621 | 74.7729216 | 66.0585601 | 64.0501546 | 65.0462612 | 60.5453285 |
| 68.3643621 | 74.7729216 | 66.0585601 | 64.0501546 | 65.0462612 | 60.5453285 |
| 67.3643621 | 73.7729216 | 65.7585601 | 64.0501546 | 65.0462612 | 60.5453285 |
| 67.3643621 | 73.7729216 | 65.5585601 | 64.0501546 | 65.0462612 | 60.5453285 |
| 67.3643621 | 73.7729216 | 65.3585601 | 64.0501546 | 64.0462612 | 60.5453285 |
| 67.3643621 | 73.7729216 | 65.5585601 | 64.0501546 | 64.0462612 | 61.5453285 |
| 67.3643621 | 71.7729216 | 65.6585601 | 66.0501546 | 65.0462612 | 61.5453285 |
| 68.3643621 | 68.7729216 | 65.5585601 | 66.0501546 | 65.0462612 | 61.5453285 |
| 68.3643621 | 68.7729216 | 65.9628917 | 66.0501546 | 65.0462612 | 61.5453285 |
| 68.3643621 | 68.7729216 | 66.1289984 | 66.0501546 | 66.0462612 | 61.5453285 |
| 68.3643621 | 67.7729216 | 65.8585601 | 67.0501546 | 65.0462612 | 60.5453285 |
| 67.3643621 | 67.7729216 | 65.8585601 | 67.0501546 | 64.0462612 | 59.5453285 |
| 67.3643621 | 67.7729216 | 65.6585601 | 67.0501546 | 64.0462612 | 60.5453285 |
| 68.3643621 | 68.7729216 | 65.9585601 | 67.0501546 | 63.0462612 | 64.5453285 |
| 67.3643621 | 68.7729216 | 65.5585601 | 67.0501546 | 63.0462612 | 64.5453285 |
| 68.3643621 | 68.7729216 | 65.6585601 | 67.0501546 | 63.0462612 | 64.5453285 |
| 68.3643621 | 69.7729216 | 65.6585601 | 66.0501546 | 63.0462612 | 64.5453285 |
| 68.3643621 | 69.7729216 | 65.5585601 | 66.0501546 | 63.0462612 | 65.5453285 |

|            |            |            |            |            |            |
|------------|------------|------------|------------|------------|------------|
| 68.3643621 | 69.7729216 | 66.2585601 | 66.0501546 | 65.0462612 | 67.5453285 |
| 69.3643621 | 70.7729216 | 67.7585601 | 73.0501546 | 65.0462612 | 70.5453285 |
| 69.3643621 | 70.7729216 | 67.9585601 | 73.0501546 | 66.0462612 | 72.5453285 |
| 70.3643621 | 70.7729216 | 68.0585601 | 73.0501546 | 66.0462612 | 72.5453285 |
| 70.3643621 | 71.7729216 | 68.4585601 | 73.0501546 | 66.0462612 | 74.5453285 |
| 70.3643621 | 74.7729216 | 68.9585601 | 72.0501546 | 66.0462612 | 79.5453285 |
| 70.3643621 | 75.7729216 | 69.2585601 | 70.0501546 | 66.0462612 | 79.5453285 |
| 70.3643621 | 75.7729216 | 69.2585601 | 70.0501546 | 66.0462612 | 80.5453285 |
| 71.3643621 | 76.7729216 | 69.3585601 | 70.0501546 | 67.0462612 | 78.5453285 |
| 71.3643621 | 77.7729216 | 69.4585601 | 70.0501546 | 67.0462612 | 78.5453285 |
| 71.3643621 | 78.7729216 | 69.4585601 | 70.0501546 | 67.0462612 | 77.5453285 |
| 70.3643621 | 78.7729216 | 69.8585601 | 70.0501546 | 68.0462612 | 77.5453285 |
| 70.3643621 | 78.7729216 | 70.0585601 | 70.0501546 | 67.0462612 | 77.5453285 |
| 70.3643621 | 78.7729216 | 70.0585601 | 68.0501546 | 67.0462612 | 77.5453285 |
| 70.3643621 | 78.7729216 | 69.4585601 | 66.0501546 | 67.0462612 | 76.5453285 |
| 70.3643621 | 78.7729216 | 69.0585601 | 66.0501546 | 67.0462612 | 75.5453285 |
| 71.3643621 | 79.7729216 | 69.3585601 | 66.0501546 | 67.0462612 | 75.5453285 |
| 70.3643621 | 79.7729216 | 69.2585601 | 66.0501546 | 68.0462612 | 75.5453285 |
| 69.3643621 | 79.7729216 | 69.1585601 | 65.0501546 | 69.0462612 | 72.5453285 |
| 69.3643621 | 79.7729216 | 69.4585601 | 65.0501546 | 69.0462612 | 72.5453285 |
| 68.3643621 | 79.7729216 | 69.7585601 | 65.0501546 | 69.0462612 | 72.5453285 |
| 69.3643621 | 77.7729216 | 69.6585601 | 64.0501546 | 69.0462612 | 72.5453285 |
| 69.3643621 | 70.7729216 | 69.2585601 | 64.0501546 | 69.0462612 | 72.5453285 |
| 68.3643621 | 69.7729216 | 68.8585601 | 64.0501546 | 70.0462612 | 72.5453285 |
| 68.3643621 | 69.7729216 | 68.4585601 | 64.0501546 | 71.0462612 | 72.5453285 |
| 68.3643621 | 69.7729216 | 68.1585601 | 64.0501546 | 71.0462612 | 72.5453285 |
| 67.3643621 | 69.7729216 | 67.0585601 | 61.0501546 | 71.0462612 | 72.5453285 |
| 67.3643621 | 69.7729216 | 66.0585601 | 61.0501546 | 69.0462612 | 72.5453285 |
| 67.3643621 | 69.7729216 | 65.4585601 | 61.0501546 | 66.0462612 | 72.5453285 |
| 67.3643621 | 69.7729216 | 65.4585601 | 61.0501546 | 64.0462612 | 72.5453285 |
| 68.3643621 | 70.7729216 | 65.4585601 | 61.0501546 | 64.0462612 | 70.5453285 |
| 68.3643621 | 70.7729216 | 65.8585601 | 61.0501546 | 64.0462612 | 71.5453285 |
| 68.3643621 | 70.7729216 | 66.2585601 | 62.0501546 | 64.0462612 | 71.5453285 |
| 67.3643621 | 72.7729216 | 66.2585601 | 64.0501546 | 64.0462612 | 71.5453285 |
| 67.3643621 | 72.7729216 | 66.5585601 | 64.0501546 | 64.0462612 | 72.5453285 |
| 68.3643621 | 72.7729216 | 66.8585601 | 65.0501546 | 65.0462612 | 72.5453285 |
| 68.3643621 | 72.7729216 | 66.8585601 | 65.0501546 | 65.0462612 | 73.5453285 |
| 68.3643621 | 75.7729216 | 66.9585601 | 65.0501546 | 65.0462612 | 73.5453285 |
| 68.3643621 | 75.7729216 | 66.4585601 | 65.0501546 | 65.0462612 | 73.5453285 |
| 69.3643621 | 75.7729216 | 66.4585601 | 65.0501546 | 65.0462612 | 74.5453285 |
| 68.3643621 | 76.7729216 | 67.1585601 | 66.0501546 | 65.0462612 | 76.5453285 |
| 67.3643621 | 76.7729216 | 67.2585601 | 66.0501546 | 65.0462612 | 76.5453285 |
| 67.3643621 | 76.7729216 | 67.4585601 | 66.0501546 | 66.0462612 | 77.5453285 |
| 68.3643621 | 76.7729216 | 67.8585601 | 66.0501546 | 66.0462612 | 77.5453285 |
| 68.3643621 | 76.7729216 | 68.3111482 | 66.0501546 | 66.0462612 | 77.5453285 |



|            |            |            |            |            |            |
|------------|------------|------------|------------|------------|------------|
| 68.3643621 | 77.7729216 | 68.4690266 | 68.0501546 | 67.0462612 | 77.5453285 |
| 68.3643621 | 77.7729216 | 68.1585601 | 64.0501546 | 67.0462612 | 77.5453285 |
| 68.3643621 | 76.7729216 | 67.5585601 | 62.0501546 | 67.0462612 | 76.5453285 |
| 68.3643621 | 77.7729216 | 67.9585601 | 61.0501546 | 67.0462612 | 77.5453285 |
| 65.3643621 | 78.7729216 | 67.5585601 | 61.0501546 | 67.0462612 | 77.5453285 |
| 63.3643621 | 77.7729216 | 67.8585601 | 62.0501546 | 68.0462612 | 81.5453285 |
| 62.3643621 | 77.7729216 | 67.7585601 | 62.0501546 | 68.0462612 | 67.7585601 |
| 61.3643621 | 77.7729216 | 67.6585601 | 62.0501546 | 68.0462612 | 67.6585601 |
| 62.3643621 | 73.7729216 | 67.3585601 | 62.0501546 | 68.0462612 | 67.3585601 |
| 64.3643621 | 73.7729216 | 67.4585601 | 62.0501546 | 68.0462612 | 67.4585601 |
| 64.3643621 | 70.7729216 | 67.0585601 | 62.0501546 | 68.0462612 | 80.5453285 |
| 65.3643621 | 67.7729216 | 66.3585601 | 60.0501546 | 67.0462612 | 66.3585601 |
| 66.3643621 | 67.7729216 | 66.6585601 | 60.0501546 | 67.0462612 | 80.5453285 |
| 66.3643621 | 64.7729216 | 66.3585601 | 60.0501546 | 67.0462612 | 66.3585601 |
| 66.3643621 | 64.7729216 | 66.0585601 | 60.0501546 | 67.0462612 | 79.5453285 |
| 65.3643621 | 64.7729216 | 66.2585601 | 61.0501546 | 67.0462612 | 79.5453285 |
| 65.3643621 | 63.7729216 | 66.3585601 | 61.0501546 | 67.0462612 | 79.5453285 |
| 64.3643621 | 63.7729216 | 66.1585601 | 61.0501546 | 67.0462612 | 78.5453285 |
| 63.3643621 | 63.7729216 | 66.4585601 | 62.0501546 | 68.0462612 | 78.5453285 |
| 63.3643621 | 63.7729216 | 66.5585601 | 63.0501546 | 69.0462612 | 76.5453285 |
| 62.3643621 | 62.7729216 | 66.4585601 | 64.0501546 | 70.0462612 | 76.5453285 |
| 62.3643621 | 62.7729216 | 66.6585601 | 64.0501546 | 71.0462612 | 76.5453285 |
| 63.3643621 | 63.7729216 | 66.6585601 | 65.0501546 | 71.0462612 | 75.5453285 |
| 64.3643621 | 63.7729216 | 66.6585601 | 66.0501546 | 71.0462612 | 74.5453285 |
| 64.3643621 | 63.7729216 | 66.6585601 | 65.0501546 | 71.0462612 | 74.5453285 |
| 64.3643621 | 64.7729216 | 66.8585601 | 65.0501546 | 71.0462612 | 72.5453285 |
| 64.3643621 | 64.7729216 | 66.7585601 | 65.0501546 | 70.0462612 | 70.5453285 |
| 64.3643621 | 64.7729216 | 66.7585601 | 65.0501546 | 69.0462612 | 70.5453285 |
| 63.3643621 | 64.7729216 | 66.6585601 | 65.0501546 | 68.0462612 | 68.5453285 |
| 63.3643621 | 65.7729216 | 66.4585601 | 65.0501546 | 68.0462612 | 65.5453285 |
| 63.3643621 | 66.7729216 | 66.2585601 | 65.0501546 | 68.0462612 | 63.5453285 |
| 64.3643621 | 66.7729216 | 66.0585601 | 65.0501546 | 66.0462612 | 63.5453285 |
| 64.3643621 | 66.7729216 | 65.7585601 | 65.0501546 | 66.0462612 | 58.5453285 |
| 66.3643621 | 66.7729216 | 66.2585601 | 65.0501546 | 65.0462612 | 56.5453285 |
| 66.3643621 | 65.7729216 | 66.1585601 | 63.0501546 | 65.0462612 | 56.5453285 |
| 66.3643621 | 65.7729216 | 66.2585601 | 61.0501546 | 65.0462612 | 57.5453285 |
| 66.3643621 | 66.7729216 | 66.2585601 | 61.0501546 | 65.0462612 | 56.5453285 |
| 66.3643621 | 67.7729216 | 66.3585601 | 61.0501546 | 65.0462612 | 56.5453285 |
| 67.3643621 | 67.7729216 | 66.6585601 | 60.0501546 | 66.0462612 | 57.5453285 |
| 67.3643621 | 67.7729216 | 66.4585601 | 60.0501546 | 66.0462612 | 57.5453285 |
| 67.3643621 | 68.7729216 | 66.5585601 | 60.0501546 | 66.0462612 | 57.5453285 |
| 66.3643621 | 69.7729216 | 66.4585601 | 60.0501546 | 67.0462612 | 56.5453285 |
| 66.3643621 | 69.7729216 | 66.9585601 | 61.0501546 | 67.0462612 | 56.5453285 |
| 66.3643621 | 69.7729216 | 67.0585601 | 61.0501546 | 67.0462612 | 55.5453285 |
| 68.3643621 | 70.7729216 | 67.7585601 | 60.0501546 | 68.0462612 | 55.5453285 |

|            |            |            |            |            |            |
|------------|------------|------------|------------|------------|------------|
| 69.3643621 | 70.7729216 | 68.5585601 | 60.0501546 | 68.0462612 | 58.5453285 |
| 69.3643621 | 70.7729216 | 68.5585601 | 61.0501546 | 67.0462612 | 58.5453285 |
| 69.3643621 | 70.7729216 | 68.6585601 | 62.0501546 | 67.0462612 | 60.5453285 |
| 69.3643621 | 70.7729216 | 68.9585601 | 63.0501546 | 67.0462612 | 62.5453285 |
| 68.3643621 | 70.7729216 | 69.1585601 | 64.0501546 | 66.0462612 | 65.5453285 |
| 67.3643621 | 71.7729216 | 68.9585601 | 65.0501546 | 65.0462612 | 66.5453285 |
| 68.3643621 | 72.7729216 | 69.0585601 | 64.0501546 | 65.0462612 | 66.5453285 |
| 70.3643621 | 72.7729216 | 69.2585601 | 63.0501546 | 65.0462612 | 66.5453285 |
| 70.3643621 | 72.7729216 | 69.2585601 | 63.0501546 | 65.0462612 | 66.5453285 |
| 72.3643621 | 72.7729216 | 68.3096504 | 62.0501546 | 66.0462612 | 64.5453285 |
| 72.3643621 | 73.7729216 | 69.8585601 | 62.0501546 | 69.0462612 | 66.5453285 |
| 72.3643621 | 73.7729216 | 69.9585601 | 62.0501546 | 69.0462612 | 66.5453285 |
| 72.3643621 | 72.7729216 | 69.7585601 | 61.0501546 | 69.0462612 | 67.5453285 |
| 73.3643621 | 71.7729216 | 69.7585601 | 61.0501546 | 69.0462612 | 70.5453285 |
| 74.3643621 | 68.7729216 | 69.4585601 | 61.0501546 | 68.0462612 | 71.5453285 |
| 74.3643621 | 68.7729216 | 69.2585601 | 61.0501546 | 68.0462612 | 71.5453285 |
| 75.3643621 | 68.7729216 | 69.9585601 | 61.0501546 | 68.0462612 | 76.5453285 |
| 75.3643621 | 67.7729216 | 69.8585601 | 61.0501546 | 68.0462612 | 77.5453285 |
| 76.3643621 | 68.7729216 | 69.7585601 | 61.0501546 | 68.0462612 | 77.5453285 |
| 76.3643621 | 68.7729216 | 69.7585601 | 61.0501546 | 68.0462612 | 77.5453285 |
| 76.3643621 | 68.7729216 | 69.7585601 | 61.0501546 | 68.0462612 | 77.5453285 |
| 76.3643621 | 68.7729216 | 69.7585601 | 61.0501546 | 68.0462612 | 77.5453285 |
| 77.3643621 | 68.7729216 | 69.9585601 | 62.0501546 | 67.0462612 | 78.5453285 |
| 77.3643621 | 68.7729216 | 70.2585601 | 62.0501546 | 67.0462612 | 78.5453285 |
| 77.3643621 | 68.7729216 | 70.4585601 | 62.0501546 | 66.0462612 | 81.5453285 |
| 77.3643621 | 68.7729216 | 69.9585601 | 60.0501546 | 66.0462612 | 81.5453285 |
| 77.3643621 | 68.7729216 | 70.4585601 | 60.0501546 | 66.0462612 | 70.4585601 |
| 77.3643621 | 68.7729216 | 71.1585601 | 60.0501546 | 66.0462612 | 71.1585601 |
| 77.3643621 | 68.7729216 | 71.4585601 | 60.0501546 | 66.0462612 | 71.4585601 |
| 82.3643621 | 68.7729216 | 72.1585601 | 60.0501546 | 67.0462612 | 72.1585601 |

behavior  
average of all behavior moving average

|             |    |            |
|-------------|----|------------|
| 75.34312991 | 71 | 70.4881676 |
| 75.67646324 | 71 | 70.5007045 |
| 76.34312991 | 71 | 70.5176274 |
| 74.34312991 | 71 | 70.5345502 |
| 74.00979658 | 71 | 70.5646309 |
| 72.34312991 | 71 | 70.5958082 |
| 70.67646324 | 71 | 70.6206088 |
| 69.67646324 | 71 | 70.6392692 |
| 70.34312991 | 71 | 70.6579295 |
| 70.00979658 | 71 | 70.6651863 |
| 70.00979658 | 71 | 70.6733203 |
| 69.67646324 | 71 | 70.6911035 |
| 67.79593251 | 71 | 70.7360796 |
| 67.79593251 | 71 | 70.7810557 |
| 67.29593251 | 71 | 70.8234002 |
| 67.54593251 | 71 | 70.8455693 |
| 67.79593251 | 71 | 70.8615981 |
| 67.79593251 | 71 | 70.8644689 |
| 67.79593251 | 71 | 70.8717257 |
| 67.79593251 | 71 | 70.8789825 |
| 67.54593251 | 71 | 70.8906253 |
| 68.29593251 | 71 | 70.91104   |
| 69.04593251 | 71 | 70.9384723 |
| 69.04593251 | 61 | 70.9509923 |
| 69.79593251 | 61 | 70.971407  |
| 70.04593251 | 61 | 70.9804182 |
| 70.04593251 | 61 | 70.9789031 |
| 69.54593251 | 61 | 70.9615985 |
| 69.79593251 | 61 | 70.9548202 |
| 69.04593251 | 61 | 70.9524279 |
| 68.79593251 | 61 | 70.9570531 |
| 69.04593251 | 61 | 70.9493977 |
| 68.79593251 | 61 | 70.9443738 |
| 69.54593251 | 61 | 70.9235604 |
| 69.54593251 | 61 | 70.8957295 |
| 69.79593251 | 61 | 70.8626355 |
| 70.29593251 | 61 | 70.8137519 |
| 70.29593251 | 61 | 70.7701316 |
| 71.29593251 | 61 | 70.6914235 |
| 71.29593251 | 61 | 70.6021891 |
| 71.29593251 | 61 | 70.5085687 |
| 72.29593251 | 61 | 70.4061764 |

|             |    |            |
|-------------|----|------------|
| 72.04593251 | 61 | 70.3248367 |
| 71.56131465 | 61 | 70.2347251 |
| 70.76131465 | 61 | 70.1665433 |
| 70.76131465 | 61 | 70.1202914 |
| 70.56131465 | 61 | 70.1184084 |
| 70.96131465 | 61 | 70.1077536 |
| 71.36131465 | 61 | 70.1014847 |
| 73.76131465 | 61 | 70.0908299 |
| 74.76131465 | 61 | 70.0714031 |
| 74.56131465 | 61 | 70.0811061 |
| 73.36131465 | 61 | 70.0886161 |
| 72.56131465 | 61 | 70.0851612 |
| 71.56131465 | 61 | 70.0762239 |
| 71.56131465 | 61 | 70.0618041 |
| 71.56131465 | 61 | 70.0386124 |
| 71.56131465 | 61 | 70.0132277 |
| 71.56131465 | 61 | 69.987843  |
| 71.76131465 | 61 | 69.9679407 |
| 70.96131465 | 61 | 69.940363  |
| 71.56131465 | 61 | 69.9007239 |
| 71.36131465 | 61 | 69.8610849 |
| 70.56131465 | 61 | 69.8181563 |
| 70.36131465 | 61 | 69.7763242 |
| 71.16131465 | 61 | 69.7366851 |
| 71.16131465 | 61 | 69.697046  |
| 72.36131465 | 61 | 69.6650824 |
| 71.76131465 | 61 | 69.6451801 |
| 71.96131465 | 61 | 69.6329533 |
| 70.76131465 | 61 | 69.626209  |
| 70.56131465 | 61 | 69.6227541 |
| 69.16131465 | 61 | 69.6094308 |
| 68.96131465 | 61 | 69.6026864 |
| 69.36131465 | 61 | 69.5992315 |
| 69.36131465 | 61 | 69.5848117 |
| 68.56131465 | 61 | 69.5791639 |
| 68.56131465 | 61 | 69.5581651 |
| 68.56131465 | 61 | 69.5327804 |
| 68.16131465 | 61 | 69.5052027 |
| 67.16131465 | 61 | 69.4644672 |
| 67.16131465 | 61 | 69.4226351 |
| 67.16131465 | 61 | 69.3871796 |
| 69.53336148 | 61 | 69.3622503 |
| 69.53336148 | 61 | 69.3373211 |
| 69.53336148 | 61 | 69.3106375 |
| 69.20002814 | 61 | 69.2655329 |

|             |    |            |
|-------------|----|------------|
| 68.20002814 | 61 | 69.2107791 |
| 68.53336148 | 61 | 69.1288324 |
| 68.36669481 | 61 | 69.0446926 |
| 67.03336148 | 61 | 68.9719564 |
| 66.86669481 | 61 | 68.9172026 |
| 66.70002814 | 61 | 68.8773612 |
| 66.03336148 | 61 | 68.8528705 |
| 65.86669481 | 61 | 68.8283799 |
| 65.86669481 | 61 | 68.8088975 |
| 66.03336148 | 61 | 68.7875353 |
| 66.20002814 | 61 | 68.7661731 |
| 66.03336148 | 61 | 68.7515779 |
| 66.03336148 | 61 | 68.7531481 |
| 66.53336148 | 61 | 68.7411844 |
| 66.86669481 | 61 | 68.7262132 |
| 67.03336148 | 61 | 68.7255277 |
| 66.53336148 | 61 | 68.7274738 |
| 67.36669481 | 61 | 68.7207733 |
| 67.53336148 | 61 | 68.7140728 |
| 67.86669481 | 61 | 68.6934625 |
| 68.53336148 | 61 | 68.6367106 |
| 68.53336148 | 61 | 68.5806165 |
| 68.53336148 | 69 | 68.5436014 |
| 69.03336148 | 69 | 68.5108626 |
| 69.53336148 | 69 | 68.5014791 |
| 69.20002814 | 69 | 68.5029508 |
| 69.86669481 | 69 | 68.4975147 |
| 69.70002814 | 69 | 68.4937233 |
| 69.36669481 | 69 | 68.5021029 |
| 69.20002814 | 69 | 68.5055483 |
| 69.20002814 | 69 | 68.5040595 |
| 68.86669481 | 69 | 68.5078339 |
| 68.86669481 | 69 | 68.5310889 |
| 68.86669481 | 69 | 68.5514199 |
| 68.86669481 | 69 | 68.573213  |
| 68.53336148 | 69 | 68.5711048 |
| 67.53336148 | 69 | 68.5880024 |
| 67.20002814 | 69 | 68.620982  |
| 67.53336148 | 69 | 68.6656574 |
| 68.36669481 | 69 | 68.7308007 |
| 69.03336148 | 69 | 68.794482  |
| 69.20002814 | 69 | 68.8588943 |
| 69.53336148 | 69 | 68.9350025 |
| 69.70002814 | 69 | 69.0162276 |
| 69.70002814 | 69 | 69.1084177 |

|             |               |
|-------------|---------------|
| 70.08064728 | 69 69.2137656 |
| 69.93779014 | 69 69.3242305 |
| 69.93779014 | 69 69.4361574 |
| 70.65207585 | 69 69.5259237 |
| 71.08064728 | 69 69.6104105 |
| 70.65207585 | 69 69.6905926 |
| 70.22350442 | 69 69.764277  |
| 70.50921871 | 69 69.8265092 |
| 70.50921871 | 69 69.8874417 |
| 70.65207585 | 69 69.9285403 |
| 70.65207585 | 69 69.9775174 |
| 70.79493299 | 69 70.0134179 |
| 67.44816675 | 69 70.0732658 |
| 67.69816675 | 69 70.135388  |
| 67.94816675 | 69 70.1838649 |
| 68.07316675 | 69 70.2323418 |
| 68.44816675 | 69 70.2787362 |
| 69.07316675 | 69 70.3170604 |
| 68.94816675 | 69 70.3468564 |
| 69.07316675 | 69 70.4119996 |
| 69.19816675 | 69 70.468371  |
| 68.82316675 | 69 70.5254733 |
| 68.44816675 | 69 70.5854997 |
| 68.44816675 | 69 70.640409  |
| 68.92869507 | 69 70.6894704 |
| 68.70647285 | 69 70.7385318 |
| 68.81758396 | 69 70.7861312 |
| 69.37313951 | 69 70.8118008 |
| 70.81758396 | 69 70.8022856 |
| 72.03980618 | 69 70.7971563 |
| 72.59536174 | 69 70.8272118 |
| 73.15091729 | 69 70.8515153 |
| 73.37313951 | 69 70.8753315 |
| 73.2620284  | 69 70.8907819 |
| 72.81758396 | 69 70.9026585 |
| 73.03980618 | 69 70.9125046 |
| 73.70647285 | 69 70.9181272 |
| 74.03980618 | 69 70.9215568 |
| 74.2620284  | 69 70.9313216 |
| 74.37313951 | 69 70.9440381 |
| 72.85559626 | 69 70.9599337 |
| 72.62102836 | 69 70.966895  |
| 72.1272012  | 69 70.9660823 |
| 71.63337404 | 69 70.9531327 |
| 71.26300367 | 69 70.9699303 |

|             |    |            |
|-------------|----|------------|
| 71.49757157 | 69 | 70.9879811 |
| 70.15685504 | 69 | 70.9891145 |
| 70.25562048 | 69 | 70.982938  |
| 70.09512665 | 69 | 70.9675719 |
| 72.0818057  | 69 | 70.9536678 |
| 72.58797854 | 69 | 70.9232641 |
| 72.21760817 | 69 | 70.9354348 |
| 72.21760817 | 69 | 70.945778  |
| 72.05933179 | 69 | 70.9484457 |
| 71.94600323 | 69 | 70.9494688 |
| 71.79785508 | 69 | 70.9455576 |
| 74.15091729 | 69 | 70.9363467 |
| 74.15091729 | 61 | 70.9360905 |
| 74.03980618 | 61 | 70.9312656 |
| 73.92869507 | 61 | 70.9306439 |
| 73.37313951 | 61 | 70.9334944 |
| 72.92869507 | 61 | 70.9442031 |
| 72.59536174 | 61 | 70.9636837 |
| 72.48425062 | 61 | 70.9739177 |
| 70.81758396 | 61 | 70.9899995 |
| 68.1435341  | 61 | 71.0016655 |
| 68.1435341  | 61 | 71.007646  |
| 69.81758396 | 61 | 71.0061541 |
| 69.04709598 | 63 | 70.9936161 |
| 69.34339227 | 63 | 70.9863062 |
| 69.54092314 | 63 | 70.9499278 |
| 69.93598487 | 63 | 70.927998  |
| 69.94833055 | 63 | 70.8830141 |
| 69.96067622 | 63 | 70.8552491 |
| 69.96067622 | 63 | 70.8148136 |
| 70.44215771 | 63 | 70.7639817 |
| 71.04709598 | 63 | 70.7168861 |
| 71.14586141 | 63 | 70.6920323 |
| 70.46684906 | 63 | 70.6371393 |
| 70.59030585 | 63 | 70.5827209 |
| 70.09647869 | 63 | 70.5330133 |
| 71.92869507 | 63 | 70.4896409 |
| 71.59536174 | 63 | 70.4759829 |
| 70.59536174 | 63 | 70.4642741 |
| 70.03980618 | 63 | 70.448017  |
| 69.48425062 | 63 | 70.4435529 |
| 69.59536174 | 63 | 70.4166845 |
| 68.48425062 | 63 | 70.3903034 |
| 68.37313951 | 63 | 70.3377818 |
| 68.48425062 | 63 | 70.2704779 |

|             |    |            |
|-------------|----|------------|
| 68.15091729 | 63 | 70.2095092 |
| 68.15091729 | 63 | 70.1467537 |
| 68.15091729 | 63 | 70.1128711 |
| 68.37313951 | 63 | 70.0804796 |
| 68.92869507 | 63 | 70.0544234 |
| 68.70647285 | 63 | 69.9886339 |
| 69.15091729 | 63 | 69.9213825 |
| 69.03980618 | 63 | 69.858517  |
| 69.2620284  | 63 | 69.7941895 |
| 69.92869507 | 63 | 69.7400959 |
| 69.70647285 | 63 | 69.6874643 |
| 69.92869507 | 63 | 69.6377567 |
| 69.70419995 | 63 | 69.5865871 |
| 69.82765674 | 63 | 69.5573474 |
| 70.70419995 | 63 | 69.5618305 |
| 71.086916   | 63 | 69.5677756 |
| 72.03980618 | 63 | 69.5473077 |
| 70.38616357 | 63 | 69.5340539 |
| 71.70647285 | 63 | 69.5169015 |
| 69.84325058 | 63 | 69.494226  |
| 70.70744811 | 63 | 69.4663523 |
| 69.96670737 | 63 | 69.4339302 |
| 69.84325058 | 63 | 69.4057316 |
| 70.46053453 | 63 | 69.377533  |
| 72.37313951 | 63 | 69.3415371 |
| 70.20127528 | 63 | 69.2858857 |
| 68.71979379 | 63 | 69.2216247 |
| 68.84325058 | 63 | 69.1589882 |
| 68.8309049  | 63 | 69.0815693 |
| 70.59536174 | 63 | 68.9960283 |
| 70.37313951 | 63 | 68.8834552 |
| 70.2620284  | 63 | 68.782578  |
| 69.81758396 | 63 | 68.6933967 |
| 68.21362095 | 63 | 68.6202973 |
| 68.09016416 | 63 | 68.5545078 |
| 68.09016416 | 63 | 68.5062622 |
| 67.47288021 | 63 | 68.4740985 |
| 67.58399132 | 63 | 68.4433967 |
| 67.44818886 | 63 | 68.4039231 |
| 69.48425062 | 63 | 68.3629874 |
| 69.48425062 | 63 | 68.3249757 |
| 69.81758396 | 63 | 68.289888  |
| 69.15091729 | 63 | 68.2606482 |
| 69.03980618 | 63 | 68.2372564 |
| 69.2620284  | 63 | 68.2094786 |



|             |    |            |
|-------------|----|------------|
| 69.03980618 | 63 | 68.1700049 |
| 69.2620284  | 63 | 68.1232213 |
| 68.92869507 | 63 | 68.0676657 |
| 68.81758396 | 63 | 68.0048002 |
| 68.59536174 | 63 | 67.9433967 |
| 68.59536174 | 63 | 67.8834552 |
| 68.48425062 | 63 | 67.8264676 |
| 68.59536174 | 63 | 67.7678555 |
| 68.2620284  | 63 | 67.693324  |
| 68.03980618 | 63 | 67.6049849 |
| 68.03980618 | 63 | 67.5026457 |
| 67.81758396 | 63 | 67.3911606 |
| 67.81758396 | 63 | 67.2815114 |
| 67.48425062 | 63 | 67.1978404 |
| 67.81758396 | 63 | 67.1042603 |
| 67.81758396 | 63 | 67.0350467 |
| 67.70647285 | 63 | 66.9718435 |
| 66.81758396 | 63 | 66.9005181 |
| 66.2620284  | 63 | 66.8069509 |
| 65.70647285 | 63 | 66.7404988 |
| 64.70647285 | 63 | 66.6993878 |
| 63.59536174 | 63 | 66.6537285 |
| 63.37313951 | 63 | 66.6184655 |
| 63.92869507 | 63 | 66.5702199 |
| 63.81758396 | 63 | 66.5351321 |
| 64.48425062 | 63 | 66.5058924 |
| 64.48425062 | 63 | 66.4781146 |
| 65.92869507 | 63 | 66.4816755 |
| 66.03980618 | 63 | 66.4912468 |
| 66.03980618 | 63 | 66.4875937 |
| 65.48425062 | 63 | 66.4940121 |
| 65.03980618 | 63 | 66.4940952 |
| 65.2620284  | 63 | 66.497752  |
| 65.48425062 | 63 | 66.4729941 |
| 66.15091729 | 63 | 66.4438503 |
| 67.15091729 | 63 | 66.4138942 |
| 66.59536174 | 63 | 66.3995327 |
| 66.15091729 | 63 | 66.3934558 |
| 65.48425062 | 63 | 66.3846173 |
| 65.03980618 | 63 | 66.3916983 |
| 65.15091729 | 63 | 66.402353  |
| 65.03980618 | 63 | 66.4287647 |
| 65.37313951 | 63 | 66.4574506 |
| 65.37313951 | 63 | 66.4890605 |
| 65.37313951 | 63 | 66.5373061 |

|             |    |            |
|-------------|----|------------|
| 65.03980618 | 63 | 66.5811658 |
| 64.37313951 | 63 | 66.6221015 |
| 64.2620284  | 63 | 66.6615751 |
| 61.91329589 | 63 | 66.7098208 |
| 63.37313951 | 63 | 66.7580664 |
| 63.48425062 | 63 | 66.803388  |
| 63.59536174 | 63 | 66.8340898 |
| 64.70647285 | 63 | 66.8574816 |
| 65.03980618 | 63 | 66.8560196 |
| 65.03980618 | 71 | 66.8413997 |
| 65.2620284  | 71 | 66.8223939 |
| 65.15091729 | 71 | 66.803388  |
| 65.59536174 | 71 | 66.7873061 |
| 65.37313951 | 71 | 66.7799962 |
| 66.15091729 | 71 | 66.7975401 |
| 66.92869507 | 71 | 66.8370137 |
| 67.70647285 | 71 | 66.8764874 |
| 68.03980618 | 71 | 66.9071892 |
| 67.70647285 | 71 | 66.9378909 |
| 68.48425062 | 71 | 66.9583588 |
| 68.81758396 | 71 | 66.9890605 |
| 67.81252808 | 71 | 67.0168383 |
| 67.96067622 | 71 | 67.0475401 |
| 67.59030585 | 71 | 67.0913997 |
| 67.72610832 | 71 | 67.1484173 |
| 67.60265153 | 71 | 67.2068968 |
| 67.2693182  | 71 | 67.2507564 |
| 67.54092314 | 71 | 67.2574116 |
| 68.05944166 | 71 | 67.2585437 |
| 68.57796017 | 71 | 67.2673156 |
| 68.59030585 | 71 | 67.2775495 |
| 69.57796017 | 71 | 67.2936314 |
| 70.07178734 | 71 | 67.3287191 |
| 70.93598487 | 71 | 67.3667308 |
| 70.99771326 | 71 | 67.3901226 |
| 70.99771326 | 71 | 67.4135145 |
| 72.2620284  | 71 | 67.4281343 |
| 71.81758396 | 71 | 67.4385585 |
| 71.70647285 | 71 | 67.4794942 |
| 71.2620284  | 71 | 67.5262778 |
| 71.70647285 | 71 | 67.5803713 |
| 71.70647285 | 71 | 67.6373889 |
| 71.2620284  | 71 | 67.7296968 |
| 70.15091729 | 71 | 67.8013342 |
| 69.2620284  | 71 | 67.8700477 |

|             |    |            |
|-------------|----|------------|
| 67.70647285 | 71 | 67.9387611 |
| 66.70647285 | 71 | 67.9884687 |
| 66.2620284  | 71 | 68.0279424 |
| 65.37313951 | 71 | 68.0630301 |
| 65.03980618 | 71 | 68.0877513 |
| 65.15091729 | 71 | 68.111303  |
| 66.03980618 | 71 | 68.132954  |
| 66.59536174 | 71 | 68.157529  |
| 66.37313951 | 71 | 68.1784491 |
| 66.2620284  | 71 | 68.1943984 |
| 66.15091729 | 71 | 68.1869558 |
| 66.03980618 | 71 | 68.1751273 |
| 66.81758396 | 71 | 68.1532111 |
| 68.03980618 | 71 | 68.1184294 |
| 68.37313951 | 71 | 68.077946  |
| 69.37313951 | 71 | 68.044108  |
| 69.81758396 | 71 | 68.0096365 |
| 69.48425062 | 71 | 67.9839856 |
| 68.59536174 | 71 | 67.9631268 |
| 65.99004313 | 71 | 67.9504714 |
| 66.23695671 | 71 | 67.9435178 |
| 67.81758396 | 71 | 67.9329904 |
| 67.37313951 | 71 | 67.9143246 |
| 67.37313951 | 71 | 67.8875204 |
| 68.15091729 | 71 | 67.8618695 |
| 67.92869507 | 71 | 67.8153285 |
| 66.92869507 | 71 | 67.7636055 |
| 66.81758396 | 71 | 67.6965642 |
| 66.48425062 | 71 | 67.6313422 |
| 66.16537443 | 71 | 67.5713833 |
| 68.48425062 | 71 | 67.4934729 |
| 68.59536174 | 71 | 67.4240421 |
| 68.48425062 | 71 | 67.3547575 |
| 68.59536174 | 71 | 67.296584  |
| 68.92869507 | 71 | 67.2351941 |
| 68.81758396 | 71 | 67.1777516 |
| 68.70647285 | 71 | 67.1314201 |
| 68.81758396 | 71 | 67.0983928 |
| 68.48425062 | 71 | 67.0704825 |
| 68.03980618 | 71 | 67.0709347 |
| 67.70647285 | 71 | 67.0990185 |
| 67.14084103 | 63 | 67.1329502 |
| 66.94084103 | 63 | 67.1864726 |
| 67.24084103 | 63 | 67.2430652 |
| 67.24084103 | 63 | 67.2929326 |

|             |               |
|-------------|---------------|
| 67.74084103 | 63 67.3297883 |
| 68.14084103 | 63 67.3553867 |
| 67.14084103 | 63 67.3812775 |
| 67.14084103 | 63 67.4073145 |
| 66.04084103 | 63 67.432182  |
| 65.84084103 | 63 67.4571956 |
| 65.74084103 | 63 67.4759226 |
| 65.24084103 | 63 67.4717879 |
| 65.34084103 | 63 67.4690567 |
| 65.64084103 | 63 67.4547465 |
| 66.14084103 | 63 67.4374831 |
| 66.64084103 | 63 67.433553  |
| 66.74084103 | 63 67.4398715 |
| 66.74084103 | 63 67.4762599 |
| 66.64084103 | 63 67.5034785 |
| 66.54084103 | 63 67.5097677 |
| 66.64084103 | 63 67.5219049 |
| 66.04084103 | 63 67.5556904 |
| 66.14084103 | 63 67.5831894 |
| 65.84084103 | 63 67.6149282 |
| 66.04084103 | 63 67.6558775 |
| 66.44084103 | 63 67.690394  |
| 66.34084103 | 63 67.7306123 |
| 66.54084103 | 63 67.7750263 |
| 66.44084103 | 63 67.7902446 |
| 66.84084103 | 63 67.8132115 |
| 67.04084103 | 63 67.8402719 |
| 67.34084103 | 63 67.8698177 |
| 67.74084103 | 63 67.897609  |
| 67.64084103 | 63 67.9281782 |
| 67.14084103 | 63 67.956262  |
| 67.74084103 | 63 67.9789364 |
| 68.84084103 | 63 67.9994179 |
| 68.84084103 | 63 68.0257473 |
| 69.44084103 | 63 68.0564627 |
| 69.34084103 | 63 68.0946206 |
| 68.94084103 | 63 68.1340943 |
| 68.84084103 | 63 68.1735679 |
| 68.54084103 | 63 68.2130416 |
| 68.34084103 | 63 68.2433048 |
| 68.24084103 | 63 68.2617258 |
| 68.04084103 | 63 68.2985679 |
| 67.94084103 | 63 68.3106038 |
| 68.24084103 | 63 68.3284291 |
| 67.72556557 | 63 68.3332518 |

|             |    |            |
|-------------|----|------------|
| 68.16556557 | 63 | 68.3401798 |
| 68.28556557 | 63 | 68.3586867 |
| 68.50556557 | 63 | 68.3761409 |
| 69.18556557 | 63 | 68.3880689 |
| 69.07556557 | 63 | 68.3899968 |
| 68.75556557 | 63 | 68.3835037 |
| 68.30556557 | 63 | 68.3664843 |
| 68.29556557 | 63 | 68.3439386 |
| 68.29556557 | 63 | 68.3261297 |
| 69.94084103 | 63 | 68.3159524 |
| 70.24084103 | 63 | 68.327555  |
| 70.34084103 | 63 | 68.3470524 |
| 70.04084103 | 63 | 68.3608918 |
| 69.44084103 | 63 | 68.3743366 |
| 69.54084103 | 63 | 68.3938339 |
| 69.54084103 | 63 | 68.4022787 |
| 69.64084103 | 63 | 68.4012497 |
| 70.34084103 | 63 | 68.3961418 |
| 70.54084103 | 63 | 68.3851129 |
| 70.84084103 | 63 | 68.3644787 |
| 71.04084103 | 63 | 68.350005  |
| 71.14084103 | 63 | 68.325005  |
| 70.84084103 | 63 | 68.2960576 |
| 70.54084103 | 63 | 68.2644787 |
| 70.04084103 | 63 | 68.2368471 |
| 70.04084103 | 63 | 68.1806389 |
| 70.04084103 | 63 | 68.1293232 |
| 70.04084103 | 63 | 68.0859021 |
| 69.94084103 | 63 | 68.0398495 |
| 70.24084103 | 63 | 67.9964284 |
| 70.24084103 | 63 | 67.9340477 |
| 70.04084103 | 63 | 67.8715355 |
| 69.54084103 | 63 | 67.8129706 |
| 69.94084103 | 63 | 67.7761285 |
| 68.05556557 | 63 | 67.7458653 |
| 67.39556557 | 71 | 67.7208653 |
| 66.20736535 | 71 | 67.6834847 |
| 66.26736535 | 71 | 67.6407092 |
| 66.64736535 | 71 | 67.617226  |
| 66.66736535 | 71 | 67.577427  |
| 66.54736535 | 71 | 67.5321017 |
| 66.28736535 | 71 | 67.4851974 |
| 66.14736535 | 71 | 67.4240826 |
| 65.44736535 | 63 | 67.3736257 |
| 65.02736535 | 63 | 67.3300109 |

|             |               |
|-------------|---------------|
| 65.28736535 | 63 67.2673049 |
| 65.76736535 | 63 67.2018358 |
| 67.52264081 | 63 67.1366298 |
| 67.52264081 | 63 67.0468807 |
| 67.19264081 | 63 66.9488421 |
| 66.86264081 | 63 66.846593  |
| 67.52264081 | 63 66.7498702 |
| 67.08264081 | 63 66.6581475 |
| 66.26264081 | 63 66.5605036 |
| 66.15264081 | 63 66.4585177 |
| 65.60264081 | 63 66.3581107 |
| 65.27264081 | 63 66.2483616 |
| 65.94084103 | 63 66.1416388 |
| 65.44084103 | 63 66.0309687 |
| 65.54084103 | 63 65.922009  |
| 65.24084103 | 63 65.8325354 |
| 65.04084103 | 63 65.7483248 |
| 63.46902264 | 63 65.6759564 |
| 64.94084103 | 63 65.6141143 |
| 65.54084103 | 63 65.5522722 |
| 65.94084103 | 63 65.4877985 |
| 66.04084103 | 63 65.422009  |
| 64.19990966 | 63 65.3562196 |
| 64.08990966 | 63 65.2851669 |
| 64.08990966 | 63 65.2114827 |
| 65.54084103 | 63 65.1127863 |
| 65.94084103 | 63 65.0193529 |
| 66.14084103 | 63 64.9278933 |
| 65.09990966 | 63 64.8626873 |
| 64.98990966 | 63 64.8076129 |
| 65.94084103 | 63 64.771199  |
| 65.14084103 | 63 64.7428114 |
| 64.84084103 | 63 64.7152133 |
| 64.94084103 | 63 64.6887994 |
| 64.54084103 | 63 64.6847662 |
| 65.24084103 | 63 64.666889  |
| 65.44084103 | 63 64.6603435 |
| 63.53990966 | 63 64.689205  |
| 63.31990966 | 63 64.7209613 |
| 63.33990966 | 63 64.7545597 |
| 63.11990966 | 63 64.7713159 |
| 62.78990966 | 63 64.7570817 |
| 62.56990966 | 63 64.7402159 |
| 62.68990966 | 63 64.7250607 |
| 62.46990966 | 63 64.7142475 |

|             |               |
|-------------|---------------|
| 62.11990966 | 63 64.7039607 |
| 61.78990966 | 63 64.7007791 |
| 62.00990966 | 63 64.7110186 |
| 61.99990966 | 63 64.7240212 |
| 62.42990966 | 63 64.7429449 |
| 62.42990966 | 63 64.7675265 |
| 62.75990966 | 63 64.7872633 |
| 64.34084103 | 63 64.8175265 |
| 64.44084103 | 63 64.8491054 |
| 65.04084103 | 63 64.8859475 |
| 65.34084103 | 63 64.9241054 |
| 65.34084103 | 63 64.9829451 |
| 65.14084103 | 63 65.0237346 |
| 65.04084103 | 63 65.0579451 |
| 64.94084103 | 63 65.0855767 |
| 64.84084103 | 63 65.1092609 |
| 64.64084103 | 63 65.1611153 |
| 62.53990966 | 63 65.2170486 |
| 62.43990966 | 63 65.2782451 |
| 62.98990966 | 63 65.3150872 |
| 63.09990966 | 63 65.3440345 |
| 63.20990966 | 63 65.3769293 |
| 63.43990966 | 63 65.4261521 |
| 64.10990966 | 63 65.4755064 |
| 64.54990966 | 63 65.5070854 |
| 64.65990966 | 63 65.5491906 |
| 66.24084103 | 63 65.5965591 |
| 64.92869507 | 63 65.6386643 |
| 65.64990966 | 63 65.6794538 |
| 67.64084103 | 63 65.7110327 |
| 67.44084103 | 63 65.7478748 |
| 67.84084103 | 63 65.8097292 |
| 67.04084103 | 63 65.8771099 |
| 66.44084103 | 63 65.9455432 |
| 66.24084103 | 63 66.0129239 |
| 66.04084103 | 63 66.0833309 |
| 66.04084103 | 63 66.1605799 |
| 66.74084103 | 63 66.2375659 |
| 66.84084103 | 63 66.314815  |
| 67.04084103 | 63 66.3966693 |
| 67.14084103 | 63 66.48155   |
| 67.04084103 | 63 66.5622202 |
| 67.14084103 | 63 66.6430219 |
| 67.44084103 | 63 66.7181657 |
| 67.74084103 | 63 66.8012043 |

|             |               |
|-------------|---------------|
| 67.94084103 | 63 66.8772692 |
| 68.04084103 | 63 66.9312166 |
| 67.94084103 | 63 66.9825323 |
| 67.94084103 | 63 67.022006  |
| 68.04084103 | 63 67.0562166 |
| 68.14084103 | 63 67.0825323 |
| 68.04084103 | 63 67.1075323 |
| 67.84084103 | 63 67.1325323 |
| 68.14084103 | 63 67.1601639 |
| 68.34084103 | 63 67.1904271 |
| 68.74084103 | 63 67.2180587 |
| 68.34084103 | 63 67.2720183 |
| 68.14084103 | 63 67.3180832 |
| 68.64084103 | 63 67.3529638 |
| 68.84084103 | 63 67.3837656 |
| 68.74084103 | 63 67.4078568 |
| 68.34084103 | 63 67.4407638 |
| 68.34084103 | 63 67.4661708 |
| 68.44084103 | 63 67.4831567 |
| 68.14084103 | 63 67.4733005 |
| 67.64084103 | 63 67.4368531 |
| 67.64084103 | 63 67.4074076 |
| 68.24084103 | 63 67.3713672 |
| 68.24084103 | 63 67.3187356 |
| 68.44084103 | 63 67.2661041 |
| 68.54084103 | 63 67.204262  |
| 68.24084103 | 63 67.1503146 |
| 68.14084103 | 63 67.1095251 |
| 68.44084103 | 63 67.0832093 |
| 68.54084103 | 63 67.0621567 |
| 68.34084103 | 63 67.0437356 |
| 68.34084103 | 63 67.022683  |
| 68.24084103 | 63 67.0068935 |
| 68.14084103 | 63 66.9963672 |
| 68.14084103 | 63 66.9871567 |
| 68.14084103 | 63 66.9845251 |
| 68.74084103 | 63 66.9832093 |
| 68.54084103 | 63 66.9818935 |
| 68.44084103 | 63 66.9779462 |
| 68.34084103 | 63 66.972683  |
| 68.04084103 | 63 66.9674198 |
| 67.94084103 | 63 66.9608409 |
| 67.34084103 | 63 66.9582093 |
| 67.04084103 | 63 66.9582093 |
| 66.94084103 | 63 66.9568935 |



|             |    |            |
|-------------|----|------------|
| 67.04084103 | 63 | 66.954262  |
| 67.14084103 | 63 | 66.9489988 |
| 66.74084103 | 63 | 66.9345251 |
| 66.64084103 | 63 | 66.9187356 |
| 65.94084103 | 63 | 66.8963672 |
| 65.64084103 | 63 | 66.879262  |
| 65.44084103 | 63 | 66.8471567 |
| 65.04084103 | 63 | 66.8287356 |
| 65.94084103 | 63 | 66.7861716 |
| 66.04084103 | 63 | 66.7474873 |
| 65.84084103 | 63 | 66.7198557 |
| 63.91083866 | 63 | 66.6882768 |
| 63.47083866 | 63 | 66.6685399 |
| 62.69083866 | 63 | 66.6632768 |
| 62.91083866 | 63 | 66.6672242 |
| 63.64084103 | 63 | 66.680382  |
| 63.44084103 | 63 | 66.686961  |
| 63.14084103 | 63 | 66.705382  |
| 62.94084103 | 63 | 66.7251189 |
| 63.34084103 | 63 | 66.7527505 |
| 64.24084103 | 63 | 66.780382  |
| 64.44084103 | 63 | 66.8001189 |
| 64.64084103 | 63 | 66.8132768 |
| 65.14084103 | 63 | 66.8238031 |
| 65.64084103 | 63 | 66.8435399 |
| 66.24084103 | 63 | 66.8685399 |
| 66.44084103 | 63 | 66.8818558 |
| 66.84084103 | 63 | 66.8979348 |
| 67.04084103 | 63 | 66.9141454 |
| 67.34084103 | 63 | 66.9275928 |
| 67.44084103 | 63 | 66.9345928 |
| 67.54084103 | 63 | 66.944356  |
| 67.64084103 | 63 | 66.9525403 |
| 67.44084103 | 63 | 66.9604614 |
| 67.74084103 | 63 | 66.9748299 |
| 68.04084103 | 63 | 66.986172  |
| 68.04084103 | 63 | 67.0042605 |
| 67.84084103 | 63 | 67.0277437 |
| 67.44084103 | 63 | 67.0424111 |
| 67.04084103 | 63 | 67.0514207 |
| 67.14084103 | 63 | 67.0672102 |
| 67.04084103 | 63 | 67.086947  |
| 67.04084103 | 63 | 67.1040523 |
| 65.70083866 | 63 | 67.130368  |
| 67.24084103 | 63 | 67.1645786 |

|             |               |
|-------------|---------------|
| 65.60597272 | 63 67.2027365 |
| 65.80083866 | 63 67.2448417 |
| 66.24084103 | 63 67.2711575 |
| 65.94084103 | 63 67.2935259 |
| 66.94084103 | 63 67.3210406 |
| 67.74084103 | 63 67.3739501 |
| 67.94084103 | 63 67.431187  |
| 68.64084103 | 63 67.4928391 |
| 68.74084103 | 63 67.5501345 |
| 69.64084103 | 63 67.6007486 |
| 69.94084103 | 63 67.6525323 |
| 70.64084103 | 63 67.7068014 |
| 70.34084103 | 63 67.7520061 |
| 69.64084103 | 63 67.7948717 |
| 69.44084103 | 63 67.8317431 |
| 69.34084103 | 63 67.8762168 |
| 69.84084103 | 63 67.9157006 |
| 70.24084103 | 63 67.9582737 |
| 69.25284482 | 63 67.9957299 |
| 69.36284482 | 63 68.0326013 |
| 69.37284482 | 63 68.0668412 |
| 69.16284482 | 63 68.0928938 |
| 69.27284482 | 63 68.1177769 |
| 69.28284482 | 63 68.1474846 |
| 69.06284482 | 63 68.1744145 |
| 68.94284482 | 63 68.1985666 |
| 69.13284482 | 63 68.2228649 |
| 68.80284482 | 63 68.2512568 |
| 68.71556557 | 63 68.2757013 |
| 68.82556557 | 63 68.2947364 |
| 68.05556557 | 63 68.3123096 |
| 67.72556557 | 63 68.3325143 |
| 68.34084103 | 63 68.3492102 |
| 68.24084103 | 63 68.3697074 |
| 67.94084103 | 63 68.3757308 |
| 67.94084103 | 63 68.385994  |
| 68.24084103 | 63 68.3962573 |
| 68.34084103 | 63 68.4168421 |
| 68.24084103 | 63 68.4259358 |
| 67.94084103 | 63 68.4594648 |
| 67.74084103 | 63 68.4918918 |
| 67.93195636 | 63 68.5287632 |
| 67.93195636 | 63 68.5739679 |
| 67.82084524 | 63 68.6089387 |
| 67.3764008  | 63 68.6304592 |

|             |               |
|-------------|---------------|
| 67.26528969 | 63 68.6522722 |
| 67.48751191 | 63 68.6465166 |
| 67.3764008  | 63 68.6413458 |
| 67.26528969 | 63 68.6195083 |
| 66.3764008  | 63 68.5905071 |
| 66.59862302 | 63 68.5694837 |
| 67.04306747 | 63 68.5567937 |
| 67.82084524 | 63 68.5518523 |
| 67.64160964 | 63 68.5510044 |
| 68.3764008  | 63 68.5500103 |
| 68.48751191 | 63 68.5395133 |
| 69.04306747 | 63 68.5021063 |
| 69.04306747 | 63 68.4793075 |
| 68.82084524 | 63 68.4534532 |
| 68.93195636 | 63 68.447652  |
| 69.59862302 | 63 68.446076  |
| 69.48751191 | 63 68.4415906 |
| 69.3764008  | 63 68.4428216 |
| 69.48751191 | 63 68.4469474 |
| 69.59862302 | 63 68.4497281 |
| 69.59862302 | 63 68.4470848 |
| 69.48751191 | 63 68.4487836 |
| 69.3764008  | 63 68.4501689 |
| 69.3764008  | 63 68.4530308 |
| 68.70973413 | 63 68.4777201 |
| 68.59862302 | 63 68.5067516 |
| 67.59862302 | 63 68.531847  |
| 67.82084524 | 63 68.5540985 |
| 67.82084524 | 63 68.5788354 |
| 67.26528969 | 63 68.6094203 |
| 67.93195636 | 63 68.6419057 |
| 68.15417858 | 63 68.6745374 |
| 68.26528969 | 63 68.7114088 |
| 69.04306747 | 63 68.7507655 |
| 69.3764008  | 63 68.7942159 |
| 69.59862302 | 63 68.8366135 |
| 69.3764008  | 63 68.8643913 |
| 69.59862302 | 63 68.8892451 |
| 68.20341539 | 63 68.9272568 |
| 68.34785983 | 63 68.9594206 |
| 67.98119316 | 63 68.9842744 |
| 67.73674872 | 63 69.0164381 |
| 69.04306747 | 63 69.0573738 |
| 69.3764008  | 63 69.1114673 |
| 69.26528969 | 63 69.1626369 |

|             |    |            |
|-------------|----|------------|
| 69.3764008  | 63 | 69.2108826 |
| 69.26528969 | 63 | 69.2445083 |
| 69.04306747 | 63 | 69.2687965 |
| 67.39791431 | 63 | 69.2790304 |
| 67.52013653 | 63 | 69.2878023 |
| 67.39791431 | 63 | 69.2834164 |
| 68.93195636 | 63 | 69.2775684 |
| 69.04306747 | 63 | 69.2687965 |
| 68.93195636 | 63 | 69.2556386 |
| 69.3764008  | 63 | 69.2351707 |
| 69.3764008  | 63 | 69.2176269 |
| 69.15417858 | 63 | 69.204469  |
| 68.93195636 | 63 | 69.197159  |
| 68.93195636 | 63 | 69.1854631 |
| 68.82084524 | 63 | 69.1781532 |
| 69.04306747 | 63 | 69.1723052 |
| 69.93195636 | 63 | 69.1693813 |
| 69.93195636 | 63 | 69.1664573 |
| 70.248095   | 63 | 69.1766912 |
| 69.93195636 | 63 | 69.1898491 |
| 69.82084524 | 63 | 69.2190889 |
| 70.26528969 | 63 | 69.2380947 |
| 70.70973413 | 63 | 69.2556386 |
| 70.82084524 | 63 | 69.2804924 |
| 71.04306747 | 63 | 69.2980362 |
| 70.93195636 | 63 | 69.3126561 |
| 71.04306747 | 63 | 69.3078792 |
| 71.15417858 | 63 | 69.2963772 |
| 70.04306747 | 63 | 69.2820974 |
| 69.70973413 | 63 | 69.3040272 |
| 70.26528969 | 63 | 69.324495  |
| 69.70973413 | 63 | 69.3376529 |
| 69.3764008  | 63 | 69.3662449 |
| 69.82084524 | 63 | 69.3900122 |
| 70.3764008  | 63 | 69.4197209 |
| 70.48751191 | 63 | 69.4501084 |
| 70.48751191 | 63 | 69.4588804 |
| 70.70973413 | 63 | 69.4574184 |
| 70.3764008  | 63 | 69.4486464 |
| 69.48751191 | 63 | 69.4340266 |
| 69.15417858 | 63 | 69.4120967 |
| 69.15417858 | 63 | 69.4028904 |
| 68.70973413 | 63 | 69.4087519 |
| 68.59862302 | 63 | 69.4182683 |
| 68.15417858 | 63 | 69.4280772 |

|             |               |
|-------------|---------------|
| 67.93195636 | 63 69.4229644 |
| 68.04306747 | 63 69.408495  |
| 68.15417858 | 63 69.3928559 |
| 68.3764008  | 63 69.3687373 |
| 68.93195636 | 63 69.3538292 |
| 68.70973413 | 63 69.3536872 |
| 69.04306747 | 63 69.3538376 |
| 69.04306747 | 63 69.3500406 |
| 69.15417858 | 63 69.351653  |
| 69.15417858 | 63 69.3424467 |
| 69.48751191 | 63 69.3175971 |
| 69.59862302 | 63 69.2940633 |
| 69.82084524 | 63 69.2624224 |
| 69.26528969 | 63 69.2283623 |
| 69.15417858 | 63 69.1997115 |
| 69.15417858 | 63 69.1717917 |
| 69.26528969 | 63 69.1367082 |
| 69.26528969 | 63 69.0988469 |
| 67.90224621 | 63 69.0580616 |
| 68.16891288 | 63 69.0174226 |
| 68.2911351  | 63 68.9779531 |
| 71.26528969 | 63 68.9317585 |
| 70.93195636 | 63 68.8936048 |
| 70.59862302 | 63 68.8572055 |
| 70.3764008  | 63 68.8174436 |
| 70.15417858 | 63 68.7915706 |
| 70.23905128 | 63 68.7727151 |
| 70.04620379 | 63 68.7519591 |
| 69.70973413 | 63 68.7317879 |
| 69.26528969 | 63 68.7180494 |
| 68.59862302 | 63 68.7056267 |
| 68.26528969 | 63 68.6942274 |
| 67.59862302 | 63 68.6806351 |
| 68.34338684 | 63 68.6761071 |
| 67.84338684 | 63 68.6733336 |
| 68.24338684 | 63 68.6692442 |
| 68.14338684 | 63 68.6775817 |
| 68.54338684 | 63 68.6900128 |
| 67.94338684 | 63 68.7109235 |
| 67.74338684 | 63 68.7360739 |
| 67.54338684 | 63 68.7623939 |
| 68.24338684 | 63 68.7898834 |
| 69.14338684 | 63 68.8183964 |
| 68.94338684 | 63 68.8392524 |
| 68.64338684 | 63 68.8713434 |

|             |    |            |
|-------------|----|------------|
| 68.94338684 | 63 | 68.8989791 |
| 68.34338684 | 63 | 68.9279307 |
| 68.04338684 | 63 | 68.9567361 |
| 68.14338684 | 63 | 68.9908046 |
| 67.84338684 | 63 | 69.0204872 |
| 67.34338684 | 63 | 69.0487078 |
| 67.64338684 | 63 | 69.0792675 |
| 68.14338684 | 63 | 69.118453  |
| 68.04338684 | 63 | 69.1577847 |
| 67.94338684 | 63 | 69.1958006 |
| 67.94338684 | 63 | 69.2297229 |
| 67.84338684 | 63 | 69.2689084 |
| 68.04338684 | 63 | 69.3299761 |
| 67.64338684 | 63 | 69.3888507 |
| 67.14338684 | 63 | 69.4461172 |
| 66.94338684 | 63 | 69.4466412 |
| 67.24338684 | 63 | 69.4386326 |
| 67.74338684 | 63 | 69.4278328 |
| 67.94338684 | 63 | 69.4242633 |
| 68.24338684 | 63 | 69.4219431 |
| 68.84338684 | 63 | 69.421377  |
| 69.44338684 | 63 | 69.4219129 |
| 69.54338684 | 63 | 69.4297469 |
| 69.84338684 | 63 | 69.447735  |
| 69.34338684 | 63 | 69.4744951 |
| 69.14338684 | 63 | 69.5013349 |
| 68.94338684 | 63 | 69.5519239 |
| 68.84338684 | 63 | 69.5927134 |
| 69.34338684 | 63 | 69.6205591 |
| 69.54338684 | 63 | 69.6560854 |
| 69.74338684 | 71 | 69.6942433 |
| 69.84338684 | 71 | 69.7297697 |
| 70.04338684 | 71 | 69.7784539 |
| 70.24338684 | 71 | 69.8310854 |
| 70.54338684 | 71 | 69.8824012 |
| 70.51701357 | 71 | 69.9245065 |
| 71.14864486 | 71 | 69.9560854 |
| 71.14338684 | 71 | 69.9810854 |
| 71.24338684 | 71 | 70.0047697 |
| 71.34338684 | 71 | 70.0258223 |
| 71.74338684 | 71 | 70.0495065 |
| 71.74338684 | 71 | 70.0718749 |
| 71.74338684 | 71 | 70.0863486 |
| 72.14338684 | 71 | 70.1021381 |
| 72.24338684 | 71 | 70.1258223 |

|             |    |            |
|-------------|----|------------|
| 72.14338684 | 63 | 70.1455591 |
| 72.04338684 | 63 | 70.1425653 |
| 71.84338684 | 63 | 70.1583547 |
| 72.24338684 | 63 | 70.168881  |
| 72.54338684 | 63 | 70.17546   |
| 72.64338684 | 63 | 70.1846705 |
| 72.64338684 | 63 | 70.1873021 |
| 71.30511636 | 63 | 70.1957085 |
| 70.32329818 | 63 | 70.2101822 |
| 69.77784364 | 63 | 70.2325506 |
| 70.10511636 | 63 | 70.2562348 |
| 69.97784364 | 63 | 70.2680769 |
| 70.19602545 | 63 | 70.279919  |
| 70.08693454 | 63 | 70.2878138 |
| 70.30511636 | 63 | 70.2917611 |
| 70.63238909 | 63 | 70.2878138 |
| 70.63238909 | 63 | 70.2825506 |
| 70.30511636 | 63 | 70.2746559 |
| 71.44338684 | 63 | 70.2733401 |
| 71.44338684 | 63 | 70.2759717 |
| 69.95966182 | 63 | 70.2825506 |
| 70.94338684 | 63 | 70.2917611 |
| 71.04338684 | 63 | 70.2667577 |
| 71.24338684 | 63 | 70.2470209 |
| 71.64338684 | 63 | 70.2193893 |
| 71.74338684 | 63 | 70.1943893 |
| 71.44338684 | 63 | 70.1601787 |
| 71.44338684 | 63 | 70.1259682 |
| 71.54338684 | 63 | 70.0904419 |
| 70.84338684 | 63 | 70.052631  |
| 70.44338684 | 63 | 70.0065092 |
| 70.54338684 | 63 | 69.9591408 |
| 70.14338684 | 63 | 69.9130882 |
| 69.74338684 | 63 | 69.8657197 |
| 69.24338684 | 63 | 69.8130882 |
| 69.04338684 | 63 | 69.7604566 |
| 69.14338684 | 63 | 69.7262461 |
| 69.14338684 | 63 | 69.6880882 |
| 67.91585281 | 63 | 69.6486145 |
| 69.24338684 | 63 | 69.6065092 |
| 68.74338684 | 63 | 69.5670355 |
| 68.44338684 | 63 | 69.5407197 |
| 68.54338684 | 63 | 69.507825  |
| 68.24338684 | 63 | 69.4736145 |
| 68.28227362 | 63 | 69.4380882 |

|             |               |
|-------------|---------------|
| 68.24338684 | 69 69.4038776 |
| 68.64338684 | 69 69.3885917 |
| 69.04338684 | 69 69.3901718 |
| 68.64338684 | 69 69.4015606 |
| 68.84338684 | 69 69.4020641 |
| 68.84338684 | 69 69.4029265 |
| 69.14338684 | 69 69.3943392 |
| 69.14338684 | 69 69.3832399 |
| 69.14338684 | 69 69.367954  |
| 69.24338684 | 69 69.3496776 |
| 69.24338684 | 69 69.3327171 |
| 69.34338684 | 69 69.3226943 |
| 69.44338684 | 69 69.2950627 |
| 69.54338684 | 69 69.2674311 |
| 67.44312553 | 69 69.2619538 |
| 68.04338684 | 69 69.2448486 |
| 67.64338684 | 69 69.2260116 |
| 67.94338684 | 69 69.2040603 |
| 67.44338684 | 69 69.168534  |
| 67.64338684 | 69 69.1303761 |
| 67.84338684 | 69 69.093534  |
| 67.64338684 | 69 69.0619551 |
| 67.64338684 | 69 69.0409024 |
| 67.54338684 | 69 69.0316919 |
| 67.74338684 | 69 69.0303761 |
| 67.74338684 | 69 69.0303761 |
| 67.74338684 | 69 69.0316919 |
| 67.74338684 | 69 69.0395867 |
| 69.14338684 | 69 69.0566919 |
| 69.24338684 | 69 69.0777446 |
| 69.24338684 | 69 69.0974814 |
| 68.94338684 | 69 69.1145867 |
| 69.04338684 | 69 69.1399489 |
| 69.84338684 | 69 69.1557384 |
| 69.74338684 | 69 69.1794226 |
| 69.94338684 | 69 69.2057384 |
| 69.94338684 | 69 69.2346858 |
| 70.04338684 | 69 69.2781068 |
| 70.14338684 | 69 69.3262794 |
| 70.44338684 | 69 69.3736478 |
| 70.64338684 | 69 69.4131215 |
| 70.14338684 | 69 69.4447004 |
| 70.04338684 | 69 69.4828583 |
| 69.54338684 | 63 69.5144373 |
| 69.24338684 | 63 69.5433846 |



|             |    |            |
|-------------|----|------------|
| 69.14338684 | 63 | 69.5644373 |
| 69.24338684 | 63 | 69.5841741 |
| 69.34338684 | 63 | 69.6078583 |
| 69.54338684 | 63 | 69.6315425 |
| 69.34338684 | 63 | 69.653911  |
| 69.34338684 | 63 | 69.6736478 |
| 69.54338684 | 63 | 69.6854899 |
| 69.64338684 | 63 | 69.7025952 |
| 69.61177538 | 63 | 69.7407565 |
| 69.57509281 | 63 | 69.7710197 |
| 68.94338684 | 63 | 69.8170723 |
| 68.84338684 | 63 | 69.8591776 |
| 68.64338684 | 63 | 69.9091776 |
| 69.04338684 | 63 | 69.9591776 |
| 69.94338684 | 63 | 70.0104933 |
| 70.14338684 | 63 | 70.0710197 |
| 70.34338684 | 63 | 70.1275986 |
| 70.54338684 | 63 | 70.1868091 |
| 70.24338684 | 63 | 70.2473355 |
| 70.34338684 | 63 | 70.3131249 |
| 70.54338684 | 63 | 70.3960197 |
| 70.64338684 | 63 | 70.5025986 |
| 70.64338684 | 63 | 70.606546  |
| 70.44338684 | 63 | 70.7289144 |
| 69.84338684 | 63 | 70.8368057 |
| 70.44338684 | 63 | 70.9675114 |
| 70.54338684 | 63 | 71.0792813 |
| 70.44338684 | 63 | 71.1950707 |
| 70.74338684 | 63 | 71.3069129 |
| 71.54338684 | 63 | 71.4161234 |
| 71.94338684 | 63 | 71.5200707 |
| 71.84338684 | 63 | 71.6148076 |
| 71.64338684 | 63 | 71.6990181 |
| 71.44338684 | 63 | 71.7766497 |
| 71.54338684 | 63 | 71.843755  |
| 71.24338684 | 63 | 71.9108602 |
| 71.04338684 | 63 | 71.9792813 |
| 70.74338684 | 63 | 72.0516497 |
| 70.64338684 | 63 | 72.1266497 |
| 70.94338684 | 63 | 72.1963865 |
| 71.04338684 | 63 | 72.262176  |
| 70.94338684 | 63 | 72.3240181 |
| 70.84338684 | 63 | 72.3832286 |
| 70.34338684 | 63 | 72.4477023 |
| 70.84338684 | 63 | 72.5161234 |

|             |    |            |
|-------------|----|------------|
| 70.34338684 | 63 | 72.5845444 |
| 70.34338684 | 63 | 72.6582286 |
| 71.14338684 | 63 | 72.7415393 |
| 71.14338684 | 63 | 72.835859  |
| 71.24338684 | 63 | 72.9411221 |
| 71.44338684 | 73 | 73.0463853 |
| 71.74338684 | 73 | 73.1411221 |
| 72.24338684 | 73 | 73.2371748 |
| 71.94338684 | 73 | 73.3253327 |
| 72.04338684 | 73 | 73.4174379 |
| 72.34338684 | 73 | 73.4907552 |
| 72.74338684 | 73 | 73.5643117 |
| 74.04338684 | 73 | 73.6360739 |
| 75.84338684 | 73 | 73.7022142 |
| 77.04338684 | 73 | 73.7654836 |
| 78.54338684 | 73 | 73.8171501 |
| 77.44312553 | 73 | 73.8544626 |
| 78.87702055 | 73 | 73.8829234 |
| 77.53789676 | 73 | 73.9178435 |
| 78.64338684 | 73 | 73.9391273 |
| 78.24338684 | 73 | 73.9519183 |
| 78.24338684 | 73 | 73.9674604 |
| 77.84338684 | 73 | 73.9792944 |
| 77.24338684 | 73 | 73.9863437 |
| 76.54338684 | 73 | 73.9866945 |
| 76.34338684 | 73 | 73.9938634 |
| 75.74338684 | 73 | 74.0036639 |
| 75.24338684 | 73 | 74.0175314 |
| 75.24338684 | 73 | 74.0398918 |
| 75.04338684 | 73 | 74.0661995 |
| 74.94338684 | 73 | 74.0908325 |
| 74.44338684 | 73 | 74.106255  |
| 74.24338684 | 73 | 74.1430971 |
| 74.04338684 | 73 | 74.1759919 |
| 74.04338684 | 73 | 74.2100752 |
| 74.24338684 | 73 | 74.2356995 |
| 74.54338684 | 73 | 74.2659627 |
| 74.74338684 | 73 | 74.3001732 |
| 75.24338684 | 73 | 74.3251732 |
| 75.94338684 | 73 | 74.3541206 |
| 76.74338684 | 73 | 74.3678731 |
| 76.94338684 | 73 | 74.3734917 |
| 76.84338684 | 73 | 74.3805457 |
| 75.84338684 | 73 | 74.3891547 |
| 76.34338684 | 73 | 74.3951321 |

|             |    |            |
|-------------|----|------------|
| 76.64338684 | 73 | 74.3957267 |
| 77.14338684 | 73 | 74.3897424 |
| 75.91549886 | 73 | 74.3891409 |
| 76.13368068 | 73 | 74.388659  |
| 75.69731704 | 73 | 74.383512  |
| 75.37004431 | 73 | 74.3747765 |
| 75.3518625  | 73 | 74.3489358 |
| 74.57004431 | 73 | 74.3001285 |
| 73.47913522 | 73 | 74.2302686 |
| 72.60640795 | 73 | 74.1366049 |
| 72.49731704 | 73 | 74.0473704 |
| 72.06095341 | 73 | 73.9363981 |
| 71.51549886 | 73 | 73.8344334 |
| 71.62458977 | 73 | 73.719119  |
| 71.64277159 | 73 | 73.6088285 |
| 72.07913522 | 73 | 73.4999734 |
| 71.97004431 | 73 | 73.3935106 |
| 72.38822613 | 73 | 73.2961387 |
| 72.38822613 | 73 | 73.2108482 |
| 72.49731704 | 73 | 73.1384764 |
| 73.24277159 | 73 | 73.07376   |
| 73.24277159 | 73 | 73.0168188 |
| 72.91549886 | 73 | 72.9553321 |
| 71.91549886 | 73 | 72.8792521 |
| 73.44338684 | 73 | 72.7987463 |
| 73.44338684 | 73 | 72.7248194 |
| 73.63372195 | 73 | 72.6518494 |
| 72.89083265 | 73 | 72.5810326 |
| 73.14338684 | 73 | 72.5218221 |
| 72.94338684 | 73 | 72.4452345 |
| 72.74338684 | 73 | 72.3646996 |
| 72.54338684 | 73 | 72.2817723 |
| 71.38858008 | 73 | 72.1884384 |
| 71.57039826 | 73 | 72.0913963 |
| 71.67948917 | 73 | 71.9761724 |
| 71.89767099 | 73 | 71.8544891 |
| 71.89767099 | 73 | 71.7432126 |
| 71.78858008 | 73 | 71.6517925 |
| 71.78858008 | 73 | 71.5480518 |
| 71.89767099 | 73 | 71.4389284 |
| 72.0067619  | 73 | 71.3148528 |
| 71.95221644 | 73 | 71.174637  |
| 72.07948917 | 73 | 71.0195886 |
| 72.07948917 | 73 | 70.8689632 |
| 72.13403463 | 73 | 70.7228084 |

|             |    |            |
|-------------|----|------------|
| 71.73403463 | 73 | 70.5780471 |
| 71.42494372 | 71 | 70.4553279 |
| 70.66130735 | 71 | 70.345647  |
| 70.44312553 | 71 | 70.2448178 |
| 69.78858008 | 71 | 70.1506871 |
| 69.87948917 | 71 | 70.0636139 |
| 69.86130735 | 71 | 69.9810861 |
| 69.97039826 | 71 | 69.8892282 |
| 69.75221644 | 71 | 69.8050257 |
| 69.84312553 | 71 | 69.7229764 |
| 70.06130735 | 71 | 69.6333559 |
| 70.84312553 | 71 | 69.544453  |
| 70.82494372 | 71 | 69.4541148 |
| 70.91585281 | 71 | 69.3699967 |
| 70.57039826 | 71 | 69.2777445 |
| 69.26130735 | 71 | 69.1897986 |
| 68.82494372 | 71 | 69.1090298 |
| 68.82494372 | 71 | 69.0428542 |
| 68.69767099 | 71 | 68.9549002 |
| 68.66130735 | 71 | 68.8726879 |
| 69.54338684 | 71 | 68.7908419 |
| 68.42273307 | 71 | 68.7202062 |
| 68.42273307 | 71 | 68.6519891 |
| 68.44091489 | 71 | 68.5921451 |
| 68.1500058  | 71 | 68.5449806 |
| 68.56818761 | 71 | 68.5004477 |
| 67.98636943 | 71 | 68.4653679 |
| 67.69546034 | 71 | 68.4250251 |
| 68.38636943 | 71 | 68.39955   |
| 68.89546034 | 71 | 68.3619937 |
| 68.4590967  | 71 | 68.3008374 |
| 68.3500058  | 71 | 68.2515585 |
| 67.71364216 | 71 | 68.1983323 |
| 65.2590967  | 71 | 68.1423549 |
| 64.3500058  | 71 | 68.0836262 |
| 64.24978666 | 71 | 68.0295627 |
| 64.26227329 | 71 | 67.9672455 |
| 64.3500058  | 71 | 67.9022968 |
| 65.24338684 | 71 | 67.8471567 |
| 65.14338684 | 71 | 67.7828904 |
| 64.94338684 | 71 | 67.7214949 |
| 65.34338684 | 71 | 67.6787596 |
| 65.44338684 | 71 | 67.634589  |
| 65.24338684 | 71 | 67.5932891 |
| 64.64338684 | 71 | 67.5493577 |

|             |               |
|-------------|---------------|
| 65.24338684 | 71 67.5013593 |
| 65.84338684 | 71 67.4547963 |
| 65.15888368 | 71 67.4182812 |
| 65.63161095 | 71 67.3875077 |
| 65.52252004 | 71 67.3524279 |
| 66.10433823 | 71 67.3070611 |
| 66.23161095 | 71 67.2590627 |
| 66.55888368 | 71 67.2098682 |
| 66.7770655  | 71 67.1628322 |
| 66.88615641 | 71 67.1413888 |
| 66.75888368 | 71 67.134778  |
| 67.19524732 | 71 67.1269709 |
| 67.41342914 | 71 67.122274  |
| 67.52252004 | 71 67.1137493 |
| 67.95888368 | 71 67.0909867 |
| 68.39524732 | 71 67.087515  |
| 69.15888368 | 71 67.0857179 |
| 69.15888368 | 71 67.0836816 |
| 68.72252004 | 71 67.0770999 |
| 68.50433823 | 71 67.0621449 |
| 69.74338684 | 71 67.05341   |
| 69.04338684 | 71 67.0398905 |
| 67.24979277 | 71 67.0175193 |
| 68.04338684 | 71 66.9870141 |
| 67.74338684 | 71 66.9579443 |
| 67.64338684 | 71 66.9317453 |
| 67.54338684 | 71 66.9096133 |
| 67.84338684 | 71 66.9212134 |
| 67.34338684 | 71 66.9462106 |
| 67.14338684 | 71 66.9725264 |
| 67.94338684 | 71 67.0168598 |
| 66.84979277 | 71 67.0686513 |
| 66.75888368 | 71 67.1086877 |
| 67.41342914 | 71 67.1555424 |
| 67.08615641 | 71 67.2093348 |
| 66.64979277 | 71 67.2604956 |
| 66.54070186 | 71 67.3276009 |
| 66.21342914 | 71 67.4065483 |
| 66.43161095 | 71 67.4841798 |
| 66.9770655  | 71 67.5512851 |
| 67.50433823 | 71 67.6091798 |
| 67.39524732 | 71 67.6800286 |
| 67.39524732 | 71 67.7472888 |
| 67.1770655  | 71 67.8146686 |
| 67.1770655  | 71 67.8730771 |

|             |    |            |
|-------------|----|------------|
| 66.99566234 | 71 | 67.929811  |
| 67.63161095 | 71 | 67.974344  |
| 68.32252004 | 71 | 68.0107429 |
| 68.23161095 | 71 | 68.0470223 |
| 68.34070186 | 71 | 68.0862921 |
| 68.01342914 | 71 | 68.1171886 |
| 67.81342914 | 71 | 68.141267  |
| 68.15888368 | 71 | 68.1665416 |
| 68.28615641 | 71 | 68.1847587 |
| 68.28615641 | 71 | 68.19855   |
| 67.64979277 | 71 | 68.1996619 |
| 67.43161095 | 71 | 68.1896141 |
| 67.32252004 | 71 | 68.1884179 |
| 66.66797459 | 71 | 68.1903318 |
| 66.68615641 | 71 | 68.1790524 |
| 66.5770655  | 71 | 68.1827252 |
| 66.24979277 | 71 | 68.2097426 |
| 66.35888368 | 71 | 68.2315677 |
| 66.03161095 | 63 | 68.267896  |
| 66.14070186 | 63 | 68.3096071 |
| 66.24979277 | 63 | 68.3497632 |
| 66.24979277 | 63 | 68.4010789 |
| 67.63161095 | 63 | 68.462921  |
| 68.28615641 | 63 | 68.5287105 |
| 68.28615641 | 63 | 68.5826579 |
| 68.70433823 | 63 | 68.6536262 |
| 69.03161095 | 63 | 68.7129564 |
| 69.23161095 | 63 | 68.7679803 |
| 70.54338684 | 63 | 68.8352052 |
| 71.24338684 | 63 | 68.9134348 |
| 70.54338684 | 63 | 68.9933392 |
| 70.34338684 | 63 | 69.0691765 |
| 70.24338684 | 63 | 69.1364014 |
| 70.54338684 | 63 | 69.1919037 |
| 70.74338684 | 63 | 69.2450491 |
| 70.64338684 | 63 | 69.3022615 |
| 70.54338684 | 63 | 69.3568423 |
| 70.54338684 | 63 | 69.4116623 |
| 69.94338684 | 63 | 69.4625349 |
| 69.54338684 | 63 | 69.5197418 |
| 69.64338684 | 63 | 69.5659494 |
| 69.74338684 | 63 | 69.5991187 |
| 69.54338684 | 63 | 69.6295368 |
| 69.24338684 | 63 | 69.6585195 |
| 69.44338684 | 63 | 69.6852295 |

|             |    |            |
|-------------|----|------------|
| 69.34338684 | 63 | 69.7093079 |
| 69.44338684 | 63 | 69.7301566 |
| 69.24338684 | 63 | 69.7453833 |
| 68.39524732 | 63 | 69.7579785 |
| 68.63161095 | 63 | 69.7736836 |
| 68.64979277 | 63 | 69.7843649 |
| 68.88615641 | 63 | 69.8004289 |
| 69.32252004 | 63 | 69.827737  |
| 69.30311059 | 63 | 69.8521742 |
| 69.70209674 | 63 | 69.8819943 |
| 70.50433823 | 63 | 69.90691   |
| 70.81342914 | 63 | 69.9290745 |
| 70.59524732 | 63 | 69.9529136 |
| 71.74338684 | 63 | 69.9753174 |
| 72.04338684 | 63 | 69.9923384 |
| 72.14338684 | 63 | 70.0106751 |
| 72.04338684 | 63 | 70.0108301 |
| 72.24338684 | 63 | 70.0089515 |
| 71.26797459 | 63 | 70.0083888 |
| 71.59524732 | 63 | 70.0010078 |
| 72.19524732 | 63 | 69.9827417 |
| 72.59524732 | 63 | 69.961844  |
| 72.61342914 | 63 | 69.9289493 |
| 71.9770655  | 63 | 69.8894756 |
| 71.54070186 | 63 | 69.861844  |
| 71.19524732 | 63 | 69.8370854 |
| 71.54338684 | 63 | 69.8291907 |
| 71.74338684 | 63 | 69.821296  |
| 71.54338684 | 63 | 69.8094539 |
| 71.34338684 | 63 | 69.7949802 |
| 71.04338684 | 63 | 69.7884012 |
| 71.34338684 | 63 | 69.7857696 |
| 71.14338684 | 63 | 69.7910328 |
| 70.84338684 | 63 | 69.8041907 |
| 70.54338684 | 63 | 69.8173486 |
| 70.54338684 | 63 | 69.8239275 |
| 70.04338684 | 63 | 69.8410328 |
| 69.64338684 | 63 | 69.864717  |
| 69.74338684 | 63 | 69.8884012 |
| 69.44338684 | 63 | 69.9173486 |
| 69.24338684 | 63 | 69.9423486 |
| 68.84338684 | 63 | 69.9686644 |
| 68.24338684 | 63 | 70.0074557 |
| 68.54338684 | 63 | 70.0405054 |
| 68.74338684 | 63 | 70.0772632 |

|             |    |            |
|-------------|----|------------|
| 68.54338684 | 63 | 70.1095952 |
| 68.84338684 | 63 | 70.1059469 |
| 68.14338684 | 63 | 70.0982479 |
| 68.04338684 | 63 | 70.0922122 |
| 67.84338684 | 63 | 70.0664102 |
| 67.84338684 | 63 | 70.0431202 |
| 67.54338684 | 63 | 70.0253326 |
| 67.64338684 | 63 | 69.991122  |
| 67.64338684 | 63 | 69.9569115 |
| 68.14338684 | 63 | 69.9240168 |
| 68.24338684 | 63 | 69.9069115 |
| 68.14338684 | 63 | 69.8779672 |
| 67.64338684 | 63 | 69.8666419 |
| 67.64338684 | 63 | 69.8495749 |
| 68.04338684 | 63 | 69.8246133 |
| 68.24338684 | 63 | 69.7862545 |
| 68.44338684 | 63 | 69.7603329 |
| 68.46173328 | 63 | 69.7309424 |
| 69.64338684 | 63 | 69.6822935 |
| 69.94338684 | 63 | 69.6289796 |
| 69.84338684 | 63 | 69.5605585 |
| 69.54338684 | 63 | 69.4868743 |
| 70.04338684 | 63 | 69.4066111 |
| 70.34338684 | 63 | 69.3250322 |
| 70.34338684 | 63 | 69.2460848 |
| 70.54338684 | 63 | 69.1631901 |
| 70.64338684 | 63 | 69.0842427 |
| 70.24338684 | 63 | 69.0145059 |
| 70.84338684 | 63 | 68.9460848 |
| 71.04338684 | 63 | 68.8776638 |
| 71.24338684 | 63 | 68.8105585 |
| 71.54338684 | 63 | 68.7381901 |
| 71.34338684 | 63 | 68.6671375 |
| 71.24338684 | 63 | 68.6066111 |
| 71.34338684 | 63 | 68.5491913 |
| 71.14338684 | 63 | 68.4975833 |
| 71.44338684 | 63 | 68.4660044 |
| 71.34338684 | 63 | 68.4436359 |
| 69.04525444 | 63 | 68.4252149 |
| 68.71798172 | 63 | 68.412057  |
| 69.24338684 | 63 | 68.3936359 |
| 68.54338684 | 63 | 68.3857412 |
| 69.04338684 | 63 | 68.3817938 |
| 69.24338684 | 63 | 68.3778465 |
| 69.14338684 | 63 | 68.3765307 |



|             |               |
|-------------|---------------|
| 69.44338684 | 63 68.3831096 |
| 69.64338684 | 63 68.3883728 |
| 70.74338684 | 63 68.3923202 |
| 70.04361613 | 63 68.3844254 |
| 70.40725249 | 63 68.3765307 |
| 70.29816158 | 63 68.3699517 |
| 70.29816158 | 63 68.3686359 |
| 69.67997977 | 63 68.3633728 |
| 70.64338684 | 63 68.3528465 |
| 69.74338684 | 63 68.3410044 |
| 67.84338684 | 63 68.3304781 |
| 67.14338684 | 63 68.315763  |
| 66.34338684 | 63 68.284184  |
| 66.14338684 | 63 68.2473419 |
| 65.44338684 | 63 68.215763  |
| 65.14338684 | 63 68.1947103 |
| 65.04338684 | 63 68.1683945 |
| 65.04338684 | 63 68.1273624 |
| 65.14338684 | 63 68.0848948 |
| 65.54338684 | 63 68.0455373 |
| 65.34338684 | 63 68.004864  |
| 65.34338684 | 63 67.9670616 |
| 64.94338684 | 63 67.9211251 |
| 64.14338684 | 63 67.8816514 |
| 64.34338684 | 63 67.840862  |
| 64.84338684 | 63 67.8013883 |
| 64.87947582 | 63 67.7671777 |
| 64.92118369 | 63 67.7382304 |
| 65.84338684 | 63 67.709283  |
| 66.84338684 | 63 67.6829672 |
| 67.34338684 | 63 67.6527041 |
| 67.54338684 | 63 67.6237567 |
| 67.44338684 | 63 67.6250479 |
| 67.54338684 | 63 67.6253822 |
| 67.74338684 | 63 67.6174874 |
| 67.54338684 | 63 67.6174874 |
| 67.74338684 | 63 67.6069611 |
| 68.04338684 | 63 67.595119  |
| 68.04338684 | 63 67.5845927 |
| 67.94338684 | 63 67.5780138 |
| 67.54338684 | 63 67.5622243 |
| 67.64338684 | 63 67.5240664 |
| 67.64338684 | 63 67.495116  |
| 67.54338684 | 63 67.461051  |
| 67.24338684 | 63 67.425786  |

|             |    |            |
|-------------|----|------------|
| 67.24338684 | 63 | 67.3948021 |
| 67.34338684 | 63 | 67.3719522 |
| 67.64338684 | 63 | 67.3377417 |
| 67.34338684 | 63 | 67.3285312 |
| 67.24338684 | 63 | 67.3495838 |
| 67.14338684 | 63 | 67.3851101 |
| 67.44338684 | 71 | 67.4285312 |
| 67.94338684 | 71 | 67.4772154 |
| 68.04338684 | 71 | 67.5416891 |
| 67.22494372 | 71 | 67.6101101 |
| 67.11585281 | 71 | 67.679847  |
| 67.55221644 | 71 | 67.754847  |
| 67.55221644 | 71 | 67.8180049 |
| 67.37039826 | 71 | 67.8745838 |
| 67.35221644 | 63 | 67.9324786 |
| 68.04338684 | 63 | 67.9890575 |
| 68.14338684 | 63 | 68.048268  |
| 68.54338684 | 63 | 68.1153733 |
| 68.74338684 | 63 | 68.179847  |
| 69.04338684 | 63 | 68.2390575 |
| 69.14338684 | 63 | 68.2872669 |
| 69.14338684 | 63 | 68.3283485 |
| 69.14338684 | 63 | 68.362559  |
| 69.14338684 | 63 | 68.3796643 |
| 69.14338684 | 63 | 68.3915064 |
| 68.74338684 | 63 | 68.4007169 |
| 68.64338684 | 63 | 68.4059801 |
| 68.54338684 | 63 | 68.412559  |
| 68.24338684 | 63 | 68.4151906 |
| 68.34338684 | 63 | 68.4112432 |
| 68.34338684 | 63 | 68.4033485 |
| 68.94338684 | 63 | 68.3901906 |
| 68.44338684 | 63 | 68.3849274 |
| 67.84338684 | 63 | 68.3915064 |
| 67.84338684 | 63 | 68.4033485 |
| 67.8183113  | 63 | 68.4217695 |
| 67.61802401 | 63 | 68.437559  |
| 67.94338684 | 63 | 68.4546643 |
| 67.94338684 | 63 | 68.4796643 |
| 68.04338684 | 63 | 68.5138748 |
| 69.04338684 | 63 | 68.5454537 |
| 69.44338684 | 63 | 68.5744011 |
| 69.84338684 | 63 | 68.6033485 |
| 69.64338684 | 63 | 68.6322959 |
| 69.84338684 | 63 | 68.6638748 |

|             |    |            |
|-------------|----|------------|
| 70.34338684 | 63 | 68.6967695 |
| 70.34338684 | 63 | 68.7178222 |
| 70.34338684 | 63 | 68.7415064 |
| 70.74338684 | 63 | 68.7759596 |
| 69.94338684 | 63 | 68.8092166 |
| 69.84338684 | 63 | 68.8354162 |
| 69.74338684 | 63 | 68.8576685 |
| 69.64338684 | 63 | 68.8818978 |
| 69.44338684 | 63 | 68.8984203 |
| 69.24338684 | 63 | 68.9089466 |
| 69.24338684 | 63 | 68.9194729 |
| 69.34338684 | 63 | 68.9221045 |
| 68.54338684 | 63 | 68.9168413 |
| 68.04338684 | 63 | 68.8957887 |
| 68.44338684 | 63 | 68.8865782 |
| 68.14338684 | 63 | 68.8773676 |
| 68.24338684 | 63 | 68.862894  |
| 68.24338684 | 63 | 68.8471045 |
| 67.84338684 | 63 | 68.8352624 |
| 68.04338684 | 63 | 68.8247361 |
| 67.94338684 | 63 | 68.8207887 |
| 67.24338684 | 63 | 68.8221045 |
| 67.14338684 | 63 | 68.8286834 |
| 67.04338684 | 63 | 68.8352624 |
| 67.64338684 | 63 | 68.8444729 |
| 68.44338684 | 63 | 68.8497361 |
| 68.44338684 | 63 | 68.8576308 |
| 69.04338684 | 63 | 68.8799992 |
| 68.84338684 | 63 | 68.8821442 |
| 68.84338684 | 63 | 68.883423  |
| 69.14338684 | 63 | 68.886141  |
| 69.84338684 | 63 | 68.8888841 |
| 69.74338684 | 63 | 68.8916272 |
| 69.84338684 | 63 | 68.8916191 |
| 69.54338684 | 63 | 68.8798885 |
| 69.44338684 | 63 | 68.863134  |
| 69.54338684 | 63 | 68.8497288 |
| 69.94338684 | 63 | 68.844936  |
| 69.54338684 | 63 | 68.8360762 |
| 69.84338684 | 63 | 68.8192021 |
| 69.84338684 | 63 | 68.8008926 |
| 69.64338684 | 63 | 68.7878462 |
| 69.54338684 | 63 | 68.782583  |
| 69.24338684 | 63 | 68.7852146 |
| 69.21183077 | 63 | 68.782583  |

|             |               |
|-------------|---------------|
| 68.60792266 | 63 68.7760041 |
| 68.84338684 | 63 68.782583  |
| 68.94338684 | 63 68.7917936 |
| 68.74338684 | 63 68.8088988 |
| 68.34338684 | 63 68.8167936 |
| 67.44338684 | 63 68.8220567 |
| 68.44338684 | 63 68.8457409 |
| 68.44338684 | 63 68.8654778 |
| 68.04338684 | 63 68.8773199 |
| 67.94338684 | 63 68.889162  |
| 68.24338684 | 63 68.8917936 |
| 67.94338684 | 63 68.889162  |
| 68.34338684 | 63 68.8904778 |
| 68.64338684 | 63 68.8838988 |
| 68.74338684 | 63 68.8799515 |
| 68.84338684 | 63 68.8852146 |
| 69.04338684 | 63 68.8913413 |
| 69.34338684 | 63 68.9048733 |
| 69.04338684 | 63 68.9061891 |
| 69.54338684 | 63 68.8982943 |
| 68.00640795 | 63 68.8890838 |
| 67.91549886 | 63 68.869347  |
| 67.82458977 | 63 68.8509259 |
| 68.1518625  | 63 68.8246101 |
| 68.1518625  | 63 68.7903996 |
| 68.04277159 | 63 68.7403996 |
| 68.1518625  | 63 68.6903996 |
| 68.17004431 | 63 68.6417154 |
| 68.82458977 | 63 68.6035575 |
| 69.27913522 | 63 68.5680312 |
| 69.17004431 | 63 68.5338207 |
| 69.06095341 | 63 68.4996101 |
| 68.9518625  | 63 68.4746101 |
| 69.3518625  | 63 68.4482943 |
| 70.34338684 | 63 68.4272417 |
| 70.14338684 | 63 68.4114522 |
| 69.64338684 | 63 68.4022417 |
| 69.24338684 | 63 68.4035575 |
| 70.14338684 | 63 68.4079201 |
| 70.14338684 | 63 68.4202288 |
| 70.54338684 | 63 68.4412814 |
| 69.84338684 | 63 68.4610183 |
| 69.74338684 | 63 68.4702254 |
| 70.34338684 | 63 68.4839779 |
| 69.54338684 | 63 68.5052663 |

|             |    |            |
|-------------|----|------------|
| 69.34338684 | 63 | 68.5133969 |
| 69.04338684 | 63 | 68.5215274 |
| 68.44338684 | 63 | 68.5351603 |
| 68.04338684 | 63 | 68.5501091 |
| 67.94338684 | 63 | 68.5594358 |
| 67.54338684 | 63 | 68.5767768 |
| 67.64338684 | 63 | 68.5859839 |
| 67.64338684 | 63 | 68.5910044 |
| 67.60901437 | 63 | 68.5961445 |
| 68.0718172  | 63 | 68.5884856 |
| 67.74338684 | 63 | 68.5755635 |
| 67.84338684 | 63 | 68.565871  |
| 67.74338684 | 63 | 68.5625183 |
| 67.54338684 | 63 | 68.550912  |
| 67.44338684 | 63 | 68.573767  |
| 66.84338684 | 63 | 68.5978181 |
| 66.54338684 | 63 | 68.6204339 |
| 66.04338684 | 63 | 68.6400592 |
| 65.94338684 | 63 | 68.6610003 |
| 66.14338684 | 63 | 68.6873242 |
| 66.64338684 | 63 | 68.7108969 |
| 66.74338684 | 63 | 68.7289672 |
| 66.94338684 | 63 | 68.7410566 |
| 67.34338684 | 63 | 68.7405862 |
| 67.64338684 | 71 | 68.7428671 |
| 67.84338684 | 71 | 68.7465833 |
| 68.24338684 | 71 | 68.7552517 |
| 68.44338684 | 71 | 68.756456  |
| 68.84338684 | 71 | 68.7432981 |
| 69.34338684 | 71 | 68.7235612 |
| 69.54338684 | 71 | 68.7038244 |
| 69.54338684 | 71 | 68.6880349 |
| 70.44338684 | 71 | 68.656456  |
| 70.44338684 | 71 | 68.6143507 |
| 69.44312553 | 63 | 68.5669823 |
| 69.38858008 | 63 | 68.5288244 |
| 69.06130735 | 63 | 68.4985612 |
| 69.06130735 | 63 | 68.4630349 |
| 69.06130735 | 63 | 68.4354034 |
| 69.07948917 | 63 | 68.4077718 |
| 69.07948917 | 63 | 68.381456  |
| 68.95221644 | 63 | 68.3643507 |
| 69.26130735 | 63 | 68.349877  |
| 69.04312553 | 63 | 68.3327718 |
| 69.02494372 | 63 | 68.3169823 |

|             |               |
|-------------|---------------|
| 69.13403463 | 63 68.2972455 |
| 68.26130735 | 63 68.2788244 |
| 68.06130735 | 63 68.2621714 |
| 68.6067619  | 63 68.2354815 |
| 68.78858008 | 63 68.2117973 |
| 68.66130735 | 63 68.1854815 |
| 69.74338684 | 63 68.1591658 |
| 69.74338684 | 63 68.1407447 |
| 69.54338684 | 69 68.1302184 |
| 69.64338684 | 69 68.1433763 |
| 69.74338684 | 69 68.1644289 |
| 70.04338684 | 69 68.1946921 |
| 69.94338684 | 69 68.2341658 |
| 69.54338684 | 69 68.2617973 |
| 69.74338684 | 69 68.28285   |
| 69.24338684 | 69 68.2999552 |
| 69.34338684 | 69 68.3091658 |
| 69.34338684 | 69 68.2999552 |
| 69.61066248 | 69 68.2907447 |
| 69.44338684 | 69 68.2736394 |
| 69.34338684 | 69 68.2420605 |
| 68.64338684 | 69 68.2025868 |
| 68.14338684 | 69 68.1617973 |
| 68.04338684 | 69 68.1196921 |
| 67.74338684 | 69 68.0710079 |
| 66.94338684 | 69 68.0302184 |
| 66.94338684 | 69 67.9789026 |
| 66.94338684 | 69 67.9249552 |
| 67.44338684 | 69 67.8762745 |
| 67.64338684 | 69 67.8256798 |
| 67.44338684 | 69 67.7807072 |
| 67.24338684 | 69 67.7462608 |
| 67.04338684 | 69 67.7131303 |
| 67.14338684 | 69 67.6823921 |
| 66.94338684 | 69 67.6516539 |
| 66.64338684 | 69 67.6403454 |
| 66.34338684 | 69 67.6269518 |
| 66.14338684 | 69 67.6243236 |
| 66.24338684 | 69 67.6258821 |
| 66.34338684 | 69 67.6299525 |
| 66.04338684 | 69 67.6612956 |
| 65.94338684 | 69 67.7044809 |
| 65.84338684 | 69 67.7404891 |
| 65.74338684 | 69 67.7701576 |
| 66.14338684 | 69 67.7922903 |

|             |               |
|-------------|---------------|
| 66.64338684 | 69 67.7949218 |
| 67.84338684 | 69 67.8015008 |
| 68.14338684 | 69 67.7978172 |
| 68.34338684 | 69 67.7849231 |
| 68.94338684 | 69 67.7678425 |
| 68.24338684 | 69 67.7379627 |
| 68.24338684 | 69 67.7050926 |
| 68.04338684 | 69 67.6772463 |
| 67.64338684 | 69 67.6479647 |
| 66.64338684 | 69 67.6310036 |
| 66.94338684 | 69 67.6110521 |
| 66.54338684 | 69 67.6005258 |
| 65.84338684 | 69 67.5851669 |
| 65.44338684 | 69 67.5667458 |
| 65.74338684 | 69 67.5364827 |
| 66.14338684 | 69 67.5088511 |
| 65.84338684 | 69 67.4851669 |
| 66.44338684 | 69 67.4575353 |
| 66.54338684 | 69 67.4312195 |
| 66.34338684 | 69 67.4167458 |
| 65.74338684 | 69 67.4035879 |
| 65.54338684 | 69 67.39043   |
| 65.64338684 | 69 67.3838511 |
| 66.44338684 | 69 67.3733248 |
| 66.54338684 | 69 67.3627985 |
| 66.74338684 | 69 67.3601669 |
| 66.74338684 | 69 67.36543   |
| 68.09277115 | 69 67.3746406 |
| 68.24338684 | 69 67.3864827 |
| 68.84338684 | 69 67.4022722 |
| 69.14338684 | 69 67.4233248 |
| 69.44338684 | 69 67.4391143 |
| 70.64338684 | 69 67.4522722 |
| 71.34338684 | 69 67.4601669 |
| 71.34338684 | 69 67.4706932 |
| 71.04338684 | 69 67.4825353 |
| 70.34338684 | 69 67.4877985 |
| 69.94338684 | 69 67.4917458 |
| 70.24338684 | 69 67.4891143 |
| 69.26343626 | 69 67.4772722 |
| 68.66343626 | 69 67.4417458 |
| 68.44525444 | 69 67.3996406 |
| 67.77252717 | 69 67.3509564 |
| 67.44525444 | 69 67.2943774 |
| 67.42707263 | 69 67.2437733 |

|             |               |
|-------------|---------------|
| 67.51798172 | 63 67.2003522 |
| 67.95434535 | 63 67.1556154 |
| 67.82707263 | 63 67.1148259 |
| 68.54338684 | 63 67.0819312 |
| 68.44338684 | 63 67.0503522 |
| 68.04338684 | 63 67.0253522 |
| 67.04338684 | 63 66.9846854 |
| 66.54338684 | 63 66.9622004 |
| 66.34338684 | 63 66.9360072 |
| 65.94338684 | 63 66.9088571 |
| 65.74338684 | 63 66.891396  |
| 65.84338684 | 63 66.8674756 |
| 65.94338684 | 63 66.8436748 |
| 65.94338684 | 63 66.8265695 |
| 66.94338684 | 63 66.8068327 |
| 66.84338684 | 63 66.7818327 |
| 66.64338684 | 63 66.7581485 |
| 67.04338684 | 63 66.7216956 |
| 67.44338684 | 63 66.6856017 |
| 67.84338684 | 63 66.6511823 |
| 67.84338684 | 63 66.616763  |
| 67.84338684 | 63 66.5676987 |
| 67.94338684 | 63 66.5192841 |
| 67.34338684 | 63 66.4648887 |
| 67.24338684 | 63 66.4223354 |
| 66.94338684 | 63 66.3813371 |
| 66.84338684 | 63 66.3379161 |
| 66.84338684 | 63 66.2892319 |
| 66.24338684 | 63 66.2326529 |
| 66.04338684 | 63 66.1826529 |
| 65.94338684 | 63 66.1458108 |
| 65.74338684 | 63 66.1155477 |
| 65.14338684 | 63 66.0813371 |
| 64.94338684 | 63 66.0573891 |
| 64.64338684 | 63 66.0387043 |
| 64.64338684 | 63 66.0097323 |
| 64.3974722  | 63 65.9856647 |
| 64.94338684 | 63 65.9645875 |
| 64.64338684 | 63 65.9371706 |
| 64.54338684 | 63 65.9085575 |
| 64.14338684 | 63 65.8742027 |
| 64.54338684 | 63 65.8428385 |
| 64.64338684 | 63 65.7941543 |
| 62.75270704 | 63 65.7481016 |
| 63.73452522 | 63 65.6994174 |



|             |               |
|-------------|---------------|
| 63.75270704 | 63 65.6678385 |
| 64.07997977 | 63 65.6481016 |
| 64.5163434  | 63 65.6402069 |
| 64.62543431 | 63 65.6375753 |
| 64.73452522 | 63 65.6481016 |
| 65.04338684 | 63 65.6625753 |
| 64.24338684 | 63 65.6941543 |
| 63.64338684 | 63 65.726038  |
| 63.84338684 | 63 65.7484064 |
| 63.67297231 | 63 65.769459  |
| 63.80024503 | 63 65.7918275 |
| 64.12751776 | 63 65.8076169 |
| 64.12751776 | 63 65.8089327 |
| 64.3638814  | 63 65.7997222 |
| 64.5638814  | 63 65.7865643 |
| 64.70933594 | 63 65.769459  |
| 65.90933594 | 63 65.7484064 |
| 66.32751776 | 63 65.7378801 |
| 67.34338684 | 63 65.7273538 |
| 67.64338684 | 63 65.7207748 |
| 67.04338684 | 63 65.7128801 |
| 67.24338684 | 63 65.6970906 |
| 67.54338684 | 63 65.6878801 |
| 67.64338684 | 63 65.6813011 |
| 67.64338684 | 63 65.6773538 |
| 67.44338684 | 63 65.6773538 |
| 67.24338684 | 63 65.6891959 |
| 66.24338684 | 63 65.7076169 |
| 65.94338684 | 63 65.7313011 |
| 65.84338684 | 63 65.7576169 |
| 65.34338684 | 63 65.7884842 |
| 65.34338684 | 63 65.8095369 |
| 65.34338684 | 63 65.8345369 |
| 65.44338684 | 63 65.8542737 |
| 64.84338684 | 63 65.8805895 |
| 64.94338684 | 63 65.9042737 |
| 64.34338684 | 63 65.9117965 |
| 64.64338684 | 63 65.9695686 |
| 65.04338684 | 63 66.0157378 |
| 65.74338684 | 63 66.0748257 |
| 65.74338684 | 63 66.132239  |
| 66.54338684 | 63 66.187858  |
| 66.94338684 | 63 66.226239  |
| 68.34338684 | 63 66.2631846 |
| 68.3665508  | 63 66.2833868 |

|             |    |            |
|-------------|----|------------|
| 68.64338684 | 63 | 66.3202289 |
| 68.44338684 | 63 | 66.3623342 |
| 68.34338684 | 63 | 66.4018078 |
| 68.24338684 | 63 | 66.4408922 |
| 67.54338684 | 63 | 66.4822494 |
| 67.14338684 | 63 | 66.5206161 |
| 66.84338684 | 63 | 66.5537196 |
| 66.54338684 | 63 | 66.5797657 |
| 66.34338684 | 63 | 66.5979171 |
| 66.54338684 | 63 | 66.6141546 |
| 66.44338684 | 63 | 66.6119711 |
| 66.44338684 | 63 | 66.6111064 |
| 66.24338684 | 63 | 66.5944826 |
| 65.64338684 | 63 | 66.5782177 |
| 65.54338684 | 63 | 66.5696082 |
| 65.54338684 | 63 | 66.5827661 |
| 65.64338684 | 63 | 66.5919766 |
| 65.74338684 | 63 | 66.6018735 |
| 66.04338684 | 63 | 66.617663  |
| 66.34338684 | 63 | 66.6400314 |
| 66.44338684 | 63 | 66.6516212 |
| 66.64338684 | 63 | 66.6720626 |
| 66.74338684 | 63 | 66.6993223 |
| 66.54338684 | 63 | 66.7278977 |
| 66.54338684 | 63 | 66.7642482 |
| 66.04338684 | 63 | 66.7991633 |
| 66.14338684 | 63 | 66.8531107 |
| 66.34338684 | 63 | 66.895216  |
| 65.21511834 | 63 | 66.9399528 |
| 67.14338684 | 63 | 66.9820581 |
| 67.24338684 | 63 | 67.0333739 |
| 68.24338684 | 63 | 67.0794265 |
| 68.44338684 | 63 | 67.1254791 |
| 68.74338684 | 63 | 67.1528745 |
| 67.54239107 | 63 | 67.1788344 |
| 67.54239107 | 63 | 67.2169923 |
| 66.57875471 | 63 | 67.2512029 |
| 67.04338684 | 63 | 67.2722555 |
| 66.84338684 | 63 | 67.2982665 |
| 66.84338684 | 63 | 67.3206349 |
| 66.64338684 | 63 | 67.3495823 |
| 66.94338684 | 63 | 67.3811612 |
| 67.04338684 | 63 | 67.4127402 |
| 66.64338684 | 63 | 67.457477  |
| 66.34338684 | 63 | 67.5127402 |

|             |               |
|-------------|---------------|
| 65.94338684 | 63 67.5745823 |
| 65.94338684 | 63 67.6377402 |
| 65.74338684 | 63 67.6833986 |
| 66.26179795 | 63 67.7278609 |
| 66.07997977 | 63 67.776749  |
| 66.40725249 | 63 67.8227663 |
| 66.38907067 | 63 67.8699798 |
| 68.24338684 | 63 67.9305061 |
| 68.24338684 | 63 67.9857693 |
| 68.39555    | 63 68.0384009 |
| 68.84338684 | 63 68.0897166 |
| 69.14338684 | 63 68.1233537 |
| 68.12420925 | 63 68.1530433 |
| 67.79693653 | 63 68.1799818 |
| 68.01511834 | 63 68.2039298 |
| 68.01511834 | 63 68.2447193 |
| 68.10602743 | 63 68.2855087 |
| 67.99693653 | 63 68.3184035 |
| 69.44338684 | 63 68.3473508 |
| 68.64338684 | 63 68.377614  |
| 68.24338684 | 63 68.3999824 |
| 68.14338684 | 63 68.4184035 |
| 68.24338684 | 63 68.4503544 |
| 68.14338684 | 63 68.4635123 |
| 68.54338684 | 63 68.4819333 |
| 67.82543431 | 63 68.4867442 |
| 67.7163434  | 63 68.4827777 |
| 69.44338684 | 63 68.4709356 |
| 69.54338684 | 63 68.4762119 |
| 69.94338684 | 63 68.494646  |
| 70.34338684 | 63 68.523128  |
| 70.34338684 | 63 68.5560228 |
| 70.64338684 | 63 68.6020754 |
| 70.74338684 | 63 68.6520754 |
| 70.64338684 | 63 68.698128  |
| 70.94338684 | 63 68.7468123 |
| 71.34338684 | 63 68.7666606 |
| 71.54338684 | 63 68.7831597 |
| 71.34338684 | 63 68.8147386 |
| 69.81342914 | 63 68.8542123 |
| 69.92252004 | 63 68.8897386 |
| 70.15888368 | 63 68.9226334 |
| 69.94070186 | 63 68.9552859 |
| 69.83161095 | 63 68.9942781 |
| 70.24338684 | 63 69.0210693 |

|             |               |
|-------------|---------------|
| 69.74338684 | 63 69.0428366 |
| 69.54338684 | 63 69.0388893 |
| 69.54338684 | 63 69.0388893 |
| 68.2997999  | 63 69.0303082 |
| 68.2997999  | 63 69.0132029 |
| 68.39070899 | 63 68.9921503 |
| 68.26343626 | 63 68.9818763 |
| 69.74338684 | 63 68.9785401 |
| 69.84338684 | 63 68.9736489 |
| 69.04338684 | 63 68.9674419 |
| 68.74338684 | 63 68.9639861 |
| 68.34338684 | 63 68.9698605 |
| 67.84338684 | 63 68.9619657 |
| 67.74338684 | 63 68.9672289 |
| 67.64338684 | 63 68.9817026 |
| 68.14338684 | 63 68.9961762 |
| 68.64338684 | 63 69.0093341 |
| 68.60901437 | 63 69.0303868 |
| 68.14193522 | 63 69.0488078 |
| 67.84338684 | 63 69.074044  |
| 67.94338684 | 63 69.1007157 |
| 68.94338684 | 63 69.0993999 |
| 68.74338684 | 63 69.0888736 |
| 69.54338684 | 63 69.0678209 |
| 70.34338684 | 63 69.0480841 |
| 70.64338684 | 63 69.0309788 |
| 70.14338684 | 63 69.0099262 |
| 70.64338684 | 63 68.9822946 |
| 68.5518625  | 63 68.9586104 |
| 67.89731704 | 63 68.9283472 |
| 68.74338684 | 63 68.8928209 |
| 68.94338684 | 63 68.8520315 |
| 68.64338684 | 63 68.8151894 |
| 68.24338684 | 63 68.7984783 |
| 68.74338684 | 63 68.7803712 |
| 69.04338684 | 63 68.763062  |
| 68.44338684 | 63 68.7459921 |
| 68.04338684 | 63 68.7264102 |
| 67.94338684 | 63 68.7000944 |
| 68.24338684 | 63 68.6764102 |
| 67.74338684 | 63 68.6540418 |
| 67.54338684 | 63 68.6369365 |
| 67.54338684 | 63 68.6388258 |
| 67.34338684 | 63 68.6367678 |
| 67.54338684 | 63 68.6387767 |

|             |               |
|-------------|---------------|
| 67.64338684 | 63 68.6477234 |
| 67.54338684 | 63 68.6398287 |
| 67.84338684 | 63 68.6319339 |
| 68.44338684 | 63 68.6385129 |
| 68.84338684 | 63 68.6490392 |
| 69.04338684 | 63 68.6661445 |
| 69.34338684 | 63 68.6858813 |
| 69.24338684 | 63 68.7069339 |
| 69.24338684 | 63 68.7319339 |
| 69.74338684 | 63 68.7464076 |
| 69.94338684 | 63 68.7477234 |
| 69.74338684 | 63 68.7389651 |
| 69.74338684 | 63 68.7350369 |
| 69.34338684 | 63 68.7310895 |
| 68.74338684 | 63 68.7350369 |
| 68.34338684 | 63 68.7310895 |
| 68.84338684 | 63 68.7389842 |
| 69.04338684 | 63 68.7376685 |
| 69.04338684 | 63 68.7245106 |
| 68.64338684 | 63 68.7008263 |
| 68.84338684 | 63 68.6837211 |
| 68.64338684 | 63 68.6587211 |
| 68.64338684 | 63 68.6586096 |
| 68.44338684 | 63 68.6671105 |
| 68.54338684 | 63 68.6631631 |
| 68.54338684 | 63 68.6434263 |
| 68.5463834  | 63 68.6250052 |
| 68.84338684 | 63 68.6118473 |
| 68.64338684 | 63 68.5921105 |
| 68.34338684 | 63 68.5657947 |
| 68.24338684 | 63 68.5447421 |
| 67.94338684 | 63 68.5302684 |
| 67.84338684 | 63 68.5171105 |
| 68.24338684 | 63 68.5052684 |
| 68.44338684 | 63 68.5039526 |
| 68.14338684 | 63 68.5026368 |
| 68.54338684 | 63 68.501321  |
| 68.94338684 | 63 68.5026368 |
| 69.14338684 | 63 68.501321  |
| 69.24338684 | 63 68.5000052 |
| 69.54338684 | 63 68.5026368 |
| 69.54338684 | 63 68.4973736 |
| 69.64338684 | 63 68.4881631 |
| 69.34338684 | 63 68.4749137 |
| 69.34338684 | 63 68.4497932 |

|             |               |
|-------------|---------------|
| 69.54338684 | 63 68.4274248 |
| 69.24338684 | 63 68.4090037 |
| 68.74338684 | 63 68.3905827 |
| 67.94338684 | 63 68.3747932 |
| 67.84338684 | 63 68.3576879 |
| 67.54338684 | 63 68.3300564 |
| 68.24338684 | 63 68.301109  |
| 68.64338684 | 63 68.2747932 |
| 69.34338684 | 63 68.2603195 |
| 69.44338684 | 63 68.2524248 |
| 69.34338684 | 63 68.2405827 |
| 68.84338684 | 63 68.2300564 |
| 68.84338684 | 63 68.21953   |
| 68.74338684 | 63 68.2168985 |
| 68.54338684 | 63 68.2103195 |
| 68.54338684 | 63 68.2090037 |
| 68.44338684 | 63 68.2090037 |
| 67.44338684 | 63 68.2168985 |
| 67.24338684 | 63 68.2234774 |
| 67.24338684 | 63 68.2326879 |
| 67.24338684 | 63 68.2405432 |
| 67.04338684 | 63 68.2471222 |
| 66.84338684 | 63 68.2576485 |
| 66.94338684 | 63 68.2708064 |
| 66.94338684 | 63 68.2879117 |
| 67.34338684 | 63 68.3102801 |
| 67.64338684 | 63 68.3170629 |
| 67.44338684 | 63 68.328905  |
| 67.44338684 | 63 68.3460103 |
| 67.44338684 | 63 68.3617998 |
| 67.44338684 | 63 68.3509392 |
| 67.54338684 | 63 68.3307484 |
| 67.74338684 | 63 68.3093615 |
| 67.44338684 | 63 68.2866588 |
| 67.74338684 | 63 68.2585734 |
| 67.83643248 | 63 68.2288132 |
| 67.13422757 | 63 68.203479  |
| 67.64338684 | 63 68.1942684 |
| 67.84338684 | 63 68.1837421 |
| 67.84338684 | 63 68.1653211 |
| 68.54338684 | 63 68.1482158 |
| 68.64338684 | 63 68.1442684 |
| 67.64338684 | 63 68.1508474 |
| 67.54338684 | 63 68.1587421 |
| 67.34338684 | 63 68.1758474 |

|             |    |            |
|-------------|----|------------|
| 67.64338684 | 63 | 68.1876895 |
| 67.74338684 | 63 | 68.1969    |
| 67.94338684 | 63 | 68.1955842 |
| 68.24338684 | 63 | 68.1916369 |
| 68.24338684 | 63 | 68.1903211 |
| 68.44338684 | 63 | 68.1995316 |
| 68.34338684 | 63 | 68.2126895 |
| 68.54338684 | 63 | 68.2270769 |
| 68.64338684 | 63 | 68.2477342 |
| 69.04338684 | 63 | 68.2661553 |
| 69.04338684 | 63 | 68.2806289 |
| 69.24338684 | 63 | 68.3095763 |
| 69.14338684 | 63 | 68.3411553 |
| 69.34338684 | 63 | 68.3766816 |
| 69.44338684 | 63 | 68.4122079 |
| 69.34338684 | 63 | 68.4503658 |
| 69.54338684 | 63 | 68.492471  |
| 69.64338684 | 63 | 68.5214184 |
| 68.35888368 | 63 | 68.5569447 |
| 69.14338684 | 63 | 68.5898395 |
| 69.74338684 | 63 | 68.62405   |
| 69.34338684 | 63 | 68.6687868 |
| 67.71798172 | 63 | 68.7161553 |
| 67.40889081 | 63 | 68.7661553 |
| 67.51798172 | 63 | 68.8187868 |
| 67.51798172 | 63 | 68.8714184 |
| 67.40889081 | 63 | 68.9214184 |
| 67.28161808 | 63 | 68.9753658 |
| 67.71798172 | 63 | 69.0214184 |
| 68.64338684 | 63 | 69.0636152 |
| 68.54338684 | 63 | 69.1111041 |
| 68.14338684 | 71 | 69.1532094 |
| 67.94338684 | 71 | 69.1913673 |
| 68.44338684 | 71 | 69.2216304 |
| 68.44338684 | 71 | 69.2426831 |
| 68.44338684 | 71 | 69.2650515 |
| 68.84338684 | 71 | 69.3018936 |
| 69.14338684 | 71 | 69.3413673 |
| 69.34338684 | 71 | 69.3821568 |
| 69.24338684 | 71 | 69.4268936 |
| 69.14338684 | 71 | 69.474262  |
| 69.24338684 | 71 | 69.5189989 |
| 69.54338684 | 71 | 69.5597883 |
| 69.84338684 | 71 | 69.5966304 |
| 69.83683077 | 71 | 69.630841  |

|             |               |
|-------------|---------------|
| 70.11334078 | 71 69.6650515 |
| 69.94338684 | 71 69.6939989 |
| 69.54338684 | 71 69.7176831 |
| 69.64338684 | 71 69.7268936 |
| 69.64338684 | 71 69.7334725 |
| 69.94338684 | 71 69.7321568 |
| 69.94338684 | 71 69.724262  |
| 69.94338684 | 71 69.7150515 |
| 70.04338684 | 71 69.705841  |
| 69.14338684 | 71 69.6966304 |
| 69.64338684 | 71 69.6821568 |
| 69.84338684 | 71 69.6545252 |
| 70.24338684 | 71 69.6424792 |
| 70.84338684 | 71 69.6161634 |
| 71.04338684 | 71 69.5819528 |
| 71.24338684 | 71 69.5569528 |
| 71.44338684 | 71 69.5540566 |
| 71.54338684 | 71 69.5577894 |
| 71.54338684 | 71 69.5541763 |
| 71.54338684 | 71 69.5479316 |
| 71.24338684 | 71 69.532596  |
| 71.04338684 | 71 69.5189351 |
| 70.74338684 | 71 69.4929536 |
| 70.84338684 | 71 69.4534799 |
| 70.74338684 | 71 69.4166378 |
| 70.14338684 | 71 69.383743  |
| 70.14338684 | 71 69.3574273 |
| 70.34338684 | 71 69.3245325 |
| 70.44338684 | 71 69.2929536 |
| 70.54338684 | 71 69.2679536 |
| 70.44338684 | 71 69.2455852 |
| 71.04338684 | 71 69.2232167 |
| 71.34338684 | 71 69.1879327 |
| 71.34338684 | 71 69.1628161 |
| 71.34338684 | 71 69.1490631 |
| 71.04338684 | 71 69.1339943 |
| 71.04338684 | 71 69.113384  |
| 70.94338684 | 71 69.0947267 |
| 70.74338684 | 71 69.0759165 |
| 70.44338684 | 71 69.0619508 |
| 69.74338684 | 71 69.0370634 |
| 69.54338684 | 71 69.0358204 |
| 69.14338684 | 71 69.0201037 |
| 68.54338684 | 71 69.0043871 |
| 68.64338684 | 71 68.9774131 |



|             |    |            |
|-------------|----|------------|
| 68.74338684 | 71 | 68.9504391 |
| 68.64338684 | 71 | 68.930775  |
| 68.44338684 | 71 | 68.9054092 |
| 67.54338684 | 71 | 68.8948095 |
| 67.44338684 | 71 | 68.8820168 |
| 67.14338684 | 71 | 68.8636685 |
| 67.14338684 | 71 | 68.8400571 |
| 67.44338684 | 71 | 68.808551  |
| 67.49786393 | 71 | 68.7904951 |
| 67.69258346 | 71 | 68.7756556 |
| 67.24338684 | 71 | 68.7757284 |
| 67.04338684 | 71 | 68.7774094 |
| 66.24338684 | 71 | 68.7644705 |
| 66.24338684 | 71 | 68.7456836 |
| 65.74338684 | 71 | 68.7220722 |
| 65.64338684 | 71 | 68.6923205 |
| 65.74338684 | 71 | 68.6533582 |
| 65.64338684 | 71 | 68.6101561 |
| 65.94338684 | 71 | 68.5697318 |
| 65.94338684 | 71 | 68.5357403 |
| 66.04338684 | 71 | 68.4988248 |
| 66.54338684 | 71 | 68.4709736 |
| 67.14338684 | 71 | 68.4461926 |
| 67.44338684 | 71 | 68.4157098 |
| 66.66179795 | 71 | 68.3850809 |
| 67.33452522 | 71 | 68.3468452 |
| 68.09816158 | 71 | 68.2981572 |
| 68.09816158 | 71 | 68.2513002 |
| 67.97700042 | 71 | 68.2059051 |
| 68.42543431 | 71 | 68.1673814 |
| 68.40725249 | 71 | 68.1230098 |
| 69.05194687 | 71 | 68.0755679 |
| 68.05194687 | 71 | 68.0336817 |
| 69.4489192  | 71 | 67.9928188 |
| 68.4489192  | 71 | 67.9567805 |
| 68.4489192  | 71 | 67.9379936 |
| 67.89336364 | 71 | 67.9317799 |
| 67.89336364 | 71 | 67.9334608 |
| 68.4489192  | 63 | 67.9309021 |
| 68.11558587 | 63 | 67.9284895 |
| 68.33780809 | 63 | 67.9259307 |
| 68.67114142 | 63 | 67.9450093 |
| 68.4489192  | 63 | 67.9722241 |
| 68.4489192  | 63 | 68.0152284 |
| 68.4489192  | 63 | 68.0689051 |

|             |    |            |
|-------------|----|------------|
| 69.67114142 | 63 | 68.1199503 |
| 70.11558587 | 63 | 68.1598844 |
| 71.4489192  | 63 | 68.1945695 |
| 71.67114142 | 71 | 68.2250844 |
| 70.56003031 | 71 | 68.2599015 |
| 70.11558587 | 71 | 68.2970578 |
| 69.4489192  | 71 | 68.3399159 |
| 68.78225253 | 71 | 68.3814581 |
| 67.78225253 | 71 | 68.4295793 |
| 67.56003031 | 71 | 68.4790163 |
| 67.67114142 | 71 | 68.5335703 |
| 67.56003031 | 71 | 68.5961652 |
| 67.33780809 | 71 | 68.6612455 |
| 68.22669698 | 71 | 68.7343667 |
| 68.56003031 | 71 | 68.8203534 |
| 68.22669698 | 71 | 68.9061939 |
| 68.11558587 | 71 | 68.9806309 |
| 68.13747616 | 71 | 69.0518516 |
| 67.64309705 | 71 | 69.139789  |
| 67.78225253 | 71 | 69.2272081 |
| 67.89336364 | 71 | 69.3110121 |
| 68.11558587 | 71 | 69.4135806 |
| 67.67114142 | 71 | 69.5133573 |
| 67.33780809 | 71 | 69.6013856 |
| 67.56003031 | 71 | 69.6867292 |
| 67.33780809 | 71 | 69.7416601 |
| 67.00447476 | 71 | 69.798053  |
| 68.11558587 | 71 | 69.8302167 |
| 68.67114142 | 71 | 69.8623805 |
| 68.67114142 | 71 | 69.8872343 |
| 68.4489192  | 71 | 69.917936  |
| 68.56003031 | 71 | 69.9398659 |
| 68.4489192  | 71 | 69.9530238 |
| 69.89336364 | 71 | 69.9661817 |
| 69.61171042 | 71 | 69.9762625 |
| 70.71171042 | 71 | 69.9631458 |
| 71.22282153 | 71 | 69.9518536 |
| 71.02282153 | 71 | 69.9357368 |
| 70.47837709 | 71 | 69.904266  |
| 70.13393264 | 71 | 69.8553975 |
| 70.01171042 | 71 | 69.8028741 |
| 69.8894882  | 71 | 69.7328068 |
| 69.86726598 | 71 | 69.6628857 |
| 69.50059931 | 71 | 69.6062687 |
| 69.40059931 | 71 | 69.5768797 |

|             |               |
|-------------|---------------|
| 69.40059931 | 71 69.5505289 |
| 69.40059931 | 71 69.5246168 |
| 69.8894882  | 71 69.507038  |
| 70.40059931 | 71 69.4891668 |
| 70.8894882  | 71 69.4774709 |
| 71.50059931 | 71 69.4774709 |
| 72.57837709 | 71 69.4730849 |
| 73.06726598 | 71 69.461389  |
| 72.80059931 | 71 69.4299961 |
| 72.85615487 | 71 69.4045974 |
| 73.34504375 | 71 69.3825612 |
| 73.97837709 | 71 69.3666697 |
| 74.46726598 | 71 69.3537745 |
| 75.89336364 | 71 69.3479265 |
| 75.56003031 | 71 69.3289207 |
| 75.11558587 | 71 69.3011429 |
| 74.89336364 | 71 69.2762891 |
| 73.22669698 | 71 69.2514353 |
| 72.33780809 | 71 69.2236575 |
| 71.89336364 | 71 69.1973417 |
| 70.89336364 | 71 69.1695639 |
| 70.33780809 | 71 69.1227803 |
| 70.22669698 | 71 69.0628388 |
| 69.56003031 | 71 68.9999733 |
| 69.4489192  | 71 68.9414938 |
| 69.11558587 | 71 68.8815522 |
| 69.10395242 | 71 68.8230727 |
| 67.67427485 | 71 68.7470493 |
| 67.59070824 | 71 68.6776559 |
| 67.22404158 | 71 68.5923267 |
| 66.05713883 | 71 68.5105064 |
| 65.95713883 | 71 68.4313176 |
| 66.12380549 | 71 68.3680645 |
| 66.12380549 | 71 68.3210395 |
| 66.35713883 | 71 68.2785466 |
| 66.25713883 | 71 68.2522818 |
| 67.88201645 | 71 68.2292334 |
| 67.4462638  | 71 68.2110095 |
| 66.81293047 | 71 68.1897155 |
| 66.4462638  | 71 68.1669595 |
| 66.20181935 | 71 68.1471274 |
| 66.78225253 | 71 68.1194006 |
| 67.56003031 | 71 68.0864107 |
| 67.00447476 | 71 68.047197  |
| 67.33780809 | 71 68.0120735 |

|             |               |
|-------------|---------------|
| 66.1741691  | 71 67.9723584 |
| 66.29639132 | 71 67.9335205 |
| 66.44083576 | 71 67.879443  |
| 66.92972465 | 71 67.8506928 |
| 66.66305799 | 71 67.8052759 |
| 67.33780809 | 71 67.7529877 |
| 66.4489192  | 71 67.6796469 |
| 66.00447476 | 71 67.5816937 |
| 65.78225253 | 71 67.4910504 |
| 65.4489192  | 71 67.4062551 |
| 65.4489192  | 71 67.3214598 |
| 65.33780809 | 71 67.2600563 |
| 64.89336364 | 71 67.2001148 |
| 64.56003031 | 71 67.1401732 |
| 64.11558587 | 71 67.0890037 |
| 63.89336364 | 71 67.040758  |
| 64.00447476 | 71 66.9925124 |
| 64.00447476 | 71 66.9530387 |
| 64.00447476 | 71 66.919413  |
| 64.11558587 | 71 66.8872493 |
| 64.33780809 | 71 66.8596246 |
| 64.22669698 | 71 66.8537354 |
| 65.00447476 | 71 66.8518697 |
| 65.00447476 | 71 66.8592146 |
| 65.67114142 | 71 66.8819135 |
| 66.56003031 | 71 66.9000802 |
| 66.78225253 | 71 66.9277498 |
| 67.89336364 | 71 66.9554194 |
| 68.11558587 | 71 66.9785569 |
| 68.11558587 | 71 67.0059341 |
| 67.78225253 | 71 67.0121637 |
| 67.67114142 | 71 67.0388929 |
| 67.89336364 | 71 67.0969688 |
| 67.78225253 | 71 67.1584072 |
| 67.89336364 | 71 67.227448  |
| 67.90924515 | 71 67.2888515 |
| 68.83121284 | 71 67.3297872 |
| 69.56003031 | 71 67.3379142 |
| 70.11558587 | 71 67.3432635 |
| 68.69070824 | 71 67.357491  |
| 70.67114142 | 71 67.3701104 |
| 69.89336364 | 71 67.3936085 |
| 70.00447476 | 71 67.40044   |
| 68.89336364 | 71 67.4005464 |
| 68.4489192  | 71 67.3917745 |

|             |    |            |
|-------------|----|------------|
| 68.67114142 | 71 | 67.3961604 |
| 68.67114142 | 71 | 67.4049324 |
| 68.4489192  | 71 | 67.4137043 |
| 68.56003031 | 71 | 67.4312482 |
| 67.78225253 | 71 | 67.451716  |
| 67.33780809 | 71 | 67.4751078 |
| 67.00447476 | 71 | 67.5116575 |
| 66.67114142 | 71 | 67.5525932 |
| 66.56003031 | 71 | 67.6080696 |
| 66.56003031 | 71 | 67.6709351 |
| 66.89336364 | 71 | 67.7338006 |
| 66.67114142 | 71 | 67.7995901 |
| 67.00447476 | 71 | 67.8580696 |
| 67.22669698 | 71 | 67.9150872 |
| 67.4489192  | 71 | 67.9691808 |
| 67.78225253 | 71 | 68.0188884 |
| 67.78225253 | 71 | 68.0510521 |
| 67.33780809 | 71 | 68.0817539 |
| 68.22669698 | 71 | 68.1095316 |
| 68.22669698 | 71 | 68.1256135 |
| 68.11558587 | 71 | 68.1387714 |
| 68.33780809 | 71 | 68.1416954 |
| 68.35546232 | 71 | 68.1416954 |
| 69.47768455 | 71 | 68.1402334 |
| 71.22669698 | 71 | 68.1416954 |
| 71.11558587 | 71 | 68.1460813 |
| 71.4489192  | 71 | 68.1519293 |
| 71.4489192  | 71 | 68.1577772 |
| 70.67114142 | 71 | 68.1636252 |
| 67.62212899 | 71 | 68.1736502 |
| 67.74435121 | 71 | 68.1730059 |
| 67.25546232 | 71 | 68.165696  |
| 67.25546232 | 71 | 68.1554621 |
| 68.22669698 | 71 | 68.1625146 |
| 67.4489192  | 71 | 68.1478947 |
| 66.67114142 | 71 | 68.1493567 |
| 66.67114142 | 71 | 68.1464327 |
| 66.78225253 | 71 | 68.1566666 |
| 66.67114142 | 71 | 68.1683625 |
| 66.4489192  | 71 | 68.1785964 |
| 66.78225253 | 71 | 68.1902923 |
| 67.00447476 | 71 | 68.2078362 |
| 67.11558587 | 71 | 68.2195321 |
| 67.67114142 | 71 | 68.2414619 |
| 67.67114142 | 69 | 68.2677777 |

|             |               |
|-------------|---------------|
| 68.33179666 | 69 68.2926315 |
| 68.67114142 | 69 68.3277192 |
| 68.78225253 | 69 68.3642689 |
| 69.00447476 | 69 68.4066666 |
| 68.4489192  | 69 68.4549122 |
| 68.4489192  | 69 68.5104678 |
| 68.4489192  | 69 68.5630994 |
| 68.00447476 | 69 68.612807  |
| 67.4489192  | 69 68.6522806 |
| 67.33780809 | 69 68.6815204 |
| 67.78225253 | 69 68.7019882 |
| 67.78225253 | 69 68.729766  |
| 67.78225253 | 69 68.7458479 |
| 68.11558587 | 69 68.7663157 |
| 68.11558587 | 69 68.7897075 |
| 68.00447476 | 69 68.8130994 |
| 67.89336364 | 69 68.8362589 |
| 68.00447476 | 69 68.8482267 |
| 68.33780809 | 69 68.8247918 |
| 68.22669698 | 69 68.8080674 |
| 68.33780809 | 69 68.8066054 |
| 68.67114142 | 69 68.8051434 |
| 68.78225253 | 69 68.8168393 |
| 69.00447476 | 69 68.8657298 |
| 69.33780809 | 69 68.8867768 |
| 69.22669698 | 69 68.922948  |
| 69.56003031 | 69 68.9518093 |
| 70.00447476 | 69 68.9488853 |
| 69.78225253 | 69 68.9561952 |
| 69.67114142 | 69 68.9722771 |
| 69.33780809 | 69 68.989821  |
| 69.4489192  | 69 69.0015169 |
| 69.56003031 | 69 68.9970092 |
| 69.78225253 | 69 68.9922356 |
| 69.4489192  | 69 68.9951596 |
| 69.4489192  | 69 68.9849257 |
| 69.33780809 | 69 68.9732298 |
| 68.89336364 | 69 68.9527619 |
| 69.33780809 | 69 68.9322941 |
| 69.33780809 | 69 68.8987475 |
| 69.78225253 | 69 68.8607358 |
| 70.56003031 | 69 68.8154141 |
| 70.89336364 | 69 68.7671685 |
| 71.00447476 | 69 68.7233089 |
| 71.00447476 | 69 68.6779872 |

|             |               |
|-------------|---------------|
| 70.4489192  | 69 68.6312036 |
| 70.00447476 | 69 68.5658706 |
| 69.33780809 | 69 68.5046578 |
| 69.4489192  | 69 68.444907  |
| 69.4489192  | 69 68.3884788 |
| 69.78225253 | 69 68.3324494 |
| 69.89336364 | 69 68.2772175 |
| 70.11558587 | 69 68.2175995 |
| 70.11558587 | 63 68.1611714 |
| 70.38723584 | 63 68.1109899 |
| 69.44564681 | 63 68.0602768 |
| 69.84453106 | 63 68.0240507 |
| 71.33780809 | 63 67.9894195 |
| 71.33780809 | 63 67.9610349 |
| 71.56003031 | 63 67.9327833 |
| 71.33780809 | 63 67.9029368 |
| 69.34391988 | 63 67.8700334 |
| 70.00447476 | 63 67.834206  |
| 69.4489192  | 63 67.7971824 |
| 68.00447476 | 63 67.758431  |
| 68.00447476 | 63 67.7168886 |
| 67.89336364 | 63 67.6647135 |
| 68.00447476 | 63 67.6281638 |
| 67.67114142 | 63 67.5945381 |
| 66.32855535 | 63 67.5696843 |
| 66.0861311  | 63 67.5433685 |
| 67.00447476 | 63 67.5159778 |
| 66.22669698 | 63 67.4823521 |
| 66.22669698 | 63 67.4574983 |
| 66.11558587 | 63 67.4311825 |
| 66.11558587 | 63 67.4092527 |
| 65.78225253 | 63 67.3917088 |
| 65.78225253 | 63 67.371241  |
| 65.33780809 | 63 67.3493112 |
| 65.33780809 | 63 67.3317673 |
| 65.11558587 | 63 67.2964109 |
| 65.00447476 | 63 67.2586622 |
| 64.89336364 | 63 67.2178567 |
| 63.03916853 | 69 67.1722664 |
| 62.79674429 | 69 67.1351822 |
| 62.79674429 | 69 67.1019524 |
| 63.49371399 | 69 67.0758996 |
| 63.52401702 | 69 67.0483848 |
| 63.58462308 | 69 67.009307  |
| 63.58462308 | 69 66.9829912 |

|             |               |
|-------------|---------------|
| 63.82704732 | 69 66.9552134 |
| 64.19068368 | 69 66.9230497 |
| 64.03916853 | 69 66.892348  |
| 65.25128975 | 69 66.8566099 |
| 65.7058352  | 69 66.8347231 |
| 66.06947156 | 69 66.8105118 |
| 66.19068368 | 69 66.7710381 |
| 66.4028049  | 69 66.7286405 |
| 66.28159278 | 69 66.6891668 |
| 66.28159278 | 69 66.658465  |
| 66.52401702 | 69 66.6569226 |
| 66.28159278 | 69 66.6423028 |
| 66.4028049  | 69 66.6408408 |
| 66.03916853 | 69 66.6539987 |
| 67.00447476 | 69 66.6656946 |
| 67.11558587 | 69 66.6744665 |
| 67.4489192  | 69 66.6773905 |
| 67.4489192  | 69 66.6832384 |
| 67.47834145 | 69 66.703828  |
| 67.22669698 | 69 66.7261454 |
| 67.56003031 | 69 66.7349173 |
| 67.4489192  | 69 66.7524612 |
| 67.67114142 | 69 66.772929  |
| 67.56003031 | 69 66.7948589 |
| 67.78225253 | 69 66.8182507 |
| 67.67114142 | 69 66.8357945 |
| 68.4489192  | 69 66.8621103 |
| 67.872947   | 69 66.8913501 |
| 68.02446215 | 69 66.9191279 |
| 67.90325003 | 69 66.9425197 |
| 67.53961367 | 69 66.9644495 |
| 67.63052276 | 69 66.9863793 |
| 67.47900761 | 69 67.0312445 |
| 67.35779549 | 69 67.0807614 |
| 67.35779549 | 69 67.1309343 |
| 66.47900761 | 69 67.1683566 |
| 67.78225253 | 69 67.2097661 |
| 67.78225253 | 69 67.2518402 |
| 67.67114142 | 69 67.2868155 |
| 67.78225253 | 69 67.325778  |
| 67.67114142 | 69 67.3659368 |
| 67.78225253 | 69 67.4144687 |
| 68.00447476 | 69 67.4609287 |
| 68.33780809 | 69 67.5028699 |
| 68.11558587 | 69 67.5341784 |



|             |               |
|-------------|---------------|
| 68.56003031 | 69 67.5565821 |
| 69.00447476 | 69 67.5776567 |
| 69.22669698 | 69 67.5886303 |
| 68.89336364 | 69 67.5996039 |
| 69.33780809 | 69 67.6044637 |
| 69.00447476 | 69 67.6139753 |
| 68.89336364 | 69 67.623354  |
| 68.56003031 | 69 67.6404414 |
| 68.22669698 | 69 67.6477513 |
| 68.11558587 | 69 67.6492133 |
| 67.89336364 | 69 67.6462893 |
| 67.78225253 | 69 67.6404414 |
| 67.67114142 | 69 67.6362548 |
| 67.56003031 | 69 67.6347928 |
| 67.78225253 | 69 67.6043069 |
| 67.78225253 | 69 67.573688  |
| 67.89336364 | 69 67.5693021 |
| 67.11558587 | 69 67.5707641 |
| 67.78225253 | 69 67.5693021 |
| 67.56003031 | 69 67.576612  |
| 67.4489192  | 69 67.5649161 |
| 66.89336364 | 69 67.5637228 |
| 66.67114142 | 69 67.5488399 |
| 66.56003031 | 69 67.5326279 |
| 66.4489192  | 69 67.5153527 |
| 66.56003031 | 69 67.4939573 |
| 66.60988639 | 69 67.4774796 |
| 66.33780809 | 69 67.4772166 |
| 66.67114142 | 69 67.4828015 |
| 66.78225253 | 69 67.5043355 |
| 66.24274628 | 69 67.5131074 |
| 66.78820083 | 69 67.5189553 |
| 67.24274628 | 69 67.5262653 |
| 67.72759477 | 69 67.5379612 |
| 68.78225253 | 69 67.5496571 |
| 68.89336364 | 69 67.559891  |
| 68.4489192  | 69 67.5701249 |
| 67.89336364 | 69 67.5745109 |
| 68.00447476 | 69 67.5788969 |
| 67.11558587 | 69 67.5745109 |
| 67.11558587 | 69 67.564277  |
| 66.89336364 | 69 67.5496571 |
| 67.00447476 | 69 67.5204535 |
| 67.11558587 | 69 67.5053713 |
| 67.33780809 | 69 67.4747057 |

|             |               |
|-------------|---------------|
| 67.56003031 | 69 67.4571619 |
| 67.22669698 | 69 67.444004  |
| 67.22669698 | 69 67.4264601 |
| 67.00447476 | 69 67.4089163 |
| 67.16015963 | 63 67.3928344 |
| 67.11558587 | 63 67.3723666 |
| 65.24310023 | 63 67.3518987 |
| 65.12188811 | 63 67.3314309 |
| 67.33780809 | 63 67.3036531 |
| 67.67114142 | 63 67.2773373 |
| 67.67114142 | 63 67.2495595 |
| 68.22669698 | 63 67.2393256 |
| 67.56003031 | 63 67.2159338 |
| 67.78225253 | 63 67.2071094 |
| 66.89336364 | 63 67.2093163 |
| 66.67114142 | 63 67.2108587 |
| 66.22669698 | 63 67.21692   |
| 66.00447476 | 63 67.2224497 |
| 66.22669698 | 63 67.2266502 |
| 67.33780809 | 63 67.230585  |
| 67.78225253 | 63 67.2358574 |
| 68.11558587 | 63 67.2435135 |
| 68.4489192  | 63 67.2479799 |
| 68.22669698 | 63 67.251383  |
| 68.22669698 | 63 67.2563028 |
| 68.67114142 | 63 67.2552417 |
| 68.56003031 | 63 67.2462061 |
| 68.56003031 | 63 67.2311896 |
| 68.78225253 | 63 67.1927267 |
| 68.67114142 | 63 67.1368528 |
| 68.4489192  | 63 67.1003031 |
| 68.22669698 | 63 67.0622914 |
| 68.22669698 | 63 67.0140458 |
| 68.11558587 | 63 66.9760341 |
| 66.67389385 | 63 66.9365605 |
| 68.19155551 | 63 66.9043967 |
| 66.67389385 | 63 66.8795429 |
| 67.56003031 | 63 66.8576131 |
| 67.56003031 | 63 66.8400692 |
| 66.89336364 | 63 66.8181394 |
| 66.78225253 | 63 66.7962096 |
| 66.67114142 | 63 66.7698938 |
| 66.22669698 | 63 66.743578  |
| 66.11558587 | 63 66.7195997 |
| 66.00447476 | 63 66.6962079 |

|             |    |            |
|-------------|----|------------|
| 65.67114142 | 63 | 66.6945301 |
| 65.78225253 | 63 | 66.6915232 |
| 65.78225253 | 63 | 66.6491255 |
| 66.33780809 | 63 | 66.6008799 |
| 66.00447476 | 63 | 66.5526343 |
| 66.88937443 | 63 | 66.5000027 |
| 67.61664716 | 63 | 66.456143  |
| 67.01058655 | 63 | 66.4093594 |
| 67.13179867 | 63 | 66.3665083 |
| 66.98028352 | 63 | 66.3343445 |
| 66.76816231 | 63 | 66.3021808 |
| 66.8590714  | 63 | 66.2700171 |
| 67.01058655 | 63 | 66.2276194 |
| 66.91967746 | 63 | 66.1676779 |
| 67.01058655 | 63 | 66.1048124 |
| 67.04088958 | 63 | 66.0390229 |
| 66.61664716 | 63 | 65.9629995 |
| 66.70755625 | 63 | 65.8884381 |
| 66.5560411  | 63 | 65.8124147 |
| 66.58634413 | 63 | 65.7261574 |
| 65.8590714  | 63 | 65.6413621 |
| 64.64695019 | 63 | 65.5594907 |
| 65.67114142 | 63 | 65.4776194 |
| 65.00447476 | 63 | 65.4089059 |
| 64.33780809 | 63 | 65.3475024 |
| 64.22669698 | 63 | 65.2963328 |
| 64.11558587 | 63 | 65.2480872 |
| 64.4489192  | 63 | 65.2013036 |
| 65.11558587 | 63 | 65.1749516 |
| 65.4489192  | 63 | 65.1344783 |
| 66.00447476 | 63 | 65.1081263 |
| 65.89336364 | 63 | 65.0715766 |
| 65.56003031 | 63 | 65.0408749 |
| 65.22669698 | 63 | 65.023331  |
| 65.00447476 | 63 | 65.0145591 |
| 65.33780809 | 63 | 65.017483  |
| 65.33780809 | 63 | 65.0335649 |
| 65.11558587 | 63 | 65.0511088 |
| 64.89336364 | 63 | 65.0715766 |
| 64.11558587 | 63 | 65.0978924 |
| 64.00447476 | 63 | 65.1154363 |
| 64.00447476 | 63 | 65.1329801 |
| 64.22669698 | 63 | 65.141752  |
| 64.22669698 | 63 | 65.151986  |
| 64.22669698 | 63 | 65.1520385 |

|             |               |
|-------------|---------------|
| 63.63667852 | 63 65.1483695 |
| 64.22669698 | 63 65.1497511 |
| 63.78225253 | 63 65.1480758 |
| 63.56003031 | 63 65.154242  |
| 63.00447476 | 63 65.1588134 |
| 62.78225253 | 63 65.1548786 |
| 63.00447476 | 63 65.1518742 |
| 63.11558587 | 63 65.154452  |
| 62.67114142 | 63 65.1572955 |
| 62.56003031 | 63 65.1670503 |
| 62.4489192  | 63 65.1867732 |
| 62.11558587 | 63 65.2111479 |
| 62.11558587 | 63 65.2404401 |
| 62.33780809 | 63 65.2722576 |
| 62.56003031 | 63 65.3151065 |
| 63.4489192  | 63 65.3753663 |
| 63.78225253 | 63 65.4233678 |
| 64.33780809 | 63 65.4609183 |
| 64.56003031 | 63 65.5079131 |
| 64.56003031 | 63 65.5563698 |
| 64.67114142 | 63 65.6078835 |
| 65.11558587 | 63 65.669287  |
| 64.67114142 | 63 65.7321525 |
| 64.78225253 | 63 65.784911  |
| 65.22669698 | 63 65.8303594 |
| 65.56003031 | 63 65.8838489 |
| 66.11558587 | 63 65.9430401 |
| 66.89336364 | 63 66.007933  |
| 67.4489192  | 63 66.0704867 |
| 67.4489192  | 63 66.1312861 |
| 67.56003031 | 63 66.1894539 |
| 67.67114142 | 63 66.2492299 |
| 67.11558587 | 63 66.3014035 |
| 67.11558587 | 63 66.3611795 |
| 67.00447476 | 63 66.4184701 |
| 66.78225253 | 63 66.4603137 |
| 66.89336364 | 63 66.5094171 |
| 67.33780809 | 63 66.5532574 |
| 67.11558587 | 63 66.5944661 |
| 67.00447476 | 63 66.6434383 |
| 67.4489192  | 63 66.6938575 |
| 67.11558587 | 63 66.7527563 |
| 66.56003031 | 63 66.8145791 |
| 66.78225253 | 63 66.8810802 |
| 67.11558587 | 63 66.9623474 |

|             |               |
|-------------|---------------|
| 67.22669698 | 63 67.0393748 |
| 67.78225253 | 63 67.1202034 |
| 68.11558587 | 63 67.2029326 |
| 68.56003031 | 63 67.2963343 |
| 68.78225253 | 63 67.3990928 |
| 69.00447476 | 63 67.5115003 |
| 69.11558587 | 63 67.6239079 |
| 69.22669698 | 63 67.7333915 |
| 69.31925054 | 63 67.8360037 |
| 67.85831207 | 63 67.933499  |
| 67.90941295 | 63 68.0213451 |
| 67.90941295 | 63 68.1018813 |
| 68.03062507 | 63 68.176862  |
| 69.11558587 | 63 68.2452637 |
| 69.89336364 | 63 68.2977297 |
| 69.45856013 | 63 68.343032  |
| 69.45856013 | 63 68.3941823 |
| 69.95856013 | 63 68.4386074 |
| 70.05856013 | 63 68.4785003 |
| 70.15856013 | 63 68.5061126 |
| 69.75856013 | 63 68.5303622 |
| 69.95856013 | 63 68.5404306 |
| 69.75856013 | 63 68.5392417 |
| 69.65856013 | 63 68.5433159 |
| 68.85856013 | 63 68.559086  |
| 68.65856013 | 63 68.57307   |
| 68.35856013 | 63 68.5824791 |
| 67.18458504 | 63 68.5843603 |
| 67.95856013 | 63 68.5877035 |
| 67.55856013 | 63 68.5926549 |
| 67.35856013 | 63 68.585618  |
| 67.35856013 | 63 68.574049  |
| 68.05856013 | 63 68.5719829 |
| 68.25856013 | 63 68.5726945 |
| 68.25856013 | 63 68.5636108 |
| 68.05856013 | 63 68.5562816 |
| 68.95856013 | 63 68.5523148 |
| 68.85856013 | 63 68.5520031 |
| 69.25856013 | 63 68.5525686 |
| 68.95856013 | 63 68.5529878 |
| 69.65856013 | 63 68.5421498 |
| 70.25856013 | 63 68.5256099 |
| 70.65856013 | 63 68.4992748 |
| 70.65856013 | 63 68.4568578 |
| 70.65856013 | 63 68.4154642 |

|             |    |            |
|-------------|----|------------|
| 70.35856013 | 63 | 68.3673454 |
| 70.85856013 | 63 | 68.3203963 |
| 70.45856013 | 63 | 68.2774924 |
| 70.45856013 | 63 | 68.2577589 |
| 70.25856013 | 63 | 68.2531424 |
| 69.75856013 | 63 | 68.238096  |
| 68.65856013 | 63 | 68.2228803 |
| 68.55856013 | 63 | 68.1947045 |
| 68.55856013 | 63 | 68.1544307 |
| 68.15856013 | 63 | 68.1233868 |
| 68.25856013 | 63 | 68.0940973 |
| 67.65856013 | 63 | 68.0568035 |
| 67.95856013 | 63 | 68.0170973 |
| 67.65856013 | 63 | 67.9863824 |
| 67.35856013 | 63 | 67.9598341 |
| 67.75856013 | 63 | 67.9359174 |
| 68.75856013 | 63 | 67.910356  |
| 68.7339237  | 63 | 67.882163  |
| 67.83067491 | 63 | 67.8676761 |
| 67.25856013 | 63 | 67.8543954 |
| 67.25856013 | 63 | 67.8382638 |
| 67.15856013 | 63 | 67.8404301 |
| 66.35856013 | 63 | 67.8366889 |
| 66.45856013 | 63 | 67.8415003 |
| 66.95856013 | 63 | 67.8476274 |
| 67.05856013 | 63 | 67.845202  |
| 66.75856013 | 63 | 67.8297283 |
| 66.55856013 | 63 | 67.8130484 |
| 66.25856013 | 63 | 67.7949431 |
| 66.75856013 | 71 | 67.7686274 |
| 67.15856013 | 71 | 67.7265221 |
| 67.25856013 | 71 | 67.6923116 |
| 66.95856013 | 71 | 67.6594168 |
| 66.85856013 | 71 | 67.6370484 |
| 66.55856013 | 71 | 67.6050997 |
| 65.55856013 | 71 | 67.5725648 |
| 65.85856013 | 71 | 67.5383543 |
| 65.45856013 | 71 | 67.5054595 |
| 65.65856013 | 71 | 67.4765121 |
| 66.05856013 | 71 | 67.4541437 |
| 66.35856013 | 71 | 67.4265121 |
| 67.55856013 | 71 | 67.4120385 |
| 66.76589195 | 71 | 67.3949332 |
| 66.87422528 | 71 | 67.3804595 |
| 66.97422528 | 71 | 67.3765121 |

|             |    |            |
|-------------|----|------------|
| 66.83255862 | 63 | 67.382483  |
| 67.09922528 | 63 | 67.3916935 |
| 67.23255862 | 63 | 67.3956409 |
| 67.12422528 | 63 | 67.3982724 |
| 67.04089195 | 63 | 67.3918176 |
| 67.82422528 | 63 | 67.394683  |
| 67.74089195 | 63 | 67.4051142 |
| 68.14089195 | 63 | 67.4204796 |
| 67.81589195 | 63 | 67.4426432 |
| 67.51589195 | 63 | 67.4649165 |
| 67.75755862 | 63 | 67.4820218 |
| 67.64922528 | 63 | 67.5020828 |
| 67.13255862 | 63 | 67.5195549 |
| 67.34922528 | 63 | 67.5353444 |
| 67.67422528 | 63 | 67.5366602 |
| 67.92422528 | 63 | 67.5248181 |
| 67.82422528 | 63 | 67.5195549 |
| 67.17422528 | 63 | 67.5103444 |
| 66.88255862 | 63 | 67.4958707 |
| 66.99089195 | 63 | 67.4800813 |
| 66.88255862 | 63 | 67.4682392 |
| 66.05856013 | 63 | 67.4603444 |
| 65.75856013 | 63 | 67.4550813 |
| 66.25856013 | 63 | 67.4419234 |
| 66.75856013 | 63 | 67.4274497 |
| 67.25856013 | 63 | 67.412976  |
| 67.23045843 | 63 | 67.4037655 |
| 67.78590649 | 63 | 67.3998181 |
| 68.05856013 | 63 | 67.4116602 |
| 68.15856013 | 69 | 67.4327128 |
| 68.45856013 | 69 | 67.4445549 |
| 68.65856013 | 69 | 67.4642918 |
| 68.75856013 | 71 | 67.4778725 |
| 69.35856013 | 71 | 67.4861901 |
| 69.15856013 | 71 | 67.4980165 |
| 69.15856013 | 71 | 67.4969042 |
| 69.45856013 | 71 | 67.5072087 |
| 69.11234198 | 71 | 67.5146623 |
| 69.25856013 | 71 | 67.5268307 |
| 68.85856013 | 71 | 67.5440431 |
| 68.35856013 | 71 | 67.5544572 |
| 67.7679961  | 71 | 67.5574151 |
| 67.87632943 | 71 | 67.5589477 |
| 68.75132943 | 71 | 67.5636507 |
| 68.82632943 | 71 | 67.5397447 |

|             |               |
|-------------|---------------|
| 69.0429961  | 71 67.5183605 |
| 69.45132943 | 71 67.4860114 |
| 70.05856013 | 71 67.4554168 |
| 70.25856013 | 71 67.4330458 |
| 69.15856013 | 71 67.4032186 |
| 68.45856013 | 71 67.3762424 |
| 67.35856013 | 71 67.3546389 |
| 66.25856013 | 71 67.331939  |
| 65.95856013 | 71 67.3124189 |
| 65.75856013 | 71 67.2910347 |
| 65.85856013 | 71 67.2681155 |
| 65.85856013 | 71 67.25342   |
| 65.85856013 | 71 67.2514437 |
| 65.95856013 | 71 67.2494675 |
| 65.85856013 | 71 67.2574693 |
| 65.75856013 | 71 67.279164  |
| 66.05856013 | 71 67.3090825 |
| 66.15856013 | 71 67.3320931 |
| 66.25856013 | 71 67.3464414 |
| 66.55856013 | 71 67.3542107 |
| 67.45856013 | 71 67.3688191 |
| 67.15856013 | 69 67.3746935 |
| 66.75856013 | 69 67.3784059 |
| 66.95856013 | 69 67.379377  |
| 66.69069668 | 69 67.3760717 |
| 66.69069668 | 69 67.3668612 |
| 67.25736334 | 69 67.3484402 |
| 67.47403001 | 69 67.3168612 |
| 67.54903001 | 69 67.2852823 |
| 67.44069668 | 69 67.2550191 |
| 67.89903001 | 69 67.2234402 |
| 68.14069668 | 69 67.1990483 |
| 67.89069668 | 69 67.1753641 |
| 67.45736334 | 69 67.1622062 |
| 67.24069668 | 69 67.1503641 |
| 67.3983255  | 69 67.1449768 |
| 66.00736334 | 69 67.1407956 |
| 66.11569668 | 69 67.1343118 |
| 65.68236334 | 69 67.1281569 |
| 65.49069668 | 69 67.1152038 |
| 65.81569668 | 69 67.0929305 |
| 65.49069668 | 69 67.0639832 |
| 65.59903001 | 69 67.0189016 |
| 65.49069668 | 69 67.0162701 |
| 65.62403001 | 69 67.0056535 |



|             |               |
|-------------|---------------|
| 66.19069668 | 69 67.0079755 |
| 66.29903001 | 69 67.0189598 |
| 66.08236334 | 69 67.022488  |
| 66.05736334 | 69 67.0257969 |
| 66.73236334 | 69 67.0292154 |
| 66.84069668 | 69 67.0351559 |
| 67.49069668 | 69 67.0421928 |
| 67.70736334 | 69 67.0486444 |
| 68.03236334 | 69 67.0480835 |
| 68.00736334 | 69 67.0511731 |
| 67.84903001 | 69 67.0510828 |
| 67.84903001 | 69 67.0454005 |
| 68.34069668 | 69 67.0441041 |
| 68.23236334 | 69 67.0392989 |
| 68.34069668 | 69 67.0379831 |
| 68.23236334 | 69 67.0498252 |
| 68.20736334 | 69 67.0695621 |
| 67.95856013 | 69 67.0879831 |
| 67.35856013 | 69 67.1112445 |
| 66.95856013 | 69 67.1331901 |
| 66.75856013 | 69 67.1489953 |
| 66.85856013 | 69 67.1527391 |
| 67.05856013 | 69 67.1410224 |
| 67.25856013 | 69 67.1307311 |
| 67.45856013 | 69 67.1130934 |
| 67.85856013 | 69 67.0856968 |
| 67.45856013 | 69 67.0694845 |
| 67.35856013 | 69 67.0510792 |
| 67.55856013 | 69 67.02763   |
| 68.25856013 | 69 67.0034226 |
| 68.35856013 | 69 66.9988331 |
| 68.05856013 | 69 67.0020286 |
| 67.75856013 | 69 67.0122418 |
| 67.85856013 | 69 67.0262926 |
| 66.83236334 | 69 67.0281724 |
| 68.95856013 | 69 67.0330127 |
| 67.65170142 | 69 67.0377433 |
| 67.53503475 | 63 67.0425837 |
| 67.09336809 | 63 67.0443538 |
| 66.22670142 | 63 67.0426152 |
| 66.01003475 | 63 67.0368195 |
| 66.11836809 | 63 67.0351905 |
| 66.31003475 | 63 67.0338905 |
| 66.39336809 | 63 67.0250246 |
| 66.44887841 | 63 67.0094702 |

|             |    |            |
|-------------|----|------------|
| 65.81593195 | 63 | 66.9814158 |
| 65.99336809 | 63 | 66.9491947 |
| 66.05170142 | 63 | 66.9074341 |
| 65.72670142 | 63 | 66.8712656 |
| 66.16003475 | 63 | 66.8411279 |
| 66.19336809 | 63 | 66.8215164 |
| 67.35856013 | 63 | 66.7941199 |
| 68.05856013 | 63 | 66.7655172 |
| 68.25856013 | 63 | 66.7354891 |
| 68.35856013 | 63 | 66.7016233 |
| 68.45856013 | 63 | 66.6615075 |
| 68.35856013 | 63 | 66.620718  |
| 68.45856013 | 63 | 66.5865075 |
| 67.75856013 | 63 | 66.5615075 |
| 66.65856013 | 63 | 66.5496654 |
| 66.65856013 | 63 | 66.5509811 |
| 66.55856013 | 63 | 66.5495965 |
| 66.05856013 | 63 | 66.5465249 |
| 66.65856013 | 63 | 66.533367  |
| 66.05856013 | 63 | 66.508367  |
| 65.45856013 | 63 | 66.483367  |
| 65.55856013 | 63 | 66.4557355 |
| 65.65856013 | 63 | 66.4241565 |
| 66.35856013 | 63 | 66.3846828 |
| 66.45856013 | 63 | 66.3373144 |
| 66.55856013 | 63 | 66.2912618 |
| 65.95856013 | 63 | 66.2386302 |
| 65.85856013 | 63 | 66.1846828 |
| 65.95856013 | 63 | 66.1442381 |
| 65.85856013 | 63 | 66.0771328 |
| 65.75856013 | 63 | 66.0351178 |
| 66.05856013 | 63 | 66.0012168 |
| 65.85856013 | 63 | 65.9757588 |
| 65.95856013 | 63 | 65.9682833 |
| 65.95856013 | 63 | 65.9597112 |
| 66.05856013 | 63 | 65.9470822 |
| 65.65856013 | 63 | 65.9279838 |
| 65.35856013 | 63 | 65.9064732 |
| 65.25856013 | 63 | 65.8802848 |
| 64.85856013 | 63 | 65.8545299 |
| 65.25856013 | 63 | 65.8264403 |
| 65.55856013 | 63 | 65.7962674 |
| 66.35856013 | 63 | 65.7703708 |
| 66.25856013 | 63 | 65.7387725 |
| 66.05856013 | 63 | 65.7106829 |

|             |               |
|-------------|---------------|
| 66.05856013 | 63 65.6672618 |
| 65.65856013 | 63 65.6106829 |
| 65.15856013 | 63 65.5501566 |
| 64.85856013 | 63 65.4843671 |
| 64.75856013 | 63 65.4185776 |
| 65.05856013 | 63 65.3593671 |
| 65.85856013 | 63 65.3014724 |
| 66.95856013 | 63 65.2554197 |
| 66.95332989 | 63 65.2304197 |
| 67.02511936 | 63 65.2080513 |
| 66.45856013 | 63 65.1896303 |
| 65.95856013 | 63 65.1935776 |
| 65.55856013 | 63 65.2041039 |
| 65.25856013 | 63 65.2291039 |
| 65.15856013 | 63 65.2554197 |
| 65.25856013 | 63 65.2636277 |
| 64.75856013 | 63 65.2690944 |
| 64.55856013 | 63 65.2628286 |
| 63.75856013 | 63 65.2523962 |
| 63.75856013 | 63 65.2285958 |
| 63.75856013 | 63 65.2124709 |
| 63.85856013 | 63 65.1976617 |
| 64.45856013 | 63 65.1894315 |
| 64.95856013 | 63 65.1952364 |
| 65.15856013 | 63 65.2049886 |
| 65.65856013 | 63 65.2107935 |
| 65.35856013 | 63 65.2165984 |
| 65.15856013 | 63 65.2226225 |
| 64.85856013 | 63 65.214173  |
| 64.75856013 | 63 65.2033112 |
| 64.45856013 | 63 65.1966161 |
| 63.85856013 | 63 65.1978157 |
| 63.85856013 | 63 65.2007697 |
| 63.75856013 | 63 65.2140307 |
| 63.75856013 | 63 65.2294847 |
| 63.75856013 | 63 65.2394562 |
| 64.05856013 | 63 65.256226  |
| 64.05856013 | 63 65.2793555 |
| 63.75856013 | 63 65.3156428 |
| 63.65856013 | 63 65.3457898 |
| 63.35856013 | 63 65.3934806 |
| 63.45856013 | 63 65.4451188 |
| 63.85856013 | 63 65.4965377 |
| 64.05856013 | 63 65.5457636 |
| 64.25856013 | 63 65.5772264 |

|             |    |            |
|-------------|----|------------|
| 64.75856013 | 63 | 65.5950927 |
| 64.95856013 | 63 | 65.6002397 |
| 65.15856013 | 63 | 65.606552  |
| 66.35856013 | 63 | 65.6117003 |
| 67.45856013 | 63 | 65.6280315 |
| 67.95856013 | 63 | 65.6542311 |
| 67.45856013 | 71 | 65.6780185 |
| 66.18236334 | 71 | 65.6972005 |
| 66.07403001 | 71 | 65.710023  |
| 65.88236334 | 71 | 65.7205585 |
| 65.66569668 | 71 | 65.7344931 |
| 64.74973047 | 63 | 65.7461252 |
| 64.7330638  | 63 | 65.7633493 |
| 64.7330638  | 63 | 65.7819989 |
| 65.3330638  | 63 | 65.7985651 |
| 66.29973047 | 63 | 65.8092103 |
| 66.49973047 | 63 | 65.8190879 |
| 66.49973047 | 63 | 65.8252375 |
| 66.29973047 | 63 | 65.8259046 |
| 66.41639714 | 63 | 65.8157164 |
| 65.31639714 | 63 | 65.8157164 |
| 65.2330638  | 63 | 65.8117691 |
| 65.14973047 | 63 | 65.8117691 |
| 65.44973047 | 63 | 65.818348  |
| 65.4830638  | 63 | 65.8275585 |
| 65.86639714 | 63 | 65.8486112 |
| 66.4330638  | 63 | 65.8709796 |
| 66.31639714 | 63 | 65.8972954 |
| 67.6330638  | 63 | 65.9262428 |
| 68.01639714 | 63 | 65.9617691 |
| 68.81639714 | 63 | 65.9959796 |
| 68.34973047 | 63 | 66.0275585 |
| 69.2830638  | 63 | 66.0670322 |
| 69.0830638  | 63 | 66.1104533 |
| 68.76639714 | 63 | 66.1578217 |
| 68.49973047 | 63 | 66.2051745 |
| 67.44973047 | 63 | 66.2459639 |
| 67.21639714 | 63 | 66.2762271 |
| 67.34973047 | 63 | 66.3025429 |
| 67.4330638  | 63 | 66.3209639 |
| 67.41639714 | 63 | 66.3380692 |
| 67.69973047 | 63 | 66.3538587 |
| 67.94973047 | 63 | 66.3499113 |
| 67.36639714 | 63 | 66.3301745 |
| 66.71639714 | 63 | 66.3025429 |

|             |    |            |
|-------------|----|------------|
| 66.1330638  | 63 | 66.2788587 |
| 66.05926059 | 63 | 66.2614402 |
| 65.81759392 | 63 | 66.2520261 |
| 65.44259392 | 63 | 66.2411866 |
| 65.06759392 | 63 | 66.2345138 |
| 65.17592726 | 63 | 66.2372615 |
| 65.01759392 | 63 | 66.2362812 |
| 64.66759392 | 63 | 66.2353009 |
| 65.20926059 | 63 | 66.2264259 |
| 65.42592726 | 63 | 66.1969368 |
| 65.20926059 | 63 | 66.1700793 |
| 64.88426059 | 63 | 66.1498007 |
| 65.35856013 | 63 | 66.1321537 |
| 64.85856013 | 63 | 66.1142875 |
| 64.85856013 | 63 | 66.116158  |
| 65.25856013 | 63 | 66.1283356 |
| 65.15856013 | 71 | 66.1402939 |
| 65.45856013 | 71 | 66.1456732 |
| 65.55856013 | 71 | 66.150614  |
| 65.75856013 | 71 | 66.1505109 |
| 65.95856013 | 71 | 66.1429516 |
| 66.45856013 | 63 | 66.139559  |
| 66.65856013 | 63 | 66.1214734 |
| 66.45856013 | 63 | 66.1049229 |
| 66.75856013 | 63 | 66.0804777 |
| 66.95856013 | 63 | 66.0661202 |
| 66.95856013 | 63 | 66.0368504 |
| 67.05736971 | 63 | 66.0154754 |
| 66.95856013 | 63 | 65.9995828 |
| 66.35856013 | 63 | 65.9819358 |
| 66.25856013 | 63 | 65.9873151 |
| 66.15856013 | 63 | 65.9839226 |
| 66.25856013 | 63 | 65.9840387 |
| 66.35856013 | 63 | 65.9738479 |
| 66.05856013 | 63 | 65.9625606 |
| 65.95856013 | 63 | 65.9409662 |
| 65.85856013 | 63 | 65.9160824 |
| 65.65856013 | 63 | 65.8949266 |
| 64.85856013 | 63 | 65.879692  |
| 65.35856013 | 63 | 65.8695011 |
| 65.05856013 | 63 | 65.862913  |
| 65.15856013 | 63 | 65.8608204 |
| 64.95856013 | 63 | 65.8623463 |
| 64.65856013 | 63 | 65.869693  |
| 64.65856013 | 63 | 65.8825576 |

|             |               |
|-------------|---------------|
| 64.65856013 | 63 65.8936229 |
| 64.05856013 | 63 65.9092936 |
| 64.45856013 | 63 65.9152054 |
| 64.95856013 | 63 65.9222137 |
| 64.95856013 | 63 65.9268098 |
| 65.05856013 | 63 65.9369979 |
| 65.45856013 | 63 65.9409453 |
| 66.15856013 | 63 65.9501558 |
| 66.05856013 | 63 65.9685769 |
| 65.85856013 | 63 66.0014716 |
| 65.85856013 | 63 66.0383137 |
| 65.85856013 | 63 66.0725242 |
| 65.85856013 | 63 66.1106821 |
| 66.05856013 | 63 66.1527874 |
| 66.25856013 | 63 66.1962084 |
| 66.75856013 | 63 66.2330505 |
| 66.95856013 | 63 66.2685769 |
| 67.25856013 | 63 66.3080505 |
| 67.05856013 | 63 66.3435769 |
| 67.45856013 | 63 66.3817348 |
| 67.55856013 | 63 66.4225242 |
| 67.15856013 | 63 66.4620136 |
| 67.85856013 | 63 66.4949083 |
| 66.95856013 | 63 66.5304346 |
| 67.35856013 | 63 66.5712241 |
| 66.65856013 | 63 66.6120136 |
| 66.55856013 | 63 66.6501715 |
| 66.05856013 | 63 66.6909609 |
| 66.05856013 | 63 66.7396452 |
| 65.75856013 | 63 66.7883294 |
| 65.55856013 | 63 66.8330662 |
| 65.35856013 | 63 66.8594963 |
| 65.55856013 | 63 66.9068647 |
| 65.65856013 | 63 66.9437068 |
| 65.55856013 | 63 66.9700226 |
| 65.62594872 | 63 66.9818647 |
| 66.15363318 | 63 66.9884436 |
| 65.85856013 | 63 66.99897   |
| 65.85856013 | 63 67.0094963 |
| 65.65856013 | 63 67.0252857 |
| 65.95856013 | 63 67.0542331 |
| 65.55856013 | 63 67.0779173 |
| 65.65856013 | 63 67.09897   |
| 65.65856013 | 63 67.12397   |
| 65.55856013 | 63 67.1476542 |

|             |               |
|-------------|---------------|
| 66.25856013 | 63 67.167391  |
| 67.75856013 | 63 67.1713384 |
| 67.95856013 | 63 67.1766015 |
| 68.05856013 | 63 67.1937068 |
| 68.45856013 | 63 67.2121279 |
| 68.95856013 | 63 67.2331805 |
| 69.25856013 | 63 67.2594963 |
| 69.25856013 | 63 67.284173  |
| 69.35856013 | 63 67.3131433 |
| 69.45856013 | 63 67.3315644 |
| 69.45856013 | 63 67.3394591 |
| 69.85856013 | 63 67.3486696 |
| 70.05856013 | 63 67.3552486 |
| 70.05856013 | 63 67.3605117 |
| 69.45856013 | 63 67.3469298 |
| 69.05856013 | 63 67.3371855 |
| 69.35856013 | 63 67.3139544 |
| 69.25856013 | 63 67.3039908 |
| 69.15856013 | 63 67.3000435 |
| 69.45856013 | 63 67.2805404 |
| 69.75856013 | 63 67.2818562 |
| 69.65856013 | 63 67.2702479 |
| 69.25856013 | 63 67.2702479 |
| 67.66724512 | 63 67.2768269 |
| 68.45856013 | 63 67.2873532 |
| 68.15856013 | 63 67.2978795 |
| 67.05856013 | 63 67.3097216 |
| 66.05856013 | 63 67.3215637 |
| 65.45856013 | 63 67.3334058 |
| 65.45856013 | 63 67.3469928 |
| 65.45856013 | 63 67.3536366 |
| 65.85856013 | 63 67.3641629 |
| 66.25856013 | 63 67.3746892 |
| 66.25856013 | 63 67.3904787 |
| 66.55856013 | 63 67.401005  |
| 66.85856013 | 63 67.4167945 |
| 66.85856013 | 63 67.4299524 |
| 66.95856013 | 63 67.4404787 |
| 66.45856013 | 63 67.4496892 |
| 66.45856013 | 63 67.4470576 |
| 67.15856013 | 63 67.4207418 |
| 67.25856013 | 63 67.3983734 |
| 67.45856013 | 63 67.3733734 |
| 67.85856013 | 63 67.3444261 |
| 67.93399147 | 63 67.3088997 |

|             |               |
|-------------|---------------|
| 68.46030454 | 63 67.2707418 |
| 68.15856013 | 63 67.2365313 |
| 67.55856013 | 63 67.1983734 |
| 67.95856013 | 63 67.1602155 |
| 67.55856013 | 63 67.1207418 |
| 67.85856013 | 63 67.0825839 |
| 66.52632943 | 63 67.0431103 |
| 66.4179961  | 63 67.0128471 |
| 66.0929961  | 63 67.001005  |
| 66.20132943 | 63 66.9944261 |
| 67.05856013 | 63 66.9852155 |
| 65.17632943 | 63 66.9812682 |
| 66.65856013 | 63 66.9812682 |
| 65.17632943 | 63 66.9746892 |
| 66.05856013 | 63 66.9654787 |
| 66.25856013 | 63 66.9602155 |
| 66.35856013 | 63 66.9602155 |
| 66.15856013 | 63 66.97688   |
| 66.45856013 | 63 66.995301  |
| 66.55856013 | 63 67.0189852 |
| 66.45856013 | 63 67.0545115 |
| 66.65856013 | 63 67.1031957 |
| 66.65856013 | 63 67.1558273 |
| 66.65856013 | 63 67.2058273 |
| 66.65856013 | 63 67.2650379 |
| 66.85856013 | 63 67.3176694 |
| 66.75856013 | 63 67.3637221 |
| 66.75856013 | 63 67.4097747 |
| 66.65856013 | 63 67.45188   |
| 66.45856013 | 63 67.4900379 |
| 66.25856013 | 63 67.5308273 |
| 66.05856013 | 63 67.5742484 |
| 65.75856013 | 63 67.62688   |
| 66.25856013 | 63 67.6729326 |
| 66.15856013 | 63 67.6976181 |
| 66.25856013 | 63 67.7221941 |
| 66.25856013 | 63 67.7473182 |
| 66.35856013 | 63 67.7771573 |
| 66.65856013 | 63 67.7972272 |
| 66.45856013 | 63 67.8164245 |
| 66.55856013 | 63 67.8297654 |
| 66.45856013 | 63 67.8477845 |
| 66.95856013 | 69 67.8716517 |
| 67.05856013 | 69 67.8973509 |
| 67.75856013 | 69 67.917458  |



|             |               |
|-------------|---------------|
| 68.55856013 | 69 67.9496669 |
| 68.55856013 | 69 67.9887288 |
| 68.65856013 | 69 68.041113  |
| 68.95856013 | 69 68.0938811 |
| 69.15856013 | 69 68.1424421 |
| 68.95856013 | 69 68.2175786 |
| 69.05856013 | 69 68.2786397 |
| 69.25856013 | 69 68.361013  |
| 69.25856013 | 69 68.4388503 |
| 68.93374185 | 69 68.5139124 |
| 69.85856013 | 69 68.5913136 |
| 69.95856013 | 69 68.6713463 |
| 69.75856013 | 69 68.7583967 |
| 69.75856013 | 69 68.8504879 |
| 69.45856013 | 69 68.9420447 |
| 69.25856013 | 60 69.0307642 |
| 69.95856013 | 69.1213341    |
| 69.85856013 | 69.200802     |
| 69.75856013 | 69.2728686    |
| 69.75856013 | 69.3437428    |
| 69.75856013 | 69.4175775    |
| 69.75856013 | 69.4969631    |
| 69.95856013 | 69.5739639    |
| 70.25856013 | 69.6480453    |
| 70.45856013 | 69.7266086    |
| 69.95856013 | 69.804165     |
| 69.03466277 | 69.8911576    |
| 69.12632943 | 69.967665     |
| 69.3679961  | 70.0489833    |
| 70.12632943 | 70.136387     |

Person 4      Person 10      Person 14      Person 6      Person 16

Time

16:01:22  
16:01:23  
16:01:24  
16:01:25  
16:01:26  
16:01:27  
16:01:28  
16:01:29  
16:01:30  
16:01:31  
16:01:32  
16:01:33  
16:01:34  
16:01:35  
16:01:36  
16:01:37  
16:01:38  
16:01:39  
16:01:40  
16:01:41  
16:01:42  
16:01:43  
16:01:44  
16:01:45  
16:01:46  
16:01:47  
16:01:48  
16:01:49  
16:01:50  
16:01:51  
16:01:52  
16:01:53  
16:01:54  
16:01:55  
16:01:56  
16:01:57  
16:01:58  
16:01:59  
16:02:00  
16:02:01  
16:02:02  
16:02:03

16:02:04  
16:02:05  
16:02:06  
16:02:07  
16:02:08  
16:02:09  
16:02:10  
16:02:11  
16:02:12  
16:02:13  
16:02:14  
16:02:15  
16:02:16  
16:02:17  
16:02:18  
16:02:19  
16:02:20  
16:02:21  
16:02:22  
16:02:23  
16:02:24  
16:02:25  
16:02:26  
16:02:27  
16:02:28  
16:02:29  
16:02:30  
16:02:31  
16:02:32  
16:02:33  
16:02:34  
16:02:35  
16:02:36  
16:02:37  
16:02:38  
16:02:39  
16:02:40  
16:02:41  
16:02:42  
16:02:43  
16:02:44  
16:02:45  
16:02:46  
16:02:47  
16:02:48

16:02:49  
16:02:50  
16:02:51  
16:02:52  
16:02:53  
16:02:54  
16:02:55  
16:02:56  
16:02:57  
16:02:58  
16:02:59  
16:03:00  
16:03:01  
16:03:02  
16:03:03  
16:03:04  
16:03:05  
16:03:06  
16:03:07  
16:03:08  
16:03:09  
16:03:10  
16:03:11  
16:03:12  
16:03:13  
16:03:14  
16:03:15  
16:03:16  
16:03:17  
16:03:18  
16:03:19  
16:03:20  
16:03:21  
16:03:22  
16:03:23  
16:03:24  
16:03:25  
16:03:26  
16:03:27  
16:03:28  
16:03:29  
16:03:30  
16:03:31  
16:03:32  
16:03:33

|          |            |
|----------|------------|
| 16:03:34 |            |
| 16:03:35 |            |
| 16:03:36 |            |
| 16:03:37 |            |
| 16:03:38 |            |
| 16:03:39 |            |
| 16:03:40 |            |
| 16:03:41 |            |
| 16:03:42 |            |
| 16:03:43 |            |
| 16:03:44 | 84.3497718 |
| 16:03:45 | 80.3497718 |
| 16:03:46 | 80.3497718 |
| 16:03:47 | 79.3497718 |
| 16:03:48 | 78.3497718 |
| 16:03:49 | 78.3497718 |
| 16:03:50 | 78.3497718 |
| 16:03:51 | 78.3497718 |
| 16:03:52 | 77.3497718 |
| 16:03:53 | 77.3497718 |
| 16:03:54 | 76.3497718 |
| 16:03:55 | 75.3497718 |
| 16:03:56 | 75.3497718 |
| 16:03:57 | 75.3497718 |
| 16:03:58 | 75.3497718 |
| 16:03:59 | 76.3497718 |
| 16:04:00 | 77.3497718 |
| 16:04:01 | 78.3497718 |
| 16:04:02 | 78.3497718 |
| 16:04:03 | 78.3497718 |
| 16:04:04 | 78.3497718 |
| 16:04:05 | 78.3497718 |
| 16:04:06 | 78.3497718 |
| 16:04:07 | 77.3497718 |
| 16:04:08 | 78.3497718 |
| 16:04:09 | 78.3497718 |
| 16:04:10 | 80.3497718 |
| 16:04:11 | 82.3497718 |
| 16:04:12 | 82.3497718 |
| 16:04:13 | 82.3497718 |
| 16:04:14 | 82.3497718 |
| 16:04:15 | 82.3497718 |
| 16:04:16 | 81.3497718 |
| 16:04:17 | 81.3497718 |
| 16:04:18 | 81.3497718 |

|          |            |            |
|----------|------------|------------|
| 16:04:19 |            | 81.3497718 |
| 16:04:20 |            | 80.3497718 |
| 16:04:21 |            | 79.3497718 |
| 16:04:22 |            | 78.3497718 |
| 16:04:23 |            | 78.3497718 |
| 16:04:24 |            | 78.3497718 |
| 16:04:25 |            | 78.3497718 |
| 16:04:26 |            | 77.3497718 |
| 16:04:27 |            | 77.3497718 |
| 16:04:28 |            | 77.3497718 |
| 16:04:29 |            | 76.3497718 |
| 16:04:30 |            | 76.3497718 |
| 16:04:31 |            | 72.3497718 |
| 16:04:32 |            | 73.3497718 |
| 16:04:33 |            | 73.3497718 |
| 16:04:34 |            | 73.3497718 |
| 16:04:35 |            | 73.3497718 |
| 16:04:36 |            | 75.3497718 |
| 16:04:37 |            | 76.3497718 |
| 16:04:38 |            | 75.3497718 |
| 16:04:39 |            | 75.3497718 |
| 16:04:40 |            | 75.3497718 |
| 16:04:41 |            | 75.3497718 |
| 16:04:42 | 65.5694799 | 74.3497718 |
| 16:04:43 | 66.5694799 | 73.3497718 |
| 16:04:44 | 64.5694799 | 73.3497718 |
| 16:04:45 | 64.5694799 | 71.3497718 |
| 16:04:46 | 64.5694799 | 71.3497718 |
| 16:04:47 | 64.5694799 | 75.3497718 |
| 16:04:48 | 64.5694799 | 75.3497718 |
| 16:04:49 | 64.5694799 | 77.3497718 |
| 16:04:50 | 64.5694799 | 77.3497718 |
| 16:04:51 | 63.5694799 | 77.3497718 |
| 16:04:52 | 63.5694799 | 78.3497718 |
| 16:04:53 | 65.5694799 | 78.3497718 |
| 16:04:54 | 65.5694799 | 78.3497718 |
| 16:04:55 | 65.5694799 | 78.3497718 |
| 16:04:56 | 66.5694799 | 79.3497718 |
| 16:04:57 | 67.5694799 | 79.3497718 |
| 16:04:58 | 67.5694799 | 79.3497718 |
| 16:04:59 | 67.5694799 | 79.3497718 |
| 16:05:00 | 67.5694799 | 80.3497718 |
| 16:05:01 | 67.5694799 | 79.3497718 |
| 16:05:02 | 67.5694799 | 79.3497718 |
| 16:05:03 | 67.5694799 | 76.3497718 |

|          |            |            |
|----------|------------|------------|
| 16:05:04 | 67.5694799 | 76.3497718 |
| 16:05:05 | 67.5694799 | 76.3497718 |
| 16:05:06 | 68.5694799 | 77.3497718 |
| 16:05:07 | 68.5694799 | 77.3497718 |
| 16:05:08 | 68.5694799 | 77.3497718 |
| 16:05:09 | 68.5694799 | 77.3497718 |
| 16:05:10 | 68.5694799 | 78.3497718 |
| 16:05:11 | 70.5694799 | 78.3497718 |
| 16:05:12 | 70.5694799 | 78.3497718 |
| 16:05:13 | 70.5694799 | 81.3497718 |
| 16:05:14 | 71.5694799 | 82.3497718 |
| 16:05:15 | 71.5694799 | 82.3497718 |
| 16:05:16 | 71.5694799 | 81.3497718 |
| 16:05:17 | 73.5694799 | 81.3497718 |
| 16:05:18 | 74.5694799 | 80.3497718 |
| 16:05:19 | 75.5694799 | 80.3497718 |
| 16:05:20 | 75.5694799 | 79.3497718 |
| 16:05:21 | 74.5694799 | 78.3497718 |
| 16:05:22 | 73.5694799 | 78.3497718 |
| 16:05:23 | 73.5694799 | 78.3497718 |
| 16:05:24 | 72.5694799 | 78.3497718 |
| 16:05:25 | 72.5694799 | 78.3497718 |
| 16:05:26 | 72.5694799 | 77.3497718 |
| 16:05:27 | 72.5694799 | 77.3497718 |
| 16:05:28 | 72.5694799 | 77.3497718 |
| 16:05:29 | 72.5694799 | 77.3497718 |
| 16:05:30 | 72.5694799 | 77.3497718 |
| 16:05:31 | 72.5694799 | 77.3497718 |
| 16:05:32 | 72.5694799 | 78.3497718 |
| 16:05:33 | 72.5694799 | 78.3497718 |
| 16:05:34 | 72.5694799 | 75.3497718 |
| 16:05:35 | 72.5694799 | 75.3497718 |
| 16:05:36 | 68.5694799 | 75.3497718 |
| 16:05:37 | 68.5694799 | 75.3497718 |
| 16:05:38 | 67.5694799 | 75.3497718 |
| 16:05:39 | 67.5694799 | 75.3497718 |
| 16:05:40 | 67.5694799 | 75.3497718 |
| 16:05:41 | 67.5694799 | 75.3497718 |
| 16:05:42 | 67.5694799 | 75.3497718 |
| 16:05:43 | 69.5694799 | 75.3497718 |
| 16:05:44 | 69.5694799 | 75.3497718 |
| 16:05:45 | 69.5694799 | 75.3497718 |
| 16:05:46 | 69.5694799 | 74.3497718 |
| 16:05:47 | 69.5694799 | 74.3497718 |
| 16:05:48 | 64.5694799 | 74.3497718 |

|          |            |            |            |
|----------|------------|------------|------------|
| 16:05:49 |            | 61.5694799 | 74.3497718 |
| 16:05:50 |            | 60.5694799 | 76.3497718 |
| 16:05:51 |            | 60.5694799 | 76.3497718 |
| 16:05:52 |            | 60.5694799 | 76.3497718 |
| 16:05:53 |            | 60.5694799 | 76.3497718 |
| 16:05:54 |            | 60.5694799 | 76.3497718 |
| 16:05:55 |            | 60.5694799 | 76.3497718 |
| 16:05:56 | 75.9599569 | 60.5694799 | 75.3497718 |
| 16:05:57 | 75.9599569 | 60.5694799 | 74.3497718 |
| 16:05:58 | 75.9599569 | 60.5694799 | 74.3497718 |
| 16:05:59 | 74.9599569 | 60.5694799 | 74.3497718 |
| 16:06:00 | 74.9599569 | 64.5694799 | 75.3497718 |
| 16:06:01 | 74.9599569 | 64.5694799 | 77.3497718 |
| 16:06:02 | 74.9599569 | 64.5694799 | 78.3497718 |
| 16:06:03 | 75.9599569 | 64.5694799 | 78.3497718 |
| 16:06:04 | 75.9599569 | 64.5694799 | 78.3497718 |
| 16:06:05 | 75.9599569 | 64.5694799 | 78.3497718 |
| 16:06:06 | 74.9599569 | 65.5694799 | 79.3497718 |
| 16:06:07 | 74.9599569 | 65.5694799 | 79.3497718 |
| 16:06:08 | 75.9599569 | 68.5694799 | 79.3497718 |
| 16:06:09 | 75.9599569 | 69.5694799 | 79.3497718 |
| 16:06:10 | 75.9599569 | 73.5694799 | 79.3497718 |
| 16:06:11 | 75.9599569 | 73.5694799 | 79.3497718 |
| 16:06:12 | 75.9599569 | 73.5694799 | 79.3497718 |
| 16:06:13 | 75.9599569 | 73.5694799 | 79.3497718 |
| 16:06:14 | 75.9599569 | 73.5694799 | 80.3497718 |
| 16:06:15 | 75.9599569 | 72.5694799 | 80.3497718 |
| 16:06:16 | 75.9599569 | 72.5694799 | 80.3497718 |
| 16:06:17 | 75.9599569 | 72.5694799 | 80.3497718 |
| 16:06:18 | 74.9599569 | 72.5694799 | 80.3497718 |
| 16:06:19 | 74.9599569 | 72.5694799 | 80.3497718 |
| 16:06:20 | 75.9599569 | 73.5694799 | 79.3497718 |
| 16:06:21 | 75.9599569 | 75.5694799 | 77.3497718 |
| 16:06:22 | 75.9599569 | 75.5694799 | 78.3497718 |
| 16:06:23 | 73.9599569 | 75.5694799 | 78.3497718 |
| 16:06:24 | 73.9599569 | 77.5694799 | 78.3497718 |
| 16:06:25 | 73.9599569 | 77.5694799 | 78.3497718 |
| 16:06:26 | 73.9599569 | 77.5694799 | 75.3497718 |
| 16:06:27 | 73.9599569 | 77.5694799 | 75.3497718 |
| 16:06:28 | 73.9599569 | 77.5694799 | 75.3497718 |
| 16:06:29 | 73.9599569 | 77.5694799 | 74.3497718 |
| 16:06:30 | 73.9599569 | 74.5694799 | 71.3497718 |
| 16:06:31 | 74.9599569 | 73.5694799 | 70.3497718 |
| 16:06:32 | 74.9599569 | 71.5694799 | 71.3497718 |
| 16:06:33 | 74.9599569 | 70.5694799 | 71.3497718 |



|          |            |            |            |
|----------|------------|------------|------------|
| 16:06:34 | 73.9599569 | 70.5694799 | 71.3497718 |
| 16:06:35 | 73.9599569 | 70.5694799 | 71.3497718 |
| 16:06:36 | 73.9599569 | 70.5694799 | 71.3497718 |
| 16:06:37 | 72.9599569 | 72.5694799 | 71.3497718 |
| 16:06:38 | 72.9599569 | 72.5694799 | 71.3497718 |
| 16:06:39 | 72.9599569 | 71.5694799 | 71.3497718 |
| 16:06:40 | 72.9599569 | 71.5694799 | 71.3497718 |
| 16:06:41 | 71.9599569 | 71.5694799 | 72.3497718 |
| 16:06:42 | 70.9599569 | 71.5694799 | 71.3497718 |
| 16:06:43 | 70.9599569 | 72.5694799 | 71.3497718 |
| 16:06:44 | 69.9599569 | 72.5694799 | 71.3497718 |
| 16:06:45 | 70.9599569 | 72.5694799 | 71.3497718 |
| 16:06:46 | 70.9599569 | 72.5694799 | 71.3497718 |
| 16:06:47 | 70.9599569 | 72.5694799 | 69.3497718 |
| 16:06:48 | 66.9599569 | 72.5694799 | 69.3497718 |
| 16:06:49 | 66.9599569 | 72.5694799 | 69.3497718 |
| 16:06:50 | 67.9599569 | 74.5694799 | 69.3497718 |
| 16:06:51 | 67.9599569 | 74.5694799 | 68.3497718 |
| 16:06:52 | 68.9599569 | 75.5694799 | 68.3497718 |
| 16:06:53 | 70.9599569 | 75.5694799 | 68.3497718 |
| 16:06:54 | 70.9599569 | 76.5694799 | 68.3497718 |
| 16:06:55 | 71.9599569 | 76.5694799 | 67.3497718 |
| 16:06:56 | 72.9599569 | 76.5694799 | 65.3497718 |
| 16:06:57 | 72.9599569 | 77.5694799 | 65.3497718 |
| 16:06:58 | 74.9599569 | 74.5694799 | 66.3497718 |
| 16:06:59 | 74.9599569 | 74.5694799 | 70.3497718 |
| 16:07:00 | 75.9599569 | 72.5694799 | 75.3497718 |
| 16:07:01 | 76.9599569 | 71.5694799 | 76.3497718 |
| 16:07:02 | 76.9599569 | 71.5694799 | 76.3497718 |
| 16:07:03 | 70.3738183 | 71.5694799 | 76.3497718 |
| 16:07:04 | 70.2488183 | 68.5694799 | 76.3497718 |
| 16:07:05 | 70.3738183 | 68.5694799 | 76.3497718 |
| 16:07:06 | 69.8738183 | 68.5694799 | 75.3497718 |
| 16:07:07 | 69.4988183 | 68.5694799 | 75.3497718 |
| 16:07:08 | 74.9599569 | 68.5694799 | 75.3497718 |
| 16:07:09 | 65.9599569 | 68.5694799 | 76.3497718 |
| 16:07:10 | 64.9599569 | 68.5694799 | 76.3497718 |
| 16:07:11 | 64.9599569 | 68.5694799 | 76.3497718 |
| 16:07:12 | 67.9599569 | 68.5694799 | 75.3497718 |
| 16:07:13 | 69.9599569 | 68.5694799 | 75.3497718 |
| 16:07:14 | 70.9599569 | 67.5694799 | 74.3497718 |
| 16:07:15 | 69.9599569 | 67.5694799 | 74.3497718 |
| 16:07:16 | 69.9599569 | 67.5694799 | 74.3497718 |
| 16:07:17 | 69.9599569 | 67.5694799 | 74.3497718 |
| 16:07:18 | 69.9599569 | 67.5694799 | 77.3497718 |

|          |            |            |            |
|----------|------------|------------|------------|
| 16:07:19 | 68.9599569 | 67.5694799 | 77.3497718 |
| 16:07:20 | 68.9599569 | 68.5694799 | 77.3497718 |
| 16:07:21 | 68.9599569 | 68.5694799 | 76.3497718 |
| 16:07:22 | 68.9599569 | 68.5694799 | 76.3497718 |
| 16:07:23 | 72.9599569 | 69.5694799 | 76.3497718 |
| 16:07:24 | 74.9599569 | 70.5694799 | 76.3497718 |
| 16:07:25 | 74.9599569 | 70.5694799 | 76.3497718 |
| 16:07:26 | 74.9599569 | 70.5694799 | 76.3497718 |
| 16:07:27 | 73.9599569 | 70.5694799 | 76.3497718 |
| 16:07:28 | 73.9599569 | 70.5694799 | 76.3497718 |
| 16:07:29 | 73.9599569 | 70.5694799 | 76.3497718 |
| 16:07:30 | 73.9599569 | 70.5694799 | 76.3497718 |
| 16:07:31 | 74.9599569 | 70.5694799 | 76.3497718 |
| 16:07:32 | 74.9599569 | 69.5694799 | 76.3497718 |
| 16:07:33 | 74.9599569 | 69.5694799 | 76.3497718 |
| 16:07:34 | 73.9599569 | 68.5694799 | 77.3497718 |
| 16:07:35 | 73.9599569 | 68.5694799 | 76.3497718 |
| 16:07:36 | 73.9599569 | 70.5694799 | 76.3497718 |
| 16:07:37 | 74.9599569 | 72.5694799 | 77.3497718 |
| 16:07:38 | 75.9599569 | 72.5694799 | 77.3497718 |
| 16:07:39 | 75.9599569 | 72.5694799 | 78.3497718 |
| 16:07:40 | 76.9599569 | 72.5694799 | 78.3497718 |
| 16:07:41 | 76.9599569 | 72.5694799 | 77.3497718 |
| 16:07:42 | 76.9599569 | 72.5694799 | 77.3497718 |
| 16:07:43 | 76.9599569 | 72.5694799 | 76.3497718 |
| 16:07:44 | 76.9599569 | 72.5694799 | 76.3497718 |
| 16:07:45 | 76.9599569 | 72.5694799 | 76.3497718 |
| 16:07:46 | 76.9599569 | 72.5694799 | 76.3497718 |
| 16:07:47 | 76.9599569 | 73.5694799 | 76.3497718 |
| 16:07:48 | 74.9599569 | 73.5694799 | 76.3497718 |
| 16:07:49 | 74.9599569 | 73.5694799 | 77.3497718 |
| 16:07:50 | 74.9599569 | 74.5694799 | 77.3497718 |
| 16:07:51 | 72.9599569 | 74.5694799 | 77.3497718 |
| 16:07:52 | 71.9599569 | 74.5694799 | 77.3497718 |
| 16:07:53 | 70.9599569 | 83.5694799 | 77.3497718 |
| 16:07:54 | 70.9599569 | 83.5694799 | 77.3497718 |
| 16:07:55 | 70.9599569 | 83.5694799 | 77.3497718 |
| 16:07:56 | 69.9599569 | 83.5694799 | 77.3497718 |
| 16:07:57 | 69.9599569 | 83.5694799 | 77.3497718 |
| 16:07:58 | 69.9599569 | 83.5694799 | 78.3497718 |
| 16:07:59 | 71.9599569 | 83.5694799 | 78.3497718 |
| 16:08:00 | 72.9599569 | 83.5694799 | 78.3497718 |
| 16:08:01 | 72.9599569 | 82.5694799 | 78.3497718 |
| 16:08:02 | 72.9599569 | 82.5694799 | 77.3497718 |
| 16:08:03 | 72.9599569 | 83.5694799 | 77.3497718 |

|          |            |            |            |
|----------|------------|------------|------------|
| 16:08:04 | 72.9599569 | 83.5694799 | 77.3497718 |
| 16:08:05 | 72.9599569 | 83.5694799 | 77.3497718 |
| 16:08:06 | 72.9599569 | 83.5694799 | 77.3497718 |
| 16:08:07 | 72.9599569 | 84.5694799 | 77.3497718 |
| 16:08:08 | 73.9599569 | 72.1238183 | 78.3497718 |
| 16:08:09 | 73.9599569 | 72.1238183 | 78.3497718 |
| 16:08:10 | 73.9599569 | 72.1238183 | 78.3497718 |
| 16:08:11 | 73.9599569 | 72.1238183 | 78.3497718 |
| 16:08:12 | 73.9599569 | 83.5694799 | 77.3497718 |
| 16:08:13 | 73.9599569 | 83.5694799 | 76.3497718 |
| 16:08:14 | 76.9599569 | 83.5694799 | 76.3497718 |
| 16:08:15 | 79.9599569 | 83.5694799 | 76.3497718 |
| 16:08:16 | 79.9599569 | 78.5694799 | 76.3497718 |
| 16:08:17 | 80.9599569 | 78.5694799 | 76.3497718 |
| 16:08:18 | 81.9599569 | 78.5694799 | 76.3497718 |
| 16:08:19 | 82.9599569 | 71.5694799 | 76.3497718 |
| 16:08:20 | 82.9599569 | 70.5694799 | 77.3497718 |
| 16:08:21 | 83.9599569 | 70.5694799 | 76.3497718 |
| 16:08:22 | 72.8738183 | 70.5694799 | 76.3497718 |
| 16:08:23 | 71.8738183 | 69.5694799 | 76.3497718 |
| 16:08:24 | 71.8738183 | 69.5694799 | 76.3497718 |
| 16:08:25 | 70.7488183 | 70.5694799 | 76.3497718 |
| 16:08:26 | 70.4988183 | 70.5694799 | 76.3497718 |
| 16:08:27 | 70.1238183 | 70.5694799 | 77.3497718 |
| 16:08:28 | 82.9599569 | 70.5694799 | 77.3497718 |
| 16:08:29 | 81.9599569 | 70.5694799 | 76.3497718 |
| 16:08:30 | 81.9599569 | 71.5694799 | 76.3497718 |
| 16:08:31 | 80.9599569 | 71.5694799 | 75.3497718 |
| 16:08:32 | 80.9599569 | 73.5694799 | 75.3497718 |
| 16:08:33 | 80.9599569 | 74.5694799 | 76.3497718 |
| 16:08:34 | 79.9599569 | 74.5694799 | 76.3497718 |
| 16:08:35 | 79.9599569 | 74.5694799 | 76.3497718 |
| 16:08:36 | 79.9599569 | 74.5694799 | 77.3497718 |
| 16:08:37 | 79.9599569 | 74.5694799 | 77.3497718 |
| 16:08:38 | 79.9599569 | 74.5694799 | 76.3497718 |
| 16:08:39 | 78.9599569 | 73.5694799 | 76.3497718 |
| 16:08:40 | 78.9599569 | 73.5694799 | 75.3497718 |
| 16:08:41 | 78.9599569 | 72.5694799 | 75.3497718 |
| 16:08:42 | 78.9599569 | 72.5694799 | 76.3497718 |
| 16:08:43 | 78.9599569 | 67.5694799 | 78.3497718 |
| 16:08:44 | 78.9599569 | 65.5694799 | 78.3497718 |
| 16:08:45 | 78.9599569 | 65.5694799 | 79.3497718 |
| 16:08:46 | 78.9599569 | 64.5694799 | 81.3497718 |
| 16:08:47 | 78.9599569 | 61.5694799 | 81.3497718 |
| 16:08:48 | 80.9599569 | 61.5694799 | 81.3497718 |

|          |            |            |            |
|----------|------------|------------|------------|
| 16:08:49 | 69.8738183 | 60.5694799 | 81.3497718 |
| 16:08:50 | 69.9988183 | 62.5694799 | 81.3497718 |
| 16:08:51 | 69.7488183 | 62.5694799 | 79.3497718 |
| 16:08:52 | 69.8738183 | 63.5694799 | 78.3497718 |
| 16:08:53 | 69.8738183 | 63.5694799 | 76.3497718 |
| 16:08:54 | 69.8738183 | 63.5694799 | 76.3497718 |
| 16:08:55 | 69.9988183 | 63.5694799 | 75.3497718 |
| 16:08:56 | 70.1238183 | 63.5694799 | 74.3497718 |
| 16:08:57 | 69.9988183 | 63.5694799 | 73.3497718 |
| 16:08:58 | 70.2488183 | 67.5694799 | 72.3497718 |
| 16:08:59 | 77.9599569 | 67.5694799 | 72.3497718 |
| 16:09:00 | 76.9599569 | 67.5694799 | 72.3497718 |
| 16:09:01 | 76.9599569 | 67.5694799 | 73.3497718 |
| 16:09:02 | 74.9599569 | 68.5694799 | 73.3497718 |
| 16:09:03 | 72.9599569 | 69.5694799 | 72.3497718 |
| 16:09:04 | 71.9599569 | 70.5694799 | 72.3497718 |
| 16:09:05 | 70.9599569 | 70.5694799 | 72.3497718 |
| 16:09:06 | 71.9599569 | 70.5694799 | 72.3497718 |
| 16:09:07 | 73.9599569 | 71.5694799 | 72.3497718 |
| 16:09:08 | 73.9599569 | 71.5694799 | 73.3497718 |
| 16:09:09 | 75.9599569 | 71.5694799 | 73.3497718 |
| 16:09:10 | 76.9599569 | 71.5694799 | 74.3497718 |
| 16:09:11 | 76.9599569 | 71.5694799 | 75.3497718 |
| 16:09:12 | 72.9599569 | 71.5694799 | 75.3497718 |
| 16:09:13 | 70.9599569 | 71.5694799 | 75.3497718 |
| 16:09:14 | 68.9599569 | 72.5694799 | 75.3497718 |
| 16:09:15 | 68.9599569 | 72.5694799 | 74.3497718 |
| 16:09:16 | 67.9599569 | 73.5694799 | 75.3497718 |
| 16:09:17 | 67.9599569 | 74.5694799 | 75.3497718 |
| 16:09:18 | 67.9599569 | 74.5694799 | 75.3497718 |
| 16:09:19 | 69.9599569 | 74.5694799 | 75.3497718 |
| 16:09:20 | 70.9599569 | 72.5694799 | 76.3497718 |
| 16:09:21 | 71.9599569 | 72.5694799 | 78.3497718 |
| 16:09:22 | 71.9599569 | 72.5694799 | 78.3497718 |
| 16:09:23 | 72.9599569 | 70.5694799 | 77.3497718 |
| 16:09:24 | 75.9599569 | 68.5694799 | 77.3497718 |
| 16:09:25 | 75.9599569 | 68.5694799 | 77.3497718 |
| 16:09:26 | 76.9599569 | 66.5694799 | 77.3497718 |
| 16:09:27 | 76.9599569 | 66.5694799 | 77.3497718 |
| 16:09:28 | 73.9599569 | 66.5694799 | 77.3497718 |
| 16:09:29 | 73.9599569 | 64.5694799 | 77.3497718 |
| 16:09:30 | 70.9599569 | 64.5694799 | 77.3497718 |
| 16:09:31 | 70.9599569 | 64.5694799 | 76.3497718 |
| 16:09:32 | 69.9599569 | 64.5694799 | 76.3497718 |
| 16:09:33 | 70.9599569 | 64.5694799 | 76.3497718 |

|          |            |            |            |
|----------|------------|------------|------------|
| 16:09:34 | 70.9599569 | 65.5694799 | 76.3497718 |
| 16:09:35 | 72.9599569 | 65.5694799 | 77.3497718 |
| 16:09:36 | 73.9599569 | 65.5694799 | 77.3497718 |
| 16:09:37 | 73.9599569 | 66.5694799 | 77.3497718 |
| 16:09:38 | 73.9599569 | 67.5694799 | 76.3497718 |
| 16:09:39 | 73.9599569 | 67.5694799 | 76.3497718 |
| 16:09:40 | 73.9599569 | 67.5694799 | 77.3497718 |
| 16:09:41 | 73.9599569 | 68.5694799 | 76.3497718 |
| 16:09:42 | 73.9599569 | 69.5694799 | 76.3497718 |
| 16:09:43 | 73.9599569 | 70.5694799 | 76.3497718 |
| 16:09:44 | 72.9599569 | 70.5694799 | 76.3497718 |
| 16:09:45 | 72.9599569 | 72.5694799 | 75.3497718 |
| 16:09:46 | 72.9599569 | 74.5694799 | 76.3497718 |
| 16:09:47 | 72.9599569 | 72.5694799 | 76.3497718 |
| 16:09:48 | 72.9599569 | 72.5694799 | 76.3497718 |
| 16:09:49 | 71.9599569 | 71.5694799 | 76.3497718 |
| 16:09:50 | 71.9599569 | 71.5694799 | 76.3497718 |
| 16:09:51 | 71.9599569 | 71.5694799 | 76.3497718 |
| 16:09:52 | 71.9599569 | 71.5694799 | 76.3497718 |
| 16:09:53 | 71.9599569 | 70.5694799 | 76.3497718 |
| 16:09:54 | 71.9599569 | 70.5694799 | 76.3497718 |
| 16:09:55 | 71.9599569 | 70.5694799 | 76.3497718 |
| 16:09:56 | 72.9599569 | 69.5694799 | 76.3497718 |
| 16:09:57 | 71.9599569 | 68.5694799 | 76.3497718 |
| 16:09:58 | 70.9599569 | 67.5694799 | 77.3497718 |
| 16:09:59 | 70.9599569 | 67.5694799 | 77.3497718 |
| 16:10:00 | 70.9599569 | 68.5694799 | 77.3497718 |
| 16:10:01 | 70.9599569 | 68.5694799 | 76.3497718 |
| 16:10:02 | 69.9599569 | 68.5694799 | 76.3497718 |
| 16:10:03 | 69.9599569 | 67.5694799 | 76.3497718 |
| 16:10:04 | 69.9599569 | 67.5694799 | 76.3497718 |
| 16:10:05 | 67.9599569 | 68.5694799 | 76.3497718 |
| 16:10:06 | 67.9599569 | 68.5694799 | 78.3497718 |
| 16:10:07 | 67.9599569 | 67.5694799 | 78.3497718 |
| 16:10:08 | 69.9599569 | 67.5694799 | 79.3497718 |
| 16:10:09 | 71.9599569 | 67.5694799 | 79.3497718 |
| 16:10:10 | 71.9599569 | 69.5694799 | 79.3497718 |
| 16:10:11 | 71.9599569 | 70.5694799 | 78.3497718 |
| 16:10:12 | 71.9599569 | 70.5694799 | 78.3497718 |
| 16:10:13 | 72.9599569 | 70.5694799 | 76.3497718 |
| 16:10:14 | 73.9599569 | 70.5694799 | 76.3497718 |
| 16:10:15 | 74.9599569 | 69.5694799 | 76.3497718 |
| 16:10:16 | 78.9599569 | 69.5694799 | 76.3497718 |
| 16:10:17 | 79.9599569 | 69.5694799 | 76.3497718 |
| 16:10:18 | 79.9599569 | 69.5694799 | 76.3497718 |

|          |            |            |            |
|----------|------------|------------|------------|
| 16:10:19 | 79.9599569 | 69.5694799 | 76.3497718 |
| 16:10:20 | 77.9599569 | 68.5694799 | 77.3497718 |
| 16:10:21 | 76.9599569 | 67.5694799 | 76.3497718 |
| 16:10:22 | 75.9599569 | 67.5694799 | 76.3497718 |
| 16:10:23 | 75.9599569 | 67.5694799 | 76.3497718 |
| 16:10:24 | 74.9599569 | 67.5694799 | 76.3497718 |
| 16:10:25 | 73.9599569 | 67.5694799 | 76.3497718 |
| 16:10:26 | 74.9599569 | 67.5694799 | 76.3497718 |
| 16:10:27 | 74.9599569 | 67.5694799 | 75.3497718 |
| 16:10:28 | 76.9599569 | 67.5694799 | 76.3497718 |
| 16:10:29 | 75.9599569 | 67.5694799 | 76.3497718 |
| 16:10:30 | 74.9599569 | 64.5694799 | 76.3497718 |
| 16:10:31 | 72.9599569 | 64.5694799 | 76.3497718 |
| 16:10:32 | 72.9599569 | 66.5694799 | 76.3497718 |
| 16:10:33 | 67.9599569 | 66.5694799 | 76.3497718 |
| 16:10:34 | 67.9599569 | 67.5694799 | 76.3497718 |
| 16:10:35 | 67.9599569 | 67.5694799 | 78.3497718 |
| 16:10:36 | 70.9599569 | 67.5694799 | 79.3497718 |
| 16:10:37 | 72.9599569 | 68.5694799 | 80.3497718 |
| 16:10:38 | 75.9599569 | 68.5694799 | 80.3497718 |
| 16:10:39 | 75.9599569 | 68.5694799 | 80.3497718 |
| 16:10:40 | 75.9599569 | 68.5694799 | 79.3497718 |
| 16:10:41 | 75.9599569 | 68.5694799 | 78.3497718 |
| 16:10:42 | 74.9599569 | 68.5694799 | 78.3497718 |
| 16:10:43 | 74.9599569 | 68.5694799 | 78.3497718 |
| 16:10:44 | 74.9599569 | 69.5694799 | 76.3497718 |
| 16:10:45 | 73.9599569 | 65.5694799 | 76.3497718 |
| 16:10:46 | 71.9599569 | 65.5694799 | 75.3497718 |
| 16:10:47 | 70.9599569 | 65.5694799 | 75.3497718 |
| 16:10:48 | 70.9599569 | 65.5694799 | 75.3497718 |
| 16:10:49 | 69.9599569 | 65.5694799 | 76.3497718 |
| 16:10:50 | 67.9599569 | 66.5694799 | 76.3497718 |
| 16:10:51 | 66.9599569 | 66.5694799 | 77.3497718 |
| 16:10:52 | 66.9599569 | 65.5694799 | 79.3497718 |
| 16:10:53 | 67.9599569 | 63.5694799 | 80.3497718 |
| 16:10:54 | 67.9599569 | 62.5694799 | 80.3497718 |
| 16:10:55 | 68.9599569 | 62.5694799 | 79.3497718 |
| 16:10:56 | 69.9599569 | 62.5694799 | 78.3497718 |
| 16:10:57 | 69.9599569 | 62.5694799 | 76.3497718 |
| 16:10:58 | 70.9599569 | 62.5694799 | 76.3497718 |
| 16:10:59 | 70.9599569 | 64.5694799 | 76.3497718 |
| 16:11:00 | 70.9599569 | 64.5694799 | 75.3497718 |
| 16:11:01 | 70.9599569 | 65.5694799 | 75.3497718 |
| 16:11:02 | 73.9599569 | 65.5694799 | 73.3497718 |
| 16:11:03 | 73.9599569 | 65.5694799 | 72.3497718 |

|          |            |            |            |
|----------|------------|------------|------------|
| 16:11:04 | 71.9599569 | 65.5694799 | 72.3497718 |
| 16:11:05 | 70.9599569 | 66.5694799 | 72.3497718 |
| 16:11:06 | 70.9599569 | 66.5694799 | 72.3497718 |
| 16:11:07 | 68.9599569 | 67.5694799 | 71.3497718 |
| 16:11:08 | 68.9599569 | 67.5694799 | 71.3497718 |
| 16:11:09 | 70.9599569 | 67.5694799 | 73.3497718 |
| 16:11:10 | 70.9599569 | 68.5694799 | 73.3497718 |
| 16:11:11 | 71.9599569 | 68.5694799 | 74.3497718 |
| 16:11:12 | 71.9599569 | 67.5694799 | 74.3497718 |
| 16:11:13 | 71.9599569 | 68.5694799 | 74.3497718 |
| 16:11:14 | 71.9599569 | 68.5694799 | 74.3497718 |
| 16:11:15 | 72.9599569 | 68.5694799 | 73.3497718 |
| 16:11:16 | 72.9599569 | 69.5694799 | 73.3497718 |
| 16:11:17 | 72.9599569 | 72.5694799 | 74.3497718 |
| 16:11:18 | 70.9599569 | 72.5694799 | 74.3497718 |
| 16:11:19 | 69.9599569 | 72.5694799 | 74.3497718 |
| 16:11:20 | 68.9599569 | 66.5694799 | 74.3497718 |
| 16:11:21 | 68.9599569 | 64.5694799 | 76.3497718 |
| 16:11:22 | 68.9599569 | 63.5694799 | 76.3497718 |
| 16:11:23 | 69.9599569 | 65.5694799 | 77.3497718 |
| 16:11:24 | 74.9599569 | 69.5694799 | 77.3497718 |
| 16:11:25 | 74.9599569 | 69.5694799 | 76.3497718 |
| 16:11:26 | 77.9599569 | 73.5694799 | 76.3497718 |
| 16:11:27 | 78.9599569 | 72.5694799 | 75.3497718 |
| 16:11:28 | 74.9599569 | 71.5694799 | 75.3497718 |
| 16:11:29 | 68.9599569 | 71.5694799 | 77.3497718 |
| 16:11:30 | 68.9599569 | 71.5694799 | 77.3497718 |
| 16:11:31 | 61.9599569 | 69.5694799 | 77.3497718 |
| 16:11:32 | 61.9599569 | 68.5694799 | 78.3497718 |
| 16:11:33 | 63.9599569 | 68.5694799 | 78.3497718 |
| 16:11:34 | 63.9599569 | 68.5694799 | 78.3497718 |
| 16:11:35 | 64.9599569 | 68.5694799 | 77.3497718 |
| 16:11:36 | 64.9599569 | 68.5694799 | 77.3497718 |
| 16:11:37 | 64.9599569 | 68.5694799 | 76.3497718 |
| 16:11:38 | 64.9599569 | 68.5694799 | 77.3497718 |
| 16:11:39 | 64.9599569 | 69.5694799 | 77.3497718 |
| 16:11:40 | 64.9599569 | 70.5694799 | 78.3497718 |
| 16:11:41 | 64.9599569 | 71.5694799 | 79.3497718 |
| 16:11:42 | 64.9599569 | 72.5694799 | 79.3497718 |
| 16:11:43 | 64.9599569 | 73.5694799 | 78.3497718 |
| 16:11:44 | 64.9599569 | 73.5694799 | 78.3497718 |
| 16:11:45 | 65.9599569 | 75.5694799 | 77.3497718 |
| 16:11:46 | 65.9599569 | 75.5694799 | 77.3497718 |
| 16:11:47 | 66.9599569 | 75.5694799 | 77.3497718 |
| 16:11:48 | 67.9599569 | 77.5694799 | 78.3497718 |

|          |            |            |            |
|----------|------------|------------|------------|
| 16:11:49 | 67.9599569 | 82.5694799 | 78.3497718 |
| 16:11:50 | 68.9599569 | 82.5694799 | 77.3497718 |
| 16:11:51 | 72.9599569 | 83.5694799 | 76.3497718 |
| 16:11:52 | 72.9599569 | 83.5694799 | 75.3497718 |
| 16:11:53 | 73.9599569 | 72.4988183 | 75.3497718 |
| 16:11:54 | 73.9599569 | 85.5694799 | 75.3497718 |
| 16:11:55 | 73.9599569 | 72.9988183 | 75.3497718 |
| 16:11:56 | 73.9599569 | 79.5694799 | 75.3497718 |
| 16:11:57 | 74.9599569 | 79.5694799 | 75.3497718 |
| 16:11:58 | 74.9599569 | 72.5694799 | 76.3497718 |
| 16:11:59 | 74.9599569 | 72.5694799 | 77.3497718 |
| 16:12:00 | 74.9599569 | 72.5694799 | 77.3497718 |
| 16:12:01 | 76.9599569 | 72.5694799 | 77.3497718 |
| 16:12:02 | 76.9599569 | 70.5694799 | 76.3497718 |
| 16:12:03 | 77.9599569 | 69.5694799 | 76.3497718 |
| 16:12:04 | 77.9599569 | 66.5694799 | 76.3497718 |
| 16:12:05 | 78.9599569 | 67.5694799 | 76.3497718 |
| 16:12:06 | 80.9599569 | 67.5694799 | 76.3497718 |
| 16:12:07 | 82.9599569 | 67.5694799 | 76.3497718 |
| 16:12:08 | 82.9599569 | 66.5694799 | 76.3497718 |
| 16:12:09 | 82.9599569 | 67.5694799 | 76.3497718 |
| 16:12:10 | 82.9599569 | 67.5694799 | 76.3497718 |
| 16:12:11 | 81.9599569 | 67.5694799 | 76.3497718 |
| 16:12:12 | 81.9599569 | 68.5694799 | 76.3497718 |
| 16:12:13 | 80.9599569 | 68.5694799 | 76.3497718 |
| 16:12:14 | 77.9599569 | 68.5694799 | 76.3497718 |
| 16:12:15 | 75.9599569 | 67.5694799 | 76.3497718 |
| 16:12:16 | 74.9599569 | 66.5694799 | 76.3497718 |
| 16:12:17 | 74.9599569 | 66.5694799 | 76.3497718 |
| 16:12:18 | 73.9599569 | 66.5694799 | 77.3497718 |
| 16:12:19 | 73.9599569 | 66.5694799 | 77.3497718 |
| 16:12:20 | 74.9599569 | 66.5694799 | 78.3497718 |
| 16:12:21 | 74.9599569 | 66.5694799 | 79.3497718 |
| 16:12:22 | 74.9599569 | 65.5694799 | 79.3497718 |
| 16:12:23 | 75.9599569 | 65.5694799 | 79.3497718 |
| 16:12:24 | 75.9599569 | 61.5694799 | 78.3497718 |
| 16:12:25 | 75.9599569 | 60.5694799 | 78.3497718 |
| 16:12:26 | 75.9599569 | 60.5694799 | 78.3497718 |
| 16:12:27 | 75.9599569 | 60.5694799 | 77.3497718 |
| 16:12:28 | 74.9599569 | 62.5694799 | 76.3497718 |
| 16:12:29 | 74.9599569 | 62.5694799 | 75.3497718 |
| 16:12:30 | 75.9599569 | 63.5694799 | 75.3497718 |
| 16:12:31 | 75.9599569 | 63.5694799 | 74.3497718 |
| 16:12:32 | 76.9599569 | 63.5694799 | 73.3497718 |
| 16:12:33 | 77.9599569 | 63.5694799 | 73.3497718 |



|          |            |            |            |
|----------|------------|------------|------------|
| 16:12:34 | 78.9599569 | 63.5694799 | 73.3497718 |
| 16:12:35 | 79.9599569 | 63.5694799 | 73.3497718 |
| 16:12:36 | 79.9599569 | 63.5694799 | 73.3497718 |
| 16:12:37 | 79.9599569 | 65.5694799 | 74.3497718 |
| 16:12:38 | 79.9599569 | 66.5694799 | 74.3497718 |
| 16:12:39 | 80.9599569 | 66.5694799 | 74.3497718 |
| 16:12:40 | 81.9599569 | 66.5694799 | 74.3497718 |
| 16:12:41 | 81.9599569 | 66.5694799 | 74.3497718 |
| 16:12:42 | 81.9599569 | 65.5694799 | 74.3497718 |
| 16:12:43 | 81.9599569 | 65.5694799 | 74.3497718 |
| 16:12:44 | 80.9599569 | 68.5694799 | 73.3497718 |
| 16:12:45 | 76.9599569 | 68.5694799 | 73.3497718 |
| 16:12:46 | 72.9599569 | 69.5694799 | 74.3497718 |
| 16:12:47 | 71.9599569 | 69.5694799 | 75.3497718 |
| 16:12:48 | 71.9599569 | 70.5694799 | 75.3497718 |
| 16:12:49 | 70.9599569 | 71.5694799 | 75.3497718 |
| 16:12:50 | 68.9599569 | 71.5694799 | 75.3497718 |
| 16:12:51 | 67.9599569 | 75.5694799 | 75.3497718 |
| 16:12:52 | 67.9599569 | 72.5694799 | 75.3497718 |
| 16:12:53 | 67.9599569 | 72.5694799 | 75.3497718 |
| 16:12:54 | 67.9599569 | 72.5694799 | 75.3497718 |
| 16:12:55 | 66.9599569 | 69.5694799 | 75.3497718 |
| 16:12:56 | 65.9599569 | 69.5694799 | 76.3497718 |
| 16:12:57 | 64.9599569 | 69.5694799 | 77.3497718 |
| 16:12:58 | 64.9599569 | 69.5694799 | 77.3497718 |
| 16:12:59 | 64.9599569 | 69.5694799 | 78.3497718 |
| 16:13:00 | 64.9599569 | 69.5694799 | 78.3497718 |
| 16:13:01 | 63.9599569 | 69.5694799 | 78.3497718 |
| 16:13:02 | 64.9599569 | 70.5694799 | 78.3497718 |
| 16:13:03 | 65.9599569 | 70.5694799 | 76.3497718 |
| 16:13:04 | 65.9599569 | 70.5694799 | 75.3497718 |
| 16:13:05 | 65.9599569 | 70.5694799 | 76.3497718 |
| 16:13:06 | 60.9599569 | 69.5694799 | 76.3497718 |
| 16:13:07 | 61.9599569 | 69.5694799 | 76.3497718 |
| 16:13:08 | 61.9599569 | 69.5694799 | 76.3497718 |
| 16:13:09 | 67.9599569 | 69.5694799 | 76.3497718 |
| 16:13:10 | 70.9599569 | 70.5694799 | 76.3497718 |
| 16:13:11 | 71.9599569 | 70.5694799 | 76.3497718 |
| 16:13:12 | 71.9599569 | 70.5694799 | 76.3497718 |
| 16:13:13 | 71.9599569 | 71.5694799 | 76.3497718 |
| 16:13:14 | 71.9599569 | 71.5694799 | 76.3497718 |
| 16:13:15 | 71.9599569 | 69.5694799 | 76.3497718 |
| 16:13:16 | 70.9599569 | 69.5694799 | 76.3497718 |
| 16:13:17 | 70.9599569 | 70.5694799 | 76.3497718 |
| 16:13:18 | 70.9599569 | 71.5694799 | 76.3497718 |

|          |            |            |            |
|----------|------------|------------|------------|
| 16:13:19 | 70.9599569 | 74.5694799 | 76.3497718 |
| 16:13:20 | 69.9599569 | 74.5694799 | 77.3497718 |
| 16:13:21 | 69.9599569 | 76.5694799 | 77.3497718 |
| 16:13:22 | 69.9599569 | 76.5694799 | 76.3497718 |
| 16:13:23 | 69.9599569 | 76.5694799 | 77.3497718 |
| 16:13:24 | 62.9599569 | 77.5694799 | 77.3497718 |
| 16:13:25 | 62.9599569 | 77.5694799 | 77.3497718 |
| 16:13:26 | 62.9599569 | 77.5694799 | 77.3497718 |
| 16:13:27 | 62.9599569 | 78.5694799 | 76.3497718 |
| 16:13:28 | 63.9599569 | 78.5694799 | 76.3497718 |
| 16:13:29 | 64.9599569 | 80.5694799 | 76.3497718 |
| 16:13:30 | 65.9599569 | 80.5694799 | 76.3497718 |
| 16:13:31 | 65.9599569 | 77.5694799 | 76.3497718 |
| 16:13:32 | 66.9599569 | 77.5694799 | 76.3497718 |
| 16:13:33 | 66.9599569 | 76.5694799 | 75.3497718 |
| 16:13:34 | 65.9599569 | 76.5694799 | 75.3497718 |
| 16:13:35 | 65.9599569 | 75.5694799 | 74.3497718 |
| 16:13:36 | 65.9599569 | 75.5694799 | 74.3497718 |
| 16:13:37 | 69.9599569 | 73.5694799 | 74.3497718 |
| 16:13:38 | 72.9599569 | 72.5694799 | 74.3497718 |
| 16:13:39 | 75.9599569 | 71.5694799 | 75.3497718 |
| 16:13:40 | 79.9599569 | 71.5694799 | 75.3497718 |
| 16:13:41 | 79.9599569 | 71.5694799 | 75.3497718 |
| 16:13:42 | 67.9988183 | 70.5694799 | 75.3497718 |
| 16:13:43 | 67.9988183 | 69.5694799 | 75.3497718 |
| 16:13:44 | 68.3738183 | 69.5694799 | 75.3497718 |
| 16:13:45 | 78.9599569 | 69.5694799 | 75.3497718 |
| 16:13:46 | 75.9599569 | 69.5694799 | 75.3497718 |
| 16:13:47 | 75.9599569 | 68.5694799 | 76.3497718 |
| 16:13:48 | 72.9599569 | 68.5694799 | 76.3497718 |
| 16:13:49 | 68.9599569 | 68.5694799 | 77.3497718 |
| 16:13:50 | 68.9599569 | 68.5694799 | 78.3497718 |
| 16:13:51 | 70.9599569 | 67.5694799 | 77.3497718 |
| 16:13:52 | 70.9599569 | 70.5694799 | 78.3497718 |
| 16:13:53 | 71.9599569 | 70.5694799 | 79.3497718 |
| 16:13:54 | 72.9599569 | 71.5694799 | 79.3497718 |
| 16:13:55 | 72.9599569 | 72.5694799 | 79.3497718 |
| 16:13:56 | 72.9599569 | 72.5694799 | 79.3497718 |
| 16:13:57 | 72.9599569 | 72.5694799 | 79.3497718 |
| 16:13:58 | 68.9599569 | 72.5694799 | 77.3497718 |
| 16:13:59 | 68.9599569 | 72.5694799 | 75.3497718 |
| 16:14:00 | 67.9599569 | 72.5694799 | 74.3497718 |
| 16:14:01 | 67.9599569 | 72.5694799 | 74.3497718 |
| 16:14:02 | 67.9599569 | 72.5694799 | 74.3497718 |
| 16:14:03 | 67.9599569 | 74.5694799 | 74.3497718 |

|          |            |            |            |
|----------|------------|------------|------------|
| 16:14:04 | 67.9599569 | 74.5694799 | 74.3497718 |
| 16:14:05 | 67.9599569 | 74.5694799 | 74.3497718 |
| 16:14:06 | 68.9599569 | 74.5694799 | 74.3497718 |
| 16:14:07 | 69.9599569 | 74.5694799 | 73.3497718 |
| 16:14:08 | 69.9599569 | 74.5694799 | 71.3497718 |
| 16:14:09 | 69.9599569 | 73.5694799 | 71.3497718 |
| 16:14:10 | 70.9599569 | 73.5694799 | 70.3497718 |
| 16:14:11 | 71.9599569 | 73.5694799 | 70.3497718 |
| 16:14:12 | 72.9599569 | 73.5694799 | 70.3497718 |
| 16:14:13 | 72.9599569 | 73.5694799 | 70.3497718 |
| 16:14:14 | 73.9599569 | 73.5694799 | 69.3497718 |
| 16:14:15 | 73.9599569 | 75.5694799 | 69.3497718 |
| 16:14:16 | 74.9599569 | 76.5694799 | 67.3497718 |
| 16:14:17 | 74.9599569 | 76.5694799 | 67.3497718 |
| 16:14:18 | 76.9599569 | 77.5694799 | 67.3497718 |
| 16:14:19 | 76.9599569 | 77.5694799 | 67.3497718 |
| 16:14:20 | 76.9599569 | 75.5694799 | 67.3497718 |
| 16:14:21 | 80.9599569 | 75.5694799 | 68.3497718 |
| 16:14:22 | 82.9599569 | 74.5694799 | 68.3497718 |
| 16:14:23 | 82.9599569 | 74.5694799 | 68.3497718 |
| 16:14:24 | 82.9599569 | 74.5694799 | 68.3497718 |
| 16:14:25 | 82.9599569 | 74.5694799 | 69.3497718 |
| 16:14:26 | 73.9599569 | 68.5694799 | 71.3497718 |
| 16:14:27 | 62.9599569 | 66.5694799 | 71.3497718 |
| 16:14:28 | 58.9599569 | 66.5694799 | 70.3497718 |
| 16:14:29 | 58.9599569 | 66.5694799 | 70.3497718 |
| 16:14:30 | 59.9599569 | 66.5694799 | 70.3497718 |
| 16:14:31 | 62.9599569 | 66.5694799 | 68.3497718 |
| 16:14:32 | 64.9599569 | 65.5694799 | 68.3497718 |
| 16:14:33 | 64.9599569 | 66.5694799 | 68.3497718 |
| 16:14:34 | 65.9599569 | 67.5694799 | 69.3497718 |
| 16:14:35 | 66.9599569 | 67.5694799 | 70.3497718 |
| 16:14:36 | 66.9599569 | 67.5694799 | 70.3497718 |
| 16:14:37 | 64.9599569 | 67.5694799 | 73.3497718 |
| 16:14:38 | 63.9599569 | 67.5694799 | 75.3497718 |
| 16:14:39 | 62.9599569 | 66.5694799 | 75.3497718 |
| 16:14:40 | 62.9599569 | 66.5694799 | 76.3497718 |
| 16:14:41 | 62.9599569 | 63.5694799 | 75.3497718 |
| 16:14:42 | 62.9599569 | 63.5694799 | 75.3497718 |
| 16:14:43 | 62.9599569 | 63.5694799 | 75.3497718 |
| 16:14:44 | 62.9599569 | 63.5694799 | 75.3497718 |
| 16:14:45 | 67.9599569 | 64.5694799 | 75.3497718 |
| 16:14:46 | 69.9599569 | 64.5694799 | 76.3497718 |
| 16:14:47 | 68.9599569 | 64.5694799 | 76.3497718 |
| 16:14:48 | 68.9599569 | 64.5694799 | 76.3497718 |

|          |            |            |            |
|----------|------------|------------|------------|
| 16:14:49 | 68.9599569 | 64.5694799 | 76.3497718 |
| 16:14:50 | 68.9599569 | 63.5694799 | 75.3497718 |
| 16:14:51 | 71.9599569 | 61.5694799 | 71.3497718 |
| 16:14:52 | 76.9599569 | 61.5694799 | 71.3497718 |
| 16:14:53 | 77.9599569 | 61.5694799 | 71.3497718 |
| 16:14:54 | 77.9599569 | 59.5694799 | 71.3497718 |
| 16:14:55 | 76.9599569 | 59.5694799 | 72.3497718 |
| 16:14:56 | 76.9599569 | 60.5694799 | 72.3497718 |
| 16:14:57 | 76.9599569 | 60.5694799 | 73.3497718 |
| 16:14:58 | 76.9599569 | 60.5694799 | 73.3497718 |
| 16:14:59 | 76.9599569 | 61.5694799 | 72.3497718 |
| 16:15:00 | 74.9599569 | 62.5694799 | 72.3497718 |
| 16:15:01 | 74.9599569 | 67.5694799 | 71.3497718 |
| 16:15:02 | 74.9599569 | 67.5694799 | 71.3497718 |
| 16:15:03 | 74.9599569 | 67.5694799 | 71.3497718 |
| 16:15:04 | 72.9599569 | 67.5694799 | 70.3497718 |
| 16:15:05 | 72.9599569 | 67.5694799 | 70.3497718 |
| 16:15:06 | 72.9599569 | 67.5694799 | 70.3497718 |
| 16:15:07 | 67.9599569 | 67.5694799 | 71.3497718 |
| 16:15:08 | 66.9599569 | 67.5694799 | 71.3497718 |
| 16:15:09 | 66.9599569 | 67.5694799 | 70.3497718 |
| 16:15:10 | 66.9599569 | 65.5694799 | 69.3497718 |
| 16:15:11 | 67.9599569 | 65.5694799 | 69.3497718 |
| 16:15:12 | 67.9599569 | 65.5694799 | 69.3497718 |
| 16:15:13 | 67.9599569 | 65.5694799 | 69.3497718 |
| 16:15:14 | 67.9599569 | 65.5694799 | 69.3497718 |
| 16:15:15 | 65.9599569 | 67.5694799 | 69.3497718 |
| 16:15:16 | 64.9599569 | 67.5694799 | 68.3497718 |
| 16:15:17 | 64.9599569 | 68.5694799 | 68.3497718 |
| 16:15:18 | 64.9599569 | 69.5694799 | 68.3497718 |
| 16:15:19 | 64.9599569 | 69.5694799 | 68.3497718 |
| 16:15:20 | 65.9599569 | 69.5694799 | 68.3497718 |
| 16:15:21 | 65.9599569 | 70.5694799 | 72.3497718 |
| 16:15:22 | 68.9599569 | 71.5694799 | 75.3497718 |
| 16:15:23 | 69.9599569 | 71.5694799 | 75.3497718 |
| 16:15:24 | 69.9599569 | 72.5694799 | 76.3497718 |
| 16:15:25 | 69.9599569 | 74.5694799 | 76.3497718 |
| 16:15:26 | 69.9599569 | 75.5694799 | 76.3497718 |
| 16:15:27 | 69.9599569 | 75.5694799 | 76.3497718 |
| 16:15:28 | 69.9599569 | 75.5694799 | 76.3497718 |
| 16:15:29 | 69.9599569 | 76.5694799 | 77.3497718 |
| 16:15:30 | 70.9599569 | 76.5694799 | 78.3497718 |
| 16:15:31 | 70.9599569 | 75.5694799 | 78.3497718 |
| 16:15:32 | 71.9599569 | 73.5694799 | 79.3497718 |
| 16:15:33 | 74.9599569 | 73.5694799 | 79.3497718 |

|          |            |            |            |
|----------|------------|------------|------------|
| 16:15:34 | 74.9599569 | 72.5694799 | 74.3497718 |
| 16:15:35 | 74.9599569 | 73.5694799 | 72.3497718 |
| 16:15:36 | 74.9599569 | 73.5694799 | 72.3497718 |
| 16:15:37 | 74.9599569 | 72.5694799 | 72.3497718 |
| 16:15:38 | 74.9599569 | 71.5694799 | 72.3497718 |
| 16:15:39 | 76.9599569 | 71.5694799 | 72.3497718 |
| 16:15:40 | 77.9599569 | 69.5694799 | 72.3497718 |
| 16:15:41 | 76.9599569 | 69.5694799 | 73.3497718 |
| 16:15:42 | 76.9599569 | 68.5694799 | 73.3497718 |
| 16:15:43 | 76.9599569 | 68.5694799 | 73.3497718 |
| 16:15:44 | 76.9599569 | 68.5694799 | 72.3497718 |
| 16:15:45 | 76.9599569 | 69.5694799 | 72.3497718 |
| 16:15:46 | 76.9599569 | 69.5694799 | 72.3497718 |
| 16:15:47 | 76.9599569 | 69.5694799 | 72.3497718 |
| 16:15:48 | 76.9599569 | 69.5694799 | 73.3497718 |
| 16:15:49 | 76.9599569 | 68.5694799 | 74.3497718 |
| 16:15:50 | 77.9599569 | 68.5694799 | 74.3497718 |
| 16:15:51 | 77.9599569 | 68.5694799 | 73.3497718 |
| 16:15:52 | 77.9599569 | 68.5694799 | 73.3497718 |
| 16:15:53 | 76.9599569 | 68.5694799 | 73.3497718 |
| 16:15:54 | 76.9599569 | 68.5694799 | 73.3497718 |
| 16:15:55 | 76.9599569 | 68.5694799 | 73.3497718 |
| 16:15:56 | 75.9599569 | 68.5694799 | 73.3497718 |
| 16:15:57 | 70.9599569 | 69.5694799 | 73.3497718 |
| 16:15:58 | 69.9599569 | 69.5694799 | 72.3497718 |
| 16:15:59 | 69.9599569 | 72.5694799 | 70.3497718 |
| 16:16:00 | 69.9599569 | 72.5694799 | 71.3497718 |
| 16:16:01 | 69.9599569 | 76.5694799 | 71.3497718 |
| 16:16:02 | 69.9599569 | 77.5694799 | 71.3497718 |
| 16:16:03 | 70.9599569 | 77.5694799 | 70.3497718 |
| 16:16:04 | 71.9599569 | 77.5694799 | 70.3497718 |
| 16:16:05 | 71.9599569 | 77.5694799 | 70.3497718 |
| 16:16:06 | 71.9599569 | 77.5694799 | 70.3497718 |
| 16:16:07 | 71.9599569 | 78.5694799 | 70.3497718 |
| 16:16:08 | 71.9599569 | 78.5694799 | 70.3497718 |
| 16:16:09 | 69.9599569 | 78.5694799 | 70.3497718 |
| 16:16:10 | 68.9599569 | 77.5694799 | 70.3497718 |
| 16:16:11 | 69.9599569 | 77.5694799 | 68.3497718 |
| 16:16:12 | 69.9599569 | 74.5694799 | 68.3497718 |
| 16:16:13 | 71.9599569 | 72.5694799 | 68.3497718 |
| 16:16:14 | 71.9599569 | 69.5694799 | 68.3497718 |
| 16:16:15 | 71.9599569 | 69.5694799 | 70.3497718 |
| 16:16:16 | 71.9599569 | 68.5694799 | 70.3497718 |
| 16:16:17 | 70.9599569 | 68.5694799 | 70.3497718 |
| 16:16:18 | 68.9599569 | 68.5694799 | 70.3497718 |

|          |            |            |            |
|----------|------------|------------|------------|
| 16:16:19 | 68.9599569 | 68.5694799 | 70.3497718 |
| 16:16:20 | 68.9599569 | 68.5694799 | 71.3497718 |
| 16:16:21 | 69.9599569 | 67.5694799 | 71.3497718 |
| 16:16:22 | 69.9599569 | 67.5694799 | 71.3497718 |
| 16:16:23 | 70.9599569 | 67.5694799 | 72.3497718 |
| 16:16:24 | 70.9599569 | 67.5694799 | 72.3497718 |
| 16:16:25 | 70.9599569 | 67.5694799 | 72.3497718 |
| 16:16:26 | 70.9599569 | 67.5694799 | 73.3497718 |
| 16:16:27 | 71.9599569 | 68.5694799 | 73.3497718 |
| 16:16:28 | 73.9599569 | 68.5694799 | 73.3497718 |
| 16:16:29 | 73.9599569 | 68.5694799 | 73.3497718 |
| 16:16:30 | 73.9599569 | 68.5694799 | 73.3497718 |
| 16:16:31 | 74.9599569 | 67.5694799 | 70.3497718 |
| 16:16:32 | 74.9599569 | 67.5694799 | 70.3497718 |
| 16:16:33 | 74.9599569 | 67.5694799 | 70.3497718 |
| 16:16:34 | 74.9599569 | 67.5694799 | 71.3497718 |
| 16:16:35 | 74.9599569 | 67.5694799 | 71.3497718 |
| 16:16:36 | 74.9599569 | 69.5694799 | 71.3497718 |
| 16:16:37 | 71.8738183 | 69.5694799 | 71.3497718 |
| 16:16:38 | 71.7488183 | 70.5694799 | 70.3497718 |
| 16:16:39 | 71.7488183 | 71.5694799 | 70.3497718 |
| 16:16:40 | 71.3738183 | 71.5694799 | 70.3497718 |
| 16:16:41 | 71.3738183 | 74.5694799 | 70.3497718 |
| 16:16:42 | 70.7488183 | 74.5694799 | 71.3497718 |
| 16:16:43 | 82.9599569 | 74.5694799 | 72.3497718 |
| 16:16:44 | 82.9599569 | 73.5694799 | 73.3497718 |
| 16:16:45 | 70.6238183 | 73.5694799 | 73.3497718 |
| 16:16:46 | 70.2488183 | 73.5694799 | 72.3497718 |
| 16:16:47 | 70.2488183 | 73.5694799 | 71.3497718 |
| 16:16:48 | 70.6238183 | 73.5694799 | 71.3497718 |
| 16:16:49 | 70.7488183 | 73.5694799 | 71.3497718 |
| 16:16:50 | 70.3738183 | 73.5694799 | 71.3497718 |
| 16:16:51 | 70.3738183 | 72.5694799 | 72.3497718 |
| 16:16:52 | 70.7488183 | 72.5694799 | 72.3497718 |
| 16:16:53 | 70.6238183 | 72.5694799 | 72.3497718 |
| 16:16:54 | 70.4988183 | 71.5694799 | 72.3497718 |
| 16:16:55 | 70.4988183 | 72.5694799 | 71.3497718 |
| 16:16:56 | 78.9599569 | 72.5694799 | 71.3497718 |
| 16:16:57 | 77.9599569 | 73.5694799 | 70.3497718 |
| 16:16:58 | 77.9599569 | 73.5694799 | 70.3497718 |
| 16:16:59 | 77.9599569 | 73.5694799 | 71.3497718 |
| 16:17:00 | 77.9599569 | 73.5694799 | 71.3497718 |
| 16:17:01 | 77.9599569 | 73.5694799 | 71.3497718 |
| 16:17:02 | 75.9599569 | 73.5694799 | 70.3497718 |
| 16:17:03 | 75.9599569 | 73.5694799 | 69.3497718 |

|          |            |            |            |            |
|----------|------------|------------|------------|------------|
| 16:17:04 |            | 75.9599569 | 74.5694799 | 69.3497718 |
| 16:17:05 |            | 76.9599569 | 75.5694799 | 69.3497718 |
| 16:17:06 |            | 75.9599569 | 75.5694799 | 69.3497718 |
| 16:17:07 |            | 75.9599569 | 76.5694799 | 69.3497718 |
| 16:17:08 | 56.1070862 | 73.9599569 | 75.5694799 | 69.3497718 |
| 16:17:09 | 58.1070862 | 73.9599569 | 75.5694799 | 69.3497718 |
| 16:17:10 | 59.1070862 | 73.9599569 | 75.5694799 | 75.3497718 |
| 16:17:11 | 59.1070862 | 73.9599569 | 72.5694799 | 76.3497718 |
| 16:17:12 | 61.1070862 | 71.9599569 | 72.5694799 | 76.3497718 |
| 16:17:13 | 67.1070862 | 70.9599569 | 68.5694799 | 75.3497718 |
| 16:17:14 | 67.1070862 | 70.9599569 | 68.5694799 | 74.3497718 |
| 16:17:15 | 67.1070862 | 70.9599569 | 63.5694799 | 74.3497718 |
| 16:17:16 | 67.1070862 | 72.9599569 | 63.5694799 | 74.3497718 |
| 16:17:17 | 67.1070862 | 73.9599569 | 63.5694799 | 74.3497718 |
| 16:17:18 | 66.1070862 | 74.9599569 | 63.5694799 | 74.3497718 |
| 16:17:19 | 66.1070862 | 74.9599569 | 63.5694799 | 74.3497718 |
| 16:17:20 | 65.1070862 | 74.9599569 | 62.5694799 | 73.3497718 |
| 16:17:21 | 65.1070862 | 74.9599569 | 62.5694799 | 72.3497718 |
| 16:17:22 | 65.1070862 | 74.9599569 | 62.5694799 | 72.3497718 |
| 16:17:23 | 65.1070862 | 75.9599569 | 62.5694799 | 71.3497718 |
| 16:17:24 | 65.1070862 | 75.9599569 | 62.5694799 | 71.3497718 |
| 16:17:25 | 66.1070862 | 76.9599569 | 64.5694799 | 71.3497718 |
| 16:17:26 | 66.1070862 | 77.9599569 | 65.5694799 | 71.3497718 |
| 16:17:27 | 64.1070862 | 76.9599569 | 65.5694799 | 70.3497718 |
| 16:17:28 | 61.1070862 | 76.9599569 | 65.5694799 | 70.3497718 |
| 16:17:29 | 60.1070862 | 75.9599569 | 65.5694799 | 70.3497718 |
| 16:17:30 | 60.1070862 | 73.9599569 | 65.5694799 | 69.3497718 |
| 16:17:31 | 63.1070862 | 71.9599569 | 65.5694799 | 69.3497718 |
| 16:17:32 | 65.1070862 | 69.9599569 | 65.5694799 | 69.3497718 |
| 16:17:33 | 65.1070862 | 68.9599569 | 65.5694799 | 69.3497718 |
| 16:17:34 | 63.1070862 | 68.9599569 | 66.5694799 | 69.3497718 |
| 16:17:35 | 62.1070862 | 69.9599569 | 67.5694799 | 70.3497718 |
| 16:17:36 | 61.1070862 | 70.9599569 | 67.5694799 | 70.3497718 |
| 16:17:37 | 60.1070862 | 70.9599569 | 68.5694799 | 70.3497718 |
| 16:17:38 | 58.1070862 | 72.9599569 | 68.5694799 | 70.3497718 |
| 16:17:39 | 58.1070862 | 72.9599569 | 68.5694799 | 70.3497718 |
| 16:17:40 | 57.1070862 | 71.9599569 | 68.5694799 | 69.3497718 |
| 16:17:41 | 57.1070862 | 70.9599569 | 68.5694799 | 69.3497718 |
| 16:17:42 | 57.1070862 | 70.9599569 | 68.5694799 | 69.3497718 |
| 16:17:43 | 57.1070862 | 70.9599569 | 68.5694799 | 70.3497718 |
| 16:17:44 | 57.1070862 | 71.9599569 | 66.5694799 | 71.3497718 |
| 16:17:45 | 56.1070862 | 71.9599569 | 66.5694799 | 72.3497718 |
| 16:17:46 | 56.1070862 | 72.9599569 | 66.5694799 | 73.3497718 |
| 16:17:47 | 58.1070862 | 73.9599569 | 70.5694799 | 74.3497718 |
| 16:17:48 | 60.1070862 | 73.9599569 | 70.5694799 | 73.3497718 |

|          |            |            |            |            |
|----------|------------|------------|------------|------------|
| 16:17:49 | 60.1070862 | 76.9599569 | 71.5694799 | 73.3497718 |
| 16:17:50 | 60.1070862 | 78.9599569 | 70.5694799 | 72.3497718 |
| 16:17:51 | 58.1070862 | 79.9599569 | 70.5694799 | 70.3497718 |
| 16:17:52 | 59.1070862 | 67.5664037 | 70.5694799 | 69.3497718 |
| 16:17:53 | 59.1070862 | 67.4552926 | 70.5694799 | 69.3497718 |
| 16:17:54 | 60.1070862 | 67.4552926 | 70.5694799 | 69.3497718 |
| 16:17:55 | 59.1070862 | 78.9599569 | 70.5694799 | 70.3497718 |
| 16:17:56 | 59.1070862 | 77.9599569 | 69.5694799 | 71.3497718 |
| 16:17:57 | 59.1070862 | 75.9599569 | 67.5694799 | 70.3497718 |
| 16:17:58 | 60.1070862 | 75.9599569 | 67.5694799 | 70.3497718 |
| 16:17:59 | 61.1070862 | 76.9599569 | 67.5694799 | 70.3497718 |
| 16:18:00 | 61.1070862 | 76.9599569 | 67.5694799 | 69.3497718 |
| 16:18:01 | 61.1070862 | 78.9599569 | 69.5694799 | 69.3497718 |
| 16:18:02 | 60.1070862 | 78.9599569 | 69.5694799 | 69.3497718 |
| 16:18:03 | 60.1070862 | 78.9599569 | 69.5694799 | 70.3497718 |
| 16:18:04 | 60.1070862 | 77.9599569 | 69.5694799 | 70.3497718 |
| 16:18:05 | 61.1070862 | 77.9599569 | 69.5694799 | 70.3497718 |
| 16:18:06 | 62.1070862 | 73.9599569 | 70.5694799 | 70.3497718 |
| 16:18:07 | 62.1070862 | 73.9599569 | 71.5694799 | 70.3497718 |
| 16:18:08 | 63.1070862 | 68.9599569 | 72.5694799 | 70.3497718 |
| 16:18:09 | 64.1070862 | 68.9599569 | 72.5694799 | 70.3497718 |
| 16:18:10 | 65.1070862 | 69.9599569 | 73.5694799 | 70.3497718 |
| 16:18:11 | 65.1070862 | 69.9599569 | 73.5694799 | 70.3497718 |
| 16:18:12 | 65.1070862 | 73.9599569 | 73.5694799 | 70.3497718 |
| 16:18:13 | 65.1070862 | 74.9599569 | 74.5694799 | 70.3497718 |
| 16:18:14 | 64.1070862 | 75.9599569 | 74.5694799 | 69.3497718 |
| 16:18:15 | 64.1070862 | 75.9599569 | 73.5694799 | 69.3497718 |
| 16:18:16 | 64.1070862 | 74.9599569 | 73.5694799 | 69.3497718 |
| 16:18:17 | 63.1070862 | 73.9599569 | 73.5694799 | 70.3497718 |
| 16:18:18 | 63.1070862 | 73.9599569 | 73.5694799 | 70.3497718 |
| 16:18:19 | 64.1070862 | 72.9599569 | 73.5694799 | 72.3497718 |
| 16:18:20 | 66.1070862 | 72.9599569 | 73.5694799 | 72.3497718 |
| 16:18:21 | 67.1070862 | 73.9599569 | 71.5694799 | 73.3497718 |
| 16:18:22 | 67.1070862 | 73.9599569 | 71.5694799 | 73.3497718 |
| 16:18:23 | 66.1070862 | 73.9599569 | 71.5694799 | 74.3497718 |
| 16:18:24 | 66.1070862 | 77.9599569 | 71.5694799 | 75.3497718 |
| 16:18:25 | 65.1070862 | 77.9599569 | 72.5694799 | 75.3497718 |
| 16:18:26 | 65.1070862 | 78.9599569 | 74.5694799 | 75.3497718 |
| 16:18:27 | 67.1070862 | 78.9599569 | 74.5694799 | 77.3497718 |
| 16:18:28 | 68.1070862 | 79.9599569 | 73.5694799 | 76.3497718 |
| 16:18:29 | 69.1070862 | 85.9599569 | 72.5694799 | 76.3497718 |
| 16:18:30 | 69.1070862 | 84.9599569 | 72.5694799 | 76.3497718 |
| 16:18:31 | 69.1070862 | 82.9599569 | 72.5694799 | 75.3497718 |
| 16:18:32 | 67.1070862 | 79.9599569 | 71.5694799 | 75.3497718 |
| 16:18:33 | 66.1070862 | 79.9599569 | 72.5694799 | 74.3497718 |



|          |            |            |            |            |
|----------|------------|------------|------------|------------|
| 16:18:34 | 66.1070862 | 74.9599569 | 72.5694799 | 74.3497718 |
| 16:18:35 | 65.1070862 | 73.9599569 | 72.5694799 | 73.3497718 |
| 16:18:36 | 65.1070862 | 73.9599569 | 72.5694799 | 72.3497718 |
| 16:18:37 | 64.1070862 | 73.9599569 | 72.5694799 | 71.3497718 |
| 16:18:38 | 64.1070862 | 75.9599569 | 71.5694799 | 71.3497718 |
| 16:18:39 | 64.1070862 | 77.9599569 | 71.5694799 | 70.3497718 |
| 16:18:40 | 64.1070862 | 78.9599569 | 71.5694799 | 70.3497718 |
| 16:18:41 | 64.1070862 | 78.9599569 | 71.5694799 | 71.3497718 |
| 16:18:42 | 63.1070862 | 78.9599569 | 71.5694799 | 71.3497718 |
| 16:18:43 | 63.1070862 | 78.9599569 | 71.5694799 | 71.3497718 |
| 16:18:44 | 62.1070862 | 77.9599569 | 71.5694799 | 71.3497718 |
| 16:18:45 | 62.1070862 | 77.9599569 | 71.5694799 | 71.3497718 |
| 16:18:46 | 62.1070862 | 77.9599569 | 71.5694799 | 71.3497718 |
| 16:18:47 | 63.1070862 | 77.9599569 | 71.5694799 | 71.3497718 |
| 16:18:48 | 63.1070862 | 77.9599569 | 71.5694799 | 71.3497718 |
| 16:18:49 | 64.1070862 | 77.9599569 | 72.5694799 | 71.3497718 |
| 16:18:50 | 64.1070862 | 76.9599569 | 72.5694799 | 71.3497718 |
| 16:18:51 | 63.1070862 | 76.9599569 | 72.5694799 | 71.3497718 |
| 16:18:52 | 63.1070862 | 76.9599569 | 72.5694799 | 71.3497718 |
| 16:18:53 | 63.1070862 | 76.9599569 | 72.5694799 | 71.3497718 |
| 16:18:54 | 63.1070862 | 77.9599569 | 73.5694799 | 71.3497718 |
| 16:18:55 | 62.1070862 | 78.9599569 | 73.5694799 | 71.3497718 |
| 16:18:56 | 61.1070862 | 79.9599569 | 74.5694799 | 70.3497718 |
| 16:18:57 | 61.1070862 | 79.9599569 | 73.5694799 | 70.3497718 |
| 16:18:58 | 61.1070862 | 80.9599569 | 72.5694799 | 71.3497718 |
| 16:18:59 | 61.1070862 | 79.9599569 | 72.5694799 | 71.3497718 |
| 16:19:00 | 59.1070862 | 78.9599569 | 72.5694799 | 70.3497718 |
| 16:19:01 | 60.1070862 | 78.9599569 | 73.5694799 | 71.3497718 |
| 16:19:02 | 60.1070862 | 76.9599569 | 76.5694799 | 71.3497718 |
| 16:19:03 | 60.1070862 | 75.9599569 | 77.5694799 | 71.3497718 |
| 16:19:04 | 61.1070862 | 75.9599569 | 78.5694799 | 71.3497718 |
| 16:19:05 | 62.1070862 | 75.9599569 | 78.5694799 | 72.3497718 |
| 16:19:06 | 63.1070862 | 75.9599569 | 78.5694799 | 72.3497718 |
| 16:19:07 | 64.1070862 | 75.9599569 | 79.5694799 | 73.3497718 |
| 16:19:08 | 64.1070862 | 75.9599569 | 79.5694799 | 72.3497718 |
| 16:19:09 | 63.1070862 | 75.9599569 | 79.5694799 | 72.3497718 |
| 16:19:10 | 62.1070862 | 76.9599569 | 79.5694799 | 72.3497718 |
| 16:19:11 | 60.1070862 | 76.9599569 | 78.5694799 | 72.3497718 |
| 16:19:12 | 60.1070862 | 76.9599569 | 78.5694799 | 72.3497718 |
| 16:19:13 | 59.1070862 | 78.9599569 | 80.5694799 | 69.3497718 |
| 16:19:14 | 59.1070862 | 78.9599569 | 82.5694799 | 69.3497718 |
| 16:19:15 | 60.1070862 | 78.9599569 | 82.5694799 | 69.3497718 |
| 16:19:16 | 60.1070862 | 77.9599569 | 82.5694799 | 69.3497718 |
| 16:19:17 | 62.1070862 | 77.9599569 | 79.5694799 | 69.3497718 |
| 16:19:18 | 62.1070862 | 77.9599569 | 78.5694799 | 68.3497718 |

|          |            |            |            |            |
|----------|------------|------------|------------|------------|
| 16:19:19 | 61.1070862 | 77.9599569 | 76.5694799 | 67.3497718 |
| 16:19:20 | 61.1070862 | 78.9599569 | 76.5694799 | 71.3497718 |
| 16:19:21 | 61.1070862 | 78.9599569 | 76.5694799 | 72.3497718 |
| 16:19:22 | 61.1070862 | 80.9599569 | 75.5694799 | 72.3497718 |
| 16:19:23 | 61.1070862 | 80.9599569 | 75.5694799 | 72.3497718 |
| 16:19:24 | 60.1070862 | 80.9599569 | 75.5694799 | 72.3497718 |
| 16:19:25 | 58.1070862 | 79.9599569 | 75.5694799 | 72.3497718 |
| 16:19:26 | 58.1070862 | 79.9599569 | 74.5694799 | 72.3497718 |
| 16:19:27 | 58.1070862 | 79.9599569 | 73.5694799 | 73.3497718 |
| 16:19:28 | 58.1070862 | 79.9599569 | 72.5694799 | 73.3497718 |
| 16:19:29 | 57.1070862 | 73.9599569 | 69.5694799 | 73.3497718 |
| 16:19:30 | 57.1070862 | 74.9599569 | 69.5694799 | 74.3497718 |
| 16:19:31 | 57.1070862 | 75.9599569 | 69.5694799 | 74.3497718 |
| 16:19:32 | 61.1070862 | 76.9599569 | 68.5694799 | 72.3497718 |
| 16:19:33 | 64.1070862 | 76.9599569 | 68.5694799 | 72.3497718 |
| 16:19:34 | 66.1070862 | 76.9599569 | 68.5694799 | 71.3497718 |
| 16:19:35 | 66.1070862 | 77.9599569 | 68.5694799 | 71.3497718 |
| 16:19:36 | 67.1070862 | 77.9599569 | 70.5694799 | 71.3497718 |
| 16:19:37 | 66.1070862 | 77.9599569 | 70.5694799 | 71.3497718 |
| 16:19:38 | 66.1070862 | 77.9599569 | 69.5694799 | 71.3497718 |
| 16:19:39 | 64.1070862 | 77.9599569 | 69.5694799 | 71.3497718 |
| 16:19:40 | 63.1070862 | 77.9599569 | 68.5694799 | 71.3497718 |
| 16:19:41 | 63.1070862 | 77.9599569 | 68.5694799 | 71.3497718 |
| 16:19:42 | 63.1070862 | 78.9599569 | 68.5694799 | 71.3497718 |
| 16:19:43 | 62.1070862 | 78.9599569 | 68.5694799 | 71.3497718 |
| 16:19:44 | 60.1070862 | 78.9599569 | 69.5694799 | 70.3497718 |
| 16:19:45 | 60.1070862 | 79.9599569 | 69.5694799 | 70.3497718 |
| 16:19:46 | 58.1070862 | 79.9599569 | 68.5694799 | 70.3497718 |
| 16:19:47 | 58.1070862 | 66.899737  | 68.5694799 | 70.3497718 |
| 16:19:48 | 58.1070862 | 76.9599569 | 69.5694799 | 71.3497718 |
| 16:19:49 | 59.1070862 | 66.4552926 | 68.5694799 | 71.3497718 |
| 16:19:50 | 60.1070862 | 66.6775148 | 68.5694799 | 72.3497718 |
| 16:19:51 | 60.1070862 | 66.6775148 | 68.5694799 | 73.3497718 |
| 16:19:52 | 60.1070862 | 67.3441814 | 69.5694799 | 75.3497718 |
| 16:19:53 | 60.1070862 | 67.6775148 | 69.5694799 | 75.3497718 |
| 16:19:54 | 61.1070862 | 67.6775148 | 69.5694799 | 75.3497718 |
| 16:19:55 | 63.1070862 | 68.1219592 | 69.5694799 | 74.3497718 |
| 16:19:56 | 66.1070862 | 68.3441814 | 70.5694799 | 73.3497718 |
| 16:19:57 | 66.1070862 | 68.4552926 | 70.5694799 | 73.3497718 |
| 16:19:58 | 66.1070862 | 68.4552926 | 70.5694799 | 72.3497718 |
| 16:19:59 | 65.1070862 | 68.0108481 | 69.5694799 | 72.3497718 |
| 16:20:00 | 65.1070862 | 68.4552926 | 69.5694799 | 72.3497718 |
| 16:20:01 | 63.1070862 | 68.4552926 | 69.5694799 | 72.3497718 |
| 16:20:02 | 63.1070862 | 68.5664037 | 69.5694799 | 72.3497718 |
| 16:20:03 | 63.1070862 | 68.2330703 | 68.5694799 | 71.3497718 |

|          |            |            |            |            |
|----------|------------|------------|------------|------------|
| 16:20:04 | 62.1070862 | 68.2330703 | 68.5694799 | 72.3497718 |
| 16:20:05 | 62.1070862 | 68.0108481 | 68.5694799 | 73.3497718 |
| 16:20:06 | 62.1070862 | 68.0108481 | 68.5694799 | 73.3497718 |
| 16:20:07 | 63.1070862 | 67.5664037 | 69.5694799 | 74.3497718 |
| 16:20:08 | 63.1070862 | 79.9599569 | 70.5694799 | 74.3497718 |
| 16:20:09 | 63.1070862 | 79.9599569 | 70.5694799 | 74.3497718 |
| 16:20:10 | 63.1070862 | 79.9599569 | 70.5694799 | 74.3497718 |
| 16:20:11 | 64.1070862 | 79.9599569 | 70.5694799 | 73.3497718 |
| 16:20:12 | 63.1070862 | 78.9599569 | 69.5694799 | 73.3497718 |
| 16:20:13 | 63.1070862 | 78.9599569 | 69.5694799 | 71.3497718 |
| 16:20:14 | 63.1070862 | 78.9599569 | 69.5694799 | 71.3497718 |
| 16:20:15 | 63.1070862 | 67.4552926 | 69.5694799 | 71.3497718 |
| 16:20:16 | 61.1070862 | 67.2330703 | 68.5694799 | 71.3497718 |
| 16:20:17 | 61.1070862 | 78.9599569 | 68.5694799 | 70.3497718 |
| 16:20:18 | 61.1070862 | 78.9599569 | 68.5694799 | 70.3497718 |
| 16:20:19 | 61.1070862 | 67.7886259 | 65.5694799 | 70.3497718 |
| 16:20:20 | 59.1070862 | 80.9599569 | 65.5694799 | 71.3497718 |
| 16:20:21 | 59.1070862 | 68.6775148 | 64.5694799 | 72.3497718 |
| 16:20:22 | 58.1070862 | 68.5664037 | 64.5694799 | 72.3497718 |
| 16:20:23 | 57.1070862 | 68.5664037 | 64.5694799 | 72.3497718 |
| 16:20:24 | 57.1070862 | 81.9599569 | 70.5694799 | 71.3497718 |
| 16:20:25 | 57.1070862 | 81.9599569 | 72.5694799 | 71.3497718 |
| 16:20:26 | 57.1070862 | 70.2330703 | 72.5694799 | 71.3497718 |
| 16:20:27 | 57.1070862 | 70.1219592 | 72.5694799 | 70.3497718 |
| 16:20:28 | 57.1070862 | 77.9599569 | 71.5694799 | 70.3497718 |
| 16:20:29 | 57.1070862 | 74.9599569 | 71.5694799 | 72.3497718 |
| 16:20:30 | 57.1070862 | 74.9599569 | 71.5694799 | 72.3497718 |
| 16:20:31 | 57.1070862 | 73.9599569 | 71.5694799 | 73.3497718 |
| 16:20:32 | 57.1070862 | 72.9599569 | 71.5694799 | 73.3497718 |
| 16:20:33 | 56.1070862 | 72.9599569 | 71.5694799 | 74.3497718 |
| 16:20:34 | 56.1070862 | 72.9599569 | 71.5694799 | 74.3497718 |
| 16:20:35 | 56.1070862 | 71.9599569 | 71.5694799 | 74.3497718 |
| 16:20:36 | 55.1070862 | 71.9599569 | 71.5694799 | 74.3497718 |
| 16:20:37 | 55.1070862 | 73.9599569 | 71.5694799 | 74.3497718 |
| 16:20:38 | 55.1070862 | 73.9599569 | 71.5694799 | 74.3497718 |
| 16:20:39 | 54.1070862 | 73.9599569 | 72.5694799 | 71.3497718 |
| 16:20:40 | 54.1070862 | 73.9599569 | 72.5694799 | 70.3497718 |
| 16:20:41 | 53.1070862 | 73.9599569 | 72.5694799 | 71.3497718 |
| 16:20:42 | 53.1070862 | 73.9599569 | 73.5694799 | 72.3497718 |
| 16:20:43 | 53.1070862 | 73.9599569 | 74.5694799 | 72.3497718 |
| 16:20:44 | 53.1070862 | 74.9599569 | 74.5694799 | 73.3497718 |
| 16:20:45 | 53.1070862 | 74.9599569 | 75.5694799 | 73.3497718 |
| 16:20:46 | 54.1070862 | 75.9599569 | 74.5694799 | 72.3497718 |
| 16:20:47 | 54.1070862 | 75.9599569 | 74.5694799 | 71.3497718 |
| 16:20:48 | 56.1070862 | 75.9599569 | 74.5694799 | 71.3497718 |

|          |            |            |            |            |
|----------|------------|------------|------------|------------|
| 16:20:49 | 56.1070862 | 75.9599569 | 74.5694799 | 71.3497718 |
| 16:20:50 | 56.1070862 | 74.9599569 | 73.5694799 | 70.3497718 |
| 16:20:51 | 56.1070862 | 75.9599569 | 73.5694799 | 70.3497718 |
| 16:20:52 | 56.1070862 | 75.9599569 | 74.5694799 | 70.3497718 |
| 16:20:53 | 77.1070862 | 75.9599569 | 74.5694799 | 71.3497718 |
| 16:20:54 | 77.1070862 | 75.9599569 | 74.5694799 | 71.3497718 |
| 16:20:55 | 77.1070862 | 74.9599569 | 74.5694799 | 70.3497718 |
| 16:20:56 | 77.1070862 | 74.9599569 | 75.5694799 | 70.3497718 |
| 16:20:57 | 77.1070862 | 74.9599569 | 75.5694799 | 70.3497718 |
| 16:20:58 | 77.1070862 | 75.9599569 | 75.5694799 | 70.3497718 |
| 16:20:59 | 77.1070862 | 76.9599569 | 74.5694799 | 70.3497718 |
| 16:21:00 | 77.1070862 | 76.9599569 | 74.5694799 | 70.3497718 |
| 16:21:01 | 77.1070862 | 77.9599569 | 73.5694799 | 71.3497718 |
| 16:21:02 | 77.1070862 | 77.9599569 | 74.5694799 | 73.3497718 |
| 16:21:03 | 77.1070862 | 77.9599569 | 74.5694799 | 73.3497718 |
| 16:21:04 | 77.1070862 | 77.9599569 | 72.5694799 | 72.3497718 |
| 16:21:05 | 77.1070862 | 76.9599569 | 70.5694799 | 72.3497718 |
| 16:21:06 | 77.1070862 | 75.9599569 | 67.5694799 | 73.3497718 |
| 16:21:07 | 77.1070862 | 75.9599569 | 68.5694799 | 72.3497718 |
| 16:21:08 | 77.1070862 | 76.9599569 | 68.5694799 | 71.3497718 |
| 16:21:09 | 77.1070862 | 77.9599569 | 68.5694799 | 71.3497718 |
| 16:21:10 | 77.1070862 | 77.9599569 | 68.5694799 | 71.3497718 |
| 16:21:11 | 77.1070862 | 78.9599569 | 68.5694799 | 72.3497718 |
| 16:21:12 | 77.1070862 | 79.9599569 | 68.5694799 | 73.3497718 |
| 16:21:13 | 77.1070862 | 79.9599569 | 68.5694799 | 73.3497718 |
| 16:21:14 | 77.1070862 | 79.9599569 | 68.5694799 | 74.3497718 |
| 16:21:15 | 77.1070862 | 79.9599569 | 68.5694799 | 75.3497718 |
| 16:21:16 | 77.1070862 | 78.9599569 | 68.5694799 | 77.3497718 |
| 16:21:17 | 77.1070862 | 77.9599569 | 69.5694799 | 77.3497718 |
| 16:21:18 | 77.1070862 | 76.9599569 | 69.5694799 | 77.3497718 |
| 16:21:19 | 77.1070862 | 76.9599569 | 69.5694799 | 77.3497718 |
| 16:21:20 | 77.1070862 | 76.9599569 | 69.5694799 | 77.3497718 |
| 16:21:21 | 77.1070862 | 76.9599569 | 68.5694799 | 77.3497718 |
| 16:21:22 | 77.1070862 | 76.9599569 | 68.5694799 | 77.3497718 |
| 16:21:23 | 77.1070862 | 76.9599569 | 69.5694799 | 77.3497718 |
| 16:21:24 | 77.1070862 | 76.9599569 | 67.5694799 | 77.3497718 |
| 16:21:25 | 77.1070862 | 76.9599569 | 67.5694799 | 77.3497718 |
| 16:21:26 | 77.1070862 | 74.9599569 | 68.5694799 | 76.3497718 |
| 16:21:27 | 77.1070862 | 72.9599569 | 66.5694799 | 74.3497718 |
| 16:21:28 | 64.1070862 | 70.9599569 | 66.5694799 | 70.3497718 |
| 16:21:29 | 63.1070862 | 70.9599569 | 65.5694799 | 70.3497718 |
| 16:21:30 | 63.1070862 | 72.9599569 | 65.5694799 | 69.3497718 |
| 16:21:31 | 64.1070862 | 72.9599569 | 65.5694799 | 69.3497718 |
| 16:21:32 | 65.1070862 | 73.9599569 | 66.5694799 | 68.3497718 |
| 16:21:33 | 65.1070862 | 75.9599569 | 66.5694799 | 68.3497718 |

|          |            |            |            |            |
|----------|------------|------------|------------|------------|
| 16:21:34 | 65.1070862 | 76.9599569 | 66.5694799 | 68.3497718 |
| 16:21:35 | 65.1070862 | 76.9599569 | 66.5694799 | 67.3497718 |
| 16:21:36 | 65.1070862 | 75.9599569 | 66.5694799 | 66.3497718 |
| 16:21:37 | 64.1070862 | 73.9599569 | 66.5694799 | 66.3497718 |
| 16:21:38 | 64.1070862 | 71.9599569 | 66.5694799 | 63.3497718 |
| 16:21:39 | 64.1070862 | 71.9599569 | 66.5694799 | 63.3497718 |
| 16:21:40 | 64.1070862 | 72.9599569 | 66.5694799 | 64.3497718 |
| 16:21:41 | 64.1070862 | 72.9599569 | 65.5694799 | 66.3497718 |
| 16:21:42 | 64.1070862 | 73.9599569 | 65.5694799 | 70.3497718 |
| 16:21:43 | 64.1070862 | 76.9599569 | 65.5694799 | 71.3497718 |
| 16:21:44 | 66.1070862 | 76.9599569 | 65.5694799 | 71.3497718 |
| 16:21:45 | 66.1070862 | 76.9599569 | 64.5694799 | 71.3497718 |
| 16:21:46 | 65.1070862 | 76.9599569 | 64.5694799 | 70.3497718 |
| 16:21:47 | 65.1070862 | 75.9599569 | 64.5694799 | 69.3497718 |
| 16:21:48 | 65.1070862 | 74.9599569 | 63.5694799 | 69.3497718 |
| 16:21:49 | 64.1070862 | 72.9599569 | 63.5694799 | 69.3497718 |
| 16:21:50 | 63.1070862 | 72.9599569 | 66.5694799 | 68.3497718 |
| 16:21:51 | 63.1070862 | 71.9599569 | 66.5694799 | 71.3497718 |
| 16:21:52 | 63.1070862 | 71.9599569 | 65.5694799 | 71.3497718 |
| 16:21:53 | 63.1070862 | 71.9599569 | 64.5694799 | 71.3497718 |
| 16:21:54 | 63.1070862 | 71.9599569 | 64.5694799 | 71.3497718 |
| 16:21:55 | 62.1070862 | 73.9599569 | 64.5694799 | 71.3497718 |
| 16:21:56 | 62.1070862 | 73.9599569 | 64.5694799 | 71.3497718 |
| 16:21:57 | 62.1070862 | 73.9599569 | 65.5694799 | 74.3497718 |
| 16:21:58 | 62.1070862 | 73.9599569 | 66.5694799 | 75.3497718 |
| 16:21:59 | 63.1070862 | 73.9599569 | 67.5694799 | 75.3497718 |
| 16:22:00 | 64.1070862 | 73.9599569 | 67.5694799 | 75.3497718 |
| 16:22:01 | 65.1070862 | 68.9599569 | 67.5694799 | 76.3497718 |
| 16:22:02 | 65.1070862 | 68.9599569 | 66.5694799 | 76.3497718 |
| 16:22:03 | 65.1070862 | 68.9599569 | 63.5694799 | 76.3497718 |
| 16:22:04 | 64.1070862 | 67.9599569 | 62.5694799 | 73.3497718 |
| 16:22:05 | 63.1070862 | 67.9599569 | 62.5694799 | 72.3497718 |
| 16:22:06 | 63.1070862 | 67.9599569 | 62.5694799 | 71.3497718 |
| 16:22:07 | 63.1070862 | 67.9599569 | 62.5694799 | 72.3497718 |
| 16:22:08 | 63.1070862 | 67.9599569 | 60.5694799 | 72.3497718 |
| 16:22:09 | 63.1070862 | 67.9599569 | 60.5694799 | 72.3497718 |
| 16:22:10 | 63.1070862 | 64.9599569 | 60.5694799 | 71.3497718 |
| 16:22:11 | 63.1070862 | 63.9599569 | 60.5694799 | 72.3497718 |
| 16:22:12 | 61.1070862 | 63.9599569 | 60.5694799 | 72.3497718 |
| 16:22:13 | 60.1070862 | 66.9599569 | 56.5694799 | 73.3497718 |
| 16:22:14 | 60.1070862 | 65.9599569 | 56.5694799 | 73.3497718 |
| 16:22:15 | 60.1070862 | 64.9599569 | 56.5694799 | 73.3497718 |
| 16:22:16 | 61.1070862 | 64.9599569 | 55.5694799 | 72.3497718 |
| 16:22:17 | 61.1070862 | 64.9599569 | 55.5694799 | 71.3497718 |
| 16:22:18 | 62.1070862 | 63.9599569 | 52.5694799 | 71.3497718 |

|          |            |            |            |            |
|----------|------------|------------|------------|------------|
| 16:22:19 | 63.1070862 | 62.9599569 | 52.5694799 | 71.3497718 |
| 16:22:20 | 63.1070862 | 62.9599569 | 51.5694799 | 70.3497718 |
| 16:22:21 | 63.1070862 | 62.9599569 | 51.5694799 | 70.3497718 |
| 16:22:22 | 65.1070862 | 65.9599569 | 49.5694799 | 71.3497718 |
| 16:22:23 | 64.1070862 | 65.9599569 | 48.5694799 | 71.3497718 |
| 16:22:24 | 64.1070862 | 65.9599569 | 49.5694799 | 71.3497718 |
| 16:22:25 | 64.1070862 | 70.9599569 | 49.5694799 | 72.3497718 |
| 16:22:26 | 64.1070862 | 70.9599569 | 49.5694799 | 72.3497718 |
| 16:22:27 | 64.1070862 | 70.9599569 | 49.5694799 | 71.3497718 |
| 16:22:28 | 64.1070862 | 71.9599569 | 49.5694799 | 71.3497718 |
| 16:22:29 | 64.1070862 | 70.9599569 | 49.5694799 | 73.3497718 |
| 16:22:30 | 65.1070862 | 70.9599569 | 49.5694799 | 73.3497718 |
| 16:22:31 | 65.1070862 | 68.9599569 | 50.5694799 | 73.3497718 |
| 16:22:32 | 65.1070862 | 68.9599569 | 50.5694799 | 73.3497718 |
| 16:22:33 | 66.1070862 | 69.9599569 | 50.5694799 | 74.3497718 |
| 16:22:34 | 67.1070862 | 70.9599569 | 50.5694799 | 72.3497718 |
| 16:22:35 | 67.1070862 | 70.9599569 | 51.5694799 | 71.3497718 |
| 16:22:36 | 69.1070862 | 69.9599569 | 51.5694799 | 69.3497718 |
| 16:22:37 | 70.1070862 | 69.9599569 | 51.5694799 | 70.3497718 |
| 16:22:38 | 70.1070862 | 68.9599569 | 51.5694799 | 71.3497718 |
| 16:22:39 | 70.1070862 | 68.9599569 | 51.5694799 | 71.3497718 |
| 16:22:40 | 70.1070862 | 71.9599569 | 50.5694799 | 72.3497718 |
| 16:22:41 | 69.1070862 | 72.9599569 | 50.5694799 | 72.3497718 |
| 16:22:42 | 68.1070862 | 72.9599569 | 50.5694799 | 71.3497718 |
| 16:22:43 | 67.1070862 | 72.9599569 | 45.5694799 | 71.3497718 |
| 16:22:44 | 67.1070862 | 71.9599569 | 45.5694799 | 70.3497718 |
| 16:22:45 | 65.1070862 | 69.9599569 | 44.5694799 | 70.3497718 |
| 16:22:46 | 65.1070862 | 68.9599569 | 44.5694799 | 69.3497718 |
| 16:22:47 | 65.1070862 | 68.9599569 | 44.5694799 | 70.3497718 |
| 16:22:48 | 65.1070862 | 68.9599569 | 44.5694799 | 70.3497718 |
| 16:22:49 | 64.1070862 | 68.9599569 | 43.5694799 | 70.3497718 |
| 16:22:50 | 64.1070862 | 68.9599569 | 43.5694799 | 70.3497718 |
| 16:22:51 | 63.1070862 | 68.9599569 | 43.5694799 | 70.3497718 |
| 16:22:52 | 63.1070862 | 68.9599569 | 43.5694799 | 70.3497718 |
| 16:22:53 | 63.1070862 | 68.9599569 | 44.5694799 | 70.3497718 |
| 16:22:54 | 63.1070862 | 68.9599569 | 44.5694799 | 71.3497718 |
| 16:22:55 | 62.1070862 | 67.9599569 | 44.5694799 | 72.3497718 |
| 16:22:56 | 61.1070862 | 67.9599569 | 44.5694799 | 72.3497718 |
| 16:22:57 | 61.1070862 | 67.9599569 | 44.5694799 | 72.3497718 |
| 16:22:58 | 61.1070862 | 68.9599569 | 46.5694799 | 72.3497718 |
| 16:22:59 | 61.1070862 | 68.9599569 | 46.5694799 | 73.3497718 |
| 16:23:00 | 63.1070862 | 68.9599569 | 46.5694799 | 74.3497718 |
| 16:23:01 | 64.1070862 | 68.9599569 | 57.5694799 | 75.3497718 |
| 16:23:02 | 64.1070862 | 69.9599569 | 64.5694799 | 76.3497718 |
| 16:23:03 | 65.1070862 | 69.9599569 | 64.5694799 | 76.3497718 |

|          |            |            |            |            |
|----------|------------|------------|------------|------------|
| 16:23:04 | 66.1070862 | 69.9599569 | 65.5694799 | 78.3497718 |
| 16:23:05 | 66.1070862 | 68.9599569 | 65.5694799 | 69.3441814 |
| 16:23:06 | 65.1070862 | 68.9599569 | 65.5694799 | 82.3497718 |
| 16:23:07 | 65.1070862 | 67.9599569 | 67.5694799 | 82.3497718 |
| 16:23:08 | 65.1070862 | 68.9599569 | 69.5694799 | 70.1219592 |
| 16:23:09 | 64.1070862 | 69.9599569 | 70.5694799 | 70.1219592 |
| 16:23:10 | 65.1070862 | 68.9599569 | 70.5694799 | 70.2330703 |
| 16:23:11 | 66.1070862 | 63.9599569 | 73.5694799 | 70.1219592 |
| 16:23:12 | 67.1070862 | 63.9599569 | 73.5694799 | 83.3497718 |
| 16:23:13 | 69.1070862 | 62.9599569 | 72.5694799 | 83.3497718 |
| 16:23:14 | 69.1070862 | 62.9599569 | 71.5694799 | 82.3497718 |
| 16:23:15 | 70.1070862 | 65.9599569 | 69.5694799 | 82.3497718 |
| 16:23:16 | 71.1070862 | 66.9599569 | 69.5694799 | 81.3497718 |
| 16:23:17 | 71.1070862 | 67.9599569 | 68.5694799 | 81.3497718 |
| 16:23:18 | 73.1070862 | 67.9599569 | 69.5694799 | 81.3497718 |
| 16:23:19 | 74.1070862 | 67.9599569 | 69.5694799 | 80.3497718 |
| 16:23:20 | 74.1070862 | 67.9599569 | 69.5694799 | 78.3497718 |
| 16:23:21 | 74.1070862 | 67.9599569 | 70.5694799 | 78.3497718 |
| 16:23:22 | 75.1070862 | 67.9599569 | 70.5694799 | 78.3497718 |
| 16:23:23 | 75.1070862 | 67.9599569 | 70.5694799 | 76.3497718 |
| 16:23:24 | 75.1070862 | 65.9599569 | 70.5694799 | 76.3497718 |
| 16:23:25 | 75.1070862 | 65.9599569 | 71.5694799 | 75.3497718 |
| 16:23:26 | 77.1070862 | 68.9599569 | 71.5694799 | 75.3497718 |
| 16:23:27 | 78.1070862 | 76.9599569 | 72.5694799 | 76.3497718 |
| 16:23:28 | 79.1070862 | 76.9599569 | 72.5694799 | 76.3497718 |
| 16:23:29 | 79.1070862 | 76.9599569 | 72.5694799 | 77.3497718 |
| 16:23:30 | 79.1070862 | 75.9599569 | 72.5694799 | 77.3497718 |
| 16:23:31 | 80.1070862 | 74.9599569 | 72.5694799 | 77.3497718 |
| 16:23:32 | 80.1070862 | 74.9599569 | 72.5694799 | 76.3497718 |
| 16:23:33 | 80.1070862 | 77.9599569 | 72.5694799 | 74.3497718 |
| 16:23:34 | 80.1070862 | 77.9599569 | 72.5694799 | 73.3497718 |
| 16:23:35 | 80.1070862 | 76.9599569 | 72.5694799 | 73.3497718 |
| 16:23:36 | 80.1070862 | 71.9599569 | 71.5694799 | 73.3497718 |
| 16:23:37 | 80.1070862 | 70.9599569 | 70.5694799 | 73.3497718 |
| 16:23:38 | 80.1070862 | 69.9599569 | 71.5694799 | 73.3497718 |
| 16:23:39 | 80.1070862 | 69.9599569 | 71.5694799 | 73.3497718 |
| 16:23:40 | 80.1070862 | 69.9599569 | 72.5694799 | 73.3497718 |
| 16:23:41 | 79.1070862 | 69.9599569 | 69.5694799 | 73.3497718 |
| 16:23:42 | 79.1070862 | 69.9599569 | 69.5694799 | 73.3497718 |
| 16:23:43 | 76.1070862 | 69.9599569 | 67.5694799 | 70.3497718 |
| 16:23:44 | 74.1070862 | 69.9599569 | 67.5694799 | 70.3497718 |
| 16:23:45 | 74.1070862 | 69.9599569 | 67.5694799 | 69.3497718 |
| 16:23:46 | 75.1070862 | 69.9599569 | 69.5694799 | 69.3497718 |
| 16:23:47 | 75.1070862 | 69.9599569 | 69.5694799 | 69.3497718 |
| 16:23:48 | 79.1070862 | 69.9599569 | 70.5694799 | 69.3497718 |

|          |            |            |            |            |
|----------|------------|------------|------------|------------|
| 16:23:49 | 81.1070862 | 69.9599569 | 70.5694799 | 69.3497718 |
| 16:23:50 | 82.1070862 | 69.9599569 | 70.5694799 | 69.3497718 |
| 16:23:51 | 69.6775148 | 68.9599569 | 71.5694799 | 69.3497718 |
| 16:23:52 | 69.7886259 | 68.9599569 | 71.5694799 | 68.3497718 |
| 16:23:53 | 69.6775148 | 68.9599569 | 69.5694799 | 68.3497718 |
| 16:23:54 | 69.4552926 | 67.9599569 | 68.5694799 | 68.3497718 |
| 16:23:55 | 69.3441814 | 67.9599569 | 68.5694799 | 66.3497718 |
| 16:23:56 | 69.5664037 | 67.9599569 | 68.5694799 | 67.3497718 |
| 16:23:57 | 69.1219592 | 66.9599569 | 68.5694799 | 67.3497718 |
| 16:23:58 | 68.899737  | 65.9599569 | 67.5694799 | 67.3497718 |
| 16:23:59 | 68.7886259 | 65.9599569 | 68.5694799 | 67.3497718 |
| 16:24:00 | 68.7886259 | 65.9599569 | 68.5694799 | 68.3497718 |
| 16:24:01 | 69.1219592 | 66.9599569 | 69.5694799 | 68.3497718 |
| 16:24:02 | 70.6775148 | 67.9599569 | 70.5694799 | 68.3497718 |
| 16:24:03 | 71.4552926 | 67.9599569 | 73.5694799 | 67.3497718 |
| 16:24:04 | 72.4552926 | 68.9599569 | 76.5694799 | 67.3497718 |
| 16:24:05 | 73.1219592 | 69.9599569 | 76.5694799 | 71.3497718 |
| 16:24:06 | 73.2330703 | 68.9599569 | 77.5694799 | 70.3497718 |
| 16:24:07 | 73.1219592 | 69.9599569 | 77.5694799 | 70.3497718 |
| 16:24:08 | 72.7886259 | 70.9599569 | 76.5694799 | 70.3497718 |
| 16:24:09 | 72.6775148 | 70.9599569 | 76.5694799 | 69.3497718 |
| 16:24:10 | 72.3441814 | 75.9599569 | 76.5694799 | 69.3497718 |
| 16:24:11 | 71.7886259 | 78.9599569 | 75.5694799 | 69.3497718 |
| 16:24:12 | 71.4552926 | 79.9599569 | 75.5694799 | 68.3497718 |
| 16:24:13 | 71.2330703 | 80.9599569 | 75.5694799 | 68.3497718 |
| 16:24:14 | 70.899737  | 80.9599569 | 73.5694799 | 68.3497718 |
| 16:24:15 | 70.899737  | 79.9599569 | 73.5694799 | 67.3497718 |
| 16:24:16 | 70.5664037 | 75.9599569 | 73.5694799 | 67.3497718 |
| 16:24:17 | 69.7886259 | 71.9599569 | 70.5694799 | 67.3497718 |
| 16:24:18 | 69.6775148 | 71.9599569 | 69.5694799 | 67.3497718 |
| 16:24:19 | 69.1219592 | 70.9599569 | 67.5694799 | 67.3497718 |
| 16:24:20 | 69.3441814 | 70.9599569 | 67.5694799 | 73.3497718 |
| 16:24:21 | 82.1070862 | 70.9599569 | 70.5694799 | 74.3497718 |
| 16:24:22 | 82.1070862 | 70.9599569 | 70.5694799 | 74.3497718 |
| 16:24:23 | 80.1070862 | 70.9599569 | 71.5694799 | 73.3497718 |
| 16:24:24 | 79.1070862 | 68.9599569 | 71.5694799 | 72.3497718 |
| 16:24:25 | 78.1070862 | 66.9599569 | 71.5694799 | 70.3497718 |
| 16:24:26 | 78.1070862 | 66.9599569 | 71.5694799 | 70.3497718 |
| 16:24:27 | 78.1070862 | 66.9599569 | 71.5694799 | 69.3497718 |
| 16:24:28 | 78.1070862 | 67.9599569 | 71.5694799 | 68.3497718 |
| 16:24:29 | 78.1070862 | 67.9599569 | 71.5694799 | 68.3497718 |
| 16:24:30 | 78.1070862 | 67.9599569 | 71.5694799 | 66.3497718 |
| 16:24:31 | 78.1070862 | 67.9599569 | 71.5694799 | 66.3497718 |
| 16:24:32 | 77.1070862 | 67.9599569 | 71.5694799 | 64.3497718 |
| 16:24:33 | 76.1070862 | 76.9599569 | 71.5694799 | 64.3497718 |



|          |            |            |            |            |
|----------|------------|------------|------------|------------|
| 16:24:34 | 74.1070862 | 77.9599569 | 70.5694799 | 64.3497718 |
| 16:24:35 | 73.1070862 | 77.9599569 | 70.5694799 | 64.3497718 |
| 16:24:36 | 73.1070862 | 77.9599569 | 70.5694799 | 64.3497718 |
| 16:24:37 | 71.1070862 | 78.9599569 | 69.5694799 | 65.3497718 |
| 16:24:38 | 71.1070862 | 79.9599569 | 67.5694799 | 68.3497718 |
| 16:24:39 | 71.1070862 | 79.9599569 | 67.5694799 | 68.3497718 |
| 16:24:40 | 69.1070862 | 79.9599569 | 67.5694799 | 68.3497718 |
| 16:24:41 | 69.1070862 | 79.9599569 | 67.5694799 | 69.3497718 |
| 16:24:42 | 70.1070862 | 80.9599569 | 68.5694799 | 69.3497718 |
| 16:24:43 | 70.1070862 | 81.9599569 | 68.5694799 | 68.3497718 |
| 16:24:44 | 70.1070862 | 81.9599569 | 69.5694799 | 68.3497718 |
| 16:24:45 | 70.1070862 | 79.9599569 | 69.5694799 | 68.3497718 |
| 16:24:46 | 70.1070862 | 74.9599569 | 69.5694799 | 68.3497718 |
| 16:24:47 | 68.1070862 | 71.9599569 | 68.5694799 | 68.3497718 |
| 16:24:48 | 65.1070862 | 71.9599569 | 68.5694799 | 68.3497718 |
| 16:24:49 | 65.1070862 | 72.9599569 | 68.5694799 | 68.3497718 |
| 16:24:50 | 64.1070862 | 73.9599569 | 65.5694799 | 68.3497718 |
| 16:24:51 | 64.1070862 | 73.9599569 | 64.5694799 | 68.3497718 |
| 16:24:52 | 64.1070862 | 74.9599569 | 64.5694799 | 68.3497718 |
| 16:24:53 | 65.1070862 | 75.9599569 | 66.5694799 | 68.3497718 |
| 16:24:54 | 65.1070862 | 75.9599569 | 66.5694799 | 65.3497718 |
| 16:24:55 | 68.1070862 | 76.9599569 | 65.5694799 | 63.3497718 |
| 16:24:56 | 68.1070862 | 76.9599569 | 65.5694799 | 63.3497718 |
| 16:24:57 | 68.1070862 | 77.9599569 | 65.5694799 | 63.3497718 |
| 16:24:58 | 68.1070862 | 76.9599569 | 65.5694799 | 68.3497718 |
| 16:24:59 | 67.1070862 | 76.9599569 | 67.5694799 | 68.3497718 |
| 16:25:00 | 67.1070862 | 78.9599569 | 68.5694799 | 68.3497718 |
| 16:25:01 | 65.1070862 | 79.9599569 | 68.5694799 | 68.3497718 |
| 16:25:02 | 65.1070862 | 80.9599569 | 68.5694799 | 68.3497718 |
| 16:25:03 | 64.1070862 | 80.9599569 | 70.5694799 | 68.3497718 |
| 16:25:04 | 64.1070862 | 80.9599569 | 70.5694799 | 68.3497718 |
| 16:25:05 | 64.1070862 | 80.9599569 | 71.5694799 | 69.3497718 |
| 16:25:06 | 65.1070862 | 80.9599569 | 71.5694799 | 71.3497718 |
| 16:25:07 | 66.1070862 | 81.9599569 | 72.5694799 | 71.3497718 |
| 16:25:08 | 66.1070862 | 81.9599569 | 72.5694799 | 69.3497718 |
| 16:25:09 | 65.1070862 | 69.3441814 | 72.5694799 | 70.3497718 |
| 16:25:10 | 65.1070862 | 69.5664037 | 72.5694799 | 71.3497718 |
| 16:25:11 | 64.1070862 | 69.4552926 | 72.5694799 | 72.3497718 |
| 16:25:12 | 64.1070862 | 69.3441814 | 72.5694799 | 72.3497718 |
| 16:25:13 | 64.1070862 | 82.9599569 | 73.5694799 | 73.3497718 |
| 16:25:14 | 64.1070862 | 82.9599569 | 73.5694799 | 73.3497718 |
| 16:25:15 | 64.1070862 | 82.9599569 | 73.5694799 | 73.3497718 |
| 16:25:16 | 64.1070862 | 69.6775148 | 72.5694799 | 73.3497718 |
| 16:25:17 | 64.1070862 | 69.3441814 | 70.5694799 | 72.3497718 |
| 16:25:18 | 65.1070862 | 69.4552926 | 70.5694799 | 71.3497718 |

|          |            |            |            |            |
|----------|------------|------------|------------|------------|
| 16:25:19 | 66.1070862 | 69.6775148 | 70.5694799 | 71.3497718 |
| 16:25:20 | 66.1070862 | 69.5664037 | 70.5694799 | 70.3497718 |
| 16:25:21 | 65.1070862 | 69.4552926 | 70.5694799 | 70.3497718 |
| 16:25:22 | 64.1070862 | 69.3441814 | 70.5694799 | 70.3497718 |
| 16:25:23 | 63.1070862 | 69.1219592 | 70.5694799 | 70.3497718 |
| 16:25:24 | 63.1070862 | 69.6775148 | 70.5694799 | 71.3497718 |
| 16:25:25 | 62.1070862 | 69.4552926 | 70.5694799 | 70.3497718 |
| 16:25:26 | 62.1070862 | 69.5664037 | 69.5694799 | 70.3497718 |
| 16:25:27 | 62.1070862 | 69.899737  | 69.5694799 | 69.3497718 |
| 16:25:28 | 62.1070862 | 70.3441814 | 69.5694799 | 69.3497718 |
| 16:25:29 | 62.1070862 | 69.5664037 | 66.5694799 | 69.3497718 |
| 16:25:30 | 62.1070862 | 69.6775148 | 66.5694799 | 69.3497718 |
| 16:25:31 | 62.1070862 | 69.3441814 | 66.5694799 | 67.3497718 |
| 16:25:32 | 64.1070862 | 75.9599569 | 67.5694799 | 68.3497718 |
| 16:25:33 | 64.1070862 | 74.9599569 | 67.5694799 | 71.3497718 |
| 16:25:34 | 65.1070862 | 73.9599569 | 67.5694799 | 71.3497718 |
| 16:25:35 | 65.1070862 | 72.9599569 | 67.5694799 | 71.3497718 |
| 16:25:36 | 65.1070862 | 71.9599569 | 67.5694799 | 72.3497718 |
| 16:25:37 | 65.1070862 | 71.9599569 | 68.5694799 | 73.3497718 |
| 16:25:38 | 64.1070862 | 68.9599569 | 67.5694799 | 73.3497718 |
| 16:25:39 | 65.1070862 | 64.9599569 | 66.5694799 | 72.3497718 |
| 16:25:40 | 65.1070862 | 63.9599569 | 66.5694799 | 72.3497718 |
| 16:25:41 | 65.1070862 | 63.9599569 | 67.5694799 | 71.3497718 |
| 16:25:42 | 65.1070862 | 67.9599569 | 67.5694799 | 71.3497718 |
| 16:25:43 | 66.1070862 | 67.9599569 | 67.5694799 | 71.3497718 |
| 16:25:44 | 67.1070862 | 68.9599569 | 67.5694799 | 71.3497718 |
| 16:25:45 | 67.1070862 | 68.9599569 | 67.5694799 | 71.3497718 |
| 16:25:46 | 68.1070862 | 68.9599569 | 67.5694799 | 71.3497718 |
| 16:25:47 | 68.1070862 | 68.9599569 | 67.5694799 | 71.3497718 |
| 16:25:48 | 69.1070862 | 68.9599569 | 68.5694799 | 71.3497718 |
| 16:25:49 | 69.1070862 | 68.9599569 | 68.5694799 | 71.3497718 |
| 16:25:50 | 69.1070862 | 67.9599569 | 67.5694799 | 70.3497718 |
| 16:25:51 | 69.1070862 | 67.9599569 | 65.5694799 | 69.3497718 |
| 16:25:52 | 68.1070862 | 67.9599569 | 65.5694799 | 69.3497718 |
| 16:25:53 | 67.1070862 | 68.9599569 | 64.5694799 | 68.3497718 |
| 16:25:54 | 64.1070862 | 69.9599569 | 62.5694799 | 68.3497718 |
| 16:25:55 | 63.1070862 | 69.9599569 | 62.5694799 | 68.3497718 |
| 16:25:56 | 61.1070862 | 71.9599569 | 63.5694799 | 68.3497718 |
| 16:25:57 | 61.1070862 | 73.9599569 | 63.5694799 | 68.3497718 |
| 16:25:58 | 61.1070862 | 73.9599569 | 63.5694799 | 69.3497718 |
| 16:25:59 | 61.1070862 | 73.9599569 | 66.5694799 | 69.3497718 |
| 16:26:00 | 62.1070862 | 74.9599569 | 66.5694799 | 69.3497718 |
| 16:26:01 | 63.1070862 | 74.9599569 | 66.5694799 | 69.3497718 |
| 16:26:02 | 64.1070862 | 74.9599569 | 65.5694799 | 74.3497718 |
| 16:26:03 | 64.1070862 | 75.9599569 | 66.5694799 | 74.3497718 |

|          |            |            |            |            |
|----------|------------|------------|------------|------------|
| 16:26:04 | 65.1070862 | 74.9599569 | 67.5694799 | 75.3497718 |
| 16:26:05 | 66.1070862 | 74.9599569 | 71.5694799 | 75.3497718 |
| 16:26:06 | 66.1070862 | 74.9599569 | 71.5694799 | 79.3497718 |
| 16:26:07 | 65.1070862 | 76.9599569 | 72.5694799 | 79.3497718 |
| 16:26:08 | 65.1070862 | 75.9599569 | 73.5694799 | 79.3497718 |
| 16:26:09 | 65.1070862 | 75.9599569 | 73.5694799 | 79.3497718 |
| 16:26:10 | 63.1070862 | 74.9599569 | 74.5694799 | 79.3497718 |
| 16:26:11 | 62.1070862 | 71.9599569 | 77.5694799 | 79.3497718 |
| 16:26:12 | 63.1070862 | 70.9599569 | 78.5694799 | 81.3497718 |
| 16:26:13 | 64.1070862 | 70.9599569 | 78.5694799 | 82.3497718 |
| 16:26:14 | 64.1070862 | 72.9599569 | 78.5694799 | 82.3497718 |
| 16:26:15 | 64.1070862 | 72.9599569 | 78.5694799 | 82.3497718 |
| 16:26:16 | 64.1070862 | 74.9599569 | 78.5694799 | 82.3497718 |
| 16:26:17 | 64.1070862 | 75.9599569 | 78.5694799 | 80.3497718 |
| 16:26:18 | 61.1070862 | 75.9599569 | 79.5694799 | 77.3497718 |
| 16:26:19 | 59.1070862 | 75.9599569 | 79.5694799 | 77.3497718 |
| 16:26:20 | 59.1070862 | 75.9599569 | 78.5694799 | 77.3497718 |
| 16:26:21 | 58.1070862 | 75.9599569 | 77.5694799 | 77.3497718 |
| 16:26:22 | 57.1070862 | 76.9599569 | 77.5694799 | 77.3497718 |
| 16:26:23 | 56.1070862 | 76.9599569 | 74.5694799 | 77.3497718 |
| 16:26:24 | 56.1070862 | 76.9599569 | 74.5694799 | 77.3497718 |
| 16:26:25 | 58.1070862 | 78.9599569 | 74.5694799 | 68.3497718 |
| 16:26:26 | 60.1070862 | 78.9599569 | 74.5694799 | 68.3497718 |
| 16:26:27 | 62.1070862 | 78.9599569 | 69.5694799 | 68.3497718 |
| 16:26:28 | 62.1070862 | 79.9599569 | 68.5694799 | 68.3497718 |
| 16:26:29 | 62.1070862 | 79.9599569 | 68.5694799 | 68.3497718 |
| 16:26:30 | 62.1070862 | 77.9599569 | 69.5694799 | 68.3497718 |
| 16:26:31 | 63.1070862 | 75.9599569 | 68.5694799 | 71.3497718 |
| 16:26:32 | 57.1070862 | 74.9599569 | 68.5694799 | 74.3497718 |
| 16:26:33 | 54.1070862 | 73.9599569 | 68.5694799 | 74.3497718 |
| 16:26:34 | 52.1070862 | 73.9599569 | 67.5694799 | 74.3497718 |
| 16:26:35 | 53.1070862 | 73.9599569 | 67.5694799 | 74.3497718 |
| 16:26:36 | 55.1070862 | 75.9599569 | 67.5694799 | 74.3497718 |
| 16:26:37 | 56.1070862 | 78.9599569 | 67.5694799 | 74.3497718 |
| 16:26:38 | 56.1070862 | 78.9599569 | 67.5694799 | 74.3497718 |
| 16:26:39 | 58.1070862 | 78.9599569 | 67.5694799 | 75.3497718 |
| 16:26:40 | 61.1070862 | 71.9599569 | 67.5694799 | 75.3497718 |
| 16:26:41 | 61.1070862 | 68.9599569 | 67.5694799 | 75.3497718 |
| 16:26:42 | 64.1070862 | 67.9599569 | 67.5694799 | 75.3497718 |
| 16:26:43 | 64.1070862 | 67.9599569 | 67.5694799 | 75.3497718 |
| 16:26:44 | 64.1070862 | 66.9599569 | 67.5694799 | 75.3497718 |
| 16:26:45 | 65.1070862 | 68.9599569 | 67.5694799 | 75.3497718 |
| 16:26:46 | 65.1070862 | 72.9599569 | 68.5694799 | 75.3497718 |
| 16:26:47 | 65.1070862 | 72.9599569 | 68.5694799 | 75.3497718 |
| 16:26:48 | 65.1070862 | 72.9599569 | 66.5694799 | 74.3497718 |

|          |            |            |            |            |
|----------|------------|------------|------------|------------|
| 16:26:49 | 65.1070862 | 71.9599569 | 60.5694799 | 74.3497718 |
| 16:26:50 | 65.1070862 | 71.9599569 | 60.5694799 | 74.3497718 |
| 16:26:51 | 65.1070862 | 68.9599569 | 61.5694799 | 72.3497718 |
| 16:26:52 | 65.1070862 | 68.9599569 | 62.5694799 | 72.3497718 |
| 16:26:53 | 65.1070862 | 68.9599569 | 62.5694799 | 71.3497718 |
| 16:26:54 | 64.1070862 | 68.9599569 | 64.5694799 | 71.3497718 |
| 16:26:55 | 63.1070862 | 68.9599569 | 66.5694799 | 72.3497718 |
| 16:26:56 | 62.1070862 | 68.9599569 | 67.5694799 | 72.3497718 |
| 16:26:57 | 62.1070862 | 68.9599569 | 67.5694799 | 71.3497718 |
| 16:26:58 | 61.1070862 | 68.9599569 | 67.5694799 | 72.3497718 |
| 16:26:59 | 61.1070862 | 68.9599569 | 65.5694799 | 71.3497718 |
| 16:27:00 | 61.1070862 | 72.9599569 | 65.5694799 | 70.3497718 |
| 16:27:01 | 62.1070862 | 74.9599569 | 65.5694799 | 70.3497718 |
| 16:27:02 | 62.1070862 | 74.9599569 | 65.5694799 | 70.3497718 |
| 16:27:03 | 61.1070862 | 74.9599569 | 65.5694799 | 69.3497718 |
| 16:27:04 | 59.1070862 | 74.9599569 | 65.5694799 | 66.3497718 |
| 16:27:05 | 57.1070862 | 73.9599569 | 65.5694799 | 65.3497718 |
| 16:27:06 | 57.1070862 | 73.9599569 | 64.5694799 | 65.3497718 |
| 16:27:07 | 57.1070862 | 72.9599569 | 64.5694799 | 65.3497718 |
| 16:27:08 | 57.1070862 | 72.9599569 | 64.5694799 | 66.3497718 |
| 16:27:09 | 57.1070862 | 73.9599569 | 65.5694799 | 66.3497718 |
| 16:27:10 | 60.1070862 | 75.9599569 | 68.5694799 | 65.3497718 |
| 16:27:11 | 61.1070862 | 75.9599569 | 68.5694799 | 64.3497718 |
| 16:27:12 | 61.1070862 | 75.9599569 | 68.5694799 | 61.3497718 |
| 16:27:13 | 62.1070862 | 74.9599569 | 68.5694799 | 61.3497718 |
| 16:27:14 | 63.1070862 | 72.9599569 | 68.5694799 | 58.3497718 |
| 16:27:15 | 63.1070862 | 72.9599569 | 69.5694799 | 60.3497718 |
| 16:27:16 | 65.1070862 | 72.9599569 | 69.5694799 | 71.3497718 |
| 16:27:17 | 65.1070862 | 74.9599569 | 69.5694799 | 73.3497718 |
| 16:27:18 | 65.1070862 | 74.9599569 | 69.5694799 | 73.3497718 |
| 16:27:19 | 63.1070862 | 74.9599569 | 69.5694799 | 73.3497718 |
| 16:27:20 | 62.1070862 | 79.9599569 | 67.5694799 | 74.3497718 |
| 16:27:21 | 62.1070862 | 76.9599569 | 67.5694799 | 74.3497718 |
| 16:27:22 | 62.1070862 | 77.9599569 | 67.5694799 | 74.3497718 |
| 16:27:23 | 61.1070862 | 77.9599569 | 67.5694799 | 74.3497718 |
| 16:27:24 | 61.1070862 | 79.9599569 | 67.5694799 | 74.3497718 |
| 16:27:25 | 64.1070862 | 81.9599569 | 67.5694799 | 74.3497718 |
| 16:27:26 | 64.1070862 | 79.9599569 | 67.5694799 | 75.3497718 |
| 16:27:27 | 67.1070862 | 78.9599569 | 67.5694799 | 75.3497718 |
| 16:27:28 | 68.1070862 | 70.9599569 | 67.5694799 | 76.3497718 |
| 16:27:29 | 68.1070862 | 67.9599569 | 67.5694799 | 76.3497718 |
| 16:27:30 | 68.1070862 | 67.9599569 | 67.5694799 | 76.3497718 |
| 16:27:31 | 68.1070862 | 67.9599569 | 67.5694799 | 75.3497718 |
| 16:27:32 | 69.1070862 | 68.9599569 | 68.5694799 | 75.3497718 |
| 16:27:33 | 69.1070862 | 70.9599569 | 66.5694799 | 74.3497718 |

|          |            |            |            |            |
|----------|------------|------------|------------|------------|
| 16:27:34 | 66.1070862 | 70.9599569 | 66.5694799 | 74.3497718 |
| 16:27:35 | 64.1070862 | 69.9599569 | 65.5694799 | 74.3497718 |
| 16:27:36 | 64.1070862 | 65.9599569 | 65.5694799 | 75.3497718 |
| 16:27:37 | 64.1070862 | 64.9599569 | 64.5694799 | 75.3497718 |
| 16:27:38 | 61.1070862 | 64.9599569 | 64.5694799 | 76.3497718 |
| 16:27:39 | 61.1070862 | 64.9599569 | 64.5694799 | 76.3497718 |
| 16:27:40 | 61.1070862 | 65.9599569 | 64.5694799 | 76.3497718 |
| 16:27:41 | 62.1070862 | 73.9599569 | 66.5694799 | 75.3497718 |
| 16:27:42 | 62.1070862 | 77.9599569 | 69.5694799 | 74.3497718 |
| 16:27:43 | 63.1070862 | 80.9599569 | 69.5694799 | 74.3497718 |
| 16:27:44 | 63.1070862 | 80.9599569 | 69.5694799 | 74.3497718 |
| 16:27:45 | 62.1070862 | 80.9599569 | 69.5694799 | 73.3497718 |
| 16:27:46 | 62.1070862 | 78.9599569 | 70.5694799 | 74.3497718 |
| 16:27:47 | 62.1070862 | 74.9599569 | 72.5694799 | 74.3497718 |
| 16:27:48 | 62.1070862 | 73.9599569 | 72.5694799 | 76.3497718 |
| 16:27:49 | 65.1070862 | 73.9599569 | 73.5694799 | 76.3497718 |
| 16:27:50 | 65.1070862 | 72.9599569 | 73.5694799 | 76.3497718 |
| 16:27:51 | 66.1070862 | 72.9599569 | 73.5694799 | 75.3497718 |
| 16:27:52 | 68.1070862 | 72.9599569 | 73.5694799 | 75.3497718 |
| 16:27:53 | 69.1070862 | 72.9599569 | 73.5694799 | 75.3497718 |
| 16:27:54 | 69.1070862 | 72.9599569 | 73.5694799 | 75.3497718 |
| 16:27:55 | 71.1070862 | 72.9599569 | 73.5694799 | 75.3497718 |
| 16:27:56 | 72.1070862 | 72.9599569 | 73.5694799 | 75.3497718 |
| 16:27:57 | 73.1070862 | 72.9599569 | 73.5694799 | 77.3497718 |
| 16:27:58 | 73.1070862 | 72.9599569 | 73.5694799 | 77.3497718 |
| 16:27:59 | 72.1070862 | 71.9599569 | 72.5694799 | 76.3497718 |
| 16:28:00 | 71.1070862 | 71.9599569 | 72.5694799 | 76.3497718 |
| 16:28:01 | 67.1070862 | 71.9599569 | 72.5694799 | 76.3497718 |
| 16:28:02 | 65.1070862 | 73.9599569 | 71.5694799 | 76.3497718 |
| 16:28:03 | 65.1070862 | 74.9599569 | 70.5694799 | 75.3497718 |
| 16:28:04 | 65.1070862 | 75.9599569 | 66.5694799 | 75.3497718 |
| 16:28:05 | 65.1070862 | 76.9599569 | 66.5694799 | 75.3497718 |
| 16:28:06 | 65.1070862 | 77.9599569 | 66.5694799 | 73.3497718 |
| 16:28:07 | 63.1070862 | 77.9599569 | 66.5694799 | 73.3497718 |
| 16:28:08 | 63.1070862 | 77.9599569 | 66.5694799 | 73.3497718 |
| 16:28:09 | 60.1070862 | 79.9599569 | 66.5694799 | 73.3497718 |
| 16:28:10 | 60.1070862 | 80.9599569 | 66.5694799 | 73.3497718 |
| 16:28:11 | 62.1070862 | 80.9599569 | 66.5694799 | 72.3497718 |
| 16:28:12 | 62.1070862 | 80.9599569 | 66.5694799 | 72.3497718 |
| 16:28:13 | 64.1070862 | 80.9599569 | 68.5694799 | 71.3497718 |
| 16:28:14 | 64.1070862 | 78.9599569 | 70.5694799 | 71.3497718 |
| 16:28:15 | 64.1070862 | 75.9599569 | 70.5694799 | 70.3497718 |
| 16:28:16 | 62.1070862 | 72.9599569 | 70.5694799 | 70.3497718 |
| 16:28:17 | 58.1070862 | 71.9599569 | 72.5694799 | 71.3497718 |
| 16:28:18 | 55.1070862 | 71.9599569 | 72.5694799 | 71.3497718 |

|          |            |            |            |            |
|----------|------------|------------|------------|------------|
| 16:28:19 | 55.1070862 | 70.9599569 | 72.5694799 | 71.3497718 |
| 16:28:20 | 55.1070862 | 68.9599569 | 72.5694799 | 71.3497718 |
| 16:28:21 | 55.1070862 | 68.9599569 | 73.5694799 | 71.3497718 |
| 16:28:22 | 59.1070862 | 67.9599569 | 74.5694799 | 72.3497718 |
| 16:28:23 | 59.1070862 | 67.9599569 | 74.5694799 | 72.3497718 |
| 16:28:24 | 61.1070862 | 67.9599569 | 74.5694799 | 73.3497718 |
| 16:28:25 | 61.1070862 | 67.9599569 | 74.5694799 | 73.3497718 |
| 16:28:26 | 61.1070862 | 66.9599569 | 74.5694799 | 73.3497718 |
| 16:28:27 | 60.1070862 | 72.9599569 | 74.5694799 | 73.3497718 |
| 16:28:28 | 59.1070862 | 78.9599569 | 74.5694799 | 75.3497718 |
| 16:28:29 | 59.1070862 | 78.9599569 | 74.5694799 | 76.3497718 |
| 16:28:30 | 60.1070862 | 78.9599569 | 74.5694799 | 76.3497718 |
| 16:28:31 | 62.1070862 | 78.9599569 | 74.5694799 | 75.3497718 |
| 16:28:32 | 63.1070862 | 78.9599569 | 72.5694799 | 73.3497718 |
| 16:28:33 | 63.1070862 | 78.9599569 | 72.5694799 | 73.3497718 |
| 16:28:34 | 69.1070862 | 77.9599569 | 72.5694799 | 73.3497718 |
| 16:28:35 | 69.1070862 | 77.9599569 | 72.5694799 | 73.3497718 |
| 16:28:36 | 69.1070862 | 77.9599569 | 72.5694799 | 73.3497718 |
| 16:28:37 | 68.1070862 | 77.9599569 | 72.5694799 | 74.3497718 |
| 16:28:38 | 66.1070862 | 80.9599569 | 72.5694799 | 74.3497718 |
| 16:28:39 | 62.1070862 | 80.9599569 | 71.5694799 | 74.3497718 |
| 16:28:40 | 60.1070862 | 80.9599569 | 72.5694799 | 74.3497718 |
| 16:28:41 | 59.1070862 | 79.9599569 | 73.5694799 | 74.3497718 |
| 16:28:42 | 59.1070862 | 71.9599569 | 74.5694799 | 74.3497718 |
| 16:28:43 | 57.1070862 | 69.9599569 | 74.5694799 | 74.3497718 |
| 16:28:44 | 56.1070862 | 69.9599569 | 73.5694799 | 74.3497718 |
| 16:28:45 | 58.1070862 | 68.9599569 | 73.5694799 | 74.3497718 |
| 16:28:46 | 59.1070862 | 68.9599569 | 73.5694799 | 72.3497718 |
| 16:28:47 | 60.1070862 | 68.9599569 | 73.5694799 | 69.3497718 |
| 16:28:48 | 60.1070862 | 68.9599569 | 73.5694799 | 68.3497718 |
| 16:28:49 | 60.1070862 | 66.9599569 | 73.5694799 | 67.3497718 |
| 16:28:50 | 60.1070862 | 66.9599569 | 73.5694799 | 67.3497718 |
| 16:28:51 | 62.1070862 | 66.9599569 | 73.5694799 | 66.3497718 |
| 16:28:52 | 64.1070862 | 70.9599569 | 74.5694799 | 66.3497718 |
| 16:28:53 | 64.1070862 | 70.9599569 | 73.5694799 | 65.3497718 |
| 16:28:54 | 63.1070862 | 70.9599569 | 73.5694799 | 65.3497718 |
| 16:28:55 | 63.1070862 | 71.9599569 | 73.5694799 | 66.3497718 |
| 16:28:56 | 63.1070862 | 71.9599569 | 72.5694799 | 66.3497718 |
| 16:28:57 | 62.1070862 | 71.9599569 | 71.5694799 | 67.3497718 |
| 16:28:58 | 61.1070862 | 71.9599569 | 71.5694799 | 67.3497718 |
| 16:28:59 | 59.1070862 | 71.9599569 | 71.5694799 | 67.3497718 |
| 16:29:00 | 58.1070862 | 72.9599569 | 71.5694799 | 68.3497718 |
| 16:29:01 | 58.1070862 | 72.9599569 | 73.5694799 | 68.3497718 |
| 16:29:02 | 59.1070862 | 72.9599569 | 73.5694799 | 69.3497718 |
| 16:29:03 | 60.1070862 | 72.9599569 | 74.5694799 | 69.3497718 |

|          |            |            |            |            |
|----------|------------|------------|------------|------------|
| 16:29:04 | 62.1070862 | 72.9599569 | 74.5694799 | 73.3497718 |
| 16:29:05 | 63.1070862 | 72.9599569 | 74.5694799 | 74.3497718 |
| 16:29:06 | 63.1070862 | 72.9599569 | 74.5694799 | 74.3497718 |
| 16:29:07 | 63.1070862 | 72.9599569 | 75.5694799 | 75.3497718 |
| 16:29:08 | 64.1070862 | 72.9599569 | 75.5694799 | 71.3497718 |
| 16:29:09 | 65.1070862 | 72.9599569 | 75.5694799 | 71.3497718 |
| 16:29:10 | 65.1070862 | 69.9599569 | 75.5694799 | 70.3497718 |
| 16:29:11 | 65.1070862 | 68.9599569 | 70.5694799 | 69.3497718 |
| 16:29:12 | 57.1070862 | 67.9599569 | 70.5694799 | 69.3497718 |
| 16:29:13 | 52.1070862 | 67.9599569 | 70.5694799 | 69.3497718 |
| 16:29:14 | 52.1070862 | 66.9599569 | 66.5694799 | 69.3497718 |
| 16:29:15 | 51.1070862 | 66.9599569 | 66.5694799 | 71.3497718 |
| 16:29:16 | 52.1070862 | 64.9599569 | 66.5694799 | 73.3497718 |
| 16:29:17 | 56.1070862 | 64.9599569 | 66.5694799 | 73.3497718 |
| 16:29:18 | 60.1070862 | 78.9599569 | 63.5694799 | 73.3497718 |
| 16:29:19 | 64.1070862 | 80.9599569 | 63.5694799 | 73.3497718 |
| 16:29:20 | 67.1070862 | 80.9599569 | 62.5694799 | 72.3497718 |
| 16:29:21 | 69.1070862 | 79.9599569 | 62.5694799 | 72.3497718 |
| 16:29:22 | 70.1070862 | 79.9599569 | 61.5694799 | 73.3497718 |
| 16:29:23 | 70.1070862 | 79.9599569 | 61.5694799 | 73.3497718 |
| 16:29:24 | 69.1070862 | 79.9599569 | 61.5694799 | 73.3497718 |
| 16:29:25 | 67.1070862 | 77.9599569 | 60.5694799 | 73.3497718 |
| 16:29:26 | 65.1070862 | 77.9599569 | 62.5694799 | 72.3497718 |
| 16:29:27 | 65.1070862 | 76.9599569 | 62.5694799 | 72.3497718 |
| 16:29:28 | 65.1070862 | 75.9599569 | 67.5694799 | 72.3497718 |
| 16:29:29 | 64.1070862 | 77.9599569 | 67.5694799 | 71.3497718 |
| 16:29:30 | 64.1070862 | 77.9599569 | 67.5694799 | 71.3497718 |
| 16:29:31 | 67.1070862 | 77.9599569 | 67.5694799 | 71.3497718 |
| 16:29:32 | 72.1070862 | 75.9599569 | 67.5694799 | 70.3497718 |
| 16:29:33 | 72.1070862 | 74.9599569 | 67.5694799 | 68.3497718 |
| 16:29:34 | 75.1070862 | 73.9599569 | 67.5694799 | 68.3497718 |
| 16:29:35 | 74.1070862 | 72.9599569 | 67.5694799 | 68.3497718 |
| 16:29:36 | 74.1070862 | 72.9599569 | 67.5694799 | 70.3497718 |
| 16:29:37 | 67.1070862 | 70.9599569 | 67.5694799 | 71.3497718 |
| 16:29:38 | 59.1070862 | 71.9599569 | 68.5694799 | 71.3497718 |
| 16:29:39 | 58.1070862 | 71.9599569 | 69.5694799 | 71.3497718 |
| 16:29:40 | 57.1070862 | 72.9599569 | 69.5694799 | 73.3497718 |
| 16:29:41 | 56.1070862 | 73.9599569 | 70.5694799 | 73.3497718 |
| 16:29:42 | 56.1070862 | 74.9599569 | 70.5694799 | 73.3497718 |
| 16:29:43 | 55.1070862 | 74.9599569 | 71.5694799 | 73.3497718 |
| 16:29:44 | 55.1070862 | 74.9599569 | 72.5694799 | 71.3497718 |
| 16:29:45 | 55.1070862 | 74.9599569 | 72.5694799 | 71.3497718 |
| 16:29:46 | 55.1070862 | 74.9599569 | 70.5694799 | 72.3497718 |
| 16:29:47 | 56.1070862 | 77.9599569 | 70.5694799 | 72.3497718 |
| 16:29:48 | 56.1070862 | 77.9599569 | 68.5694799 | 72.3497718 |

|          |            |            |            |            |
|----------|------------|------------|------------|------------|
| 16:29:49 | 57.1070862 | 77.9599569 | 67.5694799 | 72.3497718 |
| 16:29:50 | 57.1070862 | 77.9599569 | 67.5694799 | 73.3497718 |
| 16:29:51 | 58.1070862 | 77.9599569 | 67.5694799 | 72.3497718 |
| 16:29:52 | 60.1070862 | 77.9599569 | 66.5694799 | 72.3497718 |
| 16:29:53 | 62.1070862 | 78.9599569 | 65.5694799 | 72.3497718 |
| 16:29:54 | 62.1070862 | 78.9599569 | 64.5694799 | 72.3497718 |
| 16:29:55 | 63.1070862 | 78.9599569 | 64.5694799 | 73.3497718 |
| 16:29:56 | 62.1070862 | 74.9599569 | 64.5694799 | 73.3497718 |
| 16:29:57 | 62.1070862 | 72.9599569 | 64.5694799 | 73.3497718 |
| 16:29:58 | 63.1070862 | 70.9599569 | 64.5694799 | 73.3497718 |
| 16:29:59 | 66.1070862 | 70.9599569 | 64.5694799 | 73.3497718 |
| 16:30:00 | 66.1070862 | 70.9599569 | 64.5694799 | 75.3497718 |
| 16:30:01 | 68.1070862 | 70.9599569 | 66.5694799 | 77.3497718 |
| 16:30:02 | 70.1070862 | 71.9599569 | 66.5694799 | 78.3497718 |
| 16:30:03 | 70.1070862 | 73.9599569 | 68.5694799 | 78.3497718 |
| 16:30:04 | 70.1070862 | 74.9599569 | 68.5694799 | 78.3497718 |
| 16:30:05 | 69.1070862 | 76.9599569 | 68.5694799 | 78.3497718 |
| 16:30:06 | 68.1070862 | 78.9599569 | 67.5694799 | 77.3497718 |
| 16:30:07 | 68.1070862 | 79.9599569 | 67.5694799 | 77.3497718 |
| 16:30:08 | 68.1070862 | 80.9599569 | 67.5694799 | 77.3497718 |
| 16:30:09 | 64.1070862 | 80.9599569 | 67.5694799 | 76.3497718 |
| 16:30:10 | 64.1070862 | 79.9599569 | 67.5694799 | 74.3497718 |
| 16:30:11 | 64.1070862 | 76.9599569 | 67.5694799 | 74.3497718 |
| 16:30:12 | 65.1070862 | 76.9599569 | 67.5694799 | 74.3497718 |
| 16:30:13 | 65.1070862 | 73.9599569 | 69.5694799 | 74.3497718 |
| 16:30:14 | 67.1070862 | 72.9599569 | 69.5694799 | 73.3497718 |
| 16:30:15 | 67.1070862 | 73.9599569 | 76.5694799 | 74.3497718 |
| 16:30:16 | 66.1070862 | 74.9599569 | 77.5694799 | 75.3497718 |
| 16:30:17 | 66.1070862 | 74.9599569 | 77.5694799 | 75.3497718 |
| 16:30:18 | 64.1070862 | 74.9599569 | 77.5694799 | 76.3497718 |
| 16:30:19 | 63.1070862 | 74.9599569 | 75.5694799 | 76.3497718 |
| 16:30:20 | 63.1070862 | 75.9599569 | 74.5694799 | 76.3497718 |
| 16:30:21 | 63.1070862 | 77.9599569 | 73.5694799 | 75.3497718 |
| 16:30:22 | 64.1070862 | 77.9599569 | 73.5694799 | 75.3497718 |
| 16:30:23 | 65.1070862 | 77.9599569 | 72.5694799 | 75.3497718 |
| 16:30:24 | 65.1070862 | 77.9599569 | 72.5694799 | 75.3497718 |
| 16:30:25 | 68.1070862 | 78.9599569 | 72.5694799 | 74.3497718 |
| 16:30:26 | 69.1070862 | 78.9599569 | 72.5694799 | 74.3497718 |
| 16:30:27 | 70.1070862 | 79.9599569 | 72.5694799 | 74.3497718 |
| 16:30:28 | 70.1070862 | 79.9599569 | 72.5694799 | 75.3497718 |
| 16:30:29 | 70.1070862 | 81.9599569 | 69.5694799 | 75.3497718 |
| 16:30:30 | 72.1070862 | 80.9599569 | 69.5694799 | 75.3497718 |
| 16:30:31 | 71.1070862 | 77.9599569 | 70.5694799 | 75.3497718 |
| 16:30:32 | 70.1070862 | 74.9599569 | 70.5694799 | 75.3497718 |
| 16:30:33 | 69.1070862 | 74.9599569 | 72.5694799 | 75.3497718 |



|          |            |            |            |            |
|----------|------------|------------|------------|------------|
| 16:30:34 | 69.1070862 | 69.9599569 | 72.5694799 | 75.3497718 |
| 16:30:35 | 69.1070862 | 68.9599569 | 72.5694799 | 74.3497718 |
| 16:30:36 | 69.1070862 | 67.9599569 | 72.5694799 | 72.3497718 |
| 16:30:37 | 69.1070862 | 64.9599569 | 72.5694799 | 72.3497718 |
| 16:30:38 | 72.1070862 | 63.9599569 | 72.5694799 | 72.3497718 |
| 16:30:39 | 73.1070862 | 62.9599569 | 73.5694799 | 72.3497718 |
| 16:30:40 | 73.1070862 | 61.9599569 | 75.5694799 | 75.3497718 |
| 16:30:41 | 73.1070862 | 63.9599569 | 75.5694799 | 76.3497718 |
| 16:30:42 | 75.1070862 | 63.9599569 | 75.5694799 | 78.3497718 |
| 16:30:43 | 75.1070862 | 70.9599569 | 75.5694799 | 78.3497718 |
| 16:30:44 | 76.1070862 | 80.9599569 | 74.5694799 | 78.3497718 |
| 16:30:45 | 75.1070862 | 80.9599569 | 74.5694799 | 77.3497718 |
| 16:30:46 | 75.1070862 | 80.9599569 | 73.5694799 | 76.3497718 |
| 16:30:47 | 73.1070862 | 80.9599569 | 69.5694799 | 75.3497718 |
| 16:30:48 | 78.1070862 | 80.9599569 | 69.5694799 | 75.3497718 |
| 16:30:49 | 78.1070862 | 80.9599569 | 68.5694799 | 75.3497718 |
| 16:30:50 | 79.1070862 | 80.9599569 | 68.5694799 | 76.3497718 |
| 16:30:51 | 79.1070862 | 81.9599569 | 68.5694799 | 77.3497718 |
| 16:30:52 | 79.1070862 | 81.9599569 | 68.5694799 | 77.3497718 |
| 16:30:53 | 78.1070862 | 81.9599569 | 67.5694799 | 77.3497718 |
| 16:30:54 | 78.1070862 | 81.9599569 | 67.5694799 | 77.3497718 |
| 16:30:55 | 62.1070862 | 71.3441814 | 66.5694799 | 76.3497718 |
| 16:30:56 | 62.1070862 | 71.3441814 | 65.5694799 | 75.3497718 |
| 16:30:57 | 59.1070862 | 70.1219592 | 65.5694799 | 74.3497718 |
| 16:30:58 | 58.1070862 | 69.4552926 | 65.5694799 | 74.3497718 |
| 16:30:59 | 58.1070862 | 69.4552926 | 65.5694799 | 74.3497718 |
| 16:31:00 | 60.1070862 | 69.3441814 | 65.5694799 | 74.3497718 |
| 16:31:01 | 61.1070862 | 69.2330703 | 65.5694799 | 74.3497718 |
| 16:31:02 | 62.1070862 | 69.0108481 | 65.5694799 | 73.3497718 |
| 16:31:03 | 62.1070862 | 68.899737  | 66.5694799 | 72.3497718 |
| 16:31:04 | 63.1070862 | 69.0108481 | 66.5694799 | 72.3497718 |
| 16:31:05 | 63.1070862 | 68.899737  | 66.5694799 | 71.3497718 |
| 16:31:06 | 63.1070862 | 68.6775148 | 65.5694799 | 71.3497718 |
| 16:31:07 | 63.1070862 | 68.7886259 | 64.5694799 | 72.3497718 |
| 16:31:08 | 64.1070862 | 68.899737  | 63.5694799 | 73.3497718 |
| 16:31:09 | 64.1070862 | 68.7886259 | 62.5694799 | 73.3497718 |
| 16:31:10 | 64.1070862 | 68.5664037 | 62.5694799 | 72.3497718 |
| 16:31:11 | 64.1070862 | 68.5664037 | 62.5694799 | 72.3497718 |
| 16:31:12 | 64.1070862 | 68.7886259 | 64.5694799 | 71.3497718 |
| 16:31:13 | 64.1070862 | 69.2330703 | 66.5694799 | 71.3497718 |
| 16:31:14 | 64.1070862 | 69.1219592 | 65.5694799 | 71.3497718 |
| 16:31:15 | 64.1070862 | 68.7886259 | 63.5694799 | 71.3497718 |
| 16:31:16 | 64.1070862 | 68.3441814 | 62.5694799 | 71.3497718 |
| 16:31:17 | 64.1070862 | 68.3441814 | 62.5694799 | 72.3497718 |
| 16:31:18 | 67.1070862 | 68.7886259 | 62.5694799 | 72.3497718 |

|          |            |            |            |            |
|----------|------------|------------|------------|------------|
| 16:31:19 | 69.1070862 | 69.5664037 | 63.5694799 | 72.3497718 |
| 16:31:20 | 70.1070862 | 76.9599569 | 63.5694799 | 72.3497718 |
| 16:31:21 | 71.1070862 | 75.9599569 | 62.5694799 | 73.3497718 |
| 16:31:22 | 71.1070862 | 75.9599569 | 62.5694799 | 73.3497718 |
| 16:31:23 | 71.1070862 | 76.9599569 | 63.5694799 | 74.3497718 |
| 16:31:24 | 71.1070862 | 77.9599569 | 63.5694799 | 74.3497718 |
| 16:31:25 | 71.1070862 | 77.9599569 | 64.5694799 | 74.3497718 |
| 16:31:26 | 70.1070862 | 77.9599569 | 65.5694799 | 74.3497718 |
| 16:31:27 | 69.1070862 | 77.9599569 | 66.5694799 | 74.3497718 |
| 16:31:28 | 69.1070862 | 76.9599569 | 66.5694799 | 74.3497718 |
| 16:31:29 | 74.1070862 | 71.9599569 | 67.5694799 | 74.3497718 |
| 16:31:30 | 77.1070862 | 70.9599569 | 68.5694799 | 74.3497718 |
| 16:31:31 | 78.1070862 | 70.9599569 | 65.5694799 | 74.3497718 |
| 16:31:32 | 78.1070862 | 69.9599569 | 63.5694799 | 74.3497718 |
| 16:31:33 | 78.1070862 | 69.9599569 | 63.5694799 | 75.3497718 |
| 16:31:34 | 79.1070862 | 69.9599569 | 60.5694799 | 75.3497718 |
| 16:31:35 | 78.1070862 | 66.9599569 | 61.5694799 | 75.3497718 |
| 16:31:36 | 77.1070862 | 65.9599569 | 61.5694799 | 75.3497718 |
| 16:31:37 | 74.1070862 | 65.9599569 | 62.5694799 | 74.3497718 |
| 16:31:38 | 73.1070862 | 64.9599569 | 62.5694799 | 74.3497718 |
| 16:31:39 | 73.1070862 | 64.9599569 | 62.5694799 | 74.3497718 |
| 16:31:40 | 77.1070862 | 61.9599569 | 61.5694799 | 74.3497718 |
| 16:31:41 | 78.1070862 | 60.9599569 | 61.5694799 | 75.3497718 |
| 16:31:42 | 78.1070862 | 60.9599569 | 61.5694799 | 75.3497718 |
| 16:31:43 | 80.1070862 | 59.9599569 | 61.5694799 | 78.3497718 |
| 16:31:44 | 82.1070862 | 62.9599569 | 61.5694799 | 78.3497718 |
| 16:31:45 | 82.1070862 | 69.9599569 | 61.5694799 | 79.3497718 |
| 16:31:46 | 81.1070862 | 71.9599569 | 61.5694799 | 79.3497718 |
| 16:31:47 | 81.1070862 | 71.9599569 | 61.5694799 | 79.3497718 |
| 16:31:48 | 80.1070862 | 71.9599569 | 61.5694799 | 78.3497718 |
| 16:31:49 | 79.1070862 | 71.9599569 | 61.5694799 | 77.3497718 |
| 16:31:50 | 71.1070862 | 71.9599569 | 62.5694799 | 76.3497718 |
| 16:31:51 | 68.1070862 | 70.9599569 | 66.5694799 | 76.3497718 |
| 16:31:52 | 66.1070862 | 70.9599569 | 69.5694799 | 76.3497718 |
| 16:31:53 | 66.1070862 | 70.9599569 | 69.5694799 | 76.3497718 |
| 16:31:54 | 66.1070862 | 70.9599569 | 70.5694799 | 77.3497718 |
| 16:31:55 | 67.1070862 | 70.9599569 | 70.5694799 | 78.3497718 |
| 16:31:56 | 66.1070862 | 70.9599569 | 70.5694799 | 78.3497718 |
| 16:31:57 | 65.1070862 | 72.9599569 | 72.5694799 | 78.3497718 |
| 16:31:58 | 63.1070862 | 72.9599569 | 72.5694799 | 77.3497718 |
| 16:31:59 | 63.1070862 | 73.9599569 | 71.5694799 | 74.3497718 |
| 16:32:00 | 63.1070862 | 74.9599569 | 67.5694799 | 74.3497718 |
| 16:32:01 | 63.1070862 | 74.9599569 | 63.5694799 | 72.3497718 |
| 16:32:02 | 62.1070862 | 74.9599569 | 62.5694799 | 72.3497718 |
| 16:32:03 | 59.1070862 | 74.9599569 | 61.5694799 | 72.3497718 |

|          |            |            |            |            |
|----------|------------|------------|------------|------------|
| 16:32:04 | 59.1070862 | 75.9599569 | 62.5694799 | 72.3497718 |
| 16:32:05 | 56.1070862 | 75.9599569 | 62.5694799 | 72.3497718 |
| 16:32:06 | 56.1070862 | 75.9599569 | 62.5694799 | 72.3497718 |
| 16:32:07 | 56.1070862 | 75.9599569 | 63.5694799 | 72.3497718 |
| 16:32:08 | 57.1070862 | 76.9599569 | 63.5694799 | 71.3497718 |
| 16:32:09 | 57.1070862 | 76.9599569 | 63.5694799 | 71.3497718 |
| 16:32:10 | 57.1070862 | 76.9599569 | 62.5694799 | 71.3497718 |
| 16:32:11 | 56.1070862 | 76.9599569 | 62.5694799 | 70.3497718 |
| 16:32:12 | 56.1070862 | 74.9599569 | 62.5694799 | 70.3497718 |
| 16:32:13 | 56.1070862 | 73.9599569 | 60.5694799 | 70.3497718 |
| 16:32:14 | 56.1070862 | 73.9599569 | 60.5694799 | 70.3497718 |
| 16:32:15 | 56.1070862 | 73.9599569 | 63.5694799 | 70.3497718 |
| 16:32:16 | 56.1070862 | 71.9599569 | 64.5694799 | 70.3497718 |
| 16:32:17 | 56.1070862 | 71.9599569 | 65.5694799 | 70.3497718 |
| 16:32:18 | 56.1070862 | 71.9599569 | 66.5694799 | 70.3497718 |
| 16:32:19 | 60.1070862 | 71.9599569 | 66.5694799 | 70.3497718 |
| 16:32:20 | 64.1070862 | 71.9599569 | 66.5694799 | 70.3497718 |
| 16:32:21 | 65.1070862 | 70.9599569 | 66.5694799 | 71.3497718 |
| 16:32:22 | 67.1070862 | 70.9599569 | 65.5694799 | 71.3497718 |
| 16:32:23 | 68.1070862 | 70.9599569 | 65.5694799 | 72.3497718 |
| 16:32:24 | 68.1070862 | 70.9599569 | 65.5694799 | 73.3497718 |
| 16:32:25 | 68.1070862 | 70.9599569 | 66.5694799 | 73.3497718 |
| 16:32:26 | 70.1070862 | 70.9599569 | 67.5694799 | 73.3497718 |
| 16:32:27 | 74.1070862 | 70.9599569 | 68.5694799 | 76.3497718 |
| 16:32:28 | 76.1070862 | 70.9599569 | 68.5694799 | 77.3497718 |
| 16:32:29 | 77.1070862 | 70.9599569 | 68.5694799 | 77.3497718 |
| 16:32:30 | 77.1070862 | 71.9599569 | 68.5694799 | 79.3497718 |
| 16:32:31 | 79.1070862 | 71.9599569 | 69.5694799 | 79.3497718 |
| 16:32:32 | 80.1070862 | 70.9599569 | 69.5694799 | 80.3497718 |
| 16:32:33 | 80.1070862 | 70.9599569 | 69.5694799 | 80.3497718 |
| 16:32:34 | 80.1070862 | 63.9599569 | 69.5694799 | 80.3497718 |
| 16:32:35 | 80.1070862 | 62.9599569 | 69.5694799 | 82.3497718 |
| 16:32:36 | 80.1070862 | 62.9599569 | 69.5694799 | 82.3497718 |
| 16:32:37 | 82.1070862 | 62.9599569 | 69.5694799 | 82.3497718 |
| 16:32:38 | 81.1070862 | 63.9599569 | 69.5694799 | 82.3497718 |
| 16:32:39 | 80.1070862 | 67.9599569 | 70.5694799 | 82.3497718 |
| 16:32:40 | 80.1070862 | 67.9599569 | 70.5694799 | 81.3497718 |
| 16:32:41 | 80.1070862 | 70.9599569 | 70.5694799 | 80.3497718 |
| 16:32:42 | 80.1070862 | 70.9599569 | 70.5694799 | 80.3497718 |
| 16:32:43 | 81.1070862 | 71.9599569 | 64.5694799 | 80.3497718 |
| 16:32:44 | 79.1070862 | 71.9599569 | 64.5694799 | 80.3497718 |
| 16:32:45 | 78.1070862 | 67.9599569 | 63.5694799 | 80.3497718 |
| 16:32:46 | 78.1070862 | 66.9599569 | 63.5694799 | 80.3497718 |
| 16:32:47 | 77.1070862 | 66.9599569 | 63.5694799 | 79.3497718 |
| 16:32:48 | 76.1070862 | 66.9599569 | 62.5694799 | 79.3497718 |

|          |            |            |            |            |
|----------|------------|------------|------------|------------|
| 16:32:49 | 75.1070862 | 64.9599569 | 62.5694799 | 77.3497718 |
| 16:32:50 | 75.1070862 | 64.9599569 | 62.5694799 | 65.3497718 |
| 16:32:51 | 74.1070862 | 65.9599569 | 62.5694799 | 62.3497718 |
| 16:32:52 | 72.1070862 | 68.9599569 | 62.5694799 | 62.3497718 |
| 16:32:53 | 71.1070862 | 70.9599569 | 62.5694799 | 65.3497718 |
| 16:32:54 | 71.1070862 | 72.9599569 | 62.5694799 | 65.3497718 |
| 16:32:55 | 70.1070862 | 72.9599569 | 63.5694799 | 65.3497718 |
| 16:32:56 | 69.1070862 | 74.9599569 | 64.5694799 | 65.3497718 |
| 16:32:57 | 69.1070862 | 75.9599569 | 64.5694799 | 65.3497718 |
| 16:32:58 | 68.1070862 | 75.9599569 | 65.5694799 | 65.3497718 |
| 16:32:59 | 68.1070862 | 76.9599569 | 66.5694799 | 65.3497718 |
| 16:33:00 | 68.1070862 | 75.9599569 | 67.5694799 | 65.3497718 |
| 16:33:01 | 69.1070862 | 75.9599569 | 66.5694799 | 68.3497718 |
| 16:33:02 | 70.1070862 | 74.9599569 | 66.5694799 | 68.3497718 |
| 16:33:03 | 70.1070862 | 74.9599569 | 65.5694799 | 68.3497718 |
| 16:33:04 | 70.1070862 | 74.9599569 | 64.5694799 | 68.3497718 |
| 16:33:05 | 71.1070862 | 73.9599569 | 64.5694799 | 68.3497718 |
| 16:33:06 | 71.1070862 | 73.9599569 | 64.5694799 | 68.3497718 |
| 16:33:07 | 70.1070862 | 73.9599569 | 64.5694799 | 68.3497718 |
| 16:33:08 | 69.1070862 | 73.9599569 | 67.5694799 | 68.3497718 |
| 16:33:09 | 68.1070862 | 72.9599569 | 68.5694799 | 68.3497718 |
| 16:33:10 | 68.1070862 | 72.9599569 | 68.5694799 | 68.3497718 |
| 16:33:11 | 68.1070862 | 72.9599569 | 68.5694799 | 68.3497718 |
| 16:33:12 | 68.1070862 | 71.9599569 | 68.5694799 | 68.3497718 |
| 16:33:13 | 68.1070862 | 71.9599569 | 69.5694799 | 68.3497718 |
| 16:33:14 | 69.1070862 | 70.9599569 | 65.5694799 | 68.3497718 |
| 16:33:15 | 69.1070862 | 69.9599569 | 65.5694799 | 67.3497718 |
| 16:33:16 | 68.1070862 | 69.9599569 | 65.5694799 | 67.3497718 |
| 16:33:17 | 67.1070862 | 68.9599569 | 65.5694799 | 66.3497718 |
| 16:33:18 | 66.1070862 | 67.9599569 | 65.5694799 | 65.3497718 |
| 16:33:19 | 66.1070862 | 67.9599569 | 65.5694799 | 64.3497718 |
| 16:33:20 | 67.1070862 | 65.9599569 | 66.5694799 | 64.3497718 |
| 16:33:21 | 67.1070862 | 65.9599569 | 66.5694799 | 64.3497718 |
| 16:33:22 | 67.1070862 | 67.9599569 | 67.5694799 | 65.3497718 |
| 16:33:23 | 68.1070862 | 68.9599569 | 67.5694799 | 66.3497718 |
| 16:33:24 | 67.1070862 | 68.9599569 | 69.5694799 | 66.3497718 |
| 16:33:25 | 67.1070862 | 68.9599569 | 69.5694799 | 67.3497718 |
| 16:33:26 | 66.1070862 | 68.9599569 | 69.5694799 | 71.3497718 |
| 16:33:27 | 66.1070862 | 68.9599569 | 70.5694799 | 71.3497718 |
| 16:33:28 | 65.1070862 | 67.9599569 | 72.5694799 | 71.3497718 |
| 16:33:29 | 65.1070862 | 67.9599569 | 73.5694799 | 71.3497718 |
| 16:33:30 | 65.1070862 | 67.9599569 | 75.5694799 | 72.3497718 |
| 16:33:31 | 66.1070862 | 67.9599569 | 75.5694799 | 72.3497718 |
| 16:33:32 | 67.1070862 | 67.9599569 | 75.5694799 | 73.3497718 |
| 16:33:33 | 67.1070862 | 67.9599569 | 74.5694799 | 72.3497718 |

|          |            |            |            |            |
|----------|------------|------------|------------|------------|
| 16:33:34 | 67.1070862 | 67.9599569 | 74.5694799 | 72.3497718 |
| 16:33:35 | 69.1070862 | 68.9599569 | 72.5694799 | 71.3497718 |
| 16:33:36 | 69.1070862 | 68.9599569 | 72.5694799 | 71.3497718 |
| 16:33:37 | 72.1070862 | 68.9599569 | 72.5694799 | 70.3497718 |
| 16:33:38 | 72.1070862 | 67.9599569 | 71.5694799 | 71.3497718 |
| 16:33:39 | 71.1070862 | 67.9599569 | 71.5694799 | 72.3497718 |
| 16:33:40 | 69.1070862 | 67.9599569 | 71.5694799 | 75.3497718 |
| 16:33:41 | 68.1070862 | 67.9599569 | 72.5694799 | 76.3497718 |
| 16:33:42 | 67.1070862 | 65.9599569 | 72.5694799 | 76.3497718 |
| 16:33:43 | 67.1070862 | 64.9599569 | 72.5694799 | 76.3497718 |
| 16:33:44 | 66.1070862 | 64.9599569 | 72.5694799 | 76.3497718 |
| 16:33:45 | 66.1070862 | 64.9599569 | 74.5694799 | 76.3497718 |
| 16:33:46 | 67.1070862 | 64.9599569 | 75.5694799 | 78.3497718 |
| 16:33:47 | 67.1070862 | 74.9599569 | 76.5694799 | 79.3497718 |
| 16:33:48 | 68.1070862 | 74.9599569 | 76.5694799 | 79.3497718 |
| 16:33:49 | 68.1070862 | 74.9599569 | 80.5694799 | 82.3497718 |
| 16:33:50 | 68.1070862 | 74.9599569 | 70.2330703 | 82.3497718 |
| 16:33:51 | 68.1070862 | 74.9599569 | 70.6775148 | 81.3497718 |
| 16:33:52 | 69.1070862 | 74.9599569 | 81.5694799 | 79.3497718 |
| 16:33:53 | 69.1070862 | 74.9599569 | 81.5694799 | 78.3497718 |
| 16:33:54 | 67.1070862 | 75.9599569 | 80.5694799 | 78.3497718 |
| 16:33:55 | 67.1070862 | 75.9599569 | 79.5694799 | 76.3497718 |
| 16:33:56 | 65.1070862 | 74.9599569 | 79.5694799 | 74.3497718 |
| 16:33:57 | 63.1070862 | 71.9599569 | 79.5694799 | 73.3497718 |
| 16:33:58 | 63.1070862 | 70.9599569 | 79.5694799 | 73.3497718 |
| 16:33:59 | 63.1070862 | 69.9599569 | 79.5694799 | 73.3497718 |
| 16:34:00 | 63.1070862 | 69.9599569 | 79.5694799 | 73.3497718 |
| 16:34:01 | 62.1070862 | 69.9599569 | 79.5694799 | 72.3497718 |
| 16:34:02 | 62.1070862 | 70.9599569 | 74.5694799 | 71.3497718 |
| 16:34:03 | 62.1070862 | 70.9599569 | 73.5694799 | 70.3497718 |
| 16:34:04 | 61.1070862 | 70.9599569 | 73.5694799 | 70.3497718 |
| 16:34:05 | 61.1070862 | 70.9599569 | 73.5694799 | 69.3497718 |
| 16:34:06 | 61.1070862 | 70.9599569 | 73.5694799 | 69.3497718 |
| 16:34:07 | 62.1070862 | 70.9599569 | 73.5694799 | 69.3497718 |
| 16:34:08 | 62.1070862 | 70.9599569 | 73.5694799 | 69.3497718 |
| 16:34:09 | 61.1070862 | 71.9599569 | 73.5694799 | 71.3497718 |
| 16:34:10 | 61.1070862 | 72.9599569 | 73.5694799 | 72.3497718 |
| 16:34:11 | 60.1070862 | 71.9599569 | 73.5694799 | 73.3497718 |
| 16:34:12 | 58.1070862 | 71.9599569 | 72.5694799 | 74.3497718 |
| 16:34:13 | 57.1070862 | 70.9599569 | 73.5694799 | 74.3497718 |
| 16:34:14 | 57.1070862 | 66.9599569 | 73.5694799 | 74.3497718 |
| 16:34:15 | 58.1070862 | 58.9599569 | 73.5694799 | 77.3497718 |
| 16:34:16 | 58.1070862 | 57.9599569 | 73.5694799 | 76.3497718 |
| 16:34:17 | 58.1070862 | 59.9599569 | 73.5694799 | 76.3497718 |
| 16:34:18 | 58.1070862 | 59.9599569 | 73.5694799 | 76.3497718 |

|          |            |            |            |            |
|----------|------------|------------|------------|------------|
| 16:34:19 | 59.1070862 | 61.9599569 | 73.5694799 | 76.3497718 |
| 16:34:20 | 59.1070862 | 62.9599569 | 73.5694799 | 78.3497718 |
| 16:34:21 | 59.1070862 | 63.9599569 | 74.5694799 | 81.3497718 |
| 16:34:22 | 59.1070862 | 63.9599569 | 74.5694799 | 80.3497718 |
| 16:34:23 | 60.1070862 | 63.9599569 | 74.5694799 | 78.3497718 |
| 16:34:24 | 60.1070862 | 63.9599569 | 78.5694799 | 78.3497718 |
| 16:34:25 | 61.1070862 | 63.9599569 | 79.5694799 | 76.3497718 |
| 16:34:26 | 61.1070862 | 63.9599569 | 79.5694799 | 74.3497718 |
| 16:34:27 | 61.1070862 | 63.9599569 | 80.5694799 | 73.3497718 |
| 16:34:28 | 63.1070862 | 63.9599569 | 68.4552926 | 72.3497718 |
| 16:34:29 | 63.1070862 | 63.9599569 | 68.6775148 | 72.3497718 |
| 16:34:30 | 63.1070862 | 63.9599569 | 68.6775148 | 72.3497718 |
| 16:34:31 | 63.1070862 | 63.9599569 | 69.1219592 | 72.3497718 |
| 16:34:32 | 63.1070862 | 71.9599569 | 70.4552926 | 71.3497718 |
| 16:34:33 | 63.1070862 | 73.9599569 | 70.899737  | 71.3497718 |
| 16:34:34 | 63.1070862 | 73.9599569 | 70.4552926 | 69.3497718 |
| 16:34:35 | 63.1070862 | 74.9599569 | 70.2330703 | 68.3497718 |
| 16:34:36 | 63.1070862 | 76.9599569 | 70.4552926 | 68.3497718 |
| 16:34:37 | 64.1070862 | 76.9599569 | 69.3441814 | 59.3497718 |
| 16:34:38 | 64.1070862 | 76.9599569 | 69.1219592 | 58.3497718 |
| 16:34:39 | 65.1070862 | 76.9599569 | 69.1219592 | 58.3497718 |
| 16:34:40 | 65.1070862 | 75.9599569 | 69.0108481 | 58.3497718 |
| 16:34:41 | 65.1070862 | 67.9599569 | 68.3441814 | 59.3497718 |
| 16:34:42 | 65.1070862 | 66.9599569 | 68.6775148 | 59.3497718 |
| 16:34:43 | 65.1070862 | 66.9599569 | 68.5664037 | 59.3497718 |
| 16:34:44 | 64.1070862 | 65.9599569 | 68.4552926 | 60.3497718 |
| 16:34:45 | 64.1070862 | 65.9599569 | 68.5664037 | 60.3497718 |
| 16:34:46 | 63.1070862 | 66.9599569 | 80.5694799 | 64.3497718 |
| 16:34:47 | 63.1070862 | 67.9599569 | 80.5694799 | 67.3497718 |
| 16:34:48 | 64.1070862 | 67.9599569 | 80.5694799 | 67.3497718 |
| 16:34:49 | 64.1070862 | 68.9599569 | 79.5694799 | 64.3497718 |
| 16:34:50 | 64.1070862 | 66.9599569 | 78.5694799 | 64.3497718 |
| 16:34:51 | 63.1070862 | 66.9599569 | 78.5694799 | 64.3497718 |
| 16:34:52 | 63.1070862 | 66.9599569 | 73.5694799 | 66.3497718 |
| 16:34:53 | 63.1070862 | 65.9599569 | 74.5694799 | 67.3497718 |
| 16:34:54 | 63.1070862 | 70.9599569 | 74.5694799 | 67.3497718 |
| 16:34:55 | 63.1070862 | 71.9599569 | 73.5694799 | 67.3497718 |
| 16:34:56 | 63.1070862 | 71.9599569 | 72.5694799 | 67.3497718 |
| 16:34:57 | 64.1070862 | 72.9599569 | 67.5694799 | 67.3497718 |
| 16:34:58 | 64.1070862 | 73.9599569 | 67.5694799 | 67.3497718 |
| 16:34:59 | 64.1070862 | 73.9599569 | 66.5694799 | 66.3497718 |
| 16:35:00 | 65.1070862 | 73.9599569 | 65.5694799 | 66.3497718 |
| 16:35:01 | 66.1070862 | 73.9599569 | 65.5694799 | 71.3497718 |
| 16:35:02 | 66.1070862 | 74.9599569 | 62.5694799 | 76.3497718 |
| 16:35:03 | 67.1070862 | 74.9599569 | 62.5694799 | 77.3497718 |

|          |            |            |            |            |
|----------|------------|------------|------------|------------|
| 16:35:04 | 67.1070862 | 74.9599569 | 59.5694799 | 77.3497718 |
| 16:35:05 | 67.1070862 | 77.9599569 | 59.5694799 | 77.3497718 |
| 16:35:06 | 69.1070862 | 77.9599569 | 59.5694799 | 78.3497718 |
| 16:35:07 | 69.1070862 | 78.9599569 | 59.5694799 | 67.0108481 |
| 16:35:08 | 70.1070862 | 78.9599569 | 60.5694799 | 76.3497718 |
| 16:35:09 | 72.1070862 | 78.9599569 | 61.5694799 | 76.3497718 |
| 16:35:10 | 69.5664037 | 80.9599569 | 61.5694799 | 75.3497718 |
| 16:35:11 | 70.2330703 | 80.9599569 | 62.5694799 | 75.3497718 |
| 16:35:12 | 70.5664037 | 70.5664037 | 63.5694799 | 75.3497718 |
| 16:35:13 | 71.0108481 | 71.0108481 | 64.5694799 | 75.3497718 |
| 16:35:14 | 70.1219592 | 70.1219592 | 64.5694799 | 72.3497718 |
| 16:35:15 | 70.1219592 | 70.1219592 | 63.5694799 | 71.3497718 |
| 16:35:16 | 83.1070862 | 70.5664037 | 64.5694799 | 71.3497718 |
| 16:35:17 | 80.1070862 | 70.5664037 | 64.5694799 | 71.3497718 |
| 16:35:18 | 78.1070862 | 77.9599569 | 64.5694799 | 70.3497718 |
| 16:35:19 | 78.1070862 | 77.9599569 | 64.5694799 | 70.3497718 |
| 16:35:20 | 78.1070862 | 77.9599569 | 64.5694799 | 70.3497718 |
| 16:35:21 | 80.1070862 | 71.9599569 | 64.5694799 | 70.3497718 |
| 16:35:22 | 81.1070862 | 68.9599569 | 64.5694799 | 71.3497718 |
| 16:35:23 | 81.1070862 | 67.9599569 | 64.5694799 | 71.3497718 |
| 16:35:24 | 81.1070862 | 67.9599569 | 63.5694799 | 71.3497718 |
| 16:35:25 | 76.1070862 | 67.9599569 | 62.5694799 | 70.3497718 |
| 16:35:26 | 76.1070862 | 67.9599569 | 62.5694799 | 70.3497718 |
| 16:35:27 | 68.1070862 | 67.9599569 | 62.5694799 | 70.3497718 |
| 16:35:28 | 66.1070862 | 67.9599569 | 61.5694799 | 70.3497718 |
| 16:35:29 | 66.1070862 | 67.9599569 | 60.5694799 | 70.3497718 |
| 16:35:30 | 67.1070862 | 67.9599569 | 60.5694799 | 70.3497718 |
| 16:35:31 | 67.1070862 | 65.9599569 | 60.5694799 | 70.3497718 |
| 16:35:32 | 67.1070862 | 65.9599569 | 60.5694799 | 70.3497718 |
| 16:35:33 | 67.1070862 | 65.9599569 | 60.5694799 | 70.3497718 |
| 16:35:34 | 67.1070862 | 65.9599569 | 60.5694799 | 69.3497718 |
| 16:35:35 | 66.1070862 | 66.9599569 | 60.5694799 | 70.3497718 |
| 16:35:36 | 65.1070862 | 66.9599569 | 60.5694799 | 72.3497718 |
| 16:35:37 | 65.1070862 | 74.9599569 | 60.5694799 | 73.3497718 |
| 16:35:38 | 65.1070862 | 74.9599569 | 60.5694799 | 73.3497718 |
| 16:35:39 | 65.1070862 | 72.9599569 | 60.5694799 | 73.3497718 |
| 16:35:40 | 66.1070862 | 72.9599569 | 60.5694799 | 71.3497718 |
| 16:35:41 | 67.1070862 | 70.9599569 | 64.5694799 | 68.3497718 |
| 16:35:42 | 67.1070862 | 68.9599569 | 64.5694799 | 68.3497718 |
| 16:35:43 | 66.1070862 | 67.9599569 | 64.5694799 | 67.3497718 |
| 16:35:44 | 66.1070862 | 67.9599569 | 65.5694799 | 67.3497718 |
| 16:35:45 | 65.1070862 | 67.9599569 | 65.5694799 | 67.3497718 |
| 16:35:46 | 65.1070862 | 65.9599569 | 65.5694799 | 67.3497718 |
| 16:35:47 | 64.1070862 | 65.9599569 | 65.5694799 | 68.3497718 |
| 16:35:48 | 63.1070862 | 65.9599569 | 65.5694799 | 68.3497718 |

|          |            |            |            |            |
|----------|------------|------------|------------|------------|
| 16:35:49 | 63.1070862 | 63.9599569 | 65.5694799 | 68.3497718 |
| 16:35:50 | 63.1070862 | 63.9599569 | 65.5694799 | 68.3497718 |
| 16:35:51 | 64.1070862 | 63.9599569 | 64.5694799 | 69.3497718 |
| 16:35:52 | 65.1070862 | 63.9599569 | 64.5694799 | 69.3497718 |
| 16:35:53 | 65.1070862 | 63.9599569 | 65.5694799 | 69.3497718 |
| 16:35:54 | 67.1070862 | 63.9599569 | 65.5694799 | 69.3497718 |
| 16:35:55 | 68.1070862 | 65.9599569 | 64.5694799 | 70.3497718 |
| 16:35:56 | 68.1070862 | 65.9599569 | 64.5694799 | 70.3497718 |
| 16:35:57 | 68.1070862 | 66.9599569 | 64.5694799 | 70.3497718 |
| 16:35:58 | 68.1070862 | 66.9599569 | 64.5694799 | 71.3497718 |
| 16:35:59 | 68.1070862 | 66.9599569 | 64.5694799 | 71.3497718 |
| 16:36:00 | 67.1070862 | 66.9599569 | 64.5694799 | 72.3497718 |
| 16:36:01 | 67.1070862 | 66.9599569 | 64.5694799 | 72.3497718 |
| 16:36:02 | 67.1070862 | 66.9599569 | 64.5694799 | 72.3497718 |
| 16:36:03 | 67.1070862 | 64.9599569 | 65.5694799 | 72.3497718 |
| 16:36:04 | 67.1070862 | 62.9599569 | 64.5694799 | 72.3497718 |
| 16:36:05 | 67.1070862 | 61.9599569 | 64.5694799 | 72.3497718 |
| 16:36:06 | 66.1070862 | 65.9599569 | 65.5694799 | 72.3497718 |
| 16:36:07 | 66.1070862 | 67.9599569 | 66.5694799 | 72.3497718 |
| 16:36:08 | 64.1070862 | 67.9599569 | 66.5694799 | 72.3497718 |
| 16:36:09 | 64.1070862 | 69.9599569 | 68.5694799 | 71.3497718 |
| 16:36:10 | 64.1070862 | 70.9599569 | 67.5694799 | 71.3497718 |
| 16:36:11 | 64.1070862 | 70.9599569 | 67.5694799 | 69.3497718 |
| 16:36:12 | 65.1070862 | 69.9599569 | 66.5694799 | 69.3497718 |
| 16:36:13 | 69.1070862 | 65.9599569 | 66.5694799 | 68.3497718 |
| 16:36:14 | 71.1070862 | 65.9599569 | 67.5694799 | 68.3497718 |
| 16:36:15 | 71.1070862 | 65.9599569 | 67.5694799 | 68.3497718 |
| 16:36:16 | 69.1070862 | 64.9599569 | 67.5694799 | 68.3497718 |
| 16:36:17 | 67.1070862 | 63.9599569 | 67.5694799 | 69.3497718 |
| 16:36:18 | 67.1070862 | 63.9599569 | 67.5694799 | 69.3497718 |
| 16:36:19 | 61.1070862 | 63.9599569 | 65.5694799 | 70.3497718 |
| 16:36:20 | 58.1070862 | 62.9599569 | 65.5694799 | 70.3497718 |
| 16:36:21 | 57.1070862 | 63.9599569 | 65.5694799 | 70.3497718 |
| 16:36:22 | 57.1070862 | 63.9599569 | 65.5694799 | 70.3497718 |
| 16:36:23 | 57.1070862 | 64.9599569 | 66.5694799 | 70.3497718 |
| 16:36:24 | 59.1070862 | 64.9599569 | 68.5694799 | 70.3497718 |
| 16:36:25 | 60.1070862 | 66.9599569 | 68.5694799 | 70.3497718 |
| 16:36:26 | 60.1070862 | 67.9599569 | 69.5694799 | 70.3497718 |
| 16:36:27 | 60.1070862 | 67.9599569 | 68.5694799 | 70.3497718 |
| 16:36:28 | 61.1070862 | 67.9599569 | 67.5694799 | 70.3497718 |
| 16:36:29 | 62.1070862 | 67.9599569 | 67.5694799 | 70.3497718 |
| 16:36:30 | 64.1070862 | 67.9599569 | 65.5694799 | 69.3497718 |
| 16:36:31 | 64.1070862 | 67.9599569 | 65.5694799 | 69.3497718 |
| 16:36:32 | 62.1070862 | 66.9599569 | 64.5694799 | 68.3497718 |
| 16:36:33 | 62.1070862 | 65.9599569 | 64.5694799 | 67.3497718 |



|          |            |            |            |            |
|----------|------------|------------|------------|------------|
| 16:36:34 | 60.1070862 | 63.9599569 | 64.5694799 | 68.3497718 |
| 16:36:35 | 59.1070862 | 63.9599569 | 64.5694799 | 69.3497718 |
| 16:36:36 | 60.1070862 | 62.9599569 | 64.5694799 | 69.3497718 |
| 16:36:37 | 60.1070862 | 62.9599569 | 63.5694799 | 69.3497718 |
| 16:36:38 | 60.1070862 | 62.9599569 | 63.5694799 | 70.3497718 |
| 16:36:39 | 62.1070862 | 64.9599569 | 63.5694799 | 70.3497718 |
| 16:36:40 | 63.1070862 | 65.9599569 | 63.5694799 | 70.3497718 |
| 16:36:41 | 63.1070862 | 67.9599569 | 63.5694799 | 72.3497718 |
| 16:36:42 | 63.1070862 | 66.9599569 | 63.5694799 | 72.3497718 |
| 16:36:43 | 64.1070862 | 66.9599569 | 63.5694799 | 71.3497718 |
| 16:36:44 | 64.1070862 | 66.9599569 | 63.5694799 | 71.3497718 |
| 16:36:45 | 65.1070862 | 66.9599569 | 64.5694799 | 71.3497718 |
| 16:36:46 | 65.1070862 | 67.9599569 | 63.5694799 | 70.3497718 |
| 16:36:47 | 65.1070862 | 67.9599569 | 62.5694799 | 70.3497718 |
| 16:36:48 | 64.1070862 | 68.9599569 | 62.5694799 | 70.3497718 |
| 16:36:49 | 63.1070862 | 69.9599569 | 63.5694799 | 69.3497718 |
| 16:36:50 | 60.1070862 | 69.9599569 | 64.5694799 | 69.3497718 |
| 16:36:51 | 58.1070862 | 69.9599569 | 64.5694799 | 69.3497718 |
| 16:36:52 | 56.1070862 | 69.9599569 | 64.5694799 | 69.3497718 |
| 16:36:53 | 56.1070862 | 69.9599569 | 64.5694799 | 69.3497718 |
| 16:36:54 | 56.1070862 | 69.9599569 | 64.5694799 | 68.3497718 |
| 16:36:55 | 57.1070862 | 69.9599569 | 64.5694799 | 69.3497718 |
| 16:36:56 | 57.1070862 | 69.9599569 | 64.5694799 | 69.3497718 |
| 16:36:57 | 57.1070862 | 69.9599569 | 62.5694799 | 68.3497718 |
| 16:36:58 | 57.1070862 | 68.9599569 | 62.5694799 | 68.3497718 |
| 16:36:59 | 57.1070862 | 68.9599569 | 61.5694799 | 68.3497718 |
| 16:37:00 | 57.1070862 | 68.9599569 | 61.5694799 | 69.3497718 |
| 16:37:01 | 59.1070862 | 68.9599569 | 61.5694799 | 68.3497718 |
| 16:37:02 | 60.1070862 | 68.9599569 | 61.5694799 | 69.3497718 |
| 16:37:03 | 60.1070862 | 69.9599569 | 61.5694799 | 69.3497718 |
| 16:37:04 | 60.1070862 | 69.9599569 | 61.5694799 | 70.3497718 |
| 16:37:05 | 60.1070862 | 68.9599569 | 61.5694799 | 70.3497718 |
| 16:37:06 | 59.1070862 | 68.9599569 | 61.5694799 | 70.3497718 |
| 16:37:07 | 59.1070862 | 68.9599569 | 61.5694799 | 71.3497718 |
| 16:37:08 | 59.1070862 | 68.9599569 | 61.5694799 | 71.3497718 |
| 16:37:09 | 59.1070862 | 68.9599569 | 61.5694799 | 71.3497718 |
| 16:37:10 | 60.1070862 | 67.9599569 | 61.5694799 | 72.3497718 |
| 16:37:11 | 61.1070862 | 67.9599569 | 61.5694799 | 73.3497718 |
| 16:37:12 | 61.1070862 | 67.9599569 | 61.5694799 | 73.3497718 |
| 16:37:13 | 62.1070862 | 67.9599569 | 61.5694799 | 72.3497718 |
| 16:37:14 | 63.1070862 | 68.9599569 | 62.5694799 | 73.3497718 |
| 16:37:15 | 62.1070862 | 67.9599569 | 64.5694799 | 73.3497718 |
| 16:37:16 | 61.1070862 | 67.9599569 | 64.5694799 | 72.3497718 |
| 16:37:17 | 60.1070862 | 67.9599569 | 66.5694799 | 70.3497718 |
| 16:37:18 | 58.1070862 | 67.9599569 | 66.5694799 | 70.3497718 |

|          |            |            |            |            |
|----------|------------|------------|------------|------------|
| 16:37:19 | 58.1070862 | 67.9599569 | 66.5694799 | 70.3497718 |
| 16:37:20 | 58.1070862 | 67.9599569 | 65.5694799 | 69.3497718 |
| 16:37:21 | 58.1070862 | 67.9599569 | 64.5694799 | 68.3497718 |
| 16:37:22 | 59.1070862 | 68.9599569 | 64.5694799 | 68.3497718 |
| 16:37:23 | 59.1070862 | 68.9599569 | 63.5694799 | 68.3497718 |
| 16:37:24 | 59.1070862 | 65.9599569 | 63.5694799 | 67.3497718 |
| 16:37:25 | 58.1070862 | 63.9599569 | 63.5694799 | 67.3497718 |
| 16:37:26 | 58.1070862 | 63.9599569 | 63.5694799 | 68.3497718 |
| 16:37:27 | 59.1070862 | 63.9599569 | 63.5694799 | 69.3497718 |
| 16:37:28 | 59.1070862 | 63.9599569 | 63.5694799 | 69.3497718 |
| 16:37:29 | 60.1070862 | 63.9599569 | 63.5694799 | 69.3497718 |
| 16:37:30 | 60.1070862 | 62.9599569 | 63.5694799 | 68.3497718 |
| 16:37:31 | 61.1070862 | 61.9599569 | 63.5694799 | 68.3497718 |
| 16:37:32 | 60.1070862 | 61.9599569 | 67.5694799 | 68.3497718 |
| 16:37:33 | 59.1070862 | 61.9599569 | 67.5694799 | 68.3497718 |
| 16:37:34 | 59.1070862 | 59.9599569 | 64.5694799 | 68.3497718 |
| 16:37:35 | 59.1070862 | 59.9599569 | 63.5694799 | 67.3497718 |
| 16:37:36 | 60.1070862 | 59.9599569 | 63.5694799 | 67.3497718 |
| 16:37:37 | 63.1070862 | 61.9599569 | 63.5694799 | 66.3497718 |
| 16:37:38 | 63.1070862 | 61.9599569 | 62.5694799 | 66.3497718 |
| 16:37:39 | 63.1070862 | 61.9599569 | 62.5694799 | 64.3497718 |
| 16:37:40 | 64.1070862 | 60.9599569 | 62.5694799 | 64.3497718 |
| 16:37:41 | 64.1070862 | 60.9599569 | 63.5694799 | 63.3497718 |
| 16:37:42 | 67.1070862 | 60.9599569 | 64.5694799 | 63.3497718 |
| 16:37:43 | 68.1070862 | 60.9599569 | 64.5694799 | 63.3497718 |
| 16:37:44 | 69.1070862 | 60.9599569 | 64.5694799 | 63.3497718 |
| 16:37:45 | 69.1070862 | 60.9599569 | 64.5694799 | 64.3497718 |
| 16:37:46 | 69.1070862 | 60.9599569 | 65.5694799 | 64.3497718 |
| 16:37:47 | 66.1070862 | 60.9599569 | 66.5694799 | 63.3497718 |
| 16:37:48 | 64.1070862 | 61.9599569 | 66.5694799 | 63.3497718 |
| 16:37:49 | 64.1070862 | 61.9599569 | 68.5694799 | 63.3497718 |
| 16:37:50 | 64.1070862 | 61.9599569 | 69.5694799 | 63.3497718 |
| 16:37:51 | 64.1070862 | 63.9599569 | 71.5694799 | 62.3497718 |
| 16:37:52 | 66.1070862 | 63.9599569 | 71.5694799 | 61.3497718 |
| 16:37:53 | 66.1070862 | 63.9599569 | 71.5694799 | 60.3497718 |
| 16:37:54 | 66.1070862 | 63.9599569 | 71.5694799 | 60.3497718 |
| 16:37:55 | 66.1070862 | 63.9599569 | 72.5694799 | 61.3497718 |
| 16:37:56 | 67.1070862 | 64.9599569 | 71.5694799 | 61.3497718 |
| 16:37:57 | 67.1070862 | 63.9599569 | 71.5694799 | 62.3497718 |
| 16:37:58 | 68.1070862 | 68.9599569 | 71.5694799 | 64.3497718 |
| 16:37:59 | 68.1070862 | 71.9599569 | 71.5694799 | 64.3497718 |
| 16:38:00 | 69.1070862 | 72.9599569 | 71.5694799 | 64.3497718 |
| 16:38:01 | 69.1070862 | 72.9599569 | 71.5694799 | 64.3497718 |
| 16:38:02 | 70.1070862 | 73.9599569 | 71.5694799 | 64.3497718 |
| 16:38:03 | 70.1070862 | 74.9599569 | 71.5694799 | 64.3497718 |

|          |            |            |            |            |
|----------|------------|------------|------------|------------|
| 16:38:04 | 70.1070862 | 74.9599569 | 73.5694799 | 64.3497718 |
| 16:38:05 | 70.1070862 | 74.9599569 | 72.5694799 | 65.3497718 |
| 16:38:06 | 70.1070862 | 74.9599569 | 72.5694799 | 65.3497718 |
| 16:38:07 | 70.1070862 | 74.9599569 | 64.5694799 | 70.3497718 |
| 16:38:08 | 71.1070862 | 73.9599569 | 64.5694799 | 73.3497718 |
| 16:38:09 | 70.1070862 | 73.9599569 | 64.5694799 | 74.3497718 |
| 16:38:10 | 70.1070862 | 74.9599569 | 64.5694799 | 74.3497718 |
| 16:38:11 | 71.1070862 | 74.9599569 | 64.5694799 | 74.3497718 |
| 16:38:12 | 74.1070862 | 78.9599569 | 64.5694799 | 74.3497718 |
| 16:38:13 | 76.1070862 | 78.9599569 | 64.5694799 | 73.3497718 |
| 16:38:14 | 76.1070862 | 70.3441814 | 65.5694799 | 73.3497718 |
| 16:38:15 | 75.1070862 | 70.1219592 | 65.5694799 | 72.3497718 |
| 16:38:16 | 76.1070862 | 71.4552926 | 65.5694799 | 72.3497718 |
| 16:38:17 | 76.1070862 | 71.899737  | 65.5694799 | 72.3497718 |
| 16:38:18 | 75.1070862 | 71.5664037 | 65.5694799 | 71.3497718 |
| 16:38:19 | 75.1070862 | 72.899737  | 65.5694799 | 71.3497718 |
| 16:38:20 | 75.1070862 | 73.3441814 | 65.5694799 | 68.3497718 |
| 16:38:21 | 75.1070862 | 74.4552926 | 71.5694799 | 68.3497718 |
| 16:38:22 | 75.1070862 | 74.4552926 | 72.5694799 | 70.3497718 |
| 16:38:23 | 75.1070862 | 74.4552926 | 72.5694799 | 70.3497718 |
| 16:38:24 | 76.1070862 | 74.4552926 | 72.5694799 | 71.3497718 |
| 16:38:25 | 80.1070862 | 74.5664037 | 67.5694799 | 72.3497718 |
| 16:38:26 | 84.1070862 | 74.5664037 | 66.5694799 | 72.3497718 |
| 16:38:27 | 87.1070862 | 74.4552926 | 61.5694799 | 73.3497718 |
| 16:38:28 | 73.6775148 | 73.6775148 | 61.5694799 | 72.3497718 |
| 16:38:29 | 73.899737  | 73.899737  | 60.5694799 | 72.3497718 |
| 16:38:30 | 72.1219592 | 72.1219592 | 61.5694799 | 70.3497718 |
| 16:38:31 | 70.899737  | 79.9599569 | 61.5694799 | 69.3497718 |
| 16:38:32 | 70.2330703 | 71.9599569 | 63.5694799 | 69.3497718 |
| 16:38:33 | 70.4552926 | 69.9599569 | 64.5694799 | 71.3497718 |
| 16:38:34 | 70.6775148 | 69.9599569 | 65.5694799 | 71.3497718 |
| 16:38:35 | 70.899737  | 69.9599569 | 64.5694799 | 72.3497718 |
| 16:38:36 | 70.1219592 | 72.9599569 | 64.5694799 | 73.3497718 |
| 16:38:37 | 69.899737  | 73.9599569 | 63.5694799 | 73.3497718 |
| 16:38:38 | 69.5664037 | 73.9599569 | 62.5694799 | 73.3497718 |
| 16:38:39 | 69.2330703 | 74.9599569 | 62.5694799 | 73.3497718 |
| 16:38:40 | 69.3441814 | 74.9599569 | 62.5694799 | 73.3497718 |
| 16:38:41 | 69.1219592 | 74.9599569 | 65.5694799 | 73.3497718 |
| 16:38:42 | 69.6775148 | 74.9599569 | 68.5694799 | 75.3497718 |
| 16:38:43 | 69.6775148 | 74.9599569 | 68.5694799 | 75.3497718 |
| 16:38:44 | 69.6775148 | 73.9599569 | 71.5694799 | 75.3497718 |
| 16:38:45 | 81.1070862 | 73.9599569 | 73.5694799 | 79.3497718 |
| 16:38:46 | 81.1070862 | 72.9599569 | 73.5694799 | 80.3497718 |
| 16:38:47 | 81.1070862 | 72.9599569 | 69.5694799 | 80.3497718 |
| 16:38:48 | 80.1070862 | 72.9599569 | 68.5694799 | 80.3497718 |

|          |            |            |            |            |
|----------|------------|------------|------------|------------|
| 16:38:49 | 80.1070862 | 74.9599569 | 68.5694799 | 80.3497718 |
| 16:38:50 | 81.1070862 | 75.9599569 | 68.5694799 | 80.3497718 |
| 16:38:51 | 82.1070862 | 75.9599569 | 67.5694799 | 80.3497718 |
| 16:38:52 | 83.1070862 | 74.9599569 | 67.5694799 | 80.3497718 |
| 16:38:53 | 82.1070862 | 74.9599569 | 67.5694799 | 81.3497718 |
| 16:38:54 | 81.1070862 | 70.9599569 | 67.5694799 | 81.3497718 |
| 16:38:55 | 77.1070862 | 70.9599569 | 69.5694799 | 81.3497718 |
| 16:38:56 | 77.1070862 | 68.9599569 | 71.5694799 | 80.3497718 |
| 16:38:57 | 76.1070862 | 66.9599569 | 71.5694799 | 80.3497718 |
| 16:38:58 | 73.1070862 | 66.9599569 | 71.5694799 | 80.3497718 |
| 16:38:59 | 71.1070862 | 67.9599569 | 70.5694799 | 79.3497718 |
| 16:39:00 | 71.1070862 | 67.9599569 | 70.5694799 | 79.3497718 |
| 16:39:01 | 70.1070862 | 64.9599569 | 65.5694799 | 78.3497718 |
| 16:39:02 | 70.1070862 | 64.9599569 | 65.5694799 | 78.3497718 |
| 16:39:03 | 71.1070862 | 62.9599569 | 65.5694799 | 74.3497718 |
| 16:39:04 | 71.1070862 | 62.9599569 | 65.5694799 | 72.3497718 |
| 16:39:05 | 71.1070862 | 62.9599569 | 66.5694799 | 72.3497718 |
| 16:39:06 | 71.1070862 | 62.9599569 | 67.5694799 | 72.3497718 |
| 16:39:07 | 71.1070862 | 58.9599569 | 67.5694799 | 71.3497718 |
| 16:39:08 | 71.1070862 | 58.9599569 | 72.5694799 | 71.3497718 |
| 16:39:09 | 71.1070862 | 61.9599569 | 72.5694799 | 71.3497718 |
| 16:39:10 | 78.1070862 | 68.9599569 | 70.5694799 | 72.3497718 |
| 16:39:11 | 78.1070862 | 68.9599569 | 70.5694799 | 72.3497718 |
| 16:39:12 | 78.1070862 | 69.9599569 | 65.5694799 | 72.3497718 |
| 16:39:13 | 78.1070862 | 69.9599569 | 63.5694799 | 71.3497718 |
| 16:39:14 | 76.1070862 | 69.9599569 | 61.5694799 | 71.3497718 |
| 16:39:15 | 73.1070862 | 69.9599569 | 62.5694799 | 69.3497718 |
| 16:39:16 | 72.1070862 | 71.9599569 | 60.5694799 | 70.3497718 |
| 16:39:17 | 70.1070862 | 71.9599569 | 60.5694799 | 70.3497718 |
| 16:39:18 | 70.1070862 | 70.9599569 | 60.5694799 | 71.3497718 |
| 16:39:19 | 70.1070862 | 67.9599569 | 61.5694799 | 71.3497718 |
| 16:39:20 | 69.1070862 | 67.9599569 | 61.5694799 | 72.3497718 |
| 16:39:21 | 69.1070862 | 63.9599569 | 62.5694799 | 72.3497718 |
| 16:39:22 | 72.1070862 | 62.9599569 | 64.5694799 | 74.3497718 |
| 16:39:23 | 74.1070862 | 62.9599569 | 64.5694799 | 74.3497718 |
| 16:39:24 | 72.1070862 | 63.9599569 | 64.5694799 | 74.3497718 |
| 16:39:25 | 72.1070862 | 63.9599569 | 64.5694799 | 75.3497718 |
| 16:39:26 | 72.1070862 | 64.9599569 | 63.5694799 | 76.3497718 |
| 16:39:27 | 71.1070862 | 65.9599569 | 62.5694799 | 74.3497718 |
| 16:39:28 | 68.1070862 | 66.9599569 | 61.5694799 | 74.3497718 |
| 16:39:29 | 68.1070862 | 70.9599569 | 61.5694799 | 74.3497718 |
| 16:39:30 | 68.1070862 | 71.9599569 | 61.5694799 | 74.3497718 |
| 16:39:31 | 68.1070862 | 72.9599569 | 61.5694799 | 75.3497718 |
| 16:39:32 | 68.1070862 | 72.9599569 | 62.5694799 | 79.3497718 |
| 16:39:33 | 68.1070862 | 72.9599569 | 60.5694799 | 79.3497718 |

|          |            |            |            |            |
|----------|------------|------------|------------|------------|
| 16:39:34 | 67.1070862 | 72.9599569 | 59.5694799 | 81.3497718 |
| 16:39:35 | 67.1070862 | 72.9599569 | 59.5694799 | 80.3497718 |
| 16:39:36 | 67.1070862 | 72.9599569 | 63.5694799 | 80.3497718 |
| 16:39:37 | 74.1070862 | 70.9599569 | 64.5694799 | 80.3497718 |
| 16:39:38 | 75.1070862 | 70.9599569 | 65.5694799 | 78.3497718 |
| 16:39:39 | 75.1070862 | 70.9599569 | 65.5694799 | 78.3497718 |
| 16:39:40 | 74.1070862 | 70.9599569 | 65.5694799 | 78.3497718 |
| 16:39:41 | 71.1070862 | 70.9599569 | 65.5694799 | 76.3497718 |
| 16:39:42 | 71.1070862 | 70.9599569 | 65.5694799 | 76.3497718 |
| 16:39:43 | 70.1070862 | 71.9599569 | 65.5694799 | 76.3497718 |
| 16:39:44 | 70.1070862 | 72.9599569 | 63.5694799 | 75.3497718 |
| 16:39:45 | 70.1070862 | 74.9599569 | 63.5694799 | 75.3497718 |
| 16:39:46 | 71.1070862 | 74.9599569 | 64.5694799 | 75.3497718 |
| 16:39:47 | 71.1070862 | 69.9599569 | 70.5694799 | 76.3497718 |
| 16:39:48 | 71.1070862 | 65.9599569 | 72.5694799 | 76.3497718 |
| 16:39:49 | 71.1070862 | 64.9599569 | 72.5694799 | 77.3497718 |
| 16:39:50 | 71.1070862 | 64.9599569 | 72.5694799 | 78.3497718 |
| 16:39:51 | 75.1070862 | 64.9599569 | 72.5694799 | 81.3497718 |
| 16:39:52 | 75.1070862 | 64.9599569 | 73.5694799 | 80.3497718 |
| 16:39:53 | 76.1070862 | 64.9599569 | 73.5694799 | 80.3497718 |
| 16:39:54 | 76.1070862 | 64.9599569 | 73.5694799 | 80.3497718 |
| 16:39:55 | 76.1070862 | 65.9599569 | 73.5694799 | 80.3497718 |
| 16:39:56 | 77.1070862 | 66.9599569 | 74.5694799 | 80.3497718 |
| 16:39:57 | 74.1070862 | 66.9599569 | 75.5694799 | 80.3497718 |
| 16:39:58 | 73.1070862 | 66.9599569 | 76.5694799 | 80.3497718 |
| 16:39:59 | 73.1070862 | 67.9599569 | 76.5694799 | 79.3497718 |
| 16:40:00 | 73.1070862 | 67.9599569 | 75.5694799 | 79.3497718 |
| 16:40:01 | 74.1070862 | 69.9599569 | 75.5694799 | 79.3497718 |
| 16:40:02 | 74.1070862 | 70.9599569 | 73.5694799 | 78.3497718 |
| 16:40:03 | 74.1070862 | 70.9599569 | 69.5694799 | 78.3497718 |
| 16:40:04 | 75.1070862 | 71.9599569 | 68.5694799 | 77.3497718 |
| 16:40:05 | 75.1070862 | 71.9599569 | 68.5694799 | 77.3497718 |
| 16:40:06 | 75.1070862 | 68.9599569 | 66.5694799 | 74.3497718 |
| 16:40:07 | 75.1070862 | 68.9599569 | 64.5694799 | 73.3497718 |
| 16:40:08 | 78.1070862 | 66.9599569 | 64.5694799 | 73.3497718 |
| 16:40:09 | 79.1070862 | 65.9599569 | 65.5694799 | 74.3497718 |
| 16:40:10 | 79.1070862 | 63.9599569 | 65.5694799 | 74.3497718 |
| 16:40:11 | 79.1070862 | 62.9599569 | 65.5694799 | 81.3497718 |
| 16:40:12 | 80.1070862 | 62.9599569 | 64.5694799 | 82.3497718 |
| 16:40:13 | 80.1070862 | 63.9599569 | 62.5694799 | 82.3497718 |
| 16:40:14 | 80.1070862 | 63.9599569 | 62.5694799 | 82.3497718 |
| 16:40:15 | 80.1070862 | 63.9599569 | 60.5694799 | 81.3497718 |
| 16:40:16 | 80.1070862 | 63.9599569 | 60.5694799 | 82.3497718 |
| 16:40:17 | 79.1070862 | 63.9599569 | 63.5694799 | 82.3497718 |
| 16:40:18 | 79.1070862 | 64.9599569 | 64.5694799 | 81.3497718 |

|          |            |            |            |            |
|----------|------------|------------|------------|------------|
| 16:40:19 | 79.1070862 | 65.9599569 | 64.5694799 | 79.3497718 |
| 16:40:20 | 77.1070862 | 65.9599569 | 63.5694799 | 78.3497718 |
| 16:40:21 | 74.1070862 | 65.9599569 | 64.5694799 | 74.3497718 |
| 16:40:22 | 74.1070862 | 65.9599569 | 67.5694799 | 73.3497718 |
| 16:40:23 | 74.1070862 | 65.9599569 | 67.5694799 | 72.3497718 |
| 16:40:24 | 74.1070862 | 65.9599569 | 68.5694799 | 72.3497718 |
| 16:40:25 | 73.1070862 | 66.9599569 | 67.5694799 | 71.3497718 |
| 16:40:26 | 73.1070862 | 66.9599569 | 65.5694799 | 69.3497718 |
| 16:40:27 | 73.1070862 | 66.9599569 | 65.5694799 | 69.3497718 |
| 16:40:28 | 70.1070862 | 66.9599569 | 65.5694799 | 69.3497718 |
| 16:40:29 | 70.1070862 | 66.9599569 | 66.5694799 | 69.3497718 |
| 16:40:30 | 68.1070862 | 66.9599569 | 66.5694799 | 70.3497718 |
| 16:40:31 | 68.1070862 | 66.9599569 | 65.5694799 | 72.3497718 |
| 16:40:32 | 68.1070862 | 69.9599569 | 64.5694799 | 71.3497718 |
| 16:40:33 | 68.1070862 | 69.9599569 | 63.5694799 | 71.3497718 |
| 16:40:34 | 68.1070862 | 71.9599569 | 63.5694799 | 71.3497718 |
| 16:40:35 | 68.1070862 | 76.9599569 | 63.5694799 | 72.3497718 |
| 16:40:36 | 69.1070862 | 78.9599569 | 65.5694799 | 75.3497718 |
| 16:40:37 | 69.1070862 | 78.9599569 | 67.5694799 | 76.3497718 |
| 16:40:38 | 69.1070862 | 79.9599569 | 68.5694799 | 76.3497718 |
| 16:40:39 | 69.1070862 | 79.9599569 | 68.5694799 | 77.3497718 |
| 16:40:40 | 69.1070862 | 79.9599569 | 69.5694799 | 77.3497718 |
| 16:40:41 | 69.1070862 | 79.9599569 | 68.5694799 | 77.3497718 |
| 16:40:42 | 69.1070862 | 71.9599569 | 66.5694799 | 77.3497718 |
| 16:40:43 | 71.1070862 | 66.9599569 | 66.5694799 | 77.3497718 |
| 16:40:44 | 71.1070862 | 65.9599569 | 66.5694799 | 76.3497718 |
| 16:40:45 | 72.1070862 | 64.9599569 | 63.5694799 | 75.3497718 |
| 16:40:46 | 67.1070862 | 64.9599569 | 63.5694799 | 72.3497718 |
| 16:40:47 | 67.1070862 | 64.9599569 | 64.5694799 | 72.3497718 |
| 16:40:48 | 67.1070862 | 64.9599569 | 64.5694799 | 71.3497718 |
| 16:40:49 | 68.1070862 | 63.9599569 | 65.5694799 | 70.3497718 |
| 16:40:50 | 68.1070862 | 62.9599569 | 66.5694799 | 69.3497718 |
| 16:40:51 | 71.1070862 | 57.9599569 | 66.5694799 | 69.3497718 |
| 16:40:52 | 71.1070862 | 55.9599569 | 67.5694799 | 69.3497718 |
| 16:40:53 | 71.1070862 | 55.9599569 | 67.5694799 | 69.3497718 |
| 16:40:54 | 70.1070862 | 55.9599569 | 67.5694799 | 68.3497718 |
| 16:40:55 | 69.1070862 | 55.9599569 | 67.5694799 | 68.3497718 |
| 16:40:56 | 69.1070862 | 55.9599569 | 67.5694799 | 68.3497718 |
| 16:40:57 | 69.1070862 | 56.9599569 | 67.5694799 | 67.3497718 |
| 16:40:58 | 69.1070862 | 56.9599569 | 67.5694799 | 67.3497718 |
| 16:40:59 | 69.1070862 | 57.9599569 | 67.5694799 | 67.3497718 |
| 16:41:00 | 71.1070862 | 59.9599569 | 66.5694799 | 67.3497718 |
| 16:41:01 | 71.1070862 | 64.9599569 | 66.5694799 | 68.3497718 |
| 16:41:02 | 71.1070862 | 66.9599569 | 66.5694799 | 68.3497718 |
| 16:41:03 | 73.1070862 | 66.9599569 | 66.5694799 | 68.3497718 |

|          |            |            |            |            |
|----------|------------|------------|------------|------------|
| 16:41:04 | 73.1070862 | 66.9599569 | 66.5694799 | 68.3497718 |
| 16:41:05 | 73.1070862 | 66.9599569 | 65.5694799 | 68.3497718 |
| 16:41:06 | 73.1070862 | 67.9599569 | 65.5694799 | 68.3497718 |
| 16:41:07 | 74.1070862 | 67.9599569 | 65.5694799 | 68.3497718 |
| 16:41:08 | 74.1070862 | 68.9599569 | 66.5694799 | 68.3497718 |
| 16:41:09 | 73.1070862 | 76.9599569 | 66.5694799 | 68.3497718 |
| 16:41:10 | 73.1070862 | 77.9599569 | 66.5694799 | 68.3497718 |
| 16:41:11 | 72.1070862 | 79.9599569 | 65.5694799 | 68.3497718 |
| 16:41:12 | 70.1070862 | 79.9599569 | 66.5694799 | 68.3497718 |
| 16:41:13 | 68.1070862 | 78.9599569 | 68.5694799 | 73.3497718 |
| 16:41:14 | 66.1070862 | 78.9599569 | 68.5694799 | 75.3497718 |
| 16:41:15 | 66.1070862 | 76.9599569 | 68.5694799 | 76.3497718 |
| 16:41:16 | 67.1070862 | 75.9599569 | 76.5694799 | 76.3497718 |
| 16:41:17 | 68.1070862 | 75.9599569 | 77.5694799 | 76.3497718 |
| 16:41:18 | 69.1070862 | 74.9599569 | 77.5694799 | 76.3497718 |
| 16:41:19 | 70.1070862 | 79.9599569 | 75.5694799 | 76.3497718 |
| 16:41:20 | 71.1070862 | 82.9599569 | 69.5694799 | 76.3497718 |
| 16:41:21 | 71.1070862 | 81.9599569 | 66.5694799 | 73.3497718 |
| 16:41:22 | 71.1070862 | 81.9599569 | 65.5694799 | 73.3497718 |
| 16:41:23 | 70.1070862 | 80.9599569 | 65.5694799 | 72.3497718 |
| 16:41:24 | 69.1070862 | 79.9599569 | 66.5694799 | 71.3497718 |
| 16:41:25 | 68.1070862 | 75.9599569 | 66.5694799 | 71.3497718 |
| 16:41:26 | 66.1070862 | 70.9599569 | 67.5694799 | 71.3497718 |
| 16:41:27 | 66.1070862 | 68.9599569 | 67.5694799 | 71.3497718 |
| 16:41:28 | 64.1070862 | 68.9599569 | 67.5694799 | 71.3497718 |
| 16:41:29 | 64.1070862 | 68.9599569 | 67.5694799 | 70.3497718 |
| 16:41:30 | 64.1070862 | 68.9599569 | 67.5694799 | 70.3497718 |
| 16:41:31 | 66.1070862 | 68.9599569 | 67.5694799 | 70.3497718 |
| 16:41:32 | 67.1070862 | 69.9599569 | 67.5694799 | 70.3497718 |
| 16:41:33 | 67.1070862 | 69.9599569 | 67.5694799 | 71.3497718 |
| 16:41:34 | 67.1070862 | 70.9599569 | 66.5694799 | 71.3497718 |
| 16:41:35 | 67.1070862 | 70.9599569 | 64.5694799 | 72.3497718 |
| 16:41:36 | 67.1070862 | 70.9599569 | 64.5694799 | 72.3497718 |
| 16:41:37 | 67.1070862 | 70.9599569 | 63.5694799 | 77.3497718 |
| 16:41:38 | 67.1070862 | 71.9599569 | 63.5694799 | 77.3497718 |
| 16:41:39 | 67.1070862 | 72.9599569 | 62.5694799 | 77.3497718 |
| 16:41:40 | 65.1070862 | 77.9599569 | 60.5694799 | 77.3497718 |
| 16:41:41 | 65.1070862 | 68.0108481 | 60.5694799 | 75.3497718 |
| 16:41:42 | 65.1070862 | 67.5664037 | 60.5694799 | 75.3497718 |
| 16:41:43 | 64.1070862 | 66.899737  | 60.5694799 | 73.3497718 |
| 16:41:44 | 64.1070862 | 66.6775148 | 60.5694799 | 73.3497718 |
| 16:41:45 | 64.1070862 | 66.2330703 | 60.5694799 | 69.3497718 |
| 16:41:46 | 64.1070862 | 66.3441814 | 59.5694799 | 68.3497718 |
| 16:41:47 | 65.1070862 | 66.4552926 | 59.5694799 | 68.3497718 |
| 16:41:48 | 65.1070862 | 67.0108481 | 64.5694799 | 67.3497718 |

|          |            |            |            |            |
|----------|------------|------------|------------|------------|
| 16:41:49 | 66.1070862 | 67.5664037 | 68.5694799 | 67.3497718 |
| 16:41:50 | 67.1070862 | 67.5664037 | 68.5694799 | 67.3497718 |
| 16:41:51 | 67.1070862 | 68.4552926 | 69.5694799 | 68.3497718 |
| 16:41:52 | 67.1070862 | 67.899737  | 69.5694799 | 68.3497718 |
| 16:41:53 | 67.1070862 | 79.9599569 | 67.5694799 | 70.3497718 |
| 16:41:54 | 67.1070862 | 63.9599569 | 65.5694799 | 70.3497718 |
| 16:41:55 | 67.1070862 | 63.9599569 | 66.5694799 | 69.3497718 |
| 16:41:56 | 67.1070862 | 61.9599569 | 67.5694799 | 70.3497718 |
| 16:41:57 | 67.1070862 | 61.9599569 | 67.5694799 | 70.3497718 |
| 16:41:58 | 60.1070862 | 61.9599569 | 67.5694799 | 71.3497718 |
| 16:41:59 | 58.1070862 | 62.9599569 | 67.5694799 | 71.3497718 |
| 16:42:00 | 56.1070862 | 62.9599569 | 67.5694799 | 72.3497718 |
| 16:42:01 | 56.1070862 | 62.9599569 | 67.5694799 | 72.3497718 |
| 16:42:02 | 55.1070862 | 62.9599569 | 67.5694799 | 73.3497718 |
| 16:42:03 | 56.1070862 | 62.9599569 | 67.5694799 | 73.3497718 |
| 16:42:04 | 58.1070862 | 62.9599569 | 68.5694799 | 73.3497718 |
| 16:42:05 | 59.1070862 | 64.9599569 | 68.5694799 | 73.3497718 |
| 16:42:06 | 59.1070862 | 64.9599569 | 69.5694799 | 72.3497718 |
| 16:42:07 | 60.1070862 | 64.9599569 | 69.5694799 | 72.3497718 |
| 16:42:08 | 59.1070862 | 67.9599569 | 69.5694799 | 71.3497718 |
| 16:42:09 | 58.1070862 | 67.9599569 | 70.5694799 | 70.3497718 |
| 16:42:10 | 58.1070862 | 67.9599569 | 69.5694799 | 70.3497718 |
| 16:42:11 | 57.1070862 | 65.9599569 | 69.5694799 | 69.3497718 |
| 16:42:12 | 57.1070862 | 65.9599569 | 69.5694799 | 68.3497718 |
| 16:42:13 | 57.1070862 | 65.9599569 | 69.5694799 | 67.3497718 |
| 16:42:14 | 57.1070862 | 63.9599569 | 69.5694799 | 67.3497718 |
| 16:42:15 | 59.1070862 | 63.9599569 | 69.5694799 | 67.3497718 |
| 16:42:16 | 59.1070862 | 63.9599569 | 69.5694799 | 67.3497718 |
| 16:42:17 | 59.1070862 | 64.9599569 | 68.5694799 | 67.3497718 |
| 16:42:18 | 59.1070862 | 64.9599569 | 68.5694799 | 68.3497718 |
| 16:42:19 | 59.1070862 | 64.9599569 | 68.5694799 | 69.3497718 |
| 16:42:20 | 60.1070862 | 63.9599569 | 68.5694799 | 68.3497718 |
| 16:42:21 | 60.1070862 | 63.9599569 | 68.5694799 | 68.3497718 |
| 16:42:22 | 60.1070862 | 63.9599569 | 68.5694799 | 68.3497718 |
| 16:42:23 | 60.1070862 | 63.9599569 | 68.5694799 | 68.3497718 |
| 16:42:24 | 61.1070862 | 63.9599569 | 68.5694799 | 68.3497718 |
| 16:42:25 | 61.1070862 | 61.9599569 | 68.5694799 | 68.3497718 |
| 16:42:26 | 61.1070862 | 61.9599569 | 68.5694799 | 68.3497718 |
| 16:42:27 | 61.1070862 | 60.9599569 | 68.5694799 | 68.3497718 |
| 16:42:28 | 61.1070862 | 60.9599569 | 68.5694799 | 69.3497718 |
| 16:42:29 | 62.1070862 | 60.9599569 | 68.5694799 | 71.3497718 |
| 16:42:30 | 63.1070862 | 60.9599569 | 69.5694799 | 71.3497718 |
| 16:42:31 | 63.1070862 | 60.9599569 | 69.5694799 | 71.3497718 |
| 16:42:32 | 64.1070862 | 59.9599569 | 70.5694799 | 71.3497718 |
| 16:42:33 | 64.1070862 | 59.9599569 | 72.5694799 | 70.3497718 |



|          |            |            |            |            |
|----------|------------|------------|------------|------------|
| 16:42:34 | 64.1070862 | 59.9599569 | 68.5694799 | 69.3497718 |
| 16:42:35 | 64.1070862 | 58.9599569 | 68.5694799 | 68.3497718 |
| 16:42:36 | 63.1070862 | 58.9599569 | 68.5694799 | 68.3497718 |
| 16:42:37 | 62.1070862 | 58.9599569 | 68.5694799 | 68.3497718 |
| 16:42:38 | 61.1070862 | 59.9599569 | 67.5694799 | 68.3497718 |
| 16:42:39 | 61.1070862 | 68.9599569 | 67.5694799 | 68.3497718 |
| 16:42:40 | 60.1070862 | 69.9599569 | 67.5694799 | 70.3497718 |
| 16:42:41 | 61.1070862 | 68.9599569 | 67.5694799 | 71.3497718 |
| 16:42:42 | 61.1070862 | 68.9599569 | 67.5694799 | 71.3497718 |
| 16:42:43 | 63.1070862 | 68.9599569 | 67.5694799 | 70.3497718 |
| 16:42:44 | 63.1070862 | 69.9599569 | 66.5694799 | 70.3497718 |
| 16:42:45 | 64.1070862 | 69.9599569 | 66.5694799 | 69.3497718 |
| 16:42:46 | 64.1070862 | 69.9599569 | 66.5694799 | 68.3497718 |
| 16:42:47 | 63.1070862 | 67.9599569 | 66.5694799 | 68.3497718 |
| 16:42:48 | 63.1070862 | 67.9599569 | 66.5694799 | 69.3497718 |
| 16:42:49 | 63.1070862 | 62.9599569 | 66.5694799 | 69.3497718 |
| 16:42:50 | 62.1070862 | 59.9599569 | 67.5694799 | 69.3497718 |
| 16:42:51 | 64.1070862 | 59.9599569 | 68.5694799 | 69.3497718 |
| 16:42:52 | 64.1070862 | 58.9599569 | 67.5694799 | 69.3497718 |
| 16:42:53 | 65.1070862 | 59.9599569 | 67.5694799 | 69.3497718 |
| 16:42:54 | 66.1070862 | 61.9599569 | 67.5694799 | 69.3497718 |
| 16:42:55 | 66.1070862 | 62.9599569 | 67.5694799 | 68.3497718 |
| 16:42:56 | 65.1070862 | 62.9599569 | 67.5694799 | 68.3497718 |
| 16:42:57 | 64.1070862 | 62.9599569 | 67.5694799 | 68.3497718 |
| 16:42:58 | 64.1070862 | 61.9599569 | 67.5694799 | 68.3497718 |
| 16:42:59 | 63.1070862 | 61.9599569 | 67.5694799 | 68.3497718 |
| 16:43:00 | 62.1070862 | 61.9599569 | 68.5694799 | 69.3497718 |
| 16:43:01 | 62.1070862 | 62.9599569 | 68.5694799 | 69.3497718 |
| 16:43:02 | 62.1070862 | 62.9599569 | 68.5694799 | 69.3497718 |
| 16:43:03 | 62.1070862 | 64.9599569 | 69.5694799 | 69.3497718 |
| 16:43:04 | 62.1070862 | 64.9599569 | 69.5694799 | 69.3497718 |
| 16:43:05 | 62.1070862 | 63.9599569 | 70.5694799 | 69.3497718 |
| 16:43:06 | 63.1070862 | 63.9599569 | 70.5694799 | 70.3497718 |
| 16:43:07 | 64.1070862 | 63.9599569 | 70.5694799 | 70.3497718 |
| 16:43:08 | 64.1070862 | 62.9599569 | 69.5694799 | 71.3497718 |
| 16:43:09 | 67.1070862 | 62.9599569 | 69.5694799 | 71.3497718 |
| 16:43:10 | 68.1070862 | 62.9599569 | 67.5694799 | 71.3497718 |
| 16:43:11 | 68.1070862 | 62.9599569 | 67.5694799 | 71.3497718 |
| 16:43:12 | 69.1070862 | 62.9599569 | 67.5694799 | 69.3497718 |
| 16:43:13 | 69.1070862 | 61.9599569 | 68.5694799 | 69.3497718 |
| 16:43:14 | 68.1070862 | 60.9599569 | 69.5694799 | 68.3497718 |
| 16:43:15 | 68.1070862 | 58.9599569 | 69.5694799 | 68.3497718 |
| 16:43:16 | 67.1070862 | 57.9599569 | 71.5694799 | 69.3497718 |
| 16:43:17 | 67.1070862 | 60.9599569 | 74.5694799 | 69.3497718 |
| 16:43:18 | 65.1070862 | 60.9599569 | 75.5694799 | 69.3497718 |

|          |            |            |            |            |
|----------|------------|------------|------------|------------|
| 16:43:19 | 64.1070862 | 61.9599569 | 75.5694799 | 68.3497718 |
| 16:43:20 | 64.1070862 | 63.9599569 | 75.5694799 | 69.3497718 |
| 16:43:21 | 64.1070862 | 63.9599569 | 75.5694799 | 69.3497718 |
| 16:43:22 | 64.1070862 | 64.9599569 | 76.5694799 | 69.3497718 |
| 16:43:23 | 64.1070862 | 66.9599569 | 77.5694799 | 69.3497718 |
| 16:43:24 | 64.1070862 | 68.9599569 | 78.5694799 | 69.3497718 |
| 16:43:25 | 64.1070862 | 68.9599569 | 78.5694799 | 68.3497718 |
| 16:43:26 | 62.1070862 | 69.9599569 | 77.5694799 | 67.3497718 |
| 16:43:27 | 62.1070862 | 71.9599569 | 77.5694799 | 67.3497718 |
| 16:43:28 | 62.1070862 | 71.9599569 | 77.5694799 | 67.3497718 |
| 16:43:29 | 62.1070862 | 70.9599569 | 75.5694799 | 67.3497718 |
| 16:43:30 | 62.1070862 | 70.9599569 | 75.5694799 | 67.3497718 |
| 16:43:31 | 61.1070862 | 64.9599569 | 65.5694799 | 67.3497718 |
| 16:43:32 | 59.1070862 | 60.9599569 | 64.5694799 | 68.3497718 |
| 16:43:33 | 59.1070862 | 58.9599569 | 63.5694799 | 69.3497718 |
| 16:43:34 | 59.1070862 | 58.9599569 | 62.5694799 | 68.3497718 |
| 16:43:35 | 60.1070862 | 58.9599569 | 62.5694799 | 68.3497718 |
| 16:43:36 | 60.1070862 | 58.9599569 | 62.5694799 | 69.3497718 |
| 16:43:37 | 60.1070862 | 58.9599569 | 62.5694799 | 69.3497718 |
| 16:43:38 | 59.1070862 | 58.9599569 | 62.5694799 | 69.3497718 |
| 16:43:39 | 59.1070862 | 58.9599569 | 62.5694799 | 69.3497718 |
| 16:43:40 | 59.1070862 | 58.9599569 | 62.5694799 | 69.3497718 |
| 16:43:41 | 61.1070862 | 59.9599569 | 62.5694799 | 69.3497718 |
| 16:43:42 | 63.1070862 | 61.9599569 | 62.5694799 | 69.3497718 |
| 16:43:43 | 63.1070862 | 61.9599569 | 62.5694799 | 69.3497718 |
| 16:43:44 | 65.1070862 | 62.9599569 | 62.5694799 | 68.3497718 |
| 16:43:45 | 64.1070862 | 62.9599569 | 62.5694799 | 68.3497718 |
| 16:43:46 | 63.1070862 | 65.9599569 | 62.5694799 | 68.3497718 |
| 16:43:47 | 63.1070862 | 65.9599569 | 63.5694799 | 68.3497718 |
| 16:43:48 | 61.1070862 | 66.9599569 | 63.5694799 | 69.3497718 |
| 16:43:49 | 61.1070862 | 66.9599569 | 63.5694799 | 69.3497718 |
| 16:43:50 | 61.1070862 | 66.9599569 | 63.5694799 | 69.3497718 |
| 16:43:51 | 61.1070862 | 64.9599569 | 63.5694799 | 69.3497718 |
| 16:43:52 | 62.1070862 | 63.9599569 | 63.5694799 | 69.3497718 |
| 16:43:53 | 62.1070862 | 62.9599569 | 64.5694799 | 68.3497718 |
| 16:43:54 | 62.1070862 | 64.9599569 | 63.5694799 | 68.3497718 |
| 16:43:55 | 62.1070862 | 65.9599569 | 63.5694799 | 67.3497718 |
| 16:43:56 | 62.1070862 | 65.9599569 | 63.5694799 | 67.3497718 |
| 16:43:57 | 62.1070862 | 65.9599569 | 63.5694799 | 67.3497718 |
| 16:43:58 | 62.1070862 | 65.9599569 | 64.5694799 | 68.3497718 |
| 16:43:59 | 62.1070862 | 63.9599569 | 64.5694799 | 68.3497718 |
| 16:44:00 | 62.1070862 | 63.9599569 | 65.5694799 | 69.3497718 |
| 16:44:01 | 62.1070862 | 64.9599569 | 65.5694799 | 69.3497718 |
| 16:44:02 | 63.1070862 | 66.9599569 | 65.5694799 | 68.3497718 |
| 16:44:03 | 65.1070862 | 66.9599569 | 67.5694799 | 68.3497718 |

|          |            |            |            |            |
|----------|------------|------------|------------|------------|
| 16:44:04 | 65.1070862 | 69.9599569 | 68.5694799 | 67.3497718 |
| 16:44:05 | 67.1070862 | 69.9599569 | 68.5694799 | 68.3497718 |
| 16:44:06 | 68.1070862 | 69.9599569 | 67.5694799 | 68.3497718 |
| 16:44:07 | 67.1070862 | 69.9599569 | 67.5694799 | 68.3497718 |
| 16:44:08 | 64.1070862 | 69.9599569 | 67.5694799 | 68.3497718 |
| 16:44:09 | 64.1070862 | 69.9599569 | 67.5694799 | 68.3497718 |
| 16:44:10 | 62.1070862 | 67.9599569 | 65.5694799 | 68.3497718 |
| 16:44:11 | 60.1070862 | 67.9599569 | 65.5694799 | 68.3497718 |
| 16:44:12 | 58.1070862 | 67.9599569 | 65.5694799 | 69.3497718 |
| 16:44:13 | 58.1070862 | 68.9599569 | 66.5694799 | 69.3497718 |
| 16:44:14 | 61.1070862 | 73.9599569 | 66.5694799 | 70.3497718 |
| 16:44:15 | 61.1070862 | 74.9599569 | 67.5694799 | 71.3497718 |
| 16:44:16 | 63.1070862 | 75.9599569 | 67.5694799 | 71.3497718 |
| 16:44:17 | 63.1070862 | 75.9599569 | 64.5694799 | 70.3497718 |
| 16:44:18 | 63.1070862 | 72.9599569 | 64.5694799 | 70.3497718 |
| 16:44:19 | 65.1070862 | 72.9599569 | 65.5694799 | 70.3497718 |
| 16:44:20 | 67.1070862 | 63.9599569 | 65.5694799 | 72.3497718 |
| 16:44:21 | 67.1070862 | 62.9599569 | 65.5694799 | 73.3497718 |
| 16:44:22 | 68.1070862 | 62.9599569 | 65.5694799 | 73.3497718 |
| 16:44:23 | 68.1070862 | 62.9599569 | 66.5694799 | 72.3497718 |
| 16:44:24 | 68.1070862 | 62.9599569 | 66.5694799 | 72.3497718 |
| 16:44:25 | 70.1070862 | 63.9599569 | 65.5694799 | 71.3497718 |
| 16:44:26 | 75.1070862 | 63.9599569 | 64.5694799 | 71.3497718 |
| 16:44:27 | 76.1070862 | 63.9599569 | 64.5694799 | 70.3497718 |
| 16:44:28 | 77.1070862 | 63.9599569 | 64.5694799 | 70.3497718 |
| 16:44:29 | 77.1070862 | 63.9599569 | 62.5694799 | 69.3497718 |
| 16:44:30 | 77.1070862 | 57.9599569 | 61.5694799 | 68.3497718 |
| 16:44:31 | 77.1070862 | 54.9599569 | 61.5694799 | 68.3497718 |
| 16:44:32 | 75.1070862 | 54.9599569 | 62.5694799 | 67.3497718 |
| 16:44:33 | 73.1070862 | 56.9599569 | 60.5694799 | 67.3497718 |
| 16:44:34 | 73.1070862 | 58.9599569 | 60.5694799 | 66.3497718 |
| 16:44:35 | 73.1070862 | 58.9599569 | 60.5694799 | 66.3497718 |
| 16:44:36 | 75.1070862 | 60.9599569 | 60.5694799 | 66.3497718 |
| 16:44:37 | 75.1070862 | 60.9599569 | 60.5694799 | 66.3497718 |
| 16:44:38 | 76.1070862 | 60.9599569 | 61.5694799 | 67.3497718 |
| 16:44:39 | 77.1070862 | 60.9599569 | 61.5694799 | 67.3497718 |
| 16:44:40 | 76.1070862 | 60.9599569 | 61.5694799 | 68.3497718 |
| 16:44:41 | 74.1070862 | 64.9599569 | 61.5694799 | 69.3497718 |
| 16:44:42 | 72.1070862 | 64.9599569 | 61.5694799 | 69.3497718 |
| 16:44:43 | 69.1070862 | 65.9599569 | 61.5694799 | 68.3497718 |
| 16:44:44 | 68.1070862 | 66.9599569 | 62.5694799 | 69.3497718 |
| 16:44:45 | 68.1070862 | 66.9599569 | 62.5694799 | 68.3497718 |
| 16:44:46 | 67.1070862 | 66.9599569 | 62.5694799 | 68.3497718 |
| 16:44:47 | 67.1070862 | 66.9599569 | 62.5694799 | 68.3497718 |
| 16:44:48 | 69.1070862 | 66.9599569 | 62.5694799 | 69.3497718 |

|          |            |            |            |            |
|----------|------------|------------|------------|------------|
| 16:44:49 | 69.1070862 | 66.9599569 | 62.5694799 | 68.3497718 |
| 16:44:50 | 69.1070862 | 66.9599569 | 62.5694799 | 68.3497718 |
| 16:44:51 | 67.1070862 | 63.9599569 | 62.5694799 | 68.3497718 |
| 16:44:52 | 65.1070862 | 62.9599569 | 62.5694799 | 67.3497718 |
| 16:44:53 | 63.1070862 | 62.9599569 | 62.5694799 | 68.3497718 |
| 16:44:54 | 61.1070862 | 61.9599569 | 62.5694799 | 68.3497718 |
| 16:44:55 | 60.1070862 | 61.9599569 | 62.5694799 | 67.3497718 |
| 16:44:56 | 60.1070862 | 61.9599569 | 64.5694799 | 67.3497718 |
| 16:44:57 | 60.1070862 | 61.9599569 | 63.5694799 | 67.3497718 |
| 16:44:58 | 60.1070862 | 60.9599569 | 63.5694799 | 68.3497718 |
| 16:44:59 | 60.1070862 | 61.9599569 | 63.5694799 | 68.3497718 |
| 16:45:00 | 59.1070862 | 61.9599569 | 63.5694799 | 68.3497718 |
| 16:45:01 | 59.1070862 | 61.9599569 | 64.5694799 | 69.3497718 |
| 16:45:02 | 58.1070862 | 62.9599569 | 64.5694799 | 69.3497718 |
| 16:45:03 | 58.1070862 | 63.9599569 | 66.5694799 | 69.3497718 |
| 16:45:04 | 58.1070862 | 65.9599569 | 66.5694799 | 69.3497718 |
| 16:45:05 | 59.1070862 | 66.9599569 | 66.5694799 | 69.3497718 |
| 16:45:06 | 59.1070862 | 66.9599569 | 66.5694799 | 71.3497718 |
| 16:45:07 | 59.1070862 | 68.9599569 | 66.5694799 | 71.3497718 |
| 16:45:08 | 59.1070862 | 68.9599569 | 66.5694799 | 72.3497718 |
| 16:45:09 | 59.1070862 | 69.9599569 | 66.5694799 | 72.3497718 |
| 16:45:10 | 59.1070862 | 69.9599569 | 68.5694799 | 73.3497718 |
| 16:45:11 | 62.1070862 | 70.9599569 | 69.5694799 | 73.3497718 |
| 16:45:12 | 60.1070862 | 70.9599569 | 69.5694799 | 73.3497718 |
| 16:45:13 | 58.1070862 | 70.9599569 | 70.5694799 | 72.3497718 |
| 16:45:14 | 58.1070862 | 70.9599569 | 71.5694799 | 72.3497718 |
| 16:45:15 | 58.1070862 | 69.9599569 | 71.5694799 | 72.3497718 |
| 16:45:16 | 59.1070862 | 69.9599569 | 71.5694799 | 72.3497718 |
| 16:45:17 | 60.1070862 | 69.9599569 | 71.5694799 | 72.3497718 |
| 16:45:18 | 60.1070862 | 69.9599569 | 71.5694799 | 72.3497718 |
| 16:45:19 | 60.1070862 | 67.9599569 | 72.5694799 | 72.3497718 |
| 16:45:20 | 60.1070862 | 65.9599569 | 67.5694799 | 73.3497718 |
| 16:45:21 | 59.1070862 | 65.9599569 | 67.5694799 | 73.3497718 |
| 16:45:22 | 59.1070862 | 65.9599569 | 66.5694799 | 73.3497718 |
| 16:45:23 | 60.1070862 | 65.9599569 | 67.5694799 | 72.3497718 |
| 16:45:24 | 60.1070862 | 64.9599569 | 67.5694799 | 72.3497718 |
| 16:45:25 | 61.1070862 | 65.9599569 | 67.5694799 | 71.3497718 |
| 16:45:26 | 62.1070862 | 71.9599569 | 67.5694799 | 70.3497718 |
| 16:45:27 | 62.1070862 | 73.9599569 | 68.5694799 | 69.3497718 |
| 16:45:28 | 62.1070862 | 73.9599569 | 70.5694799 | 69.3497718 |
| 16:45:29 | 62.1070862 | 73.9599569 | 70.5694799 | 67.3497718 |
| 16:45:30 | 62.1070862 | 73.9599569 | 74.5694799 | 67.3497718 |
| 16:45:31 | 62.1070862 | 73.9599569 | 79.5694799 | 67.3497718 |
| 16:45:32 | 61.1070862 | 73.9599569 | 79.5694799 | 67.3497718 |
| 16:45:33 | 62.1070862 | 73.9599569 | 79.5694799 | 68.3497718 |

|          |            |            |            |            |
|----------|------------|------------|------------|------------|
| 16:45:34 | 62.1070862 | 73.9599569 | 79.5694799 | 69.3497718 |
| 16:45:35 | 63.1070862 | 73.9599569 | 68.5694799 | 69.3497718 |
| 16:45:36 | 63.1070862 | 73.9599569 | 68.5694799 | 70.3497718 |
| 16:45:37 | 63.1070862 | 71.9599569 | 67.5694799 | 69.3497718 |
| 16:45:38 | 63.1070862 | 70.9599569 | 67.5694799 | 69.3497718 |
| 16:45:39 | 67.1070862 | 70.9599569 | 67.5694799 | 69.3497718 |
| 16:45:40 | 69.1070862 | 70.9599569 | 67.5694799 | 70.3497718 |
| 16:45:41 | 69.1070862 | 69.9599569 | 67.5694799 | 70.3497718 |
| 16:45:42 | 69.1070862 | 69.9599569 | 66.5694799 | 70.3497718 |
| 16:45:43 | 68.1070862 | 69.9599569 | 66.5694799 | 70.3497718 |
| 16:45:44 | 66.1070862 | 68.9599569 | 66.5694799 | 70.3497718 |
| 16:45:45 | 64.1070862 | 70.9599569 | 66.5694799 | 69.3497718 |
| 16:45:46 | 63.1070862 | 70.9599569 | 66.5694799 | 69.3497718 |
| 16:45:47 | 63.1070862 | 71.9599569 | 66.5694799 | 69.3497718 |
| 16:45:48 | 63.1070862 | 71.9599569 | 70.5694799 | 70.3497718 |
| 16:45:49 | 63.1070862 | 74.9599569 | 67.5694799 | 70.3497718 |
| 16:45:50 | 63.1070862 | 74.9599569 | 66.5694799 | 70.3497718 |
| 16:45:51 | 63.1070862 | 74.9599569 | 66.5694799 | 70.3497718 |
| 16:45:52 | 64.1070862 | 74.9599569 | 65.5694799 | 69.3497718 |
| 16:45:53 | 64.1070862 | 74.9599569 | 64.5694799 | 69.3497718 |
| 16:45:54 | 65.1070862 | 73.9599569 | 65.5694799 | 69.3497718 |
| 16:45:55 | 65.1070862 | 73.9599569 | 65.5694799 | 69.3497718 |
| 16:45:56 | 65.1070862 | 73.9599569 | 65.5694799 | 69.3497718 |
| 16:45:57 | 64.1070862 | 73.9599569 | 64.5694799 | 68.3497718 |
| 16:45:58 | 64.1070862 | 73.9599569 | 63.5694799 | 68.3497718 |
| 16:45:59 | 64.1070862 | 71.9599569 | 63.5694799 | 68.3497718 |
| 16:46:00 | 63.1070862 | 70.9599569 | 63.5694799 | 68.3497718 |
| 16:46:01 | 63.1070862 | 70.9599569 | 63.5694799 | 70.3497718 |
| 16:46:02 | 63.1070862 | 71.9599569 | 63.5694799 | 70.3497718 |
| 16:46:03 | 64.1070862 | 73.9599569 | 63.5694799 | 70.3497718 |
| 16:46:04 | 63.1070862 | 73.9599569 | 63.5694799 | 70.3497718 |
| 16:46:05 | 63.1070862 | 73.9599569 | 63.5694799 | 70.3497718 |
| 16:46:06 | 63.1070862 | 72.9599569 | 64.5694799 | 69.3497718 |
| 16:46:07 | 63.1070862 | 72.9599569 | 64.5694799 | 70.3497718 |
| 16:46:08 | 63.1070862 | 67.9599569 | 65.5694799 | 70.3497718 |
| 16:46:09 | 63.1070862 | 66.9599569 | 65.5694799 | 70.3497718 |
| 16:46:10 | 62.1070862 | 66.9599569 | 64.5694799 | 71.3497718 |
| 16:46:11 | 60.1070862 | 66.9599569 | 64.5694799 | 74.3497718 |
| 16:46:12 | 60.1070862 | 66.9599569 | 64.5694799 | 74.3497718 |
| 16:46:13 | 59.1070862 | 66.9599569 | 65.5694799 | 74.3497718 |
| 16:46:14 | 59.1070862 | 66.9599569 | 66.5694799 | 74.3497718 |
| 16:46:15 | 58.1070862 | 64.9599569 | 68.5694799 | 72.3497718 |
| 16:46:16 | 58.1070862 | 63.9599569 | 68.5694799 | 70.3497718 |
| 16:46:17 | 58.1070862 | 63.9599569 | 70.5694799 | 70.3497718 |
| 16:46:18 | 58.1070862 | 66.9599569 | 70.5694799 | 70.3497718 |

|          |            |            |            |            |
|----------|------------|------------|------------|------------|
| 16:46:19 | 59.1070862 | 68.9599569 | 70.5694799 | 70.3497718 |
| 16:46:20 | 59.1070862 | 76.9599569 | 70.5694799 | 70.3497718 |
| 16:46:21 | 60.1070862 | 76.9599569 | 72.5694799 | 70.3497718 |
| 16:46:22 | 59.1070862 | 76.9599569 | 73.5694799 | 71.3497718 |
| 16:46:23 | 59.1070862 | 76.9599569 | 74.5694799 | 71.3497718 |
| 16:46:24 | 60.1070862 | 76.9599569 | 75.5694799 | 71.3497718 |
| 16:46:25 | 60.1070862 | 76.9599569 | 75.5694799 | 70.3497718 |
| 16:46:26 | 60.1070862 | 76.9599569 | 73.5694799 | 69.3497718 |
| 16:46:27 | 60.1070862 | 77.9599569 | 71.5694799 | 69.3497718 |
| 16:46:28 | 60.1070862 | 77.9599569 | 70.5694799 | 69.3497718 |
| 16:46:29 | 61.1070862 | 78.9599569 | 69.5694799 | 69.3497718 |
| 16:46:30 | 61.1070862 | 67.7886259 | 69.5694799 | 69.3497718 |
| 16:46:31 | 61.1070862 | 67.899737  | 69.5694799 | 71.3497718 |
| 16:46:32 | 61.1070862 | 68.3441814 | 69.5694799 | 73.3497718 |
| 16:46:33 | 61.1070862 | 68.2330703 | 69.5694799 | 73.3497718 |
| 16:46:34 | 62.1070862 | 68.3441814 | 69.5694799 | 73.3497718 |
| 16:46:35 | 62.1070862 | 79.9599569 | 69.5694799 | 72.3497718 |
| 16:46:36 | 62.1070862 | 79.9599569 | 69.5694799 | 71.3497718 |
| 16:46:37 | 63.1070862 | 72.9599569 | 68.5694799 | 70.3497718 |
| 16:46:38 | 63.1070862 | 72.9599569 | 66.5694799 | 69.3497718 |
| 16:46:39 | 63.1070862 | 72.9599569 | 66.5694799 | 69.3497718 |
| 16:46:40 | 65.1070862 | 74.9599569 | 63.5694799 | 69.3497718 |
| 16:46:41 | 66.1070862 | 74.9599569 | 63.5694799 | 70.3497718 |
| 16:46:42 | 67.1070862 | 74.9599569 | 63.5694799 | 70.3497718 |
| 16:46:43 | 67.1070862 | 69.9599569 | 63.5694799 | 69.3497718 |
| 16:46:44 | 68.1070862 | 67.9599569 | 63.5694799 | 69.3497718 |
| 16:46:45 | 69.1070862 | 66.9599569 | 63.5694799 | 69.3497718 |
| 16:46:46 | 69.1070862 | 66.9599569 | 64.5694799 | 69.3497718 |
| 16:46:47 | 70.1070862 | 65.9599569 | 65.5694799 | 69.3497718 |
| 16:46:48 | 71.1070862 | 65.9599569 | 65.5694799 | 69.3497718 |
| 16:46:49 | 71.1070862 | 64.9599569 | 65.5694799 | 69.3497718 |
| 16:46:50 | 71.1070862 | 65.9599569 | 65.5694799 | 69.3497718 |
| 16:46:51 | 69.1070862 | 65.9599569 | 66.5694799 | 70.3497718 |
| 16:46:52 | 67.1070862 | 65.9599569 | 66.5694799 | 71.3497718 |
| 16:46:53 | 65.1070862 | 66.9599569 | 68.5694799 | 72.3497718 |
| 16:46:54 | 65.1070862 | 66.9599569 | 68.5694799 | 72.3497718 |
| 16:46:55 | 60.1070862 | 66.9599569 | 69.5694799 | 72.3497718 |
| 16:46:56 | 59.1070862 | 64.9599569 | 69.5694799 | 72.3497718 |
| 16:46:57 | 59.1070862 | 64.9599569 | 69.5694799 | 72.3497718 |
| 16:46:58 | 59.1070862 | 63.9599569 | 69.5694799 | 73.3497718 |
| 16:46:59 | 61.1070862 | 63.9599569 | 69.5694799 | 73.3497718 |
| 16:47:00 | 61.1070862 | 63.9599569 | 69.5694799 | 73.3497718 |
| 16:47:01 | 61.1070862 | 63.9599569 | 67.5694799 | 73.3497718 |
| 16:47:02 | 61.1070862 | 63.9599569 | 65.5694799 | 73.3497718 |
| 16:47:03 | 61.1070862 | 64.9599569 | 65.5694799 | 71.3497718 |

|          |            |            |            |            |
|----------|------------|------------|------------|------------|
| 16:47:04 | 59.1070862 | 64.9599569 | 65.5694799 | 70.3497718 |
| 16:47:05 | 58.1070862 | 63.9599569 | 65.5694799 | 70.3497718 |
| 16:47:06 | 58.1070862 | 63.9599569 | 65.5694799 | 71.3497718 |
| 16:47:07 | 57.1070862 | 63.9599569 | 66.5694799 | 72.3497718 |
| 16:47:08 | 57.1070862 | 62.9599569 | 66.5694799 | 72.3497718 |
| 16:47:09 | 57.1070862 | 63.9599569 | 66.5694799 | 73.3497718 |
| 16:47:10 | 59.1070862 | 71.9599569 | 67.5694799 | 73.3497718 |
| 16:47:11 | 61.1070862 | 71.9599569 | 67.5694799 | 72.3497718 |
| 16:47:12 | 61.1070862 | 71.9599569 | 67.5694799 | 72.3497718 |
| 16:47:13 | 63.1070862 | 71.9599569 | 67.5694799 | 70.3497718 |
| 16:47:14 | 63.1070862 | 72.9599569 | 66.5694799 | 68.3497718 |
| 16:47:15 | 63.1070862 | 72.9599569 | 66.5694799 | 68.3497718 |
| 16:47:16 | 61.1070862 | 72.9599569 | 67.5694799 | 69.3497718 |
| 16:47:17 | 61.1070862 | 71.9599569 | 68.5694799 | 70.3497718 |
| 16:47:18 | 61.1070862 | 71.9599569 | 68.5694799 | 71.3497718 |
| 16:47:19 | 58.1070862 | 70.9599569 | 68.5694799 | 71.3497718 |
| 16:47:20 | 58.1070862 | 68.9599569 | 68.5694799 | 71.3497718 |
| 16:47:21 | 58.1070862 | 67.9599569 | 68.5694799 | 69.3497718 |
| 16:47:22 | 58.1070862 | 67.9599569 | 68.5694799 | 69.3497718 |
| 16:47:23 | 58.1070862 | 67.9599569 | 68.5694799 | 69.3497718 |
| 16:47:24 | 57.1070862 | 66.9599569 | 70.5694799 | 68.3497718 |
| 16:47:25 | 57.1070862 | 66.9599569 | 70.5694799 | 68.3497718 |
| 16:47:26 | 57.1070862 | 67.9599569 | 70.5694799 | 68.3497718 |
| 16:47:27 | 57.1070862 | 67.9599569 | 71.5694799 | 68.3497718 |
| 16:47:28 | 57.1070862 | 66.9599569 | 68.5694799 | 68.3497718 |
| 16:47:29 | 59.1070862 | 62.9599569 | 67.5694799 | 69.3497718 |
| 16:47:30 | 59.1070862 | 62.9599569 | 66.5694799 | 69.3497718 |
| 16:47:31 | 59.1070862 | 61.9599569 | 66.5694799 | 68.3497718 |
| 16:47:32 | 60.1070862 | 60.9599569 | 65.5694799 | 68.3497718 |
| 16:47:33 | 60.1070862 | 63.9599569 | 65.5694799 | 68.3497718 |
| 16:47:34 | 60.1070862 | 65.9599569 | 65.5694799 | 68.3497718 |
| 16:47:35 | 61.1070862 | 65.9599569 | 65.5694799 | 68.3497718 |
| 16:47:36 | 61.1070862 | 64.9599569 | 65.5694799 | 68.3497718 |
| 16:47:37 | 63.1070862 | 64.9599569 | 65.5694799 | 68.3497718 |
| 16:47:38 | 63.1070862 | 62.9599569 | 65.5694799 | 70.3497718 |
| 16:47:39 | 63.1070862 | 62.9599569 | 66.5694799 | 72.3497718 |
| 16:47:40 | 64.1070862 | 62.9599569 | 64.5694799 | 70.3497718 |
| 16:47:41 | 64.1070862 | 62.9599569 | 61.5694799 | 70.3497718 |
| 16:47:42 | 64.1070862 | 62.9599569 | 61.5694799 | 69.3497718 |
| 16:47:43 | 64.1070862 | 63.9599569 | 61.5694799 | 70.3497718 |
| 16:47:44 | 65.1070862 | 64.9599569 | 62.5694799 | 70.3497718 |
| 16:47:45 | 65.1070862 | 63.9599569 | 62.5694799 | 71.3497718 |
| 16:47:46 | 65.1070862 | 63.9599569 | 62.5694799 | 72.3497718 |
| 16:47:47 | 65.1070862 | 62.9599569 | 63.5694799 | 73.3497718 |
| 16:47:48 | 65.1070862 | 64.9599569 | 63.5694799 | 73.3497718 |

|          |            |            |            |            |
|----------|------------|------------|------------|------------|
| 16:47:49 | 65.1070862 | 64.9599569 | 63.5694799 | 73.3497718 |
| 16:47:50 | 65.1070862 | 64.9599569 | 63.5694799 | 73.3497718 |
| 16:47:51 | 66.1070862 | 66.9599569 | 63.5694799 | 71.3497718 |
| 16:47:52 | 66.1070862 | 67.9599569 | 63.5694799 | 71.3497718 |
| 16:47:53 | 66.1070862 | 68.9599569 | 63.5694799 | 67.3497718 |
| 16:47:54 | 66.1070862 | 68.9599569 | 63.5694799 | 67.3497718 |
| 16:47:55 | 67.1070862 | 67.9599569 | 64.5694799 | 66.3497718 |
| 16:47:56 | 67.1070862 | 67.9599569 | 64.5694799 | 66.3497718 |
| 16:47:57 | 67.1070862 | 67.9599569 | 64.5694799 | 65.3497718 |
| 16:47:58 | 67.1070862 | 67.9599569 | 64.5694799 | 65.3497718 |
| 16:47:59 | 67.1070862 | 66.9599569 | 64.5694799 | 66.3497718 |
| 16:48:00 | 67.1070862 | 66.9599569 | 64.5694799 | 66.3497718 |
| 16:48:01 | 68.1070862 | 67.9599569 | 66.5694799 | 66.3497718 |
| 16:48:02 | 71.1070862 | 67.9599569 | 65.5694799 | 66.3497718 |
| 16:48:03 | 71.1070862 | 67.9599569 | 65.5694799 | 65.3497718 |
| 16:48:04 | 67.1070862 | 68.9599569 | 64.5694799 | 65.3497718 |
| 16:48:05 | 66.1070862 | 67.9599569 | 60.5694799 | 65.3497718 |
| 16:48:06 | 66.1070862 | 67.9599569 | 59.5694799 | 64.3497718 |
| 16:48:07 | 66.1070862 | 68.9599569 | 59.5694799 | 64.3497718 |
| 16:48:08 | 67.1070862 | 68.9599569 | 62.5694799 | 64.3497718 |
| 16:48:09 | 68.1070862 | 68.9599569 | 62.5694799 | 64.3497718 |
| 16:48:10 | 69.1070862 | 69.9599569 | 65.5694799 | 64.3497718 |
| 16:48:11 | 70.1070862 | 69.9599569 | 66.5694799 | 65.3497718 |
| 16:48:12 | 70.1070862 | 69.9599569 | 66.5694799 | 66.3497718 |
| 16:48:13 | 70.1070862 | 67.9599569 | 67.5694799 | 66.3497718 |
| 16:48:14 | 68.1070862 | 65.9599569 | 67.5694799 | 66.3497718 |
| 16:48:15 | 68.1070862 | 65.9599569 | 67.5694799 | 67.3497718 |
| 16:48:16 | 68.1070862 | 65.9599569 | 70.5694799 | 67.3497718 |
| 16:48:17 | 69.1070862 | 66.9599569 | 70.5694799 | 67.3497718 |
| 16:48:18 | 69.1070862 | 67.9599569 | 70.5694799 | 67.3497718 |
| 16:48:19 | 68.1070862 | 69.9599569 | 70.5694799 | 67.3497718 |
| 16:48:20 | 67.1070862 | 69.9599569 | 70.5694799 | 67.3497718 |
| 16:48:21 | 65.1070862 | 68.9599569 | 70.5694799 | 69.3497718 |
| 16:48:22 | 63.1070862 | 66.9599569 | 70.5694799 | 73.3497718 |
| 16:48:23 | 63.1070862 | 66.9599569 | 70.5694799 | 75.3497718 |
| 16:48:24 | 63.1070862 | 64.9599569 | 70.5694799 | 75.3497718 |
| 16:48:25 | 63.1070862 | 63.9599569 | 69.5694799 | 75.3497718 |
| 16:48:26 | 63.1070862 | 63.9599569 | 66.5694799 | 75.3497718 |
| 16:48:27 | 63.1070862 | 63.9599569 | 67.5694799 | 76.3497718 |
| 16:48:28 | 62.1070862 | 63.9599569 | 67.5694799 | 76.3497718 |
| 16:48:29 | 61.1070862 | 63.9599569 | 67.5694799 | 76.3497718 |
| 16:48:30 | 61.1070862 | 64.9599569 | 66.5694799 | 78.3497718 |
| 16:48:31 | 61.1070862 | 63.9599569 | 64.5694799 | 66.899737  |
| 16:48:32 | 62.1070862 | 63.9599569 | 64.5694799 | 67.1219592 |
| 16:48:33 | 62.1070862 | 63.9599569 | 63.5694799 | 66.899737  |



|          |            |            |            |            |
|----------|------------|------------|------------|------------|
| 16:48:34 | 62.1070862 | 64.9599569 | 63.5694799 | 77.3497718 |
| 16:48:35 | 65.1070862 | 64.9599569 | 64.5694799 | 72.3497718 |
| 16:48:36 | 68.1070862 | 64.9599569 | 66.5694799 | 68.3497718 |
| 16:48:37 | 69.1070862 | 64.9599569 | 67.5694799 | 65.3497718 |
| 16:48:38 | 69.1070862 | 63.9599569 | 68.5694799 | 64.3497718 |
| 16:48:39 | 67.1070862 | 63.9599569 | 68.5694799 | 64.3497718 |
| 16:48:40 | 65.1070862 | 64.9599569 | 68.5694799 | 64.3497718 |
| 16:48:41 | 65.1070862 | 64.9599569 | 68.5694799 | 66.3497718 |
| 16:48:42 | 61.1070862 | 65.9599569 | 69.5694799 | 66.3497718 |
| 16:48:43 | 60.1070862 | 65.9599569 | 69.5694799 | 67.3497718 |
| 16:48:44 | 59.1070862 | 66.9599569 | 70.5694799 | 67.3497718 |
| 16:48:45 | 59.1070862 | 66.9599569 | 70.5694799 | 67.3497718 |
| 16:48:46 | 59.1070862 | 66.9599569 | 72.5694799 | 67.3497718 |
| 16:48:47 | 59.1070862 | 66.9599569 | 72.5694799 | 68.3497718 |
| 16:48:48 | 60.1070862 | 66.9599569 | 72.5694799 | 69.3497718 |
| 16:48:49 | 61.1070862 | 71.9599569 | 72.5694799 | 69.3497718 |
| 16:48:50 | 61.1070862 | 70.9599569 | 73.5694799 | 68.3497718 |
| 16:48:51 | 61.1070862 | 70.9599569 | 71.5694799 | 67.3497718 |
| 16:48:52 | 63.1070862 | 70.9599569 | 71.5694799 | 67.3497718 |
| 16:48:53 | 63.1070862 | 72.9599569 | 69.5694799 | 67.3497718 |
| 16:48:54 | 63.1070862 | 72.9599569 | 69.5694799 | 67.3497718 |
| 16:48:55 | 60.1070862 | 74.9599569 | 67.5694799 | 67.3497718 |
| 16:48:56 | 58.1070862 | 75.9599569 | 67.5694799 | 66.3497718 |
| 16:48:57 | 57.1070862 | 76.9599569 | 67.5694799 | 65.3497718 |
| 16:48:58 | 57.1070862 | 64.899737  | 67.5694799 | 65.3497718 |
| 16:48:59 | 57.1070862 | 77.9599569 | 67.5694799 | 65.3497718 |
| 16:49:00 | 57.1070862 | 64.899737  | 67.5694799 | 65.3497718 |
| 16:49:01 | 58.1070862 | 78.9599569 | 67.5694799 | 65.3497718 |
| 16:49:02 | 59.1070862 | 78.9599569 | 67.5694799 | 65.3497718 |
| 16:49:03 | 59.1070862 | 78.9599569 | 65.5694799 | 65.3497718 |
| 16:49:04 | 60.1070862 | 65.6775148 | 63.5694799 | 65.3497718 |
| 16:49:05 | 60.1070862 | 66.0108481 | 63.5694799 | 65.3497718 |
| 16:49:06 | 60.1070862 | 65.899737  | 63.5694799 | 65.3497718 |
| 16:49:07 | 61.1070862 | 66.2330703 | 62.5694799 | 67.3497718 |
| 16:49:08 | 62.1070862 | 66.1219592 | 62.5694799 | 67.3497718 |
| 16:49:09 | 62.1070862 | 66.1219592 | 62.5694799 | 67.3497718 |
| 16:49:10 | 61.1070862 | 66.3441814 | 63.5694799 | 66.3497718 |
| 16:49:11 | 60.1070862 | 66.1219592 | 63.5694799 | 66.3497718 |
| 16:49:12 | 59.1070862 | 65.899737  | 63.5694799 | 66.3497718 |
| 16:49:13 | 60.1070862 | 65.899737  | 63.5694799 | 66.3497718 |
| 16:49:14 | 60.1070862 | 66.1219592 | 64.5694799 | 66.3497718 |
| 16:49:15 | 59.1070862 | 65.899737  | 64.5694799 | 66.3497718 |
| 16:49:16 | 57.1070862 | 65.2330703 | 64.5694799 | 66.3497718 |
| 16:49:17 | 55.1070862 | 65.0108481 | 64.5694799 | 66.3497718 |
| 16:49:18 | 54.1070862 | 74.9599569 | 63.5694799 | 67.3497718 |

|          |            |            |            |            |
|----------|------------|------------|------------|------------|
| 16:49:19 | 54.1070862 | 74.9599569 | 63.5694799 | 69.3497718 |
| 16:49:20 | 54.1070862 | 68.9599569 | 63.5694799 | 71.3497718 |
| 16:49:21 | 55.1070862 | 65.9599569 | 63.5694799 | 71.3497718 |
| 16:49:22 | 55.1070862 | 64.9599569 | 62.5694799 | 72.3497718 |
| 16:49:23 | 55.1070862 | 66.9599569 | 62.5694799 | 72.3497718 |
| 16:49:24 | 55.1070862 | 67.9599569 | 62.5694799 | 72.3497718 |
| 16:49:25 | 54.1070862 | 67.9599569 | 63.5694799 | 71.3497718 |
| 16:49:26 | 53.1070862 | 67.9599569 | 64.5694799 | 70.3497718 |
| 16:49:27 | 53.1070862 | 66.9599569 | 65.5694799 | 68.3497718 |
| 16:49:28 | 54.1070862 | 63.9599569 | 65.5694799 | 67.3497718 |
| 16:49:29 | 54.1070862 | 61.9599569 | 65.5694799 | 65.3497718 |
| 16:49:30 | 54.1070862 | 59.9599569 | 65.5694799 | 65.3497718 |
| 16:49:31 | 54.1070862 | 57.9599569 | 65.5694799 | 64.3497718 |
| 16:49:32 | 59.1070862 | 58.9599569 | 67.5694799 | 65.3497718 |
| 16:49:33 | 63.1070862 | 58.9599569 | 68.5694799 | 65.3497718 |
| 16:49:34 | 64.1070862 | 60.9599569 | 71.5694799 | 65.3497718 |
| 16:49:35 | 64.1070862 | 60.9599569 | 72.5694799 | 66.3497718 |
| 16:49:36 | 62.1070862 | 60.9599569 | 72.5694799 | 65.3497718 |
| 16:49:37 | 62.1070862 | 59.9599569 | 72.5694799 | 66.3497718 |
| 16:49:38 | 61.1070862 | 59.9599569 | 72.5694799 | 66.3497718 |
| 16:49:39 | 61.1070862 | 57.9599569 | 72.5694799 | 66.3497718 |
| 16:49:40 | 61.1070862 | 57.9599569 | 72.5694799 | 66.3497718 |
| 16:49:41 | 61.1070862 | 57.9599569 | 73.5694799 | 67.3497718 |
| 16:49:42 | 60.1070862 | 57.9599569 | 75.5694799 | 67.3497718 |
| 16:49:43 | 60.1070862 | 57.9599569 | 77.5694799 | 67.3497718 |
| 16:49:44 | 61.1070862 | 57.9599569 | 78.5694799 | 67.3497718 |
| 16:49:45 | 62.1070862 | 57.9599569 | 78.5694799 | 68.3497718 |
| 16:49:46 | 63.1070862 | 57.9599569 | 79.5694799 | 68.3497718 |
| 16:49:47 | 64.1070862 | 57.9599569 | 67.3441814 | 68.3497718 |
| 16:49:48 | 64.1070862 | 58.9599569 | 67.4552926 | 68.3497718 |
| 16:49:49 | 61.1070862 | 59.9599569 | 67.2330703 | 68.3497718 |
| 16:49:50 | 60.1070862 | 64.9599569 | 67.3441814 | 68.3497718 |
| 16:49:51 | 61.1070862 | 64.9599569 | 68.899737  | 69.3497718 |
| 16:49:52 | 62.1070862 | 65.9599569 | 69.6775148 | 69.3497718 |
| 16:49:53 | 64.1070862 | 62.9599569 | 69.7886259 | 69.3497718 |
| 16:49:54 | 64.1070862 | 62.9599569 | 69.5664037 | 69.3497718 |
| 16:49:55 | 64.1070862 | 60.9599569 | 69.0108481 | 69.3497718 |
| 16:49:56 | 63.1070862 | 58.9599569 | 68.4552926 | 69.3497718 |
| 16:49:57 | 61.1070862 | 58.9599569 | 67.5664037 | 68.3497718 |
| 16:49:58 | 59.1070862 | 58.9599569 | 74.5694799 | 68.3497718 |
| 16:49:59 | 59.1070862 | 59.9599569 | 70.5694799 | 67.3497718 |
| 16:50:00 | 57.1070862 | 60.9599569 | 70.5694799 | 67.3497718 |
| 16:50:01 | 56.1070862 | 61.9599569 | 60.5694799 | 66.3497718 |
| 16:50:02 | 56.1070862 | 61.9599569 | 59.5694799 | 66.3497718 |
| 16:50:03 | 57.1070862 | 61.9599569 | 59.5694799 | 66.3497718 |

|          |            |            |            |            |
|----------|------------|------------|------------|------------|
| 16:50:04 | 57.1070862 | 61.9599569 | 59.5694799 | 66.3497718 |
| 16:50:05 | 57.1070862 | 61.9599569 | 59.5694799 | 66.3497718 |
| 16:50:06 | 58.1070862 | 60.9599569 | 59.5694799 | 65.3497718 |
| 16:50:07 | 59.1070862 | 60.9599569 | 63.5694799 | 66.3497718 |
| 16:50:08 | 59.1070862 | 60.9599569 | 63.5694799 | 66.3497718 |
| 16:50:09 | 61.1070862 | 61.9599569 | 63.5694799 | 66.3497718 |
| 16:50:10 | 63.1070862 | 61.9599569 | 64.5694799 | 67.3497718 |
| 16:50:11 | 63.1070862 | 61.9599569 | 65.5694799 | 67.3497718 |
| 16:50:12 | 61.1070862 | 61.9599569 | 65.5694799 | 67.3497718 |
| 16:50:13 | 61.1070862 | 62.9599569 | 65.5694799 | 67.3497718 |
| 16:50:14 | 59.1070862 | 62.9599569 | 65.5694799 | 67.3497718 |
| 16:50:15 | 59.1070862 | 62.9599569 | 67.5694799 | 68.3497718 |
| 16:50:16 | 59.1070862 | 62.9599569 | 67.5694799 | 68.3497718 |
| 16:50:17 | 59.1070862 | 62.9599569 | 69.5694799 | 68.3497718 |
| 16:50:18 | 60.1070862 | 72.9599569 | 71.5694799 | 68.3497718 |
| 16:50:19 | 60.1070862 | 72.9599569 | 71.5694799 | 68.3497718 |
| 16:50:20 | 59.1070862 | 72.9599569 | 71.5694799 | 69.3497718 |
| 16:50:21 | 59.1070862 | 71.9599569 | 71.5694799 | 69.3497718 |
| 16:50:22 | 59.1070862 | 70.9599569 | 71.5694799 | 69.3497718 |
| 16:50:23 | 59.1070862 | 65.9599569 | 71.5694799 | 69.3497718 |
| 16:50:24 | 59.1070862 | 65.9599569 | 71.5694799 | 69.3497718 |
| 16:50:25 | 60.1070862 | 65.9599569 | 71.5694799 | 69.3497718 |
| 16:50:26 | 60.1070862 | 64.9599569 | 71.5694799 | 70.3497718 |
| 16:50:27 | 60.1070862 | 58.9599569 | 70.5694799 | 70.3497718 |
| 16:50:28 | 62.1070862 | 57.9599569 | 70.5694799 | 70.3497718 |
| 16:50:29 | 63.1070862 | 57.9599569 | 71.5694799 | 70.3497718 |
| 16:50:30 | 63.1070862 | 57.9599569 | 71.5694799 | 69.3497718 |
| 16:50:31 | 63.1070862 | 57.9599569 | 69.5694799 | 69.3497718 |
| 16:50:32 | 63.1070862 | 58.9599569 | 69.5694799 | 69.3497718 |
| 16:50:33 | 63.1070862 | 61.9599569 | 67.5694799 | 69.3497718 |
| 16:50:34 | 61.1070862 | 63.9599569 | 67.5694799 | 69.3497718 |
| 16:50:35 | 60.1070862 | 63.9599569 | 67.5694799 | 69.3497718 |
| 16:50:36 | 60.1070862 | 60.9599569 | 67.5694799 | 69.3497718 |
| 16:50:37 | 59.1070862 | 59.9599569 | 67.5694799 | 69.3497718 |
| 16:50:38 | 59.1070862 | 58.9599569 | 67.5694799 | 69.3497718 |
| 16:50:39 | 61.1070862 | 58.9599569 | 67.5694799 | 69.3497718 |
| 16:50:40 | 62.1070862 | 58.9599569 | 67.5694799 | 70.3497718 |
| 16:50:41 | 62.1070862 | 57.9599569 | 67.5694799 | 71.3497718 |
| 16:50:42 | 64.1070862 | 57.9599569 | 67.5694799 | 71.3497718 |
| 16:50:43 | 67.1070862 | 56.9599569 | 67.5694799 | 75.3497718 |
| 16:50:44 | 67.1070862 | 56.9599569 | 68.5694799 | 75.3497718 |
| 16:50:45 | 63.1070862 | 56.9599569 | 68.5694799 | 74.3497718 |
| 16:50:46 | 58.1070862 | 56.9599569 | 68.5694799 | 73.3497718 |
| 16:50:47 | 55.1070862 | 60.9599569 | 67.5694799 | 73.3497718 |
| 16:50:48 | 52.1070862 | 63.9599569 | 67.5694799 | 73.3497718 |

|          |            |            |            |            |
|----------|------------|------------|------------|------------|
| 16:50:49 | 52.1070862 | 63.9599569 | 67.5694799 | 73.3497718 |
| 16:50:50 | 52.1070862 | 58.9599569 | 67.5694799 | 73.3497718 |
| 16:50:51 | 52.1070862 | 57.9599569 | 67.5694799 | 74.3497718 |
| 16:50:52 | 53.1070862 | 57.9599569 | 67.5694799 | 74.3497718 |
| 16:50:53 | 57.1070862 | 57.9599569 | 67.5694799 | 74.3497718 |
| 16:50:54 | 60.1070862 | 57.9599569 | 66.5694799 | 71.3497718 |
| 16:50:55 | 60.1070862 | 62.9599569 | 66.5694799 | 69.3497718 |
| 16:50:56 | 63.1070862 | 65.9599569 | 65.5694799 | 68.3497718 |
| 16:50:57 | 66.1070862 | 66.9599569 | 65.5694799 | 66.3497718 |
| 16:50:58 | 66.1070862 | 64.9599569 | 63.5694799 | 65.3497718 |
| 16:50:59 | 65.1070862 | 60.9599569 | 63.5694799 | 64.3497718 |
| 16:51:00 | 65.1070862 | 56.9599569 | 62.5694799 | 65.3497718 |
| 16:51:01 | 65.1070862 | 55.9599569 | 62.5694799 | 65.3497718 |
| 16:51:02 | 65.1070862 | 55.9599569 | 62.5694799 | 66.3497718 |
| 16:51:03 | 65.1070862 | 55.9599569 | 62.5694799 | 67.3497718 |
| 16:51:04 | 64.1070862 | 56.9599569 | 62.5694799 | 68.3497718 |
| 16:51:05 | 63.1070862 | 56.9599569 | 63.5694799 | 68.3497718 |
| 16:51:06 | 62.1070862 | 56.9599569 | 63.5694799 | 68.3497718 |
| 16:51:07 | 62.1070862 | 56.9599569 | 62.5694799 | 68.3497718 |
| 16:51:08 | 60.1070862 | 55.9599569 | 62.5694799 | 67.3497718 |
| 16:51:09 | 60.1070862 | 55.9599569 | 61.5694799 | 67.3497718 |
| 16:51:10 | 59.1070862 | 55.9599569 | 61.5694799 | 68.3497718 |
| 16:51:11 | 59.1070862 | 54.9599569 | 63.5694799 | 68.3497718 |
| 16:51:12 | 58.1070862 | 54.9599569 | 65.5694799 | 68.3497718 |
| 16:51:13 | 58.1070862 | 54.9599569 | 65.5694799 | 69.3497718 |
| 16:51:14 | 57.1070862 | 54.9599569 | 65.5694799 | 68.3497718 |
| 16:51:15 | 59.1070862 | 54.9599569 | 65.5694799 | 68.3497718 |
| 16:51:16 | 60.1070862 | 54.9599569 | 65.5694799 | 68.3497718 |
| 16:51:17 | 61.1070862 | 53.9599569 | 67.5694799 | 68.3497718 |
| 16:51:18 | 62.1070862 | 51.9599569 | 68.5694799 | 68.3497718 |
| 16:51:19 | 62.1070862 | 51.9599569 | 68.5694799 | 68.3497718 |
| 16:51:20 | 62.1070862 | 52.9599569 | 69.5694799 | 69.3497718 |
| 16:51:21 | 62.1070862 | 54.9599569 | 69.5694799 | 69.3497718 |
| 16:51:22 | 62.1070862 | 56.9599569 | 69.5694799 | 69.3497718 |
| 16:51:23 | 65.1070862 | 57.9599569 | 69.5694799 | 69.3497718 |
| 16:51:24 | 65.1070862 | 57.9599569 | 69.5694799 | 69.3497718 |
| 16:51:25 | 66.1070862 | 58.9599569 | 69.5694799 | 68.3497718 |
| 16:51:26 | 72.1070862 | 57.9599569 | 69.5694799 | 68.3497718 |
| 16:51:27 | 74.1070862 | 56.9599569 | 69.5694799 | 68.3497718 |
| 16:51:28 | 74.1070862 | 55.9599569 | 69.5694799 | 68.3497718 |
| 16:51:29 | 74.1070862 | 55.9599569 | 68.5694799 | 68.3497718 |
| 16:51:30 | 74.1070862 | 54.9599569 | 67.5694799 | 68.3497718 |
| 16:51:31 | 75.1070862 | 57.9599569 | 67.5694799 | 68.3497718 |
| 16:51:32 | 75.1070862 | 57.9599569 | 66.5694799 | 68.3497718 |
| 16:51:33 | 75.1070862 | 59.9599569 | 66.5694799 | 73.3497718 |

|          |            |            |            |            |
|----------|------------|------------|------------|------------|
| 16:51:34 | 75.1070862 | 60.9599569 | 66.5694799 | 75.3497718 |
| 16:51:35 | 76.1070862 | 55.9599569 | 66.5694799 | 75.3497718 |
| 16:51:36 | 76.1070862 | 55.9599569 | 66.5694799 | 75.3497718 |
| 16:51:37 | 75.1070862 | 55.9599569 | 65.5694799 | 76.3497718 |
| 16:51:38 | 74.1070862 | 55.9599569 | 65.5694799 | 67.5664037 |
| 16:51:39 | 72.1070862 | 55.9599569 | 65.5694799 | 67.7886259 |
| 16:51:40 | 72.1070862 | 54.9599569 | 66.5694799 | 68.1219592 |
| 16:51:41 | 71.1070862 | 54.9599569 | 66.5694799 | 68.1219592 |
| 16:51:42 | 71.1070862 | 54.9599569 | 66.5694799 | 68.899737  |
| 16:51:43 | 71.1070862 | 54.9599569 | 66.5694799 | 69.2330703 |
| 16:51:44 | 70.1070862 | 54.9599569 | 66.5694799 | 69.1219592 |
| 16:51:45 | 70.1070862 | 56.9599569 | 65.5694799 | 81.3497718 |
| 16:51:46 | 69.1070862 | 56.9599569 | 65.5694799 | 81.3497718 |
| 16:51:47 | 67.1070862 | 56.9599569 | 64.5694799 | 68.3441814 |
| 16:51:48 | 67.1070862 | 56.9599569 | 64.5694799 | 74.3497718 |
| 16:51:49 | 67.1070862 | 57.9599569 | 64.5694799 | 67.3497718 |
| 16:51:50 | 66.1070862 | 57.9599569 | 64.5694799 | 65.3497718 |
| 16:51:51 | 66.1070862 | 58.9599569 | 64.5694799 | 64.3497718 |
| 16:51:52 | 65.1070862 | 62.9599569 | 64.5694799 | 64.3497718 |
| 16:51:53 | 65.1070862 | 62.9599569 | 63.5694799 | 65.3497718 |
| 16:51:54 | 65.1070862 | 69.9599569 | 76.5694799 | 66.3497718 |
| 16:51:55 | 65.1070862 | 70.9599569 | 76.5694799 | 66.3497718 |
| 16:51:56 | 65.1070862 | 69.9599569 | 76.5694799 | 67.3497718 |
| 16:51:57 | 65.1070862 | 69.9599569 | 76.5694799 | 66.3497718 |
| 16:51:58 | 65.1070862 | 69.9599569 | 76.5694799 | 66.3497718 |
| 16:51:59 | 64.1070862 | 69.9599569 | 74.5694799 | 66.3497718 |
| 16:52:00 | 64.1070862 | 68.9599569 | 74.5694799 | 65.3497718 |
| 16:52:01 | 64.1070862 | 67.9599569 | 66.5694799 | 65.3497718 |
| 16:52:02 | 64.1070862 | 63.9599569 | 63.5694799 | 65.3497718 |
| 16:52:03 | 64.1070862 | 63.9599569 | 63.5694799 | 65.3497718 |
| 16:52:04 | 65.1070862 | 62.9599569 | 62.5694799 | 66.3497718 |
| 16:52:05 | 71.1070862 | 65.9599569 | 62.5694799 | 68.3497718 |
| 16:52:06 | 77.1070862 | 67.9599569 | 62.5694799 | 68.3497718 |
| 16:52:07 | 79.1070862 | 69.9599569 | 62.5694799 | 68.3497718 |
| 16:52:08 | 79.1070862 | 69.9599569 | 62.5694799 | 68.3497718 |
| 16:52:09 | 79.1070862 | 69.9599569 | 62.5694799 | 68.3497718 |
| 16:52:10 | 78.1070862 | 69.9599569 | 62.5694799 | 66.3497718 |
| 16:52:11 | 78.1070862 | 69.9599569 | 62.5694799 | 65.3497718 |
| 16:52:12 | 78.1070862 | 69.9599569 | 62.5694799 | 66.3497718 |
| 16:52:13 | 78.1070862 | 69.9599569 | 61.5694799 | 66.3497718 |
| 16:52:14 | 78.1070862 | 69.9599569 | 61.5694799 | 66.3497718 |
| 16:52:15 | 78.1070862 | 69.9599569 | 61.5694799 | 66.3497718 |
| 16:52:16 | 78.1070862 | 71.9599569 | 61.5694799 | 66.3497718 |
| 16:52:17 | 78.1070862 | 70.9599569 | 62.5694799 | 66.3497718 |
| 16:52:18 | 79.1070862 | 69.9599569 | 64.5694799 | 66.3497718 |

|          |            |            |            |            |
|----------|------------|------------|------------|------------|
| 16:52:19 | 68.7886259 | 69.9599569 | 64.5694799 | 66.3497718 |
| 16:52:20 | 68.7886259 | 68.9599569 | 64.5694799 | 66.3497718 |
| 16:52:21 | 69.6775148 | 68.9599569 | 66.5694799 | 65.3497718 |
| 16:52:22 | 69.4552926 | 69.9599569 | 66.5694799 | 65.3497718 |
| 16:52:23 | 69.6775148 | 72.9599569 | 67.5694799 | 65.3497718 |
| 16:52:24 | 69.5664037 | 75.9599569 | 67.5694799 | 65.3497718 |
| 16:52:25 | 69.4552926 | 77.9599569 | 66.5694799 | 65.3497718 |
| 16:52:26 | 68.7886259 | 77.9599569 | 66.5694799 | 65.3497718 |
| 16:52:27 | 68.3441814 | 72.9599569 | 67.5694799 | 65.3497718 |
| 16:52:28 | 81.1070862 | 66.9599569 | 67.5694799 | 73.3497718 |
| 16:52:29 | 80.1070862 | 58.9599569 | 67.5694799 | 74.3497718 |
| 16:52:30 | 80.1070862 | 58.9599569 | 66.5694799 | 74.3497718 |
| 16:52:31 | 79.1070862 | 52.9599569 | 64.5694799 | 75.3497718 |
| 16:52:32 | 78.1070862 | 51.9599569 | 62.5694799 | 71.3497718 |
| 16:52:33 | 76.1070862 | 52.9599569 | 62.5694799 | 69.3497718 |
| 16:52:34 | 73.1070862 | 52.9599569 | 61.5694799 | 69.3497718 |
| 16:52:35 | 73.1070862 | 55.9599569 | 61.5694799 | 70.3497718 |
| 16:52:36 | 70.1070862 | 55.9599569 | 61.5694799 | 69.3497718 |
| 16:52:37 | 68.1070862 | 57.9599569 | 61.5694799 | 69.3497718 |
| 16:52:38 | 68.1070862 | 55.9599569 | 60.5694799 | 70.3497718 |
| 16:52:39 | 68.1070862 | 54.9599569 | 59.5694799 | 70.3497718 |
| 16:52:40 | 69.1070862 | 54.9599569 | 59.5694799 | 70.3497718 |
| 16:52:41 | 69.1070862 | 54.9599569 | 59.5694799 | 70.3497718 |
| 16:52:42 | 69.1070862 | 59.9599569 | 59.5694799 | 69.3497718 |
| 16:52:43 | 69.1070862 | 61.9599569 | 59.5694799 | 68.3497718 |
| 16:52:44 | 69.1070862 | 61.9599569 | 59.5694799 | 68.3497718 |
| 16:52:45 | 69.1070862 | 65.9599569 | 60.5694799 | 66.3497718 |
| 16:52:46 | 69.1070862 | 66.9599569 | 62.5694799 | 65.3497718 |
| 16:52:47 | 66.1070862 | 66.9599569 | 62.5694799 | 66.3497718 |
| 16:52:48 | 65.1070862 | 66.9599569 | 60.5694799 | 67.3497718 |
| 16:52:49 | 64.1070862 | 70.9599569 | 60.5694799 | 67.3497718 |
| 16:52:50 | 63.1070862 | 70.9599569 | 59.5694799 | 67.3497718 |
| 16:52:51 | 63.1070862 | 69.9599569 | 59.5694799 | 68.3497718 |
| 16:52:52 | 64.1070862 | 69.9599569 | 58.5694799 | 68.3497718 |
| 16:52:53 | 65.1070862 | 69.9599569 | 57.5694799 | 67.3497718 |
| 16:52:54 | 65.1070862 | 69.9599569 | 57.5694799 | 67.3497718 |
| 16:52:55 | 63.1070862 | 68.9599569 | 58.5694799 | 67.3497718 |
| 16:52:56 | 61.1070862 | 68.9599569 | 60.5694799 | 67.3497718 |
| 16:52:57 | 60.1070862 | 68.9599569 | 61.5694799 | 67.3497718 |
| 16:52:58 | 58.1070862 | 68.9599569 | 61.5694799 | 68.3497718 |
| 16:52:59 | 55.1070862 | 68.9599569 | 61.5694799 | 68.3497718 |
| 16:53:00 | 55.1070862 | 68.9599569 | 60.5694799 | 68.3497718 |
| 16:53:01 | 55.1070862 | 67.9599569 | 60.5694799 | 68.3497718 |
| 16:53:02 | 57.1070862 | 66.9599569 | 60.5694799 | 68.3497718 |
| 16:53:03 | 59.1070862 | 65.9599569 | 60.5694799 | 69.3497718 |

|          |            |            |            |            |
|----------|------------|------------|------------|------------|
| 16:53:04 | 62.1070862 | 64.9599569 | 60.5694799 | 68.3497718 |
| 16:53:05 | 64.1070862 | 64.9599569 | 60.5694799 | 68.3497718 |
| 16:53:06 | 65.1070862 | 64.9599569 | 60.5694799 | 68.3497718 |
| 16:53:07 | 66.1070862 | 64.9599569 | 60.5694799 | 67.3497718 |
| 16:53:08 | 69.1070862 | 63.9599569 | 60.5694799 | 68.3497718 |
| 16:53:09 | 69.1070862 | 62.9599569 | 60.5694799 | 68.3497718 |
| 16:53:10 | 69.1070862 | 62.9599569 | 60.5694799 | 68.3497718 |
| 16:53:11 | 69.1070862 | 65.9599569 | 60.5694799 | 68.3497718 |
| 16:53:12 | 67.1070862 | 65.9599569 | 60.5694799 | 67.3497718 |
| 16:53:13 | 63.1070862 | 64.9599569 | 60.5694799 | 67.3497718 |
| 16:53:14 | 62.1070862 | 65.9599569 | 62.5694799 | 67.3497718 |
| 16:53:15 | 62.1070862 | 65.9599569 | 62.5694799 | 67.3497718 |
| 16:53:16 | 64.1070862 | 64.9599569 | 63.5694799 | 67.3497718 |
| 16:53:17 | 66.1070862 | 63.9599569 | 63.5694799 | 68.3497718 |
| 16:53:18 | 68.1070862 | 62.9599569 | 63.5694799 | 68.3497718 |
| 16:53:19 | 70.1070862 | 63.9599569 | 63.5694799 | 68.3497718 |
| 16:53:20 | 74.1070862 | 64.9599569 | 63.5694799 | 67.3497718 |
| 16:53:21 | 75.1070862 | 64.9599569 | 63.5694799 | 67.3497718 |
| 16:53:22 | 75.1070862 | 64.9599569 | 64.5694799 | 69.3497718 |
| 16:53:23 | 75.1070862 | 64.9599569 | 67.5694799 | 69.3497718 |
| 16:53:24 | 75.1070862 | 65.9599569 | 67.5694799 | 71.3497718 |
| 16:53:25 | 74.1070862 | 67.9599569 | 67.5694799 | 73.3497718 |
| 16:53:26 | 73.1070862 | 69.9599569 | 67.5694799 | 74.3497718 |
| 16:53:27 | 70.1070862 | 69.9599569 | 70.5694799 | 74.3497718 |
| 16:53:28 | 69.1070862 | 71.9599569 | 70.5694799 | 74.3497718 |
| 16:53:29 | 69.1070862 | 71.9599569 | 70.5694799 | 74.3497718 |
| 16:53:30 | 69.1070862 | 73.9599569 | 70.5694799 | 74.3497718 |
| 16:53:31 | 69.1070862 | 75.9599569 | 67.5694799 | 73.3497718 |
| 16:53:32 | 69.1070862 | 76.9599569 | 67.5694799 | 73.3497718 |
| 16:53:33 | 70.1070862 | 75.9599569 | 67.5694799 | 73.3497718 |
| 16:53:34 | 70.1070862 | 75.9599569 | 67.5694799 | 72.3497718 |
| 16:53:35 | 70.1070862 | 73.9599569 | 66.5694799 | 71.3497718 |
| 16:53:36 | 72.1070862 | 70.9599569 | 66.5694799 | 71.3497718 |
| 16:53:37 | 73.1070862 | 67.9599569 | 66.5694799 | 70.3497718 |
| 16:53:38 | 74.1070862 | 67.9599569 | 66.5694799 | 70.3497718 |
| 16:53:39 | 74.1070862 | 66.9599569 | 66.5694799 | 68.3497718 |
| 16:53:40 | 74.1070862 | 66.9599569 | 66.5694799 | 68.3497718 |
| 16:53:41 | 73.1070862 | 66.9599569 | 66.5694799 | 69.3497718 |
| 16:53:42 | 72.1070862 | 66.9599569 | 65.5694799 | 70.3497718 |
| 16:53:43 | 70.1070862 | 66.9599569 | 64.5694799 | 71.3497718 |
| 16:53:44 | 69.1070862 | 65.9599569 | 64.5694799 | 71.3497718 |
| 16:53:45 | 69.1070862 | 65.9599569 | 62.5694799 | 72.3497718 |
| 16:53:46 | 67.1070862 | 66.9599569 | 64.5694799 | 73.3497718 |
| 16:53:47 | 67.1070862 | 67.9599569 | 64.5694799 | 73.3497718 |
| 16:53:48 | 67.1070862 | 68.9599569 | 63.5694799 | 73.3497718 |

|          |            |            |            |            |
|----------|------------|------------|------------|------------|
| 16:53:49 | 66.1070862 | 68.9599569 | 62.5694799 | 72.3497718 |
| 16:53:50 | 66.1070862 | 68.9599569 | 63.5694799 | 70.3497718 |
| 16:53:51 | 68.1070862 | 73.9599569 | 63.5694799 | 68.3497718 |
| 16:53:52 | 69.1070862 | 73.9599569 | 62.5694799 | 68.3497718 |
| 16:53:53 | 69.1070862 | 77.9599569 | 62.5694799 | 69.3497718 |
| 16:53:54 | 70.1070862 | 77.9599569 | 64.5694799 | 69.3497718 |
| 16:53:55 | 68.1070862 | 73.9599569 | 64.5694799 | 69.3497718 |
| 16:53:56 | 68.1070862 | 73.9599569 | 64.5694799 | 71.3497718 |
| 16:53:57 | 63.1070862 | 71.9599569 | 63.5694799 | 71.3497718 |
| 16:53:58 | 62.1070862 | 68.9599569 | 62.5694799 | 71.3497718 |
| 16:53:59 | 62.1070862 | 66.9599569 | 62.5694799 | 71.3497718 |
| 16:54:00 | 62.1070862 | 65.9599569 | 62.5694799 | 71.3497718 |
| 16:54:01 | 63.1070862 | 65.9599569 | 61.5694799 | 68.3497718 |
| 16:54:02 | 63.1070862 | 64.9599569 | 61.5694799 | 68.3497718 |
| 16:54:03 | 66.1070862 | 64.9599569 | 61.5694799 | 67.3497718 |
| 16:54:04 | 68.1070862 | 63.9599569 | 61.5694799 | 67.3497718 |
| 16:54:05 | 68.1070862 | 63.9599569 | 61.5694799 | 67.3497718 |
| 16:54:06 | 71.1070862 | 63.9599569 | 61.5694799 | 67.3497718 |
| 16:54:07 | 71.1070862 | 63.9599569 | 61.5694799 | 67.3497718 |
| 16:54:08 | 71.1070862 | 63.9599569 | 61.5694799 | 65.3497718 |
| 16:54:09 | 69.1070862 | 64.9599569 | 61.5694799 | 65.3497718 |
| 16:54:10 | 68.1070862 | 64.9599569 | 62.5694799 | 65.3497718 |
| 16:54:11 | 68.1070862 | 65.9599569 | 62.5694799 | 65.3497718 |
| 16:54:12 | 68.1070862 | 66.9599569 | 62.5694799 | 65.3497718 |
| 16:54:13 | 67.1070862 | 66.9599569 | 63.5694799 | 65.3497718 |
| 16:54:14 | 67.1070862 | 66.9599569 | 64.5694799 | 65.3497718 |
| 16:54:15 | 67.1070862 | 66.9599569 | 63.5694799 | 65.3497718 |
| 16:54:16 | 68.1070862 | 67.9599569 | 63.5694799 | 65.3497718 |
| 16:54:17 | 68.1070862 | 67.9599569 | 64.5694799 | 69.3497718 |
| 16:54:18 | 68.1070862 | 67.9599569 | 64.5694799 | 69.3497718 |
| 16:54:19 | 71.1070862 | 65.9599569 | 64.5694799 | 69.3497718 |
| 16:54:20 | 71.1070862 | 65.9599569 | 63.5694799 | 70.3497718 |
| 16:54:21 | 72.1070862 | 65.9599569 | 62.5694799 | 68.3497718 |
| 16:54:22 | 72.1070862 | 65.9599569 | 62.5694799 | 66.3497718 |
| 16:54:23 | 72.1070862 | 61.9599569 | 62.5694799 | 66.3497718 |
| 16:54:24 | 71.1070862 | 60.9599569 | 62.5694799 | 66.3497718 |
| 16:54:25 | 71.1070862 | 60.9599569 | 61.5694799 | 67.3497718 |
| 16:54:26 | 71.1070862 | 60.9599569 | 63.5694799 | 67.3497718 |
| 16:54:27 | 71.1070862 | 59.9599569 | 64.5694799 | 67.3497718 |
| 16:54:28 | 71.1070862 | 59.9599569 | 64.5694799 | 67.3497718 |
| 16:54:29 | 71.1070862 | 59.9599569 | 66.5694799 | 67.3497718 |
| 16:54:30 | 71.1070862 | 65.9599569 | 67.5694799 | 67.3497718 |
| 16:54:31 | 71.1070862 | 65.9599569 | 67.5694799 | 67.3497718 |
| 16:54:32 | 71.1070862 | 65.9599569 | 66.5694799 | 67.3497718 |
| 16:54:33 | 72.1070862 | 55.9599569 | 66.5694799 | 67.3497718 |



|          |            |            |            |            |            |
|----------|------------|------------|------------|------------|------------|
| 16:54:34 |            | 72.1070862 | 54.9599569 | 66.5694799 | 67.3497718 |
| 16:54:35 |            | 72.1070862 | 54.9599569 | 66.5694799 | 67.3497718 |
| 16:54:36 |            | 72.1070862 | 54.9599569 | 66.5694799 | 67.3497718 |
| 16:54:37 |            | 72.1070862 | 54.9599569 | 67.5694799 | 67.3497718 |
| 16:54:38 |            | 75.1070862 | 55.9599569 | 67.5694799 | 67.3497718 |
| 16:54:39 |            | 77.1070862 | 55.9599569 | 66.5694799 | 66.3497718 |
| 16:54:40 |            | 77.1070862 | 57.9599569 | 66.5694799 | 66.3497718 |
| 16:54:41 |            | 77.1070862 | 57.9599569 | 67.5694799 | 68.3497718 |
| 16:54:42 |            | 77.1070862 | 58.9599569 | 65.5694799 | 68.3497718 |
| 16:54:43 |            | 76.1070862 | 58.9599569 | 64.5694799 | 69.3497718 |
| 16:54:44 |            | 76.1070862 | 59.9599569 | 64.5694799 | 69.3497718 |
| 16:54:45 |            | 76.1070862 | 60.9599569 | 64.5694799 | 66.3497718 |
| 16:54:46 |            | 76.1070862 | 60.9599569 | 64.5694799 | 64.3497718 |
| 16:54:47 |            | 76.1070862 | 60.9599569 | 64.5694799 | 64.3497718 |
| 16:54:48 |            | 76.1070862 | 60.9599569 | 64.5694799 | 62.3497718 |
| 16:54:49 |            | 76.1070862 | 67.9599569 | 64.5694799 | 62.3497718 |
| 16:54:50 |            | 75.1070862 | 67.9599569 | 67.5694799 | 62.3497718 |
| 16:54:51 |            | 74.1070862 | 66.9599569 | 67.5694799 | 63.3497718 |
| 16:54:52 |            | 72.1070862 | 66.9599569 | 67.5694799 | 63.3497718 |
| 16:54:53 |            | 71.1070862 | 68.9599569 | 67.5694799 | 63.3497718 |
| 16:54:54 |            | 70.1070862 | 68.9599569 | 67.5694799 | 68.3497718 |
| 16:54:55 |            | 69.1070862 | 66.9599569 | 68.5694799 | 67.3497718 |
| 16:54:56 |            | 69.1070862 | 62.9599569 | 68.5694799 | 67.3497718 |
| 16:54:57 |            | 70.1070862 | 61.9599569 | 68.5694799 | 66.3497718 |
| 16:54:58 |            | 70.1070862 | 61.9599569 | 68.5694799 | 66.3497718 |
| 16:54:59 |            | 70.1070862 | 62.9599569 | 68.5694799 | 64.3497718 |
| 16:55:00 |            | 69.1070862 | 62.9599569 | 68.5694799 | 63.3497718 |
| 16:55:01 |            | 68.1070862 | 63.9599569 | 68.5694799 | 63.3497718 |
| 16:55:02 |            | 67.1070862 | 63.9599569 | 68.5694799 | 64.3497718 |
| 16:55:03 |            | 67.1070862 | 63.9599569 | 68.5694799 | 65.3497718 |
| 16:55:04 |            | 64.1070862 | 63.9599569 | 68.5694799 | 69.3497718 |
| 16:55:05 |            | 64.1070862 | 60.9599569 | 68.5694799 | 70.3497718 |
| 16:55:06 | 59.4970493 | 64.1070862 | 59.9599569 | 68.5694799 | 70.3497718 |
| 16:55:07 | 59.4970493 | 64.1070862 | 59.9599569 | 70.5694799 | 70.3497718 |
| 16:55:08 | 59.4970493 | 64.1070862 | 59.9599569 | 70.5694799 | 70.3497718 |
| 16:55:09 | 59.4970493 | 64.1070862 | 60.9599569 | 70.5694799 | 67.3497718 |
| 16:55:10 | 59.4970493 | 65.1070862 | 62.9599569 | 71.5694799 | 65.3497718 |
| 16:55:11 | 59.4970493 | 66.1070862 | 62.9599569 | 71.5694799 | 65.3497718 |
| 16:55:12 | 59.4970493 | 66.1070862 | 62.9599569 | 71.5694799 | 65.3497718 |
| 16:55:13 | 59.4970493 | 66.1070862 | 62.9599569 | 74.5694799 | 68.3497718 |
| 16:55:14 | 58.4970493 | 64.1070862 | 63.9599569 | 74.5694799 | 68.3497718 |
| 16:55:15 | 58.4970493 | 62.1070862 | 63.9599569 | 74.5694799 | 71.3497718 |
| 16:55:16 | 61.4970493 | 60.1070862 | 63.9599569 | 74.5694799 | 73.3497718 |
| 16:55:17 | 63.4970493 | 60.1070862 | 63.9599569 | 72.5694799 | 73.3497718 |
| 16:55:18 | 63.4970493 | 61.1070862 | 62.9599569 | 68.5694799 | 71.3497718 |

|          |            |            |            |            |            |
|----------|------------|------------|------------|------------|------------|
| 16:55:19 | 63.4970493 | 63.1070862 | 62.9599569 | 64.5694799 | 71.3497718 |
| 16:55:20 | 63.4970493 | 63.1070862 | 61.9599569 | 62.5694799 | 68.3497718 |
| 16:55:21 | 63.4970493 | 70.1070862 | 61.9599569 | 62.5694799 | 68.3497718 |
| 16:55:22 | 63.4970493 | 70.1070862 | 61.9599569 | 62.5694799 | 67.3497718 |
| 16:55:23 | 63.4970493 | 70.1070862 | 61.9599569 | 62.5694799 | 66.3497718 |
| 16:55:24 | 63.4970493 | 69.1070862 | 61.9599569 | 65.5694799 | 66.3497718 |
| 16:55:25 | 63.4970493 | 68.1070862 | 61.9599569 | 65.5694799 | 67.3497718 |
| 16:55:26 | 63.4970493 | 67.1070862 | 61.9599569 | 66.5694799 | 65.3497718 |
| 16:55:27 | 64.4970493 | 67.1070862 | 60.9599569 | 67.5694799 | 65.3497718 |
| 16:55:28 | 64.4970493 | 67.1070862 | 60.9599569 | 67.5694799 | 64.3497718 |
| 16:55:29 | 68.4970493 | 67.1070862 | 63.9599569 | 67.5694799 | 64.3497718 |
| 16:55:30 | 71.4970493 | 67.1070862 | 63.9599569 | 68.5694799 | 64.3497718 |
| 16:55:31 | 74.4970493 | 67.1070862 | 60.9599569 | 67.5694799 | 63.3497718 |
| 16:55:32 | 74.4970493 | 67.1070862 | 59.9599569 | 69.5694799 | 63.3497718 |
| 16:55:33 | 76.4970493 | 70.1070862 | 59.9599569 | 69.5694799 | 64.3497718 |
| 16:55:34 | 76.4970493 | 73.1070862 | 59.9599569 | 69.5694799 | 64.3497718 |
| 16:55:35 | 77.4970493 | 75.1070862 | 59.9599569 | 69.5694799 | 65.3497718 |
| 16:55:36 | 77.4970493 | 74.1070862 | 59.9599569 | 68.5694799 | 66.3497718 |
| 16:55:37 | 78.4970493 | 74.1070862 | 59.9599569 | 68.5694799 | 66.3497718 |
| 16:55:38 | 78.4970493 | 73.1070862 | 60.9599569 | 65.5694799 | 68.3497718 |
| 16:55:39 | 78.4970493 | 72.1070862 | 61.9599569 | 65.5694799 | 71.3497718 |
| 16:55:40 | 68.2594682 | 71.1070862 | 61.9599569 | 65.5694799 | 70.3497718 |
| 16:55:41 | 67.6594682 | 70.1070862 | 60.9599569 | 65.5694799 | 70.3497718 |
| 16:55:42 | 67.7594682 | 70.1070862 | 60.9599569 | 65.5694799 | 70.3497718 |
| 16:55:43 | 67.3594682 | 68.1070862 | 60.9599569 | 65.5694799 | 71.3497718 |
| 16:55:44 | 66.7594682 | 68.1070862 | 60.9599569 | 63.5694799 | 71.3497718 |
| 16:55:45 | 66.4594682 | 67.1070862 | 60.9599569 | 63.5694799 | 71.3497718 |
| 16:55:46 | 66.7594682 | 68.1070862 | 61.9599569 | 62.5694799 | 70.3497718 |
| 16:55:47 | 66.4594682 | 68.1070862 | 61.9599569 | 62.5694799 | 68.3497718 |
| 16:55:48 | 66.5594682 | 68.1070862 | 61.9599569 | 62.5694799 | 67.3497718 |
| 16:55:49 | 66.1594682 | 66.1070862 | 61.9599569 | 62.5694799 | 67.3497718 |
| 16:55:50 | 65.8594682 | 65.1070862 | 61.9599569 | 62.5694799 | 66.3497718 |
| 16:55:51 | 65.3594682 | 65.1070862 | 59.9599569 | 62.5694799 | 64.3497718 |
| 16:55:52 | 65.0594682 | 64.1070862 | 59.9599569 | 62.5694799 | 63.3497718 |
| 16:55:53 | 64.6594682 | 64.1070862 | 56.9599569 | 61.5694799 | 63.3497718 |
| 16:55:54 | 64.3594682 | 64.1070862 | 56.9599569 | 61.5694799 | 62.3497718 |
| 16:55:55 | 64.3594682 | 64.1070862 | 56.9599569 | 61.5694799 | 61.3497718 |
| 16:55:56 | 71.4970493 | 64.1070862 | 60.9599569 | 61.5694799 | 59.3497718 |
| 16:55:57 | 67.4970493 | 65.1070862 | 60.9599569 | 60.5694799 | 58.3497718 |
| 16:55:58 | 63.4970493 | 67.1070862 | 60.9599569 | 60.5694799 | 58.3497718 |
| 16:55:59 | 63.4970493 | 67.1070862 | 57.9599569 | 60.5694799 | 58.3497718 |
| 16:56:00 | 62.4970493 | 68.1070862 | 54.9599569 | 61.5694799 | 58.3497718 |
| 16:56:01 | 62.4970493 | 68.1070862 | 54.9599569 | 61.5694799 | 59.3497718 |
| 16:56:02 | 62.4970493 | 68.1070862 | 54.9599569 | 62.5694799 | 59.3497718 |
| 16:56:03 | 61.4970493 | 68.1070862 | 54.9599569 | 63.5694799 | 59.3497718 |

|          |            |            |            |            |            |
|----------|------------|------------|------------|------------|------------|
| 16:56:04 | 61.4970493 | 67.1070862 | 55.9599569 | 64.5694799 | 59.3497718 |
| 16:56:05 | 61.4970493 | 67.1070862 | 59.9599569 | 65.5694799 | 59.3497718 |
| 16:56:06 | 61.4970493 | 67.1070862 | 59.9599569 | 65.5694799 | 59.3497718 |
| 16:56:07 | 61.4970493 | 69.1070862 | 60.9599569 | 66.5694799 | 59.3497718 |
| 16:56:08 | 61.4970493 | 69.1070862 | 60.9599569 | 65.5694799 | 59.3497718 |
| 16:56:09 | 62.4970493 | 71.1070862 | 59.9599569 | 65.5694799 | 59.3497718 |
| 16:56:10 | 63.4970493 | 71.1070862 | 58.9599569 | 65.5694799 | 59.3497718 |
| 16:56:11 | 66.4970493 | 72.1070862 | 57.9599569 | 65.5694799 | 58.3497718 |
| 16:56:12 | 66.4970493 | 72.1070862 | 57.9599569 | 65.5694799 | 58.3497718 |
| 16:56:13 | 68.4970493 | 73.1070862 | 59.9599569 | 65.5694799 | 58.3497718 |
| 16:56:14 | 69.4970493 | 73.1070862 | 59.9599569 | 64.5694799 | 58.3497718 |
| 16:56:15 | 68.4970493 | 73.1070862 | 59.9599569 | 62.5694799 | 58.3497718 |
| 16:56:16 | 68.4970493 | 73.1070862 | 58.9599569 | 61.5694799 | 58.3497718 |
| 16:56:17 | 68.4970493 | 73.1070862 | 56.9599569 | 61.5694799 | 58.3497718 |
| 16:56:18 | 67.4970493 | 74.1070862 | 54.9599569 | 61.5694799 | 57.3497718 |
| 16:56:19 | 66.4970493 | 62.9594682 | 55.9599569 | 61.5694799 | 57.3497718 |
| 16:56:20 | 66.4970493 | 63.0594682 | 56.9599569 | 61.5694799 | 57.3497718 |
| 16:56:21 | 66.4970493 | 63.7594682 | 56.9599569 | 62.5694799 | 56.3497718 |
| 16:56:22 | 66.4970493 | 64.6594682 | 58.9599569 | 63.5694799 | 56.3497718 |
| 16:56:23 | 66.4970493 | 66.0594682 | 58.9599569 | 63.5694799 | 56.3497718 |
| 16:56:24 | 66.4970493 | 66.4594682 | 59.9599569 | 64.5694799 | 56.3497718 |
| 16:56:25 | 66.4970493 | 67.9594682 | 59.9599569 | 65.5694799 | 56.3497718 |
| 16:56:26 | 66.4970493 | 68.4594682 | 59.9599569 | 67.5694799 | 57.3497718 |
| 16:56:27 | 66.4970493 | 68.7594682 | 61.9599569 | 67.5694799 | 57.3497718 |
| 16:56:28 | 68.4970493 | 69.3594682 | 64.9599569 | 67.5694799 | 59.3497718 |
| 16:56:29 | 70.4970493 | 69.9594682 | 66.9599569 | 68.5694799 | 59.3497718 |
| 16:56:30 | 70.4970493 | 70.3594682 | 69.9599569 | 68.5694799 | 60.3497718 |
| 16:56:31 | 70.4970493 | 69.9594682 | 69.9599569 | 68.5694799 | 60.3497718 |
| 16:56:32 | 70.4970493 | 69.7594682 | 69.9599569 | 68.5694799 | 60.3497718 |
| 16:56:33 | 69.4970493 | 69.7594682 | 67.9599569 | 68.5694799 | 59.3497718 |
| 16:56:34 | 69.4970493 | 69.5594682 | 66.9599569 | 68.5694799 | 59.3497718 |
| 16:56:35 | 67.4970493 | 69.1594682 | 66.9599569 | 68.5694799 | 58.3497718 |
| 16:56:36 | 65.4970493 | 68.2594682 | 66.9599569 | 66.5694799 | 56.3497718 |
| 16:56:37 | 65.4970493 | 67.9594682 | 66.9599569 | 66.5694799 | 56.3497718 |
| 16:56:38 | 65.4970493 | 67.6594682 | 66.9599569 | 66.5694799 | 56.3497718 |
| 16:56:39 | 65.4970493 | 65.9594682 | 66.9599569 | 66.5694799 | 56.3497718 |
| 16:56:40 | 65.4970493 | 65.8594682 | 66.9599569 | 66.5694799 | 57.3497718 |
| 16:56:41 | 65.4970493 | 65.4594682 | 66.9599569 | 66.5694799 | 57.3497718 |
| 16:56:42 | 65.4970493 | 65.5594682 | 66.9599569 | 66.5694799 | 59.3497718 |
| 16:56:43 | 64.4970493 | 65.1594682 | 65.9599569 | 66.5694799 | 59.3497718 |
| 16:56:44 | 64.4970493 | 65.4594682 | 65.9599569 | 67.5694799 | 59.3497718 |
| 16:56:45 | 64.4970493 | 66.4594682 | 65.9599569 | 67.5694799 | 67.3497718 |
| 16:56:46 | 64.4970493 | 66.7594682 | 65.9599569 | 67.5694799 | 70.3497718 |
| 16:56:47 | 63.4970493 | 66.8594682 | 65.9599569 | 67.5694799 | 71.3497718 |
| 16:56:48 | 63.4970493 | 66.6594682 | 66.9599569 | 66.5694799 | 72.3497718 |

|          |            |            |            |            |            |
|----------|------------|------------|------------|------------|------------|
| 16:56:49 | 62.4970493 | 67.3594682 | 69.9599569 | 66.5694799 | 72.3497718 |
| 16:56:50 | 62.4970493 | 67.9594682 | 69.9599569 | 66.5694799 | 77.3497718 |
| 16:56:51 | 63.4970493 | 68.0594682 | 69.9599569 | 66.5694799 | 76.3497718 |
| 16:56:52 | 63.4970493 | 68.3594682 | 69.9599569 | 66.5694799 | 76.3497718 |
| 16:56:53 | 64.4970493 | 68.3594682 | 68.9599569 | 66.5694799 | 76.3497718 |
| 16:56:54 | 65.4970493 | 67.4594682 | 60.9599569 | 65.5694799 | 76.3497718 |
| 16:56:55 | 66.4970493 | 67.5594682 | 59.9599569 | 65.5694799 | 76.3497718 |
| 16:56:56 | 66.4970493 | 67.3594682 | 59.9599569 | 65.5694799 | 75.3497718 |
| 16:56:57 | 66.4970493 | 66.8594682 | 57.9599569 | 63.5694799 | 75.3497718 |
| 16:56:58 | 66.4970493 | 66.8594682 | 57.9599569 | 63.5694799 | 74.3497718 |
| 16:56:59 | 66.4970493 | 67.5594682 | 57.9599569 | 64.5694799 | 78.3497718 |
| 16:57:00 | 66.4970493 | 67.6594682 | 57.9599569 | 64.5694799 | 78.3497718 |
| 16:57:01 | 66.4970493 | 68.0594682 | 57.9599569 | 64.5694799 | 77.3497718 |
| 16:57:02 | 67.4970493 | 67.8594682 | 57.9599569 | 64.5694799 | 76.3497718 |
| 16:57:03 | 67.4970493 | 67.7594682 | 58.9599569 | 64.5694799 | 76.3497718 |
| 16:57:04 | 67.4970493 | 67.2594682 | 57.9599569 | 63.5694799 | 76.3497718 |
| 16:57:05 | 67.4970493 | 66.7594682 | 60.9599569 | 63.5694799 | 76.3497718 |
| 16:57:06 | 69.4970493 | 67.4594682 | 67.9599569 | 63.5694799 | 77.3497718 |
| 16:57:07 | 69.4970493 | 67.2594682 | 67.9599569 | 63.5694799 | 76.3497718 |
| 16:57:08 | 69.4970493 | 67.1594682 | 68.9599569 | 63.5694799 | 73.3497718 |
| 16:57:09 | 69.4970493 | 67.3594682 | 68.9599569 | 68.5694799 | 73.3497718 |
| 16:57:10 | 68.4970493 | 67.1594682 | 68.9599569 | 68.5694799 | 74.3497718 |
| 16:57:11 | 65.4970493 | 66.8594682 | 68.9599569 | 68.5694799 | 74.3497718 |
| 16:57:12 | 65.4970493 | 67.1594682 | 69.9599569 | 68.5694799 | 74.3497718 |
| 16:57:13 | 65.4970493 | 67.6594682 | 72.9599569 | 68.5694799 | 75.3497718 |
| 16:57:14 | 64.4970493 | 68.1594682 | 74.9599569 | 68.5694799 | 75.3497718 |
| 16:57:15 | 65.4970493 | 69.2594682 | 80.9599569 | 69.5694799 | 75.3497718 |
| 16:57:16 | 68.4970493 | 70.3594682 | 80.9599569 | 69.5694799 | 75.3497718 |

| Person 2   | Person 1   | Person 9   | Person 15  | Peron 3    | Activity |
|------------|------------|------------|------------|------------|----------|
| 72.6030777 | 69.5164707 | 64.2200967 | 72.0018663 | 70.7698269 |          |
| 72.6030777 | 69.5164707 | 64.2200967 | 73.0018663 | 70.7698269 |          |
| 72.6030777 | 69.5164707 | 64.2200967 | 74.0018663 | 70.7698269 |          |
| 72.6030777 | 69.5164707 | 64.2200967 | 75.0018663 | 70.7698269 |          |
| 72.6030777 | 69.5164707 | 64.2200967 | 75.0018663 | 70.7698269 |          |
| 72.6030777 | 69.5164707 | 64.2200967 | 75.0018663 | 71.7698269 |          |
| 72.6030777 | 69.5164707 | 64.2200967 | 75.0018663 | 71.7698269 |          |
| 72.6030777 | 72.5164707 | 64.2200967 | 74.0018663 | 71.7698269 |          |
| 72.6030777 | 72.5164707 | 64.2200967 | 72.0018663 | 71.7698269 |          |
| 72.6030777 | 72.5164707 | 64.2200967 | 72.0018663 | 71.7698269 |          |
| 73.6030777 | 71.5164707 | 64.2200967 | 71.0018663 | 71.7698269 |          |
| 74.6030777 | 70.5164707 | 64.2200967 | 71.0018663 | 71.7698269 |          |
| 74.6030777 | 70.5164707 | 65.2200967 | 71.0018663 | 71.7698269 |          |
| 74.6030777 | 70.5164707 | 66.2200967 | 70.0018663 | 70.7698269 |          |
| 74.6030777 | 70.5164707 | 66.2200967 | 70.0018663 | 69.7698269 |          |
| 74.6030777 | 70.5164707 | 68.2200967 | 70.0018663 | 68.7698269 |          |
| 73.6030777 | 70.5164707 | 68.2200967 | 70.0018663 | 66.7698269 |          |
| 72.6030777 | 70.5164707 | 68.2200967 | 70.0018663 | 66.7698269 |          |
| 71.6030777 | 70.5164707 | 67.2200967 | 70.0018663 | 66.7698269 |          |
| 71.6030777 | 70.5164707 | 67.2200967 | 70.0018663 | 67.7698269 |          |
| 71.6030777 | 70.5164707 | 67.2200967 | 70.0018663 | 67.7698269 |          |
| 73.6030777 | 70.5164707 | 66.2200967 | 70.0018663 | 67.7698269 |          |
| 73.6030777 | 69.5164707 | 66.2200967 | 70.0018663 | 67.7698269 |          |
| 73.6030777 | 69.5164707 | 67.2200967 | 70.0018663 | 67.7698269 |          |
| 74.6030777 | 66.5164707 | 68.2200967 | 71.0018663 | 67.7698269 |          |
| 74.6030777 | 66.5164707 | 68.2200967 | 72.0018663 | 67.7698269 |          |
| 74.6030777 | 66.5164707 | 69.2200967 | 75.0018663 | 66.7698269 |          |
| 76.6030777 | 66.5164707 | 69.2200967 | 76.0018663 | 64.7698269 |          |
| 76.6030777 | 66.5164707 | 68.2200967 | 76.0018663 | 64.7698269 |          |
| 76.6030777 | 66.5164707 | 68.2200967 | 76.0018663 | 64.7698269 |          |
| 74.6030777 | 68.5164707 | 68.2200967 | 75.0018663 | 66.7698269 |          |
| 75.6030777 | 68.5164707 | 68.2200967 | 74.0018663 | 66.7698269 |          |
| 75.6030777 | 67.5164707 | 67.2200967 | 74.0018663 | 66.7698269 |          |
| 75.6030777 | 67.5164707 | 67.2200967 | 74.0018663 | 66.7698269 |          |
| 75.6030777 | 67.5164707 | 67.2200967 | 74.0018663 | 66.7698269 |          |
| 75.6030777 | 67.5164707 | 67.2200967 | 74.0018663 | 65.7698269 |          |
| 75.6030777 | 67.5164707 | 67.2200967 | 74.0018663 | 64.7698269 |          |
| 74.6030777 | 66.5164707 | 67.2200967 | 71.0018663 | 64.7698269 |          |
| 74.6030777 | 65.5164707 | 68.2200967 | 71.0018663 | 62.7698269 |          |
| 74.6030777 | 65.5164707 | 68.2200967 | 71.0018663 | 61.7698269 |          |
| 74.6030777 | 65.5164707 | 68.2200967 | 72.0018663 | 61.7698269 |          |
| 74.6030777 | 65.5164707 | 68.2200967 | 78.0018663 | 61.7698269 |          |

|            |            |            |            |            |
|------------|------------|------------|------------|------------|
| 74.6030777 | 65.5164707 | 68.2200967 | 80.0018663 | 61.7698269 |
| 74.6030777 | 65.5164707 | 68.2200967 | 80.0018663 | 61.7698269 |
| 74.6030777 | 65.5164707 | 68.2200967 | 80.0018663 | 61.7698269 |
| 74.6030777 | 65.5164707 | 68.2200967 | 77.0018663 | 62.7698269 |
| 73.6030777 | 64.5164707 | 67.2200967 | 77.0018663 | 62.7698269 |
| 73.6030777 | 66.5164707 | 67.2200967 | 76.0018663 | 63.7698269 |
| 73.6030777 | 66.5164707 | 67.2200967 | 74.0018663 | 63.7698269 |
| 73.6030777 | 66.5164707 | 67.2200967 | 74.0018663 | 64.7698269 |
| 73.6030777 | 66.5164707 | 67.2200967 | 73.0018663 | 66.7698269 |
| 72.6030777 | 69.5164707 | 67.2200967 | 73.0018663 | 67.7698269 |
| 71.6030777 | 69.5164707 | 67.2200967 | 72.0018663 | 67.7698269 |
| 71.6030777 | 69.5164707 | 67.2200967 | 72.0018663 | 67.7698269 |
| 71.6030777 | 70.5164707 | 64.2200967 | 72.0018663 | 67.7698269 |
| 71.6030777 | 70.5164707 | 64.2200967 | 72.0018663 | 67.7698269 |
| 71.6030777 | 71.5164707 | 62.2200967 | 72.0018663 | 67.7698269 |
| 70.6030777 | 71.5164707 | 62.2200967 | 72.0018663 | 66.7698269 |
| 69.6030777 | 71.5164707 | 62.2200967 | 72.0018663 | 66.7698269 |
| 69.6030777 | 71.5164707 | 62.2200967 | 75.0018663 | 66.7698269 |
| 69.6030777 | 71.5164707 | 66.2200967 | 76.0018663 | 66.7698269 |
| 69.6030777 | 71.5164707 | 67.2200967 | 76.0018663 | 67.7698269 |
| 69.6030777 | 71.5164707 | 67.2200967 | 76.0018663 | 68.7698269 |
| 69.6030777 | 72.5164707 | 68.2200967 | 76.0018663 | 69.7698269 |
| 69.6030777 | 72.5164707 | 68.2200967 | 75.0018663 | 71.7698269 |
| 69.6030777 | 71.5164707 | 68.2200967 | 75.0018663 | 71.7698269 |
| 69.6030777 | 71.5164707 | 69.2200967 | 75.0018663 | 72.7698269 |
| 69.6030777 | 71.5164707 | 69.2200967 | 75.0018663 | 74.7698269 |
| 69.6030777 | 71.5164707 | 69.2200967 | 77.0018663 | 76.7698269 |
| 69.6030777 | 72.5164707 | 71.2200967 | 78.0018663 | 76.7698269 |
| 69.6030777 | 73.5164707 | 71.2200967 | 77.0018663 | 76.7698269 |
| 69.6030777 | 73.5164707 | 71.2200967 | 77.0018663 | 76.7698269 |
| 70.6030777 | 75.5164707 | 71.2200967 | 77.0018663 | 74.7698269 |
| 70.6030777 | 75.5164707 | 71.2200967 | 76.0018663 | 70.7698269 |
| 72.6030777 | 76.5164707 | 72.2200967 | 77.0018663 | 67.7698269 |
| 71.6030777 | 77.5164707 | 72.2200967 | 79.0018663 | 65.7698269 |
| 71.6030777 | 77.5164707 | 73.2200967 | 79.0018663 | 64.7698269 |
| 69.6030777 | 77.5164707 | 73.2200967 | 79.0018663 | 64.7698269 |
| 68.6030777 | 78.5164707 | 74.2200967 | 76.0018663 | 64.7698269 |
| 68.6030777 | 79.5164707 | 74.2200967 | 75.0018663 | 64.7698269 |
| 68.6030777 | 79.5164707 | 75.2200967 | 75.0018663 | 64.7698269 |
| 68.6030777 | 79.5164707 | 76.2200967 | 75.0018663 | 64.7698269 |
| 68.6030777 | 83.5164707 | 77.2200967 | 74.0018663 | 64.7698269 |
| 68.6030777 | 83.5164707 | 78.2200967 | 74.0018663 | 68.7698269 |
| 68.6030777 | 84.5164707 | 78.2200967 | 74.0018663 | 68.7698269 |
| 67.6030777 | 84.5164707 | 81.2200967 | 73.0018663 | 68.7698269 |
| 67.6030777 | 84.5164707 | 84.2200967 | 73.0018663 | 68.7698269 |

|            |            |            |            |            |
|------------|------------|------------|------------|------------|
| 72.6030777 | 83.5164707 | 84.2200967 | 72.0018663 | 71.7698269 |
| 72.6030777 | 83.5164707 | 84.2200967 | 71.0018663 | 72.7698269 |
| 73.6030777 | 82.5164707 | 85.2200967 | 70.0018663 | 72.7698269 |
| 73.6030777 | 82.5164707 | 85.2200967 | 70.0018663 | 70.7698269 |
| 73.6030777 | 82.5164707 | 85.2200967 | 69.0018663 | 69.7698269 |
| 73.6030777 | 82.5164707 | 84.2200967 | 68.0018663 | 69.7698269 |
| 73.6030777 | 82.5164707 | 84.2200967 | 68.0018663 | 67.7698269 |
| 72.6030777 | 82.5164707 | 84.2200967 | 68.0018663 | 66.7698269 |
| 73.6030777 | 82.5164707 | 84.2200967 | 68.0018663 | 66.7698269 |
| 73.6030777 | 82.5164707 | 80.2200967 | 71.0018663 | 64.7698269 |
| 73.6030777 | 77.5164707 | 77.2200967 | 72.0018663 | 63.7698269 |
| 73.6030777 | 77.5164707 | 77.2200967 | 72.0018663 | 63.7698269 |
| 72.6030777 | 75.5164707 | 75.2200967 | 71.0018663 | 62.7698269 |
| 72.6030777 | 75.5164707 | 74.2200967 | 69.0018663 | 62.7698269 |
| 72.6030777 | 74.5164707 | 74.2200967 | 69.0018663 | 62.7698269 |
| 72.6030777 | 74.5164707 | 74.2200967 | 69.0018663 | 62.7698269 |
| 72.6030777 | 74.5164707 | 72.2200967 | 68.0018663 | 62.7698269 |
| 72.6030777 | 73.5164707 | 72.2200967 | 68.0018663 | 62.7698269 |
| 72.6030777 | 73.5164707 | 70.2200967 | 72.0018663 | 62.7698269 |
| 72.6030777 | 73.5164707 | 70.2200967 | 72.0018663 | 62.7698269 |
| 71.6030777 | 73.5164707 | 71.2200967 | 73.0018663 | 62.7698269 |
| 70.6030777 | 72.5164707 | 72.2200967 | 75.0018663 | 62.7698269 |
| 70.6030777 | 72.5164707 | 72.2200967 | 75.0018663 | 62.7698269 |
| 70.6030777 | 72.5164707 | 71.2200967 | 75.0018663 | 62.7698269 |
| 70.6030777 | 72.5164707 | 71.2200967 | 73.0018663 | 62.7698269 |
| 70.6030777 | 71.5164707 | 72.2200967 | 69.0018663 | 62.7698269 |
| 69.6030777 | 71.5164707 | 72.2200967 | 69.0018663 | 62.7698269 |
| 69.6030777 | 71.5164707 | 72.2200967 | 68.0018663 | 62.7698269 |
| 68.6030777 | 71.5164707 | 72.2200967 | 68.0018663 | 62.7698269 |
| 67.6030777 | 72.5164707 | 75.2200967 | 68.0018663 | 61.7698269 |
| 66.6030777 | 72.5164707 | 73.2200967 | 67.0018663 | 60.7698269 |
| 66.6030777 | 71.5164707 | 72.2200967 | 67.0018663 | 59.7698269 |
| 66.6030777 | 71.5164707 | 72.2200967 | 67.0018663 | 59.7698269 |
| 66.6030777 | 71.5164707 | 72.2200967 | 65.0018663 | 60.7698269 |
| 66.6030777 | 71.5164707 | 71.2200967 | 64.0018663 | 61.7698269 |
| 66.6030777 | 71.5164707 | 71.2200967 | 64.0018663 | 61.7698269 |
| 66.6030777 | 71.5164707 | 71.2200967 | 64.0018663 | 61.7698269 |
| 67.6030777 | 71.5164707 | 71.2200967 | 64.0018663 | 63.7698269 |
| 67.6030777 | 70.5164707 | 72.2200967 | 64.0018663 | 64.7698269 |
| 69.6030777 | 70.5164707 | 73.2200967 | 65.0018663 | 66.7698269 |
| 71.6030777 | 69.5164707 | 73.2200967 | 65.0018663 | 66.7698269 |
| 72.6030777 | 69.5164707 | 76.2200967 | 66.0018663 | 66.7698269 |
| 73.6030777 | 69.5164707 | 76.2200967 | 66.0018663 | 67.7698269 |
| 73.6030777 | 69.5164707 | 79.2200967 | 67.0018663 | 67.7698269 |
| 74.6030777 | 69.5164707 | 81.2200967 | 67.0018663 | 67.7698269 |

|            |            |            |            |            |
|------------|------------|------------|------------|------------|
| 74.6030777 | 69.5164707 | 82.2200967 | 67.0018663 | 66.7698269 |
| 74.6030777 | 69.5164707 | 83.2200967 | 70.0018663 | 65.7698269 |
| 74.6030777 | 69.5164707 | 85.2200967 | 70.0018663 | 65.7698269 |
| 72.6030777 | 69.5164707 | 85.2200967 | 78.0018663 | 65.7698269 |
| 72.6030777 | 68.5164707 | 86.2200967 | 75.0018663 | 65.7698269 |
| 70.6030777 | 68.5164707 | 73.2222677 | 75.0018663 | 65.7698269 |
| 69.6030777 | 70.5164707 | 86.2200967 | 75.0018663 | 66.7698269 |
| 68.6030777 | 70.5164707 | 71.6222677 | 64.0018663 | 66.7698269 |
| 68.6030777 | 70.5164707 | 71.6222677 | 64.0018663 | 66.7698269 |
| 67.6030777 | 70.5164707 | 71.6222677 | 65.0018663 | 66.7698269 |
| 67.6030777 | 70.5164707 | 73.910185  | 66.0018663 | 66.7698269 |
| 67.6030777 | 70.5164707 | 74.0768517 | 68.0018663 | 66.7698269 |
| 67.6030777 | 71.5164707 | 74.5768517 | 68.0018663 | 66.7698269 |
| 67.6030777 | 71.5164707 | 74.7435183 | 70.0018663 | 66.7698269 |
| 67.6030777 | 71.5164707 | 74.910185  | 72.0018663 | 66.7698269 |
| 67.6030777 | 73.5164707 | 75.2435183 | 71.0018663 | 67.7698269 |
| 67.6030777 | 73.5164707 | 75.2435183 | 71.0018663 | 67.7698269 |
| 68.6030777 | 75.5164707 | 75.410185  | 70.0018663 | 67.7698269 |
| 68.6030777 | 75.5164707 | 75.0768517 | 70.0018663 | 66.7698269 |
| 68.6030777 | 70.5164707 | 74.410185  | 71.0018663 | 66.7698269 |
| 68.6030777 | 70.5164707 | 74.2435183 | 71.0018663 | 66.7698269 |
| 69.6030777 | 68.5164707 | 73.2435183 | 71.0018663 | 66.7698269 |
| 70.6030777 | 68.5164707 | 73.2435183 | 71.0018663 | 66.7698269 |
| 70.6030777 | 68.5164707 | 72.2435183 | 65.0018663 | 66.7698269 |
| 69.6030777 | 68.5164707 | 72.0768517 | 65.0018663 | 66.7698269 |
| 69.6030777 | 69.5164707 | 71.910185  | 63.0018663 | 66.7698269 |
| 69.6030777 | 70.5164707 | 71.910185  | 62.0018663 | 66.7698269 |
| 69.6030777 | 71.5164707 | 85.2200967 | 62.0018663 | 69.7698269 |
| 69.6030777 | 71.5164707 | 85.2200967 | 64.0018663 | 68.7698269 |
| 69.6030777 | 72.5164707 | 85.2200967 | 64.0018663 | 67.7698269 |
| 68.6030777 | 72.5164707 | 84.2200967 | 67.0018663 | 66.7698269 |
| 68.6030777 | 72.5164707 | 84.2200967 | 71.0018663 | 66.7698269 |
| 67.6030777 | 71.5164707 | 85.2200967 | 72.0018663 | 66.7698269 |
| 67.6030777 | 70.5164707 | 73.2435183 | 70.0018663 | 66.7698269 |
| 67.6030777 | 70.5164707 | 73.2435183 | 69.0018663 | 66.7698269 |
| 67.6030777 | 70.5164707 | 73.910185  | 69.0018663 | 70.7698269 |
| 67.6030777 | 69.5164707 | 73.910185  | 68.0018663 | 70.7698269 |
| 67.6030777 | 69.5164707 | 87.2200967 | 67.0018663 | 73.7698269 |
| 67.6030777 | 70.5164707 | 87.2200967 | 67.0018663 | 73.7698269 |
| 67.6030777 | 70.5164707 | 87.2200967 | 67.0018663 | 72.7698269 |
| 67.6030777 | 70.5164707 | 87.2200967 | 67.0018663 | 72.7698269 |
| 66.6030777 | 70.5164707 | 87.2200967 | 67.0018663 | 72.7698269 |
| 67.6030777 | 70.5164707 | 74.2435183 | 67.0018663 | 71.7698269 |
| 67.6030777 | 70.5164707 | 84.2200967 | 67.0018663 | 70.7698269 |
| 67.6030777 | 70.5164707 | 84.2200967 | 67.0018663 | 69.7698269 |



|            |            |            |            |            |
|------------|------------|------------|------------|------------|
| 67.6030777 | 69.5164707 | 84.2200967 | 72.0018663 | 69.7698269 |
| 67.6030777 | 69.5164707 | 84.2200967 | 74.0018663 | 69.7698269 |
| 67.6030777 | 69.5164707 | 83.2200967 | 74.0018663 | 69.7698269 |
| 67.6030777 | 69.5164707 | 83.2200967 | 74.0018663 | 69.7698269 |
| 67.6030777 | 69.5164707 | 77.2200967 | 74.0018663 | 68.7698269 |
| 65.6030777 | 69.5164707 | 69.2200967 | 74.0018663 | 68.7698269 |
| 65.6030777 | 69.5164707 | 69.2200967 | 73.0018663 | 68.7698269 |
| 64.6030777 | 69.5164707 | 64.2200967 | 73.0018663 | 68.7698269 |
| 64.6030777 | 69.5164707 | 64.2200967 | 72.0018663 | 68.7698269 |
| 64.6030777 | 69.5164707 | 64.2200967 | 69.0018663 | 68.7698269 |
| 64.6030777 | 68.5164707 | 64.2200967 | 68.0018663 | 68.7698269 |
| 67.6030777 | 68.5164707 | 65.2200967 | 68.0018663 | 67.7698269 |
| 68.6030777 | 68.5164707 | 65.2200967 | 68.0018663 | 67.7698269 |
| 68.6030777 | 68.5164707 | 65.2200967 | 68.0018663 | 67.7698269 |
| 71.6030777 | 68.5164707 | 65.2200967 | 68.0018663 | 65.7698269 |
| 73.6030777 | 70.5164707 | 65.2200967 | 68.0018663 | 66.7698269 |
| 74.6030777 | 70.5164707 | 65.2200967 | 68.0018663 | 66.7698269 |
| 74.6030777 | 70.5164707 | 64.2200967 | 68.0018663 | 66.7698269 |
| 74.6030777 | 70.5164707 | 64.2200967 | 68.0018663 | 66.7698269 |
| 76.6030777 | 71.5164707 | 64.2200967 | 68.0018663 | 66.7698269 |
| 70.6030777 | 73.5164707 | 66.2200967 | 68.0018663 | 71.7698269 |
| 70.6030777 | 74.5164707 | 66.2200967 | 66.0018663 | 72.7698269 |
| 67.6030777 | 74.5164707 | 70.2200967 | 65.0018663 | 70.7698269 |
| 67.6030777 | 73.5164707 | 74.2200967 | 64.0018663 | 68.7698269 |
| 66.6030777 | 73.5164707 | 74.2200967 | 63.0018663 | 68.7698269 |
| 66.6030777 | 73.5164707 | 74.2200967 | 63.0018663 | 67.7698269 |
| 66.6030777 | 73.5164707 | 77.2200967 | 63.0018663 | 67.7698269 |
| 65.6030777 | 74.5164707 | 77.2200967 | 64.0018663 | 67.7698269 |
| 64.6030777 | 75.5164707 | 77.2200967 | 64.0018663 | 66.7698269 |
| 64.6030777 | 75.5164707 | 77.2200967 | 64.0018663 | 66.7698269 |
| 64.6030777 | 84.5164707 | 78.2200967 | 64.0018663 | 67.7698269 |
| 64.6030777 | 72.4329414 | 79.2200967 | 63.0018663 | 70.7698269 |
| 63.6030777 | 72.1472271 | 80.2200967 | 63.0018663 | 69.7698269 |
| 63.6030777 | 72.8615128 | 80.2200967 | 64.0018663 | 68.7698269 |
| 62.6030777 | 73.1472271 | 80.2200967 | 65.0018663 | 68.7698269 |
| 62.6030777 | 73.1472271 | 80.2200967 | 65.0018663 | 67.7698269 |
| 62.6030777 | 73.00437   | 80.2200967 | 65.0018663 | 66.7698269 |
| 66.6030777 | 74.1472271 | 81.2200967 | 65.0018663 | 66.7698269 |
| 66.6030777 | 74.1472271 | 81.2200967 | 65.0018663 | 65.7698269 |
| 66.6030777 | 74.1472271 | 81.2200967 | 65.0018663 | 65.7698269 |
| 67.6030777 | 74.4329414 | 80.2200967 | 64.0018663 | 66.7698269 |
| 69.6030777 | 75.2900843 | 80.2200967 | 65.0018663 | 66.7698269 |
| 70.6030777 | 75.2900843 | 78.2200967 | 65.0018663 | 67.7698269 |
| 71.6030777 | 75.4329414 | 78.2200967 | 65.0018663 | 67.7698269 |
| 72.6030777 | 74.8615128 | 78.2200967 | 65.0018663 | 66.7698269 |

|            |            |            |            |            |
|------------|------------|------------|------------|------------|
| 72.6030777 | 74.5757986 | 78.2200967 | 64.0018663 | 66.7698269 |
| 71.6030777 | 74.4329414 | 78.2200967 | 63.0018663 | 67.7698269 |
| 70.6030777 | 74.5757986 | 78.2200967 | 63.0018663 | 66.7698269 |
| 70.6030777 | 74.7186557 | 78.2200967 | 63.0018663 | 66.7698269 |
| 70.6030777 | 74.7186557 | 78.2200967 | 63.0018663 | 66.7698269 |
| 70.6030777 | 75.00437   | 78.2200967 | 64.0018663 | 66.7698269 |
| 70.6030777 | 75.7186557 | 77.2200967 | 66.0018663 | 66.7698269 |
| 71.6030777 | 76.4329414 | 77.2200967 | 66.0018663 | 66.7698269 |
| 70.6030777 | 76.4329414 | 77.2200967 | 67.0018663 | 66.7698269 |
| 69.6030777 | 76.8615128 | 77.2200967 | 67.0018663 | 67.7698269 |
| 69.6030777 | 77.00437   | 77.2200967 | 67.0018663 | 67.7698269 |
| 69.6030777 | 76.8615128 | 77.2200967 | 66.0018663 | 67.7698269 |
| 69.6030777 | 76.4329414 | 77.2200967 | 65.0018663 | 67.7698269 |
| 69.6030777 | 76.2900843 | 77.2200967 | 65.0018663 | 66.7698269 |
| 69.6030777 | 76.1472271 | 77.2200967 | 65.0018663 | 65.7698269 |
| 67.6030777 | 75.8615128 | 77.2200967 | 66.0018663 | 65.7698269 |
| 67.6030777 | 75.5757986 | 76.2200967 | 68.0018663 | 64.7698269 |
| 66.6030777 | 75.1472271 | 76.2200967 | 68.0018663 | 64.7698269 |
| 66.6030777 | 75.2900843 | 75.2200967 | 68.0018663 | 67.7698269 |
| 66.6030777 | 75.2900843 | 75.2200967 | 69.0018663 | 67.7698269 |
| 66.6030777 | 76.1472271 | 75.2200967 | 71.0018663 | 72.7698269 |
| 68.6030777 | 76.5757986 | 75.2200967 | 71.0018663 | 73.7698269 |
| 68.6030777 | 76.00437   | 74.2200967 | 73.0018663 | 69.7698269 |
| 68.6030777 | 76.2900843 | 74.2200967 | 75.0018663 | 69.7698269 |
| 68.6030777 | 76.1472271 | 74.2200967 | 75.0018663 | 66.7698269 |
| 68.6030777 | 76.1472271 | 74.2200967 | 75.0018663 | 65.7698269 |
| 68.6030777 | 75.7186557 | 74.2200967 | 74.0018663 | 65.7698269 |
| 70.6030777 | 75.2900843 | 72.2200967 | 74.0018663 | 67.7698269 |
| 70.6030777 | 75.4329414 | 71.2200967 | 74.0018663 | 69.7698269 |
| 70.6030777 | 75.00437   | 71.2200967 | 73.0018663 | 70.7698269 |
| 70.6030777 | 74.5757986 | 71.2200967 | 72.0018663 | 71.7698269 |
| 70.6030777 | 85.5164707 | 71.2200967 | 72.0018663 | 68.7698269 |
| 70.6030777 | 72.4329414 | 72.2200967 | 72.0018663 | 62.7698269 |
| 70.6030777 | 72.5757986 | 74.2200967 | 72.0018663 | 59.7698269 |
| 71.6030777 | 72.5757986 | 72.2200967 | 73.0018663 | 59.7698269 |
| 71.6030777 | 72.4329414 | 72.2200967 | 73.0018663 | 58.7698269 |
| 71.6030777 | 72.8615128 | 71.2200967 | 74.0018663 | 58.7698269 |
| 71.6030777 | 73.1472271 | 72.2200967 | 74.0018663 | 59.7698269 |
| 71.6030777 | 73.1472271 | 72.2200967 | 74.0018663 | 59.7698269 |
| 73.6030777 | 73.5757986 | 72.2200967 | 74.0018663 | 59.7698269 |
| 71.6030777 | 73.2900843 | 71.2200967 | 74.0018663 | 60.7698269 |
| 70.6030777 | 73.1472271 | 68.2200967 | 77.0018663 | 61.7698269 |
| 69.6030777 | 72.8615128 | 68.2200967 | 77.0018663 | 62.7698269 |
| 69.6030777 | 72.8615128 | 68.2200967 | 76.0018663 | 63.7698269 |
| 69.6030777 | 72.00437   | 69.2200967 | 75.0018663 | 64.7698269 |

|            |            |            |            |            |
|------------|------------|------------|------------|------------|
| 69.6030777 | 71.2900843 | 69.2200967 | 75.0018663 | 64.7698269 |
| 69.6030777 | 83.5164707 | 69.2200967 | 74.0018663 | 64.7698269 |
| 68.6030777 | 83.5164707 | 69.2200967 | 74.0018663 | 64.7698269 |
| 69.6030777 | 83.5164707 | 69.2200967 | 74.0018663 | 64.7698269 |
| 69.6030777 | 83.5164707 | 69.2200967 | 73.0018663 | 64.7698269 |
| 69.6030777 | 83.5164707 | 70.2200967 | 73.0018663 | 65.7698269 |
| 69.6030777 | 83.5164707 | 71.2200967 | 73.0018663 | 65.7698269 |
| 69.6030777 | 84.5164707 | 71.2200967 | 73.0018663 | 65.7698269 |
| 68.6030777 | 71.8738183 | 71.2200967 | 73.0018663 | 65.7698269 |
| 68.6030777 | 71.7488183 | 70.2200967 | 73.0018663 | 65.7698269 |
| 68.6030777 | 79.5164707 | 70.2200967 | 72.0018663 | 65.7698269 |
| 68.6030777 | 76.5164707 | 70.2200967 | 72.0018663 | 65.7698269 |
| 67.6030777 | 76.5164707 | 70.2200967 | 72.0018663 | 65.7698269 |
| 67.6030777 | 77.5164707 | 69.2200967 | 72.0018663 | 67.7698269 |
| 67.6030777 | 77.5164707 | 69.2200967 | 70.0018663 | 67.7698269 |
| 68.6030777 | 77.5164707 | 67.2200967 | 70.0018663 | 67.7698269 |
| 69.6030777 | 78.5164707 | 68.2200967 | 69.0018663 | 67.7698269 |
| 69.6030777 | 78.5164707 | 68.2200967 | 68.0018663 | 67.7698269 |
| 70.6030777 | 82.5164707 | 68.2200967 | 68.0018663 | 68.7698269 |
| 70.6030777 | 85.5164707 | 68.2200967 | 68.0018663 | 68.7698269 |
| 71.6030777 | 74.4988183 | 68.2200967 | 68.0018663 | 68.7698269 |
| 70.6030777 | 75.4988183 | 68.2200967 | 68.0018663 | 68.7698269 |
| 69.6030777 | 75.3738183 | 68.2200967 | 68.0018663 | 68.7698269 |
| 68.6030777 | 75.6238183 | 68.2200967 | 68.0018663 | 68.7698269 |
| 68.6030777 | 76.1238183 | 69.2200967 | 68.0018663 | 69.7698269 |
| 68.6030777 | 76.3738183 | 72.2200967 | 68.0018663 | 69.7698269 |
| 68.6030777 | 74.8738183 | 72.2200967 | 66.0018663 | 69.7698269 |
| 67.6030777 | 74.2488183 | 72.2200967 | 66.0018663 | 69.7698269 |
| 67.6030777 | 73.6238183 | 72.2200967 | 66.0018663 | 66.7698269 |
| 67.6030777 | 73.7488183 | 73.2200967 | 66.0018663 | 67.7698269 |
| 67.6030777 | 77.5164707 | 73.2200967 | 66.0018663 | 67.7698269 |
| 66.6030777 | 73.5164707 | 74.2200967 | 67.0018663 | 66.7698269 |
| 66.6030777 | 70.5164707 | 72.2200967 | 67.0018663 | 66.7698269 |
| 66.6030777 | 70.5164707 | 72.2200967 | 68.0018663 | 66.7698269 |
| 67.6030777 | 70.5164707 | 71.2200967 | 68.0018663 | 66.7698269 |
| 67.6030777 | 69.5164707 | 70.2200967 | 68.0018663 | 68.7698269 |
| 67.6030777 | 69.5164707 | 68.2200967 | 68.0018663 | 68.7698269 |
| 67.6030777 | 69.5164707 | 67.2200967 | 68.0018663 | 65.7698269 |
| 66.6030777 | 70.5164707 | 65.2200967 | 68.0018663 | 63.7698269 |
| 66.6030777 | 71.5164707 | 64.2200967 | 69.0018663 | 62.7698269 |
| 67.6030777 | 71.5164707 | 64.2200967 | 72.0018663 | 61.7698269 |
| 68.6030777 | 71.5164707 | 64.2200967 | 72.0018663 | 61.7698269 |
| 68.6030777 | 71.5164707 | 61.2200967 | 74.0018663 | 61.7698269 |
| 68.6030777 | 72.5164707 | 61.2200967 | 75.0018663 | 61.7698269 |
| 68.6030777 | 73.5164707 | 61.2200967 | 75.0018663 | 61.7698269 |

|            |            |            |            |            |
|------------|------------|------------|------------|------------|
| 68.6030777 | 73.5164707 | 61.2200967 | 73.0018663 | 61.7698269 |
| 68.6030777 | 74.5164707 | 61.2200967 | 73.0018663 | 61.7698269 |
| 68.6030777 | 74.5164707 | 61.2200967 | 71.0018663 | 61.7698269 |
| 68.6030777 | 74.5164707 | 61.2200967 | 67.0018663 | 61.7698269 |
| 69.6030777 | 74.5164707 | 62.2200967 | 65.0018663 | 61.7698269 |
| 69.6030777 | 75.5164707 | 62.2200967 | 64.0018663 | 61.7698269 |
| 68.6030777 | 75.5164707 | 63.2200967 | 64.0018663 | 61.7698269 |
| 67.6030777 | 76.5164707 | 67.2200967 | 65.0018663 | 61.7698269 |
| 67.6030777 | 75.5164707 | 68.2200967 | 65.0018663 | 62.7698269 |
| 67.6030777 | 75.5164707 | 68.2200967 | 65.0018663 | 65.7698269 |
| 67.6030777 | 71.5164707 | 68.2200967 | 65.0018663 | 65.7698269 |
| 67.6030777 | 71.5164707 | 69.2200967 | 65.0018663 | 65.7698269 |
| 68.6030777 | 67.5164707 | 69.2200967 | 65.0018663 | 64.7698269 |
| 68.6030777 | 67.5164707 | 68.2200967 | 65.0018663 | 63.7698269 |
| 68.6030777 | 67.5164707 | 67.2200967 | 65.0018663 | 64.7698269 |
| 68.6030777 | 68.5164707 | 67.2200967 | 65.0018663 | 65.7698269 |
| 67.6030777 | 69.5164707 | 67.2200967 | 65.0018663 | 66.7698269 |
| 67.6030777 | 71.5164707 | 66.2200967 | 65.0018663 | 66.7698269 |
| 67.6030777 | 74.5164707 | 65.2200967 | 66.0018663 | 65.7698269 |
| 67.6030777 | 73.5164707 | 65.2200967 | 66.0018663 | 64.7698269 |
| 67.6030777 | 73.5164707 | 65.2200967 | 67.0018663 | 63.7698269 |
| 67.6030777 | 73.5164707 | 65.2200967 | 67.0018663 | 63.7698269 |
| 67.6030777 | 73.5164707 | 65.2200967 | 66.0018663 | 62.7698269 |
| 67.6030777 | 69.5164707 | 65.2200967 | 66.0018663 | 62.7698269 |
| 67.6030777 | 69.5164707 | 65.2200967 | 66.0018663 | 63.7698269 |
| 67.6030777 | 68.5164707 | 65.2200967 | 66.0018663 | 63.7698269 |
| 68.6030777 | 68.5164707 | 65.2200967 | 66.0018663 | 63.7698269 |
| 67.6030777 | 68.5164707 | 65.2200967 | 66.0018663 | 63.7698269 |
| 67.6030777 | 68.5164707 | 65.2200967 | 66.0018663 | 63.7698269 |
| 67.6030777 | 68.5164707 | 64.2200967 | 66.0018663 | 63.7698269 |
| 68.6030777 | 68.5164707 | 64.2200967 | 67.0018663 | 63.7698269 |
| 70.6030777 | 68.5164707 | 62.2200967 | 67.0018663 | 63.7698269 |
| 70.6030777 | 68.5164707 | 61.2200967 | 67.0018663 | 63.7698269 |
| 69.6030777 | 67.5164707 | 61.2200967 | 67.0018663 | 62.7698269 |
| 69.6030777 | 66.5164707 | 61.2200967 | 67.0018663 | 62.7698269 |
| 69.6030777 | 66.5164707 | 61.2200967 | 67.0018663 | 62.7698269 |
| 68.6030777 | 65.5164707 | 60.2200967 | 67.0018663 | 62.7698269 |
| 68.6030777 | 65.5164707 | 61.2200967 | 67.0018663 | 62.7698269 |
| 68.6030777 | 65.5164707 | 62.2200967 | 67.0018663 | 61.7698269 |
| 68.6030777 | 66.5164707 | 62.2200967 | 68.0018663 | 62.7698269 |
| 67.6030777 | 67.5164707 | 62.2200967 | 68.0018663 | 61.7698269 |
| 67.6030777 | 69.5164707 | 62.2200967 | 68.0018663 | 61.7698269 |
| 68.6030777 | 69.5164707 | 62.2200967 | 67.0018663 | 61.7698269 |
| 68.6030777 | 69.5164707 | 62.2200967 | 66.0018663 | 61.7698269 |
| 68.6030777 | 69.5164707 | 63.2200967 | 65.0018663 | 63.7698269 |



69.6030777 65.5164707 63.2200967 67.0018663 74.7698269  
70.6030777 65.5164707 63.2200967 67.0018663 74.7698269  
70.6030777 65.5164707 63.2200967 68.0018663 73.7698269  
69.6030777 65.5164707 63.2200967 68.0018663 71.7698269  
69.6030777 65.5164707 63.2200967 68.0018663 71.7698269  
68.6030777 66.5164707 64.2200967 68.0018663 71.7698269  
68.6030777 66.5164707 64.2200967 69.0018663 70.7698269  
68.6030777 66.5164707 65.2200967 69.0018663 69.7698269  
68.6030777 66.5164707 64.2200967 70.0018663 67.7698269  
68.6030777 66.5164707 64.2200967 71.0018663 66.7698269  
68.6030777 66.5164707 63.2200967 70.0018663 66.7698269  
69.6030777 66.5164707 62.2200967 70.0018663 66.7698269  
69.6030777 66.5164707 62.2200967 70.0018663 66.7698269  
69.6030777 69.5164707 62.2200967 70.0018663 66.7698269  
70.6030777 74.5164707 61.2200967 70.0018663 64.7698269  
69.6030777 74.5164707 62.2200967 70.0018663 63.7698269  
69.6030777 83.5164707 63.2200967 69.0018663 63.7698269  
68.6030777 85.5164707 63.2200967 69.0018663 63.7698269  
67.6030777 85.5164707 63.2200967 69.0018663 63.7698269  
67.6030777 77.5164707 62.2200967 69.0018663 64.7698269  
67.6030777 77.5164707 62.2200967 69.0018663 64.7698269  
67.6030777 66.5164707 62.2200967 69.0018663 65.7698269  
67.6030777 65.5164707 62.2200967 69.0018663 65.7698269  
68.6030777 63.5164707 62.2200967 69.0018663 65.7698269  
67.6030777 63.5164707 63.2200967 70.0018663 65.7698269  
67.6030777 63.5164707 63.2200967 72.0018663 65.7698269  
67.6030777 63.5164707 63.2200967 75.0018663 66.7698269  
67.6030777 63.5164707 62.2200967 76.0018663 66.7698269  
66.6030777 63.5164707 62.2200967 76.0018663 67.7698269  
66.6030777 63.5164707 64.2200967 76.0018663 68.7698269  
68.6030777 63.5164707 64.2200967 76.0018663 69.7698269  
68.6030777 63.5164707 64.2200967 75.0018663 69.7698269  
68.6030777 63.5164707 64.2200967 72.0018663 68.7698269  
67.6030777 63.5164707 64.2200967 71.0018663 68.7698269  
67.6030777 63.5164707 63.2200967 71.0018663 68.7698269  
67.6030777 63.5164707 63.2200967 70.0018663 68.7698269  
67.6030777 64.5164707 64.2200967 68.0018663 68.7698269  
67.6030777 64.5164707 64.2200967 68.0018663 69.7698269  
68.6030777 64.5164707 65.2200967 67.0018663 69.7698269  
68.6030777 65.5164707 64.2200967 67.0018663 68.7698269  
70.6030777 69.5164707 63.2200967 67.0018663 68.7698269  
70.6030777 69.5164707 63.2200967 67.0018663 68.7698269  
68.6030777 71.5164707 63.2200967 67.0018663 67.7698269  
68.6030777 71.5164707 64.2200967 67.0018663 67.7698269  
67.6030777 71.5164707 65.2200967 65.0018663 67.7698269

|            |            |            |            |            |
|------------|------------|------------|------------|------------|
| 67.6030777 | 68.5164707 | 65.2200967 | 65.0018663 | 67.7698269 |
| 67.6030777 | 67.5164707 | 65.2200967 | 64.0018663 | 68.7698269 |
| 67.6030777 | 67.5164707 | 65.2200967 | 64.0018663 | 67.7698269 |
| 66.6030777 | 66.5164707 | 65.2200967 | 67.0018663 | 66.7698269 |
| 66.6030777 | 65.5164707 | 66.2200967 | 69.0018663 | 66.7698269 |
| 67.6030777 | 65.5164707 | 66.2200967 | 69.0018663 | 65.7698269 |
| 67.6030777 | 65.5164707 | 67.2200967 | 69.0018663 | 65.7698269 |
| 67.6030777 | 66.5164707 | 67.2200967 | 69.0018663 | 66.7698269 |
| 68.6030777 | 66.5164707 | 66.2200967 | 69.0018663 | 66.7698269 |
| 68.6030777 | 65.5164707 | 65.2200967 | 69.0018663 | 66.7698269 |
| 68.6030777 | 65.5164707 | 65.2200967 | 72.0018663 | 66.7698269 |
| 68.6030777 | 65.5164707 | 65.2200967 | 82.0018663 | 67.7698269 |
| 68.6030777 | 65.5164707 | 65.2200967 | 82.0018663 | 68.7698269 |
| 67.6030777 | 65.5164707 | 64.2200967 | 82.0018663 | 67.7698269 |
| 66.6030777 | 65.5164707 | 64.2200967 | 79.0018663 | 67.7698269 |
| 66.6030777 | 65.5164707 | 62.2200967 | 79.0018663 | 67.7698269 |
| 66.6030777 | 65.5164707 | 62.2200967 | 76.0018663 | 66.7698269 |
| 66.6030777 | 65.5164707 | 62.2200967 | 75.0018663 | 67.7698269 |
| 66.6030777 | 67.5164707 | 62.2200967 | 73.0018663 | 67.7698269 |
| 66.6030777 | 66.5164707 | 61.2200967 | 73.0018663 | 68.7698269 |
| 70.6030777 | 66.5164707 | 61.2200967 | 74.0018663 | 68.7698269 |
| 70.6030777 | 66.5164707 | 61.2200967 | 74.0018663 | 68.7698269 |
| 70.6030777 | 66.5164707 | 61.2200967 | 74.0018663 | 67.7698269 |
| 71.6030777 | 66.5164707 | 60.2200967 | 74.0018663 | 67.7698269 |
| 70.6030777 | 66.5164707 | 60.2200967 | 74.0018663 | 67.7698269 |
| 70.6030777 | 66.5164707 | 59.2200967 | 73.0018663 | 67.7698269 |
| 70.6030777 | 67.5164707 | 59.2200967 | 73.0018663 | 67.7698269 |
| 70.6030777 | 67.5164707 | 59.2200967 | 73.0018663 | 67.7698269 |
| 70.6030777 | 67.5164707 | 60.2200967 | 74.0018663 | 67.7698269 |
| 70.6030777 | 67.5164707 | 60.2200967 | 74.0018663 | 67.7698269 |
| 70.6030777 | 67.5164707 | 60.2200967 | 74.0018663 | 67.7698269 |
| 69.6030777 | 67.5164707 | 61.2200967 | 73.0018663 | 68.7698269 |
| 69.6030777 | 67.5164707 | 62.2200967 | 74.0018663 | 68.7698269 |
| 69.6030777 | 67.5164707 | 62.2200967 | 75.0018663 | 73.7698269 |
| 69.6030777 | 66.5164707 | 62.2200967 | 74.0018663 | 73.7698269 |
| 69.6030777 | 65.5164707 | 64.2200967 | 74.0018663 | 73.7698269 |
| 69.6030777 | 65.5164707 | 66.2200967 | 72.0018663 | 73.7698269 |
| 68.6030777 | 65.5164707 | 64.2200967 | 70.0018663 | 72.7698269 |
| 68.6030777 | 66.5164707 | 64.2200967 | 70.0018663 | 71.7698269 |
| 68.6030777 | 66.5164707 | 64.2200967 | 70.0018663 | 69.7698269 |
| 68.6030777 | 67.5164707 | 65.2200967 | 70.0018663 | 68.7698269 |
| 68.6030777 | 67.5164707 | 65.2200967 | 71.0018663 | 68.7698269 |
| 68.6030777 | 67.5164707 | 65.2200967 | 71.0018663 | 67.7698269 |
| 68.6030777 | 69.5164707 | 66.2200967 | 70.0018663 | 67.7698269 |
| 67.6030777 | 69.5164707 | 66.2200967 | 70.0018663 | 67.7698269 |
| 67.6030777 | 69.5164707 | 66.2200967 | 69.0018663 | 67.7698269 |

|            |            |            |            |            |
|------------|------------|------------|------------|------------|
| 67.6030777 | 69.5164707 | 66.2200967 | 70.0018663 | 67.7698269 |
| 67.6030777 | 69.5164707 | 65.2200967 | 70.0018663 | 67.7698269 |
| 67.6030777 | 69.5164707 | 65.2200967 | 69.0018663 | 67.7698269 |
| 69.6030777 | 69.5164707 | 65.2200967 | 68.0018663 | 66.7698269 |
| 70.6030777 | 69.5164707 | 65.2200967 | 68.0018663 | 66.7698269 |
| 70.6030777 | 69.5164707 | 65.2200967 | 68.0018663 | 65.7698269 |
| 70.6030777 | 71.5164707 | 68.2200967 | 68.0018663 | 66.7698269 |
| 70.6030777 | 70.5164707 | 67.2200967 | 69.0018663 | 66.7698269 |
| 70.6030777 | 70.5164707 | 65.2200967 | 69.0018663 | 67.7698269 |
| 70.6030777 | 70.5164707 | 63.2200967 | 70.0018663 | 68.7698269 |
| 70.6030777 | 69.5164707 | 61.2200967 | 70.0018663 | 68.7698269 |
| 69.6030777 | 69.5164707 | 58.2200967 | 70.0018663 | 68.7698269 |
| 69.6030777 | 69.5164707 | 58.2200967 | 70.0018663 | 67.7698269 |
| 69.6030777 | 69.5164707 | 58.2200967 | 70.0018663 | 66.7698269 |
| 68.6030777 | 70.5164707 | 58.2200967 | 75.0018663 | 67.7698269 |
| 68.6030777 | 70.5164707 | 58.2200967 | 75.0018663 | 67.7698269 |
| 68.6030777 | 70.5164707 | 58.2200967 | 80.0018663 | 68.7698269 |
| 68.6030777 | 70.5164707 | 59.2200967 | 71.7488183 | 69.7698269 |
| 69.6030777 | 70.5164707 | 59.2200967 | 73.2488183 | 71.7698269 |
| 69.6030777 | 70.5164707 | 60.2200967 | 84.0018663 | 71.7698269 |
| 69.6030777 | 69.5164707 | 60.2200967 | 84.0018663 | 71.7698269 |
| 69.6030777 | 69.5164707 | 61.2200967 | 77.0018663 | 69.7698269 |
| 69.6030777 | 69.5164707 | 61.2200967 | 77.0018663 | 65.7698269 |
| 70.6030777 | 69.5164707 | 61.2200967 | 72.0018663 | 67.7698269 |
| 71.6030777 | 69.5164707 | 62.2200967 | 72.0018663 | 67.7698269 |
| 71.6030777 | 69.5164707 | 65.2200967 | 72.0018663 | 67.7698269 |
| 71.6030777 | 68.5164707 | 65.2200967 | 71.0018663 | 66.7698269 |
| 72.6030777 | 68.5164707 | 65.2200967 | 71.0018663 | 66.7698269 |
| 73.6030777 | 68.5164707 | 65.2200967 | 70.0018663 | 65.7698269 |
| 73.6030777 | 67.5164707 | 65.2200967 | 74.0018663 | 64.7698269 |
| 72.6030777 | 66.5164707 | 65.2200967 | 76.0018663 | 63.7698269 |
| 73.6030777 | 66.5164707 | 65.2200967 | 76.0018663 | 62.7698269 |
| 73.6030777 | 66.5164707 | 65.2200967 | 76.0018663 | 62.7698269 |
| 74.6030777 | 67.5164707 | 65.2200967 | 76.0018663 | 61.7698269 |
| 74.6030777 | 67.5164707 | 66.2200967 | 76.0018663 | 61.7698269 |
| 70.6030777 | 67.5164707 | 65.2200967 | 76.0018663 | 61.7698269 |
| 68.6030777 | 68.5164707 | 65.2200967 | 76.0018663 | 61.7698269 |
| 68.6030777 | 68.5164707 | 65.2200967 | 76.0018663 | 63.7698269 |
| 68.6030777 | 68.5164707 | 65.2200967 | 76.0018663 | 63.7698269 |
| 68.6030777 | 69.5164707 | 66.2200967 | 76.0018663 | 64.7698269 |
| 68.6030777 | 70.5164707 | 67.2200967 | 76.0018663 | 67.7698269 |
| 68.6030777 | 71.5164707 | 69.2200967 | 76.0018663 | 66.7698269 |
| 68.6030777 | 71.5164707 | 69.2200967 | 76.0018663 | 66.7698269 |
| 68.6030777 | 73.5164707 | 69.2200967 | 77.0018663 | 66.7698269 |
| 68.6030777 | 73.5164707 | 69.2200967 | 77.0018663 | 66.7698269 |



|            |            |            |            |            |
|------------|------------|------------|------------|------------|
| 68.6030777 | 75.5164707 | 70.2200967 | 70.0018663 | 66.7698269 |
| 68.6030777 | 75.5164707 | 71.2200967 | 69.0018663 | 66.7698269 |
| 68.6030777 | 76.5164707 | 71.2200967 | 69.0018663 | 66.7698269 |
| 70.6030777 | 79.5164707 | 72.2200967 | 69.0018663 | 66.7698269 |
| 70.6030777 | 81.5164707 | 72.2200967 | 69.0018663 | 66.7698269 |
| 70.6030777 | 82.5164707 | 72.2200967 | 69.0018663 | 66.7698269 |
| 73.6030777 | 82.5164707 | 72.2200967 | 69.0018663 | 65.7698269 |
| 73.6030777 | 82.5164707 | 72.2200967 | 70.0018663 | 65.7698269 |
| 74.6030777 | 83.5164707 | 72.2200967 | 69.0018663 | 65.7698269 |
| 75.6030777 | 85.5164707 | 72.2200967 | 69.0018663 | 65.7698269 |
| 76.6030777 | 85.5164707 | 73.2200967 | 69.0018663 | 65.7698269 |
| 76.6030777 | 85.5164707 | 72.2200967 | 69.0018663 | 65.7698269 |
| 76.6030777 | 85.5164707 | 71.2200967 | 69.0018663 | 65.7698269 |
| 77.6030777 | 76.5164707 | 70.2200967 | 69.0018663 | 65.7698269 |
| 77.6030777 | 72.5164707 | 69.2200967 | 69.0018663 | 65.7698269 |
| 77.6030777 | 71.5164707 | 69.2200967 | 69.0018663 | 65.7698269 |
| 77.6030777 | 69.5164707 | 69.2200967 | 69.0018663 | 65.7698269 |
| 74.6030777 | 67.5164707 | 69.2200967 | 70.0018663 | 65.7698269 |
| 73.6030777 | 66.5164707 | 68.2200967 | 70.0018663 | 68.7698269 |
| 73.6030777 | 66.5164707 | 68.2200967 | 71.0018663 | 69.7698269 |
| 73.6030777 | 66.5164707 | 68.2200967 | 71.0018663 | 68.7698269 |
| 73.6030777 | 66.5164707 | 67.2200967 | 71.0018663 | 67.7698269 |
| 73.6030777 | 66.5164707 | 67.2200967 | 71.0018663 | 66.7698269 |
| 73.6030777 | 66.5164707 | 66.2200967 | 72.0018663 | 64.7698269 |
| 73.6030777 | 67.5164707 | 65.2200967 | 72.0018663 | 64.7698269 |
| 74.6030777 | 67.5164707 | 64.2200967 | 72.0018663 | 65.7698269 |
| 74.6030777 | 67.5164707 | 64.2200967 | 72.0018663 | 66.7698269 |
| 69.6030777 | 68.5164707 | 64.2200967 | 73.0018663 | 67.7698269 |
| 69.6030777 | 68.5164707 | 64.2200967 | 74.0018663 | 67.7698269 |
| 68.6030777 | 68.5164707 | 64.2200967 | 77.0018663 | 65.7698269 |
| 68.6030777 | 68.5164707 | 64.2200967 | 80.0018663 | 64.7698269 |
| 68.6030777 | 68.5164707 | 64.2200967 | 69.8738183 | 63.7698269 |
| 68.6030777 | 68.5164707 | 64.2200967 | 69.9988183 | 62.7698269 |
| 68.6030777 | 68.5164707 | 63.2200967 | 69.8738183 | 61.7698269 |
| 68.6030777 | 68.5164707 | 63.2200967 | 69.8738183 | 61.7698269 |
| 68.6030777 | 68.5164707 | 63.2200967 | 69.7488183 | 61.7698269 |
| 68.6030777 | 68.5164707 | 63.2200967 | 69.7488183 | 61.7698269 |
| 68.6030777 | 68.5164707 | 63.2200967 | 70.1238183 | 63.7698269 |
| 68.6030777 | 68.5164707 | 63.2200967 | 70.1238183 | 65.7698269 |
| 69.6030777 | 68.5164707 | 64.2200967 | 70.4988183 | 65.7698269 |
| 70.6030777 | 69.5164707 | 65.2200967 | 71.1238183 | 65.7698269 |
| 72.6030777 | 69.5164707 | 65.2200967 | 71.1238183 | 64.7698269 |
| 72.6030777 | 69.5164707 | 64.2200967 | 70.9988183 | 63.7698269 |
| 72.6030777 | 69.5164707 | 64.2200967 | 70.8738183 | 61.7698269 |
| 72.6030777 | 70.5164707 | 64.2200967 | 70.8738183 | 61.7698269 |

|            |            |            |            |            |
|------------|------------|------------|------------|------------|
| 73.6030777 | 70.5164707 | 64.2200967 | 70.7488183 | 61.7698269 |
| 74.6030777 | 70.5164707 | 64.2200967 | 83.0018663 | 62.7698269 |
| 74.6030777 | 70.5164707 | 64.2200967 | 83.0018663 | 62.7698269 |
| 76.6030777 | 69.5164707 | 63.2200967 | 73.0018663 | 64.7698269 |
| 79.6030777 | 69.5164707 | 63.2200967 | 69.0018663 | 65.7698269 |
| 79.6030777 | 69.5164707 | 63.2200967 | 68.0018663 | 65.7698269 |
| 80.6030777 | 69.5164707 | 64.2200967 | 67.0018663 | 65.7698269 |
| 80.6030777 | 69.5164707 | 64.2200967 | 66.0018663 | 64.7698269 |
| 81.6030777 | 69.5164707 | 64.2200967 | 66.0018663 | 63.7698269 |
| 81.6030777 | 69.5164707 | 64.2200967 | 66.0018663 | 62.7698269 |
| 80.6030777 | 69.5164707 | 64.2200967 | 66.0018663 | 62.7698269 |
| 79.6030777 | 69.5164707 | 63.2200967 | 66.0018663 | 62.7698269 |
| 79.6030777 | 70.5164707 | 63.2200967 | 66.0018663 | 62.7698269 |
| 78.6030777 | 70.5164707 | 63.2200967 | 66.0018663 | 62.7698269 |
| 77.6030777 | 70.5164707 | 63.2200967 | 66.0018663 | 61.7698269 |
| 76.6030777 | 70.5164707 | 63.2200967 | 64.0018663 | 60.7698269 |
| 72.6030777 | 69.5164707 | 65.2200967 | 64.0018663 | 60.7698269 |
| 72.6030777 | 69.5164707 | 65.2200967 | 64.0018663 | 61.7698269 |
| 72.6030777 | 69.5164707 | 65.2200967 | 64.0018663 | 63.7698269 |
| 74.6030777 | 69.5164707 | 64.2200967 | 64.0018663 | 63.7698269 |
| 74.6030777 | 68.5164707 | 64.2200967 | 64.0018663 | 63.7698269 |
| 75.6030777 | 67.5164707 | 64.2200967 | 64.0018663 | 63.7698269 |
| 75.6030777 | 67.5164707 | 64.2200967 | 64.0018663 | 65.7698269 |
| 76.6030777 | 67.5164707 | 64.2200967 | 65.0018663 | 66.7698269 |
| 76.6030777 | 67.5164707 | 63.2200967 | 65.0018663 | 68.7698269 |
| 77.6030777 | 67.5164707 | 63.2200967 | 65.0018663 | 68.7698269 |
| 80.6030777 | 66.5164707 | 63.2200967 | 69.0018663 | 68.7698269 |
| 80.6030777 | 66.5164707 | 63.2200967 | 71.0018663 | 68.7698269 |
| 82.6030777 | 66.5164707 | 63.2200967 | 72.0018663 | 68.7698269 |
| 70.6238183 | 65.5164707 | 63.2200967 | 72.0018663 | 68.7698269 |
| 70.9988183 | 65.5164707 | 63.2200967 | 72.0018663 | 68.7698269 |
| 71.4988183 | 65.5164707 | 64.2200967 | 74.0018663 | 69.7698269 |
| 79.6030777 | 65.5164707 | 63.2200967 | 76.0018663 | 70.7698269 |
| 79.6030777 | 65.5164707 | 63.2200967 | 79.0018663 | 69.7698269 |
| 70.6030777 | 65.5164707 | 63.2200967 | 79.0018663 | 69.7698269 |
| 69.6030777 | 65.5164707 | 63.2200967 | 80.0018663 | 68.7698269 |
| 68.6030777 | 65.5164707 | 63.2200967 | 70.3738183 | 66.7698269 |
| 68.6030777 | 65.5164707 | 63.2200967 | 70.3738183 | 64.7698269 |
| 68.6030777 | 65.5164707 | 63.2200967 | 70.3738183 | 64.7698269 |
| 68.6030777 | 65.5164707 | 63.2200967 | 83.0018663 | 65.7698269 |
| 68.6030777 | 67.5164707 | 63.2200967 | 83.0018663 | 65.7698269 |
| 68.6030777 | 67.5164707 | 63.2200967 | 82.0018663 | 65.7698269 |
| 68.6030777 | 67.5164707 | 63.2200967 | 76.0018663 | 66.7698269 |
| 68.6030777 | 66.5164707 | 64.2200967 | 72.0018663 | 67.7698269 |
| 68.6030777 | 66.5164707 | 64.2200967 | 72.0018663 | 67.7698269 |

|            |            |            |            |            |
|------------|------------|------------|------------|------------|
| 68.6030777 | 65.5164707 | 65.2200967 | 72.0018663 | 67.7698269 |
| 70.6030777 | 65.5164707 | 65.2200967 | 72.0018663 | 68.7698269 |
| 70.6030777 | 65.5164707 | 65.2200967 | 72.0018663 | 70.7698269 |
| 70.6030777 | 65.5164707 | 66.2200967 | 72.0018663 | 70.7698269 |
| 70.6030777 | 65.5164707 | 66.2200967 | 72.0018663 | 70.7698269 |
| 70.6030777 | 66.5164707 | 66.2200967 | 72.0018663 | 70.7698269 |
| 70.6030777 | 66.5164707 | 66.2200967 | 72.0018663 | 70.7698269 |
| 70.6030777 | 67.5164707 | 66.2200967 | 72.0018663 | 70.7698269 |
| 69.6030777 | 67.5164707 | 66.2200967 | 72.0018663 | 71.7698269 |
| 69.6030777 | 66.5164707 | 66.2200967 | 71.0018663 | 72.7698269 |
| 69.6030777 | 66.5164707 | 67.2200967 | 71.0018663 | 72.7698269 |
| 69.6030777 | 66.5164707 | 67.2200967 | 71.0018663 | 72.7698269 |
| 69.6030777 | 66.5164707 | 67.2200967 | 72.0018663 | 73.7698269 |
| 68.6030777 | 66.5164707 | 67.2200967 | 72.0018663 | 74.7698269 |
| 67.6030777 | 66.5164707 | 67.2200967 | 72.0018663 | 75.7698269 |
| 67.6030777 | 66.5164707 | 67.2200967 | 72.0018663 | 74.7698269 |
| 66.6030777 | 66.5164707 | 67.2200967 | 73.0018663 | 73.7698269 |
| 66.6030777 | 65.5164707 | 67.2200967 | 73.0018663 | 72.7698269 |
| 67.6030777 | 64.5164707 | 68.2200967 | 70.0018663 | 71.7698269 |
| 70.6030777 | 64.5164707 | 68.2200967 | 70.0018663 | 72.7698269 |
| 71.6030777 | 64.5164707 | 68.2200967 | 70.0018663 | 72.7698269 |
| 71.6030777 | 64.5164707 | 69.2200967 | 70.0018663 | 74.7698269 |
| 73.6030777 | 64.5164707 | 67.2200967 | 71.0018663 | 74.7698269 |
| 74.6030777 | 64.5164707 | 65.2200967 | 72.0018663 | 74.7698269 |
| 74.6030777 | 65.5164707 | 64.2200967 | 72.0018663 | 72.7698269 |
| 74.6030777 | 65.5164707 | 62.2200967 | 73.0018663 | 72.7698269 |
| 73.6030777 | 65.5164707 | 60.2200967 | 72.0018663 | 72.7698269 |
| 73.6030777 | 65.5164707 | 60.2200967 | 72.0018663 | 72.7698269 |
| 74.6030777 | 66.5164707 | 59.2200967 | 72.0018663 | 72.7698269 |
| 74.6030777 | 66.5164707 | 59.2200967 | 72.0018663 | 72.7698269 |
| 74.6030777 | 65.5164707 | 58.2200967 | 72.0018663 | 71.7698269 |
| 74.6030777 | 65.5164707 | 58.2200967 | 72.0018663 | 70.7698269 |
| 74.6030777 | 65.5164707 | 58.2200967 | 73.0018663 | 69.7698269 |
| 72.6030777 | 64.5164707 | 58.2200967 | 73.0018663 | 68.7698269 |
| 72.6030777 | 64.5164707 | 58.2200967 | 75.0018663 | 67.7698269 |
| 72.6030777 | 64.5164707 | 59.2200967 | 75.0018663 | 66.7698269 |
| 72.6030777 | 65.5164707 | 60.2200967 | 75.0018663 | 66.7698269 |
| 72.6030777 | 65.5164707 | 60.2200967 | 75.0018663 | 66.7698269 |
| 73.6030777 | 64.5164707 | 60.2200967 | 72.0018663 | 67.7698269 |
| 73.6030777 | 64.5164707 | 60.2200967 | 72.0018663 | 67.7698269 |
| 73.6030777 | 64.5164707 | 60.2200967 | 71.0018663 | 66.7698269 |
| 72.6030777 | 64.5164707 | 60.2200967 | 75.0018663 | 65.7698269 |
| 71.6030777 | 64.5164707 | 60.2200967 | 75.0018663 | 65.7698269 |
| 70.6030777 | 64.5164707 | 60.2200967 | 77.0018663 | 63.7698269 |
| 69.6030777 | 64.5164707 | 60.2200967 | 77.0018663 | 63.7698269 |

|            |            |            |            |            |
|------------|------------|------------|------------|------------|
| 68.6030777 | 64.5164707 | 60.2200967 | 77.0018663 | 63.7698269 |
| 68.6030777 | 64.5164707 | 60.2200967 | 77.0018663 | 62.7698269 |
| 68.6030777 | 64.5164707 | 60.2200967 | 77.0018663 | 62.7698269 |
| 68.6030777 | 64.5164707 | 60.2200967 | 77.0018663 | 62.7698269 |
| 68.6030777 | 64.5164707 | 60.2200967 | 77.0018663 | 63.7698269 |
| 68.6030777 | 64.5164707 | 61.2200967 | 77.0018663 | 64.7698269 |
| 68.6030777 | 65.5164707 | 62.2200967 | 77.0018663 | 64.7698269 |
| 68.6030777 | 67.5164707 | 62.2200967 | 76.0018663 | 65.7698269 |
| 68.6030777 | 68.5164707 | 62.2200967 | 74.0018663 | 67.7698269 |
| 68.6030777 | 68.5164707 | 61.2200967 | 72.0018663 | 67.7698269 |
| 68.6030777 | 68.5164707 | 61.2200967 | 72.0018663 | 73.7698269 |
| 68.6030777 | 69.5164707 | 61.2200967 | 70.0018663 | 74.7698269 |
| 68.6030777 | 70.5164707 | 60.2200967 | 69.0018663 | 74.7698269 |
| 68.6030777 | 69.5164707 | 60.2200967 | 68.0018663 | 73.7698269 |
| 68.6030777 | 69.5164707 | 61.2200967 | 68.0018663 | 72.7698269 |
| 68.6030777 | 70.5164707 | 62.2200967 | 68.0018663 | 72.7698269 |
| 68.6030777 | 70.5164707 | 62.2200967 | 69.0018663 | 70.7698269 |
| 68.6030777 | 70.5164707 | 62.2200967 | 69.0018663 | 71.7698269 |
| 69.6030777 | 68.5164707 | 62.2200967 | 69.0018663 | 71.7698269 |
| 71.6030777 | 67.5164707 | 63.2200967 | 71.0018663 | 70.7698269 |
| 71.6030777 | 67.5164707 | 63.2200967 | 71.0018663 | 70.7698269 |
| 71.6030777 | 67.5164707 | 62.2200967 | 72.0018663 | 70.7698269 |
| 72.6030777 | 66.5164707 | 62.2200967 | 72.0018663 | 70.7698269 |
| 72.6030777 | 66.5164707 | 62.2200967 | 72.0018663 | 70.7698269 |
| 72.6030777 | 66.5164707 | 62.2200967 | 72.0018663 | 70.7698269 |
| 72.6030777 | 66.5164707 | 62.2200967 | 72.0018663 | 70.7698269 |
| 72.6030777 | 66.5164707 | 62.2200967 | 73.0018663 | 70.7698269 |
| 72.6030777 | 66.5164707 | 62.2200967 | 74.0018663 | 71.7698269 |
| 71.6030777 | 67.5164707 | 63.2200967 | 74.0018663 | 71.7698269 |
| 71.6030777 | 67.5164707 | 63.2200967 | 75.0018663 | 71.7698269 |
| 71.6030777 | 67.5164707 | 65.2200967 | 75.0018663 | 71.7698269 |
| 70.6030777 | 67.5164707 | 65.2200967 | 75.0018663 | 71.7698269 |
| 70.6030777 | 67.5164707 | 67.2200967 | 75.0018663 | 71.7698269 |
| 70.6030777 | 67.5164707 | 67.2200967 | 75.0018663 | 71.7698269 |
| 70.6030777 | 67.5164707 | 67.2200967 | 75.0018663 | 71.7698269 |
| 72.6030777 | 66.5164707 | 68.2200967 | 75.0018663 | 73.7698269 |
| 72.6030777 | 67.5164707 | 68.2200967 | 75.0018663 | 80.7698269 |
| 72.6030777 | 67.5164707 | 68.2200967 | 75.0018663 | 82.7698269 |
| 73.6030777 | 67.5164707 | 68.2200967 | 76.0018663 | 82.7698269 |
| 73.6030777 | 67.5164707 | 68.2200967 | 76.0018663 | 82.7698269 |
| 74.6030777 | 67.5164707 | 69.2200967 | 75.0018663 | 79.7698269 |
| 74.6030777 | 67.5164707 | 69.2200967 | 75.0018663 | 79.7698269 |
| 74.6030777 | 67.5164707 | 69.2200967 | 78.0018663 | 76.7698269 |
| 75.6030777 | 67.5164707 | 69.2200967 | 78.0018663 | 76.7698269 |
| 75.6030777 | 67.5164707 | 69.2200967 | 78.0018663 | 76.7698269 |

|            |            |            |            |            |
|------------|------------|------------|------------|------------|
| 75.6030777 | 67.5164707 | 66.2200967 | 76.0018663 | 77.7698269 |
| 72.6030777 | 66.5164707 | 64.2200967 | 76.0018663 | 77.7698269 |
| 72.6030777 | 66.5164707 | 64.2200967 | 72.0018663 | 78.7698269 |
| 69.6030777 | 66.5164707 | 63.2200967 | 71.0018663 | 76.7698269 |
| 69.6030777 | 66.5164707 | 61.2200967 | 71.0018663 | 72.7698269 |
| 68.6030777 | 65.5164707 | 61.2200967 | 71.0018663 | 69.7698269 |
| 66.6030777 | 64.5164707 | 61.2200967 | 72.0018663 | 69.7698269 |
| 65.6030777 | 65.5164707 | 61.2200967 | 72.0018663 | 67.7698269 |
| 65.6030777 | 65.5164707 | 61.2200967 | 72.0018663 | 66.7698269 |
| 65.6030777 | 64.5164707 | 61.2200967 | 72.0018663 | 66.7698269 |
| 64.6030777 | 64.5164707 | 62.2200967 | 72.0018663 | 66.7698269 |
| 64.6030777 | 64.5164707 | 61.2200967 | 73.0018663 | 66.7698269 |
| 64.6030777 | 65.5164707 | 61.2200967 | 73.0018663 | 66.7698269 |
| 64.6030777 | 65.5164707 | 61.2200967 | 74.0018663 | 65.7698269 |
| 63.6030777 | 66.5164707 | 60.2200967 | 74.0018663 | 65.7698269 |
| 63.6030777 | 66.5164707 | 60.2200967 | 76.0018663 | 65.7698269 |
| 63.6030777 | 65.5164707 | 60.2200967 | 78.0018663 | 63.7698269 |
| 63.6030777 | 65.5164707 | 59.2200967 | 78.0018663 | 62.7698269 |
| 63.6030777 | 65.5164707 | 59.2200967 | 74.0018663 | 62.7698269 |
| 63.6030777 | 65.5164707 | 59.2200967 | 70.0018663 | 62.7698269 |
| 65.6030777 | 64.5164707 | 59.2200967 | 70.0018663 | 62.7698269 |
| 65.6030777 | 64.5164707 | 59.2200967 | 63.0018663 | 62.7698269 |
| 65.6030777 | 65.5164707 | 59.2200967 | 62.0018663 | 61.7698269 |
| 65.6030777 | 66.5164707 | 60.2200967 | 62.0018663 | 62.7698269 |
| 66.6030777 | 66.5164707 | 60.2200967 | 62.0018663 | 62.7698269 |
| 66.6030777 | 66.5164707 | 60.2200967 | 64.0018663 | 62.7698269 |
| 67.6030777 | 67.5164707 | 60.2200967 | 64.0018663 | 62.7698269 |
| 67.6030777 | 67.5164707 | 60.2200967 | 64.0018663 | 61.7698269 |
| 68.6030777 | 67.5164707 | 60.2200967 | 64.0018663 | 61.7698269 |
| 68.6030777 | 67.5164707 | 60.2200967 | 64.0018663 | 61.7698269 |
| 69.6030777 | 66.5164707 | 61.2200967 | 64.0018663 | 60.7698269 |
| 69.6030777 | 67.5164707 | 62.2200967 | 64.0018663 | 60.7698269 |
| 70.6030777 | 66.5164707 | 62.2200967 | 64.0018663 | 61.7698269 |
| 70.6030777 | 66.5164707 | 63.2200967 | 64.0018663 | 62.7698269 |
| 70.6030777 | 66.5164707 | 64.2200967 | 64.0018663 | 68.7698269 |
| 70.6030777 | 67.5164707 | 65.2200967 | 64.0018663 | 67.7698269 |
| 72.6030777 | 67.5164707 | 67.2200967 | 65.0018663 | 65.7698269 |
| 72.6030777 | 66.5164707 | 67.2200967 | 66.0018663 | 64.7698269 |
| 73.6030777 | 66.5164707 | 67.2200967 | 66.0018663 | 63.7698269 |
| 73.6030777 | 66.5164707 | 67.2200967 | 66.0018663 | 63.7698269 |
| 73.6030777 | 66.5164707 | 67.2200967 | 66.0018663 | 64.7698269 |
| 73.6030777 | 66.5164707 | 67.2200967 | 65.0018663 | 64.7698269 |
| 73.6030777 | 66.5164707 | 68.2200967 | 64.0018663 | 64.7698269 |
| 74.6030777 | 66.5164707 | 68.2200967 | 64.0018663 | 65.7698269 |
| 74.6030777 | 66.5164707 | 68.2200967 | 62.0018663 | 65.7698269 |

|            |            |            |            |            |
|------------|------------|------------|------------|------------|
| 74.6030777 | 66.5164707 | 66.2200967 | 61.0018663 | 65.7698269 |
| 75.6030777 | 66.5164707 | 65.2200967 | 61.0018663 | 65.7698269 |
| 75.6030777 | 65.5164707 | 64.2200967 | 61.0018663 | 65.7698269 |
| 76.6030777 | 65.5164707 | 64.2200967 | 61.0018663 | 65.7698269 |
| 77.6030777 | 65.5164707 | 63.2200967 | 63.0018663 | 65.7698269 |
| 77.6030777 | 64.5164707 | 63.2200967 | 63.0018663 | 65.7698269 |
| 77.6030777 | 64.5164707 | 63.2200967 | 64.0018663 | 65.7698269 |
| 77.6030777 | 64.5164707 | 63.2200967 | 64.0018663 | 65.7698269 |
| 78.6030777 | 63.5164707 | 63.2200967 | 64.0018663 | 65.7698269 |
| 78.6030777 | 63.5164707 | 63.2200967 | 65.0018663 | 65.7698269 |
| 78.6030777 | 63.5164707 | 63.2200967 | 66.0018663 | 65.7698269 |
| 80.6030777 | 63.5164707 | 63.2200967 | 66.0018663 | 65.7698269 |
| 80.6030777 | 64.5164707 | 63.2200967 | 66.0018663 | 64.7698269 |
| 81.6030777 | 66.5164707 | 63.2200967 | 66.0018663 | 65.7698269 |
| 81.6030777 | 65.5164707 | 62.2200967 | 68.0018663 | 67.7698269 |
| 83.6030777 | 65.5164707 | 62.2200967 | 68.0018663 | 67.7698269 |
| 83.6030777 | 66.5164707 | 62.2200967 | 69.0018663 | 68.7698269 |
| 78.6030777 | 66.5164707 | 62.2200967 | 69.0018663 | 68.7698269 |
| 78.6030777 | 66.5164707 | 61.2200967 | 69.0018663 | 68.7698269 |
| 77.6030777 | 66.5164707 | 62.2200967 | 69.0018663 | 68.7698269 |
| 77.6030777 | 65.5164707 | 63.2200967 | 69.0018663 | 68.7698269 |
| 77.6030777 | 65.5164707 | 63.2200967 | 69.0018663 | 68.7698269 |
| 75.6030777 | 64.5164707 | 63.2200967 | 68.0018663 | 69.7698269 |
| 74.6030777 | 63.5164707 | 63.2200967 | 67.0018663 | 69.7698269 |
| 74.6030777 | 63.5164707 | 62.2200967 | 66.0018663 | 71.7698269 |
| 74.6030777 | 63.5164707 | 62.2200967 | 66.0018663 | 70.7698269 |
| 74.6030777 | 63.5164707 | 62.2200967 | 66.0018663 | 68.7698269 |
| 74.6030777 | 63.5164707 | 62.2200967 | 66.0018663 | 63.7698269 |
| 74.6030777 | 63.5164707 | 62.2200967 | 73.0018663 | 62.7698269 |
| 74.6030777 | 63.5164707 | 62.2200967 | 75.0018663 | 62.7698269 |
| 74.6030777 | 64.5164707 | 62.2200967 | 75.0018663 | 62.7698269 |
| 74.6030777 | 64.5164707 | 62.2200967 | 75.0018663 | 62.7698269 |
| 74.6030777 | 64.5164707 | 62.2200967 | 74.0018663 | 61.7698269 |
| 73.6030777 | 64.5164707 | 63.2200967 | 70.0018663 | 61.7698269 |
| 73.6030777 | 65.5164707 | 62.2200967 | 70.0018663 | 61.7698269 |
| 73.6030777 | 64.5164707 | 62.2200967 | 66.0018663 | 62.7698269 |
| 74.6030777 | 64.5164707 | 62.2200967 | 66.0018663 | 62.7698269 |
| 75.6030777 | 63.5164707 | 62.2200967 | 66.0018663 | 63.7698269 |
| 75.6030777 | 63.5164707 | 63.2200967 | 66.0018663 | 63.7698269 |
| 76.6030777 | 64.5164707 | 64.2200967 | 68.0018663 | 64.7698269 |
| 77.6030777 | 64.5164707 | 65.2200967 | 69.0018663 | 64.7698269 |
| 78.6030777 | 64.5164707 | 65.2200967 | 69.0018663 | 64.7698269 |
| 78.6030777 | 64.5164707 | 67.2200967 | 68.0018663 | 64.7698269 |
| 79.6030777 | 64.5164707 | 67.2200967 | 68.0018663 | 65.7698269 |
| 80.6030777 | 65.5164707 | 66.2200967 | 68.0018663 | 65.7698269 |

|            |            |            |            |            |
|------------|------------|------------|------------|------------|
| 80.6030777 | 65.5164707 | 65.2200967 | 67.0018663 | 65.7698269 |
| 80.6030777 | 64.5164707 | 64.2200967 | 66.0018663 | 65.7698269 |
| 80.6030777 | 65.5164707 | 64.2200967 | 66.0018663 | 65.7698269 |
| 69.3738183 | 65.5164707 | 64.2200967 | 67.0018663 | 64.7698269 |
| 69.2488183 | 64.5164707 | 64.2200967 | 67.0018663 | 63.7698269 |
| 68.9988183 | 64.5164707 | 64.2200967 | 67.0018663 | 63.7698269 |
| 69.3738183 | 64.5164707 | 64.2200967 | 65.0018663 | 62.7698269 |
| 69.3738183 | 64.5164707 | 63.2200967 | 65.0018663 | 62.7698269 |
| 69.3738183 | 64.5164707 | 62.2200967 | 65.0018663 | 61.7698269 |
| 69.9988183 | 63.5164707 | 61.2200967 | 67.0018663 | 61.7698269 |
| 70.4988183 | 63.5164707 | 62.2200967 | 73.0018663 | 61.7698269 |
| 78.6030777 | 63.5164707 | 62.2200967 | 74.0018663 | 61.7698269 |
| 72.6030777 | 63.5164707 | 63.2200967 | 74.0018663 | 62.7698269 |
| 71.6030777 | 64.5164707 | 63.2200967 | 75.0018663 | 62.7698269 |
| 70.6030777 | 63.5164707 | 62.2200967 | 75.0018663 | 62.7698269 |
| 70.6030777 | 64.5164707 | 63.2200967 | 74.0018663 | 63.7698269 |
| 71.6030777 | 64.5164707 | 64.2200967 | 72.0018663 | 63.7698269 |
| 73.6030777 | 64.5164707 | 66.2200967 | 70.0018663 | 64.7698269 |
| 73.6030777 | 64.5164707 | 66.2200967 | 69.0018663 | 66.7698269 |
| 74.6030777 | 64.5164707 | 66.2200967 | 68.0018663 | 70.7698269 |
| 75.6030777 | 65.5164707 | 66.2200967 | 68.0018663 | 71.7698269 |
| 77.6030777 | 65.5164707 | 66.2200967 | 68.0018663 | 72.7698269 |
| 80.6030777 | 66.5164707 | 67.2200967 | 65.0018663 | 72.7698269 |
| 80.6030777 | 69.5164707 | 66.2200967 | 65.0018663 | 72.7698269 |
| 80.6030777 | 69.5164707 | 66.2200967 | 65.0018663 | 72.7698269 |
| 81.6030777 | 70.5164707 | 63.2200967 | 65.0018663 | 72.7698269 |
| 81.6030777 | 70.5164707 | 63.2200967 | 65.0018663 | 69.7698269 |
| 68.6238183 | 70.5164707 | 62.2200967 | 65.0018663 | 67.7698269 |
| 68.4988183 | 70.5164707 | 61.2200967 | 65.0018663 | 66.7698269 |
| 68.6238183 | 70.5164707 | 61.2200967 | 65.0018663 | 66.7698269 |
| 68.4988183 | 70.5164707 | 61.2200967 | 65.0018663 | 65.7698269 |
| 68.6238183 | 70.5164707 | 61.2200967 | 65.0018663 | 65.7698269 |
| 68.9988183 | 69.5164707 | 60.2200967 | 65.0018663 | 65.7698269 |
| 69.6238183 | 69.5164707 | 59.2200967 | 65.0018663 | 64.7698269 |
| 69.8738183 | 69.5164707 | 58.2200967 | 66.0018663 | 64.7698269 |
| 70.4988183 | 70.5164707 | 58.2200967 | 66.0018663 | 63.7698269 |
| 70.7488183 | 70.5164707 | 58.2200967 | 66.0018663 | 63.7698269 |
| 70.7488183 | 70.5164707 | 58.2200967 | 66.0018663 | 62.7698269 |
| 70.9988183 | 70.5164707 | 59.2200967 | 67.0018663 | 62.7698269 |
| 70.9988183 | 70.5164707 | 59.2200967 | 67.0018663 | 62.7698269 |
| 71.3738183 | 70.5164707 | 59.2200967 | 67.0018663 | 63.7698269 |
| 71.4988183 | 67.5164707 | 59.2200967 | 69.0018663 | 63.7698269 |
| 71.6238183 | 67.5164707 | 61.2200967 | 69.0018663 | 63.7698269 |
| 71.8738183 | 67.5164707 | 61.2200967 | 71.0018663 | 64.7698269 |
| 84.6030777 | 67.5164707 | 62.2200967 | 72.0018663 | 65.7698269 |

|            |            |            |            |            |
|------------|------------|------------|------------|------------|
| 83.6030777 | 65.5164707 | 62.2200967 | 72.0018663 | 65.7698269 |
| 83.6030777 | 65.5164707 | 62.2200967 | 72.0018663 | 64.7698269 |
| 83.6030777 | 65.5164707 | 62.2200967 | 72.0018663 | 64.7698269 |
| 76.6030777 | 65.5164707 | 62.2200967 | 74.0018663 | 63.7698269 |
| 73.6030777 | 64.5164707 | 62.2200967 | 75.0018663 | 62.7698269 |
| 73.6030777 | 64.5164707 | 62.2200967 | 77.0018663 | 62.7698269 |
| 71.6030777 | 64.5164707 | 63.2200967 | 79.0018663 | 63.7698269 |
| 71.6030777 | 64.5164707 | 63.2200967 | 79.0018663 | 63.7698269 |
| 72.6030777 | 63.5164707 | 63.2200967 | 70.8738183 | 64.7698269 |
| 72.6030777 | 63.5164707 | 61.2200967 | 70.6238183 | 64.7698269 |
| 72.6030777 | 63.5164707 | 61.2200967 | 71.2488183 | 65.7698269 |
| 74.6030777 | 64.5164707 | 61.2200967 | 71.9988183 | 65.7698269 |
| 74.6030777 | 64.5164707 | 61.2200967 | 71.9988183 | 65.7698269 |
| 74.6030777 | 64.5164707 | 60.2200967 | 72.2488183 | 64.7698269 |
| 73.6030777 | 64.5164707 | 59.2200967 | 71.9988183 | 64.7698269 |
| 72.6030777 | 65.5164707 | 58.2200967 | 71.7488183 | 64.7698269 |
| 72.6030777 | 65.5164707 | 58.2200967 | 71.9988183 | 65.7698269 |
| 72.6030777 | 66.5164707 | 59.2200967 | 72.1238183 | 65.7698269 |
| 71.6030777 | 66.5164707 | 59.2200967 | 71.9988183 | 65.7698269 |
| 71.6030777 | 66.5164707 | 59.2200967 | 71.8738183 | 66.7698269 |
| 71.6030777 | 66.5164707 | 61.2200967 | 71.8738183 | 65.7698269 |
| 71.6030777 | 66.5164707 | 61.2200967 | 71.9988183 | 66.7698269 |
| 71.6030777 | 65.5164707 | 61.2200967 | 71.4988183 | 66.7698269 |
| 71.6030777 | 65.5164707 | 61.2200967 | 70.7488183 | 65.7698269 |
| 71.6030777 | 65.5164707 | 61.2200967 | 70.3738183 | 65.7698269 |
| 71.6030777 | 65.5164707 | 61.2200967 | 70.4988183 | 65.7698269 |
| 71.6030777 | 65.5164707 | 61.2200967 | 70.3738183 | 66.7698269 |
| 68.6030777 | 65.5164707 | 61.2200967 | 81.0018663 | 67.7698269 |
| 68.6030777 | 66.5164707 | 61.2200967 | 79.0018663 | 67.7698269 |
| 67.6030777 | 67.5164707 | 62.2200967 | 77.0018663 | 67.7698269 |
| 67.6030777 | 70.5164707 | 64.2200967 | 75.0018663 | 66.7698269 |
| 66.6030777 | 70.5164707 | 66.2200967 | 73.0018663 | 64.7698269 |
| 67.6030777 | 74.5164707 | 66.2200967 | 73.0018663 | 63.7698269 |
| 68.6030777 | 80.5164707 | 66.2200967 | 65.0018663 | 63.7698269 |
| 68.6030777 | 80.5164707 | 68.2200967 | 65.0018663 | 63.7698269 |
| 69.6030777 | 74.5164707 | 69.2200967 | 64.0018663 | 64.7698269 |
| 69.6030777 | 69.5164707 | 69.2200967 | 64.0018663 | 66.7698269 |
| 69.6030777 | 68.5164707 | 74.2200967 | 64.0018663 | 66.7698269 |
| 69.6030777 | 68.5164707 | 75.2200967 | 65.0018663 | 67.7698269 |
| 68.6030777 | 68.5164707 | 76.2200967 | 65.0018663 | 66.7698269 |
| 68.6030777 | 68.5164707 | 76.2200967 | 66.0018663 | 66.7698269 |
| 69.6030777 | 68.5164707 | 76.2200967 | 66.0018663 | 65.7698269 |
| 71.6030777 | 68.5164707 | 76.2200967 | 67.0018663 | 65.7698269 |
| 72.6030777 | 68.5164707 | 77.2200967 | 68.0018663 | 67.7698269 |
| 73.6030777 | 67.5164707 | 77.2200967 | 68.0018663 | 69.7698269 |



|            |            |            |            |            |
|------------|------------|------------|------------|------------|
| 73.6030777 | 67.5164707 | 77.2200967 | 68.0018663 | 71.7698269 |
| 73.6030777 | 67.5164707 | 77.2200967 | 68.0018663 | 71.7698269 |
| 73.6030777 | 68.5164707 | 76.2200967 | 70.0018663 | 70.7698269 |
| 73.6030777 | 69.5164707 | 76.2200967 | 70.0018663 | 69.7698269 |
| 73.6030777 | 69.5164707 | 76.2200967 | 73.0018663 | 68.7698269 |
| 73.6030777 | 69.5164707 | 74.2200967 | 78.0018663 | 68.7698269 |
| 73.6030777 | 68.5164707 | 72.2200967 | 78.0018663 | 68.7698269 |
| 73.6030777 | 67.5164707 | 70.2200967 | 73.0018663 | 68.7698269 |
| 73.6030777 | 67.5164707 | 69.2200967 | 67.0018663 | 70.7698269 |
| 71.6030777 | 68.5164707 | 69.2200967 | 65.0018663 | 71.7698269 |
| 70.6030777 | 68.5164707 | 69.2200967 | 65.0018663 | 71.7698269 |
| 70.6030777 | 68.5164707 | 69.2200967 | 65.0018663 | 71.7698269 |
| 69.6030777 | 67.5164707 | 69.2200967 | 65.0018663 | 66.7698269 |
| 69.6030777 | 67.5164707 | 69.2200967 | 66.0018663 | 64.7698269 |
| 69.6030777 | 67.5164707 | 70.2200967 | 66.0018663 | 63.7698269 |
| 69.6030777 | 67.5164707 | 71.2200967 | 66.0018663 | 63.7698269 |
| 69.6030777 | 67.5164707 | 73.2200967 | 66.0018663 | 64.7698269 |
| 69.6030777 | 67.5164707 | 74.2200967 | 66.0018663 | 66.7698269 |
| 69.6030777 | 66.5164707 | 74.2200967 | 67.0018663 | 68.7698269 |
| 68.6030777 | 65.5164707 | 74.2200967 | 67.0018663 | 68.7698269 |
| 68.6030777 | 64.5164707 | 74.2200967 | 67.0018663 | 68.7698269 |
| 68.6030777 | 64.5164707 | 74.2200967 | 66.0018663 | 67.7698269 |
| 67.6030777 | 64.5164707 | 74.2200967 | 66.0018663 | 66.7698269 |
| 67.6030777 | 65.5164707 | 73.2200967 | 65.0018663 | 64.7698269 |
| 67.6030777 | 64.5164707 | 72.2200967 | 66.0018663 | 63.7698269 |
| 67.6030777 | 65.5164707 | 71.2200967 | 66.0018663 | 62.7698269 |
| 68.6030777 | 65.5164707 | 71.2200967 | 66.0018663 | 62.7698269 |
| 68.6030777 | 65.5164707 | 69.2200967 | 66.0018663 | 62.7698269 |
| 68.6030777 | 64.5164707 | 69.2200967 | 66.0018663 | 63.7698269 |
| 69.6030777 | 65.5164707 | 69.2200967 | 66.0018663 | 64.7698269 |
| 69.6030777 | 65.5164707 | 69.2200967 | 66.0018663 | 65.7698269 |
| 69.6030777 | 65.5164707 | 68.2200967 | 66.0018663 | 64.7698269 |
| 69.6030777 | 65.5164707 | 67.2200967 | 67.0018663 | 64.7698269 |
| 70.6030777 | 65.5164707 | 67.2200967 | 70.0018663 | 63.7698269 |
| 70.6030777 | 65.5164707 | 66.2200967 | 71.0018663 | 62.7698269 |
| 71.6030777 | 65.5164707 | 64.2200967 | 71.0018663 | 63.7698269 |
| 71.6030777 | 65.5164707 | 64.2200967 | 71.0018663 | 63.7698269 |
| 73.6030777 | 65.5164707 | 68.2200967 | 71.0018663 | 64.7698269 |
| 73.6030777 | 65.5164707 | 68.2200967 | 72.0018663 | 65.7698269 |
| 72.6030777 | 64.5164707 | 68.2200967 | 72.0018663 | 65.7698269 |
| 72.6030777 | 63.5164707 | 68.2200967 | 72.0018663 | 65.7698269 |
| 72.6030777 | 63.5164707 | 68.2200967 | 72.0018663 | 65.7698269 |
| 72.6030777 | 63.5164707 | 69.2200967 | 71.0018663 | 66.7698269 |
| 72.6030777 | 64.5164707 | 69.2200967 | 68.0018663 | 66.7698269 |
| 72.6030777 | 63.5164707 | 71.2200967 | 67.0018663 | 67.7698269 |

|            |            |            |            |            |
|------------|------------|------------|------------|------------|
| 72.6030777 | 64.5164707 | 71.2200967 | 67.0018663 | 67.7698269 |
| 72.6030777 | 64.5164707 | 72.2200967 | 66.0018663 | 67.7698269 |
| 71.6030777 | 64.5164707 | 71.2200967 | 66.0018663 | 67.7698269 |
| 69.6030777 | 64.5164707 | 71.2200967 | 67.0018663 | 67.7698269 |
| 67.6030777 | 64.5164707 | 71.2200967 | 67.0018663 | 67.7698269 |
| 64.6030777 | 64.5164707 | 68.2200967 | 67.0018663 | 67.7698269 |
| 64.6030777 | 63.5164707 | 67.2200967 | 67.0018663 | 67.7698269 |
| 63.6030777 | 63.5164707 | 67.2200967 | 66.0018663 | 70.7698269 |
| 63.6030777 | 63.5164707 | 67.2200967 | 65.0018663 | 73.7698269 |
| 62.6030777 | 64.5164707 | 67.2200967 | 65.0018663 | 73.7698269 |
| 62.6030777 | 63.5164707 | 67.2200967 | 66.0018663 | 71.7698269 |
| 62.6030777 | 63.5164707 | 67.2200967 | 66.0018663 | 71.7698269 |
| 63.6030777 | 63.5164707 | 66.2200967 | 66.0018663 | 70.7698269 |
| 65.6030777 | 63.5164707 | 64.2200967 | 67.0018663 | 69.7698269 |
| 69.6030777 | 64.5164707 | 62.2200967 | 67.0018663 | 69.7698269 |
| 69.6030777 | 63.5164707 | 62.2200967 | 67.0018663 | 69.7698269 |
| 69.6030777 | 63.5164707 | 63.2200967 | 67.0018663 | 67.7698269 |
| 69.6030777 | 64.5164707 | 65.2200967 | 67.0018663 | 66.7698269 |
| 70.6030777 | 64.5164707 | 65.2200967 | 68.0018663 | 64.7698269 |
| 69.6030777 | 63.5164707 | 67.2200967 | 68.0018663 | 63.7698269 |
| 69.6030777 | 63.5164707 | 67.2200967 | 68.0018663 | 63.7698269 |
| 69.6030777 | 62.5164707 | 69.2200967 | 69.0018663 | 63.7698269 |
| 69.6030777 | 62.5164707 | 68.2200967 | 69.0018663 | 63.7698269 |
| 69.6030777 | 62.5164707 | 67.2200967 | 72.0018663 | 64.7698269 |
| 67.6030777 | 62.5164707 | 67.2200967 | 72.0018663 | 64.7698269 |
| 68.6030777 | 62.5164707 | 67.2200967 | 76.0018663 | 64.7698269 |
| 68.6030777 | 63.5164707 | 66.2200967 | 76.0018663 | 65.7698269 |
| 67.6030777 | 63.5164707 | 66.2200967 | 76.0018663 | 65.7698269 |
| 67.6030777 | 63.5164707 | 62.2200967 | 77.0018663 | 65.7698269 |
| 67.6030777 | 63.5164707 | 59.2200967 | 79.0018663 | 65.7698269 |
| 67.6030777 | 63.5164707 | 59.2200967 | 67.6775148 | 65.7698269 |
| 67.6030777 | 63.5164707 | 57.2200967 | 67.899737  | 65.7698269 |
| 67.6030777 | 63.5164707 | 56.2200967 | 67.899737  | 65.7698269 |
| 67.6030777 | 63.5164707 | 56.2200967 | 67.899737  | 65.7698269 |
| 67.6030777 | 63.5164707 | 55.2200967 | 67.7886259 | 65.7698269 |
| 66.6030777 | 63.5164707 | 55.2200967 | 67.899737  | 67.7698269 |
| 66.6030777 | 63.5164707 | 55.2200967 | 67.7886259 | 69.7698269 |
| 66.6030777 | 63.5164707 | 55.2200967 | 67.7886259 | 70.7698269 |
| 66.6030777 | 62.5164707 | 55.2200967 | 67.5664037 | 69.7698269 |
| 66.6030777 | 62.5164707 | 56.2200967 | 67.6775148 | 68.7698269 |
| 66.6030777 | 62.5164707 | 56.2200967 | 67.5664037 | 66.7698269 |
| 65.6030777 | 62.5164707 | 56.2200967 | 67.3441814 | 65.7698269 |
| 66.6030777 | 62.5164707 | 56.2200967 | 66.6775148 | 64.7698269 |
| 70.6030777 | 62.5164707 | 58.2200967 | 76.0018663 | 64.7698269 |
| 71.6030777 | 62.5164707 | 59.2200967 | 75.0018663 | 64.7698269 |

|            |            |            |            |            |
|------------|------------|------------|------------|------------|
| 71.6030777 | 63.5164707 | 59.2200967 | 73.0018663 | 63.7698269 |
| 71.6030777 | 63.5164707 | 60.2200967 | 71.0018663 | 63.7698269 |
| 70.6030777 | 64.5164707 | 61.2200967 | 70.0018663 | 62.7698269 |
| 70.6030777 | 63.5164707 | 61.2200967 | 70.0018663 | 62.7698269 |
| 70.6030777 | 63.5164707 | 61.2200967 | 69.0018663 | 62.7698269 |
| 70.6030777 | 63.5164707 | 61.2200967 | 68.0018663 | 62.7698269 |
| 70.6030777 | 63.5164707 | 61.2200967 | 68.0018663 | 62.7698269 |
| 70.6030777 | 63.5164707 | 60.2200967 | 68.0018663 | 61.7698269 |
| 70.6030777 | 63.5164707 | 61.2200967 | 68.0018663 | 61.7698269 |
| 69.6030777 | 63.5164707 | 62.2200967 | 68.0018663 | 63.7698269 |
| 70.6030777 | 64.5164707 | 62.2200967 | 67.0018663 | 63.7698269 |
| 70.6030777 | 64.5164707 | 62.2200967 | 67.0018663 | 63.7698269 |
| 69.6030777 | 64.5164707 | 62.2200967 | 68.0018663 | 64.7698269 |
| 70.6030777 | 64.5164707 | 62.2200967 | 68.0018663 | 64.7698269 |
| 70.6030777 | 65.5164707 | 61.2200967 | 69.0018663 | 66.7698269 |
| 70.6030777 | 64.5164707 | 61.2200967 | 70.0018663 | 68.7698269 |
| 71.6030777 | 64.5164707 | 61.2200967 | 66.0018663 | 68.7698269 |
| 71.6030777 | 64.5164707 | 61.2200967 | 66.0018663 | 68.7698269 |
| 71.6030777 | 64.5164707 | 61.2200967 | 66.0018663 | 68.7698269 |
| 72.6030777 | 64.5164707 | 61.2200967 | 66.0018663 | 69.7698269 |
| 73.6030777 | 64.5164707 | 61.2200967 | 66.0018663 | 68.7698269 |
| 73.6030777 | 64.5164707 | 61.2200967 | 66.0018663 | 68.7698269 |
| 73.6030777 | 64.5164707 | 61.2200967 | 67.0018663 | 68.7698269 |
| 74.6030777 | 65.5164707 | 61.2200967 | 67.0018663 | 68.7698269 |
| 74.6030777 | 65.5164707 | 61.2200967 | 68.0018663 | 68.7698269 |
| 73.6030777 | 65.5164707 | 61.2200967 | 70.0018663 | 68.7698269 |
| 73.6030777 | 65.5164707 | 61.2200967 | 70.0018663 | 67.7698269 |
| 73.6030777 | 65.5164707 | 61.2200967 | 71.0018663 | 67.7698269 |
| 73.6030777 | 64.5164707 | 61.2200967 | 71.0018663 | 67.7698269 |
| 73.6030777 | 64.5164707 | 61.2200967 | 71.0018663 | 67.7698269 |
| 73.6030777 | 64.5164707 | 61.2200967 | 72.0018663 | 67.7698269 |
| 73.6030777 | 63.5164707 | 61.2200967 | 72.0018663 | 67.7698269 |
| 73.6030777 | 63.5164707 | 61.2200967 | 72.0018663 | 67.7698269 |
| 72.6030777 | 63.5164707 | 61.2200967 | 73.0018663 | 68.7698269 |
| 72.6030777 | 63.5164707 | 61.2200967 | 71.0018663 | 68.7698269 |
| 72.6030777 | 63.5164707 | 61.2200967 | 71.0018663 | 68.7698269 |
| 72.6030777 | 63.5164707 | 61.2200967 | 83.0018663 | 69.7698269 |
| 72.6030777 | 63.5164707 | 61.2200967 | 72.7886259 | 70.7698269 |
| 72.6030777 | 63.5164707 | 61.2200967 | 72.899737  | 70.7698269 |
| 72.6030777 | 63.5164707 | 61.2200967 | 73.6775148 | 71.7698269 |
| 72.6030777 | 64.5164707 | 61.2200967 | 73.5664037 | 70.7698269 |
| 72.6030777 | 63.5164707 | 61.2200967 | 73.0108481 | 69.7698269 |
| 72.6030777 | 62.5164707 | 64.2200967 | 72.5664037 | 69.7698269 |
| 72.6030777 | 62.5164707 | 64.2200967 | 72.3441814 | 68.7698269 |

|            |            |            |            |            |
|------------|------------|------------|------------|------------|
| 72.6030777 | 63.5164707 | 64.2200967 | 71.899737  | 68.7698269 |
| 72.6030777 | 63.5164707 | 64.2200967 | 71.2330703 | 68.7698269 |
| 72.6030777 | 64.5164707 | 64.2200967 | 83.0018663 | 69.7698269 |
| 68.6030777 | 64.5164707 | 64.2200967 | 80.0018663 | 70.7698269 |
| 68.6030777 | 64.5164707 | 62.2200967 | 79.0018663 | 70.7698269 |
| 68.6030777 | 65.5164707 | 62.2200967 | 79.0018663 | 70.7698269 |
| 69.6030777 | 65.5164707 | 60.2200967 | 79.0018663 | 70.7698269 |
| 71.6030777 | 65.5164707 | 60.2200967 | 79.0018663 | 70.7698269 |
| 71.6030777 | 65.5164707 | 60.2200967 | 78.0018663 | 69.7698269 |
| 73.6030777 | 65.5164707 | 60.2200967 | 76.0018663 | 69.7698269 |
| 73.6030777 | 65.5164707 | 60.2200967 | 74.0018663 | 69.7698269 |
| 73.6030777 | 65.5164707 | 61.2200967 | 72.0018663 | 68.7698269 |
| 75.6030777 | 64.5164707 | 61.2200967 | 71.0018663 | 67.7698269 |
| 75.6030777 | 64.5164707 | 61.2200967 | 70.0018663 | 67.7698269 |
| 74.6030777 | 63.5164707 | 63.2200967 | 70.0018663 | 67.7698269 |
| 74.6030777 | 62.5164707 | 64.2200967 | 64.0018663 | 67.7698269 |
| 74.6030777 | 62.5164707 | 65.2200967 | 63.0018663 | 67.7698269 |
| 74.6030777 | 61.5164707 | 64.2200967 | 63.0018663 | 68.7698269 |
| 74.6030777 | 61.5164707 | 62.2200967 | 62.0018663 | 68.7698269 |
| 74.6030777 | 61.5164707 | 62.2200967 | 62.0018663 | 69.7698269 |
| 74.6030777 | 61.5164707 | 62.2200967 | 62.0018663 | 71.7698269 |
| 74.6030777 | 61.5164707 | 62.2200967 | 63.0018663 | 69.7698269 |
| 73.6030777 | 61.5164707 | 62.2200967 | 62.0018663 | 69.7698269 |
| 73.6030777 | 61.5164707 | 62.2200967 | 62.0018663 | 69.7698269 |
| 73.6030777 | 61.5164707 | 62.2200967 | 60.0018663 | 69.7698269 |
| 68.6030777 | 61.5164707 | 62.2200967 | 60.0018663 | 69.7698269 |
| 67.6030777 | 62.5164707 | 63.2200967 | 59.0018663 | 69.7698269 |
| 67.6030777 | 63.5164707 | 63.2200967 | 57.0018663 | 69.7698269 |
| 67.6030777 | 63.5164707 | 63.2200967 | 57.0018663 | 72.7698269 |
| 67.6030777 | 66.5164707 | 63.2200967 | 57.0018663 | 74.7698269 |
| 66.6030777 | 70.4552926 | 63.2200967 | 56.0018663 | 75.7698269 |
| 66.6030777 | 73.1219592 | 63.2200967 | 56.0018663 | 77.7698269 |
| 66.6030777 | 73.2330703 | 62.2200967 | 56.0018663 | 78.7698269 |
| 69.6030777 | 75.7886259 | 62.2200967 | 57.0018663 | 75.7698269 |
| 69.6030777 | 75.4552926 | 62.2200967 | 57.0018663 | 72.7698269 |
| 68.6030777 | 75.2330703 | 62.2200967 | 58.0018663 | 70.7698269 |
| 67.6030777 | 75.1219592 | 62.2200967 | 58.0018663 | 70.7698269 |
| 67.6030777 | 74.6775148 | 62.2200967 | 58.0018663 | 69.7698269 |
| 67.6030777 | 74.6775148 | 62.2200967 | 58.0018663 | 69.7698269 |
| 66.6030777 | 74.899737  | 63.2200967 | 62.0018663 | 68.7698269 |
| 66.6030777 | 74.7886259 | 63.2200967 | 62.0018663 | 68.7698269 |
| 66.6030777 | 74.0108481 | 63.2200967 | 62.0018663 | 68.7698269 |
| 66.6030777 | 73.2330703 | 62.2200967 | 62.0018663 | 68.7698269 |
| 66.6030777 | 73.1219592 | 62.2200967 | 62.0018663 | 68.7698269 |
| 66.6030777 | 73.0108481 | 61.2200967 | 65.0018663 | 68.7698269 |

|            |            |            |            |            |           |
|------------|------------|------------|------------|------------|-----------|
| 67.6030777 | 72.6775148 | 61.2200967 | 65.0018663 | 68.7698269 |           |
| 67.6030777 | 81.5164707 | 61.2200967 | 65.0018663 | 66.7698269 |           |
| 68.6030777 | 74.5164707 | 61.2200967 | 65.0018663 | 66.7698269 |           |
| 68.6030777 | 70.5164707 | 61.2200967 | 65.0018663 | 66.7698269 |           |
| 67.6030777 | 67.5164707 | 59.2200967 | 64.0018663 | 67.7698269 |           |
| 67.6030777 | 66.5164707 | 60.2200967 | 64.0018663 | 67.7698269 | Before 1  |
| 67.6030777 | 67.5164707 | 60.2200967 | 63.0018663 | 67.7698269 | Before 2  |
| 67.6030777 | 67.5164707 | 59.2200967 | 63.0018663 | 67.7698269 | Before 3  |
| 68.6030777 | 65.5164707 | 60.2200967 | 63.0018663 | 67.7698269 | Before 4  |
| 68.6030777 | 65.5164707 | 60.2200967 | 62.0018663 | 70.7698269 | Before 5  |
| 69.6030777 | 65.5164707 | 60.2200967 | 62.0018663 | 70.7698269 | Before 6  |
| 69.6030777 | 65.5164707 | 60.2200967 | 62.0018663 | 71.7698269 | Before 7  |
| 69.6030777 | 63.5164707 | 60.2200967 | 62.0018663 | 70.7698269 | Before 8  |
| 70.6030777 | 63.5164707 | 60.2200967 | 63.0018663 | 70.7698269 | Before 9  |
| 70.6030777 | 63.5164707 | 60.2200967 | 65.0018663 | 68.7698269 | Before 10 |
| 69.6030777 | 62.5164707 | 60.2200967 | 65.0018663 | 68.7698269 | Before 11 |
| 68.6030777 | 62.5164707 | 61.2200967 | 66.0018663 | 68.7698269 | Before 12 |
| 68.6030777 | 62.5164707 | 61.2200967 | 67.0018663 | 67.7698269 | Before 13 |
| 68.6030777 | 62.5164707 | 61.2200967 | 70.0018663 | 67.7698269 | Before 14 |
| 68.6030777 | 62.5164707 | 61.2200967 | 72.0018663 | 67.7698269 | Before 15 |
| 68.6030777 | 63.5164707 | 64.2200967 | 72.0018663 | 67.7698269 | Before 16 |
| 68.6030777 | 64.5164707 | 64.2200967 | 74.0018663 | 67.7698269 | Before 17 |
| 67.6030777 | 64.5164707 | 65.2200967 | 73.0018663 | 67.7698269 | Before 18 |
| 67.6030777 | 66.5164707 | 64.2200967 | 76.0018663 | 65.7698269 | Before 19 |
| 67.6030777 | 66.5164707 | 63.2200967 | 81.0018663 | 63.7698269 | Before 20 |
| 66.6030777 | 66.5164707 | 59.2200967 | 68.899737  | 63.7698269 | Before 21 |
| 67.6030777 | 64.5164707 | 59.2200967 | 68.6775148 | 61.7698269 | Before 22 |
| 67.6030777 | 63.5164707 | 58.2200967 | 67.6775148 | 61.7698269 | Before 23 |
| 67.6030777 | 62.5164707 | 57.2200967 | 75.0018663 | 61.7698269 | Before 24 |
| 67.6030777 | 62.5164707 | 57.2200967 | 67.0018663 | 61.7698269 | Before 25 |
| 67.6030777 | 62.5164707 | 58.2200967 | 67.0018663 | 62.7698269 | Before 26 |
| 67.6030777 | 63.5164707 | 58.2200967 | 65.0018663 | 62.7698269 | Before 27 |
| 65.6030777 | 62.5164707 | 58.2200967 | 66.0018663 | 63.7698269 | Before 28 |
| 65.6030777 | 61.5164707 | 57.2200967 | 67.0018663 | 67.7698269 | Before 29 |
| 65.6030777 | 61.5164707 | 57.2200967 | 67.0018663 | 70.7698269 | Before 30 |
| 65.6030777 | 61.5164707 | 57.2200967 | 66.0018663 | 70.7698269 | Before 31 |
| 67.6030777 | 62.5164707 | 57.2200967 | 66.0018663 | 70.7698269 | Before 32 |
| 67.6030777 | 62.5164707 | 57.2200967 | 66.0018663 | 69.7698269 | Before 33 |
| 67.6030777 | 62.5164707 | 57.2200967 | 66.0018663 | 68.7698269 | Before 34 |
| 67.6030777 | 62.5164707 | 57.2200967 | 65.0018663 | 69.7698269 | Before 35 |
| 66.6030777 | 62.5164707 | 56.2200967 | 65.0018663 | 69.7698269 | Before 36 |
| 67.6030777 | 62.5164707 | 56.2200967 | 66.0018663 | 69.7698269 | Before 37 |
| 67.6030777 | 62.5164707 | 56.2200967 | 68.0018663 | 69.7698269 | Before 38 |
| 67.6030777 | 61.5164707 | 56.2200967 | 69.0018663 | 69.7698269 | Before 39 |
| 67.6030777 | 61.5164707 | 56.2200967 | 69.0018663 | 69.7698269 | Before 40 |

|            |            |            |            |            |           |
|------------|------------|------------|------------|------------|-----------|
| 67.6030777 | 62.5164707 | 56.2200967 | 70.0018663 | 67.7698269 | Before 41 |
| 67.6030777 | 61.5164707 | 56.2200967 | 69.0018663 | 65.7698269 | Before 42 |
| 67.6030777 | 61.5164707 | 56.2200967 | 69.0018663 | 65.7698269 | Before 43 |
| 67.6030777 | 62.5164707 | 56.2200967 | 68.0018663 | 64.7698269 | Before 44 |
| 67.6030777 | 62.5164707 | 56.2200967 | 67.0018663 | 63.7698269 | Before 45 |
| 67.6030777 | 62.5164707 | 55.2200967 | 67.0018663 | 64.7698269 | Before 46 |
| 67.6030777 | 62.5164707 | 55.2200967 | 67.0018663 | 65.7698269 | Before 47 |
| 67.6030777 | 64.5164707 | 55.2200967 | 67.0018663 | 66.7698269 | Before 48 |
| 68.6030777 | 64.5164707 | 55.2200967 | 67.0018663 | 67.7698269 | Before 49 |
| 68.6030777 | 64.5164707 | 55.2200967 | 67.0018663 | 67.7698269 | Before 50 |
| 69.6030777 | 64.5164707 | 55.2200967 | 67.0018663 | 66.7698269 | Before 51 |
| 70.6030777 | 64.5164707 | 54.2200967 | 67.0018663 | 65.7698269 | Before 52 |
| 71.6030777 | 64.5164707 | 54.2200967 | 68.0018663 | 64.7698269 | Before 53 |
| 71.6030777 | 64.5164707 | 57.2200967 | 66.0018663 | 64.7698269 | Before 54 |
| 71.6030777 | 64.5164707 | 61.2200967 | 66.0018663 | 64.7698269 | Before 55 |
| 73.6030777 | 64.5164707 | 61.2200967 | 66.0018663 | 66.7698269 | Before 56 |
| 74.6030777 | 67.5164707 | 61.2200967 | 66.0018663 | 68.7698269 | Before 57 |
| 74.6030777 | 67.5164707 | 61.2200967 | 68.0018663 | 68.7698269 | Before 58 |
| 74.6030777 | 65.5164707 | 61.2200967 | 70.0018663 | 68.7698269 | Before 59 |
| 74.6030777 | 65.5164707 | 62.2200967 | 70.0018663 | 68.7698269 | Before 60 |
| 77.6030777 | 65.5164707 | 62.2200967 | 70.0018663 | 68.7698269 | Before 61 |
| 77.6030777 | 65.5164707 | 62.2200967 | 69.0018663 | 69.7698269 | Before 62 |
| 77.6030777 | 64.5164707 | 62.2200967 | 69.0018663 | 71.7698269 | Before 63 |
| 74.6030777 | 64.5164707 | 62.2200967 | 69.0018663 | 73.7698269 | Before 64 |
| 72.6030777 | 64.5164707 | 62.2200967 | 69.0018663 | 73.7698269 | Before 65 |
| 72.6030777 | 64.5164707 | 62.2200967 | 69.0018663 | 76.7698269 | Before 66 |
| 71.6030777 | 64.5164707 | 62.2200967 | 69.0018663 | 75.7698269 | Before 67 |
| 71.6030777 | 64.5164707 | 61.2200967 | 69.0018663 | 73.7698269 | Before 68 |
| 71.6030777 | 65.5164707 | 60.2200967 | 69.0018663 | 73.7698269 | Before 69 |
| 70.6030777 | 64.5164707 | 60.2200967 | 68.0018663 | 73.7698269 | Before 70 |
| 70.6030777 | 64.5164707 | 61.2200967 | 68.0018663 | 73.7698269 | Before 71 |
| 70.6030777 | 64.5164707 | 63.2200967 | 68.0018663 | 72.7698269 | Before 72 |
| 69.6030777 | 64.5164707 | 63.2200967 | 65.0018663 | 72.7698269 | Before 73 |
| 68.6030777 | 65.5164707 | 63.2200967 | 64.0018663 | 73.7698269 | Before 74 |
| 68.6030777 | 64.5164707 | 64.2200967 | 63.0018663 | 73.7698269 | Before 75 |
| 68.6030777 | 64.5164707 | 64.2200967 | 63.0018663 | 73.7698269 | Before 76 |
| 66.6030777 | 64.5164707 | 64.2200967 | 63.0018663 | 71.7698269 | Before 77 |
| 65.6030777 | 64.5164707 | 64.2200967 | 66.0018663 | 70.7698269 | Before 78 |
| 65.6030777 | 63.5164707 | 63.2200967 | 66.0018663 | 69.7698269 | Before 79 |
| 64.6030777 | 63.5164707 | 62.2200967 | 66.0018663 | 69.7698269 | Before 80 |
| 64.6030777 | 63.5164707 | 62.2200967 | 66.0018663 | 68.7698269 | Before 81 |
| 64.6030777 | 62.5164707 | 63.2200967 | 66.0018663 | 68.7698269 | Before 82 |
| 64.6030777 | 62.5164707 | 63.2200967 | 69.0018663 | 67.7698269 | Before 83 |
| 64.6030777 | 62.5164707 | 63.2200967 | 69.0018663 | 67.7698269 | Before 84 |
| 64.6030777 | 63.5164707 | 63.2200967 | 71.0018663 | 67.7698269 | Before 85 |

|            |            |            |            |            |            |
|------------|------------|------------|------------|------------|------------|
| 64.6030777 | 62.5164707 | 63.2200967 | 73.0018663 | 66.7698269 | Before 86  |
| 62.6030777 | 62.5164707 | 63.2200967 | 73.0018663 | 66.7698269 | Before 87  |
| 62.6030777 | 62.5164707 | 63.2200967 | 73.0018663 | 66.7698269 | Before 88  |
| 62.6030777 | 63.5164707 | 63.2200967 | 73.0018663 | 66.7698269 | Before 89  |
| 62.6030777 | 63.5164707 | 63.2200967 | 72.0018663 | 67.7698269 | Before 90  |
| 63.6030777 | 63.5164707 | 63.2200967 | 72.0018663 | 68.7698269 | Before 91  |
| 64.6030777 | 63.5164707 | 63.2200967 | 71.0018663 | 69.7698269 | Before 92  |
| 64.6030777 | 63.5164707 | 63.2200967 | 69.0018663 | 70.7698269 | Before 93  |
| 65.6030777 | 62.5164707 | 63.2200967 | 69.0018663 | 70.7698269 | Before 94  |
| 65.6030777 | 63.5164707 | 62.2200967 | 68.0018663 | 71.7698269 | Before 95  |
| 65.6030777 | 63.5164707 | 63.2200967 | 68.0018663 | 71.7698269 | Before 96  |
| 65.6030777 | 63.5164707 | 63.2200967 | 68.0018663 | 71.7698269 | Before 97  |
| 67.6030777 | 62.5164707 | 64.2200967 | 67.0018663 | 71.7698269 | Before 98  |
| 67.6030777 | 62.5164707 | 63.2200967 | 66.0018663 | 70.7698269 | Before 99  |
| 67.6030777 | 61.5164707 | 63.2200967 | 66.0018663 | 70.7698269 | Before 100 |
| 67.6030777 | 61.5164707 | 63.2200967 | 66.0018663 | 71.7698269 | Before 101 |
| 68.6030777 | 61.5164707 | 63.2200967 | 66.0018663 | 71.7698269 | Before 102 |
| 68.6030777 | 61.5164707 | 64.2200967 | 66.0018663 | 72.7698269 | Before 103 |
| 70.6030777 | 62.5164707 | 65.2200967 | 66.0018663 | 71.7698269 | Before 104 |
| 71.6030777 | 62.5164707 | 65.2200967 | 65.0018663 | 72.7698269 | Before 105 |
| 71.6030777 | 62.5164707 | 65.2200967 | 64.0018663 | 72.7698269 | Before 106 |
| 71.6030777 | 62.5164707 | 65.2200967 | 63.0018663 | 73.7698269 | Before 107 |
| 71.6030777 | 62.5164707 | 66.2200967 | 63.0018663 | 73.7698269 | Before 108 |
| 71.6030777 | 62.5164707 | 67.2200967 | 62.0018663 | 71.7698269 | Before 109 |
| 71.6030777 | 62.5164707 | 67.2200967 | 62.0018663 | 70.7698269 | Before 110 |
| 71.6030777 | 62.5164707 | 68.2200967 | 62.0018663 | 69.7698269 | Before 111 |
| 71.6030777 | 61.5164707 | 68.2200967 | 63.0018663 | 68.7698269 | Before 112 |
| 71.6030777 | 61.5164707 | 69.2200967 | 63.0018663 | 67.7698269 | Before 113 |
| 71.6030777 | 62.5164707 | 70.2200967 | 63.0018663 | 67.7698269 | Before 114 |
| 70.6030777 | 62.5164707 | 70.2200967 | 63.0018663 | 67.7698269 | Before 115 |
| 70.6030777 | 62.5164707 | 69.2200967 | 66.0018663 | 67.7698269 | Before 116 |
| 70.6030777 | 62.5164707 | 67.2200967 | 67.0018663 | 66.7698269 | Before 117 |
| 74.6030777 | 61.5164707 | 68.2200967 | 68.0018663 | 66.7698269 | Before 118 |
| 74.6030777 | 61.5164707 | 68.2200967 | 67.0018663 | 65.7698269 | Before 119 |
| 74.6030777 | 61.5164707 | 68.2200967 | 66.0018663 | 64.7698269 | Before 120 |
| 74.6030777 | 61.5164707 | 68.2200967 | 64.0018663 | 64.7698269 | Before 121 |
| 74.6030777 | 61.5164707 | 68.2200967 | 64.0018663 | 64.7698269 | Before 122 |
| 74.6030777 | 61.5164707 | 67.2200967 | 59.0018663 | 65.7698269 | Before 123 |
| 74.6030777 | 61.5164707 | 67.2200967 | 59.0018663 | 65.7698269 | Before 124 |
| 73.6030777 | 61.5164707 | 66.2200967 | 59.0018663 | 64.7698269 | Before 125 |
| 72.6030777 | 61.5164707 | 66.2200967 | 59.0018663 | 64.7698269 | Before 126 |
| 71.6030777 | 61.5164707 | 65.2200967 | 63.0018663 | 63.7698269 | Before 127 |
| 71.6030777 | 61.5164707 | 65.2200967 | 65.0018663 | 62.7698269 | Before 128 |
| 71.6030777 | 61.5164707 | 65.2200967 | 67.0018663 | 62.7698269 | Before 129 |
| 71.6030777 | 61.5164707 | 63.2200967 | 68.0018663 | 62.7698269 | Before 130 |

|            |            |            |            |            |            |
|------------|------------|------------|------------|------------|------------|
| 70.6030777 | 62.5164707 | 61.2200967 | 68.0018663 | 62.7698269 | Before 131 |
| 70.6030777 | 62.5164707 | 61.2200967 | 66.0018663 | 63.7698269 | Before 132 |
| 69.6030777 | 62.5164707 | 59.2200967 | 66.0018663 | 63.7698269 | Before 133 |
| 68.6030777 | 62.5164707 | 59.2200967 | 65.0018663 | 63.7698269 | Before 134 |
| 68.6030777 | 62.5164707 | 59.2200967 | 64.0018663 | 63.7698269 | Before 135 |
| 68.6030777 | 62.5164707 | 60.2200967 | 63.0018663 | 64.7698269 | Before 136 |
| 68.6030777 | 62.5164707 | 60.2200967 | 63.0018663 | 65.7698269 | Before 137 |
| 68.6030777 | 63.5164707 | 61.2200967 | 62.0018663 | 64.7698269 | Before 138 |
| 67.6030777 | 63.5164707 | 61.2200967 | 62.0018663 | 64.7698269 | Before 139 |
| 67.6030777 | 63.5164707 | 62.2200967 | 62.0018663 | 65.7698269 | Before 140 |
| 67.6030777 | 62.5164707 | 62.2200967 | 62.0018663 | 65.7698269 | Before 141 |
| 68.6030777 | 62.5164707 | 62.2200967 | 63.0018663 | 66.7698269 | Before 142 |
| 68.6030777 | 62.5164707 | 62.2200967 | 63.0018663 | 67.7698269 | Before 143 |
| 69.6030777 | 62.5164707 | 62.2200967 | 63.0018663 | 67.7698269 | Before 144 |
| 69.6030777 | 63.5164707 | 61.2200967 | 65.0018663 | 66.7698269 | Before 145 |
| 69.6030777 | 63.5164707 | 62.2200967 | 66.0018663 | 65.7698269 | Before 146 |
| 70.6030777 | 63.5164707 | 63.2200967 | 67.0018663 | 64.7698269 | Before 147 |
| 70.6030777 | 63.5164707 | 63.2200967 | 67.0018663 | 63.7698269 | Before 148 |
| 71.6030777 | 63.5164707 | 63.2200967 | 67.0018663 | 63.7698269 | Before 149 |
| 71.6030777 | 63.5164707 | 63.2200967 | 65.0018663 | 63.7698269 | Before 150 |
| 71.6030777 | 63.5164707 | 63.2200967 | 65.0018663 | 63.7698269 | Before 151 |
| 69.6030777 | 62.5164707 | 64.2200967 | 63.0018663 | 63.7698269 | Before 152 |
| 69.6030777 | 62.5164707 | 64.2200967 | 60.0018663 | 66.7698269 | Before 153 |
| 69.6030777 | 62.5164707 | 64.2200967 | 60.0018663 | 67.7698269 | Before 154 |
| 69.6030777 | 62.5164707 | 64.2200967 | 60.0018663 | 69.7698269 | Before 155 |
| 69.6030777 | 62.5164707 | 64.2200967 | 60.0018663 | 71.7698269 | Before 156 |
| 69.6030777 | 62.5164707 | 66.2200967 | 60.0018663 | 74.7698269 | Before 157 |
| 69.6030777 | 62.5164707 | 66.2200967 | 60.0018663 | 75.7698269 | Before 158 |
| 69.6030777 | 62.5164707 | 66.2200967 | 60.0018663 | 75.7698269 | Before 159 |
| 69.6030777 | 62.5164707 | 66.2200967 | 60.0018663 | 75.7698269 | Before 160 |
| 69.6030777 | 62.5164707 | 66.2200967 | 60.0018663 | 74.7698269 | Before 161 |
| 69.6030777 | 62.5164707 | 66.2200967 | 60.0018663 | 73.7698269 | Before 162 |
| 69.6030777 | 62.5164707 | 66.2200967 | 61.0018663 | 71.7698269 | Before 163 |
| 69.6030777 | 63.5164707 | 66.2200967 | 62.0018663 | 68.7698269 | Before 164 |
| 71.6030777 | 64.5164707 | 66.2200967 | 63.0018663 | 68.7698269 | Before 165 |
| 69.6030777 | 64.5164707 | 65.2200967 | 68.0018663 | 68.7698269 | Before 166 |
| 69.6030777 | 63.5164707 | 63.2200967 | 69.0018663 | 67.7698269 | Before 167 |
| 68.6030777 | 63.5164707 | 63.2200967 | 70.0018663 | 67.7698269 | Before 168 |
| 67.6030777 | 63.5164707 | 62.2200967 | 71.0018663 | 65.7698269 | Before 169 |
| 66.6030777 | 64.5164707 | 62.2200967 | 73.0018663 | 66.7698269 | Before 170 |
| 66.6030777 | 64.5164707 | 62.2200967 | 66.1219592 | 65.7698269 | Before 171 |
| 66.6030777 | 64.5164707 | 63.2200967 | 66.0108481 | 64.7698269 | Before 172 |
| 66.6030777 | 64.5164707 | 63.2200967 | 66.3441814 | 64.7698269 | Before 173 |
| 66.6030777 | 63.5164707 | 62.2200967 | 66.3441814 | 63.7698269 | Before 174 |
| 66.6030777 | 63.5164707 | 62.2200967 | 66.3441814 | 64.7698269 | Before 175 |



|            |            |            |            |            |            |
|------------|------------|------------|------------|------------|------------|
| 66.6030777 | 63.5164707 | 63.2200967 | 66.4552926 | 64.7698269 | Before 176 |
| 66.6030777 | 63.5164707 | 63.2200967 | 66.2330703 | 63.7698269 | Before 177 |
| 66.6030777 | 64.5164707 | 63.2200967 | 66.3441814 | 63.7698269 | Before 178 |
| 66.6030777 | 64.5164707 | 63.2200967 | 66.7886259 | 63.7698269 | Before 179 |
| 65.6030777 | 64.5164707 | 62.2200967 | 66.3441814 | 63.7698269 | Before 180 |
| 64.6030777 | 64.5164707 | 61.2200967 | 66.2330703 | 63.7698269 | Before 181 |
| 65.6030777 | 64.5164707 | 61.2200967 | 67.0108481 | 63.7698269 | Before 182 |
| 65.6030777 | 64.5164707 | 61.2200967 | 67.1219592 | 64.7698269 | Before 183 |
| 67.6030777 | 64.5164707 | 61.2200967 | 67.5664037 | 65.7698269 | Before 184 |
| 67.6030777 | 64.5164707 | 61.2200967 | 67.7886259 | 66.7698269 | Before 185 |
| 67.6030777 | 65.5164707 | 61.2200967 | 68.0108481 | 66.7698269 | Before 186 |
| 68.6030777 | 65.5164707 | 61.2200967 | 68.0108481 | 66.7698269 | Before 187 |
| 68.6030777 | 65.5164707 | 61.2200967 | 67.1219592 | 65.7698269 | Before 188 |
| 68.6030777 | 65.5164707 | 62.2200967 | 66.899737  | 64.7698269 | Before 189 |
| 68.6030777 | 65.5164707 | 62.2200967 | 76.0018663 | 63.7698269 | Before 190 |
| 68.6030777 | 65.5164707 | 60.2200967 | 76.0018663 | 62.7698269 | Before 191 |
| 68.6030777 | 65.5164707 | 60.2200967 | 73.0018663 | 61.7698269 | Before 192 |
| 68.6030777 | 65.5164707 | 60.2200967 | 71.0018663 | 61.7698269 | Before 193 |
| 71.6030777 | 65.5164707 | 60.2200967 | 70.0018663 | 61.7698269 | Before 194 |
| 72.6030777 | 65.5164707 | 60.2200967 | 70.0018663 | 61.7698269 | Before 195 |
| 70.6030777 | 65.5164707 | 60.2200967 | 70.0018663 | 61.7698269 | Before 196 |
| 70.6030777 | 65.5164707 | 60.2200967 | 70.0018663 | 61.7698269 | Before 197 |
| 70.6030777 | 65.5164707 | 60.2200967 | 65.0018663 | 62.7698269 | Before 198 |
| 69.6030777 | 65.5164707 | 63.2200967 | 63.0018663 | 63.7698269 | Before 199 |
| 68.6030777 | 66.5164707 | 64.2200967 | 62.0018663 | 64.7698269 | Before 200 |
| 67.6030777 | 66.5164707 | 64.2200967 | 62.0018663 | 64.7698269 | Before 201 |
| 67.6030777 | 66.5164707 | 65.2200967 | 62.0018663 | 63.7698269 | Before 202 |
| 67.6030777 | 66.5164707 | 65.2200967 | 62.0018663 | 63.7698269 | Before 203 |
| 67.6030777 | 66.5164707 | 64.2200967 | 64.0018663 | 63.7698269 | Before 204 |
| 67.6030777 | 66.5164707 | 64.2200967 | 64.0018663 | 63.7698269 | Before 205 |
| 68.6030777 | 67.5164707 | 64.2200967 | 64.0018663 | 64.7698269 | Before 206 |
| 68.6030777 | 75.5164707 | 64.2200967 | 64.0018663 | 64.7698269 | Before 207 |
| 68.6030777 | 66.5664037 | 64.2200967 | 64.0018663 | 65.7698269 | Before 208 |
| 68.6030777 | 66.0108481 | 66.2200967 | 64.0018663 | 65.7698269 | Before 209 |
| 68.6030777 | 66.2330703 | 66.2200967 | 64.0018663 | 67.7698269 | Before 210 |
| 67.6030777 | 66.899737  | 66.2200967 | 64.0018663 | 68.7698269 | Before 211 |
| 67.6030777 | 66.6775148 | 66.2200967 | 64.0018663 | 67.7698269 | Before 212 |
| 67.6030777 | 66.6775148 | 67.2200967 | 66.0018663 | 65.7698269 | Before 213 |
| 66.6030777 | 67.0108481 | 70.2200967 | 66.0018663 | 65.7698269 | Before 214 |
| 67.6030777 | 67.5664037 | 70.2200967 | 66.0018663 | 65.7698269 | Before 215 |
| 67.6030777 | 67.899737  | 70.2200967 | 67.0018663 | 66.7698269 | Before 216 |
| 67.6030777 | 68.3441814 | 71.2200967 | 67.0018663 | 66.7698269 | Before 217 |
| 67.6030777 | 69.0108481 | 71.2200967 | 66.0018663 | 66.7698269 | Before 218 |
| 68.6030777 | 82.5164707 | 71.2200967 | 65.0018663 | 67.7698269 | Before 219 |
| 68.6030777 | 73.5164707 | 71.2200967 | 65.0018663 | 67.7698269 | Before 220 |

|            |            |            |            |            |            |
|------------|------------|------------|------------|------------|------------|
| 69.6030777 | 72.5164707 | 71.2200967 | 64.0018663 | 67.7698269 | Before 221 |
| 69.6030777 | 69.5164707 | 71.2200967 | 63.0018663 | 67.7698269 | Before 222 |
| 70.6030777 | 69.5164707 | 73.2200967 | 64.0018663 | 67.7698269 | Before 223 |
| 70.6030777 | 69.5164707 | 73.2200967 | 63.0018663 | 67.7698269 | Before 224 |
| 70.6030777 | 69.5164707 | 74.2200967 | 63.0018663 | 66.7698269 | Before 225 |
| 70.6030777 | 69.5164707 | 74.2200967 | 62.0018663 | 66.7698269 | Before 226 |
| 70.6030777 | 69.5164707 | 76.2200967 | 61.0018663 | 66.7698269 | Before 227 |
| 70.6030777 | 69.5164707 | 76.2200967 | 61.0018663 | 66.7698269 | Before 228 |
| 70.6030777 | 73.5164707 | 79.2200967 | 61.0018663 | 69.7698269 | Before 229 |
| 70.6030777 | 73.5164707 | 79.2200967 | 61.0018663 | 73.7698269 | Before 230 |
| 69.6030777 | 74.5164707 | 79.2200967 | 61.0018663 | 75.7698269 | Before 231 |
| 69.6030777 | 73.5164707 | 81.2200967 | 61.0018663 | 75.7698269 | Before 232 |
| 69.6030777 | 73.5164707 | 81.2200967 | 60.0018663 | 76.7698269 | Before 233 |
| 69.6030777 | 74.5164707 | 81.2200967 | 60.0018663 | 76.7698269 | Before 234 |
| 69.6030777 | 74.5164707 | 82.2200967 | 59.0018663 | 77.7698269 | Before 235 |
| 69.6030777 | 74.5164707 | 83.2200967 | 59.0018663 | 75.7698269 | Before 236 |
| 69.6030777 | 72.5164707 | 84.2200967 | 58.0018663 | 71.7698269 | Before 237 |
| 69.6030777 | 72.5164707 | 84.2200967 | 59.0018663 | 70.7698269 | Before 238 |
| 69.6030777 | 71.5164707 | 72.0108481 | 59.0018663 | 70.7698269 | Before 239 |
| 68.6030777 | 71.5164707 | 71.899737  | 59.0018663 | 71.7698269 | Before 240 |
| 68.6030777 | 71.5164707 | 71.7886259 | 60.0018663 | 71.7698269 | Minute 1   |
| 68.6030777 | 71.5164707 | 71.6775148 | 60.0018663 | 71.7698269 | Minute 2   |
| 68.6030777 | 72.5164707 | 71.899737  | 60.0018663 | 67.7698269 | Minute 3   |
| 68.6030777 | 72.5164707 | 84.2200967 | 62.0018663 | 66.7698269 | Minute 4   |
| 68.6030777 | 73.5164707 | 84.2200967 | 64.0018663 | 65.7698269 | Minute 5   |
| 68.6030777 | 74.5164707 | 84.2200967 | 66.0018663 | 63.7698269 | Minute 6   |
| 68.6030777 | 74.5164707 | 84.2200967 | 69.0018663 | 62.7698269 | Minute 7   |
| 70.6030777 | 74.5164707 | 84.2200967 | 70.0018663 | 60.7698269 | Minute 8   |
| 70.6030777 | 74.5164707 | 84.2200967 | 70.0018663 | 59.7698269 | Minute 9   |
| 72.6030777 | 74.5164707 | 84.2200967 | 70.0018663 | 58.7698269 | Minute 10  |
| 72.6030777 | 74.5164707 | 84.2200967 | 70.0018663 | 58.7698269 | Minute 11  |
| 71.6030777 | 74.5164707 | 83.2200967 | 70.0018663 | 57.7698269 | Minute 12  |
| 68.6030777 | 74.5164707 | 82.2200967 | 71.0018663 | 56.7698269 | Minute 13  |
| 68.6030777 | 74.5164707 | 82.2200967 | 72.0018663 | 55.7698269 | Minute 14  |
| 68.6030777 | 74.5164707 | 81.2200967 | 73.0018663 | 54.7698269 | Minute 15  |
| 68.6030777 | 72.5164707 | 81.2200967 | 72.0018663 | 54.7698269 | Minute 16  |
| 68.6030777 | 70.5164707 | 81.2200967 | 72.0018663 | 53.7698269 | Minute 17  |
| 68.6030777 | 69.5164707 | 81.2200967 | 72.0018663 | 51.7698269 | Minute 18  |
| 68.6030777 | 69.5164707 | 81.2200967 | 72.0018663 | 51.7698269 | Minute 19  |
| 67.6030777 | 68.5164707 | 78.2200967 | 72.0018663 | 48.7698269 | Minute 20  |
| 67.6030777 | 66.5164707 | 76.2200967 | 72.0018663 | 48.7698269 | Minute 21  |
| 67.6030777 | 65.5164707 | 75.2200967 | 72.0018663 | 48.7698269 | Minute 22  |
| 67.6030777 | 65.5164707 | 75.2200967 | 73.0018663 | 49.7698269 | Minute 23  |
| 67.6030777 | 65.5164707 | 73.2200967 | 73.0018663 | 50.7698269 | Minute 24  |
| 67.6030777 | 65.5164707 | 73.2200967 | 72.0018663 | 56.7698269 | Minute 25  |

|            |            |            |            |            |             |
|------------|------------|------------|------------|------------|-------------|
| 67.6030777 | 63.5164707 | 71.2200967 | 71.0018663 | 59.7698269 | Minute 26   |
| 66.6030777 | 62.5164707 | 70.2200967 | 71.0018663 | 60.7698269 | Minute 27   |
| 66.6030777 | 63.5164707 | 69.2200967 | 71.0018663 | 61.7698269 | Minute 28   |
| 66.6030777 | 63.5164707 | 69.2200967 | 71.0018663 | 63.7698269 | Minute 29   |
| 66.6030777 | 63.5164707 | 69.2200967 | 70.0018663 | 64.7698269 | Minute 30   |
| 65.6030777 | 63.5164707 | 68.2200967 | 70.0018663 | 65.7698269 | Minute 31   |
| 65.6030777 | 63.5164707 | 68.2200967 | 71.0018663 | 65.7698269 | Minute 32   |
| 67.6030777 | 63.5164707 | 67.2200967 | 70.0018663 | 66.7698269 | Minute 33   |
| 68.6030777 | 63.5164707 | 67.2200967 | 66.0018663 | 66.7698269 | Minute 34   |
| 68.6030777 | 64.5164707 | 67.2200967 | 65.0018663 | 66.7698269 | Minute 35   |
| 68.6030777 | 64.5164707 | 66.2200967 | 64.0018663 | 66.7698269 | Minute 36   |
| 68.6030777 | 63.5164707 | 66.2200967 | 64.0018663 | 66.7698269 | Minute 37   |
| 68.6030777 | 63.5164707 | 67.2200967 | 64.0018663 | 66.7698269 | Minute 38   |
| 80.6030777 | 64.5164707 | 67.2200967 | 64.0018663 | 65.7698269 | Minute 39   |
| 80.6030777 | 66.5164707 | 69.2200967 | 65.0018663 | 64.7698269 | Minute 40   |
| 83.6030777 | 67.5164707 | 69.2200967 | 66.0018663 | 64.7698269 | Minute 41   |
| 81.6030777 | 68.5164707 | 69.2200967 | 67.0018663 | 65.7698269 | Minute 42   |
| 81.6030777 | 69.5164707 | 69.2200967 | 68.0018663 | 65.7698269 | Minute 43   |
| 81.6030777 | 71.5164707 | 65.2200967 | 68.0018663 | 65.7698269 | Minute 44   |
| 80.6030777 | 72.5164707 | 62.2200967 | 68.0018663 | 65.7698269 | Minute 45   |
| 81.6030777 | 72.5164707 | 62.2200967 | 66.0018663 | 65.7698269 | Minute 46   |
| 81.6030777 | 69.5164707 | 60.2200967 | 63.0018663 | 65.7698269 | Minute 47   |
| 76.6030777 | 67.5164707 | 60.2200967 | 62.0018663 | 66.7698269 | Minute 48   |
| 72.6030777 | 67.5164707 | 61.2200967 | 62.0018663 | 66.7698269 | Minute 49   |
| 71.6030777 | 64.5164707 | 61.2200967 | 63.0018663 | 68.7698269 | Minute 50   |
| 70.6030777 | 63.5164707 | 61.2200967 | 64.0018663 | 68.7698269 | Minute 51   |
| 70.6030777 | 62.5164707 | 61.2200967 | 66.0018663 | 68.7698269 | Minute 52   |
| 70.6030777 | 62.5164707 | 62.2200967 | 67.0018663 | 67.7698269 | Minute 53   |
| 69.6030777 | 62.5164707 | 61.2200967 | 70.0018663 | 66.7698269 | Minute 54   |
| 69.6030777 | 62.5164707 | 61.2200967 | 70.0018663 | 66.7698269 | Minute 55   |
| 69.6030777 | 62.5164707 | 61.2200967 | 69.0018663 | 66.7698269 | Minute 56   |
| 69.6030777 | 62.5164707 | 62.2200967 | 69.0018663 | 65.7698269 | Minute 57   |
| 68.6030777 | 62.5164707 | 63.2200967 | 69.0018663 | 64.7698269 | Minute 58   |
| 68.6030777 | 63.5164707 | 64.2200967 | 69.0018663 | 63.7698269 | Minute 59   |
| 68.6030777 | 63.5164707 | 66.2200967 | 69.0018663 | 62.7698269 | Minute 60   |
| 68.6030777 | 63.5164707 | 67.2200967 | 69.0018663 | 62.7698269 | Activity 1  |
| 68.6030777 | 63.5164707 | 66.2200967 | 69.0018663 | 62.7698269 | Activity 2  |
| 68.6030777 | 63.5164707 | 66.2200967 | 71.0018663 | 62.7698269 | Activity 3  |
| 68.6030777 | 63.5164707 | 65.2200967 | 77.0018663 | 63.7698269 | Activity 4  |
| 68.6030777 | 63.5164707 | 63.2200967 | 77.0018663 | 63.7698269 | Activity 5  |
| 68.6030777 | 63.5164707 | 63.2200967 | 77.0018663 | 64.7698269 | Activity 6  |
| 69.6030777 | 63.5164707 | 62.2200967 | 77.0018663 | 64.7698269 | Activity 7  |
| 68.6030777 | 63.5164707 | 60.2200967 | 77.0018663 | 64.7698269 | Activity 8  |
| 68.6030777 | 63.5164707 | 59.2200967 | 76.0018663 | 64.7698269 | Activity 9  |
| 68.6030777 | 64.5164707 | 58.2200967 | 74.0018663 | 64.7698269 | Activity 10 |

|            |            |            |            |            |             |
|------------|------------|------------|------------|------------|-------------|
| 67.6030777 | 65.5164707 | 57.2200967 | 73.0018663 | 64.7698269 | Activity 11 |
| 66.6030777 | 65.5164707 | 57.2200967 | 72.0018663 | 64.7698269 | Activity 12 |
| 66.6030777 | 65.5164707 | 57.2200967 | 72.0018663 | 64.7698269 | Activity 13 |
| 65.6030777 | 65.5164707 | 57.2200967 | 70.0018663 | 66.7698269 | Activity 14 |
| 65.6030777 | 65.5164707 | 57.2200967 | 70.0018663 | 67.7698269 | Activity 15 |
| 65.6030777 | 66.5164707 | 57.2200967 | 70.0018663 | 67.7698269 | Activity 16 |
| 66.6030777 | 67.5164707 | 57.2200967 | 70.0018663 | 67.7698269 | Activity 17 |
| 67.6030777 | 69.5164707 | 57.2200967 | 70.0018663 | 67.7698269 | Activity 18 |
| 68.6030777 | 70.5164707 | 57.2200967 | 70.0018663 | 67.7698269 | Activity 19 |
| 68.6030777 | 70.5164707 | 58.2200967 | 70.0018663 | 66.7698269 | Activity 20 |
| 68.6030777 | 69.5164707 | 59.2200967 | 70.0018663 | 66.7698269 | Activity 21 |
| 67.6030777 | 68.5164707 | 59.2200967 | 71.0018663 | 66.7698269 | Activity 22 |
| 67.6030777 | 68.5164707 | 59.2200967 | 75.0018663 | 65.7698269 | Activity 23 |
| 67.6030777 | 68.5164707 | 59.2200967 | 74.0018663 | 65.7698269 | Activity 24 |
| 67.6030777 | 67.5164707 | 59.2200967 | 74.0018663 | 65.7698269 | Activity 25 |
| 67.6030777 | 67.5164707 | 60.2200967 | 75.0018663 | 65.7698269 | Activity 26 |
| 67.6030777 | 67.5164707 | 60.2200967 | 75.0018663 | 68.7698269 | Activity 27 |
| 67.6030777 | 66.5164707 | 61.2200967 | 77.0018663 | 68.7698269 | Activity 28 |
| 67.6030777 | 65.5164707 | 61.2200967 | 68.5664037 | 66.7698269 | Activity 29 |
| 67.6030777 | 65.5164707 | 61.2200967 | 69.1219592 | 64.7698269 | Activity 30 |
| 67.6030777 | 65.5164707 | 61.2200967 | 69.1219592 | 64.7698269 | Activity 31 |
| 67.6030777 | 65.5164707 | 60.2200967 | 69.2330703 | 63.7698269 | Activity 32 |
| 67.6030777 | 65.5164707 | 60.2200967 | 69.4552926 | 62.7698269 | Activity 33 |
| 67.6030777 | 65.5164707 | 61.2200967 | 70.0108481 | 62.7698269 | Activity 34 |
| 67.6030777 | 64.5164707 | 61.2200967 | 69.899737  | 63.7698269 | Activity 35 |
| 67.6030777 | 64.5164707 | 58.2200967 | 69.7886259 | 64.7698269 | Activity 36 |
| 67.6030777 | 63.5164707 | 56.2200967 | 69.7886259 | 64.7698269 | Activity 37 |
| 67.6030777 | 63.5164707 | 56.2200967 | 69.3441814 | 64.7698269 | Activity 38 |
| 67.6030777 | 62.5164707 | 54.2200967 | 69.1219592 | 64.7698269 | Activity 39 |
| 68.6030777 | 62.5164707 | 53.2200967 | 69.2330703 | 64.7698269 | Activity 40 |
| 68.6030777 | 62.5164707 | 53.2200967 | 68.899737  | 64.7698269 | Activity 41 |
| 68.6030777 | 62.5164707 | 52.2200967 | 69.0108481 | 64.7698269 | Activity 42 |
| 68.6030777 | 62.5164707 | 51.2200967 | 69.1219592 | 64.7698269 | Activity 43 |
| 68.6030777 | 61.5164707 | 51.2200967 | 69.3441814 | 64.7698269 | Activity 44 |
| 68.6030777 | 63.5164707 | 51.2200967 | 69.2330703 | 64.7698269 | Activity 45 |
| 68.6030777 | 63.5164707 | 50.2200967 | 69.3441814 | 65.7698269 | Activity 46 |
| 68.6030777 | 64.5164707 | 50.2200967 | 69.5664037 | 65.7698269 | Activity 47 |
| 67.6030777 | 64.5164707 | 50.2200967 | 69.4552926 | 65.7698269 | Activity 48 |
| 67.6030777 | 64.5164707 | 58.2200967 | 75.0018663 | 66.7698269 | Activity 49 |
| 67.6030777 | 65.5164707 | 60.2200967 | 75.0018663 | 67.7698269 | Activity 50 |
| 68.6030777 | 67.5164707 | 60.2200967 | 73.0018663 | 66.7698269 | Activity 51 |
| 68.6030777 | 68.5164707 | 61.2200967 | 71.0018663 | 66.7698269 | Activity 52 |
| 67.6030777 | 69.5164707 | 61.2200967 | 69.0018663 | 66.7698269 | Activity 53 |
| 67.6030777 | 69.5164707 | 61.2200967 | 69.0018663 | 66.7698269 | Activity 54 |
| 67.6030777 | 69.5164707 | 61.2200967 | 69.0018663 | 66.7698269 | Activity 55 |

|            |            |            |            |            |              |
|------------|------------|------------|------------|------------|--------------|
| 67.6030777 | 69.5164707 | 62.2200967 | 69.0018663 | 66.7698269 | Activity 56  |
| 67.6030777 | 68.5164707 | 62.2200967 | 69.0018663 | 66.7698269 | Activity 57  |
| 68.6030777 | 68.5164707 | 62.2200967 | 69.0018663 | 65.7698269 | Activity 58  |
| 68.6030777 | 68.5164707 | 62.2200967 | 68.0018663 | 65.7698269 | Activity 59  |
| 68.6030777 | 67.5164707 | 62.2200967 | 67.0018663 | 65.7698269 | Activity 60  |
| 68.6030777 | 65.5164707 | 62.2200967 | 68.0018663 | 65.7698269 | Activity 61  |
| 69.6030777 | 64.5164707 | 62.2200967 | 68.0018663 | 65.7698269 | Activity 62  |
| 70.6030777 | 64.5164707 | 62.2200967 | 68.0018663 | 65.7698269 | Activity 63  |
| 70.6030777 | 67.5164707 | 62.2200967 | 69.0018663 | 65.7698269 | Activity 64  |
| 70.6030777 | 70.5164707 | 62.2200967 | 69.0018663 | 66.7698269 | Activity 65  |
| 70.6030777 | 71.5164707 | 62.2200967 | 69.0018663 | 67.7698269 | Activity 66  |
| 70.6030777 | 71.5164707 | 62.2200967 | 70.0018663 | 67.7698269 | Activity 67  |
| 71.6030777 | 71.5164707 | 62.2200967 | 72.0018663 | 67.7698269 | Activity 68  |
| 72.6030777 | 70.5164707 | 65.2200967 | 72.0018663 | 67.7698269 | Activity 69  |
| 72.6030777 | 70.5164707 | 66.2200967 | 75.0018663 | 66.7698269 | Activity 70  |
| 72.6030777 | 68.5164707 | 66.2200967 | 75.0018663 | 67.7698269 | Activity 71  |
| 72.6030777 | 67.5164707 | 70.2200967 | 75.0018663 | 67.7698269 | Activity 72  |
| 73.6030777 | 66.5164707 | 71.2200967 | 75.0018663 | 67.7698269 | Activity 73  |
| 73.6030777 | 66.5164707 | 71.2200967 | 75.0018663 | 66.7698269 | Activity 74  |
| 72.6030777 | 66.5164707 | 71.2200967 | 75.0018663 | 65.7698269 | Activity 75  |
| 71.6030777 | 65.5164707 | 71.2200967 | 71.0018663 | 64.7698269 | Activity 76  |
| 71.6030777 | 64.5164707 | 71.2200967 | 71.0018663 | 65.7698269 | Activity 77  |
| 71.6030777 | 64.5164707 | 70.2200967 | 71.0018663 | 65.7698269 | Activity 78  |
| 70.6030777 | 64.5164707 | 70.2200967 | 71.0018663 | 66.7698269 | Activity 79  |
| 69.6030777 | 63.5164707 | 70.2200967 | 71.0018663 | 66.7698269 | Activity 80  |
| 69.6030777 | 63.5164707 | 70.2200967 | 71.0018663 | 66.7698269 | Activity 81  |
| 69.6030777 | 63.5164707 | 69.2200967 | 72.0018663 | 66.7698269 | Activity 82  |
| 68.6030777 | 62.5164707 | 69.2200967 | 72.0018663 | 66.7698269 | Activity 83  |
| 67.6030777 | 62.5164707 | 69.2200967 | 73.0018663 | 66.7698269 | Activity 84  |
| 67.6030777 | 63.5164707 | 67.2200967 | 74.0018663 | 66.7698269 | Activity 85  |
| 66.6030777 | 63.5164707 | 67.2200967 | 74.0018663 | 66.7698269 | Activity 86  |
| 66.6030777 | 64.5164707 | 66.2200967 | 74.0018663 | 66.7698269 | Activity 87  |
| 66.6030777 | 64.5164707 | 66.2200967 | 72.0018663 | 66.7698269 | Activity 88  |
| 66.6030777 | 63.5164707 | 66.2200967 | 72.0018663 | 68.7698269 | Activity 89  |
| 65.6030777 | 64.5164707 | 66.2200967 | 72.0018663 | 68.7698269 | Activity 90  |
| 64.6030777 | 63.5164707 | 66.2200967 | 72.0018663 | 68.7698269 | Activity 91  |
| 64.6030777 | 63.5164707 | 66.2200967 | 72.0018663 | 68.7698269 | Activity 92  |
| 64.6030777 | 63.5164707 | 66.2200967 | 71.0018663 | 68.7698269 | Activity 93  |
| 63.6030777 | 63.5164707 | 66.2200967 | 70.0018663 | 68.7698269 | Activity 94  |
| 63.6030777 | 62.5164707 | 65.2200967 | 70.0018663 | 68.7698269 | Activity 95  |
| 63.6030777 | 62.5164707 | 65.2200967 | 69.0018663 | 68.7698269 | Activity 96  |
| 63.6030777 | 63.5164707 | 64.2200967 | 69.0018663 | 68.7698269 | Activity 97  |
| 63.6030777 | 63.5164707 | 63.2200967 | 69.0018663 | 68.7698269 | Activity 98  |
| 63.6030777 | 63.5164707 | 63.2200967 | 69.0018663 | 68.7698269 | Activity 99  |
| 63.6030777 | 63.5164707 | 63.2200967 | 71.0018663 | 68.7698269 | Activity 100 |

|            |            |            |            |            |              |
|------------|------------|------------|------------|------------|--------------|
| 64.6030777 | 62.5164707 | 63.2200967 | 73.0018663 | 67.7698269 | Activity 101 |
| 64.6030777 | 62.5164707 | 64.2200967 | 73.0018663 | 67.7698269 | Activity 102 |
| 64.6030777 | 62.5164707 | 64.2200967 | 73.0018663 | 66.7698269 | Activity 103 |
| 64.6030777 | 62.5164707 | 67.2200967 | 74.0018663 | 66.7698269 | Activity 104 |
| 67.6030777 | 63.5164707 | 67.2200967 | 74.0018663 | 66.7698269 | Activity 105 |
| 67.6030777 | 63.5164707 | 68.2200967 | 72.0018663 | 67.7698269 | Activity 106 |
| 67.6030777 | 64.5164707 | 68.2200967 | 71.0018663 | 67.7698269 | Activity 107 |
| 69.6030777 | 65.5164707 | 69.2200967 | 70.0018663 | 67.7698269 | Activity 108 |
| 69.6030777 | 65.5164707 | 69.2200967 | 71.0018663 | 68.7698269 | Activity 109 |
| 70.6030777 | 66.5164707 | 70.2200967 | 72.0018663 | 68.7698269 | Activity 110 |
| 71.6030777 | 67.5164707 | 70.2200967 | 72.0018663 | 68.7698269 | Activity 111 |
| 71.6030777 | 68.5164707 | 70.2200967 | 72.0018663 | 69.7698269 | Activity 112 |
| 71.6030777 | 68.5164707 | 70.2200967 | 72.0018663 | 68.7698269 | Activity 113 |
| 72.6030777 | 68.5164707 | 70.2200967 | 69.0018663 | 68.7698269 | Activity 114 |
| 72.6030777 | 70.5164707 | 70.2200967 | 69.0018663 | 67.7698269 | Activity 115 |
| 72.6030777 | 69.5164707 | 70.2200967 | 66.0018663 | 67.7698269 | Activity 116 |
| 72.6030777 | 68.5164707 | 68.2200967 | 66.0018663 | 67.7698269 | Activity 117 |
| 72.6030777 | 68.5164707 | 68.2200967 | 65.0018663 | 68.7698269 | Activity 118 |
| 72.6030777 | 67.5164707 | 68.2200967 | 65.0018663 | 68.7698269 | Activity 119 |
| 73.6030777 | 67.5164707 | 68.2200967 | 65.0018663 | 68.7698269 | Activity 120 |
| 73.6030777 | 67.5164707 | 68.2200967 | 65.0018663 | 68.7698269 | Activity 121 |
| 72.6030777 | 67.5164707 | 68.2200967 | 66.0018663 | 69.7698269 | Activity 122 |
| 70.6030777 | 67.5164707 | 69.2200967 | 70.0018663 | 69.7698269 | Activity 123 |
| 70.6030777 | 67.5164707 | 70.2200967 | 70.0018663 | 68.7698269 | Activity 124 |
| 68.6030777 | 67.5164707 | 70.2200967 | 72.0018663 | 69.7698269 | Activity 125 |
| 65.6030777 | 66.5164707 | 64.2200967 | 74.0018663 | 69.7698269 | Activity 126 |
| 65.6030777 | 67.5164707 | 63.2200967 | 75.0018663 | 68.7698269 | Activity 127 |
| 65.6030777 | 67.5164707 | 62.2200967 | 74.0018663 | 66.7698269 | Activity 128 |
| 65.6030777 | 67.5164707 | 62.2200967 | 72.0018663 | 64.7698269 | Activity 129 |
| 65.6030777 | 66.5164707 | 62.2200967 | 70.0018663 | 63.7698269 | Activity 130 |
| 65.6030777 | 66.5164707 | 61.2200967 | 69.0018663 | 63.7698269 | Activity 131 |
| 66.6030777 | 66.5164707 | 61.2200967 | 68.0018663 | 63.7698269 | Activity 132 |
| 66.6030777 | 66.5164707 | 61.2200967 | 68.0018663 | 64.7698269 | Activity 133 |
| 66.6030777 | 66.5164707 | 61.2200967 | 68.0018663 | 64.7698269 | Activity 134 |
| 67.6030777 | 65.5164707 | 61.2200967 | 68.0018663 | 65.7698269 | Activity 135 |
| 67.6030777 | 65.5164707 | 61.2200967 | 68.0018663 | 65.7698269 | Activity 136 |
| 67.6030777 | 64.5164707 | 60.2200967 | 68.0018663 | 65.7698269 | Activity 137 |
| 66.6030777 | 64.5164707 | 61.2200967 | 69.0018663 | 64.7698269 | Activity 138 |
| 66.6030777 | 64.5164707 | 62.2200967 | 69.0018663 | 63.7698269 | Activity 139 |
| 66.6030777 | 64.5164707 | 61.2200967 | 69.0018663 | 64.7698269 | Activity 140 |
| 66.6030777 | 64.5164707 | 61.2200967 | 69.0018663 | 65.7698269 | Activity 141 |
| 66.6030777 | 64.5164707 | 61.2200967 | 69.0018663 | 65.7698269 | Activity 142 |
| 67.6030777 | 64.5164707 | 61.2200967 | 69.0018663 | 67.7698269 | Activity 143 |
| 66.6030777 | 63.5164707 | 61.2200967 | 69.0018663 | 69.7698269 | Activity 144 |
| 66.6030777 | 63.5164707 | 61.2200967 | 68.0018663 | 70.7698269 | Activity 145 |

|            |            |            |            |            |              |
|------------|------------|------------|------------|------------|--------------|
| 66.6030777 | 63.5164707 | 62.2200967 | 68.0018663 | 70.7698269 | Activity 146 |
| 66.6030777 | 63.5164707 | 62.2200967 | 68.0018663 | 69.7698269 | Activity 147 |
| 66.6030777 | 63.5164707 | 62.2200967 | 68.0018663 | 68.7698269 | Activity 148 |
| 68.6030777 | 64.5164707 | 62.2200967 | 68.0018663 | 67.7698269 | Activity 149 |
| 68.6030777 | 64.5164707 | 63.2200967 | 69.0018663 | 67.7698269 | Activity 150 |
| 67.6030777 | 64.5164707 | 65.2200967 | 72.0018663 | 67.7698269 | Activity 151 |
| 67.6030777 | 64.5164707 | 65.2200967 | 75.0018663 | 67.7698269 | Activity 152 |
| 67.6030777 | 63.5164707 | 66.2200967 | 75.0018663 | 68.7698269 | Activity 153 |
| 67.6030777 | 63.5164707 | 66.2200967 | 75.0018663 | 68.7698269 | Activity 154 |
| 67.6030777 | 63.5164707 | 63.2200967 | 72.0018663 | 69.7698269 | Activity 155 |
| 67.6030777 | 63.5164707 | 62.2200967 | 69.0018663 | 69.7698269 | Activity 156 |
| 67.6030777 | 63.5164707 | 62.2200967 | 69.0018663 | 68.7698269 | Activity 157 |
| 67.6030777 | 64.5164707 | 62.2200967 | 68.0018663 | 67.7698269 | Activity 158 |
| 67.6030777 | 64.5164707 | 63.2200967 | 68.0018663 | 67.7698269 | Activity 159 |
| 67.6030777 | 64.5164707 | 63.2200967 | 67.0018663 | 66.7698269 | Activity 160 |
| 68.6030777 | 64.5164707 | 63.2200967 | 67.0018663 | 66.7698269 | Activity 161 |
| 68.6030777 | 64.5164707 | 63.2200967 | 67.0018663 | 67.7698269 | Activity 162 |
| 71.6030777 | 64.5164707 | 63.2200967 | 67.0018663 | 67.7698269 | Activity 163 |
| 71.6030777 | 64.5164707 | 63.2200967 | 67.0018663 | 67.7698269 | Activity 164 |
| 72.6030777 | 64.5164707 | 63.2200967 | 66.0018663 | 67.7698269 | Activity 165 |
| 72.6030777 | 64.5164707 | 62.2200967 | 66.0018663 | 66.7698269 | Activity 166 |
| 73.6030777 | 63.5164707 | 62.2200967 | 66.0018663 | 66.7698269 | Activity 167 |
| 73.6030777 | 63.5164707 | 62.2200967 | 66.0018663 | 66.7698269 | Activity 168 |
| 73.6030777 | 63.5164707 | 63.2200967 | 66.0018663 | 66.7698269 | Activity 169 |
| 74.6030777 | 65.5164707 | 65.2200967 | 66.0018663 | 66.7698269 | Activity 170 |
| 76.6030777 | 65.5164707 | 65.2200967 | 74.0018663 | 66.7698269 | Activity 171 |
| 76.6030777 | 64.5164707 | 65.2200967 | 78.0018663 | 66.7698269 | Activity 172 |
| 76.6030777 | 64.5164707 | 63.2200967 | 78.0018663 | 66.7698269 | Activity 173 |
| 76.6030777 | 63.5164707 | 63.2200967 | 78.0018663 | 66.7698269 | Activity 174 |
| 76.6030777 | 63.5164707 | 63.2200967 | 78.0018663 | 66.7698269 | Activity 175 |
| 77.6030777 | 62.5164707 | 66.2200967 | 74.0018663 | 66.7698269 | Activity 176 |
| 77.6030777 | 62.5164707 | 66.2200967 | 74.0018663 | 66.7698269 | Activity 177 |
| 77.6030777 | 63.5164707 | 66.2200967 | 72.0018663 | 66.7698269 | Activity 178 |
| 77.6030777 | 63.5164707 | 69.2200967 | 70.0018663 | 66.7698269 | Activity 179 |
| 78.6030777 | 63.5164707 | 72.2200967 | 69.0018663 | 66.7698269 | Activity 180 |
| 78.6030777 | 63.5164707 | 72.2200967 | 69.0018663 | 65.7698269 | Activity 181 |
| 71.6030777 | 67.5164707 | 76.2200967 | 69.0018663 | 65.7698269 | Activity 182 |
| 70.6030777 | 68.5164707 | 75.2200967 | 73.0018663 | 65.7698269 | Activity 183 |
| 70.6030777 | 69.5164707 | 75.2200967 | 74.0018663 | 64.7698269 | Activity 184 |
| 70.6030777 | 71.5164707 | 74.2200967 | 74.0018663 | 64.7698269 | Activity 185 |
| 69.6030777 | 72.5164707 | 74.2200967 | 74.0018663 | 64.7698269 | Activity 186 |
| 69.6030777 | 72.5164707 | 74.2200967 | 74.0018663 | 66.7698269 | Activity 187 |
| 69.6030777 | 71.5164707 | 74.2200967 | 75.0018663 | 69.7698269 | Activity 188 |
| 69.6030777 | 71.5164707 | 74.2200967 | 75.0018663 | 71.7698269 | Activity 189 |
| 68.6030777 | 71.5164707 | 74.2200967 | 75.0018663 | 71.7698269 | Activity 190 |

|            |            |            |            |            |              |
|------------|------------|------------|------------|------------|--------------|
| 68.6030777 | 71.5164707 | 74.2200967 | 75.0018663 | 71.7698269 | Activity 191 |
| 68.6030777 | 71.5164707 | 76.2200967 | 75.0018663 | 70.7698269 | Activity 192 |
| 68.6030777 | 71.5164707 | 77.2200967 | 75.0018663 | 68.7698269 | Activity 193 |
| 68.6030777 | 71.5164707 | 77.2200967 | 74.0018663 | 68.7698269 | Activity 194 |
| 68.6030777 | 71.5164707 | 75.2200967 | 74.0018663 | 68.7698269 | Activity 195 |
| 68.6030777 | 72.5164707 | 74.2200967 | 73.0018663 | 67.7698269 | Activity 196 |
| 67.6030777 | 72.5164707 | 74.2200967 | 73.0018663 | 67.7698269 | Activity 197 |
| 67.6030777 | 73.5164707 | 74.2200967 | 73.0018663 | 66.7698269 | Activity 198 |
| 67.6030777 | 73.5164707 | 73.2200967 | 74.0018663 | 66.7698269 | Activity 199 |
| 67.6030777 | 74.5164707 | 66.2200967 | 74.0018663 | 66.7698269 | Activity 200 |
| 67.6030777 | 76.5164707 | 63.2200967 | 70.0018663 | 66.7698269 | Activity 201 |
| 67.6030777 | 83.5164707 | 61.2200967 | 70.0018663 | 66.7698269 | Activity 202 |
| 67.6030777 | 70.6775148 | 60.2200967 | 69.0018663 | 67.7698269 | Activity 203 |
| 67.6030777 | 70.5664037 | 60.2200967 | 69.0018663 | 68.7698269 | Activity 204 |
| 67.6030777 | 70.6775148 | 60.2200967 | 69.0018663 | 68.7698269 | Activity 205 |
| 68.6030777 | 71.2330703 | 60.2200967 | 69.0018663 | 67.7698269 | Activity 206 |
| 68.6030777 | 71.1219592 | 60.2200967 | 69.0018663 | 67.7698269 | Activity 207 |
| 69.6030777 | 71.3441814 | 60.2200967 | 69.0018663 | 67.7698269 | Activity 208 |
| 72.6030777 | 72.2330703 | 61.2200967 | 70.0018663 | 68.7698269 | Activity 209 |
| 74.6030777 | 72.6775148 | 61.2200967 | 71.0018663 | 68.7698269 | Activity 210 |
| 78.6030777 | 85.5164707 | 65.2200967 | 71.0018663 | 70.7698269 | Activity 211 |
| 78.6030777 | 83.5164707 | 69.2200967 | 71.0018663 | 70.7698269 | Activity 212 |
| 83.6030777 | 83.5164707 | 69.2200967 | 72.0018663 | 69.7698269 | Activity 213 |
| 83.6030777 | 80.5164707 | 69.2200967 | 72.0018663 | 68.7698269 | Activity 214 |
| 83.6030777 | 77.5164707 | 70.2200967 | 72.0018663 | 68.7698269 | Activity 215 |
| 75.6030777 | 75.5164707 | 70.2200967 | 72.0018663 | 67.7698269 | Activity 216 |
| 75.6030777 | 75.5164707 | 71.2200967 | 79.0018663 | 67.7698269 | Activity 217 |
| 75.6030777 | 71.5164707 | 72.2200967 | 82.0018663 | 67.7698269 | Activity 218 |
| 74.6030777 | 70.5164707 | 74.2200967 | 83.0018663 | 68.7698269 | Activity 219 |
| 74.6030777 | 70.5164707 | 74.2200967 | 83.0018663 | 68.7698269 | Activity 220 |
| 69.6030777 | 70.5164707 | 79.2200967 | 84.0018663 | 68.7698269 | Activity 221 |
| 69.6030777 | 70.5164707 | 78.2200967 | 84.0018663 | 67.7698269 | Activity 222 |
| 68.6030777 | 70.5164707 | 78.2200967 | 84.0018663 | 65.7698269 | Activity 223 |
| 68.6030777 | 70.5164707 | 77.2200967 | 71.899737  | 64.7698269 | Activity 224 |
| 67.6030777 | 70.5164707 | 77.2200967 | 71.6775148 | 63.7698269 | Activity 225 |
| 67.6030777 | 70.5164707 | 77.2200967 | 84.0018663 | 63.7698269 | Activity 226 |
| 67.6030777 | 70.5164707 | 76.2200967 | 84.0018663 | 63.7698269 | Activity 227 |
| 66.6030777 | 71.5164707 | 76.2200967 | 84.0018663 | 63.7698269 | Activity 228 |
| 66.6030777 | 71.5164707 | 76.2200967 | 84.0018663 | 63.7698269 | Activity 229 |
| 66.6030777 | 73.5164707 | 76.2200967 | 81.0018663 | 63.7698269 | Activity 230 |
| 67.6030777 | 73.5164707 | 77.2200967 | 73.0018663 | 63.7698269 | Activity 231 |
| 68.6030777 | 72.5164707 | 78.2200967 | 73.0018663 | 65.7698269 | Activity 232 |
| 68.6030777 | 72.5164707 | 80.2200967 | 73.0018663 | 65.7698269 | Activity 233 |
| 68.6030777 | 69.5164707 | 81.2200967 | 73.0018663 | 65.7698269 | Activity 234 |
| 68.6030777 | 69.5164707 | 81.2200967 | 73.0018663 | 64.7698269 | Activity 235 |



|            |            |            |            |            |              |
|------------|------------|------------|------------|------------|--------------|
| 68.6030777 | 68.5164707 | 79.2200967 | 73.0018663 | 63.7698269 | Activity 236 |
| 71.6030777 | 68.5164707 | 77.2200967 | 74.0018663 | 62.7698269 | Activity 237 |
| 73.6030777 | 67.5164707 | 77.2200967 | 74.0018663 | 62.7698269 | Activity 238 |
| 75.6030777 | 66.5164707 | 77.2200967 | 74.0018663 | 62.7698269 | Activity 239 |
| 76.6030777 | 66.5164707 | 77.2200967 | 71.0018663 | 63.7698269 | Activity 240 |
| 74.6030777 | 66.5164707 | 77.2200967 | 71.0018663 | 64.7698269 | Activity 241 |
| 72.6030777 | 66.5164707 | 78.2200967 | 71.0018663 | 65.7698269 | Activity 242 |
| 72.6030777 | 66.5164707 | 78.2200967 | 68.0018663 | 65.7698269 | Activity 243 |
| 69.6030777 | 66.5164707 | 79.2200967 | 68.0018663 | 66.7698269 | Activity 244 |
| 69.6030777 | 66.5164707 | 79.2200967 | 68.0018663 | 65.7698269 | Activity 245 |
| 69.6030777 | 66.5164707 | 80.2200967 | 68.0018663 | 65.7698269 | Activity 246 |
| 68.6030777 | 67.5164707 | 80.2200967 | 68.0018663 | 65.7698269 | Activity 247 |
| 68.6030777 | 69.5164707 | 80.2200967 | 70.0018663 | 65.7698269 | Activity 248 |
| 68.6030777 | 69.5164707 | 80.2200967 | 70.0018663 | 66.7698269 | Activity 249 |
| 68.6030777 | 71.5164707 | 77.2200967 | 70.0018663 | 67.7698269 | Activity 250 |
| 67.6030777 | 71.5164707 | 75.2200967 | 70.0018663 | 71.7698269 | Activity 251 |
| 67.6030777 | 71.5164707 | 74.2200967 | 70.0018663 | 72.7698269 | Activity 252 |
| 67.6030777 | 71.5164707 | 74.2200967 | 67.0018663 | 71.7698269 | Activity 253 |
| 67.6030777 | 71.5164707 | 74.2200967 | 67.0018663 | 67.7698269 | Activity 254 |
| 67.6030777 | 74.5164707 | 74.2200967 | 65.0018663 | 62.7698269 | Activity 255 |
| 67.6030777 | 74.5164707 | 73.2200967 | 63.0018663 | 61.7698269 | Activity 256 |
| 67.6030777 | 74.5164707 | 70.2200967 | 63.0018663 | 60.7698269 | Activity 257 |
| 67.6030777 | 74.5164707 | 68.2200967 | 63.0018663 | 60.7698269 | Activity 258 |
| 67.6030777 | 74.5164707 | 66.2200967 | 66.0018663 | 63.7698269 | Activity 259 |
| 68.6030777 | 72.5164707 | 66.2200967 | 67.0018663 | 63.7698269 | Activity 260 |
| 68.6030777 | 72.5164707 | 66.2200967 | 67.0018663 | 64.7698269 | Activity 261 |
| 71.6030777 | 69.5164707 | 65.2200967 | 68.0018663 | 64.7698269 | Activity 262 |
| 71.6030777 | 69.5164707 | 65.2200967 | 69.0018663 | 64.7698269 | Activity 263 |
| 71.6030777 | 69.5164707 | 65.2200967 | 70.0018663 | 63.7698269 | Activity 264 |
| 71.6030777 | 70.5164707 | 64.2200967 | 70.0018663 | 63.7698269 | Activity 265 |
| 71.6030777 | 70.5164707 | 64.2200967 | 70.0018663 | 62.7698269 | Activity 266 |
| 71.6030777 | 70.5164707 | 64.2200967 | 70.0018663 | 61.7698269 | Activity 267 |
| 71.6030777 | 70.5164707 | 64.2200967 | 67.0018663 | 61.7698269 | Activity 268 |
| 74.6030777 | 70.5164707 | 66.2200967 | 67.0018663 | 61.7698269 | Activity 269 |
| 77.6030777 | 70.5164707 | 66.2200967 | 67.0018663 | 62.7698269 | Activity 270 |
| 78.6030777 | 70.5164707 | 67.2200967 | 67.0018663 | 63.7698269 | Activity 271 |
| 79.6030777 | 70.5164707 | 68.2200967 | 67.0018663 | 63.7698269 | Activity 272 |
| 79.6030777 | 70.5164707 | 69.2200967 | 70.0018663 | 63.7698269 | Activity 273 |
| 79.6030777 | 75.5164707 | 69.2200967 | 71.0018663 | 63.7698269 | Activity 274 |
| 79.6030777 | 75.5164707 | 68.2200967 | 71.0018663 | 64.7698269 | Activity 275 |
| 79.6030777 | 77.5164707 | 68.2200967 | 71.0018663 | 65.7698269 | Activity 276 |
| 77.6030777 | 77.5164707 | 64.2200967 | 71.0018663 | 65.7698269 | Activity 277 |
| 76.6030777 | 78.5164707 | 64.2200967 | 71.0018663 | 65.7698269 | Activity 278 |
| 71.6030777 | 79.5164707 | 64.2200967 | 71.0018663 | 65.7698269 | Activity 279 |
| 71.6030777 | 79.5164707 | 64.2200967 | 72.0018663 | 67.7698269 | Activity 280 |

|            |            |            |            |            |              |
|------------|------------|------------|------------|------------|--------------|
| 70.6030777 | 71.5664037 | 63.2200967 | 72.0018663 | 67.7698269 | Activity 281 |
| 70.6030777 | 72.0108481 | 63.2200967 | 72.0018663 | 68.7698269 | Activity 282 |
| 70.6030777 | 71.8922095 | 63.2200967 | 72.0018663 | 68.7698269 | Activity 283 |
| 69.6030777 | 72.7886259 | 64.2200967 | 75.0018663 | 69.7698269 | Activity 284 |
| 68.6030777 | 72.7886259 | 65.2200967 | 74.0018663 | 68.7698269 | Activity 285 |
| 68.6030777 | 73.0108481 | 65.2200967 | 74.0018663 | 68.7698269 | Activity 286 |
| 68.6030777 | 72.5664037 | 65.2200967 | 74.0018663 | 67.7698269 | Activity 287 |
| 68.6030777 | 71.7886259 | 65.2200967 | 72.0018663 | 67.7698269 | Activity 288 |
| 68.6030777 | 69.4552926 | 65.2200967 | 70.0018663 | 68.7698269 | Activity 289 |
| 68.6030777 | 69.2330703 | 66.2200967 | 71.0018663 | 69.7698269 | Activity 290 |
| 67.6030777 | 80.5164707 | 69.2200967 | 71.0018663 | 69.7698269 | Activity 291 |
| 67.6030777 | 74.5164707 | 69.2200967 | 71.0018663 | 69.7698269 | Activity 292 |
| 67.6030777 | 74.5164707 | 73.2200967 | 71.0018663 | 69.7698269 | Activity 293 |
| 67.6030777 | 74.5164707 | 74.2200967 | 72.0018663 | 69.7698269 | Activity 294 |
| 68.6030777 | 72.5164707 | 73.2200967 | 72.0018663 | 69.7698269 | Activity 295 |
| 69.6030777 | 72.5164707 | 73.2200967 | 72.0018663 | 69.7698269 | Activity 296 |
| 70.6030777 | 73.5164707 | 73.2200967 | 76.0018663 | 69.7698269 | Activity 297 |
| 70.6030777 | 74.5164707 | 73.2200967 | 77.0018663 | 68.7698269 | Activity 298 |
| 71.6030777 | 75.5164707 | 73.2200967 | 74.0018663 | 69.7698269 | Activity 299 |
| 72.6030777 | 73.5164707 | 73.2200967 | 74.0018663 | 69.7698269 | Activity 300 |
| 71.6030777 | 73.5164707 | 70.2200967 | 73.0018663 | 70.7698269 | Activity 301 |
| 71.6030777 | 73.5164707 | 67.2200967 | 73.0018663 | 70.7698269 | Activity 302 |
| 71.6030777 | 73.5164707 | 65.2200967 | 74.0018663 | 70.7698269 | Activity 303 |
| 70.6030777 | 73.5164707 | 64.2200967 | 74.0018663 | 70.7698269 | Activity 304 |
| 70.6030777 | 73.5164707 | 63.2200967 | 74.0018663 | 69.7698269 | Activity 305 |
| 69.6030777 | 73.5164707 | 63.2200967 | 74.0018663 | 69.7698269 | Activity 306 |
| 69.6030777 | 72.5164707 | 63.2200967 | 74.0018663 | 68.7698269 | Activity 307 |
| 69.6030777 | 71.5164707 | 63.2200967 | 74.0018663 | 69.7698269 | Activity 308 |
| 69.6030777 | 70.5164707 | 64.2200967 | 77.0018663 | 69.7698269 | Activity 309 |
| 69.6030777 | 70.5164707 | 64.2200967 | 77.0018663 | 69.7698269 | Activity 310 |
| 69.6030777 | 69.5164707 | 64.2200967 | 77.0018663 | 69.7698269 | Activity 311 |
| 68.6030777 | 69.5164707 | 64.2200967 | 77.0018663 | 69.7698269 | Activity 312 |
| 67.6030777 | 69.5164707 | 64.2200967 | 75.0018663 | 69.7698269 | Activity 313 |
| 67.6030777 | 66.5164707 | 64.2200967 | 75.0018663 | 69.7698269 | Activity 314 |
| 67.6030777 | 66.5164707 | 64.2200967 | 75.0018663 | 70.7698269 | Activity 315 |
| 67.6030777 | 66.5164707 | 64.2200967 | 74.0018663 | 70.7698269 | Activity 316 |
| 67.6030777 | 65.5164707 | 64.2200967 | 74.0018663 | 70.7698269 | Activity 317 |
| 67.6030777 | 65.5164707 | 64.2200967 | 74.0018663 | 69.7698269 | Activity 318 |
| 67.6030777 | 64.5164707 | 65.2200967 | 72.0018663 | 69.7698269 | Activity 319 |
| 67.6030777 | 63.5164707 | 65.2200967 | 68.0018663 | 68.7698269 | Activity 320 |
| 67.6030777 | 63.5164707 | 65.2200967 | 68.0018663 | 67.7698269 | Activity 321 |
| 67.6030777 | 63.5164707 | 66.2200967 | 67.0018663 | 67.7698269 | Activity 322 |
| 67.6030777 | 63.5164707 | 66.2200967 | 67.0018663 | 67.7698269 | Activity 323 |
| 67.6030777 | 63.5164707 | 68.2200967 | 67.0018663 | 67.7698269 | Activity 324 |
| 67.6030777 | 63.5164707 | 68.2200967 | 67.0018663 | 66.7698269 | Activity 325 |

|            |            |            |            |            |              |
|------------|------------|------------|------------|------------|--------------|
| 67.6030777 | 63.5164707 | 68.2200967 | 66.0018663 | 66.7698269 | Activity 326 |
| 67.6030777 | 63.5164707 | 69.2200967 | 71.0018663 | 66.7698269 | Activity 327 |
| 67.6030777 | 62.5164707 | 69.2200967 | 75.0018663 | 66.7698269 | Activity 328 |
| 69.6030777 | 62.5164707 | 69.2200967 | 78.0018663 | 65.7698269 | Activity 329 |
| 69.6030777 | 62.5164707 | 67.2200967 | 79.0018663 | 65.7698269 | Activity 330 |
| 68.6030777 | 62.5164707 | 67.2200967 | 79.0018663 | 64.7698269 | Activity 331 |
| 68.6030777 | 62.5164707 | 67.2200967 | 79.0018663 | 64.7698269 | Activity 332 |
| 68.6030777 | 62.5164707 | 67.2200967 | 79.0018663 | 74.7698269 | Activity 333 |
| 68.6030777 | 62.5164707 | 66.2200967 | 80.0018663 | 75.7698269 | Activity 334 |
| 69.6030777 | 62.5164707 | 66.2200967 | 80.0018663 | 74.7698269 | Activity 335 |
| 69.6030777 | 62.5164707 | 66.2200967 | 81.0018663 | 73.7698269 | Activity 336 |
| 69.6030777 | 62.5164707 | 66.2200967 | 81.0018663 | 73.7698269 | Activity 337 |
| 69.6030777 | 63.5164707 | 62.2200967 | 70.0108481 | 67.7698269 | Activity 338 |
| 69.6030777 | 63.5164707 | 61.2200967 | 70.2330703 | 66.7698269 | Activity 339 |
| 68.6030777 | 64.5164707 | 60.2200967 | 70.5664037 | 66.7698269 | Activity 340 |
| 68.6030777 | 64.5164707 | 60.2200967 | 83.0018663 | 62.7698269 | Activity 341 |
| 68.6030777 | 63.5164707 | 59.2200967 | 82.0018663 | 62.7698269 | Activity 342 |
| 68.6030777 | 64.5164707 | 59.2200967 | 81.0018663 | 61.7698269 | Activity 343 |
| 68.6030777 | 64.5164707 | 59.2200967 | 81.0018663 | 61.7698269 | Activity 344 |
| 67.6030777 | 64.5164707 | 59.2200967 | 81.0018663 | 61.7698269 | Activity 345 |
| 67.6030777 | 64.5164707 | 59.2200967 | 79.0018663 | 61.7698269 | Activity 346 |
| 67.6030777 | 64.5164707 | 60.2200967 | 77.0018663 | 60.7698269 | Activity 347 |
| 67.6030777 | 64.5164707 | 62.2200967 | 77.0018663 | 60.7698269 | Activity 348 |
| 67.6030777 | 64.5164707 | 63.2200967 | 77.0018663 | 60.7698269 | Activity 349 |
| 67.6030777 | 63.5164707 | 63.2200967 | 77.0018663 | 60.7698269 | Activity 350 |
| 67.6030777 | 63.5164707 | 65.2200967 | 77.0018663 | 60.7698269 | Activity 351 |
| 67.6030777 | 62.5164707 | 64.2200967 | 77.0018663 | 61.7698269 | Activity 352 |
| 67.6030777 | 62.5164707 | 64.2200967 | 77.0018663 | 61.7698269 | Activity 353 |
| 67.6030777 | 62.5164707 | 65.2200967 | 77.0018663 | 61.7698269 | Activity 354 |
| 67.6030777 | 62.5164707 | 65.2200967 | 70.0018663 | 61.7698269 | Activity 355 |
| 67.6030777 | 62.5164707 | 65.2200967 | 67.0018663 | 66.7698269 | Activity 356 |
| 67.6030777 | 63.5164707 | 65.2200967 | 66.0018663 | 68.7698269 | Activity 357 |
| 67.6030777 | 63.5164707 | 65.2200967 | 66.0018663 | 68.7698269 | Activity 358 |
| 68.6030777 | 63.5164707 | 67.2200967 | 66.0018663 | 68.7698269 | Activity 359 |
| 67.6030777 | 63.5164707 | 71.2200967 | 66.0018663 | 68.7698269 | Activity 360 |
| 67.6030777 | 64.5164707 | 73.2200967 | 66.0018663 | 68.7698269 | Activity 361 |
| 67.6030777 | 65.5164707 | 74.2200967 | 66.0018663 | 68.7698269 | Activity 362 |
| 66.6030777 | 66.5164707 | 74.2200967 | 66.0018663 | 67.7698269 | Activity 363 |
| 66.6030777 | 68.5164707 | 74.2200967 | 66.0018663 | 67.7698269 | Activity 364 |
| 66.6030777 | 69.5164707 | 74.2200967 | 65.0018663 | 67.7698269 | Activity 365 |
| 66.6030777 | 69.5164707 | 73.2200967 | 65.0018663 | 67.7698269 | Activity 366 |
| 66.6030777 | 69.5164707 | 73.2200967 | 65.0018663 | 67.7698269 | Activity 367 |
| 66.6030777 | 69.5164707 | 73.2200967 | 64.0018663 | 67.7698269 | Activity 368 |
| 68.6030777 | 68.5164707 | 73.2200967 | 64.0018663 | 67.7698269 | Activity 369 |
| 67.6030777 | 67.5164707 | 74.2200967 | 71.0018663 | 67.7698269 | Activity 370 |

|            |            |            |            |            |              |
|------------|------------|------------|------------|------------|--------------|
| 67.6030777 | 66.5164707 | 74.2200967 | 74.0018663 | 66.7698269 | Activity 371 |
| 67.6030777 | 64.5164707 | 74.2200967 | 74.0018663 | 64.7698269 | Activity 372 |
| 67.6030777 | 64.5164707 | 74.2200967 | 77.0018663 | 63.7698269 | Activity 373 |
| 67.6030777 | 64.5164707 | 74.2200967 | 81.0018663 | 62.7698269 | Activity 374 |
| 67.6030777 | 64.5164707 | 74.2200967 | 82.0018663 | 62.7698269 | Activity 375 |
| 67.6030777 | 64.5164707 | 74.2200967 | 82.0018663 | 62.7698269 | Activity 376 |
| 66.6030777 | 64.5164707 | 72.2200967 | 80.0018663 | 63.7698269 | Activity 377 |
| 67.6030777 | 64.5164707 | 72.2200967 | 80.0018663 | 64.7698269 | Activity 378 |
| 67.6030777 | 63.5164707 | 72.2200967 | 80.0018663 | 64.7698269 | Activity 379 |
| 67.6030777 | 63.5164707 | 71.2200967 | 80.0018663 | 64.7698269 | Activity 380 |
| 68.6030777 | 63.5164707 | 70.2200967 | 79.0018663 | 64.7698269 | Activity 381 |
| 69.6030777 | 63.5164707 | 69.2200967 | 77.0018663 | 64.7698269 | Activity 382 |
| 69.6030777 | 63.5164707 | 68.2200967 | 79.0018663 | 64.7698269 | Activity 383 |
| 69.6030777 | 63.5164707 | 68.2200967 | 81.0018663 | 64.7698269 | Activity 384 |
| 69.6030777 | 63.5164707 | 68.2200967 | 81.0018663 | 64.7698269 | Activity 385 |
| 68.6030777 | 63.5164707 | 68.2200967 | 80.0018663 | 65.7698269 | Activity 386 |
| 68.6030777 | 63.5164707 | 68.2200967 | 79.0018663 | 66.7698269 | Activity 387 |
| 68.6030777 | 63.5164707 | 68.2200967 | 79.0018663 | 66.7698269 | Activity 388 |
| 69.6030777 | 63.5164707 | 68.2200967 | 76.0018663 | 69.7698269 | Activity 389 |
| 69.6030777 | 63.5164707 | 69.2200967 | 75.0018663 | 70.7698269 | Activity 390 |
| 71.6030777 | 63.5164707 | 69.2200967 | 75.0018663 | 70.7698269 | Activity 391 |
| 73.6030777 | 63.5164707 | 74.2200967 | 69.0018663 | 71.7698269 | Activity 392 |
| 73.6030777 | 62.5164707 | 75.2200967 | 69.0018663 | 71.7698269 | Activity 393 |
| 73.6030777 | 63.5164707 | 75.2200967 | 68.0018663 | 64.7698269 | Activity 394 |
| 71.6030777 | 63.5164707 | 76.2200967 | 68.0018663 | 60.7698269 | Activity 395 |
| 71.6030777 | 63.5164707 | 77.2200967 | 68.0018663 | 59.7698269 | Activity 396 |
| 71.6030777 | 64.5164707 | 74.2200967 | 67.0018663 | 59.7698269 | Activity 397 |
| 70.6030777 | 63.5164707 | 73.2200967 | 67.0018663 | 59.7698269 | Activity 398 |
| 69.6030777 | 63.5164707 | 71.2200967 | 67.0018663 | 60.7698269 | Activity 399 |
| 69.6030777 | 63.5164707 | 69.2200967 | 67.0018663 | 61.7698269 | Activity 400 |
| 69.6030777 | 63.5164707 | 68.2200967 | 67.0018663 | 62.7698269 | Activity 401 |
| 69.6030777 | 63.5164707 | 67.2200967 | 66.0018663 | 64.7698269 | Activity 402 |
| 69.6030777 | 63.5164707 | 66.2200967 | 66.0018663 | 64.7698269 | Activity 403 |
| 67.6030777 | 63.5164707 | 66.2200967 | 66.0018663 | 67.7698269 | Activity 404 |
| 67.6030777 | 63.5164707 | 66.2200967 | 66.0018663 | 67.7698269 | Activity 405 |
| 67.6030777 | 63.5164707 | 66.2200967 | 66.0018663 | 67.7698269 | Activity 406 |
| 67.6030777 | 63.5164707 | 66.2200967 | 64.0018663 | 68.7698269 | Activity 407 |
| 67.6030777 | 63.5164707 | 66.2200967 | 64.0018663 | 68.7698269 | Activity 408 |
| 67.6030777 | 64.5164707 | 66.2200967 | 64.0018663 | 68.7698269 | Activity 409 |
| 67.6030777 | 64.5164707 | 67.2200967 | 65.0018663 | 67.7698269 | Activity 410 |
| 68.6030777 | 64.5164707 | 66.2200967 | 65.0018663 | 67.7698269 | Activity 411 |
| 68.6030777 | 64.5164707 | 65.2200967 | 65.0018663 | 68.7698269 | Activity 412 |
| 68.6030777 | 64.5164707 | 64.2200967 | 65.0018663 | 68.7698269 | Activity 413 |
| 68.6030777 | 64.5164707 | 63.2200967 | 65.0018663 | 69.7698269 | Activity 414 |
| 70.6030777 | 64.5164707 | 64.2200967 | 63.0018663 | 69.7698269 | Activity 415 |

|            |            |            |            |            |              |
|------------|------------|------------|------------|------------|--------------|
| 69.6030777 | 64.5164707 | 64.2200967 | 63.0018663 | 69.7698269 | Activity 416 |
| 69.6030777 | 64.5164707 | 64.2200967 | 63.0018663 | 68.7698269 | Activity 417 |
| 69.6030777 | 64.5164707 | 64.2200967 | 63.0018663 | 67.7698269 | Activity 418 |
| 68.6030777 | 65.5164707 | 64.2200967 | 63.0018663 | 65.7698269 | Activity 419 |
| 67.6030777 | 65.5164707 | 64.2200967 | 65.0018663 | 65.7698269 | Activity 420 |
| 67.6030777 | 65.5164707 | 64.2200967 | 66.0018663 | 65.7698269 | Activity 421 |
| 67.6030777 | 65.5164707 | 64.2200967 | 67.0018663 | 65.7698269 | Activity 422 |
| 67.6030777 | 65.5164707 | 65.2200967 | 67.0018663 | 66.7698269 | Activity 423 |
| 68.6030777 | 65.5164707 | 65.2200967 | 69.0018663 | 67.7698269 | Activity 424 |
| 71.6030777 | 65.5164707 | 65.2200967 | 69.0018663 | 68.7698269 | Activity 425 |
| 71.6030777 | 65.5164707 | 65.2200967 | 71.0018663 | 68.7698269 | Activity 426 |
| 71.6030777 | 65.5164707 | 64.2200967 | 71.0018663 | 70.7698269 | Activity 427 |
| 73.6030777 | 65.5164707 | 64.2200967 | 71.0018663 | 72.7698269 | Activity 428 |
| 73.6030777 | 65.5164707 | 64.2200967 | 71.0018663 | 73.7698269 | Activity 429 |
| 73.6030777 | 65.5164707 | 65.2200967 | 74.0018663 | 73.7698269 | Activity 430 |
| 74.6030777 | 65.5164707 | 65.2200967 | 76.0018663 | 73.7698269 | Activity 431 |
| 74.6030777 | 65.5164707 | 65.2200967 | 76.0018663 | 73.7698269 | Activity 432 |
| 74.6030777 | 65.5164707 | 65.2200967 | 76.0018663 | 70.7698269 | Activity 433 |
| 73.6030777 | 65.5164707 | 65.2200967 | 76.0018663 | 68.7698269 | Activity 434 |
| 73.6030777 | 65.5164707 | 65.2200967 | 76.0018663 | 67.7698269 | Activity 435 |
| 71.6030777 | 65.5164707 | 65.2200967 | 76.0018663 | 68.7698269 | Activity 436 |
| 70.6030777 | 64.5164707 | 66.2200967 | 76.0018663 | 70.7698269 | Activity 437 |
| 70.6030777 | 65.5164707 | 66.2200967 | 76.0018663 | 72.7698269 | Activity 438 |
| 70.6030777 | 64.5164707 | 66.2200967 | 77.0018663 | 72.7698269 | Activity 439 |
| 70.6030777 | 64.5164707 | 66.2200967 | 78.0018663 | 70.7698269 | Activity 440 |
| 70.6030777 | 63.5164707 | 66.2200967 | 80.0018663 | 69.7698269 | Activity 441 |
| 71.6030777 | 63.5164707 | 65.2200967 | 80.0018663 | 69.7698269 | Activity 442 |
| 72.6030777 | 63.5164707 | 65.2200967 | 80.0018663 | 69.7698269 | Activity 443 |
| 72.6030777 | 63.5164707 | 65.2200967 | 79.0018663 | 70.7698269 | Activity 444 |
| 73.6030777 | 63.5164707 | 65.2200967 | 79.0018663 | 70.7698269 | Activity 445 |
| 74.6030777 | 63.5164707 | 66.2200967 | 78.0018663 | 72.7698269 | Activity 446 |
| 74.6030777 | 63.5164707 | 66.2200967 | 77.0018663 | 71.7698269 | Activity 447 |
| 74.6030777 | 62.5164707 | 66.2200967 | 76.0018663 | 71.7698269 | Activity 448 |
| 74.6030777 | 62.5164707 | 66.2200967 | 75.0018663 | 71.7698269 | Activity 449 |
| 74.6030777 | 62.5164707 | 66.2200967 | 73.0018663 | 74.7698269 | Activity 450 |
| 74.6030777 | 62.5164707 | 65.2200967 | 69.0018663 | 75.7698269 | Activity 451 |
| 74.6030777 | 62.5164707 | 65.2200967 | 67.0018663 | 72.7698269 | Activity 452 |
| 75.6030777 | 62.5164707 | 65.2200967 | 67.0018663 | 70.7698269 | Activity 453 |
| 75.6030777 | 63.5164707 | 65.2200967 | 67.0018663 | 68.7698269 | Activity 454 |
| 75.6030777 | 63.5164707 | 65.2200967 | 68.0018663 | 66.7698269 | Activity 455 |
| 76.6030777 | 63.5164707 | 65.2200967 | 68.0018663 | 63.7698269 | Activity 456 |
| 76.6030777 | 63.5164707 | 65.2200967 | 69.0018663 | 63.7698269 | Activity 457 |
| 76.6030777 | 63.5164707 | 66.2200967 | 69.0018663 | 63.7698269 | Activity 458 |
| 76.6030777 | 63.5164707 | 66.2200967 | 69.0018663 | 62.7698269 | Activity 459 |
| 77.6030777 | 63.5164707 | 66.2200967 | 72.0018663 | 64.7698269 | Activity 460 |

|            |            |            |            |            |              |
|------------|------------|------------|------------|------------|--------------|
| 77.6030777 | 63.5164707 | 66.2200967 | 73.0018663 | 65.7698269 | Activity 461 |
| 77.6030777 | 63.5164707 | 66.2200967 | 73.0018663 | 66.7698269 | Activity 462 |
| 77.6030777 | 63.5164707 | 66.2200967 | 71.0018663 | 67.7698269 | Activity 463 |
| 77.6030777 | 63.5164707 | 66.2200967 | 71.0018663 | 68.7698269 | Activity 464 |
| 74.6030777 | 63.5164707 | 67.2200967 | 66.0018663 | 68.7698269 | Activity 465 |
| 74.6030777 | 63.5164707 | 66.2200967 | 66.0018663 | 69.7698269 | Activity 466 |
| 74.6030777 | 63.5164707 | 65.2200967 | 65.0018663 | 70.7698269 | Activity 467 |
| 74.6030777 | 63.5164707 | 66.2200967 | 65.0018663 | 70.7698269 | Activity 468 |
| 74.6030777 | 62.5164707 | 68.2200967 | 65.0018663 | 70.7698269 | Activity 469 |
| 74.6030777 | 63.5164707 | 68.2200967 | 66.0018663 | 70.7698269 | Activity 470 |
| 72.6030777 | 63.5164707 | 69.2200967 | 67.0018663 | 70.7698269 | Activity 471 |
| 72.6030777 | 63.5164707 | 69.2200967 | 67.0018663 | 71.7698269 | Activity 472 |
| 72.6030777 | 63.5164707 | 69.2200967 | 67.0018663 | 71.7698269 | Activity 473 |
| 72.6030777 | 63.5164707 | 70.2200967 | 67.0018663 | 69.7698269 | Activity 474 |
| 72.6030777 | 63.5164707 | 70.2200967 | 67.0018663 | 69.7698269 | Activity 475 |
| 71.6030777 | 63.5164707 | 70.2200967 | 67.0018663 | 67.7698269 | Activity 476 |
| 70.6030777 | 63.5164707 | 71.2200967 | 67.0018663 | 65.7698269 | Activity 477 |
| 74.6030777 | 63.5164707 | 69.2200967 | 67.0018663 | 64.7698269 | Activity 478 |
| 76.6030777 | 63.5164707 | 69.2200967 | 67.0018663 | 65.7698269 | Activity 479 |
| 76.6030777 | 64.5164707 | 69.2200967 | 67.0018663 | 66.7698269 | Activity 480 |
| 77.6030777 | 64.5164707 | 69.2200967 | 67.0018663 | 67.7698269 | Activity 481 |
| 78.6030777 | 64.5164707 | 70.2200967 | 65.0018663 | 67.7698269 | Activity 482 |
| 78.6030777 | 62.5164707 | 71.2200967 | 65.0018663 | 68.7698269 | Activity 483 |
| 79.6030777 | 61.5164707 | 71.2200967 | 65.0018663 | 69.7698269 | Activity 484 |
| 80.6030777 | 61.5164707 | 70.2200967 | 65.0018663 | 69.7698269 | Activity 485 |
| 81.6030777 | 60.5164707 | 69.2200967 | 65.0018663 | 69.7698269 | Activity 486 |
| 81.6030777 | 60.5164707 | 67.2200967 | 66.0018663 | 69.7698269 | Activity 487 |
| 81.6030777 | 60.5164707 | 67.2200967 | 66.0018663 | 69.7698269 | Activity 488 |
| 81.6030777 | 62.5164707 | 67.2200967 | 67.0018663 | 69.7698269 | Activity 489 |
| 81.6030777 | 62.5164707 | 66.2200967 | 67.0018663 | 70.7698269 | Activity 490 |
| 81.6030777 | 63.5164707 | 66.2200967 | 67.0018663 | 72.7698269 | Activity 491 |
| 81.6030777 | 63.5164707 | 66.2200967 | 67.0018663 | 72.7698269 | Activity 492 |
| 81.6030777 | 63.5164707 | 64.2200967 | 67.0018663 | 72.7698269 | Activity 493 |
| 78.6030777 | 63.5164707 | 64.2200967 | 68.0018663 | 72.7698269 | Activity 494 |
| 75.6030777 | 63.5164707 | 64.2200967 | 68.0018663 | 72.7698269 | Activity 495 |
| 72.6030777 | 63.5164707 | 64.2200967 | 68.0018663 | 70.7698269 | Activity 496 |
| 70.6030777 | 63.5164707 | 64.2200967 | 67.0018663 | 68.7698269 | Activity 497 |
| 70.6030777 | 63.5164707 | 64.2200967 | 68.0018663 | 68.7698269 | Activity 498 |
| 70.6030777 | 63.5164707 | 64.2200967 | 68.0018663 | 68.7698269 | Activity 499 |
| 70.6030777 | 64.5164707 | 60.2200967 | 72.0018663 | 64.7698269 | Activity 500 |
| 70.6030777 | 64.5164707 | 59.2200967 | 72.0018663 | 64.7698269 | Activity 501 |
| 69.6030777 | 64.5164707 | 59.2200967 | 72.0018663 | 64.7698269 | Activity 502 |
| 69.6030777 | 64.5164707 | 58.2200967 | 70.0018663 | 63.7698269 | Activity 503 |
| 68.6030777 | 65.5164707 | 57.2200967 | 67.0018663 | 64.7698269 | Activity 504 |
| 68.6030777 | 65.5164707 | 56.2200967 | 67.0018663 | 64.7698269 | Activity 505 |

|            |            |            |            |            |              |
|------------|------------|------------|------------|------------|--------------|
| 68.6030777 | 65.5164707 | 56.2200967 | 67.0018663 | 65.7698269 | Activity 506 |
| 68.6030777 | 65.5164707 | 56.2200967 | 67.0018663 | 65.7698269 | Activity 507 |
| 68.6030777 | 65.5164707 | 57.2200967 | 66.0018663 | 64.7698269 | Activity 508 |
| 68.6030777 | 65.5164707 | 57.2200967 | 67.0018663 | 64.7698269 | Activity 509 |
| 67.6030777 | 65.5164707 | 57.2200967 | 67.0018663 | 64.7698269 | Activity 510 |
| 67.6030777 | 63.5164707 | 57.2200967 | 67.0018663 | 62.7698269 | Activity 511 |
| 67.6030777 | 64.5164707 | 57.2200967 | 68.0018663 | 62.7698269 | Activity 512 |
| 66.6030777 | 64.5164707 | 57.2200967 | 69.0018663 | 62.7698269 | Activity 513 |
| 66.6030777 | 64.5164707 | 57.2200967 | 69.0018663 | 62.7698269 | Activity 514 |
| 68.6030777 | 64.5164707 | 59.2200967 | 69.0018663 | 63.7698269 | Activity 515 |
| 68.6030777 | 64.5164707 | 60.2200967 | 69.0018663 | 63.7698269 | Activity 516 |
| 68.6030777 | 64.5164707 | 60.2200967 | 69.0018663 | 63.7698269 | Activity 517 |
| 67.6030777 | 64.5164707 | 61.2200967 | 69.0018663 | 63.7698269 | Activity 518 |
| 67.6030777 | 64.5164707 | 61.2200967 | 69.0018663 | 63.7698269 | Activity 519 |
| 67.6030777 | 64.5164707 | 61.2200967 | 69.0018663 | 63.7698269 | Activity 520 |
| 67.6030777 | 64.5164707 | 61.2200967 | 69.0018663 | 64.7698269 | Activity 521 |
| 67.6030777 | 63.5164707 | 61.2200967 | 68.0018663 | 65.7698269 | Activity 522 |
| 67.6030777 | 63.5164707 | 64.2200967 | 67.0018663 | 62.7698269 | Activity 523 |
| 69.6030777 | 63.5164707 | 64.2200967 | 67.0018663 | 62.7698269 | Activity 524 |
| 70.6030777 | 64.5164707 | 65.2200967 | 66.0018663 | 61.7698269 | Activity 525 |
| 70.6030777 | 64.5164707 | 65.2200967 | 65.0018663 | 61.7698269 | Activity 526 |
| 70.6030777 | 63.5164707 | 65.2200967 | 64.0018663 | 62.7698269 | Activity 527 |
| 69.6030777 | 64.5164707 | 66.2200967 | 65.0018663 | 63.7698269 | Activity 528 |
| 69.6030777 | 64.5164707 | 67.2200967 | 65.0018663 | 63.7698269 | Activity 529 |
| 68.6030777 | 64.5164707 | 67.2200967 | 65.0018663 | 63.7698269 | Activity 530 |
| 67.6030777 | 64.5164707 | 67.2200967 | 65.0018663 | 63.7698269 | Activity 531 |
| 67.6030777 | 64.5164707 | 65.2200967 | 65.0018663 | 64.7698269 | Activity 532 |
| 65.6030777 | 64.5164707 | 66.2200967 | 66.0018663 | 64.7698269 | Activity 533 |
| 66.6030777 | 63.5164707 | 66.2200967 | 66.0018663 | 64.7698269 | Activity 534 |
| 66.6030777 | 63.5164707 | 66.2200967 | 65.0018663 | 64.7698269 | Activity 535 |
| 66.6030777 | 62.5164707 | 65.2200967 | 65.0018663 | 64.7698269 | Activity 536 |
| 66.6030777 | 62.5164707 | 65.2200967 | 65.0018663 | 65.7698269 | Activity 537 |
| 66.6030777 | 62.5164707 | 62.2200967 | 65.0018663 | 65.7698269 | Activity 538 |
| 66.6030777 | 62.5164707 | 62.2200967 | 65.0018663 | 66.7698269 | Activity 539 |
| 66.6030777 | 61.5164707 | 62.2200967 | 65.0018663 | 66.7698269 | Minute 1     |
| 66.6030777 | 61.5164707 | 62.2200967 | 64.0018663 | 66.7698269 | Minute 2     |
| 67.6030777 | 61.5164707 | 62.2200967 | 64.0018663 | 66.7698269 | Minute 3     |
| 67.6030777 | 61.5164707 | 62.2200967 | 64.0018663 | 64.7698269 | Minute 4     |
| 67.6030777 | 62.5164707 | 62.2200967 | 64.0018663 | 62.7698269 | Minute 5     |
| 66.6030777 | 62.5164707 | 62.2200967 | 65.0018663 | 61.7698269 | Minute 6     |
| 66.6030777 | 62.5164707 | 62.2200967 | 66.0018663 | 61.7698269 | Minute 7     |
| 65.6030777 | 62.5164707 | 62.2200967 | 67.0018663 | 61.7698269 | Minute 8     |
| 65.6030777 | 62.5164707 | 62.2200967 | 68.0018663 | 63.7698269 | Minute 9     |
| 65.6030777 | 62.5164707 | 62.2200967 | 68.0018663 | 63.7698269 | Minute 10    |
| 66.6030777 | 62.5164707 | 60.2200967 | 68.0018663 | 63.7698269 | Minute 11    |

|            |            |            |            |            |           |
|------------|------------|------------|------------|------------|-----------|
| 67.6030777 | 62.5164707 | 60.2200967 | 64.0018663 | 63.7698269 | Minute 12 |
| 67.6030777 | 62.5164707 | 60.2200967 | 61.0018663 | 63.7698269 | Minute 13 |
| 67.6030777 | 62.5164707 | 60.2200967 | 61.0018663 | 63.7698269 | Minute 14 |
| 70.6030777 | 62.5164707 | 62.2200967 | 62.0018663 | 62.7698269 | Minute 15 |
| 70.6030777 | 62.5164707 | 62.2200967 | 63.0018663 | 62.7698269 | Minute 16 |
| 70.6030777 | 61.5164707 | 62.2200967 | 64.0018663 | 62.7698269 | Minute 17 |
| 70.6030777 | 61.5164707 | 62.2200967 | 67.0018663 | 62.7698269 | Minute 18 |
| 70.6030777 | 61.5164707 | 62.2200967 | 70.0018663 | 62.7698269 | Minute 19 |
| 71.6030777 | 61.5164707 | 62.2200967 | 72.0018663 | 62.7698269 | Minute 20 |
| 71.6030777 | 60.5164707 | 62.2200967 | 72.0018663 | 61.7698269 | Minute 21 |
| 71.6030777 | 60.5164707 | 62.2200967 | 72.0018663 | 61.7698269 | Minute 22 |
| 71.6030777 | 60.5164707 | 62.2200967 | 73.0018663 | 61.7698269 | Minute 23 |
| 71.6030777 | 61.5164707 | 62.2200967 | 73.0018663 | 60.7698269 | Minute 24 |
| 70.6030777 | 61.5164707 | 62.2200967 | 73.0018663 | 60.7698269 | Minute 25 |
| 70.6030777 | 61.5164707 | 62.2200967 | 71.0018663 | 60.7698269 | Minute 26 |
| 70.6030777 | 61.5164707 | 63.2200967 | 70.0018663 | 60.7698269 | Minute 27 |
| 69.6030777 | 61.5164707 | 63.2200967 | 67.0018663 | 61.7698269 | Minute 28 |
| 69.6030777 | 62.5164707 | 64.2200967 | 67.0018663 | 61.7698269 | Minute 29 |
| 68.6030777 | 62.5164707 | 65.2200967 | 67.0018663 | 63.7698269 | Minute 30 |
| 68.6030777 | 62.5164707 | 65.2200967 | 67.0018663 | 64.7698269 | Minute 31 |
| 68.6030777 | 62.5164707 | 65.2200967 | 67.0018663 | 64.7698269 | Minute 32 |
| 68.6030777 | 62.5164707 | 65.2200967 | 67.0018663 | 64.7698269 | Minute 33 |
| 70.6030777 | 62.5164707 | 65.2200967 | 67.0018663 | 64.7698269 | Minute 34 |
| 70.6030777 | 62.5164707 | 66.2200967 | 67.0018663 | 64.7698269 | Minute 35 |
| 71.6030777 | 62.5164707 | 66.2200967 | 67.0018663 | 65.7698269 | Minute 36 |
| 71.6030777 | 61.5164707 | 66.2200967 | 68.0018663 | 65.7698269 | Minute 37 |
| 71.6030777 | 61.5164707 | 67.2200967 | 66.0018663 | 66.7698269 | Minute 38 |
| 71.6030777 | 61.5164707 | 67.2200967 | 65.0018663 | 66.7698269 | Minute 39 |
| 69.6030777 | 61.5164707 | 67.2200967 | 65.0018663 | 66.7698269 | Minute 40 |
| 69.6030777 | 61.5164707 | 71.2200967 | 66.0018663 | 65.7698269 | Minute 41 |
| 69.6030777 | 62.5164707 | 72.2200967 | 66.0018663 | 65.7698269 | Minute 42 |
| 69.6030777 | 62.5164707 | 73.2200967 | 67.0018663 | 65.7698269 | Minute 43 |
| 69.6030777 | 61.5164707 | 74.2200967 | 68.0018663 | 65.7698269 | Minute 44 |
| 69.6030777 | 61.5164707 | 74.2200967 | 68.0018663 | 65.7698269 | Minute 45 |
| 69.6030777 | 62.5164707 | 75.2200967 | 72.0018663 | 65.7698269 | Minute 46 |
| 69.6030777 | 61.5164707 | 76.2200967 | 74.0018663 | 65.7698269 | Minute 47 |
| 69.6030777 | 61.5164707 | 75.2200967 | 75.0018663 | 65.7698269 | Minute 48 |
| 69.6030777 | 61.5164707 | 75.2200967 | 76.0018663 | 64.7698269 | Minute 49 |
| 69.6030777 | 62.5164707 | 75.2200967 | 76.0018663 | 64.7698269 | Minute 50 |
| 69.6030777 | 62.5164707 | 76.2200967 | 74.0018663 | 64.7698269 | Minute 51 |
| 69.6030777 | 62.5164707 | 76.2200967 | 74.0018663 | 65.7698269 | Minute 52 |
| 69.6030777 | 61.5164707 | 77.2200967 | 73.0018663 | 65.7698269 | Minute 53 |
| 69.6030777 | 61.5164707 | 77.2200967 | 72.0018663 | 65.7698269 | Minute 54 |
| 70.6030777 | 61.5164707 | 77.2200967 | 72.0018663 | 66.7698269 | Minute 55 |
| 70.6030777 | 61.5164707 | 77.2200967 | 70.0018663 | 66.7698269 | Minute 56 |



|            |            |            |            |            |           |
|------------|------------|------------|------------|------------|-----------|
| 70.6030777 | 61.5164707 | 77.2200967 | 68.0018663 | 66.7698269 | Minute 57 |
| 69.6030777 | 60.5164707 | 77.2200967 | 66.0018663 | 67.7698269 | Minute 58 |
| 69.6030777 | 60.5164707 | 77.2200967 | 66.0018663 | 67.7698269 | Minute 59 |
| 69.6030777 | 60.5164707 | 77.2200967 | 64.0018663 | 69.7698269 | Minute 60 |
| 71.6030777 | 59.5164707 | 74.2200967 | 64.0018663 | 68.7698269 | After 1   |
| 72.6030777 | 60.5164707 | 74.2200967 | 63.0018663 | 68.7698269 | After 2   |
| 72.6030777 | 60.5164707 | 73.2200967 | 63.0018663 | 68.7698269 | After 3   |
| 72.6030777 | 60.5164707 | 73.2200967 | 63.0018663 | 68.7698269 | After 4   |
| 70.6030777 | 60.5164707 | 73.2200967 | 62.0018663 | 68.7698269 | After 5   |
| 70.6030777 | 60.5164707 | 73.2200967 | 62.0018663 | 68.7698269 | After 6   |
| 71.6030777 | 61.5164707 | 73.2200967 | 61.0018663 | 68.7698269 | After 7   |
| 71.6030777 | 61.5164707 | 73.2200967 | 61.0018663 | 68.7698269 | After 8   |
| 71.6030777 | 62.5164707 | 75.2200967 | 62.0018663 | 67.7698269 | After 9   |
| 71.6030777 | 62.5164707 | 77.2200967 | 64.0018663 | 67.7698269 | After 10  |
| 71.6030777 | 62.5164707 | 78.2200967 | 65.0018663 | 67.7698269 | After 11  |
| 70.6030777 | 62.5164707 | 78.2200967 | 65.0018663 | 66.7698269 | After 12  |
| 70.6030777 | 61.5164707 | 78.2200967 | 64.0018663 | 66.7698269 | After 13  |
| 70.6030777 | 61.5164707 | 78.2200967 | 64.0018663 | 66.7698269 | After 14  |
| 70.6030777 | 61.5164707 | 78.2200967 | 62.0018663 | 66.7698269 | After 15  |
| 70.6030777 | 61.5164707 | 77.2200967 | 62.0018663 | 66.7698269 | After 16  |
| 70.6030777 | 61.5164707 | 77.2200967 | 60.0018663 | 67.7698269 | After 17  |
| 70.6030777 | 61.5164707 | 77.2200967 | 60.0018663 | 68.7698269 | After 18  |
| 70.6030777 | 62.5164707 | 77.2200967 | 60.0018663 | 69.7698269 | After 19  |
| 70.6030777 | 63.5164707 | 77.2200967 | 61.0018663 | 71.7698269 | After 20  |
| 69.6030777 | 64.5164707 | 76.2200967 | 61.0018663 | 71.7698269 | After 21  |
| 69.6030777 | 64.5164707 | 76.2200967 | 62.0018663 | 71.7698269 | After 22  |
| 69.6030777 | 65.5164707 | 76.2200967 | 62.0018663 | 71.7698269 | After 23  |
| 69.6030777 | 65.5164707 | 77.2200967 | 63.0018663 | 71.7698269 | After 24  |
| 69.6030777 | 65.5164707 | 76.2200967 | 63.0018663 | 71.7698269 | After 25  |
| 68.6030777 | 65.5164707 | 76.2200967 | 63.0018663 | 69.7698269 | After 26  |
| 68.6030777 | 65.5164707 | 76.2200967 | 63.0018663 | 66.7698269 | After 27  |
| 68.6030777 | 64.5164707 | 76.2200967 | 63.0018663 | 64.7698269 | After 28  |
| 67.6030777 | 64.5164707 | 76.2200967 | 63.0018663 | 63.7698269 | After 29  |
| 67.6030777 | 64.5164707 | 76.2200967 | 63.0018663 | 61.7698269 | After 30  |
| 67.6030777 | 64.5164707 | 76.2200967 | 62.0018663 | 62.7698269 | After 31  |
| 67.6030777 | 64.5164707 | 76.2200967 | 62.0018663 | 62.7698269 | After 32  |
| 67.6030777 | 64.5164707 | 76.2200967 | 62.0018663 | 61.7698269 | After 33  |
| 67.6030777 | 63.5164707 | 76.2200967 | 62.0018663 | 61.7698269 | After 34  |
| 67.6030777 | 64.5164707 | 76.2200967 | 62.0018663 | 60.7698269 | After 35  |
| 68.6030777 | 64.5164707 | 75.2200967 | 63.0018663 | 60.7698269 | After 36  |
| 68.6030777 | 63.5164707 | 75.2200967 | 72.0018663 | 60.7698269 | After 37  |
| 68.6030777 | 63.5164707 | 74.2200967 | 75.0018663 | 60.7698269 | After 38  |
| 68.6030777 | 63.5164707 | 74.2200967 | 74.0018663 | 59.7698269 | After 39  |
| 68.6030777 | 62.5164707 | 73.2200967 | 72.0018663 | 59.7698269 | After 40  |
| 65.6030777 | 62.5164707 | 71.2200967 | 71.0018663 | 59.7698269 | After 41  |

|            |            |            |            |            |          |
|------------|------------|------------|------------|------------|----------|
| 64.6030777 | 62.5164707 | 68.2200967 | 70.0018663 | 59.7698269 | After 42 |
| 64.6030777 | 62.5164707 | 67.2200967 | 70.0018663 | 59.7698269 | After 43 |
| 64.6030777 | 62.5164707 | 66.2200967 | 67.0018663 | 59.7698269 | After 44 |
| 64.6030777 | 61.5164707 | 65.2200967 | 65.0018663 | 58.7698269 | After 45 |
| 65.6030777 | 61.5164707 | 65.2200967 | 64.0018663 | 58.7698269 | After 46 |
| 65.6030777 | 61.5164707 | 67.2200967 | 64.0018663 | 58.7698269 | After 47 |
| 67.6030777 | 62.5164707 | 67.2200967 | 63.0018663 | 59.7698269 | After 48 |
| 67.6030777 | 62.5164707 | 67.2200967 | 62.0018663 | 60.7698269 | After 49 |
| 67.6030777 | 61.5164707 | 67.2200967 | 60.0018663 | 60.7698269 | After 50 |
| 68.6030777 | 61.5164707 | 67.2200967 | 60.0018663 | 61.7698269 | After 51 |
| 68.6030777 | 61.5164707 | 67.2200967 | 60.0018663 | 61.7698269 | After 52 |
| 69.6030777 | 61.5164707 | 68.2200967 | 60.0018663 | 61.7698269 | After 53 |
| 70.6030777 | 61.5164707 | 70.2200967 | 61.0018663 | 65.7698269 | After 54 |
| 70.6030777 | 62.5164707 | 70.2200967 | 61.0018663 | 66.7698269 | After 55 |
| 71.6030777 | 62.5164707 | 69.2200967 | 61.0018663 | 67.7698269 | After 56 |
| 71.6030777 | 62.5164707 | 67.2200967 | 61.0018663 | 67.7698269 | After 57 |
| 71.6030777 | 62.5164707 | 66.2200967 | 63.0018663 | 66.7698269 | After 58 |
| 74.6030777 | 62.5164707 | 66.2200967 | 64.0018663 | 66.7698269 | After 59 |
| 74.6030777 | 63.5164707 | 66.2200967 | 64.0018663 | 66.7698269 | After 60 |
| 74.6030777 | 64.5164707 | 66.2200967 | 64.0018663 | 67.7698269 | After 61 |
| 74.6030777 | 64.5164707 | 66.2200967 | 63.0018663 | 67.7698269 | After 62 |
| 75.6030777 | 63.5164707 | 66.2200967 | 62.0018663 | 67.7698269 | After 63 |
| 75.6030777 | 62.5164707 | 66.2200967 | 61.0018663 | 66.7698269 | After 64 |
| 75.6030777 | 62.5164707 | 66.2200967 | 61.0018663 | 66.7698269 | After 65 |
| 75.6030777 | 61.5164707 | 66.2200967 | 61.0018663 | 66.7698269 | After 66 |
| 75.6030777 | 61.5164707 | 66.2200967 | 61.0018663 | 66.7698269 | After 67 |
| 75.6030777 | 62.5164707 | 69.2200967 | 61.0018663 | 65.7698269 | After 68 |
| 74.6030777 | 62.5164707 | 69.2200967 | 61.0018663 | 66.7698269 | After 69 |
| 71.6030777 | 62.5164707 | 70.2200967 | 61.0018663 | 67.7698269 | After 70 |
| 70.6030777 | 62.5164707 | 70.2200967 | 64.0018663 | 67.7698269 | After 71 |
| 71.6030777 | 62.5164707 | 70.2200967 | 64.0018663 | 68.7698269 | After 72 |
| 71.6030777 | 62.5164707 | 70.2200967 | 64.0018663 | 68.7698269 | After 73 |
| 71.6030777 | 61.5164707 | 70.2200967 | 63.0018663 | 68.7698269 | After 74 |
| 71.6030777 | 61.5164707 | 70.2200967 | 62.0018663 | 68.7698269 | After 75 |
| 71.6030777 | 61.5164707 | 70.2200967 | 62.0018663 | 68.7698269 | After 76 |
| 71.6030777 | 61.5164707 | 70.2200967 | 62.0018663 | 70.7698269 | After 77 |
| 71.6030777 | 61.5164707 | 70.2200967 | 63.0018663 | 69.7698269 | After 78 |
| 70.6030777 | 61.5164707 | 70.2200967 | 63.0018663 | 69.7698269 | After 79 |
| 70.6030777 | 61.5164707 | 70.2200967 | 67.0018663 | 67.7698269 | After 80 |
| 70.6030777 | 61.5164707 | 69.2200967 | 67.0018663 | 67.7698269 | After 81 |
| 68.6030777 | 61.5164707 | 69.2200967 | 71.0018663 | 67.7698269 | After 82 |
| 68.6030777 | 61.5164707 | 69.2200967 | 71.0018663 | 67.7698269 | After 83 |
| 68.6030777 | 60.5164707 | 70.2200967 | 72.0018663 | 67.7698269 | After 84 |
| 68.6030777 | 60.5164707 | 70.2200967 | 69.0018663 | 68.7698269 | After 85 |
| 68.6030777 | 60.5164707 | 71.2200967 | 68.0018663 | 68.7698269 | After 86 |

|            |            |            |            |            |           |
|------------|------------|------------|------------|------------|-----------|
| 68.6030777 | 61.5164707 | 71.2200967 | 68.0018663 | 68.7698269 | After 87  |
| 68.6030777 | 61.5164707 | 75.2200967 | 68.0018663 | 68.7698269 | After 88  |
| 68.6030777 | 61.5164707 | 74.2200967 | 68.0018663 | 67.7698269 | After 89  |
| 68.6030777 | 62.5164707 | 72.2200967 | 68.0018663 | 67.7698269 | After 90  |
| 68.6030777 | 62.5164707 | 70.2200967 | 68.0018663 | 67.7698269 | After 91  |
| 68.6030777 | 62.5164707 | 68.2200967 | 69.0018663 | 67.7698269 | After 92  |
| 68.6030777 | 62.5164707 | 67.2200967 | 69.0018663 | 67.7698269 | After 93  |
| 68.6030777 | 62.5164707 | 66.2200967 | 69.0018663 | 69.7698269 | After 94  |
| 68.6030777 | 62.5164707 | 67.2200967 | 64.0018663 | 71.7698269 | After 95  |
| 68.6030777 | 62.5164707 | 67.2200967 | 63.0018663 | 71.7698269 | After 96  |
| 68.6030777 | 61.5164707 | 68.2200967 | 63.0018663 | 71.7698269 | After 97  |
| 68.6030777 | 61.5164707 | 68.2200967 | 63.0018663 | 71.7698269 | After 98  |
| 70.6030777 | 61.5164707 | 68.2200967 | 63.0018663 | 71.7698269 | After 99  |
| 71.6030777 | 61.5164707 | 66.2200967 | 64.0018663 | 71.7698269 | After 100 |
| 72.6030777 | 61.5164707 | 65.2200967 | 64.0018663 | 72.7698269 | After 101 |
| 72.6030777 | 61.5164707 | 63.2200967 | 65.0018663 | 73.7698269 | After 102 |
| 73.6030777 | 61.5164707 | 62.2200967 | 66.0018663 | 74.7698269 | After 103 |
| 74.6030777 | 62.5164707 | 61.2200967 | 66.0018663 | 74.7698269 | After 104 |
| 74.6030777 | 62.5164707 | 60.2200967 | 63.0018663 | 74.7698269 | After 105 |
| 74.6030777 | 62.5164707 | 60.2200967 | 62.0018663 | 73.7698269 | After 106 |
| 72.6030777 | 62.5164707 | 60.2200967 | 61.0018663 | 65.7698269 | After 107 |
| 72.6030777 | 62.5164707 | 61.2200967 | 61.0018663 | 63.7698269 | After 108 |
| 71.6030777 | 62.5164707 | 62.2200967 | 61.0018663 | 61.7698269 | After 109 |
| 71.6030777 | 62.5164707 | 62.2200967 | 62.0018663 | 60.7698269 | After 110 |
| 71.6030777 | 62.5164707 | 65.2200967 | 62.0018663 | 60.7698269 | After 111 |
| 71.6030777 | 62.5164707 | 64.2200967 | 63.0018663 | 60.7698269 | After 112 |
| 70.6030777 | 62.5164707 | 63.2200967 | 65.0018663 | 61.7698269 | After 113 |
| 67.6030777 | 61.5164707 | 63.2200967 | 67.0018663 | 61.7698269 | After 114 |
| 67.6030777 | 61.5164707 | 63.2200967 | 68.0018663 | 62.7698269 | After 115 |
| 67.6030777 | 61.5164707 | 63.2200967 | 68.0018663 | 62.7698269 | After 116 |
| 66.6030777 | 62.5164707 | 63.2200967 | 64.0018663 | 61.7698269 | After 117 |
| 69.6030777 | 62.5164707 | 62.2200967 | 64.0018663 | 61.7698269 | After 118 |
| 69.6030777 | 62.5164707 | 62.2200967 | 63.0018663 | 61.7698269 | After 119 |
| 68.6030777 | 62.5164707 | 62.2200967 | 63.0018663 | 60.7698269 | After 120 |
| 68.6030777 | 62.5164707 | 62.2200967 | 64.0018663 | 60.7698269 | After 121 |
| 67.6030777 | 62.5164707 | 62.2200967 | 65.0018663 | 59.7698269 | After 122 |
| 67.6030777 | 63.5164707 | 61.2200967 | 65.0018663 | 59.7698269 | After 123 |
| 68.6030777 | 63.5164707 | 60.2200967 | 65.0018663 | 59.7698269 | After 124 |
| 69.6030777 | 63.5164707 | 60.2200967 | 65.0018663 | 58.7698269 | After 125 |
| 70.6030777 | 62.5164707 | 60.2200967 | 65.0018663 | 74.7698269 | After 126 |
| 71.6030777 | 62.5164707 | 60.2200967 | 66.0018663 | 77.7698269 | After 127 |
| 71.6030777 | 62.5164707 | 60.2200967 | 66.0018663 | 77.7698269 | After 128 |
| 73.6030777 | 61.5164707 | 60.2200967 | 66.0018663 | 77.7698269 | After 129 |
| 74.6030777 | 61.5164707 | 59.2200967 | 66.0018663 | 76.7698269 | After 130 |
| 74.6030777 | 60.5164707 | 59.2200967 | 66.0018663 | 76.7698269 | After 131 |

|            |            |            |            |            |           |
|------------|------------|------------|------------|------------|-----------|
| 74.6030777 | 60.5164707 | 59.2200967 | 66.0018663 | 72.7698269 | After 132 |
| 74.6030777 | 59.5164707 | 59.2200967 | 66.0018663 | 71.7698269 | After 133 |
| 74.6030777 | 58.5164707 | 59.2200967 | 66.0018663 | 71.7698269 | After 134 |
| 74.6030777 | 59.5164707 | 59.2200967 | 66.0018663 | 71.7698269 | After 135 |
| 74.6030777 | 60.5164707 | 59.2200967 | 67.0018663 | 70.7698269 | After 136 |
| 74.6030777 | 60.5164707 | 59.2200967 | 67.0018663 | 70.7698269 | After 137 |
| 74.6030777 | 61.5164707 | 58.2200967 | 67.0018663 | 70.7698269 | After 138 |
| 74.6030777 | 61.5164707 | 59.2200967 | 70.0018663 | 71.7698269 | After 139 |
| 72.6030777 | 61.5164707 | 61.2200967 | 70.0018663 | 72.7698269 | After 140 |
| 72.6030777 | 61.5164707 | 61.2200967 | 80.0018663 | 71.7698269 | After 141 |
| 69.6030777 | 62.5164707 | 62.2200967 | 80.0018663 | 71.7698269 | After 142 |
| 68.6030777 | 62.5164707 | 62.2200967 | 80.0018663 | 71.7698269 | After 143 |
| 68.6030777 | 61.5164707 | 62.2200967 | 80.0018663 | 71.7698269 | After 144 |
| 67.6030777 | 60.5164707 | 62.2200967 | 80.0018663 | 72.7698269 | After 145 |
| 67.6030777 | 60.5164707 | 63.2200967 | 80.0018663 | 72.7698269 | After 146 |
| 67.6030777 | 60.5164707 | 63.2200967 | 80.0018663 | 72.7698269 | After 147 |
| 67.6030777 | 60.5164707 | 63.2200967 | 67.6775148 | 72.7698269 | After 148 |
| 67.6030777 | 59.5164707 | 63.2200967 | 67.3441814 | 70.7698269 | After 149 |
| 67.6030777 | 59.5164707 | 64.2200967 | 67.1219592 | 69.7698269 | After 150 |
| 67.6030777 | 59.5164707 | 65.2200967 | 67.3441814 | 69.7698269 | After 151 |
| 66.6030777 | 59.5164707 | 63.2200967 | 67.0108481 | 68.7698269 | After 152 |
| 65.6030777 | 59.5164707 | 63.2200967 | 67.0108481 | 67.7698269 | After 153 |
| 64.6030777 | 60.5164707 | 62.2200967 | 66.6775148 | 65.7698269 | After 154 |
| 64.6030777 | 60.5164707 | 62.2200967 | 66.3441814 | 64.7698269 | After 155 |
| 64.6030777 | 61.5164707 | 62.2200967 | 66.3441814 | 64.7698269 | After 156 |
| 63.6030777 | 61.5164707 | 62.2200967 | 66.2330703 | 64.7698269 | After 157 |
| 63.6030777 | 61.5164707 | 63.2200967 | 66.5664037 | 64.7698269 | After 158 |
| 64.6030777 | 61.5164707 | 63.2200967 | 66.7886259 | 64.7698269 | After 159 |
| 63.6030777 | 61.5164707 | 63.2200967 | 66.899737  | 64.7698269 | After 160 |
| 62.6030777 | 61.5164707 | 63.2200967 | 66.899737  | 64.7698269 | After 161 |
| 62.6030777 | 61.5164707 | 64.2200967 | 67.0108481 | 63.7698269 | After 162 |
| 62.6030777 | 61.5164707 | 65.2200967 | 66.6775148 | 61.7698269 | After 163 |
| 62.6030777 | 61.5164707 | 66.2200967 | 66.5664037 | 60.7698269 | After 164 |
| 62.6030777 | 61.5164707 | 63.2200967 | 66.0108481 | 60.7698269 | After 165 |
| 62.6030777 | 62.5164707 | 62.2200967 | 66.5664037 | 60.7698269 | After 166 |
| 62.6030777 | 62.5164707 | 60.2200967 | 66.4552926 | 61.7698269 | After 167 |
| 62.6030777 | 62.5164707 | 60.2200967 | 70.0108481 | 66.7698269 | After 168 |
| 62.6030777 | 63.5164707 | 59.2200967 | 70.6775148 | 68.7698269 | After 169 |
| 62.6030777 | 63.5164707 | 59.2200967 | 70.6775148 | 68.7698269 | After 170 |
| 62.6030777 | 64.5164707 | 57.2200967 | 70.899737  | 70.7698269 | After 171 |
| 63.6030777 | 65.5164707 | 57.2200967 | 71.1219592 | 70.7698269 | After 172 |
| 63.6030777 | 65.5164707 | 56.2200967 | 69.899737  | 69.7698269 | After 173 |
| 63.6030777 | 66.5164707 | 56.2200967 | 69.3441814 | 68.7698269 | After 174 |
| 66.6030777 | 66.5164707 | 53.2200967 | 68.899737  | 67.7698269 | After 175 |
| 67.6030777 | 66.5164707 | 52.2200967 | 68.1219592 | 67.7698269 | After 176 |

|            |            |            |            |            |           |
|------------|------------|------------|------------|------------|-----------|
| 66.6030777 | 66.5164707 | 52.2200967 | 68.0108481 | 67.7698269 | After 177 |
| 66.6030777 | 68.5164707 | 52.2200967 | 66.5664037 | 67.7698269 | After 178 |
| 66.6030777 | 68.5164707 | 52.2200967 | 76.0018663 | 67.7698269 | After 179 |
| 66.6030777 | 68.5164707 | 52.2200967 | 76.0018663 | 67.7698269 | After 180 |
| 66.6030777 | 67.5164707 | 52.2200967 | 69.0018663 | 65.7698269 | After 181 |
| 66.6030777 | 64.5164707 | 51.2200967 | 67.0018663 | 64.7698269 | After 182 |
| 66.6030777 | 63.5164707 | 54.2200967 | 65.0018663 | 63.7698269 | After 183 |
| 66.6030777 | 62.5164707 | 54.2200967 | 64.0018663 | 62.7698269 | After 184 |
| 66.6030777 | 61.5164707 | 54.2200967 | 64.0018663 | 62.7698269 | After 185 |
| 66.6030777 | 61.5164707 | 55.2200967 | 63.0018663 | 62.7698269 | After 186 |
| 66.6030777 | 61.5164707 | 55.2200967 | 63.0018663 | 62.7698269 | After 187 |
| 66.6030777 | 62.5164707 | 55.2200967 | 64.0018663 | 62.7698269 | After 188 |
| 66.6030777 | 62.5164707 | 55.2200967 | 63.0018663 | 62.7698269 | After 189 |
| 66.6030777 | 61.5164707 | 55.2200967 | 63.0018663 | 62.7698269 | After 190 |
| 66.6030777 | 61.5164707 | 56.2200967 | 63.0018663 | 59.7698269 | After 191 |
| 64.6030777 | 62.5164707 | 57.2200967 | 64.0018663 | 56.7698269 | After 192 |
| 65.6030777 | 62.5164707 | 58.2200967 | 65.0018663 | 56.7698269 | After 193 |
| 66.6030777 | 61.5164707 | 60.2200967 | 66.0018663 | 56.7698269 | After 194 |
| 66.6030777 | 61.5164707 | 60.2200967 | 66.0018663 | 56.7698269 | After 195 |
| 65.6030777 | 61.5164707 | 60.2200967 | 67.0018663 | 56.7698269 | After 196 |
| 65.6030777 | 61.5164707 | 60.2200967 | 67.0018663 | 56.7698269 | After 197 |
| 64.6030777 | 61.5164707 | 61.2200967 | 68.0018663 | 56.7698269 | After 198 |
| 64.6030777 | 61.5164707 | 61.2200967 | 69.0018663 | 56.7698269 | After 199 |
| 63.6030777 | 60.5164707 | 63.2200967 | 69.0018663 | 55.7698269 | After 200 |
| 64.6030777 | 60.5164707 | 63.2200967 | 69.0018663 | 55.7698269 | After 201 |
| 64.6030777 | 60.5164707 | 63.2200967 | 69.0018663 | 55.7698269 | After 202 |
| 64.6030777 | 61.5164707 | 64.2200967 | 69.0018663 | 56.7698269 | After 203 |
| 64.6030777 | 61.5164707 | 64.2200967 | 69.0018663 | 57.7698269 | After 204 |
| 64.6030777 | 61.5164707 | 65.2200967 | 69.0018663 | 57.7698269 | After 205 |
| 64.6030777 | 61.5164707 | 65.2200967 | 65.0018663 | 58.7698269 | After 206 |
| 64.6030777 | 60.5164707 | 65.2200967 | 65.0018663 | 58.7698269 | After 207 |
| 67.6030777 | 60.5164707 | 65.2200967 | 64.0018663 | 58.7698269 | After 208 |
| 66.6030777 | 61.5164707 | 65.2200967 | 64.0018663 | 58.7698269 | After 209 |
| 66.6030777 | 60.5164707 | 65.2200967 | 64.0018663 | 57.7698269 | After 210 |
| 64.6030777 | 60.5164707 | 65.2200967 | 63.0018663 | 56.7698269 | After 211 |
| 64.6030777 | 60.5164707 | 65.2200967 | 63.0018663 | 55.7698269 | After 212 |
| 64.6030777 | 61.5164707 | 62.2200967 | 63.0018663 | 54.7698269 | After 213 |
| 64.6030777 | 61.5164707 | 61.2200967 | 63.0018663 | 53.7698269 | After 214 |
| 64.6030777 | 61.5164707 | 61.2200967 | 63.0018663 | 53.7698269 | After 215 |
| 64.6030777 | 61.5164707 | 62.2200967 | 63.0018663 | 53.7698269 | After 216 |
| 64.6030777 | 62.5164707 | 62.2200967 | 64.0018663 | 54.7698269 | After 217 |
| 64.6030777 | 62.5164707 | 62.2200967 | 65.0018663 | 58.7698269 | After 218 |
| 64.6030777 | 64.5164707 | 62.2200967 | 67.0018663 | 60.7698269 | After 219 |
| 65.6030777 | 64.5164707 | 62.2200967 | 67.0018663 | 61.7698269 | After 220 |
| 67.6030777 | 65.5164707 | 63.2200967 | 65.0018663 | 62.7698269 | After 221 |

|            |            |            |            |            |           |
|------------|------------|------------|------------|------------|-----------|
| 67.6030777 | 66.5164707 | 65.2200967 | 63.0018663 | 62.7698269 | After 222 |
| 68.6030777 | 67.5164707 | 69.2200967 | 62.0018663 | 64.7698269 | After 223 |
| 68.6030777 | 67.5164707 | 69.2200967 | 62.0018663 | 64.7698269 | After 224 |
| 68.6030777 | 67.5164707 | 70.2200967 | 61.0018663 | 64.7698269 | After 225 |
| 68.6030777 | 68.5164707 | 70.2200967 | 61.0018663 | 65.7698269 | After 226 |
| 68.6030777 | 68.5164707 | 70.2200967 | 61.0018663 | 65.7698269 | After 227 |
| 68.6030777 | 70.5164707 | 70.2200967 | 61.0018663 | 66.7698269 | After 228 |
| 69.6030777 | 70.5164707 | 70.2200967 | 61.0018663 | 63.7698269 | After 229 |
| 69.6030777 | 70.5164707 | 69.2200967 | 60.0018663 | 62.7698269 | After 230 |
| 69.6030777 | 68.5164707 | 69.2200967 | 60.0018663 | 61.7698269 | After 231 |
| 69.6030777 | 68.5164707 | 69.2200967 | 64.0018663 | 61.7698269 | After 232 |
| 69.6030777 | 68.5164707 | 68.2200967 | 64.0018663 | 61.7698269 | After 233 |
| 69.6030777 | 68.5164707 | 68.2200967 | 70.0018663 | 61.7698269 | After 234 |
| 69.6030777 | 68.5164707 | 68.2200967 | 72.0018663 | 61.7698269 | After 235 |
| 69.6030777 | 66.5164707 | 67.2200967 | 74.0018663 | 61.7698269 | After 236 |
| 69.6030777 | 66.5164707 | 67.2200967 | 74.0018663 | 61.7698269 | After 237 |
| 69.6030777 | 66.5164707 | 67.2200967 | 75.0018663 | 61.7698269 | After 238 |
| 68.6030777 | 67.5164707 | 65.2200967 | 76.0018663 | 66.7698269 | After 239 |
| 66.6030777 | 67.5164707 | 65.2200967 | 77.0018663 | 66.7698269 | After 240 |
| 66.6030777 | 67.5164707 | 65.2200967 | 78.0018663 | 65.7698269 |           |
| 66.6030777 | 68.5164707 | 61.2200967 | 78.0018663 | 64.7698269 |           |
| 66.6030777 | 68.5164707 | 61.2200967 | 78.0018663 | 64.7698269 |           |
| 70.6030777 | 68.5164707 | 61.2200967 | 72.0018663 | 63.7698269 |           |
| 72.6030777 | 66.5164707 | 61.2200967 | 70.0018663 | 64.7698269 |           |
| 73.6030777 | 65.5164707 | 61.2200967 | 69.0018663 | 64.7698269 |           |
| 73.6030777 | 64.5164707 | 64.2200967 | 68.0018663 | 64.7698269 |           |
| 73.6030777 | 63.5164707 | 64.2200967 | 68.0018663 | 64.7698269 |           |
| 73.6030777 | 62.5164707 | 66.2200967 | 68.0018663 | 63.7698269 |           |
| 73.6030777 | 62.5164707 | 66.2200967 | 68.0018663 | 63.7698269 |           |
| 74.6030777 | 62.5164707 | 66.2200967 | 68.0018663 | 63.7698269 |           |
| 75.6030777 | 62.5164707 | 67.2200967 | 68.0018663 | 63.7698269 |           |
| 76.6030777 | 62.5164707 | 67.2200967 | 69.0018663 | 63.7698269 |           |
| 67.6030777 | 62.5164707 | 66.2200967 | 69.0018663 | 62.7698269 |           |
| 67.6030777 | 62.5164707 | 66.2200967 | 69.0018663 | 60.7698269 |           |
| 65.6030777 | 62.5164707 | 63.2200967 | 73.0018663 | 59.7698269 |           |
| 66.6030777 | 61.5164707 | 60.2200967 | 73.0018663 | 59.7698269 |           |
| 67.6030777 | 61.5164707 | 60.2200967 | 74.0018663 | 59.7698269 |           |
| 67.6030777 | 61.5164707 | 60.2200967 | 74.0018663 | 58.7698269 |           |
| 67.6030777 | 60.5164707 | 61.2200967 | 75.0018663 | 58.7698269 |           |
| 67.6030777 | 60.5164707 | 61.2200967 | 75.0018663 | 58.7698269 |           |
| 67.6030777 | 60.5164707 | 61.2200967 | 75.0018663 | 58.7698269 |           |
| 68.6030777 | 63.5164707 | 61.2200967 | 75.0018663 | 57.7698269 |           |
| 69.6030777 | 65.5164707 | 61.2200967 | 75.0018663 | 57.7698269 |           |
| 69.6030777 | 68.5164707 | 61.2200967 | 73.0018663 | 57.7698269 |           |

|            |            |            |            |            |
|------------|------------|------------|------------|------------|
| 69.6030777 | 68.5164707 | 60.2200967 | 70.0018663 | 58.7698269 |
| 68.6030777 | 68.5164707 | 60.2200967 | 70.0018663 | 62.7698269 |
| 67.6030777 | 68.5164707 | 60.2200967 | 70.0018663 | 62.7698269 |
| 67.6030777 | 69.5164707 | 67.2200967 | 66.0018663 | 62.7698269 |
| 67.6030777 | 70.5164707 | 71.2200967 | 66.0018663 | 62.7698269 |
| 67.6030777 | 70.5164707 | 73.2200967 | 66.0018663 | 65.7698269 |
| 67.6030777 | 70.5164707 | 72.2200967 | 63.0018663 | 66.7698269 |
| 67.6030777 | 70.5164707 | 71.2200967 | 62.0018663 | 66.7698269 |
| 68.6030777 | 70.5164707 | 69.2200967 | 62.0018663 | 66.7698269 |
| 68.6030777 | 70.5164707 | 68.2200967 | 63.0018663 | 67.7698269 |
| 68.6030777 | 70.5164707 | 68.2200967 | 63.0018663 | 67.7698269 |
| 68.6030777 | 70.5164707 | 68.2200967 | 65.0018663 | 67.7698269 |
| 68.6030777 | 69.5164707 | 67.2200967 | 69.0018663 | 66.7698269 |
| 68.6030777 | 69.5164707 | 67.2200967 | 69.0018663 | 66.7698269 |
| 66.6030777 | 69.5164707 | 67.2200967 | 72.0018663 | 66.7698269 |
| 66.6030777 | 69.5164707 | 66.2200967 | 72.0018663 | 66.7698269 |
| 66.6030777 | 69.5164707 | 65.2200967 | 72.0018663 | 66.7698269 |
| 66.6030777 | 70.5164707 | 65.2200967 | 72.0018663 | 66.7698269 |
| 66.6030777 | 71.5164707 | 66.2200967 | 73.0018663 | 66.7698269 |
| 66.6030777 | 71.5164707 | 66.2200967 | 73.0018663 | 67.7698269 |
| 68.6030777 | 71.5164707 | 66.2200967 | 73.0018663 | 68.7698269 |
| 71.6030777 | 72.5164707 | 66.2200967 | 72.0018663 | 69.7698269 |
| 73.6030777 | 73.5164707 | 65.2200967 | 72.0018663 | 69.7698269 |
| 73.6030777 | 75.5164707 | 64.2200967 | 72.0018663 | 72.7698269 |
| 73.6030777 | 75.5164707 | 63.2200967 | 72.0018663 | 73.7698269 |
| 73.6030777 | 75.5164707 | 66.2200967 | 72.0018663 | 73.7698269 |
| 72.6030777 | 75.5164707 | 66.2200967 | 72.0018663 | 73.7698269 |
| 70.6030777 | 75.5164707 | 66.2200967 | 72.0018663 | 72.7698269 |
| 70.6030777 | 76.5164707 | 66.2200967 | 72.0018663 | 71.7698269 |
| 69.6030777 | 76.5164707 | 66.2200967 | 72.0018663 | 71.7698269 |
| 69.6030777 | 76.5164707 | 65.2200967 | 72.0018663 | 67.7698269 |
| 69.6030777 | 76.5164707 | 65.2200967 | 74.0018663 | 67.7698269 |
| 69.6030777 | 77.5164707 | 65.2200967 | 75.0018663 | 65.7698269 |
| 69.6030777 | 77.5164707 | 66.2200967 | 76.0018663 | 65.7698269 |
| 69.6030777 | 77.5164707 | 67.2200967 | 76.0018663 | 64.7698269 |
| 69.6030777 | 81.5164707 | 68.2200967 | 76.0018663 | 63.7698269 |
| 69.6030777 | 81.5164707 | 68.2200967 | 76.0018663 | 63.7698269 |
| 68.6030777 | 77.5164707 | 68.2200967 | 76.0018663 | 64.7698269 |
| 68.6030777 | 75.5164707 | 68.2200967 | 77.0018663 | 64.7698269 |
| 68.6030777 | 71.5164707 | 68.2200967 | 77.0018663 | 64.7698269 |
| 68.6030777 | 70.5164707 | 68.2200967 | 78.0018663 | 64.7698269 |
| 67.6030777 | 70.5164707 | 68.2200967 | 78.0018663 | 65.7698269 |
| 66.6030777 | 68.5164707 | 68.2200967 | 77.0018663 | 67.7698269 |
| 66.6030777 | 67.5164707 | 68.2200967 | 74.0018663 | 67.7698269 |
| 66.6030777 | 68.5164707 | 68.2200967 | 73.0018663 | 67.7698269 |

|            |            |            |            |            |
|------------|------------|------------|------------|------------|
| 66.6030777 | 68.5164707 | 68.2200967 | 73.0018663 | 67.7698269 |
| 66.6030777 | 67.5164707 | 68.2200967 | 71.0018663 | 66.7698269 |
| 66.6030777 | 67.5164707 | 67.2200967 | 69.0018663 | 66.7698269 |
| 66.6030777 | 68.5164707 | 66.2200967 | 69.0018663 | 63.7698269 |
| 66.6030777 | 67.5164707 | 66.2200967 | 68.0018663 | 62.7698269 |
| 66.6030777 | 67.5164707 | 66.2200967 | 68.0018663 | 63.7698269 |
| 65.6030777 | 67.5164707 | 66.2200967 | 68.0018663 | 63.7698269 |
| 65.6030777 | 67.5164707 | 66.2200967 | 68.0018663 | 63.7698269 |
| 67.6030777 | 67.5164707 | 66.2200967 | 69.0018663 | 63.7698269 |
| 67.6030777 | 66.5164707 | 66.2200967 | 70.0018663 | 63.7698269 |
| 67.6030777 | 66.5164707 | 66.2200967 | 70.0018663 | 63.7698269 |
| 63.6030777 | 66.5164707 | 66.2200967 | 70.0018663 | 63.7698269 |
| 63.6030777 | 66.5164707 | 66.2200967 | 71.0018663 | 61.7698269 |
| 62.6030777 | 66.5164707 | 66.2200967 | 71.0018663 | 60.7698269 |
| 62.6030777 | 65.5164707 | 67.2200967 | 71.0018663 | 61.7698269 |
| 62.6030777 | 66.5164707 | 67.2200967 | 72.0018663 | 62.7698269 |
| 62.6030777 | 66.5164707 | 67.2200967 | 72.0018663 | 62.7698269 |
| 62.6030777 | 66.5164707 | 69.2200967 | 72.0018663 | 63.7698269 |
| 63.6030777 | 66.5164707 | 71.2200967 | 72.0018663 | 64.7698269 |
| 63.6030777 | 66.5164707 | 71.2200967 | 71.0018663 | 65.7698269 |
| 63.6030777 | 66.5164707 | 71.2200967 | 71.0018663 | 65.7698269 |
| 65.6030777 | 70.5164707 | 70.2200967 | 68.0018663 | 64.7698269 |
| 65.6030777 | 72.5164707 | 71.2200967 | 68.0018663 | 62.7698269 |
| 66.6030777 | 73.5164707 | 72.2200967 | 68.0018663 | 62.7698269 |
| 66.6030777 | 74.5164707 | 72.2200967 | 69.0018663 | 62.7698269 |
| 66.6030777 | 74.5164707 | 72.2200967 | 69.0018663 | 62.7698269 |
| 66.6030777 | 74.5164707 | 72.2200967 | 69.0018663 | 62.7698269 |
| 67.6030777 | 72.5164707 | 73.2200967 | 69.0018663 | 63.7698269 |
| 67.6030777 | 71.5164707 | 72.2200967 | 69.0018663 | 64.7698269 |
| 67.6030777 | 71.5164707 | 72.2200967 | 70.0018663 | 64.7698269 |
| 70.6030777 | 71.5164707 | 72.2200967 | 70.0018663 | 65.7698269 |
| 70.6030777 | 71.5164707 | 72.2200967 | 71.0018663 | 64.7698269 |
| 70.6030777 | 71.5164707 | 72.2200967 | 71.0018663 | 63.7698269 |
| 65.6030777 | 71.5164707 | 73.2200967 | 72.0018663 | 63.7698269 |
| 64.6030777 | 71.5164707 | 73.2200967 | 74.0018663 | 63.7698269 |
| 64.6030777 | 73.5164707 | 73.2200967 | 75.0018663 | 63.7698269 |
| 64.6030777 | 73.5164707 | 75.2200967 | 76.0018663 | 64.7698269 |
| 64.6030777 | 74.5164707 | 75.2200967 | 76.0018663 | 65.7698269 |
| 64.6030777 | 74.5164707 | 76.2200967 | 69.0018663 | 65.7698269 |
| 65.6030777 | 76.5164707 | 76.2200967 | 69.0018663 | 65.7698269 |
| 65.6030777 | 78.5164707 | 73.2200967 | 67.0018663 | 65.7698269 |
| 68.6030777 | 80.5164707 | 70.2200967 | 66.0018663 | 65.7698269 |
| 68.6030777 | 82.5164707 | 70.2200967 | 65.0018663 | 65.7698269 |
| 68.6030777 | 79.5164707 | 70.2200967 | 65.0018663 | 65.7698269 |
| 68.6030777 | 78.5164707 | 70.2200967 | 65.0018663 | 65.7698269 |



|            |            |            |            |            |
|------------|------------|------------|------------|------------|
| 67.6030777 | 78.5164707 | 70.2200967 | 66.0018663 | 65.7698269 |
| 67.6030777 | 79.5164707 | 70.2200967 | 66.0018663 | 65.7698269 |
| 67.6030777 | 77.5164707 | 70.2200967 | 65.0018663 | 64.7698269 |
| 67.6030777 | 72.5164707 | 70.2200967 | 65.0018663 | 64.7698269 |
| 67.6030777 | 70.5164707 | 70.2200967 | 66.0018663 | 64.7698269 |
| 67.6030777 | 70.5164707 | 71.2200967 | 67.0018663 | 64.7698269 |
| 67.6030777 | 69.5164707 | 71.2200967 | 67.0018663 | 64.7698269 |
| 67.6030777 | 68.5164707 | 71.2200967 | 67.0018663 | 64.7698269 |
| 67.6030777 | 67.5164707 | 71.2200967 | 67.0018663 | 64.7698269 |
| 67.6030777 | 66.5164707 | 71.2200967 | 68.0018663 | 63.7698269 |
| 67.6030777 | 66.5164707 | 71.2200967 | 65.0018663 | 67.7698269 |
| 67.6030777 | 67.5164707 | 71.2200967 | 64.0018663 | 68.7698269 |
| 67.6030777 | 68.5164707 | 71.2200967 | 62.0018663 | 68.7698269 |
| 67.6030777 | 70.5164707 | 71.2200967 | 62.0018663 | 68.7698269 |
| 67.6030777 | 70.5164707 | 69.2200967 | 62.0018663 | 68.7698269 |
| 67.6030777 | 70.5164707 | 68.2200967 | 61.0018663 | 67.7698269 |
| 66.6030777 | 67.5164707 | 68.2200967 | 61.0018663 | 66.7698269 |
| 66.6030777 | 66.5164707 | 69.2200967 | 66.0018663 | 65.7698269 |
| 67.6030777 | 66.5164707 | 70.2200967 | 69.0018663 | 65.7698269 |
| 67.6030777 | 66.5164707 | 72.2200967 | 69.0018663 | 65.7698269 |
| 67.6030777 | 67.5164707 | 74.2200967 | 69.0018663 | 65.7698269 |
| 67.6030777 | 67.5164707 | 75.2200967 | 70.0018663 | 64.7698269 |
| 67.6030777 | 67.5164707 | 75.2200967 | 71.0018663 | 65.7698269 |
| 68.6030777 | 65.5164707 | 75.2200967 | 70.0018663 | 66.7698269 |
| 69.6030777 | 65.5164707 | 75.2200967 | 70.0018663 | 66.7698269 |
| 69.6030777 | 65.5164707 | 75.2200967 | 71.0018663 | 66.7698269 |
| 69.6030777 | 65.5164707 | 76.2200967 | 72.0018663 | 66.7698269 |
| 69.6030777 | 65.5164707 | 76.2200967 | 73.0018663 | 67.7698269 |
| 69.6030777 | 65.5164707 | 76.2200967 | 72.0018663 | 68.7698269 |
| 69.6030777 | 65.5164707 | 76.2200967 | 72.0018663 | 68.7698269 |
| 66.6030777 | 65.5164707 | 76.2200967 | 72.0018663 | 67.7698269 |
| 65.6030777 | 65.5164707 | 76.2200967 | 68.0018663 | 66.7698269 |
| 65.6030777 | 64.5164707 | 71.2200967 | 64.0018663 | 66.7698269 |
| 66.6030777 | 64.5164707 | 71.2200967 | 64.0018663 | 66.7698269 |
| 66.6030777 | 64.5164707 | 71.2200967 | 63.0018663 | 66.7698269 |
| 66.6030777 | 64.5164707 | 70.2200967 | 63.0018663 | 65.7698269 |
| 66.6030777 | 64.5164707 | 70.2200967 | 63.0018663 | 64.7698269 |
| 66.6030777 | 65.5164707 | 70.2200967 | 65.0018663 | 64.7698269 |
| 66.6030777 | 65.5164707 | 70.2200967 | 65.0018663 | 63.7698269 |
| 66.6030777 | 66.5164707 | 71.2200967 | 66.0018663 | 61.7698269 |
| 66.6030777 | 69.5164707 | 71.2200967 | 66.0018663 | 61.7698269 |
| 66.6030777 | 70.5164707 | 74.2200967 | 65.0018663 | 64.7698269 |
| 69.6030777 | 70.5164707 | 75.2200967 | 63.0018663 | 68.7698269 |
| 70.6030777 | 70.5164707 | 76.2200967 | 63.0018663 | 69.7698269 |
| 70.6030777 | 71.5164707 | 76.2200967 | 63.0018663 | 68.7698269 |

|            |            |            |            |            |
|------------|------------|------------|------------|------------|
| 70.6030777 | 72.5164707 | 74.2200967 | 62.0018663 | 69.7698269 |
| 70.6030777 | 72.5164707 | 72.2200967 | 62.0018663 | 69.7698269 |
| 70.6030777 | 70.5164707 | 71.2200967 | 61.0018663 | 69.7698269 |
| 69.6030777 | 69.5164707 | 70.2200967 | 64.0018663 | 69.7698269 |
| 68.6030777 | 69.5164707 | 70.2200967 | 69.0018663 | 69.7698269 |
| 68.6030777 | 69.5164707 | 70.2200967 | 72.0018663 | 69.7698269 |
| 65.6030777 | 69.5164707 | 69.2200967 | 72.0018663 | 69.7698269 |
| 65.6030777 | 69.5164707 | 69.2200967 | 66.0018663 | 69.7698269 |
| 65.6030777 | 69.5164707 | 67.2200967 | 66.0018663 | 66.7698269 |
| 65.6030777 | 70.5164707 | 66.2200967 | 64.0018663 | 63.7698269 |
| 65.6030777 | 70.5164707 | 65.2200967 | 63.0018663 | 62.7698269 |
| 65.6030777 | 72.5164707 | 64.2200967 | 64.0018663 | 62.7698269 |
| 65.6030777 | 72.5164707 | 64.2200967 | 64.0018663 | 62.7698269 |
| 65.6030777 | 72.5164707 | 64.2200967 | 64.0018663 | 65.7698269 |
| 65.6030777 | 73.5164707 | 64.2200967 | 64.0018663 | 68.7698269 |
| 65.6030777 | 74.5164707 | 64.2200967 | 65.0018663 | 68.7698269 |
| 66.6030777 | 75.5164707 | 64.2200967 | 64.0018663 | 66.7698269 |
| 66.6030777 | 76.5164707 | 64.2200967 | 64.0018663 | 65.7698269 |
| 66.6030777 | 73.5164707 | 64.2200967 | 64.0018663 | 64.7698269 |
| 66.6030777 | 67.5164707 | 65.2200967 | 63.0018663 | 64.7698269 |
| 67.6030777 | 66.5164707 | 63.2200967 | 62.0018663 | 63.7698269 |
| 68.6030777 | 65.5164707 | 61.2200967 | 62.0018663 | 63.7698269 |
| 68.6030777 | 65.5164707 | 61.2200967 | 62.0018663 | 63.7698269 |
| 68.6030777 | 65.5164707 | 61.2200967 | 62.0018663 | 61.7698269 |
| 68.6030777 | 65.5164707 | 61.2200967 | 61.0018663 | 61.7698269 |
| 71.6030777 | 65.5164707 | 61.2200967 | 61.0018663 | 61.7698269 |
| 71.6030777 | 65.5164707 | 61.2200967 | 61.0018663 | 60.7698269 |
| 76.6030777 | 64.5164707 | 61.2200967 | 61.0018663 | 61.7698269 |
| 75.6030777 | 62.5164707 | 62.2200967 | 61.0018663 | 61.7698269 |
| 75.6030777 | 62.5164707 | 67.2200967 | 62.0018663 | 61.7698269 |
| 75.6030777 | 62.5164707 | 68.2200967 | 62.0018663 | 61.7698269 |
| 74.6030777 | 63.5164707 | 67.2200967 | 62.0018663 | 61.7698269 |
| 74.6030777 | 62.5164707 | 65.2200967 | 62.0018663 | 61.7698269 |
| 74.6030777 | 62.5164707 | 63.2200967 | 63.0018663 | 61.7698269 |
| 74.6030777 | 62.5164707 | 63.2200967 | 63.0018663 | 61.7698269 |
| 75.6030777 | 62.5164707 | 62.2200967 | 63.0018663 | 61.7698269 |
| 75.6030777 | 62.5164707 | 60.2200967 | 63.0018663 | 61.7698269 |
| 75.6030777 | 62.5164707 | 60.2200967 | 63.0018663 | 61.7698269 |
| 71.6030777 | 62.5164707 | 60.2200967 | 63.0018663 | 61.7698269 |
| 68.6030777 | 62.5164707 | 60.2200967 | 62.0018663 | 62.7698269 |
| 66.6030777 | 62.5164707 | 61.2200967 | 62.0018663 | 62.7698269 |
| 66.6030777 | 61.5164707 | 61.2200967 | 62.0018663 | 63.7698269 |
| 66.6030777 | 62.5164707 | 61.2200967 | 63.0018663 | 64.7698269 |
| 65.6030777 | 62.5164707 | 61.2200967 | 64.0018663 | 64.7698269 |
| 65.6030777 | 62.5164707 | 61.2200967 | 65.0018663 | 64.7698269 |

|            |            |            |            |            |
|------------|------------|------------|------------|------------|
| 65.6030777 | 62.5164707 | 61.2200967 | 65.0018663 | 64.7698269 |
| 65.6030777 | 62.5164707 | 61.2200967 | 63.0018663 | 65.7698269 |
| 65.6030777 | 65.5164707 | 62.2200967 | 63.0018663 | 67.7698269 |
| 65.6030777 | 67.5164707 | 62.2200967 | 60.0018663 | 67.7698269 |
| 65.6030777 | 67.5164707 | 64.2200967 | 58.0018663 | 70.7698269 |
| 65.6030777 | 67.5164707 | 65.2200967 | 57.0018663 | 70.7698269 |
| 65.6030777 | 67.5164707 | 65.2200967 | 57.0018663 | 69.7698269 |
| 65.6030777 | 67.5164707 | 65.2200967 | 58.0018663 | 68.7698269 |
| 65.6030777 | 67.5164707 | 65.2200967 | 58.0018663 | 68.7698269 |
| 65.6030777 | 69.5164707 | 65.2200967 | 60.0018663 | 68.7698269 |
| 65.6030777 | 66.2330703 | 61.2200967 | 61.0018663 | 68.7698269 |
| 65.6030777 | 65.899737  | 58.2200967 | 61.0018663 | 67.7698269 |
| 65.6030777 | 65.899737  | 58.2200967 | 61.0018663 | 66.7698269 |
| 65.6030777 | 65.6775148 | 57.2200967 | 61.0018663 | 65.7698269 |
| 65.6030777 | 65.6775148 | 56.2200967 | 61.0018663 | 64.7698269 |
| 65.6030777 | 65.899737  | 56.2200967 | 61.0018663 | 62.7698269 |
| 64.6030777 | 75.5164707 | 56.2200967 | 61.0018663 | 61.7698269 |
| 63.6030777 | 74.5164707 | 57.2200967 | 61.0018663 | 61.7698269 |
| 64.6030777 | 74.5164707 | 57.2200967 | 62.0018663 | 61.7698269 |
| 64.6030777 | 74.5164707 | 57.2200967 | 62.0018663 | 61.7698269 |
| 64.6030777 | 73.5164707 | 57.2200967 | 62.0018663 | 61.7698269 |
| 64.6030777 | 73.5164707 | 57.2200967 | 62.0018663 | 61.7698269 |
| 64.6030777 | 73.5164707 | 57.2200967 | 62.0018663 | 62.7698269 |
| 64.6030777 | 76.5164707 | 57.2200967 | 61.0018663 | 63.7698269 |
| 64.6030777 | 66.2330703 | 64.2200967 | 60.0018663 | 63.7698269 |
| 64.6030777 | 66.2330703 | 67.2200967 | 59.0018663 | 63.7698269 |
| 63.6030777 | 66.4552926 | 69.2200967 | 59.0018663 | 63.7698269 |
| 63.6030777 | 66.4552926 | 69.2200967 | 60.0018663 | 62.7698269 |
| 62.6030777 | 66.2330703 | 68.2200967 | 60.0018663 | 62.7698269 |
| 61.6030777 | 66.3441814 | 67.2200967 | 61.0018663 | 62.7698269 |
| 61.6030777 | 66.3441814 | 66.2200967 | 61.0018663 | 62.7698269 |
| 61.6030777 | 66.4552926 | 67.2200967 | 61.0018663 | 62.7698269 |
| 61.6030777 | 66.4552926 | 67.2200967 | 62.0018663 | 62.7698269 |
| 62.6030777 | 66.3441814 | 67.2200967 | 62.0018663 | 61.7698269 |
| 64.6030777 | 66.3441814 | 66.2200967 | 62.0018663 | 61.7698269 |
| 64.6030777 | 66.3441814 | 65.2200967 | 62.0018663 | 63.7698269 |
| 65.6030777 | 66.1219592 | 64.2200967 | 62.0018663 | 63.7698269 |
| 65.6030777 | 73.5164707 | 64.2200967 | 63.0018663 | 64.7698269 |
| 65.6030777 | 71.5164707 | 64.2200967 | 62.0018663 | 64.7698269 |
| 65.6030777 | 69.5164707 | 64.2200967 | 62.0018663 | 64.7698269 |
| 66.6030777 | 67.5164707 | 64.2200967 | 62.0018663 | 65.7698269 |
| 66.6030777 | 65.5164707 | 63.2200967 | 62.0018663 | 65.7698269 |
| 65.6030777 | 65.5164707 | 64.2200967 | 63.0018663 | 65.7698269 |
| 65.6030777 | 63.5164707 | 63.2200967 | 65.0018663 | 66.7698269 |
| 64.6030777 | 63.5164707 | 62.2200967 | 66.0018663 | 67.7698269 |

|            |            |            |            |            |
|------------|------------|------------|------------|------------|
| 64.6030777 | 64.5164707 | 60.2200967 | 68.0018663 | 67.7698269 |
| 64.6030777 | 64.5164707 | 60.2200967 | 68.0018663 | 67.7698269 |
| 64.6030777 | 64.5164707 | 60.2200967 | 68.0018663 | 67.7698269 |
| 64.6030777 | 62.5164707 | 59.2200967 | 68.0018663 | 67.7698269 |
| 64.6030777 | 63.5164707 | 59.2200967 | 68.0018663 | 68.7698269 |
| 64.6030777 | 62.5164707 | 60.2200967 | 68.0018663 | 67.7698269 |
| 64.6030777 | 62.5164707 | 60.2200967 | 68.0018663 | 67.7698269 |
| 65.6030777 | 62.5164707 | 60.2200967 | 68.0018663 | 67.7698269 |
| 65.6030777 | 62.5164707 | 60.2200967 | 68.0018663 | 67.7698269 |
| 65.6030777 | 62.5164707 | 61.2200967 | 68.0018663 | 68.7698269 |
| 65.6030777 | 62.5164707 | 61.2200967 | 67.0018663 | 69.7698269 |
| 65.6030777 | 63.5164707 | 61.2200967 | 67.0018663 | 69.7698269 |
| 65.6030777 | 62.5164707 | 60.2200967 | 66.0018663 | 69.7698269 |
| 65.6030777 | 63.5164707 | 60.2200967 | 64.0018663 | 68.7698269 |
| 65.6030777 | 63.5164707 | 58.2200967 | 64.0018663 | 67.7698269 |
| 65.6030777 | 63.5164707 | 58.2200967 | 64.0018663 | 65.7698269 |
| 65.6030777 | 62.5164707 | 58.2200967 | 63.0018663 | 64.7698269 |
| 65.6030777 | 62.5164707 | 58.2200967 | 64.0018663 | 65.7698269 |
| 65.6030777 | 62.5164707 | 59.2200967 | 62.0018663 | 65.7698269 |
| 65.6030777 | 62.5164707 | 61.2200967 | 62.0018663 | 66.7698269 |
| 65.6030777 | 62.5164707 | 61.2200967 | 61.0018663 | 66.7698269 |
| 66.6030777 | 63.5164707 | 61.2200967 | 61.0018663 | 66.7698269 |
| 67.6030777 | 62.5164707 | 63.2200967 | 60.0018663 | 66.7698269 |
| 68.6030777 | 61.5164707 | 64.2200967 | 60.0018663 | 66.7698269 |
| 66.6030777 | 60.5164707 | 64.2200967 | 60.0018663 | 66.7698269 |
| 66.6030777 | 60.5164707 | 63.2200967 | 60.0018663 | 66.7698269 |
| 66.6030777 | 61.5164707 | 62.2200967 | 63.0018663 | 67.7698269 |
| 66.6030777 | 62.5164707 | 61.2200967 | 65.0018663 | 67.7698269 |
| 66.6030777 | 61.5164707 | 60.2200967 | 66.0018663 | 68.7698269 |
| 66.6030777 | 61.5164707 | 59.2200967 | 67.0018663 | 69.7698269 |
| 66.6030777 | 62.5164707 | 59.2200967 | 68.0018663 | 71.7698269 |
| 65.6030777 | 62.5164707 | 59.2200967 | 68.0018663 | 70.7698269 |
| 65.6030777 | 61.5164707 | 59.2200967 | 68.0018663 | 70.7698269 |
| 65.6030777 | 61.5164707 | 60.2200967 | 68.0018663 | 70.7698269 |
| 65.6030777 | 61.5164707 | 61.2200967 | 68.0018663 | 70.7698269 |
| 66.6030777 | 61.5164707 | 62.2200967 | 69.0018663 | 71.7698269 |
| 67.6030777 | 62.5164707 | 64.2200967 | 70.0018663 | 71.7698269 |
| 67.6030777 | 62.5164707 | 66.2200967 | 70.0018663 | 70.7698269 |
| 67.6030777 | 62.5164707 | 68.2200967 | 69.0018663 | 69.7698269 |
| 67.6030777 | 62.5164707 | 67.2200967 | 69.0018663 | 67.7698269 |
| 68.6030777 | 62.5164707 | 66.2200967 | 68.0018663 | 65.7698269 |
| 67.6030777 | 62.5164707 | 66.2200967 | 67.0018663 | 63.7698269 |
| 67.6030777 | 62.5164707 | 65.2200967 | 67.0018663 | 62.7698269 |
| 67.6030777 | 62.5164707 | 65.2200967 | 66.0018663 | 62.7698269 |
| 65.6030777 | 60.5164707 | 63.2200967 | 66.0018663 | 62.7698269 |

|            |            |            |            |            |
|------------|------------|------------|------------|------------|
| 65.6030777 | 61.5164707 | 63.2200967 | 65.0018663 | 61.7698269 |
| 64.6030777 | 61.5164707 | 64.2200967 | 65.0018663 | 61.7698269 |
| 64.6030777 | 61.5164707 | 65.2200967 | 66.0018663 | 62.7698269 |
| 64.6030777 | 61.5164707 | 67.2200967 | 67.0018663 | 65.7698269 |
| 64.6030777 | 61.5164707 | 67.2200967 | 68.0018663 | 66.7698269 |
| 64.6030777 | 62.5164707 | 67.2200967 | 69.0018663 | 66.7698269 |
| 64.6030777 | 63.5164707 | 66.2200967 | 69.0018663 | 66.7698269 |
| 64.6030777 | 63.5164707 | 66.2200967 | 69.0018663 | 66.7698269 |
| 64.6030777 | 63.5164707 | 64.2200967 | 69.0018663 | 66.7698269 |
| 66.6030777 | 64.5164707 | 64.2200967 | 62.0018663 | 64.7698269 |
| 65.6030777 | 70.5164707 | 62.2200967 | 60.0018663 | 63.7698269 |
| 65.6030777 | 70.5164707 | 62.2200967 | 60.0018663 | 63.7698269 |
| 64.6030777 | 73.5164707 | 62.2200967 | 58.0018663 | 62.7698269 |
| 63.6030777 | 73.5164707 | 61.2200967 | 58.0018663 | 63.7698269 |
| 62.6030777 | 73.5164707 | 61.2200967 | 58.0018663 | 63.7698269 |
| 62.6030777 | 74.5164707 | 60.2200967 | 59.0018663 | 67.7698269 |
| 62.6030777 | 76.5164707 | 60.2200967 | 63.0018663 | 67.7698269 |
| 62.6030777 | 65.0108481 | 59.2200967 | 65.0018663 | 68.7698269 |
| 61.6030777 | 65.0108481 | 59.2200967 | 65.0018663 | 68.7698269 |
| 61.6030777 | 77.5164707 | 59.2200967 | 66.0018663 | 69.7698269 |
| 61.6030777 | 76.5164707 | 59.2200967 | 67.0018663 | 70.7698269 |
| 61.6030777 | 74.5164707 | 59.2200967 | 66.0018663 | 70.7698269 |
| 61.6030777 | 72.5164707 | 59.2200967 | 66.0018663 | 70.7698269 |
| 61.6030777 | 69.5164707 | 59.2200967 | 66.0018663 | 71.7698269 |
| 65.6030777 | 68.5164707 | 59.2200967 | 66.0018663 | 71.7698269 |
| 66.6030777 | 67.5164707 | 59.2200967 | 66.0018663 | 72.7698269 |
| 66.6030777 | 66.5164707 | 58.2200967 | 66.0018663 | 72.7698269 |
| 66.6030777 | 66.5164707 | 58.2200967 | 66.0018663 | 72.7698269 |
| 65.6030777 | 65.5164707 | 58.2200967 | 66.0018663 | 72.7698269 |
| 65.6030777 | 65.5164707 | 58.2200967 | 66.0018663 | 72.7698269 |
| 65.6030777 | 66.5164707 | 58.2200967 | 66.0018663 | 72.7698269 |
| 66.6030777 | 66.5164707 | 58.2200967 | 66.0018663 | 73.7698269 |
| 66.6030777 | 66.5164707 | 57.2200967 | 67.0018663 | 72.7698269 |
| 66.6030777 | 66.5164707 | 58.2200967 | 67.0018663 | 72.7698269 |
| 67.6030777 | 66.5164707 | 59.2200967 | 67.0018663 | 72.7698269 |
| 68.6030777 | 64.5164707 | 59.2200967 | 67.0018663 | 72.7698269 |
| 68.6030777 | 64.5164707 | 59.2200967 | 69.0018663 | 73.7698269 |
| 67.6030777 | 64.5164707 | 60.2200967 | 69.0018663 | 73.7698269 |
| 64.6030777 | 64.5164707 | 60.2200967 | 69.0018663 | 72.7698269 |
| 64.6030777 | 63.5164707 | 61.2200967 | 70.0018663 | 72.7698269 |
| 64.6030777 | 63.5164707 | 61.2200967 | 70.0018663 | 72.7698269 |
| 64.6030777 | 62.5164707 | 61.2200967 | 69.0018663 | 72.7698269 |
| 63.6030777 | 62.5164707 | 62.2200967 | 69.0018663 | 71.7698269 |
| 63.6030777 | 61.5164707 | 61.2200967 | 67.0018663 | 69.7698269 |
| 63.6030777 | 60.5164707 | 61.2200967 | 66.0018663 | 69.7698269 |

|            |            |            |            |            |
|------------|------------|------------|------------|------------|
| 63.6030777 | 60.5164707 | 61.2200967 | 64.0018663 | 70.7698269 |
| 63.6030777 | 60.5164707 | 61.2200967 | 63.0018663 | 70.7698269 |
| 63.6030777 | 59.5164707 | 61.2200967 | 63.0018663 | 75.7698269 |
| 63.6030777 | 59.5164707 | 61.2200967 | 63.0018663 | 78.7698269 |
| 63.6030777 | 59.5164707 | 62.2200967 | 63.0018663 | 66.4552926 |
| 65.6030777 | 59.5164707 | 63.2200967 | 63.0018663 | 66.7886259 |
| 65.6030777 | 60.5164707 | 64.2200967 | 64.0018663 | 66.4552926 |
| 65.6030777 | 60.5164707 | 65.2200967 | 63.0018663 | 77.7698269 |
| 64.6030777 | 61.5164707 | 66.2200967 | 63.0018663 | 73.7698269 |
| 64.6030777 | 61.5164707 | 67.2200967 | 63.0018663 | 70.7698269 |
| 64.6030777 | 61.5164707 | 68.2200967 | 62.0018663 | 68.7698269 |
| 64.6030777 | 61.5164707 | 68.2200967 | 62.0018663 | 67.7698269 |
| 63.6030777 | 61.5164707 | 65.2200967 | 61.0018663 | 67.7698269 |
| 62.6030777 | 61.5164707 | 65.2200967 | 59.0018663 | 67.7698269 |
| 62.6030777 | 61.5164707 | 63.2200967 | 59.0018663 | 67.7698269 |
| 62.6030777 | 61.5164707 | 62.2200967 | 59.0018663 | 67.7698269 |
| 62.6030777 | 61.5164707 | 61.2200967 | 59.0018663 | 67.7698269 |
| 63.6030777 | 62.5164707 | 60.2200967 | 59.0018663 | 67.7698269 |
| 61.6030777 | 61.5164707 | 60.2200967 | 62.0018663 | 67.7698269 |
| 61.6030777 | 61.5164707 | 62.2200967 | 62.0018663 | 67.7698269 |
| 61.6030777 | 61.5164707 | 62.2200967 | 62.0018663 | 67.7698269 |
| 61.6030777 | 63.5164707 | 62.2200967 | 62.0018663 | 68.7698269 |
| 61.6030777 | 62.5164707 | 62.2200967 | 62.0018663 | 69.7698269 |
| 61.6030777 | 62.5164707 | 63.2200967 | 59.0018663 | 69.7698269 |
| 61.6030777 | 62.5164707 | 64.2200967 | 58.0018663 | 70.7698269 |
| 62.6030777 | 62.5164707 | 65.2200967 | 58.0018663 | 70.7698269 |
| 61.6030777 | 63.5164707 | 66.2200967 | 58.0018663 | 70.7698269 |
| 61.6030777 | 63.5164707 | 67.2200967 | 58.0018663 | 70.7698269 |
| 61.6030777 | 62.5164707 | 68.2200967 | 59.0018663 | 70.7698269 |
| 61.6030777 | 62.5164707 | 69.2200967 | 60.0018663 | 71.7698269 |
| 61.6030777 | 62.5164707 | 71.2200967 | 62.0018663 | 72.7698269 |
| 61.6030777 | 62.5164707 | 71.2200967 | 65.0018663 | 72.7698269 |
| 62.6030777 | 61.5164707 | 71.2200967 | 65.0018663 | 72.7698269 |
| 62.6030777 | 61.5164707 | 71.2200967 | 67.0018663 | 72.7698269 |
| 62.6030777 | 61.5164707 | 71.2200967 | 68.0018663 | 72.7698269 |
| 63.6030777 | 61.5164707 | 72.2200967 | 67.0018663 | 72.7698269 |
| 63.6030777 | 62.5164707 | 73.2200967 | 65.0018663 | 72.7698269 |
| 63.6030777 | 64.5164707 | 75.2200967 | 65.0018663 | 72.7698269 |
| 63.6030777 | 65.5164707 | 76.2200967 | 65.0018663 | 72.7698269 |
| 63.6030777 | 67.5164707 | 76.2200967 | 64.0018663 | 73.7698269 |
| 63.6030777 | 67.5164707 | 73.2200967 | 63.0018663 | 74.7698269 |
| 63.6030777 | 67.5164707 | 64.2200967 | 61.0018663 | 74.7698269 |
| 63.6030777 | 67.5164707 | 61.2200967 | 61.0018663 | 74.7698269 |
| 65.6030777 | 67.5164707 | 60.2200967 | 61.0018663 | 74.7698269 |
| 65.6030777 | 66.5164707 | 60.2200967 | 62.0018663 | 72.7698269 |

|            |            |            |            |            |
|------------|------------|------------|------------|------------|
| 65.6030777 | 66.5164707 | 60.2200967 | 62.0018663 | 72.7698269 |
| 65.6030777 | 65.5164707 | 59.2200967 | 62.0018663 | 71.7698269 |
| 65.6030777 | 64.5164707 | 59.2200967 | 62.0018663 | 71.7698269 |
| 65.6030777 | 64.5164707 | 59.2200967 | 63.0018663 | 71.7698269 |
| 65.6030777 | 64.5164707 | 60.2200967 | 63.0018663 | 71.7698269 |
| 65.6030777 | 64.5164707 | 60.2200967 | 64.0018663 | 71.7698269 |
| 65.6030777 | 63.5164707 | 60.2200967 | 64.0018663 | 71.7698269 |
| 65.6030777 | 63.5164707 | 60.2200967 | 64.0018663 | 71.7698269 |
| 65.6030777 | 63.5164707 | 59.2200967 | 64.0018663 | 71.7698269 |
| 66.6030777 | 63.5164707 | 59.2200967 | 64.0018663 | 69.7698269 |
| 67.6030777 | 63.5164707 | 59.2200967 | 64.0018663 | 68.7698269 |
| 69.6030777 | 61.5164707 | 59.2200967 | 65.0018663 | 68.7698269 |
| 69.6030777 | 61.5164707 | 59.2200967 | 65.0018663 | 67.7698269 |
| 69.6030777 | 61.5164707 | 59.2200967 | 65.0018663 | 67.7698269 |
| 69.6030777 | 61.5164707 | 59.2200967 | 67.0018663 | 67.7698269 |
| 69.6030777 | 61.5164707 | 59.2200967 | 67.0018663 | 67.7698269 |
| 72.6030777 | 61.5164707 | 60.2200967 | 68.0018663 | 68.7698269 |
| 74.6030777 | 61.5164707 | 60.2200967 | 68.0018663 | 68.7698269 |
| 74.6030777 | 61.5164707 | 60.2200967 | 68.0018663 | 67.7698269 |
| 76.6030777 | 61.5164707 | 59.2200967 | 72.0018663 | 66.7698269 |
| 76.6030777 | 61.5164707 | 59.2200967 | 73.0018663 | 64.7698269 |
| 77.6030777 | 61.5164707 | 59.2200967 | 73.0018663 | 62.7698269 |
| 78.6030777 | 61.5164707 | 60.2200967 | 73.0018663 | 61.7698269 |
| 78.6030777 | 61.5164707 | 60.2200967 | 69.0018663 | 61.7698269 |
| 67.1219592 | 60.5164707 | 60.2200967 | 67.0018663 | 61.7698269 |
| 67.3441814 | 60.5164707 | 60.2200967 | 66.0018663 | 61.7698269 |
| 67.5664037 | 60.5164707 | 61.2200967 | 66.0018663 | 61.7698269 |
| 68.3441814 | 59.5164707 | 67.2200967 | 66.0018663 | 62.7698269 |
| 68.4552926 | 59.5164707 | 67.2200967 | 66.0018663 | 62.7698269 |
| 68.4552926 | 59.5164707 | 67.2200967 | 66.0018663 | 62.7698269 |
| 68.3441814 | 61.5164707 | 65.2200967 | 66.0018663 | 63.7698269 |
| 67.4552926 | 62.5164707 | 63.2200967 | 67.0018663 | 63.7698269 |
| 67.2330703 | 62.5164707 | 62.2200967 | 68.0018663 | 63.7698269 |
| 76.6030777 | 63.5164707 | 62.2200967 | 68.0018663 | 63.7698269 |
| 72.6030777 | 63.5164707 | 61.2200967 | 68.0018663 | 63.7698269 |
| 72.6030777 | 63.5164707 | 61.2200967 | 67.0018663 | 63.7698269 |
| 71.6030777 | 63.5164707 | 61.2200967 | 67.0018663 | 63.7698269 |
| 70.6030777 | 63.5164707 | 62.2200967 | 67.0018663 | 64.7698269 |
| 69.6030777 | 63.5164707 | 62.2200967 | 68.0018663 | 64.7698269 |
| 67.6030777 | 63.5164707 | 64.2200967 | 68.0018663 | 65.7698269 |
| 67.6030777 | 63.5164707 | 67.2200967 | 66.0018663 | 65.7698269 |
| 66.6030777 | 63.5164707 | 67.2200967 | 63.0018663 | 65.7698269 |
| 66.6030777 | 63.5164707 | 66.2200967 | 63.0018663 | 62.7698269 |
| 66.6030777 | 63.5164707 | 66.2200967 | 63.0018663 | 62.7698269 |
| 66.6030777 | 62.5164707 | 65.2200967 | 63.0018663 | 62.7698269 |

|            |            |            |            |            |
|------------|------------|------------|------------|------------|
| 65.6030777 | 61.5164707 | 65.2200967 | 62.0018663 | 62.7698269 |
| 65.6030777 | 61.5164707 | 63.2200967 | 63.0018663 | 63.7698269 |
| 65.6030777 | 61.5164707 | 63.2200967 | 63.0018663 | 64.7698269 |
| 65.6030777 | 61.5164707 | 61.2200967 | 63.0018663 | 64.7698269 |
| 65.6030777 | 61.5164707 | 61.2200967 | 62.0018663 | 64.7698269 |
| 65.6030777 | 61.5164707 | 61.2200967 | 61.0018663 | 63.7698269 |
| 65.6030777 | 61.5164707 | 60.2200967 | 61.0018663 | 62.7698269 |
| 64.6030777 | 61.5164707 | 60.2200967 | 61.0018663 | 62.7698269 |
| 64.6030777 | 61.5164707 | 60.2200967 | 59.0018663 | 62.7698269 |
| 64.6030777 | 61.5164707 | 60.2200967 | 58.0018663 | 62.7698269 |
| 63.6030777 | 61.5164707 | 60.2200967 | 57.0018663 | 62.7698269 |
| 63.6030777 | 60.5164707 | 61.2200967 | 57.0018663 | 62.7698269 |
| 62.6030777 | 60.5164707 | 61.2200967 | 57.0018663 | 62.7698269 |
| 62.6030777 | 60.5164707 | 61.2200967 | 57.0018663 | 62.7698269 |
| 62.6030777 | 61.5164707 | 61.2200967 | 61.0018663 | 61.7698269 |
| 63.6030777 | 61.5164707 | 61.2200967 | 61.0018663 | 60.7698269 |
| 64.6030777 | 68.5164707 | 61.2200967 | 62.0018663 | 60.7698269 |
| 66.6030777 | 68.5164707 | 61.2200967 | 61.0018663 | 60.7698269 |
| 66.6030777 | 69.5164707 | 62.2200967 | 61.0018663 | 60.7698269 |
| 68.6030777 | 70.5164707 | 62.2200967 | 60.0018663 | 60.7698269 |
| 68.6030777 | 70.5164707 | 62.2200967 | 59.0018663 | 62.7698269 |
| 68.6030777 | 70.5164707 | 62.2200967 | 59.0018663 | 62.7698269 |
| 69.6030777 | 70.5164707 | 62.2200967 | 59.0018663 | 62.7698269 |
| 69.6030777 | 70.5164707 | 63.2200967 | 59.0018663 | 66.7698269 |
| 69.6030777 | 71.5164707 | 63.2200967 | 59.0018663 | 70.7698269 |
| 69.6030777 | 71.5164707 | 64.2200967 | 59.0018663 | 70.7698269 |
| 69.6030777 | 72.5164707 | 65.2200967 | 59.0018663 | 71.7698269 |
| 71.6030777 | 70.5164707 | 65.2200967 | 59.0018663 | 71.7698269 |
| 72.6030777 | 67.5164707 | 65.2200967 | 59.0018663 | 71.7698269 |
| 72.6030777 | 65.5164707 | 65.2200967 | 59.0018663 | 68.7698269 |
| 72.6030777 | 64.5164707 | 66.2200967 | 59.0018663 | 67.7698269 |
| 74.6030777 | 65.5164707 | 68.2200967 | 59.0018663 | 67.7698269 |
| 75.6030777 | 64.5164707 | 69.2200967 | 59.0018663 | 67.7698269 |
| 75.6030777 | 63.5164707 | 68.2200967 | 61.0018663 | 67.7698269 |
| 74.6030777 | 63.5164707 | 67.2200967 | 66.0018663 | 67.7698269 |
| 73.6030777 | 63.5164707 | 65.2200967 | 74.0018663 | 67.7698269 |
| 73.6030777 | 63.5164707 | 64.2200967 | 74.0018663 | 66.7698269 |
| 71.6030777 | 63.5164707 | 63.2200967 | 71.0018663 | 64.7698269 |
| 71.6030777 | 63.5164707 | 63.2200967 | 71.0018663 | 64.7698269 |
| 68.6030777 | 63.5164707 | 63.2200967 | 69.0018663 | 63.7698269 |
| 67.6030777 | 63.5164707 | 63.2200967 | 68.0018663 | 62.7698269 |
| 67.6030777 | 63.5164707 | 65.2200967 | 68.0018663 | 62.7698269 |
| 68.6030777 | 62.5164707 | 67.2200967 | 68.0018663 | 62.7698269 |
| 68.6030777 | 62.5164707 | 68.2200967 | 67.0018663 | 64.7698269 |
| 68.6030777 | 62.5164707 | 68.2200967 | 67.0018663 | 64.7698269 |



|            |            |            |            |            |
|------------|------------|------------|------------|------------|
| 68.6030777 | 62.5164707 | 68.2200967 | 67.0018663 | 64.7698269 |
| 68.6030777 | 62.5164707 | 66.2200967 | 67.0018663 | 64.7698269 |
| 68.6030777 | 62.5164707 | 64.2200967 | 67.0018663 | 63.7698269 |
| 68.6030777 | 61.5164707 | 63.2200967 | 67.0018663 | 63.7698269 |
| 68.6030777 | 61.5164707 | 62.2200967 | 65.0018663 | 63.7698269 |
| 68.6030777 | 62.5164707 | 61.2200967 | 63.0018663 | 64.7698269 |
| 70.6030777 | 62.5164707 | 62.2200967 | 63.0018663 | 64.7698269 |
| 68.6030777 | 63.5164707 | 62.2200967 | 63.0018663 | 64.7698269 |
| 68.6030777 | 63.5164707 | 62.2200967 | 64.0018663 | 64.7698269 |
| 68.6030777 | 63.5164707 | 62.2200967 | 64.0018663 | 65.7698269 |
| 68.6030777 | 63.5164707 | 62.2200967 | 67.0018663 | 65.7698269 |
| 68.6030777 | 63.5164707 | 62.2200967 | 68.0018663 | 65.7698269 |
| 68.6030777 | 62.5164707 | 61.2200967 | 68.0018663 | 65.7698269 |
| 68.6030777 | 62.5164707 | 61.2200967 | 68.0018663 | 66.7698269 |
| 68.6030777 | 61.5164707 | 61.2200967 | 68.0018663 | 66.7698269 |
| 68.6030777 | 61.5164707 | 61.2200967 | 68.0018663 | 66.7698269 |
| 68.6030777 | 62.5164707 | 61.2200967 | 68.0018663 | 65.7698269 |
| 68.6030777 | 62.5164707 | 61.2200967 | 69.0018663 | 65.7698269 |
| 68.6030777 | 62.5164707 | 61.2200967 | 71.0018663 | 65.7698269 |
| 68.6030777 | 62.5164707 | 61.2200967 | 72.0018663 | 66.7698269 |
| 68.6030777 | 62.5164707 | 61.2200967 | 71.0018663 | 66.7698269 |
| 68.6030777 | 62.5164707 | 61.2200967 | 72.0018663 | 67.7698269 |
| 68.6030777 | 62.5164707 | 61.2200967 | 72.0018663 | 67.7698269 |
| 68.6030777 | 62.5164707 | 61.2200967 | 72.0018663 | 67.7698269 |
| 70.6030777 | 62.5164707 | 61.2200967 | 71.0018663 | 67.7698269 |
| 70.6030777 | 62.5164707 | 60.2200967 | 70.0018663 | 67.7698269 |
| 70.6030777 | 62.5164707 | 59.2200967 | 70.0018663 | 68.7698269 |
| 70.6030777 | 66.5164707 | 58.2200967 | 69.0018663 | 68.7698269 |
| 70.6030777 | 66.5164707 | 58.2200967 | 69.0018663 | 67.7698269 |
| 70.6030777 | 68.5164707 | 58.2200967 | 67.0018663 | 67.7698269 |
| 70.6030777 | 67.5164707 | 59.2200967 | 66.0018663 | 66.7698269 |
| 70.6030777 | 65.5164707 | 60.2200967 | 65.0018663 | 66.7698269 |
| 70.6030777 | 64.5164707 | 60.2200967 | 63.0018663 | 64.7698269 |
| 70.6030777 | 65.5164707 | 62.2200967 | 63.0018663 | 64.7698269 |
| 71.6030777 | 65.5164707 | 62.2200967 | 62.0018663 | 63.7698269 |
| 71.6030777 | 67.5164707 | 65.2200967 | 62.0018663 | 62.7698269 |
| 71.6030777 | 68.5164707 | 66.2200967 | 62.0018663 | 62.7698269 |
| 71.6030777 | 66.5164707 | 66.2200967 | 63.0018663 | 62.7698269 |
| 71.6030777 | 64.5164707 | 67.2200967 | 63.0018663 | 63.7698269 |
| 72.6030777 | 63.5164707 | 67.2200967 | 63.0018663 | 64.7698269 |
| 71.6030777 | 63.5164707 | 66.2200967 | 63.0018663 | 64.7698269 |
| 71.6030777 | 63.5164707 | 66.2200967 | 63.0018663 | 64.7698269 |
| 72.6030777 | 62.5164707 | 65.2200967 | 63.0018663 | 64.7698269 |
| 74.6030777 | 62.5164707 | 65.2200967 | 63.0018663 | 64.7698269 |
| 74.6030777 | 63.5164707 | 65.2200967 | 63.0018663 | 65.7698269 |

|            |            |            |            |            |
|------------|------------|------------|------------|------------|
| 74.6030777 | 64.5164707 | 65.2200967 | 64.0018663 | 65.7698269 |
| 73.6030777 | 64.5164707 | 63.2200967 | 63.0018663 | 65.7698269 |
| 73.6030777 | 64.5164707 | 63.2200967 | 63.0018663 | 65.7698269 |
| 74.6030777 | 64.5164707 | 63.2200967 | 62.0018663 | 66.7698269 |
| 74.6030777 | 64.5164707 | 62.2200967 | 62.0018663 | 67.7698269 |
| 74.6030777 | 64.5164707 | 62.2200967 | 61.0018663 | 67.7698269 |
| 74.6030777 | 64.5164707 | 63.2200967 | 60.0018663 | 66.7698269 |
| 74.6030777 | 65.5164707 | 63.2200967 | 60.0018663 | 66.7698269 |
| 74.6030777 | 64.5164707 | 63.2200967 | 60.0018663 | 66.7698269 |
| 79.6030777 | 62.5164707 | 63.2200967 | 60.0018663 | 65.7698269 |
| 79.6030777 | 62.5164707 | 63.2200967 | 60.0018663 | 65.7698269 |
| 67.1219592 | 63.5164707 | 63.2200967 | 60.0018663 | 65.7698269 |
| 67.1219592 | 63.5164707 | 63.2200967 | 60.0018663 | 65.7698269 |
| 67.5664037 | 63.5164707 | 63.2200967 | 62.0018663 | 65.7698269 |
| 67.899737  | 63.5164707 | 63.2200967 | 64.0018663 | 65.7698269 |
| 67.3441814 | 64.5164707 | 63.2200967 | 63.0018663 | 65.7698269 |
| 67.0108481 | 66.5164707 | 62.2200967 | 61.0018663 | 65.7698269 |
| 79.6030777 | 68.5164707 | 63.2200967 | 60.0018663 | 65.7698269 |
| 76.6030777 | 70.5164707 | 63.2200967 | 60.0018663 | 64.7698269 |
| 76.6030777 | 71.5164707 | 63.2200967 | 60.0018663 | 63.7698269 |
| 72.6030777 | 73.5164707 | 63.2200967 | 60.0018663 | 62.7698269 |
| 71.6030777 | 73.5164707 | 64.2200967 | 60.0018663 | 62.7698269 |
| 68.6030777 | 72.5164707 | 64.2200967 | 61.0018663 | 61.7698269 |
| 68.6030777 | 67.5164707 | 64.2200967 | 61.0018663 | 61.7698269 |
| 68.6030777 | 65.5164707 | 64.2200967 | 62.0018663 | 61.7698269 |
| 68.6030777 | 63.5164707 | 63.2200967 | 63.0018663 | 61.7698269 |
| 68.6030777 | 62.5164707 | 62.2200967 | 65.0018663 | 62.7698269 |
| 68.6030777 | 61.5164707 | 61.2200967 | 66.0018663 | 62.7698269 |
| 68.6030777 | 61.5164707 | 62.2200967 | 66.0018663 | 62.7698269 |
| 68.6030777 | 60.5164707 | 62.2200967 | 63.0018663 | 62.7698269 |
| 68.6030777 | 60.5164707 | 61.2200967 | 62.0018663 | 62.7698269 |
| 67.6030777 | 60.5164707 | 61.2200967 | 61.0018663 | 62.7698269 |
| 67.6030777 | 60.5164707 | 61.2200967 | 61.0018663 | 62.7698269 |
| 66.6030777 | 60.5164707 | 61.2200967 | 61.0018663 | 62.7698269 |
| 65.6030777 | 60.5164707 | 61.2200967 | 61.0018663 | 62.7698269 |
| 66.6030777 | 60.5164707 | 60.2200967 | 62.0018663 | 61.7698269 |
| 66.6030777 | 60.5164707 | 60.2200967 | 62.0018663 | 61.7698269 |
| 65.6030777 | 60.5164707 | 61.2200967 | 62.0018663 | 63.7698269 |
| 65.6030777 | 60.5164707 | 61.2200967 | 63.0018663 | 63.7698269 |
| 65.6030777 | 60.5164707 | 67.2200967 | 63.0018663 | 63.7698269 |
| 65.6030777 | 59.5164707 | 68.2200967 | 63.0018663 | 63.7698269 |
| 65.6030777 | 59.5164707 | 69.2200967 | 63.0018663 | 63.7698269 |
| 66.6030777 | 59.5164707 | 69.2200967 | 63.0018663 | 63.7698269 |
| 66.6030777 | 59.5164707 | 69.2200967 | 63.0018663 | 64.7698269 |
| 66.6030777 | 60.5164707 | 69.2200967 | 63.0018663 | 68.7698269 |

|            |            |            |            |            |
|------------|------------|------------|------------|------------|
| 67.6030777 | 61.5164707 | 69.2200967 | 63.0018663 | 68.7698269 |
| 67.6030777 | 62.5164707 | 69.2200967 | 64.0018663 | 69.7698269 |
| 67.6030777 | 62.5164707 | 69.2200967 | 64.0018663 | 70.7698269 |
| 67.6030777 | 62.5164707 | 72.2200967 | 64.0018663 | 70.7698269 |
| 67.6030777 | 61.5164707 | 75.2200967 | 65.0018663 | 70.7698269 |
| 68.6030777 | 61.5164707 | 75.2200967 | 66.0018663 | 71.7698269 |
| 69.6030777 | 61.5164707 | 74.2200967 | 67.0018663 | 71.7698269 |
| 69.6030777 | 61.5164707 | 73.2200967 | 67.0018663 | 71.7698269 |
| 70.6030777 | 60.5164707 | 72.2200967 | 68.0018663 | 71.7698269 |
| 70.6030777 | 60.5164707 | 71.2200967 | 68.0018663 | 71.7698269 |
| 70.6030777 | 59.5164707 | 70.2200967 | 68.0018663 | 69.7698269 |
| 70.6030777 | 59.5164707 | 70.2200967 | 68.0018663 | 69.7698269 |
| 66.6030777 | 59.5164707 | 68.2200967 | 67.0018663 | 68.7698269 |
| 64.6030777 | 59.5164707 | 68.2200967 | 70.0018663 | 68.7698269 |
| 64.6030777 | 59.5164707 | 66.2200967 | 68.0018663 | 68.7698269 |
| 64.6030777 | 59.5164707 | 65.2200967 | 66.0018663 | 67.7698269 |
| 64.6030777 | 59.5164707 | 64.2200967 | 66.0018663 | 66.7698269 |
| 66.6030777 | 59.5164707 | 64.2200967 | 64.0018663 | 66.7698269 |
| 66.6030777 | 60.5164707 | 65.2200967 | 64.0018663 | 65.7698269 |
| 66.6030777 | 60.5164707 | 65.2200967 | 64.0018663 | 64.7698269 |
| 65.6030777 | 60.5164707 | 66.2200967 | 65.0018663 | 63.7698269 |
| 65.6030777 | 61.5164707 | 69.2200967 | 69.0018663 | 63.7698269 |
| 65.6030777 | 61.5164707 | 72.2200967 | 70.0018663 | 61.7698269 |
| 65.6030777 | 61.5164707 | 74.2200967 | 70.0018663 | 61.7698269 |
| 65.6030777 | 61.5164707 | 74.2200967 | 70.0018663 | 61.7698269 |
| 65.6030777 | 61.5164707 | 72.2200967 | 67.0018663 | 62.7698269 |
| 65.6030777 | 61.5164707 | 70.2200967 | 66.0018663 | 62.7698269 |
| 65.6030777 | 61.5164707 | 68.2200967 | 66.0018663 | 61.7698269 |
| 65.6030777 | 61.5164707 | 67.2200967 | 64.0018663 | 61.7698269 |
| 65.6030777 | 61.5164707 | 67.2200967 | 63.0018663 | 61.7698269 |
| 65.6030777 | 60.5164707 | 66.2200967 | 63.0018663 | 60.7698269 |
| 65.6030777 | 59.5164707 | 65.2200967 | 63.0018663 | 60.7698269 |
| 65.6030777 | 59.5164707 | 65.2200967 | 64.0018663 | 60.7698269 |
| 66.6030777 | 59.5164707 | 62.2200967 | 65.0018663 | 60.7698269 |
| 67.6030777 | 60.5164707 | 65.2200967 | 65.0018663 | 60.7698269 |
| 68.6030777 | 60.5164707 | 66.2200967 | 65.0018663 | 60.7698269 |
| 68.6030777 | 60.5164707 | 65.2200967 | 65.0018663 | 60.7698269 |
| 68.6030777 | 60.5164707 | 65.2200967 | 65.0018663 | 63.7698269 |
| 68.6030777 | 60.5164707 | 64.2200967 | 65.0018663 | 65.7698269 |
| 69.6030777 | 60.5164707 | 64.2200967 | 65.0018663 | 65.7698269 |
| 69.6030777 | 61.5164707 | 63.2200967 | 65.0018663 | 66.7698269 |
| 71.6030777 | 61.5164707 | 63.2200967 | 66.0018663 | 66.7698269 |
| 71.6030777 | 61.5164707 | 63.2200967 | 68.0018663 | 67.7698269 |
| 70.6030777 | 62.5164707 | 64.2200967 | 68.0018663 | 67.7698269 |
| 70.6030777 | 62.5164707 | 64.2200967 | 67.0018663 | 67.7698269 |

|            |            |            |            |            |
|------------|------------|------------|------------|------------|
| 72.6030777 | 62.5164707 | 65.2200967 | 67.0018663 | 68.7698269 |
| 74.6030777 | 62.5164707 | 66.2200967 | 67.0018663 | 68.7698269 |
| 76.6030777 | 62.5164707 | 66.2200967 | 67.0018663 | 69.7698269 |
| 78.6030777 | 62.5164707 | 67.2200967 | 68.0018663 | 70.7698269 |
| 79.6030777 | 63.5164707 | 67.2200967 | 63.0018663 | 70.7698269 |
| 80.6030777 | 65.5164707 | 67.2200967 | 63.0018663 | 70.7698269 |
| 80.6030777 | 65.5164707 | 68.2200967 | 63.0018663 | 70.7698269 |
| 79.6030777 | 66.5164707 | 69.2200967 | 63.0018663 | 70.7698269 |
| 78.6030777 | 75.5164707 | 69.2200967 | 63.0018663 | 75.7698269 |
| 74.6030777 | 77.5164707 | 69.2200967 | 63.0018663 | 75.7698269 |
| 72.6030777 | 77.5164707 | 68.2200967 | 64.0018663 | 75.7698269 |
| 70.6030777 | 76.5164707 | 67.2200967 | 64.0018663 | 76.7698269 |
| 70.6030777 | 70.5164707 | 66.2200967 | 64.0018663 | 76.7698269 |
| 68.6030777 | 70.5164707 | 65.2200967 | 64.0018663 | 77.7698269 |
| 62.6030777 | 68.5164707 | 65.2200967 | 64.0018663 | 75.7698269 |
| 62.6030777 | 65.5164707 | 64.2200967 | 64.0018663 | 68.7698269 |
| 62.6030777 | 64.5164707 | 64.2200967 | 64.0018663 | 63.7698269 |
| 60.6030777 | 63.5164707 | 64.2200967 | 64.0018663 | 61.7698269 |
| 58.6030777 | 63.5164707 | 63.2200967 | 64.0018663 | 60.7698269 |
| 59.6030777 | 63.5164707 | 62.2200967 | 66.0018663 | 60.7698269 |
| 59.6030777 | 63.5164707 | 62.2200967 | 66.0018663 | 60.7698269 |
| 63.6030777 | 63.5164707 | 61.2200967 | 67.0018663 | 60.7698269 |
| 65.6030777 | 62.5164707 | 61.2200967 | 66.0018663 | 60.7698269 |
| 65.6030777 | 61.5164707 | 61.2200967 | 66.0018663 | 60.7698269 |
| 65.6030777 | 61.5164707 | 62.2200967 | 65.0018663 | 61.7698269 |
| 66.6030777 | 61.5164707 | 63.2200967 | 64.0018663 | 61.7698269 |
| 66.6030777 | 61.5164707 | 63.2200967 | 63.0018663 | 61.7698269 |
| 65.6030777 | 64.5164707 | 67.2200967 | 63.0018663 | 63.7698269 |
| 62.6030777 | 65.5164707 | 70.2200967 | 63.0018663 | 63.7698269 |
| 63.6030777 | 66.5164707 | 72.2200967 | 63.0018663 | 63.7698269 |
| 63.6030777 | 67.5164707 | 73.2200967 | 60.0018663 | 58.7698269 |
| 63.6030777 | 68.5164707 | 72.2200967 | 60.0018663 | 59.7698269 |
| 63.6030777 | 69.5164707 | 70.2200967 | 60.0018663 | 59.7698269 |
| 63.6030777 | 66.5164707 | 68.2200967 | 64.0018663 | 61.7698269 |
| 63.6030777 | 65.5164707 | 66.2200967 | 65.0018663 | 61.7698269 |
| 63.6030777 | 63.5164707 | 65.2200967 | 65.0018663 | 64.7698269 |
| 65.6030777 | 63.5164707 | 65.2200967 | 65.0018663 | 64.7698269 |
| 65.6030777 | 62.5164707 | 65.2200967 | 65.0018663 | 64.7698269 |
| 65.6030777 | 62.5164707 | 65.2200967 | 65.0018663 | 63.7698269 |
| 65.6030777 | 61.5164707 | 65.2200967 | 65.0018663 | 62.7698269 |
| 65.6030777 | 62.5164707 | 65.2200967 | 65.0018663 | 62.7698269 |
| 65.6030777 | 62.5164707 | 64.2200967 | 65.0018663 | 62.7698269 |
| 65.6030777 | 62.5164707 | 63.2200967 | 65.0018663 | 61.7698269 |
| 65.6030777 | 62.5164707 | 62.2200967 | 67.0018663 | 60.7698269 |
| 65.6030777 | 62.5164707 | 60.2200967 | 68.0018663 | 60.7698269 |

|            |            |            |            |            |
|------------|------------|------------|------------|------------|
| 65.6030777 | 61.5164707 | 60.2200967 | 68.0018663 | 59.7698269 |
| 65.6030777 | 61.5164707 | 60.2200967 | 68.0018663 | 59.7698269 |
| 65.6030777 | 61.5164707 | 60.2200967 | 68.0018663 | 59.7698269 |
| 66.6030777 | 61.5164707 | 61.2200967 | 68.0018663 | 59.7698269 |
| 65.6030777 | 61.5164707 | 61.2200967 | 68.0018663 | 60.7698269 |
| 65.6030777 | 61.5164707 | 61.2200967 | 69.0018663 | 61.7698269 |
| 65.6030777 | 61.5164707 | 61.2200967 | 69.0018663 | 61.7698269 |
| 64.6030777 | 61.5164707 | 60.2200967 | 65.0018663 | 60.7698269 |
| 62.6030777 | 61.5164707 | 60.2200967 | 63.0018663 | 60.7698269 |
| 62.6030777 | 61.5164707 | 59.2200967 | 63.0018663 | 60.7698269 |
| 60.6030777 | 62.5164707 | 59.2200967 | 63.0018663 | 60.7698269 |
| 60.6030777 | 62.5164707 | 58.2200967 | 63.0018663 | 60.7698269 |
| 60.6030777 | 62.5164707 | 58.2200967 | 63.0018663 | 60.7698269 |
| 61.6030777 | 63.5164707 | 58.2200967 | 63.0018663 | 59.7698269 |
| 61.6030777 | 66.5164707 | 59.2200967 | 64.0018663 | 58.7698269 |
| 61.6030777 | 66.5164707 | 59.2200967 | 66.0018663 | 58.7698269 |
| 61.6030777 | 65.5164707 | 59.2200967 | 67.0018663 | 57.7698269 |
| 61.6030777 | 64.5164707 | 59.2200967 | 67.0018663 | 58.7698269 |
| 63.6030777 | 62.5164707 | 61.2200967 | 67.0018663 | 58.7698269 |
| 64.6030777 | 62.5164707 | 61.2200967 | 67.0018663 | 58.7698269 |
| 64.6030777 | 62.5164707 | 61.2200967 | 72.0018663 | 58.7698269 |
| 65.6030777 | 62.5164707 | 62.2200967 | 76.0018663 | 58.7698269 |
| 65.6030777 | 62.5164707 | 62.2200967 | 76.0018663 | 58.7698269 |
| 65.6030777 | 62.5164707 | 63.2200967 | 77.0018663 | 58.7698269 |
| 66.6030777 | 62.5164707 | 63.2200967 | 66.1219592 | 58.7698269 |
| 67.6030777 | 62.5164707 | 63.2200967 | 66.7886259 | 59.7698269 |
| 67.6030777 | 62.5164707 | 63.2200967 | 67.1219592 | 59.7698269 |
| 67.6030777 | 61.5164707 | 63.2200967 | 67.2330703 | 59.7698269 |
| 67.6030777 | 61.5164707 | 62.2200967 | 67.3441814 | 59.7698269 |
| 67.6030777 | 61.5164707 | 62.2200967 | 67.4552926 | 59.7698269 |
| 66.6030777 | 61.5164707 | 63.2200967 | 67.2330703 | 59.7698269 |
| 66.6030777 | 61.5164707 | 62.2200967 | 67.3441814 | 59.7698269 |
| 66.6030777 | 61.5164707 | 62.2200967 | 79.0018663 | 72.7698269 |
| 67.6030777 | 61.5164707 | 62.2200967 | 78.0018663 | 75.7698269 |
| 67.6030777 | 62.5164707 | 62.2200967 | 77.0018663 | 75.7698269 |
| 67.6030777 | 62.5164707 | 63.2200967 | 77.0018663 | 75.7698269 |
| 67.6030777 | 62.5164707 | 63.2200967 | 76.0018663 | 73.7698269 |
| 68.6030777 | 62.5164707 | 64.2200967 | 76.0018663 | 69.7698269 |
| 68.6030777 | 61.5164707 | 64.2200967 | 76.0018663 | 66.7698269 |
| 68.6030777 | 61.5164707 | 64.2200967 | 75.0018663 | 64.7698269 |
| 71.6030777 | 61.5164707 | 64.2200967 | 73.0018663 | 63.7698269 |
| 69.6030777 | 62.5164707 | 65.2200967 | 73.0018663 | 63.7698269 |
| 68.6030777 | 62.5164707 | 65.2200967 | 73.0018663 | 63.7698269 |
| 66.6030777 | 62.5164707 | 65.2200967 | 68.0018663 | 62.7698269 |
| 66.6030777 | 61.5164707 | 65.2200967 | 64.0018663 | 62.7698269 |

|            |            |            |            |            |
|------------|------------|------------|------------|------------|
| 65.6030777 | 61.5164707 | 66.2200967 | 63.0018663 | 61.7698269 |
| 64.6030777 | 60.5164707 | 66.2200967 | 61.0018663 | 61.7698269 |
| 64.6030777 | 60.5164707 | 67.2200967 | 61.0018663 | 59.7698269 |
| 64.6030777 | 60.5164707 | 69.2200967 | 62.0018663 | 57.7698269 |
| 64.6030777 | 60.5164707 | 69.2200967 | 64.0018663 | 57.7698269 |
| 64.6030777 | 59.5164707 | 69.2200967 | 65.0018663 | 56.7698269 |
| 64.6030777 | 59.5164707 | 68.2200967 | 65.0018663 | 56.7698269 |
| 64.6030777 | 59.5164707 | 68.2200967 | 64.0018663 | 55.7698269 |
| 63.6030777 | 60.5164707 | 67.2200967 | 63.0018663 | 55.7698269 |
| 62.6030777 | 60.5164707 | 65.2200967 | 62.0018663 | 55.7698269 |
| 62.6030777 | 60.5164707 | 63.2200967 | 62.0018663 | 55.7698269 |
| 62.6030777 | 60.5164707 | 62.2200967 | 62.0018663 | 55.7698269 |
| 62.6030777 | 60.5164707 | 61.2200967 | 62.0018663 | 56.7698269 |
| 62.6030777 | 60.5164707 | 60.2200967 | 62.0018663 | 56.7698269 |
| 62.6030777 | 60.5164707 | 60.2200967 | 62.0018663 | 56.7698269 |
| 64.6030777 | 59.5164707 | 60.2200967 | 62.0018663 | 65.7698269 |
| 62.6030777 | 59.5164707 | 60.2200967 | 62.0018663 | 66.7698269 |
| 62.6030777 | 59.5164707 | 60.2200967 | 61.0018663 | 66.7698269 |
| 62.6030777 | 58.5164707 | 60.2200967 | 60.0018663 | 67.7698269 |
| 63.6030777 | 58.5164707 | 60.2200967 | 59.0018663 | 68.7698269 |
| 63.6030777 | 58.5164707 | 60.2200967 | 57.0018663 | 69.7698269 |
| 64.6030777 | 58.5164707 | 60.2200967 | 56.0018663 | 69.7698269 |
| 64.6030777 | 58.5164707 | 60.2200967 | 56.0018663 | 68.7698269 |
| 64.6030777 | 60.5164707 | 60.2200967 | 56.0018663 | 68.7698269 |
| 66.6030777 | 60.5164707 | 60.2200967 | 56.0018663 | 66.7698269 |
| 67.6030777 | 61.5164707 | 61.2200967 | 56.0018663 | 65.7698269 |
| 66.6030777 | 61.5164707 | 61.2200967 | 56.0018663 | 63.7698269 |
| 66.6030777 | 61.5164707 | 61.2200967 | 57.0018663 | 63.7698269 |
| 66.6030777 | 61.5164707 | 61.2200967 | 58.0018663 | 63.7698269 |
| 65.6030777 | 61.5164707 | 62.2200967 | 58.0018663 | 63.7698269 |
| 65.6030777 | 62.5164707 | 63.2200967 | 58.0018663 | 64.7698269 |
| 65.6030777 | 62.5164707 | 63.2200967 | 58.0018663 | 64.7698269 |
| 65.6030777 | 62.5164707 | 63.2200967 | 58.0018663 | 64.7698269 |
| 65.6030777 | 62.5164707 | 63.2200967 | 58.0018663 | 63.7698269 |
| 65.6030777 | 60.5164707 | 63.2200967 | 59.0018663 | 62.7698269 |
| 65.6030777 | 60.5164707 | 63.2200967 | 59.0018663 | 61.7698269 |
| 66.6030777 | 60.5164707 | 63.2200967 | 59.0018663 | 61.7698269 |
| 67.6030777 | 60.5164707 | 63.2200967 | 60.0018663 | 60.7698269 |
| 67.6030777 | 60.5164707 | 63.2200967 | 60.0018663 | 60.7698269 |
| 65.6030777 | 60.5164707 | 63.2200967 | 59.0018663 | 63.7698269 |
| 64.6030777 | 61.5164707 | 63.2200967 | 59.0018663 | 63.7698269 |
| 64.6030777 | 61.5164707 | 64.2200967 | 59.0018663 | 63.7698269 |
| 64.6030777 | 60.5164707 | 64.2200967 | 59.0018663 | 63.7698269 |
| 64.6030777 | 61.5164707 | 67.2200967 | 60.0018663 | 63.7698269 |
| 65.6030777 | 61.5164707 | 67.2200967 | 60.0018663 | 63.7698269 |

|            |            |            |            |            |
|------------|------------|------------|------------|------------|
| 65.6030777 | 61.5164707 | 69.2200967 | 60.0018663 | 63.7698269 |
| 65.6030777 | 60.5164707 | 69.2200967 | 61.0018663 | 63.7698269 |
| 65.6030777 | 60.5164707 | 67.2200967 | 61.0018663 | 64.7698269 |
| 66.6030777 | 60.5164707 | 67.2200967 | 61.0018663 | 64.7698269 |
| 66.6030777 | 59.5164707 | 65.2200967 | 61.0018663 | 65.7698269 |
| 64.6030777 | 59.5164707 | 65.2200967 | 61.0018663 | 65.7698269 |
| 63.6030777 | 59.5164707 | 65.2200967 | 62.0018663 | 65.7698269 |
| 62.6030777 | 59.5164707 | 65.2200967 | 62.0018663 | 65.7698269 |
| 62.6030777 | 59.5164707 | 65.2200967 | 64.0018663 | 65.7698269 |
| 63.6030777 | 59.5164707 | 65.2200967 | 66.0018663 | 65.7698269 |
| 63.6030777 | 59.5164707 | 65.2200967 | 66.0018663 | 65.7698269 |
| 63.6030777 | 59.5164707 | 66.2200967 | 67.0018663 | 66.7698269 |
| 63.6030777 | 60.5164707 | 66.2200967 | 67.0018663 | 65.7698269 |
| 62.6030777 | 61.5164707 | 66.2200967 | 63.0018663 | 66.7698269 |
| 61.6030777 | 61.5164707 | 58.2200967 | 62.0018663 | 67.7698269 |
| 61.6030777 | 61.5164707 | 56.2200967 | 62.0018663 | 67.7698269 |
| 61.6030777 | 62.5164707 | 56.2200967 | 62.0018663 | 66.7698269 |
| 61.6030777 | 63.5164707 | 56.2200967 | 63.0018663 | 66.7698269 |
| 61.6030777 | 63.5164707 | 56.2200967 | 64.0018663 | 66.7698269 |
| 61.6030777 | 63.5164707 | 56.2200967 | 64.0018663 | 65.7698269 |
| 61.6030777 | 62.5164707 | 60.2200967 | 65.0018663 | 66.7698269 |
| 61.6030777 | 62.5164707 | 62.2200967 | 65.0018663 | 66.7698269 |
| 61.6030777 | 61.5164707 | 62.2200967 | 64.0018663 | 66.7698269 |
| 65.6030777 | 61.5164707 | 62.2200967 | 63.0018663 | 67.7698269 |
| 65.6030777 | 62.5164707 | 63.2200967 | 62.0018663 | 69.7698269 |
| 65.6030777 | 62.5164707 | 64.2200967 | 61.0018663 | 70.7698269 |
| 65.6030777 | 61.5164707 | 64.2200967 | 61.0018663 | 70.7698269 |
| 64.6030777 | 61.5164707 | 62.2200967 | 61.0018663 | 70.7698269 |
| 64.6030777 | 61.5164707 | 62.2200967 | 61.0018663 | 70.7698269 |
| 65.6030777 | 61.5164707 | 62.2200967 | 61.0018663 | 69.7698269 |
| 65.6030777 | 61.5164707 | 62.2200967 | 60.0018663 | 67.7698269 |
| 68.6030777 | 62.5164707 | 63.2200967 | 60.0018663 | 66.7698269 |
| 69.6030777 | 62.5164707 | 65.2200967 | 60.0018663 | 66.7698269 |
| 73.6030777 | 62.5164707 | 67.2200967 | 60.0018663 | 66.7698269 |
| 65.6030777 | 62.5164707 | 67.2200967 | 60.0018663 | 66.7698269 |
| 64.6030777 | 62.5164707 | 67.2200967 | 61.0018663 | 66.7698269 |
| 64.6030777 | 62.5164707 | 67.2200967 | 61.0018663 | 66.7698269 |
| 64.6030777 | 62.5164707 | 66.2200967 | 61.0018663 | 64.7698269 |
| 63.6030777 | 62.5164707 | 66.2200967 | 61.0018663 | 64.7698269 |
| 63.6030777 | 63.5164707 | 66.2200967 | 61.0018663 | 65.7698269 |
| 63.6030777 | 64.5164707 | 65.2200967 | 61.0018663 | 65.7698269 |
| 66.6030777 | 64.5164707 | 65.2200967 | 61.0018663 | 66.7698269 |
| 66.6030777 | 64.5164707 | 63.2200967 | 61.0018663 | 67.7698269 |
| 66.6030777 | 64.5164707 | 60.2200967 | 61.0018663 | 69.7698269 |
| 66.6030777 | 64.5164707 | 59.2200967 | 64.0018663 | 69.7698269 |

|            |            |            |            |            |
|------------|------------|------------|------------|------------|
| 66.6030777 | 65.5164707 | 59.2200967 | 65.0018663 | 70.7698269 |
| 67.6030777 | 65.5164707 | 58.2200967 | 66.0018663 | 70.7698269 |
| 67.6030777 | 65.5164707 | 58.2200967 | 66.0018663 | 70.7698269 |
| 67.6030777 | 64.5164707 | 58.2200967 | 66.0018663 | 71.7698269 |
| 67.6030777 | 64.5164707 | 58.2200967 | 66.0018663 | 71.7698269 |
| 67.6030777 | 63.5164707 | 62.2200967 | 66.0018663 | 71.7698269 |
| 68.6030777 | 63.5164707 | 64.2200967 | 67.0018663 | 70.7698269 |
| 68.6030777 | 63.5164707 | 64.2200967 | 69.0018663 | 70.7698269 |
| 69.6030777 | 63.5164707 | 64.2200967 | 75.0018663 | 70.7698269 |
| 69.6030777 | 62.5164707 | 65.2200967 | 79.0018663 | 70.7698269 |
| 68.6030777 | 62.5164707 | 65.2200967 | 81.0018663 | 70.7698269 |
| 68.6030777 | 62.5164707 | 65.2200967 | 82.0018663 | 70.7698269 |
| 67.6030777 | 62.5164707 | 65.2200967 | 79.0018663 | 70.7698269 |
| 67.6030777 | 62.5164707 | 65.2200967 | 79.0018663 | 70.7698269 |
| 67.6030777 | 61.5164707 | 65.2200967 | 78.0018663 | 68.7698269 |
| 67.6030777 | 61.5164707 | 69.2200967 | 77.0018663 | 68.7698269 |
| 67.6030777 | 61.5164707 | 70.2200967 | 74.0018663 | 66.7698269 |
| 68.6030777 | 61.5164707 | 70.2200967 | 73.0018663 | 65.7698269 |
| 69.6030777 | 61.5164707 | 71.2200967 | 68.0018663 | 65.7698269 |
| 69.6030777 | 61.5164707 | 71.2200967 | 68.0018663 | 64.7698269 |
| 69.6030777 | 61.5164707 | 71.2200967 | 69.0018663 | 64.7698269 |
| 72.6030777 | 61.5164707 | 73.2200967 | 70.0018663 | 64.7698269 |
| 73.6030777 | 61.5164707 | 74.2200967 | 72.0018663 | 64.7698269 |
| 76.6030777 | 62.5164707 | 74.2200967 | 72.0018663 | 64.7698269 |
| 77.6030777 | 62.5164707 | 73.2200967 | 72.0018663 | 64.7698269 |
| 77.6030777 | 62.5164707 | 73.2200967 | 72.0018663 | 68.7698269 |
| 78.6030777 | 61.5164707 | 71.2200967 | 72.0018663 | 67.7698269 |
| 78.6030777 | 62.5164707 | 70.2200967 | 74.0018663 | 67.7698269 |
| 78.6030777 | 62.5164707 | 70.2200967 | 75.0018663 | 66.7698269 |
| 78.6030777 | 63.5164707 | 69.2200967 | 75.0018663 | 66.7698269 |
| 68.3441814 | 64.5164707 | 69.2200967 | 76.0018663 | 66.7698269 |
| 69.7886259 | 63.5164707 | 69.2200967 | 77.0018663 | 65.7698269 |
| 70.5664037 | 62.5164707 | 68.2200967 | 77.0018663 | 66.7698269 |
| 83.6030777 | 61.5164707 | 68.2200967 | 77.0018663 | 66.7698269 |
| 70.6030777 | 61.5164707 | 67.2200967 | 77.0018663 | 67.7698269 |
| 65.6030777 | 61.5164707 | 67.2200967 | 75.0018663 | 66.7698269 |
| 64.6030777 | 61.5164707 | 67.2200967 | 75.0018663 | 66.7698269 |
| 64.6030777 | 62.5164707 | 67.2200967 | 74.0018663 | 62.7698269 |
| 64.6030777 | 62.5164707 | 67.2200967 | 75.0018663 | 62.7698269 |
| 64.6030777 | 63.5164707 | 66.2200967 | 75.0018663 | 63.7698269 |
| 64.6030777 | 63.5164707 | 66.2200967 | 75.0018663 | 64.7698269 |
| 63.6030777 | 63.5164707 | 66.2200967 | 74.0018663 | 64.7698269 |
| 63.6030777 | 64.5164707 | 65.2200967 | 74.0018663 | 65.7698269 |
| 63.6030777 | 64.5164707 | 65.2200967 | 73.0018663 | 66.7698269 |
| 63.6030777 | 65.5164707 | 64.2200967 | 73.0018663 | 66.7698269 |



|            |            |            |            |            |
|------------|------------|------------|------------|------------|
| 63.6030777 | 65.5164707 | 65.2200967 | 74.0018663 | 67.7698269 |
| 63.6030777 | 65.5164707 | 66.2200967 | 72.0018663 | 67.7698269 |
| 67.6030777 | 65.5164707 | 69.2200967 | 72.0018663 | 66.7698269 |
| 67.6030777 | 65.5164707 | 70.2200967 | 70.0018663 | 63.7698269 |
| 67.6030777 | 65.5164707 | 68.2200967 | 70.0018663 | 63.7698269 |
| 67.6030777 | 65.5164707 | 66.2200967 | 70.0018663 | 61.7698269 |
| 67.6030777 | 63.5164707 | 66.2200967 | 70.0018663 | 61.7698269 |
| 62.6030777 | 62.5164707 | 66.2200967 | 70.0018663 | 62.7698269 |
| 62.6030777 | 62.5164707 | 66.2200967 | 70.0018663 | 64.7698269 |
| 62.6030777 | 62.5164707 | 66.2200967 | 70.0018663 | 64.7698269 |
| 62.6030777 | 62.5164707 | 66.2200967 | 70.0018663 | 65.7698269 |
| 62.6030777 | 62.5164707 | 66.2200967 | 70.0018663 | 65.7698269 |
| 61.6030777 | 63.5164707 | 66.2200967 | 69.0018663 | 66.7698269 |
| 61.6030777 | 63.5164707 | 66.2200967 | 69.0018663 | 67.7698269 |
| 61.6030777 | 63.5164707 | 66.2200967 | 70.0018663 | 67.7698269 |
| 61.6030777 | 63.5164707 | 65.2200967 | 69.0018663 | 65.7698269 |
| 61.6030777 | 64.5164707 | 64.2200967 | 69.0018663 | 64.7698269 |
| 67.6030777 | 64.5164707 | 63.2200967 | 69.0018663 | 64.7698269 |
| 67.6030777 | 63.5164707 | 63.2200967 | 69.0018663 | 63.7698269 |
| 72.6030777 | 63.5164707 | 63.2200967 | 69.0018663 | 63.7698269 |
| 72.6030777 | 63.5164707 | 63.2200967 | 67.0018663 | 63.7698269 |
| 72.6030777 | 63.5164707 | 63.2200967 | 67.0018663 | 63.7698269 |
| 73.6030777 | 62.5164707 | 63.2200967 | 69.0018663 | 63.7698269 |
| 73.6030777 | 62.5164707 | 63.2200967 | 69.0018663 | 63.7698269 |
| 75.6030777 | 63.5164707 | 63.2200967 | 69.0018663 | 64.7698269 |
| 73.6030777 | 63.5164707 | 63.2200967 | 73.0018663 | 64.7698269 |
| 68.6030777 | 63.5164707 | 63.2200967 | 67.2330703 | 64.7698269 |
| 67.6030777 | 63.5164707 | 64.2200967 | 68.3441814 | 64.7698269 |
| 67.6030777 | 63.5164707 | 64.2200967 | 68.899737  | 65.7698269 |
| 66.6030777 | 63.5164707 | 66.2200967 | 68.899737  | 65.7698269 |
| 65.6030777 | 63.5164707 | 66.2200967 | 69.2330703 | 66.7698269 |
| 63.6030777 | 64.5164707 | 66.2200967 | 69.0108481 | 66.7698269 |
| 64.6030777 | 64.5164707 | 66.2200967 | 69.2330703 | 67.7698269 |
| 65.6030777 | 64.5164707 | 66.2200967 | 69.3441814 | 67.7698269 |
| 66.6030777 | 64.5164707 | 67.2200967 | 69.5664037 | 67.7698269 |
| 66.6030777 | 65.5164707 | 68.2200967 | 69.899737  | 66.7698269 |
| 66.6030777 | 65.5164707 | 68.2200967 | 69.6775148 | 66.7698269 |
| 67.6030777 | 65.5164707 | 73.2200967 | 70.3441814 | 65.7698269 |
| 67.6030777 | 64.5164707 | 74.2200967 | 70.3441814 | 64.7698269 |
| 67.6030777 | 64.5164707 | 74.2200967 | 70.2330703 | 63.7698269 |
| 68.6030777 | 64.5164707 | 74.2200967 | 70.0108481 | 62.7698269 |
| 68.6030777 | 64.5164707 | 74.2200967 | 69.899737  | 62.7698269 |
| 68.6030777 | 64.5164707 | 70.2200967 | 69.4552926 | 62.7698269 |
| 68.6030777 | 64.5164707 | 70.2200967 | 69.6775148 | 63.7698269 |
| 66.6030777 | 64.5164707 | 67.2200967 | 69.0108481 | 63.7698269 |

|            |            |            |            |            |
|------------|------------|------------|------------|------------|
| 66.6030777 | 63.5164707 | 66.2200967 | 68.1219592 | 62.7698269 |
| 64.6030777 | 63.5164707 | 64.2200967 | 67.899737  | 62.7698269 |
| 62.6030777 | 63.5164707 | 64.2200967 | 67.6775148 | 62.7698269 |
| 62.6030777 | 63.5164707 | 64.2200967 | 67.4552926 | 61.7698269 |
| 61.6030777 | 63.5164707 | 64.2200967 | 67.3441814 | 60.7698269 |
| 61.6030777 | 63.5164707 | 64.2200967 | 67.0108481 | 59.7698269 |
| 61.6030777 | 63.5164707 | 63.2200967 | 66.7886259 | 59.7698269 |
| 61.6030777 | 64.5164707 | 63.2200967 | 67.2330703 | 59.7698269 |
| 61.6030777 | 64.5164707 | 63.2200967 | 66.899737  | 60.7698269 |
| 61.6030777 | 65.5164707 | 62.2200967 | 66.4552926 | 60.7698269 |
| 61.6030777 | 65.5164707 | 62.2200967 | 66.7886259 | 60.7698269 |
| 61.6030777 | 66.5164707 | 63.2200967 | 67.0108481 | 60.7698269 |
| 61.6030777 | 66.5164707 | 64.2200967 | 67.3441814 | 60.7698269 |
| 61.6030777 | 65.5164707 | 64.2200967 | 67.5664037 | 60.7698269 |
| 61.6030777 | 65.5164707 | 65.2200967 | 66.7886259 | 59.7698269 |
| 61.6030777 | 65.5164707 | 65.2200967 | 77.0018663 | 60.7698269 |
| 61.6030777 | 65.5164707 | 64.2200967 | 68.0018663 | 62.7698269 |
| 61.6030777 | 65.5164707 | 63.2200967 | 62.0018663 | 64.7698269 |
| 61.6030777 | 65.5164707 | 63.2200967 | 62.0018663 | 65.7698269 |
| 61.6030777 | 66.5164707 | 64.2200967 | 62.0018663 | 65.7698269 |
| 61.6030777 | 66.5164707 | 64.2200967 | 60.0018663 | 65.7698269 |
| 65.6030777 | 64.5164707 | 64.2200967 | 58.0018663 | 64.7698269 |
| 65.6030777 | 63.5164707 | 64.2200967 | 58.0018663 | 64.7698269 |
| 66.6030777 | 63.5164707 | 64.2200967 | 59.0018663 | 65.7698269 |
| 66.6030777 | 63.5164707 | 65.2200967 | 59.0018663 | 65.7698269 |
| 65.6030777 | 64.5164707 | 66.2200967 | 61.0018663 | 65.7698269 |
| 65.6030777 | 64.5164707 | 65.2200967 | 61.0018663 | 65.7698269 |
| 64.6030777 | 64.5164707 | 65.2200967 | 61.0018663 | 65.7698269 |
| 64.6030777 | 64.5164707 | 65.2200967 | 61.0018663 | 64.7698269 |
| 64.6030777 | 64.5164707 | 65.2200967 | 62.0018663 | 60.7698269 |
| 65.6030777 | 64.5164707 | 64.2200967 | 62.0018663 | 60.7698269 |
| 65.6030777 | 64.5164707 | 62.2200967 | 62.0018663 | 59.7698269 |
| 65.6030777 | 64.5164707 | 61.2200967 | 62.0018663 | 59.7698269 |
| 65.6030777 | 65.5164707 | 61.2200967 | 63.0018663 | 59.7698269 |
| 65.6030777 | 65.5164707 | 62.2200967 | 63.0018663 | 60.7698269 |
| 65.6030777 | 65.5164707 | 63.2200967 | 63.0018663 | 60.7698269 |
| 65.6030777 | 65.5164707 | 64.2200967 | 64.0018663 | 60.7698269 |
| 65.6030777 | 65.5164707 | 64.2200967 | 64.0018663 | 61.7698269 |
| 65.6030777 | 65.5164707 | 64.2200967 | 64.0018663 | 61.7698269 |
| 65.6030777 | 66.5164707 | 64.2200967 | 61.0018663 | 60.7698269 |
| 65.6030777 | 65.5164707 | 64.2200967 | 61.0018663 | 60.7698269 |
| 65.6030777 | 65.5164707 | 64.2200967 | 59.0018663 | 60.7698269 |
| 66.6030777 | 64.5164707 | 64.2200967 | 59.0018663 | 60.7698269 |
| 66.6030777 | 64.5164707 | 64.2200967 | 59.0018663 | 61.7698269 |
| 66.6030777 | 64.5164707 | 64.2200967 | 59.0018663 | 61.7698269 |

|            |            |            |            |            |
|------------|------------|------------|------------|------------|
| 65.6030777 | 64.5164707 | 64.2200967 | 59.0018663 | 62.7698269 |
| 64.6030777 | 63.5164707 | 64.2200967 | 59.0018663 | 62.7698269 |
| 64.6030777 | 63.5164707 | 64.2200967 | 59.0018663 | 63.7698269 |
| 64.6030777 | 63.5164707 | 65.2200967 | 60.0018663 | 63.7698269 |
| 63.6030777 | 63.5164707 | 65.2200967 | 60.0018663 | 63.7698269 |
| 62.6030777 | 63.5164707 | 65.2200967 | 60.0018663 | 63.7698269 |
| 62.6030777 | 63.5164707 | 65.2200967 | 58.0018663 | 63.7698269 |
| 62.6030777 | 62.5164707 | 65.2200967 | 58.0018663 | 63.7698269 |
| 63.6030777 | 62.5164707 | 68.2200967 | 58.0018663 | 62.7698269 |
| 63.6030777 | 61.5164707 | 68.2200967 | 58.0018663 | 61.7698269 |
| 63.6030777 | 61.5164707 | 68.2200967 | 58.0018663 | 61.7698269 |
| 66.6030777 | 61.5164707 | 67.2200967 | 58.0018663 | 60.7698269 |
| 67.6030777 | 61.5164707 | 67.2200967 | 58.0018663 | 59.7698269 |
| 67.6030777 | 61.5164707 | 67.2200967 | 58.0018663 | 59.7698269 |
| 67.6030777 | 61.5164707 | 68.2200967 | 58.0018663 | 59.7698269 |
| 67.6030777 | 61.5164707 | 68.2200967 | 58.0018663 | 60.7698269 |
| 66.6030777 | 61.5164707 | 68.2200967 | 57.0018663 | 60.7698269 |
| 69.6030777 | 61.5164707 | 68.2200967 | 57.0018663 | 60.7698269 |
| 70.6030777 | 61.5164707 | 67.2200967 | 57.0018663 | 60.7698269 |
| 70.6030777 | 61.5164707 | 66.2200967 | 58.0018663 | 61.7698269 |
| 70.6030777 | 62.5164707 | 65.2200967 | 58.0018663 | 61.7698269 |
| 70.6030777 | 62.5164707 | 66.2200967 | 58.0018663 | 61.7698269 |
| 68.6030777 | 62.5164707 | 67.2200967 | 59.0018663 | 62.7698269 |
| 68.6030777 | 62.5164707 | 70.2200967 | 59.0018663 | 63.7698269 |
| 68.6030777 | 62.5164707 | 70.2200967 | 59.0018663 | 64.7698269 |
| 67.6030777 | 62.5164707 | 70.2200967 | 59.0018663 | 66.7698269 |
| 66.6030777 | 62.5164707 | 69.2200967 | 59.0018663 | 66.7698269 |
| 66.6030777 | 63.5164707 | 69.2200967 | 58.0018663 | 66.7698269 |
| 66.6030777 | 63.5164707 | 64.2200967 | 58.0018663 | 67.7698269 |
| 66.6030777 | 63.5164707 | 64.2200967 | 58.0018663 | 67.7698269 |
| 66.6030777 | 63.5164707 | 63.2200967 | 58.0018663 | 71.7698269 |
| 65.6030777 | 63.5164707 | 63.2200967 | 59.0018663 | 71.7698269 |
| 65.6030777 | 63.5164707 | 63.2200967 | 58.0018663 | 66.7698269 |
| 65.6030777 | 64.5164707 | 63.2200967 | 58.0018663 | 60.7698269 |
| 65.6030777 | 64.5164707 | 63.2200967 | 58.0018663 | 58.7698269 |
| 64.6030777 | 65.5164707 | 63.2200967 | 58.0018663 | 58.7698269 |
| 64.6030777 | 65.5164707 | 63.2200967 | 58.0018663 | 57.7698269 |
| 64.6030777 | 65.5164707 | 62.2200967 | 58.0018663 | 56.7698269 |
| 63.6030777 | 65.5164707 | 63.2200967 | 58.0018663 | 56.7698269 |
| 63.6030777 | 65.5164707 | 64.2200967 | 58.0018663 | 55.7698269 |
| 63.6030777 | 65.5164707 | 64.2200967 | 57.0018663 | 55.7698269 |
| 63.6030777 | 65.5164707 | 65.2200967 | 57.0018663 | 56.7698269 |
| 63.6030777 | 65.5164707 | 65.2200967 | 60.0018663 | 57.7698269 |
| 63.6030777 | 66.5164707 | 65.2200967 | 63.0018663 | 58.7698269 |
| 62.6030777 | 65.5164707 | 65.2200967 | 63.0018663 | 58.7698269 |

|            |            |            |            |            |
|------------|------------|------------|------------|------------|
| 62.6030777 | 64.5164707 | 65.2200967 | 65.0018663 | 58.7698269 |
| 62.6030777 | 64.5164707 | 65.2200967 | 68.0018663 | 58.7698269 |
| 62.6030777 | 63.5164707 | 65.2200967 | 71.0018663 | 58.7698269 |
| 62.6030777 | 63.5164707 | 65.2200967 | 72.0018663 | 60.7698269 |
| 62.6030777 | 63.5164707 | 65.2200967 | 72.0018663 | 61.7698269 |
| 62.6030777 | 63.5164707 | 66.2200967 | 72.0018663 | 65.7698269 |
| 64.6030777 | 63.5164707 | 66.2200967 | 71.0018663 | 65.7698269 |
| 64.6030777 | 63.5164707 | 66.2200967 | 69.0018663 | 65.7698269 |
| 64.6030777 | 63.5164707 | 68.2200967 | 67.0018663 | 65.7698269 |
| 64.6030777 | 63.5164707 | 68.2200967 | 67.0018663 | 65.7698269 |
| 65.6030777 | 63.5164707 | 69.2200967 | 66.0018663 | 65.7698269 |
| 65.6030777 | 62.5164707 | 69.2200967 | 66.0018663 | 65.7698269 |
| 65.6030777 | 62.5164707 | 71.2200967 | 66.0018663 | 65.7698269 |
| 65.6030777 | 62.5164707 | 73.2200967 | 65.0018663 | 66.7698269 |
| 65.6030777 | 62.5164707 | 73.2200967 | 66.0018663 | 66.7698269 |
| 65.6030777 | 61.5164707 | 73.2200967 | 66.0018663 | 68.7698269 |
| 65.6030777 | 61.5164707 | 72.2200967 | 66.0018663 | 68.7698269 |
| 65.6030777 | 61.5164707 | 70.2200967 | 66.0018663 | 68.7698269 |
| 65.6030777 | 61.5164707 | 69.2200967 | 66.0018663 | 67.7698269 |
| 67.6030777 | 61.5164707 | 68.2200967 | 67.0018663 | 67.7698269 |
| 68.6030777 | 62.5164707 | 68.2200967 | 67.0018663 | 67.7698269 |
| 70.6030777 | 62.5164707 | 67.2200967 | 64.0018663 | 68.7698269 |
| 72.6030777 | 62.5164707 | 67.2200967 | 62.0018663 | 67.7698269 |
| 74.6030777 | 62.5164707 | 65.2200967 | 61.0018663 | 67.7698269 |
| 74.6030777 | 62.5164707 | 62.2200967 | 60.0018663 | 67.7698269 |
| 74.6030777 | 61.5164707 | 60.2200967 | 60.0018663 | 68.7698269 |
| 76.6030777 | 62.5164707 | 58.2200967 | 60.0018663 | 68.7698269 |
| 77.6030777 | 62.5164707 | 57.2200967 | 60.0018663 | 68.7698269 |
| 65.4552926 | 62.5164707 | 57.2200967 | 60.0018663 | 66.7698269 |
| 65.7886259 | 62.5164707 | 58.2200967 | 60.0018663 | 66.7698269 |
| 66.2330703 | 62.5164707 | 58.2200967 | 61.0018663 | 66.7698269 |
| 66.1219592 | 62.5164707 | 58.2200967 | 61.0018663 | 67.7698269 |
| 65.3594682 | 62.5164707 | 58.2200967 | 61.0018663 | 67.7698269 |
| 66.6030777 | 62.5164707 | 58.2200967 | 61.0018663 | 68.7698269 |
| 64.6030777 | 62.5164707 | 59.2200967 | 61.0018663 | 68.7698269 |
| 63.6030777 | 61.5164707 | 60.2200967 | 61.0018663 | 67.7698269 |
| 62.6030777 | 61.5164707 | 60.2200967 | 63.0018663 | 67.7698269 |
| 62.6030777 | 61.5164707 | 61.2200967 | 63.0018663 | 66.7698269 |
| 62.6030777 | 61.5164707 | 61.2200967 | 63.0018663 | 66.7698269 |
| 62.6030777 | 61.5164707 | 60.2200967 | 63.0018663 | 66.7698269 |
| 61.6030777 | 61.5164707 | 59.2200967 | 62.0018663 | 65.7698269 |
| 61.6030777 | 61.5164707 | 59.2200967 | 63.0018663 | 65.7698269 |
| 62.6030777 | 61.5164707 | 60.2200967 | 64.0018663 | 65.7698269 |
| 63.6030777 | 61.5164707 | 60.2200967 | 65.0018663 | 65.7698269 |
| 63.6030777 | 61.5164707 | 61.2200967 | 67.0018663 | 64.7698269 |

|            |            |            |            |            |
|------------|------------|------------|------------|------------|
| 63.6030777 | 62.5164707 | 64.2200967 | 68.0018663 | 63.7698269 |
| 63.6030777 | 62.5164707 | 64.2200967 | 68.0018663 | 61.7698269 |
| 64.6030777 | 62.5164707 | 64.2200967 | 68.0018663 | 61.7698269 |
| 67.6030777 | 63.5164707 | 64.2200967 | 67.0018663 | 60.7698269 |
| 69.6030777 | 63.5164707 | 65.2200967 | 65.0018663 | 60.7698269 |
| 70.6030777 | 63.5164707 | 67.2200967 | 65.0018663 | 60.7698269 |
| 71.6030777 | 63.5164707 | 66.2200967 | 65.0018663 | 60.7698269 |
| 67.6030777 | 64.5164707 | 66.2200967 | 64.0018663 | 59.7698269 |
| 65.6030777 | 64.5164707 | 68.2200967 | 63.0018663 | 59.7698269 |
| 64.6030777 | 64.5164707 | 69.2200967 | 63.0018663 | 59.7698269 |
| 64.6030777 | 64.5164707 | 70.2200967 | 62.0018663 | 60.7698269 |
| 64.6030777 | 65.5164707 | 71.2200967 | 62.0018663 | 60.7698269 |
| 65.6030777 | 64.5164707 | 70.2200967 | 62.0018663 | 65.7698269 |
| 65.6030777 | 64.5164707 | 70.2200967 | 62.0018663 | 67.7698269 |
| 66.6030777 | 64.5164707 | 70.2200967 | 61.0018663 | 68.7698269 |
| 66.6030777 | 64.5164707 | 70.2200967 | 61.0018663 | 68.7698269 |
| 66.6030777 | 64.5164707 | 70.2200967 | 61.0018663 | 70.7698269 |
| 66.6030777 | 64.5164707 | 70.2200967 | 61.0018663 | 70.7698269 |
| 70.6030777 | 64.5164707 | 69.2200967 | 62.0018663 | 70.7698269 |
| 70.6030777 | 63.5164707 | 68.2200967 | 63.0018663 | 70.7698269 |
| 70.6030777 | 63.5164707 | 68.2200967 | 62.0018663 | 68.7698269 |
| 71.6030777 | 64.5164707 | 67.2200967 | 62.0018663 | 66.7698269 |
| 71.6030777 | 63.5164707 | 66.2200967 | 62.0018663 | 64.7698269 |
| 71.6030777 | 63.5164707 | 66.2200967 | 62.0018663 | 64.7698269 |
| 71.6030777 | 63.5164707 | 66.2200967 | 62.0018663 | 61.7698269 |
| 67.6030777 | 64.5164707 | 65.2200967 | 62.0018663 | 61.7698269 |
| 66.6030777 | 63.5164707 | 65.2200967 | 61.0018663 | 61.7698269 |
| 66.6030777 | 63.5164707 | 65.2200967 | 61.0018663 | 61.7698269 |
| 65.6030777 | 63.5164707 | 64.2200967 | 61.0018663 | 62.7698269 |
| 65.6030777 | 63.5164707 | 64.2200967 | 61.0018663 | 62.7698269 |
| 64.6030777 | 63.5164707 | 64.2200967 | 61.0018663 | 63.7698269 |
| 64.6030777 | 62.5164707 | 64.2200967 | 61.0018663 | 63.7698269 |
| 64.6030777 | 63.5164707 | 64.2200967 | 61.0018663 | 63.7698269 |
| 63.6030777 | 63.5164707 | 64.2200967 | 61.0018663 | 63.7698269 |
| 63.6030777 | 63.5164707 | 65.2200967 | 61.0018663 | 61.7698269 |
| 62.6030777 | 63.5164707 | 65.2200967 | 61.0018663 | 61.7698269 |
| 62.6030777 | 63.5164707 | 66.2200967 | 60.0018663 | 62.7698269 |
| 62.6030777 | 63.5164707 | 66.2200967 | 60.0018663 | 62.7698269 |
| 62.6030777 | 63.5164707 | 66.2200967 | 60.0018663 | 63.7698269 |
| 62.6030777 | 63.5164707 | 66.2200967 | 61.0018663 | 63.7698269 |
| 62.6030777 | 63.5164707 | 65.2200967 | 61.0018663 | 64.7698269 |
| 60.6030777 | 62.5164707 | 65.2200967 | 61.0018663 | 64.7698269 |
| 60.6030777 | 62.5164707 | 66.2200967 | 61.0018663 | 63.7698269 |
| 60.6030777 | 61.5164707 | 66.2200967 | 61.0018663 | 63.7698269 |
| 61.6030777 | 61.5164707 | 66.2200967 | 61.0018663 | 63.7698269 |

61.6030777 62.5164707 66.2200967 61.0018663 63.7698269  
63.6030777 62.5164707 66.2200967 60.0018663 63.7698269  
63.6030777 62.5164707 66.2200967 60.0018663 64.7698269  
63.6030777 64.5164707 62.2200967 60.0018663 65.7698269  
64.6030777 64.5164707 61.2200967 60.0018663 65.7698269  
62.6030777 64.5164707 60.2200967 58.0018663 65.7698269  
62.6030777 64.5164707 60.2200967 58.0018663 65.7698269  
62.6030777 65.5164707 60.2200967 58.0018663 65.7698269  
62.6030777 65.5164707 59.2200967 57.0018663 64.7698269  
62.6030777 64.5164707 59.2200967 57.0018663 64.7698269  
61.6030777 63.5164707 58.2200967 57.0018663 64.7698269  
61.6030777 63.5164707 58.2200967 58.0018663 64.7698269  
61.6030777 63.5164707 58.2200967 58.0018663 64.7698269  
60.6030777 63.5164707 58.2200967 63.0018663 64.7698269  
60.6030777 63.5164707 58.2200967 66.0018663 64.7698269  
60.6030777 63.5164707 58.2200967 66.0018663 63.7698269  
60.6030777 63.5164707 57.2200967 66.0018663 61.7698269  
61.6030777 64.5164707 57.2200967 66.0018663 60.7698269  
61.6030777 65.5164707 61.2200967 68.0018663 59.7698269  
60.6030777 66.5164707 70.2200967 68.0018663 59.7698269  
60.6030777 66.5164707 73.2200967 68.0018663 58.7698269  
60.6030777 67.5164707 75.2200967 69.0018663 58.7698269  
60.6030777 67.5164707 75.2200967 69.0018663 58.7698269  
60.6030777 67.5164707 74.2200967 69.0018663 58.7698269  
60.6030777 66.5164707 73.2200967 69.0018663 58.7698269  
61.6030777 66.5164707 72.2200967 69.0018663 58.7698269  
61.6030777 66.5164707 72.2200967 69.0018663 58.7698269  
61.6030777 66.5164707 69.2200967 68.0018663 58.7698269  
60.6030777 65.5164707 67.2200967 69.0018663 59.7698269  
60.6030777 66.5164707 67.2200967 70.0018663 60.7698269  
60.6030777 66.5164707 65.2200967 71.0018663 60.7698269  
60.6030777 66.5164707 64.2200967 71.0018663 60.7698269  
60.6030777 67.5164707 64.2200967 71.0018663 56.7698269  
60.6030777 66.5164707 62.2200967 71.0018663 56.7698269  
60.6030777 65.5164707 61.2200967 70.0018663 56.7698269  
61.6030777 65.5164707 61.2200967 70.0018663 56.7698269  
61.6030777 65.5164707 61.2200967 69.0018663 57.7698269  
61.6030777 65.5164707 60.2200967 67.0018663 57.7698269  
61.6030777 65.5164707 60.2200967 67.0018663 58.7698269  
61.6030777 64.5164707 59.2200967 67.0018663 58.7698269  
61.6030777 64.5164707 59.2200967 68.0018663 59.7698269  
60.6030777 64.5164707 59.2200967 69.0018663 61.7698269  
60.6030777 64.5164707 59.2200967 69.0018663 62.7698269  
60.6030777 64.5164707 60.2200967 69.0018663 62.7698269  
60.6030777 63.5164707 60.2200967 68.0018663 62.7698269

|            |            |            |            |            |
|------------|------------|------------|------------|------------|
| 60.6030777 | 62.5164707 | 66.2200967 | 68.0018663 | 62.7698269 |
| 60.6030777 | 62.5164707 | 67.2200967 | 68.0018663 | 62.7698269 |
| 60.6030777 | 62.5164707 | 68.2200967 | 68.0018663 | 62.7698269 |
| 60.6030777 | 62.5164707 | 68.2200967 | 68.0018663 | 65.7698269 |
| 60.6030777 | 62.5164707 | 67.2200967 | 67.0018663 | 67.7698269 |
| 60.6030777 | 63.5164707 | 66.2200967 | 67.0018663 | 66.7698269 |
| 61.6030777 | 64.5164707 | 66.2200967 | 67.0018663 | 65.7698269 |
| 61.6030777 | 65.5164707 | 65.2200967 | 66.0018663 | 65.7698269 |
| 62.6030777 | 66.5164707 | 64.2200967 | 65.0018663 | 65.7698269 |
| 63.6030777 | 66.5164707 | 64.2200967 | 65.0018663 | 65.7698269 |
| 63.6030777 | 66.5164707 | 64.2200967 | 63.0018663 | 65.7698269 |
| 63.6030777 | 67.5164707 | 64.2200967 | 63.0018663 | 65.7698269 |
| 62.6030777 | 69.5164707 | 65.2200967 | 60.0018663 | 65.7698269 |
| 61.6030777 | 69.5164707 | 64.2200967 | 60.0018663 | 65.7698269 |
| 61.6030777 | 69.5164707 | 63.2200967 | 60.0018663 | 65.7698269 |
| 61.6030777 | 68.5164707 | 61.2200967 | 59.0018663 | 66.7698269 |
| 61.6030777 | 68.5164707 | 61.2200967 | 59.0018663 | 66.7698269 |
| 61.6030777 | 68.5164707 | 61.2200967 | 59.0018663 | 64.7698269 |
| 61.6030777 | 68.5164707 | 60.2200967 | 59.0018663 | 63.7698269 |
| 61.6030777 | 67.5164707 | 60.2200967 | 59.0018663 | 63.7698269 |
| 61.6030777 | 64.5164707 | 60.2200967 | 59.0018663 | 62.7698269 |
| 61.6030777 | 64.5164707 | 60.2200967 | 58.0018663 | 61.7698269 |
| 61.6030777 | 64.5164707 | 60.2200967 | 58.0018663 | 61.7698269 |
| 61.6030777 | 65.5164707 | 60.2200967 | 58.0018663 | 62.7698269 |
| 61.6030777 | 65.5164707 | 60.2200967 | 58.0018663 | 63.7698269 |
| 61.6030777 | 65.5164707 | 60.2200967 | 58.0018663 | 64.7698269 |
| 61.6030777 | 64.5164707 | 60.2200967 | 61.0018663 | 65.7698269 |
| 61.6030777 | 64.5164707 | 60.2200967 | 67.0018663 | 65.7698269 |

Avg of all    Behavior    Rolling avg

|            |    |            |
|------------|----|------------|
| 69.8222677 | 60 | 68.9575995 |
| 70.0222677 | 60 | 69.006298  |
| 70.2222677 | 60 | 69.0505189 |
| 70.4222677 | 60 | 69.0827995 |
| 70.4222677 | 60 | 69.0986622 |
| 70.6222677 | 60 | 69.1025845 |
| 70.6222677 | 60 | 69.1079995 |
| 71.0222677 | 60 | 69.1268472 |
| 70.6222677 | 61 | 69.1516651 |
| 70.6222677 | 61 | 69.1899158 |
| 70.4222677 | 61 | 69.226674  |
| 70.4222677 | 61 | 69.2604472 |
| 70.6222677 | 61 | 69.2927278 |
| 70.4222677 | 61 | 69.3309785 |
| 70.2222677 | 61 | 69.3528113 |
| 70.4222677 | 61 | 69.3761367 |
| 69.8222677 | 61 | 69.396477  |
| 69.6222677 | 61 | 69.4287576 |
| 69.2222677 | 61 | 69.4565605 |
| 69.4222677 | 61 | 69.4918262 |
| 69.4222677 | 61 | 69.5285844 |
| 69.6222677 | 61 | 69.5548948 |
| 69.4222677 | 61 | 69.5812053 |
| 69.6222677 | 61 | 69.6030381 |
| 69.6222677 | 61 | 69.6189008 |
| 69.8222677 | 61 | 69.6467038 |
| 70.4222677 | 61 | 69.6939097 |
| 70.6222677 | 61 | 69.7426082 |
| 70.4222677 | 61 | 69.7868291 |
| 70.4222677 | 61 | 69.8325425 |
| 70.6222677 | 61 | 69.8648231 |
| 70.6222677 | 61 | 69.8777007 |
| 70.2222677 | 61 | 69.9237602 |
| 70.2222677 | 61 | 69.9546206 |
| 70.2222677 | 61 | 69.9961807 |
| 70.0222677 | 61 | 70.0479819 |
| 69.8222677 | 61 | 70.1022677 |
| 68.8222677 | 61 | 70.1536962 |
| 68.4222677 | 61 | 70.2051248 |
| 68.2222677 | 61 | 70.2394105 |
| 68.4222677 | 61 | 70.2794105 |
| 69.6222677 | 61 | 70.3165534 |



|            |    |            |
|------------|----|------------|
| 70.0222677 | 61 | 70.3536962 |
| 70.0222677 | 61 | 70.3794105 |
| 70.0222677 | 61 | 70.4051248 |
| 69.6222677 | 61 | 70.4308391 |
| 69.0222677 | 61 | 70.4622677 |
| 69.4222677 | 61 | 70.4965534 |
| 69.0222677 | 61 | 70.5394105 |
| 69.2222677 | 61 | 70.5994105 |
| 69.4222677 | 61 | 70.6651248 |
| 70.0222677 | 61 | 70.7308391 |
| 69.6222677 | 61 | 70.8136962 |
| 69.6222677 | 61 | 70.9165534 |
| 69.2222677 | 61 | 71.0251248 |
| 69.2222677 | 61 | 71.1308391 |
| 69.0222677 | 61 | 71.2308391 |
| 68.6222677 | 61 | 71.3222677 |
| 68.4222677 | 61 | 71.4108391 |
| 69.0222677 | 61 | 71.4908391 |
| 70.0222677 | 61 | 71.5651248 |
| 70.4222677 | 61 | 71.6394105 |
| 70.6222677 | 61 | 71.6965534 |
| 71.2222677 | 61 | 71.7279819 |
| 71.4222677 | 61 | 71.7622677 |
| 71.2222677 | 61 | 71.7765534 |
| 71.6222677 | 61 | 71.7794105 |
| 72.0222677 | 61 | 71.7794105 |
| 72.8222677 | 61 | 71.7851248 |
| 73.6222677 | 61 | 71.7822677 |
| 73.6222677 | 61 | 71.7765534 |
| 73.6222677 | 61 | 71.7794105 |
| 73.8222677 | 61 | 71.7851248 |
| 72.8222677 | 61 | 71.8079819 |
| 73.2222677 | 61 | 71.8394105 |
| 73.2222677 | 61 | 71.8736962 |
| 73.2222677 | 61 | 71.9022677 |
| 72.8222677 | 61 | 71.9079819 |
| 72.4222677 | 61 | 71.8965534 |
| 72.4222677 | 61 | 71.8822677 |
| 72.6222677 | 61 | 71.8651248 |
| 72.8222677 | 61 | 71.8508391 |
| 73.6222677 | 61 | 71.8508391 |
| 74.6222677 | 61 | 71.8308391 |
| 74.8222677 | 61 | 71.8079819 |
| 75.0222677 | 61 | 71.7822677 |
| 75.6222677 | 61 | 71.7508391 |

|            |    |            |
|------------|----|------------|
| 76.8222677 | 61 | 71.7079819 |
| 76.8222677 | 61 | 71.6708391 |
| 76.8222677 | 61 | 71.6336962 |
| 76.4222677 | 61 | 71.6108391 |
| 76.0222677 | 61 | 71.5908391 |
| 75.6222677 | 61 | 71.5908391 |
| 75.2222677 | 61 | 71.5994105 |
| 74.8222677 | 61 | 71.6251248 |
| 75.0222677 | 61 | 71.6479819 |
| 74.4222677 | 61 | 71.6679819 |
| 72.8222677 | 61 | 71.6908391 |
| 72.8222677 | 61 | 71.7108391 |
| 71.4222677 | 61 | 71.7308391 |
| 70.8222677 | 61 | 71.7536962 |
| 70.6222677 | 61 | 71.7965534 |
| 70.6222677 | 61 | 71.8251248 |
| 70.0222677 | 61 | 71.805131  |
| 69.8222677 | 61 | 71.8165596 |
| 70.2222677 | 61 | 71.7405658 |
| 70.2222677 | 61 | 71.664572  |
| 70.4222677 | 61 | 71.5885782 |
| 70.6222677 | 61 | 71.5557629 |
| 70.6222677 | 61 | 71.5328683 |
| 70.4222677 | 61 | 71.5078308 |
| 70.0222677 | 61 | 71.4855711 |
| 69.2222677 | 61 | 71.4660892 |
| 69.0222677 | 61 | 71.4578771 |
| 68.8222677 | 61 | 71.4553793 |
| 68.6222677 | 61 | 71.4580403 |
| 69.0222677 | 61 | 71.4522885 |
| 68.0222677 | 61 | 71.4325685 |
| 67.4222677 | 61 | 71.3986421 |
| 67.4222677 | 61 | 71.3432872 |
| 67.2222677 | 61 | 71.287456  |
| 67.0222677 | 61 | 71.2121011 |
| 67.0222677 | 61 | 71.125397  |
| 67.0222677 | 61 | 71.0211531 |
| 67.6222677 | 61 | 70.9192903 |
| 67.8222677 | 61 | 70.8610224 |
| 69.0222677 | 61 | 70.8108498 |
| 69.2222677 | 61 | 70.7663915 |
| 70.2222677 | 61 | 70.7276474 |
| 70.6222677 | 71 | 70.7041415 |
| 71.4222677 | 71 | 70.6863498 |
| 72.0222677 | 71 | 70.6276616 |

|            |    |            |
|------------|----|------------|
| 72.0222677 | 71 | 70.5775447 |
| 72.6222677 | 71 | 70.5613961 |
| 73.0222677 | 71 | 70.5452475 |
| 74.2222677 | 61 | 70.590313  |
| 73.6222677 | 61 | 70.6463309 |
| 70.6227018 | 61 | 70.7028249 |
| 73.6222677 | 61 | 70.759319  |
| 68.3027018 | 61 | 70.8220035 |
| 68.3027018 | 61 | 70.8542676 |
| 68.3027018 | 61 | 70.9021903 |
| 71.5251997 | 61 | 70.947732  |
| 71.2196442 | 61 | 70.9999403 |
| 71.4696442 | 61 | 71.0516724 |
| 71.6640886 | 61 | 71.0986427 |
| 71.8585331 | 61 | 71.1460891 |
| 72.2474219 | 61 | 71.1825832 |
| 72.2474219 | 61 | 71.2066963 |
| 72.6085331 | 61 | 71.2312856 |
| 72.2196442 | 61 | 71.2420654 |
| 71.4418664 | 61 | 71.2533213 |
| 71.2474219 | 61 | 71.2517201 |
| 70.7474219 | 61 | 71.2572618 |
| 70.9140886 | 61 | 71.2785178 |
| 69.7474219 | 61 | 71.2926309 |
| 69.5529775 | 61 | 71.3119821 |
| 69.5251997 | 61 | 71.3365714 |
| 69.6918664 | 61 | 71.3730654 |
| 72.7435183 | 61 | 71.4119405 |
| 72.910185  | 61 | 71.444625  |
| 72.910185  | 61 | 71.4768333 |
| 72.910185  | 61 | 71.4966607 |
| 73.5768517 | 73 | 71.5207738 |
| 73.5768517 | 73 | 71.5306012 |
| 70.9140886 | 73 | 71.5299524 |
| 70.9140886 | 73 | 71.5056151 |
| 71.6918664 | 73 | 71.4686247 |
| 71.6918664 | 73 | 71.4255119 |
| 74.5768517 | 73 | 71.3758685 |
| 74.7435183 | 73 | 71.3225516 |
| 74.5768517 | 73 | 71.2582143 |
| 74.5768517 | 73 | 71.2024484 |
| 74.410185  | 73 | 71.216064  |
| 72.0807553 | 73 | 71.1682909 |
| 73.5768517 | 73 | 71.1918469 |
| 73.410185  | 73 | 71.2189015 |

|            |    |            |
|------------|----|------------|
| 74.0768517 | 73 | 71.2506207 |
| 74.2435183 | 73 | 71.2342635 |
| 73.910185  | 73 | 71.2199389 |
| 73.7435183 | 73 | 71.2186611 |
| 72.5768517 | 73 | 71.2146054 |
| 70.910185  | 73 | 71.207772  |
| 70.7435183 | 73 | 71.195966  |
| 69.5768517 | 73 | 71.1940727 |
| 69.410185  | 73 | 71.1849798 |
| 68.910185  | 73 | 71.1837748 |
| 68.410185  | 73 | 71.1863923 |
| 68.910185  | 73 | 71.1891636 |
| 68.410185  | 73 | 71.1967455 |
| 68.5768517 | 73 | 71.2022379 |
| 68.7435183 | 73 | 71.2246886 |
| 69.5768517 | 73 | 71.249917  |
| 69.7435183 | 73 | 71.2781662 |
| 69.910185  | 73 | 71.3095737 |
| 70.0768517 | 73 | 71.3049664 |
| 70.410185  | 73 | 71.2979782 |
| 70.910185  | 73 | 71.2979871 |
| 70.910185  | 73 | 71.3023691 |
| 70.5768517 | 73 | 71.294895  |
| 69.7186557 | 73 | 71.2824645 |
| 69.4329414 | 73 | 71.3098229 |
| 69.00437   | 73 | 71.3348488 |
| 69.1472271 | 61 | 71.3481806 |
| 69.2900843 | 61 | 71.3588885 |
| 69.7186557 | 61 | 71.3213852 |
| 69.7186557 | 61 | 71.2838333 |
| 71.5757986 | 61 | 71.2507032 |
| 70.2781515 | 61 | 71.2315672 |
| 69.9516209 | 61 | 71.2218093 |
| 70.1965189 | 61 | 71.2359995 |
| 70.5230495 | 61 | 71.2334816 |
| 70.3801923 | 61 | 71.2269307 |
| 70.216927  | 61 | 71.2088152 |
| 71.3801923 | 61 | 71.1854032 |
| 71.3801923 | 61 | 71.1699602 |
| 71.3801923 | 61 | 71.1612713 |
| 71.4210087 | 61 | 71.1683744 |
| 72.1148862 | 61 | 71.19229   |
| 71.9720291 | 61 | 71.2347919 |
| 72.1352944 | 61 | 71.2488921 |
| 71.6250903 | 61 | 71.263624  |

|            |    |            |
|------------|----|------------|
| 71.4414168 | 61 | 71.2834579 |
| 71.2781515 | 61 | 71.3081024 |
| 71.2985597 | 61 | 71.3264786 |
| 71.3189678 | 61 | 71.3566623 |
| 71.3189678 | 61 | 71.3844652 |
| 71.5026413 | 61 | 71.4189249 |
| 71.8903964 | 63 | 71.4368152 |
| 72.4210087 | 63 | 71.452033  |
| 72.4210087 | 63 | 71.4622459 |
| 72.9108046 | 63 | 71.4700779 |
| 73.216927  | 63 | 71.4632355 |
| 73.0536617 | 63 | 71.44167   |
| 72.7067229 | 63 | 71.4450563 |
| 72.8291719 | 63 | 71.4511637 |
| 72.6659066 | 63 | 71.4715719 |
| 72.6250903 | 63 | 71.4940208 |
| 72.4414168 | 63 | 71.5266739 |
| 71.9516209 | 63 | 71.559327  |
| 72.1148862 | 63 | 71.5980232 |
| 72.2577434 | 63 | 71.6044493 |
| 73.2373352 | 63 | 71.6088665 |
| 73.7271311 | 63 | 71.5970525 |
| 73.0740699 | 63 | 71.6073478 |
| 73.4006005 | 63 | 71.6240935 |
| 72.9516209 | 63 | 71.6426977 |
| 72.8087638 | 63 | 71.6548516 |
| 72.6046821 | 63 | 71.6672605 |
| 72.8291719 | 63 | 71.6855733 |
| 73.1352944 | 63 | 71.6872679 |
| 73.0740699 | 63 | 71.6996769 |
| 72.584274  | 63 | 71.7245858 |
| 73.7186557 | 63 | 71.7328087 |
| 70.5638658 | 63 | 71.7382619 |
| 70.4414168 | 63 | 71.743747  |
| 70.2985597 | 63 | 71.7455605 |
| 70.1352944 | 63 | 71.7591269 |
| 70.1965189 | 63 | 71.7829064 |
| 70.5230495 | 63 | 71.8009827 |
| 70.5230495 | 63 | 71.8158656 |
| 71.1557025 | 63 | 71.8239837 |
| 70.8291719 | 63 | 71.8341107 |
| 70.8087638 | 63 | 71.8483418 |
| 70.6250903 | 63 | 71.8516764 |
| 70.6250903 | 63 | 71.8385023 |
| 69.9312127 | 63 | 71.8288996 |

|            |    |            |
|------------|----|------------|
| 69.4006005 | 63 | 71.8087283 |
| 71.1472271 | 63 | 71.7877554 |
| 71.00437   | 63 | 71.7655433 |
| 71.1472271 | 63 | 71.7357875 |
| 71.00437   | 63 | 71.6971396 |
| 71.2900843 | 63 | 71.6608241 |
| 71.4329414 | 63 | 71.6286663 |
| 71.9988183 | 63 | 71.5901974 |
| 70.1684868 | 63 | 71.5551573 |
| 70.0278618 | 63 | 71.5195706 |
| 70.7488183 | 63 | 71.4819431 |
| 70.9988183 | 63 | 71.4249643 |
| 71.1238183 | 63 | 71.3627741 |
| 71.4988183 | 63 | 71.306342  |
| 71.3738183 | 63 | 71.2398879 |
| 71.2488183 | 63 | 71.1798479 |
| 71.4988183 | 63 | 71.120063  |
| 71.4988183 | 63 | 71.0631935 |
| 72.2488183 | 71 | 71.0120456 |
| 73.1238183 | 71 | 70.9547388 |
| 71.9966118 | 71 | 70.9054495 |
| 72.4966118 | 71 | 70.8542287 |
| 72.3559868 | 71 | 70.7903739 |
| 72.2622368 | 71 | 70.7644446 |
| 72.5747368 | 63 | 70.7331218 |
| 73.1059868 | 63 | 70.6966969 |
| 72.5434868 | 63 | 70.6661758 |
| 72.3403618 | 63 | 70.6419229 |
| 71.8872368 | 63 | 70.6130054 |
| 72.0278618 | 63 | 70.5912306 |
| 72.4988183 | 63 | 70.560418  |
| 72.1238183 | 63 | 70.5360558 |
| 71.4988183 | 63 | 70.5119852 |
| 71.7488183 | 63 | 70.4851813 |
| 71.4988183 | 63 | 70.4530202 |
| 71.7488183 | 63 | 70.4325575 |
| 71.4988183 | 63 | 70.425032  |
| 70.6238183 | 63 | 70.4014833 |
| 70.1238183 | 63 | 70.3799754 |
| 70.1238183 | 63 | 70.3564267 |
| 70.3738183 | 63 | 70.3213722 |
| 69.7488183 | 63 | 70.2802271 |
| 69.4988183 | 63 | 70.2372643 |
| 69.6238183 | 63 | 70.1817534 |
| 69.6238183 | 63 | 70.1463632 |

|            |    |            |
|------------|----|------------|
| 69.2488183 | 63 | 70.1209483 |
| 69.3738183 | 63 | 70.0709483 |
| 69.1238183 | 63 | 70.010234  |
| 68.7488183 | 63 | 69.9495197 |
| 68.7488183 | 63 | 69.8870197 |
| 68.6238183 | 63 | 69.835234  |
| 68.6238183 | 63 | 69.7816626 |
| 69.2488183 | 63 | 69.7263055 |
| 69.1238183 | 63 | 69.6709483 |
| 69.6238183 | 63 | 69.6030912 |
| 68.9988183 | 63 | 69.5316626 |
| 69.2488183 | 63 | 69.4816941 |
| 68.7488183 | 63 | 69.4281542 |
| 68.2488183 | 63 | 69.3748375 |
| 67.7488183 | 63 | 69.3246458 |
| 67.9988183 | 63 | 69.2789184 |
| 68.4988183 | 63 | 69.2309589 |
| 68.4988183 | 63 | 69.191035  |
| 68.9988183 | 63 | 69.1593701 |
| 68.9988183 | 63 | 69.1395356 |
| 69.1238183 | 63 | 69.1194778 |
| 69.1238183 | 63 | 69.0891207 |
| 68.7488183 | 63 | 69.0676921 |
| 68.3738183 | 63 | 69.0587635 |
| 68.4988183 | 63 | 69.0409064 |
| 68.8738183 | 63 | 69.024835  |
| 69.4988183 | 63 | 69.0069778 |
| 69.4988183 | 63 | 68.9891207 |
| 69.4988183 | 63 | 68.9909064 |
| 68.550551  | 63 | 69.0069778 |
| 68.409926  | 63 | 69.0194778 |
| 68.425551  | 63 | 69.0230493 |
| 68.113051  | 63 | 69.0337635 |
| 67.691176  | 63 | 69.0444778 |
| 68.2488183 | 63 | 69.0516207 |
| 67.2488183 | 63 | 69.0551921 |
| 66.7488183 | 63 | 69.062335  |
| 66.8738183 | 63 | 69.0676921 |
| 67.1238183 | 63 | 69.0766207 |
| 67.7488183 | 63 | 69.0962635 |
| 67.4988183 | 63 | 69.1141207 |
| 67.6238183 | 63 | 69.1391207 |
| 67.6238183 | 63 | 69.162335  |
| 67.4988183 | 63 | 69.1730493 |
| 68.1238183 | 63 | 69.187335  |

|            |    |            |
|------------|----|------------|
| 68.4988183 | 63 | 69.2087635 |
| 68.7488183 | 63 | 69.2426921 |
| 68.6238183 | 63 | 69.2730493 |
| 68.7488183 | 63 | 69.312335  |
| 69.3738183 | 63 | 69.3480493 |
| 69.7488183 | 63 | 69.3926921 |
| 69.7488183 | 63 | 69.437335  |
| 70.1238183 | 63 | 69.474835  |
| 70.4988183 | 63 | 69.5105493 |
| 70.6238183 | 63 | 69.5355493 |
| 70.3738183 | 63 | 69.5694778 |
| 70.6238183 | 63 | 69.6069778 |
| 70.8738183 | 63 | 69.6462635 |
| 70.4988183 | 63 | 69.6909064 |
| 70.3738183 | 63 | 69.737335  |
| 70.4988183 | 63 | 69.7633249 |
| 70.2488183 | 63 | 69.7857433 |
| 70.7488183 | 63 | 69.7992332 |
| 71.2488183 | 63 | 69.8127231 |
| 70.9988183 | 63 | 69.8412945 |
| 70.6238183 | 63 | 69.8816269 |
| 70.4988183 | 63 | 69.925754  |
| 70.2488183 | 63 | 69.9750149 |
| 70.1238183 | 63 | 70.0198116 |
| 69.8738183 | 63 | 70.0777779 |
| 69.7488183 | 63 | 70.1349208 |
| 69.7488183 | 63 | 70.1938493 |
| 69.7488183 | 63 | 70.2759922 |
| 70.1238183 | 63 | 70.3581351 |
| 69.9988183 | 63 | 70.4151241 |
| 70.3738183 | 63 | 70.4453274 |
| 70.2488183 | 63 | 70.4791022 |
| 69.9988183 | 63 | 70.4930108 |
| 70.1238183 | 63 | 70.5046874 |
| 71.1238183 | 63 | 70.51748   |
| 71.3738183 | 63 | 70.5460514 |
| 71.3738183 | 63 | 70.5692657 |
| 71.4988183 | 63 | 70.5978371 |
| 70.7488183 | 63 | 70.6246229 |
| 70.8738183 | 63 | 70.6531943 |
| 71.1238183 | 63 | 70.6817657 |
| 71.1238183 | 63 | 70.7085514 |
| 70.9988183 | 63 | 70.7335514 |
| 70.7488183 | 63 | 70.7478371 |
| 71.3738183 | 63 | 70.7531943 |



|            |    |            |
|------------|----|------------|
| 71.7488183 | 63 | 70.7531943 |
| 71.8738183 | 63 | 70.7514086 |
| 71.8738183 | 63 | 70.7442657 |
| 71.6238183 | 63 | 70.7335514 |
| 70.3181107 | 63 | 70.7317657 |
| 70.4431107 | 63 | 70.7246229 |
| 70.4431107 | 63 | 70.7210514 |
| 70.4431107 | 63 | 70.7228371 |
| 71.4988183 | 63 | 70.71748   |
| 71.3738183 | 71 | 70.7014086 |
| 71.4988183 | 71 | 70.6889086 |
| 71.8738183 | 71 | 70.6548262 |
| 71.2488183 | 71 | 70.6245384 |
| 71.7488183 | 71 | 70.5920185 |
| 72.2488183 | 71 | 70.5615076 |
| 71.3738183 | 71 | 70.534568  |
| 72.4988183 | 71 | 70.5094142 |
| 72.6238183 | 71 | 70.4844836 |
| 71.113051  | 71 | 70.4615619 |
| 69.863051  | 71 | 70.4312742 |
| 69.863051  | 71 | 70.4050043 |
| 68.597426  | 71 | 70.3925043 |
| 68.441176  | 63 | 70.3996472 |
| 68.394301  | 63 | 70.4139329 |
| 70.1238183 | 63 | 70.41929   |
| 70.1238183 | 63 | 70.3996472 |
| 70.7488183 | 63 | 70.3728614 |
| 70.4988183 | 63 | 70.3371472 |
| 70.7488183 | 63 | 70.3014329 |
| 71.3738183 | 63 | 70.28179   |
| 71.6238183 | 63 | 70.2603614 |
| 71.4988183 | 63 | 70.2478614 |
| 71.1238183 | 63 | 70.2389329 |
| 70.8738183 | 63 | 70.23179   |
| 70.6238183 | 63 | 70.2210757 |
| 70.2488183 | 63 | 70.1960757 |
| 70.1238183 | 63 | 70.1603614 |
| 70.1238183 | 63 | 70.1228614 |
| 70.3738183 | 63 | 70.0871472 |
| 69.8738183 | 63 | 70.0603614 |
| 70.2488183 | 71 | 70.0522287 |
| 70.3738183 | 71 | 70.0458817 |
| 70.3738183 | 71 | 70.0431061 |
| 70.1238183 | 71 | 70.0564019 |
| 70.1238183 | 71 | 70.0510447 |

|            |    |            |
|------------|----|------------|
| 68.238051  | 71 | 70.0456876 |
| 68.378676  | 71 | 70.0403305 |
| 67.972426  | 71 | 70.0189019 |
| 67.988051  | 63 | 70.0046162 |
| 67.988051  | 63 | 69.9796162 |
| 67.988051  | 63 | 69.9439019 |
| 68.003676  | 63 | 69.9189019 |
| 68.144301  | 63 | 69.8706876 |
| 68.003676  | 63 | 69.8224733 |
| 68.159926  | 63 | 69.79227   |
| 69.4988183 | 63 | 69.7799238 |
| 70.7488183 | 63 | 69.7711491 |
| 70.9988183 | 63 | 69.7840261 |
| 70.4988183 | 63 | 69.7991353 |
| 69.7488183 | 63 | 69.8166998 |
| 69.4988183 | 63 | 69.8113427 |
| 68.8738183 | 63 | 69.8041998 |
| 68.9988183 | 63 | 69.8006284 |
| 69.3738183 | 63 | 69.7988427 |
| 69.3738183 | 63 | 69.7934855 |
| 70.2488183 | 63 | 69.7809855 |
| 70.4988183 | 63 | 69.7577712 |
| 70.4988183 | 63 | 69.7309855 |
| 69.9988183 | 63 | 69.7131284 |
| 69.6238183 | 63 | 69.6934855 |
| 69.2488183 | 63 | 69.6881284 |
| 69.2488183 | 63 | 69.6845569 |
| 69.3738183 | 63 | 69.6934855 |
| 69.7488183 | 63 | 69.6912479 |
| 69.7488183 | 63 | 69.6934746 |
| 69.9988183 | 63 | 69.7220461 |
| 70.2488183 | 63 | 69.7434746 |
| 71.3738183 | 63 | 69.7488318 |
| 71.1238183 | 63 | 69.7470461 |
| 70.9988183 | 63 | 69.7416889 |
| 71.1238183 | 63 | 69.7381175 |
| 70.3738183 | 63 | 69.7668427 |
| 70.2488183 | 63 | 69.7899876 |
| 69.9988183 | 63 | 69.8189361 |
| 69.7488183 | 63 | 69.8440899 |
| 69.6238183 | 63 | 69.8710294 |
| 69.1238183 | 63 | 69.8961833 |
| 69.2488183 | 63 | 69.9193281 |
| 68.9988183 | 63 | 69.9440355 |
| 68.9988183 | 63 | 69.9707519 |

|            |    |            |
|------------|----|------------|
| 69.2488183 | 63 | 70.0023789 |
| 69.4988183 | 63 | 70.0095217 |
| 69.4988183 | 63 | 70.0005932 |
| 69.6238183 | 63 | 69.9916646 |
| 69.7488183 | 63 | 69.9898789 |
| 69.6238183 | 63 | 70.0023789 |
| 70.4988183 | 63 | 70.0291646 |
| 70.3738183 | 63 | 70.0684503 |
| 70.3738183 | 63 | 70.1130932 |
| 70.4988183 | 63 | 70.1595217 |
| 69.9988183 | 63 | 70.2059503 |
| 69.6238183 | 63 | 70.232736  |
| 69.8738183 | 63 | 70.2523789 |
| 69.4988183 | 63 | 70.2684503 |
| 70.2488183 | 63 | 70.3005932 |
| 69.9988183 | 63 | 70.3416646 |
| 70.7488183 | 63 | 70.3880932 |
| 69.9671874 | 63 | 70.4363075 |
| 70.5296874 | 63 | 70.4863075 |
| 71.8738183 | 63 | 70.5309503 |
| 71.7488183 | 63 | 70.5863075 |
| 70.7488183 | 63 | 70.6398789 |
| 70.2488183 | 63 | 70.6809503 |
| 69.7488183 | 63 | 70.7005932 |
| 69.8738183 | 63 | 70.7113075 |
| 70.2488183 | 63 | 70.7059503 |
| 69.9988183 | 63 | 70.6988075 |
| 69.9988183 | 63 | 70.7023789 |
| 69.7488183 | 63 | 70.707736  |
| 69.8738183 | 63 | 70.7238075 |
| 69.7488183 | 63 | 70.7523789 |
| 69.6238183 | 63 | 70.7809503 |
| 69.8738183 | 63 | 70.8113075 |
| 69.8738183 | 63 | 70.8363075 |
| 70.3738183 | 63 | 70.8595217 |
| 69.9988183 | 63 | 70.882736  |
| 70.1238183 | 63 | 70.9023789 |
| 70.3738183 | 63 | 70.9113075 |
| 70.3738183 | 63 | 70.9113075 |
| 70.6238183 | 63 | 70.9095217 |
| 71.3738183 | 63 | 70.9059503 |
| 71.6238183 | 63 | 70.907736  |
| 72.1238183 | 63 | 70.8753645 |
| 72.6238183 | 63 | 70.8432162 |
| 72.6238183 | 63 | 70.809059  |

|            |    |            |
|------------|----|------------|
| 72.1238183 | 63 | 70.773116  |
| 71.8738183 | 63 | 70.742307  |
| 71.6238183 | 63 | 70.7168552 |
| 72.2488183 | 63 | 70.6920729 |
| 72.4988183 | 63 | 70.6726478 |
| 72.4988183 | 63 | 70.6485353 |
| 72.6238183 | 63 | 70.6380387 |
| 72.8738183 | 63 | 70.6168279 |
| 72.8738183 | 63 | 70.6047744 |
| 73.6238183 | 63 | 70.5826762 |
| 73.7488183 | 63 | 70.5413761 |
| 73.1238183 | 63 | 70.4998528 |
| 72.7488183 | 63 | 70.4980671 |
| 71.8738183 | 63 | 70.5034242 |
| 70.6238183 | 63 | 70.4980671 |
| 70.6238183 | 63 | 70.4909242 |
| 70.6238183 | 63 | 70.4837813 |
| 70.6238183 | 63 | 70.4837813 |
| 71.1238183 | 63 | 70.4837813 |
| 71.7488183 | 63 | 70.4855671 |
| 71.6238183 | 63 | 70.4855671 |
| 71.2488183 | 63 | 70.4855671 |
| 70.9988183 | 63 | 70.4837813 |
| 70.6238183 | 63 | 70.4819956 |
| 70.6238183 | 63 | 70.4855671 |
| 70.6238183 | 63 | 70.4748528 |
| 70.1238183 | 63 | 70.4605671 |
| 69.4988183 | 63 | 70.4266385 |
| 69.4988183 | 63 | 70.3909242 |
| 69.4988183 | 63 | 70.3569956 |
| 69.7488183 | 63 | 70.3284242 |
| 68.2328124 | 63 | 70.3034242 |
| 68.1234374 | 63 | 70.2730671 |
| 67.9828124 | 63 | 70.2516385 |
| 67.9828124 | 63 | 70.2266385 |
| 67.8421874 | 63 | 70.1944956 |
| 67.8421874 | 63 | 70.1641385 |
| 68.1390624 | 63 | 70.1480671 |
| 68.1390624 | 63 | 70.1230671 |
| 68.5609374 | 63 | 70.0944956 |
| 69.2640624 | 63 | 70.042747  |
| 69.2640624 | 63 | 69.9916679 |
| 69.1234374 | 63 | 69.9468389 |
| 68.9828124 | 63 | 69.9164817 |
| 68.9828124 | 63 | 69.8879103 |

|            |    |            |
|------------|----|------------|
| 68.8421874 | 63 | 69.8343389 |
| 70.6238183 | 63 | 69.7789817 |
| 70.6238183 | 63 | 69.7135745 |
| 69.3738183 | 63 | 69.6535244 |
| 69.3738183 | 63 | 69.6077601 |
| 69.7488183 | 63 | 69.6041886 |
| 69.9988183 | 63 | 69.6041886 |
| 69.9988183 | 63 | 69.6059743 |
| 69.8738183 | 63 | 69.5988315 |
| 69.8738183 | 63 | 69.5809743 |
| 69.7488183 | 63 | 69.5613315 |
| 69.4988183 | 63 | 69.5524029 |
| 69.7488183 | 63 | 69.5541886 |
| 70.1238183 | 63 | 69.5702601 |
| 69.6238183 | 63 | 69.5916886 |
| 68.9988183 | 63 | 69.5951339 |
| 67.7488183 | 63 | 69.6237053 |
| 67.8738183 | 63 | 69.636972  |
| 67.9988183 | 63 | 69.6726863 |
| 68.6238183 | 63 | 69.7101863 |
| 69.6238183 | 63 | 69.7351863 |
| 69.4988183 | 63 | 69.7601863 |
| 70.6238183 | 63 | 69.8068435 |
| 70.8738183 | 63 | 69.8622061 |
| 70.3738183 | 63 | 69.9142205 |
| 69.9988183 | 63 | 69.9662348 |
| 70.7488183 | 63 | 70.0131153 |
| 69.8738183 | 63 | 70.0617814 |
| 70.2488183 | 63 | 70.1062065 |
| 68.8764109 | 63 | 70.1488459 |
| 68.9232859 | 63 | 70.1908156 |
| 69.4857859 | 63 | 70.2263121 |
| 70.7488183 | 63 | 70.2671658 |
| 70.8738183 | 63 | 70.3100284 |
| 69.8738183 | 63 | 70.3566856 |
| 69.8738183 | 63 | 70.3979857 |
| 68.5453124 | 63 | 70.4341518 |
| 68.5453124 | 63 | 70.4323661 |
| 68.6703124 | 63 | 70.427009  |
| 70.3738183 | 63 | 70.4412947 |
| 70.6238183 | 63 | 70.4555804 |
| 70.7488183 | 63 | 70.4591518 |
| 70.1238183 | 63 | 70.4609376 |
| 69.8738183 | 63 | 70.464509  |
| 70.3738183 | 63 | 70.4609376 |

|            |    |            |
|------------|----|------------|
| 70.9988183 | 63 | 70.4609376 |
| 71.3738183 | 63 | 70.4537947 |
| 72.1238183 | 63 | 70.452009  |
| 72.1238183 | 63 | 70.4466518 |
| 70.8649857 | 63 | 70.4305804 |
| 72.6238183 | 63 | 70.4216518 |
| 71.0524857 | 63 | 70.4162947 |
| 71.9988183 | 63 | 70.4359376 |
| 72.1238183 | 63 | 70.4502233 |
| 71.2488183 | 63 | 70.4609376 |
| 71.4988183 | 63 | 70.4627233 |
| 71.4988183 | 63 | 70.4502233 |
| 71.9988183 | 63 | 70.439509  |
| 71.6238183 | 63 | 70.4127233 |
| 71.6238183 | 63 | 70.3877233 |
| 71.1238183 | 63 | 70.3734376 |
| 71.2488183 | 63 | 70.3698661 |
| 71.2488183 | 63 | 70.3609376 |
| 71.1238183 | 63 | 70.3680804 |
| 71.4988183 | 63 | 70.3698661 |
| 71.7488183 | 63 | 70.3859005 |
| 72.1238183 | 63 | 70.4137653 |
| 72.1238183 | 63 | 70.4264514 |
| 72.2488183 | 63 | 70.4157372 |
| 71.8738183 | 63 | 70.39788   |
| 71.3738183 | 63 | 70.3960943 |
| 70.4988183 | 63 | 70.39788   |
| 70.2488183 | 63 | 70.4132872 |
| 70.3738183 | 63 | 70.4358373 |
| 70.3738183 | 63 | 70.4494588 |
| 69.9988183 | 63 | 70.4441017 |
| 70.1238183 | 63 | 70.4351731 |
| 70.2488183 | 63 | 70.417316  |
| 69.6238183 | 63 | 70.4083874 |
| 69.8738183 | 63 | 70.4030303 |
| 69.2488183 | 63 | 70.3905303 |
| 69.3738183 | 63 | 70.3708874 |
| 69.3738183 | 63 | 70.3476731 |
| 68.9988183 | 63 | 70.3155303 |
| 68.9988183 | 63 | 70.2887446 |
| 68.6238183 | 63 | 70.2799422 |
| 69.1238183 | 63 | 70.2477993 |
| 68.8738183 | 63 | 70.2381041 |
| 68.7488183 | 63 | 70.2077469 |
| 68.7488183 | 63 | 70.1773898 |

|            |    |            |
|------------|----|------------|
| 68.7488183 | 63 | 70.1595326 |
| 68.7488183 | 63 | 70.1559612 |
| 68.7488183 | 63 | 70.1738183 |
| 69.1238183 | 63 | 70.1898898 |
| 69.3738183 | 63 | 70.2148898 |
| 69.7488183 | 63 | 70.2416755 |
| 70.1238183 | 63 | 70.2720326 |
| 70.3738183 | 63 | 70.2970326 |
| 70.3738183 | 63 | 70.3202469 |
| 69.9988183 | 63 | 70.3488183 |
| 70.8738183 | 63 | 70.3738183 |
| 70.3738183 | 63 | 70.3934612 |
| 69.9988183 | 63 | 70.3970326 |
| 69.6238183 | 63 | 70.3988183 |
| 69.7488183 | 63 | 70.3845326 |
| 69.9988183 | 63 | 70.3666755 |
| 69.6238183 | 63 | 70.3363183 |
| 70.1238183 | 63 | 70.3148898 |
| 69.6238183 | 63 | 70.2934612 |
| 69.9988183 | 63 | 70.2684612 |
| 69.9988183 | 63 | 70.2434612 |
| 69.4988183 | 63 | 70.2291755 |
| 69.4988183 | 63 | 70.2148898 |
| 69.4988183 | 63 | 70.1952469 |
| 69.4988183 | 63 | 70.1863183 |
| 69.6238183 | 63 | 70.1684612 |
| 69.7488183 | 63 | 70.1613183 |
| 69.8738183 | 63 | 70.1470326 |
| 70.2488183 | 63 | 70.1291755 |
| 70.2488183 | 63 | 70.1131041 |
| 70.3738183 | 63 | 70.0934612 |
| 70.3738183 | 63 | 70.0863183 |
| 69.8738183 | 63 | 70.0666755 |
| 69.9988183 | 63 | 70.0488183 |
| 69.9988183 | 63 | 70.0149592 |
| 71.2488183 | 63 | 69.9811    |
| 72.7488183 | 63 | 69.9514819 |
| 73.1238183 | 63 | 69.944339  |
| 73.3738183 | 63 | 69.9300533 |
| 73.4988183 | 63 | 69.9121962 |
| 73.2488183 | 63 | 69.8854105 |
| 72.9988183 | 63 | 69.8479105 |
| 72.8738183 | 63 | 69.8104105 |
| 73.1238183 | 63 | 69.7711247 |
| 73.2488183 | 63 | 69.7425533 |

|            |    |            |
|------------|----|------------|
| 73.1238183 | 63 | 69.7354105 |
| 72.3738183 | 63 | 69.7211247 |
| 72.2488183 | 63 | 69.7211247 |
| 71.2488183 | 63 | 69.7246962 |
| 70.6238183 | 63 | 69.7336247 |
| 69.2488183 | 63 | 69.7300533 |
| 68.9988183 | 63 | 69.7211247 |
| 68.7488183 | 63 | 69.7121962 |
| 68.6238183 | 63 | 69.6961247 |
| 68.6238183 | 63 | 69.6907676 |
| 68.9988183 | 63 | 69.6800533 |
| 69.1238183 | 63 | 69.6639819 |
| 68.8738183 | 63 | 69.6550533 |
| 68.9988183 | 63 | 69.644339  |
| 68.6238183 | 63 | 69.6354105 |
| 68.7488183 | 63 | 69.6264819 |
| 68.3738183 | 63 | 69.6121962 |
| 68.1238183 | 63 | 69.5979105 |
| 67.8738183 | 63 | 69.5836247 |
| 67.6238183 | 63 | 69.5657676 |
| 68.1238183 | 63 | 69.5496962 |
| 67.7488183 | 63 | 69.5336247 |
| 67.6238183 | 63 | 69.5246962 |
| 66.378676  | 63 | 69.5229105 |
| 66.378676  | 63 | 69.5264819 |
| 66.675551  | 63 | 69.5389819 |
| 68.2488183 | 63 | 69.5371962 |
| 67.7488183 | 63 | 69.5157676 |
| 67.8738183 | 63 | 69.4889819 |
| 67.4988183 | 63 | 69.4586247 |
| 67.1238183 | 63 | 69.4264819 |
| 67.4988183 | 63 | 69.3979105 |
| 67.6238183 | 63 | 69.3746962 |
| 68.3738183 | 63 | 69.3246962 |
| 69.4988183 | 63 | 69.2425533 |
| 69.8738183 | 63 | 69.1496962 |
| 70.3738183 | 63 | 69.056839  |
| 70.2488183 | 63 | 68.9729105 |
| 70.2488183 | 63 | 68.8836247 |
| 69.4988183 | 63 | 68.8211247 |
| 69.3738183 | 63 | 68.7729105 |
| 68.9988183 | 63 | 68.7514819 |
| 68.9988183 | 63 | 68.7371962 |
| 69.2488183 | 63 | 68.7229105 |
| 69.2488183 | 63 | 68.7050533 |



|            |    |            |
|------------|----|------------|
| 68.8738183 | 63 | 68.6889819 |
| 68.8738183 | 63 | 68.656839  |
| 68.7488183 | 63 | 68.6264819 |
| 68.8738183 | 63 | 68.594339  |
| 68.8738183 | 63 | 68.5621962 |
| 68.6238183 | 63 | 68.5461247 |
| 68.7488183 | 63 | 68.5336247 |
| 68.8738183 | 63 | 68.5389819 |
| 68.9988183 | 63 | 68.5550533 |
| 69.1238183 | 63 | 68.5764819 |
| 69.2488183 | 63 | 68.6032676 |
| 69.7488183 | 63 | 68.619339  |
| 69.7488183 | 63 | 68.631839  |
| 70.2488183 | 63 | 68.6425533 |
| 70.8738183 | 63 | 68.6599317 |
| 71.1238183 | 63 | 68.6753011 |
| 71.2488183 | 63 | 68.6824116 |
| 71.2488183 | 63 | 68.6623594 |
| 71.2488183 | 63 | 68.64945   |
| 71.2488183 | 63 | 68.6329691 |
| 71.2488183 | 63 | 68.6229615 |
| 71.3738183 | 63 | 68.6317039 |
| 69.3738183 | 63 | 68.6495611 |
| 67.3738183 | 63 | 68.6656325 |
| 66.7488183 | 63 | 68.6727754 |
| 66.6238183 | 63 | 68.6584896 |
| 66.4988183 | 63 | 68.6370611 |
| 65.9988183 | 63 | 68.6084896 |
| 66.8738183 | 63 | 68.5870611 |
| 67.2488183 | 63 | 68.5602754 |
| 67.7488183 | 63 | 68.5495611 |
| 67.9988183 | 63 | 68.5442039 |
| 67.7488183 | 63 | 68.5442039 |
| 67.3738183 | 63 | 68.5495611 |
| 67.4988183 | 63 | 68.5549182 |
| 66.7488183 | 63 | 68.5602754 |
| 66.9988183 | 63 | 68.5692039 |
| 66.6238183 | 63 | 68.5727754 |
| 66.7488183 | 63 | 68.5460267 |
| 67.4988183 | 63 | 68.5154834 |
| 67.8738183 | 63 | 68.486949  |
| 68.7488183 | 63 | 68.4599771 |
| 69.2488183 | 63 | 68.4332284 |
| 69.3738183 | 63 | 68.4107208 |
| 69.4988183 | 63 | 68.3964721 |

|            |    |            |
|------------|----|------------|
| 69.2488183 | 63 | 68.3826699 |
| 68.6238183 | 63 | 68.3717694 |
| 68.3738183 | 63 | 68.3577439 |
| 67.5951609 | 63 | 68.3437185 |
| 67.4545359 | 63 | 68.326568  |
| 67.1732859 | 63 | 68.300489  |
| 66.8451609 | 63 | 68.2768653 |
| 66.8451609 | 63 | 68.2534648 |
| 66.7201609 | 63 | 68.2320733 |
| 66.7982859 | 63 | 68.2164853 |
| 67.7357859 | 63 | 68.2343425 |
| 68.7488183 | 63 | 68.2361282 |
| 68.7488183 | 63 | 68.2325568 |
| 68.8738183 | 63 | 68.2575568 |
| 68.4988183 | 63 | 68.2986282 |
| 68.3738183 | 63 | 68.3396996 |
| 68.3738183 | 63 | 68.3896996 |
| 68.7488183 | 63 | 68.4432711 |
| 68.3738183 | 63 | 68.5039853 |
| 68.7488183 | 63 | 68.5376853 |
| 68.9988183 | 63 | 68.5620102 |
| 68.9988183 | 63 | 68.5803083 |
| 69.3738183 | 63 | 68.6035171 |
| 69.6238183 | 63 | 68.6302974 |
| 69.6238183 | 63 | 68.6593098 |
| 69.4988183 | 63 | 68.6843044 |
| 69.1238183 | 63 | 68.7177811 |
| 66.8764109 | 75 | 68.7517042 |
| 66.7357859 | 63 | 68.7929934 |
| 66.8764109 | 63 | 68.830488  |
| 66.7357859 | 63 | 68.857045  |
| 66.8764109 | 63 | 68.8800307 |
| 67.2982859 | 63 | 68.8925252 |
| 68.0014109 | 63 | 68.8934126 |
| 68.1576609 | 63 | 68.8822465 |
| 68.4857859 | 63 | 68.8650535 |
| 68.7670359 | 63 | 68.8534409 |
| 68.7670359 | 63 | 68.8541051 |
| 69.0482859 | 63 | 68.8808909 |
| 69.0482859 | 63 | 68.9188002 |
| 69.4701609 | 63 | 68.9569329 |
| 69.6107859 | 63 | 69.0044405 |
| 69.7514109 | 63 | 69.0512784 |
| 70.1576609 | 63 | 69.1052592 |
| 72.4988183 | 63 | 69.1610258 |

|            |    |            |
|------------|----|------------|
| 71.3738183 | 63 | 69.2192477 |
| 71.1238183 | 63 | 69.2533624 |
| 71.1238183 | 63 | 69.2640767 |
| 70.2488183 | 63 | 69.2801481 |
| 69.6238183 | 63 | 69.2944338 |
| 70.1238183 | 63 | 69.312291  |
| 70.2488183 | 63 | 69.3283624 |
| 70.2488183 | 63 | 69.3480053 |
| 69.2328124 | 63 | 69.3658624 |
| 68.9515624 | 63 | 69.3962196 |
| 69.0296874 | 63 | 69.4212196 |
| 69.6234374 | 63 | 69.4462196 |
| 69.6234374 | 63 | 69.4730053 |
| 69.4046874 | 63 | 69.4962196 |
| 69.2484374 | 63 | 69.5158624 |
| 69.0921874 | 63 | 69.5426481 |
| 69.3734374 | 63 | 69.5765767 |
| 69.5140624 | 63 | 69.6105053 |
| 69.3734374 | 63 | 69.6640397 |
| 69.3578124 | 63 | 69.7142258 |
| 69.4828124 | 63 | 69.7624031 |
| 69.6234374 | 63 | 69.8108036 |
| 69.3109374 | 63 | 69.8571951 |
| 68.5921874 | 63 | 69.8797027 |
| 68.2953124 | 63 | 69.8903799 |
| 68.4359374 | 63 | 69.8988251 |
| 68.6703124 | 63 | 69.9061541 |
| 70.2488183 | 63 | 69.9148224 |
| 70.2488183 | 63 | 69.9324193 |
| 70.1238183 | 63 | 69.9440588 |
| 70.4988183 | 63 | 69.9519037 |
| 70.1238183 | 63 | 69.9537217 |
| 70.6238183 | 63 | 69.9492898 |
| 70.6238183 | 63 | 69.9446347 |
| 70.8738183 | 63 | 69.9294884 |
| 70.1238183 | 63 | 69.900917  |
| 69.4988183 | 63 | 69.8866313 |
| 69.8738183 | 63 | 69.8556739 |
| 69.8738183 | 63 | 69.8186897 |
| 69.7488183 | 63 | 69.7924199 |
| 69.4988183 | 63 | 69.7811053 |
| 69.7488183 | 63 | 69.7646569 |
| 69.9988183 | 63 | 69.7421816 |
| 70.4988183 | 63 | 69.7197064 |
| 70.4988183 | 63 | 69.7177723 |

|            |    |            |
|------------|----|------------|
| 70.7488183 | 63 | 69.7178471 |
| 70.8738183 | 63 | 69.7147969 |
| 70.9988183 | 63 | 69.7032646 |
| 70.9988183 | 63 | 69.7193415 |
| 71.4988183 | 63 | 69.7403291 |
| 71.8738183 | 63 | 69.7599774 |
| 71.4988183 | 63 | 69.7818578 |
| 70.6238183 | 63 | 69.7997204 |
| 70.2488183 | 63 | 69.8173598 |
| 70.2488183 | 63 | 69.8280795 |
| 70.1238183 | 63 | 69.8390225 |
| 70.1238183 | 63 | 69.8517511 |
| 68.8738183 | 63 | 69.8660423 |
| 68.7488183 | 63 | 69.8794406 |
| 68.7488183 | 63 | 69.9031067 |
| 68.9988183 | 63 | 69.9006303 |
| 69.3738183 | 63 | 69.8897957 |
| 69.9988183 | 63 | 69.8835493 |
| 69.863051  | 63 | 69.8531656 |
| 69.597426  | 63 | 69.8259565 |
| 69.597426  | 63 | 69.8005332 |
| 69.300551  | 63 | 69.7649907 |
| 69.425551  | 63 | 69.7268689 |
| 69.097426  | 63 | 69.6831916 |
| 70.4988183 | 63 | 69.6411015 |
| 70.3738183 | 63 | 69.600202  |
| 68.956801  | 63 | 69.5684294 |
| 68.534926  | 63 | 69.5392361 |
| 68.409926  | 63 | 69.5062731 |
| 68.831801  | 63 | 69.47331   |
| 68.972426  | 63 | 69.4405453 |
| 68.675551  | 63 | 69.4113521 |
| 68.675551  | 63 | 69.3881113 |
| 69.097426  | 63 | 69.3628863 |
| 68.956801  | 63 | 69.3289312 |
| 68.816176  | 63 | 69.2870395 |
| 68.816176  | 63 | 69.2463384 |
| 70.7488183 | 63 | 69.2006769 |
| 70.8738183 | 63 | 69.1532297 |
| 70.6238183 | 63 | 69.1010206 |
| 70.6238183 | 63 | 69.038494  |
| 70.6238183 | 63 | 68.9510479 |
| 70.7488183 | 63 | 68.8693116 |
| 70.1238183 | 63 | 68.798488  |
| 70.1238183 | 63 | 68.7330216 |

|            |    |            |
|------------|----|------------|
| 70.3738183 | 63 | 68.6657914 |
| 70.6238183 | 63 | 68.6021107 |
| 70.2488183 | 63 | 68.5366663 |
| 70.2488183 | 63 | 68.489079  |
| 68.1219592 | 63 | 68.4397502 |
| 67.6775148 | 63 | 68.392185  |
| 68.2330703 | 63 | 68.3376973 |
| 68.1219592 | 63 | 68.2743253 |
| 68.3441814 | 63 | 68.204141  |
| 68.3441814 | 63 | 68.172919  |
| 68.0108481 | 63 | 68.1486663 |
| 67.4552926 | 63 | 68.1275883 |
| 67.5664037 | 63 | 68.1091639 |
| 67.6775148 | 75 | 68.0826047 |
| 68.0108481 | 63 | 68.0394733 |
| 67.899737  | 63 | 67.9745584 |
| 67.4552926 | 63 | 67.9114292 |
| 67.5664037 | 63 | 67.8868045 |
| 67.5664037 | 63 | 67.8634446 |
| 67.4552926 | 63 | 67.8355213 |
| 67.4552926 | 63 | 67.8063331 |
| 68.1219592 | 63 | 67.7798978 |
| 68.2330703 | 63 | 67.7561164 |
| 68.1219592 | 63 | 67.7402714 |
| 67.5664037 | 63 | 67.7183997 |
| 67.899737  | 63 | 67.7048861 |
| 67.6775148 | 63 | 67.6949687 |
| 67.6775148 | 63 | 67.6818767 |
| 67.3441814 | 63 | 67.6380009 |
| 67.1219592 | 63 | 67.5939267 |
| 65.7525868 | 63 | 67.5518367 |
| 65.7772782 | 63 | 67.5113339 |
| 65.6661671 | 63 | 67.4755931 |
| 65.6661671 | 63 | 67.4396538 |
| 65.5427103 | 63 | 67.422167  |
| 65.6661671 | 63 | 67.409442  |
| 65.5427103 | 63 | 67.3931456 |
| 65.5427103 | 63 | 67.3701032 |
| 65.2957967 | 63 | 67.3524179 |
| 65.4192535 | 63 | 67.331558  |
| 65.1846856 | 63 | 67.3410818 |
| 64.937772  | 63 | 67.3617167 |
| 65.0859202 | 63 | 67.3760024 |
| 67.6775148 | 63 | 67.3934627 |
| 67.899737  | 63 | 67.4077485 |

|            |    |            |
|------------|----|------------|
| 68.1219592 | 63 | 67.4236215 |
| 68.0108481 | 63 | 67.4490183 |
| 67.5664037 | 63 | 67.4823516 |
| 66.0782311 | 63 | 67.5394945 |
| 65.9547743 | 63 | 67.5867751 |
| 65.9547743 | 63 | 67.6294701 |
| 67.2330703 | 63 | 67.6860981 |
| 66.899737  | 63 | 67.7473117 |
| 66.4552926 | 63 | 67.7981196 |
| 66.7886259 | 63 | 67.8418728 |
| 67.1219592 | 63 | 67.883686  |
| 67.0108481 | 63 | 67.9184445 |
| 67.5664037 | 63 | 67.9378591 |
| 67.5664037 | 63 | 67.9759544 |
| 68.0108481 | 63 | 68.0029385 |
| 68.1219592 | 63 | 68.0346845 |
| 67.899737  | 63 | 68.0648433 |
| 67.6775148 | 63 | 68.0981766 |
| 67.7886259 | 63 | 68.1362718 |
| 67.6775148 | 63 | 68.1743671 |
| 67.7886259 | 63 | 68.2156369 |
| 68.1219592 | 63 | 68.27012   |
| 68.2330703 | 63 | 68.3210758 |
| 68.899737  | 63 | 68.3720315 |
| 69.2330703 | 63 | 68.4229873 |
| 69.2330703 | 63 | 68.4757067 |
| 69.0108481 | 63 | 68.5203133 |
| 69.0108481 | 63 | 68.5650962 |
| 68.7886259 | 63 | 68.6067045 |
| 68.7886259 | 63 | 68.6470783 |
| 69.1219592 | 63 | 68.6872756 |
| 69.2330703 | 63 | 68.7371732 |
| 69.3441814 | 63 | 68.7890108 |
| 69.3441814 | 63 | 68.8355574 |
| 69.4552926 | 63 | 68.8434939 |
| 69.7886259 | 63 | 68.8466685 |
| 69.7886259 | 63 | 68.8371447 |
| 71.5664037 | 63 | 68.822859  |
| 70.9871547 | 63 | 68.8180971 |
| 70.9995004 | 63 | 68.840944  |
| 71.8636979 | 63 | 68.8734911 |
| 71.7402411 | 63 | 68.9138775 |
| 71.1229572 | 63 | 68.9465847 |
| 70.62913   | 63 | 68.9858174 |
| 70.3822165 | 63 | 69.0418049 |

|            |    |            |
|------------|----|------------|
| 69.8883893 | 63 | 69.0861523 |
| 69.4809819 | 63 | 69.120623  |
| 70.899737  | 63 | 69.1549175 |
| 70.0108481 | 63 | 69.1742207 |
| 69.7886259 | 63 | 69.193524  |
| 70.0108481 | 63 | 69.2115926 |
| 70.0108481 | 63 | 69.2310723 |
| 70.3441814 | 63 | 69.2540792 |
| 70.0108481 | 63 | 69.2758516 |
| 70.0108481 | 63 | 69.294273  |
| 69.5664037 | 63 | 69.3141053 |
| 69.3441814 | 63 | 69.3270594 |
| 69.2330703 | 63 | 69.3540435 |
| 69.2330703 | 63 | 69.3715038 |
| 69.2330703 | 63 | 69.3746784 |
| 68.7886259 | 63 | 69.3635673 |
| 68.6775148 | 63 | 69.3508689 |
| 68.4552926 | 63 | 69.3365832 |
| 68.1219592 | 63 | 69.3191229 |
| 68.2330703 | 63 | 69.3048372 |
| 68.6775148 | 63 | 69.2921387 |
| 68.5664037 | 63 | 69.2603927 |
| 68.3441814 | 63 | 69.2318213 |
| 68.2330703 | 63 | 69.1984879 |
| 68.1219592 | 63 | 69.1715038 |
| 67.4552926 | 63 | 69.1476943 |
| 67.0108481 | 63 | 69.1175356 |
| 67.2330703 | 63 | 69.0905514 |
| 67.6775148 | 63 | 69.0429324 |
| 68.2330703 | 63 | 69.0067629 |
| 68.7818283 | 63 | 68.9720044 |
| 69.5225691 | 63 | 68.9280748 |
| 69.6460258 | 63 | 68.8874962 |
| 70.3744209 | 63 | 68.8541486 |
| 69.8929394 | 63 | 68.8326176 |
| 69.5349147 | 63 | 68.8162012 |
| 69.4114579 | 63 | 68.7765187 |
| 68.9176308 | 63 | 68.7391289 |
| 68.9176308 | 63 | 68.6719474 |
| 69.2756555 | 63 | 68.6051851 |
| 69.485532  | 63 | 68.5480423 |
| 69.5102234 | 63 | 68.4742253 |
| 69.2015814 | 63 | 68.4023484 |
| 69.0781246 | 63 | 68.3257097 |
| 69.0657789 | 63 | 68.2644148 |

|            |    |            |
|------------|----|------------|
| 68.6954086 | 63 | 68.2084109 |
| 70.0108481 | 63 | 68.1587562 |
| 69.4552926 | 63 | 68.1193308 |
| 69.1219592 | 63 | 68.0850201 |
| 68.4552926 | 63 | 68.0492984 |
| 68.3441814 | 63 | 68.0119894 |
| 68.0108481 | 63 | 67.9739749 |
| 67.7886259 | 63 | 67.9414279 |
| 67.7886259 | 63 | 67.9120554 |
| 67.899737  | 63 | 67.8876212 |
| 66.899737  | 63 | 67.8578959 |
| 67.2330703 | 63 | 67.8218215 |
| 67.0108481 | 63 | 67.7822198 |
| 67.4552926 | 63 | 67.7457926 |
| 67.7886259 | 63 | 67.7134219 |
| 67.6775148 | 63 | 67.7007235 |
| 67.899737  | 63 | 67.6975489 |
| 68.2330703 | 63 | 67.7023108 |
| 68.4552926 | 63 | 67.70866   |
| 68.5664037 | 63 | 67.7070727 |
| 68.7886259 | 63 | 67.6943743 |
| 68.899737  | 63 | 67.6738364 |
| 68.7886259 | 63 | 67.622868  |
| 69.1219592 | 63 | 67.5666084 |
| 69.2330703 | 63 | 67.5185574 |
| 67.1106115 | 63 | 67.4837339 |
| 66.8636979 | 63 | 67.43788   |
| 66.1970313 | 63 | 67.4226332 |
| 65.3374903 | 63 | 67.3981197 |
| 65.7886259 | 63 | 67.3718426 |
| 64.8436632 | 63 | 67.3404508 |
| 64.9794657 | 63 | 67.3400188 |
| 64.9794657 | 63 | 67.3424087 |
| 65.7202064 | 63 | 67.332181  |
| 66.0905768 | 63 | 67.3203659 |
| 66.0905768 | 63 | 67.3164066 |
| 66.5844039 | 63 | 67.3209129 |
| 66.8313175 | 63 | 67.3034525 |
| 66.7325521 | 63 | 67.2891668 |
| 66.621441  | 63 | 67.2780557 |
| 66.1276138 | 63 | 67.2717065 |
| 66.3992187 | 63 | 67.2685319 |
| 66.3992187 | 63 | 67.2701192 |
| 66.4115644 | 63 | 67.2669446 |
| 66.1523052 | 63 | 67.2669446 |



|            |    |            |
|------------|----|------------|
| 66.1523052 | 63 | 67.26377   |
| 65.7942805 | 63 | 67.2701192 |
| 65.7942805 | 63 | 67.26377   |
| 65.96712   | 63 | 67.2621827 |
| 67.2330703 | 63 | 67.2526589 |
| 67.2330703 | 63 | 67.2367859 |
| 67.3441814 | 63 | 67.2240875 |
| 67.6775148 | 63 | 67.2098017 |
| 67.5664037 | 63 | 67.1939287 |
| 67.3441814 | 63 | 67.1732938 |
| 67.3441814 | 63 | 67.1590081 |
| 65.9547743 | 63 | 67.1415478 |
| 65.7078607 | 63 | 67.1145636 |
| 67.0108481 | 63 | 67.0907541 |
| 67.4552926 | 63 | 67.0653573 |
| 66.3251447 | 63 | 67.0732938 |
| 68.3441814 | 63 | 67.1147258 |
| 67.2016879 | 63 | 67.1580977 |
| 67.0782311 | 63 | 67.2109935 |
| 67.0782311 | 63 | 67.2761685 |
| 69.4552926 | 63 | 67.336486  |
| 69.6775148 | 63 | 67.4118902 |
| 68.4856385 | 63 | 67.4853544 |
| 68.2510706 | 63 | 67.5619932 |
| 68.7886259 | 63 | 67.62805   |
| 69.0108481 | 63 | 67.6872284 |
| 68.7886259 | 63 | 67.7432323 |
| 68.4552926 | 63 | 67.7890069 |
| 68.3441814 | 63 | 67.8296669 |
| 68.0108481 | 63 | 67.8764997 |
| 68.1219592 | 63 | 67.9265071 |
| 68.1219592 | 63 | 67.9835692 |
| 67.5664037 | 63 | 68.0367512 |
| 67.7886259 | 63 | 68.0946951 |
| 67.6775148 | 63 | 68.1524626 |
| 67.3441814 | 63 | 68.2123466 |
| 66.7886259 | 63 | 68.2738178 |
| 66.899737  | 63 | 68.3404037 |
| 66.7886259 | 63 | 68.4085769 |
| 66.6775148 | 63 | 68.4774555 |
| 66.7886259 | 63 | 68.5250746 |
| 66.899737  | 63 | 68.5758682 |
| 67.1219592 | 63 | 68.6219    |
| 67.0108481 | 63 | 68.669519  |
| 67.5664037 | 63 | 68.7155508 |

|            |    |            |
|------------|----|------------|
| 67.5664037 | 63 | 68.7631698 |
| 67.0108481 | 63 | 68.8044397 |
| 67.1219592 | 63 | 68.8655582 |
| 67.3441814 | 63 | 68.9190929 |
| 69.7886259 | 63 | 68.9444898 |
| 70.0108481 | 63 | 68.9286167 |
| 69.899737  | 63 | 68.9241268 |
| 69.899737  | 63 | 68.8939681 |
| 69.899737  | 63 | 68.8833053 |
| 70.0108481 | 63 | 68.8807554 |
| 70.1219592 | 63 | 68.8797927 |
| 70.1219592 | 63 | 68.8432848 |
| 70.3441814 | 63 | 68.8004277 |
| 70.3441814 | 63 | 68.7666608 |
| 70.2330703 | 63 | 68.7283084 |
| 70.0108481 | 63 | 68.6727529 |
| 69.7886259 | 63 | 68.61561   |
| 69.6775148 | 63 | 68.5664037 |
| 70.0108481 | 63 | 68.5235465 |
| 70.1219592 | 63 | 68.4886259 |
| 70.1219592 | 63 | 68.467991  |
| 70.1219592 | 63 | 68.447356  |
| 70.4552926 | 63 | 68.4298957 |
| 70.4552926 | 63 | 68.4187846 |
| 70.3441814 | 63 | 68.4029116 |
| 70.4552926 | 63 | 68.3870386 |
| 70.4552926 | 63 | 68.3727529 |
| 70.5664037 | 63 | 68.3711656 |
| 70.7886259 | 63 | 68.3695783 |
| 70.5664037 | 63 | 68.3695783 |
| 70.7886259 | 63 | 68.3664037 |
| 70.5664037 | 63 | 68.3616418 |
| 71.0108481 | 63 | 68.3505306 |
| 70.7886259 | 63 | 68.3362449 |
| 70.6775148 | 63 | 68.331483  |
| 70.2330703 | 63 | 68.3251338 |
| 70.2330703 | 63 | 68.3251338 |
| 69.4552926 | 63 | 68.3425941 |
| 68.7886259 | 63 | 68.3552926 |
| 66.3441814 | 63 | 68.3632291 |
| 66.0108481 | 63 | 68.331483  |
| 66.2330703 | 63 | 68.2854513 |
| 66.4552926 | 63 | 68.2362449 |
| 66.899737  | 63 | 68.183864  |
| 67.0108481 | 63 | 68.131483  |

|            |    |            |
|------------|----|------------|
| 66.899737  | 63 | 68.0806894 |
| 66.6775148 | 63 | 68.031483  |
| 66.1219592 | 63 | 67.9711656 |
| 65.5664037 | 63 | 67.9076735 |
| 64.899737  | 63 | 67.8362449 |
| 65.0108481 | 63 | 67.7695783 |
| 65.3441814 | 63 | 67.6919911 |
| 65.4552926 | 63 | 67.6158149 |
| 65.899737  | 63 | 67.5401678 |
| 66.5664037 | 63 | 67.4534095 |
| 66.6775148 | 63 | 67.3618894 |
| 66.899737  | 63 | 67.2721329 |
| 66.7886259 | 63 | 67.1772618 |
| 66.6775148 | 63 | 67.0793925 |
| 66.5664037 | 63 | 66.9885778 |
| 66.3441814 | 63 | 66.8922958 |
| 66.6775148 | 63 | 66.7926628 |
| 66.7886259 | 63 | 66.7053755 |
| 66.7886259 | 63 | 66.6182645 |
| 66.4552926 | 63 | 66.531859  |
| 66.4552926 | 63 | 66.4521554 |
| 66.1219592 | 63 | 66.3728046 |
| 66.1219592 | 63 | 66.299803  |
| 66.6775148 | 63 | 66.2158666 |
| 67.1219592 | 63 | 66.1347521 |
| 67.5664037 | 63 | 66.0728474 |
| 68.2330703 | 63 | 66.0125299 |
| 68.0108481 | 63 | 65.9458633 |
| 67.899737  | 63 | 65.8855458 |
| 67.5664037 | 63 | 65.8411014 |
| 66.7886259 | 63 | 65.8331648 |
| 66.4552926 | 63 | 65.8268156 |
| 66.2330703 | 63 | 65.8220537 |
| 66.2330703 | 63 | 65.807768  |
| 66.4552926 | 63 | 65.7855458 |
| 66.6775148 | 63 | 65.7537998 |
| 65.899737  | 63 | 65.7188791 |
| 65.899737  | 63 | 65.6791966 |
| 65.3441814 | 63 | 65.644276  |
| 65.5664037 | 63 | 65.6204664 |
| 64.5797473 | 63 | 65.6061807 |
| 64.4562905 | 63 | 65.591895  |
| 64.3822165 | 63 | 65.5855458 |
| 63.937772  | 63 | 65.5634028 |
| 63.7155498 | 63 | 65.5372034 |

|            |    |            |
|------------|----|------------|
| 63.8390066 | 63 | 65.5065949 |
| 63.4809819 | 63 | 65.4770445 |
| 63.6044387 | 63 | 65.4407922 |
| 64.0982658 | 63 | 65.4061272 |
| 63.6044387 | 63 | 65.3767532 |
| 63.4809819 | 63 | 65.3561975 |
| 64.3451794 | 63 | 65.3441074 |
| 64.4686362 | 63 | 65.3343102 |
| 64.7402411 | 63 | 65.3430314 |
| 64.9871547 | 63 | 65.3890631 |
| 65.2340683 | 69 | 65.4271584 |
| 65.4562905 | 69 | 65.4700155 |
| 65.1353029 | 69 | 65.4954035 |
| 65.1106115 | 69 | 65.5461971 |
| 66.3441814 | 69 | 65.5890543 |
| 66.0108481 | 69 | 65.6109149 |
| 65.5664037 | 69 | 65.6264263 |
| 65.2330703 | 69 | 65.6341776 |
| 65.6775148 | 69 | 65.6433398 |
| 65.7886259 | 69 | 65.6925461 |
| 65.5664037 | 69 | 65.7528636 |
| 65.899737  | 69 | 65.8242921 |
| 65.4552926 | 69 | 65.9052445 |
| 65.3441814 | 69 | 65.9909588 |
| 64.7886259 | 69 | 66.0782604 |
| 64.4552926 | 69 | 66.1687366 |
| 63.899737  | 69 | 66.2544509 |
| 63.6775148 | 69 | 66.3385779 |
| 63.899737  | 69 | 66.4242921 |
| 63.899737  | 69 | 66.4985632 |
| 64.0108481 | 69 | 66.5663086 |
| 64.899737  | 69 | 66.6463855 |
| 63.9052851 | 69 | 66.7280497 |
| 64.0657789 | 69 | 66.8142994 |
| 64.4238036 | 69 | 66.9455021 |
| 64.6089888 | 69 | 67.0846413 |
| 64.3620752 | 69 | 67.2251914 |
| 64.3620752 | 69 | 67.3724435 |
| 64.6213345 | 69 | 67.5195192 |
| 65.1275073 | 69 | 67.6563656 |
| 65.4978777 | 69 | 67.8034413 |
| 65.9917049 | 69 | 67.9506933 |
| 67.3991123 | 69 | 68.0792505 |
| 70.0108481 | 69 | 68.190171  |
| 69.1219592 | 69 | 68.2940368 |

|            |    |            |
|------------|----|------------|
| 69.4552926 | 69 | 68.392788  |
| 67.8991159 | 69 | 68.4832499 |
| 69.6775148 | 69 | 68.5673626 |
| 69.6775148 | 69 | 68.6449498 |
| 68.6522023 | 69 | 68.7228897 |
| 68.6522023 | 69 | 68.7578103 |
| 68.7756591 | 69 | 68.787969  |
| 68.6522023 | 69 | 68.8197151 |
| 71.3441814 | 69 | 68.8641595 |
| 71.7886259 | 69 | 68.9006674 |
| 71.7886259 | 69 | 68.9514611 |
| 72.1219592 | 69 | 69.0054293 |
| 72.2330703 | 69 | 69.0530484 |
| 72.3441814 | 69 | 69.0888745 |
| 72.7886259 | 69 | 69.1280515 |
| 72.6775148 | 69 | 69.1718141 |
| 71.7886259 | 69 | 69.215224  |
| 71.899737  | 69 | 69.2648066 |
| 70.5431538 | 69 | 69.3210913 |
| 70.3085859 | 69 | 69.3671466 |
| 70.1851291 | 69 | 69.4096746 |
| 70.1727834 | 69 | 69.4488517 |
| 70.419697  | 69 | 69.4753303 |
| 73.1219592 | 69 | 69.5213064 |
| 73.4552926 | 69 | 69.5896811 |
| 73.6775148 | 69 | 69.6636995 |
| 73.7886259 | 69 | 69.7509455 |
| 73.899737  | 69 | 69.8523008 |
| 73.6775148 | 69 | 69.9554197 |
| 73.899737  | 69 | 70.0530713 |
| 73.7886259 | 69 | 70.1382008 |
| 73.3441814 | 69 | 70.2146884 |
| 72.2330703 | 69 | 70.2788303 |
| 72.0108481 | 69 | 70.314048  |
| 71.899737  | 69 | 70.3066642 |
| 71.5664037 | 69 | 70.3116261 |
| 71.3441814 | 69 | 70.306535  |
| 70.5664037 | 69 | 70.3220878 |
| 70.5664037 | 69 | 70.3069438 |
| 68.7886259 | 69 | 70.2794542 |
| 68.1219592 | 69 | 70.2648483 |
| 67.7886259 | 69 | 70.2430113 |
| 68.3441814 | 69 | 70.2292871 |
| 68.2330703 | 69 | 70.2423471 |
| 69.3441814 | 69 | 70.2185376 |

|            |    |            |
|------------|----|------------|
| 69.3441814 | 69 | 70.1867916 |
| 69.2330703 | 69 | 70.1502837 |
| 67.963118  | 69 | 70.09949   |
| 68.0865747 | 69 | 70.0502837 |
| 67.8520068 | 69 | 70.0074265 |
| 67.4939821 | 69 | 69.9550456 |
| 67.3705254 | 69 | 69.9058392 |
| 67.6174389 | 69 | 69.8661567 |
| 67.1236118 | 69 | 69.8201249 |
| 66.8766982 | 69 | 69.7855364 |
| 66.7532414 | 61 | 69.7638227 |
| 66.7532414 | 61 | 69.7375235 |
| 67.1236118 | 61 | 69.7066387 |
| 68.8520068 | 61 | 69.6722265 |
| 69.6050933 | 61 | 69.5960361 |
| 70.7162044 | 61 | 69.5198456 |
| 71.4569451 | 61 | 69.4420678 |
| 71.5804019 | 61 | 69.3627027 |
| 71.4569451 | 61 | 69.2880996 |
| 71.0865747 | 61 | 69.2246075 |
| 70.8520068 | 61 | 69.1579408 |
| 70.4816365 | 61 | 69.0944488 |
| 69.8643525 | 61 | 69.032544  |
| 69.4939821 | 61 | 68.9833377 |
| 69.4692908 | 61 | 68.9261948 |
| 69.0989204 | 61 | 68.86429   |
| 68.9878093 | 61 | 68.8119091 |
| 68.6174389 | 61 | 68.7627027 |
| 67.7532414 | 61 | 68.7261948 |
| 67.6297846 | 61 | 68.6731226 |
| 67.1236118 | 61 | 68.6495037 |
| 67.8149698 | 61 | 68.6306467 |
| 69.5664037 | 61 | 68.6151407 |
| 69.6775148 | 61 | 68.5904636 |
| 69.5664037 | 61 | 68.5714302 |
| 69.2330703 | 73 | 68.5426967 |
| 68.5664037 | 73 | 68.5121995 |
| 68.7886259 | 73 | 68.4832896 |
| 69.3441814 | 73 | 68.4702291 |
| 69.1219592 | 73 | 68.4518776 |
| 69.2330703 | 73 | 68.4386407 |
| 69.0108481 | 73 | 68.4299894 |
| 68.6775148 | 73 | 68.4248654 |
| 68.1219592 | 73 | 68.4195651 |
| 68.7886259 | 73 | 68.4248467 |

|            |    |            |
|------------|----|------------|
| 68.3441814 | 73 | 68.4334793 |
| 68.0108481 | 73 | 68.424027  |
| 68.0108481 | 73 | 68.4184546 |
| 67.7886259 | 73 | 68.4056513 |
| 68.1219592 | 73 | 68.39107   |
| 68.2330703 | 73 | 68.3968665 |
| 68.2330703 | 73 | 68.38679   |
| 68.6775148 | 73 | 68.3661315 |
| 69.2330703 | 73 | 68.3178641 |
| 69.2330703 | 73 | 68.2660694 |
| 69.3441814 | 73 | 68.2197421 |
| 69.0108481 | 73 | 68.1802931 |
| 68.7886259 | 73 | 68.1427842 |
| 68.0108481 | 73 | 68.1123299 |
| 67.5664037 | 73 | 68.0838156 |
| 67.899737  | 73 | 68.0505395 |
| 67.899737  | 73 | 68.0234361 |
| 68.0108481 | 73 | 67.9943928 |
| 66.8513523 | 73 | 67.9708168 |
| 67.1353029 | 73 | 67.9648775 |
| 66.8019695 | 73 | 67.9677565 |
| 66.7032041 | 73 | 67.9750448 |
| 66.6167844 | 73 | 67.9742201 |
| 66.900735  | 73 | 67.9494331 |
| 67.3328337 | 73 | 67.9446712 |
| 67.209377  | 73 | 67.9494331 |
| 67.209377  | 73 | 67.9573697 |
| 67.0488831 | 73 | 67.9780046 |
| 66.8019695 | 73 | 67.9970522 |
| 66.9254263 | 73 | 68.0097506 |
| 66.8883893 | 73 | 68.0145125 |
| 67.0118461 | 73 | 67.9986395 |
| 67.246414  | 73 | 67.9843538 |
| 67.4933276 | 73 | 67.9732427 |
| 67.4809819 | 73 | 67.9764173 |
| 66.0915747 | 73 | 67.9684808 |
| 66.3631797 | 73 | 67.9700681 |
| 66.2273772 | 73 | 67.9764173 |
| 67.8313175 | 73 | 67.9811792 |
| 70.0108481 | 73 | 67.9891157 |
| 70.0108481 | 73 | 67.9954649 |
| 70.0108481 | 73 | 67.9986395 |
| 68.2016879 | 73 | 67.9970522 |
| 67.8313175 | 73 | 67.9811792 |
| 67.8436632 | 73 | 67.9573697 |

|            |    |            |
|------------|----|------------|
| 68.0905768 | 73 | 67.9303855 |
| 67.8560089 | 73 | 67.8922903 |
| 67.7325521 | 73 | 67.8573697 |
| 67.4979842 | 73 | 67.8256236 |
| 67.1399595 | 73 | 67.8049887 |
| 67.2016879 | 73 | 67.7891157 |
| 66.9547743 | 73 | 67.7716554 |
| 66.96712   | 73 | 67.7573697 |
| 67.3374903 | 73 | 67.7414966 |
| 67.8313175 | 73 | 67.7501244 |
| 67.6337866 | 73 | 67.7610448 |
| 67.7572434 | 73 | 67.7814891 |
| 67.8313175 | 73 | 67.8128682 |
| 69.3441814 | 73 | 67.8502437 |
| 69.899737  | 73 | 67.8930866 |
| 69.7886259 | 73 | 67.9361058 |
| 70.0108481 | 73 | 67.9808888 |
| 70.1219592 | 73 | 68.0224971 |
| 70.2330703 | 73 | 68.0695728 |
| 69.4552926 | 73 | 68.1281123 |
| 68.1219592 | 73 | 68.194412  |
| 68.0108481 | 73 | 68.26759   |
| 67.899737  | 73 | 68.3421789 |
| 68.3441814 | 73 | 68.4150041 |
| 68.2330703 | 73 | 68.4795401 |
| 68.4552926 | 73 | 68.5379033 |
| 68.4552926 | 73 | 68.6065913 |
| 68.3441814 | 73 | 68.6650501 |
| 68.3441814 | 73 | 68.7222743 |
| 68.5664037 | 73 | 68.7549977 |
| 68.4552926 | 73 | 68.7518231 |
| 68.1219592 | 73 | 68.7486485 |
| 67.5664037 | 73 | 68.7391247 |
| 67.5664037 | 73 | 68.7633826 |
| 67.3441814 | 73 | 68.7881695 |
| 66.6775148 | 73 | 68.8143674 |
| 66.5664037 | 73 | 68.8243395 |
| 66.5664037 | 73 | 68.8360753 |
| 66.5664037 | 73 | 68.8448129 |
| 66.4552926 | 73 | 68.844203  |
| 66.6775148 | 73 | 68.8360093 |
| 66.899737  | 73 | 68.8189973 |
| 66.899737  | 73 | 68.8071    |
| 67.4552926 | 73 | 68.8029628 |
| 67.899737  | 73 | 68.7998838 |



|            |    |            |
|------------|----|------------|
| 68.2330703 | 73 | 68.7913374 |
| 68.899737  | 73 | 68.7903747 |
| 69.2330703 | 73 | 68.7781247 |
| 69.899737  | 73 | 68.7600545 |
| 70.3441814 | 73 | 68.7235465 |
| 70.3441814 | 73 | 68.6791021 |
| 70.1219592 | 73 | 68.6362449 |
| 70.3441814 | 73 | 68.5949751 |
| 70.899737  | 73 | 68.5648164 |
| 71.5664037 | 73 | 68.5330703 |
| 72.0108481 | 73 | 68.5076735 |
| 72.2330703 | 73 | 68.4918005 |
| 72.3441814 | 73 | 68.4759275 |
| 72.0108481 | 73 | 68.4537053 |
| 71.5664037 | 73 | 68.4298957 |
| 70.899737  | 73 | 68.4092608 |
| 70.4552926 | 73 | 68.3933878 |
| 70.2330703 | 73 | 68.3854513 |
| 70.1219592 | 73 | 68.3806894 |
| 69.7886259 | 73 | 68.3743402 |
| 69.7886259 | 73 | 68.3568799 |
| 69.3441814 | 73 | 68.3298957 |
| 69.899737  | 73 | 68.3108481 |
| 69.5664037 | 73 | 68.3029116 |
| 69.6775148 | 73 | 68.2965624 |
| 68.7886259 | 73 | 68.2870386 |
| 68.6775148 | 73 | 68.2806894 |
| 68.3441814 | 73 | 68.2711656 |
| 67.4552926 | 73 | 68.2648164 |
| 66.5664037 | 73 | 68.2568799 |
| 66.0108481 | 73 | 68.252118  |
| 66.1219592 | 73 | 68.2441814 |
| 66.6775148 | 73 | 68.2441814 |
| 67.1219592 | 73 | 68.2441814 |
| 67.2330703 | 73 | 68.2330703 |
| 67.5664037 | 73 | 68.2235465 |
| 66.899737  | 73 | 68.2187846 |
| 66.5664037 | 73 | 68.2140227 |
| 66.7886259 | 73 | 68.2219592 |
| 66.7886259 | 73 | 68.2251338 |
| 66.7886259 | 73 | 68.2219592 |
| 67.1219592 | 73 | 68.2140227 |
| 68.0108481 | 73 | 68.2140227 |
| 68.0108481 | 73 | 68.2044989 |
| 67.6775148 | 73 | 68.1902132 |

|            |    |            |
|------------|----|------------|
| 67.0108481 | 73 | 68.1695783 |
| 66.899737  | 73 | 68.1441814 |
| 66.3441814 | 73 | 68.1251338 |
| 66.6775148 | 73 | 68.1076735 |
| 66.7886259 | 73 | 68.099737  |
| 67.3441814 | 73 | 68.0902132 |
| 67.899737  | 73 | 68.0854513 |
| 68.0108481 | 73 | 68.0902132 |
| 67.899737  | 73 | 68.1013243 |
| 67.3441814 | 73 | 68.1219592 |
| 66.5664037 | 73 | 68.1441814 |
| 66.7886259 | 73 | 68.1616418 |
| 67.0108481 | 73 | 68.1806894 |
| 67.1219592 | 73 | 68.1854513 |
| 66.6775148 | 73 | 68.1902132 |
| 66.2330703 | 73 | 68.1870386 |
| 65.899737  | 73 | 68.1933878 |
| 66.1219592 | 73 | 68.2013243 |
| 66.0108481 | 73 | 68.2298957 |
| 66.1219592 | 73 | 68.2806894 |
| 66.1219592 | 73 | 68.3410068 |
| 66.899737  | 73 | 68.4013243 |
| 66.899737  | 73 | 68.4648164 |
| 66.6775148 | 73 | 68.4984053 |
| 67.2330703 | 73 | 68.5238814 |
| 67.899737  | 73 | 68.5495339 |
| 68.5664037 | 73 | 68.5776554 |
| 69.7886259 | 73 | 68.6135372 |
| 70.1219592 | 73 | 68.6561208 |
| 70.1219592 | 73 | 68.7096393 |
| 69.7886259 | 73 | 68.7702123 |
| 70.1219592 | 73 | 68.8670377 |
| 69.6775148 | 73 | 68.9654504 |
| 69.899737  | 73 | 69.0606885 |
| 70.1219592 | 73 | 69.1543393 |
| 70.2330703 | 73 | 69.2495774 |
| 70.899737  | 73 | 69.3305298 |
| 71.1219592 | 73 | 69.4241806 |
| 71.4552926 | 73 | 69.5194187 |
| 70.899737  | 73 | 69.6114822 |
| 70.5664037 | 73 | 69.7003711 |
| 70.7886259 | 73 | 69.7781488 |
| 71.0108481 | 73 | 69.8464028 |
| 71.5664037 | 73 | 69.9067203 |
| 71.3441814 | 73 | 69.9430661 |

|            |    |            |
|------------|----|------------|
| 71.0108481 | 73 | 69.9838211 |
| 70.6775148 | 73 | 70.0536624 |
| 70.2330703 | 73 | 70.120329  |
| 69.899737  | 73 | 70.1854084 |
| 69.4552926 | 73 | 70.2489005 |
| 69.2330703 | 73 | 70.3219163 |
| 69.2330703 | 73 | 70.3917576 |
| 70.3441814 | 73 | 70.4647735 |
| 71.0108481 | 73 | 70.5298528 |
| 70.7886259 | 73 | 70.5901703 |
| 70.2330703 | 73 | 70.6425513 |
| 70.5664037 | 73 | 70.6869957 |
| 69.0287419 | 73 | 70.7187417 |
| 68.9052851 | 73 | 70.7536624 |
| 69.0287419 | 73 | 70.8012814 |
| 69.5349147 | 73 | 70.8393767 |
| 69.4114579 | 73 | 70.8711227 |
| 69.5472604 | 73 | 70.8933449 |
| 70.5349147 | 73 | 70.8917576 |
| 71.0287419 | 73 | 70.8917576 |
| 73.5664037 | 73 | 70.9012814 |
| 74.0108481 | 73 | 70.9187417 |
| 74.6775148 | 73 | 70.9330274 |
| 74.5664037 | 73 | 70.9615989 |
| 74.3441814 | 73 | 70.9838211 |
| 72.6775148 | 73 | 71.0028687 |
| 73.4552926 | 73 | 71.0298528 |
| 73.0108481 | 73 | 71.0473132 |
| 73.1219592 | 73 | 71.0552497 |
| 73.0108481 | 73 | 71.0520751 |
| 72.7886259 | 73 | 71.0520751 |
| 72.6775148 | 73 | 71.0425513 |
| 72.2330703 | 73 | 71.0219163 |
| 70.4439449 | 73 | 70.9933449 |
| 70.1970313 | 73 | 70.9520751 |
| 71.4552926 | 73 | 70.9076306 |
| 71.4552926 | 73 | 70.8663608 |
| 71.5664037 | 73 | 70.8314401 |
| 71.5664037 | 73 | 70.8028687 |
| 71.7886259 | 73 | 70.7758846 |
| 71.1219592 | 73 | 70.7536624 |
| 71.0108481 | 73 | 70.7282655 |
| 70.6775148 | 73 | 70.7012814 |
| 70.2330703 | 73 | 70.6552497 |
| 69.7886259 | 73 | 70.6187417 |

|            |    |            |
|------------|----|------------|
| 69.2330703 | 73 | 70.588583  |
| 69.1219592 | 73 | 70.5695354 |
| 69.3441814 | 73 | 70.5520751 |
| 70.0108481 | 73 | 70.5613433 |
| 69.899737  | 73 | 70.5803116 |
| 70.1219592 | 73 | 70.595929  |
| 70.1219592 | 73 | 70.6059027 |
| 69.6775148 | 73 | 70.6097035 |
| 70.1219592 | 73 | 70.6147388 |
| 70.7886259 | 73 | 70.6024903 |
| 71.0108481 | 73 | 70.5911235 |
| 71.1219592 | 73 | 70.5372345 |
| 71.6775148 | 73 | 70.4824637 |
| 71.4552926 | 73 | 70.4179808 |
| 71.4552926 | 73 | 70.3660318 |
| 72.1219592 | 73 | 70.3093209 |
| 72.1219592 | 73 | 70.2783596 |
| 71.6775148 | 73 | 70.2276452 |
| 71.2330703 | 73 | 70.1677598 |
| 70.899737  | 73 | 70.0867103 |
| 69.899737  | 73 | 70.0037208 |
| 69.3441814 | 73 | 69.9370541 |
| 69.0108481 | 73 | 69.8640382 |
| 68.6775148 | 73 | 69.8053081 |
| 68.2330703 | 73 | 69.7816606 |
| 68.1219592 | 73 | 69.7821755 |
| 68.2330703 | 73 | 69.7758263 |
| 68.2330703 | 73 | 69.7805882 |
| 68.0108481 | 73 | 69.7869374 |
| 67.899737  | 73 | 69.7948739 |
| 67.4552926 | 73 | 69.7980485 |
| 67.3441814 | 73 | 69.8028104 |
| 67.1219592 | 73 | 69.7964612 |
| 68.4552926 | 73 | 69.7916993 |
| 68.6775148 | 73 | 69.7885247 |
| 68.899737  | 73 | 69.7948739 |
| 69.3441814 | 73 | 69.8075723 |
| 69.6775148 | 73 | 69.8186834 |
| 70.2330703 | 73 | 69.8313818 |
| 70.1219592 | 73 | 69.8424929 |
| 70.2330703 | 73 | 69.8504295 |
| 69.6775148 | 73 | 69.8567787 |
| 69.899737  | 73 | 69.858366  |
| 69.6775148 | 73 | 69.8647152 |
| 70.2330703 | 73 | 69.8472549 |

|            |    |            |
|------------|----|------------|
| 69.794174  | 73 | 69.8123342 |
| 70.17689   | 73 | 69.7726517 |
| 70.163708  | 73 | 69.7329691 |
| 70.9299765 | 73 | 69.6853501 |
| 70.3744209 | 73 | 69.6393183 |
| 70.5102234 | 73 | 69.5837628 |
| 69.9052851 | 73 | 69.5155088 |
| 68.8188654 | 73 | 69.4472549 |
| 67.448495  | 73 | 69.3837628 |
| 67.2015814 | 73 | 69.3361437 |
| 68.1219592 | 73 | 69.2885247 |
| 67.5664037 | 73 | 69.2536041 |
| 68.1219592 | 73 | 69.237731  |
| 68.7886259 | 73 | 69.2313818 |
| 70.2330703 | 73 | 69.237731  |
| 71.0108481 | 73 | 69.2520168 |
| 71.7886259 | 73 | 69.2631279 |
| 72.0108481 | 73 | 69.2758263 |
| 72.1219592 | 73 | 69.2964612 |
| 72.0108481 | 73 | 69.3186834 |
| 71.4552926 | 73 | 69.3409056 |
| 70.5664037 | 73 | 69.374239  |
| 70.3441814 | 73 | 69.4123342 |
| 70.0108481 | 73 | 69.4313961 |
| 70.2330703 | 73 | 69.4349377 |
| 70.1219592 | 73 | 69.4405957 |
| 69.899737  | 73 | 69.458056  |
| 70.2330703 | 73 | 69.4659925 |
| 70.7886259 | 73 | 69.4659925 |
| 70.4552926 | 73 | 69.4596433 |
| 70.5664037 | 73 | 69.4548814 |
| 70.2330703 | 73 | 69.4374211 |
| 70.1219592 | 73 | 69.4199608 |
| 68.899737  | 73 | 69.3977385 |
| 68.3441814 | 73 | 69.3818655 |
| 68.2330703 | 73 | 69.3548814 |
| 68.3441814 | 73 | 69.3373418 |
| 68.3441814 | 73 | 69.3270333 |
| 68.2330703 | 73 | 69.3200877 |
| 67.5664037 | 73 | 69.3037827 |
| 67.3441814 | 73 | 69.2827157 |
| 67.3441814 | 73 | 69.2581215 |
| 67.2330703 | 73 | 69.2453438 |
| 67.899737  | 73 | 69.2480864 |
| 67.5664037 | 73 | 69.276755  |

|            |    |            |
|------------|----|------------|
| 67.4552926 | 73 | 69.3137127 |
| 68.2330703 | 73 | 69.3422842 |
| 68.5664037 | 73 | 69.3867286 |
| 69.1219592 | 73 | 69.4232366 |
| 69.2330703 | 73 | 69.4565699 |
| 68.899737  | 73 | 69.4708556 |
| 69.1219592 | 73 | 69.4708556 |
| 69.6775148 | 73 | 69.4613318 |
| 69.5664037 | 73 | 69.4422842 |
| 69.4552926 | 73 | 69.4168874 |
| 69.7886259 | 73 | 69.4041889 |
| 70.0108481 | 73 | 69.3930778 |
| 68.4562905 | 73 | 69.3851413 |
| 68.7032041 | 73 | 69.3787921 |
| 69.0735745 | 73 | 69.3772048 |
| 70.1219592 | 73 | 69.3772048 |
| 69.899737  | 73 | 69.3803794 |
| 69.6775148 | 73 | 69.3867286 |
| 69.7886259 | 73 | 69.3962524 |
| 69.7886259 | 73 | 69.4026016 |
| 69.0108481 | 73 | 69.4232366 |
| 68.4552926 | 73 | 69.4565699 |
| 68.3441814 | 73 | 69.4883159 |
| 68.5664037 | 73 | 69.520062  |
| 68.3441814 | 73 | 69.5613318 |
| 68.5664037 | 73 | 69.6184747 |
| 69.4552926 | 73 | 69.6740302 |
| 69.6775148 | 73 | 69.7311731 |
| 69.7886259 | 73 | 69.7914905 |
| 68.899737  | 73 | 69.8549826 |
| 68.7886259 | 73 | 69.9264112 |
| 69.0108481 | 73 | 70.0041889 |
| 69.0108481 | 73 | 70.0397195 |
| 69.4552926 | 73 | 70.0736627 |
| 69.7886259 | 73 | 70.0786817 |
| 70.1219592 | 73 | 70.0778807 |
| 70.6775148 | 73 | 70.0786669 |
| 70.6775148 | 73 | 70.0665784 |
| 71.1219592 | 73 | 70.046377  |
| 71.2330703 | 73 | 70.0147117 |
| 71.0108481 | 73 | 69.9796955 |
| 71.1219592 | 73 | 69.9512048 |
| 70.6775148 | 73 | 69.9177759 |
| 70.3441814 | 73 | 69.8728832 |
| 71.1219592 | 73 | 69.8313414 |

|            |    |            |
|------------|----|------------|
| 70.6775148 | 73 | 69.7931505 |
| 70.0108481 | 73 | 69.7484341 |
| 69.899737  | 73 | 69.6970158 |
| 69.899737  | 73 | 69.6678054 |
| 70.2330703 | 73 | 69.6385951 |
| 70.3441814 | 73 | 69.6095611 |
| 70.3441814 | 73 | 69.5637865 |
| 70.899737  | 73 | 69.5174828 |
| 71.2330703 | 73 | 69.4704736 |
| 71.899737  | 73 | 69.4234644 |
| 72.899737  | 73 | 69.3835099 |
| 72.4552926 | 73 | 69.3590757 |
| 72.3441814 | 73 | 69.3543138 |
| 71.7886259 | 73 | 69.3495519 |
| 72.3441814 | 73 | 69.3384408 |
| 72.1219592 | 73 | 69.3368535 |
| 72.3441814 | 73 | 69.3352662 |
| 72.5664037 | 73 | 69.3241551 |
| 72.6775148 | 73 | 69.313044  |
| 72.5664037 | 73 | 69.3066948 |
| 72.7886259 | 73 | 69.3178059 |
| 69.8313175 | 73 | 69.3352662 |
| 69.6090953 | 73 | 69.3559011 |
| 68.2510706 | 73 | 69.3797106 |
| 67.5103298 | 73 | 69.3939963 |
| 67.5103298 | 73 | 69.4114567 |
| 67.3868731 | 73 | 69.4257424 |
| 67.1523052 | 73 | 69.4273297 |
| 66.9053916 | 73 | 69.4209805 |
| 66.7819348 | 73 | 69.3987583 |
| 66.9053916 | 73 | 69.3701868 |
| 66.7819348 | 73 | 69.3432027 |
| 66.5350212 | 73 | 69.3162186 |
| 66.658478  | 73 | 69.3019329 |
| 66.7819348 | 73 | 69.292409  |
| 66.658478  | 73 | 69.276536  |
| 66.4115644 | 73 | 69.2749487 |
| 66.4115644 | 73 | 69.2955837 |
| 66.658478  | 73 | 69.3209805 |
| 67.041194  | 73 | 69.3463773 |
| 66.9177373 | 73 | 69.3654249 |
| 66.658478  | 73 | 69.3844725 |
| 66.3868731 | 73 | 69.3876471 |
| 66.4979842 | 73 | 69.3797106 |
| 66.9918113 | 73 | 69.3670122 |

|            |    |            |
|------------|----|------------|
| 67.3004533 | 73 | 69.3463773 |
| 68.1219592 | 73 | 69.3082821 |
| 68.0108481 | 73 | 69.2717741 |
| 67.7886259 | 73 | 69.2336789 |
| 68.2330703 | 73 | 69.2066948 |
| 68.4552926 | 73 | 69.1654249 |
| 68.6775148 | 73 | 69.1193932 |
| 68.899737  | 73 | 69.0670122 |
| 69.3441814 | 73 | 69.0035202 |
| 69.6775148 | 73 | 68.9336789 |
| 70.0108481 | 73 | 68.8685995 |
| 70.4552926 | 73 | 68.8066948 |
| 70.6775148 | 73 | 68.7838627 |
| 70.4552926 | 73 | 68.7626179 |
| 71.0108481 | 73 | 68.763948  |
| 71.1219592 | 73 | 68.7663364 |
| 70.7886259 | 73 | 68.7687247 |
| 70.2330703 | 73 | 68.7697021 |
| 69.5664037 | 73 | 68.7724432 |
| 69.2330703 | 73 | 68.7771244 |
| 69.1219592 | 73 | 68.7819819 |
| 69.2330703 | 73 | 68.7850757 |
| 69.6775148 | 73 | 68.7962824 |
| 69.6775148 | 73 | 68.8094291 |
| 70.0108481 | 73 | 68.8208122 |
| 70.5664037 | 73 | 68.8320189 |
| 71.4552926 | 73 | 68.8465765 |
| 71.6775148 | 73 | 68.8678361 |
| 71.6775148 | 73 | 68.8922704 |
| 71.5664037 | 73 | 68.9195264 |
| 71.6775148 | 73 | 68.9476644 |
| 70.5664037 | 73 | 68.9823278 |
| 70.3441814 | 73 | 69.0222823 |
| 70.3441814 | 73 | 69.0708788 |
| 70.4552926 | 73 | 69.1321737 |
| 70.2330703 | 73 | 69.1911758 |
| 69.899737  | 73 | 69.2457687 |
| 69.6775148 | 73 | 69.2918005 |
| 69.899737  | 73 | 69.3441814 |
| 69.4552926 | 73 | 69.4060862 |
| 68.899737  | 73 | 69.4616418 |
| 68.6775148 | 73 | 69.5076735 |
| 68.1219592 | 73 | 69.552118  |
| 67.7886259 | 73 | 69.5902132 |
| 68.0108481 | 73 | 69.6219592 |



|            |    |            |
|------------|----|------------|
| 68.4552926 | 73 | 69.6441814 |
| 68.2330703 | 73 | 69.6600545 |
| 68.1219592 | 73 | 69.6600545 |
| 68.3441814 | 73 | 69.6616418 |
| 67.6775148 | 73 | 69.6664037 |
| 67.6775148 | 73 | 69.652118  |
| 67.4552926 | 73 | 69.631483  |
| 67.3441814 | 73 | 69.6044989 |
| 67.2330703 | 73 | 69.5775148 |
| 67.1219592 | 73 | 69.552118  |
| 67.1219592 | 73 | 69.5267211 |
| 67.5664037 | 73 | 69.4965624 |
| 67.4552926 | 73 | 69.4457687 |
| 67.4552926 | 73 | 69.3822767 |
| 67.5664037 | 73 | 69.3219592 |
| 67.6775148 | 73 | 69.2616418 |
| 67.899737  | 73 | 69.1902132 |
| 68.1219592 | 73 | 69.1092608 |
| 68.5664037 | 73 | 69.0283084 |
| 69.0108481 | 73 | 68.9489433 |
| 69.3441814 | 73 | 68.8791021 |
| 69.4552926 | 73 | 68.8124354 |
| 69.7886259 | 73 | 68.7616418 |
| 70.7886259 | 73 | 68.7187846 |
| 71.1219592 | 73 | 68.6759275 |
| 71.1219592 | 73 | 68.6298957 |
| 71.3441814 | 73 | 68.5870386 |
| 71.6775148 | 73 | 68.547356  |
| 72.1219592 | 73 | 68.5092608 |
| 72.1219592 | 73 | 68.4695783 |
| 71.6775148 | 73 | 68.4410068 |
| 71.7886259 | 73 | 68.4171973 |
| 71.5664037 | 73 | 68.3949751 |
| 71.5664037 | 73 | 68.3854513 |
| 71.2330703 | 73 | 68.3806894 |
| 71.1219592 | 73 | 68.3727529 |
| 70.4552926 | 73 | 68.3505306 |
| 70.7886259 | 73 | 68.3267211 |
| 70.7886259 | 73 | 68.3029116 |
| 70.0108481 | 73 | 68.2711656 |
| 69.6775148 | 73 | 68.2425941 |
| 68.899737  | 73 | 68.2092608 |
| 68.3441814 | 73 | 68.1806894 |
| 67.7886259 | 73 | 68.1489433 |
| 67.4552926 | 73 | 68.1267211 |

|            |    |            |
|------------|----|------------|
| 67.0108481 | 73 | 68.1092608 |
| 65.6775148 | 73 | 68.0918005 |
| 65.2330703 | 73 | 68.0711656 |
| 65.4552926 | 73 | 68.0537053 |
| 65.7886259 | 73 | 68.0362449 |
| 65.5664037 | 73 | 68.01561   |
| 65.7886259 | 73 | 67.9965624 |
| 66.0108481 | 73 | 67.9791021 |
| 66.1219592 | 73 | 67.9648164 |
| 66.6775148 | 73 | 67.947356  |
| 67.0108481 | 73 | 67.9187846 |
| 67.0108481 | 73 | 67.8806894 |
| 67.3441814 | 73 | 67.8362449 |
| 67.3441814 | 73 | 67.7870386 |
| 67.2330703 | 73 | 67.7346576 |
| 67.2330703 | 73 | 67.6775148 |
| 67.1219592 | 73 | 67.6203719 |
| 67.0108481 | 73 | 67.5664037 |
| 67.1219592 | 73 | 67.5140227 |
| 67.4552926 | 73 | 67.4552926 |
| 67.2330703 | 73 | 67.3918005 |
| 67.1219592 | 73 | 67.3330703 |
| 67.4552926 | 73 | 67.2775148 |
| 67.4552926 | 73 | 67.231483  |
| 67.4552926 | 73 | 67.2029116 |
| 66.899737  | 73 | 67.1775148 |
| 66.5664037 | 73 | 67.1648164 |
| 66.4552926 | 73 | 67.1404729 |
| 66.1219592 | 73 | 67.1136602 |
| 65.6775148 | 73 | 67.1057237 |
| 65.3441814 | 73 | 67.1088983 |
| 65.4552926 | 73 | 67.1136602 |
| 65.1219592 | 73 | 67.1247713 |
| 65.6775148 | 73 | 67.139057  |
| 65.899737  | 63 | 67.1533428 |
| 65.899737  | 63 | 67.1739777 |
| 66.1219592 | 63 | 67.1993745 |
| 66.2330703 | 63 | 67.2438189 |
| 66.2330703 | 63 | 67.2898507 |
| 66.1219592 | 63 | 67.3215967 |
| 66.3441814 | 63 | 67.3517555 |
| 66.6775148 | 63 | 67.3866761 |
| 67.1219592 | 63 | 67.4200094 |
| 67.3441814 | 63 | 67.4517555 |
| 67.0108481 | 63 | 67.4835015 |

|            |    |            |
|------------|----|------------|
| 66.6775148 | 63 | 67.5168348 |
| 66.3441814 | 63 | 67.5517555 |
| 66.3441814 | 63 | 67.5898507 |
| 67.1219592 | 63 | 67.6215967 |
| 67.1219592 | 63 | 67.6517555 |
| 67.1219592 | 63 | 67.6803269 |
| 67.5664037 | 63 | 67.7041364 |
| 68.0108481 | 63 | 67.7215967 |
| 68.0108481 | 63 | 67.7358824 |
| 67.6775148 | 63 | 67.7549301 |
| 67.5664037 | 63 | 67.7660412 |
| 67.899737  | 63 | 67.7819142 |
| 68.3441814 | 63 | 67.7993745 |
| 69.5664037 | 63 | 67.8200094 |
| 69.4552926 | 63 | 67.839057  |
| 70.2330703 | 63 | 67.8517555 |
| 68.7512471 | 63 | 67.8803269 |
| 68.9117409 | 63 | 67.9120729 |
| 70.2330703 | 63 | 67.9422316 |
| 70.2330703 | 63 | 67.9723904 |
| 70.0108481 | 63 | 67.9912567 |
| 69.6775148 | 63 | 68.0168251 |
| 69.3441814 | 63 | 68.0408061 |
| 68.7886259 | 63 | 68.0750163 |
| 68.899737  | 63 | 68.1208668 |
| 68.7886259 | 63 | 68.1705974 |
| 68.7886259 | 63 | 68.2132733 |
| 68.4552926 | 63 | 68.2492473 |
| 67.6775148 | 63 | 68.2871612 |
| 67.899737  | 63 | 68.3074385 |
| 68.0108481 | 63 | 68.3257758 |
| 68.1219592 | 63 | 68.3409385 |
| 68.2330703 | 63 | 68.3511629 |
| 68.3441814 | 63 | 68.3460434 |
| 69.0108481 | 63 | 68.3430402 |
| 69.4552926 | 63 | 68.3430354 |
| 69.6775148 | 63 | 68.347616  |
| 69.5664037 | 63 | 68.3587222 |
| 69.4552926 | 63 | 68.3984048 |
| 69.2330703 | 63 | 68.4317381 |
| 68.899737  | 63 | 68.4618968 |
| 68.3441814 | 63 | 68.4825318 |
| 68.0108481 | 63 | 68.4872937 |
| 68.4552926 | 63 | 68.4809445 |
| 68.2330703 | 63 | 68.4666587 |

|            |    |            |
|------------|----|------------|
| 68.3441814 | 63 | 68.4587222 |
| 68.3441814 | 63 | 68.4603095 |
| 68.899737  | 63 | 68.4555476 |
| 68.7886259 | 63 | 68.4412619 |
| 68.3441814 | 63 | 68.404754  |
| 68.899737  | 63 | 68.3730079 |
| 68.7886259 | 63 | 68.3396746 |
| 68.5664037 | 63 | 68.3306848 |
| 68.2330703 | 63 | 68.3257514 |
| 66.9981606 | 63 | 68.3003546 |
| 67.1339631 | 63 | 68.2686085 |
| 67.1339631 | 63 | 68.2273387 |
| 67.5166792 | 63 | 68.1940054 |
| 68.8870495 | 63 | 68.1638466 |
| 69.3808767 | 63 | 68.1172769 |
| 68.8870495 | 63 | 68.0871182 |
| 68.6401359 | 63 | 68.0664833 |
| 68.8870495 | 63 | 68.0481647 |
| 67.6524816 | 63 | 68.0372536 |
| 67.405568  | 63 | 68.0183104 |
| 67.405568  | 63 | 68.0023654 |
| 67.3932224 | 63 | 67.9772493 |
| 66.7635927 | 63 | 67.9505459 |
| 67.1339631 | 63 | 67.9578577 |
| 67.0105063 | 63 | 67.961995  |
| 66.9981606 | 63 | 67.9651696 |
| 67.1216174 | 63 | 67.9588204 |
| 69.1219592 | 63 | 67.9492965 |
| 69.4552926 | 63 | 67.94136   |
| 69.2330703 | 63 | 67.9350108 |
| 68.5664037 | 63 | 67.9334235 |
| 67.899737  | 63 | 67.9334235 |
| 67.5664037 | 63 | 67.9286616 |
| 67.0108481 | 63 | 67.9238997 |
| 67.1219592 | 63 | 67.9000902 |
| 67.6775148 | 63 | 67.8731061 |
| 67.5664037 | 63 | 67.8429473 |
| 67.3441814 | 63 | 67.8191378 |
| 67.0108481 | 63 | 67.7842172 |
| 67.2330703 | 63 | 67.7492965 |
| 67.899737  | 63 | 67.7238997 |
| 68.1219592 | 63 | 67.6921537 |
| 68.5664037 | 63 | 67.6635823 |
| 68.4552926 | 63 | 67.6365981 |
| 68.0108481 | 63 | 67.6270743 |

|            |    |            |
|------------|----|------------|
| 67.1219592 | 63 | 67.6351921 |
| 67.3441814 | 63 | 67.6413698 |
| 67.2330703 | 63 | 67.6459602 |
| 65.5287455 | 63 | 67.643496  |
| 66.7886259 | 63 | 67.621455  |
| 67.3441814 | 63 | 67.5860101 |
| 67.5063278 | 63 | 67.5623819 |
| 67.691513  | 63 | 67.5406936 |
| 66.3514886 | 63 | 67.5138908 |
| 66.7835873 | 63 | 67.50155   |
| 66.2527231 | 63 | 67.4911492 |
| 66.2527231 | 63 | 67.4791611 |
| 68.7448978 | 63 | 67.4736986 |
| 68.6337866 | 63 | 67.4756436 |
| 69.2330703 | 63 | 67.4722975 |
| 69.0108481 | 63 | 67.4691278 |
| 69.0108481 | 63 | 67.4677217 |
| 69.0108481 | 63 | 67.4677266 |
| 69.0108481 | 63 | 67.4407425 |
| 69.1219592 | 63 | 67.4074091 |
| 68.899737  | 63 | 67.3772504 |
| 68.0108481 | 63 | 67.3566155 |
| 67.6775148 | 61 | 67.3455044 |
| 66.7886259 | 61 | 67.3423298 |
| 66.3441814 | 61 | 67.3470917 |
| 66.2330703 | 61 | 67.3502663 |
| 66.6775148 | 61 | 67.3407425 |
| 66.4552926 | 61 | 67.3343933 |
| 66.3441814 | 61 | 67.3391552 |
| 66.5664037 | 61 | 67.3470917 |
| 66.6775148 | 61 | 67.3455044 |
| 66.7886259 | 61 | 67.3216948 |
| 66.6775148 | 61 | 67.2931234 |
| 67.5664037 | 61 | 67.2518536 |
| 67.5664037 | 61 | 67.2105837 |
| 67.5664037 | 61 | 67.1788377 |
| 67.4552926 | 61 | 67.164552  |
| 67.3441814 | 61 | 67.148679  |
| 67.3441814 | 61 | 67.1264567 |
| 66.899737  | 61 | 67.128582  |
| 67.2330703 | 63 | 67.112709  |
| 67.1219592 | 63 | 67.0698519 |
| 67.0108481 | 63 | 67.0215037 |
| 66.7886259 | 63 | 66.9689228 |
| 66.6775148 | 63 | 66.9323105 |

|            |    |            |
|------------|----|------------|
| 66.5664037 | 63 | 66.8942872 |
| 67.0108481 | 63 | 66.8686096 |
| 66.899737  | 63 | 66.847694  |
| 66.899737  | 63 | 66.7943504 |
| 66.7886259 | 63 | 66.7410068 |
| 66.899737  | 63 | 66.7044989 |
| 67.1219592 | 63 | 66.6806894 |
| 67.2330703 | 63 | 66.6552926 |
| 67.1219592 | 63 | 66.631483  |
| 67.1219592 | 63 | 66.5981497 |
| 67.1219592 | 63 | 66.5584672 |
| 67.1219592 | 63 | 66.5108481 |
| 67.3441814 | 63 | 66.4727529 |
| 67.3441814 | 63 | 66.4378322 |
| 67.3441814 | 63 | 66.41561   |
| 67.0108481 | 63 | 66.4029116 |
| 67.1219592 | 63 | 66.3981497 |
| 67.6775148 | 63 | 66.3902132 |
| 67.5664037 | 63 | 66.399737  |
| 67.1219592 | 63 | 66.4108481 |
| 66.2330703 | 63 | 66.4330703 |
| 66.1219592 | 63 | 66.452118  |
| 65.6775148 | 63 | 66.4711656 |
| 65.5664037 | 63 | 66.4886259 |
| 65.7886259 | 63 | 66.4902132 |
| 66.1219592 | 63 | 66.4933878 |
| 66.2330703 | 63 | 66.4965624 |
| 65.6775148 | 63 | 66.4785872 |
| 65.6775148 | 63 | 66.4537338 |
| 65.6775148 | 63 | 66.425353  |
| 64.3441814 | 63 | 66.4052614 |
| 64.1219592 | 63 | 66.3719423 |
| 64.0108481 | 63 | 66.3402105 |
| 63.7886259 | 63 | 66.3047751 |
| 64.1219592 | 63 | 66.2656359 |
| 64.4552926 | 63 | 66.228084  |
| 64.7886259 | 63 | 66.1887685 |
| 65.0108481 | 63 | 66.1468074 |
| 64.899737  | 63 | 66.109961  |
| 66.6775148 | 63 | 66.0748782 |
| 67.3441814 | 63 | 66.0413828 |
| 67.2330703 | 63 | 66.0080637 |
| 67.3441814 | 63 | 65.9678663 |
| 66.6775148 | 63 | 65.924318  |
| 66.3441814 | 63 | 65.8783005 |

|            |    |            |
|------------|----|------------|
| 65.5664037 | 63 | 65.8331648 |
| 65.3441814 | 63 | 65.7862655 |
| 65.2330703 | 63 | 65.7545337 |
| 65.2330703 | 63 | 65.7270348 |
| 65.4552926 | 63 | 65.6995358 |
| 65.899737  | 63 | 65.6739769 |
| 66.1219592 | 61 | 65.6630564 |
| 67.1219592 | 61 | 65.645434  |
| 67.1219592 | 61 | 65.6158186 |
| 68.1219592 | 61 | 65.5839104 |
| 68.0108481 | 61 | 65.5539423 |
| 68.1219592 | 61 | 65.534909  |
| 67.899737  | 61 | 65.5151701 |
| 67.6775148 | 61 | 65.5135828 |
| 67.7886259 | 61 | 65.5167574 |
| 67.7886259 | 61 | 65.4992971 |
| 66.1970313 | 61 | 65.4596146 |
| 65.6044387 | 61 | 65.4119955 |
| 65.3575251 | 61 | 65.3691384 |
| 65.4933276 | 61 | 65.3278686 |
| 64.900735  | 61 | 65.2865987 |
| 64.900735  | 61 | 65.2659638 |
| 64.5303646 | 61 | 65.2485035 |
| 64.0488831 | 61 | 65.2310432 |
| 64.0488831 | 61 | 65.219932  |
| 63.8143152 | 61 | 65.1992971 |
| 64.0735745 | 61 | 65.1627892 |
| 64.3204881 | 61 | 65.1231066 |
| 64.4439449 | 61 | 65.0865987 |
| 64.4439449 | 61 | 65.0580273 |
| 64.5674016 | 61 | 65.0024717 |
| 64.3081424 | 61 | 64.9342178 |
| 64.1846856 | 61 | 64.8691384 |
| 63.900735  | 61 | 64.804059  |
| 63.9624634 | 61 | 64.7532654 |
| 63.8390066 | 61 | 64.7104082 |
| 64.900735  | 61 | 64.6802495 |
| 65.4192535 | 61 | 64.6596146 |
| 65.4192535 | 61 | 64.6437416 |
| 65.555056  | 61 | 64.624694  |
| 66.246414  | 61 | 64.5961225 |
| 65.8883893 | 61 | 64.5627892 |
| 65.6044387 | 61 | 64.5310432 |
| 65.3328337 | 61 | 64.4897733 |
| 65.0241918 | 61 | 64.4469162 |

|            |    |            |
|------------|----|------------|
| 64.900735  | 61 | 64.3818368 |
| 64.7402411 | 61 | 64.3167574 |
| 65.5664037 | 61 | 64.2485035 |
| 65.7886259 | 61 | 64.1818368 |
| 64.5664037 | 63 | 64.1183447 |
| 63.3441814 | 63 | 64.0675511 |
| 62.899737  | 63 | 64.0262813 |
| 62.6775148 | 63 | 64.0188596 |
| 62.7886259 | 63 | 64.0294273 |
| 62.7886259 | 63 | 64.0498716 |
| 62.899737  | 63 | 64.0747251 |
| 62.899737  | 63 | 64.1128061 |
| 62.7886259 | 63 | 64.1619982 |
| 63.0108481 | 63 | 64.2164813 |
| 62.6775148 | 63 | 64.2730808 |
| 61.899737  | 63 | 64.3376168 |
| 62.0108481 | 63 | 64.4055038 |
| 62.4552926 | 63 | 64.4760362 |
| 62.899737  | 63 | 64.5414541 |
| 62.7886259 | 63 | 64.6114575 |
| 62.5664037 | 63 | 64.6782862 |
| 62.6775148 | 63 | 64.737612  |
| 62.7886259 | 63 | 64.7955269 |
| 63.1219592 | 63 | 64.8684329 |
| 63.3441814 | 63 | 64.9492754 |
| 63.4552926 | 63 | 65.0239451 |
| 63.899737  | 63 | 65.1024949 |
| 64.1219592 | 63 | 65.163408  |
| 63.899737  | 63 | 65.2345503 |
| 63.4552926 | 63 | 65.3088673 |
| 63.5664037 | 63 | 65.3812442 |
| 63.899737  | 63 | 65.44057   |
| 64.2330703 | 63 | 65.5051868 |
| 64.1219592 | 63 | 65.57386   |
| 63.5664037 | 63 | 65.6430624 |
| 63.4552926 | 63 | 65.6909479 |
| 63.3441814 | 63 | 65.7413026 |
| 63.2330703 | 63 | 65.7851317 |
| 63.2330703 | 63 | 65.8260724 |
| 64.2330703 | 63 | 65.8532565 |
| 64.899737  | 63 | 65.9014283 |
| 65.6775148 | 63 | 65.972175  |
| 66.3441814 | 63 | 66.0527982 |
| 66.7886259 | 63 | 66.1242504 |
| 67.2330703 | 63 | 66.190588  |



|            |    |            |
|------------|----|------------|
| 67.5664037 | 63 | 66.2516345 |
| 68.3441814 | 63 | 66.30739   |
| 68.3441814 | 63 | 66.3664965 |
| 68.0108481 | 63 | 66.4300122 |
| 68.5664037 | 63 | 66.5007589 |
| 68.5664037 | 63 | 66.5762675 |
| 69.0108481 | 63 | 66.6660619 |
| 68.899737  | 63 | 66.7819349 |
| 69.3441814 | 63 | 66.8962206 |
| 69.1219592 | 63 | 67.0025698 |
| 68.7202064 | 63 | 67.108919  |
| 68.3621817 | 63 | 67.2168555 |
| 69.2881076 | 63 | 67.3311412 |
| 69.5597126 | 63 | 67.4422523 |
| 69.1893422 | 63 | 67.5549507 |
| 69.3374903 | 63 | 67.6724111 |
| 69.1646508 | 63 | 67.7882841 |
| 70.3992187 | 63 | 67.8898714 |
| 70.621441  | 63 | 67.9835222 |
| 70.621441  | 63 | 68.0739984 |
| 70.3992187 | 63 | 68.1676492 |
| 70.4115644 | 63 | 68.2549507 |
| 70.4115644 | 63 | 68.340665  |
| 70.1769965 | 63 | 68.4073317 |
| 68.3761799 | 63 | 68.4755857 |
| 68.4255627 | 63 | 68.5454269 |
| 67.8082787 | 63 | 68.6120936 |
| 68.4322538 | 63 | 68.6803476 |
| 67.691513  | 63 | 68.7533634 |
| 67.9384266 | 63 | 68.8232047 |
| 68.2964513 | 63 | 68.8882841 |
| 68.5433649 | 63 | 68.9533634 |
| 67.6791673 | 63 | 69.0343158 |
| 67.4322538 | 63 | 69.108919  |
| 67.0618834 | 63 | 69.177173  |
| 66.8026241 | 63 | 69.2343158 |
| 67.037192  | 63 | 69.2851095 |
| 67.2347229 | 63 | 69.3168555 |
| 67.963118  | 63 | 69.3438396 |
| 67.963118  | 63 | 69.3724111 |
| 68.1853402 | 63 | 69.3914587 |
| 70.1219592 | 63 | 69.3993952 |
| 70.4552926 | 63 | 69.4041571 |
| 70.3441814 | 63 | 69.4057444 |
| 70.2330703 | 63 | 69.4136809 |

|            |    |            |
|------------|----|------------|
| 70.1219592 | 63 | 69.4279666 |
| 70.6775148 | 63 | 69.4527536 |
| 70.5664037 | 63 | 69.4842424 |
| 71.0108481 | 63 | 69.4977419 |
| 71.5664037 | 63 | 69.5010121 |
| 71.5664037 | 63 | 69.4984622 |
| 71.0108481 | 63 | 69.5001451 |
| 70.6775148 | 63 | 69.5058844 |
| 70.2330703 | 63 | 69.493987  |
| 70.0108481 | 63 | 69.4805024 |
| 69.6775148 | 63 | 69.4638431 |
| 69.899737  | 63 | 69.4503585 |
| 68.899737  | 63 | 69.4287609 |
| 68.899737  | 63 | 69.4087507 |
| 68.4552926 | 63 | 69.3968533 |
| 68.1219592 | 63 | 69.40592   |
| 68.1219592 | 63 | 69.4158685 |
| 68.3441814 | 63 | 69.4314608 |
| 68.1219592 | 63 | 69.4302026 |
| 68.7886259 | 63 | 69.4442884 |
| 69.4552926 | 63 | 69.4548468 |
| 71.3441814 | 63 | 69.4571159 |
| 71.5664037 | 63 | 69.4526832 |
| 71.5664037 | 63 | 69.4621834 |
| 71.2330703 | 63 | 69.4752109 |
| 71.1219592 | 63 | 69.4919421 |
| 70.5664037 | 63 | 69.517139  |
| 70.2330703 | 63 | 69.5405722 |
| 70.0108481 | 63 | 69.5770565 |
| 69.899737  | 73 | 69.6094844 |
| 69.1219592 | 73 | 69.6434996 |
| 69.3441814 | 73 | 69.6743402 |
| 69.0108481 | 73 | 69.6806894 |
| 69.899737  | 73 | 69.6886259 |
| 70.1219592 | 73 | 69.699737  |
| 70.4552926 | 73 | 69.71561   |
| 70.5664037 | 73 | 69.7330703 |
| 70.2330703 | 73 | 69.7410068 |
| 69.7886259 | 73 | 69.7568799 |
| 69.0108481 | 73 | 69.7616418 |
| 69.4552926 | 73 | 69.7537053 |
| 69.5664037 | 73 | 69.752118  |
| 69.5664037 | 73 | 69.7584672 |
| 69.6775148 | 73 | 69.7552926 |
| 69.4552926 | 73 | 69.7489433 |

|            |    |            |
|------------|----|------------|
| 69.4552926 | 73 | 69.7489433 |
| 68.899737  | 73 | 69.7616418 |
| 69.0108481 | 73 | 69.7743402 |
| 69.3441814 | 73 | 69.8140227 |
| 69.0108481 | 73 | 69.8457687 |
| 69.1219592 | 73 | 69.8870386 |
| 68.899737  | 73 | 69.9283084 |
| 68.3441814 | 73 | 69.9664037 |
| 68.6775148 | 73 | 70.0044989 |
| 68.6775148 | 73 | 70.0441814 |
| 68.4552926 | 73 | 70.0743402 |
| 68.2330703 | 73 | 70.0933878 |
| 68.3441814 | 73 | 70.0806894 |
| 68.3441814 | 73 | 70.0489433 |
| 68.2330703 | 73 | 70.0124354 |
| 68.5664037 | 73 | 69.9775148 |
| 68.6775148 | 73 | 69.9489433 |
| 69.7886259 | 73 | 69.9235465 |
| 70.2330703 | 73 | 69.8949751 |
| 70.3441814 | 73 | 69.867991  |
| 70.3441814 | 73 | 69.8362449 |
| 70.5664037 | 73 | 69.8187846 |
| 71.0108481 | 73 | 69.7981497 |
| 71.1219592 | 73 | 69.7822767 |
| 71.3441814 | 73 | 69.7584672 |
| 71.3441814 | 73 | 69.7267211 |
| 71.2330703 | 73 | 69.6886259 |
| 71.6775148 | 73 | 69.6505306 |
| 71.3441814 | 73 | 69.6362449 |
| 71.0108481 | 73 | 69.6410068 |
| 71.4552926 | 73 | 69.6632291 |
| 71.4552926 | 73 | 69.6854513 |
| 70.4552926 | 73 | 69.7092608 |
| 69.7886259 | 73 | 69.7346576 |
| 70.0108481 | 73 | 69.7410068 |
| 70.5664037 | 73 | 69.747356  |
| 70.7886259 | 73 | 69.752118  |
| 71.6775148 | 73 | 69.7616418 |
| 71.1219592 | 73 | 69.7600545 |
| 71.3441814 | 73 | 69.7552926 |
| 71.0108481 | 73 | 69.7537053 |
| 70.7886259 | 73 | 69.7441814 |
| 71.0108481 | 73 | 69.7267211 |
| 70.899737  | 73 | 69.6981497 |
| 70.899737  | 73 | 69.6648164 |

|            |    |            |
|------------|----|------------|
| 70.7886259 | 73 | 69.6298957 |
| 70.4552926 | 73 | 69.5918005 |
| 69.3441814 | 73 | 69.5537053 |
| 69.0108481 | 73 | 69.5187846 |
| 68.7886259 | 73 | 69.4822767 |
| 69.1219592 | 73 | 69.4489433 |
| 68.7886259 | 73 | 69.4171973 |
| 68.2330703 | 73 | 69.3981497 |
| 68.1219592 | 73 | 69.3822767 |
| 67.6775148 | 73 | 69.367991  |
| 67.899737  | 73 | 69.3552926 |
| 67.899737  | 73 | 69.3410068 |
| 67.899737  | 73 | 69.3187846 |
| 68.2330703 | 73 | 69.2854513 |
| 67.899737  | 73 | 69.252118  |
| 67.7886259 | 73 | 69.2251338 |
| 67.899737  | 73 | 69.2140227 |
| 69.2330703 | 73 | 69.199737  |
| 70.1219592 | 73 | 69.1695783 |
| 70.5664037 | 73 | 69.1346576 |
| 71.0108481 | 73 | 69.1029116 |
| 71.2330703 | 73 | 69.0600545 |
| 71.3441814 | 73 | 69.0187846 |
| 70.1219592 | 73 | 69.0044989 |
| 69.899737  | 73 | 69.0076735 |
| 69.7886259 | 73 | 69.0140227 |
| 69.5664037 | 73 | 69.0219592 |
| 68.899737  | 73 | 69.0219592 |
| 69.0108481 | 73 | 68.9981497 |
| 68.899737  | 73 | 68.9743402 |
| 68.4552926 | 73 | 68.9330703 |
| 67.6775148 | 73 | 68.8870386 |
| 66.3441814 | 73 | 68.8330703 |
| 66.3441814 | 73 | 68.7664037 |
| 66.2330703 | 73 | 68.6949751 |
| 65.7886259 | 73 | 68.6187846 |
| 65.5664037 | 73 | 68.547356  |
| 65.899737  | 73 | 68.4791021 |
| 65.7886259 | 73 | 68.4378322 |
| 65.899737  | 73 | 68.4013243 |
| 66.3441814 | 73 | 68.3791021 |
| 67.3441814 | 73 | 68.3537053 |
| 68.6775148 | 73 | 68.3298957 |
| 69.2330703 | 73 | 68.3092608 |
| 69.4552926 | 73 | 68.2949751 |

|            |    |            |
|------------|----|------------|
| 69.3441814 | 73 | 68.2886259 |
| 69.0108481 | 73 | 68.2791021 |
| 68.6775148 | 73 | 68.267991  |
| 68.7886259 | 73 | 68.237913  |
| 69.4552926 | 73 | 68.1960185 |
| 70.5664037 | 73 | 68.1483039 |
| 70.2330703 | 73 | 68.1002365 |
| 69.5664037 | 73 | 68.0435271 |
| 68.899737  | 73 | 67.9695338 |
| 68.7886259 | 73 | 67.8846058 |
| 68.4552926 | 73 | 67.8021469 |
| 68.5664037 | 73 | 67.7221571 |
| 69.4552926 | 73 | 67.6389928 |
| 70.0108481 | 73 | 67.5683504 |
| 70.4552926 | 73 | 67.5126993 |
| 71.1219592 | 73 | 67.4841279 |
| 70.7886259 | 73 | 67.4285723 |
| 70.0108481 | 73 | 67.3746041 |
| 69.4552926 | 73 | 67.3301596 |
| 68.4552926 | 73 | 67.2841279 |
| 67.7886259 | 73 | 67.2365088 |
| 67.0108481 | 73 | 67.183678  |
| 66.3441814 | 73 | 67.1334927 |
| 65.899737  | 73 | 67.1007678 |
| 65.5664037 | 73 | 67.0645155 |
| 65.7886259 | 73 | 67.0282631 |
| 65.6775148 | 73 | 67.0003001 |
| 66.4552926 | 73 | 66.9923636 |
| 66.4552926 | 73 | 66.9780779 |
| 67.2330703 | 73 | 66.9701413 |
| 67.3441814 | 73 | 66.9622048 |
| 67.1219592 | 73 | 66.9447445 |
| 66.7886259 | 73 | 66.9114112 |
| 67.1219592 | 73 | 66.8542683 |
| 67.2330703 | 73 | 66.7923636 |
| 67.2330703 | 73 | 66.7188979 |
| 67.1219592 | 73 | 66.6470194 |
| 65.7942805 | 73 | 66.5850176 |
| 65.3004533 | 73 | 66.5277776 |
| 64.5597126 | 73 | 66.465423  |
| 64.4239101 | 73 | 66.393721  |
| 63.9300829 | 73 | 66.3061459 |
| 64.0535397 | 73 | 66.2235091 |
| 64.1769965 | 73 | 66.1519834 |
| 64.7942805 | 73 | 66.0898052 |

|            |    |            |
|------------|----|------------|
| 65.4115644 | 73 | 66.0308015 |
| 65.4115644 | 73 | 65.9797344 |
| 66.3992187 | 73 | 65.9235527 |
| 66.2263792 | 73 | 65.8695844 |
| 67.899737  | 73 | 65.8013304 |
| 65.899737  | 73 | 65.72514   |
| 65.7886259 | 73 | 65.6441876 |
| 65.7886259 | 73 | 65.5664098 |
| 65.7886259 | 73 | 65.5013304 |
| 65.5664037 | 73 | 65.4457749 |
| 64.757137  | 73 | 65.4060923 |
| 64.1645444 | 73 | 65.3695844 |
| 64.0534333 | 73 | 65.341013  |
| 63.8065197 | 73 | 65.3203781 |
| 63.6954086 | 73 | 65.2997431 |
| 63.831211  | 73 | 65.2854574 |
| 65.0108481 | 73 | 65.2806955 |
| 64.899737  | 73 | 65.2806955 |
| 65.2330703 | 73 | 65.272759  |
| 65.3441814 | 73 | 65.2648225 |
| 65.1219592 | 73 | 65.2505368 |
| 65.0108481 | 73 | 65.2346638 |
| 64.6775148 | 73 | 65.2235527 |
| 64.899737  | 63 | 65.2108542 |
| 64.3126925 | 63 | 65.1854574 |
| 64.3126925 | 63 | 65.1552987 |
| 64.6707172 | 63 | 65.1140288 |
| 64.6707172 | 63 | 65.0648225 |
| 64.4238036 | 63 | 65.0425195 |
| 64.4361493 | 63 | 65.0225093 |
| 64.4361493 | 63 | 65.0210176 |
| 64.448495  | 63 | 65.0246405 |
| 64.5596061 | 63 | 65.0384927 |
| 64.5472604 | 63 | 65.0505812 |
| 64.6583715 | 63 | 65.0609061 |
| 64.8805937 | 63 | 65.0560634 |
| 64.6336802 | 63 | 65.0392278 |
| 65.6775148 | 63 | 65.0303286 |
| 65.2330703 | 63 | 65.0120821 |
| 65.1219592 | 63 | 64.9963046 |
| 65.4552926 | 63 | 64.9629713 |
| 65.3441814 | 63 | 64.9645586 |
| 65.4552926 | 63 | 64.9645586 |
| 65.5664037 | 63 | 64.9661459 |
| 65.6775148 | 63 | 64.9709078 |

|            |    |            |
|------------|----|------------|
| 65.2330703 | 63 | 64.9788443 |
| 65.0108481 | 63 | 65.0094529 |
| 64.899737  | 63 | 65.0548763 |
| 64.4552926 | 63 | 65.1034743 |
| 64.5664037 | 63 | 65.1540123 |
| 65.4552926 | 63 | 65.2013757 |
| 65.6775148 | 63 | 65.2388626 |
| 65.899737  | 63 | 65.2499737 |
| 65.899737  | 63 | 65.2610848 |
| 66.2330703 | 63 | 65.2753705 |
| 66.2330703 | 63 | 65.2769578 |
| 66.3441814 | 63 | 65.2785451 |
| 65.899737  | 63 | 65.2864816 |
| 65.3441814 | 63 | 65.303942  |
| 65.1219592 | 63 | 65.3309261 |
| 64.3441814 | 63 | 65.3742331 |
| 63.6775148 | 63 | 65.4254766 |
| 64.2330703 | 63 | 65.4700181 |
| 63.899737  | 63 | 65.5097978 |
| 64.4552926 | 63 | 65.5531048 |
| 64.6775148 | 63 | 65.5867116 |
| 64.899737  | 63 | 65.6155565 |
| 64.899737  | 63 | 65.644225  |
| 64.899737  | 63 | 65.6427348 |
| 64.4552926 | 63 | 65.6303099 |
| 64.2330703 | 63 | 65.6115357 |
| 64.7886259 | 63 | 65.5943489 |
| 65.1219592 | 63 | 65.5918005 |
| 65.1219592 | 63 | 65.5608392 |
| 65.5664037 | 63 | 65.5346398 |
| 66.0108481 | 63 | 65.5314652 |
| 65.7886259 | 63 | 65.525116  |
| 65.899737  | 63 | 65.5155922 |
| 66.1219592 | 63 | 65.5060684 |
| 66.1219592 | 63 | 65.4981318 |
| 66.899737  | 63 | 65.4933699 |
| 67.3441814 | 63 | 65.4997191 |
| 67.4552926 | 63 | 65.5044811 |
| 67.3441814 | 63 | 65.5140049 |
| 67.0108481 | 63 | 65.5282906 |
| 66.4552926 | 63 | 65.540989  |
| 65.7886259 | 63 | 65.5425763 |
| 65.6775148 | 63 | 65.5441636 |
| 66.2330703 | 63 | 65.5378144 |
| 65.4552926 | 63 | 65.5330525 |

|            |    |            |
|------------|----|------------|
| 65.2330703 | 63 | 65.525116  |
| 65.5664037 | 63 | 65.5171795 |
| 65.899737  | 63 | 65.5124176 |
| 66.7886259 | 63 | 65.5140049 |
| 67.3441814 | 63 | 65.5171795 |
| 67.899737  | 63 | 65.5282906 |
| 67.7886259 | 63 | 65.5473382 |
| 67.4552926 | 63 | 65.5759096 |
| 67.4552926 | 63 | 65.5965445 |
| 66.7886259 | 63 | 65.6155922 |
| 66.4552926 | 63 | 65.6298779 |
| 66.4552926 | 63 | 65.6441636 |
| 64.4552926 | 63 | 65.6584493 |
| 63.6775148 | 63 | 65.6790842 |
| 63.3441814 | 63 | 65.7028938 |
| 63.6775148 | 63 | 65.710331  |
| 64.4552926 | 63 | 65.7262339 |
| 63.5102234 | 63 | 65.7289092 |
| 63.3991123 | 63 | 65.7416076 |
| 64.899737  | 63 | 65.7479568 |
| 65.0108481 | 63 | 65.7479568 |
| 64.6775148 | 63 | 65.7527187 |
| 64.7886259 | 63 | 65.7638298 |
| 65.0108481 | 63 | 65.770179  |
| 65.3441814 | 63 | 65.7622425 |
| 65.6775148 | 63 | 65.7463695 |
| 65.3441814 | 63 | 65.72256   |
| 65.5664037 | 63 | 65.6828775 |
| 65.4552926 | 63 | 65.6431949 |
| 65.4552926 | 63 | 65.606687  |
| 65.5664037 | 63 | 65.5781155 |
| 65.7886259 | 63 | 65.5574806 |
| 65.4552926 | 63 | 65.5527187 |
| 65.5664037 | 63 | 65.5558933 |
| 65.6775148 | 63 | 65.5479568 |
| 65.6775148 | 63 | 65.554306  |
| 66.0108481 | 63 | 65.5622425 |
| 66.0108481 | 63 | 65.554306  |
| 65.5664037 | 63 | 65.538433  |
| 65.899737  | 63 | 65.5082743 |
| 65.6775148 | 63 | 65.4717663 |
| 65.6775148 | 63 | 65.4368457 |
| 65.6775148 | 63 | 65.4082743 |
| 65.2330703 | 63 | 65.390814  |
| 65.4552926 | 63 | 65.3765282 |



|            |    |            |
|------------|----|------------|
| 65.6775148 | 63 | 65.3781155 |
| 65.899737  | 63 | 65.3876394 |
| 66.3441814 | 63 | 65.3971632 |
| 66.5664037 | 63 | 65.4463695 |
| 64.9758999 | 63 | 65.506687  |
| 65.3462702 | 63 | 65.570179  |
| 64.9758999 | 63 | 65.6273219 |
| 66.0108481 | 63 | 65.654306  |
| 65.5664037 | 63 | 65.6884419 |
| 65.5664037 | 63 | 65.7257524 |
| 66.3441814 | 63 | 65.7432128 |
| 66.5664037 | 63 | 65.7574985 |
| 66.3441814 | 63 | 65.7717842 |
| 65.5664037 | 63 | 65.7749588 |
| 65.0108481 | 63 | 65.7701969 |
| 65.2330703 | 63 | 65.7606731 |
| 64.5664037 | 63 | 65.7432128 |
| 64.6775148 | 63 | 65.7257524 |
| 64.7886259 | 63 | 65.7082921 |
| 65.0108481 | 71 | 65.6892445 |
| 65.0108481 | 71 | 65.6686096 |
| 65.4552926 | 71 | 65.6479747 |
| 65.899737  | 71 | 65.6241651 |
| 65.6775148 | 71 | 65.6067048 |
| 65.899737  | 71 | 65.5876572 |
| 65.7886259 | 71 | 65.5749588 |
| 65.0108481 | 71 | 65.565435  |
| 64.7886259 | 71 | 65.5638477 |
| 64.6775148 | 71 | 65.5686096 |
| 64.7886259 | 63 | 65.581308  |
| 65.4552926 | 63 | 65.597181  |
| 65.7886259 | 63 | 65.6162286 |
| 66.2330703 | 63 | 65.6384509 |
| 66.4552926 | 63 | 65.6701969 |
| 66.899737  | 63 | 65.6987683 |
| 67.1219592 | 63 | 65.6980046 |
| 67.1219592 | 63 | 65.6944191 |
| 67.899737  | 63 | 65.6880117 |
| 67.899737  | 63 | 65.6876007 |
| 67.7886259 | 63 | 65.6857788 |
| 67.6775148 | 63 | 65.7066784 |
| 66.3441814 | 63 | 65.7221107 |
| 65.899737  | 63 | 65.7318992 |
| 66.0108481 | 63 | 65.7249626 |
| 66.1219592 | 63 | 65.7392484 |

|            |    |            |
|------------|----|------------|
| 66.0108481 | 63 | 65.7471849 |
| 65.6775148 | 63 | 65.7408357 |
| 65.0108481 | 63 | 65.7313118 |
| 64.6775148 | 63 | 65.7360738 |
| 64.6775148 | 63 | 65.7551214 |
| 64.4552926 | 63 | 65.7868674 |
| 64.1219592 | 63 | 65.8138515 |
| 64.3441814 | 63 | 65.8503595 |
| 64.1219592 | 63 | 65.8868674 |
| 64.0108481 | 63 | 65.9202007 |
| 64.1219592 | 63 | 65.9503595 |
| 64.1219592 | 63 | 65.9773436 |
| 64.2330703 | 63 | 65.9821055 |
| 64.2330703 | 63 | 65.9836928 |
| 64.7886259 | 63 | 65.9789309 |
| 65.0108481 | 63 | 65.9678198 |
| 65.899737  | 63 | 65.9614706 |
| 66.3441814 | 63 | 65.9678198 |
| 66.4552926 | 63 | 65.974169  |
| 67.0108481 | 63 | 65.9773436 |
| 67.0108481 | 63 | 65.9757563 |
| 67.2330703 | 63 | 65.9567087 |
| 67.899737  | 63 | 65.9313118 |
| 67.2330703 | 63 | 65.8963912 |
| 65.4018349 | 63 | 65.8598833 |
| 65.4265263 | 63 | 65.8313118 |
| 65.4512177 | 63 | 65.7995658 |
| 66.3154152 | 63 | 65.7805182 |
| 66.438872  | 63 | 65.7519468 |
| 66.438872  | 63 | 65.7249626 |
| 66.4265263 | 63 | 65.7011531 |
| 65.6610942 | 63 | 65.6821055 |
| 65.5252917 | 63 | 65.6821055 |
| 66.5664037 | 63 | 65.690042  |
| 66.1219592 | 63 | 65.6995658 |
| 65.899737  | 63 | 65.7138515 |
| 65.899737  | 63 | 65.7281372 |
| 66.6775148 | 63 | 65.7487722 |
| 66.899737  | 63 | 65.7821055 |
| 67.2330703 | 63 | 65.8186134 |
| 67.1219592 | 63 | 65.8519468 |
| 67.1219592 | 63 | 65.8852801 |
| 67.2330703 | 63 | 65.9313118 |
| 67.1219592 | 63 | 65.974169  |
| 67.1219592 | 63 | 66.021788  |

|            |    |            |
|------------|----|------------|
| 66.899737  | 63 | 66.0694071 |
| 65.7886259 | 63 | 66.121788  |
| 66.0108481 | 63 | 66.1694071 |
| 65.3441814 | 63 | 66.2043277 |
| 65.1219592 | 63 | 66.2392484 |
| 65.3441814 | 63 | 66.2567087 |
| 65.4552926 | 63 | 66.2678198 |
| 65.2330703 | 63 | 66.2646452 |
| 64.899737  | 63 | 66.2535341 |
| 64.6775148 | 63 | 66.2471849 |
| 64.1219592 | 63 | 66.2376611 |
| 64.0108481 | 63 | 66.2328992 |
| 63.7886259 | 63 | 66.2344865 |
| 63.899737  | 63 | 66.2265499 |
| 64.899737  | 63 | 66.2265499 |
| 64.899737  | 63 | 66.2495358 |
| 65.7886259 | 63 | 66.2737563 |
| 65.899737  | 63 | 66.3007987 |
| 66.0108481 | 63 | 66.3091461 |
| 66.1219592 | 63 | 66.3157299 |
| 66.3441814 | 63 | 66.3223137 |
| 66.3441814 | 63 | 66.335423  |
| 66.4552926 | 63 | 66.3433222 |
| 66.6775148 | 63 | 66.3533377 |
| 67.1219592 | 63 | 66.3539476 |
| 67.0108481 | 63 | 66.359143  |
| 67.1219592 | 63 | 66.3692767 |
| 67.3441814 | 63 | 66.3962608 |
| 67.2330703 | 63 | 66.4121338 |
| 67.0108481 | 63 | 66.4153084 |
| 66.7886259 | 63 | 66.4121338 |
| 67.3441814 | 63 | 66.4089592 |
| 67.3441814 | 63 | 66.4105465 |
| 67.4552926 | 63 | 66.4137211 |
| 67.3441814 | 63 | 66.4200704 |
| 67.7886259 | 63 | 66.418483  |
| 67.4552926 | 63 | 66.4153084 |
| 66.6775148 | 63 | 66.4280069 |
| 66.6775148 | 63 | 66.4422926 |
| 66.0108481 | 63 | 66.4661021 |
| 65.7886259 | 63 | 66.4946735 |
| 65.6775148 | 63 | 66.5153084 |
| 65.5664037 | 63 | 66.5327688 |
| 66.0108481 | 63 | 66.5454672 |
| 66.3441814 | 63 | 66.5661021 |

|            |    |            |
|------------|----|------------|
| 66.6775148 | 63 | 66.5914989 |
| 67.3441814 | 63 | 66.6311815 |
| 67.3441814 | 63 | 66.6692767 |
| 67.2330703 | 63 | 66.7041973 |
| 67.0108481 | 63 | 66.7375307 |
| 67.1219592 | 63 | 66.7581656 |
| 67.3441814 | 63 | 66.7788005 |
| 66.899737  | 63 | 66.786737  |
| 66.899737  | 63 | 66.7883243 |
| 66.899737  | 63 | 66.7883243 |
| 67.3441814 | 63 | 66.7883243 |
| 66.2140336 | 63 | 66.7835624 |
| 66.2263792 | 63 | 66.7692767 |
| 66.6090953 | 63 | 66.754991  |
| 66.4856385 | 63 | 66.7407053 |
| 66.6090953 | 63 | 66.718483  |
| 67.7886259 | 63 | 66.6994354 |
| 67.7886259 | 63 | 66.6946735 |
| 67.1219592 | 63 | 66.6899116 |
| 67.0108481 | 63 | 66.6851497 |
| 66.899737  | 63 | 66.686737  |
| 67.2330703 | 63 | 66.6883243 |
| 67.4552926 | 63 | 66.6637511 |
| 67.5664037 | 63 | 66.6391779 |
| 67.0108481 | 63 | 66.6184848 |
| 66.6775148 | 63 | 66.60467   |
| 66.6775148 | 63 | 66.5772749 |
| 67.0108481 | 63 | 66.5493507 |
| 67.0108481 | 63 | 66.550938  |
| 67.1219592 | 63 | 66.5493507 |
| 66.7886259 | 63 | 66.5572872 |
| 66.6775148 | 63 | 66.5620491 |
| 66.1219592 | 63 | 66.5683983 |
| 66.3441814 | 63 | 66.5715729 |
| 66.4552926 | 63 | 66.5620491 |
| 66.899737  | 63 | 66.5398269 |
| 66.6775148 | 63 | 66.5064936 |
| 66.2330703 | 63 | 66.4636364 |
| 66.2330703 | 63 | 66.4160174 |
| 66.3441814 | 63 | 66.3699856 |
| 66.3441814 | 63 | 66.3255412 |
| 66.3441814 | 63 | 66.2795094 |
| 66.0108481 | 63 | 66.2287158 |
| 66.0108481 | 63 | 66.182684  |
| 66.1219592 | 63 | 66.1382396 |

|            |    |            |
|------------|----|------------|
| 66.0108481 | 63 | 66.0922078 |
| 65.3441814 | 63 | 66.0445888 |
| 65.4552926 | 63 | 66.0083528 |
| 65.6775148 | 63 | 65.9703532 |
| 65.5664037 | 63 | 65.9268861 |
| 65.6775148 | 63 | 65.8978812 |
| 66.7886259 | 63 | 65.8718745 |
| 67.0108481 | 63 | 65.8306047 |
| 66.899737  | 63 | 65.7925094 |
| 67.1219592 | 63 | 65.7671126 |
| 66.899737  | 63 | 65.7544142 |
| 65.6240572 | 63 | 65.7464777 |
| 65.6240572 | 63 | 65.7385412 |
| 66.0067732 | 63 | 65.7306047 |
| 66.3771436 | 63 | 65.7274301 |
| 65.8709708 | 63 | 65.732192  |
| 65.5006004 | 63 | 65.7464777 |
| 66.7886259 | 63 | 65.7623507 |
| 66.5664037 | 63 | 65.7718745 |
| 66.5664037 | 63 | 65.779811  |
| 66.1219592 | 63 | 65.7845729 |
| 66.1219592 | 63 | 65.7877475 |
| 65.7886259 | 63 | 65.7925094 |
| 65.3441814 | 63 | 65.7988586 |
| 64.7886259 | 63 | 65.8067951 |
| 64.3441814 | 63 | 65.8052078 |
| 64.3441814 | 63 | 65.7845729 |
| 64.0108481 | 63 | 65.7544142 |
| 64.0108481 | 63 | 65.7274301 |
| 63.899737  | 63 | 65.7036205 |
| 63.899737  | 63 | 65.6829856 |
| 63.7886259 | 63 | 65.663938  |
| 63.6775148 | 63 | 65.6655253 |
| 63.7886259 | 63 | 65.679811  |
| 63.6775148 | 63 | 65.6988586 |
| 64.0108481 | 63 | 65.7147316 |
| 63.6775148 | 63 | 65.7194935 |
| 63.5664037 | 63 | 65.7306047 |
| 63.5664037 | 63 | 65.7401285 |
| 64.4552926 | 63 | 65.7448904 |
| 64.7886259 | 63 | 65.7512396 |
| 64.899737  | 63 | 65.7528269 |
| 65.1219592 | 63 | 65.7337793 |
| 65.3441814 | 63 | 65.711557  |
| 66.1219592 | 63 | 65.6893348 |

|            |    |            |
|------------|----|------------|
| 66.3441814 | 63 | 65.6750491 |
| 66.6775148 | 63 | 65.663938  |
| 66.899737  | 63 | 65.666289  |
| 67.3441814 | 63 | 65.66864   |
| 67.3441814 | 63 | 65.6702855 |
| 67.6775148 | 63 | 65.66664   |
| 67.7886259 | 63 | 65.6702255 |
| 67.6775148 | 63 | 65.6870386 |
| 67.5664037 | 63 | 65.6672766 |
| 67.4552926 | 63 | 65.6542166 |
| 67.0108481 | 63 | 65.6376292 |
| 67.0108481 | 63 | 65.651915  |
| 66.5664037 | 63 | 65.6693753 |
| 66.899737  | 63 | 65.6979467 |
| 66.3441814 | 63 | 65.7392166 |
| 65.4552926 | 63 | 65.7820737 |
| 64.5664037 | 63 | 65.8328673 |
| 64.3441814 | 63 | 65.883661  |
| 64.5664037 | 63 | 65.9439785 |
| 64.899737  | 63 | 66.0217562 |
| 65.0108481 | 63 | 66.0979467 |
| 66.4552926 | 63 | 66.1725499 |
| 67.0108481 | 63 | 66.2439785 |
| 67.3441814 | 63 | 66.3090578 |
| 67.2330703 | 63 | 66.3709626 |
| 66.3441814 | 63 | 66.4217562 |
| 66.1219592 | 63 | 66.4598515 |
| 66.1219592 | 63 | 66.4915975 |
| 66.0108481 | 63 | 66.5122324 |
| 66.0108481 | 63 | 66.5296927 |
| 65.7886259 | 63 | 66.5376292 |
| 65.4552926 | 63 | 66.5408039 |
| 65.4552926 | 63 | 66.5439785 |
| 65.3441814 | 63 | 66.5408039 |
| 66.1219592 | 63 | 66.53128   |
| 66.1219592 | 63 | 66.4930892 |
| 65.7886259 | 63 | 66.4740416 |
| 65.7886259 | 63 | 66.4279143 |
| 66.1219592 | 63 | 66.4152159 |
| 66.1219592 | 63 | 66.3993428 |
| 66.1219592 | 63 | 66.3866444 |
| 66.6775148 | 63 | 66.3369898 |
| 65.4052887 | 63 | 66.2878642 |
| 65.6522023 | 63 | 66.2385622 |
| 65.4052887 | 63 | 66.1961386 |

|            |    |            |
|------------|----|------------|
| 67.1219592 | 63 | 66.1535386 |
| 67.3441814 | 63 | 66.1172878 |
| 67.7886259 | 63 | 66.0829771 |
| 68.2330703 | 63 | 66.0514882 |
| 67.7886259 | 63 | 66.0117101 |
| 67.899737  | 63 | 65.9782811 |
| 67.899737  | 63 | 65.961078  |
| 68.2330703 | 63 | 65.9530459 |
| 69.4552926 | 63 | 65.940781  |
| 69.2330703 | 63 | 65.9218141 |
| 69.1219592 | 63 | 65.910703  |
| 68.7886259 | 63 | 65.8980046 |
| 68.2330703 | 63 | 65.8583221 |
| 68.1219592 | 63 | 65.8075284 |
| 67.2330703 | 63 | 65.7535602 |
| 66.6775148 | 63 | 65.7043538 |
| 65.899737  | 63 | 65.6726078 |
| 65.0108481 | 63 | 65.6424491 |
| 64.7886259 | 63 | 65.5995919 |
| 65.0108481 | 63 | 65.5487983 |
| 65.0108481 | 63 | 65.4916554 |
| 65.1219592 | 63 | 65.4297506 |
| 64.899737  | 63 | 65.3678459 |
| 64.6775148 | 63 | 65.3011792 |
| 63.4486015 | 63 | 65.2519729 |
| 65.0108481 | 63 | 65.2059411 |
| 63.4486015 | 63 | 65.1726078 |
| 66.0108481 | 63 | 65.1456237 |
| 66.2330703 | 63 | 65.1138776 |
| 66.4552926 | 63 | 65.0805443 |
| 64.2016879 | 63 | 65.047211  |
| 64.349836  | 63 | 65.0186395 |
| 64.2263792 | 63 | 64.9916554 |
| 64.5967496 | 63 | 64.9860205 |
| 64.4732928 | 63 | 64.9816202 |
| 64.4732928 | 63 | 64.9682395 |
| 64.6090953 | 63 | 64.9377423 |
| 64.3621817 | 63 | 64.9077742 |
| 64.1152681 | 63 | 64.8732205 |
| 64.004157  | 63 | 64.8130888 |
| 64.2510706 | 63 | 64.7612463 |
| 64.004157  | 63 | 64.7039365 |
| 63.4856385 | 63 | 64.6517413 |
| 63.2387249 | 63 | 64.6395671 |
| 64.1219592 | 63 | 64.6191036 |

|            |    |            |
|------------|----|------------|
| 64.1219592 | 63 | 64.6004039 |
| 63.6775148 | 63 | 64.584526  |
| 63.4552926 | 63 | 64.5645916 |
| 63.5664037 | 63 | 64.5437755 |
| 63.7886259 | 63 | 64.5120246 |
| 64.1219592 | 63 | 64.4961515 |
| 64.0108481 | 63 | 64.4818658 |
| 63.1219592 | 63 | 64.4771039 |
| 62.4552926 | 63 | 64.4659928 |
| 62.0108481 | 63 | 64.4437706 |
| 61.4552926 | 63 | 64.4120246 |
| 61.1219592 | 63 | 64.3771039 |
| 60.7886259 | 63 | 64.3342468 |
| 61.899737  | 63 | 64.2913896 |
| 62.899737  | 63 | 64.2628182 |
| 63.7886259 | 63 | 64.2549773 |
| 63.899737  | 63 | 64.2279932 |
| 63.5664037 | 63 | 64.2280888 |
| 63.7886259 | 63 | 64.1899935 |
| 63.7886259 | 69 | 64.1423745 |
| 64.1219592 | 69 | 64.0868189 |
| 64.7886259 | 69 | 64.0571085 |
| 65.0108481 | 69 | 64.0284563 |
| 65.3441814 | 69 | 64.0015678 |
| 64.4686362 | 69 | 63.9709755 |
| 64.9871547 | 69 | 63.9627819 |
| 65.246414  | 69 | 63.9704612 |
| 65.3698708 | 69 | 63.9746132 |
| 64.02385   | 69 | 63.979118  |
| 64.1596524 | 69 | 63.9839755 |
| 63.8880475 | 69 | 63.9840711 |
| 64.2460722 | 69 | 63.979052  |
| 67.3808767 | 69 | 63.9791476 |
| 68.022852  | 69 | 63.9850633 |
| 67.9240866 | 69 | 63.9865698 |
| 68.0105063 | 69 | 63.977046  |
| 67.3932224 | 69 | 63.9738714 |
| 66.7759384 | 69 | 63.9706968 |
| 65.8993952 | 69 | 63.9691095 |
| 66.1219592 | 63 | 63.9691095 |
| 65.6775148 | 63 | 63.9675222 |
| 65.5664037 | 63 | 63.9659349 |
| 64.2330703 | 63 | 63.9643476 |
| 63.2330703 | 63 | 63.9706968 |
| 62.7886259 | 63 | 63.9818079 |



|            |    |            |
|------------|----|------------|
| 62.5664037 | 63 | 63.9945063 |
| 62.1219592 | 63 | 64.0167286 |
| 61.899737  | 63 | 64.0484746 |
| 62.6775148 | 63 | 64.0865698 |
| 62.899737  | 63 | 64.1119667 |
| 63.1219592 | 63 | 64.1326016 |
| 63.4552926 | 63 | 64.1421254 |
| 63.3441814 | 63 | 64.1437127 |
| 62.899737  | 63 | 64.1389508 |
| 62.5664037 | 63 | 64.1389508 |
| 62.1219592 | 63 | 64.1405381 |
| 62.3441814 | 63 | 64.1405381 |
| 62.3441814 | 63 | 64.1230778 |
| 62.4552926 | 63 | 64.1008555 |
| 63.899737  | 63 | 64.077046  |
| 65.0108481 | 63 | 64.0689189 |
| 64.899737  | 63 | 64.0486224 |
| 64.6775148 | 63 | 64.0293842 |
| 64.4552926 | 63 | 64.0131442 |
| 64.0108481 | 63 | 64.0224823 |
| 63.899737  | 63 | 64.0267057 |
| 64.0108481 | 63 | 64.0252854 |
| 63.899737  | 63 | 64.0171631 |
| 63.3441814 | 63 | 63.9626707 |
| 63.4552926 | 63 | 63.8958325 |
| 63.899737  | 63 | 63.8177069 |
| 63.4552926 | 63 | 63.7367594 |
| 63.3441814 | 63 | 63.6646302 |
| 63.5664037 | 63 | 63.6029067 |
| 63.6775148 | 63 | 63.5537053 |
| 64.0108481 | 63 | 63.4933878 |
| 63.899737  | 63 | 63.4457687 |
| 63.5664037 | 63 | 63.4029116 |
| 63.2330703 | 63 | 63.3775148 |
| 62.899737  | 63 | 63.3743402 |
| 63.0108481 | 63 | 63.383864  |
| 63.3441814 | 63 | 63.3949751 |
| 63.4552926 | 63 | 63.4140227 |
| 63.6775148 | 63 | 63.4330703 |
| 64.3441814 | 63 | 63.4441814 |
| 64.4552926 | 63 | 63.452118  |
| 64.0108481 | 63 | 63.452118  |
| 63.2330703 | 63 | 63.4584672 |
| 63.7886259 | 63 | 63.4743402 |
| 63.899737  | 63 | 63.5092608 |

|            |    |            |
|------------|----|------------|
| 64.1219592 | 63 | 63.5425941 |
| 63.5664037 | 63 | 63.5822767 |
| 63.4552926 | 63 | 63.6203719 |
| 63.6775148 | 63 | 63.6616418 |
| 63.899737  | 63 | 63.7013243 |
| 63.5664037 | 63 | 63.7219592 |
| 63.899737  | 63 | 63.7251338 |
| 64.2330703 | 63 | 63.7330703 |
| 64.6775148 | 63 | 63.7489433 |
| 64.4552926 | 63 | 63.7648164 |
| 63.7886259 | 63 | 63.8013243 |
| 63.6775148 | 63 | 63.8489433 |
| 63.5664037 | 63 | 63.8902132 |
| 63.3441814 | 63 | 63.9330703 |
| 62.4552926 | 63 | 63.9822767 |
| 62.3441814 | 63 | 64.0143666 |
| 62.3441814 | 63 | 64.0420473 |
| 62.4552926 | 63 | 64.0813682 |
| 62.4552926 | 63 | 64.1238638 |
| 61.899737  | 63 | 64.1755304 |
| 62.3441814 | 63 | 64.232488  |
| 62.5664037 | 63 | 64.2845073 |
| 62.4552926 | 63 | 64.3606978 |
| 63.0108481 | 63 | 64.4337137 |
| 63.4552926 | 63 | 64.4860858 |
| 63.3441814 | 63 | 64.5464032 |
| 63.4552926 | 63 | 64.6003715 |
| 63.2330703 | 63 | 64.6384667 |
| 63.4552926 | 63 | 64.6733874 |
| 63.4552926 | 63 | 64.7051334 |
| 63.1219592 | 63 | 64.7257683 |
| 63.899737  | 63 | 64.7797366 |
| 64.4552926 | 63 | 64.8511651 |
| 65.3441814 | 63 | 64.940054  |
| 64.899737  | 63 | 65.0257683 |
| 64.899737  | 63 | 65.1098953 |
| 65.0108481 | 63 | 65.192435  |
| 65.2330703 | 63 | 65.2749747 |
| 65.2330703 | 63 | 65.3479905 |
| 65.3441814 | 63 | 65.4067207 |
| 65.2330703 | 63 | 65.4622762 |
| 65.4552926 | 63 | 65.5094843 |
| 65.7886259 | 63 | 65.5700963 |
| 65.5664037 | 63 | 65.6382921 |
| 66.5664037 | 63 | 65.7255937 |

|            |    |            |
|------------|----|------------|
| 67.2330703 | 63 | 65.7954349 |
| 66.899737  | 63 | 65.8621016 |
| 66.899737  | 63 | 65.9240064 |
| 66.7886259 | 63 | 65.9795619 |
| 65.701585  | 63 | 66.0414667 |
| 65.8373875 | 63 | 66.1160699 |
| 66.2077578 | 63 | 66.1938476 |
| 66.3188689 | 63 | 66.2684508 |
| 67.1830665 | 63 | 66.3462286 |
| 67.6645479 | 63 | 66.4240064 |
| 67.6522023 | 63 | 66.5128953 |
| 69.2330703 | 63 | 66.5838183 |
| 68.6775148 | 63 | 66.6483922 |
| 66.8991159 | 63 | 66.7270754 |
| 67.1219592 | 63 | 66.7927075 |
| 66.7886259 | 63 | 66.8555177 |
| 66.0108481 | 63 | 66.9181515 |
| 65.899737  | 63 | 66.9774344 |
| 65.899737  | 63 | 67.0308972 |
| 65.7886259 | 63 | 67.0773053 |
| 68.2330703 | 63 | 67.1471465 |
| 69.0108481 | 63 | 67.2106386 |
| 69.4552926 | 63 | 67.2614322 |
| 69.7886259 | 63 | 67.291591  |
| 69.7886259 | 63 | 67.2979402 |
| 69.899737  | 63 | 67.307464  |
| 69.3441814 | 63 | 67.3042894 |
| 68.5664037 | 63 | 67.3042894 |
| 67.7886259 | 63 | 67.3027021 |
| 67.7886259 | 63 | 67.2979402 |
| 66.8709708 | 63 | 67.2963529 |
| 68.1425757 | 63 | 67.2900037 |
| 69.0067732 | 63 | 67.2820672 |
| 70.7886259 | 63 | 67.2725433 |
| 69.3441814 | 63 | 67.2725433 |
| 68.4552926 | 63 | 67.2661941 |
| 68.0108481 | 63 | 67.2534957 |
| 67.4552926 | 63 | 67.2332278 |
| 67.6775148 | 63 | 67.2178981 |
| 67.6775148 | 63 | 67.2034503 |
| 67.7886259 | 63 | 67.2029443 |
| 67.5664037 | 63 | 67.2057893 |
| 67.899737  | 63 | 67.1982287 |
| 67.899737  | 63 | 67.1926081 |
| 68.1219592 | 63 | 67.1764055 |

|            |    |            |
|------------|----|------------|
| 67.308797  | 63 | 67.1552646 |
| 67.0865747 | 63 | 67.1364165 |
| 67.963118  | 63 | 67.0914572 |
| 67.6050933 | 63 | 67.0634291 |
| 67.8520068 | 63 | 67.0592194 |
| 67.72855   | 63 | 67.0484753 |
| 67.6050933 | 63 | 67.0373785 |
| 66.9754636 | 63 | 67.035629  |
| 66.7038587 | 63 | 67.026825  |
| 68.3441814 | 63 | 67.0215482 |
| 67.5664037 | 63 | 67.0120387 |
| 67.4552926 | 63 | 66.9630229 |
| 66.5664037 | 63 | 66.8993688 |
| 65.7886259 | 63 | 66.8274253 |
| 65.5664037 | 71 | 66.74878   |
| 64.6775148 | 71 | 66.6715456 |
| 65.0108481 | 71 | 66.5890201 |
| 65.1219592 | 71 | 66.5124912 |
| 64.899737  | 71 | 66.454128  |
| 65.2330703 | 71 | 66.4031723 |
| 64.7886259 | 71 | 66.3435745 |
| 64.899737  | 71 | 66.3007898 |
| 65.1219592 | 71 | 66.2433667 |
| 65.5664037 | 71 | 66.1788889 |
| 66.1219592 | 71 | 66.0908961 |
| 66.3441814 | 71 | 66.023891  |
| 65.4809819 | 71 | 65.992145  |
| 65.8266609 | 71 | 65.9603989 |
| 65.7772782 | 71 | 65.9302402 |
| 65.6661671 | 69 | 65.9032561 |
| 66.0365374 | 69 | 65.8842085 |
| 65.6785128 | 69 | 65.8651608 |
| 65.9254263 | 69 | 65.8524624 |
| 66.0488831 | 69 | 65.8365894 |
| 66.1846856 | 69 | 65.8254783 |
| 66.3328337 | 69 | 65.8143672 |
| 66.0859202 | 69 | 65.8196346 |
| 66.7155498 | 69 | 65.8296639 |
| 66.6044387 | 69 | 65.8224092 |
| 66.3698708 | 69 | 65.8202692 |
| 66.0118461 | 69 | 65.80984   |
| 65.8883893 | 69 | 65.7995871 |
| 65.283451  | 69 | 65.7799868 |
| 65.5303646 | 69 | 65.7662065 |
| 65.1229572 | 69 | 65.7547191 |

|            |    |            |
|------------|----|------------|
| 64.8019695 | 69 | 65.7245604 |
| 64.555056  | 69 | 65.7023381 |
| 64.4192535 | 69 | 65.6848778 |
| 64.283451  | 69 | 65.6817032 |
| 64.3822165 | 69 | 65.6880524 |
| 64.1229572 | 69 | 65.6896397 |
| 63.9871547 | 69 | 65.6991635 |
| 64.4809819 | 69 | 65.6991635 |
| 64.2217226 | 69 | 65.7007508 |
| 63.6167844 | 69 | 65.7086873 |
| 63.8760436 | 69 | 65.7118619 |
| 64.1229572 | 69 | 65.7166238 |
| 64.4933276 | 69 | 65.7150365 |
| 64.62913   | 69 | 65.7197984 |
| 64.6538214 | 69 | 65.7213858 |
| 66.2330703 | 69 | 65.7213858 |
| 65.7886259 | 69 | 65.7213858 |
| 65.3441814 | 69 | 65.7210188 |
| 65.7886259 | 69 | 65.7173008 |
| 66.3441814 | 69 | 65.7063518 |
| 66.4552926 | 69 | 65.685879  |
| 66.6775148 | 69 | 65.6569406 |
| 66.7886259 | 69 | 65.6331168 |
| 67.1219592 | 63 | 65.6010038 |
| 67.3441814 | 63 | 65.5655398 |
| 67.6775148 | 63 | 65.5328977 |
| 67.7886259 | 63 | 65.5013137 |
| 67.4552926 | 63 | 65.4700825 |
| 67.4552926 | 63 | 65.4393805 |
| 67.1219592 | 63 | 65.4102657 |
| 67.0108481 | 63 | 65.3829146 |
| 66.2330703 | 63 | 65.3590908 |
| 66.0108481 | 63 | 65.338618  |
| 65.899737  | 63 | 65.3299617 |
| 66.2330703 | 71 | 65.3257147 |
| 66.0108481 | 71 | 65.328875  |
| 66.2330703 | 71 | 65.3397955 |
| 66.3441814 | 71 | 65.3494814 |
| 66.2330703 | 71 | 65.364282  |
| 65.6775148 | 71 | 65.3826099 |
| 65.3441814 | 71 | 65.3995268 |
| 65.0108481 | 63 | 65.4264967 |
| 65.2330703 | 63 | 65.4554066 |
| 65.4552926 | 63 | 65.4645634 |
| 65.4552926 | 63 | 65.4663128 |

|            |    |            |
|------------|----|------------|
| 65.1219592 | 63 | 65.4671804 |
| 64.7886259 | 63 | 65.4611697 |
| 65.4552926 | 71 | 65.4500443 |
| 65.6775148 | 71 | 65.4336279 |
| 66.1219592 | 71 | 65.4152715 |
| 66.3441814 | 71 | 65.3965624 |
| 65.4552926 | 71 | 65.3568799 |
| 65.5664037 | 71 | 65.3378322 |
| 65.0108481 | 71 | 65.331483  |
| 64.2330703 | 71 | 65.3251338 |
| 64.0108481 | 71 | 65.2933878 |
| 64.0108481 | 71 | 65.2600545 |
| 63.6775148 | 71 | 65.2283084 |
| 63.5664037 | 71 | 65.1981497 |
| 63.899737  | 71 | 65.1695783 |
| 64.1219592 | 71 | 65.1457687 |
| 63.899737  | 71 | 65.1251338 |
| 64.5664037 | 71 | 65.1076735 |
| 64.5664037 | 71 | 65.0965624 |
| 64.4552926 | 63 | 65.083864  |
| 64.3441814 | 63 | 65.0743402 |
| 64.4552926 | 63 | 65.0695783 |
| 64.6775148 | 63 | 65.0711656 |
| 65.2330703 | 63 | 65.0759275 |
| 65.3441814 | 63 | 65.0854513 |
| 65.5664037 | 63 | 65.0886259 |
| 65.2330703 | 63 | 65.1076735 |
| 65.4552926 | 63 | 65.1251338 |
| 65.5664037 | 63 | 65.1362449 |
| 65.5664037 | 63 | 65.1425941 |
| 66.0108481 | 63 | 65.1616418 |
| 66.0108481 | 63 | 65.1949751 |
| 65.1219592 | 63 | 65.2267211 |
| 64.3441814 | 63 | 65.247356  |
| 63.6775148 | 63 | 65.2616418 |
| 63.4552926 | 63 | 65.2695783 |
| 63.3441814 | 63 | 65.2775148 |
| 63.3441814 | 63 | 65.2886259 |
| 63.3441814 | 63 | 65.2902132 |
| 63.3441814 | 63 | 65.2661691 |
| 63.4552926 | 63 | 65.2394795 |
| 64.4552926 | 63 | 65.2134953 |
| 64.899737  | 63 | 65.1984459 |
| 65.3441814 | 63 | 65.1722846 |
| 64.1219592 | 63 | 65.160122  |

|            |    |            |
|------------|----|------------|
| 64.1219592 | 63 | 65.157642  |
| 64.4552926 | 63 | 65.1526223 |
| 64.6775148 | 63 | 65.1518883 |
| 65.1219592 | 63 | 65.1573447 |
| 65.6775148 | 63 | 65.1643885 |
| 66.2330703 | 63 | 65.1738132 |
| 66.5664037 | 63 | 65.1714919 |
| 66.6775148 | 63 | 65.1752024 |
| 66.5664037 | 63 | 65.1779605 |
| 66.4552926 | 63 | 65.1835757 |
| 66.6775148 | 71 | 65.1850639 |
| 66.3441814 | 71 | 65.1909966 |
| 66.3441814 | 71 | 65.1839134 |
| 66.5664037 | 71 | 65.1850841 |
| 66.4552926 | 71 | 65.1797469 |
| 67.3441814 | 71 | 65.1728225 |
| 67.4552926 | 71 | 65.1698663 |
| 67.1219592 | 71 | 65.1716719 |
| 66.6775148 | 63 | 65.160303  |
| 67.0108481 | 63 | 65.1473468 |
| 67.6775148 | 63 | 65.132962  |
| 67.2330703 | 63 | 65.1236566 |
| 66.6775148 | 63 | 65.1229226 |
| 66.4552926 | 63 | 65.1377441 |
| 66.0108481 | 63 | 65.1679625 |
| 65.6775148 | 63 | 65.2177047 |
| 65.5664037 | 63 | 65.2749072 |
| 65.5664037 | 63 | 65.3422685 |
| 63.9944275 | 63 | 65.4082011 |
| 64.2536868 | 63 | 65.4812767 |
| 64.5252917 | 63 | 65.551495  |
| 64.4018349 | 63 | 65.6201261 |
| 63.7351073 | 63 | 65.6555607 |
| 64.1594682 | 63 | 65.6752174 |
| 64.0594682 | 63 | 65.6886678 |
| 63.6594682 | 63 | 65.7132928 |
| 63.9594682 | 63 | 65.7284893 |
| 64.0594682 | 63 | 65.732781  |
| 64.0594682 | 63 | 65.7343266 |
| 64.5594682 | 63 | 65.7248088 |
| 63.9594682 | 63 | 65.7060687 |
| 64.1594682 | 63 | 65.6759635 |
| 64.7594682 | 63 | 65.6363822 |
| 64.9594682 | 63 | 65.5902136 |
| 64.5594682 | 63 | 65.5409179 |

|            |    |            |
|------------|----|------------|
| 64.7594682 | 63 | 65.4854953 |
| 63.9594682 | 63 | 65.4236124 |
| 64.7594682 | 63 | 65.3664914 |
| 64.8594682 | 63 | 65.3224241 |
| 64.8594682 | 63 | 65.2694678 |
| 65.3594682 | 63 | 65.2166704 |
| 65.3594682 | 63 | 65.1468887 |
| 64.6594682 | 63 | 65.068377  |
| 64.6594682 | 63 | 64.9960557 |
| 64.5594682 | 63 | 64.9300836 |
| 65.3594682 | 63 | 64.8607781 |
| 65.9594682 | 63 | 64.7848061 |
| 66.1594682 | 63 | 64.7237546 |
| 66.4594682 | 63 | 64.6720682 |
| 67.1594682 | 63 | 64.6278422 |
| 67.4594682 | 63 | 64.5885367 |
| 68.0594682 | 63 | 64.5497075 |
| 67.9594682 | 63 | 64.5124656 |
| 68.4594682 | 63 | 64.4795093 |
| 68.2594682 | 63 | 64.4647242 |
| 68.2594682 | 63 | 64.4519496 |
| 66.9357101 | 63 | 64.4310093 |
| 66.2757101 | 63 | 64.4089755 |
| 66.2857101 | 63 | 64.3936092 |
| 65.8457101 | 63 | 64.3750378 |
| 65.1857101 | 63 | 64.3578949 |
| 64.7557101 | 63 | 64.3291126 |
| 64.7857101 | 63 | 64.2933303 |
| 64.4557101 | 63 | 64.258548  |
| 64.3657101 | 63 | 64.2379086 |
| 64.1257101 | 63 | 64.2249834 |
| 63.7957101 | 63 | 64.2269154 |
| 63.4457101 | 63 | 64.2352759 |
| 63.1157101 | 63 | 64.240065  |
| 62.5757101 | 63 | 64.2438541 |
| 62.3457101 | 63 | 64.2613575 |
| 62.3457101 | 63 | 64.2840038 |
| 63.2594682 | 63 | 64.3243643 |
| 62.8594682 | 63 | 64.3470106 |
| 62.7594682 | 63 | 64.3650854 |
| 62.4594682 | 63 | 64.3817317 |
| 61.9594682 | 63 | 64.3880922 |
| 62.0594682 | 63 | 64.3881671 |
| 62.0594682 | 63 | 64.3840991 |
| 62.1594682 | 63 | 64.3753167 |



|            |    |            |
|------------|----|------------|
| 62.3594682 | 63 | 64.3632487 |
| 62.9594682 | 63 | 64.3387521 |
| 63.0594682 | 63 | 64.3069698 |
| 63.3594682 | 63 | 64.2674732 |
| 63.2594682 | 63 | 64.2281195 |
| 62.9594682 | 63 | 64.17248   |
| 62.9594682 | 69 | 64.1172691 |
| 63.2594682 | 69 | 64.0692011 |
| 62.9594682 | 69 | 64.0287045 |
| 63.3594682 | 69 | 63.9826365 |
| 63.0594682 | 69 | 63.9377113 |
| 62.8594682 | 69 | 63.9037861 |
| 62.6594682 | 69 | 63.8982004 |
| 62.8594682 | 69 | 63.9036146 |
| 62.8594682 | 69 | 63.9136003 |
| 61.6447064 | 69 | 63.9298717 |
| 61.4547064 | 69 | 63.9414287 |
| 61.6247064 | 69 | 63.9607001 |
| 62.6147064 | 69 | 63.9764001 |
| 63.6547064 | 69 | 63.9903857 |
| 64.0947064 | 69 | 64.0056571 |
| 64.7447064 | 69 | 64.0296428 |
| 65.0947064 | 69 | 64.0599141 |
| 65.2247064 | 69 | 64.0928998 |
| 65.7847064 | 69 | 64.1274569 |
| 66.3447064 | 69 | 64.1695854 |
| 66.7847064 | 69 | 64.2071425 |
| 66.3447064 | 69 | 64.248271  |
| 66.1247064 | 69 | 64.2887744 |
| 66.0247064 | 69 | 64.3304207 |
| 65.8047064 | 69 | 64.3690669 |
| 65.3647064 | 69 | 64.4137132 |
| 64.3747064 | 69 | 64.4623595 |
| 64.0447064 | 69 | 64.5048629 |
| 63.7147064 | 69 | 64.5520806 |
| 63.6447064 | 69 | 64.6057268 |
| 63.7347064 | 69 | 64.6600874 |
| 63.3947064 | 69 | 64.7231622 |
| 63.7047064 | 69 | 64.799237  |
| 63.2647064 | 69 | 64.8659242 |
| 63.5947064 | 69 | 64.8892062 |
| 64.6947064 | 69 | 64.9175847 |
| 65.1247064 | 69 | 64.9468103 |
| 65.2347064 | 69 | 64.9723761 |
| 65.1147064 | 69 | 65.0033439 |

|            |    |            |
|------------|----|------------|
| 65.8847064 | 69 | 65.0290294 |
| 66.5447064 | 69 | 65.0602923 |
| 66.6547064 | 69 | 65.0957895 |
| 66.9847064 | 69 | 65.1357292 |
| 66.9847064 | 69 | 65.1736669 |
| 65.9947064 | 69 | 65.2128906 |
| 66.1047064 | 69 | 65.274411  |
| 65.8847064 | 69 | 65.3414233 |
| 65.4347064 | 69 | 65.4077933 |
| 65.4347064 | 69 | 65.4585767 |
| 65.8047064 | 69 | 65.4919817 |
| 65.9147064 | 69 | 65.5183454 |
| 65.7547064 | 69 | 65.533223  |
| 65.5347064 | 69 | 65.5418214 |
| 65.5247064 | 69 | 65.5481637 |
| 64.9747064 | 69 | 65.5433363 |
| 65.2247064 | 69 | 65.5266411 |
| 66.0947064 | 69 | 65.4998737 |
| 65.7747064 | 69 | 65.4815078 |
| 65.4647064 | 69 | 65.4672145 |
| 65.5847064 | 69 | 65.4545442 |
| 65.3647064 | 69 | 65.4464009 |
| 65.0347064 | 69 | 65.448346  |
| 65.3647064 | 69 | 65.4745324 |
| 65.9147064 | 69 | 65.510278  |
| 66.1647064 | 69 | 65.5563183 |
| 67.3747064 | 60 | 65.6066239 |
| 68.3847064 | 60 | 65.6572163 |

| Time | Person 16 | Person 11 | Person 6 | Person 14 | Person 5 |
|------|-----------|-----------|----------|-----------|----------|
|------|-----------|-----------|----------|-----------|----------|

|          |  |  |  |  |  |
|----------|--|--|--|--|--|
| 16:00:01 |  |  |  |  |  |
| 16:00:02 |  |  |  |  |  |
| 16:00:03 |  |  |  |  |  |
| 16:00:04 |  |  |  |  |  |
| 16:00:05 |  |  |  |  |  |
| 16:00:06 |  |  |  |  |  |
| 16:00:07 |  |  |  |  |  |
| 16:00:08 |  |  |  |  |  |
| 16:00:09 |  |  |  |  |  |
| 16:00:10 |  |  |  |  |  |
| 16:00:11 |  |  |  |  |  |
| 16:00:12 |  |  |  |  |  |
| 16:00:13 |  |  |  |  |  |
| 16:00:14 |  |  |  |  |  |
| 16:00:15 |  |  |  |  |  |
| 16:00:16 |  |  |  |  |  |
| 16:00:17 |  |  |  |  |  |
| 16:00:18 |  |  |  |  |  |
| 16:00:19 |  |  |  |  |  |
| 16:00:20 |  |  |  |  |  |
| 16:00:21 |  |  |  |  |  |
| 16:00:22 |  |  |  |  |  |
| 16:00:23 |  |  |  |  |  |
| 16:00:24 |  |  |  |  |  |
| 16:00:25 |  |  |  |  |  |
| 16:00:26 |  |  |  |  |  |
| 16:00:27 |  |  |  |  |  |
| 16:00:28 |  |  |  |  |  |
| 16:00:29 |  |  |  |  |  |
| 16:00:30 |  |  |  |  |  |
| 16:00:31 |  |  |  |  |  |
| 16:00:32 |  |  |  |  |  |
| 16:00:33 |  |  |  |  |  |
| 16:00:34 |  |  |  |  |  |
| 16:00:35 |  |  |  |  |  |
| 16:00:36 |  |  |  |  |  |
| 16:00:37 |  |  |  |  |  |
| 16:00:38 |  |  |  |  |  |
| 16:00:39 |  |  |  |  |  |
| 16:00:40 |  |  |  |  |  |
| 16:00:41 |  |  |  |  |  |
| 16:00:42 |  |  |  |  |  |

16:00:43  
16:00:44  
16:00:45  
16:00:46  
16:00:47  
16:00:48  
16:00:49  
16:00:50  
16:00:51  
16:00:52  
16:00:53  
16:00:54  
16:00:55  
16:00:56  
16:00:57  
16:00:58  
16:00:59  
16:01:00  
16:01:01  
16:01:02  
16:01:03  
16:01:04  
16:01:05  
16:01:06  
16:01:07  
16:01:08  
16:01:09  
16:01:10  
16:01:11  
16:01:12  
16:01:13  
16:01:14  
16:01:15  
16:01:16  
16:01:17  
16:01:18  
16:01:19  
16:01:20  
16:01:21  
16:01:22  
16:01:23  
16:01:24  
16:01:25  
16:01:26  
16:01:27

16:01:28  
16:01:29  
16:01:30  
16:01:31  
16:01:32  
16:01:33  
16:01:34  
16:01:35  
16:01:36  
16:01:37  
16:01:38  
16:01:39  
16:01:40  
16:01:41  
16:01:42  
16:01:43  
16:01:44  
16:01:45  
16:01:46  
16:01:47  
16:01:48  
16:01:49  
16:01:50  
16:01:51  
16:01:52  
16:01:53  
16:01:54  
16:01:55  
16:01:56  
16:01:57  
16:01:58  
16:01:59  
16:02:00  
16:02:01  
16:02:02  
16:02:03  
16:02:04  
16:02:05  
16:02:06  
16:02:07  
16:02:08  
16:02:09  
16:02:10  
16:02:11  
16:02:12

16:02:13  
16:02:14  
16:02:15  
16:02:16  
16:02:17  
16:02:18  
16:02:19  
16:02:20  
16:02:21  
16:02:22  
16:02:23  
16:02:24  
16:02:25  
16:02:26  
16:02:27  
16:02:28  
16:02:29  
16:02:30  
16:02:31  
16:02:32  
16:02:33  
16:02:34  
16:02:35  
16:02:36  
16:02:37  
16:02:38  
16:02:39  
16:02:40  
16:02:41  
16:02:42  
16:02:43  
16:02:44  
16:02:45  
16:02:46  
16:02:47  
16:02:48  
16:02:49  
16:02:50  
16:02:51  
16:02:52  
16:02:53  
16:02:54  
16:02:55  
16:02:56  
16:02:57

16:02:58  
16:02:59  
16:03:00  
16:03:01  
16:03:02  
16:03:03  
16:03:04  
16:03:05  
16:03:06  
16:03:07  
16:03:08  
16:03:09  
16:03:10  
16:03:11  
16:03:12  
16:03:13  
16:03:14  
16:03:15  
16:03:16  
16:03:17  
16:03:18  
16:03:19  
16:03:20  
16:03:21  
16:03:22  
16:03:23  
16:03:24  
16:03:25  
16:03:26  
16:03:27  
16:03:28  
16:03:29  
16:03:30  
16:03:31  
16:03:32  
16:03:33  
16:03:34  
16:03:35  
16:03:36  
16:03:37  
16:03:38  
16:03:39  
16:03:40  
16:03:41  
16:03:42

71.3767765  
71.3767765  
74.3767765 85.6528503  
74.3767765 81.6528503  
74.3767765 77.6528503  
73.3767765 76.6528503  
72.3767765 75.6528503  
71.3767765 74.6528503  
72.3767765 74.6528503  
72.3767765 74.6528503  
73.3767765 73.6528503  
74.3767765 72.6528503  
74.3767765 72.6528503

|          |            |            |
|----------|------------|------------|
| 16:03:43 | 74.3767765 | 71.6528503 |
| 16:03:44 | 74.3767765 | 69.6528503 |
| 16:03:45 | 75.3767765 | 69.6528503 |
| 16:03:46 | 75.3767765 | 69.6528503 |
| 16:03:47 | 76.3767765 | 72.6528503 |
| 16:03:48 | 78.3767765 | 72.6528503 |
| 16:03:49 | 78.3767765 | 73.6528503 |
| 16:03:50 | 78.3767765 | 73.6528503 |
| 16:03:51 | 79.3767765 | 73.6528503 |
| 16:03:52 | 81.3767765 | 73.6528503 |
| 16:03:53 | 81.3767765 | 73.6528503 |
| 16:03:54 | 81.3767765 | 73.6528503 |
| 16:03:55 | 82.3767765 | 73.6528503 |
| 16:03:56 | 83.3767765 | 73.6528503 |
| 16:03:57 | 83.3767765 | 71.6528503 |
| 16:03:58 | 83.3767765 | 71.6528503 |
| 16:03:59 | 83.3767765 | 70.6528503 |
| 16:04:00 | 75.3767765 | 70.6528503 |
| 16:04:01 | 70.3767765 | 70.6528503 |
| 16:04:02 | 70.3767765 | 70.6528503 |
| 16:04:03 | 67.3767765 | 68.6528503 |
| 16:04:04 | 67.3767765 | 66.6528503 |
| 16:04:05 | 67.3767765 | 64.6528503 |
| 16:04:06 | 67.3767765 | 64.6528503 |
| 16:04:07 | 66.3767765 | 64.6528503 |
| 16:04:08 | 66.3767765 | 64.6528503 |
| 16:04:09 | 69.3767765 | 64.6528503 |
| 16:04:10 | 71.3767765 | 64.6528503 |
| 16:04:11 | 71.3767765 | 64.6528503 |
| 16:04:12 | 72.3767765 | 64.6528503 |
| 16:04:13 | 75.3767765 | 64.6528503 |
| 16:04:14 | 75.3767765 | 64.6528503 |
| 16:04:15 | 75.3767765 | 65.6528503 |
| 16:04:16 | 78.3767765 | 65.6528503 |
| 16:04:17 | 79.3767765 | 65.6528503 |
| 16:04:18 | 82.3767765 | 64.6528503 |
| 16:04:19 | 84.3767765 | 64.6528503 |
| 16:04:20 | 84.3767765 | 64.6528503 |
| 16:04:21 | 86.3767765 | 63.6528503 |
| 16:04:22 | 87.3767765 | 63.6528503 |
| 16:04:23 | 87.3767765 | 64.6528503 |
| 16:04:24 | 87.3767765 | 64.6528503 |
| 16:04:25 | 87.3767765 | 64.6528503 |
| 16:04:26 | 87.3767765 | 64.6528503 |
| 16:04:27 | 88.3767765 | 64.6528503 |



|          |            |            |
|----------|------------|------------|
| 16:04:28 | 81.3767765 | 64.6528503 |
| 16:04:29 | 78.3767765 | 64.6528503 |
| 16:04:30 | 78.3767765 | 65.6528503 |
| 16:04:31 | 76.3767765 | 64.6528503 |
| 16:04:32 | 75.3767765 | 64.6528503 |
| 16:04:33 | 74.3767765 | 65.6528503 |
| 16:04:34 | 74.3767765 | 66.6528503 |
| 16:04:35 | 74.3767765 | 66.6528503 |
| 16:04:36 | 73.3767765 | 66.6528503 |
| 16:04:37 | 74.3767765 | 66.6528503 |
| 16:04:38 | 74.3767765 | 66.6528503 |
| 16:04:39 | 74.3767765 | 66.6528503 |
| 16:04:40 | 74.3767765 | 66.6528503 |
| 16:04:41 | 74.3767765 | 64.6528503 |
| 16:04:42 | 74.3767765 | 64.6528503 |
| 16:04:43 | 74.3767765 | 64.6528503 |
| 16:04:44 | 74.3767765 | 63.6528503 |
| 16:04:45 | 74.3767765 | 63.6528503 |
| 16:04:46 | 74.3767765 | 63.6528503 |
| 16:04:47 | 80.3767765 | 63.6528503 |
| 16:04:48 | 80.3767765 | 63.6528503 |
| 16:04:49 | 79.3767765 | 63.6528503 |
| 16:04:50 | 77.3767765 | 65.6528503 |
| 16:04:51 | 76.3767765 | 65.6528503 |
| 16:04:52 | 76.3767765 | 65.6528503 |
| 16:04:53 | 76.3767765 | 66.6528503 |
| 16:04:54 | 76.3767765 | 68.6528503 |
| 16:04:55 | 76.3767765 | 68.6528503 |
| 16:04:56 | 76.3767765 | 70.6528503 |
| 16:04:57 | 76.3767765 | 71.6528503 |
| 16:04:58 | 79.3767765 | 71.6528503 |
| 16:04:59 | 79.3767765 | 71.6528503 |
| 16:05:00 | 79.3767765 | 72.6528503 |
| 16:05:01 | 79.3767765 | 70.6528503 |
| 16:05:02 | 79.3767765 | 69.6528503 |
| 16:05:03 | 79.3767765 | 69.6528503 |
| 16:05:04 | 79.3767765 | 68.6528503 |
| 16:05:05 | 77.3767765 | 66.6528503 |
| 16:05:06 | 77.3767765 | 66.6528503 |
| 16:05:07 | 78.3767765 | 66.6528503 |
| 16:05:08 | 78.3767765 | 68.6528503 |
| 16:05:09 | 79.3767765 | 68.6528503 |
| 16:05:10 | 80.3767765 | 70.6528503 |
| 16:05:11 | 80.3767765 | 71.6528503 |
| 16:05:12 | 80.3767765 | 72.6528503 |

|          |            |            |            |
|----------|------------|------------|------------|
| 16:05:13 |            | 80.3767765 | 72.6528503 |
| 16:05:14 |            | 81.3767765 | 72.6528503 |
| 16:05:15 |            | 82.3767765 | 74.6528503 |
| 16:05:16 |            | 82.3767765 | 74.6528503 |
| 16:05:17 |            | 82.3767765 | 76.6528503 |
| 16:05:18 |            | 82.3767765 | 74.6528503 |
| 16:05:19 |            | 81.3767765 | 74.6528503 |
| 16:05:20 |            | 81.3767765 | 73.6528503 |
| 16:05:21 |            | 81.3767765 | 73.6528503 |
| 16:05:22 |            | 81.3767765 | 72.6528503 |
| 16:05:23 |            | 78.3767765 | 72.6528503 |
| 16:05:24 |            | 78.3767765 | 72.6528503 |
| 16:05:25 |            | 78.3767765 | 71.6528503 |
| 16:05:26 |            | 79.3767765 | 71.6528503 |
| 16:05:27 |            | 80.3767765 | 71.6528503 |
| 16:05:28 |            | 79.3767765 | 71.6528503 |
| 16:05:29 | 86.2872494 | 79.3767765 | 71.6528503 |
| 16:05:30 | 84.2872494 | 79.3767765 | 71.6528503 |
| 16:05:31 | 82.2872494 | 79.3767765 | 71.6528503 |
| 16:05:32 | 82.2872494 | 79.3767765 | 71.6528503 |
| 16:05:33 | 81.2872494 | 79.3767765 | 72.6528503 |
| 16:05:34 | 81.2872494 | 79.3767765 | 73.6528503 |
| 16:05:35 | 81.2872494 | 80.3767765 | 75.6528503 |
| 16:05:36 | 81.2872494 | 80.3767765 | 76.6528503 |
| 16:05:37 | 81.2872494 | 80.3767765 | 76.6528503 |
| 16:05:38 | 80.2872494 | 80.3767765 | 76.6528503 |
| 16:05:39 | 80.2872494 | 80.3767765 | 76.6528503 |
| 16:05:40 | 80.2872494 | 80.3767765 | 80.6528503 |
| 16:05:41 | 80.2872494 | 81.3767765 | 81.6528503 |
| 16:05:42 | 80.2872494 | 81.3767765 | 81.6528503 |
| 16:05:43 | 80.2872494 | 82.3767765 | 81.6528503 |
| 16:05:44 | 83.2872494 | 83.3767765 | 82.6528503 |
| 16:05:45 | 83.2872494 | 83.3767765 | 82.6528503 |
| 16:05:46 | 83.2872494 | 83.3767765 | 81.6528503 |
| 16:05:47 | 82.2872494 | 83.3767765 | 81.6528503 |
| 16:05:48 | 82.2872494 | 84.3767765 | 81.6528503 |
| 16:05:49 | 82.2872494 | 84.3767765 | 81.6528503 |
| 16:05:50 | 82.2872494 | 83.3767765 | 80.6528503 |
| 16:05:51 | 80.2872494 | 82.3767765 | 79.6528503 |
| 16:05:52 | 79.2872494 | 82.3767765 | 79.6528503 |
| 16:05:53 | 78.2872494 | 81.3767765 | 79.6528503 |
| 16:05:54 | 78.2872494 | 79.3767765 | 79.6528503 |
| 16:05:55 | 78.2872494 | 76.3767765 | 79.6528503 |
| 16:05:56 | 78.2872494 | 76.3767765 | 79.6528503 |
| 16:05:57 | 78.2872494 | 73.3767765 | 79.6528503 |

|          |            |            |            |
|----------|------------|------------|------------|
| 16:05:58 | 78.2872494 | 73.3767765 | 79.6528503 |
| 16:05:59 | 78.2872494 | 72.3767765 | 79.6528503 |
| 16:06:00 | 78.2872494 | 72.3767765 | 76.6528503 |
| 16:06:01 | 78.2872494 | 72.3767765 | 76.6528503 |
| 16:06:02 | 78.2872494 | 72.3767765 | 76.6528503 |
| 16:06:03 | 76.2872494 | 72.3767765 | 77.6528503 |
| 16:06:04 | 76.2872494 | 73.3767765 | 77.6528503 |
| 16:06:05 | 76.2872494 | 70.3767765 | 77.6528503 |
| 16:06:06 | 76.2872494 | 69.3767765 | 77.6528503 |
| 16:06:07 | 76.2872494 | 69.3767765 | 77.6528503 |
| 16:06:08 | 76.2872494 | 69.3767765 | 78.6528503 |
| 16:06:09 | 76.2872494 | 69.3767765 | 73.6528503 |
| 16:06:10 | 77.2872494 | 69.3767765 | 73.6528503 |
| 16:06:11 | 77.2872494 | 70.3767765 | 73.6528503 |
| 16:06:12 | 77.2872494 | 71.3767765 | 72.6528503 |
| 16:06:13 | 77.2872494 | 71.3767765 | 72.6528503 |
| 16:06:14 | 77.2872494 | 71.3767765 | 72.6528503 |
| 16:06:15 | 77.2872494 | 72.3767765 | 72.6528503 |
| 16:06:16 | 77.2872494 | 72.3767765 | 72.6528503 |
| 16:06:17 | 77.2872494 | 72.3767765 | 71.6528503 |
| 16:06:18 | 78.2872494 | 72.3767765 | 71.6528503 |
| 16:06:19 | 78.2872494 | 72.3767765 | 72.6528503 |
| 16:06:20 | 74.2872494 | 75.3767765 | 72.6528503 |
| 16:06:21 | 74.2872494 | 75.3767765 | 73.6528503 |
| 16:06:22 | 74.2872494 | 76.3767765 | 73.6528503 |
| 16:06:23 | 74.2872494 | 76.3767765 | 73.6528503 |
| 16:06:24 | 74.2872494 | 76.3767765 | 74.6528503 |
| 16:06:25 | 75.2872494 | 75.3767765 | 75.6528503 |
| 16:06:26 | 75.2872494 | 73.3767765 | 76.6528503 |
| 16:06:27 | 77.2872494 | 73.3767765 | 77.6528503 |
| 16:06:28 | 77.2872494 | 73.3767765 | 77.6528503 |
| 16:06:29 | 78.2872494 | 74.3767765 | 78.6528503 |
| 16:06:30 | 76.2872494 | 74.3767765 | 78.6528503 |
| 16:06:31 | 76.2872494 | 75.3767765 | 78.6528503 |
| 16:06:32 | 75.2872494 | 75.3767765 | 77.6528503 |
| 16:06:33 | 75.2872494 | 75.3767765 | 77.6528503 |
| 16:06:34 | 75.2872494 | 74.3767765 | 76.6528503 |
| 16:06:35 | 77.2872494 | 72.3767765 | 76.6528503 |
| 16:06:36 | 77.2872494 | 72.3767765 | 76.6528503 |
| 16:06:37 | 78.2872494 | 72.3767765 | 76.6528503 |
| 16:06:38 | 82.2872494 | 72.3767765 | 76.6528503 |
| 16:06:39 | 84.2872494 | 72.3767765 | 74.6528503 |
| 16:06:40 | 84.2872494 | 73.3767765 | 74.6528503 |
| 16:06:41 | 85.2872494 | 73.3767765 | 74.6528503 |
| 16:06:42 | 85.2872494 | 73.3767765 | 74.6528503 |

|          |            |            |            |
|----------|------------|------------|------------|
| 16:06:43 | 85.2872494 | 73.3767765 | 74.6528503 |
| 16:06:44 | 85.2872494 | 73.3767765 | 74.6528503 |
| 16:06:45 | 85.2872494 | 73.3767765 | 72.6528503 |
| 16:06:46 | 85.2872494 | 72.3767765 | 72.6528503 |
| 16:06:47 | 85.2872494 | 72.3767765 | 72.6528503 |
| 16:06:48 | 85.2872494 | 72.3767765 | 72.6528503 |
| 16:06:49 | 85.2872494 | 72.3767765 | 74.6528503 |
| 16:06:50 | 85.2872494 | 72.3767765 | 76.6528503 |
| 16:06:51 | 84.2872494 | 72.3767765 | 76.6528503 |
| 16:06:52 | 81.2872494 | 73.3767765 | 77.6528503 |
| 16:06:53 | 81.2872494 | 73.3767765 | 77.6528503 |
| 16:06:54 | 82.2872494 | 74.3767765 | 77.6528503 |
| 16:06:55 | 82.2872494 | 74.3767765 | 77.6528503 |
| 16:06:56 | 81.2872494 | 74.3767765 | 77.6528503 |
| 16:06:57 | 81.2872494 | 74.3767765 | 77.6528503 |
| 16:06:58 | 81.2872494 | 75.3767765 | 76.6528503 |
| 16:06:59 | 78.2872494 | 75.3767765 | 76.6528503 |
| 16:07:00 | 78.2872494 | 75.3767765 | 76.6528503 |
| 16:07:01 | 78.2872494 | 75.3767765 | 75.6528503 |
| 16:07:02 | 79.2872494 | 75.3767765 | 74.6528503 |
| 16:07:03 | 80.2872494 | 75.3767765 | 74.6528503 |
| 16:07:04 | 78.2872494 | 78.3767765 | 74.6528503 |
| 16:07:05 | 77.2872494 | 78.3767765 | 72.6528503 |
| 16:07:06 | 77.2872494 | 81.3767765 | 71.6528503 |
| 16:07:07 | 76.2872494 | 80.3767765 | 70.6528503 |
| 16:07:08 | 76.2872494 | 73.3767765 | 70.6528503 |
| 16:07:09 | 76.2872494 | 72.3767765 | 70.6528503 |
| 16:07:10 | 76.2872494 | 72.3767765 | 70.6528503 |
| 16:07:11 | 76.2872494 | 72.3767765 | 71.6528503 |
| 16:07:12 | 76.2872494 | 76.3767765 | 71.6528503 |
| 16:07:13 | 76.2872494 | 78.3767765 | 71.6528503 |
| 16:07:14 | 76.2872494 | 78.3767765 | 71.6528503 |
| 16:07:15 | 77.2872494 | 78.3767765 | 71.6528503 |
| 16:07:16 | 77.2872494 | 78.3767765 | 71.6528503 |
| 16:07:17 | 77.2872494 | 78.3767765 | 70.6528503 |
| 16:07:18 | 77.2872494 | 78.3767765 | 68.6528503 |
| 16:07:19 | 75.2872494 | 78.3767765 | 67.6528503 |
| 16:07:20 | 74.2872494 | 78.3767765 | 67.6528503 |
| 16:07:21 | 74.2872494 | 78.3767765 | 67.6528503 |
| 16:07:22 | 74.2872494 | 75.3767765 | 68.6528503 |
| 16:07:23 | 74.2872494 | 75.3767765 | 69.6528503 |
| 16:07:24 | 74.2872494 | 74.3767765 | 70.6528503 |
| 16:07:25 | 74.2872494 | 74.3767765 | 70.6528503 |
| 16:07:26 | 74.2872494 | 73.3767765 | 70.6528503 |
| 16:07:27 | 74.2872494 | 72.3767765 | 71.6528503 |

|          |            |            |            |
|----------|------------|------------|------------|
| 16:07:28 | 75.2872494 | 72.3767765 | 71.6528503 |
| 16:07:29 | 76.2872494 | 74.3767765 | 71.6528503 |
| 16:07:30 | 76.2872494 | 74.3767765 | 71.6528503 |
| 16:07:31 | 81.2872494 | 74.3767765 | 71.6528503 |
| 16:07:32 | 82.2872494 | 75.3767765 | 71.6528503 |
| 16:07:33 | 82.2872494 | 71.3767765 | 71.6528503 |
| 16:07:34 | 82.2872494 | 70.3767765 | 71.6528503 |
| 16:07:35 | 82.2872494 | 69.3767765 | 72.6528503 |
| 16:07:36 | 82.2872494 | 69.3767765 | 74.6528503 |
| 16:07:37 | 82.2872494 | 69.3767765 | 75.6528503 |
| 16:07:38 | 82.2872494 | 69.3767765 | 75.6528503 |
| 16:07:39 | 81.2872494 | 69.3767765 | 75.6528503 |
| 16:07:40 | 81.2872494 | 70.3767765 | 76.6528503 |
| 16:07:41 | 81.2872494 | 70.3767765 | 76.6528503 |
| 16:07:42 | 81.2872494 | 70.3767765 | 76.6528503 |
| 16:07:43 | 82.2872494 | 70.3767765 | 76.6528503 |
| 16:07:44 | 83.2872494 | 70.3767765 | 75.6528503 |
| 16:07:45 | 85.2872494 | 70.3767765 | 77.6528503 |
| 16:07:46 | 85.2872494 | 70.3767765 | 77.6528503 |
| 16:07:47 | 87.2872494 | 69.3767765 | 78.6528503 |
| 16:07:48 | 87.2872494 | 69.3767765 | 78.6528503 |
| 16:07:49 | 87.2872494 | 71.3767765 | 78.6528503 |
| 16:07:50 | 86.2872494 | 72.3767765 | 78.6528503 |
| 16:07:51 | 86.2872494 | 72.3767765 | 78.6528503 |
| 16:07:52 | 86.2872494 | 74.3767765 | 78.6528503 |
| 16:07:53 | 85.2872494 | 74.3767765 | 73.6528503 |
| 16:07:54 | 85.2872494 | 75.3767765 | 71.6528503 |
| 16:07:55 | 83.2872494 | 77.3767765 | 71.6528503 |
| 16:07:56 | 83.2872494 | 77.3767765 | 71.6528503 |
| 16:07:57 | 77.2872494 | 80.3767765 | 70.6528503 |
| 16:07:58 | 77.2872494 | 81.3767765 | 69.6528503 |
| 16:07:59 | 77.2872494 | 81.3767765 | 69.6528503 |
| 16:08:00 | 74.2872494 | 81.3767765 | 69.6528503 |
| 16:08:01 | 74.2872494 | 81.3767765 | 68.6528503 |
| 16:08:02 | 75.2872494 | 81.3767765 | 68.6528503 |
| 16:08:03 | 77.2872494 | 81.3767765 | 68.6528503 |
| 16:08:04 | 78.2872494 | 81.3767765 | 67.6528503 |
| 16:08:05 | 79.2872494 | 81.3767765 | 67.6528503 |
| 16:08:06 | 80.2872494 | 81.3767765 | 67.6528503 |
| 16:08:07 | 80.2872494 | 81.3767765 | 67.6528503 |
| 16:08:08 | 79.2872494 | 81.3767765 | 67.6528503 |
| 16:08:09 | 79.2872494 | 81.3767765 | 68.6528503 |
| 16:08:10 | 79.2872494 | 81.3767765 | 68.6528503 |
| 16:08:11 | 81.2872494 | 81.3767765 | 68.6528503 |
| 16:08:12 | 82.2872494 | 81.3767765 | 68.6528503 |

|          |            |            |            |            |
|----------|------------|------------|------------|------------|
| 16:08:13 |            | 82.2872494 | 81.3767765 | 68.6528503 |
| 16:08:14 |            | 84.2872494 | 81.3767765 | 68.6528503 |
| 16:08:15 |            | 83.2872494 | 83.3767765 | 68.6528503 |
| 16:08:16 |            | 83.2872494 | 83.3767765 | 68.6528503 |
| 16:08:17 |            | 83.2872494 | 86.3767765 | 68.6528503 |
| 16:08:18 |            | 82.2872494 | 87.3767765 | 68.6528503 |
| 16:08:19 |            | 82.2872494 | 87.3767765 | 68.6528503 |
| 16:08:20 |            | 82.2872494 | 87.3767765 | 69.6528503 |
| 16:08:21 |            | 82.2872494 | 89.3767765 | 71.6528503 |
| 16:08:22 |            | 82.2872494 | 89.3767765 | 73.6528503 |
| 16:08:23 |            | 83.2872494 | 89.3767765 | 74.6528503 |
| 16:08:24 |            | 83.2872494 | 89.3767765 | 74.6528503 |
| 16:08:25 |            | 83.2872494 | 94.3767765 | 74.6528503 |
| 16:08:26 |            | 86.2872494 | 80.3764882 | 74.6528503 |
| 16:08:27 |            | 86.2872494 | 80.3764882 | 74.6528503 |
| 16:08:28 |            | 86.2872494 | 80.2336311 | 75.6528503 |
| 16:08:29 |            | 86.2872494 | 80.2336311 | 75.6528503 |
| 16:08:30 |            | 86.2872494 | 80.5193454 | 79.6528503 |
| 16:08:31 |            | 86.2872494 | 80.8050597 | 79.6528503 |
| 16:08:32 |            | 84.2872494 | 81.2336311 | 79.6528503 |
| 16:08:33 |            | 84.2872494 | 81.2336311 | 78.6528503 |
| 16:08:34 |            | 84.2872494 | 81.5193454 | 78.6528503 |
| 16:08:35 |            | 84.2872494 | 81.3764882 | 78.6528503 |
| 16:08:36 |            | 84.2872494 | 81.2336311 | 78.6528503 |
| 16:08:37 |            | 85.2872494 | 81.5193454 | 78.6528503 |
| 16:08:38 |            | 86.2872494 | 81.5193454 | 78.6528503 |
| 16:08:39 |            | 86.2872494 | 80.8050597 | 78.6528503 |
| 16:08:40 |            | 86.2872494 | 80.6622025 | 78.6528503 |
| 16:08:41 | 75.0497845 | 86.2872494 | 79.9606503 | 77.6528503 |
| 16:08:42 | 74.0497845 | 86.2872494 | 79.0856503 | 76.6528503 |
| 16:08:43 | 74.0497845 | 86.2872494 | 78.0856503 | 76.6528503 |
| 16:08:44 | 71.0497845 | 80.2872494 | 76.9606503 | 76.6528503 |
| 16:08:45 | 71.0497845 | 79.2872494 | 75.8356503 | 74.6528503 |
| 16:08:46 | 71.0497845 | 79.2872494 | 74.7106503 | 73.6528503 |
| 16:08:47 | 71.0497845 | 79.2872494 | 74.2106503 | 73.6528503 |
| 16:08:48 | 71.0497845 | 81.2872494 | 74.4606503 | 73.6528503 |
| 16:08:49 | 70.0497845 | 83.2872494 | 74.4606503 | 72.6528503 |
| 16:08:50 | 70.0497845 | 84.2872494 | 74.2106503 | 69.6528503 |
| 16:08:51 | 71.0497845 | 84.2872494 | 74.5856503 | 69.6528503 |
| 16:08:52 | 71.0497845 | 84.2872494 | 74.4606503 | 68.6528503 |
| 16:08:53 | 71.0497845 | 83.2872494 | 74.3356503 | 68.6528503 |
| 16:08:54 | 71.0497845 | 79.2872494 | 73.7106503 | 68.6528503 |
| 16:08:55 | 71.0497845 | 79.2872494 | 74.3356503 | 68.6528503 |
| 16:08:56 | 72.0497845 | 79.2872494 | 74.5856503 | 70.6528503 |
| 16:08:57 | 72.0497845 | 80.2872494 | 74.5856503 | 70.6528503 |

|          |            |            |            |            |
|----------|------------|------------|------------|------------|
| 16:08:58 | 72.0497845 | 81.2872494 | 74.7106503 | 71.6528503 |
| 16:08:59 | 74.0497845 | 81.2872494 | 74.5856503 | 69.6528503 |
| 16:09:00 | 77.0497845 | 81.2872494 | 74.9606503 | 69.6528503 |
| 16:09:01 | 78.0497845 | 81.2872494 | 74.8356503 | 67.6528503 |
| 16:09:02 | 78.0497845 | 81.2872494 | 74.8356503 | 68.6528503 |
| 16:09:03 | 76.0497845 | 81.2872494 | 91.3767765 | 70.6528503 |
| 16:09:04 | 75.0497845 | 81.2872494 | 91.3767765 | 71.6528503 |
| 16:09:05 | 74.0497845 | 81.2872494 | 90.3767765 | 71.6528503 |
| 16:09:06 | 74.0497845 | 81.2872494 | 90.3767765 | 73.6528503 |
| 16:09:07 | 74.0497845 | 82.2872494 | 92.3767765 | 73.6528503 |
| 16:09:08 | 75.0497845 | 82.2872494 | 92.3767765 | 73.6528503 |
| 16:09:09 | 76.0497845 | 82.2872494 | 78.3356503 | 73.6528503 |
| 16:09:10 | 77.0497845 | 82.2872494 | 78.4606503 | 72.6528503 |
| 16:09:11 | 77.0497845 | 82.2872494 | 78.4606503 | 72.6528503 |
| 16:09:12 | 77.0497845 | 82.2872494 | 78.4606503 | 72.6528503 |
| 16:09:13 | 77.0497845 | 84.2872494 | 78.2106503 | 71.6528503 |
| 16:09:14 | 78.0497845 | 84.2872494 | 78.2106503 | 71.6528503 |
| 16:09:15 | 76.0497845 | 85.2872494 | 77.8356503 | 71.6528503 |
| 16:09:16 | 73.0497845 | 82.2872494 | 77.0856503 | 74.6528503 |
| 16:09:17 | 73.0497845 | 70.2872494 | 75.4606503 | 74.6528503 |
| 16:09:18 | 73.0497845 | 70.2872494 | 75.4606503 | 74.6528503 |
| 16:09:19 | 76.0497845 | 70.2872494 | 88.3767765 | 73.6528503 |
| 16:09:20 | 76.0497845 | 70.2872494 | 83.3767765 | 72.6528503 |
| 16:09:21 | 78.0497845 | 70.2872494 | 78.3767765 | 72.6528503 |
| 16:09:22 | 80.0497845 | 70.2872494 | 77.3767765 | 72.6528503 |
| 16:09:23 | 81.0497845 | 70.2872494 | 77.3767765 | 72.6528503 |
| 16:09:24 | 81.0497845 | 70.2872494 | 77.3767765 | 72.6528503 |
| 16:09:25 | 81.0497845 | 71.2872494 | 76.3767765 | 72.6528503 |
| 16:09:26 | 81.0497845 | 72.2872494 | 75.3767765 | 72.6528503 |
| 16:09:27 | 77.0497845 | 73.2872494 | 75.3767765 | 72.6528503 |
| 16:09:28 | 77.0497845 | 73.2872494 | 73.3767765 | 72.6528503 |
| 16:09:29 | 74.0497845 | 73.2872494 | 74.3767765 | 72.6528503 |
| 16:09:30 | 74.0497845 | 76.2872494 | 76.3767765 | 71.6528503 |
| 16:09:31 | 74.0497845 | 81.2872494 | 76.3767765 | 71.6528503 |
| 16:09:32 | 74.0497845 | 82.2872494 | 76.3767765 | 71.6528503 |
| 16:09:33 | 74.0497845 | 82.2872494 | 70.3767765 | 71.6528503 |
| 16:09:34 | 74.0497845 | 81.2872494 | 67.3767765 | 71.6528503 |
| 16:09:35 | 74.0497845 | 80.2872494 | 66.3767765 | 71.6528503 |
| 16:09:36 | 74.0497845 | 80.2872494 | 66.3767765 | 73.6528503 |
| 16:09:37 | 73.0497845 | 80.2872494 | 66.3767765 | 73.6528503 |
| 16:09:38 | 73.0497845 | 80.2872494 | 66.3767765 | 72.6528503 |
| 16:09:39 | 73.0497845 | 80.2872494 | 66.3767765 | 72.6528503 |
| 16:09:40 | 73.0497845 | 80.2872494 | 66.3767765 | 72.6528503 |
| 16:09:41 | 72.0497845 | 80.2872494 | 66.3767765 | 72.6528503 |
| 16:09:42 | 72.0497845 | 80.2872494 | 66.3767765 | 72.6528503 |

|          |            |            |            |            |
|----------|------------|------------|------------|------------|
| 16:09:43 | 72.0497845 | 82.2872494 | 66.3767765 | 72.6528503 |
| 16:09:44 | 72.0497845 | 82.2872494 | 68.3767765 | 72.6528503 |
| 16:09:45 | 72.0497845 | 82.2872494 | 69.3767765 | 71.6528503 |
| 16:09:46 | 71.0497845 | 85.2872494 | 69.3767765 | 71.6528503 |
| 16:09:47 | 74.0497845 | 89.2872494 | 69.3767765 | 72.6528503 |
| 16:09:48 | 74.0497845 | 90.2872494 | 71.3767765 | 73.6528503 |
| 16:09:49 | 74.0497845 | 90.2872494 | 73.3767765 | 73.6528503 |
| 16:09:50 | 74.0497845 | 91.2872494 | 73.3767765 | 73.6528503 |
| 16:09:51 | 73.0497845 | 91.2872494 | 76.3767765 | 74.6528503 |
| 16:09:52 | 71.0497845 | 90.2872494 | 78.3767765 | 73.6528503 |
| 16:09:53 | 71.0497845 | 90.2872494 | 77.3767765 | 73.6528503 |
| 16:09:54 | 68.0497845 | 89.2872494 | 77.3767765 | 73.6528503 |
| 16:09:55 | 67.0497845 | 89.2872494 | 76.3767765 | 72.6528503 |
| 16:09:56 | 67.0497845 | 88.2872494 | 76.3767765 | 72.6528503 |
| 16:09:57 | 67.0497845 | 88.2872494 | 73.3767765 | 72.6528503 |
| 16:09:58 | 68.0497845 | 89.2872494 | 73.3767765 | 72.6528503 |
| 16:09:59 | 68.0497845 | 90.2872494 | 70.3767765 | 71.6528503 |
| 16:10:00 | 70.0497845 | 90.2872494 | 69.3767765 | 71.6528503 |
| 16:10:01 | 72.0497845 | 89.2872494 | 67.3767765 | 71.6528503 |
| 16:10:02 | 72.0497845 | 89.2872494 | 65.3767765 | 70.6528503 |
| 16:10:03 | 73.0497845 | 89.2872494 | 65.3767765 | 70.6528503 |
| 16:10:04 | 71.0497845 | 72.3356503 | 64.3767765 | 66.6528503 |
| 16:10:05 | 71.0497845 | 88.2872494 | 64.3767765 | 64.6528503 |
| 16:10:06 | 69.0497845 | 71.3356503 | 62.3767765 | 64.6528503 |
| 16:10:07 | 68.0497845 | 87.2872494 | 62.3767765 | 64.6528503 |
| 16:10:08 | 68.0497845 | 87.2872494 | 62.3767765 | 65.6528503 |
| 16:10:09 | 67.0497845 | 79.2872494 | 62.3767765 | 65.6528503 |
| 16:10:10 | 67.0497845 | 78.2872494 | 62.3767765 | 65.6528503 |
| 16:10:11 | 68.0497845 | 77.2872494 | 63.3767765 | 65.6528503 |
| 16:10:12 | 68.0497845 | 77.2872494 | 63.3767765 | 69.6528503 |
| 16:10:13 | 69.0497845 | 76.2872494 | 63.3767765 | 75.6528503 |
| 16:10:14 | 69.0497845 | 76.2872494 | 62.3767765 | 75.6528503 |
| 16:10:15 | 69.0497845 | 75.2872494 | 61.3767765 | 75.6528503 |
| 16:10:16 | 70.0497845 | 75.2872494 | 59.3767765 | 75.6528503 |
| 16:10:17 | 70.0497845 | 75.2872494 | 58.3767765 | 75.6528503 |
| 16:10:18 | 70.0497845 | 77.2872494 | 58.3767765 | 76.6528503 |
| 16:10:19 | 71.0497845 | 77.2872494 | 58.3767765 | 77.6528503 |
| 16:10:20 | 77.0497845 | 77.2872494 | 58.3767765 | 77.6528503 |
| 16:10:21 | 79.0497845 | 78.2872494 | 58.3767765 | 77.6528503 |
| 16:10:22 | 79.0497845 | 76.2872494 | 58.3767765 | 77.6528503 |
| 16:10:23 | 77.0497845 | 75.2872494 | 58.3767765 | 78.6528503 |
| 16:10:24 | 78.0497845 | 74.2872494 | 57.3767765 | 78.6528503 |
| 16:10:25 | 78.0497845 | 74.2872494 | 57.3767765 | 78.6528503 |
| 16:10:26 | 79.0497845 | 74.2872494 | 57.3767765 | 78.6528503 |
| 16:10:27 | 79.0497845 | 73.2872494 | 57.3767765 | 78.6528503 |



|          |            |            |            |            |
|----------|------------|------------|------------|------------|
| 16:10:28 | 79.0497845 | 73.2872494 | 58.3767765 | 78.6528503 |
| 16:10:29 | 78.0497845 | 73.2872494 | 63.3767765 | 78.6528503 |
| 16:10:30 | 78.0497845 | 75.2872494 | 63.3767765 | 71.6528503 |
| 16:10:31 | 78.0497845 | 77.2872494 | 65.3767765 | 71.6528503 |
| 16:10:32 | 78.0497845 | 79.2872494 | 66.3767765 | 72.6528503 |
| 16:10:33 | 78.0497845 | 79.2872494 | 66.3767765 | 72.6528503 |
| 16:10:34 | 78.0497845 | 79.2872494 | 66.3767765 | 72.6528503 |
| 16:10:35 | 78.0497845 | 79.2872494 | 64.3767765 | 72.6528503 |
| 16:10:36 | 78.0497845 | 79.2872494 | 59.3767765 | 73.6528503 |
| 16:10:37 | 78.0497845 | 79.2872494 | 59.3767765 | 73.6528503 |
| 16:10:38 | 79.0497845 | 79.2872494 | 54.3767765 | 74.6528503 |
| 16:10:39 | 79.0497845 | 79.2872494 | 53.3767765 | 74.6528503 |
| 16:10:40 | 81.0497845 | 75.2872494 | 56.3767765 | 74.6528503 |
| 16:10:41 | 86.0497845 | 75.2872494 | 56.3767765 | 74.6528503 |
| 16:10:42 | 88.0497845 | 75.2872494 | 59.3767765 | 73.6528503 |
| 16:10:43 | 90.0497845 | 75.2872494 | 60.3767765 | 72.6528503 |
| 16:10:44 | 90.0497845 | 73.2872494 | 64.3767765 | 72.6528503 |
| 16:10:45 | 90.0497845 | 73.2872494 | 64.3767765 | 72.6528503 |
| 16:10:46 | 90.0497845 | 73.2872494 | 64.3767765 | 71.6528503 |
| 16:10:47 | 78.0497845 | 74.2872494 | 64.3767765 | 71.6528503 |
| 16:10:48 | 75.0497845 | 74.2872494 | 64.3767765 | 70.6528503 |
| 16:10:49 | 75.0497845 | 74.2872494 | 64.3767765 | 70.6528503 |
| 16:10:50 | 74.0497845 | 75.2872494 | 64.3767765 | 70.6528503 |
| 16:10:51 | 74.0497845 | 75.2872494 | 64.3767765 | 70.6528503 |
| 16:10:52 | 74.0497845 | 75.2872494 | 64.3767765 | 68.6528503 |
| 16:10:53 | 73.0497845 | 76.2872494 | 64.3767765 | 68.6528503 |
| 16:10:54 | 71.0497845 | 76.2872494 | 64.3767765 | 68.6528503 |
| 16:10:55 | 71.0497845 | 76.2872494 | 64.3767765 | 68.6528503 |
| 16:10:56 | 70.0497845 | 76.2872494 | 64.3767765 | 68.6528503 |
| 16:10:57 | 70.0497845 | 77.2872494 | 64.3767765 | 68.6528503 |
| 16:10:58 | 70.0497845 | 78.2872494 | 64.3767765 | 68.6528503 |
| 16:10:59 | 70.0497845 | 79.2872494 | 63.3767765 | 68.6528503 |
| 16:11:00 | 69.0497845 | 79.2872494 | 69.3767765 | 68.6528503 |
| 16:11:01 | 69.0497845 | 79.2872494 | 69.3767765 | 68.6528503 |
| 16:11:02 | 68.0497845 | 79.2872494 | 68.3767765 | 68.6528503 |
| 16:11:03 | 68.0497845 | 80.2872494 | 65.3767765 | 68.6528503 |
| 16:11:04 | 68.0497845 | 80.2872494 | 65.3767765 | 68.6528503 |
| 16:11:05 | 68.0497845 | 79.2872494 | 65.3767765 | 68.6528503 |
| 16:11:06 | 68.0497845 | 79.2872494 | 65.3767765 | 64.6528503 |
| 16:11:07 | 68.0497845 | 79.2872494 | 65.3767765 | 59.6528503 |
| 16:11:08 | 68.0497845 | 78.2872494 | 64.3767765 | 59.6528503 |
| 16:11:09 | 68.0497845 | 78.2872494 | 64.3767765 | 58.6528503 |
| 16:11:10 | 68.0497845 | 74.2872494 | 64.3767765 | 57.6528503 |
| 16:11:11 | 68.0497845 | 74.2872494 | 64.3767765 | 57.6528503 |
| 16:11:12 | 75.0497845 | 74.2872494 | 64.3767765 | 58.6528503 |

|          |            |            |            |            |
|----------|------------|------------|------------|------------|
| 16:11:13 | 75.0497845 | 76.2872494 | 63.3767765 | 62.6528503 |
| 16:11:14 | 75.0497845 | 77.2872494 | 63.3767765 | 64.6528503 |
| 16:11:15 | 73.0497845 | 78.2872494 | 63.3767765 | 66.6528503 |
| 16:11:16 | 72.0497845 | 78.2872494 | 65.3767765 | 66.6528503 |
| 16:11:17 | 71.0497845 | 78.2872494 | 66.3767765 | 67.6528503 |
| 16:11:18 | 71.0497845 | 79.2872494 | 66.3767765 | 67.6528503 |
| 16:11:19 | 71.0497845 | 80.2872494 | 66.3767765 | 68.6528503 |
| 16:11:20 | 71.0497845 | 81.2872494 | 66.3767765 | 68.6528503 |
| 16:11:21 | 75.0497845 | 81.2872494 | 67.3767765 | 71.6528503 |
| 16:11:22 | 75.0497845 | 83.2872494 | 65.3767765 | 74.6528503 |
| 16:11:23 | 76.0497845 | 83.2872494 | 65.3767765 | 73.6528503 |
| 16:11:24 | 72.0497845 | 84.2872494 | 65.3767765 | 72.6528503 |
| 16:11:25 | 72.0497845 | 86.2872494 | 65.3767765 | 71.6528503 |
| 16:11:26 | 69.0497845 | 85.2872494 | 64.3767765 | 71.6528503 |
| 16:11:27 | 69.0497845 | 84.2872494 | 64.3767765 | 71.6528503 |
| 16:11:28 | 70.0497845 | 84.2872494 | 64.3767765 | 71.6528503 |
| 16:11:29 | 70.0497845 | 81.2872494 | 64.3767765 | 72.6528503 |
| 16:11:30 | 69.0497845 | 81.2872494 | 64.3767765 | 72.6528503 |
| 16:11:31 | 70.0497845 | 81.2872494 | 64.3767765 | 72.6528503 |
| 16:11:32 | 70.0497845 | 81.2872494 | 64.3767765 | 71.6528503 |
| 16:11:33 | 71.0497845 | 80.2872494 | 64.3767765 | 71.6528503 |
| 16:11:34 | 71.0497845 | 81.2872494 | 64.3767765 | 71.6528503 |
| 16:11:35 | 72.0497845 | 80.2872494 | 79.3767765 | 70.6528503 |
| 16:11:36 | 72.0497845 | 80.2872494 | 79.3767765 | 71.6528503 |
| 16:11:37 | 71.0497845 | 81.2872494 | 78.3767765 | 72.6528503 |
| 16:11:38 | 71.0497845 | 80.2872494 | 78.3767765 | 74.6528503 |
| 16:11:39 | 72.0497845 | 78.2872494 | 75.3767765 | 74.6528503 |
| 16:11:40 | 72.0497845 | 77.2872494 | 70.3767765 | 75.6528503 |
| 16:11:41 | 72.0497845 | 77.2872494 | 70.3767765 | 75.6528503 |
| 16:11:42 | 71.0497845 | 78.2872494 | 69.3767765 | 74.6528503 |
| 16:11:43 | 70.0497845 | 78.2872494 | 70.3767765 | 74.6528503 |
| 16:11:44 | 70.0497845 | 78.2872494 | 70.3767765 | 74.6528503 |
| 16:11:45 | 70.0497845 | 79.2872494 | 71.3767765 | 74.6528503 |
| 16:11:46 | 70.0497845 | 79.2872494 | 72.3767765 | 74.6528503 |
| 16:11:47 | 70.0497845 | 79.2872494 | 72.3767765 | 73.6528503 |
| 16:11:48 | 69.0497845 | 79.2872494 | 72.3767765 | 72.6528503 |
| 16:11:49 | 71.0497845 | 79.2872494 | 70.3767765 | 72.6528503 |
| 16:11:50 | 71.0497845 | 79.2872494 | 70.3767765 | 72.6528503 |
| 16:11:51 | 71.0497845 | 79.2872494 | 70.3767765 | 72.6528503 |
| 16:11:52 | 69.0497845 | 80.2872494 | 69.3767765 | 72.6528503 |
| 16:11:53 | 69.0497845 | 80.2872494 | 68.3767765 | 71.6528503 |
| 16:11:54 | 69.0497845 | 81.2872494 | 69.3767765 | 71.6528503 |
| 16:11:55 | 69.0497845 | 81.2872494 | 68.3767765 | 70.6528503 |
| 16:11:56 | 69.0497845 | 81.2872494 | 68.3767765 | 70.6528503 |
| 16:11:57 | 69.0497845 | 79.2872494 | 68.3767765 | 69.6528503 |

|          |            |            |            |            |
|----------|------------|------------|------------|------------|
| 16:11:58 | 69.0497845 | 78.2872494 | 68.3767765 | 68.6528503 |
| 16:11:59 | 69.0497845 | 78.2872494 | 67.3767765 | 68.6528503 |
| 16:12:00 | 69.0497845 | 78.2872494 | 67.3767765 | 68.6528503 |
| 16:12:01 | 70.0497845 | 78.2872494 | 66.3767765 | 71.6528503 |
| 16:12:02 | 72.0497845 | 78.2872494 | 66.3767765 | 72.6528503 |
| 16:12:03 | 72.0497845 | 78.2872494 | 66.3767765 | 72.6528503 |
| 16:12:04 | 71.0497845 | 79.2872494 | 64.3767765 | 72.6528503 |
| 16:12:05 | 71.0497845 | 79.2872494 | 64.3767765 | 72.6528503 |
| 16:12:06 | 72.0497845 | 79.2872494 | 63.3767765 | 72.6528503 |
| 16:12:07 | 73.0497845 | 79.2872494 | 63.3767765 | 72.6528503 |
| 16:12:08 | 73.0497845 | 79.2872494 | 63.3767765 | 73.6528503 |
| 16:12:09 | 73.0497845 | 79.2872494 | 63.3767765 | 72.6528503 |
| 16:12:10 | 73.0497845 | 80.2872494 | 64.3767765 | 72.6528503 |
| 16:12:11 | 73.0497845 | 80.2872494 | 64.3767765 | 72.6528503 |
| 16:12:12 | 73.0497845 | 80.2872494 | 64.3767765 | 72.6528503 |
| 16:12:13 | 75.0497845 | 80.2872494 | 65.3767765 | 72.6528503 |
| 16:12:14 | 75.0497845 | 80.2872494 | 65.3767765 | 70.6528503 |
| 16:12:15 | 73.0497845 | 79.2872494 | 65.3767765 | 70.6528503 |
| 16:12:16 | 73.0497845 | 79.2872494 | 63.3767765 | 68.6528503 |
| 16:12:17 | 72.0497845 | 80.2872494 | 62.3767765 | 67.6528503 |
| 16:12:18 | 72.0497845 | 80.2872494 | 61.3767765 | 68.6528503 |
| 16:12:19 | 71.0497845 | 80.2872494 | 61.3767765 | 68.6528503 |
| 16:12:20 | 70.0497845 | 80.2872494 | 61.3767765 | 68.6528503 |
| 16:12:21 | 69.0497845 | 80.2872494 | 61.3767765 | 68.6528503 |
| 16:12:22 | 70.0497845 | 80.2872494 | 61.3767765 | 68.6528503 |
| 16:12:23 | 71.0497845 | 80.2872494 | 61.3767765 | 68.6528503 |
| 16:12:24 | 71.0497845 | 81.2872494 | 61.3767765 | 68.6528503 |
| 16:12:25 | 71.0497845 | 82.2872494 | 61.3767765 | 68.6528503 |
| 16:12:26 | 71.0497845 | 82.2872494 | 61.3767765 | 68.6528503 |
| 16:12:27 | 72.0497845 | 80.2872494 | 62.3767765 | 68.6528503 |
| 16:12:28 | 72.0497845 | 81.2872494 | 65.3767765 | 67.6528503 |
| 16:12:29 | 72.0497845 | 81.2872494 | 65.3767765 | 67.6528503 |
| 16:12:30 | 72.0497845 | 81.2872494 | 65.3767765 | 67.6528503 |
| 16:12:31 | 71.0497845 | 82.2872494 | 66.3767765 | 67.6528503 |
| 16:12:32 | 71.0497845 | 82.2872494 | 66.3767765 | 67.6528503 |
| 16:12:33 | 71.0497845 | 82.2872494 | 66.3767765 | 67.6528503 |
| 16:12:34 | 71.0497845 | 83.2872494 | 66.3767765 | 68.6528503 |
| 16:12:35 | 71.0497845 | 85.2872494 | 66.3767765 | 68.6528503 |
| 16:12:36 | 71.0497845 | 85.2872494 | 67.3767765 | 68.6528503 |
| 16:12:37 | 69.0497845 | 84.2872494 | 66.3767765 | 68.6528503 |
| 16:12:38 | 68.0497845 | 83.2872494 | 66.3767765 | 68.6528503 |
| 16:12:39 | 68.0497845 | 81.2872494 | 66.3767765 | 70.6528503 |
| 16:12:40 | 68.0497845 | 81.2872494 | 66.3767765 | 71.6528503 |
| 16:12:41 | 67.0497845 | 81.2872494 | 66.3767765 | 71.6528503 |
| 16:12:42 | 67.0497845 | 80.2872494 | 65.3767765 | 71.6528503 |

|          |            |            |            |            |
|----------|------------|------------|------------|------------|
| 16:12:43 | 67.0497845 | 77.2872494 | 65.3767765 | 71.6528503 |
| 16:12:44 | 68.0497845 | 77.2872494 | 65.3767765 | 71.6528503 |
| 16:12:45 | 68.0497845 | 77.2872494 | 66.3767765 | 70.6528503 |
| 16:12:46 | 68.0497845 | 78.2872494 | 66.3767765 | 70.6528503 |
| 16:12:47 | 68.0497845 | 78.2872494 | 66.3767765 | 70.6528503 |
| 16:12:48 | 68.0497845 | 78.2872494 | 66.3767765 | 69.6528503 |
| 16:12:49 | 68.0497845 | 78.2872494 | 66.3767765 | 69.6528503 |
| 16:12:50 | 68.0497845 | 78.2872494 | 69.3767765 | 69.6528503 |
| 16:12:51 | 69.0497845 | 78.2872494 | 71.3767765 | 68.6528503 |
| 16:12:52 | 70.0497845 | 78.2872494 | 72.3767765 | 68.6528503 |
| 16:12:53 | 69.0497845 | 78.2872494 | 72.3767765 | 68.6528503 |
| 16:12:54 | 69.0497845 | 78.2872494 | 72.3767765 | 68.6528503 |
| 16:12:55 | 71.0497845 | 78.2872494 | 72.3767765 | 69.6528503 |
| 16:12:56 | 71.0497845 | 78.2872494 | 71.3767765 | 68.6528503 |
| 16:12:57 | 72.0497845 | 78.2872494 | 71.3767765 | 68.6528503 |
| 16:12:58 | 72.0497845 | 79.2872494 | 72.3767765 | 70.6528503 |
| 16:12:59 | 72.0497845 | 77.2872494 | 73.3767765 | 70.6528503 |
| 16:13:00 | 72.0497845 | 78.2872494 | 73.3767765 | 71.6528503 |
| 16:13:01 | 72.0497845 | 78.2872494 | 73.3767765 | 71.6528503 |
| 16:13:02 | 72.0497845 | 78.2872494 | 72.3767765 | 71.6528503 |
| 16:13:03 | 72.0497845 | 79.2872494 | 72.3767765 | 71.6528503 |
| 16:13:04 | 72.0497845 | 79.2872494 | 75.3767765 | 72.6528503 |
| 16:13:05 | 72.0497845 | 79.2872494 | 76.3767765 | 72.6528503 |
| 16:13:06 | 73.0497845 | 79.2872494 | 76.3767765 | 73.6528503 |
| 16:13:07 | 73.0497845 | 77.2872494 | 77.3767765 | 75.6528503 |
| 16:13:08 | 72.0497845 | 77.2872494 | 72.3767765 | 75.6528503 |
| 16:13:09 | 71.0497845 | 77.2872494 | 72.3767765 | 76.6528503 |
| 16:13:10 | 71.0497845 | 77.2872494 | 71.3767765 | 76.6528503 |
| 16:13:11 | 70.0497845 | 77.2872494 | 71.3767765 | 77.6528503 |
| 16:13:12 | 69.0497845 | 77.2872494 | 71.3767765 | 77.6528503 |
| 16:13:13 | 69.0497845 | 77.2872494 | 71.3767765 | 78.6528503 |
| 16:13:14 | 69.0497845 | 83.2872494 | 70.3767765 | 78.6528503 |
| 16:13:15 | 69.0497845 | 83.2872494 | 68.3767765 | 78.6528503 |
| 16:13:16 | 69.0497845 | 84.2872494 | 68.3767765 | 78.6528503 |
| 16:13:17 | 69.0497845 | 84.2872494 | 68.3767765 | 78.6528503 |
| 16:13:18 | 69.0497845 | 84.2872494 | 65.3767765 | 76.6528503 |
| 16:13:19 | 69.0497845 | 85.2872494 | 64.3767765 | 71.6528503 |
| 16:13:20 | 69.0497845 | 85.2872494 | 64.3767765 | 70.6528503 |
| 16:13:21 | 69.0497845 | 85.2872494 | 64.3767765 | 70.6528503 |
| 16:13:22 | 69.0497845 | 85.2872494 | 64.3767765 | 70.6528503 |
| 16:13:23 | 69.0497845 | 85.2872494 | 64.3767765 | 69.6528503 |
| 16:13:24 | 69.0497845 | 85.2872494 | 64.3767765 | 69.6528503 |
| 16:13:25 | 68.0497845 | 85.2872494 | 64.3767765 | 69.6528503 |
| 16:13:26 | 68.0497845 | 85.2872494 | 64.3767765 | 69.6528503 |
| 16:13:27 | 68.0497845 | 86.2872494 | 64.3767765 | 69.6528503 |

|          |            |            |            |            |
|----------|------------|------------|------------|------------|
| 16:13:28 | 69.0497845 | 86.2872494 | 64.3767765 | 69.6528503 |
| 16:13:29 | 69.0497845 | 87.2872494 | 64.3767765 | 69.6528503 |
| 16:13:30 | 71.0497845 | 88.2872494 | 65.3767765 | 69.6528503 |
| 16:13:31 | 73.0497845 | 88.2872494 | 65.3767765 | 69.6528503 |
| 16:13:32 | 76.0497845 | 87.2872494 | 65.3767765 | 69.6528503 |
| 16:13:33 | 78.0497845 | 86.2872494 | 65.3767765 | 68.6528503 |
| 16:13:34 | 77.0497845 | 86.2872494 | 65.3767765 | 68.6528503 |
| 16:13:35 | 77.0497845 | 83.2872494 | 65.3767765 | 68.6528503 |
| 16:13:36 | 77.0497845 | 83.2872494 | 65.3767765 | 69.6528503 |
| 16:13:37 | 77.0497845 | 81.2872494 | 65.3767765 | 70.6528503 |
| 16:13:38 | 74.0497845 | 81.2872494 | 65.3767765 | 69.6528503 |
| 16:13:39 | 73.0497845 | 82.2872494 | 66.3767765 | 69.6528503 |
| 16:13:40 | 73.0497845 | 82.2872494 | 67.3767765 | 69.6528503 |
| 16:13:41 | 73.0497845 | 82.2872494 | 67.3767765 | 69.6528503 |
| 16:13:42 | 73.0497845 | 82.2872494 | 67.3767765 | 69.6528503 |
| 16:13:43 | 73.0497845 | 82.2872494 | 68.3767765 | 69.6528503 |
| 16:13:44 | 73.0497845 | 83.2872494 | 68.3767765 | 69.6528503 |
| 16:13:45 | 73.0497845 | 83.2872494 | 68.3767765 | 69.6528503 |
| 16:13:46 | 73.0497845 | 83.2872494 | 68.3767765 | 69.6528503 |
| 16:13:47 | 73.0497845 | 83.2872494 | 69.3767765 | 69.6528503 |
| 16:13:48 | 73.0497845 | 83.2872494 | 69.3767765 | 69.6528503 |
| 16:13:49 | 76.0497845 | 83.2872494 | 70.3767765 | 70.6528503 |
| 16:13:50 | 76.0497845 | 83.2872494 | 70.3767765 | 71.6528503 |
| 16:13:51 | 76.0497845 | 83.2872494 | 71.3767765 | 71.6528503 |
| 16:13:52 | 75.0497845 | 83.2872494 | 71.3767765 | 71.6528503 |
| 16:13:53 | 72.0497845 | 84.2872494 | 71.3767765 | 71.6528503 |
| 16:13:54 | 71.0497845 | 84.2872494 | 71.3767765 | 71.6528503 |
| 16:13:55 | 71.0497845 | 84.2872494 | 71.3767765 | 72.6528503 |
| 16:13:56 | 71.0497845 | 84.2872494 | 71.3767765 | 73.6528503 |
| 16:13:57 | 71.0497845 | 85.2872494 | 70.3767765 | 73.6528503 |
| 16:13:58 | 70.0497845 | 85.2872494 | 69.3767765 | 73.6528503 |
| 16:13:59 | 69.0497845 | 85.2872494 | 69.3767765 | 73.6528503 |
| 16:14:00 | 68.0497845 | 85.2872494 | 69.3767765 | 75.6528503 |
| 16:14:01 | 69.0497845 | 85.2872494 | 69.3767765 | 75.6528503 |
| 16:14:02 | 69.0497845 | 84.2872494 | 74.3767765 | 75.6528503 |
| 16:14:03 | 69.0497845 | 83.2872494 | 77.3767765 | 76.6528503 |
| 16:14:04 | 68.0497845 | 83.2872494 | 78.3767765 | 76.6528503 |
| 16:14:05 | 68.0497845 | 83.2872494 | 78.3767765 | 77.6528503 |
| 16:14:06 | 67.0497845 | 83.2872494 | 79.3767765 | 77.6528503 |
| 16:14:07 | 67.0497845 | 83.2872494 | 79.3767765 | 77.6528503 |
| 16:14:08 | 67.0497845 | 83.2872494 | 79.3767765 | 77.6528503 |
| 16:14:09 | 67.0497845 | 82.2872494 | 79.3767765 | 77.6528503 |
| 16:14:10 | 68.0497845 | 82.2872494 | 79.3767765 | 77.6528503 |
| 16:14:11 | 70.0497845 | 80.2872494 | 79.3767765 | 77.6528503 |
| 16:14:12 | 70.0497845 | 85.2872494 | 79.3767765 | 77.6528503 |

|          |            |            |            |            |
|----------|------------|------------|------------|------------|
| 16:14:13 | 72.0497845 | 85.2872494 | 82.3767765 | 77.6528503 |
| 16:14:14 | 73.0497845 | 85.2872494 | 82.3767765 | 77.6528503 |
| 16:14:15 | 73.0497845 | 85.2872494 | 79.3767765 | 75.6528503 |
| 16:14:16 | 73.0497845 | 85.2872494 | 77.3767765 | 75.6528503 |
| 16:14:17 | 71.0497845 | 84.2872494 | 77.3767765 | 75.6528503 |
| 16:14:18 | 70.0497845 | 84.2872494 | 72.3767765 | 75.6528503 |
| 16:14:19 | 70.0497845 | 84.2872494 | 72.3767765 | 76.6528503 |
| 16:14:20 | 70.0497845 | 84.2872494 | 72.3767765 | 77.6528503 |
| 16:14:21 | 70.0497845 | 84.2872494 | 72.3767765 | 78.6528503 |
| 16:14:22 | 70.0497845 | 83.2872494 | 72.3767765 | 79.6528503 |
| 16:14:23 | 70.0497845 | 83.2872494 | 71.3767765 | 79.6528503 |
| 16:14:24 | 71.0497845 | 83.2872494 | 71.3767765 | 80.6528503 |
| 16:14:25 | 73.0497845 | 83.2872494 | 69.3767765 | 79.6528503 |
| 16:14:26 | 73.0497845 | 83.2872494 | 68.3767765 | 79.6528503 |
| 16:14:27 | 74.0497845 | 83.2872494 | 67.3767765 | 79.6528503 |
| 16:14:28 | 75.0497845 | 83.2872494 | 67.3767765 | 79.6528503 |
| 16:14:29 | 75.0497845 | 83.2872494 | 68.3767765 | 79.6528503 |
| 16:14:30 | 77.0497845 | 83.2872494 | 68.3767765 | 79.6528503 |
| 16:14:31 | 77.0497845 | 83.2872494 | 68.3767765 | 79.6528503 |
| 16:14:32 | 77.0497845 | 80.2872494 | 68.3767765 | 80.6528503 |
| 16:14:33 | 78.0497845 | 80.2872494 | 68.3767765 | 80.6528503 |
| 16:14:34 | 78.0497845 | 80.2872494 | 69.3767765 | 80.6528503 |
| 16:14:35 | 79.0497845 | 80.2872494 | 69.3767765 | 79.6528503 |
| 16:14:36 | 79.0497845 | 73.2872494 | 69.3767765 | 79.6528503 |
| 16:14:37 | 79.0497845 | 73.2872494 | 69.3767765 | 78.6528503 |
| 16:14:38 | 77.0497845 | 72.2872494 | 69.3767765 | 78.6528503 |
| 16:14:39 | 74.0497845 | 72.2872494 | 72.3767765 | 78.6528503 |
| 16:14:40 | 74.0497845 | 73.2872494 | 72.3767765 | 78.6528503 |
| 16:14:41 | 71.0497845 | 73.2872494 | 73.3767765 | 78.6528503 |
| 16:14:42 | 71.0497845 | 73.2872494 | 73.3767765 | 78.6528503 |
| 16:14:43 | 66.0497845 | 74.2872494 | 74.3767765 | 78.6528503 |
| 16:14:44 | 66.0497845 | 75.2872494 | 76.3767765 | 78.6528503 |
| 16:14:45 | 66.0497845 | 75.2872494 | 76.3767765 | 79.6528503 |
| 16:14:46 | 66.0497845 | 75.2872494 | 76.3767765 | 82.6528503 |
| 16:14:47 | 66.0497845 | 75.2872494 | 78.3767765 | 84.6528503 |
| 16:14:48 | 66.0497845 | 75.2872494 | 79.3767765 | 85.6528503 |
| 16:14:49 | 66.0497845 | 75.2872494 | 74.3767765 | 85.6528503 |
| 16:14:50 | 65.0497845 | 77.2872494 | 74.3767765 | 85.6528503 |
| 16:14:51 | 64.0497845 | 76.2872494 | 73.3767765 | 85.6528503 |
| 16:14:52 | 63.0497845 | 76.2872494 | 73.3767765 | 85.6528503 |
| 16:14:53 | 62.0497845 | 76.2872494 | 73.3767765 | 83.6528503 |
| 16:14:54 | 62.0497845 | 75.2872494 | 73.3767765 | 83.6528503 |
| 16:14:55 | 61.0497845 | 73.2872494 | 73.3767765 | 83.6528503 |
| 16:14:56 | 61.0497845 | 73.2872494 | 73.3767765 | 83.6528503 |
| 16:14:57 | 61.0497845 | 72.2872494 | 73.3767765 | 83.6528503 |

|          |            |            |            |            |
|----------|------------|------------|------------|------------|
| 16:14:58 | 61.0497845 | 72.2872494 | 73.3767765 | 83.6528503 |
| 16:14:59 | 61.0497845 | 72.2872494 | 73.3767765 | 83.6528503 |
| 16:15:00 | 62.0497845 | 71.2872494 | 73.3767765 | 81.6528503 |
| 16:15:01 | 63.0497845 | 71.2872494 | 73.3767765 | 79.6528503 |
| 16:15:02 | 64.0497845 | 71.2872494 | 73.3767765 | 79.6528503 |
| 16:15:03 | 64.0497845 | 71.2872494 | 74.3767765 | 77.6528503 |
| 16:15:04 | 64.0497845 | 71.2872494 | 74.3767765 | 75.6528503 |
| 16:15:05 | 64.0497845 | 73.2872494 | 73.3767765 | 74.6528503 |
| 16:15:06 | 63.0497845 | 73.2872494 | 71.3767765 | 74.6528503 |
| 16:15:07 | 63.0497845 | 73.2872494 | 71.3767765 | 74.6528503 |
| 16:15:08 | 62.0497845 | 77.2872494 | 72.3767765 | 74.6528503 |
| 16:15:09 | 62.0497845 | 79.2872494 | 72.3767765 | 74.6528503 |
| 16:15:10 | 63.0497845 | 80.2872494 | 72.3767765 | 75.6528503 |
| 16:15:11 | 62.0497845 | 80.2872494 | 72.3767765 | 75.6528503 |
| 16:15:12 | 62.0497845 | 81.2872494 | 71.3767765 | 78.6528503 |
| 16:15:13 | 62.0497845 | 81.2872494 | 71.3767765 | 77.6528503 |
| 16:15:14 | 63.0497845 | 83.2872494 | 71.3767765 | 75.6528503 |
| 16:15:15 | 63.0497845 | 83.2872494 | 69.3767765 | 73.6528503 |
| 16:15:16 | 63.0497845 | 83.2872494 | 69.3767765 | 72.6528503 |
| 16:15:17 | 63.0497845 | 83.2872494 | 69.3767765 | 72.6528503 |
| 16:15:18 | 64.0497845 | 83.2872494 | 69.3767765 | 74.6528503 |
| 16:15:19 | 64.0497845 | 83.2872494 | 70.3767765 | 77.6528503 |
| 16:15:20 | 63.0497845 | 83.2872494 | 70.3767765 | 77.6528503 |
| 16:15:21 | 63.0497845 | 83.2872494 | 71.3767765 | 78.6528503 |
| 16:15:22 | 63.0497845 | 83.2872494 | 71.3767765 | 78.6528503 |
| 16:15:23 | 63.0497845 | 84.2872494 | 72.3767765 | 78.6528503 |
| 16:15:24 | 63.0497845 | 87.2872494 | 72.3767765 | 78.6528503 |
| 16:15:25 | 64.0497845 | 87.2872494 | 71.3767765 | 82.6528503 |
| 16:15:26 | 64.0497845 | 87.2872494 | 70.3767765 | 82.6528503 |
| 16:15:27 | 66.0497845 | 88.2872494 | 69.3767765 | 82.6528503 |
| 16:15:28 | 67.0497845 | 88.2872494 | 69.3767765 | 82.6528503 |
| 16:15:29 | 67.0497845 | 88.2872494 | 68.3767765 | 77.6528503 |
| 16:15:30 | 67.0497845 | 88.2872494 | 69.3767765 | 77.6528503 |
| 16:15:31 | 67.0497845 | 86.2872494 | 69.3767765 | 77.6528503 |
| 16:15:32 | 67.0497845 | 84.2872494 | 69.3767765 | 77.6528503 |
| 16:15:33 | 67.0497845 | 84.2872494 | 70.3767765 | 77.6528503 |
| 16:15:34 | 67.0497845 | 79.2872494 | 70.3767765 | 78.6528503 |
| 16:15:35 | 67.0497845 | 77.2872494 | 70.3767765 | 78.6528503 |
| 16:15:36 | 67.0497845 | 77.2872494 | 70.3767765 | 78.6528503 |
| 16:15:37 | 68.0497845 | 74.2872494 | 69.3767765 | 79.6528503 |
| 16:15:38 | 77.0497845 | 75.2872494 | 69.3767765 | 79.6528503 |
| 16:15:39 | 78.0497845 | 75.2872494 | 69.3767765 | 79.6528503 |
| 16:15:40 | 78.0497845 | 75.2872494 | 70.3767765 | 78.6528503 |
| 16:15:41 | 78.0497845 | 75.2872494 | 70.3767765 | 78.6528503 |
| 16:15:42 | 78.0497845 | 75.2872494 | 73.3767765 | 75.6528503 |

|          |            |            |            |            |
|----------|------------|------------|------------|------------|
| 16:15:43 | 78.0497845 | 76.2872494 | 73.3767765 | 75.6528503 |
| 16:15:44 | 78.0497845 | 76.2872494 | 73.3767765 | 74.6528503 |
| 16:15:45 | 76.0497845 | 77.2872494 | 73.3767765 | 73.6528503 |
| 16:15:46 | 76.0497845 | 77.2872494 | 74.3767765 | 73.6528503 |
| 16:15:47 | 76.0497845 | 78.2872494 | 74.3767765 | 73.6528503 |
| 16:15:48 | 75.0497845 | 74.2872494 | 74.3767765 | 74.6528503 |
| 16:15:49 | 75.0497845 | 73.2872494 | 74.3767765 | 74.6528503 |
| 16:15:50 | 76.0497845 | 73.2872494 | 75.3767765 | 75.6528503 |
| 16:15:51 | 76.0497845 | 72.2872494 | 76.3767765 | 76.6528503 |
| 16:15:52 | 69.0497845 | 73.2872494 | 76.3767765 | 76.6528503 |
| 16:15:53 | 69.0497845 | 73.2872494 | 79.3767765 | 77.6528503 |
| 16:15:54 | 68.0497845 | 74.2872494 | 79.3767765 | 77.6528503 |
| 16:15:55 | 68.0497845 | 77.2872494 | 79.3767765 | 77.6528503 |
| 16:15:56 | 68.0497845 | 77.2872494 | 79.3767765 | 76.6528503 |
| 16:15:57 | 67.0497845 | 77.2872494 | 79.3767765 | 75.6528503 |
| 16:15:58 | 67.0497845 | 77.2872494 | 79.3767765 | 75.6528503 |
| 16:15:59 | 67.0497845 | 77.2872494 | 82.3767765 | 76.6528503 |
| 16:16:00 | 68.0497845 | 77.2872494 | 84.3767765 | 76.6528503 |
| 16:16:01 | 68.0497845 | 78.2872494 | 85.3767765 | 77.6528503 |
| 16:16:02 | 68.0497845 | 78.2872494 | 85.3767765 | 78.6528503 |
| 16:16:03 | 69.0497845 | 78.2872494 | 85.3767765 | 78.6528503 |
| 16:16:04 | 69.0497845 | 80.2872494 | 87.3767765 | 78.6528503 |
| 16:16:05 | 74.0497845 | 80.2872494 | 89.3767765 | 78.6528503 |
| 16:16:06 | 74.0497845 | 80.2872494 | 89.3767765 | 78.6528503 |
| 16:16:07 | 72.0497845 | 80.2872494 | 77.0856503 | 78.6528503 |
| 16:16:08 | 68.0497845 | 79.2872494 | 76.0856503 | 77.6528503 |
| 16:16:09 | 68.0497845 | 78.2872494 | 75.7106503 | 77.6528503 |
| 16:16:10 | 67.0497845 | 78.2872494 | 75.4606503 | 76.6528503 |
| 16:16:11 | 66.0497845 | 78.2872494 | 75.4606503 | 76.6528503 |
| 16:16:12 | 66.0497845 | 78.2872494 | 76.5856503 | 76.6528503 |
| 16:16:13 | 66.0497845 | 78.2872494 | 76.5856503 | 76.6528503 |
| 16:16:14 | 66.0497845 | 78.2872494 | 77.2106503 | 76.6528503 |
| 16:16:15 | 66.0497845 | 80.2872494 | 77.7106503 | 76.6528503 |
| 16:16:16 | 66.0497845 | 82.2872494 | 77.5856503 | 75.6528503 |
| 16:16:17 | 68.0497845 | 82.2872494 | 77.7106503 | 74.6528503 |
| 16:16:18 | 68.0497845 | 82.2872494 | 77.8356503 | 74.6528503 |
| 16:16:19 | 68.0497845 | 83.2872494 | 78.3356503 | 74.6528503 |
| 16:16:20 | 67.0497845 | 84.2872494 | 95.3767765 | 74.6528503 |
| 16:16:21 | 67.0497845 | 85.2872494 | 95.3767765 | 74.6528503 |
| 16:16:22 | 67.0497845 | 85.2872494 | 94.3767765 | 74.6528503 |
| 16:16:23 | 66.0497845 | 91.2872494 | 94.3767765 | 74.6528503 |
| 16:16:24 | 66.0497845 | 90.2872494 | 94.3767765 | 74.6528503 |
| 16:16:25 | 66.0497845 | 90.2872494 | 93.3767765 | 74.6528503 |
| 16:16:26 | 66.0497845 | 90.2872494 | 93.3767765 | 74.6528503 |
| 16:16:27 | 66.0497845 | 90.2872494 | 92.3767765 | 74.6528503 |



|          |            |            |            |            |
|----------|------------|------------|------------|------------|
| 16:16:28 | 66.0497845 | 92.2872494 | 91.3767765 | 74.6528503 |
| 16:16:29 | 67.0497845 | 92.2872494 | 91.3767765 | 74.6528503 |
| 16:16:30 | 67.0497845 | 92.2872494 | 91.3767765 | 73.6528503 |
| 16:16:31 | 68.0497845 | 93.2872494 | 91.3767765 | 72.6528503 |
| 16:16:32 | 68.0497845 | 93.2872494 | 91.3767765 | 71.6528503 |
| 16:16:33 | 66.0497845 | 75.7106503 | 91.3767765 | 71.6528503 |
| 16:16:34 | 64.0497845 | 74.3356503 | 90.3767765 | 70.6528503 |
| 16:16:35 | 64.0497845 | 73.8356503 | 89.3767765 | 70.6528503 |
| 16:16:36 | 63.0497845 | 89.2872494 | 89.3767765 | 70.6528503 |
| 16:16:37 | 63.0497845 | 89.2872494 | 89.3767765 | 71.6528503 |
| 16:16:38 | 63.0497845 | 89.2872494 | 89.3767765 | 74.6528503 |
| 16:16:39 | 63.0497845 | 88.2872494 | 89.3767765 | 74.6528503 |
| 16:16:40 | 64.0497845 | 86.2872494 | 89.3767765 | 75.6528503 |
| 16:16:41 | 64.0497845 | 85.2872494 | 72.3767765 | 74.6528503 |
| 16:16:42 | 64.0497845 | 77.2872494 | 72.3767765 | 74.6528503 |
| 16:16:43 | 65.0497845 | 77.2872494 | 68.3767765 | 75.6528503 |
| 16:16:44 | 65.0497845 | 77.2872494 | 66.3767765 | 75.6528503 |
| 16:16:45 | 65.0497845 | 77.2872494 | 65.3767765 | 75.6528503 |
| 16:16:46 | 66.0497845 | 77.2872494 | 66.3767765 | 75.6528503 |
| 16:16:47 | 66.0497845 | 77.2872494 | 66.3767765 | 76.6528503 |
| 16:16:48 | 65.0497845 | 77.2872494 | 66.3767765 | 76.6528503 |
| 16:16:49 | 65.0497845 | 77.2872494 | 66.3767765 | 76.6528503 |
| 16:16:50 | 62.0497845 | 76.2872494 | 66.3767765 | 77.6528503 |
| 16:16:51 | 62.0497845 | 75.2872494 | 66.3767765 | 77.6528503 |
| 16:16:52 | 62.0497845 | 75.2872494 | 66.3767765 | 77.6528503 |
| 16:16:53 | 63.0497845 | 75.2872494 | 66.3767765 | 77.6528503 |
| 16:16:54 | 63.0497845 | 73.2872494 | 67.3767765 | 78.6528503 |
| 16:16:55 | 64.0497845 | 73.2872494 | 67.3767765 | 78.6528503 |
| 16:16:56 | 64.0497845 | 73.2872494 | 67.3767765 | 78.6528503 |
| 16:16:57 | 67.0497845 | 72.2872494 | 67.3767765 | 76.6528503 |
| 16:16:58 | 67.0497845 | 73.2872494 | 67.3767765 | 73.6528503 |
| 16:16:59 | 67.0497845 | 73.2872494 | 66.3767765 | 73.6528503 |
| 16:17:00 | 67.0497845 | 73.2872494 | 66.3767765 | 73.6528503 |
| 16:17:01 | 67.0497845 | 74.2872494 | 66.3767765 | 72.6528503 |
| 16:17:02 | 67.0497845 | 74.2872494 | 66.3767765 | 71.6528503 |
| 16:17:03 | 67.0497845 | 73.2872494 | 67.3767765 | 71.6528503 |
| 16:17:04 | 67.0497845 | 73.2872494 | 67.3767765 | 72.6528503 |
| 16:17:05 | 67.0497845 | 73.2872494 | 67.3767765 | 73.6528503 |
| 16:17:06 | 67.0497845 | 74.2872494 | 68.3767765 | 73.6528503 |
| 16:17:07 | 67.0497845 | 75.2872494 | 68.3767765 | 73.6528503 |
| 16:17:08 | 67.0497845 | 75.2872494 | 68.3767765 | 71.6528503 |
| 16:17:09 | 67.0497845 | 75.2872494 | 68.3767765 | 70.6528503 |
| 16:17:10 | 68.0497845 | 75.2872494 | 68.3767765 | 70.6528503 |
| 16:17:11 | 68.0497845 | 76.2872494 | 68.3767765 | 70.6528503 |
| 16:17:12 | 69.0497845 | 78.2872494 | 71.3767765 | 70.6528503 |

|          |            |            |            |            |
|----------|------------|------------|------------|------------|
| 16:17:13 | 70.0497845 | 79.2872494 | 74.3767765 | 73.6528503 |
| 16:17:14 | 70.0497845 | 81.2872494 | 74.3767765 | 73.6528503 |
| 16:17:15 | 70.0497845 | 81.2872494 | 75.3767765 | 72.6528503 |
| 16:17:16 | 71.0497845 | 83.2872494 | 72.3767765 | 72.6528503 |
| 16:17:17 | 75.0497845 | 83.2872494 | 66.3767765 | 72.6528503 |
| 16:17:18 | 75.0497845 | 83.2872494 | 66.3767765 | 72.6528503 |
| 16:17:19 | 75.0497845 | 81.2872494 | 64.3767765 | 71.6528503 |
| 16:17:20 | 75.0497845 | 79.2872494 | 64.3767765 | 71.6528503 |
| 16:17:21 | 75.0497845 | 79.2872494 | 69.3767765 | 71.6528503 |
| 16:17:22 | 76.0497845 | 79.2872494 | 69.3767765 | 70.6528503 |
| 16:17:23 | 76.0497845 | 79.2872494 | 70.3767765 | 69.6528503 |
| 16:17:24 | 76.0497845 | 79.2872494 | 70.3767765 | 69.6528503 |
| 16:17:25 | 76.0497845 | 79.2872494 | 70.3767765 | 68.6528503 |
| 16:17:26 | 76.0497845 | 79.2872494 | 70.3767765 | 68.6528503 |
| 16:17:27 | 77.0497845 | 79.2872494 | 70.3767765 | 68.6528503 |
| 16:17:28 | 78.0497845 | 79.2872494 | 70.3767765 | 67.6528503 |
| 16:17:29 | 74.0497845 | 79.2872494 | 69.3767765 | 67.6528503 |
| 16:17:30 | 74.0497845 | 79.2872494 | 69.3767765 | 67.6528503 |
| 16:17:31 | 71.0497845 | 79.2872494 | 68.3767765 | 67.6528503 |
| 16:17:32 | 70.0497845 | 79.2872494 | 68.3767765 | 67.6528503 |
| 16:17:33 | 69.0497845 | 80.2872494 | 68.3767765 | 67.6528503 |
| 16:17:34 | 69.0497845 | 82.2872494 | 67.3767765 | 67.6528503 |
| 16:17:35 | 68.0497845 | 82.2872494 | 64.3767765 | 67.6528503 |
| 16:17:36 | 67.0497845 | 83.2872494 | 64.3767765 | 67.6528503 |
| 16:17:37 | 66.0497845 | 84.2872494 | 64.3767765 | 67.6528503 |
| 16:17:38 | 66.0497845 | 85.2872494 | 63.3767765 | 69.6528503 |
| 16:17:39 | 66.0497845 | 85.2872494 | 64.3767765 | 72.6528503 |
| 16:17:40 | 67.0497845 | 85.2872494 | 65.3767765 | 72.6528503 |
| 16:17:41 | 68.0497845 | 85.2872494 | 65.3767765 | 74.6528503 |
| 16:17:42 | 68.0497845 | 85.2872494 | 65.3767765 | 75.6528503 |
| 16:17:43 | 66.0497845 | 86.2872494 | 66.3767765 | 75.6528503 |
| 16:17:44 | 66.0497845 | 86.2872494 | 66.3767765 | 75.6528503 |
| 16:17:45 | 66.0497845 | 86.2872494 | 66.3767765 | 75.6528503 |
| 16:17:46 | 67.0497845 | 86.2872494 | 66.3767765 | 75.6528503 |
| 16:17:47 | 68.0497845 | 86.2872494 | 66.3767765 | 74.6528503 |
| 16:17:48 | 68.0497845 | 86.2872494 | 66.3767765 | 74.6528503 |
| 16:17:49 | 67.0497845 | 86.2872494 | 66.3767765 | 72.6528503 |
| 16:17:50 | 66.0497845 | 86.2872494 | 66.3767765 | 72.6528503 |
| 16:17:51 | 66.0497845 | 86.2872494 | 66.3767765 | 72.6528503 |
| 16:17:52 | 67.0497845 | 86.2872494 | 66.3767765 | 72.6528503 |
| 16:17:53 | 70.0497845 | 85.2872494 | 66.3767765 | 71.6528503 |
| 16:17:54 | 70.0497845 | 85.2872494 | 68.3767765 | 71.6528503 |
| 16:17:55 | 70.0497845 | 84.2872494 | 69.3767765 | 70.6528503 |
| 16:17:56 | 71.0497845 | 73.2872494 | 69.3767765 | 69.6528503 |
| 16:17:57 | 71.0497845 | 73.2872494 | 69.3767765 | 69.6528503 |

|          |            |            |            |            |
|----------|------------|------------|------------|------------|
| 16:17:58 | 71.0497845 | 70.2872494 | 70.3767765 | 68.6528503 |
| 16:17:59 | 70.0497845 | 71.2872494 | 70.3767765 | 68.6528503 |
| 16:18:00 | 69.0497845 | 74.2872494 | 72.3767765 | 69.6528503 |
| 16:18:01 | 69.0497845 | 75.2872494 | 72.3767765 | 69.6528503 |
| 16:18:02 | 70.0497845 | 75.2872494 | 72.3767765 | 69.6528503 |
| 16:18:03 | 70.0497845 | 74.2872494 | 71.3767765 | 69.6528503 |
| 16:18:04 | 70.0497845 | 72.2872494 | 71.3767765 | 69.6528503 |
| 16:18:05 | 72.0497845 | 72.2872494 | 72.3767765 | 70.6528503 |
| 16:18:06 | 75.0497845 | 72.2872494 | 77.3767765 | 70.6528503 |
| 16:18:07 | 80.0497845 | 70.2872494 | 77.3767765 | 70.6528503 |
| 16:18:08 | 80.0497845 | 70.2872494 | 77.3767765 | 70.6528503 |
| 16:18:09 | 82.0497845 | 70.2872494 | 73.3767765 | 70.6528503 |
| 16:18:10 | 82.0497845 | 70.2872494 | 71.3767765 | 70.6528503 |
| 16:18:11 | 81.0497845 | 69.2872494 | 71.3767765 | 70.6528503 |
| 16:18:12 | 81.0497845 | 68.2872494 | 72.3767765 | 70.6528503 |
| 16:18:13 | 80.0497845 | 70.2872494 | 74.3767765 | 70.6528503 |
| 16:18:14 | 80.0497845 | 71.2872494 | 74.3767765 | 72.6528503 |
| 16:18:15 | 78.0497845 | 71.2872494 | 74.3767765 | 72.6528503 |
| 16:18:16 | 78.0497845 | 74.2872494 | 75.3767765 | 73.6528503 |
| 16:18:17 | 78.0497845 | 74.2872494 | 75.3767765 | 73.6528503 |
| 16:18:18 | 78.0497845 | 74.2872494 | 77.3767765 | 73.6528503 |
| 16:18:19 | 78.0497845 | 75.2872494 | 79.3767765 | 73.6528503 |
| 16:18:20 | 78.0497845 | 75.2872494 | 80.3767765 | 73.6528503 |
| 16:18:21 | 77.0497845 | 75.2872494 | 81.3767765 | 72.6528503 |
| 16:18:22 | 77.0497845 | 75.2872494 | 82.3767765 | 72.6528503 |
| 16:18:23 | 77.0497845 | 75.2872494 | 82.3767765 | 71.6528503 |
| 16:18:24 | 77.0497845 | 75.2872494 | 83.3767765 | 71.6528503 |
| 16:18:25 | 76.0497845 | 74.2872494 | 83.3767765 | 71.6528503 |
| 16:18:26 | 74.0497845 | 74.2872494 | 83.3767765 | 72.6528503 |
| 16:18:27 | 69.0497845 | 74.2872494 | 83.3767765 | 72.6528503 |
| 16:18:28 | 68.0497845 | 75.2872494 | 78.3767765 | 72.6528503 |
| 16:18:29 | 68.0497845 | 75.2872494 | 77.3767765 | 72.6528503 |
| 16:18:30 | 68.0497845 | 75.2872494 | 76.3767765 | 72.6528503 |
| 16:18:31 | 67.0497845 | 75.2872494 | 73.3767765 | 72.6528503 |
| 16:18:32 | 67.0497845 | 75.2872494 | 72.3767765 | 72.6528503 |
| 16:18:33 | 67.0497845 | 74.2872494 | 73.3767765 | 72.6528503 |
| 16:18:34 | 67.0497845 | 74.2872494 | 73.3767765 | 74.6528503 |
| 16:18:35 | 67.0497845 | 74.2872494 | 74.3767765 | 76.6528503 |
| 16:18:36 | 66.0497845 | 72.2872494 | 75.3767765 | 76.6528503 |
| 16:18:37 | 66.0497845 | 72.2872494 | 75.3767765 | 76.6528503 |
| 16:18:38 | 66.0497845 | 72.2872494 | 75.3767765 | 76.6528503 |
| 16:18:39 | 65.0497845 | 72.2872494 | 75.3767765 | 76.6528503 |
| 16:18:40 | 64.0497845 | 71.2872494 | 76.3767765 | 76.6528503 |
| 16:18:41 | 64.0497845 | 71.2872494 | 80.3767765 | 76.6528503 |
| 16:18:42 | 64.0497845 | 71.2872494 | 80.3767765 | 76.6528503 |

|          |            |            |            |            |
|----------|------------|------------|------------|------------|
| 16:18:43 | 64.0497845 | 71.2872494 | 82.3767765 | 76.6528503 |
| 16:18:44 | 64.0497845 | 74.2872494 | 82.3767765 | 76.6528503 |
| 16:18:45 | 64.0497845 | 74.2872494 | 83.3767765 | 76.6528503 |
| 16:18:46 | 64.0497845 | 74.2872494 | 84.3767765 | 76.6528503 |
| 16:18:47 | 64.0497845 | 73.2872494 | 87.3767765 | 76.6528503 |
| 16:18:48 | 65.0497845 | 73.2872494 | 91.3767765 | 76.6528503 |
| 16:18:49 | 65.0497845 | 73.2872494 | 91.3767765 | 76.6528503 |
| 16:18:50 | 65.0497845 | 73.2872494 | 91.3767765 | 76.6528503 |
| 16:18:51 | 65.0497845 | 73.2872494 | 93.3767765 | 76.6528503 |
| 16:18:52 | 68.0497845 | 73.2872494 | 94.3767765 | 76.6528503 |
| 16:18:53 | 69.0497845 | 73.2872494 | 94.3767765 | 76.6528503 |
| 16:18:54 | 69.0497845 | 73.2872494 | 95.3767765 | 76.6528503 |
| 16:18:55 | 69.0497845 | 83.2872494 | 77.8356503 | 76.6528503 |
| 16:18:56 | 68.0497845 | 83.2872494 | 91.3767765 | 76.6528503 |
| 16:18:57 | 68.0497845 | 85.2872494 | 89.3767765 | 76.6528503 |
| 16:18:58 | 69.0497845 | 86.2872494 | 89.3767765 | 75.6528503 |
| 16:18:59 | 69.0497845 | 85.2872494 | 88.3767765 | 75.6528503 |
| 16:19:00 | 68.0497845 | 85.2872494 | 84.3767765 | 75.6528503 |
| 16:19:01 | 68.0497845 | 84.2872494 | 81.3767765 | 75.6528503 |
| 16:19:02 | 68.0497845 | 78.2872494 | 81.3767765 | 75.6528503 |
| 16:19:03 | 67.0497845 | 78.2872494 | 78.3767765 | 74.6528503 |
| 16:19:04 | 69.0497845 | 78.2872494 | 77.3767765 | 74.6528503 |
| 16:19:05 | 69.0497845 | 79.2872494 | 75.3767765 | 70.6528503 |
| 16:19:06 | 70.0497845 | 80.2872494 | 75.3767765 | 70.6528503 |
| 16:19:07 | 69.0497845 | 81.2872494 | 74.3767765 | 70.6528503 |
| 16:19:08 | 68.0497845 | 80.2872494 | 73.3767765 | 70.6528503 |
| 16:19:09 | 68.0497845 | 80.2872494 | 73.3767765 | 70.6528503 |
| 16:19:10 | 68.0497845 | 80.2872494 | 73.3767765 | 70.6528503 |
| 16:19:11 | 68.0497845 | 81.2872494 | 73.3767765 | 70.6528503 |
| 16:19:12 | 68.0497845 | 81.2872494 | 73.3767765 | 70.6528503 |
| 16:19:13 | 71.0497845 | 80.2872494 | 73.3767765 | 70.6528503 |
| 16:19:14 | 73.0497845 | 80.2872494 | 68.3767765 | 71.6528503 |
| 16:19:15 | 76.0497845 | 81.2872494 | 68.3767765 | 72.6528503 |
| 16:19:16 | 78.0497845 | 81.2872494 | 67.3767765 | 73.6528503 |
| 16:19:17 | 78.0497845 | 81.2872494 | 65.3767765 | 73.6528503 |
| 16:19:18 | 80.0497845 | 81.2872494 | 63.3767765 | 73.6528503 |
| 16:19:19 | 81.0497845 | 81.2872494 | 62.3767765 | 73.6528503 |
| 16:19:20 | 81.0497845 | 81.2872494 | 62.3767765 | 73.6528503 |
| 16:19:21 | 81.0497845 | 81.2872494 | 61.3767765 | 75.6528503 |
| 16:19:22 | 81.0497845 | 81.2872494 | 60.3767765 | 77.6528503 |
| 16:19:23 | 81.0497845 | 81.2872494 | 60.3767765 | 77.6528503 |
| 16:19:24 | 81.0497845 | 81.2872494 | 65.3767765 | 77.6528503 |
| 16:19:25 | 82.0497845 | 83.2872494 | 65.3767765 | 72.6528503 |
| 16:19:26 | 84.0497845 | 83.2872494 | 68.3767765 | 72.6528503 |
| 16:19:27 | 86.0497845 | 83.2872494 | 68.3767765 | 72.6528503 |

|          |            |            |            |            |
|----------|------------|------------|------------|------------|
| 16:19:28 | 87.0497845 | 82.2872494 | 66.3767765 | 72.6528503 |
| 16:19:29 | 88.0497845 | 82.2872494 | 66.3767765 | 72.6528503 |
| 16:19:30 | 89.0497845 | 82.2872494 | 67.3767765 | 71.6528503 |
| 16:19:31 | 89.0497845 | 82.2872494 | 69.3767765 | 71.6528503 |
| 16:19:32 | 88.0497845 | 81.2872494 | 69.3767765 | 71.6528503 |
| 16:19:33 | 88.0497845 | 81.2872494 | 71.3767765 | 69.6528503 |
| 16:19:34 | 86.0497845 | 81.2872494 | 73.3767765 | 68.6528503 |
| 16:19:35 | 85.0497845 | 81.2872494 | 73.3767765 | 68.6528503 |
| 16:19:36 | 83.0497845 | 82.2872494 | 73.3767765 | 68.6528503 |
| 16:19:37 | 83.0497845 | 82.2872494 | 73.3767765 | 68.6528503 |
| 16:19:38 | 71.0497845 | 82.2872494 | 73.3767765 | 68.6528503 |
| 16:19:39 | 70.0497845 | 80.2872494 | 73.3767765 | 67.6528503 |
| 16:19:40 | 70.0497845 | 80.2872494 | 73.3767765 | 67.6528503 |
| 16:19:41 | 68.0497845 | 80.2872494 | 72.3767765 | 67.6528503 |
| 16:19:42 | 67.0497845 | 81.2872494 | 73.3767765 | 68.6528503 |
| 16:19:43 | 66.0497845 | 82.2872494 | 70.3767765 | 68.6528503 |
| 16:19:44 | 66.0497845 | 83.2872494 | 69.3767765 | 68.6528503 |
| 16:19:45 | 66.0497845 | 83.2872494 | 69.3767765 | 67.6528503 |
| 16:19:46 | 67.0497845 | 83.2872494 | 68.3767765 | 67.6528503 |
| 16:19:47 | 67.0497845 | 83.2872494 | 68.3767765 | 65.6528503 |
| 16:19:48 | 67.0497845 | 83.2872494 | 69.3767765 | 64.6528503 |
| 16:19:49 | 66.0497845 | 83.2872494 | 69.3767765 | 64.6528503 |
| 16:19:50 | 66.0497845 | 83.2872494 | 69.3767765 | 64.6528503 |
| 16:19:51 | 66.0497845 | 83.2872494 | 71.3767765 | 64.6528503 |
| 16:19:52 | 65.0497845 | 83.2872494 | 71.3767765 | 64.6528503 |
| 16:19:53 | 66.0497845 | 85.2872494 | 72.3767765 | 64.6528503 |
| 16:19:54 | 66.0497845 | 85.2872494 | 73.3767765 | 64.6528503 |
| 16:19:55 | 66.0497845 | 86.2872494 | 74.3767765 | 65.6528503 |
| 16:19:56 | 67.0497845 | 86.2872494 | 74.3767765 | 65.6528503 |
| 16:19:57 | 67.0497845 | 82.2872494 | 74.3767765 | 65.6528503 |
| 16:19:58 | 66.0497845 | 82.2872494 | 74.3767765 | 65.6528503 |
| 16:19:59 | 66.0497845 | 82.2872494 | 72.3767765 | 65.6528503 |
| 16:20:00 | 66.0497845 | 82.2872494 | 72.3767765 | 65.6528503 |
| 16:20:01 | 66.0497845 | 82.2872494 | 72.3767765 | 65.6528503 |
| 16:20:02 | 67.0497845 | 80.2872494 | 72.3767765 | 65.6528503 |
| 16:20:03 | 67.0497845 | 80.2872494 | 72.3767765 | 64.6528503 |
| 16:20:04 | 67.0497845 | 80.2872494 | 74.3767765 | 64.6528503 |
| 16:20:05 | 67.0497845 | 81.2872494 | 74.3767765 | 64.6528503 |
| 16:20:06 | 67.0497845 | 81.2872494 | 76.3767765 | 64.6528503 |
| 16:20:07 | 67.0497845 | 81.2872494 | 77.3767765 | 66.6528503 |
| 16:20:08 | 66.0497845 | 80.2872494 | 81.3767765 | 68.6528503 |
| 16:20:09 | 66.0497845 | 76.2872494 | 81.3767765 | 69.6528503 |
| 16:20:10 | 66.0497845 | 76.2872494 | 81.3767765 | 69.6528503 |
| 16:20:11 | 66.0497845 | 76.2872494 | 89.3767765 | 69.6528503 |
| 16:20:12 | 68.0497845 | 75.2872494 | 89.3767765 | 69.6528503 |

|          |            |            |            |            |
|----------|------------|------------|------------|------------|
| 16:20:13 | 68.0497845 | 76.2872494 | 90.3767765 | 69.6528503 |
| 16:20:14 | 67.0497845 | 76.2872494 | 90.3767765 | 68.6528503 |
| 16:20:15 | 66.0497845 | 77.2872494 | 90.3767765 | 65.6528503 |
| 16:20:16 | 66.0497845 | 77.2872494 | 90.3767765 | 66.6528503 |
| 16:20:17 | 65.0497845 | 81.2872494 | 90.3767765 | 66.6528503 |
| 16:20:18 | 65.0497845 | 82.2872494 | 90.3767765 | 66.6528503 |
| 16:20:19 | 65.0497845 | 83.2872494 | 90.3767765 | 66.6528503 |
| 16:20:20 | 65.0497845 | 83.2872494 | 93.3767765 | 65.6528503 |
| 16:20:21 | 66.0497845 | 83.2872494 | 93.3767765 | 64.6528503 |
| 16:20:22 | 66.0497845 | 83.2872494 | 93.3767765 | 61.6528503 |
| 16:20:23 | 66.0497845 | 83.2872494 | 78.3767765 | 61.6528503 |
| 16:20:24 | 68.0497845 | 83.2872494 | 78.3767765 | 62.6528503 |
| 16:20:25 | 69.0497845 | 85.2872494 | 78.3767765 | 61.6528503 |
| 16:20:26 | 69.0497845 | 84.2872494 | 75.3767765 | 61.6528503 |
| 16:20:27 | 64.0497845 | 84.2872494 | 75.3767765 | 61.6528503 |
| 16:20:28 | 63.0497845 | 84.2872494 | 75.3767765 | 61.6528503 |
| 16:20:29 | 64.0497845 | 84.2872494 | 73.3767765 | 61.6528503 |
| 16:20:30 | 64.0497845 | 83.2872494 | 72.3767765 | 62.6528503 |
| 16:20:31 | 64.0497845 | 83.2872494 | 73.3767765 | 66.6528503 |
| 16:20:32 | 65.0497845 | 83.2872494 | 73.3767765 | 67.6528503 |
| 16:20:33 | 66.0497845 | 83.2872494 | 73.3767765 | 68.6528503 |
| 16:20:34 | 66.0497845 | 83.2872494 | 73.3767765 | 69.6528503 |
| 16:20:35 | 67.0497845 | 83.2872494 | 73.3767765 | 69.6528503 |
| 16:20:36 | 67.0497845 | 83.2872494 | 72.3767765 | 69.6528503 |
| 16:20:37 | 67.0497845 | 83.2872494 | 71.3767765 | 69.6528503 |
| 16:20:38 | 66.0497845 | 83.2872494 | 71.3767765 | 68.6528503 |
| 16:20:39 | 65.0497845 | 83.2872494 | 73.3767765 | 67.6528503 |
| 16:20:40 | 65.0497845 | 83.2872494 | 73.3767765 | 66.6528503 |
| 16:20:41 | 65.0497845 | 84.2872494 | 74.3767765 | 66.6528503 |
| 16:20:42 | 64.0497845 | 84.2872494 | 75.3767765 | 66.6528503 |
| 16:20:43 | 64.0497845 | 84.2872494 | 75.3767765 | 65.6528503 |
| 16:20:44 | 64.0497845 | 83.2872494 | 75.3767765 | 65.6528503 |
| 16:20:45 | 64.0497845 | 84.2872494 | 76.3767765 | 65.6528503 |
| 16:20:46 | 64.0497845 | 85.2872494 | 76.3767765 | 65.6528503 |
| 16:20:47 | 64.0497845 | 86.2872494 | 76.3767765 | 65.6528503 |
| 16:20:48 | 64.0497845 | 86.2872494 | 76.3767765 | 65.6528503 |
| 16:20:49 | 64.0497845 | 87.2872494 | 75.3767765 | 66.6528503 |
| 16:20:50 | 64.0497845 | 87.2872494 | 75.3767765 | 66.6528503 |
| 16:20:51 | 65.0497845 | 71.3356503 | 75.3767765 | 66.6528503 |
| 16:20:52 | 65.0497845 | 72.2106503 | 77.3767765 | 67.6528503 |
| 16:20:53 | 65.0497845 | 88.2872494 | 77.3767765 | 67.6528503 |
| 16:20:54 | 66.0497845 | 88.2872494 | 78.3767765 | 67.6528503 |
| 16:20:55 | 67.0497845 | 88.2872494 | 78.3767765 | 67.6528503 |
| 16:20:56 | 68.0497845 | 88.2872494 | 77.3767765 | 68.6528503 |
| 16:20:57 | 70.0497845 | 87.2872494 | 77.3767765 | 69.6528503 |

|          |            |            |            |            |
|----------|------------|------------|------------|------------|
| 16:20:58 | 70.0497845 | 86.2872494 | 77.3767765 | 69.6528503 |
| 16:20:59 | 70.0497845 | 86.2872494 | 76.3767765 | 69.6528503 |
| 16:21:00 | 70.0497845 | 86.2872494 | 76.3767765 | 69.6528503 |
| 16:21:01 | 72.0497845 | 83.2872494 | 76.3767765 | 71.6528503 |
| 16:21:02 | 73.0497845 | 81.2872494 | 76.3767765 | 71.6528503 |
| 16:21:03 | 74.0497845 | 80.2872494 | 76.3767765 | 71.6528503 |
| 16:21:04 | 77.0497845 | 80.2872494 | 77.3767765 | 71.6528503 |
| 16:21:05 | 80.0497845 | 79.2872494 | 77.3767765 | 71.6528503 |
| 16:21:06 | 81.0497845 | 78.2872494 | 75.3767765 | 71.6528503 |
| 16:21:07 | 81.0497845 | 78.2872494 | 70.3767765 | 69.6528503 |
| 16:21:08 | 81.0497845 | 78.2872494 | 68.3767765 | 69.6528503 |
| 16:21:09 | 74.0497845 | 79.2872494 | 68.3767765 | 69.6528503 |
| 16:21:10 | 71.0497845 | 79.2872494 | 68.3767765 | 69.6528503 |
| 16:21:11 | 69.0497845 | 80.2872494 | 68.3767765 | 68.6528503 |
| 16:21:12 | 67.0497845 | 80.2872494 | 68.3767765 | 68.6528503 |
| 16:21:13 | 65.0497845 | 80.2872494 | 74.3767765 | 68.6528503 |
| 16:21:14 | 65.0497845 | 82.2872494 | 74.3767765 | 68.6528503 |
| 16:21:15 | 63.0497845 | 82.2872494 | 74.3767765 | 68.6528503 |
| 16:21:16 | 63.0497845 | 82.2872494 | 75.3767765 | 69.6528503 |
| 16:21:17 | 63.0497845 | 82.2872494 | 75.3767765 | 69.6528503 |
| 16:21:18 | 63.0497845 | 82.2872494 | 75.3767765 | 69.6528503 |
| 16:21:19 | 63.0497845 | 82.2872494 | 76.3767765 | 69.6528503 |
| 16:21:20 | 63.0497845 | 82.2872494 | 74.3767765 | 69.6528503 |
| 16:21:21 | 63.0497845 | 82.2872494 | 75.3767765 | 70.6528503 |
| 16:21:22 | 63.0497845 | 82.2872494 | 75.3767765 | 70.6528503 |
| 16:21:23 | 62.0497845 | 83.2872494 | 74.3767765 | 71.6528503 |
| 16:21:24 | 62.0497845 | 82.2872494 | 76.3767765 | 74.6528503 |
| 16:21:25 | 62.0497845 | 80.2872494 | 77.3767765 | 74.6528503 |
| 16:21:26 | 64.0497845 | 80.2872494 | 77.3767765 | 76.6528503 |
| 16:21:27 | 65.0497845 | 78.2872494 | 80.3767765 | 75.6528503 |
| 16:21:28 | 67.0497845 | 78.2872494 | 81.3767765 | 75.6528503 |
| 16:21:29 | 69.0497845 | 78.2872494 | 81.3767765 | 75.6528503 |
| 16:21:30 | 71.0497845 | 78.2872494 | 81.3767765 | 75.6528503 |
| 16:21:31 | 73.0497845 | 77.2872494 | 81.3767765 | 75.6528503 |
| 16:21:32 | 74.0497845 | 76.2872494 | 81.3767765 | 76.6528503 |
| 16:21:33 | 74.0497845 | 76.2872494 | 69.3767765 | 76.6528503 |
| 16:21:34 | 74.0497845 | 76.2872494 | 68.3767765 | 76.6528503 |
| 16:21:35 | 74.0497845 | 77.2872494 | 69.3767765 | 76.6528503 |
| 16:21:36 | 74.0497845 | 77.2872494 | 71.3767765 | 76.6528503 |
| 16:21:37 | 75.0497845 | 77.2872494 | 71.3767765 | 76.6528503 |
| 16:21:38 | 75.0497845 | 77.2872494 | 71.3767765 | 74.6528503 |
| 16:21:39 | 82.0497845 | 77.2872494 | 72.3767765 | 74.6528503 |
| 16:21:40 | 85.0497845 | 78.2872494 | 72.3767765 | 74.6528503 |
| 16:21:41 | 84.0497845 | 78.2872494 | 72.3767765 | 74.6528503 |
| 16:21:42 | 84.0497845 | 78.2872494 | 70.3767765 | 74.6528503 |

|          |            |            |            |            |
|----------|------------|------------|------------|------------|
| 16:21:43 | 83.0497845 | 78.2872494 | 69.3767765 | 75.6528503 |
| 16:21:44 | 84.0497845 | 80.2872494 | 69.3767765 | 75.6528503 |
| 16:21:45 | 85.0497845 | 80.2872494 | 71.3767765 | 74.6528503 |
| 16:21:46 | 83.0497845 | 80.2872494 | 72.3767765 | 74.6528503 |
| 16:21:47 | 83.0497845 | 80.2872494 | 72.3767765 | 74.6528503 |
| 16:21:48 | 83.0497845 | 80.2872494 | 73.3767765 | 74.6528503 |
| 16:21:49 | 82.0497845 | 80.2872494 | 73.3767765 | 74.6528503 |
| 16:21:50 | 82.0497845 | 77.2872494 | 73.3767765 | 74.6528503 |
| 16:21:51 | 79.0497845 | 77.2872494 | 72.3767765 | 73.6528503 |
| 16:21:52 | 79.0497845 | 77.2872494 | 72.3767765 | 73.6528503 |
| 16:21:53 | 76.0497845 | 78.2872494 | 72.3767765 | 72.6528503 |
| 16:21:54 | 76.0497845 | 78.2872494 | 72.3767765 | 72.6528503 |
| 16:21:55 | 69.0497845 | 79.2872494 | 72.3767765 | 71.6528503 |
| 16:21:56 | 68.0497845 | 80.2872494 | 72.3767765 | 71.6528503 |
| 16:21:57 | 68.0497845 | 80.2872494 | 72.3767765 | 72.6528503 |
| 16:21:58 | 68.0497845 | 81.2872494 | 74.3767765 | 73.6528503 |
| 16:21:59 | 68.0497845 | 81.2872494 | 74.3767765 | 73.6528503 |
| 16:22:00 | 67.0497845 | 81.2872494 | 74.3767765 | 74.6528503 |
| 16:22:01 | 65.0497845 | 82.2872494 | 74.3767765 | 75.6528503 |
| 16:22:02 | 65.0497845 | 82.2872494 | 74.3767765 | 75.6528503 |
| 16:22:03 | 66.0497845 | 82.2872494 | 74.3767765 | 75.6528503 |
| 16:22:04 | 66.0497845 | 82.2872494 | 74.3767765 | 74.6528503 |
| 16:22:05 | 64.0497845 | 79.2872494 | 74.3767765 | 74.6528503 |
| 16:22:06 | 65.0497845 | 78.2872494 | 74.3767765 | 74.6528503 |
| 16:22:07 | 65.0497845 | 78.2872494 | 74.3767765 | 74.6528503 |
| 16:22:08 | 65.0497845 | 78.2872494 | 74.3767765 | 74.6528503 |
| 16:22:09 | 66.0497845 | 78.2872494 | 74.3767765 | 74.6528503 |
| 16:22:10 | 67.0497845 | 78.2872494 | 74.3767765 | 74.6528503 |
| 16:22:11 | 67.0497845 | 78.2872494 | 75.3767765 | 74.6528503 |
| 16:22:12 | 69.0497845 | 79.2872494 | 77.3767765 | 75.6528503 |
| 16:22:13 | 69.0497845 | 79.2872494 | 73.3356503 | 75.6528503 |
| 16:22:14 | 68.0497845 | 79.2872494 | 74.4606503 | 77.6528503 |
| 16:22:15 | 68.0497845 | 79.2872494 | 74.9606503 | 81.6528503 |
| 16:22:16 | 68.0497845 | 79.2872494 | 75.4606503 | 82.6528503 |
| 16:22:17 | 64.0497845 | 79.2872494 | 75.2106503 | 82.6528503 |
| 16:22:18 | 62.0497845 | 79.2872494 | 75.5856503 | 83.6528503 |
| 16:22:19 | 61.0497845 | 79.2872494 | 75.7106503 | 83.6528503 |
| 16:22:20 | 60.0497845 | 79.2872494 | 75.7106503 | 83.6528503 |
| 16:22:21 | 60.0497845 | 79.2872494 | 75.2106503 | 83.6528503 |
| 16:22:22 | 60.0497845 | 79.2872494 | 75.2106503 | 83.6528503 |
| 16:22:23 | 61.0497845 | 79.2872494 | 72.3767765 | 84.6528503 |
| 16:22:24 | 64.0497845 | 79.2872494 | 65.3767765 | 84.6528503 |
| 16:22:25 | 65.0497845 | 79.2872494 | 62.3767765 | 84.6528503 |
| 16:22:26 | 66.0497845 | 78.2872494 | 60.3767765 | 83.6528503 |
| 16:22:27 | 66.0497845 | 78.2872494 | 60.3767765 | 82.6528503 |



|          |            |            |            |            |
|----------|------------|------------|------------|------------|
| 16:22:28 | 66.0497845 | 78.2872494 | 60.3767765 | 81.6528503 |
| 16:22:29 | 65.0497845 | 78.2872494 | 60.3767765 | 81.6528503 |
| 16:22:30 | 64.0497845 | 78.2872494 | 60.3767765 | 80.6528503 |
| 16:22:31 | 64.0497845 | 76.2872494 | 60.3767765 | 79.6528503 |
| 16:22:32 | 64.0497845 | 72.2872494 | 60.3767765 | 79.6528503 |
| 16:22:33 | 65.0497845 | 72.2872494 | 60.3767765 | 79.6528503 |
| 16:22:34 | 66.0497845 | 72.2872494 | 62.3767765 | 77.6528503 |
| 16:22:35 | 66.0497845 | 72.2872494 | 63.3767765 | 77.6528503 |
| 16:22:36 | 66.0497845 | 71.2872494 | 64.3767765 | 76.6528503 |
| 16:22:37 | 66.0497845 | 71.2872494 | 64.3767765 | 75.6528503 |
| 16:22:38 | 66.0497845 | 72.2872494 | 64.3767765 | 74.6528503 |
| 16:22:39 | 67.0497845 | 72.2872494 | 64.3767765 | 74.6528503 |
| 16:22:40 | 67.0497845 | 72.2872494 | 63.3767765 | 72.6528503 |
| 16:22:41 | 67.0497845 | 72.2872494 | 63.3767765 | 71.6528503 |
| 16:22:42 | 67.0497845 | 80.2872494 | 63.3767765 | 70.6528503 |
| 16:22:43 | 67.0497845 | 80.2872494 | 64.3767765 | 71.6528503 |
| 16:22:44 | 67.0497845 | 80.2872494 | 65.3767765 | 71.6528503 |
| 16:22:45 | 67.0497845 | 81.2872494 | 65.3767765 | 71.6528503 |
| 16:22:46 | 67.0497845 | 83.2872494 | 65.3767765 | 72.6528503 |
| 16:22:47 | 67.0497845 | 85.2872494 | 68.3767765 | 74.6528503 |
| 16:22:48 | 67.0497845 | 85.2872494 | 68.3767765 | 74.6528503 |
| 16:22:49 | 67.0497845 | 86.2872494 | 67.3767765 | 74.6528503 |
| 16:22:50 | 69.0497845 | 87.2872494 | 67.3767765 | 74.6528503 |
| 16:22:51 | 69.0497845 | 88.2872494 | 69.3767765 | 74.6528503 |
| 16:22:52 | 72.0497845 | 89.2872494 | 69.3767765 | 74.6528503 |
| 16:22:53 | 73.0497845 | 90.2872494 | 69.3767765 | 75.6528503 |
| 16:22:54 | 73.0497845 | 92.2872494 | 68.3767765 | 76.6528503 |
| 16:22:55 | 73.0497845 | 76.7106503 | 68.3767765 | 76.6528503 |
| 16:22:56 | 71.0497845 | 77.0856503 | 68.3767765 | 78.6528503 |
| 16:22:57 | 71.0497845 | 94.2872494 | 69.3767765 | 78.6528503 |
| 16:22:58 | 71.0497845 | 94.2872494 | 68.3767765 | 78.6528503 |
| 16:22:59 | 70.0497845 | 93.2872494 | 68.3767765 | 78.6528503 |
| 16:23:00 | 70.0497845 | 93.2872494 | 68.3767765 | 77.6528503 |
| 16:23:01 | 70.0497845 | 93.2872494 | 68.3767765 | 77.6528503 |
| 16:23:02 | 69.0497845 | 91.2872494 | 68.3767765 | 75.6528503 |
| 16:23:03 | 69.0497845 | 90.2872494 | 68.3767765 | 75.6528503 |
| 16:23:04 | 69.0497845 | 89.2872494 | 68.3767765 | 73.6528503 |
| 16:23:05 | 69.0497845 | 86.2872494 | 68.3767765 | 72.6528503 |
| 16:23:06 | 68.0497845 | 78.2872494 | 65.3767765 | 72.6528503 |
| 16:23:07 | 68.0497845 | 75.2872494 | 65.3767765 | 72.6528503 |
| 16:23:08 | 68.0497845 | 75.2872494 | 65.3767765 | 71.6528503 |
| 16:23:09 | 67.0497845 | 75.2872494 | 65.3767765 | 72.6528503 |
| 16:23:10 | 67.0497845 | 75.2872494 | 65.3767765 | 72.6528503 |
| 16:23:11 | 69.0497845 | 75.2872494 | 65.3767765 | 72.6528503 |
| 16:23:12 | 69.0497845 | 75.2872494 | 70.3767765 | 72.6528503 |

|          |            |            |            |            |
|----------|------------|------------|------------|------------|
| 16:23:13 | 71.0497845 | 75.2872494 | 70.3767765 | 71.6528503 |
| 16:23:14 | 71.0497845 | 76.2872494 | 68.3767765 | 71.6528503 |
| 16:23:15 | 71.0497845 | 77.2872494 | 67.3767765 | 71.6528503 |
| 16:23:16 | 71.0497845 | 80.2872494 | 67.3767765 | 71.6528503 |
| 16:23:17 | 72.0497845 | 81.2872494 | 69.3767765 | 71.6528503 |
| 16:23:18 | 72.0497845 | 84.2872494 | 70.3767765 | 71.6528503 |
| 16:23:19 | 75.0497845 | 84.2872494 | 70.3767765 | 71.6528503 |
| 16:23:20 | 76.0497845 | 87.2872494 | 70.3767765 | 71.6528503 |
| 16:23:21 | 76.0497845 | 88.2872494 | 70.3767765 | 71.6528503 |
| 16:23:22 | 78.0497845 | 88.2872494 | 69.3767765 | 73.6528503 |
| 16:23:23 | 79.0497845 | 88.2872494 | 69.3767765 | 74.6528503 |
| 16:23:24 | 79.0497845 | 88.2872494 | 68.3767765 | 74.6528503 |
| 16:23:25 | 81.0497845 | 88.2872494 | 68.3767765 | 74.6528503 |
| 16:23:26 | 81.0497845 | 88.2872494 | 69.3767765 | 73.6528503 |
| 16:23:27 | 81.0497845 | 88.2872494 | 70.3767765 | 73.6528503 |
| 16:23:28 | 81.0497845 | 87.2872494 | 71.3767765 | 73.6528503 |
| 16:23:29 | 81.0497845 | 87.2872494 | 71.3767765 | 73.6528503 |
| 16:23:30 | 81.0497845 | 86.2872494 | 72.3767765 | 72.6528503 |
| 16:23:31 | 82.0497845 | 86.2872494 | 72.3767765 | 72.6528503 |
| 16:23:32 | 83.0497845 | 86.2872494 | 72.3767765 | 72.6528503 |
| 16:23:33 | 83.0497845 | 86.2872494 | 77.3767765 | 72.6528503 |
| 16:23:34 | 89.0497845 | 87.2872494 | 79.3767765 | 72.6528503 |
| 16:23:35 | 92.0497845 | 87.2872494 | 79.3767765 | 72.6528503 |
| 16:23:36 | 93.0497845 | 87.2872494 | 79.3767765 | 65.6528503 |
| 16:23:37 | 93.0497845 | 88.2872494 | 80.3767765 | 67.6528503 |
| 16:23:38 | 93.0497845 | 87.2872494 | 80.3767765 | 63.6528503 |
| 16:23:39 | 93.0497845 | 86.2872494 | 87.3767765 | 63.6528503 |
| 16:23:40 | 94.0497845 | 86.2872494 | 88.3767765 | 63.6528503 |
| 16:23:41 | 94.0497845 | 87.2872494 | 90.3767765 | 65.6528503 |
| 16:23:42 | 94.0497845 | 87.2872494 | 90.3767765 | 65.6528503 |
| 16:23:43 | 89.0497845 | 88.2872494 | 90.3767765 | 66.6528503 |
| 16:23:44 | 89.0497845 | 88.2872494 | 90.3767765 | 67.6528503 |
| 16:23:45 | 88.0497845 | 88.2872494 | 90.3767765 | 68.6528503 |
| 16:23:46 | 83.0497845 | 88.2872494 | 90.3767765 | 68.6528503 |
| 16:23:47 | 83.0497845 | 88.2872494 | 90.3767765 | 68.6528503 |
| 16:23:48 | 76.0497845 | 88.2872494 | 76.4606503 | 68.6528503 |
| 16:23:49 | 72.0497845 | 88.2872494 | 75.7106503 | 68.6528503 |
| 16:23:50 | 73.0497845 | 88.2872494 | 75.7106503 | 68.6528503 |
| 16:23:51 | 73.0497845 | 84.2872494 | 74.8356503 | 65.6528503 |
| 16:23:52 | 74.0497845 | 79.2872494 | 74.5856503 | 65.6528503 |
| 16:23:53 | 73.0497845 | 79.2872494 | 74.2106503 | 65.6528503 |
| 16:23:54 | 70.0497845 | 77.2872494 | 73.5856503 | 66.6528503 |
| 16:23:55 | 68.0497845 | 77.2872494 | 73.5856503 | 66.6528503 |
| 16:23:56 | 68.0497845 | 76.2872494 | 89.3767765 | 67.6528503 |
| 16:23:57 | 65.0497845 | 76.2872494 | 87.3767765 | 67.6528503 |

|          |            |            |            |            |
|----------|------------|------------|------------|------------|
| 16:23:58 | 61.0497845 | 76.2872494 | 86.3767765 | 67.6528503 |
| 16:23:59 | 62.0497845 | 76.2872494 | 86.3767765 | 67.6528503 |
| 16:24:00 | 62.0497845 | 76.2872494 | 86.3767765 | 67.6528503 |
| 16:24:01 | 62.0497845 | 77.2872494 | 86.3767765 | 68.6528503 |
| 16:24:02 | 62.0497845 | 77.2872494 | 85.3767765 | 68.6528503 |
| 16:24:03 | 63.0497845 | 78.2872494 | 81.3767765 | 68.6528503 |
| 16:24:04 | 63.0497845 | 80.2872494 | 81.3767765 | 72.6528503 |
| 16:24:05 | 62.0497845 | 80.2872494 | 81.3767765 | 72.6528503 |
| 16:24:06 | 62.0497845 | 80.2872494 | 81.3767765 | 72.6528503 |
| 16:24:07 | 62.0497845 | 79.2872494 | 81.3767765 | 73.6528503 |
| 16:24:08 | 62.0497845 | 79.2872494 | 77.3767765 | 73.6528503 |
| 16:24:09 | 63.0497845 | 79.2872494 | 79.3767765 | 81.6528503 |
| 16:24:10 | 64.0497845 | 79.2872494 | 79.3767765 | 81.6528503 |
| 16:24:11 | 64.0497845 | 79.2872494 | 81.3767765 | 82.6528503 |
| 16:24:12 | 64.0497845 | 79.2872494 | 82.3767765 | 82.6528503 |
| 16:24:13 | 64.0497845 | 81.2872494 | 81.3767765 | 82.6528503 |
| 16:24:14 | 64.0497845 | 81.2872494 | 79.3767765 | 80.6528503 |
| 16:24:15 | 67.0497845 | 82.2872494 | 79.3767765 | 80.6528503 |
| 16:24:16 | 70.0497845 | 82.2872494 | 75.3767765 | 79.6528503 |
| 16:24:17 | 70.0497845 | 82.2872494 | 73.3767765 | 77.6528503 |
| 16:24:18 | 70.0497845 | 82.2872494 | 72.3767765 | 76.6528503 |
| 16:24:19 | 68.0497845 | 81.2872494 | 69.3767765 | 76.6528503 |
| 16:24:20 | 66.0497845 | 81.2872494 | 69.3767765 | 75.6528503 |
| 16:24:21 | 66.0497845 | 81.2872494 | 69.3767765 | 75.6528503 |
| 16:24:22 | 67.0497845 | 82.2872494 | 66.3767765 | 74.6528503 |
| 16:24:23 | 67.0497845 | 81.2872494 | 64.3767765 | 71.6528503 |
| 16:24:24 | 68.0497845 | 79.2872494 | 62.3767765 | 69.6528503 |
| 16:24:25 | 68.0497845 | 79.2872494 | 62.3767765 | 69.6528503 |
| 16:24:26 | 68.0497845 | 80.2872494 | 62.3767765 | 69.6528503 |
| 16:24:27 | 67.0497845 | 80.2872494 | 62.3767765 | 68.6528503 |
| 16:24:28 | 67.0497845 | 79.2872494 | 62.3767765 | 68.6528503 |
| 16:24:29 | 67.0497845 | 78.2872494 | 63.3767765 | 68.6528503 |
| 16:24:30 | 67.0497845 | 79.2872494 | 63.3767765 | 68.6528503 |
| 16:24:31 | 67.0497845 | 79.2872494 | 62.3767765 | 68.6528503 |
| 16:24:32 | 67.0497845 | 79.2872494 | 58.3767765 | 67.6528503 |
| 16:24:33 | 66.0497845 | 79.2872494 | 57.3767765 | 67.6528503 |
| 16:24:34 | 66.0497845 | 79.2872494 | 58.3767765 | 66.6528503 |
| 16:24:35 | 66.0497845 | 80.2872494 | 59.3767765 | 66.6528503 |
| 16:24:36 | 66.0497845 | 80.2872494 | 59.3767765 | 66.6528503 |
| 16:24:37 | 65.0497845 | 80.2872494 | 61.3767765 | 69.6528503 |
| 16:24:38 | 65.0497845 | 80.2872494 | 63.3767765 | 74.6528503 |
| 16:24:39 | 64.0497845 | 80.2872494 | 62.3767765 | 76.6528503 |
| 16:24:40 | 64.0497845 | 80.2872494 | 62.3767765 | 76.6528503 |
| 16:24:41 | 64.0497845 | 80.2872494 | 62.3767765 | 76.6528503 |
| 16:24:42 | 64.0497845 | 80.2872494 | 62.3767765 | 77.6528503 |

|          |            |            |            |            |
|----------|------------|------------|------------|------------|
| 16:24:43 | 65.0497845 | 80.2872494 | 63.3767765 | 77.6528503 |
| 16:24:44 | 65.0497845 | 79.2872494 | 64.3767765 | 76.6528503 |
| 16:24:45 | 65.0497845 | 78.2872494 | 65.3767765 | 75.6528503 |
| 16:24:46 | 65.0497845 | 79.2872494 | 65.3767765 | 74.6528503 |
| 16:24:47 | 65.0497845 | 80.2872494 | 65.3767765 | 73.6528503 |
| 16:24:48 | 66.0497845 | 80.2872494 | 65.3767765 | 73.6528503 |
| 16:24:49 | 66.0497845 | 80.2872494 | 65.3767765 | 73.6528503 |
| 16:24:50 | 67.0497845 | 79.2872494 | 65.3767765 | 73.6528503 |
| 16:24:51 | 67.0497845 | 79.2872494 | 65.3767765 | 73.6528503 |
| 16:24:52 | 67.0497845 | 79.2872494 | 67.3767765 | 73.6528503 |
| 16:24:53 | 69.0497845 | 79.2872494 | 66.3767765 | 73.6528503 |
| 16:24:54 | 69.0497845 | 78.2872494 | 65.3767765 | 73.6528503 |
| 16:24:55 | 73.0497845 | 78.2872494 | 65.3767765 | 72.6528503 |
| 16:24:56 | 73.0497845 | 76.2872494 | 65.3767765 | 72.6528503 |
| 16:24:57 | 73.0497845 | 75.2872494 | 66.3767765 | 71.6528503 |
| 16:24:58 | 73.0497845 | 75.2872494 | 67.3767765 | 71.6528503 |
| 16:24:59 | 74.0497845 | 74.2872494 | 67.3767765 | 71.6528503 |
| 16:25:00 | 74.0497845 | 73.2872494 | 67.3767765 | 71.6528503 |
| 16:25:01 | 74.0497845 | 73.2872494 | 67.3767765 | 71.6528503 |
| 16:25:02 | 74.0497845 | 68.2872494 | 67.3767765 | 73.6528503 |
| 16:25:03 | 74.0497845 | 68.2872494 | 67.3767765 | 73.6528503 |
| 16:25:04 | 74.0497845 | 68.2872494 | 68.3767765 | 77.6528503 |
| 16:25:05 | 74.0497845 | 68.2872494 | 69.3767765 | 77.6528503 |
| 16:25:06 | 74.0497845 | 68.2872494 | 69.3767765 | 76.6528503 |
| 16:25:07 | 74.0497845 | 68.2872494 | 71.3767765 | 76.6528503 |
| 16:25:08 | 74.0497845 | 68.2872494 | 71.3767765 | 76.6528503 |
| 16:25:09 | 73.0497845 | 69.2872494 | 73.3767765 | 76.6528503 |
| 16:25:10 | 73.0497845 | 69.2872494 | 73.3767765 | 77.6528503 |
| 16:25:11 | 74.0497845 | 69.2872494 | 73.3767765 | 79.6528503 |
| 16:25:12 | 74.0497845 | 70.2872494 | 73.3767765 | 80.6528503 |
| 16:25:13 | 75.0497845 | 71.2872494 | 73.3767765 | 80.6528503 |
| 16:25:14 | 78.0497845 | 71.2872494 | 67.3767765 | 81.6528503 |
| 16:25:15 | 78.0497845 | 71.2872494 | 65.3767765 | 81.6528503 |
| 16:25:16 | 78.0497845 | 74.2872494 | 65.3767765 | 80.6528503 |
| 16:25:17 | 78.0497845 | 74.2872494 | 65.3767765 | 80.6528503 |
| 16:25:18 | 79.0497845 | 73.2872494 | 65.3767765 | 79.6528503 |
| 16:25:19 | 79.0497845 | 73.2872494 | 67.3767765 | 78.6528503 |
| 16:25:20 | 80.0497845 | 73.2872494 | 68.3767765 | 78.6528503 |
| 16:25:21 | 84.0497845 | 76.2872494 | 68.3767765 | 78.6528503 |
| 16:25:22 | 85.0497845 | 76.2872494 | 68.3767765 | 78.6528503 |
| 16:25:23 | 85.0497845 | 76.2872494 | 68.3767765 | 79.6528503 |
| 16:25:24 | 83.0497845 | 76.2872494 | 69.3767765 | 80.6528503 |
| 16:25:25 | 79.0497845 | 76.2872494 | 69.3767765 | 80.6528503 |
| 16:25:26 | 79.0497845 | 77.2872494 | 69.3767765 | 81.6528503 |
| 16:25:27 | 78.0497845 | 79.2872494 | 69.3767765 | 82.6528503 |

|          |            |            |            |            |
|----------|------------|------------|------------|------------|
| 16:25:28 | 77.0497845 | 78.2872494 | 69.3767765 | 81.6528503 |
| 16:25:29 | 74.0497845 | 78.2872494 | 69.3767765 | 81.6528503 |
| 16:25:30 | 74.0497845 | 78.2872494 | 69.3767765 | 79.6528503 |
| 16:25:31 | 73.0497845 | 79.2872494 | 72.3767765 | 76.6528503 |
| 16:25:32 | 69.0497845 | 79.2872494 | 72.3767765 | 76.6528503 |
| 16:25:33 | 68.0497845 | 79.2872494 | 72.3767765 | 74.6528503 |
| 16:25:34 | 68.0497845 | 80.2872494 | 72.3767765 | 73.6528503 |
| 16:25:35 | 67.0497845 | 80.2872494 | 73.3767765 | 73.6528503 |
| 16:25:36 | 67.0497845 | 80.2872494 | 71.3767765 | 74.6528503 |
| 16:25:37 | 67.0497845 | 80.2872494 | 69.3767765 | 75.6528503 |
| 16:25:38 | 67.0497845 | 80.2872494 | 68.3767765 | 75.6528503 |
| 16:25:39 | 67.0497845 | 80.2872494 | 68.3767765 | 75.6528503 |
| 16:25:40 | 68.0497845 | 80.2872494 | 68.3767765 | 75.6528503 |
| 16:25:41 | 68.0497845 | 80.2872494 | 68.3767765 | 75.6528503 |
| 16:25:42 | 68.0497845 | 80.2872494 | 67.3767765 | 75.6528503 |
| 16:25:43 | 73.0497845 | 80.2872494 | 67.3767765 | 75.6528503 |
| 16:25:44 | 76.0497845 | 80.2872494 | 66.3767765 | 75.6528503 |
| 16:25:45 | 74.0497845 | 81.2872494 | 66.3767765 | 75.6528503 |
| 16:25:46 | 73.0497845 | 81.2872494 | 70.3767765 | 75.6528503 |
| 16:25:47 | 73.0497845 | 81.2872494 | 70.3767765 | 75.6528503 |
| 16:25:48 | 73.0497845 | 83.2872494 | 72.3767765 | 76.6528503 |
| 16:25:49 | 73.0497845 | 83.2872494 | 72.3767765 | 76.6528503 |
| 16:25:50 | 73.0497845 | 83.2872494 | 71.3767765 | 76.6528503 |
| 16:25:51 | 75.0497845 | 84.2872494 | 69.3767765 | 77.6528503 |
| 16:25:52 | 75.0497845 | 84.2872494 | 70.3767765 | 83.6528503 |
| 16:25:53 | 76.0497845 | 78.3356503 | 70.3767765 | 83.6528503 |
| 16:25:54 | 76.0497845 | 84.2872494 | 72.3767765 | 83.6528503 |
| 16:25:55 | 75.0497845 | 79.2872494 | 75.3767765 | 84.6528503 |
| 16:25:56 | 74.0497845 | 79.2872494 | 79.3767765 | 84.6528503 |
| 16:25:57 | 73.0497845 | 72.2872494 | 79.3767765 | 84.6528503 |
| 16:25:58 | 71.0497845 | 72.2872494 | 79.3767765 | 84.6528503 |
| 16:25:59 | 71.0497845 | 72.2872494 | 79.3767765 | 85.6528503 |
| 16:26:00 | 70.0497845 | 72.2872494 | 80.3767765 | 86.6528503 |
| 16:26:01 | 70.0497845 | 72.2872494 | 85.3767765 | 86.6528503 |
| 16:26:02 | 70.0497845 | 72.2872494 | 89.3767765 | 86.6528503 |
| 16:26:03 | 71.0497845 | 71.2872494 | 89.3767765 | 87.6528503 |
| 16:26:04 | 71.0497845 | 71.2872494 | 91.3767765 | 88.6528503 |
| 16:26:05 | 70.0497845 | 71.2872494 | 92.3767765 | 89.6528503 |
| 16:26:06 | 68.0497845 | 70.2872494 | 76.9606503 | 89.6528503 |
| 16:26:07 | 68.0497845 | 70.2872494 | 76.9606503 | 89.6528503 |
| 16:26:08 | 65.0497845 | 75.2872494 | 77.2106503 | 88.6528503 |
| 16:26:09 | 65.0497845 | 75.2872494 | 77.2106503 | 86.6528503 |
| 16:26:10 | 68.0497845 | 79.2872494 | 78.3356503 | 86.6528503 |
| 16:26:11 | 68.0497845 | 80.2872494 | 78.0856503 | 85.6528503 |
| 16:26:12 | 73.0497845 | 82.2872494 | 77.4606503 | 85.6528503 |

|          |            |            |            |            |
|----------|------------|------------|------------|------------|
| 16:26:13 | 76.0497845 | 83.2872494 | 78.4606503 | 85.6528503 |
| 16:26:14 | 76.0497845 | 83.2872494 | 78.2106503 | 85.6528503 |
| 16:26:15 | 76.0497845 | 83.2872494 | 88.3767765 | 85.6528503 |
| 16:26:16 | 74.0497845 | 84.2872494 | 88.3767765 | 85.6528503 |
| 16:26:17 | 72.0497845 | 85.2872494 | 84.3767765 | 85.6528503 |
| 16:26:18 | 71.0497845 | 85.2872494 | 79.3767765 | 85.6528503 |
| 16:26:19 | 71.0497845 | 85.2872494 | 76.3767765 | 85.6528503 |
| 16:26:20 | 71.0497845 | 84.2872494 | 76.3767765 | 85.6528503 |
| 16:26:21 | 71.0497845 | 84.2872494 | 74.3767765 | 81.6528503 |
| 16:26:22 | 71.0497845 | 84.2872494 | 71.3767765 | 76.6528503 |
| 16:26:23 | 71.0497845 | 84.2872494 | 71.3767765 | 71.6528503 |
| 16:26:24 | 71.0497845 | 84.2872494 | 71.3767765 | 71.6528503 |
| 16:26:25 | 71.0497845 | 84.2872494 | 71.3767765 | 67.6528503 |
| 16:26:26 | 71.0497845 | 85.2872494 | 70.3767765 | 68.6528503 |
| 16:26:27 | 71.0497845 | 85.2872494 | 70.3767765 | 69.6528503 |
| 16:26:28 | 71.0497845 | 85.2872494 | 68.3767765 | 71.6528503 |
| 16:26:29 | 72.0497845 | 85.2872494 | 67.3767765 | 72.6528503 |
| 16:26:30 | 72.0497845 | 86.2872494 | 67.3767765 | 73.6528503 |
| 16:26:31 | 77.0497845 | 86.2872494 | 68.3767765 | 73.6528503 |
| 16:26:32 | 76.0497845 | 86.2872494 | 68.3767765 | 74.6528503 |
| 16:26:33 | 76.0497845 | 86.2872494 | 68.3767765 | 74.6528503 |
| 16:26:34 | 71.0497845 | 86.2872494 | 68.3767765 | 74.6528503 |
| 16:26:35 | 71.0497845 | 86.2872494 | 67.3767765 | 77.6528503 |
| 16:26:36 | 71.0497845 | 85.2872494 | 67.3767765 | 77.6528503 |
| 16:26:37 | 71.0497845 | 85.2872494 | 70.3767765 | 78.6528503 |
| 16:26:38 | 71.0497845 | 85.2872494 | 70.3767765 | 78.6528503 |
| 16:26:39 | 71.0497845 | 85.2872494 | 70.3767765 | 75.6528503 |
| 16:26:40 | 69.0497845 | 87.2872494 | 70.3767765 | 73.6528503 |
| 16:26:41 | 68.0497845 | 87.2872494 | 71.3767765 | 73.6528503 |
| 16:26:42 | 67.0497845 | 88.2872494 | 71.3767765 | 73.6528503 |
| 16:26:43 | 67.0497845 | 88.2872494 | 71.3767765 | 73.6528503 |
| 16:26:44 | 67.0497845 | 88.2872494 | 72.3767765 | 73.6528503 |
| 16:26:45 | 69.0497845 | 88.2872494 | 72.3767765 | 73.6528503 |
| 16:26:46 | 69.0497845 | 90.2872494 | 75.3767765 | 74.6528503 |
| 16:26:47 | 69.0497845 | 90.2872494 | 75.3767765 | 74.6528503 |
| 16:26:48 | 69.0497845 | 90.2872494 | 76.3767765 | 74.6528503 |
| 16:26:49 | 67.0497845 | 82.2872494 | 77.3767765 | 76.6528503 |
| 16:26:50 | 67.0497845 | 82.2872494 | 88.3767765 | 76.6528503 |
| 16:26:51 | 66.0497845 | 76.2872494 | 88.3767765 | 76.6528503 |
| 16:26:52 | 66.0497845 | 76.2872494 | 88.3767765 | 76.6528503 |
| 16:26:53 | 66.0497845 | 76.2872494 | 88.3767765 | 77.6528503 |
| 16:26:54 | 66.0497845 | 76.2872494 | 88.3767765 | 78.6528503 |
| 16:26:55 | 67.0497845 | 75.2872494 | 89.3767765 | 78.6528503 |
| 16:26:56 | 67.0497845 | 74.2872494 | 90.3767765 | 77.6528503 |
| 16:26:57 | 67.0497845 | 74.2872494 | 92.3767765 | 77.6528503 |

|          |            |            |            |            |
|----------|------------|------------|------------|------------|
| 16:26:58 | 68.0497845 | 74.2872494 | 92.3767765 | 76.6528503 |
| 16:26:59 | 68.0497845 | 72.2872494 | 92.3767765 | 77.6528503 |
| 16:27:00 | 68.0497845 | 72.2872494 | 77.9606503 | 78.6528503 |
| 16:27:01 | 68.0497845 | 71.2872494 | 90.3767765 | 78.6528503 |
| 16:27:02 | 68.0497845 | 70.2872494 | 86.3767765 | 78.6528503 |
| 16:27:03 | 68.0497845 | 76.2872494 | 86.3767765 | 78.6528503 |
| 16:27:04 | 69.0497845 | 76.2872494 | 86.3767765 | 77.6528503 |
| 16:27:05 | 70.0497845 | 77.2872494 | 86.3767765 | 76.6528503 |
| 16:27:06 | 68.0497845 | 79.2872494 | 85.3767765 | 74.6528503 |
| 16:27:07 | 67.0497845 | 79.2872494 | 85.3767765 | 74.6528503 |
| 16:27:08 | 66.0497845 | 79.2872494 | 77.3767765 | 73.6528503 |
| 16:27:09 | 66.0497845 | 78.2872494 | 77.3767765 | 73.6528503 |
| 16:27:10 | 65.0497845 | 78.2872494 | 74.3767765 | 73.6528503 |
| 16:27:11 | 66.0497845 | 78.2872494 | 74.3767765 | 73.6528503 |
| 16:27:12 | 66.0497845 | 78.2872494 | 70.3767765 | 73.6528503 |
| 16:27:13 | 67.0497845 | 78.2872494 | 68.3767765 | 73.6528503 |
| 16:27:14 | 68.0497845 | 79.2872494 | 68.3767765 | 74.6528503 |
| 16:27:15 | 68.0497845 | 79.2872494 | 68.3767765 | 73.6528503 |
| 16:27:16 | 68.0497845 | 80.2872494 | 68.3767765 | 73.6528503 |
| 16:27:17 | 68.0497845 | 80.2872494 | 68.3767765 | 73.6528503 |
| 16:27:18 | 68.0497845 | 80.2872494 | 68.3767765 | 73.6528503 |
| 16:27:19 | 68.0497845 | 81.2872494 | 68.3767765 | 73.6528503 |
| 16:27:20 | 68.0497845 | 81.2872494 | 68.3767765 | 73.6528503 |
| 16:27:21 | 68.0497845 | 81.2872494 | 68.3767765 | 73.6528503 |
| 16:27:22 | 67.0497845 | 81.2872494 | 68.3767765 | 75.6528503 |
| 16:27:23 | 67.0497845 | 79.2872494 | 68.3767765 | 75.6528503 |
| 16:27:24 | 67.0497845 | 79.2872494 | 68.3767765 | 75.6528503 |
| 16:27:25 | 67.0497845 | 79.2872494 | 68.3767765 | 74.6528503 |
| 16:27:26 | 67.0497845 | 78.2872494 | 71.3767765 | 73.6528503 |
| 16:27:27 | 67.0497845 | 78.2872494 | 71.3767765 | 73.6528503 |
| 16:27:28 | 67.0497845 | 79.2872494 | 71.3767765 | 72.6528503 |
| 16:27:29 | 67.0497845 | 73.2872494 | 71.3767765 | 73.6528503 |
| 16:27:30 | 68.0497845 | 73.2872494 | 70.3767765 | 73.6528503 |
| 16:27:31 | 68.0497845 | 71.2872494 | 70.3767765 | 73.6528503 |
| 16:27:32 | 68.0497845 | 74.2872494 | 70.3767765 | 74.6528503 |
| 16:27:33 | 69.0497845 | 74.2872494 | 69.3767765 | 74.6528503 |
| 16:27:34 | 71.0497845 | 78.2872494 | 69.3767765 | 74.6528503 |
| 16:27:35 | 71.0497845 | 79.2872494 | 67.3767765 | 74.6528503 |
| 16:27:36 | 71.0497845 | 79.2872494 | 66.3767765 | 74.6528503 |
| 16:27:37 | 73.0497845 | 79.2872494 | 66.3767765 | 74.6528503 |
| 16:27:38 | 76.0497845 | 79.2872494 | 66.3767765 | 75.6528503 |
| 16:27:39 | 76.0497845 | 79.2872494 | 66.3767765 | 75.6528503 |
| 16:27:40 | 78.0497845 | 79.2872494 | 66.3767765 | 75.6528503 |
| 16:27:41 | 79.0497845 | 79.2872494 | 66.3767765 | 75.6528503 |
| 16:27:42 | 80.0497845 | 79.2872494 | 66.3767765 | 76.6528503 |

|          |            |            |            |            |
|----------|------------|------------|------------|------------|
| 16:27:43 | 80.0497845 | 79.2872494 | 67.3767765 | 76.6528503 |
| 16:27:44 | 79.0497845 | 81.2872494 | 67.3767765 | 76.6528503 |
| 16:27:45 | 79.0497845 | 82.2872494 | 67.3767765 | 76.6528503 |
| 16:27:46 | 78.0497845 | 84.2872494 | 67.3767765 | 76.6528503 |
| 16:27:47 | 78.0497845 | 86.2872494 | 67.3767765 | 76.6528503 |
| 16:27:48 | 88.0497845 | 86.2872494 | 67.3767765 | 76.6528503 |
| 16:27:49 | 88.0497845 | 86.2872494 | 67.3767765 | 76.6528503 |
| 16:27:50 | 88.0497845 | 86.2872494 | 68.3767765 | 76.6528503 |
| 16:27:51 | 88.0497845 | 86.2872494 | 68.3767765 | 79.6528503 |
| 16:27:52 | 88.0497845 | 87.2872494 | 68.3767765 | 79.6528503 |
| 16:27:53 | 88.0497845 | 86.2872494 | 68.3767765 | 80.6528503 |
| 16:27:54 | 88.0497845 | 86.2872494 | 68.3767765 | 80.6528503 |
| 16:27:55 | 80.0497845 | 86.2872494 | 67.3767765 | 80.6528503 |
| 16:27:56 | 80.0497845 | 85.2872494 | 67.3767765 | 80.6528503 |
| 16:27:57 | 81.0497845 | 86.2872494 | 67.3767765 | 80.6528503 |
| 16:27:58 | 80.0497845 | 86.2872494 | 67.3767765 | 80.6528503 |
| 16:27:59 | 80.0497845 | 85.2872494 | 68.3767765 | 79.6528503 |
| 16:28:00 | 81.0497845 | 83.2872494 | 69.3767765 | 75.6528503 |
| 16:28:01 | 82.0497845 | 83.2872494 | 69.3767765 | 74.6528503 |
| 16:28:02 | 82.0497845 | 82.2872494 | 69.3767765 | 73.6528503 |
| 16:28:03 | 82.0497845 | 81.2872494 | 69.3767765 | 73.6528503 |
| 16:28:04 | 82.0497845 | 80.2872494 | 70.3767765 | 73.6528503 |
| 16:28:05 | 80.0497845 | 80.2872494 | 70.3767765 | 74.6528503 |
| 16:28:06 | 76.0497845 | 81.2872494 | 71.3767765 | 74.6528503 |
| 16:28:07 | 73.0497845 | 81.2872494 | 71.3767765 | 74.6528503 |
| 16:28:08 | 73.0497845 | 81.2872494 | 72.3767765 | 76.6528503 |
| 16:28:09 | 71.0497845 | 81.2872494 | 72.3767765 | 76.6528503 |
| 16:28:10 | 71.0497845 | 81.2872494 | 72.3767765 | 77.6528503 |
| 16:28:11 | 71.0497845 | 81.2872494 | 73.3767765 | 77.6528503 |
| 16:28:12 | 71.0497845 | 81.2872494 | 73.3767765 | 76.6528503 |
| 16:28:13 | 71.0497845 | 80.2872494 | 73.3767765 | 75.6528503 |
| 16:28:14 | 74.0497845 | 79.2872494 | 73.3767765 | 74.6528503 |
| 16:28:15 | 74.0497845 | 79.2872494 | 73.3767765 | 74.6528503 |
| 16:28:16 | 74.0497845 | 78.2872494 | 82.3767765 | 73.6528503 |
| 16:28:17 | 74.0497845 | 77.2872494 | 83.3767765 | 72.6528503 |
| 16:28:18 | 74.0497845 | 76.2872494 | 84.3767765 | 72.6528503 |
| 16:28:19 | 74.0497845 | 76.2872494 | 84.3767765 | 72.6528503 |
| 16:28:20 | 73.0497845 | 76.2872494 | 85.3767765 | 72.6528503 |
| 16:28:21 | 73.0497845 | 75.2872494 | 85.3767765 | 72.6528503 |
| 16:28:22 | 73.0497845 | 75.2872494 | 80.3767765 | 70.6528503 |
| 16:28:23 | 73.0497845 | 73.2872494 | 79.3767765 | 68.6528503 |
| 16:28:24 | 73.0497845 | 73.2872494 | 79.3767765 | 67.6528503 |
| 16:28:25 | 73.0497845 | 72.2872494 | 77.3767765 | 67.6528503 |
| 16:28:26 | 73.0497845 | 72.2872494 | 75.3767765 | 66.6528503 |
| 16:28:27 | 73.0497845 | 69.2872494 | 69.3767765 | 66.6528503 |



|          |            |            |            |            |
|----------|------------|------------|------------|------------|
| 16:28:28 | 74.0497845 | 69.2872494 | 67.3767765 | 64.6528503 |
| 16:28:29 | 74.0497845 | 69.2872494 | 67.3767765 | 61.6528503 |
| 16:28:30 | 74.0497845 | 67.2872494 | 67.3767765 | 61.6528503 |
| 16:28:31 | 72.0497845 | 69.2872494 | 67.3767765 | 59.6528503 |
| 16:28:32 | 71.0497845 | 70.2872494 | 67.3767765 | 58.6528503 |
| 16:28:33 | 71.0497845 | 70.2872494 | 67.3767765 | 58.6528503 |
| 16:28:34 | 70.0497845 | 70.2872494 | 69.3767765 | 58.6528503 |
| 16:28:35 | 69.0497845 | 70.2872494 | 69.3767765 | 57.6528503 |
| 16:28:36 | 69.0497845 | 70.2872494 | 69.3767765 | 56.6528503 |
| 16:28:37 | 69.0497845 | 70.2872494 | 68.3767765 | 56.6528503 |
| 16:28:38 | 69.0497845 | 70.2872494 | 67.3767765 | 57.6528503 |
| 16:28:39 | 69.0497845 | 71.2872494 | 67.3767765 | 57.6528503 |
| 16:28:40 | 69.0497845 | 73.2872494 | 67.3767765 | 58.6528503 |
| 16:28:41 | 69.0497845 | 73.2872494 | 67.3767765 | 56.6528503 |
| 16:28:42 | 71.0497845 | 74.2872494 | 67.3767765 | 52.6528503 |
| 16:28:43 | 71.0497845 | 80.2872494 | 67.3767765 | 52.6528503 |
| 16:28:44 | 71.0497845 | 83.2872494 | 67.3767765 | 52.6528503 |
| 16:28:45 | 71.0497845 | 83.2872494 | 67.3767765 | 52.6528503 |
| 16:28:46 | 71.0497845 | 83.2872494 | 68.3767765 | 50.6528503 |
| 16:28:47 | 72.0497845 | 83.2872494 | 67.3767765 | 50.6528503 |
| 16:28:48 | 70.0497845 | 83.2872494 | 67.3767765 | 49.6528503 |
| 16:28:49 | 71.0497845 | 84.2872494 | 67.3767765 | 49.6528503 |
| 16:28:50 | 72.0497845 | 84.2872494 | 67.3767765 | 48.6528503 |
| 16:28:51 | 72.0497845 | 83.2872494 | 68.3767765 | 48.6528503 |
| 16:28:52 | 73.0497845 | 83.2872494 | 68.3767765 | 48.6528503 |
| 16:28:53 | 73.0497845 | 83.2872494 | 68.3767765 | 47.6528503 |
| 16:28:54 | 73.0497845 | 80.2872494 | 68.3767765 | 47.6528503 |
| 16:28:55 | 73.0497845 | 80.2872494 | 68.3767765 | 46.6528503 |
| 16:28:56 | 73.0497845 | 80.2872494 | 68.3767765 | 48.6528503 |
| 16:28:57 | 73.0497845 | 80.2872494 | 68.3767765 | 48.6528503 |
| 16:28:58 | 73.0497845 | 80.2872494 | 68.3767765 | 65.6528503 |
| 16:28:59 | 73.0497845 | 81.2872494 | 68.3767765 | 65.6528503 |
| 16:29:00 | 72.0497845 | 81.2872494 | 68.3767765 | 65.6528503 |
| 16:29:01 | 72.0497845 | 81.2872494 | 75.3767765 | 66.6528503 |
| 16:29:02 | 72.0497845 | 81.2872494 | 75.3767765 | 66.6528503 |
| 16:29:03 | 72.0497845 | 81.2872494 | 75.3767765 | 66.6528503 |
| 16:29:04 | 72.0497845 | 82.2872494 | 70.3767765 | 67.6528503 |
| 16:29:05 | 72.0497845 | 82.2872494 | 67.3767765 | 67.6528503 |
| 16:29:06 | 72.0497845 | 82.2872494 | 67.3767765 | 67.6528503 |
| 16:29:07 | 73.0497845 | 83.2872494 | 67.3767765 | 70.6528503 |
| 16:29:08 | 72.0497845 | 83.2872494 | 67.3767765 | 70.6528503 |
| 16:29:09 | 72.0497845 | 84.2872494 | 71.3767765 | 70.6528503 |
| 16:29:10 | 72.0497845 | 84.2872494 | 72.3767765 | 70.6528503 |
| 16:29:11 | 72.0497845 | 84.2872494 | 73.3767765 | 70.6528503 |
| 16:29:12 | 71.0497845 | 82.2872494 | 73.3767765 | 70.6528503 |

|          |            |            |            |            |
|----------|------------|------------|------------|------------|
| 16:29:13 | 70.0497845 | 79.2872494 | 72.3767765 | 70.6528503 |
| 16:29:14 | 69.0497845 | 79.2872494 | 72.3767765 | 70.6528503 |
| 16:29:15 | 69.0497845 | 80.2872494 | 72.3767765 | 70.6528503 |
| 16:29:16 | 69.0497845 | 80.2872494 | 69.3767765 | 70.6528503 |
| 16:29:17 | 68.0497845 | 81.2872494 | 69.3767765 | 69.6528503 |
| 16:29:18 | 68.0497845 | 82.2872494 | 71.3767765 | 69.6528503 |
| 16:29:19 | 67.0497845 | 82.2872494 | 71.3767765 | 69.6528503 |
| 16:29:20 | 67.0497845 | 83.2872494 | 73.3767765 | 68.6528503 |
| 16:29:21 | 68.0497845 | 84.2872494 | 73.3767765 | 68.6528503 |
| 16:29:22 | 69.0497845 | 84.2872494 | 73.3767765 | 69.6528503 |
| 16:29:23 | 71.0497845 | 84.2872494 | 73.3767765 | 69.6528503 |
| 16:29:24 | 71.0497845 | 83.2872494 | 72.3767765 | 69.6528503 |
| 16:29:25 | 71.0497845 | 79.2872494 | 72.3767765 | 69.6528503 |
| 16:29:26 | 72.0497845 | 76.2872494 | 72.3767765 | 69.6528503 |
| 16:29:27 | 74.0497845 | 76.2872494 | 73.3767765 | 70.6528503 |
| 16:29:28 | 76.0497845 | 76.2872494 | 73.3767765 | 70.6528503 |
| 16:29:29 | 72.0497845 | 76.2872494 | 73.3767765 | 73.6528503 |
| 16:29:30 | 71.0497845 | 76.2872494 | 73.3767765 | 73.6528503 |
| 16:29:31 | 71.0497845 | 76.2872494 | 73.3767765 | 73.6528503 |
| 16:29:32 | 70.0497845 | 76.2872494 | 73.3767765 | 73.6528503 |
| 16:29:33 | 69.0497845 | 76.2872494 | 73.3767765 | 74.6528503 |
| 16:29:34 | 69.0497845 | 76.2872494 | 68.3767765 | 74.6528503 |
| 16:29:35 | 68.0497845 | 77.2872494 | 68.3767765 | 74.6528503 |
| 16:29:36 | 68.0497845 | 77.2872494 | 67.3767765 | 74.6528503 |
| 16:29:37 | 67.0497845 | 77.2872494 | 68.3767765 | 74.6528503 |
| 16:29:38 | 67.0497845 | 77.2872494 | 68.3767765 | 69.6528503 |
| 16:29:39 | 66.0497845 | 76.2872494 | 68.3767765 | 69.6528503 |
| 16:29:40 | 66.0497845 | 76.2872494 | 68.3767765 | 69.6528503 |
| 16:29:41 | 66.0497845 | 75.2872494 | 68.3767765 | 69.6528503 |
| 16:29:42 | 66.0497845 | 76.2872494 | 68.3767765 | 69.6528503 |
| 16:29:43 | 66.0497845 | 76.2872494 | 69.3767765 | 70.6528503 |
| 16:29:44 | 66.0497845 | 75.2872494 | 69.3767765 | 71.6528503 |
| 16:29:45 | 70.0497845 | 75.2872494 | 69.3767765 | 72.6528503 |
| 16:29:46 | 74.0497845 | 75.2872494 | 69.3767765 | 71.6528503 |
| 16:29:47 | 75.0497845 | 74.2872494 | 70.3767765 | 71.6528503 |
| 16:29:48 | 75.0497845 | 74.2872494 | 69.3767765 | 70.6528503 |
| 16:29:49 | 74.0497845 | 74.2872494 | 69.3767765 | 68.6528503 |
| 16:29:50 | 72.0497845 | 75.2872494 | 71.3767765 | 66.6528503 |
| 16:29:51 | 72.0497845 | 75.2872494 | 76.3767765 | 66.6528503 |
| 16:29:52 | 69.0497845 | 75.2872494 | 76.3767765 | 66.6528503 |
| 16:29:53 | 69.0497845 | 75.2872494 | 81.3767765 | 66.6528503 |
| 16:29:54 | 69.0497845 | 75.2872494 | 83.3767765 | 66.6528503 |
| 16:29:55 | 69.0497845 | 75.2872494 | 83.3767765 | 66.6528503 |
| 16:29:56 | 69.0497845 | 75.2872494 | 83.3767765 | 66.6528503 |
| 16:29:57 | 71.0497845 | 74.2872494 | 83.3767765 | 66.6528503 |

|          |            |            |            |            |
|----------|------------|------------|------------|------------|
| 16:29:58 | 74.0497845 | 74.2872494 | 81.3767765 | 67.6528503 |
| 16:29:59 | 77.0497845 | 74.2872494 | 75.3767765 | 67.6528503 |
| 16:30:00 | 77.0497845 | 72.2872494 | 75.3767765 | 67.6528503 |
| 16:30:01 | 79.0497845 | 69.2872494 | 72.3767765 | 69.6528503 |
| 16:30:02 | 71.0497845 | 69.2872494 | 73.3767765 | 71.6528503 |
| 16:30:03 | 71.0497845 | 68.2872494 | 73.3767765 | 75.6528503 |
| 16:30:04 | 66.0497845 | 66.2872494 | 72.3767765 | 77.6528503 |
| 16:30:05 | 65.0497845 | 66.2872494 | 71.3767765 | 77.6528503 |
| 16:30:06 | 65.0497845 | 66.2872494 | 71.3767765 | 78.6528503 |
| 16:30:07 | 66.0497845 | 64.2872494 | 71.3767765 | 78.6528503 |
| 16:30:08 | 68.0497845 | 64.2872494 | 72.3767765 | 78.6528503 |
| 16:30:09 | 71.0497845 | 66.2872494 | 72.3767765 | 79.6528503 |
| 16:30:10 | 71.0497845 | 66.2872494 | 74.3767765 | 79.6528503 |
| 16:30:11 | 71.0497845 | 70.2872494 | 77.3767765 | 79.6528503 |
| 16:30:12 | 71.0497845 | 72.2872494 | 77.3767765 | 79.6528503 |
| 16:30:13 | 72.0497845 | 74.2872494 | 80.3767765 | 80.6528503 |
| 16:30:14 | 73.0497845 | 75.2872494 | 80.3767765 | 81.6528503 |
| 16:30:15 | 73.0497845 | 75.2872494 | 84.3767765 | 81.6528503 |
| 16:30:16 | 74.0497845 | 75.2872494 | 86.3767765 | 81.6528503 |
| 16:30:17 | 75.0497845 | 75.2872494 | 86.3767765 | 81.6528503 |
| 16:30:18 | 75.0497845 | 75.2872494 | 84.3767765 | 79.6528503 |
| 16:30:19 | 75.0497845 | 75.2872494 | 84.3767765 | 77.6528503 |
| 16:30:20 | 76.0497845 | 75.2872494 | 84.3767765 | 77.6528503 |
| 16:30:21 | 74.0497845 | 75.2872494 | 92.3767765 | 77.6528503 |
| 16:30:22 | 72.0497845 | 76.2872494 | 92.3767765 | 77.6528503 |
| 16:30:23 | 71.0497845 | 76.2872494 | 79.7106503 | 77.6528503 |
| 16:30:24 | 70.0497845 | 76.2872494 | 79.8356503 | 77.6528503 |
| 16:30:25 | 70.0497845 | 77.2872494 | 89.3767765 | 76.6528503 |
| 16:30:26 | 69.0497845 | 78.2872494 | 86.3767765 | 77.6528503 |
| 16:30:27 | 67.0497845 | 78.2872494 | 82.3767765 | 77.6528503 |
| 16:30:28 | 67.0497845 | 78.2872494 | 82.3767765 | 77.6528503 |
| 16:30:29 | 67.0497845 | 79.2872494 | 77.3767765 | 77.6528503 |
| 16:30:30 | 67.0497845 | 84.2872494 | 76.3767765 | 77.6528503 |
| 16:30:31 | 71.0497845 | 85.2872494 | 76.3767765 | 76.6528503 |
| 16:30:32 | 72.0497845 | 84.2872494 | 76.3767765 | 76.6528503 |
| 16:30:33 | 72.0497845 | 85.2872494 | 76.3767765 | 76.6528503 |
| 16:30:34 | 72.0497845 | 85.2872494 | 76.3767765 | 76.6528503 |
| 16:30:35 | 72.0497845 | 85.2872494 | 76.3767765 | 76.6528503 |
| 16:30:36 | 69.0497845 | 88.2872494 | 77.3767765 | 76.6528503 |
| 16:30:37 | 70.0497845 | 88.2872494 | 79.3767765 | 76.6528503 |
| 16:30:38 | 70.0497845 | 88.2872494 | 80.3767765 | 76.6528503 |
| 16:30:39 | 72.0497845 | 88.2872494 | 84.3767765 | 76.6528503 |
| 16:30:40 | 73.0497845 | 85.2872494 | 84.3767765 | 76.6528503 |
| 16:30:41 | 74.0497845 | 85.2872494 | 83.3767765 | 76.6528503 |
| 16:30:42 | 74.0497845 | 85.2872494 | 82.3767765 | 76.6528503 |

|          |            |            |            |            |
|----------|------------|------------|------------|------------|
| 16:30:43 | 74.0497845 | 84.2872494 | 79.3767765 | 71.6528503 |
| 16:30:44 | 74.0497845 | 83.2872494 | 79.3767765 | 71.6528503 |
| 16:30:45 | 74.0497845 | 83.2872494 | 78.3767765 | 71.6528503 |
| 16:30:46 | 75.0497845 | 83.2872494 | 78.3767765 | 74.6528503 |
| 16:30:47 | 75.0497845 | 81.2872494 | 79.3767765 | 76.6528503 |
| 16:30:48 | 75.0497845 | 80.2872494 | 80.3767765 | 76.6528503 |
| 16:30:49 | 78.0497845 | 80.2872494 | 80.3767765 | 76.6528503 |
| 16:30:50 | 78.0497845 | 79.2872494 | 78.3767765 | 77.6528503 |
| 16:30:51 | 78.0497845 | 79.2872494 | 78.3767765 | 76.6528503 |
| 16:30:52 | 78.0497845 | 79.2872494 | 77.3767765 | 76.6528503 |
| 16:30:53 | 79.0497845 | 79.2872494 | 75.3767765 | 72.6528503 |
| 16:30:54 | 79.0497845 | 79.2872494 | 75.3767765 | 72.6528503 |
| 16:30:55 | 79.0497845 | 79.2872494 | 75.3767765 | 69.6528503 |
| 16:30:56 | 79.0497845 | 81.2872494 | 74.3767765 | 67.6528503 |
| 16:30:57 | 79.0497845 | 82.2872494 | 74.3767765 | 68.6528503 |
| 16:30:58 | 79.0497845 | 82.2872494 | 75.3767765 | 68.6528503 |
| 16:30:59 | 80.0497845 | 84.2872494 | 76.3767765 | 68.6528503 |
| 16:31:00 | 80.0497845 | 84.2872494 | 75.3767765 | 69.6528503 |
| 16:31:01 | 80.0497845 | 83.2872494 | 75.3767765 | 69.6528503 |
| 16:31:02 | 80.0497845 | 83.2872494 | 75.3767765 | 68.6528503 |
| 16:31:03 | 80.0497845 | 83.2872494 | 75.3767765 | 68.6528503 |
| 16:31:04 | 79.0497845 | 83.2872494 | 75.3767765 | 68.6528503 |
| 16:31:05 | 79.0497845 | 82.2872494 | 76.3767765 | 69.6528503 |
| 16:31:06 | 79.0497845 | 82.2872494 | 76.3767765 | 69.6528503 |
| 16:31:07 | 79.0497845 | 81.2872494 | 75.3767765 | 69.6528503 |
| 16:31:08 | 79.0497845 | 81.2872494 | 73.3767765 | 72.6528503 |
| 16:31:09 | 79.0497845 | 79.2872494 | 73.3767765 | 71.6528503 |
| 16:31:10 | 79.0497845 | 79.2872494 | 72.3767765 | 70.6528503 |
| 16:31:11 | 79.0497845 | 76.2872494 | 66.3767765 | 70.6528503 |
| 16:31:12 | 79.0497845 | 74.2872494 | 64.3767765 | 69.6528503 |
| 16:31:13 | 80.0497845 | 73.2872494 | 63.3767765 | 69.6528503 |
| 16:31:14 | 79.0497845 | 73.2872494 | 63.3767765 | 68.6528503 |
| 16:31:15 | 79.0497845 | 74.2872494 | 63.3767765 | 67.6528503 |
| 16:31:16 | 79.0497845 | 74.2872494 | 67.3767765 | 66.6528503 |
| 16:31:17 | 79.0497845 | 73.2872494 | 67.3767765 | 65.6528503 |
| 16:31:18 | 79.0497845 | 73.2872494 | 67.3767765 | 64.6528503 |
| 16:31:19 | 79.0497845 | 74.2872494 | 67.3767765 | 64.6528503 |
| 16:31:20 | 79.0497845 | 74.2872494 | 67.3767765 | 64.6528503 |
| 16:31:21 | 81.0497845 | 74.2872494 | 67.3767765 | 63.6528503 |
| 16:31:22 | 82.0497845 | 74.2872494 | 67.3767765 | 63.6528503 |
| 16:31:23 | 82.0497845 | 75.2872494 | 68.3767765 | 63.6528503 |
| 16:31:24 | 82.0497845 | 75.2872494 | 72.3767765 | 63.6528503 |
| 16:31:25 | 82.0497845 | 76.2872494 | 77.3767765 | 63.6528503 |
| 16:31:26 | 82.0497845 | 76.2872494 | 78.3767765 | 62.6528503 |
| 16:31:27 | 82.0497845 | 76.2872494 | 78.3767765 | 64.6528503 |

|          |            |            |            |            |
|----------|------------|------------|------------|------------|
| 16:31:28 | 82.0497845 | 79.2872494 | 78.3767765 | 65.6528503 |
| 16:31:29 | 82.0497845 | 80.2872494 | 78.3767765 | 65.6528503 |
| 16:31:30 | 82.0497845 | 80.2872494 | 79.3767765 | 65.6528503 |
| 16:31:31 | 85.0497845 | 84.2872494 | 79.3767765 | 65.6528503 |
| 16:31:32 | 89.0497845 | 87.2872494 | 79.3767765 | 65.6528503 |
| 16:31:33 | 89.0497845 | 88.2872494 | 80.3767765 | 63.6528503 |
| 16:31:34 | 90.0497845 | 89.2872494 | 80.3767765 | 63.6528503 |
| 16:31:35 | 90.0497845 | 89.2872494 | 80.3767765 | 63.6528503 |
| 16:31:36 | 90.0497845 | 89.2872494 | 79.3767765 | 63.6528503 |
| 16:31:37 | 91.0497845 | 90.2872494 | 80.3767765 | 65.6528503 |
| 16:31:38 | 91.0497845 | 90.2872494 | 80.3767765 | 65.6528503 |
| 16:31:39 | 91.0497845 | 90.2872494 | 80.3767765 | 65.6528503 |
| 16:31:40 | 91.0497845 | 90.2872494 | 81.3767765 | 67.6528503 |
| 16:31:41 | 91.0497845 | 90.2872494 | 82.3767765 | 67.6528503 |
| 16:31:42 | 90.0497845 | 90.2872494 | 84.3767765 | 67.6528503 |
| 16:31:43 | 91.0497845 | 90.2872494 | 84.3767765 | 67.6528503 |
| 16:31:44 | 92.0497845 | 90.2872494 | 84.3767765 | 69.6528503 |
| 16:31:45 | 92.0497845 | 90.2872494 | 84.3767765 | 69.6528503 |
| 16:31:46 | 92.0497845 | 89.2872494 | 85.3767765 | 70.6528503 |
| 16:31:47 | 94.0497845 | 89.2872494 | 85.3767765 | 70.6528503 |
| 16:31:48 | 94.0497845 | 89.2872494 | 85.3767765 | 70.6528503 |
| 16:31:49 | 79.7106503 | 89.2872494 | 85.3767765 | 71.6528503 |
| 16:31:50 | 80.9606503 | 90.2872494 | 85.3767765 | 72.6528503 |
| 16:31:51 | 81.5856503 | 90.2872494 | 85.3767765 | 72.6528503 |
| 16:31:52 | 81.9606503 | 91.2872494 | 86.3767765 | 72.6528503 |
| 16:31:53 | 82.2106503 | 91.2872494 | 86.3767765 | 72.6528503 |
| 16:31:54 | 82.3356503 | 91.2872494 | 86.3767765 | 72.6528503 |
| 16:31:55 | 82.3356503 | 92.2872494 | 86.3767765 | 71.6528503 |
| 16:31:56 | 82.0856503 | 93.2872494 | 88.3767765 | 68.6528503 |
| 16:31:57 | 81.8356503 | 93.2872494 | 88.3767765 | 66.6528503 |
| 16:31:58 | 81.9606503 | 93.2872494 | 88.3767765 | 66.6528503 |
| 16:31:59 | 81.8356503 | 92.2872494 | 88.3767765 | 66.6528503 |
| 16:32:00 | 81.9606503 | 92.2872494 | 88.3767765 | 66.6528503 |
| 16:32:01 | 82.0856503 | 92.2872494 | 87.3767765 | 66.6528503 |
| 16:32:02 | 82.5856503 | 92.2872494 | 87.3767765 | 66.6528503 |
| 16:32:03 | 82.9606503 | 92.2872494 | 87.3767765 | 67.6528503 |
| 16:32:04 | 82.8356503 | 92.2872494 | 86.3767765 | 67.6528503 |
| 16:32:05 | 83.2106503 | 92.2872494 | 86.3767765 | 68.6528503 |
| 16:32:06 | 83.7106503 | 94.2872494 | 84.3767765 | 68.6528503 |
| 16:32:07 | 84.4606503 | 96.2872494 | 84.3767765 | 68.6528503 |
| 16:32:08 | 83.7106503 | 98.2872494 | 82.3767765 | 66.6528503 |
| 16:32:09 | 83.8356503 | 98.2872494 | 82.3767765 | 66.6528503 |
| 16:32:10 | 84.3356503 | 99.2872494 | 82.3767765 | 67.6528503 |
| 16:32:11 | 84.3356503 | 99.2872494 | 82.3767765 | 67.6528503 |
| 16:32:12 | 84.5856503 | 99.2872494 | 82.3767765 | 67.6528503 |

|          |            |            |            |            |
|----------|------------|------------|------------|------------|
| 16:32:13 | 84.3356503 | 98.2872494 | 82.3767765 | 67.6528503 |
| 16:32:14 | 83.3356503 | 96.2872494 | 77.3767765 | 67.6528503 |
| 16:32:15 | 82.0856503 | 96.2872494 | 75.3767765 | 67.6528503 |
| 16:32:16 | 81.5856503 | 94.2872494 | 76.3767765 | 68.6528503 |
| 16:32:17 | 81.4606503 | 93.2872494 | 77.3767765 | 68.6528503 |
| 16:32:18 |            | 93.2872494 | 77.3767765 | 70.6528503 |
| 16:32:19 |            | 93.2872494 | 78.3767765 | 68.6528503 |
| 16:32:20 |            | 92.2872494 | 80.3767765 | 68.6528503 |
| 16:32:21 |            | 90.2872494 | 80.3767765 | 68.6528503 |
| 16:32:22 |            | 90.2872494 | 80.3767765 | 68.6528503 |
| 16:32:23 |            | 91.2872494 | 80.3767765 | 68.6528503 |
| 16:32:24 |            | 91.2872494 | 81.3767765 | 68.6528503 |
| 16:32:25 |            | 93.2872494 | 82.3767765 | 69.6528503 |
| 16:32:26 |            | 93.2872494 | 82.3767765 | 70.6528503 |
| 16:32:27 |            | 94.2872494 | 82.3767765 | 70.6528503 |
| 16:32:28 |            | 94.2872494 | 82.3767765 | 70.6528503 |
| 16:32:29 |            | 95.2872494 | 83.3767765 | 70.6528503 |
| 16:32:30 |            | 95.2872494 | 83.3767765 | 70.6528503 |
| 16:32:31 |            | 95.2872494 | 83.3767765 | 70.6528503 |
| 16:32:32 |            | 95.2872494 | 83.3767765 | 71.6528503 |
| 16:32:33 |            | 95.2872494 | 78.3767765 | 71.6528503 |
| 16:32:34 |            | 95.2872494 | 74.3767765 | 72.6528503 |
| 16:32:35 |            | 93.2872494 | 74.3767765 | 72.6528503 |
| 16:32:36 |            | 92.2872494 | 74.3767765 | 72.6528503 |
| 16:32:37 |            | 92.2872494 | 74.3767765 | 72.6528503 |
| 16:32:38 |            | 91.2872494 | 74.3767765 | 73.6528503 |
| 16:32:39 |            | 91.2872494 | 74.3767765 | 73.6528503 |
| 16:32:40 |            | 91.2872494 | 74.3767765 | 74.6528503 |
| 16:32:41 |            | 91.2872494 | 74.3767765 | 75.6528503 |
| 16:32:42 |            | 91.2872494 | 74.3767765 | 75.6528503 |
| 16:32:43 |            | 92.2872494 | 74.3767765 | 74.6528503 |
| 16:32:44 |            | 92.2872494 | 75.3767765 | 74.6528503 |
| 16:32:45 |            | 93.2872494 | 75.3767765 | 74.6528503 |
| 16:32:46 |            | 93.2872494 | 76.3767765 | 74.6528503 |
| 16:32:47 |            | 95.2872494 | 76.3767765 | 74.6528503 |
| 16:32:48 |            | 95.2872494 | 77.3767765 | 76.6528503 |
| 16:32:49 |            | 95.2872494 | 77.3767765 | 77.6528503 |
| 16:32:50 |            | 95.2872494 | 77.3767765 | 77.6528503 |
| 16:32:51 |            | 95.2872494 | 77.3767765 | 77.6528503 |
| 16:32:52 |            | 79.0907739 | 77.3767765 | 77.6528503 |
| 16:32:53 |            | 79.2336311 | 77.3767765 | 77.6528503 |
| 16:32:54 |            | 79.0907739 | 77.3767765 | 77.6528503 |
| 16:32:55 |            | 77.9479168 | 68.3767765 | 77.6528503 |
| 16:32:56 |            | 77.2336311 | 62.3767765 | 77.6528503 |
| 16:32:57 |            | 77.3764882 | 62.3767765 | 77.6528503 |

|          |            |            |            |
|----------|------------|------------|------------|
| 16:32:58 | 77.9479168 | 66.3767765 | 76.6528503 |
| 16:32:59 | 78.8050597 | 66.3767765 | 76.6528503 |
| 16:33:00 | 79.0907739 | 69.3767765 | 75.6528503 |
| 16:33:01 | 80.5193454 | 71.3767765 | 74.6528503 |
| 16:33:02 | 80.8050597 | 71.3767765 | 74.6528503 |
| 16:33:03 | 80.0907739 | 72.3767765 | 74.6528503 |
| 16:33:04 | 79.6622025 | 72.3767765 | 74.6528503 |
| 16:33:05 | 79.5193454 | 72.3767765 | 74.6528503 |
| 16:33:06 | 79.5193454 | 73.3767765 | 73.6528503 |
| 16:33:07 | 79.0907739 | 73.3767765 | 70.6528503 |
| 16:33:08 | 79.0907739 | 73.3767765 | 70.6528503 |
| 16:33:09 | 79.2336311 | 75.3767765 | 69.6528503 |
| 16:33:10 | 79.3764882 | 76.3767765 | 69.6528503 |
| 16:33:11 | 79.5193454 | 77.3767765 | 68.6528503 |
| 16:33:12 | 79.3764882 | 77.3767765 | 68.6528503 |
| 16:33:13 | 79.3764882 | 78.3767765 | 68.6528503 |
| 16:33:14 | 79.2336311 | 78.3767765 | 68.6528503 |
| 16:33:15 | 79.9479168 | 78.3767765 | 69.6528503 |
| 16:33:16 | 80.3764882 | 80.3767765 | 69.6528503 |
| 16:33:17 | 80.6622025 | 80.3767765 | 70.6528503 |
| 16:33:18 | 79.2336311 | 82.3767765 | 71.6528503 |
| 16:33:19 | 79.3764882 | 82.3767765 | 72.6528503 |
| 16:33:20 | 79.5193454 | 82.3767765 | 72.6528503 |
| 16:33:21 | 79.6622025 | 82.3767765 | 72.6528503 |
| 16:33:22 | 80.2336311 | 84.3767765 | 72.6528503 |
| 16:33:23 | 80.2336311 | 84.3767765 | 72.6528503 |
| 16:33:24 | 80.0907739 | 83.3767765 | 72.6528503 |
| 16:33:25 | 79.6622025 | 83.3767765 | 73.6528503 |
| 16:33:26 | 79.9479168 | 83.3767765 | 73.6528503 |
| 16:33:27 | 79.9479168 | 83.3767765 | 74.6528503 |
| 16:33:28 | 80.2336311 | 83.3767765 | 74.6528503 |
| 16:33:29 | 80.8050597 | 82.3767765 | 78.6528503 |
| 16:33:30 | 81.6622025 | 81.3767765 | 80.6528503 |
| 16:33:31 | 81.8050597 | 81.3767765 | 79.6528503 |
| 16:33:32 | 81.9479168 | 81.3767765 | 79.6528503 |
| 16:33:33 | 98.2872494 | 81.3767765 | 78.6528503 |
| 16:33:34 | 96.2872494 | 81.3767765 | 76.6528503 |
| 16:33:35 | 96.2872494 | 81.3767765 | 74.6528503 |
| 16:33:36 | 96.2872494 | 81.3767765 | 74.6528503 |
| 16:33:37 | 95.2872494 | 81.3767765 | 74.6528503 |
| 16:33:38 | 90.2872494 | 80.3767765 | 73.6528503 |
| 16:33:39 | 90.2872494 | 80.3767765 | 73.6528503 |
| 16:33:40 | 90.2872494 | 80.3767765 | 74.6528503 |
| 16:33:41 | 90.2872494 | 80.3767765 | 74.6528503 |
| 16:33:42 | 89.2872494 | 80.3767765 | 76.6528503 |

|          |            |            |            |
|----------|------------|------------|------------|
| 16:33:43 | 89.2872494 | 80.3767765 | 77.6528503 |
| 16:33:44 | 88.2872494 | 79.3767765 | 77.6528503 |
| 16:33:45 | 88.2872494 | 80.3767765 | 77.6528503 |
| 16:33:46 | 89.2872494 | 80.3767765 | 77.6528503 |
| 16:33:47 | 89.2872494 | 80.3767765 | 77.6528503 |
| 16:33:48 | 89.2872494 | 80.3767765 | 77.6528503 |
| 16:33:49 | 89.2872494 | 78.3767765 | 74.6528503 |
| 16:33:50 | 89.2872494 | 78.3767765 | 74.6528503 |
| 16:33:51 | 89.2872494 | 78.3767765 | 73.6528503 |
| 16:33:52 | 89.2872494 | 73.3767765 | 71.6528503 |
| 16:33:53 | 89.2872494 | 72.3767765 | 71.6528503 |
| 16:33:54 | 89.2872494 | 72.3767765 | 71.6528503 |
| 16:33:55 | 90.2872494 | 72.3767765 | 71.6528503 |
| 16:33:56 | 90.2872494 | 72.3767765 | 71.6528503 |
| 16:33:57 | 90.2872494 | 72.3767765 | 71.6528503 |
| 16:33:58 | 91.2872494 | 72.3767765 | 71.6528503 |
| 16:33:59 | 91.2872494 | 72.3767765 | 70.6528503 |
| 16:34:00 | 91.2872494 | 76.3767765 | 72.6528503 |
| 16:34:01 | 87.2872494 | 81.3767765 | 73.6528503 |
| 16:34:02 | 87.2872494 | 81.3767765 | 73.6528503 |
| 16:34:03 | 87.2872494 | 85.3767765 | 72.6528503 |
| 16:34:04 | 85.2872494 | 87.3767765 | 73.6528503 |
| 16:34:05 | 85.2872494 | 87.3767765 | 74.6528503 |
| 16:34:06 | 82.2872494 | 81.3767765 | 74.6528503 |
| 16:34:07 | 82.2872494 | 79.3767765 | 74.6528503 |
| 16:34:08 | 81.2872494 | 78.3767765 | 74.6528503 |
| 16:34:09 | 79.2872494 | 78.3767765 | 74.6528503 |
| 16:34:10 | 79.2872494 | 78.3767765 | 75.6528503 |
| 16:34:11 | 79.2872494 | 78.3767765 | 75.6528503 |
| 16:34:12 | 80.2872494 | 77.3767765 | 75.6528503 |
| 16:34:13 | 82.2872494 | 77.3767765 | 75.6528503 |
| 16:34:14 | 83.2872494 | 78.3767765 | 75.6528503 |
| 16:34:15 | 83.2872494 | 77.3767765 | 75.6528503 |
| 16:34:16 | 82.2872494 | 77.3767765 | 75.6528503 |
| 16:34:17 | 82.2872494 | 77.3767765 | 75.6528503 |
| 16:34:18 | 82.2872494 | 77.3767765 | 75.6528503 |
| 16:34:19 | 82.2872494 | 76.3767765 | 75.6528503 |
| 16:34:20 | 82.2872494 | 75.3767765 | 75.6528503 |
| 16:34:21 | 82.2872494 | 74.3767765 | 75.6528503 |
| 16:34:22 | 85.2872494 | 74.3767765 | 75.6528503 |
| 16:34:23 | 85.2872494 | 74.3767765 | 75.6528503 |
| 16:34:24 | 85.2872494 | 73.3767765 | 75.6528503 |
| 16:34:25 | 83.2872494 | 72.3767765 | 76.6528503 |
| 16:34:26 | 83.2872494 | 72.3767765 | 75.6528503 |
| 16:34:27 | 78.2872494 | 71.3767765 | 75.6528503 |



|          |            |            |            |
|----------|------------|------------|------------|
| 16:34:28 | 75.2872494 | 71.3767765 | 75.6528503 |
| 16:34:29 | 75.2872494 | 68.3767765 | 75.6528503 |
| 16:34:30 | 75.2872494 | 68.3767765 | 75.6528503 |
| 16:34:31 | 75.2872494 | 68.3767765 | 75.6528503 |
| 16:34:32 | 75.2872494 | 67.3767765 | 74.6528503 |
| 16:34:33 | 74.2872494 | 67.3767765 | 74.6528503 |
| 16:34:34 | 75.2872494 | 67.3767765 | 74.6528503 |
| 16:34:35 | 75.2872494 | 67.3767765 | 74.6528503 |
| 16:34:36 | 75.2872494 | 67.3767765 | 73.6528503 |
| 16:34:37 | 75.2872494 | 76.3767765 | 73.6528503 |
| 16:34:38 | 75.2872494 | 78.3767765 | 73.6528503 |
| 16:34:39 | 75.2872494 | 78.3767765 | 73.6528503 |
| 16:34:40 | 74.2872494 | 77.3767765 | 72.6528503 |
| 16:34:41 | 74.2872494 | 77.3767765 | 72.6528503 |
| 16:34:42 | 74.2872494 | 64.3767765 | 71.6528503 |
| 16:34:43 | 77.2872494 | 64.3767765 | 70.6528503 |
| 16:34:44 | 77.2872494 | 64.3767765 | 69.6528503 |
| 16:34:45 | 78.2872494 | 67.3767765 | 69.6528503 |
| 16:34:46 | 77.2872494 | 69.3767765 | 69.6528503 |
| 16:34:47 | 77.2872494 | 69.3767765 | 69.6528503 |
| 16:34:48 | 76.2872494 | 69.3767765 | 68.6528503 |
| 16:34:49 | 76.2872494 | 68.3767765 | 68.6528503 |
| 16:34:50 | 76.2872494 | 69.3767765 | 68.6528503 |
| 16:34:51 | 77.2872494 | 69.3767765 | 68.6528503 |
| 16:34:52 | 77.2872494 | 70.3767765 | 68.6528503 |
| 16:34:53 | 78.2872494 | 72.3767765 | 68.6528503 |
| 16:34:54 | 75.2872494 | 72.3767765 | 68.6528503 |
| 16:34:55 | 73.2872494 | 74.3767765 | 68.6528503 |
| 16:34:56 | 73.2872494 | 76.3767765 | 68.6528503 |
| 16:34:57 | 72.2872494 | 76.3767765 | 69.6528503 |
| 16:34:58 | 72.2872494 | 79.3767765 | 69.6528503 |
| 16:34:59 | 72.2872494 | 80.3767765 | 69.6528503 |
| 16:35:00 | 72.2872494 | 80.3767765 | 69.6528503 |
| 16:35:01 | 72.2872494 | 78.3767765 | 69.6528503 |
| 16:35:02 | 72.2872494 | 78.3767765 | 68.6528503 |
| 16:35:03 | 72.2872494 | 78.3767765 | 68.6528503 |
| 16:35:04 | 72.2872494 | 78.3767765 | 69.6528503 |
| 16:35:05 | 72.2872494 | 78.3767765 | 69.6528503 |
| 16:35:06 | 72.2872494 | 77.3767765 | 69.6528503 |
| 16:35:07 | 72.2872494 | 77.3767765 | 69.6528503 |
| 16:35:08 | 74.2872494 | 77.3767765 | 71.6528503 |
| 16:35:09 | 74.2872494 | 77.3767765 | 71.6528503 |
| 16:35:10 | 76.2872494 | 77.3767765 | 71.6528503 |
| 16:35:11 | 76.2872494 | 77.3767765 | 73.6528503 |
| 16:35:12 | 77.2872494 | 77.3767765 | 74.6528503 |

|          |            |            |            |
|----------|------------|------------|------------|
| 16:35:13 | 79.2872494 | 77.3767765 | 74.6528503 |
| 16:35:14 | 79.2872494 | 77.3767765 | 74.6528503 |
| 16:35:15 | 80.2872494 | 77.3767765 | 74.6528503 |
| 16:35:16 | 77.2872494 | 77.3767765 | 74.6528503 |
| 16:35:17 | 75.2872494 | 77.3767765 | 74.6528503 |
| 16:35:18 | 73.2872494 | 77.3767765 | 74.6528503 |
| 16:35:19 | 73.2872494 | 76.3767765 | 74.6528503 |
| 16:35:20 | 73.2872494 | 77.3767765 | 72.6528503 |
| 16:35:21 | 74.2872494 | 78.3767765 | 72.6528503 |
| 16:35:22 | 75.2872494 | 78.3767765 | 72.6528503 |
| 16:35:23 | 79.2872494 | 79.3767765 | 72.6528503 |
| 16:35:24 | 79.2872494 | 79.3767765 | 72.6528503 |
| 16:35:25 | 81.2872494 | 76.3767765 | 72.6528503 |
| 16:35:26 | 80.2872494 | 74.3767765 | 71.6528503 |
| 16:35:27 | 80.2872494 | 74.3767765 | 70.6528503 |
| 16:35:28 | 78.2872494 | 74.3767765 | 70.6528503 |
| 16:35:29 | 77.2872494 | 74.3767765 | 70.6528503 |
| 16:35:30 | 77.2872494 | 73.3767765 | 70.6528503 |
| 16:35:31 | 76.2872494 | 73.3767765 | 70.6528503 |
| 16:35:32 | 75.2872494 | 72.3767765 | 71.6528503 |
| 16:35:33 | 75.2872494 | 72.3767765 | 71.6528503 |
| 16:35:34 | 75.2872494 | 72.3767765 | 72.6528503 |
| 16:35:35 | 75.2872494 | 72.3767765 | 73.6528503 |
| 16:35:36 | 76.2872494 | 72.3767765 | 74.6528503 |
| 16:35:37 | 76.2872494 | 72.3767765 | 75.6528503 |
| 16:35:38 | 76.2872494 | 75.3767765 | 75.6528503 |
| 16:35:39 | 76.2872494 | 78.3767765 | 75.6528503 |
| 16:35:40 | 76.2872494 | 78.3767765 | 75.6528503 |
| 16:35:41 | 77.2872494 | 81.3767765 | 75.6528503 |
| 16:35:42 | 77.2872494 | 81.3767765 | 75.6528503 |
| 16:35:43 | 76.2872494 | 80.3767765 | 76.6528503 |
| 16:35:44 | 76.2872494 | 81.3767765 | 76.6528503 |
| 16:35:45 | 76.2872494 | 81.3767765 | 76.6528503 |
| 16:35:46 | 76.2872494 | 81.3767765 | 77.6528503 |
| 16:35:47 | 75.2872494 | 83.3767765 | 78.6528503 |
| 16:35:48 | 69.2872494 | 87.3767765 | 78.6528503 |
| 16:35:49 | 69.2872494 | 87.3767765 | 78.6528503 |
| 16:35:50 | 73.2872494 | 87.3767765 | 79.6528503 |
| 16:35:51 | 74.2872494 | 86.3767765 | 78.6528503 |
| 16:35:52 | 73.2872494 | 84.3767765 | 78.6528503 |
| 16:35:53 | 73.2872494 | 84.3767765 | 78.6528503 |
| 16:35:54 | 76.2872494 | 82.3767765 | 78.6528503 |
| 16:35:55 | 76.2872494 | 79.3767765 | 78.6528503 |
| 16:35:56 | 76.2872494 | 79.3767765 | 78.6528503 |
| 16:35:57 | 73.2872494 | 77.3767765 | 74.6528503 |

|          |            |            |            |
|----------|------------|------------|------------|
| 16:35:58 | 73.2872494 | 78.3767765 | 71.6528503 |
| 16:35:59 | 70.2872494 | 78.3767765 | 68.6528503 |
| 16:36:00 | 70.2872494 | 78.3767765 | 68.6528503 |
| 16:36:01 | 71.2872494 | 78.3767765 | 68.6528503 |
| 16:36:02 | 72.2872494 | 77.3767765 | 68.6528503 |
| 16:36:03 | 73.2872494 | 77.3767765 | 67.6528503 |
| 16:36:04 | 73.2872494 | 77.3767765 | 67.6528503 |
| 16:36:05 | 71.2872494 | 77.3767765 | 67.6528503 |
| 16:36:06 | 70.2872494 | 77.3767765 | 67.6528503 |
| 16:36:07 | 69.2872494 | 76.3767765 | 64.6528503 |
| 16:36:08 | 69.2872494 | 74.3767765 | 63.6528503 |
| 16:36:09 | 71.2872494 | 74.3767765 | 62.6528503 |
| 16:36:10 | 73.2872494 | 73.3767765 | 62.6528503 |
| 16:36:11 | 74.2872494 | 73.3767765 | 64.6528503 |
| 16:36:12 | 74.2872494 | 73.3767765 | 64.6528503 |
| 16:36:13 | 72.2872494 | 73.3767765 | 64.6528503 |
| 16:36:14 | 72.2872494 | 73.3767765 | 67.6528503 |
| 16:36:15 | 73.2872494 | 73.3767765 | 67.6528503 |
| 16:36:16 | 73.2872494 | 72.3767765 | 67.6528503 |
| 16:36:17 | 75.2872494 | 72.3767765 | 67.6528503 |
| 16:36:18 | 75.2872494 | 72.3767765 | 67.6528503 |
| 16:36:19 | 74.2872494 | 73.3767765 | 67.6528503 |
| 16:36:20 | 74.2872494 | 73.3767765 | 67.6528503 |
| 16:36:21 | 73.2872494 | 73.3767765 | 67.6528503 |
| 16:36:22 | 72.2872494 | 74.3767765 | 66.6528503 |
| 16:36:23 | 71.2872494 | 74.3767765 | 66.6528503 |
| 16:36:24 | 70.2872494 | 74.3767765 | 66.6528503 |
| 16:36:25 | 70.2872494 | 73.3767765 | 66.6528503 |
| 16:36:26 | 70.2872494 | 73.3767765 | 66.6528503 |
| 16:36:27 | 70.2872494 | 73.3767765 | 66.6528503 |
| 16:36:28 | 70.2872494 | 72.3767765 | 67.6528503 |
| 16:36:29 | 69.2872494 | 72.3767765 | 68.6528503 |
| 16:36:30 | 69.2872494 | 71.3767765 | 69.6528503 |
| 16:36:31 | 70.2872494 | 71.3767765 | 69.6528503 |
| 16:36:32 | 70.2872494 | 71.3767765 | 69.6528503 |
| 16:36:33 | 69.2872494 | 71.3767765 | 71.6528503 |
| 16:36:34 | 69.2872494 | 71.3767765 | 71.6528503 |
| 16:36:35 | 68.2872494 | 71.3767765 | 71.6528503 |
| 16:36:36 | 67.2872494 | 71.3767765 | 72.6528503 |
| 16:36:37 | 66.2872494 | 72.3767765 | 72.6528503 |
| 16:36:38 | 66.2872494 | 73.3767765 | 72.6528503 |
| 16:36:39 | 66.2872494 | 73.3767765 | 74.6528503 |
| 16:36:40 | 65.2872494 | 83.3767765 | 74.6528503 |
| 16:36:41 | 65.2872494 | 83.3767765 | 72.6528503 |
| 16:36:42 | 62.2872494 | 84.3767765 | 69.6528503 |

|          |            |            |            |
|----------|------------|------------|------------|
| 16:36:43 | 60.2872494 | 82.3767765 | 69.6528503 |
| 16:36:44 | 57.2872494 | 82.3767765 | 69.6528503 |
| 16:36:45 | 57.2872494 | 80.3767765 | 69.6528503 |
| 16:36:46 | 57.2872494 | 80.3767765 | 68.6528503 |
| 16:36:47 | 59.2872494 | 80.3767765 | 64.6528503 |
| 16:36:48 | 61.2872494 | 79.3767765 | 63.6528503 |
| 16:36:49 | 61.2872494 | 78.3767765 | 63.6528503 |
| 16:36:50 | 63.2872494 | 78.3767765 | 63.6528503 |
| 16:36:51 | 64.2872494 | 77.3767765 | 63.6528503 |
| 16:36:52 | 66.2872494 | 76.3767765 | 63.6528503 |
| 16:36:53 | 67.2872494 | 76.3767765 | 63.6528503 |
| 16:36:54 | 67.2872494 | 78.3767765 | 63.6528503 |
| 16:36:55 | 69.2872494 | 78.3767765 | 63.6528503 |
| 16:36:56 | 69.2872494 | 75.3767765 | 63.6528503 |
| 16:36:57 | 69.2872494 | 74.3767765 | 63.6528503 |
| 16:36:58 | 70.2872494 | 74.3767765 | 64.6528503 |
| 16:36:59 | 71.2872494 | 74.3767765 | 64.6528503 |
| 16:37:00 | 74.2872494 | 74.3767765 | 65.6528503 |
| 16:37:01 | 76.2872494 | 75.3767765 | 65.6528503 |
| 16:37:02 | 76.2872494 | 77.3767765 | 65.6528503 |
| 16:37:03 | 76.2872494 | 80.3767765 | 66.6528503 |
| 16:37:04 | 76.2872494 | 80.3767765 | 69.6528503 |
| 16:37:05 | 77.2872494 | 84.3767765 | 69.6528503 |
| 16:37:06 | 78.2872494 | 84.3767765 | 70.6528503 |
| 16:37:07 | 78.2872494 | 83.3767765 | 71.6528503 |
| 16:37:08 | 78.2872494 | 82.3767765 | 71.6528503 |
| 16:37:09 | 77.2872494 | 82.3767765 | 70.6528503 |
| 16:37:10 | 75.2872494 | 79.3767765 | 70.6528503 |
| 16:37:11 | 74.2872494 | 79.3767765 | 70.6528503 |
| 16:37:12 | 74.2872494 | 79.3767765 | 70.6528503 |
| 16:37:13 | 74.2872494 | 78.3767765 | 72.6528503 |
| 16:37:14 | 74.2872494 | 77.3767765 | 72.6528503 |
| 16:37:15 | 76.2872494 | 76.3767765 | 73.6528503 |
| 16:37:16 | 77.2872494 | 71.3767765 | 73.6528503 |
| 16:37:17 | 77.2872494 | 71.3767765 | 73.6528503 |
| 16:37:18 | 76.2872494 | 70.3767765 | 73.6528503 |
| 16:37:19 | 76.2872494 | 69.3767765 | 72.6528503 |
| 16:37:20 | 76.2872494 | 69.3767765 | 71.6528503 |
| 16:37:21 | 76.2872494 | 69.3767765 | 70.6528503 |
| 16:37:22 | 76.2872494 | 66.3767765 | 70.6528503 |
| 16:37:23 | 75.2872494 | 64.3767765 | 70.6528503 |
| 16:37:24 | 75.2872494 | 63.3767765 | 70.6528503 |
| 16:37:25 | 75.2872494 | 63.3767765 | 69.6528503 |
| 16:37:26 | 73.2872494 | 63.3767765 | 67.6528503 |
| 16:37:27 | 69.2872494 | 63.3767765 | 66.6528503 |

|          |            |            |            |
|----------|------------|------------|------------|
| 16:37:28 | 68.2872494 | 63.3767765 | 66.6528503 |
| 16:37:29 | 68.2872494 | 63.3767765 | 66.6528503 |
| 16:37:30 | 66.2872494 | 64.3767765 | 67.6528503 |
| 16:37:31 | 65.2872494 | 68.3767765 | 69.6528503 |
| 16:37:32 | 65.2872494 | 70.3767765 | 70.6528503 |
| 16:37:33 | 65.2872494 | 70.3767765 | 70.6528503 |
| 16:37:34 | 65.2872494 | 70.3767765 | 70.6528503 |
| 16:37:35 | 72.2872494 | 70.3767765 | 71.6528503 |
| 16:37:36 | 73.2872494 | 71.3767765 | 71.6528503 |
| 16:37:37 | 73.2872494 | 73.3767765 | 71.6528503 |
| 16:37:38 | 74.2872494 | 74.3767765 | 72.6528503 |
| 16:37:39 | 75.2872494 | 74.3767765 | 73.6528503 |
| 16:37:40 | 75.2872494 | 77.3767765 | 73.6528503 |
| 16:37:41 | 75.2872494 | 83.3767765 | 74.6528503 |
| 16:37:42 | 75.2872494 | 83.3767765 | 74.6528503 |
| 16:37:43 | 75.2872494 | 85.3767765 | 74.6528503 |
| 16:37:44 | 75.2872494 | 85.3767765 | 72.6528503 |
| 16:37:45 | 75.2872494 | 85.3767765 | 71.6528503 |
| 16:37:46 | 73.2872494 | 86.3767765 | 70.6528503 |
| 16:37:47 | 73.2872494 | 86.3767765 | 70.6528503 |
| 16:37:48 | 70.2872494 | 86.3767765 | 70.6528503 |
| 16:37:49 | 70.2872494 | 85.3767765 | 70.6528503 |
| 16:37:50 | 70.2872494 | 85.3767765 | 69.6528503 |
| 16:37:51 | 72.2872494 | 84.3767765 | 68.6528503 |
| 16:37:52 | 72.2872494 | 84.3767765 | 68.6528503 |
| 16:37:53 | 72.2872494 | 84.3767765 | 68.6528503 |
| 16:37:54 | 71.2872494 | 85.3767765 | 68.6528503 |
| 16:37:55 | 71.2872494 | 88.3767765 | 68.6528503 |
| 16:37:56 | 73.2872494 | 88.3767765 | 67.6528503 |
| 16:37:57 | 73.2872494 | 72.8050597 | 66.6528503 |
| 16:37:58 | 75.2872494 | 72.8050597 | 65.6528503 |
| 16:37:59 | 73.2872494 | 72.8050597 | 65.6528503 |
| 16:38:00 | 73.2872494 | 72.8050597 | 65.6528503 |
| 16:38:01 | 73.2872494 | 72.9479168 | 64.6528503 |
| 16:38:02 | 72.2872494 | 73.0907739 | 64.6528503 |
| 16:38:03 | 71.2872494 | 73.0907739 | 64.6528503 |
| 16:38:04 | 71.2872494 | 86.3767765 | 65.6528503 |
| 16:38:05 | 72.2872494 | 86.3767765 | 65.6528503 |
| 16:38:06 | 72.2872494 | 85.3767765 | 65.6528503 |
| 16:38:07 | 71.2872494 | 84.3767765 | 66.6528503 |
| 16:38:08 | 71.2872494 | 84.3767765 | 67.6528503 |
| 16:38:09 | 73.2872494 | 87.3767765 | 67.6528503 |
| 16:38:10 | 74.2872494 | 71.5193454 | 67.6528503 |
| 16:38:11 | 76.2872494 | 72.0907739 | 70.6528503 |
| 16:38:12 | 76.2872494 | 71.9479168 | 71.6528503 |

|          |            |            |            |
|----------|------------|------------|------------|
| 16:38:13 | 76.2872494 | 72.2336311 | 72.6528503 |
| 16:38:14 | 76.2872494 | 72.5193454 | 72.6528503 |
| 16:38:15 | 76.2872494 | 73.3767765 | 72.6528503 |
| 16:38:16 | 77.2872494 | 69.3767765 | 72.6528503 |
| 16:38:17 | 78.2872494 | 67.3767765 | 72.6528503 |
| 16:38:18 | 78.2872494 | 67.3767765 | 71.6528503 |
| 16:38:19 | 81.2872494 | 67.3767765 | 71.6528503 |
| 16:38:20 | 82.2872494 | 67.3767765 | 71.6528503 |
| 16:38:21 | 82.2872494 | 71.3767765 | 70.6528503 |
| 16:38:22 | 86.2872494 | 76.3767765 | 70.6528503 |
| 16:38:23 | 86.2872494 | 76.3767765 | 70.6528503 |
| 16:38:24 | 86.2872494 | 76.3767765 | 71.6528503 |
| 16:38:25 | 82.2872494 | 76.3767765 | 73.6528503 |
| 16:38:26 | 82.2872494 | 76.3767765 | 76.6528503 |
| 16:38:27 | 81.2872494 | 74.3767765 | 76.6528503 |
| 16:38:28 | 77.2872494 | 74.3767765 | 78.6528503 |
| 16:38:29 | 77.2872494 | 72.3767765 | 83.6528503 |
| 16:38:30 | 77.2872494 | 72.3767765 | 83.6528503 |
| 16:38:31 | 76.2872494 | 72.3767765 | 69.6528503 |
| 16:38:32 | 76.2872494 | 72.3767765 | 67.6528503 |
| 16:38:33 | 76.2872494 | 72.3767765 | 67.6528503 |
| 16:38:34 | 76.2872494 | 71.3767765 | 68.6528503 |
| 16:38:35 | 76.2872494 | 71.3767765 | 69.6528503 |
| 16:38:36 | 76.2872494 | 72.3767765 | 72.6528503 |
| 16:38:37 | 75.2872494 | 72.3767765 | 72.6528503 |
| 16:38:38 | 75.2872494 | 72.3767765 | 72.6528503 |
| 16:38:39 | 75.2872494 | 71.3767765 | 72.6528503 |
| 16:38:40 | 75.2872494 | 66.3767765 | 72.6528503 |
| 16:38:41 | 77.2872494 | 66.3767765 | 72.6528503 |
| 16:38:42 | 77.2872494 | 65.3767765 | 72.6528503 |
| 16:38:43 | 78.2872494 | 64.3767765 | 72.6528503 |
| 16:38:44 | 78.2872494 | 64.3767765 | 73.6528503 |
| 16:38:45 | 76.2872494 | 65.3767765 | 73.6528503 |
| 16:38:46 | 76.2872494 | 65.3767765 | 74.6528503 |
| 16:38:47 | 75.2872494 | 65.3767765 | 77.6528503 |
| 16:38:48 | 73.2872494 | 66.3767765 | 77.6528503 |
| 16:38:49 | 74.2872494 | 67.3767765 | 77.6528503 |
| 16:38:50 | 77.2872494 | 69.3767765 | 76.6528503 |
| 16:38:51 | 77.2872494 | 69.3767765 | 76.6528503 |
| 16:38:52 | 79.2872494 | 71.3767765 | 74.6528503 |
| 16:38:53 | 81.2872494 | 70.3767765 | 73.6528503 |
| 16:38:54 | 81.2872494 | 70.3767765 | 73.6528503 |
| 16:38:55 | 80.2872494 | 70.3767765 | 73.6528503 |
| 16:38:56 | 76.2872494 | 70.3767765 | 73.6528503 |
| 16:38:57 | 72.2872494 | 72.3767765 | 72.6528503 |

|          |            |            |            |
|----------|------------|------------|------------|
| 16:38:58 | 70.2872494 | 72.3767765 | 72.6528503 |
| 16:38:59 | 70.2872494 | 73.3767765 | 73.6528503 |
| 16:39:00 | 70.2872494 | 73.3767765 | 73.6528503 |
| 16:39:01 | 71.2872494 | 73.3767765 | 75.6528503 |
| 16:39:02 | 71.2872494 | 73.3767765 | 75.6528503 |
| 16:39:03 | 72.2872494 | 76.3767765 | 76.6528503 |
| 16:39:04 | 73.2872494 | 80.3767765 | 75.6528503 |
| 16:39:05 | 73.2872494 | 85.3767765 | 75.6528503 |
| 16:39:06 | 73.2872494 | 86.3767765 | 75.6528503 |
| 16:39:07 | 73.2872494 | 86.3767765 | 75.6528503 |
| 16:39:08 | 73.2872494 | 86.3767765 | 74.6528503 |
| 16:39:09 | 73.2872494 | 87.3767765 | 74.6528503 |
| 16:39:10 | 70.2872494 | 71.8050597 | 74.6528503 |
| 16:39:11 | 69.2872494 | 71.9479168 | 74.6528503 |
| 16:39:12 | 69.2872494 | 84.3767765 | 73.6528503 |
| 16:39:13 | 69.2872494 | 71.3767765 | 73.6528503 |
| 16:39:14 | 69.2872494 | 70.3767765 | 72.6528503 |
| 16:39:15 | 70.2872494 | 69.3767765 | 72.6528503 |
| 16:39:16 | 70.2872494 | 69.3767765 | 72.6528503 |
| 16:39:17 | 70.2872494 | 69.3767765 | 71.6528503 |
| 16:39:18 | 73.2872494 | 72.3767765 | 71.6528503 |
| 16:39:19 | 74.2872494 | 75.3767765 | 71.6528503 |
| 16:39:20 | 74.2872494 | 78.3767765 | 69.6528503 |
| 16:39:21 | 74.2872494 | 79.3767765 | 69.6528503 |
| 16:39:22 | 74.2872494 | 79.3767765 | 68.6528503 |
| 16:39:23 | 75.2872494 | 79.3767765 | 66.6528503 |
| 16:39:24 | 76.2872494 | 79.3767765 | 66.6528503 |
| 16:39:25 | 77.2872494 | 78.3767765 | 67.6528503 |
| 16:39:26 | 77.2872494 | 78.3767765 | 68.6528503 |
| 16:39:27 | 77.2872494 | 78.3767765 | 69.6528503 |
| 16:39:28 | 77.2872494 | 78.3767765 | 70.6528503 |
| 16:39:29 | 77.2872494 | 76.3767765 | 71.6528503 |
| 16:39:30 | 78.2872494 | 70.3767765 | 71.6528503 |
| 16:39:31 | 79.2872494 | 70.3767765 | 69.6528503 |
| 16:39:32 | 78.2872494 | 68.3767765 | 69.6528503 |
| 16:39:33 | 78.2872494 | 69.3767765 | 68.6528503 |
| 16:39:34 | 77.2872494 | 70.3767765 | 68.6528503 |
| 16:39:35 | 77.2872494 | 70.3767765 | 68.6528503 |
| 16:39:36 | 77.2872494 | 71.3767765 | 68.6528503 |
| 16:39:37 | 76.2872494 | 72.3767765 | 69.6528503 |
| 16:39:38 | 76.2872494 | 73.3767765 | 69.6528503 |
| 16:39:39 | 76.2872494 | 73.3767765 | 71.6528503 |
| 16:39:40 | 76.2872494 | 75.3767765 | 71.6528503 |
| 16:39:41 | 76.2872494 | 76.3767765 | 71.6528503 |
| 16:39:42 | 76.2872494 | 73.3767765 | 71.6528503 |

|          |            |            |            |
|----------|------------|------------|------------|
| 16:39:43 | 76.2872494 | 73.3767765 | 71.6528503 |
| 16:39:44 | 76.2872494 | 72.3767765 | 71.6528503 |
| 16:39:45 | 76.2872494 | 71.3767765 | 70.6528503 |
| 16:39:46 | 76.2872494 | 71.3767765 | 69.6528503 |
| 16:39:47 | 76.2872494 | 71.3767765 | 69.6528503 |
| 16:39:48 | 76.2872494 | 70.3767765 | 64.6528503 |
| 16:39:49 | 76.2872494 | 70.3767765 | 63.6528503 |
| 16:39:50 | 76.2872494 | 70.3767765 | 62.6528503 |
| 16:39:51 | 75.2872494 | 69.3767765 | 62.6528503 |
| 16:39:52 | 75.2872494 | 68.3767765 | 62.6528503 |
| 16:39:53 | 74.2872494 | 68.3767765 | 63.6528503 |
| 16:39:54 | 74.2872494 | 68.3767765 | 63.6528503 |
| 16:39:55 | 76.2872494 | 68.3767765 | 66.6528503 |
| 16:39:56 | 76.2872494 | 68.3767765 | 66.6528503 |
| 16:39:57 | 76.2872494 | 68.3767765 | 66.6528503 |
| 16:39:58 | 77.2872494 | 68.3767765 | 67.6528503 |
| 16:39:59 | 77.2872494 | 69.3767765 | 68.6528503 |
| 16:40:00 | 77.2872494 | 69.3767765 | 69.6528503 |
| 16:40:01 | 78.2872494 | 69.3767765 | 71.6528503 |
| 16:40:02 | 78.2872494 | 67.3767765 | 72.6528503 |
| 16:40:03 | 78.2872494 | 65.3767765 | 73.6528503 |
| 16:40:04 | 78.2872494 | 65.3767765 | 73.6528503 |
| 16:40:05 | 80.2872494 | 65.3767765 | 73.6528503 |
| 16:40:06 | 79.2872494 | 65.3767765 | 74.6528503 |
| 16:40:07 | 79.2872494 | 65.3767765 | 74.6528503 |
| 16:40:08 | 79.2872494 | 65.3767765 | 73.6528503 |
| 16:40:09 | 79.2872494 | 66.3767765 | 73.6528503 |
| 16:40:10 | 79.2872494 | 66.3767765 | 72.6528503 |
| 16:40:11 | 80.2872494 | 66.3767765 | 72.6528503 |
| 16:40:12 | 80.2872494 | 66.3767765 | 71.6528503 |
| 16:40:13 | 79.2872494 | 67.3767765 | 71.6528503 |
| 16:40:14 | 79.2872494 | 67.3767765 | 71.6528503 |
| 16:40:15 | 72.2872494 | 65.3767765 | 71.6528503 |
| 16:40:16 | 71.2872494 | 65.3767765 | 69.6528503 |
| 16:40:17 | 71.2872494 | 65.3767765 | 67.6528503 |
| 16:40:18 | 71.2872494 | 65.3767765 | 66.6528503 |
| 16:40:19 | 72.2872494 | 66.3767765 | 66.6528503 |
| 16:40:20 | 72.2872494 | 66.3767765 | 66.6528503 |
| 16:40:21 | 72.2872494 | 66.3767765 | 66.6528503 |
| 16:40:22 | 74.2872494 | 65.3767765 | 64.6528503 |
| 16:40:23 | 74.2872494 | 65.3767765 | 63.6528503 |
| 16:40:24 | 75.2872494 | 66.3767765 | 63.6528503 |
| 16:40:25 | 76.2872494 | 67.3767765 | 63.6528503 |
| 16:40:26 | 76.2872494 | 68.3767765 | 63.6528503 |
| 16:40:27 | 76.2872494 | 68.3767765 | 63.6528503 |



|          |            |            |            |            |
|----------|------------|------------|------------|------------|
| 16:40:28 |            | 79.2872494 | 69.3767765 | 63.6528503 |
| 16:40:29 |            | 77.2872494 | 70.3767765 | 63.6528503 |
| 16:40:30 |            | 77.2872494 | 70.3767765 | 63.6528503 |
| 16:40:31 |            | 77.2872494 | 70.3767765 | 63.6528503 |
| 16:40:32 |            | 75.2872494 | 70.3767765 | 64.6528503 |
| 16:40:33 |            | 75.2872494 | 70.3767765 | 64.6528503 |
| 16:40:34 |            | 73.2872494 | 71.3767765 | 64.6528503 |
| 16:40:35 |            | 72.2872494 | 71.3767765 | 65.6528503 |
| 16:40:36 |            | 71.2872494 | 70.3767765 | 65.6528503 |
| 16:40:37 |            | 70.2872494 | 70.3767765 | 65.6528503 |
| 16:40:38 |            | 70.2872494 | 70.3767765 | 66.6528503 |
| 16:40:39 |            | 70.2872494 | 70.3767765 | 66.6528503 |
| 16:40:40 |            | 69.2872494 | 72.3767765 | 66.6528503 |
| 16:40:41 |            | 69.2872494 | 72.3767765 | 65.6528503 |
| 16:40:42 |            | 69.2872494 | 73.3767765 | 66.6528503 |
| 16:40:43 |            | 71.2872494 | 73.3767765 | 66.6528503 |
| 16:40:44 |            | 78.2872494 | 73.3767765 | 66.6528503 |
| 16:40:45 |            | 81.2872494 | 73.3767765 | 66.6528503 |
| 16:40:46 |            | 82.2872494 | 73.3767765 | 66.6528503 |
| 16:40:47 |            | 82.2872494 | 72.3767765 | 65.6528503 |
| 16:40:48 |            | 84.2872494 | 72.3767765 | 65.6528503 |
| 16:40:49 |            | 87.2872494 | 73.3767765 | 65.6528503 |
| 16:40:50 |            | 88.2872494 | 73.3767765 | 65.6528503 |
| 16:40:51 |            | 85.2872494 | 73.3767765 | 65.6528503 |
| 16:40:52 |            | 85.2872494 | 72.3767765 | 64.6528503 |
| 16:40:53 |            | 83.2872494 | 72.3767765 | 64.6528503 |
| 16:40:54 |            | 82.2872494 | 68.3767765 | 67.6528503 |
| 16:40:55 |            | 82.2872494 | 68.3767765 | 67.6528503 |
| 16:40:56 |            | 82.2872494 | 70.3767765 | 68.6528503 |
| 16:40:57 |            | 83.2872494 | 70.3767765 | 71.6528503 |
| 16:40:58 |            | 85.2872494 | 71.3767765 | 71.6528503 |
| 16:40:59 |            | 85.2872494 | 71.3767765 | 71.6528503 |
| 16:41:00 |            | 87.2872494 | 71.3767765 | 71.6528503 |
| 16:41:01 | 78.5856503 | 88.2872494 | 70.3767765 | 70.6528503 |
| 16:41:02 | 78.5856503 | 88.2872494 | 69.3767765 | 70.6528503 |
| 16:41:03 | 79.0856503 | 88.2872494 | 68.3767765 | 70.6528503 |
| 16:41:04 | 77.0856503 | 87.2872494 | 68.3767765 | 69.6528503 |
| 16:41:05 | 77.2106503 | 86.2872494 | 68.3767765 | 70.6528503 |
| 16:41:06 | 76.8356503 | 85.2872494 | 72.3767765 | 70.6528503 |
| 16:41:07 | 94.0497845 | 84.2872494 | 77.3767765 | 74.6528503 |
| 16:41:08 | 93.0497845 | 83.2872494 | 78.3767765 | 74.6528503 |
| 16:41:09 | 93.0497845 | 83.2872494 | 79.3767765 | 75.6528503 |
| 16:41:10 | 92.0497845 | 82.2872494 | 79.3767765 | 75.6528503 |
| 16:41:11 | 92.0497845 | 81.2872494 | 74.3767765 | 76.6528503 |
| 16:41:12 | 74.8356503 | 78.2872494 | 72.3767765 | 76.6528503 |

|          |            |            |            |            |
|----------|------------|------------|------------|------------|
| 16:41:13 | 90.0497845 | 75.2872494 | 73.3767765 | 76.6528503 |
| 16:41:14 | 90.0497845 | 72.2872494 | 73.3767765 | 70.6528503 |
| 16:41:15 | 90.0497845 | 72.2872494 | 74.3767765 | 69.6528503 |
| 16:41:16 | 87.0497845 | 70.2872494 | 74.3767765 | 69.6528503 |
| 16:41:17 | 87.0497845 | 70.2872494 | 75.3767765 | 68.6528503 |
| 16:41:18 | 87.0497845 | 70.2872494 | 74.3767765 | 67.6528503 |
| 16:41:19 | 82.0497845 | 70.2872494 | 74.3767765 | 66.6528503 |
| 16:41:20 | 81.0497845 | 70.2872494 | 74.3767765 | 66.6528503 |
| 16:41:21 | 81.0497845 | 69.2872494 | 74.3767765 | 67.6528503 |
| 16:41:22 | 80.0497845 | 69.2872494 | 74.3767765 | 67.6528503 |
| 16:41:23 | 80.0497845 | 68.2872494 | 74.3767765 | 67.6528503 |
| 16:41:24 | 80.0497845 | 68.2872494 | 73.3767765 | 67.6528503 |
| 16:41:25 | 80.0497845 | 68.2872494 | 73.3767765 | 67.6528503 |
| 16:41:26 | 79.0497845 | 68.2872494 | 72.3767765 | 67.6528503 |
| 16:41:27 | 79.0497845 | 69.2872494 | 71.3767765 | 67.6528503 |
| 16:41:28 | 78.0497845 | 68.2872494 | 70.3767765 | 67.6528503 |
| 16:41:29 | 78.0497845 | 70.2872494 | 70.3767765 | 66.6528503 |
| 16:41:30 | 78.0497845 | 70.2872494 | 72.3767765 | 66.6528503 |
| 16:41:31 | 75.0497845 | 72.2872494 | 73.3767765 | 67.6528503 |
| 16:41:32 | 75.0497845 | 72.2872494 | 74.3767765 | 69.6528503 |
| 16:41:33 | 75.0497845 | 73.2872494 | 74.3767765 | 69.6528503 |
| 16:41:34 | 79.0497845 | 73.2872494 | 74.3767765 | 69.6528503 |
| 16:41:35 | 79.0497845 | 74.2872494 | 74.3767765 | 69.6528503 |
| 16:41:36 | 76.0497845 | 74.2872494 | 74.3767765 | 67.6528503 |
| 16:41:37 | 76.0497845 | 75.2872494 | 75.3767765 | 66.6528503 |
| 16:41:38 | 74.0497845 | 75.2872494 | 76.3767765 | 66.6528503 |
| 16:41:39 | 74.0497845 | 75.2872494 | 76.3767765 | 67.6528503 |
| 16:41:40 | 74.0497845 | 76.2872494 | 76.3767765 | 67.6528503 |
| 16:41:41 | 74.0497845 | 76.2872494 | 76.3767765 | 68.6528503 |
| 16:41:42 | 74.0497845 | 76.2872494 | 76.3767765 | 68.6528503 |
| 16:41:43 | 74.0497845 | 76.2872494 | 76.3767765 | 69.6528503 |
| 16:41:44 | 74.0497845 | 80.2872494 | 76.3767765 | 69.6528503 |
| 16:41:45 | 74.0497845 | 78.2872494 | 87.3767765 | 69.6528503 |
| 16:41:46 | 74.0497845 | 78.2872494 | 75.9606503 | 69.6528503 |
| 16:41:47 | 74.0497845 | 76.2872494 | 76.5856503 | 69.6528503 |
| 16:41:48 | 70.0497845 | 75.2872494 | 76.2106503 | 69.6528503 |
| 16:41:49 | 70.0497845 | 76.2872494 | 76.3356503 | 73.6528503 |
| 16:41:50 | 67.0497845 | 76.2872494 | 75.9606503 | 73.6528503 |
| 16:41:51 | 67.0497845 | 76.2872494 | 75.2106503 | 73.6528503 |
| 16:41:52 | 67.0497845 | 76.2872494 | 75.2106503 | 75.6528503 |
| 16:41:53 | 67.0497845 | 77.2872494 | 75.0856503 | 75.6528503 |
| 16:41:54 | 67.0497845 | 78.2872494 | 75.2106503 | 75.6528503 |
| 16:41:55 | 67.0497845 | 78.2872494 | 74.9606503 | 74.6528503 |
| 16:41:56 | 67.0497845 | 79.2872494 | 74.4606503 | 74.6528503 |
| 16:41:57 | 65.0497845 | 79.2872494 | 73.8356503 | 71.6528503 |

|          |            |            |            |            |
|----------|------------|------------|------------|------------|
| 16:41:58 | 65.0497845 | 78.2872494 | 73.5856503 | 71.6528503 |
| 16:41:59 | 65.0497845 | 77.2872494 | 72.9606503 | 71.6528503 |
| 16:42:00 | 66.0497845 | 77.2872494 | 72.3356503 | 66.6528503 |
| 16:42:01 | 66.0497845 | 75.2872494 | 71.8356503 | 64.6528503 |
| 16:42:02 | 66.0497845 | 74.2872494 | 71.5856503 | 64.6528503 |
| 16:42:03 | 67.0497845 | 73.2872494 | 71.2106503 | 64.6528503 |
| 16:42:04 | 67.0497845 | 73.2872494 | 71.3356503 | 65.6528503 |
| 16:42:05 | 67.0497845 | 72.2872494 | 71.2106503 | 65.6528503 |
| 16:42:06 | 67.0497845 | 71.2872494 | 70.5856503 | 65.6528503 |
| 16:42:07 | 69.0497845 | 69.2872494 | 81.3767765 | 65.6528503 |
| 16:42:08 | 69.0497845 | 68.2872494 | 74.3767765 | 65.6528503 |
| 16:42:09 | 69.0497845 | 68.2872494 | 71.3767765 | 65.6528503 |
| 16:42:10 | 71.0497845 | 66.2872494 | 71.3767765 | 65.6528503 |
| 16:42:11 | 71.0497845 | 69.2872494 | 68.3767765 | 65.6528503 |
| 16:42:12 | 71.0497845 | 69.2872494 | 67.3767765 | 64.6528503 |
| 16:42:13 | 68.0497845 | 69.2872494 | 67.3767765 | 64.6528503 |
| 16:42:14 | 68.0497845 | 68.2872494 | 66.3767765 | 64.6528503 |
| 16:42:15 | 68.0497845 | 69.2872494 | 66.3767765 | 64.6528503 |
| 16:42:16 | 68.0497845 | 69.2872494 | 66.3767765 | 64.6528503 |
| 16:42:17 | 69.0497845 | 69.2872494 | 66.3767765 | 64.6528503 |
| 16:42:18 | 69.0497845 | 69.2872494 | 65.3767765 | 64.6528503 |
| 16:42:19 | 70.0497845 | 70.2872494 | 65.3767765 | 64.6528503 |
| 16:42:20 | 70.0497845 | 70.2872494 | 65.3767765 | 66.6528503 |
| 16:42:21 | 70.0497845 | 70.2872494 | 65.3767765 | 70.6528503 |
| 16:42:22 | 71.0497845 | 72.2872494 | 67.3767765 | 71.6528503 |
| 16:42:23 | 71.0497845 | 72.2872494 | 67.3767765 | 71.6528503 |
| 16:42:24 | 73.0497845 | 72.2872494 | 67.3767765 | 72.6528503 |
| 16:42:25 | 73.0497845 | 72.2872494 | 67.3767765 | 73.6528503 |
| 16:42:26 | 73.0497845 | 72.2872494 | 68.3767765 | 73.6528503 |
| 16:42:27 | 73.0497845 | 72.2872494 | 68.3767765 | 73.6528503 |
| 16:42:28 | 74.0497845 | 72.2872494 | 68.3767765 | 71.6528503 |
| 16:42:29 | 74.0497845 | 72.2872494 | 68.3767765 | 70.6528503 |
| 16:42:30 | 71.0497845 | 70.2872494 | 68.3767765 | 69.6528503 |
| 16:42:31 | 71.0497845 | 70.2872494 | 69.3767765 | 69.6528503 |
| 16:42:32 | 71.0497845 | 70.2872494 | 69.3767765 | 69.6528503 |
| 16:42:33 | 71.0497845 | 70.2872494 | 69.3767765 | 69.6528503 |
| 16:42:34 | 71.0497845 | 73.2872494 | 69.3767765 | 68.6528503 |
| 16:42:35 | 71.0497845 | 75.2872494 | 71.3767765 | 68.6528503 |
| 16:42:36 | 71.0497845 | 75.2872494 | 71.3767765 | 67.6528503 |
| 16:42:37 | 71.0497845 | 75.2872494 | 72.3767765 | 66.6528503 |
| 16:42:38 | 72.0497845 | 75.2872494 | 74.3767765 | 66.6528503 |
| 16:42:39 | 72.0497845 | 75.2872494 | 74.3767765 | 65.6528503 |
| 16:42:40 | 72.0497845 | 75.2872494 | 74.3767765 | 64.6528503 |
| 16:42:41 | 72.0497845 | 75.2872494 | 74.3767765 | 64.6528503 |
| 16:42:42 | 72.0497845 | 73.2872494 | 74.3767765 | 64.6528503 |

|          |            |            |            |            |
|----------|------------|------------|------------|------------|
| 16:42:43 | 72.0497845 | 72.2872494 | 74.3767765 | 65.6528503 |
| 16:42:44 | 72.0497845 | 72.2872494 | 74.3767765 | 65.6528503 |
| 16:42:45 | 72.0497845 | 72.2872494 | 74.3767765 | 65.6528503 |
| 16:42:46 | 72.0497845 | 73.2872494 | 74.3767765 | 66.6528503 |
| 16:42:47 | 72.0497845 | 73.2872494 | 74.3767765 | 66.6528503 |
| 16:42:48 | 72.0497845 | 74.2872494 | 73.3767765 | 66.6528503 |
| 16:42:49 | 70.0497845 | 75.2872494 | 73.3767765 | 66.6528503 |
| 16:42:50 | 70.0497845 | 76.2872494 | 73.3767765 | 69.6528503 |
| 16:42:51 | 69.0497845 | 78.2872494 | 74.3767765 | 72.6528503 |
| 16:42:52 | 69.0497845 | 78.2872494 | 74.3767765 | 72.6528503 |
| 16:42:53 | 69.0497845 | 79.2872494 | 74.3767765 | 73.6528503 |
| 16:42:54 | 69.0497845 | 80.2872494 | 74.3767765 | 72.6528503 |
| 16:42:55 | 71.0497845 | 81.2872494 | 71.3767765 | 72.6528503 |
| 16:42:56 | 73.0497845 | 81.2872494 | 70.3767765 | 72.6528503 |
| 16:42:57 | 73.0497845 | 81.2872494 | 70.3767765 | 66.6528503 |
| 16:42:58 | 73.0497845 | 80.2872494 | 68.3767765 | 63.6528503 |
| 16:42:59 | 73.0497845 | 79.2872494 | 69.3767765 | 62.6528503 |
| 16:43:00 | 73.0497845 | 79.2872494 | 70.3767765 | 62.6528503 |
| 16:43:01 | 73.0497845 | 79.2872494 | 70.3767765 | 61.6528503 |
| 16:43:02 | 73.0497845 | 76.2872494 | 70.3767765 | 61.6528503 |
| 16:43:03 | 68.0497845 | 75.2872494 | 68.3767765 | 61.6528503 |
| 16:43:04 | 68.0497845 | 75.2872494 | 68.3767765 | 64.6528503 |
| 16:43:05 | 67.0497845 | 74.2872494 | 67.3767765 | 64.6528503 |
| 16:43:06 | 67.0497845 | 74.2872494 | 66.3767765 | 65.6528503 |
| 16:43:07 | 67.0497845 | 74.2872494 | 66.3767765 | 65.6528503 |
| 16:43:08 | 67.0497845 | 74.2872494 | 67.3767765 | 65.6528503 |
| 16:43:09 | 66.0497845 | 74.2872494 | 68.3767765 | 65.6528503 |
| 16:43:10 | 66.0497845 | 73.2872494 | 68.3767765 | 65.6528503 |
| 16:43:11 | 66.0497845 | 73.2872494 | 67.3767765 | 65.6528503 |
| 16:43:12 | 63.0497845 | 73.2872494 | 67.3767765 | 66.6528503 |
| 16:43:13 | 63.0497845 | 73.2872494 | 67.3767765 | 67.6528503 |
| 16:43:14 | 63.0497845 | 73.2872494 | 67.3767765 | 67.6528503 |
| 16:43:15 | 63.0497845 | 73.2872494 | 67.3767765 | 67.6528503 |
| 16:43:16 | 64.0497845 | 72.2872494 | 67.3767765 | 68.6528503 |
| 16:43:17 | 64.0497845 | 71.2872494 | 67.3767765 | 68.6528503 |
| 16:43:18 | 64.0497845 | 71.2872494 | 67.3767765 | 68.6528503 |
| 16:43:19 | 66.0497845 | 70.2872494 | 67.3767765 | 66.6528503 |
| 16:43:20 | 66.0497845 | 69.2872494 | 68.3767765 | 65.6528503 |
| 16:43:21 | 67.0497845 | 69.2872494 | 68.3767765 | 65.6528503 |
| 16:43:22 | 67.0497845 | 69.2872494 | 68.3767765 | 65.6528503 |
| 16:43:23 | 67.0497845 | 68.2872494 | 69.3767765 | 65.6528503 |
| 16:43:24 | 67.0497845 | 68.2872494 | 69.3767765 | 66.6528503 |
| 16:43:25 | 67.0497845 | 66.2872494 | 69.3767765 | 67.6528503 |
| 16:43:26 | 67.0497845 | 64.2872494 | 71.3767765 | 67.6528503 |
| 16:43:27 | 67.0497845 | 63.2872494 | 71.3767765 | 67.6528503 |

|          |            |            |            |            |
|----------|------------|------------|------------|------------|
| 16:43:28 | 67.0497845 | 63.2872494 | 71.3767765 | 67.6528503 |
| 16:43:29 | 67.0497845 | 63.2872494 | 72.3767765 | 67.6528503 |
| 16:43:30 | 67.0497845 | 63.2872494 | 72.3767765 | 67.6528503 |
| 16:43:31 | 67.0497845 | 63.2872494 | 73.3767765 | 68.6528503 |
| 16:43:32 | 67.0497845 | 63.2872494 | 73.3767765 | 68.6528503 |
| 16:43:33 | 67.0497845 | 64.2872494 | 73.3767765 | 69.6528503 |
| 16:43:34 | 67.0497845 | 71.2872494 | 73.3767765 | 70.6528503 |
| 16:43:35 | 67.0497845 | 71.2872494 | 73.3767765 | 73.6528503 |
| 16:43:36 | 77.0497845 | 71.2872494 | 73.3767765 | 73.6528503 |
| 16:43:37 | 77.0497845 | 72.2872494 | 72.3767765 | 75.6528503 |
| 16:43:38 | 77.0497845 | 71.2872494 | 72.3767765 | 75.6528503 |
| 16:43:39 | 77.0497845 | 71.2872494 | 72.3767765 | 73.6528503 |
| 16:43:40 | 77.0497845 | 71.2872494 | 73.3767765 | 73.6528503 |
| 16:43:41 | 77.0497845 | 73.2872494 | 73.3767765 | 71.6528503 |
| 16:43:42 | 73.0497845 | 75.2872494 | 73.3767765 | 69.6528503 |
| 16:43:43 | 73.0497845 | 75.2872494 | 73.3767765 | 65.6528503 |
| 16:43:44 | 73.0497845 | 75.2872494 | 73.3767765 | 63.6528503 |
| 16:43:45 | 72.0497845 | 71.2872494 | 73.3767765 | 62.6528503 |
| 16:43:46 | 72.0497845 | 71.2872494 | 74.3767765 | 62.6528503 |
| 16:43:47 | 72.0497845 | 67.2872494 | 74.3767765 | 62.6528503 |
| 16:43:48 | 67.0497845 | 67.2872494 | 75.3767765 | 62.6528503 |
| 16:43:49 | 67.0497845 | 68.2872494 | 75.3767765 | 62.6528503 |
| 16:43:50 | 67.0497845 | 70.2872494 | 76.3767765 | 62.6528503 |
| 16:43:51 | 66.0497845 | 70.2872494 | 78.3767765 | 62.6528503 |
| 16:43:52 | 66.0497845 | 72.2872494 | 78.3767765 | 63.6528503 |
| 16:43:53 | 66.0497845 | 73.2872494 | 73.3767765 | 63.6528503 |
| 16:43:54 | 66.0497845 | 73.2872494 | 73.3767765 | 63.6528503 |
| 16:43:55 | 66.0497845 | 73.2872494 | 68.3767765 | 62.6528503 |
| 16:43:56 | 66.0497845 | 73.2872494 | 67.3767765 | 62.6528503 |
| 16:43:57 | 65.0497845 | 74.2872494 | 67.3767765 | 62.6528503 |
| 16:43:58 | 65.0497845 | 74.2872494 | 68.3767765 | 63.6528503 |
| 16:43:59 | 65.0497845 | 74.2872494 | 68.3767765 | 63.6528503 |
| 16:44:00 | 64.0497845 | 74.2872494 | 69.3767765 | 63.6528503 |
| 16:44:01 | 64.0497845 | 74.2872494 | 71.3767765 | 63.6528503 |
| 16:44:02 | 64.0497845 | 74.2872494 | 71.3767765 | 63.6528503 |
| 16:44:03 | 64.0497845 | 74.2872494 | 71.3767765 | 65.6528503 |
| 16:44:04 | 62.0497845 | 74.2872494 | 70.3767765 | 65.6528503 |
| 16:44:05 | 62.0497845 | 74.2872494 | 68.3767765 | 66.6528503 |
| 16:44:06 | 61.0497845 | 74.2872494 | 68.3767765 | 66.6528503 |
| 16:44:07 | 66.0497845 | 74.2872494 | 68.3767765 | 66.6528503 |
| 16:44:08 | 66.0497845 | 74.2872494 | 67.3767765 | 66.6528503 |
| 16:44:09 | 66.0497845 | 74.2872494 | 67.3767765 | 65.6528503 |
| 16:44:10 | 69.0497845 | 74.2872494 | 67.3767765 | 65.6528503 |
| 16:44:11 | 69.0497845 | 74.2872494 | 67.3767765 | 65.6528503 |
| 16:44:12 | 72.0497845 | 74.2872494 | 67.3767765 | 65.6528503 |

|          |            |            |            |            |
|----------|------------|------------|------------|------------|
| 16:44:13 | 72.0497845 | 74.2872494 | 67.3767765 | 66.6528503 |
| 16:44:14 | 71.0497845 | 73.2872494 | 67.3767765 | 66.6528503 |
| 16:44:15 | 71.0497845 | 73.2872494 | 67.3767765 | 66.6528503 |
| 16:44:16 | 71.0497845 | 73.2872494 | 67.3767765 | 66.6528503 |
| 16:44:17 | 71.0497845 | 72.2872494 | 67.3767765 | 65.6528503 |
| 16:44:18 | 70.0497845 | 73.2872494 | 67.3767765 | 65.6528503 |
| 16:44:19 | 70.0497845 | 73.2872494 | 68.3767765 | 63.6528503 |
| 16:44:20 | 70.0497845 | 73.2872494 | 68.3767765 | 62.6528503 |
| 16:44:21 | 71.0497845 | 73.2872494 | 68.3767765 | 62.6528503 |
| 16:44:22 | 71.0497845 | 74.2872494 | 68.3767765 | 62.6528503 |
| 16:44:23 | 71.0497845 | 75.2872494 | 69.3767765 | 65.6528503 |
| 16:44:24 | 71.0497845 | 75.2872494 | 69.3767765 | 65.6528503 |
| 16:44:25 | 70.0497845 | 76.2872494 | 70.3767765 | 65.6528503 |
| 16:44:26 | 70.0497845 | 76.2872494 | 70.3767765 | 65.6528503 |
| 16:44:27 | 70.0497845 | 76.2872494 | 70.3767765 | 65.6528503 |
| 16:44:28 | 71.0497845 | 76.2872494 | 71.3767765 | 66.6528503 |
| 16:44:29 | 71.0497845 | 76.2872494 | 72.3767765 | 66.6528503 |
| 16:44:30 | 70.0497845 | 76.2872494 | 72.3767765 | 66.6528503 |
| 16:44:31 | 70.0497845 | 76.2872494 | 72.3767765 | 67.6528503 |
| 16:44:32 | 70.0497845 | 75.2872494 | 72.3767765 | 67.6528503 |
| 16:44:33 | 71.0497845 | 76.2872494 | 72.3767765 | 71.6528503 |
| 16:44:34 | 71.0497845 | 76.2872494 | 74.3767765 | 72.6528503 |
| 16:44:35 | 71.0497845 | 76.2872494 | 74.3767765 | 71.6528503 |
| 16:44:36 | 71.0497845 | 73.2872494 | 75.3767765 | 71.6528503 |
| 16:44:37 | 71.0497845 | 71.2872494 | 75.3767765 | 70.6528503 |
| 16:44:38 | 70.0497845 | 70.2872494 | 75.3767765 | 70.6528503 |
| 16:44:39 | 70.0497845 | 70.2872494 | 76.3767765 | 70.6528503 |
| 16:44:40 | 70.0497845 | 70.2872494 | 76.3767765 | 70.6528503 |
| 16:44:41 | 71.0497845 | 70.2872494 | 77.3767765 | 70.6528503 |
| 16:44:42 | 71.0497845 | 69.2872494 | 77.3767765 | 70.6528503 |
| 16:44:43 | 71.0497845 | 69.2872494 | 78.3767765 | 70.6528503 |
| 16:44:44 | 71.0497845 | 68.2872494 | 79.3767765 | 70.6528503 |
| 16:44:45 | 72.0497845 | 67.2872494 | 79.3767765 | 71.6528503 |
| 16:44:46 | 72.0497845 | 66.2872494 | 79.3767765 | 72.6528503 |
| 16:44:47 | 75.0497845 | 66.2872494 | 81.3767765 | 73.6528503 |
| 16:44:48 | 75.0497845 | 66.2872494 | 82.3767765 | 74.6528503 |
| 16:44:49 | 75.0497845 | 66.2872494 | 82.3767765 | 74.6528503 |
| 16:44:50 | 75.0497845 | 67.2872494 | 81.3767765 | 75.6528503 |
| 16:44:51 | 80.0497845 | 71.2872494 | 78.3767765 | 75.6528503 |
| 16:44:52 | 80.0497845 | 71.2872494 | 78.3767765 | 75.6528503 |
| 16:44:53 | 80.0497845 | 73.2872494 | 78.3767765 | 75.6528503 |
| 16:44:54 | 83.0497845 | 73.2872494 | 82.3767765 | 76.6528503 |
| 16:44:55 | 83.0497845 | 73.2872494 | 83.3767765 | 76.6528503 |
| 16:44:56 | 83.0497845 | 73.2872494 | 83.3767765 | 76.6528503 |
| 16:44:57 | 83.0497845 | 73.2872494 | 83.3767765 | 76.6528503 |

|          |            |            |            |            |
|----------|------------|------------|------------|------------|
| 16:44:58 | 82.0497845 | 74.2872494 | 83.3767765 | 75.6528503 |
| 16:44:59 | 82.0497845 | 73.2872494 | 82.3767765 | 75.6528503 |
| 16:45:00 | 81.0497845 | 72.2872494 | 82.3767765 | 75.6528503 |
| 16:45:01 | 81.0497845 | 72.2872494 | 80.3767765 | 76.6528503 |
| 16:45:02 | 81.0497845 | 70.2872494 | 78.3767765 | 76.6528503 |
| 16:45:03 | 81.0497845 | 68.2872494 | 74.3767765 | 77.6528503 |
| 16:45:04 | 80.0497845 | 70.2872494 | 74.3767765 | 77.6528503 |
| 16:45:05 | 80.0497845 | 70.2872494 | 73.3767765 | 77.6528503 |
| 16:45:06 | 80.0497845 | 73.2872494 | 73.3767765 | 77.6528503 |
| 16:45:07 | 73.0497845 | 74.2872494 | 74.3767765 | 75.6528503 |
| 16:45:08 | 73.0497845 | 76.2872494 | 74.3767765 | 75.6528503 |
| 16:45:09 | 73.0497845 | 77.2872494 | 74.3767765 | 73.6528503 |
| 16:45:10 | 69.0497845 | 77.2872494 | 73.3767765 | 70.6528503 |
| 16:45:11 | 69.0497845 | 77.2872494 | 73.3767765 | 67.6528503 |
| 16:45:12 | 69.0497845 | 77.2872494 | 72.3767765 | 67.6528503 |
| 16:45:13 | 69.0497845 | 75.2872494 | 72.3767765 | 67.6528503 |
| 16:45:14 | 68.0497845 | 75.2872494 | 72.3767765 | 67.6528503 |
| 16:45:15 | 68.0497845 | 76.2872494 | 72.3767765 | 66.6528503 |
| 16:45:16 | 68.0497845 | 77.2872494 | 72.3767765 | 66.6528503 |
| 16:45:17 | 67.0497845 | 77.2872494 | 72.3767765 | 67.6528503 |
| 16:45:18 | 67.0497845 | 77.2872494 | 72.3767765 | 67.6528503 |
| 16:45:19 | 67.0497845 | 77.2872494 | 73.3767765 | 67.6528503 |
| 16:45:20 | 68.0497845 | 77.2872494 | 73.3767765 | 67.6528503 |
| 16:45:21 | 68.0497845 | 77.2872494 | 73.3767765 | 64.6528503 |
| 16:45:22 | 68.0497845 | 77.2872494 | 73.3767765 | 63.6528503 |
| 16:45:23 | 67.0497845 | 77.2872494 | 74.3767765 | 63.6528503 |
| 16:45:24 | 67.0497845 | 77.2872494 | 74.3767765 | 64.6528503 |
| 16:45:25 | 67.0497845 | 79.2872494 | 75.3767765 | 64.6528503 |
| 16:45:26 | 66.0497845 | 79.2872494 | 75.3767765 | 64.6528503 |
| 16:45:27 | 66.0497845 | 81.2872494 | 76.3767765 | 64.6528503 |
| 16:45:28 | 66.0497845 | 83.2872494 | 76.3767765 | 64.6528503 |
| 16:45:29 | 66.0497845 | 84.2872494 | 77.3767765 | 64.6528503 |
| 16:45:30 | 68.0497845 | 84.2872494 | 79.3767765 | 64.6528503 |
| 16:45:31 | 68.0497845 | 84.2872494 | 79.3767765 | 64.6528503 |
| 16:45:32 | 68.0497845 | 85.2872494 | 79.3767765 | 63.6528503 |
| 16:45:33 | 68.0497845 | 85.2872494 | 80.3767765 | 63.6528503 |
| 16:45:34 | 68.0497845 | 88.2872494 | 80.3767765 | 63.6528503 |
| 16:45:35 | 68.0497845 | 88.2872494 | 80.3767765 | 63.6528503 |
| 16:45:36 | 68.0497845 | 88.2872494 | 78.3767765 | 63.6528503 |
| 16:45:37 | 71.0497845 | 84.2872494 | 78.3767765 | 63.6528503 |
| 16:45:38 | 71.0497845 | 84.2872494 | 77.3767765 | 65.6528503 |
| 16:45:39 | 71.0497845 | 80.2872494 | 76.3767765 | 66.6528503 |
| 16:45:40 | 71.0497845 | 78.2872494 | 76.3767765 | 71.6528503 |
| 16:45:41 | 68.0497845 | 78.2872494 | 76.3767765 | 72.6528503 |
| 16:45:42 | 68.0497845 | 78.2872494 | 74.3767765 | 72.6528503 |

|          |            |            |            |            |
|----------|------------|------------|------------|------------|
| 16:45:43 | 68.0497845 | 78.2872494 | 74.3767765 | 72.6528503 |
| 16:45:44 | 68.0497845 | 78.2872494 | 74.3767765 | 72.6528503 |
| 16:45:45 | 68.0497845 | 77.2872494 | 73.3767765 | 68.6528503 |
| 16:45:46 | 68.0497845 | 77.2872494 | 73.3767765 | 68.6528503 |
| 16:45:47 | 68.0497845 | 76.2872494 | 73.3767765 | 68.6528503 |
| 16:45:48 | 68.0497845 | 76.2872494 | 73.3767765 | 68.6528503 |
| 16:45:49 | 69.0497845 | 76.2872494 | 73.3767765 | 68.6528503 |
| 16:45:50 | 69.0497845 | 76.2872494 | 70.3767765 | 69.6528503 |
| 16:45:51 | 69.0497845 | 76.2872494 | 66.3767765 | 70.6528503 |
| 16:45:52 | 69.0497845 | 75.2872494 | 66.3767765 | 72.6528503 |
| 16:45:53 | 69.0497845 | 75.2872494 | 66.3767765 | 72.6528503 |
| 16:45:54 | 68.0497845 | 73.2872494 | 66.3767765 | 73.6528503 |
| 16:45:55 | 68.0497845 | 73.2872494 | 69.3767765 | 73.6528503 |
| 16:45:56 | 68.0497845 | 73.2872494 | 71.3767765 | 73.6528503 |
| 16:45:57 | 67.0497845 | 73.2872494 | 72.3767765 | 73.6528503 |
| 16:45:58 | 67.0497845 | 73.2872494 | 72.3767765 | 73.6528503 |
| 16:45:59 | 68.0497845 | 73.2872494 | 73.3767765 | 75.6528503 |
| 16:46:00 | 68.0497845 | 75.2872494 | 73.3767765 | 75.6528503 |
| 16:46:01 | 68.0497845 | 73.2872494 | 71.3767765 | 75.6528503 |
| 16:46:02 | 68.0497845 | 73.2872494 | 71.3767765 | 75.6528503 |
| 16:46:03 | 68.0497845 | 74.2872494 | 71.3767765 | 75.6528503 |
| 16:46:04 | 68.0497845 | 75.2872494 | 71.3767765 | 75.6528503 |
| 16:46:05 | 68.0497845 | 76.2872494 | 71.3767765 | 73.6528503 |
| 16:46:06 | 68.0497845 | 76.2872494 | 72.3767765 | 73.6528503 |
| 16:46:07 | 68.0497845 | 76.2872494 | 73.3767765 | 73.6528503 |
| 16:46:08 | 68.0497845 | 76.2872494 | 73.3767765 | 70.6528503 |
| 16:46:09 | 68.0497845 | 76.2872494 | 73.3767765 | 69.6528503 |
| 16:46:10 | 68.0497845 | 76.2872494 | 73.3767765 | 68.6528503 |
| 16:46:11 | 68.0497845 | 76.2872494 | 70.3767765 | 68.6528503 |
| 16:46:12 | 67.0497845 | 76.2872494 | 70.3767765 | 68.6528503 |
| 16:46:13 | 66.0497845 | 76.2872494 | 66.3767765 | 68.6528503 |
| 16:46:14 | 66.0497845 | 76.2872494 | 65.3767765 | 68.6528503 |
| 16:46:15 | 66.0497845 | 75.2872494 | 66.3767765 | 67.6528503 |
| 16:46:16 | 66.0497845 | 72.2872494 | 66.3767765 | 67.6528503 |
| 16:46:17 | 66.0497845 | 70.2872494 | 66.3767765 | 67.6528503 |
| 16:46:18 | 66.0497845 | 70.2872494 | 66.3767765 | 65.6528503 |
| 16:46:19 | 66.0497845 | 68.2872494 | 67.3767765 | 65.6528503 |
| 16:46:20 | 66.0497845 | 68.2872494 | 69.3767765 | 65.6528503 |
| 16:46:21 | 66.0497845 | 66.2872494 | 69.3767765 | 65.6528503 |
| 16:46:22 | 65.0497845 | 66.2872494 | 69.3767765 | 65.6528503 |
| 16:46:23 | 65.0497845 | 70.2872494 | 70.3767765 | 65.6528503 |
| 16:46:24 | 66.0497845 | 71.2872494 | 69.3767765 | 65.6528503 |
| 16:46:25 | 66.0497845 | 71.2872494 | 68.3767765 | 65.6528503 |
| 16:46:26 | 66.0497845 | 71.2872494 | 69.3767765 | 65.6528503 |
| 16:46:27 | 66.0497845 | 71.2872494 | 71.3767765 | 66.6528503 |



|          |            |            |            |            |
|----------|------------|------------|------------|------------|
| 16:46:28 | 67.0497845 | 71.2872494 | 75.3767765 | 67.6528503 |
| 16:46:29 | 67.0497845 | 71.2872494 | 77.3767765 | 67.6528503 |
| 16:46:30 | 67.0497845 | 71.2872494 | 77.3767765 | 67.6528503 |
| 16:46:31 | 67.0497845 | 72.2872494 | 78.3767765 | 67.6528503 |
| 16:46:32 | 67.0497845 | 72.2872494 | 79.3767765 | 66.6528503 |
| 16:46:33 | 67.0497845 | 72.2872494 | 79.3767765 | 66.6528503 |
| 16:46:34 | 67.0497845 | 74.2872494 | 78.3767765 | 67.6528503 |
| 16:46:35 | 67.0497845 | 74.2872494 | 77.3767765 | 69.6528503 |
| 16:46:36 | 67.0497845 | 71.2872494 | 77.3767765 | 69.6528503 |
| 16:46:37 | 67.0497845 | 71.2872494 | 77.3767765 | 69.6528503 |
| 16:46:38 | 67.0497845 | 71.2872494 | 75.3767765 | 69.6528503 |
| 16:46:39 | 67.0497845 | 72.2872494 | 73.3767765 | 70.6528503 |
| 16:46:40 | 67.0497845 | 73.2872494 | 72.3767765 | 70.6528503 |
| 16:46:41 | 68.0497845 | 74.2872494 | 72.3767765 | 70.6528503 |
| 16:46:42 | 68.0497845 | 74.2872494 | 72.3767765 | 71.6528503 |
| 16:46:43 | 68.0497845 | 74.2872494 | 72.3767765 | 70.6528503 |
| 16:46:44 | 68.0497845 | 74.2872494 | 74.3767765 | 70.6528503 |
| 16:46:45 | 68.0497845 | 75.2872494 | 75.3767765 | 70.6528503 |
| 16:46:46 | 68.0497845 | 75.2872494 | 74.3767765 | 70.6528503 |
| 16:46:47 | 68.0497845 | 75.2872494 | 72.3767765 | 71.6528503 |
| 16:46:48 | 67.0497845 | 76.2872494 | 72.3767765 | 71.6528503 |
| 16:46:49 | 67.0497845 | 77.2872494 | 72.3767765 | 71.6528503 |
| 16:46:50 | 67.0497845 | 78.2872494 | 70.3767765 | 73.6528503 |
| 16:46:51 | 68.0497845 | 81.2872494 | 69.3767765 | 76.6528503 |
| 16:46:52 | 70.0497845 | 81.2872494 | 68.3767765 | 76.6528503 |
| 16:46:53 | 70.0497845 | 81.2872494 | 68.3767765 | 77.6528503 |
| 16:46:54 | 70.0497845 | 80.2872494 | 68.3767765 | 77.6528503 |
| 16:46:55 | 70.0497845 | 77.2872494 | 68.3767765 | 78.6528503 |
| 16:46:56 | 68.0497845 | 76.2872494 | 68.3767765 | 78.6528503 |
| 16:46:57 | 68.0497845 | 76.2872494 | 67.3767765 | 79.6528503 |
| 16:46:58 | 68.0497845 | 76.2872494 | 67.3767765 | 79.6528503 |
| 16:46:59 | 67.0497845 | 75.2872494 | 67.3767765 | 79.6528503 |
| 16:47:00 | 67.0497845 | 75.2872494 | 67.3767765 | 71.6528503 |
| 16:47:01 | 67.0497845 | 75.2872494 | 67.3767765 | 71.6528503 |
| 16:47:02 | 65.0497845 | 75.2872494 | 66.3767765 | 71.6528503 |
| 16:47:03 | 65.0497845 | 74.2872494 | 66.3767765 | 71.6528503 |
| 16:47:04 | 65.0497845 | 74.2872494 | 66.3767765 | 71.6528503 |
| 16:47:05 | 65.0497845 | 74.2872494 | 66.3767765 | 71.6528503 |
| 16:47:06 | 65.0497845 | 74.2872494 | 66.3767765 | 71.6528503 |
| 16:47:07 | 65.0497845 | 74.2872494 | 66.3767765 | 70.6528503 |
| 16:47:08 | 65.0497845 | 73.2872494 | 67.3767765 | 70.6528503 |
| 16:47:09 | 65.0497845 | 73.2872494 | 67.3767765 | 70.6528503 |
| 16:47:10 | 65.0497845 | 73.2872494 | 67.3767765 | 70.6528503 |
| 16:47:11 | 66.0497845 | 73.2872494 | 67.3767765 | 68.6528503 |
| 16:47:12 | 66.0497845 | 73.2872494 | 68.3767765 | 68.6528503 |

|          |            |            |            |            |
|----------|------------|------------|------------|------------|
| 16:47:13 | 66.0497845 | 73.2872494 | 68.3767765 | 66.6528503 |
| 16:47:14 | 66.0497845 | 74.2872494 | 68.3767765 | 64.6528503 |
| 16:47:15 | 67.0497845 | 79.2872494 | 68.3767765 | 64.6528503 |
| 16:47:16 | 67.0497845 | 79.2872494 | 71.3767765 | 64.6528503 |
| 16:47:17 | 77.0497845 | 79.2872494 | 71.3767765 | 61.6528503 |
| 16:47:18 | 76.0497845 | 79.2872494 | 72.3767765 | 60.6528503 |
| 16:47:19 | 76.0497845 | 80.2872494 | 70.3767765 | 60.6528503 |
| 16:47:20 | 76.0497845 | 80.2872494 | 70.3767765 | 61.6528503 |
| 16:47:21 | 70.0497845 | 81.2872494 | 70.3767765 | 61.6528503 |
| 16:47:22 | 70.0497845 | 81.2872494 | 70.3767765 | 61.6528503 |
| 16:47:23 | 70.0497845 | 81.2872494 | 70.3767765 | 61.6528503 |
| 16:47:24 | 65.0497845 | 81.2872494 | 72.3767765 | 61.6528503 |
| 16:47:25 | 65.0497845 | 84.2872494 | 76.3767765 | 59.6528503 |
| 16:47:26 | 65.0497845 | 84.2872494 | 78.3767765 | 59.6528503 |
| 16:47:27 | 62.0497845 | 85.2872494 | 78.3767765 | 59.6528503 |
| 16:47:28 | 62.0497845 | 68.3356503 | 78.3767765 | 59.6528503 |
| 16:47:29 | 62.0497845 | 83.2872494 | 78.3767765 | 58.6528503 |
| 16:47:30 | 62.0497845 | 83.2872494 | 77.3767765 | 58.6528503 |
| 16:47:31 | 62.0497845 | 83.2872494 | 77.3767765 | 58.6528503 |
| 16:47:32 | 62.0497845 | 83.2872494 | 73.3767765 | 58.6528503 |
| 16:47:33 | 65.0497845 | 83.2872494 | 72.3767765 | 60.6528503 |
| 16:47:34 | 67.0497845 | 84.2872494 | 72.3767765 | 61.6528503 |
| 16:47:35 | 67.0497845 | 84.2872494 | 73.3767765 | 61.6528503 |
| 16:47:36 | 68.0497845 | 84.2872494 | 73.3767765 | 61.6528503 |
| 16:47:37 | 68.0497845 | 70.2872494 | 74.3767765 | 61.6528503 |
| 16:47:38 | 68.0497845 | 69.2872494 | 75.3767765 | 62.6528503 |
| 16:47:39 | 68.0497845 | 68.2872494 | 75.3767765 | 62.6528503 |
| 16:47:40 | 69.0497845 | 68.2872494 | 74.3767765 | 64.6528503 |
| 16:47:41 | 69.0497845 | 67.2872494 | 71.3767765 | 64.6528503 |
| 16:47:42 | 70.0497845 | 67.2872494 | 69.3767765 | 66.6528503 |
| 16:47:43 | 70.0497845 | 67.2872494 | 69.3767765 | 66.6528503 |
| 16:47:44 | 70.0497845 | 66.2872494 | 70.3767765 | 67.6528503 |
| 16:47:45 | 70.0497845 | 66.2872494 | 70.3767765 | 68.6528503 |
| 16:47:46 | 70.0497845 | 66.2872494 | 71.3767765 | 68.6528503 |
| 16:47:47 | 70.0497845 | 66.2872494 | 71.3767765 | 67.6528503 |
| 16:47:48 | 70.0497845 | 65.2872494 | 72.3767765 | 67.6528503 |
| 16:47:49 | 70.0497845 | 63.2872494 | 73.3767765 | 67.6528503 |
| 16:47:50 | 70.0497845 | 66.2872494 | 73.3767765 | 66.6528503 |
| 16:47:51 | 68.0497845 | 66.2872494 | 73.3767765 | 66.6528503 |
| 16:47:52 | 68.0497845 | 67.2872494 | 73.3767765 | 64.6528503 |
| 16:47:53 | 68.0497845 | 67.2872494 | 73.3767765 | 63.6528503 |
| 16:47:54 | 68.0497845 | 67.2872494 | 73.3767765 | 63.6528503 |
| 16:47:55 | 68.0497845 | 67.2872494 | 73.3767765 | 63.6528503 |
| 16:47:56 | 68.0497845 | 69.2872494 | 73.3767765 | 62.6528503 |
| 16:47:57 | 68.0497845 | 70.2872494 | 73.3767765 | 62.6528503 |

|          |            |            |            |            |
|----------|------------|------------|------------|------------|
| 16:47:58 | 68.0497845 | 70.2872494 | 72.3767765 | 61.6528503 |
| 16:47:59 | 68.0497845 | 69.2872494 | 72.3767765 | 61.6528503 |
| 16:48:00 | 68.0497845 | 69.2872494 | 72.3767765 | 61.6528503 |
| 16:48:01 | 68.0497845 | 69.2872494 | 72.3767765 | 61.6528503 |
| 16:48:02 | 68.0497845 | 69.2872494 | 72.3767765 | 61.6528503 |
| 16:48:03 | 68.0497845 | 68.2872494 | 72.3767765 | 61.6528503 |
| 16:48:04 | 68.0497845 | 68.2872494 | 71.3767765 | 61.6528503 |
| 16:48:05 | 68.0497845 | 69.2872494 | 70.3767765 | 61.6528503 |
| 16:48:06 | 69.0497845 | 69.2872494 | 69.3767765 | 60.6528503 |
| 16:48:07 | 76.0497845 | 69.2872494 | 69.3767765 | 60.6528503 |
| 16:48:08 | 76.0497845 | 69.2872494 | 68.3767765 | 60.6528503 |
| 16:48:09 | 76.0497845 | 69.2872494 | 67.3767765 | 67.6528503 |
| 16:48:10 | 77.0497845 | 68.2872494 | 66.3767765 | 69.6528503 |
| 16:48:11 | 77.0497845 | 71.2872494 | 68.3767765 | 69.6528503 |
| 16:48:12 | 78.0497845 | 71.2872494 | 68.3767765 | 71.6528503 |
| 16:48:13 | 78.0497845 | 73.2872494 | 69.3767765 | 73.6528503 |
| 16:48:14 | 78.0497845 | 75.2872494 | 69.3767765 | 73.6528503 |
| 16:48:15 | 78.0497845 | 75.2872494 | 69.3767765 | 74.6528503 |
| 16:48:16 | 81.0497845 | 72.2872494 | 68.3767765 | 74.6528503 |
| 16:48:17 | 81.0497845 | 72.2872494 | 68.3767765 | 77.6528503 |
| 16:48:18 | 81.0497845 | 72.2872494 | 68.3767765 | 78.6528503 |
| 16:48:19 | 83.0497845 | 71.2872494 | 67.3767765 | 78.6528503 |
| 16:48:20 | 83.0497845 | 71.2872494 | 67.3767765 | 78.6528503 |
| 16:48:21 | 81.0497845 | 71.2872494 | 67.3767765 | 78.6528503 |
| 16:48:22 | 80.0497845 | 71.2872494 | 67.3767765 | 80.6528503 |
| 16:48:23 | 80.0497845 | 72.2872494 | 66.3767765 | 80.6528503 |
| 16:48:24 | 80.0497845 | 73.2872494 | 66.3767765 | 81.6528503 |
| 16:48:25 | 80.0497845 | 75.2872494 | 66.3767765 | 81.6528503 |
| 16:48:26 | 80.0497845 | 75.2872494 | 66.3767765 | 80.6528503 |
| 16:48:27 | 80.0497845 | 76.2872494 | 64.3767765 | 79.6528503 |
| 16:48:28 | 76.0497845 | 75.2872494 | 63.3767765 | 79.6528503 |
| 16:48:29 | 76.0497845 | 75.2872494 | 62.3767765 | 79.6528503 |
| 16:48:30 | 76.0497845 | 75.2872494 | 63.3767765 | 79.6528503 |
| 16:48:31 | 76.0497845 | 75.2872494 | 63.3767765 | 80.6528503 |
| 16:48:32 | 75.0497845 | 75.2872494 | 63.3767765 | 81.6528503 |
| 16:48:33 | 75.0497845 | 75.2872494 | 63.3767765 | 81.6528503 |
| 16:48:34 | 75.0497845 | 75.2872494 | 63.3767765 | 81.6528503 |
| 16:48:35 | 75.0497845 | 75.2872494 | 63.3767765 | 80.6528503 |
| 16:48:36 | 75.0497845 | 75.2872494 | 63.3767765 | 79.6528503 |
| 16:48:37 | 75.0497845 | 78.2872494 | 63.3767765 | 78.6528503 |
| 16:48:38 | 75.0497845 | 78.2872494 | 64.3767765 | 78.6528503 |
| 16:48:39 | 76.0497845 | 78.2872494 | 64.3767765 | 78.6528503 |
| 16:48:40 | 76.0497845 | 78.2872494 | 64.3767765 | 80.6528503 |
| 16:48:41 | 76.0497845 | 79.2872494 | 64.3767765 | 81.6528503 |
| 16:48:42 | 77.0497845 | 79.2872494 | 64.3767765 | 81.6528503 |

|          |            |            |            |            |
|----------|------------|------------|------------|------------|
| 16:48:43 | 77.0497845 | 79.2872494 | 64.3767765 | 81.6528503 |
| 16:48:44 | 77.0497845 | 80.2872494 | 63.3767765 | 80.6528503 |
| 16:48:45 | 80.0497845 | 80.2872494 | 63.3767765 | 80.6528503 |
| 16:48:46 | 80.0497845 | 80.2872494 | 63.3767765 | 80.6528503 |
| 16:48:47 | 80.0497845 | 78.2872494 | 63.3767765 | 79.6528503 |
| 16:48:48 | 72.0497845 | 79.2872494 | 64.3767765 | 79.6528503 |
| 16:48:49 | 72.0497845 | 79.2872494 | 64.3767765 | 79.6528503 |
| 16:48:50 | 72.0497845 | 80.2872494 | 67.3767765 | 79.6528503 |
| 16:48:51 | 71.0497845 | 82.2872494 | 68.3767765 | 80.6528503 |
| 16:48:52 | 71.0497845 | 82.2872494 | 68.3767765 | 80.6528503 |
| 16:48:53 | 71.0497845 | 83.2872494 | 69.3767765 | 80.6528503 |
| 16:48:54 | 71.0497845 | 83.2872494 | 69.3767765 | 79.6528503 |
| 16:48:55 | 71.0497845 | 83.2872494 | 71.3767765 | 78.6528503 |
| 16:48:56 | 70.0497845 | 81.2872494 | 71.3767765 | 77.6528503 |
| 16:48:57 | 70.0497845 | 80.2872494 | 71.3767765 | 76.6528503 |
| 16:48:58 | 70.0497845 | 80.2872494 | 72.3767765 | 75.6528503 |
| 16:48:59 | 71.0497845 | 77.2872494 | 73.3767765 | 75.6528503 |
| 16:49:00 | 71.0497845 | 72.2872494 | 72.3767765 | 75.6528503 |
| 16:49:01 | 71.0497845 | 71.2872494 | 72.3767765 | 74.6528503 |
| 16:49:02 | 72.0497845 | 70.2872494 | 70.3767765 | 74.6528503 |
| 16:49:03 | 72.0497845 | 70.2872494 | 69.3767765 | 74.6528503 |
| 16:49:04 | 73.0497845 | 68.2872494 | 67.3767765 | 73.6528503 |
| 16:49:05 | 73.0497845 | 67.2872494 | 64.3767765 | 73.6528503 |
| 16:49:06 | 73.0497845 | 67.2872494 | 64.3767765 | 73.6528503 |
| 16:49:07 | 76.0497845 | 67.2872494 | 64.3767765 | 73.6528503 |
| 16:49:08 | 76.0497845 | 64.2872494 | 66.3767765 | 72.6528503 |
| 16:49:09 | 76.0497845 | 62.2872494 | 67.3767765 | 72.6528503 |
| 16:49:10 | 90.0497845 | 62.2872494 | 67.3767765 | 72.6528503 |
| 16:49:11 | 90.0497845 | 62.2872494 | 68.3767765 | 72.6528503 |
| 16:49:12 | 90.0497845 | 61.2872494 | 68.3767765 | 72.6528503 |
| 16:49:13 | 90.0497845 | 61.2872494 | 67.3767765 | 71.6528503 |
| 16:49:14 | 90.0497845 | 60.2872494 | 67.3767765 | 71.6528503 |
| 16:49:15 | 89.0497845 | 61.2872494 | 67.3767765 | 71.6528503 |
| 16:49:16 | 89.0497845 | 61.2872494 | 67.3767765 | 71.6528503 |
| 16:49:17 | 90.0497845 | 63.2872494 | 68.3767765 | 71.6528503 |
| 16:49:18 | 90.0497845 | 63.2872494 | 68.3767765 | 71.6528503 |
| 16:49:19 | 90.0497845 | 62.2872494 | 68.3767765 | 68.6528503 |
| 16:49:20 | 90.0497845 | 62.2872494 | 68.3767765 | 68.6528503 |
| 16:49:21 | 88.0497845 | 62.2872494 | 69.3767765 | 68.6528503 |
| 16:49:22 | 88.0497845 | 62.2872494 | 69.3767765 | 68.6528503 |
| 16:49:23 | 88.0497845 | 62.2872494 | 69.3767765 | 69.6528503 |
| 16:49:24 | 89.0497845 | 64.2872494 | 70.3767765 | 69.6528503 |
| 16:49:25 | 89.0497845 | 65.2872494 | 70.3767765 | 71.6528503 |
| 16:49:26 | 88.0497845 | 65.2872494 | 70.3767765 | 73.6528503 |
| 16:49:27 | 89.0497845 | 67.2872494 | 70.3767765 | 73.6528503 |

|          |            |            |            |            |
|----------|------------|------------|------------|------------|
| 16:49:28 | 89.0497845 | 69.2872494 | 70.3767765 | 73.6528503 |
| 16:49:29 | 89.0497845 | 69.2872494 | 70.3767765 | 73.6528503 |
| 16:49:30 | 89.0497845 | 69.2872494 | 70.3767765 | 74.6528503 |
| 16:49:31 | 88.0497845 | 69.2872494 | 70.3767765 | 74.6528503 |
| 16:49:32 | 88.0497845 | 70.2872494 | 70.3767765 | 74.6528503 |
| 16:49:33 | 86.0497845 | 72.2872494 | 70.3767765 | 74.6528503 |
| 16:49:34 | 86.0497845 | 72.2872494 | 68.3767765 | 75.6528503 |
| 16:49:35 | 86.0497845 | 73.2872494 | 67.3767765 | 75.6528503 |
| 16:49:36 | 86.0497845 | 73.2872494 | 67.3767765 | 76.6528503 |
| 16:49:37 | 82.0497845 | 74.2872494 | 67.3767765 | 76.6528503 |
| 16:49:38 | 82.0497845 | 74.2872494 | 66.3767765 | 76.6528503 |
| 16:49:39 | 84.0497845 | 73.2872494 | 65.3767765 | 76.6528503 |
| 16:49:40 | 84.0497845 | 73.2872494 | 65.3767765 | 76.6528503 |
| 16:49:41 | 84.0497845 | 73.2872494 | 65.3767765 | 76.6528503 |
| 16:49:42 | 84.0497845 | 71.2872494 | 65.3767765 | 76.6528503 |
| 16:49:43 | 85.0497845 | 71.2872494 | 66.3767765 | 76.6528503 |
| 16:49:44 | 85.0497845 | 71.2872494 | 77.3767765 | 76.6528503 |
| 16:49:45 | 84.0497845 | 71.2872494 | 79.3767765 | 76.6528503 |
| 16:49:46 | 84.0497845 | 72.2872494 | 80.3767765 | 74.6528503 |
| 16:49:47 | 84.0497845 | 72.2872494 | 80.3767765 | 74.6528503 |
| 16:49:48 | 84.0497845 | 72.2872494 | 81.3767765 | 74.6528503 |
| 16:49:49 | 84.0497845 | 73.2872494 | 82.3767765 | 74.6528503 |
| 16:49:50 | 84.0497845 | 72.2872494 | 82.3767765 | 74.6528503 |
| 16:49:51 | 85.0497845 | 72.2872494 | 83.3767765 | 74.6528503 |
| 16:49:52 | 85.0497845 | 71.2872494 | 83.3767765 | 74.6528503 |
| 16:49:53 | 86.0497845 | 71.2872494 | 83.3767765 | 74.6528503 |
| 16:49:54 | 86.0497845 | 71.2872494 | 83.3767765 | 74.6528503 |
| 16:49:55 | 86.0497845 | 72.2872494 | 82.3767765 | 74.6528503 |
| 16:49:56 | 88.0497845 | 72.2872494 | 82.3767765 | 72.6528503 |
| 16:49:57 | 88.0497845 | 71.2872494 | 81.3767765 | 71.6528503 |
| 16:49:58 | 88.0497845 | 68.2872494 | 81.3767765 | 71.6528503 |
| 16:49:59 | 88.0497845 | 68.2872494 | 81.3767765 | 71.6528503 |
| 16:50:00 | 77.9606503 | 67.2872494 | 78.3767765 | 70.6528503 |
| 16:50:01 | 79.2106503 | 66.2872494 | 77.3767765 | 72.6528503 |
| 16:50:02 | 78.5856503 | 62.2872494 | 74.3767765 | 72.6528503 |
| 16:50:03 | 78.7106503 | 60.2872494 | 74.3767765 | 73.6528503 |
| 16:50:04 | 78.3356503 | 60.2872494 | 72.3767765 | 73.6528503 |
| 16:50:05 | 80.0856503 | 59.2872494 | 72.3767765 | 89.6528503 |
| 16:50:06 | 78.9606503 | 59.2872494 | 71.3767765 | 86.6528503 |
| 16:50:07 | 78.3356503 | 60.2872494 | 71.3767765 | 79.6528503 |
| 16:50:08 | 77.8356503 | 60.2872494 | 71.3767765 | 77.6528503 |
| 16:50:09 | 77.7106503 | 60.2872494 | 70.3767765 | 76.6528503 |
| 16:50:10 | 81.2106503 | 60.2872494 | 70.3767765 | 74.6528503 |
| 16:50:11 | 81.8356503 | 60.2872494 | 70.3767765 | 73.6528503 |
| 16:50:12 | 80.4606503 | 64.2872494 | 70.3767765 | 73.6528503 |

|          |            |            |            |            |
|----------|------------|------------|------------|------------|
| 16:50:13 | 79.9606503 | 68.2872494 | 69.3767765 | 75.6528503 |
| 16:50:14 | 79.7106503 | 69.2872494 | 69.3767765 | 75.6528503 |
| 16:50:15 | 79.5856503 | 70.2872494 | 70.3767765 | 75.6528503 |
| 16:50:16 | 79.7106503 | 70.2872494 | 71.3767765 | 75.6528503 |
| 16:50:17 | 89.0497845 | 71.2872494 | 71.3767765 | 75.6528503 |
| 16:50:18 | 89.0497845 | 74.2872494 | 71.3767765 | 75.6528503 |
| 16:50:19 | 89.0497845 | 74.2872494 | 71.3767765 | 75.6528503 |
| 16:50:20 | 89.0497845 | 76.2872494 | 70.3767765 | 70.6528503 |
| 16:50:21 | 85.0497845 | 78.2872494 | 70.3767765 | 69.6528503 |
| 16:50:22 | 85.0497845 | 78.2872494 | 70.3767765 | 72.6528503 |
| 16:50:23 | 77.0497845 | 78.2872494 | 70.3767765 | 75.6528503 |
| 16:50:24 | 77.0497845 | 78.2872494 | 70.3767765 | 75.6528503 |
| 16:50:25 | 77.0497845 | 78.2872494 | 69.3767765 | 76.6528503 |
| 16:50:26 | 76.0497845 | 78.2872494 | 69.3767765 | 76.6528503 |
| 16:50:27 | 76.0497845 | 78.2872494 | 69.3767765 | 76.6528503 |
| 16:50:28 | 76.0497845 | 78.2872494 | 64.3767765 | 75.6528503 |
| 16:50:29 | 76.0497845 | 78.2872494 | 63.3767765 | 74.6528503 |
| 16:50:30 | 77.0497845 | 77.2872494 | 63.3767765 | 74.6528503 |
| 16:50:31 | 77.0497845 | 75.2872494 | 63.3767765 | 74.6528503 |
| 16:50:32 | 77.0497845 | 75.2872494 | 65.3767765 | 73.6528503 |
| 16:50:33 | 79.0497845 | 75.2872494 | 65.3767765 | 73.6528503 |
| 16:50:34 | 79.0497845 | 75.2872494 | 66.3767765 | 73.6528503 |
| 16:50:35 | 79.0497845 | 74.2872494 | 65.3767765 | 73.6528503 |
| 16:50:36 | 79.0497845 | 73.2872494 | 65.3767765 | 74.6528503 |
| 16:50:37 | 80.0497845 | 73.2872494 | 65.3767765 | 74.6528503 |
| 16:50:38 | 80.0497845 | 72.2872494 | 65.3767765 | 74.6528503 |
| 16:50:39 | 80.0497845 | 72.2872494 | 64.3767765 | 74.6528503 |
| 16:50:40 | 82.0497845 | 72.2872494 | 64.3767765 | 73.6528503 |
| 16:50:41 | 82.0497845 | 72.2872494 | 65.3767765 | 72.6528503 |
| 16:50:42 | 82.0497845 | 72.2872494 | 65.3767765 | 72.6528503 |
| 16:50:43 | 78.0497845 | 79.2872494 | 67.3767765 | 72.6528503 |
| 16:50:44 | 78.0497845 | 79.2872494 | 67.3767765 | 72.6528503 |
| 16:50:45 | 78.0497845 | 80.2872494 | 67.3767765 | 72.6528503 |
| 16:50:46 | 76.0497845 | 80.2872494 | 67.3767765 | 72.6528503 |
| 16:50:47 | 76.0497845 | 80.2872494 | 68.3767765 | 72.6528503 |
| 16:50:48 | 76.0497845 | 79.2872494 | 68.3767765 | 72.6528503 |
| 16:50:49 | 79.0497845 | 79.2872494 | 68.3767765 | 72.6528503 |
| 16:50:50 | 81.0497845 | 77.2872494 | 68.3767765 | 72.6528503 |
| 16:50:51 | 81.0497845 | 77.2872494 | 68.3767765 | 72.6528503 |
| 16:50:52 | 81.0497845 | 77.2872494 | 69.3767765 | 72.6528503 |
| 16:50:53 | 82.0497845 | 75.2872494 | 69.3767765 | 72.6528503 |
| 16:50:54 | 82.0497845 | 75.2872494 | 69.3767765 | 72.6528503 |
| 16:50:55 | 82.0497845 | 75.2872494 | 69.3767765 | 73.6528503 |
| 16:50:56 | 79.0497845 | 75.2872494 | 69.3767765 | 76.6528503 |
| 16:50:57 | 79.0497845 | 75.2872494 | 68.3767765 | 76.6528503 |

|          |            |            |            |            |
|----------|------------|------------|------------|------------|
| 16:50:58 | 79.0497845 | 75.2872494 | 68.3767765 | 76.6528503 |
| 16:50:59 | 76.0497845 | 75.2872494 | 68.3767765 | 76.6528503 |
| 16:51:00 | 76.0497845 | 73.2872494 | 69.3767765 | 77.6528503 |
| 16:51:01 | 76.0497845 | 69.2872494 | 69.3767765 | 77.6528503 |
| 16:51:02 | 74.0497845 | 66.2872494 | 69.3767765 | 76.6528503 |
| 16:51:03 | 74.0497845 | 66.2872494 | 66.3767765 | 74.6528503 |
| 16:51:04 | 77.0497845 | 65.2872494 | 67.3767765 | 73.6528503 |
| 16:51:05 | 77.0497845 | 62.2872494 | 67.3767765 | 73.6528503 |
| 16:51:06 | 78.0497845 | 61.2872494 | 68.3767765 | 73.6528503 |
| 16:51:07 | 78.0497845 | 62.2872494 | 68.3767765 | 74.6528503 |
| 16:51:08 | 81.0497845 | 62.2872494 | 68.3767765 | 74.6528503 |
| 16:51:09 | 81.0497845 | 71.2872494 | 67.3767765 | 74.6528503 |
| 16:51:10 | 81.0497845 | 74.2872494 | 67.3767765 | 72.6528503 |
| 16:51:11 | 81.0497845 | 74.2872494 | 66.3767765 | 72.6528503 |
| 16:51:12 | 82.0497845 | 74.2872494 | 66.3767765 | 72.6528503 |
| 16:51:13 | 82.0497845 | 75.2872494 | 66.3767765 | 73.6528503 |
| 16:51:14 | 82.0497845 | 75.2872494 | 67.3767765 | 74.6528503 |
| 16:51:15 | 85.0497845 | 75.2872494 | 69.3767765 | 73.6528503 |
| 16:51:16 | 85.0497845 | 78.2872494 | 70.3767765 | 71.6528503 |
| 16:51:17 | 85.0497845 | 78.2872494 | 70.3767765 | 71.6528503 |
| 16:51:18 | 73.0856503 | 78.2872494 | 70.3767765 | 69.6528503 |
| 16:51:19 | 72.2106503 | 78.2872494 | 68.3767765 | 66.6528503 |
| 16:51:20 | 72.3356503 | 79.2872494 | 67.3767765 | 68.6528503 |
| 16:51:21 | 83.0497845 | 80.2872494 | 65.3767765 | 70.6528503 |
| 16:51:22 | 83.0497845 | 81.2872494 | 65.3767765 | 70.6528503 |
| 16:51:23 | 83.0497845 | 81.2872494 | 64.3767765 | 69.6528503 |
| 16:51:24 | 83.0497845 | 81.2872494 | 64.3767765 | 64.6528503 |
| 16:51:25 | 83.0497845 | 82.2872494 | 62.3767765 | 64.6528503 |
| 16:51:26 | 83.0497845 | 83.2872494 | 62.3767765 | 64.6528503 |
| 16:51:27 | 83.0497845 | 86.2872494 | 60.3767765 | 64.6528503 |
| 16:51:28 | 84.0497845 | 88.2872494 | 59.3767765 | 65.6528503 |
| 16:51:29 | 84.0497845 | 88.2872494 | 59.3767765 | 67.6528503 |
| 16:51:30 | 84.0497845 | 88.2872494 | 59.3767765 | 67.6528503 |
| 16:51:31 | 84.0497845 | 88.2872494 | 58.3767765 | 67.6528503 |
| 16:51:32 | 84.0497845 | 72.3356503 | 58.3767765 | 69.6528503 |
| 16:51:33 | 84.0497845 | 89.2872494 | 68.3767765 | 69.6528503 |
| 16:51:34 | 84.0497845 | 89.2872494 | 69.3767765 | 69.6528503 |
| 16:51:35 | 88.0497845 | 90.2872494 | 69.3767765 | 69.6528503 |
| 16:51:36 | 88.0497845 | 90.2872494 | 69.3767765 | 69.6528503 |
| 16:51:37 | 89.0497845 | 73.8356503 | 72.3767765 | 70.6528503 |
| 16:51:38 | 89.0497845 | 73.7106503 | 72.3767765 | 70.6528503 |
| 16:51:39 | 90.0497845 | 91.2872494 | 74.3767765 | 72.6528503 |
| 16:51:40 | 90.0497845 | 91.2872494 | 76.3767765 | 72.6528503 |
| 16:51:41 | 90.0497845 | 91.2872494 | 79.3767765 | 72.6528503 |
| 16:51:42 | 89.0497845 | 91.2872494 | 79.3767765 | 72.6528503 |

|          |            |            |            |            |
|----------|------------|------------|------------|------------|
| 16:51:43 | 89.0497845 | 91.2872494 | 80.3767765 | 72.6528503 |
| 16:51:44 | 87.0497845 | 92.2872494 | 80.3767765 | 73.6528503 |
| 16:51:45 | 87.0497845 | 92.2872494 | 80.3767765 | 73.6528503 |
| 16:51:46 | 87.0497845 | 90.2872494 | 80.3767765 | 73.6528503 |
| 16:51:47 | 81.0497845 | 90.2872494 | 80.3767765 | 73.6528503 |
| 16:51:48 | 81.0497845 | 90.2872494 | 81.3767765 | 72.6528503 |
| 16:51:49 | 81.0497845 | 90.2872494 | 80.3767765 | 71.6528503 |
| 16:51:50 | 79.0497845 | 90.2872494 | 79.3767765 | 70.6528503 |
| 16:51:51 | 79.0497845 | 90.2872494 | 79.3767765 | 69.6528503 |
| 16:51:52 | 79.0497845 | 90.2872494 | 79.3767765 | 69.6528503 |
| 16:51:53 | 75.0497845 | 89.2872494 | 79.3767765 | 69.6528503 |
| 16:51:54 | 75.0497845 | 90.2872494 | 79.3767765 | 69.6528503 |
| 16:51:55 | 70.0497845 | 73.8356503 | 79.3767765 | 69.6528503 |
| 16:51:56 | 70.0497845 | 72.9606503 | 72.3767765 | 69.6528503 |
| 16:51:57 | 70.0497845 | 72.8356503 | 72.3767765 | 69.6528503 |
| 16:51:58 | 68.0497845 | 72.8356503 | 71.3767765 | 69.6528503 |
| 16:51:59 | 68.0497845 | 74.0856503 | 69.3767765 | 70.6528503 |
| 16:52:00 | 68.0497845 | 74.8356503 | 70.3767765 | 70.6528503 |
| 16:52:01 | 68.0497845 | 75.2106503 | 70.3767765 | 70.6528503 |
| 16:52:02 | 69.0497845 | 75.4606503 | 70.3767765 | 70.6528503 |
| 16:52:03 | 69.0497845 | 75.9606503 | 72.3767765 | 71.6528503 |
| 16:52:04 | 68.0497845 | 75.2106503 | 72.3767765 | 71.6528503 |
| 16:52:05 | 68.0497845 | 88.2872494 | 73.3767765 | 71.6528503 |
| 16:52:06 | 68.0497845 | 83.2872494 | 74.3767765 | 70.6528503 |
| 16:52:07 | 67.0497845 | 83.2872494 | 76.3767765 | 70.6528503 |
| 16:52:08 | 67.0497845 | 81.2872494 | 76.3767765 | 70.6528503 |
| 16:52:09 | 67.0497845 | 82.2872494 | 76.3767765 | 70.6528503 |
| 16:52:10 | 69.0497845 | 83.2872494 | 76.3767765 | 70.6528503 |
| 16:52:11 | 69.0497845 | 83.2872494 | 76.3767765 | 70.6528503 |
| 16:52:12 | 69.0497845 | 86.2872494 | 78.3767765 | 69.6528503 |
| 16:52:13 | 69.0497845 | 86.2872494 | 80.3767765 | 67.6528503 |
| 16:52:14 | 73.0497845 | 88.2872494 | 82.3767765 | 67.6528503 |
| 16:52:15 | 73.0497845 | 88.2872494 | 83.3767765 | 65.6528503 |
| 16:52:16 | 73.0497845 | 89.2872494 | 83.3767765 | 65.6528503 |
| 16:52:17 | 73.0497845 | 86.2872494 | 83.3767765 | 64.6528503 |
| 16:52:18 | 73.0497845 | 86.2872494 | 81.3767765 | 64.6528503 |
| 16:52:19 | 73.0497845 | 82.2872494 | 81.3767765 | 64.6528503 |
| 16:52:20 | 65.0497845 | 79.2872494 | 81.3767765 | 64.6528503 |
| 16:52:21 | 65.0497845 | 77.2872494 | 80.3767765 | 64.6528503 |
| 16:52:22 | 65.0497845 | 77.2872494 | 78.3767765 | 64.6528503 |
| 16:52:23 | 65.0497845 | 75.2872494 | 78.3767765 | 64.6528503 |
| 16:52:24 | 66.0497845 | 75.2872494 | 76.3767765 | 64.6528503 |
| 16:52:25 | 66.0497845 | 74.2872494 | 76.3767765 | 64.6528503 |
| 16:52:26 | 65.0497845 | 73.2872494 | 76.3767765 | 64.6528503 |
| 16:52:27 | 65.0497845 | 73.2872494 | 76.3767765 | 64.6528503 |



|          |            |            |            |            |
|----------|------------|------------|------------|------------|
| 16:52:28 | 66.0497845 | 73.2872494 | 76.3767765 | 64.6528503 |
| 16:52:29 | 66.0497845 | 73.2872494 | 76.3767765 | 64.6528503 |
| 16:52:30 | 66.0497845 | 73.2872494 | 76.3767765 | 65.6528503 |
| 16:52:31 | 68.0497845 | 75.2872494 | 77.3767765 | 66.6528503 |
| 16:52:32 | 68.0497845 | 76.2872494 | 78.3767765 | 66.6528503 |
| 16:52:33 | 74.0497845 | 76.2872494 | 78.3767765 | 66.6528503 |
| 16:52:34 | 74.0497845 | 75.2872494 | 78.3767765 | 69.6528503 |
| 16:52:35 | 74.0497845 | 73.2872494 | 78.3767765 | 69.6528503 |
| 16:52:36 | 74.0497845 | 71.2872494 | 78.3767765 | 69.6528503 |
| 16:52:37 | 77.0497845 | 70.2872494 | 78.3767765 | 69.6528503 |
| 16:52:38 | 77.0497845 | 70.2872494 | 78.3767765 | 68.6528503 |
| 16:52:39 | 79.0497845 | 70.2872494 | 78.3767765 | 67.6528503 |
| 16:52:40 | 79.0497845 | 70.2872494 | 73.3767765 | 67.6528503 |
| 16:52:41 | 79.0497845 | 70.2872494 | 73.3767765 | 67.6528503 |
| 16:52:42 | 79.0497845 | 70.2872494 | 72.3767765 | 67.6528503 |
| 16:52:43 | 82.0497845 | 70.2872494 | 72.3767765 | 68.6528503 |
| 16:52:44 | 82.0497845 | 70.2872494 | 72.3767765 | 68.6528503 |
| 16:52:45 | 82.0497845 | 70.2872494 | 72.3767765 | 68.6528503 |
| 16:52:46 | 82.0497845 | 70.2872494 | 72.3767765 | 68.6528503 |
| 16:52:47 | 80.0497845 | 70.2872494 | 72.3767765 | 68.6528503 |
| 16:52:48 | 80.0497845 | 70.2872494 | 72.3767765 | 68.6528503 |
| 16:52:49 | 80.0497845 | 70.2872494 | 72.3767765 | 69.6528503 |
| 16:52:50 | 79.0497845 | 70.2872494 | 73.3767765 | 69.6528503 |
| 16:52:51 | 79.0497845 | 69.2872494 | 74.3767765 | 70.6528503 |
| 16:52:52 | 72.0497845 | 68.2872494 | 74.3767765 | 70.6528503 |
| 16:52:53 | 72.0497845 | 67.2872494 | 74.3767765 | 70.6528503 |
| 16:52:54 | 72.0497845 | 66.2872494 | 74.3767765 | 69.6528503 |
| 16:52:55 | 67.0497845 | 65.2872494 | 74.3767765 | 69.6528503 |
| 16:52:56 | 67.0497845 | 65.2872494 | 72.3767765 | 69.6528503 |
| 16:52:57 | 67.0497845 | 60.2872494 | 72.3767765 | 69.6528503 |
| 16:52:58 | 67.0497845 | 59.2872494 | 72.3767765 | 70.6528503 |
| 16:52:59 | 67.0497845 | 59.2872494 | 72.3767765 | 70.6528503 |
| 16:53:00 | 68.0497845 | 59.2872494 | 72.3767765 | 70.6528503 |
| 16:53:01 | 68.0497845 | 59.2872494 | 72.3767765 | 70.6528503 |
| 16:53:02 | 68.0497845 | 58.2872494 | 73.3767765 | 60.6528503 |
| 16:53:03 | 68.0497845 | 58.2872494 | 73.3767765 | 60.6528503 |
| 16:53:04 | 72.0497845 | 58.2872494 | 71.3767765 | 60.6528503 |
| 16:53:05 | 72.0497845 | 59.2872494 | 70.3767765 | 60.6528503 |
| 16:53:06 | 74.0497845 | 60.2872494 | 70.3767765 | 60.6528503 |
| 16:53:07 | 74.0497845 | 61.2872494 | 70.3767765 | 60.6528503 |
| 16:53:08 | 74.0497845 | 61.2872494 | 67.3767765 | 60.6528503 |
| 16:53:09 | 74.0497845 | 61.2872494 | 65.3767765 | 63.6528503 |
| 16:53:10 | 74.0497845 | 62.2872494 | 64.3767765 | 63.6528503 |
| 16:53:11 | 74.0497845 | 62.2872494 | 65.3767765 | 68.6528503 |
| 16:53:12 | 76.0497845 | 62.2872494 | 67.3767765 | 68.6528503 |

|          |            |            |            |            |
|----------|------------|------------|------------|------------|
| 16:53:13 | 76.0497845 | 63.2872494 | 67.3767765 | 68.6528503 |
| 16:53:14 | 76.0497845 | 66.2872494 | 69.3767765 | 69.6528503 |
| 16:53:15 | 76.0497845 | 69.2872494 | 69.3767765 | 72.6528503 |
| 16:53:16 | 76.0497845 | 69.2872494 | 69.3767765 | 72.6528503 |
| 16:53:17 | 80.0497845 | 70.2872494 | 69.3767765 | 72.6528503 |
| 16:53:18 | 78.0497845 | 73.2872494 | 68.3767765 | 74.6528503 |
| 16:53:19 | 78.0497845 | 74.2872494 | 68.3767765 | 74.6528503 |
| 16:53:20 | 78.0497845 | 74.2872494 | 68.3767765 | 74.6528503 |
| 16:53:21 | 77.0497845 | 72.2872494 | 66.3767765 | 74.6528503 |
| 16:53:22 | 77.0497845 | 72.2872494 | 66.3767765 | 74.6528503 |
| 16:53:23 | 76.0497845 | 72.2872494 | 68.3767765 | 74.6528503 |
| 16:53:24 | 76.0497845 | 72.2872494 | 68.3767765 | 74.6528503 |
| 16:53:25 | 76.0497845 | 72.2872494 | 68.3767765 | 75.6528503 |
| 16:53:26 | 76.0497845 | 72.2872494 | 68.3767765 | 75.6528503 |
| 16:53:27 | 75.0497845 | 71.2872494 | 64.3767765 | 75.6528503 |
| 16:53:28 | 75.0497845 | 74.2872494 | 64.3767765 | 76.6528503 |
| 16:53:29 | 74.0497845 | 74.2872494 | 64.3767765 | 77.6528503 |
| 16:53:30 | 74.0497845 | 77.2872494 | 64.3767765 | 77.6528503 |
| 16:53:31 | 74.0497845 | 79.2872494 | 64.3767765 | 77.6528503 |
| 16:53:32 | 73.0497845 | 75.2872494 | 64.3767765 | 75.6528503 |
| 16:53:33 | 73.0497845 | 75.2872494 | 65.3767765 | 75.6528503 |
| 16:53:34 | 74.0497845 | 70.2872494 | 67.3767765 | 75.6528503 |
| 16:53:35 | 74.0497845 | 69.2872494 | 67.3767765 | 74.6528503 |
| 16:53:36 | 74.0497845 | 69.2872494 | 69.3767765 | 74.6528503 |
| 16:53:37 | 74.0497845 | 72.2872494 | 69.3767765 | 74.6528503 |
| 16:53:38 | 74.0497845 | 72.2872494 | 69.3767765 | 74.6528503 |
| 16:53:39 | 74.0497845 | 72.2872494 | 65.3767765 | 74.6528503 |
| 16:53:40 | 74.0497845 | 72.2872494 | 64.3767765 | 74.6528503 |
| 16:53:41 | 74.0497845 | 73.2872494 | 64.3767765 | 74.6528503 |
| 16:53:42 | 74.0497845 | 73.2872494 | 67.3767765 | 74.6528503 |
| 16:53:43 | 74.0497845 | 73.2872494 | 73.3767765 | 75.6528503 |
| 16:53:44 | 74.0497845 | 73.2872494 | 80.3767765 | 75.6528503 |
| 16:53:45 | 75.0497845 | 73.2872494 | 81.3767765 | 75.6528503 |
| 16:53:46 | 75.0497845 | 74.2872494 | 81.3767765 | 75.6528503 |
| 16:53:47 | 75.0497845 | 74.2872494 | 76.3767765 | 75.6528503 |
| 16:53:48 | 76.0497845 | 74.2872494 | 76.3767765 | 75.6528503 |
| 16:53:49 | 76.0497845 | 73.2872494 | 75.3767765 | 74.6528503 |
| 16:53:50 | 76.0497845 | 73.2872494 | 75.3767765 | 73.6528503 |
| 16:53:51 | 76.0497845 | 72.2872494 | 75.3767765 | 71.6528503 |
| 16:53:52 | 76.0497845 | 71.2872494 | 75.3767765 | 71.6528503 |
| 16:53:53 | 76.0497845 | 71.2872494 | 75.3767765 | 70.6528503 |
| 16:53:54 | 76.0497845 | 67.2872494 | 58.3767765 | 71.6528503 |
| 16:53:55 | 76.0497845 | 67.2872494 | 58.3767765 | 71.6528503 |
| 16:53:56 | 76.0497845 | 67.2872494 | 54.3767765 | 71.6528503 |
| 16:53:57 | 76.0497845 | 76.2872494 | 53.3767765 | 71.6528503 |

|          |            |            |            |            |
|----------|------------|------------|------------|------------|
| 16:53:58 | 76.0497845 | 79.2872494 | 53.3767765 | 72.6528503 |
| 16:53:59 | 76.0497845 | 79.2872494 | 53.3767765 | 72.6528503 |
| 16:54:00 | 76.0497845 | 76.2872494 | 53.3767765 | 72.6528503 |
| 16:54:01 | 80.0497845 | 76.2872494 | 53.3767765 | 73.6528503 |
| 16:54:02 | 80.0497845 | 74.2872494 | 53.3767765 | 75.6528503 |
| 16:54:03 | 80.0497845 | 75.2872494 | 53.3767765 | 76.6528503 |
| 16:54:04 | 78.0497845 | 75.2872494 | 53.3767765 | 76.6528503 |
| 16:54:05 | 78.0497845 | 79.2872494 | 53.3767765 | 76.6528503 |
| 16:54:06 | 81.0497845 | 79.2872494 | 53.3767765 | 78.6528503 |
| 16:54:07 | 81.0497845 | 79.2872494 | 52.3767765 | 78.6528503 |
| 16:54:08 | 79.0497845 | 79.2872494 | 52.3767765 | 78.6528503 |
| 16:54:09 | 79.0497845 | 79.2872494 | 52.3767765 | 79.6528503 |
| 16:54:10 | 79.0497845 | 79.2872494 | 52.3767765 | 79.6528503 |
| 16:54:11 | 78.0497845 | 80.2872494 | 54.3767765 | 79.6528503 |
| 16:54:12 | 78.0497845 | 80.2872494 | 63.3767765 | 80.6528503 |
| 16:54:13 | 78.0497845 | 80.2872494 | 65.3767765 | 72.6528503 |
| 16:54:14 | 75.0497845 | 83.2872494 | 66.3767765 | 72.6528503 |
| 16:54:15 | 75.0497845 | 84.2872494 | 69.3767765 | 72.6528503 |
| 16:54:16 | 75.0497845 | 84.2872494 | 69.3767765 | 71.6528503 |
| 16:54:17 | 75.0497845 | 83.2872494 | 70.3767765 | 70.6528503 |
| 16:54:18 | 75.0497845 | 83.2872494 | 70.3767765 | 70.6528503 |
| 16:54:19 | 79.0497845 | 80.2872494 | 71.3767765 | 70.6528503 |
| 16:54:20 | 79.0497845 | 81.2872494 | 71.3767765 | 70.6528503 |
| 16:54:21 | 73.0497845 | 81.2872494 | 71.3767765 | 70.6528503 |
| 16:54:22 | 73.0497845 | 81.2872494 | 71.3767765 | 71.6528503 |
| 16:54:23 | 73.0497845 | 82.2872494 | 71.3767765 | 71.6528503 |
| 16:54:24 | 73.0497845 | 82.2872494 | 70.3767765 | 71.6528503 |
| 16:54:25 | 76.0497845 | 82.2872494 | 70.3767765 | 69.6528503 |
| 16:54:26 | 76.0497845 | 78.2872494 | 71.3767765 | 68.6528503 |
| 16:54:27 | 76.0497845 | 78.2872494 | 73.3767765 | 68.6528503 |
| 16:54:28 | 77.0497845 | 78.2872494 | 75.3767765 | 67.6528503 |
| 16:54:29 | 77.0497845 | 78.2872494 | 75.3767765 | 67.6528503 |
| 16:54:30 | 77.0497845 | 78.2872494 | 75.3767765 | 67.6528503 |
| 16:54:31 | 78.0497845 | 78.2872494 | 75.3767765 | 67.6528503 |
| 16:54:32 | 78.0497845 | 79.2872494 | 76.3767765 | 67.6528503 |
| 16:54:33 | 78.0497845 | 79.2872494 | 76.3767765 | 67.6528503 |
| 16:54:34 | 77.0497845 | 79.2872494 | 74.3767765 | 67.6528503 |
| 16:54:35 | 77.0497845 | 80.2872494 | 74.3767765 | 67.6528503 |
| 16:54:36 | 77.0497845 | 80.2872494 | 74.3767765 | 67.6528503 |
| 16:54:37 | 79.0497845 | 82.2872494 | 74.3767765 | 67.6528503 |
| 16:54:38 | 79.0497845 | 82.2872494 | 74.3767765 | 67.6528503 |
| 16:54:39 | 81.0497845 | 82.2872494 | 73.3767765 | 67.6528503 |
| 16:54:40 | 81.0497845 | 83.2872494 | 73.3767765 | 67.6528503 |
| 16:54:41 | 81.0497845 | 83.2872494 | 73.3767765 | 68.6528503 |
| 16:54:42 | 81.0497845 | 83.2872494 | 73.3767765 | 68.6528503 |

|          |            |            |            |            |
|----------|------------|------------|------------|------------|
| 16:54:43 | 81.0497845 | 83.2872494 | 73.3767765 | 68.6528503 |
| 16:54:44 | 78.0497845 | 84.2872494 | 73.3767765 | 69.6528503 |
| 16:54:45 | 78.0497845 | 84.2872494 | 73.3767765 | 69.6528503 |
| 16:54:46 | 78.0497845 | 82.2872494 | 71.3767765 | 69.6528503 |
| 16:54:47 | 78.0497845 | 82.2872494 | 71.3767765 | 71.6528503 |
| 16:54:48 | 85.0497845 | 81.2872494 | 71.3767765 | 72.6528503 |
| 16:54:49 | 85.0497845 | 81.2872494 | 71.3767765 | 73.6528503 |
| 16:54:50 | 81.0497845 | 81.2872494 | 72.3767765 | 73.6528503 |
| 16:54:51 | 81.0497845 | 81.2872494 | 71.3767765 | 73.6528503 |
| 16:54:52 | 81.0497845 | 81.2872494 | 71.3767765 | 73.6528503 |
| 16:54:53 | 81.0497845 | 81.2872494 | 71.3767765 | 73.6528503 |
| 16:54:54 | 69.0497845 | 81.2872494 | 70.3767765 | 73.6528503 |
| 16:54:55 | 69.0497845 | 81.2872494 | 68.3767765 | 73.6528503 |
| 16:54:56 | 69.0497845 | 81.2872494 | 68.3767765 | 73.6528503 |
| 16:54:57 | 69.0497845 | 81.2872494 | 64.3767765 | 73.6528503 |
| 16:54:58 | 69.0497845 | 82.2872494 | 62.3767765 | 73.6528503 |
| 16:54:59 | 69.0497845 | 81.2872494 | 60.3767765 | 73.6528503 |
| 16:55:00 | 69.0497845 | 81.2872494 | 59.3767765 | 74.6528503 |
| 16:55:01 | 69.0497845 | 82.2872494 | 59.3767765 | 74.6528503 |
| 16:55:02 | 69.0497845 | 83.2872494 | 57.3767765 | 78.6528503 |
| 16:55:03 | 71.0497845 | 83.2872494 | 57.3767765 | 78.6528503 |
| 16:55:04 | 71.0497845 | 85.2872494 | 56.3767765 | 78.6528503 |
| 16:55:05 | 71.0497845 | 85.2872494 | 56.3767765 | 79.6528503 |
| 16:55:06 | 73.0497845 | 83.2872494 | 57.3767765 | 83.6528503 |
| 16:55:07 | 73.0497845 | 83.2872494 | 57.3767765 | 84.6528503 |
| 16:55:08 | 73.0497845 | 83.2872494 | 58.3767765 | 85.6528503 |
| 16:55:09 | 75.0497845 | 86.2872494 | 58.3767765 | 85.6528503 |
| 16:55:10 | 75.0497845 | 87.2872494 | 59.3767765 | 85.6528503 |
| 16:55:11 | 76.0497845 | 87.2872494 | 59.3767765 | 85.6528503 |
| 16:55:12 | 76.0497845 | 87.2872494 | 59.3767765 | 85.6528503 |
| 16:55:13 | 76.0497845 | 84.2872494 | 62.3767765 | 85.6528503 |
| 16:55:14 | 80.0497845 | 81.2872494 | 65.3767765 | 86.6528503 |
| 16:55:15 | 80.0497845 | 81.2872494 | 65.3767765 | 87.6528503 |
| 16:55:16 | 80.0497845 | 81.2872494 | 66.3767765 | 87.6528503 |
| 16:55:17 | 85.0497845 | 81.2872494 | 67.3767765 | 80.6528503 |
| 16:55:18 | 85.0497845 | 80.2872494 | 68.3767765 | 80.6528503 |
| 16:55:19 | 85.0497845 | 80.2872494 | 68.3767765 | 80.6528503 |
| 16:55:20 | 86.0497845 | 80.2872494 | 68.3767765 | 79.6528503 |
| 16:55:21 | 86.0497845 | 80.2872494 | 69.3767765 | 79.6528503 |
| 16:55:22 | 86.0497845 | 80.2872494 | 69.3767765 | 78.6528503 |
| 16:55:23 | 76.0497845 | 80.2872494 | 70.3767765 | 77.6528503 |
| 16:55:24 | 76.0497845 | 80.2872494 | 71.3767765 | 77.6528503 |
| 16:55:25 | 76.0497845 | 77.2872494 | 71.3767765 | 77.6528503 |
| 16:55:26 | 72.0497845 | 76.2872494 | 71.3767765 | 77.6528503 |
| 16:55:27 | 72.0497845 | 76.2872494 | 70.3767765 | 77.6528503 |

|          |            |            |            |            |
|----------|------------|------------|------------|------------|
| 16:55:28 | 72.0497845 | 77.2872494 | 69.3767765 | 77.6528503 |
| 16:55:29 | 72.0497845 | 77.2872494 | 69.3767765 | 77.6528503 |
| 16:55:30 | 72.0497845 | 77.2872494 | 69.3767765 | 77.6528503 |
| 16:55:31 | 72.0497845 | 77.2872494 | 70.3767765 | 76.6528503 |
| 16:55:32 | 72.0497845 | 77.2872494 | 70.3767765 | 73.6528503 |
| 16:55:33 | 72.0497845 | 77.2872494 | 70.3767765 | 73.6528503 |
| 16:55:34 | 72.0497845 | 77.2872494 | 70.3767765 | 73.6528503 |
| 16:55:35 | 72.0497845 | 77.2872494 | 71.3767765 | 73.6528503 |
| 16:55:36 | 72.0497845 | 78.2872494 | 71.3767765 | 73.6528503 |
| 16:55:37 | 76.0497845 | 78.2872494 | 71.3767765 | 73.6528503 |
| 16:55:38 | 76.0497845 | 81.2872494 | 70.3767765 | 73.6528503 |
| 16:55:39 | 76.0497845 | 81.2872494 | 69.3767765 | 73.6528503 |
| 16:55:40 | 76.0497845 | 81.2872494 | 69.3767765 | 72.6528503 |
| 16:55:41 | 76.0497845 | 81.2872494 | 71.3767765 | 72.6528503 |
| 16:55:42 | 76.0497845 | 82.2872494 | 73.3767765 | 72.6528503 |
| 16:55:43 | 76.0497845 | 83.2872494 | 73.3767765 | 71.6528503 |
| 16:55:44 | 73.0497845 | 83.2872494 | 73.3767765 | 71.6528503 |
| 16:55:45 | 73.0497845 | 84.2872494 | 73.3767765 | 70.6528503 |
| 16:55:46 | 73.0497845 | 84.2872494 | 73.3767765 | 70.6528503 |
| 16:55:47 | 73.0497845 | 84.2872494 | 73.3767765 | 70.6528503 |
| 16:55:48 | 73.0497845 | 84.2872494 | 73.3767765 | 70.6528503 |
| 16:55:49 | 73.0497845 | 84.2872494 | 73.3767765 | 71.6528503 |
| 16:55:50 | 77.0497845 | 84.2872494 | 70.3767765 | 71.6528503 |
| 16:55:51 | 77.0497845 | 84.2872494 | 68.3767765 | 70.6528503 |
| 16:55:52 | 77.0497845 | 84.2872494 | 67.3767765 | 70.6528503 |
| 16:55:53 | 80.0497845 | 85.2872494 | 65.3767765 | 71.6528503 |
| 16:55:54 | 80.0497845 | 86.2872494 | 65.3767765 | 71.6528503 |
| 16:55:55 | 80.0497845 | 87.2872494 | 64.3767765 | 71.6528503 |
| 16:55:56 | 78.0497845 | 87.2872494 | 64.3767765 | 71.6528503 |
| 16:55:57 | 78.0497845 | 88.2872494 | 64.3767765 | 71.6528503 |
| 16:55:58 | 78.0497845 | 88.2872494 | 63.3767765 | 71.6528503 |
| 16:55:59 | 71.0497845 | 88.2872494 | 63.3767765 | 72.6528503 |
| 16:56:00 | 71.0497845 | 88.2872494 | 64.3767765 | 73.6528503 |
| 16:56:01 | 74.0497845 | 88.2872494 | 60.3767765 | 74.6528503 |
| 16:56:02 | 74.0497845 | 88.2872494 | 57.3767765 | 74.6528503 |
| 16:56:03 | 75.0497845 | 88.2872494 | 57.3767765 | 74.6528503 |
| 16:56:04 | 75.0497845 | 88.2872494 | 56.3767765 | 74.6528503 |
| 16:56:05 | 75.0497845 | 88.2872494 | 56.3767765 | 74.6528503 |
| 16:56:06 | 75.0497845 | 88.2872494 | 58.3767765 | 74.6528503 |
| 16:56:07 | 76.0497845 | 87.2872494 | 60.3767765 | 75.6528503 |
| 16:56:08 | 76.0497845 | 87.2872494 | 61.3767765 | 77.6528503 |
| 16:56:09 | 76.0497845 | 87.2872494 | 60.3767765 | 77.6528503 |
| 16:56:10 | 73.0497845 | 87.2872494 | 61.3767765 | 77.6528503 |
| 16:56:11 | 73.0497845 | 86.2872494 | 61.3767765 | 86.6528503 |
| 16:56:12 | 73.0497845 | 86.2872494 | 63.3767765 | 86.6528503 |

|          |            |            |            |            |
|----------|------------|------------|------------|------------|
| 16:56:13 | 73.0497845 | 86.2872494 | 63.3767765 | 86.6528503 |
| 16:56:14 | 73.0497845 | 86.2872494 | 66.3767765 | 85.6528503 |
| 16:56:15 | 79.0497845 | 86.2872494 | 66.3767765 | 85.6528503 |
| 16:56:16 | 79.0497845 | 86.2872494 | 66.3767765 | 85.6528503 |
| 16:56:17 | 81.0497845 | 85.2872494 | 67.3767765 | 85.6528503 |
| 16:56:18 | 81.0497845 | 82.2872494 | 68.3767765 | 88.6528503 |
| 16:56:19 | 81.0497845 | 81.2872494 | 69.3767765 | 88.6528503 |
| 16:56:20 | 82.0497845 | 81.2872494 | 69.3767765 | 87.6528503 |
| 16:56:21 | 82.0497845 | 83.2872494 | 71.3767765 | 85.6528503 |
| 16:56:22 | 82.0497845 | 84.2872494 | 72.3767765 | 81.6528503 |
| 16:56:23 | 82.0497845 | 84.2872494 | 72.3767765 | 81.6528503 |
| 16:56:24 | 82.0497845 | 84.2872494 | 72.3767765 | 80.6528503 |
| 16:56:25 | 82.0497845 | 84.2872494 | 72.3767765 | 80.6528503 |
| 16:56:26 | 82.0497845 | 84.2872494 | 72.3767765 | 80.6528503 |
| 16:56:27 | 83.0497845 | 84.2872494 | 72.3767765 | 80.6528503 |
| 16:56:28 | 83.0497845 | 84.2872494 | 72.3767765 | 80.6528503 |
| 16:56:29 | 83.0497845 | 85.2872494 | 73.3767765 | 80.6528503 |
| 16:56:30 | 85.0497845 | 85.2872494 | 75.3767765 | 80.6528503 |
| 16:56:31 | 85.0497845 | 86.2872494 | 63.3767765 | 79.6528503 |
| 16:56:32 | 85.0497845 | 86.2872494 | 63.3767765 | 77.6528503 |
| 16:56:33 | 87.0497845 | 85.2872494 | 57.3767765 | 76.6528503 |
| 16:56:34 | 87.0497845 | 85.2872494 | 57.3767765 | 76.6528503 |
| 16:56:35 | 87.0497845 | 85.2872494 | 57.3767765 | 76.6528503 |











































































| Person 2 | Person 4 | Person 3   | Person 1  | Activity | average of all |
|----------|----------|------------|-----------|----------|----------------|
|          |          |            | 72.678859 |          | 72.678859      |
|          |          |            | 72.678859 |          | 72.678859      |
|          |          |            | 72.678859 |          | 72.678859      |
|          |          |            | 72.678859 |          | 72.678859      |
|          |          |            | 72.678859 |          | 72.678859      |
|          |          |            | 72.678859 |          | 72.678859      |
|          |          |            | 72.678859 |          | 72.678859      |
|          |          |            | 71.678859 |          | 71.678859      |
|          |          |            | 70.678859 |          | 70.678859      |
|          |          |            | 70.678859 |          | 70.678859      |
|          |          |            | 70.678859 |          | 70.678859      |
|          |          | 75.9357253 | 69.678859 |          | 72.8072921     |
|          |          | 74.9357253 | 69.678859 |          | 72.3072921     |
|          |          | 74.9357253 | 69.678859 |          | 72.3072921     |
|          |          | 74.9357253 | 70.678859 |          | 72.8072921     |
|          |          | 74.9357253 | 70.678859 |          | 72.8072921     |
|          |          | 74.9357253 | 71.678859 |          | 73.3072921     |
|          |          | 74.9357253 | 71.678859 |          | 73.3072921     |
|          |          | 74.9357253 | 70.678859 |          | 72.8072921     |
|          |          | 74.9357253 | 70.678859 |          | 72.8072921     |
|          |          | 74.9357253 | 70.678859 |          | 72.8072921     |
|          |          | 74.9357253 | 70.678859 |          | 72.8072921     |
|          |          | 74.9357253 | 70.678859 |          | 72.8072921     |
|          |          | 74.9357253 | 70.678859 |          | 72.8072921     |
|          |          | 74.9357253 | 69.678859 |          | 72.3072921     |
|          |          | 74.9357253 | 69.678859 |          | 72.3072921     |
|          |          | 75.9357253 | 69.678859 |          | 72.8072921     |
|          |          | 75.9357253 | 69.678859 |          | 72.8072921     |
|          |          | 75.9357253 | 69.678859 |          | 72.8072921     |
|          |          | 76.9357253 | 72.678859 |          | 74.8072921     |
|          |          | 76.9357253 | 72.678859 |          | 74.8072921     |
|          |          | 76.9357253 | 72.678859 |          | 74.8072921     |
|          |          | 80.9357253 | 73.678859 |          | 77.3072921     |
|          |          | 81.9357253 | 72.678859 |          | 77.3072921     |
|          |          | 81.9357253 | 72.678859 |          | 77.3072921     |
|          |          | 81.9357253 | 72.678859 |          | 77.3072921     |
|          |          | 85.9357253 | 72.678859 |          | 79.3072921     |
|          |          | 87.9357253 | 72.678859 |          | 80.3072921     |
|          |          | 87.9357253 | 72.678859 |          | 80.3072921     |
|          |          | 87.9357253 | 72.678859 |          | 80.3072921     |
|          |          | 87.9357253 | 72.678859 |          | 80.3072921     |
|          |          | 86.9357253 | 72.678859 |          | 79.8072921     |



|            |           |            |
|------------|-----------|------------|
| 86.9357253 | 72.678859 | 79.8072921 |
| 86.9357253 | 73.678859 | 80.3072921 |
| 85.9357253 | 74.678859 | 80.3072921 |
| 85.9357253 | 74.678859 | 80.3072921 |
| 82.9357253 | 74.678859 | 78.8072921 |
| 82.9357253 | 75.678859 | 79.3072921 |
| 82.9357253 | 75.678859 | 79.3072921 |
| 83.9357253 | 75.678859 | 79.8072921 |
| 83.9357253 | 78.678859 | 81.3072921 |
| 83.9357253 | 78.678859 | 81.3072921 |
| 83.9357253 | 78.678859 | 81.3072921 |
| 83.9357253 | 80.678859 | 82.3072921 |
| 83.9357253 | 80.678859 | 82.3072921 |
| 83.9357253 | 80.678859 | 82.3072921 |
| 83.9357253 | 80.678859 | 82.3072921 |
| 83.9357253 | 80.678859 | 82.3072921 |
| 83.9357253 | 80.678859 | 82.3072921 |
| 84.9357253 | 80.678859 | 82.8072921 |
| 83.9357253 | 80.678859 | 82.3072921 |
| 83.9357253 | 77.678859 | 80.8072921 |
| 83.9357253 | 77.678859 | 80.8072921 |
| 84.9357253 | 77.678859 | 81.3072921 |
| 84.9357253 | 79.678859 | 82.3072921 |
| 83.9357253 | 80.678859 | 82.3072921 |
| 83.9357253 | 80.678859 | 82.3072921 |
| 83.9357253 | 80.678859 | 82.3072921 |
| 80.9357253 | 81.678859 | 81.3072921 |
| 80.9357253 | 81.678859 | 81.3072921 |
| 80.9357253 | 81.678859 | 81.3072921 |
| 80.9357253 | 81.678859 | 81.3072921 |
| 80.9357253 | 81.678859 | 81.3072921 |
| 80.9357253 | 81.678859 | 81.3072921 |
| 76.9357253 | 81.678859 | 79.3072921 |
| 75.9357253 | 81.678859 | 78.8072921 |
| 75.9357253 | 82.678859 | 79.3072921 |
| 75.9357253 | 82.678859 | 79.3072921 |
| 75.9357253 | 83.678859 | 79.8072921 |
| 75.9357253 | 84.678859 | 80.3072921 |
| 74.9357253 | 85.678859 | 80.3072921 |
| 74.9357253 | 85.678859 | 80.3072921 |
| 79.9357253 | 85.678859 | 82.8072921 |
| 80.9357253 | 86.678859 | 83.8072921 |
| 80.9357253 | 87.678859 | 84.3072921 |
| 80.9357253 | 87.678859 | 84.3072921 |
| 80.9357253 | 91.678859 | 86.3072921 |

|            |            |            |
|------------|------------|------------|
| 80.9357253 | 93.678859  | 87.3072921 |
| 80.9357253 | 94.678859  | 87.8072921 |
| 81.9357253 | 94.678859  | 88.3072921 |
| 79.9357253 | 95.678859  | 87.8072921 |
| 79.9357253 | 95.678859  | 87.8072921 |
| 79.9357253 | 95.678859  | 87.8072921 |
| 79.9357253 | 95.678859  | 87.8072921 |
| 78.9357253 | 95.678859  | 87.3072921 |
| 78.9357253 | 94.678859  | 86.8072921 |
| 73.9357253 | 94.678859  | 84.3072921 |
| 72.9357253 | 94.678859  | 83.8072921 |
| 72.9357253 | 94.678859  | 83.8072921 |
| 72.9357253 | 93.678859  | 83.3072921 |
| 73.9357253 | 93.678859  | 83.8072921 |
| 73.9357253 | 93.678859  | 83.8072921 |
| 73.9357253 | 93.678859  | 83.8072921 |
| 75.9357253 | 94.678859  | 85.3072921 |
| 77.9357253 | 97.678859  | 87.8072921 |
| 77.9357253 | 98.678859  | 88.3072921 |
| 77.9357253 | 99.678859  | 88.8072921 |
| 76.9357253 | 99.678859  | 88.3072921 |
| 75.9357253 | 100.678859 | 88.3072921 |
| 75.9357253 | 100.678859 | 88.3072921 |
| 75.9357253 | 101.678859 | 88.8072921 |
| 75.9357253 | 101.678859 | 88.8072921 |
| 75.9357253 | 99.678859  | 87.8072921 |
| 76.9357253 | 88.678859  | 82.8072921 |
| 76.9357253 | 82.678859  | 79.8072921 |
| 76.9357253 | 78.678859  | 77.8072921 |
| 76.9357253 | 78.678859  | 77.8072921 |
| 77.9357253 | 75.678859  | 76.8072921 |
| 77.9357253 | 74.678859  | 76.3072921 |
| 77.9357253 | 74.678859  | 76.3072921 |
| 77.9357253 | 72.678859  | 75.3072921 |
| 77.9357253 | 71.678859  | 74.8072921 |
| 78.9357253 | 71.678859  | 75.3072921 |
| 78.9357253 | 72.678859  | 75.8072921 |
| 79.9357253 | 72.678859  | 76.3072921 |
| 79.9357253 | 72.678859  | 76.3072921 |
| 80.9357253 | 72.678859  | 76.8072921 |
| 80.9357253 | 71.678859  | 76.3072921 |
| 82.9357253 | 71.678859  | 77.3072921 |
| 83.9357253 | 71.678859  | 77.8072921 |
| 83.9357253 | 71.678859  | 77.8072921 |
| 83.9357253 | 71.678859  | 77.8072921 |

|            |            |            |           |            |
|------------|------------|------------|-----------|------------|
|            |            | 84.9357253 | 71.678859 | 78.3072921 |
|            |            | 84.9357253 | 71.678859 | 78.3072921 |
|            |            | 84.9357253 | 69.678859 | 77.3072921 |
|            |            | 84.9357253 | 69.678859 | 77.3072921 |
|            |            | 84.9357253 | 69.678859 | 77.3072921 |
|            |            | 84.9357253 | 69.678859 | 77.3072921 |
|            |            | 84.9357253 | 69.678859 | 77.3072921 |
|            |            | 84.9357253 | 69.678859 | 77.3072921 |
| 80.6782344 |            | 84.9357253 | 69.678859 | 78.4309396 |
| 79.6782344 |            | 84.9357253 | 68.678859 | 77.7642729 |
| 79.6782344 |            | 84.9357253 | 68.678859 | 77.7642729 |
| 79.6782344 |            | 84.9357253 | 68.678859 | 77.7642729 |
| 79.6782344 |            | 84.9357253 | 67.678859 | 77.4309396 |
| 79.6782344 |            | 84.9357253 | 67.678859 | 77.4309396 |
| 79.6782344 |            | 83.9357253 | 67.678859 | 77.0976062 |
| 79.6782344 |            | 82.9357253 | 67.678859 | 76.7642729 |
| 78.6782344 |            | 81.9357253 | 67.678859 | 76.0976062 |
| 76.6782344 |            | 81.9357253 | 67.678859 | 75.4309396 |
| 74.6782344 | 81.0257226 | 78.9357253 | 68.678859 | 75.8296353 |
| 74.6782344 | 81.0257226 | 75.9357253 | 68.678859 | 75.0796353 |
| 74.6782344 | 81.0257226 | 75.9357253 | 68.678859 | 75.0796353 |
| 74.6782344 | 81.0257226 | 74.9357253 | 68.678859 | 74.8296353 |
| 74.6782344 | 81.0257226 | 73.9357253 | 68.678859 | 74.5796353 |
| 74.6782344 | 81.0257226 | 73.9357253 | 68.678859 | 74.5796353 |
| 74.6782344 | 81.0257226 | 73.9357253 | 68.678859 | 74.5796353 |
| 74.6782344 | 81.0257226 | 73.9357253 | 69.678859 | 74.8296353 |
| 74.6782344 | 80.0257226 | 73.9357253 | 69.678859 | 74.5796353 |
| 75.6782344 | 79.0257226 | 70.9357253 | 69.678859 | 73.8296353 |
| 75.6782344 | 78.0257226 | 70.9357253 | 69.678859 | 73.5796353 |
| 75.6782344 | 78.0257226 | 70.9357253 | 68.678859 | 73.3296353 |
| 75.6782344 | 78.0257226 | 70.9357253 | 68.678859 | 73.3296353 |
| 75.6782344 | 80.0257226 | 69.9357253 | 68.678859 | 73.5796353 |
| 75.6782344 | 80.0257226 | 70.9357253 | 68.678859 | 73.8296353 |
| 75.6782344 | 80.0257226 | 70.9357253 | 67.678859 | 73.5796353 |
| 75.6782344 | 80.0257226 | 69.9357253 | 67.678859 | 73.3296353 |
| 76.6782344 | 82.0257226 | 69.9357253 | 66.678859 | 73.8296353 |
| 76.6782344 | 83.0257226 | 68.9357253 | 66.678859 | 73.8296353 |
| 76.6782344 | 83.0257226 | 68.9357253 | 65.678859 | 73.5796353 |
| 78.6782344 | 83.0257226 | 67.9357253 | 65.678859 | 73.8296353 |
| 78.6782344 | 83.0257226 | 67.9357253 | 65.678859 | 73.8296353 |
| 78.6782344 | 82.0257226 | 66.9357253 | 67.678859 | 73.8296353 |
| 79.6782344 | 81.0257226 | 67.9357253 | 68.678859 | 74.3296353 |
| 79.6782344 | 81.0257226 | 67.9357253 | 69.678859 | 74.5796353 |
| 79.6782344 | 78.0257226 | 70.9357253 | 70.678859 | 74.8296353 |

|            |            |            |           |            |
|------------|------------|------------|-----------|------------|
| 78.6782344 | 77.0257226 | 70.9357253 | 70.678859 | 74.3296353 |
| 77.6782344 | 74.0257226 | 70.9357253 | 72.678859 | 73.8296353 |
| 77.6782344 | 74.0257226 | 70.9357253 | 72.678859 | 73.8296353 |
| 75.6782344 | 74.0257226 | 71.9357253 | 73.678859 | 73.8296353 |
| 75.6782344 | 74.0257226 | 71.9357253 | 73.678859 | 73.8296353 |
| 71.6782344 | 75.0257226 | 71.9357253 | 76.678859 | 73.8296353 |
| 71.6782344 | 75.0257226 | 71.9357253 | 77.678859 | 74.0796353 |
| 71.6782344 | 76.0257226 | 71.9357253 | 77.678859 | 74.3296353 |
| 71.6782344 | 76.0257226 | 71.9357253 | 78.678859 | 74.5796353 |
| 73.6782344 | 67.0257226 | 71.9357253 | 79.678859 | 73.0796353 |
| 73.6782344 | 65.0257226 | 71.9357253 | 80.678859 | 72.8296353 |
| 73.6782344 | 65.0257226 | 70.9357253 | 79.678859 | 72.3296353 |
| 73.6782344 | 66.0257226 | 69.9357253 | 77.678859 | 71.8296353 |
| 70.6782344 | 68.0257226 | 69.9357253 | 76.678859 | 71.3296353 |
| 69.6782344 | 71.0257226 | 69.9357253 | 75.678859 | 71.5796353 |
| 69.6782344 | 73.0257226 | 69.9357253 | 75.678859 | 72.0796353 |
| 69.6782344 | 73.0257226 | 68.9357253 | 73.678859 | 71.3296353 |
| 69.6782344 | 73.0257226 | 81.9357253 | 73.678859 | 74.5796353 |
| 69.6782344 | 72.0257226 | 86.9357253 | 72.678859 | 75.3296353 |
| 74.6782344 | 72.0257226 | 88.9357253 | 70.678859 | 76.5796353 |
| 74.6782344 | 70.0257226 | 88.9357253 | 70.678859 | 76.0796353 |
| 74.6782344 | 71.0257226 | 85.9357253 | 70.678859 | 75.5796353 |
| 73.6782344 | 71.0257226 | 83.9357253 | 70.678859 | 74.8296353 |
| 72.6782344 | 71.0257226 | 81.9357253 | 69.678859 | 73.8296353 |
| 69.6782344 | 71.0257226 | 78.9357253 | 69.678859 | 72.3296353 |
| 69.6782344 | 71.0257226 | 76.9357253 | 68.678859 | 71.5796353 |
| 70.6782344 | 71.0257226 | 76.9357253 | 68.678859 | 71.8296353 |
| 70.6782344 | 70.0257226 | 76.9357253 | 69.678859 | 71.8296353 |
| 71.6782344 | 69.0257226 | 76.9357253 | 69.678859 | 71.8296353 |
| 73.6782344 | 69.0257226 | 78.9357253 | 69.678859 | 72.8296353 |
| 75.6782344 | 69.0257226 | 79.9357253 | 70.678859 | 73.8296353 |
| 75.6782344 | 69.0257226 | 79.9357253 | 72.678859 | 74.3296353 |
| 75.6782344 | 69.0257226 | 79.9357253 | 73.678859 | 73.9390636 |
| 75.6782344 | 68.0257226 | 79.9357253 | 73.678859 | 73.7390636 |
| 76.6782344 | 68.0257226 | 78.9357253 | 72.678859 | 76.058028  |
| 76.6782344 | 68.0257226 | 75.9357253 | 71.678859 | 74.7246947 |
| 76.6782344 | 68.0257226 | 72.9357253 | 72.678859 | 73.7246947 |
| 76.6782344 | 68.0257226 | 72.9357253 | 72.678859 | 73.3913614 |
| 76.6782344 | 68.0257226 | 70.9357253 | 73.678859 | 72.8913614 |
| 78.6782344 | 81.0257226 | 71.9357253 | 72.678859 | 75.058028  |
| 80.6782344 | 85.0257226 | 72.9357253 | 72.678859 | 76.3913614 |
| 80.6782344 | 85.0257226 | 73.9357253 | 72.678859 | 76.558028  |
| 80.6782344 | 88.0257226 | 74.9357253 | 72.678859 | 77.2246947 |
| 79.6782344 | 88.0257226 | 74.9357253 | 72.678859 | 77.058028  |
| 79.6782344 | 88.0257226 | 75.9357253 | 70.678859 | 76.8913614 |

|            |            |            |           |            |
|------------|------------|------------|-----------|------------|
| 79.6782344 | 88.0257226 | 75.9357253 | 70.678859 | 76.7246947 |
| 79.6782344 | 88.0257226 | 74.9357253 | 83.678859 | 78.3913614 |
| 79.6782344 | 88.0257226 | 73.9357253 | 80.678859 | 77.8913614 |
| 79.6782344 | 89.0257226 | 73.9357253 | 75.678859 | 77.2246947 |
| 80.6782344 | 89.0257226 | 71.9357253 | 75.678859 | 77.7246947 |
| 80.6782344 | 90.0257226 | 70.9357253 | 75.678859 | 78.058028  |
| 79.6782344 | 90.0257226 | 69.9357253 | 75.678859 | 77.8913614 |
| 79.6782344 | 91.0257226 | 69.9357253 | 75.678859 | 78.058028  |
| 78.6782344 | 91.0257226 | 69.9357253 | 75.678859 | 78.058028  |
| 78.6782344 | 91.0257226 | 69.9357253 | 75.678859 | 78.3913614 |
| 78.6782344 | 93.0257226 | 69.9357253 | 77.678859 | 79.058028  |
| 78.6782344 | 93.0257226 | 69.9357253 | 77.678859 | 79.058028  |
| 79.6782344 | 93.0257226 | 69.9357253 | 77.678859 | 79.3913614 |
| 80.6782344 | 93.0257226 | 68.9357253 | 76.678859 | 79.3913614 |
| 80.6782344 | 93.0257226 | 68.9357253 | 76.678859 | 79.058028  |
| 80.6782344 | 92.0257226 | 67.9357253 | 76.678859 | 78.7246947 |
| 81.6782344 | 92.0257226 | 66.9357253 | 78.678859 | 78.8913614 |
| 81.6782344 | 92.0257226 | 65.9357253 | 78.678859 | 77.3913614 |
| 80.6782344 | 91.0257226 | 65.9357253 | 78.678859 | 76.2246947 |
| 80.6782344 | 90.0257226 | 63.9357253 | 79.678859 | 75.8913614 |
| 79.6782344 | 89.0257226 | 63.9357253 | 79.678859 | 74.7246947 |
| 79.6782344 | 89.0257226 | 63.9357253 | 79.678859 | 74.3913614 |
| 80.6782344 | 89.0257226 | 61.9357253 | 79.678859 | 73.8913614 |
| 80.6782344 | 89.0257226 | 61.9357253 | 79.678859 | 73.8913614 |
| 80.6782344 | 89.0257226 | 60.9357253 | 79.678859 | 73.558028  |
| 80.6782344 | 90.0257226 | 60.9357253 | 76.678859 | 73.2246947 |
| 80.6782344 | 91.0257226 | 62.9357253 | 76.678859 | 74.2246947 |
| 80.6782344 | 91.0257226 | 64.9357253 | 76.678859 | 74.8913614 |
| 80.6782344 | 91.0257226 | 66.9357253 | 76.678859 | 75.2246947 |
| 80.6782344 | 91.0257226 | 66.9357253 | 76.678859 | 75.3913614 |
| 80.6782344 | 91.0257226 | 71.9357253 | 76.678859 | 76.7246947 |
| 81.6782344 | 92.0257226 | 71.9357253 | 76.678859 | 77.058028  |
| 81.6782344 | 92.0257226 | 71.9357253 | 76.678859 | 77.2246947 |
| 84.6782344 | 92.0257226 | 71.9357253 | 76.678859 | 78.2246947 |
| 85.6782344 | 93.0257226 | 71.9357253 | 76.678859 | 78.7246947 |
| 85.6782344 | 93.0257226 | 71.9357253 | 76.678859 | 79.058028  |
| 86.6782344 | 93.0257226 | 71.9357253 | 76.678859 | 79.558028  |
| 86.6782344 | 93.0257226 | 73.9357253 | 76.678859 | 79.8913614 |
| 85.6782344 | 93.0257226 | 73.9357253 | 76.678859 | 79.8913614 |
| 84.6782344 | 93.0257226 | 74.9357253 | 76.678859 | 80.058028  |
| 83.6782344 | 93.0257226 | 74.9357253 | 76.678859 | 80.058028  |
| 83.6782344 | 93.0257226 | 75.9357253 | 75.678859 | 80.058028  |
| 82.6782344 | 93.0257226 | 74.9357253 | 75.678859 | 79.7246947 |
| 81.6782344 | 92.0257226 | 74.9357253 | 76.678859 | 79.558028  |
| 81.6782344 | 92.0257226 | 73.9357253 | 77.678859 | 79.7246947 |

|            |            |            |           |            |
|------------|------------|------------|-----------|------------|
| 81.6782344 | 92.0257226 | 73.9357253 | 78.678859 | 78.7246947 |
| 81.6782344 | 92.0257226 | 73.9357253 | 78.678859 | 78.2246947 |
| 81.6782344 | 92.0257226 | 72.9357253 | 78.678859 | 78.2246947 |
| 80.6782344 | 91.0257226 | 71.9357253 | 77.678859 | 77.058028  |
| 78.6782344 | 91.0257226 | 71.9357253 | 75.678859 | 76.2246947 |
| 78.6782344 | 91.0257226 | 71.9357253 | 74.678859 | 76.058028  |
| 78.6782344 | 91.0257226 | 71.9357253 | 74.678859 | 76.2246947 |
| 78.6782344 | 91.0257226 | 71.9357253 | 71.678859 | 75.7246947 |
| 79.6782344 | 92.0257226 | 71.9357253 | 71.678859 | 75.8913614 |
| 79.6782344 | 76.058028  | 72.9357253 | 69.678859 | 73.2300789 |
| 80.6782344 | 75.8913614 | 72.9357253 | 67.678859 | 73.0356345 |
| 79.6782344 | 87.0257226 | 73.9357253 | 66.678859 | 74.7246947 |
| 79.6782344 | 87.0257226 | 74.9357253 | 63.678859 | 74.3913614 |
| 79.6782344 | 85.0257226 | 74.9357253 | 62.678859 | 73.558028  |
| 79.6782344 | 82.0257226 | 74.9357253 | 62.678859 | 73.058028  |
| 79.6782344 | 80.0257226 | 74.9357253 | 62.678859 | 72.7246947 |
| 79.6782344 | 80.0257226 | 75.9357253 | 63.678859 | 72.8913614 |
| 80.6782344 | 80.0257226 | 75.9357253 | 64.678859 | 73.2246947 |
| 80.6782344 | 79.0257226 | 75.9357253 | 65.678859 | 73.2246947 |
| 81.6782344 | 79.0257226 | 74.9357253 | 66.678859 | 74.3913614 |
| 81.6782344 | 79.0257226 | 74.9357253 | 66.678859 | 74.3913614 |
| 80.6782344 | 79.0257226 | 74.9357253 | 67.678859 | 74.2246947 |
| 80.6782344 | 79.0257226 | 74.9357253 | 69.678859 | 74.558028  |
| 80.6782344 | 79.0257226 | 74.9357253 | 69.678859 | 74.3913614 |
| 80.6782344 | 69.0257226 | 74.9357253 | 69.678859 | 72.7246947 |
| 80.6782344 | 66.0257226 | 73.9357253 | 69.678859 | 72.2246947 |
| 80.6782344 | 66.0257226 | 73.9357253 | 69.678859 | 72.558028  |
| 80.6782344 | 66.0257226 | 73.9357253 | 70.678859 | 72.7246947 |
| 80.6782344 | 66.0257226 | 73.9357253 | 70.678859 | 73.058028  |
| 80.6782344 | 66.0257226 | 73.9357253 | 70.678859 | 73.2246947 |
| 80.6782344 | 66.0257226 | 74.9357253 | 71.678859 | 74.058028  |
| 79.6782344 | 66.0257226 | 74.9357253 | 71.678859 | 73.8913614 |
| 79.6782344 | 66.0257226 | 76.9357253 | 71.678859 | 74.3913614 |
| 78.6782344 | 67.0257226 | 76.9357253 | 72.678859 | 74.2246947 |
| 78.6782344 | 68.0257226 | 76.9357253 | 72.678859 | 74.2246947 |
| 78.6782344 | 68.0257226 | 75.9357253 | 72.678859 | 74.058028  |
| 78.6782344 | 68.0257226 | 75.9357253 | 72.678859 | 73.8913614 |
| 78.6782344 | 67.0257226 | 75.9357253 | 72.678859 | 73.058028  |
| 78.6782344 | 67.0257226 | 75.9357253 | 72.678859 | 73.058028  |
| 78.6782344 | 66.0257226 | 74.9357253 | 72.678859 | 72.8913614 |
| 78.6782344 | 66.0257226 | 74.9357253 | 73.678859 | 73.3913614 |
| 78.6782344 | 65.0257226 | 73.9357253 | 73.678859 | 73.2246947 |
| 78.6782344 | 65.0257226 | 73.9357253 | 73.678859 | 73.7246947 |
| 78.6782344 | 65.0257226 | 74.9357253 | 72.678859 | 73.8913614 |
| 79.6782344 | 65.0257226 | 75.9357253 | 71.678859 | 74.2246947 |

|            |            |            |           |            |
|------------|------------|------------|-----------|------------|
| 80.6782344 | 63.0257226 | 76.9357253 | 70.678859 | 74.058028  |
| 84.6782344 | 62.0257226 | 76.9357253 | 70.678859 | 74.7246947 |
| 83.6782344 | 62.0257226 | 76.9357253 | 71.678859 | 75.2246947 |
| 83.6782344 | 62.0257226 | 75.9357253 | 70.678859 | 74.8913614 |
| 83.6782344 | 66.0257226 | 73.9357253 | 71.678859 | 75.7246947 |
| 82.6782344 | 66.0257226 | 72.9357253 | 72.678859 | 75.2246947 |
| 82.6782344 | 66.0257226 | 71.9357253 | 72.678859 | 74.8913614 |
| 82.6782344 | 65.0257226 | 71.9357253 | 72.678859 | 74.558028  |
| 82.6782344 | 65.0257226 | 71.9357253 | 72.678859 | 74.558028  |
| 82.6782344 | 64.0257226 | 71.9357253 | 72.678859 | 74.2246947 |
| 82.6782344 | 64.0257226 | 72.9357253 | 72.678859 | 73.8913614 |
| 82.6782344 | 62.0257226 | 73.9357253 | 72.678859 | 73.7246947 |
| 83.6782344 | 63.0257226 | 74.9357253 | 72.678859 | 74.058028  |
| 83.6782344 | 63.0257226 | 74.9357253 | 72.678859 | 74.2246947 |
| 84.6782344 | 63.0257226 | 74.9357253 | 72.678859 | 74.558028  |
| 84.6782344 | 64.0257226 | 74.9357253 | 72.678859 | 74.558028  |
| 84.6782344 | 65.0257226 | 74.9357253 | 72.678859 | 76.3764882 |
| 88.6782344 | 64.0257226 | 75.9357253 | 72.678859 | 76.6622025 |
| 88.6782344 | 63.0257226 | 75.9357253 | 72.678859 | 76.2336311 |
| 93.6782344 | 62.0257226 | 75.9357253 | 73.678859 | 76.9479168 |
| 93.6782344 | 63.0257226 | 75.9357253 | 73.678859 | 77.0907739 |
| 93.6782344 | 64.0257226 | 76.9357253 | 72.678859 | 77.3764882 |
| 93.6782344 | 64.0257226 | 76.9357253 | 72.678859 | 77.8050597 |
| 91.6782344 | 66.0257226 | 76.9357253 | 72.678859 | 77.9479168 |
| 89.6782344 | 66.0257226 | 78.9357253 | 72.678859 | 77.9479168 |
| 85.6782344 | 66.0257226 | 78.9357253 | 71.678859 | 77.0907739 |
| 83.6782344 | 66.0257226 | 78.9357253 | 70.678859 | 76.6622025 |
| 83.6782344 | 66.0257226 | 77.9357253 | 70.678859 | 77.0907739 |
| 83.6782344 | 66.0257226 | 77.9357253 | 69.678859 | 77.2336311 |
| 81.6782344 | 66.0257226 | 77.9357253 | 69.678859 | 76.9479168 |
| 79.6782344 | 66.0257226 | 78.9357253 | 70.678859 | 77.0907739 |
| 76.6782344 | 65.0257226 | 78.9357253 | 70.678859 | 77.2336311 |
| 75.6782344 | 65.0257226 | 79.9357253 | 71.678859 | 77.3764882 |
| 75.6782344 | 66.0257226 | 79.9357253 | 71.678859 | 77.3764882 |
| 75.6782344 | 66.0257226 | 79.9357253 | 70.678859 | 77.0907739 |
| 75.6782344 | 66.0257226 | 79.9357253 | 70.678859 | 77.2336311 |
| 75.6782344 | 66.0257226 | 79.9357253 | 70.678859 | 77.2336311 |
| 74.6782344 | 63.0257226 | 79.9357253 | 69.678859 | 76.2336311 |
| 77.6782344 | 63.0257226 | 79.9357253 | 69.678859 | 76.0907739 |
| 77.6782344 | 63.0257226 | 79.9357253 | 69.678859 | 75.9479168 |
| 78.6782344 | 63.0257226 | 78.9357253 | 69.678859 | 75.6622025 |
| 74.6782344 | 64.0257226 | 79.9357253 | 69.678859 | 75.0907739 |
| 74.6782344 | 64.0257226 | 79.9357253 | 69.678859 | 74.6622025 |
| 74.6782344 | 64.0257226 | 78.9357253 | 69.678859 | 74.5193454 |
| 74.6782344 | 64.0257226 | 77.9357253 | 69.678859 | 73.9479168 |

|            |            |            |           |            |
|------------|------------|------------|-----------|------------|
| 73.6782344 | 62.0257226 | 77.9357253 | 69.678859 | 73.5193454 |
| 73.6782344 | 62.0257226 | 76.9357253 | 69.678859 | 73.2336311 |
| 73.6782344 | 62.0257226 | 77.9357253 | 72.678859 | 73.3764882 |
| 78.6782344 | 62.0257226 | 77.9357253 | 73.678859 | 74.2336311 |
| 78.6782344 | 71.0257226 | 76.9357253 | 73.678859 | 75.3764882 |
| 78.6782344 | 71.0257226 | 76.9357253 | 73.678859 | 75.2336311 |
| 78.6782344 | 71.0257226 | 74.9357253 | 73.678859 | 75.0907739 |
| 78.6782344 | 70.0257226 | 74.9357253 | 73.678859 | 74.5193454 |
| 78.6782344 | 70.0257226 | 74.9357253 | 74.678859 | 74.5193454 |
| 79.6782344 | 70.0257226 | 74.9357253 | 76.678859 | 74.9479168 |
| 78.6782344 | 69.0257226 | 74.9357253 | 76.678859 | 74.8050597 |
| 78.6782344 | 69.0257226 | 74.9357253 | 77.678859 | 74.2336311 |
| 78.6782344 | 70.0257226 | 75.9357253 | 78.678859 | 74.8050597 |
| 75.6782344 | 70.0257226 | 75.9357253 | 75.678859 | 74.0907739 |
| 73.6782344 | 70.0257226 | 75.9357253 | 74.678859 | 73.6622025 |
| 73.6782344 | 70.0257226 | 75.9357253 | 74.678859 | 73.6622025 |
| 73.6782344 | 71.0257226 | 75.9357253 | 74.678859 | 73.8050597 |
| 73.6782344 | 72.0257226 | 76.9357253 | 73.678859 | 74.0907739 |
| 73.6782344 | 72.0257226 | 77.9357253 | 73.678859 | 74.2336311 |
| 73.6782344 | 72.0257226 | 77.9357253 | 72.678859 | 73.9479168 |
| 73.6782344 | 72.0257226 | 77.9357253 | 72.678859 | 74.0907739 |
| 73.6782344 | 75.0257226 | 77.9357253 | 72.678859 | 74.6622025 |
| 73.6782344 | 75.0257226 | 79.9357253 | 72.678859 | 74.8050597 |
| 71.6782344 | 75.0257226 | 79.9357253 | 72.678859 | 74.6622025 |
| 72.6782344 | 75.0257226 | 80.9357253 | 73.678859 | 75.2336311 |
| 73.6782344 | 72.0257226 | 79.9357253 | 72.678859 | 74.6622025 |
| 74.6782344 | 71.0257226 | 80.9357253 | 72.678859 | 74.9479168 |
| 74.6782344 | 71.0257226 | 80.9357253 | 72.678859 | 75.0907739 |
| 73.6782344 | 71.0257226 | 80.9357253 | 72.678859 | 74.8050597 |
| 69.6782344 | 71.0257226 | 80.9357253 | 72.678859 | 74.6622025 |
| 68.6782344 | 67.0257226 | 82.9357253 | 72.678859 | 74.2336311 |
| 68.6782344 | 64.0257226 | 82.9357253 | 72.678859 | 74.2336311 |
| 68.6782344 | 64.0257226 | 81.9357253 | 72.678859 | 73.8050597 |
| 70.6782344 | 64.0257226 | 81.9357253 | 72.678859 | 74.2336311 |
| 70.6782344 | 63.0257226 | 81.9357253 | 72.678859 | 73.8050597 |
| 72.6782344 | 67.0257226 | 80.9357253 | 72.678859 | 74.5193454 |
| 75.6782344 | 66.0257226 | 78.9357253 | 72.678859 | 74.2336311 |
| 75.6782344 | 66.0257226 | 76.9357253 | 72.678859 | 73.9479168 |
| 75.6782344 | 66.0257226 | 76.9357253 | 72.678859 | 73.9479168 |
| 76.6782344 | 66.0257226 | 74.9357253 | 73.678859 | 74.0907739 |
| 75.6782344 | 66.0257226 | 74.9357253 | 73.678859 | 74.5193454 |
| 75.6782344 | 64.0257226 | 74.9357253 | 72.678859 | 74.0907739 |
| 75.6782344 | 64.0257226 | 74.9357253 | 72.678859 | 74.2336311 |
| 75.6782344 | 63.0257226 | 75.9357253 | 71.678859 | 74.2336311 |
| 75.6782344 | 66.0257226 | 75.9357253 | 71.678859 | 74.6622025 |



|            |            |            |            |            |
|------------|------------|------------|------------|------------|
| 75.6782344 | 66.0257226 | 75.9357253 | 70.678859  | 74.5193454 |
| 75.6782344 | 67.0257226 | 75.9357253 | 70.678859  | 74.6622025 |
| 77.6782344 | 67.0257226 | 75.9357253 | 70.678859  | 74.6622025 |
| 77.6782344 | 66.0257226 | 75.9357253 | 71.678859  | 74.5193454 |
| 77.6782344 | 66.0257226 | 75.9357253 | 71.678859  | 74.5193454 |
| 77.6782344 | 66.0257226 | 74.9357253 | 71.678859  | 74.3764882 |
| 77.6782344 | 65.0257226 | 74.9357253 | 72.678859  | 74.6622025 |
| 77.6782344 | 65.0257226 | 74.9357253 | 72.678859  | 74.9479168 |
| 76.6782344 | 65.0257226 | 73.9357253 | 72.678859  | 74.5193454 |
| 76.6782344 | 63.0257226 | 72.9357253 | 73.678859  | 74.0907739 |
| 76.6782344 | 62.0257226 | 71.9357253 | 73.678859  | 73.8050597 |
| 81.6782344 | 62.0257226 | 70.9357253 | 73.678859  | 74.6622025 |
| 82.6782344 | 62.0257226 | 71.9357253 | 74.678859  | 75.0907739 |
| 83.6782344 | 62.0257226 | 71.9357253 | 76.678859  | 75.3764882 |
| 82.6782344 | 58.0257226 | 70.9357253 | 77.678859  | 74.6622025 |
| 82.6782344 | 59.0257226 | 70.9357253 | 79.678859  | 75.0907739 |
| 83.6782344 | 59.0257226 | 69.9357253 | 84.678859  | 75.3764882 |
| 83.6782344 | 59.0257226 | 69.9357253 | 84.678859  | 75.3764882 |
| 84.6782344 | 59.0257226 | 69.9357253 | 76.9479168 | 74.2720679 |
| 84.6782344 | 63.0257226 | 69.9357253 | 85.678859  | 76.0907739 |
| 84.6782344 | 63.0257226 | 70.9357253 | 81.678859  | 75.8050597 |
| 77.6782344 | 69.0257226 | 70.9357253 | 78.678859  | 75.3764882 |
| 76.6782344 | 77.0257226 | 70.9357253 | 77.678859  | 75.8050597 |
| 76.6782344 | 79.0257226 | 71.9357253 | 76.678859  | 76.3764882 |
| 76.6782344 | 79.0257226 | 71.9357253 | 75.678859  | 75.8050597 |
| 74.6782344 | 78.0257226 | 73.9357253 | 75.678859  | 74.6622025 |
| 74.6782344 | 78.0257226 | 72.9357253 | 73.678859  | 74.0907739 |
| 74.6782344 | 78.0257226 | 72.9357253 | 72.678859  | 73.9479168 |
| 73.6782344 | 77.0257226 | 73.9357253 | 72.678859  | 73.9479168 |
| 73.6782344 | 77.0257226 | 73.9357253 | 71.678859  | 74.3764882 |
| 73.6782344 | 77.0257226 | 74.9357253 | 71.678859  | 74.8050597 |
| 73.6782344 | 77.0257226 | 74.9357253 | 71.678859  | 74.8050597 |
| 73.6782344 | 81.0257226 | 75.9357253 | 72.678859  | 75.8050597 |
| 74.6782344 | 80.0257226 | 75.9357253 | 72.678859  | 75.8050597 |
| 73.6782344 | 79.0257226 | 75.9357253 | 72.678859  | 75.3764882 |
| 71.6782344 | 79.0257226 | 75.9357253 | 72.678859  | 74.8050597 |
| 71.6782344 | 78.0257226 | 75.9357253 | 73.678859  | 74.3764882 |
| 70.6782344 | 78.0257226 | 75.9357253 | 72.678859  | 73.9479168 |
| 74.6782344 | 77.0257226 | 76.9357253 | 72.678859  | 74.5193454 |
| 74.6782344 | 76.0257226 | 76.9357253 | 72.678859  | 74.0907739 |
| 77.6782344 | 76.0257226 | 76.9357253 | 72.678859  | 74.6622025 |
| 78.6782344 | 76.0257226 | 77.9357253 | 71.678859  | 74.8050597 |
| 78.6782344 | 76.0257226 | 78.9357253 | 71.678859  | 74.9479168 |
| 78.6782344 | 76.0257226 | 78.9357253 | 71.678859  | 74.8050597 |
| 78.6782344 | 75.0257226 | 79.9357253 | 71.678859  | 74.8050597 |

|            |            |            |           |            |
|------------|------------|------------|-----------|------------|
| 78.6782344 | 75.0257226 | 78.9357253 | 72.678859 | 74.9479168 |
| 78.6782344 | 76.0257226 | 78.9357253 | 73.678859 | 75.6622025 |
| 78.6782344 | 76.0257226 | 78.9357253 | 73.678859 | 75.6622025 |
| 75.6782344 | 76.0257226 | 78.9357253 | 72.678859 | 75.8050597 |
| 75.6782344 | 76.0257226 | 79.9357253 | 72.678859 | 76.2336311 |
| 75.6782344 | 76.0257226 | 79.9357253 | 72.678859 | 75.6622025 |
| 77.6782344 | 75.0257226 | 79.9357253 | 72.678859 | 75.6622025 |
| 79.6782344 | 75.0257226 | 79.9357253 | 71.678859 | 75.8050597 |
| 80.6782344 | 70.0257226 | 79.9357253 | 71.678859 | 75.5193454 |
| 81.6782344 | 64.0257226 | 79.9357253 | 71.678859 | 74.9479168 |
| 81.6782344 | 64.0257226 | 79.9357253 | 70.678859 | 74.8050597 |
| 81.6782344 | 64.0257226 | 79.9357253 | 70.678859 | 74.6622025 |
| 81.6782344 | 64.0257226 | 79.9357253 | 70.678859 | 74.9479168 |
| 82.6782344 | 64.0257226 | 79.9357253 | 71.678859 | 75.2336311 |
| 83.6782344 | 64.0257226 | 79.9357253 | 71.678859 | 75.3764882 |
| 83.6782344 | 63.0257226 | 80.9357253 | 71.678859 | 75.5193454 |
| 83.6782344 | 62.0257226 | 80.9357253 | 72.678859 | 75.5193454 |
| 83.6782344 | 62.0257226 | 80.9357253 | 72.678859 | 76.0907739 |
| 83.6782344 | 61.0257226 | 81.9357253 | 72.678859 | 76.0907739 |
| 84.6782344 | 61.0257226 | 81.9357253 | 72.678859 | 76.5193454 |
| 85.6782344 | 61.0257226 | 83.9357253 | 72.678859 | 76.9479168 |
| 82.6782344 | 61.0257226 | 83.9357253 | 72.678859 | 76.8050597 |
| 79.6782344 | 61.0257226 | 84.9357253 | 73.678859 | 76.6622025 |
| 79.6782344 | 61.0257226 | 84.9357253 | 73.678859 | 76.6622025 |
| 78.6782344 | 61.0257226 | 84.9357253 | 73.678859 | 76.8050597 |
| 78.6782344 | 60.0257226 | 84.9357253 | 72.678859 | 75.6622025 |
| 78.6782344 | 60.0257226 | 85.9357253 | 72.678859 | 75.6622025 |
| 77.6782344 | 60.0257226 | 86.9357253 | 72.678859 | 75.6622025 |
| 79.6782344 | 60.0257226 | 86.9357253 | 72.678859 | 75.9479168 |
| 80.6782344 | 61.0257226 | 87.9357253 | 72.678859 | 75.8050597 |
| 80.6782344 | 62.0257226 | 87.9357253 | 71.678859 | 75.8050597 |
| 80.6782344 | 65.0257226 | 87.9357253 | 71.678859 | 76.2336311 |
| 80.6782344 | 65.0257226 | 87.9357253 | 70.678859 | 75.6622025 |
| 80.6782344 | 65.0257226 | 88.9357253 | 70.678859 | 75.6622025 |
| 77.6782344 | 66.0257226 | 91.9357253 | 69.678859 | 75.8050597 |
| 77.6782344 | 69.0257226 | 76.9479168 | 69.678859 | 74.3782299 |
| 76.6782344 | 69.0257226 | 76.8050597 | 69.678859 | 74.2149646 |
| 76.6782344 | 74.0257226 | 77.6622025 | 69.678859 | 75.1945564 |
| 75.6782344 | 75.0257226 | 77.8050597 | 69.678859 | 75.3578217 |
| 74.6782344 | 71.0257226 | 92.9357253 | 69.678859 | 76.8050597 |
| 74.6782344 | 71.0257226 | 92.9357253 | 69.678859 | 76.6622025 |
| 74.6782344 | 68.0257226 | 91.9357253 | 73.678859 | 76.8050597 |
| 74.6782344 | 69.0257226 | 91.9357253 | 74.678859 | 77.0907739 |
| 74.6782344 | 73.0257226 | 87.9357253 | 74.678859 | 77.3764882 |
| 74.6782344 | 75.0257226 | 87.9357253 | 74.678859 | 77.8050597 |

|            |            |            |           |            |
|------------|------------|------------|-----------|------------|
| 74.6782344 | 76.0257226 | 84.9357253 | 74.678859 | 77.5193454 |
| 74.6782344 | 77.0257226 | 79.9357253 | 73.678859 | 77.0907739 |
| 74.6782344 | 78.0257226 | 79.9357253 | 73.678859 | 77.3764882 |
| 73.6782344 | 78.0257226 | 78.9357253 | 73.678859 | 77.0907739 |
| 73.6782344 | 78.0257226 | 78.9357253 | 73.678859 | 77.5193454 |
| 73.6782344 | 79.0257226 | 79.9357253 | 73.678859 | 77.8050597 |
| 73.6782344 | 81.0257226 | 81.9357253 | 73.678859 | 78.3764882 |
| 73.6782344 | 81.0257226 | 81.9357253 | 73.678859 | 78.5193454 |
| 73.6782344 | 82.0257226 | 81.9357253 | 73.678859 | 79.2336311 |
| 73.6782344 | 82.0257226 | 81.9357253 | 73.678859 | 79.5193454 |
| 73.6782344 | 82.0257226 | 77.9357253 | 73.678859 | 79.2336311 |
| 73.6782344 | 82.0257226 | 77.9357253 | 73.678859 | 79.2336311 |
| 73.6782344 | 83.0257226 | 73.9357253 | 74.678859 | 79.6622025 |
| 72.6782344 | 83.0257226 | 73.9357253 | 74.678859 | 77.9478756 |
| 72.6782344 | 83.0257226 | 73.9357253 | 74.678859 | 77.9478756 |
| 69.6782344 | 83.0257226 | 73.9357253 | 74.678859 | 77.6417532 |
| 69.6782344 | 83.0257226 | 73.9357253 | 74.678859 | 77.6417532 |
| 68.6782344 | 83.0257226 | 72.9357253 | 73.678859 | 77.8254266 |
| 69.6782344 | 83.0257226 | 73.9357253 | 73.678859 | 78.1519572 |
| 72.6782344 | 83.0257226 | 74.9357253 | 73.678859 | 78.498896  |
| 73.6782344 | 83.0257226 | 74.9357253 | 73.678859 | 78.498896  |
| 73.6782344 | 83.0257226 | 75.9357253 | 74.678859 | 78.8254266 |
| 72.6782344 | 82.0257226 | 75.9357253 | 74.678859 | 78.5193042 |
| 72.6782344 | 81.0257226 | 76.9357253 | 74.678859 | 78.498896  |
| 72.6782344 | 80.0257226 | 77.9357253 | 75.678859 | 78.8254266 |
| 72.6782344 | 79.0257226 | 77.9357253 | 75.678859 | 78.8254266 |
| 72.6782344 | 75.0257226 | 77.9357253 | 74.678859 | 78.0091001 |
| 72.6782344 | 74.0257226 | 78.9357253 | 74.678859 | 77.9886919 |
| 72.6782344 | 74.0257226 | 78.9357253 | 75.678859 | 77.5336345 |
| 69.6782344 | 71.0257226 | 79.9357253 | 75.678859 | 76.5492595 |
| 64.6782344 | 70.0257226 | 79.9357253 | 75.678859 | 75.6742595 |
| 64.6782344 | 70.0257226 | 80.9357253 | 75.678859 | 74.5336345 |
| 60.6782344 | 70.0257226 | 79.9357253 | 75.678859 | 73.3930095 |
| 57.6782344 | 68.0257226 | 77.9357253 | 74.678859 | 72.1273845 |
| 57.6782344 | 65.0257226 | 76.9357253 | 74.678859 | 71.5648845 |
| 58.6782344 | 64.0257226 | 76.9357253 | 73.678859 | 71.7211345 |
| 59.6782344 | 64.0257226 | 76.9357253 | 73.678859 | 71.8461345 |
| 60.6782344 | 64.0257226 | 75.9357253 | 73.678859 | 71.5648845 |
| 62.6782344 | 65.0257226 | 75.9357253 | 72.678859 | 71.9867595 |
| 63.6782344 | 64.0257226 | 75.9357253 | 72.678859 | 71.8461345 |
| 65.6782344 | 62.0257226 | 75.9357253 | 72.678859 | 71.7055095 |
| 65.6782344 | 62.0257226 | 74.9357253 | 72.678859 | 71.0023845 |
| 66.6782344 | 62.0257226 | 74.9357253 | 76.678859 | 71.7055095 |
| 65.6782344 | 62.0257226 | 73.9357253 | 77.678859 | 71.9867595 |
| 65.6782344 | 63.0257226 | 71.9357253 | 77.678859 | 71.9867595 |

|            |            |            |           |            |
|------------|------------|------------|-----------|------------|
| 65.6782344 | 64.0257226 | 70.9357253 | 77.678859 | 72.2523845 |
| 65.6782344 | 64.0257226 | 70.9357253 | 76.678859 | 72.1117595 |
| 65.6782344 | 62.0257226 | 72.9357253 | 76.678859 | 72.5336345 |
| 65.6782344 | 62.0257226 | 72.9357253 | 76.678859 | 72.3930095 |
| 67.6782344 | 61.0257226 | 72.9357253 | 74.678859 | 72.3930095 |
| 68.6782344 | 64.0257226 | 72.9357253 | 73.678859 | 74.8356503 |
| 70.6782344 | 67.0257226 | 72.9357253 | 73.678859 | 75.4606503 |
| 70.6782344 | 67.0257226 | 72.9357253 | 74.678859 | 75.3356503 |
| 73.6782344 | 72.0257226 | 72.9357253 | 74.678859 | 76.5856503 |
| 74.6782344 | 72.0257226 | 74.9357253 | 74.678859 | 77.3356503 |
| 73.6782344 | 71.0257226 | 75.9357253 | 74.678859 | 77.3356503 |
| 72.6782344 | 71.0257226 | 75.9357253 | 75.678859 | 75.7055095 |
| 72.6782344 | 68.0257226 | 76.9357253 | 76.678859 | 75.5961345 |
| 73.6782344 | 67.0257226 | 75.9357253 | 76.678859 | 75.4711345 |
| 74.6782344 | 67.0257226 | 74.9357253 | 76.678859 | 75.4711345 |
| 76.6782344 | 66.0257226 | 74.9357253 | 74.678859 | 75.4398845 |
| 76.6782344 | 66.0257226 | 74.9357253 | 73.678859 | 75.4398845 |
| 77.6782344 | 66.0257226 | 73.9357253 | 72.678859 | 75.1430095 |
| 77.6782344 | 64.0257226 | 73.9357253 | 71.678859 | 74.2992595 |
| 77.6782344 | 64.0257226 | 72.9357253 | 71.678859 | 72.4711345 |
| 77.6782344 | 64.0257226 | 72.9357253 | 71.678859 | 72.4711345 |
| 79.6782344 | 65.0257226 | 71.9357253 | 71.678859 | 74.5856503 |
| 79.6782344 | 66.0257226 | 71.9357253 | 72.678859 | 74.0856503 |
| 79.6782344 | 67.0257226 | 71.9357253 | 72.678859 | 73.8356503 |
| 78.6782344 | 67.0257226 | 72.9357253 | 72.678859 | 73.9606503 |
| 77.6782344 | 67.0257226 | 75.9357253 | 72.678859 | 74.3356503 |
| 77.6782344 | 68.0257226 | 77.9357253 | 72.678859 | 74.7106503 |
| 78.6782344 | 69.0257226 | 79.9357253 | 71.678859 | 75.0856503 |
| 78.6782344 | 69.0257226 | 79.9357253 | 71.678859 | 75.0856503 |
| 78.6782344 | 70.0257226 | 80.9357253 | 71.678859 | 74.9606503 |
| 81.6782344 | 72.0257226 | 79.9357253 | 71.678859 | 75.2106503 |
| 80.6782344 | 76.0257226 | 79.9357253 | 71.678859 | 75.3356503 |
| 80.6782344 | 76.0257226 | 79.9357253 | 70.678859 | 75.7106503 |
| 80.6782344 | 82.0257226 | 80.9357253 | 70.678859 | 77.2106503 |
| 80.6782344 | 84.0257226 | 80.9357253 | 70.678859 | 77.5856503 |
| 79.6782344 | 84.0257226 | 80.9357253 | 70.678859 | 76.7106503 |
| 79.6782344 | 84.0257226 | 79.9357253 | 70.678859 | 76.0856503 |
| 78.6782344 | 81.0257226 | 78.9357253 | 69.678859 | 75.0856503 |
| 78.6782344 | 81.0257226 | 77.9357253 | 70.678859 | 75.3356503 |
| 77.6782344 | 78.0257226 | 77.9357253 | 71.678859 | 74.8356503 |
| 76.6782344 | 74.0257226 | 77.9357253 | 71.678859 | 74.0856503 |
| 75.6782344 | 74.0257226 | 77.9357253 | 71.678859 | 73.9606503 |
| 75.6782344 | 66.0257226 | 77.9357253 | 71.678859 | 72.9606503 |
| 72.6782344 | 65.0257226 | 78.9357253 | 72.678859 | 72.5856503 |
| 72.6782344 | 65.0257226 | 78.9357253 | 71.678859 | 72.4606503 |

|            |            |            |           |            |
|------------|------------|------------|-----------|------------|
| 72.6782344 | 64.0257226 | 77.9357253 | 71.678859 | 72.4606503 |
| 73.6782344 | 64.0257226 | 76.9357253 | 70.678859 | 72.5856503 |
| 73.6782344 | 64.0257226 | 75.9357253 | 70.678859 | 72.4606503 |
| 74.6782344 | 64.0257226 | 75.9357253 | 68.678859 | 72.5856503 |
| 74.6782344 | 63.0257226 | 78.9357253 | 67.678859 | 73.7106503 |
| 78.6782344 | 63.0257226 | 79.9357253 | 67.678859 | 74.8356503 |
| 79.6782344 | 63.0257226 | 80.9357253 | 67.678859 | 75.3356503 |
| 78.6782344 | 63.0257226 | 80.9357253 | 67.678859 | 75.3356503 |
| 78.6782344 | 63.0257226 | 82.9357253 | 70.678859 | 76.3356503 |
| 78.6782344 | 63.0257226 | 83.9357253 | 71.678859 | 76.3356503 |
| 79.6782344 | 62.0257226 | 82.9357253 | 72.678859 | 76.2106503 |
| 79.6782344 | 61.0257226 | 80.9357253 | 72.678859 | 75.3356503 |
| 80.6782344 | 61.0257226 | 79.9357253 | 72.678859 | 74.9606503 |
| 80.6782344 | 61.0257226 | 80.9357253 | 71.678859 | 74.8356503 |
| 81.6782344 | 60.0257226 | 80.9357253 | 70.678859 | 74.3356503 |
| 81.6782344 | 61.0257226 | 79.9357253 | 71.678859 | 74.7106503 |
| 81.6782344 | 61.0257226 | 79.9357253 | 71.678859 | 74.3356503 |
| 81.6782344 | 61.0257226 | 77.9357253 | 71.678859 | 74.2106503 |
| 82.6782344 | 61.0257226 | 76.9357253 | 72.678859 | 74.2106503 |
| 82.6782344 | 61.0257226 | 75.9357253 | 72.678859 | 73.7106503 |
| 79.6782344 | 61.0257226 | 74.9357253 | 72.678859 | 73.3356503 |
| 79.6782344 | 61.0257226 | 74.9357253 | 71.678859 | 70.2167004 |
| 78.6782344 | 61.0257226 | 74.9357253 | 71.678859 | 71.8356503 |
| 78.6782344 | 61.0257226 | 74.9357253 | 71.678859 | 69.2167004 |
| 78.6782344 | 61.0257226 | 74.9357253 | 71.678859 | 71.0856503 |
| 78.6782344 | 61.0257226 | 75.9357253 | 71.678859 | 71.3356503 |
| 78.6782344 | 61.0257226 | 75.9357253 | 71.678859 | 70.2106503 |
| 78.6782344 | 61.0257226 | 77.9357253 | 72.678859 | 70.4606503 |
| 78.6782344 | 61.0257226 | 78.9357253 | 72.678859 | 70.7106503 |
| 78.6782344 | 61.0257226 | 78.9357253 | 72.678859 | 71.2106503 |
| 76.6782344 | 62.0257226 | 76.9357253 | 71.678859 | 71.4606503 |
| 76.6782344 | 63.0257226 | 75.9357253 | 71.678859 | 71.3356503 |
| 75.6782344 | 63.0257226 | 75.9357253 | 71.678859 | 70.9606503 |
| 75.6782344 | 66.0257226 | 74.9357253 | 75.678859 | 71.5856503 |
| 75.6782344 | 66.0257226 | 74.9357253 | 81.678859 | 72.2106503 |
| 75.6782344 | 68.0257226 | 75.9357253 | 82.678859 | 73.0856503 |
| 74.6782344 | 68.0257226 | 75.9357253 | 79.678859 | 72.8356503 |
| 74.6782344 | 68.0257226 | 76.9357253 | 78.678859 | 73.5856503 |
| 77.6782344 | 70.0257226 | 76.9357253 | 77.678859 | 74.4606503 |
| 78.6782344 | 74.0257226 | 76.9357253 | 76.678859 | 74.7106503 |
| 79.6782344 | 76.0257226 | 75.9357253 | 76.678859 | 74.7106503 |
| 79.6782344 | 76.0257226 | 73.9357253 | 75.678859 | 74.2106503 |
| 79.6782344 | 82.0257226 | 73.9357253 | 76.678859 | 75.0856503 |
| 79.6782344 | 83.0257226 | 74.9357253 | 76.678859 | 75.4606503 |
| 78.6782344 | 84.0257226 | 74.9357253 | 76.678859 | 75.3356503 |

|            |            |            |           |            |
|------------|------------|------------|-----------|------------|
| 78.6782344 | 84.0257226 | 74.9357253 | 76.678859 | 75.4606503 |
| 78.6782344 | 84.0257226 | 74.9357253 | 76.678859 | 75.9606503 |
| 77.6782344 | 84.0257226 | 74.9357253 | 75.678859 | 75.0856503 |
| 77.6782344 | 84.0257226 | 74.9357253 | 75.678859 | 75.5856503 |
| 78.6782344 | 80.0257226 | 75.9357253 | 75.678859 | 75.8356503 |
| 80.6782344 | 78.0257226 | 77.9357253 | 75.678859 | 76.0856503 |
| 79.6782344 | 75.0257226 | 78.9357253 | 75.678859 | 75.7106503 |
| 78.6782344 | 74.0257226 | 79.9357253 | 75.678859 | 75.3356503 |
| 78.6782344 | 74.0257226 | 79.9357253 | 76.678859 | 74.9606503 |
| 77.6782344 | 66.0257226 | 78.9357253 | 76.678859 | 73.7106503 |
| 76.6782344 | 64.0257226 | 77.9357253 | 78.678859 | 73.0856503 |
| 76.6782344 | 63.0257226 | 77.9357253 | 78.678859 | 72.8356503 |
| 76.6782344 | 63.0257226 | 77.9357253 | 74.678859 | 72.4606503 |
| 78.6782344 | 62.0257226 | 77.9357253 | 74.678859 | 73.2106503 |
| 79.6782344 | 62.0257226 | 77.9357253 | 74.678859 | 73.8356503 |
| 78.6782344 | 62.0257226 | 77.9357253 | 73.678859 | 73.8356503 |
| 78.6782344 | 63.0257226 | 77.9357253 | 73.678859 | 74.2106503 |
| 77.6782344 | 63.0257226 | 77.9357253 | 73.678859 | 74.0856503 |
| 77.6782344 | 67.0257226 | 81.9357253 | 73.678859 | 74.9606503 |
| 77.6782344 | 69.0257226 | 82.9357253 | 73.678859 | 73.9606503 |
| 77.6782344 | 69.0257226 | 82.9357253 | 74.678859 | 73.5856503 |
| 77.6782344 | 68.0257226 | 83.9357253 | 74.678859 | 73.5856503 |
| 77.6782344 | 68.0257226 | 82.9357253 | 74.678859 | 73.4606503 |
| 76.6782344 | 68.0257226 | 80.9357253 | 74.678859 | 73.0856503 |
| 76.6782344 | 68.0257226 | 76.9357253 | 74.678859 | 72.3356503 |
| 76.6782344 | 68.0257226 | 74.9357253 | 73.678859 | 71.9606503 |
| 76.6782344 | 68.0257226 | 74.9357253 | 73.678859 | 71.7106503 |
| 76.6782344 | 68.0257226 | 75.9357253 | 72.678859 | 71.7106503 |
| 76.6782344 | 67.0257226 | 77.9357253 | 72.678859 | 71.7106503 |
| 76.6782344 | 67.0257226 | 78.9357253 | 71.678859 | 71.8356503 |
| 76.6782344 | 66.0257226 | 78.9357253 | 71.678859 | 71.8356503 |
| 75.6782344 | 66.0257226 | 78.9357253 | 71.678859 | 71.7106503 |
| 75.6782344 | 66.0257226 | 78.9357253 | 71.678859 | 72.3356503 |
| 75.6782344 | 66.0257226 | 77.9357253 | 71.678859 | 72.2106503 |
| 75.6782344 | 68.0257226 | 73.9357253 | 71.678859 | 71.7106503 |
| 75.6782344 | 69.0257226 | 71.9357253 | 71.678859 | 71.3356503 |
| 75.6782344 | 69.0257226 | 70.9357253 | 71.678859 | 71.2106503 |
| 76.6782344 | 67.0257226 | 70.9357253 | 71.678859 | 70.9606503 |
| 76.6782344 | 67.0257226 | 70.9357253 | 71.678859 | 70.4606503 |
| 77.6782344 | 66.0257226 | 72.9357253 | 70.678859 | 69.9606503 |
| 79.6782344 | 66.0257226 | 71.9357253 | 70.678859 | 69.8356503 |
| 79.6782344 | 67.0257226 | 71.9357253 | 70.678859 | 69.8356503 |
| 80.6782344 | 67.0257226 | 71.9357253 | 70.678859 | 69.3356503 |
| 79.6782344 | 67.0257226 | 71.9357253 | 71.678859 | 69.3356503 |
| 79.6782344 | 67.0257226 | 70.9357253 | 72.678859 | 70.3356503 |

|            |            |            |           |            |
|------------|------------|------------|-----------|------------|
| 79.6782344 | 67.0257226 | 70.9357253 | 72.678859 | 70.9606503 |
| 78.6782344 | 66.0257226 | 70.9357253 | 73.678859 | 71.2106503 |
| 76.6782344 | 67.0257226 | 69.9357253 | 73.678859 | 71.0856503 |
| 72.6782344 | 69.0257226 | 69.9357253 | 73.678859 | 70.9606503 |
| 72.6782344 | 69.0257226 | 70.9357253 | 73.678859 | 71.2106503 |
| 68.6782344 | 70.0257226 | 71.9357253 | 73.678859 | 71.0856503 |
| 69.6782344 | 70.0257226 | 72.9357253 | 72.678859 | 71.4606503 |
| 69.6782344 | 70.0257226 | 72.9357253 | 71.678859 | 71.4606503 |
| 69.6782344 | 72.0257226 | 72.9357253 | 70.678859 | 72.5856503 |
| 69.6782344 | 72.0257226 | 71.9357253 | 69.678859 | 72.7106503 |
| 69.6782344 | 72.0257226 | 70.9357253 | 68.678859 | 72.4606503 |
| 72.6782344 | 73.0257226 | 70.9357253 | 68.678859 | 72.4606503 |
| 71.6782344 | 71.0257226 | 70.9357253 | 68.678859 | 72.2106503 |
| 71.6782344 | 71.0257226 | 71.9357253 | 69.678859 | 71.8356503 |
| 71.6782344 | 71.0257226 | 71.9357253 | 69.678859 | 71.7106503 |
| 71.6782344 | 71.0257226 | 71.9357253 | 70.678859 | 71.9606503 |
| 72.6782344 | 70.0257226 | 71.9357253 | 71.678859 | 71.8356503 |
| 72.6782344 | 69.0257226 | 71.9357253 | 71.678859 | 71.5856503 |
| 73.6782344 | 69.0257226 | 76.9357253 | 72.678859 | 72.5856503 |
| 73.6782344 | 68.0257226 | 76.9357253 | 72.678859 | 72.3356503 |
| 73.6782344 | 67.0257226 | 77.9357253 | 71.678859 | 72.2106503 |
| 73.6782344 | 66.0257226 | 77.9357253 | 71.678859 | 72.2106503 |
| 73.6782344 | 66.0257226 | 77.9357253 | 71.678859 | 73.9606503 |
| 73.6782344 | 65.0257226 | 76.9357253 | 71.678859 | 73.8356503 |
| 73.6782344 | 64.0257226 | 75.9357253 | 71.678859 | 73.5856503 |
| 74.6782344 | 64.0257226 | 75.9357253 | 71.678859 | 73.8356503 |
| 74.6782344 | 61.0257226 | 74.9357253 | 71.678859 | 72.8356503 |
| 76.6782344 | 59.0257226 | 73.9357253 | 71.678859 | 72.0856503 |
| 76.6782344 | 59.0257226 | 70.9357253 | 70.678859 | 71.5856503 |
| 76.6782344 | 59.0257226 | 70.9357253 | 70.678859 | 71.3356503 |
| 76.6782344 | 63.0257226 | 69.9357253 | 70.678859 | 71.7106503 |
| 77.6782344 | 69.0257226 | 68.9357253 | 70.678859 | 72.4606503 |
| 78.6782344 | 69.0257226 | 68.9357253 | 71.678859 | 72.9606503 |
| 71.6782344 | 74.0257226 | 68.9357253 | 71.678859 | 72.8356503 |
| 71.6782344 | 74.0257226 | 69.9357253 | 71.678859 | 72.8356503 |
| 73.6782344 | 74.0257226 | 71.9357253 | 70.678859 | 72.9606503 |
| 73.6782344 | 73.0257226 | 71.9357253 | 68.678859 | 72.5856503 |
| 74.6782344 | 73.0257226 | 71.9357253 | 68.678859 | 72.7106503 |
| 77.6782344 | 71.0257226 | 70.9357253 | 68.678859 | 72.7106503 |
| 78.6782344 | 72.0257226 | 68.9357253 | 68.678859 | 72.4606503 |
| 80.6782344 | 73.0257226 | 68.9357253 | 68.678859 | 72.5856503 |
| 80.6782344 | 73.0257226 | 68.9357253 | 69.678859 | 72.9606503 |
| 80.6782344 | 73.0257226 | 68.9357253 | 70.678859 | 72.8356503 |
| 80.6782344 | 73.0257226 | 69.9357253 | 70.678859 | 72.9606503 |
| 80.6782344 | 71.0257226 | 69.9357253 | 70.678859 | 72.3356503 |

|            |            |            |           |            |
|------------|------------|------------|-----------|------------|
| 80.6782344 | 71.0257226 | 69.9357253 | 71.678859 | 72.2106503 |
| 79.6782344 | 71.0257226 | 68.9357253 | 71.678859 | 71.8356503 |
| 79.6782344 | 71.0257226 | 68.9357253 | 71.678859 | 71.8356503 |
| 79.6782344 | 71.0257226 | 68.9357253 | 71.678859 | 72.2106503 |
| 79.6782344 | 71.0257226 | 67.9357253 | 71.678859 | 72.4606503 |
| 79.6782344 | 71.0257226 | 67.9357253 | 72.678859 | 72.5856503 |
| 82.6782344 | 71.0257226 | 67.9357253 | 75.678859 | 73.0856503 |
| 81.6782344 | 72.0257226 | 69.9357253 | 76.678859 | 73.4606503 |
| 81.6782344 | 73.0257226 | 70.9357253 | 75.678859 | 73.5856503 |
| 81.6782344 | 74.0257226 | 70.9357253 | 72.678859 | 73.4606503 |
| 80.6782344 | 78.0257226 | 70.9357253 | 72.678859 | 73.9606503 |
| 80.6782344 | 78.0257226 | 70.9357253 | 71.678859 | 73.7106503 |
| 79.6782344 | 77.0257226 | 70.9357253 | 70.678859 | 73.5856503 |
| 79.6782344 | 77.0257226 | 70.9357253 | 70.678859 | 73.5856503 |
| 78.6782344 | 76.0257226 | 70.9357253 | 71.678859 | 73.4606503 |
| 78.6782344 | 76.0257226 | 70.9357253 | 71.678859 | 73.8356503 |
| 80.6782344 | 76.0257226 | 70.9357253 | 71.678859 | 73.8356503 |
| 81.6782344 | 76.0257226 | 69.9357253 | 72.678859 | 73.5856503 |
| 79.6782344 | 74.0257226 | 68.9357253 | 72.678859 | 72.4606503 |
| 79.6782344 | 74.0257226 | 68.9357253 | 72.678859 | 72.2106503 |
| 78.6782344 | 72.0257226 | 68.9357253 | 72.678859 | 71.8356503 |
| 76.6782344 | 71.0257226 | 67.9357253 | 72.678859 | 71.2106503 |
| 76.6782344 | 69.0257226 | 67.9357253 | 71.678859 | 70.7106503 |
| 76.6782344 | 69.0257226 | 67.9357253 | 71.678859 | 70.5856503 |
| 76.6782344 | 68.0257226 | 68.9357253 | 72.678859 | 70.8356503 |
| 76.6782344 | 71.0257226 | 68.9357253 | 75.678859 | 71.7106503 |
| 78.6782344 | 74.0257226 | 68.9357253 | 76.678859 | 72.5856503 |
| 80.6782344 | 74.0257226 | 67.9357253 | 76.678859 | 72.8356503 |
| 81.6782344 | 74.0257226 | 68.9357253 | 75.678859 | 72.9606503 |
| 81.6782344 | 76.0257226 | 68.9357253 | 74.678859 | 73.0856503 |
| 81.6782344 | 76.0257226 | 69.9357253 | 74.678859 | 73.5856503 |
| 81.6782344 | 76.0257226 | 69.9357253 | 72.678859 | 73.3356503 |
| 80.6782344 | 74.0257226 | 70.9357253 | 71.678859 | 72.9606503 |
| 80.6782344 | 74.0257226 | 70.9357253 | 70.678859 | 72.9606503 |
| 79.6782344 | 71.0257226 | 70.9357253 | 69.678859 | 72.3356503 |
| 78.6782344 | 69.0257226 | 70.9357253 | 69.678859 | 71.9606503 |
| 78.6782344 | 64.0257226 | 70.9357253 | 69.678859 | 71.5856503 |
| 78.6782344 | 64.0257226 | 70.9357253 | 70.678859 | 71.9606503 |
| 79.6782344 | 62.0257226 | 71.9357253 | 71.678859 | 72.2106503 |
| 79.6782344 | 62.0257226 | 71.9357253 | 71.678859 | 71.7106503 |
| 79.6782344 | 62.0257226 | 71.9357253 | 71.678859 | 71.4606503 |
| 79.6782344 | 63.0257226 | 71.9357253 | 71.678859 | 71.5856503 |
| 70.6782344 | 63.0257226 | 70.9357253 | 70.678859 | 70.3356503 |
| 67.6782344 | 63.0257226 | 69.9357253 | 69.678859 | 69.5856503 |
| 67.6782344 | 63.0257226 | 69.9357253 | 69.678859 | 69.3356503 |



|            |            |            |           |            |
|------------|------------|------------|-----------|------------|
| 67.6782344 | 63.0257226 | 69.9357253 | 69.678859 | 68.9606503 |
| 65.6782344 | 60.0257226 | 69.9357253 | 69.678859 | 68.4606503 |
| 65.6782344 | 60.0257226 | 69.9357253 | 69.678859 | 68.4606503 |
| 65.6782344 | 61.0257226 | 68.9357253 | 70.678859 | 68.7106503 |
| 70.6782344 | 61.0257226 | 71.9357253 | 72.678859 | 69.9606503 |
| 70.6782344 | 63.0257226 | 71.9357253 | 73.678859 | 70.2106503 |
| 70.6782344 | 63.0257226 | 71.9357253 | 73.678859 | 70.2106503 |
| 72.6782344 | 61.0257226 | 71.9357253 | 74.678859 | 70.7106503 |
| 72.6782344 | 61.0257226 | 71.9357253 | 73.678859 | 70.8356503 |
| 71.6782344 | 61.0257226 | 71.9357253 | 73.678859 | 70.9606503 |
| 70.6782344 | 61.0257226 | 71.9357253 | 73.678859 | 70.7106503 |
| 70.6782344 | 61.0257226 | 71.9357253 | 73.678859 | 70.7106503 |
| 70.6782344 | 67.0257226 | 73.9357253 | 71.678859 | 71.8356503 |
| 69.6782344 | 69.0257226 | 73.9357253 | 70.678859 | 71.5856503 |
| 69.6782344 | 69.0257226 | 73.9357253 | 70.678859 | 71.7106503 |
| 69.6782344 | 69.0257226 | 74.9357253 | 69.678859 | 72.2106503 |
| 69.6782344 | 70.0257226 | 74.9357253 | 69.678859 | 72.2106503 |
| 69.6782344 | 69.0257226 | 74.9357253 | 69.678859 | 72.3356503 |
| 69.6782344 | 69.0257226 | 74.9357253 | 69.678859 | 72.3356503 |
| 70.6782344 | 69.0257226 | 74.9357253 | 69.678859 | 72.3356503 |
| 70.6782344 | 69.0257226 | 75.9357253 | 70.678859 | 72.7106503 |
| 71.6782344 | 70.0257226 | 75.9357253 | 70.678859 | 73.4606503 |
| 69.6782344 | 71.0257226 | 76.9357253 | 70.678859 | 73.5856503 |
| 69.6782344 | 71.0257226 | 76.9357253 | 69.678859 | 73.7106503 |
| 69.6782344 | 71.0257226 | 76.9357253 | 69.678859 | 73.8356503 |
| 69.6782344 | 72.0257226 | 75.9357253 | 69.678859 | 73.0856503 |
| 69.6782344 | 73.0257226 | 75.9357253 | 69.678859 | 73.2106503 |
| 69.6782344 | 72.0257226 | 75.9357253 | 69.678859 | 72.9606503 |
| 73.6782344 | 72.0257226 | 75.9357253 | 70.678859 | 73.5856503 |
| 73.6782344 | 72.0257226 | 75.9357253 | 70.678859 | 73.4606503 |
| 73.6782344 | 74.0257226 | 78.9357253 | 70.678859 | 74.2106503 |
| 68.6782344 | 74.0257226 | 76.9357253 | 70.678859 | 73.9606503 |
| 67.6782344 | 74.0257226 | 75.9357253 | 70.678859 | 73.4606503 |
| 68.6782344 | 74.0257226 | 75.9357253 | 70.678859 | 73.7106503 |
| 68.6782344 | 73.0257226 | 74.9357253 | 71.678859 | 73.5856503 |
| 69.6782344 | 73.0257226 | 74.9357253 | 72.678859 | 73.2106503 |
| 71.6782344 | 72.0257226 | 74.9357253 | 74.678859 | 72.9606503 |
| 73.6782344 | 68.0257226 | 74.9357253 | 73.678859 | 72.4606503 |
| 72.6782344 | 66.0257226 | 75.9357253 | 71.678859 | 71.9606503 |
| 72.6782344 | 66.0257226 | 75.9357253 | 71.678859 | 71.9606503 |
| 70.6782344 | 66.0257226 | 77.9357253 | 71.678859 | 71.8356503 |
| 70.6782344 | 65.0257226 | 77.9357253 | 71.678859 | 71.7106503 |
| 70.6782344 | 65.0257226 | 75.9357253 | 71.678859 | 71.3356503 |
| 70.6782344 | 65.0257226 | 75.9357253 | 72.678859 | 71.4606503 |
| 70.6782344 | 65.0257226 | 75.9357253 | 72.678859 | 71.5856503 |

|            |            |            |           |            |
|------------|------------|------------|-----------|------------|
| 70.6782344 | 65.0257226 | 74.9357253 | 72.678859 | 71.5856503 |
| 73.6782344 | 65.0257226 | 72.9357253 | 72.678859 | 71.8356503 |
| 73.6782344 | 64.0257226 | 72.9357253 | 73.678859 | 72.3356503 |
| 72.6782344 | 64.0257226 | 72.9357253 | 73.678859 | 72.4606503 |
| 72.6782344 | 63.0257226 | 72.9357253 | 73.678859 | 72.5856503 |
| 71.6782344 | 63.0257226 | 72.9357253 | 72.678859 | 72.3356503 |
| 71.6782344 | 63.0257226 | 72.9357253 | 72.678859 | 72.2106503 |
| 71.6782344 | 62.0257226 | 72.9357253 | 72.678859 | 71.7106503 |
| 71.6782344 | 62.0257226 | 72.9357253 | 72.678859 | 71.8356503 |
| 71.6782344 | 62.0257226 | 70.9357253 | 71.678859 | 71.3356503 |
| 71.6782344 | 62.0257226 | 68.9357253 | 70.678859 | 70.4606503 |
| 71.6782344 | 62.0257226 | 67.9357253 | 70.678859 | 70.4606503 |
| 72.6782344 | 62.0257226 | 67.9357253 | 70.678859 | 70.7106503 |
| 72.6782344 | 63.0257226 | 69.9357253 | 70.678859 | 71.0856503 |
| 71.6782344 | 63.0257226 | 69.9357253 | 69.678859 | 70.8356503 |
| 70.6782344 | 63.0257226 | 70.9357253 | 68.678859 | 70.8356503 |
| 69.6782344 | 63.0257226 | 72.9357253 | 66.678859 | 70.8356503 |
| 70.6782344 | 62.0257226 | 72.9357253 | 66.678859 | 70.8356503 |
| 71.6782344 | 63.0257226 | 72.9357253 | 66.678859 | 71.0856503 |
| 71.6782344 | 65.0257226 | 72.9357253 | 66.678859 | 71.4606503 |
| 71.6782344 | 65.0257226 | 72.9357253 | 66.678859 | 71.4606503 |
| 73.6782344 | 66.0257226 | 72.9357253 | 66.678859 | 72.4606503 |
| 73.6782344 | 69.0257226 | 72.9357253 | 67.678859 | 73.0856503 |
| 72.6782344 | 70.0257226 | 72.9357253 | 68.678859 | 73.3356503 |
| 70.6782344 | 70.0257226 | 72.9357253 | 67.678859 | 72.8356503 |
| 70.6782344 | 70.0257226 | 72.9357253 | 67.678859 | 72.5856503 |
| 69.6782344 | 70.0257226 | 72.9357253 | 67.678859 | 72.3356503 |
| 70.6782344 | 69.0257226 | 72.9357253 | 68.678859 | 72.5856503 |
| 71.6782344 | 69.0257226 | 72.9357253 | 68.678859 | 72.8356503 |
| 72.6782344 | 70.0257226 | 75.9357253 | 67.678859 | 73.3356503 |
| 72.6782344 | 72.0257226 | 76.9357253 | 67.678859 | 73.4606503 |
| 74.6782344 | 72.0257226 | 77.9357253 | 67.678859 | 73.7106503 |
| 74.6782344 | 73.0257226 | 79.9357253 | 67.678859 | 74.2106503 |
| 74.6782344 | 79.0257226 | 79.9357253 | 67.678859 | 75.0856503 |
| 74.6782344 | 79.0257226 | 79.9357253 | 67.678859 | 75.5856503 |
| 74.6782344 | 80.0257226 | 77.9357253 | 67.678859 | 75.8356503 |
| 74.6782344 | 79.0257226 | 77.9357253 | 68.678859 | 75.8356503 |
| 74.6782344 | 79.0257226 | 77.9357253 | 68.678859 | 75.9606503 |
| 75.6782344 | 78.0257226 | 77.9357253 | 68.678859 | 75.9606503 |
| 75.6782344 | 78.0257226 | 77.9357253 | 68.678859 | 75.9606503 |
| 77.6782344 | 78.0257226 | 77.9357253 | 68.678859 | 76.2106503 |
| 77.6782344 | 77.0257226 | 78.9357253 | 68.678859 | 76.0856503 |
| 77.6782344 | 77.0257226 | 80.9357253 | 68.678859 | 76.4606503 |
| 78.6782344 | 77.0257226 | 80.9357253 | 68.678859 | 76.5856503 |
| 78.6782344 | 77.0257226 | 80.9357253 | 68.678859 | 77.2106503 |

|            |            |            |           |            |
|------------|------------|------------|-----------|------------|
| 78.6782344 | 77.0257226 | 80.9357253 | 68.678859 | 77.8356503 |
| 78.6782344 | 77.0257226 | 79.9357253 | 71.678859 | 78.2106503 |
| 78.6782344 | 77.0257226 | 78.9357253 | 72.678859 | 77.5856503 |
| 78.6782344 | 76.0257226 | 78.9357253 | 72.678859 | 77.2106503 |
| 78.6782344 | 76.0257226 | 78.9357253 | 71.678859 | 76.7106503 |
| 80.6782344 | 70.0257226 | 77.9357253 | 71.678859 | 75.3356503 |
| 80.6782344 | 70.0257226 | 77.9357253 | 72.678859 | 75.5856503 |
| 79.6782344 | 70.0257226 | 77.9357253 | 72.678859 | 75.5856503 |
| 79.6782344 | 70.0257226 | 80.9357253 | 72.678859 | 76.0856503 |
| 75.6782344 | 68.0257226 | 81.9357253 | 72.678859 | 75.4606503 |
| 75.6782344 | 67.0257226 | 81.9357253 | 72.678859 | 75.2106503 |
| 72.6782344 | 66.0257226 | 81.9357253 | 72.678859 | 74.9606503 |
| 72.6782344 | 66.0257226 | 82.9357253 | 72.678859 | 74.9606503 |
| 73.6782344 | 66.0257226 | 82.9357253 | 71.678859 | 74.8356503 |
| 73.6782344 | 66.0257226 | 82.9357253 | 71.678859 | 74.8356503 |
| 76.6782344 | 65.0257226 | 84.9357253 | 70.678859 | 75.3356503 |
| 77.6782344 | 64.0257226 | 84.9357253 | 70.678859 | 75.4606503 |
| 77.6782344 | 63.0257226 | 83.9357253 | 70.678859 | 75.4606503 |
| 77.6782344 | 63.0257226 | 83.9357253 | 69.678859 | 75.3356503 |
| 73.6782344 | 62.0257226 | 83.9357253 | 69.678859 | 74.4606503 |
| 71.6782344 | 63.0257226 | 81.9357253 | 68.678859 | 74.0856503 |
| 69.6782344 | 63.0257226 | 81.9357253 | 67.678859 | 73.8356503 |
| 69.6782344 | 63.0257226 | 81.9357253 | 67.678859 | 73.8356503 |
| 69.6782344 | 66.0257226 | 77.9357253 | 66.678859 | 72.7106503 |
| 68.6782344 | 66.0257226 | 77.9357253 | 67.678859 | 72.5856503 |
| 68.6782344 | 67.0257226 | 77.9357253 | 67.678859 | 72.3356503 |
| 68.6782344 | 67.0257226 | 78.9357253 | 73.678859 | 73.2106503 |
| 67.6782344 | 67.0257226 | 79.9357253 | 76.678859 | 73.7106503 |
| 67.6782344 | 67.0257226 | 79.9357253 | 77.678859 | 73.5856503 |
| 67.6782344 | 67.0257226 | 79.9357253 | 77.678859 | 73.5856503 |
| 66.6782344 | 66.0257226 | 78.9357253 | 81.678859 | 73.3356503 |
| 65.6782344 | 66.0257226 | 78.9357253 | 81.678859 | 73.5856503 |
| 64.6782344 | 66.0257226 | 78.9357253 | 81.678859 | 73.5856503 |
| 63.6782344 | 67.0257226 | 78.9357253 | 81.678859 | 73.9606503 |
| 63.6782344 | 68.0257226 | 78.9357253 | 79.678859 | 74.3356503 |
| 62.6782344 | 79.0257226 | 78.9357253 | 79.678859 | 75.8356503 |
| 61.6782344 | 78.0257226 | 77.9357253 | 79.678859 | 74.8356503 |
| 63.6782344 | 76.0257226 | 77.9357253 | 79.678859 | 74.9606503 |
| 63.6782344 | 76.0257226 | 77.9357253 | 83.678859 | 75.0856503 |
| 63.6782344 | 76.0257226 | 74.9357253 | 87.678859 | 75.0856503 |
| 61.6782344 | 79.0257226 | 73.9357253 | 87.678859 | 74.7106503 |
| 59.6782344 | 80.0257226 | 73.9357253 | 86.678859 | 74.3356503 |
| 59.6782344 | 80.0257226 | 73.9357253 | 84.678859 | 73.7106503 |
| 59.6782344 | 80.0257226 | 73.9357253 | 80.678859 | 73.2106503 |
| 59.6782344 | 80.0257226 | 73.9357253 | 76.678859 | 72.5856503 |

|            |            |            |           |            |
|------------|------------|------------|-----------|------------|
| 59.6782344 | 80.0257226 | 73.9357253 | 75.678859 | 72.4606503 |
| 59.6782344 | 81.0257226 | 73.9357253 | 75.678859 | 72.5856503 |
| 59.6782344 | 81.0257226 | 73.9357253 | 75.678859 | 72.3356503 |
| 59.6782344 | 82.0257226 | 73.9357253 | 75.678859 | 72.3356503 |
| 61.6782344 | 82.0257226 | 73.9357253 | 73.678859 | 72.4606503 |
| 77.6782344 | 80.0257226 | 73.9357253 | 73.678859 | 74.0856503 |
| 80.6782344 | 80.0257226 | 72.9357253 | 71.678859 | 73.8356503 |
| 81.6782344 | 72.0257226 | 69.9357253 | 72.678859 | 72.7106503 |
| 81.6782344 | 62.0257226 | 69.9357253 | 72.678859 | 71.0856503 |
| 81.6782344 | 62.0257226 | 68.9357253 | 74.678859 | 71.2106503 |
| 80.6782344 | 62.0257226 | 68.9357253 | 74.678859 | 71.5856503 |
| 79.6782344 | 62.0257226 | 68.9357253 | 74.678859 | 71.7106503 |
| 77.6782344 | 61.0257226 | 69.9357253 | 74.678859 | 71.8356503 |
| 76.6782344 | 59.0257226 | 69.9357253 | 75.678859 | 71.4606503 |
| 76.6782344 | 57.0257226 | 69.9357253 | 74.678859 | 71.4606503 |
| 76.6782344 | 56.0257226 | 69.9357253 | 74.678859 | 71.2106503 |
| 76.6782344 | 56.0257226 | 69.9357253 | 74.678859 | 71.3356503 |
| 76.6782344 | 55.0257226 | 69.9357253 | 74.678859 | 70.7106503 |
| 76.6782344 | 55.0257226 | 69.9357253 | 74.678859 | 70.5856503 |
| 76.6782344 | 55.0257226 | 69.9357253 | 74.678859 | 70.5856503 |
| 77.6782344 | 58.0257226 | 69.9357253 | 74.678859 | 71.4606503 |
| 77.6782344 | 61.0257226 | 68.9357253 | 74.678859 | 72.2106503 |
| 78.6782344 | 64.0257226 | 68.9357253 | 74.678859 | 72.5856503 |
| 78.6782344 | 65.0257226 | 68.9357253 | 74.678859 | 72.9606503 |
| 79.6782344 | 65.0257226 | 68.9357253 | 74.678859 | 73.0856503 |
| 79.6782344 | 65.0257226 | 68.9357253 | 74.678859 | 73.3356503 |
| 79.6782344 | 64.0257226 | 69.9357253 | 73.678859 | 73.5856503 |
| 80.6782344 | 64.0257226 | 69.9357253 | 72.678859 | 74.0856503 |
| 79.6782344 | 65.0257226 | 69.9357253 | 71.678859 | 73.8356503 |
| 78.6782344 | 65.0257226 | 69.9357253 | 71.678859 | 73.9606503 |
| 77.6782344 | 65.0257226 | 69.9357253 | 71.678859 | 73.9606503 |
| 77.6782344 | 64.0257226 | 70.9357253 | 72.678859 | 73.3356503 |
| 76.6782344 | 64.0257226 | 70.9357253 | 72.678859 | 73.3356503 |
| 76.6782344 | 66.0257226 | 71.9357253 | 72.678859 | 73.4606503 |
| 79.6782344 | 66.0257226 | 71.9357253 | 72.678859 | 73.5856503 |
| 79.6782344 | 65.0257226 | 72.9357253 | 73.678859 | 73.8356503 |
| 79.6782344 | 65.0257226 | 73.9357253 | 73.678859 | 73.4606503 |
| 77.6782344 | 64.0257226 | 73.9357253 | 73.678859 | 72.8356503 |
| 77.6782344 | 64.0257226 | 73.9357253 | 73.678859 | 72.8356503 |
| 74.6782344 | 67.0257226 | 73.9357253 | 73.678859 | 72.5856503 |
| 72.6782344 | 67.0257226 | 72.9357253 | 73.678859 | 73.4606503 |
| 71.6782344 | 73.0257226 | 72.9357253 | 73.678859 | 74.2106503 |
| 69.6782344 | 73.0257226 | 72.9357253 | 73.678859 | 73.9606503 |
| 69.6782344 | 73.0257226 | 72.9357253 | 73.678859 | 73.9606503 |
| 69.6782344 | 71.0257226 | 72.9357253 | 74.678859 | 73.8356503 |

|            |            |            |           |            |
|------------|------------|------------|-----------|------------|
| 69.6782344 | 70.0257226 | 73.9357253 | 74.678859 | 73.9606503 |
| 69.6782344 | 70.0257226 | 73.9357253 | 74.678859 | 73.8356503 |
| 68.6782344 | 69.0257226 | 72.9357253 | 74.678859 | 73.2106503 |
| 68.6782344 | 69.0257226 | 71.9357253 | 73.678859 | 73.0856503 |
| 68.6782344 | 69.0257226 | 71.9357253 | 73.678859 | 73.2106503 |
| 71.6782344 | 69.0257226 | 62.9357253 | 73.678859 | 71.9606503 |
| 73.6782344 | 69.0257226 | 62.9357253 | 73.678859 | 72.0856503 |
| 75.6782344 | 70.0257226 | 62.9357253 | 73.678859 | 72.8356503 |
| 75.6782344 | 70.0257226 | 62.9357253 | 74.678859 | 73.0856503 |
| 77.6782344 | 70.0257226 | 63.9357253 | 75.678859 | 72.8356503 |
| 79.6782344 | 70.0257226 | 64.9357253 | 75.678859 | 73.7106503 |
| 79.6782344 | 70.0257226 | 64.9357253 | 76.678859 | 73.8356503 |
| 80.6782344 | 73.0257226 | 65.9357253 | 78.678859 | 75.0856503 |
| 80.6782344 | 73.0257226 | 65.9357253 | 78.678859 | 74.9606503 |
| 79.6782344 | 74.0257226 | 65.9357253 | 78.678859 | 74.7106503 |
| 78.6782344 | 75.0257226 | 66.9357253 | 79.678859 | 74.9606503 |
| 78.6782344 | 75.0257226 | 66.9357253 | 79.678859 | 75.4606503 |
| 78.6782344 | 76.0257226 | 66.9357253 | 80.678859 | 76.0856503 |
| 78.6782344 | 75.0257226 | 66.9357253 | 80.678859 | 76.3356503 |
| 78.6782344 | 74.0257226 | 66.9357253 | 80.678859 | 76.3356503 |
| 78.6782344 | 73.0257226 | 66.9357253 | 80.678859 | 76.3356503 |
| 78.6782344 | 73.0257226 | 66.9357253 | 79.678859 | 76.7106503 |
| 77.6782344 | 73.0257226 | 66.9357253 | 77.678859 | 77.2106503 |
| 75.6782344 | 73.0257226 | 66.9357253 | 77.678859 | 76.9606503 |
| 75.6782344 | 73.0257226 | 66.9357253 | 73.678859 | 74.6742595 |
| 72.6782344 | 73.0257226 | 66.9357253 | 73.678859 | 73.4242595 |
| 71.6782344 | 73.0257226 | 65.9357253 | 73.678859 | 73.0023845 |
| 71.6782344 | 73.0257226 | 65.9357253 | 73.678859 | 72.7211345 |
| 71.6782344 | 72.0257226 | 66.9357253 | 74.678859 | 72.7211345 |
| 70.6782344 | 82.0257226 | 66.9357253 | 74.678859 | 73.9867595 |
| 70.6782344 | 82.0257226 | 65.9357253 | 75.678859 | 73.9867595 |
| 70.6782344 | 87.0257226 | 65.9357253 | 75.678859 | 74.6898845 |
| 72.6782344 | 88.0257226 | 65.9357253 | 74.678859 | 75.2523845 |
| 72.6782344 | 88.0257226 | 63.9357253 | 75.678859 | 75.2367595 |
| 73.6782344 | 88.0257226 | 62.9357253 | 75.678859 | 75.3773845 |
| 73.6782344 | 88.0257226 | 62.9357253 | 76.678859 | 75.5180095 |
| 76.6782344 | 88.0257226 | 62.9357253 | 77.678859 | 76.2055095 |
| 77.6782344 | 88.0257226 | 65.9357253 | 77.678859 | 78.8356503 |
| 77.6782344 | 88.0257226 | 68.9357253 | 77.678859 | 79.3356503 |
| 76.6782344 | 88.0257226 | 68.9357253 | 77.678859 | 79.0856503 |
| 75.6782344 | 88.0257226 | 75.9357253 | 77.678859 | 80.4606503 |
| 75.6782344 | 88.0257226 | 75.9357253 | 77.678859 | 80.3356503 |
| 75.6782344 | 88.0257226 | 75.9357253 | 77.678859 | 80.2106503 |
| 75.6782344 | 87.0257226 | 75.9357253 | 77.678859 | 80.0856503 |
| 75.6782344 | 82.0257226 | 75.9357253 | 77.678859 | 79.3356503 |

|            |            |            |           |            |
|------------|------------|------------|-----------|------------|
| 72.6782344 | 76.0257226 | 75.9357253 | 76.678859 | 78.2106503 |
| 71.6782344 | 74.0257226 | 75.9357253 | 76.678859 | 77.9606503 |
| 71.6782344 | 74.0257226 | 73.9357253 | 76.678859 | 77.5856503 |
| 70.6782344 | 74.0257226 | 71.9357253 | 77.678859 | 77.4606503 |
| 67.6782344 | 74.0257226 | 71.9357253 | 77.678859 | 76.9606503 |
| 66.6782344 | 67.0257226 | 71.9357253 | 77.678859 | 73.5135754 |
| 63.6782344 | 63.0257226 | 71.9357253 | 77.678859 | 71.9667004 |
| 63.6782344 | 61.0257226 | 71.9357253 | 77.678859 | 71.5292004 |
| 63.6782344 | 60.0257226 | 70.9357253 | 78.678859 | 73.2106503 |
| 63.6782344 | 60.0257226 | 69.9357253 | 78.678859 | 73.2106503 |
| 63.6782344 | 59.0257226 | 69.9357253 | 78.678859 | 73.4606503 |
| 63.6782344 | 59.0257226 | 68.9357253 | 79.678859 | 73.3356503 |
| 64.6782344 | 59.0257226 | 68.9357253 | 76.678859 | 73.0856503 |
| 66.6782344 | 60.0257226 | 68.9357253 | 75.678859 | 70.9606503 |
| 67.6782344 | 60.0257226 | 67.9357253 | 75.678859 | 69.9606503 |
| 68.6782344 | 60.0257226 | 67.9357253 | 74.678859 | 69.7106503 |
| 71.6782344 | 60.0257226 | 67.9357253 | 74.678859 | 69.8356503 |
| 71.6782344 | 60.0257226 | 68.9357253 | 74.678859 | 69.8356503 |
| 72.6782344 | 60.0257226 | 68.9357253 | 73.678859 | 70.0856503 |
| 73.6782344 | 61.0257226 | 68.9357253 | 73.678859 | 70.4606503 |
| 73.6782344 | 63.0257226 | 68.9357253 | 73.678859 | 70.5856503 |
| 74.6782344 | 64.0257226 | 68.9357253 | 73.678859 | 70.8356503 |
| 72.6782344 | 64.0257226 | 68.9357253 | 73.678859 | 70.2106503 |
| 69.6782344 | 64.0257226 | 68.9357253 | 74.678859 | 69.8356503 |
| 67.6782344 | 64.0257226 | 69.9357253 | 74.678859 | 69.7106503 |
| 67.6782344 | 65.0257226 | 69.9357253 | 75.678859 | 70.0856503 |
| 67.6782344 | 65.0257226 | 69.9357253 | 75.678859 | 70.0856503 |
| 67.6782344 | 67.0257226 | 69.9357253 | 75.678859 | 70.4606503 |
| 67.6782344 | 68.0257226 | 71.9357253 | 76.678859 | 70.9606503 |
| 68.6782344 | 69.0257226 | 71.9357253 | 76.678859 | 71.2106503 |
| 68.6782344 | 69.0257226 | 73.9357253 | 75.678859 | 71.0856503 |
| 68.6782344 | 69.0257226 | 74.9357253 | 75.678859 | 71.0856503 |
| 68.6782344 | 69.0257226 | 74.9357253 | 74.678859 | 70.9606503 |
| 68.6782344 | 70.0257226 | 76.9357253 | 73.678859 | 71.2106503 |
| 68.6782344 | 74.0257226 | 76.9357253 | 73.678859 | 71.5856503 |
| 68.6782344 | 74.0257226 | 76.9357253 | 72.678859 | 71.4606503 |
| 68.6782344 | 75.0257226 | 74.9357253 | 72.678859 | 71.4606503 |
| 68.6782344 | 73.0257226 | 73.9357253 | 72.678859 | 71.2106503 |
| 68.6782344 | 68.0257226 | 73.9357253 | 73.678859 | 70.9606503 |
| 70.6782344 | 66.0257226 | 73.9357253 | 73.678859 | 71.0856503 |
| 70.6782344 | 65.0257226 | 72.9357253 | 73.678859 | 70.5856503 |
| 70.6782344 | 64.0257226 | 72.9357253 | 73.678859 | 70.3356503 |
| 73.6782344 | 64.0257226 | 72.9357253 | 73.678859 | 70.8356503 |
| 73.6782344 | 65.0257226 | 71.9357253 | 77.678859 | 71.4606503 |
| 73.6782344 | 67.0257226 | 71.9357253 | 77.678859 | 72.4606503 |

|            |            |            |           |            |
|------------|------------|------------|-----------|------------|
| 73.6782344 | 67.0257226 | 71.9357253 | 78.678859 | 73.5856503 |
| 74.6782344 | 69.0257226 | 71.9357253 | 78.678859 | 74.2106503 |
| 74.6782344 | 70.0257226 | 72.9357253 | 78.678859 | 74.4606503 |
| 74.6782344 | 70.0257226 | 72.9357253 | 78.678859 | 74.4606503 |
| 75.6782344 | 73.0257226 | 71.9357253 | 77.678859 | 74.4606503 |
| 75.6782344 | 75.0257226 | 71.9357253 | 76.678859 | 74.5856503 |
| 76.6782344 | 77.0257226 | 71.9357253 | 76.678859 | 74.3356503 |
| 77.6782344 | 79.0257226 | 71.9357253 | 76.678859 | 74.4606503 |
| 77.6782344 | 79.0257226 | 71.9357253 | 75.678859 | 74.9606503 |
| 78.6782344 | 79.0257226 | 71.9357253 | 75.678859 | 75.0856503 |
| 78.6782344 | 78.0257226 | 70.9357253 | 75.678859 | 74.8356503 |
| 78.6782344 | 78.0257226 | 70.9357253 | 75.678859 | 74.8356503 |
| 76.6782344 | 72.0257226 | 71.9357253 | 76.678859 | 73.9606503 |
| 76.6782344 | 72.0257226 | 71.9357253 | 76.678859 | 73.9606503 |
| 75.6782344 | 70.0257226 | 71.9357253 | 76.678859 | 73.7106503 |
| 78.6782344 | 69.0257226 | 71.9357253 | 76.678859 | 73.9606503 |
| 78.6782344 | 68.0257226 | 73.9357253 | 76.678859 | 73.4606503 |
| 78.6782344 | 68.0257226 | 74.9357253 | 75.678859 | 73.4606503 |
| 78.6782344 | 68.0257226 | 76.9357253 | 75.678859 | 73.2106503 |
| 78.6782344 | 67.0257226 | 76.9357253 | 73.678859 | 72.7106503 |
| 78.6782344 | 67.0257226 | 76.9357253 | 73.678859 | 72.7106503 |
| 79.6782344 | 65.0257226 | 76.9357253 | 74.678859 | 72.8356503 |
| 79.6782344 | 65.0257226 | 76.9357253 | 75.678859 | 72.4606503 |
| 79.6782344 | 64.0257226 | 79.9357253 | 75.678859 | 72.7106503 |
| 79.6782344 | 64.0257226 | 84.9357253 | 75.678859 | 73.3356503 |
| 79.6782344 | 63.0257226 | 87.9357253 | 75.678859 | 73.8356503 |
| 79.6782344 | 62.0257226 | 88.9357253 | 75.678859 | 74.3356503 |
| 78.6782344 | 62.0257226 | 90.9357253 | 75.678859 | 74.7106503 |
| 78.6782344 | 63.0257226 | 90.9357253 | 75.678859 | 75.2106503 |
| 75.6782344 | 63.0257226 | 90.9357253 | 74.678859 | 74.8356503 |
| 73.6782344 | 65.0257226 | 75.2106503 | 74.678859 | 72.8700159 |
| 65.6782344 | 65.0257226 | 74.2106503 | 73.678859 | 71.6200159 |
| 64.6782344 | 64.0257226 | 73.7106503 | 71.678859 | 71.0575159 |
| 64.6782344 | 64.0257226 | 73.5856503 | 69.678859 | 70.9168909 |
| 63.6782344 | 64.0257226 | 78.9357253 | 69.678859 | 71.4606503 |
| 63.6782344 | 65.0257226 | 72.9357253 | 69.678859 | 70.8356503 |
| 63.6782344 | 65.0257226 | 69.9357253 | 69.678859 | 70.0856503 |
| 63.6782344 | 65.0257226 | 68.9357253 | 69.678859 | 69.8356503 |
| 64.6782344 | 66.0257226 | 67.9357253 | 69.678859 | 69.9606503 |
| 64.6782344 | 66.0257226 | 67.9357253 | 69.678859 | 70.0856503 |
| 64.6782344 | 68.0257226 | 66.9357253 | 69.678859 | 70.3356503 |
| 67.6782344 | 68.0257226 | 65.9357253 | 69.678859 | 70.8356503 |
| 68.6782344 | 70.0257226 | 65.9357253 | 68.678859 | 70.9606503 |
| 68.6782344 | 72.0257226 | 64.9357253 | 68.678859 | 69.7106503 |
| 68.6782344 | 73.0257226 | 64.9357253 | 67.678859 | 69.7106503 |

|            |            |            |            |            |
|------------|------------|------------|------------|------------|
| 68.6782344 | 75.0257226 | 64.9357253 | 66.678859  | 69.4606503 |
| 68.6782344 | 76.0257226 | 65.9357253 | 65.678859  | 69.5856503 |
| 69.6782344 | 76.0257226 | 64.9357253 | 65.678859  | 70.2106503 |
| 70.6782344 | 77.0257226 | 64.9357253 | 65.678859  | 70.5856503 |
| 70.6782344 | 77.0257226 | 64.9357253 | 66.678859  | 70.8356503 |
| 74.6782344 | 77.0257226 | 64.9357253 | 67.678859  | 71.2106503 |
| 75.6782344 | 77.0257226 | 64.9357253 | 68.678859  | 71.2106503 |
| 75.6782344 | 77.0257226 | 65.9357253 | 68.678859  | 71.8356503 |
| 75.6782344 | 76.0257226 | 65.9357253 | 68.678859  | 72.7106503 |
| 75.6782344 | 75.0257226 | 65.9357253 | 68.678859  | 72.9606503 |
| 74.6782344 | 72.0257226 | 65.9357253 | 69.678859  | 72.5856503 |
| 74.6782344 | 70.0257226 | 66.9357253 | 70.678859  | 72.3356503 |
| 74.6782344 | 69.0257226 | 65.9357253 | 70.678859  | 71.8356503 |
| 74.6782344 | 68.0257226 | 66.9357253 | 70.678859  | 71.5856503 |
| 79.6782344 | 70.0257226 | 67.9357253 | 70.678859  | 72.5856503 |
| 81.6782344 | 70.0257226 | 68.9357253 | 69.678859  | 73.2106503 |
| 81.6782344 | 73.0257226 | 69.9357253 | 70.678859  | 74.2106503 |
| 79.6782344 | 75.0257226 | 69.9357253 | 69.678859  | 73.8356503 |
| 79.6782344 | 76.0257226 | 69.9357253 | 69.678859  | 74.5856503 |
| 78.6782344 | 76.0257226 | 69.9357253 | 69.678859  | 74.4606503 |
| 78.6782344 | 76.0257226 | 69.9357253 | 69.678859  | 74.7106503 |
| 76.6782344 | 79.0257226 | 69.9357253 | 68.678859  | 75.0856503 |
| 76.6782344 | 79.0257226 | 69.9357253 | 68.678859  | 75.2106503 |
| 76.6782344 | 76.0257226 | 69.9357253 | 68.678859  | 74.7106503 |
| 76.6782344 | 76.0257226 | 69.9357253 | 67.678859  | 74.7106503 |
| 75.6782344 | 75.0257226 | 69.9357253 | 67.678859  | 74.3356503 |
| 73.6782344 | 75.0257226 | 66.9357253 | 67.678859  | 73.8356503 |
| 73.6782344 | 76.0257226 | 66.9357253 | 67.678859  | 73.7106503 |
| 70.6782344 | 76.0257226 | 65.9357253 | 67.678859  | 73.0856503 |
| 68.6782344 | 75.0257226 | 66.9357253 | 75.678859  | 73.2106503 |
| 67.6782344 | 74.0257226 | 66.9357253 | 84.678859  | 73.4606503 |
| 67.6782344 | 74.0257226 | 66.9357253 | 84.678859  | 73.3356503 |
| 67.6782344 | 74.0257226 | 66.9357253 | 88.678859  | 73.7106503 |
| 67.6782344 | 72.0257226 | 66.9357253 | 73.3356503 | 71.0427492 |
| 69.6782344 | 70.0257226 | 65.9357253 | 73.0856503 | 70.7614992 |
| 74.6782344 | 69.0257226 | 66.9357253 | 74.8356503 | 71.6052492 |
| 75.6782344 | 69.0257226 | 66.9357253 | 75.2106503 | 72.0271242 |
| 77.6782344 | 70.0257226 | 67.9357253 | 76.3356503 | 73.0427492 |
| 77.6782344 | 70.0257226 | 67.9357253 | 75.8356503 | 72.7302492 |
| 77.6782344 | 70.0257226 | 73.9357253 | 76.2106503 | 73.5271242 |
| 78.6782344 | 69.0257226 | 74.9357253 | 76.2106503 | 73.6521242 |
| 78.6782344 | 69.0257226 | 75.9357253 | 76.0856503 | 73.6364992 |
| 78.6782344 | 69.0257226 | 75.9357253 | 75.8356503 | 73.4802492 |
| 78.6782344 | 70.0257226 | 76.9357253 | 76.5856503 | 74.3239992 |
| 78.6782344 | 70.0257226 | 77.9357253 | 76.7106503 | 74.4646242 |



|            |            |            |            |            |
|------------|------------|------------|------------|------------|
| 78.6782344 | 70.0257226 | 77.9357253 | 76.9606503 | 74.7458742 |
| 78.6782344 | 70.0257226 | 78.9357253 | 77.4606503 | 75.3083742 |
| 77.6782344 | 71.0257226 | 78.9357253 | 77.5856503 | 75.4489992 |
| 76.6782344 | 74.0257226 | 78.9357253 | 94.678859  | 77.9606503 |
| 76.6782344 | 73.0257226 | 78.9357253 | 94.678859  | 78.0856503 |
| 75.6782344 | 73.0257226 | 76.9357253 | 94.678859  | 78.3356503 |
| 75.6782344 | 73.0257226 | 74.9357253 | 94.678859  | 78.0856503 |
| 74.6782344 | 73.0257226 | 72.9357253 | 77.7106503 | 75.5896242 |
| 74.6782344 | 73.0257226 | 70.9357253 | 77.7106503 | 75.5896242 |
| 81.6782344 | 72.0257226 | 69.9357253 | 94.678859  | 78.8356503 |
| 82.6782344 | 69.0257226 | 69.9357253 | 94.678859  | 78.7106503 |
| 82.6782344 | 69.0257226 | 69.9357253 | 93.678859  | 78.7106503 |
| 81.6782344 | 68.0257226 | 69.9357253 | 78.678859  | 75.6430095 |
| 81.6782344 | 68.0257226 | 69.9357253 | 75.678859  | 76.8356503 |
| 81.6782344 | 68.0257226 | 69.9357253 | 74.678859  | 76.7106503 |
| 80.6782344 | 68.0257226 | 69.9357253 | 73.678859  | 76.5856503 |
| 81.6782344 | 68.0257226 | 69.9357253 | 73.678859  | 76.4606503 |
| 81.6782344 | 68.0257226 | 69.9357253 | 73.678859  | 75.8356503 |
| 80.6782344 | 69.0257226 | 69.9357253 | 73.678859  | 75.3356503 |
| 80.6782344 | 75.0257226 | 70.9357253 | 73.678859  | 75.4606503 |
| 80.6782344 | 79.0257226 | 71.9357253 | 73.678859  | 75.4606503 |
| 80.6782344 | 79.0257226 | 73.9357253 | 74.678859  | 75.9606503 |
| 80.6782344 | 81.0257226 | 73.9357253 | 74.678859  | 75.5856503 |
| 80.6782344 | 82.0257226 | 73.9357253 | 74.678859  | 75.9606503 |
| 80.6782344 | 84.0257226 | 73.9357253 | 74.678859  | 76.0856503 |
| 80.6782344 | 85.0257226 | 74.9357253 | 74.678859  | 75.9606503 |
| 80.6782344 | 85.0257226 | 71.9357253 | 74.678859  | 75.5856503 |
| 80.6782344 | 85.0257226 | 70.9357253 | 73.678859  | 75.3356503 |
| 80.6782344 | 85.0257226 | 70.9357253 | 73.678859  | 75.4606503 |
| 80.6782344 | 85.0257226 | 70.9357253 | 73.678859  | 75.4606503 |
| 80.6782344 | 86.0257226 | 70.9357253 | 72.678859  | 75.7106503 |
| 80.6782344 | 86.0257226 | 70.9357253 | 72.678859  | 75.4606503 |
| 80.6782344 | 86.0257226 | 70.9357253 | 71.678859  | 75.9606503 |
| 78.6782344 | 86.0257226 | 71.9357253 | 69.678859  | 75.8356503 |
| 78.6782344 | 86.0257226 | 71.9357253 | 69.678859  | 75.5856503 |
| 74.6782344 | 86.0257226 | 71.9357253 | 68.678859  | 74.9606503 |
| 72.6782344 | 86.0257226 | 72.9357253 | 67.678859  | 74.7106503 |
| 72.6782344 | 86.0257226 | 69.9357253 | 65.678859  | 74.0856503 |
| 72.6782344 | 88.0257226 | 68.9357253 | 68.678859  | 74.7106503 |
| 72.6782344 | 86.0257226 | 68.9357253 | 69.678859  | 74.7106503 |
| 77.6782344 | 86.0257226 | 69.9357253 | 70.678859  | 75.5856503 |
| 77.6782344 | 83.0257226 | 70.9357253 | 70.678859  | 75.9606503 |
| 77.6782344 | 74.0257226 | 71.9357253 | 70.678859  | 74.7106503 |
| 73.6782344 | 70.0257226 | 71.9357253 | 69.678859  | 74.2106503 |
| 72.6782344 | 70.0257226 | 71.9357253 | 69.678859  | 74.3356503 |

|            |            |            |           |            |
|------------|------------|------------|-----------|------------|
| 71.6782344 | 70.0257226 | 70.9357253 | 69.678859 | 73.8356503 |
| 71.6782344 | 64.0257226 | 69.9357253 | 68.678859 | 72.9606503 |
| 70.6782344 | 65.0257226 | 69.9357253 | 67.678859 | 72.9606503 |
| 66.6782344 | 64.0257226 | 68.9357253 | 67.678859 | 72.4606503 |
| 64.6782344 | 64.0257226 | 68.9357253 | 68.678859 | 72.0856503 |
| 64.6782344 | 64.0257226 | 68.9357253 | 67.678859 | 71.9606503 |
| 64.6782344 | 64.0257226 | 69.9357253 | 67.678859 | 71.9606503 |
| 63.6782344 | 64.0257226 | 69.9357253 | 67.678859 | 71.7106503 |
| 62.6782344 | 64.0257226 | 69.9357253 | 68.678859 | 71.5856503 |
| 62.6782344 | 64.0257226 | 69.9357253 | 68.678859 | 71.5856503 |
| 61.6782344 | 64.0257226 | 69.9357253 | 68.678859 | 69.9606503 |
| 61.6782344 | 64.0257226 | 69.9357253 | 68.678859 | 69.4606503 |
| 61.6782344 | 64.0257226 | 69.9357253 | 68.678859 | 69.4606503 |
| 61.6782344 | 63.0257226 | 69.9357253 | 68.678859 | 68.9606503 |
| 61.6782344 | 63.0257226 | 69.9357253 | 69.678859 | 69.3356503 |
| 62.6782344 | 66.0257226 | 69.9357253 | 70.678859 | 69.5856503 |
| 62.6782344 | 67.0257226 | 69.9357253 | 70.678859 | 69.7106503 |
| 63.6782344 | 67.0257226 | 69.9357253 | 71.678859 | 69.8356503 |
| 63.6782344 | 67.0257226 | 71.9357253 | 75.678859 | 70.5856503 |
| 63.6782344 | 67.0257226 | 72.9357253 | 75.678859 | 70.4606503 |
| 62.6782344 | 66.0257226 | 72.9357253 | 75.678859 | 70.2106503 |
| 62.6782344 | 66.0257226 | 73.9357253 | 75.678859 | 70.2106503 |
| 62.6782344 | 67.0257226 | 76.9357253 | 75.678859 | 70.7106503 |
| 62.6782344 | 67.0257226 | 78.9357253 | 75.678859 | 71.2106503 |
| 63.6782344 | 68.0257226 | 78.9357253 | 75.678859 | 71.3356503 |
| 63.6782344 | 68.0257226 | 78.9357253 | 75.678859 | 71.8356503 |
| 64.6782344 | 68.0257226 | 76.9357253 | 73.678859 | 71.5856503 |
| 67.6782344 | 68.0257226 | 76.9357253 | 72.678859 | 72.2106503 |
| 68.6782344 | 68.0257226 | 75.9357253 | 72.678859 | 72.3356503 |
| 68.6782344 | 68.0257226 | 75.9357253 | 72.678859 | 71.8356503 |
| 66.6782344 | 68.0257226 | 74.9357253 | 73.678859 | 71.4606503 |
| 66.6782344 | 74.0257226 | 72.9357253 | 73.678859 | 71.7106503 |
| 67.6782344 | 80.0257226 | 70.9357253 | 73.678859 | 72.3356503 |
| 71.6782344 | 80.0257226 | 69.9357253 | 73.678859 | 72.7106503 |
| 71.6782344 | 83.0257226 | 69.9357253 | 73.678859 | 72.9606503 |
| 71.6782344 | 86.0257226 | 69.9357253 | 74.678859 | 73.3356503 |
| 72.6782344 | 88.0257226 | 69.9357253 | 74.678859 | 73.9606503 |
| 72.6782344 | 89.0257226 | 69.9357253 | 74.678859 | 74.2106503 |
| 72.6782344 | 89.0257226 | 69.9357253 | 74.678859 | 74.4606503 |
| 72.6782344 | 90.0257226 | 69.9357253 | 75.678859 | 75.0856503 |
| 72.6782344 | 90.0257226 | 71.9357253 | 75.678859 | 75.8356503 |
| 73.6782344 | 90.0257226 | 75.9357253 | 75.678859 | 76.0856503 |
| 73.6782344 | 90.0257226 | 77.9357253 | 75.678859 | 76.3356503 |
| 74.6782344 | 90.0257226 | 78.9357253 | 75.678859 | 77.5856503 |
| 76.6782344 | 87.0257226 | 79.9357253 | 75.678859 | 77.7106503 |

|            |            |            |           |            |
|------------|------------|------------|-----------|------------|
| 77.6782344 | 87.0257226 | 79.9357253 | 76.678859 | 78.2106503 |
| 75.6782344 | 88.0257226 | 79.9357253 | 76.678859 | 77.8356503 |
| 75.6782344 | 90.0257226 | 80.9357253 | 75.678859 | 77.7106503 |
| 73.6782344 | 91.0257226 | 79.9357253 | 75.678859 | 77.5856503 |
| 73.6782344 | 91.0257226 | 80.9357253 | 74.678859 | 77.9606503 |
| 72.6782344 | 89.0257226 | 80.9357253 | 73.678859 | 77.5856503 |
| 74.6782344 | 84.0257226 | 81.9357253 | 73.678859 | 77.4606503 |
| 75.6782344 | 84.0257226 | 83.9357253 | 72.678859 | 77.9606503 |
| 74.6782344 | 84.0257226 | 83.9357253 | 72.678859 | 77.8356503 |
| 73.6782344 | 80.0257226 | 83.9357253 | 71.678859 | 76.7106503 |
| 73.6782344 | 80.0257226 | 81.9357253 | 71.678859 | 74.5856503 |
| 72.6782344 | 75.0257226 | 79.9357253 | 71.678859 | 73.9606503 |
| 72.6782344 | 69.0257226 | 77.9357253 | 70.678859 | 73.0856503 |
| 72.6782344 | 67.0257226 | 74.9357253 | 70.678859 | 71.9606503 |
| 72.6782344 | 62.0257226 | 72.9357253 | 69.678859 | 70.3356503 |
| 71.6782344 | 62.0257226 | 71.9357253 | 68.678859 | 69.8356503 |
| 71.6782344 | 61.0257226 | 70.9357253 | 68.678859 | 69.4606503 |
| 71.6782344 | 61.0257226 | 69.9357253 | 68.678859 | 69.2106503 |
| 71.6782344 | 60.0257226 | 69.9357253 | 68.678859 | 69.7106503 |
| 71.6782344 | 59.0257226 | 69.9357253 | 68.678859 | 69.8356503 |
| 75.6782344 | 59.0257226 | 70.9357253 | 68.678859 | 70.7106503 |
| 76.6782344 | 60.0257226 | 71.9357253 | 68.678859 | 71.2106503 |
| 76.6782344 | 60.0257226 | 72.9357253 | 69.678859 | 71.5856503 |
| 76.6782344 | 60.0257226 | 70.9357253 | 70.678859 | 71.3356503 |
| 76.6782344 | 60.0257226 | 70.9357253 | 70.678859 | 71.2106503 |
| 76.6782344 | 59.0257226 | 69.9357253 | 68.678859 | 70.4606503 |
| 76.6782344 | 58.0257226 | 69.9357253 | 66.678859 | 70.0856503 |
| 76.6782344 | 59.0257226 | 69.9357253 | 66.678859 | 70.0856503 |
| 76.6782344 | 59.0257226 | 69.9357253 | 66.678859 | 70.3356503 |
| 79.6782344 | 60.0257226 | 69.9357253 | 66.678859 | 70.8356503 |
| 78.6782344 | 60.0257226 | 69.9357253 | 67.678859 | 70.7106503 |
| 73.6782344 | 62.0257226 | 69.9357253 | 67.678859 | 70.2106503 |
| 73.6782344 | 66.0257226 | 69.9357253 | 68.678859 | 71.0856503 |
| 69.6782344 | 67.0257226 | 69.9357253 | 68.678859 | 70.8356503 |
| 68.6782344 | 67.0257226 | 69.9357253 | 69.678859 | 70.9606503 |
| 68.6782344 | 67.0257226 | 69.9357253 | 68.678859 | 70.8356503 |
| 68.6782344 | 68.0257226 | 69.9357253 | 68.678859 | 71.0856503 |
| 67.6782344 | 68.0257226 | 69.9357253 | 68.678859 | 70.9606503 |
| 67.6782344 | 69.0257226 | 69.9357253 | 68.678859 | 69.2167004 |
| 67.6782344 | 71.0257226 | 70.9357253 | 68.678859 | 70.0760754 |
| 67.6782344 | 74.0257226 | 76.9357253 | 68.678859 | 73.2106503 |
| 67.6782344 | 74.0257226 | 76.9357253 | 68.678859 | 73.4606503 |
| 67.6782344 | 76.0257226 | 76.9357253 | 67.678859 | 73.7106503 |
| 68.6782344 | 83.0257226 | 75.9357253 | 68.678859 | 74.8356503 |
| 68.6782344 | 86.0257226 | 75.9357253 | 71.678859 | 75.8356503 |

|            |            |            |           |            |
|------------|------------|------------|-----------|------------|
| 68.6782344 | 86.0257226 | 75.9357253 | 72.678859 | 75.8356503 |
| 68.6782344 | 86.0257226 | 74.9357253 | 72.678859 | 75.5856503 |
| 68.6782344 | 86.0257226 | 74.9357253 | 72.678859 | 75.5856503 |
| 69.6782344 | 81.0257226 | 74.9357253 | 73.678859 | 75.3356503 |
| 71.6782344 | 83.0257226 | 74.9357253 | 73.678859 | 75.7106503 |
| 72.6782344 | 83.0257226 | 74.9357253 | 72.678859 | 75.7106503 |
| 71.6782344 | 85.0257226 | 74.9357253 | 72.678859 | 76.3356503 |
| 71.6782344 | 87.0257226 | 74.9357253 | 72.678859 | 76.8356503 |
| 71.6782344 | 90.0257226 | 74.9357253 | 71.678859 | 76.8356503 |
| 71.6782344 | 90.0257226 | 74.9357253 | 71.678859 | 75.9606503 |
| 70.6782344 | 90.0257226 | 74.9357253 | 70.678859 | 75.4606503 |
| 70.6782344 | 83.0257226 | 73.9357253 | 70.678859 | 73.7106503 |
| 70.6782344 | 78.0257226 | 73.9357253 | 69.678859 | 72.5856503 |
| 71.6782344 | 75.0257226 | 73.9357253 | 68.678859 | 71.9606503 |
| 71.6782344 | 75.0257226 | 73.9357253 | 68.678859 | 71.7106503 |
| 71.6782344 | 73.0257226 | 72.9357253 | 67.678859 | 71.7106503 |
| 70.6782344 | 73.0257226 | 71.9357253 | 66.678859 | 71.5856503 |
| 71.6782344 | 73.0257226 | 71.9357253 | 66.678859 | 71.4606503 |
| 71.6782344 | 73.0257226 | 71.9357253 | 66.678859 | 71.7106503 |
| 74.6782344 | 73.0257226 | 71.9357253 | 66.678859 | 72.0856503 |
| 74.6782344 | 73.0257226 | 71.9357253 | 66.678859 | 72.0856503 |
| 76.6782344 | 73.0257226 | 71.9357253 | 66.678859 | 72.4606503 |
| 77.6782344 | 72.0257226 | 70.9357253 | 65.678859 | 71.9606503 |
| 77.6782344 | 71.0257226 | 69.9357253 | 65.678859 | 71.9606503 |
| 78.6782344 | 71.0257226 | 69.9357253 | 65.678859 | 72.0856503 |
| 78.6782344 | 70.0257226 | 69.9357253 | 65.678859 | 71.9606503 |
| 78.6782344 | 70.0257226 | 69.9357253 | 65.678859 | 72.4606503 |
| 80.6782344 | 73.0257226 | 73.9357253 | 66.678859 | 73.5856503 |
| 82.6782344 | 73.0257226 | 77.9357253 | 67.678859 | 74.9606503 |
| 83.6782344 | 73.0257226 | 77.9357253 | 68.678859 | 75.3356503 |
| 84.6782344 | 72.0257226 | 77.9357253 | 68.678859 | 75.7106503 |
| 84.6782344 | 72.0257226 | 77.9357253 | 68.678859 | 75.9606503 |
| 84.6782344 | 71.0257226 | 75.9357253 | 68.678859 | 75.8356503 |
| 87.6782344 | 72.0257226 | 75.9357253 | 68.678859 | 76.4606503 |
| 88.6782344 | 73.0257226 | 75.9357253 | 67.678859 | 76.7106503 |
| 89.6782344 | 74.0257226 | 74.9357253 | 67.678859 | 75.3356503 |
| 88.6782344 | 75.0257226 | 74.9357253 | 67.678859 | 75.2106503 |
| 88.6782344 | 75.0257226 | 75.9357253 | 67.678859 | 75.5856503 |
| 84.6782344 | 75.0257226 | 75.9357253 | 68.678859 | 75.4606503 |
| 83.6782344 | 74.0257226 | 75.9357253 | 68.678859 | 75.3356503 |
| 81.6782344 | 72.0257226 | 75.9357253 | 69.678859 | 74.7106503 |
| 79.6782344 | 69.0257226 | 75.9357253 | 69.678859 | 75.0856503 |
| 79.6782344 | 69.0257226 | 76.9357253 | 68.678859 | 75.5856503 |
| 80.6782344 | 69.0257226 | 76.9357253 | 68.678859 | 75.5856503 |
| 80.6782344 | 69.0257226 | 75.9357253 | 68.678859 | 75.2106503 |

|            |            |            |           |            |
|------------|------------|------------|-----------|------------|
| 80.6782344 | 69.0257226 | 75.9357253 | 67.678859 | 74.9606503 |
| 80.6782344 | 69.0257226 | 74.9357253 | 66.678859 | 75.0856503 |
| 80.6782344 | 66.0257226 | 74.9357253 | 65.678859 | 74.8356503 |
| 80.6782344 | 64.0257226 | 74.9357253 | 66.678859 | 74.5856503 |
| 80.6782344 | 63.0257226 | 74.9357253 | 66.678859 | 74.4606503 |
| 80.6782344 | 63.0257226 | 74.9357253 | 66.678859 | 74.5856503 |
| 80.6782344 | 63.0257226 | 73.9357253 | 66.678859 | 74.3356503 |
| 80.6782344 | 63.0257226 | 72.9357253 | 67.678859 | 73.9606503 |
| 74.6782344 | 63.0257226 | 70.9357253 | 67.678859 | 72.3356503 |
| 72.6782344 | 65.0257226 | 68.9357253 | 68.678859 | 72.2106503 |
| 72.6782344 | 65.0257226 | 67.9357253 | 67.678859 | 71.5856503 |
| 72.6782344 | 65.0257226 | 67.9357253 | 67.678859 | 71.5856503 |
| 72.6782344 | 65.0257226 | 66.9357253 | 66.678859 | 70.4606503 |
| 71.6782344 | 65.0257226 | 69.9357253 | 66.678859 | 70.7106503 |
| 72.6782344 | 65.0257226 | 69.9357253 | 67.678859 | 71.0856503 |
| 73.6782344 | 66.0257226 | 71.9357253 | 67.678859 | 72.0856503 |
| 73.6782344 | 67.0257226 | 71.9357253 | 67.678859 | 72.2106503 |
| 75.6782344 | 67.0257226 | 71.9357253 | 68.678859 | 72.5856503 |
| 75.6782344 | 68.0257226 | 71.9357253 | 70.678859 | 72.9606503 |
| 75.6782344 | 68.0257226 | 71.9357253 | 68.678859 | 72.7106503 |
| 75.6782344 | 69.0257226 | 71.9357253 | 68.678859 | 72.9606503 |
| 75.6782344 | 69.0257226 | 70.9357253 | 67.678859 | 72.5856503 |
| 74.6782344 | 71.0257226 | 70.9357253 | 67.678859 | 72.0856503 |
| 72.6782344 | 71.0257226 | 69.9357253 | 67.678859 | 71.7106503 |
| 72.6782344 | 72.0257226 | 69.9357253 | 67.678859 | 71.8356503 |
| 70.6782344 | 73.0257226 | 69.9357253 | 67.678859 | 71.7106503 |
| 68.6782344 | 76.0257226 | 68.9357253 | 66.678859 | 71.7106503 |
| 67.6782344 | 78.0257226 | 68.9357253 | 65.678859 | 71.8356503 |
| 67.6782344 | 78.0257226 | 68.9357253 | 65.678859 | 71.9606503 |
| 67.6782344 | 72.0257226 | 68.9357253 | 66.678859 | 72.0856503 |
| 65.6782344 | 69.0257226 | 68.9357253 | 66.678859 | 70.9555095 |
| 65.6782344 | 70.0257226 | 68.9357253 | 67.678859 | 71.4711345 |
| 65.6782344 | 70.0257226 | 68.9357253 | 67.678859 | 72.0336345 |
| 65.6782344 | 72.0257226 | 68.9357253 | 67.678859 | 72.4711345 |
| 67.6782344 | 72.0257226 | 68.9357253 | 67.678859 | 72.1898845 |
| 68.6782344 | 73.0257226 | 70.9357253 | 67.678859 | 72.6117595 |
| 67.6782344 | 73.0257226 | 73.9357253 | 67.678859 | 72.7523845 |
| 67.6782344 | 73.0257226 | 73.9357253 | 67.678859 | 72.6273845 |
| 67.6782344 | 72.0257226 | 73.9357253 | 67.678859 | 72.4398845 |
| 67.6782344 | 72.0257226 | 73.9357253 | 67.678859 | 72.4398845 |
| 67.6782344 | 72.0257226 | 73.9357253 | 67.678859 | 72.3356503 |
| 69.6782344 | 74.0257226 | 73.9357253 | 67.678859 | 72.3356503 |
| 70.6782344 | 74.0257226 | 74.9357253 | 67.678859 | 72.3356503 |
| 70.6782344 | 75.0257226 | 73.9357253 | 67.678859 | 71.9606503 |
| 70.6782344 | 75.0257226 | 71.9357253 | 67.678859 | 71.5856503 |

|            |            |            |           |            |
|------------|------------|------------|-----------|------------|
| 72.6782344 | 75.0257226 | 70.9357253 | 67.678859 | 71.5856503 |
| 72.6782344 | 76.0257226 | 69.9357253 | 67.678859 | 71.4606503 |
| 72.6782344 | 76.0257226 | 69.9357253 | 67.678859 | 71.2106503 |
| 72.6782344 | 76.0257226 | 70.9357253 | 66.678859 | 70.8356503 |
| 72.6782344 | 75.0257226 | 72.9357253 | 67.678859 | 70.5856503 |
| 73.6782344 | 75.0257226 | 73.9357253 | 67.678859 | 70.9606503 |
| 72.6782344 | 75.0257226 | 73.9357253 | 67.678859 | 70.9606503 |
| 71.6782344 | 78.0257226 | 74.9357253 | 67.678859 | 71.4606503 |
| 70.6782344 | 78.0257226 | 74.9357253 | 67.678859 | 71.2106503 |
| 70.6782344 | 82.0257226 | 72.9357253 | 67.678859 | 71.3356503 |
| 69.6782344 | 83.0257226 | 71.9357253 | 67.678859 | 71.2106503 |
| 68.6782344 | 83.0257226 | 71.9357253 | 68.678859 | 71.3356503 |
| 65.6782344 | 83.0257226 | 72.9357253 | 68.678859 | 70.7106503 |
| 65.6782344 | 82.0257226 | 72.9357253 | 68.678859 | 70.4606503 |
| 65.6782344 | 82.0257226 | 73.9357253 | 68.678859 | 71.4606503 |
| 65.6782344 | 80.0257226 | 75.9357253 | 68.678859 | 71.7106503 |
| 65.6782344 | 79.0257226 | 75.9357253 | 67.678859 | 71.5856503 |
| 65.6782344 | 79.0257226 | 75.9357253 | 68.678859 | 71.8356503 |
| 65.6782344 | 79.0257226 | 75.9357253 | 68.678859 | 72.2106503 |
| 65.6782344 | 79.0257226 | 75.9357253 | 67.678859 | 72.9606503 |
| 65.6782344 | 79.0257226 | 75.9357253 | 67.678859 | 72.9606503 |
| 65.6782344 | 80.0257226 | 75.9357253 | 67.678859 | 73.0856503 |
| 65.6782344 | 79.0257226 | 75.9357253 | 67.678859 | 73.3356503 |
| 65.6782344 | 79.0257226 | 75.9357253 | 68.678859 | 73.8356503 |
| 70.6782344 | 79.0257226 | 75.9357253 | 68.678859 | 74.9606503 |
| 71.6782344 | 81.0257226 | 75.9357253 | 69.678859 | 75.8356503 |
| 73.6782344 | 81.0257226 | 75.9357253 | 69.678859 | 76.3356503 |
| 73.6782344 | 81.0257226 | 75.9357253 | 70.678859 | 74.5135754 |
| 74.6782344 | 81.0257226 | 76.9357253 | 71.678859 | 74.9354504 |
| 74.6782344 | 81.0257226 | 76.9357253 | 74.678859 | 77.5856503 |
| 74.6782344 | 81.0257226 | 75.9357253 | 78.678859 | 77.8356503 |
| 74.6782344 | 82.0257226 | 74.9357253 | 79.678859 | 77.7106503 |
| 72.6782344 | 83.0257226 | 74.9357253 | 79.678859 | 77.4606503 |
| 72.6782344 | 83.0257226 | 74.9357253 | 80.678859 | 77.5856503 |
| 72.6782344 | 84.0257226 | 74.9357253 | 81.678859 | 77.2106503 |
| 72.6782344 | 84.0257226 | 74.9357253 | 82.678859 | 77.2106503 |
| 74.6782344 | 84.0257226 | 74.9357253 | 83.678859 | 77.2106503 |
| 74.6782344 | 84.0257226 | 74.9357253 | 79.678859 | 76.2106503 |
| 74.6782344 | 83.0257226 | 73.9357253 | 76.678859 | 74.0856503 |
| 75.6782344 | 82.0257226 | 73.9357253 | 76.678859 | 73.7106503 |
| 75.6782344 | 82.0257226 | 72.9357253 | 72.678859 | 72.9606503 |
| 70.6782344 | 81.0257226 | 71.9357253 | 71.678859 | 71.9606503 |
| 70.6782344 | 84.0257226 | 71.9357253 | 71.678859 | 72.3356503 |
| 70.6782344 | 84.0257226 | 71.9357253 | 70.678859 | 72.4606503 |
| 71.6782344 | 88.0257226 | 72.9357253 | 68.678859 | 73.5856503 |

|            |            |            |           |            |
|------------|------------|------------|-----------|------------|
| 72.6782344 | 90.0257226 | 74.9357253 | 67.678859 | 74.2106503 |
| 73.6782344 | 91.0257226 | 75.9357253 | 66.678859 | 74.3356503 |
| 73.6782344 | 91.0257226 | 75.9357253 | 65.678859 | 74.2106503 |
| 76.6782344 | 90.0257226 | 73.9357253 | 65.678859 | 74.5856503 |
| 75.6782344 | 86.0257226 | 72.9357253 | 65.678859 | 74.3356503 |
| 75.6782344 | 86.0257226 | 72.9357253 | 65.678859 | 74.8356503 |
| 74.6782344 | 76.0257226 | 72.9357253 | 66.678859 | 73.9606503 |
| 73.6782344 | 70.0257226 | 73.9357253 | 67.678859 | 73.8356503 |
| 72.6782344 | 66.0257226 | 72.9357253 | 68.678859 | 73.3356503 |
| 72.6782344 | 66.0257226 | 71.9357253 | 68.678859 | 73.5856503 |
| 72.6782344 | 66.0257226 | 70.9357253 | 69.678859 | 73.8356503 |
| 72.6782344 | 65.0257226 | 69.9357253 | 69.678859 | 73.4606503 |
| 72.6782344 | 64.0257226 | 68.9357253 | 69.678859 | 73.4606503 |
| 73.6782344 | 64.0257226 | 67.9357253 | 69.678859 | 73.4606503 |
| 73.6782344 | 67.0257226 | 68.9357253 | 68.678859 | 73.9606503 |
| 73.6782344 | 69.0257226 | 69.9357253 | 68.678859 | 74.3356503 |
| 73.6782344 | 69.0257226 | 70.9357253 | 68.678859 | 74.4606503 |
| 73.6782344 | 69.0257226 | 71.9357253 | 67.678859 | 74.3356503 |
| 73.6782344 | 70.0257226 | 71.9357253 | 68.678859 | 74.7106503 |
| 73.6782344 | 71.0257226 | 70.9357253 | 68.678859 | 74.8356503 |
| 74.6782344 | 72.0257226 | 69.9357253 | 68.678859 | 75.5856503 |
| 74.6782344 | 73.0257226 | 69.9357253 | 68.678859 | 76.8356503 |
| 74.6782344 | 74.0257226 | 68.9357253 | 69.678859 | 77.3356503 |
| 75.6782344 | 74.0257226 | 68.9357253 | 70.678859 | 76.8356503 |
| 75.6782344 | 75.0257226 | 68.9357253 | 70.678859 | 77.4606503 |
| 77.6782344 | 74.0257226 | 68.9357253 | 70.678859 | 76.9606503 |
| 79.6782344 | 74.0257226 | 67.9357253 | 71.678859 | 77.9606503 |
| 79.6782344 | 73.0257226 | 67.9357253 | 71.678859 | 78.0856503 |
| 78.6782344 | 73.0257226 | 67.9357253 | 71.678859 | 78.5856503 |
| 78.6782344 | 73.0257226 | 67.9357253 | 71.678859 | 78.5856503 |
| 78.6782344 | 72.0257226 | 67.9357253 | 71.678859 | 78.0856503 |
| 77.6782344 | 72.0257226 | 66.9357253 | 71.678859 | 77.9606503 |
| 77.6782344 | 71.0257226 | 66.9357253 | 71.678859 | 77.8356503 |
| 77.6782344 | 71.0257226 | 66.9357253 | 70.678859 | 77.0856503 |
| 77.6782344 | 71.0257226 | 66.9357253 | 70.678859 | 77.0856503 |
| 76.6782344 | 71.0257226 | 66.9357253 | 70.678859 | 74.3461345 |
| 74.6782344 | 71.0257226 | 66.9357253 | 69.678859 | 73.3773845 |
| 73.6782344 | 71.0257226 | 66.9357253 | 69.678859 | 73.3773845 |
| 71.6782344 | 71.0257226 | 69.9357253 | 68.678859 | 72.3930095 |
| 70.6782344 | 71.0257226 | 70.9357253 | 68.678859 | 71.8617595 |
| 69.6782344 | 70.0257226 | 70.9357253 | 68.678859 | 71.4398845 |
| 69.6782344 | 69.0257226 | 70.9357253 | 68.678859 | 70.7367595 |
| 69.6782344 | 69.0257226 | 70.9357253 | 69.678859 | 70.6117595 |
| 69.6782344 | 71.0257226 | 72.9357253 | 69.678859 | 73.0856503 |
| 69.6782344 | 76.0257226 | 72.9357253 | 71.678859 | 73.3356503 |

|            |            |            |           |            |
|------------|------------|------------|-----------|------------|
| 69.6782344 | 79.0257226 | 70.9357253 | 71.678859 | 72.8356503 |
| 69.6782344 | 79.0257226 | 69.9357253 | 71.678859 | 72.8356503 |
| 69.6782344 | 83.0257226 | 69.9357253 | 71.678859 | 73.3356503 |
| 68.6782344 | 83.0257226 | 68.9357253 | 71.678859 | 73.3356503 |
| 69.6782344 | 83.0257226 | 67.9357253 | 71.678859 | 73.2106503 |
| 68.6782344 | 83.0257226 | 67.9357253 | 69.678859 | 72.5856503 |
| 68.6782344 | 83.0257226 | 65.9357253 | 69.678859 | 73.0856503 |
| 68.6782344 | 82.0257226 | 65.9357253 | 69.678859 | 72.8356503 |
| 69.6782344 | 82.0257226 | 65.9357253 | 68.678859 | 72.8356503 |
| 69.6782344 | 82.0257226 | 64.9357253 | 68.678859 | 72.7106503 |
| 69.6782344 | 82.0257226 | 64.9357253 | 68.678859 | 72.2106503 |
| 69.6782344 | 82.0257226 | 64.9357253 | 67.678859 | 73.4606503 |
| 69.6782344 | 82.0257226 | 64.9357253 | 67.678859 | 73.5856503 |
| 69.6782344 | 82.0257226 | 64.9357253 | 66.678859 | 73.8356503 |
| 69.6782344 | 83.0257226 | 64.9357253 | 66.678859 | 74.0856503 |
| 69.6782344 | 83.0257226 | 63.9357253 | 66.678859 | 74.0856503 |
| 70.6782344 | 83.0257226 | 62.9357253 | 66.678859 | 73.5856503 |
| 73.6782344 | 83.0257226 | 62.9357253 | 66.678859 | 74.4606503 |
| 74.6782344 | 83.0257226 | 63.9357253 | 66.678859 | 74.4606503 |
| 75.6782344 | 82.0257226 | 64.9357253 | 67.678859 | 74.2106503 |
| 75.6782344 | 82.0257226 | 64.9357253 | 67.678859 | 73.9606503 |
| 75.6782344 | 80.0257226 | 65.9357253 | 67.678859 | 73.0856503 |
| 75.6782344 | 79.0257226 | 65.9357253 | 67.678859 | 72.5856503 |
| 75.6782344 | 79.0257226 | 65.9357253 | 67.678859 | 72.5856503 |
| 76.6782344 | 75.0257226 | 66.9357253 | 67.678859 | 72.0856503 |
| 76.6782344 | 74.0257226 | 67.9357253 | 68.678859 | 71.4606503 |
| 76.6782344 | 74.0257226 | 67.9357253 | 68.678859 | 70.8356503 |
| 77.6782344 | 77.0257226 | 67.9357253 | 69.678859 | 71.4606503 |
| 77.6782344 | 77.0257226 | 68.9357253 | 68.678859 | 71.5856503 |
| 77.6782344 | 77.0257226 | 82.9357253 | 68.678859 | 73.0856503 |
| 77.6782344 | 78.0257226 | 83.9357253 | 68.678859 | 73.2106503 |
| 78.6782344 | 78.0257226 | 83.9357253 | 67.678859 | 73.2106503 |
| 78.6782344 | 78.0257226 | 77.9357253 | 67.678859 | 72.5856503 |
| 78.6782344 | 78.0257226 | 76.9357253 | 67.678859 | 72.3356503 |
| 78.6782344 | 83.0257226 | 73.9357253 | 67.678859 | 71.9606503 |
| 78.6782344 | 83.0257226 | 71.9357253 | 67.678859 | 71.4606503 |
| 78.6782344 | 81.0257226 | 70.9357253 | 66.678859 | 70.9606503 |
| 78.6782344 | 77.0257226 | 69.9357253 | 66.678859 | 70.5856503 |
| 78.6782344 | 77.0257226 | 69.9357253 | 66.678859 | 70.5856503 |
| 76.6782344 | 71.0257226 | 69.9357253 | 66.678859 | 70.0856503 |
| 72.6782344 | 70.0257226 | 69.9357253 | 66.678859 | 70.3356503 |
| 72.6782344 | 70.0257226 | 69.9357253 | 67.678859 | 70.4606503 |
| 72.6782344 | 70.0257226 | 69.9357253 | 67.678859 | 70.4606503 |
| 72.6782344 | 70.0257226 | 70.9357253 | 67.678859 | 70.5856503 |
| 72.6782344 | 70.0257226 | 70.9357253 | 67.678859 | 70.7106503 |



|            |            |            |           |            |
|------------|------------|------------|-----------|------------|
| 73.6782344 | 70.0257226 | 70.9357253 | 67.678859 | 71.0856503 |
| 73.6782344 | 70.0257226 | 70.9357253 | 67.678859 | 70.9606503 |
| 72.6782344 | 70.0257226 | 70.9357253 | 67.678859 | 70.7106503 |
| 72.6782344 | 70.0257226 | 73.9357253 | 68.678859 | 71.2106503 |
| 72.6782344 | 71.0257226 | 73.9357253 | 68.678859 | 71.3356503 |
| 72.6782344 | 71.0257226 | 77.9357253 | 68.678859 | 71.9606503 |
| 72.6782344 | 71.0257226 | 80.9357253 | 68.678859 | 72.3356503 |
| 71.6782344 | 72.0257226 | 81.9357253 | 68.678859 | 72.4606503 |
| 71.6782344 | 72.0257226 | 81.9357253 | 68.678859 | 72.4606503 |
| 71.6782344 | 72.0257226 | 81.9357253 | 68.678859 | 72.7106503 |
| 68.6782344 | 73.0257226 | 81.9357253 | 69.678859 | 72.7106503 |
| 67.6782344 | 73.0257226 | 81.9357253 | 69.678859 | 72.3356503 |
| 67.6782344 | 73.0257226 | 81.9357253 | 69.678859 | 72.7106503 |
| 67.6782344 | 72.0257226 | 81.9357253 | 70.678859 | 72.4606503 |
| 67.6782344 | 76.0257226 | 81.9357253 | 69.678859 | 72.7106503 |
| 67.6782344 | 76.0257226 | 81.9357253 | 68.678859 | 72.7106503 |
| 66.6782344 | 82.0257226 | 77.9357253 | 68.678859 | 72.8356503 |
| 66.6782344 | 82.0257226 | 73.9357253 | 67.678859 | 72.0856503 |
| 67.6782344 | 82.0257226 | 72.9357253 | 66.678859 | 71.9606503 |
| 70.6782344 | 82.0257226 | 70.9357253 | 66.678859 | 71.7106503 |
| 70.6782344 | 82.0257226 | 69.9357253 | 66.678859 | 71.5856503 |
| 71.6782344 | 74.0257226 | 68.9357253 | 66.678859 | 71.2106503 |
| 71.6782344 | 68.0257226 | 68.9357253 | 67.678859 | 70.7106503 |
| 72.6782344 | 68.0257226 | 68.9357253 | 66.678859 | 70.5856503 |
| 72.6782344 | 71.0257226 | 68.9357253 | 66.678859 | 71.2106503 |
| 71.6782344 | 73.0257226 | 67.9357253 | 67.678859 | 71.3356503 |
| 71.6782344 | 73.0257226 | 67.9357253 | 68.678859 | 71.7106503 |
| 71.6782344 | 74.0257226 | 67.9357253 | 69.678859 | 72.0856503 |
| 70.6782344 | 73.0257226 | 67.9357253 | 69.678859 | 72.2106503 |
| 70.6782344 | 70.0257226 | 67.9357253 | 69.678859 | 72.0856503 |
| 70.6782344 | 68.0257226 | 69.9357253 | 69.678859 | 72.3356503 |
| 70.6782344 | 67.0257226 | 68.9357253 | 68.678859 | 71.7106503 |
| 69.6782344 | 67.0257226 | 68.9357253 | 68.678859 | 71.3356503 |
| 69.6782344 | 67.0257226 | 68.9357253 | 68.678859 | 71.5856503 |
| 69.6782344 | 68.0257226 | 68.9357253 | 68.678859 | 71.7106503 |
| 71.6782344 | 69.0257226 | 66.9357253 | 68.678859 | 71.7106503 |
| 71.6782344 | 68.0257226 | 65.9357253 | 68.678859 | 71.5856503 |
| 71.6782344 | 68.0257226 | 65.9357253 | 68.678859 | 71.8356503 |
| 71.6782344 | 66.0257226 | 65.9357253 | 67.678859 | 72.3356503 |
| 72.6782344 | 66.0257226 | 65.9357253 | 65.678859 | 72.3356503 |
| 73.6782344 | 66.0257226 | 66.9357253 | 64.678859 | 72.5856503 |
| 73.6782344 | 66.0257226 | 73.9357253 | 64.678859 | 73.4606503 |
| 73.6782344 | 69.0257226 | 73.9357253 | 64.678859 | 73.3356503 |
| 74.6782344 | 69.0257226 | 73.9357253 | 64.678859 | 73.7106503 |
| 74.6782344 | 69.0257226 | 73.9357253 | 64.678859 | 73.9606503 |

|            |            |            |           |            |
|------------|------------|------------|-----------|------------|
| 74.6782344 | 70.0257226 | 73.9357253 | 65.678859 | 73.8356503 |
| 73.6782344 | 70.0257226 | 74.9357253 | 65.678859 | 73.4606503 |
| 73.6782344 | 70.0257226 | 74.9357253 | 65.678859 | 73.2106503 |
| 71.6782344 | 71.0257226 | 72.9357253 | 66.678859 | 72.9606503 |
| 71.6782344 | 71.0257226 | 71.9357253 | 66.678859 | 72.3356503 |
| 71.6782344 | 73.0257226 | 70.9357253 | 66.678859 | 72.0856503 |
| 73.6782344 | 73.0257226 | 70.9357253 | 66.678859 | 72.3356503 |
| 73.6782344 | 71.0257226 | 69.9357253 | 65.678859 | 71.8356503 |
| 73.6782344 | 71.0257226 | 69.9357253 | 67.678859 | 71.9606503 |
| 73.6782344 | 71.0257226 | 68.9357253 | 67.678859 | 71.7106503 |
| 73.6782344 | 72.0257226 | 67.9357253 | 67.678859 | 71.5856503 |
| 74.6782344 | 72.0257226 | 67.9357253 | 67.678859 | 71.7106503 |
| 74.6782344 | 73.0257226 | 67.9357253 | 67.678859 | 71.9606503 |
| 75.6782344 | 73.0257226 | 67.9357253 | 67.678859 | 72.0856503 |
| 75.6782344 | 73.0257226 | 71.9357253 | 66.678859 | 72.3356503 |
| 75.6782344 | 74.0257226 | 71.9357253 | 66.678859 | 73.0856503 |
| 75.6782344 | 76.0257226 | 76.9357253 | 67.678859 | 74.3356503 |
| 76.6782344 | 76.0257226 | 76.9357253 | 67.678859 | 74.3356503 |
| 76.6782344 | 76.0257226 | 76.9357253 | 67.678859 | 74.7106503 |
| 76.6782344 | 76.0257226 | 78.9357253 | 67.678859 | 74.9606503 |
| 75.6782344 | 78.0257226 | 75.9357253 | 67.678859 | 75.3356503 |
| 75.6782344 | 78.0257226 | 71.9357253 | 66.678859 | 74.7106503 |
| 75.6782344 | 80.0257226 | 69.9357253 | 66.678859 | 74.5856503 |
| 75.6782344 | 82.0257226 | 66.9357253 | 66.678859 | 74.7106503 |
| 75.6782344 | 82.0257226 | 66.9357253 | 66.678859 | 75.5856503 |
| 75.6782344 | 86.0257226 | 66.9357253 | 66.678859 | 75.4667004 |
| 75.6782344 | 86.0257226 | 68.9357253 | 66.678859 | 76.7106503 |
| 75.6782344 | 86.0257226 | 68.9357253 | 66.678859 | 76.4606503 |
| 75.6782344 | 91.0257226 | 68.9357253 | 67.678859 | 77.5856503 |
| 75.6782344 | 91.0257226 | 67.9357253 | 67.678859 | 76.4606503 |
| 75.6782344 | 90.0257226 | 64.9357253 | 67.678859 | 75.7106503 |
| 75.6782344 | 90.0257226 | 64.9357253 | 67.678859 | 75.8356503 |
| 75.6782344 | 89.0257226 | 63.9357253 | 68.678859 | 75.8356503 |
| 73.6782344 | 87.0257226 | 63.9357253 | 68.678859 | 75.9606503 |
| 73.6782344 | 87.0257226 | 64.9357253 | 68.678859 | 76.5856503 |
| 73.6782344 | 87.0257226 | 65.9357253 | 68.678859 | 76.8356503 |
| 72.6782344 | 82.0257226 | 66.9357253 | 68.678859 | 76.5856503 |
| 72.6782344 | 81.0257226 | 66.9357253 | 68.678859 | 76.5856503 |
| 72.6782344 | 81.0257226 | 67.9357253 | 68.678859 | 74.4086345 |
| 72.6782344 | 81.0257226 | 67.9357253 | 68.678859 | 74.4086345 |
| 72.6782344 | 76.0257226 | 67.9357253 | 68.678859 | 73.9398845 |
| 72.6782344 | 76.0257226 | 67.9357253 | 70.678859 | 73.9398845 |
| 72.6782344 | 78.0257226 | 67.9357253 | 70.678859 | 75.2055095 |
| 72.6782344 | 77.0257226 | 67.9357253 | 71.678859 | 75.1742595 |
| 72.6782344 | 70.0257226 | 68.9357253 | 72.678859 | 75.3461345 |

|            |            |            |           |          |            |
|------------|------------|------------|-----------|----------|------------|
| 72.6782344 | 70.0257226 | 69.9357253 | 72.678859 |          | 76.0961345 |
| 72.6782344 | 68.0257226 | 69.9357253 | 73.678859 |          | 75.9398845 |
| 72.6782344 | 68.0257226 | 70.9357253 | 77.678859 |          | 77.8356503 |
| 72.6782344 | 65.0257226 | 70.9357253 | 83.678859 |          | 78.0856503 |
| 70.6782344 | 65.0257226 | 70.9357253 | 87.678859 |          | 77.7106503 |
| 70.6782344 | 65.0257226 | 70.9357253 | 88.678859 |          | 77.0856503 |
| 70.6782344 | 65.0257226 | 70.9357253 | 88.678859 |          | 76.7106503 |
| 69.6782344 | 64.0257226 | 70.9357253 | 90.678859 |          | 76.5856503 |
| 69.6782344 | 65.0257226 | 71.9357253 | 91.678859 |          | 76.2106503 |
| 67.6782344 | 65.0257226 | 72.9357253 | 90.678859 |          | 74.9606503 |
| 67.6782344 | 65.0257226 | 73.9357253 | 73.678859 | before1  | 72.3356503 |
| 67.6782344 | 65.0257226 | 73.9357253 | 73.678859 | before2  | 72.3356503 |
| 78.6782344 | 65.0257226 | 71.9357253 | 69.678859 | before3  | 72.4606503 |
| 78.6782344 | 66.0257226 | 70.9357253 | 68.678859 | before4  | 72.4606503 |
| 78.6782344 | 67.0257226 | 69.9357253 | 67.678859 | before5  | 72.4606503 |
| 81.6782344 | 67.0257226 | 68.9357253 | 67.678859 | before6  | 72.7106503 |
| 84.6782344 | 67.0257226 | 68.9357253 | 67.678859 | before7  | 73.2106503 |
| 85.6782344 | 66.0257226 | 68.9357253 | 67.678859 | before8  | 73.4606503 |
| 85.6782344 | 66.0257226 | 68.9357253 | 67.678859 | before9  | 74.2106503 |
| 84.6782344 | 66.0257226 | 68.9357253 | 67.678859 | before10 | 74.0856503 |
| 84.6782344 | 66.0257226 | 68.9357253 | 67.678859 | before11 | 74.0856503 |
| 76.6782344 | 68.0257226 | 68.9357253 | 67.678859 | before12 | 72.7106503 |
| 66.6782344 | 70.0257226 | 68.9357253 | 67.678859 | before13 | 71.9606503 |
| 63.6782344 | 73.0257226 | 68.9357253 | 67.678859 | before14 | 71.8356503 |
| 63.6782344 | 73.0257226 | 69.9357253 | 66.678859 | before15 | 72.3356503 |
| 63.6782344 | 75.0257226 | 69.9357253 | 66.678859 | before16 | 72.5856503 |
| 63.6782344 | 77.0257226 | 69.9357253 | 65.678859 | before17 | 72.3356503 |
| 63.6782344 | 80.0257226 | 70.9357253 | 65.678859 | before18 | 72.5856503 |
| 63.6782344 | 80.0257226 | 71.9357253 | 65.678859 | before19 | 72.7106503 |
| 63.6782344 | 80.0257226 | 72.9357253 | 65.678859 | before20 | 72.8356503 |
| 63.6782344 | 80.0257226 | 73.9357253 | 65.678859 | before21 | 72.9606503 |
| 63.6782344 | 80.0257226 | 73.9357253 | 65.678859 | before22 | 73.0856503 |
| 66.6782344 | 80.0257226 | 72.9357253 | 65.678859 | before23 | 73.5856503 |
| 67.6782344 | 80.0257226 | 70.9357253 | 65.678859 | before24 | 74.2106503 |
| 67.6782344 | 80.0257226 | 69.9357253 | 65.678859 | before25 | 74.0856503 |
| 69.6782344 | 78.0257226 | 69.9357253 | 65.678859 | before26 | 74.2106503 |
| 69.6782344 | 78.0257226 | 69.9357253 | 65.678859 | before27 | 73.3356503 |
| 70.6782344 | 77.0257226 | 69.9357253 | 64.678859 | before28 | 74.5856503 |
| 72.6782344 | 77.0257226 | 69.9357253 | 64.678859 | before29 | 73.9606503 |
| 72.6782344 | 77.0257226 | 70.9357253 | 64.678859 | before30 | 74.0856503 |
| 75.6782344 | 77.0257226 | 71.9357253 | 64.678859 | before31 | 74.7106503 |
| 75.6782344 | 77.0257226 | 72.9357253 | 64.678859 | before32 | 74.9606503 |
| 77.6782344 | 77.0257226 | 73.9357253 | 64.678859 | before33 | 75.4606503 |
| 77.6782344 | 77.0257226 | 73.9357253 | 64.678859 | before34 | 75.3356503 |
| 77.6782344 | 81.0257226 | 74.9357253 | 64.678859 | before35 | 76.2106503 |

|            |            |            |           |          |            |
|------------|------------|------------|-----------|----------|------------|
| 77.6782344 | 81.0257226 | 74.9357253 | 65.678859 | before36 | 76.3356503 |
| 77.6782344 | 82.0257226 | 72.9357253 | 65.678859 | before37 | 76.0856503 |
| 76.6782344 | 82.0257226 | 72.9357253 | 65.678859 | before38 | 74.2836345 |
| 77.6782344 | 81.0257226 | 73.9357253 | 65.678859 | before39 | 75.8356503 |
| 77.6782344 | 81.0257226 | 73.9357253 | 64.678859 | before40 | 75.0856503 |
| 77.6782344 | 80.0257226 | 74.9357253 | 63.678859 | before41 | 75.7106503 |
| 77.6782344 | 80.0257226 | 74.9357253 | 63.678859 | before42 | 75.7106503 |
| 76.6782344 | 79.0257226 | 74.9357253 | 62.678859 | before43 | 75.4606503 |
| 76.6782344 | 79.0257226 | 74.9357253 | 62.678859 | before44 | 75.0856503 |
| 76.6782344 | 79.0257226 | 73.9357253 | 62.678859 | before45 | 74.8356503 |
| 76.6782344 | 78.0257226 | 73.9357253 | 63.678859 | before46 | 73.5856503 |
| 76.6782344 | 78.0257226 | 72.9357253 | 63.678859 | before47 | 73.3356503 |
| 76.6782344 | 78.0257226 | 73.9357253 | 63.678859 | before48 | 72.9606503 |
| 76.6782344 | 79.0257226 | 73.9357253 | 63.678859 | before49 | 73.2106503 |
| 76.6782344 | 80.0257226 | 73.9357253 | 64.678859 | before50 | 72.9606503 |
| 77.6782344 | 82.0257226 | 75.9357253 | 63.678859 | before51 | 73.3356503 |
| 77.6782344 | 83.0257226 | 75.9357253 | 62.678859 | before52 | 73.7106503 |
| 76.6782344 | 83.0257226 | 75.9357253 | 62.678859 | before53 | 73.4606503 |
| 76.6782344 | 83.0257226 | 75.9357253 | 61.678859 | before54 | 73.4606503 |
| 76.6782344 | 83.0257226 | 75.9357253 | 61.678859 | before55 | 73.4606503 |
| 76.6782344 | 83.0257226 | 75.9357253 | 61.678859 | before56 | 73.4606503 |
| 75.6782344 | 83.0257226 | 74.9357253 | 61.678859 | before57 | 73.3356503 |
| 75.6782344 | 83.0257226 | 75.9357253 | 62.678859 | before58 | 73.5856503 |
| 75.6782344 | 85.0257226 | 75.9357253 | 63.678859 | before59 | 73.9606503 |
| 74.6782344 | 85.0257226 | 79.9357253 | 63.678859 | before60 | 74.4606503 |
| 74.6782344 | 85.0257226 | 81.9357253 | 63.678859 | before61 | 74.4606503 |
| 69.6782344 | 85.0257226 | 81.9357253 | 67.678859 | before62 | 74.3356503 |
| 69.6782344 | 83.0257226 | 78.9357253 | 67.678859 | before63 | 73.5856503 |
| 70.6782344 | 83.0257226 | 76.9357253 | 69.678859 | before64 | 73.8356503 |
| 70.6782344 | 85.0257226 | 75.9357253 | 68.678859 | before65 | 73.8356503 |
| 70.6782344 | 85.0257226 | 75.9357253 | 67.678859 | before66 | 73.7106503 |
| 70.6782344 | 85.0257226 | 73.9357253 | 66.678859 | before67 | 72.7106503 |
| 71.6782344 | 86.0257226 | 72.9357253 | 65.678859 | before68 | 72.7106503 |
| 72.6782344 | 86.0257226 | 69.9357253 | 63.678859 | before69 | 71.9606503 |
| 72.6782344 | 86.0257226 | 68.9357253 | 63.678859 | before70 | 72.3356503 |
| 76.6782344 | 86.0257226 | 67.9357253 | 63.678859 | before71 | 72.7106503 |
| 78.6782344 | 86.0257226 | 67.9357253 | 63.678859 | before72 | 73.7106503 |
| 77.6782344 | 83.0257226 | 67.9357253 | 64.678859 | before73 | 73.2106503 |
| 77.6782344 | 83.0257226 | 66.9357253 | 64.678859 | before74 | 72.9606503 |
| 77.6782344 | 82.0257226 | 66.9357253 | 65.678859 | before75 | 73.2106503 |
| 76.6782344 | 81.0257226 | 66.9357253 | 66.678859 | before76 | 73.5856503 |
| 75.6782344 | 81.0257226 | 67.9357253 | 67.678859 | before77 | 73.7106503 |
| 75.6782344 | 81.0257226 | 67.9357253 | 68.678859 | before78 | 74.0856503 |
| 75.6782344 | 81.0257226 | 67.9357253 | 68.678859 | before79 | 74.2106503 |
| 75.6782344 | 81.0257226 | 68.9357253 | 69.678859 | before80 | 74.7106503 |

|            |            |            |           |           |            |
|------------|------------|------------|-----------|-----------|------------|
| 74.6782344 | 80.0257226 | 68.9357253 | 68.678859 | before81  | 74.4606503 |
| 72.6782344 | 80.0257226 | 68.9357253 | 68.678859 | before82  | 74.3356503 |
| 72.6782344 | 79.0257226 | 68.9357253 | 67.678859 | before83  | 74.2106503 |
| 72.6782344 | 79.0257226 | 68.9357253 | 66.678859 | before84  | 74.2106503 |
| 70.6782344 | 78.0257226 | 68.9357253 | 66.678859 | before85  | 74.0856503 |
| 68.6782344 | 77.0257226 | 68.9357253 | 66.678859 | before86  | 74.9606503 |
| 67.6782344 | 77.0257226 | 68.9357253 | 68.678859 | before87  | 75.0856503 |
| 67.6782344 | 77.0257226 | 68.9357253 | 70.678859 | before88  | 75.4606503 |
| 66.6782344 | 77.0257226 | 68.9357253 | 71.678859 | before89  | 75.8356503 |
| 66.6782344 | 77.0257226 | 68.9357253 | 71.678859 | before90  | 75.9606503 |
| 65.6782344 | 77.0257226 | 68.9357253 | 71.678859 | before91  | 75.8356503 |
| 65.6782344 | 77.0257226 | 68.9357253 | 71.678859 | before92  | 75.8356503 |
| 65.6782344 | 77.0257226 | 68.9357253 | 70.678859 | before93  | 74.5856503 |
| 65.6782344 | 76.0257226 | 68.9357253 | 70.678859 | before94  | 74.3356503 |
| 65.6782344 | 76.0257226 | 69.9357253 | 69.678859 | before95  | 74.5856503 |
| 64.6782344 | 76.0257226 | 69.9357253 | 68.678859 | before96  | 74.2106503 |
| 64.6782344 | 76.0257226 | 69.9357253 | 67.678859 | before97  | 73.9606503 |
| 64.6782344 | 75.0257226 | 65.9357253 | 67.678859 | before98  | 72.8356503 |
| 64.6782344 | 75.0257226 | 65.9357253 | 67.678859 | before99  | 72.8356503 |
| 64.6782344 | 75.0257226 | 65.9357253 | 67.678859 | before100 | 72.5856503 |
| 68.6782344 | 73.0257226 | 65.9357253 | 69.678859 | before101 | 72.9606503 |
| 72.6782344 | 73.0257226 | 65.9357253 | 70.678859 | before102 | 73.5856503 |
| 73.6782344 | 72.0257226 | 65.9357253 | 70.678859 | before103 | 73.4606503 |
| 73.6782344 | 75.0257226 | 66.9357253 | 71.678859 | before104 | 73.8356503 |
| 73.6782344 | 77.0257226 | 66.9357253 | 71.678859 | before105 | 73.7106503 |
| 77.6782344 | 78.0257226 | 66.9357253 | 70.678859 | before106 | 74.5856503 |
| 77.6782344 | 78.0257226 | 66.9357253 | 69.678859 | before107 | 74.2106503 |
| 77.6782344 | 78.0257226 | 67.9357253 | 69.678859 | before108 | 74.4606503 |
| 77.6782344 | 79.0257226 | 67.9357253 | 68.678859 | before109 | 74.5856503 |
| 77.6782344 | 79.0257226 | 67.9357253 | 68.678859 | before110 | 74.4606503 |
| 77.6782344 | 85.0257226 | 67.9357253 | 68.678859 | before111 | 74.9606503 |
| 77.6782344 | 85.0257226 | 67.9357253 | 68.678859 | before112 | 75.0856503 |
| 77.6782344 | 86.0257226 | 68.9357253 | 68.678859 | before113 | 75.3356503 |
| 77.6782344 | 86.0257226 | 68.9357253 | 68.678859 | before114 | 76.2106503 |
| 77.6782344 | 86.0257226 | 68.9357253 | 68.678859 | before115 | 76.0856503 |
| 78.6782344 | 86.0257226 | 68.9357253 | 68.678859 | before116 | 76.2106503 |
| 77.6782344 | 86.0257226 | 68.9357253 | 67.678859 | before117 | 75.9606503 |
| 77.6782344 | 86.0257226 | 68.9357253 | 67.678859 | before118 | 75.9606503 |
| 77.6782344 | 86.0257226 | 69.9357253 | 67.678859 | before119 | 75.9606503 |
| 76.6782344 | 82.0257226 | 69.9357253 | 66.678859 | before120 | 74.3356503 |
| 76.6782344 | 81.0257226 | 66.9357253 | 66.678859 | before121 | 73.2106503 |
| 76.6782344 | 81.0257226 | 66.9357253 | 66.678859 | before122 | 73.0856503 |
| 76.6782344 | 81.0257226 | 66.9357253 | 66.678859 | before123 | 72.7106503 |
| 77.6782344 | 81.0257226 | 66.9357253 | 66.678859 | before124 | 72.4606503 |
| 77.6782344 | 82.0257226 | 68.9357253 | 66.678859 | before125 | 71.7106503 |

|            |            |            |           |           |            |
|------------|------------|------------|-----------|-----------|------------|
| 78.6782344 | 82.0257226 | 68.9357253 | 66.678859 | before126 | 71.4606503 |
| 80.6782344 | 84.0257226 | 69.9357253 | 69.678859 | before127 | 72.0856503 |
| 81.6782344 | 85.0257226 | 68.9357253 | 69.678859 | before128 | 71.9606503 |
| 81.6782344 | 86.0257226 | 68.9357253 | 70.678859 | before129 | 71.9606503 |
| 81.6782344 | 86.0257226 | 68.9357253 | 71.678859 | before130 | 71.9606503 |
| 81.6782344 | 85.0257226 | 67.9357253 | 72.678859 | before131 | 71.8356503 |
| 81.6782344 | 85.0257226 | 66.9357253 | 72.678859 | before132 | 71.8356503 |
| 81.6782344 | 83.0257226 | 64.9357253 | 72.678859 | before133 | 71.0856503 |
| 80.6782344 | 81.0257226 | 63.9357253 | 72.678859 | before134 | 70.4606503 |
| 79.6782344 | 81.0257226 | 63.9357253 | 72.678859 | before135 | 70.2106503 |
| 79.6782344 | 80.0257226 | 63.9357253 | 72.678859 | before136 | 70.0856503 |
| 79.6782344 | 78.0257226 | 64.9357253 | 72.678859 | before137 | 70.0856503 |
| 79.6782344 | 78.0257226 | 65.9357253 | 72.678859 | before138 | 70.5856503 |
| 81.6782344 | 78.0257226 | 65.9357253 | 72.678859 | before139 | 70.5856503 |
| 81.6782344 | 78.0257226 | 66.9357253 | 72.678859 | before140 | 70.5856503 |
| 81.6782344 | 78.0257226 | 66.9357253 | 71.678859 | before141 | 71.2106503 |
| 82.6782344 | 78.0257226 | 66.9357253 | 71.678859 | before142 | 71.7106503 |
| 82.6782344 | 78.0257226 | 66.9357253 | 71.678859 | before143 | 71.7106503 |
| 83.6782344 | 78.0257226 | 66.9357253 | 71.678859 | before144 | 71.7106503 |
| 84.6782344 | 73.0257226 | 66.9357253 | 71.678859 | before145 | 71.2106503 |
| 85.6782344 | 72.0257226 | 65.9357253 | 72.678859 | before146 | 70.8356503 |
| 85.6782344 | 70.0257226 | 65.9357253 | 72.678859 | before147 | 70.8356503 |
| 86.6782344 | 70.0257226 | 65.9357253 | 71.678859 | before148 | 70.8356503 |
| 71.2106503 | 70.0257226 | 66.9357253 | 70.678859 | before149 | 68.9022022 |
| 71.2106503 | 68.0257226 | 66.9357253 | 69.678859 | before150 | 68.6522022 |
| 72.0856503 | 75.0257226 | 66.9357253 | 69.678859 | before151 | 69.5115772 |
| 71.8356503 | 75.0257226 | 67.9357253 | 69.678859 | before152 | 69.2303272 |
| 71.8356503 | 75.0257226 | 67.9357253 | 69.678859 | before153 | 69.1053272 |
| 71.9606503 | 75.0257226 | 67.9357253 | 69.678859 | before154 | 69.3709522 |
| 72.2106503 | 75.0257226 | 67.9357253 | 69.678859 | before155 | 69.4022022 |
| 74.7106503 | 76.0257226 | 68.9357253 | 70.678859 | before156 | 72.2147022 |
| 75.3356503 | 77.0257226 | 68.9357253 | 70.678859 | before157 | 72.5428272 |
| 75.4606503 | 77.0257226 | 69.9357253 | 71.678859 | before158 | 72.6834522 |
| 77.2106503 | 78.0257226 | 69.9357253 | 75.678859 | before159 | 74.5272022 |
| 77.5856503 | 78.0257226 | 70.9357253 | 77.678859 | before160 | 74.9490772 |
| 77.8356503 | 78.0257226 | 70.9357253 | 78.678859 | before161 | 75.1053272 |
| 77.9606503 | 80.0257226 | 70.9357253 | 78.678859 | before162 | 74.9959522 |
| 77.4606503 | 80.0257226 | 70.9357253 | 77.678859 | before163 | 74.4334522 |
| 77.4606503 | 80.0257226 | 70.9357253 | 77.678859 | before164 | 74.4334522 |
| 87.6782344 | 80.0257226 | 68.9357253 | 77.678859 | before165 | 76.0856503 |
| 86.6782344 | 79.0257226 | 68.9357253 | 76.678859 | before166 | 75.5856503 |
| 86.6782344 | 78.0257226 | 67.9357253 | 76.678859 | before167 | 75.9606503 |
| 85.6782344 | 77.0257226 | 68.9357253 | 76.678859 | before168 | 75.9606503 |
| 83.6782344 | 78.0257226 | 68.9357253 | 76.678859 | before169 | 75.9606503 |
| 83.6782344 | 79.0257226 | 69.9357253 | 77.678859 | before170 | 75.9606503 |

|            |            |            |           |           |            |
|------------|------------|------------|-----------|-----------|------------|
| 83.6782344 | 79.0257226 | 69.9357253 | 76.678859 | before171 | 75.2106503 |
| 85.6782344 | 80.0257226 | 69.9357253 | 76.678859 | before172 | 75.4606503 |
| 87.6782344 | 81.0257226 | 69.9357253 | 73.678859 | before173 | 75.5856503 |
| 87.6782344 | 82.0257226 | 69.9357253 | 73.678859 | before174 | 75.3356503 |
| 87.6782344 | 82.0257226 | 66.9357253 | 73.678859 | before175 | 74.8356503 |
| 87.6782344 | 82.0257226 | 65.9357253 | 72.678859 | before176 | 74.9606503 |
| 88.6782344 | 83.0257226 | 64.9357253 | 71.678859 | before177 | 74.8356503 |
| 88.6782344 | 83.0257226 | 63.9357253 | 71.678859 | before178 | 74.9606503 |
| 88.6782344 | 83.0257226 | 63.9357253 | 71.678859 | before179 | 75.2106503 |
| 88.6782344 | 85.0257226 | 63.9357253 | 71.678859 | before180 | 75.7106503 |
| 88.6782344 | 87.0257226 | 63.9357253 | 71.678859 | before181 | 76.2106503 |
| 92.6782344 | 87.0257226 | 63.9357253 | 71.678859 | before182 | 76.4606503 |
| 76.3356503 | 87.0257226 | 62.9357253 | 72.678859 | before183 | 73.9178272 |
| 75.9606503 | 87.0257226 | 62.9357253 | 71.678859 | before184 | 73.4959522 |
| 76.2106503 | 87.0257226 | 61.9357253 | 70.678859 | before185 | 73.7772022 |
| 76.0856503 | 85.0257226 | 60.9357253 | 70.678859 | before186 | 73.6365772 |
| 75.7106503 | 84.0257226 | 60.9357253 | 70.678859 | before187 | 73.3397022 |
| 75.4606503 | 84.0257226 | 59.9357253 | 70.678859 | before188 | 73.0584522 |
| 75.2106503 | 84.0257226 | 59.9357253 | 70.678859 | before189 | 73.0272022 |
| 74.8356503 | 84.0257226 | 58.9357253 | 69.678859 | before190 | 72.6053272 |
| 74.5856503 | 84.0257226 | 57.9357253 | 69.678859 | before191 | 72.4490772 |
| 90.6782344 | 85.0257226 | 57.9357253 | 69.678859 | before192 | 73.9606503 |
| 88.6782344 | 85.0257226 | 53.9357253 | 69.678859 | before193 | 73.2106503 |
| 87.6782344 | 80.0257226 | 52.9357253 | 70.678859 | before194 | 72.3356503 |
| 87.6782344 | 79.0257226 | 52.9357253 | 70.678859 | before195 | 72.2106503 |
| 84.6782344 | 80.0257226 | 52.9357253 | 70.678859 | before196 | 71.3356503 |
| 83.6782344 | 80.0257226 | 52.9357253 | 70.678859 | before197 | 70.9606503 |
| 83.6782344 | 80.0257226 | 52.9357253 | 71.678859 | before198 | 71.0856503 |
| 80.6782344 | 81.0257226 | 60.9357253 | 72.678859 | before199 | 71.8356503 |
| 75.6782344 | 81.0257226 | 64.9357253 | 70.678859 | before200 | 71.5856503 |
| 74.6782344 | 81.0257226 | 65.9357253 | 70.678859 | before201 | 71.8356503 |
| 74.6782344 | 81.0257226 | 67.9357253 | 70.678859 | before202 | 72.0856503 |
| 74.6782344 | 81.0257226 | 66.9357253 | 69.678859 | before203 | 72.4606503 |
| 74.6782344 | 81.0257226 | 67.9357253 | 70.678859 | before204 | 73.0856503 |
| 74.6782344 | 81.0257226 | 67.9357253 | 70.678859 | before205 | 73.2106503 |
| 76.6782344 | 81.0257226 | 65.9357253 | 70.678859 | before206 | 72.9606503 |
| 76.6782344 | 80.0257226 | 66.9357253 | 69.678859 | before207 | 72.4606503 |
| 77.6782344 | 80.0257226 | 66.9357253 | 69.678859 | before208 | 72.4606503 |
| 77.6782344 | 80.0257226 | 67.9357253 | 70.678859 | before209 | 73.3356503 |
| 77.6782344 | 80.0257226 | 69.9357253 | 70.678859 | before210 | 73.2106503 |
| 78.6782344 | 89.0257226 | 69.9357253 | 70.678859 | before211 | 75.0856503 |
| 78.6782344 | 89.0257226 | 69.9357253 | 70.678859 | before212 | 75.3356503 |
| 77.6782344 | 87.0257226 | 70.9357253 | 71.678859 | before213 | 75.2106503 |
| 77.6782344 | 87.0257226 | 70.9357253 | 72.678859 | before214 | 75.3356503 |
| 77.6782344 | 84.0257226 | 69.9357253 | 72.678859 | before215 | 74.9606503 |

|            |            |            |           |           |            |
|------------|------------|------------|-----------|-----------|------------|
| 76.6782344 | 82.0257226 | 69.9357253 | 72.678859 | before216 | 74.8356503 |
| 76.6782344 | 78.0257226 | 69.9357253 | 72.678859 | before217 | 73.9606503 |
| 76.6782344 | 78.0257226 | 69.9357253 | 72.678859 | before218 | 73.7106503 |
| 75.6782344 | 78.0257226 | 68.9357253 | 72.678859 | before219 | 73.2106503 |
| 72.6782344 | 77.0257226 | 69.9357253 | 72.678859 | before220 | 72.2106503 |
| 72.6782344 | 77.0257226 | 70.9357253 | 72.678859 | before221 | 72.7106503 |
| 71.6782344 | 83.0257226 | 70.9357253 | 72.678859 | before222 | 72.5856503 |
| 71.6782344 | 83.0257226 | 70.9357253 | 72.678859 | before223 | 72.3356503 |
| 71.6782344 | 85.0257226 | 71.9357253 | 73.678859 | before224 | 72.9606503 |
| 71.6782344 | 85.0257226 | 71.9357253 | 74.678859 | before225 | 72.9606503 |
| 71.6782344 | 85.0257226 | 71.9357253 | 74.678859 | before226 | 73.3356503 |
| 71.6782344 | 89.0257226 | 71.9357253 | 75.678859 | before227 | 74.7106503 |
| 71.6782344 | 91.0257226 | 71.9357253 | 75.678859 | before228 | 75.2106503 |
| 71.6782344 | 91.0257226 | 71.9357253 | 75.678859 | before229 | 76.0856503 |
| 71.6782344 | 90.0257226 | 72.9357253 | 75.678859 | before230 | 76.3356503 |
| 70.6782344 | 90.0257226 | 72.9357253 | 75.678859 | before231 | 77.0856503 |
| 70.6782344 | 67.0257226 | 73.9357253 | 75.678859 | before232 | 74.7106503 |
| 70.6782344 | 65.0257226 | 73.9357253 | 75.678859 | before233 | 74.9606503 |
| 71.6782344 | 64.0257226 | 76.9357253 | 75.678859 | before234 | 75.7106503 |
| 71.6782344 | 64.0257226 | 78.9357253 | 75.678859 | before235 | 76.0856503 |
| 71.6782344 | 62.0257226 | 79.9357253 | 75.678859 | before236 | 75.4606503 |
| 71.6782344 | 64.0257226 | 79.9357253 | 75.678859 | before237 | 75.4606503 |
| 72.6782344 | 65.0257226 | 80.9357253 | 76.678859 | before238 | 76.0856503 |
| 72.6782344 | 67.0257226 | 81.9357253 | 78.678859 | before239 | 77.4606503 |
| 73.6782344 | 70.0257226 | 83.9357253 | 79.678859 | before240 | 78.2106503 |
| 72.6782344 | 73.0257226 | 83.9357253 | 79.678859 | minute1   | 76.7523845 |
| 71.6782344 | 77.0257226 | 83.9357253 | 78.678859 | minute2   | 76.8930095 |
| 71.6782344 | 77.0257226 | 83.9357253 | 75.678859 | minute3   | 77.7106503 |
| 72.6782344 | 79.0257226 | 83.9357253 | 73.678859 | minute4   | 77.5856503 |
| 74.6782344 | 79.0257226 | 84.9357253 | 67.678859 | minute5   | 76.4606503 |
| 74.6782344 | 79.0257226 | 85.9357253 | 65.678859 | minute6   | 76.3356503 |
| 74.6782344 | 80.0257226 | 85.9357253 | 66.678859 | minute7   | 76.0856503 |
| 74.6782344 | 81.0257226 | 84.9357253 | 66.678859 | minute8   | 76.5856503 |
| 76.6782344 | 81.0257226 | 84.9357253 | 66.678859 | minute9   | 77.3356503 |
| 76.6782344 | 82.0257226 | 83.9357253 | 66.678859 | minute10  | 77.3356503 |
| 76.6782344 | 81.0257226 | 82.9357253 | 66.678859 | minute11  | 77.2106503 |
| 77.6782344 | 81.0257226 | 76.9357253 | 66.678859 | minute12  | 76.5856503 |
| 78.6782344 | 81.0257226 | 74.9357253 | 66.678859 | minute13  | 76.4606503 |
| 79.6782344 | 81.0257226 | 74.9357253 | 66.678859 | minute14  | 76.7106503 |
| 79.6782344 | 82.0257226 | 73.9357253 | 66.678859 | minute15  | 77.0856503 |
| 80.6782344 | 82.0257226 | 74.9357253 | 66.678859 | minute16  | 77.4606503 |
| 80.6782344 | 82.0257226 | 74.9357253 | 66.678859 | minute17  | 78.2106503 |
| 81.6782344 | 82.0257226 | 75.9357253 | 66.678859 | minute18  | 78.2106503 |
| 82.6782344 | 83.0257226 | 74.9357253 | 66.678859 | minute19  | 78.3356503 |
| 82.6782344 | 84.0257226 | 74.9357253 | 66.678859 | minute20  | 78.3356503 |



|            |            |            |           |          |            |
|------------|------------|------------|-----------|----------|------------|
| 83.6782344 | 89.0257226 | 74.9357253 | 66.678859 | minute21 | 77.9606503 |
| 83.6782344 | 92.0257226 | 73.9357253 | 69.678859 | minute22 | 78.4606503 |
| 83.6782344 | 93.0257226 | 73.9357253 | 70.678859 | minute23 | 78.5856503 |
| 84.6782344 | 94.0257226 | 73.9357253 | 70.678859 | minute24 | 79.3356503 |
| 84.6782344 | 96.0257226 | 73.9357253 | 71.678859 | minute25 | 79.8356503 |
| 83.6782344 | 96.0257226 | 73.9357253 | 72.678859 | minute26 | 79.8356503 |
| 81.6782344 | 79.9606503 | 73.9357253 | 70.678859 | minute27 | 77.7025162 |
| 80.6782344 | 79.5856503 | 73.9357253 | 70.678859 | minute28 | 77.2806412 |
| 80.6782344 | 79.4606503 | 73.9357253 | 70.678859 | minute29 | 77.1400162 |
| 80.6782344 | 93.0257226 | 72.9357253 | 70.678859 | minute30 | 78.5856503 |
| 80.6782344 | 89.0257226 | 72.9357253 | 70.678859 | minute31 | 77.4606503 |
| 80.6782344 | 89.0257226 | 70.9357253 | 70.678859 | minute32 | 77.2106503 |
| 80.6782344 | 86.0257226 | 68.9357253 | 70.678859 | minute33 | 76.2106503 |
| 80.6782344 | 82.0257226 | 67.9357253 | 68.678859 | minute34 | 75.2106503 |
| 80.6782344 | 76.0257226 | 67.9357253 | 67.678859 | minute35 | 74.5856503 |
| 79.6782344 | 73.0257226 | 68.9357253 | 67.678859 | minute36 | 74.3356503 |
| 78.6782344 | 73.0257226 | 72.9357253 | 66.678859 | minute37 | 75.0856503 |
| 76.6782344 | 68.0257226 | 75.9357253 | 65.678859 | minute38 | 74.4606503 |
| 76.6782344 | 65.0257226 | 80.9357253 | 65.678859 | minute39 | 74.5856503 |
| 72.6782344 | 65.0257226 | 80.9357253 | 64.678859 | minute40 | 73.8356503 |
| 70.6782344 | 63.0257226 | 80.9357253 | 64.678859 | minute41 | 73.3356503 |
| 70.6782344 | 62.0257226 | 80.9357253 | 64.678859 | minute42 | 73.0856503 |
| 70.6782344 | 63.0257226 | 69.9357253 | 64.678859 | minute43 | 71.9606503 |
| 70.6782344 | 63.0257226 | 67.9357253 | 64.678859 | minute44 | 71.7106503 |
| 70.6782344 | 66.0257226 | 66.9357253 | 64.678859 | minute45 | 71.7106503 |
| 70.6782344 | 68.0257226 | 66.9357253 | 63.678859 | minute46 | 71.9606503 |
| 70.6782344 | 69.0257226 | 66.9357253 | 63.678859 | minute47 | 71.7106503 |
| 70.6782344 | 69.0257226 | 67.9357253 | 63.678859 | minute48 | 71.5856503 |
| 70.6782344 | 69.0257226 | 68.9357253 | 63.678859 | minute49 | 70.5856503 |
| 71.6782344 | 69.0257226 | 68.9357253 | 66.678859 | minute50 | 70.4606503 |
| 71.6782344 | 72.0257226 | 68.9357253 | 68.678859 | minute51 | 70.9606503 |
| 73.6782344 | 72.0257226 | 69.9357253 | 68.678859 | minute52 | 71.0856503 |
| 73.6782344 | 75.0257226 | 69.9357253 | 69.678859 | minute53 | 71.5856503 |
| 74.6782344 | 79.0257226 | 69.9357253 | 69.678859 | minute54 | 72.5856503 |
| 75.6782344 | 82.0257226 | 69.9357253 | 68.678859 | minute55 | 72.7106503 |
| 75.6782344 | 83.0257226 | 69.9357253 | 68.678859 | minute56 | 72.7106503 |
| 75.6782344 | 83.0257226 | 68.9357253 | 68.678859 | minute57 | 72.7106503 |
| 76.6782344 | 83.0257226 | 68.9357253 | 68.678859 | minute58 | 72.8356503 |
| 77.6782344 | 86.0257226 | 66.9357253 | 68.678859 | minute59 | 73.2106503 |
| 74.6782344 | 87.0257226 | 66.9357253 | 70.678859 | minute60 | 73.3356503 |
| 74.6782344 | 87.0257226 | 66.9357253 | 70.678859 | Activity | 73.5856503 |
| 75.6782344 | 89.0257226 | 65.9357253 | 72.678859 | Activity | 74.5856503 |
| 75.6782344 | 90.0257226 | 65.9357253 | 73.678859 | Activity | 75.5856503 |
| 75.6782344 | 91.0257226 | 65.9357253 | 73.678859 | Activity | 75.7106503 |
| 75.6782344 | 76.7106503 | 68.9357253 | 73.678859 | Activity | 74.5462662 |

|            |            |            |           |          |            |
|------------|------------|------------|-----------|----------|------------|
| 74.6782344 | 77.0856503 | 68.9357253 | 73.678859 | Activity | 74.9681412 |
| 74.6782344 | 94.0257226 | 69.9357253 | 73.678859 | Activity | 77.3356503 |
| 73.6782344 | 77.4606503 | 69.9357253 | 73.678859 | Activity | 75.2650162 |
| 73.6782344 | 78.4606503 | 69.9357253 | 73.678859 | Activity | 76.2650162 |
| 73.6782344 | 79.4606503 | 69.9357253 | 73.678859 | Activity | 77.2650162 |
| 72.6782344 | 79.5856503 | 70.9357253 | 73.678859 | Activity | 77.2806412 |
| 68.6782344 | 79.2106503 | 70.9357253 | 73.678859 | Activity | 76.9837662 |
| 66.6782344 | 78.7106503 | 70.9357253 | 71.678859 | Activity | 76.4212662 |
| 66.6782344 | 78.2106503 | 69.9357253 | 70.678859 | Activity | 75.9837662 |
| 65.6782344 | 94.0257226 | 69.9357253 | 70.678859 | Activity | 78.4606503 |
| 65.6782344 | 94.0257226 | 68.9357253 | 69.678859 | Activity | 78.2106503 |
| 67.6782344 | 94.0257226 | 68.9357253 | 69.678859 | Activity | 78.4606503 |
| 68.6782344 | 94.0257226 | 68.9357253 | 69.678859 | Activity | 78.9606503 |
| 68.6782344 | 92.0257226 | 68.9357253 | 69.678859 | Activity | 78.8356503 |
| 68.6782344 | 92.0257226 | 67.9357253 | 68.678859 | Activity | 78.7106503 |
| 68.6782344 | 92.0257226 | 67.9357253 | 66.678859 | Activity | 78.5856503 |
| 68.6782344 | 92.0257226 | 67.9357253 | 63.678859 | Activity | 78.5856503 |
| 68.6782344 | 92.0257226 | 67.9357253 | 63.678859 | Activity | 78.5856503 |
| 68.6782344 | 92.0257226 | 67.9357253 | 63.678859 | Activity | 78.7106503 |
| 68.6782344 | 92.0257226 | 67.9357253 | 63.678859 | Activity | 78.9606503 |
| 68.6782344 | 92.0257226 | 67.9357253 | 63.678859 | Activity | 78.9606503 |
| 68.6782344 | 92.0257226 | 67.9357253 | 64.678859 | Activity | 77.4182585 |
| 68.6782344 | 92.0257226 | 66.9357253 | 65.678859 | Activity | 77.8245085 |
| 71.6782344 | 92.0257226 | 67.9357253 | 65.678859 | Activity | 78.4026335 |
| 73.6782344 | 91.0257226 | 67.9357253 | 65.678859 | Activity | 78.8245085 |
| 74.6782344 | 90.0257226 | 68.9357253 | 66.678859 | Activity | 79.1057585 |
| 74.6782344 | 90.0257226 | 69.9357253 | 66.678859 | Activity | 79.2463835 |
| 74.6782344 | 87.0257226 | 71.9357253 | 66.678859 | Activity | 79.1213835 |
| 74.6782344 | 85.0257226 | 71.9357253 | 66.678859 | Activity | 78.8401335 |
| 74.6782344 | 85.0257226 | 71.9357253 | 66.678859 | Activity | 78.5588835 |
| 73.6782344 | 86.0257226 | 71.9357253 | 67.678859 | Activity | 78.6995085 |
| 73.6782344 | 86.0257226 | 71.9357253 | 67.678859 | Activity | 78.5588835 |
| 73.6782344 | 87.0257226 | 71.9357253 | 67.678859 | Activity | 78.6995085 |
| 74.6782344 | 87.0257226 | 72.9357253 | 67.678859 | Activity | 78.8401335 |
| 74.6782344 | 89.0257226 | 72.9357253 | 68.678859 | Activity | 79.2776335 |
| 75.6782344 | 89.0257226 | 72.9357253 | 69.678859 | Activity | 79.6995085 |
| 75.6782344 | 89.0257226 | 72.9357253 | 69.678859 | Activity | 79.5588835 |
| 76.6782344 | 90.0257226 | 72.9357253 | 69.678859 | Activity | 79.9807585 |
| 78.6782344 | 88.0257226 | 75.9357253 | 70.678859 | Activity | 80.5432585 |
| 78.6782344 | 88.0257226 | 78.9357253 | 71.678859 | Activity | 81.3870085 |
| 78.6782344 | 84.0257226 | 78.9357253 | 71.678859 | Activity | 80.5432585 |
| 79.6782344 | 85.0257226 | 77.9357253 | 71.678859 | Activity | 80.6838835 |
| 79.6782344 | 86.0257226 | 77.9357253 | 72.678859 | Activity | 81.2463835 |
| 79.6782344 | 86.0257226 | 77.9357253 | 72.678859 | Activity | 81.2463835 |
| 81.6782344 | 86.0257226 | 77.9357253 | 72.678859 | Activity | 81.5276335 |

|            |            |            |           |          |            |
|------------|------------|------------|-----------|----------|------------|
| 80.6782344 | 86.0257226 | 77.9357253 | 72.678859 | Activity | 81.2463835 |
| 80.6782344 | 85.0257226 | 77.9357253 | 72.678859 | Activity | 80.1213835 |
| 80.6782344 | 78.0257226 | 77.9357253 | 71.678859 | Activity | 78.7151335 |
| 80.6782344 | 75.0257226 | 77.9357253 | 70.678859 | Activity | 78.1526335 |
| 80.6782344 | 75.0257226 | 77.9357253 | 69.678859 | Activity | 78.0120085 |
| 80.6782344 | 74.0257226 | 77.9357253 | 69.678859 | Activity | 77.6622025 |
| 81.6782344 | 73.0257226 | 77.9357253 | 68.678859 | Activity | 77.3764882 |
| 81.6782344 | 73.0257226 | 77.9357253 | 68.678859 | Activity | 77.5193454 |
| 81.6782344 | 75.0257226 | 79.9357253 | 68.678859 | Activity | 77.8050597 |
| 81.6782344 | 76.0257226 | 78.9357253 | 67.678859 | Activity | 77.6622025 |
| 83.6782344 | 76.0257226 | 78.9357253 | 67.678859 | Activity | 78.0907739 |
| 83.6782344 | 76.0257226 | 78.9357253 | 67.678859 | Activity | 78.2336311 |
| 83.6782344 | 77.0257226 | 78.9357253 | 66.678859 | Activity | 78.8050597 |
| 82.6782344 | 80.0257226 | 78.9357253 | 66.678859 | Activity | 79.2336311 |
| 80.6782344 | 82.0257226 | 77.9357253 | 66.678859 | Activity | 79.2336311 |
| 80.6782344 | 84.0257226 | 78.9357253 | 65.678859 | Activity | 79.5193454 |
| 80.6782344 | 84.0257226 | 79.9357253 | 65.678859 | Activity | 79.9479168 |
| 80.6782344 | 85.0257226 | 79.9357253 | 66.678859 | Activity | 80.2336311 |
| 79.6782344 | 85.0257226 | 78.9357253 | 66.678859 | Activity | 79.9479168 |
| 79.6782344 | 85.0257226 | 78.9357253 | 66.678859 | Activity | 80.0907739 |
| 79.6782344 | 85.0257226 | 78.9357253 | 66.678859 | Activity | 79.3764882 |
| 79.6782344 | 85.0257226 | 78.9357253 | 66.678859 | Activity | 78.9479168 |
| 79.6782344 | 85.0257226 | 78.9357253 | 67.678859 | Activity | 78.8050597 |
| 81.6782344 | 85.0257226 | 76.9357253 | 68.678859 | Activity | 78.8050597 |
| 81.6782344 | 85.0257226 | 79.9357253 | 68.678859 | Activity | 79.2336311 |
| 81.6782344 | 85.0257226 | 82.9357253 | 69.678859 | minute1  | 79.8050597 |
| 81.6782344 | 85.0257226 | 81.9357253 | 69.678859 | minute2  | 79.6622025 |
| 83.6782344 | 85.0257226 | 79.9357253 | 69.678859 | minute3  | 79.8050597 |
| 83.6782344 | 85.0257226 | 76.9357253 | 69.678859 | minute4  | 79.5193454 |
| 83.6782344 | 85.0257226 | 76.9357253 | 69.678859 | minute5  | 79.5193454 |
| 83.6782344 | 84.0257226 | 74.9357253 | 69.678859 | minute6  | 79.0907739 |
| 83.6782344 | 84.0257226 | 72.9357253 | 70.678859 | minute7  | 79.0907739 |
| 84.6782344 | 80.0257226 | 71.9357253 | 71.678859 | minute8  | 78.8050597 |
| 84.6782344 | 80.0257226 | 71.9357253 | 71.678859 | minute9  | 78.9479168 |
| 84.6782344 | 80.0257226 | 71.9357253 | 71.678859 | minute10 | 79.2336311 |
| 85.6782344 | 84.0257226 | 71.9357253 | 70.678859 | minute11 | 80.2336311 |
| 85.6782344 | 84.0257226 | 69.9357253 | 70.678859 | minute12 | 80.0907739 |
| 85.6782344 | 84.0257226 | 69.9357253 | 69.678859 | minute13 | 79.9479168 |
| 85.6782344 | 82.0257226 | 67.9357253 | 69.678859 | minute14 | 79.3764882 |
| 85.6782344 | 80.0257226 | 67.9357253 | 68.678859 | minute15 | 76.6341346 |
| 87.6782344 | 79.0257226 | 67.9357253 | 68.678859 | minute16 | 76.7973999 |
| 87.6782344 | 79.0257226 | 66.9357253 | 68.678859 | minute17 | 76.6341346 |
| 88.6782344 | 79.0257226 | 66.9357253 | 67.678859 | minute18 | 75.185155  |
| 88.6782344 | 79.0257226 | 67.9357253 | 66.678859 | minute19 | 74.2259713 |
| 88.6782344 | 79.0257226 | 67.9357253 | 66.678859 | minute20 | 74.2463795 |

|            |            |            |           |          |            |
|------------|------------|------------|-----------|----------|------------|
| 88.6782344 | 79.0257226 | 68.9357253 | 65.678859 | minute21 | 74.7565836 |
| 91.6782344 | 81.0257226 | 68.9357253 | 65.678859 | minute22 | 75.5933183 |
| 91.6782344 | 81.0257226 | 68.9357253 | 65.678859 | minute23 | 75.9198489 |
| 80.5193454 | 81.0257226 | 68.9357253 | 66.678859 | minute24 | 74.8155178 |
| 80.8050597 | 83.0257226 | 68.9357253 | 66.678859 | minute25 | 75.1828647 |
| 91.6782344 | 84.0257226 | 68.9357253 | 66.678859 | minute26 | 76.9198489 |
| 87.6782344 | 85.0257226 | 68.9357253 | 66.678859 | minute27 | 76.430053  |
| 85.6782344 | 86.0257226 | 68.9357253 | 66.678859 | minute28 | 76.2667876 |
| 84.6782344 | 86.0257226 | 68.9357253 | 66.678859 | minute29 | 76.1239305 |
| 84.6782344 | 86.0257226 | 68.9357253 | 66.678859 | minute30 | 75.6341346 |
| 84.6782344 | 87.0257226 | 67.9357253 | 66.678859 | minute31 | 75.6341346 |
| 83.6782344 | 87.0257226 | 67.9357253 | 66.678859 | minute32 | 75.6545427 |
| 83.6782344 | 87.0257226 | 67.9357253 | 66.678859 | minute33 | 75.8178081 |
| 83.6782344 | 87.0257226 | 67.9357253 | 67.678859 | minute34 | 75.9810734 |
| 82.6782344 | 88.0257226 | 66.9357253 | 67.678859 | minute35 | 75.8178081 |
| 82.6782344 | 88.0257226 | 66.9357253 | 67.678859 | minute36 | 75.9606652 |
| 82.6782344 | 88.0257226 | 66.9357253 | 67.678859 | minute37 | 75.940257  |
| 86.6782344 | 89.0257226 | 65.9357253 | 67.678859 | minute38 | 76.7565836 |
| 86.6782344 | 90.0257226 | 65.9357253 | 67.678859 | minute39 | 77.2463795 |
| 86.6782344 | 91.0257226 | 65.9357253 | 67.678859 | minute40 | 77.5729101 |
| 71.6782344 | 91.0257226 | 66.9357253 | 67.678859 | minute41 | 75.7973999 |
| 71.6782344 | 91.0257226 | 66.9357253 | 67.678859 | minute42 | 75.9606652 |
| 71.6782344 | 90.0257226 | 67.9357253 | 67.678859 | minute43 | 75.9810734 |
| 71.6782344 | 89.0257226 | 67.9357253 | 67.678859 | minute44 | 75.8586244 |
| 72.6782344 | 88.0257226 | 68.9357253 | 67.678859 | minute45 | 76.3688285 |
| 72.6782344 | 88.0257226 | 68.9357253 | 67.678859 | minute46 | 76.3688285 |
| 72.6782344 | 87.0257226 | 67.9357253 | 68.678859 | minute47 | 76.062706  |
| 72.6782344 | 84.0257226 | 66.9357253 | 68.678859 | minute48 | 75.5729101 |
| 72.6782344 | 84.0257226 | 67.9357253 | 70.678859 | minute49 | 76.0422978 |
| 72.6782344 | 83.0257226 | 67.9357253 | 70.678859 | minute50 | 76.0422978 |
| 72.6782344 | 83.0257226 | 68.9357253 | 71.678859 | minute51 | 76.3688285 |
| 77.6782344 | 84.0257226 | 68.9357253 | 71.678859 | minute52 | 77.7361754 |
| 82.6782344 | 84.0257226 | 70.9357253 | 71.678859 | minute53 | 79.0014815 |
| 84.6782344 | 84.0257226 | 70.9357253 | 71.678859 | minute54 | 79.1647468 |
| 85.6782344 | 84.0257226 | 70.9357253 | 71.678859 | minute55 | 79.3280121 |
| 86.6782344 | 85.0257226 | 70.9357253 | 72.678859 | minute56 | 81.9479168 |
| 85.6782344 | 85.0257226 | 70.9357253 | 72.678859 | minute57 | 81.2336311 |
| 85.6782344 | 86.0257226 | 71.9357253 | 72.678859 | minute58 | 81.2336311 |
| 85.6782344 | 86.0257226 | 71.9357253 | 72.678859 | minute59 | 81.2336311 |
| 84.6782344 | 84.0257226 | 71.9357253 | 74.678859 | minute60 | 80.9479168 |
| 84.6782344 | 84.0257226 | 71.9357253 | 74.678859 | After 1  | 79.9479168 |
| 83.6782344 | 83.0257226 | 72.9357253 | 78.678859 | After 2  | 80.3764882 |
| 83.6782344 | 82.0257226 | 72.9357253 | 80.678859 | After 3  | 80.6622025 |
| 82.6782344 | 82.0257226 | 72.9357253 | 80.678859 | After 4  | 80.5193454 |
| 82.6782344 | 83.0257226 | 72.9357253 | 81.678859 | After 5  | 80.9479168 |

|            |            |            |           |          |            |
|------------|------------|------------|-----------|----------|------------|
| 82.6782344 | 86.0257226 | 72.9357253 | 81.678859 | After 6  | 81.5193454 |
| 81.6782344 | 89.0257226 | 74.9357253 | 80.678859 | After 7  | 81.6622025 |
| 81.6782344 | 90.0257226 | 76.9357253 | 78.678859 | After 8  | 81.9479168 |
| 81.6782344 | 90.0257226 | 78.9357253 | 73.678859 | After 9  | 81.6622025 |
| 81.6782344 | 90.0257226 | 78.9357253 | 72.678859 | After 10 | 81.5193454 |
| 81.6782344 | 90.0257226 | 78.9357253 | 71.678859 | After 11 | 81.3764882 |
| 80.6782344 | 90.0257226 | 78.9357253 | 70.678859 | After 12 | 80.3764882 |
| 79.6782344 | 90.0257226 | 72.9357253 | 70.678859 | After 13 | 79.3764882 |
| 79.6782344 | 86.0257226 | 71.9357253 | 70.678859 | After 14 | 78.5193454 |
| 78.6782344 | 84.0257226 | 71.9357253 | 70.678859 | After 15 | 77.0907739 |
| 78.6782344 | 86.0257226 | 71.9357253 | 69.678859 | After 16 | 77.0907739 |
| 77.6782344 | 88.0257226 | 71.9357253 | 70.678859 | After 17 | 77.3764882 |
| 77.6782344 | 90.0257226 | 71.9357253 | 70.678859 | After 18 | 77.8050597 |
| 77.6782344 | 90.0257226 | 74.9357253 | 70.678859 | After 19 | 78.2336311 |
| 77.6782344 | 92.0257226 | 76.9357253 | 70.678859 | After 20 | 78.8050597 |
| 78.6782344 | 93.0257226 | 78.9357253 | 70.678859 | After 21 | 79.5193454 |
| 77.6782344 | 93.0257226 | 78.9357253 | 71.678859 | After 22 | 79.3764882 |
| 77.6782344 | 92.0257226 | 78.9357253 | 71.678859 | After 23 | 80.0907739 |
| 77.6782344 | 89.0257226 | 77.9357253 | 70.678859 | After 24 | 79.6622025 |
| 73.6782344 | 86.0257226 | 75.9357253 | 70.678859 | After 25 | 78.3764882 |
| 73.6782344 | 85.0257226 | 75.9357253 | 69.678859 | After 26 | 78.5193454 |
| 73.6782344 | 85.0257226 | 74.9357253 | 69.678859 | After 27 | 78.5193454 |
| 72.6782344 | 85.0257226 | 74.9357253 | 69.678859 | After 28 | 78.5193454 |
| 72.6782344 | 86.0257226 | 71.9357253 | 69.678859 | After 29 | 76.9479168 |
| 72.6782344 | 86.0257226 | 74.9357253 | 69.678859 | After 30 | 77.0907739 |
| 72.6782344 | 87.0257226 | 74.9357253 | 69.678859 | After 31 | 76.9479168 |
| 72.6782344 | 89.0257226 | 74.9357253 | 69.678859 | After 32 | 76.9479168 |
| 71.6782344 | 90.0257226 | 73.9357253 | 69.678859 | After 33 | 76.9479168 |
| 71.6782344 | 90.0257226 | 69.9357253 | 70.678859 | After 34 | 76.5193454 |
| 71.6782344 | 89.0257226 | 67.9357253 | 71.678859 | After 35 | 76.2336311 |
| 71.6782344 | 88.0257226 | 67.9357253 | 71.678859 | After 36 | 76.3764882 |
| 71.6782344 | 88.0257226 | 66.9357253 | 71.678859 | After 37 | 76.5193454 |
| 72.6782344 | 88.0257226 | 67.9357253 | 69.678859 | After 38 | 76.3764882 |
| 75.6782344 | 88.0257226 | 68.9357253 | 68.678859 | After 39 | 76.6622025 |
| 76.6782344 | 88.0257226 | 70.9357253 | 67.678859 | After 40 | 76.9479168 |
| 78.6782344 | 87.0257226 | 71.9357253 | 67.678859 | After 41 | 77.2336311 |
| 80.6782344 | 88.0257226 | 72.9357253 | 68.678859 | After 42 | 77.8050597 |
| 82.6782344 | 88.0257226 | 72.9357253 | 69.678859 | After 43 | 78.0907739 |
| 83.6782344 | 89.0257226 | 72.9357253 | 70.678859 | After 44 | 78.3764882 |
| 85.6782344 | 89.0257226 | 72.9357253 | 70.678859 | After 45 | 79.0907739 |
| 85.6782344 | 87.0257226 | 71.9357253 | 71.678859 | After 46 | 78.8050597 |
| 82.6782344 | 87.0257226 | 71.9357253 | 71.678859 | After 47 | 78.2336311 |
| 76.6782344 | 87.0257226 | 71.9357253 | 71.678859 | After 48 | 77.0907739 |
| 69.6782344 | 88.0257226 | 72.9357253 | 71.678859 | After 49 | 76.2336311 |
| 64.6782344 | 91.0257226 | 73.9357253 | 72.678859 | After 50 | 75.3764882 |

|            |            |            |           |          |            |
|------------|------------|------------|-----------|----------|------------|
| 61.6782344 | 91.0257226 | 73.9357253 | 72.678859 | After 51 | 74.5193454 |
| 60.6782344 | 73.8050597 | 73.9357253 | 71.678859 | After 52 | 71.3449649 |
| 60.6782344 | 73.8050597 | 73.9357253 | 71.678859 | After 53 | 71.3449649 |
| 60.6782344 | 73.8050597 | 74.9357253 | 69.678859 | After 54 | 71.2021078 |
| 61.6782344 | 73.8050597 | 75.9357253 | 68.678859 | After 55 | 71.0592507 |
| 62.6782344 | 73.8050597 | 75.9357253 | 68.678859 | After 56 | 71.0592507 |
| 62.6782344 | 73.9479168 | 75.9357253 | 68.678859 | After 57 | 71.222516  |
| 65.6782344 | 75.0907739 | 75.9357253 | 67.678859 | After 58 | 71.6714956 |
| 66.6782344 | 75.0907739 | 75.9357253 | 67.678859 | After 59 | 71.6714956 |
| 67.6782344 | 76.8050597 | 76.9357253 | 67.678859 | After 60 | 73.4878221 |
| 68.6782344 | 77.3764882 | 76.9357253 | 67.678859 | After 61 | 73.9980262 |
| 68.6782344 | 77.3764882 | 76.9357253 | 67.678859 | After 62 | 73.9980262 |
| 69.6782344 | 77.0907739 | 76.9357253 | 67.678859 | After 63 | 73.6714956 |
| 70.6782344 | 77.3764882 | 76.9357253 | 67.678859 | After 64 | 73.855169  |
| 72.6782344 | 75.9479168 | 76.9357253 | 67.678859 | After 65 | 71.9368017 |
| 72.6782344 | 76.5193454 | 76.9357253 | 67.678859 | After 66 | 72.3041486 |
| 72.6782344 | 76.3764882 | 76.9357253 | 67.678859 | After 67 | 72.1408833 |
| 73.6782344 | 77.3764882 | 79.9357253 | 66.678859 | After 68 | 73.2837405 |
| 73.6782344 | 78.0907739 | 81.9357253 | 66.678859 | After 69 | 73.8143527 |
| 73.6782344 | 78.9479168 | 86.9357253 | 67.678859 | After 70 | 74.7939445 |
| 71.6782344 | 79.2336311 | 87.9357253 | 71.678859 | After 71 | 74.977618  |
| 70.6782344 | 79.0907739 | 87.9357253 | 71.678859 | After 72 | 74.6714956 |
| 70.6782344 | 79.0907739 | 86.9357253 | 71.678859 | After 73 | 74.6714956 |
| 70.6782344 | 79.2336311 | 86.9357253 | 71.678859 | After 74 | 74.8347609 |
| 70.6782344 | 79.5193454 | 86.9357253 | 72.678859 | After 75 | 75.1612915 |
| 70.6782344 | 79.9479168 | 86.9357253 | 72.678859 | After 76 | 75.6510874 |
| 70.6782344 | 79.3764882 | 86.9357253 | 72.678859 | After 77 | 75.1408833 |
| 70.6782344 | 79.3764882 | 86.9357253 | 72.678859 | After 78 | 75.1408833 |
| 70.6782344 | 79.2336311 | 84.9357253 | 71.678859 | After 79 | 74.977618  |
| 70.6782344 | 78.8050597 | 82.9357253 | 70.678859 | After 80 | 74.4878221 |
| 70.6782344 | 78.6622025 | 81.9357253 | 67.678859 | After 81 | 74.3245568 |
| 69.6782344 | 78.5193454 | 81.9357253 | 66.678859 | After 82 | 74.1612915 |
| 69.6782344 | 78.3764882 | 81.9357253 | 65.678859 | After 83 | 73.9980262 |
| 69.6782344 | 78.2336311 | 82.9357253 | 65.678859 | After 84 | 73.8347609 |
| 69.6782344 | 77.8050597 | 83.9357253 | 65.678859 | After 85 | 73.7735364 |
| 69.6782344 | 77.9479168 | 84.9357253 | 65.678859 | After 86 | 73.9368017 |
| 68.6782344 | 77.8050597 | 83.9357253 | 65.678859 | After 87 | 73.7735364 |
| 70.6782344 | 77.9479168 | 82.9357253 | 65.678859 | After 88 | 73.9368017 |
| 72.6782344 | 78.0907739 | 81.9357253 | 66.678859 | After 89 | 74.100067  |
| 73.6782344 | 78.2336311 | 81.9357253 | 66.678859 | After 90 | 74.2633323 |
| 73.6782344 | 78.5193454 | 80.9357253 | 65.678859 | After 91 | 74.5898629 |
| 77.6782344 | 78.9479168 | 79.9357253 | 65.678859 | After 92 | 75.0796588 |
| 79.6782344 | 79.2336311 | 77.9357253 | 65.678859 | After 93 | 75.4061894 |
| 80.6782344 | 79.2336311 | 75.9357253 | 64.678859 | After 94 | 75.4061894 |
| 81.6782344 | 79.6622025 | 74.9357253 | 64.678859 | After 95 | 75.7531282 |

|            |            |            |           |           |            |
|------------|------------|------------|-----------|-----------|------------|
| 81.6782344 | 79.2336311 | 73.9357253 | 64.678859 | After 96  | 75.8347609 |
| 80.6782344 | 78.0907739 | 71.9357253 | 64.678859 | After 97  | 75.2429241 |
| 78.6782344 | 77.8050597 | 70.9357253 | 64.678859 | After 98  | 74.9163935 |
| 77.6782344 | 77.2336311 | 70.9357253 | 64.678859 | After 99  | 74.2633323 |
| 76.6782344 | 76.8050597 | 70.9357253 | 65.678859 | After 100 | 73.9163935 |
| 71.6782344 | 75.8050597 | 70.9357253 | 65.678859 | After 101 | 72.7735364 |
| 68.6782344 | 75.2336311 | 70.9357253 | 65.678859 | After 102 | 72.1204751 |
| 66.6782344 | 74.5193454 | 70.9357253 | 65.678859 | After 103 | 71.5898629 |
| 65.6782344 | 74.2336311 | 70.9357253 | 65.678859 | After 104 | 71.6919037 |
| 66.6782344 | 74.5193454 | 70.9357253 | 65.678859 | After 105 | 72.0184343 |
| 68.6782344 | 92.0257226 | 70.9357253 | 65.678859 | After 106 | 75.5193454 |
| 68.6782344 | 92.0257226 | 70.9357253 | 65.678859 | After 107 | 75.5193454 |
| 71.6782344 | 91.0257226 | 70.9357253 | 65.678859 | After 108 | 75.6622025 |
| 71.6782344 | 89.0257226 | 68.9357253 | 65.678859 | After 109 | 74.5193454 |
| 71.6782344 | 83.0257226 | 68.9357253 | 64.678859 | After 110 | 73.3764882 |
| 70.6782344 | 83.0257226 | 68.9357253 | 64.678859 | After 111 | 72.9479168 |
| 69.6782344 | 78.0257226 | 69.9357253 | 65.678859 | After 112 | 72.2336311 |
| 69.6782344 | 77.0257226 | 69.9357253 | 65.678859 | After 113 | 71.9479168 |
| 68.6782344 | 77.0257226 | 69.9357253 | 65.678859 | After 114 | 71.6622025 |
| 68.6782344 | 75.0257226 | 69.9357253 | 65.678859 | After 115 | 71.2336311 |
| 68.6782344 | 74.0257226 | 69.9357253 | 65.678859 | After 116 | 71.0907739 |
| 69.6782344 | 74.0257226 | 70.9357253 | 64.678859 | After 117 | 71.3764882 |
| 69.6782344 | 73.0257226 | 71.9357253 | 65.678859 | After 118 | 71.6622025 |
| 70.6782344 | 73.0257226 | 73.9357253 | 65.678859 | After 119 | 72.3764882 |
| 70.6782344 | 73.0257226 | 73.9357253 | 65.678859 | After 120 | 72.5193454 |
| 69.6782344 | 72.0257226 | 72.9357253 | 65.678859 | After 121 | 72.5193454 |
| 68.6782344 | 72.0257226 | 72.9357253 | 65.678859 | After 122 | 72.8050597 |
| 67.6782344 | 72.0257226 | 71.9357253 | 65.678859 | After 123 | 72.5193454 |
| 66.6782344 | 73.0257226 | 70.9357253 | 65.678859 | After 124 | 72.9479168 |
| 66.6782344 | 73.0257226 | 70.9357253 | 64.678859 | After 125 | 72.8050597 |
| 66.6782344 | 73.0257226 | 70.9357253 | 64.678859 | After 126 | 72.6622025 |
| 66.6782344 | 73.0257226 | 69.9357253 | 64.678859 | After 127 | 72.6622025 |
| 66.6782344 | 73.0257226 | 68.9357253 | 64.678859 | After 128 | 72.5193454 |
| 66.6782344 | 74.0257226 | 67.9357253 | 64.678859 | After 129 | 72.6622025 |
| 66.6782344 | 75.0257226 | 66.9357253 | 65.678859 | After 130 | 73.0907739 |
| 66.6782344 | 75.0257226 | 66.9357253 | 66.678859 | After 131 | 72.9479168 |
| 66.6782344 | 75.0257226 | 66.9357253 | 67.678859 | After 132 | 73.0907739 |
| 67.6782344 | 77.0257226 | 66.9357253 | 67.678859 | After 133 | 74.2336311 |
| 68.6782344 | 77.0257226 | 66.9357253 | 66.678859 | After 134 | 74.0907739 |
| 68.6782344 | 77.0257226 | 67.9357253 | 66.678859 | After 135 | 73.8050597 |
| 68.6782344 | 80.0257226 | 67.9357253 | 65.678859 | After 136 | 74.0907739 |
| 64.6782344 | 82.0257226 | 67.9357253 | 65.678859 | After 137 | 73.9479168 |
| 64.6782344 | 82.0257226 | 68.9357253 | 65.678859 | After 138 | 73.6622025 |
| 62.6782344 | 82.0257226 | 68.9357253 | 66.678859 | After 139 | 73.5193454 |
| 62.6782344 | 82.0257226 | 68.9357253 | 65.678859 | After 140 | 72.0907739 |

|            |            |            |           |           |            |
|------------|------------|------------|-----------|-----------|------------|
| 62.6782344 | 83.0257226 | 69.9357253 | 66.678859 | After 141 | 72.2336311 |
| 62.6782344 | 83.0257226 | 69.9357253 | 66.678859 | After 142 | 71.3764882 |
| 62.6782344 | 85.0257226 | 69.9357253 | 66.678859 | After 143 | 71.6622025 |
| 62.6782344 | 84.0257226 | 69.9357253 | 66.678859 | After 144 | 71.6622025 |
| 62.6782344 | 84.0257226 | 70.9357253 | 66.678859 | After 145 | 71.8050597 |
| 63.6782344 | 85.0257226 | 69.9357253 | 66.678859 | After 146 | 71.9479168 |
| 63.6782344 | 85.0257226 | 69.9357253 | 66.678859 | After 147 | 71.9479168 |
| 63.6782344 | 85.0257226 | 69.9357253 | 66.678859 | After 148 | 71.6622025 |
| 63.6782344 | 85.0257226 | 69.9357253 | 66.678859 | After 149 | 71.5193454 |
| 63.6782344 | 82.0257226 | 69.9357253 | 66.678859 | After 150 | 70.3764882 |
| 63.6782344 | 82.0257226 | 67.9357253 | 66.678859 | After 151 | 69.6622025 |
| 64.6782344 | 82.0257226 | 66.9357253 | 66.678859 | After 152 | 69.8050597 |
| 64.6782344 | 82.0257226 | 66.9357253 | 67.678859 | After 153 | 70.0907739 |
| 64.6782344 | 82.0257226 | 65.9357253 | 67.678859 | After 154 | 70.3764882 |
| 64.6782344 | 78.0257226 | 65.9357253 | 66.678859 | After 155 | 69.6622025 |
| 63.6782344 | 78.0257226 | 64.9357253 | 66.678859 | After 156 | 69.0907739 |
| 63.6782344 | 79.0257226 | 64.9357253 | 67.678859 | After 157 | 69.8050597 |
| 63.6782344 | 79.0257226 | 64.9357253 | 67.678859 | After 158 | 69.9479168 |
| 63.6782344 | 79.0257226 | 64.9357253 | 66.678859 | After 159 | 69.6622025 |
| 63.6782344 | 78.0257226 | 63.9357253 | 66.678859 | After 160 | 69.6622025 |
| 63.6782344 | 78.0257226 | 63.9357253 | 66.678859 | After 161 | 69.6622025 |
| 63.6782344 | 80.0257226 | 62.9357253 | 66.678859 | After 162 | 69.8050597 |
| 63.6782344 | 82.0257226 | 62.9357253 | 66.678859 | After 163 | 70.0907739 |
| 63.6782344 | 82.0257226 | 62.9357253 | 66.678859 | After 164 | 69.9479168 |
| 63.6782344 | 83.0257226 | 62.9357253 | 67.678859 | After 165 | 70.0907739 |
| 64.6782344 | 82.0257226 | 62.9357253 | 67.678859 | After 166 | 69.9479168 |
| 64.6782344 | 82.0257226 | 61.9357253 | 67.678859 | After 167 | 69.6622025 |
| 63.6782344 | 83.0257226 | 61.9357253 | 66.678859 | After 168 | 69.3764882 |
| 63.6782344 | 85.0257226 | 60.9357253 | 67.678859 | After 169 | 69.6622025 |
| 63.6782344 | 85.0257226 | 63.9357253 | 67.678859 | After 170 | 70.0907739 |
| 63.6782344 | 70.8050597 | 64.9357253 | 67.678859 | After 171 | 68.2021078 |
| 64.6782344 | 71.0907739 | 64.9357253 | 66.678859 | After 172 | 68.2429241 |
| 64.6782344 | 71.2336311 | 65.9357253 | 66.678859 | After 173 | 68.4061894 |
| 65.6782344 | 71.6622025 | 65.9357253 | 67.678859 | After 174 | 68.8959853 |
| 65.6782344 | 71.3764882 | 65.9357253 | 67.678859 | After 175 | 68.855169  |
| 65.6782344 | 86.0257226 | 67.9357253 | 67.678859 | After 176 | 71.3764882 |
| 65.6782344 | 84.0257226 | 67.9357253 | 67.678859 | After 177 | 71.0907739 |
| 64.6782344 | 84.0257226 | 69.9357253 | 67.678859 | After 178 | 71.0907739 |
| 63.6782344 | 83.0257226 | 70.9357253 | 67.678859 | After 179 | 70.9479168 |
| 63.6782344 | 83.0257226 | 71.9357253 | 67.678859 | After 180 | 71.0907739 |
| 63.6782344 | 83.0257226 | 71.9357253 | 67.678859 | After 181 | 71.2336311 |
| 63.6782344 | 83.0257226 | 71.9357253 | 67.678859 | After 182 | 71.5193454 |
| 63.6782344 | 83.0257226 | 71.9357253 | 67.678859 | After 183 | 72.8050597 |
| 63.6782344 | 83.0257226 | 71.9357253 | 67.678859 | After 184 | 72.5193454 |
| 64.6782344 | 82.0257226 | 70.9357253 | 67.678859 | After 185 | 71.6622025 |



|            |            |            |           |           |            |
|------------|------------|------------|-----------|-----------|------------|
| 64.6782344 | 78.0257226 | 70.9357253 | 67.678859 | After 186 | 70.5193454 |
| 64.6782344 | 77.0257226 | 70.9357253 | 67.678859 | After 187 | 69.9479168 |
| 65.6782344 | 75.0257226 | 70.9357253 | 67.678859 | After 188 | 69.5193454 |
| 64.6782344 | 74.0257226 | 70.9357253 | 66.678859 | After 189 | 68.9479168 |
| 64.6782344 | 74.0257226 | 70.9357253 | 66.678859 | After 190 | 68.6622025 |
| 63.6782344 | 74.0257226 | 74.9357253 | 66.678859 | After 191 | 69.0907739 |
| 63.6782344 | 73.0257226 | 75.9357253 | 66.678859 | After 192 | 68.9479168 |
| 63.6782344 | 73.0257226 | 72.9357253 | 66.678859 | After 193 | 68.8050597 |
| 62.6782344 | 73.0257226 | 70.9357253 | 66.678859 | After 194 | 68.3764882 |
| 62.6782344 | 72.0257226 | 69.9357253 | 67.678859 | After 195 | 68.3764882 |
| 61.6782344 | 72.0257226 | 69.9357253 | 66.678859 | After 196 | 68.2336311 |
| 60.6782344 | 71.0257226 | 68.9357253 | 67.678859 | After 197 | 68.2336311 |
| 60.6782344 | 71.0257226 | 68.9357253 | 67.678859 | After 198 | 68.5193454 |
| 63.6782344 | 71.0257226 | 68.9357253 | 68.678859 | After 199 | 68.6622025 |
| 63.6782344 | 73.0257226 | 68.9357253 | 67.678859 | After 200 | 68.6622025 |
| 68.6782344 | 73.0257226 | 68.9357253 | 67.678859 | After 201 | 69.6622025 |
| 73.6782344 | 73.0257226 | 70.9357253 | 67.678859 | After 202 | 70.8050597 |
| 75.6782344 | 73.0257226 | 71.9357253 | 67.678859 | After 203 | 71.8050597 |
| 77.6782344 | 69.0257226 | 71.9357253 | 67.678859 | After 204 | 71.9479168 |
| 77.6782344 | 68.0257226 | 71.9357253 | 67.678859 | After 205 | 72.0907739 |
| 75.6782344 | 68.0257226 | 73.9357253 | 67.678859 | After 206 | 72.6622025 |
| 69.6782344 | 68.0257226 | 73.9357253 | 67.678859 | After 207 | 72.2336311 |
| 66.6782344 | 67.0257226 | 73.9357253 | 67.678859 | After 208 | 72.3764882 |
| 66.6782344 | 67.0257226 | 77.9357253 | 67.678859 | After 209 | 73.2336311 |
| 65.6782344 | 67.0257226 | 77.9357253 | 67.678859 | After 210 | 73.0907739 |
| 64.6782344 | 67.0257226 | 69.9357253 | 68.678859 | After 211 | 71.8050597 |
| 63.6782344 | 67.0257226 | 68.9357253 | 67.678859 | After 212 | 71.0907739 |
| 64.6782344 | 66.0257226 | 68.9357253 | 67.678859 | After 213 | 70.3764882 |
| 65.6782344 | 66.0257226 | 68.9357253 | 67.678859 | After 214 | 70.3764882 |
| 65.6782344 | 65.0257226 | 68.9357253 | 67.678859 | After 215 | 70.2336311 |
| 67.6782344 | 64.0257226 | 70.9357253 | 66.678859 | After 216 | 70.6622025 |
| 67.6782344 | 63.0257226 | 70.9357253 | 66.678859 | After 217 | 70.3764882 |
| 65.6782344 | 63.0257226 | 69.9357253 | 66.678859 | After 218 | 70.2336311 |
| 64.6782344 | 63.0257226 | 69.9357253 | 66.678859 | After 219 | 69.5193454 |
| 64.6782344 | 65.0257226 | 69.9357253 | 66.678859 | After 220 | 69.8050597 |
| 64.6782344 | 64.0257226 | 69.9357253 | 66.678859 | After 221 | 69.3764882 |
| 64.6782344 | 63.0257226 | 69.9357253 | 66.678859 | After 222 | 68.9479168 |
| 64.6782344 | 62.0257226 | 68.9357253 | 66.678859 | After 223 | 68.5193454 |
| 68.6782344 | 62.0257226 | 66.9357253 | 66.678859 | After 224 | 68.6622025 |
| 71.6782344 | 59.0257226 | 64.9357253 | 67.678859 | After 225 | 68.0907739 |
| 71.6782344 | 59.0257226 | 64.9357253 | 67.678859 | After 226 | 67.6622025 |
| 71.6782344 | 59.0257226 | 64.9357253 | 67.678859 | After 227 | 67.5193454 |
| 71.6782344 | 59.0257226 | 65.9357253 | 68.678859 | After 228 | 67.6622025 |
| 73.6782344 | 55.0257226 | 65.9357253 | 67.678859 | After 229 | 66.6622025 |
| 73.6782344 | 55.0257226 | 65.9357253 | 67.678859 | After 230 | 65.9479168 |

|            |            |            |           |           |            |
|------------|------------|------------|-----------|-----------|------------|
| 73.6782344 | 55.0257226 | 66.9357253 | 67.678859 | After 231 | 65.9479168 |
| 72.6782344 | 56.0257226 | 66.9357253 | 68.678859 | After 232 | 66.0907739 |
| 70.6782344 | 61.0257226 | 66.9357253 | 68.678859 | After 233 | 66.5193454 |
| 68.6782344 | 61.0257226 | 66.9357253 | 68.678859 | After 234 | 66.9479168 |
| 67.6782344 | 63.0257226 | 67.9357253 | 67.678859 | After 235 | 67.5193454 |
| 66.6782344 | 63.0257226 | 67.9357253 | 67.678859 | After 236 | 67.3764882 |
| 65.6782344 | 63.0257226 | 68.9357253 | 67.678859 | After 237 | 67.3764882 |
| 64.6782344 | 65.0257226 | 68.9357253 | 67.678859 | After 238 | 68.6622025 |
| 64.6782344 | 67.0257226 | 68.9357253 | 66.678859 | After 239 | 69.0907739 |
| 64.6782344 | 69.0257226 | 70.9357253 | 66.678859 | After 240 | 69.9479168 |
| 63.6782344 | 69.0257226 | 71.9357253 | 66.678859 |           | 70.3764882 |
| 63.6782344 | 73.0257226 | 72.9357253 | 66.678859 |           | 71.3764882 |
| 63.6782344 | 75.0257226 | 72.9357253 | 66.678859 |           | 72.0907739 |
| 63.6782344 | 76.0257226 | 78.9357253 | 64.678859 |           | 73.8050597 |
| 63.6782344 | 76.0257226 | 77.9357253 | 63.678859 |           | 73.5193454 |
| 61.6782344 | 77.0257226 | 75.9357253 | 63.678859 |           | 73.3764882 |
| 61.6782344 | 79.0257226 | 74.9357253 | 63.678859 |           | 73.2336311 |
| 61.6782344 | 81.0257226 | 73.9357253 | 64.678859 |           | 73.3764882 |
| 62.6782344 | 81.0257226 | 73.9357253 | 64.678859 |           | 73.2336311 |
| 62.6782344 | 83.0257226 | 73.9357253 | 66.678859 |           | 73.8050597 |
| 62.6782344 | 83.0257226 | 71.9357253 | 66.678859 |           | 73.0907739 |
| 62.6782344 | 83.0257226 | 70.9357253 | 66.678859 |           | 72.8050597 |
| 61.6782344 | 84.0257226 | 68.9357253 | 71.678859 |           | 73.0907739 |
| 63.6782344 | 84.0257226 | 68.9357253 | 72.678859 |           | 73.5193454 |
| 64.6782344 | 85.0257226 | 67.9357253 | 70.678859 |           | 73.3764882 |
| 63.6782344 | 85.0257226 | 66.9357253 | 69.678859 |           | 72.9479168 |
| 62.6782344 | 85.0257226 | 66.9357253 | 67.678859 |           | 72.5193454 |
| 62.6782344 | 84.0257226 | 66.9357253 | 66.678859 |           | 72.6622025 |
| 61.6782344 | 84.0257226 | 66.9357253 | 67.678859 |           | 72.8050597 |
| 61.6782344 | 83.0257226 | 66.9357253 | 67.678859 |           | 70.2948144 |
| 61.6782344 | 82.0257226 | 66.9357253 | 67.678859 |           | 70.2948144 |
| 62.6782344 | 82.0257226 | 66.9357253 | 67.678859 |           | 70.1519572 |
| 64.6782344 | 80.0257226 | 66.9357253 | 67.678859 |           | 70.1519572 |
| 66.6782344 | 80.0257226 | 66.9357253 | 67.678859 |           | 70.3152225 |
| 67.6782344 | 80.0257226 | 67.9357253 | 67.678859 |           | 70.4784879 |
| 68.6782344 | 80.0257226 | 67.9357253 | 67.678859 |           | 70.4784879 |
| 66.6782344 | 79.0257226 | 71.9357253 | 67.678859 |           | 72.6622025 |
| 64.6782344 | 79.0257226 | 71.9357253 | 66.678859 |           | 72.3764882 |
| 64.6782344 | 79.0257226 | 71.9357253 | 66.678859 |           | 72.2336311 |
| 62.6782344 | 77.0257226 | 72.9357253 | 66.678859 |           | 71.6622025 |
| 61.6782344 | 76.0257226 | 70.9357253 | 66.678859 |           | 71.2336311 |
| 61.6782344 | 75.0257226 | 68.9357253 | 66.678859 |           | 71.5193454 |
| 59.6782344 | 75.0257226 | 67.9357253 | 66.678859 |           | 68.9682838 |
| 59.6782344 | 75.0257226 | 66.9357253 | 66.678859 |           | 69.621345  |
| 59.6782344 | 72.0257226 | 66.9357253 | 67.678859 |           | 69.4580797 |

|            |            |            |           |            |
|------------|------------|------------|-----------|------------|
| 59.6782344 | 72.0257226 | 67.9357253 | 67.678859 | 69.7846103 |
| 59.6782344 | 71.0257226 | 67.9357253 | 68.678859 | 69.8254266 |
| 59.6782344 | 69.0257226 | 67.9357253 | 68.678859 | 69.6622025 |
| 59.6782344 | 68.0257226 | 67.9357253 | 69.678859 | 69.2336311 |
| 59.6782344 | 68.0257226 | 65.9357253 | 69.678859 | 68.8050597 |
| 58.6782344 | 66.0257226 | 64.9357253 | 69.678859 | 68.0907739 |
| 63.6782344 | 66.0257226 | 62.9357253 | 68.678859 | 68.8050597 |
| 65.6782344 | 66.0257226 | 62.9357253 | 68.678859 | 69.2336311 |
| 66.6782344 | 61.0257226 | 61.9357253 | 68.678859 | 68.9479168 |
| 75.6782344 | 55.0257226 | 61.9357253 | 65.678859 | 70.2336311 |
| 76.6782344 | 55.0257226 | 62.9357253 | 64.678859 | 70.3764882 |
| 76.6782344 | 51.0257226 | 62.9357253 | 64.678859 | 69.9479168 |
| 74.6782344 | 51.0257226 | 63.9357253 | 64.678859 | 69.5193454 |
| 74.6782344 | 50.0257226 | 63.9357253 | 65.678859 | 69.9479168 |
| 74.6782344 | 50.0257226 | 63.9357253 | 65.678859 | 69.5193454 |
| 73.6782344 | 50.0257226 | 63.9357253 | 67.678859 | 69.3764882 |
| 71.6782344 | 49.0257226 | 62.9357253 | 68.678859 | 69.3764882 |
| 72.6782344 | 49.0257226 | 61.9357253 | 69.678859 | 69.5193454 |
| 73.6782344 | 49.0257226 | 62.9357253 | 70.678859 | 67.8050597 |
| 74.6782344 | 49.0257226 | 62.9357253 | 70.678859 | 67.6622025 |
| 75.6782344 | 49.0257226 | 63.9357253 | 71.678859 | 68.0907739 |
| 76.6782344 | 49.0257226 | 64.9357253 | 70.678859 | 68.2336311 |
| 76.6782344 | 49.0257226 | 64.9357253 | 69.678859 | 68.2336311 |
| 77.6782344 | 49.0257226 | 65.9357253 | 69.678859 | 69.0907739 |
| 77.6782344 | 52.0257226 | 65.9357253 | 69.678859 | 69.3764882 |
| 77.6782344 | 65.0257226 | 64.9357253 | 68.678859 | 70.9479168 |
| 77.6782344 | 65.0257226 | 64.9357253 | 67.678859 | 70.6622025 |
| 76.6782344 | 73.0257226 | 63.9357253 | 66.678859 | 70.6622025 |
| 76.6782344 | 75.0257226 | 64.9357253 | 66.678859 | 71.3764882 |
| 76.6782344 | 75.0257226 | 64.9357253 | 66.678859 | 71.2336311 |
| 76.6782344 | 75.0257226 | 64.9357253 | 65.678859 | 71.0907739 |
| 77.6782344 | 75.0257226 | 64.9357253 | 65.678859 | 71.3764882 |
| 78.6782344 | 75.0257226 | 64.9357253 | 66.678859 | 71.5193454 |
| 79.6782344 | 75.0257226 | 64.9357253 | 66.678859 | 71.8050597 |
| 80.6782344 | 76.0257226 | 64.9357253 | 67.678859 | 72.5193454 |
| 80.6782344 | 76.0257226 | 64.9357253 | 67.678859 | 72.3764882 |
| 77.6782344 | 77.0257226 | 64.9357253 | 67.678859 | 72.3764882 |
| 75.6782344 | 77.0257226 | 65.9357253 | 67.678859 | 72.8050597 |
| 74.6782344 | 76.0257226 | 65.9357253 | 67.678859 | 72.5193454 |
| 72.6782344 | 75.0257226 | 66.9357253 | 66.678859 | 72.3764882 |
| 71.6782344 | 76.0257226 | 69.9357253 | 66.678859 | 72.8050597 |
| 69.6782344 | 77.0257226 | 69.9357253 | 65.678859 | 72.5193454 |
| 68.6782344 | 77.0257226 | 70.9357253 | 64.678859 | 72.2336311 |
| 68.6782344 | 77.0257226 | 70.9357253 | 65.678859 | 71.8050597 |
| 67.6782344 | 78.0257226 | 70.9357253 | 65.678859 | 71.3764882 |

|            |            |            |           |            |
|------------|------------|------------|-----------|------------|
| 65.6782344 | 78.0257226 | 70.9357253 | 65.678859 | 70.8050597 |
| 63.6782344 | 77.0257226 | 70.9357253 | 65.678859 | 70.6622025 |
| 63.6782344 | 77.0257226 | 70.9357253 | 65.678859 | 70.6622025 |
| 63.6782344 | 76.0257226 | 70.9357253 | 66.678859 | 71.0907739 |
| 63.6782344 | 76.0257226 | 70.9357253 | 66.678859 | 71.0907739 |
| 63.6782344 | 76.0257226 | 70.9357253 | 65.678859 | 71.6622025 |
| 63.6782344 | 77.0257226 | 69.9357253 | 65.678859 | 72.2336311 |
| 63.6782344 | 78.0257226 | 68.9357253 | 64.678859 | 72.8050597 |
| 63.6782344 | 78.0257226 | 66.9357253 | 63.678859 | 72.5193454 |
| 63.6782344 | 78.0257226 | 66.9357253 | 62.678859 | 72.3764882 |
| 63.6782344 | 76.0257226 | 66.9357253 | 62.678859 | 71.9479168 |
| 63.6782344 | 75.0257226 | 65.9357253 | 62.678859 | 71.8050597 |
| 63.6782344 | 74.0257226 | 65.9357253 | 62.678859 | 69.0091001 |
| 63.6782344 | 74.0257226 | 66.9357253 | 62.678859 | 69.0295083 |
| 64.6782344 | 74.0257226 | 67.9357253 | 63.678859 | 71.0907739 |
| 64.6782344 | 74.0257226 | 67.9357253 | 63.678859 | 69.2336311 |
| 64.6782344 | 74.0257226 | 68.9357253 | 63.678859 | 69.0907739 |
| 64.6782344 | 74.0257226 | 68.9357253 | 63.678859 | 69.0907739 |
| 64.6782344 | 76.0257226 | 68.9357253 | 65.678859 | 69.6622025 |
| 63.6782344 | 77.0257226 | 66.9357253 | 65.678859 | 69.2336311 |
| 63.6782344 | 77.0257226 | 66.9357253 | 66.678859 | 70.2336311 |
| 64.6782344 | 77.0257226 | 66.9357253 | 66.678859 | 70.9479168 |
| 64.6782344 | 77.0257226 | 66.9357253 | 66.678859 | 71.0907739 |
| 65.6782344 | 77.0257226 | 66.9357253 | 66.678859 | 71.3764882 |
| 67.6782344 | 77.0257226 | 67.9357253 | 65.678859 | 71.5193454 |
| 67.6782344 | 77.0257226 | 66.9357253 | 63.678859 | 70.9479168 |
| 66.6782344 | 77.0257226 | 67.9357253 | 63.678859 | 71.0907739 |
| 65.6782344 | 77.0257226 | 67.9357253 | 64.678859 | 71.2336311 |
| 65.6782344 | 77.0257226 | 67.9357253 | 64.678859 | 71.3764882 |
| 65.6782344 | 76.0257226 | 67.9357253 | 65.678859 | 71.5193454 |
| 65.6782344 | 76.0257226 | 67.9357253 | 65.678859 | 71.6622025 |
| 66.6782344 | 76.0257226 | 67.9357253 | 65.678859 | 71.6622025 |
| 66.6782344 | 77.0257226 | 67.9357253 | 66.678859 | 71.2336311 |
| 71.6782344 | 79.0257226 | 67.9357253 | 66.678859 | 72.0907739 |
| 72.6782344 | 80.0257226 | 67.9357253 | 66.678859 | 71.9479168 |
| 72.6782344 | 80.0257226 | 67.9357253 | 66.678859 | 71.9479168 |
| 72.6782344 | 80.0257226 | 67.9357253 | 65.678859 | 71.8050597 |
| 73.6782344 | 79.0257226 | 67.9357253 | 65.678859 | 71.8050597 |
| 73.6782344 | 79.0257226 | 67.9357253 | 66.678859 | 72.0907739 |
| 74.6782344 | 79.0257226 | 67.9357253 | 65.678859 | 72.2336311 |
| 76.6782344 | 79.0257226 | 66.9357253 | 64.678859 | 72.3764882 |
| 76.6782344 | 79.0257226 | 66.9357253 | 63.678859 | 72.5193454 |
| 76.6782344 | 79.0257226 | 65.9357253 | 63.678859 | 72.6622025 |
| 76.6782344 | 78.0257226 | 65.9357253 | 62.678859 | 72.5193454 |
| 76.6782344 | 78.0257226 | 65.9357253 | 61.678859 | 71.9479168 |
