# Supplementary material for: Student engagement, assessed using heart rate, shows no reset following active learning sessions in lectures
Source: PubMed Central journal article supplement (PMC6886849; doi:10.1371/journal.pone.0225709), 2019-12-02
Supplement: pone.0225709.s003.pdf [file pone.0225709.s003.pdf]

### S3 Dataset: R formatted data for S1 table, ANOVA

# S3 Dataset is a data frame with 4 columns

# column "who" is the person number (nuisance variable)

# column "when" is the activity identifier (nuisance variable)

# "what" is the variable of interest, taking values "Before", "Activity", or "After"

# "rate" is the response variable, the average heartrate

| <b>who</b> | <b>when</b> | <b>what</b> | <b>rate</b>      |
|------------|-------------|-------------|------------------|
| Person 1   | Class 1     | Before      | 78.293052442714  |
| Person 1   | Class 1     | Activity    | 80.0241582800431 |
| Person 1   | Class 1     | After       | 75.394297255992  |
| Person 1   | Class 10    | Before      | 62.4322433474929 |
| Person 1   | Class 10    | Activity    | 62.9641877919375 |
| Person 1   | Class 10    | After       | 63.6155766808262 |
| Person 1   | Class 11    | Before      | 67.5712774235763 |
| Person 1   | Class 11    | Activity    | 63.9045647760643 |
| Person 1   | Class 11    | After       | 63.5212238548866 |
| Person 1   | Class 12    | Before      | 76.0479702064807 |
| Person 1   | Class 12    | Activity    | 77.5345966894055 |
| Person 1   | Class 12    | After       | 69.7433923900969 |
| Person 1   | Class 13    | Before      | 74.0229702064807 |
| Person 1   | Class 13    | Activity    | 74.4803420013525 |
| Person 1   | Class 13    | After       | 73.1146368731474 |
| Person 1   | Class 14    | Before      | 74.9628116362801 |
| Person 1   | Class 14    | Activity    | 71.5986485010544 |
| Person 1   | Class 14    | After       | 70.3229702064807 |
| Person 1   | Class 15    | Before      | 66.0354702064807 |
| Person 1   | Class 15    | Activity    | 70.6370901801737 |
| Person 1   | Class 15    | After       | 70.7438035398141 |
| Person 1   | Class 16    | Before      | 69.1010843981377 |
| Person 1   | Class 16    | Activity    | 70.1422449919302 |
| Person 1   | Class 16    | After       | 66.7494818340352 |
| Person 1   | Class 17    | Before      | 78.57482100912   |
| Person 1   | Class 17    | Activity    | 81.0856485944691 |
| Person 1   | Class 17    | After       | 76.0398152611361 |
| Person 1   | Class 18    | Before      | 70.2414891279482 |
| Person 1   | Class 18    | Activity    | 65.3755013403559 |
| Person 1   | Class 18    | After       | 68.7149389834475 |
| Person 1   | Class 19    | Before      | 68.1789116795708 |
| Person 1   | Class 19    | Activity    | 72.2473225322844 |
| Person 1   | Class 19    | After       | 68.2455783462375 |
| Person 1   | Class 2     | Before      | 68.3290357063121 |
| Person 1   | Class 2     | Activity    | 74.7035533497033 |
| Person 1   | Class 2     | After       | 67.4252049433571 |
| Person 1   | Class 20    | Before      | 64.3633180655055 |
| Person 1   | Class 20    | Activity    | 67.4748225184211 |

|           |          |          |                  |
|-----------|----------|----------|------------------|
| Person 1  | Class 20 | After    | 62.558137348068  |
| Person 1  | Class 21 | Before   | 62.633137348068  |
| Person 1  | Class 21 | Activity | 68.4991296409389 |
| Person 1  | Class 21 | After    | 64.3699138915565 |
| Person 1  | Class 22 | Before   | 69.6370180268893 |
| Person 1  | Class 22 | Activity | 78.4856311412896 |
| Person 1  | Class 22 | After    | 68.1830256977401 |
| Person 1  | Class 3  | Before   | 69.1021915720857 |
| Person 1  | Class 3  | Activity | 71.8557172131114 |
| Person 1  | Class 3  | After    | 71.4622711018229 |
| Person 1  | Class 4  | Before   | 71.7063582387523 |
| Person 1  | Class 4  | Activity | 72.6171767152513 |
| Person 1  | Class 4  | After    | 67.642864514903  |
| Person 1  | Class 5  | Before   | 69.4051006451273 |
| Person 1  | Class 5  | Activity | 68.2709686283626 |
| Person 1  | Class 5  | After    | 71.9813582387523 |
| Person 1  | Class 6  | Before   | 71.7371187279782 |
| Person 1  | Class 6  | Activity | 71.1533840842435 |
| Person 1  | Class 6  | After    | 72.1312628721224 |
| Person 1  | Class 7  | Before   | 71.0562628721224 |
| Person 1  | Class 7  | Activity | 70.8999150983558 |
| Person 1  | Class 7  | After    | 71.8437628721224 |
| Person 1  | Class 8  | Before   | 67.3285050783578 |
| Person 1  | Class 8  | Activity | 72.3222152530749 |
| Person 1  | Class 8  | After    | 70.4687628721224 |
| Person 1  | Class 9  | Before   | 69.7604295387891 |
| Person 1  | Class 9  | Activity | 73.0648214306808 |
| Person 1  | Class 9  | After    | 69.2270962054557 |
| Person 10 | Class 1  | Before   | 82.7148834643726 |
| Person 10 | Class 1  | Activity | 83.5831085959588 |
| Person 10 | Class 1  | After    | 76.1487181808318 |
| Person 10 | Class 10 | Before   |                  |
| Person 10 | Class 10 | Activity |                  |
| Person 10 | Class 10 | After    |                  |
| Person 10 | Class 11 | Before   |                  |
| Person 10 | Class 11 | Activity |                  |
| Person 10 | Class 11 | After    |                  |
| Person 10 | Class 12 | Before   | 74.8550011875213 |
| Person 10 | Class 12 | Activity | 77.3786866358523 |
| Person 10 | Class 12 | After    | 75.6800011875213 |
| Person 10 | Class 13 | Before   | 73.6008345208546 |
| Person 10 | Class 13 | Activity | 70.8316037516238 |
| Person 10 | Class 13 | After    | 68.0849113781286 |
| Person 10 | Class 14 | Before   | 68.2258345208546 |
| Person 10 | Class 14 | Activity | 70.3140128154283 |

|           |          |          |                  |
|-----------|----------|----------|------------------|
| Person 10 | Class 14 | After    | 70.359167854188  |
| Person 10 | Class 15 | Before   | 69.5731849954025 |
| Person 10 | Class 15 | Activity | 69.4856830057029 |
| Person 10 | Class 15 | After    | 64.0050011875212 |
| Person 10 | Class 16 | Before   |                  |
| Person 10 | Class 16 | Activity |                  |
| Person 10 | Class 16 | After    |                  |
| Person 10 | Class 17 | Before   | 70.2729961168916 |
| Person 10 | Class 17 | Activity | 69.8507738946694 |
| Person 10 | Class 17 | After    | 73.2729961168916 |
| Person 10 | Class 18 | Before   |                  |
| Person 10 | Class 18 | Activity |                  |
| Person 10 | Class 18 | After    |                  |
| Person 10 | Class 19 | Before   |                  |
| Person 10 | Class 19 | Activity |                  |
| Person 10 | Class 19 | After    |                  |
| Person 10 | Class 2  | Before   | 69.8715605912904 |
| Person 10 | Class 2  | Activity | 68.4505017439425 |
| Person 10 | Class 2  | After    | 60.2773145938493 |
| Person 10 | Class 20 | Before   | 63.5779195404307 |
| Person 10 | Class 20 | Activity | 66.169550794541  |
| Person 10 | Class 20 | After    | 66.7194950694755 |
| Person 10 | Class 21 | Before   | 67.1403284028089 |
| Person 10 | Class 21 | Activity | 72.4964732148608 |
| Person 10 | Class 21 | After    | 63.6362528737641 |
| Person 10 | Class 22 | Before   |                  |
| Person 10 | Class 22 | Activity |                  |
| Person 10 | Class 22 | After    |                  |
| Person 10 | Class 3  | Before   | 74.7058731268226 |
| Person 10 | Class 3  | Activity | 74.2433739161389 |
| Person 10 | Class 3  | After    | 69.031460955315  |
| Person 10 | Class 4  | Before   | 69.5475397934893 |
| Person 10 | Class 4  | Activity | 76.6457974920297 |
| Person 10 | Class 4  | After    | 70.6411590403512 |
| Person 10 | Class 5  | Before   | 70.2392064601559 |
| Person 10 | Class 5  | Activity | 77.4868255077752 |
| Person 10 | Class 5  | After    | 69.2017064601559 |
| Person 10 | Class 6  | Before   |                  |
| Person 10 | Class 6  | Activity |                  |
| Person 10 | Class 6  | After    |                  |
| Person 10 | Class 7  | Before   |                  |
| Person 10 | Class 7  | Activity |                  |
| Person 10 | Class 7  | After    |                  |
| Person 10 | Class 8  | Before   |                  |
| Person 10 | Class 8  | Activity |                  |

|           |          |          |                  |
|-----------|----------|----------|------------------|
| Person 10 | Class 8  | After    |                  |
| Person 10 | Class 9  | Before   |                  |
| Person 10 | Class 9  | Activity |                  |
| Person 10 | Class 9  | After    |                  |
| Person 11 | Class 1  | Before   |                  |
| Person 11 | Class 1  | Activity |                  |
| Person 11 | Class 1  | After    |                  |
| Person 11 | Class 10 | Before   | 67.6368231841462 |
| Person 11 | Class 10 | Activity | 71.3132120730353 |
| Person 11 | Class 10 | After    | 67.8118231841462 |
| Person 11 | Class 11 | Before   | 61.5368231841463 |
| Person 11 | Class 11 | Activity | 64.4403946127177 |
| Person 11 | Class 11 | After    | 61.7201565174796 |
| Person 11 | Class 12 | Before   |                  |
| Person 11 | Class 12 | Activity |                  |
| Person 11 | Class 12 | After    |                  |
| Person 11 | Class 13 | Before   |                  |
| Person 11 | Class 13 | Activity |                  |
| Person 11 | Class 13 | After    |                  |
| Person 11 | Class 14 | Before   | 69.0956154200962 |
| Person 11 | Class 14 | Activity | 76.2643015141127 |
| Person 11 | Class 14 | After    | 75.7640139176762 |
| Person 11 | Class 15 | Before   | 69.1625385431794 |
| Person 11 | Class 15 | Activity | 71.099076100437  |
| Person 11 | Class 15 | After    | 71.1729868752414 |
| Person 11 | Class 16 | Before   | 73.8741994521297 |
| Person 11 | Class 16 | Activity | 81.3986658650391 |
| Person 11 | Class 16 | After    | 64.3086002127193 |
| Person 11 | Class 17 | Before   | 70.8259481725172 |
| Person 11 | Class 17 | Activity | 87.8099923543357 |
| Person 11 | Class 17 | After    | 70.9055464744787 |
| Person 11 | Class 18 | Before   | 66.7940960310643 |
| Person 11 | Class 18 | Activity | 64.6120038324832 |
| Person 11 | Class 18 | After    | 71.0943605268625 |
| Person 11 | Class 19 | Before   |                  |
| Person 11 | Class 19 | Activity |                  |
| Person 11 | Class 19 | After    |                  |
| Person 11 | Class 2  | Before   |                  |
| Person 11 | Class 2  | Activity |                  |
| Person 11 | Class 2  | After    |                  |
| Person 11 | Class 20 | Before   |                  |
| Person 11 | Class 20 | Activity |                  |
| Person 11 | Class 20 | After    |                  |
| Person 11 | Class 21 | Before   |                  |
| Person 11 | Class 21 | Activity |                  |

|           |          |          |                  |
|-----------|----------|----------|------------------|
| Person 11 | Class 21 | After    |                  |
| Person 11 | Class 22 | Before   |                  |
| Person 11 | Class 22 | Activity |                  |
| Person 11 | Class 22 | After    |                  |
| Person 11 | Class 3  | Before   | 73.8931667033869 |
| Person 11 | Class 3  | Activity | 75.0176994566007 |
| Person 11 | Class 3  | After    | 74.741674679899  |
| Person 11 | Class 4  | Before   |                  |
| Person 11 | Class 4  | Activity |                  |
| Person 11 | Class 4  | After    |                  |
| Person 11 | Class 5  | Before   |                  |
| Person 11 | Class 5  | Activity |                  |
| Person 11 | Class 5  | After    |                  |
| Person 11 | Class 6  | Before   | 76.419237910764  |
| Person 11 | Class 6  | Activity | 77.9568136683395 |
| Person 11 | Class 6  | After    | 74.7275712440973 |
| Person 11 | Class 7  | Before   | 71.8425380689902 |
| Person 11 | Class 7  | Activity | 78.7671320142535 |
| Person 11 | Class 7  | After    | 71.965369322848  |
| Person 11 | Class 8  | Before   | 68.7110844335459 |
| Person 11 | Class 8  | Activity | 69.2773331488594 |
| Person 11 | Class 8  | After    | 68.7650712440975 |
| Person 11 | Class 9  | Before   | 65.7859045774308 |
| Person 11 | Class 9  | Activity | 72.5068505233763 |
| Person 11 | Class 9  | After    | 66.8525712440975 |
| Person 12 | Class 1  | Before   |                  |
| Person 12 | Class 1  | Activity |                  |
| Person 12 | Class 1  | After    |                  |
| Person 12 | Class 10 | Before   | 74.2164038174    |
| Person 12 | Class 10 | Activity | 73.3565602143833 |
| Person 12 | Class 10 | After    | 70.0095556062072 |
| Person 12 | Class 11 | Before   | 67.8071278418306 |
| Person 12 | Class 11 | Activity | 72.4862460071557 |
| Person 12 | Class 11 | After    |                  |
| Person 12 | Class 12 | Before   |                  |
| Person 12 | Class 12 | Activity |                  |
| Person 12 | Class 12 | After    |                  |
| Person 12 | Class 13 | Before   |                  |
| Person 12 | Class 13 | Activity |                  |
| Person 12 | Class 13 | After    |                  |
| Person 12 | Class 14 | Before   | 75.9036988258722 |
| Person 12 | Class 14 | Activity | 75.511445492404  |
| Person 12 | Class 14 | After    | 74.0655179584117 |
| Person 12 | Class 15 | Before   | 70.3536988258722 |
| Person 12 | Class 15 | Activity | 70.6177139773873 |

|           |          |          |                  |
|-----------|----------|----------|------------------|
| Person 12 | Class 15 | After    | 71.2578654925389 |
| Person 12 | Class 16 | Before   |                  |
| Person 12 | Class 16 | Activity |                  |
| Person 12 | Class 16 | After    |                  |
| Person 12 | Class 17 | Before   |                  |
| Person 12 | Class 17 | Activity |                  |
| Person 12 | Class 17 | After    |                  |
| Person 12 | Class 18 | Before   |                  |
| Person 12 | Class 18 | Activity |                  |
| Person 12 | Class 18 | After    |                  |
| Person 12 | Class 19 | Before   |                  |
| Person 12 | Class 19 | Activity |                  |
| Person 12 | Class 19 | After    |                  |
| Person 12 | Class 2  | Before   | 74.7995608282869 |
| Person 12 | Class 2  | Activity | 71.0996333104827 |
| Person 12 | Class 2  | After    | 69.6183283251455 |
| Person 12 | Class 20 | Before   |                  |
| Person 12 | Class 20 | Activity |                  |
| Person 12 | Class 20 | After    |                  |
| Person 12 | Class 21 | Before   |                  |
| Person 12 | Class 21 | Activity |                  |
| Person 12 | Class 21 | After    |                  |
| Person 12 | Class 22 | Before   |                  |
| Person 12 | Class 22 | Activity |                  |
| Person 12 | Class 22 | After    |                  |
| Person 12 | Class 3  | Before   | 70.7885053644318 |
| Person 12 | Class 3  | Activity | 73.8176322398464 |
| Person 12 | Class 3  | After    | 72.2133892352714 |
| Person 12 | Class 4  | Before   |                  |
| Person 12 | Class 4  | Activity |                  |
| Person 12 | Class 4  | After    |                  |
| Person 12 | Class 5  | Before   |                  |
| Person 12 | Class 5  | Activity |                  |
| Person 12 | Class 5  | After    |                  |
| Person 12 | Class 6  | Before   | 74.3109936174174 |
| Person 12 | Class 6  | Activity | 76.6963198761741 |
| Person 12 | Class 6  | After    | 70.4193269507508 |
| Person 12 | Class 7  | Before   | 69.1734936174174 |
| Person 12 | Class 7  | Activity | 72.1302498421993 |
| Person 12 | Class 7  | After    | 71.9943269507507 |
| Person 12 | Class 8  | Before   | 71.372667503435  |
| Person 12 | Class 8  | Activity | 72.7059460234762 |
| Person 12 | Class 8  | After    | 72.5358269758573 |
| Person 12 | Class 9  | Before   | 67.7483269758572 |
| Person 12 | Class 9  | Activity | 71.928957606488  |

|           |          |          |                  |
|-----------|----------|----------|------------------|
| Person 12 | Class 9  | After    | 69.3649936425239 |
| Person 13 | Class 1  | Before   |                  |
| Person 13 | Class 1  | Activity |                  |
| Person 13 | Class 1  | After    |                  |
| Person 13 | Class 10 | Before   | 70.679397574885  |
| Person 13 | Class 10 | Activity | 73.7960864826529 |
| Person 13 | Class 10 | After    | 69.4600164179273 |
| Person 13 | Class 11 | Before   | 66.4085642415517 |
| Person 13 | Class 11 | Activity | 73.2439809082184 |
| Person 13 | Class 11 | After    | 64.5918975748851 |
| Person 13 | Class 12 | Before   |                  |
| Person 13 | Class 12 | Activity |                  |
| Person 13 | Class 12 | After    |                  |
| Person 13 | Class 13 | Before   |                  |
| Person 13 | Class 13 | Activity |                  |
| Person 13 | Class 13 | After    |                  |
| Person 13 | Class 14 | Before   |                  |
| Person 13 | Class 14 | Activity |                  |
| Person 13 | Class 14 | After    |                  |
| Person 13 | Class 15 | Before   |                  |
| Person 13 | Class 15 | Activity |                  |
| Person 13 | Class 15 | After    |                  |
| Person 13 | Class 16 | Before   |                  |
| Person 13 | Class 16 | Activity |                  |
| Person 13 | Class 16 | After    |                  |
| Person 13 | Class 17 | Before   |                  |
| Person 13 | Class 17 | Activity |                  |
| Person 13 | Class 17 | After    |                  |
| Person 13 | Class 18 | Before   | 67.472207055093  |
| Person 13 | Class 18 | Activity | 67.963583886293  |
| Person 13 | Class 18 | After    | 66.744967722466  |
| Person 13 | Class 19 | Before   | 69.4436765338394 |
| Person 13 | Class 19 | Activity | 72.018192037715  |
| Person 13 | Class 19 | After    | 69.2442643975122 |
| Person 13 | Class 2  | Before   |                  |
| Person 13 | Class 2  | Activity |                  |
| Person 13 | Class 2  | After    |                  |
| Person 13 | Class 20 | Before   |                  |
| Person 13 | Class 20 | Activity |                  |
| Person 13 | Class 20 | After    |                  |
| Person 13 | Class 21 | Before   |                  |
| Person 13 | Class 21 | Activity |                  |
| Person 13 | Class 21 | After    |                  |
| Person 13 | Class 22 | Before   |                  |
| Person 13 | Class 22 | Activity |                  |

|           |          |          |                  |
|-----------|----------|----------|------------------|
| Person 13 | Class 22 | After    |                  |
| Person 13 | Class 3  | Before   | 72.6965727928989 |
| Person 13 | Class 3  | Activity | 74.9480469052809 |
| Person 13 | Class 3  | After    | 71.0649955168353 |
| Person 13 | Class 4  | Before   |                  |
| Person 13 | Class 4  | Activity |                  |
| Person 13 | Class 4  | After    |                  |
| Person 13 | Class 5  | Before   |                  |
| Person 13 | Class 5  | Activity |                  |
| Person 13 | Class 5  | After    |                  |
| Person 13 | Class 6  | Before   | 73.1019617653679 |
| Person 13 | Class 6  | Activity | 70.4934011593073 |
| Person 13 | Class 6  | After    | 73.4770473349085 |
| Person 13 | Class 7  | Before   | 73.6025972618684 |
| Person 13 | Class 7  | Activity | 72.6025183237314 |
| Person 13 | Class 7  | After    | 70.4769617653679 |
| Person 13 | Class 8  | Before   | 68.5054090075739 |
| Person 13 | Class 8  | Activity | 70.2346998606059 |
| Person 13 | Class 8  | After    | 68.7852950987012 |
| Person 13 | Class 9  | Before   | 70.1519617653679 |
| Person 13 | Class 9  | Activity | 70.7311284320346 |
| Person 13 | Class 9  | After    | 69.1019617653679 |
| Person 14 | Class 1  | Before   |                  |
| Person 14 | Class 1  | Activity |                  |
| Person 14 | Class 1  | After    |                  |
| Person 14 | Class 10 | Before   |                  |
| Person 14 | Class 10 | Activity |                  |
| Person 14 | Class 10 | After    |                  |
| Person 14 | Class 11 | Before   |                  |
| Person 14 | Class 11 | Activity |                  |
| Person 14 | Class 11 | After    |                  |
| Person 14 | Class 12 | Before   |                  |
| Person 14 | Class 12 | Activity |                  |
| Person 14 | Class 12 | After    |                  |
| Person 14 | Class 13 | Before   |                  |
| Person 14 | Class 13 | Activity |                  |
| Person 14 | Class 13 | After    |                  |
| Person 14 | Class 14 | Before   |                  |
| Person 14 | Class 14 | Activity |                  |
| Person 14 | Class 14 | After    |                  |
| Person 14 | Class 15 | Before   |                  |
| Person 14 | Class 15 | Activity |                  |
| Person 14 | Class 15 | After    |                  |
| Person 14 | Class 16 | Before   |                  |
| Person 14 | Class 16 | Activity |                  |



|           |          |          |                  |
|-----------|----------|----------|------------------|
| Person 14 | Class 16 | After    |                  |
| Person 14 | Class 17 | Before   | 80.1659910961744 |
| Person 14 | Class 17 | Activity | 78.4456024754891 |
| Person 14 | Class 17 | After    | 77.7957220638606 |
| Person 14 | Class 18 | Before   |                  |
| Person 14 | Class 18 | Activity |                  |
| Person 14 | Class 18 | After    |                  |
| Person 14 | Class 19 | Before   |                  |
| Person 14 | Class 19 | Activity |                  |
| Person 14 | Class 19 | After    |                  |
| Person 14 | Class 2  | Before   |                  |
| Person 14 | Class 2  | Activity |                  |
| Person 14 | Class 2  | After    |                  |
| Person 14 | Class 20 | Before   | 75.6003266441354 |
| Person 14 | Class 20 | Activity | 73.0918082583872 |
| Person 14 | Class 20 | After    | 69.2857662171977 |
| Person 14 | Class 21 | Before   | 69.3024328838644 |
| Person 14 | Class 21 | Activity | 68.8467817907887 |
| Person 14 | Class 21 | After    | 65.2106496085516 |
| Person 14 | Class 22 | Before   | 72.990098184948  |
| Person 14 | Class 22 | Activity | 68.3061836190884 |
| Person 14 | Class 22 | After    | 75.6392765375884 |
| Person 14 | Class 3  | Before   |                  |
| Person 14 | Class 3  | Activity |                  |
| Person 14 | Class 3  | After    |                  |
| Person 14 | Class 4  | Before   |                  |
| Person 14 | Class 4  | Activity |                  |
| Person 14 | Class 4  | After    |                  |
| Person 14 | Class 5  | Before   |                  |
| Person 14 | Class 5  | Activity |                  |
| Person 14 | Class 5  | After    |                  |
| Person 14 | Class 6  | Before   |                  |
| Person 14 | Class 6  | Activity |                  |
| Person 14 | Class 6  | After    |                  |
| Person 14 | Class 7  | Before   |                  |
| Person 14 | Class 7  | Activity |                  |
| Person 14 | Class 7  | After    |                  |
| Person 14 | Class 8  | Before   |                  |
| Person 14 | Class 8  | Activity |                  |
| Person 14 | Class 8  | After    |                  |
| Person 14 | Class 9  | Before   |                  |
| Person 14 | Class 9  | Activity |                  |
| Person 14 | Class 9  | After    |                  |
| Person 15 | Class 1  | Before   |                  |
| Person 15 | Class 1  | Activity |                  |

|           |          |          |                  |
|-----------|----------|----------|------------------|
| Person 15 | Class 1  | After    |                  |
| Person 15 | Class 10 | Before   |                  |
| Person 15 | Class 10 | Activity |                  |
| Person 15 | Class 10 | After    |                  |
| Person 15 | Class 11 | Before   |                  |
| Person 15 | Class 11 | Activity |                  |
| Person 15 | Class 11 | After    |                  |
| Person 15 | Class 12 | Before   |                  |
| Person 15 | Class 12 | Activity |                  |
| Person 15 | Class 12 | After    |                  |
| Person 15 | Class 13 | Before   |                  |
| Person 15 | Class 13 | Activity |                  |
| Person 15 | Class 13 | After    |                  |
| Person 15 | Class 14 | Before   |                  |
| Person 15 | Class 14 | Activity |                  |
| Person 15 | Class 14 | After    |                  |
| Person 15 | Class 15 | Before   |                  |
| Person 15 | Class 15 | Activity |                  |
| Person 15 | Class 15 | After    |                  |
| Person 15 | Class 16 | Before   |                  |
| Person 15 | Class 16 | Activity |                  |
| Person 15 | Class 16 | After    |                  |
| Person 15 | Class 17 | Before   |                  |
| Person 15 | Class 17 | Activity |                  |
| Person 15 | Class 17 | After    |                  |
| Person 15 | Class 18 | Before   |                  |
| Person 15 | Class 18 | Activity |                  |
| Person 15 | Class 18 | After    |                  |
| Person 15 | Class 19 | Before   | 68.4950313405485 |
| Person 15 | Class 19 | Activity | 79.9431902552772 |
| Person 15 | Class 19 | After    | 65.9484172190354 |
| Person 15 | Class 2  | Before   |                  |
| Person 15 | Class 2  | Activity |                  |
| Person 15 | Class 2  | After    |                  |
| Person 15 | Class 20 | Before   | 67.170670356947  |
| Person 15 | Class 20 | Activity | 70.4823901083379 |
| Person 15 | Class 20 | After    | 65.7518663188242 |
| Person 15 | Class 21 | Before   | 65.7768663188242 |
| Person 15 | Class 21 | Activity | 69.3544674748937 |
| Person 15 | Class 21 | After    | 64.0393663188242 |
| Person 15 | Class 22 | Before   |                  |
| Person 15 | Class 22 | Activity |                  |
| Person 15 | Class 22 | After    |                  |
| Person 15 | Class 3  | Before   |                  |
| Person 15 | Class 3  | Activity |                  |

|           |          |          |
|-----------|----------|----------|
| Person 15 | Class 3  | After    |
| Person 15 | Class 4  | Before   |
| Person 15 | Class 4  | Activity |
| Person 15 | Class 4  | After    |
| Person 15 | Class 5  | Before   |
| Person 15 | Class 5  | Activity |
| Person 15 | Class 5  | After    |
| Person 15 | Class 6  | Before   |
| Person 15 | Class 6  | Activity |
| Person 15 | Class 6  | After    |
| Person 15 | Class 7  | Before   |
| Person 15 | Class 7  | Activity |
| Person 15 | Class 7  | After    |
| Person 15 | Class 8  | Before   |
| Person 15 | Class 8  | Activity |
| Person 15 | Class 8  | After    |
| Person 15 | Class 9  | Before   |
| Person 15 | Class 9  | Activity |
| Person 15 | Class 9  | After    |
| Person 16 | Class 1  | Before   |
| Person 16 | Class 1  | Activity |
| Person 16 | Class 1  | After    |
| Person 16 | Class 10 | Before   |
| Person 16 | Class 10 | Activity |
| Person 16 | Class 10 | After    |
| Person 16 | Class 11 | Before   |
| Person 16 | Class 11 | Activity |
| Person 16 | Class 11 | After    |
| Person 16 | Class 12 | Before   |
| Person 16 | Class 12 | Activity |
| Person 16 | Class 12 | After    |
| Person 16 | Class 13 | Before   |
| Person 16 | Class 13 | Activity |
| Person 16 | Class 13 | After    |
| Person 16 | Class 14 | Before   |
| Person 16 | Class 14 | Activity |
| Person 16 | Class 14 | After    |
| Person 16 | Class 15 | Before   |
| Person 16 | Class 15 | Activity |
| Person 16 | Class 15 | After    |
| Person 16 | Class 16 | Before   |
| Person 16 | Class 16 | Activity |
| Person 16 | Class 16 | After    |
| Person 16 | Class 17 | Before   |
| Person 16 | Class 17 | Activity |

|           |          |          |                  |
|-----------|----------|----------|------------------|
| Person 16 | Class 17 | After    |                  |
| Person 16 | Class 18 | Before   |                  |
| Person 16 | Class 18 | Activity |                  |
| Person 16 | Class 18 | After    |                  |
| Person 16 | Class 19 | Before   | 69.7333133390235 |
| Person 16 | Class 19 | Activity | 67.8178504741574 |
| Person 16 | Class 19 | After    | 66.9768621020641 |
| Person 16 | Class 2  | Before   |                  |
| Person 16 | Class 2  | Activity |                  |
| Person 16 | Class 2  | After    |                  |
| Person 16 | Class 20 | Before   | 71.9664384394127 |
| Person 16 | Class 20 | Activity | 72.520818656927  |
| Person 16 | Class 20 | After    | 70.9733595908164 |
| Person 16 | Class 21 | Before   | 71.2400262574831 |
| Person 16 | Class 21 | Activity | 73.4191359345957 |
| Person 16 | Class 21 | After    | 69.774771772746  |
| Person 16 | Class 22 | Before   |                  |
| Person 16 | Class 22 | Activity |                  |
| Person 16 | Class 22 | After    |                  |
| Person 16 | Class 3  | Before   |                  |
| Person 16 | Class 3  | Activity |                  |
| Person 16 | Class 3  | After    |                  |
| Person 16 | Class 4  | Before   |                  |
| Person 16 | Class 4  | Activity |                  |
| Person 16 | Class 4  | After    |                  |
| Person 16 | Class 5  | Before   |                  |
| Person 16 | Class 5  | Activity |                  |
| Person 16 | Class 5  | After    |                  |
| Person 16 | Class 6  | Before   |                  |
| Person 16 | Class 6  | Activity |                  |
| Person 16 | Class 6  | After    |                  |
| Person 16 | Class 7  | Before   |                  |
| Person 16 | Class 7  | Activity |                  |
| Person 16 | Class 7  | After    |                  |
| Person 16 | Class 8  | Before   |                  |
| Person 16 | Class 8  | Activity |                  |
| Person 16 | Class 8  | After    |                  |
| Person 16 | Class 9  | Before   |                  |
| Person 16 | Class 9  | Activity |                  |
| Person 16 | Class 9  | After    |                  |
| Person 2  | Class 1  | Before   | 70.194688582191  |
| Person 2  | Class 1  | Activity | 78.1400253358625 |
| Person 2  | Class 1  | After    | 77.4235960758404 |
| Person 2  | Class 10 | Before   | 69.2517835343689 |
| Person 2  | Class 10 | Activity | 69.4740057565914 |

|          |          |          |                  |
|----------|----------|----------|------------------|
| Person 2 | Class 10 | After    | 69.2917818948974 |
| Person 2 | Class 11 | Before   | 69.1517835343689 |
| Person 2 | Class 11 | Activity | 72.1758786006031 |
| Person 2 | Class 11 | After    | 69.1497312010784 |
| Person 2 | Class 12 | Before   | 76.1525359973157 |
| Person 2 | Class 12 | Activity | 83.0927145687443 |
| Person 2 | Class 12 | After    | 74.1677864152188 |
| Person 2 | Class 13 | Before   | 80.148369330649  |
| Person 2 | Class 13 | Activity | 83.8211431904988 |
| Person 2 | Class 13 | After    | 76.9192026639824 |
| Person 2 | Class 14 | Before   | 67.0026122393056 |
| Person 2 | Class 14 | Activity | 65.1615476252228 |
| Person 2 | Class 14 | After    | 61.6483693306492 |
| Person 2 | Class 15 | Before   | 63.1317026639825 |
| Person 2 | Class 15 | Activity | 62.4453390276187 |
| Person 2 | Class 15 | After    | 73.2779573456301 |
| Person 2 | Class 16 | Before   | 75.271162175854  |
| Person 2 | Class 16 | Activity | 81.8148435407303 |
| Person 2 | Class 16 | After    | 77.0874997160804 |
| Person 2 | Class 17 | Before   | 74.0527575001513 |
| Person 2 | Class 17 | Activity | 75.555711086649  |
| Person 2 | Class 17 | After    | 76.0057110866492 |
| Person 2 | Class 18 | Before   | 65.3558325383314 |
| Person 2 | Class 18 | Activity | 64.2882948484269 |
| Person 2 | Class 18 | After    | 65.9688799548098 |
| Person 2 | Class 19 | Before   | 76.9075331202497 |
| Person 2 | Class 19 | Activity | 80.6564385599352 |
| Person 2 | Class 19 | After    | 71.1670226873049 |
| Person 2 | Class 2  | Before   | 74.660460131036  |
| Person 2 | Class 2  | Activity | 76.4736771643738 |
| Person 2 | Class 2  | After    | 75.8018896410467 |
| Person 2 | Class 20 | Before   | 69.9072443317421 |
| Person 2 | Class 20 | Activity | 69.6123541029236 |
| Person 2 | Class 20 | After    | 69.8239109984088 |
| Person 2 | Class 21 | Before   | 69.9572443317422 |
| Person 2 | Class 21 | Activity | 67.6204187055381 |
| Person 2 | Class 21 | After    | 66.1734616493389 |
| Person 2 | Class 22 | Before   | 76.1209557036733 |
| Person 2 | Class 22 | Activity | 85.1812472907688 |
| Person 2 | Class 22 | After    | 69.7407343774044 |
| Person 2 | Class 3  | Before   | 68.9134555580818 |
| Person 2 | Class 3  | Activity | 68.6945453016717 |
| Person 2 | Class 3  | After    | 67.7863635802118 |
| Person 2 | Class 4  | Before   |                  |
| Person 2 | Class 4  | Activity |                  |

|          |          |          |                  |
|----------|----------|----------|------------------|
| Person 2 | Class 4  | After    |                  |
| Person 2 | Class 5  | Before   |                  |
| Person 2 | Class 5  | Activity |                  |
| Person 2 | Class 5  | After    |                  |
| Person 2 | Class 6  | Before   | 73.943263065592  |
| Person 2 | Class 6  | Activity | 74.2555357928647 |
| Person 2 | Class 6  | After    | 77.1265963989253 |
| Person 2 | Class 7  | Before   | 72.7450536973548 |
| Person 2 | Class 7  | Activity | 72.9574327406822 |
| Person 2 | Class 7  | After    | 69.4140963989254 |
| Person 2 | Class 8  | Before   | 64.1984788929305 |
| Person 2 | Class 8  | Activity | 63.4368344941637 |
| Person 2 | Class 8  | After    | 62.3992259709786 |
| Person 2 | Class 9  | Before   | 63.7265963989254 |
| Person 2 | Class 9  | Activity | 57.745290092619  |
| Person 2 | Class 9  | After    | 58.9599297322587 |
| Person 3 | Class 1  | Before   | 76.6484536517059 |
| Person 3 | Class 1  | Activity | 79.4887314294834 |
| Person 3 | Class 1  | After    | 74.7151894746658 |
| Person 3 | Class 10 | Before   | 70.5230142830258 |
| Person 3 | Class 10 | Activity | 66.357117029751  |
| Person 3 | Class 10 | After    | 70.7515614741956 |
| Person 3 | Class 11 | Before   | 68.2140614741956 |
| Person 3 | Class 11 | Activity | 69.741144807529  |
| Person 3 | Class 11 | After    | 67.6890614741956 |
| Person 3 | Class 12 | Before   | 78.1160034208079 |
| Person 3 | Class 12 | Activity | 76.3258248493793 |
| Person 3 | Class 12 | After    | 73.3118367541412 |
| Person 3 | Class 13 | Before   | 76.7326700874745 |
| Person 3 | Class 13 | Activity | 75.7374777797822 |
| Person 3 | Class 13 | After    | 74.6039541056672 |
| Person 3 | Class 14 | Before   | 75.0410034208079 |
| Person 3 | Class 14 | Activity | 74.4498212502652 |
| Person 3 | Class 14 | After    | 70.9694083003991 |
| Person 3 | Class 15 | Before   | 70.3201700874745 |
| Person 3 | Class 15 | Activity | 72.2815337238382 |
| Person 3 | Class 15 | After    | 67.4285034208079 |
| Person 3 | Class 16 | Before   |                  |
| Person 3 | Class 16 | Activity |                  |
| Person 3 | Class 16 | After    |                  |
| Person 3 | Class 17 | Before   | 69.8310834165681 |
| Person 3 | Class 17 | Activity | 76.4130278610124 |
| Person 3 | Class 17 | After    | 72.2394167499014 |
| Person 3 | Class 18 | Before   | 69.9269007278808 |
| Person 3 | Class 18 | Activity | 65.0983546285901 |

|          |          |          |                  |
|----------|----------|----------|------------------|
| Person 3 | Class 18 | After    | 67.0522668329262 |
| Person 3 | Class 19 | Before   | 66.7452514612153 |
| Person 3 | Class 19 | Activity | 72.6412025249834 |
| Person 3 | Class 19 | After    | 70.3471133776969 |
| Person 3 | Class 2  | Before   | 74.3342974452903 |
| Person 3 | Class 2  | Activity | 70.1995289205232 |
| Person 3 | Class 2  | After    | 70.8350927701633 |
| Person 3 | Class 20 | Before   | 68.4614935426626 |
| Person 3 | Class 20 | Activity | 66.4822573027124 |
| Person 3 | Class 20 | After    | 65.8531602093293 |
| Person 3 | Class 21 | Before   | 65.8406602093293 |
| Person 3 | Class 21 | Activity | 63.3767632921809 |
| Person 3 | Class 21 | After    | 67.4922840858608 |
| Person 3 | Class 22 | Before   | 69.2997420024005 |
| Person 3 | Class 22 | Activity | 69.0521923644067 |
| Person 3 | Class 22 | After    | 72.2023919326654 |
| Person 3 | Class 3  | Before   | 76.6027052836384 |
| Person 3 | Class 3  | Activity | 74.2622348190465 |
| Person 3 | Class 3  | After    | 71.5657928037505 |
| Person 3 | Class 4  | Before   |                  |
| Person 3 | Class 4  | Activity |                  |
| Person 3 | Class 4  | After    |                  |
| Person 3 | Class 5  | Before   |                  |
| Person 3 | Class 5  | Activity |                  |
| Person 3 | Class 5  | After    |                  |
| Person 3 | Class 6  | Before   | 74.0772300443238 |
| Person 3 | Class 6  | Activity | 70.0969270140209 |
| Person 3 | Class 6  | After    | 72.0063967109904 |
| Person 3 | Class 7  | Before   | 75.8063967109905 |
| Person 3 | Class 7  | Activity | 74.372476735058  |
| Person 3 | Class 7  | After    | 75.6438967109905 |
| Person 3 | Class 8  | Before   | 68.6706353201034 |
| Person 3 | Class 8  | Activity | 71.1462776633714 |
| Person 3 | Class 8  | After    | 68.3563967109904 |
| Person 3 | Class 9  | Before   | 70.1480633776571 |
| Person 3 | Class 9  | Activity | 69.990293107387  |
| Person 3 | Class 9  | After    | 69.8772300443237 |
| Person 4 | Class 1  | Before   |                  |
| Person 4 | Class 1  | Activity |                  |
| Person 4 | Class 1  | After    |                  |
| Person 4 | Class 10 | Before   | 70.3625860598534 |
| Person 4 | Class 10 | Activity | 73.1994784228215 |
| Person 4 | Class 10 | After    | 69.8619784228215 |
| Person 4 | Class 11 | Before   | 65.6828117561548 |
| Person 4 | Class 11 | Activity | 67.6690771088518 |

|          |          |          |                  |
|----------|----------|----------|------------------|
| Person 4 | Class 11 | After    | 61.2869784228215 |
| Person 4 | Class 12 | Before   | 75.8753521060023 |
| Person 4 | Class 12 | Activity | 72.5066021060024 |
| Person 4 | Class 12 | After    | 71.1086854393357 |
| Person 4 | Class 13 | Before   | 67.7170187726691 |
| Person 4 | Class 13 | Activity | 73.651954670105  |
| Person 4 | Class 13 | After    | 63.3961854393357 |
| Person 4 | Class 14 | Before   | 73.7781183886549 |
| Person 4 | Class 14 | Activity | 75.4380791796237 |
| Person 4 | Class 14 | After    | 71.7027750758237 |
| Person 4 | Class 15 | Before   | 65.782255299096  |
| Person 4 | Class 15 | Activity | 69.3918369370779 |
| Person 4 | Class 15 | After    | 70.6280886324294 |
| Person 4 | Class 16 | Before   | 69.0747965165065 |
| Person 4 | Class 16 | Activity | 70.8090745192054 |
| Person 4 | Class 16 | After    | 65.951399080609  |
| Person 4 | Class 17 | Before   | 74.431703973253  |
| Person 4 | Class 17 | Activity | 77.466298022304  |
| Person 4 | Class 17 | After    | 73.5454646889706 |
| Person 4 | Class 18 | Before   | 67.1820432067147 |
| Person 4 | Class 18 | Activity | 66.7912630648703 |
| Person 4 | Class 18 | After    | 66.848117108467  |
| Person 4 | Class 19 | Before   | 70.0227622812286 |
| Person 4 | Class 19 | Activity | 74.5447584052601 |
| Person 4 | Class 19 | After    | 67.8060956145619 |
| Person 4 | Class 2  | Before   |                  |
| Person 4 | Class 2  | Activity |                  |
| Person 4 | Class 2  | After    |                  |
| Person 4 | Class 20 | Before   |                  |
| Person 4 | Class 20 | Activity |                  |
| Person 4 | Class 20 | After    |                  |
| Person 4 | Class 21 | Before   |                  |
| Person 4 | Class 21 | Activity |                  |
| Person 4 | Class 21 | After    |                  |
| Person 4 | Class 22 | Before   | 79.3478983761387 |
| Person 4 | Class 22 | Activity | 73.3890585993317 |
| Person 4 | Class 22 | After    | 77.9202858491246 |
| Person 4 | Class 3  | Before   | 72.9239854488027 |
| Person 4 | Class 3  | Activity | 74.9180669828402 |
| Person 4 | Class 3  | After    | 72.5954652319464 |
| Person 4 | Class 4  | Before   | 80.5302530202922 |
| Person 4 | Class 4  | Activity | 87.6285107188329 |
| Person 4 | Class 4  | After    | 81.6238722671542 |
| Person 4 | Class 5  | Before   | 81.2219196869589 |
| Person 4 | Class 5  | Activity | 88.4695387345783 |



|          |          |          |                  |
|----------|----------|----------|------------------|
| Person 4 | Class 5  | After    | 80.1844196869589 |
| Person 4 | Class 6  | Before   | 74.2698789419915 |
| Person 4 | Class 6  | Activity | 73.1500738563559 |
| Person 4 | Class 6  | After    | 72.9973507857843 |
| Person 4 | Class 7  | Before   | 69.1181841191176 |
| Person 4 | Class 7  | Activity | 73.9769128817543 |
| Person 4 | Class 7  | After    | 69.9558051389471 |
| Person 4 | Class 8  | Before   | 73.4640343403879 |
| Person 4 | Class 8  | Activity | 74.1035947799483 |
| Person 4 | Class 8  | After    | 71.4708566847102 |
| Person 4 | Class 9  | Before   | 73.3000233513769 |
| Person 4 | Class 9  | Activity | 71.6000233513769 |
| Person 4 | Class 9  | After    | 72.0046957334166 |
| Person 5 | Class 1  | Before   | 74.6145152987143 |
| Person 5 | Class 1  | Activity | 74.4547930764923 |
| Person 5 | Class 1  | After    | 68.8494738049383 |
| Person 5 | Class 10 | Before   |                  |
| Person 5 | Class 10 | Activity |                  |
| Person 5 | Class 10 | After    |                  |
| Person 5 | Class 11 | Before   |                  |
| Person 5 | Class 11 | Activity |                  |
| Person 5 | Class 11 | After    |                  |
| Person 5 | Class 12 | Before   | 78.5808611474832 |
| Person 5 | Class 12 | Activity | 75.3121684899476 |
| Person 5 | Class 12 | After    | 72.8982413435549 |
| Person 5 | Class 13 | Before   | 75.8919219808541 |
| Person 5 | Class 13 | Activity | 77.4829682703467 |
| Person 5 | Class 13 | After    | 70.2305539416472 |
| Person 5 | Class 14 | Before   | 68.968675064186  |
| Person 5 | Class 14 | Activity | 75.1811038166856 |
| Person 5 | Class 14 | After    | 71.5652876502923 |
| Person 5 | Class 15 | Before   | 66.7730993514014 |
| Person 5 | Class 15 | Activity | 69.8112357598288 |
| Person 5 | Class 15 | After    | 66.649313528337  |
| Person 5 | Class 16 | Before   |                  |
| Person 5 | Class 16 | Activity |                  |
| Person 5 | Class 16 | After    |                  |
| Person 5 | Class 17 | Before   | 70.2568440884269 |
| Person 5 | Class 17 | Activity | 71.2360107550933 |
| Person 5 | Class 17 | After    | 72.5526774217602 |
| Person 5 | Class 18 | Before   |                  |
| Person 5 | Class 18 | Activity |                  |
| Person 5 | Class 18 | After    |                  |
| Person 5 | Class 19 | Before   | 70.6251092168537 |
| Person 5 | Class 19 | Activity | 74.0403634610334 |

|          |          |          |                  |
|----------|----------|----------|------------------|
| Person 5 | Class 19 | After    | 69.5765192800632 |
| Person 5 | Class 2  | Before   | 64.0344943782121 |
| Person 5 | Class 2  | Activity | 75.9795147146808 |
| Person 5 | Class 2  | After    | 71.0929429211129 |
| Person 5 | Class 20 | Before   |                  |
| Person 5 | Class 20 | Activity |                  |
| Person 5 | Class 20 | After    |                  |
| Person 5 | Class 21 | Before   |                  |
| Person 5 | Class 21 | Activity |                  |
| Person 5 | Class 21 | After    |                  |
| Person 5 | Class 22 | Before   | 71.3097540514452 |
| Person 5 | Class 22 | Activity | 75.7315677107375 |
| Person 5 | Class 22 | After    | 71.5278502857549 |
| Person 5 | Class 3  | Before   | 69.7587965894864 |
| Person 5 | Class 3  | Activity | 73.8573384195688 |
| Person 5 | Class 3  | After    | 74.566669199439  |
| Person 5 | Class 4  | Before   | 80.638107650338  |
| Person 5 | Class 4  | Activity | 85.7763842575773 |
| Person 5 | Class 4  | After    | 85.3126543727927 |
| Person 5 | Class 5  | Before   | 81.4047743170047 |
| Person 5 | Class 5  | Activity | 85.3590246540156 |
| Person 5 | Class 5  | After    | 76.5962238388089 |
| Person 5 | Class 6  | Before   | 77.6591611542818 |
| Person 5 | Class 6  | Activity | 76.5043157921521 |
| Person 5 | Class 6  | After    | 61.1548611705626 |
| Person 5 | Class 7  | Before   | 70.258910845494  |
| Person 5 | Class 7  | Activity | 75.9953652348828 |
| Person 5 | Class 7  | After    | 67.5173611705626 |
| Person 5 | Class 8  | Before   | 65.1672112904669 |
| Person 5 | Class 8  | Activity | 70.5445714819327 |
| Person 5 | Class 8  | After    | 65.1048611705625 |
| Person 5 | Class 9  | Before   | 64.0381945038959 |
| Person 5 | Class 9  | Activity | 65.0722035129051 |
| Person 5 | Class 9  | After    | 71.1006016547715 |
| Person 6 | Class 1  | Before   | 80.8396208932654 |
| Person 6 | Class 1  | Activity | 77.4125375599321 |
| Person 6 | Class 1  | After    | 74.6136527051603 |
| Person 6 | Class 10 | Before   | 69.9208100785879 |
| Person 6 | Class 10 | Activity | 67.7666434119213 |
| Person 6 | Class 10 | After    | 69.7833100785879 |
| Person 6 | Class 11 | Before   | 66.7802690560205 |
| Person 6 | Class 11 | Activity | 65.7095005547784 |
| Person 6 | Class 11 | After    | 60.0541434119212 |
| Person 6 | Class 12 | Before   |                  |
| Person 6 | Class 12 | Activity |                  |

|          |          |          |                  |
|----------|----------|----------|------------------|
| Person 6 | Class 12 | After    |                  |
| Person 6 | Class 13 | Before   |                  |
| Person 6 | Class 13 | Activity |                  |
| Person 6 | Class 13 | After    |                  |
| Person 6 | Class 14 | Before   |                  |
| Person 6 | Class 14 | Activity |                  |
| Person 6 | Class 14 | After    |                  |
| Person 6 | Class 15 | Before   |                  |
| Person 6 | Class 15 | Activity |                  |
| Person 6 | Class 15 | After    |                  |
| Person 6 | Class 16 | Before   | 79.2758349438439 |
| Person 6 | Class 16 | Activity | 73.2055245969737 |
| Person 6 | Class 16 | After    | 79.7625118549318 |
| Person 6 | Class 17 | Before   | 76.1637379905985 |
| Person 6 | Class 17 | Activity | 81.1827421114594 |
| Person 6 | Class 17 | After    | 73.2674643336817 |
| Person 6 | Class 18 | Before   |                  |
| Person 6 | Class 18 | Activity |                  |
| Person 6 | Class 18 | After    |                  |
| Person 6 | Class 19 | Before   | 72.01441789765   |
| Person 6 | Class 19 | Activity | 80.9484233392289 |
| Person 6 | Class 19 | After    | 71.7251546354084 |
| Person 6 | Class 2  | Before   | 73.8833796101413 |
| Person 6 | Class 2  | Activity | 71.4861262696095 |
| Person 6 | Class 2  | After    | 70.9391387996015 |
| Person 6 | Class 20 | Before   | 71.444479850696  |
| Person 6 | Class 20 | Activity | 68.5064000733303 |
| Person 6 | Class 20 | After    | 68.4368160944961 |
| Person 6 | Class 21 | Before   | 68.5451494278295 |
| Person 6 | Class 21 | Activity | 66.8642775385574 |
| Person 6 | Class 21 | After    | 66.781979850696  |
| Person 6 | Class 22 | Before   | 78.6763707680432 |
| Person 6 | Class 22 | Activity | 81.7901098709215 |
| Person 6 | Class 22 | After    | 75.7289160957978 |
| Person 6 | Class 3  | Before   | 74.6546136561854 |
| Person 6 | Class 3  | Activity | 73.2247144098902 |
| Person 6 | Class 3  | After    | 75.269697918774  |
| Person 6 | Class 4  | Before   |                  |
| Person 6 | Class 4  | Activity |                  |
| Person 6 | Class 4  | After    |                  |
| Person 6 | Class 5  | Before   |                  |
| Person 6 | Class 5  | Activity |                  |
| Person 6 | Class 5  | After    |                  |
| Person 6 | Class 6  | Before   | 80.9704506740181 |
| Person 6 | Class 6  | Activity | 79.0165553995143 |

|          |          |          |                  |
|----------|----------|----------|------------------|
| Person 6 | Class 6  | After    | 76.3579506740181 |
| Person 6 | Class 7  | Before   | 75.5496173406847 |
| Person 6 | Class 7  | Activity | 76.3566871361119 |
| Person 6 | Class 7  | After    | 75.7768989451169 |
| Person 6 | Class 8  | Before   | 68.6352888035148 |
| Person 6 | Class 8  | Activity | 65.0593792454468 |
| Person 6 | Class 8  | After    | 68.1412840073514 |
| Person 6 | Class 9  | Before   | 66.9829506740181 |
| Person 6 | Class 9  | Activity | 69.2234912145586 |
| Person 6 | Class 9  | After    | 66.9287840073515 |
| Person 7 | Class 1  | Before   |                  |
| Person 7 | Class 1  | Activity |                  |
| Person 7 | Class 1  | After    |                  |
| Person 7 | Class 10 | Before   | 69.2813603736529 |
| Person 7 | Class 10 | Activity | 68.2210474104208 |
| Person 7 | Class 10 | After    | 67.9113251881985 |
| Person 7 | Class 11 | Before   | 67.8646773496618 |
| Person 7 | Class 11 | Activity | 67.275015664389  |
| Person 7 | Class 11 | After    | 66.5907933092414 |
| Person 7 | Class 12 | Before   | 78.5125048421154 |
| Person 7 | Class 12 | Activity | 75.4797198749722 |
| Person 7 | Class 12 | After    | 72.189243684496  |
| Person 7 | Class 13 | Before   | 71.4556724967193 |
| Person 7 | Class 13 | Activity | 77.0969359921883 |
| Person 7 | Class 13 | After    | 73.1310251814802 |
| Person 7 | Class 14 | Before   | 72.214243684496  |
| Person 7 | Class 14 | Activity | 71.0652066176133 |
| Person 7 | Class 14 | After    | 70.6309103511626 |
| Person 7 | Class 15 | Before   | 71.4723367179712 |
| Person 7 | Class 15 | Activity | 72.6494992220705 |
| Person 7 | Class 15 | After    | 70.3434103511627 |
| Person 7 | Class 16 | Before   | 67.9268231055055 |
| Person 7 | Class 16 | Activity | 64.5164317424822 |
| Person 7 | Class 16 | After    | 69.7591949003773 |
| Person 7 | Class 17 | Before   |                  |
| Person 7 | Class 17 | Activity |                  |
| Person 7 | Class 17 | After    |                  |
| Person 7 | Class 18 | Before   | 68.7892622215711 |
| Person 7 | Class 18 | Activity | 65.2260756064585 |
| Person 7 | Class 18 | After    | 66.2432741384622 |
| Person 7 | Class 19 | Before   |                  |
| Person 7 | Class 19 | Activity |                  |
| Person 7 | Class 19 | After    |                  |
| Person 7 | Class 2  | Before   |                  |
| Person 7 | Class 2  | Activity |                  |

|          |          |          |                  |
|----------|----------|----------|------------------|
| Person 7 | Class 2  | After    |                  |
| Person 7 | Class 20 | Before   |                  |
| Person 7 | Class 20 | Activity |                  |
| Person 7 | Class 20 | After    |                  |
| Person 7 | Class 21 | Before   |                  |
| Person 7 | Class 21 | Activity |                  |
| Person 7 | Class 21 | After    |                  |
| Person 7 | Class 22 | Before   |                  |
| Person 7 | Class 22 | Activity |                  |
| Person 7 | Class 22 | After    |                  |
| Person 7 | Class 3  | Before   |                  |
| Person 7 | Class 3  | Activity |                  |
| Person 7 | Class 3  | After    |                  |
| Person 7 | Class 4  | Before   | 72.7296592980314 |
| Person 7 | Class 4  | Activity | 71.4103454136446 |
| Person 7 | Class 4  | After    | 77.6036481404303 |
| Person 7 | Class 5  | Before   | 65.3046592980313 |
| Person 7 | Class 5  | Activity | 70.9346376530103 |
| Person 7 | Class 5  | After    | 73.1635430275071 |
| Person 7 | Class 6  | Before   |                  |
| Person 7 | Class 6  | Activity |                  |
| Person 7 | Class 6  | After    |                  |
| Person 7 | Class 7  | Before   | 68.8005509918678 |
| Person 7 | Class 7  | Activity | 73.3649561147224 |
| Person 7 | Class 7  | After    | 68.3838843252012 |
| Person 7 | Class 8  | Before   | 70.6613123827549 |
| Person 7 | Class 8  | Activity | 69.3170986109153 |
| Person 7 | Class 8  | After    | 69.9443870283205 |
| Person 7 | Class 9  | Before   | 76.9636535313953 |
| Person 7 | Class 9  | Activity | 71.7538167576336 |
| Person 7 | Class 9  | After    | 69.6505509918678 |
| Person 8 | Class 1  | Before   | 77.5457845956449 |
| Person 8 | Class 1  | Activity | 77.1409234845336 |
| Person 8 | Class 1  | After    | 74.754498288591  |
| Person 8 | Class 10 | Before   | 67.547443439296  |
| Person 8 | Class 10 | Activity | 67.2016101059627 |
| Person 8 | Class 10 | After    | 63.659943439296  |
| Person 8 | Class 11 | Before   | 64.8307767726293 |
| Person 8 | Class 11 | Activity | 64.8135148678674 |
| Person 8 | Class 11 | After    | 64.2250480605045 |
| Person 8 | Class 12 | Before   | 75.8674693607308 |
| Person 8 | Class 12 | Activity | 78.185620284379  |
| Person 8 | Class 12 | After    | 72.1058641370019 |
| Person 8 | Class 13 | Before   | 75.9344298081885 |
| Person 8 | Class 13 | Activity | 73.6305836543423 |

|          |          |          |                  |
|----------|----------|----------|------------------|
| Person 8 | Class 13 | After    | 71.8677631415219 |
| Person 8 | Class 14 | Before   | 71.8543036768814 |
| Person 8 | Class 14 | Activity | 75.1619491880335 |
| Person 8 | Class 14 | After    | 77.4321003612233 |
| Person 8 | Class 15 | Before   | 66.6677631415218 |
| Person 8 | Class 15 | Activity | 67.5177631415216 |
| Person 8 | Class 15 | After    | 70.2805120591916 |
| Person 8 | Class 16 | Before   | 72.5666302577261 |
| Person 8 | Class 16 | Activity | 72.6678448326249 |
| Person 8 | Class 16 | After    | 74.0327000660353 |
| Person 8 | Class 17 | Before   | 71.4701814707816 |
| Person 8 | Class 17 | Activity | 68.5271259152264 |
| Person 8 | Class 17 | After    | 76.8701814707817 |
| Person 8 | Class 18 | Before   | 71.4278747126253 |
| Person 8 | Class 18 | Activity | 72.4108802393307 |
| Person 8 | Class 18 | After    | 69.5125646364938 |
| Person 8 | Class 19 | Before   | 69.4647463838124 |
| Person 8 | Class 19 | Activity | 74.9562566405581 |
| Person 8 | Class 19 | After    | 69.2335441635118 |
| Person 8 | Class 2  | Before   | 69.1889668611604 |
| Person 8 | Class 2  | Activity | 70.7691716924192 |
| Person 8 | Class 2  | After    | 69.2094209592814 |
| Person 8 | Class 20 | Before   |                  |
| Person 8 | Class 20 | Activity |                  |
| Person 8 | Class 20 | After    |                  |
| Person 8 | Class 21 | Before   |                  |
| Person 8 | Class 21 | Activity |                  |
| Person 8 | Class 21 | After    |                  |
| Person 8 | Class 22 | Before   |                  |
| Person 8 | Class 22 | Activity |                  |
| Person 8 | Class 22 | After    |                  |
| Person 8 | Class 3  | Before   | 73.0061066774389 |
| Person 8 | Class 3  | Activity | 72.3208502671824 |
| Person 8 | Class 3  | After    | 72.2049869779825 |
| Person 8 | Class 4  | Before   |                  |
| Person 8 | Class 4  | Activity |                  |
| Person 8 | Class 4  | After    |                  |
| Person 8 | Class 5  | Before   |                  |
| Person 8 | Class 5  | Activity |                  |
| Person 8 | Class 5  | After    |                  |
| Person 8 | Class 6  | Before   |                  |
| Person 8 | Class 6  | Activity |                  |
| Person 8 | Class 6  | After    |                  |
| Person 8 | Class 7  | Before   |                  |
| Person 8 | Class 7  | Activity |                  |

|          |          |          |                  |
|----------|----------|----------|------------------|
| Person 8 | Class 7  | After    |                  |
| Person 8 | Class 8  | Before   |                  |
| Person 8 | Class 8  | Activity |                  |
| Person 8 | Class 8  | After    |                  |
| Person 8 | Class 9  | Before   |                  |
| Person 8 | Class 9  | Activity |                  |
| Person 8 | Class 9  | After    |                  |
| Person 9 | Class 1  | Before   | 74.6509594137401 |
| Person 9 | Class 1  | Activity | 73.9974871915176 |
| Person 9 | Class 1  | After    | 71.6617062822329 |
| Person 9 | Class 10 | Before   | 65.2905358692702 |
| Person 9 | Class 10 | Activity | 66.948869202604  |
| Person 9 | Class 10 | After    | 69.3280358692702 |
| Person 9 | Class 11 | Before   | 69.7238692026036 |
| Person 9 | Class 11 | Activity | 74.1085554330127 |
| Person 9 | Class 11 | After    | 63.7863692026036 |
| Person 9 | Class 12 | Before   |                  |
| Person 9 | Class 12 | Activity |                  |
| Person 9 | Class 12 | After    |                  |
| Person 9 | Class 13 | Before   |                  |
| Person 9 | Class 13 | Activity |                  |
| Person 9 | Class 13 | After    |                  |
| Person 9 | Class 14 | Before   | 71.2006734358114 |
| Person 9 | Class 14 | Activity | 72.2401411878199 |
| Person 9 | Class 14 | After    | 73.9006734358114 |
| Person 9 | Class 15 | Before   | 72.3708091103191 |
| Person 9 | Class 15 | Activity | 75.2999158600539 |
| Person 9 | Class 15 | After    | 72.9356249294106 |
| Person 9 | Class 16 | Before   |                  |
| Person 9 | Class 16 | Activity |                  |
| Person 9 | Class 16 | After    |                  |
| Person 9 | Class 17 | Before   |                  |
| Person 9 | Class 17 | Activity |                  |
| Person 9 | Class 17 | After    |                  |
| Person 9 | Class 18 | Before   |                  |
| Person 9 | Class 18 | Activity |                  |
| Person 9 | Class 18 | After    |                  |
| Person 9 | Class 19 | Before   |                  |
| Person 9 | Class 19 | Activity |                  |
| Person 9 | Class 19 | After    |                  |
| Person 9 | Class 2  | Before   | 69.8446658293608 |
| Person 9 | Class 2  | Activity | 74.9270809968239 |
| Person 9 | Class 2  | After    | 75.8320326598752 |
| Person 9 | Class 20 | Before   | 61.5700967149184 |
| Person 9 | Class 20 | Activity | 67.5450985316081 |

|          |          |          |                  |
|----------|----------|----------|------------------|
| Person 9 | Class 20 | After    | 67.1700967149184 |
| Person 9 | Class 21 | Before   | 67.2992633815851 |
| Person 9 | Class 21 | Activity | 66.7345475819705 |
| Person 9 | Class 21 | After    | 62.4700967149184 |
| Person 9 | Class 22 | Before   |                  |
| Person 9 | Class 22 | Activity |                  |
| Person 9 | Class 22 | After    |                  |
| Person 9 | Class 3  | Before   |                  |
| Person 9 | Class 3  | Activity |                  |
| Person 9 | Class 3  | After    |                  |
| Person 9 | Class 4  | Before   |                  |
| Person 9 | Class 4  | Activity |                  |
| Person 9 | Class 4  | After    |                  |
| Person 9 | Class 5  | Before   |                  |
| Person 9 | Class 5  | Activity |                  |
| Person 9 | Class 5  | After    |                  |
| Person 9 | Class 6  | Before   | 76.8528201082781 |
| Person 9 | Class 6  | Activity | 75.6659244758955 |
| Person 9 | Class 6  | After    | 76.6861534416114 |
| Person 9 | Class 7  | Before   | 74.1111534416114 |
| Person 9 | Class 7  | Activity | 77.4590174608654 |
| Person 9 | Class 7  | After    | 72.7194867749447 |
| Person 9 | Class 8  | Before   | 66.1579759835774 |
| Person 9 | Class 8  | Activity | 70.8864650656727 |
| Person 9 | Class 8  | After    | 68.4486534416114 |
| Person 9 | Class 9  | Before   | 64.7861534416113 |
| Person 9 | Class 9  | Activity | 71.2477212552086 |
| Person 9 | Class 9  | After    | 62.815320108278  |
