# Supplementary material for: Student engagement, assessed using heart rate, shows no reset following active learning sessions in lectures
Source: PubMed Central journal article supplement (PMC6886849; doi:10.1371/journal.pone.0225709), 2019-12-02
Supplement: pone.0225709.s004.pdf [file pone.0225709.s004.pdf]

S1 Table: Statistical output (R) from Activity ANOVAs

DATASET = S3 Dataset # S3 Dataset is a data frame with 4 columns

# column "who" is the person number (nuisance variable)

# column "when" is the activity identifier (nuisance variable)

# "what" is the variable of interest, taking values "Before", "Activity", or "After"

# "rate" is the response variable, the average heartrate

one-way ANOVA for unbalanced data

ANOVA for three-way comparison of HR vs. Before/Activity/After

Response:

| RATE        | SumSq      | Df       | F-value      | Pr(>F)          | P>         |
|-------------|------------|----------|--------------|-----------------|------------|
| (Intercept) | 98784      | 1        | 80066.96     | <2.2E-16        | ***        |
| <b>what</b> | <b>583</b> | <b>2</b> | <b>23.79</b> | <b>1.20E-10</b> | <b>***</b> |
| who         | 578        | 15       | 3.15         | 5.65E-05        | ***        |
| when        | 5394       | 21       | 20.98        | <2.2E-16        | ***        |
| Residuals   | 6894       | 563      |              |                 |            |

**Interpretation: Heartrates are significantly different for 'what' values**

two-way comparison: Activity vs. After (not Before)

Type III test

Response:

| RATE        | SumSq      | Df       | F-value      | Pr(>F)          | P>         |
|-------------|------------|----------|--------------|-----------------|------------|
| (Intercept) | 67223      | 1        | 5028.86      | <2.2E-16        | ***        |
| <b>what</b> | <b>573</b> | <b>1</b> | <b>42.84</b> | <b>2.03E-10</b> | <b>***</b> |
| who         | 389        | 15       | 1.94         | 1.90E-02        | *          |
| when        | 5394       | 21       | 20.98        | <2.2E-16        | ***        |
| Residuals   | 4852       | 363      |              |                 |            |

**Interpretation: Heartrates are significantly different for Activity vs. After**

two-way comparison: Before vs. After (not Activity)

Type III test

Response:

| RATE        | SumSq     | Df       | F-value     | Pr(>F)          | P>        |
|-------------|-----------|----------|-------------|-----------------|-----------|
| (Intercept) | 63119     | 1        | 6087.85     | <2.2E-16        | ***       |
| <b>what</b> | <b>85</b> | <b>1</b> | <b>8.19</b> | <b>4.50E-03</b> | <b>**</b> |
| who         | 541       | 15       | 3.48        | 1.40E-05        | ***       |
| when        | 3308      | 21       | 15.19       | <2.2E-16        | ***       |
| Residuals   | 3764      | 363      |             |                 |           |

**Interpretation: Heartrates are significantly different for Before vs. After**

two-way comparison: Before vs. Activity (not After)

Type III test

Response:

| RATE        | SumSq      | Df       | F-value      | Pr(>F)          | P>         |
|-------------|------------|----------|--------------|-----------------|------------|
| (Intercept) | 68773      | 1        | 5236.05      | <2.2E-16        | ***        |
| <b>what</b> | <b>218</b> | <b>1</b> | <b>16.57</b> | <b>5.75E-05</b> | <b>***</b> |
| who         | 401        | 15       | 2.035        | 1.25E-02        | *          |
| when        | 3928       | 21       | 14.24        | <2.2E-16        | ***        |
| Residuals   | 4781       | 364      |              |                 |            |

**Interpretation: Heartrates are significantly different for Before vs. Activity**
