# Supplementary material for: Student engagement, assessed using heart rate, shows no reset following active learning sessions in lectures
Source: PubMed Central journal article supplement (PMC6886849; doi:10.1371/journal.pone.0225709), 2019-12-02
Supplement: pone.0225709.s005.pdf [file pone.0225709.s005.pdf]

S2 Table Y intercepts for before and after breaks (same instructor).

| FACULTY | Y intercept (t<br>cropped | slope/sec<br>cropped | total seconds | Y2 intercept | Drop    | Between class |
|---------|---------------------------|----------------------|---------------|--------------|---------|---------------|
| 1A      | 79.061                    | -0.0018              | 2955          | 73.742       | -5.319  | 0.648         |
| 1B      | 74.39                     | -0.0021              | 3206          | 67.6574      | -6.7326 |               |
| 2A      | 73.391                    | -0.0013              | 2820          | 69.725       | -3.666  |               |
| 2B      | 78.173                    | -0.0007              | 4853          | 74.7759      | -3.3971 |               |
| 3A      | 75.027                    | -0.002               | 3171          | 68.685       | -6.342  | 0.837         |
| 3B      | 69.522                    | -0.0009              | 2770          | 67.029       | -2.493  |               |
| 4A      | 76.932                    | -0.0025              | 3234          | 68.847       | -8.085  |               |
| 4B      | 67.402                    | 0.0003               | 3884          | 68.5672      | 1.1652  |               |
| 5A      | 76.647                    | -0.0019              | 3103          | 70.7513      | -5.8957 |               |
| 5B      | 70.283                    | -0.0005              | 4368          | 68.099       | -2.184  |               |
| 6A      | 69.102                    | 0.0008               | 2448          | 71.0604      | 1.9584  |               |
| 6B      | 68.773                    | -0.0005              | 1644          | 67.951       | -0.822  |               |
| 7A      | 76.668                    | -0.0007              | 2409          | 74.9817      | -1.6863 | -1.9727       |
| 7B      | 73.009                    | -0.0019              | 2040          | 69.133       | -3.876  |               |
| 8A      | 75.86                     | -0.0012              | 4555          | 70.394       | -5.466  |               |
| 8B      | 75.945                    | -0.0016              | 2484          | 71.9706      | -3.9744 |               |
| 9A      | 71.732                    | -0.0004              | 1680          | 71.06        | -0.672  |               |
| 9B      | 69.599                    | -0.0015              | 3281          | 64.6775      | -4.9215 |               |
| 10A     | 71.33                     | -0.0013              | 3243          | 67.1141      | -4.2159 |               |
| 10B     | 70.026                    | -0.0012              | 3052          | 66.3636      | -3.6624 | 0.6434        |
| 11A     | 67.007                    | -0.0002              | 3013          | 66.4044      | -0.6026 |               |
| 11B     | 79.531                    | -0.0031              | 2899          | 70.5441      | -8.9869 | 3.4869        |
| 12A     | 74.031                    | -0.0018              | 3166          | 68.3322      | -5.6988 |               |
| 12B     | 72.395                    | -0.0014              | 2575          | 68.79        | -3.605  | -1.56         |
| 13A     | 67.23                     | 0.0005               | 2810          | 68.635       | 1.405   |               |
| 13B     | 74.384                    | -0.0007              | 3147          | 72.1811      | -2.2029 |               |
| 4A      | 75.526                    | -0.0014              | 3147          | 71.1202      | -4.4058 |               |
| 4B      | 69.672                    | 0.0016               | 1887          | 72.6912      | 3.0192  |               |
| 15A     | 70.959                    | -0.0009              | 3252          | 68.0322      | -2.9268 |               |
| 15B     | 74.095                    | -0.0014              | 4340          | 68.019       | -6.076  |               |
| 16A     | 76.457                    | -0.0035              | 2313          | 68.3615      | -8.0955 |               |
| 16B     | 70.016                    | -0.001               | 1639          | 68.377       | -1.639  |               |
| 17A     | 72.676                    | -0.0009              | 3105          | 69.8815      | -2.7945 | -2.3715       |
| 17B     | 67.51                     | -0.0006              | 3058          | 65.6752      | -1.8348 |               |
| 18A     | 64.034                    | -0.0003              | 3567          | 62.9639      | -1.0701 |               |
| 18B     | 68.356                    | -0.0006              | 3003          | 66.5542      | -1.8018 |               |
| 19A     | 69.004                    | -0.0006              | 3177          | 67.0978      | -1.9062 | -1.7258       |
| 19B     | 65.372                    | -0.0005              | 2974          | 63.885       | -1.487  |               |

|     |        |         |             |         |         |         |
|-----|--------|---------|-------------|---------|---------|---------|
| 20A | 70.657 | -0.0018 | <b>3354</b> | 64.6198 | -6.0372 | 1.3112  |
| 20B | 65.931 | -0.0012 | <b>3241</b> | 62.0418 | -3.8892 | -0.7828 |
| 21A | 61.259 | 0.0009  | <b>2477</b> | 63.4883 | 2.2293  |         |
| 21B | 74.782 | -0.0009 | <b>4862</b> | 70.4062 | -4.3758 |         |
| 22A | 74.84  | -0.001  | <b>3229</b> | 71.611  | -3.229  |         |
| 22B | 74.782 | -0.0009 | <b>1200</b> | 73.702  | -1.08   |         |
| 23A | 75.937 | -0.001  | <b>4189</b> | 71.748  | -4.189  |         |
| 23B | 76.991 | -0.0022 | <b>2545</b> | 71.392  | -5.599  |         |
| 24A | 75.937 | -0.001  | <b>1225</b> | 74.712  | -1.225  |         |
| 24B | 67.559 | 0.0006  | <b>3306</b> | 69.5426 | 1.9836  |         |

0.244375

gray

-0.14863

within class

-2.2874

-0.2386

-1.4482

1.6545

3.171

4.545

all  
0.89938333  
red
